# Supplementary material
Source: PubMed Central journal article supplement (PMC3591655)

## Supplementary Figures

Deletion of Cysteine Cathepsins B or L Yields Differential Impacts on Murine Skin Proteome and Degradome.

Tholen et al.

**Supplementary Figure 1:** Density graphs of fold change values ( $\log_2$ ) for proteins identified in the biological replicates of the (A) *Ctsb* and (B) *Ctsl* experiment. A fold change of 0 indicates unaffected protein abundance. Fold change values lower than -0.58 and higher than 0.58 represent changes in protein abundance of more than 50 %.

**Supplementary Figure 2:** Volcano plots of the transcriptomic analysis of wild-type and (A) *Ctsb*<sup>-/-</sup> deficient MEFs or (B) *Ctsl*<sup>-/-</sup> deficient MEFs respectively. Gene expression was considered to be significantly up- or downregulated, if the averaged p-value is lower than 0.01. Red-marked genes are functionally annotated with the GO term "proteolysis" and genes marked in blue are functionally annotated with the GO term "regulation of proteolysis". The *Ctsl* probe was not functional and yielded an insufficient signal in wild-type samples. However, *Ctsl* mRNA- and protein levels were independently validated by qPCR and immunoblotting thereby confirming wild-type and *Ctsl*<sup>-/-</sup> status.

**Supplementary Figure 3:** (A) CTSL degrades periostin at pH 5.5. Minor processing was observed at pH 7.0; (B) at neutral pH, minor processing of periostin was observed even in the presence of dextrane sulfate (10 ng/ $\mu$ l), which reportedly stabilizes cathepsin activity at neutral and basic pH (65). ON, overnight

**Supplementary Figure 4:** (A/B) Pathways affected by *Ctsb* or *Ctsl* depletion and (C/D) protein classes affected by the depletion of *Ctsb* and *Ctsl*. Analysis was performed

using the Panther Classification System (<http://www.pantherdb.org>) (66). Pathways or protein classes for which PANTHER determined an enrichment of proteins with increased abundance upon cathepsin depletion are labeled with "+". Pathways or protein classes for which PANTHER determined an enrichment of proteins with decreased abundance upon cathepsin depletion are labeled with "-".

**Supplementary Figure 5:** Cathepsin inhibition impairs *in vitro* angiogenesis. VEGF-induced vessel sprouting from rat aortic rings is reduced by the cysteine cathepsin inhibitor E64d. \*\* significant ( $p < 0.01$ ; ANOVA).

**Supplementary Figure 6:** Density graphs of peptide fold change values ( $\log_2$ ) identified in the biological replicates of the (A) Ctsb and (B) Ctsl TAILS experiment. A fold change of 0 indicates unaffected peptide abundance. Fold change values lower than -0.58 and higher than 0.58 represent changes in peptide abundance of more than 50 %. Q<sub>1</sub>: quantile 0 – 15; Q<sub>2</sub>: quantile 15 – 25; Q<sub>3</sub>: quantile 25 – 75; Q<sub>4</sub>: quantile 75 – 85; Q<sub>5</sub>: quantile 75 – 100

**Supplementary Figure 7:** Correlation graph of proteins identified in the proteome comparison for which the TAILS procedure identified an N-terminal peptide (analysis restricted to proteins and N-termini identified in both biological replicates).

Tholen *et al.*, Sup. Fig. S1

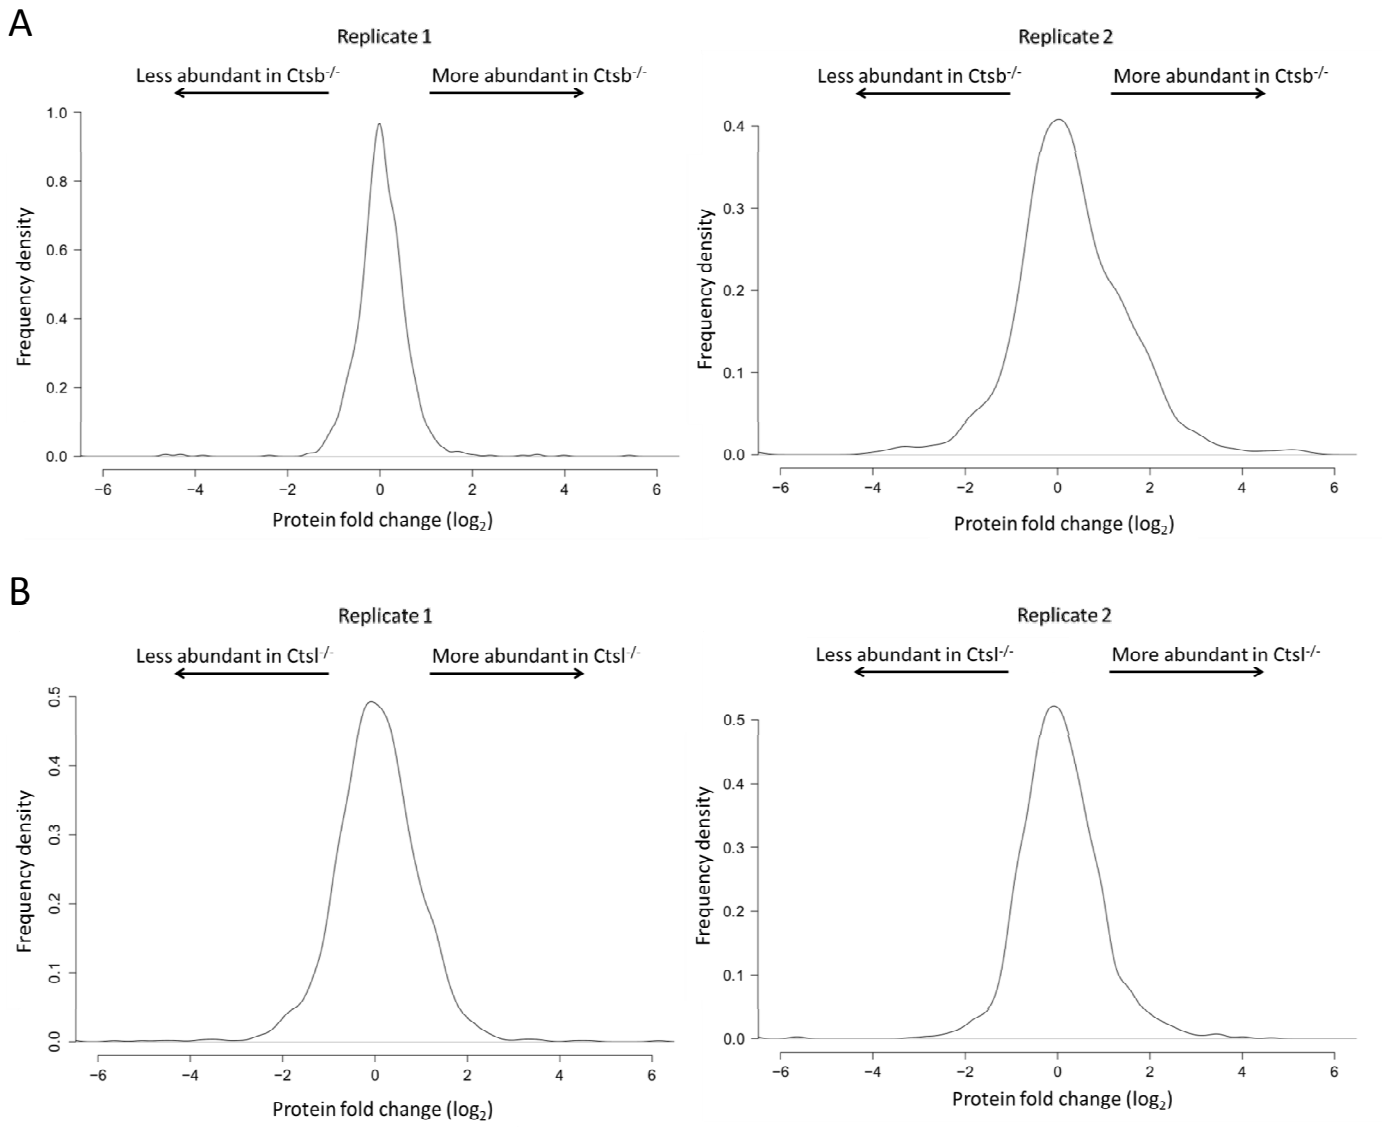

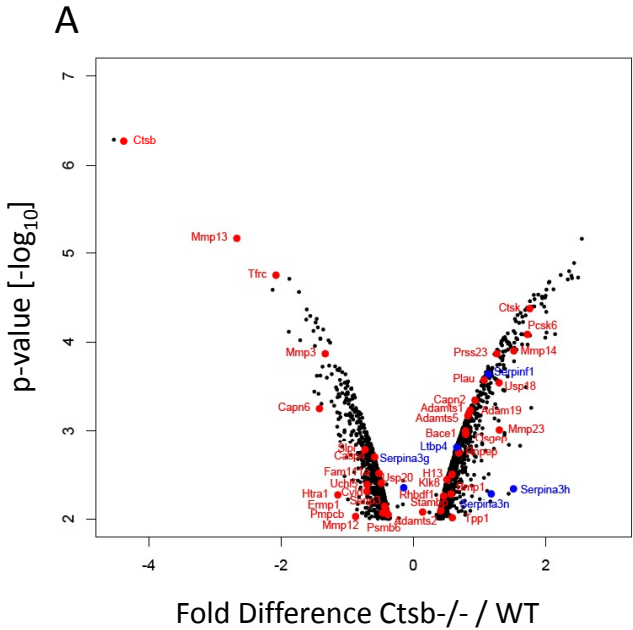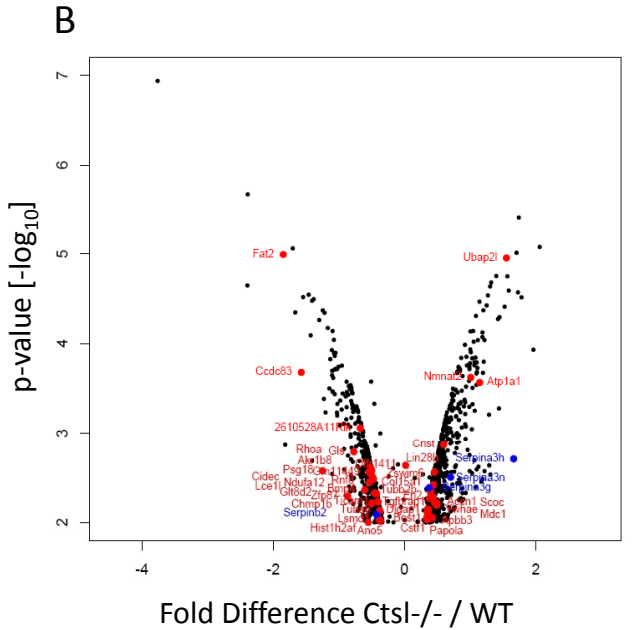

Tholen *et al.*, Sup. Fig. S3

**A**

|                             |     |     |      |      |     |     |      |      |     |
|-----------------------------|-----|-----|------|------|-----|-----|------|------|-----|
| Periostin [ $\mu\text{g}$ ] | 2.0 | 2.0 | 2.0  | 2.0  | 2.0 | 2.0 | 2.0  | 2.0  | 2.0 |
| CTSL [ $\mu\text{g}$ ]      | 0.2 | 0.2 | 0.02 | 0.02 | 0.2 | 0.2 | 0.02 | 0.02 | -   |
| Incubation                  | 2h  | ON  | 2h   | ON   | 2h  | ON  | 2h   | ON   | ON  |
| pH                          | 5.5 | 5.5 | 5.5  | 5.5  | 7.0 | 7.0 | 7.0  | 7.0  | 5.5 |

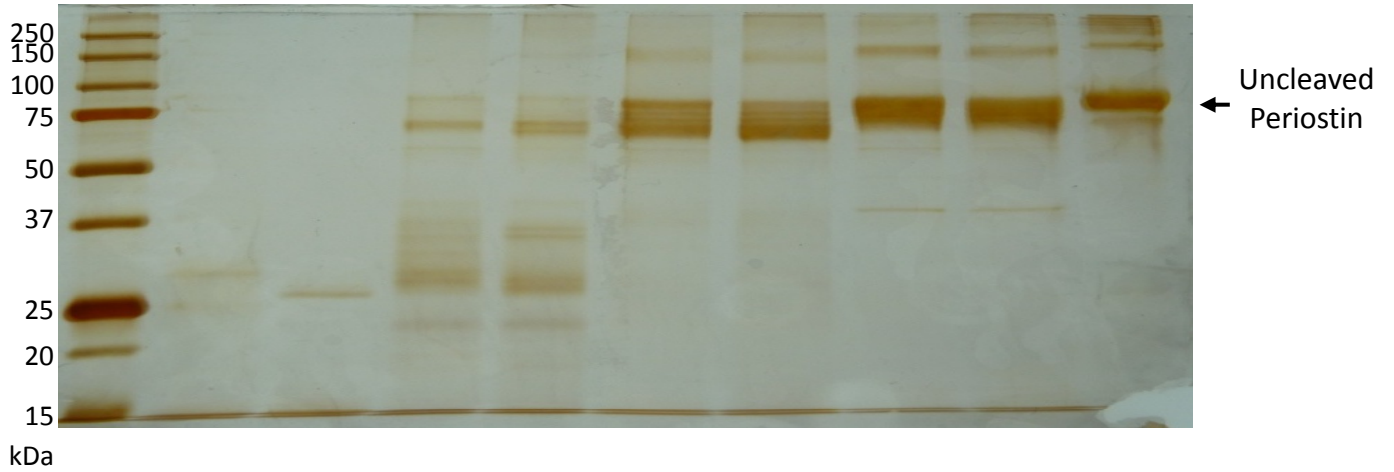

**B**

|                                              |     |     |      |      |     |
|----------------------------------------------|-----|-----|------|------|-----|
| Periostin [ $\mu\text{g}$ ]                  | 2.0 | 2.0 | 2.0  | 2.0  | 2.0 |
| CTSL [ $\mu\text{g}$ ]                       | 0.2 | 0.2 | 0.02 | 0.02 | -   |
| Incubation                                   | 2h  | ON  | 2h   | ON   | ON  |
| pH                                           | 7.0 | 7.0 | 7.0  | 7.0  | 7.0 |
| Dextrane sulfate [ $\text{ng}/\mu\text{l}$ ] | 10  | 10  | 10   | 10   | 10  |

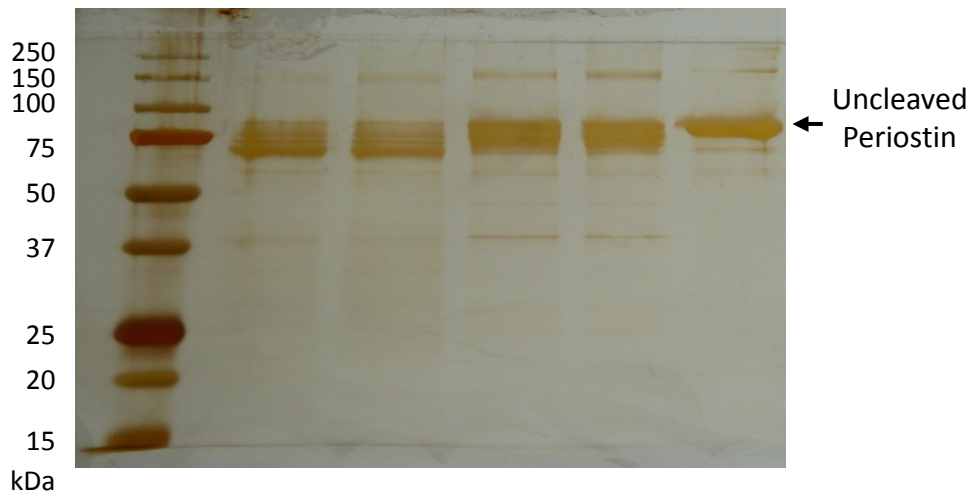

Tholen *et al.*, Sup. Fig. S4

**A**

| WT/Ctsb <sup>-/-</sup>         |                    |     |          |
|--------------------------------|--------------------|-----|----------|
| Pathways                       | Number of proteins | +/- | p value  |
| Ubiquitin proteasome pathway   | 28                 | +   | 6,48E-09 |
| p53 pathway                    | 11                 | +   | 4,41E-05 |
| FGF signaling pathway          | 20                 | +   | 1,13E-04 |
| Angiogenesis                   | 18                 | +   | 3,60E-04 |
| EGF receptor signaling pathway | 21                 | +   | 7,52E-04 |
| VEGF signaling pathway         | 10                 | +   | 2,38E-03 |
| Parkinson disease              | 35                 | +   | 3,66E-03 |
| PI3 kinase pathway             | 12                 | +   | 1,57E-02 |
| PDGF signaling pathway         | 10                 | +   | 1,98E-02 |
| Ras Pathway                    | 12                 | +   | 2,92E-02 |
| Blood coagulation              | 17                 | -   | 4,92E-02 |
| TCA cycle                      | 10                 | -   | 1,23E-01 |
| Glycolysis                     | 13                 | -   | 5,18E-01 |

**B**

| WT/Cts1 <sup>-/-</sup>         |                    |     |          |
|--------------------------------|--------------------|-----|----------|
| Pathways                       | Number of proteins | +/- | p value  |
| Ubiquitin proteasome pathway   | 30                 | +   | 2,46E-05 |
| Blood coagulation              | 17                 | -   | 2,67E-05 |
| TCA cycle                      | 10                 | -   | 6,32E-04 |
| p53 pathway                    | 12                 | +   | 1,49E-03 |
| FGF signaling pathway          | 19                 | +   | 3,56E-03 |
| Parkinson disease              | 34                 | +   | 6,12E-03 |
| PI3 kinase pathway             | 11                 | +   | 6,25E-03 |
| Glycolysis                     | 16                 | -   | 1,43E-02 |
| EGF receptor signaling pathway | 21                 | +   | 3,29E-02 |
| Ras Pathway                    | 13                 | +   | 2,44E-01 |
| PDGF signaling pathway         | 10                 | +   | 2,75E-01 |
| VEGF signaling pathway         | 10                 | -   | 7,51E-01 |
| Angiogenesis                   | 19                 | +   | 8,03E+01 |

**C**

| WT/Ctsb <sup>-/-</sup>    |                    |     |          |
|---------------------------|--------------------|-----|----------|
| Protein Class             | Number of proteins | +/- | p value  |
| oxidoreductase            | 107                | -   | 5,46E-07 |
| chaperone                 | 32                 | +   | 9,82E-06 |
| dehydrogenase             | 64                 | -   | 2,90E-04 |
| nucleic acid binding      | 62                 | +   | 2,34E-03 |
| metalloprotease           | 18                 | -   | 2,84E-03 |
| serine protease inhibitor | 21                 | -   | 4,10E-03 |
| ligase                    | 29                 | +   | 1,01E-02 |
| protease inhibitor        | 23                 | -   | 1,03E-02 |
| DNA binding protein       | 13                 | +   | 1,30E-02 |
| RNA binding protein       | 43                 | +   | 1,32E-02 |
| isomerase                 | 30                 | -   | 1,46E-02 |
| receptor                  | 36                 | -   | 2,81E-02 |
| structural protein        | 10                 | +   | 2,94E-02 |
| ATP synthase              | 10                 | -   | 4,54E-02 |

**D**

| WT/Cts1 <sup>-/-</sup>            |                    |     |          |
|-----------------------------------|--------------------|-----|----------|
| Protein Class                     | Number of proteins | +/- | p value  |
| nucleic acid binding              | 70                 | +   | 2,43E-06 |
| chaperone                         | 32                 | +   | 3,14E-06 |
| serine protease inhibitor         | 23                 | -   | 8,03E-06 |
| protease inhibitor                | 27                 | -   | 2,87E-05 |
| oxidoreductase                    | 113                | -   | 3,00E-05 |
| dehydrogenase                     | 64                 | -   | 1,06E-04 |
| RNA binding protein               | 47                 | +   | 1,93E-04 |
| mRNA processing factor            | 13                 | +   | 5,98E-04 |
| DNA binding protein               | 17                 | +   | 6,25E-04 |
| cysteine protease                 | 23                 | +   | 3,41E-03 |
| ligase                            | 35                 | +   | 9,61E-03 |
| transferase                       | 150                | -   | 2,25E-02 |
| lyase                             | 21                 | -   | 3,94E-02 |
| microtubule family cytoskeletal p | 17                 | +   | 4,43E-02 |

Tholen *et al.*, Sup. Fig. S5

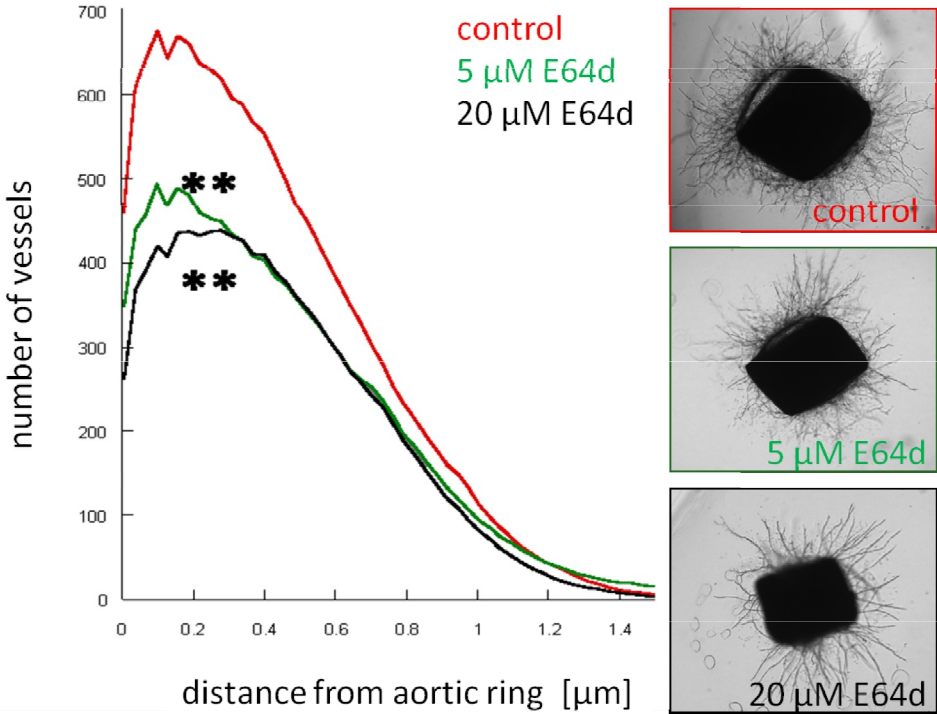

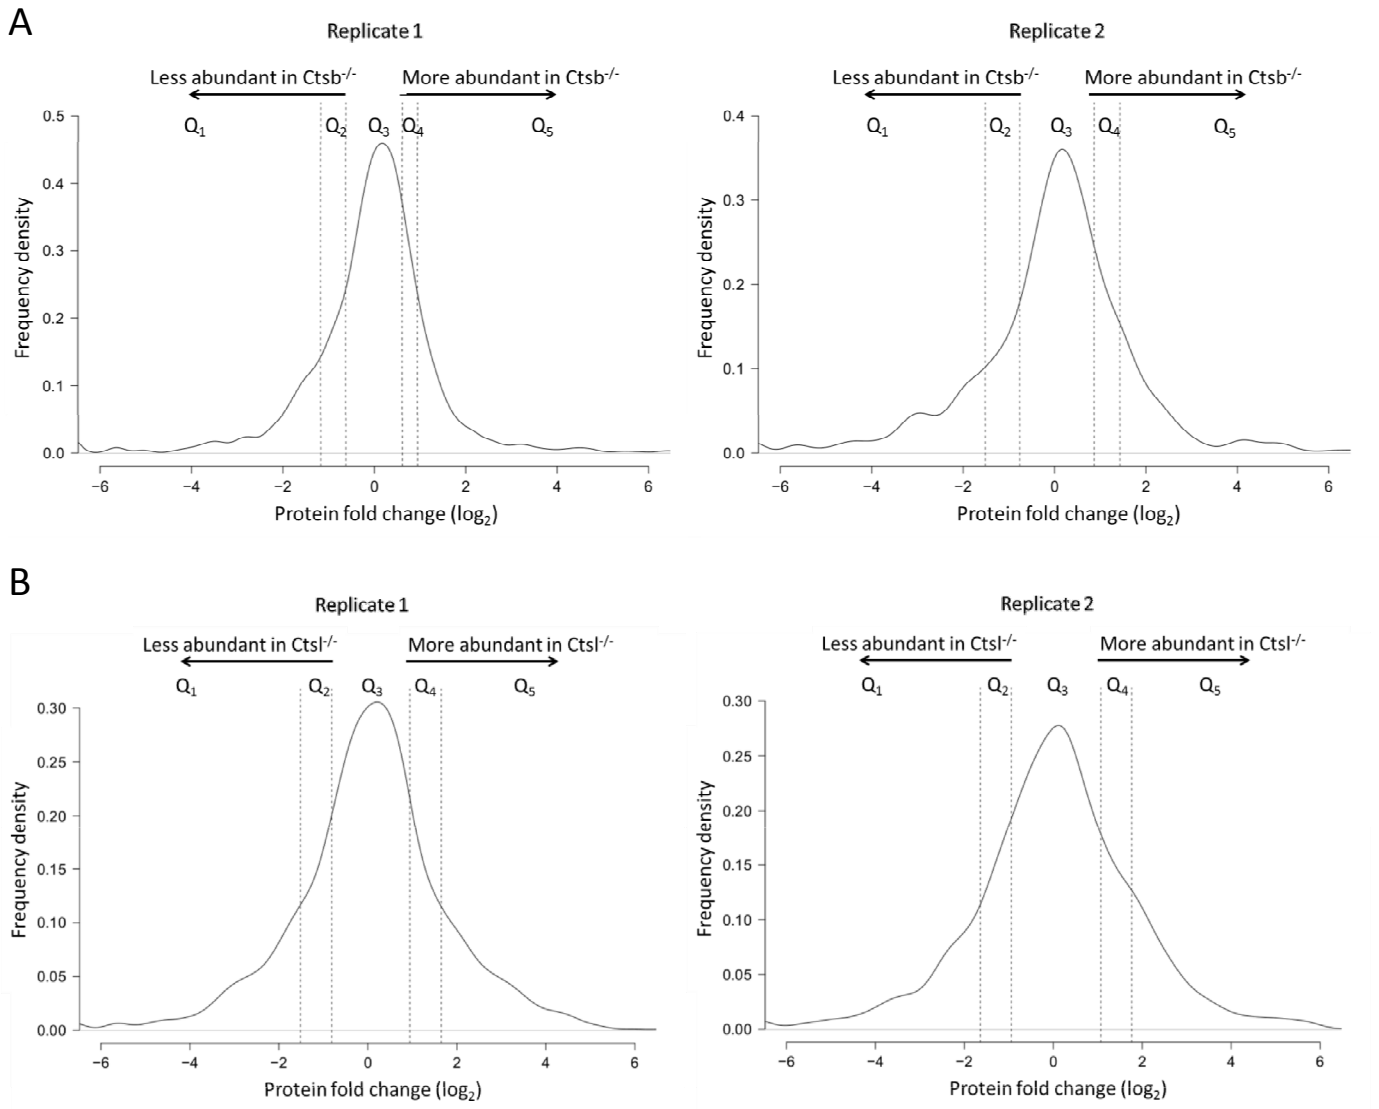



Tholen *et al.*, Sup. Fig. S7

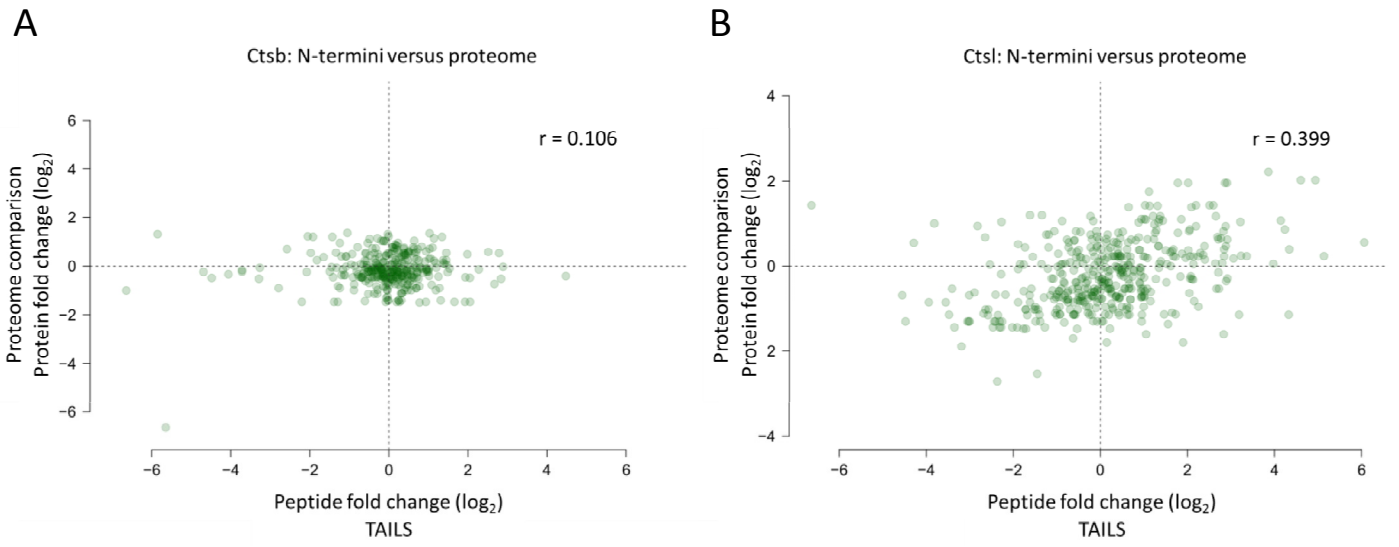

Supplement: supp_M112.017962_mcp.M112.017962-1.pdf [file supp_M112.017962_mcp.M112.017962-1.pdf]
