# Supplementary material
Source: PubMed Central journal article supplement (PMC3591655)
Supplement: supp_M112.017962_mcp.M112.017962-2.pdf [file supp_M112.017962_mcp.M112.017962-2.pdf]

## Legends for supplementary files

Deletion of Cysteine Cathepsins B or L Yields Differential Impacts on Murine Skin Proteome and Degradome.

Tholen et al.

**Supplementary File 1:** MS/MS spectra of dimethylated (naturally unmodified) N-termini identified in the TAILS experiment comparing wild-type and *Ctsb*<sup>-/-</sup> skin (replicate 1).

**Supplementary File 2:** MS/MS spectra of dimethylated (naturally unmodified) N-termini identified in the TAILS experiment comparing wild-type and *Ctsb*<sup>-/-</sup> skin (replicate 2).

**Supplementary File 3:** MS/MS spectra of dimethylated (naturally unmodified) N-termini identified in the TAILS experiment comparing wild-type and *Ctsl*<sup>-/-</sup> skin (replicate 1).

**Supplementary File 4:** MS/MS spectra of dimethylated (naturally unmodified) N-termini identified in the TAILS experiment comparing wild-type and *Ctsl*<sup>-/-</sup> skin (replicate 2).

**Supplementary File 5:** MS/MS spectra of acetylated N-termini identified in the TAILS experiment comparing wild-type and *Ctsb*<sup>-/-</sup> skin (replicate 1).

**Supplementary File 6:** MS/MS spectra of acetylated N-termini identified in the TAILS experiment comparing wild-type and *Ctsb*<sup>-/-</sup> skin (replicate 2).

**Supplementary File 7:** MS/MS spectra of acetylated N-termini identified in the TAILS experiment comparing wild-type and *Ctsl*<sup>-/-</sup> skin (replicate 1).

**Supplementary File 8:** MS/MS spectra of acetylated N-termini identified in the TAILS experiment comparing wild-type and *Ctsl*<sup>-/-</sup> skin (replicate 2).

**Table S1:** List of all identified and quantified proteins in the quantitative proteome comparison of wild-type and *Ctsb*<sup>-/-</sup> skin (replicate 1). \*Ctsb quantification by LC-MS/MS is due to chromatographic background in the *Ctsb*<sup>-/-</sup> sample.

**Table S2:** List of all identified and quantified proteins in the quantitative proteome comparison of wild-type and *Ctsb*<sup>-/-</sup> skin (replicate 2). \*Ctsb quantification by LC-MS/MS is due to chromatographic background in the *Ctsb*<sup>-/-</sup> sample.

**Table S3:** List of all identified and quantified proteins in the quantitative proteome comparison of wild-type and *Ctsl*<sup>-/-</sup> skin (replicate 1). \*Ctsl quantification by LC-MS/MS is due to chromatographic background in the *Ctsl*<sup>-/-</sup> sample.

**Table S4:** List of all identified and quantified proteins in the quantitative proteome comparison of wild-type and *Ctsl*<sup>-/-</sup> skin (replicate 2). \*Ctsl quantification by LC-MS/MS is due to chromatographic background in the *Ctsl*<sup>-/-</sup> sample.

**Table S5:** List of all identified and quantified proteins in both replicates of the quantitative proteome comparison of wild-type and *Ctsb*<sup>-/-</sup> skin lysates. \*Ctsb quantification by LC-MS/MS is due to chromatographic background in the *Ctsb*<sup>-/-</sup> sample.

**Table S6:** List of all identified and quantified proteins in both replicates of the quantitative proteome comparison of wild-type and *Ctsl*<sup>-/-</sup> skin lysates. \*Ctsl quantification by LC-MS/MS is due to chromatographic background in the *Ctsl*<sup>-/-</sup> sample.

**Table S7:** Dimethylated (naturally unmodified) N-termini identified in the TAILS experiment comparing wild-type and *Ctsb*<sup>-/-</sup> skin (replicate 1). This is a comprehensive, non redundant listing. Up to two potential protein IDs per peptide are stated. Prime-site sequences of proteineous cleavage sites were determined experimentally. The corresponding non-prime sequences are derived bioinformatically by database searches. Modifications are lysine and N-terminal dimethylation (light formaldehyde + 28.03 Da; heavy formaldehyde + 34.06 Da) and cysteine carboxyamidomethylation(+ 57.02 Da).

**Table S8:** Dimethylated (naturally unmodified) N-termini identified in the TAILS experiment comparing wild-type and *Ctsb*<sup>-/-</sup> skin (replicate 2). This is a comprehensive, non redundant listing. Up to two potential protein IDs per peptide are stated. Prime-site sequences of proteineous cleavage sites were determined experimentally. The corresponding non-prime sequences are derived bioinformatically by database searches. Modifications are lysine and N-terminal dimethylation (light formaldehyde + 28.03 Da; heavy formaldehyde + 34.06 Da) and cysteine carboxyamidomethylation(+ 57.02 Da).

**Table S9:** Dimethylated (naturally unmodified) N-termini identified in both replicates of the TAILS experiment comparing wild-type and *Ctsb*<sup>-/-</sup> skin. This is a comprehensive, non redundant listing displaying those dimethylated (naturally unmodified) N-termini that occur in both replicates.

**Table S10:** Dimethylated (naturally unmodified) N-termini identified in the TAILS experiment comparing wild-type and *Ctsl*<sup>-/-</sup> skin (replicate 1). This is a comprehensive, non redundant listing. Up to two potential protein IDs per peptide are stated. Prime-site sequences of proteineous cleavage sites were determined experimentally. The corresponding non-prime sequences are derived bioinformatically by database searches. Modifications are lysine and N-terminal dimethylation (light formaldehyde + 28.03 Da; heavy formaldehyde + 34.06 Da) and cysteine carboxyamidomethylation(+ 57.02 Da).

**Table S11:** Dimethylated (naturally unmodified) N-termini identified in the TAILS experiment comparing wild-type and *Ctsl*<sup>-/-</sup> skin (replicate 2). This is a comprehensive, non redundant listing. Up to two potential protein IDs per peptide are stated. Prime-site sequences of proteineous cleavage sites were determined experimentally. The corresponding non-prime sequences are derived bioinformatically by database searches. Modifications are lysine and N-terminal dimethylation (light formaldehyde + 28.03 Da; heavy formaldehyde + 34.06 Da) and cysteine carboxyamidomethylation(+ 57.02 Da).

**Table S12:** Dimethylated (naturally unmodified) N-termini identified in both replicates of the TAILS experiment comparing wild-type and *Ctsl*<sup>-/-</sup> skin. This is a comprehensive, non redundant listing displaying those dimethylated (naturally unmodified) N-termini that occur in both replicates.

**Table S13:** Ranking of dimethylated (naturally unmodified) N-termini reduce in the TAILS experiment comparing wild-type and *Ctsb*<sup>-/-</sup> skin.

**Table S14:** Ranking of dimethylated (naturally unmodified) N-termini reduced in the TAILS experiment comparing wild-type and *Ctsl*<sup>-/-</sup> skin.

**Table S15:** Acetylated N-termini identified in the TAILS experiment comparing wild-type and *Ctsb*<sup>-/-</sup> skin (replicate 1). Up to two potential protein IDs per peptide are stated. Prime-site sequences of proteinoous cleavage sites were determined experimentally. The corresponding non-prime sequences are derived bioinformatically by database searches. Modifications are lysine and N-terminal dimethylation (light formaldehyde + 28.03 Da; heavy formaldehyde + 34.06 Da), cysteine carboxyamidomethylation (+ 57.02 Da) and N-terminal acetylation (+ 42.01 Da).

**Table S16:** Acetylated N-termini identified in the TAILS experiment comparing wild-type and *Ctsb*<sup>-/-</sup> skin (replicate 2). Up to two potential protein IDs per peptide are stated. Prime-site sequences of proteinoous cleavage sites were determined experimentally. The corresponding non-prime sequences are derived bioinformatically by database searches. Modifications are lysine and N-terminal dimethylation (light formaldehyde + 28.03 Da; heavy formaldehyde + 34.06 Da), cysteine carboxyamidomethylation (+ 57.02 Da) and N-terminal acetylation (+ 42.01 Da).

**Table S17:** Acetylated N-termini identified in the TAILS experiment comparing wild-type and *Ctsf*<sup>-/-</sup> skin (replicate 1). Up to two potential protein IDs per peptide are stated. Prime-site sequences of proteinoous cleavage sites were determined experimentally. The corresponding non-prime sequences are derived bioinformatically by database searches. Modifications are lysine and N-terminal dimethylation (light formaldehyde + 28.03 Da; heavy formaldehyde + 34.06 Da), cysteine carboxyamidomethylation (+ 57.02 Da) and N-terminal acetylation (+ 42.01 Da).

**Table S18:** Acetylated N-termini identified in the TAILS experiment comparing wild-type and *Ctsf*<sup>-/-</sup> skin (replicate 2). Up to two potential protein IDs per peptide are stated. Prime-site sequences of proteinoous cleavage sites were determined experimentally. The corresponding non-prime sequences are derived bioinformatically by database searches. Modifications are lysine and N-terminal dimethylation (light formaldehyde + 28.03 Da; heavy formaldehyde + 34.06 Da), cysteine carboxyamidomethylation (+ 57.02 Da) and N-terminal acetylation (+ 42.01 Da).
