# Supplementary material
Source: PubMed Central journal article supplement (PMC3591655)
Supplement: supp_M112.017962_mcp.M112.017962-3.pdf [file supp_M112.017962_mcp.M112.017962-3.pdf]

**Table S1:** List of all identified and quantified proteins in the quantitative proteome comparison of skin lysates wt and *Ctsb*<sup>-/-</sup> (replicate 1).

| Protein                                                                              | Uniprot accession | ProteinProphet Prob. Score | Unique peptides | Total peptides | Sequence coverage [%] | Fold change (log <sub>2</sub> ) of ASAPratio | Fold change standard deviation | ASAPratio p-value |
|--------------------------------------------------------------------------------------|-------------------|----------------------------|-----------------|----------------|-----------------------|----------------------------------------------|--------------------------------|-------------------|
| Cathepsin B;                                                                         | P10605            | 1                          | 8               | 12             | 21.8                  | -6.644*                                      | -0.001                         | 0.000             |
| Betaine--homocysteine S-methyltransferase 1;                                         | O35490            | 1                          | 6               | 9              | 22.1                  | -6.644                                       | -0.001                         | 0.000             |
| Liver carboxylesterase 31;                                                           | Q63880            | 0.998                      | 2               | 2              | 5.8                   | -6.644                                       | -6.644                         | 0.000             |
| Fructose-bisphosphate aldolase B;                                                    | Q91Y97            | 1                          | 5               | 7              | 15.7                  | -4.644                                       | -2.322                         | 0.000             |
| Glycine N-methyltransferase;                                                         | Q9QXF8            | 1                          | 4               | 5              | 19.1                  | -4.644                                       | -1.161                         | 0.000             |
| Dimethylglycine dehydrogenase, mitochondrial;                                        | Q9DBT9            | 1                          | 3               | 3              | 3.9                   | -4.322                                       | -0.864                         | 0.000             |
| Disks large-associated protein 4;                                                    | B1AZP2            | 0.985                      | 2               | 2              | 1.5                   | -4.322                                       | -0.864                         | 0.000             |
| Fatty acid-binding protein, liver;                                                   | P12710            | 0.962                      | 2               | 3              | 15                    | -3.837                                       | -2.741                         | 0.000             |
| Surfeit locus protein 4;                                                             | Q64310            | 0.978                      | 2               | 2              | 7.1                   | -2.396                                       | -2.144                         | 0.068             |
| Fatty acid-binding protein, heart;                                                   | P11404            | 1                          | 8               | 12             | 35.3                  | -1.556                                       | -0.87                          | 0.080             |
| IgG receptor FcRn large subunit p51;                                                 | Q61559            | 1                          | 2               | 2              | 9.9                   | -1.515                                       | -0.952                         | 0.131             |
| Sorting nexin-4;                                                                     | Q91YJ2            | 1                          | 2               | 2              | 4                     | -1.515                                       | -0.173                         | 0.000             |
| Hydroxymethylglutaryl-CoA synthase, mitochondrial;                                   | P54869            | 1                          | 4               | 7              | 8.1                   | -1.396                                       | -0.845                         | 0.151             |
| CD 81 antigen, isoform CRA_c; CD81 antigen; Tapa-1 protein; Uncharacterized protein; | Q91V78            | 1                          | 3               | 6              | 19.1                  | -1.286                                       | -0.125                         | 0.002             |
| V-type proton ATPase 116 kDa subunit a isoform 1;                                    | Q9Z1G4            | 1                          | 3               | 3              | 2.4                   | -1.252                                       | -0.656                         | 0.148             |
| N-acetylmuramoyl-L-alanine amidase;                                                  | Q8VCS0            | 1                          | 4               | 7              | 7.2                   | -1.252                                       | -0.715                         | 0.165             |
| Uncharacterized protein;                                                             | D3YYM6            | 1                          | 3               | 3              | 15.4                  | -1.252                                       | -0.447                         | 0.053             |
| UPF0696 protein C11orf68 homolog;                                                    | Q8VD62            | 1                          | 2               | 2              | 7.2                   | -1.252                                       | -0.805                         | 0.216             |
| Serpin H1;                                                                           | P19324            | 1                          | 18              | 23             | 31.4                  | -1.184                                       | -0.404                         | 0.061             |
| 60S ribosomal protein L12;                                                           | P35979            | 1                          | 5               | 6              | 39.4                  | -1.184                                       | -0.7                           | 0.203             |
| Mitochondrial carrier homolog 2;                                                     | Q791V5            | 1                          | 4               | 4              | 16.2                  | -1.184                                       | -1.076                         | 0.386             |
| Ig kappa chain V-II region 26-10;                                                    | P01631            | 1                          | 2               | 4              | 11.5                  | -1.152                                       | -0.154                         | 0.007             |
| Carboxypeptidase B2;                                                                 | Q9JHH6            | 1                          | 3               | 3              | 9                     | -1.152                                       | -0.128                         | 0.005             |
| 60S acidic ribosomal protein P2;                                                     | P99027            | 1                          | 3               | 4              | 45.2                  | -1.12                                        | -0.17                          | 0.012             |
| Complement C1s-A subcomponent;                                                       | Q8CG14            | 1                          | 3               | 3              | 5                     | -1.12                                        | -0.365                         | 0.069             |
| CD209 antigen-like protein D;                                                        | Q91ZW8            | 1                          | 2               | 2              | 9.3                   | -1.089                                       | -0.162                         | 0.015             |
| Ubiquitin-conjugating enzyme E2 D3;                                                  | P61079            | 0.999                      | 2               | 2              | 7.5                   | -1.089                                       | -0.023                         | 0.005             |
| UDP-N-acetylhexosamine pyrophosphorylase;                                            | Q91YN5            | 1                          | 7               | 7              | 13                    | -1.059                                       | -0.265                         | 0.045             |
| Ras-related protein Rap-1b;                                                          | Q99JI6            | 1                          | 6               | 6              | 19.6                  | -1.059                                       | -0.11                          | 0.011             |
| Lymphocyte antigen 6 complex locus protein G6c;                                      | Q9Z1Q4            | 1                          | 3               | 5              | 14.3                  | -1.059                                       | -0.11                          | 0.011             |
| Uncharacterized protein;                                                             | E9Q6D8            | 1                          | 11              | 11             | 15.1                  | -1.059                                       | -0.375                         | 0.094             |
| Angiotensin-converting enzyme;                                                       | P09470            | 1                          | 25              | 37             | 17.1                  | -1.059                                       | -0.309                         | 0.067             |
| Collagen alpha-1(I) chain;                                                           | P11087            | 1                          | 41              | 67             | 24.4                  | -1.059                                       | -0.574                         | 0.225             |
| Pleckstrin;                                                                          | Q9JHK5            | 1                          | 2               | 2              | 4.3                   | -1.059                                       | -0.11                          | 0.011             |
| Peptidyl-prolyl cis-trans isomerase FKBP7;                                           | O54998            | 1                          | 7               | 12             | 17.4                  | -1.029                                       | -0.189                         | 0.033             |
| Ig mu chain C region secreted form;                                                  | P01872            | 1                          | 9               | 11             | 14.5                  | -1.029                                       | -0.126                         | 0.017             |
| Oxidation resistance protein 1;                                                      | Q4KMM3            | 1                          | 4               | 4              | 4.9                   | -1.029                                       | -0.273                         | 0.063             |
| A-kinase anchor protein 12;                                                          | Q9WTK5            | 1                          | 42              | 63             | 19.5                  | -1.029                                       | -0.693                         | 0.328             |
| CD9 antigen;                                                                         | P40240            | 1                          | 3               | 4              | 14.2                  | -1.029                                       | -0.168                         | 0.026             |
| Growth/differentiation factor 8;                                                     | O08689            | 1                          | 2               | 2              | 4.8                   | -1.029                                       | -0.105                         | 0.014             |

Table S1, Tholen et al.

| Protein                                                                                                        | Uniprot accession | ProteinProphet Prob. Score | Unique peptides | Total peptides | Sequence coverage [%] | Fold change (log <sub>2</sub> ) of ASAPratio | Fold change standard deviation | ASAPratio p-value |
|----------------------------------------------------------------------------------------------------------------|-------------------|----------------------------|-----------------|----------------|-----------------------|----------------------------------------------|--------------------------------|-------------------|
| Scavenger receptor cysteine-rich type 1 protein M130;                                                          | Q2VLH6            | 1                          | 4               | 4              | 3.4                   | -0.971                                       | -0.095                         | 0.017             |
| Protein Noxp20;                                                                                                | Q9D281            | 1                          | 3               | 3              | 6.3                   | -0.971                                       | -0.514                         | 0.256             |
| Major urinary protein 8; Novel member of the major urinary protein (Mup) gene family; Uncharacterized protein; | A2BIN1            | 0.999                      | 2               | 3              | 56.7                  | -0.971                                       | -0.095                         | 0.017             |
| Major urinary protein 2;                                                                                       | P11589            | 0.998                      | 5               | 10             | 55                    | -0.474                                       | -0.053                         | 0.258             |
| Myosin-binding protein H;                                                                                      | P70402            | 1                          | 6               | 6              | 12                    | -0.943                                       | -0.671                         | 0.384             |
| Metalloreductase STEAP3;                                                                                       | Q8CI59            | 1                          | 4               | 4              | 10.7                  | -0.943                                       | -0.363                         | 0.163             |
| UPF0556 protein C19orf10 homolog;                                                                              | Q9CPT4            | 1                          | 3               | 3              | 12.7                  | -0.943                                       | -0.381                         | 0.180             |
| Cysteine-rich with EGF-like domain protein 2;                                                                  | Q9CYA0            | 1                          | 3               | 3              | 6.6                   | -0.943                                       | -0.326                         | 0.130             |
| Sodium/potassium-transporting ATPase subunit beta-3;                                                           | P97370            | 1                          | 4               | 4              | 11.2                  | -0.943                                       | -0.435                         | 0.214             |
| Myelin basic protein;                                                                                          | P04370            | 1                          | 2               | 2              | 8                     | -0.916                                       | -0.086                         | 0.025             |
| Complement component C9;                                                                                       | P06683            | 1                          | 26              | 31             | 26.8                  | -0.916                                       | -0.207                         | 0.069             |
| Myosin-binding protein C, fast-type;                                                                           | Q5XKE0            | 1                          | 44              | 61             | 28                    | -0.916                                       | -0.156                         | 0.049             |
| Ubiquitin carboxyl-terminal hydrolase isozyme L1;                                                              | Q9R0P9            | 1                          | 7               | 9              | 27.8                  | -0.916                                       | -0.709                         | 0.438             |
| Carbonyl reductase [NADPH] 2;                                                                                  | P08074            | 1                          | 18              | 27             | 48.4                  | -0.916                                       | -0.311                         | 0.138             |
| Dipeptidase 1;                                                                                                 | P31428            | 1                          | 4               | 7              | 9.8                   | -0.889                                       | -0.132                         | 0.047             |
| C-type mannose receptor 2;                                                                                     | Q64449            | 1                          | 15              | 17             | 9.7                   | -0.889                                       | -0.181                         | 0.065             |
| Leukemia inhibitory factor receptor;                                                                           | P42703            | 1                          | 6               | 6              | 6.7                   | -0.862                                       | -0.172                         | 0.073             |
| Protein canopy homolog 2;                                                                                      | Q9QXT0            | 1                          | 3               | 5              | 15.4                  | -0.862                                       | -0.063                         | 0.031             |
| Uncharacterized protein;                                                                                       | D3YXF5            | 1                          | 9               | 12             | 29.2                  | -0.862                                       | -0.486                         | 0.337             |
| COP9 signalosome complex subunit 1;                                                                            | Q99LD4            | 1                          | 2               | 2              | 5.5                   | -0.862                                       | -0.141                         | 0.063             |
| Heterogeneous nuclear ribonucleoprotein L;                                                                     | Q8R081            | 0.999                      | 2               | 2              | 4.6                   | -0.862                                       | -0.611                         | 0.432             |
| Equilibrative nucleoside transporter 1;                                                                        | Q9JIM1            | 0.998                      | 2               | 2              | 9.9                   | -0.862                                       | -0.047                         | 0.030             |
| Macrophage colony-stimulating factor 1 receptor;                                                               | P09581            | 0.993                      | 2               | 2              | 1.8                   | -0.862                                       | -0.078                         | 0.036             |
| Niemann-Pick C1 protein;                                                                                       | Q35604            | 1                          | 3               | 5              | 2                     | -0.811                                       | -0.085                         | 0.048             |
| SPARC;                                                                                                         | P07214            | 1                          | 7               | 10             | 13                    | -0.811                                       | -0.114                         | 0.062             |
| Murinoglobulin-1;                                                                                              | P28665            | 1                          | 77              | 149            | 30.9                  | -0.811                                       | -0.299                         | 0.217             |
| Complement component C8 alpha chain;                                                                           | Q8K182            | 1                          | 11              | 13             | 19.1                  | -0.811                                       | -0.256                         | 0.167             |
| Hypoxia up-regulated protein 1;                                                                                | Q9JKR6            | 1                          | 19              | 22             | 16.1                  | -0.811                                       | -0.47                          | 0.375             |
| Prenylcysteine oxidase;                                                                                        | Q9CQF9            | 1                          | 2               | 2              | 5.9                   | -0.811                                       | -0.114                         | 0.062             |
| Complement component C8 beta chain;                                                                            | Q8BH35            | 1                          | 8               | 8              | 15.1                  | -0.786                                       | -0.122                         | 0.081             |
| Protein phosphatase 1F;                                                                                        | Q8CGA0            | 1                          | 4               | 4              | 6.2                   | -0.786                                       | -0.461                         | 0.398             |
| Aminopeptidase B;                                                                                              | Q8VCT3            | 1                          | 11              | 11             | 16                    | -0.786                                       | -0.379                         | 0.316             |
| Mitochondrial-processing peptidase subunit alpha;                                                              | Q9DC61            | 1                          | 4               | 4              | 4.3                   | -0.786                                       | -0.325                         | 0.261             |
| S-formylglutathione hydrolase;                                                                                 | Q9R0P3            | 1                          | 13              | 20             | 29.1                  | -0.786                                       | -0.081                         | 0.056             |
| UDP-glucose 6-dehydrogenase;                                                                                   | O70475            | 1                          | 21              | 22             | 37.9                  | -0.786                                       | -0.163                         | 0.104             |
| Adenylosuccinate lyase;                                                                                        | P54822            | 1                          | 10              | 11             | 21.5                  | -0.786                                       | -0.556                         | 0.475             |
| Malignant T cell-amplified sequence 1;                                                                         | Q9DB27            | 1                          | 2               | 3              | 19.9                  | -0.786                                       | -0.054                         | 0.046             |
| Afamin;                                                                                                        | O89020            | 1                          | 22              | 26             | 22.2                  | -0.761                                       | -0.348                         | 0.321             |
| Coagulation factor XIII B chain;                                                                               | Q07968            | 1                          | 3               | 3              | 5.7                   | -0.761                                       | -0.271                         | 0.239             |
| Protein PRRC1;                                                                                                 | Q3UPH1            | 1                          | 2               | 2              | 7                     | -0.761                                       | -0.245                         | 0.206             |
| Delta-1-pyrroline-5-carboxylate dehydrogenase, mitochondrial;                                                  | Q8CHT0            | 1                          | 8               | 8              | 11                    | -0.761                                       | -0.503                         | 0.456             |
| Thioredoxin domain-containing protein 5;                                                                       | Q91W90            | 1                          | 21              | 35             | 41.3                  | -0.761                                       | -0.103                         | 0.081             |

Table S1, Tholen et al.

| Protein                                                                                                           | Uniprot accession | ProteinProphet Prob. Score | Unique peptides | Total peptides | Sequence coverage [%] | Fold change (log <sub>2</sub> ) of ASAPratio | Fold change standard deviation | ASAPratio p-value |
|-------------------------------------------------------------------------------------------------------------------|-------------------|----------------------------|-----------------|----------------|-----------------------|----------------------------------------------|--------------------------------|-------------------|
| Collagen triple helix repeat-containing protein 1;                                                                | Q9D1D6            | 1                          | 2               | 2              | 11                    | -0.761                                       | -0.103                         | 0.081             |
| Histidine-rich glycoprotein;                                                                                      | Q9ESB3            | 1                          | 9               | 10             | 11.6                  | -0.761                                       | -0.271                         | 0.239             |
| Nucleobindin-1;                                                                                                   | Q02819            | 1                          | 6               | 9              | 11.3                  | -0.761                                       | -0.439                         | 0.408             |
| Clathrin light polypeptide (Lca); Uncharacterized protein;                                                        | B1AWE0            | 1                          | 4               | 4              | 13.9                  | -0.761                                       | -0.077                         | 0.065             |
| Uncharacterized protein;                                                                                          | E9PV38            | 1                          | 17              | 22             | 29.3                  | -0.761                                       | -0.348                         | 0.321             |
| Uncharacterized protein;                                                                                          | Q9DBD0            | 1                          | 26              | 31             | 28.7                  | -0.761                                       | -0.361                         | 0.329             |
| Collagen alpha-1(III) chain;                                                                                      | P08121            | 1                          | 14              | 15             | 8                     | -0.737                                       | -0.086                         | 0.083             |
| Glutathione peroxidase 7;                                                                                         | Q99LJ6            | 1                          | 3               | 4              | 16.1                  | -0.737                                       | -0.061                         | 0.069             |
| Hepatitis B virus X-interacting protein homolog;                                                                  | Q9D1L9            | 1                          | 2               | 2              | 22                    | -0.737                                       | -0.086                         | 0.083             |
| Prolyl 4-hydroxylase subunit alpha-1;                                                                             | Q60715            | 1                          | 5               | 6              | 11.2                  | -0.737                                       | -0.111                         | 0.102             |
| Myeloid-associated differentiation marker;                                                                        | O35682            | 1                          | 2               | 2              | 5.3                   | -0.713                                       | -0.082                         | 0.094             |
| Collagen alpha-2(I) chain;                                                                                        | Q01149            | 1                          | 28              | 58             | 17.6                  | -0.713                                       | -0.199                         | 0.198             |
| Sulfated glycoprotein 1;                                                                                          | Q61207            | 1                          | 10              | 15             | 13.2                  | -0.713                                       | -0.094                         | 0.103             |
| Poly(ADP-ribose) glycohydrolase ARH3;                                                                             | Q8CG72            | 1                          | 2               | 2              | 7                     | -0.713                                       | -0.339                         | 0.374             |
| Ubiquitin-like-conjugating enzyme ATG3;                                                                           | Q9CPX6            | 1                          | 4               | 4              | 7.3                   | -0.713                                       | -0.257                         | 0.280             |
| NADH dehydrogenase [ubiquinone] 1 alpha subcomplex subunit 2;                                                     | Q9CQ75            | 1                          | 2               | 2              | 14.1                  | -0.713                                       | -0.082                         | 0.094             |
| Epidermal growth factor receptor;                                                                                 | Q01279            | 1                          | 19              | 26             | 14.9                  | -0.713                                       | -0.199                         | 0.198             |
| Protein ERGIC-53;                                                                                                 | Q9D0F3            | 1                          | 3               | 3              | 12.2                  | -0.713                                       | -0.058                         | 0.080             |
| GTPase NRas;                                                                                                      | P08556            | 0.997                      | 2               | 2              | 12.2                  | -0.713                                       | -0.14                          | 0.138             |
| 4F2 cell-surface antigen heavy chain;                                                                             | P10852            | 1                          | 4               | 4              | 6.8                   | -0.69                                        | -0.312                         | 0.371             |
| Hemopexin;                                                                                                        | Q91X72            | 1                          | 36              | 204            | 47.2                  | -0.69                                        | -0.067                         | 0.098             |
| Vacuolar protein sorting-associated protein 29;                                                                   | Q9QZ88            | 1                          | 4               | 4              | 25.3                  | -0.69                                        | -0.045                         | 0.086             |
| Calcium/calmodulin-dependent protein kinase type 1;                                                               | Q91YS8            | 1                          | 4               | 4              | 11.2                  | -0.69                                        | -0.245                         | 0.293             |
| Cytosolic non-specific dipeptidase;                                                                               | Q9D1A2            | 1                          | 29              | 56             | 37.1                  | -0.69                                        | -0.078                         | 0.106             |
| Alpha-aminoadipic semialdehyde dehydrogenase;                                                                     | Q9DBF1            | 1                          | 17              | 22             | 26.2                  | -0.69                                        | -0.089                         | 0.112             |
| GTP:AMP phosphotransferase, mitochondrial;                                                                        | Q9WTP7            | 1                          | 6               | 6              | 26.9                  | -0.69                                        | -0.445                         | 0.499             |
| Uncharacterized protein;                                                                                          | F8VFN4            | 1                          | 58              | 72             | 31                    | -0.69                                        | -0.234                         | 0.277             |
| SAR1 gene homolog A (S. cerevisiae); SAR1 gene homolog A (S. cerevisiae), isoform CRA_b; Uncharacterized protein; | Q99JZ4            | 1                          | 4               | 6              | 33.8                  | -0.69                                        | -0.189                         | 0.212             |
| GTP-binding protein SAR1b;                                                                                        | Q9CQC9            | 1                          | 2               | 2              | 25.8                  | -0.713                                       | -0.175                         | 0.180             |
| Secretory carrier-associated membrane protein 4;                                                                  | Q9JKV5            | 1                          | 2               | 2              | 4.8                   | -0.69                                        | -0.156                         | 0.180             |
| Ubiquitin-like modifier-activating enzyme ATG7;                                                                   | Q9D906            | 0.998                      | 2               | 2              | 3.6                   | -0.69                                        | -0.367                         | 0.427             |
| Beta-glucuronidase;                                                                                               | P12265            | 1                          | 13              | 16             | 12.8                  | -0.667                                       | -0.296                         | 0.382             |
| Splicing factor U2AF 65 kDa subunit;                                                                              | P26369            | 1                          | 3               | 6              | 8.5                   | -0.644                                       | -0.07                          | 0.120             |
| Biglycan;                                                                                                         | P28653            | 1                          | 3               | 4              | 4.9                   | -0.644                                       | -0.292                         | 0.398             |
| Coatmer subunit delta;                                                                                            | Q5XJY5            | 1                          | 11              | 11             | 15.9                  | -0.644                                       | -0.272                         | 0.369             |
| Succinate dehydrogenase [ubiquinone] flavoprotein subunit, mitochondrial;                                         | Q8K2B3            | 1                          | 17              | 25             | 28.5                  | -0.644                                       | -0.322                         | 0.426             |
| Carboxypeptidase N subunit 2;                                                                                     | Q9DBB9            | 1                          | 10              | 11             | 18.5                  | -0.644                                       | -0.342                         | 0.452             |
| Sorting nexin-1;                                                                                                  | Q9WV80            | 1                          | 7               | 7              | 8.6                   | -0.644                                       | -0.191                         | 0.258             |
| Phosphoribosylformylglycinamide synthase;                                                                         | Q5SUR0            | 1                          | 8               | 8              | 6.2                   | -0.644                                       | -0.463                         | 0.562             |
| Enoyl-CoA hydratase domain-containing protein 2, mitochondrial;                                                   | Q3TLP5            | 1                          | 2               | 2              | 14.3                  | -0.644                                       | -0.06                          | 0.112             |
| 40S ribosomal protein SA;                                                                                         | P14206            | 1                          | 12              | 22             | 40.3                  | -0.621                                       | -0.134                         | 0.210             |
| Macrophage mannose receptor 1;                                                                                    | Q61830            | 1                          | 29              | 37             | 17.5                  | -0.621                                       | -0.162                         | 0.241             |

Table S1, Tholen et al.

| Protein                                                                            | Uniprot accession | ProteinProphet Prob. Score | Unique peptides | Total peptides | Sequence coverage [%] | Fold change (log <sub>2</sub> ) of ASAPratio | Fold change standard deviation | ASAPratio p-value |
|------------------------------------------------------------------------------------|-------------------|----------------------------|-----------------|----------------|-----------------------|----------------------------------------------|--------------------------------|-------------------|
| SEC23-interacting protein;                                                         | Q6NZC7            | 1                          | 3               | 3              | 2.6                   | -0.621                                       | -0.048                         | 0.119             |
| Mannose-1-phosphate guanyltransferase beta;                                        | Q8BTZ7            | 1                          | 9               | 10             | 23.9                  | -0.621                                       | -0.038                         | 0.114             |
| Cell cycle control protein 50A;                                                    | Q8VEK0            | 1                          | 3               | 3              | 7.3                   | -0.621                                       | -0.287                         | 0.424             |
| Aspartyl-tRNA synthetase, cytoplasmic;                                             | Q922B2            | 1                          | 4               | 4              | 7.2                   | -0.621                                       | -0.029                         | 0.110             |
| Protein disulfide-isomerase A3;                                                    | P27773            | 1                          | 53              | 129            | 56.2                  | -0.621                                       | -0.239                         | 0.353             |
| N-acylglucosamine 2-epimerase;                                                     | P82343            | 1                          | 5               | 6              | 9.5                   | -0.621                                       | -0.277                         | 0.412             |
| Phosphoenolpyruvate carboxykinase [GTP], mitochondrial;                            | Q8BH04            | 1                          | 6               | 6              | 8.4                   | -0.621                                       | -0.277                         | 0.412             |
| UPF0587 protein C1orf123 homolog;                                                  | Q8BHG2            | 1                          | 6               | 6              | 38.4                  | -0.621                                       | -0.449                         | 0.576             |
| MCG21506; Macrophage galactose N-acetyl-galactosamine specific lectin 2 isoform i; |                   |                            |                 |                |                       |                                              |                                |                   |
| Uncharacterized protein;                                                           | A9XX86            | 1                          | 5               | 6              | 16.9                  | -0.621                                       | -0.086                         | 0.156             |
| Paralemmin-1;                                                                      | Q9Z0P4            | 1                          | 2               | 4              | 4.7                   | -0.621                                       | -0.105                         | 0.168             |
| Histone deacetylase 2;                                                             | P70288            | 0.999                      | 2               | 2              | 10.2                  | -0.621                                       | -0.124                         | 0.195             |
| Plasma kallikrein;                                                                 | P26262            | 1                          | 10              | 11             | 17.1                  | -0.599                                       | -0.163                         | 0.273             |
| Ceruloplasmin;                                                                     | Q61147            | 1                          | 47              | 71             | 32.1                  | -0.599                                       | -0.064                         | 0.151             |
| Lon protease homolog, mitochondrial;                                               | Q8CGK3            | 1                          | 3               | 3              | 4.1                   | -0.599                                       | -0.281                         | 0.442             |
| Cell adhesion molecule 4;                                                          | Q8R464            | 1                          | 2               | 2              | 5.4                   | -0.599                                       | -0.064                         | 0.151             |
| Complement component C8 gamma chain;                                               | Q8VCG4            | 1                          | 2               | 2              | 20.8                  | -0.599                                       | -0.064                         | 0.151             |
| Disabled homolog 2;                                                                | P98078            | 1                          | 3               | 4              | 7.2                   | -0.599                                       | -0.045                         | 0.135             |
| C-Jun-amino-terminal kinase-interacting protein 4;                                 | Q58A65            | 1                          | 6               | 6              | 4.5                   | -0.599                                       | -0.254                         | 0.411             |
| Frizzled-7;                                                                        | Q61090            | 1                          | 3               | 3              | 3.1                   | -0.599                                       | -0.054                         | 0.142             |
| Alpha-2-antiplasmin;                                                               | Q61247            | 1                          | 8               | 10             | 13                    | -0.599                                       | -0.091                         | 0.167             |
| Coagulation factor XII;                                                            | Q80YC5            | 1                          | 9               | 9              | 11.9                  | -0.599                                       | -0.082                         | 0.169             |
| Uncharacterized protein;                                                           | F7DBB3            | 1                          | 4               | 4              | 15.6                  | -0.599                                       | -0.372                         | 0.541             |
| Phosphoenolpyruvate carboxykinase, cytosolic [GTP];                                | Q9Z2V4            | 0.991                      | 2               | 2              | 4.2                   | -0.599                                       | -0.417                         | 0.578             |
| Receptor-type tyrosine-protein phosphatase C;                                      | P06800            | 1                          | 6               | 6              | 5.1                   | -0.578                                       | -0.276                         | 0.465             |
| Properdin;                                                                         | P11680            | 1                          | 3               | 3              | 7.1                   | -0.578                                       | -0.095                         | 0.202             |
| Peptidyl-prolyl cis-trans isomerase C;                                             | P30412            | 1                          | 7               | 13             | 26.4                  | -0.578                                       | -0.06                          | 0.168             |
| Peroxisome dismutase 4;                                                            | Q08807            | 1                          | 10              | 11             | 43.1                  | -0.578                                       | -0.069                         | 0.178             |
| Adseverin;                                                                         | Q60604            | 1                          | 12              | 17             | 13.6                  | -0.578                                       | -0.242                         | 0.410             |
| Ubiquitin-associated protein 2-like;                                               | Q80X50            | 1                          | 8               | 8              | 7.9                   | -0.578                                       | -0.336                         | 0.533             |
| Procollagen-lysine,2-oxoglutarate 5-dioxygenase 1;                                 | Q9R0E2            | 1                          | 6               | 6              | 8                     | -0.578                                       | -0.112                         | 0.229             |
| STE20-like serine/threonine-protein kinase;                                        | O54988            | 1                          | 3               | 3              | 2.1                   | -0.556                                       | -0.065                         | 0.196             |
| Inorganic pyrophosphatase 2, mitochondrial;                                        | Q91VM9            | 1                          | 2               | 2              | 4                     | -0.556                                       | -0.065                         | 0.196             |
| Nicotinamide phosphoribosyltransferase;                                            | Q99KQ4            | 1                          | 13              | 15             | 27.1                  | -0.556                                       | -0.237                         | 0.454             |
| Pterin-4-alpha-carbinolamine dehydratase 2;                                        | Q9CZL5            | 1                          | 2               | 2              | 8.1                   | -0.556                                       | -0.065                         | 0.195             |
| Coatomer subunit zeta-2;                                                           | Q9JHH9            | 1                          | 3               | 3              | 14.1                  | -0.556                                       | -0.041                         | 0.170             |
| Palmitoyl-protein thioesterase 1;                                                  | O88531            | 1                          | 5               | 6              | 16.9                  | -0.556                                       | -0.237                         | 0.454             |
| Guanine nucleotide-binding protein G(i) subunit alpha-2;                           | P08752            | 1                          | 10              | 13             | 31.8                  | -0.556                                       | -0.172                         | 0.354             |
| Guanine nucleotide-binding protein G(s) subunit alpha isoforms short;              | P63094            | 1                          | 4               | 4              | 11.7                  | -0.105                                       | -0.008                         | 0.798             |
| AP-1 complex subunit beta-1;                                                       | O35643            | 1                          | 4               | 5              | 3.7                   | -0.515                                       | -0.243                         | 0.505             |
| Antithrombin-III;                                                                  | P32261            | 1                          | 25              | 39             | 34.4                  | -0.515                                       | -0.235                         | 0.493             |
| Ran-specific GTPase-activating protein;                                            | P34022            | 1                          | 3               | 4              | 10.8                  | -0.515                                       | -0.294                         | 0.568             |
| Tetranectin;                                                                       | P43025            | 1                          | 10              | 23             | 45                    | -0.515                                       | -0.074                         | 0.227             |

Table S1, Tholen et al.

| Protein                                                                           | Uniprot accession | ProteinProphet Prob. Score | Unique peptides | Total peptides | Sequence coverage [%] | Fold change (log <sub>2</sub> ) of ASAPratio | Fold change standard deviation | ASAPratio p-value |
|-----------------------------------------------------------------------------------|-------------------|----------------------------|-----------------|----------------|-----------------------|----------------------------------------------|--------------------------------|-------------------|
| Ribonuclease UK114;                                                               | P52760            | 1                          | 2               | 2              | 19.3                  | -0.515                                       | -0.052                         | 0.206             |
| 40S ribosomal protein S20;                                                        | P60867            | 1                          | 2               | 3              | 10.1                  | -0.515                                       | -0.029                         | 0.184             |
| Nucleobindin-2;                                                                   | P81117            | 1                          | 6               | 6              | 14                    | -0.515                                       | -0.147                         | 0.356             |
| Complement factor I;                                                              | Q61129            | 1                          | 11              | 20             | 15.4                  | -0.515                                       | -0.11                          | 0.296             |
| Sorbitol dehydrogenase;                                                           | Q64442            | 1                          | 6               | 9              | 9.8                   | -0.515                                       | -0.132                         | 0.326             |
| Oligoribonuclease, mitochondrial;                                                 | Q9D8S4            | 1                          | 3               | 3              | 9.3                   | -0.515                                       | -0.11                          | 0.296             |
| Inositol-3-phosphate synthase 1;                                                  | Q9JHU9            | 1                          | 8               | 8              | 9.7                   | -0.515                                       | -0.044                         | 0.197             |
| Uncharacterized protein;                                                          | F8VQL5            | 1                          | 5               | 11             | 47.9                  | -0.515                                       | -0.052                         | 0.206             |
| Dynamamin-2;                                                                      | P39054            | 1                          | 5               | 5              | 7.4                   | -0.515                                       | -0.191                         | 0.429             |
| CUGBP Elav-like family member 2;                                                  | Q9Z0H4            | 1                          | 3               | 3              | 11.5                  | -0.515                                       | -0.059                         | 0.216             |
| Protein phosphatase 1 regulatory subunit 7;                                       | Q3UM45            | 1                          | 13              | 19             | 27.1                  | -0.494                                       | -0.174                         | 0.432             |
| Cytosolic purine 5'-nucleotidase;                                                 | Q3V1L4            | 1                          | 4               | 4              | 9.5                   | -0.494                                       | -0.125                         | 0.345             |
| Dipeptidyl peptidase 2;                                                           | Q9ET22            | 1                          | 10              | 13             | 14.2                  | -0.494                                       | -0.125                         | 0.345             |
| Plasma glutamate carboxypeptidase;                                                | Q9WVJ3            | 1                          | 10              | 12             | 19.6                  | -0.494                                       | -0.125                         | 0.345             |
| ATP synthase subunit alpha, mitochondrial;                                        | Q03265            | 1                          | 44              | 90             | 44.3                  | -0.494                                       | -0.334                         | 0.637             |
| Peptidyl-prolyl cis-trans isomerase FKBP10;                                       | Q61576            | 1                          | 12              | 13             | 13.8                  | -0.494                                       | -0.077                         | 0.260             |
| Myoferlin;                                                                        | Q69ZN7            | 1                          | 12              | 12             | 4.6                   | -0.494                                       | -0.139                         | 0.375             |
| Sodium/potassium-transporting ATPase subunit alpha-1;                             | Q8VDN2            | 1                          | 11              | 13             | 17.7                  | -0.494                                       | -0.23                          | 0.520             |
| Sodium/potassium-transporting ATPase subunit alpha-2;                             | Q6PIE5            | 1                          | 6               | 9              | 16.2                  | -0.644                                       | -0.362                         | 0.476             |
| Hsc70-interacting protein;                                                        | Q99L47            | 1                          | 6               | 12             | 13.5                  | -0.494                                       | -0.195                         | 0.472             |
| Complement factor H;                                                              | P06909            | 1                          | 3               | 3              | 2.7                   | -0.494                                       | -0.223                         | 0.508             |
| Reversion-inducing cysteine-rich protein with Kazal motifs;                       | Q9Z0J1            | 1                          | 2               | 2              | 0.8                   | -0.494                                       | -0.035                         | 0.210             |
| Peptidyl-prolyl cis-trans isomerase FKBP2;                                        | P45878            | 0.995                      | 2               | 4              | 8.6                   | -0.494                                       | -0.056                         | 0.237             |
| Dipeptidyl peptidase 4;                                                           | P28843            | 1                          | 8               | 9              | 10.1                  | -0.474                                       | -0.086                         | 0.308             |
| Guanine nucleotide-binding protein subunit beta-2-like 1;                         | P68040            | 1                          | 27              | 35             | 60.9                  | -0.474                                       | -0.092                         | 0.322             |
| Pyruvate dehydrogenase phosphatase regulatory subunit, mitochondrial;             | Q77TSQ8           | 1                          | 3               | 3              | 4.2                   | -0.474                                       | -0.092                         | 0.322             |
| Cleavage stimulation factor subunit 2;                                            | Q8BIQ5            | 1                          | 2               | 2              | 6                     | -0.474                                       | -0.066                         | 0.270             |
| CD209 antigen-like protein B;                                                     | Q8CJ91            | 1                          | 2               | 2              | 10.8                  | -0.474                                       | -0.066                         | 0.270             |
| Mitochondrial 10-formyltetrahydrofolate dehydrogenase;                            | Q8K009            | 1                          | 9               | 9              | 12.1                  | -0.474                                       | -0.158                         | 0.436             |
| GDP-fucose protein O-fucosyltransferase 1;                                        | Q91ZW2            | 1                          | 2               | 2              | 4.5                   | -0.474                                       | -0.039                         | 0.240             |
| Cell adhesion molecule 3;                                                         | Q99N28            | 1                          | 2               | 4              | 5.5                   | -0.474                                       | -0.053                         | 0.258             |
| S-methyl-5'-thioadenosine phosphorylase;                                          | Q9CQ65            | 1                          | 9               | 10             | 24                    | -0.474                                       | -0.145                         | 0.422             |
| 40S ribosomal protein S21;                                                        | Q9CQR2            | 1                          | 3               | 3              | 22.9                  | -0.474                                       | -0.066                         | 0.270             |
| Peptidyl-prolyl cis-trans isomerase FKBP9;                                        | Q9Z247            | 1                          | 10              | 11             | 10.9                  | -0.474                                       | -0.204                         | 0.512             |
| Uncharacterized protein;                                                          | E9Q019            | 1                          | 3               | 4              | 20.8                  | -0.474                                       | -0.257                         | 0.585             |
| Alpha-N-acetylglucosaminidase (Sanfilippo disease IIIB); Uncharacterized protein; | A2BFA6            | 1                          | 2               | 2              | 1.1                   | -0.474                                       | -0.033                         | 0.233             |
| Protein S100-A13;                                                                 | P97352            | 1                          | 5               | 7              | 31.6                  | -0.454                                       | -0.168                         | 0.493             |
| Probable proline racemase;                                                        | Q9CXA2            | 1                          | 8               | 10             | 24                    | -0.454                                       | -0.112                         | 0.385             |
| Glycyl-tRNA synthetase;                                                           | Q9CZD3            | 1                          | 15              | 16             | 15.9                  | -0.454                                       | -0.236                         | 0.590             |
| ADP-ribosylation factor-like protein 3;                                           | Q9WUL7            | 1                          | 8               | 9              | 34.1                  | -0.454                                       | -0.037                         | 0.263             |
| Gelsolin;                                                                         | P13020            | 1                          | 36              | 98             | 25.4                  | -0.454                                       | -0.323                         | 0.679             |
| SAM domain and HD domain-containing protein 1;                                    | Q60710            | 1                          | 18              | 23             | 30.1                  | -0.454                                       | -0.106                         | 0.371             |
| Alpha-2-macroglobulin;                                                            | Q61838            | 1                          | 91              | 235            | 39.8                  | -0.454                                       | -0.05                          | 0.281             |

Table S1, Tholen et al.

| Protein                                                                  | Uniprot accession | ProteinProphet Prob. Score | Unique peptides | Total peptides | Sequence coverage [%] | Fold change (log <sub>2</sub> ) of ASAPratio | Fold change standard deviation | ASAPratio p-value |
|--------------------------------------------------------------------------|-------------------|----------------------------|-----------------|----------------|-----------------------|----------------------------------------------|--------------------------------|-------------------|
| Argininosuccinate lyase;                                                 | Q91YI0            | 1                          | 6               | 6              | 11.6                  | -0.454                                       | -0.025                         | 0.250             |
| Cytosolic acyl coenzyme A thioester hydrolase;                           | Q91V12            | 1                          | 2               | 2              | 7.1                   | -0.454                                       | -0.336                         | 0.691             |
| Argininosuccinate synthase;                                              | P16460            | 0.999                      | 3               | 4              | 4.1                   | -0.454                                       | -0.317                         | 0.673             |
| Tripartite motif-containing protein 72;                                  | Q1XH17            | 1                          | 11              | 14             | 18.2                  | -0.434                                       | -0.182                         | 0.545             |
| Glycerol-3-phosphate dehydrogenase, mitochondrial;                       | Q64521            | 1                          | 4               | 5              | 3.4                   | -0.434                                       | -0.158                         | 0.511             |
| Spermidine synthase;                                                     | Q64674            | 1                          | 7               | 11             | 14.6                  | -0.434                                       | -0.07                          | 0.340             |
| Zinc-alpha-2-glycoprotein;                                               | Q64726            | 1                          | 6               | 8              | 18.6                  | -0.434                                       | -0.041                         | 0.296             |
| Ribulose-phosphate 3-epimerase;                                          | Q8VEE0            | 1                          | 3               | 3              | 17.5                  | -0.434                                       | -0.129                         | 0.461             |
| Stomatin-like protein 2;                                                 | Q99JB2            | 1                          | 2               | 2              | 4                     | -0.434                                       | -0.047                         | 0.306             |
| Phosphoacetylglucosamine mutase;                                         | Q9CYR6            | 1                          | 9               | 10             | 15.8                  | -0.434                                       | -0.076                         | 0.353             |
| Epidermal growth factor receptor substrate 15;                           | P42567            | 1                          | 4               | 5              | 4.6                   | -0.434                                       | -0.129                         | 0.461             |
| PDZ and LIM domain protein 7;                                            | Q3TJD7            | 1                          | 4               | 5              | 42.7                  | -0.434                                       | -0.123                         | 0.448             |
| Pyrroline-5-carboxylate reductase 1, mitochondrial;                      | Q922W5            | 1                          | 2               | 2              | 11.7                  | -0.434                                       | -0.065                         | 0.328             |
| UPF0160 protein MYG1, mitochondrial;                                     | Q9JK81            | 1                          | 6               | 6              | 19.3                  | -0.434                                       | -0.106                         | 0.407             |
| Cathepsin E;                                                             | P70269            | 0.997                      | 2               | 2              | 4.9                   | -0.434                                       | -0.035                         | 0.288             |
| Cathepsin K;                                                             | P55097            | 0.994                      | 2               | 2              | 3                     | -0.434                                       | -0.029                         | 0.281             |
| Leukotriene A-4 hydrolase;                                               | P24527            | 1                          | 37              | 46             | 41.1                  | -0.415                                       | -0.188                         | 0.592             |
| Ras-related protein Rab-23;                                              | P35288            | 1                          | 4               | 4              | 17.3                  | -0.415                                       | -0.066                         | 0.364             |
| Immunoglobulin superfamily containing leucine-rich repeat protein;       | Q6GU68            | 1                          | 2               | 2              | 3.3                   | -0.415                                       | -0.028                         | 0.306             |
| 14 kDa phosphohistidine phosphatase;                                     | Q9DAK9            | 1                          | 5               | 6              | 28.2                  | -0.415                                       | -0.055                         | 0.341             |
| Carboxypeptidase N catalytic chain;                                      | Q9JJN5            | 1                          | 6               | 6              | 17.3                  | -0.415                                       | -0.066                         | 0.364             |
| Catalase;                                                                | P24270            | 1                          | 35              | 47             | 45.2                  | -0.415                                       | -0.227                         | 0.635             |
| Xanthine dehydrogenase/oxidase;                                          | Q00519            | 1                          | 46              | 56             | 28.1                  | -0.415                                       | -0.1                           | 0.410             |
| Inter-alpha-trypsin inhibitor heavy chain H2;                            | Q61703            | 1                          | 11              | 11             | 11.6                  | -0.415                                       | -0.061                         | 0.352             |
|                                                                          | Q8R164            | 1                          | 8               | 8              | 27.8                  | -0.415                                       | -0.243                         | 0.658             |
| NEDD9-interacting protein with calponin homology and LIM domains;        | Q8VDP3            | 1                          | 4               | 4              | 5.2                   | -0.415                                       | -0.072                         | 0.376             |
| Electron transfer flavoprotein-ubiquinone oxidoreductase, mitochondrial; | Q921G7            | 1                          | 10              | 10             | 15.1                  | -0.415                                       | -0.177                         | 0.561             |
| Flavin reductase (NADPH);                                                | Q923D2            | 1                          | 9               | 11             | 43.2                  | -0.415                                       | -0.194                         | 0.602             |
| Vitamin D-binding protein;                                               | P21614            | 1                          | 31              | 54             | 54.6                  | -0.377                                       | -0.034                         | 0.348             |
| Alpha-2-HS-glycoprotein;                                                 | P29699            | 1                          | 21              | 52             | 37.1                  | -0.377                                       | -0.029                         | 0.340             |
| Protein AMBP;                                                            | Q07456            | 1                          | 7               | 9              | 14.3                  | -0.377                                       | -0.088                         | 0.452             |
| COMM domain-containing protein 3;                                        | Q63829            | 1                          | 3               | 3              | 12.3                  | -0.377                                       | -0.049                         | 0.367             |
| Prostaglandin reductase 1;                                               | Q91YR9            | 1                          | 10              | 14             | 24.9                  | -0.377                                       | -0.264                         | 0.725             |
| Serine protease inhibitor A3K;                                           | P07759            | 1                          | 36              | 549            | 50.7                  | -0.377                                       | -0.024                         | 0.333             |
| Uncharacterized protein;                                                 | D3Z450            | 1                          | 4               | 6              | 12.9                  | 0.705                                        | 0.221                          | 0.237             |
| Serine protease inhibitor A3N;                                           | Q91WP6            | 1                          | 4               | 4              | 19.4                  | -0.494                                       | -0.049                         | 0.227             |
| Serine protease inhibitor A3G;                                           | Q5I2A0            | 1                          | 3               | 3              | 15.2                  | 0.566                                        | 0.042                          | 0.155             |
| Serine protease inhibitor A3M;                                           | Q03734            | 0.986                      | 2               | 2              | 20.8                  | 0.848                                        | 0.033                          | 0.029             |
| Septin-2;                                                                | P42208            | 1                          | 13              | 15             | 36.8                  | -0.377                                       | -0.093                         | 0.464             |
| Thiosulfate sulfurtransferase;                                           | P52196            | 1                          | 11              | 12             | 30.6                  | -0.377                                       | -0.024                         | 0.333             |
| Isocitrate dehydrogenase [NADP], mitochondrial;                          | P54071            | 1                          | 39              | 72             | 38.5                  | -0.377                                       | -0.054                         | 0.378             |
| Prolyl 4-hydroxylase subunit alpha-2;                                    | Q60716            | 1                          | 9               | 9              | 14.2                  | -0.377                                       | -0.069                         | 0.413             |
| NADH dehydrogenase [ubiquinone] flavoprotein 1, mitochondrial;           | Q91YT0            | 1                          | 12              | 15             | 24.8                  | -0.377                                       | -0.201                         | 0.658             |

Table S1, Tholen et al.

| Protein                                                                  | Uniprot accession | ProteinProphet Prob. Score | Unique peptides | Total peptides | Sequence coverage [%] | Fold change (log <sub>2</sub> ) of ASAPratio | Fold change standard deviation | ASAPratio p-value |
|--------------------------------------------------------------------------|-------------------|----------------------------|-----------------|----------------|-----------------------|----------------------------------------------|--------------------------------|-------------------|
| Prolow-density lipoprotein receptor-related protein 1;                   | Q91ZX7            | 1                          | 40              | 44             | 7.7                   | -0.377                                       | -0.132                         | 0.549             |
| Golgi reassembly-stacking protein 2;                                     | Q99JX3            | 1                          | 6               | 7              | 11.4                  | -0.377                                       | -0.029                         | 0.340             |
| Nucleoside diphosphate kinase;                                           | E9PZFO            | 1                          | 12              | 49             | 74.2                  | -0.377                                       | -0.152                         | 0.580             |
| Serum albumin;                                                           | P07724            | 1                          | 96              | 3649           | 70.2                  | -0.358                                       | -0.133                         | 0.588             |
| Prothrombin;                                                             | P19221            | 1                          | 13              | 16             | 12.5                  | -0.358                                       | -0.083                         | 0.475             |
| N(G),N(G)-dimethylarginine dimethylaminohydrolase 2;                     | Q99LD8            | 1                          | 18              | 26             | 40.7                  | -0.358                                       | -0.119                         | 0.557             |
| Succinate dehydrogenase [ubiquinone] iron-sulfur subunit, mitochondrial; | Q9CQA3            | 1                          | 10              | 16             | 28.7                  | -0.358                                       | -0.129                         | 0.578             |
| Sorting nexin-5;                                                         | Q9D8U8            | 1                          | 7               | 10             | 11.9                  | -0.358                                       | -0.078                         | 0.463             |
| Glutamate dehydrogenase 1, mitochondrial;                                | P26443            | 1                          | 15              | 16             | 20.1                  | -0.358                                       | -0.069                         | 0.451             |
| F-actin-capping protein subunit alpha-1;                                 | P47753            | 1                          | 5               | 6              | 27.6                  | -0.358                                       | -0.083                         | 0.475             |
| F-actin-capping protein subunit alpha-2;                                 | P47754            | 0.995                      | 2               | 2              | 27.6                  | -0.515                                       | -0.066                         | 0.229             |
| Ras-related protein Rab-1A;                                              | P62821            | 1                          | 10              | 11             | 41.1                  | -0.358                                       | -0.064                         | 0.439             |
| Ras-related protein Rab-14;                                              | Q91V41            | 1                          | 6               | 10             | 36.4                  | -0.089                                       | -0.013                         | 0.848             |
| Ras-related protein Rab-1B;                                              | Q9D1G1            | 1                          | 4               | 4              | 26.9                  | 0.345                                        | 0.035                          | 0.401             |
| Ras-related protein Rab-10;                                              | P61027            | 1                          | 3               | 5              | 22.5                  | 0.176                                        | 0.023                          | 0.681             |
| Ras-related protein Rab-8A;                                              | P55258            | 1                          | 2               | 3              | 17.4                  | -0.12                                        | -0.025                         | 0.801             |
| Guanine nucleotide-binding protein G(I)/G(S)/G(T) subunit beta-1;        | P62874            | 1                          | 6               | 9              | 29.4                  | -0.358                                       | -0.055                         | 0.415             |
| Guanine nucleotide-binding protein G(I)/G(S)/G(T) subunit beta-2;        | P62880            | 1                          | 3               | 4              | 25.1                  | -0.358                                       | -0.133                         | 0.588             |
| Aminopeptidase N;                                                        | P97449            | 1                          | 17              | 20             | 11.9                  | -0.358                                       | -0.078                         | 0.463             |
| Leukocyte elastase inhibitor A;                                          | Q9D154            | 1                          | 22              | 53             | 38.5                  | -0.358                                       | -0.078                         | 0.463             |
| Fetuin-B;                                                                | Q9QXC1            | 1                          | 10              | 19             | 24.7                  | -0.358                                       | -0.032                         | 0.376             |
| Guanine deaminase;                                                       | Q9R111            | 1                          | 20              | 23             | 39.6                  | -0.358                                       | -0.069                         | 0.451             |
| MCG140951; Plexin B2; Plxn2 protein; Uncharacterized protein;            | B2RXS4            | 1                          | 2               | 2              | 2.1                   | -0.358                                       | -0.023                         | 0.361             |
| Transmembrane emp24 domain-containing protein 10;                        | Q9D1D4            | 1                          | 3               | 3              | 9.6                   | -0.358                                       | -0.023                         | 0.361             |
| Acylpyruvase FAHD1, mitochondrial;                                       | Q8R0F8            | 0.999                      | 3               | 3              | 16.7                  | -0.358                                       | -0.046                         | 0.394             |
| Myc box-dependent-interacting protein 1;                                 | O08539            | 1                          | 8               | 12             | 18                    | -0.34                                        | -0.245                         | 0.756             |
| Complement C4-B;                                                         | P01029            | 1                          | 30              | 33             | 15.5                  | -0.34                                        | -0.121                         | 0.595             |
| Nuclear transport factor 2;                                              | P61971            | 1                          | 4               | 4              | 23.6                  | -0.34                                        | -0.06                          | 0.464             |
| UDP-N-acetylhexosamine pyrophosphorylase-like protein 1;                 | Q3TW96            | 1                          | 26              | 31             | 32.7                  | -0.34                                        | -0.125                         | 0.607             |
| Sulfhydryl oxidase 1;                                                    | Q8BND5            | 1                          | 8               | 10             | 9.8                   | -0.34                                        | -0.047                         | 0.432             |
| Dihydropyrimidinase-related protein 2;                                   | O08553            | 1                          | 48              | 84             | 55.1                  | -0.34                                        | -0.052                         | 0.442             |
| Uncharacterized protein;                                                 | E9PWE8            | 1                          | 24              | 28             | 35.1                  | -0.12                                        | -0.018                         | 0.786             |
| Vacuolar protein sorting-associated protein 26A;                         | P40336            | 1                          | 4               | 4              | 9.2                   | -0.34                                        | -0.121                         | 0.598             |
| Ras-related protein Rab-2A;                                              | P53994            | 1                          | 7               | 8              | 19.3                  | -0.34                                        | -0.056                         | 0.453             |
| Endoplasmic reticulum resident protein 29;                               | P57759            | 1                          | 7               | 13             | 17.6                  | -0.34                                        | -0.06                          | 0.464             |
| Histidine triad nucleotide-binding protein 1;                            | P70349            | 1                          | 8               | 31             | 71.4                  | -0.34                                        | -0.164                         | 0.666             |
| Lysosomal alpha-glucosidase;                                             | P70699            | 1                          | 3               | 4              | 4.8                   | -0.34                                        | -0.116                         | 0.588             |
| Keratin, type II cytoskeletal 1b;                                        | Q61FZ6            | 1                          | 8               | 8              | 10.1                  | -0.34                                        | -0.112                         | 0.578             |
| Clathrin light chain B;                                                  | Q6IRU5            | 1                          | 3               | 4              | 7.9                   | -0.34                                        | -0.034                         | 0.412             |
| Isoleucyl-tRNA synthetase, mitochondrial;                                | Q8BIJ6            | 1                          | 10              | 10             | 9.1                   | -0.34                                        | -0.142                         | 0.634             |
| Protein DJ-1;                                                            | Q99LX0            | 1                          | 11              | 17             | 43.4                  | -0.34                                        | -0.159                         | 0.659             |
| Selenocysteine lyase;                                                    | Q9JLI6            | 1                          | 3               | 3              | 9.5                   | -0.34                                        | -0.065                         | 0.476             |
| Extracellular matrix protein 1;                                          | Q61508            | 1                          | 2               | 2              | 11.7                  | -0.34                                        | -0.082                         | 0.511             |

Table S1, Tholen et al.

| Protein                                                            | Uniprot accession | ProteinProphet Prob. Score | Unique peptides | Total peptides | Sequence coverage [%] | Fold change (log <sub>2</sub> ) of ASAPratio | Fold change standard deviation | ASAPratio p-value |
|--------------------------------------------------------------------|-------------------|----------------------------|-----------------|----------------|-----------------------|----------------------------------------------|--------------------------------|-------------------|
| Beta-hexosaminidase subunit beta;                                  | P20060            | 0.986                      | 2               | 2              | 1.7                   | -0.34                                        | -0.022                         | 0.391             |
| Lymphocyte antigen 6D;                                             | P35459            | 1                          | 5               | 6              | 48                    | -0.322                                       | -0.129                         | 0.644             |
| Adenosine kinase;                                                  | P55264            | 1                          | 16              | 22             | 25.2                  | -0.322                                       | -0.101                         | 0.597             |
| Fibulin-1;                                                         | Q08879            | 1                          | 13              | 13             | 12.6                  | -0.322                                       | -0.056                         | 0.491             |
| 1-phosphatidylinositol-4,5-bisphosphate phosphodiesterase delta-1; | Q8R3B1            | 1                          | 8               | 8              | 13.8                  | -0.322                                       | -0.101                         | 0.594             |
| Alpha-1-antitrypsin 1-1;                                           | P07758            | 1                          | 11              | 45             | 38.3                  | -0.322                                       | -0.032                         | 0.441             |
| Alpha-1-antitrypsin 1-2;                                           | P22599            | 1                          | 9               | 20             | 35.6                  | -0.252                                       | -0.018                         | 0.521             |
| Alpha-1-antitrypsin 1-4;                                           | Q00897            | 1                          | 7               | 13             | 33.9                  | -0.621                                       | -0.038                         | 0.114             |
| Elongation factor 1-alpha 1;                                       | P10126            | 1                          | 13              | 30             | 36.4                  | -0.322                                       | -0.056                         | 0.491             |
| Elongation factor 1-alpha 2;                                       | P62631            | 1                          | 11              | 18             | 30.2                  | 0.202                                        | 0.03                           | 0.636             |
| Selenium-binding protein 1;                                        | P17563            | 1                          | 36              | 53             | 52.5                  | -0.322                                       | -0.06                          | 0.502             |
| Dipeptidyl peptidase 1;                                            | P97821            | 1                          | 9               | 13             | 12.4                  | -0.322                                       | -0.076                         | 0.535             |
| Tubulin-tyrosine ligase-like protein 12;                           | Q3UDE2            | 1                          | 9               | 13             | 11.6                  | -0.322                                       | -0.205                         | 0.747             |
| Arachidonate 5-lipoxygenase;                                       | P48999            | 1                          | 2               | 2              | 1.3                   | -0.322                                       | -0.04                          | 0.450             |
| Cartilage-associated protein;                                      | Q9CYD3            | 1                          | 2               | 2              | 2                     | -0.322                                       | -0.04                          | 0.450             |
| Uncharacterized protein;                                           | E9Q4Y1            | 1                          | 2               | 2              | 4.6                   | -0.322                                       | -0.02                          | 0.421             |
| Dynactin subunit 3;                                                | Q9Z0Y1            | 0.999                      | 2               | 2              | 5.7                   | -0.322                                       | -0.04                          | 0.450             |
| D-dopachrome decarboxylase;                                        | O35215            | 1                          | 11              | 17             | 51.7                  | -0.304                                       | -0.116                         | 0.655             |
| Annexin A3;                                                        | O35639            | 1                          | 13              | 14             | 29.4                  | -0.304                                       | -0.068                         | 0.550             |
| Ectonucleoside triphosphate diphosphohydrolase 2;                  | O55026            | 1                          | 4               | 4              | 7.1                   | -0.304                                       | -0.068                         | 0.550             |
| Proteasome subunit alpha type-3;                                   | O70435            | 1                          | 7               | 9              | 18                    | -0.304                                       | -0.18                          | 0.751             |
| BAG family molecular chaperone regulator 3;                        | Q9JLV1            | 1                          | 5               | 6              | 6.4                   | -0.304                                       | -0.023                         | 0.457             |
| Galactokinase;                                                     | Q9RON0            | 1                          | 6               | 7              | 11.5                  | -0.304                                       | -0.038                         | 0.480             |
| Prostaglandin F2 receptor negative regulator;                      | Q9WV91            | 1                          | 3               | 3              | 5.8                   | -0.304                                       | -0.045                         | 0.498             |
| Coatamer subunit epsilon;                                          | O89079            | 1                          | 3               | 3              | 14.1                  | -0.304                                       | -0.094                         | 0.610             |
| Protein disulfide-isomerase;                                       | P09103            | 1                          | 37              | 72             | 33.2                  | -0.304                                       | -0.03                          | 0.471             |
| V-type proton ATPase catalytic subunit A;                          | P50516            | 1                          | 15              | 20             | 19.9                  | -0.304                                       | -0.049                         | 0.508             |
| Elongation factor 2;                                               | P58252            | 1                          | 50              | 82             | 39.3                  | -0.304                                       | -0.109                         | 0.647             |
| Retinoid-inducible serine carboxypeptidase;                        | Q920A5            | 1                          | 8               | 10             | 15                    | -0.304                                       | -0.083                         | 0.591             |
| Peptidyl-prolyl cis-trans isomerase D;                             | Q9CR16            | 1                          | 20              | 24             | 31.6                  | -0.304                                       | -0.049                         | 0.508             |
| Obg-like ATPase 1;                                                 | Q9CZ30            | 1                          | 9               | 9              | 16.7                  | -0.304                                       | -0.173                         | 0.741             |
| Aspartyl aminopeptidase;                                           | Q9Z2W0            | 1                          | 13              | 14             | 28.5                  | -0.304                                       | -0.034                         | 0.469             |
| Uncharacterized protein;                                           | Q3ULW8            | 1                          | 7               | 8              | 9.7                   | -0.304                                       | -0.019                         | 0.452             |
| Creatine kinase M-type;                                            | P07310            | 1                          | 46              | 1232           | 60.4                  | -0.286                                       | -0.042                         | 0.527             |
| Creatine kinase B-type;                                            | Q04447            | 1                          | 28              | 54             | 37.3                  | -0.286                                       | -0.049                         | 0.546             |
| Synaptic vesicle membrane protein VAT-1 homolog;                   | Q62465            | 1                          | 19              | 34             | 26.1                  | -0.286                                       | -0.045                         | 0.536             |
| Neutral alpha-glucosidase AB;                                      | Q8BHN3            | 1                          | 13              | 17             | 12.4                  | -0.286                                       | -0.049                         | 0.546             |
| Aflatoxin B1 aldehyde reductase member 2;                          | Q8CG76            | 1                          | 13              | 23             | 26.4                  | -0.286                                       | -0.049                         | 0.546             |
| Aldose 1-epimerase;                                                | Q8K157            | 1                          | 4               | 4              | 13.2                  | -0.286                                       | -0.038                         | 0.518             |
| ATP-dependent RNA helicase DDX1;                                   | Q91VR5            | 1                          | 2               | 2              | 1.8                   | -0.286                                       | -0.017                         | 0.483             |
| 6-phosphogluconate dehydrogenase, decarboxylating;                 | Q9DCD0            | 1                          | 23              | 36             | 32.3                  | -0.286                                       | -0.091                         | 0.642             |
| Interferon-induced guanylate-binding protein 2;                    | Q9Z0E6            | 1                          | 6               | 6              | 9.2                   | -0.286                                       | -0.094                         | 0.650             |
| Epididymal secretory protein E1;                                   | Q9Z0J0            | 1                          | 7               | 16             | 24.8                  | -0.286                                       | -0.035                         | 0.510             |



Table S1, Tholen et al.

| Protein                                                                       | Uniprot accession | ProteinProphet Prob. Score | Unique peptides | Total peptides | Sequence coverage [%] | Fold change (log <sub>2</sub> ) of ASAPratio | Fold change standard deviation | ASAPratio p-value |
|-------------------------------------------------------------------------------|-------------------|----------------------------|-----------------|----------------|-----------------------|----------------------------------------------|--------------------------------|-------------------|
| Inositol monophosphatase 1;                                                   | O55023            | 1                          | 7               | 9              | 22.4                  | -0.286                                       | -0.073                         | 0.605             |
| Glutathione S-transferase Mu 2;                                               | P15626            | 1                          | 17              | 24             | 70.2                  | -0.286                                       | -0.024                         | 0.495             |
| Glutathione S-transferase Mu 1;                                               | P10649            | 1                          | 14              | 20             | 52.8                  | -0.105                                       | -0.017                         | 0.821             |
| Glutathione S-transferase Mu 5;                                               | P48774            | 1                          | 6               | 6              | 24.2                  | -0.12                                        | -0.035                         | 0.833             |
| Fumarylacetoacetase;                                                          | P35505            | 1                          | 10              | 13             | 25.5                  | -0.286                                       | -0.066                         | 0.585             |
| Nascent polypeptide-associated complex subunit alpha, muscle-specific form;   | P70670            | 1                          | 31              | 33             | 11.8                  | -0.286                                       | -0.038                         | 0.518             |
| Pyruvate dehydrogenase protein X component, mitochondrial;                    | Q8BKZ9            | 1                          | 9               | 11             | 16.6                  | -0.286                                       | -0.119                         | 0.697             |
| Bleomycin hydrolase;                                                          | Q8R016            | 1                          | 12              | 15             | 25.9                  | -0.286                                       | -0.059                         | 0.566             |
| Saccharopine dehydrogenase-like oxidoreductase;                               | Q8R127            | 1                          | 4               | 4              | 8.4                   | -0.286                                       | -0.052                         | 0.556             |
| Mannose-6-phosphate isomerase;                                                | Q924M7            | 1                          | 6               | 6              | 13.5                  | -0.286                                       | -0.063                         | 0.575             |
| Eukaryotic translation initiation factor 3 subunit I;                         | Q9QZD9            | 1                          | 3               | 4              | 12                    | -0.286                                       | -0.091                         | 0.642             |
| Xin actin-binding repeat-containing protein 1;                                | O70373            | 1                          | 3               | 3              | 2.7                   | -0.286                                       | -0.045                         | 0.536             |
| Angiotensinogen;                                                              | P11859            | 1                          | 2               | 2              | 4.6                   | -0.286                                       | -0.017                         | 0.483             |
| Proteasome subunit beta type-10;                                              | O35955            | 0.999                      | 2               | 2              | 7.7                   | -0.286                                       | -0.129                         | 0.710             |
| Bis(5'-nucleosyl)-tetraphosphatase [asymmetrical];                            | P56380            | 1                          | 6               | 6              | 42.2                  | -0.269                                       | -0.045                         | 0.558             |
| Steroid receptor RNA activator 1;                                             | Q80VJ2            | 1                          | 3               | 7              | 12.1                  | -0.269                                       | -0.019                         | 0.499             |
| Reticulocalbin-3;                                                             | Q8BH97            | 1                          | 4               | 5              | 11.7                  | -0.269                                       | -0.042                         | 0.542             |
| Serpin B8;                                                                    | O08800            | 1                          | 7               | 11             | 9.9                   | -0.252                                       | -0.015                         | 0.516             |
| Epididymis-specific alpha-mannosidase;                                        | O54782            | 1                          | 2               | 3              | 2.8                   | -0.252                                       | -0.015                         | 0.516             |
| Dystrophin;                                                                   | P11531            | 1                          | 3               | 3              | 4.9                   | -0.252                                       | -0.042                         | 0.574             |
| Indolethylamine N-methyltransferase;                                          | P40936            | 1                          | 6               | 8              | 25.4                  | -0.252                                       | -0.099                         | 0.709             |
| Heparin cofactor 2;                                                           | P49182            | 1                          | 9               | 10             | 11.7                  | -0.252                                       | -0.039                         | 0.565             |
| Apolipoprotein A-I;                                                           | Q00623            | 1                          | 20              | 30             | 34.5                  | -0.252                                       | -0.018                         | 0.521             |
| Ganglioside GM2 activator;                                                    | Q60648            | 1                          | 2               | 2              | 16.6                  | -0.252                                       | -0.054                         | 0.602             |
| Putative N-acetylglucosamine-6-phosphate deacetylase;                         | Q8JZV7            | 1                          | 4               | 4              | 10.5                  | -0.252                                       | -0.039                         | 0.565             |
| Eukaryotic translation initiation factor 3 subunit H;                         | Q91WK2            | 1                          | 4               | 8              | 27.1                  | -0.252                                       | -0.039                         | 0.565             |
| Torsin-1B;                                                                    | Q9ER41            | 1                          | 3               | 4              | 6.2                   | -0.252                                       | -0.033                         | 0.548             |
| Sec24 related gene family, member D (S. cerevisiae); Uncharacterized protein; | Q6NXL1            | 1                          | 7               | 9              | 6.4                   | -0.252                                       | -0.033                         | 0.548             |
| Phosphatidylinositol transfer protein alpha isoform;                          | P53810            | 1                          | 7               | 9              | 21                    | -0.252                                       | -0.012                         | 0.512             |
| Plasma protease C1 inhibitor;                                                 | P97290            | 1                          | 12              | 19             | 16.9                  | -0.252                                       | -0.039                         | 0.565             |
| Periostin;                                                                    | Q62009            | 1                          | 8               | 8              | 7.9                   | -0.252                                       | -0.066                         | 0.638             |
| Zyxin;                                                                        | Q62523            | 1                          | 13              | 16             | 15.4                  | -0.252                                       | -0.045                         | 0.583             |
| Major vault protein;                                                          | Q9EQK5            | 1                          | 6               | 7              | 8.6                   | -0.252                                       | -0.063                         | 0.629             |
| Uncharacterized protein;                                                      | Q3TUE1            | 1                          | 11              | 15             | 19.5                  | -0.252                                       | -0.075                         | 0.673             |
| Synaptophysin-like protein 1;                                                 | O09117            | 1                          | 2               | 2              | 11.4                  | -0.252                                       | -0.021                         | 0.527             |
| NADPH:adrenodoxin oxidoreductase, mitochondrial;                              | Q61578            | 0.992                      | 2               | 2              | 2.6                   | -0.252                                       | -0.021                         | 0.527             |
| Putative ATP-dependent Clp protease proteolytic subunit, mitochondrial;       | O88696            | 1                          | 4               | 7              | 15.1                  | -0.234                                       | -0.047                         | 0.620             |
| Alcohol dehydrogenase 1;                                                      | P00329            | 1                          | 6               | 7              | 10.1                  | -0.234                                       | -0.022                         | 0.565             |
| CD44 antigen;                                                                 | P15379            | 1                          | 2               | 2              | 2.6                   | -0.234                                       | -0.033                         | 0.587             |
| T-complex protein 1 subunit theta;                                            | P42932            | 1                          | 5               | 5              | 6.4                   | -0.234                                       | -0.019                         | 0.559             |
| Ras-related protein Rab-7a;                                                   | P51150            | 1                          | 17              | 21             | 40.1                  | -0.234                                       | -0.019                         | 0.559             |
| Long-chain specific acyl-CoA dehydrogenase, mitochondrial;                    | P51174            | 1                          | 17              | 24             | 28.1                  | -0.234                                       | -0.077                         | 0.701             |
| Acyl-CoA synthetase short-chain family member 3, mitochondrial;               | Q14DH7            | 1                          | 6               | 6              | 13                    | -0.234                                       | -0.102                         | 0.746             |

Table S1, Tholen et al.

| Protein                                                                           | Uniprot accession | ProteinProphet Prob. Score | Unique peptides | Total peptides | Sequence coverage [%] | Fold change (log <sub>2</sub> ) of ASAPratio | Fold change standard deviation | ASAPratio p-value |
|-----------------------------------------------------------------------------------|-------------------|----------------------------|-----------------|----------------|-----------------------|----------------------------------------------|--------------------------------|-------------------|
| NudC domain-containing protein 2;                                                 | Q9CQ48            | 1                          | 2               | 2              | 8.3                   | -0.234                                       | -0.019                         | 0.559             |
| Calcium-regulated heat stable protein 1;                                          | Q9CR86            | 1                          | 4               | 8              | 18.2                  | -0.234                                       | -0.022                         | 0.565             |
| Sorting nexin-2;                                                                  | Q9CWK8            | 1                          | 17              | 17             | 26.8                  | -0.234                                       | -0.036                         | 0.595             |
| Endoplasmic reticulum resident protein 44;                                        | Q9D1Q6            | 1                          | 12              | 14             | 21.4                  | -0.234                                       | -0.039                         | 0.603             |
| Phosphoglycerate mutase 1;                                                        | Q9DBJ1            | 1                          | 25              | 89             | 50.8                  | -0.234                                       | -0.017                         | 0.554             |
| Gamma-interferon-inducible lysosomal thiol reductase;                             | Q9ESY9            | 1                          | 2               | 2              | 5.2                   | -0.234                                       | -0.019                         | 0.559             |
| Ribonuclease 4;                                                                   | Q9JJH1            | 1                          | 6               | 7              | 27.7                  | -0.234                                       | -0.094                         | 0.734             |
| Carbonyl reductase 3; Uncharacterized protein;                                    | Q8K354            | 1                          | 13              | 14             | 39.7                  | -0.234                                       | -0.036                         | 0.595             |
| N-acetylneuraminic acid synthase (Sialic acid synthase); Uncharacterized protein; | Q99J77            | 1                          | 7               | 8              | 20.6                  | -0.234                                       | -0.036                         | 0.595             |
| Myosin light chain 1/3, skeletal muscle isoform;                                  | P05977            | 1                          | 12              | 132            | 52.1                  | -0.234                                       | -0.022                         | 0.565             |
| Lysosomal protective protein;                                                     | P16675            | 1                          | 9               | 12             | 10.1                  | -0.234                                       | -0.047                         | 0.620             |
| Purine nucleoside phosphorylase;                                                  | P23492            | 1                          | 12              | 12             | 34.9                  | -0.234                                       | -0.05                          | 0.629             |
| Cytochrome b5;                                                                    | P56395            | 1                          | 5               | 6              | 41                    | -0.234                                       | -0.028                         | 0.572             |
| Heat shock protein 105 kDa;                                                       | Q61699            | 1                          | 12              | 12             | 14.8                  | -0.234                                       | -0.127                         | 0.786             |
| Inorganic pyrophosphatase;                                                        | Q9D819            | 1                          | 17              | 26             | 48.4                  | -0.234                                       | -0.022                         | 0.565             |
| Leucine-rich repeat-containing protein 20;                                        | Q8CI70            | 0.986                      | 2               | 2              | 4.9                   | -0.234                                       | -0.019                         | 0.559             |
| Voltage-dependent calcium channel subunit alpha-2/delta-1;                        | O08532            | 1                          | 2               | 2              | 1.3                   | -0.218                                       | -0.013                         | 0.583             |
| Metallothionein-2;                                                                | P02798            | 1                          | 2               | 3              | 19.7                  | -0.218                                       | -0.025                         | 0.604             |
| Ornithine aminotransferase, mitochondrial;                                        | P29758            | 1                          | 17              | 22             | 30.8                  | -0.218                                       | -0.081                         | 0.742             |
| 182 kDa tankyrase-1-binding protein;                                              | P58871            | 1                          | 7               | 7              | 5.8                   | -0.218                                       | -0.056                         | 0.687             |
| Far upstream element-binding protein 2;                                           | Q3U0V1            | 1                          | 21              | 26             | 27.8                  | -0.218                                       | -0.053                         | 0.680             |
| Arginase-1;                                                                       | Q61176            | 1                          | 11              | 13             | 31.9                  | -0.218                                       | -0.028                         | 0.611             |
| Phosphoglucomutase-2;                                                             | Q7TSV4            | 1                          | 12              | 16             | 13.4                  | -0.218                                       | -0.048                         | 0.664             |
| Phostensin;                                                                       | Q8BQ30            | 1                          | 2               | 2              | 4.2                   | -0.218                                       | -0.018                         | 0.592             |
| Succinate-semialdehyde dehydrogenase, mitochondrial;                              | Q8BWF0            | 1                          | 5               | 5              | 12                    | -0.218                                       | -0.071                         | 0.723             |
| ES1 protein homolog, mitochondrial;                                               | Q9D172            | 1                          | 15              | 21             | 39.5                  | -0.218                                       | -0.053                         | 0.680             |
| 4-trimethylaminobutyraldehyde dehydrogenase;                                      | Q9JLJ2            | 1                          | 26              | 34             | 32.4                  | -0.218                                       | -0.028                         | 0.611             |
| Proline synthase co-transcribed bacterial homolog protein;                        | Q9Z2Y8            | 1                          | 4               | 8              | 8                     | -0.218                                       | -0.086                         | 0.754             |
| Glucosamine-6-phosphate isomerase 1;                                              | O88958            | 1                          | 3               | 3              | 8                     | -0.218                                       | -0.086                         | 0.754             |
| Adenosylhomocysteinase;                                                           | P50247            | 1                          | 30              | 49             | 44.4                  | -0.218                                       | -0.02                          | 0.598             |
| Pyruvate kinase isozymes M1/M2;                                                   | P52480            | 1                          | 68              | 329            | 67.6                  | -0.218                                       | -0.076                         | 0.730             |
| Glyoxylate reductase/hydroxypyruvate reductase;                                   | Q91Z53            | 1                          | 17              | 24             | 35.7                  | -0.218                                       | -0.033                         | 0.625             |
| Serotransferrin;                                                                  | Q921I1            | 1                          | 89              | 620            | 58.8                  | -0.218                                       | -0.02                          | 0.598             |
| Mitochondrial 2-oxoglutarate/malate carrier protein;                              | Q9CR62            | 1                          | 4               | 4              | 9.8                   | -0.218                                       | -0.068                         | 0.716             |
| N(G),N(G)-dimethylarginine dimethylaminohydrolase 1;                              | Q9CWS0            | 1                          | 4               | 4              | 17.5                  | -0.218                                       | -0.063                         | 0.702             |
| Phosphoglucomutase-1;                                                             | Q9D0F9            | 1                          | 49              | 81             | 53.2                  | -0.218                                       | -0.035                         | 0.633             |
| Cysteine sulfinic acid decarboxylase;                                             | Q9DBE0            | 1                          | 8               | 10             | 13                    | -0.218                                       | -0.056                         | 0.687             |
| Choline transporter-like protein 2;                                               | Q8BY89            | 0.999                      | 2               | 2              | 2.4                   | -0.218                                       | -0.02                          | 0.598             |
| Complement C3;                                                                    | P01027            | 1                          | 116             | 214            | 41.1                  | -0.201                                       | -0.049                         | 0.706             |
| Plasminogen;                                                                      | P20918            | 1                          | 10              | 10             | 6                     | -0.201                                       | -0.028                         | 0.649             |
| Ras-related protein Rab-21;                                                       | P35282            | 1                          | 4               | 4              | 22.5                  | -0.201                                       | -0.039                         | 0.677             |
| Dynein light chain roadblock-type 1;                                              | P62627            | 1                          | 5               | 5              | 51                    | -0.201                                       | -0.03                          | 0.656             |
| Stress-induced-phosphoprotein 1;                                                  | Q60864            | 1                          | 23              | 28             | 27.3                  | -0.201                                       | -0.058                         | 0.726             |

Table S1, Tholen et al.

| Protein                                                                       | Uniprot accession | ProteinProphet Prob. Score | Unique peptides | Total peptides | Sequence coverage [%] | Fold change (log <sub>2</sub> ) of ASAPratio | Fold change standard deviation | ASAPratio p-value |
|-------------------------------------------------------------------------------|-------------------|----------------------------|-----------------|----------------|-----------------------|----------------------------------------------|--------------------------------|-------------------|
| Gephyrin;                                                                     | Q8BUV3            | 1                          | 4               | 6              | 4                     | -0.201                                       | -0.111                         | 0.824             |
| Probable fructose-2,6-bisphosphatase TIGAR;                                   | Q8BZA9            | 1                          | 4               | 4              | 16.7                  | -0.201                                       | -0.025                         | 0.643             |
| Arf-GAP domain and FG repeats-containing protein 1;                           | Q8K2K6            | 1                          | 5               | 5              | 10                    | -0.201                                       | -0.076                         | 0.768             |
| Neudesin;                                                                     | Q9CQ45            | 1                          | 5               | 6              | 25.7                  | -0.201                                       | -0.016                         | 0.626             |
| Tetratricopeptide repeat protein 38;                                          | A3KMP2            | 1                          | 12              | 15             | 20.2                  | -0.201                                       | -0.102                         | 0.809             |
| COP9 signalosome complex subunit 3;                                           | O88543            | 1                          | 4               | 4              | 16.1                  | -0.201                                       | -0.102                         | 0.809             |
|                                                                               | P35492            | 1                          | 29              | 41             | 35.3                  | -0.201                                       | -0.028                         | 0.649             |
| Myosin regulatory light chain 2, skeletal muscle isoform;                     | P97457            | 1                          | 20              | 49             | 55.6                  | -0.201                                       | -0.025                         | 0.643             |
| Junction plakoglobin;                                                         | Q02257            | 1                          | 9               | 9              | 12.2                  | -0.201                                       | -0.085                         | 0.783             |
| Catenin beta-1;                                                               | Q02248            | 0.997                      | 2               | 2              | 6.3                   | 0.475                                        | 0.284                          | 0.613             |
| Echinoderm microtubule-associated protein-like 2;                             | Q7TNG5            | 1                          | 17              | 18             | 29.7                  | -0.201                                       | -0.065                         | 0.745             |
| Peroxisomal acyl-coenzyme A oxidase 3;                                        | Q9EPL9            | 1                          | 12              | 18             | 11.7                  | -0.201                                       | -0.169                         | 0.876             |
| Uncharacterized protein;                                                      | F8WIT2            | 1                          | 65              | 117            | 51.9                  | -0.201                                       | -0.049                         | 0.706             |
| PDZ and LIM domain protein 1;                                                 | O70400            | 1                          | 3               | 3              | 15                    | -0.201                                       | -0.032                         | 0.656             |
| Catechol O-methyltransferase;                                                 | O88587            | 1                          | 2               | 2              | 6.8                   | -0.201                                       | -0.025                         | 0.643             |
| Amine oxidase [flavin-containing] A;                                          | Q64133            | 0.997                      | 2               | 2              | 5.7                   | -0.201                                       | -0.012                         | 0.617             |
| Collagen alpha-1(XV) chain;                                                   | O35206            | 1                          | 4               | 4              | 12.2                  | -0.184                                       | -0.067                         | 0.783             |
| Ig heavy chain V region 441;                                                  | P01806            | 1                          | 3               | 3              | 13.8                  | -0.184                                       | -0.017                         | 0.664             |
| ATP synthase subunit beta, mitochondrial;                                     | P56480            | 1                          | 46              | 151            | 43.5                  | -0.184                                       | -0.025                         | 0.681             |
| Cellular retinoic acid-binding protein 1;                                     | P62965            | 1                          | 6               | 7              | 34.3                  | -0.184                                       | -0.04                          | 0.719             |
| Bifunctional ATP-dependent dihydroxyacetone kinase/FAD-AMP lyase (cyclizing); | Q8VC30            | 1                          | 4               | 4              | 4                     | -0.184                                       | -0.013                         | 0.656             |
| NADH-ubiquinone oxidoreductase 75 kDa subunit, mitochondrial;                 | Q91VD9            | 1                          | 13              | 20             | 16.4                  | -0.184                                       | -0.027                         | 0.687             |
| Protein SEC13 homolog;                                                        | Q9D1M0            | 1                          | 8               | 10             | 18                    | -0.184                                       | -0.042                         | 0.725             |
| Protein NDRG2;                                                                | Q9QYG0            | 1                          | 17              | 25             | 34                    | -0.184                                       | -0.042                         | 0.725             |
| Probable methylthioribulose-1-phosphate dehydratase;                          | Q9WVQ5            | 1                          | 5               | 5              | 21.6                  | -0.184                                       | -0.017                         | 0.664             |
| Ahnak protein; MCG17833, isoform CRA_b; Uncharacterized protein;              | Q8R2L7            | 1                          | 4               | 4              | 57.8                  | -0.184                                       | -0.042                         | 0.725             |
| Integrin beta-1;                                                              | P09055            | 1                          | 9               | 10             | 9.4                   | -0.184                                       | -0.054                         | 0.756             |
| Chromobox protein homolog 3;                                                  | P23198            | 1                          | 4               | 4              | 19.1                  | -0.184                                       | -0.065                         | 0.778             |
| Microtubule-associated protein 4;                                             | P27546            | 1                          | 25              | 30             | 19.7                  | -0.184                                       | -0.038                         | 0.712             |
| Protein transport protein Sec23A;                                             | Q01405            | 1                          | 12              | 19             | 13.5                  | -0.184                                       | -0.023                         | 0.675             |
| Pyridoxal kinase;                                                             | Q8K183            | 1                          | 13              | 14             | 22.8                  | -0.184                                       | -0.04                          | 0.719             |
| Endoplasmic reticulum aminopeptidase 1;                                       | Q9EQH2            | 1                          | 11              | 12             | 8.7                   | -0.184                                       | -0.044                         | 0.732             |
| Uncharacterized protein;                                                      | D3Z0Y2            | 1                          | 28              | 89             | 72.5                  | -0.184                                       | -0.023                         | 0.675             |
| Peptidyl-prolyl cis-trans isomerase-like 1;                                   | Q9D0W5            | 1                          | 3               | 4              | 14.5                  | -0.184                                       | -0.006                         | 0.647             |
| Sushi domain-containing protein 2;                                            | Q9DBX3            | 0.999                      | 2               | 2              | 2.4                   | -0.184                                       | -0.038                         | 0.712             |
| Histamine N-methyltransferase;                                                | Q91VF2            | 0.998                      | 2               | 2              | 6.1                   | -0.184                                       | -0.04                          | 0.719             |
| Dynactin subunit 2;                                                           | Q99KJ8            | 1                          | 6               | 6              | 10.2                  | -0.168                                       | -0.038                         | 0.737             |
| C-1-tetrahydrofolate synthase, cytoplasmic;                                   | Q922D8            | 1                          | 18              | 19             | 19.1                  | -0.168                                       | -0.102                         | 0.860             |
| Phosphoglycerate mutase 2;                                                    | O70250            | 1                          | 27              | 185            | 49                    | -0.152                                       | -0.019                         | 0.707             |
| Cytoplasmic dynein 1 intermediate chain 2;                                    | O88487            | 1                          | 7               | 7              | 7.5                   | -0.152                                       | -0.068                         | 0.833             |
| Basigin;                                                                      | P18572            | 1                          | 4               | 6              | 5.9                   | -0.152                                       | -0.008                         | 0.687             |
| Myristoylated alanine-rich C-kinase substrate;                                | P26645            | 1                          | 8               | 14             | 21                    | -0.152                                       | -0.019                         | 0.707             |
| Cytoplasmic aconitate hydratase;                                              | P28271            | 1                          | 35              | 51             | 28.1                  | -0.152                                       | -0.042                         | 0.775             |

Table S1, Tholen et al.

| Protein                                                      | Uniprot accession | ProteinProphet Prob. Score | Unique peptides | Total peptides | Sequence coverage [%] | Fold change (log <sub>2</sub> ) of ASAPratio | Fold change standard deviation | ASAPratio p-value |
|--------------------------------------------------------------|-------------------|----------------------------|-----------------|----------------|-----------------------|----------------------------------------------|--------------------------------|-------------------|
| Protein phosphatase 1A;                                      | P49443            | 1                          | 7               | 8              | 28.2                  | -0.152                                       | -0.024                         | 0.724             |
| Neural cell adhesion molecule L1-like protein;               | P70232            | 1                          | 3               | 3              | 1.5                   | -0.152                                       | -0.014                         | 0.698             |
| Fructose-1,6-bisphosphatase isozyme 2;                       | P70695            | 1                          | 6               | 6              | 12.1                  | -0.152                                       | -0.081                         | 0.855             |
| Hsp90 co-chaperone Cdc37;                                    | Q61081            | 1                          | 5               | 5              | 13.2                  | -0.152                                       | -0.052                         | 0.800             |
| Myomesin-1;                                                  | Q62234            | 1                          | 32              | 38             | 12.4                  | -0.152                                       | -0.054                         | 0.805             |
| Peptidyl-prolyl cis-trans isomerase FKBP3;                   | Q62446            | 1                          | 4               | 5              | 14.7                  | -0.152                                       | -0.03                          | 0.741             |
| Hematopoietic progenitor cell antigen CD34;                  | Q64314            | 1                          | 5               | 5              | 11.8                  | -0.152                                       | -0.03                          | 0.741             |
| Ribonuclease inhibitor;                                      | Q91VI7            | 1                          | 54              | 69             | 73.9                  | -0.152                                       | -0.022                         | 0.718             |
| Electron transfer flavoprotein subunit beta;                 | Q9DCW4            | 1                          | 16              | 32             | 40.8                  | -0.152                                       | -0.047                         | 0.790             |
| Profilin-2;                                                  | Q9JJV2            | 1                          | 2               | 4              | 12.7                  | -0.152                                       | -0.012                         | 0.694             |
| Kininogen-1;                                                 | O08677            | 1                          | 34              | 83             | 43.8                  | -0.152                                       | -0.017                         | 0.703             |
| Sorting nexin-3;                                             | O70492            | 1                          | 7               | 8              | 20.4                  | -0.152                                       | -0.032                         | 0.747             |
| Sorting nexin-12;                                            | O70493            | 0.948                      | 2               | 2              | 15.4                  | -0.074                                       | -0.003                         | 0.864             |
| Isocitrate dehydrogenase [NADP] cytoplasmic;                 | O88844            | 1                          | 37              | 63             | 52.4                  | -0.152                                       | -0.01                          | 0.690             |
| Beta-galactosidase;                                          | P23780            | 1                          | 13              | 20             | 18.5                  | -0.152                                       | -0.014                         | 0.698             |
| Aldose reductase;                                            | P45376            | 1                          | 28              | 54             | 41.1                  | -0.152                                       | -0.01                          | 0.690             |
| Profilin-1;                                                  | P62962            | 1                          | 23              | 100            | 64.3                  | -0.152                                       | -0.01                          | 0.690             |
| Clusterin;                                                   | Q06890            | 1                          | 4               | 6              | 8.5                   | -0.152                                       | -0.024                         | 0.724             |
| Serpin B6;                                                   | Q60854            | 1                          | 29              | 69             | 49.2                  | -0.152                                       | -0.02                          | 0.713             |
| Uncharacterized protein;                                     | E9Q9T2            | 1                          | 10              | 14             | 24.6                  | 0.263                                        | 0.066                          | 0.613             |
| Plastin-2;                                                   | Q61233            | 1                          | 44              | 67             | 47                    | -0.152                                       | -0.035                         | 0.758             |
| Low molecular weight phosphotyrosine protein phosphatase;    | Q9D358            | 1                          | 8               | 15             | 31.6                  | -0.152                                       | -0.042                         | 0.775             |
| Enoyl-CoA delta isomerase 2, mitochondrial;                  | Q9WUR2            | 1                          | 4               | 5              | 22.4                  | -0.152                                       | -0.037                         | 0.764             |
| Transcription elongation factor B polypeptide 1;             | P83940            | 0.997                      | 2               | 2              | 10.7                  | -0.152                                       | -0.007                         | 0.685             |
| AP-2 complex subunit alpha-1;                                | P17426            | 0.928                      | 2               | 2              | 1                     | -0.152                                       | -0.017                         | 0.703             |
| Protein disulfide-isomerase A4;                              | P08003            | 1                          | 11              | 12             | 12.9                  | -0.136                                       | -0.03                          | 0.786             |
| Lysosome-associated membrane glycoprotein 1;                 | P11438            | 1                          | 2               | 3              | 5.7                   | -0.136                                       | -0.052                         | 0.837             |
| Glycerol-3-phosphate dehydrogenase [NAD+], cytoplasmic;      | P13707            | 1                          | 36              | 73             | 57.7                  | -0.136                                       | -0.025                         | 0.765             |
| Monocarboxylate transporter 1;                               | P53986            | 1                          | 2               | 2              | 4.1                   | -0.136                                       | -0.015                         | 0.736             |
| Isochorismatase domain-containing protein 2A, mitochondrial; | P85094            | 1                          | 6               | 6              | 13.1                  | -0.136                                       | -0.004                         | 0.719             |
| 2,4-dienoyl-CoA reductase, mitochondrial;                    | Q9CQ62            | 1                          | 5               | 5              | 21.8                  | -0.136                                       | -0.057                         | 0.844             |
| EH domain-containing protein 4;                              | Q9EQP2            | 1                          | 6               | 6              | 8.3                   | -0.136                                       | -0.033                         | 0.790             |
| Hepatoma-derived growth factor;                              | P51859            | 1                          | 7               | 8              | 22.8                  | -0.136                                       | -0.061                         | 0.854             |
| Actin, alpha cardiac muscle 1;                               | P68033            | 1                          | 8               | 10             | 62.1                  | -0.136                                       | -0.009                         | 0.725             |
| Heat shock 70 kDa protein 4;                                 | Q61316            | 1                          | 31              | 37             | 30.3                  | -0.136                                       | -0.016                         | 0.740             |
| Heat shock 70 kDa protein 4L;                                | P48722            | 1                          | 10              | 11             | 17.1                  | -0.454                                       | -0.193                         | 0.529             |
| NEDD8-activating enzyme E1 regulatory subunit;               | Q8VBW6            | 1                          | 7               | 7              | 12                    | -0.136                                       | -0.046                         | 0.822             |
| Dynein light chain 2, cytoplasmic;                           | Q9DOM5            | 1                          | 6               | 7              | 20.2                  | -0.136                                       | -0.01                          | 0.728             |
| StAR-related lipid transfer protein 5;                       | Q9EPQ7            | 1                          | 5               | 5              | 20.7                  | -0.136                                       | -0.015                         | 0.736             |
| Transgelin-2;                                                | Q9WVA4            | 1                          | 21              | 34             | 62.8                  | -0.136                                       | -0.04                          | 0.809             |
| Opioid growth factor receptor;                               | Q99PG2            | 0.999                      | 3               | 3              | 7.7                   | -0.136                                       | -0.01                          | 0.730             |
| Alpha-adducin;                                               | Q9QYC0            | 0.999                      | 3               | 4              | 4.5                   | -0.136                                       | -0.007                         | 0.723             |
| Phosphatidylinositol-binding clathrin assembly protein;      | Q7M6Y3            | 0.999                      | 2               | 2              | 2.3                   | -0.136                                       | -0.022                         | 0.760             |

Table S1, Tholen et al.

| Protein                                                  | Uniprot accession | ProteinProphet Prob. Score | Unique peptides | Total peptides | Sequence coverage [%] | Fold change (log <sub>2</sub> ) of ASAPratio | Fold change standard deviation | ASAPratio p-value |
|----------------------------------------------------------|-------------------|----------------------------|-----------------|----------------|-----------------------|----------------------------------------------|--------------------------------|-------------------|
| Chaperone activity of bc1 complex-like, mitochondrial;   | Q60936            | 0.99                       | 2               | 2              | 6.5                   | -0.136                                       | -0.042                         | 0.813             |
| Heterogeneous nuclear ribonucleoprotein H;               | O35737            | 1                          | 10              | 11             | 22.9                  | -0.12                                        | -0.01                          | 0.766             |
| Protein S100-A1;                                         | P56565            | 1                          | 2               | 2              | 16                    | -0.12                                        | -0.017                         | 0.781             |
| Serrate RNA effector molecule homolog;                   | Q99MR6            | 1                          | 2               | 2              | 1.5                   | -0.12                                        | -0.02                          | 0.790             |
| Bifunctional purine biosynthesis protein PURH;           | Q9CWJ9            | 1                          | 34              | 61             | 35.1                  | -0.12                                        | -0.017                         | 0.781             |
| Iron-sulfur cluster assembly 2 homolog, mitochondrial;   | Q9DCB8            | 1                          | 2               | 2              | 7.8                   | -0.12                                        | -0.013                         | 0.770             |
| Prolyl endopeptidase;                                    | Q9QUR6            | 1                          | 20              | 27             | 22.8                  | -0.12                                        | -0.04                          | 0.844             |
| Myomesin 2; Uncharacterized protein;                     | Q14BI5            | 1                          | 44              | 57             | 23.2                  | -0.12                                        | -0.067                         | 0.891             |
| H-2 class I histocompatibility antigen, L-D alpha chain; | P01897            | 1                          | 13              | 15             | 27.3                  | -0.12                                        | -0.022                         | 0.794             |
| H-2 class I histocompatibility antigen, K-B alpha chain; | P01901            | 1                          | 3               | 3              | 13.4                  | -0.014                                       | -0.002                         | 0.975             |
| H-2 class I histocompatibility antigen, Q10 alpha chain; | P01898            | 1                          | 2               | 3              | 9.8                   | -0.889                                       | -0.296                         | 0.147             |
| Phosphoglycerate kinase 1;                               | P09411            | 1                          | 43              | 142            | 59.5                  | -0.12                                        | -0.01                          | 0.755             |
| GTP-binding nuclear protein Ran;                         | P62827            | 1                          | 19              | 41             | 42.6                  | -0.12                                        | -0.007                         | 0.758             |
| T-complex protein 1 subunit epsilon;                     | P80316            | 1                          | 6               | 7              | 7                     | -0.12                                        | -0.013                         | 0.770             |
| Dihydropteridine reductase;                              | Q8BVI4            | 1                          | 11              | 11             | 39.2                  | -0.12                                        | -0.013                         | 0.770             |
| UPF0366 protein C11orf67 homolog;                        | Q8ROP4            | 1                          | 9               | 11             | 36.9                  | -0.12                                        | -0.02                          | 0.795             |
| Thioredoxin-dependent peroxide reductase, mitochondrial; | P20108            | 1                          | 13              | 27             | 28                    | -0.105                                       | -0.05                          | 0.895             |
| Peptidyl-prolyl cis-trans isomerase FKBP1A;              | P26883            | 1                          | 3               | 4              | 13                    | -0.105                                       | -0.007                         | 0.796             |
| Transforming growth factor-beta-induced protein ig-h3;   | P82198            | 1                          | 5               | 5              | 7.1                   | -0.105                                       | -0.005                         | 0.792             |
| Xaa-Pro dipeptidase;                                     | Q11136            | 1                          | 9               | 10             | 15.2                  | -0.105                                       | -0.028                         | 0.850             |
| Hydroxysteroid dehydrogenase-like protein 2;             | Q2TPA8            | 1                          | 2               | 2              | 4.5                   | -0.105                                       | -0.009                         | 0.801             |
| Leukocyte surface antigen CD47;                          | Q61735            | 1                          | 3               | 4              | 4.6                   | -0.105                                       | -0.019                         | 0.824             |
| UPF0586 protein C9orf41 homolog;                         | Q80UY1            | 1                          | 4               | 4              | 5.8                   | -0.105                                       | -0.007                         | 0.796             |
| D-2-hydroxyglutarate dehydrogenase, mitochondrial;       | Q8CIM3            | 1                          | 2               | 2              | 3.6                   | -0.105                                       | -0.003                         | 0.791             |
| Beta-lactamase-like protein 2;                           | Q99KR3            | 1                          | 5               | 5              | 12.5                  | -0.105                                       | -0.035                         | 0.866             |
| Thioredoxin domain-containing protein 17;                | Q9CQM5            | 1                          | 6               | 8              | 26.8                  | -0.105                                       | -0.007                         | 0.796             |
| Trans-1,2-dihydrobenzene-1,2-diol dehydrogenase;         | Q9DBB8            | 1                          | 4               | 7              | 12                    | -0.105                                       | -0.042                         | 0.881             |
| AP-2 complex subunit beta;                               | Q9DBG3            | 1                          | 5               | 5              | 4.8                   | -0.105                                       | -0.012                         | 0.807             |
| Glutathione S-transferase kappa 1;                       | Q9DCM2            | 1                          | 5               | 5              | 16.8                  | -0.105                                       | -0.052                         | 0.899             |
| Acyl-protein thioesterase 2;                             | Q9WTL7            | 1                          | 4               | 4              | 12.6                  | -0.105                                       | -0.015                         | 0.813             |
| Glycogen synthase kinase-3 beta;                         | Q9WV60            | 1                          | 4               | 4              | 9.8                   | -0.105                                       | -0.011                         | 0.803             |
| Mitotic checkpoint protein BUB3;                         | Q9WVA3            | 1                          | 5               | 5              | 13.8                  | -0.105                                       | -0.036                         | 0.869             |
| C-terminal-binding protein 1;                            | O88712            | 1                          | 6               | 9              | 15.4                  | -0.105                                       | -0.011                         | 0.803             |
| C-terminal-binding protein 2;                            | P56546            | 1                          | 4               | 4              | 9.3                   | -0.044                                       | -0.002                         | 0.900             |
| Glutathione S-transferase A3;                            | P30115            | 0.987                      | 4               | 4              | 8.6                   | -0.105                                       | -0.014                         | 0.810             |
| Heat shock cognate 71 kDa protein;                       | P63017            | 1                          | 51              | 118            | 48.3                  | -0.105                                       | -0.012                         | 0.807             |
| Heat shock 70 kDa protein 1A;                            | Q61696            | 1                          | 37              | 62             | 46.8                  | 0.251                                        | 0.023                          | 0.538             |
| 78 kDa glucose-regulated protein;                        | P20029            | 1                          | 36              | 59             | 37.6                  | -0.786                                       | -0.325                         | 0.261             |
| Secernin-3;                                              | Q3TMH2            | 1                          | 6               | 8              | 12.2                  | -0.105                                       | -0.014                         | 0.810             |
| Inter-alpha-trypsin inhibitor heavy chain H3;            | Q61704            | 1                          | 9               | 9              | 7.4                   | -0.105                                       | -0.023                         | 0.836             |
| Copine-3;                                                | Q8BT60            | 1                          | 8               | 13             | 14.8                  | -0.105                                       | -0.014                         | 0.810             |
| Copine-1;                                                | Q8C166            | 1                          | 7               | 10             | 17.5                  | -0.252                                       | -0.036                         | 0.557             |
| Scavenger mRNA-decapping enzyme DcpS;                    | Q9DAR7            | 1                          | 19              | 25             | 40.5                  | -0.105                                       | -0.036                         | 0.869             |

Table S1, Tholen et al.

| Protein                                                                                                                                   | Uniprot accession | ProteinProphet Prob. Score | Unique peptides | Total peptides | Sequence coverage [%] | Fold change (log <sub>2</sub> ) of ASAPratio | Fold change standard deviation | ASAPratio p-value |
|-------------------------------------------------------------------------------------------------------------------------------------------|-------------------|----------------------------|-----------------|----------------|-----------------------|----------------------------------------------|--------------------------------|-------------------|
| Mitogen-activated protein kinase 9;                                                                                                       | Q9WTU6            | 1                          | 4               | 6              | 5                     | -0.105                                       | -0.014                         | 0.810             |
| ADP-ribosylation factor-like protein 8B;                                                                                                  | Q9CQW2            | 1                          | 2               | 5              | 4.8                   | -0.105                                       | -0.003                         | 0.791             |
| UPF0364 protein C6orf211 homolog;                                                                                                         | A6H630            | 0.975                      | 2               | 2              | 3.4                   | -0.105                                       | -0.023                         | 0.836             |
| Lysosomal alpha-mannosidase;                                                                                                              | O09159            | 1                          | 7               | 7              | 5.3                   | -0.089                                       | -0.019                         | 0.864             |
| Cathepsin S;                                                                                                                              | O70370            | 1                          | 7               | 10             | 26.5                  | -0.089                                       | -0.017                         | 0.857             |
| Bifunctional 3'-phosphoadenosine 5'-phosphosulfate synthase 2;                                                                            | O88428            | 1                          | 3               | 5              | 5.3                   | -0.089                                       | -0.016                         | 0.854             |
| Calreticulin;                                                                                                                             | P14211            | 1                          | 14              | 19             | 22.6                  | -0.089                                       | -0.01                          | 0.842             |
| Tryptophanyl-tRNA synthetase, cytoplasmic;                                                                                                | P32921            | 1                          | 6               | 7              | 10.6                  | -0.089                                       | -0.008                         | 0.835             |
| Na(+)/H(+) exchange regulatory cofactor NHE-RF1;                                                                                          | P70441            | 1                          | 5               | 7              | 13.2                  | -0.089                                       | -0.007                         | 0.833             |
| T-complex protein 1 subunit delta;                                                                                                        | P80315            | 1                          | 5               | 5              | 4.3                   | -0.089                                       | -0.018                         | 0.859             |
| Vitamin K-dependent protein S;                                                                                                            | Q08761            | 1                          | 2               | 2              | 2.7                   | -0.089                                       | -0.011                         | 0.842             |
| Zinc finger CCCH domain-containing protein 15;                                                                                            | Q3TIV5            | 1                          | 2               | 2              | 3.3                   | -0.089                                       | -0.009                         | 0.837             |
| Suprabasin;                                                                                                                               | Q8CIT9            | 1                          | 7               | 7              | 14.4                  | -0.089                                       | -0.021                         | 0.870             |
| Pyridoxine-5'-phosphate oxidase;                                                                                                          | Q91XF0            | 1                          | 4               | 4              | 6.9                   | -0.089                                       | -0.007                         | 0.833             |
| von Willebrand factor A domain-containing protein 5A;                                                                                     | Q99KC8            | 1                          | 33              | 48             | 24.1                  | -0.089                                       | -0.031                         | 0.894             |
| Ribosome-binding protein 1;                                                                                                               | Q99PL5            | 1                          | 5               | 5              | 3.4                   | -0.089                                       | -0.023                         | 0.873             |
| Thioredoxin domain-containing protein 12;                                                                                                 | Q9CQU0            | 1                          | 3               | 7              | 17.6                  | -0.089                                       | -0.005                         | 0.829             |
| Mitochondrial peptide methionine sulfoxide reductase;                                                                                     | Q9D6Y7            | 1                          | 6               | 6              | 19.7                  | -0.089                                       | -0.032                         | 0.896             |
| [Pyruvate dehydrogenase [lipoamide]] kinase isozyme 2, mitochondrial;                                                                     | Q9JK42            | 1                          | 4               | 4              | 11.8                  | -0.089                                       | -0.026                         | 0.881             |
| Succinyl-CoA ligase [ADP/GDP-forming] subunit alpha, mitochondrial;                                                                       | Q9WUM5            | 1                          | 9               | 15             | 19.1                  | -0.089                                       | -0.003                         | 0.827             |
| Succinyl-CoA ligase [ADP-forming] subunit beta, mitochondrial;                                                                            | Q9Z2I9            | 1                          | 22              | 31             | 29.4                  | -0.089                                       | -0.016                         | 0.854             |
| Branched-chain-amino-acid aminotransferase, mitochondrial;                                                                                | O35855            | 1                          | 16              | 22             | 25.3                  | -0.089                                       | -0.03                          | 0.891             |
| Glutathione S-transferase P 1;                                                                                                            | P19157            | 1                          | 16              | 31             | 39.7                  | -0.089                                       | -0.007                         | 0.833             |
| Aldehyde dehydrogenase, mitochondrial;                                                                                                    | P47738            | 1                          | 34              | 92             | 43.9                  | -0.089                                       | -0.007                         | 0.833             |
| Retinal dehydrogenase 1;                                                                                                                  | P24549            | 1                          | 22              | 38             | 24                    | -0.218                                       | -0.02                          | 0.598             |
| Aldehyde dehydrogenase, cytosolic 1;                                                                                                      | O35945            | 1                          | 2               | 2              | 11.6                  | 0.345                                        | 0.033                          | 0.396             |
| Glucosamine--fructose-6-phosphate aminotransferase [isomerizing] 1;                                                                       | P47856            | 1                          | 4               | 4              | 4                     | -0.089                                       | -0.006                         | 0.831             |
| Glycerol-3-phosphate dehydrogenase 1-like protein;                                                                                        | Q3ULJ0            | 1                          | 15              | 20             | 29.3                  | -0.089                                       | -0.019                         | 0.864             |
| Myosin light polypeptide 6;                                                                                                               | Q60605            | 1                          | 13              | 27             | 46.4                  | -0.089                                       | -0.014                         | 0.851             |
| Nischarin;                                                                                                                                | Q80TM9            | 1                          | 4               | 4              | 11.6                  | -0.089                                       | -0.008                         | 0.835             |
| Nitrilase homolog 1;                                                                                                                      | Q8VDK1            | 1                          | 4               | 5              | 9                     | -0.089                                       | -0.009                         | 0.837             |
| Thioredoxin reductase 1, cytoplasmic;                                                                                                     | Q9JMH6            | 1                          | 10              | 12             | 14.7                  | -0.089                                       | -0.018                         | 0.860             |
| MCG142264, isoform CRA_a; Uncharacterized protein;                                                                                        | D3Z494            | 1                          | 6               | 6              | 16.7                  | -0.089                                       | -0.012                         | 0.845             |
| Capping protein (Actin filament), gelsolin-like; Capping protein (Actin filament), gelsolin-like, isoform CRA_a; Uncharacterized protein; | Q99LB4            | 1                          | 23              | 56             | 45.3                  | -0.089                                       | -0.008                         | 0.835             |
| Rho GTPase-activating protein 1;                                                                                                          | Q5FWK3            | 1                          | 2               | 2              | 2.5                   | -0.089                                       | -0.014                         | 0.851             |
| Serine/threonine-protein phosphatase 2B catalytic subunit beta isoform;                                                                   | P48453            | 0.998                      | 2               | 3              | 5.8                   | -0.089                                       | -0.011                         | 0.842             |
| Activator of 90 kDa heat shock protein ATPase homolog 1;                                                                                  | Q8BK64            | 0.992                      | 2               | 2              | 8.9                   | -0.089                                       | -0.019                         | 0.864             |
| WD repeat-containing protein 1;                                                                                                           | O88342            | 1                          | 22              | 33             | 31.5                  | -0.074                                       | -0.013                         | 0.884             |
| Vitronectin;                                                                                                                              | P29788            | 1                          | 3               | 3              | 6.7                   | -0.074                                       | -0.009                         | 0.873             |
| ELAV-like protein 1;                                                                                                                      | P70372            | 1                          | 4               | 4              | 12.6                  | -0.074                                       | -0.035                         | 0.932             |
| Fascin;                                                                                                                                   | Q61553            | 1                          | 3               | 3              | 4.1                   | -0.074                                       | -0.016                         | 0.892             |
| Transaldolase;                                                                                                                            | Q93092            | 1                          | 12              | 33             | 21.4                  | -0.074                                       | -0.014                         | 0.887             |

Table S1, Tholen et al.

| Protein                                                               | Uniprot accession | ProteinProphet Prob. Score | Unique peptides | Total peptides | Sequence coverage [%] | Fold change (log <sub>2</sub> ) of ASAPratio | Fold change standard deviation | ASAPratio p-value |
|-----------------------------------------------------------------------|-------------------|----------------------------|-----------------|----------------|-----------------------|----------------------------------------------|--------------------------------|-------------------|
| Succinyl-CoA:3-ketoacid-coenzyme A transferase 1, mitochondrial;      | Q9D0K2            | 1                          | 34              | 59             | 43.2                  | -0.074                                       | -0.009                         | 0.875             |
| Protein LSM12 homolog;                                                | Q9D0R8            | 1                          | 2               | 2              | 19.5                  | -0.074                                       | -0.019                         | 0.899             |
| Prostamide/prostaglandin F synthase;                                  | Q9DB60            | 1                          | 4               | 5              | 30.7                  | -0.074                                       | -0.009                         | 0.873             |
| Omega-amidase NIT2;                                                   | Q9JHW2            | 1                          | 11              | 12             | 39.5                  | -0.074                                       | -0.005                         | 0.866             |
| Serine-threonine kinase receptor-associated protein;                  | Q9Z1Z2            | 1                          | 13              | 15             | 32.3                  | -0.074                                       | -0.016                         | 0.894             |
| Sepiapterin reductase;                                                | Q64105            | 1                          | 23              | 29             | 51.3                  | -0.074                                       | -0.005                         | 0.868             |
| ATP synthase subunit gamma, mitochondrial;                            | Q91VR2            | 1                          | 15              | 21             | 42.9                  | -0.074                                       | -0.005                         | 0.868             |
| 3-hydroxyisobutyrate dehydrogenase, mitochondrial;                    | Q99L13            | 1                          | 15              | 27             | 25.4                  | -0.074                                       | -0.011                         | 0.880             |
| Lysosomal Pro-X carboxypeptidase;                                     | Q7TMR0            | 1                          | 2               | 2              | 9.6                   | -0.074                                       | -0.02                          | 0.901             |
| Proteolipid protein 2;                                                | Q9R1Q7            | 0.994                      | 2               | 3              | 7.9                   | -0.074                                       | -0.005                         | 0.866             |
| Proteasome assembly chaperone 1;                                      | Q9JK23            | 0.974                      | 2               | 2              | 2.6                   | -0.074                                       | -0.006                         | 0.869             |
| Arginyl-tRNA synthetase, cytoplasmic;                                 | Q9D0I9            | 1                          | 7               | 7              | 10.2                  | -0.059                                       | -0.021                         | 0.931             |
| 1,4-alpha-glucan-branching enzyme;                                    | Q9D6Y9            | 1                          | 10              | 13             | 14.4                  | -0.059                                       | -0.047                         | 0.966             |
| Protein DDI1 homolog 2;                                               | A2ADY9            | 1                          | 8               | 10             | 20.3                  | -0.044                                       | -0.003                         | 0.918             |
| Glucosidase 2 subunit beta;                                           | Q08795            | 1                          | 7               | 9              | 8.8                   | -0.044                                       | -0.029                         | 0.962             |
| Hypoxanthine-guanine phosphoribosyltransferase;                       | P00493            | 1                          | 15              | 25             | 42.2                  | -0.044                                       | -0.012                         | 0.930             |
| NADP-dependent malic enzyme;                                          | P06801            | 1                          | 17              | 26             | 28.6                  | -0.044                                       | -0.018                         | 0.945             |
| Epoxide hydrolase 2;                                                  | P34914            | 1                          | 12              | 16             | 15.7                  | -0.044                                       | -0.003                         | 0.901             |
| Hydroxymethylglutaryl-CoA lyase, mitochondrial;                       | P38060            | 1                          | 7               | 7              | 21.2                  | -0.044                                       | -0.014                         | 0.934             |
| Ras suppressor protein 1;                                             | Q01730            | 1                          | 8               | 8              | 13.1                  | -0.044                                       | -0.006                         | 0.909             |
| Calcium-binding protein 39;                                           | Q06138            | 1                          | 2               | 2              | 3.2                   | -0.044                                       | -0.009                         | 0.918             |
| Putative phospholipase B-like 2;                                      | Q3TCN2            | 1                          | 4               | 4              | 5.4                   | -0.044                                       | -0.024                         | 0.956             |
| Aldehyde dehydrogenase family 16 member A1;                           | Q571I9            | 1                          | 5               | 5              | 8                     | -0.044                                       | -0.017                         | 0.942             |
| Guanylate kinase;                                                     | Q64520            | 1                          | 2               | 2              | 6.1                   | -0.044                                       | -0.003                         | 0.902             |
| 2-oxoisovalerate dehydrogenase subunit beta, mitochondrial;           | Q6P3A8            | 1                          | 3               | 3              | 8.2                   | -0.044                                       | -0.005                         | 0.905             |
| Trifunctional enzyme subunit alpha, mitochondrial;                    | Q8BMS1            | 1                          | 23              | 31             | 26                    | -0.044                                       | -0.02                          | 0.948             |
| Putative hydroxypyruvate isomerase;                                   | Q8R1F5            | 1                          | 4               | 4              | 34.2                  | -0.044                                       | -0.006                         | 0.911             |
| Protein phosphatase 1 regulatory subunit 3A;                          | Q99MR9            | 1                          | 8               | 10             | 6.7                   | -0.044                                       | -0.005                         | 0.906             |
| Protein S100-A14;                                                     | Q9D2Q8            | 1                          | 3               | 3              | 26                    | -0.044                                       | -0.019                         | 0.947             |
| ATP synthase subunit delta, mitochondrial;                            | Q9D3D9            | 1                          | 4               | 10             | 13.7                  | -0.044                                       | -0.002                         | 0.900             |
| Apoptosis-inducing factor 1, mitochondrial;                           | Q9Z0X1            | 1                          | 5               | 6              | 8.7                   | -0.044                                       | -0.008                         | 0.914             |
| L-lactate dehydrogenase A chain;                                      | P06151            | 1                          | 22              | 99             | 38.3                  | -0.044                                       | -0.004                         | 0.903             |
| L-lactate dehydrogenase B chain;                                      | P16125            | 1                          | 19              | 33             | 32.3                  | 0.151                                        | 0.008                          | 0.708             |
| Cathepsin D;                                                          | P18242            | 1                          | 19              | 28             | 23.4                  | -0.044                                       | -0.005                         | 0.905             |
| Phospholipase A-2-activating protein;                                 | P27612            | 1                          | 7               | 7              | 9.7                   | -0.044                                       | -0.006                         | 0.909             |
| Creatine kinase U-type, mitochondrial;                                | P30275            | 1                          | 8               | 16             | 21.1                  | -0.044                                       | -0.001                         | 0.899             |
| Peroxiredoxin-1;                                                      | P35700            | 1                          | 22              | 69             | 72.4                  | -0.044                                       | -0.002                         | 0.900             |
| S-adenosylmethionine synthase isoform type-2;                         | Q3THS6            | 1                          | 6               | 7              | 19.5                  | -0.044                                       | -0.012                         | 0.930             |
| Rho GDP-dissociation inhibitor 2;                                     | Q61599            | 1                          | 10              | 11             | 22                    | -0.044                                       | -0.009                         | 0.918             |
| D-3-phosphoglycerate dehydrogenase;                                   | Q61753            | 1                          | 13              | 16             | 19.3                  | -0.044                                       | -0.007                         | 0.913             |
| Ubiquitin thioesterase OTUB1;                                         | Q7TQI3            | 1                          | 13              | 15             | 31.5                  | -0.044                                       | -0.014                         | 0.934             |
| Hydroxyacylglutathione hydrolase, mitochondrial;                      | Q99KB8            | 1                          | 7               | 10             | 23.6                  | -0.044                                       | -0.005                         | 0.908             |
| Methylmalonate-semialdehyde dehydrogenase [acylating], mitochondrial; | Q9EQ20            | 1                          | 17              | 28             | 22.4                  | -0.044                                       | -0.01                          | 0.923             |

Table S1, Tholen et al.

| Protein                                                                                                           | Uniprot accession | ProteinProphet Prob. Score | Unique peptides | Total peptides | Sequence coverage [%] | Fold change (log <sub>2</sub> ) of ASAPratio | Fold change standard deviation | ASAPratio p-value |
|-------------------------------------------------------------------------------------------------------------------|-------------------|----------------------------|-----------------|----------------|-----------------------|----------------------------------------------|--------------------------------|-------------------|
| Uncharacterized protein;                                                                                          | E9Q616            | 1                          | 190             | 241            | 40.3                  | -0.044                                       | -0.011                         | 0.927             |
| Oxysterol-binding protein;                                                                                        | E9QPD4            | 1                          | 4               | 4              | 4.7                   | -0.044                                       | -0.005                         | 0.908             |
| Ketosamine-3-kinase;                                                                                              | Q8K274            | 1                          | 3               | 4              | 9.1                   | -0.044                                       | -0.005                         | 0.905             |
| GMP synthase [glutamine-hydrolyzing];                                                                             | Q3THK7            | 0.998                      | 2               | 2              | 3.2                   | -0.044                                       | -0.003                         | 0.899             |
| Oxysterol-binding protein-related protein 9;                                                                      | A2A8Z1            | 0.998                      | 2               | 2              | 3                     | -0.044                                       | -0.01                          | 0.923             |
| Protein unc-119 homolog B;                                                                                        | Q8C4B4            | 0.997                      | 2               | 2              | 5.1                   | -0.044                                       | -0.005                         | 0.908             |
| NEDD4-binding protein 1;                                                                                          | Q6A037            | 0.996                      | 2               | 2              | 3.9                   | -0.044                                       | -0.002                         | 0.900             |
| Peptidase inhibitor 16;                                                                                           | Q9ET66            | 0.986                      | 2               | 2              | 4.3                   | -0.044                                       | -0.005                         | 0.905             |
| Proteasome subunit beta type-5;                                                                                   | O55234            | 1                          | 5               | 5              | 24.6                  | -0.029                                       | -0.01                          | 0.959             |
| Prefoldin subunit 2;                                                                                              | O70591            | 1                          | 2               | 3              | 7.8                   | -0.029                                       | -0.002                         | 0.936             |
| Cytochrome c oxidase subunit 6B1;                                                                                 | P56391            | 1                          | 4               | 4              | 29.1                  | -0.029                                       | -0.002                         | 0.938             |
| SUMO-conjugating enzyme UBC9;                                                                                     | P63280            | 1                          | 4               | 5              | 12                    | -0.029                                       | -0.001                         | 0.935             |
| T-complex protein 1 subunit beta;                                                                                 | P80314            | 1                          | 7               | 9              | 13.8                  | -0.029                                       | -0.007                         | 0.950             |
| Osteoclast-stimulating factor 1;                                                                                  | Q62422            | 1                          | 11              | 18             | 42.3                  | -0.029                                       | -0.007                         | 0.950             |
| Lactoylglutathione lyase;                                                                                         | Q9CPU0            | 1                          | 11              | 19             | 27.2                  | -0.029                                       | -0.001                         | 0.936             |
| Adenylate kinase isoenzyme 1;                                                                                     | Q9ROY5            | 1                          | 19              | 71             | 50.5                  | -0.029                                       | -0.002                         | 0.938             |
| Uncharacterized protein;                                                                                          | E9PVD2            | 1                          | 9               | 11             | 10                    | -0.029                                       | -0.007                         | 0.950             |
| Septin-7;                                                                                                         | O55131            | 1                          | 7               | 7              | 20.1                  | -0.029                                       | -0.009                         | 0.956             |
| Adenylyl cyclase-associated protein 1;                                                                            | P40124            | 1                          | 17              | 20             | 22.4                  | -0.029                                       | -0.008                         | 0.953             |
| Serine/threonine-protein phosphatase PP1-alpha catalytic subunit;                                                 | P62137            | 1                          | 14              | 16             | 36.4                  | -0.029                                       | -0.006                         | 0.948             |
| Acyl-protein thioesterase 1;                                                                                      | P97823            | 1                          | 6               | 10             | 20                    | -0.029                                       | -0.007                         | 0.950             |
| Ubiquitin-like modifier-activating enzyme 1;                                                                      | Q02053            | 1                          | 49              | 65             | 28.5                  | -0.029                                       | -0.01                          | 0.961             |
| Serine/threonine-protein phosphatase 2A 65 kDa regulatory subunit A alpha isoform;                                | Q76MZ3            | 1                          | 15              | 18             | 21.1                  | -0.029                                       | -0.011                         | 0.963             |
| Alcohol dehydrogenase [NADP+];                                                                                    | Q9JII6            | 1                          | 22              | 36             | 37.5                  | -0.029                                       | -0.004                         | 0.940             |
| Glutathione reductase, mitochondrial;                                                                             | P47791            | 1                          | 12              | 12             | 21.8                  | -0.014                                       | -0.003                         | 0.975             |
| Annexin A5;                                                                                                       | P48036            | 1                          | 36              | 83             | 58.9                  | -0.014                                       | -0.001                         | 0.971             |
| Platelet-activating factor acetylhydrolase IB subunit alpha;                                                      | P63005            | 1                          | 5               | 7              | 6.3                   | -0.014                                       | -0.007                         | 0.985             |
| Vacuolar protein sorting-associated protein 45;                                                                   | P97390            | 1                          | 2               | 2              | 2.5                   | -0.014                                       | -0.001                         | 0.971             |
| Beta-2-glycoprotein 1;                                                                                            | Q01339            | 1                          | 16              | 21             | 30.7                  | -0.014                                       | -0.005                         | 0.982             |
| Rab GDP dissociation inhibitor beta;                                                                              | Q61598            | 1                          | 33              | 55             | 56.6                  | -0.014                                       | -0.002                         | 0.972             |
| Transcription factor BTF3;                                                                                        | Q64152            | 1                          | 2               | 2              | 9.3                   | -0.014                                       | -0.002                         | 0.973             |
| Alanyl-tRNA synthetase, cytoplasmic;                                                                              | Q8BQG7            | 1                          | 14              | 14             | 13.3                  | -0.014                                       | -0.003                         | 0.977             |
| L-asparaginase;                                                                                                   | Q8C0M9            | 1                          | 5               | 5              | 16                    | -0.014                                       | -0.002                         | 0.979             |
| Protein Z-dependent protease inhibitor;                                                                           | Q8R121            | 1                          | 3               | 3              | 5.8                   | -0.014                                       | -0.006                         | 0.985             |
| Oxysterol-binding protein-related protein 1;                                                                      | Q91XL9            | 1                          | 2               | 2              | 5.4                   | -0.014                                       | -0.003                         | 0.977             |
| Dipeptidyl peptidase 3;                                                                                           | Q99KK7            | 1                          | 15              | 17             | 15.9                  | -0.014                                       | -0.006                         | 0.983             |
| Dihydrolipoyllysine-residue succinyltransferase component of 2-oxoglutarate dehydrogenase complex, mitochondrial; | Q9D2G2            | 1                          | 12              | 17             | 15.2                  | -0.014                                       | -0.001                         | 0.972             |
| Uncharacterized protein;                                                                                          | E9PV24            | 1                          | 16              | 26             | 17.8                  | -0.014                                       | -0.005                         | 0.983             |
| 60S acidic ribosomal protein P0;                                                                                  | P14869            | 1                          | 3               | 3              | 10.7                  | -0.014                                       | -0.003                         | 0.975             |
| Peptidyl-prolyl cis-trans isomerase FKBP4;                                                                        | P30416            | 1                          | 6               | 6              | 14.8                  | -0.014                                       | -0.006                         | 0.983             |
| Glutathione peroxidase 3;                                                                                         | P46412            | 1                          | 7               | 11             | 29.1                  | -0.014                                       | -0.001                         | 0.971             |
| Xaa-Pro aminopeptidase 1;                                                                                         | Q6P1B1            | 1                          | 14              | 16             | 15.2                  | -0.014                                       | -0.007                         | 0.986             |



Table S1, Tholen et al.

| Protein                                                        | Uniprot accession | ProteinProphet Prob. Score | Unique peptides | Total peptides | Sequence coverage [%] | Fold change (log <sub>2</sub> ) of ASAPratio | Fold change standard deviation | ASAPratio p-value |
|----------------------------------------------------------------|-------------------|----------------------------|-----------------|----------------|-----------------------|----------------------------------------------|--------------------------------|-------------------|
| 3-hydroxyisobutyryl-CoA hydrolase, mitochondrial;              | Q8QZS1            | 1                          | 14              | 15             | 22.9                  | -0.014                                       | -0.004                         | 0.978             |
| Sarcoplasmic/endoplasmic reticulum calcium ATPase 1;           | Q8R429            | 1                          | 64              | 173            | 35.1                  | -0.014                                       | -0.002                         | 0.975             |
| Protein disulfide-isomerase A6;                                | Q922R8            | 1                          | 12              | 15             | 18.6                  | -0.014                                       | -0.006                         | 0.984             |
| 3-mercaptopyruvate sulfurtransferase;                          | Q99J99            | 1                          | 21              | 33             | 42.1                  | -0.014                                       | -0.003                         | 0.977             |
| 5'(3')-deoxyribonucleotidase, cytosolic type;                  | Q9JM14            | 1                          | 7               | 9              | 20                    | -0.014                                       | -0.001                         | 0.971             |
| Basal cell adhesion molecule;                                  | Q9R069            | 1                          | 9               | 9              | 12.9                  | -0.014                                       | -0.001                         | 0.966             |
| Fructose-bisphosphate aldolase;                                | A6ZI44            | 1                          | 21              | 364            | 75.4                  | -0.014                                       | -0.002                         | 0.972             |
| Fructose-bisphosphate aldolase;                                | Q9CPQ9            | 0.999                      | 2               | 3              | 48.1                  | -0.434                                       | -0.164                         | 0.523             |
| Alpha-amylase 1;                                               | P00687            | 0.999                      | 2               | 2              | 4.1                   | -0.014                                       | -0.002                         | 0.974             |
| 1,2-dihydroxy-3-keto-5-methylthiopentene dioxygenase;          | Q99JT9            | 0.999                      | 2               | 2              | 4.5                   | -0.014                                       | -0.002                         | 0.973             |
| Carnitine O-palmitoyltransferase 2, mitochondrial;             | P52825            | 0.962                      | 3               | 3              | 4.9                   | -0.014                                       | -0.002                         | 0.974             |
| Transketolase;                                                 | P40142            | 1                          | 46              | 98             | 48.2                  | 0                                            | 0                              | 0.998             |
| 60S acidic ribosomal protein P1;                               | P47955            | 1                          | 2               | 2              | 14                    | 0                                            | 0                              | 0.996             |
| Proteasome subunit beta type-4;                                | P99026            | 1                          | 10              | 11             | 31.8                  | 0                                            | 0                              | 0.997             |
| Retinol-binding protein 1;                                     | Q00915            | 1                          | 3               | 3              | 15.6                  | 0                                            | 0                              | 0.997             |
| Mitogen-activated protein kinase 3;                            | Q63844            | 1                          | 6               | 6              | 13.7                  | 0                                            | 0                              | 0.996             |
| 10 kDa heat shock protein, mitochondrial;                      | Q64433            | 1                          | 9               | 16             | 48                    | 0                                            | 0                              | 0.995             |
| Phosphoglycolate phosphatase;                                  | Q8CHP8            | 1                          | 14              | 17             | 30.5                  | 0                                            | 0                              | 0.996             |
| Apolipoprotein A-I-binding protein;                            | Q8K4Z3            | 1                          | 11              | 15             | 24.8                  | 0                                            | 0                              | 0.995             |
| Anamorsin;                                                     | Q8WTY4            | 1                          | 2               | 6              | 8.9                   | 0                                            | 0                              | 0.995             |
| NADH dehydrogenase [ubiquinone] flavoprotein 2, mitochondrial; | Q9D6J6            | 1                          | 8               | 10             | 24.2                  | 0                                            | 0                              | 0.995             |
| Acid ceramidase;                                               | Q9WV54            | 1                          | 8               | 8              | 13.2                  | 0                                            | 0                              | 0.998             |
| Chloride intracellular channel protein 1;                      | Q9Z1Q5            | 1                          | 20              | 30             | 61.4                  | 0                                            | 0                              | 0.995             |
| Complement factor B;                                           | P04186            | 1                          | 20              | 28             | 17.7                  | 0                                            | 0                              | 0.996             |
| Glucose-6-phosphate isomerase;                                 | P06745            | 1                          | 39              | 96             | 33.9                  | 0                                            | 0                              | 0.995             |
| Bisphosphoglycerate mutase;                                    | P15327            | 1                          | 6               | 7              | 18.5                  | 0                                            | 0                              | 0.997             |
| Quinone oxidoreductase;                                        | P47199            | 1                          | 10              | 13             | 29.3                  | 0                                            | 0                              | 0.997             |
| Phosphatidylethanolamine-binding protein 1;                    | P70296            | 1                          | 11              | 30             | 56.7                  | 0                                            | 0                              | 0.995             |
| 2-oxoglutarate dehydrogenase, mitochondrial;                   | Q60597            | 1                          | 53              | 86             | 35.5                  | 0                                            | 0                              | 0.996             |
| Peroxisome oxidoreductase-2;                                   | Q61171            | 1                          | 17              | 46             | 47.5                  | 0                                            | 0                              | 0.995             |
| Abhydrolase domain-containing protein 14B;                     | Q8VCR7            | 1                          | 7               | 8              | 27.1                  | 0                                            | 0                              | 0.995             |
| NADH-cytochrome b5 reductase 3;                                | Q9DCN2            | 1                          | 6               | 6              | 13.3                  | 0                                            | 0                              | 0.998             |
| DAZ-associated protein 1;                                      | Q9JII5            | 1                          | 5               | 5              | 11.6                  | 0                                            | 0                              | 0.996             |
| Afadin;                                                        | Q9QZQ1            | 1                          | 3               | 3              | 2                     | 0                                            | 0                              | 0.995             |
| Mitochondrial antiviral-signaling protein;                     | Q8VCF0            | 1                          | 2               | 3              | 2                     | 0                                            | 0                              | 0.995             |
| Nucleoside diphosphate kinase 3;                               | Q9WV85            | 0.998                      | 2               | 2              | 4.1                   | 0                                            | 0                              | 0.995             |
| Prohibitin-2;                                                  | O35129            | 1                          | 2               | 3              | 7.6                   | 0.014                                        | 0.003                          | 0.967             |
| Complement factor D;                                           | P03953            | 1                          | 8               | 9              | 20.1                  | 0.014                                        | 0.001                          | 0.961             |
| Tyrosine-protein kinase CSK;                                   | P41241            | 1                          | 2               | 3              | 9.9                   | 0.014                                        | 0.003                          | 0.968             |
| Fumarate hydratase, mitochondrial;                             | P97807            | 1                          | 30              | 46             | 43.8                  | 0.014                                        | 0.002                          | 0.963             |
| Retinol-binding protein 4;                                     | Q00724            | 1                          | 6               | 12             | 14.9                  | 0.014                                        | 0.001                          | 0.962             |
| Poly(U)-binding-splicing factor PUF60;                         | Q3UEB3            | 1                          | 2               | 2              | 2.8                   | 0.014                                        | 0.001                          | 0.961             |
| Platelet-activating factor acetylhydrolase IB subunit beta;    | Q61206            | 1                          | 5               | 11             | 18.9                  | 0.014                                        | 0.001                          | 0.960             |

Table S1, Tholen et al.

| Protein                                                      | Uniprot accession | ProteinProphet Prob. Score | Unique peptides | Total peptides | Sequence coverage [%] | Fold change (log <sub>2</sub> ) of ASAPratio | Fold change standard deviation | ASAPratio p-value |
|--------------------------------------------------------------|-------------------|----------------------------|-----------------|----------------|-----------------------|----------------------------------------------|--------------------------------|-------------------|
| Interleukin-1 receptor accessory protein;                    | Q61730            | 1                          | 8               | 9              | 13                    | 0.014                                        | 0.003                          | 0.970             |
| Selenide, water dikinase 1;                                  | Q8BH69            | 1                          | 6               | 7              | 7.7                   | 0.014                                        | 0.001                          | 0.961             |
| Bifunctional aminoacyl-tRNA synthetase;                      | Q8CGC7            | 1                          | 7               | 8              | 3.5                   | 0.014                                        | 0.006                          | 0.979             |
| GDP-mannose 4,6 dehydratase;                                 | Q8K0C9            | 1                          | 2               | 2              | 6.5                   | 0.014                                        | 0.003                          | 0.970             |
| Sulfite oxidase, mitochondrial;                              | Q8R086            | 1                          | 4               | 5              | 9.2                   | 0.014                                        | 0.002                          | 0.965             |
| Electron transfer flavoprotein subunit alpha, mitochondrial; | Q99LC5            | 1                          | 33              | 63             | 53.2                  | 0.014                                        | 0.001                          | 0.961             |
| Delta(3,5)-Delta(2,4)-dienoyl-CoA isomerase, mitochondrial;  | O35459            | 1                          | 5               | 5              | 14.4                  | 0.014                                        | 0.001                          | 0.961             |
| Ig kappa chain V-III region PC 3741/TEPC 111;                | P01660            | 1                          | 5               | 5              | 26.1                  | 0.014                                        | 0.002                          | 0.964             |
| Peptidyl-prolyl cis-trans isomerase A;                       | P17742            | 1                          | 13              | 51             | 47                    | 0.014                                        | 0.002                          | 0.963             |
| Ras-related protein Rab-11B;                                 | P46638            | 1                          | 14              | 21             | 36.7                  | 0.014                                        | 0.002                          | 0.967             |
| Rab GDP dissociation inhibitor alpha;                        | P50396            | 1                          | 4               | 5              | 13.6                  | 0.014                                        | 0.001                          | 0.962             |
| 60 kDa heat shock protein, mitochondrial;                    | P63038            | 1                          | 33              | 50             | 38.7                  | 0.014                                        | 0.002                          | 0.967             |
| PEST proteolytic signal-containing nuclear protein;          | Q6P8I4            | 1                          | 3               | 4              | 21.1                  | 0.014                                        | 0.002                          | 0.963             |
| 6-phosphogluconolactonase;                                   | Q9CQ60            | 1                          | 16              | 25             | 36.2                  | 0.014                                        | 0.001                          | 0.960             |
| Cytochrome b-c1 complex subunit 1, mitochondrial;            | Q9CZ13            | 1                          | 20              | 31             | 28.8                  | 0.014                                        | 0.001                          | 0.961             |
| Ferritin;                                                    | Q9CPX4            | 1                          | 19              | 50             | 54.1                  | 0.014                                        | 0.001                          | 0.962             |
| AMP deaminase 1;                                             | Q3V1D3            | 0.999                      | 2               | 2              | 2.6                   | 0.014                                        | 0.001                          | 0.969             |
| GDH/6PGL endoplasmic bifunctional protein;                   | Q8CFX1            | 0.998                      | 3               | 3              | 3.4                   | 0.014                                        | 0.002                          | 0.969             |
| Lipoma-preferred partner homolog;                            | Q8BFW7            | 0.991                      | 2               | 3              | 3.9                   | 0.014                                        | 0.001                          | 0.961             |
| Dual specificity protein phosphatase 23;                     | Q6NT99            | 1                          | 7               | 7              | 32.7                  | 0.029                                        | 0.002                          | 0.936             |
| Serine/threonine-protein phosphatase;                        | F7BX26            | 1                          | 3               | 4              | 6.3                   | 0.029                                        | 0.006                          | 0.951             |
| N-acetyl-D-glucosamine kinase;                               | Q9QZ08            | 1                          | 3               | 3              | 6.4                   | 0.029                                        | 0.005                          | 0.952             |
| Proteasome subunit beta type-1;                              | O09061            | 1                          | 10              | 11             | 30.8                  | 0.043                                        | 0.018                          | 0.960             |
| Thioredoxin;                                                 | P10639            | 1                          | 4               | 9              | 21                    | 0.043                                        | 0.007                          | 0.936             |
| Cytochrome c oxidase subunit 5A, mitochondrial;              | P12787            | 1                          | 4               | 4              | 27.4                  | 0.043                                        | 0.005                          | 0.931             |
| Glutathione S-transferase A4;                                | P24472            | 1                          | 5               | 6              | 13.1                  | 0.043                                        | 0.017                          | 0.958             |
| Serine hydroxymethyltransferase, cytosolic;                  | P50431            | 1                          | 6               | 6              | 7.7                   | 0.043                                        | 0.028                          | 0.971             |
| Transcription elongation factor B polypeptide 2;             | P62869            | 1                          | 4               | 4              | 43.2                  | 0.043                                        | 0.01                           | 0.945             |
| Eukaryotic translation initiation factor 4E;                 | P63073            | 1                          | 7               | 8              | 21.2                  | 0.043                                        | 0.003                          | 0.928             |
| Protein FAM63A;                                              | Q76LS9            | 1                          | 4               | 4              | 8.1                   | 0.043                                        | 0.003                          | 0.928             |
| Isochorismatase domain-containing protein 1;                 | Q91V64            | 1                          | 6               | 10             | 8.4                   | 0.043                                        | 0.003                          | 0.929             |
| Cytosol aminopeptidase;                                      | Q9CPY7            | 1                          | 32              | 37             | 42.8                  | 0.043                                        | 0.009                          | 0.942             |
| Coactosin-like protein;                                      | Q9CQI6            | 1                          | 5               | 9              | 30.3                  | 0.043                                        | 0.013                          | 0.949             |
| Isovaleryl-CoA dehydrogenase, mitochondrial;                 | Q9JHI5            | 1                          | 16              | 19             | 26.4                  | 0.043                                        | 0.01                           | 0.945             |
| 2-amino-3-ketobutyrate coenzyme A ligase, mitochondrial;     | O88986            | 1                          | 6               | 6              | 13.5                  | 0.043                                        | 0.016                          | 0.957             |
| Aspartate aminotransferase, cytoplasmic;                     | P05201            | 1                          | 24              | 61             | 37.3                  | 0.043                                        | 0.011                          | 0.946             |
| Ubiquitin-conjugating enzyme E2 L3;                          | P68037            | 1                          | 10              | 15             | 47.4                  | 0.043                                        | 0.02                           | 0.963             |
| Glucose-6-phosphate 1-dehydrogenase X;                       | Q00612            | 1                          | 23              | 32             | 31.5                  | 0.043                                        | 0.022                          | 0.966             |
| Voltage-dependent L-type calcium channel subunit alpha-1S;   | Q02789            | 1                          | 3               | 3              | 1.9                   | 0.043                                        | 0.021                          | 0.964             |
| Puromycin-sensitive aminopeptidase;                          | Q11011            | 1                          | 32              | 38             | 23.9                  | 0.043                                        | 0.011                          | 0.946             |
| Peptidyl-prolyl cis-trans isomerase;                         | A2BGI8            | 1                          | 3               | 4              | 13.3                  | 0.043                                        | 0.005                          | 0.933             |
| Nuclear migration protein nudC;                              | O35685            | 1                          | 3               | 3              | 6                     | 0.043                                        | 0.013                          | 0.949             |
| WW domain-binding protein 11;                                | Q923D5            | 0.967                      | 2               | 2              | 2.3                   | 0.043                                        | 0.006                          | 0.935             |

Table S1, Tholen et al.

| Protein                                                                             | Uniprot accession | ProteinProphet Prob. Score | Unique peptides | Total peptides | Sequence coverage [%] | Fold change (log <sub>2</sub> ) of ASAPratio | Fold change standard deviation | ASAPratio p-value |
|-------------------------------------------------------------------------------------|-------------------|----------------------------|-----------------|----------------|-----------------------|----------------------------------------------|--------------------------------|-------------------|
| Extracellular superoxide dismutase [Cu-Zn];                                         | O09164            | 1                          | 7               | 8              | 19.9                  | 0.057                                        | 0.002                          | 0.893             |
| Heterogeneous nuclear ribonucleoprotein A1;                                         | P49312            | 1                          | 7               | 10             | 15.3                  | 0.057                                        | 0.008                          | 0.906             |
| Calpastatin;                                                                        | P51125            | 1                          | 5               | 6              | 6.7                   | 0.057                                        | 0.031                          | 0.952             |
| CD166 antigen;                                                                      | Q61490            | 1                          | 4               | 4              | 9.3                   | 0.057                                        | 0.003                          | 0.894             |
| Protein canopy homolog 4;                                                           | Q8BQ47            | 1                          | 4               | 4              | 13.5                  | 0.057                                        | 0.014                          | 0.921             |
| Presequence protease, mitochondrial;                                                | Q8K411            | 1                          | 12              | 12             | 11.7                  | 0.057                                        | 0.018                          | 0.929             |
| Eukaryotic peptide chain release factor GTP-binding subunit ERF3A;                  | Q8R050            | 1                          | 4               | 4              | 3.6                   | 0.057                                        | 0.011                          | 0.912             |
| Galectin-related protein A;                                                         | Q8VED9            | 1                          | 4               | 4              | 12.2                  | 0.057                                        | 0.004                          | 0.896             |
| MACRO domain-containing protein 1;                                                  | Q922B1            | 1                          | 10              | 13             | 22.9                  | 0.057                                        | 0.003                          | 0.894             |
| Ran-binding protein 3;                                                              | Q9CT10            | 1                          | 4               | 5              | 9.4                   | 0.057                                        | 0.006                          | 0.899             |
| Perilipin-3;                                                                        | Q9DBG5            | 1                          | 6               | 6              | 11.2                  | 0.057                                        | 0.021                          | 0.937             |
| E3 SUMO-protein ligase RanBP2;                                                      | Q9ERU9            | 1                          | 2               | 2              | 0.7                   | 0.057                                        | 0.012                          | 0.914             |
| CD2-associated protein;                                                             | Q9JLQ0            | 1                          | 7               | 8              | 10.2                  | 0.057                                        | 0.032                          | 0.954             |
| Cadherin-13;                                                                        | Q9WTR5            | 1                          | 8               | 10             | 9.2                   | 0.057                                        | 0.004                          | 0.895             |
| Eukaryotic translation initiation factor 4H;                                        | Q9WUK2            | 1                          | 2               | 2              | 5.7                   | 0.057                                        | 0.004                          | 0.895             |
| Kelch repeat and BTB (POZ) domain containing 10; MCG12931; Uncharacterized protein; | A2AUC9            | 1                          | 8               | 8              | 9.9                   | 0.057                                        | 0.016                          | 0.926             |
| LanC-like protein 1;                                                                | O89112            | 1                          | 2               | 2              | 6.5                   | 0.057                                        | 0.02                           | 0.934             |
| Apolipoprotein A-II;                                                                | P09813            | 1                          | 5               | 9              | 18.6                  | 0.057                                        | 0.014                          | 0.921             |
| Triosephosphate isomerase;                                                          | P17751            | 1                          | 37              | 596            | 67.5                  | 0.057                                        | 0.006                          | 0.899             |
| Proliferating cell nuclear antigen;                                                 | P17918            | 1                          | 7               | 8              | 28.4                  | 0.057                                        | 0.01                           | 0.911             |
| Protein S100-A11;                                                                   | P50543            | 1                          | 8               | 10             | 27.6                  | 0.057                                        | 0.01                           | 0.911             |
| Poly(rC)-binding protein 1;                                                         | P60335            | 1                          | 9               | 15             | 28.7                  | 0.057                                        | 0.012                          | 0.914             |
| Poly(rC)-binding protein 2;                                                         | Q61990            | 1                          | 8               | 14             | 20.4                  | -0.105                                       | -0.006                         | 0.794             |
| Serine/threonine-protein kinase PAK 2;                                              | Q8CIN4            | 1                          | 7               | 14             | 8.6                   | 0.057                                        | 0.001                          | 0.892             |
| Aldo-keto reductase family 1 member C18;                                            | Q8K023            | 1                          | 5               | 9              | 9.9                   | 0.057                                        | 0.003                          | 0.894             |
| Glyceraldehyde-3-phosphate dehydrogenase;                                           | E9QAC7            | 1                          | 17              | 141            | 62.8                  | 0.057                                        | 0.007                          | 0.901             |
| Glyceraldehyde-3-phosphate dehydrogenase;                                           | E9PYX4            | 1                          | 5               | 92             | 37.6                  | 0.043                                        | 0.005                          | 0.931             |
| Uncharacterized protein;                                                            | F6ZFU0            | 1                          | 2               | 4              | 17.2                  | 0.057                                        | 0.004                          | 0.895             |
| Elongation factor 1-delta;                                                          | P57776            | 1                          | 2               | 3              | 40                    | -0.029                                       | -0.003                         | 0.938             |
| Protein FAM114A2;                                                                   | Q8VE88            | 0.966                      | 2               | 2              | 5.6                   | 0.057                                        | 0.009                          | 0.907             |
| C-type lectin domain family 11 member A;                                            | O88200            | 1                          | 7               | 7              | 14.9                  | 0.07                                         | 0.005                          | 0.863             |
| Delta-aminolevulinic acid dehydratase;                                              | P10518            | 1                          | 15              | 23             | 35.5                  | 0.07                                         | 0.022                          | 0.908             |
| Apolipoprotein C-III;                                                               | P33622            | 1                          | 4               | 9              | 19.2                  | 0.07                                         | 0.008                          | 0.870             |
| ADP-ribosylation factor 6;                                                          | P62331            | 1                          | 4               | 4              | 24                    | 0.07                                         | 0.013                          | 0.883             |
| Latexin;                                                                            | P70202            | 1                          | 4               | 5              | 12.2                  | 0.07                                         | 0.012                          | 0.880             |
| Bifunctional 3'-phosphoadenosine 5'-phosphosulfate synthase 1;                      | Q60967            | 1                          | 8               | 11             | 12                    | 0.07                                         | 0.039                          | 0.938             |
| Synemin;                                                                            | Q70IV5            | 1                          | 3               | 5              | 3.5                   | 0.07                                         | 0.015                          | 0.889             |
| Scavenger receptor cysteine-rich domain-containing protein LOC284297 homolog;       | Q8BV57            | 1                          | 6               | 6              | 6                     | 0.07                                         | 0.021                          | 0.906             |
| Thimet oligopeptidase;                                                              | Q8C1A5            | 1                          | 18              | 24             | 19.9                  | 0.07                                         | 0.011                          | 0.878             |
| Rho GDP-dissociation inhibitor 1;                                                   | Q99PT1            | 1                          | 8               | 22             | 15.2                  | 0.07                                         | 0.003                          | 0.860             |
| SUMO-activating enzyme subunit 1;                                                   | Q9R1T2            | 1                          | 8               | 10             | 23.7                  | 0.07                                         | 0.004                          | 0.862             |
| Ig gamma-2A chain C region, A allele;                                               | P01863            | 1                          | 6               | 10             | 13.3                  | 0.07                                         | 0.007                          | 0.868             |

Table S1, Tholen et al.

| Protein                                                                                                             | Uniprot accession | ProteinProphet Prob. Score | Unique peptides | Total peptides | Sequence coverage [%] | Fold change (log <sub>2</sub> ) of ASAPratio | Fold change standard deviation | ASAPratio p-value |
|---------------------------------------------------------------------------------------------------------------------|-------------------|----------------------------|-----------------|----------------|-----------------------|----------------------------------------------|--------------------------------|-------------------|
| Peroxioredoxin-5, mitochondrial;                                                                                    | P99029            | 1                          | 21              | 43             | 44.8                  | 0.07                                         | 0.005                          | 0.863             |
| Tyrosine-protein kinase Yes;                                                                                        | Q04736            | 1                          | 4               | 4              | 4.6                   | 0.07                                         | 0.009                          | 0.874             |
| Corticosteroid-binding globulin;                                                                                    | Q06770            | 1                          | 10              | 15             | 11.1                  | 0.07                                         | 0.005                          | 0.865             |
| Protein transport protein Sec31A;                                                                                   | Q3UPL0            | 1                          | 17              | 23             | 12.4                  | 0.07                                         | 0.019                          | 0.900             |
| Eukaryotic translation initiation factor 2A;                                                                        | Q8BJW6            | 1                          | 5               | 5              | 6.5                   | 0.07                                         | 0.008                          | 0.870             |
| Actin-related protein 2/3 complex subunit 3;                                                                        | Q9JM76            | 1                          | 9               | 15             | 27.5                  | 0.07                                         | 0.013                          | 0.883             |
| Troponin T, fast skeletal muscle;                                                                                   | Q9QZ47            | 1                          | 4               | 6              | 13                    | 0.07                                         | 0.032                          | 0.929             |
| Band 4.1-like protein 3;                                                                                            | Q9WV92            | 1                          | 4               | 4              | 8.5                   | 0.07                                         | 0.016                          | 0.892             |
| Dci protein; Dodecenoyl-Coenzyme A delta isomerase (3,2 trans-enoyl-Coenzyme A isomerase); Uncharacterized protein; | Q8QZV3            | 1                          | 21              | 40             | 29.8                  | 0.07                                         | 0.012                          | 0.880             |
| Glycogen synthase kinase-3 alpha;                                                                                   | Q2NL51            | 0.999                      | 2               | 2              | 3.5                   | 0.07                                         | 0.005                          | 0.863             |
| Superoxide dismutase [Cu-Zn];                                                                                       | P08228            | 1                          | 13              | 25             | 32.5                  | 0.084                                        | 0.009                          | 0.837             |
| Stress-70 protein, mitochondrial;                                                                                   | P38647            | 1                          | 28              | 48             | 26.4                  | 0.084                                        | 0.006                          | 0.831             |
| V-type proton ATPase subunit B, brain isoform;                                                                      | P62814            | 1                          | 7               | 11             | 11.5                  | 0.084                                        | 0.027                          | 0.888             |
| Hydroxyacyl-coenzyme A dehydrogenase, mitochondrial;                                                                | Q61425            | 1                          | 9               | 17             | 22.3                  | 0.084                                        | 0.01                           | 0.839             |
| Dihydrolipoyllysine-residue acetyltransferase component of pyruvate dehydrogenase complex, mitochondrial;           | Q8BMF4            | 1                          | 24              | 40             | 28.2                  | 0.084                                        | 0.009                          | 0.837             |
| Tubulin polymerization-promoting protein family member 3;                                                           | Q9CRB6            | 1                          | 4               | 6              | 11.9                  | 0.084                                        | 0.01                           | 0.842             |
| Histidine triad nucleotide-binding protein 2, mitochondrial;                                                        | Q9DOS9            | 1                          | 11              | 15             | 39.9                  | 0.084                                        | 0.005                          | 0.830             |
| Elongation factor 1-gamma;                                                                                          | Q9D8N0            | 1                          | 15              | 20             | 20.1                  | 0.084                                        | 0.021                          | 0.874             |
| Valyl-tRNA synthetase;                                                                                              | Q9Z1Q9            | 1                          | 9               | 9              | 5.8                   | 0.084                                        | 0.025                          | 0.881             |
| Dihydrolipoyl dehydrogenase, mitochondrial;                                                                         | O08749            | 1                          | 23              | 48             | 26.3                  | 0.084                                        | 0.004                          | 0.829             |
| Annexin A2;                                                                                                         | P07356            | 1                          | 42              | 208            | 68.4                  | 0.084                                        | 0.008                          | 0.835             |
| Cofilin-1;                                                                                                          | P18760            | 1                          | 11              | 19             | 43.4                  | 0.084                                        | 0.005                          | 0.830             |
| Beta-enolase;                                                                                                       | P21550            | 1                          | 35              | 289            | 59                    | 0.084                                        | 0.01                           | 0.839             |
| Alpha-enolase;                                                                                                      | P17182            | 1                          | 15              | 57             | 59.7                  | -0.234                                       | -0.069                         | 0.679             |
| Enolase;                                                                                                            | B0QZL1            | 1                          | 4               | 5              | 70.1                  | -0.218                                       | -0.018                         | 0.592             |
| Procollagen C-endopeptidase enhancer 1;                                                                             | Q61398            | 1                          | 10              | 18             | 40.8                  | 0.084                                        | 0.012                          | 0.847             |
| Peroxisomal N(1)-acetyl-spermine/spermidine oxidase;                                                                | Q8COL6            | 1                          | 5               | 5              | 7.3                   | 0.084                                        | 0.036                          | 0.908             |
| Septin-11;                                                                                                          | Q8C1B7            | 1                          | 8               | 9              | 25.5                  | 0.084                                        | 0.01                           | 0.842             |
| Septin-8;                                                                                                           | Q8CHH9            | 1                          | 5               | 7              | 11                    | 0.333                                        | 0.092                          | 0.550             |
| Septin-6;                                                                                                           | Q9R1T4            | 1                          | 4               | 4              | 13.1                  | -0.621                                       | -0.057                         | 0.126             |
| Secernin-1;                                                                                                         | Q9CZC8            | 1                          | 6               | 10             | 9.9                   | 0.084                                        | 0.006                          | 0.833             |
| cAMP-dependent protein kinase type I-alpha regulatory subunit;                                                      | Q9DBC7            | 1                          | 6               | 7              | 6.6                   | 0.084                                        | 0.006                          | 0.833             |
| RuvB-like 1;                                                                                                        | P60122            | 1                          | 2               | 2              | 7                     | 0.084                                        | 0.012                          | 0.848             |
| Coronin-1B;                                                                                                         | Q9WUM3            | 0.994                      | 2               | 2              | 3.9                   | 0.084                                        | 0.015                          | 0.867             |
| Glutathione peroxidase 1;                                                                                           | P11352            | 1                          | 18              | 28             | 55.7                  | 0.098                                        | 0.048                          | 0.899             |
| Alcohol dehydrogenase class-3;                                                                                      | P28474            | 1                          | 12              | 22             | 21.4                  | 0.098                                        | 0.005                          | 0.799             |
| Heterogeneous nuclear ribonucleoprotein H2;                                                                         | P70333            | 1                          | 8               | 9              | 16                    | 0.098                                        | 0.005                          | 0.799             |
| N(4)-(beta-N-acetylglucosaminy)-L-asparaginase;                                                                     | Q64191            | 1                          | 5               | 6              | 18.8                  | 0.098                                        | 0.01                           | 0.807             |
| N-acetylneuraminase lyase;                                                                                          | Q9DCJ9            | 1                          | 19              | 25             | 40                    | 0.098                                        | 0.01                           | 0.807             |
| Protein ETHE1, mitochondrial;                                                                                       | Q9DCM0            | 1                          | 5               | 6              | 18.1                  | 0.098                                        | 0.012                          | 0.812             |
| Eukaryotic translation initiation factor 3 subunit G;                                                               | Q9Z1D1            | 1                          | 5               | 6              | 10                    | 0.098                                        | 0.013                          | 0.815             |

Table S1, Tholen et al.

| Protein                                                                                                                                                                   | Uniprot accession | ProteinProphet Prob. Score | Unique peptides | Total peptides | Sequence coverage [%] | Fold change (log <sub>2</sub> ) of ASAPratio | Fold change standard deviation | ASAPratio p-value |
|---------------------------------------------------------------------------------------------------------------------------------------------------------------------------|-------------------|----------------------------|-----------------|----------------|-----------------------|----------------------------------------------|--------------------------------|-------------------|
| Polyadenylate-binding protein 1;                                                                                                                                          | P29341            | 1                          | 17              | 20             | 24.8                  | 0.098                                        | 0.011                          | 0.809             |
| Poly A binding protein, cytoplasmic 4; Uncharacterized protein;                                                                                                           | A3KFU5            | 0.918                      | 2               | 2              | 11.2                  | 0.084                                        | 0.005                          | 0.830             |
| Very long-chain specific acyl-CoA dehydrogenase, mitochondrial;                                                                                                           | P50544            | 1                          | 14              | 18             | 18.3                  | 0.098                                        | 0.032                          | 0.869             |
| Annexin A11;                                                                                                                                                              | P97384            | 1                          | 18              | 20             | 25.2                  | 0.098                                        | 0.035                          | 0.874             |
| Adiponectin;                                                                                                                                                              | Q60994            | 1                          | 5               | 5              | 15                    | 0.098                                        | 0.009                          | 0.804             |
| Sorcin;                                                                                                                                                                   | Q6P069            | 1                          | 12              | 18             | 37.4                  | 0.098                                        | 0.016                          | 0.824             |
| Sulfatase-modifying factor 2;                                                                                                                                             | Q8BPG6            | 1                          | 3               | 4              | 8.6                   | 0.098                                        | 0.006                          | 0.800             |
| Fermitin family homolog 2;                                                                                                                                                | Q8CIB5            | 1                          | 6               | 6              | 6.3                   | 0.098                                        | 0.012                          | 0.812             |
| CAP-Gly domain-containing linker protein 1;                                                                                                                               | Q922J3            | 1                          | 6               | 6              | 4.5                   | 0.098                                        | 0.026                          | 0.853             |
| Trans-2-enoyl-CoA reductase, mitochondrial;                                                                                                                               | Q9DCS3            | 1                          | 5               | 5              | 14.5                  | 0.098                                        | 0.024                          | 0.846             |
| Uncharacterized protein;                                                                                                                                                  | E9Q2P1            | 1                          | 12              | 25             | 23.4                  | 0.098                                        | 0.012                          | 0.812             |
| NK13; Serine (Or cysteine) peptidase inhibitor, clade B, member 6b; Serine (Or cysteine) peptidase inhibitor, clade B, member 6b, isoform CRA_a; Uncharacterized protein; | O08804            | 1                          | 5               | 5              | 9.5                   | 0.098                                        | 0.014                          | 0.818             |
| Ribosome maturation protein SBDS;                                                                                                                                         | P70122            | 1                          | 2               | 2              | 9.8                   | 0.098                                        | 0.011                          | 0.809             |
| GDP-D-glucose phosphorylase C15orf58 homolog;                                                                                                                             | Q3TLS3            | 0.999                      | 2               | 2              | 3.3                   | 0.098                                        | 0.011                          | 0.809             |
| Copper transport protein ATOX1;                                                                                                                                           | O08997            | 1                          | 6               | 8              | 57.4                  | 0.111                                        | 0.022                          | 0.808             |
| Malate dehydrogenase, mitochondrial;                                                                                                                                      | P08249            | 1                          | 47              | 174            | 63.6                  | 0.111                                        | 0.021                          | 0.804             |
| Microtubule-associated protein 1B;                                                                                                                                        | P14873            | 1                          | 2               | 2              | 0.9                   | 0.111                                        | 0.01                           | 0.774             |
| Serine/threonine-protein kinase WNK1;                                                                                                                                     | P83741            | 1                          | 2               | 2              | 4.4                   | 0.111                                        | 0.015                          | 0.790             |
| Neuroplastin;                                                                                                                                                             | P97300            | 1                          | 2               | 3              | 3                     | 0.111                                        | 0.002                          | 0.763             |
| Acetyl-CoA acetyltransferase, mitochondrial;                                                                                                                              | Q8QZT1            | 1                          | 10              | 12             | 15.1                  | 0.111                                        | 0.036                          | 0.848             |
| Pyruvate dehydrogenase E1 component subunit beta, mitochondrial;                                                                                                          | Q9D051            | 1                          | 24              | 46             | 40.9                  | 0.111                                        | 0.012                          | 0.780             |
| GMP reductase 1;                                                                                                                                                          | Q9DCZ1            | 1                          | 4               | 4              | 13.4                  | 0.111                                        | 0.006                          | 0.768             |
| Hexokinase-2;                                                                                                                                                             | O08528            | 1                          | 30              | 33             | 24.5                  | 0.111                                        | 0.059                          | 0.890             |
| Hexokinase-1;                                                                                                                                                             | P17710            | 1                          | 8               | 9              | 9.6                   | 0.333                                        | 0.056                          | 0.464             |
| Seryl-tRNA synthetase, cytoplasmic;                                                                                                                                       | P26638            | 1                          | 8               | 8              | 11.5                  | 0.111                                        | 0.015                          | 0.790             |
| Methionine adenosyltransferase 2 subunit beta;                                                                                                                            | Q99LB6            | 1                          | 2               | 2              | 11.1                  | 0.111                                        | 0.015                          | 0.790             |
| Diphosphoinositol polyphosphate phosphohydrolase 1;                                                                                                                       | Q9JI46            | 1                          | 3               | 3              | 10.1                  | 0.111                                        | 0.012                          | 0.780             |
| Exportin-2;                                                                                                                                                               | Q9ERK4            | 1                          | 2               | 2              | 2.8                   | 0.111                                        | 0.014                          | 0.786             |
| Serine/threonine-protein phosphatase 6 catalytic subunit;                                                                                                                 | Q9CQR6            | 1                          | 2               | 4              | 2.6                   | 0.111                                        | 0.01                           | 0.774             |
| Eukaryotic translation initiation factor 3 subunit E;                                                                                                                     | P60229            | 1                          | 2               | 2              | 4                     | 0.111                                        | 0.057                          | 0.889             |
| Methylosome protein 50;                                                                                                                                                   | Q99J09            | 0.999                      | 2               | 4              | 20                    | 0.111                                        | 0.005                          | 0.766             |
| Laminin subunit gamma-1;                                                                                                                                                  | P02468            | 1                          | 4               | 4              | 3                     | 0.138                                        | 0.023                          | 0.754             |
| 1-phosphatidylinositol-4,5-bisphosphate phosphodiesterase beta-3;                                                                                                         | P51432            | 1                          | 3               | 3              | 1.7                   | 0.138                                        | 0.04                           | 0.817             |
| Lumican;                                                                                                                                                                  | P51885            | 1                          | 27              | 207            | 38.8                  | 0.138                                        | 0.014                          | 0.748             |
| Microtubule-associated protein RP/EB family member 1;                                                                                                                     | Q61166            | 1                          | 2               | 2              | 7.5                   | 0.138                                        | 0.013                          | 0.745             |
| Myosin light chain kinase 2, skeletal/cardiac muscle;                                                                                                                     | Q8VCR8            | 1                          | 14              | 17             | 15.7                  | 0.138                                        | 0.046                          | 0.830             |
| Phosphate carrier protein, mitochondrial;                                                                                                                                 | Q8VEM8            | 1                          | 4               | 6              | 8.4                   | 0.138                                        | 0.025                          | 0.778             |
| Cytochrome b-c1 complex subunit 7;                                                                                                                                        | Q9D855            | 1                          | 3               | 3              | 18.9                  | 0.138                                        | 0.033                          | 0.798             |
| Peroxisomal acyl-coenzyme A oxidase 1;                                                                                                                                    | Q9R0H0            | 1                          | 6               | 7              | 9                     | 0.138                                        | 0.046                          | 0.830             |
| Dextrin;                                                                                                                                                                  | Q9ROP5            | 1                          | 12              | 24             | 38.8                  | 0.138                                        | 0.018                          | 0.758             |
| Malate dehydrogenase, cytoplasmic;                                                                                                                                        | P14152            | 1                          | 20              | 66             | 26.6                  | 0.138                                        | 0.008                          | 0.738             |

Table S1, Tholen et al.

| Protein                                                                                                     | Uniprot accession | ProteinProphet Prob. Score | Unique peptides | Total peptides | Sequence coverage [%] | Fold change (log <sub>2</sub> ) of ASAPratio | Fold change standard deviation | ASAPratio p-value |
|-------------------------------------------------------------------------------------------------------------|-------------------|----------------------------|-----------------|----------------|-----------------------|----------------------------------------------|--------------------------------|-------------------|
| Radixin;                                                                                                    | P26043            | 1                          | 7               | 7              | 11                    | 0.138                                        | 0.015                          | 0.751             |
| Moesin;                                                                                                     | P26041            | 1                          | 6               | 6              | 12.1                  | 0.202                                        | 0.012                          | 0.601             |
| Ezrin;                                                                                                      | P26040            | 0.962                      | 2               | 2              | 4.6                   | 0.623                                        | 0.065                          | 0.129             |
| Caveolin-1;                                                                                                 | P49817            | 1                          | 7               | 8              | 30.9                  | 0.138                                        | 0.026                          | 0.765             |
| Mitogen-activated protein kinase 1;                                                                         | P63085            | 1                          | 7               | 9              | 15.9                  | 0.138                                        | 0.031                          | 0.784             |
| Galactose-1-phosphate uridylyltransferase;                                                                  | Q03249            | 1                          | 4               | 4              | 6.9                   | 0.138                                        | 0.034                          | 0.802             |
| Collagen alpha-1(VI) chain;                                                                                 | Q04857            | 1                          | 5               | 5              | 5.4                   | 0.138                                        | 0.034                          | 0.802             |
| Vinculin;                                                                                                   | Q64727            | 1                          | 35              | 42             | 20.9                  | 0.138                                        | 0.024                          | 0.775             |
| Trifunctional purine biosynthetic protein adenosine-3;                                                      | Q64737            | 1                          | 12              | 12             | 15.7                  | 0.138                                        | 0.035                          | 0.806             |
| Citrate lyase subunit beta-like protein, mitochondrial;                                                     | Q8R4N0            | 1                          | 6               | 6              | 15.7                  | 0.138                                        | 0.024                          | 0.774             |
| Glyoxalase domain-containing protein 4;                                                                     | Q9CPV4            | 1                          | 21              | 28             | 53                    | 0.138                                        | 0.019                          | 0.762             |
| Macrophage migration inhibitory factor;                                                                     | P34884            | 0.997                      | 2               | 4              | 7.8                   | 0.138                                        | 0.008                          | 0.738             |
| Biotinidase;                                                                                                | Q8CIF4            | 0.954                      | 2               | 2              | 1.7                   | 0.138                                        | 0.014                          | 0.748             |
| Dehydrogenase/reductase SDR family member 7;                                                                | Q9CXR1            | 0.948                      | 2               | 2              | 5.9                   | 0.138                                        | 0.024                          | 0.774             |
| Aspartate aminotransferase, mitochondrial;                                                                  | P05202            | 1                          | 42              | 95             | 51.4                  | 0.151                                        | 0.026                          | 0.747             |
| Adenylosuccinate synthetase isozyme 1;                                                                      | P28650            | 1                          | 35              | 54             | 41.8                  | 0.151                                        | 0.024                          | 0.743             |
| Small glutamine-rich tetratricopeptide repeat-containing protein alpha;                                     | Q8BJU0            | 1                          | 4               | 4              | 7.9                   | 0.151                                        | 0.008                          | 0.708             |
| Phospholipase B-like 1;                                                                                     | Q8VCI0            | 1                          | 3               | 3              | 5.8                   | 0.151                                        | 0.018                          | 0.727             |
| Ester hydrolase C11orf54 homolog;                                                                           | Q91V76            | 1                          | 9               | 10             | 28.6                  | 0.151                                        | 0.063                          | 0.836             |
| Aconitate hydratase, mitochondrial;                                                                         | Q99K10            | 1                          | 70              | 146            | 48.2                  | 0.151                                        | 0.014                          | 0.716             |
| Serine/threonine-protein phosphatase 2A activator;                                                          | P58389            | 1                          | 7               | 10             | 17.6                  | 0.151                                        | 0.03                           | 0.761             |
| Platelet-activating factor acetylhydrolase IB subunit gamma;                                                | Q61205            | 1                          | 4               | 6              | 13.9                  | 0.151                                        | 0.016                          | 0.723             |
| Coronin-7;                                                                                                  | Q9D2V7            | 1                          | 13              | 15             | 12.8                  | 0.151                                        | 0.019                          | 0.731             |
| Lipoamide acyltransferase component of branched-chain alpha-keto acid dehydrogenase complex, mitochondrial; | P53395            | 0.998                      | 4               | 5              | 5.4                   | 0.151                                        | 0.01                           | 0.711             |
| AH receptor-interacting protein;                                                                            | O08915            | 1                          | 2               | 2              | 4.2                   | 0.163                                        | 0.015                          | 0.688             |
| Ferritin heavy chain;                                                                                       | P09528            | 1                          | 9               | 13             | 21.4                  | 0.163                                        | 0.015                          | 0.688             |
| Galectin-3;                                                                                                 | P16110            | 1                          | 13              | 23             | 36.2                  | 0.163                                        | 0.038                          | 0.750             |
| Cofilin-2;                                                                                                  | P45591            | 1                          | 8               | 19             | 36.1                  | 0.163                                        | 0.019                          | 0.699             |
| Adenylosuccinate synthetase isozyme 2;                                                                      | P46664            | 1                          | 7               | 7              | 10.7                  | 0.163                                        | 0.022                          | 0.708             |
| Carbonyl reductase [NADPH] 1;                                                                               | P48758            | 1                          | 19              | 21             | 43.7                  | 0.163                                        | 0.019                          | 0.699             |
| Myotrophin;                                                                                                 | P62774            | 1                          | 4               | 5              | 14.4                  | 0.163                                        | 0.009                          | 0.680             |
| Peptidyl-prolyl cis-trans isomerase FKBP5;                                                                  | Q64378            | 1                          | 4               | 4              | 8.6                   | 0.163                                        | 0.016                          | 0.692             |
| NAD(P)H dehydrogenase [quinone] 1;                                                                          | Q64669            | 1                          | 6               | 6              | 20.1                  | 0.163                                        | 0.032                          | 0.736             |
| Tubulin-specific chaperone C;                                                                               | Q8VCN9            | 1                          | 3               | 3              | 6.7                   | 0.163                                        | 0.045                          | 0.768             |
| Acyl-coenzyme A thioesterase 1;                                                                             | O55137            | 1                          | 11              | 14             | 23.9                  | 0.163                                        | 0.031                          | 0.731             |
| Acyl-coenzyme A thioesterase 2, mitochondrial;                                                              | Q9QYR9            | 0.999                      | 2               | 2              | 21.9                  | -0.252                                       | -0.081                         | 0.672             |
| Myelin protein PO;                                                                                          | P27573            | 1                          | 6               | 7              | 14.1                  | 0.163                                        | 0.048                          | 0.777             |
| Cell division control protein 42 homolog;                                                                   | P60766            | 1                          | 12              | 16             | 36.6                  | 0.163                                        | 0.041                          | 0.759             |
| Ras-related C3 botulinum toxin substrate 1;                                                                 | P63001            | 1                          | 11              | 23             | 34.4                  | -0.811                                       | -0.185                         | 0.107             |
| Rho-related GTP-binding protein RhoG;                                                                       | P84096            | 1                          | 2               | 2              | 14.7                  | -0.434                                       | -0.035                         | 0.288             |
| Septin-9;                                                                                                   | Q80UG5            | 1                          | 6               | 8              | 9.2                   | 0.163                                        | 0.029                          | 0.726             |
| NEDD8-activating enzyme E1 catalytic subunit;                                                               | Q8C878            | 1                          | 6               | 6              | 19.6                  | 0.163                                        | 0.029                          | 0.726             |

Table S1, Tholen et al.

| Protein                                                                                                             | Uniprot accession | ProteinProphet Prob. Score | Unique peptides | Total peptides | Sequence coverage [%] | Fold change (log <sub>2</sub> ) of ASAPratio | Fold change standard deviation | ASAPratio p-value |
|---------------------------------------------------------------------------------------------------------------------|-------------------|----------------------------|-----------------|----------------|-----------------------|----------------------------------------------|--------------------------------|-------------------|
| Actin-related protein 3;                                                                                            | Q99JY9            | 1                          | 17              | 22             | 38.3                  | 0.163                                        | 0.036                          | 0.745             |
| Proteasome subunit alpha type-5;                                                                                    | Q9Z2U1            | 1                          | 12              | 16             | 47.7                  | 0.163                                        | 0.036                          | 0.745             |
| Uncharacterized protein;                                                                                            | F6RPJ9            | 1                          | 22              | 33             | 13.8                  | 0.163                                        | 0.044                          | 0.764             |
| Sodium channel protein type 4 subunit alpha;                                                                        | Q9ER60            | 0.998                      | 2               | 2              | 1.6                   | 0.163                                        | 0.031                          | 0.731             |
| Histone-binding protein RBBP4;                                                                                      | Q60972            | 0.991                      | 2               | 2              | 4.1                   | 0.163                                        | 0.031                          | 0.731             |
| Ig alpha chain C region;                                                                                            | P01878            | 1                          | 3               | 4              | 7                     | 0.176                                        | 0.019                          | 0.668             |
| Transthyretin;                                                                                                      | P07309            | 1                          | 11              | 37             | 46.3                  | 0.176                                        | 0.012                          | 0.657             |
| Uroporphyrinogen decarboxylase;                                                                                     | P70697            | 1                          | 4               | 4              | 12.3                  | 0.176                                        | 0.017                          | 0.664             |
| Eukaryotic translation initiation factor 3 subunit B;                                                               | Q8JZQ9            | 1                          | 5               | 5              | 6.6                   | 0.176                                        | 0.023                          | 0.681             |
| Glycine cleavage system H protein, mitochondrial;                                                                   | Q91WK5            | 1                          | 2               | 2              | 5.9                   | 0.176                                        | 0.003                          | 0.646             |
| Leucine carboxyl methyltransferase 1; Leucine carboxyl methyltransferase 1, isoform CRA_b; Uncharacterized protein; | A2RTH5            | 1                          | 3               | 3              | 5.4                   | 0.176                                        | 0.025                          | 0.681             |
| Calcium/calmodulin-dependent protein kinase type II subunit alpha;                                                  | P11798            | 1                          | 7               | 9              | 8.4                   | 0.176                                        | 0.009                          | 0.652             |
| ADP-ribosylation factor 3;                                                                                          | P61205            | 1                          | 5               | 10             | 53.6                  | 0.176                                        | 0.022                          | 0.677             |
| ADP-ribosylation factor 5;                                                                                          | P84084            | 1                          | 5               | 10             | 46.7                  | 0.057                                        | 0.019                          | 0.932             |
| Translationally-controlled tumor protein;                                                                           | P63028            | 1                          | 8               | 27             | 30.2                  | 0.176                                        | 0.017                          | 0.669             |
| Trifunctional enzyme subunit beta, mitochondrial;                                                                   | Q99JY0            | 1                          | 10              | 13             | 18.5                  | 0.176                                        | 0.031                          | 0.701             |
| Actin-related protein 2/3 complex subunit 5;                                                                        | Q9CPW4            | 1                          | 4               | 5              | 29.1                  | 0.176                                        | 0.047                          | 0.741             |
| Calcium channel, voltage-dependent, beta 1 subunit; Uncharacterized protein;                                        | A2A542            | 1                          | 4               | 4              | 6.3                   | 0.176                                        | 0.011                          | 0.654             |
| Epoxide hydrolase 1;                                                                                                | Q9D379            | 1                          | 2               | 2              | 7.3                   | 0.176                                        | 0.017                          | 0.664             |
| Calponin-2;                                                                                                         | Q08093            | 1                          | 2               | 2              | 9                     | 0.176                                        | 0.009                          | 0.652             |
| Apolipoprotein A-IV;                                                                                                | P06728            | 1                          | 25              | 37             | 42.8                  | 0.189                                        | 0.041                          | 0.702             |
| Galectin-1;                                                                                                         | P16045            | 1                          | 15              | 37             | 45.2                  | 0.189                                        | 0.028                          | 0.661             |
| Haloacid dehalogenase-like hydrolase domain-containing protein 2;                                                   | Q3UGR5            | 1                          | 8               | 13             | 16.2                  | 0.189                                        | 0.023                          | 0.651             |
| 28S ribosomal protein S36, mitochondrial;                                                                           | Q9CQX8            | 1                          | 2               | 2              | 21                    | 0.189                                        | 0.018                          | 0.638             |
| Phosphorylase b kinase gamma catalytic chain, skeletal muscle isoform;                                              | P07934            | 1                          | 3               | 3              | 6.4                   | 0.189                                        | 0.017                          | 0.643             |
| Fatty acid-binding protein, epidermal;                                                                              | Q05816            | 1                          | 21              | 38             | 71.9                  | 0.189                                        | 0.07                           | 0.770             |
| Adapter molecule crk;                                                                                               | Q64010            | 1                          | 12              | 18             | 19.4                  | 0.189                                        | 0.013                          | 0.630             |
| Carboxylesterase 3;                                                                                                 | Q8VCT4            | 1                          | 25              | 46             | 28.7                  | 0.189                                        | 0.056                          | 0.739             |
| Liver carboxylesterase N;                                                                                           | P23953            | 1                          | 17              | 40             | 20.9                  | -0.074                                       | -0.006                         | 0.869             |
| Uncharacterized protein;                                                                                            | D3Z5G7            | 1                          | 12              | 28             | 16.6                  | -0.152                                       | -0.017                         | 0.703             |
| Enoyl-CoA hydratase domain-containing protein 1;                                                                    | Q9D9V3            | 1                          | 11              | 13             | 23.9                  | 0.189                                        | 0.086                          | 0.800             |
| ATP synthase subunit O, mitochondrial;                                                                              | Q9DB20            | 1                          | 14              | 18             | 46.5                  | 0.189                                        | 0.012                          | 0.627             |
| Chloride channel calcium activated 2; Endothelial chloride channel; MCG120735;                                      | Q9EQR4            | 1                          | 7               | 8              | 8.8                   | 0.189                                        | 0.01                           | 0.625             |
| Uncharacterized protein;                                                                                            | Q9EQR4            | 1                          | 7               | 8              | 8.8                   | 0.189                                        | 0.01                           | 0.625             |
| Signal transducer and activator of transcription 5B;                                                                | P42232            | 1                          | 3               | 3              | 4.2                   | 0.189                                        | 0.03                           | 0.667             |
| TIP41-like protein;                                                                                                 | Q8BH58            | 1                          | 2               | 2              | 4.4                   | 0.189                                        | 0.023                          | 0.651             |
| Ubiquitin-fold modifier-conjugating enzyme 1;                                                                       | Q9CR09            | 0.999                      | 2               | 4              | 4.8                   | 0.189                                        | 0.008                          | 0.622             |
| S-phase kinase-associated protein 1;                                                                                | Q9WTX5            | 0.994                      | 2               | 2              | 8.3                   | 0.189                                        | 0.01                           | 0.625             |
| Crk-like protein;                                                                                                   | P47941            | 1                          | 2               | 2              | 5.9                   | 0.202                                        | 0.012                          | 0.601             |
| 40S ribosomal protein S14;                                                                                          | P62264            | 1                          | 2               | 2              | 8.6                   | 0.202                                        | 0.018                          | 0.608             |
| Serine/threonine-protein phosphatase 2A catalytic subunit alpha isoform;                                            | P63330            | 1                          | 13              | 19             | 32.7                  | 0.202                                        | 0.018                          | 0.608             |
| Glutaredoxin-related protein 5, mitochondrial;                                                                      | Q80Y14            | 1                          | 4               | 4              | 21.7                  | 0.202                                        | 0.023                          | 0.621             |

Table S1, Tholen et al.

| Protein                                                                                                                                                           | Uniprot accession | ProteinProphet Prob. Score | Unique peptides | Total peptides | Sequence coverage [%] | Fold change (log <sub>2</sub> ) of ASAPratio | Fold change standard deviation | ASAPratio p-value |
|-------------------------------------------------------------------------------------------------------------------------------------------------------------------|-------------------|----------------------------|-----------------|----------------|-----------------------|----------------------------------------------|--------------------------------|-------------------|
| Vigilin;                                                                                                                                                          | Q8VDJ3            | 1                          | 4               | 5              | 3.5                   | 0.202                                        | 0.081                          | 0.766             |
| Brain acid soluble protein 1;                                                                                                                                     | Q91XV3            | 1                          | 3               | 8              | 19.9                  | 0.202                                        | 0.049                          | 0.692             |
| UMP-CMP kinase;                                                                                                                                                   | Q9DBP5            | 1                          | 14              | 21             | 52                    | 0.202                                        | 0.044                          | 0.675             |
| Ubiquitin carboxyl-terminal hydrolase 14;                                                                                                                         | Q9JMA1            | 1                          | 6               | 11             | 8.5                   | 0.202                                        | 0.012                          | 0.601             |
| Heat shock protein HSP 90-beta;                                                                                                                                   | P11499            | 1                          | 33              | 50             | 40.7                  | 0.202                                        | 0.033                          | 0.647             |
| Heat shock protein HSP 90-alpha;                                                                                                                                  | P07901            | 1                          | 19              | 31             | 31.2                  | 0.227                                        | 0.043                          | 0.640             |
| Endoplasmic;                                                                                                                                                      | P08113            | 1                          | 10              | 13             | 11                    | 0.098                                        | 0.034                          | 0.872             |
| BTB/POZ domain-containing protein KCTD12;                                                                                                                         | Q6WVG3            | 1                          | 12              | 13             | 25.7                  | 0.202                                        | 0.091                          | 0.783             |
| Alpha-soluble NSF attachment protein;                                                                                                                             | Q9DB05            | 1                          | 4               | 4              | 8.8                   | 0.202                                        | 0.018                          | 0.608             |
| Uncharacterized protein;                                                                                                                                          | E9PYJ9            | 1                          | 28              | 34             | 23.1                  | 0.202                                        | 0.049                          | 0.692             |
| Uncharacterized protein;                                                                                                                                          | E9Q0S6            | 1                          | 4               | 4              | 2.9                   | 0.202                                        | 0.023                          | 0.621             |
| 40S ribosomal protein S12;                                                                                                                                        | Q6ZWZ6            | 1                          | 9               | 19             | 45.5                  | 0.202                                        | 0.049                          | 0.692             |
| Complement component 1, q subcomponent binding protein; Complement component 1, q subcomponent binding protein, isoform CRA_b; Uncharacterized protein; p32-RACK; | Q8R5L1            | 1                          | 6               | 7              | 17.2                  | 0.202                                        | 0.011                          | 0.598             |
| Ribosomal protein S6 kinase alpha-1;                                                                                                                              | P18653            | 0.998                      | 3               | 3              | 5.1                   | 0.202                                        | 0.042                          | 0.669             |
| Annexin A4;                                                                                                                                                       | P97429            | 1                          | 28              | 42             | 45.1                  | 0.214                                        | 0.02                           | 0.591             |
| Proteasome subunit beta type-9;                                                                                                                                   | P28076            | 1                          | 3               | 3              | 14.2                  | 0.227                                        | 0.037                          | 0.623             |
| Tyrosine-protein phosphatase non-receptor type 6;                                                                                                                 | P29351            | 1                          | 2               | 2              | 2                     | 0.227                                        | 0.021                          | 0.586             |
| Pyruvate dehydrogenase E1 component subunit alpha, somatic form, mitochondrial;                                                                                   | P35486            | 1                          | 19              | 28             | 31.8                  | 0.227                                        | 0.058                          | 0.676             |
| Haptoglobin;                                                                                                                                                      | Q61646            | 1                          | 7               | 10             | 11.8                  | 0.227                                        | 0.027                          | 0.601             |
| Cytochrome b-c1 complex subunit 2, mitochondrial;                                                                                                                 | Q9DB77            | 1                          | 17              | 19             | 26.5                  | 0.227                                        | 0.033                          | 0.611             |
| Phosphotriesterase-related protein;                                                                                                                               | Q60866            | 1                          | 4               | 4              | 9.5                   | 0.227                                        | 0.072                          | 0.709             |
| Acetyl-CoA acetyltransferase, cytosolic;                                                                                                                          | Q8CAY6            | 1                          | 11              | 13             | 32.5                  | 0.227                                        | 0.074                          | 0.714             |
| Programmed cell death 6-interacting protein;                                                                                                                      | Q9WU78            | 1                          | 9               | 12             | 8.7                   | 0.227                                        | 0.041                          | 0.634             |
| Calpain-1 catalytic subunit;                                                                                                                                      | O35350            | 1                          | 21              | 23             | 22.6                  | 0.239                                        | 0.022                          | 0.562             |
| Proteasome subunit beta type-8;                                                                                                                                   | P28063            | 1                          | 4               | 5              | 8                     | 0.239                                        | 0.049                          | 0.624             |
| Lysophosphatidic acid phosphatase type 6;                                                                                                                         | Q8BP40            | 1                          | 4               | 7              | 9.8                   | 0.239                                        | 0.03                           | 0.582             |
| Asporin;                                                                                                                                                          | Q99MQ4            | 1                          | 8               | 8              | 23.9                  | 0.239                                        | 0.03                           | 0.574             |
| ADP/ATP translocase 1;                                                                                                                                            | P48962            | 1                          | 23              | 62             | 34.2                  | 0.239                                        | 0.059                          | 0.640             |
| ADP/ATP translocase 2;                                                                                                                                            | P51881            | 1                          | 4               | 6              | 22.8                  | 0.202                                        | 0.012                          | 0.601             |
| Heterogeneous nuclear ribonucleoprotein K;                                                                                                                        | P61979            | 1                          | 24              | 35             | 34.2                  | 0.239                                        | 0.036                          | 0.593             |
| Carboxymethylenebutenolidase homolog;                                                                                                                             | Q8R1G2            | 1                          | 10              | 11             | 22                    | 0.239                                        | 0.024                          | 0.567             |
| TAR DNA-binding protein 43;                                                                                                                                       | Q921F2            | 1                          | 8               | 8              | 31.3                  | 0.239                                        | 0.081                          | 0.699             |
| Rab GTPase-binding effector protein 2;                                                                                                                            | Q91WG2            | 0.998                      | 2               | 3              | 3.8                   | 0.239                                        | 0.085                          | 0.715             |
| ADP-ribose pyrophosphatase, mitochondrial;                                                                                                                        | Q8BVU5            | 0.995                      | 2               | 2              | 13.9                  | 0.239                                        | 0.079                          | 0.699             |
| Calumenin;                                                                                                                                                        | O35887            | 0.99                       | 2               | 2              | 7.3                   | 0.239                                        | 0.01                           | 0.545             |
| Cytochrome c oxidase subunit 2;                                                                                                                                   | P00405            | 1                          | 4               | 5              | 13.2                  | 0.251                                        | 0.017                          | 0.530             |
| Programmed cell death protein 6;                                                                                                                                  | P12815            | 1                          | 6               | 7              | 22.5                  | 0.251                                        | 0.089                          | 0.696             |
| Protein-glutamine gamma-glutamyltransferase 2;                                                                                                                    | P21981            | 1                          | 6               | 6              | 8.7                   | 0.251                                        | 0.097                          | 0.711             |
| Costars family protein C6orf115 homolog;                                                                                                                          | Q4KML4            | 1                          | 3               | 4              | 16                    | 0.251                                        | 0.051                          | 0.602             |
| Alcohol dehydrogenase class 4 mu/sigma chain;                                                                                                                     | Q64437            | 1                          | 12              | 15             | 24.9                  | 0.251                                        | 0.072                          | 0.658             |
| UDP-glucose:glycoprotein glucosyltransferase 1;                                                                                                                   | Q6P5E4            | 1                          | 6               | 6              | 3.9                   | 0.251                                        | 0.078                          | 0.669             |



Table S1, Tholen et al.

| Protein                                                                                                             | Uniprot accession | ProteinProphet Prob. Score | Unique peptides | Total peptides | Sequence coverage [%] | Fold change (log <sub>2</sub> ) of ASAPratio | Fold change standard deviation | ASAPratio p-value |
|---------------------------------------------------------------------------------------------------------------------|-------------------|----------------------------|-----------------|----------------|-----------------------|----------------------------------------------|--------------------------------|-------------------|
| Elongation factor Tu, mitochondrial;                                                                                | Q8BFR5            | 1                          | 6               | 6              | 8.8                   | 0.251                                        | 0.017                          | 0.530             |
| Alanine aminotransferase 1;                                                                                         | Q8QZR5            | 1                          | 13              | 16             | 29                    | 0.251                                        | 0.044                          | 0.589             |
| Microfibril-associated glycoprotein 4;                                                                              | Q9D1H9            | 1                          | 3               | 5              | 7                     | 0.251                                        | 0.055                          | 0.614             |
| Ribosome-recycling factor, mitochondrial;                                                                           | Q9D6S7            | 1                          | 2               | 2              | 6.5                   | 0.251                                        | 0.025                          | 0.543             |
| Heterogeneous nuclear ribonucleoprotein F;                                                                          | Q9Z2X1            | 1                          | 7               | 10             | 15.4                  | 0.251                                        | 0.021                          | 0.534             |
| H-2 class II histocompatibility antigen, A-Q beta chain;                                                            | P06342            | 1                          | 6               | 6              | 24.2                  | 0.251                                        | 0.013                          | 0.524             |
| Cathepsin L1;                                                                                                       | P06797            | 1                          | 4               | 4              | 12.9                  | 0.251                                        | 0.046                          | 0.595             |
| 14-3-3 protein zeta/delta;                                                                                          | P63101            | 1                          | 12              | 18             | 42                    | 0.251                                        | 0.067                          | 0.646             |
| Spermine synthase;                                                                                                  | P97355            | 1                          | 8               | 9              | 25.4                  | 0.251                                        | 0.051                          | 0.602             |
| EGF-containing fibulin-like extracellular matrix protein 1;                                                         | Q8BPP5            | 1                          | 15              | 18             | 25.4                  | 0.251                                        | 0.059                          | 0.627             |
| ATP synthase subunit g, mitochondrial;                                                                              | Q9CPQ8            | 1                          | 3               | 5              | 27.2                  | 0.251                                        | 0.008                          | 0.519             |
| Proteasome subunit alpha type-6;                                                                                    | Q9QUM9            | 1                          | 18              | 21             | 37.8                  | 0.251                                        | 0.032                          | 0.559             |
| Lectin, galactose binding, soluble 7; Lectin, galactose binding, soluble 7, isoform CRA_a; Uncharacterized protein; | Q9CRB1            | 1                          | 21              | 63             | 75                    | 0.251                                        | 0.013                          | 0.524             |
| Dual specificity mitogen-activated protein kinase kinase 4;                                                         | P47809            | 0.995                      | 2               | 2              | 2.8                   | 0.251                                        | 0.021                          | 0.534             |
| Arylsulfatase B;                                                                                                    | P50429            | 1                          | 4               | 5              | 5.4                   | 0.263                                        | 0.164                          | 0.787             |
| Ubiquitin-conjugating enzyme E2 E1;                                                                                 | P52482            | 1                          | 2               | 2              | 7.7                   | 0.263                                        | 0.022                          | 0.511             |
| Acylphosphatase-1;                                                                                                  | P56376            | 1                          | 9               | 11             | 48.5                  | 0.263                                        | 0.103                          | 0.699             |
| Synaptobrevin homolog YKT6;                                                                                         | Q9CQW1            | 1                          | 4               | 4              | 19.7                  | 0.263                                        | 0.053                          | 0.580             |
| Chloride intracellular channel protein 4;                                                                           | Q9QYB1            | 1                          | 5               | 8              | 10.7                  | 0.263                                        | 0.033                          | 0.536             |
| Calpain-2 catalytic subunit;                                                                                        | O08529            | 1                          | 6               | 7              | 7.6                   | 0.263                                        | 0.022                          | 0.511             |
| Talin-1;                                                                                                            | P26039            | 1                          | 43              | 47             | 15.6                  | 0.263                                        | 0.059                          | 0.600             |
| Heterogeneous nuclear ribonucleoprotein A3;                                                                         | Q8BG05            | 1                          | 11              | 15             | 18.3                  | 0.263                                        | 0.031                          | 0.530             |
| Early endosome antigen 1;                                                                                           | Q8BL66            | 1                          | 6               | 6              | 3.5                   | 0.263                                        | 0.085                          | 0.662             |
| Propionyl-CoA carboxylase alpha chain, mitochondrial;                                                               | Q91ZA3            | 1                          | 15              | 16             | 19.1                  | 0.263                                        | 0.136                          | 0.753             |
| Ethanolamine-phosphate cytidylyltransferase;                                                                        | Q922E4            | 1                          | 2               | 2              | 7.8                   | 0.263                                        | 0.033                          | 0.536             |
| 26S proteasome non-ATPase regulatory subunit 4;                                                                     | O35226            | 1                          | 5               | 6              | 10.6                  | 0.275                                        | 0.025                          | 0.493             |
| Serine/threonine-protein phosphatase 2B catalytic subunit alpha isoform;                                            | P63328            | 1                          | 3               | 3              | 11.6                  | 0.275                                        | 0.034                          | 0.514             |
| Sorting nexin-6;                                                                                                    | Q6P8X1            | 1                          | 8               | 9              | 11.1                  | 0.275                                        | 0.148                          | 0.746             |
| Kynurenine--oxoglutarate transaminase 3;                                                                            | Q71RI9            | 1                          | 3               | 3              | 7.9                   | 0.275                                        | 0.045                          | 0.539             |
| Fibrinogen beta chain;                                                                                              | Q8K0E8            | 1                          | 25              | 53             | 32                    | 0.275                                        | 0.02                           | 0.484             |
| Reticulon-4;                                                                                                        | Q99P72            | 1                          | 4               | 4              | 11.5                  | 0.275                                        | 0.055                          | 0.559             |
| Na(+)/H(+) exchange regulatory cofactor NHE-RF3;                                                                    | Q9JIL4            | 1                          | 2               | 2              | 2.7                   | 0.275                                        | 0.016                          | 0.481             |
| SH3 domain-binding glutamic acid-rich-like protein;                                                                 | Q9JUU8            | 1                          | 4               | 6              | 20.2                  | 0.275                                        | 0.032                          | 0.508             |
| Band 4.1-like protein 2;                                                                                            | O70318            | 1                          | 12              | 15             | 12.1                  | 0.275                                        | 0.045                          | 0.539             |
| Glia maturation factor beta;                                                                                        | Q9CQI3            | 1                          | 3               | 3              | 21.1                  | 0.275                                        | 0.107                          | 0.681             |
| Glia maturation factor gamma;                                                                                       | Q9ERL7            | 1                          | 2               | 2              | 19.8                  | -0.014                                       | -0.001                         | 0.971             |
| EF-hand domain-containing protein D2;                                                                               | Q9D8Y0            | 1                          | 3               | 3              | 9.6                   | 0.275                                        | 0.045                          | 0.539             |
| SPRY domain-containing protein 4;                                                                                   | Q91WK1            | 1                          | 2               | 2              | 4.3                   | 0.275                                        | 0.023                          | 0.488             |
| Uridine diphosphate glucose pyrophosphatase;                                                                        | Q9D142            | 1                          | 2               | 2              | 4.1                   | 0.275                                        | 0.027                          | 0.497             |
| Uncharacterized protein;                                                                                            | E9Q8T1            | 1                          | 6               | 6              | 1.6                   | 0.287                                        | 0.071                          | 0.575             |
| Ferrochelatase, mitochondrial;                                                                                      | P22315            | 1                          | 2               | 2              | 3.5                   | 0.299                                        | 0.024                          | 0.466             |
| Serine/threonine-protein phosphatase 2A catalytic subunit beta isoform;                                             | P62715            | 1                          | 2               | 2              | 32.7                  | 0.299                                        | 0.036                          | 0.492             |

Table S1, Tholen et al.

| Protein                                                       | Uniprot accession | ProteinProphet Prob. Score | Unique peptides | Total peptides | Sequence coverage [%] | Fold change (log <sub>2</sub> ) of ASAPratio | Fold change standard deviation | ASAPratio p-value |
|---------------------------------------------------------------|-------------------|----------------------------|-----------------|----------------|-----------------------|----------------------------------------------|--------------------------------|-------------------|
| Cytochrome c, somatic;                                        | P62897            | 1                          | 4               | 6              | 18.1                  | 0.299                                        | 0.032                          | 0.481             |
| Eukaryotic translation initiation factor 5A-1;                | P63242            | 1                          | 4               | 4              | 19                    | 0.299                                        | 0.041                          | 0.498             |
| Annexin A7;                                                   | Q07076            | 1                          | 12              | 14             | 17.7                  | 0.299                                        | 0.046                          | 0.511             |
| Myosin light chain kinase, smooth muscle;                     | Q6PDN3            | 1                          | 14              | 20             | 5.6                   | 0.299                                        | 0.141                          | 0.707             |
| Fibrinogen gamma chain;                                       | Q8VCM7            | 1                          | 22              | 34             | 29.8                  | 0.299                                        | 0.046                          | 0.511             |
| Neurolysin, mitochondrial;                                    | Q91YP2            | 1                          | 6               | 6              | 9.7                   | 0.299                                        | 0.097                          | 0.631             |
| Copper homeostasis protein cutC homolog;                      | Q9D8X1            | 1                          | 3               | 3              | 7.1                   | 0.299                                        | 0.027                          | 0.471             |
| Calpain small subunit 1;                                      | O88456            | 1                          | 6               | 6              | 13.3                  | 0.299                                        | 0.041                          | 0.498             |
| Voltage-dependent anion-selective channel protein 2;          | Q60930            | 1                          | 7               | 7              | 15.6                  | 0.299                                        | 0.027                          | 0.471             |
| Cullin-associated NEDD8-dissociated protein 1;                | Q6ZQ38            | 1                          | 10              | 11             | 6.6                   | 0.299                                        | 0.061                          | 0.545             |
| E3 ubiquitin-protein ligase HUWE1;                            | Q7TMY8            | 1                          | 9               | 9              | 2.4                   | 0.299                                        | 0.058                          | 0.538             |
| Plastin-3;                                                    | Q99K51            | 1                          | 32              | 48             | 36.2                  | 0.299                                        | 0.066                          | 0.559             |
| Ubiquitin carboxyl-terminal hydrolase isozyme L3;             | Q9JKB1            | 1                          | 3               | 3              | 12.6                  | 0.299                                        | 0.09                           | 0.612             |
| Toll-interacting protein;                                     | Q9QZ06            | 1                          | 4               | 5              | 16.8                  | 0.299                                        | 0.027                          | 0.471             |
| NEDD8-conjugating enzyme Ubc12;                               | P61082            | 1                          | 4               | 4              | 16.9                  | 0.299                                        | 0.066                          | 0.553             |
| Large proline-rich protein BAG6;                              | Q9Z1R2            | 0.995                      | 2               | 2              | 3.7                   | 0.299                                        | 0.022                          | 0.462             |
| Heterogeneous nuclear ribonucleoproteins A2/B1;               | O88569            | 1                          | 10              | 26             | 19                    | 0.31                                         | 0.03                           | 0.455             |
| Ubiquitin-fold modifier 1;                                    | P61961            | 1                          | 3               | 4              | 18.3                  | 0.31                                         | 0.028                          | 0.450             |
| Sarcalumenin;                                                 | Q7TQ48            | 1                          | 10              | 12             | 11.5                  | 0.31                                         | 0.048                          | 0.490             |
| Cold shock domain-containing protein E1;                      | Q91W50            | 1                          | 3               | 3              | 3.9                   | 0.31                                         | 0.025                          | 0.445             |
| Ribonuclease T2;                                              | Q9CQ01            | 1                          | 3               | 3              | 9.7                   | 0.31                                         | 0.052                          | 0.504             |
| Glutaredoxin-3;                                               | Q9CQM9            | 1                          | 7               | 9              | 14.5                  | 0.31                                         | 0.03                           | 0.455             |
| ATP synthase subunit d, mitochondrial;                        | Q9DCX2            | 1                          | 6               | 7              | 37.7                  | 0.31                                         | 0.043                          | 0.477             |
| Glutathione S-transferase omega-1;                            | O09131            | 1                          | 6               | 8              | 19.6                  | 0.31                                         | 0.102                          | 0.619             |
| Eukaryotic initiation factor 4A-II;                           | P10630            | 1                          | 13              | 13             | 24.9                  | 0.31                                         | 0.045                          | 0.484             |
| Eukaryotic initiation factor 4A-I;                            | P60843            | 0.964                      | 2               | 2              | 18.5                  | 0.39                                         | 0.054                          | 0.372             |
| Voltage-dependent anion-selective channel protein 1;          | Q60932            | 1                          | 20              | 29             | 49.3                  | 0.31                                         | 0.083                          | 0.573             |
| Transportin-3;                                                | Q6P2B1            | 1                          | 4               | 6              | 4.9                   | 0.31                                         | 0.077                          | 0.560             |
| Calcineurin-like phosphoesterase domain-containing protein 1; | Q8BFS6            | 1                          | 3               | 3              | 6.4                   | 0.31                                         | 0.125                          | 0.658             |
| Adenylate kinase 2, mitochondrial;                            | Q9WTP6            | 1                          | 8               | 9              | 27.2                  | 0.31                                         | 0.063                          | 0.525             |
| Ras GTPase-activating protein-binding protein 1;              | P97855            | 1                          | 2               | 2              | 2.3                   | 0.31                                         | 0.033                          | 0.460             |
| RING finger protein 114;                                      | Q9ET26            | 1                          | 2               | 2              | 8.4                   | 0.31                                         | 0.033                          | 0.460             |
| T-complex protein 1 subunit zeta;                             | P80317            | 1                          | 2               | 2              | 7                     | 0.31                                         | 0.055                          | 0.511             |
| Small ubiquitin-related modifier 2;                           | P61957            | 0.991                      | 2               | 2              | 16.9                  | 0.31                                         | 0.025                          | 0.445             |
| Cystatin-B;                                                   | Q62426            | 0.99                       | 2               | 2              | 11.2                  | 0.31                                         | 0.018                          | 0.438             |
| Medium-chain specific acyl-CoA dehydrogenase, mitochondrial;  | P45952            | 1                          | 4               | 4              | 7.8                   | 0.322                                        | 0.1                            | 0.588             |
| Creatine kinase S-type, mitochondrial;                        | Q6P8J7            | 1                          | 28              | 41             | 44.6                  | 0.322                                        | 0.098                          | 0.582             |
| Troponin C, skeletal muscle;                                  | P20801            | 1                          | 17              | 25             | 53.8                  | 0.322                                        | 0.036                          | 0.445             |
| Elongation factor G, mitochondrial;                           | Q8KOD5            | 1                          | 5               | 5              | 4.7                   | 0.322                                        | 0.147                          | 0.673             |
| Gamma-butyrobetaine dioxygenase;                              | Q924Y0            | 1                          | 4               | 4              | 11.9                  | 0.322                                        | 0.07                           | 0.519             |
| Cytoplasmic protein NCK1;                                     | Q99M51            | 1                          | 5               | 5              | 10.3                  | 0.322                                        | 0.103                          | 0.595             |
| COP9 signalosome complex subunit 4;                           | O88544            | 1                          | 4               | 4              | 13.1                  | 0.322                                        | 0.134                          | 0.653             |
| BolA-like protein 2;                                          | Q8BGS2            | 0.999                      | 2               | 2              | 32.6                  | 0.322                                        | 0.191                          | 0.733             |

Table S1, Tholen et al.

| Protein                                                                                                                              | Uniprot accession | ProteinProphet Prob. Score | Unique peptides | Total peptides | Sequence coverage [%] | Fold change (log <sub>2</sub> ) of ASAPratio | Fold change standard deviation | ASAPratio p-value |
|--------------------------------------------------------------------------------------------------------------------------------------|-------------------|----------------------------|-----------------|----------------|-----------------------|----------------------------------------------|--------------------------------|-------------------|
| PDZ and LIM domain protein 3;                                                                                                        | O70209            | 1                          | 4               | 5              | 25                    | 0.333                                        | 0.071                          | 0.500             |
| Caspase-14;                                                                                                                          | O89094            | 1                          | 5               | 7              | 14.8                  | 0.333                                        | 0.034                          | 0.420             |
| Superoxide dismutase [Mn], mitochondrial;                                                                                            | P09671            | 1                          | 9               | 20             | 19.4                  | 0.333                                        | 0.085                          | 0.529             |
| GDP-L-fucose synthase;                                                                                                               | P23591            | 1                          | 5               | 5              | 7.2                   | 0.333                                        | 0.069                          | 0.493             |
| Catenin delta-1;                                                                                                                     | P30999            | 1                          | 4               | 4              | 8.9                   | 0.333                                        | 0.069                          | 0.493             |
| Neutral amino acid transporter B(0);                                                                                                 | P51912            | 1                          | 2               | 2              | 2.4                   | 0.333                                        | 0.037                          | 0.426             |
| Cysteine and glycine-rich protein 1;                                                                                                 | P97315            | 1                          | 13              | 20             | 35.2                  | 0.333                                        | 0.074                          | 0.507             |
| N-acetylglucosamine-6-sulfatase;                                                                                                     | Q8BFR4            | 1                          | 12              | 16             | 13.4                  | 0.333                                        | 0.079                          | 0.515             |
| Thioredoxin-like protein 1;                                                                                                          | Q8CDN6            | 1                          | 7               | 7              | 19.4                  | 0.333                                        | 0.034                          | 0.420             |
| Acylamino-acid-releasing enzyme;                                                                                                     | Q8R146            | 1                          | 6               | 6              | 7.4                   | 0.333                                        | 0.085                          | 0.529             |
| 5-hydroxyisourate hydrolase;                                                                                                         | Q9CRB3            | 1                          | 7               | 10             | 29.7                  | 0.333                                        | 0.032                          | 0.415             |
| Isoamyl acetate-hydrolyzing esterase 1 homolog;                                                                                      | Q9DB29            | 1                          | 6               | 7              | 20.9                  | 0.333                                        | 0.103                          | 0.571             |
| ADP-sugar pyrophosphatase;                                                                                                           | Q9JKX6            | 1                          | 2               | 5              | 6.9                   | 0.333                                        | 0.066                          | 0.479             |
| Peroxisomal acyl-coenzyme A oxidase 2;                                                                                               | Q9QXD1            | 1                          | 2               | 2              | 4.4                   | 0.333                                        | 0.238                          | 0.760             |
| General vesicular transport factor p115;                                                                                             | Q9Z1Z0            | 1                          | 3               | 3              | 3.3                   | 0.333                                        | 0.032                          | 0.415             |
| Plasminogen activator inhibitor 2, macrophage;                                                                                       | P12388            | 1                          | 11              | 14             | 17.6                  | 0.333                                        | 0.058                          | 0.471             |
| Mitogen-activated protein kinase 14;                                                                                                 | P47811            | 1                          | 7               | 7              | 17.1                  | 0.333                                        | 0.04                           | 0.431             |
| Protein Niban;                                                                                                                       | Q3UW53            | 1                          | 3               | 3              | 4.6                   | 0.333                                        | 0.032                          | 0.415             |
| Propionyl-CoA carboxylase beta chain, mitochondrial;                                                                                 | Q99MN9            | 1                          | 18              | 18             | 24.2                  | 0.333                                        | 0.058                          | 0.471             |
| Aldehyde dehydrogenase;                                                                                                              | E9Q3E1            | 1                          | 9               | 9              | 14.6                  | 0.333                                        | 0.05                           | 0.451             |
| Coatomer subunit beta;                                                                                                               | Q9JIF7            | 1                          | 2               | 3              | 2.2                   | 0.333                                        | 0.034                          | 0.420             |
| Glutathione S-transferase theta-1;                                                                                                   | Q64471            | 0.998                      | 2               | 3              | 8.3                   | 0.333                                        | 0.251                          | 0.773             |
| Protein farnesyltransferase/geranylgeranyltransferase type-1 subunit alpha;                                                          | Q61239            | 0.998                      | 2               | 2              | 4.2                   | 0.333                                        | 0.04                           | 0.431             |
| Ear5 protein; Eosinophil-associated ribonuclease 5; Eosinophil-associated, ribonuclease A family, member 5; Uncharacterized protein; | Q8K416            | 0.998                      | 2               | 2              | 14.8                  | 0.333                                        | 0.092                          | 0.550             |
| COP9 signalosome complex subunit 5;                                                                                                  | O35864            | 1                          | 3               | 3              | 10.2                  | 0.345                                        | 0.209                          | 0.714             |
| Catenin alpha-1;                                                                                                                     | P26231            | 1                          | 6               | 6              | 6.7                   | 0.345                                        | 0.101                          | 0.539             |
| Kynurenine--oxoglutarate transaminase 1;                                                                                             | Q8BTY1            | 1                          | 4               | 4              | 8.6                   | 0.345                                        | 0.03                           | 0.391             |
| V-type proton ATPase subunit H;                                                                                                      | Q8BVE3            | 1                          | 3               | 4              | 8.7                   | 0.345                                        | 0.052                          | 0.432             |
| Uncharacterized protein;                                                                                                             | E9Q8E3            | 1                          | 4               | 4              | 2.4                   | 0.345                                        | 0.019                          | 0.379             |
| Annexin A8;                                                                                                                          | O35640            | 1                          | 32              | 51             | 48.6                  | 0.345                                        | 0.035                          | 0.401             |
| Apolipoprotein E;                                                                                                                    | P08226            | 1                          | 7               | 7              | 21.2                  | 0.345                                        | 0.12                           | 0.579             |
| Polypyrimidine tract-binding protein 1;                                                                                              | P17225            | 1                          | 6               | 10             | 16.1                  | 0.345                                        | 0.03                           | 0.391             |
| Ras-related protein Rab-5C;                                                                                                          | P35278            | 1                          | 3               | 3              | 26.9                  | 0.345                                        | 0.054                          | 0.438             |
| UV excision repair protein RAD23 homolog B;                                                                                          | P54728            | 1                          | 5               | 5              | 14.1                  | 0.345                                        | 0.095                          | 0.532             |
| Tubulin beta-5 chain;                                                                                                                | P99024            | 1                          | 6               | 10             | 51.4                  | 0.345                                        | 0.046                          | 0.419             |
| Tubulin beta-4B chain;                                                                                                               | P68372            | 1                          | 6               | 6              | 47.4                  | 0.791                                        | 0.059                          | 0.049             |
| Tubulin beta-2A chain;                                                                                                               | Q7TMM9            | 0.998                      | 2               | 2              | 35.3                  | 0.163                                        | 0.015                          | 0.688             |
| Cardiomyopathy-associated protein 5;                                                                                                 | Q70KF4            | 1                          | 9               | 10             | 3.3                   | 0.345                                        | 0.128                          | 0.598             |
| Ubiquitin-conjugating enzyme E2 variant 1;                                                                                           | Q9CZY3            | 0.986                      | 4               | 5              | 16                    | 0.345                                        | 0.024                          | 0.383             |
| Spliceosome RNA helicase Ddx39b;                                                                                                     | Q9Z1N5            | 1                          | 10              | 11             | 17.3                  | 0.345                                        | 0.084                          | 0.504             |
| Uncharacterized protein;                                                                                                             | E9PWQ3            | 1                          | 10              | 10             | 4.4                   | 0.345                                        | 0.247                          | 0.754             |
| Cyclin-dependent kinase 6;                                                                                                           | Q64261            | 1                          | 2               | 2              | 4.9                   | 0.345                                        | 0.035                          | 0.401             |

Table S1, Tholen et al.

| Protein                                                                                         | Uniprot accession | ProteinProphet Prob. Score | Unique peptides | Total peptides | Sequence coverage [%] | Fold change (log <sub>2</sub> ) of ASAPratio | Fold change standard deviation | ASAPratio p-value |
|-------------------------------------------------------------------------------------------------|-------------------|----------------------------|-----------------|----------------|-----------------------|----------------------------------------------|--------------------------------|-------------------|
| Tyrosine-protein phosphatase non-receptor type 11;                                              | P35235            | 1                          | 3               | 3              | 6.9                   | 0.345                                        | 0.033                          | 0.396             |
| Target of Myb protein 1;                                                                        | O88746            | 1                          | 5               | 5              | 11                    | 0.356                                        | 0.259                          | 0.746             |
| Protein-L-isoaspartate(D-aspartate) O-methyltransferase;                                        | P23506            | 1                          | 5               | 7              | 15.8                  | 0.356                                        | 0.042                          | 0.394             |
| Serpin B5;                                                                                      | P70124            | 1                          | 43              | 90             | 60.8                  | 0.356                                        | 0.053                          | 0.413             |
| Mimecan;                                                                                        | Q62000            | 1                          | 7               | 12             | 15.1                  | 0.356                                        | 0.117                          | 0.556             |
| Versican core protein;                                                                          | Q62059            | 1                          | 5               | 5              | 6.7                   | 0.356                                        | 0.047                          | 0.400             |
| Protein arginine N-methyltransferase 5;                                                         | Q8CIG8            | 1                          | 2               | 2              | 3.1                   | 0.356                                        | 0.042                          | 0.394             |
| NADH dehydrogenase [ubiquinone] 1 subunit C2;                                                   | Q9CQ54            | 1                          | 2               | 2              | 10.8                  | 0.356                                        | 0.017                          | 0.358             |
| Acyl-coenzyme A thioesterase 13;                                                                | Q9CQR4            | 1                          | 3               | 3              | 16.4                  | 0.356                                        | 0.017                          | 0.358             |
| E3 ubiquitin-protein ligase ARIH1;                                                              | Q9Z1K5            | 1                          | 2               | 2              | 2                     | 0.356                                        | 0.031                          | 0.373             |
| Proliferation-associated protein 2G4;                                                           | P50580            | 1                          | 5               | 5              | 12.4                  | 0.356                                        | 0.036                          | 0.383             |
| ATP-binding cassette sub-family E member 1;                                                     | P61222            | 1                          | 3               | 3              | 3.8                   | 0.356                                        | 0.07                           | 0.449             |
| COP9 signalosome complex subunit 2;                                                             | P61202            | 1                          | 3               | 3              | 5.7                   | 0.356                                        | 0.022                          | 0.362             |
| Ubiquitin-like modifier-activating enzyme 6;                                                    | Q8C7R4            | 1                          | 4               | 4              | 3.5                   | 0.379                                        | 0.117                          | 0.526             |
| Nuclear receptor-binding protein;                                                               | Q99J45            | 1                          | 2               | 2              | 2.8                   | 0.379                                        | 0.067                          | 0.416             |
| Transportin-2;                                                                                  | Q99LG2            | 1                          | 3               | 4              | 3                     | 0.379                                        | 0.117                          | 0.526             |
| Ly6/PLAUR domain-containing protein 5;                                                          | Q9D7Z7            | 1                          | 2               | 2              | 6.2                   | 0.379                                        | 0.073                          | 0.431             |
| 3-ketoacyl-CoA thiolase A, peroxisomal;                                                         | Q921H8            | 1                          | 19              | 25             | 38                    | 0.379                                        | 0.058                          | 0.402             |
| Glutathione S-transferase theta 3; Glutathione S-transferase, theta 3; Uncharacterized protein; | Q99L20            | 1                          | 6               | 8              | 14.1                  | 0.379                                        | 0.076                          | 0.438             |
| Transitional endoplasmic reticulum ATPase;                                                      | Q01853            | 1                          | 34              | 41             | 30                    | 0.39                                         | 0.113                          | 0.495             |
| Cytoplasmic dynein 1 light intermediate chain 2;                                                | Q6PDL0            | 1                          | 4               | 4              | 6.7                   | 0.39                                         | 0.101                          | 0.473             |
| 3-ketoacyl-CoA thiolase, mitochondrial;                                                         | Q8BWT1            | 1                          | 25              | 46             | 44.3                  | 0.39                                         | 0.033                          | 0.338             |
| Carbonic anhydrase 13;                                                                          | Q9D6N1            | 1                          | 5               | 5              | 23.7                  | 0.39                                         | 0.074                          | 0.414             |
| Proteasomal ubiquitin receptor ADRM1;                                                           | Q9JKV1            | 1                          | 3               | 11             | 6.1                   | 0.39                                         | 0.054                          | 0.372             |
| Serine/threonine-protein kinase DCLK1;                                                          | Q9JLM8            | 1                          | 2               | 2              | 3                     | 0.39                                         | 0.119                          | 0.510             |
| Annexin A1;                                                                                     | P10107            | 1                          | 39              | 88             | 57.5                  | 0.39                                         | 0.033                          | 0.338             |
| Protein RCC2;                                                                                   | Q8BK67            | 1                          | 9               | 10             | 15.8                  | 0.39                                         | 0.113                          | 0.495             |
| Phosphoserine aminotransferase;                                                                 | Q99K85            | 1                          | 18              | 19             | 43.5                  | 0.39                                         | 0.057                          | 0.378             |
| Ubiquitin carboxyl-terminal hydrolase isozyme L5;                                               | Q9WUP7            | 1                          | 2               | 2              | 4.3                   | 0.39                                         | 0.033                          | 0.338             |
| 1-phosphatidylinositol-4,5-bisphosphate phosphodiesterase gamma-1;                              | Q62077            | 0.999                      | 2               | 2              | 2.4                   | 0.39                                         | 0.033                          | 0.338             |
| Interleukin-1 receptor antagonist protein;                                                      | P25085            | 0.977                      | 2               | 2              | 8.1                   | 0.39                                         | 0.039                          | 0.348             |
| Cytochrome c oxidase subunit 4 isoform 1, mitochondrial;                                        | P19783            | 1                          | 5               | 11             | 23.7                  | 0.401                                        | 0.046                          | 0.343             |
| Uncharacterized protein;                                                                        | E9Q043            | 1                          | 2               | 5              | 1.5                   | 0.401                                        | 0.058                          | 0.361             |
| Heterogeneous nuclear ribonucleoprotein Q;                                                      | Q7TMK9            | 1                          | 10              | 12             | 12.8                  | 0.401                                        | 0.061                          | 0.368             |
| NSFL1 cofactor p47;                                                                             | Q9CZ44            | 1                          | 17              | 19             | 33.2                  | 0.401                                        | 0.055                          | 0.355             |
| Hydroxysteroid (17-beta) dehydrogenase 10; Uncharacterized protein;                             | A2AFQ2            | 1                          | 5               | 5              | 21.1                  | 0.401                                        | 0.07                           | 0.382             |
| Inactive tyrosine-protein kinase 7;                                                             | Q8BKG3            | 1                          | 2               | 4              | 6.5                   | 0.401                                        | 0.058                          | 0.361             |
| 2-oxoisovalerate dehydrogenase subunit alpha, mitochondrial;                                    | P50136            | 1                          | 3               | 3              | 6.6                   | 0.411                                        | 0.071                          | 0.366             |
| Isocitrate dehydrogenase [NAD] subunit gamma 1, mitochondrial;                                  | P70404            | 1                          | 13              | 15             | 30.3                  | 0.411                                        | 0.043                          | 0.322             |
| Echinoderm microtubule-associated protein-like 1;                                               | Q05BC3            | 1                          | 5               | 5              | 5                     | 0.411                                        | 0.127                          | 0.485             |
| Retroviral-like aspartic protease 1;                                                            | Q09PK2            | 1                          | 3               | 4              | 10.6                  | 0.411                                        | 0.071                          | 0.366             |
| Drebrin-like protein;                                                                           | Q62418            | 1                          | 10              | 10             | 17.9                  | 0.411                                        | 0.108                          | 0.448             |

Table S1, Tholen et al.

| Protein                                                                                 | Uniprot accession | ProteinProphet Prob. Score | Unique peptides | Total peptides | Sequence coverage [%] | Fold change (log <sub>2</sub> ) of ASAPratio | Fold change standard deviation | ASAPratio p-value |
|-----------------------------------------------------------------------------------------|-------------------|----------------------------|-----------------|----------------|-----------------------|----------------------------------------------|--------------------------------|-------------------|
| Farnesyl pyrophosphate synthase;                                                        | Q920E5            | 1                          | 11              | 13             | 19.3                  | 0.411                                        | 0.046                          | 0.327             |
| Heterogeneous nuclear ribonucleoprotein A/B;                                            | Q99020            | 1                          | 4               | 4              | 8                     | 0.411                                        | 0.034                          | 0.306             |
| tRNA-splicing ligase RtcB homolog;                                                      | Q99LF4            | 1                          | 3               | 3              | 5.3                   | 0.411                                        | 0.124                          | 0.477             |
| Integrin beta-4;                                                                        | A2A863            | 1                          | 3               | 3              | 2.4                   | 0.411                                        | 0.077                          | 0.380             |
| Glutamine synthetase;                                                                   | P15105            | 1                          | 7               | 7              | 16.6                  | 0.411                                        | 0.093                          | 0.410             |
| Ras-related protein R-Ras;                                                              | P10833            | 1                          | 3               | 5              | 10.6                  | 0.422                                        | 0.06                           | 0.330             |
| Lysosome-associated membrane glycoprotein 2;                                            | P17047            | 1                          | 5               | 5              | 8.7                   | 0.422                                        | 0.044                          | 0.308             |
| Calnexin;                                                                               | P35564            | 1                          | 2               | 2              | 1.7                   | 0.422                                        | 0.035                          | 0.291             |
| Transgelin;                                                                             | P37804            | 1                          | 15              | 29             | 43.3                  | 0.422                                        | 0.047                          | 0.312             |
| Acylphosphatase-2;                                                                      | P56375            | 1                          | 7               | 11             | 39.2                  | 0.422                                        | 0.06                           | 0.330             |
| 14-3-3 protein theta;                                                                   | P68254            | 1                          | 7               | 7              | 27.8                  | 0.422                                        | 0.057                          | 0.323             |
| Platelet glycoprotein 4;                                                                | Q08857            | 1                          | 8               | 14             | 11                    | 0.422                                        | 0.06                           | 0.330             |
| Zinc transporter SLC39A7;                                                               | Q31125            | 1                          | 2               | 2              | 2.7                   | 0.422                                        | 0.041                          | 0.301             |
| Perilipin-1;                                                                            | Q8CGN5            | 1                          | 16              | 16             | 25                    | 0.422                                        | 0.192                          | 0.577             |
| Acetoacetyl-CoA synthetase;                                                             | Q9D2R0            | 1                          | 7               | 8              | 9.4                   | 0.422                                        | 0.151                          | 0.511             |
| Prolyl-tRNA synthetase associated domain-containing protein 1;                          | Q9D820            | 1                          | 3               | 3              | 15.4                  | 0.422                                        | 0.072                          | 0.350             |
| Isocitrate dehydrogenase 3 (NAD+) beta; Tumor-related protein; Uncharacterized protein; | Q91VA7            | 1                          | 8               | 10             | 20.3                  | 0.422                                        | 0.06                           | 0.330             |
| Protein diaphanous homolog 1;                                                           | O08808            | 1                          | 2               | 2              | 3                     | 0.422                                        | 0.299                          | 0.697             |
| NADPH-cytochrome P450 reductase;                                                        | P37040            | 1                          | 4               | 4              | 4                     | 0.422                                        | 0.145                          | 0.497             |
| Lambda-crystallin homolog;                                                              | Q99KP3            | 1                          | 11              | 12             | 25.4                  | 0.422                                        | 0.117                          | 0.440             |
| Alpha-galactosidase A;                                                                  | P51569            | 1                          | 2               | 2              | 2.9                   | 0.444                                        | 0.049                          | 0.297             |
| Zinc-binding alcohol dehydrogenase domain-containing protein 2;                         | Q8BGC4            | 1                          | 9               | 10             | 18.3                  | 0.444                                        | 0.049                          | 0.297             |
| CD109 antigen;                                                                          | Q8R422            | 1                          | 4               | 4              | 2.2                   | 0.444                                        | 0.036                          | 0.277             |
| Serine/threonine-protein kinase 24;                                                     | Q99KH8            | 1                          | 2               | 2              | 3                     | 0.444                                        | 0.065                          | 0.321             |
| Probable C->U-editing enzyme APOBEC-2;                                                  | Q9WV35            | 1                          | 3               | 3              | 6.7                   | 0.444                                        | 0.062                          | 0.315             |
| SUMO-activating enzyme subunit 2;                                                       | Q9Z1F9            | 1                          | 5               | 5              | 8.8                   | 0.444                                        | 0.039                          | 0.281             |
| Protein S100-A4;                                                                        | P07091            | 1                          | 4               | 6              | 15.8                  | 0.444                                        | 0.059                          | 0.309             |
| Actin-related protein 2/3 complex subunit 4;                                            | P59999            | 1                          | 4               | 5              | 16.7                  | 0.444                                        | 0.069                          | 0.328             |
| Heterogeneous nuclear ribonucleoprotein D0;                                             | Q60668            | 1                          | 4               | 5              | 20.6                  | 0.444                                        | 0.101                          | 0.386             |
| Proteasome subunit alpha type-4;                                                        | Q9R1P0            | 1                          | 9               | 14             | 31.4                  | 0.444                                        | 0.124                          | 0.432             |
| Uncharacterized protein;                                                                | E9QJY4            | 1                          | 2               | 2              | 2.4                   | 0.444                                        | 0.042                          | 0.283             |
| E3 ubiquitin-protein ligase NEDD4;                                                      | P46935            | 1                          | 4               | 4              | 4.5                   | 0.444                                        | 0.131                          | 0.447             |
| Ig heavy chain V region MOPC 104E;                                                      | P01756            | 1                          | 2               | 5              | 16.2                  | 0.454                                        | 0.03                           | 0.256             |
| Coatomer subunit gamma;                                                                 | Q9QZE5            | 1                          | 3               | 3              | 5.9                   | 0.454                                        | 0.093                          | 0.356             |
| Secernin-2;                                                                             | Q8VCA8            | 1                          | 6               | 8              | 13.2                  | 0.454                                        | 0.169                          | 0.495             |
| Actin-related protein 2/3 complex subunit 2;                                            | Q9CVB6            | 1                          | 5               | 5              | 13                    | 0.454                                        | 0.099                          | 0.364             |
| Protein arginine N-methyltransferase 1;                                                 | Q9JIF0            | 1                          | 2               | 2              | 11                    | 0.454                                        | 0.04                           | 0.268             |
| Proteasome subunit alpha type-7;                                                        | Q9Z2U0            | 1                          | 14              | 26             | 37.5                  | 0.454                                        | 0.02                           | 0.250             |
| Proteasome subunit beta type-7;                                                         | P70195            | 1                          | 6               | 7              | 11.2                  | 0.465                                        | 0.078                          | 0.306             |
| Vasodilator-stimulated phosphoprotein;                                                  | P70460            | 1                          | 3               | 3              | 6.7                   | 0.465                                        | 0.078                          | 0.306             |
| Voltage-dependent anion-selective channel protein 3;                                    | Q60931            | 1                          | 5               | 5              | 15.5                  | 0.465                                        | 0.084                          | 0.320             |
| Calponin-3;                                                                             | Q9DAW9            | 1                          | 3               | 3              | 6.7                   | 0.465                                        | 0.246                          | 0.589             |

Table S1, Tholen et al.

| Protein                                                                       | Uniprot accession | ProteinProphet Prob. Score | Unique peptides | Total peptides | Sequence coverage [%] | Fold change (log <sub>2</sub> ) of ASAPratio | Fold change standard deviation | ASAPratio p-value |
|-------------------------------------------------------------------------------|-------------------|----------------------------|-----------------|----------------|-----------------------|----------------------------------------------|--------------------------------|-------------------|
| 1-acylglycerol-3-phosphate O-acyltransferase ABHD5;                           | Q9DBL9            | 1                          | 3               | 3              | 11.1                  | 0.465                                        | 0.216                          | 0.547             |
| Acyl-CoA dehydrogenase family member 9, mitochondrial;                        | Q8JZN5            | 1                          | 13              | 14             | 19.4                  | 0.465                                        | 0.091                          | 0.334             |
| Uncharacterized protein;                                                      | E9Q7G0            | 1                          | 3               | 4              | 1.2                   | 0.465                                        | 0.35                           | 0.687             |
| Dual specificity mitogen-activated protein kinase kinase 6;                   | P70236            | 1                          | 2               | 2              | 5.5                   | 0.465                                        | 0.054                          | 0.269             |
| Thiopurine S-methyltransferase;                                               | O55060            | 1                          | 2               | 2              | 8.3                   | 0.465                                        | 0.388                          | 0.713             |
| Carbohydrate kinase domain-containing protein;                                | Q9CZ42            | 1                          | 2               | 2              | 10.2                  | 0.465                                        | 0.202                          | 0.530             |
| UPF0554 protein C2orf43 homolog;                                              | Q8BVA5            | 0.996                      | 2               | 2              | 4                     | 0.465                                        | 0.061                          | 0.280             |
| Ig kappa chain C region;                                                      | P01837            | 1                          | 7               | 23             | 44.3                  | 0.475                                        | 0.058                          | 0.261             |
| Methylmalonyl-CoA mutase, mitochondrial;                                      | P16332            | 1                          | 5               | 5              | 5.6                   | 0.475                                        | 0.229                          | 0.551             |
| Isocitrate dehydrogenase [NAD] subunit alpha, mitochondrial;                  | Q9D6R2            | 1                          | 16              | 24             | 32.2                  | 0.475                                        | 0.137                          | 0.402             |
| Calmodulin-4;                                                                 | Q9JM83            | 1                          | 9               | 9              | 41.2                  | 0.475                                        | 0.034                          | 0.234             |
| Cathepsin Z;                                                                  | Q9WUU7            | 1                          | 5               | 9              | 7.8                   | 0.475                                        | 0.048                          | 0.251             |
| Gamma-synuclein;                                                              | Q9Z0F7            | 1                          | 6               | 7              | 47.2                  | 0.475                                        | 0.031                          | 0.231             |
| Uncharacterized protein;                                                      | Q9CX86            | 1                          | 3               | 4              | 12.1                  | 0.475                                        | 0.024                          | 0.228             |
| 26S proteasome non-ATPase regulatory subunit 13;                              | Q9WVJ2            | 1                          | 4               | 4              | 10                    | 0.475                                        | 0.055                          | 0.256             |
| Histidyl-tRNA synthetase, cytoplasmic;                                        | Q61035            | 1                          | 2               | 2              | 5.9                   | 0.475                                        | 0.031                          | 0.230             |
| NADH dehydrogenase [ubiquinone] 1 alpha subcomplex subunit 10, mitochondrial; | Q99LC3            | 1                          | 4               | 4              | 9                     | 0.485                                        | 0.371                          | 0.676             |
| Dual specificity protein phosphatase 3;                                       | Q9D7X3            | 1                          | 10              | 10             | 32.4                  | 0.485                                        | 0.055                          | 0.243             |
| Apoptosis-associated speck-like protein containing a CARD;                    | Q9EPB4            | 1                          | 9               | 11             | 35.2                  | 0.485                                        | 0.059                          | 0.249             |
| Maleylacetoacetate isomerase;                                                 | Q9WVLO            | 1                          | 17              | 21             | 51.9                  | 0.485                                        | 0.097                          | 0.314             |
| Glycogen phosphorylase, muscle form;                                          | Q9WUB3            | 1                          | 54              | 107            | 48.1                  | 0.485                                        | 0.09                           | 0.300             |
| Glycogen phosphorylase, brain form;                                           | Q8CI94            | 1                          | 15              | 19             | 21.8                  | 0.07                                         | 0.01                           | 0.875             |
| Glycogen phosphorylase, liver form;                                           | Q9ET01            | 1                          | 4               | 4              | 9.4                   | -0.152                                       | -0.01                          | 0.690             |
| T-complex protein 1 subunit eta;                                              | P80313            | 1                          | 3               | 3              | 3.1                   | 0.496                                        | 0.165                          | 0.418             |
| Eukaryotic peptide chain release factor subunit 1;                            | Q8BWY3            | 1                          | 2               | 2              | 2.3                   | 0.496                                        | 0.06                           | 0.237             |
| DCC-interacting protein 13-alpha;                                             | Q8K3H0            | 1                          | 3               | 3              | 4.5                   | 0.496                                        | -0.032                         | 0.207             |
| UTP--glucose-1-phosphate uridylyltransferase;                                 | Q91ZJ5            | 1                          | 33              | 56             | 37                    | 0.496                                        | 0.12                           | 0.337             |
| Cystatin E/M; Cystatin M/E; Uncharacterized protein;                          | Q9D1B1            | 1                          | 7               | 9              | 35.6                  | 0.496                                        | 0.186                          | 0.452             |
| Titin;                                                                        | A2ASS6            | 1                          | 37              | 48             | 1.1                   | 0.496                                        | 0.324                          | 0.624             |
| Monoglyceride lipase;                                                         | O35678            | 1                          | 7               | 7              | 26.4                  | 0.496                                        | 0.106                          | 0.317             |
| Tubulin alpha-1B chain;                                                       | P05213            | 1                          | 10              | 13             | 38.8                  | 0.496                                        | 0.056                          | 0.231             |
| Tubulin alpha-4A chain;                                                       | P68368            | 1                          | 5               | 5              | 34.6                  | 0.546                                        | 0.224                          | 0.440             |
| Acyl-CoA-binding protein;                                                     | P31786            | 1                          | 7               | 8              | 39.1                  | 0.496                                        | 0.042                          | 0.218             |
| Coronin-1C;                                                                   | Q9WUM4            | 1                          | 7               | 7              | 12.2                  | 0.496                                        | 0.032                          | 0.207             |
| Proteasome subunit alpha type-2;                                              | P49722            | 1                          | 12              | 14             | 39.7                  | 0.516                                        | 0.094                          | 0.264             |
| [Pyruvate dehydrogenase [acetyl-transferring]]-phosphatase 1, mitochondrial;  | Q3UV70            | 1                          | 3               | 3              | 4.6                   | 0.516                                        | 0.036                          | 0.199             |
| 5'-nucleotidase;                                                              | Q61503            | 1                          | 4               | 4              | 5.6                   | 0.516                                        | 0.382                          | 0.654             |
| Filamin-B;                                                                    | Q80X90            | 1                          | 11              | 11             | 5.2                   | 0.516                                        | 0.108                          | 0.286             |
| Heme-binding protein 1;                                                       | Q9R257            | 1                          | 5               | 7              | 14.7                  | 0.516                                        | 0.051                          | 0.215             |
| Coagulation factor XIII A chain;                                              | Q8BH61            | 1                          | 6               | 6              | 7.2                   | 0.516                                        | 0.076                          | 0.248             |
| Pantetheinase;                                                                | Q9Z0K8            | 1                          | 3               | 3              | 5.1                   | 0.526                                        | 0.026                          | 0.184             |
| H-2 class II histocompatibility antigen, A-Q alpha chain;                     | P04227            | 1                          | 4               | 4              | 11.8                  | 0.526                                        | 0.062                          | 0.214             |
| Perilipin-2;                                                                  | P43883            | 1                          | 5               | 6              | 11.5                  | 0.526                                        | 0.27                           | 0.533             |

Table S1, Tholen et al.

| Protein                                                                                                               | Uniprot accession | ProteinProphet Prob. Score | Unique peptides | Total peptides | Sequence coverage [%] | Fold change (log <sub>2</sub> ) of ASAPratio | Fold change standard deviation | ASAPratio p-value |
|-----------------------------------------------------------------------------------------------------------------------|-------------------|----------------------------|-----------------|----------------|-----------------------|----------------------------------------------|--------------------------------|-------------------|
| Rho-related GTP-binding protein RhoC;<br>Four and a half LIM domains 1; Four and a half LIM domains 1, isoform CRA_b; | Q62159            | 1                          | 7               | 8              | 36.8                  | 0.526                                        | 0.102                          | 0.275             |
| Uncharacterized protein;                                                                                              | A2AEX8            | 1                          | 23              | 49             | 41.2                  | 0.526                                        | 0.124                          | 0.311             |
| Ufm1-specific protease 1;                                                                                             | Q9CZP0            | 1                          | 3               | 3              | 13.8                  | 0.526                                        | 0.329                          | 0.592             |
| 26S proteasome non-ATPase regulatory subunit 7;                                                                       | P26516            | 1                          | 8               | 9              | 21.2                  | 0.536                                        | 0.166                          | 0.364             |
| NADH dehydrogenase [ubiquinone] iron-sulfur protein 4, mitochondrial;                                                 | Q9CXZ1            | 1                          | 3               | 3              | 14.3                  | 0.536                                        | 0.092                          | 0.243             |
| Cytosolic 5'-nucleotidase 3;                                                                                          | Q9D020            | 1                          | 7               | 7              | 17.8                  | 0.536                                        | 0.1                            | 0.257             |
| 26S proteasome non-ATPase regulatory subunit 12;                                                                      | Q9D8W5            | 1                          | 2               | 2              | 3.1                   | 0.536                                        | 0.1                            | 0.257             |
| Proteasome subunit alpha type-1;                                                                                      | Q9R1P4            | 1                          | 16              | 18             | 35.9                  | 0.536                                        | 0.311                          | 0.560             |
| Twinfilin-2;                                                                                                          | Q9Z0P5            | 1                          | 4               | 4              | 12.9                  | 0.536                                        | 0.055                          | 0.190             |
| Succinyl-CoA ligase [GDP-forming] subunit beta, mitochondrial;                                                        | Q9Z2I8            | 1                          | 15              | 16             | 37.9                  | 0.536                                        | 0.362                          | 0.609             |
| Lupus La protein homolog;                                                                                             | P32067            | 1                          | 2               | 2              | 6                     | 0.536                                        | 0.177                          | 0.386             |
| Pigment epithelium-derived factor;                                                                                    | P97298            | 1                          | 4               | 4              | 9.6                   | 0.536                                        | 0.078                          | 0.225             |
| 5-oxoprolinase;                                                                                                       | Q8K010            | 1                          | 17              | 18             | 10.9                  | 0.536                                        | 0.137                          | 0.313             |
| 14-3-3 protein beta/alpha;                                                                                            | Q9CQV8            | 1                          | 8               | 10             | 34.1                  | 0.536                                        | 0.059                          | 0.198             |
| 14-3-3 protein eta;                                                                                                   | P68510            | 1                          | 2               | 2              | 14.6                  | 0.604                                        | 0.06                           | 0.140             |
| Dysferlin;                                                                                                            | Q9ESD7            | 1                          | 3               | 3              | 0.9                   | 0.546                                        | 0.034                          | 0.167             |
| 26S protease regulatory subunit 6A;                                                                                   | O88685            | 1                          | 16              | 16             | 31.2                  | 0.546                                        | 0.217                          | 0.433             |
| Ubiquitin carboxyl-terminal hydrolase 5;                                                                              | P56399            | 1                          | 13              | 14             | 12.1                  | 0.546                                        | 0.243                          | 0.464             |
| Proteasome subunit beta type-3;                                                                                       | Q9R1P1            | 1                          | 4               | 4              | 15.1                  | 0.546                                        | 0.093                          | 0.232             |
| Actin-related protein 2/3 complex subunit 1B;                                                                         | Q9WV32            | 1                          | 10              | 10             | 21                    | 0.546                                        | 0.067                          | 0.198             |
| Carbonic anhydrase 2;                                                                                                 | P00920            | 1                          | 12              | 12             | 37.3                  | 0.556                                        | 0.253                          | 0.464             |
| 6-phosphofructokinase, liver type;                                                                                    | P12382            | 1                          | 11              | 12             | 13.8                  | 0.556                                        | 0.219                          | 0.415             |
| Carbonic anhydrase 3;                                                                                                 | P16015            | 1                          | 35              | 868            | 65.4                  | 0.556                                        | 0.045                          | 0.167             |
| Cytosolic 10-formyltetrahydrofolate dehydrogenase;                                                                    | Q8R0Y6            | 1                          | 7               | 7              | 8.4                   | 0.556                                        | 0.091                          | 0.215             |
| COP9 signalosome complex subunit 8;                                                                                   | Q8VBV7            | 1                          | 2               | 2              | 17.2                  | 0.556                                        | 0.386                          | 0.602             |
| 2-aminoethanethiol dioxygenase;                                                                                       | Q6PDY2            | 1                          | 2               | 2              | 4.3                   | 0.556                                        | 0.072                          | 0.193             |
| U6 snRNA-associated Sm-like protein LSm2;                                                                             | Q35900            | 1                          | 2               | 2              | 20                    | 0.566                                        | 0.119                          | 0.243             |
| Niban-like protein 1;                                                                                                 | Q8R1F1            | 1                          | 6               | 6              | 6.9                   | 0.566                                        | 0.134                          | 0.271             |
| Ig kappa chain V-V region L6;                                                                                         | P01638            | 1                          | 3               | 3              | 22.6                  | 0.566                                        | 0.076                          | 0.188             |
| Polyubiquitin-B;                                                                                                      | P0CG49            | 1                          | 5               | 6              | 32.8                  | 0.566                                        | 0.317                          | 0.522             |
| Galectin-3-binding protein;                                                                                           | Q07797            | 1                          | 3               | 3              | 7.5                   | 0.566                                        | 0.302                          | 0.507             |
| Ig gamma-2B chain C region;                                                                                           | P01867            | 1                          | 4               | 5              | 13.4                  | 0.585                                        | 0.062                          | 0.161             |
| Thiamin pyrophosphokinase 1;                                                                                          | Q9ROM5            | 1                          | 3               | 3              | 15.2                  | 0.585                                        | 0.078                          | 0.179             |
| Proteasome subunit beta type-2;                                                                                       | Q9R1P3            | 1                          | 3               | 5              | 12.9                  | 0.585                                        | 0.105                          | 0.213             |
| Phospholysine phosphohistidine inorganic pyrophosphate phosphatase;                                                   | Q9D7I5            | 0.999                      | 3               | 3              | 8.1                   | 0.585                                        | 0.039                          | 0.144             |
| Protein phosphatase 1B;                                                                                               | P36993            | 1                          | 5               | 5              | 7.9                   | 0.595                                        | 0.118                          | 0.216             |
| ATP synthase subunit f, mitochondrial;                                                                                | P56135            | 1                          | 3               | 5              | 30.3                  | 0.595                                        | 0.039                          | 0.136             |
| 14-3-3 protein gamma;                                                                                                 | P61982            | 1                          | 5               | 8              | 25.1                  | 0.595                                        | 0.051                          | 0.145             |
| Importin subunit beta-1;                                                                                              | P70168            | 1                          | 6               | 8              | 6.2                   | 0.595                                        | 0.307                          | 0.479             |
| V-type proton ATPase subunit E 1;                                                                                     | P50518            | 1                          | 3               | 3              | 8.4                   | 0.595                                        | 0.067                          | 0.156             |
| Cytochrome P450 2F2;                                                                                                  | P33267            | 1                          | 2               | 2              | 3.9                   | 0.595                                        | 0.063                          | 0.152             |
| Ig gamma-1 chain C region secreted form;                                                                              | P01868            | 1                          | 12              | 35             | 23.8                  | 0.604                                        | 0.02                           | 0.121             |

Table S1, Tholen et al.

| Protein                                                                      | Uniprot accession | ProteinProphet Prob. Score | Unique peptides | Total peptides | Sequence coverage [%] | Fold change (log <sub>2</sub> ) of ASAPratio | Fold change standard deviation | ASAPratio p-value |
|------------------------------------------------------------------------------|-------------------|----------------------------|-----------------|----------------|-----------------------|----------------------------------------------|--------------------------------|-------------------|
| Peroxisomal multifunctional enzyme type 2;                                   | P51660            | 1                          | 8               | 9              | 10.1                  | 0.604                                        | 0.06                           | 0.141             |
| MAP kinase-activated protein kinase 3;                                       | Q3UMW7            | 1                          | 2               | 2              | 4.5                   | 0.604                                        | 0.056                          | 0.141             |
| NADH dehydrogenase [ubiquinone] 1 alpha subcomplex subunit 4;                | Q62425            | 1                          | 4               | 4              | 26.8                  | 0.604                                        | 0.044                          | 0.132             |
| Membrane primary amine oxidase;                                              | O70423            | 1                          | 14              | 21             | 15.8                  | 0.604                                        | 0.155                          | 0.259             |
| Ubiquinone biosynthesis protein COQ9, mitochondrial;                         | Q8K1Z0            | 1                          | 6               | 6              | 19.5                  | 0.604                                        | 0.095                          | 0.177             |
| Multifunctional protein ADE2;                                                | Q9DCL9            | 1                          | 10              | 10             | 17.6                  | 0.604                                        | 0.199                          | 0.321             |
| Mitogen-activated protein kinase 12;                                         | O08911            | 1                          | 5               | 5              | 13.9                  | 0.614                                        | 0.096                          | 0.172             |
| Sulfotransferase family cytosolic 2B member 1;                               | O35400            | 1                          | 3               | 3              | 5.9                   | 0.614                                        | 0.076                          | 0.149             |
| Pyruvate carboxylase, mitochondrial;                                         | Q05920            | 1                          | 29              | 42             | 21.7                  | 0.614                                        | 0.128                          | 0.209             |
| EH domain-containing protein 2;                                              | Q8BH64            | 1                          | 3               | 4              | 3.7                   | 0.614                                        | 0.181                          | 0.282             |
| Tumor protein D54;                                                           | Q9CYZ2            | 1                          | 2               | 2              | 6.2                   | 0.614                                        | 0.076                          | 0.149             |
| Alpha-methylacyl-CoA racemase;                                               | O09174            | 1                          | 7               | 7              | 12.3                  | 0.623                                        | 0.312                          | 0.441             |
| Diphosphomevalonate decarboxylase;                                           | Q99JF5            | 1                          | 3               | 3              | 5.7                   | 0.623                                        | 0.057                          | 0.126             |
| Coronin-1A;                                                                  | O89053            | 1                          | 10              | 14             | 12.6                  | 0.623                                        | 0.065                          | 0.129             |
| Enoyl-CoA hydratase, mitochondrial;                                          | Q8BH95            | 1                          | 7               | 8              | 18.6                  | 0.623                                        | 0.073                          | 0.137             |
| ATP-citrate synthase;                                                        | Q91V92            | 1                          | 36              | 42             | 22.4                  | 0.623                                        | 0.121                          | 0.187             |
| T-complex protein 1 subunit alpha;                                           | P11983            | 1                          | 2               | 2              | 9.7                   | 0.623                                        | 0.053                          | 0.123             |
| Non-specific lipid-transfer protein;                                         | P32020            | 1                          | 9               | 14             | 10.8                  | 0.642                                        | 0.115                          | 0.173             |
| Prostaglandin reductase 2;                                                   | Q8VDQ1            | 1                          | 4               | 5              | 11.7                  | 0.642                                        | 0.099                          | 0.152             |
| ATP synthase protein 8;                                                      | P03930            | 0.999                      | 2               | 2              | 14.9                  | 0.642                                        | 0.025                          | 0.103             |
| Alanyl-tRNA editing protein Aarsd1;                                          | Q3THG9            | 0.981                      | 2               | 2              | 6.8                   | 0.642                                        | 0.099                          | 0.152             |
| Tripeptidyl-peptidase 1;                                                     | O89023            | 1                          | 3               | 4              | 6.2                   | 0.651                                        | 0.249                          | 0.337             |
| Decorin;                                                                     | P28654            | 1                          | 4               | 7              | 5.9                   | 0.651                                        | 0.075                          | 0.123             |
| Hormone-sensitive lipase;                                                    | P54310            | 1                          | 6               | 6              | 7.8                   | 0.651                                        | 0.108                          | 0.154             |
| Gamma-glutamylcyclotransferase;                                              | Q9D7X8            | 1                          | 7               | 7              | 21.8                  | 0.651                                        | 0.141                          | 0.194             |
| Keratin, type I cytoskeletal 17;                                             | Q9QWL7            | 1                          | 5               | 5              | 12.5                  | 0.651                                        | 0.166                          | 0.225             |
| Keratin 15; Keratin 15, isoform CRA_a; Uncharacterized protein;              | B1AQ77            | 1                          | 5               | 5              | 22.1                  | 1.014                                        | 0.432                          | 0.165             |
| Acyl-coenzyme A thioesterase 9, mitochondrial;                               | Q9R0X4            | 1                          | 5               | 5              | 7.7                   | 0.651                                        | 0.141                          | 0.196             |
| 26S proteasome non-ATPase regulatory subunit 1;                              | Q3TXS7            | 1                          | 8               | 8              | 10.6                  | 0.66                                         | 0.071                          | 0.113             |
| NADH dehydrogenase [ubiquinone] 1 beta subcomplex subunit 11, mitochondrial; | O09111            | 0.996                      | 2               | 2              | 6.6                   | 0.66                                         | 0.1                            | 0.137             |
| Epidermal growth factor receptor kinase substrate 8-like protein 1;          | Q8R5F8            | 1                          | 5               | 5              | 5.3                   | 0.669                                        | 0.063                          | 0.101             |
| Heat shock protein beta-2;                                                   | Q99PR8            | 1                          | 6               | 8              | 30.8                  | 0.669                                        | 0.189                          | 0.233             |
| Desmoglein-3;                                                                | O35902            | 0.986                      | 2               | 2              | 1.8                   | 0.669                                        | 0.042                          | 0.091             |
| Mevalonate kinase;                                                           | Q9R008            | 1                          | 5               | 8              | 16.7                  | 0.678                                        | 0.114                          | 0.137             |
| Carnitine O-palmitoyltransferase 1, muscle isoform;                          | Q924X2            | 1                          | 3               | 3              | 3.6                   | 0.678                                        | 0.042                          | 0.086             |
| Acyl-CoA synthetase family member 2, mitochondrial;                          | Q8VCW8            | 1                          | 8               | 8              | 14.5                  | 0.687                                        | 0.205                          | 0.233             |
| Cytochrome c1, heme protein, mitochondrial;                                  | Q9D0M3            | 1                          | 4               | 4              | 5.8                   | 0.687                                        | 0.055                          | 0.087             |
| Sorting nexin-27;                                                            | Q3UHD6            | 0.933                      | 2               | 2              | 7.2                   | 0.687                                        | 0.422                          | 0.474             |
| Fatty acid-binding protein, adipocyte;                                       | P04117            | 1                          | 17              | 79             | 64.4                  | 0.705                                        | 0.03                           | 0.073             |
| Acetyl-coenzyme A synthetase, cytoplasmic;                                   | Q9QXG4            | 1                          | 5               | 5              | 6.4                   | 0.705                                        | 0.277                          | 0.307             |
| 6-phosphofructokinase type C;                                                | Q9WUA3            | 1                          | 9               | 10             | 15.6                  | 0.705                                        | 0.061                          | 0.085             |
| Ubiquitin-protein ligase E3A;                                                | O08759            | 1                          | 3               | 3              | 2.6                   | 0.714                                        | 0.139                          | 0.136             |
| Gasdermin-A;                                                                 | Q9EST1            | 1                          | 4               | 6              | 7.6                   | 0.714                                        | 0.083                          | 0.091             |



Table S1, Tholen et al.

| Protein                                                                                                                                                                                                                   | Uniprot accession | ProteinProphet Prob. Score | Unique peptides | Total peptides | Sequence coverage [%] | Fold change (log <sub>2</sub> ) of ASAPratio | Fold change standard deviation | ASAPratio p-value |
|---------------------------------------------------------------------------------------------------------------------------------------------------------------------------------------------------------------------------|-------------------|----------------------------|-----------------|----------------|-----------------------|----------------------------------------------|--------------------------------|-------------------|
| Protein S100-A10;                                                                                                                                                                                                         | P08207            | 0.994                      | 2               | 2              | 7.2                   | 0.714                                        | 0.017                          | 0.067             |
| Ras GTPase-activating-like protein IQGAP1;                                                                                                                                                                                | Q9JKF1            | 1                          | 21              | 22             | 11.4                  | 0.722                                        | 0.429                          | 0.442             |
| 14-3-3 protein epsilon;                                                                                                                                                                                                   | P62259            | 1                          | 12              | 17             | 39.2                  | 0.722                                        | 0.123                          | 0.116             |
| PDZ and LIM domain protein 5;                                                                                                                                                                                             | Q8CI51            | 1                          | 6               | 6              | 14.7                  | 0.722                                        | 0.07                           | 0.078             |
| Citrate synthase, mitochondrial;                                                                                                                                                                                          | Q9CZU6            | 1                          | 15              | 31             | 20.9                  | 0.722                                        | 0.166                          | 0.153             |
| Four and a half LIM domains 3; Uncharacterized protein;                                                                                                                                                                   | A6H6N4            | 1                          | 4               | 4              | 12.8                  | 0.722                                        | 0.372                          | 0.388             |
| Protein kinase, cAMP dependent regulatory, type II alpha; Protein kinase, cAMP dependent regulatory, type II alpha, isoform CRA_b; Uncharacterized protein; cAMP-dependent protein kinase type II-alpha regulatory chain; | Q8K1M3            | 1                          | 7               | 8              | 23.9                  | 0.722                                        | 0.031                          | 0.065             |
| cAMP-dependent protein kinase catalytic subunit alpha;                                                                                                                                                                    | P05132            | 0.98                       | 3               | 3              | 5.4                   | 0.722                                        | 0.061                          | 0.076             |
| Cytochrome c oxidase subunit 7A1, mitochondrial;                                                                                                                                                                          | P56392            | 1                          | 2               | 2              | 16.2                  | 0.731                                        | 0.044                          | 0.064             |
| MCG21235; Uncharacterized protein;                                                                                                                                                                                        | Q9D1Q5            | 1                          | 12              | 17             | 21.4                  | 0.731                                        | 0.154                          | 0.138             |
| NHL repeat-containing protein 3;                                                                                                                                                                                          | Q8CCH2            | 0.999                      | 2               | 2              | 6.1                   | 0.731                                        | 0.181                          | 0.165             |
| Fatty acid synthase;                                                                                                                                                                                                      | P19096            | 1                          | 114             | 184            | 34.2                  | 0.74                                         | 0.323                          | 0.315             |
| Prolargin;                                                                                                                                                                                                                | Q9JK53            | 1                          | 18              | 34             | 23.8                  | 0.74                                         | 0.133                          | 0.109             |
| 26S proteasome non-ATPase regulatory subunit 14;                                                                                                                                                                          | O35593            | 1                          | 2               | 2              | 5.3                   | 0.74                                         | 0.058                          | 0.065             |
| Long-chain-fatty-acid--CoA ligase 5;                                                                                                                                                                                      | Q8JZR0            | 0.964                      | 2               | 2              | 2.9                   | 0.74                                         | 0.044                          | 0.061             |
| Parvalbumin alpha;                                                                                                                                                                                                        | P32848            | 1                          | 12              | 180            | 45.5                  | 0.757                                        | 0.112                          | 0.088             |
| 26S protease regulatory subunit 7;                                                                                                                                                                                        | P46471            | 1                          | 4               | 4              | 10.9                  | 0.757                                        | 0.202                          | 0.167             |
| Prohibitin;                                                                                                                                                                                                               | P67778            | 1                          | 3               | 3              | 7.7                   | 0.757                                        | 0.085                          | 0.073             |
| 26S proteasome non-ATPase regulatory subunit 11;                                                                                                                                                                          | Q8BG32            | 1                          | 16              | 18             | 24.4                  | 0.757                                        | 0.04                           | 0.056             |
| ATP-dependent RNA helicase DDX19A;                                                                                                                                                                                        | Q61655            | 0.999                      | 2               | 2              | 2.1                   | 0.757                                        | 0.054                          | 0.060             |
| Alanine aminotransferase 2;                                                                                                                                                                                               | Q8BGT5            | 1                          | 3               | 3              | 4.4                   | 0.766                                        | 0.149                          | 0.111             |
| Leucyl-tRNA synthetase, cytoplasmic;                                                                                                                                                                                      | Q8BMJ2            | 1                          | 4               | 4              | 3.8                   | 0.766                                        | 0.063                          | 0.060             |
| Neurobeachin;                                                                                                                                                                                                             | Q9EPN1            | 0.909                      | 2               | 2              | 1.6                   | 0.766                                        | 0.086                          | 0.069             |
| Cadherin-1;                                                                                                                                                                                                               | P09803            | 1                          | 5               | 7              | 6.2                   | 0.774                                        | 0.077                          | 0.060             |
| Clathrin heavy chain 1;                                                                                                                                                                                                   | Q68FD5            | 1                          | 25              | 29             | 14.2                  | 0.774                                        | 0.154                          | 0.110             |
| Cell surface glycoprotein MUC18;                                                                                                                                                                                          | Q8R2Y2            | 1                          | 4               | 4              | 8.2                   | 0.774                                        | 0.349                          | 0.305             |
| Short-chain specific acyl-CoA dehydrogenase, mitochondrial;                                                                                                                                                               | Q07417            | 1                          | 2               | 2              | 8.3                   | 0.782                                        | 0.091                          | 0.064             |
| Heat shock protein beta-1;                                                                                                                                                                                                | P14602            | 1                          | 20              | 49             | 46.4                  | 0.782                                        | 0.045                          | 0.048             |
| Spectrin alpha chain, brain;                                                                                                                                                                                              | P16546            | 1                          | 23              | 25             | 10.5                  | 0.782                                        | 0.259                          | 0.201             |
| Nidogen-1;                                                                                                                                                                                                                | P10493            | 1                          | 6               | 6              | 4                     | 0.791                                        | 0.046                          | 0.046             |
| Long-chain-fatty-acid--CoA ligase 1;                                                                                                                                                                                      | P41216            | 1                          | 7               | 8              | 8.3                   | 0.791                                        | 0.142                          | 0.088             |
| Carnitine O-acetyltransferase;                                                                                                                                                                                            | P47934            | 1                          | 2               | 2              | 19.7                  | 0.791                                        | 0.087                          | 0.058             |
| Proteasome activator complex subunit 1;                                                                                                                                                                                   | P97371            | 1                          | 3               | 4              | 10.4                  | 0.791                                        | 0.119                          | 0.074             |
| Vacuolar protein sorting-associated protein 35;                                                                                                                                                                           | Q9EQH3            | 1                          | 4               | 4              | 4.1                   | 0.791                                        | 0.229                          | 0.161             |
| Filamin-A;                                                                                                                                                                                                                | Q8BTM8            | 1                          | 75              | 102            | 27                    | 0.791                                        | 0.274                          | 0.210             |
| Beta-1-syntrophin;                                                                                                                                                                                                        | Q99L88            | 1                          | 2               | 2              | 2.2                   | 0.791                                        | 0.087                          | 0.058             |
| Suppressor of G2 allele of SKP1 homolog;                                                                                                                                                                                  | Q9CX34            | 0.992                      | 2               | 2              | 7.1                   | 0.791                                        | 0.32                           | 0.255             |
| 26S proteasome non-ATPase regulatory subunit 6;                                                                                                                                                                           | Q99JI4            | 1                          | 4               | 5              | 6.2                   | 0.799                                        | 0.073                          | 0.049             |
| Proteasome activator complex subunit 2;                                                                                                                                                                                   | P97372            | 1                          | 4               | 4              | 16.3                  | 0.799                                        | 0.298                          | 0.231             |
| 14-3-3 protein sigma;                                                                                                                                                                                                     | O70456            | 1                          | 10              | 21             | 29.8                  | 0.832                                        | 0.056                          | 0.037             |
| SEC14-like protein 4;                                                                                                                                                                                                     | Q8R0F9            | 1                          | 7               | 7              | 17.9                  | 0.832                                        | 0.065                          | 0.040             |

Table S1, Tholen et al.

| Protein                                                                       | Uniprot accession | ProteinProphet Prob. Score | Unique peptides | Total peptides | Sequence coverage [%] | Fold change (log <sub>2</sub> ) of ASAPratio | Fold change standard deviation | ASAPratio p-value |
|-------------------------------------------------------------------------------|-------------------|----------------------------|-----------------|----------------|-----------------------|----------------------------------------------|--------------------------------|-------------------|
| Alpha-crystallin B chain;                                                     | P23927            | 1                          | 13              | 42             | 34.3                  | 0.832                                        | 0.037                          | 0.034             |
| RNA-binding protein FUS;                                                      | P56959            | 0.999                      | 2               | 2              | 2.8                   | 0.832                                        | 0.042                          | 0.034             |
| Calcium-binding mitochondrial carrier protein SCaMC-1;                        | Q8BMD8            | 0.993                      | 2               | 2              | 1.9                   | 0.848                                        | 0.085                          | 0.039             |
| Phosphorylase b kinase regulatory subunit alpha, skeletal muscle isoform;     | P18826            | 1                          | 3               | 3              | 2                     | 0.856                                        | 0.407                          | 0.274             |
| Ig kappa chain V-V region HP R16.7;                                           | P01644            | 1                          | 4               | 4              | 36.1                  | 0.856                                        | 0.189                          | 0.086             |
| Calcineurin subunit B type 1;                                                 | Q63810            | 1                          | 2               | 3              | 12.9                  | 0.856                                        | 0.151                          | 0.063             |
| Uncharacterized protein;                                                      | F7CAE1            | 1                          | 14              | 43             | 57.9                  | 0.872                                        | 0.152                          | 0.060             |
| Chondroitin sulfate proteoglycan 4;                                           | Q8VHY0            | 0.997                      | 2               | 2              | 1.5                   | 0.872                                        | 0.124                          | 0.047             |
| Hemoglobin subunit beta-1;                                                    | P02088            | 1                          | 19              | 100            | 87.8                  | 0.888                                        | 0.096                          | 0.034             |
| Hemoglobin subunit beta-2;                                                    | P02089            | 1                          | 18              | 60             | 83.7                  | 0.824                                        | 0.098                          | 0.053             |
| Hydroxymethylglutaryl-CoA synthase, cytoplasmic;                              | Q8JZK9            | 1                          | 12              | 12             | 14.4                  | 0.895                                        | 0.212                          | 0.081             |
| Heat shock 70 kDa protein 12A;                                                | Q8KOU4            | 0.979                      | 2               | 2              | 1.5                   | 0.895                                        | 0.077                          | 0.027             |
| Myozenin-1;                                                                   | Q9JK37            | 0.946                      | 2               | 2              | 2.7                   | 0.895                                        | 0.101                          | 0.033             |
| Glycolipid transfer protein;                                                  | Q9JL62            | 1                          | 3               | 3              | 14.7                  | 0.903                                        | 0.14                           | 0.044             |
| Laminin subunit alpha-4;                                                      | P97927            | 0.999                      | 2               | 2              | 0.6                   | 0.903                                        | 0.077                          | 0.025             |
| Ig gamma-3 chain C region;                                                    | P03987            | 0.991                      | 3               | 3              | 8.3                   | 0.911                                        | 0.111                          | 0.031             |
| 26S protease regulatory subunit 6B;                                           | P54775            | 1                          | 6               | 8              | 10.8                  | 0.918                                        | 0.165                          | 0.050             |
| MCG117626; Odorant binding protein Ia; Uncharacterized protein;               | Q9D3H2            | 0.998                      | 2               | 2              | 9.2                   | 0.918                                        | 0.044                          | 0.020             |
| 40S ribosomal protein S3;                                                     | P62908            | 1                          | 3               | 3              | 11                    | 0.926                                        | 0.297                          | 0.127             |
| Angio-associated migratory protein; Uncharacterized protein;                  | Q3TJ22            | 1                          | 2               | 2              | 3                     | 0.926                                        | 0.122                          | 0.032             |
| Calcium-binding mitochondrial carrier protein Aralar1;                        | Q8BH59            | 1                          | 9               | 9              | 9.9                   | 0.934                                        | 0.504                          | 0.281             |
| Perilipin-4;                                                                  | O88492            | 1                          | 27              | 38             | 36.5                  | 0.949                                        | 0.462                          | 0.237             |
| 26S proteasome non-ATPase regulatory subunit 2;                               | Q8VDM4            | 1                          | 14              | 15             | 13.8                  | 0.956                                        | 0.256                          | 0.079             |
| Periplakin;                                                                   | Q9R269            | 1                          | 6               | 6              | 2.1                   | 0.971                                        | 0.154                          | 0.030             |
| tRNA (cytosine(34)-C(5))-methyltransferase;                                   | Q1HFZ0            | 1                          | 2               | 2              | 3.6                   | 0.978                                        | 0.333                          | 0.117             |
| Myosin-4;                                                                     | Q5SX39            | 1                          | 21              | 22             | 22.1                  | 0.978                                        | 0.124                          | 0.022             |
| Myosin-1;                                                                     | Q5SX40            | 1                          | 9               | 12             | 22.5                  | 3.401                                        | 1.311                          | 0.000             |
| Myosin, heavy polypeptide 2, skeletal muscle, adult; Uncharacterized protein; | Q5SX41            | 1                          | 3               | 3              | 16.3                  | 3.406                                        | 1.671                          | 0.000             |
| Threonyl-tRNA synthetase, cytoplasmic;                                        | Q9D0R2            | 0.996                      | 3               | 3              | 3.5                   | 0.978                                        | 0.05                           | 0.013             |
| Calsequestrin-1;                                                              | O09165            | 1                          | 4               | 6              | 22.4                  | 0.993                                        | 0.16                           | 0.028             |
| UDP-glucose 4-epimerase;                                                      | Q8R059            | 1                          | 5               | 5              | 6.1                   | 1                                            | 0.275                          | 0.071             |
| Ribose-phosphate pyrophosphokinase 1;                                         | Q9D7G0            | 1                          | 4               | 4              | 10.7                  | 1                                            | 0.4                            | 0.149             |
| Heat shock protein beta-3;                                                    | Q9QZ57            | 0.994                      | 2               | 2              | 17.5                  | 1.036                                        | 0.091                          | 0.011             |
|                                                                               | O54724            | 1                          | 4               | 6              | 11.2                  | 1.043                                        | 0.137                          | 0.016             |
| ATPase Asna1;                                                                 | O54984            | 1                          | 2               | 2              | 6                     | 1.064                                        | 0.137                          | 0.014             |
| Ubiquitin carboxyl-terminal hydrolase 4;                                      | P35123            | 1                          | 2               | 3              | 3.1                   | 1.064                                        | 0.86                           | 0.384             |
| Fibulin-5;                                                                    | Q9WVH9            | 1                          | 7               | 8              | 14.1                  | 1.07                                         | 0.168                          | 0.017             |
| Nebulin; Uncharacterized protein;                                             | A2AQA9            | 1                          | 6               | 7              | 1.5                   | 1.07                                         | 0.627                          | 0.246             |
| 26S protease regulatory subunit 4;                                            | P62192            | 1                          | 6               | 7              | 16.8                  | 1.077                                        | 0.454                          | 0.135             |
| Spectrin beta chain, brain 1;                                                 | Q62261            | 1                          | 4               | 4              | 2.4                   | 1.084                                        | 0.332                          | 0.065             |
| Phosphoserine phosphatase;                                                    | Q99LS3            | 1                          | 2               | 2              | 10.7                  | 1.084                                        | 0.205                          | 0.022             |
| Alpha-actinin-4;                                                              | P57780            | 1                          | 5               | 5              | 5.8                   | 1.091                                        | 0.359                          | 0.073             |
| Alpha-actinin-3;                                                              | O88990            | 1                          | 4               | 4              | 6.4                   | 1.757                                        | 0.587                          | 0.005             |

Table S1, Tholen et al.

| Protein                                                           | Uniprot accession | ProteinProphet Prob. Score | Unique peptides | Total peptides | Sequence coverage [%] | Fold change (log <sub>2</sub> ) of ASAPratio | Fold change standard deviation | ASAPratio p-value |
|-------------------------------------------------------------------|-------------------|----------------------------|-----------------|----------------|-----------------------|----------------------------------------------|--------------------------------|-------------------|
| Glutaredoxin-1;                                                   | Q9QUH0            | 1                          | 3               | 4              | 22.4                  | 1.098                                        | 0.267                          | 0.035             |
| Heat shock protein beta-6;                                        | Q5EBG6            | 1                          | 7               | 11             | 29                    | 1.111                                        | 0.206                          | 0.019             |
| Protein S100-A6;                                                  | P14069            | 0.994                      | 4               | 5              | 24.7                  | 1.118                                        | 0.752                          | 0.282             |
| Asparagine synthetase [glutamine-hydrolyzing];                    | Q61024            | 1                          | 2               | 2              | 1.6                   | 1.151                                        | 0.202                          | 0.013             |
| Carbonic anhydrase 1;                                             | P13634            | 1                          | 2               | 2              | 12.3                  | 1.163                                        | 0.244                          | 0.018             |
| 26S protease regulatory subunit 8;                                | P62196            | 1                          | 4               | 4              | 14.7                  | 1.17                                         | 0.697                          | 0.215             |
| Myoglobin;                                                        | P04247            | 1                          | 16              | 44             | 41.6                  | 1.183                                        | 0.177                          | 0.008             |
| RelA-associated inhibitor;                                        | Q511X5            | 1                          | 2               | 2              | 1                     | 1.195                                        | 0.13                           | 0.004             |
| Monofunctional C1-tetrahydrofolate synthase, mitochondrial;       | Q3V3R1            | 1                          | 3               | 3              | 2.4                   | 1.202                                        | 0.157                          | 0.005             |
| 26S protease regulatory subunit 10B;                              | P62334            | 1                          | 8               | 10             | 12.3                  | 1.208                                        | 0.267                          | 0.016             |
| Tripartite motif-containing protein 29;                           | Q8R2Q0            | 1                          | 2               | 5              | 1.7                   | 1.214                                        | 0.037                          | 0.002             |
| Kinesin-1 heavy chain;                                            | Q61768            | 1                          | 11              | 13             | 10.5                  | 1.275                                        | 0.232                          | 0.006             |
| Plectin;                                                          | Q9QXS1            | 1                          | 15              | 17             | 3.6                   | 1.299                                        | 0.76                           | 0.161             |
| Heat shock protein beta-7;                                        | P35385            | 1                          | 5               | 6              | 26                    | 1.322                                        | 0.243                          | 0.005             |
| Uncharacterized protein;                                          | E9PXU6            | 0.903                      | 2               | 2              | 4.1                   | 1.328                                        | 0.069                          | 0.001             |
| RIKEN cDNA 8030451F13, isoform CRA_c; Uncharacterized protein;    | D3YU50            | 1                          | 35              | 40             | 23.8                  | 1.362                                        | 0.472                          | 0.031             |
| Filamin-C;                                                        | Q8VHX6            | 1                          | 16              | 16             | 9                     | 1.379                                        | 0.536                          | 0.043             |
| Myomesin-3;                                                       | A2ABU4            | 1                          | 4               | 4              | 3.5                   | 1.39                                         | 0.377                          | 0.012             |
| 6-phosphofructokinase, muscle type;                               | P47857            | 1                          | 38              | 59             | 34.1                  | 1.411                                        | 0.286                          | 0.004             |
| Vimentin;                                                         | P20152            | 1                          | 9               | 9              | 18.5                  | 1.485                                        | 0.727                          | 0.064             |
| Keratin, type II cytoskeletal 5;                                  | Q922U2            | 1                          | 2               | 2              | 4.8                   | 1.59                                         | 0.417                          | 0.003             |
| Uncharacterized protein;                                          | E9Q4Z2            | 1                          | 2               | 2              | 1.2                   | 1.614                                        | 0.195                          | 0.000             |
| Syntaxin 17; Syntaxin 17, isoform CRA_b; Uncharacterized protein; | Q9D614            | 0.971                      | 2               | 2              | 3.3                   | 1.637                                        | 0.153                          | 0.000             |
| Protein CREG1;                                                    | O88668            | 1                          | 6               | 9              | 13.2                  | 1.674                                        | 0.184                          | 0.000             |
| DnaJ homolog subfamily A member 4;                                | Q9JMC3            | 1                          | 2               | 2              | 2.5                   | 1.778                                        | 0.202                          | 0.000             |
| Rho-associated protein kinase 2;                                  | P70336            | 1                          | 3               | 3              | 2.2                   | 1.791                                        | 0.223                          | 0.000             |
| Histone H2A type 1;                                               | P22752            | 1                          | 3               | 3              | 20.2                  | 1.937                                        | 0.137                          | 0.000             |
| Protein-arginine deiminase type-2;                                | Q08642            | 1                          | 12              | 12             | 18.9                  | 2.057                                        | 0.722                          | 0.001             |
| Histone H4;                                                       | P62806            | 1                          | 6               | 6              | 21.4                  | 2.384                                        | 0.516                          | 0.000             |
| Absent in melanoma 1-like; Uncharacterized protein;               | B7ZCC2            | 0.986                      | 2               | 2              | 0.7                   | 3.089                                        | 0.236                          | 0.000             |
| Homeobox protein Hox-D8;                                          | P23463            | 0.934                      | 2               | 2              | 4.3                   | 3.981                                        | 3.678                          | 0.004             |
| Fumarylacetoacetate hydrolase domain-containing protein 2A;       | Q3TC72            | 0.995                      | 2               | 2              | 9.6                   | 5.396                                        | 0.926                          | 0.000             |
| Structural maintenance of chromosomes protein 5;                  | Q8CG46            | 0.999                      | 2               | 2              | 0.9                   | 9.964                                        | 0.202                          | 0.000             |
| Histone H2B type 1-F/J/L;                                         | P10853            | 0.999                      | 2               | 2              | 15.9                  | 9.964                                        | 0.202                          | 0.000             |
| Microtubule-actin cross-linking factor 1;                         | Q9QXZ0            | 0.994                      | 2               | 2              | 0.5                   | 9.964                                        | 0.202                          | 0.000             |
