# Supplementary material
Source: PubMed Central journal article supplement (PMC3591655)
Supplement: supp_M112.017962_mcp.M112.017962-5.pdf [file supp_M112.017962_mcp.M112.017962-5.pdf]

Table S3, Tholen et al.

| Protein                                                                       | Uniprot accession | ProteinProphet Prob. Score | Unique peptides | Total peptides | Sequence coverage [%] | Fold change (log <sub>2</sub> ) of ASAPratio | Fold change standard deviation | ASAPratio p-value |
|-------------------------------------------------------------------------------|-------------------|----------------------------|-----------------|----------------|-----------------------|----------------------------------------------|--------------------------------|-------------------|
| Cathepsin L1;                                                                 | P06797            | 1                          | 2               | 2              | 9.9                   | -6.644*                                      | -0.001                         | 0.000             |
| Ninein;                                                                       | Q61043            | 0.968                      | 2               | 2              | 1.1                   | -6.644                                       | -6.644                         | 0.000             |
| Alpha-actinin-4;                                                              | P57780            | 1                          | 6               | 6              | 17.5                  | 0.791                                        | 0.146                          | 0.368             |
| Alpha-actinin-2;                                                              | Q9JI91            | 1                          | 5               | 6              | 15.5                  | -4.644                                       | -4.644                         | 0.007             |
| Myosin-4;                                                                     | Q5SX39            | 1                          | 24              | 30             | 31.5                  | -4.322                                       | -4.322                         | 0.010             |
| Myosin-1;                                                                     | Q5SX40            | 1                          | 16              | 24             | 34                    | -5.644                                       | -2.822                         | 0.000             |
| Myosin, heavy polypeptide 2, skeletal muscle, adult; Uncharacterized protein; | Q5SX41            | 1                          | 3               | 3              | 23.4                  | -5.059                                       | -1.686                         | 0.000             |
| Mast cell carboxypeptidase A;                                                 | P15089            | 1                          | 5               | 6              | 15.8                  | -3.837                                       | -2.193                         | 0.002             |
| Ig heavy chain V region MOPC 47A;                                             | P01786            | 0.987                      | 2               | 2              | 7.7                   | -3.644                                       | -0.456                         | 0.000             |
| Chymase;                                                                      | P21844            | 1                          | 4               | 6              | 25.5                  | -3.474                                       | -0.386                         | 0.000             |
| Creatine kinase S-type, mitochondrial;                                        | Q6P8J7            | 1                          | 16              | 23             | 31.5                  | -2.943                                       | -0.906                         | 0.002             |
| Calsequestrin-1;                                                              | O09165            | 1                          | 3               | 4              | 22.4                  | -2.556                                       | -0.451                         | 0.004             |
| Ig kappa chain V-III region CBPC 101;                                         | P01664            | 1                          | 4               | 5              | 30.9                  | -2.556                                       | -1.353                         | 0.027             |
| Myosin-11;                                                                    | O08638            | 1                          | 4               | 4              | 1.9                   | -2.474                                       | -0.825                         | 0.011             |
| Cytochrome b-c1 complex subunit 2, mitochondrial;                             | Q9DB77            | 1                          | 6               | 9              | 12.6                  | -2.474                                       | -1.512                         | 0.039             |
| Myosin light chain 1/3, skeletal muscle isoform;                              | P05977            | 1                          | 10              | 30             | 52.1                  | -2.474                                       | -0.412                         | 0.004             |
| Reticulon-2;                                                                  | O70622            | 1                          | 4               | 5              | 7.2                   | -2.252                                       | -0.536                         | 0.012             |
| Troponin C, skeletal muscle;                                                  | P20801            | 1                          | 12              | 14             | 53.8                  | -2.252                                       | -0.322                         | 0.010             |
| ADP/ATP translocase 1;                                                        | P48962            | 1                          | 19              | 32             | 31.2                  | -2.252                                       | -1.501                         | 0.083             |
| ADP/ATP translocase 2;                                                        | P51881            | 1                          | 4               | 5              | 22.8                  | -0.136                                       | -0.013                         | 0.870             |
| Cytochrome c oxidase subunit 6B1;                                             | P56391            | 1                          | 5               | 6              | 41.9                  | -2.184                                       | -1.489                         | 0.092             |
| C-type lectin domain family 11 member A;                                      | O88200            | 1                          | 2               | 3              | 3.4                   | -2.12                                        | -0.461                         | 0.018             |
| NADH dehydrogenase [ubiquinone] 1 alpha subcomplex subunit 4;                 | Q62425            | 1                          | 3               | 3              | 26.8                  | -2.12                                        | -0.737                         | 0.029             |
| Uncharacterized protein;                                                      | D3YXF5            | 1                          | 10              | 10             | 30.5                  | -2.12                                        | -0.645                         | 0.025             |
| Dystrophin;                                                                   | P11531            | 1                          | 3               | 3              | 3.3                   | -2                                           | -0.48                          | 0.027             |
| Sarcalumenin;                                                                 | Q7TQ48            | 1                          | 10              | 10             | 10.7                  | -2                                           | -0.8                           | 0.045             |
| Mitochondrial 10-formyltetrahydrofolate dehydrogenase;                        | Q8K009            | 1                          | 8               | 8              | 11                    | -2                                           | -0.72                          | 0.041             |
| Ig heavy chain V region 441;                                                  | P01806            | 1                          | 4               | 4              | 31                    | -2                                           | -1.36                          | 0.125             |
| Acyl-coenzyme A synthetase ACSM2, mitochondrial;                              | Q8K0L3            | 1                          | 4               | 5              | 11.5                  | -2                                           | -0.32                          | 0.022             |
| RIKEN cDNA 8030451F13, isoform CRA_c; Uncharacterized protein;                | D3YU50            | 1                          | 17              | 24             | 10.5                  | -2                                           | -1.44                          | 0.136             |
| Myosin-binding protein C, fast-type;                                          | Q5XKE0            | 1                          | 22              | 22             | 17.3                  | -1.943                                       | -0.822                         | 0.065             |
| Mast cell protease 4, isoform CRA_a; Uncharacterized protein;                 | Q3UN88            | 1                          | 3               | 3              | 15.9                  | -1.943                                       | -0.299                         | 0.026             |
| [Pyruvate dehydrogenase [lipoamide]] kinase isozyme 2, mitochondrial;         | Q9JK42            | 1                          | 4               | 4              | 7.1                   | -1.889                                       | -0.91                          | 0.084             |
| Uncharacterized protein;                                                      | E9Q8T1            | 1                          | 4               | 4              | 2                     | -1.889                                       | -0.84                          | 0.073             |
| ATP synthase subunit O, mitochondrial;                                        | Q9DB20            | 1                          | 11              | 11             | 41.8                  | -1.889                                       | -1.749                         | 0.225             |
| Troponin T, fast skeletal muscle;                                             | Q9QZ47            | 1                          | 3               | 3              | 13                    | -1.889                                       | -0.35                          | 0.031             |
| Ig gamma-1 chain C region secreted form;                                      | P01868            | 1                          | 9               | 22             | 23.5                  | -1.837                                       | -0.459                         | 0.045             |
| Protein-glutamine gamma-glutamyltransferase 2;                                | P21981            | 1                          | 5               | 5              | 13.1                  | -1.837                                       | -0.394                         | 0.042             |
| 6-phosphofructokinase, muscle type;                                           | P47857            | 1                          | 16              | 17             | 20.5                  | -1.837                                       | -0.394                         | 0.039             |
| Medium-chain specific acyl-CoA dehydrogenase, mitochondrial;                  | P45952            | 1                          | 8               | 8              | 16.6                  | -1.837                                       | -0.59                          | 0.052             |
| Glycine cleavage system H protein, mitochondrial;                             | Q91WK5            | 1                          | 3               | 3              | 17.6                  | -1.837                                       | -1.509                         | 0.210             |
| Keratin, type II cytoskeletal 5;                                              | Q922U2            | 1                          | 5               | 6              | 11                    | -1.837                                       | -1.115                         | 0.130             |
| NADH dehydrogenase [ubiquinone] 1 alpha subcomplex subunit 10, mitochondrial; | Q99LC3            | 1                          | 5               | 5              | 15.2                  | -1.786                                       | -0.801                         | 0.087             |

Table S3, Tholen et al.

| Protein                                                                   | Uniprot accession | ProteinProphet Prob. Score | Unique peptides | Total peptides | Sequence coverage [%] | Fold change (log <sub>2</sub> ) of ASAPratio | Fold change standard deviation | ASAPratio p-value |
|---------------------------------------------------------------------------|-------------------|----------------------------|-----------------|----------------|-----------------------|----------------------------------------------|--------------------------------|-------------------|
| Fructose-1,6-bisphosphatase 1;                                            | Q9QXD6            | 1                          | 2               | 2              | 7.4                   | -1.786                                       | -0.37                          | 0.042             |
| Decorin;                                                                  | P28654            | 1                          | 7               | 8              | 19.8                  | -1.737                                       | -0.695                         | 0.084             |
| Ig gamma-2A chain C region, A allele;                                     | P01863            | 1                          | 5               | 7              | 18.5                  | -1.737                                       | -0.521                         | 0.061             |
| Voltage-dependent anion-selective channel protein 1;                      | Q60932            | 1                          | 18              | 25             | 49.3                  | -1.737                                       | -1.1                           | 0.155             |
| Mitochondrial inner membrane protein;                                     | Q8CAQ8            | 0.998                      | 2               | 2              | 7                     | -1.737                                       | -0.463                         | 0.057             |
| Ig kappa chain V-V region MOPC 173;                                       | P01643            | 1                          | 4               | 5              | 16.7                  | -1.69                                        | -0.382                         | 0.058             |
| Uncharacterized protein;                                                  | E9Q6D8            | 1                          | 5               | 5              | 9.2                   | -1.69                                        | -0.491                         | 0.072             |
| Myomesin 2; Uncharacterized protein;                                      | Q14BI5            | 1                          | 27              | 33             | 14.8                  | -1.69                                        | -0.218                         | 0.052             |
| Ig heavy chain V region AC38 205.12;                                      | P06330            | 1                          | 5               | 6              | 36.4                  | -1.69                                        | -0.491                         | 0.076             |
| Vimentin;                                                                 | P20152            | 1                          | 8               | 8              | 22.5                  | -1.69                                        | -1.09                          | 0.180             |
| Desmin;                                                                   | P31001            | 1                          | 5               | 5              | 10.2                  | -1.644                                       | -0.308                         | 0.063             |
| Neurofilament medium polypeptide;                                         | P08553            | 1                          | 2               | 2              | 3.5                   | -1.396                                       | -1.396                         | 0.400             |
| Collagen alpha-2(VI) chain;                                               | Q02788            | 1                          | 3               | 3              | 4.5                   | -1.644                                       | -0.771                         | 0.128             |
| Synemin;                                                                  | Q70IV5            | 1                          | 4               | 6              | 6.7                   | -1.644                                       | -0.719                         | 0.121             |
| ATP synthase subunit delta, mitochondrial;                                | Q9D3D9            | 1                          | 2               | 4              | 13.7                  | -1.644                                       | -0.462                         | 0.076             |
| Fatty acid-binding protein, liver;                                        | P12710            | 1                          | 10              | 13             | 48                    | -1.599                                       | -0.872                         | 0.161             |
| Asporin;                                                                  | Q99MQ4            | 1                          | 7               | 7              | 24.4                  | -1.599                                       | -0.436                         | 0.080             |
| Periplakin;                                                               | Q9R269            | 1                          | 4               | 6              | 1.7                   | -1.599                                       | -0.581                         | 0.107             |
| 60S ribosomal protein L18a;                                               | P62717            | 0.991                      | 2               | 2              | 4                     | -1.599                                       | -0.872                         | 0.158             |
| ATP synthase subunit beta, mitochondrial;                                 | P56480            | 1                          | 42              | 102            | 50.5                  | -1.515                                       | -0.649                         | 0.137             |
| Coagulation factor XIII B chain;                                          | Q07968            | 1                          | 2               | 2              | 1.8                   | -1.515                                       | -0.13                          | 0.070             |
| Fructose-bisphosphate aldolase B;                                         | Q91Y97            | 1                          | 12              | 14             | 28.6                  | -1.515                                       | -0.519                         | 0.120             |
| Oxidation resistance protein 1;                                           | Q4KMMM3           | 1                          | 11              | 13             | 12.4                  | -1.515                                       | -1.039                         | 0.242             |
| Vitronectin;                                                              | P29788            | 0.913                      | 2               | 2              | 2.9                   | -1.515                                       | -0.216                         | 0.075             |
| Histone H4;                                                               | P62806            | 1                          | 5               | 7              | 29.1                  | -1.474                                       | -0.532                         | 0.135             |
| A-kinase anchor protein 12;                                               | Q9WTQ5            | 1                          | 31              | 43             | 17.4                  | -1.474                                       | -0.942                         | 0.239             |
| Cytochrome c oxidase subunit 4 isoform 1, mitochondrial;                  | P19783            | 1                          | 3               | 5              | 17.8                  | -1.434                                       | -0.039                         | 0.082             |
| Plasminogen;                                                              | P20918            | 1                          | 6               | 12             | 5.7                   | -1.434                                       | -0.233                         | 0.100             |
| ES1 protein homolog, mitochondrial;                                       | Q9D172            | 1                          | 6               | 7              | 30.1                  | -1.434                                       | -1.008                         | 0.273             |
| Dolichyl-diphosphooligosaccharide--protein glycosyltransferase subunit 2; | Q9DBG6            | 1                          | 3               | 3              | 2.3                   | -1.434                                       | -0.349                         | 0.113             |
| Myomesin-3;                                                               | A2ABU4            | 1                          | 2               | 2              | 1                     | -1.396                                       | -0.294                         | 0.112             |
| 40S ribosomal protein SA;                                                 | P14206            | 1                          | 9               | 13             | 35.6                  | -1.396                                       | -0.331                         | 0.128             |
| Collagen alpha-2(I) chain;                                                | Q01149            | 1                          | 24              | 47             | 16.4                  | -1.396                                       | -0.404                         | 0.136             |
| Voltage-dependent anion-selective channel protein 3;                      | Q60931            | 1                          | 4               | 5              | 17.7                  | -1.396                                       | -0.147                         | 0.104             |
| NADH-ubiquinone oxidoreductase 75 kDa subunit, mitochondrial;             | Q91VD9            | 1                          | 10              | 10             | 11.8                  | -1.396                                       | -0.294                         | 0.120             |
| Voltage-dependent L-type calcium channel subunit beta-1;                  | Q8R3Z5            | 1                          | 3               | 3              | 5.7                   | -1.396                                       | -0.661                         | 0.201             |
| 4-aminobutyrate aminotransferase, mitochondrial;                          | P61922            | 1                          | 3               | 3              | 3.8                   | -1.396                                       | -0.404                         | 0.135             |
| Retinal dehydrogenase 1;                                                  | P24549            | 1                          | 27              | 33             | 26.7                  | -1.358                                       | -0.279                         | 0.123             |
| Dynein light chain roadblock-type 1;                                      | P62627            | 1                          | 3               | 3              | 51                    | -1.358                                       | -0.522                         | 0.171             |
| Keratin, type II cytoskeletal 1b;                                         | Q6IFZ6            | 1                          | 9               | 9              | 16.8                  | -1.358                                       | -0.731                         | 0.231             |
| Pyruvate dehydrogenase phosphatase regulatory subunit, mitochondrial;     | Q7TSQ8            | 1                          | 6               | 6              | 6.4                   | -1.358                                       | -0.836                         | 0.264             |
| Sarcoplasmic/endoplasmic reticulum calcium ATPase 1;                      | Q8R429            | 1                          | 51              | 111            | 32.6                  | -1.358                                       | -0.522                         | 0.176             |
| Adenylosuccinate synthetase isozyme 1;                                    | P28650            | 1                          | 27              | 48             | 38.1                  | -1.322                                       | -0.529                         | 0.198             |

Table S3, Tholen et al.

| Protein                                                                   | Uniprot accession | ProteinProphet Prob. Score | Unique peptides | Total peptides | Sequence coverage [%] | Fold change (log <sub>2</sub> ) of ASAPratio | Fold change standard deviation | ASAPratio p-value |
|---------------------------------------------------------------------------|-------------------|----------------------------|-----------------|----------------|-----------------------|----------------------------------------------|--------------------------------|-------------------|
| Succinate dehydrogenase [ubiquinone] flavoprotein subunit, mitochondrial; | Q8K2B3            | 1                          | 21              | 24             | 26.4                  | -1.322                                       | -0.43                          | 0.167             |
| NADH dehydrogenase [ubiquinone] 1 alpha subcomplex subunit 6;             | Q9CQZ5            | 1                          | 2               | 2              | 13                    | -1.322                                       | -0.463                         | 0.177             |
| Collagen triple helix repeat-containing protein 1;                        | Q9D1D6            | 1                          | 2               | 4              | 6.1                   | -1.322                                       | -0.099                         | 0.112             |
| Microfibril-associated glycoprotein 4;                                    | Q9D1H9            | 1                          | 5               | 5              | 9.7                   | -1.322                                       | -0.364                         | 0.153             |
| Pigment epithelium-derived factor;                                        | P97298            | 1                          | 9               | 12             | 17.7                  | -1.322                                       | -0.463                         | 0.177             |
| PDZ and LIM domain protein 7;                                             | Q3TJD7            | 1                          | 5               | 10             | 42.7                  | -1.322                                       | -0.43                          | 0.166             |
| 60S ribosomal protein L14;                                                | Q9CR57            | 1                          | 2               | 2              | 6                     | -1.286                                       | -0.157                         | 0.131             |
| Collagen alpha-1(I) chain;                                                | P11087            | 1                          | 30              | 52             | 16.2                  | -1.286                                       | -0.753                         | 0.277             |
| Cytochrome c oxidase subunit 2;                                           | P00405            | 1                          | 4               | 4              | 13.2                  | -1.252                                       | -0.119                         | 0.134             |
| Nucleobindin-2;                                                           | P81117            | 1                          | 3               | 3              | 4.8                   | -1.252                                       | -0.149                         | 0.144             |
| Haptoglobin;                                                              | Q61646            | 1                          | 4               | 5              | 12.7                  | -1.252                                       | -0.179                         | 0.148             |
| Glycogen [starch] synthase, muscle;                                       | Q9Z1E4            | 1                          | 4               | 4              | 3.3                   | -1.252                                       | -0.179                         | 0.146             |
| Transforming growth factor-beta-induced protein ig-h3;                    | P82198            | 1                          | 8               | 8              | 11.1                  | -1.252                                       | -0.268                         | 0.164             |
| Threonine synthase-like 2;                                                | Q80W22            | 1                          | 4               | 4              | 10.1                  | -1.252                                       | -0.417                         | 0.188             |
| Cytochrome c oxidase subunit 5A, mitochondrial;                           | P12787            | 1                          | 2               | 2              | 11                    | -1.218                                       | -0.142                         | 0.150             |
| Thioredoxin-dependent peroxide reductase, mitochondrial;                  | P20108            | 1                          | 11              | 20             | 21.4                  | -1.218                                       | -0.17                          | 0.160             |
| Cystatin-C;                                                               | P21460            | 1                          | 2               | 2              | 10.8                  | -1.218                                       | -0.085                         | 0.151             |
| Tetranectin;                                                              | P43025            | 1                          | 9               | 14             | 28.7                  | -1.218                                       | -0.198                         | 0.158             |
| Acyl-CoA synthetase short-chain family member 3, mitochondrial;           | Q14DH7            | 1                          | 5               | 5              | 10.3                  | -1.218                                       | -0.595                         | 0.267             |
| Neudesin;                                                                 | Q9CQ45            | 1                          | 5               | 5              | 22.8                  | -1.218                                       | -1.048                         | 0.416             |
| Mitochondrial 2-oxoglutarate/malate carrier protein;                      | Q9CR62            | 1                          | 2               | 2              | 14.5                  | -1.218                                       | -0.085                         | 0.151             |
| Cytochrome b-c1 complex subunit 1, mitochondrial;                         | Q9CZ13            | 1                          | 12              | 17             | 20.2                  | -1.218                                       | -0.312                         | 0.178             |
| Glycogen phosphorylase, muscle form;                                      | Q9WUB3            | 1                          | 59              | 112            | 48.2                  | -1.218                                       | -0.425                         | 0.212             |
| Glycogen phosphorylase, brain form;                                       | Q8CI94            | 1                          | 13              | 14             | 21.9                  | 0.454                                        | 0.103                          | 0.613             |
| Nebulin; Uncharacterized protein;                                         | A2AQA9            | 1                          | 5               | 7              | 1.1                   | -1.218                                       | -0.906                         | 0.365             |
| Histone H1.2;                                                             | P15864            | 0.998                      | 2               | 2              | 5.3                   | -1.218                                       | -0.113                         | 0.154             |
| 60S acidic ribosomal protein P2;                                          | P99027            | 1                          | 2               | 2              | 28.7                  | -1.184                                       | -0.215                         | 0.177             |
| Actin, aortic smooth muscle;                                              | P62737            | 1                          | 7               | 19             | 67.6                  | -1.184                                       | -0.538                         | 0.266             |
| Actin, alpha skeletal muscle;                                             | P68134            | 1                          | 7               | 7              | 67.6                  | -1.322                                       | -0.132                         | 0.122             |
| Long-chain specific acyl-CoA dehydrogenase, mitochondrial;                | P51174            | 1                          | 21              | 26             | 28.1                  | -1.152                                       | -0.486                         | 0.267             |
| Succinyl-CoA ligase [ADP/GDP-forming] subunit alpha, mitochondrial;       | Q9WUM5            | 1                          | 11              | 14             | 22.5                  | -1.152                                       | -0.64                          | 0.319             |
| Uncharacterized protein;                                                  | F6UFZ5            | 0.924                      | 2               | 2              | 2                     | -1.152                                       | -0.077                         | 0.174             |
| Leukemia inhibitory factor receptor;                                      | P42703            | 1                          | 9               | 11             | 7.8                   | -1.12                                        | -0.317                         | 0.224             |
| Peroxisomal bifunctional enzyme;                                          | Q9DBM2            | 1                          | 3               | 3              | 6                     | -1.12                                        | -0.122                         | 0.186             |
| ATP synthase subunit gamma, mitochondrial;                                | Q91VR2            | 1                          | 11              | 17             | 35.7                  | -1.12                                        | -0.755                         | 0.389             |
| Methylmalonyl-CoA mutase, mitochondrial;                                  | P16332            | 1                          | 3               | 3              | 4.9                   | -1.089                                       | -0.996                         | 0.490             |
| Peptidyl-prolyl cis-trans isomerase B;                                    | P24369            | 1                          | 6               | 6              | 26.4                  | -1.089                                       | -0.626                         | 0.353             |
| Heparin cofactor 2;                                                       | P49182            | 1                          | 10              | 11             | 14.2                  | -1.089                                       | -0.394                         | 0.271             |
| Myomesin-1;                                                               | Q62234            | 1                          | 30              | 35             | 11.5                  | -1.089                                       | -0.579                         | 0.335             |
| Acyl-coenzyme A thioesterase 13;                                          | Q9CQR4            | 1                          | 6               | 10             | 25                    | -1.089                                       | -0.139                         | 0.206             |
| ATP synthase subunit d, mitochondrial;                                    | Q9DCX2            | 1                          | 2               | 2              | 8.7                   | -1.089                                       | -0.162                         | 0.201             |
| Major urinary protein 2;                                                  | P11589            | 1                          | 22              | 35             | 50                    | -1.089                                       | -0.093                         | 0.192             |
| 40S ribosomal protein S12;                                                | Q6ZWZ6            | 1                          | 9               | 16             | 45.5                  | -1.089                                       | -0.209                         | 0.209             |

Table S3, Tholen et al.

| Protein                                                                       | Uniprot accession | ProteinProphet Prob. Score | Unique peptides | Total peptides | Sequence coverage [%] | Fold change (log <sub>2</sub> ) of ASAPratio | Fold change standard deviation | ASAPratio p-value |
|-------------------------------------------------------------------------------|-------------------|----------------------------|-----------------|----------------|-----------------------|----------------------------------------------|--------------------------------|-------------------|
| Dolichyl-diphosphooligosaccharide--protein glycosyltransferase subunit STT3B; | Q3TDQ1            | 1                          | 2               | 2              | 0.9                   | -1.089                                       | -0.139                         | 0.196             |
| RAC-beta serine/threonine-protein kinase;                                     | Q60823            | 0.998                      | 2               | 2              | 5.5                   | -1.089                                       | -0.348                         | 0.245             |
| Coproporphyrinogen-III oxidase, mitochondrial;                                | P36552            | 1                          | 6               | 6              | 11.1                  | -1.059                                       | -0.154                         | 0.216             |
| Myosin light chain kinase, smooth muscle;                                     | Q6PDN3            | 1                          | 23              | 33             | 8.3                   | -1.059                                       | -0.485                         | 0.319             |
| Adenylate kinase isoenzyme 1;                                                 | Q9R0Y5            | 1                          | 17              | 57             | 51                    | -1.059                                       | -0.199                         | 0.225             |
| Carnitine O-acetyltransferase;                                                | P47934            | 1                          | 11              | 11             | 11.2                  | -1.059                                       | -0.419                         | 0.295             |
| Enoyl-CoA hydratase, mitochondrial;                                           | Q8BH95            | 1                          | 5               | 7              | 18.3                  | -1.059                                       | -0.088                         | 0.208             |
| Coatomer subunit delta;                                                       | Q5XJY5            | 1                          | 9               | 9              | 13.3                  | -1.029                                       | -0.672                         | 0.410             |
| Arginase-1;                                                                   | Q61176            | 1                          | 14              | 18             | 22.9                  | -1.029                                       | -0.084                         | 0.216             |
| Complement component C8 gamma chain;                                          | Q8VCG4            | 1                          | 3               | 3              | 16.7                  | -1.029                                       | -0.126                         | 0.230             |
| Synaptopodin-2;                                                               | Q91YE8            | 1                          | 3               | 3              | 2.4                   | -1.029                                       | -0.084                         | 0.223             |
| Uncharacterized protein;                                                      | E9Q2T3            | 1                          | 5               | 5              | 1.5                   | -1.029                                       | -0.336                         | 0.280             |
| Betaine--homocysteine S-methyltransferase 1;                                  | O35490            | 1                          | 5               | 5              | 15.5                  | -1.029                                       | -0.189                         | 0.232             |
| Secernin-1;                                                                   | Q9CZC8            | 1                          | 7               | 7              | 16.2                  | -1.029                                       | -0.42                          | 0.311             |
| Phosphoglycerate mutase 2;                                                    | O70250            | 1                          | 26              | 219            | 45.1                  | -1                                           | -0.08                          | 0.233             |
| Ig mu chain C region secreted form;                                           | P01872            | 1                          | 10              | 10             | 13                    | -1                                           | -0.08                          | 0.240             |
| NAD(P)H dehydrogenase [quinone] 1;                                            | Q64669            | 1                          | 4               | 4              | 16.8                  | -1                                           | -0.24                          | 0.273             |
| Succinate dehydrogenase [ubiquinone] iron-sulfur subunit, mitochondrial;      | Q9CQA3            | 1                          | 5               | 5              | 12.1                  | -1                                           | -0.1                           | 0.243             |
| Fructose-bisphosphate aldolase A;                                             | P05064            | 1                          | 26              | 360            | 81                    | -1                                           | -0.12                          | 0.246             |
| Fructose-bisphosphate aldolase;                                               | Q9CPQ9            | 1                          | 12              | 74             | 48.1                  | -1                                           | -0.06                          | 0.237             |
| Fructose-bisphosphate aldolase C;                                             | P05063            | 1                          | 4               | 4              | 25.1                  | 0.888                                        | 0.091                          | 0.296             |
| Hippocalcin-like protein 1;                                                   | P62748            | 1                          | 5               | 5              | 23.8                  | -1                                           | -0.5                           | 0.365             |
| Nascent polypeptide-associated complex subunit alpha, muscle-specific form;   | P70670            | 1                          | 38              | 46             | 16.2                  | -1                                           | -0.76                          | 0.474             |
| Adseverin;                                                                    | Q60604            | 1                          | 5               | 5              | 6.3                   | -1                                           | -0.62                          | 0.416             |
| Serpin B6;                                                                    | Q60854            | 1                          | 26              | 87             | 50                    | -1                                           | -0.26                          | 0.280             |
| Phosphotriesterase-related protein;                                           | Q60866            | 1                          | 4               | 5              | 7.4                   | -1                                           | -0.22                          | 0.261             |
| GDH/6PGL endoplasmic bifunctional protein;                                    | Q8CFX1            | 1                          | 5               | 5              | 6.3                   | -1                                           | -1                             | 0.549             |
| EH domain-binding protein 1-like protein 1;                                   | Q99MS7            | 1                          | 3               | 3              | 2.3                   | -1                                           | -0.28                          | 0.284             |
| Vacuolar protein-sorting-associated protein 36;                               | Q91XD6            | 1                          | 2               | 2              | 6.2                   | -1                                           | -0.22                          | 0.261             |
| 40S ribosomal protein S21;                                                    | Q9CQR2            | 1                          | 2               | 2              | 10.8                  | -1                                           | -0.1                           | 0.243             |
| Transthyretin;                                                                | P07309            | 1                          | 11              | 30             | 46.3                  | -0.971                                       | -0.171                         | 0.267             |
| Carbonic anhydrase 3;                                                         | P16015            | 1                          | 35              | 527            | 65.4                  | -0.971                                       | -0.114                         | 0.255             |
| Fructose-1,6-bisphosphatase isozyme 2;                                        | P70695            | 1                          | 14              | 14             | 26.8                  | -0.971                                       | -0.209                         | 0.274             |
| Secernin-3;                                                                   | Q3TMH2            | 1                          | 6               | 8              | 12.2                  | -0.971                                       | -0.209                         | 0.274             |
| Apolipoprotein A-IV;                                                          | P06728            | 1                          | 13              | 16             | 32.7                  | -0.943                                       | -0.707                         | 0.483             |
| Prothrombin;                                                                  | P19221            | 1                          | 6               | 6              | 11.3                  | -0.943                                       | -0.435                         | 0.372             |
| Apolipoprotein A-I;                                                           | Q00623            | 1                          | 14              | 30             | 34.5                  | -0.943                                       | -0.199                         | 0.282             |
| Beta-2-glycoprotein 1;                                                        | Q01339            | 1                          | 7               | 7              | 19.7                  | -0.943                                       | -0.073                         | 0.265             |
| Protein-arginine deiminase type-2;                                            | Q08642            | 1                          | 12              | 13             | 12.9                  | -0.943                                       | -0.272                         | 0.308             |
| Sulfhydryl oxidase 1;                                                         | Q8BND5            | 1                          | 5               | 5              | 11                    | -0.943                                       | -0.109                         | 0.272             |
| Protein Z-dependent protease inhibitor;                                       | Q8R121            | 1                          | 3               | 3              | 5.8                   | -0.943                                       | -0.145                         | 0.276             |
| Carbohydrate kinase domain-containing protein;                                | Q9CZ42            | 1                          | 5               | 5              | 17.2                  | -0.943                                       | -0.163                         | 0.276             |
| Serine protease inhibitor A3K;                                                | P07759            | 1                          | 38              | 568            | 47.8                  | -0.943                                       | -0.199                         | 0.282             |

Table S3, Tholen et al.

| Protein                                                                                                             | Uniprot accession | ProteinProphet Prob. Score | Unique peptides | Total peptides | Sequence coverage [%] | Fold change (log <sub>2</sub> ) of ASAPratio | Fold change standard deviation | ASAPratio p-value |
|---------------------------------------------------------------------------------------------------------------------|-------------------|----------------------------|-----------------|----------------|-----------------------|----------------------------------------------|--------------------------------|-------------------|
| Serine protease inhibitor A3N;                                                                                      | Q91WP6            | 1                          | 5               | 8              | 14.4                  | -0.136                                       | -0.076                         | 0.904             |
| Uncharacterized protein;                                                                                            | D3Z450            | 1                          | 5               | 7              | 12.9                  | 0.526                                        | 0.077                          | 0.538             |
| Serine protease inhibitor A3G;                                                                                      | Q512A0            | 1                          | 3               | 3              | 15.2                  | 0.642                                        | 0.041                          | 0.443             |
| Four and a half LIM domains protein 1;                                                                              | P97447            | 1                          | 16              | 27             | 41.1                  | -0.943                                       | -0.435                         | 0.379             |
| Lambda-crystallin homolog;                                                                                          | Q99KP3            | 1                          | 10              | 10             | 24.8                  | -0.943                                       | -0.29                          | 0.312             |
| Cardiomyopathy-associated protein 5;                                                                                | Q70KF4            | 1                          | 2               | 2              | 0.6                   | -0.943                                       | -0.073                         | 0.267             |
| Ig kappa chain V19-17;                                                                                              | P01633            | 1                          | 2               | 2              | 6                     | -0.943                                       | -0.091                         | 0.260             |
| Methionine aminopeptidase 2;                                                                                        | O08663            | 1                          | 4               | 4              | 8.6                   | -0.916                                       | -0.363                         | 0.362             |
| Collagen alpha-1(III) chain;                                                                                        | P08121            | 1                          | 10              | 10             | 5.8                   | -0.916                                       | -0.104                         | 0.279             |
| Histone H2B type 1-F/J/L;                                                                                           | P10853            | 1                          | 2               | 2              | 11.9                  | -0.916                                       | -0.19                          | 0.298             |
| Lumican;                                                                                                            | P51885            | 1                          | 27              | 413            | 38.8                  | -0.916                                       | -0.19                          | 0.302             |
| Complement component C8 alpha chain;                                                                                | Q8K182            | 1                          | 6               | 8              | 13.1                  | -0.916                                       | -0.104                         | 0.279             |
| Kinesin-like protein KIF21B;                                                                                        | Q9QXL1            | 1                          | 2               | 2              | 2.3                   | -0.916                                       | -0.346                         | 0.358             |
| SH3 and PX domain-containing protein 2B;                                                                            | A2AAY5            | 1                          | 3               | 3              | 3.1                   | -0.916                                       | -0.363                         | 0.362             |
| Creatine kinase M-type;                                                                                             | P07310            | 1                          | 44              | 1204           | 58.3                  | -0.889                                       | -0.066                         | 0.283             |
| Parvalbumin alpha;                                                                                                  | P32848            | 1                          | 8               | 63             | 32.7                  | -0.889                                       | -0.082                         | 0.295             |
| Ribonuclease UK114;                                                                                                 | P52760            | 1                          | 4               | 4              | 26.7                  | -0.889                                       | -0.132                         | 0.302             |
| Calcium-regulated heat stable protein 1;                                                                            | Q9CR86            | 1                          | 4               | 6              | 18.2                  | -0.889                                       | -0.642                         | 0.506             |
| Succinyl-CoA ligase [ADP-forming] subunit beta, mitochondrial;                                                      | Q9Z2I9            | 1                          | 20              | 27             | 28.9                  | -0.889                                       | -0.346                         | 0.381             |
| Creatine kinase U-type, mitochondrial;                                                                              | P30275            | 1                          | 5               | 5              | 22.5                  | -0.889                                       | -0.23                          | 0.332             |
| Dci protein; Dodecenoyl-Coenzyme A delta isomerase (3,2 trans-enoyl-Coenzyme A isomerase); Uncharacterized protein; | Q8QZV3            | 1                          | 15              | 25             | 29.8                  | -0.889                                       | -0.329                         | 0.361             |
| ATP synthase subunit f, mitochondrial;                                                                              | P56135            | 1                          | 2               | 3              | 30.3                  | -0.889                                       | -0.033                         | 0.280             |
| Ig kappa chain C region;                                                                                            | P01837            | 1                          | 3               | 11             | 26.4                  | -0.862                                       | -0.235                         | 0.348             |
| 60S ribosomal protein L12;                                                                                          | P35979            | 1                          | 3               | 3              | 9.1                   | -0.862                                       | -0.141                         | 0.319             |
| Cytochrome c, somatic;                                                                                              | P62897            | 1                          | 4               | 10             | 18.1                  | -0.862                                       | -0.063                         | 0.311             |
| Creatine kinase B-type;                                                                                             | Q04447            | 1                          | 31              | 57             | 41.2                  | -0.862                                       | -0.078                         | 0.313             |
| Complement factor I;                                                                                                | Q61129            | 1                          | 9               | 14             | 10.3                  | -0.862                                       | -0.078                         | 0.313             |
| Zinc-alpha-2-glycoprotein;                                                                                          | Q64726            | 1                          | 16              | 18             | 32.9                  | -0.862                                       | -0.298                         | 0.371             |
| UTP--glucose-1-phosphate uridylyltransferase;                                                                       | Q91ZJ5            | 1                          | 38              | 69             | 41.3                  | -0.862                                       | -0.141                         | 0.316             |
| Aconitate hydratase, mitochondrial;                                                                                 | Q99K10            | 1                          | 62              | 193            | 47.3                  | -0.862                                       | -0.141                         | 0.325             |
| Cell adhesion molecule 3;                                                                                           | Q99N28            | 1                          | 4               | 4              | 17.2                  | -0.862                                       | -0.094                         | 0.316             |
| Lactoylglutathione lyase;                                                                                           | Q9CPU0            | 1                          | 10              | 16             | 31                    | -0.862                                       | -0.407                         | 0.424             |
| Dihydrolipoyl dehydrogenase, mitochondrial;                                                                         | O08749            | 1                          | 22              | 34             | 25.7                  | -0.862                                       | -0.204                         | 0.337             |
| SPARC;                                                                                                              | P07214            | 1                          | 5               | 7              | 13.6                  | -0.862                                       | -0.204                         | 0.342             |
| Glutamate dehydrogenase 1, mitochondrial;                                                                           | P26443            | 1                          | 9               | 12             | 11.8                  | -0.862                                       | -0.125                         | 0.320             |
| Plasma protease C1 inhibitor;                                                                                       | P97290            | 1                          | 11              | 14             | 21.6                  | -0.862                                       | -0.313                         | 0.376             |
| Phosphoglucomutase-1;                                                                                               | Q9D0F9            | 1                          | 47              | 93             | 50.4                  | -0.862                                       | -0.125                         | 0.314             |
| Procollagen-lysine,2-oxoglutarate 5-dioxygenase 1;                                                                  | Q9ROE2            | 1                          | 8               | 8              | 11                    | -0.862                                       | -0.188                         | 0.332             |
| Apolipoprotein A-II;                                                                                                | P09813            | 0.999                      | 2               | 3              | 9.8                   | -0.862                                       | -0.172                         | 0.336             |
| Acid trehalase-like protein 1;                                                                                      | Q8BP56            | 1                          | 5               | 5              | 6.1                   | -0.837                                       | -0.389                         | 0.434             |
| Uncharacterized protein;                                                                                            | E9QA15            | 1                          | 3               | 4              | 2.7                   | -0.837                                       | -0.374                         | 0.425             |
| Acetyl-coenzyme A synthetase 2-like, mitochondrial;                                                                 | Q99NB1            | 0.998                      | 2               | 2              | 3.1                   | -0.837                                       | -0.09                          | 0.324             |

Table S3, Tholen et al.

| Protein                                                                       | Uniprot accession | ProteinProphet Prob. Score | Unique peptides | Total peptides | Sequence coverage [%] | Fold change (log <sub>2</sub> ) of ASAPratio | Fold change standard deviation | ASAPratio p-value |
|-------------------------------------------------------------------------------|-------------------|----------------------------|-----------------|----------------|-----------------------|----------------------------------------------|--------------------------------|-------------------|
| Malate dehydrogenase, mitochondrial;                                          | P08249            | 1                          | 40              | 189            | 59.2                  | -0.811                                       | -0.043                         | 0.338             |
| Fumarate hydratase, mitochondrial;                                            | P97807            | 1                          | 31              | 55             | 41.6                  | -0.811                                       | -0.441                         | 0.481             |
| Protein AMBP;                                                                 | Q07456            | 1                          | 5               | 5              | 10                    | -0.811                                       | -0.327                         | 0.424             |
| L-asparaginase;                                                               | Q8C0M9            | 1                          | 11              | 15             | 27                    | -0.811                                       | -0.157                         | 0.362             |
| Phosphoglycolate phosphatase;                                                 | Q8CHP8            | 1                          | 10              | 12             | 21.2                  | -0.811                                       | -0.583                         | 0.540             |
| Hemopexin;                                                                    | Q91X72            | 1                          | 35              | 176            | 36.7                  | -0.811                                       | -0.071                         | 0.341             |
| Neurolysin, mitochondrial;                                                    | Q91YP2            | 1                          | 10              | 11             | 12.6                  | -0.811                                       | -0.726                         | 0.595             |
| MACRO domain-containing protein 1;                                            | Q922B1            | 1                          | 9               | 13             | 26                    | -0.811                                       | -0.1                           | 0.346             |
| NADH dehydrogenase [ubiquinone] flavoprotein 2, mitochondrial;                | Q9D6J6            | 1                          | 4               | 4              | 16.5                  | -0.811                                       | -0.228                         | 0.384             |
| GMP reductase 1;                                                              | Q9DCZ1            | 1                          | 2               | 2              | 7.6                   | -0.811                                       | -0.057                         | 0.329             |
| Complement factor B;                                                          | P04186            | 1                          | 14              | 19             | 11.6                  | -0.811                                       | -0.285                         | 0.411             |
| Adenylosuccinate lyase;                                                       | P54822            | 1                          | 7               | 9              | 10.3                  | -0.811                                       | -0.114                         | 0.348             |
| Voltage-dependent anion-selective channel protein 2;                          | Q60930            | 1                          | 9               | 9              | 33.9                  | -0.811                                       | -0.213                         | 0.378             |
| NADH dehydrogenase [ubiquinone] flavoprotein 1, mitochondrial;                | Q91YT0            | 1                          | 6               | 6              | 9.2                   | -0.811                                       | -0.114                         | 0.350             |
| Ig kappa chain V-II region 26-10;                                             | P01631            | 1                          | 2               | 2              | 11.5                  | -0.811                                       | -0.142                         | 0.357             |
| Complement factor D;                                                          | P03953            | 1                          | 5               | 5              | 16.6                  | -0.786                                       | -0.081                         | 0.353             |
| Complement component C9;                                                      | P06683            | 1                          | 13              | 36             | 17.5                  | -0.786                                       | -0.271                         | 0.415             |
| Alpha-2-HS-glycoprotein;                                                      | P29699            | 1                          | 23              | 44             | 45.5                  | -0.786                                       | -0.041                         | 0.347             |
| Scavenger receptor cysteine-rich domain-containing protein LOC284297 homolog; | Q8BV57            | 1                          | 3               | 3              | 2.3                   | -0.786                                       | -0.339                         | 0.447             |
| Trans-1,2-dihydrobenzene-1,2-diol dehydrogenase;                              | Q9DBB8            | 1                          | 6               | 9              | 13.5                  | -0.786                                       | -0.081                         | 0.352             |
| Histidine-rich glycoprotein;                                                  | Q9ESB3            | 1                          | 3               | 3              | 5.1                   | -0.786                                       | -0.122                         | 0.361             |
| Mitogen-activated protein kinase 12;                                          | O08911            | 1                          | 4               | 4              | 12                    | -0.786                                       | -0.108                         | 0.357             |
| Isocitrate dehydrogenase [NADP], mitochondrial;                               | P54071            | 1                          | 34              | 61             | 40.7                  | -0.786                                       | -0.23                          | 0.400             |
| Citrate lyase subunit beta-like protein, mitochondrial;                       | Q8R4N0            | 1                          | 7               | 7              | 17.2                  | -0.786                                       | -0.068                         | 0.350             |
| Uncharacterized protein;                                                      | D3YY36            | 1                          | 22              | 31             | 22.7                  | -0.786                                       | -0.339                         | 0.451             |
| Vesicle-associated membrane protein-associated protein B;                     | Q9QY76            | 0.998                      | 2               | 2              | 10.7                  | -0.786                                       | -0.108                         | 0.359             |
| Integrin beta-4;                                                              | A2A863            | 1                          | 4               | 4              | 2.3                   | -0.761                                       | -0.271                         | 0.430             |
| Cell surface glycoprotein MUC18;                                              | Q8R2Y2            | 1                          | 5               | 7              | 6.8                   | -0.761                                       | -0.258                         | 0.431             |
| Peroxisomal trans-2-enoyl-CoA reductase;                                      | Q99MZ7            | 1                          | 2               | 2              | 34.1                  | -0.761                                       | -0.103                         | 0.378             |
| Plexin domain-containing protein 2;                                           | Q9DC11            | 1                          | 3               | 3              | 6.1                   | -0.761                                       | -0.155                         | 0.395             |
| Deoxyguanosine kinase, mitochondrial;                                         | Q9QX60            | 1                          | 2               | 2              | 9                     | -0.761                                       | -0.064                         | 0.360             |
| cAMP-dependent protein kinase catalytic subunit alpha;                        | P05132            | 1                          | 3               | 3              | 9.4                   | -0.761                                       | -0.451                         | 0.524             |
| 60S acidic ribosomal protein P0;                                              | P14869            | 1                          | 4               | 4              | 13.6                  | -0.761                                       | -0.09                          | 0.374             |
| Bisphosphoglycerate mutase;                                                   | P15327            | 1                          | 7               | 7              | 15.8                  | -0.761                                       | -0.103                         | 0.376             |
| Purine nucleoside phosphorylase;                                              | P23492            | 1                          | 18              | 22             | 42.6                  | -0.761                                       | -0.181                         | 0.396             |
| Prohibitin;                                                                   | P67778            | 1                          | 4               | 4              | 7.4                   | -0.761                                       | -0.142                         | 0.378             |
| Histidine triad nucleotide-binding protein 1;                                 | P70349            | 1                          | 8               | 11             | 57.9                  | -0.761                                       | -0.413                         | 0.509             |
| WW domain-binding protein 2;                                                  | P97765            | 1                          | 3               | 3              | 9.2                   | -0.761                                       | -0.077                         | 0.371             |
| Carboxymethylenebutenolidase homolog;                                         | Q8R1G2            | 1                          | 7               | 10             | 15.1                  | -0.761                                       | -0.039                         | 0.366             |
| Mannose-6-phosphate isomerase;                                                | Q924M7            | 1                          | 5               | 5              | 9.9                   | -0.761                                       | -0.039                         | 0.357             |
| Propionyl-CoA carboxylase beta chain, mitochondrial;                          | Q99MN9            | 1                          | 26              | 36             | 37.7                  | -0.761                                       | -0.31                          | 0.461             |
| Angiotensinogen;                                                              | P11859            | 1                          | 3               | 3              | 11.7                  | -0.737                                       | -0.098                         | 0.397             |
| Annexin A6;                                                                   | P14824            | 1                          | 64              | 101            | 50.8                  | -0.737                                       | -0.283                         | 0.457             |

Table S3, Tholen et al.

| Protein                                                                                                           | Uniprot accession | ProteinProphet Prob. Score | Unique peptides | Total peptides | Sequence coverage [%] | Fold change (log <sub>2</sub> ) of ASAPratio | Fold change standard deviation | ASAPratio p-value |
|-------------------------------------------------------------------------------------------------------------------|-------------------|----------------------------|-----------------|----------------|-----------------------|----------------------------------------------|--------------------------------|-------------------|
| Ceruloplasmin;                                                                                                    | Q61147            | 1                          | 45              | 61             | 31.8                  | -0.737                                       | -0.319                         | 0.484             |
| Mitochondrial carrier homolog 2;                                                                                  | Q791V5            | 1                          | 2               | 2              | 6.9                   | -0.737                                       | -0.098                         | 0.395             |
| UPF0586 protein C9orf41 homolog;                                                                                  | Q80UY1            | 1                          | 2               | 2              | 2.8                   | -0.737                                       | -0.074                         | 0.390             |
| Delta-1-pyrroline-5-carboxylate dehydrogenase, mitochondrial;                                                     | Q8CHT0            | 1                          | 7               | 8              | 6.9                   | -0.737                                       | -0.074                         | 0.390             |
| N(G),N(G)-dimethylarginine dimethylaminohydrolase 2;                                                              | Q99LD8            | 1                          | 12              | 19             | 35.1                  | -0.737                                       | -0.16                          | 0.404             |
| Dihydrolipoyllysine-residue succinyltransferase component of 2-oxoglutarate dehydrogenase complex, mitochondrial; | Q9D2G2            | 1                          | 10              | 12             | 11                    | -0.737                                       | -0.061                         | 0.388             |
| Elastase 1, pancreatic; Uncharacterized protein;                                                                  | Q91X79            | 1                          | 2               | 2              | 8.3                   | -0.737                                       | -0.135                         | 0.405             |
| Angiotensin-converting enzyme;                                                                                    | P09470            | 1                          | 17              | 22             | 9                     | -0.737                                       | -0.16                          | 0.416             |
| Triosephosphate isomerase;                                                                                        | P17751            | 1                          | 36              | 317            | 64.7                  | -0.737                                       | -0.184                         | 0.421             |
| Murinoglobulin-1;                                                                                                 | P28665            | 1                          | 76              | 133            | 30.6                  | -0.737                                       | -0.356                         | 0.496             |
| Adiponectin;                                                                                                      | Q60994            | 1                          | 8               | 11             | 18.6                  | -0.737                                       | -0.135                         | 0.408             |
| Uncharacterized protein;                                                                                          | E9PV38            | 1                          | 14              | 16             | 22.3                  | -0.737                                       | -0.344                         | 0.495             |
| Uncharacterized protein;                                                                                          | F8VPN4            | 1                          | 57              | 67             | 27.7                  | -0.737                                       | -0.418                         | 0.526             |
| GTP-binding protein 1;                                                                                            | Q08582            | 1                          | 2               | 2              | 1.6                   | -0.737                                       | -0.123                         | 0.403             |
| Mammalian ependymin-related protein 1;                                                                            | Q99M71            | 1                          | 2               | 2              | 9.4                   | -0.737                                       | -0.332                         | 0.484             |
| Acylphosphatase-2;                                                                                                | P56375            | 1                          | 8               | 17             | 37.1                  | -0.713                                       | -0.21                          | 0.449             |
| Ras suppressor protein 1;                                                                                         | Q01730            | 1                          | 2               | 5              | 6.5                   | -0.713                                       | -0.094                         | 0.406             |
| Hexaprenyldihydroxybenzoate methyltransferase, mitochondrial;                                                     | Q8BMS4            | 1                          | 2               | 2              | 8.9                   | -0.713                                       | -0.503                         | 0.588             |
| Histidine triad nucleotide-binding protein 2, mitochondrial;                                                      | Q9D0S9            | 1                          | 4               | 4              | 21.5                  | -0.713                                       | -0.07                          | 0.400             |
| 2-oxoglutarate dehydrogenase, mitochondrial;                                                                      | Q60597            | 1                          | 41              | 60             | 32.2                  | -0.713                                       | -0.187                         | 0.439             |
| Golgi reassembly-stacking protein 2;                                                                              | Q99JX3            | 1                          | 8               | 10             | 16.2                  | -0.713                                       | -0.187                         | 0.439             |
| Scavenger mRNA-decapping enzyme DcpS;                                                                             | Q9DAR7            | 1                          | 13              | 13             | 36.4                  | -0.713                                       | -0.351                         | 0.514             |
| Beta-hexosaminidase subunit alpha;                                                                                | P29416            | 1                          | 2               | 2              | 4.2                   | -0.713                                       | -0.117                         | 0.412             |
| Alpha-amylase 1;                                                                                                  | P00687            | 1                          | 2               | 2              | 4.1                   | -0.69                                        | -0.078                         | 0.413             |
| Epidermal growth factor receptor;                                                                                 | Q01279            | 1                          | 13              | 15             | 17.7                  | -0.69                                        | -0.078                         | 0.413             |
| Protein cordon-bleu;                                                                                              | Q5NBX1            | 1                          | 2               | 2              | 5.5                   | -0.69                                        | -0.1                           | 0.427             |
| Mimecan;                                                                                                          | Q62000            | 1                          | 7               | 9              | 19.8                  | -0.69                                        | -0.111                         | 0.429             |
| Sulfite oxidase, mitochondrial;                                                                                   | Q8R086            | 1                          | 5               | 6              | 15.4                  | -0.69                                        | -0.345                         | 0.528             |
| Filamin-C;                                                                                                        | Q8VHX6            | 1                          | 30              | 32             | 12.3                  | -0.69                                        | -0.39                          | 0.556             |
| Prohibitin-2;                                                                                                     | O35129            | 1                          | 3               | 8              | 7                     | -0.69                                        | -0.078                         | 0.413             |
| Aspartate aminotransferase, cytoplasmic;                                                                          | P05201            | 1                          | 28              | 49             | 47.5                  | -0.69                                        | -0.134                         | 0.438             |
| Prelamin-A/C;                                                                                                     | P48678            | 1                          | 7               | 11             | 11.7                  | -0.69                                        | -0.401                         | 0.556             |
| Cytochrome b5;                                                                                                    | P56395            | 1                          | 8               | 9              | 41                    | -0.69                                        | -0.056                         | 0.407             |
| Short-chain specific acyl-CoA dehydrogenase, mitochondrial;                                                       | Q07417            | 1                          | 4               | 4              | 10.9                  | -0.69                                        | -0.345                         | 0.528             |
| Echinoderm microtubule-associated protein-like 2;                                                                 | Q7TNG5            | 1                          | 12              | 12             | 21.1                  | -0.69                                        | -0.089                         | 0.426             |
| GDP-fucose protein O-fucosyltransferase 1;                                                                        | Q91ZW2            | 1                          | 5               | 6              | 10.5                  | -0.69                                        | -0.167                         | 0.439             |
| Serotransferrin;                                                                                                  | Q921I1            | 1                          | 29              | 218            | 56.5                  | -0.69                                        | -0.1                           | 0.427             |
| Citrate synthase, mitochondrial;                                                                                  | Q9CZU6            | 1                          | 18              | 25             | 23.9                  | -0.69                                        | -0.056                         | 0.417             |
| Follistatin-related protein 1;                                                                                    | Q62356            | 0.998                      | 2               | 2              | 2.6                   | -0.69                                        | -0.045                         | 0.406             |
| Acylpyruvase FAHD1, mitochondrial;                                                                                | Q8R0F8            | 0.998                      | 2               | 2              | 13.2                  | -0.69                                        | -0.111                         | 0.429             |
| Afamin;                                                                                                           | O89020            | 1                          | 14              | 16             | 17.3                  | -0.667                                       | -0.191                         | 0.472             |
| 60S acidic ribosomal protein P1;                                                                                  | P47955            | 1                          | 2               | 2              | 14                    | -0.667                                       | -0.116                         | 0.445             |

Table S3, Tholen et al.

| Protein                                                             | Uniprot accession | ProteinProphet Prob. Score | Unique peptides | Total peptides | Sequence coverage [%] | Fold change (log <sub>2</sub> ) of ASAPratio | Fold change standard deviation | ASAPratio p-value |
|---------------------------------------------------------------------|-------------------|----------------------------|-----------------|----------------|-----------------------|----------------------------------------------|--------------------------------|-------------------|
| Interleukin-1 receptor accessory protein;                           | Q61730            | 1                          | 4               | 4              | 5.6                   | -0.667                                       | -0.074                         | 0.432             |
| CCA tRNA nucleotidyltransferase 1, mitochondrial;                   | Q8K1J6            | 1                          | 3               | 3              | 8.5                   | -0.667                                       | -0.328                         | 0.542             |
| Mitochondrial peptide methionine sulfoxide reductase;               | Q9D6Y7            | 1                          | 3               | 3              | 13.3                  | -0.667                                       | -0.244                         | 0.501             |
| Glucose-6-phosphate isomerase;                                      | P06745            | 1                          | 38              | 111            | 36.7                  | -0.667                                       | -0.222                         | 0.487             |
| Galectin-related protein A;                                         | Q8VED9            | 1                          | 3               | 3              | 26.2                  | -0.667                                       | -0.275                         | 0.514             |
| ATP synthase subunit g, mitochondrial;                              | Q9CPQ8            | 1                          | 5               | 8              | 27.2                  | -0.667                                       | -0.032                         | 0.425             |
| Plectin;                                                            | Q9QXS1            | 1                          | 37              | 39             | 5.9                   | -0.667                                       | -0.455                         | 0.605             |
| Complement C4-B;                                                    | P01029            | 1                          | 30              | 32             | 17.3                  | -0.644                                       | -0.362                         | 0.582             |
| Serum albumin;                                                      | P07724            | 1                          | 94              | 3304           | 67.8                  | -0.644                                       | -0.161                         | 0.484             |
| Cofilin-2;                                                          | P45591            | 1                          | 10              | 28             | 36.7                  | -0.644                                       | -0.111                         | 0.462             |
| 60S ribosomal protein L13;                                          | P47963            | 1                          | 2               | 2              | 5.8                   | -0.644                                       | -0.101                         | 0.460             |
| Isocitrate dehydrogenase [NAD] subunit gamma 1, mitochondrial;      | P70404            | 1                          | 12              | 13             | 25.2                  | -0.644                                       | -0.241                         | 0.512             |
| Retinol-binding protein 4;                                          | Q00724            | 1                          | 5               | 6              | 18.9                  | -0.644                                       | -0.101                         | 0.448             |
| Myosin light chain kinase 2, skeletal/cardiac muscle;               | Q8VCR8            | 1                          | 16              | 22             | 16.2                  | -0.644                                       | -0.201                         | 0.501             |
| Glycyl-tRNA synthetase;                                             | Q9CZD3            | 1                          | 19              | 22             | 19.9                  | -0.644                                       | -0.272                         | 0.533             |
| Carboxypeptidase N subunit 2;                                       | Q9DBB9            | 1                          | 5               | 5              | 8.6                   | -0.644                                       | -0.131                         | 0.471             |
| Thiopurine S-methyltransferase;                                     | O55060            | 1                          | 3               | 3              | 8.3                   | -0.644                                       | -0.101                         | 0.460             |
| L-lactate dehydrogenase A chain;                                    | P06151            | 1                          | 28              | 172            | 43.4                  | -0.644                                       | -0.091                         | 0.456             |
| L-lactate dehydrogenase B chain;                                    | P16125            | 1                          | 21              | 42             | 38.3                  | -0.059                                       | -0.007                         | 0.942             |
| Protein-L-isoaspartate(D-aspartate) O-methyltransferase;            | P23506            | 1                          | 5               | 6              | 21.5                  | -0.644                                       | -0.171                         | 0.478             |
| Collagen alpha-1(VI) chain;                                         | Q04857            | 1                          | 8               | 8              | 7                     | -0.644                                       | -0.181                         | 0.492             |
| Amine oxidase [flavin-containing] B;                                | Q8BW75            | 1                          | 3               | 3              | 5                     | -0.644                                       | -0.091                         | 0.447             |
| Trifunctional enzyme subunit beta, mitochondrial;                   | Q99JY0            | 1                          | 10              | 11             | 19.2                  | -0.644                                       | -0.433                         | 0.613             |
| UPF0585 protein C16orf13 homolog;                                   | Q9DCS2            | 1                          | 5               | 5              | 15.7                  | -0.644                                       | -0.312                         | 0.549             |
| Hydroxysteroid (17-beta) dehydrogenase 10; Uncharacterized protein; | A2AFQ2            | 1                          | 5               | 5              | 26.1                  | -0.644                                       | -0.252                         | 0.526             |
| Peptidyl-prolyl cis-trans isomerase FKBP7;                          | O54998            | 1                          | 5               | 9              | 17.4                  | -0.621                                       | -0.076                         | 0.465             |
| Ig kappa chain V-II region 7S34.1;                                  | P01630            | 1                          | 2               | 2              | 11.5                  | -0.621                                       | -0.076                         | 0.463             |
| 4-hydroxyphenylpyruvate dioxygenase;                                | P49429            | 1                          | 2               | 2              | 20.1                  | -0.621                                       | -0.172                         | 0.501             |
| Pyruvate kinase isozymes M1/M2;                                     | P52480            | 1                          | 69              | 507            | 63.3                  | -0.621                                       | -0.201                         | 0.516             |
| Alpha-aminoadipic semialdehyde dehydrogenase;                       | Q9DBF1            | 1                          | 18              | 21             | 24.3                  | -0.621                                       | -0.105                         | 0.469             |
| Apoptosis-inducing factor 1, mitochondrial;                         | Q9Z0X1            | 1                          | 2               | 2              | 3.5                   | -0.621                                       | -0.048                         | 0.457             |
| Complement C3;                                                      | P01027            | 1                          | 114             | 183            | 39.3                  | -0.599                                       | -0.145                         | 0.499             |
| Serpin H1;                                                          | P19324            | 1                          | 20              | 21             | 26.4                  | -0.599                                       | -0.154                         | 0.513             |
| Glutathione S-transferase A4;                                       | P24472            | 1                          | 7               | 8              | 13.1                  | -0.599                                       | -0.209                         | 0.530             |
| Glutathione reductase, mitochondrial;                               | P47791            | 1                          | 12              | 14             | 25.1                  | -0.599                                       | -0.1                           | 0.493             |
| Eukaryotic translation initiation factor 5A-1;                      | P63242            | 1                          | 3               | 3              | 7.8                   | -0.599                                       | -0.073                         | 0.484             |
| Coatomer subunit zeta-2;                                            | Q9JHH9            | 1                          | 2               | 2              | 9.3                   | -0.599                                       | -0.136                         | 0.494             |
| Fetuin-B;                                                           | Q9QXC1            | 1                          | 8               | 14             | 28.2                  | -0.599                                       | -0.036                         | 0.477             |
| Alpha-1-antitrypsin 1-1;                                            | P07758            | 1                          | 12              | 58             | 42.5                  | -0.599                                       | -0.027                         | 0.466             |
| Alpha-1-antitrypsin 1-2;                                            | P22599            | 1                          | 11              | 31             | 41.4                  | -0.667                                       | -0.095                         | 0.437             |
| Alpha-1-antitrypsin 1-4;                                            | Q00897            | 1                          | 11              | 21             | 39.7                  | -0.889                                       | -0.148                         | 0.301             |
| Very long-chain specific acyl-CoA dehydrogenase, mitochondrial;     | P50544            | 1                          | 13              | 13             | 22.1                  | -0.599                                       | -0.127                         | 0.492             |
| Glyoxylate reductase/hydroxypyruvate reductase;                     | Q91Z53            | 1                          | 15              | 19             | 32                    | -0.599                                       | -0.182                         | 0.518             |



Table S3, Tholen et al.

| Protein                                                                            | Uniprot accession | ProteinProphet Prob. Score | Unique peptides | Total peptides | Sequence coverage [%] | Fold change (log <sub>2</sub> ) of ASAPratio | Fold change standard deviation | ASAPratio p-value |
|------------------------------------------------------------------------------------|-------------------|----------------------------|-----------------|----------------|-----------------------|----------------------------------------------|--------------------------------|-------------------|
| Uncharacterized protein;                                                           | E9PVD2            | 1                          | 11              | 11             | 11.5                  | -0.599                                       | -0.336                         | 0.605             |
| Nucleoside diphosphate kinase;                                                     | E9PZFO            | 1                          | 12              | 41             | 68.5                  | -0.599                                       | -0.027                         | 0.475             |
| Aspartate aminotransferase, mitochondrial;                                         | P05202            | 1                          | 39              | 90             | 45.8                  | -0.578                                       | -0.095                         | 0.512             |
| Superoxide dismutase [Mn], mitochondrial;                                          | P09671            | 1                          | 11              | 23             | 19.4                  | -0.578                                       | -0.095                         | 0.501             |
| Heat shock protein beta-7;                                                         | P35385            | 1                          | 3               | 3              | 19.5                  | -0.578                                       | -0.112                         | 0.506             |
| 182 kDa tankyrase-1-binding protein;                                               | P58871            | 1                          | 8               | 8              | 7.3                   | -0.578                                       | -0.561                         | 0.721             |
| Extended synaptotagmin-1;                                                          | Q3U7R1            | 1                          | 6               | 6              | 4.4                   | -0.578                                       | -0.078                         | 0.506             |
| Sorbitol dehydrogenase;                                                            | Q64442            | 1                          | 9               | 9              | 20.2                  | -0.578                                       | -0.224                         | 0.572             |
| GDP-fucose protein O-fucosyltransferase 2;                                         | Q8VHI3            | 1                          | 3               | 3              | 5.8                   | -0.578                                       | -0.06                          | 0.501             |
| Isochorismatase domain-containing protein 1;                                       | Q91V64            | 1                          | 12              | 20             | 29                    | -0.578                                       | -0.147                         | 0.532             |
| Glutathione S-transferase Mu 5;                                                    | P48774            | 1                          | 11              | 12             | 30.8                  | -0.578                                       | -0.242                         | 0.573             |
| Protein DJ-1;                                                                      | Q99LX0            | 1                          | 13              | 24             | 66.3                  | -0.578                                       | -0.19                          | 0.552             |
| Thymidylate kinase;                                                                | P97930            | 1                          | 2               | 2              | 10.8                  | -0.578                                       | -0.423                         | 0.669             |
| Synaptic vesicle membrane protein VAT-1 homolog-like;                              | Q80TB8            | 0.96                       | 2               | 2              | 5                     | -0.578                                       | -0.138                         | 0.527             |
| Myc box-dependent-interacting protein 1;                                           | O08539            | 1                          | 6               | 8              | 14                    | -0.556                                       | -0.204                         | 0.570             |
| Heterogeneous nuclear ribonucleoprotein L;                                         | Q8R081            | 1                          | 7               | 7              | 10.9                  | -0.556                                       | -0.213                         | 0.580             |
| Isovaleryl-CoA dehydrogenase, mitochondrial;                                       | Q9JHI5            | 1                          | 10              | 12             | 18.2                  | -0.556                                       | -0.09                          | 0.522             |
| Ribonuclease 4;                                                                    | Q9JJH1            | 1                          | 6               | 8              | 16.2                  | -0.556                                       | -0.098                         | 0.524             |
| Band 4.1-like protein 3;                                                           | Q9WV92            | 1                          | 10              | 12             | 12.4                  | -0.556                                       | -0.082                         | 0.518             |
| Uncharacterized protein;                                                           | D3Z0Y2            | 1                          | 30              | 65             | 72.5                  | -0.556                                       | -0.065                         | 0.513             |
| Delta-aminolevulinic acid dehydratase;                                             | P10518            | 1                          | 15              | 17             | 35.5                  | -0.535                                       | -0.039                         | 0.519             |
| Plasma kallikrein;                                                                 | P26262            | 1                          | 7               | 7              | 13.3                  | -0.535                                       | -0.078                         | 0.537             |
| Antithrombin-III;                                                                  | P32261            | 1                          | 24              | 49             | 35.1                  | -0.535                                       | -0.14                          | 0.552             |
| Mannose-binding protein C;                                                         | P41317            | 1                          | 3               | 3              | 9.8                   | -0.535                                       | -0.194                         | 0.591             |
| Transcription elongation factor B polypeptide 2;                                   | P62869            | 1                          | 4               | 4              | 35.6                  | -0.535                                       | -0.163                         | 0.576             |
| Annexin A7;                                                                        | Q07076            | 1                          | 21              | 32             | 28.3                  | -0.535                                       | -0.271                         | 0.631             |
| Kynurenine--oxoglutarate transaminase 3;                                           | Q71RI9            | 1                          | 3               | 3              | 5.3                   | -0.535                                       | -0.256                         | 0.616             |
| Heat shock protein beta-2;                                                         | Q99PR8            | 1                          | 5               | 7              | 20.9                  | -0.535                                       | -0.217                         | 0.604             |
| Spectrin alpha chain, brain;                                                       | P16546            | 1                          | 40              | 42             | 14.2                  | -0.535                                       | -0.419                         | 0.706             |
| Selenium-binding protein 1;                                                        | P17563            | 1                          | 35              | 48             | 51.9                  | -0.535                                       | -0.155                         | 0.568             |
| Quinone oxidoreductase;                                                            | P47199            | 1                          | 6               | 6              | 16.9                  | -0.535                                       | -0.054                         | 0.522             |
| Protein transport protein Sec23A;                                                  | Q01405            | 1                          | 11              | 11             | 14.1                  | -0.535                                       | -0.163                         | 0.573             |
| MCG142264, isoform CRA_a; Uncharacterized protein;                                 | D3Z494            | 1                          | 7               | 10             | 20.5                  | -0.535                                       | -0.124                         | 0.557             |
| Aldose reductase-related protein 2;                                                | P45377            | 1                          | 5               | 5              | 21.8                  | 0.963                                        | 0.267                          | 0.295             |
| Alpha-1-syntrophin;                                                                | Q61234            | 1                          | 3               | 5              | 5.2                   | -0.535                                       | -0.039                         | 0.518             |
| Extracellular superoxide dismutase [Cu-Zn];                                        | O09164            | 1                          | 10              | 11             | 24.7                  | -0.515                                       | -0.022                         | 0.537             |
| Gamma-synuclein;                                                                   | Q9Z0F7            | 1                          | 9               | 12             | 54.5                  | -0.515                                       | -0.206                         | 0.610             |
| Kininogen-1;                                                                       | O08677            | 1                          | 31              | 60             | 40.4                  | -0.515                                       | -0.044                         | 0.541             |
| Kng2 protein; LMW kininogen-II; MCG128256, isoform CRA_e; Uncharacterized protein; | Q6S9I0            | 1                          | 2               | 2              | 12.5                  | -0.556                                       | -0.123                         | 0.534             |
| Annexin A8;                                                                        | O35640            | 1                          | 30              | 57             | 53.2                  | -0.515                                       | -0.11                          | 0.565             |
| Rab GDP dissociation inhibitor alpha;                                              | P50396            | 1                          | 18              | 19             | 29.8                  | -0.515                                       | -0.184                         | 0.597             |
| Alcohol dehydrogenase [NADP+];                                                     | Q9JII6            | 1                          | 18              | 31             | 37.2                  | -0.515                                       | -0.206                         | 0.610             |

Table S3, Tholen et al.

| Protein                                                                                                                                                     | Uniprot accession | ProteinProphet Prob. Score | Unique peptides | Total peptides | Sequence coverage [%] | Fold change (log <sub>2</sub> ) of ASAPratio | Fold change standard deviation | ASAPratio p-value |
|-------------------------------------------------------------------------------------------------------------------------------------------------------------|-------------------|----------------------------|-----------------|----------------|-----------------------|----------------------------------------------|--------------------------------|-------------------|
| Legumain;                                                                                                                                                   | O89017            | 1                          | 4               | 4              | 3.9                   | -0.494                                       | -0.077                         | 0.569             |
| Inter-alpha-trypsin inhibitor heavy chain H3;                                                                                                               | Q61704            | 1                          | 11              | 16             | 14.7                  | -0.494                                       | -0.118                         | 0.577             |
| Spectrin beta chain, brain 1;                                                                                                                               | Q62261            | 1                          | 8               | 8              | 3.3                   | -0.494                                       | -0.097                         | 0.568             |
| UDP-N-acetylhexosamine pyrophosphorylase;                                                                                                                   | Q91YN5            | 1                          | 13              | 16             | 17.8                  | -0.494                                       | -0.181                         | 0.618             |
| Beta-lactamase-like protein 2;                                                                                                                              | Q99KR3            | 1                          | 4               | 5              | 13.2                  | -0.494                                       | -0.139                         | 0.595             |
| Protein phosphatase 1 regulatory subunit 3A;                                                                                                                | Q99MR9            | 1                          | 5               | 5              | 3.2                   | -0.494                                       | -0.028                         | 0.548             |
| Copper homeostasis protein cutC homolog;                                                                                                                    | Q9D8X1            | 1                          | 6               | 6              | 20.1                  | -0.494                                       | -0.035                         | 0.559             |
| Hexokinase-2;                                                                                                                                               | O08528            | 1                          | 34              | 39             | 35.2                  | -0.494                                       | -0.23                          | 0.645             |
| Hexokinase-1;                                                                                                                                               | P17710            | 1                          | 25              | 28             | 24.9                  | 0.333                                        | 0.143                          | 0.752             |
| Hexokinase-3;                                                                                                                                               | Q3TRM8            | 1                          | 2               | 2              | 5.8                   | -0.168                                       | -0.053                         | 0.865             |
| Annexin A2;                                                                                                                                                 | P07356            | 1                          | 41              | 126            | 66.4                  | -0.494                                       | -0.056                         | 0.553             |
| Annexin A11;                                                                                                                                                | P97384            | 1                          | 26              | 33             | 27.6                  | -0.494                                       | -0.042                         | 0.560             |
| Xanthine dehydrogenase/oxidase;                                                                                                                             | Q00519            | 1                          | 46              | 61             | 23.4                  | -0.494                                       | -0.139                         | 0.597             |
| NEDD8-activating enzyme E1 regulatory subunit;                                                                                                              | Q8VBW6            | 1                          | 7               | 7              | 6.9                   | -0.494                                       | -0.264                         | 0.667             |
| 3-mercaptopyruvate sulfurtransferase;                                                                                                                       | Q99J99            | 1                          | 13              | 16             | 34.7                  | -0.494                                       | -0.077                         | 0.572             |
| Sodium/potassium-transporting ATPase subunit beta-1;                                                                                                        | P14094            | 1                          | 3               | 4              | 8.2                   | -0.474                                       | -0.033                         | 0.579             |
| Biglycan;                                                                                                                                                   | P28653            | 1                          | 4               | 5              | 9.5                   | -0.474                                       | -0.296                         | 0.697             |
| Heat shock protein beta-6;                                                                                                                                  | Q5EBG6            | 1                          | 9               | 17             | 29                    | -0.474                                       | -0.092                         | 0.596             |
| Ketosamine-3-kinase;                                                                                                                                        | Q8K274            | 1                          | 4               | 4              | 9.1                   | -0.474                                       | -0.079                         | 0.592             |
| Arsenite methyltransferase;                                                                                                                                 | Q91WU5            | 1                          | 6               | 6              | 13.8                  | -0.474                                       | -0.125                         | 0.611             |
| Carboxypeptidase N catalytic chain;                                                                                                                         | Q9JJN5            | 1                          | 2               | 2              | 3.3                   | -0.474                                       | -0.086                         | 0.595             |
| Kelch repeat and BTB (POZ) domain containing 10; MCG12931; Uncharacterized protein;                                                                         | A2AUC9            | 1                          | 5               | 6              | 6.3                   | -0.474                                       | -0.165                         | 0.622             |
| Tetratricopeptide repeat protein 38;                                                                                                                        | A3KMP2            | 1                          | 16              | 17             | 25.8                  | -0.474                                       | -0.092                         | 0.596             |
| Myelin protein P0;                                                                                                                                          | P27573            | 1                          | 3               | 5              | 8.9                   | -0.474                                       | -0.039                         | 0.580             |
| Aldose reductase;                                                                                                                                           | P45376            | 1                          | 24              | 51             | 48.1                  | -0.474                                       | -0.046                         | 0.572             |
| Glutathione peroxidase 3;                                                                                                                                   | P46412            | 1                          | 6               | 9              | 18.1                  | -0.474                                       | -0.046                         | 0.572             |
| Proliferation-associated protein 2G4;                                                                                                                       | P50580            | 1                          | 12              | 12             | 18                    | -0.474                                       | -0.072                         | 0.579             |
| Thiosulfate sulfurtransferase;                                                                                                                              | P52196            | 1                          | 8               | 9              | 22.2                  | -0.474                                       | -0.072                         | 0.579             |
| Serine/threonine-protein phosphatase 2A activator;                                                                                                          | P58389            | 1                          | 11              | 16             | 29.7                  | -0.474                                       | -0.217                         | 0.660             |
| Peptidyl-prolyl cis-trans isomerase FKBP10;                                                                                                                 | Q61576            | 1                          | 15              | 21             | 15.1                  | -0.474                                       | -0.178                         | 0.640             |
| Alpha-2-macroglobulin;                                                                                                                                      | Q61838            | 1                          | 84              | 166            | 37.7                  | -0.474                                       | -0.072                         | 0.589             |
| C-type mannose receptor 2;                                                                                                                                  | Q64449            | 1                          | 9               | 12             | 5.4                   | -0.474                                       | -0.072                         | 0.590             |
| Interferon-activable protein 205-A;                                                                                                                         | Q8CGE8            | 1                          | 5               | 5              | 8.9                   | -0.474                                       | -0.27                          | 0.690             |
| Inositol (Myo)-1(Or 4)-monophosphatase 1; Inositol (Myo)-1(Or 4)-monophosphatase 1, isoform CRA_a; Myo-inositol monophosphatase 1; Uncharacterized protein; | Q924B0            | 1                          | 9               | 13             | 27.1                  | -0.474                                       | -0.132                         | 0.615             |
| Protein S100-A6;                                                                                                                                            | P14069            | 0.994                      | 3               | 3              | 16.9                  | -0.474                                       | -0.033                         | 0.580             |
| Lysozyme C-2;                                                                                                                                               | P08905            | 1                          | 2               | 2              | 27                    | -0.454                                       | -0.118                         | 0.620             |
| Acylphosphatase-1;                                                                                                                                          | P56376            | 1                          | 8               | 10             | 39.4                  | -0.454                                       | -0.112                         | 0.618             |
| Dolichyl-diphosphooligosaccharide--protein glycosyltransferase subunit 1;                                                                                   | Q91YQ5            | 1                          | 2               | 3              | 5.6                   | -0.454                                       | -0.162                         | 0.643             |
| Uncharacterized protein;                                                                                                                                    | E9Q8E3            | 1                          | 2               | 2              | 2.1                   | -0.454                                       | -0.075                         | 0.601             |
| Sec24 related gene family, member D (S. cerevisiae); Uncharacterized protein;                                                                               | Q6NXL1            | 1                          | 8               | 8              | 8.5                   | -0.454                                       | -0.155                         | 0.641             |

Table S3, Tholen et al.

| Protein                                                                                                                                                                                                                   | Uniprot accession | ProteinProphet Prob. Score | Unique peptides | Total peptides | Sequence coverage [%] | Fold change (log <sub>2</sub> ) of ASAPratio | Fold change standard deviation | ASAPratio p-value |
|---------------------------------------------------------------------------------------------------------------------------------------------------------------------------------------------------------------------------|-------------------|----------------------------|-----------------|----------------|-----------------------|----------------------------------------------|--------------------------------|-------------------|
| Complement factor H;                                                                                                                                                                                                      | P06909            | 1                          | 3               | 3              | 2.9                   | -0.454                                       | -0.05                          | 0.594             |
| Carbonyl reductase [NADPH] 2;                                                                                                                                                                                             | P08074            | 1                          | 12              | 17             | 29.9                  | -0.454                                       | -0.05                          | 0.593             |
| ATP synthase subunit alpha, mitochondrial;                                                                                                                                                                                | Q03265            | 1                          | 32              | 52             | 34.9                  | -0.454                                       | -0.056                         | 0.595             |
| Fumarylacetoacetate hydrolase domain-containing protein 2A;                                                                                                                                                               | Q3TC72            | 1                          | 2               | 2              | 10.5                  | -0.454                                       | -0.05                          | 0.593             |
| Uncharacterized protein;                                                                                                                                                                                                  | E9Q0S6            | 0.999                      | 4               | 4              | 3.6                   | -0.454                                       | -0.093                         | 0.609             |
| Leukotriene A-4 hydrolase;                                                                                                                                                                                                | P24527            | 1                          | 32              | 44             | 32.1                  | -0.434                                       | -0.293                         | 0.737             |
| Splicing factor U2AF 65 kDa subunit;                                                                                                                                                                                      | P26369            | 1                          | 4               | 4              | 12.7                  | -0.434                                       | -0.123                         | 0.646             |
| Cellular retinoic acid-binding protein 1;                                                                                                                                                                                 | P62965            | 1                          | 6               | 6              | 36.5                  | -0.434                                       | -0.152                         | 0.654             |
| Tripartite motif-containing protein 72;                                                                                                                                                                                   | Q1XH17            | 1                          | 9               | 9              | 20.5                  | -0.434                                       | -0.199                         | 0.685             |
| Synaptic vesicle membrane protein VAT-1 homolog;                                                                                                                                                                          | Q62465            | 1                          | 22              | 36             | 33.5                  | -0.434                                       | -0.1                           | 0.624             |
| Choline dehydrogenase, mitochondrial;                                                                                                                                                                                     | Q8BJ64            | 1                          | 2               | 2              | 8.6                   | -0.434                                       | -0.117                         | 0.631             |
| Phosphopantothenate--cysteine ligase;                                                                                                                                                                                     | Q8VDG5            | 1                          | 5               | 5              | 9.6                   | -0.434                                       | -0.029                         | 0.610             |
| Probable proline racemase;                                                                                                                                                                                                | Q9CXA2            | 1                          | 5               | 6              | 14.4                  | -0.434                                       | -0.229                         | 0.704             |
| Inositol-3-phosphate synthase 1;                                                                                                                                                                                          | Q9JHU9            | 1                          | 5               | 5              | 10.6                  | -0.434                                       | -0.129                         | 0.639             |
| Thioredoxin reductase 1, cytoplasmic;                                                                                                                                                                                     | Q9JMH6            | 1                          | 9               | 12             | 20.6                  | -0.434                                       | -0.1                           | 0.633             |
| Maleylacetoacetate isomerase;                                                                                                                                                                                             | Q9WVL0            | 1                          | 15              | 15             | 41.2                  | -0.434                                       | -0.152                         | 0.654             |
| Plasminogen activator inhibitor 2, macrophage;                                                                                                                                                                            | P12388            | 1                          | 9               | 11             | 15.7                  | -0.434                                       | -0.065                         | 0.618             |
| Malate dehydrogenase, cytoplasmic;                                                                                                                                                                                        | P14152            | 1                          | 25              | 65             | 31.4                  | -0.434                                       | -0.029                         | 0.610             |
| Ras-related protein Rab-2A;                                                                                                                                                                                               | P53994            | 1                          | 9               | 11             | 32.1                  | -0.434                                       | -0.065                         | 0.618             |
| Myosin light polypeptide 6;                                                                                                                                                                                               | Q60605            | 1                          | 10              | 20             | 32.5                  | -0.434                                       | -0.164                         | 0.666             |
| Valacyclovir hydrolase;                                                                                                                                                                                                   | Q8R164            | 1                          | 7               | 8              | 19.6                  | -0.434                                       | -0.053                         | 0.605             |
| Hydroxyacylglutathione hydrolase, mitochondrial;                                                                                                                                                                          | Q99KB8            | 1                          | 8               | 8              | 27                    | -0.434                                       | -0.1                           | 0.624             |
| Protein kinase, cAMP dependent regulatory, type II alpha; Protein kinase, cAMP dependent regulatory, type II alpha, isoform CRA_b; Uncharacterized protein; cAMP-dependent protein kinase type II-alpha regulatory chain; | Q8K1M3            | 1                          | 12              | 15             | 35.1                  | -0.434                                       | -0.076                         | 0.624             |
| cAMP-dependent protein kinase type II-beta regulatory subunit;                                                                                                                                                            | P31324            | 1                          | 6               | 6              | 18.5                  | 0.506                                        | 0.107                          | 0.571             |
| Neural cell adhesion molecule L1-like protein;                                                                                                                                                                            | P70232            | 1                          | 2               | 2              | 1.6                   | -0.434                                       | -0.387                         | 0.774             |
| Caspase-6;                                                                                                                                                                                                                | O08738            | 1                          | 3               | 3              | 11.2                  | -0.415                                       | -0.172                         | 0.690             |
| Ferritin heavy chain;                                                                                                                                                                                                     | P09528            | 1                          | 8               | 11             | 28.6                  | -0.415                                       | -0.039                         | 0.622             |
| Pyruvate dehydrogenase E1 component subunit alpha, somatic form, mitochondrial;                                                                                                                                           | P35486            | 1                          | 19              | 27             | 29.5                  | -0.415                                       | -0.083                         | 0.638             |
| N(4)-(beta-N-acetylglucosaminy)-L-asparaginase;                                                                                                                                                                           | Q64191            | 1                          | 2               | 2              | 12.4                  | -0.415                                       | -0.127                         | 0.661             |
| WW domain-binding protein 11;                                                                                                                                                                                             | Q923D5            | 1                          | 4               | 4              | 4.2                   | -0.415                                       | -0.172                         | 0.685             |
| Protein canopy homolog 2;                                                                                                                                                                                                 | Q9QXT0            | 1                          | 7               | 8              | 29.1                  | -0.415                                       | -0.022                         | 0.619             |
| Phosphatidylethanolamine-binding protein 1;                                                                                                                                                                               | P70296            | 1                          | 12              | 24             | 56.7                  | -0.415                                       | -0.028                         | 0.620             |
| Abhydrolase domain-containing protein 14B;                                                                                                                                                                                | Q8VCR7            | 1                          | 8               | 8              | 31.9                  | -0.415                                       | -0.111                         | 0.649             |
| Annexin A3;                                                                                                                                                                                                               | O35639            | 1                          | 17              | 22             | 39                    | -0.396                                       | -0.047                         | 0.635             |
| Protein PRRC1;                                                                                                                                                                                                            | Q3UPH1            | 1                          | 2               | 2              | 2.7                   | -0.396                                       | -0.031                         | 0.642             |
| Mannose-1-phosphate guanyltransferase beta;                                                                                                                                                                               | Q8BTZ7            | 1                          | 9               | 11             | 24.4                  | -0.396                                       | -0.068                         | 0.651             |
| Poly(ADP-ribose) glycohydrolase ARH3;                                                                                                                                                                                     | Q8CG72            | 1                          | 6               | 7              | 16.8                  | -0.396                                       | -0.172                         | 0.698             |
| Metalloreductase STEAP3;                                                                                                                                                                                                  | Q8CI59            | 1                          | 4               | 4              | 7.9                   | -0.396                                       | -0.078                         | 0.647             |
| Electron transfer flavoprotein subunit beta;                                                                                                                                                                              | Q9DCW4            | 1                          | 21              | 39             | 48.6                  | -0.396                                       | -0.042                         | 0.634             |
| Torsin-1B;                                                                                                                                                                                                                | Q9ER41            | 1                          | 4               | 4              | 4.2                   | -0.396                                       | -0.047                         | 0.645             |
| Dysferlin;                                                                                                                                                                                                                | Q9ESD7            | 1                          | 2               | 2              | 0.5                   | -0.396                                       | -0.052                         | 0.647             |

Table S3, Tholen et al.

| Protein                                                                           | Uniprot accession | ProteinProphet Prob. Score | Unique peptides | Total peptides | Sequence coverage [%] | Fold change (log <sub>2</sub> ) of ASAPratio | Fold change standard deviation | ASAPratio p-value |
|-----------------------------------------------------------------------------------|-------------------|----------------------------|-----------------|----------------|-----------------------|----------------------------------------------|--------------------------------|-------------------|
| N-acetylneuraminic acid synthase (Sialic acid synthase); Uncharacterized protein; | Q99J77            | 1                          | 8               | 8              | 34.5                  | -0.396                                       | -0.198                         | 0.723             |
| Procollagen C-endopeptidase enhancer 1;                                           | Q61398            | 1                          | 10              | 10             | 33.1                  | -0.396                                       | -0.13                          | 0.683             |
| 3-hydroxyisobutyryl-CoA hydrolase, mitochondrial;                                 | Q8QZS1            | 1                          | 17              | 22             | 27.8                  | -0.396                                       | -0.13                          | 0.684             |
| NAD-dependent deacetylase sirtuin-2;                                              | Q8VDQ8            | 1                          | 4               | 5              | 12.1                  | -0.396                                       | -0.068                         | 0.655             |
| Prolow-density lipoprotein receptor-related protein 1;                            | Q91ZX7            | 1                          | 40              | 47             | 8.2                   | -0.396                                       | -0.099                         | 0.666             |
| Trans-2-enoyl-CoA reductase, mitochondrial;                                       | Q9DCS3            | 1                          | 5               | 5              | 11.3                  | -0.396                                       | -0.193                         | 0.710             |
| Actin-related protein 2/3 complex subunit 1B;                                     | Q9WV32            | 1                          | 9               | 12             | 23.9                  | -0.396                                       | -0.172                         | 0.698             |
| Actin-related protein 2/3 complex subunit 1A;                                     | Q9R0Q6            | 1                          | 6               | 6              | 18.4                  | -1.218                                       | -0.198                         | 0.158             |
| Ectonucleoside triphosphate diphosphohydrolase 2;                                 | O55026            | 1                          | 10              | 10             | 14.1                  | -0.377                                       | -0.113                         | 0.694             |
| COP9 signalosome complex subunit 6;                                               | O88545            | 1                          | 4               | 4              | 10.4                  | -0.377                                       | -0.264                         | 0.775             |
| Laminin subunit gamma-1;                                                          | P02468            | 1                          | 8               | 8              | 4.9                   | -0.377                                       | -0.083                         | 0.680             |
| Nucleolin;                                                                        | P09405            | 1                          | 5               | 5              | 6.2                   | -0.377                                       | -0.078                         | 0.669             |
| Ornithine aminotransferase, mitochondrial;                                        | P29758            | 1                          | 20              | 29             | 26.4                  | -0.377                                       | -0.118                         | 0.688             |
| Indolethylamine N-methyltransferase;                                              | P40936            | 1                          | 8               | 9              | 29.2                  | -0.377                                       | -0.137                         | 0.709             |
| Annexin A5;                                                                       | P48036            | 1                          | 32              | 95             | 56.4                  | -0.377                                       | -0.073                         | 0.665             |
| Fibulin-1;                                                                        | Q08879            | 1                          | 11              | 11             | 16.3                  | -0.377                                       | -0.108                         | 0.683             |
| UDP-N-acetylhexosamine pyrophosphorylase-like protein 1;                          | Q3TW96            | 1                          | 16              | 19             | 24.5                  | -0.377                                       | -0.186                         | 0.736             |
| Electron transfer flavoprotein subunit alpha, mitochondrial;                      | Q99LC5            | 1                          | 35              | 66             | 48                    | -0.377                                       | -0.054                         | 0.658             |
| Ribosome-recycling factor, mitochondrial;                                         | Q9D6S7            | 1                          | 2               | 2              | 6.5                   | -0.377                                       | -0.054                         | 0.658             |
| Omega-amidase NIT2;                                                               | Q9JHW2            | 1                          | 22              | 27             | 56.2                  | -0.377                                       | -0.098                         | 0.677             |
| Peptidyl-prolyl cis-trans isomerase NIMA-interacting 1;                           | Q9QUR7            | 1                          | 2               | 2              | 20.6                  | -0.377                                       | -0.049                         | 0.655             |
| Glutathione S-transferase P 1;                                                    | P19157            | 1                          | 13              | 27             | 48.3                  | -0.377                                       | -0.059                         | 0.660             |
| Fumarylacetoacetase;                                                              | P35505            | 1                          | 12              | 13             | 26.5                  | -0.377                                       | -0.113                         | 0.687             |
| ADP-ribose pyrophosphatase, mitochondrial;                                        | Q8BVU5            | 1                          | 5               | 5              | 8                     | -0.377                                       | -0.02                          | 0.660             |
| D-2-hydroxyglutarate dehydrogenase, mitochondrial;                                | Q8CIM3            | 1                          | 2               | 2              | 5.8                   | -0.377                                       | -0.108                         | 0.683             |
| 1,5-anhydro-D-fructose reductase;                                                 | Q9DCT1            | 0.993                      | 2               | 2              | 5.7                   | -0.377                                       | -0.054                         | 0.668             |
| Microfibrillar-associated protein 2;                                              | P55002            | 1                          | 2               | 2              | 5.5                   | -0.358                                       | -0.05                          | 0.677             |
| Protein dpy-30 homolog;                                                           | Q99LT0            | 1                          | 2               | 2              | 16.2                  | -0.358                                       | -0.055                         | 0.679             |
| Prefoldin subunit 2;                                                              | O70591            | 1                          | 5               | 7              | 22.7                  | -0.358                                       | -0.087                         | 0.693             |
| Hepatoma-derived growth factor;                                                   | P51859            | 1                          | 7               | 7              | 21.5                  | -0.358                                       | -0.17                          | 0.741             |
| Echinoderm microtubule-associated protein-like 1;                                 | Q05BC3            | 1                          | 5               | 5              | 4.1                   | -0.358                                       | -0.046                         | 0.677             |
| Guanine nucleotide-binding protein subunit alpha-11;                              | P21278            | 1                          | 2               | 2              | 2.5                   | -0.358                                       | -0.046                         | 0.677             |
| Proteasome subunit beta type-1;                                                   | O09061            | 1                          | 18              | 21             | 42.5                  | -0.34                                        | -0.228                         | 0.787             |
| Guanidinoacetate N-methyltransferase;                                             | O35969            | 1                          | 2               | 2              | 8.9                   | -0.34                                        | -0.034                         | 0.684             |
| Periaxin;                                                                         | O55103            | 1                          | 13              | 14             | 11.1                  | -0.34                                        | -0.039                         | 0.695             |
| Adenosine kinase;                                                                 | P55264            | 1                          | 16              | 25             | 27.1                  | -0.34                                        | -0.099                         | 0.722             |
| Haloacid dehalogenase-like hydrolase domain-containing protein 2;                 | Q3UGR5            | 1                          | 6               | 12             | 16.2                  | -0.34                                        | -0.112                         | 0.719             |
| Acetyl-CoA acetyltransferase, mitochondrial;                                      | Q8QZT1            | 1                          | 13              | 20             | 24.3                  | -0.34                                        | -0.077                         | 0.710             |
| Glutathione peroxidase 7;                                                         | Q99LJ6            | 1                          | 2               | 2              | 9.1                   | -0.34                                        | -0.043                         | 0.686             |
| Plasma glutamate carboxypeptidase;                                                | Q9WVJ3            | 1                          | 11              | 12             | 19.1                  | -0.34                                        | -0.065                         | 0.704             |
| Serine-threonine kinase receptor-associated protein;                              | Q9Z1Z2            | 1                          | 15              | 23             | 40.9                  | -0.34                                        | -0.185                         | 0.765             |
| Glutathione S-transferase Mu 1;                                                   | P10649            | 1                          | 12              | 19             | 49.5                  | -0.34                                        | -0.138                         | 0.735             |
| Glutathione S-transferase Mu 2;                                                   | P15626            | 1                          | 11              | 12             | 37.2                  | -0.152                                       | -0.017                         | 0.859             |

Table S3, Tholen et al.

| Protein                                                               | Uniprot accession | ProteinProphet Prob. Score | Unique peptides | Total peptides | Sequence coverage [%] | Fold change (log <sub>2</sub> ) of ASAPratio | Fold change standard deviation | ASAPratio p-value |
|-----------------------------------------------------------------------|-------------------|----------------------------|-----------------|----------------|-----------------------|----------------------------------------------|--------------------------------|-------------------|
| Ras-related protein Rab-5B;                                           | P61021            | 1                          | 2               | 2              | 16.7                  | -0.168                                       | -0.019                         | 0.841             |
| Ras-related protein Rab-5A;                                           | Q9CQD1            | 1                          | 2               | 2              | 16.7                  | 0.367                                        | 0.051                          | 0.673             |
| Xaa-Pro dipeptidase;                                                  | Q11136            | 1                          | 14              | 15             | 19.9                  | -0.34                                        | -0.112                         | 0.729             |
| Actin-related protein 2/3 complex subunit 2;                          | Q9CVB6            | 1                          | 15              | 21             | 29.3                  | -0.34                                        | -0.142                         | 0.745             |
| Dynein light chain 2, cytoplasmic;                                    | Q9D0M5            | 1                          | 4               | 4              | 20.2                  | -0.34                                        | -0.09                          | 0.717             |
| 3-oxoacyl-[acyl-carrier-protein] synthase, mitochondrial;             | Q9D404            | 1                          | 5               | 5              | 15.7                  | -0.34                                        | -0.034                         | 0.683             |
| 1,4-alpha-glucan-branching enzyme;                                    | Q9D6Y9            | 1                          | 9               | 11             | 11.4                  | -0.34                                        | -0.142                         | 0.743             |
| Proline synthase co-transcribed bacterial homolog protein;            | Q9Z2Y8            | 1                          | 6               | 8              | 19                    | -0.34                                        | -0.065                         | 0.704             |
| Serine hydrolase-like protein;                                        | Q9EPB5            | 1                          | 3               | 3              | 6.4                   | -0.34                                        | -0.069                         | 0.697             |
| UDP-glucose:glycoprotein glucosyltransferase 1;                       | Q6P5E4            | 1                          | 10              | 10             | 5                     | -0.322                                       | -0.125                         | 0.748             |
| UPF0556 protein C19orf10 homolog;                                     | Q9CPT4            | 1                          | 4               | 4              | 12.7                  | -0.322                                       | -0.072                         | 0.718             |
| Galectin-3-binding protein;                                           | Q07797            | 1                          | 2               | 2              | 4.5                   | -0.322                                       | -0.254                         | 0.819             |
| Peroxiredoxin-2;                                                      | Q61171            | 1                          | 16              | 67             | 47.5                  | -0.322                                       | -0.04                          | 0.699             |
| Secernin-2;                                                           | Q8VCA8            | 1                          | 7               | 7              | 16.2                  | -0.322                                       | -0.036                         | 0.700             |
| Inorganic pyrophosphatase 2, mitochondrial;                           | Q91VM9            | 1                          | 5               | 5              | 17.6                  | -0.322                                       | -0.105                         | 0.738             |
| PDZ and LIM domain protein 3;                                         | O70209            | 1                          | 6               | 7              | 22.2                  | -0.304                                       | -0.026                         | 0.722             |
| Carbonic anhydrase 2;                                                 | P00920            | 1                          | 9               | 9              | 30                    | -0.304                                       | -0.105                         | 0.759             |
| Bis(5'-nucleosyl)-tetraphosphatase [asymmetrical];                    | P56380            | 1                          | 6               | 8              | 21.8                  | -0.304                                       | -0.049                         | 0.719             |
| EH domain-containing protein 2;                                       | Q8BH64            | 1                          | 5               | 5              | 11.1                  | -0.304                                       | -0.113                         | 0.753             |
| Aminoacylase-1;                                                       | Q99JW2            | 1                          | 8               | 10             | 12                    | -0.304                                       | -0.023                         | 0.721             |
| Low molecular weight phosphotyrosine protein phosphatase;             | Q9D358            | 1                          | 9               | 11             | 31.6                  | -0.304                                       | -0.03                          | 0.723             |
| Isocitrate dehydrogenase [NAD] subunit alpha, mitochondrial;          | Q9D6R2            | 1                          | 16              | 26             | 32                    | -0.304                                       | -0.094                         | 0.752             |
| Mitochondrial-processing peptidase subunit alpha;                     | Q9DC61            | 1                          | 5               | 5              | 9.1                   | -0.304                                       | -0.161                         | 0.791             |
| Galactokinase;                                                        | Q9R0N0            | 1                          | 8               | 9              | 14.1                  | -0.304                                       | -0.143                         | 0.772             |
| Cullin-1;                                                             | Q9WTX6            | 1                          | 3               | 3              | 7.3                   | -0.304                                       | -0.06                          | 0.725             |
| Probable methylthioribulose-1-phosphate dehydratase;                  | Q9WVQ5            | 1                          | 4               | 4              | 20.7                  | -0.304                                       | -0.135                         | 0.768             |
| Eukaryotic translation initiation factor 3 subunit G;                 | Q9Z1D1            | 1                          | 4               | 4              | 11.9                  | -0.304                                       | -0.038                         | 0.725             |
| Succinyl-CoA ligase [GDP-forming] subunit beta, mitochondrial;        | Q9Z2I8            | 1                          | 10              | 10             | 26.1                  | -0.304                                       | -0.161                         | 0.792             |
| UDP-glucose 6-dehydrogenase;                                          | O70475            | 1                          | 26              | 31             | 43.4                  | -0.304                                       | -0.038                         | 0.715             |
| Keratin, type I cytoskeletal 17;                                      | Q9QWL7            | 1                          | 8               | 9              | 21.2                  | 1                                            | 0.195                          | 0.257             |
| Keratin 15; Keratin 15, isoform CRA_a; Uncharacterized protein;       | B1AQ77            | 1                          | 5               | 7              | 18.4                  | -3.322                                       | -2.99                          | 0.037             |
| Keratin, type I cytoskeletal 10;                                      | P02535            | 1                          | 3               | 3              | 7.4                   | -1                                           | -0.24                          | 0.273             |
| Cytosolic non-specific dipeptidase;                                   | Q9D1A2            | 1                          | 28              | 40             | 43.8                  | -0.304                                       | -0.06                          | 0.735             |
| Methylmalonate-semialdehyde dehydrogenase [acylating], mitochondrial; | Q9EQ20            | 1                          | 27              | 39             | 35.1                  | -0.304                                       | -0.079                         | 0.744             |
| Actin-like protein 6A;                                                | Q9Z2N8            | 1                          | 4               | 5              | 12.4                  | -0.304                                       | -0.098                         | 0.750             |
| Uncharacterized protein;                                              | E9PYJ9            | 1                          | 25              | 39             | 27.4                  | -0.304                                       | -0.161                         | 0.791             |
| Glyceraldehyde-3-phosphate dehydrogenase;                             | E9QAC7            | 1                          | 18              | 112            | 59.2                  | -0.304                                       | -0.049                         | 0.719             |
| Glyceraldehyde-3-phosphate dehydrogenase;                             | E9PYX4            | 1                          | 5               | 55             | 32.8                  | -0.837                                       | -0.523                         | 0.498             |
| Uncharacterized protein;                                              | Q3ULW8            | 1                          | 7               | 7              | 10.8                  | -0.304                                       | -0.113                         | 0.763             |
| Catechol-O-methyltransferase 1; Uncharacterized protein;              | Q91XH4            | 1                          | 4               | 4              | 18.5                  | -0.304                                       | -0.053                         | 0.731             |
| Platelet-activating factor acetylhydrolase IB subunit gamma;          | Q61205            | 1                          | 2               | 3              | 6.3                   | -0.304                                       | -0.03                          | 0.713             |
| 3-hydroxyanthranilate 3,4-dioxygenase;                                | Q78JT3            | 0.999                      | 2               | 2              | 12.2                  | -0.304                                       | -0.068                         | 0.737             |
| Integrin alpha-5;                                                     | P11688            | 1                          | 2               | 2              | 1                     | -0.286                                       | -0.031                         | 0.734             |

Table S3, Tholen et al.

| Protein                                                                   | Uniprot accession | ProteinProphet Prob. Score | Unique peptides | Total peptides | Sequence coverage [%] | Fold change (log <sub>2</sub> ) of ASAPratio | Fold change standard deviation | ASAPratio p-value |
|---------------------------------------------------------------------------|-------------------|----------------------------|-----------------|----------------|-----------------------|----------------------------------------------|--------------------------------|-------------------|
| Peptidyl-prolyl cis-trans isomerase C;                                    | P30412            | 1                          | 9               | 15             | 26.4                  | -0.286                                       | -0.028                         | 0.733             |
| Succinate-semialdehyde dehydrogenase, mitochondrial;                      | Q8BWF0            | 1                          | 3               | 3              | 8.2                   | -0.286                                       | -0.066                         | 0.748             |
| Probable fructose-2,6-bisphosphatase TIGAR;                               | Q8BZA9            | 1                          | 4               | 4              | 15.6                  | -0.286                                       | -0.133                         | 0.788             |
| Tubulin polymerization-promoting protein family member 3;                 | Q9CRB6            | 1                          | 3               | 6              | 11.9                  | -0.286                                       | -0.021                         | 0.731             |
| Pyruvate dehydrogenase E1 component subunit beta, mitochondrial;          | Q9D051            | 1                          | 22              | 43             | 34.5                  | -0.286                                       | -0.035                         | 0.735             |
| Peroxisomal acyl-coenzyme A oxidase 1;                                    | Q9ROH0            | 1                          | 21              | 23             | 25.3                  | -0.286                                       | -0.105                         | 0.771             |
| Phosphoglycerate kinase 1;                                                | P09411            | 1                          | 41              | 143            | 54.4                  | -0.286                                       | -0.07                          | 0.749             |
| Putative adenosylhomocysteinase 2;                                        | Q80SW1            | 1                          | 6               | 8              | 9.4                   | -0.286                                       | -0.056                         | 0.744             |
| Lysophosphatidic acid phosphatase type 6;                                 | Q8BP40            | 1                          | 9               | 10             | 20.6                  | -0.286                                       | -0.153                         | 0.800             |
| UPF0160 protein MYG1, mitochondrial;                                      | Q9JK81            | 1                          | 8               | 8              | 22.4                  | -0.286                                       | -0.157                         | 0.802             |
| Spliceosome RNA helicase Ddx39b;                                          | Q9Z1N5            | 1                          | 12              | 17             | 29.7                  | -0.286                                       | -0.15                          | 0.799             |
| ATP-dependent RNA helicase DDX39A;                                        | Q8VDW0            | 1                          | 2               | 2              | 15.5                  | -0.396                                       | -0.026                         | 0.630             |
| TOM1-like protein 2;                                                      | Q5SRX1            | 0.998                      | 2               | 2              | 3.5                   | -0.286                                       | -0.01                          | 0.730             |
| Phosphorylase b kinase regulatory subunit alpha, skeletal muscle isoform; | P18826            | 1                          | 4               | 4              | 3.4                   | -0.269                                       | -0.139                         | 0.809             |
| Dipeptidyl peptidase 4;                                                   | Q28843            | 1                          | 12              | 12             | 11.8                  | -0.269                                       | -0.123                         | 0.803             |
| Laminin subunit alpha-4;                                                  | P97927            | 1                          | 3               | 4              | 2.4                   | -0.269                                       | -0.071                         | 0.763             |
| Protein NDRG1;                                                            | Q62433            | 1                          | 2               | 2              | 3.6                   | -0.269                                       | -0.036                         | 0.746             |
| Myoferlin;                                                                | Q69ZN7            | 1                          | 7               | 7              | 3                     | -0.269                                       | -0.091                         | 0.775             |
| Aflatoxin B1 aldehyde reductase member 2;                                 | Q8CG76            | 1                          | 14              | 18             | 24.3                  | -0.269                                       | -0.036                         | 0.746             |
| PCTP-like protein;                                                        | Q9JMD3            | 1                          | 3               | 3              | 10                    | -0.269                                       | -0.107                         | 0.784             |
| AP-1 complex subunit beta-1;                                              | Q35643            | 1                          | 10              | 13             | 11.6                  | -0.269                                       | -0.104                         | 0.791             |
| Adenosylhomocysteinase;                                                   | P50247            | 1                          | 24              | 37             | 39.4                  | -0.269                                       | -0.058                         | 0.756             |
| Protein phosphatase 1 regulatory subunit 7;                               | Q3UM45            | 1                          | 13              | 14             | 28.5                  | -0.269                                       | -0.068                         | 0.771             |
| Sepiapterin reductase;                                                    | Q64105            | 1                          | 19              | 26             | 40.6                  | -0.269                                       | -0.032                         | 0.754             |
| Coagulation factor XIII A chain;                                          | Q8BH61            | 1                          | 7               | 8              | 6.1                   | -0.269                                       | -0.084                         | 0.770             |
| Dihydropteridine reductase;                                               | Q8BVI4            | 1                          | 17              | 21             | 68.8                  | -0.269                                       | -0.049                         | 0.750             |
| Carboxylesterase 3;                                                       | Q8VCT4            | 1                          | 22              | 31             | 34.2                  | -0.269                                       | -0.136                         | 0.802             |
| Liver carboxylesterase N;                                                 | P23953            | 1                          | 21              | 51             | 20.9                  | -0.494                                       | -0.035                         | 0.548             |
| Uncharacterized protein;                                                  | D3Z5G7            | 1                          | 13              | 36             | 18.2                  | -1.252                                       | -1.103                         | 0.413             |
| Expressed sequence AU018778; Uncharacterized protein;                     | Q91WU0            | 1                          | 4               | 4              | 6.8                   | -2.12                                        | -2.12                          | 0.198             |
| Calcium/calmodulin-dependent protein kinase type 1;                       | Q91YS8            | 1                          | 7               | 7              | 14.4                  | -0.269                                       | -0.068                         | 0.762             |
| Lysosome-associated membrane glycoprotein 1;                              | P11438            | 1                          | 7               | 11             | 8.4                   | -0.252                                       | -0.063                         | 0.778             |
| Fibulin-2;                                                                | P37889            | 1                          | 3               | 3              | 3.7                   | -0.252                                       | -0.096                         | 0.805             |
| Platelet-activating factor acetylhydrolase IB subunit alpha;              | P63005            | 1                          | 6               | 9              | 11.5                  | -0.252                                       | -0.051                         | 0.782             |
| N-acetylglucosamine-6-sulfatase;                                          | Q8BFR4            | 1                          | 10              | 13             | 10.5                  | -0.252                                       | -0.009                         | 0.760             |
| Presequence protease, mitochondrial;                                      | Q8K411            | 1                          | 9               | 10             | 9.7                   | -0.252                                       | -0.024                         | 0.772             |
| Apolipoprotein A-I-binding protein;                                       | Q8K4Z3            | 1                          | 9               | 11             | 22                    | -0.252                                       | -0.009                         | 0.770             |
| SPRY domain-containing protein 4;                                         | Q91WK1            | 1                          | 7               | 7              | 29.5                  | -0.252                                       | -0.111                         | 0.808             |
| Iron-sulfur cluster assembly 2 homolog, mitochondrial;                    | Q9DCB8            | 1                          | 7               | 7              | 40.3                  | -0.252                                       | -0.027                         | 0.773             |
| Protein NDRG2;                                                            | Q9QYG0            | 1                          | 18              | 25             | 52.8                  | -0.252                                       | -0.033                         | 0.775             |
| S-formylglutathione hydrolase;                                            | Q9R0P3            | 1                          | 16              | 23             | 40.4                  | -0.252                                       | -0.06                          | 0.777             |
| Glycogen synthase kinase-3 beta;                                          | Q9WV60            | 1                          | 5               | 6              | 15                    | -0.252                                       | -0.054                         | 0.784             |

Table S3, Tholen et al.

| Protein                                                                                                                                                           | Uniprot accession | ProteinProphet Prob. Score | Unique peptides | Total peptides | Sequence coverage [%] | Fold change (log <sub>2</sub> ) of ASAPratio | Fold change standard deviation | ASAPratio p-value |
|-------------------------------------------------------------------------------------------------------------------------------------------------------------------|-------------------|----------------------------|-----------------|----------------|-----------------------|----------------------------------------------|--------------------------------|-------------------|
| Iso citrate dehydrogenase 3 (NAD+) beta; Tumor-related protein; Uncharacterized protein;                                                                          | Q91VA7            | 1                          | 11              | 11             | 24.2                  | -0.252                                       | -0.096                         | 0.805             |
| Branched-chain-amino-acid aminotransferase, mitochondrial;                                                                                                        | O35855            | 1                          | 12              | 14             | 19.8                  | -0.252                                       | -0.084                         | 0.800             |
| U6 snRNA-associated Sm-like protein LSm2;                                                                                                                         | O35900            | 1                          | 5               | 5              | 47.4                  | -0.252                                       | -0.03                          | 0.774             |
| Spermine synthase;                                                                                                                                                | P97355            | 1                          | 7               | 7              | 12.8                  | -0.252                                       | -0.09                          | 0.802             |
| Annexin A4;                                                                                                                                                       | P97429            | 1                          | 32              | 49             | 50.5                  | -0.252                                       | -0.036                         | 0.776             |
| Peroxiredoxin-5, mitochondrial;                                                                                                                                   | P99029            | 1                          | 20              | 35             | 44.8                  | -0.252                                       | -0.018                         | 0.761             |
| Ubiquitin thioesterase OTUB1;                                                                                                                                     | Q7TQI3            | 1                          | 14              | 18             | 31.1                  | -0.252                                       | -0.141                         | 0.825             |
| Alpha-mannosidase 2C1;                                                                                                                                            | Q91W89            | 1                          | 5               | 5              | 8.9                   | -0.252                                       | -0.12                          | 0.814             |
| Quinone oxidoreductase-like protein 1;                                                                                                                            | Q921W4            | 1                          | 3               | 3              | 9.3                   | -0.252                                       | -0.045                         | 0.769             |
| Flavin reductase (NADPH);                                                                                                                                         | Q923D2            | 1                          | 10              | 23             | 42.7                  | -0.252                                       | -0.045                         | 0.770             |
| Ras-related protein Rab-34;                                                                                                                                       | Q64008            | 0.999                      | 2               | 2              | 5.5                   | -0.252                                       | -0.03                          | 0.764             |
| Cytohesin-3;                                                                                                                                                      | O08967            | 0.998                      | 2               | 2              | 1.8                   | -0.252                                       | -0.033                         | 0.766             |
| Interleukin enhancer-binding factor 3;                                                                                                                            | Q9Z1X4            | 0.959                      | 2               | 2              | 5.5                   | -0.252                                       | -0.198                         | 0.861             |
| Histamine N-methyltransferase;                                                                                                                                    | Q91VF2            | 0.952                      | 2               | 2              | 14.2                  | -0.252                                       | -0.036                         | 0.766             |
| D-dopachrome decarboxylase;                                                                                                                                       | O35215            | 1                          | 12              | 17             | 51.7                  | -0.234                                       | -0.022                         | 0.782             |
| Retinal rod rhodopsin-sensitive cGMP 3',5'-cyclic phosphodiesterase subunit delta;                                                                                | O55057            | 1                          | 3               | 3              | 20.7                  | -0.234                                       | -0.03                          | 0.783             |
| Vacuolar protein sorting-associated protein 26A;                                                                                                                  | P40336            | 1                          | 3               | 5              | 11.2                  | -0.234                                       | -0.022                         | 0.782             |
| Small nuclear ribonucleoprotein Sm D3;                                                                                                                            | P62320            | 1                          | 2               | 2              | 7.9                   | -0.234                                       | -0.028                         | 0.784             |
| Scavenger receptor cysteine-rich type 1 protein M130;                                                                                                             | Q2VLH6            | 1                          | 5               | 5              | 3.6                   | -0.234                                       | -0.036                         | 0.786             |
| Peptidyl-prolyl cis-trans isomerase FKBP3;                                                                                                                        | Q62446            | 1                          | 5               | 9              | 14.7                  | -0.234                                       | -0.017                         | 0.781             |
| NADP-dependent malic enzyme;                                                                                                                                      | P06801            | 1                          | 28              | 36             | 35                    | -0.234                                       | -0.088                         | 0.813             |
| Arylsulfatase A;                                                                                                                                                  | P50428            | 1                          | 3               | 3              | 8.7                   | -0.234                                       | -0.03                          | 0.780             |
| Propionyl-CoA carboxylase alpha chain, mitochondrial;                                                                                                             | Q91ZA3            | 1                          | 9               | 9              | 11.3                  | -0.234                                       | -0.135                         | 0.842             |
| Obg-like ATPase 1;                                                                                                                                                | Q9CZ30            | 1                          | 14              | 17             | 22.2                  | -0.234                                       | -0.03                          | 0.784             |
| Plasma membrane Ca <sup>++</sup> transporting ATPase 4 variant x/e; Uncharacterized protein;                                                                      | D1FNM8            | 1                          | 5               | 5              | 3.2                   | -0.234                                       | -0.072                         | 0.805             |
| Selenide, water dikinase 2;                                                                                                                                       | P97364            | 0.999                      | 2               | 2              | 6.6                   | -0.234                                       | -0.05                          | 0.792             |
| Transgelin;                                                                                                                                                       | P37804            | 1                          | 18              | 22             | 56.7                  | -0.218                                       | -0.063                         | 0.819             |
| Hydroxymethylglutaryl-CoA lyase, mitochondrial;                                                                                                                   | P38060            | 1                          | 5               | 6              | 15.7                  | -0.218                                       | -0.066                         | 0.821             |
| Glutamate--cysteine ligase catalytic subunit;                                                                                                                     | P97494            | 1                          | 4               | 4              | 3.1                   | -0.218                                       | -0.094                         | 0.838             |
| Protein farnesyltransferase/geranylgeranyltransferase type-1 subunit alpha;                                                                                       | Q61239            | 1                          | 2               | 2              | 6.1                   | -0.218                                       | -0.129                         | 0.859             |
| Spermidine synthase;                                                                                                                                              | Q64674            | 1                          | 9               | 12             | 21.9                  | -0.218                                       | -0.071                         | 0.815             |
| PITH domain-containing protein 1;                                                                                                                                 | Q8BWR2            | 1                          | 2               | 3              | 16.9                  | -0.218                                       | -0.051                         | 0.812             |
| Succinyl-CoA:3-ketoacid-coenzyme A transferase 1, mitochondrial;                                                                                                  | Q9DOK2            | 1                          | 29              | 57             | 43.6                  | -0.218                                       | -0.035                         | 0.806             |
| Catenin alpha-1;                                                                                                                                                  | P26231            | 1                          | 6               | 6              | 9.4                   | -0.218                                       | -0.112                         | 0.842             |
| Ras-related protein Rab-11B;                                                                                                                                      | P46638            | 1                          | 18              | 20             | 52.3                  | -0.218                                       | -0.119                         | 0.853             |
| UPF0366 protein C11orf67 homolog;                                                                                                                                 | Q8ROP4            | 1                          | 3               | 3              | 20.5                  | -0.218                                       | -0.117                         | 0.851             |
| Guanine deaminase;                                                                                                                                                | Q9R111            | 1                          | 21              | 32             | 38.5                  | -0.218                                       | -0.041                         | 0.799             |
| Septin-5;                                                                                                                                                         | Q9Z2Q6            | 1                          | 3               | 3              | 8.4                   | -0.218                                       | -0.033                         | 0.805             |
| Complement component 1, q subcomponent binding protein; Complement component 1, q subcomponent binding protein, isoform CRA_b; Uncharacterized protein; p32-RACK; | Q8R5L1            | 1                          | 7               | 9              | 17.2                  | -0.218                                       | -0.03                          | 0.795             |
| Ferritin;                                                                                                                                                         | Q9CPX4            | 1                          | 23              | 51             | 66.1                  | -0.218                                       | -0.038                         | 0.807             |

Table S3, Tholen et al.

| Protein                                                | Uniprot accession | ProteinProphet Prob. Score | Unique peptides | Total peptides | Sequence coverage [%] | Fold change (log <sub>2</sub> ) of ASAPratio | Fold change standard deviation | ASAPratio p-value |
|--------------------------------------------------------|-------------------|----------------------------|-----------------|----------------|-----------------------|----------------------------------------------|--------------------------------|-------------------|
| TIP41-like protein;                                    | Q8BH58            | 1                          | 2               | 2              | 5.5                   | -0.218                                       | -0.028                         | 0.804             |
| Coatomer subunit alpha;                                | Q8CIE6            | 0.999                      | 4               | 4              | 4.3                   | -0.218                                       | -0.033                         | 0.796             |
| Peroxiredoxin-4;                                       | O08807            | 1                          | 12              | 14             | 39.1                  | -0.201                                       | -0.053                         | 0.825             |
| Ras-related protein R-Ras;                             | P10833            | 1                          | 4               | 6              | 17.9                  | -0.201                                       | -0.097                         | 0.852             |
| 78 kDa glucose-regulated protein;                      | P20029            | 1                          | 41              | 76             | 36.8                  | -0.201                                       | -0.139                         | 0.876             |
| Heat shock cognate 71 kDa protein;                     | P63017            | 1                          | 40              | 93             | 47.8                  | -0.168                                       | -0.076                         | 0.878             |
| Heat shock 70 kDa protein 1A;                          | Q61696            | 1                          | 35              | 52             | 40.6                  | 0                                            | 0                              | 0.998             |
| Ras-related protein Rab-6A;                            | P35279            | 1                          | 4               | 5              | 9.6                   | -0.201                                       | -0.113                         | 0.862             |
| 40S ribosomal protein S7;                              | P62082            | 1                          | 2               | 2              | 4.2                   | -0.184                                       | -0.023                         | 0.832             |
| Peptidyl-prolyl cis-trans isomerase FKBP5;             | Q64378            | 1                          | 3               | 3              | 6.4                   | -0.184                                       | -0.069                         | 0.847             |
| Prostaglandin reductase 1;                             | Q91YR9            | 1                          | 17              | 20             | 37.7                  | -0.184                                       | -0.036                         | 0.831             |
| Mitochondrial fission 1 protein;                       | Q9CQ92            | 1                          | 3               | 3              | 7.9                   | -0.184                                       | -0.052                         | 0.836             |
| Dual specificity protein phosphatase 3;                | Q9D7X3            | 1                          | 13              | 17             | 40.5                  | -0.184                                       | -0.023                         | 0.832             |
| N-acylglucosamine 2-epimerase;                         | P82343            | 1                          | 4               | 4              | 9.5                   | -0.184                                       | -0.042                         | 0.831             |
| Isoleucyl-tRNA synthetase, mitochondrial;              | Q8BIJ6            | 1                          | 7               | 7              | 6.9                   | -0.184                                       | -0.092                         | 0.862             |
| Ubiquinone biosynthesis protein COQ9, mitochondrial;   | Q8K1Z0            | 1                          | 5               | 5              | 19.2                  | -0.184                                       | -0.088                         | 0.860             |
| 14 kDa phosphohistidine phosphatase;                   | Q9DAK9            | 0.999                      | 2               | 3              | 8.9                   | -0.184                                       | -0.027                         | 0.833             |
| Putative ATP-dependent RNA helicase Pl10;              | P16381            | 1                          | 6               | 7              | 5.9                   | -0.168                                       | -0.011                         | 0.839             |
| Nuclear transport factor 2;                            | P61971            | 1                          | 7               | 10             | 44.9                  | -0.168                                       | -0.006                         | 0.847             |
| Eukaryotic translation initiation factor 4E;           | P63073            | 1                          | 8               | 8              | 18                    | -0.168                                       | -0.015                         | 0.849             |
| Fibrinogen gamma chain;                                | Q8VCM7            | 1                          | 15              | 20             | 26.8                  | -0.168                                       | -0.015                         | 0.839             |
| Tubulin-specific chaperone C;                          | Q8VCN9            | 1                          | 2               | 2              | 3.8                   | -0.168                                       | -0.053                         | 0.865             |
| Ribonuclease inhibitor;                                | Q91VI7            | 1                          | 50              | 71             | 64.9                  | -0.168                                       | -0.094                         | 0.890             |
| Translationally-controlled tumor protein;              | P63028            | 1                          | 10              | 34             | 30.2                  | -0.168                                       | -0.011                         | 0.838             |
| Trifunctional purine biosynthetic protein adenosine-3; | Q64737            | 1                          | 20              | 23             | 20.6                  | -0.168                                       | -0.079                         | 0.881             |
| Copine-1;                                              | Q8C166            | 1                          | 10              | 13             | 20                    | -0.168                                       | -0.036                         | 0.856             |
| Copine-3;                                              | Q8BT60            | 1                          | 6               | 7              | 17.3                  | -0.474                                       | -0.342                         | 0.720             |
| N(G),N(G)-dimethylarginine dimethylaminohydrolase 1;   | Q9CWS0            | 1                          | 5               | 5              | 28.4                  | -0.168                                       | -0.053                         | 0.858             |
| NIF3-like protein 1;                                   | Q9EQ80            | 1                          | 2               | 2              | 7.2                   | -0.168                                       | -0.025                         | 0.842             |
| Profilin-2;                                            | Q9JJV2            | 1                          | 6               | 7              | 25                    | -0.168                                       | -0.07                          | 0.868             |
| Prostaglandin reductase 2;                             | Q8VDQ1            | 1                          | 3               | 3              | 11.1                  | -0.168                                       | -0.091                         | 0.883             |
| Carbonic anhydrase 1;                                  | P13634            | 1                          | 2               | 2              | 10.9                  | -0.168                                       | -0.049                         | 0.855             |
| Dihydropyrimidinase-related protein 5;                 | Q9EQF6            | 1                          | 3               | 3              | 4.4                   | -0.168                                       | -0.028                         | 0.844             |
| Mannan-binding lectin serine protease 1;               | P98064            | 0.996                      | 2               | 2              | 3                     | -0.168                                       | -0.03                          | 0.854             |
| Galectin-3;                                            | P16110            | 1                          | 13              | 18             | 36.2                  | -0.152                                       | -0.008                         | 0.857             |
| Glutathione S-transferase theta-2;                     | Q61133            | 1                          | 5               | 5              | 18                    | -0.152                                       | -0.073                         | 0.889             |
| Nicotinamide phosphoribosyltransferase;                | Q99KQ4            | 1                          | 13              | 14             | 25.9                  | -0.152                                       | -0.044                         | 0.871             |
| Filamin-A;                                             | Q8BTM8            | 1                          | 74              | 100            | 23.5                  | -0.152                                       | -0.088                         | 0.898             |
| V-type proton ATPase 116 kDa subunit a isoform 1;      | Q9Z1G4            | 0.997                      | 2               | 2              | 2.4                   | -0.152                                       | -0.025                         | 0.862             |
| Superoxide dismutase [Cu-Zn];                          | P08228            | 1                          | 14              | 49             | 32.5                  | -0.136                                       | -0.018                         | 0.879             |
| Galectin-1;                                            | P16045            | 1                          | 13              | 44             | 37.8                  | -0.136                                       | -0.016                         | 0.878             |
| Calnexin;                                              | P35564            | 1                          | 3               | 3              | 4.4                   | -0.136                                       | -0.013                         | 0.877             |
| Macrophage mannose receptor 1;                         | Q61830            | 1                          | 17              | 20             | 11                    | -0.136                                       | -0.049                         | 0.886             |



Table S3, Tholen et al.

| Protein                                                                            | Uniprot accession | ProteinProphet Prob. Score | Unique peptides | Total peptides | Sequence coverage [%] | Fold change (log <sub>2</sub> ) of ASAPratio | Fold change standard deviation | ASAPratio p-value |
|------------------------------------------------------------------------------------|-------------------|----------------------------|-----------------|----------------|-----------------------|----------------------------------------------|--------------------------------|-------------------|
| BTB/POZ domain-containing protein KCTD12;                                          | Q6WVG3            | 1                          | 10              | 10             | 26.3                  | -0.136                                       | -0.066                         | 0.904             |
| Protein phosphatase 1F;                                                            | Q8CGA0            | 1                          | 2               | 2              | 4.4                   | -0.136                                       | -0.019                         | 0.879             |
| Aspartoacylase;                                                                    | Q8R3P0            | 1                          | 2               | 2              | 7.4                   | -0.136                                       | -0.028                         | 0.874             |
| Hepatocyte growth factor activator;                                                | Q9R098            | 1                          | 3               | 3              | 6                     | -0.136                                       | -0.045                         | 0.883             |
| Delta(3,5)-Delta(2,4)-dienoyl-CoA isomerase, mitochondrial;                        | O35459            | 1                          | 7               | 8              | 14.4                  | -0.136                                       | -0.027                         | 0.873             |
| Seryl-tRNA synthetase, cytoplasmic;                                                | P26638            | 1                          | 11              | 11             | 17.6                  | -0.136                                       | -0.06                          | 0.900             |
| Disabled homolog 2;                                                                | P98078            | 1                          | 3               | 3              | 8.5                   | -0.136                                       | -0.021                         | 0.880             |
| Adapter molecule crk;                                                              | Q64010            | 1                          | 17              | 18             | 36.2                  | -0.136                                       | -0.045                         | 0.883             |
| Enoyl-CoA delta isomerase 2, mitochondrial;                                        | Q9WUR2            | 1                          | 5               | 9              | 22.4                  | -0.136                                       | -0.015                         | 0.868             |
| Phosphate carrier protein, mitochondrial;                                          | Q8VEM8            | 1                          | 2               | 2              | 3.1                   | -0.136                                       | -0.009                         | 0.867             |
| SET and MYND domain-containing protein 5;                                          | Q3TYX3            | 0.999                      | 2               | 2              | 2.2                   | -0.136                                       | -0.03                          | 0.874             |
| Desmoplakin;                                                                       | E9Q557            | 1                          | 4               | 4              | 2                     | -0.12                                        | -0.021                         | 0.890             |
| Ras-related protein Rab-7a;                                                        | P51150            | 1                          | 21              | 32             | 48.8                  | -0.12                                        | -0.013                         | 0.887             |
| Arf-GAP with Rho-GAP domain, ANK repeat and PH domain-containing protein 1;        | Q4LDD4            | 1                          | 3               | 3              | 6.1                   | -0.12                                        | -0.025                         | 0.892             |
| Platelet-activating factor acetylhydrolase IB subunit beta;                        | Q61206            | 1                          | 4               | 11             | 18.9                  | -0.12                                        | -0.003                         | 0.885             |
| Meteorin-like protein;                                                             | Q8VE43            | 1                          | 2               | 2              | 5.1                   | -0.12                                        | -0.025                         | 0.892             |
| Transmembrane emp24 domain-containing protein 10;                                  | Q9D1D4            | 1                          | 2               | 2              | 13.7                  | -0.12                                        | -0.017                         | 0.888             |
| Magnesium-dependent phosphatase 1;                                                 | Q9D967            | 1                          | 7               | 7              | 21.3                  | -0.12                                        | -0.025                         | 0.892             |
| Protein phosphatase 1 regulatory subunit 12A;                                      | Q9DBR7            | 1                          | 3               | 3              | 3.9                   | -0.12                                        | -0.018                         | 0.889             |
| Glycine N-methyltransferase;                                                       | Q9QXF8            | 1                          | 4               | 6              | 10.9                  | -0.12                                        | -0.02                          | 0.889             |
| Proteasome subunit beta type-2;                                                    | Q9R1P3            | 1                          | 4               | 5              | 17.9                  | -0.12                                        | -0.035                         | 0.897             |
| ADP-ribosylation factor-like protein 3;                                            | Q9WUL7            | 1                          | 4               | 4              | 28.6                  | -0.12                                        | -0.014                         | 0.887             |
| Caveolin-1;                                                                        | P49817            | 1                          | 3               | 5              | 19.7                  | -0.12                                        | -0.035                         | 0.897             |
| Serine/threonine-protein phosphatase 2B catalytic subunit alpha isoform;           | P63328            | 1                          | 6               | 7              | 17.3                  | -0.12                                        | -0.059                         | 0.912             |
| Coronin-1C;                                                                        | Q9WUM4            | 1                          | 7               | 7              | 12.4                  | -0.12                                        | -0.013                         | 0.887             |
| MCG21506; Macrophage galactose N-acetyl-galactosamine specific lectin 2 isoform i; |                   |                            |                 |                |                       |                                              |                                |                   |
| Uncharacterized protein;                                                           | A9XX86            | 1                          | 2               | 2              | 11.7                  | -0.12                                        | -0.046                         | 0.904             |
| Aldehyde dehydrogenase, cytosolic 1;                                               | Q35945            | 1                          | 3               | 3              | 17.4                  | -0.105                                       | -0.059                         | 0.930             |
| Porphobilinogen deaminase;                                                         | P22907            | 1                          | 3               | 4              | 10.8                  | -0.105                                       | -0.041                         | 0.916             |
| Protein S100-A13;                                                                  | P97352            | 1                          | 3               | 3              | 23.5                  | -0.105                                       | -0.024                         | 0.910             |
| Sorting nexin-2;                                                                   | Q9CWK8            | 1                          | 22              | 24             | 26.8                  | -0.105                                       | -0.024                         | 0.901             |
| AP-2 complex subunit beta;                                                         | Q9DBG3            | 1                          | 11              | 12             | 10                    | -0.105                                       | -0.014                         | 0.897             |
| Proteasome subunit beta type-5;                                                    | O55234            | 1                          | 17              | 22             | 31.1                  | -0.105                                       | -0.024                         | 0.910             |
| Aldehyde dehydrogenase, mitochondrial;                                             | P47738            | 1                          | 34              | 90             | 40.5                  | -0.105                                       | -0.014                         | 0.906             |
| Glyoxalase domain-containing protein 4;                                            | Q9CPV4            | 1                          | 15              | 17             | 35.8                  | -0.105                                       | -0.03                          | 0.906             |
| Vacuolar protein sorting-associated protein 45;                                    | P97390            | 0.999                      | 2               | 2              | 4.2                   | -0.105                                       | -0.006                         | 0.895             |
| Zinc-binding alcohol dehydrogenase domain-containing protein 2;                    | Q8BGC4            | 1                          | 8               | 11             | 16.2                  | -0.089                                       | -0.008                         | 0.915             |
| Rho GDP-dissociation inhibitor 1;                                                  | Q99PT1            | 1                          | 8               | 22             | 21.6                  | -0.089                                       | -0.006                         | 0.922             |
| Thioredoxin domain-containing protein 17;                                          | Q9CQM5            | 1                          | 5               | 9              | 26.8                  | -0.089                                       | -0.013                         | 0.924             |
| Septin-7;                                                                          | O55131            | 1                          | 10              | 13             | 19.9                  | -0.089                                       | -0.026                         | 0.930             |
| Annexin A1;                                                                        | P10107            | 1                          | 39              | 84             | 59.8                  | -0.089                                       | -0.01                          | 0.914             |
| Inositol polyphosphate 1-phosphatase;                                              | P49442            | 1                          | 3               | 3              | 5.8                   | -0.089                                       | -0.01                          | 0.915             |
| Ras-related protein Rab-1A;                                                        | P62821            | 1                          | 10              | 11             | 45.5                  | -0.089                                       | -0.02                          | 0.927             |

Table S3, Tholen et al.

| Protein                                                                                                             | Uniprot accession | ProteinProphet Prob. Score | Unique peptides | Total peptides | Sequence coverage [%] | Fold change (log <sub>2</sub> ) of ASAPratio | Fold change standard deviation | ASAPratio p-value |
|---------------------------------------------------------------------------------------------------------------------|-------------------|----------------------------|-----------------|----------------|-----------------------|----------------------------------------------|--------------------------------|-------------------|
| Ras-related protein Rab-14;                                                                                         | Q91V41            | 1                          | 7               | 7              | 23.7                  | 0.098                                        | 0.01                           | 0.907             |
| Ras-related protein Rab-10;                                                                                         | P61027            | 1                          | 6               | 9              | 22.5                  | 0.084                                        | 0.022                          | 0.929             |
| Ras-related protein Rab-8A;                                                                                         | P55258            | 1                          | 6               | 7              | 23.2                  | 0.714                                        | 0.213                          | 0.445             |
| Ras-related protein Rab-1B;                                                                                         | Q9D1G1            | 1                          | 5               | 7              | 35.3                  | 0.333                                        | 0.071                          | 0.707             |
| Pyruvate dehydrogenase protein X component, mitochondrial;                                                          | Q8BKZ9            | 1                          | 8               | 9              | 15.2                  | -0.089                                       | -0.029                         | 0.925             |
| Leukocyte elastase inhibitor A;                                                                                     | Q9D154            | 1                          | 28              | 49             | 36.4                  | -0.089                                       | -0.006                         | 0.922             |
| Ubiquitin carboxyl-terminal hydrolase isozyme L3;                                                                   | Q9JKB1            | 1                          | 9               | 11             | 29.6                  | -0.089                                       | -0.034                         | 0.927             |
| Thiomorpholine-carboxylate dehydrogenase;                                                                           | O54983            | 1                          | 4               | 4              | 12.1                  | -0.074                                       | -0.015                         | 0.927             |
| Guanine nucleotide-binding protein subunit beta-2-like 1;                                                           | P68040            | 1                          | 17              | 20             | 43.2                  | -0.074                                       | -0.022                         | 0.939             |
| Eukaryotic translation initiation factor 3 subunit B;                                                               | Q8JZQ9            | 1                          | 2               | 3              | 4                     | -0.074                                       | -0.029                         | 0.943             |
| Glutamine synthetase;                                                                                               | P15105            | 1                          | 8               | 10             | 16.6                  | -0.074                                       | -0.023                         | 0.939             |
| Peptidyl-prolyl cis-trans isomerase FKBP1A;                                                                         | P26883            | 1                          | 3               | 4              | 27.8                  | -0.074                                       | -0.019                         | 0.937             |
| Cytoplasmic aconitate hydratase;                                                                                    | P28271            | 1                          | 30              | 35             | 31.5                  | -0.074                                       | -0.026                         | 0.941             |
| Mitogen-activated protein kinase 14;                                                                                | P47811            | 1                          | 7               | 8              | 31.4                  | -0.074                                       | -0.009                         | 0.935             |
| Serine/threonine-protein phosphatase 5;                                                                             | Q60676            | 1                          | 6               | 8              | 8.4                   | -0.074                                       | -0.015                         | 0.935             |
| Disks large homolog 1;                                                                                              | Q811D0            | 1                          | 3               | 3              | 4.1                   | -0.074                                       | -0.016                         | 0.936             |
| UPF0587 protein C1orf123 homolog;                                                                                   | Q8BHG2            | 1                          | 4               | 4              | 26.1                  | -0.074                                       | -0.025                         | 0.940             |
| Serpin B8;                                                                                                          | O08800            | 1                          | 11              | 17             | 21.4                  | -0.059                                       | -0.009                         | 0.942             |
| F-box only protein 7;                                                                                               | Q3U7U3            | 1                          | 2               | 2              | 5                     | -0.059                                       | -0.012                         | 0.944             |
| Fibrinogen beta chain;                                                                                              | Q8K0E8            | 1                          | 23              | 34             | 30.4                  | -0.059                                       | -0.013                         | 0.944             |
| Rab GTPase-binding effector protein 2;                                                                              | Q91WG2            | 1                          | 4               | 4              | 6.7                   | -0.059                                       | -0.012                         | 0.952             |
| Calponin-3;                                                                                                         | Q9DAW9            | 1                          | 4               | 5              | 10                    | -0.059                                       | -0.014                         | 0.945             |
| Cadherin-13;                                                                                                        | Q9WTR5            | 1                          | 3               | 5              | 4.9                   | -0.059                                       | -0.009                         | 0.942             |
| Peptidyl-prolyl cis-trans isomerase FKBP9;                                                                          | Q9Z247            | 1                          | 6               | 6              | 9.1                   | -0.059                                       | -0.012                         | 0.944             |
| Non-catalytic region of tyrosine kinase adaptor protein 1, isoform CRA_b;                                           |                   |                            |                 |                |                       |                                              |                                |                   |
| Uncharacterized protein;                                                                                            | Q8BH99            | 1                          | 2               | 2              | 4.5                   | -0.059                                       | -0.008                         | 0.942             |
| Glucosamine--fructose-6-phosphate aminotransferase [isomerizing] 1;                                                 | P47856            | 1                          | 5               | 5              | 8.2                   | -0.059                                       | -0.033                         | 0.957             |
| Pyruvate carboxylase, mitochondrial;                                                                                | Q05920            | 1                          | 8               | 8              | 6.4                   | -0.059                                       | -0.02                          | 0.956             |
| Corticosteroid-binding globulin;                                                                                    | Q06770            | 1                          | 10              | 10             | 12.8                  | -0.059                                       | -0.02                          | 0.956             |
| Prolyl 4-hydroxylase subunit alpha-2;                                                                               | Q60716            | 1                          | 9               | 13             | 10.8                  | -0.059                                       | -0.028                         | 0.961             |
| Putative transferase CAF17 homolog, mitochondrial;                                                                  | Q8CAK1            | 1                          | 3               | 3              | 10.9                  | -0.059                                       | -0.023                         | 0.948             |
| Nitrilase homolog 1;                                                                                                | Q8VDK1            | 1                          | 6               | 6              | 21.4                  | -0.059                                       | -0.018                         | 0.955             |
| Peptidyl-prolyl cis-trans isomerase D;                                                                              | Q9CR16            | 1                          | 16              | 25             | 34.6                  | -0.059                                       | -0.022                         | 0.948             |
| Putative hydrolase RBBP9;                                                                                           | O88851            | 1                          | 5               | 5              | 28                    | -0.044                                       | -0.013                         | 0.963             |
| Serine/threonine-protein phosphatase PP1-beta catalytic subunit;                                                    | P62141            | 1                          | 17              | 19             | 42.2                  | -0.044                                       | -0.007                         | 0.960             |
| Cytosolic purine 5'-nucleotidase;                                                                                   | Q3V1L4            | 1                          | 2               | 2              | 7.9                   | -0.044                                       | -0.008                         | 0.960             |
| Bifunctional purine biosynthesis protein PURH;                                                                      | Q9CWJ9            | 1                          | 31              | 46             | 35.5                  | -0.044                                       | -0.004                         | 0.959             |
| Selenocysteine lyase;                                                                                               | Q9JL16            | 1                          | 5               | 5              | 13.8                  | -0.044                                       | -0.006                         | 0.959             |
| Leucine carboxyl methyltransferase 1; Leucine carboxyl methyltransferase 1, isoform CRA_b; Uncharacterized protein; | A2RTH5            | 1                          | 2               | 2              | 5.7                   | -0.044                                       | -0.005                         | 0.958             |
| Target of Myb protein 1;                                                                                            | O88746            | 1                          | 4               | 4              | 6.1                   | -0.029                                       | -0.004                         | 0.968             |
| Alcohol dehydrogenase class-3;                                                                                      | P28474            | 1                          | 11              | 14             | 21.9                  | -0.029                                       | -0.004                         | 0.968             |
| Tyrosine-protein phosphatase non-receptor type 11;                                                                  | P35235            | 1                          | 6               | 7              | 9.2                   | -0.029                                       | -0.01                          | 0.972             |

Table S3, Tholen et al.

| Protein                                                                                                             | Uniprot accession | ProteinProphet Prob. Score | Unique peptides | Total peptides | Sequence coverage [%] | Fold change (log <sub>2</sub> ) of ASAPratio | Fold change standard deviation | ASAPratio p-value |
|---------------------------------------------------------------------------------------------------------------------|-------------------|----------------------------|-----------------|----------------|-----------------------|----------------------------------------------|--------------------------------|-------------------|
| Cysteine and glycine-rich protein 3;                                                                                | P50462            | 1                          | 6               | 8              | 18                    | -0.029                                       | -0.005                         | 0.977             |
| Rab GDP dissociation inhibitor beta;                                                                                | Q61598            | 1                          | 40              | 75             | 66.1                  | -0.029                                       | -0.007                         | 0.978             |
| Protein arginine N-methyltransferase 5;                                                                             | Q8CIG8            | 1                          | 4               | 4              | 5.8                   | -0.029                                       | -0.007                         | 0.977             |
| C-type lectin domain family 2 member D;                                                                             | Q91V08            | 1                          | 2               | 2              | 5.3                   | -0.029                                       | -0.003                         | 0.968             |
| Metalloreductase STEAP4;                                                                                            | Q923B6            | 1                          | 2               | 2              | 2.8                   | -0.029                                       | -0.004                         | 0.968             |
| Thioredoxin domain-containing protein 12;                                                                           | Q9CQU0            | 1                          | 4               | 4              | 22.9                  | -0.029                                       | -0.002                         | 0.976             |
| Vacuolar protein sorting-associated protein 35;                                                                     | Q9EQH3            | 1                          | 7               | 9              | 5.8                   | -0.029                                       | -0.007                         | 0.970             |
| Ubiquitin carboxyl-terminal hydrolase 14;                                                                           | Q9JMA1            | 1                          | 4               | 4              | 8.3                   | -0.029                                       | -0.002                         | 0.976             |
| Dihydropyrimidinase-related protein 2;                                                                              | O08553            | 1                          | 53              | 76             | 59.3                  | -0.029                                       | -0.005                         | 0.968             |
| Dihydropyrimidinase-related protein 3;                                                                              | Q62188            | 1                          | 19              | 22             | 38.2                  | 0.536                                        | 0.044                          | 0.525             |
| Proteasome subunit alpha type-3;                                                                                    | O70435            | 1                          | 9               | 11             | 25.1                  | -0.029                                       | -0.011                         | 0.972             |
| Isocitrate dehydrogenase [NADP] cytoplasmic;                                                                        | O88844            | 1                          | 40              | 71             | 57                    | -0.029                                       | -0.006                         | 0.978             |
| Actin-related protein 2/3 complex subunit 4;                                                                        | P59999            | 1                          | 7               | 9              | 29.2                  | -0.029                                       | -0.012                         | 0.980             |
| Ubiquitin-fold modifier 1;                                                                                          | P61961            | 1                          | 4               | 5              | 50.6                  | -0.029                                       | -0.004                         | 0.968             |
| Acyl-protein thioesterase 1;                                                                                        | P97823            | 1                          | 5               | 7              | 27.8                  | -0.029                                       | -0.006                         | 0.969             |
| Biliverdin reductase A;                                                                                             | Q9CY64            | 1                          | 14              | 17             | 29.8                  | -0.029                                       | -0.005                         | 0.969             |
| Uncharacterized protein;                                                                                            | E9PWQ3            | 1                          | 32              | 37             | 10.9                  | -0.029                                       | -0.025                         | 0.982             |
| Cysteine sulfinic acid decarboxylase;                                                                               | Q9DBE0            | 1                          | 3               | 4              | 9.1                   | -0.014                                       | -0.004                         | 0.986             |
| Heme-binding protein 1;                                                                                             | Q9R257            | 1                          | 5               | 7              | 24.2                  | -0.014                                       | -0.004                         | 0.986             |
| Protein disulfide-isomerase A3;                                                                                     | P27773            | 1                          | 40              | 71             | 50.5                  | -0.014                                       | -0.001                         | 0.989             |
| Lupus La protein homolog;                                                                                           | P32067            | 1                          | 4               | 4              | 9.9                   | -0.014                                       | -0.004                         | 0.986             |
| Histidine ammonia-lyase;                                                                                            | P35492            | 1                          | 33              | 48             | 35.9                  | -0.014                                       | -0.005                         | 0.987             |
| DNA damage-binding protein 1;                                                                                       | Q3U1J4            | 1                          | 13              | 15             | 14.9                  | -0.014                                       | -0.003                         | 0.986             |
| Kynurenine--oxoglutarate transaminase 1;                                                                            | Q8BTY1            | 1                          | 3               | 3              | 12.3                  | -0.014                                       | -0.003                         | 0.986             |
| Pyridoxal kinase;                                                                                                   | Q8K183            | 1                          | 16              | 17             | 22.8                  | -0.014                                       | -0.002                         | 0.985             |
| Plastin-3;                                                                                                          | Q99K51            | 1                          | 28              | 40             | 33.3                  | -0.014                                       | -0.005                         | 0.987             |
| von Willebrand factor A domain-containing protein 5A;                                                               | Q99KC8            | 1                          | 37              | 63             | 27.2                  | -0.014                                       | -0.005                         | 0.987             |
| Lectin, galactose binding, soluble 7; Lectin, galactose binding, soluble 7, isoform CRA_a; Uncharacterized protein; | Q9CRB1            | 1                          | 20              | 61             | 75                    | -0.014                                       | -0.003                         | 0.986             |
| Myeloid-associated differentiation marker;                                                                          | O35682            | 1                          | 3               | 7              | 5.3                   | 0                                            | 0                              | 0.994             |
| Myoglobin;                                                                                                          | P04247            | 1                          | 13              | 29             | 41.6                  | 0                                            | 0                              | 0.998             |
| Myotrophin;                                                                                                         | P62774            | 1                          | 4               | 8              | 14.4                  | 0                                            | 0                              | 0.998             |
| Microtubule-associated protein RP/EB family member 1;                                                               | Q61166            | 1                          | 2               | 3              | 7.5                   | 0                                            | 0                              | 0.994             |
| Osteoclast-stimulating factor 1;                                                                                    | Q62422            | 1                          | 13              | 16             | 49.3                  | 0                                            | 0                              | 0.994             |
| Regucalcin;                                                                                                         | Q64374            | 1                          | 3               | 3              | 10.4                  | 0                                            | 0                              | 0.994             |
| Cytoplasmic dynein 1 light intermediate chain 2;                                                                    | Q6PDL0            | 1                          | 3               | 3              | 8.7                   | 0                                            | 0                              | 0.999             |
| NEDD8-activating enzyme E1 catalytic subunit;                                                                       | Q8C878            | 1                          | 3               | 5              | 7.6                   | 0                                            | 0                              | 0.998             |
| Electron transfer flavoprotein-ubiquinone oxidoreductase, mitochondrial;                                            | Q921G7            | 1                          | 4               | 4              | 5.8                   | 0                                            | 0                              | 0.998             |
| Phosphoacetylglucosamine mutase;                                                                                    | Q9CYR6            | 1                          | 11              | 24             | 19.4                  | 0                                            | 0                              | 0.995             |
| Mannose-1-phosphate guanylyltransferase alpha;                                                                      | Q922H4            | 1                          | 2               | 2              | 6.4                   | 0                                            | 0                              | 0.998             |
| Hydroxyacid-oxoacid transhydrogenase, mitochondrial;                                                                | Q8RON6            | 0.997                      | 3               | 3              | 11.4                  | 0                                            | 0                              | 0.998             |
| Protein DDI1 homolog 2;                                                                                             | A2ADY9            | 1                          | 7               | 8              | 18                    | 0.014                                        | 0.005                          | 0.984             |
| Hydroxyacyl-coenzyme A dehydrogenase, mitochondrial;                                                                | Q61425            | 1                          | 7               | 13             | 25.5                  | 0.014                                        | 0.001                          | 0.989             |

Table S3, Tholen et al.

| Protein                                                             | Uniprot accession | ProteinProphet Prob. Score | Unique peptides | Total peptides | Sequence coverage [%] | Fold change (log <sub>2</sub> ) of ASAPratio | Fold change standard deviation | ASAPratio p-value |
|---------------------------------------------------------------------|-------------------|----------------------------|-----------------|----------------|-----------------------|----------------------------------------------|--------------------------------|-------------------|
| NAD-dependent malic enzyme, mitochondrial;                          | Q99KE1            | 1                          | 3               | 3              | 7.8                   | 0.014                                        | 0.003                          | 0.982             |
| Prostaglandin F2 receptor negative regulator;                       | Q9WV91            | 1                          | 4               | 4              | 7.1                   | 0.014                                        | 0.003                          | 0.982             |
| Fatty acid-binding protein, adipocyte;                              | P04117            | 1                          | 18              | 272            | 64.4                  | 0.014                                        | 0.006                          | 0.991             |
| Heat shock protein beta-1;                                          | P14602            | 1                          | 16              | 35             | 33.5                  | 0.014                                        | 0.001                          | 0.981             |
| Glutathione synthetase;                                             | P51855            | 1                          | 4               | 4              | 8                     | 0.014                                        | 0.001                          | 0.981             |
| Elongation factor 2;                                                | P58252            | 1                          | 57              | 103            | 39.2                  | 0.014                                        | 0.006                          | 0.984             |
| Heterogeneous nuclear ribonucleoprotein D0;                         | Q60668            | 1                          | 4               | 10             | 31.8                  | 0.014                                        | 0.006                          | 0.991             |
| Hypoxia up-regulated protein 1;                                     | Q9JKR6            | 1                          | 21              | 22             | 18.2                  | 0.014                                        | 0.007                          | 0.992             |
| Sorting nexin-1;                                                    | Q9WV80            | 1                          | 9               | 10             | 10.6                  | 0.014                                        | 0.001                          | 0.981             |
| EF hand domain containing 2; Efh2 protein; Uncharacterized protein; | Q8C845            | 1                          | 6               | 7              | 19.2                  | 0.014                                        | 0.002                          | 0.989             |
| Protein phosphatase 1G;                                             | Q61074            | 0.998                      | 2               | 2              | 3.7                   | 0.014                                        | 0.002                          | 0.989             |
| Protein disulfide-isomerase A4;                                     | P08003            | 1                          | 15              | 20             | 14.7                  | 0.029                                        | 0.008                          | 0.975             |
| Parkinson disease 7 domain-containing protein 1;                    | Q8BFQ8            | 1                          | 2               | 2              | 20                    | 0.029                                        | 0.003                          | 0.972             |
| Myosin-9;                                                           | Q8VDD5            | 1                          | 2               | 2              | 0.6                   | 0.029                                        | 0.004                          | 0.973             |
| Ester hydrolase C11orf54 homolog;                                   | Q91V76            | 1                          | 8               | 8              | 20.6                  | 0.029                                        | 0.003                          | 0.972             |
| Ubiquitin-fold modifier-conjugating enzyme 1;                       | Q9CR09            | 1                          | 3               | 3              | 10.2                  | 0.029                                        | 0.004                          | 0.973             |
| Calcineurin-like phosphoesterase domain-containing protein 1;       | Q8BFS6            | 1                          | 5               | 7              | 18.9                  | 0.029                                        | 0.003                          | 0.972             |
| Vacuolar protein sorting-associated protein 29;                     | Q9QZ88            | 1                          | 7               | 7              | 25                    | 0.029                                        | 0.011                          | 0.977             |
| Proteasome subunit alpha type-4;                                    | Q9R1P0            | 1                          | 14              | 22             | 58.1                  | 0.029                                        | 0.005                          | 0.974             |
| Biotinidase;                                                        | Q8CIF4            | 1                          | 2               | 2              | 7.7                   | 0.043                                        | 0.005                          | 0.964             |
| GDP-mannose 4,6 dehydratase;                                        | Q8K0C9            | 1                          | 2               | 2              | 6.7                   | 0.043                                        | 0.022                          | 0.975             |
| Mitochondrial antiviral-signaling protein;                          | Q8VCF0            | 1                          | 4               | 4              | 4.4                   | 0.043                                        | 0.004                          | 0.955             |
| Ribulose-phosphate 3-epimerase;                                     | Q8VEE0            | 1                          | 3               | 4              | 8.3                   | 0.043                                        | 0.004                          | 0.956             |
| Pyridoxine-5'-phosphate oxidase;                                    | Q91XF0            | 1                          | 3               | 3              | 6.9                   | 0.043                                        | 0.005                          | 0.956             |
| Ubiquitin carboxyl-terminal hydrolase isozyme L1;                   | Q9R0P9            | 1                          | 8               | 9              | 31.4                  | 0.043                                        | 0.014                          | 0.968             |
| Eukaryotic translation initiation factor 4H;                        | Q9WUK2            | 1                          | 2               | 2              | 11.7                  | 0.043                                        | 0.014                          | 0.961             |
| Paralemmin-1;                                                       | Q9Z0P4            | 1                          | 4               | 4              | 5                     | 0.043                                        | 0.01                           | 0.966             |
| Protein disulfide-isomerase;                                        | P09103            | 1                          | 39              | 74             | 47                    | 0.043                                        | 0.014                          | 0.968             |
| Alpha-crystallin B chain;                                           | P23927            | 1                          | 11              | 19             | 28                    | 0.043                                        | 0.002                          | 0.955             |
| LIM and cysteine-rich domains protein 1;                            | Q8VEE1            | 1                          | 5               | 5              | 14.5                  | 0.043                                        | 0.02                           | 0.971             |
| TAR DNA-binding protein 43;                                         | Q921F2            | 1                          | 8               | 9              | 23.8                  | 0.043                                        | 0.02                           | 0.969             |
| Peroxisomal acyl-coenzyme A oxidase 3;                              | Q9EPL9            | 1                          | 15              | 19             | 16.9                  | 0.043                                        | 0.01                           | 0.958             |
| Basal cell adhesion molecule;                                       | Q9R069            | 1                          | 7               | 7              | 10.3                  | 0.043                                        | 0.012                          | 0.959             |
| Glutathione peroxidase 1;                                           | P11352            | 1                          | 16              | 21             | 55.7                  | 0.057                                        | 0.003                          | 0.947             |
| Histidyl-tRNA synthetase, cytoplasmic;                              | Q61035            | 1                          | 3               | 3              | 8.1                   | 0.057                                        | 0.01                           | 0.949             |
| Tripeptidyl-peptidase 2;                                            | Q64514            | 1                          | 7               | 7              | 5.1                   | 0.057                                        | 0.021                          | 0.955             |
| Signal transducer and activator of transcription 3;                 | P42227            | 1                          | 3               | 3              | 5.2                   | 0.057                                        | 0.011                          | 0.942             |
| Reticulocalbin-3;                                                   | Q8BH97            | 1                          | 5               | 5              | 13.5                  | 0.057                                        | 0.008                          | 0.948             |
| Protein transport protein Sec24A;                                   | Q3U2P1            | 1                          | 5               | 6              | 13.7                  | 0.07                                         | 0.006                          | 0.939             |
| BAG family molecular chaperone regulator 1;                         | Q60739            | 1                          | 9               | 14             | 12.1                  | 0.07                                         | 0.011                          | 0.940             |
| NmrA-like family domain-containing protein 1;                       | Q8K2T1            | 1                          | 2               | 2              | 5.4                   | 0.07                                         | 0.009                          | 0.940             |
| CD109 antigen;                                                      | Q8R422            | 1                          | 6               | 6              | 3.6                   | 0.07                                         | 0.025                          | 0.940             |
| Serine/threonine-protein kinase DCLK1;                              | Q9JLM8            | 1                          | 2               | 2              | 3                     | 0.07                                         | 0.011                          | 0.932             |

Table S3, Tholen et al.

| Protein                                                                                                         | Uniprot accession | ProteinProphet Prob. Score | Unique peptides | Total peptides | Sequence coverage [%] | Fold change (log <sub>2</sub> ) of ASAPratio | Fold change standard deviation | ASAPratio p-value |
|-----------------------------------------------------------------------------------------------------------------|-------------------|----------------------------|-----------------|----------------|-----------------------|----------------------------------------------|--------------------------------|-------------------|
| S-phase kinase-associated protein 1;                                                                            | Q9WTK5            | 1                          | 3               | 3              | 15.3                  | 0.07                                         | 0.007                          | 0.932             |
| Probable C->U-editing enzyme APOBEC-2;                                                                          | Q9WV35            | 1                          | 10              | 11             | 31.2                  | 0.07                                         | 0.028                          | 0.942             |
| Dynactin subunit 1;                                                                                             | O08788            | 1                          | 2               | 2              | 3                     | 0.07                                         | 0.018                          | 0.943             |
| Protein canopy homolog 4;                                                                                       | Q8BQ47            | 1                          | 4               | 4              | 17.6                  | 0.07                                         | 0.009                          | 0.932             |
| L-xylulose reductase;                                                                                           | Q91X52            | 1                          | 7               | 8              | 18.9                  | 0.07                                         | 0.022                          | 0.936             |
| MAGUK p55 subfamily member 6;                                                                                   | Q9JLBO            | 1                          | 3               | 3              | 3.4                   | 0.07                                         | 0.021                          | 0.938             |
| Adenine phosphoribosyl transferase; Adenine phosphoribosyl transferase, isoform CRA_b; Uncharacterized protein; | Q6PK77            | 1                          | 5               | 6              | 34.4                  | 0.07                                         | 0.027                          | 0.942             |
| Nucleoside diphosphate kinase 3;                                                                                | Q9WV85            | 0.999                      | 2               | 2              | 4.1                   | 0.07                                         | 0.008                          | 0.939             |
| Thioredoxin;                                                                                                    | P10639            | 1                          | 8               | 15             | 46.7                  | 0.084                                        | 0.021                          | 0.928             |
| Isochorismatase domain-containing protein 2A, mitochondrial;                                                    | P85094            | 1                          | 4               | 4              | 7.8                   | 0.084                                        | 0.012                          | 0.924             |
| Phosphoglucomutase-2;                                                                                           | Q7TSV4            | 1                          | 14              | 15             | 12.7                  | 0.084                                        | 0.025                          | 0.927             |
| Cytosolic 5'-nucleotidase 3;                                                                                    | Q9D020            | 1                          | 10              | 10             | 24.2                  | 0.084                                        | 0.009                          | 0.915             |
| Eukaryotic translation initiation factor 3 subunit I;                                                           | Q9QZD9            | 1                          | 3               | 3              | 11.5                  | 0.084                                        | 0.015                          | 0.925             |
| Destrin;                                                                                                        | Q9R0P5            | 1                          | 11              | 25             | 40.6                  | 0.084                                        | 0.012                          | 0.924             |
| Uncharacterized protein;                                                                                        | E9PV24            | 1                          | 11              | 14             | 19.9                  | 0.084                                        | 0.017                          | 0.926             |
| Beta-galactosidase;                                                                                             | P23780            | 1                          | 14              | 16             | 16.9                  | 0.084                                        | 0.017                          | 0.929             |
| Peroxisome protein 1;                                                                                           | P35700            | 1                          | 22              | 49             | 72.4                  | 0.084                                        | 0.016                          | 0.918             |
| 3-hydroxyisobutyrate dehydrogenase, mitochondrial;                                                              | Q99L13            | 1                          | 16              | 23             | 37.6                  | 0.084                                        | 0.015                          | 0.917             |
| NSFL1 cofactor p47;                                                                                             | Q9CZ44            | 1                          | 17              | 21             | 33.8                  | 0.084                                        | 0.018                          | 0.919             |
| Malignant T cell-amplified sequence 1;                                                                          | Q9DB27            | 1                          | 4               | 5              | 25.4                  | 0.084                                        | 0.016                          | 0.925             |
| CUGBP Elav-like family member 2;                                                                                | Q9Z0H4            | 1                          | 6               | 6              | 14                    | 0.084                                        | 0.035                          | 0.939             |
| 3'(2'),5'-bisphosphate nucleotidase 1;                                                                          | Q9Z0S1            | 1                          | 8               | 8              | 25.3                  | 0.084                                        | 0.031                          | 0.927             |
| Glucosidase 2 subunit beta;                                                                                     | O08795            | 1                          | 8               | 8              | 12.7                  | 0.098                                        | 0.01                           | 0.908             |
| Cysteine and glycine-rich protein 1;                                                                            | P97315            | 1                          | 9               | 10             | 30.1                  | 0.098                                        | 0.024                          | 0.913             |
| Alanine aminotransferase 1;                                                                                     | Q8QZR5            | 1                          | 16              | 18             | 26                    | 0.098                                        | 0.022                          | 0.910             |
| Lysosomal alpha-glucosidase;                                                                                    | P70699            | 1                          | 8               | 8              | 7                     | 0.098                                        | 0.014                          | 0.908             |
| Uncharacterized protein;                                                                                        | Q3TUE1            | 1                          | 5               | 5              | 10.3                  | 0.098                                        | 0.029                          | 0.916             |
| COP9 signalosome complex subunit 5;                                                                             | O35864            | 1                          | 5               | 6              | 16.8                  | 0.111                                        | 0.029                          | 0.899             |
| Fatty acid-binding protein, heart;                                                                              | P11404            | 1                          | 10              | 14             | 47.4                  | 0.111                                        | 0.032                          | 0.901             |
| Proteasome subunit beta type-8;                                                                                 | P28063            | 1                          | 7               | 11             | 16.3                  | 0.111                                        | 0.024                          | 0.896             |
| Crk-like protein;                                                                                               | P47941            | 1                          | 4               | 4              | 5.9                   | 0.111                                        | 0.009                          | 0.899             |
| Desmocollin-3;                                                                                                  | P55850            | 1                          | 3               | 3              | 4.5                   | 0.111                                        | 0.024                          | 0.896             |
| Proteasome subunit beta type-4;                                                                                 | P99026            | 1                          | 9               | 11             | 32.6                  | 0.111                                        | 0.015                          | 0.900             |
| Proteasome subunit beta type-6;                                                                                 | Q60692            | 1                          | 4               | 6              | 8.8                   | 0.111                                        | 0.012                          | 0.891             |
| Peptidyl-prolyl cis-trans isomerase F, mitochondrial;                                                           | Q99KR7            | 1                          | 2               | 2              | 24.8                  | 0.111                                        | 0.035                          | 0.903             |
| Calcyclin-binding protein;                                                                                      | Q9CXW3            | 1                          | 2               | 2              | 13.1                  | 0.111                                        | 0.01                           | 0.891             |
| Dipeptidyl peptidase 2;                                                                                         | Q9ET22            | 1                          | 7               | 9              | 9.7                   | 0.111                                        | 0.011                          | 0.891             |
| Translin-associated protein X;                                                                                  | Q9QZE7            | 1                          | 5               | 5              | 18.3                  | 0.111                                        | 0.011                          | 0.891             |
| Tyrosine-protein kinase Lyn;                                                                                    | P25911            | 1                          | 3               | 3              | 3.9                   | 0.111                                        | 0.056                          | 0.916             |
| Actin-related protein 3;                                                                                        | Q99JY9            | 1                          | 18              | 28             | 33.3                  | 0.111                                        | 0.015                          | 0.892             |
| Glia maturation factor beta;                                                                                    | Q9CQI3            | 1                          | 5               | 7              | 21.1                  | 0.111                                        | 0.009                          | 0.899             |
| WD repeat-containing protein 91;                                                                                | Q7TMQ7            | 1                          | 2               | 2              | 3.1                   | 0.111                                        | 0.022                          | 0.895             |

Table S3, Tholen et al.

| Protein                                                   | Uniprot accession | ProteinProphet Prob. Score | Unique peptides | Total peptides | Sequence coverage [%] | Fold change (log <sub>2</sub> ) of ASAPratio | Fold change standard deviation | ASAPratio p-value |
|-----------------------------------------------------------|-------------------|----------------------------|-----------------|----------------|-----------------------|----------------------------------------------|--------------------------------|-------------------|
| Heterogeneous nuclear ribonucleoprotein H2;               | P70333            | 1                          | 9               | 9              | 24.3                  | 0.124                                        | 0.027                          | 0.889             |
| Cytosolic 10-formyltetrahydrofolate dehydrogenase;        | Q8R0Y6            | 1                          | 15              | 15             | 14.7                  | 0.124                                        | 0.044                          | 0.899             |
| Septin-2;                                                 | P42208            | 1                          | 17              | 22             | 41.6                  | 0.124                                        | 0.023                          | 0.892             |
| C-1-tetrahydrofolate synthase, cytoplasmic;               | Q922D8            | 1                          | 11              | 11             | 11.1                  | 0.124                                        | 0.051                          | 0.903             |
| Multifunctional protein ADE2;                             | Q9DCL9            | 1                          | 11              | 13             | 21.6                  | 0.124                                        | 0.024                          | 0.888             |
| ATPase Asn1;                                              | O54984            | 1                          | 2               | 2              | 6                     | 0.138                                        | 0.016                          | 0.869             |
| Calreticulin;                                             | P14211            | 1                          | 16              | 25             | 26.7                  | 0.138                                        | 0.018                          | 0.869             |
| Vitamin D-binding protein;                                | P21614            | 1                          | 38              | 46             | 54.6                  | 0.138                                        | 0.023                          | 0.873             |
| Rho GTPase-activating protein 25;                         | Q8BYW1            | 1                          | 3               | 3              | 3.9                   | 0.138                                        | 0.018                          | 0.869             |
| Mitotic checkpoint protein BUB3;                          | Q9WVA3            | 1                          | 3               | 3              | 7.4                   | 0.138                                        | 0.07                           | 0.899             |
| Polymerase I and transcript release factor;               | O54724            | 1                          | 8               | 8              | 15.1                  | 0.138                                        | 0.078                          | 0.909             |
| Diphosphoinositol polyphosphate phosphohydrolase 3-alpha; | P0C027            | 1                          | 4               | 4              | 9.8                   | 0.138                                        | 0.02                           | 0.877             |
| Prolyl 3-hydroxylase 1;                                   | Q3V1T4            | 1                          | 2               | 2              | 3.2                   | 0.138                                        | 0.026                          | 0.872             |
| Glutathione S-transferase theta-1;                        | Q64471            | 1                          | 4               | 4              | 5.8                   | 0.138                                        | 0.011                          | 0.875             |
| Vinculin;                                                 | Q64727            | 1                          | 33              | 38             | 28                    | 0.138                                        | 0.021                          | 0.878             |
| Xaa-Pro aminopeptidase 1;                                 | Q6P1B1            | 1                          | 23              | 27             | 26.2                  | 0.138                                        | 0.013                          | 0.875             |
| Major vault protein;                                      | Q9EQK5            | 1                          | 9               | 9              | 11                    | 0.138                                        | 0.046                          | 0.891             |
| Glycerol-3-phosphate dehydrogenase [NAD+], cytoplasmic;   | P13707            | 1                          | 29              | 53             | 54.6                  | 0.151                                        | 0.041                          | 0.871             |
| Glutathione S-transferase kappa 1;                        | Q9DCM2            | 1                          | 11              | 13             | 35                    | 0.151                                        | 0.052                          | 0.878             |
| Guanine nucleotide-binding protein G(i) subunit alpha-2;  | P08752            | 1                          | 13              | 15             | 38                    | 0.151                                        | 0.054                          | 0.880             |
| Guanine nucleotide-binding protein G(k) subunit alpha;    | Q9DC51            | 1                          | 4               | 5              | 17.2                  | 0.614                                        | 0.088                          | 0.474             |
| Ras-related protein Rap-2b;                               | P61226            | 0.983                      | 2               | 2              | 6                     | 0.151                                        | 0.015                          | 0.860             |
| GDP-L-fucose synthase;                                    | P23591            | 1                          | 6               | 6              | 13.1                  | 0.163                                        | 0.036                          | 0.853             |
| Actin-related protein 2;                                  | P61161            | 1                          | 17              | 17             | 26.9                  | 0.163                                        | 0.048                          | 0.860             |
| Survival of motor neuron-related-splicing factor 30;      | Q8BGT7            | 1                          | 2               | 2              | 4.2                   | 0.163                                        | 0.016                          | 0.853             |
| Abl interactor 1;                                         | Q8CBW3            | 1                          | 2               | 2              | 2.3                   | 0.163                                        | 0.007                          | 0.851             |
| Acylamino-acid-releasing enzyme;                          | Q8R146            | 1                          | 14              | 16             | 15.2                  | 0.163                                        | 0.055                          | 0.871             |
| Dipeptidyl peptidase 3;                                   | Q99KK7            | 1                          | 18              | 23             | 21                    | 0.163                                        | 0.051                          | 0.869             |
| Glucosamine-6-phosphate isomerase 1;                      | O88958            | 1                          | 4               | 4              | 17.6                  | 0.163                                        | 0.051                          | 0.868             |
| Chromobox protein homolog 3;                              | P23198            | 1                          | 3               | 3              | 14.8                  | 0.163                                        | 0.044                          | 0.865             |
| F-actin-capping protein subunit beta;                     | P47757            | 1                          | 7               | 7              | 23.1                  | 0.163                                        | 0.073                          | 0.875             |
| Glucose-6-phosphate 1-dehydrogenase X;                    | Q00612            | 1                          | 27              | 34             | 32.4                  | 0.163                                        | 0.031                          | 0.851             |
| Lysosomal acid phosphatase;                               | P24638            | 0.978                      | 2               | 2              | 8.5                   | 0.163                                        | 0.02                           | 0.846             |
| Synaptophysin-like protein 2;                             | O89104            | 1                          | 2               | 2              | 10.6                  | 0.176                                        | 0.03                           | 0.834             |
| Nucleosome assembly protein 1-like 4;                     | Q78ZA7            | 1                          | 5               | 5              | 10.1                  | 0.176                                        | 0.076                          | 0.862             |
| Thioredoxin-like protein 1;                               | Q8CDN6            | 1                          | 8               | 9              | 24.6                  | 0.176                                        | 0.03                           | 0.842             |
| Perilipin-1;                                              | Q8CGN5            | 1                          | 11              | 11             | 27.1                  | 0.176                                        | 0.056                          | 0.849             |
| Endoplasmic reticulum resident protein 44;                | Q9D1Q6            | 1                          | 13              | 13             | 23.6                  | 0.176                                        | 0.036                          | 0.844             |
| Prolargin;                                                | Q9JK53            | 1                          | 16              | 24             | 24.1                  | 0.176                                        | 0.012                          | 0.829             |
| Integrin beta-1;                                          | P09055            | 1                          | 4               | 4              | 4.9                   | 0.176                                        | 0.092                          | 0.878             |
| Protein 4.1;                                              | P48193            | 1                          | 4               | 5              | 5.3                   | 0.176                                        | 0.069                          | 0.856             |
| Aminopeptidase N;                                         | P97449            | 1                          | 20              | 23             | 15.8                  | 0.176                                        | 0.059                          | 0.858             |
| Ubiquitin-like modifier-activating enzyme 1;              | Q02053            | 1                          | 54              | 83             | 27.6                  | 0.176                                        | 0.042                          | 0.840             |

Table S3, Tholen et al.

| Protein                                                                                                                                   | Uniprot accession | ProteinProphet Prob. Score | Unique peptides | Total peptides | Sequence coverage [%] | Fold change (log <sub>2</sub> ) of ASAPratio | Fold change standard deviation | ASAPratio p-value |
|-------------------------------------------------------------------------------------------------------------------------------------------|-------------------|----------------------------|-----------------|----------------|-----------------------|----------------------------------------------|--------------------------------|-------------------|
| Versican core protein;                                                                                                                    | Q62059            | 1                          | 8               | 8              | 8.7                   | 0.176                                        | 0.03                           | 0.834             |
| cAMP-dependent protein kinase type I-alpha regulatory subunit;                                                                            | Q9DBC7            | 1                          | 7               | 8              | 9.4                   | 0.176                                        | 0.016                          | 0.837             |
| N-acetyl-D-glucosamine kinase;                                                                                                            | Q9QZ08            | 1                          | 4               | 4              | 11.1                  | 0.176                                        | 0.019                          | 0.830             |
| Apoptosis inhibitor 5;                                                                                                                    | O35841            | 1                          | 2               | 2              | 4.2                   | 0.176                                        | 0.028                          | 0.834             |
| 1,2-dihydroxy-3-keto-5-methylthiopentene dioxygenase;                                                                                     | Q99JT9            | 1                          | 2               | 2              | 11.7                  | 0.176                                        | 0.031                          | 0.835             |
| Platelet glycoprotein 4;                                                                                                                  | Q08857            | 1                          | 6               | 8              | 12.9                  | 0.189                                        | 0.038                          | 0.830             |
| Transcription factor BTF3;                                                                                                                | Q64152            | 1                          | 4               | 4              | 23                    | 0.189                                        | 0.025                          | 0.824             |
| N-alpha-acetyltransferase 38, NatC auxiliary subunit;                                                                                     | Q6ZWM4            | 1                          | 3               | 4              | 27.1                  | 0.189                                        | 0.075                          | 0.851             |
| Eukaryotic translation initiation factor 2 subunit 1;                                                                                     | Q6ZWX6            | 1                          | 3               | 3              | 7                     | 0.189                                        | 0.022                          | 0.823             |
| ATP-dependent RNA helicase DDX42;                                                                                                         | Q810A7            | 1                          | 2               | 3              | 2.6                   | 0.189                                        | 0.012                          | 0.821             |
| Neutral alpha-glucosidase AB;                                                                                                             | Q8BHN3            | 1                          | 17              | 20             | 11.2                  | 0.189                                        | 0.017                          | 0.822             |
| Prolyl endopeptidase;                                                                                                                     | Q9QUR6            | 1                          | 30              | 33             | 39.9                  | 0.189                                        | 0.04                           | 0.831             |
| DnaJ homolog subfamily B member 2;                                                                                                        | Q9QYI5            | 1                          | 3               | 3              | 7.9                   | 0.189                                        | 0.086                          | 0.858             |
| Proteasome subunit beta type-3;                                                                                                           | Q9R1P1            | 1                          | 16              | 18             | 38.5                  | 0.189                                        | 0.017                          | 0.822             |
| Capping protein (Actin filament), gelsolin-like; Capping protein (Actin filament), gelsolin-like, isoform CRA_a; Uncharacterized protein; | Q99LB4            | 1                          | 23              | 53             | 45.3                  | 0.189                                        | 0.012                          | 0.821             |
| Transketolase;                                                                                                                            | P40142            | 1                          | 41              | 74             | 42.5                  | 0.202                                        | 0.042                          | 0.815             |
| Peroxisomal multifunctional enzyme type 2;                                                                                                | P51660            | 1                          | 14              | 18             | 15.8                  | 0.202                                        | 0.069                          | 0.838             |
| Filamin-B;                                                                                                                                | Q80X90            | 1                          | 22              | 23             | 8.8                   | 0.202                                        | 0.104                          | 0.859             |
| Ubiquitin-like modifier-activating enzyme 5;                                                                                              | Q8VE47            | 1                          | 4               | 4              | 5.2                   | 0.202                                        | 0.03                           | 0.811             |
| Resistin-like alpha;                                                                                                                      | Q9EP95            | 1                          | 2               | 2              | 13.5                  | 0.202                                        | 0.061                          | 0.827             |
| Glutathione S-transferase theta 3; Glutathione S-transferase, theta 3; Uncharacterized protein;                                           | Q99L20            | 1                          | 6               | 7              | 24.1                  | 0.202                                        | 0.032                          | 0.812             |
| Band 4.1-like protein 2;                                                                                                                  | O70318            | 1                          | 10              | 10             | 8.4                   | 0.202                                        | 0.067                          | 0.837             |
| Proteasome activator complex subunit 2;                                                                                                   | P97372            | 1                          | 6               | 6              | 23.4                  | 0.202                                        | 0.077                          | 0.844             |
| Nischarin;                                                                                                                                | Q80TM9            | 1                          | 2               | 2              | 11.6                  | 0.202                                        | 0.037                          | 0.821             |
| Methionine adenosyltransferase 2 subunit beta;                                                                                            | Q99LB6            | 1                          | 6               | 6              | 18.9                  | 0.202                                        | 0.04                           | 0.823             |
| Actin-related protein 2/3 complex subunit 5;                                                                                              | Q9CPW4            | 1                          | 6               | 8              | 29.1                  | 0.202                                        | 0.019                          | 0.815             |
| Toll-interacting protein;                                                                                                                 | Q9QZ06            | 1                          | 3               | 5              | 10.5                  | 0.202                                        | 0.014                          | 0.807             |
| Heat shock protein 4; Heat shock protein 4, isoform CRA_a; Uncharacterized protein;                                                       | Q3U2G2            | 1                          | 39              | 58             | 33                    | 0.202                                        | 0.067                          | 0.838             |
| Heat shock 70 kDa protein 4L;                                                                                                             | P48722            | 1                          | 10              | 11             | 16.7                  | 0.872                                        | 0.248                          | 0.350             |
| Trk-fused; Uncharacterized protein;                                                                                                       | Q8C2C6            | 1                          | 3               | 3              | 7.8                   | 0.202                                        | 0.104                          | 0.860             |
| Stress-70 protein, mitochondrial;                                                                                                         | P38647            | 1                          | 38              | 53             | 35.5                  | 0.214                                        | 0.028                          | 0.803             |
| DCC-interacting protein 13-alpha;                                                                                                         | Q8K3H0            | 1                          | 5               | 6              | 8.3                   | 0.214                                        | 0.09                           | 0.839             |
| Heterogeneous nuclear ribonucleoprotein A/B;                                                                                              | Q99020            | 1                          | 6               | 7              | 21.4                  | 0.214                                        | 0.05                           | 0.812             |
| Calpain-1 catalytic subunit;                                                                                                              | O35350            | 1                          | 23              | 27             | 24.4                  | 0.227                                        | 0.027                          | 0.794             |
| 10 kDa heat shock protein, mitochondrial;                                                                                                 | Q64433            | 1                          | 11              | 27             | 54.9                  | 0.227                                        | 0.114                          | 0.842             |
| Elongation factor G, mitochondrial;                                                                                                       | Q8K0D5            | 1                          | 3               | 3              | 3.8                   | 0.227                                        | 0.045                          | 0.802             |
| Thioredoxin domain-containing protein 5;                                                                                                  | Q91W90            | 1                          | 18              | 25             | 33.1                  | 0.227                                        | 0.089                          | 0.820             |
| UPF0368 protein Cxorf26 homolog;                                                                                                          | Q9D0B6            | 1                          | 5               | 5              | 22.7                  | 0.227                                        | 0.043                          | 0.794             |
| Sorting nexin-5;                                                                                                                          | Q9D8U8            | 1                          | 8               | 11             | 14.6                  | 0.227                                        | 0.12                           | 0.840             |
| Epididymal secretory protein E1;                                                                                                          | Q9Z0J0            | 1                          | 5               | 5              | 24.8                  | 0.227                                        | 0.023                          | 0.787             |
| Peptidyl-prolyl cis-trans isomerase A;                                                                                                    | P17742            | 1                          | 13              | 50             | 47                    | 0.227                                        | 0.017                          | 0.793             |

Table S3, Tholen et al.

| Protein                                                                 | Uniprot accession | ProteinProphet Prob. Score | Unique peptides | Total peptides | Sequence coverage [%] | Fold change (log <sub>2</sub> ) of ASAPratio | Fold change standard deviation | ASAPratio p-value |
|-------------------------------------------------------------------------|-------------------|----------------------------|-----------------|----------------|-----------------------|----------------------------------------------|--------------------------------|-------------------|
| Endoplasmic reticulum resident protein 29;                              | P57759            | 1                          | 8               | 10             | 17.6                  | 0.227                                        | 0.031                          | 0.789             |
| Profilin-1;                                                             | P62962            | 1                          | 24              | 217            | 64.3                  | 0.227                                        | 0.012                          | 0.792             |
| Endoplasmic reticulum aminopeptidase 1;                                 | Q9EQH2            | 1                          | 17              | 18             | 12.9                  | 0.227                                        | 0.072                          | 0.816             |
| MCG140951; Plexin B2; Plxn2 protein; Uncharacterized protein;           | B2RXS4            | 1                          | 3               | 3              | 2.7                   | 0.227                                        | 0.047                          | 0.803             |
| WD repeat-containing protein 1;                                         | O88342            | 1                          | 27              | 38             | 44.1                  | 0.239                                        | 0.115                          | 0.822             |
| Thy-1 membrane glycoprotein;                                            | P01831            | 1                          | 7               | 8              | 22.2                  | 0.239                                        | 0.022                          | 0.773             |
| AP-2 complex subunit alpha-2;                                           | P17427            | 1                          | 8               | 8              | 10.4                  | 0.239                                        | 0.085                          | 0.811             |
| [Protein ADP-ribosylarginine] hydrolase;                                | P54923            | 1                          | 4               | 4              | 13.8                  | 0.239                                        | 0.022                          | 0.779             |
| Mitochondrial-processing peptidase subunit beta;                        | Q9CXT8            | 1                          | 3               | 3              | 4.5                   | 0.239                                        | 0.038                          | 0.778             |
| 4-trimethylaminobutyraldehyde dehydrogenase;                            | Q9JLJ2            | 1                          | 23              | 30             | 35                    | 0.239                                        | 0.047                          | 0.788             |
| Heterogeneous nuclear ribonucleoprotein K;                              | P61979            | 1                          | 23              | 32             | 30.4                  | 0.239                                        | 0.095                          | 0.815             |
| Guanine nucleotide-binding protein G(I)/G(S)/G(T) subunit beta-1;       | P62874            | 1                          | 12              | 22             | 29.4                  | 0.239                                        | 0.113                          | 0.827             |
| Proteasome subunit alpha type-7;                                        | Q9Z2U0            | 1                          | 19              | 34             | 45.6                  | 0.239                                        | 0.036                          | 0.777             |
| Endophilin-A2;                                                          | Q62419            | 0.991                      | 2               | 2              | 4.3                   | 0.239                                        | 0.067                          | 0.792             |
| Epsin-1;                                                                | Q80VP1            | 0.977                      | 3               | 3              | 6.1                   | 0.239                                        | 0.087                          | 0.810             |
| Heterogeneous nuclear ribonucleoproteins A2/B1;                         | O88569            | 1                          | 13              | 20             | 20.5                  | 0.251                                        | 0.084                          | 0.794             |
| Gelsolin;                                                               | P13020            | 1                          | 25              | 46             | 20.4                  | 0.251                                        | 0.049                          | 0.780             |
| Hsc70-interacting protein;                                              | Q99L47            | 1                          | 10              | 10             | 20.2                  | 0.251                                        | 0.049                          | 0.774             |
| 26S proteasome non-ATPase regulatory subunit 4;                         | O35226            | 1                          | 4               | 5              | 13.6                  | 0.263                                        | 0.028                          | 0.753             |
| Ig gamma-2B chain C region;                                             | P01867            | 1                          | 4               | 6              | 13.4                  | 0.263                                        | 0.072                          | 0.779             |
| Basigin;                                                                | P18572            | 1                          | 5               | 5              | 9.8                   | 0.263                                        | 0.129                          | 0.810             |
| Rho GTPase-activating protein 1;                                        | Q5FWK3            | 1                          | 4               | 5              | 14.7                  | 0.263                                        | 0.094                          | 0.785             |
| CB1 cannabinoid receptor-interacting protein 1;                         | Q5M8N0            | 1                          | 3               | 3              | 23.8                  | 0.263                                        | 0.033                          | 0.761             |
| Serine/threonine-protein kinase OSR1;                                   | Q6P9R2            | 1                          | 7               | 7              | 11.2                  | 0.263                                        | 0.184                          | 0.838             |
| Selenide, water dikinase 1;                                             | Q8BH69            | 1                          | 4               | 5              | 11                    | 0.263                                        | 0.035                          | 0.756             |
| Small glutamine-rich tetratricopeptide repeat-containing protein alpha; | Q8BJU0            | 1                          | 7               | 7              | 15.9                  | 0.263                                        | 0.182                          | 0.842             |
| Transaldolase;                                                          | Q93092            | 1                          | 14              | 26             | 22.3                  | 0.263                                        | 0.127                          | 0.806             |
| Ubiquitin-like modifier-activating enzyme ATG7;                         | Q9D906            | 1                          | 3               | 3              | 3.4                   | 0.263                                        | 0.037                          | 0.763             |
| Guanylate binding protein 1; Uncharacterized protein;                   | A4UUI2            | 1                          | 3               | 3              | 4.2                   | 0.263                                        | 0.044                          | 0.758             |
| Serine/threonine-protein kinase PAK 2;                                  | Q8CIN4            | 1                          | 13              | 18             | 23.9                  | 0.263                                        | 0.031                          | 0.760             |
| Cysteinyl-tRNA synthetase, cytoplasmic;                                 | Q9ER72            | 1                          | 2               | 3              | 2.8                   | 0.263                                        | 0.033                          | 0.754             |
| Aspartyl aminopeptidase;                                                | Q9Z2W0            | 1                          | 8               | 8              | 15.4                  | 0.263                                        | 0.092                          | 0.783             |
| Coatomer subunit beta;                                                  | Q9JIF7            | 0.994                      | 2               | 2              | 3.9                   | 0.263                                        | 0.153                          | 0.827             |
| Membrane primary amine oxidase;                                         | O70423            | 1                          | 10              | 13             | 18.3                  | 0.275                                        | 0.041                          | 0.750             |
| Gamma-butyrobetaine dioxygenase;                                        | Q924Y0            | 1                          | 4               | 4              | 10.9                  | 0.275                                        | 0.093                          | 0.776             |
| Glutaredoxin-3;                                                         | Q9CQM9            | 1                          | 12              | 17             | 25.5                  | 0.275                                        | 0.068                          | 0.762             |
| Ribonuclease T2;                                                        | Q9CQ01            | 0.999                      | 2               | 2              | 9.7                   | 0.275                                        | 0.025                          | 0.745             |
| C-reactive protein;                                                     | P14847            | 1                          | 2               | 2              | 12                    | 0.287                                        | 0.094                          | 0.762             |
| Microtubule-associated protein 4;                                       | P27546            | 1                          | 21              | 23             | 13.9                  | 0.287                                        | 0.038                          | 0.735             |
| Thioredoxin, mitochondrial;                                             | P97493            | 1                          | 2               | 2              | 14.1                  | 0.287                                        | 0.019                          | 0.730             |
| Tissue alpha-L-fucosidase;                                              | Q99LJ1            | 1                          | 3               | 3              | 6.2                   | 0.287                                        | 0.104                          | 0.774             |
| 5-hydroxyisourate hydrolase;                                            | Q9CRB3            | 1                          | 5               | 6              | 37.3                  | 0.287                                        | 0.082                          | 0.755             |
| Cytoglobin;                                                             | Q9CX80            | 1                          | 4               | 5              | 14.7                  | 0.287                                        | 0.038                          | 0.735             |



Table S3, Tholen et al.

| Protein                                                   | Uniprot accession | ProteinProphet Prob. Score | Unique peptides | Total peptides | Sequence coverage [%] | Fold change (log <sub>2</sub> ) of ASAPratio | Fold change standard deviation | ASAPratio p-value |
|-----------------------------------------------------------|-------------------|----------------------------|-----------------|----------------|-----------------------|----------------------------------------------|--------------------------------|-------------------|
| SH3 domain-binding glutamic acid-rich-like protein;       | Q9JJU8            | 1                          | 7               | 10             | 53.5                  | 0.287                                        | 0.016                          | 0.736             |
| Hemoglobin subunit beta-1;                                | P02088            | 1                          | 16              | 83             | 76.9                  | 0.287                                        | 0.024                          | 0.731             |
| Hemoglobin subunit beta-2;                                | P02089            | 1                          | 14              | 52             | 72.8                  | 0.614                                        | 0.161                          | 0.502             |
| ATP-dependent RNA helicase DDX19A;                        | Q61655            | 1                          | 3               | 4              | 4.4                   | 0.287                                        | 0.111                          | 0.778             |
| Prostamide/prostaglandin F synthase;                      | Q9DB60            | 1                          | 8               | 9              | 17.9                  | 0.287                                        | 0.024                          | 0.737             |
| Proteasome subunit beta type-9;                           | P28076            | 1                          | 4               | 6              | 18.3                  | 0.299                                        | 0.039                          | 0.728             |
| Guanylate kinase;                                         | Q64520            | 1                          | 3               | 4              | 17.2                  | 0.299                                        | 0.049                          | 0.725             |
| Protein FAM63A;                                           | Q76LS9            | 1                          | 2               | 2              | 6.4                   | 0.299                                        | 0.068                          | 0.734             |
| Ran-binding protein 3;                                    | Q9CT10            | 1                          | 4               | 5              | 6.7                   | 0.299                                        | 0.049                          | 0.725             |
| Phytanoyl-CoA dioxygenase domain-containing protein 1;    | Q9DB26            | 1                          | 2               | 2              | 7.2                   | 0.299                                        | 0.053                          | 0.727             |
| Guanine nucleotide-binding protein subunit alpha-13;      | P27601            | 1                          | 4               | 4              | 12.7                  | 0.299                                        | 0.058                          | 0.729             |
| Septin-11;                                                | Q8C1B7            | 1                          | 8               | 10             | 22.2                  | 0.299                                        | 0.046                          | 0.724             |
| Septin-8;                                                 | Q8CHH9            | 1                          | 6               | 7              | 16.3                  | 0                                            | 0                              | 0.998             |
| Septin-6;                                                 | Q9R1T4            | 1                          | 6               | 7              | 24.7                  | 0.275                                        | 0.02                           | 0.744             |
| Argininosuccinate lyase;                                  | Q91YI0            | 1                          | 9               | 11             | 17.9                  | 0.299                                        | 0.1                            | 0.758             |
| Uncharacterized protein;                                  | E9Q616            | 1                          | 246             | 370            | 46                    | 0.299                                        | 0.143                          | 0.784             |
| Uncharacterized protein;                                  | F7CAE1            | 1                          | 14              | 34             | 57.9                  | 0.299                                        | 0.019                          | 0.717             |
| Eukaryotic translation initiation factor 4 gamma 1;       | Q6NZJ6            | 1                          | 2               | 2              | 2.1                   | 0.299                                        | 0.233                          | 0.828             |
| Phosphatidylinositol-glycan-specific phospholipase D;     | O70362            | 1                          | 8               | 9              | 6.2                   | 0.31                                         | 0.12                           | 0.756             |
| 14-3-3 protein gamma;                                     | P61982            | 1                          | 3               | 5              | 20.2                  | 0.31                                         | 0.107                          | 0.748             |
| Elongation factor Tu, mitochondrial;                      | Q8BFR5            | 1                          | 7               | 9              | 11.7                  | 0.31                                         | 0.028                          | 0.712             |
| Heterogeneous nuclear ribonucleoprotein U;                | Q8VEK3            | 1                          | 7               | 7              | 10.9                  | 0.31                                         | 0.087                          | 0.737             |
| S-methyl-5'-thioadenosine phosphorylase;                  | Q9CQ65            | 1                          | 9               | 10             | 26.5                  | 0.31                                         | 0.03                           | 0.712             |
| AP-2 complex subunit alpha-1;                             | P17426            | 1                          | 3               | 3              | 4.8                   | 0.31                                         | 0.095                          | 0.742             |
| Serpin B12;                                               | Q9D7P9            | 1                          | 6               | 6              | 13                    | 0.31                                         | 0.258                          | 0.835             |
| Actin-related protein 2/3 complex subunit 3;              | Q9JM76            | 1                          | 9               | 12             | 23.6                  | 0.31                                         | 0.068                          | 0.727             |
| Uncharacterized protein;                                  | E9QK49            | 1                          | 6               | 6              | 6.5                   | 0.31                                         | 0.1                            | 0.744             |
| Protein S100-A4;                                          | P07091            | 1                          | 2               | 2              | 7.9                   | 0.322                                        | 0.028                          | 0.705             |
| ADP-ribosylation factor 6;                                | P62331            | 1                          | 4               | 5              | 28                    | 0.322                                        | 0.041                          | 0.709             |
| Alpha-parvin;                                             | Q9EPC1            | 1                          | 5               | 5              | 11.3                  | 0.322                                        | 0.111                          | 0.736             |
| Chloride intracellular channel protein 1;                 | Q9Z1Q5            | 1                          | 22              | 32             | 53.9                  | 0.322                                        | 0.064                          | 0.717             |
| Golgi apparatus protein 1;                                | Q61543            | 1                          | 2               | 2              | 2.8                   | 0.322                                        | 0.052                          | 0.714             |
| Heat shock protein 105 kDa;                               | Q61699            | 1                          | 19              | 21             | 18.1                  | 0.322                                        | 0.07                           | 0.713             |
| Protein Noxp20;                                           | Q9D281            | 1                          | 4               | 4              | 8.3                   | 0.322                                        | 0.031                          | 0.699             |
| Serine/threonine-protein phosphatase 4 catalytic subunit; | P97470            | 1                          | 2               | 2              | 14.3                  | 0.322                                        | 0.041                          | 0.702             |
| Adenylosuccinate synthetase isozyme 2;                    | P46664            | 1                          | 9               | 10             | 17.8                  | 0.333                                        | 0.116                          | 0.735             |
| Peroxisomal N(1)-acetyl-spermine/spermidine oxidase;      | Q8C0L6            | 1                          | 5               | 12             | 20.8                  | 0.333                                        | 0.034                          | 0.693             |
| Arf-GAP domain and FG repeats-containing protein 1;       | Q8K2K6            | 1                          | 2               | 2              | 5.9                   | 0.333                                        | 0.193                          | 0.778             |
| Dynactin subunit 2;                                       | Q99KJ8            | 1                          | 11              | 11             | 24.9                  | 0.333                                        | 0.095                          | 0.720             |
| SUMO-activating enzyme subunit 1;                         | Q9R1T2            | 1                          | 12              | 13             | 39.1                  | 0.333                                        | 0.026                          | 0.692             |
|                                                           | A6H630            | 1                          | 4               | 4              | 9.1                   | 0.333                                        | 0.074                          | 0.709             |
| Small ubiquitin-related modifier 2;                       | P61957            | 1                          | 2               | 2              | 16.9                  | 0.333                                        | 0.037                          | 0.694             |
| Integrin beta-5;                                          | O70309            | 1                          | 4               | 4              | 2.1                   | 0.345                                        | 0.054                          | 0.687             |

Table S3, Tholen et al.

| Protein                                                                                                                                                                   | Uniprot accession | ProteinProphet Prob. Score | Unique peptides | Total peptides | Sequence coverage [%] | Fold change (log <sub>2</sub> ) of ASAPratio | Fold change standard deviation | ASAPratio p-value |
|---------------------------------------------------------------------------------------------------------------------------------------------------------------------------|-------------------|----------------------------|-----------------|----------------|-----------------------|----------------------------------------------|--------------------------------|-------------------|
| Proteasome subunit alpha type-2;                                                                                                                                          | P49722            | 1                          | 12              | 16             | 42.7                  | 0.345                                        | 0.076                          | 0.696             |
| GTPase NRas;                                                                                                                                                              | P08556            | 1                          | 4               | 4              | 16.9                  | 0.345                                        | 0.041                          | 0.690             |
| Sorcin;                                                                                                                                                                   | Q6P069            | 1                          | 10              | 10             | 36.4                  | 0.345                                        | 0.13                           | 0.727             |
| Septin-9;                                                                                                                                                                 | Q80UG5            | 1                          | 10              | 11             | 15.8                  | 0.345                                        | 0.035                          | 0.687             |
| Protein disulfide-isomerase A6;                                                                                                                                           | Q922R8            | 1                          | 15              | 18             | 30.7                  | 0.345                                        | 0.062                          | 0.690             |
| Vacuolar protein-sorting-associated protein 25;                                                                                                                           | Q9CQ80            | 1                          | 3               | 3              | 14.1                  | 0.345                                        | 0.046                          | 0.684             |
| Ubiquitin-conjugating enzyme E2 variant 1;                                                                                                                                | Q9CZY3            | 1                          | 7               | 9              | 38.8                  | 0.345                                        | 0.014                          | 0.683             |
| Cullin-3;                                                                                                                                                                 | Q9JLV5            | 1                          | 3               | 3              | 2.5                   | 0.345                                        | 0.098                          | 0.708             |
| Proteasome subunit alpha type-5;                                                                                                                                          | Q9Z2U1            | 1                          | 14              | 22             | 58.9                  | 0.345                                        | 0.06                           | 0.695             |
| Nucleosome assembly protein 1-like 1;                                                                                                                                     | P28656            | 1                          | 5               | 5              | 9.9                   | 0.356                                        | 0.05                           | 0.679             |
| Junction plakoglobin;                                                                                                                                                     | Q02257            | 1                          | 9               | 9              | 16.4                  | 0.356                                        | 0.1                            | 0.701             |
| Catenin beta-1;                                                                                                                                                           | Q02248            | 1                          | 5               | 5              | 6.9                   | 0.526                                        | 0.146                          | 0.567             |
| Heterogeneous nuclear ribonucleoprotein A1;                                                                                                                               | P49312            | 1                          | 9               | 13             | 15.3                  | 0.367                                        | 0.051                          | 0.673             |
| Calcineurin subunit B type 1;                                                                                                                                             | Q63810            | 1                          | 3               | 3              | 12.9                  | 0.367                                        | 0.048                          | 0.665             |
| NHL repeat-containing protein 3;                                                                                                                                          | Q8CCH2            | 1                          | 4               | 4              | 11                    | 0.367                                        | 0.046                          | 0.665             |
| Eukaryotic translation initiation factor 6;                                                                                                                               | O55135            | 1                          | 6               | 6              | 29.8                  | 0.367                                        | 0.071                          | 0.674             |
| Calpain small subunit 1;                                                                                                                                                  | O88456            | 1                          | 7               | 7              | 13.3                  | 0.367                                        | 0.034                          | 0.668             |
| C-terminal-binding protein 1;                                                                                                                                             | O88712            | 1                          | 6               | 7              | 15.2                  | 0.367                                        | 0.057                          | 0.675             |
| Ubiquitin carboxyl-terminal hydrolase 5;                                                                                                                                  | P56399            | 1                          | 16              | 22             | 18                    | 0.367                                        | 0.051                          | 0.673             |
| Mitogen-activated protein kinase 3;                                                                                                                                       | Q63844            | 1                          | 5               | 5              | 18.7                  | 0.367                                        | 0.046                          | 0.665             |
| Mitogen-activated protein kinase 1;                                                                                                                                       | P63085            | 1                          | 4               | 4              | 11.2                  | 0.239                                        | 0.075                          | 0.803             |
| Programmed cell death protein 10;                                                                                                                                         | Q8VE70            | 1                          | 3               | 3              | 15.6                  | 0.367                                        | 0.091                          | 0.690             |
| NADH-cytochrome b5 reductase 3;                                                                                                                                           | Q9DCN2            | 1                          | 4               | 4              | 13                    | 0.367                                        | 0.148                          | 0.718             |
| Proteasome subunit alpha type-6;                                                                                                                                          | Q9QUM9            | 1                          | 17              | 23             | 41.9                  | 0.367                                        | 0.088                          | 0.682             |
| Histone-arginine methyltransferase CARM1;                                                                                                                                 | Q9WVG6            | 1                          | 3               | 3              | 6.6                   | 0.367                                        | 0.185                          | 0.742             |
| Uncharacterized protein;                                                                                                                                                  | E9Q9T2            | 1                          | 14              | 18             | 34.9                  | 0.367                                        | 0.176                          | 0.738             |
| NK13; Serine (Or cysteine) peptidase inhibitor, clade B, member 6b; Serine (Or cysteine) peptidase inhibitor, clade B, member 6b, isoform CRA_a; Uncharacterized protein; | O08804            | 1                          | 6               | 11             | 11.7                  | -1.286                                       | -0.188                         | 0.135             |
| Twinfilin-2;                                                                                                                                                              | Q9Z0P5            | 1                          | 2               | 2              | 10.9                  | 0.367                                        | 0.048                          | 0.672             |
| Macrophage migration inhibitory factor;                                                                                                                                   | P34884            | 1                          | 2               | 7              | 7.8                   | 0.379                                        | 0.102                          | 0.682             |
| Serpin B5;                                                                                                                                                                | P70124            | 1                          | 43              | 100            | 65.6                  | 0.379                                        | 0.029                          | 0.655             |
| Proteasome subunit beta type-7;                                                                                                                                           | P70195            | 1                          | 4               | 9              | 7.2                   | 0.379                                        | 0.064                          | 0.664             |
| Glutaredoxin-related protein 5, mitochondrial;                                                                                                                            | Q80Y14            | 1                          | 2               | 2              | 12.5                  | 0.379                                        | 0.029                          | 0.654             |
| Alanyl-tRNA synthetase, cytoplasmic;                                                                                                                                      | Q8BGQ7            | 1                          | 14              | 16             | 14.2                  | 0.379                                        | 0.093                          | 0.674             |
| Dynamin-1-like protein;                                                                                                                                                   | Q8K1M6            | 1                          | 12              | 12             | 16                    | 0.379                                        | 0.079                          | 0.665             |
| Threonyl-tRNA synthetase, cytoplasmic;                                                                                                                                    | Q9D0R2            | 1                          | 7               | 7              | 9.1                   | 0.379                                        | 0.143                          | 0.705             |
| Gamma-glutamylcyclotransferase;                                                                                                                                           | Q9D7X8            | 1                          | 4               | 4              | 22.9                  | 0.379                                        | 0.038                          | 0.650             |
| Coatomer subunit gamma;                                                                                                                                                   | Q9QZE5            | 1                          | 4               | 4              | 5.9                   | 0.379                                        | 0.16                           | 0.717             |
| Puromycin-sensitive aminopeptidase;                                                                                                                                       | Q11011            | 1                          | 26              | 34             | 24.8                  | 0.379                                        | 0.128                          | 0.692             |
| Protein RCC2;                                                                                                                                                             | Q8BK67            | 1                          | 6               | 6              | 11.3                  | 0.379                                        | 0.157                          | 0.709             |
| 5-oxoprolinase;                                                                                                                                                           | Q8K010            | 1                          | 19              | 22             | 14.7                  | 0.379                                        | 0.16                           | 0.716             |

Table S3, Tholen et al.

| Protein                                                                                                                             | Uniprot accession | ProteinProphet Prob. Score | Unique peptides | Total peptides | Sequence coverage [%] | Fold change (log <sub>2</sub> ) of ASAPratio | Fold change standard deviation | ASAPratio p-value |
|-------------------------------------------------------------------------------------------------------------------------------------|-------------------|----------------------------|-----------------|----------------|-----------------------|----------------------------------------------|--------------------------------|-------------------|
| SAR1 gene homolog A ( <i>S. cerevisiae</i> ); SAR1 gene homolog A ( <i>S. cerevisiae</i> ), isoform CRA_b; Uncharacterized protein; | Q99JZ4            | 1                          | 6               | 7              | 25.8                  | 0.379                                        | 0.079                          | 0.665             |
| GTP-binding protein SAR1b;                                                                                                          | Q9CQC9            | 1                          | 4               | 5              | 39.4                  | 0.433                                        | 0.058                          | 0.614             |
| Hypoxanthine-guanine phosphoribosyltransferase;                                                                                     | P00493            | 1                          | 17              | 21             | 50.5                  | 0.39                                         | 0.045                          | 0.646             |
| Ras-related protein Rap-1A;                                                                                                         | P62835            | 1                          | 6               | 6              | 19.6                  | 0.39                                         | 0.188                          | 0.723             |
| Tubulin-specific chaperone D;                                                                                                       | Q8BYA0            | 1                          | 8               | 8              | 4.8                   | 0.39                                         | 0.176                          | 0.716             |
| MKIAA0079 protein; SEC24 related gene family, member C ( <i>S. cerevisiae</i> ), isoform CRA_b; Uncharacterized protein;            | Q80U83            | 1                          | 8               | 8              | 10.1                  | 0.39                                         | 0.086                          | 0.662             |
| Phosphatidylinositol transfer protein alpha isoform;                                                                                | P53810            | 1                          | 7               | 8              | 27.3                  | 0.39                                         | 0.036                          | 0.644             |
| Eukaryotic initiation factor 4A-I;                                                                                                  | P60843            | 1                          | 4               | 4              | 30.5                  | 0.39                                         | 0.11                           | 0.673             |
| Eukaryotic initiation factor 4A-II;                                                                                                 | P10630            | 1                          | 2               | 2              | 20.7                  | -0.69                                        | -0.111                         | 0.431             |
| SAM domain and HD domain-containing protein 1;                                                                                      | Q60710            | 1                          | 18              | 20             | 27.9                  | 0.39                                         | 0.095                          | 0.667             |
| 6-phosphogluconolactonase;                                                                                                          | Q9CQ60            | 1                          | 14              | 16             | 36.2                  | 0.39                                         | 0.06                           | 0.651             |
| MCG21235; Uncharacterized protein;                                                                                                  | Q9D1Q5            | 1                          | 19              | 34             | 32                    | 0.39                                         | 0.113                          | 0.676             |
| Ribosome-releasing factor 2, mitochondrial;                                                                                         | Q8R2Q4            | 0.996                      | 2               | 2              | 5.1                   | 0.39                                         | 0.146                          | 0.694             |
| Tryptophanyl-tRNA synthetase, cytoplasmic;                                                                                          | P32921            | 1                          | 9               | 10             | 15.4                  | 0.401                                        | 0.085                          | 0.653             |
| H-2 class I histocompatibility antigen, L-D alpha chain;                                                                            | P01897            | 1                          | 9               | 11             | 25.4                  | 0.401                                        | 0.112                          | 0.662             |
| H-2 class I histocompatibility antigen, Q10 alpha chain;                                                                            | P01898            | 1                          | 5               | 5              | 18.5                  | 0.651                                        | 0.274                          | 0.529             |
| H-2 class I histocompatibility antigen, K-W28 alpha chain;                                                                          | P03991            | 1                          | 3               | 3              | 11                    | 1.144                                        | 0.16                           | 0.182             |
| Cofilin-1;                                                                                                                          | P18760            | 1                          | 14              | 34             | 45.2                  | 0.401                                        | 0.085                          | 0.655             |
| Epidermal growth factor receptor substrate 15;                                                                                      | P42567            | 1                          | 6               | 6              | 9.3                   | 0.401                                        | 0.122                          | 0.668             |
| Ubiquitin-conjugating enzyme E2 K;                                                                                                  | P61087            | 1                          | 6               | 6              | 20                    | 0.401                                        | 0.091                          | 0.651             |
| NudC domain-containing protein 3;                                                                                                   | Q8R1N4            | 1                          | 2               | 2              | 3.3                   | 0.401                                        | 0.033                          | 0.631             |
| Vasodilator-stimulated phosphoprotein;                                                                                              | P70460            | 1                          | 2               | 2              | 9.9                   | 0.411                                        | 0.077                          | 0.639             |
| Costars family protein C6orf115 homolog;                                                                                            | Q4KML4            | 1                          | 4               | 4              | 27.2                  | 0.411                                        | 0.059                          | 0.632             |
| CD166 antigen;                                                                                                                      | Q61490            | 1                          | 3               | 3              | 9.3                   | 0.411                                        | 0.108                          | 0.653             |
| Polyadenylate-binding protein 2;                                                                                                    | Q8CCS6            | 1                          | 2               | 2              | 7                     | 0.411                                        | 0.015                          | 0.623             |
| Protein LSM12 homolog;                                                                                                              | Q9D0R8            | 1                          | 2               | 2              | 19                    | 0.411                                        | 0.114                          | 0.657             |
| EH domain-binding protein 1;                                                                                                        | Q69ZW3            | 1                          | 2               | 2              | 1.1                   | 0.422                                        | 0.094                          | 0.634             |
| Sorting nexin-6;                                                                                                                    | Q6P8X1            | 1                          | 10              | 12             | 18.5                  | 0.422                                        | 0.12                           | 0.653             |
| Elongation factor 1-gamma;                                                                                                          | Q9D8N0            | 1                          | 17              | 26             | 21.1                  | 0.422                                        | 0.088                          | 0.633             |
| Intersectin-1;                                                                                                                      | Q9Z0R4            | 1                          | 2               | 2              | 1                     | 0.422                                        | 0.079                          | 0.628             |
| Polyadenylate-binding protein 1;                                                                                                    | P29341            | 1                          | 24              | 26             | 25.6                  | 0.422                                        | 0.088                          | 0.637             |
| Ubiquitin-conjugating enzyme E2 N;                                                                                                  | P61089            | 1                          | 10              | 12             | 41.4                  | 0.422                                        | 0.101                          | 0.642             |
| Inter-alpha-trypsin inhibitor heavy chain H2;                                                                                       | Q61703            | 1                          | 10              | 13             | 12.9                  | 0.422                                        | 0.195                          | 0.696             |
| Cullin-associated NEDD8-dissociated protein 1;                                                                                      | Q6ZQ38            | 1                          | 17              | 20             | 13.7                  | 0.422                                        | 0.148                          | 0.664             |
| Heterogeneous nuclear ribonucleoprotein Q;                                                                                          | Q7TMK9            | 1                          | 18              | 23             | 22.5                  | 0.422                                        | 0.11                           | 0.649             |
| Heterogeneous nuclear ribonucleoprotein R; Uncharacterized protein;                                                                 | Q8VHM5            | 1                          | 5               | 7              | 9.2                   | 0.766                                        | 0.194                          | 0.399             |
| Heterogeneous nuclear ribonucleoprotein H;                                                                                          | O35737            | 1                          | 12              | 12             | 25.8                  | 0.433                                        | 0.042                          | 0.610             |
| Nidogen-1;                                                                                                                          | P10493            | 1                          | 7               | 9              | 5.1                   | 0.433                                        | 0.173                          | 0.671             |
| Dual specificity mitogen-activated protein kinase kinase 4;                                                                         | P47809            | 1                          | 3               | 3              | 10.1                  | 0.433                                        | 0.144                          | 0.650             |
| Ribose-5-phosphate isomerase;                                                                                                       | P47968            | 1                          | 2               | 2              | 9.6                   | 0.433                                        | 0.077                          | 0.616             |
| Trifunctional enzyme subunit alpha, mitochondrial;                                                                                  | Q8BMS1            | 1                          | 26              | 34             | 29.4                  | 0.433                                        | 0.199                          | 0.686             |

Table S3, Tholen et al.

| Protein                                                                                                   | Uniprot accession | ProteinProphet Prob. Score | Unique peptides | Total peptides | Sequence coverage [%] | Fold change (log <sub>2</sub> ) of ASAPratio | Fold change standard deviation | ASAPratio p-value |
|-----------------------------------------------------------------------------------------------------------|-------------------|----------------------------|-----------------|----------------|-----------------------|----------------------------------------------|--------------------------------|-------------------|
| Heat shock 70 kDa protein 12A;                                                                            | Q8K0U4            | 1                          | 2               | 2              | 1.5                   | 0.433                                        | 0.051                          | 0.612             |
| Bifunctional protein NCOAT;                                                                               | Q9EQQ9            | 1                          | 2               | 2              | 4.4                   | 0.433                                        | 0.135                          | 0.650             |
| Ubiquitin-conjugating enzyme E2 L3;                                                                       | P68037            | 1                          | 6               | 9              | 41.6                  | 0.433                                        | 0.055                          | 0.613             |
| T-complex protein 1 subunit gamma;                                                                        | P80318            | 1                          | 4               | 4              | 9.5                   | 0.433                                        | 0.048                          | 0.612             |
| Protein arginine N-methyltransferase 1;                                                                   | Q9JIF0            | 1                          | 3               | 4              | 7.5                   | 0.433                                        | 0.154                          | 0.660             |
| Vigilin;                                                                                                  | Q8VDJ3            | 1                          | 5               | 5              | 2.4                   | 0.444                                        | 0.176                          | 0.664             |
| Ras GTPase-activating-like protein IQGAP1;                                                                | Q9JKF1            | 1                          | 40              | 49             | 20                    | 0.444                                        | 0.219                          | 0.684             |
| ADP-ribosylation factor 3;                                                                                | P61205            | 1                          | 7               | 20             | 42                    | 0.444                                        | 0.036                          | 0.597             |
| ADP-ribosylation factor 5;                                                                                | P84084            | 1                          | 6               | 18             | 43.3                  | 1.17                                         | 0.796                          | 0.364             |
| Peptidyl-prolyl cis-trans isomerase FKBP2;                                                                | P45878            | 0.934                      | 2               | 3              | 8.6                   | 0.444                                        | 0.202                          | 0.676             |
| Pro-interleukin-16;                                                                                       | O54824            | 1                          | 2               | 2              | 0.8                   | 0.454                                        | 0.056                          | 0.591             |
| Leukocyte surface antigen CD47;                                                                           | Q61735            | 1                          | 3               | 6              | 8.9                   | 0.454                                        | 0.099                          | 0.607             |
| 1-phosphatidylinositol-4,5-bisphosphate phosphodiesterase delta-1;                                        | Q8R3B1            | 1                          | 11              | 12             | 11.6                  | 0.454                                        | 0.109                          | 0.617             |
| Ras-related protein Rap-1b;                                                                               | Q99J16            | 1                          | 2               | 2              | 19.6                  | 0.454                                        | 0.05                           | 0.590             |
| Tumor protein D54;                                                                                        | Q9CYZ2            | 1                          | 3               | 3              | 18                    | 0.454                                        | 0.056                          | 0.591             |
| GTP-binding nuclear protein Ran;                                                                          | P62827            | 1                          | 11              | 25             | 31                    | 0.454                                        | 0.023                          | 0.584             |
| 55 kDa erythrocyte membrane protein;                                                                      | P70290            | 1                          | 4               | 4              | 9.4                   | 0.454                                        | 0.04                           | 0.587             |
| Uncharacterized protein;                                                                                  | E9QJY4            | 1                          | 4               | 4              | 2.4                   | 0.454                                        | 0.083                          | 0.606             |
| Transitional endoplasmic reticulum ATPase;                                                                | Q01853            | 1                          | 43              | 60             | 31                    | 0.465                                        | 0.067                          | 0.588             |
| 26S proteasome non-ATPase regulatory subunit 3;                                                           | P14685            | 1                          | 19              | 20             | 27.5                  | 0.465                                        | 0.249                          | 0.681             |
| Catalase;                                                                                                 | P24270            | 1                          | 33              | 46             | 43.5                  | 0.465                                        | 0.104                          | 0.607             |
| IgG receptor FcRn large subunit p51;                                                                      | Q61559            | 1                          | 2               | 2              | 6.6                   | 0.475                                        | 0.113                          | 0.596             |
| UMP-CMP kinase;                                                                                           | Q9DBP5            | 1                          | 12              | 20             | 40.8                  | 0.475                                        | 0.123                          | 0.601             |
| PDZ domain-containing protein GIPC1;                                                                      | Q9Z0G0            | 1                          | 2               | 2              | 3.9                   | 0.475                                        | 0.068                          | 0.578             |
| Serine/threonine-protein phosphatase 2A 55 kDa regulatory subunit B alpha isoform;                        | Q6P1F6            | 1                          | 4               | 5              | 6.7                   | 0.475                                        | 0.144                          | 0.612             |
| Serine/threonine-protein phosphatase 2A catalytic subunit alpha isoform;                                  | P63330            | 1                          | 9               | 11             | 39.2                  | 0.485                                        | 0.052                          | 0.563             |
| Proteasome activator complex subunit 1;                                                                   | P97371            | 1                          | 15              | 19             | 34.1                  | 0.485                                        | 0.132                          | 0.600             |
| Glucuronidase, beta; Glucuronidase, beta, isoform CRA_a; Uncharacterized protein;                         | Q6IR10            | 1                          | 15              | 17             | 15.6                  | 0.485                                        | 0.381                          | 0.731             |
| Regulator of nonsense transcripts 1;                                                                      | Q9EPU0            | 0.999                      | 2               | 2              | 2.6                   | 0.485                                        | 0.087                          | 0.579             |
| Ran-specific GTPase-activating protein;                                                                   | P34022            | 1                          | 3               | 3              | 10.8                  | 0.496                                        | 0.084                          | 0.567             |
| Epoxide hydrolase 2;                                                                                      | P34914            | 1                          | 11              | 11             | 17                    | 0.496                                        | 0.077                          | 0.564             |
| Hormone-sensitive lipase;                                                                                 | P54310            | 1                          | 8               | 10             | 10.9                  | 0.496                                        | 0.088                          | 0.569             |
| Dihydrolipoyllysine-residue acetyltransferase component of pyruvate dehydrogenase complex, mitochondrial; | Q8BMF4            | 1                          | 25              | 29             | 30.8                  | 0.496                                        | 0.056                          | 0.562             |
| Heterogeneous nuclear ribonucleoprotein A3;                                                               | Q8BG05            | 1                          | 10              | 20             | 18.3                  | 0.496                                        | 0.091                          | 0.570             |
| Serine/threonine-protein kinase 38;                                                                       | Q91VJ4            | 1                          | 4               | 4              | 7.7                   | 0.496                                        | 0.169                          | 0.607             |
| Uncharacterized protein;                                                                                  | F7DBB3            | 1                          | 3               | 9              | 14.3                  | 0.496                                        | 0.067                          | 0.561             |
| Uncharacterized protein;                                                                                  | E9PYB0            | 1                          | 3               | 3              | 23.7                  | -0.168                                       | -0.034                         | 0.855             |
| Microtubule-associated protein 1B;                                                                        | P14873            | 1                          | 2               | 2              | 2                     | 0.506                                        | 0.15                           | 0.591             |
| ELAV-like protein 1;                                                                                      | P70372            | 1                          | 8               | 9              | 20.2                  | 0.506                                        | 0.196                          | 0.616             |
| Acyl-CoA synthetase family member 2, mitochondrial;                                                       | Q8VCW8            | 1                          | 11              | 11             | 18.7                  | 0.506                                        | 0.189                          | 0.614             |
| Twinfilin-1;                                                                                              | Q91YR1            | 1                          | 2               | 3              | 3.7                   | 0.506                                        | 0.071                          | 0.557             |
| COP9 signalosome complex subunit 1;                                                                       | Q99LD4            | 1                          | 5               | 6              | 10.2                  | 0.506                                        | 0.064                          | 0.551             |

Table S3, Tholen et al.

| Protein                                                                | Uniprot accession | ProteinProphet Prob. Score | Unique peptides | Total peptides | Sequence coverage [%] | Fold change (log <sub>2</sub> ) of ASAPratio | Fold change standard deviation | ASAPratio p-value |
|------------------------------------------------------------------------|-------------------|----------------------------|-----------------|----------------|-----------------------|----------------------------------------------|--------------------------------|-------------------|
| Sodium/potassium-transporting ATPase subunit alpha-1;                  | Q8VDN2            | 1                          | 11              | 12             | 18.3                  | 0.506                                        | 0.217                          | 0.624             |
| Sodium/potassium-transporting ATPase subunit alpha-2;                  | Q6PIE5            | 1                          | 6               | 6              | 15.3                  | -0.252                                       | -0.015                         | 0.761             |
| Sodium/potassium-transporting ATPase subunit alpha-3;                  | Q6PIC6            | 1                          | 3               | 3              | 12.4                  | -0.252                                       | -0.048                         | 0.771             |
| GTP:AMP phosphotransferase, mitochondrial;                             | Q9WTP7            | 1                          | 9               | 9              | 33.9                  | 0.506                                        | 0.078                          | 0.560             |
| Sushi domain-containing protein 2;                                     | Q9DBX3            | 0.992                      | 2               | 2              | 1.1                   | 0.506                                        | 0.05                           | 0.552             |
| Nuclear protein localization protein 4 homolog;                        | P60670            | 1                          | 2               | 2              | 2.5                   | 0.516                                        | 0.043                          | 0.540             |
| T-complex protein 1 subunit beta;                                      | P80314            | 1                          | 11              | 11             | 20.7                  | 0.516                                        | 0.032                          | 0.538             |
| COP9 signalosome complex subunit 3;                                    | O88543            | 1                          | 4               | 4              | 19.6                  | 0.516                                        | 0.159                          | 0.585             |
| Elongation factor 1-alpha 1;                                           | P10126            | 1                          | 16              | 94             | 37.9                  | 0.516                                        | 0.188                          | 0.601             |
| Adenylate kinase 2, mitochondrial;                                     | Q9WTP6            | 1                          | 4               | 5              | 27.6                  | 0.516                                        | 0.141                          | 0.575             |
| Importin subunit alpha-3;                                              | O35344            | 0.997                      | 2               | 2              | 5.2                   | 0.516                                        | 0.04                           | 0.539             |
| Sec1 family domain-containing protein 1;                               | Q8BRF7            | 1                          | 4               | 4              | 6.7                   | 0.526                                        | 0.23                           | 0.613             |
| Coactosin-like protein;                                                | Q9CQI6            | 1                          | 6               | 7              | 46.5                  | 0.526                                        | 0.194                          | 0.597             |
| Isoamyl acetate-hydrolyzing esterase 1 homolog;                        | Q9DB29            | 1                          | 12              | 13             | 28.5                  | 0.526                                        | 0.153                          | 0.570             |
| Pleckstrin;                                                            | Q9JHK5            | 1                          | 2               | 2              | 4.3                   | 0.526                                        | 0.099                          | 0.546             |
| Carbonyl reductase 3; Uncharacterized protein;                         | Q8K354            | 1                          | 18              | 27             | 48                    | 0.526                                        | 0.026                          | 0.532             |
| Sodium/potassium-transporting ATPase subunit beta-3;                   | P97370            | 1                          | 5               | 6              | 19.1                  | 0.526                                        | 0.168                          | 0.578             |
| 26S proteasome non-ATPase regulatory subunit 14;                       | O35593            | 1                          | 3               | 4              | 5.3                   | 0.536                                        | 0.174                          | 0.575             |
| 40S ribosomal protein S3a;                                             | P97351            | 1                          | 2               | 2              | 4.9                   | 0.536                                        | 0.092                          | 0.539             |
| Transgelin-2;                                                          | Q9WVA4            | 1                          | 13              | 19             | 46.7                  | 0.536                                        | 0.081                          | 0.535             |
| General vesicular transport factor p115;                               | Q9Z1Z0            | 1                          | 6               | 8              | 6.2                   | 0.536                                        | 0.44                           | 0.712             |
| Calpain-2 catalytic subunit;                                           | O08529            | 1                          | 18              | 24             | 20.1                  | 0.536                                        | 0.17                           | 0.574             |
| N-acetylgalactosamine kinase;                                          | Q68FH4            | 1                          | 6               | 7              | 18.5                  | 0.536                                        | 0.296                          | 0.643             |
| Smoothelin-like protein 1;                                             | Q99LM3            | 1                          | 4               | 4              | 10                    | 0.536                                        | 0.085                          | 0.536             |
| Band 4.1-like protein 1;                                               | Q9Z2H5            | 1                          | 3               | 3              | 5.6                   | 0.536                                        | 0.203                          | 0.587             |
| Long-chain-fatty-acid--CoA ligase 1;                                   | P41216            | 1                          | 4               | 4              | 5.4                   | 0.536                                        | 0.104                          | 0.542             |
| Aminoacyl tRNA synthase complex-interacting multifunctional protein 1; | P31230            | 1                          | 6               | 8              | 25.5                  | 0.546                                        | 0.086                          | 0.531             |
| Stress-induced-phosphoprotein 1;                                       | Q60864            | 1                          | 23              | 30             | 24.1                  | 0.546                                        | 0.101                          | 0.536             |
| Thimet oligopeptidase;                                                 | Q8C1A5            | 1                          | 19              | 24             | 24                    | 0.546                                        | 0.127                          | 0.547             |
| Phospholysine phosphohistidine inorganic pyrophosphate phosphatase;    | Q9D7I5            | 1                          | 5               | 5              | 13                    | 0.546                                        | 0.15                           | 0.557             |
| Phosphoglycerate mutase 1;                                             | Q9DBJ1            | 1                          | 23              | 75             | 52.8                  | 0.546                                        | 0.056                          | 0.522             |
| Serine/threonine-protein kinase WNK1;                                  | P83741            | 1                          | 4               | 5              | 1.9                   | 0.546                                        | 0.105                          | 0.537             |
| Phosphoenolpyruvate carboxykinase [GTP], mitochondrial;                | Q8BH04            | 1                          | 4               | 5              | 5.6                   | 0.546                                        | 0.217                          | 0.588             |
| Coronin-7;                                                             | Q9D2V7            | 1                          | 9               | 9              | 14.2                  | 0.546                                        | 0.108                          | 0.539             |
| Lysosomal alpha-mannosidase;                                           | O09159            | 1                          | 8               | 8              | 5.7                   | 0.556                                        | 0.208                          | 0.573             |
| Copper transport protein ATOX1;                                        | O08997            | 1                          | 7               | 12             | 57.4                  | 0.566                                        | 0.283                          | 0.608             |
| Cytosol aminopeptidase;                                                | Q9CPY7            | 1                          | 31              | 43             | 45.7                  | 0.566                                        | 0.115                          | 0.521             |
| 3-ketoacyl-CoA thiolase A, peroxisomal;                                | Q921H8            | 1                          | 16              | 20             | 42                    | 0.566                                        | 0.184                          | 0.556             |
| 26S proteasome non-ATPase regulatory subunit 13;                       | Q9WVJ2            | 1                          | 11              | 11             | 25.5                  | 0.566                                        | 0.275                          | 0.602             |
| Cyclin-dependent kinase 6;                                             | Q64261            | 1                          | 2               | 2              | 10.1                  | 0.566                                        | 0.122                          | 0.524             |
| Dipeptidase 1;                                                         | P31428            | 1                          | 6               | 7              | 17.3                  | 0.575                                        | 0.32                           | 0.616             |
| UV excision repair protein RAD23 homolog B;                            | P54728            | 1                          | 5               | 5              | 12.5                  | 0.575                                        | 0.131                          | 0.523             |
| Peflin;                                                                | Q8BFY6            | 1                          | 5               | 5              | 11.6                  | 0.575                                        | 0.062                          | 0.495             |

Table S3, Tholen et al.

| Protein                                                           | Uniprot accession | ProteinProphet Prob. Score | Unique peptides | Total peptides | Sequence coverage [%] | Fold change (log <sub>2</sub> ) of ASAPratio | Fold change standard deviation | ASAPratio p-value |
|-------------------------------------------------------------------|-------------------|----------------------------|-----------------|----------------|-----------------------|----------------------------------------------|--------------------------------|-------------------|
| Erythrocyte band 7 integral membrane protein;                     | P54116            | 1                          | 4               | 4              | 11.3                  | 0.575                                        | 0.166                          | 0.537             |
| 14-3-3 protein epsilon;                                           | P62259            | 1                          | 14              | 23             | 45.9                  | 0.575                                        | 0.297                          | 0.604             |
| Acyl-CoA dehydrogenase family member 9, mitochondrial;            | Q8JZN5            | 1                          | 17              | 20             | 30.6                  | 0.575                                        | 0.208                          | 0.556             |
| Anamorsin;                                                        | Q8WTY4            | 1                          | 4               | 4              | 16.8                  | 0.575                                        | 0.324                          | 0.620             |
| CAP-Gly domain-containing linker protein 1;                       | Q922J3            | 1                          | 9               | 9              | 5.1                   | 0.575                                        | 0.216                          | 0.561             |
| Dual specificity protein phosphatase 23;                          | Q6NT99            | 1                          | 3               | 3              | 26                    | 0.585                                        | 0.14                           | 0.521             |
| DAZ-associated protein 1;                                         | Q9JII5            | 1                          | 6               | 9              | 28.1                  | 0.585                                        | 0.129                          | 0.512             |
| V-type proton ATPase subunit E 1;                                 | P50518            | 1                          | 4               | 5              | 9.3                   | 0.585                                        | 0.152                          | 0.519             |
| Tubulin-tyrosine ligase-like protein 12;                          | Q3UDE2            | 1                          | 12              | 16             | 17.5                  | 0.585                                        | 0.23                           | 0.561             |
| WD repeat-containing protein 82;                                  | Q8BFQ4            | 0.997                      | 2               | 2              | 4.5                   | 0.585                                        | 0.094                          | 0.499             |
| Syntaxin 17; Syntaxin 17, isoform CRA_b; Uncharacterized protein; | Q9D614            | 0.981                      | 2               | 3              | 3.3                   | 0.585                                        | 0.066                          | 0.491             |
| Cathepsin B;                                                      | P10605            | 1                          | 21              | 33             | 41.6                  | 0.595                                        | 0.154                          | 0.514             |
| Programmed cell death protein 6;                                  | P12815            | 1                          | 5               | 6              | 17.8                  | 0.595                                        | 0.11                           | 0.501             |
| Farnesyl pyrophosphate synthase;                                  | Q920E5            | 1                          | 14              | 21             | 27.5                  | 0.595                                        | 0.193                          | 0.536             |
| Synaptobrevin homolog YKT6;                                       | Q9CQW1            | 1                          | 10              | 12             | 36.4                  | 0.595                                        | 0.256                          | 0.564             |
| AH receptor-interacting protein;                                  | O08915            | 1                          | 3               | 4              | 13.9                  | 0.595                                        | 0.252                          | 0.563             |
| Acyl-coenzyme A thioesterase 1;                                   | O55137            | 1                          | 11              | 14             | 24.8                  | 0.595                                        | 0.213                          | 0.546             |
| Acyl-coenzyme A thioesterase 2, mitochondrial;                    | Q9QYR9            | 1                          | 2               | 3              | 12.8                  | -0.136                                       | -0.022                         | 0.880             |
| Vesicular integral-membrane protein VIP36;                        | Q9DBH5            | 1                          | 3               | 3              | 13.1                  | 0.595                                        | 0.051                          | 0.483             |
| Protein canopy homolog 3;                                         | Q9DAU1            | 0.994                      | 2               | 2              | 9.4                   | 0.595                                        | 0.169                          | 0.519             |
| Calpastatin;                                                      | P51125            | 1                          | 4               | 6              | 8.5                   | 0.604                                        | 0.052                          | 0.471             |
| Heat shock protein HSP 90-beta;                                   | P11499            | 1                          | 36              | 64             | 37.6                  | 0.604                                        | 0.187                          | 0.520             |
| Endoplasmic;                                                      | P08113            | 1                          | 24              | 30             | 26.4                  | 0.084                                        | 0.053                          | 0.947             |
| Heat shock protein HSP 90-alpha;                                  | P07901            | 1                          | 23              | 38             | 27.7                  | 0.263                                        | 0.085                          | 0.780             |
| Inorganic pyrophosphatase;                                        | Q9D819            | 1                          | 18              | 31             | 45.7                  | 0.604                                        | 0.207                          | 0.529             |
| Zinc finger CCCH domain-containing protein 15;                    | Q3TIV5            | 1                          | 3               | 3              | 3.3                   | 0.614                                        | 0.084                          | 0.473             |
| Far upstream element-binding protein 2;                           | Q3U0V1            | 1                          | 13              | 15             | 15.4                  | 0.614                                        | 0.157                          | 0.499             |
| Activator of 90 kDa heat shock protein ATPase homolog 1;          | Q8BK64            | 1                          | 7               | 9              | 18.9                  | 0.614                                        | 0.209                          | 0.526             |
| Bleomycin hydrolase;                                              | Q8R016            | 1                          | 14              | 18             | 30.1                  | 0.614                                        | 0.084                          | 0.472             |
| T-complex protein 1 subunit theta;                                | P42932            | 1                          | 12              | 14             | 17.3                  | 0.623                                        | 0.21                           | 0.520             |
| Vitamin K-dependent protein S;                                    | Q08761            | 1                          | 2               | 2              | 2.7                   | 0.623                                        | 0.109                          | 0.471             |
| Src substrate cortactin;                                          | Q60598            | 1                          | 2               | 2              | 8.6                   | 0.623                                        | 0.134                          | 0.481             |
| Hsp90 co-chaperone Cdc37;                                         | Q61081            | 1                          | 6               | 7              | 20.1                  | 0.623                                        | 0.138                          | 0.486             |
| COP9 signalosome complex subunit 8;                               | Q8VBV7            | 1                          | 4               | 4              | 23.4                  | 0.623                                        | 0.121                          | 0.476             |
| Ubiquitin carboxyl-terminal hydrolase isozyme L5;                 | Q9WUP7            | 1                          | 4               | 4              | 17                    | 0.623                                        | 0.312                          | 0.569             |
| H-2 class II histocompatibility antigen, A-Q beta chain;          | P06342            | 1                          | 10              | 12             | 32.8                  | 0.623                                        | 0.55                           | 0.681             |
| COP9 signalosome complex subunit 2;                               | P61202            | 1                          | 8               | 9              | 15.8                  | 0.623                                        | 0.243                          | 0.537             |
| Tubulin alpha-1A chain;                                           | P68369            | 1                          | 12              | 21             | 43.7                  | 0.623                                        | 0.235                          | 0.533             |
| Tubulin alpha-4A chain;                                           | P68368            | 1                          | 7               | 8              | 37.5                  | 0.832                                        | 0.276                          | 0.384             |
| C-Jun-amino-terminal kinase-interacting protein 4;                | Q58A65            | 1                          | 11              | 15             | 7                     | 0.623                                        | 0.198                          | 0.514             |
| Prefoldin subunit 5;                                              | Q9WU28            | 1                          | 3               | 3              | 31.2                  | 0.623                                        | 0.202                          | 0.514             |
| Fibrillin 1; Uncharacterized protein;                             | A2AQ53            | 1                          | 7               | 7              | 3.7                   | 0.623                                        | 0.182                          | 0.502             |
| Protein MEMO1;                                                    | Q91VH6            | 1                          | 2               | 3              | 5.1                   | 0.632                                        | 0.236                          | 0.524             |

Table S3, Tholen et al.

| Protein                                                           | Uniprot accession | ProteinProphet Prob. Score | Unique peptides | Total peptides | Sequence coverage [%] | Fold change (log <sub>2</sub> ) of ASAPratio | Fold change standard deviation | ASAPratio p-value |
|-------------------------------------------------------------------|-------------------|----------------------------|-----------------|----------------|-----------------------|----------------------------------------------|--------------------------------|-------------------|
| 15 kDa selenoprotein;                                             | Q9ERR7            | 1                          | 4               | 5              | 17.9                  | 0.632                                        | 0.204                          | 0.507             |
| Alpha-enolase;                                                    | P17182            | 1                          | 33              | 106            | 71.9                  | 0.632                                        | 0.106                          | 0.466             |
| Beta-enolase;                                                     | P21550            | 1                          | 29              | 346            | 51.4                  | -0.916                                       | -0.086                         | 0.277             |
| Gamma-enolase;                                                    | P17183            | 1                          | 2               | 3              | 23.3                  | -0.029                                       | -0.009                         | 0.971             |
| Tyrosyl-tRNA synthetase, cytoplasmic;                             | Q91WQ3            | 1                          | 3               | 3              | 5.5                   | 0.632                                        | 0.053                          | 0.453             |
| SEC14-like protein 2;                                             | Q99J08            | 1                          | 4               | 4              | 8.4                   | 0.642                                        | 0.111                          | 0.459             |
| Arginyl-tRNA synthetase, cytoplasmic;                             | Q9D0I9            | 1                          | 19              | 21             | 23.9                  | 0.642                                        | 0.173                          | 0.483             |
| Phosphoribosylformylglycinamide synthase;                         | Q5SUR0            | 1                          | 11              | 11             | 11.5                  | 0.642                                        | 0.045                          | 0.443             |
| Complement C1s-A subcomponent;                                    | Q8CG14            | 1                          | 6               | 6              | 7.8                   | 0.642                                        | 0.074                          | 0.450             |
| Hydroxymethylglutaryl-CoA synthase, mitochondrial;                | P54869            | 1                          | 3               | 4              | 8.7                   | 0.651                                        | 0.124                          | 0.459             |
| Epidermal growth factor receptor substrate 15-like 1;             | Q60902            | 1                          | 4               | 4              | 8.6                   | 0.651                                        | 0.182                          | 0.484             |
| Phospholipase B-like 1;                                           | Q8VCI0            | 1                          | 9               | 11             | 15.3                  | 0.651                                        | 0.124                          | 0.460             |
| Uncharacterized protein;                                          | Q9CX86            | 1                          | 8               | 12             | 29.2                  | 0.651                                        | 0.058                          | 0.437             |
| 14-3-3 protein zeta/delta;                                        | P63101            | 1                          | 15              | 28             | 41.6                  | 0.651                                        | 0.133                          | 0.457             |
| Plastin-2;                                                        | Q61233            | 1                          | 57              | 86             | 52.8                  | 0.651                                        | 0.207                          | 0.490             |
| Proteasome-associated protein ECM29 homolog;                      | Q6PDI5            | 1                          | 6               | 6              | 4                     | 0.651                                        | 0.075                          | 0.444             |
| EGF-containing fibulin-like extracellular matrix protein 1;       | Q8BPP5            | 1                          | 12              | 14             | 31                    | 0.651                                        | 0.145                          | 0.464             |
| Chloride intracellular channel protein 4;                         | Q9QYB1            | 1                          | 6               | 6              | 24.5                  | 0.66                                         | 0.267                          | 0.515             |
| Phenylalanyl-tRNA synthetase beta chain;                          | Q9WUA2            | 1                          | 4               | 5              | 8.6                   | 0.669                                        | 0.038                          | 0.426             |
| 26S protease regulatory subunit 6A;                               | O88685            | 1                          | 17              | 18             | 34.2                  | 0.669                                        | 0.261                          | 0.504             |
| Aldehyde dehydrogenase family 1 member A3;                        | Q9JHW9            | 1                          | 4               | 4              | 7.4                   | 0.669                                        | 0.614                          | 0.666             |
| Low affinity immunoglobulin gamma Fc region receptor II;          | P08101            | 1                          | 2               | 3              | 3.8                   | 0.678                                        | 0.076                          | 0.424             |
| V-type proton ATPase catalytic subunit A;                         | P50516            | 1                          | 15              | 18             | 18.2                  | 0.678                                        | 0.225                          | 0.480             |
| Serine/threonine-protein phosphatase 6 regulatory subunit 3;      | Q922D4            | 1                          | 2               | 2              | 2.8                   | 0.687                                        | 0.418                          | 0.568             |
| Ribosome-binding protein 1;                                       | Q99PL5            | 1                          | 19              | 24             | 11                    | 0.687                                        | 0.132                          | 0.436             |
| WD repeat-containing protein 61;                                  | Q9ERF3            | 1                          | 2               | 2              | 13.3                  | 0.687                                        | 0.081                          | 0.422             |
| Glycerol-3-phosphate dehydrogenase 1-like protein;                | Q3ULJ0            | 1                          | 12              | 16             | 21.9                  | 0.687                                        | 0.333                          | 0.525             |
| Retinoid-inducible serine carboxypeptidase;                       | Q920A5            | 1                          | 13              | 15             | 13.9                  | 0.687                                        | 0.235                          | 0.481             |
| Phosphomannomutase 2;                                             | Q9Z2M7            | 1                          | 7               | 7              | 22.3                  | 0.687                                        | 0.367                          | 0.544             |
| Protein prune homolog;                                            | Q8BIW1            | 1                          | 7               | 9              | 13.2                  | 0.696                                        | 0.236                          | 0.472             |
| Palmitoyl-protein thioesterase 1;                                 | O88531            | 1                          | 5               | 5              | 17.9                  | 0.696                                        | 0.172                          | 0.443             |
| GMP synthase [glutamine-hydrolyzing];                             | Q3THK7            | 1                          | 9               | 11             | 14.3                  | 0.705                                        | 0.203                          | 0.449             |
| Ubiquitin-like modifier-activating enzyme 6;                      | Q8C7R4            | 1                          | 15              | 15             | 12.9                  | 0.705                                        | 0.177                          | 0.437             |
| Haloacid dehalogenase-like hydrolase domain-containing protein 3; | Q9CYW4            | 1                          | 3               | 3              | 10.8                  | 0.705                                        | 0.35                           | 0.524             |
| Tubulin-folding cofactor B;                                       | Q9D1E6            | 1                          | 3               | 3              | 8.6                   | 0.705                                        | 0.117                          | 0.416             |
| COP9 signalosome complex subunit 7a;                              | Q9CZ04            | 1                          | 2               | 3              | 13.6                  | 0.705                                        | 0.074                          | 0.404             |
| 14-3-3 protein theta;                                             | P68254            | 1                          | 8               | 8              | 38.4                  | 0.714                                        | 0.135                          | 0.417             |
| Cold shock domain-containing protein E1;                          | Q91W50            | 1                          | 3               | 3              | 4.8                   | 0.714                                        | 0.17                           | 0.429             |
| Eosinophil cationic-type ribonuclease 3;                          | O35290            | 1                          | 2               | 2              | 14.7                  | 0.714                                        | 0.122                          | 0.409             |
| Rho GDP-dissociation inhibitor 2;                                 | Q61599            | 1                          | 9               | 14             | 35                    | 0.714                                        | 0.044                          | 0.392             |
| 26S proteasome non-ATPase regulatory subunit 12;                  | Q9D8W5            | 1                          | 9               | 11             | 12.3                  | 0.714                                        | 0.257                          | 0.465             |
| ADP-sugar pyrophosphatase;                                        | Q9JKX6            | 1                          | 4               | 5              | 17.9                  | 0.714                                        | 0.091                          | 0.400             |
| 5'(3')-deoxyribonucleotidase, cytosolic type;                     | Q9JM14            | 1                          | 5               | 5              | 20                    | 0.714                                        | 0.087                          | 0.400             |

Table S3, Tholen et al.

| Protein                                                              | Uniprot accession | ProteinProphet Prob. Score | Unique peptides | Total peptides | Sequence coverage [%] | Fold change (log <sub>2</sub> ) of ASAPratio | Fold change standard deviation | ASAPratio p-value |
|----------------------------------------------------------------------|-------------------|----------------------------|-----------------|----------------|-----------------------|----------------------------------------------|--------------------------------|-------------------|
| Ribosomal protein S6 kinase alpha-3;                                 | P18654            | 1                          | 6               | 6              | 10.2                  | 0.722                                        | 0.328                          | 0.495             |
| Interleukin-1 receptor antagonist protein;                           | P25085            | 1                          | 6               | 8              | 29.4                  | 0.722                                        | 0.074                          | 0.393             |
| GrpE protein homolog 1, mitochondrial;                               | Q99LP6            | 1                          | 3               | 3              | 10.1                  | 0.722                                        | 0.083                          | 0.395             |
| Macrophage colony-stimulating factor 1 receptor;                     | P09581            | 1                          | 3               | 3              | 3.9                   | 0.731                                        | 0.185                          | 0.423             |
| Glutamate--cysteine ligase regulatory subunit;                       | O09172            | 1                          | 3               | 3              | 16.4                  | 0.731                                        | 0.432                          | 0.541             |
| Clathrin heavy chain 1;                                              | Q68FD5            | 1                          | 43              | 53             | 24.5                  | 0.74                                         | 0.372                          | 0.504             |
| Nuclease-sensitive element-binding protein 1;                        | P62960            | 1                          | 3               | 4              | 17.1                  | 0.748                                        | 0.125                          | 0.387             |
| Nucleophosmin;                                                       | Q61937            | 1                          | 2               | 2              | 13.2                  | 0.748                                        | 0.116                          | 0.388             |
| Uncharacterized protein;                                             | E9Q912            | 1                          | 14              | 16             | 21.6                  | 0.748                                        | 0.183                          | 0.407             |
| CD63 antigen;                                                        | P41731            | 0.998                      | 2               | 2              | 4.6                   | 0.748                                        | 0.045                          | 0.374             |
| Gbp6 protein; Guanylate binding protein 7; MCG141961, isoform CRA_a; |                   |                            |                 |                |                       |                                              |                                |                   |
| Uncharacterized protein;                                             | Q91Z40            | 1                          | 4               | 4              | 7.8                   | 0.757                                        | 0.273                          | 0.439             |
| Heterogeneous nuclear ribonucleoprotein F;                           | Q9Z2X1            | 1                          | 11              | 11             | 28.4                  | 0.766                                        | 0.302                          | 0.447             |
| Ezrin;                                                               | P26040            | 1                          | 11              | 12             | 23.2                  | 0.766                                        | 0.144                          | 0.385             |
| Moesin;                                                              | P26041            | 1                          | 11              | 11             | 19.8                  | -1.434                                       | -1.163                         | 0.319             |
| Radixin;                                                             | P26043            | 1                          | 4               | 4              | 12.9                  | -0.943                                       | -0.091                         | 0.268             |
| Protein S100-A11;                                                    | P50543            | 1                          | 8               | 21             | 27.6                  | 0.766                                        | 0.117                          | 0.374             |
| Mitogen-activated protein kinase kinase kinase MLT;                  | Q9ESL4            | 1                          | 6               | 6              | 5.7                   | 0.766                                        | 0.342                          | 0.466             |
| Coronin-1B;                                                          | Q9WUM3            | 1                          | 5               | 5              | 13.6                  | 0.766                                        | 0.27                           | 0.433             |
| Proteasome subunit beta type-10;                                     | O35955            | 1                          | 4               | 4              | 11                    | 0.774                                        | 0.43                           | 0.505             |
| Nardilysin;                                                          | Q8BHG1            | 1                          | 8               | 8              | 8.5                   | 0.774                                        | 0.145                          | 0.380             |
| Pantothenate kinase 4;                                               | Q80YV4            | 1                          | 2               | 2              | 2.9                   | 0.774                                        | 0.104                          | 0.368             |
| 60 kDa heat shock protein, mitochondrial;                            | P63038            | 1                          | 25              | 55             | 39.8                  | 0.782                                        | 0.114                          | 0.362             |
| Carbonyl reductase [NADPH] 1;                                        | P48758            | 1                          | 15              | 24             | 52.7                  | 0.791                                        | 0.146                          | 0.368             |
| 6-phosphogluconate dehydrogenase, decarboxylating;                   | Q9DCD0            | 1                          | 16              | 27             | 26.5                  | 0.791                                        | 0.187                          | 0.382             |
| Uncharacterized protein;                                             | E9QZ28            | 1                          | 3               | 3              | 3.6                   | 0.791                                        | 0.128                          | 0.363             |
| Tyrosine-protein kinase CSK;                                         | P41241            | 1                          | 3               | 3              | 5.1                   | 0.791                                        | 0.169                          | 0.376             |
| Stromal membrane-associated protein 1;                               | Q91VZ6            | 1                          | 3               | 3              | 7.3                   | 0.791                                        | 0.11                           | 0.358             |
| mRNA cap guanine-N7 methyltransferase;                               | Q9D0L8            | 1                          | 2               | 2              | 8.8                   | 0.791                                        | 0.169                          | 0.375             |
| Heterogeneous nuclear ribonucleoprotein M;                           | Q9D0E1            | 0.998                      | 2               | 2              | 2.7                   | 0.799                                        | 0.156                          | 0.362             |
| Pirin;                                                               | Q9D711            | 1                          | 3               | 4              | 11.1                  | 0.807                                        | 0.143                          | 0.354             |
| Cytoplasmic dynein 1 intermediate chain 2;                           | O88487            | 1                          | 4               | 4              | 3.8                   | 0.807                                        | 0.078                          | 0.338             |
| Polyubiquitin-B;                                                     | P0CG49            | 1                          | 5               | 6              | 32.8                  | 0.807                                        | 0.138                          | 0.355             |
| 14-3-3 protein eta;                                                  | P68510            | 1                          | 9               | 10             | 42.7                  | 0.807                                        | 0.286                          | 0.408             |
| Rho-related GTP-binding protein RhoC;                                | Q62159            | 1                          | 5               | 5              | 36.8                  | 0.807                                        | 0.148                          | 0.354             |
| Programmed cell death 6-interacting protein;                         | Q9WU78            | 1                          | 20              | 26             | 24.6                  | 0.807                                        | 0.203                          | 0.376             |
| Peptidyl-prolyl cis-trans isomerase-like 1;                          | Q9D0W5            | 1                          | 2               | 2              | 10.2                  | 0.807                                        | 0.161                          | 0.359             |
| Alanine aminotransferase 2;                                          | Q8BGT5            | 0.994                      | 2               | 2              | 4.2                   | 0.807                                        | 0.719                          | 0.600             |
| Caspase-1;                                                           | P29452            | 1                          | 5               | 5              | 11.2                  | 0.816                                        | 0.408                          | 0.460             |
| 26S protease regulatory subunit 6B;                                  | P54775            | 1                          | 11              | 12             | 22.5                  | 0.816                                        | 0.399                          | 0.452             |
| Lon protease homolog, mitochondrial;                                 | Q8CGK3            | 1                          | 5               | 6              | 5.7                   | 0.816                                        | 0.134                          | 0.345             |
| NEDD8-conjugating enzyme Ubc12;                                      | P61082            | 1                          | 9               | 11             | 25.7                  | 0.816                                        | 0.209                          | 0.369             |
| Transportin-3;                                                       | Q6P2B1            | 1                          | 4               | 4              | 4.4                   | 0.816                                        | 0.417                          | 0.464             |



Table S3, Tholen et al.

| Protein                                                             | Uniprot accession | ProteinProphet Prob. Score | Unique peptides | Total peptides | Sequence coverage [%] | Fold change (log <sub>2</sub> ) of ASAPratio | Fold change standard deviation | ASAPratio p-value |
|---------------------------------------------------------------------|-------------------|----------------------------|-----------------|----------------|-----------------------|----------------------------------------------|--------------------------------|-------------------|
| Acetyl-coenzyme A synthetase, cytoplasmic;                          | Q9QXG4            | 1                          | 2               | 2              | 4.9                   | 0.824                                        | 0.093                          | 0.333             |
| 26S protease regulatory subunit 10B;                                | P62334            | 1                          | 14              | 20             | 39.6                  | 0.832                                        | 0.739                          | 0.584             |
| Carbamoyl-phosphate synthase [ammonia], mitochondrial;              | Q8C196            | 1                          | 22              | 23             | 15.8                  | 0.832                                        | 0.594                          | 0.531             |
| Protein SEC13 homolog;                                              | Q9D1M0            | 1                          | 6               | 6              | 15.2                  | 0.832                                        | 0.224                          | 0.364             |
| Cathepsin Z;                                                        | Q9WUU7            | 1                          | 4               | 4              | 11.8                  | 0.832                                        | 0.065                          | 0.324             |
| Clusterin;                                                          | Q06890            | 1                          | 4               | 4              | 9.6                   | 0.832                                        | 0.182                          | 0.348             |
| Elongation factor 1-beta;                                           | O70251            | 1                          | 5               | 10             | 34.7                  | 0.84                                         | 0.117                          | 0.328             |
| Synergin gamma;                                                     | Q5SV85            | 1                          | 2               | 2              | 1.7                   | 0.84                                         | 0.239                          | 0.367             |
| Glutathione S-transferase omega-1;                                  | O09131            | 1                          | 2               | 2              | 7.1                   | 0.84                                         | 0.174                          | 0.343             |
| Nuclear migration protein nudC;                                     | O35685            | 1                          | 9               | 10             | 23.8                  | 0.848                                        | 0.188                          | 0.341             |
| Alpha-soluble NSF attachment protein;                               | Q9DB05            | 1                          | 5               | 5              | 14.6                  | 0.848                                        | 0.236                          | 0.358             |
| COP9 signalosome complex subunit 4;                                 | O88544            | 1                          | 12              | 12             | 28.8                  | 0.848                                        | 0.207                          | 0.348             |
| Selenoprotein O;                                                    | Q9DBC0            | 1                          | 3               | 3              | 9.1                   | 0.848                                        | 0.155                          | 0.334             |
| Oxysterol-binding protein;                                          | E9QPD4            | 1                          | 2               | 3              | 5.2                   | 0.848                                        | 0.118                          | 0.321             |
| Probable E3 ubiquitin-protein ligase HERC4;                         | Q6PAV2            | 1                          | 6               | 6              | 8.4                   | 0.856                                        | 0.307                          | 0.381             |
| S-adenosylmethionine synthase;                                      | F8WJ09            | 1                          | 5               | 6              | 15.2                  | 0.856                                        | 0.359                          | 0.404             |
| AP-3 complex subunit beta-1;                                        | Q9Z1T1            | 1                          | 3               | 3              | 3.8                   | 0.864                                        | 0.456                          | 0.445             |
| 14-3-3 protein beta/alpha;                                          | Q9CQV8            | 1                          | 10              | 15             | 41.1                  | 0.864                                        | 0.161                          | 0.323             |
| Protein CREG1;                                                      | O88668            | 1                          | 4               | 4              | 13.2                  | 0.872                                        | 0.143                          | 0.316             |
| Bifunctional 3'-phosphoadenosine 5'-phosphosulfate synthase 1;      | Q60967            | 1                          | 4               | 6              | 6.9                   | 0.872                                        | 0.152                          | 0.315             |
| Uncharacterized protein;                                            | E9PUF0            | 1                          | 4               | 4              | 9.6                   | 0.872                                        | 0.129                          | 0.312             |
| Proteasomal ubiquitin receptor ADRM1;                               | Q9JKV1            | 1                          | 2               | 2              | 2.2                   | 0.872                                        | 0.052                          | 0.297             |
| Peroxisomal biogenesis factor 19;                                   | Q8VCI5            | 0.999                      | 2               | 2              | 11                    | 0.872                                        | 0.172                          | 0.320             |
| Stromal membrane-associated protein 2;                              | Q7TN29            | 0.998                      | 3               | 3              | 7.5                   | 0.872                                        | 0.143                          | 0.312             |
| Dihydrofolate reductase;                                            | P00375            | 1                          | 2               | 2              | 8.6                   | 0.88                                         | 0.12                           | 0.304             |
| Ribonucleoprotein PTB-binding 1;                                    | Q9CW46            | 1                          | 3               | 3              | 8.2                   | 0.888                                        | 0.552                          | 0.471             |
| Glycolipid transfer protein;                                        | Q9JL62            | 1                          | 4               | 5              | 10                    | 0.888                                        | 0.13                           | 0.304             |
| Protein phosphatase 1B;                                             | P36993            | 1                          | 5               | 5              | 10                    | 0.895                                        | 0.212                          | 0.317             |
| Carnitine O-palmitoyltransferase 2, mitochondrial;                  | P52825            | 1                          | 3               | 5              | 3.2                   | 0.895                                        | 0.101                          | 0.293             |
| Flotillin-2;                                                        | Q60634            | 1                          | 3               | 3              | 8.4                   | 0.895                                        | 0.563                          | 0.467             |
| Polypyrimidine tract-binding protein 1;                             | P17225            | 1                          | 9               | 14             | 24.9                  | 0.895                                        | 0.375                          | 0.383             |
| Calcium/calmodulin-dependent protein kinase type 1D;                | Q8BW96            | 1                          | 7               | 7              | 16.9                  | 0.903                                        | 0.222                          | 0.318             |
| Heterogeneous nuclear ribonucleoprotein U-like protein 1;           | Q8VDM6            | 1                          | 4               | 4              | 4.2                   | 0.903                                        | 0.367                          | 0.375             |
| Receptor-type tyrosine-protein phosphatase C;                       | P06800            | 1                          | 6               | 6              | 6.9                   | 0.903                                        | 0.169                          | 0.301             |
| E3 ubiquitin-protein ligase HUWE1;                                  | Q7TMY8            | 1                          | 13              | 15             | 3.6                   | 0.903                                        | 0.681                          | 0.508             |
| Retinol-binding protein 1;                                          | Q00915            | 1                          | 5               | 6              | 27.4                  | 0.911                                        | 0.174                          | 0.301             |
| Protein transport protein Sec31A;                                   | Q3UPL0            | 1                          | 26              | 30             | 22.5                  | 0.911                                        | 0.615                          | 0.479             |
| Epidermal growth factor receptor kinase substrate 8-like protein 1; | Q8R5F8            | 1                          | 7               | 7              | 8.4                   | 0.911                                        | 0.572                          | 0.460             |
| Uncharacterized protein;                                            | F6RPJ9            | 1                          | 31              | 35             | 25.5                  | 0.911                                        | 0.16                           | 0.294             |
| Glutaredoxin-1;                                                     | Q9QUH0            | 1                          | 2               | 4              | 29.9                  | 0.918                                        | 0.117                          | 0.281             |
| Uncharacterized protein;                                            | E9Q1Y3            | 1                          | 6               | 9              | 1.4                   | 0.918                                        | 0.194                          | 0.301             |
| Inactive tyrosine-protein kinase 7;                                 | Q8BKG3            | 1                          | 2               | 2              | 1.5                   | 0.918                                        | 0.165                          | 0.293             |
| Cathepsin S;                                                        | O70370            | 1                          | 9               | 11             | 29.1                  | 0.926                                        | 0.112                          | 0.276             |

Table S3, Tholen et al.

| Protein                                                                            | Uniprot accession | ProteinProphet Prob. Score | Unique peptides | Total peptides | Sequence coverage [%] | Fold change (log <sub>2</sub> ) of ASAPratio | Fold change standard deviation | ASAPratio p-value |
|------------------------------------------------------------------------------------|-------------------|----------------------------|-----------------|----------------|-----------------------|----------------------------------------------|--------------------------------|-------------------|
| Peroxisomal acyl-coenzyme A oxidase 2;                                             | Q9QXD1            | 1                          | 2               | 3              | 1.6                   | 0.926                                        | 0.132                          | 0.280             |
| Importin subunit alpha-4;                                                          | Q35343            | 1                          | 2               | 3              | 5.2                   | 0.926                                        | 0.117                          | 0.279             |
| Keratin, type II cytoskeletal 79;                                                  | Q8VED5            | 1                          | 14              | 17             | 23.4                  | 0.934                                        | 0.416                          | 0.374             |
| Ribose-phosphate pyrophosphokinase 1;                                              | Q9D7G0            | 1                          | 8               | 13             | 21.4                  | 0.934                                        | 0.059                          | 0.266             |
| D-3-phosphoglycerate dehydrogenase;                                                | Q61753            | 1                          | 14              | 17             | 21.6                  | 0.934                                        | 0.528                          | 0.425             |
| 3-ketoacyl-CoA thiolase, mitochondrial;                                            | Q8BWT1            | 1                          | 20              | 27             | 42.6                  | 0.941                                        | 0.603                          | 0.449             |
| Myosin-Ic;                                                                         | Q9WTI7            | 1                          | 5               | 7              | 4.9                   | 0.941                                        | 0.446                          | 0.383             |
| 26S protease regulatory subunit 8;                                                 | P62196            | 1                          | 7               | 7              | 17.2                  | 0.941                                        | 0.127                          | 0.271             |
| Ribose-phosphate pyrophosphokinase 2;                                              | Q9CS42            | 0.999                      | 2               | 2              | 15.7                  | 0.941                                        | 0.196                          | 0.290             |
| Tryptase beta-2;                                                                   | P21845            | 0.998                      | 2               | 2              | 6.5                   | 0.941                                        | 0.191                          | 0.285             |
| Caspase-3;                                                                         | P70677            | 1                          | 6               | 6              | 26                    | 0.949                                        | 0.118                          | 0.266             |
| Nicotinate phosphoribosyltransferase;                                              | Q8CC86            | 1                          | 3               | 3              | 5.2                   | 0.949                                        | 0.211                          | 0.287             |
| Striatin-3;                                                                        | Q9ERG2            | 1                          | 3               | 3              | 3.7                   | 0.956                                        | 0.557                          | 0.419             |
| Sialoadhesin;                                                                      | Q62230            | 0.998                      | 2               | 2              | 1.6                   | 0.956                                        | 0.271                          | 0.303             |
| Epithelial splicing regulatory protein 1;                                          | Q3US41            | 1                          | 3               | 4              | 7.1                   | 0.963                                        | 0.568                          | 0.421             |
| CDKN2A-interacting protein;                                                        | Q8BI72            | 1                          | 3               | 3              | 5.7                   | 0.971                                        | 0.218                          | 0.277             |
| 40S ribosomal protein S3;                                                          | P62908            | 1                          | 5               | 5              | 17.3                  | 0.971                                        | 0.53                           | 0.396             |
| Tripeptidyl-peptidase 1;                                                           | O89023            | 1                          | 4               | 5              | 6.2                   | 0.978                                        | 0.204                          | 0.269             |
| Tyrosine-protein phosphatase non-receptor type 23;                                 | Q6PB44            | 1                          | 3               | 3              | 2.8                   | 0.978                                        | 0.293                          | 0.300             |
| H-2 class II histocompatibility antigen, A-Q alpha chain;                          | P04227            | 1                          | 3               | 3              | 6.8                   | 0.986                                        | 0.085                          | 0.243             |
| Non-specific lipid-transfer protein;                                               | P32020            | 1                          | 12              | 19             | 10.8                  | 0.986                                        | 0.393                          | 0.329             |
| FAS-associated factor 1;                                                           | P54731            | 1                          | 2               | 2              | 1.7                   | 0.986                                        | 0.174                          | 0.256             |
| Protein KIAA1967 homolog;                                                          | Q8VDP4            | 1                          | 3               | 3              | 3.1                   | 0.993                                        | 0.259                          | 0.277             |
| Gamma-interferon-inducible lysosomal thiol reductase;                              | Q9ESY9            | 1                          | 2               | 2              | 5.2                   | 0.993                                        | 0.105                          | 0.241             |
| Histone deacetylase 1;                                                             | O09106            | 1                          | 3               | 3              | 10.4                  | 0.993                                        | 0.419                          | 0.335             |
| Inosine triphosphate pyrophosphatase;                                              | Q9D892            | 1                          | 8               | 9              | 28.3                  | 1                                            | 0.1                            | 0.238             |
| RuvB-like 1;                                                                       | P60122            | 1                          | 2               | 2              | 4.6                   | 1                                            | 0.15                           | 0.247             |
| Ubiquitin-like-conjugating enzyme ATG3;                                            | Q9CPX6            | 1                          | 2               | 2              | 4.1                   | 1.007                                        | 0.095                          | 0.233             |
| Fatty acid synthase;                                                               | P19096            | 1                          | 116             | 176            | 37.7                  | 1.014                                        | 0.909                          | 0.511             |
| Talin-1;                                                                           | P26039            | 1                          | 79              | 89             | 31.3                  | 1.014                                        | 0.909                          | 0.511             |
| Talin-2;                                                                           | Q71LX4            | 1                          | 6               | 7              | 6.1                   | -0.136                                       | -0.03                          | 0.884             |
| Far upstream element (FUSE) binding protein 3; MCG130458; Uncharacterized protein; | A2AJ72            | 1                          | 4               | 4              | 10.9                  | 1.014                                        | 0.141                          | 0.236             |
| Ferric-chelate reductase 1;                                                        | Q8K385            | 1                          | 2               | 2              | 3.5                   | 1.014                                        | 0.11                           | 0.231             |
| Tyrosine-protein phosphatase non-receptor type 6;                                  | P29351            | 1                          | 12              | 12             | 17.6                  | 1.021                                        | 0.282                          | 0.266             |
| Fascin;                                                                            | Q61553            | 1                          | 6               | 7              | 13.6                  | 1.021                                        | 0.096                          | 0.226             |
| Phosphoribosyl pyrophosphate synthase-associated protein 2;                        | Q8R574            | 1                          | 2               | 2              | 10.6                  | 1.021                                        | 0.121                          | 0.230             |
| Sulfotransferase family cytosolic 2B member 1;                                     | O35400            | 1                          | 4               | 5              | 11.2                  | 1.021                                        | 0.05                           | 0.220             |
| Small ubiquitin-related modifier 1;                                                | P63166            | 1                          | 2               | 3              | 11.9                  | 1.029                                        | 0.383                          | 0.298             |
| Peptidyl-prolyl cis-trans isomerase FKBP4;                                         | P30416            | 1                          | 15              | 15             | 27.7                  | 1.05                                         | 0.259                          | 0.248             |
| Leucyl-tRNA synthetase, cytoplasmic;                                               | Q8BMJ2            | 1                          | 5               | 5              | 5.9                   | 1.057                                        | 0.224                          | 0.232             |
| Signal transducer and activator of transcription 1;                                | P42225            | 1                          | 4               | 4              | 7.1                   | 1.057                                        | 0.274                          | 0.248             |
| Ras-related protein Rab-21;                                                        | P35282            | 1                          | 9               | 12             | 33.3                  | 1.064                                        | 0.972                          | 0.495             |

Table S3, Tholen et al.

| Protein                                                                            | Uniprot accession | ProteinProphet Prob. Score | Unique peptides | Total peptides | Sequence coverage [%] | Fold change (log <sub>2</sub> ) of ASAPratio | Fold change standard deviation | ASAPratio p-value |
|------------------------------------------------------------------------------------|-------------------|----------------------------|-----------------|----------------|-----------------------|----------------------------------------------|--------------------------------|-------------------|
| Tubulin beta-5 chain;                                                              | P99024            | 1                          | 6               | 12             | 52                    | 1.064                                        | 0.249                          | 0.238             |
| Tubulin beta-2A chain;                                                             | Q7TMM9            | 1                          | 4               | 6              | 42.5                  | 0.978                                        | 0.109                          | 0.250             |
| Tubulin beta-4B chain;                                                             | P68372            | 1                          | 3               | 4              | 52.4                  | 1.084                                        | 0.097                          | 0.199             |
| Ubiquitin-associated protein 2-like;                                               | Q80X50            | 1                          | 6               | 6              | 5.7                   | 1.064                                        | 0.122                          | 0.212             |
| Interferon-induced guanylate-binding protein 2;                                    | Q9Z0E6            | 1                          | 13              | 15             | 17                    | 1.064                                        | 0.265                          | 0.243             |
| SUMO-activating enzyme subunit 2;                                                  | Q9Z1F9            | 1                          | 15              | 18             | 16.5                  | 1.064                                        | 0.173                          | 0.221             |
| CD44 antigen;                                                                      | P15379            | 0.998                      | 2               | 2              | 4.5                   | 1.064                                        | 0.214                          | 0.229             |
| Phosphoserine aminotransferase;                                                    | Q99K85            | 1                          | 21              | 23             | 41.9                  | 1.07                                         | 0.214                          | 0.226             |
| 26S proteasome non-ATPase regulatory subunit 7;                                    | P26516            | 1                          | 8               | 9              | 31.5                  | 1.077                                        | 0.107                          | 0.204             |
| Cytosolic acyl coenzyme A thioester hydrolase;                                     | Q91V12            | 1                          | 5               | 6              | 16.3                  | 1.077                                        | 0.398                          | 0.275             |
| Inositol monophosphatase 2;                                                        | Q91UZ5            | 1                          | 4               | 6              | 11                    | 1.084                                        | 0.153                          | 0.207             |
| Calmodulin-4;                                                                      | Q9JM83            | 1                          | 12              | 25             | 41.2                  | 1.084                                        | 0.138                          | 0.205             |
| Coronin-1A;                                                                        | O89053            | 1                          | 8               | 10             | 10.8                  | 1.084                                        | 0.225                          | 0.219             |
| Dynammin-2;                                                                        | P39054            | 1                          | 2               | 2              | 7                     | 1.084                                        | 0.169                          | 0.208             |
| Transportin-1;                                                                     | Q8BFY9            | 1                          | 5               | 5              | 9.4                   | 1.091                                        | 0.246                          | 0.223             |
| Transportin-2;                                                                     | Q99LG2            | 1                          | 3               | 3              | 7                     | 1.163                                        | 0.421                          | 0.236             |
| Calponin-2;                                                                        | Q08093            | 1                          | 5               | 5              | 16.1                  | 1.098                                        | 0.072                          | 0.190             |
| Dermokine;                                                                         | Q6P253            | 1                          | 5               | 6              | 10.4                  | 1.098                                        | 0.113                          | 0.195             |
| Serine/threonine-protein kinase 24;                                                | Q99KH8            | 1                          | 6               | 8              | 10.7                  | 1.104                                        | 0.462                          | 0.281             |
| Lysosome-associated membrane glycoprotein 2;                                       | P17047            | 1                          | 5               | 6              | 6.5                   | 1.118                                        | 0.577                          | 0.316             |
| Ganglioside GM2 activator;                                                         | Q60648            | 1                          | 4               | 4              | 20.7                  | 1.118                                        | 0.129                          | 0.187             |
| Poly(rC)-binding protein 1;                                                        | P60335            | 1                          | 11              | 19             | 40.7                  | 1.118                                        | 0.345                          | 0.238             |
| Poly(rC)-binding protein 2;                                                        | Q61990            | 1                          | 10              | 15             | 26                    | 0.856                                        | 0.17                           | 0.332             |
| Aldo-keto reductase family 1 member C18;                                           | Q8K023            | 1                          | 4               | 4              | 14.6                  | 1.118                                        | 0.144                          | 0.191             |
| Aspartyl-tRNA synthetase, cytoplasmic;                                             | Q922B2            | 1                          | 11              | 11             | 16                    | 1.118                                        | 0.649                          | 0.345             |
| Cation-dependent mannose-6-phosphate receptor;                                     | P24668            | 1                          | 2               | 2              | 9.7                   | 1.118                                        | 0.252                          | 0.210             |
| Dipeptidyl peptidase 1;                                                            | P97821            | 1                          | 10              | 11             | 15.4                  | 1.124                                        | 0.093                          | 0.182             |
| 26S proteasome non-ATPase regulatory subunit 2;                                    | Q8VDM4            | 1                          | 17              | 25             | 18.7                  | 1.124                                        | 0.294                          | 0.220             |
| Amidophosphoribosyltransferase;                                                    | Q8CIH9            | 1                          | 3               | 3              | 6                     | 1.131                                        | 0.356                          | 0.235             |
| Uncharacterized protein;                                                           | E9Q4K7            | 1                          | 6               | 7              | 3                     | 1.138                                        | 0.316                          | 0.219             |
| F-actin-capping protein subunit alpha-1;                                           | P47753            | 1                          | 11              | 19             | 32.9                  | 1.144                                        | 0.326                          | 0.219             |
| GlutaminyI-tRNA synthetase; Uncharacterized protein;                               | Q8BML9            | 1                          | 13              | 14             | 20.3                  | 1.144                                        | 0.595                          | 0.306             |
| Sorting nexin-3;                                                                   | O70492            | 0.908                      | 2               | 2              | 9.3                   | 1.151                                        | 0.404                          | 0.239             |
| Cellular nucleic acid-binding protein;                                             | P53996            | 1                          | 2               | 2              | 7.3                   | 1.17                                         | 0.203                          | 0.179             |
| Protein FAM49B;                                                                    | Q921M7            | 1                          | 8               | 10             | 33.6                  | 1.17                                         | 0.598                          | 0.293             |
| Coatomer subunit beta';                                                            | O55029            | 1                          | 2               | 2              | 4.5                   | 1.176                                        | 0.369                          | 0.217             |
| N-acetylneuraminase lyase;                                                         | Q9DCJ9            | 1                          | 18              | 21             | 55.3                  | 1.176                                        | 0.541                          | 0.269             |
| Adenylyl cyclase-associated protein 1;                                             | P40124            | 1                          | 22              | 32             | 35                    | 1.183                                        | 0.240                          | 0.180             |
| Protein phosphatase 1A;                                                            | P49443            | 1                          | 4               | 4              | 13                    | 1.189                                        | 0.271                          | 0.184             |
| T-complex protein 1 subunit eta;                                                   | P80313            | 1                          | 5               | 5              | 11.6                  | 1.189                                        | 0.302                          | 0.191             |
| Bcl-2-like protein 13;                                                             | P59017            | 1                          | 4               | 4              | 12                    | 1.208                                        | 0.173                          | 0.160             |
| Serine/threonine-protein phosphatase 2A 65 kDa regulatory subunit A alpha isoform; | Q76MZ3            | 1                          | 22              | 27             | 30.4                  | 1.208                                        | 0.758                          | 0.325             |
| Adenosine deaminase;                                                               | P03958            | 1                          | 5               | 5              | 17                    | 1.214                                        | 0.434                          | 0.213             |

Table S3, Tholen et al.

| Protein                                                                        | Uniprot accession | ProteinProphet Prob. Score | Unique peptides | Total peptides | Sequence coverage [%] | Fold change (log <sub>2</sub> ) of ASAPratio | Fold change standard deviation | ASAPratio p-value |
|--------------------------------------------------------------------------------|-------------------|----------------------------|-----------------|----------------|-----------------------|----------------------------------------------|--------------------------------|-------------------|
| 26S proteasome non-ATPase regulatory subunit 6;                                | Q99JI4            | 1                          | 9               | 10             | 19.5                  | 1.214                                        | 0.570                          | 0.257             |
| Periostin;                                                                     | Q62009            | 1                          | 12              | 12             | 12.1                  | 1.214                                        | 0.141                          | 0.152             |
| Nucleoside diphosphate-linked moiety X motif 17;                               | Q9CWD3            | 1                          | 2               | 2              | 11.8                  | 1.227                                        | 0.288                          | 0.172             |
| Ubiquitin carboxyl-terminal hydrolase 4;                                       | P35123            | 1                          | 5               | 5              | 5.2                   | 1.227                                        | 0.593                          | 0.258             |
| Histone-binding protein RBBP7;                                                 | Q60973            | 1                          | 2               | 2              | 4.7                   | 1.227                                        | 0.220                          | 0.159             |
| 14-3-3 protein sigma;                                                          | O70456            | 1                          | 13              | 46             | 37.5                  | 1.239                                        | 0.341                          | 0.181             |
| T-complex protein 1 subunit delta;                                             | P80315            | 1                          | 9               | 9              | 15                    | 1.239                                        | 0.578                          | 0.246             |
| Asparagine synthetase [glutamine-hydrolyzing];                                 | Q61024            | 1                          | 3               | 3              | 3.6                   | 1.239                                        | 0.089                          | 0.141             |
| Phosphatidylinositol-binding clathrin assembly protein;                        | Q7M6Y3            | 1                          | 3               | 3              | 5.3                   | 1.239                                        | 0.362                          | 0.184             |
| Uncharacterized protein;                                                       | F7BJK1            | 1                          | 2               | 2              | 0.8                   | 1.239                                        | 0.184                          | 0.151             |
| Proliferating cell nuclear antigen;                                            | P17918            | 1                          | 8               | 9              | 27.2                  | 1.239                                        | 0.284                          | 0.167             |
| Elongation factor 1-delta;                                                     | P57776            | 1                          | 2               | 2              | 38.8                  | 1.239                                        | 0.562                          | 0.244             |
| Chloride channel calcium activated 2; Endothelial chloride channel; MCG120735; |                   |                            |                 |                |                       |                                              |                                |                   |
| Uncharacterized protein;                                                       | Q9EQR4            | 1                          | 17              | 19             | 23.5                  | 1.239                                        | 0.409                          | 0.198             |
| Uncharacterized protein;                                                       | E9PUF7            | 0.984                      | 2               | 2              | 4.2                   | 1.239                                        | 0.163                          | 0.148             |
| Protein Niban;                                                                 | Q3UW53            | 1                          | 10              | 10             | 15.4                  | 1.245                                        | 0.636                          | 0.263             |
| Ras-related C3 botulinum toxin substrate 1;                                    | P63001            | 1                          | 10              | 15             | 34.4                  | 1.251                                        | 0.279                          | 0.162             |
| Cell division control protein 42 homolog;                                      | P60766            | 1                          | 8               | 11             | 32.5                  | 0.714                                        | 0.078                          | 0.402             |
| Mevalonate kinase;                                                             | Q9R008            | 1                          | 5               | 6              | 23.3                  | 1.257                                        | 0.289                          | 0.160             |
| Cadherin-1;                                                                    | P09803            | 1                          | 3               | 4              | 4.9                   | 1.263                                        | 0.232                          | 0.149             |
| Cellular retinoic acid-binding protein 2;                                      | P22935            | 1                          | 7               | 7              | 41.3                  | 1.263                                        | 0.126                          | 0.135             |
| tRNA (cytosine(34)-C(5))-methyltransferase;                                    | Q1HFX0            | 1                          | 3               | 3              | 5.7                   | 1.263                                        | 0.837                          | 0.319             |
| Alcohol dehydrogenase 1;                                                       | P00329            | 1                          | 2               | 2              | 8                     | 1.263                                        | 0.089                          | 0.132             |
| Ras-related protein Rab-18;                                                    | P35293            | 1                          | 2               | 2              | 6.8                   | 1.269                                        | 0.242                          | 0.147             |
| SEC14-like protein 4;                                                          | Q8R0F9            | 1                          | 11              | 15             | 32.3                  | 1.269                                        | 0.379                          | 0.175             |
| 26S proteasome non-ATPase regulatory subunit 8;                                | Q9CX56            | 1                          | 3               | 6              | 11.3                  | 1.275                                        | 0.448                          | 0.191             |
| Uncharacterized protein;                                                       | E9PYU6            | 1                          | 6               | 6              | 1.7                   | 1.275                                        | 0.300                          | 0.156             |
| Oxysterol-binding protein-related protein 9;                                   | A2A8Z1            | 0.998                      | 2               | 2              | 4.9                   | 1.275                                        | 0.738                          | 0.280             |
| Isoleucyl-tRNA synthetase, cytoplasmic;                                        | Q8BU30            | 0.997                      | 3               | 3              | 3.3                   | 1.275                                        | 0.443                          | 0.191             |
| Vacuolar protein sorting-associated protein 4B;                                | P46467            | 1                          | 3               | 3              | 12.6                  | 1.281                                        | 0.648                          | 0.249             |
| Cystatin-B;                                                                    | Q62426            | 1                          | 3               | 6              | 32.7                  | 1.281                                        | 0.084                          | 0.127             |
| Importin-7;                                                                    | Q9EPL8            | 1                          | 6               | 7              | 7.2                   | 1.281                                        | 0.643                          | 0.245             |
| Rho-associated protein kinase 2;                                               | P70336            | 1                          | 3               | 3              | 3.3                   | 1.287                                        | 0.733                          | 0.273             |
| Protein Hook homolog 3;                                                        | Q8BUK6            | 1                          | 2               | 2              | 4.2                   | 1.287                                        | 0.274                          | 0.146             |
| Diphosphomevalonate decarboxylase;                                             | Q99JF5            | 1                          | 6               | 10             | 14.5                  | 1.287                                        | 0.158                          | 0.131             |
| Lysosomal protective protein;                                                  | P16675            | 1                          | 19              | 25             | 19.8                  | 1.287                                        | 0.095                          | 0.125             |
| Transcription intermediary factor 1-beta;                                      | Q62318            | 1                          | 7               | 7              | 5.4                   | 1.293                                        | 0.654                          | 0.243             |
| Pantetheinase;                                                                 | Q9Z0K8            | 1                          | 4               | 5              | 10.2                  | 1.293                                        | 0.670                          | 0.247             |
| Lysosomal Pro-X carboxypeptidase;                                              | Q7TMR0            | 1                          | 2               | 2              | 9.6                   | 1.293                                        | 0.391                          | 0.169             |
| Signal transducer and activator of transcription 5A;                           | P42230            | 1                          | 2               | 2              | 2.4                   | 1.299                                        | 0.169                          | 0.129             |
| Large proline-rich protein BAG6;                                               | Q9Z1R2            | 1                          | 3               | 4              | 4.7                   | 1.299                                        | 0.216                          | 0.134             |
| Uncharacterized protein;                                                       | E9Q7G0            | 1                          | 7               | 8              | 8.3                   | 1.305                                        | 1.025                          | 0.353             |
| Lymphocyte-specific protein 1;                                                 | P19973            | 1                          | 3               | 4              | 13.7                  | 1.316                                        | 0.270                          | 0.136             |

Table S3, Tholen et al.

| Protein                                                                                                                                                        | Uniprot accession | ProteinProphet Prob. Score | Unique peptides | Total peptides | Sequence coverage [%] | Fold change (log <sub>2</sub> ) of ASAPratio | Fold change standard deviation | ASAPratio p-value |
|----------------------------------------------------------------------------------------------------------------------------------------------------------------|-------------------|----------------------------|-----------------|----------------|-----------------------|----------------------------------------------|--------------------------------|-------------------|
| Fibulin-5;                                                                                                                                                     | Q9WVH9            | 1                          | 11              | 12             | 23.7                  | 1.316                                        | 0.159                          | 0.121             |
| Bifunctional ATP-dependent dihydroxyacetone kinase/FAD-AMP lyase (cyclizing);                                                                                  | Q8VC30            | 1                          | 6               | 9              | 9.5                   | 1.316                                        | 0.359                          | 0.152             |
| 26S proteasome non-ATPase regulatory subunit 1;                                                                                                                | Q3TXS7            | 1                          | 21              | 28             | 23                    | 1.328                                        | 0.450                          | 0.169             |
| Leucyl-cystinyl aminopeptidase;                                                                                                                                | Q8C129            | 1                          | 2               | 2              | 3.1                   | 1.328                                        | 0.497                          | 0.180             |
| T-complex protein 1 subunit alpha;                                                                                                                             | P11983            | 1                          | 5               | 5              | 9                     | 1.339                                        | 0.376                          | 0.148             |
| Latexin;                                                                                                                                                       | P70202            | 1                          | 5               | 6              | 17.6                  | 1.350                                        | 0.122                          | 0.110             |
| Heparan N-sulfatase; N-sulfoglucosamine sulfohydrolase (Sulfamidase); N-sulfoglucosamine sulfohydrolase (Sulfamidase), isoform CRA_b; Uncharacterized protein; | Q9EQ08            | 1                          | 2               | 2              | 3.2                   | 1.350                                        | 0.365                          | 0.143             |
| 1-phosphatidylinositol-4,5-bisphosphate phosphodiesterase gamma-2;                                                                                             | Q8CIH5            | 1                          | 2               | 2              | 2.1                   | 1.356                                        | 0.260                          | 0.123             |
| Tax1-binding protein 3;                                                                                                                                        | Q9DBG9            | 1                          | 4               | 5              | 13.7                  | 1.356                                        | 0.900                          | 0.285             |
| PDZ and LIM domain protein 1;                                                                                                                                  | O70400            | 1                          | 6               | 8              | 29.4                  | 1.362                                        | 0.334                          | 0.133             |
| Perilipin-4;                                                                                                                                                   | O88492            | 1                          | 43              | 74             | 42.9                  | 1.367                                        | 0.736                          | 0.230             |
| 26S protease regulatory subunit 7;                                                                                                                             | P46471            | 1                          | 9               | 9              | 19.2                  | 1.367                                        | 0.466                          | 0.157             |
| Ectonucleoside triphosphate diphosphohydrolase 1;                                                                                                              | P55772            | 1                          | 3               | 3              | 5.9                   | 1.367                                        | 0.334                          | 0.131             |
| Arfp1 protein; Uncharacterized protein;                                                                                                                        | A2RSX9            | 1                          | 2               | 2              | 11.7                  | 1.367                                        | 0.286                          | 0.122             |
| Ly6/PLAUR domain-containing protein 3;                                                                                                                         | Q91YK8            | 1                          | 2               | 2              | 5.2                   | 1.373                                        | 0.398                          | 0.141             |
| Alpha-N-acetylglucosaminidase (Sanfilippo disease IIIB); Uncharacterized protein;                                                                              | A2BFA6            | 1                          | 2               | 2              | 4.1                   | 1.373                                        | 0.355                          | 0.133             |
| Secretory carrier-associated membrane protein 2;                                                                                                               | Q9ERN0            | 1                          | 2               | 2              | 3.6                   | 1.384                                        | 0.159                          | 0.103             |
| T-complex protein 1 subunit epsilon;                                                                                                                           | P80316            | 1                          | 6               | 6              | 11.3                  | 1.384                                        | 0.361                          | 0.130             |
| Uncharacterized protein;                                                                                                                                       | E9Q9C6            | 1                          | 9               | 9              | 4.2                   | 1.384                                        | 0.334                          | 0.126             |
| Guanylate-binding protein 4;                                                                                                                                   | Q61107            | 1                          | 3               | 3              | 5.3                   | 1.390                                        | 0.605                          | 0.183             |
| Arf-GAP with coiled-coil, ANK repeat and PH domain-containing protein 2;                                                                                       | Q6ZQK5            | 1                          | 3               | 4              | 3.8                   | 1.395                                        | 0.827                          | 0.244             |
| MOB kinase activator 1B;                                                                                                                                       | Q8BPP0            | 1                          | 3               | 3              | 10.6                  | 1.395                                        | 0.149                          | 0.099             |
| BRO1 domain-containing protein BROX;                                                                                                                           | Q8K2Q7            | 1                          | 3               | 3              | 11.9                  | 1.401                                        | 0.287                          | 0.114             |
| CD 81 antigen, isoform CRA_c; CD81 antigen; Tapa-1 protein; Uncharacterized protein;                                                                           | Q91V78            | 1                          | 2               | 2              | 19.1                  | 1.406                                        | 0.276                          | 0.111             |
| Lipopolysaccharide-responsive and beige-like anchor protein;                                                                                                   | Q9ESE1            | 1                          | 5               | 5              | 2.6                   | 1.417                                        | 0.265                          | 0.106             |
| Alcohol dehydrogenase class 4 mu/sigma chain;                                                                                                                  | Q64437            | 1                          | 14              | 22             | 43.3                  | 1.428                                        | 1.109                          | 0.307             |
| Acetyl-CoA acetyltransferase, cytosolic;                                                                                                                       | Q8CAY6            | 1                          | 7               | 8              | 38.5                  | 1.433                                        | 0.494                          | 0.140             |
| Bifunctional aminoacyl-tRNA synthetase;                                                                                                                        | Q8CGC7            | 1                          | 16              | 16             | 11.4                  | 1.438                                        | 0.499                          | 0.139             |
| F-box only protein 6;                                                                                                                                          | Q9QZN4            | 1                          | 2               | 2              | 7.1                   | 1.438                                        | 0.801                          | 0.214             |
| Acid ceramidase;                                                                                                                                               | Q9WV54            | 1                          | 8               | 9              | 18.8                  | 1.449                                        | 0.276                          | 0.098             |
| Epidermal growth factor receptor kinase substrate 8-like protein 2;                                                                                            | Q99K30            | 0.998                      | 2               | 2              | 3.7                   | 1.449                                        | 0.393                          | 0.116             |
| Phosphoserine phosphatase;                                                                                                                                     | Q99LS3            | 1                          | 4               | 8              | 16.4                  | 1.454                                        | 0.196                          | 0.089             |
| Nuclear autoantigenic sperm protein;                                                                                                                           | Q99MD9            | 1                          | 3               | 4              | 9.8                   | 1.459                                        | 0.170                          | 0.086             |
| Early endosome antigen 1;                                                                                                                                      | Q8BL66            | 1                          | 9               | 10             | 8.2                   | 1.459                                        | 0.451                          | 0.123             |
| 26S protease regulatory subunit 4;                                                                                                                             | P62192            | 1                          | 12              | 13             | 22.7                  | 1.480                                        | 0.371                          | 0.104             |
| Ubiquitin-conjugating enzyme E2 D3;                                                                                                                            | P61079            | 1                          | 2               | 3              | 19.7                  | 1.485                                        | 0.154                          | 0.079             |
| Uncharacterized protein;                                                                                                                                       | Q8BVL6            | 1                          | 2               | 3              | 5.6                   | 1.485                                        | 0.122                          | 0.078             |
| Uncharacterized protein;                                                                                                                                       | E9PZ00            | 1                          | 14              | 31             | 16.7                  | 1.496                                        | 0.647                          | 0.151             |
| V-type proton ATPase subunit H;                                                                                                                                | Q8BVE3            | 1                          | 8               | 8              | 16.6                  | 1.511                                        | 0.392                          | 0.098             |
| 6-phosphofructokinase type C;                                                                                                                                  | Q9WUA3            | 1                          | 13              | 15             | 24.9                  | 1.521                                        | 0.996                          | 0.228             |

Table S3, Tholen et al.

| Protein                                                                  | Uniprot accession | ProteinProphet Prob. Score | Unique peptides | Total peptides | Sequence coverage [%] | Fold change (log <sub>2</sub> ) of ASAPratio | Fold change standard deviation | ASAPratio p-value |
|--------------------------------------------------------------------------|-------------------|----------------------------|-----------------|----------------|-----------------------|----------------------------------------------|--------------------------------|-------------------|
| Acetoacetyl-CoA synthetase;                                              | Q9D2R0            | 1                          | 8               | 9              | 12.9                  | 1.526                                        | 0.477                          | 0.107             |
| Clathrin interactor 1; MCG22297, isoform CRA_b; Uncharacterized protein; | Q5SUH6            | 1                          | 4               | 4              | 8.8                   | 1.531                                        | 0.238                          | 0.077             |
| Protein diaphanous homolog 1;                                            | O08808            | 1                          | 9               | 9              | 8.5                   | 1.536                                        | 0.461                          | 0.101             |
| Importin-5;                                                              | Q8BKC5            | 1                          | 15              | 17             | 17.6                  | 1.536                                        | 0.916                          | 0.198             |
| Alpha-galactosidase A;                                                   | P51569            | 1                          | 4               | 4              | 8.1                   | 1.546                                        | 0.418                          | 0.092             |
| Neutrophil cytosol factor 4;                                             | P97369            | 1                          | 3               | 3              | 7.4                   | 1.546                                        | 0.259                          | 0.074             |
| StAR-related lipid transfer protein 5;                                   | Q9EPQ7            | 1                          | 3               | 3              | 24.4                  | 1.551                                        | 0.307                          | 0.078             |
| Uncharacterized protein;                                                 | E9PZZ3            | 1                          | 5               | 5              | 2.6                   | 1.570                                        | 0.539                          | 0.106             |
| RNA-binding protein 14;                                                  | Q8C2Q3            | 1                          | 2               | 2              | 6.5                   | 1.570                                        | 0.322                          | 0.076             |
| 1-acylglycerol-3-phosphate O-acyltransferase ABHD5;                      | Q9DBL9            | 1                          | 2               | 2              | 4.8                   | 1.580                                        | 0.233                          | 0.066             |
| Serine hydroxymethyltransferase, cytosolic;                              | P50431            | 1                          | 3               | 3              | 7.3                   | 1.585                                        | 0.317                          | 0.073             |
| Poly(U)-binding-splicing factor PUF60;                                   | Q3UEB3            | 1                          | 6               | 7              | 13.3                  | 1.590                                        | 0.576                          | 0.107             |
| Angio-associated migratory protein; Uncharacterized protein;             | Q3TJ22            | 1                          | 3               | 3              | 3                     | 1.590                                        | 0.275                          | 0.067             |
| Sphingomyelin phosphodiesterase;                                         | Q04519            | 1                          | 2               | 2              | 4                     | 1.595                                        | 0.227                          | 0.064             |
| Heat shock protein 75 kDa, mitochondrial;                                | Q9CQN1            | 1                          | 6               | 7              | 13.9                  | 1.599                                        | 0.290                          | 0.067             |
| Proactivator polypeptide-like 1;                                         | Q8C1C1            | 1                          | 2               | 2              | 5.4                   | 1.609                                        | 0.559                          | 0.098             |
| T-cell specific GTPase; Uncharacterized protein;                         | Q5SVP4            | 1                          | 2               | 2              | 14.4                  | 1.614                                        | 0.237                          | 0.060             |
| Dehydrogenase/reductase SDR family member 1;                             | Q99L04            | 1                          | 4               | 5              | 10.5                  | 1.642                                        | 0.258                          | 0.057             |
| Carboxypeptidase E;                                                      | Q00493            | 1                          | 5               | 6              | 17                    | 1.646                                        | 0.663                          | 0.105             |
| Ribosomal protein S6 kinase alpha-1;                                     | P18653            | 1                          | 3               | 3              | 5                     | 1.651                                        | 0.237                          | 0.054             |
| Uroporphyrinogen decarboxylase;                                          | P70697            | 1                          | 7               | 7              | 16.1                  | 1.674                                        | 0.561                          | 0.082             |
| Deoxyribonuclease-2-alpha;                                               | P56542            | 1                          | 7               | 9              | 22.3                  | 1.678                                        | 1.573                          | 0.291             |
| Apolipoprotein C-III;                                                    | P33622            | 1                          | 3               | 4              | 19.2                  | 1.687                                        | 0.110                          | 0.044             |
| Treacle protein;                                                         | O08784            | 1                          | 2               | 2              | 1.8                   | 1.692                                        | 0.278                          | 0.051             |
| Fatty acid-binding protein, epidermal;                                   | Q05816            | 1                          | 17              | 81             | 65.2                  | 1.696                                        | 0.230                          | 0.047             |
| Pleckstrin homology domain-containing family O member 2;                 | Q8K124            | 1                          | 2               | 2              | 10.3                  | 1.705                                        | 0.664                          | 0.090             |
| Cytoplasmic dynein 1 heavy chain 1;                                      | Q9JHU4            | 1                          | 18              | 18             | 5.4                   | 1.709                                        | 0.408                          | 0.058             |
| Chitotriosidase-1;                                                       | Q9D7Q1            | 0.977                      | 2               | 2              | 4.5                   | 1.722                                        | 0.204                          | 0.043             |
| Uncharacterized protein;                                                 | E9Q4Z2            | 1                          | 7               | 7              | 3.8                   | 1.731                                        | 0.480                          | 0.061             |
| Exportin-1;                                                              | Q6P5F9            | 1                          | 6               | 6              | 6.6                   | 1.748                                        | 0.411                          | 0.052             |
| Apoptosis-associated speck-like protein containing a CARD;               | Q9EPB4            | 1                          | 9               | 13             | 35.2                  | 1.757                                        | 0.639                          | 0.075             |
| Putative phospholipase B-like 2;                                         | Q3TCN2            | 1                          | 10              | 13             | 13.6                  | 1.770                                        | 0.618                          | 0.069             |
| SEC23-interacting protein;                                               | Q6NZC7            | 1                          | 3               | 3              | 5.4                   | 1.778                                        | 0.259                          | 0.038             |
| Uncharacterized protein;                                                 | D3Z4B0            | 1                          | 2               | 2              | 13                    | 1.778                                        | 0.187                          | 0.036             |
| ATP-citrate synthase;                                                    | Q91V92            | 1                          | 35              | 43             | 29.5                  | 1.803                                        | 0.568                          | 0.058             |
| Isopentenyl-diphosphate Delta-isomerase 1;                               | P58044            | 1                          | 3               | 4              | 18.9                  | 1.828                                        | 0.896                          | 0.094             |
| Latent-transforming growth factor beta-binding protein 4;                | Q8K4G1            | 1                          | 4               | 4              | 3.9                   | 1.856                                        | 0.795                          | 0.073             |
| Tumor necrosis factor receptor type 1-associated DEATH domain protein;   | Q3U0V2            | 1                          | 6               | 6              | 17.1                  | 1.860                                        | 0.272                          | 0.030             |
| General transcription factor II-I;                                       | Q9ESZ8            | 1                          | 2               | 2              | 1.7                   | 1.876                                        | 0.434                          | 0.037             |
| Importin subunit beta-1;                                                 | P70168            | 1                          | 12              | 14             | 12                    | 1.899                                        | 0.524                          | 0.040             |
| Aldehyde dehydrogenase;                                                  | E9Q3E1            | 1                          | 7               | 7              | 16.5                  | 1.899                                        | 0.545                          | 0.041             |
| Cathepsin D;                                                             | P18242            | 1                          | 26              | 56             | 37.6                  | 1.930                                        | 0.350                          | 0.027             |
| Methylthioribose-1-phosphate isomerase;                                  | Q9CQT1            | 1                          | 4               | 4              | 9.2                   | 1.963                                        | 0.327                          | 0.024             |

Table S3, Tholen et al.

| Protein                                                   | Uniprot accession | ProteinProphet Prob. Score | Unique peptides | Total peptides | Sequence coverage [%] | Fold change (log <sub>2</sub> ) of ASAPratio | Fold change standard deviation | ASAPratio p-value |
|-----------------------------------------------------------|-------------------|----------------------------|-----------------|----------------|-----------------------|----------------------------------------------|--------------------------------|-------------------|
| Protein-glutamine gamma-glutamyltransferase E;            | Q08189            | 1                          | 5               | 5              | 9.2                   | 1.993                                        | 0.481                          | 0.027             |
| Short-chain dehydrogenase/reductase family 16C member 6;  | Q05A13            | 1                          | 3               | 3              | 10.1                  | 1.996                                        | 1.086                          | 0.082             |
| Cystatin E/M; Cystatin M/E; Uncharacterized protein;      | Q9D1B1            | 1                          | 7               | 12             | 49                    | 1.996                                        | 0.460                          | 0.026             |
| Retroviral-like aspartic protease 1;                      | Q09PK2            | 1                          | 10              | 21             | 28                    | 2.046                                        | 0.530                          | 0.025             |
| Protein S100-A14;                                         | Q9D2Q8            | 1                          | 2               | 3              | 33.7                  | 2.053                                        | 0.143                          | 0.015             |
| Hydroxymethylglutaryl-CoA synthase, cytoplasmic;          | Q8JZK9            | 1                          | 14              | 18             | 25                    | 2.070                                        | 0.789                          | 0.038             |
| Gamma-glutamyl hydrolase;                                 | Q9Z0L8            | 1                          | 3               | 3              | 12                    | 2.091                                        | 0.358                          | 0.016             |
| Uridine 5'-monophosphate synthase;                        | P13439            | 1                          | 4               | 4              | 11.4                  | 2.094                                        | 1.103                          | 0.063             |
| Exportin-2;                                               | Q9ERK4            | 1                          | 3               | 3              | 8.2                   | 2.118                                        | 0.332                          | 0.014             |
| Long-chain-fatty-acid--CoA ligase 4;                      | Q9QUJ7            | 1                          | 2               | 2              | 2.7                   | 2.121                                        | 0.395                          | 0.016             |
| Leucine-rich PPR motif-containing protein, mitochondrial; | Q6PB66            | 0.997                      | 2               | 2              | 2.7                   | 2.121                                        | 0.536                          | 0.020             |
| Glucocorticoid receptor;                                  | P06537            | 1                          | 4               | 4              | 7.8                   | 2.170                                        | 0.473                          | 0.015             |
| Interleukin-36 alpha;                                     | Q9JLA2            | 1                          | 2               | 2              | 8.8                   | 2.186                                        | 0.480                          | 0.014             |
| Lymphocyte antigen 6D;                                    | P35459            | 1                          | 3               | 4              | 48                    | 2.239                                        | 0.934                          | 0.029             |
| Eosinophil cationic-type ribonuclease 5;                  | Q35292            | 1                          | 2               | 3              | 9.7                   | 2.310                                        | 0.410                          | 0.008             |
| Desmoglein-1-gamma;                                       | Q7TSF0            | 0.991                      | 2               | 2              | 2.6                   | 2.319                                        | 0.785                          | 0.016             |
| Carboxypeptidase A4;                                      | Q6P8K8            | 1                          | 6               | 7              | 12.1                  | 2.348                                        | 0.438                          | 0.007             |
| Uncharacterized protein;                                  | F8VQ05            | 1                          | 2               | 2              | 1.1                   | 2.370                                        | 0.601                          | 0.009             |
| Caspase-14;                                               | O89094            | 1                          | 8               | 10             | 26.1                  | 2.480                                        | 0.707                          | 0.008             |
| Lymphocyte antigen 6 complex locus protein G6c;           | Q9Z1Q4            | 1                          | 2               | 2              | 14.3                  | 2.485                                        | 0.821                          | 0.010             |
| Metastasis-associated protein MTA1;                       | Q8K4B0            | 1                          | 2               | 2              | 3.6                   | 2.524                                        | 0.465                          | 0.004             |
| Monoglyceride lipase;                                     | O35678            | 1                          | 8               | 10             | 33                    | 2.568                                        | 0.896                          | 0.008             |
| Gasdermin-A;                                              | Q9EST1            | 1                          | 7               | 9              | 17.3                  | 2.816                                        | 1.408                          | 0.011             |
| Tumor suppressor p53-binding protein 1;                   | P70399            | 1                          | 2               | 2              | 3.8                   | 3.155                                        | 0.928                          | 0.001             |
| Junctional adhesion molecule A;                           | O88792            | 1                          | 3               | 3              | 11.3                  | 3.259                                        | 0.531                          | 0.000             |
| Perilipin-2;                                              | P43883            | 1                          | 14              | 20             | 31.3                  | 3.458                                        | 2.218                          | 0.005             |
| Thrombospondin-1;                                         | P35441            | 1                          | 3               | 3              | 3.1                   | 3.597                                        | 0.389                          | 0.000             |
| Cornifin-A;                                               | Q62266            | 1                          | 2               | 3              | 27.8                  | 4.328                                        | 0.606                          | 0.000             |
| Afadin;                                                   | Q9QZQ1            | 0.991                      | 2               | 2              | 1.7                   | 4.655                                        | 1.175                          | 0.000             |
| Uncharacterized protein;                                  | D3YTN4            | 1                          | 3               | 3              | 8.2                   | 6.141                                        | 1.664                          | 0                 |
| Bifunctional coenzyme A synthase;                         | Q9DBL7            | 1                          | 2               | 2              | 1.6                   | 9.298                                        | 0.15                           | 0                 |
| CD2-associated protein;                                   | Q9JLQ0            | 1                          | 3               | 3              | 4.4                   | 9.298                                        | 0.15                           | 0                 |
