# Supplementary material
Source: PubMed Central journal article supplement (PMC3591655)
Supplement: supp_M112.017962_mcp.M112.017962-7.pdf [file supp_M112.017962_mcp.M112.017962-7.pdf]

**Table S5:** List of all identified and quantified proteins in both replicates of the quantitative proteome comparison of skin lysates wt and *Ctsb*<sup>-/-</sup>.

| Protein                                                                              | Uniprot | Fold change (log <sub>2</sub> ) of ASAPRatio replicate 1 | Fold change (log <sub>2</sub> ) of ASAPRatio replicate 2 | Average fold change (log <sub>2</sub> ) of ASAPRatio | Standard deviation | 90 % confidence interval (t-test) | Fisher's exact test |
|--------------------------------------------------------------------------------------|---------|----------------------------------------------------------|----------------------------------------------------------|------------------------------------------------------|--------------------|-----------------------------------|---------------------|
| Cathepsin B;                                                                         | P10605  | -6,64*                                                   | -6,64*                                                   | -6,64*                                               | 0.00               | 0.00                              | 36.84               |
| Betaine--homocysteine S-methyltransferase 1;                                         | O35490  | -6.64                                                    | -2.94                                                    | -4.79                                                | 2.62               | 11.68                             | 30.45               |
| Fructose-bisphosphate aldolase B;                                                    | Q91Y97  | -4.64                                                    | -3.47                                                    | -4.06                                                | 0.83               | 3.69                              | 39.65               |
| Glycine N-methyltransferase;                                                         | Q9QXF8  | -4.64                                                    | 2.04                                                     | -1.30                                                | 4.72               | 21.09                             | 24.84               |
| Fatty acid-binding protein, liver;                                                   | P12710  | -3.84                                                    | -2.12                                                    | -2.98                                                | 1.21               | 5.42                              | 24.67               |
| Fatty acid-binding protein, heart;                                                   | P11404  | -1.56                                                    | -1.47                                                    | -1.52                                                | 0.06               | 0.26                              | 8.56                |
| Hydroxymethylglutaryl-CoA synthase, mitochondrial;                                   | P54869  | -1.40                                                    | -1.40                                                    | -1.40                                                | 0.00               | 0.00                              | 7.79                |
| CD 81 antigen, isoform CRA_c; CD81 antigen; Tapa-1 protein; Uncharacterized protein; | Q91V78  | -1.29                                                    | -0.17                                                    | -0.73                                                | 0.79               | 3.53                              | 13.09               |
| N-acetylmuramoyl-L-alanine amidase;                                                  | Q8VCS0  | -1.25                                                    | -0.20                                                    | -0.73                                                | 0.74               | 3.32                              | 3.99                |
| Uncharacterized protein;                                                             | D3YYM6  | -1.25                                                    | 3.14                                                     | 0.94                                                 | 3.11               | 13.87                             | 20.53               |
| Serpin H1;                                                                           | P19324  | -1.18                                                    | -0.62                                                    | -0.90                                                | 0.40               | 1.78                              | 6.92                |
| 60S ribosomal protein L12;                                                           | P35979  | -1.18                                                    | -0.34                                                    | -0.76                                                | 0.60               | 2.66                              | 3.79                |
| Mitochondrial carrier homolog 2;                                                     | Q791V5  | -1.18                                                    | -2.12                                                    | -1.65                                                | 0.66               | 2.95                              | 6.86                |
| Carboxypeptidase B2;                                                                 | Q9JHH6  | -1.15                                                    | -0.40                                                    | -0.77                                                | 0.53               | 2.39                              | 11.19               |
| 60S acidic ribosomal protein P2;                                                     | P99027  | -1.12                                                    | 0.26                                                     | -0.43                                                | 0.98               | 4.37                              | 9.33                |
| UDP-N-acetylhexosamine pyrophosphorylase;                                            | Q91YN5  | -1.06                                                    | -1.22                                                    | -1.14                                                | 0.11               | 0.50                              | 9.44                |
| Uncharacterized protein;                                                             | E9Q6D8  | -1.06                                                    | -0.40                                                    | -0.73                                                | 0.47               | 2.09                              | 5.32                |
| Angiotensin-converting enzyme;                                                       | P09470  | -1.06                                                    | -0.89                                                    | -0.97                                                | 0.12               | 0.54                              | 7.64                |
| Collagen alpha-1(I) chain;                                                           | P11087  | -1.06                                                    | -1.89                                                    | -1.47                                                | 0.59               | 2.62                              | 7.62                |
| Peptidyl-prolyl cis-trans isomerase FKBP7;                                           | O54998  | -1.03                                                    | -0.69                                                    | -0.86                                                | 0.24               | 1.07                              | 8.24                |
| Ig mu chain C region secreted form;                                                  | P01872  | -1.03                                                    | -0.40                                                    | -0.71                                                | 0.45               | 2.00                              | 8.99                |
| Oxidation resistance protein 1;                                                      | Q4KMM3  | -1.03                                                    | -0.86                                                    | -0.95                                                | 0.12               | 0.53                              | 7.66                |
| A-kinase anchor protein 12;                                                          | Q9WTQ5  | -1.03                                                    | -1.25                                                    | -1.14                                                | 0.16               | 0.70                              | 5.08                |
| Scavenger receptor cysteine-rich type 1 protein M130;                                | Q2VLH6  | -0.97                                                    | -2.00                                                    | -1.49                                                | 0.73               | 3.25                              | 13.33               |
| Major urinary protein 2;                                                             | P11589  | -0.47                                                    | -0.89                                                    | -0.68                                                | 0.29               | 1.31                              | 4.68                |
| Myosin-binding protein H;                                                            | P70402  | -0.94                                                    | -3.32                                                    | -2.13                                                | 1.68               | 7.51                              | 16.45               |
| Cysteine-rich with EGF-like domain protein 2;                                        | Q9CYA0  | -0.94                                                    | -0.27                                                    | -0.61                                                | 0.48               | 2.13                              | 4.61                |
| Sodium/potassium-transporting ATPase subunit beta-3;                                 | P97370  | -0.94                                                    | 0.96                                                     | 0.01                                                 | 1.34               | 5.99                              | 5.36                |
| Complement component C9;                                                             | P06683  | -0.92                                                    | -0.04                                                    | -0.48                                                | 0.62               | 2.75                              | 5.44                |
| Myosin-binding protein C, fast-type;                                                 | Q5XKE0  | -0.92                                                    | -1.18                                                    | -1.05                                                | 0.19               | 0.85                              | 8.45                |
| Ubiquitin carboxyl-terminal hydrolase isozyme L1;                                    | Q9R0P9  | -0.92                                                    | -1.25                                                    | -1.08                                                | 0.24               | 1.06                              | 5.18                |
| Carbonyl reductase [NADPH] 2;                                                        | P08074  | -0.92                                                    | -0.58                                                    | -0.75                                                | 0.24               | 1.07                              | 5.23                |
| Dipeptidase 1;                                                                       | P31428  | -0.89                                                    | 0.38                                                     | -0.26                                                | 0.90               | 4.00                              | 6.84                |
| Leukemia inhibitory factor receptor;                                                 | P42703  | -0.86                                                    | -0.03                                                    | -0.45                                                | 0.59               | 2.63                              | 5.29                |
| Protein canopy homolog 2;                                                            | Q9QXT0  | -0.86                                                    | 0.08                                                     | -0.39                                                | 0.67               | 2.99                              | 7.07                |

Table S5, Tholen et al.

| Protein                                                       | Uniprot | Fold change (log <sub>2</sub> ) of ASAPRatio replicate 1 | Fold change (log <sub>2</sub> ) of ASAPRatio replicate 2 | Average fold change (log <sub>2</sub> ) of ASAPRatio | Standard deviation | 90 % confidence interval (t-test) | Fisher's exact test |
|---------------------------------------------------------------|---------|----------------------------------------------------------|----------------------------------------------------------|------------------------------------------------------|--------------------|-----------------------------------|---------------------|
| Complement component 6                                        | D3YXF5  | -0.86                                                    | -1.47                                                    | -1.17                                                | 0.43               | 1.93                              | 5.77                |
| COP9 signalosome complex subunit 1;                           | Q99LD4  | -0.86                                                    | 0.10                                                     | -0.38                                                | 0.68               | 3.03                              | 5.69                |
| Equilibrative nucleoside transporter 1;                       | Q9JIM1  | -0.86                                                    | 0.53                                                     | -0.17                                                | 0.98               | 4.38                              | 8.19                |
| Macrophage colony-stimulating factor 1 receptor;              | P09581  | -0.86                                                    | -1.12                                                    | -0.99                                                | 0.18               | 0.81                              | 9.73                |
| Niemann-Pick C1 protein;                                      | O35604  | -0.81                                                    | -0.06                                                    | -0.44                                                | 0.53               | 2.37                              | 6.19                |
| SPARC;                                                        | P07214  | -0.81                                                    | -1.79                                                    | -1.30                                                | 0.69               | 3.08                              | 10.37               |
| Murinoglobulin-1;                                             | P28665  | -0.81                                                    | -0.29                                                    | -0.55                                                | 0.37               | 1.66                              | 3.58                |
| Complement component C8 alpha chain;                          | Q8K182  | -0.81                                                    | 0.07                                                     | -0.37                                                | 0.62               | 2.78                              | 3.71                |
| Hypoxia up-regulated protein 1;                               | Q9JKR6  | -0.81                                                    | 0.04                                                     | -0.38                                                | 0.60               | 2.70                              | 2.04                |
| Complement component 6                                        | Q9CQF9  | -0.81                                                    | -0.64                                                    | -0.73                                                | 0.12               | 0.53                              | 6.97                |
| Complement component C8 beta chain;                           | Q8BH35  | -0.79                                                    | -0.18                                                    | -0.49                                                | 0.43               | 1.90                              | 5.37                |
| Protein phosphatase 1F;                                       | Q8CGA0  | -0.79                                                    | -0.32                                                    | -0.55                                                | 0.33               | 1.46                              | 2.40                |
| Aminopeptidase B;                                             | Q8VCT3  | -0.79                                                    | 0.36                                                     | -0.22                                                | 0.81               | 3.61                              | 2.97                |
| Mitochondrial-processing peptidase subunit alpha;             | Q9DC61  | -0.79                                                    | -0.18                                                    | -0.49                                                | 0.43               | 1.90                              | 2.95                |
| S-formylglutathione hydrolase;                                | Q9R0P3  | -0.79                                                    | -1.64                                                    | -1.22                                                | 0.61               | 2.71                              | 10.44               |
| UDP-glucose 6-dehydrogenase;                                  | O70475  | -0.79                                                    | -0.74                                                    | -0.76                                                | 0.03               | 0.15                              | 5.98                |
| Adenylosuccinate lyase;                                       | P54822  | -0.79                                                    | -0.45                                                    | -0.62                                                | 0.23               | 1.05                              | 2.46                |
| Afamin;                                                       | O89020  | -0.76                                                    | -0.42                                                    | -0.59                                                | 0.24               | 1.09                              | 3.06                |
| Delta-1-pyrroline-5-carboxylate dehydrogenase, mitochondrial; | Q8CHT0  | -0.76                                                    | -0.18                                                    | -0.47                                                | 0.41               | 1.82                              | 1.91                |
| Thioredoxin domain-containing protein 5;                      | Q91W90  | -0.76                                                    | -0.11                                                    | -0.43                                                | 0.46               | 2.07                              | 5.21                |
| Collagen triple helix repeat-containing protein 1;            | Q9D1D6  | -0.76                                                    | -2.32                                                    | -1.54                                                | 1.10               | 4.93                              | 13.30               |
| Histidine-rich glycoprotein;                                  | Q9ESB3  | -0.76                                                    | -1.09                                                    | -0.93                                                | 0.23               | 1.04                              | 4.80                |
| Nucleobindin-1;                                               | Q02819  | -0.76                                                    | -1.84                                                    | -1.30                                                | 0.76               | 3.40                              | 7.20                |
| Clathrin light polypeptide (Lca); Uncharacterized protein;    | B1AWE0  | -0.76                                                    | 0.12                                                     | -0.32                                                | 0.63               | 2.79                              | 5.68                |
| Uncharacterized protein;                                      | E9PV38  | -0.76                                                    | -0.23                                                    | -0.50                                                | 0.37               | 1.66                              | 2.73                |
| Uncharacterized protein;                                      | Q9DBD0  | -0.76                                                    | -0.14                                                    | -0.45                                                | 0.44               | 1.97                              | 2.48                |
| Collagen alpha-1(III) chain;                                  | P08121  | -0.74                                                    | -1.03                                                    | -0.88                                                | 0.21               | 0.92                              | 7.47                |
| Glutathione peroxidase 7;                                     | Q99LJ6  | -0.74                                                    | -0.17                                                    | -0.45                                                | 0.40               | 1.80                              | 5.67                |
| Prolyl 4-hydroxylase subunit alpha-1;                         | Q60715  | -0.74                                                    | 0.39                                                     | -0.17                                                | 0.80               | 3.56                              | 5.38                |
| Myeloid-associated differentiation marker;                    | O35682  | -0.71                                                    | 0.45                                                     | -0.13                                                | 0.83               | 3.68                              | 5.68                |
| Collagen alpha-2(I) chain;                                    | Q01149  | -0.71                                                    | -2.12                                                    | -1.42                                                | 0.99               | 4.44                              | 9.38                |
| Sulfated glycoprotein 1;                                      | Q61207  | -0.71                                                    | -1.00                                                    | -0.86                                                | 0.20               | 0.91                              | 6.14                |
| Ubiquitin-like-conjugating enzyme ATG3;                       | Q9CPX6  | -0.71                                                    | 0.72                                                     | 0.00                                                 | 1.01               | 4.53                              | 4.25                |
| Epidermal growth factor receptor;                             | Q01279  | -0.71                                                    | -0.30                                                    | -0.51                                                | 0.29               | 1.29                              | 3.66                |
| 4F2 cell-surface antigen heavy chain;                         | P10852  | -0.69                                                    | 2.22                                                     | 0.77                                                 | 2.06               | 9.20                              | 9.79                |
| Hemopexin;                                                    | Q91X72  | -0.69                                                    | -0.81                                                    | -0.75                                                | 0.09               | 0.38                              | 6.64                |
| Vacuolar protein sorting-associated protein 29;               | Q9QZ88  | -0.69                                                    | -1.09                                                    | -0.89                                                | 0.28               | 1.26                              | 7.44                |
| Cytosolic non-specific dipeptidase;                           | Q9D1A2  | -0.69                                                    | -0.52                                                    | -0.60                                                | 0.12               | 0.55                              | 5.61                |

Table S5, Tholen et al.

| Protein                                                                                                           | Uniprot | Fold change (log <sub>2</sub> ) of ASAPRatio replicate 1 | Fold change (log <sub>2</sub> ) of ASAPRatio replicate 2 | Average fold change (log <sub>2</sub> ) of ASAPRatio | Standard deviation | 90 % confidence interval (t-test) | Fisher's exact test |
|-------------------------------------------------------------------------------------------------------------------|---------|----------------------------------------------------------|----------------------------------------------------------|------------------------------------------------------|--------------------|-----------------------------------|---------------------|
| Alpha-aminoadipic semialdehyde dehydrogenase;                                                                     | Q9DBF1  | -0.69                                                    | -0.52                                                    | -0.60                                                | 0.12               | 0.55                              | 5.53                |
| Uncharacterized protein;                                                                                          | F8VFN4  | -0.69                                                    | -0.42                                                    | -0.55                                                | 0.19               | 0.87                              | 3.44                |
| SAR1 gene homolog A (S. cerevisiae); SAR1 gene homolog A (S. cerevisiae), isoform CRA_b; Uncharacterized protein; | Q99JZ4  | -0.69                                                    | 1.08                                                     | 0.19                                                 | 1.25               | 5.58                              | 6.01                |
| Secretory carrier-associated membrane protein 4;                                                                  | Q9JKV5  | -0.69                                                    | -3.84                                                    | -2.26                                                | 2.23               | 9.93                              | 24.62               |
| Ubiquitin-like modifier-activating enzyme ATG7;                                                                   | Q9D906  | -0.69                                                    | 0.19                                                     | -0.25                                                | 0.62               | 2.77                              | 1.95                |
| Beta-glucuronidase;                                                                                               | P12265  | -0.67                                                    | -0.42                                                    | -0.54                                                | 0.18               | 0.80                              | 2.75                |
| Splicing factor U2AF 65 kDa subunit;                                                                              | P26369  | -0.64                                                    | -1.89                                                    | -1.27                                                | 0.88               | 3.93                              | 10.12               |
| Biglycan;                                                                                                         | P28653  | -0.64                                                    | -3.32                                                    | -1.98                                                | 1.89               | 8.45                              | 17.87               |
| Coatomer subunit delta;                                                                                           | Q5XJY5  | -0.64                                                    | -1.00                                                    | -0.82                                                | 0.25               | 1.12                              | 4.07                |
| Succinate dehydrogenase [ubiquinone] flavoprotein subunit, mitochondrial;                                         | Q8K2B3  | -0.64                                                    | -1.74                                                    | -1.19                                                | 0.77               | 3.45                              | 7.50                |
| Carboxypeptidase N subunit 2;                                                                                     | Q9DBB9  | -0.64                                                    | 0.03                                                     | -0.31                                                | 0.48               | 2.12                              | 1.63                |
| Sorting nexin-1;                                                                                                  | Q9WV80  | -0.64                                                    | 0.49                                                     | -0.08                                                | 0.80               | 3.56                              | 3.66                |
| Phosphoribosylformylglycinamide synthase;                                                                         | Q5SUR0  | -0.64                                                    | 0.80                                                     | 0.08                                                 | 1.02               | 4.56                              | 3.01                |
| 40S ribosomal protein SA;                                                                                         | P14206  | -0.62                                                    | -0.81                                                    | -0.72                                                | 0.13               | 0.60                              | 4.81                |
| Macrophage mannose receptor 1;                                                                                    | Q61830  | -0.62                                                    | -0.76                                                    | -0.69                                                | 0.10               | 0.44                              | 4.52                |
| SEC23-interacting protein;                                                                                        | Q6NZC7  | -0.62                                                    | 1.09                                                     | 0.24                                                 | 1.21               | 5.40                              | 7.19                |
| Mannose-1-phosphate guanyltransferase beta;                                                                       | Q8BTZ7  | -0.62                                                    | -1.09                                                    | -0.86                                                | 0.33               | 1.48                              | 6.55                |
| Cell cycle control protein 50A;                                                                                   | Q8VEK0  | -0.62                                                    | -1.36                                                    | -0.99                                                | 0.52               | 2.33                              | 3.57                |
| Aspartyl-tRNA synthetase, cytoplasmic;                                                                            | Q922B2  | -0.62                                                    | 0.76                                                     | 0.07                                                 | 0.97               | 4.35                              | 6.10                |
| Protein disulfide-isomerase A3;                                                                                   | P27773  | -0.62                                                    | -0.18                                                    | -0.40                                                | 0.31               | 1.38                              | 2.37                |
| N-acylglucosamine 2-epimerase;                                                                                    | P82343  | -0.62                                                    | 0.24                                                     | -0.19                                                | 0.61               | 2.71                              | 2.23                |
| Phosphoenolpyruvate carboxykinase [GTP], mitochondrial;                                                           | Q8BH04  | -0.62                                                    | -0.20                                                    | -0.41                                                | 0.30               | 1.33                              | 2.07                |
| UPF0587 protein C1orf123 homolog;                                                                                 | Q8BHG2  | -0.62                                                    | -0.20                                                    | -0.41                                                | 0.30               | 1.33                              | 1.43                |
| MCG21506; Macrophage galactose N-acetyl-galactosamine specific lectin 2 isoform i; Uncharacterized protein;       | A9XX86  | -0.62                                                    | -0.17                                                    | -0.39                                                | 0.32               | 1.43                              | 4.01                |
| Paralemmin-1;                                                                                                     | Q9Z0P4  | -0.62                                                    | -0.47                                                    | -0.55                                                | 0.10               | 0.46                              | 4.56                |
| Histone deacetylase 2;                                                                                            | P70288  | -0.62                                                    | 0.24                                                     | -0.19                                                | 0.61               | 2.71                              | 3.73                |
| Plasma kallikrein;                                                                                                | P26262  | -0.60                                                    | -0.12                                                    | -0.36                                                | 0.34               | 1.51                              | 2.80                |
| Ceruloplasmin;                                                                                                    | Q61147  | -0.60                                                    | -0.60                                                    | -0.60                                                | 0.00               | 0.00                              | 4.84                |
| Lon protease homolog, mitochondrial;                                                                              | Q8CGK3  | -0.60                                                    | 1.10                                                     | 0.25                                                 | 1.20               | 5.38                              | 4.57                |
| Complement component C8 gamma chain;                                                                              | Q8VCG4  | -0.60                                                    | 0.12                                                     | -0.24                                                | 0.51               | 2.28                              | 4.02                |
| Disabled homolog 2;                                                                                               | P98078  | -0.60                                                    | -0.45                                                    | -0.53                                                | 0.10               | 0.46                              | 4.68                |
| C-Jun-amino-terminal kinase-interacting protein 4;                                                                | Q58A65  | -0.60                                                    | 0.35                                                     | -0.13                                                | 0.67               | 2.98                              | 2.48                |
| Frizzled-7;                                                                                                       | Q61090  | -0.60                                                    | 1.11                                                     | 0.26                                                 | 1.21               | 5.40                              | 6.91                |
| Coagulation factor XII;                                                                                           | Q80YC5  | -0.60                                                    | -1.40                                                    | -1.00                                                | 0.56               | 2.52                              | 7.64                |
| Uncharacterized protein;                                                                                          | F7DBB3  | -0.60                                                    | -0.76                                                    | -0.68                                                | 0.11               | 0.51                              | 2.44                |
| Phosphoenolpyruvate carboxykinase, cytosolic [GTP];                                                               | Q9Z2V4  | -0.60                                                    | -0.34                                                    | -0.47                                                | 0.18               | 0.82                              | 1.78                |

Table S5, Tholen et al.

| Protein                                                               | Uniprot | Fold change (log <sub>2</sub> ) of ASAPRatio replicate 1 | Fold change (log <sub>2</sub> ) of ASAPRatio replicate 2 | Average fold change (log <sub>2</sub> ) of ASAPRatio | Standard deviation | 90 % confidence interval (t-test) | Fisher's exact test |
|-----------------------------------------------------------------------|---------|----------------------------------------------------------|----------------------------------------------------------|------------------------------------------------------|--------------------|-----------------------------------|---------------------|
| Receptor-type tyrosine-protein phosphatase C;                         | P06800  | -0.58                                                    | -0.23                                                    | -0.41                                                | 0.24               | 1.09                              | 1.97                |
| Peptidyl-prolyl cis-trans isomerase C;                                | P30412  | -0.58                                                    | -0.58                                                    | -0.58                                                | 0.00               | 0.00                              | 4.85                |
| Peroxiredoxin-4;                                                      | O08807  | -0.58                                                    | -0.43                                                    | -0.51                                                | 0.10               | 0.45                              | 4.38                |
| Adseverin;                                                            | Q60604  | -0.58                                                    | -0.86                                                    | -0.72                                                | 0.20               | 0.90                              | 3.36                |
| Ubiquitin-associated protein 2-like;                                  | Q80X50  | -0.58                                                    | 0.31                                                     | -0.13                                                | 0.63               | 2.80                              | 1.88                |
| Procollagen-lysine,2-oxoglutarate 5-dioxygenase 1;                    | Q9R0E2  | -0.58                                                    | -1.03                                                    | -0.80                                                | 0.32               | 1.42                              | 5.51                |
| STE20-like serine/threonine-protein kinase;                           | O54988  | -0.56                                                    | 1.41                                                     | 0.43                                                 | 1.39               | 6.19                              | 7.39                |
| Inorganic pyrophosphatase 2, mitochondrial;                           | Q91VM9  | -0.56                                                    | -0.40                                                    | -0.48                                                | 0.11               | 0.51                              | 3.86                |
| Nicotinamide phosphoribosyltransferase;                               | Q99KQ4  | -0.56                                                    | -0.74                                                    | -0.65                                                | 0.13               | 0.57                              | 3.25                |
| Palmitoyl-protein thioesterase 1;                                     | O88531  | -0.56                                                    | 0.60                                                     | 0.02                                                 | 0.81               | 3.63                              | 2.87                |
| Guanine nucleotide-binding protein G(i) subunit alpha-2;              | P08752  | -0.56                                                    | -0.11                                                    | -0.33                                                | 0.32               | 1.42                              | 2.22                |
| Guanine nucleotide-binding protein G(s) subunit alpha isoforms short; | P63094  | -0.11                                                    | 0.33                                                     | 0.11                                                 | 0.31               | 1.38                              | 1.08                |
| AP-1 complex subunit beta-1;                                          | O35643  | -0.52                                                    | 0.64                                                     | 0.06                                                 | 0.82               | 3.65                              | 2.64                |
| Antithrombin-III;                                                     | P32261  | -0.52                                                    | -0.03                                                    | -0.27                                                | 0.34               | 1.53                              | 1.47                |
| Ran-specific GTPase-activating protein;                               | P34022  | -0.52                                                    | 1.21                                                     | 0.35                                                 | 1.22               | 5.46                              | 4.50                |
| Tetranectin;                                                          | P43025  | -0.52                                                    | -2.00                                                    | -1.26                                                | 1.05               | 4.69                              | 9.76                |
| 40S ribosomal protein S20;                                            | P60867  | -0.52                                                    | 1.78                                                     | 0.63                                                 | 1.62               | 7.24                              | 7.97                |
| Nucleobindin-2;                                                       | P81117  | -0.52                                                    | -1.09                                                    | -0.80                                                | 0.41               | 1.81                              | 4.81                |
| Complement factor I;                                                  | Q61129  | -0.52                                                    | -0.52                                                    | -0.52                                                | 0.00               | 0.00                              | 3.53                |
| Sorbitol dehydrogenase;                                               | Q64442  | -0.52                                                    | -0.71                                                    | -0.61                                                | 0.14               | 0.63                              | 3.33                |
| Oligoribonuclease, mitochondrial;                                     | Q9D8S4  | -0.52                                                    | 1.50                                                     | 0.49                                                 | 1.43               | 6.36                              | 6.87                |
| Inositol-3-phosphate synthase 1;                                      | Q9JHU9  | -0.52                                                    | 0.23                                                     | -0.14                                                | 0.52               | 2.34                              | 3.63                |
| Uncharacterized protein;                                              | F8VQL5  | -0.52                                                    | -0.09                                                    | -0.30                                                | 0.30               | 1.34                              | 3.32                |
| Dynamin-2;                                                            | P39054  | -0.52                                                    | 0.83                                                     | 0.16                                                 | 0.95               | 4.25                              | 3.37                |
| CUGBP Elav-like family member 2;                                      | Q9Z0H4  | -0.52                                                    | 0.33                                                     | -0.09                                                | 0.60               | 2.68                              | 3.73                |
| Protein phosphatase 1 regulatory subunit 7;                           | Q3UM45  | -0.49                                                    | 0.35                                                     | -0.07                                                | 0.59               | 2.65                              | 2.37                |
| Dipeptidyl peptidase 2;                                               | Q9ET22  | -0.49                                                    | -0.64                                                    | -0.57                                                | 0.11               | 0.47                              | 3.55                |
| Plasma glutamate carboxypeptidase;                                    | Q9WVJ3  | -0.49                                                    | -0.52                                                    | -0.50                                                | 0.01               | 0.07                              | 3.18                |
| ATP synthase subunit alpha, mitochondrial;                            | Q03265  | -0.49                                                    | -1.47                                                    | -0.98                                                | 0.69               | 3.09                              | 4.97                |
| Peptidyl-prolyl cis-trans isomerase FKBP10;                           | Q61576  | -0.49                                                    | -0.06                                                    | -0.28                                                | 0.31               | 1.37                              | 2.80                |
| Myoferlin;                                                            | Q69ZN7  | -0.49                                                    | -0.17                                                    | -0.33                                                | 0.23               | 1.03                              | 2.24                |
| Sodium/potassium-transporting ATPase subunit alpha-1;                 | Q8VDN2  | -0.49                                                    | 1.03                                                     | 0.27                                                 | 1.08               | 4.81                              | 3.79                |
| Sodium/potassium-transporting ATPase subunit alpha-2;                 | Q6PIE5  | -0.64                                                    | 0.08                                                     | -0.28                                                | 0.51               | 2.30                              | 1.64                |
| Complement factor H;                                                  | P06909  | -0.49                                                    | -0.94                                                    | -0.72                                                | 0.32               | 1.42                              | 3.24                |
| Reversion-inducing cysteine-rich protein with Kazal motifs;           | Q9Z0J1  | -0.49                                                    | 1.68                                                     | 0.59                                                 | 1.54               | 6.87                              | 8.60                |
| Peptidyl-prolyl cis-trans isomerase FKBP2;                            | P45878  | -0.49                                                    | 0.01                                                     | -0.24                                                | 0.36               | 1.60                              | 2.90                |
| Guanine nucleotide-binding protein subunit beta-2-like 1;             | P68040  | -0.47                                                    | -1.47                                                    | -0.97                                                | 0.71               | 3.16                              | 5.60                |
| GDP-fucose protein O-fucosyltransferase 1;                            | Q91ZW2  | -0.47                                                    | -0.42                                                    | -0.44                                                | 0.04               | 0.19                              | 3.73                |

Table S5, Tholen et al.

| Protein                                                                           | Uniprot  | Fold change (log <sub>2</sub> ) of ASAPRatio replicate 1 | Fold change (log <sub>2</sub> ) of ASAPRatio replicate 2 | Average fold change (log <sub>2</sub> ) of ASAPRatio | Standard deviation | 90 % confidence interval (t-test) | Fisher's exact test |
|-----------------------------------------------------------------------------------|----------|----------------------------------------------------------|----------------------------------------------------------|------------------------------------------------------|--------------------|-----------------------------------|---------------------|
| Cell adhesion molecule 3;                                                         | Q99N28   | -0.47                                                    | -0.67                                                    | -0.57                                                | 0.14               | 0.61                              | 4.27                |
| S-methyl-5'-thioadenosine phosphorylase;                                          | Q9CQ65   | -0.47                                                    | 0.45                                                     | -0.01                                                | 0.66               | 2.93                              | 2.64                |
| 40S ribosomal protein S21;                                                        | Q9CQR2   | -0.47                                                    | 0.74                                                     | 0.13                                                 | 0.86               | 3.83                              | 3.92                |
| Peptidyl-prolyl cis-trans isomerase FKBP9;                                        | Q9Z247   | -0.47                                                    | 0.08                                                     | -0.20                                                | 0.39               | 1.76                              | 1.47                |
| Alpha-N-acetylglucosaminidase (Sanfilippo disease IIIB); Uncharacterized protein; | A2BFA6   | -0.47                                                    | 0.38                                                     | -0.05                                                | 0.60               | 2.69                              | 3.69                |
| Protein S100-A13;                                                                 | P97352   | -0.45                                                    | -1.00                                                    | -0.73                                                | 0.39               | 1.72                              | 4.04                |
| Probable proline racemase;                                                        | Q9CXA2   | -0.45                                                    | -0.30                                                    | -0.38                                                | 0.11               | 0.47                              | 2.50                |
| Glycyl-tRNA synthetase;                                                           | Q9CZD3   | -0.45                                                    | 0.16                                                     | -0.15                                                | 0.44               | 1.95                              | 1.33                |
| ADP-ribosylation factor-like protein 3;                                           | Q9WUL7   | -0.45                                                    | 0.12                                                     | -0.17                                                | 0.41               | 1.82                              | 2.89                |
| Gelsolin;                                                                         | P13020   | -0.45                                                    | -0.47                                                    | -0.46                                                | 0.01               | 0.06                              | 1.73                |
| SAM domain and HD domain-containing protein 1;                                    | Q60710   | -0.45                                                    | -1.40                                                    | -0.93                                                | 0.67               | 2.97                              | 4.90                |
| Alpha-2-macroglobulin;                                                            | Q61838   | -0.45                                                    | 0.37                                                     | -0.04                                                | 0.58               | 2.59                              | 3.25                |
| Argininosuccinate lyase;                                                          | Q91YI0   | -0.45                                                    | -0.14                                                    | -0.30                                                | 0.22               | 1.00                              | 3.03                |
| Argininosuccinate synthase;                                                       | P16460   | -0.45                                                    | 2.38                                                     | 0.96                                                 | 2.00               | 8.95                              | 8.64                |
| Tripartite motif-containing protein 72;                                           | Q1XH17   | -0.43                                                    | -0.67                                                    | -0.55                                                | 0.16               | 0.74                              | 2.46                |
| Spermidine synthase;                                                              | Q64674   | -0.43                                                    | -0.67                                                    | -0.55                                                | 0.16               | 0.74                              | 3.32                |
| Zinc-alpha-2-glycoprotein;                                                        | Q64726   | -0.43                                                    | -0.23                                                    | -0.33                                                | 0.14               | 0.63                              | 2.90                |
| Ribulose-phosphate 3-epimerase;                                                   | Q8VEE0   | -0.43                                                    | 0.48                                                     | 0.02                                                 | 0.64               | 2.87                              | 2.48                |
| Phosphoacetylglucosamine mutase;                                                  | Q9CYR6   | -0.43                                                    | -0.18                                                    | -0.31                                                | 0.18               | 0.79                              | 2.42                |
| Epidermal growth factor receptor substrate 15;                                    | P42567   | -0.43                                                    | -0.22                                                    | -0.33                                                | 0.15               | 0.68                              | 1.82                |
| UPF0160 protein MYG1, mitochondrial;                                              | Q9JK81   | -0.43                                                    | -0.04                                                    | -0.24                                                | 0.28               | 1.23                              | 1.88                |
| Cathepsin E;                                                                      | P70269   | -0.43                                                    | 1.44                                                     | 0.51                                                 | 1.33               | 5.93                              | 6.70                |
| Leukotriene A-4 hydrolase;                                                        | P24527   | -0.42                                                    | -0.58                                                    | -0.50                                                | 0.12               | 0.51                              | 2.12                |
| Ras-related protein Rab-23;                                                       | P35288   | -0.42                                                    | -0.12                                                    | -0.27                                                | 0.21               | 0.93                              | 2.21                |
| 14 kDa phosphohistidine phosphatase;                                              | Q9DAK9   | -0.42                                                    | 0.35                                                     | -0.04                                                | 0.54               | 2.40                              | 2.85                |
| Carboxypeptidase N catalytic chain;                                               | Q9JJN5   | -0.42                                                    | 0.14                                                     | -0.14                                                | 0.39               | 1.75                              | 2.28                |
| Catalase;                                                                         | P24270   | -0.42                                                    | -1.22                                                    | -0.82                                                | 0.57               | 2.53                              | 3.17                |
| Xanthine dehydrogenase/oxidase;                                                   | Q00519   | -0.42                                                    | -0.81                                                    | -0.61                                                | 0.28               | 1.25                              | 3.73                |
|                                                                                   | O Q8R164 | -0.42                                                    | -0.89                                                    | -0.65                                                | 0.34               | 1.50                              | 2.81                |
| NEDD9-interacting protein with calponin homology and LIM domains;                 | Q8VDP3   | -0.42                                                    | 0.12                                                     | -0.15                                                | 0.38               | 1.70                              | 2.16                |
| Electron transfer flavoprotein-ubiquinone oxidoreductase, mitochondrial;          | Q921G7   | -0.42                                                    | -1.79                                                    | -1.10                                                | 0.97               | 4.33                              | 7.12                |
| Flavin reductase (NADPH);                                                         | Q923D2   | -0.42                                                    | -0.56                                                    | -0.49                                                | 0.10               | 0.45                              | 2.25                |
| Vitamin D-binding protein;                                                        | P21614   | -0.38                                                    | -0.30                                                    | -0.34                                                | 0.05               | 0.23                              | 2.57                |
| Alpha-2-HS-glycoprotein;                                                          | P29699   | -0.38                                                    | -0.47                                                    | -0.43                                                | 0.07               | 0.31                              | 3.14                |
| Protein AMBP;                                                                     | Q07456   | -0.38                                                    | 0.53                                                     | 0.07                                                 | 0.64               | 2.85                              | 2.59                |
| Prostaglandin reductase 1;                                                        | Q91YR9   | -0.38                                                    | -0.14                                                    | -0.26                                                | 0.17               | 0.76                              | 0.90                |
| Serine protease inhibitor A3K;                                                    | P07759   | -0.38                                                    | -0.43                                                    | -0.41                                                | 0.04               | 0.18                              | 3.10                |
| Uncharacterized protein;                                                          | D3Z450   | 0.71                                                     | -0.49                                                    | 0.11                                                 | 0.85               | 3.79                              | 3.94                |

Table S5, Tholen et al.

| Protein                                                                  | Uniprot | Fold change (log <sub>2</sub> ) of ASAPRatio replicate 1 | Fold change (log <sub>2</sub> ) of ASAPRatio replicate 2 | Average fold change (log <sub>2</sub> ) of ASAPRatio | Standard deviation | 90 % confidence interval (t-test) | Fisher's exact test |
|--------------------------------------------------------------------------|---------|----------------------------------------------------------|----------------------------------------------------------|------------------------------------------------------|--------------------|-----------------------------------|---------------------|
| Serine protease inhibitor A3N;                                           | Q91WP6  | -0.49                                                    | -0.34                                                    | -0.42                                                | 0.11               | 0.49                              | 3.62                |
| Septin-2;                                                                | P42208  | -0.38                                                    | -1.52                                                    | -0.95                                                | 0.80               | 3.59                              | 4.35                |
| Thiosulfate sulfurtransferase;                                           | P52196  | -0.38                                                    | -0.58                                                    | -0.48                                                | 0.14               | 0.63                              | 3.40                |
| Isocitrate dehydrogenase [NADP], mitochondrial;                          | P54071  | -0.38                                                    | -0.74                                                    | -0.56                                                | 0.25               | 1.14                              | 3.64                |
| Prolyl 4-hydroxylase subunit alpha-2;                                    | Q60716  | -0.38                                                    | 0.65                                                     | 0.14                                                 | 0.73               | 3.25                              | 3.25                |
| NADH dehydrogenase [ubiquinone] flavoprotein 1, mitochondrial;           | Q91YT0  | -0.38                                                    | -1.94                                                    | -1.16                                                | 1.11               | 4.94                              | 6.35                |
| Prolow-density lipoprotein receptor-related protein 1;                   | Q91ZX7  | -0.38                                                    | -0.42                                                    | -0.40                                                | 0.03               | 0.12                              | 1.83                |
| Golgi reassembly-stacking protein 2;                                     | Q99JX3  | -0.38                                                    | 0.23                                                     | -0.08                                                | 0.43               | 1.91                              | 2.59                |
| Nucleoside diphosphate kinase;                                           | E9PZF0  | -0.38                                                    | -0.54                                                    | -0.46                                                | 0.11               | 0.50                              | 2.11                |
| Serum albumin;                                                           | P07724  | -0.36                                                    | -0.67                                                    | -0.51                                                | 0.22               | 0.98                              | 2.58                |
| Prothrombin;                                                             | P19221  | -0.36                                                    | 0.26                                                     | -0.05                                                | 0.44               | 1.96                              | 1.93                |
| N(G),N(G)-dimethylarginine dimethylaminohydrolase 2;                     | Q99LD8  | -0.36                                                    | -0.94                                                    | -0.65                                                | 0.41               | 1.85                              | 3.41                |
| Succinate dehydrogenase [ubiquinone] iron-sulfur subunit, mitochondrial; | Q9CQA3  | -0.36                                                    | -1.60                                                    | -0.98                                                | 0.88               | 3.92                              | 6.16                |
| Sorting nexin-5;                                                         | Q9D8U8  | -0.36                                                    | 0.06                                                     | -0.15                                                | 0.29               | 1.31                              | 1.64                |
| Glutamate dehydrogenase 1, mitochondrial;                                | P26443  | -0.36                                                    | -3.18                                                    | -1.77                                                | 2.00               | 8.92                              | 16.93               |
| F-actin-capping protein subunit alpha-1;                                 | P47753  | -0.36                                                    | 0.31                                                     | -0.02                                                | 0.47               | 2.11                              | 2.11                |
| F-actin-capping protein subunit alpha-2;                                 | P47754  | -0.52                                                    | -0.56                                                    | -0.54                                                | 0.03               | 0.13                              | 3.98                |
| Ras-related protein Rab-1A;                                              | P62821  | -0.36                                                    | 0.57                                                     | 0.10                                                 | 0.65               | 2.92                              | 2.90                |
| Ras-related protein Rab-14;                                              | Q91V41  | -0.09                                                    | 0.26                                                     | 0.09                                                 | 0.25               | 1.11                              | 0.85                |
| Ras-related protein Rab-1B;                                              | Q9D1G1  | 0.35                                                     | 0.78                                                     | 0.56                                                 | 0.31               | 1.38                              | 3.68                |
| Ras-related protein Rab-10;                                              | P61027  | 0.18                                                     | 0.93                                                     | 0.56                                                 | 0.54               | 2.39                              | 3.04                |
| Guanine nucleotide-binding protein G(I)/G(S)/G(T) subunit beta-1;        | P62874  | -0.36                                                    | 0.23                                                     | -0.07                                                | 0.41               | 1.85                              | 2.20                |
| Guanine nucleotide-binding protein G(I)/G(S)/G(T) subunit beta-2;        | P62880  | -0.36                                                    | -0.54                                                    | -0.45                                                | 0.13               | 0.56                              | 1.84                |
| Aminopeptidase N;                                                        | P97449  | -0.36                                                    | -0.27                                                    | -0.31                                                | 0.06               | 0.28                              | 2.05                |
| Leukocyte elastase inhibitor A;                                          | Q9D154  | -0.36                                                    | -0.64                                                    | -0.50                                                | 0.20               | 0.90                              | 2.93                |
| Fetuin-B;                                                                | Q9QXC1  | -0.36                                                    | -0.56                                                    | -0.46                                                | 0.14               | 0.63                              | 3.20                |
| Guanine deaminase;                                                       | Q9R111  | -0.36                                                    | -1.64                                                    | -1.00                                                | 0.91               | 4.06                              | 5.97                |
| MCG140951; Plexin B2; Plxn2 protein; Uncharacterized protein;            | B2RXS4  | -0.36                                                    | 0.19                                                     | -0.08                                                | 0.39               | 1.73                              | 2.40                |
| Transmembrane emp24 domain-containing protein 10;                        | Q9D1D4  | -0.36                                                    | -0.01                                                    | -0.19                                                | 0.24               | 1.09                              | 2.06                |
| Myc box-dependent-interacting protein 1;                                 | O08539  | -0.34                                                    | -0.94                                                    | -0.64                                                | 0.43               | 1.90                              | 2.44                |
| Complement C4-B;                                                         | P01029  | -0.34                                                    | -0.71                                                    | -0.53                                                | 0.26               | 1.18                              | 2.64                |
| UDP-N-acetylhexosamine pyrophosphorylase-like protein 1;                 | Q3TW96  | -0.34                                                    | -0.81                                                    | -0.58                                                | 0.33               | 1.49                              | 2.87                |
| Sulfhydryl oxidase 1;                                                    | Q8BND5  | -0.34                                                    | -0.29                                                    | -0.31                                                | 0.04               | 0.17                              | 2.26                |
| Dihydropyrimidinase-related protein 2;                                   | O08553  | -0.34                                                    | -1.12                                                    | -0.73                                                | 0.55               | 2.46                              | 3.61                |
| Uncharacterized protein;                                                 | E9PWE8  | -0.12                                                    | -0.43                                                    | -0.28                                                | 0.22               | 0.99                              | 1.38                |
| Vacuolar protein sorting-associated protein 26A;                         | P40336  | -0.34                                                    | -0.58                                                    | -0.46                                                | 0.17               | 0.75                              | 2.26                |
| Ras-related protein Rab-2A;                                              | P53994  | -0.34                                                    | 0.18                                                     | -0.08                                                | 0.36               | 1.63                              | 1.90                |
| Endoplasmic reticulum resident protein 29;                               | P57759  | -0.34                                                    | -0.54                                                    | -0.44                                                | 0.14               | 0.62                              | 2.65                |

Table S5, Tholen et al.

| Protein                                                            | Uniprot | Fold change (log <sub>2</sub> ) of ASAPRatio replicate 1 | Fold change (log <sub>2</sub> ) of ASAPRatio replicate 2 | Average fold change (log <sub>2</sub> ) of ASAPRatio | Standard deviation | 90 % confidence interval (t-test) | Fisher's exact test |
|--------------------------------------------------------------------|---------|----------------------------------------------------------|----------------------------------------------------------|------------------------------------------------------|--------------------|-----------------------------------|---------------------|
| Histidine triad nucleotide-binding protein 1;                      | P70349  | -0.34                                                    | 0.03                                                     | -0.16                                                | 0.26               | 1.16                              | 0.85                |
| Lysosomal alpha-glucosidase;                                       | P70699  | -0.34                                                    | -0.17                                                    | -0.25                                                | 0.12               | 0.54                              | 1.38                |
| Keratin, type II cytoskeletal 1b;                                  | Q61FZ6  | -0.34                                                    | 0.06                                                     | -0.14                                                | 0.28               | 1.25                              | 1.20                |
| Clathrin light chain B;                                            | Q61RU5  | -0.34                                                    | -0.52                                                    | -0.43                                                | 0.12               | 0.55                              | 2.87                |
| Isoleucyl-tRNA synthetase, mitochondrial;                          | Q8BIJ6  | -0.34                                                    | -0.03                                                    | -0.18                                                | 0.22               | 0.98                              | 0.96                |
| Protein DJ-1;                                                      | Q99LX0  | -0.34                                                    | -0.67                                                    | -0.50                                                | 0.23               | 1.03                              | 2.02                |
| Extracellular matrix protein 1;                                    | Q61508  | -0.34                                                    | -1.15                                                    | -0.75                                                | 0.57               | 2.56                              | 3.70                |
| Beta-hexosaminidase subunit beta;                                  | P20060  | -0.34                                                    | -1.89                                                    | -1.11                                                | 1.10               | 4.89                              | 8.44                |
| Adenosine kinase;                                                  | P55264  | -0.32                                                    | -0.23                                                    | -0.28                                                | 0.06               | 0.28                              | 1.47                |
| Fibulin-1;                                                         | Q08879  | -0.32                                                    | -0.45                                                    | -0.39                                                | 0.09               | 0.42                              | 2.29                |
| 1-phosphatidylinositol-4,5-bisphosphate phosphodiesterase delta-1; | Q8R3B1  | -0.32                                                    | 0.04                                                     | -0.14                                                | 0.26               | 1.15                              | 1.12                |
| Alpha-1-antitrypsin 1-1;                                           | P07758  | -0.32                                                    | 0.00                                                     | -0.16                                                | 0.23               | 1.02                              | 1.64                |
| Alpha-1-antitrypsin 1-2;                                           | P22599  | -0.25                                                    | -0.20                                                    | -0.23                                                | 0.04               | 0.16                              | 1.67                |
| Alpha-1-antitrypsin 1-4;                                           | Q00897  | -0.62                                                    | -0.23                                                    | -0.43                                                | 0.27               | 1.22                              | 4.80                |
| Elongation factor 1-alpha 1;                                       | P10126  | -0.32                                                    | 0.12                                                     | -0.10                                                | 0.32               | 1.41                              | 1.62                |
| Elongation factor 1-alpha 2;                                       | P62631  | 0.20                                                     | -1.00                                                    | -0.40                                                | 0.85               | 3.79                              | 3.22                |
| Selenium-binding protein 1;                                        | P17563  | -0.32                                                    | 0.08                                                     | -0.12                                                | 0.29               | 1.28                              | 1.51                |
| Dipeptidyl peptidase 1;                                            | P97821  | -0.32                                                    | 0.75                                                     | 0.21                                                 | 0.76               | 3.38                              | 2.98                |
| Tubulin--tyrosine ligase-like protein 12;                          | Q3UDE2  | -0.32                                                    | 0.50                                                     | 0.09                                                 | 0.58               | 2.58                              | 1.65                |
| Arachidonate 5-lipoxygenase;                                       | P48999  | -0.32                                                    | -0.38                                                    | -0.35                                                | 0.04               | 0.17                              | 2.35                |
| Cartilage-associated protein;                                      | Q9CYD3  | -0.32                                                    | 2.14                                                     | 0.91                                                 | 1.74               | 7.78                              | 9.42                |
| D-dopachrome decarboxylase;                                        | O35215  | -0.30                                                    | -0.89                                                    | -0.60                                                | 0.41               | 1.85                              | 2.54                |
| Annexin A3;                                                        | O35639  | -0.30                                                    | -0.60                                                    | -0.45                                                | 0.21               | 0.93                              | 2.47                |
| Proteasome subunit alpha type-3;                                   | O70435  | -0.30                                                    | 0.01                                                     | -0.15                                                | 0.22               | 1.00                              | 0.59                |
| BAG family molecular chaperone regulator 3;                        | Q9JLV1  | -0.30                                                    | -0.30                                                    | -0.30                                                | 0.00               | 0.00                              | 2.10                |
| Galactokinase;                                                     | Q9R0N0  | -0.30                                                    | 0.31                                                     | 0.00                                                 | 0.43               | 1.94                              | 2.08                |
| Protein disulfide-isomerase;                                       | P09103  | -0.30                                                    | -0.06                                                    | -0.18                                                | 0.17               | 0.77                              | 1.61                |
| V-type proton ATPase catalytic subunit A;                          | P50516  | -0.30                                                    | -0.12                                                    | -0.21                                                | 0.13               | 0.58                              | 1.56                |
| Elongation factor 2;                                               | P58252  | -0.30                                                    | 0.36                                                     | 0.03                                                 | 0.47               | 2.08                              | 1.57                |
| Retinoid-inducible serine carboxypeptidase;                        | Q920A5  | -0.30                                                    | -0.36                                                    | -0.33                                                | 0.04               | 0.17                              | 1.65                |
| Peptidyl-prolyl cis-trans isomerase D;                             | Q9CR16  | -0.30                                                    | 0.42                                                     | 0.06                                                 | 0.51               | 2.29                              | 2.20                |
| Obg-like ATPase 1;                                                 | Q9CZ30  | -0.30                                                    | 0.89                                                     | 0.29                                                 | 0.84               | 3.76                              | 2.75                |
| Aspartyl aminopeptidase;                                           | Q922W0  | -0.30                                                    | -0.34                                                    | -0.32                                                | 0.03               | 0.11                              | 2.15                |
| Creatine kinase M-type;                                            | P07310  | -0.29                                                    | -0.62                                                    | -0.45                                                | 0.24               | 1.06                              | 2.65                |
| Creatine kinase B-type;                                            | Q04447  | -0.29                                                    | -0.56                                                    | -0.42                                                | 0.19               | 0.85                              | 2.36                |
| Synaptic vesicle membrane protein VAT-1 homolog;                   | Q62465  | -0.29                                                    | -0.64                                                    | -0.47                                                | 0.25               | 1.13                              | 2.45                |
| Neutral alpha-glucosidase AB;                                      | Q8BHN3  | -0.29                                                    | -0.11                                                    | -0.20                                                | 0.13               | 0.57                              | 1.33                |
| Aflatoxin B1 aldehyde reductase member 2;                          | Q8CG76  | -0.29                                                    | -1.18                                                    | -0.74                                                | 0.63               | 2.83                              | 3.18                |

Table S5, Tholen et al.

| Protein                                                                       | Uniprot | Fold change (log <sub>2</sub> ) of ASAPRatio replicate 1 | Fold change (log <sub>2</sub> ) of ASAPRatio replicate 2 | Average fold change (log <sub>2</sub> ) of ASAPRatio | Standard deviation | 90 % confidence interval (t-test) | Fisher's exact test |
|-------------------------------------------------------------------------------|---------|----------------------------------------------------------|----------------------------------------------------------|------------------------------------------------------|--------------------|-----------------------------------|---------------------|
| Aldose 1-epimerase;                                                           | Q8K157  | -0.29                                                    | -1.00                                                    | -0.64                                                | 0.50               | 2.25                              | 3.88                |
| ATP-dependent RNA helicase DDX1;                                              | Q91VR5  | -0.29                                                    | -0.14                                                    | -0.21                                                | 0.11               | 0.47                              | 1.72                |
| 6-phosphogluconate dehydrogenase, decarboxylating;                            | Q9DCD0  | -0.29                                                    | 0.19                                                     | -0.05                                                | 0.34               | 1.50                              | 1.24                |
| Interferon-induced guanylate-binding protein 2;                               | Q9Z0E6  | -0.29                                                    | 0.51                                                     | 0.11                                                 | 0.56               | 2.50                              | 1.80                |
| Epididymal secretory protein E1;                                              | Q9Z0J0  | -0.29                                                    | -0.52                                                    | -0.40                                                | 0.16               | 0.72                              | 2.50                |
| Inositol monophosphatase 1;                                                   | O55023  | -0.29                                                    | -0.12                                                    | -0.20                                                | 0.12               | 0.52                              | 1.24                |
| Glutathione S-transferase Mu 2;                                               | P15626  | -0.29                                                    | -0.56                                                    | -0.42                                                | 0.19               | 0.85                              | 2.57                |
| Glutathione S-transferase Mu 1;                                               | P10649  | -0.11                                                    | -0.86                                                    | -0.48                                                | 0.54               | 2.39                              | 2.49                |
| Fumarylacetoacetase;                                                          | P35505  | -0.29                                                    | -0.54                                                    | -0.41                                                | 0.18               | 0.79                              | 2.23                |
| Nascent polypeptide-associated complex subunit alpha, muscle-specific form;   | P70670  | -0.29                                                    | -0.76                                                    | -0.52                                                | 0.34               | 1.50                              | 2.64                |
| Pyruvate dehydrogenase protein X component, mitochondrial;                    | Q8BKZ9  | -0.29                                                    | 0.01                                                     | -0.14                                                | 0.21               | 0.95                              | 0.74                |
| Bleomycin hydrolase;                                                          | Q8R016  | -0.29                                                    | 0.37                                                     | 0.04                                                 | 0.46               | 2.06                              | 1.81                |
| Saccharopine dehydrogenase-like oxidoreductase;                               | Q8R127  | -0.29                                                    | -0.64                                                    | -0.47                                                | 0.25               | 1.13                              | 2.66                |
| Mannose-6-phosphate isomerase;                                                | Q924M7  | -0.29                                                    | -0.32                                                    | -0.30                                                | 0.03               | 0.11                              | 1.68                |
| Eukaryotic translation initiation factor 3 subunit I;                         | Q9QZD9  | -0.29                                                    | 1.44                                                     | 0.58                                                 | 1.22               | 5.46                              | 4.92                |
| Xin actin-binding repeat-containing protein 1;                                | O70373  | -0.29                                                    | -2.06                                                    | -1.17                                                | 1.25               | 5.60                              | 8.84                |
| Proteasome subunit beta type-10;                                              | O35955  | -0.29                                                    | -0.38                                                    | -0.33                                                | 0.06               | 0.29                              | 1.46                |
| Bis(5'-nucleosyl)-tetrphosphatase [asymmetrical];                             | P56380  | -0.27                                                    | 0.26                                                     | 0.00                                                 | 0.38               | 1.68                              | 1.69                |
| Steroid receptor RNA activator 1;                                             | Q80VJ2  | -0.27                                                    | 0.77                                                     | 0.25                                                 | 0.73               | 3.27                              | 3.21                |
| Reticulocalbin-3;                                                             | Q8BH97  | -0.27                                                    | -0.60                                                    | -0.43                                                | 0.23               | 1.04                              | 2.44                |
| Serpin B8;                                                                    | O08800  | -0.25                                                    | -0.76                                                    | -0.51                                                | 0.36               | 1.61                              | 2.82                |
| Epididymis-specific alpha-mannosidase;                                        | O54782  | -0.25                                                    | -0.12                                                    | -0.19                                                | 0.09               | 0.42                              | 1.53                |
| Dystrophin;                                                                   | P11531  | -0.25                                                    | 0.00                                                     | -0.13                                                | 0.18               | 0.80                              | 1.11                |
| Indolethylamine N-methyltransferase;                                          | P40936  | -0.25                                                    | -1.52                                                    | -0.88                                                | 0.89               | 3.99                              | 4.46                |
| Heparin cofactor 2;                                                           | P49182  | -0.25                                                    | -0.58                                                    | -0.42                                                | 0.23               | 1.03                              | 2.32                |
| Apolipoprotein A-I;                                                           | Q00623  | -0.25                                                    | 1.29                                                     | 0.52                                                 | 1.09               | 4.86                              | 4.86                |
| Ganglioside GM2 activator;                                                    | Q60648  | -0.25                                                    | 0.62                                                     | 0.19                                                 | 0.62               | 2.76                              | 2.43                |
| Eukaryotic translation initiation factor 3 subunit H;                         | Q91WK2  | -0.25                                                    | 2.07                                                     | 0.91                                                 | 1.64               | 7.34                              | 8.08                |
| Torsin-1B;                                                                    | Q9ER41  | -0.25                                                    | -0.20                                                    | -0.23                                                | 0.04               | 0.16                              | 1.58                |
| Sec24 related gene family, member D (S. cerevisiae); Uncharacterized protein; | Q6NXL1  | -0.25                                                    | -0.18                                                    | -0.22                                                | 0.05               | 0.21                              | 1.54                |
| Phosphatidylinositol transfer protein alpha isoform;                          | P53810  | -0.25                                                    | 0.60                                                     | 0.18                                                 | 0.61               | 2.70                              | 2.67                |
| Plasma protease C1 inhibitor;                                                 | P97290  | -0.25                                                    | -0.92                                                    | -0.58                                                | 0.47               | 2.10                              | 3.27                |
| Periostin;                                                                    | Q62009  | -0.25                                                    | 0.61                                                     | 0.18                                                 | 0.61               | 2.73                              | 2.23                |
| Zyxin;                                                                        | Q62523  | -0.25                                                    | 1.00                                                     | 0.37                                                 | 0.89               | 3.95                              | 3.54                |
| Major vault protein;                                                          | Q9EQK5  | -0.25                                                    | -0.97                                                    | -0.61                                                | 0.51               | 2.27                              | 3.28                |
| Uncharacterized protein;                                                      | Q3TUE1  | -0.25                                                    | 0.21                                                     | -0.02                                                | 0.33               | 1.47                              | 1.20                |
| Synaptophysin-like protein 1;                                                 | O09117  | -0.25                                                    | 0.28                                                     | 0.01                                                 | 0.37               | 1.66                              | 1.82                |
| Putative ATP-dependent Clp protease proteolytic subunit, mitochondrial;       | O88696  | -0.23                                                    | 0.43                                                     | 0.10                                                 | 0.47               | 2.11                              | 1.68                |



Table S5, Tholen et al.

| Protein                                                                           | Uniprot | Fold change (log <sub>2</sub> ) of ASAPRatio replicate 1 | Fold change (log <sub>2</sub> ) of ASAPRatio replicate 2 | Average fold change (log <sub>2</sub> ) of ASAPRatio | Standard deviation | 90 % confidence interval (t-test) | Fisher's exact test |
|-----------------------------------------------------------------------------------|---------|----------------------------------------------------------|----------------------------------------------------------|------------------------------------------------------|--------------------|-----------------------------------|---------------------|
| T-complex protein 1 subunit theta;                                                | P42932  | -0.23                                                    | 1.45                                                     | 0.61                                                 | 1.19               | 5.31                              | 3.61                |
| Ras-related protein Rab-7a;                                                       | P51150  | -0.23                                                    | 0.44                                                     | 0.11                                                 | 0.48               | 2.14                              | 2.09                |
| Long-chain specific acyl-CoA dehydrogenase, mitochondrial;                        | P51174  | -0.23                                                    | -1.06                                                    | -0.65                                                | 0.58               | 2.60                              | 2.54                |
| Acyl-CoA synthetase short-chain family member 3, mitochondrial;                   | Q14DH7  | -0.23                                                    | -1.40                                                    | -0.82                                                | 0.82               | 3.67                              | 3.83                |
| Calcium-regulated heat stable protein 1;                                          | Q9CR86  | -0.23                                                    | -0.47                                                    | -0.35                                                | 0.17               | 0.76                              | 2.15                |
| Sorting nexin-2;                                                                  | Q9CWK8  | -0.23                                                    | 0.64                                                     | 0.20                                                 | 0.62               | 2.77                              | 2.39                |
| Endoplasmic reticulum resident protein 44;                                        | Q9D1Q6  | -0.23                                                    | -0.30                                                    | -0.27                                                | 0.05               | 0.22                              | 1.45                |
| Phosphoglycerate mutase 1;                                                        | Q9DBJ1  | -0.23                                                    | -0.42                                                    | -0.32                                                | 0.13               | 0.57                              | 1.87                |
| Ribonuclease 4;                                                                   | Q9JJH1  | -0.23                                                    | -0.42                                                    | -0.32                                                | 0.13               | 0.57                              | 1.37                |
| Carbonyl reductase 3; Uncharacterized protein;                                    | Q8K354  | -0.23                                                    | -0.04                                                    | -0.14                                                | 0.13               | 0.60                              | 1.12                |
| N-acetylneuraminic acid synthase (Sialic acid synthase); Uncharacterized protein; | Q99J77  | -0.23                                                    | -0.36                                                    | -0.30                                                | 0.09               | 0.39                              | 1.77                |
| Myosin light chain 1/3, skeletal muscle isoform;                                  | P05977  | -0.23                                                    | -2.00                                                    | -1.12                                                | 1.25               | 5.58                              | 7.55                |
| Lysosomal protective protein;                                                     | P16675  | -0.23                                                    | -0.27                                                    | -0.25                                                | 0.02               | 0.11                              | 1.45                |
| Purine nucleoside phosphorylase;                                                  | P23492  | -0.23                                                    | -0.47                                                    | -0.35                                                | 0.17               | 0.76                              | 1.93                |
| Cytochrome b5;                                                                    | P56395  | -0.23                                                    | -0.47                                                    | -0.35                                                | 0.17               | 0.76                              | 2.12                |
| Heat shock protein 105 kDa;                                                       | Q61699  | -0.23                                                    | 0.24                                                     | 0.00                                                 | 0.33               | 1.49                              | 0.85                |
| Inorganic pyrophosphatase;                                                        | Q9D819  | -0.23                                                    | 0.12                                                     | -0.06                                                | 0.25               | 1.13                              | 1.38                |
| Voltage-dependent calcium channel subunit alpha-2/delta-1;                        | O08532  | -0.22                                                    | -0.62                                                    | -0.42                                                | 0.28               | 1.27                              | 2.47                |
| Ornithine aminotransferase, mitochondrial;                                        | P29758  | -0.22                                                    | 0.14                                                     | -0.04                                                | 0.25               | 1.12                              | 0.85                |
| 182 kDa tankyrase-1-binding protein;                                              | P58871  | -0.22                                                    | -0.04                                                    | -0.13                                                | 0.12               | 0.55                              | 0.84                |
| Far upstream element-binding protein 2;                                           | Q3U0V1  | -0.22                                                    | -0.06                                                    | -0.14                                                | 0.11               | 0.50                              | 0.86                |
| Arginase-1;                                                                       | Q61176  | -0.22                                                    | -2.00                                                    | -1.11                                                | 1.26               | 5.63                              | 6.44                |
| Phosphoglucomutase-2;                                                             | Q7TSV4  | -0.22                                                    | 0.12                                                     | -0.05                                                | 0.24               | 1.08                              | 0.99                |
| Phostensin;                                                                       | Q8BQ30  | -0.22                                                    | 0.19                                                     | -0.01                                                | 0.29               | 1.28                              | 1.42                |
| Succinate-semialdehyde dehydrogenase, mitochondrial;                              | Q8BWF0  | -0.22                                                    | 0.35                                                     | 0.06                                                 | 0.40               | 1.78                              | 1.33                |
| ES1 protein homolog, mitochondrial;                                               | Q9D172  | -0.22                                                    | -0.92                                                    | -0.57                                                | 0.49               | 2.20                              | 2.61                |
| 4-trimethylaminobutyraldehyde dehydrogenase;                                      | Q9JLJ2  | -0.22                                                    | -0.47                                                    | -0.35                                                | 0.18               | 0.81                              | 1.91                |
| Proline synthase co-transcribed bacterial homolog protein;                        | Q9Z2Y8  | -0.22                                                    | -0.03                                                    | -0.12                                                | 0.13               | 0.60                              | 0.61                |
| Glucosamine-6-phosphate isomerase 1;                                              | O88958  | -0.22                                                    | 0.19                                                     | -0.01                                                | 0.29               | 1.28                              | 0.88                |
| Adenosylhomocysteinase;                                                           | P50247  | -0.22                                                    | 0.37                                                     | 0.07                                                 | 0.41               | 1.85                              | 1.74                |
| Pyruvate kinase isozymes M1/M2;                                                   | P52480  | -0.22                                                    | -0.52                                                    | -0.37                                                | 0.21               | 0.94                              | 1.65                |
| Glyoxylate reductase/hydroxypyruvate reductase;                                   | Q91Z53  | -0.22                                                    | -0.67                                                    | -0.44                                                | 0.32               | 1.42                              | 2.33                |
| Serotransferrin;                                                                  | Q921I1  | -0.22                                                    | -0.49                                                    | -0.36                                                | 0.20               | 0.87                              | 2.06                |
| N(G),N(G)-dimethylarginine dimethylaminohydrolase 1;                              | Q9CWS0  | -0.22                                                    | -0.42                                                    | -0.32                                                | 0.14               | 0.62                              | 1.53                |
| Phosphoglucomutase-1;                                                             | Q9D0F9  | -0.22                                                    | -0.52                                                    | -0.37                                                | 0.21               | 0.94                              | 2.01                |
| Cysteine sulfinic acid decarboxylase;                                             | Q9DBE0  | -0.22                                                    | -0.20                                                    | -0.21                                                | 0.01               | 0.05                              | 1.11                |
| Choline transporter-like protein 2;                                               | Q8BY89  | -0.22                                                    | -0.11                                                    | -0.16                                                | 0.08               | 0.36                              | 1.21                |
| Complement C3;                                                                    | P01027  | -0.20                                                    | -0.29                                                    | -0.24                                                | 0.06               | 0.27                              | 1.20                |

Table S5, Tholen et al.

| Protein                                                                       | Uniprot  | Fold change (log <sub>2</sub> ) of ASAPRatio replicate 1 | Fold change (log <sub>2</sub> ) of ASAPRatio replicate 2 | Average fold change (log <sub>2</sub> ) of ASAPRatio | Standard deviation | 90 % confidence interval (t-test) | Fisher's exact test |
|-------------------------------------------------------------------------------|----------|----------------------------------------------------------|----------------------------------------------------------|------------------------------------------------------|--------------------|-----------------------------------|---------------------|
| Plasminogen;                                                                  | P20918   | -0.20                                                    | -0.47                                                    | -0.34                                                | 0.19               | 0.86                              | 1.75                |
| Ras-related protein Rab-21;                                                   | P35282   | -0.20                                                    | 0.90                                                     | 0.35                                                 | 0.77               | 3.46                              | 2.91                |
| Dynein light chain roadblock-type 1;                                          | P62627   | -0.20                                                    | -0.15                                                    | -0.18                                                | 0.03               | 0.15                              | 1.13                |
| Stress-induced-phosphoprotein 1;                                              | Q60864   | -0.20                                                    | 0.48                                                     | 0.14                                                 | 0.48               | 2.13                              | 1.62                |
| Gephyrin;                                                                     | Q8BUV3   | -0.20                                                    | 0.19                                                     | -0.01                                                | 0.28               | 1.23                              | 0.72                |
| Probable fructose-2,6-bisphosphatase TIGAR;                                   | Q8BZA9   | -0.20                                                    | -0.04                                                    | -0.12                                                | 0.11               | 0.50                              | 0.97                |
| Arf-GAP domain and FG repeats-containing protein 1;                           | Q8K2K6   | -0.20                                                    | 0.15                                                     | -0.03                                                | 0.25               | 1.11                              | 0.80                |
| Neudesin;                                                                     | Q9CQ45   | -0.20                                                    | -0.03                                                    | -0.12                                                | 0.12               | 0.54                              | 0.98                |
| Tetratricopeptide repeat protein 38;                                          | A3KMP2   | -0.20                                                    | -0.40                                                    | -0.30                                                | 0.14               | 0.62                              | 1.17                |
| COP9 signalosome complex subunit 3;                                           | O88543   | -0.20                                                    | 1.34                                                     | 0.57                                                 | 1.09               | 4.86                              | 3.98                |
|                                                                               | 0 P35492 | -0.20                                                    | -0.76                                                    | -0.48                                                | 0.40               | 1.77                              | 2.48                |
| Myosin regulatory light chain 2, skeletal muscle isoform;                     | P97457   | -0.20                                                    | -1.43                                                    | -0.82                                                | 0.87               | 3.89                              | 3.00                |
| Junction plakoglobin;                                                         | Q02257   | -0.20                                                    | 1.31                                                     | 0.55                                                 | 1.06               | 4.75                              | 3.32                |
| Catenin beta-1;                                                               | Q02248   | 0.48                                                     | 0.20                                                     | 0.34                                                 | 0.19               | 0.86                              | 1.19                |
| Echinoderm microtubule-associated protein-like 2;                             | Q7TNG5   | -0.20                                                    | -0.89                                                    | -0.55                                                | 0.49               | 2.17                              | 2.16                |
| Peroxisomal acyl-coenzyme A oxidase 3;                                        | Q9EPL9   | -0.20                                                    | -1.79                                                    | -0.99                                                | 1.12               | 5.00                              | 6.09                |
| Uncharacterized protein;                                                      | F8WIT2   | -0.20                                                    | -0.56                                                    | -0.38                                                | 0.25               | 1.12                              | 1.57                |
| PDZ and LIM domain protein 1;                                                 | O70400   | -0.20                                                    | 1.31                                                     | 0.55                                                 | 1.07               | 4.77                              | 4.61                |
| Ig heavy chain V region 441;                                                  | P01806   | -0.18                                                    | -2.32                                                    | -1.25                                                | 1.51               | 6.75                              | 9.36                |
| ATP synthase subunit beta, mitochondrial;                                     | P56480   | -0.18                                                    | -1.69                                                    | -0.94                                                | 1.06               | 4.75                              | 6.00                |
| Cellular retinoic acid-binding protein 1;                                     | P62965   | -0.18                                                    | -0.06                                                    | -0.12                                                | 0.09               | 0.39                              | 0.77                |
| Bifunctional ATP-dependent dihydroxyacetone kinase/FAD-AMP lyase (cyclizing); | Q8VC30   | -0.18                                                    | 1.02                                                     | 0.42                                                 | 0.85               | 3.80                              | 3.51                |
| NADH-ubiquinone oxidoreductase 75 kDa subunit, mitochondrial;                 | Q91VD9   | -0.18                                                    | -2.74                                                    | -1.46                                                | 1.81               | 8.06                              | 9.23                |
| Protein SEC13 homolog;                                                        | Q9D1M0   | -0.18                                                    | -0.12                                                    | -0.15                                                | 0.05               | 0.20                              | 0.84                |
| Protein NDRG2;                                                                | Q9QYG0   | -0.18                                                    | -0.49                                                    | -0.34                                                | 0.22               | 0.98                              | 1.67                |
| Ahnak protein; MCG17833, isoform CRA_b; Uncharacterized protein;              | Q8R2L7   | -0.18                                                    | -0.92                                                    | -0.55                                                | 0.52               | 2.31                              | 2.97                |
| Integrin beta-1;                                                              | P09055   | -0.18                                                    | -0.03                                                    | -0.11                                                | 0.11               | 0.49                              | 0.60                |
| Chromobox protein homolog 3;                                                  | P23198   | -0.18                                                    | 0.44                                                     | 0.13                                                 | 0.44               | 1.98                              | 1.43                |
| Microtubule-associated protein 4;                                             | P27546   | -0.18                                                    | -0.32                                                    | -0.25                                                | 0.10               | 0.44                              | 1.29                |
| Protein transport protein Sec23A;                                             | Q01405   | -0.18                                                    | -0.22                                                    | -0.20                                                | 0.02               | 0.11                              | 1.22                |
| Pyridoxal kinase;                                                             | Q8K183   | -0.18                                                    | -0.45                                                    | -0.32                                                | 0.19               | 0.85                              | 1.56                |
| Endoplasmic reticulum aminopeptidase 1;                                       | Q9EQH2   | -0.18                                                    | -0.20                                                    | -0.19                                                | 0.01               | 0.05                              | 0.99                |
| Uncharacterized protein;                                                      | D3Z0Y2   | -0.18                                                    | -1.00                                                    | -0.59                                                | 0.58               | 2.58                              | 3.33                |
| Peptidyl-prolyl cis-trans isomerase-like 1;                                   | Q9D0W5   | -0.18                                                    | 0.29                                                     | 0.05                                                 | 0.33               | 1.49                              | 1.45                |
| Histamine N-methyltransferase;                                                | Q91VF2   | -0.18                                                    | -0.34                                                    | -0.26                                                | 0.11               | 0.49                              | 1.34                |
| Dynactin subunit 2;                                                           | Q99KJ8   | -0.17                                                    | 0.32                                                     | 0.08                                                 | 0.35               | 1.55                              | 1.21                |
| C-1-tetrahydrofolate synthase, cytoplasmic;                                   | Q922D8   | -0.17                                                    | -0.62                                                    | -0.39                                                | 0.32               | 1.43                              | 1.64                |
| Phosphoglycerate mutase 2;                                                    | O70250   | -0.15                                                    | -0.64                                                    | -0.40                                                | 0.35               | 1.55                              | 2.12                |

Table S5, Tholen et al.

| Protein                                                      | Uniprot | Fold change (log <sub>2</sub> ) of ASAPRatio replicate 1 | Fold change (log <sub>2</sub> ) of ASAPRatio replicate 2 | Average fold change (log <sub>2</sub> ) of ASAPRatio | Standard deviation | 90 % confidence interval (t-test) | Fisher's exact test |
|--------------------------------------------------------------|---------|----------------------------------------------------------|----------------------------------------------------------|------------------------------------------------------|--------------------|-----------------------------------|---------------------|
| Cytoplasmic dynein 1 intermediate chain 2;                   | O88487  | -0.15                                                    | 0.36                                                     | 0.10                                                 | 0.36               | 1.60                              | 1.10                |
| Basigin;                                                     | P18572  | -0.15                                                    | -0.25                                                    | -0.20                                                | 0.07               | 0.32                              | 1.20                |
| Myristoylated alanine-rich C-kinase substrate;               | P26645  | -0.15                                                    | 0.59                                                     | 0.22                                                 | 0.52               | 2.33                              | 1.98                |
| Cytoplasmic aconitate hydratase;                             | P28271  | -0.15                                                    | -0.62                                                    | -0.39                                                | 0.33               | 1.48                              | 1.80                |
| Protein phosphatase 1A;                                      | P49443  | -0.15                                                    | 0.29                                                     | 0.07                                                 | 0.31               | 1.39                              | 1.14                |
| Neural cell adhesion molecule L1-like protein;               | P70232  | -0.15                                                    | -1.29                                                    | -0.72                                                | 0.80               | 3.58                              | 4.36                |
| Fructose-1,6-bisphosphatase isozyme 2;                       | P70695  | -0.15                                                    | -0.84                                                    | -0.49                                                | 0.48               | 2.16                              | 1.83                |
| Hsp90 co-chaperone Cdc37;                                    | Q61081  | -0.15                                                    | 1.60                                                     | 0.73                                                 | 1.24               | 5.54                              | 5.40                |
| Myomesin-1;                                                  | Q62234  | -0.15                                                    | -1.40                                                    | -0.77                                                | 0.88               | 3.93                              | 3.21                |
| Hematopoietic progenitor cell antigen CD34;                  | Q64314  | -0.15                                                    | -0.62                                                    | -0.39                                                | 0.33               | 1.48                              | 1.97                |
| Ribonuclease inhibitor;                                      | Q91VI7  | -0.15                                                    | -0.43                                                    | -0.29                                                | 0.20               | 0.89                              | 1.56                |
| Electron transfer flavoprotein subunit beta;                 | Q9DCW4  | -0.15                                                    | -0.03                                                    | -0.09                                                | 0.09               | 0.39                              | 0.51                |
| Profilin-2;                                                  | Q9JJV2  | -0.15                                                    | 0.79                                                     | 0.32                                                 | 0.67               | 2.98                              | 2.59                |
| Kininogen-1;                                                 | O08677  | -0.15                                                    | -0.20                                                    | -0.18                                                | 0.03               | 0.15                              | 1.10                |
| Sorting nexin-3;                                             | O70492  | -0.15                                                    | 1.72                                                     | 0.78                                                 | 1.32               | 5.90                              | 5.64                |
| Isocitrate dehydrogenase [NADP] cytoplasmic;                 | O88844  | -0.15                                                    | -0.12                                                    | -0.14                                                | 0.02               | 0.10                              | 0.93                |
| Beta-galactosidase;                                          | P23780  | -0.15                                                    | -1.03                                                    | -0.59                                                | 0.62               | 2.77                              | 3.19                |
| Aldose reductase;                                            | P45376  | -0.15                                                    | -0.60                                                    | -0.38                                                | 0.32               | 1.41                              | 2.07                |
| Profilin-1;                                                  | P62962  | -0.15                                                    | -0.03                                                    | -0.09                                                | 0.09               | 0.39                              | 0.81                |
| Clusterin;                                                   | Q06890  | -0.15                                                    | 1.31                                                     | 0.58                                                 | 1.03               | 4.60                              | 4.13                |
| Serpin B6;                                                   | Q60854  | -0.15                                                    | -1.09                                                    | -0.62                                                | 0.66               | 2.96                              | 3.57                |
| Uncharacterized protein;                                     | E9Q9T2  | 0.26                                                     | -1.69                                                    | -0.71                                                | 1.38               | 6.17                              | 5.45                |
| Plastin-2;                                                   | Q61233  | -0.15                                                    | -1.09                                                    | -0.62                                                | 0.66               | 2.96                              | 3.06                |
| Low molecular weight phosphotyrosine protein phosphatase;    | Q9D358  | -0.15                                                    | 0.04                                                     | -0.05                                                | 0.14               | 0.62                              | 0.60                |
| Enoyl-CoA delta isomerase 2, mitochondrial;                  | Q9WUR2  | -0.15                                                    | -0.30                                                    | -0.23                                                | 0.11               | 0.48                              | 1.16                |
| Protein disulfide-isomerase A4;                              | P08003  | -0.14                                                    | 0.11                                                     | -0.01                                                | 0.17               | 0.78                              | 0.65                |
| Lysosome-associated membrane glycoprotein 1;                 | P11438  | -0.14                                                    | -1.18                                                    | -0.66                                                | 0.74               | 3.31                              | 3.63                |
| Glycerol-3-phosphate dehydrogenase [NAD+], cytoplasmic;      | P13707  | -0.14                                                    | 0.07                                                     | -0.03                                                | 0.15               | 0.65                              | 0.66                |
| Isochorismatase domain-containing protein 2A, mitochondrial; | P85094  | -0.14                                                    | -0.32                                                    | -0.23                                                | 0.13               | 0.59                              | 1.32                |
| EH domain-containing protein 4;                              | Q9EQP2  | -0.14                                                    | 0.11                                                     | -0.01                                                | 0.17               | 0.78                              | 0.67                |
| Hepatoma-derived growth factor;                              | P51859  | -0.14                                                    | 0.71                                                     | 0.28                                                 | 0.59               | 2.65                              | 1.76                |
| Actin, alpha cardiac muscle 1;                               | P68033  | -0.14                                                    | -0.81                                                    | -0.47                                                | 0.48               | 2.13                              | 2.63                |
| Heat shock 70 kDa protein 4L;                                | P48722  | -0.45                                                    | 0.45                                                     | 0.00                                                 | 0.64               | 2.87                              | 2.03                |
| NEDD8-activating enzyme E1 regulatory subunit;               | Q8VBW6  | -0.14                                                    | -0.52                                                    | -0.33                                                | 0.27               | 1.20                              | 1.18                |
| Dynein light chain 2, cytoplasmic;                           | Q9D0M5  | -0.14                                                    | -0.62                                                    | -0.38                                                | 0.34               | 1.53                              | 1.68                |
| StAR-related lipid transfer protein 5;                       | Q9EPQ7  | -0.14                                                    | 1.18                                                     | 0.52                                                 | 0.93               | 4.14                              | 3.82                |
| Transgelin-2;                                                | Q9WVA4  | -0.14                                                    | 0.44                                                     | 0.15                                                 | 0.41               | 1.83                              | 1.34                |
| Opioid growth factor receptor;                               | Q99PG2  | -0.14                                                    | 0.71                                                     | 0.29                                                 | 0.60               | 2.68                              | 2.31                |

Table S5, Tholen et al.

| Protein                                                  | Uniprot | Fold change (log <sub>2</sub> ) of ASAPRatio replicate 1 | Fold change (log <sub>2</sub> ) of ASAPRatio replicate 2 | Average fold change (log <sub>2</sub> ) of ASAPRatio | Standard deviation | 90 % confidence interval (t-test) | Fisher's exact test |
|----------------------------------------------------------|---------|----------------------------------------------------------|----------------------------------------------------------|------------------------------------------------------|--------------------|-----------------------------------|---------------------|
| Alpha-adducin;                                           | Q9QYC0  | -0.14                                                    | -0.58                                                    | -0.36                                                | 0.31               | 1.40                              | 1.66                |
| Phosphatidylinositol-binding clathrin assembly protein;  | Q7M6Y3  | -0.14                                                    | 1.87                                                     | 0.87                                                 | 1.42               | 6.34                              | 6.56                |
| Heterogeneous nuclear ribonucleoprotein H;               | O35737  | -0.12                                                    | 0.24                                                     | 0.06                                                 | 0.25               | 1.13                              | 0.97                |
| Protein S100-A1;                                         | P56565  | -0.12                                                    | 0.82                                                     | 0.35                                                 | 0.66               | 2.95                              | 2.41                |
| Serrate RNA effector molecule homolog;                   | Q99MR6  | -0.12                                                    | -0.56                                                    | -0.34                                                | 0.31               | 1.38                              | 1.14                |
| Bifunctional purine biosynthesis protein PURH;           | Q9CWJ9  | -0.12                                                    | 0.14                                                     | 0.01                                                 | 0.18               | 0.81                              | 0.75                |
| Iron-sulfur cluster assembly 2 homolog, mitochondrial;   | Q9DCB8  | -0.12                                                    | -0.23                                                    | -0.18                                                | 0.08               | 0.36                              | 0.98                |
| Prolyl endopeptidase;                                    | Q9QUR6  | -0.12                                                    | 0.64                                                     | 0.26                                                 | 0.54               | 2.41                              | 1.77                |
| Myomesin 2; Uncharacterized protein;                     | Q14BI5  | -0.12                                                    | -1.52                                                    | -0.82                                                | 0.99               | 4.40                              | 3.04                |
| H-2 class I histocompatibility antigen, L-D alpha chain; | P01897  | -0.12                                                    | 0.03                                                     | -0.05                                                | 0.11               | 0.47                              | 0.50                |
| H-2 class I histocompatibility antigen, K-B alpha chain; | P01901  | -0.01                                                    | 0.18                                                     | 0.08                                                 | 0.13               | 0.60                              | 0.38                |
| H-2 class I histocompatibility antigen, Q10 alpha chain; | P01898  | -0.89                                                    | 0.70                                                     | -0.10                                                | 1.12               | 5.00                              | 4.75                |
| Phosphoglycerate kinase 1;                               | P09411  | -0.12                                                    | -0.30                                                    | -0.21                                                | 0.13               | 0.58                              | 1.18                |
| GTP-binding nuclear protein Ran;                         | P62827  | -0.12                                                    | 0.88                                                     | 0.38                                                 | 0.71               | 3.16                              | 2.37                |
| T-complex protein 1 subunit epsilon;                     | P80316  | -0.12                                                    | 1.43                                                     | 0.65                                                 | 1.09               | 4.89                              | 4.51                |
| UPF0366 protein C11orf67 homolog;                        | Q8R0P4  | -0.12                                                    | -0.42                                                    | -0.27                                                | 0.21               | 0.93                              | 1.30                |
| Thioredoxin-dependent peroxide reductase, mitochondrial; | P20108  | -0.11                                                    | -1.25                                                    | -0.68                                                | 0.81               | 3.62                              | 2.53                |
| Transforming growth factor-beta-induced protein ig-h3;   | P82198  | -0.11                                                    | -1.64                                                    | -0.87                                                | 1.09               | 4.86                              | 5.53                |
| Xaa-Pro dipeptidase;                                     | Q11136  | -0.11                                                    | -0.43                                                    | -0.27                                                | 0.23               | 1.04                              | 1.24                |
| Hydroxysteroid dehydrogenase-like protein 2;             | Q2TPA8  | -0.11                                                    | 0.19                                                     | 0.04                                                 | 0.21               | 0.93                              | 0.77                |
| Leukocyte surface antigen CD47;                          | Q61735  | -0.11                                                    | -0.29                                                    | -0.20                                                | 0.13               | 0.57                              | 0.93                |
| UPF0586 protein C9orf41 homolog;                         | Q80UY1  | -0.11                                                    | -0.15                                                    | -0.13                                                | 0.03               | 0.15                              | 0.72                |
| D-2-hydroxyglutarate dehydrogenase, mitochondrial;       | Q8CIM3  | -0.11                                                    | 0.06                                                     | -0.02                                                | 0.11               | 0.51                              | 0.58                |
| Beta-lactamase-like protein 2;                           | Q99KR3  | -0.11                                                    | -0.56                                                    | -0.33                                                | 0.32               | 1.42                              | 1.53                |
| Thioredoxin domain-containing protein 17;                | Q9CQM5  | -0.11                                                    | 0.37                                                     | 0.13                                                 | 0.33               | 1.49                              | 1.21                |
| Trans-1,2-dihydrobenzene-1,2-diol dehydrogenase;         | Q9DBB8  | -0.11                                                    | -1.00                                                    | -0.55                                                | 0.63               | 2.83                              | 2.78                |
| AP-2 complex subunit beta;                               | Q9DBG3  | -0.11                                                    | 0.19                                                     | 0.04                                                 | 0.21               | 0.93                              | 0.75                |
| Glutathione S-transferase kappa 1;                       | Q9DCM2  | -0.11                                                    | 1.00                                                     | 0.45                                                 | 0.78               | 3.49                              | 2.46                |
| Glycogen synthase kinase-3 beta;                         | Q9WV60  | -0.11                                                    | 0.35                                                     | 0.12                                                 | 0.32               | 1.42                              | 1.12                |
| Mitotic checkpoint protein BUB3;                         | Q9WVA3  | -0.11                                                    | -0.76                                                    | -0.43                                                | 0.46               | 2.07                              | 2.14                |
| C-terminal-binding protein 1;                            | O88712  | -0.11                                                    | -0.49                                                    | -0.30                                                | 0.28               | 1.23                              | 1.49                |
| C-terminal-binding protein 2;                            | P56546  | -0.04                                                    | 0.14                                                     | 0.05                                                 | 0.13               | 0.57                              | 0.47                |
| Heat shock cognate 71 kDa protein;                       | P63017  | -0.11                                                    | 0.26                                                     | 0.08                                                 | 0.26               | 1.16                              | 0.92                |
| Heat shock 70 kDa protein 1A;                            | Q61696  | 0.25                                                     | 0.18                                                     | 0.21                                                 | 0.05               | 0.24                              | 1.57                |
| 78 kDa glucose-regulated protein;                        | P20029  | -0.79                                                    | -0.25                                                    | -0.52                                                | 0.38               | 1.69                              | 3.17                |
| Secernin-3;                                              | Q3TMH2  | -0.11                                                    | -0.45                                                    | -0.28                                                | 0.25               | 1.10                              | 1.34                |
| Inter-alpha-trypsin inhibitor heavy chain H3;            | Q61704  | -0.11                                                    | -0.27                                                    | -0.19                                                | 0.12               | 0.52                              | 0.87                |
| Copine-3;                                                | Q8BT60  | -0.11                                                    | -0.32                                                    | -0.21                                                | 0.15               | 0.69                              | 1.01                |

Table S5, Tholen et al.

| Protein                                                                                                                                   | Uniprot | Fold change (log <sub>2</sub> ) of ASAPRatio replicate 1 | Fold change (log <sub>2</sub> ) of ASAPRatio replicate 2 | Average fold change (log <sub>2</sub> ) of ASAPRatio | Standard deviation | 90 % confidence interval (t-test) | Fisher's exact test |
|-------------------------------------------------------------------------------------------------------------------------------------------|---------|----------------------------------------------------------|----------------------------------------------------------|------------------------------------------------------|--------------------|-----------------------------------|---------------------|
| Copine-1;                                                                                                                                 | Q8C166  | -0.25                                                    | -0.47                                                    | -0.36                                                | 0.16               | 0.70                              | 2.18                |
| Scavenger mRNA-decapping enzyme Dcp5;                                                                                                     | Q9DAR7  | -0.11                                                    | -0.45                                                    | -0.28                                                | 0.25               | 1.10                              | 1.05                |
| Mitogen-activated protein kinase 9;                                                                                                       | Q9WTU6  | -0.11                                                    | 0.59                                                     | 0.24                                                 | 0.49               | 2.18                              | 1.71                |
| Lysosomal alpha-mannosidase;                                                                                                              | O09159  | -0.09                                                    | -0.47                                                    | -0.28                                                | 0.27               | 1.22                              | 1.12                |
| Cathepsin S;                                                                                                                              | O70370  | -0.09                                                    | -1.60                                                    | -0.84                                                | 1.07               | 4.77                              | 4.78                |
| Bifunctional 3'-phosphoadenosine 5'-phosphosulfate synthase 2;                                                                            | O88428  | -0.09                                                    | -0.07                                                    | -0.08                                                | 0.01               | 0.05                              | 0.44                |
| Calreticulin;                                                                                                                             | P14211  | -0.09                                                    | 0.21                                                     | 0.06                                                 | 0.21               | 0.96                              | 0.70                |
| Tryptophanyl-tRNA synthetase, cytoplasmic;                                                                                                | P32921  | -0.09                                                    | 0.26                                                     | 0.09                                                 | 0.25               | 1.11                              | 0.89                |
| Na(+)/H(+) exchange regulatory cofactor NHE-RF1;                                                                                          | P70441  | -0.09                                                    | 1.28                                                     | 0.60                                                 | 0.97               | 4.32                              | 2.79                |
| T-complex protein 1 subunit delta;                                                                                                        | P80315  | -0.09                                                    | 2.29                                                     | 1.10                                                 | 1.68               | 7.51                              | 9.02                |
| Vitamin K-dependent protein S;                                                                                                            | Q08761  | -0.09                                                    | 0.28                                                     | 0.09                                                 | 0.26               | 1.15                              | 0.88                |
| Zinc finger CCCH domain-containing protein 15;                                                                                            | Q3TIV5  | -0.09                                                    | 0.16                                                     | 0.04                                                 | 0.18               | 0.80                              | 0.66                |
| Suprabasin;                                                                                                                               | Q8CIT9  | -0.09                                                    | -1.40                                                    | -0.74                                                | 0.92               | 4.13                              | 2.99                |
| Pyridoxine-5'-phosphate oxidase;                                                                                                          | Q91XF0  | -0.09                                                    | -0.11                                                    | -0.10                                                | 0.01               | 0.05                              | 0.55                |
| von Willebrand factor A domain-containing protein 5A;                                                                                     | Q99KC8  | -0.09                                                    | -0.64                                                    | -0.37                                                | 0.39               | 1.75                              | 1.49                |
| Ribosome-binding protein 1;                                                                                                               | Q99PL5  | -0.09                                                    | -1.47                                                    | -0.78                                                | 0.98               | 4.37                              | 4.11                |
| Thioredoxin domain-containing protein 12;                                                                                                 | Q9CQU0  | -0.09                                                    | 0.23                                                     | 0.07                                                 | 0.22               | 1.00                              | 0.82                |
| [Pyruvate dehydrogenase [lipoamide]] kinase isozyme 2, mitochondrial;                                                                     | Q9JK42  | -0.09                                                    | 0.63                                                     | 0.27                                                 | 0.51               | 2.28                              | 1.71                |
| Succinyl-CoA ligase [ADP/GDP-forming] subunit alpha, mitochondrial;                                                                       | Q9WUM5  | -0.09                                                    | -0.34                                                    | -0.21                                                | 0.18               | 0.79                              | 1.07                |
| Succinyl-CoA ligase [ADP-forming] subunit beta, mitochondrial;                                                                            | Q9Z2I9  | -0.09                                                    | -0.18                                                    | -0.14                                                | 0.07               | 0.30                              | 0.59                |
| Branched-chain-amino-acid aminotransferase, mitochondrial;                                                                                | O35855  | -0.09                                                    | -0.23                                                    | -0.16                                                | 0.10               | 0.46                              | 0.68                |
| Glutathione S-transferase P 1;                                                                                                            | P19157  | -0.09                                                    | -0.32                                                    | -0.21                                                | 0.16               | 0.74                              | 1.00                |
| Aldehyde dehydrogenase, mitochondrial;                                                                                                    | P47738  | -0.09                                                    | -0.64                                                    | -0.37                                                | 0.39               | 1.75                              | 1.46                |
| Retinal dehydrogenase 1;                                                                                                                  | P24549  | -0.22                                                    | -1.69                                                    | -0.95                                                | 1.04               | 4.65                              | 5.27                |
| Aldehyde dehydrogenase, cytosolic 1;                                                                                                      | O35945  | 0.35                                                     | 0.21                                                     | 0.28                                                 | 0.09               | 0.41                              | 2.27                |
| Glycerol-3-phosphate dehydrogenase 1-like protein;                                                                                        | Q3ULJ0  | -0.09                                                    | -0.64                                                    | -0.37                                                | 0.39               | 1.75                              | 1.53                |
| Myosin light polypeptide 6;                                                                                                               | Q60605  | -0.09                                                    | -0.54                                                    | -0.31                                                | 0.32               | 1.41                              | 1.49                |
| Nischarin;                                                                                                                                | Q80TM9  | -0.09                                                    | 1.03                                                     | 0.47                                                 | 0.79               | 3.53                              | 2.53                |
| Nitrilase homolog 1;                                                                                                                      | Q8VDK1  | -0.09                                                    | -0.29                                                    | -0.19                                                | 0.14               | 0.62                              | 0.91                |
| Thioredoxin reductase 1, cytoplasmic;                                                                                                     | Q9JMH6  | -0.09                                                    | 0.23                                                     | 0.07                                                 | 0.22               | 1.00                              | 0.75                |
| MCG142264, isoform CRA_a; Uncharacterized protein;                                                                                        | D3Z494  | -0.09                                                    | -0.34                                                    | -0.21                                                | 0.18               | 0.79                              | 1.02                |
| Capping protein (Actin filament), gelsolin-like; Capping protein (Actin filament), gelsolin-like, isoform CRA_a; Uncharacterized protein; | Q99LB4  | -0.09                                                    | -0.40                                                    | -0.24                                                | 0.22               | 0.97                              | 1.13                |
| Rho GTPase-activating protein 1;                                                                                                          | Q5FWK3  | -0.09                                                    | 1.71                                                     | 0.81                                                 | 1.27               | 5.68                              | 4.14                |
| Activator of 90 kDa heat shock protein ATPase homolog 1;                                                                                  | Q8BK64  | -0.09                                                    | 1.73                                                     | 0.82                                                 | 1.29               | 5.75                              | 5.72                |
| WD repeat-containing protein 1;                                                                                                           | O88342  | -0.07                                                    | -0.06                                                    | -0.07                                                | 0.01               | 0.05                              | 0.36                |
| Vitronectin;                                                                                                                              | P29788  | -0.07                                                    | -0.15                                                    | -0.11                                                | 0.06               | 0.25                              | 0.56                |
| Fascin;                                                                                                                                   | Q61553  | -0.07                                                    | 0.99                                                     | 0.46                                                 | 0.75               | 3.37                              | 2.37                |

Table S5, Tholen et al.

| Protein                                                               | Uniprot | Fold change (log <sub>2</sub> ) of ASAPRatio replicate 1 | Fold change (log <sub>2</sub> ) of ASAPRatio replicate 2 | Average fold change (log <sub>2</sub> ) of ASAPRatio | Standard deviation | 90 % confidence interval (t-test) | Fisher's exact test |
|-----------------------------------------------------------------------|---------|----------------------------------------------------------|----------------------------------------------------------|------------------------------------------------------|--------------------|-----------------------------------|---------------------|
| Transaldolase;                                                        | Q93092  | -0.07                                                    | 0.04                                                     | -0.02                                                | 0.08               | 0.37                              | 0.33                |
| Succinyl-CoA:3-ketoacid-coenzyme A transferase 1, mitochondrial;      | Q9D0K2  | -0.07                                                    | -0.15                                                    | -0.11                                                | 0.06               | 0.25                              | 0.55                |
| Prostamide/prostaglandin F synthase;                                  | Q9DB60  | -0.07                                                    | 0.19                                                     | 0.06                                                 | 0.19               | 0.83                              | 0.62                |
| Omega-amidase NIT2;                                                   | Q9JHW2  | -0.07                                                    | -0.20                                                    | -0.14                                                | 0.09               | 0.40                              | 0.64                |
| Serine-threonine kinase receptor-associated protein;                  | Q9Z1Z2  | -0.07                                                    | 0.37                                                     | 0.15                                                 | 0.31               | 1.39                              | 0.93                |
| Sepiapterin reductase;                                                | Q64105  | -0.07                                                    | -0.29                                                    | -0.18                                                | 0.15               | 0.67                              | 0.84                |
| ATP synthase subunit gamma, mitochondrial;                            | Q91VR2  | -0.07                                                    | -1.52                                                    | -0.79                                                | 1.02               | 4.55                              | 4.43                |
| 3-hydroxyisobutyrate dehydrogenase, mitochondrial;                    | Q99L13  | -0.07                                                    | -0.47                                                    | -0.27                                                | 0.28               | 1.26                              | 1.18                |
| Proteolipid protein 2;                                                | Q9R1Q7  | -0.07                                                    | 0.15                                                     | 0.04                                                 | 0.16               | 0.71                              | 0.57                |
| Arginyl-tRNA synthetase, cytoplasmic;                                 | Q9D0I9  | -0.06                                                    | 1.89                                                     | 0.92                                                 | 1.38               | 6.16                              | 6.66                |
| Protein DDI1 homolog 2;                                               | A2ADY9  | -0.04                                                    | 0.77                                                     | 0.36                                                 | 0.57               | 2.56                              | 1.97                |
| Glucosidase 2 subunit beta;                                           | O08795  | -0.04                                                    | 0.97                                                     | 0.46                                                 | 0.72               | 3.20                              | 2.51                |
| Hypoxanthine-guanine phosphoribosyltransferase;                       | P00493  | -0.04                                                    | 0.49                                                     | 0.22                                                 | 0.37               | 1.67                              | 1.03                |
| NADP-dependent malic enzyme;                                          | P06801  | -0.04                                                    | -0.22                                                    | -0.13                                                | 0.12               | 0.55                              | 0.54                |
| Epoxide hydrolase 2;                                                  | P34914  | -0.04                                                    | 0.14                                                     | 0.05                                                 | 0.13               | 0.57                              | 0.46                |
| Hydroxymethylglutaryl-CoA lyase, mitochondrial;                       | P38060  | -0.04                                                    | 0.14                                                     | 0.05                                                 | 0.13               | 0.57                              | 0.32                |
| Ras suppressor protein 1;                                             | Q01730  | -0.04                                                    | -0.60                                                    | -0.32                                                | 0.39               | 1.75                              | 1.51                |
| Calcium-binding protein 39;                                           | Q06138  | -0.04                                                    | 1.06                                                     | 0.51                                                 | 0.78               | 3.50                              | 2.63                |
| Aldehyde dehydrogenase family 16 member A1;                           | Q571I9  | -0.04                                                    | 0.86                                                     | 0.41                                                 | 0.64               | 2.84                              | 2.17                |
| Guanylate kinase;                                                     | Q64520  | -0.04                                                    | 0.47                                                     | 0.21                                                 | 0.36               | 1.61                              | 1.21                |
| Trifunctional enzyme subunit alpha, mitochondrial;                    | Q8BMS1  | -0.04                                                    | 0.82                                                     | 0.39                                                 | 0.61               | 2.71                              | 1.70                |
| Putative hydroxypyruvate isomerase;                                   | Q8R1F5  | -0.04                                                    | -0.32                                                    | -0.18                                                | 0.20               | 0.88                              | 0.84                |
| Protein phosphatase 1 regulatory subunit 3A;                          | Q99MR9  | -0.04                                                    | -0.43                                                    | -0.24                                                | 0.28               | 1.23                              | 1.03                |
| Protein S100-A14;                                                     | Q9D2Q8  | -0.04                                                    | 1.10                                                     | 0.53                                                 | 0.81               | 3.62                              | 3.11                |
| ATP synthase subunit delta, mitochondrial;                            | Q9D3D9  | -0.04                                                    | -1.47                                                    | -0.76                                                | 1.01               | 4.51                              | 4.47                |
| Apoptosis-inducing factor 1, mitochondrial;                           | Q9Z0X1  | -0.04                                                    | -1.64                                                    | -0.84                                                | 1.13               | 5.05                              | 3.87                |
| L-lactate dehydrogenase A chain;                                      | P06151  | -0.04                                                    | -0.74                                                    | -0.39                                                | 0.49               | 2.19                              | 1.87                |
| L-lactate dehydrogenase B chain;                                      | P16125  | 0.15                                                     | -0.42                                                    | -0.13                                                | 0.40               | 1.79                              | 1.57                |
| Cathepsin D;                                                          | P18242  | -0.04                                                    | -0.25                                                    | -0.15                                                | 0.15               | 0.66                              | 0.69                |
| Phospholipase A-2-activating protein;                                 | P27612  | -0.04                                                    | 1.65                                                     | 0.80                                                 | 1.20               | 5.34                              | 4.01                |
| Creatine kinase U-type, mitochondrial;                                | P30275  | -0.04                                                    | -1.84                                                    | -0.94                                                | 1.27               | 5.66                              | 6.38                |
| Peroxiredoxin-1;                                                      | P35700  | -0.04                                                    | -0.32                                                    | -0.18                                                | 0.20               | 0.88                              | 0.86                |
| S-adenosylmethionine synthase isoform type-2;                         | Q3THS6  | -0.04                                                    | 0.52                                                     | 0.24                                                 | 0.40               | 1.77                              | 1.22                |
| Rho GDP-dissociation inhibitor 2;                                     | Q61599  | -0.04                                                    | 0.03                                                     | -0.01                                                | 0.05               | 0.23                              | 0.22                |
| D-3-phosphoglycerate dehydrogenase;                                   | Q61753  | -0.04                                                    | 1.47                                                     | 0.71                                                 | 1.07               | 4.76                              | 4.39                |
| Ubiquitin thioesterase OTUB1;                                         | Q7TQI3  | -0.04                                                    | 0.71                                                     | 0.34                                                 | 0.54               | 2.39                              | 1.76                |
| Hydroxyacylglutathione hydrolase, mitochondrial;                      | Q99KB8  | -0.04                                                    | 0.04                                                     | 0.00                                                 | 0.06               | 0.27                              | 0.26                |
| Methylmalonate-semialdehyde dehydrogenase [acylating], mitochondrial; | Q9EQ20  | -0.04                                                    | -0.60                                                    | -0.32                                                | 0.39               | 1.75                              | 1.19                |

Table S5, Tholen et al.

| Protein                                                                                                           | Uniprot | Fold change (log <sub>2</sub> ) of ASAPRatio replicate 1 | Fold change (log <sub>2</sub> ) of ASAPRatio replicate 2 | Average fold change (log <sub>2</sub> ) of ASAPRatio | Standard deviation | 90 % confidence interval (t-test) | Fisher's exact test |
|-------------------------------------------------------------------------------------------------------------------|---------|----------------------------------------------------------|----------------------------------------------------------|------------------------------------------------------|--------------------|-----------------------------------|---------------------|
| Uncharacterized protein;                                                                                          | E9Q616  | -0.04                                                    | -0.23                                                    | -0.14                                                | 0.13               | 0.60                              | 0.53                |
| Oxysterol-binding protein;                                                                                        | E9QPD4  | -0.04                                                    | 0.99                                                     | 0.47                                                 | 0.73               | 3.25                              | 2.77                |
| GMP synthase [glutamine-hydrolyzing];                                                                             | Q3THK7  | -0.04                                                    | 0.86                                                     | 0.41                                                 | 0.64               | 2.84                              | 2.34                |
| Oxysterol-binding protein-related protein 9;                                                                      | A2A8Z1  | -0.04                                                    | 0.65                                                     | 0.30                                                 | 0.49               | 2.19                              | 1.66                |
| Protein unc-119 homolog B;                                                                                        | Q8C4B4  | -0.04                                                    | 0.60                                                     | 0.28                                                 | 0.46               | 2.05                              | 1.54                |
| Proteasome subunit beta type-5;                                                                                   | O55234  | -0.03                                                    | 0.55                                                     | 0.26                                                 | 0.41               | 1.82                              | 1.14                |
| Prefoldin subunit 2;                                                                                              | O70591  | -0.03                                                    | 1.28                                                     | 0.63                                                 | 0.93               | 4.14                              | 3.80                |
| SUMO-conjugating enzyme UBC9;                                                                                     | P63280  | -0.03                                                    | -0.14                                                    | -0.08                                                | 0.08               | 0.34                              | 0.40                |
| T-complex protein 1 subunit beta;                                                                                 | P80314  | -0.03                                                    | 1.82                                                     | 0.89                                                 | 1.30               | 5.82                              | 4.61                |
| Osteoclast-stimulating factor 1;                                                                                  | Q62422  | -0.03                                                    | -0.03                                                    | -0.03                                                | 0.00               | 0.00                              | 0.17                |
| Lactoylglutathione lyase;                                                                                         | Q9CPU0  | -0.03                                                    | -0.20                                                    | -0.12                                                | 0.12               | 0.54                              | 0.53                |
| Adenylate kinase isoenzyme 1;                                                                                     | Q9R0Y5  | -0.03                                                    | -0.42                                                    | -0.22                                                | 0.27               | 1.22                              | 1.00                |
| Uncharacterized protein;                                                                                          | E9PVD2  | -0.03                                                    | 0.29                                                     | 0.13                                                 | 0.22               | 1.00                              | 0.62                |
| Septin-7;                                                                                                         | O55131  | -0.03                                                    | -0.89                                                    | -0.46                                                | 0.61               | 2.71                              | 1.94                |
| Adenylyl cyclase-associated protein 1;                                                                            | P40124  | -0.03                                                    | 0.54                                                     | 0.25                                                 | 0.40               | 1.78                              | 1.03                |
| Serine/threonine-protein phosphatase PP1-alpha catalytic subunit;                                                 | P62137  | -0.03                                                    | 0.03                                                     | 0.00                                                 | 0.04               | 0.18                              | 0.15                |
| Acyl-protein thioesterase 1;                                                                                      | P97823  | -0.03                                                    | -0.03                                                    | -0.03                                                | 0.00               | 0.00                              | 0.15                |
| Ubiquitin-like modifier-activating enzyme 1;                                                                      | Q02053  | -0.03                                                    | 0.67                                                     | 0.32                                                 | 0.49               | 2.20                              | 1.62                |
| Serine/threonine-protein phosphatase 2A 65 kDa regulatory subunit A alpha isoform;                                | Q76M23  | -0.03                                                    | 1.64                                                     | 0.81                                                 | 1.18               | 5.28                              | 4.40                |
| Alcohol dehydrogenase [NADP+];                                                                                    | Q9JII6  | -0.03                                                    | -0.22                                                    | -0.12                                                | 0.13               | 0.60                              | 0.55                |
| Glutathione reductase, mitochondrial;                                                                             | P47791  | -0.01                                                    | -0.29                                                    | -0.15                                                | 0.19               | 0.86                              | 0.60                |
| Annexin A5;                                                                                                       | P48036  | -0.01                                                    | -0.54                                                    | -0.27                                                | 0.37               | 1.64                              | 1.23                |
| Platelet-activating factor acetylhydrolase IB subunit alpha;                                                      | P63005  | -0.01                                                    | -0.38                                                    | -0.20                                                | 0.26               | 1.15                              | 0.79                |
| Vacuolar protein sorting-associated protein 45;                                                                   | P97390  | -0.01                                                    | -0.20                                                    | -0.11                                                | 0.13               | 0.59                              | 0.43                |
| Beta-2-glycoprotein 1;                                                                                            | Q01339  | -0.01                                                    | -0.38                                                    | -0.20                                                | 0.26               | 1.15                              | 0.64                |
| Rab GDP dissociation inhibitor beta;                                                                              | Q61598  | -0.01                                                    | 0.25                                                     | 0.12                                                 | 0.19               | 0.84                              | 0.54                |
| Transcription factor BTF3;                                                                                        | Q64152  | -0.01                                                    | 2.00                                                     | 0.99                                                 | 1.42               | 6.35                              | 7.11                |
| L-asparaginase;                                                                                                   | Q8C0M9  | -0.01                                                    | -0.36                                                    | -0.19                                                | 0.24               | 1.09                              | 0.76                |
| Protein Z-dependent protease inhibitor;                                                                           | Q8R121  | -0.01                                                    | 0.30                                                     | 0.14                                                 | 0.22               | 0.99                              | 0.53                |
| Oxysterol-binding protein-related protein 1;                                                                      | Q91XL9  | -0.01                                                    | -0.52                                                    | -0.26                                                | 0.35               | 1.58                              | 1.13                |
| Dipeptidyl peptidase 3;                                                                                           | Q99KK7  | -0.01                                                    | 0.03                                                     | 0.01                                                 | 0.03               | 0.14                              | 0.08                |
| Dihydrolipoyllysine-residue succinyltransferase component of 2-oxoglutarate dehydrogenase complex, mitochondrial; | Q9D2G2  | -0.01                                                    | -0.79                                                    | -0.40                                                | 0.55               | 2.44                              | 1.99                |
| Uncharacterized protein;                                                                                          | E9PV24  | -0.01                                                    | 0.19                                                     | 0.09                                                 | 0.14               | 0.64                              | 0.36                |
| Peptidyl-prolyl cis-trans isomerase FKBP4;                                                                        | P30416  | -0.01                                                    | 1.14                                                     | 0.56                                                 | 0.81               | 3.64                              | 2.36                |
| Glutathione peroxidase 3;                                                                                         | P46412  | -0.01                                                    | -1.15                                                    | -0.58                                                | 0.80               | 3.59                              | 3.23                |
| Xaa-Pro aminopeptidase 1;                                                                                         | Q6P1B1  | -0.01                                                    | -0.03                                                    | -0.02                                                | 0.01               | 0.05                              | 0.07                |
| 3-hydroxyisobutyryl-CoA hydrolase, mitochondrial;                                                                 | Q8QZS1  | -0.01                                                    | -0.14                                                    | -0.08                                                | 0.09               | 0.39                              | 0.29                |

Table S5, Tholen et al.

| Protein                                                        | Uniprot | Fold change (log <sub>2</sub> ) of ASAPRatio replicate 1 | Fold change (log <sub>2</sub> ) of ASAPRatio replicate 2 | Average fold change (log <sub>2</sub> ) of ASAPRatio | Standard deviation | 90 % confidence interval (t-test) | Fisher's exact test |
|----------------------------------------------------------------|---------|----------------------------------------------------------|----------------------------------------------------------|------------------------------------------------------|--------------------|-----------------------------------|---------------------|
| Sarcoplasmic/endoplasmic reticulum calcium ATPase 1;           | Q8R429  | -0.01                                                    | 0.24                                                     | 0.11                                                 | 0.18               | 0.80                              | 0.50                |
| Protein disulfide-isomerase A6;                                | Q922R8  | -0.01                                                    | 1.28                                                     | 0.63                                                 | 0.91               | 4.07                              | 3.32                |
| 3-mercaptopyruvate sulfurtransferase;                          | Q99J99  | -0.01                                                    | -0.23                                                    | -0.12                                                | 0.16               | 0.69                              | 0.47                |
| 5'(3')-deoxyribonucleotidase, cytosolic type;                  | Q9JM14  | -0.01                                                    | 0.01                                                     | 0.00                                                 | 0.02               | 0.09                              | 0.08                |
| Transketolase;                                                 | P40142  | 0.00                                                     | -0.12                                                    | -0.06                                                | 0.08               | 0.38                              | 0.22                |
| 60S acidic ribosomal protein P1;                               | P47955  | 0.00                                                     | 0.56                                                     | 0.28                                                 | 0.39               | 1.76                              | 1.19                |
| Proteasome subunit beta type-4;                                | P99026  | 0.00                                                     | 0.26                                                     | 0.13                                                 | 0.19               | 0.83                              | 0.43                |
| Mitogen-activated protein kinase 3;                            | Q63844  | 0.00                                                     | 0.10                                                     | 0.05                                                 | 0.07               | 0.31                              | 0.18                |
| 10 kDa heat shock protein, mitochondrial;                      | Q64433  | 0.00                                                     | 0.28                                                     | 0.14                                                 | 0.19               | 0.87                              | 0.55                |
| Phosphoglycolate phosphatase;                                  | Q8CHP8  | 0.00                                                     | -0.30                                                    | -0.15                                                | 0.21               | 0.96                              | 0.58                |
| Apolipoprotein A-I-binding protein;                            | Q8K4Z3  | 0.00                                                     | -0.20                                                    | -0.10                                                | 0.14               | 0.63                              | 0.39                |
| Anamorsin;                                                     | Q8WTY4  | 0.00                                                     | 1.49                                                     | 0.75                                                 | 1.05               | 4.71                              | 4.41                |
| NADH dehydrogenase [ubiquinone] flavoprotein 2, mitochondrial; | Q9D6J6  | 0.00                                                     | -1.56                                                    | -0.78                                                | 1.10               | 4.91                              | 4.94                |
| Acid ceramidase;                                               | Q9WV54  | 0.00                                                     | 0.48                                                     | 0.24                                                 | 0.34               | 1.50                              | 0.97                |
| Chloride intracellular channel protein 1;                      | Q9Z1Q5  | 0.00                                                     | 0.15                                                     | 0.08                                                 | 0.11               | 0.48                              | 0.28                |
| Complement factor B;                                           | P04186  | 0.00                                                     | -0.14                                                    | -0.07                                                | 0.10               | 0.43                              | 0.25                |
| Glucose-6-phosphate isomerase;                                 | P06745  | 0.00                                                     | -0.60                                                    | -0.30                                                | 0.42               | 1.89                              | 1.32                |
| Bisphosphoglycerate mutase;                                    | P15327  | 0.00                                                     | 0.31                                                     | 0.16                                                 | 0.22               | 0.98                              | 0.54                |
| Quinone oxidoreductase;                                        | P47199  | 0.00                                                     | -0.60                                                    | -0.30                                                | 0.42               | 1.89                              | 1.31                |
| Phosphatidylethanolamine-binding protein 1;                    | P70296  | 0.00                                                     | -0.32                                                    | -0.16                                                | 0.23               | 1.02                              | 0.67                |
| 2-oxoglutarate dehydrogenase, mitochondrial;                   | Q60597  | 0.00                                                     | -0.97                                                    | -0.49                                                | 0.69               | 3.07                              | 1.82                |
| Peroxiredoxin-2;                                               | Q61171  | 0.00                                                     | 0.37                                                     | 0.18                                                 | 0.26               | 1.16                              | 0.76                |
| Abhydrolase domain-containing protein 14B;                     | Q8VCR7  | 0.00                                                     | -0.56                                                    | -0.28                                                | 0.39               | 1.76                              | 1.25                |
| NADH-cytochrome b5 reductase 3;                                | Q9DCN2  | 0.00                                                     | -0.38                                                    | -0.19                                                | 0.27               | 1.19                              | 0.69                |
| DAZ-associated protein 1;                                      | Q9JII5  | 0.00                                                     | 0.15                                                     | 0.08                                                 | 0.11               | 0.48                              | 0.29                |
| Complement factor D;                                           | P03953  | 0.01                                                     | -1.09                                                    | -0.54                                                | 0.78               | 3.48                              | 2.98                |
| Tyrosine-protein kinase CSK;                                   | P41241  | 0.01                                                     | 0.11                                                     | 0.06                                                 | 0.07               | 0.31                              | 0.24                |
| Fumarate hydratase, mitochondrial;                             | P97807  | 0.01                                                     | -0.47                                                    | -0.23                                                | 0.35               | 1.54                              | 0.89                |
| Retinol-binding protein 4;                                     | Q00724  | 0.01                                                     | 0.31                                                     | 0.16                                                 | 0.21               | 0.93                              | 0.68                |
| Poly(U)-binding-splicing factor PUF60;                         | Q3UEB3  | 0.01                                                     | 0.60                                                     | 0.30                                                 | 0.41               | 1.83                              | 1.36                |
| Platelet-activating factor acetylhydrolase IB subunit beta;    | Q61206  | 0.01                                                     | -0.20                                                    | -0.09                                                | 0.15               | 0.68                              | 0.45                |
| Interleukin-1 receptor accessory protein;                      | Q61730  | 0.01                                                     | -0.03                                                    | -0.01                                                | 0.03               | 0.14                              | 0.10                |
| Selenide, water dikinase 1;                                    | Q8BH69  | 0.01                                                     | 0.12                                                     | 0.07                                                 | 0.08               | 0.35                              | 0.32                |
| Bifunctional aminoacyl-tRNA synthetase;                        | Q8CGC7  | 0.01                                                     | 1.82                                                     | 0.92                                                 | 1.28               | 5.71                              | 4.37                |
| Sulfite oxidase, mitochondrial;                                | Q8R086  | 0.01                                                     | -0.69                                                    | -0.34                                                | 0.50               | 2.22                              | 1.68                |
| Electron transfer flavoprotein subunit alpha, mitochondrial;   | Q99LC5  | 0.01                                                     | -0.12                                                    | -0.05                                                | 0.09               | 0.42                              | 0.29                |
| Delta(3,5)-Delta(2,4)-dienoyl-CoA isomerase, mitochondrial;    | O35459  | 0.01                                                     | -1.79                                                    | -0.89                                                | 1.27               | 5.68                              | 6.04                |
| Peptidyl-prolyl cis-trans isomerase A;                         | P17742  | 0.01                                                     | 0.44                                                     | 0.23                                                 | 0.30               | 1.36                              | 0.87                |



Table S5, Tholen et al.

| Protein                                                  | Uniprot | Fold change (log <sub>2</sub> ) of ASAPRatio replicate 1 | Fold change (log <sub>2</sub> ) of ASAPRatio replicate 2 | Average fold change (log <sub>2</sub> ) of ASAPRatio | Standard deviation | 90 % confidence interval (t-test) | Fisher's exact test |
|----------------------------------------------------------|---------|----------------------------------------------------------|----------------------------------------------------------|------------------------------------------------------|--------------------|-----------------------------------|---------------------|
| Ras-related protein Rab-11B;                             | P46638  | 0.01                                                     | 0.50                                                     | 0.26                                                 | 0.34               | 1.52                              | 1.13                |
| Rab GDP dissociation inhibitor alpha;                    | P50396  | 0.01                                                     | 0.28                                                     | 0.14                                                 | 0.18               | 0.82                              | 0.63                |
| 60 kDa heat shock protein, mitochondrial;                | P63038  | 0.01                                                     | 1.14                                                     | 0.58                                                 | 0.79               | 3.55                              | 3.16                |
| PEST proteolytic signal-containing nuclear protein;      | Q6P8I4  | 0.01                                                     | 0.00                                                     | 0.01                                                 | 0.01               | 0.04                              | 0.08                |
| 6-phosphogluconolactonase;                               | Q9CQ60  | 0.01                                                     | 0.14                                                     | 0.08                                                 | 0.09               | 0.39                              | 0.34                |
| Cytochrome b-c1 complex subunit 1, mitochondrial;        | Q9CZ13  | 0.01                                                     | -2.47                                                    | -1.23                                                | 1.76               | 7.85                              | 8.28                |
| AMP deaminase 1;                                         | Q3V1D3  | 0.01                                                     | 0.11                                                     | 0.06                                                 | 0.07               | 0.31                              | 0.26                |
| GDH/6PGL endoplasmic bifunctional protein;               | Q8CFX1  | 0.01                                                     | -0.58                                                    | -0.28                                                | 0.42               | 1.87                              | 1.35                |
| Lipoma-preferred partner homolog;                        | Q8BFW7  | 0.01                                                     | 0.70                                                     | 0.36                                                 | 0.48               | 2.15                              | 1.67                |
| Serine/threonine-protein phosphatase;                    | F7BX26  | 0.03                                                     | 0.47                                                     | 0.25                                                 | 0.31               | 1.38                              | 1.00                |
| N-acetyl-D-glucosamine kinase;                           | Q9QZ08  | 0.03                                                     | 0.71                                                     | 0.37                                                 | 0.48               | 2.16                              | 1.71                |
| Proteasome subunit beta type-1;                          | O09061  | 0.04                                                     | 0.21                                                     | 0.13                                                 | 0.12               | 0.54                              | 0.41                |
| Thioredoxin;                                             | P10639  | 0.04                                                     | 0.15                                                     | 0.10                                                 | 0.08               | 0.34                              | 0.42                |
| Glutathione S-transferase A4;                            | P24472  | 0.04                                                     | -0.07                                                    | -0.02                                                | 0.08               | 0.37                              | 0.22                |
| Serine hydroxymethyltransferase, cytosolic;              | P50431  | 0.04                                                     | 1.69                                                     | 0.87                                                 | 1.16               | 5.19                              | 4.51                |
| Transcription elongation factor B polypeptide 2;         | P62869  | 0.04                                                     | 0.30                                                     | 0.17                                                 | 0.18               | 0.81                              | 0.68                |
| Eukaryotic translation initiation factor 4E;             | P63073  | 0.04                                                     | 0.41                                                     | 0.23                                                 | 0.26               | 1.16                              | 0.96                |
| Protein FAM63A;                                          | Q76LS9  | 0.04                                                     | 0.73                                                     | 0.39                                                 | 0.49               | 2.17                              | 1.83                |
| Isochorismatase domain-containing protein 1;             | Q91V64  | 0.04                                                     | 0.10                                                     | 0.07                                                 | 0.04               | 0.17                              | 0.32                |
| Cytosol aminopeptidase;                                  | Q9CPY7  | 0.04                                                     | 1.76                                                     | 0.90                                                 | 1.21               | 5.41                              | 5.78                |
| Coactosin-like protein;                                  | Q9CQI6  | 0.04                                                     | -0.64                                                    | -0.30                                                | 0.49               | 2.17                              | 1.46                |
| Isovaleryl-CoA dehydrogenase, mitochondrial;             | Q9JHI5  | 0.04                                                     | -0.18                                                    | -0.07                                                | 0.16               | 0.72                              | 0.46                |
| 2-amino-3-ketobutyrate coenzyme A ligase, mitochondrial; | O88986  | 0.04                                                     | 0.62                                                     | 0.33                                                 | 0.41               | 1.83                              | 1.48                |
| Ubiquitin-conjugating enzyme E2 L3;                      | P68037  | 0.04                                                     | 0.55                                                     | 0.29                                                 | 0.36               | 1.59                              | 0.96                |
| Glucose-6-phosphate 1-dehydrogenase X;                   | Q00612  | 0.04                                                     | 0.73                                                     | 0.39                                                 | 0.49               | 2.17                              | 1.68                |
| Puromycin-sensitive aminopeptidase;                      | Q11011  | 0.04                                                     | -0.20                                                    | -0.08                                                | 0.17               | 0.77                              | 0.45                |
| Peptidyl-prolyl cis-trans isomerase;                     | A2BGI8  | 0.04                                                     | -0.67                                                    | -0.31                                                | 0.50               | 2.24                              | 1.61                |
| Nuclear migration protein nudC;                          | O35685  | 0.04                                                     | 2.06                                                     | 1.05                                                 | 1.43               | 6.38                              | 6.98                |
| WW domain-binding protein 11;                            | Q923D5  | 0.04                                                     | 0.50                                                     | 0.27                                                 | 0.32               | 1.43                              | 0.95                |
| Extracellular superoxide dismutase [Cu-Zn];              | O09164  | 0.06                                                     | -2.00                                                    | -0.97                                                | 1.45               | 6.49                              | 4.25                |
| Heterogeneous nuclear ribonucleoprotein A1;              | P49312  | 0.06                                                     | 0.08                                                     | 0.07                                                 | 0.02               | 0.09                              | 0.32                |
| CD166 antigen;                                           | Q61490  | 0.06                                                     | 0.60                                                     | 0.33                                                 | 0.38               | 1.70                              | 1.55                |
| Protein canopy homolog 4;                                | Q8BQ47  | 0.06                                                     | 0.72                                                     | 0.39                                                 | 0.47               | 2.10                              | 1.86                |
| Presequence protease, mitochondrial;                     | Q8K411  | 0.06                                                     | 0.55                                                     | 0.30                                                 | 0.35               | 1.54                              | 1.16                |
| Galectin-related protein A;                              | Q8VED9  | 0.06                                                     | 0.33                                                     | 0.20                                                 | 0.20               | 0.87                              | 0.86                |
| MACRO domain-containing protein 1;                       | Q922B1  | 0.06                                                     | -0.79                                                    | -0.36                                                | 0.60               | 2.66                              | 2.12                |
| Ran-binding protein 3;                                   | Q9CT10  | 0.06                                                     | 0.86                                                     | 0.46                                                 | 0.56               | 2.52                              | 2.18                |
| Perilipin-3;                                             | Q9DBG5  | 0.06                                                     | 0.45                                                     | 0.26                                                 | 0.28               | 1.25                              | 0.96                |

Table S5, Tholen et al.

| Protein                                                                                                             | Uniprot | Fold change (log <sub>2</sub> ) of ASAPRatio replicate 1 | Fold change (log <sub>2</sub> ) of ASAPRatio replicate 2 | Average fold change (log <sub>2</sub> ) of ASAPRatio | Standard deviation | 90 % confidence interval (t-test) | Fisher's exact test |
|---------------------------------------------------------------------------------------------------------------------|---------|----------------------------------------------------------|----------------------------------------------------------|------------------------------------------------------|--------------------|-----------------------------------|---------------------|
| E3 SUMO-protein ligase RanBP2;                                                                                      | Q9ERU9  | 0.06                                                     | 1.02                                                     | 0.54                                                 | 0.68               | 3.04                              | 2.82                |
| CD2-associated protein;                                                                                             | Q9JLQ0  | 0.06                                                     | 1.03                                                     | 0.54                                                 | 0.69               | 3.07                              | 2.66                |
| Cadherin-13;                                                                                                        | Q9WTRS  | 0.06                                                     | -0.89                                                    | -0.42                                                | 0.67               | 2.99                              | 2.42                |
| Kelch repeat and BTB (POZ) domain containing 10; MCG12931; Uncharacterized protein;                                 | A2AUC9  | 0.06                                                     | -0.34                                                    | -0.14                                                | 0.28               | 1.25                              | 0.85                |
| Apolipoprotein A-II;                                                                                                | P09813  | 0.06                                                     | 1.27                                                     | 0.66                                                 | 0.86               | 3.83                              | 3.80                |
| Triosephosphate isomerase;                                                                                          | P17751  | 0.06                                                     | -0.45                                                    | -0.20                                                | 0.36               | 1.61                              | 1.17                |
| Proliferating cell nuclear antigen;                                                                                 | P17918  | 0.06                                                     | 1.28                                                     | 0.67                                                 | 0.86               | 3.85                              | 3.75                |
| Protein S100-A11;                                                                                                   | P50543  | 0.06                                                     | -0.17                                                    | -0.06                                                | 0.16               | 0.71                              | 0.50                |
| Poly(rC)-binding protein 1;                                                                                         | P60335  | 0.06                                                     | 1.41                                                     | 0.73                                                 | 0.96               | 4.27                              | 4.26                |
| Poly(rC)-binding protein 2;                                                                                         | Q61990  | -0.11                                                    | 1.41                                                     | 0.65                                                 | 1.07               | 4.77                              | 4.35                |
| Serine/threonine-protein kinase PAK 2;                                                                              | Q8CIN4  | 0.06                                                     | 0.92                                                     | 0.49                                                 | 0.61               | 2.72                              | 2.40                |
| Aldo-keto reductase family 1 member C18;                                                                            | Q8K023  | 0.06                                                     | -0.30                                                    | -0.12                                                | 0.26               | 1.14                              | 0.84                |
| Glyceraldehyde-3-phosphate dehydrogenase;                                                                           | E9QAC7  | 0.06                                                     | -0.42                                                    | -0.18                                                | 0.33               | 1.49                              | 1.08                |
| Uncharacterized protein;                                                                                            | F6ZFU0  | 0.06                                                     | 0.51                                                     | 0.28                                                 | 0.32               | 1.42                              | 1.31                |
| Protein FAM114A2;                                                                                                   | Q8VE88  | 0.06                                                     | 1.23                                                     | 0.64                                                 | 0.83               | 3.69                              | 2.71                |
| C-type lectin domain family 11 member A;                                                                            | O88200  | 0.07                                                     | -0.25                                                    | -0.09                                                | 0.23               | 1.02                              | 0.78                |
| Delta-aminolevulinic acid dehydratase;                                                                              | P10518  | 0.07                                                     | 0.40                                                     | 0.24                                                 | 0.23               | 1.04                              | 1.03                |
| Apolipoprotein C-III;                                                                                               | P33622  | 0.07                                                     | 2.35                                                     | 1.21                                                 | 1.61               | 7.20                              | 9.16                |
| ADP-ribosylation factor 6;                                                                                          | P62331  | 0.07                                                     | 0.78                                                     | 0.43                                                 | 0.50               | 2.25                              | 2.13                |
| Latexin;                                                                                                            | P70202  | 0.07                                                     | 0.63                                                     | 0.35                                                 | 0.40               | 1.77                              | 1.69                |
| Bifunctional 3'-phosphoadenosine 5'-phosphosulfate synthase 1;                                                      | Q60967  | 0.07                                                     | 0.55                                                     | 0.31                                                 | 0.34               | 1.50                              | 1.02                |
| Synemin;                                                                                                            | Q70IV5  | 0.07                                                     | -0.38                                                    | -0.15                                                | 0.32               | 1.41                              | 1.00                |
| Scavenger receptor cysteine-rich domain-containing protein LOC284297 homolog;                                       | Q8BV57  | 0.07                                                     | -2.64                                                    | -1.29                                                | 1.92               | 8.57                              | 9.04                |
| Thimet oligopeptidase;                                                                                              | Q8C1A5  | 0.07                                                     | 0.04                                                     | 0.06                                                 | 0.02               | 0.09                              | 0.34                |
| Rho GDP-dissociation inhibitor 1;                                                                                   | Q99PT1  | 0.07                                                     | 0.18                                                     | 0.12                                                 | 0.07               | 0.33                              | 0.62                |
| SUMO-activating enzyme subunit 1;                                                                                   | Q9R1T2  | 0.07                                                     | 0.64                                                     | 0.36                                                 | 0.40               | 1.81                              | 1.72                |
| Ig gamma-2A chain C region, A allele;                                                                               | P01863  | 0.07                                                     | -1.32                                                    | -0.63                                                | 0.98               | 4.39                              | 4.16                |
| Peroxiredoxin-5, mitochondrial;                                                                                     | P99029  | 0.07                                                     | -0.20                                                    | -0.07                                                | 0.19               | 0.86                              | 0.69                |
| Corticosteroid-binding globulin;                                                                                    | Q06770  | 0.07                                                     | -0.14                                                    | -0.03                                                | 0.15               | 0.65                              | 0.55                |
| Protein transport protein Sec31A;                                                                                   | Q3UPL0  | 0.07                                                     | 0.50                                                     | 0.28                                                 | 0.30               | 1.34                              | 1.11                |
| Eukaryotic translation initiation factor 2A;                                                                        | Q8BJW6  | 0.07                                                     | 0.11                                                     | 0.09                                                 | 0.03               | 0.13                              | 0.45                |
| Actin-related protein 2/3 complex subunit 3;                                                                        | Q9JM76  | 0.07                                                     | -0.58                                                    | -0.25                                                | 0.46               | 2.05                              | 1.53                |
| Troponin T, fast skeletal muscle;                                                                                   | Q9QZ47  | 0.07                                                     | -0.71                                                    | -0.32                                                | 0.55               | 2.47                              | 1.75                |
| Band 4.1-like protein 3;                                                                                            | Q9WV92  | 0.07                                                     | -0.56                                                    | -0.24                                                | 0.44               | 1.98                              | 1.45                |
| Dci protein; Dodecenoyl-Coenzyme A delta isomerase (3,2 trans-enoyl-Coenzyme A isomerase); Uncharacterized protein; | Q8QZV3  | 0.07                                                     | -0.84                                                    | -0.38                                                | 0.64               | 2.86                              | 2.27                |
| Glycogen synthase kinase-3 alpha;                                                                                   | Q2NL51  | 0.07                                                     | 0.96                                                     | 0.51                                                 | 0.63               | 2.80                              | 2.66                |

Table S5, Tholen et al.

| Protein                                                                                                   | Uniprot | Fold change (log <sub>2</sub> ) of ASAPRatio replicate 1 | Fold change (log <sub>2</sub> ) of ASAPRatio replicate 2 | Average fold change (log <sub>2</sub> ) of ASAPRatio | Standard deviation | 90 % confidence interval (t-test) | Fisher's exact test |
|-----------------------------------------------------------------------------------------------------------|---------|----------------------------------------------------------|----------------------------------------------------------|------------------------------------------------------|--------------------|-----------------------------------|---------------------|
| Superoxide dismutase [Cu-Zn];                                                                             | P08228  | 0.08                                                     | -0.74                                                    | -0.33                                                | 0.58               | 2.59                              | 1.77                |
| Stress-70 protein, mitochondrial;                                                                         | P38647  | 0.08                                                     | 0.23                                                     | 0.16                                                 | 0.10               | 0.45                              | 0.79                |
| V-type proton ATPase subunit B, brain isoform;                                                            | P62814  | 0.08                                                     | 0.50                                                     | 0.29                                                 | 0.29               | 1.30                              | 1.19                |
| Hydroxyacyl-coenzyme A dehydrogenase, mitochondrial;                                                      | Q61425  | 0.08                                                     | -0.42                                                    | -0.17                                                | 0.35               | 1.58                              | 1.21                |
| Dihydrolipoyllysine-residue acetyltransferase component of pyruvate dehydrogenase complex, mitochondrial; | Q8BMF4  | 0.08                                                     | -0.36                                                    | -0.14                                                | 0.31               | 1.40                              | 1.03                |
| Tubulin polymerization-promoting protein family member 3;                                                 | Q9CRB6  | 0.08                                                     | 0.37                                                     | 0.23                                                 | 0.20               | 0.89                              | 1.09                |
| Histidine triad nucleotide-binding protein 2, mitochondrial;                                              | Q9D0S9  | 0.08                                                     | 0.19                                                     | 0.14                                                 | 0.07               | 0.33                              | 0.70                |
| Elongation factor 1-gamma;                                                                                | Q9D8N0  | 0.08                                                     | 0.78                                                     | 0.43                                                 | 0.49               | 2.20                              | 2.13                |
| Valyl-tRNA synthetase;                                                                                    | Q9Z1Q9  | 0.08                                                     | 0.96                                                     | 0.52                                                 | 0.62               | 2.77                              | 2.75                |
| Dihydrolipoyl dehydrogenase, mitochondrial;                                                               | O08749  | 0.08                                                     | -0.79                                                    | -0.35                                                | 0.62               | 2.75                              | 2.29                |
| Annexin A2;                                                                                               | P07356  | 0.08                                                     | -1.32                                                    | -0.62                                                | 0.99               | 4.44                              | 3.61                |
| Cofilin-1;                                                                                                | P18760  | 0.08                                                     | 0.57                                                     | 0.33                                                 | 0.34               | 1.52                              | 1.59                |
| Beta-enolase;                                                                                             | P21550  | 0.08                                                     | -0.47                                                    | -0.20                                                | 0.39               | 1.76                              | 1.36                |
| Alpha-enolase;                                                                                            | P17182  | -0.23                                                    | -0.03                                                    | -0.13                                                | 0.14               | 0.65                              | 0.83                |
| Enolase;                                                                                                  | B0QZL1  | -0.22                                                    | -1.09                                                    | -0.65                                                | 0.62               | 2.75                              | 3.93                |
| Procollagen C-endopeptidase enhancer 1;                                                                   | Q61398  | 0.08                                                     | -0.76                                                    | -0.34                                                | 0.60               | 2.67                              | 1.55                |
| Peroxisomal N(1)-acetyl-spermine/spermidine oxidase;                                                      | Q8COL6  | 0.08                                                     | 1.15                                                     | 0.62                                                 | 0.75               | 3.37                              | 3.12                |
| Septin-11;                                                                                                | Q8C1B7  | 0.08                                                     | -0.45                                                    | -0.19                                                | 0.38               | 1.70                              | 1.30                |
| Secernin-1;                                                                                               | Q9CZC8  | 0.08                                                     | -0.42                                                    | -0.17                                                | 0.35               | 1.58                              | 1.21                |
| cAMP-dependent protein kinase type I-alpha regulatory subunit;                                            | Q9DBC7  | 0.08                                                     | 0.44                                                     | 0.26                                                 | 0.25               | 1.14                              | 1.26                |
| RuvB-like 1;                                                                                              | P60122  | 0.08                                                     | 1.01                                                     | 0.55                                                 | 0.66               | 2.94                              | 2.33                |
| Coronin-1B;                                                                                               | Q9WUM3  | 0.08                                                     | -0.23                                                    | -0.08                                                | 0.22               | 1.00                              | 0.73                |
| Glutathione peroxidase 1;                                                                                 | P11352  | 0.10                                                     | -0.25                                                    | -0.08                                                | 0.25               | 1.10                              | 0.70                |
| Alcohol dehydrogenase class-3;                                                                            | P28474  | 0.10                                                     | -0.32                                                    | -0.11                                                | 0.30               | 1.33                              | 1.08                |
| N(4)-(beta-N-acetylglucosaminy)-L-asparaginase;                                                           | Q64191  | 0.10                                                     | 0.24                                                     | 0.17                                                 | 0.10               | 0.45                              | 0.89                |
| N-acetylneuraminase lyase;                                                                                | Q9DCJ9  | 0.10                                                     | -0.67                                                    | -0.28                                                | 0.54               | 2.42                              | 1.91                |
| Protein ETHE1, mitochondrial;                                                                             | Q9DCM0  | 0.10                                                     | -0.03                                                    | 0.03                                                 | 0.09               | 0.40                              | 0.45                |
| Eukaryotic translation initiation factor 3 subunit G;                                                     | Q9Z1D1  | 0.10                                                     | 1.33                                                     | 0.71                                                 | 0.87               | 3.88                              | 4.27                |
| Polyadenylate-binding protein 1;                                                                          | P29341  | 0.10                                                     | 0.55                                                     | 0.32                                                 | 0.32               | 1.41                              | 1.56                |
| Very long-chain specific acyl-CoA dehydrogenase, mitochondrial;                                           | P50544  | 0.10                                                     | 0.59                                                     | 0.34                                                 | 0.34               | 1.54                              | 1.53                |
| Annexin A11;                                                                                              | P97384  | 0.10                                                     | -0.29                                                    | -0.09                                                | 0.27               | 1.21                              | 0.79                |
| Adiponectin;                                                                                              | Q60994  | 0.10                                                     | -0.92                                                    | -0.41                                                | 0.72               | 3.20                              | 2.80                |
| Sorcin;                                                                                                   | Q6P069  | 0.10                                                     | 0.35                                                     | 0.22                                                 | 0.17               | 0.78                              | 0.98                |
| Sulfatase-modifying factor 2;                                                                             | Q8BPG6  | 0.10                                                     | 0.07                                                     | 0.08                                                 | 0.02               | 0.09                              | 0.58                |
| Fermitin family homolog 2;                                                                                | Q8CIB5  | 0.10                                                     | 0.28                                                     | 0.19                                                 | 0.13               | 0.56                              | 0.95                |
| CAP-Gly domain-containing linker protein 1;                                                               | Q922J3  | 0.10                                                     | -0.76                                                    | -0.33                                                | 0.61               | 2.71                              | 2.11                |
| Trans-2-enoyl-CoA reductase, mitochondrial;                                                               | Q9DCS3  | 0.10                                                     | 0.28                                                     | 0.19                                                 | 0.13               | 0.56                              | 0.88                |

Table S5, Tholen et al.

| Protein                                                                                                                                                                   | Uniprot | Fold change (log <sub>2</sub> ) of ASAPRatio replicate 1 | Fold change (log <sub>2</sub> ) of ASAPRatio replicate 2 | Average fold change (log <sub>2</sub> ) of ASAPRatio | Standard deviation | 90 % confidence interval (t-test) | Fisher's exact test |
|---------------------------------------------------------------------------------------------------------------------------------------------------------------------------|---------|----------------------------------------------------------|----------------------------------------------------------|------------------------------------------------------|--------------------|-----------------------------------|---------------------|
| Uncharacterized protein;                                                                                                                                                  | E9Q2P1  | 0.10                                                     | -1.09                                                    | -0.50                                                | 0.84               | 3.75                              | 2.93                |
| NK13; Serine (Or cysteine) peptidase inhibitor, clade B, member 6b; Serine (Or cysteine) peptidase inhibitor, clade B, member 6b, isoform CRA_a; Uncharacterized protein; |         |                                                          |                                                          |                                                      |                    |                                   | 2.93                |
|                                                                                                                                                                           | O08804  | 0.10                                                     | -1.00                                                    | -0.45                                                | 0.78               | 3.47                              |                     |
| GDP-D-glucose phosphorylase C15orf58 homolog;                                                                                                                             | Q3TLS3  | 0.10                                                     | 0.19                                                     | 0.14                                                 | 0.06               | 0.29                              | 0.77                |
| Copper transport protein ATOX1;                                                                                                                                           | O08997  | 0.11                                                     | 1.30                                                     | 0.71                                                 | 0.84               | 3.75                              | 3.84                |
| Malate dehydrogenase, mitochondrial;                                                                                                                                      | P08249  | 0.11                                                     | -0.29                                                    | -0.09                                                | 0.28               | 1.25                              | 0.99                |
| Microtubule-associated protein 1B;                                                                                                                                        | P14873  | 0.11                                                     | -0.42                                                    | -0.15                                                | 0.37               | 1.66                              | 1.36                |
| Serine/threonine-protein kinase WNK1;                                                                                                                                     | P83741  | 0.11                                                     | 0.11                                                     | 0.11                                                 | 0.00               | 0.00                              | 0.67                |
| Acetyl-CoA acetyltransferase, mitochondrial;                                                                                                                              | Q8QZT1  | 0.11                                                     | 1.25                                                     | 0.68                                                 | 0.81               | 3.60                              | 3.90                |
| Pyruvate dehydrogenase E1 component subunit beta, mitochondrial;                                                                                                          | Q9D051  | 0.11                                                     | -0.30                                                    | -0.10                                                | 0.29               | 1.31                              | 1.12                |
| GMP reductase 1;                                                                                                                                                          | Q9DCZ1  | 0.11                                                     | -0.12                                                    | 0.00                                                 | 0.16               | 0.73                              | 0.76                |
| Hexokinase-2;                                                                                                                                                             | O08528  | 0.11                                                     | -0.84                                                    | -0.36                                                | 0.67               | 2.99                              | 1.77                |
| Hexokinase-1;                                                                                                                                                             | P17710  | 0.33                                                     | 0.24                                                     | 0.29                                                 | 0.07               | 0.30                              | 1.96                |
| Seryl-tRNA synthetase, cytoplasmic;                                                                                                                                       | P26638  | 0.11                                                     | 0.83                                                     | 0.47                                                 | 0.51               | 2.28                              | 2.41                |
| Methionine adenosyltransferase 2 subunit beta;                                                                                                                            | Q99LB6  | 0.11                                                     | 0.35                                                     | 0.23                                                 | 0.17               | 0.74                              | 1.13                |
| Exportin-2;                                                                                                                                                               | Q9ERK4  | 0.11                                                     | 2.69                                                     | 1.40                                                 | 1.82               | 8.14                              | 11.79               |
| Serine/threonine-protein phosphatase 6 catalytic subunit;                                                                                                                 | Q9CQR6  | 0.11                                                     | 0.36                                                     | 0.23                                                 | 0.17               | 0.77                              | 1.24                |
| Eukaryotic translation initiation factor 3 subunit E;                                                                                                                     | P60229  | 0.11                                                     | 2.68                                                     | 1.39                                                 | 1.81               | 8.10                              | 10.92               |
| Methylosome protein 50;                                                                                                                                                   | Q99J09  | 0.11                                                     | 0.67                                                     | 0.39                                                 | 0.39               | 1.76                              | 1.92                |
| Laminin subunit gamma-1;                                                                                                                                                  | P02468  | 0.14                                                     | -0.07                                                    | 0.03                                                 | 0.15               | 0.67                              | 0.69                |
| Lumican;                                                                                                                                                                  | P51885  | 0.14                                                     | -0.64                                                    | -0.25                                                | 0.55               | 2.47                              | 2.02                |
| Microtubule-associated protein RP/EB family member 1;                                                                                                                     | Q61166  | 0.14                                                     | 0.53                                                     | 0.33                                                 | 0.27               | 1.22                              | 1.70                |
| Myosin light chain kinase 2, skeletal/cardiac muscle;                                                                                                                     | Q8VCR8  | 0.14                                                     | 0.04                                                     | 0.09                                                 | 0.07               | 0.30                              | 0.46                |
| Cytochrome b-c1 complex subunit 7;                                                                                                                                        | Q9D855  | 0.14                                                     | -1.84                                                    | -0.85                                                | 1.40               | 6.23                              | 6.41                |
| Peroxisomal acyl-coenzyme A oxidase 1;                                                                                                                                    | Q9R0H0  | 0.14                                                     | -1.25                                                    | -0.56                                                | 0.98               | 4.39                              | 3.68                |
| Destrin;                                                                                                                                                                  | Q9R0P5  | 0.14                                                     | -0.20                                                    | -0.03                                                | 0.24               | 1.07                              | 0.90                |
| Malate dehydrogenase, cytoplasmic;                                                                                                                                        | P14152  | 0.14                                                     | -0.20                                                    | -0.03                                                | 0.24               | 1.07                              | 0.97                |
| Radixin;                                                                                                                                                                  | P26043  | 0.14                                                     | 0.04                                                     | 0.09                                                 | 0.07               | 0.30                              | 0.64                |
| Moesin;                                                                                                                                                                   | P26041  | 0.20                                                     | -0.84                                                    | -0.32                                                | 0.73               | 3.28                              | 2.76                |
| Ezrin;                                                                                                                                                                    | P26040  | 0.62                                                     | 0.12                                                     | 0.37                                                 | 0.35               | 1.58                              | 4.33                |
| Caveolin-1;                                                                                                                                                               | P49817  | 0.14                                                     | -0.36                                                    | -0.11                                                | 0.35               | 1.57                              | 1.23                |
| Mitogen-activated protein kinase 1;                                                                                                                                       | P63085  | 0.14                                                     | 0.44                                                     | 0.29                                                 | 0.22               | 0.97                              | 1.35                |
| Galactose-1-phosphate uridylyltransferase;                                                                                                                                | Q03249  | 0.14                                                     | 0.51                                                     | 0.32                                                 | 0.26               | 1.16                              | 1.46                |
| Collagen alpha-1(VI) chain;                                                                                                                                               | Q04857  | 0.14                                                     | -0.92                                                    | -0.39                                                | 0.75               | 3.33                              | 2.14                |
| Vinculin;                                                                                                                                                                 | Q64727  | 0.14                                                     | 0.61                                                     | 0.38                                                 | 0.34               | 1.50                              | 1.70                |
| Trifunctional purine biosynthetic protein adenosine-3;                                                                                                                    | Q64737  | 0.14                                                     | 0.77                                                     | 0.45                                                 | 0.44               | 1.98                              | 2.02                |
| Citrate lyase subunit beta-like protein, mitochondrial;                                                                                                                   | Q8R4N0  | 0.14                                                     | -0.36                                                    | -0.11                                                | 0.35               | 1.57                              | 1.11                |

Table S5, Tholen et al.

| Protein                                                                                                     | Uniprot | Fold change (log <sub>2</sub> ) of ASAPRatio replicate 1 | Fold change (log <sub>2</sub> ) of ASAPRatio replicate 2 | Average fold change (log <sub>2</sub> ) of ASAPRatio | Standard deviation | 90 % confidence interval (t-test) | Fisher's exact test |
|-------------------------------------------------------------------------------------------------------------|---------|----------------------------------------------------------|----------------------------------------------------------|------------------------------------------------------|--------------------|-----------------------------------|---------------------|
| Glyoxalase domain-containing protein 4;                                                                     | Q9CPV4  | 0.14                                                     | 0.06                                                     | 0.10                                                 | 0.06               | 0.26                              | 0.65                |
| Biotinidase;                                                                                                | Q8CIF4  | 0.14                                                     | -0.30                                                    | -0.08                                                | 0.31               | 1.40                              | 1.20                |
| Dehydrogenase/reductase SDR family member 7;                                                                | Q9CXR1  | 0.14                                                     | -0.30                                                    | -0.08                                                | 0.31               | 1.40                              | 1.14                |
| Aspartate aminotransferase, mitochondrial;                                                                  | P05202  | 0.15                                                     | -0.45                                                    | -0.15                                                | 0.43               | 1.91                              | 1.50                |
| Adenylosuccinate synthetase isozyme 1;                                                                      | P28650  | 0.15                                                     | -0.76                                                    | -0.31                                                | 0.64               | 2.88                              | 2.30                |
| Small glutamine-rich tetratricopeptide repeat-containing protein alpha;                                     | Q8BJU0  | 0.15                                                     | 1.02                                                     | 0.59                                                 | 0.62               | 2.75                              | 3.37                |
| Phospholipase B-like 1;                                                                                     | Q8VCI0  | 0.15                                                     | -1.06                                                    | -0.45                                                | 0.86               | 3.82                              | 3.43                |
| Ester hydrolase C11orf54 homolog;                                                                           | Q91V76  | 0.15                                                     | -0.20                                                    | -0.03                                                | 0.25               | 1.11                              | 0.73                |
| Aconitate hydratase, mitochondrial;                                                                         | Q99KI0  | 0.15                                                     | -0.52                                                    | -0.18                                                | 0.47               | 2.10                              | 1.76                |
| Serine/threonine-protein phosphatase 2A activator;                                                          | P58389  | 0.15                                                     | -0.29                                                    | -0.07                                                | 0.31               | 1.38                              | 1.08                |
| Platelet-activating factor acetylhydrolase IB subunit gamma;                                                | Q61205  | 0.15                                                     | 0.11                                                     | 0.13                                                 | 0.03               | 0.13                              | 0.86                |
| Coronin-7;                                                                                                  | Q9D2V7  | 0.15                                                     | 0.33                                                     | 0.24                                                 | 0.13               | 0.57                              | 1.14                |
| Lipoamide acyltransferase component of branched-chain alpha-keto acid dehydrogenase complex, mitochondrial; | P53395  | 0.15                                                     | 0.08                                                     | 0.12                                                 | 0.05               | 0.21                              | 0.84                |
| AH receptor-interacting protein;                                                                            | O08915  | 0.16                                                     | 1.40                                                     | 0.78                                                 | 0.87               | 3.89                              | 4.81                |
| Ferritin heavy chain;                                                                                       | P09528  | 0.16                                                     | -1.25                                                    | -0.54                                                | 1.00               | 4.47                              | 4.26                |
| Galectin-3;                                                                                                 | P16110  | 0.16                                                     | 0.45                                                     | 0.31                                                 | 0.21               | 0.92                              | 1.53                |
| Cofilin-2;                                                                                                  | P45591  | 0.16                                                     | -0.12                                                    | 0.02                                                 | 0.20               | 0.89                              | 0.92                |
| Adenylosuccinate synthetase isozyme 2;                                                                      | P46664  | 0.16                                                     | 0.29                                                     | 0.23                                                 | 0.09               | 0.39                              | 1.25                |
| Carbonyl reductase [NADPH] 1;                                                                               | P48758  | 0.16                                                     | 0.39                                                     | 0.28                                                 | 0.16               | 0.72                              | 1.51                |
| Myotrophin;                                                                                                 | P62774  | 0.16                                                     | 0.21                                                     | 0.19                                                 | 0.04               | 0.16                              | 1.19                |
| Peptidyl-prolyl cis-trans isomerase FKBP5;                                                                  | Q64378  | 0.16                                                     | 0.49                                                     | 0.32                                                 | 0.23               | 1.02                              | 1.56                |
| Acyl-coenzyme A thioesterase 1;                                                                             | O55137  | 0.16                                                     | 0.48                                                     | 0.32                                                 | 0.22               | 0.98                              | 1.59                |
| Acyl-coenzyme A thioesterase 2, mitochondrial;                                                              | Q9QYR9  | -0.25                                                    | -0.52                                                    | -0.38                                                | 0.19               | 0.83                              | 1.88                |
| Myelin protein P0;                                                                                          | P27573  | 0.16                                                     | -0.52                                                    | -0.18                                                | 0.48               | 2.14                              | 1.65                |
| Cell division control protein 42 homolog;                                                                   | P60766  | 0.16                                                     | 0.59                                                     | 0.37                                                 | 0.30               | 1.33                              | 1.74                |
| Ras-related C3 botulinum toxin substrate 1;                                                                 | P63001  | -0.81                                                    | 0.28                                                     | -0.27                                                | 0.77               | 3.43                              | 5.02                |
| Septin-9;                                                                                                   | Q80UG5  | 0.16                                                     | -1.36                                                    | -0.60                                                | 1.08               | 4.80                              | 3.91                |
| NEDD8-activating enzyme E1 catalytic subunit;                                                               | Q8C878  | 0.16                                                     | -0.03                                                    | 0.07                                                 | 0.14               | 0.61                              | 0.70                |
| Actin-related protein 3;                                                                                    | Q99JY9  | 0.16                                                     | -0.52                                                    | -0.18                                                | 0.48               | 2.14                              | 1.71                |
| Proteasome subunit alpha type-5;                                                                            | Q922U1  | 0.16                                                     | 0.58                                                     | 0.37                                                 | 0.29               | 1.30                              | 1.84                |
| Uncharacterized protein;                                                                                    | F6RPJ9  | 0.16                                                     | 0.51                                                     | 0.33                                                 | 0.24               | 1.08                              | 1.56                |
| Histone-binding protein RBBP4;                                                                              | Q60972  | 0.16                                                     | 1.28                                                     | 0.72                                                 | 0.79               | 3.51                              | 3.87                |
| Ig alpha chain C region;                                                                                    | P01878  | 0.18                                                     | -0.20                                                    | -0.01                                                | 0.27               | 1.19                              | 1.16                |
| Transthyretin;                                                                                              | P07309  | 0.18                                                     | 0.12                                                     | 0.15                                                 | 0.04               | 0.16                              | 1.08                |
| Uroporphyrinogen decarboxylase;                                                                             | P70697  | 0.18                                                     | 0.50                                                     | 0.34                                                 | 0.23               | 1.01                              | 1.88                |
| Eukaryotic translation initiation factor 3 subunit B;                                                       | Q8JZQ9  | 0.18                                                     | 1.26                                                     | 0.72                                                 | 0.77               | 3.43                              | 4.04                |

Table S5, Tholen et al.

| Protein                                                                                                             | Uniprot | Fold change (log <sub>2</sub> ) of ASAPRatio replicate 1 | Fold change (log <sub>2</sub> ) of ASAPRatio replicate 2 | Average fold change (log <sub>2</sub> ) of ASAPRatio | Standard deviation | 90 % confidence interval (t-test) | Fisher's exact test |
|---------------------------------------------------------------------------------------------------------------------|---------|----------------------------------------------------------|----------------------------------------------------------|------------------------------------------------------|--------------------|-----------------------------------|---------------------|
| Leucine carboxyl methyltransferase 1; Leucine carboxyl methyltransferase 1, isoform CRA_b; Uncharacterized protein; | A2RTH5  | 0.18                                                     | -0.15                                                    | 0.01                                                 | 0.23               | 1.04                              | 1.01                |
| Calcium/calmodulin-dependent protein kinase type II subunit alpha;                                                  | P11798  | 0.18                                                     | -0.89                                                    | -0.36                                                | 0.75               | 3.36                              | 3.07                |
| ADP-ribosylation factor 3;                                                                                          | P61205  | 0.18                                                     | 0.30                                                     | 0.24                                                 | 0.09               | 0.39                              | 1.30                |
| ADP-ribosylation factor 5;                                                                                          | P84084  | 0.06                                                     | 2.36                                                     | 1.21                                                 | 1.63               | 7.26                              | 9.42                |
| Translationally-controlled tumor protein;                                                                           | P63028  | 0.18                                                     | 0.21                                                     | 0.20                                                 | 0.03               | 0.12                              | 1.22                |
| Trifunctional enzyme subunit beta, mitochondrial;                                                                   | Q99JY0  | 0.18                                                     | 0.86                                                     | 0.52                                                 | 0.48               | 2.15                              | 2.77                |
| Actin-related protein 2/3 complex subunit 5;                                                                        | Q9CPW4  | 0.18                                                     | -0.43                                                    | -0.13                                                | 0.43               | 1.93                              | 1.52                |
| Epoxide hydrolase 1;                                                                                                | Q9D379  | 0.18                                                     | -0.62                                                    | -0.22                                                | 0.56               | 2.52                              | 2.23                |
| Apolipoprotein A-IV;                                                                                                | P06728  | 0.19                                                     | 1.01                                                     | 0.60                                                 | 0.58               | 2.58                              | 3.09                |
| Galectin-1;                                                                                                         | P16045  | 0.19                                                     | -0.04                                                    | 0.07                                                 | 0.16               | 0.74                              | 0.91                |
| Halooacid dehalogenase-like hydrolase domain-containing protein 2;                                                  | Q3UGR5  | 0.19                                                     | -0.22                                                    | -0.01                                                | 0.29               | 1.28                              | 1.28                |
| 28S ribosomal protein S36, mitochondrial;                                                                           | Q9CQX8  | 0.19                                                     | 1.15                                                     | 0.67                                                 | 0.68               | 3.04                              | 4.02                |
| Phosphorylase b kinase gamma catalytic chain, skeletal muscle isoform;                                              | P07934  | 0.19                                                     | 1.33                                                     | 0.76                                                 | 0.81               | 3.60                              | 4.66                |
| Fatty acid-binding protein, epidermal;                                                                              | Q05816  | 0.19                                                     | 1.52                                                     | 0.86                                                 | 0.94               | 4.20                              | 5.21                |
| Adapter molecule crk;                                                                                               | Q64010  | 0.19                                                     | 0.19                                                     | 0.19                                                 | 0.00               | 0.00                              | 1.30                |
| Carboxylesterase 3;                                                                                                 | Q8VCT4  | 0.19                                                     | -1.18                                                    | -0.50                                                | 0.97               | 4.33                              | 3.36                |
| Liver carboxylesterase N;                                                                                           | P23953  | -0.07                                                    | -0.32                                                    | -0.20                                                | 0.18               | 0.78                              | 0.94                |
| Uncharacterized protein;                                                                                            | D3Z5G7  | -0.15                                                    | -0.42                                                    | -0.28                                                | 0.19               | 0.83                              | 1.58                |
| Enoyl-CoA hydratase domain-containing protein 1;                                                                    | Q9D9V3  | 0.19                                                     | 0.61                                                     | 0.40                                                 | 0.30               | 1.34                              | 1.19                |
| ATP synthase subunit O, mitochondrial;                                                                              | Q9DB20  | 0.19                                                     | -1.89                                                    | -0.85                                                | 1.47               | 6.56                              | 6.65                |
| TIP41-like protein;                                                                                                 | Q8BH58  | 0.19                                                     | 0.11                                                     | 0.15                                                 | 0.06               | 0.25                              | 1.05                |
| Ubiquitin-fold modifier-conjugating enzyme 1;                                                                       | Q9CR09  | 0.19                                                     | 1.52                                                     | 0.86                                                 | 0.94               | 4.20                              | 5.70                |
| S-phase kinase-associated protein 1;                                                                                | Q9WTX5  | 0.19                                                     | -0.76                                                    | -0.29                                                | 0.67               | 3.00                              | 1.96                |
| Crk-like protein;                                                                                                   | P47941  | 0.20                                                     | 0.10                                                     | 0.15                                                 | 0.07               | 0.33                              | 1.19                |
| 40S ribosomal protein S14;                                                                                          | P62264  | 0.20                                                     | 3.61                                                     | 1.91                                                 | 2.41               | 10.75                             | 19.70               |
| Serine/threonine-protein phosphatase 2A catalytic subunit alpha isoform;                                            | P63330  | 0.20                                                     | 0.38                                                     | 0.29                                                 | 0.13               | 0.56                              | 1.76                |
| Glutaredoxin-related protein 5, mitochondrial;                                                                      | Q80Y14  | 0.20                                                     | 0.19                                                     | 0.20                                                 | 0.01               | 0.04                              | 1.30                |
| UMP-CMP kinase;                                                                                                     | Q9DBP5  | 0.20                                                     | 0.26                                                     | 0.23                                                 | 0.04               | 0.19                              | 1.15                |
| Ubiquitin carboxyl-terminal hydrolase 14;                                                                           | Q9JMA1  | 0.20                                                     | 0.56                                                     | 0.38                                                 | 0.25               | 1.12                              | 2.25                |
| Heat shock protein HSP 90-beta;                                                                                     | P11499  | 0.20                                                     | 1.32                                                     | 0.76                                                 | 0.79               | 3.54                              | 3.41                |
| Heat shock protein HSP 90-alpha;                                                                                    | P07901  | 0.23                                                     | 1.52                                                     | 0.87                                                 | 0.91               | 4.07                              | 4.69                |
| Endoplasmic reticulum chaperone protein BiP; ER chaperone protein;                                                  | P08113  | 0.10                                                     | 0.81                                                     | 0.45                                                 | 0.50               | 2.24                              | 1.29                |
| BTB/POZ domain-containing protein KCTD12;                                                                           | Q6WVG3  | 0.20                                                     | 0.08                                                     | 0.14                                                 | 0.08               | 0.37                              | 0.64                |
| Uncharacterized protein;                                                                                            | E9PYJ9  | 0.20                                                     | -0.34                                                    | -0.07                                                | 0.38               | 1.71                              | 1.21                |
| Uncharacterized protein;                                                                                            | E9Q0S6  | 0.20                                                     | -0.49                                                    | -0.15                                                | 0.49               | 2.20                              | 1.70                |
| 40S ribosomal protein S12;                                                                                          | Q6ZWZ6  | 0.20                                                     | 0.11                                                     | 0.16                                                 | 0.06               | 0.29                              | 0.91                |

Table S5, Tholen et al.

| Protein                                                                                                                                                           | Uniprot | Fold change (log <sub>2</sub> ) of ASAPRatio replicate 1 | Fold change (log <sub>2</sub> ) of ASAPRatio replicate 2 | Average fold change (log <sub>2</sub> ) of ASAPRatio | Standard deviation | 90 % confidence interval (t-test) | Fisher's exact test |
|-------------------------------------------------------------------------------------------------------------------------------------------------------------------|---------|----------------------------------------------------------|----------------------------------------------------------|------------------------------------------------------|--------------------|-----------------------------------|---------------------|
| Complement component 1, q subcomponent binding protein; Complement component 1, q subcomponent binding protein, isoform CRA_b; Uncharacterized protein; p32-RACK; | Q8R5L1  | 0.20                                                     | 0.47                                                     | 0.33                                                 | 0.19               | 0.83                              | 1.92                |
| Annexin A4;                                                                                                                                                       | P97429  | 0.21                                                     | -0.23                                                    | -0.01                                                | 0.32               | 1.41                              | 1.39                |
| Pyruvate dehydrogenase E1 component subunit alpha, somatic form, mitochondrial;                                                                                   | P35486  | 0.23                                                     | -0.36                                                    | -0.07                                                | 0.41               | 1.85                              | 1.51                |
| Haptoglobin;                                                                                                                                                      | Q61646  | 0.23                                                     | 0.82                                                     | 0.52                                                 | 0.42               | 1.86                              | 3.01                |
| Cytochrome b-c1 complex subunit 2, mitochondrial;                                                                                                                 | Q9DB77  | 0.23                                                     | -2.84                                                    | -1.31                                                | 2.17               | 9.67                              | 6.13                |
| Phosphotriesterase-related protein;                                                                                                                               | Q60866  | 0.23                                                     | -0.12                                                    | 0.05                                                 | 0.25               | 1.10                              | 0.85                |
| Programmed cell death 6-interacting protein;                                                                                                                      | Q9WU78  | 0.23                                                     | 1.18                                                     | 0.71                                                 | 0.68               | 3.02                              | 3.07                |
| Calpain-1 catalytic subunit;                                                                                                                                      | O35350  | 0.24                                                     | 0.29                                                     | 0.26                                                 | 0.03               | 0.15                              | 1.67                |
| Proteasome subunit beta type-8;                                                                                                                                   | P28063  | 0.24                                                     | -0.52                                                    | -0.14                                                | 0.53               | 2.38                              | 2.09                |
| Lysophosphatidic acid phosphatase type 6;                                                                                                                         | Q8BP40  | 0.24                                                     | 0.07                                                     | 0.15                                                 | 0.12               | 0.53                              | 1.21                |
| Asporin;                                                                                                                                                          | Q99MQ4  | 0.24                                                     | -1.00                                                    | -0.38                                                | 0.88               | 3.91                              | 3.24                |
| ADP/ATP translocase 1;                                                                                                                                            | P48962  | 0.24                                                     | -2.64                                                    | -1.20                                                | 2.04               | 9.10                              | 11.62               |
| ADP/ATP translocase 2;                                                                                                                                            | P51881  | 0.20                                                     | -0.97                                                    | -0.38                                                | 0.83               | 3.70                              | 3.54                |
| Heterogeneous nuclear ribonucleoprotein K;                                                                                                                        | P61979  | 0.24                                                     | 0.75                                                     | 0.49                                                 | 0.36               | 1.61                              | 2.75                |
| Carboxymethylenebutenolidase homolog;                                                                                                                             | Q8R1G2  | 0.24                                                     | -0.94                                                    | -0.35                                                | 0.84               | 3.73                              | 3.56                |
| TAR DNA-binding protein 43;                                                                                                                                       | Q921F2  | 0.24                                                     | 0.48                                                     | 0.36                                                 | 0.17               | 0.75                              | 1.32                |
| Calumenin;                                                                                                                                                        | O35887  | 0.24                                                     | 0.10                                                     | 0.17                                                 | 0.10               | 0.45                              | 1.37                |
| Cytochrome c oxidase subunit 2;                                                                                                                                   | P00405  | 0.25                                                     | -2.06                                                    | -0.90                                                | 1.63               | 7.29                              | 8.63                |
| Programmed cell death protein 6;                                                                                                                                  | P12815  | 0.25                                                     | 1.82                                                     | 1.04                                                 | 1.11               | 4.95                              | 5.18                |
| Protein-glutamine gamma-glutamyltransferase 2;                                                                                                                    | P21981  | 0.25                                                     | -0.25                                                    | 0.00                                                 | 0.36               | 1.59                              | 1.18                |
| Costars family protein C6orf115 homolog;                                                                                                                          | Q4KML4  | 0.25                                                     | 0.54                                                     | 0.39                                                 | 0.20               | 0.90                              | 2.09                |
| Alcohol dehydrogenase class 4 mu/sigma chain;                                                                                                                     | Q64437  | 0.25                                                     | -0.27                                                    | -0.01                                                | 0.37               | 1.64                              | 1.36                |
| UDP-glucose:glycoprotein glucosyltransferase 1;                                                                                                                   | Q6P5E4  | 0.25                                                     | -0.07                                                    | 0.09                                                 | 0.23               | 1.03                              | 0.94                |
| Elongation factor Tu, mitochondrial;                                                                                                                              | Q8BFR5  | 0.25                                                     | 0.11                                                     | 0.18                                                 | 0.10               | 0.44                              | 1.45                |
| Alanine aminotransferase 1;                                                                                                                                       | Q8QZR5  | 0.25                                                     | -0.42                                                    | -0.08                                                | 0.47               | 2.10                              | 1.88                |
| Microfibril-associated glycoprotein 4;                                                                                                                            | Q9D1H9  | 0.25                                                     | -1.29                                                    | -0.52                                                | 1.09               | 4.85                              | 4.38                |
| Ribosome-recycling factor, mitochondrial;                                                                                                                         | Q9D6S7  | 0.25                                                     | -0.42                                                    | -0.08                                                | 0.47               | 2.10                              | 2.06                |
| Heterogeneous nuclear ribonucleoprotein F;                                                                                                                        | Q9Z2X1  | 0.25                                                     | 0.86                                                     | 0.55                                                 | 0.43               | 1.91                              | 3.38                |
| H-2 class II histocompatibility antigen, A-Q beta chain;                                                                                                          | P06342  | 0.25                                                     | 0.33                                                     | 0.29                                                 | 0.06               | 0.26                              | 1.88                |
| Cathepsin L1;                                                                                                                                                     | P06797  | 0.25                                                     | 0.85                                                     | 0.55                                                 | 0.42               | 1.88                              | 3.03                |
| 14-3-3 protein zeta/delta;                                                                                                                                        | P63101  | 0.25                                                     | 1.01                                                     | 0.63                                                 | 0.53               | 2.39                              | 3.50                |
| Spermine synthase;                                                                                                                                                | P97355  | 0.25                                                     | -0.84                                                    | -0.29                                                | 0.77               | 3.43                              | 3.08                |
| EGF-containing fibulin-like extracellular matrix protein 1;                                                                                                       | Q8BPB5  | 0.25                                                     | -0.15                                                    | 0.05                                                 | 0.28               | 1.27                              | 1.22                |
| ATP synthase subunit g, mitochondrial;                                                                                                                            | Q9CPQ8  | 0.25                                                     | -2.00                                                    | -0.87                                                | 1.59               | 7.11                              | 8.62                |
| Proteasome subunit alpha type-6;                                                                                                                                  | Q9QUM9  | 0.25                                                     | 0.60                                                     | 0.42                                                 | 0.24               | 1.09                              | 2.47                |

Table S5, Tholen et al.

| Protein                                                                                                             | Uniprot | Fold change (log <sub>2</sub> ) of ASAPRatio replicate 1 | Fold change (log <sub>2</sub> ) of ASAPRatio replicate 2 | Average fold change (log <sub>2</sub> ) of ASAPRatio | Standard deviation | 90 % confidence interval (t-test) | Fisher's exact test |
|---------------------------------------------------------------------------------------------------------------------|---------|----------------------------------------------------------|----------------------------------------------------------|------------------------------------------------------|--------------------|-----------------------------------|---------------------|
| Lectin, galactose binding, soluble 7; Lectin, galactose binding, soluble 7, isoform CRA_a; Uncharacterized protein; | Q9CRB1  | 0.25                                                     | 0.23                                                     | 0.24                                                 | 0.02               | 0.08                              | 1.73                |
| Dual specificity mitogen-activated protein kinase kinase 4;                                                         | P47809  | 0.25                                                     | 2.28                                                     | 1.26                                                 | 1.43               | 6.40                              | 9.85                |
| Arylsulfatase B;                                                                                                    | P50429  | 0.26                                                     | -0.11                                                    | 0.08                                                 | 0.26               | 1.16                              | 0.64                |
| Acylphosphatase-1;                                                                                                  | P56376  | 0.26                                                     | -0.52                                                    | -0.13                                                | 0.55               | 2.46                              | 1.81                |
| Synaptobrevin homolog YKT6;                                                                                         | Q9CQW1  | 0.26                                                     | 2.02                                                     | 1.14                                                 | 1.24               | 5.54                              | 7.43                |
| Chloride intracellular channel protein 4;                                                                           | Q9QYB1  | 0.26                                                     | 0.84                                                     | 0.55                                                 | 0.41               | 1.82                              | 3.24                |
| Calpain-2 catalytic subunit;                                                                                        | O08529  | 0.26                                                     | 1.33                                                     | 0.80                                                 | 0.75               | 3.36                              | 4.92                |
| Talin-1;                                                                                                            | P26039  | 0.26                                                     | 1.14                                                     | 0.70                                                 | 0.62               | 2.78                              | 3.78                |
| Heterogeneous nuclear ribonucleoprotein A3;                                                                         | Q8BG05  | 0.26                                                     | 0.82                                                     | 0.54                                                 | 0.39               | 1.75                              | 3.21                |
| Early endosome antigen 1;                                                                                           | Q8BL66  | 0.26                                                     | 0.12                                                     | 0.19                                                 | 0.10               | 0.44                              | 1.03                |
| Propionyl-CoA carboxylase alpha chain, mitochondrial;                                                               | Q91ZA3  | 0.26                                                     | -0.43                                                    | -0.09                                                | 0.49               | 2.20                              | 1.40                |
| 26S proteasome non-ATPase regulatory subunit 4;                                                                     | O35226  | 0.28                                                     | 0.95                                                     | 0.61                                                 | 0.48               | 2.13                              | 3.82                |
| Sorting nexin-6;                                                                                                    | Q6P8X1  | 0.28                                                     | 0.52                                                     | 0.40                                                 | 0.17               | 0.76                              | 1.68                |
| Kynurenine--oxoglutarate transaminase 3;                                                                            | Q71RI9  | 0.28                                                     | 0.44                                                     | 0.36                                                 | 0.12               | 0.53                              | 2.00                |
| Fibrinogen beta chain;                                                                                              | Q8K0E8  | 0.28                                                     | -0.22                                                    | 0.03                                                 | 0.35               | 1.56                              | 1.88                |
| Reticulon-4;                                                                                                        | Q99P72  | 0.28                                                     | 0.55                                                     | 0.41                                                 | 0.19               | 0.86                              | 2.34                |
| SH3 domain-binding glutamic acid-rich-like protein;                                                                 | Q9JJU8  | 0.28                                                     | -0.12                                                    | 0.08                                                 | 0.28               | 1.25                              | 1.56                |
| Band 4.1-like protein 2;                                                                                            | O70318  | 0.28                                                     | 0.04                                                     | 0.16                                                 | 0.16               | 0.73                              | 1.32                |
| Glia maturation factor gamma;                                                                                       | Q9ERL7  | -0.01                                                    | -1.06                                                    | -0.54                                                | 0.74               | 3.30                              | 2.32                |
| SPRY domain-containing protein 4;                                                                                   | Q91WK1  | 0.28                                                     | -0.32                                                    | -0.02                                                | 0.42               | 1.88                              | 2.09                |
| Uridine diphosphate glucose pyrophosphatase;                                                                        | Q9D142  | 0.28                                                     | 0.33                                                     | 0.30                                                 | 0.04               | 0.18                              | 2.06                |
| Uncharacterized protein;                                                                                            | E9Q8T1  | 0.29                                                     | -0.20                                                    | 0.04                                                 | 0.35               | 1.54                              | 1.44                |
| Serine/threonine-protein phosphatase 2A catalytic subunit beta isoform;                                             | P62715  | 0.30                                                     | 0.75                                                     | 0.52                                                 | 0.32               | 1.42                              | 3.16                |
| Cytochrome c, somatic;                                                                                              | P62897  | 0.30                                                     | -0.14                                                    | 0.08                                                 | 0.31               | 1.37                              | 1.73                |
| Eukaryotic translation initiation factor 5A-1;                                                                      | P63242  | 0.30                                                     | -0.22                                                    | 0.04                                                 | 0.37               | 1.63                              | 1.82                |
| Annexin A7;                                                                                                         | Q07076  | 0.30                                                     | 0.60                                                     | 0.45                                                 | 0.21               | 0.93                              | 2.59                |
| Myosin light chain kinase, smooth muscle;                                                                           | Q6PDN3  | 0.30                                                     | 0.08                                                     | 0.19                                                 | 0.15               | 0.68                              | 0.83                |
| Fibrinogen gamma chain;                                                                                             | Q8VCM7  | 0.30                                                     | -0.52                                                    | -0.11                                                | 0.58               | 2.57                              | 2.35                |
| Copper homeostasis protein cutC homolog;                                                                            | Q9D8X1  | 0.30                                                     | -0.84                                                    | -0.27                                                | 0.80               | 3.59                              | 3.27                |
| Voltage-dependent anion-selective channel protein 2;                                                                | Q60930  | 0.30                                                     | -1.15                                                    | -0.43                                                | 1.03               | 4.58                              | 4.37                |
| Cullin-associated NEDD8-dissociated protein 1;                                                                      | Q62Q38  | 0.30                                                     | 1.29                                                     | 0.79                                                 | 0.70               | 3.12                              | 3.64                |
| E3 ubiquitin-protein ligase HUWE1;                                                                                  | Q7TMY8  | 0.30                                                     | 1.38                                                     | 0.84                                                 | 0.77               | 3.43                              | 4.03                |
| Plastin-3;                                                                                                          | Q99K51  | 0.30                                                     | 0.11                                                     | 0.21                                                 | 0.13               | 0.59                              | 1.36                |
| Ubiquitin carboxyl-terminal hydrolase isozyme L3;                                                                   | Q9JKB1  | 0.30                                                     | 0.68                                                     | 0.49                                                 | 0.27               | 1.20                              | 2.49                |
| Toll-interacting protein;                                                                                           | Q9QZ06  | 0.30                                                     | 0.03                                                     | 0.16                                                 | 0.19               | 0.85                              | 1.55                |
| NEDD8-conjugating enzyme Ubc12;                                                                                     | P61082  | 0.30                                                     | 1.80                                                     | 1.05                                                 | 1.06               | 4.74                              | 6.95                |
| Large proline-rich protein BAG6;                                                                                    | Q9Z1R2  | 0.30                                                     | 0.93                                                     | 0.61                                                 | 0.44               | 1.98                              | 3.74                |



Table S5, Tholen et al.

| Protein                                                      | Uniprot | Fold change (log <sub>2</sub> ) of ASAPRatio replicate 1 | Fold change (log <sub>2</sub> ) of ASAPRatio replicate 2 | Average fold change (log <sub>2</sub> ) of ASAPRatio | Standard deviation | 90 % confidence interval (t-test) | Fisher's exact test |
|--------------------------------------------------------------|---------|----------------------------------------------------------|----------------------------------------------------------|------------------------------------------------------|--------------------|-----------------------------------|---------------------|
| Heterogeneous nuclear ribonucleoproteins A2/B1;              | O88569  | 0.31                                                     | 1.12                                                     | 0.71                                                 | 0.57               | 2.55                              | 3.96                |
| Ubiquitin-fold modifier 1;                                   | P61961  | 0.31                                                     | 0.59                                                     | 0.45                                                 | 0.19               | 0.87                              | 2.87                |
| Sarcalumenin;                                                | Q7TQ48  | 0.31                                                     | 0.50                                                     | 0.40                                                 | 0.13               | 0.59                              | 2.38                |
| Cold shock domain-containing protein E1;                     | Q91W50  | 0.31                                                     | 1.52                                                     | 0.92                                                 | 0.86               | 3.82                              | 6.29                |
| Ribonuclease T2;                                             | Q9CQ01  | 0.31                                                     | 1.85                                                     | 1.08                                                 | 1.09               | 4.86                              | 7.64                |
| Glutaredoxin-3;                                              | Q9CQM9  | 0.31                                                     | 1.87                                                     | 1.09                                                 | 1.10               | 4.93                              | 7.71                |
| ATP synthase subunit d, mitochondrial;                       | Q9DCX2  | 0.31                                                     | -0.97                                                    | -0.33                                                | 0.91               | 4.04                              | 3.72                |
| Glutathione S-transferase omega-1;                           | O09131  | 0.31                                                     | 0.32                                                     | 0.32                                                 | 0.01               | 0.04                              | 1.60                |
| Eukaryotic initiation factor 4A-II;                          | P10630  | 0.31                                                     | 0.39                                                     | 0.35                                                 | 0.06               | 0.25                              | 2.22                |
| Eukaryotic initiation factor 4A-I;                           | P60843  | 0.39                                                     | 1.70                                                     | 1.04                                                 | 0.92               | 4.12                              | 6.76                |
| Voltage-dependent anion-selective channel protein 1;         | Q60932  | 0.31                                                     | -1.69                                                    | -0.69                                                | 1.41               | 6.31                              | 5.06                |
| Transportin-3;                                               | Q6P2B1  | 0.31                                                     | 1.75                                                     | 1.03                                                 | 1.02               | 4.56                              | 6.65                |
| Adenylate kinase 2, mitochondrial;                           | Q9WTP6  | 0.31                                                     | 0.76                                                     | 0.53                                                 | 0.32               | 1.41                              | 2.83                |
| Ras GTPase-activating protein-binding protein 1;             | P97855  | 0.31                                                     | 0.41                                                     | 0.36                                                 | 0.07               | 0.32                              | 2.40                |
| RING finger protein 114;                                     | Q9ET26  | 0.31                                                     | 2.93                                                     | 1.62                                                 | 1.86               | 8.28                              | 14.77               |
| T-complex protein 1 subunit zeta;                            | P80317  | 0.31                                                     | 1.98                                                     | 1.15                                                 | 1.18               | 5.28                              | 5.79                |
| Small ubiquitin-related modifier 2;                          | P61957  | 0.31                                                     | 1.99                                                     | 1.15                                                 | 1.19               | 5.31                              | 8.74                |
| Cystatin-B;                                                  | Q62426  | 0.31                                                     | 1.36                                                     | 0.83                                                 | 0.74               | 3.30                              | 5.46                |
| Medium-chain specific acyl-CoA dehydrogenase, mitochondrial; | P45952  | 0.32                                                     | -1.74                                                    | -0.71                                                | 1.46               | 6.50                              | 6.30                |
| Creatine kinase S-type, mitochondrial;                       | Q6P8J7  | 0.32                                                     | -2.84                                                    | -1.26                                                | 2.23               | 9.97                              | 6.23                |
| Troponin C, skeletal muscle;                                 | P20801  | 0.32                                                     | -3.32                                                    | -1.50                                                | 2.58               | 11.50                             | 12.50               |
| Elongation factor G, mitochondrial;                          | Q8K0D5  | 0.32                                                     | 0.56                                                     | 0.44                                                 | 0.17               | 0.74                              | 2.01                |
| Gamma-butyrobetaine dioxygenase;                             | Q924Y0  | 0.32                                                     | -1.32                                                    | -0.50                                                | 1.16               | 5.19                              | 5.11                |
| COP9 signalosome complex subunit 4;                          | O88544  | 0.32                                                     | 1.46                                                     | 0.89                                                 | 0.80               | 3.59                              | 4.95                |
| PDZ and LIM domain protein 3;                                | O70209  | 0.33                                                     | 0.16                                                     | 0.25                                                 | 0.12               | 0.54                              | 1.67                |
| Caspase-14;                                                  | O89094  | 0.33                                                     | 2.21                                                     | 1.27                                                 | 1.32               | 5.91                              | 8.42                |
| Superoxide dismutase [Mn], mitochondrial;                    | P09671  | 0.33                                                     | -0.03                                                    | 0.15                                                 | 0.26               | 1.14                              | 1.33                |
| GDP-L-fucose synthase;                                       | P23591  | 0.33                                                     | 0.19                                                     | 0.26                                                 | 0.10               | 0.45                              | 1.73                |
| Cysteine and glycine-rich protein 1;                         | P97315  | 0.33                                                     | -0.45                                                    | -0.06                                                | 0.56               | 2.48                              | 2.20                |
| N-acetylglucosamine-6-sulfatase;                             | Q8BFR4  | 0.33                                                     | 0.30                                                     | 0.32                                                 | 0.02               | 0.11                              | 1.89                |
| Thioredoxin-like protein 1;                                  | Q8CDN6  | 0.33                                                     | 0.78                                                     | 0.56                                                 | 0.32               | 1.42                              | 3.62                |
| Acylamino-acid-releasing enzyme;                             | Q8R146  | 0.33                                                     | 1.04                                                     | 0.69                                                 | 0.50               | 2.24                              | 3.75                |
| 5-hydroxyisourate hydrolase;                                 | Q9CRB3  | 0.33                                                     | 0.30                                                     | 0.32                                                 | 0.02               | 0.11                              | 2.36                |
| Isoamyl acetate-hydrolyzing esterase 1 homolog;              | Q9DB29  | 0.33                                                     | -0.07                                                    | 0.13                                                 | 0.29               | 1.28                              | 1.25                |
| ADP-sugar pyrophosphatase;                                   | Q9JKX6  | 0.33                                                     | 0.26                                                     | 0.30                                                 | 0.05               | 0.22                              | 1.86                |
| General vesicular transport factor p115;                     | Q9Z1Z0  | 0.33                                                     | 2.47                                                     | 1.40                                                 | 1.51               | 6.75                              | 10.72               |
| Plasminogen activator inhibitor 2, macrophage;               | P12388  | 0.33                                                     | -0.64                                                    | -0.16                                                | 0.69               | 3.08                              | 2.86                |
| Mitogen-activated protein kinase 14;                         | P47811  | 0.33                                                     | 0.62                                                     | 0.48                                                 | 0.21               | 0.92                              | 2.96                |

Table S5, Tholen et al.

| Protein                                                                                         | Uniprot | Fold change (log <sub>2</sub> ) of ASAPRatio replicate 1 | Fold change (log <sub>2</sub> ) of ASAPRatio replicate 2 | Average fold change (log <sub>2</sub> ) of ASAPRatio | Standard deviation | 90 % confidence interval (t-test) | Fisher's exact test |
|-------------------------------------------------------------------------------------------------|---------|----------------------------------------------------------|----------------------------------------------------------|------------------------------------------------------|--------------------|-----------------------------------|---------------------|
| Protein Niban;                                                                                  | Q3UW53  | 0.33                                                     | 1.23                                                     | 0.78                                                 | 0.64               | 2.84                              | 4.36                |
| Propionyl-CoA carboxylase beta chain, mitochondrial;                                            | Q99MN9  | 0.33                                                     | -0.40                                                    | -0.03                                                | 0.52               | 2.30                              | 2.25                |
| Aldehyde dehydrogenase;                                                                         | E9Q3E1  | 0.33                                                     | 0.63                                                     | 0.48                                                 | 0.21               | 0.94                              | 2.73                |
| Coatomer subunit beta;                                                                          | Q9JIF7  | 0.33                                                     | 1.86                                                     | 1.10                                                 | 1.08               | 4.82                              | 7.10                |
| Protein farnesyltransferase/geranylgeranyltransferase type-1 subunit alpha;                     | Q61239  | 0.33                                                     | 0.61                                                     | 0.47                                                 | 0.20               | 0.89                              | 2.81                |
| COP9 signalosome complex subunit 5;                                                             | O35864  | 0.35                                                     | 0.44                                                     | 0.39                                                 | 0.07               | 0.31                              | 1.51                |
| Kynurenine--oxoglutarate transaminase 1;                                                        | Q8BTY1  | 0.35                                                     | 0.44                                                     | 0.39                                                 | 0.07               | 0.31                              | 2.81                |
| V-type proton ATPase subunit H;                                                                 | Q8BVE3  | 0.35                                                     | 1.06                                                     | 0.70                                                 | 0.51               | 2.27                              | 4.37                |
| Uncharacterized protein;                                                                        | E9Q8E3  | 0.35                                                     | -1.89                                                    | -0.77                                                | 1.58               | 7.05                              | 6.01                |
| Annexin A8;                                                                                     | O35640  | 0.35                                                     | -0.34                                                    | 0.00                                                 | 0.48               | 2.16                              | 2.52                |
| Apolipoprotein E;                                                                               | P08226  | 0.35                                                     | 1.82                                                     | 1.08                                                 | 1.04               | 4.66                              | 6.82                |
| Ras-related protein Rab-5C;                                                                     | P35278  | 0.35                                                     | 1.19                                                     | 0.77                                                 | 0.60               | 2.66                              | 4.59                |
| UV excision repair protein RAD23 homolog B;                                                     | P54728  | 0.35                                                     | 0.70                                                     | 0.52                                                 | 0.25               | 1.11                              | 2.67                |
| Tubulin beta-5 chain;                                                                           | P99024  | 0.35                                                     | 2.90                                                     | 1.62                                                 | 1.81               | 8.06                              | 14.83               |
| Tubulin beta-2A chain;                                                                          | Q7TMM9  | 0.16                                                     | 1.92                                                     | 1.04                                                 | 1.24               | 5.55                              | 5.69                |
| Uncharacterized protein;                                                                        | E9PWQ3  | 0.35                                                     | -0.32                                                    | 0.01                                                 | 0.47               | 2.11                              | 1.08                |
| Target of Myb protein 1;                                                                        | O88746  | 0.36                                                     | 0.16                                                     | 0.26                                                 | 0.14               | 0.61                              | 0.89                |
| Protein-L-isoaspartate(D-aspartate) O-methyltransferase;                                        | P23506  | 0.36                                                     | 0.69                                                     | 0.52                                                 | 0.23               | 1.04                              | 3.23                |
| Serpin B5;                                                                                      | P70124  | 0.36                                                     | 0.71                                                     | 0.54                                                 | 0.25               | 1.13                              | 3.42                |
| Mimecan;                                                                                        | Q62000  | 0.36                                                     | 0.45                                                     | 0.41                                                 | 0.07               | 0.31                              | 2.13                |
| Versican core protein;                                                                          | Q62059  | 0.36                                                     | 0.20                                                     | 0.28                                                 | 0.11               | 0.49                              | 2.22                |
| Protein arginine N-methyltransferase 5;                                                         | Q8CIG8  | 0.36                                                     | 1.30                                                     | 0.83                                                 | 0.67               | 2.98                              | 4.95                |
| Acyl-coenzyme A thioesterase 13;                                                                | Q9CQR4  | 0.36                                                     | 0.14                                                     | 0.25                                                 | 0.15               | 0.69                              | 2.32                |
| Proliferation-associated protein 2G4;                                                           | P50580  | 0.36                                                     | -0.62                                                    | -0.13                                                | 0.69               | 3.08                              | 2.83                |
| ATP-binding cassette sub-family E member 1;                                                     | P61222  | 0.36                                                     | 0.60                                                     | 0.48                                                 | 0.17               | 0.75                              | 2.84                |
| Ubiquitin-like modifier-activating enzyme 6;                                                    | Q8C7R4  | 0.38                                                     | 1.37                                                     | 0.87                                                 | 0.70               | 3.12                              | 4.75                |
| Ly6/PLAUR domain-containing protein 5;                                                          | Q9D7Z7  | 0.38                                                     | 0.90                                                     | 0.64                                                 | 0.36               | 1.63                              | 3.83                |
| 3-ketoacyl-CoA thiolase A, peroxisomal;                                                         | Q921H8  | 0.38                                                     | -0.12                                                    | 0.13                                                 | 0.35               | 1.58                              | 2.05                |
| Glutathione S-transferase theta 3; Glutathione S-transferase, theta 3; Uncharacterized protein; | Q99L20  | 0.38                                                     | 0.15                                                     | 0.27                                                 | 0.16               | 0.72                              | 1.93                |
| Transitional endoplasmic reticulum ATPase;                                                      | Q01853  | 0.39                                                     | 1.66                                                     | 1.03                                                 | 0.90               | 4.02                              | 6.57                |
| Cytoplasmic dynein 1 light intermediate chain 2;                                                | Q6PDL0  | 0.39                                                     | 0.97                                                     | 0.68                                                 | 0.41               | 1.83                              | 3.75                |
| 3-ketoacyl-CoA thiolase, mitochondrial;                                                         | Q8BWT1  | 0.39                                                     | 0.39                                                     | 0.39                                                 | 0.00               | 0.00                              | 2.98                |
| Carbonic anhydrase 13;                                                                          | Q9D6N1  | 0.39                                                     | -0.15                                                    | 0.12                                                 | 0.38               | 1.71                              | 2.03                |
| Proteasomal ubiquitin receptor ADRM1;                                                           | Q9JKV1  | 0.39                                                     | 1.78                                                     | 1.08                                                 | 0.98               | 4.38                              | 5.39                |
| Annexin A1;                                                                                     | P10107  | 0.39                                                     | 0.00                                                     | 0.20                                                 | 0.28               | 1.23                              | 2.17                |
| Protein RCC2;                                                                                   | Q8BK67  | 0.39                                                     | -1.00                                                    | -0.31                                                | 0.98               | 4.39                              | 3.25                |
| Phosphoserine aminotransferase;                                                                 | Q99K85  | 0.39                                                     | -0.01                                                    | 0.19                                                 | 0.29               | 1.28                              | 1.96                |

Table S5, Tholen et al.

| Protein                                                                                 | Uniprot | Fold change (log <sub>2</sub> ) of ASAPRatio replicate 1 | Fold change (log <sub>2</sub> ) of ASAPRatio replicate 2 | Average fold change (log <sub>2</sub> ) of ASAPRatio | Standard deviation | 90 % confidence interval (t-test) | Fisher's exact test |
|-----------------------------------------------------------------------------------------|---------|----------------------------------------------------------|----------------------------------------------------------|------------------------------------------------------|--------------------|-----------------------------------|---------------------|
| 1-phosphatidylinositol-4,5-bisphosphate phosphodiesterase gamma-1;                      | Q62077  | 0.39                                                     | 1.29                                                     | 0.84                                                 | 0.63               | 2.83                              | 5.89                |
| Cytochrome c oxidase subunit 4 isoform 1, mitochondrial;                                | P19783  | 0.40                                                     | -1.79                                                    | -0.69                                                | 1.55               | 6.90                              | 7.67                |
| Heterogeneous nuclear ribonucleoprotein Q;                                              | Q7TMK9  | 0.40                                                     | 1.50                                                     | 0.95                                                 | 0.78               | 3.47                              | 6.06                |
| NSFL1 cofactor p47;                                                                     | Q9CZ44  | 0.40                                                     | 0.71                                                     | 0.55                                                 | 0.21               | 0.96                              | 3.70                |
| Hydroxysteroid (17-beta) dehydrogenase 10; Uncharacterized protein;                     | A2AFQ2  | 0.40                                                     | -0.07                                                    | 0.16                                                 | 0.34               | 1.50                              | 2.05                |
| Inactive tyrosine-protein kinase 7;                                                     | Q8BKG3  | 0.40                                                     | 1.64                                                     | 1.02                                                 | 0.87               | 3.90                              | 6.97                |
| 2-oxoisovalerate dehydrogenase subunit alpha, mitochondrial;                            | P50136  | 0.41                                                     | 0.45                                                     | 0.43                                                 | 0.03               | 0.14                              | 2.97                |
| Isocitrate dehydrogenase [NAD] subunit gamma 1, mitochondrial;                          | P70404  | 0.41                                                     | 0.25                                                     | 0.33                                                 | 0.11               | 0.51                              | 2.75                |
| Echinoderm microtubule-associated protein-like 1;                                       | Q05BC3  | 0.41                                                     | -1.03                                                    | -0.31                                                | 1.02               | 4.55                              | 3.37                |
| Retroviral-like aspartic protease 1;                                                    | Q09PK2  | 0.41                                                     | 1.10                                                     | 0.76                                                 | 0.49               | 2.19                              | 4.94                |
| Drebrin-like protein;                                                                   | Q62418  | 0.41                                                     | 0.33                                                     | 0.37                                                 | 0.06               | 0.25                              | 2.28                |
| Farnesyl pyrophosphate synthase;                                                        | Q920E5  | 0.41                                                     | 0.92                                                     | 0.66                                                 | 0.36               | 1.60                              | 4.46                |
| Heterogeneous nuclear ribonucleoprotein A/B;                                            | Q99020  | 0.41                                                     | 1.25                                                     | 0.83                                                 | 0.59               | 2.63                              | 5.81                |
| Integrin beta-4;                                                                        | A2A863  | 0.41                                                     | -0.84                                                    | -0.21                                                | 0.88               | 3.94                              | 3.89                |
| Glutamine synthetase;                                                                   | P15105  | 0.41                                                     | -1.84                                                    | -0.71                                                | 1.59               | 7.10                              | 6.09                |
| Transgelin;                                                                             | P37804  | 0.42                                                     | 0.24                                                     | 0.33                                                 | 0.13               | 0.58                              | 2.75                |
| Acylphosphatase-2;                                                                      | P56375  | 0.42                                                     | -0.20                                                    | 0.11                                                 | 0.44               | 1.97                              | 2.53                |
| 14-3-3 protein theta;                                                                   | P68254  | 0.42                                                     | 1.12                                                     | 0.77                                                 | 0.49               | 2.20                              | 5.23                |
| Platelet glycoprotein 4;                                                                | Q08857  | 0.42                                                     | -0.62                                                    | -0.10                                                | 0.74               | 3.29                              | 3.60                |
| Zinc transporter SLC39A7;                                                               | Q31125  | 0.42                                                     | -0.64                                                    | -0.11                                                | 0.75               | 3.37                              | 3.89                |
| Perilipin-1;                                                                            | Q8CGN5  | 0.42                                                     | 0.75                                                     | 0.59                                                 | 0.23               | 1.03                              | 2.49                |
| Acetoacetyl-CoA synthetase;                                                             | Q9D2R0  | 0.42                                                     | 0.90                                                     | 0.66                                                 | 0.34               | 1.52                              | 3.59                |
| Isocitrate dehydrogenase 3 (NAD+) beta; Tumor-related protein; Uncharacterized protein; | Q91VA7  | 0.42                                                     | 0.16                                                     | 0.29                                                 | 0.18               | 0.82                              | 2.51                |
| Protein diaphanous homolog 1;                                                           | O08808  | 0.42                                                     | 1.48                                                     | 0.95                                                 | 0.74               | 3.32                              | 5.10                |
| Lambda-crystallin homolog;                                                              | Q99KP3  | 0.42                                                     | -0.56                                                    | -0.07                                                | 0.69               | 3.09                              | 2.89                |
| Alpha-galactosidase A;                                                                  | P51569  | 0.44                                                     | 1.01                                                     | 0.73                                                 | 0.40               | 1.78                              | 5.00                |
| Zinc-binding alcohol dehydrogenase domain-containing protein 2;                         | Q8BGC4  | 0.44                                                     | 0.04                                                     | 0.24                                                 | 0.28               | 1.27                              | 2.51                |
| CD109 antigen;                                                                          | Q8R422  | 0.44                                                     | -0.01                                                    | 0.22                                                 | 0.32               | 1.45                              | 2.59                |
| Probable C->U-editing enzyme APOBEC-2;                                                  | Q9WV35  | 0.44                                                     | -1.06                                                    | -0.31                                                | 1.06               | 4.74                              | 5.03                |
| SUMO-activating enzyme subunit 2;                                                       | Q9Z1F9  | 0.44                                                     | 1.99                                                     | 1.22                                                 | 1.09               | 4.87                              | 8.22                |
| Protein S100-A4;                                                                        | P07091  | 0.44                                                     | -0.67                                                    | -0.11                                                | 0.79               | 3.51                              | 3.89                |
| Actin-related protein 2/3 complex subunit 4;                                            | P59999  | 0.44                                                     | -0.32                                                    | 0.06                                                 | 0.54               | 2.42                              | 2.86                |
| Proteasome subunit alpha type-4;                                                        | Q9R1P0  | 0.44                                                     | 0.32                                                     | 0.38                                                 | 0.09               | 0.39                              | 2.31                |
| Uncharacterized protein;                                                                | E9QJY4  | 0.44                                                     | 0.15                                                     | 0.30                                                 | 0.21               | 0.92                              | 2.74                |
| E3 ubiquitin-protein ligase NEDD4;                                                      | P46935  | 0.44                                                     | 1.35                                                     | 0.89                                                 | 0.64               | 2.84                              | 4.04                |
| Ig heavy chain V region MOPC 104E;                                                      | P01756  | 0.45                                                     | -0.97                                                    | -0.26                                                | 1.01               | 4.50                              | 5.25                |
| Coatomer subunit gamma;                                                                 | Q9QZE5  | 0.45                                                     | 1.60                                                     | 1.03                                                 | 0.81               | 3.61                              | 6.63                |

Table S5, Tholen et al.

| Protein                                                      | Uniprot | Fold change (log <sub>2</sub> ) of ASAPRatio replicate 1 | Fold change (log <sub>2</sub> ) of ASAPRatio replicate 2 | Average fold change (log <sub>2</sub> ) of ASAPRatio | Standard deviation | 90 % confidence interval (t-test) | Fisher's exact test |
|--------------------------------------------------------------|---------|----------------------------------------------------------|----------------------------------------------------------|------------------------------------------------------|--------------------|-----------------------------------|---------------------|
| Secernin-2;                                                  | Q8VCA8  | 0.45                                                     | -0.92                                                    | -0.23                                                | 0.97               | 4.32                              | 3.04                |
| Actin-related protein 2/3 complex subunit 2;                 | Q9CVB6  | 0.45                                                     | -0.92                                                    | -0.23                                                | 0.97               | 4.32                              | 3.95                |
| Protein arginine N-methyltransferase 1;                      | Q9JIF0  | 0.45                                                     | 0.55                                                     | 0.50                                                 | 0.07               | 0.29                              | 3.82                |
| Proteasome subunit alpha type-7;                             | Q9Z2U0  | 0.45                                                     | 0.86                                                     | 0.66                                                 | 0.28               | 1.27                              | 4.86                |
| Proteasome subunit beta type-7;                              | P70195  | 0.47                                                     | 0.43                                                     | 0.45                                                 | 0.02               | 0.10                              | 3.26                |
| Vasodilator-stimulated phosphoprotein;                       | P70460  | 0.47                                                     | 0.23                                                     | 0.35                                                 | 0.17               | 0.75                              | 2.79                |
| Voltage-dependent anion-selective channel protein 3;         | Q60931  | 0.47                                                     | -2.00                                                    | -0.77                                                | 1.74               | 7.78                              | 9.13                |
| Calponin-3;                                                  | Q9DAW9  | 0.47                                                     | 1.85                                                     | 1.16                                                 | 0.98               | 4.37                              | 7.28                |
| 1-acylglycerol-3-phosphate O-acyltransferase ABHD5;          | Q9DBL9  | 0.47                                                     | 1.08                                                     | 0.77                                                 | 0.44               | 1.95                              | 3.75                |
| Acyl-CoA dehydrogenase family member 9, mitochondrial;       | Q8JZN5  | 0.47                                                     | 0.54                                                     | 0.50                                                 | 0.05               | 0.22                              | 3.27                |
| Uncharacterized protein;                                     | E9Q7G0  | 0.47                                                     | 1.27                                                     | 0.87                                                 | 0.57               | 2.54                              | 3.70                |
| Carbohydrate kinase domain-containing protein;               | Q9CZ42  | 0.47                                                     | -0.27                                                    | 0.10                                                 | 0.52               | 2.32                              | 1.78                |
| Ig kappa chain C region;                                     | P01837  | 0.48                                                     | -0.97                                                    | -0.25                                                | 1.02               | 4.56                              | 5.04                |
| Methylmalonyl-CoA mutase, mitochondrial;                     | P16332  | 0.48                                                     | 0.74                                                     | 0.61                                                 | 0.19               | 0.84                              | 2.95                |
| Isocitrate dehydrogenase [NAD] subunit alpha, mitochondrial; | Q9D6R2  | 0.48                                                     | 0.61                                                     | 0.54                                                 | 0.10               | 0.44                              | 3.10                |
| Calmodulin-4;                                                | Q9JM83  | 0.48                                                     | 0.33                                                     | 0.40                                                 | 0.10               | 0.45                              | 3.55                |
| Cathepsin Z;                                                 | Q9WUU7  | 0.48                                                     | 0.29                                                     | 0.38                                                 | 0.13               | 0.59                              | 3.33                |
| Gamma-synuclein;                                             | Q9Z0F7  | 0.48                                                     | 0.59                                                     | 0.53                                                 | 0.08               | 0.35                              | 4.23                |
| Uncharacterized protein;                                     | Q9CX86  | 0.48                                                     | 0.39                                                     | 0.43                                                 | 0.06               | 0.27                              | 3.73                |
| 26S proteasome non-ATPase regulatory subunit 13;             | Q9WVJ2  | 0.48                                                     | 1.89                                                     | 1.18                                                 | 1.00               | 4.47                              | 8.90                |
| Histidyl-tRNA synthetase, cytoplasmic;                       | Q61035  | 0.48                                                     | 0.79                                                     | 0.63                                                 | 0.22               | 1.00                              | 4.80                |
| Dual specificity protein phosphatase 3;                      | Q9D7X3  | 0.49                                                     | 0.60                                                     | 0.54                                                 | 0.08               | 0.35                              | 4.16                |
| Apoptosis-associated speck-like protein containing a CARD;   | Q9EPB4  | 0.49                                                     | -0.42                                                    | 0.04                                                 | 0.64               | 2.84                              | 3.54                |
| Maleylacetoacetate isomerase;                                | Q9WVLO  | 0.49                                                     | -0.09                                                    | 0.20                                                 | 0.41               | 1.81                              | 2.47                |
| Glycogen phosphorylase, muscle form;                         | Q9WUB3  | 0.49                                                     | -0.32                                                    | 0.08                                                 | 0.57               | 2.55                              | 3.04                |
| Glycogen phosphorylase, brain form;                          | Q8CI94  | 0.07                                                     | 0.11                                                     | 0.09                                                 | 0.03               | 0.13                              | 0.46                |
| Glycogen phosphorylase, liver form;                          | Q9ET01  | -0.15                                                    | -0.64                                                    | -0.40                                                | 0.35               | 1.55                              | 2.18                |
| T-complex protein 1 subunit eta;                             | P80313  | 0.50                                                     | 2.18                                                     | 1.34                                                 | 1.19               | 5.30                              | 8.01                |
| DCC-interacting protein 13-alpha;                            | Q8K3H0  | 0.50                                                     | 1.51                                                     | 1.00                                                 | 0.71               | 3.19                              | 7.76                |
| UTP--glucose-1-phosphate uridylyltransferase;                | Q91ZJ5  | 0.50                                                     | -0.07                                                    | 0.21                                                 | 0.40               | 1.80                              | 2.30                |
| Cystatin E/M; Cystatin M/E; Uncharacterized protein;         | Q9D1B1  | 0.50                                                     | 0.60                                                     | 0.55                                                 | 0.07               | 0.31                              | 2.90                |
| Titin;                                                       | A2ASS6  | 0.50                                                     | -1.22                                                    | -0.36                                                | 1.21               | 5.41                              | 3.47                |
| Monoglyceride lipase;                                        | O35678  | 0.50                                                     | 0.49                                                     | 0.49                                                 | 0.01               | 0.03                              | 3.17                |
| Tubulin alpha-4A chain;                                      | P68368  | 0.55                                                     | 2.03                                                     | 1.29                                                 | 1.05               | 4.69                              | 7.84                |
| Acyl-CoA-binding protein;                                    | P31786  | 0.50                                                     | 1.18                                                     | 0.84                                                 | 0.48               | 2.15                              | 6.25                |
| Coronin-1C;                                                  | Q9WUM4  | 0.50                                                     | -0.89                                                    | -0.20                                                | 0.98               | 4.37                              | 5.33                |
| Proteasome subunit alpha type-2;                             | P49722  | 0.52                                                     | 0.68                                                     | 0.60                                                 | 0.11               | 0.51                              | 4.25                |
| 5'-nucleotidase;                                             | Q61503  | 0.52                                                     | 0.00                                                     | 0.26                                                 | 0.36               | 1.63                              | 0.85                |

Table S5, Tholen et al.

| Protein                                                               | Uniprot | Fold change (log <sub>2</sub> ) of ASAPRatio replicate 1 | Fold change (log <sub>2</sub> ) of ASAPRatio replicate 2 | Average fold change (log <sub>2</sub> ) of ASAPRatio | Standard deviation | 90 % confidence interval (t-test) | Fisher's exact test |
|-----------------------------------------------------------------------|---------|----------------------------------------------------------|----------------------------------------------------------|------------------------------------------------------|--------------------|-----------------------------------|---------------------|
| Filamin-B;                                                            | Q80X90  | 0.52                                                     | 0.82                                                     | 0.67                                                 | 0.22               | 0.97                              | 4.12                |
| Heme-binding protein 1;                                               | Q9R257  | 0.52                                                     | 0.12                                                     | 0.32                                                 | 0.28               | 1.24                              | 3.31                |
| Coagulation factor XIII A chain;                                      | Q8BH61  | 0.52                                                     | -0.27                                                    | 0.12                                                 | 0.56               | 2.48                              | 3.29                |
| H-2 class II histocompatibility antigen, A-Q alpha chain;             | P04227  | 0.53                                                     | 0.45                                                     | 0.49                                                 | 0.05               | 0.23                              | 3.99                |
| Perilipin-2;                                                          | P43883  | 0.53                                                     | -0.22                                                    | 0.15                                                 | 0.53               | 2.35                              | 1.59                |
| 26S proteasome non-ATPase regulatory subunit 7;                       | P26516  | 0.54                                                     | 1.60                                                     | 1.07                                                 | 0.76               | 3.37                              | 6.28                |
| NADH dehydrogenase [ubiquinone] iron-sulfur protein 4, mitochondrial; | Q9CXZ1  | 0.54                                                     | -1.52                                                    | -0.49                                                | 1.45               | 6.47                              | 5.29                |
| Cytosolic 5'-nucleotidase 3;                                          | Q9D020  | 0.54                                                     | 0.43                                                     | 0.48                                                 | 0.07               | 0.33                              | 3.62                |
| 26S proteasome non-ATPase regulatory subunit 12;                      | Q9D8W5  | 0.54                                                     | 1.00                                                     | 0.77                                                 | 0.33               | 1.46                              | 4.92                |
| Proteasome subunit alpha type-1;                                      | Q9R1P4  | 0.54                                                     | 0.99                                                     | 0.76                                                 | 0.32               | 1.42                              | 3.32                |
| Twinfilin-2;                                                          | Q9Z0P5  | 0.54                                                     | -0.06                                                    | 0.24                                                 | 0.42               | 1.88                              | 3.40                |
| Succinyl-CoA ligase [GDP-forming] subunit beta, mitochondrial;        | Q9Z2I8  | 0.54                                                     | 0.12                                                     | 0.33                                                 | 0.29               | 1.30                              | 1.21                |
| Lupus La protein homolog;                                             | P32067  | 0.54                                                     | 0.76                                                     | 0.65                                                 | 0.16               | 0.70                              | 3.23                |
| 5-oxoprolinase;                                                       | Q8K010  | 0.54                                                     | 1.67                                                     | 1.10                                                 | 0.80               | 3.58                              | 7.25                |
| 14-3-3 protein beta/alpha;                                            | Q9CQV8  | 0.54                                                     | 1.01                                                     | 0.77                                                 | 0.33               | 1.49                              | 5.77                |
| 14-3-3 protein eta;                                                   | P68510  | 0.60                                                     | 1.02                                                     | 0.81                                                 | 0.29               | 1.32                              | 6.56                |
| Dysferlin;                                                            | Q9ESD7  | 0.55                                                     | 0.48                                                     | 0.51                                                 | 0.05               | 0.22                              | 4.59                |
| 26S protease regulatory subunit 6A;                                   | O88685  | 0.55                                                     | 1.09                                                     | 0.82                                                 | 0.39               | 1.72                              | 4.12                |
| Ubiquitin carboxyl-terminal hydrolase 5;                              | P56399  | 0.55                                                     | 0.54                                                     | 0.54                                                 | 0.01               | 0.03                              | 2.64                |
| Proteasome subunit beta type-3;                                       | Q9R1P1  | 0.55                                                     | 0.50                                                     | 0.52                                                 | 0.04               | 0.16                              | 3.97                |
| Actin-related protein 2/3 complex subunit 1B;                         | Q9WV32  | 0.55                                                     | -0.69                                                    | -0.07                                                | 0.87               | 3.90                              | 4.76                |
| Carbonic anhydrase 2;                                                 | P00920  | 0.56                                                     | 0.84                                                     | 0.70                                                 | 0.20               | 0.90                              | 3.35                |
| 6-phosphofructokinase, liver type;                                    | P12382  | 0.56                                                     | 1.47                                                     | 1.01                                                 | 0.64               | 2.87                              | 5.12                |
| Cytosolic 10-formyltetrahydrofolate dehydrogenase;                    | Q8R0Y6  | 0.56                                                     | 1.10                                                     | 0.83                                                 | 0.39               | 1.73                              | 5.91                |
| COP9 signalosome complex subunit 8;                                   | Q8VBV7  | 0.56                                                     | 1.02                                                     | 0.79                                                 | 0.33               | 1.47                              | 3.69                |
| 2-aminoethanethiol dioxygenase;                                       | Q6PDY2  | 0.56                                                     | 0.20                                                     | 0.38                                                 | 0.25               | 1.12                              | 3.68                |
| U6 snRNA-associated Sm-like protein LSM2;                             | O35900  | 0.57                                                     | 0.07                                                     | 0.32                                                 | 0.35               | 1.57                              | 2.95                |
| Niban-like protein 1;                                                 | Q8R1F1  | 0.57                                                     | 0.74                                                     | 0.65                                                 | 0.12               | 0.55                              | 4.35                |
| Ig kappa chain V-V region L6;                                         | P01638  | 0.57                                                     | -1.09                                                    | -0.26                                                | 1.17               | 5.22                              | 6.32                |
| Galectin-3-binding protein;                                           | Q07797  | 0.57                                                     | -0.11                                                    | 0.23                                                 | 0.47               | 2.12                              | 1.50                |
| Ig gamma-2B chain C region;                                           | P01867  | 0.59                                                     | -0.42                                                    | 0.09                                                 | 0.71               | 3.16                              | 4.39                |
| Thiamin pyrophosphokinase 1;                                          | Q9ROM5  | 0.59                                                     | 0.15                                                     | 0.37                                                 | 0.31               | 1.37                              | 3.71                |
| 14-3-3 protein gamma;                                                 | P61982  | 0.60                                                     | 0.77                                                     | 0.68                                                 | 0.13               | 0.57                              | 5.71                |
| Importin subunit beta-1;                                              | P70168  | 0.60                                                     | 2.34                                                     | 1.47                                                 | 1.23               | 5.51                              | 8.92                |
| V-type proton ATPase subunit E 1;                                     | P50518  | 0.60                                                     | -0.45                                                    | 0.07                                                 | 0.74               | 3.31                              | 4.68                |
| Cytochrome P450 2F2;                                                  | P33267  | 0.60                                                     | -1.36                                                    | -0.38                                                | 1.38               | 6.17                              | 7.43                |
| Ig gamma-1 chain C region secreted form;                              | P01868  | 0.60                                                     | -0.71                                                    | -0.05                                                | 0.93               | 4.16                              | 5.89                |
| Peroxisomal multifunctional enzyme type 2;                            | P51660  | 0.60                                                     | -0.07                                                    | 0.27                                                 | 0.48               | 2.14                              | 4.01                |

Table S5, Tholen et al.

| Protein                                                                                                                                                                                                                   | Uniprot | Fold change (log <sub>2</sub> ) of ASAPRatio replicate 1 | Fold change (log <sub>2</sub> ) of ASAPRatio replicate 2 | Average fold change (log <sub>2</sub> ) of ASAPRatio | Standard deviation | 90 % confidence interval (t-test) | Fisher's exact test |
|---------------------------------------------------------------------------------------------------------------------------------------------------------------------------------------------------------------------------|---------|----------------------------------------------------------|----------------------------------------------------------|------------------------------------------------------|--------------------|-----------------------------------|---------------------|
| MAP kinase-activated protein kinase 3;                                                                                                                                                                                    | Q3UMW7  | 0.60                                                     | 0.47                                                     | 0.53                                                 | 0.10               | 0.44                              | 4.90                |
| Membrane primary amine oxidase;                                                                                                                                                                                           | O70423  | 0.60                                                     | -0.86                                                    | -0.13                                                | 1.04               | 4.63                              | 4.84                |
| Ubiquinone biosynthesis protein COQ9, mitochondrial;                                                                                                                                                                      | Q8K1Z0  | 0.60                                                     | 0.90                                                     | 0.75                                                 | 0.21               | 0.92                              | 5.64                |
| Multifunctional protein ADE2;                                                                                                                                                                                             | Q9DCL9  | 0.60                                                     | 1.26                                                     | 0.93                                                 | 0.46               | 2.06                              | 5.25                |
| Mitogen-activated protein kinase 12;                                                                                                                                                                                      | O08911  | 0.61                                                     | 0.12                                                     | 0.37                                                 | 0.35               | 1.55                              | 3.73                |
| Sulfotransferase family cytosolic 2B member 1;                                                                                                                                                                            | O35400  | 0.61                                                     | 1.80                                                     | 1.21                                                 | 0.84               | 3.75                              | 7.55                |
| Pyruvate carboxylase, mitochondrial;                                                                                                                                                                                      | Q05920  | 0.61                                                     | 0.15                                                     | 0.38                                                 | 0.33               | 1.46                              | 3.41                |
| Tumor protein D54;                                                                                                                                                                                                        | Q9CYZ2  | 0.61                                                     | 0.40                                                     | 0.51                                                 | 0.15               | 0.67                              | 4.64                |
| Diphosphomevalonate decarboxylase;                                                                                                                                                                                        | Q99JF5  | 0.62                                                     | 0.61                                                     | 0.62                                                 | 0.01               | 0.03                              | 5.53                |
| Coronin-1A;                                                                                                                                                                                                               | O89053  | 0.62                                                     | -0.76                                                    | -0.07                                                | 0.98               | 4.37                              | 5.89                |
| Enoyl-CoA hydratase, mitochondrial;                                                                                                                                                                                       | Q8BH95  | 0.62                                                     | -0.84                                                    | -0.11                                                | 1.03               | 4.61                              | 5.97                |
| ATP-citrate synthase;                                                                                                                                                                                                     | Q91V92  | 0.62                                                     | 1.25                                                     | 0.94                                                 | 0.44               | 1.98                              | 6.60                |
| T-complex protein 1 subunit alpha;                                                                                                                                                                                        | P11983  | 0.62                                                     | 2.97                                                     | 1.80                                                 | 1.66               | 7.42                              | 17.08               |
| Non-specific lipid-transfer protein;                                                                                                                                                                                      | P32020  | 0.64                                                     | 0.81                                                     | 0.72                                                 | 0.12               | 0.52                              | 5.48                |
| Tripeptidyl-peptidase 1;                                                                                                                                                                                                  | O89023  | 0.65                                                     | 0.82                                                     | 0.74                                                 | 0.12               | 0.55                              | 4.19                |
| Decorin;                                                                                                                                                                                                                  | P28654  | 0.65                                                     | -1.09                                                    | -0.22                                                | 1.23               | 5.49                              | 7.02                |
| Hormone-sensitive lipase;                                                                                                                                                                                                 | P54310  | 0.65                                                     | 1.18                                                     | 0.92                                                 | 0.38               | 1.68                              | 6.88                |
| Gamma-glutamylcyclotransferase;                                                                                                                                                                                           | Q9D7X8  | 0.65                                                     | 0.55                                                     | 0.60                                                 | 0.07               | 0.33                              | 4.27                |
| Keratin, type I cytoskeletal 17;                                                                                                                                                                                          | Q9QWL7  | 0.65                                                     | 0.21                                                     | 0.43                                                 | 0.31               | 1.38                              | 3.26                |
| Acyl-coenzyme A thioesterase 9, mitochondrial;                                                                                                                                                                            | Q9R0X4  | 0.65                                                     | 0.45                                                     | 0.55                                                 | 0.14               | 0.62                              | 4.19                |
| 26S proteasome non-ATPase regulatory subunit 1;                                                                                                                                                                           | Q3TXS7  | 0.66                                                     | 2.00                                                     | 1.33                                                 | 0.94               | 4.22                              | 7.64                |
| Epidermal growth factor receptor kinase substrate 8-like protein 1;                                                                                                                                                       | Q8R5F8  | 0.67                                                     | -0.01                                                    | 0.33                                                 | 0.48               | 2.16                              | 4.60                |
| Heat shock protein beta-2;                                                                                                                                                                                                | Q99PR8  | 0.67                                                     | 0.50                                                     | 0.58                                                 | 0.12               | 0.55                              | 3.77                |
| Mevalonate kinase;                                                                                                                                                                                                        | Q9R008  | 0.68                                                     | 0.67                                                     | 0.67                                                 | 0.01               | 0.03                              | 5.45                |
| Acyl-CoA synthetase family member 2, mitochondrial;                                                                                                                                                                       | Q8VCW8  | 0.69                                                     | 1.29                                                     | 0.99                                                 | 0.43               | 1.91                              | 6.60                |
| Sorting nexin-27;                                                                                                                                                                                                         | Q3UHD6  | 0.69                                                     | 0.61                                                     | 0.65                                                 | 0.05               | 0.23                              | 2.73                |
| Fatty acid-binding protein, adipocyte;                                                                                                                                                                                    | P04117  | 0.71                                                     | -0.25                                                    | 0.23                                                 | 0.68               | 3.02                              | 5.75                |
| 6-phosphofructokinase type C;                                                                                                                                                                                             | Q9WUA3  | 0.71                                                     | 1.90                                                     | 1.30                                                 | 0.84               | 3.76                              | 11.03               |
| Ubiquitin-protein ligase E3A;                                                                                                                                                                                             | O08759  | 0.71                                                     | 1.95                                                     | 1.33                                                 | 0.88               | 3.91                              | 10.80               |
| Gasdermin-A;                                                                                                                                                                                                              | Q9EST1  | 0.71                                                     | 2.90                                                     | 1.81                                                 | 1.54               | 6.89                              | 14.24               |
| Ras GTPase-activating-like protein IQGAP1;                                                                                                                                                                                | Q9JKF1  | 0.72                                                     | 0.94                                                     | 0.83                                                 | 0.15               | 0.69                              | 3.48                |
| 14-3-3 protein epsilon;                                                                                                                                                                                                   | P62259  | 0.72                                                     | 1.41                                                     | 1.06                                                 | 0.48               | 2.16                              | 8.14                |
| PDZ and LIM domain protein 5;                                                                                                                                                                                             | Q8CI51  | 0.72                                                     | 0.80                                                     | 0.76                                                 | 0.05               | 0.24                              | 6.31                |
| Citrate synthase, mitochondrial;                                                                                                                                                                                          | Q9CZU6  | 0.72                                                     | 0.36                                                     | 0.54                                                 | 0.26               | 1.16                              | 4.48                |
| Four and a half LIM domains 3; Uncharacterized protein;                                                                                                                                                                   | A6H6N4  | 0.72                                                     | 1.19                                                     | 0.96                                                 | 0.33               | 1.47                              | 5.11                |
| Protein kinase, cAMP dependent regulatory, type II alpha; Protein kinase, cAMP dependent regulatory, type II alpha, isoform CRA_b; Uncharacterized protein; cAMP-dependent protein kinase type II-alpha regulatory chain; | Q8K1M3  | 0.72                                                     | -0.09                                                    | 0.32                                                 | 0.57               | 2.56                              | 5.64                |

Table S5, Tholen et al.

| Protein                                                                   | Uniprot | Fold change (log <sub>2</sub> ) of ASAPRatio replicate 1 | Fold change (log <sub>2</sub> ) of ASAPRatio replicate 2 | Average fold change (log <sub>2</sub> ) of ASAPRatio | Standard deviation | 90 % confidence interval (t-test) | Fisher's exact test |
|---------------------------------------------------------------------------|---------|----------------------------------------------------------|----------------------------------------------------------|------------------------------------------------------|--------------------|-----------------------------------|---------------------|
| MCG21235; Uncharacterized protein;                                        | Q9D1Q5  | 0.73                                                     | -0.92                                                    | -0.09                                                | 1.16               | 5.20                              | 6.05                |
| Fatty acid synthase;                                                      | P19096  | 0.74                                                     | 1.06                                                     | 0.90                                                 | 0.23               | 1.02                              | 4.53                |
| Prolargin;                                                                | Q9JK53  | 0.74                                                     | 0.12                                                     | 0.43                                                 | 0.44               | 1.94                              | 4.63                |
| 26S proteasome non-ATPase regulatory subunit 14;                          | O35593  | 0.74                                                     | 1.19                                                     | 0.96                                                 | 0.32               | 1.42                              | 8.75                |
| Parvalbumin alpha;                                                        | P32848  | 0.76                                                     | -3.64                                                    | -1.44                                                | 3.11               | 13.89                             | 23.29               |
| 26S protease regulatory subunit 7;                                        | P46471  | 0.76                                                     | 1.25                                                     | 1.00                                                 | 0.35               | 1.54                              | 6.10                |
| 26S proteasome non-ATPase regulatory subunit 11;                          | Q8BG32  | 0.76                                                     | 1.82                                                     | 1.29                                                 | 0.75               | 3.36                              | 11.88               |
| ATP-dependent RNA helicase DDX19A;                                        | Q61655  | 0.76                                                     | 2.32                                                     | 1.54                                                 | 1.11               | 4.94                              | 14.65               |
| Leucyl-tRNA synthetase, cytoplasmic;                                      | Q8BMJ2  | 0.77                                                     | 2.60                                                     | 1.68                                                 | 1.30               | 5.80                              | 10.08               |
| Cadherin-1;                                                               | P09803  | 0.77                                                     | 1.92                                                     | 1.35                                                 | 0.81               | 3.61                              | 12.07               |
| Clathrin heavy chain 1;                                                   | Q68FD5  | 0.77                                                     | 2.27                                                     | 1.52                                                 | 1.06               | 4.71                              | 10.80               |
| Cell surface glycoprotein MUC18;                                          | Q8R2Y2  | 0.77                                                     | -0.01                                                    | 0.38                                                 | 0.56               | 2.49                              | 2.39                |
| Heat shock protein beta-1;                                                | P14602  | 0.78                                                     | 1.05                                                     | 0.92                                                 | 0.19               | 0.85                              | 8.87                |
| Spectrin alpha chain, brain;                                              | P16546  | 0.78                                                     | -0.32                                                    | 0.23                                                 | 0.78               | 3.49                              | 3.80                |
| Nidogen-1;                                                                | P10493  | 0.79                                                     | 0.57                                                     | 0.68                                                 | 0.16               | 0.71                              | 7.09                |
| Long-chain-fatty-acid--CoA ligase 1;                                      | P41216  | 0.79                                                     | 0.41                                                     | 0.60                                                 | 0.27               | 1.20                              | 5.73                |
| Carnitine O-acetyltransferase;                                            | P47934  | 0.79                                                     | -0.71                                                    | 0.04                                                 | 1.06               | 4.75                              | 7.32                |
| Proteasome activator complex subunit 1;                                   | P97371  | 0.79                                                     | -0.47                                                    | 0.16                                                 | 0.89               | 3.99                              | 5.81                |
| Vacuolar protein sorting-associated protein 35;                           | Q9EQH3  | 0.79                                                     | 0.47                                                     | 0.63                                                 | 0.23               | 1.03                              | 4.40                |
| Filamin-A;                                                                | Q8BTM8  | 0.79                                                     | -0.09                                                    | 0.35                                                 | 0.62               | 2.78                              | 3.25                |
| Suppressor of G2 allele of SKP1 homolog;                                  | Q9CX34  | 0.79                                                     | 1.53                                                     | 1.16                                                 | 0.52               | 2.34                              | 6.91                |
| 26S proteasome non-ATPase regulatory subunit 6;                           | Q99J14  | 0.80                                                     | 1.19                                                     | 0.99                                                 | 0.28               | 1.23                              | 8.47                |
| Proteasome activator complex subunit 2;                                   | P97372  | 0.80                                                     | 0.14                                                     | 0.47                                                 | 0.47               | 2.09                              | 3.11                |
| 14-3-3 protein sigma;                                                     | O70456  | 0.83                                                     | 1.38                                                     | 1.11                                                 | 0.39               | 1.73                              | 10.60               |
| SEC14-like protein 4;                                                     | Q8R0F9  | 0.83                                                     | 0.74                                                     | 0.79                                                 | 0.07               | 0.29                              | 8.14                |
| Alpha-crystallin B chain;                                                 | P23927  | 0.83                                                     | 0.28                                                     | 0.55                                                 | 0.39               | 1.76                              | 7.31                |
| Phosphorylase b kinase regulatory subunit alpha, skeletal muscle isoform; | P18826  | 0.86                                                     | 0.82                                                     | 0.84                                                 | 0.02               | 0.10                              | 4.08                |
| Uncharacterized protein;                                                  | F7CAE1  | 0.87                                                     | 1.37                                                     | 1.12                                                 | 0.35               | 1.56                              | 9.70                |
| Chondroitin sulfate proteoglycan 4;                                       | Q8VHY0  | 0.87                                                     | 2.17                                                     | 1.52                                                 | 0.92               | 4.11                              | 12.84               |
| Hemoglobin subunit beta-1;                                                | P02088  | 0.89                                                     | 1.57                                                     | 1.23                                                 | 0.48               | 2.15                              | 11.73               |
| Hemoglobin subunit beta-2;                                                | P02089  | 0.82                                                     | 1.80                                                     | 1.31                                                 | 0.69               | 3.09                              | 11.82               |
| Hydroxymethylglutaryl-CoA synthase, cytoplasmic;                          | Q8JZK9  | 0.90                                                     | 1.28                                                     | 1.09                                                 | 0.27               | 1.20                              | 7.99                |
| Laminin subunit alpha-4;                                                  | P97927  | 0.90                                                     | -0.22                                                    | 0.34                                                 | 0.79               | 3.54                              | 7.70                |
| Ig gamma-3 chain C region;                                                | P03987  | 0.91                                                     | -1.40                                                    | -0.24                                                | 1.63               | 7.28                              | 11.16               |
| 26S protease regulatory subunit 6B;                                       | P54775  | 0.92                                                     | 2.16                                                     | 1.54                                                 | 0.88               | 3.91                              | 13.87               |
| 40S ribosomal protein S3;                                                 | P62908  | 0.93                                                     | 3.41                                                     | 2.17                                                 | 1.75               | 7.83                              | 16.78               |
| Angio-associated migratory protein; Uncharacterized protein;              | Q3TJ22  | 0.93                                                     | 1.95                                                     | 1.44                                                 | 0.72               | 3.23                              | 13.11               |
| Perilipin-4;                                                              | O88492  | 0.95                                                     | 0.72                                                     | 0.84                                                 | 0.16               | 0.72                              | 4.36                |

Table S5, Tholen et al.

| Protein                                                        | Uniprot | Fold change (log <sub>2</sub> ) of ASAPRatio replicate 1 | Fold change (log <sub>2</sub> ) of ASAPRatio replicate 2 | Average fold change (log <sub>2</sub> ) of ASAPRatio | Standard deviation | 90 % confidence interval (t-test) | Fisher's exact test |
|----------------------------------------------------------------|---------|----------------------------------------------------------|----------------------------------------------------------|------------------------------------------------------|--------------------|-----------------------------------|---------------------|
| 26S proteasome non-ATPase regulatory subunit 2;                | Q8VDM4  | 0.96                                                     | 2.04                                                     | 1.50                                                 | 0.76               | 3.41                              | 11.88               |
| Periplakin;                                                    | Q9R269  | 0.97                                                     | -1.18                                                    | -0.11                                                | 1.52               | 6.80                              | 9.59                |
| tRNA (cytosine(34)-C(5))-methyltransferase;                    | Q1HFZ0  | 0.98                                                     | 1.35                                                     | 1.16                                                 | 0.26               | 1.17                              | 7.32                |
| Myosin-4;                                                      | Q5SX39  | 0.98                                                     | -1.52                                                    | -0.27                                                | 1.76               | 7.87                              | 11.82               |
| Myosin-1;                                                      | Q5SX40  | 3.40                                                     | -3.06                                                    | 0.17                                                 | 4.57               | 20.39                             | 35.28               |
| Threonyl-tRNA synthetase, cytoplasmic;                         | Q9D0R2  | 0.98                                                     | -0.18                                                    | 0.40                                                 | 0.82               | 3.67                              | 9.01                |
| Calsequestrin-1;                                               | O09165  | 0.99                                                     | 1.74                                                     | 1.36                                                 | 0.53               | 2.35                              | 12.57               |
| Ribose-phosphate pyrophosphokinase 1;                          | Q9D7G0  | 1.00                                                     | 1.65                                                     | 1.32                                                 | 0.46               | 2.04                              | 8.03                |
| Polymerase I and transcript release factor                     | O54724  | 1.04                                                     | 0.87                                                     | 0.96                                                 | 0.12               | 0.54                              | 10.03               |
| Ubiquitin carboxyl-terminal hydrolase 4;                       | P35123  | 1.06                                                     | 1.18                                                     | 1.12                                                 | 0.08               | 0.38                              | 5.08                |
| Fibulin-5;                                                     | Q9WVH9  | 1.07                                                     | 1.18                                                     | 1.13                                                 | 0.08               | 0.36                              | 11.20               |
| Nebulin; Uncharacterized protein;                              | A2AQA9  | 1.07                                                     | -0.54                                                    | 0.27                                                 | 1.13               | 5.07                              | 3.57                |
| 26S protease regulatory subunit 4;                             | P62192  | 1.08                                                     | 1.95                                                     | 1.51                                                 | 0.61               | 2.74                              | 10.86               |
| Spectrin beta chain, brain 1;                                  | Q62261  | 1.08                                                     | 0.67                                                     | 0.88                                                 | 0.29               | 1.31                              | 6.66                |
| Alpha-actinin-4;                                               | P57780  | 1.09                                                     | 1.43                                                     | 1.26                                                 | 0.24               | 1.08                              | 8.53                |
| Heat shock protein beta-6;                                     | Q5EBG6  | 1.11                                                     | 0.23                                                     | 0.67                                                 | 0.63               | 2.79                              | 8.37                |
| Asparagine synthetase [glutamine-hydrolyzing];                 | Q61024  | 1.15                                                     | 0.73                                                     | 0.94                                                 | 0.30               | 1.33                              | 10.09               |
| Carbonic anhydrase 1;                                          | P13634  | 1.16                                                     | 0.88                                                     | 1.02                                                 | 0.20               | 0.89                              | 10.22               |
| 26S protease regulatory subunit 8;                             | P62196  | 1.17                                                     | 1.50                                                     | 1.33                                                 | 0.23               | 1.03                              | 6.29                |
| Myoglobin;                                                     | P04247  | 1.18                                                     | -0.12                                                    | 0.53                                                 | 0.92               | 4.11                              | 9.97                |
| RelA-associated inhibitor;                                     | Q511X5  | 1.20                                                     | 1.25                                                     | 1.22                                                 | 0.04               | 0.16                              | 14.33               |
| Monofunctional C1-tetrahydrofolate synthase, mitochondrial;    | Q3V3R1  | 1.20                                                     | 1.40                                                     | 1.30                                                 | 0.14               | 0.63                              | 14.00               |
| 26S protease regulatory subunit 10B;                           | P62334  | 1.21                                                     | 2.21                                                     | 1.71                                                 | 0.70               | 3.15                              | 16.01               |
| Tripartite motif-containing protein 29;                        | Q8R2Q0  | 1.21                                                     | 1.74                                                     | 1.48                                                 | 0.37               | 1.65                              | 18.46               |
| Kinesin-1 heavy chain;                                         | Q61768  | 1.28                                                     | 2.26                                                     | 1.77                                                 | 0.69               | 3.10                              | 18.67               |
| Plectin;                                                       | Q9QXS1  | 1.30                                                     | 0.04                                                     | 0.67                                                 | 0.89               | 3.97                              | 3.71                |
| Heat shock protein beta-7;                                     | P35385  | 1.32                                                     | -0.86                                                    | 0.23                                                 | 1.54               | 6.89                              | 12.72               |
| RIKEN cDNA 8030451F13, isoform CRA_c; Uncharacterized protein; | D3YU50  | 1.36                                                     | -2.32                                                    | -0.48                                                | 2.60               | 11.63                             | 15.05               |
| Filamin-C;                                                     | Q8VHX6  | 1.38                                                     | -0.52                                                    | 0.43                                                 | 1.34               | 5.98                              | 7.35                |
| 6-phosphofructokinase, muscle type;                            | P47857  | 1.41                                                     | -0.01                                                    | 0.70                                                 | 1.01               | 4.50                              | 11.25               |
| Vimentin;                                                      | P20152  | 1.49                                                     | -0.71                                                    | 0.39                                                 | 1.55               | 6.94                              | 6.91                |
| Protein CREG1;                                                 | O88668  | 1.67                                                     | 0.51                                                     | 1.09                                                 | 0.83               | 3.69                              | 20.57               |
| Rho-associated protein kinase 2;                               | P70336  | 1.79                                                     | 0.93                                                     | 1.36                                                 | 0.61               | 2.71                              | 23.41               |
| Histone H2A type 1;                                            | P22752  | 1.94                                                     | 1.52                                                     | 1.73                                                 | 0.29               | 1.31                              | 32.12               |
| Protein-arginine deiminase type-2;                             | Q08642  | 2.06                                                     | 0.92                                                     | 1.49                                                 | 0.81               | 3.60                              | 15.47               |
| Histone H4;                                                    | P62806  | 2.38                                                     | -0.40                                                    | 0.99                                                 | 1.97               | 8.78                              | 27.39               |
| Microtubule-actin cross-linking factor 1;                      | Q9QXZ0  | 9.96                                                     | 1.75                                                     | 5.86                                                 | 5.81               | 25.92                             | 23.18               |
