# Supplementary material
Source: PubMed Central journal article supplement (PMC3591655)
Supplement: supp_M112.017962_mcp.M112.017962-8.pdf [file supp_M112.017962_mcp.M112.017962-8.pdf]

**Table S6:** List of all identified and quantified proteins in both replicates of the quantitative proteome comparison of skin lysates wt and *Cts1<sup>-/-</sup>*.

| Protein                                                               | Uniprot | Fold change (log <sub>2</sub> ) of ASAPRatio replicate 1 | Fold change (log <sub>2</sub> ) of ASAPRatio replicate 2 | Average fold change (log <sub>2</sub> ) of ASAPRatio | Standard deviation | 90 % confidence interval (t-test) | Fisher's exact test |
|-----------------------------------------------------------------------|---------|----------------------------------------------------------|----------------------------------------------------------|------------------------------------------------------|--------------------|-----------------------------------|---------------------|
| Cathepsin L1;                                                         | P06797  | -6,64*                                                   | -6,64*                                                   | -6,64*                                               | 0.00               | 0.00                              | 36.84               |
| Alpha-actinin-4;                                                      | P57780  | 0.79                                                     | 1.03                                                     | 0.91                                                 | 0.17               | 0.75                              | 4.80                |
| Myosin-4;                                                             | Q5SX39  | -4.32                                                    | -0.74                                                    | -2.53                                                | 2.53               | 11.32                             | 10.78               |
| Myosin-1;                                                             | Q5SX40  | -5.64                                                    | 0.23                                                     | -2.71                                                | 4.15               | 18.53                             | 24.22               |
| Chymase;                                                              | P21844  | -3.47                                                    | 0.77                                                     | -1.35                                                | 3.00               | 13.39                             | 22.73               |
| Creatine kinase S-type, mitochondrial;                                | Q6P8J7  | -2.94                                                    | -0.84                                                    | -1.89                                                | 1.49               | 6.65                              | 14.04               |
| Calsequestrin-1;                                                      | O09165  | -2.56                                                    | -0.84                                                    | -1.70                                                | 1.22               | 5.43                              | 13.06               |
| Cytochrome b-c1 complex subunit 2, mitochondrial;                     | Q9DB77  | -2.47                                                    | -0.23                                                    | -1.35                                                | 1.58               | 7.07                              | 6.94                |
| Myosin light chain 1/3, skeletal muscle isoform;                      | P05977  | -2.47                                                    | 0.16                                                     | -1.16                                                | 1.86               | 8.32                              | 11.30               |
| Reticulon-2;                                                          | O70622  | -2.25                                                    | -0.89                                                    | -1.57                                                | 0.96               | 4.30                              | 11.25               |
| Troponin C, skeletal muscle;                                          | P20801  | -2.25                                                    | -0.17                                                    | -1.21                                                | 1.47               | 6.58                              | 9.62                |
| ADP/ATP translocase 1;                                                | P48962  | -2.25                                                    | 0.18                                                     | -1.04                                                | 1.72               | 7.66                              | 5.32                |
| ADP/ATP translocase 2;                                                | P51881  | -0.14                                                    | 1.10                                                     | 0.48                                                 | 0.87               | 3.90                              | 3.65                |
| Cytochrome c oxidase subunit 6B1;                                     | P56391  | -2.18                                                    | 0.08                                                     | -1.05                                                | 1.60               | 7.16                              | 4.93                |
| Complement component 7                                                | D3YXF5  | -2.12                                                    | -2.47                                                    | -2.30                                                | 0.25               | 1.12                              | 12.34               |
| NADH dehydrogenase [ubiquinone] 1 alpha subcomplex subunit 4;         | Q62425  | -2.12                                                    | -0.29                                                    | -1.20                                                | 1.30               | 5.79                              | 7.67                |
| Ig heavy chain V region 441;                                          | P01806  | -2.00                                                    | -2.06                                                    | -2.03                                                | 0.04               | 0.19                              | 12.33               |
| Fatty acid-binding protein, liver;                                    | P12710  | -1.60                                                    | -2.18                                                    | -1.89                                                | 0.41               | 1.85                              | 9.71                |
| Mitochondrial 10-formyltetrahydrofolate dehydrogenase;                | Q8K009  | -2.00                                                    | -1.22                                                    | -1.61                                                | 0.55               | 2.47                              | 9.07                |
| C-type lectin domain family 11 member A;                              | O88200  | -2.12                                                    | -1.56                                                    | -1.84                                                | 0.40               | 1.78                              | 13.30               |
| RIKEN cDNA 8030451F13, isoform CRA_c; Uncharacterized protein;        | D3YU50  | -2.00                                                    | 0.63                                                     | -0.68                                                | 1.86               | 8.31                              | 5.45                |
| Myosin-binding protein C, fast-type;                                  | Q5XKE0  | -1.94                                                    | -0.79                                                    | -1.36                                                | 0.82               | 3.65                              | 7.51                |
| [Pyruvate dehydrogenase [lipoamide]] kinase isozyme 2, mitochondrial; | Q9JK42  | -1.89                                                    | -0.67                                                    | -1.28                                                | 0.86               | 3.86                              | 6.55                |
| Uncharacterized protein;                                              | E9Q8T1  | -1.89                                                    | 0.47                                                     | -0.71                                                | 1.66               | 7.43                              | 6.15                |
| ATP synthase subunit O, mitochondrial;                                | Q9DB20  | -1.89                                                    | -0.07                                                    | -0.98                                                | 1.28               | 5.73                              | 3.12                |
| Troponin T, fast skeletal muscle;                                     | Q9QZ47  | -1.89                                                    | 0.55                                                     | -0.67                                                | 1.72               | 7.69                              | 8.19                |
| Ig gamma-1 chain C region secreted form;                              | P01868  | -1.84                                                    | -1.09                                                    | -1.46                                                | 0.53               | 2.36                              | 9.62                |
| Protein-glutamine gamma-glutamyltransferase 2;                        | P21981  | -1.84                                                    | -0.34                                                    | -1.09                                                | 1.06               | 4.73                              | 7.05                |
| 6-phosphofructokinase, muscle type;                                   | P47857  | -1.84                                                    | -0.40                                                    | -1.12                                                | 1.02               | 4.55                              | 7.28                |
| Medium-chain specific acyl-CoA dehydrogenase, mitochondrial;          | P45952  | -1.84                                                    | -0.45                                                    | -1.15                                                | 0.98               | 4.37                              | 6.76                |
| Glycine cleavage system H protein, mitochondrial;                     | Q91WK5  | -1.84                                                    | -1.03                                                    | -1.43                                                | 0.57               | 2.55                              | 5.63                |
| Fructose-1,6-bisphosphatase 1;                                        | Q9QXD6  | -1.79                                                    | -1.89                                                    | -1.84                                                | 0.07               | 0.33                              | 12.31               |
| Decorin;                                                              | P28654  | -1.74                                                    | 0.52                                                     | -0.61                                                | 1.59               | 7.11                              | 6.10                |
| Ig gamma-2A chain C region, A allele;                                 | P01863  | -1.74                                                    | -1.15                                                    | -1.44                                                | 0.41               | 1.85                              | 8.44                |
| Voltage-dependent anion-selective channel protein 1;                  | Q60932  | -1.74                                                    | 0.04                                                     | -0.85                                                | 1.26               | 5.62                              | 3.80                |
| Mitochondrial inner membrane protein;                                 | Q8CAQ8  | -1.74                                                    | -0.29                                                    | -1.01                                                | 1.03               | 4.58                              | 6.28                |

Table S6, Tholen et al.

| Protein                                                                   | Uniprot | Fold change (log <sub>2</sub> ) of ASAPRatio replicate 1 | Fold change (log <sub>2</sub> ) of ASAPRatio replicate 2 | Average fold change (log <sub>2</sub> ) of ASAPRatio | Standard deviation | 90 % confidence interval (t-test) | Fisher's exact test |
|---------------------------------------------------------------------------|---------|----------------------------------------------------------|----------------------------------------------------------|------------------------------------------------------|--------------------|-----------------------------------|---------------------|
| Sarcalumenin;                                                             | Q7TQ48  | -2.00                                                    | -1.60                                                    | -1.80                                                | 0.28               | 1.27                              | 10.20               |
| Myomesin 2; Uncharacterized protein;                                      | Q14BI5  | -1.69                                                    | 0.19                                                     | -0.75                                                | 1.33               | 5.93                              | 6.23                |
| Vimentin;                                                                 | P20152  | -1.69                                                    | 1.06                                                     | -0.32                                                | 1.94               | 8.67                              | 5.08                |
| Desmin;                                                                   | P31001  | -1.64                                                    | -1.03                                                    | -1.34                                                | 0.43               | 1.94                              | 8.51                |
| Neurofilament medium polypeptide;                                         | P08553  | -1.40                                                    | 0.83                                                     | -0.28                                                | 1.58               | 7.03                              | 3.25                |
| Collagen alpha-2(VI) chain;                                               | Q02788  | -1.64                                                    | 0.74                                                     | -0.45                                                | 1.69               | 7.53                              | 5.38                |
| Synemin;                                                                  | Q70IV5  | -1.64                                                    | -0.12                                                    | -0.88                                                | 1.08               | 4.81                              | 4.48                |
| ATP synthase subunit delta, mitochondrial;                                | Q9D3D9  | -1.64                                                    | -0.17                                                    | -0.91                                                | 1.04               | 4.66                              | 5.49                |
| Complement component 6                                                    | E9Q6D8  | -1.69                                                    | -1.84                                                    | -1.76                                                | 0.10               | 0.46                              | 10.80               |
| Asporin;                                                                  | Q99MQ4  | -1.60                                                    | -0.07                                                    | -0.84                                                | 1.08               | 4.81                              | 5.19                |
| Periplakin;                                                               | Q9R269  | -1.60                                                    | 0.80                                                     | -0.40                                                | 1.70               | 7.57                              | 6.55                |
| ATP synthase subunit beta, mitochondrial;                                 | P56480  | -1.52                                                    | -0.14                                                    | -0.83                                                | 0.98               | 4.35                              | 4.22                |
| Coagulation factor XIII B chain;                                          | Q07968  | -1.52                                                    | -0.32                                                    | -0.92                                                | 0.84               | 3.77                              | 6.03                |
| Fructose-bisphosphate aldolase B;                                         | Q91Y97  | -1.52                                                    | -2.18                                                    | -1.85                                                | 0.47               | 2.11                              | 12.56               |
| Oxidation resistance protein 1;                                           | Q4KMM3  | -1.52                                                    | -1.74                                                    | -1.63                                                | 0.16               | 0.70                              | 7.67                |
| Vitronectin;                                                              | P29788  | -1.52                                                    | -0.92                                                    | -1.22                                                | 0.42               | 1.89                              | 7.32                |
| Histone H4;                                                               | P62806  | -1.47                                                    | 0.87                                                     | -0.30                                                | 1.66               | 7.41                              | 6.33                |
| Complement component 6                                                    | Q9WTQ5  | -1.47                                                    | -1.47                                                    | -1.47                                                | 0.00               | 0.00                              | 7.12                |
| Cytochrome c oxidase subunit 4 isoform 1, mitochondrial;                  | P19783  | -1.43                                                    | -0.17                                                    | -0.80                                                | 0.90               | 4.00                              | 5.29                |
| Plasminogen;                                                              | P20918  | -1.43                                                    | -0.79                                                    | -1.11                                                | 0.46               | 2.05                              | 6.21                |
| ES1 protein homolog, mitochondrial;                                       | Q9D172  | -1.43                                                    | -0.94                                                    | -1.19                                                | 0.35               | 1.55                              | 5.07                |
| 40S ribosomal protein SA;                                                 | P14206  | -1.40                                                    | 0.64                                                     | -0.38                                                | 1.44               | 6.43                              | 5.54                |
| Haptoglobin;                                                              | Q61646  | -1.25                                                    | -1.69                                                    | -1.47                                                | 0.31               | 1.38                              | 9.12                |
| Voltage-dependent anion-selective channel protein 3;                      | Q60931  | -1.40                                                    | 0.23                                                     | -0.58                                                | 1.15               | 5.12                              | 4.90                |
| NADH-ubiquinone oxidoreductase 75 kDa subunit, mitochondrial;             | Q91VD9  | -1.40                                                    | 0.31                                                     | -0.54                                                | 1.21               | 5.39                              | 4.91                |
| Voltage-dependent L-type calcium channel subunit beta-1;                  | Q8R3Z5  | -1.40                                                    | -1.09                                                    | -1.24                                                | 0.22               | 0.97                              | 6.48                |
| 4-aminobutyrate aminotransferase, mitochondrial;                          | P61922  | -1.40                                                    | -1.15                                                    | -1.27                                                | 0.17               | 0.77                              | 7.48                |
| Retinal dehydrogenase 1;                                                  | P24549  | -1.36                                                    | -1.43                                                    | -1.40                                                | 0.05               | 0.24                              | 6.69                |
| Dynein light chain roadblock-type 1;                                      | P62627  | -1.36                                                    | -0.67                                                    | -1.01                                                | 0.49               | 2.18                              | 5.17                |
| Keratin, type II cytoskeletal 1b;                                         | Q6IFZ6  | -1.36                                                    | 0.50                                                     | -0.43                                                | 1.31               | 5.85                              | 3.97                |
| Pyruvate dehydrogenase phosphatase regulatory subunit, mitochondrial;     | Q7TSQ8  | -1.36                                                    | -0.67                                                    | -1.01                                                | 0.49               | 2.18                              | 4.28                |
| Sarcoplasmic/endoplasmic reticulum calcium ATPase 1;                      | Q8R429  | -1.36                                                    | -0.74                                                    | -1.05                                                | 0.44               | 1.96                              | 4.90                |
| Adenylosuccinate synthetase isozyme 1;                                    | P28650  | -1.32                                                    | -0.56                                                    | -0.94                                                | 0.54               | 2.42                              | 4.28                |
| Succinate dehydrogenase [ubiquinone] flavoprotein subunit, mitochondrial; | Q8K2B3  | -1.32                                                    | -0.23                                                    | -0.78                                                | 0.77               | 3.43                              | 3.99                |
| Microfibril-associated glycoprotein 4;                                    | Q9D1H9  | -1.32                                                    | -0.97                                                    | -1.15                                                | 0.25               | 1.11                              | 6.34                |
| Pigment epithelium-derived factor;                                        | P97298  | -1.32                                                    | -1.43                                                    | -1.38                                                | 0.08               | 0.35                              | 7.20                |
| PDZ and LIM domain protein 7;                                             | Q3TJD7  | -1.32                                                    | -0.81                                                    | -1.07                                                | 0.36               | 1.61                              | 5.80                |
| 60S ribosomal protein L14;                                                | Q9CR57  | -1.29                                                    | 0.77                                                     | -0.26                                                | 1.46               | 6.50                              | 6.10                |

Table S6, Tholen et al.

| Protein                                                             | Uniprot | Fold change (log <sub>2</sub> ) of ASAPRatio replicate 1 | Fold change (log <sub>2</sub> ) of ASAPRatio replicate 2 | Average fold change (log <sub>2</sub> ) of ASAPRatio | Standard deviation | 90 % confidence interval (t-test) | Fisher's exact test |
|---------------------------------------------------------------------|---------|----------------------------------------------------------|----------------------------------------------------------|------------------------------------------------------|--------------------|-----------------------------------|---------------------|
| Collagen alpha-1(I) chain;                                          | P11087  | -1.29                                                    | -1.32                                                    | -1.30                                                | 0.03               | 0.11                              | 6.68                |
| Cytochrome c oxidase subunit 2;                                     | P00405  | -1.25                                                    | 0.19                                                     | -0.53                                                | 1.02               | 4.55                              | 4.40                |
| Collagen alpha-2(I) chain;                                          | Q01149  | -1.40                                                    | -1.47                                                    | -1.44                                                | 0.06               | 0.25                              | 9.04                |
| Nucleobindin-2;                                                     | P81117  | -1.25                                                    | -1.47                                                    | -1.36                                                | 0.16               | 0.70                              | 9.04                |
| Glycogen [starch] synthase, muscle;                                 | Q9Z1E4  | -1.25                                                    | 0.66                                                     | -0.30                                                | 1.35               | 6.04                              | 5.39                |
| Transforming growth factor-beta-induced protein ig-h3;              | P82198  | -1.25                                                    | 0.62                                                     | -0.31                                                | 1.33               | 5.92                              | 5.08                |
| Thioredoxin-dependent peroxide reductase, mitochondrial;            | P20108  | -1.22                                                    | -0.38                                                    | -0.80                                                | 0.59               | 2.65                              | 4.53                |
| Cystatin-C;                                                         | P21460  | -1.22                                                    | -1.09                                                    | -1.15                                                | 0.09               | 0.41                              | 7.10                |
| Tetranectin;                                                        | P43025  | -1.22                                                    | -1.43                                                    | -1.33                                                | 0.15               | 0.68                              | 6.80                |
| Mitochondrial 2-oxoglutarate/malate carrier protein;                | Q9CR62  | -1.22                                                    | 0.37                                                     | -0.43                                                | 1.12               | 5.00                              | 4.47                |
| Cytochrome b-c1 complex subunit 1, mitochondrial;                   | Q9CZ13  | -1.22                                                    | 0.10                                                     | -0.56                                                | 0.93               | 4.15                              | 3.62                |
| Glycogen phosphorylase, muscle form;                                | Q9WUB3  | -1.22                                                    | 0.20                                                     | -0.51                                                | 1.00               | 4.48                              | 3.40                |
| Glycogen phosphorylase, brain form;                                 | Q8CI94  | 0.45                                                     | 0.54                                                     | 0.50                                                 | 0.06               | 0.26                              | 2.24                |
| Nebulin; Uncharacterized protein;                                   | A2AQA9  | -1.22                                                    | 0.30                                                     | -0.46                                                | 1.07               | 4.79                              | 2.64                |
| 60S acidic ribosomal protein P2;                                    | P99027  | -1.18                                                    | 0.04                                                     | -0.57                                                | 0.87               | 3.87                              | 3.54                |
| Actin, alpha skeletal muscle;                                       | P68134  | -1.32                                                    | -0.97                                                    | -1.15                                                | 0.25               | 1.11                              | 6.15                |
| Long-chain specific acyl-CoA dehydrogenase, mitochondrial;          | P51174  | -1.15                                                    | -0.23                                                    | -0.69                                                | 0.65               | 2.90                              | 3.06                |
| Succinyl-CoA ligase [ADP/GDP-forming] subunit alpha, mitochondrial; | Q9WUM5  | -1.15                                                    | -0.45                                                    | -0.80                                                | 0.49               | 2.20                              | 3.34                |
| Leukemia inhibitory factor receptor;                                | P42703  | -1.12                                                    | -2.06                                                    | -1.59                                                | 0.66               | 2.96                              | 10.53               |
| ATP synthase subunit gamma, mitochondrial;                          | Q91VR2  | -1.12                                                    | 0.08                                                     | -0.52                                                | 0.85               | 3.80                              | 2.06                |
| Methylmalonyl-CoA mutase, mitochondrial;                            | P16332  | -1.09                                                    | 0.03                                                     | -0.53                                                | 0.79               | 3.53                              | 1.47                |
| Heparin cofactor 2;                                                 | P49182  | -1.09                                                    | -0.79                                                    | -0.94                                                | 0.21               | 0.96                              | 4.41                |
| Myomesin-1;                                                         | Q62234  | -1.09                                                    | -0.03                                                    | -0.56                                                | 0.75               | 3.35                              | 2.23                |
| Acyl-coenzyme A thioesterase 13;                                    | Q9CQR4  | -1.09                                                    | -1.29                                                    | -1.19                                                | 0.14               | 0.62                              | 7.06                |
| ATP synthase subunit d, mitochondrial;                              | Q9DCX2  | -1.09                                                    | 0.26                                                     | -0.41                                                | 0.96               | 4.27                              | 3.73                |
| Major urinary protein 2;                                            | P11589  | -1.09                                                    | -1.60                                                    | -1.34                                                | 0.36               | 1.61                              | 8.93                |
| 40S ribosomal protein S12;                                          | Q6ZWZ6  | -1.09                                                    | 0.72                                                     | -0.18                                                | 1.28               | 5.72                              | 4.91                |
| Coproporphyrinogen-III oxidase, mitochondrial;                      | P36552  | -1.06                                                    | 0.18                                                     | -0.44                                                | 0.87               | 3.90                              | 3.43                |
| Myosin light chain kinase, smooth muscle;                           | Q6PDN3  | -1.06                                                    | -0.71                                                    | -0.89                                                | 0.24               | 1.09                              | 4.13                |
| Adenylate kinase isoenzyme 1;                                       | Q9R0Y5  | -1.06                                                    | -1.22                                                    | -1.14                                                | 0.11               | 0.50                              | 6.38                |
| Carnitine O-acetyltransferase;                                      | P47934  | -1.06                                                    | -0.47                                                    | -0.77                                                | 0.41               | 1.85                              | 3.53                |
| Enoyl-CoA hydratase, mitochondrial;                                 | Q8BH95  | -1.06                                                    | -0.03                                                    | -0.54                                                | 0.73               | 3.25                              | 3.21                |
| Coatomer subunit delta;                                             | Q5XJY5  | -1.03                                                    | -0.54                                                    | -0.78                                                | 0.35               | 1.56                              | 2.73                |
| Arginase-1;                                                         | Q61176  | -1.03                                                    | -2.25                                                    | -1.64                                                | 0.86               | 3.86                              | 12.24               |
| Synaptopodin-2;                                                     | Q91YE8  | -1.03                                                    | -0.89                                                    | -0.96                                                | 0.10               | 0.44                              | 5.53                |
| Uncharacterized protein;                                            | E9Q2T3  | -1.03                                                    | 0.35                                                     | -0.34                                                | 0.97               | 4.34                              | 3.18                |
| Betaine--homocysteine S-methyltransferase 1;                        | O35490  | -1.03                                                    | -2.84                                                    | -1.93                                                | 1.28               | 5.71                              | 8.40                |
| Phosphoglycerate mutase 2;                                          | O70250  | -1.00                                                    | -1.03                                                    | -1.01                                                | 0.02               | 0.09                              | 5.02                |

Table S6, Tholen et al.

| Protein                                                                     | Uniprot | Fold change (log <sub>2</sub> ) of ASAPRatio replicate 1 | Fold change (log <sub>2</sub> ) of ASAPRatio replicate 2 | Average fold change (log <sub>2</sub> ) of ASAPRatio | Standard deviation | 90 % confidence interval (t-test) | Fisher's exact test |
|-----------------------------------------------------------------------------|---------|----------------------------------------------------------|----------------------------------------------------------|------------------------------------------------------|--------------------|-----------------------------------|---------------------|
| Ig mu chain C region secreted form;                                         | P01872  | -1.00                                                    | -1.00                                                    | -1.00                                                | 0.00               | 0.00                              | 5.63                |
| NAD(P)H dehydrogenase [quinone] 1;                                          | Q64669  | -1.00                                                    | -0.56                                                    | -0.78                                                | 0.31               | 1.40                              | 3.97                |
| Succinate dehydrogenase [ubiquinone] iron-sulfur subunit, mitochondrial;    | Q9CQA3  | -1.00                                                    | -0.18                                                    | -0.59                                                | 0.58               | 2.58                              | 3.18                |
| Fructose-bisphosphate aldolase A;                                           | P05064  | -1.00                                                    | -0.92                                                    | -0.96                                                | 0.06               | 0.27                              | 5.03                |
| Fructose-bisphosphate aldolase C;                                           | P05063  | 0.89                                                     | 0.65                                                     | 0.77                                                 | 0.17               | 0.75                              | 4.06                |
| Hippocalcin-like protein 1;                                                 | P62748  | -1.00                                                    | -1.43                                                    | -1.22                                                | 0.31               | 1.37                              | 6.70                |
| Nascent polypeptide-associated complex subunit alpha, muscle-specific form; | P70670  | -1.00                                                    | -0.94                                                    | -0.97                                                | 0.04               | 0.18                              | 3.45                |
| Adseverin;                                                                  | Q60604  | -1.00                                                    | 0.06                                                     | -0.47                                                | 0.75               | 3.34                              | 1.84                |
| Serpin B6;                                                                  | Q60854  | -1.00                                                    | -0.86                                                    | -0.93                                                | 0.10               | 0.44                              | 4.62                |
| Phosphotriesterase-related protein;                                         | Q60866  | -1.00                                                    | -0.97                                                    | -0.99                                                | 0.02               | 0.09                              | 5.30                |
| GDH/6PGL endoplasmic bifunctional protein;                                  | Q8CFX1  | -1.00                                                    | -0.22                                                    | -0.61                                                | 0.55               | 2.47                              | 1.59                |
| EH domain-binding protein 1-like protein 1;                                 | Q99MS7  | -1.00                                                    | -1.18                                                    | -1.09                                                | 0.13               | 0.58                              | 6.04                |
| 40S ribosomal protein S21;                                                  | Q9CQR2  | -1.00                                                    | 0.42                                                     | -0.29                                                | 1.01               | 4.49                              | 3.65                |
| Transthyretin;                                                              | P07309  | -0.97                                                    | -1.00                                                    | -0.99                                                | 0.02               | 0.09                              | 5.21                |
| Carbonic anhydrase 3;                                                       | P16015  | -0.97                                                    | -0.42                                                    | -0.69                                                | 0.39               | 1.76                              | 3.38                |
| Fructose-1,6-bisphosphatase isozyme 2;                                      | P70695  | -0.97                                                    | -0.64                                                    | -0.81                                                | 0.23               | 1.03                              | 4.18                |
| Secernin-3;                                                                 | Q3TMH2  | -0.97                                                    | -1.25                                                    | -1.11                                                | 0.20               | 0.89                              | 6.67                |
| Apolipoprotein A-IV;                                                        | P06728  | -0.94                                                    | -2.84                                                    | -1.89                                                | 1.34               | 5.98                              | 11.78               |
| Prothrombin;                                                                | P19221  | -0.94                                                    | -0.71                                                    | -0.83                                                | 0.16               | 0.73                              | 3.43                |
| Apolipoprotein A-I;                                                         | Q00623  | -0.94                                                    | -2.25                                                    | -1.60                                                | 0.93               | 4.13                              | 12.32               |
| Beta-2-glycoprotein 1;                                                      | Q01339  | -0.94                                                    | -1.64                                                    | -1.29                                                | 0.50               | 2.21                              | 8.46                |
| Protein-arginine deiminase type-2;                                          | Q08642  | -0.94                                                    | -0.69                                                    | -0.82                                                | 0.18               | 0.80                              | 4.12                |
| Sulfhydryl oxidase 1;                                                       | Q8BND5  | -0.94                                                    | -0.89                                                    | -0.92                                                | 0.04               | 0.17                              | 5.03                |
| Protein Z-dependent protease inhibitor;                                     | Q8R121  | -0.94                                                    | -0.84                                                    | -0.89                                                | 0.07               | 0.33                              | 4.70                |
| Carbohydrate kinase domain-containing protein;                              | Q9CZ42  | -0.94                                                    | -0.47                                                    | -0.71                                                | 0.33               | 1.48                              | 3.68                |
| Serine protease inhibitor A3K;                                              | P07759  | -0.94                                                    | -0.76                                                    | -0.85                                                | 0.13               | 0.57                              | 3.84                |
| Serine protease inhibitor A3N;                                              | Q91WP6  | -0.14                                                    | -0.81                                                    | -0.47                                                | 0.48               | 2.13                              | 1.87                |
| Uncharacterized protein;                                                    | D3Z450  | 0.53                                                     | 0.86                                                     | 0.69                                                 | 0.23               | 1.04                              | 3.61                |
| Four and a half LIM domains protein 1;                                      | P97447  | -0.94                                                    | -0.23                                                    | -0.59                                                | 0.50               | 2.24                              | 2.44                |
| Lambda-crystallin homolog;                                                  | Q99KP3  | -0.94                                                    | -0.81                                                    | -0.88                                                | 0.09               | 0.42                              | 4.35                |
| Cardiomyopathy-associated protein 5;                                        | Q70KF4  | -0.94                                                    | -1.40                                                    | -1.17                                                | 0.32               | 1.43                              | 6.27                |
| Ig kappa chain V19-17;                                                      | P01633  | -0.94                                                    | -0.52                                                    | -0.73                                                | 0.30               | 1.35                              | 3.95                |
| Methionine aminopeptidase 2;                                                | O08663  | -0.92                                                    | 0.99                                                     | 0.04                                                 | 1.34               | 6.00                              | 4.87                |
| Collagen alpha-1(III) chain;                                                | P08121  | -0.92                                                    | -1.32                                                    | -1.12                                                | 0.29               | 1.28                              | 7.00                |
| Lumican;                                                                    | P51885  | -0.92                                                    | -0.45                                                    | -0.69                                                | 0.33               | 1.46                              | 3.39                |
| Complement component C8 alpha chain;                                        | Q8K182  | -0.92                                                    | -0.92                                                    | -0.92                                                | 0.00               | 0.00                              | 4.74                |
| SH3 and PX domain-containing protein 2B;                                    | A2AAY5  | -0.92                                                    | -1.09                                                    | -1.00                                                | 0.12               | 0.55                              | 4.58                |
| Creatine kinase M-type;                                                     | P07310  | -0.89                                                    | -1.15                                                    | -1.02                                                | 0.19               | 0.83                              | 5.88                |

Table S6, Tholen et al.

| Protein                                                                                                             | Uniprot | Fold change (log <sub>2</sub> ) of ASAPRatio replicate 1 | Fold change (log <sub>2</sub> ) of ASAPRatio replicate 2 | Average fold change (log <sub>2</sub> ) of ASAPRatio | Standard deviation | 90 % confidence interval (t-test) | Fisher's exact test |
|---------------------------------------------------------------------------------------------------------------------|---------|----------------------------------------------------------|----------------------------------------------------------|------------------------------------------------------|--------------------|-----------------------------------|---------------------|
| Parvalbumin alpha;                                                                                                  | P32848  | -0.89                                                    | -0.09                                                    | -0.49                                                | 0.57               | 2.53                              | 2.60                |
| Calcium-regulated heat stable protein 1;                                                                            | Q9CR86  | -0.89                                                    | -0.89                                                    | -0.89                                                | 0.00               | 0.00                              | 3.37                |
| Succinyl-CoA ligase [ADP-forming] subunit beta, mitochondrial;                                                      | Q9Z2I9  | -0.89                                                    | -0.69                                                    | -0.79                                                | 0.14               | 0.63                              | 3.50                |
| Creatine kinase U-type, mitochondrial;                                                                              | P30275  | -0.89                                                    | 0.42                                                     | -0.23                                                | 0.93               | 4.14                              | 2.97                |
| Dci protein; Dodecenoyl-Coenzyme A delta isomerase (3,2 trans-enoyl-Coenzyme A isomerase); Uncharacterized protein; | Q8QZV3  | -0.89                                                    | -0.49                                                    | -0.69                                                | 0.28               | 1.25                              | 3.10                |
| Ig kappa chain C region;                                                                                            | P01837  | -0.86                                                    | 0.51                                                     | -0.18                                                | 0.97               | 4.32                              | 2.97                |
| 60S ribosomal protein L12;                                                                                          | P35979  | -0.86                                                    | 0.94                                                     | 0.04                                                 | 1.27               | 5.69                              | 4.51                |
| Cytochrome c, somatic;                                                                                              | P62897  | -0.86                                                    | -0.27                                                    | -0.57                                                | 0.42               | 1.87                              | 2.84                |
| Creatine kinase B-type;                                                                                             | Q04447  | -0.86                                                    | -1.06                                                    | -0.96                                                | 0.14               | 0.62                              | 4.83                |
| Complement factor I;                                                                                                | Q61129  | -0.86                                                    | -1.03                                                    | -0.95                                                | 0.12               | 0.53                              | 4.93                |
| Zinc-alpha-2-glycoprotein;                                                                                          | Q64726  | -0.86                                                    | -0.74                                                    | -0.80                                                | 0.09               | 0.39                              | 3.65                |
| UTP--glucose-1-phosphate uridylyltransferase;                                                                       | Q91ZJ5  | -0.86                                                    | -0.94                                                    | -0.90                                                | 0.06               | 0.26                              | 4.69                |
| Aconitate hydratase, mitochondrial;                                                                                 | Q99KI0  | -0.86                                                    | -0.58                                                    | -0.72                                                | 0.20               | 0.90                              | 3.50                |
| Cell adhesion molecule 3;                                                                                           | Q99N28  | -0.86                                                    | -0.89                                                    | -0.88                                                | 0.02               | 0.09                              | 4.77                |
| Lactoylglutathione lyase;                                                                                           | Q9CPU0  | -0.86                                                    | -0.56                                                    | -0.71                                                | 0.22               | 0.97                              | 3.00                |
| Dihydrolipoyl dehydrogenase, mitochondrial;                                                                         | O08749  | -0.86                                                    | 0.03                                                     | -0.42                                                | 0.63               | 2.81                              | 2.23                |
| SPARC;                                                                                                              | P07214  | -0.86                                                    | -1.74                                                    | -1.30                                                | 0.62               | 2.76                              | 6.12                |
| Glutamate dehydrogenase 1, mitochondrial;                                                                           | P26443  | -0.86                                                    | 0.47                                                     | -0.20                                                | 0.94               | 4.19                              | 3.39                |
| Plasma protease C1 inhibitor;                                                                                       | P97290  | -0.86                                                    | -1.03                                                    | -0.95                                                | 0.12               | 0.53                              | 4.41                |
| Phosphoglucomutase-1;                                                                                               | Q9D0F9  | -0.86                                                    | -0.81                                                    | -0.84                                                | 0.04               | 0.16                              | 4.39                |
| Procollagen-lysine,2-oxoglutarate 5-dioxygenase 1;                                                                  | Q9R0E2  | -0.86                                                    | -0.71                                                    | -0.79                                                | 0.11               | 0.47                              | 3.97                |
| Apolipoprotein A-II;                                                                                                | P09813  | -0.86                                                    | -1.89                                                    | -1.38                                                | 0.73               | 3.24                              | 9.49                |
| Uncharacterized protein;                                                                                            | E9QA15  | -0.84                                                    | 0.48                                                     | -0.18                                                | 0.93               | 4.14                              | 2.79                |
| Malate dehydrogenase, mitochondrial;                                                                                | P08249  | -0.81                                                    | -0.71                                                    | -0.76                                                | 0.07               | 0.31                              | 4.02                |
| Fumarate hydratase, mitochondrial;                                                                                  | P97807  | -0.81                                                    | -0.27                                                    | -0.54                                                | 0.38               | 1.71                              | 1.94                |
| Protein AMBP;                                                                                                       | Q07456  | -0.81                                                    | -1.09                                                    | -0.95                                                | 0.20               | 0.88                              | 4.85                |
| L-asparaginase;                                                                                                     | Q8C0M9  | -0.81                                                    | -0.86                                                    | -0.84                                                | 0.04               | 0.16                              | 4.26                |
| Phosphoglycolate phosphatase;                                                                                       | Q8CHP8  | -0.81                                                    | -0.76                                                    | -0.79                                                | 0.04               | 0.16                              | 2.97                |
| Hemopexin;                                                                                                          | Q91X72  | -0.81                                                    | -0.45                                                    | -0.63                                                | 0.25               | 1.13                              | 2.99                |
| Neurolysin, mitochondrial;                                                                                          | Q91YP2  | -0.81                                                    | 0.10                                                     | -0.36                                                | 0.64               | 2.87                              | 1.22                |
| MACRO domain-containing protein 1;                                                                                  | Q922B1  | -0.81                                                    | -0.76                                                    | -0.79                                                | 0.04               | 0.16                              | 3.90                |
| NADH dehydrogenase [ubiquinone] flavoprotein 2, mitochondrial;                                                      | Q9D6J6  | -0.81                                                    | 0.41                                                     | -0.20                                                | 0.86               | 3.86                              | 2.79                |
| GMP reductase 1;                                                                                                    | Q9DCZ1  | -0.81                                                    | -0.58                                                    | -0.69                                                | 0.16               | 0.74                              | 3.67                |
| Complement factor B;                                                                                                | P04186  | -0.81                                                    | -0.84                                                    | -0.82                                                | 0.02               | 0.08                              | 3.68                |
| Adenylosuccinate lyase;                                                                                             | P54822  | -0.81                                                    | 0.39                                                     | -0.21                                                | 0.85               | 3.79                              | 2.94                |
| Voltage-dependent anion-selective channel protein 2;                                                                | Q60930  | -0.81                                                    | 0.71                                                     | -0.05                                                | 1.07               | 4.79                              | 3.15                |
| NADH dehydrogenase [ubiquinone] flavoprotein 1, mitochondrial;                                                      | Q91YT0  | -0.81                                                    | -0.07                                                    | -0.44                                                | 0.52               | 2.33                              | 2.20                |

Table S6, Tholen et al.

| Protein                                                                                                           | Uniprot | Fold change (log <sub>2</sub> ) of ASAPRatio replicate 1 | Fold change (log <sub>2</sub> ) of ASAPRatio replicate 2 | Average fold change (log <sub>2</sub> ) of ASAPRatio | Standard deviation | 90 % confidence interval (t-test) | Fisher's exact test |
|-------------------------------------------------------------------------------------------------------------------|---------|----------------------------------------------------------|----------------------------------------------------------|------------------------------------------------------|--------------------|-----------------------------------|---------------------|
| Ig kappa chain V-II region 26-10;                                                                                 | P01631  | -0.81                                                    | -1.56                                                    | -1.18                                                | 0.53               | 2.35                              | 5.29                |
| Complement factor D;                                                                                              | P03953  | -0.79                                                    | -0.56                                                    | -0.67                                                | 0.16               | 0.73                              | 3.05                |
| Alpha-2-HS-glycoprotein;                                                                                          | P29699  | -0.79                                                    | -0.86                                                    | -0.82                                                | 0.05               | 0.24                              | 4.50                |
| Scavenger receptor cysteine-rich domain-containing protein LOC284297 homolog;                                     | Q8BV57  | -0.79                                                    | -0.45                                                    | -0.62                                                | 0.23               | 1.05                              | 2.68                |
| Trans-1,2-dihydrobenzene-1,2-diol dehydrogenase;                                                                  | Q9DBB8  | -0.79                                                    | -0.42                                                    | -0.60                                                | 0.26               | 1.17                              | 2.89                |
| Histidine-rich glycoprotein;                                                                                      | Q9ESB3  | -0.79                                                    | -0.11                                                    | -0.45                                                | 0.48               | 2.15                              | 2.22                |
| Mitogen-activated protein kinase 12;                                                                              | O08911  | -0.79                                                    | -0.74                                                    | -0.76                                                | 0.03               | 0.15                              | 3.99                |
| Isocitrate dehydrogenase [NADP], mitochondrial;                                                                   | P54071  | -0.79                                                    | -0.84                                                    | -0.81                                                | 0.04               | 0.16                              | 3.54                |
| Citrate lyase subunit beta-like protein, mitochondrial;                                                           | Q8R4N0  | -0.79                                                    | -0.43                                                    | -0.61                                                | 0.25               | 1.11                              | 3.08                |
| Vesicle-associated membrane protein-associated protein B;                                                         | Q9QY76  | -0.79                                                    | -0.84                                                    | -0.81                                                | 0.04               | 0.16                              | 4.34                |
| Integrin beta-4;                                                                                                  | A2A863  | -0.76                                                    | 0.71                                                     | -0.03                                                | 1.04               | 4.63                              | 3.30                |
| Cell surface glycoprotein MUC18;                                                                                  | Q8R2Y2  | -0.76                                                    | 0.25                                                     | -0.26                                                | 0.72               | 3.19                              | 2.19                |
| Plexin domain-containing protein 2;                                                                               | Q9DC11  | -0.76                                                    | -0.89                                                    | -0.83                                                | 0.09               | 0.40                              | 4.31                |
| Deoxyguanosine kinase, mitochondrial;                                                                             | Q9QX60  | -0.76                                                    | -0.49                                                    | -0.63                                                | 0.19               | 0.84                              | 3.22                |
| Bisphosphoglycerate mutase;                                                                                       | P15327  | -0.76                                                    | -0.71                                                    | -0.74                                                | 0.03               | 0.15                              | 3.81                |
| Purine nucleoside phosphorylase;                                                                                  | P23492  | -0.76                                                    | -0.11                                                    | -0.43                                                | 0.46               | 2.07                              | 2.03                |
| Prohibitin;                                                                                                       | P67778  | -0.76                                                    | 0.93                                                     | 0.09                                                 | 1.20               | 5.35                              | 4.48                |
| Histidine triad nucleotide-binding protein 1;                                                                     | P70349  | -0.76                                                    | -0.62                                                    | -0.69                                                | 0.10               | 0.44                              | 2.92                |
| Carboxymethylenebutenolidase homolog;                                                                             | Q8R1G2  | -0.76                                                    | -0.45                                                    | -0.61                                                | 0.22               | 0.97                              | 2.84                |
| Mannose-6-phosphate isomerase;                                                                                    | Q924M7  | -0.76                                                    | -0.18                                                    | -0.47                                                | 0.41               | 1.82                              | 2.34                |
| Propionyl-CoA carboxylase beta chain, mitochondrial;                                                              | Q99MN9  | -0.76                                                    | -0.40                                                    | -0.58                                                | 0.26               | 1.15                              | 2.37                |
| Angiotensinogen;                                                                                                  | P11859  | -0.74                                                    | -0.71                                                    | -0.73                                                | 0.02               | 0.08                              | 3.67                |
| Annexin A6;                                                                                                       | P14824  | -0.74                                                    | 1.94                                                     | 0.60                                                 | 1.89               | 8.44                              | 8.56                |
| Ceruloplasmin;                                                                                                    | Q61147  | -0.74                                                    | -1.00                                                    | -0.87                                                | 0.19               | 0.83                              | 3.60                |
| UPF0586 protein C9orf41 homolog;                                                                                  | Q80UY1  | -0.74                                                    | -0.89                                                    | -0.81                                                | 0.11               | 0.48                              | 3.59                |
| Delta-1-pyrroline-5-carboxylate dehydrogenase, mitochondrial;                                                     | Q8CHT0  | -0.74                                                    | -0.81                                                    | -0.77                                                | 0.05               | 0.23                              | 3.98                |
| N(G),N(G)-dimethylarginine dimethylaminohydrolase 2;                                                              | Q99LD8  | -0.74                                                    | -1.25                                                    | -0.99                                                | 0.36               | 1.63                              | 5.16                |
| Dihydrolipoyllysine-residue succinyltransferase component of 2-oxoglutarate dehydrogenase complex, mitochondrial; | Q9D2G2  | -0.74                                                    | -0.30                                                    | -0.52                                                | 0.31               | 1.37                              | 2.55                |
| Angiotensin-converting enzyme;                                                                                    | P09470  | -0.74                                                    | -0.47                                                    | -0.61                                                | 0.19               | 0.83                              | 2.87                |
| Triosephosphate isomerase;                                                                                        | P17751  | -0.74                                                    | -0.71                                                    | -0.73                                                | 0.02               | 0.08                              | 3.56                |
| Murinoglobulin-1;                                                                                                 | P28665  | -0.74                                                    | -0.84                                                    | -0.79                                                | 0.07               | 0.32                              | 3.11                |
| Adiponectin;                                                                                                      | Q60994  | -0.74                                                    | -0.23                                                    | -0.49                                                | 0.36               | 1.59                              | 2.32                |
| Uncharacterized protein;                                                                                          | E9PV38  | -0.74                                                    | -1.06                                                    | -0.90                                                | 0.23               | 1.02                              | 4.35                |
| Uncharacterized protein;                                                                                          | F8VFN4  | -0.74                                                    | -0.60                                                    | -0.67                                                | 0.10               | 0.44                              | 2.55                |
| Acylophosphatase-2;                                                                                               | P56375  | -0.71                                                    | -0.23                                                    | -0.47                                                | 0.34               | 1.51                              | 2.05                |
| Ras suppressor protein 1;                                                                                         | Q01730  | -0.71                                                    | 0.41                                                     | -0.15                                                | 0.79               | 3.55                              | 2.76                |
| Histidine triad nucleotide-binding protein 2, mitochondrial;                                                      | Q9DOS9  | -0.71                                                    | -0.81                                                    | -0.76                                                | 0.07               | 0.31                              | 3.76                |

Table S6, Tholen et al.

| Protein                                                        | Uniprot | Fold change (log <sub>2</sub> ) of ASAPRatio replicate 1 | Fold change (log <sub>2</sub> ) of ASAPRatio replicate 2 | Average fold change (log <sub>2</sub> ) of ASAPRatio | Standard deviation | 90 % confidence interval (t-test) | Fisher's exact test |
|----------------------------------------------------------------|---------|----------------------------------------------------------|----------------------------------------------------------|------------------------------------------------------|--------------------|-----------------------------------|---------------------|
| 2-oxoglutarate dehydrogenase, mitochondrial;                   | Q60597  | -0.71                                                    | 0.06                                                     | -0.33                                                | 0.54               | 2.43                              | 1.74                |
| Golgi reassembly-stacking protein 2;                           | Q99JX3  | -0.71                                                    | -0.76                                                    | -0.74                                                | 0.03               | 0.15                              | 3.66                |
| Scavenger mRNA-decapping enzyme Dcp5;                          | Q9DAR7  | -0.71                                                    | -0.76                                                    | -0.74                                                | 0.03               | 0.15                              | 2.73                |
| Beta-hexosaminidase subunit alpha;                             | P29416  | -0.71                                                    | 1.13                                                     | 0.21                                                 | 1.30               | 5.82                              | 4.57                |
| Epidermal growth factor receptor;                              | Q01279  | -0.69                                                    | -1.03                                                    | -0.86                                                | 0.24               | 1.07                              | 4.75                |
| Mimecan;                                                       | Q62000  | -0.69                                                    | -0.71                                                    | -0.70                                                | 0.02               | 0.07                              | 3.34                |
| Sulfite oxidase, mitochondrial;                                | Q8R086  | -0.69                                                    | -0.38                                                    | -0.53                                                | 0.22               | 0.99                              | 2.11                |
| Prohibitin-2;                                                  | O35129  | -0.69                                                    | 0.81                                                     | 0.06                                                 | 1.06               | 4.73                              | 3.59                |
| Aspartate aminotransferase, cytoplasmic;                       | P05201  | -0.69                                                    | -0.18                                                    | -0.44                                                | 0.36               | 1.60                              | 1.96                |
| Prelamin-A/C;                                                  | P48678  | -0.69                                                    | 0.92                                                     | 0.11                                                 | 1.14               | 5.08                              | 2.82                |
| Cytochrome b5;                                                 | P56395  | -0.69                                                    | 0.41                                                     | -0.14                                                | 0.78               | 3.48                              | 2.73                |
| Short-chain specific acyl-CoA dehydrogenase, mitochondrial;    | Q07417  | -0.69                                                    | 0.54                                                     | -0.08                                                | 0.87               | 3.87                              | 2.59                |
| Echinoderm microtubule-associated protein-like 2;              | Q7TNG5  | -0.69                                                    | -0.74                                                    | -0.71                                                | 0.03               | 0.15                              | 2.88                |
| GDP-fucose protein O-fucosyltransferase 1;                     | Q91ZW2  | -0.69                                                    | -0.52                                                    | -0.60                                                | 0.12               | 0.55                              | 2.84                |
| Serotransferrin;                                               | Q921I1  | -0.69                                                    | -0.71                                                    | -0.70                                                | 0.02               | 0.07                              | 3.36                |
| Citrate synthase, mitochondrial;                               | Q9CZU6  | -0.69                                                    | -0.49                                                    | -0.59                                                | 0.14               | 0.62                              | 2.85                |
| Acylpyruvase FAHD1, mitochondrial;                             | Q8R0F8  | -0.69                                                    | -1.00                                                    | -0.85                                                | 0.22               | 0.98                              | 4.56                |
| Afamin;                                                        | O89020  | -0.67                                                    | -0.67                                                    | -0.67                                                | 0.00               | 0.00                              | 2.84                |
| Interleukin-1 receptor accessory protein;                      | Q61730  | -0.67                                                    | -0.94                                                    | -0.81                                                | 0.20               | 0.87                              | 4.36                |
| CCA tRNA nucleotidyltransferase 1, mitochondrial;              | Q8K1J6  | -0.67                                                    | 0.15                                                     | -0.26                                                | 0.58               | 2.58                              | 1.46                |
| Mitochondrial peptide methionine sulfoxide reductase;          | Q9D6Y7  | -0.67                                                    | -0.30                                                    | -0.49                                                | 0.26               | 1.15                              | 1.83                |
| Glucose-6-phosphate isomerase;                                 | P06745  | -0.67                                                    | -0.40                                                    | -0.53                                                | 0.19               | 0.86                              | 2.23                |
| Galectin-related protein A;                                    | Q8VED9  | -0.67                                                    | -0.06                                                    | -0.36                                                | 0.43               | 1.92                              | 1.44                |
| ATP synthase subunit g, mitochondrial;                         | Q9CPQ8  | -0.67                                                    | 0.24                                                     | -0.21                                                | 0.64               | 2.86                              | 2.20                |
| Plectin;                                                       | Q9QXS1  | -0.67                                                    | 0.54                                                     | -0.07                                                | 0.85               | 3.80                              | 2.00                |
| Complement C4-B;                                               | P01029  | -0.64                                                    | -1.06                                                    | -0.85                                                | 0.29               | 1.31                              | 2.58                |
| Serum albumin;                                                 | P07724  | -0.64                                                    | -0.42                                                    | -0.53                                                | 0.16               | 0.72                              | 2.08                |
| Cofilin-2;                                                     | P45591  | -0.64                                                    | -1.12                                                    | -0.88                                                | 0.34               | 1.50                              | 4.71                |
| Isocitrate dehydrogenase [NAD] subunit gamma 1, mitochondrial; | P70404  | -0.64                                                    | -0.58                                                    | -0.61                                                | 0.05               | 0.21                              | 2.70                |
| Retinol-binding protein 4;                                     | Q00724  | -0.64                                                    | -1.25                                                    | -0.95                                                | 0.43               | 1.92                              | 4.16                |
| Myosin light chain kinase 2, skeletal/cardiac muscle;          | Q8VCR8  | -0.64                                                    | -1.15                                                    | -0.90                                                | 0.36               | 1.60                              | 4.27                |
| Glycyl-tRNA synthetase;                                        | Q9CZD3  | -0.64                                                    | -0.40                                                    | -0.52                                                | 0.18               | 0.78                              | 2.10                |
| Carboxypeptidase N subunit 2;                                  | Q9DBB9  | -0.64                                                    | -0.89                                                    | -0.77                                                | 0.17               | 0.77                              | 3.88                |
| L-lactate dehydrogenase B chain;                               | P16125  | -0.06                                                    | -0.29                                                    | -0.17                                                | 0.16               | 0.72                              | 0.73                |
| Protein-L-isoaspartate(D-aspartate) O-methyltransferase;       | P23506  | -0.64                                                    | -0.40                                                    | -0.52                                                | 0.18               | 0.78                              | 2.25                |
| Collagen alpha-1(VI) chain;                                    | Q04857  | -0.64                                                    | 0.59                                                     | -0.03                                                | 0.87               | 3.88                              | 2.62                |
| Trifunctional enzyme subunit beta, mitochondrial;              | Q99JY0  | -0.64                                                    | -0.54                                                    | -0.59                                                | 0.08               | 0.34                              | 2.03                |
| UPF0585 protein C16orf13 homolog;                              | Q9DCS2  | -0.64                                                    | 0.20                                                     | -0.22                                                | 0.60               | 2.67                              | 1.60                |

Table S6, Tholen et al.

| Protein                                                             | Uniprot | Fold change (log <sub>2</sub> ) of ASAPRatio replicate 1 | Fold change (log <sub>2</sub> ) of ASAPRatio replicate 2 | Average fold change (log <sub>2</sub> ) of ASAPRatio | Standard deviation | 90 % confidence interval (t-test) | Fisher's exact test |
|---------------------------------------------------------------------|---------|----------------------------------------------------------|----------------------------------------------------------|------------------------------------------------------|--------------------|-----------------------------------|---------------------|
| Hydroxysteroid (17-beta) dehydrogenase 10; Uncharacterized protein; | A2AFQ2  | -0.64                                                    | -0.45                                                    | -0.55                                                | 0.13               | 0.60                              | 2.18                |
| Peptidyl-prolyl cis-trans isomerase FKBP7;                          | O54998  | -0.62                                                    | -1.29                                                    | -0.95                                                | 0.47               | 2.10                              | 5.61                |
| 4-hydroxyphenylpyruvate dioxygenase;                                | P49429  | -0.62                                                    | -2.47                                                    | -1.55                                                | 1.31               | 5.85                              | 6.52                |
| Pyruvate kinase isozymes M1/M2;                                     | P52480  | -0.62                                                    | -0.47                                                    | -0.55                                                | 0.10               | 0.46                              | 2.32                |
| Alpha-aminoadipic semialdehyde dehydrogenase;                       | Q9DBF1  | -0.62                                                    | -0.49                                                    | -0.56                                                | 0.09               | 0.40                              | 2.54                |
| Complement C3;                                                      | P01027  | -0.60                                                    | -0.86                                                    | -0.73                                                | 0.19               | 0.83                              | 3.08                |
| Serpin H1;                                                          | P19324  | -0.60                                                    | -1.60                                                    | -1.10                                                | 0.71               | 3.16                              | 5.30                |
| Glutathione S-transferase A4;                                       | P24472  | -0.60                                                    | -0.40                                                    | -0.50                                                | 0.14               | 0.64                              | 2.12                |
| Glutathione reductase, mitochondrial;                               | P47791  | -0.60                                                    | -0.56                                                    | -0.58                                                | 0.03               | 0.14                              | 2.77                |
| Eukaryotic translation initiation factor 5A-1;                      | P63242  | -0.60                                                    | 0.66                                                     | 0.03                                                 | 0.89               | 3.97                              | 2.61                |
| Coatomer subunit zeta-2;                                            | Q9JHH9  | -0.60                                                    | -0.52                                                    | -0.56                                                | 0.06               | 0.27                              | 2.61                |
| Fetuin-B;                                                           | Q9QXC1  | -0.60                                                    | -0.67                                                    | -0.63                                                | 0.05               | 0.21                              | 3.19                |
| Alpha-1-antitrypsin 1-1;                                            | P07758  | -0.60                                                    | -0.97                                                    | -0.79                                                | 0.26               | 1.17                              | 4.38                |
| Alpha-1-antitrypsin 1-2;                                            | P22599  | -0.67                                                    | -0.89                                                    | -0.78                                                | 0.16               | 0.70                              | 4.11                |
| Alpha-1-antitrypsin 1-4;                                            | Q00897  | -0.89                                                    | -0.58                                                    | -0.73                                                | 0.22               | 0.98                              | 3.46                |
| Very long-chain specific acyl-CoA dehydrogenase, mitochondrial;     | P50544  | -0.60                                                    | -0.42                                                    | -0.51                                                | 0.13               | 0.58                              | 2.26                |
| Glyoxylate reductase/hydroxypyruvate reductase;                     | Q91Z53  | -0.60                                                    | -0.84                                                    | -0.72                                                | 0.17               | 0.75                              | 3.59                |
| Uncharacterized protein;                                            | E9PVD2  | -0.60                                                    | -0.69                                                    | -0.64                                                | 0.06               | 0.29                              | 2.54                |
| Nucleoside diphosphate kinase;                                      | E9PZF0  | -0.60                                                    | -0.22                                                    | -0.41                                                | 0.27               | 1.20                              | 1.94                |
| Aspartate aminotransferase, mitochondrial;                          | P05202  | -0.58                                                    | -0.47                                                    | -0.53                                                | 0.07               | 0.33                              | 2.31                |
| Superoxide dismutase [Mn], mitochondrial;                           | P09671  | -0.58                                                    | -0.29                                                    | -0.43                                                | 0.21               | 0.92                              | 1.91                |
| Heat shock protein beta-7;                                          | P35385  | -0.58                                                    | 0.69                                                     | 0.05                                                 | 0.89               | 3.99                              | 2.62                |
| 182 kDa tankyrase-1-binding protein;                                | P58871  | -0.58                                                    | 0.35                                                     | -0.12                                                | 0.65               | 2.91                              | 1.20                |
| Extended synaptotagmin-1;                                           | Q3U7R1  | -0.58                                                    | 0.98                                                     | 0.20                                                 | 1.10               | 4.91                              | 3.37                |
| Sorbitol dehydrogenase;                                             | Q64442  | -0.58                                                    | -0.74                                                    | -0.66                                                | 0.11               | 0.50                              | 2.68                |
| GDP-fucose protein O-fucosyltransferase 2;                          | Q8VHI3  | -0.58                                                    | 0.06                                                     | -0.26                                                | 0.45               | 2.00                              | 1.48                |
| Isochorismatase domain-containing protein 1;                        | Q91V64  | -0.58                                                    | -0.09                                                    | -0.33                                                | 0.35               | 1.54                              | 1.40                |
| Glutathione S-transferase Mu 5;                                     | P48774  | -0.58                                                    | 0.53                                                     | -0.03                                                | 0.78               | 3.49                              | 2.04                |
| Protein DJ-1;                                                       | Q99LX0  | -0.58                                                    | -1.18                                                    | -0.88                                                | 0.43               | 1.91                              | 4.23                |
| Synaptic vesicle membrane protein VAT-1 homolog-like;               | Q80TB8  | -0.58                                                    | -0.47                                                    | -0.53                                                | 0.07               | 0.33                              | 2.38                |
| Myc box-dependent-interacting protein 1;                            | O08539  | -0.56                                                    | -0.42                                                    | -0.49                                                | 0.10               | 0.45                              | 2.05                |
| Heterogeneous nuclear ribonucleoprotein L;                          | Q8R081  | -0.56                                                    | 0.37                                                     | -0.09                                                | 0.65               | 2.91                              | 1.58                |
| Isovaleryl-CoA dehydrogenase, mitochondrial;                        | Q9JHI5  | -0.56                                                    | -0.62                                                    | -0.59                                                | 0.05               | 0.21                              | 2.82                |
| Ribonuclease 4;                                                     | Q9JJH1  | -0.56                                                    | -0.71                                                    | -0.63                                                | 0.11               | 0.50                              | 3.02                |
| Band 4.1-like protein 3;                                            | Q9WV92  | -0.56                                                    | -0.43                                                    | -0.50                                                | 0.09               | 0.39                              | 2.28                |
| Uncharacterized protein;                                            | D3Z0Y2  | -0.56                                                    | -0.64                                                    | -0.60                                                | 0.06               | 0.28                              | 2.55                |
| Delta-aminolevulinic acid dehydratase;                              | P10518  | -0.54                                                    | 0.07                                                     | -0.23                                                | 0.43               | 1.91                              | 1.43                |
| Plasma kallikrein;                                                  | P26262  | -0.54                                                    | -0.74                                                    | -0.64                                                | 0.14               | 0.64                              | 3.25                |



Table S6, Tholen et al.

| Protein                                              | Uniprot | Fold change (log <sub>2</sub> ) of ASAPRatio replicate 1 | Fold change (log <sub>2</sub> ) of ASAPRatio replicate 2 | Average fold change (log <sub>2</sub> ) of ASAPRatio | Standard deviation | 90 % confidence interval (t-test) | Fisher's exact test |
|------------------------------------------------------|---------|----------------------------------------------------------|----------------------------------------------------------|------------------------------------------------------|--------------------|-----------------------------------|---------------------|
| Antithrombin-III;                                    | P32261  | -0.54                                                    | -0.67                                                    | -0.60                                                | 0.09               | 0.42                              | 2.49                |
| Transcription elongation factor B polypeptide 2;     | P62869  | -0.54                                                    | 0.18                                                     | -0.18                                                | 0.50               | 2.24                              | 1.48                |
| Annexin A7;                                          | Q07076  | -0.54                                                    | -0.32                                                    | -0.43                                                | 0.15               | 0.67                              | 1.54                |
| Kynurenine--oxoglutarate transaminase 3;             | Q71R19  | -0.54                                                    | -0.23                                                    | -0.38                                                | 0.21               | 0.95                              | 1.49                |
| Heat shock protein beta-2;                           | Q99PR8  | -0.54                                                    | -1.03                                                    | -0.78                                                | 0.35               | 1.56                              | 4.05                |
| Selenium-binding protein 1;                          | P17563  | -0.54                                                    | -1.03                                                    | -0.78                                                | 0.35               | 1.56                              | 3.24                |
| Quinone oxidoreductase;                              | P47199  | -0.54                                                    | -0.20                                                    | -0.37                                                | 0.24               | 1.05                              | 1.71                |
| Protein transport protein Sec23A;                    | Q01405  | -0.54                                                    | -0.92                                                    | -0.73                                                | 0.27               | 1.20                              | 3.48                |
| Aldose reductase-related protein 2;                  | P45377  | 0.96                                                     | 0.42                                                     | 0.69                                                 | 0.38               | 1.71                              | 3.32                |
| Alpha-1-syntrophin;                                  | Q61234  | -0.54                                                    | -1.12                                                    | -0.83                                                | 0.41               | 1.85                              | 4.72                |
| Extracellular superoxide dismutase [Cu-Zn];          | O09164  | -0.52                                                    | 0.10                                                     | -0.21                                                | 0.43               | 1.94                              | 1.42                |
| Gamma-synuclein;                                     | Q920F7  | -0.52                                                    | -0.29                                                    | -0.40                                                | 0.16               | 0.72                              | 1.59                |
| Kininogen-1;                                         | O08677  | -0.52                                                    | -0.71                                                    | -0.61                                                | 0.14               | 0.63                              | 3.07                |
| Annexin A8;                                          | O35640  | -0.52                                                    | -0.54                                                    | -0.53                                                | 0.01               | 0.06                              | 2.23                |
| Rab GDP dissociation inhibitor alpha;                | P50396  | -0.52                                                    | -0.29                                                    | -0.40                                                | 0.16               | 0.72                              | 1.52                |
| Alcohol dehydrogenase [NADP+];                       | Q9JII6  | -0.52                                                    | -0.32                                                    | -0.42                                                | 0.14               | 0.61                              | 1.62                |
| Legumain;                                            | O89017  | -0.49                                                    | 0.55                                                     | 0.03                                                 | 0.74               | 3.28                              | 2.42                |
| Inter-alpha-trypsin inhibitor heavy chain H3;        | Q61704  | -0.49                                                    | -0.07                                                    | -0.28                                                | 0.30               | 1.33                              | 1.20                |
| Spectrin beta chain, brain 1;                        | Q62261  | -0.49                                                    | 0.49                                                     | 0.00                                                 | 0.69               | 3.09                              | 2.02                |
| UDP-N-acetylhexosamine pyrophosphorylase;            | Q91YN5  | -0.49                                                    | -1.60                                                    | -1.05                                                | 0.78               | 3.49                              | 5.12                |
| Beta-lactamase-like protein 2;                       | Q99KR3  | -0.49                                                    | -0.67                                                    | -0.58                                                | 0.12               | 0.55                              | 2.80                |
| Protein phosphatase 1 regulatory subunit 3A;         | Q99MR9  | -0.49                                                    | -1.74                                                    | -1.12                                                | 0.88               | 3.92                              | 4.52                |
| Copper homeostasis protein cutC homolog;             | Q9D8X1  | -0.49                                                    | -0.64                                                    | -0.57                                                | 0.11               | 0.47                              | 2.67                |
| Hexokinase-2;                                        | O08528  | -0.49                                                    | -0.54                                                    | -0.51                                                | 0.03               | 0.13                              | 1.89                |
| Hexokinase-1;                                        | P17710  | 0.33                                                     | 0.19                                                     | 0.26                                                 | 0.10               | 0.45                              | 0.86                |
| Hexokinase-3;                                        | Q3TRM8  | -0.17                                                    | -0.81                                                    | -0.49                                                | 0.45               | 2.03                              | 1.90                |
| Annexin A2;                                          | P07356  | -0.49                                                    | 0.01                                                     | -0.24                                                | 0.36               | 1.60                              | 1.22                |
| Annexin A11;                                         | P97384  | -0.49                                                    | -0.52                                                    | -0.50                                                | 0.01               | 0.07                              | 2.30                |
| Xanthine dehydrogenase/oxidase;                      | Q00519  | -0.49                                                    | -0.60                                                    | -0.55                                                | 0.07               | 0.33                              | 2.11                |
| NEDD8-activating enzyme E1 regulatory subunit;       | Q8VBW6  | -0.49                                                    | 0.12                                                     | -0.19                                                | 0.44               | 1.95                              | 1.04                |
| 3-mercaptopyruvate sulfurtransferase;                | Q99J99  | -0.49                                                    | -0.92                                                    | -0.71                                                | 0.30               | 1.33                              | 3.38                |
| Sodium/potassium-transporting ATPase subunit beta-1; | P14094  | -0.47                                                    | -1.79                                                    | -1.13                                                | 0.93               | 4.14                              | 3.75                |
| Biglycan;                                            | P28653  | -0.47                                                    | 0.20                                                     | -0.14                                                | 0.48               | 2.13                              | 0.97                |
| Heat shock protein beta-6;                           | Q5EBG6  | -0.47                                                    | -0.89                                                    | -0.68                                                | 0.29               | 1.31                              | 3.53                |
| Ketosamine-3-kinase;                                 | Q8K274  | -0.47                                                    | -0.06                                                    | -0.27                                                | 0.29               | 1.31                              | 1.11                |
| Arsenite methyltransferase;                          | Q91WU5  | -0.47                                                    | -0.86                                                    | -0.67                                                | 0.27               | 1.22                              | 3.33                |
| Carboxypeptidase N catalytic chain;                  | Q9JJN5  | -0.47                                                    | -1.74                                                    | -1.11                                                | 0.89               | 3.99                              | 7.21                |

Table S6, Tholen et al.

| Protein                                                                                                                                                     | Uniprot | Fold change (log <sub>2</sub> ) of ASAPRatio replicate 1 | Fold change (log <sub>2</sub> ) of ASAPRatio replicate 2 | Average fold change (log <sub>2</sub> ) of ASAPRatio | Standard deviation | 90 % confidence interval (t-test) | Fisher's exact test |
|-------------------------------------------------------------------------------------------------------------------------------------------------------------|---------|----------------------------------------------------------|----------------------------------------------------------|------------------------------------------------------|--------------------|-----------------------------------|---------------------|
| Kelch repeat and BTB (POZ) domain containing 10; MCG12931; Uncharacterized protein;                                                                         | A2AUC9  | -0.47                                                    | -0.94                                                    | -0.71                                                | 0.33               | 1.48                              | 3.34                |
| Tetratricopeptide repeat protein 38;                                                                                                                        | A3KMP2  | -0.47                                                    | -0.27                                                    | -0.37                                                | 0.14               | 0.65                              | 1.58                |
| Myelin protein P0;                                                                                                                                          | P27573  | -0.47                                                    | 0.66                                                     | 0.09                                                 | 0.80               | 3.58                              | 2.43                |
| Aldose reductase;                                                                                                                                           | P45376  | -0.47                                                    | -0.71                                                    | -0.59                                                | 0.17               | 0.75                              | 2.69                |
| Glutathione peroxidase 3;                                                                                                                                   | P46412  | -0.47                                                    | 0.07                                                     | -0.20                                                | 0.38               | 1.72                              | 1.26                |
| Proliferation-associated protein 2G4;                                                                                                                       | P50580  | -0.47                                                    | 0.99                                                     | 0.26                                                 | 1.03               | 4.61                              | 3.65                |
| Thiosulfate sulfurtransferase;                                                                                                                              | P52196  | -0.47                                                    | -0.97                                                    | -0.72                                                | 0.35               | 1.57                              | 3.87                |
| Serine/threonine-protein phosphatase 2A activator;                                                                                                          | P58389  | -0.47                                                    | -0.18                                                    | -0.33                                                | 0.21               | 0.92                              | 1.13                |
| Peptidyl-prolyl cis-trans isomerase FKBP10;                                                                                                                 | Q61576  | -0.47                                                    | -0.94                                                    | -0.71                                                | 0.33               | 1.48                              | 3.06                |
| Alpha-2-macroglobulin;                                                                                                                                      | Q61838  | -0.47                                                    | -0.97                                                    | -0.72                                                | 0.35               | 1.57                              | 3.38                |
| C-type mannose receptor 2;                                                                                                                                  | Q64449  | -0.47                                                    | -0.79                                                    | -0.63                                                | 0.22               | 0.98                              | 2.72                |
| Interferon-activable protein 205-A;                                                                                                                         | Q8CGE8  | -0.47                                                    | 0.51                                                     | 0.02                                                 | 0.69               | 3.09                              | 1.89                |
| Inositol (Myo)-1(Or 4)-monophosphatase 1; Inositol (Myo)-1(Or 4)-monophosphatase 1, isoform CRA_a; Myo-inositol monophosphatase 1; Uncharacterized protein; | Q924B0  | -0.47                                                    | -0.38                                                    | -0.43                                                | 0.07               | 0.31                              | 1.60                |
| Protein S100-A6;                                                                                                                                            | P14069  | -0.47                                                    | -0.92                                                    | -0.70                                                | 0.31               | 1.40                              | 3.41                |
| Acylophosphatase-1;                                                                                                                                         | P56376  | -0.45                                                    | -0.67                                                    | -0.56                                                | 0.15               | 0.67                              | 2.62                |
| Dolichyl-diphosphooligosaccharide--protein glycosyltransferase subunit 1;                                                                                   | Q91YQ5  | -0.45                                                    | 0.15                                                     | -0.15                                                | 0.43               | 1.91                              | 1.16                |
| Uncharacterized protein;                                                                                                                                    | E9Q8E3  | -0.45                                                    | 0.54                                                     | 0.04                                                 | 0.70               | 3.13                              | 1.90                |
| Sec24 related gene family, member D (S. cerevisiae); Uncharacterized protein;                                                                               | Q6NXL1  | -0.45                                                    | -1.03                                                    | -0.74                                                | 0.41               | 1.82                              | 3.16                |
| Carbonyl reductase [NADPH] 2;                                                                                                                               | P08074  | -0.45                                                    | -0.84                                                    | -0.65                                                | 0.27               | 1.21                              | 2.99                |
| ATP synthase subunit alpha, mitochondrial;                                                                                                                  | Q03265  | -0.45                                                    | -0.30                                                    | -0.38                                                | 0.11               | 0.47                              | 1.51                |
| Fumarylacetoacetate hydrolase domain-containing protein 2A;                                                                                                 | Q3TC72  | -0.45                                                    | -0.52                                                    | -0.48                                                | 0.04               | 0.19                              | 2.27                |
| Uncharacterized protein;                                                                                                                                    | E9Q0S6  | -0.45                                                    | -0.07                                                    | -0.26                                                | 0.27               | 1.20                              | 1.14                |
| Leukotriene A-4 hydrolase;                                                                                                                                  | P24527  | -0.43                                                    | -0.34                                                    | -0.39                                                | 0.07               | 0.30                              | 1.29                |
| Splicing factor U2AF 65 kDa subunit;                                                                                                                        | P26369  | -0.43                                                    | 3.25                                                     | 1.41                                                 | 2.60               | 11.62                             | 12.45               |
| Cellular retinoic acid-binding protein 1;                                                                                                                   | P62965  | -0.43                                                    | -0.47                                                    | -0.45                                                | 0.03               | 0.13                              | 1.78                |
| Tripartite motif-containing protein 72;                                                                                                                     | Q1XH17  | -0.43                                                    | -0.76                                                    | -0.60                                                | 0.23               | 1.03                              | 2.47                |
| Synaptic vesicle membrane protein VAT-1 homolog;                                                                                                            | Q62465  | -0.43                                                    | -0.71                                                    | -0.57                                                | 0.20               | 0.88                              | 2.50                |
| Phosphopantothenate--cysteine ligase;                                                                                                                       | Q8VDG5  | -0.43                                                    | -0.12                                                    | -0.28                                                | 0.22               | 0.99                              | 1.24                |
| Probable proline racemase;                                                                                                                                  | Q9CXA2  | -0.43                                                    | -0.47                                                    | -0.45                                                | 0.03               | 0.13                              | 1.86                |
| Inositol-3-phosphate synthase 1;                                                                                                                            | Q9JHU9  | -0.43                                                    | -0.29                                                    | -0.36                                                | 0.10               | 0.47                              | 1.52                |
| Thioredoxin reductase 1, cytoplasmic;                                                                                                                       | Q9JMH6  | -0.43                                                    | -0.71                                                    | -0.57                                                | 0.20               | 0.88                              | 2.55                |
| Maleylacetoacetate isomerase;                                                                                                                               | Q9WVL0  | -0.43                                                    | -0.18                                                    | -0.31                                                | 0.18               | 0.79                              | 1.18                |
| Plasminogen activator inhibitor 2, macrophage;                                                                                                              | P12388  | -0.43                                                    | -0.74                                                    | -0.59                                                | 0.21               | 0.96                              | 2.33                |
| Malate dehydrogenase, cytoplasmic;                                                                                                                          | P14152  | -0.43                                                    | -0.67                                                    | -0.55                                                | 0.16               | 0.74                              | 2.21                |
| Ras-related protein Rab-2A;                                                                                                                                 | P53994  | -0.43                                                    | -0.81                                                    | -0.62                                                | 0.27               | 1.19                              | 3.18                |

Table S6, Tholen et al.

| Protein                                                                                                                                                                                                                   | Uniprot | Fold change (log <sub>2</sub> ) of ASAPRatio replicate 1 | Fold change (log <sub>2</sub> ) of ASAPRatio replicate 2 | Average fold change (log <sub>2</sub> ) of ASAPRatio | Standard deviation | 90 % confidence interval (t-test) | Fisher's exact test |
|---------------------------------------------------------------------------------------------------------------------------------------------------------------------------------------------------------------------------|---------|----------------------------------------------------------|----------------------------------------------------------|------------------------------------------------------|--------------------|-----------------------------------|---------------------|
| Myosin light polypeptide 6;                                                                                                                                                                                               | Q60605  | -0.43                                                    | 0.39                                                     | -0.02                                                | 0.58               | 2.60                              | 1.61                |
| Valacyclovir hydrolase;                                                                                                                                                                                                   | Q8R164  | -0.43                                                    | -0.45                                                    | -0.44                                                | 0.01               | 0.06                              | 2.07                |
| Hydroxyacylglutathione hydrolase, mitochondrial;                                                                                                                                                                          | Q99KB8  | -0.43                                                    | -0.52                                                    | -0.47                                                | 0.06               | 0.26                              | 2.11                |
| Protein kinase, cAMP dependent regulatory, type II alpha; Protein kinase, cAMP dependent regulatory, type II alpha, isoform CRA_b; Uncharacterized protein; cAMP-dependent protein kinase type II-alpha regulatory chain; | Q8K1M3  | -0.43                                                    | -0.58                                                    | -0.51                                                | 0.10               | 0.45                              | 2.22                |
| Caspase-6;                                                                                                                                                                                                                | O08738  | -0.42                                                    | -0.40                                                    | -0.41                                                | 0.01               | 0.06                              | 1.25                |
| Ferritin heavy chain;                                                                                                                                                                                                     | P09528  | -0.42                                                    | -0.43                                                    | -0.42                                                | 0.01               | 0.06                              | 1.92                |
| Pyruvate dehydrogenase E1 component subunit alpha, somatic form, mitochondrial;                                                                                                                                           | P35486  | -0.42                                                    | -0.11                                                    | -0.26                                                | 0.22               | 0.98                              | 1.05                |
| N(4)-(beta-N-acetylglucosaminyl)-L-asparaginase;                                                                                                                                                                          | Q64191  | -0.42                                                    | -0.84                                                    | -0.63                                                | 0.30               | 1.33                              | 2.99                |
| WW domain-binding protein 11;                                                                                                                                                                                             | Q923D5  | -0.42                                                    | 0.99                                                     | 0.29                                                 | 0.99               | 4.42                              | 3.55                |
| Protein canopy homolog 2;                                                                                                                                                                                                 | Q9QXT0  | -0.42                                                    | -0.36                                                    | -0.39                                                | 0.04               | 0.18                              | 1.56                |
| Phosphatidylethanolamine-binding protein 1;                                                                                                                                                                               | P70296  | -0.42                                                    | -0.47                                                    | -0.44                                                | 0.04               | 0.19                              | 2.04                |
| Abhydrolase domain-containing protein 14B;                                                                                                                                                                                | Q8VCR7  | -0.42                                                    | -0.92                                                    | -0.67                                                | 0.35               | 1.58                              | 3.18                |
| Annexin A3;                                                                                                                                                                                                               | O35639  | -0.40                                                    | -0.64                                                    | -0.52                                                | 0.18               | 0.78                              | 2.15                |
| Protein PRRC1;                                                                                                                                                                                                            | Q3UPH1  | -0.40                                                    | -0.54                                                    | -0.47                                                | 0.10               | 0.44                              | 2.22                |
| Mannose-1-phosphate guanyltransferase beta;                                                                                                                                                                               | Q8BTZ7  | -0.40                                                    | -0.74                                                    | -0.57                                                | 0.24               | 1.08                              | 2.58                |
| Poly(ADP-ribose) glycohydrolase ARH3;                                                                                                                                                                                     | Q8CG72  | -0.40                                                    | -0.06                                                    | -0.23                                                | 0.24               | 1.06                              | 0.82                |
| Metalloreductase STEAP3;                                                                                                                                                                                                  | Q8CI59  | -0.40                                                    | 0.43                                                     | 0.02                                                 | 0.59               | 2.62                              | 1.86                |
| Electron transfer flavoprotein subunit beta;                                                                                                                                                                              | Q9DCW4  | -0.40                                                    | -0.71                                                    | -0.55                                                | 0.22               | 1.00                              | 2.29                |
| Torsin-1B;                                                                                                                                                                                                                | Q9ER41  | -0.40                                                    | -0.32                                                    | -0.36                                                | 0.05               | 0.23                              | 1.44                |
| Dysferlin;                                                                                                                                                                                                                | Q9ESD7  | -0.40                                                    | -0.12                                                    | -0.26                                                | 0.20               | 0.87                              | 1.09                |
| N-acetylneuraminic acid synthase (Sialic acid synthase); Uncharacterized protein;                                                                                                                                         | Q99J77  | -0.40                                                    | -0.67                                                    | -0.53                                                | 0.19               | 0.86                              | 1.91                |
| Procollagen C-endopeptidase enhancer 1;                                                                                                                                                                                   | Q61398  | -0.40                                                    | -0.84                                                    | -0.62                                                | 0.31               | 1.39                              | 2.43                |
| 3-hydroxyisobutyryl-CoA hydrolase, mitochondrial;                                                                                                                                                                         | Q8QZS1  | -0.40                                                    | -0.76                                                    | -0.58                                                | 0.26               | 1.15                              | 2.43                |
| NAD-dependent deacetylase sirtuin-2;                                                                                                                                                                                      | Q8VDQ8  | -0.40                                                    | -0.43                                                    | -0.42                                                | 0.03               | 0.12                              | 1.83                |
| Pro-low-density lipoprotein receptor-related protein 1;                                                                                                                                                                   | Q91ZX7  | -0.40                                                    | -0.30                                                    | -0.35                                                | 0.07               | 0.29                              | 1.33                |
| Trans-2-enoyl-CoA reductase, mitochondrial;                                                                                                                                                                               | Q9DCS3  | -0.40                                                    | 0.21                                                     | -0.09                                                | 0.43               | 1.93                              | 1.09                |
| Actin-related protein 2/3 complex subunit 1B;                                                                                                                                                                             | Q9WV32  | -0.40                                                    | 0.10                                                     | -0.15                                                | 0.35               | 1.56                              | 0.90                |
| Actin-related protein 2/3 complex subunit 1A;                                                                                                                                                                             | Q9R0Q6  | -1.22                                                    | -0.43                                                    | -0.83                                                | 0.55               | 2.47                              | 4.66                |
| Ectonucleoside triphosphate diphosphohydrolase 2;                                                                                                                                                                         | O55026  | -0.38                                                    | -0.54                                                    | -0.46                                                | 0.11               | 0.50                              | 1.80                |
| COP9 signalosome complex subunit 6;                                                                                                                                                                                       | O88545  | -0.38                                                    | 0.70                                                     | 0.16                                                 | 0.76               | 3.39                              | 2.00                |
| Nucleolin;                                                                                                                                                                                                                | P09405  | -0.38                                                    | 1.94                                                     | 0.78                                                 | 1.64               | 7.31                              | 8.25                |
| Ornithine aminotransferase, mitochondrial;                                                                                                                                                                                | P29758  | -0.38                                                    | -0.42                                                    | -0.40                                                | 0.03               | 0.12                              | 1.68                |
| Indolethylamine N-methyltransferase;                                                                                                                                                                                      | P40936  | -0.38                                                    | -0.22                                                    | -0.30                                                | 0.11               | 0.50                              | 1.09                |
| Annexin A5;                                                                                                                                                                                                               | P48036  | -0.38                                                    | -0.20                                                    | -0.29                                                | 0.12               | 0.56                              | 1.20                |
| UDP-N-acetylhexosamine pyrophosphorylase-like protein 1;                                                                                                                                                                  | Q3TW96  | -0.38                                                    | -1.09                                                    | -0.73                                                | 0.50               | 2.25                              | 2.10                |
| Electron transfer flavoprotein subunit alpha, mitochondrial;                                                                                                                                                              | Q99LC5  | -0.38                                                    | -0.36                                                    | -0.37                                                | 0.01               | 0.06                              | 1.58                |

Table S6, Tholen et al.

| Protein                                                           | Uniprot | Fold change (log <sub>2</sub> ) of ASAPRatio replicate 1 | Fold change (log <sub>2</sub> ) of ASAPRatio replicate 2 | Average fold change (log <sub>2</sub> ) of ASAPRatio | Standard deviation | 90 % confidence interval (t-test) | Fisher's exact test |
|-------------------------------------------------------------------|---------|----------------------------------------------------------|----------------------------------------------------------|------------------------------------------------------|--------------------|-----------------------------------|---------------------|
| Omega-amidase NIT2;                                               | Q9JHW2  | -0.38                                                    | -0.07                                                    | -0.23                                                | 0.21               | 0.96                              | 0.88                |
| Glutathione S-transferase P 1;                                    | P19157  | -0.38                                                    | -0.67                                                    | -0.52                                                | 0.21               | 0.92                              | 2.31                |
| Fumarylacetoacetase;                                              | P35505  | -0.38                                                    | -0.79                                                    | -0.58                                                | 0.29               | 1.29                              | 2.86                |
| D-2-hydroxyglutarate dehydrogenase, mitochondrial;                | Q8CIM3  | -0.38                                                    | -0.79                                                    | -0.58                                                | 0.29               | 1.29                              | 2.87                |
| Protein dpy-30 homolog;                                           | Q99LT0  | -0.36                                                    | 0.26                                                     | -0.05                                                | 0.44               | 1.96                              | 1.34                |
| Prefoldin subunit 2;                                              | O70591  | -0.36                                                    | -0.32                                                    | -0.34                                                | 0.03               | 0.11                              | 1.45                |
| Echinoderm microtubule-associated protein-like 1;                 | Q05BC3  | -0.36                                                    | 0.19                                                     | -0.08                                                | 0.39               | 1.73                              | 1.14                |
| Proteasome subunit beta type-1;                                   | O09061  | -0.34                                                    | 0.57                                                     | 0.11                                                 | 0.64               | 2.86                              | 1.62                |
| Periaxin;                                                         | O55103  | -0.34                                                    | 0.54                                                     | 0.10                                                 | 0.62               | 2.77                              | 1.60                |
| Adenosine kinase;                                                 | P55264  | -0.34                                                    | -0.25                                                    | -0.30                                                | 0.06               | 0.28                              | 1.07                |
| Haloacid dehalogenase-like hydrolase domain-containing protein 2; | Q3UGR5  | -0.34                                                    | -0.94                                                    | -0.64                                                | 0.43               | 1.90                              | 3.14                |
| Acetyl-CoA acetyltransferase, mitochondrial;                      | Q8QZT1  | -0.34                                                    | 0.00                                                     | -0.17                                                | 0.24               | 1.07                              | 0.69                |
| Glutathione peroxidase 7;                                         | Q99LJ6  | -0.34                                                    | -0.92                                                    | -0.63                                                | 0.41               | 1.82                              | 3.21                |
| Plasma glutamate carboxypeptidase;                                | Q9WVJ3  | -0.34                                                    | -0.67                                                    | -0.50                                                | 0.23               | 1.03                              | 2.32                |
| Serine-threonine kinase receptor-associated protein;              | Q9Z1Z2  | -0.34                                                    | 0.18                                                     | -0.08                                                | 0.36               | 1.63                              | 0.89                |
| Glutathione S-transferase Mu 1;                                   | P10649  | -0.34                                                    | 0.07                                                     | -0.14                                                | 0.29               | 1.29                              | 0.73                |
| Glutathione S-transferase Mu 2;                                   | P15626  | -0.15                                                    | -0.03                                                    | -0.09                                                | 0.09               | 0.39                              | 0.37                |
| Ras-related protein Rab-5A;                                       | Q9CQD1  | 0.37                                                     | -0.23                                                    | 0.07                                                 | 0.42               | 1.90                              | 1.30                |
| Xaa-Pro dipeptidase;                                              | Q11136  | -0.34                                                    | -0.45                                                    | -0.40                                                | 0.08               | 0.36                              | 1.49                |
| Actin-related protein 2/3 complex subunit 2;                      | Q9CVB6  | -0.34                                                    | 0.15                                                     | -0.09                                                | 0.35               | 1.55                              | 0.89                |
| Dynein light chain 2, cytoplasmic;                                | Q9D0M5  | -0.34                                                    | 0.68                                                     | 0.17                                                 | 0.72               | 3.21                              | 2.10                |
| 3-oxoacyl-[acyl-carrier-protein] synthase, mitochondrial;         | Q9D404  | -0.34                                                    | -0.56                                                    | -0.45                                                | 0.15               | 0.68                              | 2.11                |
| 1,4-alpha-glucan-branching enzyme;                                | Q9D6Y9  | -0.34                                                    | -0.40                                                    | -0.37                                                | 0.04               | 0.18                              | 1.40                |
| Proline synthase co-transcribed bacterial homolog protein;        | Q9Z2Y8  | -0.34                                                    | -0.12                                                    | -0.23                                                | 0.16               | 0.69                              | 0.92                |
| UDP-glucose:glycoprotein glucosyltransferase 1;                   | Q6P5E4  | -0.32                                                    | -0.20                                                    | -0.26                                                | 0.09               | 0.38                              | 0.95                |
| UPF0556 protein C19orf10 homolog;                                 | Q9CPT4  | -0.32                                                    | -1.32                                                    | -0.82                                                | 0.71               | 3.16                              | 3.81                |
| Galectin-3-binding protein;                                       | Q07797  | -0.32                                                    | -1.00                                                    | -0.66                                                | 0.48               | 2.14                              | 3.13                |
| Peroxiredoxin-2;                                                  | Q61171  | -0.32                                                    | -0.56                                                    | -0.44                                                | 0.17               | 0.74                              | 1.82                |
| Inorganic pyrophosphatase 2, mitochondrial;                       | Q91VM9  | -0.32                                                    | 0.23                                                     | -0.05                                                | 0.39               | 1.73                              | 0.93                |
| PDZ and LIM domain protein 3;                                     | O70209  | -0.30                                                    | -0.07                                                    | -0.19                                                | 0.16               | 0.73                              | 0.77                |
| Carbonic anhydrase 2;                                             | P00920  | -0.30                                                    | -0.64                                                    | -0.47                                                | 0.24               | 1.07                              | 2.15                |
| Bis(5'-nucleosyl)-tetraphosphatase [asymmetrical];                | P56380  | -0.30                                                    | -0.43                                                    | -0.37                                                | 0.09               | 0.41                              | 1.52                |
| Low molecular weight phosphotyrosine protein phosphatase;         | Q9D358  | -0.30                                                    | -0.47                                                    | -0.39                                                | 0.12               | 0.54                              | 1.79                |
| Isocitrate dehydrogenase [NAD] subunit alpha, mitochondrial;      | Q9D6R2  | -0.30                                                    | -0.40                                                    | -0.35                                                | 0.07               | 0.29                              | 1.28                |
| Galactokinase;                                                    | Q9R0N0  | -0.30                                                    | -0.29                                                    | -0.30                                                | 0.01               | 0.06                              | 1.07                |
| Cullin-1;                                                         | Q9WTX6  | -0.30                                                    | 0.76                                                     | 0.23                                                 | 0.75               | 3.35                              | 2.66                |
| Probable methylthioribulose-1-phosphate dehydratase;              | Q9WVQ5  | -0.30                                                    | -0.29                                                    | -0.30                                                | 0.01               | 0.06                              | 1.15                |
| Succinyl-CoA ligase [GDP-forming] subunit beta, mitochondrial;    | Q9Z2I8  | -0.30                                                    | -1.25                                                    | -0.78                                                | 0.67               | 2.99                              | 2.08                |

Table S6, Tholen et al.

| Protein                                                                   | Uniprot | Fold change (log <sub>2</sub> ) of ASAPRatio replicate 1 | Fold change (log <sub>2</sub> ) of ASAPRatio replicate 2 | Average fold change (log <sub>2</sub> ) of ASAPRatio | Standard deviation | 90 % confidence interval (t-test) | Fisher's exact test |
|---------------------------------------------------------------------------|---------|----------------------------------------------------------|----------------------------------------------------------|------------------------------------------------------|--------------------|-----------------------------------|---------------------|
| UDP-glucose 6-dehydrogenase;                                              | O70475  | -0.30                                                    | -0.56                                                    | -0.43                                                | 0.18               | 0.80                              | 2.01                |
| Keratin, type I cytoskeletal 17;                                          | Q9QWL7  | 1.00                                                     | 3.05                                                     | 2.03                                                 | 1.45               | 6.48                              | 17.87               |
| Keratin, type I cytoskeletal 10;                                          | P02535  | -1.00                                                    | 0.38                                                     | -0.31                                                | 0.98               | 4.35                              | 3.38                |
| Cytosolic non-specific dipeptidase;                                       | Q9D1A2  | -0.30                                                    | -0.52                                                    | -0.41                                                | 0.15               | 0.67                              | 1.63                |
| Methylmalonate-semialdehyde dehydrogenase [acylating], mitochondrial;     | Q9EQ20  | -0.30                                                    | -0.52                                                    | -0.41                                                | 0.15               | 0.67                              | 1.71                |
| Uncharacterized protein;                                                  | E9PYJ9  | -0.30                                                    | -0.86                                                    | -0.58                                                | 0.39               | 1.76                              | 2.21                |
| Glyceraldehyde-3-phosphate dehydrogenase;                                 | E9QAC7  | -0.30                                                    | -1.00                                                    | -0.65                                                | 0.49               | 2.20                              | 3.50                |
| Uncharacterized protein;                                                  | Q3ULW8  | -0.30                                                    | -0.22                                                    | -0.26                                                | 0.06               | 0.27                              | 0.98                |
| Platelet-activating factor acetylhydrolase IB subunit gamma;              | Q61205  | -0.30                                                    | -0.58                                                    | -0.44                                                | 0.19               | 0.86                              | 2.11                |
| 3-hydroxyanthranilate 3,4-dioxygenase;                                    | Q78JT3  | -0.30                                                    | -2.00                                                    | -1.15                                                | 1.20               | 5.35                              | 8.55                |
| Integrin alpha-5;                                                         | P11688  | -0.29                                                    | -0.18                                                    | -0.24                                                | 0.07               | 0.32                              | 1.01                |
| Peptidyl-prolyl cis-trans isomerase C;                                    | P30412  | -0.29                                                    | -0.67                                                    | -0.48                                                | 0.27               | 1.20                              | 2.35                |
| Succinate-semialdehyde dehydrogenase, mitochondrial;                      | Q8BWF0  | -0.29                                                    | 0.04                                                     | -0.12                                                | 0.23               | 1.04                              | 0.65                |
| Probable fructose-2,6-bisphosphatase TIGAR;                               | Q8BZA9  | -0.29                                                    | -0.94                                                    | -0.61                                                | 0.46               | 2.07                              | 2.81                |
| Tubulin polymerization-promoting protein family member 3;                 | Q9CRB6  | -0.29                                                    | -0.58                                                    | -0.43                                                | 0.21               | 0.92                              | 1.57                |
| Pyruvate dehydrogenase E1 component subunit beta, mitochondrial;          | Q9D051  | -0.29                                                    | -0.12                                                    | -0.20                                                | 0.12               | 0.52                              | 0.85                |
| Peroxisomal acyl-coenzyme A oxidase 1;                                    | Q9R0H0  | -0.29                                                    | 0.59                                                     | 0.15                                                 | 0.62               | 2.75                              | 1.76                |
| Phosphoglycerate kinase 1;                                                | P09411  | -0.29                                                    | -0.45                                                    | -0.37                                                | 0.12               | 0.53                              | 1.62                |
| Lysophosphatidic acid phosphatase type 6;                                 | Q8BP40  | -0.29                                                    | 0.45                                                     | 0.08                                                 | 0.52               | 2.34                              | 1.37                |
| UPF0160 protein MYG1, mitochondrial;                                      | Q9JK81  | -0.29                                                    | -0.30                                                    | -0.30                                                | 0.01               | 0.06                              | 1.07                |
| Spliceosome RNA helicase Ddx39b;                                          | Q9Z1N5  | -0.29                                                    | 1.01                                                     | 0.36                                                 | 0.92               | 4.10                              | 2.64                |
| TOM1-like protein 2;                                                      | Q5SRX1  | -0.29                                                    | -0.06                                                    | -0.17                                                | 0.16               | 0.72                              | 0.72                |
| Phosphorylase b kinase regulatory subunit alpha, skeletal muscle isoform; | P18826  | -0.27                                                    | -0.49                                                    | -0.38                                                | 0.16               | 0.71                              | 1.45                |
| Dipeptidyl peptidase 4;                                                   | P28843  | -0.27                                                    | -0.54                                                    | -0.40                                                | 0.19               | 0.84                              | 1.43                |
| Laminin subunit alpha-4;                                                  | P97927  | -0.27                                                    | 0.72                                                     | 0.23                                                 | 0.70               | 3.13                              | 2.43                |
| Myoferlin;                                                                | Q69ZN7  | -0.27                                                    | 0.06                                                     | -0.11                                                | 0.23               | 1.03                              | 0.60                |
| Aflatoxin B1 aldehyde reductase member 2;                                 | Q8CG76  | -0.27                                                    | -0.81                                                    | -0.54                                                | 0.38               | 1.71                              | 2.60                |
| AP-1 complex subunit beta-1;                                              | O35643  | -0.27                                                    | 0.26                                                     | 0.00                                                 | 0.38               | 1.68                              | 0.89                |
| Adenosylhomocysteinase;                                                   | P50247  | -0.27                                                    | -0.32                                                    | -0.30                                                | 0.04               | 0.17                              | 1.23                |
| Protein phosphatase 1 regulatory subunit 7;                               | Q3UM45  | -0.27                                                    | 0.23                                                     | -0.02                                                | 0.35               | 1.57                              | 0.92                |
| Sepiapterin reductase;                                                    | Q64105  | -0.27                                                    | -0.62                                                    | -0.45                                                | 0.25               | 1.11                              | 2.10                |
| Coagulation factor XIII A chain;                                          | Q8BH61  | -0.27                                                    | -0.17                                                    | -0.22                                                | 0.07               | 0.32                              | 0.77                |
| Dihydropteridine reductase;                                               | Q8BVI4  | -0.27                                                    | -0.52                                                    | -0.39                                                | 0.17               | 0.78                              | 1.84                |
| Carboxylesterase 3;                                                       | Q8VCT4  | -0.27                                                    | -0.23                                                    | -0.25                                                | 0.02               | 0.11                              | 0.86                |
| Liver carboxylesterase N;                                                 | P23953  | -0.49                                                    | -1.18                                                    | -0.84                                                | 0.49               | 2.18                              | 4.27                |
| Uncharacterized protein;                                                  | D3Z5G7  | -1.25                                                    | -0.58                                                    | -0.92                                                | 0.48               | 2.13                              | 3.19                |
| Calcium/calmodulin-dependent protein kinase type 1;                       | Q91YS8  | -0.27                                                    | -0.34                                                    | -0.30                                                | 0.05               | 0.22                              | 1.28                |
| Lysosome-associated membrane glycoprotein 1;                              | P11438  | -0.25                                                    | -0.27                                                    | -0.26                                                | 0.01               | 0.05                              | 1.05                |

Table S6, Tholen et al.

| Protein                                                                                              | Uniprot | Fold change (log <sub>2</sub> ) of ASAPRatio replicate 1 | Fold change (log <sub>2</sub> ) of ASAPRatio replicate 2 | Average fold change (log <sub>2</sub> ) of ASAPRatio | Standard deviation | 90 % confidence interval (t-test) | Fisher's exact test |
|------------------------------------------------------------------------------------------------------|---------|----------------------------------------------------------|----------------------------------------------------------|------------------------------------------------------|--------------------|-----------------------------------|---------------------|
| Fibulin-2;                                                                                           | P37889  | -0.25                                                    | 0.41                                                     | 0.08                                                 | 0.47               | 2.09                              | 1.37                |
| Platelet-activating factor acetylhydrolase IB subunit alpha;                                         | P63005  | -0.25                                                    | -0.34                                                    | -0.30                                                | 0.06               | 0.28                              | 1.19                |
| N-acetylglucosamine-6-sulfatase;                                                                     | Q8BFR4  | -0.25                                                    | -0.52                                                    | -0.38                                                | 0.19               | 0.83                              | 1.69                |
| Presequence protease, mitochondrial;                                                                 | Q8K411  | -0.25                                                    | -0.04                                                    | -0.15                                                | 0.15               | 0.66                              | 0.61                |
| Apolipoprotein A-I-binding protein;                                                                  | Q8K4Z3  | -0.25                                                    | -0.43                                                    | -0.34                                                | 0.13               | 0.57                              | 1.54                |
| SPRY domain-containing protein 4;                                                                    | Q91WK1  | -0.25                                                    | -0.34                                                    | -0.30                                                | 0.06               | 0.28                              | 1.07                |
| Protein NDRG2;                                                                                       | Q9QYG0  | -0.25                                                    | -0.27                                                    | -0.26                                                | 0.01               | 0.05                              | 1.03                |
| S-formylglutathione hydrolase;                                                                       | Q9R0P3  | -0.25                                                    | -0.36                                                    | -0.31                                                | 0.07               | 0.33                              | 1.21                |
| Glycogen synthase kinase-3 beta;                                                                     | Q9WV60  | -0.25                                                    | -0.42                                                    | -0.33                                                | 0.12               | 0.51                              | 1.37                |
| Isocitrate dehydrogenase 3 (NAD <sup>+</sup> ) beta; Tumor-related protein; Uncharacterized protein; | Q91VA7  | -0.25                                                    | -0.40                                                    | -0.32                                                | 0.10               | 0.45                              | 1.29                |
| Branched-chain-amino-acid aminotransferase, mitochondrial;                                           | O35855  | -0.25                                                    | -0.47                                                    | -0.36                                                | 0.16               | 0.70                              | 1.36                |
| U6 snRNA-associated Sm-like protein LSM2;                                                            | O35900  | -0.25                                                    | 0.52                                                     | 0.13                                                 | 0.54               | 2.42                              | 1.67                |
| Spermine synthase;                                                                                   | P97355  | -0.25                                                    | -0.20                                                    | -0.23                                                | 0.04               | 0.16                              | 0.75                |
| Annexin A4;                                                                                          | P97429  | -0.25                                                    | -0.54                                                    | -0.39                                                | 0.20               | 0.89                              | 1.55                |
| Peroxiredoxin-5, mitochondrial;                                                                      | P99029  | -0.25                                                    | -0.42                                                    | -0.33                                                | 0.12               | 0.51                              | 1.49                |
| Ubiquitin thioesterase OTUB1;                                                                        | Q7TQI3  | -0.25                                                    | 0.28                                                     | 0.01                                                 | 0.37               | 1.66                              | 0.90                |
| Alpha-mannosidase 2C1;                                                                               | Q91W89  | -0.25                                                    | -0.30                                                    | -0.28                                                | 0.04               | 0.16                              | 0.97                |
| Flavin reductase (NADPH);                                                                            | Q923D2  | -0.25                                                    | -0.84                                                    | -0.54                                                | 0.41               | 1.85                              | 2.82                |
| D-dopachrome decarboxylase;                                                                          | O35215  | -0.23                                                    | -1.09                                                    | -0.66                                                | 0.60               | 2.70                              | 3.89                |
| Vacuolar protein sorting-associated protein 26A;                                                     | P40336  | -0.23                                                    | 0.41                                                     | 0.09                                                 | 0.46               | 2.04                              | 1.45                |
| Scavenger receptor cysteine-rich type 1 protein M130;                                                | Q2VLH6  | -0.23                                                    | -0.15                                                    | -0.19                                                | 0.06               | 0.26                              | 0.73                |
| Peptidyl-prolyl cis-trans isomerase FKBP3;                                                           | Q62446  | -0.23                                                    | -0.12                                                    | -0.18                                                | 0.08               | 0.36                              | 0.74                |
| NADP-dependent malic enzyme;                                                                         | P06801  | -0.23                                                    | -0.09                                                    | -0.16                                                | 0.10               | 0.46                              | 0.57                |
| Propionyl-CoA carboxylase alpha chain, mitochondrial;                                                | Q91ZA3  | -0.23                                                    | 0.08                                                     | -0.08                                                | 0.22               | 1.00                              | 0.48                |
| Obg-like ATPase 1;                                                                                   | Q9CZ30  | -0.23                                                    | -0.09                                                    | -0.16                                                | 0.10               | 0.46                              | 0.64                |
| Plasma membrane Ca <sup>++</sup> transporting ATPase 4 variant x/e; Uncharacterized protein;         | D1FNM8  | -0.23                                                    | 0.52                                                     | 0.14                                                 | 0.53               | 2.37                              | 1.68                |
| Transgelin;                                                                                          | P37804  | -0.22                                                    | -0.23                                                    | -0.23                                                | 0.01               | 0.05                              | 0.87                |
| Hydroxymethylglutaryl-CoA lyase, mitochondrial;                                                      | P38060  | -0.22                                                    | -0.60                                                    | -0.41                                                | 0.27               | 1.20                              | 1.84                |
| Glutamate--cysteine ligase catalytic subunit;                                                        | P97494  | -0.22                                                    | -0.43                                                    | -0.33                                                | 0.15               | 0.68                              | 1.39                |
| Protein farnesyltransferase/geranylgeranyltransferase type-1 subunit alpha;                          | Q61239  | -0.22                                                    | 0.66                                                     | 0.22                                                 | 0.62               | 2.77                              | 1.91                |
| Spermidine synthase;                                                                                 | Q64674  | -0.22                                                    | -0.79                                                    | -0.50                                                | 0.40               | 1.79                              | 2.55                |
| Succinyl-CoA:3-ketoacid-coenzyme A transferase 1, mitochondrial;                                     | Q9D0K2  | -0.22                                                    | -0.01                                                    | -0.12                                                | 0.14               | 0.64                              | 0.45                |
| Catenin alpha-1;                                                                                     | P26231  | -0.22                                                    | 0.77                                                     | 0.28                                                 | 0.70               | 3.13                              | 1.65                |
| Ras-related protein Rab-11B;                                                                         | P46638  | -0.22                                                    | -0.25                                                    | -0.24                                                | 0.02               | 0.11                              | 0.85                |
| UPF0366 protein C11orf67 homolog;                                                                    | Q8R0P4  | -0.22                                                    | -1.18                                                    | -0.70                                                | 0.68               | 3.05                              | 3.74                |
| Guanine deaminase;                                                                                   | Q9R111  | -0.22                                                    | -0.17                                                    | -0.19                                                | 0.04               | 0.16                              | 0.73                |
| Septin-5;                                                                                            | Q9Z2Q6  | -0.22                                                    | 0.50                                                     | 0.14                                                 | 0.50               | 2.25                              | 1.54                |

Table S6, Tholen et al.

| Protein                                                                                                                                                           | Uniprot | Fold change (log <sub>2</sub> ) of ASAPRatio replicate 1 | Fold change (log <sub>2</sub> ) of ASAPRatio replicate 2 | Average fold change (log <sub>2</sub> ) of ASAPRatio | Standard deviation | 90 % confidence interval (t-test) | Fisher's exact test |
|-------------------------------------------------------------------------------------------------------------------------------------------------------------------|---------|----------------------------------------------------------|----------------------------------------------------------|------------------------------------------------------|--------------------|-----------------------------------|---------------------|
| Complement component 1, q subcomponent binding protein; Complement component 1, q subcomponent binding protein, isoform CRA_b; Uncharacterized protein; p32-RACK; | Q8R5L1  | -0.22                                                    | 0.53                                                     | 0.15                                                 | 0.53               | 2.35                              | 1.68                |
| Ferritin;                                                                                                                                                         | Q9CPX4  | -0.22                                                    | -0.38                                                    | -0.30                                                | 0.11               | 0.50                              | 1.14                |
| TIP41-like protein;                                                                                                                                               | Q8BH58  | -0.22                                                    | -0.17                                                    | -0.19                                                | 0.04               | 0.16                              | 0.76                |
| Coatomer subunit alpha;                                                                                                                                           | Q8CIE6  | -0.22                                                    | -0.22                                                    | -0.22                                                | 0.00               | 0.00                              | 0.86                |
| Peroxiredoxin-4;                                                                                                                                                  | O08807  | -0.20                                                    | -0.30                                                    | -0.25                                                | 0.07               | 0.33                              | 1.04                |
| Ras-related protein R-Ras;                                                                                                                                        | P10833  | -0.20                                                    | -0.60                                                    | -0.40                                                | 0.28               | 1.26                              | 1.61                |
| 78 kDa glucose-regulated protein;                                                                                                                                 | P20029  | -0.20                                                    | -0.20                                                    | -0.20                                                | 0.00               | 0.00                              | 0.52                |
| Heat shock cognate 71 kDa protein;                                                                                                                                | P63017  | -0.17                                                    | 0.19                                                     | 0.01                                                 | 0.25               | 1.13                              | 0.63                |
| Heat shock 70 kDa protein 1A;                                                                                                                                     | Q61696  | 0.00                                                     | 0.45                                                     | 0.23                                                 | 0.32               | 1.43                              | 0.95                |
| Peptidyl-prolyl cis-trans isomerase FKBP5;                                                                                                                        | Q64378  | -0.18                                                    | -0.04                                                    | -0.11                                                | 0.10               | 0.44                              | 0.42                |
| Prostaglandin reductase 1;                                                                                                                                        | Q91YR9  | -0.18                                                    | 0.10                                                     | -0.04                                                | 0.20               | 0.89                              | 0.57                |
| Dual specificity protein phosphatase 3;                                                                                                                           | Q9D7X3  | -0.18                                                    | -0.69                                                    | -0.44                                                | 0.36               | 1.60                              | 2.05                |
| N-acylglucosamine 2-epimerase;                                                                                                                                    | P82343  | -0.18                                                    | -0.06                                                    | -0.12                                                | 0.09               | 0.39                              | 0.45                |
| Isoleucyl-tRNA synthetase, mitochondrial;                                                                                                                         | Q8BIJ6  | -0.18                                                    | 0.24                                                     | 0.03                                                 | 0.30               | 1.34                              | 0.66                |
| Ubiquinone biosynthesis protein COQ9, mitochondrial;                                                                                                              | Q8K1Z0  | -0.18                                                    | -0.18                                                    | -0.18                                                | 0.00               | 0.00                              | 0.54                |
| 14 kDa phosphohistidine phosphatase;                                                                                                                              | Q9DAK9  | -0.18                                                    | 1.06                                                     | 0.44                                                 | 0.88               | 3.92                              | 3.30                |
| Putative ATP-dependent RNA helicase Pl10;                                                                                                                         | P16381  | -0.17                                                    | 0.97                                                     | 0.40                                                 | 0.81               | 3.60                              | 3.06                |
| Nuclear transport factor 2;                                                                                                                                       | P61971  | -0.17                                                    | -0.34                                                    | -0.25                                                | 0.12               | 0.54                              | 1.09                |
| Eukaryotic translation initiation factor 4E;                                                                                                                      | P63073  | -0.17                                                    | -0.60                                                    | -0.38                                                | 0.30               | 1.36                              | 1.61                |
| Ribonuclease inhibitor;                                                                                                                                           | Q91VI7  | -0.17                                                    | -0.18                                                    | -0.18                                                | 0.01               | 0.05                              | 0.56                |
| Translationally-controlled tumor protein;                                                                                                                         | P63028  | -0.17                                                    | -0.34                                                    | -0.25                                                | 0.12               | 0.54                              | 1.11                |
| Trifunctional purine biosynthetic protein adenosine-3;                                                                                                            | Q64737  | -0.17                                                    | 0.10                                                     | -0.04                                                | 0.19               | 0.84                              | 0.43                |
| Copine-1;                                                                                                                                                         | Q8C166  | -0.17                                                    | -0.18                                                    | -0.18                                                | 0.01               | 0.05                              | 0.66                |
| Copine-3;                                                                                                                                                         | Q8BT60  | -0.47                                                    | 0.00                                                     | -0.24                                                | 0.34               | 1.50                              | 0.66                |
| N(G),N(G)-dimethylarginine dimethylaminohydrolase 1;                                                                                                              | Q9CWS0  | -0.17                                                    | -0.09                                                    | -0.13                                                | 0.06               | 0.25                              | 0.49                |
| Profilin-2;                                                                                                                                                       | Q9JJV2  | -0.17                                                    | -0.40                                                    | -0.28                                                | 0.16               | 0.72                              | 1.08                |
| Prostaglandin reductase 2;                                                                                                                                        | Q8VDQ1  | -0.17                                                    | -0.25                                                    | -0.21                                                | 0.06               | 0.27                              | 0.78                |
| Carbonic anhydrase 1;                                                                                                                                             | P13634  | -0.17                                                    | -0.56                                                    | -0.36                                                | 0.27               | 1.22                              | 1.69                |
| Dihydropyrimidinase-related protein 5;                                                                                                                            | Q9EQF6  | -0.17                                                    | -0.29                                                    | -0.23                                                | 0.08               | 0.37                              | 0.89                |
| Galectin-3;                                                                                                                                                       | P16110  | -0.15                                                    | -0.23                                                    | -0.19                                                | 0.06               | 0.26                              | 0.83                |
| Nicotinamide phosphoribosyltransferase;                                                                                                                           | Q99KQ4  | -0.15                                                    | -0.01                                                    | -0.08                                                | 0.10               | 0.44                              | 0.31                |
| Filamin-A;                                                                                                                                                        | Q8BTM8  | -0.15                                                    | 0.38                                                     | 0.11                                                 | 0.38               | 1.68                              | 0.79                |
| V-type proton ATPase 116 kDa subunit a isoform 1;                                                                                                                 | Q9Z1G4  | -0.15                                                    | -0.15                                                    | -0.15                                                | 0.00               | 0.00                              | 0.61                |
| Superoxide dismutase [Cu-Zn];                                                                                                                                     | P08228  | -0.14                                                    | -0.09                                                    | -0.11                                                | 0.03               | 0.15                              | 0.43                |
| Galectin-1;                                                                                                                                                       | P16045  | -0.14                                                    | -0.47                                                    | -0.31                                                | 0.24               | 1.07                              | 1.42                |
| Calnexin;                                                                                                                                                         | P35564  | -0.14                                                    | 0.89                                                     | 0.38                                                 | 0.72               | 3.23                              | 2.66                |

Table S6, Tholen et al.

| Protein                                                                            | Uniprot | Fold change (log <sub>2</sub> ) of ASAPRatio replicate 1 | Fold change (log <sub>2</sub> ) of ASAPRatio replicate 2 | Average fold change (log <sub>2</sub> ) of ASAPRatio | Standard deviation | 90 % confidence interval (t-test) | Fisher's exact test |
|------------------------------------------------------------------------------------|---------|----------------------------------------------------------|----------------------------------------------------------|------------------------------------------------------|--------------------|-----------------------------------|---------------------|
| Macrophage mannose receptor 1;                                                     | Q61830  | -0.14                                                    | -0.12                                                    | -0.13                                                | 0.01               | 0.05                              | 0.45                |
| BTB/POZ domain-containing protein KCTD12;                                          | Q6WVG3  | -0.14                                                    | 0.38                                                     | 0.12                                                 | 0.36               | 1.63                              | 0.93                |
| Protein phosphatase 1F;                                                            | Q8CGA0  | -0.14                                                    | -1.00                                                    | -0.57                                                | 0.61               | 2.73                              | 2.49                |
| Aspartoacylase;                                                                    | Q8R3P0  | -0.14                                                    | -0.30                                                    | -0.22                                                | 0.12               | 0.53                              | 0.83                |
| Hepatocyte growth factor activator;                                                | Q9R098  | -0.14                                                    | -0.62                                                    | -0.38                                                | 0.34               | 1.53                              | 1.13                |
| Delta(3,5)-Delta(2,4)-dienoyl-CoA isomerase, mitochondrial;                        | O35459  | -0.14                                                    | 0.39                                                     | 0.13                                                 | 0.37               | 1.66                              | 1.07                |
| Seryl-tRNA synthetase, cytoplasmic;                                                | P26638  | -0.14                                                    | 0.10                                                     | -0.02                                                | 0.17               | 0.74                              | 0.38                |
| Disabled homolog 2;                                                                | P98078  | -0.14                                                    | -1.25                                                    | -0.69                                                | 0.79               | 3.52                              | 3.33                |
| Adapter molecule crk;                                                              | Q64010  | -0.14                                                    | -0.56                                                    | -0.35                                                | 0.30               | 1.33                              | 1.31                |
| Enoyl-CoA delta isomerase 2, mitochondrial;                                        | Q9WUR2  | -0.14                                                    | 0.08                                                     | -0.03                                                | 0.16               | 0.69                              | 0.43                |
| Phosphate carrier protein, mitochondrial;                                          | Q8VEM8  | -0.14                                                    | 0.96                                                     | 0.41                                                 | 0.77               | 3.45                              | 2.41                |
| Ras-related protein Rab-7a;                                                        | P51150  | -0.12                                                    | -0.29                                                    | -0.20                                                | 0.12               | 0.52                              | 0.82                |
| Platelet-activating factor acetylhydrolase IB subunit beta;                        | Q61206  | -0.12                                                    | -0.56                                                    | -0.34                                                | 0.31               | 1.38                              | 1.50                |
| Transmembrane emp24 domain-containing protein 10;                                  | Q9D1D4  | -0.12                                                    | 0.53                                                     | 0.20                                                 | 0.46               | 2.04                              | 1.36                |
| Magnesium-dependent phosphatase 1;                                                 | Q9D967  | -0.12                                                    | -0.12                                                    | -0.12                                                | 0.00               | 0.00                              | 0.46                |
| Glycine N-methyltransferase;                                                       | Q9QXF8  | -0.12                                                    | -1.84                                                    | -0.98                                                | 1.21               | 5.42                              | 4.43                |
| Proteasome subunit beta type-2;                                                    | Q9R1P3  | -0.12                                                    | 0.00                                                     | -0.06                                                | 0.08               | 0.38                              | 0.22                |
| ADP-ribosylation factor-like protein 3;                                            | Q9WUL7  | -0.12                                                    | -0.43                                                    | -0.28                                                | 0.22               | 0.99                              | 1.12                |
| Caveolin-1;                                                                        | P49817  | -0.12                                                    | 0.72                                                     | 0.30                                                 | 0.60               | 2.66                              | 2.09                |
| Serine/threonine-protein phosphatase 2B catalytic subunit alpha isoform;           | P63328  | -0.12                                                    | -0.36                                                    | -0.24                                                | 0.17               | 0.75                              | 0.94                |
| Coronin-1C;                                                                        | Q9WUM4  | -0.12                                                    | 0.59                                                     | 0.23                                                 | 0.50               | 2.23                              | 1.52                |
| MCG21506; Macrophage galactose N-acetyl-galactosamine specific lectin 2 isoform i; |         |                                                          |                                                          |                                                      |                    |                                   |                     |
| Uncharacterized protein;                                                           | A9XX86  | -0.12                                                    | 0.28                                                     | 0.08                                                 | 0.28               | 1.25                              | 0.72                |
| Sorting nexin-2;                                                                   | Q9CWK8  | -0.11                                                    | -0.71                                                    | -0.41                                                | 0.43               | 1.92                              | 1.93                |
| AP-2 complex subunit beta;                                                         | Q9DBG3  | -0.11                                                    | 0.25                                                     | 0.07                                                 | 0.25               | 1.12                              | 0.72                |
| Proteasome subunit beta type-5;                                                    | O55234  | -0.11                                                    | 0.19                                                     | 0.04                                                 | 0.21               | 0.93                              | 0.51                |
| Aldehyde dehydrogenase, mitochondrial;                                             | P47738  | -0.11                                                    | -0.32                                                    | -0.21                                                | 0.15               | 0.69                              | 0.81                |
| Glyoxalase domain-containing protein 4;                                            | Q9CPV4  | -0.11                                                    | -0.32                                                    | -0.21                                                | 0.15               | 0.69                              | 0.92                |
| Zinc-binding alcohol dehydrogenase domain-containing protein 2;                    | Q8BGC4  | -0.09                                                    | 0.32                                                     | 0.12                                                 | 0.29               | 1.30                              | 0.80                |
| Rho GDP-dissociation inhibitor 1;                                                  | Q99PT1  | -0.09                                                    | -0.40                                                    | -0.24                                                | 0.22               | 0.97                              | 1.06                |
| Thioredoxin domain-containing protein 17;                                          | Q9CQM5  | -0.09                                                    | -0.27                                                    | -0.18                                                | 0.13               | 0.57                              | 0.74                |
| Septin-7;                                                                          | O55131  | -0.09                                                    | 0.28                                                     | 0.09                                                 | 0.26               | 1.15                              | 0.65                |
| Annexin A1;                                                                        | P10107  | -0.09                                                    | -0.15                                                    | -0.12                                                | 0.04               | 0.20                              | 0.49                |
| Inositol polyphosphate 1-phosphatase;                                              | P49442  | -0.09                                                    | -0.18                                                    | -0.14                                                | 0.07               | 0.30                              | 0.51                |
| Ras-related protein Rab-1A;                                                        | P62821  | -0.09                                                    | -0.42                                                    | -0.25                                                | 0.23               | 1.03                              | 1.08                |
| Ras-related protein Rab-14;                                                        | Q91V41  | 0.10                                                     | -0.23                                                    | -0.07                                                | 0.23               | 1.05                              | 0.70                |
| Ras-related protein Rab-10;                                                        | P61027  | 0.08                                                     | -0.23                                                    | -0.08                                                | 0.22               | 1.00                              | 0.64                |
| Ras-related protein Rab-8A;                                                        | P55258  | 0.71                                                     | 0.03                                                     | 0.37                                                 | 0.48               | 2.16                              | 1.67                |



Table S6, Tholen et al.

| Protein                                                                                                             | Uniprot | Fold change (log <sub>2</sub> ) of ASAPRatio replicate 1 | Fold change (log <sub>2</sub> ) of ASAPRatio replicate 2 | Average fold change (log <sub>2</sub> ) of ASAPRatio | Standard deviation | 90 % confidence interval (t-test) | Fisher's exact test |
|---------------------------------------------------------------------------------------------------------------------|---------|----------------------------------------------------------|----------------------------------------------------------|------------------------------------------------------|--------------------|-----------------------------------|---------------------|
| Ras-related protein Rab-1B;                                                                                         | Q9D1G1  | 0.33                                                     | -0.03                                                    | 0.15                                                 | 0.26               | 1.14                              | 0.76                |
| Pyruvate dehydrogenase protein X component, mitochondrial;                                                          | Q8BKZ9  | -0.09                                                    | 0.39                                                     | 0.15                                                 | 0.34               | 1.51                              | 0.92                |
| Leukocyte elastase inhibitor A;                                                                                     | Q9D154  | -0.09                                                    | -0.56                                                    | -0.32                                                | 0.33               | 1.47                              | 1.29                |
| Ubiquitin carboxyl-terminal hydrolase isozyme L3;                                                                   | Q9JKB1  | -0.09                                                    | 0.06                                                     | -0.02                                                | 0.10               | 0.46                              | 0.26                |
| Guanine nucleotide-binding protein subunit beta-2-like 1;                                                           | P68040  | -0.07                                                    | 0.99                                                     | 0.46                                                 | 0.75               | 3.35                              | 2.09                |
| Eukaryotic translation initiation factor 3 subunit B;                                                               | Q8JZQ9  | -0.07                                                    | 1.16                                                     | 0.54                                                 | 0.87               | 3.89                              | 3.17                |
| Glutamine synthetase;                                                                                               | P15105  | -0.07                                                    | 0.90                                                     | 0.41                                                 | 0.69               | 3.08                              | 2.68                |
| Peptidyl-prolyl cis-trans isomerase FKBP1A;                                                                         | P26883  | -0.07                                                    | -0.54                                                    | -0.30                                                | 0.33               | 1.46                              | 1.45                |
| Cytoplasmic aconitate hydratase;                                                                                    | P28271  | -0.07                                                    | -0.30                                                    | -0.19                                                | 0.16               | 0.73                              | 0.64                |
| Mitogen-activated protein kinase 14;                                                                                | P47811  | -0.07                                                    | 0.01                                                     | -0.03                                                | 0.06               | 0.28                              | 0.15                |
| Disks large homolog 1;                                                                                              | Q811D0  | -0.07                                                    | -0.06                                                    | -0.07                                                | 0.01               | 0.05                              | 0.23                |
| UPF0587 protein C1orf123 homolog;                                                                                   | Q8BHG2  | -0.07                                                    | -0.36                                                    | -0.22                                                | 0.20               | 0.90                              | 0.93                |
| Serpin B8;                                                                                                          | O08800  | -0.06                                                    | -0.58                                                    | -0.32                                                | 0.37               | 1.64                              | 1.38                |
| F-box only protein 7;                                                                                               | Q3U7U3  | -0.06                                                    | -0.71                                                    | -0.39                                                | 0.46               | 2.06                              | 1.93                |
| Fibrinogen beta chain;                                                                                              | Q8K0E8  | -0.06                                                    | 0.61                                                     | 0.28                                                 | 0.48               | 2.12                              | 1.63                |
| Calponin-3;                                                                                                         | Q9DAW9  | -0.06                                                    | 0.08                                                     | 0.01                                                 | 0.10               | 0.45                              | 0.26                |
| Cadherin-13;                                                                                                        | Q9WTR5  | -0.06                                                    | 0.24                                                     | 0.09                                                 | 0.21               | 0.94                              | 0.62                |
| Peptidyl-prolyl cis-trans isomerase FKBP9;                                                                          | Q9Z247  | -0.06                                                    | -0.58                                                    | -0.32                                                | 0.37               | 1.64                              | 1.40                |
| Glucosamine--fructose-6-phosphate aminotransferase [isomerizing] 1;                                                 | P47856  | -0.06                                                    | -0.23                                                    | -0.15                                                | 0.12               | 0.55                              | 0.56                |
| Pyruvate carboxylase, mitochondrial;                                                                                | Q05920  | -0.06                                                    | 0.36                                                     | 0.15                                                 | 0.29               | 1.31                              | 0.91                |
| Corticosteroid-binding globulin;                                                                                    | Q06770  | -0.06                                                    | -0.01                                                    | -0.04                                                | 0.03               | 0.14                              | 0.11                |
| Prolyl 4-hydroxylase subunit alpha-2;                                                                               | Q60716  | -0.06                                                    | -0.81                                                    | -0.44                                                | 0.53               | 2.37                              | 1.54                |
| Putative transferase CAF17 homolog, mitochondrial;                                                                  | Q8CAK1  | -0.06                                                    | 0.51                                                     | 0.22                                                 | 0.40               | 1.78                              | 1.32                |
| Nitrilase homolog 1;                                                                                                | Q8VDK1  | -0.06                                                    | -0.17                                                    | -0.11                                                | 0.08               | 0.34                              | 0.45                |
| Peptidyl-prolyl cis-trans isomerase D;                                                                              | Q9CR16  | -0.06                                                    | 0.01                                                     | -0.02                                                | 0.05               | 0.23                              | 0.12                |
| Putative hydrolase RBBP9;                                                                                           | O88851  | -0.04                                                    | -0.89                                                    | -0.47                                                | 0.60               | 2.67                              | 2.42                |
| Cytosolic purine 5'-nucleotidase;                                                                                   | Q3V1L4  | -0.04                                                    | 0.40                                                     | 0.18                                                 | 0.31               | 1.40                              | 0.98                |
| Bifunctional purine biosynthesis protein PURH;                                                                      | Q9CWJ9  | -0.04                                                    | -0.17                                                    | -0.11                                                | 0.09               | 0.39                              | 0.41                |
| Selenocysteine lyase;                                                                                               | Q9JLI6  | -0.04                                                    | 0.36                                                     | 0.16                                                 | 0.28               | 1.26                              | 0.70                |
| Leucine carboxyl methyltransferase 1; Leucine carboxyl methyltransferase 1, isoform CRA_b; Uncharacterized protein; | A2RTH5  | -0.04                                                    | -0.56                                                    | -0.30                                                | 0.36               | 1.62                              | 1.33                |
| Target of Myb protein 1;                                                                                            | O88746  | -0.03                                                    | -0.04                                                    | -0.04                                                | 0.01               | 0.05                              | 0.14                |
| Alcohol dehydrogenase class-3;                                                                                      | P28474  | -0.03                                                    | -0.07                                                    | -0.05                                                | 0.03               | 0.14                              | 0.18                |
| Tyrosine-protein phosphatase non-receptor type 11;                                                                  | P35235  | -0.03                                                    | 0.37                                                     | 0.17                                                 | 0.28               | 1.25                              | 0.80                |
| Cysteine and glycine-rich protein 3;                                                                                | P50462  | -0.03                                                    | -0.03                                                    | -0.03                                                | 0.00               | 0.00                              | 0.10                |
| Rab GDP dissociation inhibitor beta;                                                                                | Q61598  | -0.03                                                    | -0.14                                                    | -0.08                                                | 0.08               | 0.34                              | 0.26                |
| Protein arginine N-methyltransferase 5;                                                                             | Q8CIG8  | -0.03                                                    | 0.55                                                     | 0.26                                                 | 0.41               | 1.82                              | 1.37                |
| Thioredoxin domain-containing protein 12;                                                                           | Q9CQU0  | -0.03                                                    | -0.12                                                    | -0.07                                                | 0.06               | 0.29                              | 0.29                |

Table S6, Tholen et al.

| Protein                                                                                                             | Uniprot | Fold change (log <sub>2</sub> ) of ASAPRatio replicate 1 | Fold change (log <sub>2</sub> ) of ASAPRatio replicate 2 | Average fold change (log <sub>2</sub> ) of ASAPRatio | Standard deviation | 90 % confidence interval (t-test) | Fisher's exact test |
|---------------------------------------------------------------------------------------------------------------------|---------|----------------------------------------------------------|----------------------------------------------------------|------------------------------------------------------|--------------------|-----------------------------------|---------------------|
| Vacuolar protein sorting-associated protein 35;                                                                     | Q9EQH3  | -0.03                                                    | 0.12                                                     | 0.05                                                 | 0.11               | 0.48                              | 0.25                |
| Ubiquitin carboxyl-terminal hydrolase 14;                                                                           | Q9JMA1  | -0.03                                                    | 0.39                                                     | 0.18                                                 | 0.30               | 1.32                              | 0.94                |
| Dihydropyrimidinase-related protein 2;                                                                              | O08553  | -0.03                                                    | -0.09                                                    | -0.06                                                | 0.04               | 0.19                              | 0.23                |
| Dihydropyrimidinase-related protein 3;                                                                              | Q62188  | 0.54                                                     | 0.25                                                     | 0.39                                                 | 0.20               | 0.90                              | 1.81                |
| Isocitrate dehydrogenase [NADP] cytoplasmic;                                                                        | O88844  | -0.03                                                    | -0.15                                                    | -0.09                                                | 0.09               | 0.39                              | 0.31                |
| Actin-related protein 2/3 complex subunit 4;                                                                        | P59999  | -0.03                                                    | 0.65                                                     | 0.31                                                 | 0.48               | 2.15                              | 1.50                |
| Ubiquitin-fold modifier 1;                                                                                          | P61961  | -0.03                                                    | -0.36                                                    | -0.19                                                | 0.23               | 1.04                              | 0.90                |
| Acyl-protein thioesterase 1;                                                                                        | P97823  | -0.03                                                    | -0.56                                                    | -0.29                                                | 0.37               | 1.66                              | 1.30                |
| Biliverdin reductase A;                                                                                             | Q9CY64  | -0.03                                                    | -0.09                                                    | -0.06                                                | 0.04               | 0.19                              | 0.21                |
| Uncharacterized protein;                                                                                            | E9PWQ3  | -0.03                                                    | 1.29                                                     | 0.63                                                 | 0.93               | 4.17                              | 3.14                |
| Cysteine sulfinic acid decarboxylase;                                                                               | Q9DBE0  | -0.01                                                    | -0.45                                                    | -0.23                                                | 0.31               | 1.39                              | 0.79                |
| Heme-binding protein 1;                                                                                             | Q9R257  | -0.01                                                    | -0.86                                                    | -0.44                                                | 0.60               | 2.68                              | 1.80                |
| Protein disulfide-isomerase A3;                                                                                     | P27773  | -0.01                                                    | 0.10                                                     | 0.04                                                 | 0.08               | 0.35                              | 0.20                |
| Lupus La protein homolog;                                                                                           | P32067  | -0.01                                                    | 1.55                                                     | 0.77                                                 | 1.10               | 4.92                              | 3.49                |
| Histidine ammonia-lyase;                                                                                            | P35492  | -0.01                                                    | -0.18                                                    | -0.10                                                | 0.12               | 0.54                              | 0.39                |
| DNA damage-binding protein 1;                                                                                       | Q3U1J4  | -0.01                                                    | 0.43                                                     | 0.21                                                 | 0.32               | 1.41                              | 1.02                |
| Kynurenine--oxoglutarate transaminase 1;                                                                            | Q8BTY1  | -0.01                                                    | -0.27                                                    | -0.14                                                | 0.18               | 0.81                              | 0.55                |
| Pyridoxal kinase;                                                                                                   | Q8K183  | -0.01                                                    | -0.34                                                    | -0.18                                                | 0.23               | 1.03                              | 0.77                |
| Plastin-3;                                                                                                          | Q99K51  | -0.01                                                    | -0.04                                                    | -0.03                                                | 0.02               | 0.09                              | 0.09                |
| von Willebrand factor A domain-containing protein 5A;                                                               | Q99KC8  | -0.01                                                    | 0.28                                                     | 0.13                                                 | 0.20               | 0.91                              | 0.52                |
| Lectin, galactose binding, soluble 7; Lectin, galactose binding, soluble 7, isoform CRA_a; Uncharacterized protein; | Q9CRB1  | -0.01                                                    | 0.47                                                     | 0.23                                                 | 0.34               | 1.51                              | 1.02                |
| Myeloid-associated differentiation marker;                                                                          | O35682  | 0.00                                                     | 0.85                                                     | 0.42                                                 | 0.60               | 2.68                              | 2.13                |
| Myoglobin;                                                                                                          | P04247  | 0.00                                                     | -0.47                                                    | -0.24                                                | 0.34               | 1.50                              | 1.01                |
| Myotrophin;                                                                                                         | P62774  | 0.00                                                     | 0.35                                                     | 0.17                                                 | 0.24               | 1.09                              | 0.73                |
| Microtubule-associated protein RP/EB family member 1;                                                               | Q61166  | 0.00                                                     | -0.45                                                    | -0.23                                                | 0.32               | 1.43                              | 1.08                |
| Osteoclast-stimulating factor 1;                                                                                    | Q62422  | 0.00                                                     | 0.28                                                     | 0.14                                                 | 0.19               | 0.87                              | 0.58                |
| Regucalcin;                                                                                                         | Q64374  | 0.00                                                     | -1.94                                                    | -0.97                                                | 1.37               | 6.13                              | 6.70                |
| Cytoplasmic dynein 1 light intermediate chain 2;                                                                    | Q6PDL0  | 0.00                                                     | 0.44                                                     | 0.22                                                 | 0.31               | 1.40                              | 1.00                |
| NEDD8-activating enzyme E1 catalytic subunit;                                                                       | Q8C878  | 0.00                                                     | -0.18                                                    | -0.09                                                | 0.13               | 0.58                              | 0.39                |
| Electron transfer flavoprotein-ubiquinone oxidoreductase, mitochondrial;                                            | Q921G7  | 0.00                                                     | 0.58                                                     | 0.29                                                 | 0.41               | 1.82                              | 1.37                |
| Phosphoacetylglucosamine mutase;                                                                                    | Q9CYR6  | 0.00                                                     | -0.92                                                    | -0.46                                                | 0.65               | 2.89                              | 2.28                |
| Protein DDI1 homolog 2;                                                                                             | A2ADY9  | 0.01                                                     | -0.14                                                    | -0.06                                                | 0.11               | 0.47                              | 0.29                |
| Hydroxyacyl-coenzyme A dehydrogenase, mitochondrial;                                                                | Q61425  | 0.01                                                     | 0.10                                                     | 0.06                                                 | 0.06               | 0.27                              | 0.21                |
| NAD-dependent malic enzyme, mitochondrial;                                                                          | Q99KE1  | 0.01                                                     | -0.11                                                    | -0.05                                                | 0.08               | 0.38                              | 0.25                |
| Prostaglandin F2 receptor negative regulator;                                                                       | Q9WV91  | 0.01                                                     | -0.40                                                    | -0.19                                                | 0.29               | 1.29                              | 0.74                |
| Fatty acid-binding protein, adipocyte;                                                                              | P04117  | 0.01                                                     | 0.07                                                     | 0.04                                                 | 0.04               | 0.18                              | 0.15                |
| Heat shock protein beta-1;                                                                                          | P14602  | 0.01                                                     | -0.23                                                    | -0.11                                                | 0.18               | 0.78                              | 0.47                |

Table S6, Tholen et al.

| Protein                                                             | Uniprot | Fold change (log <sub>2</sub> ) of ASAPRatio replicate 1 | Fold change (log <sub>2</sub> ) of ASAPRatio replicate 2 | Average fold change (log <sub>2</sub> ) of ASAPRatio | Standard deviation | 90 % confidence interval (t-test) | Fisher's exact test |
|---------------------------------------------------------------------|---------|----------------------------------------------------------|----------------------------------------------------------|------------------------------------------------------|--------------------|-----------------------------------|---------------------|
| Elongation factor 2;                                                | P58252  | 0.01                                                     | 0.38                                                     | 0.20                                                 | 0.26               | 1.15                              | 0.72                |
| Heterogeneous nuclear ribonucleoprotein D0;                         | Q60668  | 0.01                                                     | 0.07                                                     | 0.04                                                 | 0.04               | 0.18                              | 0.14                |
| Hypoxia up-regulated protein 1;                                     | Q9JKR6  | 0.01                                                     | 0.29                                                     | 0.15                                                 | 0.19               | 0.86                              | 0.59                |
| Sorting nexin-1;                                                    | Q9WV80  | 0.01                                                     | -0.54                                                    | -0.26                                                | 0.39               | 1.73                              | 1.25                |
| EF hand domain containing 2; Efh2 protein; Uncharacterized protein; | Q8C845  | 0.01                                                     | -0.92                                                    | -0.45                                                | 0.66               | 2.94                              | 2.11                |
| Protein disulfide-isomerase A4;                                     | P08003  | 0.03                                                     | 0.36                                                     | 0.19                                                 | 0.23               | 1.03                              | 0.59                |
| Parkinson disease 7 domain-containing protein 1;                    | Q8BFQ8  | 0.03                                                     | 0.40                                                     | 0.22                                                 | 0.26               | 1.17                              | 0.86                |
| Ester hydrolase C11orf54 homolog;                                   | Q91V76  | 0.03                                                     | -0.43                                                    | -0.20                                                | 0.33               | 1.46                              | 1.04                |
| Ubiquitin-fold modifier-conjugating enzyme 1;                       | Q9CR09  | 0.03                                                     | -0.01                                                    | 0.01                                                 | 0.03               | 0.14                              | 0.09                |
| Calcineurin-like phosphoesterase domain-containing protein 1;       | Q8BFS6  | 0.03                                                     | -0.30                                                    | -0.14                                                | 0.24               | 1.05                              | 0.71                |
| Vacuolar protein sorting-associated protein 29;                     | Q9QZ88  | 0.03                                                     | 0.01                                                     | 0.02                                                 | 0.01               | 0.05                              | 0.07                |
| Proteasome subunit alpha type-4;                                    | Q9R1P0  | 0.03                                                     | 0.30                                                     | 0.16                                                 | 0.19               | 0.85                              | 0.70                |
| Biotinidase;                                                        | Q8CIF4  | 0.04                                                     | 1.61                                                     | 0.83                                                 | 1.11               | 4.94                              | 5.90                |
| GDP-mannose 4,6 dehydratase;                                        | Q8K0C9  | 0.04                                                     | 0.23                                                     | 0.14                                                 | 0.13               | 0.58                              | 0.48                |
| Ribulose-phosphate 3-epimerase;                                     | Q8VEE0  | 0.04                                                     | -0.29                                                    | -0.12                                                | 0.23               | 1.04                              | 0.68                |
| Pyridoxine-5'-phosphate oxidase;                                    | Q91XF0  | 0.04                                                     | -0.23                                                    | -0.10                                                | 0.20               | 0.87                              | 0.59                |
| Ubiquitin carboxyl-terminal hydrolase isozyme L1;                   | Q9R0P9  | 0.04                                                     | -0.30                                                    | -0.13                                                | 0.25               | 1.10                              | 0.46                |
| Protein disulfide-isomerase;                                        | P09103  | 0.04                                                     | 0.14                                                     | 0.09                                                 | 0.07               | 0.30                              | 0.26                |
| Alpha-crystallin B chain;                                           | P23927  | 0.04                                                     | -0.32                                                    | -0.14                                                | 0.26               | 1.15                              | 0.81                |
| LIM and cysteine-rich domains protein 1;                            | Q8VEE1  | 0.04                                                     | -0.54                                                    | -0.25                                                | 0.41               | 1.82                              | 0.96                |
| TAR DNA-binding protein 43;                                         | Q921F2  | 0.04                                                     | 1.65                                                     | 0.85                                                 | 1.14               | 5.08                              | 6.10                |
| Peroxisomal acyl-coenzyme A oxidase 3;                              | Q9EPL9  | 0.04                                                     | -0.07                                                    | -0.02                                                | 0.08               | 0.37                              | 0.21                |
| Basal cell adhesion molecule;                                       | Q9R069  | 0.04                                                     | 0.15                                                     | 0.10                                                 | 0.08               | 0.34                              | 0.39                |
| Glutathione peroxidase 1;                                           | P11352  | 0.06                                                     | -0.40                                                    | -0.17                                                | 0.32               | 1.43                              | 0.88                |
| Histidyl-tRNA synthetase, cytoplasmic;                              | Q61035  | 0.06                                                     | 0.14                                                     | 0.10                                                 | 0.06               | 0.26                              | 0.35                |
| Tripeptidyl-peptidase 2;                                            | Q64514  | 0.06                                                     | 1.10                                                     | 0.58                                                 | 0.74               | 3.29                              | 2.32                |
| Signal transducer and activator of transcription 3;                 | P42227  | 0.06                                                     | -0.76                                                    | -0.35                                                | 0.58               | 2.58                              | 2.07                |
| Reticulocalbin-3;                                                   | Q8BH97  | 0.06                                                     | -0.14                                                    | -0.04                                                | 0.14               | 0.61                              | 0.28                |
| BAG family molecular chaperone regulator 1;                         | Q60739  | 0.07                                                     | 0.77                                                     | 0.42                                                 | 0.49               | 2.20                              | 2.16                |
| CD109 antigen;                                                      | Q8R422  | 0.07                                                     | 0.72                                                     | 0.40                                                 | 0.46               | 2.06                              | 1.62                |
| Serine/threonine-protein kinase DCLK1;                              | Q9JLM8  | 0.07                                                     | -0.20                                                    | -0.07                                                | 0.19               | 0.86                              | 0.54                |
| S-phase kinase-associated protein 1;                                | Q9WTX5  | 0.07                                                     | 0.49                                                     | 0.28                                                 | 0.29               | 1.31                              | 1.29                |
| Probable C->U-editing enzyme APOBEC-2;                              | Q9WV35  | 0.07                                                     | -0.56                                                    | -0.24                                                | 0.44               | 1.98                              | 1.25                |
| Protein canopy homolog 4;                                           | Q8BQ47  | 0.07                                                     | 0.01                                                     | 0.04                                                 | 0.04               | 0.18                              | 0.18                |
| L-xylulose reductase;                                               | Q91X52  | 0.07                                                     | -0.60                                                    | -0.26                                                | 0.47               | 2.11                              | 1.59                |
| MAGUK p55 subfamily member 6;                                       | Q9JLB0  | 0.07                                                     | 0.23                                                     | 0.15                                                 | 0.11               | 0.50                              | 0.56                |
| Nucleoside diphosphate kinase 3;                                    | Q9WV85  | 0.07                                                     | -0.20                                                    | -0.07                                                | 0.19               | 0.86                              | 0.56                |
| Thioredoxin;                                                        | P10639  | 0.08                                                     | 0.04                                                     | 0.06                                                 | 0.03               | 0.13                              | 0.23                |

Table S6, Tholen et al.

| Protein                                                      | Uniprot | Fold change (log <sub>2</sub> ) of ASAPRatio replicate 1 | Fold change (log <sub>2</sub> ) of ASAPRatio replicate 2 | Average fold change (log <sub>2</sub> ) of ASAPRatio | Standard deviation | 90 % confidence interval (t-test) | Fisher's exact test |
|--------------------------------------------------------------|---------|----------------------------------------------------------|----------------------------------------------------------|------------------------------------------------------|--------------------|-----------------------------------|---------------------|
| Isochorismatase domain-containing protein 2A, mitochondrial; | P85094  | 0.08                                                     | -0.38                                                    | -0.15                                                | 0.33               | 1.46                              | 0.97                |
| Phosphoglucomutase-2;                                        | Q7TSV4  | 0.08                                                     | -0.23                                                    | -0.08                                                | 0.22               | 1.00                              | 0.41                |
| Cytosolic 5'-nucleotidase 3;                                 | Q9D020  | 0.08                                                     | -0.20                                                    | -0.06                                                | 0.20               | 0.90                              | 0.53                |
| Eukaryotic translation initiation factor 3 subunit I;        | Q9QZD9  | 0.08                                                     | 0.42                                                     | 0.25                                                 | 0.24               | 1.07                              | 1.09                |
| Destrin;                                                     | Q9R0P5  | 0.08                                                     | 0.58                                                     | 0.33                                                 | 0.35               | 1.55                              | 1.16                |
| Uncharacterized protein;                                     | E9PV24  | 0.08                                                     | 0.59                                                     | 0.33                                                 | 0.35               | 1.58                              | 1.20                |
| Beta-galactosidase;                                          | P23780  | 0.08                                                     | 0.12                                                     | 0.10                                                 | 0.03               | 0.13                              | 0.39                |
| Peroxiredoxin-1;                                             | P35700  | 0.08                                                     | -0.14                                                    | -0.03                                                | 0.16               | 0.69                              | 0.45                |
| 3-hydroxyisobutyrate dehydrogenase, mitochondrial;           | Q99L13  | 0.08                                                     | 0.32                                                     | 0.20                                                 | 0.17               | 0.75                              | 0.76                |
| NSFL1 cofactor p47;                                          | Q9CZ44  | 0.08                                                     | 0.18                                                     | 0.13                                                 | 0.07               | 0.29                              | 0.48                |
| Malignant T cell-amplified sequence 1;                       | Q9DB27  | 0.08                                                     | 0.08                                                     | 0.08                                                 | 0.00               | 0.00                              | 0.33                |
| 3'(2'),5'-bisphosphate nucleotidase 1;                       | Q9Z0S1  | 0.08                                                     | -0.20                                                    | -0.06                                                | 0.20               | 0.90                              | 0.52                |
| Glucosidase 2 subunit beta;                                  | O08795  | 0.10                                                     | 0.49                                                     | 0.29                                                 | 0.27               | 1.22                              | 1.31                |
| Cysteine and glycine-rich protein 1;                         | P97315  | 0.10                                                     | -0.74                                                    | -0.32                                                | 0.59               | 2.64                              | 2.01                |
| Alanine aminotransferase 1;                                  | Q8QZR5  | 0.10                                                     | -0.11                                                    | 0.00                                                 | 0.14               | 0.64                              | 0.39                |
| Lysosomal alpha-glucosidase;                                 | P70699  | 0.10                                                     | 0.00                                                     | 0.05                                                 | 0.07               | 0.31                              | 0.20                |
| Uncharacterized protein;                                     | Q3TUE1  | 0.10                                                     | 0.92                                                     | 0.51                                                 | 0.58               | 2.59                              | 2.68                |
| COP9 signalosome complex subunit 5;                          | O35864  | 0.11                                                     | 0.76                                                     | 0.43                                                 | 0.46               | 2.04                              | 1.81                |
| Fatty acid-binding protein, heart;                           | P11404  | 0.11                                                     | -0.56                                                    | -0.22                                                | 0.47               | 2.11                              | 1.57                |
| Proteasome subunit beta type-8;                              | P28063  | 0.11                                                     | 0.38                                                     | 0.25                                                 | 0.19               | 0.85                              | 0.88                |
| Crk-like protein;                                            | P47941  | 0.11                                                     | -0.06                                                    | 0.03                                                 | 0.12               | 0.54                              | 0.31                |
| Proteasome subunit beta type-4;                              | P99026  | 0.11                                                     | 0.29                                                     | 0.20                                                 | 0.12               | 0.56                              | 0.78                |
| Proteasome subunit beta type-6;                              | Q60692  | 0.11                                                     | 0.25                                                     | 0.18                                                 | 0.10               | 0.44                              | 0.76                |
| Calcyclin-binding protein;                                   | Q9CXW3  | 0.11                                                     | -0.60                                                    | -0.24                                                | 0.50               | 2.24                              | 1.75                |
| Dipeptidyl peptidase 2;                                      | Q9ET22  | 0.11                                                     | -0.03                                                    | 0.04                                                 | 0.10               | 0.44                              | 0.30                |
| Translin-associated protein X;                               | Q9QZE7  | 0.11                                                     | 0.07                                                     | 0.09                                                 | 0.03               | 0.13                              | 0.36                |
| Actin-related protein 3;                                     | Q99JY9  | 0.11                                                     | 0.10                                                     | 0.10                                                 | 0.01               | 0.04                              | 0.41                |
| Glia maturation factor beta;                                 | Q9CQI3  | 0.11                                                     | -0.23                                                    | -0.06                                                | 0.24               | 1.09                              | 0.71                |
| Cytosolic 10-formyltetrahydrofolate dehydrogenase;           | Q8R0Y6  | 0.12                                                     | -0.69                                                    | -0.28                                                | 0.58               | 2.57                              | 1.63                |
| Septin-2;                                                    | P42208  | 0.12                                                     | 0.08                                                     | 0.10                                                 | 0.03               | 0.13                              | 0.36                |
| C-1-tetrahydrofolate synthase, cytoplasmic;                  | Q922D8  | 0.12                                                     | 0.38                                                     | 0.25                                                 | 0.18               | 0.81                              | 1.00                |
| Multifunctional protein ADE2;                                | Q9DCL9  | 0.12                                                     | 0.35                                                     | 0.23                                                 | 0.16               | 0.70                              | 0.77                |
| ATPase Asna1;                                                | O54984  | 0.14                                                     | 0.35                                                     | 0.24                                                 | 0.15               | 0.65                              | 1.06                |
| Calreticulin;                                                | P14211  | 0.14                                                     | 0.99                                                     | 0.57                                                 | 0.60               | 2.70                              | 3.20                |
| Vitamin D-binding protein;                                   | P21614  | 0.14                                                     | -0.76                                                    | -0.31                                                | 0.64               | 2.84                              | 1.92                |
| Mitotic checkpoint protein BUB3;                             | Q9WVA3  | 0.14                                                     | 1.60                                                     | 0.87                                                 | 1.03               | 4.61                              | 5.39                |
| Polymerase I and transcript release factor;                  | O54724  | 0.14                                                     | 0.99                                                     | 0.56                                                 | 0.60               | 2.68                              | 3.03                |
| Diphosphoinositol polyphosphate phosphohydrolase 3-alpha;    | POC027  | 0.14                                                     | -0.18                                                    | -0.02                                                | 0.23               | 1.02                              | 0.61                |

Table S6, Tholen et al.

| Protein                                                                                                                                   | Uniprot | Fold change (log <sub>2</sub> ) of ASAPRatio replicate 1 | Fold change (log <sub>2</sub> ) of ASAPRatio replicate 2 | Average fold change (log <sub>2</sub> ) of ASAPRatio | Standard deviation | 90 % confidence interval (t-test) | Fisher's exact test |
|-------------------------------------------------------------------------------------------------------------------------------------------|---------|----------------------------------------------------------|----------------------------------------------------------|------------------------------------------------------|--------------------|-----------------------------------|---------------------|
| Prolyl 3-hydroxylase 1;                                                                                                                   | Q3V1T4  | 0.14                                                     | -0.27                                                    | -0.07                                                | 0.29               | 1.28                              | 0.72                |
| Glutathione S-transferase theta-1;                                                                                                        | Q64471  | 0.14                                                     | -0.15                                                    | -0.01                                                | 0.21               | 0.92                              | 0.51                |
| Vinculin;                                                                                                                                 | Q64727  | 0.14                                                     | 0.35                                                     | 0.24                                                 | 0.15               | 0.65                              | 0.84                |
| Xaa-Pro aminopeptidase 1;                                                                                                                 | Q6P1B1  | 0.14                                                     | -0.15                                                    | -0.01                                                | 0.21               | 0.92                              | 0.57                |
| Major vault protein;                                                                                                                      | Q9EQK5  | 0.14                                                     | 0.71                                                     | 0.43                                                 | 0.41               | 1.82                              | 1.77                |
| Glycerol-3-phosphate dehydrogenase [NAD+], cytoplasmic;                                                                                   | P13707  | 0.15                                                     | -0.58                                                    | -0.21                                                | 0.52               | 2.30                              | 1.43                |
| Glutathione S-transferase kappa 1;                                                                                                        | Q9DCM2  | 0.15                                                     | 0.35                                                     | 0.25                                                 | 0.14               | 0.61                              | 0.82                |
| Guanine nucleotide-binding protein G(i) subunit alpha-2;                                                                                  | P08752  | 0.15                                                     | -0.04                                                    | 0.05                                                 | 0.14               | 0.62                              | 0.33                |
| Guanine nucleotide-binding protein G(k) subunit alpha;                                                                                    | Q9DC51  | 0.61                                                     | 0.36                                                     | 0.49                                                 | 0.18               | 0.81                              | 2.24                |
| GDP-L-fucose synthase;                                                                                                                    | P23591  | 0.16                                                     | 0.15                                                     | 0.16                                                 | 0.01               | 0.04                              | 0.62                |
| Actin-related protein 2;                                                                                                                  | P61161  | 0.16                                                     | 0.60                                                     | 0.38                                                 | 0.31               | 1.36                              | 1.66                |
| Acylamino-acid-releasing enzyme;                                                                                                          | Q8R146  | 0.16                                                     | -0.29                                                    | -0.06                                                | 0.32               | 1.42                              | 0.85                |
| Dipeptidyl peptidase 3;                                                                                                                   | Q99KK7  | 0.16                                                     | 0.16                                                     | 0.16                                                 | 0.00               | 0.00                              | 0.59                |
| Glucosamine-6-phosphate isomerase 1;                                                                                                      | O88958  | 0.16                                                     | 0.16                                                     | 0.16                                                 | 0.00               | 0.00                              | 0.54                |
| Chromobox protein homolog 3;                                                                                                              | P23198  | 0.16                                                     | 0.24                                                     | 0.20                                                 | 0.05               | 0.24                              | 0.73                |
| F-actin-capping protein subunit beta;                                                                                                     | P47757  | 0.16                                                     | -0.09                                                    | 0.04                                                 | 0.18               | 0.80                              | 0.44                |
| Glucose-6-phosphate 1-dehydrogenase X;                                                                                                    | Q00612  | 0.16                                                     | 0.15                                                     | 0.16                                                 | 0.01               | 0.04                              | 0.62                |
| Nucleosome assembly protein 1-like 4;                                                                                                     | Q78ZA7  | 0.18                                                     | 0.37                                                     | 0.27                                                 | 0.14               | 0.60                              | 1.13                |
| Thioredoxin-like protein 1;                                                                                                               | Q8CDN6  | 0.18                                                     | 0.36                                                     | 0.27                                                 | 0.13               | 0.57                              | 1.07                |
| Perilipin-1;                                                                                                                              | Q8CGN5  | 0.18                                                     | -0.47                                                    | -0.15                                                | 0.46               | 2.05                              | 1.43                |
| Endoplasmic reticulum resident protein 44;                                                                                                | Q9D1Q6  | 0.18                                                     | -0.29                                                    | -0.06                                                | 0.33               | 1.46                              | 0.83                |
| Prolargin;                                                                                                                                | Q9JK53  | 0.18                                                     | 1.47                                                     | 0.82                                                 | 0.91               | 4.07                              | 5.37                |
| Integrin beta-1;                                                                                                                          | P09055  | 0.18                                                     | 0.29                                                     | 0.23                                                 | 0.08               | 0.35                              | 0.87                |
| Protein 4.1;                                                                                                                              | P48193  | 0.18                                                     | -0.06                                                    | 0.06                                                 | 0.17               | 0.74                              | 0.41                |
| Aminopeptidase N;                                                                                                                         | P97449  | 0.18                                                     | -0.01                                                    | 0.08                                                 | 0.13               | 0.60                              | 0.32                |
| Ubiquitin-like modifier-activating enzyme 1;                                                                                              | Q02053  | 0.18                                                     | -0.06                                                    | 0.06                                                 | 0.17               | 0.74                              | 0.43                |
| Versican core protein;                                                                                                                    | Q62059  | 0.18                                                     | 0.91                                                     | 0.54                                                 | 0.52               | 2.32                              | 2.64                |
| cAMP-dependent protein kinase type I-alpha regulatory subunit;                                                                            | Q9DBC7  | 0.18                                                     | -0.25                                                    | -0.04                                                | 0.30               | 1.35                              | 0.90                |
| N-acetyl-D-glucosamine kinase;                                                                                                            | Q9QZ08  | 0.18                                                     | 0.18                                                     | 0.18                                                 | 0.00               | 0.00                              | 0.75                |
| Platelet glycoprotein 4;                                                                                                                  | Q08857  | 0.19                                                     | 0.25                                                     | 0.22                                                 | 0.04               | 0.20                              | 0.92                |
| N-alpha-acetyltransferase 38, NatC auxiliary subunit;                                                                                     | Q6ZWM4  | 0.19                                                     | 0.42                                                     | 0.31                                                 | 0.16               | 0.74                              | 1.31                |
| ATP-dependent RNA helicase DDX42;                                                                                                         | Q810A7  | 0.19                                                     | 1.14                                                     | 0.67                                                 | 0.68               | 3.01                              | 2.39                |
| Neutral alpha-glucosidase AB;                                                                                                             | Q8BHN3  | 0.19                                                     | 0.74                                                     | 0.46                                                 | 0.39               | 1.74                              | 2.10                |
| Prolyl endopeptidase;                                                                                                                     | Q9QUR6  | 0.19                                                     | 0.00                                                     | 0.09                                                 | 0.13               | 0.60                              | 0.38                |
| Proteasome subunit beta type-3;                                                                                                           | Q9R1P1  | 0.19                                                     | -0.04                                                    | 0.07                                                 | 0.16               | 0.74                              | 0.48                |
| Capping protein (Actin filament), gelsolin-like; Capping protein (Actin filament), gelsolin-like, isoform CRA_a; Uncharacterized protein; | Q99LB4  | 0.19                                                     | -0.09                                                    | 0.05                                                 | 0.20               | 0.88                              | 0.58                |
| Transketolase;                                                                                                                            | P40142  | 0.20                                                     | 0.20                                                     | 0.20                                                 | 0.00               | 0.00                              | 0.82                |

Table S6, Tholen et al.

| Protein                                                                                         | Uniprot | Fold change (log <sub>2</sub> ) of ASAPRatio replicate 1 | Fold change (log <sub>2</sub> ) of ASAPRatio replicate 2 | Average fold change (log <sub>2</sub> ) of ASAPRatio | Standard deviation | 90 % confidence interval (t-test) | Fisher's exact test |
|-------------------------------------------------------------------------------------------------|---------|----------------------------------------------------------|----------------------------------------------------------|------------------------------------------------------|--------------------|-----------------------------------|---------------------|
| Peroxisomal multifunctional enzyme type 2;                                                      | P51660  | 0.20                                                     | 0.16                                                     | 0.18                                                 | 0.03               | 0.12                              | 0.70                |
| Filamin-B;                                                                                      | Q80X90  | 0.20                                                     | 0.04                                                     | 0.12                                                 | 0.11               | 0.50                              | 0.35                |
| Ubiquitin-like modifier-activating enzyme 5;                                                    | Q8VE47  | 0.20                                                     | -0.84                                                    | -0.32                                                | 0.73               | 3.28                              | 2.29                |
| Glutathione S-transferase theta 3; Glutathione S-transferase, theta 3; Uncharacterized protein; | Q99L20  | 0.20                                                     | -0.23                                                    | -0.02                                                | 0.31               | 1.38                              | 0.90                |
| Band 4.1-like protein 2;                                                                        | O70318  | 0.20                                                     | -0.14                                                    | 0.03                                                 | 0.24               | 1.07                              | 0.58                |
| Proteasome activator complex subunit 2;                                                         | P97372  | 0.20                                                     | -0.29                                                    | -0.04                                                | 0.35               | 1.54                              | 0.90                |
| Nischarin;                                                                                      | Q80TM9  | 0.20                                                     | 0.03                                                     | 0.12                                                 | 0.12               | 0.55                              | 0.45                |
| Methionine adenosyltransferase 2 subunit beta;                                                  | Q99LB6  | 0.20                                                     | -0.20                                                    | 0.00                                                 | 0.28               | 1.27                              | 0.78                |
| Actin-related protein 2/3 complex subunit 5;                                                    | Q9CPW4  | 0.20                                                     | 0.20                                                     | 0.20                                                 | 0.00               | 0.00                              | 0.72                |
| Toll-interacting protein;                                                                       | Q9QZ06  | 0.20                                                     | -0.06                                                    | 0.07                                                 | 0.18               | 0.82                              | 0.53                |
| Heat shock protein 4; Heat shock protein 4, isoform CRA_a; Uncharacterized protein;             | Q3U2G2  | 0.20                                                     | 0.58                                                     | 0.39                                                 | 0.26               | 1.18                              | 1.36                |
| Heat shock 70 kDa protein 4L;                                                                   | P48722  | 0.87                                                     | 0.90                                                     | 0.89                                                 | 0.02               | 0.10                              | 4.38                |
| Trk-fused; Uncharacterized protein;                                                             | Q8C2C6  | 0.20                                                     | 0.03                                                     | 0.12                                                 | 0.12               | 0.55                              | 0.35                |
| Stress-70 protein, mitochondrial;                                                               | P38647  | 0.21                                                     | 0.53                                                     | 0.37                                                 | 0.22               | 0.98                              | 1.56                |
| DCC-interacting protein 13-alpha;                                                               | Q8K3H0  | 0.21                                                     | -0.30                                                    | -0.05                                                | 0.37               | 1.64                              | 1.01                |
| Heterogeneous nuclear ribonucleoprotein A/B;                                                    | Q99020  | 0.21                                                     | 0.89                                                     | 0.55                                                 | 0.48               | 2.13                              | 2.88                |
| Calpain-1 catalytic subunit;                                                                    | O35350  | 0.23                                                     | 0.18                                                     | 0.20                                                 | 0.04               | 0.16                              | 0.73                |
| 10 kDa heat shock protein, mitochondrial;                                                       | Q64433  | 0.23                                                     | -0.17                                                    | 0.03                                                 | 0.28               | 1.25                              | 0.68                |
| Elongation factor G, mitochondrial;                                                             | Q8K0D5  | 0.23                                                     | 0.16                                                     | 0.20                                                 | 0.05               | 0.20                              | 0.78                |
| Thioredoxin domain-containing protein 5;                                                        | Q91W90  | 0.23                                                     | -0.45                                                    | -0.11                                                | 0.48               | 2.15                              | 1.48                |
| UPF0368 protein Cxorf26 homolog;                                                                | Q9D0B6  | 0.23                                                     | 0.07                                                     | 0.15                                                 | 0.11               | 0.50                              | 0.60                |
| Sorting nexin-5;                                                                                | Q9D8U8  | 0.23                                                     | -0.32                                                    | -0.05                                                | 0.39               | 1.73                              | 0.99                |
| Epididymal secretory protein E1;                                                                | Q9Z0J0  | 0.23                                                     | -0.06                                                    | 0.08                                                 | 0.20               | 0.90                              | 0.59                |
| Peptidyl-prolyl cis-trans isomerase A;                                                          | P17742  | 0.23                                                     | 0.47                                                     | 0.35                                                 | 0.17               | 0.75                              | 1.16                |
| Endoplasmic reticulum resident protein 29;                                                      | P57759  | 0.23                                                     | -0.27                                                    | -0.02                                                | 0.35               | 1.57                              | 1.05                |
| Profilin-1;                                                                                     | P62962  | 0.23                                                     | 0.12                                                     | 0.18                                                 | 0.07               | 0.33                              | 0.71                |
| Endoplasmic reticulum aminopeptidase 1;                                                         | Q9EQH2  | 0.23                                                     | 0.47                                                     | 0.35                                                 | 0.17               | 0.75                              | 1.50                |
| MCG140951; Plexin B2; Plxn2 protein; Uncharacterized protein;                                   | B2RXS4  | 0.23                                                     | 0.38                                                     | 0.30                                                 | 0.11               | 0.48                              | 1.29                |
| WD repeat-containing protein 1;                                                                 | O88342  | 0.24                                                     | -0.30                                                    | -0.03                                                | 0.38               | 1.71                              | 0.90                |
| Thy-1 membrane glycoprotein;                                                                    | P01831  | 0.24                                                     | 0.50                                                     | 0.37                                                 | 0.18               | 0.81                              | 1.58                |
| AP-2 complex subunit alpha-2;                                                                   | P17427  | 0.24                                                     | 0.08                                                     | 0.16                                                 | 0.11               | 0.49                              | 0.55                |
| [Protein ADP-ribosylarginine] hydrolase;                                                        | P54923  | 0.24                                                     | -0.69                                                    | -0.23                                                | 0.66               | 2.93                              | 2.08                |
| 4-trimethylaminobutyraldehyde dehydrogenase;                                                    | Q9JLJ2  | 0.24                                                     | -0.27                                                    | -0.02                                                | 0.36               | 1.60                              | 0.97                |
| Heterogeneous nuclear ribonucleoprotein K;                                                      | P61979  | 0.24                                                     | 0.55                                                     | 0.39                                                 | 0.22               | 0.97                              | 1.71                |
| Guanine nucleotide-binding protein G(I)/G(S)/G(T) subunit beta-1;                               | P62874  | 0.24                                                     | 0.12                                                     | 0.18                                                 | 0.08               | 0.36                              | 0.60                |
| Proteasome subunit alpha type-7;                                                                | Q9Z2U0  | 0.24                                                     | 0.29                                                     | 0.26                                                 | 0.03               | 0.15                              | 1.12                |
| Heterogeneous nuclear ribonucleoproteins A2/B1;                                                 | O88569  | 0.25                                                     | 1.88                                                     | 1.06                                                 | 1.15               | 5.13                              | 5.24                |

Table S6, Tholen et al.

| Protein                                                                 | Uniprot | Fold change (log <sub>2</sub> ) of ASAPRatio replicate 1 | Fold change (log <sub>2</sub> ) of ASAPRatio replicate 2 | Average fold change (log <sub>2</sub> ) of ASAPRatio | Standard deviation | 90 % confidence interval (t-test) | Fisher's exact test |
|-------------------------------------------------------------------------|---------|----------------------------------------------------------|----------------------------------------------------------|------------------------------------------------------|--------------------|-----------------------------------|---------------------|
| Gelsolin;                                                               | P13020  | 0.25                                                     | -0.47                                                    | -0.11                                                | 0.51               | 2.29                              | 1.31                |
| 26S proteasome non-ATPase regulatory subunit 4;                         | O35226  | 0.26                                                     | 0.11                                                     | 0.19                                                 | 0.11               | 0.48                              | 0.80                |
| Ig gamma-2B chain C region;                                             | P01867  | 0.26                                                     | 0.57                                                     | 0.41                                                 | 0.21               | 0.96                              | 1.74                |
| Basigin;                                                                | P18572  | 0.26                                                     | 0.12                                                     | 0.19                                                 | 0.10               | 0.44                              | 0.67                |
| Rho GTPase-activating protein 1;                                        | Q5FWK3  | 0.26                                                     | -0.07                                                    | 0.09                                                 | 0.24               | 1.06                              | 0.61                |
| CB1 cannabinoid receptor-interacting protein 1;                         | Q5M8N0  | 0.26                                                     | -0.34                                                    | -0.04                                                | 0.43               | 1.90                              | 1.23                |
| Serine/threonine-protein kinase OSR1;                                   | Q6P9R2  | 0.26                                                     | 0.06                                                     | 0.16                                                 | 0.15               | 0.65                              | 0.47                |
| Selenide, water dikinase 1;                                             | Q8BH69  | 0.26                                                     | 0.06                                                     | 0.16                                                 | 0.15               | 0.65                              | 0.66                |
| Small glutamine-rich tetratricopeptide repeat-containing protein alpha; | Q8BJU0  | 0.26                                                     | 0.93                                                     | 0.59                                                 | 0.47               | 2.09                              | 2.27                |
| Transaldolase;                                                          | Q93092  | 0.26                                                     | 0.16                                                     | 0.21                                                 | 0.07               | 0.32                              | 0.77                |
| Ubiquitin-like modifier-activating enzyme ATG7;                         | Q9D906  | 0.26                                                     | -0.27                                                    | 0.00                                                 | 0.38               | 1.68                              | 0.96                |
| Serine/threonine-protein kinase PAK 2;                                  | Q8CIN4  | 0.26                                                     | -0.15                                                    | 0.06                                                 | 0.29               | 1.31                              | 0.85                |
| Cysteinyl-tRNA synthetase, cytoplasmic;                                 | Q9ER72  | 0.26                                                     | -0.32                                                    | -0.03                                                | 0.41               | 1.85                              | 1.13                |
| Aspartyl aminopeptidase;                                                | Q9Z2W0  | 0.26                                                     | -0.40                                                    | -0.07                                                | 0.47               | 2.08                              | 1.25                |
| Membrane primary amine oxidase;                                         | O70423  | 0.28                                                     | 0.32                                                     | 0.30                                                 | 0.03               | 0.15                              | 1.13                |
| Gamma-butyrobetaine dioxygenase;                                        | Q924Y0  | 0.28                                                     | 0.16                                                     | 0.22                                                 | 0.08               | 0.35                              | 0.82                |
| Glutaredoxin-3;                                                         | Q9CQM9  | 0.28                                                     | -0.34                                                    | -0.03                                                | 0.43               | 1.94                              | 1.26                |
| C-reactive protein;                                                     | P14847  | 0.29                                                     | -0.76                                                    | -0.24                                                | 0.74               | 3.31                              | 2.54                |
| Microtubule-associated protein 4;                                       | P27546  | 0.29                                                     | -0.18                                                    | 0.05                                                 | 0.33               | 1.49                              | 0.92                |
| Tissue alpha-L-fucosidase;                                              | Q99LJ1  | 0.29                                                     | 0.49                                                     | 0.39                                                 | 0.14               | 0.63                              | 1.59                |
| 5-hydroxyisourate hydrolase;                                            | Q9CRB3  | 0.29                                                     | 0.08                                                     | 0.19                                                 | 0.14               | 0.64                              | 0.71                |
| SH3 domain-binding glutamic acid-rich-like protein;                     | Q9JJU8  | 0.29                                                     | -0.30                                                    | -0.01                                                | 0.42               | 1.87                              | 1.20                |
| Hemoglobin subunit beta-1;                                              | P02088  | 0.29                                                     | -0.36                                                    | -0.04                                                | 0.46               | 2.04                              | 1.44                |
| Hemoglobin subunit beta-2;                                              | P02089  | 0.61                                                     | -0.49                                                    | 0.06                                                 | 0.78               | 3.50                              | 2.49                |
| Prostamide/prostaglandin F synthase;                                    | Q9DB60  | 0.29                                                     | -0.60                                                    | -0.16                                                | 0.63               | 2.80                              | 1.91                |
| Proteasome subunit beta type-9;                                         | P28076  | 0.30                                                     | 0.38                                                     | 0.34                                                 | 0.06               | 0.25                              | 1.36                |
| Guanylate kinase;                                                       | Q64520  | 0.30                                                     | -0.01                                                    | 0.14                                                 | 0.22               | 0.99                              | 0.68                |
| Phytoenyl-CoA dioxygenase domain-containing protein 1;                  | Q9DB26  | 0.30                                                     | -0.45                                                    | -0.08                                                | 0.53               | 2.38                              | 1.65                |
| Guanine nucleotide-binding protein subunit alpha-13;                    | P27601  | 0.30                                                     | 0.23                                                     | 0.26                                                 | 0.05               | 0.23                              | 1.07                |
| Septin-11;                                                              | Q8C1B7  | 0.30                                                     | 0.93                                                     | 0.62                                                 | 0.45               | 2.00                              | 2.73                |
| Septin-8;                                                               | Q8CHH9  | 0.00                                                     | 0.18                                                     | 0.09                                                 | 0.12               | 0.56                              | 0.31                |
| Septin-6;                                                               | Q9R1T4  | 0.28                                                     | 0.43                                                     | 0.35                                                 | 0.11               | 0.50                              | 1.38                |
| Argininosuccinate lyase;                                                | Q91YI0  | 0.30                                                     | -0.30                                                    | 0.00                                                 | 0.43               | 1.90                              | 1.18                |
| Uncharacterized protein;                                                | E9Q616  | 0.30                                                     | 0.59                                                     | 0.44                                                 | 0.20               | 0.90                              | 1.53                |
| Uncharacterized protein;                                                | F7CAE1  | 0.30                                                     | -0.42                                                    | -0.06                                                | 0.50               | 2.25                              | 1.61                |
| Eukaryotic translation initiation factor 4 gamma 1;                     | Q6NZJ6  | 0.30                                                     | 0.93                                                     | 0.62                                                 | 0.45               | 2.00                              | 2.99                |
| 14-3-3 protein gamma;                                                   | P61982  | 0.31                                                     | 0.54                                                     | 0.42                                                 | 0.16               | 0.71                              | 1.50                |
| Elongation factor Tu, mitochondrial;                                    | Q8BFR5  | 0.31                                                     | -0.17                                                    | 0.07                                                 | 0.34               | 1.51                              | 1.03                |

Table S6, Tholen et al.

| Protein                                              | Uniprot  | Fold change (log <sub>2</sub> ) of ASAPRatio replicate 1 | Fold change (log <sub>2</sub> ) of ASAPRatio replicate 2 | Average fold change (log <sub>2</sub> ) of ASAPRatio | Standard deviation | 90 % confidence interval (t-test) | Fisher's exact test |
|------------------------------------------------------|----------|----------------------------------------------------------|----------------------------------------------------------|------------------------------------------------------|--------------------|-----------------------------------|---------------------|
| S-methyl-5'-thioadenosine phosphorylase;             | Q9CQ65   | 0.31                                                     | -0.07                                                    | 0.12                                                 | 0.27               | 1.21                              | 0.81                |
| AP-2 complex subunit alpha-1;                        | P17426   | 0.31                                                     | 0.96                                                     | 0.63                                                 | 0.46               | 2.04                              | 3.32                |
| Serpin B12;                                          | Q9D7P9   | 0.31                                                     | 0.31                                                     | 0.31                                                 | 0.00               | 0.00                              | 0.87                |
| Actin-related protein 2/3 complex subunit 3;         | Q9JM76   | 0.31                                                     | 0.72                                                     | 0.52                                                 | 0.29               | 1.30                              | 2.04                |
| Uncharacterized protein;                             | E9QK49   | 0.31                                                     | 0.12                                                     | 0.22                                                 | 0.13               | 0.59                              | 0.80                |
| Protein S100-A4;                                     | P07091   | 0.32                                                     | 0.26                                                     | 0.29                                                 | 0.04               | 0.19                              | 1.25                |
| ADP-ribosylation factor 6;                           | P62331   | 0.32                                                     | -0.56                                                    | -0.12                                                | 0.62               | 2.77                              | 2.01                |
| Chloride intracellular channel protein 1;            | Q9Z1Q5   | 0.32                                                     | 0.20                                                     | 0.26                                                 | 0.08               | 0.38                              | 1.07                |
| Golgi apparatus protein 1;                           | Q61543   | 0.32                                                     | 0.76                                                     | 0.54                                                 | 0.31               | 1.37                              | 2.46                |
| Heat shock protein 105 kDa;                          | Q61699   | 0.32                                                     | 0.31                                                     | 0.32                                                 | 0.01               | 0.04                              | 1.18                |
| Protein Noxp20;                                      | Q9D281   | 0.32                                                     | -0.94                                                    | -0.31                                                | 0.89               | 3.99                              | 2.96                |
| Peroxisomal N(1)-acetyl-spermine/spermidine oxidase; | Q8C0L6   | 0.33                                                     | 0.31                                                     | 0.32                                                 | 0.02               | 0.07                              | 1.41                |
| Arf-GAP domain and FG repeats-containing protein 1;  | Q8K2K6   | 0.33                                                     | 0.58                                                     | 0.45                                                 | 0.17               | 0.76                              | 1.73                |
| Dynactin subunit 2;                                  | Q99KJ8   | 0.33                                                     | 0.74                                                     | 0.54                                                 | 0.29               | 1.28                              | 2.35                |
| SUMO-activating enzyme subunit 1;                    | Q9R1T2   | 0.33                                                     | -0.03                                                    | 0.15                                                 | 0.26               | 1.14                              | 0.80                |
|                                                      | O A6H630 | 0.33                                                     | 0.45                                                     | 0.39                                                 | 0.09               | 0.38                              | 1.36                |
| Small ubiquitin-related modifier 2;                  | P61957   | 0.33                                                     | 0.11                                                     | 0.22                                                 | 0.16               | 0.70                              | 0.97                |
| Integrin beta-5;                                     | O70309   | 0.35                                                     | 0.53                                                     | 0.44                                                 | 0.13               | 0.57                              | 2.02                |
| Proteasome subunit alpha type-2;                     | P49722   | 0.35                                                     | -0.03                                                    | 0.16                                                 | 0.26               | 1.18                              | 0.77                |
| GTPase NRas;                                         | P08556   | 0.35                                                     | 0.29                                                     | 0.32                                                 | 0.04               | 0.18                              | 1.37                |
| Sorcin;                                              | Q6P069   | 0.35                                                     | -0.18                                                    | 0.08                                                 | 0.37               | 1.67                              | 1.00                |
| Septin-9;                                            | Q80UG5   | 0.35                                                     | 0.87                                                     | 0.61                                                 | 0.37               | 1.66                              | 3.01                |
| Protein disulfide-isomerase A6;                      | Q922R8   | 0.35                                                     | 0.10                                                     | 0.22                                                 | 0.17               | 0.78                              | 0.92                |
| Vacuolar protein-sorting-associated protein 25;      | Q9CQ80   | 0.35                                                     | -0.06                                                    | 0.14                                                 | 0.29               | 1.28                              | 0.85                |
| Ubiquitin-conjugating enzyme E2 variant 1;           | Q9CZY3   | 0.35                                                     | 0.00                                                     | 0.17                                                 | 0.24               | 1.09                              | 0.77                |
| Proteasome subunit alpha type-5;                     | Q9Z2U1   | 0.35                                                     | 0.31                                                     | 0.33                                                 | 0.02               | 0.11                              | 1.31                |
| Junction plakoglobin;                                | Q02257   | 0.36                                                     | 0.39                                                     | 0.37                                                 | 0.02               | 0.11                              | 1.33                |
| Heterogeneous nuclear ribonucleoprotein A1;          | P49312   | 0.37                                                     | 2.97                                                     | 1.67                                                 | 1.84               | 8.21                              | 8.17                |
| Calcineurin subunit B type 1;                        | Q63810   | 0.37                                                     | 0.77                                                     | 0.57                                                 | 0.29               | 1.28                              | 2.43                |
| NHL repeat-containing protein 3;                     | Q8CCH2   | 0.37                                                     | 0.40                                                     | 0.38                                                 | 0.02               | 0.11                              | 1.51                |
| Eukaryotic translation initiation factor 6;          | O55135   | 0.37                                                     | 0.45                                                     | 0.41                                                 | 0.06               | 0.27                              | 1.83                |
| Calpain small subunit 1;                             | O88456   | 0.37                                                     | 0.01                                                     | 0.19                                                 | 0.25               | 1.11                              | 0.83                |
| C-terminal-binding protein 1;                        | O88712   | 0.37                                                     | 0.12                                                     | 0.25                                                 | 0.17               | 0.77                              | 1.03                |
| Ubiquitin carboxyl-terminal hydrolase 5;             | P56399   | 0.37                                                     | 0.01                                                     | 0.19                                                 | 0.25               | 1.11                              | 0.81                |
| Mitogen-activated protein kinase 3;                  | Q63844   | 0.37                                                     | -0.03                                                    | 0.17                                                 | 0.28               | 1.25                              | 0.87                |
| Mitogen-activated protein kinase 1;                  | P63085   | 0.24                                                     | 1.07                                                     | 0.65                                                 | 0.59               | 2.62                              | 3.04                |
| NADH-cytochrome b5 reductase 3;                      | Q9DCN2   | 0.37                                                     | 0.99                                                     | 0.68                                                 | 0.44               | 1.98                              | 3.16                |
| Proteasome subunit alpha type-6;                     | Q9QUM9   | 0.37                                                     | 0.64                                                     | 0.50                                                 | 0.19               | 0.87                              | 2.04                |



Table S6, Tholen et al.

| Protein                                                                                                                                                                   | Uniprot | Fold change (log <sub>2</sub> ) of ASAPRatio replicate 1 | Fold change (log <sub>2</sub> ) of ASAPRatio replicate 2 | Average fold change (log <sub>2</sub> ) of ASAPRatio | Standard deviation | 90 % confidence interval (t-test) | Fisher's exact test |
|---------------------------------------------------------------------------------------------------------------------------------------------------------------------------|---------|----------------------------------------------------------|----------------------------------------------------------|------------------------------------------------------|--------------------|-----------------------------------|---------------------|
| Uncharacterized protein;                                                                                                                                                  | E9Q9T2  | 0.37                                                     | 0.89                                                     | 0.63                                                 | 0.37               | 1.64                              | 2.83                |
| NK13; Serine (Or cysteine) peptidase inhibitor, clade B, member 6b; Serine (Or cysteine) peptidase inhibitor, clade B, member 6b, isoform CRA_a; Uncharacterized protein; | O08804  | -1.29                                                    | -0.84                                                    | -1.06                                                | 0.32               | 1.42                              | 5.85                |
| Macrophage migration inhibitory factor;                                                                                                                                   | P34884  | 0.38                                                     | 0.00                                                     | 0.19                                                 | 0.27               | 1.20                              | 0.77                |
| Serpin B5;                                                                                                                                                                | P70124  | 0.38                                                     | 0.01                                                     | 0.20                                                 | 0.26               | 1.15                              | 0.88                |
| Proteasome subunit beta type-7;                                                                                                                                           | P70195  | 0.38                                                     | 0.90                                                     | 0.64                                                 | 0.36               | 1.63                              | 3.30                |
| Glutaredoxin-related protein 5, mitochondrial;                                                                                                                            | Q80Y14  | 0.38                                                     | 0.54                                                     | 0.46                                                 | 0.11               | 0.50                              | 2.18                |
| Alanyl-tRNA synthetase, cytoplasmic;                                                                                                                                      | Q8BGQ7  | 0.38                                                     | -0.14                                                    | 0.12                                                 | 0.36               | 1.63                              | 1.08                |
| Dynamin-1-like protein;                                                                                                                                                   | Q8K1M6  | 0.38                                                     | -0.56                                                    | -0.09                                                | 0.66               | 2.95                              | 2.12                |
| Threonyl-tRNA synthetase, cytoplasmic;                                                                                                                                    | Q9D0R2  | 0.38                                                     | 0.15                                                     | 0.27                                                 | 0.16               | 0.72                              | 0.95                |
| Gamma-glutamylcyclotransferase;                                                                                                                                           | Q9D7X8  | 0.38                                                     | 0.35                                                     | 0.36                                                 | 0.02               | 0.11                              | 1.63                |
| Coatomer subunit gamma;                                                                                                                                                   | Q9QZE5  | 0.38                                                     | 1.09                                                     | 0.74                                                 | 0.50               | 2.25                              | 3.37                |
| Puromycin-sensitive aminopeptidase;                                                                                                                                       | Q11011  | 0.38                                                     | -0.36                                                    | 0.01                                                 | 0.52               | 2.33                              | 1.40                |
| Protein RCC2;                                                                                                                                                             | Q8BK67  | 0.38                                                     | 1.23                                                     | 0.81                                                 | 0.60               | 2.70                              | 3.37                |
| 5-oxoprolinase;                                                                                                                                                           | Q8K010  | 0.38                                                     | -0.12                                                    | 0.13                                                 | 0.35               | 1.58                              | 0.87                |
| SAR1 gene homolog A (S. cerevisiae); SAR1 gene homolog A (S. cerevisiae), isoform CRA_b; Uncharacterized protein;                                                         | Q99JZ4  | 0.38                                                     | 0.00                                                     | 0.19                                                 | 0.27               | 1.20                              | 0.82                |
| GTP-binding protein SAR1b;                                                                                                                                                | Q9CQC9  | 0.43                                                     | -0.12                                                    | 0.16                                                 | 0.39               | 1.75                              | 1.20                |
| Hypoxanthine-guanine phosphoribosyltransferase;                                                                                                                           | P00493  | 0.39                                                     | 0.14                                                     | 0.26                                                 | 0.18               | 0.80                              | 1.13                |
| Tubulin-specific chaperone D;                                                                                                                                             | Q8BYA0  | 0.39                                                     | 1.22                                                     | 0.81                                                 | 0.59               | 2.62                              | 4.24                |
| MKIAA0079 protein; SEC24 related gene family, member C (S. cerevisiae), isoform CRA_b; Uncharacterized protein;                                                           | Q80U83  | 0.39                                                     | 0.56                                                     | 0.47                                                 | 0.12               | 0.52                              | 2.14                |
| Phosphatidylinositol transfer protein alpha isoform;                                                                                                                      | P53810  | 0.39                                                     | 0.04                                                     | 0.22                                                 | 0.25               | 1.10                              | 0.94                |
| Eukaryotic initiation factor 4A-II;                                                                                                                                       | P10630  | -0.69                                                    | -0.11                                                    | -0.40                                                | 0.41               | 1.85                              | 1.90                |
| 6-phosphogluconolactonase;                                                                                                                                                | Q9CQ60  | 0.39                                                     | -0.27                                                    | 0.06                                                 | 0.47               | 2.08                              | 1.42                |
| MCG21235; Uncharacterized protein;                                                                                                                                        | Q9D1Q5  | 0.39                                                     | 0.52                                                     | 0.45                                                 | 0.09               | 0.40                              | 1.73                |
| Tryptophanyl-tRNA synthetase, cytoplasmic;                                                                                                                                | P32921  | 0.40                                                     | -0.25                                                    | 0.07                                                 | 0.46               | 2.06                              | 1.40                |
| H-2 class I histocompatibility antigen, Q10 alpha chain;                                                                                                                  | P01898  | 0.65                                                     | 0.20                                                     | 0.43                                                 | 0.32               | 1.42                              | 1.69                |
| Cofilin-1;                                                                                                                                                                | P18760  | 0.40                                                     | 1.12                                                     | 0.76                                                 | 0.51               | 2.28                              | 2.79                |
| Epidermal growth factor receptor substrate 15;                                                                                                                            | P42567  | 0.40                                                     | 0.29                                                     | 0.34                                                 | 0.08               | 0.36                              | 1.35                |
| Ubiquitin-conjugating enzyme E2 K;                                                                                                                                        | P61087  | 0.40                                                     | -0.01                                                    | 0.19                                                 | 0.29               | 1.31                              | 0.89                |
| Vasodilator-stimulated phosphoprotein;                                                                                                                                    | P70460  | 0.41                                                     | 0.24                                                     | 0.33                                                 | 0.12               | 0.54                              | 1.38                |
| Costars family protein C6orf115 homolog;                                                                                                                                  | Q4KML4  | 0.41                                                     | 0.19                                                     | 0.30                                                 | 0.16               | 0.70                              | 1.28                |
| CD166 antigen;                                                                                                                                                            | Q61490  | 0.41                                                     | 0.47                                                     | 0.44                                                 | 0.04               | 0.17                              | 1.94                |
| Polyadenylate-binding protein 2;                                                                                                                                          | Q8CCS6  | 0.41                                                     | 1.92                                                     | 1.17                                                 | 1.07               | 4.77                              | 8.84                |
| Sorting nexin-6;                                                                                                                                                          | Q6P8X1  | 0.42                                                     | -0.56                                                    | -0.07                                                | 0.69               | 3.09                              | 2.03                |
| Elongation factor 1-gamma;                                                                                                                                                | Q9D8N0  | 0.42                                                     | 0.95                                                     | 0.69                                                 | 0.37               | 1.66                              | 3.49                |

Table S6, Tholen et al.

| Protein                                                                            | Uniprot | Fold change (log <sub>2</sub> ) of ASAPRatio replicate 1 | Fold change (log <sub>2</sub> ) of ASAPRatio replicate 2 | Average fold change (log <sub>2</sub> ) of ASAPRatio | Standard deviation | 90 % confidence interval (t-test) | Fisher's exact test |
|------------------------------------------------------------------------------------|---------|----------------------------------------------------------|----------------------------------------------------------|------------------------------------------------------|--------------------|-----------------------------------|---------------------|
| Polyadenylate-binding protein 1;                                                   | P29341  | 0.42                                                     | 1.02                                                     | 0.72                                                 | 0.42               | 1.89                              | 3.37                |
| Ubiquitin-conjugating enzyme E2 N;                                                 | P61089  | 0.42                                                     | -0.01                                                    | 0.20                                                 | 0.31               | 1.38                              | 0.92                |
| Inter-alpha-trypsin inhibitor heavy chain H2;                                      | Q61703  | 0.42                                                     | -0.86                                                    | -0.22                                                | 0.91               | 4.05                              | 2.99                |
| Cullin-associated NEDD8-dissociated protein 1;                                     | Q62Q38  | 0.42                                                     | -0.27                                                    | 0.08                                                 | 0.49               | 2.18                              | 1.27                |
| Heterogeneous nuclear ribonucleoprotein Q;                                         | Q7TMK9  | 0.42                                                     | 1.47                                                     | 0.94                                                 | 0.74               | 3.29                              | 4.59                |
| Heterogeneous nuclear ribonucleoprotein H;                                         | O35737  | 0.43                                                     | 1.63                                                     | 1.03                                                 | 0.84               | 3.77                              | 5.93                |
| Nidogen-1;                                                                         | P10493  | 0.43                                                     | 0.83                                                     | 0.63                                                 | 0.28               | 1.26                              | 2.83                |
| Dual specificity mitogen-activated protein kinase kinase 4;                        | P47809  | 0.43                                                     | -0.17                                                    | 0.13                                                 | 0.42               | 1.90                              | 1.11                |
| Trifunctional enzyme subunit alpha, mitochondrial;                                 | Q8BMS1  | 0.43                                                     | 0.10                                                     | 0.27                                                 | 0.24               | 1.06                              | 0.96                |
| Bifunctional protein NCOAT;                                                        | Q9EQQ9  | 0.43                                                     | 0.20                                                     | 0.32                                                 | 0.16               | 0.73                              | 1.28                |
| Ubiquitin-conjugating enzyme E2 L3;                                                | P68037  | 0.43                                                     | 0.06                                                     | 0.25                                                 | 0.27               | 1.19                              | 1.07                |
| T-complex protein 1 subunit gamma;                                                 | P80318  | 0.43                                                     | 0.64                                                     | 0.54                                                 | 0.15               | 0.66                              | 2.33                |
| Protein arginine N-methyltransferase 1;                                            | Q9JIF0  | 0.43                                                     | 1.49                                                     | 0.96                                                 | 0.74               | 3.32                              | 5.25                |
| Vigilin;                                                                           | Q8VDJ3  | 0.44                                                     | 0.78                                                     | 0.61                                                 | 0.24               | 1.07                              | 2.44                |
| Ras GTPase-activating-like protein IQGAP1;                                         | Q9JKF1  | 0.44                                                     | 0.78                                                     | 0.61                                                 | 0.24               | 1.07                              | 2.25                |
| ADP-ribosylation factor 3;                                                         | P61205  | 0.44                                                     | -0.09                                                    | 0.18                                                 | 0.38               | 1.68                              | 1.20                |
| ADP-ribosylation factor 5;                                                         | P84084  | 1.17                                                     | -0.27                                                    | 0.45                                                 | 1.02               | 4.54                              | 2.59                |
| Peptidyl-prolyl cis-trans isomerase FKBP2;                                         | P45878  | 0.44                                                     | -0.11                                                    | 0.17                                                 | 0.39               | 1.73                              | 0.97                |
| Pro-interleukin-16;                                                                | O54824  | 0.45                                                     | 1.66                                                     | 1.05                                                 | 0.85               | 3.79                              | 6.90                |
| Leukocyte surface antigen CD47;                                                    | Q61735  | 0.45                                                     | 0.08                                                     | 0.27                                                 | 0.26               | 1.17                              | 1.16                |
| 1-phosphatidylinositol-4,5-bisphosphate phosphodiesterase delta-1;                 | Q8R3B1  | 0.45                                                     | 0.03                                                     | 0.24                                                 | 0.30               | 1.34                              | 1.01                |
| Ras-related protein Rap-1b;                                                        | Q99JI6  | 0.45                                                     | 0.28                                                     | 0.36                                                 | 0.13               | 0.57                              | 1.65                |
| Tumor protein D54;                                                                 | Q9CYZ2  | 0.45                                                     | -0.47                                                    | -0.01                                                | 0.66               | 2.93                              | 2.19                |
| GTP-binding nuclear protein Ran;                                                   | P62827  | 0.45                                                     | 0.04                                                     | 0.25                                                 | 0.29               | 1.30                              | 1.16                |
| 55 kDa erythrocyte membrane protein;                                               | P70290  | 0.45                                                     | -0.67                                                    | -0.11                                                | 0.79               | 3.54                              | 2.28                |
| Transitional endoplasmic reticulum ATPase;                                         | Q01853  | 0.47                                                     | 1.15                                                     | 0.81                                                 | 0.49               | 2.17                              | 3.64                |
| 26S proteasome non-ATPase regulatory subunit 3;                                    | P14685  | 0.47                                                     | 0.40                                                     | 0.43                                                 | 0.05               | 0.20                              | 1.48                |
| Catalase;                                                                          | P24270  | 0.47                                                     | 0.08                                                     | 0.27                                                 | 0.27               | 1.20                              | 1.13                |
| IgG receptor FcRn large subunit p51;                                               | Q61559  | 0.48                                                     | 0.53                                                     | 0.50                                                 | 0.04               | 0.16                              | 2.28                |
| UMP-CMP kinase;                                                                    | Q9DBP5  | 0.48                                                     | 0.10                                                     | 0.29                                                 | 0.27               | 1.19                              | 1.18                |
| Serine/threonine-protein phosphatase 2A 55 kDa regulatory subunit B alpha isoform; | Q6P1F6  | 0.48                                                     | -0.29                                                    | 0.09                                                 | 0.54               | 2.40                              | 1.59                |
| Serine/threonine-protein phosphatase 2A catalytic subunit alpha isoform;           | P63330  | 0.49                                                     | 0.10                                                     | 0.29                                                 | 0.27               | 1.22                              | 1.31                |
| Proteasome activator complex subunit 1;                                            | P97371  | 0.49                                                     | 0.16                                                     | 0.32                                                 | 0.23               | 1.02                              | 1.35                |
| Regulator of nonsense transcripts 1;                                               | Q9EPU0  | 0.49                                                     | 1.72                                                     | 1.10                                                 | 0.87               | 3.91                              | 7.15                |
| Ran-specific GTPase-activating protein;                                            | P34022  | 0.50                                                     | 0.60                                                     | 0.55                                                 | 0.07               | 0.31                              | 2.62                |
| Epoxide hydrolase 2;                                                               | P34914  | 0.50                                                     | -0.27                                                    | 0.11                                                 | 0.54               | 2.42                              | 1.70                |
| Hormone-sensitive lipase;                                                          | P54310  | 0.50                                                     | 0.07                                                     | 0.28                                                 | 0.30               | 1.34                              | 1.25                |

Table S6, Tholen et al.

| Protein                                                                                                   | Uniprot | Fold change (log <sub>2</sub> ) of ASAPRatio replicate 1 | Fold change (log <sub>2</sub> ) of ASAPRatio replicate 2 | Average fold change (log <sub>2</sub> ) of ASAPRatio | Standard deviation | 90 % confidence interval (t-test) | Fisher's exact test |
|-----------------------------------------------------------------------------------------------------------|---------|----------------------------------------------------------|----------------------------------------------------------|------------------------------------------------------|--------------------|-----------------------------------|---------------------|
| Dihydrolipoyllysine-residue acetyltransferase component of pyruvate dehydrogenase complex, mitochondrial; | Q8BMF4  | 0.50                                                     | -0.01                                                    | 0.24                                                 | 0.36               | 1.61                              | 1.18                |
| Heterogeneous nuclear ribonucleoprotein A3;                                                               | Q8BG05  | 0.50                                                     | 1.90                                                     | 1.20                                                 | 0.99               | 4.42                              | 7.24                |
| Serine/threonine-protein kinase 38;                                                                       | Q91VJ4  | 0.50                                                     | 0.00                                                     | 0.25                                                 | 0.35               | 1.57                              | 1.00                |
| Uncharacterized protein;                                                                                  | F7DBB3  | 0.50                                                     | 0.12                                                     | 0.31                                                 | 0.26               | 1.17                              | 1.35                |
| Microtubule-associated protein 1B;                                                                        | P14873  | 0.51                                                     | 0.15                                                     | 0.33                                                 | 0.25               | 1.12                              | 1.35                |
| ELAV-like protein 1;                                                                                      | P70372  | 0.51                                                     | 0.72                                                     | 0.61                                                 | 0.15               | 0.68                              | 2.52                |
| Acyl-CoA synthetase family member 2, mitochondrial;                                                       | Q8VCW8  | 0.51                                                     | 0.15                                                     | 0.33                                                 | 0.25               | 1.12                              | 1.23                |
| Twinfilin-1;                                                                                              | Q91YR1  | 0.51                                                     | -0.40                                                    | 0.06                                                 | 0.64               | 2.85                              | 2.03                |
| COP9 signalosome complex subunit 1;                                                                       | Q99LD4  | 0.51                                                     | -0.32                                                    | 0.09                                                 | 0.59               | 2.61                              | 1.72                |
| Sodium/potassium-transporting ATPase subunit alpha-1;                                                     | Q8VDN2  | 0.51                                                     | 0.99                                                     | 0.75                                                 | 0.34               | 1.54                              | 3.38                |
| Sodium/potassium-transporting ATPase subunit alpha-2;                                                     | Q6PIE5  | -0.25                                                    | -0.32                                                    | -0.29                                                | 0.05               | 0.22                              | 1.18                |
| GTP:AMP phosphotransferase, mitochondrial;                                                                | Q9WTP7  | 0.51                                                     | 0.08                                                     | 0.30                                                 | 0.30               | 1.33                              | 1.32                |
| Nuclear protein localization protein 4 homolog;                                                           | P60670  | 0.52                                                     | 0.56                                                     | 0.54                                                 | 0.03               | 0.13                              | 2.61                |
| T-complex protein 1 subunit beta;                                                                         | P80314  | 0.52                                                     | 0.43                                                     | 0.47                                                 | 0.06               | 0.26                              | 2.00                |
| COP9 signalosome complex subunit 3;                                                                       | O88543  | 0.52                                                     | 0.52                                                     | 0.52                                                 | 0.00               | 0.00                              | 2.05                |
| Adenylate kinase 2, mitochondrial;                                                                        | Q9WTP6  | 0.52                                                     | -0.09                                                    | 0.21                                                 | 0.43               | 1.91                              | 1.27                |
| Importin subunit alpha-3;                                                                                 | O35344  | 0.52                                                     | -0.20                                                    | 0.16                                                 | 0.51               | 2.26                              | 1.61                |
| Coactosin-like protein;                                                                                   | Q9CQI6  | 0.53                                                     | 0.41                                                     | 0.47                                                 | 0.08               | 0.36                              | 1.96                |
| Isoamyl acetate-hydrolyzing esterase 1 homolog;                                                           | Q9DB29  | 0.53                                                     | 0.37                                                     | 0.45                                                 | 0.11               | 0.50                              | 1.76                |
| Pleckstrin;                                                                                               | Q9JHK5  | 0.53                                                     | 0.87                                                     | 0.70                                                 | 0.24               | 1.09                              | 3.53                |
| Carbonyl reductase 3; Uncharacterized protein;                                                            | Q8K354  | 0.53                                                     | -0.04                                                    | 0.24                                                 | 0.40               | 1.80                              | 1.33                |
| Sodium/potassium-transporting ATPase subunit beta-3;                                                      | P97370  | 0.53                                                     | 0.79                                                     | 0.66                                                 | 0.19               | 0.84                              | 3.12                |
| 26S proteasome non-ATPase regulatory subunit 14;                                                          | O35593  | 0.54                                                     | 0.11                                                     | 0.32                                                 | 0.30               | 1.34                              | 1.34                |
| Transgelin-2;                                                                                             | Q9WVA4  | 0.54                                                     | 0.33                                                     | 0.43                                                 | 0.14               | 0.64                              | 1.85                |
| General vesicular transport factor p115;                                                                  | Q9Z1Z0  | 0.54                                                     | 0.20                                                     | 0.37                                                 | 0.24               | 1.05                              | 1.10                |
| Calpain-2 catalytic subunit;                                                                              | O08529  | 0.54                                                     | -0.03                                                    | 0.25                                                 | 0.40               | 1.78                              | 1.17                |
| N-acetylgalactosamine kinase;                                                                             | Q68FH4  | 0.54                                                     | -0.36                                                    | 0.09                                                 | 0.63               | 2.82                              | 1.62                |
| Smoothelin-like protein 1;                                                                                | Q99LM3  | 0.54                                                     | -0.89                                                    | -0.18                                                | 1.01               | 4.50                              | 2.76                |
| Band 4.1-like protein 1;                                                                                  | Q9Z2H5  | 0.54                                                     | -0.11                                                    | 0.22                                                 | 0.45               | 2.02                              | 1.28                |
| Long-chain-fatty-acid--CoA ligase 1;                                                                      | P41216  | 0.54                                                     | 0.08                                                     | 0.31                                                 | 0.32               | 1.43                              | 1.35                |
| Aminoacyl tRNA synthase complex-interacting multifunctional protein 1;                                    | P31230  | 0.55                                                     | 0.44                                                     | 0.50                                                 | 0.07               | 0.32                              | 2.29                |
| Stress-induced-phosphoprotein 1;                                                                          | Q60864  | 0.55                                                     | 0.21                                                     | 0.38                                                 | 0.23               | 1.05                              | 1.62                |
| Thimet oligopeptidase;                                                                                    | Q8C1A5  | 0.55                                                     | 0.21                                                     | 0.38                                                 | 0.23               | 1.05                              | 1.57                |
| Phospholysine phosphohistidine inorganic pyrophosphate phosphatase;                                       | Q9D7I5  | 0.55                                                     | 0.33                                                     | 0.44                                                 | 0.15               | 0.67                              | 1.93                |
| Phosphoglycerate mutase 1;                                                                                | Q9DBJ1  | 0.55                                                     | 0.11                                                     | 0.33                                                 | 0.31               | 1.37                              | 1.53                |
| Serine/threonine-protein kinase WNK1;                                                                     | P83741  | 0.55                                                     | 0.47                                                     | 0.51                                                 | 0.06               | 0.26                              | 2.29                |
| Phosphoenolpyruvate carboxykinase [GTP], mitochondrial;                                                   | Q8BH04  | 0.55                                                     | -1.03                                                    | -0.24                                                | 1.11               | 4.97                              | 3.48                |

Table S6, Tholen et al.

| Protein                                                  | Uniprot | Fold change (log <sub>2</sub> ) of ASAPRatio replicate 1 | Fold change (log <sub>2</sub> ) of ASAPRatio replicate 2 | Average fold change (log <sub>2</sub> ) of ASAPRatio | Standard deviation | 90 % confidence interval (t-test) | Fisher's exact test |
|----------------------------------------------------------|---------|----------------------------------------------------------|----------------------------------------------------------|------------------------------------------------------|--------------------|-----------------------------------|---------------------|
| Coronin-7;                                               | Q9D2V7  | 0.55                                                     | -0.07                                                    | 0.24                                                 | 0.44               | 1.96                              | 1.36                |
| Lysosomal alpha-mannosidase;                             | O09159  | 0.56                                                     | 0.03                                                     | 0.29                                                 | 0.37               | 1.66                              | 1.16                |
| Copper transport protein ATOX1;                          | O08997  | 0.57                                                     | -0.06                                                    | 0.25                                                 | 0.44               | 1.97                              | 1.11                |
| Cytosol aminopeptidase;                                  | Q9CPY7  | 0.57                                                     | 0.28                                                     | 0.42                                                 | 0.21               | 0.92                              | 1.85                |
| 3-ketoacyl-CoA thiolase A, peroxisomal;                  | Q921H8  | 0.57                                                     | 0.69                                                     | 0.63                                                 | 0.09               | 0.38                              | 2.77                |
| 26S proteasome non-ATPase regulatory subunit 13;         | Q9WVJ2  | 0.57                                                     | 0.77                                                     | 0.67                                                 | 0.15               | 0.66                              | 2.66                |
| Cyclin-dependent kinase 6;                               | Q64261  | 0.57                                                     | -0.18                                                    | 0.19                                                 | 0.53               | 2.37                              | 1.64                |
| Dipeptidase 1;                                           | P31428  | 0.58                                                     | -0.49                                                    | 0.04                                                 | 0.76               | 3.37                              | 2.06                |
| UV excision repair protein RAD23 homolog B;              | P54728  | 0.58                                                     | 0.28                                                     | 0.43                                                 | 0.21               | 0.95                              | 1.85                |
| 14-3-3 protein epsilon;                                  | P62259  | 0.58                                                     | 1.20                                                     | 0.89                                                 | 0.44               | 1.96                              | 4.20                |
| Anamorsin;                                               | Q8WTY4  | 0.58                                                     | -0.20                                                    | 0.19                                                 | 0.55               | 2.45                              | 1.27                |
| CAP-Gly domain-containing linker protein 1;              | Q922J3  | 0.58                                                     | 0.18                                                     | 0.38                                                 | 0.28               | 1.26                              | 1.44                |
| Dual specificity protein phosphatase 23;                 | Q6NT99  | 0.59                                                     | -1.84                                                    | -0.63                                                | 1.71               | 7.65                              | 8.60                |
| DAZ-associated protein 1;                                | Q9JII5  | 0.59                                                     | 0.08                                                     | 0.33                                                 | 0.35               | 1.58                              | 1.50                |
| V-type proton ATPase subunit E 1;                        | P50518  | 0.59                                                     | 0.67                                                     | 0.63                                                 | 0.06               | 0.27                              | 3.03                |
| Tubulin--tyrosine ligase-like protein 12;                | Q3UDE2  | 0.59                                                     | 0.77                                                     | 0.68                                                 | 0.13               | 0.57                              | 2.76                |
| Cathepsin B;                                             | P10605  | 0.60                                                     | 0.35                                                     | 0.47                                                 | 0.18               | 0.79                              | 2.00                |
| Programmed cell death protein 6;                         | P12815  | 0.60                                                     | -1.06                                                    | -0.23                                                | 1.17               | 5.22                              | 2.94                |
| Farnesyl pyrophosphate synthase;                         | Q920E5  | 0.60                                                     | 0.36                                                     | 0.48                                                 | 0.17               | 0.75                              | 2.04                |
| Synaptobrevin homolog YKT6;                              | Q9CQW1  | 0.60                                                     | -0.36                                                    | 0.12                                                 | 0.67               | 3.01                              | 1.81                |
| AH receptor-interacting protein;                         | O08915  | 0.60                                                     | 0.67                                                     | 0.63                                                 | 0.05               | 0.23                              | 2.70                |
| Acyl-coenzyme A thioesterase 1;                          | O55137  | 0.60                                                     | 0.12                                                     | 0.36                                                 | 0.33               | 1.49                              | 1.47                |
| Acyl-coenzyme A thioesterase 2, mitochondrial;           | Q9QYR9  | -0.14                                                    | 0.36                                                     | 0.11                                                 | 0.35               | 1.55                              | 1.05                |
| Calpastatin;                                             | P51125  | 0.60                                                     | 0.16                                                     | 0.38                                                 | 0.31               | 1.39                              | 1.78                |
| Heat shock protein HSP 90-beta;                          | P11499  | 0.60                                                     | 0.19                                                     | 0.40                                                 | 0.29               | 1.31                              | 1.60                |
| Endoplasmic reticulum chaperone protein BiP;             | P08113  | 0.08                                                     | 0.38                                                     | 0.23                                                 | 0.21               | 0.93                              | 0.67                |
| Heat shock protein HSP 90-alpha;                         | P07901  | 0.26                                                     | 0.62                                                     | 0.44                                                 | 0.25               | 1.14                              | 1.86                |
| Inorganic pyrophosphatase;                               | Q9D819  | 0.60                                                     | 0.53                                                     | 0.57                                                 | 0.06               | 0.25                              | 2.27                |
| Far upstream element-binding protein 2;                  | Q3U0V1  | 0.61                                                     | 0.93                                                     | 0.77                                                 | 0.22               | 0.98                              | 3.87                |
| Activator of 90 kDa heat shock protein ATPase homolog 1; | Q8BK64  | 0.61                                                     | -0.18                                                    | 0.22                                                 | 0.56               | 2.52                              | 1.60                |
| Bleomycin hydrolase;                                     | Q8R016  | 0.61                                                     | 0.56                                                     | 0.59                                                 | 0.04               | 0.18                              | 2.41                |
| T-complex protein 1 subunit theta;                       | P42932  | 0.62                                                     | 0.31                                                     | 0.47                                                 | 0.22               | 0.99                              | 1.76                |
| Vitamin K-dependent protein S;                           | Q08761  | 0.62                                                     | 0.35                                                     | 0.48                                                 | 0.20               | 0.88                              | 2.26                |
| Hsp90 co-chaperone Cdc37;                                | Q61081  | 0.62                                                     | 0.30                                                     | 0.46                                                 | 0.23               | 1.02                              | 2.08                |
| COP9 signalosome complex subunit 8;                      | Q8VBV7  | 0.62                                                     | 0.10                                                     | 0.36                                                 | 0.37               | 1.66                              | 1.68                |
| Ubiquitin carboxyl-terminal hydrolase isozyme L5;        | Q9WUP7  | 0.62                                                     | 0.23                                                     | 0.43                                                 | 0.28               | 1.25                              | 1.59                |
| H-2 class II histocompatibility antigen, A-Q beta chain; | P06342  | 0.62                                                     | 0.89                                                     | 0.76                                                 | 0.19               | 0.84                              | 3.25                |
| COP9 signalosome complex subunit 2;                      | P61202  | 0.62                                                     | 0.32                                                     | 0.47                                                 | 0.21               | 0.95                              | 1.87                |

Table S6, Tholen et al.

| Protein                                                          | Uniprot | Fold change (log <sub>2</sub> ) of ASAPRatio replicate 1 | Fold change (log <sub>2</sub> ) of ASAPRatio replicate 2 | Average fold change (log <sub>2</sub> ) of ASAPRatio | Standard deviation | 90 % confidence interval (t-test) | Fisher's exact test |
|------------------------------------------------------------------|---------|----------------------------------------------------------|----------------------------------------------------------|------------------------------------------------------|--------------------|-----------------------------------|---------------------|
| Tubulin alpha-1A chain;                                          | P68369  | 0.62                                                     | -0.15                                                    | 0.24                                                 | 0.55               | 2.45                              | 1.53                |
| Tubulin alpha-4A chain;                                          | P68368  | 0.83                                                     | -0.14                                                    | 0.35                                                 | 0.68               | 3.06                              | 2.10                |
| C-Jun-amino-terminal kinase-interacting protein 4;               | Q58A65  | 0.62                                                     | -0.23                                                    | 0.19                                                 | 0.61               | 2.71                              | 1.71                |
| Protein MEMO1;                                                   | Q91VH6  | 0.63                                                     | 0.54                                                     | 0.58                                                 | 0.07               | 0.30                              | 2.57                |
| Alpha-enolase;                                                   | P17182  | 0.63                                                     | 0.40                                                     | 0.52                                                 | 0.16               | 0.73                              | 2.42                |
| Beta-enolase;                                                    | P21550  | -0.92                                                    | -0.79                                                    | -0.85                                                | 0.09               | 0.41                              | 4.55                |
| Gamma-enolase;                                                   | P17183  | -0.03                                                    | -0.11                                                    | -0.07                                                | 0.05               | 0.24                              | 0.22                |
| SEC14-like protein 2;                                            | Q99J08  | 0.64                                                     | 0.16                                                     | 0.40                                                 | 0.34               | 1.51                              | 1.89                |
| Arginyl-tRNA synthetase, cytoplasmic;                            | Q9D0I9  | 0.64                                                     | 0.10                                                     | 0.37                                                 | 0.38               | 1.72                              | 1.59                |
| Phosphoribosylformylglycinamide synthase;                        | Q55UR0  | 0.64                                                     | 0.66                                                     | 0.65                                                 | 0.01               | 0.06                              | 2.98                |
| Complement C1s-A subcomponent;                                   | Q8CG14  | 0.64                                                     | -0.36                                                    | 0.14                                                 | 0.71               | 3.16                              | 2.10                |
| Hydroxymethylglutaryl-CoA synthase, mitochondrial;               | P54869  | 0.65                                                     | -1.32                                                    | -0.34                                                | 1.40               | 6.23                              | 5.80                |
| Epidermal growth factor receptor substrate 15-like 1;            | Q60902  | 0.65                                                     | 0.33                                                     | 0.49                                                 | 0.22               | 1.00                              | 2.03                |
| Phospholipase B-like 1;                                          | Q8VCI0  | 0.65                                                     | 1.30                                                     | 0.98                                                 | 0.46               | 2.05                              | 5.14                |
| Uncharacterized protein;                                         | Q9CX86  | 0.65                                                     | 2.03                                                     | 1.34                                                 | 0.97               | 4.34                              | 7.73                |
| Plastin-2;                                                       | Q61233  | 0.65                                                     | 0.83                                                     | 0.74                                                 | 0.13               | 0.57                              | 3.19                |
| EGF-containing fibulin-like extracellular matrix protein 1;      | Q8BPP5  | 0.65                                                     | 0.24                                                     | 0.45                                                 | 0.29               | 1.30                              | 1.90                |
| Chloride intracellular channel protein 4;                        | Q9QYB1  | 0.66                                                     | 0.20                                                     | 0.43                                                 | 0.32               | 1.45                              | 1.72                |
| Phenylalanyl-tRNA synthetase beta chain;                         | Q9WUA2  | 0.67                                                     | 0.07                                                     | 0.37                                                 | 0.42               | 1.89                              | 1.85                |
| 26S protease regulatory subunit 6A;                              | O88685  | 0.67                                                     | 0.03                                                     | 0.35                                                 | 0.45               | 2.02                              | 1.41                |
| Aldehyde dehydrogenase family 1 member A3;                       | Q9JHW9  | 0.67                                                     | 0.06                                                     | 0.36                                                 | 0.43               | 1.93                              | 0.88                |
| V-type proton ATPase catalytic subunit A;                        | P50516  | 0.68                                                     | 0.14                                                     | 0.41                                                 | 0.38               | 1.70                              | 1.73                |
| Serine/threonine-protein phosphatase 6 regulatory subunit 3;     | Q922D4  | 0.69                                                     | 1.40                                                     | 1.04                                                 | 0.50               | 2.24                              | 5.72                |
| Ribosome-binding protein 1;                                      | Q99PL5  | 0.69                                                     | 0.81                                                     | 0.75                                                 | 0.08               | 0.38                              | 3.60                |
| WD repeat-containing protein 61;                                 | Q9ERF3  | 0.69                                                     | 1.06                                                     | 0.88                                                 | 0.27               | 1.19                              | 4.87                |
| Glycerol-3-phosphate dehydrogenase 1-like protein;               | Q3ULJ0  | 0.69                                                     | -0.23                                                    | 0.23                                                 | 0.65               | 2.91                              | 1.70                |
| Retinoid-inducible serine carboxypeptidase;                      | Q920A5  | 0.69                                                     | 0.73                                                     | 0.71                                                 | 0.03               | 0.14                              | 3.24                |
| Phosphomannomutase 2;                                            | Q9Z2M7  | 0.69                                                     | 0.95                                                     | 0.82                                                 | 0.19               | 0.83                              | 3.93                |
| Protein prune homolog;                                           | Q8BIW1  | 0.70                                                     | -0.64                                                    | 0.03                                                 | 0.95               | 4.23                              | 3.10                |
| Palmitoyl-protein thioesterase 1;                                | O88531  | 0.70                                                     | -0.11                                                    | 0.30                                                 | 0.57               | 2.53                              | 1.77                |
| GMP synthase [glutamine-hydrolyzing];                            | Q3THK7  | 0.71                                                     | 0.89                                                     | 0.80                                                 | 0.13               | 0.58                              | 3.82                |
| Ubiquitin-like modifier-activating enzyme 6;                     | Q8C7R4  | 0.71                                                     | 0.24                                                     | 0.47                                                 | 0.33               | 1.47                              | 2.08                |
| Halocid dehalogenase-like hydrolase domain-containing protein 3; | Q9CYW4  | 0.71                                                     | 0.07                                                     | 0.39                                                 | 0.45               | 2.00                              | 1.41                |
| Tubulin-folding cofactor B;                                      | Q9D1E6  | 0.71                                                     | 0.49                                                     | 0.60                                                 | 0.16               | 0.69                              | 2.86                |
| COP9 signalosome complex subunit 7a;                             | Q9CZ04  | 0.71                                                     | 0.18                                                     | 0.44                                                 | 0.37               | 1.67                              | 2.18                |
| 14-3-3 protein theta;                                            | P68254  | 0.71                                                     | 0.85                                                     | 0.78                                                 | 0.09               | 0.42                              | 3.72                |
| Cold shock domain-containing protein E1;                         | Q91W50  | 0.71                                                     | 0.97                                                     | 0.84                                                 | 0.18               | 0.81                              | 3.78                |
| 26S proteasome non-ATPase regulatory subunit 12;                 | Q9D8W5  | 0.71                                                     | 1.42                                                     | 1.07                                                 | 0.50               | 2.22                              | 5.51                |

Table S6, Tholen et al.

| Protein                                                              | Uniprot | Fold change (log <sub>2</sub> ) of ASAPRatio replicate 1 | Fold change (log <sub>2</sub> ) of ASAPRatio replicate 2 | Average fold change (log <sub>2</sub> ) of ASAPRatio | Standard deviation | 90 % confidence interval (t-test) | Fisher's exact test |
|----------------------------------------------------------------------|---------|----------------------------------------------------------|----------------------------------------------------------|------------------------------------------------------|--------------------|-----------------------------------|---------------------|
| ADP-sugar pyrophosphatase;                                           | Q9JKX6  | 0.71                                                     | 0.00                                                     | 0.36                                                 | 0.50               | 2.25                              | 1.84                |
| 5'(3')-deoxyribonucleotidase, cytosolic type;                        | Q9JM14  | 0.71                                                     | -0.06                                                    | 0.33                                                 | 0.55               | 2.44                              | 1.95                |
| Interleukin-1 receptor antagonist protein;                           | P25085  | 0.72                                                     | 0.77                                                     | 0.74                                                 | 0.03               | 0.14                              | 3.40                |
| Macrophage colony-stimulating factor 1 receptor;                     | P09581  | 0.73                                                     | -0.54                                                    | 0.10                                                 | 0.90               | 4.00                              | 2.67                |
| Glutamate--cysteine ligase regulatory subunit;                       | O09172  | 0.73                                                     | 0.66                                                     | 0.70                                                 | 0.05               | 0.22                              | 2.93                |
| Clathrin heavy chain 1;                                              | Q68FD5  | 0.74                                                     | 0.93                                                     | 0.84                                                 | 0.14               | 0.61                              | 3.12                |
| Nuclease-sensitive element-binding protein 1;                        | P62960  | 0.75                                                     | 2.26                                                     | 1.50                                                 | 1.07               | 4.76                              | 11.53               |
| Nucleophosmin;                                                       | Q61937  | 0.75                                                     | 2.33                                                     | 1.54                                                 | 1.12               | 4.98                              | 8.98                |
| Uncharacterized protein;                                             | E9Q912  | 0.75                                                     | 0.16                                                     | 0.46                                                 | 0.41               | 1.85                              | 2.05                |
| Gbp6 protein; Guanylate binding protein 7; MCG141961, isoform CRA_a; |         |                                                          |                                                          |                                                      |                    |                                   |                     |
| Uncharacterized protein;                                             | Q91Z40  | 0.76                                                     | 0.15                                                     | 0.45                                                 | 0.43               | 1.91                              | 1.94                |
| Heterogeneous nuclear ribonucleoprotein F;                           | Q9Z2X1  | 0.77                                                     | 1.82                                                     | 1.30                                                 | 0.75               | 3.34                              | 7.00                |
| Ezrin;                                                               | P26040  | 0.77                                                     | 0.72                                                     | 0.74                                                 | 0.03               | 0.14                              | 3.45                |
| Moesin;                                                              | P26041  | -1.43                                                    | 0.68                                                     | -0.38                                                | 1.49               | 6.67                              | 3.79                |
| Radixin;                                                             | P26043  | -0.94                                                    | 0.20                                                     | -0.37                                                | 0.81               | 3.61                              | 2.97                |
| Protein S100-A11;                                                    | P50543  | 0.77                                                     | -0.12                                                    | 0.32                                                 | 0.63               | 2.80                              | 2.21                |
| Coronin-1B;                                                          | Q9WUM3  | 0.77                                                     | 1.70                                                     | 1.23                                                 | 0.66               | 2.95                              | 7.93                |
| Proteasome subunit beta type-10;                                     | O35955  | 0.77                                                     | -0.03                                                    | 0.37                                                 | 0.57               | 2.53                              | 1.44                |
| Nardilysin;                                                          | Q8BHG1  | 0.77                                                     | 2.22                                                     | 1.50                                                 | 1.02               | 4.56                              | 11.61               |
| 60 kDa heat shock protein, mitochondrial;                            | P63038  | 0.78                                                     | 0.23                                                     | 0.50                                                 | 0.39               | 1.75                              | 2.46                |
| Carbonyl reductase [NADPH] 1;                                        | P48758  | 0.79                                                     | -0.06                                                    | 0.37                                                 | 0.60               | 2.68                              | 2.11                |
| 6-phosphogluconate dehydrogenase, decarboxylating;                   | Q9DCD0  | 0.79                                                     | 0.57                                                     | 0.68                                                 | 0.16               | 0.71                              | 3.13                |
| Tyrosine-protein kinase CSK;                                         | P41241  | 0.79                                                     | 0.39                                                     | 0.59                                                 | 0.28               | 1.27                              | 2.84                |
| Stromal membrane-associated protein 1;                               | Q91VZ6  | 0.79                                                     | 0.15                                                     | 0.47                                                 | 0.45               | 2.02                              | 2.35                |
| Heterogeneous nuclear ribonucleoprotein M;                           | Q9D0E1  | 0.80                                                     | 2.53                                                     | 1.67                                                 | 1.23               | 5.48                              | 13.11               |
| Cytoplasmic dynein 1 intermediate chain 2;                           | O88487  | 0.81                                                     | 0.80                                                     | 0.80                                                 | 0.01               | 0.03                              | 4.12                |
| Polyubiquitin-B;                                                     | P0CG49  | 0.81                                                     | 0.25                                                     | 0.53                                                 | 0.39               | 1.76                              | 2.61                |
| 14-3-3 protein eta;                                                  | P68510  | 0.81                                                     | 0.73                                                     | 0.77                                                 | 0.05               | 0.24                              | 3.19                |
| Rho-related GTP-binding protein RhoC;                                | Q62159  | 0.81                                                     | 0.12                                                     | 0.47                                                 | 0.48               | 2.16                              | 2.35                |
| Programmed cell death 6-interacting protein;                         | Q9WU78  | 0.81                                                     | -0.45                                                    | 0.18                                                 | 0.89               | 3.98                              | 2.91                |
| Peptidyl-prolyl cis-trans isomerase-like 1;                          | Q9DOW5  | 0.81                                                     | -0.17                                                    | 0.32                                                 | 0.69               | 3.08                              | 2.38                |
| Caspase-1;                                                           | P29452  | 0.82                                                     | -0.20                                                    | 0.31                                                 | 0.72               | 3.21                              | 1.88                |
| 26S protease regulatory subunit 6B;                                  | P54775  | 0.82                                                     | 0.41                                                     | 0.61                                                 | 0.29               | 1.28                              | 2.28                |
| Lon protease homolog, mitochondrial;                                 | Q8CGK3  | 0.82                                                     | -0.79                                                    | 0.02                                                 | 1.13               | 5.06                              | 3.77                |
| NEDD8-conjugating enzyme Ubc12;                                      | P61082  | 0.82                                                     | -0.45                                                    | 0.18                                                 | 0.90               | 4.01                              | 3.04                |
| Transportin-3;                                                       | Q6P2B1  | 0.82                                                     | -0.52                                                    | 0.15                                                 | 0.94               | 4.20                              | 2.65                |
| Acetyl-coenzyme A synthetase, cytoplasmic;                           | Q9QXG4  | 0.82                                                     | 0.61                                                     | 0.72                                                 | 0.15               | 0.66                              | 3.54                |
| 26S protease regulatory subunit 10B;                                 | P62334  | 0.83                                                     | 0.55                                                     | 0.69                                                 | 0.20               | 0.90                              | 2.24                |

Table S6, Tholen et al.

| Protein                                                        | Uniprot | Fold change (log <sub>2</sub> ) of ASAPRatio replicate 1 | Fold change (log <sub>2</sub> ) of ASAPRatio replicate 2 | Average fold change (log <sub>2</sub> ) of ASAPRatio | Standard deviation | 90 % confidence interval (t-test) | Fisher's exact test |
|----------------------------------------------------------------|---------|----------------------------------------------------------|----------------------------------------------------------|------------------------------------------------------|--------------------|-----------------------------------|---------------------|
| Carbamoyl-phosphate synthase [ammonia], mitochondrial;         | Q8C196  | 0.83                                                     | -2.25                                                    | -0.71                                                | 2.18               | 9.74                              | 6.43                |
| Protein SEC13 homolog;                                         | Q9D1M0  | 0.83                                                     | -0.15                                                    | 0.34                                                 | 0.70               | 3.11                              | 2.32                |
| Cathepsin Z;                                                   | Q9WUU7  | 0.83                                                     | 0.37                                                     | 0.60                                                 | 0.33               | 1.47                              | 3.09                |
| Clusterin;                                                     | Q06890  | 0.83                                                     | -0.84                                                    | 0.00                                                 | 1.18               | 5.27                              | 3.76                |
| Elongation factor 1-beta;                                      | O70251  | 0.84                                                     | 1.22                                                     | 1.03                                                 | 0.27               | 1.20                              | 5.03                |
| Glutathione S-transferase omega-1;                             | O09131  | 0.84                                                     | 0.58                                                     | 0.71                                                 | 0.19               | 0.84                              | 3.38                |
| Nuclear migration protein nudC;                                | O35685  | 0.85                                                     | -0.12                                                    | 0.36                                                 | 0.68               | 3.06                              | 2.39                |
| Alpha-soluble NSF attachment protein;                          | Q9DB05  | 0.85                                                     | 1.30                                                     | 1.07                                                 | 0.32               | 1.42                              | 6.26                |
| COP9 signalosome complex subunit 4;                            | O88544  | 0.85                                                     | 0.66                                                     | 0.75                                                 | 0.13               | 0.59                              | 3.66                |
| Oxysterol-binding protein;                                     | E9QPD4  | 0.85                                                     | -0.69                                                    | 0.08                                                 | 1.09               | 4.86                              | 3.86                |
| Probable E3 ubiquitin-protein ligase HERC4;                    | Q6PAV2  | 0.86                                                     | 0.14                                                     | 0.50                                                 | 0.51               | 2.27                              | 2.20                |
| AP-3 complex subunit beta-1;                                   | Q9Z1T1  | 0.86                                                     | -0.01                                                    | 0.43                                                 | 0.62               | 2.77                              | 1.64                |
| 14-3-3 protein beta/alpha;                                     | Q9CQV8  | 0.86                                                     | 1.10                                                     | 0.98                                                 | 0.17               | 0.74                              | 4.95                |
| Protein CREG1;                                                 | O88668  | 0.87                                                     | 1.10                                                     | 0.99                                                 | 0.16               | 0.73                              | 5.60                |
| Bifunctional 3'-phosphoadenosine 5'-phosphosulfate synthase 1; | Q60967  | 0.87                                                     | 0.40                                                     | 0.64                                                 | 0.33               | 1.49                              | 3.23                |
| Dihydrofolate reductase;                                       | P00375  | 0.88                                                     | 0.60                                                     | 0.74                                                 | 0.20               | 0.87                              | 3.87                |
| Glycolipid transfer protein;                                   | Q9JL62  | 0.89                                                     | 0.18                                                     | 0.53                                                 | 0.50               | 2.25                              | 2.74                |
| Protein phosphatase 1B;                                        | P36993  | 0.90                                                     | 0.16                                                     | 0.53                                                 | 0.52               | 2.31                              | 2.64                |
| Carnitine O-palmitoyltransferase 2, mitochondrial;             | P52825  | 0.90                                                     | -0.92                                                    | -0.01                                                | 1.28               | 5.72                              | 4.77                |
| Polypyrimidine tract-binding protein 1;                        | P17225  | 0.90                                                     | 1.17                                                     | 1.03                                                 | 0.19               | 0.87                              | 5.56                |
| Calcium/calmodulin-dependent protein kinase type 1D;           | Q8BW96  | 0.90                                                     | -0.18                                                    | 0.36                                                 | 0.77               | 3.43                              | 2.61                |
| Receptor-type tyrosine-protein phosphatase C;                  | P06800  | 0.90                                                     | 1.95                                                     | 1.43                                                 | 0.74               | 3.31                              | 9.84                |
| E3 ubiquitin-protein ligase HUWE1;                             | Q7TMY8  | 0.90                                                     | 0.63                                                     | 0.77                                                 | 0.19               | 0.86                              | 2.70                |
| Retinol-binding protein 1;                                     | Q00915  | 0.91                                                     | 1.22                                                     | 1.07                                                 | 0.22               | 0.98                              | 6.09                |
| Protein transport protein Sec31A;                              | Q3UPL0  | 0.91                                                     | -0.06                                                    | 0.43                                                 | 0.69               | 3.06                              | 1.58                |
| Uncharacterized protein;                                       | F6RPJ9  | 0.91                                                     | 1.06                                                     | 0.99                                                 | 0.11               | 0.48                              | 5.09                |
| Glutaredoxin-1;                                                | Q9QUH0  | 0.92                                                     | 1.08                                                     | 1.00                                                 | 0.11               | 0.50                              | 5.84                |
| Uncharacterized protein;                                       | E9Q1Y3  | 0.92                                                     | 0.70                                                     | 0.81                                                 | 0.16               | 0.70                              | 4.19                |
| Inactive tyrosine-protein kinase 7;                            | Q8BKG3  | 0.92                                                     | 0.65                                                     | 0.78                                                 | 0.19               | 0.84                              | 4.08                |
| Cathepsin S;                                                   | O70370  | 0.93                                                     | 1.16                                                     | 1.04                                                 | 0.17               | 0.75                              | 5.50                |
| Peroxisomal acyl-coenzyme A oxidase 2;                         | Q9QXD1  | 0.93                                                     | 2.34                                                     | 1.63                                                 | 1.00               | 4.45                              | 12.33               |
| Importin subunit alpha-4;                                      | O35343  | 0.93                                                     | 1.57                                                     | 1.25                                                 | 0.45               | 2.02                              | 7.55                |
| Ribose-phosphate pyrophosphokinase 1;                          | Q9D7G0  | 0.93                                                     | 0.62                                                     | 0.78                                                 | 0.22               | 0.98                              | 4.17                |
| D-3-phosphoglycerate dehydrogenase;                            | Q61753  | 0.93                                                     | 0.71                                                     | 0.82                                                 | 0.16               | 0.69                              | 3.45                |
| 3-ketoacyl-CoA thiolase, mitochondrial;                        | Q8BWT1  | 0.94                                                     | -0.15                                                    | 0.39                                                 | 0.77               | 3.45                              | 1.88                |
| 26S protease regulatory subunit 8;                             | P62196  | 0.94                                                     | 0.00                                                     | 0.47                                                 | 0.67               | 2.97                              | 2.62                |
| Caspase-3;                                                     | P70677  | 0.95                                                     | 1.01                                                     | 0.98                                                 | 0.05               | 0.21                              | 5.46                |
| Nicotinate phosphoribosyltransferase;                          | Q8CC86  | 0.95                                                     | -0.76                                                    | 0.09                                                 | 1.21               | 5.40                              | 4.53                |

Table S6, Tholen et al.

| Protein                                                   | Uniprot | Fold change (log <sub>2</sub> ) of ASAPRatio replicate 1 | Fold change (log <sub>2</sub> ) of ASAPRatio replicate 2 | Average fold change (log <sub>2</sub> ) of ASAPRatio | Standard deviation | 90 % confidence interval (t-test) | Fisher's exact test |
|-----------------------------------------------------------|---------|----------------------------------------------------------|----------------------------------------------------------|------------------------------------------------------|--------------------|-----------------------------------|---------------------|
| Sialoadhesin;                                             | Q62230  | 0.96                                                     | 0.86                                                     | 0.91                                                 | 0.07               | 0.29                              | 4.82                |
| Epithelial splicing regulatory protein 1;                 | Q3U541  | 0.96                                                     | 2.09                                                     | 1.53                                                 | 0.80               | 3.57                              | 10.09               |
| 40S ribosomal protein S3;                                 | P62908  | 0.97                                                     | 1.31                                                     | 1.14                                                 | 0.24               | 1.05                              | 6.11                |
| Tripeptidyl-peptidase 1;                                  | O89023  | 0.98                                                     | 0.60                                                     | 0.79                                                 | 0.27               | 1.21                              | 3.87                |
| H-2 class II histocompatibility antigen, A-Q alpha chain; | P04227  | 0.99                                                     | 1.28                                                     | 1.13                                                 | 0.20               | 0.91                              | 5.79                |
| Non-specific lipid-transfer protein;                      | P32020  | 0.99                                                     | 0.15                                                     | 0.57                                                 | 0.59               | 2.64                              | 2.44                |
| Protein KIAA1967 homolog;                                 | Q8VDP4  | 0.99                                                     | 2.03                                                     | 1.51                                                 | 0.73               | 3.27                              | 7.89                |
| Histone deacetylase 1;                                    | O09106  | 0.99                                                     | 1.71                                                     | 1.35                                                 | 0.51               | 2.26                              | 8.62                |
| Inosine triphosphate pyrophosphatase;                     | Q9D892  | 1.00                                                     | 0.38                                                     | 0.69                                                 | 0.44               | 1.96                              | 3.63                |
| Ubiquitin-like-conjugating enzyme ATG3;                   | Q9CPX6  | 1.01                                                     | 0.00                                                     | 0.50                                                 | 0.71               | 3.18                              | 2.92                |
| Fatty acid synthase;                                      | P19096  | 1.01                                                     | 0.70                                                     | 0.86                                                 | 0.22               | 1.00                              | 2.76                |
| Talin-1;                                                  | P26039  | 1.01                                                     | 0.24                                                     | 0.63                                                 | 0.55               | 2.45                              | 1.76                |
| Talin-2;                                                  | Q71LX4  | -0.14                                                    | 0.07                                                     | -0.03                                                | 0.15               | 0.65                              | 0.35                |
| Ferric-chelate reductase 1;                               | Q8K385  | 1.01                                                     | 1.04                                                     | 1.03                                                 | 0.02               | 0.07                              | 6.01                |
| Tyrosine-protein phosphatase non-receptor type 6;         | P29351  | 1.02                                                     | 0.60                                                     | 0.81                                                 | 0.30               | 1.34                              | 3.89                |
| Fascin;                                                   | Q61553  | 1.02                                                     | 0.19                                                     | 0.61                                                 | 0.59               | 2.63                              | 3.35                |
| Sulfotransferase family cytosolic 2B member 1;            | O35400  | 1.02                                                     | 0.86                                                     | 0.94                                                 | 0.12               | 0.52                              | 4.88                |
| Small ubiquitin-related modifier 1;                       | P63166  | 1.03                                                     | 0.12                                                     | 0.58                                                 | 0.64               | 2.86                              | 2.61                |
| Peptidyl-prolyl cis-trans isomerase FKBP4;                | P30416  | 1.05                                                     | 1.13                                                     | 1.09                                                 | 0.06               | 0.26                              | 6.23                |
| Leucyl-tRNA synthetase, cytoplasmic;                      | Q8BMJ2  | 1.06                                                     | 0.76                                                     | 0.91                                                 | 0.21               | 0.95                              | 4.76                |
| Signal transducer and activator of transcription 1;       | P42225  | 1.06                                                     | 0.49                                                     | 0.77                                                 | 0.40               | 1.81                              | 3.73                |
| Ras-related protein Rab-21;                               | P35282  | 1.06                                                     | 0.06                                                     | 0.56                                                 | 0.71               | 3.18                              | 1.50                |
| Tubulin beta-5 chain;                                     | P99024  | 1.06                                                     | 0.24                                                     | 0.65                                                 | 0.58               | 2.60                              | 3.31                |
| Tubulin beta-2A chain;                                    | Q7TMM9  | 0.98                                                     | 0.33                                                     | 0.66                                                 | 0.46               | 2.04                              | 3.53                |
| Tubulin beta-4B chain;                                    | P68372  | 1.08                                                     | 0.58                                                     | 0.83                                                 | 0.36               | 1.61                              | 4.66                |
| Ubiquitin-associated protein 2-like;                      | Q80X50  | 1.06                                                     | 0.94                                                     | 1.00                                                 | 0.09               | 0.39                              | 5.78                |
| Interferon-induced guanylate-binding protein 2;           | Q9Z0E6  | 1.06                                                     | 0.18                                                     | 0.62                                                 | 0.63               | 2.80                              | 3.17                |
| SUMO-activating enzyme subunit 2;                         | Q9Z1F9  | 1.06                                                     | 0.73                                                     | 0.90                                                 | 0.24               | 1.05                              | 4.78                |
| CD44 antigen;                                             | P15379  | 1.06                                                     | 0.88                                                     | 0.97                                                 | 0.13               | 0.58                              | 5.38                |
| Phosphoserine aminotransferase;                           | Q99K85  | 1.07                                                     | 0.72                                                     | 0.90                                                 | 0.25               | 1.10                              | 4.64                |
| 26S proteasome non-ATPase regulatory subunit 7;           | P26516  | 1.08                                                     | 0.62                                                     | 0.85                                                 | 0.32               | 1.43                              | 4.69                |
| Cytosolic acyl coenzyme A thioester hydrolase;            | Q91V12  | 1.08                                                     | 0.82                                                     | 0.95                                                 | 0.18               | 0.80                              | 4.68                |
| Dynamin-2;                                                | P39054  | 1.08                                                     | -0.34                                                    | 0.37                                                 | 1.01               | 4.50                              | 3.68                |
| Transportin-1;                                            | Q8BFY9  | 1.09                                                     | 0.60                                                     | 0.84                                                 | 0.35               | 1.57                              | 4.31                |
| Transportin-2;                                            | Q99LG2  | 1.16                                                     | -0.11                                                    | 0.53                                                 | 0.90               | 4.00                              | 3.10                |
| Calponin-2;                                               | Q08093  | 1.10                                                     | 0.77                                                     | 0.93                                                 | 0.23               | 1.05                              | 5.32                |
| Serine/threonine-protein kinase 24;                       | Q99KH8  | 1.10                                                     | 0.59                                                     | 0.84                                                 | 0.37               | 1.64                              | 3.90                |
| Lysosome-associated membrane glycoprotein 2;              | P17047  | 1.12                                                     | 0.83                                                     | 0.98                                                 | 0.20               | 0.90                              | 4.24                |



Table S6, Tholen et al.

| Protein                                                                            | Uniprot | Fold change (log <sub>2</sub> ) of ASAPRatio replicate 1 | Fold change (log <sub>2</sub> ) of ASAPRatio replicate 2 | Average fold change (log <sub>2</sub> ) of ASAPRatio | Standard deviation | 90 % confidence interval (t-test) | Fisher's exact test |
|------------------------------------------------------------------------------------|---------|----------------------------------------------------------|----------------------------------------------------------|------------------------------------------------------|--------------------|-----------------------------------|---------------------|
| Ganglioside GM2 activator;                                                         | Q60648  | 1.12                                                     | 0.15                                                     | 0.63                                                 | 0.68               | 3.05                              | 3.66                |
| Poly(rC)-binding protein 1;                                                        | P60335  | 1.12                                                     | 0.15                                                     | 0.63                                                 | 0.68               | 3.05                              | 3.17                |
| Poly(rC)-binding protein 2;                                                        | Q61990  | 0.86                                                     | 0.25                                                     | 0.55                                                 | 0.43               | 1.91                              | 2.75                |
| Aldo-keto reductase family 1 member C18;                                           | Q8K023  | 1.12                                                     | 0.37                                                     | 0.74                                                 | 0.53               | 2.37                              | 4.06                |
| Aspartyl-tRNA synthetase, cytoplasmic;                                             | Q922B2  | 1.12                                                     | 0.58                                                     | 0.85                                                 | 0.38               | 1.71                              | 3.41                |
| Dipeptidyl peptidase 1;                                                            | P97821  | 1.12                                                     | 0.95                                                     | 1.04                                                 | 0.12               | 0.55                              | 6.11                |
| 26S proteasome non-ATPase regulatory subunit 2;                                    | Q8VDM4  | 1.12                                                     | 0.70                                                     | 0.91                                                 | 0.30               | 1.35                              | 4.34                |
| Amidophosphoribosyltransferase;                                                    | Q8CIH9  | 1.13                                                     | 0.31                                                     | 0.72                                                 | 0.58               | 2.59                              | 3.53                |
| Uncharacterized protein;                                                           | E9Q4K7  | 1.14                                                     | -0.03                                                    | 0.55                                                 | 0.83               | 3.68                              | 3.10                |
| F-actin-capping protein subunit alpha-1;                                           | P47753  | 1.14                                                     | 0.01                                                     | 0.58                                                 | 0.80               | 3.57                              | 3.06                |
| Glutaminyl-tRNA synthetase; Uncharacterized protein;                               | Q8BML9  | 1.14                                                     | 0.38                                                     | 0.76                                                 | 0.54               | 2.42                              | 3.17                |
| Sorting nexin-3;                                                                   | O70492  | 1.15                                                     | -0.71                                                    | 0.22                                                 | 1.32               | 5.88                              | 4.70                |
| Protein FAM49B;                                                                    | Q921M7  | 1.17                                                     | -0.20                                                    | 0.48                                                 | 0.97               | 4.33                              | 2.76                |
| Coatamer subunit beta';                                                            | O55029  | 1.18                                                     | 0.47                                                     | 0.82                                                 | 0.50               | 2.24                              | 4.03                |
| N-acetylneuraminase lyase;                                                         | Q9DCJ9  | 1.18                                                     | 0.86                                                     | 1.02                                                 | 0.22               | 0.98                              | 4.68                |
| Adenylyl cyclase-associated protein 1;                                             | P40124  | 1.18                                                     | 0.37                                                     | 0.78                                                 | 0.58               | 2.58                              | 4.22                |
| Protein phosphatase 1A;                                                            | P49443  | 1.19                                                     | 1.08                                                     | 1.13                                                 | 0.08               | 0.35                              | 6.05                |
| T-complex protein 1 subunit eta;                                                   | P80313  | 1.19                                                     | 0.39                                                     | 0.79                                                 | 0.56               | 2.52                              | 3.97                |
| Cystatin-B;                                                                        | Q62426  | 1.28                                                     | 1.31                                                     | 1.29                                                 | 0.02               | 0.08                              | 8.35                |
| Serine/threonine-protein phosphatase 2A 65 kDa regulatory subunit A alpha isoform; | Q76MZ3  | 1.21                                                     | 0.15                                                     | 0.68                                                 | 0.75               | 3.34                              | 2.50                |
| Adenosine deaminase;                                                               | P03958  | 1.21                                                     | 0.65                                                     | 0.93                                                 | 0.40               | 1.78                              | 4.28                |
| 26S proteasome non-ATPase regulatory subunit 6;                                    | Q99J14  | 1.21                                                     | 1.00                                                     | 1.11                                                 | 0.15               | 0.68                              | 4.88                |
| Bcl-2-like protein 13;                                                             | P59017  | 1.21                                                     | 1.46                                                     | 1.33                                                 | 0.18               | 0.79                              | 8.14                |
| Nucleoside diphosphate-linked moiety X motif 17;                                   | Q9CWD3  | 1.23                                                     | 1.14                                                     | 1.18                                                 | 0.06               | 0.28                              | 6.91                |
| Ubiquitin carboxyl-terminal hydrolase 4;                                           | P35123  | 1.23                                                     | 0.48                                                     | 0.85                                                 | 0.53               | 2.37                              | 3.81                |
| 14-3-3 protein sigma;                                                              | O70456  | 1.24                                                     | 1.53                                                     | 1.39                                                 | 0.21               | 0.92                              | 7.41                |
| T-complex protein 1 subunit delta;                                                 | P80315  | 1.24                                                     | 0.97                                                     | 1.11                                                 | 0.19               | 0.85                              | 5.06                |
| Asparagine synthetase [glutamine-hydrolyzing];                                     | Q61024  | 1.24                                                     | 0.76                                                     | 1.00                                                 | 0.34               | 1.52                              | 5.56                |
| Phosphatidylinositol-binding clathrin assembly protein;                            | Q7M6Y3  | 1.24                                                     | -0.29                                                    | 0.48                                                 | 1.08               | 4.81                              | 4.00                |
| Proliferating cell nuclear antigen;                                                | P17918  | 1.24                                                     | 1.77                                                     | 1.50                                                 | 0.38               | 1.68                              | 10.47               |
| Periostin;                                                                         | Q62009  | 1.21                                                     | 1.51                                                     | 1.36                                                 | 0.21               | 0.94                              | 8.61                |
| Protein Niban;                                                                     | Q3UW53  | 1.25                                                     | 0.03                                                     | 0.64                                                 | 0.86               | 3.84                              | 2.72                |
| Ras-related C3 botulinum toxin substrate 1;                                        | P63001  | 1.25                                                     | 0.55                                                     | 0.90                                                 | 0.50               | 2.23                              | 4.80                |
| Cell division control protein 42 homolog;                                          | P60766  | 0.71                                                     | 0.33                                                     | 0.52                                                 | 0.27               | 1.20                              | 2.54                |
| Mevalonate kinase;                                                                 | Q9R008  | 1.26                                                     | 0.47                                                     | 0.86                                                 | 0.56               | 2.50                              | 4.66                |
| Cadherin-1;                                                                        | P09803  | 1.26                                                     | 0.82                                                     | 1.04                                                 | 0.31               | 1.39                              | 5.74                |
| Cellular retinoic acid-binding protein 2;                                          | P22935  | 1.26                                                     | 0.71                                                     | 0.99                                                 | 0.39               | 1.73                              | 5.89                |
| SEC14-like protein 4;                                                              | Q8R0F9  | 1.27                                                     | 0.47                                                     | 0.87                                                 | 0.57               | 2.54                              | 4.39                |

Table S6, Tholen et al.

| Protein                                                                              | Uniprot | Fold change (log <sub>2</sub> ) of ASAPRatio replicate 1 | Fold change (log <sub>2</sub> ) of ASAPRatio replicate 2 | Average fold change (log <sub>2</sub> ) of ASAPRatio | Standard deviation | 90 % confidence interval (t-test) | Fisher's exact test |
|--------------------------------------------------------------------------------------|---------|----------------------------------------------------------|----------------------------------------------------------|------------------------------------------------------|--------------------|-----------------------------------|---------------------|
| Uncharacterized protein;                                                             | E9PYU6  | 1.28                                                     | 0.82                                                     | 1.05                                                 | 0.32               | 1.42                              | 5.69                |
| Isoleucyl-tRNA synthetase, cytoplasmic;                                              | Q8BU30  | 1.28                                                     | 0.48                                                     | 0.88                                                 | 0.57               | 2.53                              | 4.34                |
| Vacuolar protein sorting-associated protein 4B;                                      | P46467  | 1.28                                                     | -0.34                                                    | 0.47                                                 | 1.15               | 5.12                              | 3.54                |
| Chloride channel calcium activated 2; Endothelial chloride channel; MCG120735;       |         |                                                          |                                                          |                                                      |                    |                                   |                     |
| Uncharacterized protein;                                                             | Q9EQR4  | 1.24                                                     | 1.50                                                     | 1.37                                                 | 0.19               | 0.83                              | 8.12                |
| Importin-7;                                                                          | Q9EPL8  | 1.28                                                     | 1.17                                                     | 1.23                                                 | 0.08               | 0.35                              | 6.00                |
| Rho-associated protein kinase 2;                                                     | P70336  | 1.29                                                     | 0.66                                                     | 0.97                                                 | 0.44               | 1.98                              | 4.02                |
| Diphosphomevalonate decarboxylase;                                                   | Q99JF5  | 1.29                                                     | 0.91                                                     | 1.10                                                 | 0.27               | 1.19                              | 6.23                |
| Lysosomal protective protein;                                                        | P16675  | 1.29                                                     | 0.92                                                     | 1.10                                                 | 0.26               | 1.16                              | 6.49                |
| Transcription intermediary factor 1-beta;                                            | Q62318  | 1.29                                                     | 1.03                                                     | 1.16                                                 | 0.19               | 0.83                              | 5.76                |
| Pantetheinase;                                                                       | Q9Z0K8  | 1.29                                                     | 1.11                                                     | 1.20                                                 | 0.13               | 0.57                              | 6.20                |
| Large proline-rich protein BAG6;                                                     | Q9Z1R2  | 1.30                                                     | 1.48                                                     | 1.39                                                 | 0.12               | 0.56                              | 8.93                |
| Uncharacterized protein;                                                             | E9Q7G0  | 1.31                                                     | 3.58                                                     | 2.44                                                 | 1.61               | 7.19                              | 20.22               |
| Lymphocyte-specific protein 1;                                                       | P19973  | 1.32                                                     | 0.38                                                     | 0.85                                                 | 0.66               | 2.96                              | 4.74                |
| Fibulin-5;                                                                           | Q9WVH9  | 1.32                                                     | 0.90                                                     | 1.11                                                 | 0.30               | 1.33                              | 6.77                |
| Bifunctional ATP-dependent dihydroxyacetone kinase/FAD-AMP lyase (cyclizing);        | Q8VC30  | 1.32                                                     | -0.32                                                    | 0.50                                                 | 1.16               | 5.17                              | 4.42                |
| 26S proteasome non-ATPase regulatory subunit 1;                                      | Q3TXS7  | 1.33                                                     | 0.72                                                     | 1.03                                                 | 0.43               | 1.91                              | 4.92                |
| Leucyl-cystinyl aminopeptidase;                                                      | Q8C129  | 1.33                                                     | 1.38                                                     | 1.35                                                 | 0.04               | 0.16                              | 7.65                |
| Latexin;                                                                             | P70202  | 1.35                                                     | 0.93                                                     | 1.14                                                 | 0.30               | 1.34                              | 6.84                |
| Tax1-binding protein 3;                                                              | Q9DBG9  | 1.36                                                     | 0.56                                                     | 0.96                                                 | 0.57               | 2.53                              | 3.89                |
| PDZ and LIM domain protein 1;                                                        | O70400  | 1.36                                                     | 0.98                                                     | 1.17                                                 | 0.27               | 1.21                              | 6.30                |
| Perilipin-4;                                                                         | O88492  | 1.37                                                     | 0.33                                                     | 0.85                                                 | 0.73               | 3.26                              | 3.52                |
| Ectonucleoside triphosphate diphosphohydrolase 1;                                    | P55772  | 1.37                                                     | 0.99                                                     | 1.18                                                 | 0.27               | 1.20                              | 6.87                |
| Arfip1 protein; Uncharacterized protein;                                             | A2RSX9  | 1.37                                                     | -0.11                                                    | 0.63                                                 | 1.04               | 4.65                              | 4.40                |
| Alpha-N-acetylglucosaminidase (Sanfilippo disease IIIB); Uncharacterized protein;    | A2BFA6  | 1.37                                                     | 1.04                                                     | 1.20                                                 | 0.24               | 1.06                              | 7.15                |
| Secretory carrier-associated membrane protein 2;                                     | Q9ERN0  | 1.38                                                     | 0.60                                                     | 0.99                                                 | 0.55               | 2.46                              | 5.70                |
| T-complex protein 1 subunit epsilon;                                                 | P80316  | 1.38                                                     | 0.84                                                     | 1.11                                                 | 0.38               | 1.72                              | 6.40                |
| MOB kinase activator 1B;                                                             | Q8BPB0  | 1.40                                                     | -0.09                                                    | 0.65                                                 | 1.05               | 4.68                              | 4.81                |
| CD 81 antigen, isoform CRA_c; CD81 antigen; Tapa-1 protein; Uncharacterized protein; | Q91V78  | 1.41                                                     | 0.98                                                     | 1.19                                                 | 0.30               | 1.35                              | 6.34                |
| Alcohol dehydrogenase class 4 mu/sigma chain;                                        | Q64437  | 1.43                                                     | 1.52                                                     | 1.47                                                 | 0.07               | 0.29                              | 7.53                |
| Acetyl-CoA acetyltransferase, cytosolic;                                             | Q8CAY6  | 1.43                                                     | 0.77                                                     | 1.10                                                 | 0.47               | 2.08                              | 5.68                |
| Bifunctional aminoacyl-tRNA synthetase;                                              | Q8CGC7  | 1.44                                                     | 0.26                                                     | 0.85                                                 | 0.83               | 3.71                              | 4.47                |
| Acid ceramidase;                                                                     | Q9WV54  | 1.45                                                     | 0.89                                                     | 1.17                                                 | 0.40               | 1.77                              | 6.62                |
| Phosphoserine phosphatase;                                                           | Q99LS3  | 1.45                                                     | 0.70                                                     | 1.08                                                 | 0.54               | 2.39                              | 6.40                |
| Nuclear autoantigenic sperm protein;                                                 | Q99MD9  | 1.46                                                     | 1.37                                                     | 1.42                                                 | 0.06               | 0.27                              | 7.65                |
| Early endosome antigen 1;                                                            | Q8BL66  | 1.46                                                     | 0.72                                                     | 1.09                                                 | 0.52               | 2.33                              | 5.75                |
| 26S protease regulatory subunit 4;                                                   | P62192  | 1.48                                                     | 1.06                                                     | 1.27                                                 | 0.29               | 1.31                              | 7.24                |

Table S6, Tholen et al.

| Protein                                                              | Uniprot | Fold change (log <sub>2</sub> ) of ASAPRatio replicate 1 | Fold change (log <sub>2</sub> ) of ASAPRatio replicate 2 | Average fold change (log <sub>2</sub> ) of ASAPRatio | Standard deviation | 90 % confidence interval (t-test) | Fisher's exact test |
|----------------------------------------------------------------------|---------|----------------------------------------------------------|----------------------------------------------------------|------------------------------------------------------|--------------------|-----------------------------------|---------------------|
| Ubiquitin-conjugating enzyme E2 D3;                                  | P61079  | 1.49                                                     | -0.18                                                    | 0.65                                                 | 1.18               | 5.27                              | 5.38                |
| Uncharacterized protein;                                             | E9PZ00  | 1.50                                                     | 0.70                                                     | 1.10                                                 | 0.57               | 2.53                              | 5.12                |
| V-type proton ATPase subunit H;                                      | Q8BVE3  | 1.51                                                     | -0.17                                                    | 0.67                                                 | 1.19               | 5.30                              | 4.96                |
| 6-phosphofructokinase type C;                                        | Q9WUA3  | 1.52                                                     | 1.23                                                     | 1.38                                                 | 0.20               | 0.91                              | 6.90                |
| Acetoacetyl-CoA synthetase;                                          | Q9D2R0  | 1.53                                                     | 1.01                                                     | 1.27                                                 | 0.37               | 1.64                              | 6.97                |
| Protein diaphanous homolog 1;                                        | O08808  | 1.54                                                     | 0.69                                                     | 1.11                                                 | 0.60               | 2.68                              | 5.70                |
| Importin-5;                                                          | Q8BKC5  | 1.54                                                     | 0.31                                                     | 0.92                                                 | 0.87               | 3.87                              | 3.69                |
| StAR-related lipid transfer protein 5;                               | Q9EPQ7  | 1.55                                                     | 0.89                                                     | 1.22                                                 | 0.47               | 2.09                              | 6.95                |
| Serine hydroxymethyltransferase, cytosolic;                          | P50431  | 1.59                                                     | 1.28                                                     | 1.43                                                 | 0.22               | 0.98                              | 9.03                |
| 1-acylglycerol-3-phosphate O-acyltransferase ABHD5;                  | Q9DBL9  | 1.58                                                     | 0.44                                                     | 1.01                                                 | 0.80               | 3.59                              | 6.44                |
| Putative phospholipase B-like 2;                                     | Q3TCN2  | 1.77                                                     | 1.45                                                     | 1.61                                                 | 0.22               | 1.00                              | 9.82                |
| Carboxypeptidase E;                                                  | Q00493  | 1.65                                                     | 1.68                                                     | 1.66                                                 | 0.02               | 0.10                              | 9.09                |
| Heat shock protein 75 kDa, mitochondrial;                            | Q9CQN1  | 1.60                                                     | 0.37                                                     | 0.98                                                 | 0.87               | 3.89                              | 6.22                |
| T-cell specific GTPase; Uncharacterized protein;                     | Q5SVP4  | 1.61                                                     | -0.38                                                    | 0.62                                                 | 1.41               | 6.29                              | 6.46                |
| Dehydrogenase/reductase SDR family member 1;                         | Q99L04  | 1.64                                                     | 0.93                                                     | 1.29                                                 | 0.50               | 2.24                              | 8.29                |
| Isopentenyl-diphosphate Delta-isomerase 1;                           | P58044  | 1.83                                                     | 1.57                                                     | 1.70                                                 | 0.19               | 0.83                              | 9.68                |
| Uroporphyrinogen decarboxylase;                                      | P70697  | 1.67                                                     | 0.61                                                     | 1.14                                                 | 0.75               | 3.35                              | 6.53                |
| Cathepsin D;                                                         | P18242  | 1.93                                                     | 1.54                                                     | 1.74                                                 | 0.28               | 1.23                              | 12.40               |
| Fatty acid-binding protein, epidermal;                               | Q05816  | 1.70                                                     | 1.16                                                     | 1.43                                                 | 0.38               | 1.68                              | 9.54                |
| Cytoplasmic dynein 1 heavy chain 1;                                  | Q9JHU4  | 1.71                                                     | 0.83                                                     | 1.27                                                 | 0.62               | 2.77                              | 7.21                |
| Chitotriosidase-1;                                                   | Q9D7Q1  | 1.72                                                     | 1.16                                                     | 1.44                                                 | 0.40               | 1.76                              | 9.93                |
| Uncharacterized protein;                                             | E9Q4Z2  | 1.73                                                     | 0.53                                                     | 1.13                                                 | 0.85               | 3.80                              | 6.40                |
| Exportin-1;                                                          | Q6P5F9  | 1.75                                                     | 0.45                                                     | 1.10                                                 | 0.91               | 4.08                              | 6.70                |
| Treacle protein;                                                     | O08784  | 1.69                                                     | 1.81                                                     | 1.75                                                 | 0.08               | 0.36                              | 12.29               |
| Apoptosis-associated speck-like protein containing a CARD;           | Q9EPB4  | 1.76                                                     | 1.77                                                     | 1.76                                                 | 0.01               | 0.03                              | 9.43                |
| SEC23-interacting protein;                                           | Q6NZC7  | 1.78                                                     | -0.42                                                    | 0.68                                                 | 1.55               | 6.92                              | 7.45                |
| Uncharacterized protein;                                             | D3Z4B0  | 1.78                                                     | 2.81                                                     | 2.29                                                 | 0.73               | 3.25                              | 18.99               |
| Poly(U)-binding-splicing factor PUF60;                               | Q3UEB3  | 1.59                                                     | 1.98                                                     | 1.78                                                 | 0.27               | 1.22                              | 10.65               |
| Nuclear pore complex-associated intranuclear coiled-coil protein TPR | E9PZZ3  | 1.57                                                     | 2.06                                                     | 1.81                                                 | 0.34               | 1.54                              | 12.87               |
| Protein S100-A14;                                                    | Q9D2Q8  | 2.05                                                     | 1.59                                                     | 1.82                                                 | 0.33               | 1.46                              | 13.33               |
| Importin subunit beta-1;                                             | P70168  | 1.90                                                     | 1.03                                                     | 1.46                                                 | 0.62               | 2.75                              | 8.80                |
| Aldehyde dehydrogenase;                                              | E9Q3E1  | 1.90                                                     | 0.81                                                     | 1.35                                                 | 0.77               | 3.45                              | 8.02                |
| Cystatin E/M; Cystatin M/E; Uncharacterized protein;                 | Q9D1B1  | 2.00                                                     | 1.92                                                     | 1.96                                                 | 0.06               | 0.25                              | 13.51               |
| ATP-citrate synthase;                                                | Q91V92  | 1.80                                                     | 2.30                                                     | 2.05                                                 | 0.35               | 1.57                              | 15.24               |
| Carboxypeptidase A4;                                                 | Q6P8K8  | 2.35                                                     | 1.85                                                     | 2.10                                                 | 0.35               | 1.58                              | 16.40               |
| Retroviral-like aspartic protease 1;                                 | Q09PK2  | 2.05                                                     | 1.46                                                     | 1.75                                                 | 0.42               | 1.85                              | 12.33               |
| Latent-transforming growth factor beta-binding protein 4;            | Q8K4G1  | 1.86                                                     | 2.43                                                     | 2.14                                                 | 0.40               | 1.81                              | 12.95               |
| Hydroxymethylglutaryl-CoA synthase, cytoplasmic;                     | Q8JZK9  | 2.07                                                     | 1.39                                                     | 1.73                                                 | 0.48               | 2.15                              | 9.84                |

Table S6, Tholen et al.

| Protein                                                  | Uniprot | Fold change (log <sub>2</sub> ) of ASAPRatio replicate 1 | Fold change (log <sub>2</sub> ) of ASAPRatio replicate 2 | Average fold change (log <sub>2</sub> ) of ASAPRatio | Standard deviation | 90 % confidence interval (t-test) | Fisher's exact test |
|----------------------------------------------------------|---------|----------------------------------------------------------|----------------------------------------------------------|------------------------------------------------------|--------------------|-----------------------------------|---------------------|
| Gamma-glutamyl hydrolase;                                | Q9Z0L8  | 2.09                                                     | 3.50                                                     | 2.80                                                 | 1.00               | 4.45                              | 22.23               |
| Uridine 5'-monophosphate synthase;                       | P13439  | 2.09                                                     | 0.90                                                     | 1.50                                                 | 0.84               | 3.76                              | 7.98                |
| Exportin-2;                                              | Q9ERK4  | 2.12                                                     | 0.03                                                     | 1.07                                                 | 1.48               | 6.59                              | 8.58                |
| Long-chain-fatty-acid--CoA ligase 4;                     | Q9QUJ7  | 2.12                                                     | 3.38                                                     | 2.75                                                 | 0.89               | 3.97                              | 18.59               |
| Glucocorticoid receptor;                                 | P06537  | 2.17                                                     | 0.30                                                     | 1.23                                                 | 1.32               | 5.91                              | 9.06                |
| Lymphocyte antigen 6D;                                   | P35459  | 2.24                                                     | 2.20                                                     | 2.22                                                 | 0.03               | 0.12                              | 16.41               |
| Short-chain dehydrogenase/reductase family 16C member 6; | Q05A13  | 2.00                                                     | 2.57                                                     | 2.28                                                 | 0.40               | 1.80                              | 17.14               |
| Caspase-14;                                              | O89094  | 2.48                                                     | 2.36                                                     | 2.42                                                 | 0.09               | 0.38                              | 13.52               |
| Monoglyceride lipase;                                    | O35678  | 2.57                                                     | 1.45                                                     | 2.01                                                 | 0.79               | 3.53                              | 13.20               |
| Gasdermin-A;                                             | Q9EST1  | 2.82                                                     | 1.15                                                     | 1.98                                                 | 1.18               | 5.26                              | 11.14               |
| Perilipin-2;                                             | P43883  | 3.46                                                     | 2.12                                                     | 2.79                                                 | 0.95               | 4.23                              | 15.38               |
| Cornifin-A;                                              | Q62266  | 4.33                                                     | 1.46                                                     | 2.89                                                 | 2.03               | 9.06                              | 34.17               |
| Afadin;                                                  | Q9QZQ1  | 4.66                                                     | 0.97                                                     | 2.81                                                 | 2.60               | 11.63                             | 31.69               |
| CD2-associated protein;                                  | Q9JLQ0  | 9.30                                                     | 0.58                                                     | 4.94                                                 | 6.17               | 27.54                             | 19.83               |
