# Supplementary material
Source: PubMed Central journal article supplement (PMC3591655)
Supplement: supp_M112.017962_mcp.M112.017962-9.pdf [file supp_M112.017962_mcp.M112.017962-9.pdf]

**Table S7:** Dimethylated (naturally unmodified) N-termini identified in the TAILS experiment comparing wild-type and *Ctsb*<sup>-/-</sup> skin (replicate 1). This is a comprehensive, non redundant listing. Up to two potential protein IDs per peptide are stated.

| Non Prime Site | Prime Site                  | Modifications                             | Hyperscore | Mass error in ppm | Charge | Precursor neutral mass in Da | Fold change (log <sub>2</sub> ) of ASAPRatio | FC-error of ASAPRatio | Uniprot ID 1 | Uniprot ID 2 | Protein Name 1                                                                  | Protein Name 2                                                                                                                                                                  |
|----------------|-----------------------------|-------------------------------------------|------------|-------------------|--------|------------------------------|----------------------------------------------|-----------------------|--------------|--------------|---------------------------------------------------------------------------------|---------------------------------------------------------------------------------------------------------------------------------------------------------------------------------|
| QTATQQAQLA     | AAAEIDEEPVKAKQSR            | N-ter +34.06 Da, K +34.06 Da              | 28.7       | 88.0              | 4      | 1930.29                      | 0.28                                         | 0.04                  | NACAM_MOUSE  | NACA_MOUSE   | Nascent polypeptide-associated complex subunit alpha, muscle-specific form;     | Alpha-NAC, muscle-specific form;                                                                                                                                                |
| RRAPAAQPPA     | AAAPSAVGSPAAAPR             | N-ter +28.03 Da                           | 45.2       | 50.3              | 3      | 1320.78                      | 0.23                                         | 0.04                  | CHCH2_MOUSE  | B2RPJ8_MOUSE | Coiled-coil-helix-coiled-coil-helix domain-containing protein 2, mitochondrial; |                                                                                                                                                                                 |
| DLLATGGTMM     | AACDLLHLRL                  | N-ter +34.06 Da, C +57.02 Da              | 26.0       | 48.9              | 3      | 1229.74                      | -1.29                                        | 0.09                  | APT_MOUSE    | Q6PK77_MOUSE | Adenine phosphoribosyltransferase;                                              |                                                                                                                                                                                 |
| APFRPSSERF     | AACTVEEILAKMEQPR            | N-ter +34.06 Da, K +34.06 Da, C +57.02 Da | 26.6       | 69.3              | 3      | 1913.17                      | -1.60                                        | 0.29                  | TB182_MOUSE  |              | 182 kDa tankyrase-1-binding protein;                                            |                                                                                                                                                                                 |
| MIRFH          | AADVKFVEMYR                 | N-ter +28.03 Da, K +28.03 Da              | 28.8       | 78.9              | 3      | 1454.87                      | 1.45                                         | 0.10                  | Q9D1Q5_MOUSE |              |                                                                                 |                                                                                                                                                                                 |
| TATQQAQLAA     | AAEIDEEPVKAKQSR             | N-ter +28.03 Da, K +28.03 Da              | 28.8       | 68.9              | 4      | 1841.12                      | 1.69                                         | 0.07                  | NACAM_MOUSE  | NACA_MOUSE   | Nascent polypeptide-associated complex subunit alpha, muscle-specific form;     | Alpha-NAC, muscle-specific form;                                                                                                                                                |
| CGTCGQPADK     | AAGGAGAQQVGGSSISSGSSASVTVTR | N-ter +28.03 Da                           | 91.5       | 51.3              | 3      | 2249.24                      | -1.60                                        | 0.19                  | LMNA_MOUSE   |              | Prelamin-A/C;                                                                   |                                                                                                                                                                                 |
| SQADCAVLIV     | AAGVGEFAGKISNGQTR           | N-ter +28.03 Da, K +28.03 Da              | 26.0       | 56.3              | 3      | 1847.06                      | 1.55                                         | 0.06                  | EF1A1_MOUSE  | EF1A2_MOUSE  | Elongation factor 1-alpha 1;                                                    | Elongation factor Tu;Eukaryotic elongation factor 1 A-1;                                                                                                                        |
| MTRPLEQAV      | AAIVCTFQEYAGR               | N-ter +34.06 Da, C +57.02 Da              | 30.7       | 34.2              | 3      | 1518.82                      | -1.29                                        | 0.13                  | S10A3_MOUSE  |              | Protein S100-A3;                                                                | Protein S-100E;S100 calcium-binding protein A3;                                                                                                                                 |
| TAGAGVRARR     | AALDQTSGLPGGAAQDPGGR        | N-ter +34.06 Da                           | 40.6       | 53.0              | 3      | 1872.05                      | -0.54                                        | 0.02                  | ATS2_MOUSE   |              | A disintegrin and metalloproteinase with thrombospondin motifs 2;               | Procollagen I N-proteinase;Procollagen I/II amino propeptide-processing enzyme;Procollagen N-endopeptidase;                                                                     |
| PFAGGGYRLG     | AAPEEESAVVAGER              | N-ter +34.06 Da                           | 40.9       | 52.5              | 3      | 1511.81                      | -0.20                                        | 0.03                  | NSF1C_MOUSE  |              | NSFL1 cofactor p47;                                                             | p97 cofactor p47;                                                                                                                                                               |
| LRAMRGVING     | AAPELVPVTTGGPMAGAR          | N-ter +28.03 Da                           | 41.2       | 41.9              | 3      | 1618.92                      | 0.19                                         | 0.01                  | VATB2_MOUSE  |              | V-type proton ATPase subunit B, brain isoform;                                  | subunit;Vacuolar proton pump subunit B 2;                                                                                                                                       |
| EKEERALLYAD    | AAPGDKNLLHHYPDGR            | N-ter +34.06 Da, K +34.06 Da              | 32.2       | 61.8              | 4      | 1804.14                      | -0.54                                        | 0.05                  | SRCA_MOUSE   |              | Sarcalumenin;                                                                   |                                                                                                                                                                                 |
| YALSSPLQLL     | AAQASSSTPVVITR              | N-ter +34.06 Da                           | 31.9       | 51.1              | 3      | 1420.88                      | -0.32                                        | 0.02                  | FOXK1_MOUSE  | E9Q4K6_MOUSE | Forkhead box protein K1;                                                        | Myocyte nuclear factor;                                                                                                                                                         |
| NSVQSGNLAL     | AASAAAVDAGMAMAGSQSPVLR      | N-ter +34.06 Da                           | 56.8       | 41.2              | 3      | 1978.10                      | 0.35                                         | 0.02                  | PTBP1_MOUSE  | Q922I7_MOUSE | Poly(pyrimidine tract-binding protein 1;                                        | Heterogeneous nuclear ribonucleoprotein I;                                                                                                                                      |
| GTKASKMPKP     | AASDLPVPAEGVVR              | N-ter +34.06 Da                           | 37.8       | 31.7              | 2      | 1314.78                      | -0.58                                        | 0.02                  | Q8VCQ8_MOUSE | E9Q0M9_MOUSE |                                                                                 |                                                                                                                                                                                 |
| QHLKSVMLQI     | AATELEKEER                  | N-ter +34.06 Da, K +34.06 Da              | 32.1       | 73.5              | 3      | 1329.84                      | 0.01                                         | 0.00                  | TNNI2_MOUSE  | A2A6K0_MOUSE | Troponin I, fast skeletal muscle;                                               | Troponin I, fast-twitch isoform;                                                                                                                                                |
| QTQDPLYGYF     | AAVAGDQGIADDELQQR           | N-ter +28.03 Da                           | 59.4       | 48.5              | 3      | 1783.96                      | -3.32                                        | 0.33                  | SORCN_MOUSE  | F6T867_MOUSE | Sorcin;                                                                         |                                                                                                                                                                                 |
| DLYTAKGLFR     | AAVPSGASTGIYEALERL          | N-ter +28.03 Da                           | 53.2       | 45.4              | 3      | 1832.05                      | 0.80                                         | 0.08                  | ENOA_MOUSE   | ENOB_MOUSE   | Alpha-enolase;                                                                  | 2-phospho-D-glycerate hydro-lyase;Enolase 1;Non-neural enolase;                                                                                                                 |
| MVHLTDAEK      | AAVSCLWGWKNSDEVGGEALGR      | N-ter +34.06 Da, K +34.06 Da, C +57.02 Da | 49.0       | 74.9              | 4      | 2342.41                      | -4.06                                        | 0.68                  | HBB1_MOUSE   |              | Hemoglobin subunit beta-1;                                                      | Beta-1-globin;Hemoglobin beta-1 chain;Hemoglobin beta-major chain;                                                                                                              |
| LWLLPSLALA     | AAVTEPADLEYTEVPR            | N-ter +34.06 Da                           | 46.3       | 38.5              | 3      | 1793.99                      | -0.79                                        | 0.04                  | Q8BVL6_MOUSE |              |                                                                                 |                                                                                                                                                                                 |
| LSGEDKSNIK     | AAWGIKGGHGAEGAEALER         | N-ter +34.06 Da, K +34.06 Da              | 45.5       | 61.2              | 4      | 2110.25                      | -3.47                                        | 0.39                  | HBA_MOUSE    | Q91VB8_MOUSE | Hemoglobin subunit alpha;                                                       | Alpha-globin;Hemoglobin alpha chain;                                                                                                                                            |
| SVTRESGQY      | AAYSINAVGAAYSSAR            | N-ter +34.06 Da                           | 32.5       | 75.7              | 3      | 1604.96                      | -6.64                                        | 0.00                  | OBSCN_MOUSE  | E9QQ96_MOUSE | Obscurin;                                                                       | Obscurin-RhoGEF;Obscurin-myosin light chain kinase;                                                                                                                             |
| QPFPPTVPTK     | ACDITLIKTR                  | N-ter +28.03 Da, K +28.03 Da, C +57.02 Da | 19.3       | 119.3             | 3      | 1233.82                      | 3.72                                         | 0.27                  | CG031_MOUSE  |              | Uncharacterized protein C7orf31 homolog;                                        | Protein TISP74;                                                                                                                                                                 |
| M              | ACGLVASNLNLKPGECKVLR        | N-ter +28.03 Da, K +28.03 Da, C +57.02 Da | 36.0       | 62.7              | 4      | 2282.40                      | 0.21                                         | 0.02                  | LEG1_MOUSE   |              |                                                                                 | 14 kDa lectin;Beta-galactoside-binding lectin L-14-I;Galactin;Lactose-binding lectin 1;Lectin galactoside-binding soluble 1;S-Lac lectin 1;                                     |
| YEKRAMEVA      | ADALGEEWKGIVVR              | N-ter +28.03 Da, K +28.03 Da              | 26.4       | 84.3              | 3      | 1648.00                      | -1.56                                        | 0.18                  | RS6_MOUSE    | D3YX41_MOUSE | 40S ribosomal protein S6;                                                       | Phosphoprotein NP33;                                                                                                                                                            |
| LLLESYTSHG     | ADANLEAGSLKETR              | N-ter +34.06 Da, K +34.06 Da              | 29.6       | 63.7              | 3      | 1541.97                      | 0.19                                         | 0.03                  | FBN1_MOUSE   | A2AQ53_MOUSE | Fibrillin-1;                                                                    |                                                                                                                                                                                 |
| IQNLHSFDPF     | ADASKGDDLLPAGTEDYHIR        | N-ter +34.06 Da, K +34.06 Da              | 64.4       | 71.6              | 4      | 2324.40                      | 0.90                                         | 0.10                  | EIF1_MOUSE   |              | Eukaryotic translation initiation factor 1;                                     | Protein translation factor SUI1 homolog;                                                                                                                                        |
| IQNLQSFDPF     | ADATKGDDLLPAGTEDYHIR        | N-ter +28.03 Da, K +28.03 Da              | 46.9       | 80.6              | 4      | 2326.37                      | 1.99                                         | 0.21                  | EIF1B_MOUSE  |              | Eukaryotic translation initiation factor 1b;                                    |                                                                                                                                                                                 |
| ALMLQGVDDL     | ADAVAVTMGPCKGR              | N-ter +28.03 Da, K +28.03 Da              | 35.8       | 70.7              | 3      | 1327.82                      | 0.54                                         | 0.06                  | CH60_MOUSE   | D3Z2F2_MOUSE | 60 kDa heat shock protein, mitochondrial;                                       | 60 kDa chaperonin;Chaperonin 60;HSP-65;Heat shock protein 60;Mitochondrial matrix protein P1;                                                                                   |
| LLSQVLLVTS     | ADDLECTPGFQR                | N-ter +28.03 Da, C +57.02 Da              | 24.5       | 54.3              | 3      | 1435.72                      | 0.04                                         | 0.01                  | CAD13_MOUSE  |              | Cadherin-13;                                                                    | Heart cadherin;Truncated cadherin;                                                                                                                                              |
| MSFSAQDI       | ADFKFAFLFDR                 | N-ter +34.06 Da, K +34.06 Da              | 40.6       | 70.7              | 3      | 1538.99                      | 0.41                                         | 0.11                  | E9PWG4_MOUSE |              |                                                                                 |                                                                                                                                                                                 |
| VQIKRRKRV      | ADGIFKAELNEFLTR             | N-ter +34.06 Da, K +34.06 Da              | 24.7       | 55.5              | 3      | 1791.12                      | -1.06                                        | 0.18                  | RS3_MOUSE    | D3YV43_MOUSE | 40S ribosomal protein S3;                                                       |                                                                                                                                                                                 |
| EELRSPKLFY     | ADHPPIFLVR                  | N-ter +34.06 Da                           | 23.7       | 60.9              | 3      | 1247.80                      | -0.36                                        | 0.01                  | SERPH_MOUSE  |              | Serpin H1;                                                                      | 47 kDa heat shock protein;Collagen-binding protein;Serine protease inhibitor J6;                                                                                                |
| VIDTQKVKL      | ADIQIEQLNR                  | N-ter +34.06 Da                           | 38.3       | 23.3              | 2      | 1232.72                      | 0.66                                         | 0.03                  | PPD1_MOUSE   | Q9CQF7_MOUSE | Prefoldin subunit 1;                                                            |                                                                                                                                                                                 |
| ALHAAAWKGY     | ADIVQLLAKGAR                | N-ter +34.06 Da, K +34.06 Da              | 29.6       | 80.5              | 3      | 1435.07                      | -1.56                                        | 0.23                  | OSTF1_MOUSE  |              | Osteoclast-stimulating factor 1;                                                | SH3 domain protein 3;                                                                                                                                                           |
| VPRPEDTLTY     | ADLDMVHLR                   | N-ter +28.03 Da                           | 35.5       | 62.3              | 3      | 1183.68                      | 0.41                                         | 0.04                  | SHPS1_MOUSE  | Q6P6I8_MOUSE | Tyrosine-protein phosphatase non-receptor type substrate 1;                     | Brain Ig-like molecule with tyrosine-based activation motifs;CD172 antigen-like family member A;inhibitory receptor SHPS-1;MyD-1 antigen;Signal-regulatory protein alpha-1;p84; |
| AGDEESYEVF     | ADLFDVPVILR                 | N-ter +34.06 Da, K +34.06 Da              | 38.0       | 57.6              | 3      | 1353.94                      | -0.43                                        | 0.22                  | KCRS_MOUSE   |              | Creatine kinase 5-type, mitochondrial;                                          | Basic-type mitochondrial creatine kinase;Sarcomeric mitochondrial creatine kinase;                                                                                              |
| ASLFVVARIL     | ADLNQQAPAPAPAEER            | N-ter +28.03 Da                           | 45.4       | 48.5              | 3      | 1575.88                      | -0.22                                        | 0.02                  | KLF13_MOUSE  |              | Kruppel-like factor 13;                                                         | Basic transcription element-binding protein 3;Erythroid transcription factor FKLF-2;RANTES                                                                                      |
| LKGRVFEVSL     | ADLNQDEVAFR                 | N-ter +34.06 Da                           | 52.2       | 29.5              | 2      | 1310.71                      | 1.10                                         | 0.07                  | RS3A_MOUSE   | D3Z7W7_MOUSE | 40S ribosomal protein S3a;                                                      | factor of late activated T-lymphocytes 1;Transcription factor BTEB3; Protein TU-11;                                                                                             |

Table S7, Tholen et al.

| Non Prime Site | Prime Site                 | Modifications                             | Hyperscore | Mass error in ppm | Charge | Precursor neutral mass in Da | Fold change (log <sub>2</sub> ) of ASAPRatio | FC-error of ASAPRatio | Uniprot ID 1 | Uniprot ID 2 | Protein Name 1                                                        | Protein Name 2                                                                                                  |
|----------------|----------------------------|-------------------------------------------|------------|-------------------|--------|------------------------------|----------------------------------------------|-----------------------|--------------|--------------|-----------------------------------------------------------------------|-----------------------------------------------------------------------------------------------------------------|
| YSNISKDRRY     | ADLTEDQLPSCSKLDTIAR        | N-ter +34.06 Da, K +34.06 Da, C +57.02 Da | 49.0       | 55.8              | 3      | 2329.34                      | 0.07                                         | 0.01                  | PGAM1_MOUSE  |              | Phosphoglycerate mutase 1;                                            | BPG-dependent PGAM 1;Phosphoglycerate mutase isozyme B;                                                         |
| IWTRHPVQG      | ADLVQLDSICTR               | N-ter +34.06 Da, C +57.02 Da              | 36.0       | 40.8              | 3      | 1510.85                      | 0.04                                         | 0.00                  | LYVE1_MOUSE  |              | Lymphatic vessel endothelial hyaluronate receptor 1;                  | Cell surface retention sequence-binding protein 1;Extracellular link domain-containing protein 1;               |
| RSGETEDTFI     | ADLVVGLCTGQKGTGAPCR        | N-ter +28.03 Da, K +28.03 Da, C +57.02 Da | 61.0       | 57.7              | 3      | 2071.21                      | 4.68                                         | 0.53                  | ENOB_MOUSE   | ENOA_MOUSE   | Beta-enolase;                                                         | 2-phospho-D-glycerate hydro-lyase;Enolase 3;                                                                    |
| ALPSRMRERWS    | ADPLAPGAFCTQIVR            | N-ter +34.06 Da, C +57.02 Da              | 41.9       | 52.4              | 3      | 1648.97                      | 0.29                                         | 0.02                  | Q3URZ6_MOUSE | F7DBB3_MOUSE |                                                                       | Muscle-specific enolase;Skeletal muscle enolase;                                                                |
| TRRGRRAVGS     | ADSADELENGALLQLQLSSPIGQR   | N-ter +34.06 Da                           | 23.1       | 9.0               | 4      | 3112.71                      | -6.64                                        | 0.00                  | RHG36_MOUSE  |              | Rho GTPase-activating protein 36;                                     |                                                                                                                 |
| LLPPPNAYA      | ADTPGEATPPPR               | N-ter +34.06 Da                           | 27.1       | 80.7              | 3      | 1241.75                      | 0.67                                         | 0.04                  | MESD_MOUSE   | D3YVR4_MOUSE | LDLR chaperone MESD;                                                  | Mesoderm development candidate 2;                                                                               |
| EKEKEPVQDY     | ADVNLPLPCFYAVSR            | N-ter +34.06 Da, C +57.02 Da              | 23.1       | 58.3              | 3      | 1884.08                      | -0.67                                        | 0.07                  | STAP1_MOUSE  | E9PYX8_MOUSE | Signal-transducing adaptor protein 1;                                 | Mesoderm development protein;                                                                                   |
| TLGISPFHEF     | ADWVFTANDSGHR              | N-ter +34.06 Da                           | 56.0       | 70.0              | 3      | 1421.81                      | -1.79                                        | 0.12                  | TTHY_MOUSE   |              | Transthyretin;                                                        | Stem cell adaptor protein 1;                                                                                    |
| VREKEAQLPE     | AEAPGVLDLGLPEGR            | N-ter +28.03 Da                           | 42.8       | 43.8              | 3      | 1520.89                      | -0.36                                        | 0.03                  | NIBAN_MOUSE  |              | Protein Niban;                                                        | Prealbumin;                                                                                                     |
| VPYEPDSVVM     | AEAPVGVETDLIDVGFDDVKKGGPGR | N-ter +34.06 Da, K +34.06 Da              | 51.8       | 88.5              | 4      | 2843.83                      | -2.25                                        | 0.21                  | IST1_MOUSE   | Q8BHC2_MOUSE | IST1 homolog;                                                         | Protein FAM129A;                                                                                                |
| VLDDEDLDF      | AEATEEVLSDSPER             | N-ter +28.03 Da                           | 45.6       | 69.2              | 3      | 1559.84                      | -0.03                                        | 0.00                  | SNX2_MOUSE   |              | Sorting nexin-2;                                                      |                                                                                                                 |
| APVAPCENKF     | AEDSAEAAVSPESR             | N-ter +34.06 Da                           | 42.0       | 55.9              | 3      | 1550.85                      | 0.99                                         | 0.10                  | CA174_MOUSE  | E9PUHO_MOUSE | UPF0688 protein C1orf174 homolog;                                     |                                                                                                                 |
| M              | AEGQVLVDGR                 | N-ter +28.03 Da                           | 48.1       | 16.8              | 2      | 1183.68                      | 0.00                                         | 0.00                  | RL13A_MOUSE  | Q3TDS9_MOUSE | 60S ribosomal protein L13a;                                           | Transplantation antigen P198;Tum-P198 antigen;                                                                  |
| AGDEEYEVF      | AELFDPVIQER                | N-ter +34.06 Da                           | 34.4       | 8.0               | 2      | 1349.75                      | -0.60                                        | 0.05                  | KCRU_MOUSE   | B0R0F0_MOUSE | Creatine kinase U-type, mitochondrial;                                | Acidic-type mitochondrial creatine kinase;Ubiquitous mitochondrial creatine kinase;                             |
| LEITESQSAD     | AEPPPPDKPDLRSR             | N-ter +34.06 Da, K +34.06 Da              | 42.1       | 63.9              | 3      | 1467.97                      | -0.14                                        | 0.00                  | ZDHC5_MOUSE  | E9Q092_MOUSE | Palmitoyltransferase ZDHC5;                                           | Zinc finger DHHC domain-containing protein 5;                                                                   |
| SLQLVSWTLA     | AEPVDVLEAWGVHR             | N-ter +34.06 Da                           | 67.8       | 84.8              | 3      | 1611.00                      | 0.25                                         | 0.02                  | Q9JL12_MOUSE |              |                                                                       |                                                                                                                 |
| ARSKPSPQLS     | AETPVAALPEFPR              | N-ter +28.03 Da                           | 28.9       | 54.9              | 3      | 1424.85                      | -0.23                                        | 0.01                  | E9Q0S6_MOUSE |              |                                                                       |                                                                                                                 |
| SAAGSIVTLM     | AEVNLSTQVDADQLDLQLSR       | N-ter +34.06 Da                           | 58.5       | 54.2              | 3      | 2377.35                      | -0.69                                        | 0.08                  | SYNEM_MOUSE  | F6VN34_MOUSE | Synemin;                                                              | Desmuslin;                                                                                                      |
| ISLEVSRGSR     | AEVSTHLSQSPGR              | N-ter +34.06 Da                           | 51.8       | 69.8              | 3      | 1427.89                      | -1.56                                        | 0.14                  | SYNEM_MOUSE  | F6VN34_MOUSE | Synemin;                                                              | Desmuslin;                                                                                                      |
| KKPRKGMYSY     | AFVQTCSR                   | N-ter +34.06 Da, C +57.02 Da              | 27.5       | 32.2              | 2      | 1061.59                      | 0.45                                         | 0.02                  | HMG81_MOUSE  | HMG82_MOUSE  | High mobility group protein B1;                                       | High mobility group protein 1;                                                                                  |
| PFDAAGTYSR     | AFNELGEALAECKLDVLR         | N-ter +34.06 Da, K +34.06 Da, C +57.02 Da | 33.1       | 76.3              | 3      | 2002.24                      | -1.89                                        | 0.28                  | MYPC2_MOUSE  | F8W134_MOUSE | Myosin-binding protein C, fast-type;                                  | C-protein, skeletal muscle fast isoform;                                                                        |
| PKHLSRKTIV     | AFPKVMPPPOAR               | N-ter +28.03 Da, K +28.03 Da              | 34.4       | 56.3              | 3      | 1521.93                      | 0.90                                         | 0.04                  | Q3U422_MOUSE |              | Myosin regulatory light chain 2, skeletal muscle isoform;             |                                                                                                                 |
| SSVLTPTPPQ     | AFTVIDQNR                  | N-ter +28.03 Da                           | 32.6       | 30.5              | 2      | 1090.61                      | 1.09                                         | 0.04                  | MLRS_MOUSE   | F6ULR7_MOUSE |                                                                       | Fast skeletal myosin light chain 2;MLC2F;                                                                       |
| DFRTHMVGGR     | AGDAFGDTSFLTSKAR           | N-ter +28.03 Da, K +28.03 Da              | 40.8       | 80.1              | 3      | 1698.99                      | -0.64                                        | 0.05                  | BORG4_MOUSE  | A2A6Q2_MOUSE | Cdc42 effector protein 4;                                             | Binder of Rho GTPases 4;                                                                                        |
| RTFGTTGERR     | AGEEAADSPELPR              | N-ter +28.03 Da                           | 60.6       | 44.1              | 2      | 1368.71                      | -0.20                                        | 0.01                  | ADXL_MOUSE   |              | Adrenodoxin-like protein, mitochondrial;                              | Ferredoxin-1-like protein;                                                                                      |
| FKRSSEGGQED    | AGELDFSGLLKR               | N-ter +28.03 Da, K +28.03 Da              | 42.3       | 67.7              | 3      | 1360.86                      | -0.14                                        | 0.02                  | D3YU50_MOUSE | Q6P6L5_MOUSE |                                                                       |                                                                                                                 |
| VFVSEAGPAG     | AGESKCLPMVKVLDVAVR         | N-ter +28.03 Da, K +28.03 Da, C +57.02 Da | 21.4       | 68.3              | 4      | 1956.22                      | 0.10                                         | 0.01                  | TTHY_MOUSE   |              | Transthyretin;                                                        | Prealbumin;                                                                                                     |
| VCDNGSLGCK     | AGFAGDDAPR                 | N-ter +34.06 Da                           | 39.6       | 39.6              | 2      | 1009.54                      | -0.69                                        | 0.07                  | ACTA_MOUSE   | ACTB_MOUSE   | Actin, aortic smooth muscle;                                          | Alpha-actin-2;                                                                                                  |
| M              | AGGEAGVTLGQPILSR           | N-ter +28.03 Da                           | 49.2       | 8.7               | 2      | 1576.85                      | 5.53                                         | 0.72                  | IF2H_MOUSE   |              | Eukaryotic translation initiation factor 2 subunit 3, Y-linked;       | Eukaryotic translation initiation factor 2 subunit gamma, Y-linked;                                             |
| GGPPPPGPPP     | AGGGGGAAGAGGGPPPPGPPGAGDR  | N-ter +34.06 Da                           | 76.8       | 56.8              | 3      | 1848.01                      | 0.29                                         | 0.03                  | FUBP2_MOUSE  |              | Far upstream element-binding protein 2;                               | KH type-splicing regulatory protein;                                                                            |
| ENALGLDQFL     | AGLDLNSDDNSQSGSTASKGR      | N-ter +28.03 Da, K +28.03 Da              | 40.7       | 84.3              | 3      | 2077.18                      | 0.00                                         | 0.00                  | DDX3X_MOUSE  |              | ATP-dependent RNA helicase DDX3X;                                     | D1Pas1-related sequence 2;DEAD box RNA helicase DEAD3;DEAD box protein 3, X-chromosomal;Embryonic RNA helicase; |
| YSLGQLPGL      | AGLHGDOGAPVPGVAGPR         | N-ter +28.03 Da                           | 35.3       | 36.8              | 3      | 1737.95                      | 0.65                                         | 0.03                  | CO1A2_MOUSE  | E9Q6U9_MOUSE | Collagen alpha-2(I) chain;                                            | Alpha-2 type I collagen;                                                                                        |
| MN             | AGSDPVVIVSAAR              | N-ter +28.03 Da                           | 32.4       | 19.7              | 2      | 1268.73                      | 0.37                                         | 0.01                  | THIC_MOUSE   |              | Acetyl-CoA acetyltransferase, cytosolic;                              | Cytosolic acetoacetyl-CoA thiolase;                                                                             |
| RGQSSANRR      | AGSSSGSGVQGSASAGLAADASR    | N-ter +28.03 Da                           | 75.4       | 55.3              | 3      | 1948.03                      | 2.40                                         | 0.41                  | E9Q019_MOUSE | FILA_MOUSE   |                                                                       |                                                                                                                 |
| IKVDKGVVPL     | AGTNGETTQGLDLSER           | N-ter +34.06 Da                           | 39.3       | 52.3              | 3      | 1840.00                      | 0.85                                         | 0.04                  | ALDOA_MOUSE  | Q9CPQ9_MOUSE | Fructose-bisphosphate aldolase A;                                     | Aldolase 1;Muscle-type aldolase;                                                                                |
| QADCAVLIVA     | AGVGEFEAGISKNGQTR          | N-ter +34.06 Da, K +34.06 Da              | 37.6       | 64.0              | 3      | 1788.10                      | 0.33                                         | 0.02                  | EF1A1_MOUSE  | EF1A2_MOUSE  | Elongation factor 1-alpha 1;                                          | Elongation factor Tu;Eukaryotic elongation factor 1 A-1;                                                        |
| GARGAQVRGN     | AGVSDGSEVAKAQAAPGGASPTIFSR | N-ter +34.06 Da, K +34.06 Da              | 33.6       | 58.2              | 4      | 2660.65                      | -0.07                                        | 0.01                  | HINT2_MOUSE  |              | Histidine triad nucleotide-binding protein 2, mitochondrial;          | HINT-3;                                                                                                         |
| QMSYGYDEKS     | AGVSVPGPMGSPGPR            | N-ter +28.03 Da                           | 47.6       | 54.9              | 3      | 1392.80                      | 1.06                                         | 0.07                  | CO1A1_MOUSE  | F8WGB7_MOUSE | Collagen alpha-1(I) chain;                                            | Alpha-1 type I collagen;                                                                                        |
| KQVSLAYVEA     | AGYLTEPVNR                 | N-ter +34.06 Da                           | 32.2       | 16.6              | 2      | 1152.65                      | 0.07                                         | 0.00                  | GPDM_MOUSE   | A2AQR0_MOUSE | Glycerol-3-phosphate dehydrogenase, mitochondrial;                    | Protein TISP38;                                                                                                 |
| VLLGLTPARA     | AHEDPVKIEGFSR              | N-ter +34.06 Da, K +34.06 Da              | 36.9       | 105.3             | 4      | 1780.17                      | 0.25                                         | 0.00                  | SBS1_MOUSE   | E9QPB2_MOUSE | Suprabasin;                                                           |                                                                                                                 |
| RAISTSVCLR     | AHGSVVKSEDYAFPTYADR        | N-ter +34.06 Da, K +34.06 Da              | 21.9       | 62.8              | 4      | 2180.25                      | 0.33                                         | 0.03                  | COX41_MOUSE  |              | Cytochrome c oxidase subunit 4 isoform 1, mitochondrial;              | Cytochrome c oxidase polypeptide IV;                                                                            |
| LTDPAATTF      | AHLDTATVLSR                | N-ter +34.06 Da                           | 30.5       | 36.4              | 3      | 1216.74                      | -0.60                                        | 0.01                  | ATPB_MOUSE   |              | ATP synthase subunit beta, mitochondrial;                             | Cytochrome c oxidase subunit IV isoform 1;                                                                      |
| DRQKEVNEF      | AIDJIAQQPVNEVHR            | N-ter +28.03 Da                           | 51.3       | 62.5              | 3      | 1859.11                      | 0.08                                         | 0.00                  | NDU56_MOUSE  | D3YV32_MOUSE | NADH dehydrogenase [ubiquinone] iron-sulfur protein 6, mitochondrial; | Complex I-13kD-A;NADH-ubiquinone oxidoreductase 13 kDa-A subunit;                                               |
| SLAEHYDILC     | AIETSAKSSNVEEAFTR          | N-ter +34.06 Da, K +34.06 Da              | 16.9       | 64.6              | 4      | 2022.18                      | -1.52                                        | 0.13                  | RAB43_MOUSE  | Q91Z34_MOUSE | Ras-related protein Rab-43;                                           |                                                                                                                 |
| AAAAAASRI      | AIPGLAGAGNSVLLVSNLNPFR     | N-ter +34.06 Da                           | 56.3       | 51.1              | 3      | 2195.36                      | -1.89                                        | 0.28                  | PTBP1_MOUSE  | Q92217_MOUSE | Polypyrimidine tract-binding protein 1;                               | Heterogeneous nuclear ribonucleoprotein I;                                                                      |

Table S7, Tholen et al.

| Non Prime Site                                                                                                   | Prime Site                                                                                                                                                                            | Modifications                                                                                                                                                                                                               | Hyperscore                                                           | Mass error in ppm                                                    | Charge                                    | Precursor neutral mass in Da                                                                    | Fold change (log <sub>2</sub> ) of ASAPRatio                              | FC-error of ASAPRatio                                                | Uniprot ID 1                                                                                                                  | Uniprot ID 2                 | Protein Name 1                                                                                                                                                                                                                                                                                                                              | Protein Name 2                                                                                                                                                                 |
|------------------------------------------------------------------------------------------------------------------|---------------------------------------------------------------------------------------------------------------------------------------------------------------------------------------|-----------------------------------------------------------------------------------------------------------------------------------------------------------------------------------------------------------------------------|----------------------------------------------------------------------|----------------------------------------------------------------------|-------------------------------------------|-------------------------------------------------------------------------------------------------|---------------------------------------------------------------------------|----------------------------------------------------------------------|-------------------------------------------------------------------------------------------------------------------------------|------------------------------|---------------------------------------------------------------------------------------------------------------------------------------------------------------------------------------------------------------------------------------------------------------------------------------------------------------------------------------------|--------------------------------------------------------------------------------------------------------------------------------------------------------------------------------|
| AMRILGGVIS<br>EFEQLPMMQ                                                                                          | AISEAAQYNPEPPPR<br>AISNNKQGGYEDFVEGLR                                                                                                                                                 | N-ter +28.03 Da<br>N-ter +28.03 Da, K +28.03 Da                                                                                                                                                                             | 45.0<br>31.9                                                         | 48.5<br>67.4                                                         | 3<br>3                                    | 1835.01<br>2167.20                                                                              | 0.00<br>0.51                                                              | 0.00<br>0.06                                                         | CPNS1_MOUSE<br>E9PWG4_MOUSE                                                                                                   | D3YW48_MOUSE<br>MYL1_MOUSE   | Calpain small subunit 1;<br>Calpain small subunit 1;<br>Calcium-dependent protease small subunit 1;<br>Calpain regulatory subunit;                                                                                                                                                                                                          | Calcium-activated neutral proteinase small subunit;<br>Calcium-dependent protease small subunit;<br>Calcium-dependent protease small subunit 1;<br>Calpain regulatory subunit; |
| LLPLLAGAQA                                                                                                       | AIVFIKEPSSQDALQGR                                                                                                                                                                     | N-ter +34.06 Da, K +34.06 Da<br>N-ter +28.03 Da, K +28.03 Da, C +57.02 Da                                                                                                                                                   | 31.7                                                                 | 64.4                                                                 | 3                                         | 1926.24                                                                                         | 1.37                                                                      | 0.12                                                                 | PTK7_MOUSE                                                                                                                    | Q3V2W2_MOUSE                 | Inactive tyrosine-protein kinase 7;                                                                                                                                                                                                                                                                                                         | Protein chuzhoi;<br>Protein-tyrosine kinase 7;<br>Pseudo tyrosine kinase receptor 7;<br>Tyrosine-protein kinase-like 7;                                                        |
| DFHRCEKAMT<br>PDLSKHNNHM                                                                                         | AKGGDVSVCEWYR<br>AKVLTPLDYNKLR                                                                                                                                                        | N-ter +34.06 Da, K +34.06 Da                                                                                                                                                                                                | 42.1<br>19.7                                                         | 64.1<br>56.0                                                         | 3<br>4                                    | 1581.86<br>1632.17                                                                              | -1.29<br>0.82                                                             | 0.13<br>0.07                                                         | CX6B1_MOUSE<br>KCRM_MOUSE                                                                                                     |                              | Cytochrome c oxidase subunit 6B1;<br>Creatine kinase M-type;                                                                                                                                                                                                                                                                                | Cytochrome c oxidase subunit VIb isoform 1;<br>Creatine kinase M chain;<br>M-CK;<br>Beta-2-globin;<br>Hemoglobin beta-2 chain;<br>Hemoglobin beta-minor chain;                 |
| AEKSAVSCDLW<br>SKYREPEKYI                                                                                        | AKVNPDEVGGEALGR<br>ALDGDLSLTDLVNLGKGR                                                                                                                                                 | N-ter +34.06 Da, K +34.06 Da<br>N-ter +28.03 Da, K +28.03 Da                                                                                                                                                                | 46.4<br>47.3                                                         | 53.5<br>62.4                                                         | 3<br>3                                    | 1578.98<br>2015.18                                                                              | -0.94<br>0.53                                                             | 0.05<br>0.08                                                         | HBB2_MOUSE<br>HUTH_MOUSE                                                                                                      | F8WH73_MOUSE                 | Hemoglobin subunit beta-2;<br>Histidine ammonia-lyase;                                                                                                                                                                                                                                                                                      | Acetyl-CoA acyltransferase;<br>Beta-ketothiolase;<br>Mitochondrial 3-oxoacyl-CoA thiolase;                                                                                     |
| FAPQFLSVQK                                                                                                       | ALDLDPSKTNVSGGAIALGHLGGSGSR                                                                                                                                                           | N-ter +28.03 Da, K +28.03 Da                                                                                                                                                                                                | 34.0                                                                 | 68.5                                                                 | 4                                         | 2702.62                                                                                         | 0.10                                                                      | 0.01                                                                 | THIM_MOUSE                                                                                                                    |                              | 3-ketoacyl-CoA thiolase, mitochondrial;<br>NADH dehydrogenase [ubiquinone] 1 alpha subcomplex subunit 4;                                                                                                                                                                                                                                    | Complex I-MLRQ;<br>NADH-ubiquinone oxidoreductase MLRQ subunit;<br>Heparin-binding protein 44;<br>Low density lipoprotein receptor-related protein-associated protein 1;       |
| TGAALYVMRL                                                                                                       | ALFNPDVSWDR                                                                                                                                                                           | N-ter +34.06 Da                                                                                                                                                                                                             | 43.5                                                                 | 27.5                                                                 | 2                                         | 1352.73                                                                                         | 1.28                                                                      | 0.08                                                                 | NDUA_MOUSE                                                                                                                    |                              |                                                                                                                                                                                                                                                                                                                                             |                                                                                                                                                                                |
| RKDAQMVHNS                                                                                                       | ALNEDTQDELGDPR                                                                                                                                                                        | N-ter +28.03 Da                                                                                                                                                                                                             | 29.0                                                                 | 59.9                                                                 | 3                                         | 1599.83                                                                                         | 0.43                                                                      | 0.03                                                                 | AMRP_MOUSE                                                                                                                    | F6Y09_MOUSE                  | Alpha-2-macroglobulin receptor-associated protein;                                                                                                                                                                                                                                                                                          |                                                                                                                                                                                |
| ERHLLITMIV<br>SLVSGQMQL                                                                                          | ALNPDFKPPADYKPPATR<br>ALSEASQTDPSPGPPR                                                                                                                                                | N-ter +34.06 Da, K +34.06 Da<br>N-ter +34.06 Da                                                                                                                                                                             | 22.7<br>58.9                                                         | 53.2<br>47.5                                                         | 4<br>3                                    | 2099.34<br>1642.92                                                                              | 0.60<br>-0.25                                                             | 0.04<br>0.01                                                         | SF01_MOUSE<br>F134C_MOUSE                                                                                                     | Q3UI45_MOUSE                 | Splicing factor 1;<br>Protein FAM134C;                                                                                                                                                                                                                                                                                                      | CW17;<br>Mammalian branch point-binding protein;<br>Transcription factor ZFM1;<br>Zinc finger gene in MEN1 locus;<br>Zinc finger protein 162;                                  |
| KTDQVIQFFI<br>GMLPEKDCRY<br>LALAFGLAHA                                                                           | ALVNDPQPEHLR<br>ALYDASFETKESR<br>AMEGPWKTVAIAADR                                                                                                                                      | N-ter +28.03 Da<br>N-ter +34.06 Da, K +34.06 Da<br>N-ter +34.06 Da, K +34.06 Da                                                                                                                                             | 41.4<br>38.0<br>31.2                                                 | 62.7<br>61.9<br>71.9                                                 | 3<br>3<br>3                               | 1512.90<br>1583.94<br>1683.07                                                                   | -0.09<br>-1.25<br>0.79                                                    | 0.01<br>0.09<br>0.03                                                 | UB2L3_MOUSE<br>DEST_MOUSE<br>AZAEN9_MOUSE                                                                                     | Q9D3H2_MOUSE                 | Ubiquitin-conjugating enzyme E2 L3;<br>Destrin;                                                                                                                                                                                                                                                                                             | UbcM4;<br>Ubiquitin carrier protein L3;<br>Ubiquitin-protein ligase L3;<br>Actin-depolymerizing factor;<br>Sid 23;                                                             |
| PREIFKQKER<br>SPVSSGVNLF                                                                                         | AMSTTSVTSSQPGKLR<br>ANDGSFLEFKR                                                                                                                                                       | N-ter +28.03 Da, K +28.03 Da<br>N-ter +28.03 Da, K +28.03 Da                                                                                                                                                                | 34.8<br>32.2                                                         | 63.6<br>65.5                                                         | 3<br>3                                    | 1706.01<br>1451.87                                                                              | -1.18<br>0.01                                                             | 0.11<br>0.00                                                         | DBNL_MOUSE<br>CS043_MOUSE                                                                                                     |                              | Drebrin-like protein;<br>Uncharacterized protein C19orf43 homolog;                                                                                                                                                                                                                                                                          |                                                                                                                                                                                |
| QPISNVRAIQ<br>NPEESIEDIY<br>CDIDIRKDLY<br>SPSEIPGMP<br>FGVTTLDIVR<br>CDVDIRKDLY<br>QSQWQKVKDF<br>HHSFYNELRV<br>M | ANINIPMGAFRPGAGOPPR<br>ANIPDLSPSYPSR<br>ANNVMSGGTTMYPGIADR<br>ANQDTIFEGIGGPR<br>ANTFVAELKGLDPR<br>ANTVLSGGTTMYPGIADR<br>ANVYVDVAVKDSGR<br>APEEHPTLLTEAPLNPKANR<br>APKGGSKQSEEDLLQDFSR | N-ter +34.06 Da<br>N-ter +34.06 Da<br>N-ter +28.03 Da<br>N-ter +28.03 Da<br>N-ter +28.03 Da, K +28.03 Da<br>N-ter +34.06 Da<br>N-ter +34.06 Da, K +34.06 Da<br>N-ter +28.03 Da, K +28.03 Da<br>N-ter +28.03 Da, K +28.03 Da | 23.1<br>33.1<br>24.7<br>50.8<br>25.2<br>36.1<br>42.1<br>28.4<br>33.1 | 63.7<br>33.1<br>71.4<br>54.1<br>63.4<br>52.4<br>70.2<br>73.1<br>59.8 | 3<br>3<br>3<br>3<br>3<br>3<br>3<br>3<br>4 | 1997.21<br>1562.90<br>1882.01<br>1501.83<br>1657.03<br>1857.05<br>1460.93<br>2253.38<br>2416.40 | -0.15<br>-1.29<br>-2.84<br>0.52<br>0.89<br>-0.25<br>-1.18<br>3.03<br>1.40 | 0.01<br>0.06<br>0.20<br>0.04<br>0.03<br>0.02<br>0.14<br>0.20<br>0.16 | SMPX_MOUSE<br>PALMD_MOUSE<br>ACT5_MOUSE<br>COSA1_MOUSE<br>MDHM_MOUSE<br>ACTB_MOUSE<br>APOA1_MOUSE<br>ACTA_MOUSE<br>SSRG_MOUSE | Q3UV77_MOUSE                 | Small muscular protein;<br>Palmdelphin;<br>Actin, alpha skeletal muscle;<br>Collagen alpha-1(V) chain;<br>Malate dehydrogenase, mitochondrial;<br>Actin, cytoplasmic 1;<br>Apolipoprotein A-I;<br>Actin, aortic smooth muscle;<br>Translocon-associated protein subunit gamma;<br>Serine/threonine-protein phosphatase 6 catalytic subunit; | Stretch-responsive skeletal muscle protein;<br>Alpha-actin-1;                                                                                                                  |
| M<br>QSKGQWLTE<br>M                                                                                              | APLDLDKYVEIAR<br>APLDTINVHLR<br>APNVLASEPEIPKGR                                                                                                                                       | N-ter +34.06 Da, K +34.06 Da<br>N-ter +28.03 Da<br>N-ter +34.06 Da, K +34.06 Da                                                                                                                                             | 13.7<br>33.0<br>36.1                                                 | 59.5<br>46.8<br>63.5                                                 | 3<br>3<br>3                               | 1570.03<br>1275.79<br>1758.18                                                                   | 1.14<br>0.63<br>-0.23                                                     | 0.15<br>0.07<br>0.01                                                 | PPP6_MOUSE<br>LYAG_MOUSE<br>KAD2_MOUSE                                                                                        |                              | Lysosomal alpha-glucosidase;<br>Adenylate kinase 2, mitochondrial;                                                                                                                                                                                                                                                                          | Acid maltase;<br>ATP-AMP transphosphorylase 2;                                                                                                                                 |
| TSQLTAFPLG                                                                                                       | APPPWPIQDSSGPELGSR                                                                                                                                                                    | N-ter +28.03 Da                                                                                                                                                                                                             | 42.4                                                                 | 46.8                                                                 | 3                                         | 2015.11                                                                                         | 0.08                                                                      | 0.00                                                                 | GORS1_MOUSE                                                                                                                   |                              | Golgi reassembly-stacking protein 1;                                                                                                                                                                                                                                                                                                        | Golgi peripheral membrane protein p65;<br>Golgi reassembly-stacking protein of 65 kDa;<br>Proline-rich and coiled-coil-containing protein 1;                                   |
| ATSASGALLS<br>VAGPQAQTG<br>NAILVRYTQK<br>M                                                                       | APPSGPPISGFSVGTYYDTR<br>APQGLSLEYLFR<br>APQVSTPTLVEAAR<br>APVEHVADAGAFIR                                                                                                              | N-ter +34.06 Da<br>N-ter +34.06 Da<br>N-ter +28.03 Da<br>N-ter +34.06 Da                                                                                                                                                    | 55.9<br>43.1<br>29.3<br>42.3                                         | 46.4<br>63.2<br>47.8<br>53.9                                         | 3<br>3<br>3<br>3                          | 2153.22<br>1499.88<br>1466.88<br>1584.97                                                        | -0.12<br>0.64<br>-0.45<br>-0.54                                           | 0.01<br>0.04<br>0.03<br>0.02                                         | PRRC1_MOUSE<br>FRIL1_MOUSE<br>ALBU_MOUSE<br>NOB1_MOUSE                                                                        | Q9CPX4_MOUSE<br>F6YB8_MOUSE  | Protein PRRC1;<br>Ferritin light chain 1;<br>Serum albumin;<br>RNA-binding protein NOB1;                                                                                                                                                                                                                                                    | Ferritin L subunit 1;                                                                                                                                                          |
| LLATVWHGQG<br>LAQYREVAAF                                                                                         | APVIEPSGPELVPEGETVTLR<br>AQFGSDLAATQQLLSR                                                                                                                                             | N-ter +28.03 Da<br>N-ter +34.06 Da<br>N-ter +34.06 Da, K +34.06 Da, C +57.02 Da                                                                                                                                             | 40.8<br>59.2<br>41.5                                                 | 37.9<br>54.6<br>36.8                                                 | 3<br>3<br>4                               | 2316.35<br>1854.07<br>3206.71                                                                   | -0.11<br>-0.67<br>-1.89                                                   | 0.01<br>0.02<br>0.28                                                 | CSF1R_MOUSE<br>ATPA_MOUSE<br>ALBU_MOUSE                                                                                       | Q3TBH6_MOUSE<br>D3ZGF5_MOUSE | Macrophage colony-stimulating factor 1 receptor;<br>ATP synthase subunit alpha, mitochondrial;                                                                                                                                                                                                                                              | CSF-1 receptor;<br>Proto-oncogene c-Fms;                                                                                                                                       |
| EQLKTMDDF                                                                                                        | AQFLDTCCKAADKDTCTFSTEGPNLVTR                                                                                                                                                          | N-ter +28.03 Da, K +28.03 Da, C +57.02 Da                                                                                                                                                                                   | 41.5                                                                 | 36.8                                                                 | 4                                         | 3206.71                                                                                         | -1.89                                                                     | 0.28                                                                 | ALBU_MOUSE                                                                                                                    |                              | Serum albumin;                                                                                                                                                                                                                                                                                                                              |                                                                                                                                                                                |
| ITQASMTSL<br>NLQSRFRIL<br>QNSHSNPVSN                                                                             | AQGPSTSAITFPPEEQDPR<br>AQMTGTEYMQDPPDEALR<br>AQPAGAEKPEAKVLFDR                                                                                                                        | N-ter +28.03 Da<br>N-ter +34.06 Da<br>N-ter +28.03 Da, K +28.03 Da                                                                                                                                                          | 30.2<br>49.0<br>19.1                                                 | 48.3<br>49.7<br>78.4                                                 | 3<br>3<br>4                               | 2158.12<br>2118.05<br>2110.21                                                                   | -0.36<br>-0.40<br>0.76                                                    | 0.04<br>0.05<br>0.02                                                 | PRRC1_MOUSE<br>E9PYJ9_MOUSE<br>SYEP_MOUSE                                                                                     | LDB3_MOUSE                   | Protein PRRC1;<br>Bifunctional glutamate/proline-tRNA ligase;<br>Coiled-coil-helix-coiled-coil-helix domain-containing protein 2, mitochondrial;                                                                                                                                                                                            | Proline-rich and coiled-coil-containing protein 1;                                                                                                                             |
| MRAAPRRAPA                                                                                                       | AQPAAAAPSVAVSPAAAPR                                                                                                                                                                   | N-ter +34.06 Da                                                                                                                                                                                                             | 64.3                                                                 | 50.5                                                                 | 3                                         | 1791.08                                                                                         | 0.00                                                                      | 0.00                                                                 | CHCH2_MOUSE                                                                                                                   | B2RP8_MOUSE                  |                                                                                                                                                                                                                                                                                                                                             |                                                                                                                                                                                |
| SVQSGNLALA<br>KQFPPIVLV<br>SPCLPRVHL                                                                             | ASAAAVDAGMAMAGQSPVLR<br>ASAEEEDVEEAALKR<br>ASAFSGSTESLVAR                                                                                                                             | N-ter +34.06 Da<br>N-ter +34.06 Da, K +34.06 Da<br>N-ter +28.03 Da                                                                                                                                                          | 60.8<br>28.5<br>55.8                                                 | 25.4<br>63.4<br>33.1                                                 | 3<br>3<br>2                               | 1907.03<br>1858.08<br>1409.76                                                                   | 0.26<br>-0.74<br>1.04                                                     | 0.01<br>0.07<br>0.07                                                 | PTBP1_MOUSE<br>CO6A5_MOUSE<br>THEMS_MOUSE                                                                                     | Q922I7_MOUSE<br>CO6A6_MOUSE  | Poly(pyrimidine tract-binding protein 1;<br>Collagen alpha-5(VI) chain;<br>Thioesterase superfamily member 5;                                                                                                                                                                                                                               | Heterogeneous nuclear ribonucleoprotein I;<br>Collagen alpha-1(XIX) chain;                                                                                                     |

Table S7, Tholen et al.

| Non Prime Site       | Prime Site                     | Modifications                             | Hyperscore | Mass error in ppm | Charge | Precursor neutral mass in Da | Fold change (log <sub>2</sub> ) of ASAPRatio | FC-error of ASAPRatio | Uniprot ID 1 | Uniprot ID 2 | Protein Name 1                                                                             | Protein Name 2                                                                                                       |
|----------------------|--------------------------------|-------------------------------------------|------------|-------------------|--------|------------------------------|----------------------------------------------|-----------------------|--------------|--------------|--------------------------------------------------------------------------------------------|----------------------------------------------------------------------------------------------------------------------|
| KNVREATESF           | ASDPILYRVAVALDTKGEIR           | N-ter +34.06 Da, K +34.06 Da              | 21.6       | 62.3              | 4      | 2448.59                      | -1.18                                        | 0.11                  | KPYM_MOUSE   |              | Pyruvate kinase isozymes M1/M2;                                                            | Pyruvate kinase muscle isozyme; C-terminal LIM domain protein 1;Elfin;LIM domain protein CLP-36;                     |
| GKRHPYKMNLLGISLPQVEL | ASEPQEVLIHGSANHR               | N-ter +28.03 Da                           | 34.9       | 85.1              | 4      | 1772.05                      | 0.36                                         | 0.02                  | PDLI1_MOUSE  |              | PDZ and LIM domain protein 1;                                                              |                                                                                                                      |
| ENAFRSRSGGR          | ASFGAEGPEIVSAEAGTAGSR          | N-ter +28.03 Da                           | 41.1       | 41.2              | 3      | 2088.10                      | 0.14                                         | 0.01                  | PRAX_MOUSE   | Q6NVF7_MOUSE | Periaxin;                                                                                  |                                                                                                                      |
| GAVGAPGPAG           | ASGDKEAEGAPQVEAGKR             | N-ter +28.03 Da, K +28.03 Da              | 32.7       | 83.5              | 4      | 1883.13                      | -1.06                                        | 0.22                  | Q8VC08_MOUSE | E9QM09_MOUSE | Collagen alpha-2(I) chain;                                                                 | Alpha-2 type I collagen;                                                                                             |
| ARGAAVTRSM           | ASGGGVPTDEEQATGLER             | N-ter +28.03 Da                           | 52.1       | 58.1              | 3      | 1800.95                      | -0.11                                        | 0.01                  | COX5B_MOUSE  | Q9D881_MOUSE | Cytochrome c oxidase subunit 5B, mitochondrial;                                            | Cytochrome c oxidase polypeptide Vb;                                                                                 |
| KTSEGSWEFF           | ASGKTAESGELGLTTDEKFEVGYR       | N-ter +34.06 Da, K +34.06 Da              | 21.2       | 75.4              | 4      | 2882.77                      | 1.70                                         | 0.13                  | TTHY_MOUSE   |              | Transthyretin;                                                                             | Prealbumin; Aldehyde dehydrogenase family 5 member A1;NAD(+)-dependent succinic semialdehyde dehydrogenase;          |
| EPAGTPRRSY           | ASGPGGLHADLLR                  | N-ter +34.06 Da                           | 38.7       | 50.2              | 3      | 1296.80                      | 0.63                                         | 0.03                  | SSDH_MOUSE   |              | Succinate-semialdehyde dehydrogenase, mitochondrial;                                       | H1 VAR.1;H1C;                                                                                                        |
| KTGAAAGKRK           | ASGPPVELITKAVAASKER            | N-ter +34.06 Da, K +34.06 Da              | 34.3       | 80.8              | 4      | 2112.47                      | -1.52                                        | 0.04                  | H13_MOUSE    |              | Histone H1.2;                                                                              |                                                                                                                      |
| MENANVLARY           | ASICQQNGIVPIPELIPDGDHDKR       | N-ter +28.03 Da, K +28.03 Da, C +57.02 Da | 55.5       | 80.3              | 4      | 3068.84                      | -6.64                                        | 0.00                  | ALDOA_MOUSE  | ALDOC_MOUSE  | Fructose-bisphosphate aldolase A;                                                          | Aldolase 1;Muscle-type aldolase;                                                                                     |
| QEVRCLEERSY          | ASKPTLNEVVIVSAIR               | N-ter +28.03 Da, K +28.03 Da              | 48.4       | 74.0              | 3      | 1752.18                      | 0.58                                         | 0.03                  | THII_MOUSE   |              | Acetyl-CoA acetyltransferase, mitochondrial;                                               | Acetoacetyl-CoA thiolase;                                                                                            |
| AQEQFGGNPF           | ASLVSSSSAEATQPSR               | N-ter +34.06 Da                           | 28.4       | 61.5              | 3      | 1683.95                      | 0.10                                         | 0.01                  | UBQLL_MOUSE  |              | Ubiquilin-1;                                                                               | Protein linking IAP with cytoskeleton 1;                                                                             |
| KPLRRALSGR           | ASPVTPSSGLHAAVR                | N-ter +28.03 Da                           | 54.1       | 61.4              | 3      | 1547.94                      | -0.76                                        | 0.04                  |              |              | Uncharacterized protein KIAA1522;                                                          |                                                                                                                      |
| M                    | ASQTQGIQQLLQAEKR               | N-ter +28.03 Da, K +28.03 Da              | 38.2       | 12.3              | 3      | 1854.06                      | 5.36                                         | 0.47                  | VATG2_MOUSE  |              | V-type proton ATPase subunit G 2;                                                          | V-ATPase 13 kDa subunit 2;Vacuolar proton pump subunit G 2;                                                          |
| RSALQSIW             | ASQTTDGKLPVTKDVER              | N-ter +28.03 Da, K +28.03 Da              | 17.4       | 65.2              | 4      | 2057.24                      | -0.12                                        | 0.01                  | SERPH_MOUSE  |              | Serpin H1;                                                                                 | 47 kDa heat shock protein;Collagen-binding protein;Serine protease inhibitor I6;                                     |
| TTLNNAVSSL           | ASTGLSLTKVDER                  | N-ter +34.06 Da, K +34.06 Da              | 28.9       | 54.7              | 3      | 1443.94                      | 1.08                                         | 0.17                  | PICA_MOUSE   |              | Phosphatidylinositol-binding clathrin assembly protein;                                    | Clathrin assembly lymphoid myeloid leukemia;                                                                         |
| LSNAIGPSAQ           | ASTGSLVITPCSNLNDLKESNNR        | N-ter +34.06 Da, K +34.06 Da, C +57.02 Da | 34.3       | 67.6              | 4      | 2644.56                      | 0.19                                         | 0.02                  | SHLB1_MOUSE  | Q3TYR7_MOUSE | Endophilin-B1;                                                                             | SH3 domain-containing GRB2-like protein B1; Alpha-CP1;Heterogeneous nuclear ribonucleoprotein E1;                    |
| EVKGYWASLD           | ASTQTTHLTIPTNNLIGCIGR          | N-ter +34.06 Da, C +57.02 Da              | 51.4       | 56.8              | 3      | 2442.45                      | -0.67                                        | 0.15                  | PCBP1_MOUSE  |              | Poly(rC)-binding protein 1; WD repeat domain phosphoinositide-interacting protein 2;       |                                                                                                                      |
| WTGYFGKVLMM          | ASTSYLPSQVTEFMFNQGR            | N-ter +34.06 Da                           | 38.6       | 65.6              | 3      | 2049.14                      | -2.94                                        | 0.45                  | WIPI2_MOUSE  | D3YWK1_MOUSE |                                                                                            |                                                                                                                      |
| HDLRHAFSPV           | ASVESASGETLHSPKVGQGAAGVSPMCPGR | N-ter +28.03 Da, K +28.03 Da, C +57.02 Da | 46.1       | 54.8              | 4      | 3173.73                      | 1.50                                         | 0.16                  | FETUA_MOUSE  |              | Alpha-2-HS-glycoprotein;                                                                   | Countertryptin;Fetuin-A;                                                                                             |
| IIPTRARCLY           | ASVLTAAQPR                     | N-ter +34.06 Da                           | 29.6       | 35.6              | 2      | 975.63                       | -1.40                                        | 0.11                  | EF2_MOUSE    |              | Elongation factor 2;                                                                       |                                                                                                                      |
| IREGEVEVLK           | ATEMVEVGEPEDEVGAEAR            | N-ter +28.03 Da                           | 49.2       | 59.2              | 3      | 1959.99                      | -0.23                                        | 0.03                  | PTRF_MOUSE   |              | Polymerase I and transcript release factor;                                                | Cav-p60;Cavin-1;                                                                                                     |
| IKKRLETYYN           | ATEPVISFYDKR                   | N-ter +28.03 Da, K +28.03 Da              | 42.6       | 52.2              | 3      | 1480.87                      | -0.12                                        | 0.01                  | KAD1_MOUSE   |              | Adenylate kinase isoenzyme 1;                                                              | ATP-AMP transphosphorylase 1;Myokinase;                                                                              |
| VIQHRPSQOY           | ATLDVYNPFENR                   | N-ter +34.06 Da                           | 27.4       | 59.5              | 3      | 1471.84                      | -0.15                                        | 0.01                  | SCAM3_MOUSE  | Q3UXS0_MOUSE | Secretory carrier-associated membrane protein 3;                                           |                                                                                                                      |
| GRRDKSPTK            | ATPLPAEGKNTLR                  | N-ter +28.03 Da, K +28.03 Da              | 24.5       | 69.1              | 4      | 1579.06                      | -0.40                                        | 0.05                  | E41L2_MOUSE  |              | Band 4.1-like protein 2;                                                                   | Generally expressed protein 4.1; Cargo selection protein TIP47;Mannose-6-phosphate receptor-binding protein 1;       |
| PLTEAELALI           | ATPPEDSDMASLQQQR               | N-ter +28.03 Da                           | 58.1       | 57.9              | 3      | 1800.94                      | 0.59                                         | 0.02                  | PLIN3_MOUSE  |              | Perilipin-3;                                                                               |                                                                                                                      |
| MAAN                 | ATTNPSQLLPLELVKICIGSR          | N-ter +28.03 Da, K +28.03 Da, C +57.02 Da | 52.9       | 53.1              | 3      | 2367.41                      | 0.47                                         | 0.07                  | LSM5_MOUSE   |              | U6 snRNA-associated 5m-like protein LSM5;                                                  |                                                                                                                      |
| AMGGVAPQAL           | AVAASGGSSFR                    | N-ter +34.06 Da                           | 29.8       | 32.1              | 2      | 1139.65                      | 1.25                                         | 0.06                  | A2M_MOUSE    | D3YW52_MOUSE | Alpha-2-macroglobulin;                                                                     | Pregnancy zone protein; Germ cell lineage protein gercelin;Src-suppressed C kinase substrate;                        |
| QERQTAQVLQ           | AVADKVKEDSQVPAQTQLQR           | N-ter +34.06 Da, K +34.06 Da              | 37.3       | 58.5              | 4      | 2285.48                      | -0.01                                        | 0.00                  | AKA12_MOUSE  |              | A-kinase anchor protein 12; Mitochondrial import inner membrane translocase subunit Tim13; |                                                                                                                      |
| AIMEQVKVQI           | AVANAQELLOR                    | N-ter +34.06 Da                           | 37.0       | 37.1              | 3      | 1245.77                      | 0.30                                         | 0.02                  | TIM13_MOUSE  |              |                                                                                            |                                                                                                                      |
| KRGTTGGVDTA          | AVGAVFDISNADR                  | N-ter +28.03 Da                           | 48.7       | 29.8              | 2      | 1361.73                      | 1.23                                         | 0.07                  | KCRM_MOUSE   |              | Creatine kinase M-type;                                                                    | Creatine kinase M chain;M-CK;                                                                                        |
| IIPASTGAAK           | AVGKVIPELNGKLTGMAFR            | N-ter +34.06 Da, K +34.06 Da              | 26.4       | 84.2              | 4      | 2102.49                      | -1.56                                        | 0.05                  | G3P_MOUSE    | F8WJL5_MOUSE | Glyceraldehyde-3-phosphate dehydrogenase;                                                  | Peptidyl-cysteine S-nitrosylase GAPDH; Protein cypher;Protein oracle;Z-band alternatively spliced PDZ-motif protein; |
| AVDSASPVIQ           | AVIKQSKPEDEADEWAR              | N-ter +28.03 Da, K +28.03 Da              | 20.9       | 77.9              | 4      | 2156.28                      | 0.47                                         | 0.02                  | LDB3_MOUSE   | E9PYJ9_MOUSE | LIM domain-binding protein 3;                                                              |                                                                                                                      |
| GPEPTTDCFV           | AVMHGETETVPGNALVVDPEKPFRR      | N-ter +34.06 Da, K +34.06 Da              | 42.5       | 55.3              | 4      | 2717.60                      | 0.03                                         | 0.00                  | EHD2_MOUSE   |              | EH domain-containing protein 2;                                                            |                                                                                                                      |
| WGRGLSTVLA           | AVPAPPPTSPR                    | N-ter +28.03 Da                           | 38.3       | 29.9              | 2      | 1116.66                      | -0.01                                        | 0.00                  | HTRA2_MOUSE  | F6XUR8_MOUSE | Serine protease HTRA2, mitochondrial;                                                      | High temperature requirement protein A2;Omi stress-regulated endoprotease;Serine protease 25;Serine proteinase OMI;  |
| VLTFGGMTLT           | AVPIAQKSEPOSLNEALMR            | N-ter +34.06 Da, K +34.06 Da              | 42.2       | 80.4              | 4      | 2236.43                      | 0.08                                         | 0.01                  | Q542V8_MOUSE | D3ZK5_MOUSE  |                                                                                            |                                                                                                                      |
| TIAPELLAC            | AVQEEWLDIPSKLDNR               | N-ter +28.03 Da, K +28.03 Da              | 54.9       | 77.0              | 3      | 1968.18                      | -0.43                                        | 0.04                  | E9Q7D5_MOUSE |              |                                                                                            |                                                                                                                      |
| LSLEVQELAQ           | AVRPLQLLGTCAELCR               | N-ter +34.06 Da, C +57.02 Da              | 54.6       | 83.0              | 3      | 1890.20                      | -0.27                                        | 0.04                  | Q8BTE6_MOUSE |              |                                                                                            | Splicing factor that interacts with PQBP-1 and PP1;                                                                  |
| KTSAYGPPAR           | AVSILPLLGHGVPR                 | N-ter +34.06 Da                           | 52.4       | 79.2              | 3      | 1462.04                      | -0.09                                        | 0.02                  | WBP11_MOUSE  |              | WW domain-binding protein 11;                                                              |                                                                                                                      |
| QEASIPQEQE           | AVSPDITSTER                    | N-ter +34.06 Da                           | 38.1       | 42.1              | 2      | 1208.70                      | 0.52                                         | 0.04                  | CO6A2_MOUSE  | D3Z7D5_MOUSE | Collagen alpha-2(VI) chain;                                                                |                                                                                                                      |
| HSSPASLQLG           | AVSPGTLTASGVSGPAAAPAAQHRL      | N-ter +34.06 Da                           | 51.0       | 75.5              | 4      | 2419.52                      | 0.47                                         | 0.05                  | YAP1_MOUSE   |              | Yorkie homolog;                                                                            | 65 kDa Yes-associated protein;                                                                                       |
| AASRATLSN            | AVSSLASTGLSLTKVDER             | N-ter +34.06 Da, K +34.06 Da              | 38.5       | 62.1              | 3      | 1901.23                      | 0.51                                         | 0.06                  | PICA_MOUSE   |              | Phosphatidylinositol-binding clathrin assembly protein;                                    | Clathrin assembly lymphoid myeloid leukemia;                                                                         |
| LSKDITANTW           | AVTVDCPSTNAKR                  | N-ter +28.03 Da, K +28.03 Da, C +57.02 Da | 30.3       | 6.0               | 3      | 1570.82                      | -6.64                                        | 0.00                  | PPR3A_MOUSE  |              | Protein phosphatase 1 regulatory subunit 3A;                                               | Protein phosphatase 1 glycogen-associated regulatory subunit;Protein phosphatase type-1 glycogen targeting subunit;  |

Table S7, Tholen et al.

| Non Prime Site                                                           | Prime Site                                                                                              | Modifications                                                                                                                                                                                | Hyperscore                           | Mass error in ppm                    | Charge                | Precursor neutral mass in Da                        | Fold change (log <sub>2</sub> ) of ASAPRatio | FC-error of ASAPRatio                | Uniprot ID 1                                                          | Uniprot ID 2                               | Protein Name 1                                                                                                                               | Protein Name 2                                                                                                                                                                                                          |
|--------------------------------------------------------------------------|---------------------------------------------------------------------------------------------------------|----------------------------------------------------------------------------------------------------------------------------------------------------------------------------------------------|--------------------------------------|--------------------------------------|-----------------------|-----------------------------------------------------|----------------------------------------------|--------------------------------------|-----------------------------------------------------------------------|--------------------------------------------|----------------------------------------------------------------------------------------------------------------------------------------------|-------------------------------------------------------------------------------------------------------------------------------------------------------------------------------------------------------------------------|
| LWSVAGSNM<br>EAYLGTVTN                                                   | AVVTGGSVVKLLNTR<br>AVVTVPAYFNDSQR                                                                       | N-ter +34.06 Da, K +34.06 Da, C +57.02 Da<br>N-ter +34.06 Da                                                                                                                                 | 27.7<br>18.8                         | 59.7<br>56.8                         | 3<br>3                | 1684.13<br>1599.94                                  | -0.32<br>-0.38                               | 0.02<br>0.03                         | SDF2_MOUSE<br>HSP7C_MOUSE                                             |                                            | Stromal cell-derived factor 2;<br>Heat shock cognate 71 kDa protein;                                                                         | Heat shock 70 kDa protein 8;                                                                                                                                                                                            |
| TISLQMGTK                                                                | CASQVGMTAPGTR                                                                                           | N-ter +34.06 Da, C +57.02 Da<br>N-ter +28.03 Da, K +28.03 Da, C +57.02 Da                                                                                                                    | 33.9<br>45.8                         | 69.5<br>81.5                         | 3<br>4                | 1368.77<br>2513.38                                  | -0.38<br>-1.84                               | 0.02<br>0.20                         | CNN2_MOUSE<br>ALBU_MOUSE                                              | D3Z7R6_MOUSE                               | Calponin-2;<br>Serum albumin;                                                                                                                | Calponin H2, smooth muscle;Neutral calponin;                                                                                                                                                                            |
| MDDFAQLDT<br>ARNLGRVGTK                                                  | CCKAADKDTFCSTEGPNLVTR<br>CCTLPEDQR                                                                      | N-ter +34.06 Da, C +57.02 Da<br>N-ter +34.06 Da, K +34.06 Da, C +57.02 Da                                                                                                                    | 35.4<br>47.7                         | 41.9<br>59.5                         | 2<br>3                | 1211.60<br>1974.11                                  | -0.18<br>-0.62                               | 0.03<br>0.07                         | ALBU_MOUSE<br>ACTC_MOUSE                                              |                                            | Serum albumin;<br>Actin, alpha cardiac muscle 1;                                                                                             |                                                                                                                                                                                                                         |
| CDDEETALV<br>MEPYS<br>HNLPGLFCE<br>WLLDHCQESY<br>TCCKAADKDT<br>QAGRFBVNL | CDNGSLVKAGFAGDDAPR<br>CDTFVALPPATVGNR<br>CEIGYELDR<br>CEPTVCQPTCYQR<br>CFSTEGPNLVTR<br>CGEEQGADAAHLFNPR | N-ter +34.06 Da, C +57.02 Da<br>N-ter +34.06 Da, C +57.02 Da<br>N-ter +34.06 Da, C +57.02 Da<br>N-ter +28.03 Da, C +57.02 Da<br>N-ter +28.03 Da, C +57.02 Da<br>N-ter +28.03 Da, C +57.02 Da | 30.4<br>35.4<br>35.5<br>39.6<br>88.7 | 37.2<br>34.4<br>56.9<br>31.0<br>49.6 | 3<br>2<br>3<br>2<br>3 | 1650.92<br>1187.61<br>1725.83<br>1407.73<br>1798.90 | 0.52<br>1.14<br>1.09<br>-0.04<br>1.44        | 0.02<br>0.07<br>0.09<br>0.00<br>0.15 | ACTC_MOUSE<br>SCRN3_MOUSE<br>FBN1_MOUSE<br>ALBU_MOUSE<br>LEG7_MOUSE   | ACTS_MOUSE<br>A2AWQ9_MOUSE<br>A2AQ53_MOUSE | Actin, alpha cardiac muscle 1;<br>Secernin-3;<br>Fibrillin-1;<br>Serum albumin;<br>Galectin-7;                                               | Alpha-cardiac actin;                                                                                                                                                                                                    |
| ESLWNQENRF<br>SRTTSTSTM                                                  | CGWFDAELSEKGAEAAKR<br>CGYGNYYGGR                                                                        | N-ter +34.06 Da, K +34.06 Da, C +57.02 Da<br>N-ter +28.03 Da, C +57.02 Da<br>N-ter +34.06 Da, K +34.06 Da, C +57.02 Da                                                                       | 39.9<br>34.7<br>28.8                 | 61.5<br>53.5<br>66.6                 | 4<br>2<br>3           | 2184.27<br>1356.63<br>2122.19                       | -1.84<br>-1.43<br>-6.64                      | 0.13<br>0.19<br>0.00                 | PGAM2_MOUSE<br>KR168_MOUSE<br>CFAI_MOUSE                              |                                            | Phosphoglycerate mutase 2;<br>Keratin-associated protein 16-8;<br>Complement factor I;                                                       | BPG-dependent PGAM 2;Muscle-specific phosphoglycerate mutase;Phosphoglycerate mutase isozyme M;<br>Keratin-associated protein 16.8;                                                                                     |
| NKVFCQPWR<br>DDFAQLDTC                                                   | CIEGTICKLPYQCP<br>CKAADKDTFCSTEGPNLVTR                                                                  | N-ter +28.03 Da, K +28.03 Da, C +57.02 Da<br>N-ter +34.06 Da, K +34.06 Da, C +57.02 Da                                                                                                       | 41.1<br>53.2                         | 77.9<br>69.8                         | 4<br>3                | 2353.32<br>2038.24                                  | -0.23<br>-0.62                               | 0.02<br>0.09                         | ALBU_MOUSE<br>HBB2_MOUSE                                              |                                            | Serum albumin;<br>Hemoglobin subunit beta-2;                                                                                                 |                                                                                                                                                                                                                         |
| LDTAEKSAVS<br>LDTAEKAAVS                                                 | CLWAKVNPDEVGGEALGR<br>CLWGKVNDSVEVGGEALGR                                                               | N-ter +34.06 Da, K +34.06 Da, C +57.02 Da<br>N-ter +28.03 Da, K +28.03 Da, C +57.02 Da                                                                                                       | 53.2<br>50.7                         | 69.8<br>65.7                         | 3<br>3                | 2038.24<br>2002.13                                  | -0.62<br>-0.09                               | 0.09<br>0.01                         | HBB2_MOUSE<br>HBB1_MOUSE                                              |                                            | Hemoglobin subunit beta-2;<br>Hemoglobin subunit beta-1;                                                                                     | Beta-2-globin;Hemoglobin beta-2 chain;Hemoglobin beta-minor chain;<br>Beta-1-globin;Hemoglobin beta-1 chain;Hemoglobin beta-major chain;                                                                                |
| TLSSAFADSL<br>CQQVGGISTV<br>GNSTHPMHSR<br>KPTDGASSN<br>AEFKAADFDMF       | CPSTSLYLGR<br>CQPVGISTVCQPTCGVSR<br>CSPDPGLTALLSDHR<br>CVTDISHLVR<br>DADGGDISVKELGTVMR                  | N-ter +34.06 Da, C +57.02 Da<br>N-ter +28.03 Da, K +28.03 Da                                 | 30.4<br>41.3<br>39.0<br>35.1<br>45.2 | 34.8<br>49.2<br>82.0<br>58.1<br>52.3 | 2<br>3<br>3<br>3<br>3 | 1299.75<br>2090.07<br>1665.95<br>1226.72<br>1875.04 | 0.64<br>0.26<br>5.84<br>0.78<br>1.54         | 0.05<br>0.03<br>1.45<br>0.04<br>0.20 | ERN1_MOUSE<br>E9Q2E9_MOUSE<br>HEMO_MOUSE<br>NASP_MOUSE<br>TNNC2_MOUSE |                                            | Serine/threonine-protein kinase/endoribonuclease IRE1;<br>Hemopexin;<br>Nuclear autoantigenic sperm protein;<br>Troponin C, skeletal muscle; | Endoplasmic reticulum-to-nucleus signaling 1;inositol-requiring protein 1;Ire1-alpha;                                                                                                                                   |
| TRNRESRIR<br>MQN                                                         | DAEKELCKEFENQVR<br>DAGEFVDLYVPR                                                                         | N-ter +34.06 Da, K +34.06 Da, C +57.02 Da<br>N-ter +28.03 Da                                                                                                                                 | 20.0<br>35.0                         | 54.4<br>61.6                         | 4<br>3                | 1996.19<br>1407.79                                  | 0.67<br>1.35                                 | 0.09<br>0.07                         | Q148R4_MOUSE<br>RS21_MOUSE                                            | Q8BM18_MOUSE                               | 40S ribosomal protein S21;                                                                                                                   |                                                                                                                                                                                                                         |
| MELHPSCRY<br>LGVKSVQKLL                                                  | DALEVFAAGSGTSGQR<br>DAVDYIPVPT                                                                          | N-ter +34.06 Da<br>N-ter +28.03 Da<br>N-ter +28.03 Da, K +28.03 Da, C +57.02 Da                                                                                                              | 41.6<br>35.7<br>23.0                 | 46.5<br>35.0<br>63.1                 | 3<br>2<br>4           | 1527.84<br>1373.77<br>1834.13                       | -1.06<br>0.19<br>2.19                        | 0.04<br>0.01<br>0.09                 | PCOC1_MOUSE<br>EFTU_MOUSE                                             | D3YZE3_MOUSE<br>D3YVN7_MOUSE               | Procollagen C-endopeptidase enhancer 1;<br>Elongation factor Tu, mitochondrial;                                                              | P14;Procollagen COOH-terminal proteinase enhancer 1;Type 1 procollagen C-proteinase enhancer protein;Type I procollagen COOH-terminal proteinase enhancer;                                                              |
| ASGTTLEAL<br>LPLLARLSAG                                                  | DCILPPTRPDKPLR<br>DCPCSEALCQPIR                                                                         | N-ter +28.03 Da, K +28.03 Da, C +57.02 Da<br>N-ter +34.06 Da, C +57.02 Da<br>N-ter +34.06 Da, K +34.06 Da, C +57.02 Da                                                                       | 42.0<br>42.6<br>32.0                 | 56.0<br>66.2<br>96.6                 | 3<br>3<br>2           | 1709.87<br>1980.07<br>1354.78                       | 0.52<br>-0.84<br>-2.94                       | 0.07<br>0.15<br>0.45                 | EF1A1_MOUSE<br>DIAC_MOUSE<br>IGJ_MOUSE                                | D3YZ68_MOUSE                               | Elongation factor 1-alpha 1;<br>Di-N-acetylchitinase;<br>Immunoglobulin J chain;                                                             | Elongation factor Tu;Eukaryotic elongation factor 1 A-1;                                                                                                                                                                |
| IFVKAVLVTG<br>VVANRFHQLL<br>ESAAKDEAVF                                   | DDEATILADNCKMCTR<br>DDESDFDILR<br>DDEVAPDAAAENCLAER                                                     | N-ter +34.06 Da<br>N-ter +34.06 Da<br>N-ter +28.03 Da, C +57.02 Da                                                                                                                           | 42.6<br>32.0<br>45.6                 | 66.2<br>96.6<br>82.2                 | 3<br>2<br>3           | 1980.07<br>1354.78<br>1872.97                       | -0.84<br>-2.94<br>0.18                       | 0.15<br>0.45<br>0.02                 | IGJ_MOUSE<br>HABP4_MOUSE<br>E9PVP1_MOUSE                              | E9QK82_MOUSE                               | Intracellular hyaluronan-binding protein 4;                                                                                                  |                                                                                                                                                                                                                         |
| VLLTFGVRA<br>DLNPDNLQGG<br>DNGKHAIHII<br>AAGGGGGENY                      | DDEVDVDTVEEDLKGSR<br>DDLDPNYVLSR<br>DDLKQAVAYR<br>DDPHKTPASPVVHIR                                       | N-ter +34.06 Da, K +34.06 Da<br>N-ter +34.06 Da<br>N-ter +28.03 Da, K +28.03 Da<br>N-ter +28.03 Da, K +28.03 Da                                                                              | 55.8<br>48.2<br>28.6<br>25.3         | 66.6<br>25.6<br>76.9<br>88.8         | 3<br>2<br>3<br>4      | 2045.14<br>1426.75<br>1320.81<br>1724.09            | 0.14<br>0.53<br>-1.40<br>-0.45               | 0.02<br>0.04<br>0.18<br>0.03         | ENPL_MOUSE<br>KCRM_MOUSE<br>ATPA_MOUSE<br>HNRPL_MOUSE                 | KCRB_MOUSE<br>D3Z6F5_MOUSE<br>E9Q8W8_MOUSE | Endoplasmic;<br>Creatine kinase M-type;<br>ATP synthase subunit alpha, mitochondrial;<br>Heterogeneous nuclear ribonucleoprotein L;          | 94 kDa glucose-regulated protein;Endoplasmic reticulum resident protein 99;Heat shock protein 90 kDa beta member 1;Polymorphic tumor rejection antigen 1;Tumor rejection antigen gp96;<br>Creatine kinase M chain;M-CK; |
| PPPCPRELF<br>TNLRDDIMRL                                                  | DDPSYNIQNLDKAR<br>DDTVHVVIATPGR                                                                         | N-ter +28.03 Da, K +28.03 Da<br>N-ter +28.03 Da                                                                                                                                              | 33.7<br>35.3                         | 76.2<br>81.1                         | 3<br>3                | 1803.05<br>1406.87                                  | 0.25<br>2.00                                 | 0.01<br>0.15                         | SHC1_MOUSE<br>DDX6_MOUSE                                              |                                            | SHC-transforming protein 1;<br>Probable ATP-dependent RNA helicase DDX6;                                                                     | SHC-transforming protein A;Src homology 2 domain-containing-transforming protein C1; ATP-dependent RNA helicase p54;DEAD box protein 6;Oncogene RCK homolog;                                                            |
| TWKLVSSENF<br>LAAGPRPSLG                                                 | DDYMKVEGVGFATR<br>DEAIHCPCCSEKLAR                                                                       | N-ter +28.03 Da, K +28.03 Da<br>N-ter +28.03 Da, K +28.03 Da, C +57.02 Da                                                                                                                    | 52.3<br>29.8                         | 76.7<br>69.9                         | 3<br>4                | 1642.93<br>1967.06                                  | -1.18<br>0.67                                | 0.16<br>0.06                         | FABP4_MOUSE<br>IBP4_MOUSE                                             |                                            | Fatty acid-binding protein, adipocyte;<br>Insulin-like growth factor-binding protein 4;                                                      | 3T3-L1 lipid-binding protein;Adipocyte lipid-binding protein;Adipocyte-type fatty acid-binding protein;Fatty acid-binding protein 4;Myelin P2 protein homolog;P15;P2 adipocyte protein;Protein 422;                     |

Table S7, Tholen et al.

| Non Prime Site | Prime Site                 | Modifications                             | Hyperscore | Mass error in ppm | Charge | Precursor neutral mass in Da | Fold change (log <sub>2</sub> ) of ASAPRatio | FC-error of ASAPRatio | Uniprot ID 1 | Uniprot ID 2 | Protein Name 1                                           | Protein Name 2                                                                                                                                                                                      |
|----------------|----------------------------|-------------------------------------------|------------|-------------------|--------|------------------------------|----------------------------------------------|-----------------------|--------------|--------------|----------------------------------------------------------|-----------------------------------------------------------------------------------------------------------------------------------------------------------------------------------------------------|
| KAVLSAEKLR     | DEEVHTGLGELLR              | N-ter +34.06 Da                           | 49.7       | 67.6              | 3      | 1500.90                      | 1.05                                         | 0.12                  | SERPH_MOUSE  |              | Serpin H1;                                               | 47 kDa heat shock protein;Collagen-binding protein;Serine protease inhibitor J6;                                                                                                                    |
| VIGAVVDVQF     | DEGLPPLNALEVQGR            | N-ter +34.06 Da                           | 55.6       | 58.5              | 3      | 1754.08                      | -0.58                                        | 0.06                  | ATPB_MOUSE   |              | ATP synthase subunit beta, mitochondrial;                |                                                                                                                                                                                                     |
| IENHEGVRRF     | DEILEASDGMIVAR             | N-ter +34.06 Da                           | 43.8       | 50.9              | 3      | 1551.88                      | -1.18                                        | 0.08                  | KPYM_MOUSE   |              | Pyruvate kinase isozymes M1/M2;                          | Pyruvate kinase muscle isozyme;                                                                                                                                                                     |
| NFASQMSYGY     | DEKASGVSPGPMGSPGR          | N-ter +28.03 Da, K +28.03 Da              | 26.6       | 85.6              | 3      | 1880.11                      | -0.38                                        | 0.03                  | CO1A1_MOUSE  | F8WGB7_MOUSE | Collagen alpha-1(I) chain;                               | Alpha-1 type I collagen;                                                                                                                                                                            |
| GSQAWHWVQK     | DEPOSQWDKVDVANVYVDVAVKDSGR | N-ter +34.06 Da, K +34.06 Da              | 30.2       | 99.6              | 4      | 3132.00                      | -1.15                                        | 0.18                  | APOA1_MOUSE  | Q8BPD5_MOUSE | Apolipoprotein A-I;                                      | Apolipoprotein A1;                                                                                                                                                                                  |
| ALRAYFERIM     | DEPSPLAK                   | N-ter +28.03 Da, K +28.03 Da              | 20.5       | 118.5             | 2      | 1042.66                      | -3.47                                        | 0.39                  | ACACA_MOUSE  |              | Acetyl-CoA carboxylase 1;                                | ACC-alpha;Acetyl-CoA carboxylase 265;                                                                                                                                                               |
| NYPKDNKRKM     | DETDASSAVKVR               | N-ter +34.06 Da, K +34.06 Da              | 26.3       | 83.3              | 4      | 1507.04                      | -0.01                                        | 0.00                  | TADBP_MOUSE  | Q8R0B4_MOUSE | TAR DNA-binding protein 43;                              |                                                                                                                                                                                                     |
| YGKWFYFVMV     | DEVAPFLTAQATHLR            | N-ter +34.06 Da                           | 21.8       | 67.2              | 4      | 1702.04                      | -2.12                                        | 0.18                  | E9PZQ0_MOUSE |              |                                                          | Williams-Beuren syndrome chromosomal region 1 protein homolog;                                                                                                                                      |
| KFKGCYCFV      | DEVSLKEALTYDGLGDR          | N-ter +34.06 Da, K +34.06 Da              | 61.9       | 58.9              | 3      | 2247.32                      | 0.86                                         | 0.21                  | IF4H_MOUSE   | Q80U88_MOUSE | Eukaryotic translation initiation factor 4H;             | Myostatin;                                                                                                                                                                                          |
| VTDPTRKRRR     | DFGLDCDEHSTESR             | N-ter +28.03 Da, C +57.02 Da              | 57.3       | 76.0              | 3      | 1694.81                      | -0.47                                        | 0.09                  | GDF8_MOUSE   |              | Growth/differentiation factor 8;                         |                                                                                                                                                                                                     |
| SQASDSEGH5     | DFSEGGVAGHAHR              | N-ter +34.06 Da                           | 39.8       | 87.8              | 3      | 1306.76                      | 0.04                                         | 0.00                  | F6TL02_MOUSE | FILA_MOUSE   |                                                          |                                                                                                                                                                                                     |
|                |                            | N-ter +28.03 Da, K +28.03 Da, C +57.02 Da | 21.7       | 88.9              | 4      | 2077.28                      | -0.36                                        | 0.02                  | FABP4_MOUSE  |              | Fatty acid-binding protein, adipocyte;                   | 3T3-L1 lipid-binding protein;Adipocyte lipid-binding protein;Adipocyte-type fatty acid-binding protein;Fatty acid-binding protein 4;Myelin P2 protein homolog;P15;P2 adipocyte protein;Protein 422; |
| GKSTIKRRK      | DGDKLVVECMKGVSTR           | N-ter +28.03 Da, K +28.03 Da, C +57.02 Da | 24.0       | 67.1              | 3      | 1266.78                      | 0.86                                         | 0.10                  | CS043_MOUSE  |              | Uncharacterized protein C19orf43 homolog;                |                                                                                                                                                                                                     |
| VSSGVNLFAN     | DGSFLELFKR                 | N-ter +28.03 Da, K +28.03 Da              | 41.3       | 64.8              | 3      | 1617.90                      | -0.79                                        | 0.04                  | RS21_MOUSE   |              | 40S ribosomal protein S21;                               |                                                                                                                                                                                                     |
| SASNRIIAK      | DHASIQMNVAEVDK             | N-ter +34.06 Da                           | 51.8       | 59.4              | 4      | 1936.14                      | -2.12                                        | 0.28                  | MDHM_MOUSE   |              | Malate dehydrogenase, mitochondrial;                     |                                                                                                                                                                                                     |
| SPLVRLTLTY     | DIAHTPGVAADLSHIETR         | N-ter +34.06 Da                           | 39.6       | 31.4              | 2      | 1324.71                      | -5.64                                        | 0.00                  | CATB_MOUSE   |              | Cathepsin B;                                             | Cathepsin B1;                                                                                                                                                                                       |
| KLPGRVAFGE     | DIDLPETFDAR                | N-ter +34.06 Da                           | 41.5       | 35.9              | 2      | 1282.72                      | 0.56                                         | 0.02                  | CTNB1_MOUSE  | F7CRC6_MOUSE | Catenin beta-1;                                          | Beta-catenin;                                                                                                                                                                                       |
| AWNNETADLGL    | DIGAQAQGEALGYR             | N-ter +28.03 Da, K +28.03 Da, C +57.02 Da | 21.6       | 73.3              | 4      | 2672.55                      | 1.47                                         | 0.12                  | PKHH2_MOUSE  |              | Pleckstrin homology domain-containing family H member 2; |                                                                                                                                                                                                     |
| HCLQGNKIC      | DISKWEQASKEQPGKCEGSR       | N-ter +28.03 Da, K +28.03 Da              | 52.0       | 66.8              | 3      | 2056.13                      | -0.07                                        | 0.01                  | KV5A5_MOUSE  | KV5A6_MOUSE  | Ig kappa chain V-V region T1;                            |                                                                                                                                                                                                     |
| LLLVFPKIC      | DIKMTQSPSSMYASLGER         | N-ter +28.03 Da, K +28.03 Da              | 50.6       | 55.9              | 3      | 1923.18                      | -0.45                                        | 0.08                  | KV5A9_MOUSE  |              | Ig kappa chain V-V region L7;                            |                                                                                                                                                                                                     |
| LLFWIPASRG     | DILLTQSPAILSVSPGER         | N-ter +34.06 Da                           | 48.0       | 37.7              | 3      | 1940.05                      | 0.45                                         | 0.06                  | KV5A7_MOUSE  | KV5A8_MOUSE  | Ig kappa chain V-V region MOPC 41;                       |                                                                                                                                                                                                     |
| LLVWFGARC      | DIQMTQSPSSLSASLGER         | N-ter +28.03 Da, C +57.02 Da              | 46.7       | 65.8              | 3      | 2265.05                      | -0.97                                        | 0.17                  | FBLN1_MOUSE  |              | Fibulin-1;                                               | Basement-membrane protein 90;                                                                                                                                                                       |
| L5LLAARANA     | DISMEACCTDGNQMANQHR        | N-ter +28.03 Da, K +28.03 Da, C +57.02 Da | 34.7       | 32.0              | 2      | 1234.67                      | -1.79                                        | 0.25                  | PPIA_MOUSE   | E9Q1E3_MOUSE | Peptidyl-prolyl cis-trans isomerase A;                   | Cyclophilin A;Cyclosporin A-binding protein;Rotamase A;SP18;                                                                                                                                        |
| MVNPVTFV       | DITADDEPLGR                | N-ter +34.06 Da                           | 44.1       | 72.0              | 4      | 2106.24                      | -0.40                                        | 0.04                  | KV5A1_MOUSE  |              | Ig kappa chain V19-17;                                   | Ig kappa chain V-V region MPC11;                                                                                                                                                                    |
| MLLWLSGVEG     | DIVMTQSHKFMSTSVGDR         | N-ter +34.06 Da, K +34.06 Da              | 48.5       | 62.4              | 3      | 1610.02                      | 0.35                                         | 0.01                  | KCRM_MOUSE   | KCRB_MOUSE   | Creatine kinase M-type;                                  | Creatine kinase M chain;M-CK;                                                                                                                                                                       |
| QQLIDHFLF      | DKPVPPLLLASGMAR            | N-ter +28.03 Da, K +28.03 Da              | 41.9       | 25.7              | 2      | 1311.72                      | -0.30                                        | 0.02                  | KCRM_MOUSE   | KCRB_MOUSE   | Creatine kinase M-type;                                  | Creatine kinase M chain;M-CK;                                                                                                                                                                       |
| LNPDNLQGGD     | DLDPNVVLSRR                | N-ter +34.06 Da                           | 38.2       | 32.6              | 2      | 1264.73                      | 0.82                                         | 0.04                  | KCRM_MOUSE   |              | Creatine kinase M-type;                                  | Creatine kinase M chain;M-CK;                                                                                                                                                                       |
| GDEESTVFK      | DLFPIIQDR                  | N-ter +34.06 Da                           | 32.3       | 39.7              | 2      | 1139.58                      | 0.47                                         | 0.04                  | ALBU_MOUSE   |              | Serum albumin;                                           |                                                                                                                                                                                                     |
| TKVKNKCCHG     | DLLECCADDR                 | N-ter +34.06 Da, C +57.02 Da              | 20.1       | 71.7              | 3      | 1393.99                      | -1.43                                        | 0.16                  | ACON_MOUSE   |              | Aconitate hydratase, mitochondrial;                      | Citrate hydro-lyase;                                                                                                                                                                                |
| HFEPEYIRY      | DLLEKNINIVR                | N-ter +34.06 Da, K +34.06 Da              | 27.8       | 82.5              | 3      | 1287.89                      | 1.39                                         | 0.16                  | Q3U422_MOUSE | NDUV3_MOUSE  |                                                          |                                                                                                                                                                                                     |
| HHDYNTYTF      | DLNLDLSKFR                 | N-ter +34.06 Da, K +34.06 Da              |            |                   |        |                              |                                              |                       |              |              |                                                          |                                                                                                                                                                                                     |
| PTESKDILLV     | DLNSEIDTQNSLR              | N-ter +34.06 Da                           | 39.9       | 51.1              | 3      | 1651.91                      | -0.40                                        | 0.04                  | DAB2_MOUSE   | E9QL31_MOUSE | Disabled homolog 2;                                      | DOC-2;Mitogen-responsive phosphoprotein;                                                                                                                                                            |
|                |                            | N-ter +34.06 Da                           | 44.3       | 3.2               | 2      | 1184.68                      | -0.86                                        | 0.02                  | LEG3_MOUSE   | Q8C253_MOUSE | Galectin-3;                                              | 35 kDa lectin;Carbohydrate-binding protein 35;Galactose-specific lectin 3;IgE-binding protein;L-34 galactoside-binding lectin;Laminin-binding protein;Lectin L-29;Mac-2 antigen;                    |
| CPRWTAVPY      | DLPLPGVMR                  | N-ter +34.06 Da                           |            |                   |        |                              |                                              |                       |              |              |                                                          | Leukemia-associated gene protein;Leukemia-associated phosphoprotein p18;Metablastin;Oncoprotein 18;Phosphoprotein p19;Protein Pr22;pp17;                                                            |
|                |                            | N-ter +28.03 Da, K +28.03 Da              | 47.0       | 59.8              | 3      | 1652.11                      | 0.28                                         | 0.12                  | A2M_MOUSE    | D3YW52_MOUSE | Alpha-2-macroglobulin;                                   | Pregnancy zone protein;                                                                                                                                                                             |
| PRTLASPKKK     | DLSEEEIQKLEAAEER           | N-ter +28.03 Da, K +28.03 Da              | 49.4       | 40.3              | 2      | 1265.69                      | 0.28                                         | 0.03                  | A2M_MOUSE    | D3YW52_MOUSE | Alpha-2-macroglobulin;                                   | Pregnancy zone protein;                                                                                                                                                                             |
| LTSESSRPTR     | DLSSSDLTASKIVK             | N-ter +34.06 Da, K +34.06 Da              |            |                   |        |                              |                                              |                       |              |              |                                                          |                                                                                                                                                                                                     |
| LTSESSRPTR     | DLSSSDLTASK                | N-ter +28.03 Da, K +28.03 Da              |            |                   |        |                              |                                              |                       |              |              |                                                          |                                                                                                                                                                                                     |
|                |                            | N-ter +34.06 Da, K +34.06 Da, C +57.02 Da | 53.9       | 49.3              | 3      | 1925.16                      | 0.58                                         | 0.08                  | Q9D1B1_MOUSE |              |                                                          |                                                                                                                                                                                                     |
| RKTRVSGEHM     | DLTTCPLAAGGQQEKLK          | N-ter +34.06 Da, K +34.06 Da, C +57.02 Da | 19.3       | 68.1              | 4      | 1797.18                      | -0.52                                        | 0.07                  | TETN_MOUSE   | Q8CFZ6_MOUSE | Tetranectin;                                             | C-type lectin domain family 3 member B;Plasminogen kringle 4-binding protein;                                                                                                                       |
| KAKKAANAKK     | DLVSKMFEELKNR              | N-ter +34.06 Da, K +34.06 Da              | 27.4       | 49.6              | 3      | 1677.88                      | -0.43                                        | 0.08                  | OLFL3_MOUSE  |              | Olfactomedin-like protein 3;                             |                                                                                                                                                                                                     |
| KGKGRNREKY     | DMVYDCSYTVAQVR             | N-ter +34.06 Da, C +57.02 Da              | 39.6       | 34.4              | 2      | 1234.67                      | 0.47                                         | 0.01                  | ARC1B_MOUSE  | F6THG2_MOUSE | Actin-related protein 2/3 complex subunit 1B;            | Arp2/3 complex 41 kDa subunit;p41-ARC;                                                                                                                                                              |
| HDCFPVLFY      | DNAAVTL5FGGR               | N-ter +28.03 Da                           | 50.8       | 90.8              | 4      | 2068.29                      | 0.76                                         | 0.10                  | KCRM_MOUSE   |              | Creatine kinase M-type;                                  | Creatine kinase M chain;M-CK;                                                                                                                                                                       |
| WPDARGIWHN     | DNKSFLVWVNEEDHLR           | N-ter +34.06 Da, K +34.06 Da              | 36.5       | 50.5              | 4      | 1936.10                      | 0.74                                         | 0.05                  | LUM_MOUSE    |              | Lumican;                                                 | Keratan sulfate proteoglycan lumican;                                                                                                                                                               |
| LPTSLTLTYL     | DNKISNIPDEYFKR             | N-ter +28.03 Da, K +28.03 Da              |            |                   |        |                              |                                              |                       |              |              |                                                          | CRP55;Calregulin;Endoplasmic reticulum resident protein 60;HACBP;                                                                                                                                   |
| LLGLLGLAAA     | DPAIYKEQFLDGAWNTNR         | N-ter +28.03 Da, K +28.03 Da              | 30.3       | 70.7              | 3      | 2341.30                      | -0.43                                        | 0.11                  | CALR_MOUSE   |              | Calreticulin;                                            | Countertryptin;Fetuin-A;                                                                                                                                                                            |
| LLTACLASRA     | DPASTLPDIQVQENFSESR        | N-ter +34.06 Da                           | 46.4       | 35.9              | 3      | 2166.14                      | 0.39                                         | 0.02                  | AMBP_MOUSE   |              | Protein AMBP;                                            | Lysosomal acid alpha-mannosidase;Mannosidase alpha class 2B member 1;Mannosidase alpha-B;                                                                                                           |
| VPTANAALPA     | DPPASVVVGPVVVPR            | N-ter +34.06 Da                           | 41.8       | 44.4              | 3      | 1520.98                      | 1.77                                         | 0.06                  | FETUA_MOUSE  |              | Alpha-2-HS-glycoprotein;                                 | Complement factor P;                                                                                                                                                                                |
|                |                            | N-ter +34.06 Da, K +34.06 Da              | 27.2       | 70.6              | 3      | 1554.02                      | 0.76                                         | 0.06                  | MA2B1_MOUSE  |              | Lysosomal alpha-mannosidase;                             |                                                                                                                                                                                                     |
| PTSYPEPSKL     | DPTSVTLKPMER               | N-ter +34.06 Da, K +34.06 Da              | 54.8       | 57.3              | 3      | 1820.95                      | 0.49                                         | 0.01                  | PROP_MOUSE   |              | Properdin;                                               |                                                                                                                                                                                                     |
| LLVILPATGS     | DPVLCFTQYEESGR             | N-ter +34.06 Da, C +57.02 Da              |            |                   |        |                              |                                              |                       |              |              |                                                          |                                                                                                                                                                                                     |

Table S7, Tholen et al.

| Non Prime Site | Prime Site                 | Modifications                             | Hyperscore | Mass error in ppm | Charge | Precursor neutral mass in Da | Fold change (log <sub>2</sub> ) of ASAPRatio | FC-error of ASAPRatio | Uniprot ID 1 | Uniprot ID 2 | Protein Name 1                                                                                    | Protein Name 2                                                                                                                                                                  |
|----------------|----------------------------|-------------------------------------------|------------|-------------------|--------|------------------------------|----------------------------------------------|-----------------------|--------------|--------------|---------------------------------------------------------------------------------------------------|---------------------------------------------------------------------------------------------------------------------------------------------------------------------------------|
| SWASRNEAAP     | DQDEIDCLPLAKQPSFR          | N-ter +28.03 Da, K +28.03 Da, C +57.02 Da | 46.9       | 46.1              | 3      | 2144.16                      | -0.11                                        | 0.01                  | PPGB_MOUSE   | A2A5J9_MOUSE | Lysosomal protective protein;                                                                     | Carboxypeptidase C;Carboxypeptidase L;Cathepsin A;Protective protein cathepsin A;Protective protein for beta-galactosidase; Adenylate kinase 3;Adenylate kinase 3 alpha-like 1; |
| EIGVLAKTFI     | DQGLKIPDDVMTR              | N-ter +34.06 Da, K +34.06 Da              | 31.9       | 59.3              | 3      | 1554.96                      | -0.11                                        | 0.01                  | KAD3_MOUSE   |              | GTP:AMP phosphotransferase, mitochondrial; Membrane-associated progesterone receptor component 1; |                                                                                                                                                                                 |
| IFLLYKIVRG     | DQPASGDNDDDEPPPLPR         | N-ter +28.03 Da                           | 30.3       | 58.6              | 3      | 2019.00                      | 0.08                                         | 0.00                  | PGRC1_MOUSE  | Q3TFP8_MOUSE | Plasminogen activator inhibitor 1 RNA-binding protein;                                            | PAI1 RNA-binding protein 1;SERPINE1 mRNA-binding protein 1;                                                                                                                     |
| EGIRRVRRP      | DQQLQGDGKLIARR             | N-ter +28.03 Da, K +28.03 Da              | 17.0       | 91.1              | 4      | 1697.08                      | 0.38                                         | 0.01                  | PAIRB_MOUSE  |              | Plasminogen activator inhibitor 1 RNA-binding protein;                                            | PAI1 RNA-binding protein 1;SERPINE1 mRNA-binding protein 1;                                                                                                                     |
| EGIRRVRRP      | DQQLQGDGKLIARR             | N-ter +34.06 Da, K +34.06 Da              | 26.6       | 66.1              | 3      | 1552.99                      | 0.43                                         | 0.06                  | PAIRB_MOUSE  |              | Plasminogen activator inhibitor 1 RNA-binding protein;                                            | Alpha-1 protease inhibitor 1;Alpha-1-antiprotease;Serine protease inhibitor 1-1;Serine protease inhibitor A1a;                                                                  |
| DVQETDTSQK     | DQSPASHEIATNLGDFAIISLYR    | N-ter +34.06 Da                           | 63.2       | 48.5              | 3      | 2438.35                      | 0.00                                         | 0.00                  | A1AT1_MOUSE  | A1AT2_MOUSE  | Alpha-1-antitrypsin 1-1;                                                                          |                                                                                                                                                                                 |
| DVQETDTSQK     | DQSPASHEIATNLGDFALR        | N-ter +28.03 Da                           | 51.7       | 57.5              | 3      | 2069.14                      | 0.03                                         | 0.00                  | A1AT4_MOUSE  |              | Alpha-1-antitrypsin 1-4; Myosin regulatory light chain 2, skeletal muscle isoform;                | Alpha-1 protease inhibitor 4;Serine protease inhibitor 1-4;Serine protease inhibitor A1d;                                                                                       |
| EGSSNVFSMF     | DQTQIQEFKEAFTVIDQNR        | N-ter +34.06 Da, K +34.06 Da              | 42.2       | 71.2              | 4      | 2377.42                      | 0.16                                         | 0.04                  | MLRS_MOUSE   | F6ULR7_MOUSE | Collagen alpha-2(I) chain;                                                                        | Fast skeletal myosin light chain 2;MLC2F;                                                                                                                                       |
| GAPGPAGASG     | DRGEAGAAGPSGPAGPR          | N-ter +34.06 Da                           | 52.9       | 68.5              | 3      | 1555.90                      | 1.31                                         | 0.23                  | CO1A2_MOUSE  | E9Q6U9_MOUSE | Collagen alpha-1(I) chain;                                                                        | Alpha-2 type I collagen;                                                                                                                                                        |
| GPVGPAGKNG     | DRGETGAGPAGPIGPAGAR        | N-ter +28.03 Da                           | 55.5       | 66.2              | 3      | 1831.06                      | 2.24                                         | 0.14                  | CO1A1_MOUSE  | F8WGB7_MOUSE | Collagen alpha-1(I) chain;                                                                        | Alpha-1 type I collagen;                                                                                                                                                        |
| MHR            | DSCPLDKVYVYVNLGNNGNKTELER  | N-ter +34.06 Da, K +34.06 Da, C +57.02 Da | 25.2       | 57.2              | 4      | 2953.68                      | -1.03                                        | 0.13                  | SRSF3_MOUSE  |              | Serine/arginine-rich splicing factor 3; MKI67 FHA domain-interacting nucleolar phosphoprotein;    | Pre-mRNA-splicing factor SRP20;Protein X16;Splicing factor, arginine/serine-rich 3; Nucleolar protein interacting with the FHA domain of pK1-67;                                |
| KPKNIAVAHR     | DSEGNQVLDPQKEGLSGEPRR      | N-ter +28.03 Da, K +28.03 Da              | 19.9       | 54.5              | 4      | 2366.31                      | 0.68                                         | 0.04                  | MKG71_MOUSE  |              | ATPase inhibitor, mitochondrial;                                                                  | Inhibitor of F(1)F(o)-ATPase;                                                                                                                                                   |
| QTRGFVSDSS     | DSMDTGAGSIR                | N-ter +34.06 Da                           | 39.9       | 62.3              | 2      | 1142.62                      | 1.06                                         | 0.03                  | ATIF1_MOUSE  | Q9D879_MOUSE | ATPase inhibitor, mitochondrial;                                                                  |                                                                                                                                                                                 |
| PRQPSQSS       | DSQVHSGVQVEGR              | N-ter +34.06 Da                           | 47.6       | 76.1              | 3      | 1430.84                      | 0.88                                         | 0.08                  | F6TL02_MOUSE | FILA_MOUSE   | ATPase inhibitor, mitochondrial;                                                                  |                                                                                                                                                                                 |
| KVLQTRGFVS     | DSSDSMDTGAGSIR             | N-ter +28.03 Da                           | 53.2       | 47.9              | 2      | 1425.67                      | 1.14                                         | 0.11                  | ATIF1_MOUSE  | Q9D879_MOUSE | ATPase inhibitor, mitochondrial;                                                                  | Inhibitor of F(1)F(o)-ATPase;                                                                                                                                                   |
| DVEPDTYCRY     | DSVSFVNGAVSDSDSKR          | N-ter +34.06 Da, K +34.06 Da              | 72.1       | 59.1              | 3      | 1750.02                      | -0.23                                        | 0.03                  | PCOC1_MOUSE  | D3ZE3_MOUSE  | Procollagen C-endopeptidase enhancer 1;                                                           | P14;Procollagen COOH-terminal proteinase enhancer 1;Type 1 procollagen C-proteinase enhancer protein;Type I procollagen COOH-terminal proteinase enhancer;                      |
| QGVVMVGMGQK    | DSYVGDEAOSKR               | N-ter +34.06 Da, K +34.06 Da              | 38.7       | 85.1              | 3      | 1421.86                      | -1.15                                        | 0.13                  | ACTC_MOUSE   | ACTA_MOUSE   | Actin, alpha cardiac muscle 1;                                                                    | Alpha-cardiac actin;                                                                                                                                                            |
| LATLVQRQYGG    | DTDGFNLEDALKETSSVKQR       | N-ter +28.03 Da, K +28.03 Da              | 21.2       | 101.2             | 4      | 2336.42                      | -1.94                                        | 0.22                  | C99L2_MOUSE  |              | CD99 antigen-like protein 2;                                                                      | MIC2-like protein 1;                                                                                                                                                            |
| ARHGFLPRHR     | DTGLDISGR                  | N-ter +34.06 Da                           | 36.9       | 19.9              | 2      | 1079.63                      | 0.68                                         | 0.07                  | MBP_MOUSE    | F7A0B0_MOUSE | Myelin basic protein;                                                                             | Myelin A1 protein;                                                                                                                                                              |
| CDYNKFMVSVL    | DTNKDCEVDFGEYVR            | N-ter +28.03 Da, K +28.03 Da, C +57.02 Da | 40.8       | 77.3              | 3      | 1901.99                      | -0.03                                        | 0.01                  | S10A3_MOUSE  |              | Protein S100-A3;                                                                                  | Protein S-100E;S100 calcium-binding protein A3;                                                                                                                                 |
| CPPPESKRRR     | DTQSNELIEINPQTEGKVVYTR     | N-ter +28.03 Da, K +28.03 Da              | 56.8       | 74.1              | 4      | 2490.44                      | 0.41                                         | 0.05                  | COGA1_MOUSE  | A3KFV3_MOUSE | Collagen alpha-1(XVI) chain;                                                                      |                                                                                                                                                                                 |
| IMEKGELVPL     | DTVLDMLR                   | N-ter +28.03 Da                           | 25.6       | 59.0              | 2      | 989.58                       | 0.66                                         | 0.03                  | KAD1_MOUSE   |              | Adenylate kinase isoenzyme 1;                                                                     | ATP-AMP transphosphorylase 1;Myokinase;                                                                                                                                         |
| PEEYVSPNSE     | DVGVEGPKDGPQGPGR           | N-ter +34.06 Da, K +34.06 Da              | 33.6       | 68.5              | 3      | 1729.06                      | 0.83                                         | 0.11                  | CO1A1_MOUSE  | F8WGB7_MOUSE | Collagen alpha-1(I) chain;                                                                        | Alpha-1 type I collagen;                                                                                                                                                        |
| VDTNTQSACF     | DVIDQKSLPTSAEER            | N-ter +28.03 Da, K +28.03 Da, C +57.02 Da | 49.9       | 58.9              | 3      | 1743.01                      | 0.41                                         | 0.01                  | PRC2C_MOUSE  | E9QKG5_MOUSE | Protein PRRC2C;                                                                                   | BAT2 domain-containing protein 1;HLA-B-associated transcript 2-like 2;Proline-rich and coiled-coil-containing protein 2C;                                                       |
| KDYGKESQAK     | DVIEEYFKCK                 | N-ter +34.06 Da                           | 21.2       | 99.1              | 4      | 1594.13                      | -3.32                                        | 0.33                  | RS12_MOUSE   | D3Z6B6_MOUSE | 40S ribosomal protein S12;                                                                        |                                                                                                                                                                                 |
| LTKYKTLG       | DVPVVADPTVNVTVTR           | N-ter +34.06 Da                           | 47.8       | 57.6              | 3      | 1812.13                      | -0.52                                        | 0.03                  | GDIR2_MOUSE  |              | Rho GDP-dissociation inhibitor 2;                                                                 | D4;Rho-GDI beta;                                                                                                                                                                |
| LVLLKGVQC      | DVQLVESGGGLVQPGGSR         | N-ter +34.06 Da                           | 50.8       | 39.4              | 3      | 1788.03                      | 3.69                                         | 0.37                  | HVM16_MOUSE  |              | Ig heavy chain V region MOPC 21;                                                                  |                                                                                                                                                                                 |
| SVGDGETVEF     | DVVEGEKGAEEANVTGDPGVPEVGSR | N-ter +34.06 Da, K +34.06 Da              | 58.2       | 79.8              | 4      | 2606.55                      | 0.90                                         | 0.15                  | DBPA_MOUSE   | F6TIF5_MOUSE | DNA-binding protein A;                                                                            | Cold shock domain-containing protein A;Y-box protein 3;                                                                                                                         |
| TDKRLRPLQ      | DVYKIGGIGTVPVGR            | N-ter +28.03 Da, K +28.03 Da              | 57.2       | 64.3              | 3      | 1586.02                      | -0.14                                        | 0.01                  | EF1A1_MOUSE  | EF1A2_MOUSE  | Elongation factor 1-alpha 1;                                                                      | Elongation factor Tu;Eukaryotic elongation factor 1 A-1;                                                                                                                        |
| LVFAPVGVQS     | DWLSISLPHR                 | N-ter +34.06 Da                           | 40.8       | 72.6              | 3      | 1256.80                      | -0.49                                        | 0.03                  | Q9EQY5_MOUSE | D3YYJ5_MOUSE |                                                                                                   | Glycine- and tyrosine-rich RNA-binding protein;NS1-associated protein 1;Synaptotagmin-binding, cytoplasmic RNA-interacting protein;pp68;                                        |
| GKLERVKKLK     | DYAFIHFDER                 | N-ter +34.06 Da                           | 36.6       | 60.1              | 3      | 1345.73                      | -1.94                                        | 0.22                  | HNRPO_MOUSE  |              | Heterogeneous nuclear ribonucleoprotein Q;                                                        |                                                                                                                                                                                 |
| ILGGVISALS     | EAAAQYNPEPPPPR             | N-ter +28.03 Da                           | 29.2       | 59.9              | 3      | 1563.86                      | 1.15                                         | 0.03                  | CPNS1_MOUSE  | D3YW48_MOUSE | Calpain small subunit 1;                                                                          | Calcium-activated neutral proteinase small subunit;Calcium-dependent protease small subunit;Calcium-dependent protease small subunit 1;Calpain regulatory subunit;              |
| DGSASGTLL      | EALDCILPPTRPDKPLR          | N-ter +34.06 Da, K +34.06 Da, C +57.02 Da | 33.2       | 63.8              | 4      | 2159.38                      | 1.49                                         | 0.04                  | EF1A1_MOUSE  | D3Y268_MOUSE | Elongation factor 1-alpha 1;                                                                      | Elongation factor Tu;Eukaryotic elongation factor 1 A-1;                                                                                                                        |
| EGNASGVSL      | EALDTLPPTRPTDKPLR          | N-ter +28.03 Da, K +28.03 Da              | 30.4       | 81.4              | 4      | 2088.36                      | 1.16                                         | 0.02                  | EF1A2_MOUSE  | B7ZBW3_MOUSE | Elongation factor 1-alpha 2;                                                                      | Eukaryotic elongation factor 1 A-2;Statin-S1;                                                                                                                                   |
| VLDPMYSTYL     | EALGIKGTIPPEYR             | N-ter +28.03 Da, K +28.03 Da              | 33.5       | 75.4              | 3      | 1728.08                      | -2.84                                        | 0.00                  | ICAL_MOUSE   | Q921U7_MOUSE | Calpastatin;                                                                                      | Calpain inhibitor;                                                                                                                                                              |
| GSYIYEKPT      | EAPQVTGPIEVVVR             | N-ter +28.03 Da                           | 30.4       | 29.1              | 3      | 1617.96                      | 1.25                                         | 0.11                  | CRIP2_MOUSE  |              | Cysteine-rich protein 2;                                                                          | Heart LIM protein;                                                                                                                                                              |
| PISARLYAR      | EATQAVLDKPELSSDASTR        | N-ter +28.03 Da, K +28.03 Da              | 37.3       | 60.7              | 3      | 2174.24                      | 1.00                                         | 0.12                  | ACADV_MOUSE  |              | Very long-chain specific acyl-CoA dehydrogenase, mitochondrial;                                   | MVLCAD;                                                                                                                                                                         |

Table S7, Tholen et al.

| Non Prime Site | Prime Site                  | Modifications                                          | Hyperscore | Mass error in ppm | Charge | Precursor neutral mass in Da | Fold change (log <sub>2</sub> ) of ASAPRatio | FC-error of ASAPRatio | Uniprot ID 1 | Uniprot ID 2 | Protein Name 1                                                                                            | Protein Name 2                                                                                                                                                    |
|----------------|-----------------------------|--------------------------------------------------------|------------|-------------------|--------|------------------------------|----------------------------------------------|-----------------------|--------------|--------------|-----------------------------------------------------------------------------------------------------------|-------------------------------------------------------------------------------------------------------------------------------------------------------------------|
| GTEAAATVF      | EAVPMSMPPILR                | N-ter +34.06 Da                                        | 24.9       | 53.3              | 3      | 1373.84                      | -0.30                                        | 0.02                  | A1AT2_MOUSE  |              |                                                                                                           | Alpha-1 protease inhibitor 2;Alpha-1-antitrypsinase;Serine protease inhibitor 1-2;Serine protease inhibitor A1b;                                                  |
| LGTPRLGVQ      | EDGLDFPEYDGVDR              | N-ter +34.06 Da                                        | 48.5       | 36.6              | 2      | 1659.81                      | -0.92                                        | 0.09                  | CASQ1_MOUSE  | E9Q489_MOUSE | Calsequestrin-1;                                                                                          | Calsequestrin, skeletal muscle isoform; Eukaryotic initiation factor 5A isoform 1;eIF-4D;                                                                         |
| GTDIPTGKY      | EDICPSTHNDVPIK              | N-ter +34.06 Da, K +34.06 Da, C +57.02 Da              | 47.9       | 69.9              | 4      | 2093.21                      | 1.59                                         | 0.16                  | IF5A1_MOUSE  | IF5A2_MOUSE  | Eukaryotic translation initiation factor 5A-1;                                                            | Cathepsin B1;                                                                                                                                                     |
| PKLPGRVAF      | EDIDLPEFDAR                 | N-ter +34.06 Da                                        | 30.3       | 25.5              | 2      | 1453.75                      | -5.64                                        | 0.00                  | CATB_MOUSE   |              | Cathepsin B;                                                                                              | Alpha-1 type I collagen;                                                                                                                                          |
| GATALLTHGQ     | EDIPEVSCIHNGLR              | N-ter +34.06 Da, C +57.02 Da                           | 45.4       | 78.9              | 3      | 1671.98                      | -0.92                                        | 0.09                  | CO1A1_MOUSE  | F8WGB7_MOUSE | Collagen alpha-1(I) chain;                                                                                |                                                                                                                                                                   |
| TLTAVHDAIL     | EDLVFSEIVGKR                | N-ter +34.06 Da, K +34.06 Da                           | 52.7       | 75.7              | 3      | 1556.04                      | 0.58                                         | 0.05                  | RS7_MOUSE    | F6SVV1_MOUSE | 40S ribosomal protein S7;                                                                                 |                                                                                                                                                                   |
| KVSSGTPKI      | EDPNQFVPLNTNPTVELEKR        | N-ter +34.06 Da, K +34.06 Da                           | 32.9       | 59.9              | 3      | 2407.45                      | -0.86                                        | 0.13                  | ADDG_MOUSE   |              | Gamma-adducin;                                                                                            | Adducin-like protein 70;                                                                                                                                          |
| LGTLPARAAH     | EDPVEKIVIEGFSR              | N-ter +34.06 Da, K +34.06 Da                           | 28.5       | 84.9              | 3      | 1572.02                      | 0.51                                         | 0.01                  | SBSN_MOUSE   | E9QPB2_MOUSE | Suprabasin;                                                                                               |                                                                                                                                                                   |
| HSDASKRLI      | EDTEDWRPR                   | N-ter +34.06 Da                                        | 14.5       | 93.0              | 3      | 1236.71                      | 2.50                                         | 0.14                  | PDU15_MOUSE  | Q9CRA2_MOUSE | PDZ and LIM domain protein 5;                                                                             | Enigma homolog;Enigma-like PDZ and LIM domains protein;                                                                                                           |
| RVLKEDKERW     | EDVKEEMTSALATMR             | N-ter +28.03 Da, K +28.03 Da                           | 41.5       | 82.2              | 3      | 1766.00                      | -1.69                                        | 0.38                  | MAPK2_MOUSE  |              | MAP kinase-activated protein kinase 2;                                                                    |                                                                                                                                                                   |
| TAKQTGHTLL     | EDYQIVERPQR                 | N-ter +28.03 Da                                        | 20.3       | 51.5              | 3      | 1459.82                      | -0.23                                        | 0.01                  | SPG20_MOUSE  |              | Spartin;                                                                                                  |                                                                                                                                                                   |
| DMLEEQTAF      | EDYVQSMVDAAFNK              | N-ter +34.06 Da, K +34.06 Da, C +57.02 Da              | 40.0       | 64.6              | 3      | 1797.04                      | -1.15                                        | 0.08                  | EF1B_MOUSE   |              | Elongation factor 1-beta;                                                                                 |                                                                                                                                                                   |
| SGLLLTQTG      | EEAQEIDCNDEAVFQAVDASLKLINAR | N-ter +34.06 Da, K +34.06 Da, C +57.02 Da              | 49.6       | 93.2              | 4      | 3164.95                      | -1.84                                        | 0.26                  | Q65913_MOUSE | Q65912_MOUSE |                                                                                                           |                                                                                                                                                                   |
| IDSHFEARKK     | EEEELIALKER                 | N-ter +28.03 Da, K +28.03 Da                           | 24.1       | 68.1              | 3      | 1413.87                      | -1.43                                        | 0.12                  | TNNT3_MOUSE  | A2A6J0_MOUSE | Troponin T, fast skeletal muscle;                                                                         | Fast skeletal muscle troponin T; 2-phospho-D-glycerate hydro-lyase;Enolase 1;Non-neural enolase; 140 kDa Ser/Arg-rich domain protein;U2-associated protein SR140; |
| LAKYNQLRI      | EELGSKAKFAGR                | N-ter +34.06 Da, K +34.06 Da                           | 14.7       | 83.4              | 4      | 1523.05                      | 0.14                                         | 0.01                  | ENOA_MOUSE   | Q6PHC1_MOUSE | Alpha-enolase;                                                                                            |                                                                                                                                                                   |
| EDEKAAEYF      | EEFLAFAEGSDGNKVTFR          | N-ter +28.03 Da, K +28.03 Da                           | 39.0       | 57.9              | 4      | 2327.35                      | 0.29                                         | 0.02                  | SR140_MOUSE  | E9QM87_MOUSE | U2 snRNP-associated SURP motif-containing protein;                                                        |                                                                                                                                                                   |
| DLLEEITKF      | EEHVQSDVIAAFNK              | N-ter +34.06 Da, K +34.06 Da                           | 44.6       | 70.3              | 3      | 1767.11                      | -3.64                                        | 0.46                  | D3YV68_MOUSE | Q80T06_MOUSE |                                                                                                           |                                                                                                                                                                   |
| GHACTQKFSN     | EIAMATVTLAR                 | N-ter +34.06 Da                                        | 41.7       | 17.5              | 2      | 1337.77                      | 0.20                                         | 0.01                  | ALDOA_MOUSE  | ALDOC_MOUSE  | Fructose-bisphosphate aldolase A;                                                                         | Aldolase 1;Muscle-type aldolase;                                                                                                                                  |
| MPCKI          | EEIKFLLTAR                  | N-ter +28.03 Da, K +28.03 Da                           | 33.9       | 75.2              | 3      | 1389.89                      | 0.31                                         | 0.03                  | RL38_MOUSE   |              | 60S ribosomal protein L38;                                                                                |                                                                                                                                                                   |
| LULSGELYA      | EEKQCFPTVENGR               | N-ter +34.06 Da, K +34.06 Da, C +57.02 Da              | 34.0       | 53.9              | 3      | 1775.97                      | -0.12                                        | 0.01                  | F13B_MOUSE   | B1AY02_MOUSE | Coagulation factor XIII B chain;                                                                          | Protein-glutamine gamma-glutamyltransferase B chain;Transglutaminase B chain;                                                                                     |
| FSETLTRAKF     | EELNMDLFR                   | N-ter +28.03 Da                                        | 26.9       | 44.9              | 2      | 1193.63                      | -1.40                                        | 0.15                  | GRP78_MOUSE  |              | 78 kDa glucose-regulated protein;                                                                         | Heat shock 70 kDa protein 5;immunoglobulin heavy chain-binding protein;                                                                                           |
| PHLHYSKEAF     | EEMEGTSPSPHVSAR             | N-ter +28.03 Da                                        | 52.2       | 70.8              | 3      | 1824.96                      | 0.31                                         | 0.03                  | E9Q056_MOUSE | E9Q6Y2_MOUSE |                                                                                                           |                                                                                                                                                                   |
| LIVKDEKSLV     | EEQLPDGKGLQGR               | N-ter +34.06 Da, K +34.06 Da                           | 17.7       | 87.7              | 4      | 1686.16                      | -0.18                                        | 0.01                  | TITIN_MOUSE  | E9Q8M7_MOUSE | Titin;                                                                                                    | Connectin;                                                                                                                                                        |
| ERGNPVIQW      | EEVEDASEEAPLRDR             | N-ter +34.06 Da                                        | 37.1       | 69.8              | 3      | 1777.98                      | 0.00                                         | 0.00                  | SRCA_MOUSE   |              | Sarcalumenin;                                                                                             |                                                                                                                                                                   |
| ERGNPVIQW      | EEVEDASEEAPLR               | N-ter +34.06 Da                                        | 46.5       | 56.9              | 3      | 1506.81                      | 2.17                                         | 0.21                  | SRCA_MOUSE   |              | Sarcalumenin;                                                                                             |                                                                                                                                                                   |
| FRHACVPVDF     | EEVHVSSNADEEDIR             | N-ter +34.06 Da                                        | 58.3       | 78.2              | 3      | 1761.96                      | 1.01                                         | 0.25                  | IDHG1_MOUSE  | Q3TKM5_MOUSE | Isocitrate dehydrogenase [NAD] subunit gamma 1, mitochondrial;                                            | Isocitric dehydrogenase subunit gamma;NAD(+)-specific ICDH subunit gamma;                                                                                         |
| DQNSSGPDAY     | EEVTDGAQTGGGLFNLR           | N-ter +28.03 Da                                        | 54.2       | 38.9              | 3      | 1790.95                      | 0.28                                         | 0.03                  | PTN18_MOUSE  |              | Tyrosine-protein phosphatase non-receptor type 18;                                                        | Fetal liver phosphatase 1;PTP-K1;                                                                                                                                 |
| KYRSQHIIPL     | EEVTLEPLTELQAKNR            | N-ter +28.03 Da, K +28.03 Da                           | 52.0       | 75.8              | 3      | 2022.25                      | 0.73                                         | 0.08                  | PKHF1_MOUSE  |              | Pleckstrin homology domain-containing family F member 1;                                                  | Lysosome-associated apoptosis-inducing protein containing PH and FYVE domains;                                                                                    |
| TEEHLRDYF      | EEYKIDTIEITDR               | N-ter +34.06 Da, K +34.06 Da                           | 32.7       | 70.0              | 3      | 1862.16                      | 2.10                                         | 0.23                  | ROA2_MOUSE   | F6U106_MOUSE | Heterogeneous nuclear ribonucleoproteins A2/B1; Myosin regulatory light chain 2, skeletal muscle isoform; | Fast skeletal myosin light chain 2;MLC2F;                                                                                                                         |
| FSMFDQTIQ      | EFKEAFTVIDQNR               | N-ter +34.06 Da, K +34.06 Da                           | 33.6       | 80.0              | 3      | 1664.05                      | 0.10                                         | 0.01                  | MLRS_MOUSE   | F6ULR7_MOUSE |                                                                                                           |                                                                                                                                                                   |
| RLSLESEGAN     | EGATAAPELSALEAFRR           | N-ter +34.06 Da                                        | 25.4       | 75.5              | 3      | 1951.17                      | -0.52                                        | 0.11                  | TPPP_MOUSE   |              | Tubulin polymerization-promoting protein;                                                                 |                                                                                                                                                                   |
| RLSLESEGAN     | EGATAAPELSALEAFR            | N-ter +28.03 Da                                        | 49.0       | 35.2              | 2      | 1788.95                      | 0.25                                         | 0.05                  | TPPP_MOUSE   |              | Tubulin polymerization-promoting protein;                                                                 |                                                                                                                                                                   |
| IIRNVKGPVQ     | EGDVLTLLESER                | N-ter +28.03 Da                                        | 38.2       | 24.8              | 2      | 1387.75                      | 0.44                                         | 0.03                  | RS28_MOUSE   | D3YVD9_MOUSE | 40S ribosomal protein S28;                                                                                |                                                                                                                                                                   |
| GVSEQASDS      | EGHSDFSEGOAVGAHR            | N-ter +34.06 Da                                        | 44.0       | 87.7              | 4      | 1716.95                      | 1.29                                         | 0.17                  | F78V11_MOUSE | FILA_MOUSE   |                                                                                                           |                                                                                                                                                                   |
| KKAGHPFMWN     | EHLGYVLTCPSNLTGLR           | N-ter +34.06 Da, C +57.02 Da                           | 55.3       | 72.6              | 3      | 2020.21                      | 0.01                                         | 0.00                  | KCRM_MOUSE   |              | Creatine kinase M-type;                                                                                   | Creatine kinase M chain;M-CK;                                                                                                                                     |
| DAYGPPSNFL     | EIDVSNPQTVGVGR              | N-ter +34.06 Da                                        | 23.1       | 41.0              | 3      | 1503.87                      | 0.36                                         | 0.01                  | SNX3_MOUSE   | Q78ZM0_MOUSE | Sorting nexin-3;                                                                                          | SDP3 protein;                                                                                                                                                     |
| LARELSGTH      | EILGTAQSGVCNDVGR            | N-ter +28.03 Da, C +57.02 Da                           | 45.3       | 62.3              | 3      | 1702.94                      | 0.29                                         | 0.03                  | RL12_MOUSE   |              | 60S ribosomal protein L12;                                                                                |                                                                                                                                                                   |
| DPLNNGRTL      | EIPGSSDPNIPDGDVSLVR         | N-ter +34.06 Da                                        | 36.7       | 47.5              | 3      | 2234.23                      | 0.59                                         | 0.04                  | CO4B_MOUSE   |              | Complement C4-B;                                                                                          |                                                                                                                                                                   |
| YPGIADRMQK     | EITALAPSTMKIIAPP            | N-ter +34.06 Da, K +34.06 Da                           | 21.9       | 80.1              | 4      | 2280.62                      | 1.23                                         | 0.05                  | ACTS_MOUSE   | ACTA_MOUSE   | Actin, alpha skeletal muscle;                                                                             | Alpha-actin-1;                                                                                                                                                    |
| NLVKTNCDLY     | EKLGEYGFQNAIVR              | N-ter +28.03 Da, K +28.03 Da                           | 42.9       | 67.6              | 3      | 1792.11                      | -0.58                                        | 0.03                  | ALBU_MOUSE   |              | Serum albumin;                                                                                            |                                                                                                                                                                   |
| LAVLPTTTA      | EKNQIDIVSLTVDSR             | N-ter +34.06 Da, K +34.06 Da                           | 42.8       | 59.7              | 3      | 1777.10                      | 1.29                                         | 0.10                  | Q9BKB8_MOUSE | Q8C7G9_MOUSE |                                                                                                           |                                                                                                                                                                   |
| KLPSLAFLYM     | EKNQLEEVPSALPR              | N-ter +34.06 Da, K +34.06 Da                           | 48.0       | 44.2              | 3      | 1677.05                      | 0.38                                         | 0.03                  | PRELP_MOUSE  |              |                                                                                                           |                                                                                                                                                                   |
| NIGGASGYI      | EKPQTEAPQVTGPIEVVVR         | N-ter +28.03 Da, K +28.03 Da                           | 47.9       | 75.8              | 4      | 2229.41                      | 0.70                                         | 0.06                  | CRIP2_MOUSE  |              | Cysteine-rich protein 2;                                                                                  | Heart LIM protein;                                                                                                                                                |
| FASQMSIYGYD    | EKSAGVSPGPMGSPGR            | N-ter +28.03 Da, K +28.03 Da, C +57.02 Da, K +34.06 Da | 26.4       | 67.2              | 3      | 1765.04                      | 0.37                                         | 0.02                  | CO1A1_MOUSE  | F8WGB7_MOUSE | Collagen alpha-1(I) chain;                                                                                | Alpha-1 type I collagen;                                                                                                                                          |
| AIPNLRNYG      | ELADCCTKQEPER               | N-ter +34.06 Da                                        | 24.1       | 69.1              | 3      | 1702.95                      | -3.84                                        | 1.10                  | ALBU_MOUSE   |              | Serum albumin;                                                                                            |                                                                                                                                                                   |
| KDKSGFIEED     | ELGSILKPFSSDAR              | N-ter +34.06 Da, K +34.06 Da                           | 29.7       | 76.2              | 3      | 1547.02                      | 0.39                                         | 0.03                  | PRVA_MOUSE   |              | Parvalbumin alpha;                                                                                        |                                                                                                                                                                   |
| MNSDLKAQLR     | ELNITAAKEIEVGGR             | N-ter +34.06 Da, K +34.06 Da                           | 20.4       | 53.2              | 3      | 1724.10                      | -0.25                                        | 0.01                  | RS7_MOUSE    | F6SVV1_MOUSE | 40S ribosomal protein S7;                                                                                 |                                                                                                                                                                   |
| QKQRKNLDLM     | ELQALIDSHFAR                | N-ter +28.03 Da                                        | 53.9       | 78.5              | 3      | 1555.92                      | -0.49                                        | 0.07                  | TNNT3_MOUSE  | A2A6J0_MOUSE | Troponin T, fast skeletal muscle;                                                                         | Fast skeletal muscle troponin T;                                                                                                                                  |
| RQMRHRSLAR     | ELSGTIKEILGTAQSGVCNDVGR     | N-ter +34.06 Da, K +34.06 Da, C +57.02 Da              | 49.2       | 73.6              | 4      | 2471.51                      | -0.20                                        | 0.04                  | RL12_MOUSE   |              | 60S ribosomal protein L12;                                                                                |                                                                                                                                                                   |
| EGEVVVKAT      | EMVEVGPEDDEVGAER            | N-ter +34.06 Da                                        | 39.9       | 43.9              | 3      | 1793.90                      | 0.47                                         | 0.03                  | PTRF_MOUSE   |              | Polymerase I and transcript release factor;                                                               | Cav-p60;Cavin-1;                                                                                                                                                  |
| LGQQQLNLL      | ENWDTLGVSTVQLQER            | N-ter +28.03 Da                                        | 39.5       | 54.4              | 3      | 1890.01                      | 0.16                                         | 0.02                  | APOA1_MOUSE  | Q8BPD5_MOUSE | Apolipoprotein A-I;                                                                                       | Apolipoprotein A1;                                                                                                                                                |
| DKLCAIPNLR     | ENYGELADCCTKQEPER           | N-ter +28.03 Da, K +28.03 Da, C +57.02 Da              | 43.6       | 68.8              | 3      | 2154.08                      | 2.83                                         | 0.28                  | ALBU_MOUSE   |              | Serum albumin;                                                                                            |                                                                                                                                                                   |



| Non Prime Site                                    | Prime Site                                                                      | Modifications                                                                                                   | Hyperscore                   | Mass error in ppm            | Charge           | Precursor neutral mass in Da             | Fold change (log <sub>2</sub> ) of ASAPRatio | FC-error of ASAPRatio        | Uniprot ID 1                                            | Uniprot ID 2                 | Protein Name 1                                                                                                                                   | Protein Name 2                                                                                                                                                                                                                            |
|---------------------------------------------------|---------------------------------------------------------------------------------|-----------------------------------------------------------------------------------------------------------------|------------------------------|------------------------------|------------------|------------------------------------------|----------------------------------------------|------------------------------|---------------------------------------------------------|------------------------------|--------------------------------------------------------------------------------------------------------------------------------------------------|-------------------------------------------------------------------------------------------------------------------------------------------------------------------------------------------------------------------------------------------|
| RLYFCEDRKA<br>LQLVSWTLAA<br>LLWAAACAQS            | EPEGLRR<br>EPVDVLEAWGVHR<br>EQDYFDKAVNIR                                        | N-ter +34.06 Da<br>N-ter +34.06 Da<br>N-ter +28.03 Da, K +28.03 Da                                              | 8.7<br>66.4<br>21.6          | 2.0<br>70.4<br>74.6          | 2<br>3<br>3      | 889.52<br>1539.93<br>1699.98             | -2.64<br>0.28<br>-0.32                       | 0.17<br>0.03<br>0.02         | AICDA_MOUSE<br>Q9JL12_MOUSE<br>QPX7_MOUSE               |                              | Activation-induced cytidine deaminase;<br>Glutathione peroxidase 7;                                                                              | Cytidine aminohydrolase;                                                                                                                                                                                                                  |
| LIWDNGMVLG<br>KGKSCRTITF                          | EQEVS DNELQELSTQGSR<br>EQFQEALEELAKKR                                           | N-ter +34.06 Da<br>N-ter +34.06 Da, K +34.06 Da                                                                 | 56.3<br>29.4                 | 38.2<br>69.7                 | 3<br>4           | 2082.07<br>1820.22                       | -0.18<br>1.07                                | 0.01<br>0.12                 | CLUS_MOUSE<br>TPPP_MOUSE                                | E9Q988_MOUSE                 | Clusterin;<br>Tubulin polymerization-promoting protein;                                                                                          | Apolipoprotein J;Clusterin;Sulfated glycoprotein 2;                                                                                                                                                                                       |
| KRSRWNQDTM<br>GPRGERGTPG                          | EQKTVIPGMPPTVPPGLTR<br>ESGAAGPSGPIGSR                                           | N-ter +28.03 Da, K +28.03 Da<br>N-ter +34.06 Da                                                                 | 40.7<br>48.1                 | 58.7<br>32.3                 | 3<br>2           | 2089.32<br>1275.70                       | 0.36<br>1.18                                 | 0.01<br>0.09                 | SF01_MOUSE<br>CO1A2_MOUSE                               | Q3U145_MOUSE<br>E9Q6U9_MOUSE | Splicing factor 1;<br>Collagen alpha-2(I) chain;                                                                                                 | CW17;Mammalian branch point-binding protein;Transcription factor ZFM1;Zinc finger gene in MEN1 locus;Zinc finger protein 162; Alpha-2 type I collagen;                                                                                    |
| RSGGESHQDQ<br>VSEAGPAGAG                          | ESIHQLQSSFFSLQEEDKSR<br>ESKCLPMVKVLDVAVR                                        | N-ter +34.06 Da, K +34.06 Da<br>N-ter +34.06 Da, K +34.06 Da, C +57.02 Da                                       | 23.1<br>22.6                 | 88.9<br>75.0                 | 4<br>4           | 2397.50<br>1846.27                       | -5.64<br>1.81                                | 0.00<br>0.21                 | ARP21_MOUSE<br>TTHY_MOUSE                               | E9Q4A0_MOUSE                 | cAMP-regulated phosphoprotein 21;<br>Transthyretin;                                                                                              | Regulator of calmodulin signaling;Thymocyte cAMP-regulated phosphoprotein;                                                                                                                                                                |
| LSIFVSGSCFS<br>ADRQGRRGVSV<br>RSPRRSPVHP          | ESPTKVLQVGGAAHR<br>ESQASDSEGHSDFSEGGAVGAHR<br>ESSEGEHSVVPQR                     | N-ter +34.06 Da, K +34.06 Da<br>N-ter +34.06 Da<br>N-ter +34.06 Da                                              | 38.5<br>61.0<br>34.5         | 86.3<br>89.1<br>66.8         | 4<br>4<br>3      | 1546.06<br>2421.28<br>1602.88            | 0.26<br>2.51<br>0.93                         | 0.03<br>0.54<br>0.10         | CDSL_MOUSE<br>F6TL02_MOUSE<br>FILA2_MOUSE               | F7BVV1_MOUSE<br>FILA2_MOUSE  | CD5 antigen-like;<br>Filaggrin-2;                                                                                                                | Intermediate filament-associated protein; Interferon-induced, double-stranded RNA-activated protein kinase inhibitor;Protein kinase inhibitor of 58 kDa; Eukaryotic initiation factor 5A isoform 1;eIF-4D;                                |
| GRYTDATSKY<br>MADDLDF<br>GPAGKNGDRG<br>GGKGEQKQMK | ESVMKTEPSVAEYTVR<br>ETGDAGASATPFMQCSALR<br>ETGPAGPAGPIGAGAR<br>ETIMNKEKLAQLQAVR | N-ter +28.03 Da, K +28.03 Da<br>N-ter +28.03 Da, C +57.02 Da<br>N-ter +34.06 Da<br>N-ter +28.03 Da, K +28.03 Da | 34.7<br>55.4<br>50.0<br>17.5 | 61.5<br>36.2<br>49.2<br>66.2 | 3<br>3<br>3<br>4 | 1881.07<br>1996.97<br>1508.89<br>2083.32 | 0.19<br>0.47<br>2.64<br>1.31                 | 0.02<br>0.04<br>0.20<br>0.09 | DNIC3_MOUSE<br>IF5A1_MOUSE<br>CO1A1_MOUSE<br>BTF3_MOUSE |                              | Dnal homolog subfamily C member 3;<br>Eukaryotic translation initiation factor 5A-1;<br>Collagen alpha-1(I) chain;<br>Transcription factor BTF3; | HESB-like domain-containing protein 1;                                                                                                                                                                                                    |
| RRSGRLLTRW<br>LASLLSGQA<br>FSRGLSNAER             | ETSSSIPEAGEGQIR<br>EVEDASEEAPLR<br>EVGKALEGINNGITQAGR                           | N-ter +34.06 Da<br>N-ter +28.03 Da<br>N-ter +28.03 Da, K +28.03 Da                                              | 39.7<br>44.8<br>52.2         | 56.4<br>40.0<br>61.4         | 3<br>2<br>3      | 1607.91<br>1371.71<br>1882.14            | 0.39<br>-0.76<br>-0.43                       | 0.05<br>0.09<br>0.03         | ISCA2_MOUSE<br>SRCA_MOUSE<br>SBSN_MOUSE                 | E9QP82_MOUSE                 | Iron-sulfur cluster assembly 2 homolog, mitochondrial;<br>Sarcalumenin;<br>Suprabasin;                                                           |                                                                                                                                                                                                                                           |
| VLSAEKLDE<br>LTKLPGYPVK<br>GAGFRPKVKR             | EVHTGLGELLR<br>EVKCDMEVSCPEGYTCCR<br>EVKVDCEYLALSKR                             | N-ter +28.03 Da<br>N-ter +28.03 Da, K +28.03 Da, C +57.02 Da<br>N-ter +28.03 Da, K +28.03 Da, C +57.02 Da       | 33.6<br>55.9<br>33.3         | 42.6<br>47.0<br>61.6         | 3<br>3<br>4      | 1250.75<br>2335.05<br>1880.12            | 0.68<br>0.77<br>0.87                         | 0.07<br>0.09<br>0.09         | SERPH_MOUSE<br>GRN_MOUSE<br>Q8BM18_MOUSE                |                              | Serpin H1;<br>Granulins;                                                                                                                         | 47 kDa heat shock protein;Collagen-binding protein;Serine protease inhibitor J6;                                                                                                                                                          |
| VLMDIFQVKA<br>VAFVKHTTF<br>LMAVIGINS              | EVLDMAENAFDDEYLKCKSR<br>EVLPEKADRQYELLCLDNTR<br>EVQLQSQGAELVR                   | N-ter +28.03 Da, K +28.03 Da, C +57.02 Da<br>N-ter +34.06 Da, K +34.06 Da, C +57.02 Da<br>N-ter +34.06 Da       | 44.9<br>31.4<br>48.8         | 95.1<br>58.6<br>39.4         | 4<br>4<br>3      | 2516.43<br>2644.54<br>1489.89            | -6.64<br>-1.74<br>0.60                       | 0.00<br>0.12<br>0.06         | NAR3_MOUSE<br>TRFE_MOUSE<br>HVMO2_MOUSE                 | E9Q1U7_MOUSE<br>E9Q035_MOUSE | Ecto-ADP-ribosyltransferase 3;<br>Serotransferrin;<br>Ig heavy chain V region 93G7;                                                              | Mono(ADP-ribosyl)transferase 3;NAD(P)(+)-arginine ADP-ribosyltransferase 3;                                                                                                                                                               |
| DKRSALQISN<br>LASVFHATAF<br>EEHHLRDYFE            | EWASQITDGLKPEVTKDVER<br>EWDTEGNPFDQDIYGR<br>EYKIDTIEITDR                        | N-ter +28.03 Da, K +28.03 Da<br>N-ter +34.06 Da<br>N-ter +28.03 Da, K +28.03 Da                                 | 39.9<br>42.7<br>22.3         | 70.7<br>80.5<br>80.3         | 4<br>3<br>3      | 2372.39<br>1975.04<br>1721.06            | 0.51<br>-0.84<br>-1.47                       | 0.03<br>0.12<br>0.08         | SERPH_MOUSE<br>SERPH_MOUSE<br>ROA2_MOUSE                |                              | Serpin H1;<br>Serpin H1;<br>Heterogeneous nuclear ribonucleoproteins A2/B1;                                                                      | 47 kDa heat shock protein;Collagen-binding protein;Serine protease inhibitor J6;                                                                                                                                                          |
| IHFPRLSISG<br>GIRGITGLPG<br>RSFSTSVVVRP           | EYNKLTMLSPGLITR<br>FAGPPGLPGLPGHPGPR<br>FAKLVRRPVQVYVIEGR                       | N-ter +34.06 Da, K +34.06 Da<br>N-ter +28.03 Da<br>N-ter +28.03 Da, K +28.03 Da                                 | 33.5<br>24.9<br>36.8         | 71.7<br>44.1<br>48.7         | 3<br>3<br>4      | 1803.19<br>1650.97<br>1984.26            | 1.02<br>1.61<br>-0.97                        | 0.15<br>0.07<br>0.06         | A1AT1_MOUSE<br>CO4A3_MOUSE<br>ATPO_MOUSE                | A1AT3_MOUSE<br>D3Z4J0_MOUSE  | Alpha-1-antitrypsin 1-1;<br>Collagen alpha-3(IV) chain;<br>ATP synthase subunit O, mitochondrial;                                                | Alpha-1 protease inhibitor 1;Alpha-1-antiprotease;Serine protease inhibitor 1-1;Serine protease inhibitor A1a;                                                                                                                            |
| PSSLITRVSY<br>PEISASVMKI                          | FAVFDGGHGR<br>FDAAKAPIQWEER                                                     | N-ter +34.06 Da<br>N-ter +28.03 Da, K +28.03 Da                                                                 | 38.5<br>23.7                 | 51.6<br>62.1                 | 3<br>3           | 1208.71<br>1615.94                       | -1.89<br>-0.40                               | 0.07<br>0.04                 | ILKAP_MOUSE<br>IDH3A_MOUSE                              |                              | Isocitrate dehydrogenase [NAD] subunit alpha, mitochondrial;                                                                                     | Oligomycin sensitivity conferral protein;                                                                                                                                                                                                 |
| GKADVSVFLV<br>PYQLKTAMFC                          | FDCNNEICIER<br>FDEGSSTPGTSGPPKPTAR                                              | N-ter +34.06 Da, C +57.02 Da<br>N-ter +28.03 Da, K +28.03 Da                                                    | 28.0<br>56.1                 | 53.3<br>54.1                 | 3<br>3           | 1502.75<br>1944.06                       | -1.40<br>0.00                                | 0.15<br>0.00                 | KCY_MOUSE<br>SYP2L_MOUSE                                |                              | UMP-CMP kinase;<br>Synaptopodin 2-like protein;                                                                                                  | Isocitric dehydrogenase subunit alpha;NAD(+)-specific ICDH subunit alpha;<br>Cytidine monophosphate kinase;Cytidylylate kinase;Deoxycytidylylate kinase;Uridine monophosphate kinase;Uridine monophosphate/cytidine monophosphate kinase; |
| EIFDKARVLF<br>VVKGEKILPV<br>DGLRKRPLUV            | FDELDSIAKAR<br>FDEPPNPTNVEESLKR<br>FDGSSTSTSIKVKR                               | N-ter +34.06 Da, K +34.06 Da<br>N-ter +34.06 Da, K +34.06 Da<br>N-ter +28.03 Da, K +28.03 Da                    | 19.9<br>37.7<br>22.7         | 71.1<br>61.3<br>85.8         | 3<br>3<br>4      | 1331.87<br>1939.15<br>1596.03            | -1.25<br>-1.18<br>0.07                       | 0.18<br>0.05<br>0.00         | TERA_MOUSE<br>TMOD3_MOUSE<br>ASHWN_MOUSE                |                              | Transitional endoplasmic reticulum ATPase;<br>Tropomodulin-3;<br>Ashwin;                                                                         | 15S Mg(2+)-ATPase p97 subunit;Valosin-containing protein;<br>Ubiquitous tropomodulin;                                                                                                                                                     |

Table S7, Tholen et al.

| Non Prime Site                         | Prime Site                                                    | Modifications                                                                    | Hyperscore           | Mass error in ppm    | Charge      | Precursor neutral mass in Da  | Fold change (log <sub>2</sub> ) of ASAPRatio | FC-error of ASAPRatio | Uniprot ID 1                               | Uniprot ID 2                 | Protein Name 1                                                                                                                             | Protein Name 2                                                                                                                                                                                                                                                                                                                                                           |
|----------------------------------------|---------------------------------------------------------------|----------------------------------------------------------------------------------|----------------------|----------------------|-------------|-------------------------------|----------------------------------------------|-----------------------|--------------------------------------------|------------------------------|--------------------------------------------------------------------------------------------------------------------------------------------|--------------------------------------------------------------------------------------------------------------------------------------------------------------------------------------------------------------------------------------------------------------------------------------------------------------------------------------------------------------------------|
| MVNPTVF<br>QQQLIDHFL                   | FDITADDEPLGR<br>FDKPVSPLLASGMAR                               | N-ter +28.03 Da<br>N-ter +28.03 Da, K +28.03 Da                                  | 51.6<br>37.5         | 38.8<br>66.8         | 2<br>3      | 1375.72<br>1757.11            | -0.86<br>0.67                                | 0.08<br>0.05          | PPIA_MOUSE<br>KCRM_MOUSE                   | E9Q1E3_MOUSE<br>KCRB_MOUSE   | Peptidyl-prolyl cis-trans isomerase A;<br>Creatine kinase M-type;                                                                          | Cyclophilin A;Cyclosporin A-binding protein;Rotamase A;SP18;<br>Creatine kinase M chain;M-CK;                                                                                                                                                                                                                                                                            |
| KGPKVTKVY                              | FDLQIGDESIVGR                                                 | N-ter +28.03 Da                                                                  | 37.9                 | 37.4                 | 2           | 1362.73                       | -0.04                                        | 0.00                  | PPIB_MOUSE                                 |                              | Peptidyl-prolyl cis-trans isomerase B;<br>Myosin regulatory light chain 2, skeletal muscle isoform;                                        | CYP-51;Cyclophilin B;Rotamase B;5-cyclophilin;                                                                                                                                                                                                                                                                                                                           |
| AEGSSNVFSM<br>SYTYLSLGF                | FDQTIQEFKEAFTVIDQNR<br>FDRDDVALEGVGHFFR                       | N-ter +28.03 Da, K +28.03 Da<br>N-ter +34.06 Da                                  | 54.0<br>61.3         | 66.0<br>101.0        | 4<br>4      | 2512.43<br>1913.16            | 0.19<br>-2.12                                | 0.05<br>0.18          | MLRS_MOUSE<br>FRIL1_MOUSE                  | F6ULR7_MOUSE<br>FRIL2_MOUSE  | Myosin regulatory light chain 2, skeletal muscle isoform;<br>Ferritin light chain 1;                                                       | Fast skeletal myosin light chain 2;MLC2F;<br>Ferritin L subunit 1;                                                                                                                                                                                                                                                                                                       |
| VDSRSPGMPL                             | FDVEEGLSKR                                                    | N-ter +34.06 Da, K +34.06 Da                                                     | 25.9                 | 49.6                 | 3           | 1345.85                       | 0.26                                         | 0.02                  | CMYA5_MOUSE                                | E9QU10_MOUSE                 | Cardiomyopathy-associated protein 5;                                                                                                       | Heart and skeletal muscle-specific and sprout domain-containing;Myospryn;Stretch-response protein 553;Stretch-responsive fibronectin protein type 3;TRIM-like protein;<br>BAT2 domain-containing protein 1;HLA-B associated transcript 2-like 2;Proline-rich and coiled-coil-containing protein 2C;<br>Rotamase H;<br>NDR1 protein kinase;Nuclear Dbf2-related kinase 1; |
| HVDNTQASAC<br>KRARVNPVVF               | FDVIDQKSLPTSAEER<br>FDVSIQGEVGR                               | N-ter +28.03 Da, K +28.03 Da<br>N-ter +28.03 Da                                  | 36.1<br>27.0         | 79.7<br>39.5         | 3<br>2      | 1890.12<br>1290.71            | -1.09<br>-1.40                               | 0.12<br>0.15          | PRC2C_MOUSE<br>PPIH_MOUSE                  | E9QKGS_MOUSE<br>A2BG19_MOUSE | Protein PRC2C;<br>Peptidyl-prolyl cis-trans isomerase H;                                                                                   | Hippocampus abundant transcript 3;SCG10-like protein;SCG10-related protein HIAT3;                                                                                                                                                                                                                                                                                        |
| GVEEIKNLF<br>DTEEYNLRDY                | FEQVDWEHIR<br>FEKYKJIEIVMEDR                                  | N-ter +28.03 Da<br>N-ter +28.03 Da, K +28.03 Da                                  | 29.9<br>37.9         | 52.5<br>70.0         | 3<br>4      | 1314.70<br>2070.22            | 0.84<br>0.53                                 | 0.09<br>0.04          | STK38_MOUSE<br>ROA3_MOUSE                  | A2AL12_MOUSE                 | Serine/threonine-protein kinase 38;<br>Heterogeneous nuclear ribonucleoprotein A3;                                                         |                                                                                                                                                                                                                                                                                                                                                                          |
| QLDKRRSGQS<br>KSIIIMYLSL               | FEVILKSPDLSPEVLSPPPKR<br>FEVLPQQVTIDAIR                       | N-ter +34.06 Da, K +34.06 Da<br>N-ter +28.03 Da<br>N-ter +34.06 Da, K +34.06 Da, | 19.6<br>31.1         | 65.0<br>55.6         | 4<br>3      | 2710.78<br>1656.02            | -2.12<br>0.14                                | 0.18<br>0.01          | STMN3_MOUSE<br>Q3TR59_MOUSE                | F6QG16_MOUSE<br>E9Q6R7_MOUSE | Stathmin-3;                                                                                                                                |                                                                                                                                                                                                                                                                                                                                                                          |
| NRPPTYTKY<br>GGPKLPGRVA<br>EQALEDFSS   | FGCELGAQTQDFVKNDR<br>FGEDIDLPEFDAR<br>FGPISEVVVKDR            | C +57.02 Da<br>N-ter +34.06 Da<br>N-ter +28.03 Da, K +28.03 Da                   | 31.5<br>34.2<br>27.8 | 60.5<br>39.6<br>62.7 | 3<br>3<br>3 | 2052.16<br>1657.87<br>1499.96 | 0.03<br>-6.64<br>1.73                        | 0.01<br>0.00<br>0.19  | IFS_MOUSE<br>CATB_MOUSE<br>RBM3_MOUSE      | Q8BVV6_MOUSE<br>Q8BG13_MOUSE | Eukaryotic translation initiation factor 5;<br>Cathepsin B;<br>Putative RNA-binding protein 3;                                             | Cathepsin B1;<br>RNA-binding motif protein 3;<br>DNA-binding p52/p100 complex, 100 kDa subunit;Polypyrimidine tract-binding protein-associated-splicing factor;                                                                                                                                                                                                          |
| MMGSDMRTER                             | FGQGGAGVPGQGQPR                                               | N-ter +34.06 Da                                                                  | 34.9                 | 56.6                 | 3           | 1374.80                       | 0.65                                         | 0.03                  | SFPQ_MOUSE                                 |                              | Splicing factor, proline- and glutamine-rich;<br>Myosin regulatory light chain 2, skeletal muscle isoform;                                 | Fast skeletal myosin light chain 2;MLC2F;                                                                                                                                                                                                                                                                                                                                |
| SMFDQTIQIE                             | FKEAFTVIDQNR                                                  | N-ter +28.03 Da, K +28.03 Da                                                     | 45.0                 | 49.0                 | 3           | 1522.89                       | -0.14                                        | 0.01                  | MLRS_MOUSE                                 | F6ULR7_MOUSE                 |                                                                                                                                            |                                                                                                                                                                                                                                                                                                                                                                          |
| VARGKHLVLL                             | FKEETEIPAR                                                    | N-ter +34.06 Da, K +34.06 Da                                                     | 34.4                 | 51.6                 | 3           | 1286.82                       | 0.01                                         | 0.00                  | PRDBP_MOUSE                                |                              | Protein kinase C delta-binding protein;<br>Myosin regulatory light chain 2, skeletal muscle isoform;                                       | Cavin-3;Serum deprivation response factor-related gene product that binds to C-kinase;                                                                                                                                                                                                                                                                                   |
| PEGKTIKKQ                              | FLEELLTQCDDR                                                  | N-ter +34.06 Da, C +57.02 Da                                                     | 26.0                 | 49.5                 | 3           | 1557.87                       | 2.30                                         | 0.15                  | MLRS_MOUSE                                 |                              |                                                                                                                                            | Fast skeletal myosin light chain 2;MLC2F;<br>Annexin I;Annexin-1;Calpactin II;Calpactin-2;Chromobindin-9;Lipocortin I;Phospholipase A2 inhibitory protein;p35;                                                                                                                                                                                                           |
| MVSEFLKQAR                             | FLENQEYEVQAVK                                                 | N-ter +34.06 Da, K +34.06 Da                                                     | 44.2                 | 42.0                 | 3           | 1792.04                       | -0.67                                        | 0.03                  | ANXA1_MOUSE                                | E9QA30_MOUSE                 | Annexin A1;                                                                                                                                |                                                                                                                                                                                                                                                                                                                                                                          |
| KIVSNVPQLE                             | FLNLSNPLSLVLER                                                | N-ter +28.03 Da                                                                  | 27.9                 | 54.4                 | 4           | 1816.11                       | 2.62                                         | 0.19                  | TBCEL_MOUSE                                |                              | Tubulin-specific chaperone cofactor E-like protein;                                                                                        | Leucine-rich repeat-containing protein 35;<br>Adhesion and degranulation promoting adaptor protein;FVB-120/130;FYN-T-binding protein;SLAP-130;SLP-76-associated phosphoprotein;                                                                                                                                                                                          |
| FSKVAGAKSK                             | FMPAAQDTSKPR                                                  | N-ter +34.06 Da, K +34.06 Da<br>N-ter +34.06 Da, K +34.06 Da,<br>C +57.02 Da     | 27.5<br>23.4         | 70.3<br>61.1         | 3<br>3      | 1530.92<br>1931.16            | -0.62<br>-0.64                               | 0.12<br>0.13          | FYB_MOUSE<br>MYPC2_MOUSE                   | F8W134_MOUSE                 | FYN-binding protein;<br>Myosin-binding protein C, fast-type;                                                                               | C-protein, skeletal muscle fast isoform;                                                                                                                                                                                                                                                                                                                                 |
| EEFDARWVWY<br>MK                       | FNKPIDAWELR<br>FNPFVTSDR                                      | N-ter +34.06 Da, K +34.06 Da<br>N-ter +28.03 Da                                  | 38.3<br>31.9         | 61.6<br>26.9         | 3<br>2      | 1570.97<br>1109.58            | -1.79<br>0.31                                | 0.25<br>0.01          | COX5A_MOUSE<br>RL26_MOUSE                  | D3Z3Q9_MOUSE                 | Cytochrome c oxidase subunit 5A, mitochondrial;<br>60S ribosomal protein L26;                                                              | Cytochrome c oxidase polypeptide Va;<br>Silica-induced gene 20 protein;                                                                                                                                                                                                                                                                                                  |
| RATVASSSQK<br>EAASGALSMF<br>TGSILVAVNP | FQDLGVKNSEPAAR<br>FQGEETENEENLSSEKAGLDR<br>FQMLPLYLTLQVQIYYSR | N-ter +34.06 Da, K +34.06 Da<br>N-ter +28.03 Da, K +28.03 Da<br>N-ter +34.06 Da  | 25.7<br>42.9<br>24.8 | 63.0<br>62.9<br>62.1 | 3<br>4<br>4 | 1599.01<br>2593.41<br>2325.37 | 2.08<br>0.35<br>-1.22                        | 0.15<br>0.05<br>0.09  | SEPT9_MOUSE<br>A2AIX1_MOUSE<br>MYO7B_MOUSE | A2A6J3_MOUSE<br>E9QAT4_MOUSE | Septin-9;<br>Myosin-VIIB;                                                                                                                  | SL3-3 integration site 1 protein;                                                                                                                                                                                                                                                                                                                                        |
| IILYEQHGFA<br>ELNGKLTGMA               | FQSGQVLSALPR<br>FRVPTPNVSVVDLTCR                              | N-ter +28.03 Da<br>N-ter +28.03 Da, C +57.02 Da                                  | 30.0<br>50.6         | 54.5<br>72.5         | 3<br>3      | 1329.81<br>1887.14            | 0.28<br>0.30                                 | 0.03<br>0.02          | CBPB2_MOUSE<br>E9Q9E5_MOUSE                | G3PT_MOUSE                   | Carboxypeptidase B2;<br>Glyceraldehyde-3-phosphate dehydrogenase;                                                                          | Carboxypeptidase R;Carboxypeptidase U;Thrombin-activable fibrinolysis inhibitor;                                                                                                                                                                                                                                                                                         |
| VLRPPGGGSN<br>SLNDITKKEK               | FSLGFDEPAEQPR<br>FSPILTANLMLLAENGR                            | N-ter +28.03 Da<br>N-ter +34.06 Da                                               | 40.9<br>30.6         | 54.5<br>69.9         | 3<br>3      | 1618.89<br>1894.15            | 0.84<br>-0.27                                | 0.03<br>0.04          | HN1_MOUSE<br>ATPO_MOUSE                    | D3Z4J0_MOUSE                 | Hematological and neurological expressed 1 protein;<br>ATP synthase subunit O, mitochondrial;                                              | Oligomycin sensitivity conferral protein;<br>Calgizzarin;Endothelial monocyte-activating polypeptide;Protein S100-C;S100 calcium-binding protein A11;                                                                                                                                                                                                                    |
| LSFMTELA<br>SAPRVEFDLA<br>ATLVESSTSG   | FTKNQKDPGVLDL<br>FTPEISWSLR<br>FTPSGAGASVSMIASR               | N-ter +28.03 Da, K +28.03 Da<br>N-ter +34.06 Da<br>N-ter +28.03 Da               | 19.8<br>29.6<br>45.2 | 91.7<br>37.5<br>43.8 | 4<br>2<br>3 | 1601.04<br>1268.75<br>1565.86 | 0.19<br>0.52<br>0.21                         | 0.02<br>0.04<br>0.02  | S10AB_MOUSE<br>MUG1_MOUSE<br>NASP_MOUSE    | F6S3J5_MOUSE                 | Protein S100-A11;<br>Muringlobulin-1;<br>Nuclear autoantigenic sperm protein;<br>Myosin regulatory light chain 2, skeletal muscle isoform; |                                                                                                                                                                                                                                                                                                                                                                          |
| SVLTPPPQA<br>RYLSPKIKM                 | FTVIDQNR<br>FVLDEADEMLSR                                      | N-ter +28.03 Da<br>N-ter +28.03 Da                                               | 23.3<br>38.1         | 47.9<br>34.9         | 2<br>2      | 1019.59<br>1451.75            | 0.71<br>0.58                                 | 0.02<br>0.07          | MLRS_MOUSE<br>IF4A1_MOUSE                  | F6ULR7_MOUSE<br>IF4A2_MOUSE  | Eukaryotic initiation factor 4A-1;                                                                                                         | Fast skeletal myosin light chain 2;MLC2F;<br>ATP-dependent RNA helicase eIF4A-1;<br>Deubiquitinating enzyme 47;Ubiquitin thiolesterase 47;Ubiquitin-specific-processing protease 47;                                                                                                                                                                                     |
| LDRHANTIRL                             | FVLLPEQSPGSYSKR                                               | N-ter +28.03 Da, K +28.03 Da                                                     | 44.7                 | 62.0                 | 3           | 1763.07                       | -0.92                                        | 0.05                  | UBP47_MOUSE                                | F6ZD38_MOUSE                 | Ubiquitin carboxyl-terminal hydrolase 47;                                                                                                  |                                                                                                                                                                                                                                                                                                                                                                          |

Table S7, Tholen et al.

| Non Prime Site | Prime Site                | Modifications                             | Hyperscore | Mass error in ppm | Charge | Precursor neutral mass in Da | Fold change (log <sub>2</sub> ) of ASAPRatio | FC-error of ASAPRatio | Uniprot ID 1 | Uniprot ID 2 | Protein Name 1                                                 | Protein Name 2                                                                                                                                                                                                              |
|----------------|---------------------------|-------------------------------------------|------------|-------------------|--------|------------------------------|----------------------------------------------|-----------------------|--------------|--------------|----------------------------------------------------------------|-----------------------------------------------------------------------------------------------------------------------------------------------------------------------------------------------------------------------------|
| RTSTSAVPLN     | FVPLNTNPKVEQEMR           | N-ter +34.06 Da, K +34.06 Da              | 21.5       | 60.9              | 3      | 1869.16                      | 0.01                                         | 0.00                  | ADDA_MOUSE   | E9Q1K3_MOUSE | Alpha-adducin;                                                 | Erythrocyte adducin subunit alpha;                                                                                                                                                                                          |
| WGMKVLQTRG     | FVSDSSDMTGTAGSIR          | N-ter +34.06 Da                           | 26.5       | 74.9              | 3      | 1764.94                      | -0.97                                        | 0.10                  | ATF1_MOUSE   | Q9D879_MOUSE | ATPase inhibitor, mitochondrial;                               | Inhibitor of F(1)F(o)-ATPase;                                                                                                                                                                                               |
| HRDDGLADLL     | FVSSGPTNASAFER            | N-ter +34.06 Da                           | 43.7       | 49.5              | 3      | 1603.89                      | 0.08                                         | 0.01                  | MAP4_MOUSE   | E9QPW8_MOUSE | Microtubule-associated protein 4;                              |                                                                                                                                                                                                                             |
| GGAAGATSLC     | FVYPLDFAR                 | N-ter +28.03 Da                           | 21.9       | 43.3              | 2      | 1154.66                      | 0.38                                         | 0.03                  | ADT1_MOUSE   | ADT2_MOUSE   | ADP/ATP translocase 1;                                         | ADP,ATP carrier protein 1;ADP,ATP carrier protein, heart/skeletal muscle isoform                                                                                                                                            |
| NESGNPSYKY     | FVYSAEQVVGGMKEAQR         | N-ter +34.06 Da, K +34.06 Da              | 23.9       | 66.4              | 3      | 2166.29                      | -5.64                                        | 0.00                  | TXD12_MOUSE  |              | Thioredoxin domain-containing protein 12;                      | T1;Adenine nucleotide translocator 1;Solute carrier family 25 member 4;mANC1;                                                                                                                                               |
| GPPPPAGGGG     | GAAGAGGPPPGPPGADR         | N-ter +34.06 Da                           | 44.0       | 67.3              | 3      | 1548.89                      | -0.52                                        | 0.04                  | FUBP2_MOUSE  |              | Far upstream element-binding protein 2;                        | Endoplasmic reticulum resident protein 19;Thioredoxin-like protein p19;                                                                                                                                                     |
| NPLKNSGIEV     | GAFOGLKLSYIR              | N-ter +34.06 Da, K +34.06 Da              | 30.7       | 61.6              | 3      | 1507.01                      | 1.60                                         | 0.17                  | PGS2_MOUSE   |              | Decorin;                                                       | KH type-splicing regulatory protein;                                                                                                                                                                                        |
| LLRGGPVARA     | GAGAVGAGPVVR              | N-ter +34.06 Da                           | 47.7       | 37.7              | 2      | 1043.67                      | -0.12                                        | 0.01                  | Q6PE62_MOUSE |              |                                                                | Bone proteoglycan II;PG-S2;PG40;                                                                                                                                                                                            |
| RNLHKTAVHN     | GAGGALFVHR                | N-ter +34.06 Da                           | 46.6       | 40.3              | 2      | 1017.63                      | 0.37                                         | 0.05                  | NDUV2_MOUSE  |              | NADH dehydrogenase [ubiquinone] flavoprotein 2, mitochondrial; | NADH-ubiquinone oxidoreductase 24 kDa subunit;                                                                                                                                                                              |
| MSVFGKLF       | GAGGGKAGGGPTPQEAQR        | N-ter +34.06 Da, K +34.06 Da              | 24.2       | 86.3              | 4      | 1938.32                      | 0.18                                         | 0.03                  | CHM48_MOUSE  |              | Charged multivesicular body protein 4b;                        | Chromatin-modifying protein 4b;                                                                                                                                                                                             |
| ATPKGPRML      | GAPEADANEQVVR             | N-ter +28.03 Da                           | 34.9       | 62.4              | 3      | 1470.75                      | 0.60                                         | 0.05                  | CYTC_MOUSE   | A2APX3_MOUSE | Cystatin-C;                                                    | Cystatin-3;                                                                                                                                                                                                                 |
| RVAGQPQAQT     | GAPQGSLEYLFR              | N-ter +28.03 Da                           | 41.3       | 67.4              | 3      | 1550.88                      | -0.36                                        | 0.03                  | FRIL1_MOUSE  | Q9CPX4_MOUSE | Ferritin light chain 1;                                        | Ferritin L subunit 1;                                                                                                                                                                                                       |
| ESEIGIGSNF     | GAPSASVAAPAPAR            | N-ter +34.06 Da                           | 31.4       | 52.6              | 3      | 1326.82                      | 0.59                                         | 0.10                  | AP181_MOUSE  | Q8CC13_MOUSE | AP-1 complex subunit beta-1;                                   | Adapter-related protein complex 1 subunit beta-1;Adaptor protein complex AP-1 subunit beta-1;Beta-1-adaptin;Beta-adaptin 1;Clathrin assembly protein complex 1 beta large chain;Golgi adaptor HA1/AP1 adaptin beta subunit; |
| AGSSSGSGVQ     | GASAGLAADASR              | N-ter +28.03 Da                           | 72.7       | 45.5              | 2      | 1130.62                      | 2.12                                         | 0.16                  | FILA_MOUSE   | F7BVV1_MOUSE | Filaggrin;                                                     |                                                                                                                                                                                                                             |
| TISLQMGTKN     | GASQAGMLAPGTR             | N-ter +34.06 Da                           | 65.1       | 40.0              | 2      | 1249.72                      | -0.47                                        | 0.04                  | CNN3_MOUSE   |              | Calponin-3;                                                    | Calponin, acidic isoform;                                                                                                                                                                                                   |
| VSQKTTPRAQP    | GATTVQEQLR                | N-ter +28.03 Da                           | 40.1       | 37.7              | 2      | 1129.65                      | -1.60                                        | 0.10                  | PLD4_MOUSE   |              | Phospholipase D4;                                              | Choline phosphatase 4;Phosphatidylcholine-hydrolyzing phospholipase D4;                                                                                                                                                     |
| GKSGGSGGAGK    | GAVSAEQVIAGFNR            | N-ter +34.06 Da                           | 42.8       | 58.5              | 3      | 1451.88                      | -0.67                                        | 0.04                  | PFDD2_MOUSE  | F8WJ30_MOUSE | Prefoldin subunit 2;                                           |                                                                                                                                                                                                                             |
| DYKSAHKGFK     | GAYDAQGLTSLKIFKLGR        | N-ter +34.06 Da, K +34.06 Da              | 30.0       | 84.6              | 4      | 1983.37                      | -0.49                                        | 0.05                  | F7A0B0_MOUSE | F6RT34_MOUSE |                                                                |                                                                                                                                                                                                                             |
| TDLNPDLQGG     | GDDLDPNVYLSRR             | N-ter +28.03 Da                           | 37.1       | 33.9              | 2      | 1477.75                      | 0.35                                         | 0.03                  | KCRM_MOUSE   | KCRB_MOUSE   | Creatine kinase M-type;                                        | Creatine kinase M chain;M-CK;                                                                                                                                                                                               |
| TMRQTYPLQR     | GDEAATLENLASER            | N-ter +28.03 Da                           | 23.0       | 45.5              | 3      | 1615.88                      | 0.31                                         | 0.06                  | E9Q492_MOUSE | Q3V0V1_MOUSE |                                                                |                                                                                                                                                                                                                             |
| PASHEIATNL     | GDFAIISLYR                | N-ter +34.06 Da                           | 34.7       | 29.1              | 2      | 1074.62                      | 0.87                                         | 0.08                  | A1AT1_MOUSE  | A1AT2_MOUSE  | Alpha-1-antitrypsin 1-1;                                       | Alpha-1 protease inhibitor 1;Alpha-1-antitrypsinase;Serine protease inhibitor 1-1;Serine protease inhibitor A1a;                                                                                                            |
| SHDFNFHINY     | GDGLFGLPEDLR              | N-ter +34.06 Da                           | 48.2       | 36.6              | 2      | 1321.76                      | -0.92                                        | 0.12                  | HYOU1_MOUSE  |              | Hypoxia up-regulated protein 1;                                | Hypoxia c(2+)-binding protein;                                                                                                                                                                                              |
| LTKVNEKCECH    | GDLLCADDR                 | N-ter +34.06 Da, C +57.02 Da              | 37.7       | 33.3              | 2      | 1196.60                      | -0.62                                        | 0.02                  | ALBU_MOUSE   |              | Serum albumin;                                                 |                                                                                                                                                                                                                             |
| EDERKMLTGS     | GDPKEEEEEVDPLTTR          | N-ter +34.06 Da, K +34.06 Da              | 47.8       | 62.0              | 3      | 2252.31                      | -0.14                                        | 0.02                  | QCR6_MOUSE   |              | Cytochrome b-c1 complex subunit 6, mitochondrial;              | Complex III subunit 6;Complex III subunit VIII;Cytochrome c1 non-heme 11 kDa protein;Mitochondrial hinge protein;Ubiquinol-cytochrome c reductase complex 11 kDa protein;                                                   |
| PGPVGPAGKN     | GDRGETGPAGPAGIPAGAR       | N-ter +34.06 Da                           | 73.5       | 47.2              | 3      | 1894.08                      | 2.32                                         | 0.30                  | CO1A1_MOUSE  | F8WGB7_MOUSE | Collagen alpha-1(I) chain;                                     | Alpha-1 type I collagen;                                                                                                                                                                                                    |
| RPVGLPHTRY     | GDSPKIDLAGSALSGLDKDLSDR   | N-ter +34.06 Da, K +34.06 Da              | 65.1       | 82.4              | 4      | 2544.66                      | -0.25                                        | 0.04                  | SH3K1_MOUSE  | B0R0Y8_MOUSE | SH3 domain-containing kinase-binding protein 1;                | Regulator of ubiquitous kinase;SH3-containing, expressed in tumorigenic astrocytes;                                                                                                                                         |
| LNDGDILSTY     | GDSTVNTESATASAPR          | N-ter +34.06 Da                           | 48.6       | 59.4              | 3      | 1596.88                      | 0.77                                         | 0.14                  | B0QZV3_MOUSE | A1L3P4_MOUSE | Sodium/hydrogen exchanger;                                     | Nervous system over-expressed protein 20;Protein FAM114A1;                                                                                                                                                                  |
| VECVDVSLLE     | GDTGSEIPLKEQDDAAVDPSSQAGR | N-ter +34.06 Da, K +34.06 Da              | 49.5       | 74.4              | 4      | 2610.50                      | -0.62                                        | 0.10                  | NXP20_MOUSE  | D3Z2J2_MOUSE | Protein Noxp20;                                                |                                                                                                                                                                                                                             |
| IRNVKGPQVE     | GDVLTLLSESR               | N-ter +28.03 Da                           | 38.6       | 37.0              | 2      | 1258.72                      | -1.84                                        | 0.13                  | RS28_MOUSE   | D3YVD9_MOUSE | 40S ribosomal protein S28;                                     |                                                                                                                                                                                                                             |
| SLTKYKTKLL     | GDVPPVADPTVNVTVTR         | N-ter +28.03 Da                           | 47.2       | 39.4              | 3      | 1863.08                      | 0.43                                         | 0.04                  | GDIRZ_MOUSE  |              | Rho GDP-dissociation inhibitor 2;                              | D4;Rho-GDI beta;                                                                                                                                                                                                            |
| VLGVSEPVLA     | GDVSSCDNPSGTEPSGTNR       | N-ter +34.06 Da, C +57.02 Da              | 49.7       | 66.7              | 3      | 1969.98                      | 0.39                                         | 0.07                  | Q9D140_MOUSE |              |                                                                |                                                                                                                                                                                                                             |
| VSGALSDLSF     | GEAPAAPQSPMSSEER          | N-ter +28.03 Da                           | 32.7       | 66.3              | 3      | 1670.87                      | -0.30                                        | 0.02                  | GLYG_MOUSE   | D3Z5N4_MOUSE | Glycogenin-1;                                                  |                                                                                                                                                                                                                             |
| ASVPTLASTL     | GEAPVPPPLSVR              | N-ter +28.03 Da                           | 18.9       | 83.6              | 3      | 1245.81                      | 4.90                                         | 0.46                  | IGDC3_MOUSE  | Q5R1W1_MOUSE | Immunoglobulin superfamily DCC subclass member 3;              | Putative neuronal cell adhesion molecule;                                                                                                                                                                                   |
| LSNNQEVSAF     | GEDGEGDDLWLTVR            | N-ter +28.03 Da                           | 45.1       | 89.8              | 3      | 1703.92                      | 0.01                                         | 0.00                  | SDF2L_MOUSE  |              | Stromal cell-derived factor 2-like protein 1;                  |                                                                                                                                                                                                                             |
| AGRFHVNLCC     | GEEQGADAALHFNPR           | N-ter +34.06 Da                           | 83.8       | 54.7              | 3      | 1644.90                      | 1.31                                         | 0.09                  | LEG7_MOUSE   | Q9CRB1_MOUSE | Galectin-7;                                                    |                                                                                                                                                                                                                             |
| ARQGHREPQQ     | GEIAHQPLQPTGPPSR          | N-ter +34.06 Da                           | 34.4       | 69.6              | 3      | 1708.03                      | -0.34                                        | 0.05                  | Q9QZV4_MOUSE | E9Q399_MOUSE |                                                                |                                                                                                                                                                                                                             |
| EKIREYFGQF     | GEIEAIELPIDPKLNKR         | N-ter +28.03 Da, K +28.03 Da              | 29.5       | 65.2              | 4      | 2018.31                      | -1.94                                        | 0.15                  | ROAA_MOUSE   | Q8QXR6_MOUSE | Heterogeneous nuclear ribonucleoprotein A/B;                   | CarG-binding factor-A;                                                                                                                                                                                                      |
| CAIPNLRINY     | GELADCCKQEPER             | N-ter +34.06 Da, K +34.06 Da, C +57.02 Da | 30.8       | 67.2              | 3      | 1759.97                      | -1.22                                        | 0.23                  | ALBU_MOUSE   |              | Serum albumin;                                                 |                                                                                                                                                                                                                             |
| MSDN           | GELEDKPPAPVVR             | N-ter +28.03 Da, K +28.03 Da              | 31.7       | 71.5              | 3      | 1459.91                      | 1.31                                         | 0.07                  | PAK2_MOUSE   |              | Serine/threonine-protein kinase PAK 2;                         | Gamma-PAK;p21-activated kinase 2;                                                                                                                                                                                           |
| FVSEAGPAGA     | GESKPLMKVVLDAVR           | N-ter +34.06 Da, K +34.06 Da, C +57.02 Da | 27.5       | 76.2              | 4      | 1903.29                      | -0.04                                        | 0.00                  | TTHY_MOUSE   |              | Transthyretin;                                                 | Prealbumin;                                                                                                                                                                                                                 |
| ACGSVTMSNP     | GESFIDLADR                | N-ter +34.06 Da                           | 37.9       | 39.9              | 2      | 1129.59                      | -0.01                                        | 0.00                  | SODE_MOUSE   |              | Extracellular superoxide dismutase [Cu-Zn];                    |                                                                                                                                                                                                                             |
| DCTKVVCYRC     | GETGHVAINCSKTSEVNCYR      | N-ter +28.03 Da, K +28.03 Da, C +57.02 Da | 34.5       | 77.5              | 4      | 2337.27                      | 0.20                                         | 0.04                  | CNBP_MOUSE   |              | Cellular nucleic acid-binding protein;                         | Zinc finger protein 9;                                                                                                                                                                                                      |
| VGPAGKNGDR     | GETGPAGPAGIPGAGAR         | N-ter +34.06 Da                           | 57.1       | 48.2              | 3      | 1565.91                      | 1.60                                         | 0.10                  | CO1A1_MOUSE  | F8WGB7_MOUSE | Collagen alpha-1(I) chain;                                     | Alpha-1 type I collagen;                                                                                                                                                                                                    |
| NVVKTRGVML     | GETNPADSKPGTIR            | N-ter +28.03 Da, K +28.03 Da              | 46.7       | 71.4              | 3      | 1497.89                      | 1.40                                         | 0.21                  | NDKA_MOUSE   | NDKB_MOUSE   | Nucleoside diphosphate kinase A;                               | Metastasis inhibition factor NM23;NDPK-A;Tumor metastatic process-associated protein;nm23-M1;                                                                                                                               |

Table S7, Tholen et al.

| Non Prime Site | Prime Site                      | Modifications                                    | Hyperscore | Mass error in ppm | Charge | Precursor neutral mass in Da | Fold change (log <sub>2</sub> ) of ASAPRatio | FC-error of ASAPRatio | Uniprot ID 1 | Uniprot ID 2 | Protein Name 1                                      | Protein Name 2                                                                                                                                                                     |
|----------------|---------------------------------|--------------------------------------------------|------------|-------------------|--------|------------------------------|----------------------------------------------|-----------------------|--------------|--------------|-----------------------------------------------------|------------------------------------------------------------------------------------------------------------------------------------------------------------------------------------|
| KGVVPLAGTN     | GETTTQGLDGLSER                  | N-ter +28.03 Da<br>N-ter +28.03 Da, K +28.03 Da, | 46.5       | 47.5              | 3      | 1490.79                      | 0.28                                         | 0.02                  | ALDOA_MOUSE  | Q9CPQ9_MOUSE | Fructose-bisphosphate aldolase A;                   | Aldolase 1;Muscle-type aldolase;                                                                                                                                                   |
| KDLTEYLSRF     | GEVVDCTIKTPDVTGR                | N-ter +28.03 Da, K +28.03 Da,<br>C +57.02 Da     | 40.2       | 67.2              | 3      | 1802.05                      | 1.14                                         | 0.11                  | HNRDL_MOUSE  | F6VQH5_MOUSE | Heterogeneous nuclear ribonucleoprotein D-like;     | JKT41-binding protein;                                                                                                                                                             |
| KDLKDYFSKF     | GEVVDCTLKLDPITGR                | N-ter +28.03 Da, K +28.03 Da,<br>C +57.02 Da     | 40.4       | 55.1              | 3      | 1828.08                      | -0.11                                        | 0.03                  | HNRPD_MOUSE  | E9QC56_MOUSE | Heterogeneous nuclear ribonucleoprotein D0;         | AU-rich element RNA-binding protein 1;                                                                                                                                             |
| DLHLKGPNVK     | GEYDVTVPR                       | N-ter +28.03 Da                                  | 37.9       | 41.0              | 2      | 1062.58                      | -0.69                                        | 0.02                  | F7BRM2_MOUSE | E9Q616_MOUSE |                                                     |                                                                                                                                                                                    |
| KTNCDLYEKL     | GEYGFQNAILVR                    | N-ter +34.06 Da                                  | 36.1       | 46.9              | 3      | 1399.83                      | -0.69                                        | 0.02                  | ALBU_MOUSE   |              | Serum albumin;                                      |                                                                                                                                                                                    |
| PPGGGSNFL      | GFDEPAEQPVR                     | N-ter +28.03 Da                                  | 42.9       | 31.7              | 2      | 1271.66                      | 0.66                                         | 0.04                  | HN1_MOUSE    |              | Hematological and neurological expressed 1 protein; |                                                                                                                                                                                    |
| TLHIVERPYS     | GFDPASSEGEPTQGEAR               | N-ter +28.03 Da                                  | 43.5       | 56.0              | 3      | 1858.94                      | -1.09                                        | 0.02                  | PTRF_MOUSE   | Q3U4N4_MOUSE | Polymerase I and transcript release factor;         | Cav-p60;Cavin-1;                                                                                                                                                                   |
|                |                                 |                                                  |            |                   |        |                              |                                              |                       |              |              |                                                     | Alpha-mannosidase IIx;Mannosidase alpha class 2A member 2;Mannosyl-oligosaccharide 1,3-1,6-alpha-mannosidase; Metastatic lymph node gene 50 protein;                               |
| SQGTFFDLN      | GFQIQPR                         | N-ter +34.06 Da                                  | 23.9       | 17.8              | 2      | 878.53                       | -0.34                                        | 0.00                  | MA2A2_MOUSE  | Q197W7_MOUSE | Alpha-mannosidase 2x;                               |                                                                                                                                                                                    |
| KEEFEKNGK      | GFVWADTPELQR                    | N-ter +34.06 Da                                  | 34.3       | 31.2              | 3      | 1451.83                      | 0.10                                         | 0.01                  | LASP1_MOUSE  | A2A6G6_MOUSE | LIM and SH3 domain protein 1;                       |                                                                                                                                                                                    |
| EEYSGLSDGY     | GFITDLFGR                       | N-ter +34.06 Da                                  | 28.0       | 35.9              | 2      | 1046.60                      | 2.18                                         | 0.12                  | HNRPF_MOUSE  |              | Heterogeneous nuclear ribonucleoprotein F;          |                                                                                                                                                                                    |
| KTDLNPDLNQ     | GGDDLDPNYVLSR                   | N-ter +28.03 Da                                  | 41.2       | 38.0              | 2      | 1534.79                      | 0.66                                         | 0.04                  | KCRM_MOUSE   | KCRB_MOUSE   | Creatine kinase M-type;                             | Creatine kinase M chain;M-CK; CDKN2A-interacting protein N-terminal-like protein;                                                                                                  |
| MV             | GGEASAAEVLVSGVR                 | N-ter +34.06 Da, K +34.06 Da                     | 54.3       | 56.6              | 3      | 1597.04                      | 0.82                                         | 0.04                  | C2AIL_MOUSE  |              | CDKN2AIP N-terminal-like protein;                   | STNC;                                                                                                                                                                              |
| KAADFMDAD      | GGGDISVKELGTVMR                 | N-ter +34.06 Da, K +34.06 Da                     | 26.7       | 71.7              | 3      | 1586.03                      | 0.82                                         | 0.07                  | TNNC2_MOUSE  |              | Troponin C, skeletal muscle;                        |                                                                                                                                                                                    |
| ETRANRAKRR     | GGGGHDALKGNVCGSR                | N-ter +28.03 Da, K +28.03 Da,<br>C +57.02 Da     | 23.8       | 105.2             | 4      | 1694.01                      | -0.23                                        | 0.01                  | FBN1_MOUSE   | A2AQ53_MOUSE | Fibrillin-1;                                        |                                                                                                                                                                                    |
| GGNFGGDSR      | GGGGNFGPGGNSFR                  | N-ter +28.03 Da                                  | 54.6       | 66.1              | 3      | 1404.75                      | -0.25                                        | 0.01                  | ROA2_MOUSE   | F6U106_MOUSE | Heterogeneous nuclear ribonucleoproteins A2/B1;     | 56 kDa cytokeatin;Cytokeatin-10;Keratin, type I cytoskeletal 59 kDa;Keratin-10; Alpha-globin;Hemoglobin alpha chain;                                                               |
| VRVSTRGSL      | GGGYSSGGFSGGFSR                 | N-ter +34.06 Da                                  | 53.8       | 26.5              | 2      | 1499.73                      | -1.60                                        | 0.15                  | K1C10_MOUSE  | A2A513_MOUSE | Keratin, type I cytoskeletal 10;                    |                                                                                                                                                                                    |
| SNIKAAWGKI     | GGHGAEGAEALER                   | N-ter +34.06 Da                                  | 57.9       | 77.0              | 3      | 1449.82                      | -0.62                                        | 0.05                  | HBA_MOUSE    | Q91V88_MOUSE | Hemoglobin subunit alpha;                           |                                                                                                                                                                                    |
| AHLTVKIFIV     | GGIKEDTEEYNLR                   | N-ter +34.06 Da, K +34.06 Da                     | 20.4       | 50.8              | 3      | 1590.93                      | -1.69                                        | 0.22                  | ROA3_MOUSE   | A2AL12_MOUSE | Heterogeneous nuclear ribonucleoprotein A3;         |                                                                                                                                                                                    |
| VASSLGLVSL     | GGKATTASQAKAVLSAEKLR            | N-ter +28.03 Da, K +28.03 Da                     | 17.7       | 84.9              | 4      | 2098.43                      | 1.80                                         | 0.22                  | SERPH_MOUSE  |              | Serpin H1;                                          | 47 kDa heat shock protein;Collagen-binding protein;Serine protease inhibitor J6;                                                                                                   |
| QEVQSRSGR      | GGNFGGDSR                       | N-ter +28.03 Da                                  | 37.3       | 48.9              | 2      | 1040.52                      | -0.58                                        | 0.01                  | ROA2_MOUSE   | F6U106_MOUSE | Heterogeneous nuclear ribonucleoproteins A2/B1;     |                                                                                                                                                                                    |
| YVASYLAL       | GGNSSPSAKDIKILDSVIGIEADDR       | N-ter +28.03 Da, K +28.03 Da                     | 31.9       | 103.6             | 4      | 2798.76                      | -5.06                                        | 1.69                  | RLA2_MOUSE   |              | 60S acidic ribosomal protein P2;                    |                                                                                                                                                                                    |
| AVLTSQETLF     | GGSDCTGNFLFKSTTKDLFR            | N-ter +28.03 Da, K +28.03 Da,<br>C +57.02 Da     | 27.3       | 107.5             | 4      | 2607.56                      | -4.32                                        | 0.86                  | TRFE_MOUSE   | E9Q035_MOUSE | Serotransferrin;                                    | Beta-1 metal-binding globulin;Siderophilin;                                                                                                                                        |
| YGGGGGGGYG     | GGSGYGGGGGGYGGGEGYSISPNYSR      | N-ter +34.06 Da                                  | 22.3       | 43.9              | 4      | 2460.19                      | -5.64                                        | 0.00                  | E9QNN1_MOUSE |              |                                                     |                                                                                                                                                                                    |
| GFSSRSLSL      | GGSKSIFGNLVGR                   | N-ter +28.03 Da, K +28.03 Da                     | 53.2       | 49.8              | 3      | 1346.83                      | -0.30                                        | 0.03                  | K2C1B_MOUSE  |              | Keratin, type II cytoskeletal 1b;                   | Cytokeatin-18;Embryonic type II keratin-1;Keratin-77;Type-II keratin Kb39;                                                                                                         |
| MQAISNNKDK     | GGYEDFVEGLR                     | N-ter +34.06 Da                                  | 37.4       | 33.6              | 2      | 1274.68                      | 0.77                                         | 0.05                  | MYL1_MOUSE   | E9PWG4_MOUSE | Myosin light chain 1/3, skeletal muscle isoform;    | Myosin light chain alkali 1/2;                                                                                                                                                     |
| PQQQMTSSY      | GGYKEPAAPVSIQR                  | N-ter +34.06 Da, K +34.06 Da                     | 31.1       | 66.2              | 3      | 1540.01                      | 0.11                                         | 0.02                  | LASP1_MOUSE  | A2A6H0_MOUSE | LIM and SH3 domain protein 1;                       | Metastatic lymph node gene 50 protein;                                                                                                                                             |
| VSESQASDSE     | GHSDFSEGGQAVGAHR                | N-ter +28.03 Da                                  | 44.3       | 109.0             | 4      | 1581.90                      | 1.10                                         | 0.19                  | E9Q019_MOUSE | FILA_MOUSE   |                                                     |                                                                                                                                                                                    |
| LRQLPFRGDD     | GIFDNDFIEER                     | N-ter +34.06 Da                                  | 45.6       | 25.3              | 2      | 1387.72                      | -1.79                                        | 0.12                  | SNX3_MOUSE   | Q78ZM0_MOUSE | Sorting nexin-3;                                    | SDP3 protein;                                                                                                                                                                      |
| VCYGRRYGPK     | GIGFGQGAGCLDSTTGEHLGLQFQQSPKPAR | N-ter +34.06 Da, K +34.06 Da,<br>C +57.02 Da     | 59.3       | 66.9              | 4      | 3281.91                      | 0.07                                         | 0.00                  | CSR3_MOUSE   |              | Cysteine and glycine-rich protein 3;                | Cysteine-rich protein 3;LIM domain protein, cardiac;Muscle LIM protein;                                                                                                            |
| NIKRNDQFLI     | GIQDGYLLQDSGEVR                 | N-ter +28.03 Da                                  | 47.9       | 66.8              | 3      | 1877.08                      | -2.12                                        | 0.37                  | IF5A1_MOUSE  |              | Eukaryotic translation initiation factor 5A-1;      | Eukaryotic initiation factor 5A isoform 1;eIF-4D;                                                                                                                                  |
| SSNSDGTGKI     | GIQLPELVSVSTKK                  | N-ter +34.06 Da, K +34.06 Da                     | 38.9       | 49.0              | 3      | 1858.24                      | 0.71                                         | 0.03                  | E9Q1H8_MOUSE | E9Q616_MOUSE |                                                     |                                                                                                                                                                                    |
| MD             | GIVPDIAGTKR                     | N-ter +34.06 Da, K +34.06 Da                     | 40.5       | 77.0              | 3      | 1292.95                      | 0.84                                         | 0.05                  | PTBP1_MOUSE  | Q92217_MOUSE | Polypyrimidine tract-binding protein 1;             | Heterogeneous nuclear ribonucleoprotein I;                                                                                                                                         |
| ARYASICOQN     | GIVPVEPELPGDHDHDKR              | N-ter +34.06 Da, K +34.06 Da                     | 43.3       | 51.4              | 4      | 2279.43                      | 0.07                                         | 0.00                  | ALDOA_MOUSE  | ALDOC_MOUSE  | Fructose-bisphosphate aldolase A;                   | Aldolase 1;Muscle-type aldolase;                                                                                                                                                   |
| EKLKRRKERF     | GIVTSSAGTGTTEDEAKKR             | N-ter +28.03 Da, K +28.03 Da                     | 43.1       | 83.6              | 4      | 2092.28                      | 1.77                                         | 0.31                  | SARNP_MOUSE  |              | SAP domain-containing ribonucleoprotein;            | Nuclear protein Hcc-1;                                                                                                                                                             |
| M              | GKDYQTGLAR                      | N-ter +34.06 Da, K +34.06 Da                     | 32.8       | 38.8              | 3      | 1451.90                      | 0.43                                         | 0.04                  | DNJB1_MOUSE  |              | Dnaj homolog subfamily B member 1;                  | Heat shock 40 kDa protein 1;                                                                                                                                                       |
| PSNQVIMLTF     | GKFDVEPDTYCR                    | N-ter +34.06 Da, K +34.06 Da,<br>C +57.02 Da     | 30.9       | 51.6              | 3      | 1553.86                      | -1.47                                        | 0.08                  | PCOC1_MOUSE  | D3ZE3_MOUSE  | Procollagen C-endopeptidase enhancer 1;             | P14;Procollagen COOH-terminal proteinase enhancer 1;Type 1 procollagen C-proteinase enhancer protein;Type I procollagen COOH-terminal proteinase enhancer;                         |
| HHLRDYFEFY     | GKIDTIEITDR                     | N-ter +28.03 Da, K +28.03 Da                     | 36.9       | 71.1              | 3      | 1428.92                      | 1.04                                         | 0.05                  | ROA2_MOUSE   | F6U106_MOUSE | Heterogeneous nuclear ribonucleoproteins A2/B1;     |                                                                                                                                                                                    |
| YNLRDYFEFY     | GKIEIIVMEDR                     | N-ter +28.03 Da, K +28.03 Da                     | 39.3       | 32.2              | 3      | 1474.82                      | 0.82                                         | 0.06                  | ROA3_MOUSE   | A2AL12_MOUSE | Heterogeneous nuclear ribonucleoprotein A3;         |                                                                                                                                                                                    |
| EDKSNIAKAW     | GKIGGHGAEGAEALER                | N-ter +34.06 Da, K +34.06 Da                     | 32.6       | 71.8              | 4      | 1782.10                      | -0.97                                        | 0.02                  | HBA_MOUSE    | Q91V88_MOUSE | Hemoglobin subunit alpha;                           | Alpha-globin;Hemoglobin alpha chain; Beta-1-globin;Hemoglobin beta-1 chain;Hemoglobin beta-major chain;                                                                            |
| AEKAASVCLW     | GKVNSEVDEGGALGR                 | N-ter +28.03 Da, K +28.03 Da                     | 52.7       | 63.1              | 3      | 1542.90                      | 0.00                                         | 0.00                  | HBB1_MOUSE   |              | Hemoglobin subunit beta-1;                          | 2-phospho-D-glycerate hydro-lyase;Enolase 3;Muscle-specific enolase;Skeletal muscle enolase;                                                                                       |
| DVAASEFYRN     | GKYDLDFKSPDDPAR                 | N-ter +28.03 Da, K +28.03 Da                     | 36.0       | 54.9              | 4      | 1807.01                      | 0.14                                         | 0.01                  | ENOB_MOUSE   |              | Beta-enolase;                                       | Carboxypeptidase N 83 kDa chain;Carboxypeptidase N large subunit;Carboxypeptidase N polypeptide 2;Carboxypeptidase N regulatory subunit; Calsequestrin-1, skeletal muscle isoform; |
| NPGHLSRFL      | GLDEGEPAGSWDLTVEGR              | N-ter +28.03 Da                                  | 45.2       | 60.2              | 3      | 1915.01                      | -1.25                                        | 0.03                  | CPN2_MOUSE   |              | Carboxypeptidase N subunit 2;                       |                                                                                                                                                                                    |
| TPRLGVQGED     | GLDFPEYDGVDR                    | N-ter +34.06 Da                                  | 31.2       | 5.0               | 2      | 1415.69                      | -0.58                                        | 0.04                  | CASQ1_MOUSE  | E9Q489_MOUSE | Calsequestrin-1;                                    |                                                                                                                                                                                    |

Table S7, Tholen et al.

| Non Prime Site | Prime Site                       | Modifications                             | Hyperscore | Mass error in ppm | Charge | Precursor neutral mass in Da | Fold change (log <sub>2</sub> ) of ASAPRatio | FC-error of ASAPRatio | Uniprot ID 1 | Uniprot ID 2 | Protein Name 1                                                                                              | Protein Name 2                                                                                                                                                                                                                                                                    |
|----------------|----------------------------------|-------------------------------------------|------------|-------------------|--------|------------------------------|----------------------------------------------|-----------------------|--------------|--------------|-------------------------------------------------------------------------------------------------------------|-----------------------------------------------------------------------------------------------------------------------------------------------------------------------------------------------------------------------------------------------------------------------------------|
| VTVVRNLETY     | GLDPCSVAAILQQR                   | N-ter +28.03 Da, C +57.02 Da              | 47.3       | 58.5              | 3      | 1554.91                      | 0.63                                         | 0.04                  | E1F2D_MOUSE  | E9PUG7_MOUSE | Eukaryotic translation initiation factor 2D;                                                                | Ligatin;                                                                                                                                                                                                                                                                          |
| KTFSHELSDF     | GLESTTGEVPPVAIR                  | N-ter +28.03 Da                           | 39.3       | 31.1              | 3      | 1554.91                      | 1.06                                         | 0.08                  | PDIA3_MOUSE  |              | Protein disulfide-isomerase A3;                                                                             | 58 kDa glucose-regulated protein;58 kDa microsomal protein;Disulfide isomerase ER-60;Endoplasmic reticulum resident protein 57;Endoplasmic reticulum resident protein 60;                                                                                                         |
| MFGGLSSWL      | GLKPPGAAEEGEEPPSR                | N-ter +34.06 Da, K +34.06 Da              | 25.5       | 50.6              | 3      | 1859.10                      | -1.56                                        | 0.09                  | SYAP1_MOUSE  |              | Synapse-associated protein 1;                                                                               | GCS heavy chain;Gamma-ECS;Gamma-glutamylcysteine synthetase;                                                                                                                                                                                                                      |
| M              | GLLSQGSPLSWEETQR                 | N-ter +28.03 Da                           | 62.2       | 51.5              | 3      | 1815.01                      | 0.77                                         | 0.06                  | GSH1_MOUSE   |              | Glutamate--cysteine ligase catalytic subunit;                                                               | Alpha-2 type I collagen;                                                                                                                                                                                                                                                          |
| PGLKGYSLQ      | GLPGLAGLHGDQGAGPVPAGPR           | N-ter +28.03 Da                           | 49.2       | 82.1              | 4      | 2175.33                      | 0.82                                         | 0.07                  | CO1A2_MOUSE  | E9Q6U9_MOUSE | Collagen alpha-2(I) chain;                                                                                  |                                                                                                                                                                                                                                                                                   |
| MGTK           | GLPLYPDCR                        | N-ter +34.06 Da, C +57.02 Da              | 43.1       | 21.3              | 2      | 1220.67                      | -0.23                                        | 0.01                  | YI005_MOUSE  |              | Uncharacterized protein FLJ45252 homolog;                                                                   |                                                                                                                                                                                                                                                                                   |
| QPRGSLRSVR     | GLSAPSCGLDDKTEASAR               | N-ter +34.06 Da, K +34.06 Da, C +57.02 Da | 57.1       | 62.4              | 3      | 1999.16                      | -1.29                                        | 0.19                  | PLIN1_MOUSE  |              | Perilipin-1;                                                                                                | Lipid droplet-associated protein;Perilipin A;                                                                                                                                                                                                                                     |
| SLDQTMAAF      | GLSVPNVHGLAPLAIPIASAAAAAASR      | N-ter +28.03 Da                           | 55.7       | 75.0              | 4      | 2480.57                      | 0.26                                         | 0.03                  | PTBP1_MOUSE  | Q92217_MOUSE | Poly(pyrimidine tract-binding protein 1);                                                                   | Heterogeneous nuclear ribonucleoprotein I;                                                                                                                                                                                                                                        |
| ERRRQLAEKY     | GLTLDPEADSEYLSR                  | N-ter +28.03 Da                           | 33.3       | 6.5               | 2      | 1692.83                      | 0.42                                         | 0.04                  | SVIL_MOUSE   | Q8K4L2_MOUSE | Supervillin;                                                                                                | Archvillin;p205/p250;                                                                                                                                                                                                                                                             |
| KGYMRPTKSR     | GLTPDLPKSASQER                   | N-ter +28.03 Da, K +28.03 Da              | 29.2       | 66.8              | 3      | 1553.95                      | -0.32                                        | 0.02                  | F7CK47_MOUSE |              | Microtubule-associated protein;                                                                             |                                                                                                                                                                                                                                                                                   |
| GRPRHQGMV      | GMGQKDSYVGEAQSKR                 | N-ter +34.06 Da, K +34.06 Da              | 38.8       | 92.1              | 4      | 1957.22                      | 0.41                                         | 0.05                  | ACT5_MOUSE   | ACTA_MOUSE   | Actin, alpha skeletal muscle;                                                                               | Alpha-actin-1;                                                                                                                                                                                                                                                                    |
| VGPISGADLH     | GMLEIPDLR                        | N-ter +34.06 Da                           | 34.2       | 21.0              | 2      | 1076.63                      | 0.25                                         | 0.02                  | DSG1A_MOUSE  | DSG1B_MOUSE  | Desmoglein-1-alpha;                                                                                         | DG1;DG1;Desmosomal glycoprotein I;                                                                                                                                                                                                                                                |
| IFAREILDSR     | GNPTVEVDLHTAKGR                  | N-ter +28.03 Da, K +28.03 Da              | 21.6       | 101.9             | 4      | 1649.06                      | 0.71                                         | 0.02                  | ENOB_MOUSE   | Q5SX59_MOUSE | Beta-enolase;                                                                                               | 2-phospho-D-glycerate hydro-lyase;Enolase 3;Muscle-specific enolase;Skeletal muscle enolase;                                                                                                                                                                                      |
| LAGLVFVSEA     | GPAGAGESKCLPMVKLVDAVR            | N-ter +34.06 Da, K +34.06 Da, C +57.02 Da | 41.1       | 57.3              | 3      | 2256.45                      | -0.11                                        | 0.00                  | TTHY_MOUSE   |              | Transthyretin;                                                                                              | Prealbumin;                                                                                                                                                                                                                                                                       |
| YHEINTDFM      | GLPSLSAESLKR                     | N-ter +28.03 Da, K +28.03 Da              | 34.2       | 69.2              | 3      | 1584.00                      | -0.62                                        | 0.06                  | PPR3A_MOUSE  |              | Protein phosphatase 1 regulatory subunit 3A;                                                                | Protein phosphatase 1 glycogen-associated regulatory subunit;Protein phosphatase type-1 glycogen targeting subunit;                                                                                                                                                               |
| SMPDVLHLK      | GNPKVGEYDVTVPR                   | N-ter +28.03 Da, K +28.03 Da              | 30.4       | 68.0              | 3      | 1585.95                      | -0.15                                        | 0.01                  | E9Q616_MOUSE | F7BRM2_MOUSE | Lamina-associated polypeptide 2, isoforms                                                                   | Thymopoietin isoforms alpha/zeta;                                                                                                                                                                                                                                                 |
| PPLAAGANSK     | GPPDFSSDEEREPTVLGSGASVGR         | N-ter +28.03 Da                           | 44.2       | 79.3              | 4      | 2570.43                      | 1.71                                         | 0.09                  | LAP2A_MOUSE  | LAP2B_MOUSE  | alpha/zeta;                                                                                                 |                                                                                                                                                                                                                                                                                   |
| QDHPSSMGVY     | GQESGGFSGPENR                    | N-ter +34.06 Da                           | 48.9       | 62.6              | 3      | 1411.74                      | 0.54                                         | 0.05                  | EWS_MOUSE    | Q5SUS8_MOUSE | RNA-binding protein EWS;                                                                                    | CarG-binding factor-A;                                                                                                                                                                                                                                                            |
| ATEEKIREYF     | GQFGEIEAIELPIDPKLNKR             | N-ter +28.03 Da, K +28.03 Da              | 47.4       | 90.9              | 4      | 2350.54                      | -1.60                                        | 0.24                  | ROAA_MOUSE   | Q80XR6_MOUSE | Heterogeneous nuclear ribonucleoprotein A/B;                                                                | Basement-membrane protein 40;Osteonectin;Secreted protein acidic and rich in cysteine;                                                                                                                                                                                            |
| MYIFPVHWQF     | GQLDQHPIDGYSLTELAPLR             | N-ter +34.06 Da                           | 52.8       | 62.1              | 4      | 2393.40                      | -0.12                                        | 0.01                  | SPRC_MOUSE   | Q5NCU4_MOUSE | SPARC;                                                                                                      |                                                                                                                                                                                                                                                                                   |
| RSRTLVCGTC     | GQPADKAAGGAGAGQVGSISSGSSASSVTVTR | N-ter +28.03 Da, K +28.03 Da              | 66.1       | 76.6              | 4      | 2873.67                      | 0.61                                         | 0.06                  | LMNA_MOUSE   |              | Prelamin-A/C;                                                                                               |                                                                                                                                                                                                                                                                                   |
| FQLRSICYLL     | GQPEPLAPGTTLPAPDR                | N-ter +28.03 Da                           | 26.3       | 37.4              | 3      | 1743.98                      | 0.01                                         | 0.00                  | RN123_MOUSE  | Q05CH9_MOUSE | E3 ubiquitin-protein ligase RNF123;                                                                         | Kip1 ubiquitination-promoting complex protein 1;RING finger protein 123;                                                                                                                                                                                                          |
| VSKQPSRITN     | GQPQQTGAASGGYIKR                 | N-ter +34.06 Da, K +34.06 Da              | 40.3       | 73.8              | 3      | 1787.13                      | 0.61                                         | 0.05                  | SNP23_MOUSE  | Q9D3L3_MOUSE | Synaptosomal-associated protein 23;                                                                         | Syndet;Vesicle-membrane fusion protein SNAP-23;                                                                                                                                                                                                                                   |
| EVQVVRGHYK     | GQQJGKVVQVYR                     | N-ter +34.06 Da, K +34.06 Da              | 30.8       | 69.8              | 3      | 1442.00                      | -0.79                                        | 0.05                  | RL26_MOUSE   | D3Z3Q9_MOUSE | 60S ribosomal protein L26;                                                                                  | Silica-induced gene 20 protein;                                                                                                                                                                                                                                                   |
| HGHGHGYAA      | GQTWQEGDKVIRPQVSGAGEMEQFGQVGR    | N-ter +34.06 Da, K +34.06 Da              | 28.5       | 60.2              | 4      | 3370.90                      | -0.11                                        | 0.01                  | E9QP82_MOUSE |              |                                                                                                             |                                                                                                                                                                                                                                                                                   |
| MR             | GQVGDLSPPQQEALAR                 | N-ter +34.06 Da                           | 51.2       | 45.0              | 3      | 1729.99                      | -0.36                                        | 0.02                  | S14L4_MOUSE  |              | SEC14-like protein 4;                                                                                       | Branched-chain alpha-keto acid dehydrogenase complex component E2;Dihydroliipoamide acetyltransferase component of branched-chain alpha-keto acid dehydrogenase complex;Dihydroliipoamide branched chain transacylase;Dihydroliipoalysine-residue (2-methylpropanoyl)transferase; |
| HSLRTAAVLQ     | GQVQFKLSDIGEGIR                  | N-ter +34.06 Da, K +34.06 Da              | 43.7       | 69.4              | 3      | 1813.20                      | 0.35                                         | 0.02                  | ODB2_MOUSE   |              | Lipoamide acyltransferase component of branched-chain alpha-keto acid dehydrogenase complex, mitochondrial; | Alpha-2 type I collagen;                                                                                                                                                                                                                                                          |
| EGPVGPLGID     | GRPGIPGAGPR                      | N-ter +28.03 Da                           | 32.5       | 60.6              | 3      | 1158.73                      | 1.55                                         | 0.11                  | CO1A2_MOUSE  | E9Q6U9_MOUSE | Collagen alpha-2(I) chain;                                                                                  |                                                                                                                                                                                                                                                                                   |
| RGDSPKIDLA     | GSALSGLDKLDSLR                   | N-ter +34.06 Da, K +34.06 Da              | 38.5       | 79.5              | 3      | 1614.05                      | -0.40                                        | 0.03                  | SH3K1_MOUSE  | B0R0Y8_MOUSE | SH3 domain-containing kinase-binding protein 1;                                                             | Regulator of ubiquitous kinase;SH3-containing, expressed in tumorigenic astrocytes;                                                                                                                                                                                               |
| EETLALVCDN     | GSGLVKAGFAGDDAPR                 | N-ter +28.03 Da, K +28.03 Da              | 36.0       | 73.7              | 3      | 1572.94                      | 0.67                                         | 0.08                  | ACTC_MOUSE   | ACTS_MOUSE   | Actin, alpha cardiac muscle 1;                                                                              | Alpha-cardiac actin;                                                                                                                                                                                                                                                              |
| HPTSPRPPG      | GSITVYKPEIR                      | N-ter +28.03 Da, K +28.03 Da              | 40.4       | 60.1              | 3      | 1430.94                      | 0.54                                         | 0.03                  | MA2B2_MOUSE  |              | Epididymis-specific alpha-mannosidase;                                                                      | Mannosidase alpha class 2B member 2;                                                                                                                                                                                                                                              |
| GGRPAMEPGN     | GSLDLGGDAAGR                     | N-ter +34.06 Da                           | 57.5       | 26.3              | 2      | 1121.62                      | 1.63                                         | 0.02                  | HNRPU_MOUSE  |              | Heterogeneous nuclear ribonucleoprotein U;                                                                  | Scaffold attachment factor A;                                                                                                                                                                                                                                                     |
| EASITGPMHT     | GSPGLWEASILKTGAEDTR              | N-ter +34.06 Da, K +34.06 Da              | 53.2       | 60.8              | 3      | 2055.25                      | 0.39                                         | 0.05                  | Q3URZ6_MOUSE | F7DBB3_MOUSE |                                                                                                             |                                                                                                                                                                                                                                                                                   |
| GQSSANRRRA     | GSSSGSVQVASAGGLAADASR            | N-ter +34.06 Da                           | 82.6       | 45.9              | 3      | 1883.01                      | 1.52                                         | 0.24                  | FILA_MOUSE   | F7BVV1_MOUSE | Filaggrin;                                                                                                  |                                                                                                                                                                                                                                                                                   |
| HGPPMDQYL      | GSTPVGSGVYR                      | N-ter +28.03 Da                           | 37.7       | 50.5              | 2      | 1106.63                      | 0.61                                         | 0.04                  | SF01_MOUSE   | Q3UI45_MOUSE | Splicing factor 1;                                                                                          | CW17;Mammalian branch point-binding protein;Transcription factor ZFM1;Zinc finger gene in MEN1 locus;Zinc finger protein 162;                                                                                                                                                     |
| GDHSTPPSAY     | GSKPYTNFDAER                     | N-ter +34.06 Da, K +34.06 Da              | 44.7       | 53.6              | 3      | 1550.92                      | 1.40                                         | 0.21                  | ANXA2_MOUSE  | B0V2N7_MOUSE | Annexin A2;                                                                                                 | Annexin II;Annexin-2;Calpactin I heavy chain;Calpactin-1 heavy chain;Chromobindin-8;Lipocortin II;Placental anticoagulant protein IV;Protein I;p36;                                                                                                                               |

Table S7, Tholen et al.

| Non Prime Site | Prime Site                                            | Modifications                                                | Hyperscore | Mass error in ppm | Charge | Precursor neutral mass in Da | Fold change (log <sub>2</sub> ) of ASAPRatio | FC-error of ASAPRatio | Uniprot ID 1 | Uniprot ID 2 | Protein Name 1                                                        | Protein Name 2                                                                                                                                               |
|----------------|-------------------------------------------------------|--------------------------------------------------------------|------------|-------------------|--------|------------------------------|----------------------------------------------|-----------------------|--------------|--------------|-----------------------------------------------------------------------|--------------------------------------------------------------------------------------------------------------------------------------------------------------|
| ISTSVCLRAH     | GSVVKSEDYAFPTYADR<br>GTCGQPADKAAGGAGAQVGGSISSGSSASVTV | N-ter +28.03 Da, K +28.03 Da<br>N-ter +34.06 Da, K +34.06 Da | 38.7       | 70.5              | 3      | 1960.10                      | 0.64                                         | 0.07                  | COX41_MOUSE  |              | Cytochrome c oxidase subunit 4 isoform 1, mitochondrial;              | Cytochrome c oxidase polypeptide IV;Cytochrome c oxidase subunit IV isoform 1;                                                                               |
| YNLRSRTVLC     |                                                       | C +57.02 Da                                                  | 73.1       | 77.0              | 4      | 3203.86                      | -1.40                                        | 0.18                  | LMNA_MOUSE   |              | Prelamin-A/C;                                                         |                                                                                                                                                              |
| ILTRLRLQKR     | GTGGVDTAAVGAVFDISNADR                                 | N-ter +28.03 Da                                              | 67.1       | 52.8              | 3      | 2020.09                      | 1.86                                         | 0.05                  | KCRM_MOUSE   |              | Creatine kinase M-type;                                               | Creatine kinase M chain;M-CK;                                                                                                                                |
| SVCVHLRNL      | GTLDNPSLDEYATER                                       | N-ter +28.03 Da                                              | 43.5       | 54.9              | 3      | 1794.93                      | 0.26                                         | 0.03                  | FRDA_MOUSE   | E9Q2P9_MOUSE | Frataxin, mitochondrial;                                              |                                                                                                                                                              |
| FDQTTISLQMQ    | GTNKGASQAGMLAPGTR                                     | N-ter +28.03 Da, K +28.03 Da                                 | 34.7       | 49.6              | 3      | 1671.96                      | 0.88                                         | 0.05                  | CNN3_MOUSE   |              | Calponin-3;                                                           | Calponin, acidic isoform;                                                                                                                                    |
| RKNKMASNIF     | GTPEENPPSWAKSAGSKSSGGR                                | N-ter +34.06 Da, K +34.06 Da                                 | 30.3       | 65.7              | 4      | 2288.38                      | 0.12                                         | 0.01                  | HN1_MOUSE    |              | Hematological and neurological expressed 1 protein;                   |                                                                                                                                                              |
| TIDCDVITLML    | GTSPGTAEPYDGTAKAR                                     | N-ter +34.06 Da, K +34.06 Da                                 | 41.3       | 70.7              | 3      | 1675.00                      | 0.44                                         | 0.10                  | BSDC1_MOUSE  |              | BSD domain-containing protein 1;                                      |                                                                                                                                                              |
| QEFQHYPMAMG    | GVAPQALVAASGPGSSFR                                    | N-ter +34.06 Da                                              | 63.6       | 30.5              | 3      | 1776.03                      | 0.18                                         | 0.01                  | A2M_MOUSE    | D3YW52_MOUSE | Alpha-2-macroglobulin;                                                | Pregnancy zone protein;                                                                                                                                      |
| CDLPIKISQLD    | GVDDGTESDTSVTATSR                                     | N-ter +28.03 Da                                              | 39.9       | 51.0              | 3      | 1724.86                      | 0.25                                         | 0.05                  | MLL1_MOUSE   | E9QNQ1_MOUSE | Histone-lysine N-methyltransferase MLL;                               | ALL-1;Zinc finger protein HRX;                                                                                                                               |
| RLRLQKRGTQ     | GVDTAAVAVGAVFDISNADR                                  | N-ter +28.03 Da                                              | 64.1       | 53.5              | 3      | 1804.99                      | 0.21                                         | 0.01                  | KCRM_MOUSE   |              | Creatine kinase M-type;                                               | Creatine kinase M chain;M-CK;                                                                                                                                |
| LDHGRTLREQ     | GVEEHETLLLR                                           | N-ter +34.06 Da                                              | 36.3       | 55.6              | 3      | 1328.83                      | 1.08                                         | 0.06                  | TLN1_MOUSE   | A2AIM2_MOUSE | Talin-1;                                                              |                                                                                                                                                              |
| EYVSPNSEDEV    | GVEGPKGDPGPGQGR                                       | N-ter +28.03 Da, K +28.03 Da                                 | 36.7       | 69.1              | 3      | 1502.89                      | 0.77                                         | 0.25                  | CO1A1_MOUSE  | F8WGB7_MOUSE | Collagen alpha-1(I) chain;                                            | Alpha-1 type I collagen;                                                                                                                                     |
| M              | GVEIETISPGDGR                                         | N-ter +28.03 Da                                              | 41.6       | 37.9              | 2      | 1356.74                      | -0.27                                        | 0.01                  | FKB1B_MOUSE  |              | Peptidyl-prolyl cis-trans isomerase FKBP1B;                           | 12.6 kDa FK506-binding protein;FK506-binding protein 1B;immunophilin FKBP12.6;Rotamase;                                                                      |
| ADCAVLIVAA     | GVGEFEAGISKNGQTR                                      | N-ter +28.03 Da, K +28.03 Da                                 | 37.0       | 68.0              | 3      | 1705.00                      | 1.13                                         | 0.10                  | EF1A1_MOUSE  | EF1A2_MOUSE  | Elongation factor 1-alpha 1;                                          | Elongation factor Tu;Eukaryotic elongation factor 1 A-1;                                                                                                     |
| PSVIGRPRHQ     | GVMVMGQKQDSYVGEAQSQR                                  | N-ter +28.03 Da, K +28.03 Da                                 | 38.6       | 60.1              | 4      | 2325.29                      | -0.20                                        | 0.02                  | ACTA_MOUSE   | ACTB_MOUSE   | Actin, aortic smooth muscle;                                          | Alpha-actin-2;                                                                                                                                               |
| M              | GVQPPNFWSVLPGR                                        | N-ter +28.03 Da                                              | 37.0       | 46.8              | 3      | 1580.92                      | 0.10                                         | 0.01                  | DUS23_MOUSE  |              | Dual specificity protein phosphatase 23;                              | Low molecular mass dual specificity phosphatase 3;                                                                                                           |
| AQKEAEKVAH     | GVQTGVNQAGKETQR                                       | N-ter +28.03 Da, K +28.03 Da                                 | 28.7       | 75.5              | 3      | 1627.99                      | 1.20                                         | 0.12                  | SBSN_MOUSE   | E9QP82_MOUSE | Suprabasin;                                                           |                                                                                                                                                              |
| M              | GVQVETISPGDGR                                         | N-ter +28.03 Da                                              | 52.9       | 35.1              | 2      | 1341.74                      | 1.27                                         | 0.07                  | FKB1A_MOUSE  | Q1JUQ8_MOUSE | Peptidyl-prolyl cis-trans isomerase FKBP1A;                           | 12 kDa FK506-binding protein;FK506-binding protein 1A;immunophilin FKBP12;Rotamase;                                                                          |
| LTLPRAARGF     | GVQVSPSGEKITHGTQVYDEKDYR                              | N-ter +34.06 Da, K +34.06 Da                                 | 24.5       | 73.7              | 4      | 2794.71                      | -0.86                                        | 0.14                  | NDU56_MOUSE  | D3YW32_MOUSE | NADH dehydrogenase [ubiquinone] iron-sulfur protein 6, mitochondrial; | Complex I-13kD-A;NADH-ubiquinone oxidoreductase 13 kDa-A subunit;                                                                                            |
| ARGAQVRGNA     | GVSDGSEVAKAQAAPGGASPTIFSR                             | N-ter +28.03 Da, K +28.03 Da                                 | 36.0       | 68.5              | 4      | 2571.54                      | 0.21                                         | 0.03                  | HINT2_MOUSE  |              | Histidine triad nucleotide-binding protein 2, mitochondrial;          | HINT-3;                                                                                                                                                      |
| WQEGDKVIRP     | GVSQAGEEMEFGQGVRR                                     | N-ter +34.06 Da                                              | 50.3       | 42.1              | 3      | 1841.96                      | 0.01                                         | 0.00                  | SBSN_MOUSE   | E9QP82_MOUSE | Suprabasin;                                                           |                                                                                                                                                              |
| GNFAAQYSDK     | GVSSGPGPMLMGR                                         | N-ter +28.03 Da                                              | 66.2       | 49.1              | 3      | 1426.78                      | 0.38                                         | 0.02                  | CO1A2_MOUSE  | E0CXI2_MOUSE | Collagen alpha-2(I) chain;                                            | Alpha-2 type I collagen;                                                                                                                                     |
| SAPPKLASK      | GVVPEDAVETLAGSLGR                                     | N-ter +34.06 Da                                              | 60.6       | 51.9              | 3      | 1804.07                      | -0.18                                        | 0.03                  | ICAL_MOUSE   | Q921U7_MOUSE | Calpastatin;                                                          | Calpain inhibitor;                                                                                                                                           |
| GGNFASQMSY     | GYDEKSAGSVSPGMPGSPGR                                  | N-ter +28.03 Da, K +28.03 Da                                 | 38.1       | 45.6              | 3      | 2100.13                      | 0.42                                         | 0.01                  | CO1A1_MOUSE  | F8WGB7_MOUSE | Collagen alpha-1(I) chain;                                            | Alpha-1 type I collagen;                                                                                                                                     |
| QAISNKKDQSQ    | GYEDFVEGLR                                            | N-ter +28.03 Da                                              | 34.3       | 47.9              | 2      | 1211.64                      | 0.21                                         | 0.02                  | MYL1_MOUSE   | E9PWG4_MOUSE | Myosin light chain 1/3, skeletal muscle isoform;                      | Myosin light chain alkali 1/2;                                                                                                                               |
| AFRVFDKQDN     | GYISAELR                                              | N-ter +34.06 Da                                              | 31.1       | 15.3              | 2      | 1012.59                      | 0.50                                         | 0.03                  | CALM_MOUSE   | Q3UKW2_MOUSE | Calmodulin;                                                           |                                                                                                                                                              |
| QQQMTSSYSG     | GYKEPAAPVSIQR                                         | N-ter +34.06 Da, K +34.06 Da                                 | 37.8       | 65.7              | 3      | 1482.98                      | -0.03                                        | 0.00                  | LASP1_MOUSE  | A2A6H0_MOUSE | LIM and SH3 domain protein 1;                                         | Metastatic lymph node gene 50 protein;                                                                                                                       |
| TQCARIVEKY     | GYTHLSAGELLR                                          | N-ter +34.06 Da                                              | 30.1       | 35.7              | 3      | 1349.80                      | -0.74                                        | 0.04                  | KCY_MOUSE    |              | UMP-CMP kinase;                                                       | Cytidine monophosphate kinase;Cytidylylate kinase;Deoxycytidylylate kinase;Uridine monophosphate kinase;Uridine monophosphate/cytidine monophosphate kinase; |
| TQCEKIVQKY     | GYTHLSTGDLR                                           | N-ter +28.03 Da                                              | 41.9       | 66.2              | 3      | 1359.80                      | -1.84                                        | 0.20                  | KAD1_MOUSE   |              | Adenylate kinase isoenzyme 1;                                         | ATP-AMP transphosphorylase 1;Myokinase;                                                                                                                      |
| GHPFMWNEHL     | GYVLTCPNSLGTGLR                                       | N-ter +28.03 Da, C +57.02 Da                                 | 39.2       | 40.8              | 3      | 1634.91                      | 0.29                                         | 0.02                  | KCRM_MOUSE   |              | Creatine kinase M-type;                                               | Creatine kinase M chain;M-CK;                                                                                                                                |
| SDHRTYHDLR     | HAIFSPVASVESASGETLHSPK                                | N-ter +34.06 Da, K +34.06 Da                                 | 58.6       | 81.9              | 4      | 2205.35                      | -1.52                                        | 0.22                  | FETUA_MOUSE  |              | Alpha-2-HS-glycoprotein;                                              | Countertrypsin;Fetuin-A;                                                                                                                                     |
| GIVEGLMTTV     | HAITATQKTVDPGSPGLWLR                                  | N-ter +28.03 Da, K +28.03 Da                                 | 21.0       | 77.2              | 4      | 2149.37                      | -1.09                                        | 0.12                  | G3P_MOUSE    | F8WJL5_MOUSE | Glyceraldehyde-3-phosphate dehydrogenase;                             | Peptidyl-cysteine S-nitrosylase GAPDH;                                                                                                                       |
| MGHM           | HAPGKGLSQSALPYR                                       | N-ter +34.06 Da, K +34.06 Da                                 | 26.1       | 64.5              | 3      | 1649.08                      | -0.43                                        | 0.01                  | RS13_MOUSE   | Q921R2_MOUSE | 40S ribosomal protein S13;                                            |                                                                                                                                                              |
| RPRSRTLAV      | HDALILEDVFPSEIVGKR                                    | N-ter +28.03 Da, K +28.03 Da                                 | 32.7       | 80.4              | 4      | 2093.32                      | -0.40                                        | 0.06                  | RS7_MOUSE    | F6SVV1_MOUSE | 40S ribosomal protein S7;                                             |                                                                                                                                                              |
| GPHGGYHSHY     | HDEGYGPPPHYEGR                                        | N-ter +28.03 Da                                              | 37.2       | 92.2              | 4      | 1734.94                      | 1.98                                         | 0.16                  | HNRPL_MOUSE  | E9Q8W8_MOUSE | Heterogeneous nuclear ribonucleoprotein L;                            |                                                                                                                                                              |
| QICPNNLVAF     | HDFSSDLENVPLHR                                        | N-ter +28.03 Da                                              | 41.2       | 104.2             | 4      | 1693.00                      | -1.09                                        | 0.12                  | PRELP_MOUSE  |              | Prolargin;                                                            | Proline-arginine-rich end leucine-rich repeat protein;                                                                                                       |
| LLGTLPARAA     | HEDPVKEVIEGFSR                                        | N-ter +28.03 Da, K +28.03 Da                                 | 36.9       | 41.7              | 4      | 1696.95                      | 0.50                                         | 0.01                  | SBSN_MOUSE   | E9QP82_MOUSE | Suprabasin;                                                           |                                                                                                                                                              |
| YWKTLGISPF     | HEFADVFTANDSGHR                                       | N-ter +34.06 Da                                              | 49.9       | 49.8              | 3      | 1834.97                      | -1.94                                        | 0.30                  | THY_MOUSE    |              | Transthyretin;                                                        | Prealbumin;                                                                                                                                                  |
| PTDKHKTDLN     | HENKGGDDLDPNYLSSR                                     | N-ter +28.03 Da, K +28.03 Da                                 | 27.4       | 53.5              | 4      | 2184.20                      | 0.49                                         | 0.01                  | KCRM_MOUSE   |              | Creatine kinase M-type;                                               | Creatine kinase M chain;M-CK;                                                                                                                                |
| LIGALCAIC      | HGNPVDDICAKPR                                         | N-ter +28.03 Da, K +28.03 Da, C +57.02 Da                    | 46.1       | 70.2              | 3      | 1646.97                      | 0.45                                         | 0.05                  | ANT3_MOUSE   |              | Antithrombin-III;                                                     | Serpin C1;                                                                                                                                                   |
| ENLATAFTIL     | HHPEFTPDQPTER                                         | N-ter +28.03 Da                                              | 33.1       | 86.1              | 3      | 1617.89                      | -0.12                                        | 0.02                  | TXLNB_MOUSE  |              | Beta-taxilin;                                                         | Muscle-derived protein 77;                                                                                                                                   |
| PVRLTFPLDY     | HLNQPLFLVLR                                           | N-ter +28.03 Da                                              | 21.8       | 48.9              | 3      | 1410.88                      | 3.21                                         | 0.06                  | PEDF_MOUSE   |              | Pigment epithelium-derived factor;                                    | Caspin;Serpin F1;Stromal cell-derived factor 3;                                                                                                              |
| SMSSGLEFVY     | HNPPSEAAAPPVAR                                        | N-ter +28.03 Da                                              | 25.7       | 46.1              | 3      | 1440.81                      | 0.31                                         | 0.01                  | ATX2_MOUSE   | E9QQ60_MOUSE | Ataxin-2;                                                             | Spinocerebellar ataxia type 2 protein homolog;                                                                                                               |
| HIPTSAFVYQ     | HPVSVYKVTSPGLR                                        | N-ter +28.03 Da, K +28.03 Da                                 | 22.9       | 70.8              | 3      | 1595.03                      | 2.69                                         | 0.28                  | E9Q476_MOUSE |              |                                                                       |                                                                                                                                                              |
| VFPSVIGRPR     | HQQVMVMGQKQDSYVGEAQSQR                                | N-ter +34.06 Da, K +34.06 Da                                 | 63.5       | 62.9              | 4      | 2452.41                      | -4.06                                        | 0.00                  | ACT5_MOUSE   |              | Actin, alpha skeletal muscle;                                         | Alpha-actin-1;                                                                                                                                               |
| PSPLAVPRRA     | HSILPVDDDDINGNEEQQLR                                  | N-ter +34.06 Da, K +34.06 Da                                 | 58.7       | 66.3              | 4      | 2500.52                      | 0.71                                         | 0.08                  | IVD_MOUSE    |              | Isovaleryl-CoA dehydrogenase, mitochondrial;                          |                                                                                                                                                              |
| QAQQAMDVQL     | HSPAFQFPDVFDR                                         | N-ter +28.03 Da                                              | 37.1       | 67.6              | 3      | 1702.96                      | -1.40                                        | 0.22                  | CLUS_MOUSE   |              | Clusterin;                                                            | Apolipoprotein J;Clusterin;Sulfated glycoprotein 2;                                                                                                          |
| MPAY           | HSSLMDPDKLIGNMALLPLR                                  | N-ter +28.03 Da, K +28.03 Da                                 | 23.9       | 81.9              | 4      | 2377.48                      | 0.39                                         | 0.04                  | ARPC3_MOUSE  |              | Actin-related protein 2/3 complex subunit 3;                          | Arp2/3 complex 21 kDa subunit;                                                                                                                               |

Table S7, Tholen et al.

| Non Prime Site                                                                                                                        | Prime Site                                                                                                                                                                                | Modifications                                                                                                                                                                                                                                                            | Hyperscore                                                                   | Mass error in ppm                                                            | Charge                                         | Precursor neutral mass in Da                                                                               | Fold change (log <sub>2</sub> ) of ASAPRatio                                         | FC-error of ASAPRatio                                                        | Uniprot ID 1                                                                                                                                | Uniprot ID 2                                                              | Protein Name 1                                                                                                                                                                                                                    | Protein Name 2                                                                                                                                                                                                                                                                                                                                                                                                                                                                         |
|---------------------------------------------------------------------------------------------------------------------------------------|-------------------------------------------------------------------------------------------------------------------------------------------------------------------------------------------|--------------------------------------------------------------------------------------------------------------------------------------------------------------------------------------------------------------------------------------------------------------------------|------------------------------------------------------------------------------|------------------------------------------------------------------------------|------------------------------------------------|------------------------------------------------------------------------------------------------------------|--------------------------------------------------------------------------------------|------------------------------------------------------------------------------|---------------------------------------------------------------------------------------------------------------------------------------------|---------------------------------------------------------------------------|-----------------------------------------------------------------------------------------------------------------------------------------------------------------------------------------------------------------------------------|----------------------------------------------------------------------------------------------------------------------------------------------------------------------------------------------------------------------------------------------------------------------------------------------------------------------------------------------------------------------------------------------------------------------------------------------------------------------------------------|
| LLCMPFGKS<br>MVKKTKAQTG                                                                                                               | HTEEDFIHTKTGR<br>HTLLEDDYQIVERPQR                                                                                                                                                         | N-ter +28.03 Da, K +28.03 Da<br>N-ter +34.06 Da                                                                                                                                                                                                                          | 23.7<br>40.1                                                                 | 92.8<br>89.4                                                                 | 4<br>4                                         | 1703.05<br>1930.22                                                                                         | 0.10<br>-0.27                                                                        | 0.01<br>0.02                                                                 | CHLE_MOUSE<br>SPG20_MOUSE                                                                                                                   |                                                                           | Cholinesterase;<br>Spartin;                                                                                                                                                                                                       | Acylcholine acylhydrolase;Butyrylcholine esterase;Choline esterase I;Pseudocholinesterase;                                                                                                                                                                                                                                                                                                                                                                                             |
| HRSGETEDTF                                                                                                                            | IADLVVLCTGQIKTGAPCR                                                                                                                                                                       | N-ter +28.03 Da, K +28.03 Da, C +57.02 Da                                                                                                                                                                                                                                | 51.5                                                                         | 79.1                                                                         | 4                                              | 2184.35                                                                                                    | 0.30                                                                                 | 0.04                                                                         | ENOB_MOUSE                                                                                                                                  | ENOA_MOUSE                                                                | Beta-enolase;                                                                                                                                                                                                                     | 2-phospho-D-glycerate hydro-lyase;Enolase 3;Muscle-specific enolase;Skeletal muscle enolase;                                                                                                                                                                                                                                                                                                                                                                                           |
| SAAAAAASR<br>YSKYREPEKY                                                                                                               | IAIPGLAGAGNSVLLVSNLNP<br>IALDGDLSSTEDLVNLGKGR                                                                                                                                             | N-ter +34.06 Da<br>N-ter +34.06 Da, K +34.06 Da                                                                                                                                                                                                                          | 58.4<br>42.5                                                                 | 38.4<br>57.7                                                                 | 3<br>3                                         | 2308.42<br>2140.32                                                                                         | -1.84<br>0.49                                                                        | 0.33<br>0.05                                                                 | PTBP1_MOUSE<br>HUTH_MOUSE                                                                                                                   | Q92217_MOUSE<br>F8WH73_MOUSE                                              | Polypyrimidine tract-binding protein 1;<br>Histidine ammonia-lyase;                                                                                                                                                               | Heterogeneous nuclear ribonucleoprotein I;                                                                                                                                                                                                                                                                                                                                                                                                                                             |
| TKTDQVIQFF                                                                                                                            | IALVNDPQPEHPLR                                                                                                                                                                            | N-ter +34.06 Da                                                                                                                                                                                                                                                          | 38.8                                                                         | 65.7                                                                         | 3                                              | 1632.03                                                                                                    | -1.00                                                                                | 0.08                                                                         | UB2L3_MOUSE                                                                                                                                 |                                                                           | Ubiquitin-conjugating enzyme E2 L3;                                                                                                                                                                                               | UbcM4;Ubiquitin carrier protein L3;Ubiquitin-protein ligase L3;<br>Cargo selection protein TIP47;Mannose-6-phosphate receptor-binding protein 1;<br>Creatine kinase M chain;M-CK;                                                                                                                                                                                                                                                                                                      |
| LPLTEAELAL<br>SMTEAEQQL<br>EDDFRRVDF                                                                                                  | IATPPEDSDMASLQQQR<br>IDHFLFDKVPSPLLASGMAR<br>IDEGVNLGVEYKR                                                                                                                                | N-ter +28.03 Da<br>N-ter +28.03 Da, K +28.03 Da<br>N-ter +28.03 Da, K +28.03 Da                                                                                                                                                                                          | 46.2<br>23.0<br>28.9                                                         | 47.3<br>84.9<br>54.7                                                         | 3<br>4<br>3                                    | 1914.01<br>2497.55<br>1496.94                                                                              | 0.39<br>-0.14<br>0.23                                                                | 0.01<br>0.02<br>0.01                                                         | PLIN3_MOUSE<br>KCRM_MOUSE<br>Q9CZN7_MOUSE                                                                                                   |                                                                           | Perilipin-3;<br>Creatine kinase M-type;<br>Serine hydroxymethyltransferase;                                                                                                                                                       | 15S Mg(2+)-ATPase p97 subunit;Valosin-containing protein;<br>Osteoblast-specific factor 2;                                                                                                                                                                                                                                                                                                                                                                                             |
| AEKNAPAIIF<br>EPVIKKYTKI<br>IDRVFPLNSY<br>PDKPSPNMFY<br>SNCWQPVIDY<br>EAPVGVETDL                                                      | IDELDAIAPKR<br>IDGVVPVEITEKQTR<br>IDGVMTMEATVSGILGKR<br>IDPEKGDIVTVSPALLDR<br>IDSKFEDYLNAEER<br>IDVGFTDDKKGKGGPR                                                                          | N-ter +34.06 Da, K +34.06 Da<br>N-ter +34.06 Da, K +34.06 Da<br>N-ter +28.03 Da, K +28.03 Da<br>N-ter +34.06 Da, K +34.06 Da<br>N-ter +34.06 Da, K +34.06 Da<br>N-ter +34.06 Da, K +34.06 Da                                                                             | 31.3<br>23.6<br>22.4<br>45.8<br>30.0<br>23.3                                 | 60.5<br>40.9<br>76.1<br>53.9<br>65.2<br>75.3                                 | 3<br>3<br>3<br>3<br>3<br>4                     | 1307.89<br>1652.05<br>1931.19<br>2104.36<br>1754.03<br>1762.18                                             | -0.79<br>0.43<br>0.54<br>-1.15<br>0.20<br>0.65                                       | 0.07<br>0.04<br>0.11<br>0.10<br>0.20<br>0.07                                 | TERA_MOUSE<br>POSTN_MOUSE<br>ZCCHV_MOUSE<br>CAD13_MOUSE<br>E9Q9F5_MOUSE<br>IST1_MOUSE                                                       |                                                                           | Transitional endoplasmic reticulum ATPase;<br>Periostin;<br>Zinc finger CCHC-type antiviral protein 1;<br>Cadherin-13;<br>SEPT7_MOUSE<br>Q8BHC2_MOUSE                                                                             | Heart cadherin;Truncated cadherin;                                                                                                                                                                                                                                                                                                                                                                                                                                                     |
| THSDASKKRL<br>FVNPDCQLN<br>QLEAAKPEPV                                                                                                 | IETEDWRPR<br>IEENDEVLVAGFGR<br>IEEVDLANLAPR                                                                                                                                               | N-ter +34.06 Da<br>N-ter +34.06 Da<br>N-ter +34.06 Da                                                                                                                                                                                                                    | 19.8<br>35.7<br>39.8                                                         | 52.9<br>34.3<br>43.2                                                         | 3<br>3<br>3                                    | 1349.75<br>1580.88<br>1372.84                                                                              | 1.49<br>0.21<br>0.54                                                                 | 0.09<br>0.02<br>0.03                                                         | PDI5_MOUSE<br>RS23_MOUSE<br>CCD12_MOUSE                                                                                                     | Q9CRA2_MOUSE<br>Q9C215_MOUSE                                              | PDZ and LIM domain protein 5;<br>40S ribosomal protein S23;<br>Coiled-coil domain-containing protein 12;                                                                                                                          | Enigma homolog;Enigma-like PDZ and LIM domains protein;                                                                                                                                                                                                                                                                                                                                                                                                                                |
| NKLDKDNLSY                                                                                                                            | IEHIFEISR                                                                                                                                                                                 | N-ter +34.06 Da                                                                                                                                                                                                                                                          | 30.4                                                                         | 53.6                                                                         | 3                                              | 1176.73                                                                                                    | -0.01                                                                                | 0.00                                                                         | PEA15_MOUSE                                                                                                                                 | D3Z375_MOUSE                                                              | Astrocytic phosphoprotein PEA-15;                                                                                                                                                                                                 | 15 kDa phosphoprotein enriched in astrocytes; BAT2 domain-containing protein 1;HLA-B-associated transcript 2-like 2;Proline-rich and coiled-coil-containing protein 2C;                                                                                                                                                                                                                                                                                                                |
| LKQLDEKLG<br>MSSLKSVNGQ<br>EGNKKEQIKI<br>LANFNQYQFF<br>KSNIKAWGK<br>MENSQCKLF<br>PRGLKMSFTF<br>VPRKCSASNR<br>PKHPVDQVQR<br>MSFSKDWFSY | IEKQSPPEELR<br>IESLSPDGRS<br>IETLSQQLQAKGKELNEFR<br>IGENMNPDMVALLDVR<br>IGGHGAEGAEALER<br>IGGLNVQTSSEGLR<br>IGNSTAIQELFKR<br>IIAAKHASIQMNVAEVDR<br>IIGGSMDAKGSFPWQAK<br>ILAHTFTPTETDTYACR | N-ter +34.06 Da, K +34.06 Da<br>N-ter +28.03 Da<br>N-ter +34.06 Da, K +34.06 Da<br>N-ter +34.06 Da<br>N-ter +34.06 Da<br>N-ter +34.06 Da<br>N-ter +34.06 Da, K +34.06 Da<br>N-ter +34.06 Da, K +34.06 Da<br>N-ter +28.03 Da, K +28.03 Da<br>N-ter +34.06 Da, C +57.02 Da | 23.4<br>26.8<br>22.4<br>52.9<br>47.7<br>31.3<br>19.7<br>40.2<br>19.0<br>48.3 | 53.9<br>37.4<br>59.9<br>57.8<br>49.5<br>51.9<br>64.9<br>67.9<br>68.8<br>70.4 | 3<br>2<br>3<br>3<br>3<br>3<br>3<br>4<br>3<br>3 | 1392.90<br>1200.68<br>2333.52<br>1941.07<br>1562.87<br>1463.89<br>1544.04<br>2148.35<br>1876.12<br>2159.19 | 1.01<br>1.37<br>-0.11<br>-1.22<br>-1.84<br>-0.12<br>-0.92<br>-0.84<br>-0.86<br>-1.84 | 0.05<br>0.05<br>0.01<br>0.20<br>0.13<br>0.00<br>0.07<br>0.08<br>0.14<br>0.33 | PRC2C_MOUSE<br>CO3A1_MOUSE<br>PFD2_MOUSE<br>TCTP_MOUSE<br>HBA_MOUSE<br>Q9CX86_MOUSE<br>TBB2A_MOUSE<br>RS21_MOUSE<br>HPT_MOUSE<br>B2MG_MOUSE | E9QKG5_MOUSE<br>Q5DTG2_MOUSE<br>D3YU75_MOUSE<br>Q91YB8_MOUSE              | Protein PRC2C;<br>Collagen alpha-1(III) chain;<br>Prefoldin subunit 2;<br>Translationally-controlled tumor protein;<br>Hemoglobin subunit alpha;                                                                                  | 21 kDa polypeptide;p21;p23;<br>Alpha-globin;Hemoglobin alpha chain;                                                                                                                                                                                                                                                                                                                                                                                                                    |
| SSNLQSRFR                                                                                                                             | ILAQMTGTEYMQDPDEEALRR                                                                                                                                                                     | N-ter +34.06 Da                                                                                                                                                                                                                                                          | 40.2                                                                         | 73.3                                                                         | 4                                              | 2500.40                                                                                                    | -1.06                                                                                | 0.13                                                                         | LDB3_MOUSE                                                                                                                                  | E9PYJ9_MOUSE                                                              | LIM domain-binding protein 3;                                                                                                                                                                                                     | Protein cypher;Protein oracle;Z-band alternatively spliced PDZ-motif protein;<br>28 kDa adipocyte protein;Adipon;C3 convertase activator;Properdin factor D;<br>Cathepsin C;Cathepsin J;Dipeptidyl peptidase I;Dipeptidyl transferase;                                                                                                                                                                                                                                                 |
| AAVCAQPRGR                                                                                                                            | ILGGQEAHAAR                                                                                                                                                                               | N-ter +34.06 Da                                                                                                                                                                                                                                                          | 42.3                                                                         | 76.4                                                                         | 3                                              | 1226.79                                                                                                    | 0.04                                                                                 | 0.01                                                                         | CFAD_MOUSE                                                                                                                                  |                                                                           | Complement factor D;                                                                                                                                                                                                              |                                                                                                                                                                                                                                                                                                                                                                                                                                                                                        |
| APMTDEIQQQ<br>SVPDSSGPER<br>FTVNRPLFF                                                                                                 | ILNLPESDWR<br>ILSISADIETGEILK<br>IMEDTIGVPLVFGSVR                                                                                                                                         | N-ter +28.03 Da<br>N-ter +28.03 Da, K +28.03 Da<br>N-ter +34.06 Da                                                                                                                                                                                                       | 33.7<br>33.7<br>45.1                                                         | 50.7<br>54.2<br>43.0                                                         | 3<br>4<br>3                                    | 1455.82<br>1770.13<br>1766.06                                                                              | 0.52<br>7.06<br>-0.43                                                                | 0.09<br>0.70<br>0.05                                                         | CATC_MOUSE<br>HNRPK_MOUSE<br>A2AP_MOUSE                                                                                                     | D3Z220_MOUSE<br>E9Q8D6_MOUSE                                              | Dipeptidyl peptidase 1;<br>Heterogeneous nuclear ribonucleoprotein K;<br>Alpha-2-antiplasmin;                                                                                                                                     | Alpha-2-plasmin inhibitor;Serpin F2;<br>Lbc's second cousin;Lymphoid blast crisis-like 2;                                                                                                                                                                                                                                                                                                                                                                                              |
| LISEDVQRRF<br>VLVSLTGLYA<br>D<br>D<br>KPHSEAGTAF<br>IGEEAPQMNY                                                                        | IQEVVQSOQAAVSR<br>IQKTPQIQVYSR<br>IQMTQTPSSLSASLGDR<br>IQMTQTTSSLSASLGDR<br>IQTQLHAAMADTFLEHMCR<br>IQVTPOEKEAIER                                                                          | N-ter +34.06 Da<br>N-ter +28.03 Da, K +28.03 Da<br>N-ter +34.06 Da<br>N-ter +28.03 Da<br>N-ter +34.06 Da, C +57.02 Da<br>N-ter +28.03 Da, K +28.03 Da                                                                                                                    | 31.6<br>29.3<br>31.9<br>50.3<br>45.2<br>19.9                                 | 23.1<br>24.8<br>28.3<br>55.4<br>83.6<br>51.2                                 | 3<br>3<br>3<br>3<br>3<br>3                     | 1575.92<br>1515.92<br>1940.03<br>1938.04<br>2434.38<br>1595.97                                             | 1.05<br>0.78<br>-3.84<br>1.23<br>-3.32<br>0.30                                       | 0.07<br>0.06<br>0.00<br>0.02<br>0.66<br>0.02                                 | ARHG1_MOUSE<br>B2MG_MOUSE<br>KVSFA_MOUSE<br>KVSAA_MOUSE<br>KPYM_MOUSE<br>RD23A_MOUSE                                                        | E9PUF7_MOUSE<br>Q91XJ8_MOUSE<br>KVSAG_MOUSE<br>KVSAB_MOUSE<br>RD23B_MOUSE | Rho guanine nucleotide exchange factor 1;<br>Beta-2-microglobulin;<br>Ig kappa chain V-V region HP 91A3;<br>Ig kappa chain V-V region MOPC 173;<br>Pyruvate kinase isozymes M1/M2;<br>UV excision repair protein RAD23 homolog A; |                                                                                                                                                                                                                                                                                                                                                                                                                                                                                        |
| LRTEEFKFK                                                                                                                             | ISDKDASVVGFFR                                                                                                                                                                             | N-ter +28.03 Da, K +28.03 Da                                                                                                                                                                                                                                             | 16.4                                                                         | 81.5                                                                         | 3                                              | 1495.93                                                                                                    | -1.69                                                                                | 0.16                                                                         | PDIA3_MOUSE                                                                                                                                 |                                                                           | Protein disulfide-isomerase A3;                                                                                                                                                                                                   | 58 kDa glucose-regulated protein;58 kDa microsomal protein;Disulfide isomerase ER-60;Endoplasmic reticulum resident protein 57;Endoplasmic reticulum resident protein 60;<br>21 kDa transmembrane-trafficking protein;Transmembrane protein Tmp21;p24 family protein delta-1;<br>Beta-actin;<br>94 kDa glucose-regulated protein;Endoplasmic reticulum resident protein 99;Heat shock protein 90 kDa beta member 1;Polymorphic tumor rejection antigen 1;Tumor rejection antigen gp96; |
| LLGPPSVLG<br>ASLSTFQQMW                                                                                                               | ISFHLPVNSR<br>ISKQEYDESGPSIVHR                                                                                                                                                            | N-ter +28.03 Da<br>N-ter +34.06 Da, K +34.06 Da                                                                                                                                                                                                                          | 30.3<br>36.2                                                                 | 61.8<br>84.1                                                                 | 3<br>4                                         | 1196.74<br>1912.19                                                                                         | 0.10<br>0.04                                                                         | 0.01<br>0.00                                                                 | TMEDA_MOUSE<br>ACTB_MOUSE                                                                                                                   | ACTG_MOUSE                                                                | Transmembrane emp24 domain-containing protein 10;<br>Actin, cytoplasmic 1;                                                                                                                                                        |                                                                                                                                                                                                                                                                                                                                                                                                                                                                                        |
| SNKEIFREL<br>FEQLPMMQA                                                                                                                | ISNASDALDKIR<br>ISNNKDGQGYEDFVEGLR                                                                                                                                                        | N-ter +34.06 Da, K +34.06 Da<br>N-ter +34.06 Da, K +34.06 Da                                                                                                                                                                                                             | 28.2<br>17.7                                                                 | 45.5<br>73.4                                                                 | 3<br>3                                         | 1369.88<br>2108.24                                                                                         | 0.47<br>0.14                                                                         | 0.03<br>0.02                                                                 | ENPL_MOUSE<br>E9PWG4_MOUSE                                                                                                                  | HS90B_MOUSE<br>MYL1_MOUSE                                                 | Endoplasmic;                                                                                                                                                                                                                      |                                                                                                                                                                                                                                                                                                                                                                                                                                                                                        |

Table S7, Tholen et al.

| Non Prime Site | Prime Site                   | Modifications                             | Hyperscore | Mass error in ppm | Charge | Precursor neutral mass in Da | Fold change (log <sub>2</sub> ) of ASAPRatio | FC-error of ASAPRatio | Uniprot ID 1 | Uniprot ID 2 | Protein Name 1                                                 | Protein Name 2                                                                                                                                |
|----------------|------------------------------|-------------------------------------------|------------|-------------------|--------|------------------------------|----------------------------------------------|-----------------------|--------------|--------------|----------------------------------------------------------------|-----------------------------------------------------------------------------------------------------------------------------------------------|
| GHAGKTIPL      | ISQCTPKVDFPQQDLATLGR         | N-ter +34.06 Da, K +34.06 Da, C +57.02 Da | 45.5       | 76.5              | 4      | 2442.51                      | -1.40                                        | 0.07                  | MDHM_MOUSE   |              | Malate dehydrogenase, mitochondrial;                           |                                                                                                                                               |
| LAHVAPRRS      | ISSQQTIPPSAKYGG              | N-ter +34.06 Da, K +34.06 Da              | 24.8       | 71.8              | 3      | 1757.14                      | -0.23                                        | 0.01                  | IDHG1_MOUSE  |              | Isocitrate dehydrogenase [NAD] subunit gamma 1, mitochondrial; | Isocitrate dehydrogenase subunit gamma;NAD(+)-specific IDH subunit gamma;                                                                     |
| GSSSSSNFH      | ISVEESVDGKVVSSR              | N-ter +34.06 Da, K +34.06 Da              | 24.4       | 59.5              | 3      | 1658.05                      | 0.87                                         | 0.06                  | K1C15_MOUSE  | B1AQ77_MOUSE | Keratin, type I cytoskeletal 15;                               | Cytokeratin-15;Keratin-15;                                                                                                                    |
| IALNDFVKL      | ISWYDNEYGSNR                 | N-ter +28.03 Da                           | 37.1       | 30.1              | 2      | 1693.79                      | -1.56                                        | 0.14                  | G3P_MOUSE    | F8WL5_MOUSE  | Glyceraldehyde-3-phosphate dehydrogenase;                      | Peptidyl-cysteine S-nitrosylase GAPDH;                                                                                                        |
| ASLSTFQQM      | ITKQEYDEAGPSVHR              | N-ter +28.03 Da, K +28.03 Da              | 35.7       | 82.9              | 4      | 1898.15                      | 0.83                                         | 0.05                  | ACT5_MOUSE   |              | Actin, alpha skeletal muscle;                                  | Alpha-actin-1;                                                                                                                                |
| DAVTRQVRT      | IVEEVQDGKVISSR               | N-ter +34.06 Da, K +34.06 Da              | 18.7       | 66.7              | 3      | 1626.07                      | 0.25                                         | 0.02                  | K1C17_MOUSE  | D3YXP7_MOUSE | Keratin, type I cytoskeletal 17;                               | Cytokeratin-17;Keratin-17;                                                                                                                    |
| SLYASGRTTG     | IVLDSGDGVTHNVPIYEGYALPHAIMR  | N-ter +28.03 Da                           | 53.9       | 95.1              | 4      | 2964.80                      | -2.32                                        | 0.35                  | ACTA_MOUSE   | ACTC_MOUSE   | Actin, aortic smooth muscle;                                   | Alpha-actin-2;                                                                                                                                |
| LLWVPGSTGD     | IVLTQSPASLAVSLGQR            | N-ter +34.06 Da                           | 58.9       | 46.3              | 3      | 1888.17                      | 0.50                                         | 0.10                  | KV3A1_MOUSE  | KV3A2_MOUSE  | Ig kappa chain V-III region PC 2880/PC 1229;                   |                                                                                                                                               |
| RYASICQQNG     | IVPIVEPEILDGDHDLKR           | N-ter +34.06 Da, K +34.06 Da              | 35.4       | 77.1              | 4      | 2222.47                      | 1.01                                         | 0.07                  | ALDOA_MOUSE  | ALDOC_MOUSE  | Fructose-bisphosphate aldolase A;                              | Aldolase 1;Muscle-type aldolase;                                                                                                              |
| GSKGTQCEK      | IVQKYGYTHLSTGDLR             | N-ter +34.06 Da, K +34.06 Da              | 30.2       | 80.2              | 4      | 2031.34                      | -1.06                                        | 0.09                  | KAD1_MOUSE   |              | Adenylate kinase isoenzyme 1;                                  | ATP-AMP transphosphorylase 1;Myokinase;                                                                                                       |
| LTAASEAACL     | IVSVDETIKNPR                 | N-ter +28.03 Da, K +28.03 Da              | 20.0       | 37.2              | 3      | 1425.87                      | 1.14                                         | 0.09                  | TCPH_MOUSE   |              | T-complex protein 1 subunit eta;                               | CCT-eta;                                                                                                                                      |
| LKHVTEDCVF     | IYQVGDGPKYKDPNDFR            | N-ter +34.06 Da, K +34.06 Da, C +57.02 Da | 19.3       | 66.7              | 4      | 2516.47                      | -1.52                                        | 0.22                  | TXD17_MOUSE  |              | Thioredoxin domain-containing protein 17;                      | 14 kDa thioredoxin-related protein;Protein 42-9-9;Thioredoxin-like protein 5;                                                                 |
| GVNIGGAGSV     | IYEKPTTEAPQVTGPIEVPVVR       | N-ter +28.03 Da, K +28.03 Da              | 52.1       | 73.0              | 4      | 2505.57                      | 0.21                                         | 0.02                  | CRIP2_MOUSE  |              | Cysteine-rich protein 2;                                       | Heart LIM protein;                                                                                                                            |
| VTHGQVGVGK     | KAEAVATVVAAVDQAR             | N-ter +34.06 Da, K +34.06 Da              | 37.0       | 46.5              | 3      | 1666.08                      | -0.23                                        | 0.03                  | TITIN_MOUSE  | E9Q8M7_MOUSE | Titin;                                                         | Connectin;                                                                                                                                    |
| KRKFVADGVL     | KAELNEFLTR                   | N-ter +34.06 Da, K +34.06 Da              | 29.2       | 22.5              | 3      | 1287.81                      | -0.32                                        | 0.01                  | RS3_MOUSE    | D3YV43_MOUSE | 40S ribosomal protein S3;                                      |                                                                                                                                               |
| KIREGEVIF      | KATEMVEVGPEDDEVGAE           | N-ter +28.03 Da, K +28.03 Da              | 58.7       | 64.0              | 3      | 2116.14                      | -0.84                                        | 0.12                  | PTRF_MOUSE   |              | Polymerase I and transcript release factor;                    | Cav-p60;Cavin-1;                                                                                                                              |
| YVKNKFSQVH     | KATIGADFLTKEMVDDR            | N-ter +28.03 Da, K +28.03 Da              | 47.5       | 69.6              | 4      | 2092.27                      | 0.99                                         | 0.09                  | RAB7A_MOUSE  |              | Ras-related protein Rab-7a;                                    |                                                                                                                                               |
| KKLSVSQVHQ     | KAVIDVAETGTEAAATGVGGIR       | N-ter +34.06 Da, K +34.06 Da              | 51.0       | 68.3              | 4      | 2337.51                      | -0.38                                        | 0.03                  | SPA3K_MOUSE  |              | Serine protease inhibitor A3K;                                 | Contrapsin;SPI-2;                                                                                                                             |
| PKSQETPAHK     | KAVQGGAAAPVGVAVQVPGMPPMPQAPR | N-ter +34.06 Da, K +34.06 Da              | 48.0       | 58.4              | 4      | 2845.78                      | 0.52                                         | 0.02                  | SNRPA_MOUSE  | D3Z056_MOUSE | U1 small nuclear ribonucleoprotein A;                          |                                                                                                                                               |
| SGLAWQDCDF     | KDAEEAATGECTATVGR            | N-ter +34.06 Da, K +34.06 Da, C +57.02 Da | 29.0       | 83.9              | 4      | 1995.25                      | -3.32                                        | 0.00                  | KNG1_MOUSE   | D3Z2B2_MOUSE | Kininogen-1;                                                   |                                                                                                                                               |
| APPWKDSKFF     | KDAPDGPPTVLTVDGR             | N-ter +28.03 Da, K +28.03 Da              | 31.4       | 65.1              | 3      | 1695.03                      | -6.64                                        | 0.00                  | FA12_MOUSE   | F6WLH2_MOUSE | Coagulation factor XII;                                        | Hageman factor;                                                                                                                               |
| YKNSKFRHVI     | KDFMIQGGDFTR                 | N-ter +28.03 Da, K +28.03 Da              | 31.7       | 48.5              | 3      | 1469.81                      | 1.72                                         | 0.13                  | PPIB_MOUSE   |              | Peptidyl-prolyl cis-trans isomerase B;                         | CYP-51;Cyclophilin B;Rotamase B;S-cyclophilin;                                                                                                |
| CSASNRIAA      | KDHASIQMNVAEVDR              | N-ter +28.03 Da, K +28.03 Da              | 39.9       | 61.2              | 3      | 1768.00                      | 0.29                                         | 0.03                  | RS21_MOUSE   |              | 40S ribosomal protein S21;                                     |                                                                                                                                               |
| IATDKEIAF      | KDLDAVLVGSMPR                | N-ter +34.06 Da, K +34.06 Da              | 37.2       | 57.2              | 3      | 1567.03                      | -1.56                                        | 0.09                  | MHDC_MOUSE   | B1ATQ3_MOUSE | Malate dehydrogenase, cytoplasmic;                             | Cytosolic malate dehydrogenase;                                                                                                               |
| AGDEEYDVF      | KDLFPPIIEER                  | N-ter +28.03 Da, K +28.03 Da              | 31.3       | 77.5              | 3      | 1429.89                      | -0.12                                        | 0.01                  | KCRB_MOUSE   |              | Creatine kinase B-type;                                        | B-CK;Creatine kinase B chain;                                                                                                                 |
| AGDEEYTVF      | KDLFPPIQDR                   | N-ter +34.06 Da, K +34.06 Da              | 31.4       | 87.1              | 3      | 1426.97                      | -0.45                                        | 0.02                  | KCRM_MOUSE   |              | Creatine kinase M-type;                                        | Creatine kinase M chain;M-CK;                                                                                                                 |
| LPMMQASINN     | KDQGGYEDFVEGLR               | N-ter +34.06 Da, K +34.06 Da              | 25.4       | 39.6              | 3      | 1679.95                      | 0.56                                         | 0.01                  | MYL1_MOUSE   | E9PWG4_MOUSE | Myosin light chain 1/3, skeletal muscle isoform;               | Myosin light chain alkali 1/2; Alpha-1-protease inhibitor 2;Alpha-1-antiprotease;Serine protease inhibitor 1-2;Serine protease inhibitor A1b; |
| EDVQETDTSQ     | KDQSPASHEIATNLGDFAIISLYR     | N-ter +28.03 Da, K +28.03 Da              | 43.1       | 99.7              | 4      | 2588.58                      | -5.64                                        | 0.00                  | A1AT2_MOUSE  | A1AT1_MOUSE  | Alpha-1-antitrypsin 1-2;                                       |                                                                                                                                               |
| MPGVTV         | KDVNQEQFVR                   | N-ter +28.03 Da, K +28.03 Da              | 27.1       | 76.7              | 3      | 1317.81                      | 1.18                                         | 0.02                  | RS19_MOUSE   | F6Q5Z8_MOUSE | 40S ribosomal protein S19;                                     | Myosin regulatory light chain 2, skeletal muscle isoform;                                                                                     |
| MFDQTQIQEF     | KEAFTVIDQNR                  | N-ter +28.03 Da, K +28.03 Da              | 35.6       | 60.5              | 3      | 1375.83                      | 0.23                                         | 0.00                  | MLRS_MOUSE   | F6ULR7_MOUSE |                                                                | Fast skeletal myosin light chain 2;MLC2F;                                                                                                     |
| TQDHSSVKY      | KEAIGQGTPIPDLPVKR            | N-ter +34.06 Da, K +34.06 Da              | 34.8       | 51.3              | 4      | 2049.37                      | 1.39                                         | 0.12                  | A2AQ82_MOUSE | A2AQA9_MOUSE |                                                                |                                                                                                                                               |
| KLATDLTKVN     | KECCHGDLLECCADR              | N-ter +28.03 Da, K +28.03 Da, C +57.02 Da | 32.6       | 103.3             | 4      | 1933.01                      | 0.08                                         | 0.01                  | ALBU_MOUSE   |              | Serum albumin;                                                 |                                                                                                                                               |
| EKSKLDWESF     | KEEGIEELAIHNR                | N-ter +34.06 Da, K +34.06 Da              | 25.9       | 80.3              | 4      | 1791.12                      | 0.39                                         | 0.04                  | CFDP1_MOUSE  |              | Craniofacial development protein 1;                            | 27 kDa craniofacial protein;Bucentaur;Protein Cp27;                                                                                           |
| AGDNSTLLSF     | KEGLITLLVPEAR                | N-ter +28.03 Da, K +28.03 Da              | 40.3       | 81.5              | 3      | 1609.08                      | -0.01                                        | 0.00                  | BAIP2_MOUSE  | B1AZ46_MOUSE | Brain-specific angiogenesis inhibitor 1-associated protein 2;  | Insulin receptor substrate protein of 53 kDa;Insulin receptor tyrosine kinase 53 kDa substrate;                                               |
| SQQTITLYGY     | KEHISTKVPQPR                 | N-ter +28.03 Da, K +28.03 Da              | 19.1       | 99.4              | 4      | 1733.16                      | 0.98                                         | 0.07                  | TITIN_MOUSE  | E9Q8M7_MOUSE | Titin;                                                         | Connectin;                                                                                                                                    |
| SLARELSGTI     | KEILGTAQSVGCNVDR             | N-ter +28.03 Da, K +28.03 Da, C +57.02 Da | 52.0       | 67.5              | 3      | 1859.08                      | 0.73                                         | 0.09                  | RL12_MOUSE   |              | 60S ribosomal protein L12;                                     | Metastatic lymph node gene 50 protein;                                                                                                        |
| QQMTSSYGGY     | KEPAAPVSIQR                  | N-ter +28.03 Da, K +28.03 Da              | 23.7       | 54.9              | 3      | 1250.80                      | 0.42                                         | 0.03                  | LASP1_MOUSE  | A2A6H0_MOUSE | LIM and SH3 domain protein 1;                                  | CRP55;Calregulin;Endoplasmic reticulum resident protein 60;HACBP;                                                                             |
| LAADPAIFY      | KEQFLDGDWATNR                | N-ter +28.03 Da, K +28.03 Da              | 42.7       | 49.8              | 3      | 1634.89                      | -1.56                                        | 0.14                  | CALR_MOUSE   |              | Calreticulin;                                                  | Myosin light chain 1/3, skeletal muscle isoform;                                                                                              |
| DLSAIKIEFS     | KEQQEDFKFAFLFDR              | N-ter +28.03 Da, K +28.03 Da              | 40.0       | 101.3             | 4      | 2126.32                      | -2.32                                        | 0.46                  | MYL1_MOUSE   | E0CZ30_MOUSE | Myosin light chain 1/3, skeletal muscle isoform;               | Protein DEK;                                                                                                                                  |
| LEEVTMKQIC     | KEVYENYPAYDLTER              | N-ter +28.03 Da, K +28.03 Da              | 34.5       | 66.9              | 3      | 1945.08                      | 0.51                                         | 0.06                  | DEK_MOUSE    |              |                                                                |                                                                                                                                               |
| M              | KFNFPVTSDR                   | N-ter +34.06 Da, K +34.06 Da              | 35.4       | 46.3              | 3      | 1408.85                      | -0.62                                        | 0.06                  | RL26_MOUSE   | D3Z3Q9_MOUSE | 60S ribosomal protein L26;                                     | Silica-induced gene 20 protein;                                                                                                               |
| FHRCEKAMTA     | KGGDVSVCEWYR                 | N-ter +28.03 Da, K +28.03 Da, C +57.02 Da | 30.9       | 41.2              | 3      | 1510.79                      | 0.90                                         | 0.05                  | CX6B1_MOUSE  |              | Cytochrome c oxidase subunit 6B1;                              | Cytochrome c oxidase subunit VIb isoform 1;                                                                                                   |
| ISMPDVLHL      | KGPNVXGKEYDVTVPR             | N-ter +34.06 Da, K +34.06 Da              | 22.8       | 87.9              | 4      | 1760.22                      | -0.12                                        | 0.01                  | F7BRM2_MOUSE | E9Q616_MOUSE |                                                                |                                                                                                                                               |
| MSMN           | KGPTLLDGLPEQENVLQR           | N-ter +34.06 Da, K +34.06 Da              | 47.7       | 85.2              | 4      | 2189.42                      | 0.04                                         | 0.01                  | PLIN1_MOUSE  |              | Perilipin-1;                                                   | Lipid droplet-associated protein;Perilipin A;                                                                                                 |
| IPTLEEYQHY     | KGSDFDCELR                   | N-ter +28.03 Da, K +28.03 Da, C +57.02 Da | 27.2       | 80.7              | 3      | 1281.71                      | -0.92                                        | 0.12                  | HNRPK_MOUSE  | E9Q8D6_MOUSE | Heterogeneous nuclear ribonucleoprotein K;                     |                                                                                                                                               |
| RSAPPKLASL     | KGVVPEDAVETLAGSLGR           | N-ter +34.06 Da, K +34.06 Da              | 57.7       | 56.9              | 3      | 1966.25                      | 0.08                                         | 0.01                  | ICAL_MOUSE   | Q921U7_MOUSE | Calpastatin;                                                   | Calpain inhibitor;                                                                                                                            |
| AAAAAAVYQ      | KHSPQEAHPVQYER               | N-ter +28.03 Da, K +28.03 Da              | 24.2       | 106.3             | 4      | 1761.08                      | 0.85                                         | 0.11                  | CNTRF_MOUSE  | Q9D586_MOUSE | Ciliary neurotrophic factor receptor subunit alpha;            |                                                                                                                                               |
| PLRLPLQDQVY    | KIGGIGTVPVGR                 | N-ter +34.06 Da, K +34.06 Da              | 31.6       | 29.9              | 3      | 1220.86                      | 0.73                                         | 0.07                  | EF1A1_MOUSE  | EF1A2_MOUSE  | Elongation factor 1-alpha 1;                                   | Elongation factor Tu;Eukaryotic elongation factor 1 A-1;                                                                                      |
| VPNTPPSTPV     | KLEEDLPQEPSR                 | N-ter +34.06 Da, K +34.06 Da              | 23.3       | 69.4              | 3      | 1609.01                      | 0.85                                         | 0.07                  | ADDA_MOUSE   |              | Alpha-adducin;                                                 | Erythrocyte adducin subunit alpha;                                                                                                            |



Table S7, Tholen et al.

| Non Prime Site | Prime Site                    | Modifications                                                           | Hyperscore | Mass error in ppm | Charge | Precursor neutral mass in Da | Fold change (log <sub>2</sub> ) of ASAPRatio | FC-error of ASAPRatio | Uniprot ID 1 | Uniprot ID 2 | Protein Name 1                                                              | Protein Name 2                                                                                                                                                                                                                     |
|----------------|-------------------------------|-------------------------------------------------------------------------|------------|-------------------|--------|------------------------------|----------------------------------------------|-----------------------|--------------|--------------|-----------------------------------------------------------------------------|------------------------------------------------------------------------------------------------------------------------------------------------------------------------------------------------------------------------------------|
| SLERQAGQIK     | KLEVNEAELLR                   | N-ter +34.06 Da, K +34.06 Da                                            | 36.4       | 44.7              | 3      | 1380.92                      | -0.81                                        | 0.06                  | PTRF_MOUSE   | Q3U4N4_MOUSE | Polymerase I and transcript release factor;                                 | Cav-p60;Cavin-1; Adipocyte protein P27;Lung carbonyl reductase;NADPH-dependent carbonyl reductase 2;                                                                                                                               |
| M              | KLNFSGLR                      | N-ter +34.06 Da, K +34.06 Da                                            | 31.3       | 39.6              | 3      | 1132.75                      | 0.42                                         | 0.04                  | CBR2_MOUSE   |              | Carbonyl reductase [NADPH] 2;                                               |                                                                                                                                                                                                                                    |
| M              | KLNISFPATGQCKLIEVDDER         | N-ter +34.06 Da, K +34.06 Da, C +57.02 Da                               | 40.9       | 73.5              | 4      | 2534.61                      | -1.00                                        | 0.08                  | R56_MOUSE    | D3Z6N6_MOUSE | 40S ribosomal protein S6;                                                   | Phosphoprotein NP33;                                                                                                                                                                                                               |
| GPSAGDVEAI     | KNAIANASTLAEVER               | N-ter +28.03 Da, K +28.03 Da, N-ter +34.06 Da, K +34.06 Da, C +57.02 Da | 41.9       | 46.5              | 3      | 1641.98                      | 0.03                                         | 0.00                  | RU2A_MOUSE   |              | U2 small nuclear ribonucleoprotein A';                                      |                                                                                                                                                                                                                                    |
| NLEEAKKII      | KNDPSPLEPACVKISALEGYR         | N-ter +34.06 Da, K +34.06 Da                                            | 36.1       | 73.8              | 4      | 2445.56                      | 0.03                                         | 0.00                  | SYNC_MOUSE   |              | Asparagine-tRNA ligase, cytoplasmic;                                        | Asparaginyl-tRNA synthetase;                                                                                                                                                                                                       |
| QLIDDHFLFD     | KPVSPILLASGMAR                | N-ter +34.06 Da, K +34.06 Da, N-ter +34.06 Da, K +34.06 Da, C +57.02 Da | 42.8       | 45.2              | 3      | 1507.03                      | 0.88                                         | 0.02                  | KCRM_MOUSE   | KCRB_MOUSE   | Creatine kinase M-type;                                                     | Creatine kinase M chain;M-CK;                                                                                                                                                                                                      |
| LDPEKGKTIK     | KQFLEELTTQCDR                 | N-ter +34.06 Da, K +34.06 Da, C +57.02 Da                               | 38.3       | 62.4              | 3      | 1848.12                      | -0.92                                        | 0.09                  | MLRS_MOUSE   |              | Myosin regulatory light chain 2, skeletal muscle isoform;                   | Fast skeletal myosin light chain 2;MLC2F; Acidic-type mitochondrial creatine kinase;Ubiquitous mitochondrial creatine kinase;                                                                                                      |
| DARGIWHNNE     | KSFLIWWNEEDHTR                | N-ter +34.06 Da, K +34.06 Da, N-ter +34.06 Da, K +34.06 Da, C +57.02 Da | 17.5       | 57.6              | 4      | 1841.12                      | -2.94                                        | 0.23                  | KCRU_MOUSE   |              | Creatine kinase U-type, mitochondrial;                                      |                                                                                                                                                                                                                                    |
| ELINGYIRKI     | KSGEEDFESLASQFSDCCSAKAR       | N-ter +34.06 Da, K +34.06 Da, C +57.02 Da                               | 51.2       | 72.9              | 4      | 2637.50                      | -1.03                                        | 0.15                  | PIN1_MOUSE   |              | Peptidyl-prolyl cis-trans isomerase NIMA-interacting 1;                     | Peptidyl-prolyl cis-trans isomerase Pin1;                                                                                                                                                                                          |
| AGLILPGILA     | KSIGTSLDPCKDPTR               | N-ter +34.06 Da, K +34.06 Da, C +57.02 Da                               | 18.9       | 84.9              | 4      | 1776.18                      | 0.96                                         | 0.09                  | CDSN_MOUSE   |              | Corneodesmosin;                                                             |                                                                                                                                                                                                                                    |
| AQAYKALKDI     | KSSLDISSLLQIEPR               | N-ter +28.03 Da, K +28.03 Da                                            | 58.1       | 72.7              | 3      | 1828.16                      | 0.77                                         | 0.10                  | TOM34_MOUSE  |              | Mitochondrial import receptor subunit TOM34;                                | Translocase of outer membrane 34 kDa subunit;                                                                                                                                                                                      |
| NLHASNTRLQ     | KTGTAEMSSILEER                | N-ter +28.03 Da, K +28.03 Da                                            | 46.8       | 75.2              | 3      | 1606.94                      | 0.74                                         | 0.04                  | ATPA_MOUSE   | D6RJ16_MOUSE | ATP synthase subunit alpha, mitochondrial;                                  |                                                                                                                                                                                                                                    |
| LDMLRDAMLA     | KVDSSNGFLIDGYPR               | N-ter +34.06 Da, K +34.06 Da, N-ter +28.03 Da, K +28.03 Da, C +57.02 Da | 25.0       | 53.7              | 3      | 1735.05                      | -0.86                                        | 0.03                  | KAD1_MOUSE   |              | Adenylate kinase isoenzyme 1;                                               | ATP-AMP transphosphorylase 1;Myokinase;                                                                                                                                                                                            |
| EEGSPRKDGN     | KVDVVGATGQAGQSCSR             | N-ter +28.03 Da, K +28.03 Da, C +57.02 Da                               | 55.1       | 67.8              | 3      | 1775.02                      | 0.96                                         | 0.13                  | IF4B_MOUSE   | Q3TDD8_MOUSE | Eukaryotic translation initiation factor 4B;                                |                                                                                                                                                                                                                                    |
| PQKASGTAS      | KVPVPAETQEVAVSSR              | N-ter +28.03 Da, K +28.03 Da                                            | 38.6       | 60.7              | 3      | 1752.08                      | 0.23                                         | 0.01                  | NACAM_MOUSE  |              | Nascent polypeptide-associated complex subunit alpha, muscle-specific form; | Alpha-NAC, muscle-specific form; PDGF-associated protein;PDGFA-associated protein 1;                                                                                                                                               |
| NPNRVAQTK      | KVTQLDLGPKELSR                | N-ter +28.03 Da, K +28.03 Da                                            | 22.4       | 65.9              | 4      | 1782.14                      | -0.43                                        | 0.04                  | HAP28_MOUSE  |              | 28 kDa heat- and acid-stable phosphoprotein;                                |                                                                                                                                                                                                                                    |
| FPTDPHYEK      | KYFFPVR                       | N-ter +28.03 Da, K +28.03 Da                                            | 16.5       | 73.1              | 2      | 1027.66                      | 4.55                                         | 0.69                  | H65T1_MOUSE  |              | Heparan-sulfate 6-O-sulfotransferase 1;                                     |                                                                                                                                                                                                                                    |
| RQELKARARY     | LAEKYWDVAEAR                  | N-ter +34.06 Da, K +34.06 Da                                            | 28.3       | 80.7              | 3      | 1647.03                      | -0.45                                        | 0.02                  | EF2_MOUSE    |              | Elongation factor 2;                                                        |                                                                                                                                                                                                                                    |
| FDMTSKFLTA     | LAQDGVINEALSVELDR             | N-ter +28.03 Da                                                         | 50.0       | 70.3              | 3      | 2099.22                      | 0.31                                         | 0.02                  | PDC6I_MOUSE  | B8JL8_MOUSE  | Programmed cell death 6-interacting protein;                                | ALG-2-interacting protein 1;ALG-2-interacting protein X;E2F1-inducible protein;Eig2; Aldehyde reductase;Aldo-keto reductase family 1 member A1;                                                                                    |
| AVLQVECHPY     | LAQNEUIAHCHAR                 | N-ter +34.06 Da, C +57.02 Da                                            | 30.0       | 92.2              | 4      | 1565.98                      | -1.32                                        | 0.10                  | AK1A1_MOUSE  | B1AXW3_MOUSE | Alcohol dehydrogenase [NADP+];                                              | GST 1-1;GST class-mu 1;Glutathione S-transferase G8.7;pmGT10;                                                                                                                                                                      |
| AGDKVTYVDF     | LAYDILDQYR                    | N-ter +34.06 Da                                                         | 25.0       | 32.3              | 2      | 1302.74                      | 0.56                                         | 0.04                  | GSTM1_MOUSE  | GSTM4_MOUSE  | Glutathione S-transferase Mu 1;                                             |                                                                                                                                                                                                                                    |
| DQAGRFHVNL     | LCGEEQADAAALHFNPR             | N-ter +34.06 Da, C +57.02 Da, N-ter +34.06 Da, K +34.06 Da, C +57.02 Da | 79.0       | 72.1              | 3      | 1918.06                      | 1.00                                         | 0.13                  | LEG7_MOUSE   | Q9CRB1_MOUSE | Galectin-7;                                                                 |                                                                                                                                                                                                                                    |
| VKKYEAQPLD     | LDACSQDEGAVISKISEIPNR         | N-ter +34.06 Da, K +34.06 Da, C +57.02 Da                               | 28.0       | 64.6              | 4      | 2369.41                      | -2.25                                        | 0.11                  | TACC1_MOUSE  | F8VQ95_MOUSE | Transforming acidic coiled-coil-containing protein 1;                       |                                                                                                                                                                                                                                    |
| NRVMMVAKKF     | LDAGHKLNFVAASR                | N-ter +34.06 Da, K +34.06 Da, N-ter +28.03 Da, K +28.03 Da, C +57.02 Da | 23.3       | 71.0              | 4      | 1566.04                      | -0.76                                        | 0.09                  | PDIA3_MOUSE  |              | Protein disulfide-isomerase A3;                                             | 58 kDa glucose-regulated protein;58 kDa microsomal protein;Disulfide isomerase ER-60;Endoplasmic reticulum resident protein 57;Endoplasmic reticulum resident protein 60; Elongation factor Tu;Eukaryotic elongation factor 1 A-1; |
| SASGTTLEA      | LDCIPLPTRPTDKPLR              | N-ter +34.06 Da, K +34.06 Da, N-ter +34.06 Da                           | 26.2       | 64.8              | 3      | 2008.15                      | -0.07                                        | 0.01                  | SAMH1_MOUSE  | E9Q0K6_MOUSE | SAM domain and HD domain-containing protein 1;                              | Interferon-gamma-inducible protein Mg11;                                                                                                                                                                                           |
| NKIAGSLFPF     | LDEDRLDLGVSSLEER              | N-ter +34.06 Da                                                         | 26.2       | 64.8              | 3      | 2008.15                      | -0.07                                        | 0.01                  | SAMH1_MOUSE  | E9Q0K6_MOUSE | SAM domain and HD domain-containing protein 1;                              | Methionine adenosyltransferase 2;                                                                                                                                                                                                  |
| VIKAVPAKY      | LDEDTIYHLQPSGR                | N-ter +34.06 Da                                                         | 34.0       | 66.0              | 3      | 1676.97                      | -2.94                                        | 0.68                  | METK2_MOUSE  | Q6PE05_MOUSE | S-adenosylmethionine synthase isoform type-2;                               |                                                                                                                                                                                                                                    |
| TYHCKNSIAY     | LDEETGSLNKAVLLQGSNDVELVAEGNSR | N-ter +28.03 Da, K +28.03 Da                                            | 39.1       | 39.1              | 4      | 3112.71                      | 6.37                                         | 0.41                  | CO1A2_MOUSE  | E9Q6U9_MOUSE | Collagen alpha-2(I) chain;                                                  | Alpha-2 type I collagen;                                                                                                                                                                                                           |
| KLKLNLSFLY     | LDHNDLESVPPNLPESLR            | N-ter +34.06 Da                                                         | 30.4       | 66.2              | 3      | 2078.22                      | -0.15                                        | 0.01                  | MIME_MOUSE   |              | Mimecan;                                                                    | Osteoglycin;                                                                                                                                                                                                                       |
| KTNKPSRLPF     | LDIAPLDIGGADQEFR              | N-ter +34.06 Da                                                         | 57.7       | 53.6              | 3      | 1763.03                      | -1.06                                        | 0.20                  | CO1A2_MOUSE  | E9Q6U9_MOUSE | Collagen alpha-2(I) chain;                                                  | Alpha-2 type I collagen;                                                                                                                                                                                                           |
| MAWNETADLG     | LDIGAQGEALGYR                 | N-ter +34.06 Da                                                         | 49.2       | 53.5              | 3      | 1395.83                      | 0.71                                         | 0.05                  | CTNB1_MOUSE  | F7CRC6_MOUSE | Catenin beta-1;                                                             | Beta-catenin;                                                                                                                                                                                                                      |
| PLQKRGVKL      | LDISELNTVGAGR                 | N-ter +28.03 Da                                                         | 20.9       | 55.0              | 3      | 1371.81                      | 1.87                                         | 0.09                  | NELFA_MOUSE  |              | Negative elongation factor A;                                               | Wolf-Hirschhorn syndrome candidate 2 homolog;                                                                                                                                                                                      |
| KPKGDKQVEY     | LDLDDSGKSTPPR                 | N-ter +34.06 Da, K +34.06 Da                                            | 21.1       | 64.3              | 3      | 1581.01                      | 0.47                                         | 0.01                  | GAB1_MOUSE   |              | GRB2-associated-binding protein 1;                                          | GRB2-associated binder 1;Growth factor receptor bound protein 2-associated protein 1;                                                                                                                                              |
| QHHDVNTYTF     | LDLNLDSKFR                    | N-ter +28.03 Da, K +28.03 Da                                            | 21.3       | 82.0              | 3      | 1388.92                      | -0.52                                        | 0.07                  | Q3U422_MOUSE | NDUV3_MOUSE  |                                                                             |                                                                                                                                                                                                                                    |
| PSPGEALHL      | LDLCTPPPAPIPSVR               | N-ter +34.06 Da, C +57.02 Da                                            | 33.6       | 29.9              | 3      | 1860.09                      | 0.01                                         | 0.00                  | APIG2_MOUSE  |              | AP-1 complex subunit gamma-like 2;                                          | Gamma2-adaptin;                                                                                                                                                                                                                    |
| GLPSSLTLY      | LDNKNISNIDYEFKR               | N-ter +34.06 Da, K +34.06 Da                                            | 27.7       | 54.0              | 3      | 2067.30                      | -1.52                                        | 0.09                  | LUM_MOUSE    |              | Lumican;                                                                    | Keratan sulfate proteoglycan lumican;                                                                                                                                                                                              |
| LEEKSSNLG      | LDPPALLTTEVDKLER              | N-ter +34.06 Da, K +34.06 Da                                            | 24.3       | 63.1              | 3      | 1877.23                      | -0.12                                        | 0.01                  | LMTK2_MOUSE  |              | Serine/threonine-protein kinase LMTK2;                                      | Brain-enriched kinase;Lemur tyrosine kinase 2; Lysosomal acid alpha-mannosidase;Mannosidase alpha class 2B member 1;Mannosidase alpha-B;                                                                                           |
| GPTSYPEPSK     | LDPTSVTLKPMIEIR               | N-ter +28.03 Da, K +28.03 Da                                            | 28.4       | 63.0              | 3      | 1655.04                      | 0.36                                         | 0.04                  | MA2B1_MOUSE  |              | Lysosomal alpha-mannosidase;                                                | HSE-MSF;                                                                                                                                                                                                                           |
| MPTTVIAVHY     | LDQTEQWEKFGIEKR               | N-ter +34.06 Da, K +34.06 Da                                            | 30.7       | 58.3              | 4      | 2008.27                      | -1.09                                        | 0.09                  | CO3_MOUSE    |              | Complement C3;                                                              |                                                                                                                                                                                                                                    |
| SPSAKDIKI      | LDSVGIEADDDR                  | N-ter +28.03 Da                                                         | 51.2       | 37.3              | 2      | 1331.67                      | -1.03                                        | 0.06                  | RLA2_MOUSE   |              | 60S acidic ribosomal protein P2;                                            |                                                                                                                                                                                                                                    |

Table S7, Tholen et al.

| Non Prime Site | Prime Site            | Modifications                             | Hyperscore | Mass error in ppm | Charge | Precursor neutral mass in Da | Fold change (log <sub>2</sub> ) of ASAPRatio | FC-error of ASAPRatio | Uniprot ID 1 | Uniprot ID 2 | Protein Name 1                                                            | Protein Name 2                                                                                                             |
|----------------|-----------------------|-------------------------------------------|------------|-------------------|--------|------------------------------|----------------------------------------------|-----------------------|--------------|--------------|---------------------------------------------------------------------------|----------------------------------------------------------------------------------------------------------------------------|
| KTVMDDFQAF     | LDTCKAADKDCFTSEGNLVTR | N-ter +28.03 Da, K +28.03 Da, C +57.02 Da | 39.8       | 63.3              | 4      | 2842.51                      | -1.60                                        | 0.15                  | ALBU_MOUSE   |              | Serum albumin;                                                            |                                                                                                                            |
| NSSSGNPLVY     | LDVGADGQPLGR          | N-ter +34.06 Da                           | 20.3       | 21.1              | 2      | 1230.70                      | -0.25                                        | 0.01                  | PPIF_MOUSE   |              | Peptidyl-prolyl cis-trans isomerase F, mitochondrial;                     | Cyclophilin F;Rotamase F;                                                                                                  |
| TGTGTLILLV     | LDVNDNAPIPEPR         | N-ter +34.06 Da                           | 26.4       | 49.3              | 3      | 1482.86                      | 0.95                                         | 0.05                  | CADH1_MOUSE  |              | Cadherin-1;                                                               | ARC-1;Epithelial cadherin;Uvomorulin;                                                                                      |
| RLSEGFQAF      | LDVSHFTPDEVTVR        | N-ter +34.06 Da                           | 42.3       | 65.1              | 3      | 1647.98                      | -0.30                                        | 0.03                  | HSPB2_MOUSE  | E9QKE3_MOUSE | Heat shock protein beta-2;                                                |                                                                                                                            |
| QHRPSQQYAT     | LDVYNPFENR            | N-ter +28.03 Da                           | 25.9       | 47.9              | 2      | 1293.70                      | 0.21                                         | 0.01                  | SCAM3_MOUSE  | Q3UXS0_MOUSE | Secretory carrier-associated membrane protein 3;                          |                                                                                                                            |
| YERTFMASEF     | LDWLVEQEATTR          | N-ter +28.03 Da                           | 36.5       | 47.6              | 3      | 1544.86                      | -0.25                                        | 0.01                  | DPTOR_MOUSE  | B2ZR55_MOUSE | DEP domain-containing mTOR-interacting protein;                           | DEP domain-containing protein 6;                                                                                           |
| HGHHPHGDF      | LDYGPCDPPSNOELKGGQYHR | N-ter +34.06 Da, K +34.06 Da, C +57.02 Da | 25.2       | 64.8              | 4      | 2528.40                      | -0.27                                        | 0.02                  | HRG_MOUSE    |              | Histidine-rich glycoprotein;                                              | Histidine-proline-rich glycoprotein;                                                                                       |
| FRAMGVPMMG     | LDYSDEINQVVEVR        | N-ter +34.06 Da                           | 39.0       | 56.0              | 3      | 1711.98                      | 0.00                                         | 0.00                  | A2M_MOUSE    | D3YW52_MOUSE | Alpha-2-macroglobulin;                                                    | Pregnancy zone protein;                                                                                                    |
| KDGSASGTTL     | LEALDCLPPTRPTRDKPLR   | N-ter +28.03 Da, K +28.03 Da, C +57.02 Da | 24.2       | 75.6              | 4      | 2260.43                      | 0.73                                         | 0.02                  | EF1A1_MOUSE  | D3Y268_MOUSE | Elongation factor 1-alpha 1;                                              | Elongation factor Tu;Eukaryotic elongation factor 1 A-1;                                                                   |
| KEGNASGVSL     | LEALDILPPTRPTRDKPLR   | N-ter +28.03 Da, K +28.03 Da              | 30.2       | 64.7              | 4      | 2201.42                      | 0.95                                         | 0.02                  | EF1A2_MOUSE  | B7ZBW3_MOUSE | Elongation factor 1-alpha 2;                                              | Eukaryotic elongation factor 1 A-2;Statin-S1;                                                                              |
| VVLDPMYSTY     | LEALGKIGETPIPEYR      | N-ter +34.06 Da, K +34.06 Da              | 23.3       | 49.3              | 3      | 1853.19                      | 1.06                                         | 0.09                  | ICAL_MOUSE   | Q921U7_MOUSE | Calpastatin;                                                              | Calpain inhibitor;                                                                                                         |
| KKKQDVLVCF     | LEANKIGFEEKDIAANEENR  | N-ter +34.06 Da, K +34.06 Da              | 20.3       | 74.6              | 4      | 2391.49                      | -0.81                                        | 0.09                  | SH3L1_MOUSE  |              | SH3 domain-binding glutamic acid-rich-like protein;                       |                                                                                                                            |
| VLRPGTALVL     | LEAQAATGFIDPVNRR      | N-ter +28.03 Da                           | 32.4       | 50.9              | 3      | 1856.07                      | 0.03                                         | 0.00                  | EPIPL_MOUSE  |              | Epiplakin;                                                                |                                                                                                                            |
| GPCSLEIKQF     | LECAQNSQDKLCEGFNEVLR  | N-ter +34.06 Da, K +34.06 Da, C +57.02 Da | 30.0       | 79.9              | 4      | 2576.51                      | -0.69                                        | 0.12                  | CHCH2_MOUSE  | B2RPUB_MOUSE | Coiled-coil-helix-coiled-coil domain-containing protein 2, mitochondrial; |                                                                                                                            |
| PLLLCEGAQA     | LECYSCVQKAGDCCSPHR    | N-ter +34.06 Da, K +34.06 Da, C +57.02 Da | 56.9       | 83.1              | 4      | 2249.22                      | 0.63                                         | 0.10                  | LYPD3_MOUSE  |              | Ly6/PLAUR domain-containing protein 3;                                    | GPI-anchored metastasis-associated protein C4.4A homolog;                                                                  |
| RTLTAVHDAI     | LEDLVFSPSEIVGKR       | N-ter +28.03 Da, K +28.03 Da              | 42.5       | 79.3              | 3      | 1657.08                      | 0.39                                         | 0.07                  | R57_MOUSE    | F6SVV1_MOUSE | 40S ribosomal protein S7;                                                 |                                                                                                                            |
| HHKVYDLTKF     | LEEHPGGEVLR           | N-ter +28.03 Da                           | 33.6       | 57.9              | 3      | 1391.79                      | -2.18                                        | 0.10                  | CYB5_MOUSE   |              | Cytochrome b5;                                                            |                                                                                                                            |
| EGKGTIKKQF     | LEELLTQCDR            | N-ter +34.06 Da, C +57.02 Da              | 34.0       | 24.7              | 2      | 1410.76                      | -0.07                                        | 0.00                  | MLRS_MOUSE   |              | Myosin regulatory light chain 2, skeletal muscle isoform;                 | Fast skeletal myosin light chain 2;MLC2F;                                                                                  |
| LAPPEEALC      | LEEVAAPPASGTR         | N-ter +34.06 Da                           | 25.9       | 42.9              | 2      | 1259.75                      | -0.15                                        | 0.02                  | SHLB2_MOUSE  | A2AWI7_MOUSE | Endophilin-B2;                                                            | SH3 domain-containing GRB2-like protein B2;                                                                                |
| KSPEERTIEY     | LEEVAVNFAGLADR        | N-ter +34.06 Da, K +34.06 Da              | 31.6       | 69.4              | 3      | 1699.11                      | -0.49                                        | 0.04                  | ECHA_MOUSE   |              | Trifunctional enzyme subunit alpha, mitochondrial;                        | TP-alpha;                                                                                                                  |
| NDAYGPPSNF     | LEIDVSNPQTGVGVR       | N-ter +28.03 Da                           | 39.8       | 48.2              | 3      | 1610.94                      | -0.92                                        | 0.09                  | SNX3_MOUSE   | Q78ZM0_MOUSE | Sorting nexin-3;                                                          | SDP3 protein;                                                                                                              |
| PKKAPVLKTL     | LELIPELR              | N-ter +34.06 Da                           | 22.9       | 35.9              | 2      | 1015.69                      | 0.68                                         | 0.06                  | LPPRC_MOUSE  |              | Leucine-rich PPR motif-containing protein, mitochondrial;                 | 130 kDa leucine-rich protein;                                                                                              |
| EQKKILAKYL     | LETSGNLDGLYKLELHDFGYR | N-ter +28.03 Da, K +28.03 Da              | 28.5       | 105.0             | 4      | 2382.44                      | -1.52                                        | 0.13                  | NAMPT_MOUSE  |              | Nicotinamide phosphoribosyltransferase;                                   | Pre-B-cell colony-enhancing factor 1 homolog;Visfatin;                                                                     |
| ASSLPPDPDW     | LETSSSPAEPAPQGACR     | N-ter +34.06 Da, C +57.02 Da              | 51.6       | 61.6              | 3      | 1878.02                      | -0.38                                        | 0.08                  | DLGP4_MOUSE  | B7ZNS2_MOUSE | Disks large-associated protein 4;                                         | PSD-95/SAP90-binding protein 4;SAP90/PSD-95-associated protein 4;                                                          |
| LWVVLGLPAH     | LEVAEDSGHPWR          | N-ter +34.06 Da                           | 37.7       | 60.5              | 3      | 1428.81                      | -0.15                                        | 0.01                  | TXD15_MOUSE  |              | Thioredoxin domain-containing protein 15;                                 |                                                                                                                            |
| APGSINGVPL     | LEVLDLDFEDKQWR        | N-ter +34.06 Da, K +34.06 Da              | 23.0       | 93.2              | 3      | 1816.14                      | -1.69                                        | 0.33                  | FIP1_MOUSE   | D3Z619_MOUSE | Pre-mRNA 3'-end-processing factor FIP1;                                   | FIP1-like 1 protein;                                                                                                       |
| TFLRKMHHVL     | LEVVDVLEGLTQPCSEGR    | N-ter +34.06 Da, C +57.02 Da              | 37.1       | 54.8              | 3      | 1935.09                      | -0.30                                        | 0.02                  | TR112_MOUSE  |              | tRNA methyltransferase 112 homolog;                                       | TRM112-like protein;                                                                                                       |
| YVSDAFHKAF     | LEVNEEGSEAAASTSVVITGR | N-ter +28.03 Da                           | 59.3       | 45.8              | 3      | 2146.17                      | 0.31                                         | 0.02                  | ANT3_MOUSE   |              | Antithrombin-III;                                                         | Serpin C1;                                                                                                                 |
| AANCDKSLHT     | LFGDKLCAIPNLR         | N-ter +34.06 Da, K +34.06 Da, C +57.02 Da | 12.7       | 70.3              | 3      | 1584.06                      | 0.03                                         | 0.00                  | ALBU_MOUSE   |              | Serum albumin;                                                            |                                                                                                                            |
| LLHLELRR       | LFTMEPSKDKPEPSEQR     | N-ter +34.06 Da, K +34.06 Da              | 9.3        | 22.5              | 4      | 2120.22                      | -1.74                                        | 0.12                  | FUZZY_MOUSE  |              | Protein fuzzy homolog;                                                    |                                                                                                                            |
| LPEGTTPEKY     | LGAEMYQSVGNMR         | N-ter +28.03 Da                           | 37.3       | 55.1              | 3      | 1482.78                      | -1.79                                        | 0.19                  | TRFE_MOUSE   | E9Q035_MOUSE | Serotransferrin;                                                          | Beta-1 metal-binding globulin;Siderophilin;                                                                                |
| AATPKQGPRM     | LGAPEEADANEQVRR       | N-ter +34.06 Da                           | 18.0       | 77.1              | 3      | 1746.01                      | 0.18                                         | 0.03                  | CYTC_MOUSE   | A2APX3_MOUSE | Cystatin-C;                                                               | Cystatin-3;                                                                                                                |
| AATPKQGPRM     | LGAPEEADANEQVRR       | N-ter +28.03 Da                           | 40.7       | 59.4              | 3      | 1583.84                      | 0.14                                         | 0.01                  | CYTC_MOUSE   | A2APX3_MOUSE | Cystatin-C;                                                               | Cystatin-3;                                                                                                                |
| DHHHTHKTDK     | LGCPPEPDKNSDRPR       | N-ter +28.03 Da, K +28.03 Da, C +57.02 Da | 21.2       | 94.9              | 4      | 1947.15                      | -1.52                                        | 0.13                  | HRG_MOUSE    |              | Histidine-rich glycoprotein;                                              | Histidine-proline-rich glycoprotein;                                                                                       |
| SPASHEIATN     | LGDFAIISLYR           | N-ter +34.06 Da                           | 16.6       | 37.4              | 2      | 1187.72                      | 1.05                                         | 0.08                  | A1AT1_MOUSE  | A1AT2_MOUSE  | Alpha-1-antitrypsin 1-1;                                                  | Alpha-1 protease inhibitor 1;Alpha-1-antiprotease;Serine protease inhibitor 1-1;Serine protease inhibitor A1a;             |
| TIGRIRFHDF     | LGDSWGILFSHR          | N-ter +34.06 Da                           | 20.5       | 97.2              | 3      | 1517.97                      | -3.64                                        | 0.46                  | PRDX6_MOUSE  | Q6GT24_MOUSE | Peroxiredoxin-6;                                                          | 1-Cys peroxiredoxin;Acidic calcium-independent phospholipase A2;Antioxidant protein 2;Non-selenium glutathione peroxidase; |
| RPPGGGSNFS     | LGDFEPAEQPVR          | N-ter +34.06 Da                           | 39.0       | 22.0              | 2      | 1390.76                      | 1.32                                         | 0.12                  | HN1_MOUSE    |              | Hematological and neurological expressed 1 protein;                       |                                                                                                                            |
| QSVCVHLRR      | LGTLDNPSLDETAYR       | N-ter +28.03 Da                           | 42.1       | 50.3              | 3      | 1908.01                      | 0.70                                         | 0.04                  | FRDA_MOUSE   | E9Q2P9_MOUSE | Fratxin, mitochondrial;                                                   |                                                                                                                            |
| EGFTQPVAVF     | LGVPFAKPLGSLR         | N-ter +28.03 Da, K +28.03 Da              | 27.3       | 66.4              | 3      | 1507.03                      | -1.09                                        | 0.07                  | CES3_MOUSE   | EST1_MOUSE   | Carboxylesterase 3;                                                       | Fatty acid ethyl ester synthase;Triacylglycerol hydrolase;                                                                 |
| GIALNDNFVK     | LISWYDNEYGYSNR        | N-ter +34.06 Da                           | 22.9       | 61.7              | 3      | 1812.96                      | -6.64                                        | 0.00                  | G3P_MOUSE    | F8WJL5_MOUSE | Glyceraldehyde-3-phosphate dehydrogenase;                                 | Peptidyl-cysteine S-nitrosylase GAPDH;                                                                                     |
| KHKTDLHNEN     | LKGGDDLDPNVYLSR       | N-ter +28.03 Da, K +28.03 Da              | 43.7       | 63.4              | 3      | 1804.05                      | 0.20                                         | 0.01                  | KCRM_MOUSE   |              | Creatine kinase M-type;                                                   | Creatine kinase M chain;M-CK;                                                                                              |
| GCLVLPGYEA     | LKGPKEISFEGDVTSLR     | N-ter +28.03 Da, K +28.03 Da              | 40.9       | 71.6              | 4      | 2016.27                      | -0.01                                        | 0.00                  | CLM9_MOUSE   |              | CMRF35-like molecule 9;                                                   | CD300 antigen-like family member G;Nepmucin;                                                                               |
| GKNPAEAWAKN    | LKQEDFELLCPDQTR       | N-ter +28.03 Da, K +28.03 Da, C +57.02 Da | 33.8       | 94.7              | 3      | 1876.12                      | 0.07                                         | 0.01                  | TRFE_MOUSE   | E9Q035_MOUSE | Serotransferrin;                                                          | Beta-1 metal-binding globulin;Siderophilin;                                                                                |

Table S7, Tholen et al.

| Non Prime Site                                                     | Prime Site                                                                                   | Modifications                                                                                                                                                   | Hyperscore                           | Mass error in ppm                    | Charge                | Precursor neutral mass in Da                        | Fold change (log <sub>2</sub> ) of ASAPRatio | FC-error of ASAPRatio                | Uniprot ID 1                                                           | Uniprot ID 2                              | Protein Name 1                                                                                                                                                                                    | Protein Name 2                                                                                                                                                                                                                                                                            |
|--------------------------------------------------------------------|----------------------------------------------------------------------------------------------|-----------------------------------------------------------------------------------------------------------------------------------------------------------------|--------------------------------------|--------------------------------------|-----------------------|-----------------------------------------------------|----------------------------------------------|--------------------------------------|------------------------------------------------------------------------|-------------------------------------------|---------------------------------------------------------------------------------------------------------------------------------------------------------------------------------------------------|-------------------------------------------------------------------------------------------------------------------------------------------------------------------------------------------------------------------------------------------------------------------------------------------|
| PRLSISGEYN<br>PDQAGRPHVN                                           | LKTLMSPLGTR<br>LLCGEEQGDAAALHFNPR                                                            | N-ter +34.06 Da, K +34.06 Da<br>N-ter +34.06 Da, K +57.02 Da                                                                                                    | 28.1<br>60.2                         | 55.1<br>72.6                         | 3<br>3                | 1396.99<br>2031.15                                  | 0.50<br>-0.32                                | 0.03<br>0.05                         | A1AT1_MOUSE<br>LEG7_MOUSE                                              | A1AT2_MOUSE<br>Q9CRB1_MOUSE               | Alpha-1-antitrypsin 1-1;<br>Galectin-7;                                                                                                                                                           | Alpha-1 protease inhibitor 1;Alpha-1-<br>antitrypsinase;Serine protease inhibitor 1-<br>1;Serine protease inhibitor A1a;                                                                                                                                                                  |
| LLKEASRLRS<br>GWGVVSCAL                                            | LLEEEKNNVALAR<br>LLEIINIGLSVEIK                                                              | N-ter +34.06 Da, K +34.06 Da<br>N-ter +28.03 Da, K +28.03 Da                                                                                                    | 16.8<br>9.3                          | 108.8<br>114.3                       | 4<br>4                | 1680.17<br>1722.29                                  | -2.94<br>4.69                                | 0.00<br>0.63                         | EVPL_MOUSE<br>Q3V494_MOUSE                                             |                                           | Envoplakin;                                                                                                                                                                                       | 210 kDa cornified envelope precursor<br>protein;p210;                                                                                                                                                                                                                                     |
| TPPCEECIVW                                                         | LLLKEPMTVSSDQMAKLR                                                                           | N-ter +34.06 Da, K +34.06 Da                                                                                                                                    | 25.7                                 | 40.5                                 | 4                     | 2161.39                                             | -1.40                                        | 0.07                                 | CAH3_MOUSE                                                             |                                           | Carbonic anhydrase 3;                                                                                                                                                                             | Carbonate dehydratase III;Carbonic anhydrase<br>III;                                                                                                                                                                                                                                      |
| LQGGGLGPLS<br>AFRSVPALES<br>KKILAEERRK<br>NMQHRVYELF<br>KCCTLPEDQR | LLPPDLPLEPECR<br>LMLNNALNAVYQKTVESLPNLR<br>LNIDHLSDDKLR<br>LNSTAGASGGAYEHR<br>LPCVEDYLSAILNR | N-ter +28.03 Da, C +57.02 Da<br>N-ter +28.03 Da, K +28.03 Da<br>N-ter +34.06 Da, K +34.06 Da<br>N-ter +34.06 Da<br>N-ter +28.03 Da, C +57.02 Da                 | 31.1<br>22.3<br>22.8<br>75.4<br>41.2 | 45.2<br>70.9<br>45.4<br>75.5<br>71.5 | 3<br>4<br>4<br>3<br>3 | 1690.94<br>2670.64<br>1505.95<br>1523.87<br>1690.00 | 0.67<br>-0.47<br>1.05<br>-1.18<br>3.27       | 0.02<br>0.02<br>0.15<br>0.22<br>0.61 | OSTM1_MOUSE<br>LRRN1_MOUSE<br>TNRN3_MOUSE<br>HNRH1_MOUSE<br>ALBU_MOUSE | A2A6J0_MOUSE<br>Q8C2Q7_MOUSE              | Osteopetrosis-associated transmembrane protein 1;<br>Leucine-rich repeat neuronal protein 1;<br>Troponin T, fast skeletal muscle;<br>Heterogeneous nuclear ribonucleoprotein H;<br>Serum albumin; | Grey-lethal protein;<br>Neuronal leucine-rich repeat protein 1;<br>Fast skeletal muscle troponin T;                                                                                                                                                                                       |
| VLDQPDAAATH                                                        | LPHPPSPPLPGWEER                                                                              | N-ter +28.03 Da                                                                                                                                                 | 35.7                                 | 69.0                                 | 3                     | 1962.14                                             | 0.60                                         | 0.03                                 | NEDD4_MOUSE                                                            |                                           | E3 ubiquitin-protein ligase NEDD4;                                                                                                                                                                | Neural precursor cell expressed<br>developmentally down-regulated protein 4;<br>CC chemokine ILC;Cutaneous T-cell-attracting<br>chemokine;ESKine;IL-11 R-alpha-locus<br>chemokine;Skinkine;Small-inducible cytokine<br>A27;                                                               |
| WNKTQKQKEA<br>ALLCAGRAQG                                           | LPLPSSTSCCTQLYR<br>LQCCEYGVPIETSCPAVTCR                                                      | N-ter +34.06 Da, C +57.02 Da<br>N-ter +28.03 Da, C +57.02 Da                                                                                                    | 32.1<br>55.3                         | 46.8<br>43.9                         | 3<br>3                | 1815.99<br>2590.25                                  | 0.00<br>0.50                                 | 0.00<br>0.04                         | CCL27_MOUSE<br>LY6C1_MOUSE                                             | A2AMS6_MOUSE<br>LY6C2_MOUSE               | C-C motif chemokine 27;<br>Lymphocyte antigen 6C1;                                                                                                                                                |                                                                                                                                                                                                                                                                                           |
| PRKIISLSQL                                                         | LQEDSLNVDLSSLR                                                                               | N-ter +28.03 Da                                                                                                                                                 | 39.1                                 | 47.5                                 | 3                     | 1686.96                                             | 0.35                                         | 0.01                                 | PSME2_MOUSE                                                            | E0C290_MOUSE                              | Proteasome activator complex subunit 2;                                                                                                                                                           | 11S regulator complex subunit beta;Activator<br>of multicatalytic protease subunit<br>2;Proteasome activator 28 subunit beta;<br>Lysosomal acid alpha-<br>mannosidase;Mannosidase alpha class 2B<br>member 1;Mannosidase alpha-B;                                                         |
| NLFQFTTINY                                                         | LQETTLAANQPLSR                                                                               | N-ter +34.06 Da                                                                                                                                                 | 32.8                                 | 59.2                                 | 3                     | 1574.98                                             | -1.52                                        | 0.09                                 | MA2B1_MOUSE                                                            |                                           | Lysosomal alpha-mannosidase;                                                                                                                                                                      |                                                                                                                                                                                                                                                                                           |
| SRDGKALEQF<br>ARRQHLKSVM                                           | LQEFYDGNLKR<br>LQIAATELEKEESR                                                                | N-ter +28.03 Da, K +28.03 Da<br>N-ter +28.03 Da, K +28.03 Da                                                                                                    | 26.1<br>22.8                         | 46.9<br>55.0                         | 3<br>3                | 1437.83<br>1672.00                                  | 0.14<br>0.33                                 | 0.01<br>0.02                         | PDIA3_MOUSE<br>TNIN2_MOUSE                                             | A2A6K0_MOUSE                              | Protein disulfide-isomerase A3;<br>Troponin I, fast skeletal muscle;                                                                                                                              | 58 kDa glucose-regulated protein;58 kDa<br>microsomal protein;Disulfide isomerase ER-<br>60;Endoplasmic reticulum resident protein<br>57;Endoplasmic reticulum resident protein 60;<br>Troponin I, fast-twitch isoform;                                                                   |
| QAKAVLSAEK                                                         | LRDEEVTGLGELLR                                                                               | N-ter +34.06 Da                                                                                                                                                 | 44.9                                 | 84.6                                 | 4                     | 1770.13                                             | -1.56                                        | 0.14                                 | SERPH_MOUSE                                                            |                                           | Serpin H1;                                                                                                                                                                                        | 47 kDa heat shock protein;Collagen-binding<br>protein;Serine protease inhibitor J6;<br>94 kDa glucose-regulated protein;Endoplasmic<br>reticulum resident protein 99;Heat shock<br>protein 90 kDa beta member 1;Polymorphic<br>tumor rejection antigen 1;Tumor rejection<br>antigen gp96; |
| NTFYNSKEIF                                                         | LRELISNASDALDKIR                                                                             | N-ter +34.06 Da, K +34.06 Da<br>N-ter +34.06 Da, K +34.06 Da,<br>C +57.02 Da                                                                                    | 39.7<br>44.8                         | 98.5<br>83.3                         | 4<br>4                | 1881.32<br>2435.39                                  | 0.61<br>-6.64                                | 0.06<br>0.00                         | ENPL_MOUSE<br>ALBU_MOUSE                                               | HS90B_MOUSE                               | Endoplasmic;<br>Serum albumin;<br>Mesencephalic astrocyte-derived neurotrophic<br>factor;                                                                                                         |                                                                                                                                                                                                                                                                                           |
| ALSVLPSRA                                                          | LRPGDCEVCISYLGR                                                                              | N-ter +34.06 Da, C +57.02 Da                                                                                                                                    | 54.8                                 | 56.3                                 | 3                     | 1828.02                                             | 1.20                                         | 0.14                                 | MANF_MOUSE                                                             | Q3TMX5_MOUSE                              |                                                                                                                                                                                                   | Arginine-rich protein;Protein ARMET;                                                                                                                                                                                                                                                      |
| GAIMARIAQF                                                         | LSGIPETVPLSTVNR                                                                              | N-ter +34.06 Da                                                                                                                                                 | 31.1                                 | 33.0                                 | 3                     | 1615.99                                             | -1.09                                        | 0.07                                 | THIKA_MOUSE                                                            | THIKB_MOUSE                               | 3-ketoacyl-CoA thiolase A, peroxisomal;                                                                                                                                                           | Acetyl-CoA acyltransferase A;Beta-ketothiolase<br>A;Peroxisomal 3-oxoacyl-CoA thiolase A;<br>2-phospho-D-glycerate hydro-lyase;Enolase<br>3;Muscle-specific enolase;Skeletal muscle<br>enolase;                                                                                           |
| QDDWATWTSF<br>RFQHVGTSVF<br>RVAPEEHPTL<br>LLIATGPTTA<br>YQEDMGSLFY | LSGVDIQVGGDLTLVTNPKR<br>LSVTGEQYGNPIR<br>LTEAPLNPKANR<br>LTEDEKQTMVDLHNQYR<br>LTLVDLETCHVLSR | N-ter +28.03 Da, K +28.03 Da<br>N-ter +28.03 Da<br>N-ter +34.06 Da, K +34.06 Da<br>N-ter +34.06 Da, K +34.06 Da,<br>C +57.02 Da<br>N-ter +34.06 Da, C +57.02 Da | 51.5<br>32.8<br>17.3<br>30.6<br>53.9 | 53.7<br>43.3<br>75.5<br>68.2<br>77.6 | 3<br>3<br>3<br>4<br>3 | 2195.33<br>1460.83<br>1390.96<br>2187.28<br>1804.10 | -3.64<br>-0.52<br>0.16<br>0.38<br>-2.74      | 0.46<br>0.02<br>0.02<br>0.04<br>0.37 | ENOB_MOUSE<br>SDF2L_MOUSE<br>ACTC_MOUSE<br>PI16_MOUSE<br>FETUB_MOUSE   | ACTA_MOUSE<br>D3Z6T6_MOUSE<br>Q6YJ1_MOUSE | Beta-enolase;<br>Stromal cell-derived factor 2-like protein 1;<br>Actin, alpha cardiac muscle 1;<br>Peptidase inhibitor 16;<br>Fetuin-B;                                                          | Alpha-cardiac actin;<br>Cysteine-rich protease inhibitor;<br>Fetuin-like protein IRL685;<br>Dolichyl-diphosphooligosaccharide--protein<br>glycosyltransferase 63 kDa subunit;Ribophorin<br>II;Ribophorin-2;                                                                               |
| ALTITASVQA                                                         | LTPHTYLKQDVER                                                                                | N-ter +28.03 Da, K +28.03 Da                                                                                                                                    | 20.1                                 | 106.8                                | 4                     | 1756.14                                             | 0.04                                         | 0.00                                 | RPN2_MOUSE                                                             | A2ACG7_MOUSE                              | Dolichyl-diphosphooligosaccharide--protein<br>glycosyltransferase subunit 2;                                                                                                                      |                                                                                                                                                                                                                                                                                           |
| DQFSRSVNV5                                                         | LTQEELSDGLDLSVR                                                                              | N-ter +28.03 Da                                                                                                                                                 | 45.3                                 | 54.4                                 | 3                     | 1831.02                                             | 0.50                                         | 0.03                                 | AKAP2_MOUSE                                                            | A2API8_MOUSE                              | A-kinase anchor protein 2;                                                                                                                                                                        | AKAP expressed in kidney and lung;Protein<br>kinase A-anchoring protein 2;<br>Proline-arginine-rich end leucine-rich repeat<br>protein;                                                                                                                                                   |
| INGTQICPNN<br>LEFQAQITTL<br>STSVVRPFK<br>GIWHNDNKS<br>KGSVAGGAVY   | LVAFHDFSSDENVPHLR<br>LVDLGTQPAEJAR<br>LVRPVPQVYVIEGR<br>LWVVNEEDHLR<br>LVYDQELGSPDKSEALR     | N-ter +34.06 Da<br>N-ter +28.03 Da<br>N-ter +28.03 Da<br>N-ter +34.06 Da<br>N-ter +34.06 Da, K +34.06 Da                                                        | 26.9<br>32.3<br>31.1<br>51.5<br>59.4 | 92.5<br>31.2<br>50.6<br>55.1<br>62.5 | 4<br>3<br>3<br>3<br>3 | 2129.31<br>1409.83<br>1610.01<br>1442.85<br>2171.35 | -0.74<br>0.51<br>0.01<br>-1.06<br>0.16       | 0.10<br>0.02<br>0.00<br>0.09<br>0.02 | PRELP_MOUSE<br>SYMPK_MOUSE<br>ATPO_MOUSE<br>KCRM_MOUSE<br>QIL1_MOUSE   | E9PVR1_MOUSE<br>D3Z4J0_MOUSE              | Prolargin;<br>Symplekin;<br>ATP synthase subunit O, mitochondrial;<br>Creatine kinase M-type;<br>Protein QIL1;                                                                                    | Oligomycin sensitivity conferral protein;<br>Creatine kinase M chain;M-CK;                                                                                                                                                                                                                |
| AGNKVTYVDF                                                         | LVYDVLQHR                                                                                    | N-ter +34.06 Da                                                                                                                                                 | 38.5                                 | 55.4                                 | 3                     | 1290.79                                             | -0.36                                        | 0.01                                 | GSTM2_MOUSE                                                            | GSTM6_MOUSE                               | Glutathione S-transferase Mu 2;                                                                                                                                                                   | GST 5-5;GST class-mu 2;Glutathione S-<br>transferase pmGT2;                                                                                                                                                                                                                               |

| Non Prime Site | Prime Site                | Modifications                             | Hyperscore | Mass error in ppm | Charge | Precursor neutral mass in Da | Fold change (log <sub>2</sub> ) of ASAPRatio | FC-error of ASAPRatio | Uniprot ID 1 | Uniprot ID 2 | Protein Name 1                                                                                                    | Protein Name 2                                                                                                                                           |
|----------------|---------------------------|-------------------------------------------|------------|-------------------|--------|------------------------------|----------------------------------------------|-----------------------|--------------|--------------|-------------------------------------------------------------------------------------------------------------------|----------------------------------------------------------------------------------------------------------------------------------------------------------|
| DSPGLHRVYW     | LVYEQEQLSCDEPILNSKSGDNR   | N-ter +34.06 Da, K +34.06 Da, C +57.02 Da | 47.8       | 67.5              | 4      | 2858.63                      | -0.47                                        | 0.06                  | PEBP1_MOUSE  | D3Z1V4_MOUSE | Phosphatidylethanolamine-binding protein 1;                                                                       | HCNPPp;<br>Proline-arginine-rich end leucine-rich repeat protein;<br>Thioredoxin domain-containing protein 7;                                            |
| VLGKPLSLAF     | LYMEKNQLEEVPSALPR         | N-ter +34.06 Da, K +34.06 Da              | 22.7       | 57.3              | 3      | 2084.28                      | -2.56                                        | 0.15                  | PRELP_MOUSE  |              | Prolargin;                                                                                                        |                                                                                                                                                          |
| SCTFFLAVSG     | LYSSDDVIELTSPFNFR         | N-ter +34.06 Da                           | 52.7       | 55.3              | 3      | 2090.11                      | 0.16                                         | 0.02                  | PDI A6_MOUSE | Q3TML0_MOUSE | Protein disulfide-isomerase A6;                                                                                   |                                                                                                                                                          |
| EQKIGQPTLL     | LYVDAGAETMTQR             | N-ter +34.06 Da                           | 49.9       | 55.7              | 3      | 1487.83                      | -1.06                                        | 0.11                  | KAD1_MOUSE   |              | Adenylate kinase isoenzyme 1;                                                                                     | ATP-AMP transphosphorylase 1;Myokinase;                                                                                                                  |
| TARGAAVTRS     | MASGGGVPTDEEQATGLER       | N-ter +34.06 Da                           | 33.9       | 56.7              | 3      | 1938.03                      | -0.45                                        | 0.03                  | COX5B_MOUSE  | Q9D881_MOUSE | Cytochrome c oxidase subunit 5B, mitochondrial;                                                                   | Cytochrome c oxidase polypeptide Vb;                                                                                                                     |
| TYHCKNSVAY     | MDQQTGNLKKALLQGSNEIELR    | N-ter +34.06 Da, K +34.06 Da              | 35.7       | 56.5              | 4      | 2700.72                      | -0.49                                        | 0.02                  | CO1A1_MOUSE  | F8WGB7_MOUSE | Collagen alpha-1(I) chain;                                                                                        | Alpha-1 type I collagen;<br>C-type lectin domain family 3 member B;Plasminogen kringle 4-binding protein;                                                |
| SKMFEELKNR     | MDVLAQEVALLKEK            | N-ter +34.06 Da, K +34.06 Da              | 48.5       | 84.1              | 3      | 1688.21                      | -2.94                                        | 0.23                  | TETN_MOUSE   | Q8CFZ6_MOUSE | Tetranectin;                                                                                                      |                                                                                                                                                          |
| TYLERHMSEF     | MECNLDELVKHGLR            | N-ter +28.03 Da, K +28.03 Da, C +57.02 Da | 19.5       | 91.5              | 4      | 1769.06                      | -0.27                                        | 0.02                  | PSA1_MOUSE   | E9Q3B7_MOUSE |                                                                                                                   | Proline-arginine-rich end leucine-rich repeat protein;                                                                                                   |
| GKPLSLAFLY     | MEKNQLEEVPSALPR           | N-ter +34.06 Da, K +34.06 Da              | 42.5       | 62.8              | 3      | 1808.13                      | -0.97                                        | 0.08                  | PRELP_MOUSE  |              | Prolargin;<br>Phospholysine phosphohistidine inorganic pyrophosphate phosphatase;                                 |                                                                                                                                                          |
| QNMNRAFQVL     | MELENPVLISLGGKR           | N-ter +34.06 Da, K +34.06 Da              | 30.9       | 64.0              | 3      | 1723.14                      | 0.68                                         | 0.03                  | LHPP_MOUSE   |              | Apolipoprotein C-III;                                                                                             | Apolipoprotein C3;                                                                                                                                       |
| SLLLGSVQGY     | MEQASKTVQDALSSVQESDIAVVAR | N-ter +34.06 Da, K +34.06 Da              | 45.6       | 74.7              | 4      | 2729.66                      | -1.00                                        | 0.14                  | APOC3_MOUSE  | E9QP56_MOUSE |                                                                                                                   |                                                                                                                                                          |
| KTIDCDVITL     | MFIQTQDTPNPNLSKIPGKPVLETR | N-ter +34.06 Da, K +34.06 Da              | 22.5       | 63.5              | 4      | 3072.95                      | -5.06                                        | 0.00                  | NFU1_MOUSE   | D3Z285_MOUSE | NFU1 iron-sulfur cluster scaffold homolog, mitochondrial;                                                         | HIRA-interacting protein 5;                                                                                                                              |
|                | MGTPSGTAEPYDGTAKAR        | N-ter +34.06 Da, K +34.06 Da              | 48.1       | 67.7              | 3      | 1806.05                      | 0.37                                         | 0.06                  | BSDC1_MOUSE  |              | BSD domain-containing protein 1;                                                                                  |                                                                                                                                                          |
| SVILQHLRMS     | MHTEAAEVLLER              | N-ter +34.06 Da                           | 40.1       | 48.2              | 3      | 1431.83                      | 0.18                                         | 0.02                  | HIBCH_MOUSE  | E0CX19_MOUSE | 3-hydroxyisobutyryl-CoA hydrolase, mitochondrial;                                                                 | 3-hydroxyisobutyryl-coenzyme A hydrolase;<br>2-phospho-D-glycerate hydro-lyase;Enolase 3;Muscle-specific enolase;Skeletal muscle enolase;                |
| AGNKLAMQEF     | MILPVGASSFKEAMR           | N-ter +34.06 Da, K +34.06 Da              | 28.1       | 73.0              | 3      | 1704.10                      | 0.23                                         | 0.03                  | ENOB_MOUSE   | Q5SX59_MOUSE | Beta-enolase;                                                                                                     | Nucleolar protein 1;                                                                                                                                     |
| SEVKMKMQQEN    | MKPQEQLTLEPYER            | N-ter +28.03 Da, K +28.03 Da              | 29.8       | 40.7              | 3      | 1817.01                      | 1.44                                         | 0.04                  | FBRI_MOUSE   |              | rRNA 2'-O-methyltransferase fibrillar;                                                                            |                                                                                                                                                          |
|                | MKQLPILEPGDKPR            | N-ter +28.03 Da, K +28.03 Da              | 37.9       | 52.7              | 4      | 1705.09                      | 0.89                                         | 0.03                  | RABEK_MOUSE  | B0R0S4_MOUSE | Rab9 effector protein with kelch motifs;                                                                          |                                                                                                                                                          |
|                | MKVFTVGLPAEGR             | N-ter +34.06 Da, K +34.06 Da              | 26.8       | 70.0              | 3      | 1569.05                      | 0.52                                         | 0.05                  | GRHPR_MOUSE  | D6REG4_MOUSE | Glyoxylate reductase/hydroxypyruvate reductase;                                                                   |                                                                                                                                                          |
| WAATPKQGPR     | MLGAPEEADANEQGVRR         | N-ter +28.03 Da                           | 22.8       | 68.0              | 3      | 1871.01                      | 0.31                                         | 0.04                  | CYTC_MOUSE   | A2APX3_MOUSE | Cystatin-C;                                                                                                       | Cystatin-3;                                                                                                                                              |
| WAATPKQGPR     | MLGAPEEADANEQGVRR         | N-ter +28.03 Da                           | 57.1       | 49.4              | 3      | 1714.87                      | -0.12                                        | 0.01                  | CYTC_MOUSE   | A2APX3_MOUSE | Cystatin-C;                                                                                                       | Cystatin-3;                                                                                                                                              |
| TARRQHLKSV     | MLQJAATELEKEESR           | N-ter +34.06 Da, K +34.06 Da              | 21.7       | 65.1              | 3      | 1815.13                      | 1.61                                         | 0.15                  | TNNI2_MOUSE  | A2A6K0_MOUSE | Troponin I, fast skeletal muscle;                                                                                 | Troponin I, fast-twitch isoform;<br>Calgizzarin;Endothelial monocyte-activating polypeptide;Protein S100-C;S100 calcium-binding protein A11;             |
| QLSKTEFLSF     | MNTELAFTKNQDGPVLDLR       | N-ter +34.06 Da, K +34.06 Da              | 18.0       | 63.1              | 4      | 2349.47                      | -0.11                                        | 0.01                  | S10AB_MOUSE  | F6S135_MOUSE | Protein S100-A11;                                                                                                 | Protein cypher;Protein oracle;Z-band alternatively spliced PDZ-motif protein;                                                                            |
| RLPASPVISN     | MPAQVDQGVATEDR            | N-ter +28.03 Da                           | 36.7       | 49.6              | 3      | 1543.81                      | 0.52                                         | 0.02                  | 3BP1_MOUSE   | A2ASV4_MOUSE | SH3 domain-binding protein 1;                                                                                     | Protein phosphatase 2B regulatory subunit 1;Protein phosphatase 3 regulatory subunit B alpha isoform 1;                                                  |
| ILAQMTGTEY     | MQDPDEALRR                | N-ter +28.03 Da                           | 25.5       | 63.6              | 3      | 1386.74                      | 1.27                                         | 0.13                  | LDB3_MOUSE   | E9PYJ9_MOUSE | LIM domain-binding protein 3;                                                                                     | Protein 5-100E;S100 calcium-binding protein A3;                                                                                                          |
| NSGSLSEEF      | MSLPQLQNPVLR              | N-ter +34.06 Da                           | 35.0       | 46.0              | 3      | 1686.01                      | -0.74                                        | 0.04                  | CANB1_MOUSE  |              | Calcineurin subunit B type 1;                                                                                     | Alpha-1 type I collagen;                                                                                                                                 |
| EFRECDYNFK     | MSVLDTNKDCVDFGEYVR        | N-ter +28.03 Da, K +28.03 Da, C +57.02 Da | 25.2       | 68.6              | 3      | 2332.23                      | 0.63                                         | 0.07                  | S10A3_MOUSE  |              | Protein S100-A3;                                                                                                  | Tumor protein D52-like 2;                                                                                                                                |
| PGLGGNFASQ     | MSYGYDEKSAGVSPGPMGPSGR    | N-ter +28.03 Da, K +28.03 Da              | 42.3       | 72.4              | 4      | 2481.35                      | 0.88                                         | 0.06                  | CO1A1_MOUSE  | F8WGB7_MOUSE | Collagen alpha-1(I) chain;                                                                                        | Protein cypher;Protein oracle;Z-band alternatively spliced PDZ-motif protein;                                                                            |
| SPNKGVLSDF     | MTDVPVDPGVVHR             | N-ter +34.06 Da                           | 42.8       | 79.5              | 3      | 1454.89                      | -0.94                                        | 0.05                  | TPD54_MOUSE  | Q3TUJ9_MOUSE | Tumor protein D54;                                                                                                | Protein cypher;Protein oracle;Z-band alternatively spliced PDZ-motif protein;                                                                            |
| QSRSFRLAQ      | MTGTEYMQDPDEALRR          | N-ter +34.06 Da                           | 23.7       | 54.7              | 3      | 2075.06                      | 0.11                                         | 0.01                  | LDB3_MOUSE   | E9PYJ9_MOUSE | LIM domain-binding protein 3;                                                                                     | Protein cypher;Protein oracle;Z-band alternatively spliced PDZ-motif protein;                                                                            |
| QSRSFRLAQ      | MTGTEYMQDPDEALR           | N-ter +28.03 Da                           | 44.3       | 45.9              | 3      | 1912.91                      | -0.01                                        | 0.00                  | LDB3_MOUSE   | E9PYJ9_MOUSE | LIM domain-binding protein 3;                                                                                     | Protein cypher;Protein oracle;Z-band alternatively spliced PDZ-motif protein;                                                                            |
| TTLEHSDCAF     | MVDNEAIYDICR              | N-ter +34.06 Da, C +57.02 Da              | 37.7       | 46.3              | 3      | 1531.79                      | -0.81                                        | 0.06                  | TBA1A_MOUSE  | TBA1B_MOUSE  | Tubulin alpha-1A chain;                                                                                           | Alpha-tubulin 1;Alpha-tubulin isotype M-alpha-1;Tubulin alpha-1 chain;                                                                                   |
| ISKEWGFTKF     | NADEFEDMVAEKR             | N-ter +34.06 Da, K +34.06 Da              | 22.7       | 61.7              | 3      | 1620.91                      | -1.40                                        | 0.15                  | RL10_MOUSE   |              | 60S ribosomal protein L10;                                                                                        | Protein QM homolog;<br>Brain protein H19;MH19;Membrane-associated protein HEM-2;p125Nap1;                                                                |
| NLPNTENLTF     | NAEESYDSEMR               | N-ter +34.06 Da                           | 22.3       | 97.6              | 3      | 1476.81                      | -2.74                                        | 0.55                  | NCKP1_MOUSE  | A2AS98_MOUSE | Nck-associated protein 1;                                                                                         |                                                                                                                                                          |
| TIKKRLETYY     | NATEPVISFYDKR             | N-ter +28.03 Da, K +28.03 Da              | 21.9       | 48.1              | 3      | 1594.91                      | -1.74                                        | 0.17                  | KAD1_MOUSE   |              | Adenylate kinase isoenzyme 1;                                                                                     | ATP-AMP transphosphorylase 1;Myokinase;                                                                                                                  |
| TGGRTTWART     | NATLSVEPEGR               | N-ter +34.06 Da                           | 35.1       | 42.0              | 2      | 1205.70                      | 0.76                                         | 0.05                  | ACOT2_MOUSE  |              | Acyl-coenzyme A thioesterase 2, mitochondrial;                                                                    | Acyl coenzyme A thioester hydrolase;MTE-1;Very-long-chain acyl-CoA thioesterase;                                                                         |
| SFRPNQNTK      | NCWQNYLDFHR               | N-ter +28.03 Da, C +57.02 Da              | 27.9       | 56.2              | 3      | 1579.79                      | 0.23                                         | 0.02                  | CX6B1_MOUSE  |              | Cytochrome c oxidase subunit 6B1;                                                                                 | Cytochrome c oxidase subunit VIb isoform 1;                                                                                                              |
| FSHFRFDEN      | NDAAILVLEPIER             | N-ter +28.03 Da                           | 24.0       | 68.5              | 3      | 1593.02                      | 0.30                                         | 0.02                  | TLR2_MOUSE   |              | Toll-like receptor 2;                                                                                             |                                                                                                                                                          |
| PGDYSLVKY      | NDQHIPSPTAR               | N-ter +34.06 Da                           | 25.4       | 51.8              | 3      | 1472.84                      | -1.25                                        | 0.03                  | FLNA_MOUSE   | B7FAV1_MOUSE | Filamin-A;                                                                                                        | Actin-binding protein 280;Alpha-filamin;Endothelial actin-binding protein;Filamin-1;Non-muscle filamin;                                                  |
| FGVCHIFASF     | NDTFVHVDLSGKETICR         | N-ter +28.03 Da, K +28.03 Da, C +57.02 Da | 27.2       | 65.5              | 4      | 2147.21                      | 0.07                                         | 0.01                  | RS14_MOUSE   | D3YVF4_MOUSE | 40S ribosomal protein S14;                                                                                        |                                                                                                                                                          |
| RFQTTAVCK      | NDVITVQTPAFAESVTEGDVR     | N-ter +28.03 Da                           | 61.8       | 50.0              | 3      | 2275.25                      | 0.35                                         | 0.03                  | ODO2_MOUSE   |              | Dihydrolypopylysine-residue succinyltransferase component of 2-oxoglutarate dehydrogenase complex, mitochondrial; | 2-oxoglutarate dehydrogenase complex component E2;Dihydrolypopylysine-residue succinyltransferase component of 2-oxoglutarate dehydrogenase complex;E2K; |

Table S7, Tholen et al.

| Non Prime Site                                      | Prime Site                                                         | Modifications                                                                                                   | Hyperscore                   | Mass error in ppm            | Charge           | Precursor neutral mass in Da             | Fold change (log <sub>2</sub> ) of ASAPRatio | FC-error of ASAPRatio        | Uniprot ID 1                                             | Uniprot ID 2                                | Protein Name 1                                                                                                                | Protein Name 2                                                                                                                                                                                                                                                                                                   |
|-----------------------------------------------------|--------------------------------------------------------------------|-----------------------------------------------------------------------------------------------------------------|------------------------------|------------------------------|------------------|------------------------------------------|----------------------------------------------|------------------------------|----------------------------------------------------------|---------------------------------------------|-------------------------------------------------------------------------------------------------------------------------------|------------------------------------------------------------------------------------------------------------------------------------------------------------------------------------------------------------------------------------------------------------------------------------------------------------------|
| PGDYEVSKF<br>FKKAGHPFMW                             | NEEHIPSPFVVPVSPSGDAR<br>NEHLGYLVTCPSNLGTGLR                        | N-ter +34.06 Da<br>N-ter +28.03 Da, C +57.02 Da                                                                 | 30.6<br>46.3                 | 36.5<br>68.3                 | 3<br>3           | 2353.26<br>2128.22                       | -3.64<br>0.19                                | 1.37<br>0.02                 | FLNA_MOUSE<br>KCRM_MOUSE                                 | B7FAV1_MOUSE                                | Filamin-A;<br>Creatine kinase M-type;                                                                                         | Actin-binding protein 280;Alpha-filamin;Endothelial actin-binding protein;Filamin-1,Non-muscle filamin; Creatine kinase M chain;M-CK; 2-oxoglutarate dehydrogenase complex component E2;Dihydroliipoamide succinyltransferase component of 2-oxoglutarate dehydrogenase complex, mitochondrial; Twinfilin-1;     |
| QNTCAMLTF<br>AEEELRQIKI                             | NEVDMSNIQEMR<br>NEVQTDVSDVTKHQLQGVAFPISR                           | N-ter +34.06 Da<br>N-ter +34.06 Da, K +34.06 Da                                                                 | 33.3<br>31.9                 | 49.9<br>57.6                 | 3<br>4           | 1498.77<br>2836.70                       | -1.22<br>-1.52                               | 0.11<br>0.13                 | ODO2_MOUSE<br>TWF1_MOUSE                                 |                                             | Dihydroliopolysine-residue succinyltransferase component of 2-oxoglutarate dehydrogenase complex, mitochondrial; Twinfilin-1; | 47 kDa heat shock protein;Collagen-binding protein;Serine protease inhibitor J6;                                                                                                                                                                                                                                 |
| RDKRSALOSI                                          | NEWASQTTDQKGLPEVTKDVER                                             | N-ter +28.03 Da, K +28.03 Da                                                                                    | 40.4                         | 72.0                         | 4                | 2486.45                                  | 0.16                                         | 0.01                         | SERPH_MOUSE                                              |                                             | Serpin H1;                                                                                                                    |                                                                                                                                                                                                                                                                                                                  |
| ILLWLYGADG                                          | NIVLQSPASLAVSLGQR                                                  | N-ter +28.03 Da                                                                                                 | 54.4                         | 45.2                         | 3                | 1881.15                                  | 3.49                                         | 0.20                         | KV3A9_MOUSE                                              | KV3AA_MOUSE                                 | Ig kappa chain V-III region MOPC 63;                                                                                          |                                                                                                                                                                                                                                                                                                                  |
|                                                     | NIVMTQSPKMSMSVGER                                                  | N-ter +28.03 Da, K +28.03 Da                                                                                    | 47.3                         | 72.2                         | 3                | 2037.15                                  | -1.06                                        | 0.13                         | KV5A2_MOUSE                                              |                                             | Ig kappa chain V-V region MOPC 21;                                                                                            |                                                                                                                                                                                                                                                                                                                  |
| YNKFMSVLDT<br>FLPMMQAISN                            | NKDCEVDFGEYVR<br>NKDQGGYDFVEGLR                                    | N-ter +28.03 Da, C +57.02 Da<br>N-ter +34.06 Da, K +34.06 Da                                                    | 42.5<br>45.8                 | 57.1<br>40.0                 | 3<br>3           | 1685.87<br>1793.99                       | 0.99<br>0.49                                 | 0.10<br>0.09                 | S10A3_MOUSE<br>MYL1_MOUSE                                | E9PWG4_MOUSE                                | Protein S100-A3;<br>Myosin light chain 1/3, skeletal muscle isoform;                                                          | Protein S-100E;S100 calcium-binding protein A3;<br>Myosin light chain alkali 1/2;<br>Alpha-1 protease inhibitor 1;Alpha-1-antiprotease;Serine protease inhibitor 1-1;Serine protease inhibitor A1a;                                                                                                              |
| QSPASHEIAT<br>VPDQAGRFHV<br>SSSLGQQLNL              | NLGDFAIISLYR<br>NLLCGEEQADAAALHFNPR<br>NLLNWDVTLGTVSLOQER          | N-ter +28.03 Da<br>N-ter +34.06 Da, C +57.02 Da<br>N-ter +34.06 Da                                              | 42.6<br>69.1<br>50.0         | 38.8<br>69.0<br>33.3         | 2<br>3<br>3      | 1295.74<br>2145.20<br>2236.23            | 0.29<br>-2.94<br>-0.36                       | 0.04<br>0.45<br>0.06         | A1AT1_MOUSE<br>LEG7_MOUSE<br>APOA1_MOUSE                 | A1AT2_MOUSE<br>Q9CRB1_MOUSE<br>Q8BPD5_MOUSE | Alpha-1-antitrypsin 1-1;<br>Galectin-7;<br>Apolipoprotein A-I;                                                                | Protein S-100E;S100 calcium-binding protein A3;<br>Myosin light chain alkali 1/2;<br>Alpha-1 protease inhibitor 1;Alpha-1-antiprotease;Serine protease inhibitor 1-1;Serine protease inhibitor A1a;                                                                                                              |
| KINGTQICPN<br>LAACGSVTMS                            | NLVAHFDFSSDLENVPHLR<br>NPGESSFDLADR                                | N-ter +28.03 Da<br>N-ter +28.03 Da                                                                              | 28.6<br>48.9                 | 98.3<br>42.9                 | 4<br>2           | 2237.34<br>1334.67                       | 3.14<br>-2.25                                | 0.48<br>0.21                 | PRELP_MOUSE<br>SODE_MOUSE                                |                                             | Prolargin;<br>Extracellular superoxide dismutase [Cu-Zn];                                                                     |                                                                                                                                                                                                                                                                                                                  |
| GSRRNGDQWGV                                         | NPGGFVER                                                           | N-ter +28.03 Da                                                                                                 | 19.6                         | 79.6                         | 2                | 902.53                                   | 0.33                                         | 0.02                         | ANS18_MOUSE                                              |                                             | Ankyrin repeat and sterile alpha motif domain-containing protein 1B;                                                          | Amyloid-beta protein intracellular domain-associated protein 1;E2A-PBX1-associated protein;                                                                                                                                                                                                                      |
| DDIGRNFILM                                          | NPQNGLKIRPFMKAHLNR                                                 | N-ter +28.03 Da, K +28.03 Da<br>N-ter +28.03 Da, K +28.03 Da, C +57.02 Da                                       | 18.5                         | 79.0                         | 4                | 2217.44                                  | 4.01                                         | 0.30                         | UBCP1_MOUSE                                              |                                             | Ubiquitin-like domain-containing CTD phosphatase 1;                                                                           | Nuclear proteasome inhibitor UBLCP1;                                                                                                                                                                                                                                                                             |
| GALGCAICHG<br>IPRHEVTEIS                            | NPVDDICIAKPR<br>NTDVTQPQKTVIR                                      | N-ter +28.03 Da, K +28.03 Da<br>N-ter +28.03 Da, K +28.03 Da                                                    | 36.7<br>22.6                 | 43.1<br>67.9                 | 3<br>3           | 1452.84<br>1612.99                       | 0.78<br>-0.15                                | 0.06<br>0.03                 | ANT3_MOUSE<br>E9QE616_MOUSE                              |                                             | Antithrombin-III;                                                                                                             | Serpin C1;                                                                                                                                                                                                                                                                                                       |
| QPVPKLGVEV<br>ELRQLMEKVQ                            | NTHGPEPKDKNIR<br>NVSQSMVEVLELR                                     | N-ter +28.03 Da, K +28.03 Da<br>N-ter +28.03 Da                                                                 | 25.9<br>33.6                 | 105.6<br>63.6                | 4<br>3           | 1647.01<br>1431.83                       | -1.40<br>3.38                                | 0.18<br>0.29                 | NMT1_MOUSE<br>NOE2_MOUSE                                 |                                             | Glycolipase N-tetradecanoyltransferase 1;<br>Noelin-2;                                                                        | Myristoyl-CoA:protein N-myristoyltransferase 1;Peptide N-myristoyltransferase 1; Olfactomedin-2;                                                                                                                                                                                                                 |
| FHTNRPIKIF<br>KRQNKDLMEL                            | NVWDTAGQKFKFGLR<br>QALIDSHFEAR                                     | N-ter +34.06 Da, K +34.06 Da<br>N-ter +34.06 Da                                                                 | 23.2<br>31.6                 | 43.8<br>56.0                 | 3<br>3           | 1745.03<br>1319.78                       | -0.64<br>-0.30                               | 0.04<br>0.01                 | RAN_MOUSE<br>TNNT3_MOUSE                                 | RANT_MOUSE<br>A2A6J0_MOUSE                  | GTP-binding nuclear protein Ran;<br>Troponin T, fast skeletal muscle;                                                         | GTPase Ran;Ras-like protein TC4;Ras-related nuclear protein;<br>Fast skeletal muscle troponin T;<br>Protein cypher;Protein oracle;Z-band alternatively spliced PDZ-motif protein;                                                                                                                                |
| LAVDSASPVY<br>LLTDVELQYP                            | QAVIKTQSKPEDEDEWAR<br>QDAVLALTQHR                                  | N-ter +34.06 Da, K +34.06 Da<br>N-ter +34.06 Da                                                                 | 22.5<br>20.9                 | 59.4<br>76.3                 | 4<br>3           | 2302.40<br>1284.83                       | -0.79<br>-0.27                               | 0.04<br>0.02                 | LDB3_MOUSE<br>ITI1_MOUSE                                 | E9PYJ9_MOUSE<br>F8WJ05_MOUSE                | LIM domain-binding protein 3;<br>Inter-alpha-trypsin inhibitor heavy chain H1;                                                |                                                                                                                                                                                                                                                                                                                  |
| GRKTETVCTF                                          | QDGALVHQHQWDGKESTITR                                               | N-ter +34.06 Da, K +34.06 Da                                                                                    | 50.1                         | 69.8                         | 4                | 2364.41                                  | -0.86                                        | 0.06                         | FABP5_MOUSE                                              |                                             | Fatty acid-binding protein, epidermal;                                                                                        | Epidermal-type fatty acid-binding protein;Fatty acid-binding protein 5;Keratinocyte lipid-binding protein;Psoriasis-associated fatty acid-binding protein homolog;                                                                                                                                               |
| KRNDFLQIGI<br>ATVASSQKF                             | QDGYLSLLQDSGEVR<br>QDLGVKNSEPAAR                                   | N-ter +34.06 Da<br>N-ter +28.03 Da, K +28.03 Da                                                                 | 38.6<br>32.2                 | 63.9<br>72.1                 | 3<br>3           | 1712.99<br>1439.88                       | -0.01<br>-0.62                               | 0.00<br>0.10                 | IF5A1_MOUSE<br>SEPT9_MOUSE                               | A2A6U3_MOUSE                                | Eukaryotic translation initiation factor 5A-1;<br>Septin-9;                                                                   | Eukaryotic initiation factor 5A isoform 1;eIF-4D;<br>SL3-3 integration site 1 protein;                                                                                                                                                                                                                           |
| PRQSGSFRVL                                          | QDLVNDGPDPRPAGTR                                                   | N-ter +34.06 Da                                                                                                 | 38.5                         | 72.3                         | 3                | 1759.00                                  | 1.19                                         | 0.15                         | PDLI3_MOUSE                                              |                                             | PDZ and LIM domain protein 3;                                                                                                 | Actinin-associated LIM protein;Alpha-actinin-2-associated LIM protein;                                                                                                                                                                                                                                           |
| PTDKPLRLPL<br>TSGVPPTTG<br>LGATALLTHG               | QDVYKIGGIGTVPVGR<br>QEASAEHPAVAPR<br>QEDIPVSCIHNGLR                | N-ter +34.06 Da, K +34.06 Da<br>N-ter +34.06 Da<br>N-ter +34.06 Da, C +57.02 Da                                 | 37.0<br>41.6<br>53.4         | 62.6<br>67.1<br>71.7         | 3<br>3<br>3      | 1726.15<br>1492.89<br>1800.03            | -0.22<br>-0.47<br>0.25                       | 0.01<br>0.06<br>0.02         | EF1A1_MOUSE<br>Q3U422_MOUSE<br>CO1A1_MOUSE               | EF1A2_MOUSE                                 | Elongation factor 1-alpha 1;                                                                                                  | Elongation factor Tu;Eukaryotic elongation factor 1 A-1;                                                                                                                                                                                                                                                         |
| VFSMFDQTI<br>HGYAAGQTW                              | QEFKEAFTVIDQNR<br>QEGDKVIRPGVSQAQGEEMEQFGQGV                       | N-ter +34.06 Da, K +34.06 Da<br>N-ter +34.06 Da, K +34.06 Da                                                    | 39.8<br>43.6                 | 68.8<br>34.5                 | 3<br>4           | 1792.10<br>2898.59                       | -0.14<br>0.44                                | 0.02<br>0.02                 | MLRS_MOUSE<br>E9QP82_MOUSE                               | F6ULR7_MOUSE                                | Collagen alpha-1(I) chain;<br>Myosin regulatory light chain 2, skeletal muscle isoform;                                       | Alpha-1 type I collagen;                                                                                                                                                                                                                                                                                         |
| PKQSTSFLVL                                          | QEILESOGKGDPNKPSGFR                                                | N-ter +28.03 Da, K +28.03 Da                                                                                    | 21.3                         | 60.3                         | 4                | 2157.24                                  | -4.32                                        | 0.00                         | PDL1_MOUSE                                               |                                             | PDZ and LIM domain protein 1;                                                                                                 | Fast skeletal myosin light chain 2;MLC2F;                                                                                                                                                                                                                                                                        |
| QDQLDAVSKY<br>RQYFYRITD<br>QMKQDRITRY<br>RRQHLKSVML | QEVTNLFEAKELQR<br>QEYIYSIHR<br>QGVNLYVKNLDDGIDDER<br>QJAATELEKEESR | N-ter +34.06 Da, K +34.06 Da<br>N-ter +34.06 Da<br>N-ter +34.06 Da, K +34.06 Da<br>N-ter +28.03 Da, K +28.03 Da | 31.3<br>29.5<br>38.0<br>31.7 | 67.5<br>47.0<br>64.2<br>80.1 | 3<br>3<br>3<br>3 | 1886.18<br>1342.77<br>2130.26<br>1558.95 | -0.14<br>0.50<br>-2.32<br>-0.20              | 0.01<br>0.01<br>0.23<br>0.01 | CAPR1_MOUSE<br>MAZB2_MOUSE<br>PABP1_MOUSE<br>TNNI2_MOUSE | F6TMZ3_MOUSE                                | Caprin-1;<br>Epididymis-specific alpha-mannosidase;<br>Polyadenylate-binding protein 1;<br>Troponin I, fast skeletal muscle;  | C-terminal LIM domain protein 1;Elfin;LIM domain protein CLP-36;<br><br>Cytoplasmic activation- and proliferation-associated protein 1;GPI-anchored membrane protein 1;GPI-anchored protein p137;Membrane component chromosome 11 surface marker 1;RNA granule protein 105; Mannosidase alpha class 2B member 2; |
|                                                     |                                                                    |                                                                                                                 |                              |                              |                  |                                          |                                              |                              |                                                          |                                             |                                                                                                                               | Troponin I, fast-twitch isoform;                                                                                                                                                                                                                                                                                 |

| Non Prime Site                                      | Prime Site                                                                       | Modifications                                                                                      | Hyperscore                   | Mass error in ppm            | Charge           | Precursor neutral mass in Da             | Fold change (log <sub>2</sub> ) of ASAPRatio | FC-error of ASAPRatio        | Uniprot ID 1                                            | Uniprot ID 2                                 | Protein Name 1                                                                                                                                                                   | Protein Name 2                                                                                                                                                                                                                                                       |
|-----------------------------------------------------|----------------------------------------------------------------------------------|----------------------------------------------------------------------------------------------------|------------------------------|------------------------------|------------------|------------------------------------------|----------------------------------------------|------------------------------|---------------------------------------------------------|----------------------------------------------|----------------------------------------------------------------------------------------------------------------------------------------------------------------------------------|----------------------------------------------------------------------------------------------------------------------------------------------------------------------------------------------------------------------------------------------------------------------|
| DLVLRLRGGM<br>RNLHASNTRL                            | QIFVKLTGK<br>KQTGTAEMSSILEER                                                     | N-ter +28.03 Da, K +28.03 Da<br>N-ter +34.06 Da, K +34.06 Da                                       | 14.9<br>46.5                 | 60.2<br>51.9                 | 3<br>3           | 1348.90<br>1747.04                       | 0.00<br>0.18                                 | 0.00<br>0.01                 | RL40_MOUSE<br>ATPA_MOUSE                                | RS27A_MOUSE<br>D6RJ16_MOUSE                  | Ubiquitin-60S ribosomal protein L40;<br>ATP synthase subunit alpha, mitochondrial;                                                                                               | Ubiquitin A-52 residue ribosomal protein fusion product 1;                                                                                                                                                                                                           |
| LQAYVAWVNA<br>NTEENRRFYR                            | QLKKRPSVKPVQDLR<br>QLLLTADDR                                                     | N-ter +28.03 Da, K +28.03 Da<br>N-ter +28.03 Da                                                    | 23.4<br>30.4                 | 44.3<br>27.3                 | 4<br>2           | 1903.29<br>1071.62                       | 3.73<br>0.91                                 | 0.32<br>0.02                 | DIXC1_MOUSE<br>ALDOA_MOUSE                              | F22453_MOUSE<br>Q9CPQ9_MOUSE                 | Dixin;<br>Fructose-bisphosphate aldolase A;                                                                                                                                      | Coiled-coil protein DIX1;DIX domain-containing protein 1;<br>Aldolase 1;Muscle-type aldolase;<br>HECT domain and RCC1-like domain-containing protein 2;                                                                                                              |
| EETRKETAPV                                          | QLPVSGPELAAMMKIGTR                                                               | N-ter +28.03 Da, K +28.03 Da                                                                       | 27.4                         | 59.3                         | 3                | 1954.19                                  | -0.14                                        | 0.00                         | HERC2_MOUSE                                             | F8WJE1_MOUSE                                 | E3 ubiquitin-protein ligase HERC2;                                                                                                                                               |                                                                                                                                                                                                                                                                      |
| LIVSQKTPRA<br>QSLPSSHGFS<br>HIPTSAPVYQ              | QPGATTVQEQLR<br>QPGLPAVLSSPSPPLSPR<br>QPQQQMTSSYGGYKEPAAPVSIQR                   | N-ter +34.06 Da<br>N-ter +28.03 Da<br>N-ter +28.03 Da, K +28.03 Da                                 | 19.9<br>21.1<br>56.1         | 38.0<br>77.4<br>77.9         | 2<br>4<br>4      | 1360.80<br>1827.17<br>2834.62            | -0.45<br>6.34<br>0.43                        | 0.03<br>0.56<br>0.09         | PLD4_MOUSE<br>CB071_MOUSE<br>LASP1_MOUSE                |                                              | Phospholipase D4;<br>Uncharacterized protein C2orf71 homolog;<br>LIM and SH3 domain protein 1;                                                                                   | Choline phosphatase 4;Phosphatidylcholine-hydrolyzing phospholipase D4;                                                                                                                                                                                              |
| TARKDNIGRN<br>RSSNRDRPR<br>LLHPTLILAQ               | QSPQAGLAGPGPAGYGAARPTIPAR<br>QSPSQSSDSQVHSGVQVEGR<br>QSNVDELGSHLQGSYESR          | N-ter +28.03 Da<br>N-ter +28.03 Da<br>N-ter +28.03 Da, C +57.02 Da                                 | 25.0<br>39.2<br>55.4         | 56.4<br>62.5<br>58.3         | 4<br>3<br>3      | 2485.46<br>2223.19<br>2193.10            | 2.02<br>1.06<br>0.82                         | 0.07<br>0.10<br>0.08         | SYNJ1_MOUSE<br>F7BVV1_MOUSE<br>CO3A1_MOUSE              | F7CD11_MOUSE<br>F7BVV1_MOUSE<br>Q5DTG2_MOUSE | Synaptotagmin-1;<br>F7BVV1_MOUSE<br>Collagen alpha-1(III) chain;                                                                                                                 | Metastatic lymph node gene 50 protein;<br>Synaptic inositol-1,4,5-trisphosphate 5-phosphatase 1;                                                                                                                                                                     |
| LGRFAVRDMR                                          | QTVAVGVKAVDK                                                                     | N-ter +34.06 Da, K +34.06 Da                                                                       | 29.5                         | 57.7                         | 3                | 1429.06                                  | 0.18                                         | 0.02                         | EF1A1_MOUSE                                             |                                              | Elongation factor 1-alpha 1;                                                                                                                                                     | Elongation factor Tu;Eukaryotic elongation factor 1 A-1;                                                                                                                                                                                                             |
| LGRFAVRDMR                                          | QTVAVGVKIVVEK                                                                    | N-ter +34.06 Da, K +34.06 Da                                                                       | 23.1                         | 28.7                         | 3                | 1486.04                                  | -0.34                                        | 0.03                         | EF1A2_MOUSE                                             | B7ZBW3_MOUSE                                 | Elongation factor 1-alpha 2;                                                                                                                                                     | Eukaryotic elongation factor 1 A-2;Statin-S1;<br>DEAD box RNA helicase DEAD1;DEAD box protein 5;RNA helicase p68;                                                                                                                                                    |
| YTFPTNNIK<br>RRGQSSANR<br>RRGQSSANR                 | QVSDLISVLR<br>RAGSSSGVQGSAGLAADASR<br>RAGSSSGVQGTSGAGLAADASR                     | N-ter +34.06 Da<br>N-ter +28.03 Da<br>N-ter +28.03 Da                                              | 31.7<br>86.2<br>68.8         | 31.9<br>64.7<br>67.3         | 2<br>3<br>3      | 1162.75<br>2104.16<br>2134.18            | -0.30<br>2.59<br>2.14                        | 0.02<br>0.44<br>0.21         | DDX5_MOUSE<br>E9Q019_MOUSE<br>E9Q019_MOUSE              | Q8BT50_MOUSE<br>FILA_MOUSE                   | Probable ATP-dependent RNA helicase DDX5;<br>FILA_MOUSE                                                                                                                          |                                                                                                                                                                                                                                                                      |
| MRAAPR                                              | RAPAAQPPAAAPSAVGSPPAAAPR                                                         | N-ter +28.03 Da                                                                                    | 43.2                         | 74.1                         | 4                | 2180.34                                  | -0.27                                        | 0.02                         | CHCH2_MOUSE                                             | B2RPU8_MOUSE                                 | Coiled-coil-helix-coiled-coil-helix domain-containing protein 2, mitochondrial;                                                                                                  |                                                                                                                                                                                                                                                                      |
| AKAVLSAEKL                                          | RDEEVHTGLGELLR                                                                   | N-ter +28.03 Da                                                                                    | 28.2                         | 56.6                         | 3                | 1650.96                                  | -0.38                                        | 0.02                         | SERPH_MOUSE                                             |                                              | Serpin H1;                                                                                                                                                                       | 47 kDa heat shock protein;Collagen-binding protein;Serine protease inhibitor I6;                                                                                                                                                                                     |
| LSLMEPESEF                                          | RDIDNPSAEAEER                                                                    | N-ter +34.06 Da                                                                                    | 35.0                         | 75.9                         | 3                | 1405.81                                  | 2.62                                         | 0.41                         | PLIN1_MOUSE                                             |                                              | Perilipin-1;                                                                                                                                                                     | Lipid droplet-associated protein;Perilipin A;                                                                                                                                                                                                                        |
| DKDASVVGFF<br>APSDNRVTSF                            | RDLFSDGHSEFLKAASNLR<br>RDLIHDQDEEEEEEGQR                                         | N-ter +34.06 Da, K +34.06 Da<br>N-ter +34.06 Da                                                    | 18.4<br>32.0                 | 99.0<br>99.3                 | 4<br>4           | 2230.43<br>2289.25                       | 0.29<br>-1.29                                | 0.02<br>0.16                 | PDIA3_MOUSE<br>NSF1C_MOUSE                              | A2AT02_MOUSE                                 | Protein disulfide-isomerase A3;<br>NSF1 cofactor p47;<br>Histidine triad nucleotide-binding protein 2, mitochondrial;                                                            | 58 kDa glucose-regulated protein;58 kDa microsomal protein;Disulfide isomerase ER-60;Endoplasmic reticulum resident protein 57;Endoplasmic reticulum resident protein 60; p97 cofactor p47;                                                                          |
| LYEDQQLVF<br>KNRFQTVHFF<br>DIKSKTYQVM<br>SIIRNVKGPV | RDVAPQAPVHFLVIPR<br>RDVLGMQVLR<br>RDYEAGSAAPSVSFSR<br>REGDVLTLLESER              | N-ter +34.06 Da<br>N-ter +34.06 Da<br>N-ter +28.03 Da<br>N-ter +28.03 Da                           | 51.6<br>35.2<br>52.0<br>30.0 | 58.2<br>50.3<br>63.1<br>59.3 | 4<br>3<br>3<br>3 | 1848.20<br>1219.79<br>1767.97<br>1543.91 | -2.06<br>-0.94<br>1.04<br>-0.79              | 0.09<br>0.05<br>0.08<br>0.08 | HINT2_MOUSE<br>GLOD4_MOUSE<br>MSTN1_MOUSE<br>RS28_MOUSE | E9Q055_MOUSE                                 | Glyoxalase domain-containing protein 4;<br>Musculoskeletal embryonic nuclear protein 1;<br>40S ribosomal protein S28;<br>STE20/SPS1-related proline-alanine-rich protein kinase; | HINT-3;                                                                                                                                                                                                                                                              |
| QAQPNANEDY<br>KQDFDENDIL                            | REGPCAVNLVLR<br>RELEELSLEAQGIR                                                   | N-ter +28.03 Da, C +57.02 Da<br>N-ter +34.06 Da                                                    | 36.8<br>58.3                 | 54.0<br>49.7                 | 3<br>3           | 1410.85<br>1676.02                       | -0.38<br>4.04                                | 0.02<br>0.38                 | STK39_MOUSE<br>IF2I_MOUSE                               |                                              | Eukaryotic translation initiation factor 5B;                                                                                                                                     | Serine/threonine-protein kinase 39;<br>Translation initiation factor IF-2;<br>94 kDa glucose-regulated protein;Endoplasmic reticulum resident protein 99;Heat shock protein 90 kDa beta member 1;Polymorphic tumor rejection antigen 1;Tumor rejection antigen gp96; |
| TFYSNKEIFL<br>PLPTFSSNL                             | RELISNASDALDKIR<br>RETNLLESLPLVDTHSKR                                            | N-ter +34.06 Da, K +34.06 Da<br>N-ter +28.03 Da, K +28.03 Da                                       | 38.7<br>23.7                 | 78.0<br>74.3                 | 4<br>4           | 1768.19<br>2050.27                       | 0.28<br>0.42                                 | 0.01<br>0.03                 | ENPL_MOUSE<br>VIME_MOUSE                                | HS90B_MOUSE<br>E9PZV5_MOUSE                  | Endoplasmin;<br>Vimentin;                                                                                                                                                        |                                                                                                                                                                                                                                                                      |
| KYDHQREQL<br>GKAFRLQLPF<br>GKALKRQLPF               | REWIEGVTR<br>RGDDGIFDDNFIEER<br>RGDEGIFEEFSIEER                                  | N-ter +28.03 Da<br>N-ter +28.03 Da<br>N-ter +34.06 Da                                              | 29.2<br>50.5<br>44.2         | 56.1<br>65.8<br>44.4         | 3<br>3<br>3      | 1229.72<br>1824.95<br>1845.98            | 0.01<br>-0.18<br>-0.32                       | 0.00<br>0.02<br>0.04         | CNN1_MOUSE<br>SNX3_MOUSE<br>SNX12_MOUSE                 | Q78ZM0_MOUSE<br>Q6ZWQ5_MOUSE                 | Calponin-1;<br>Sorting nexin-3;<br>Sorting nexin-12;                                                                                                                             | Basic calponin;Calponin H1, smooth muscle;<br>SDP3 protein;<br>SDP8 protein;                                                                                                                                                                                         |
| EVSSLKNNLR<br>SVGPVAGVGP<br>M<br>LVTAGVASK          | RGDLFPVTR<br>RGPSGQQGIR<br>RGQVGLDSPQQEALAR<br>RHLFEKELSGQNR                     | N-ter +28.03 Da<br>N-ter +28.03 Da<br>N-ter +28.03 Da<br>N-ter +28.03 Da, K +28.03 Da              | 25.0<br>41.9<br>43.4<br>19.9 | 72.3<br>21.4<br>42.7<br>92.3 | 3<br>2<br>3<br>4 | 1186.77<br>1051.61<br>2011.11<br>1669.06 | 0.35<br>6.62<br>-0.32<br>-0.09               | 0.02<br>0.46<br>0.04<br>0.00 | MYH9_MOUSE<br>CO1A2_MOUSE<br>S14L4_MOUSE<br>LAD1_MOUSE  | E9Q6U9_MOUSE                                 | Myosin-9;<br>Collagen alpha-2(I) chain;<br>SEC14-like protein 4;<br>Ladinin-1;                                                                                                   | Cellular myosin heavy chain, type A;Myosin heavy chain 9;Myosin heavy chain, non-muscle Ila;Non-muscle myosin heavy chain A;Non-muscle myosin heavy chain Ila;<br>Alpha-2 type I collagen;                                                                           |
| EQSNVNLAKF<br>FLERPIAFV<br>LLALAGLLQA<br>VETQPQKTVI | RKIQHELEAEER<br>RLAPAVLLSGLTEVPVTR<br>RLLLPQQAQFGCECDR<br>RLPSGSGPASPPTTGSAAVDIR | N-ter +28.03 Da, K +28.03 Da<br>N-ter +28.03 Da<br>N-ter +28.03 Da, C +57.02 Da<br>N-ter +34.06 Da | 30.3<br>22.7<br>31.9<br>55.6 | 90.8<br>25.4<br>49.1<br>63.5 | 4<br>3<br>3<br>3 | 1722.06<br>2016.26<br>1787.00<br>1959.18 | 0.20<br>2.96<br>-1.84<br>-0.12               | 0.03<br>0.15<br>0.13<br>0.02 | MYH1_MOUSE<br>S4A7_MOUSE<br>ENDD1_MOUSE<br>E9Q616_MOUSE | MYH4_MOUSE<br>D3Y273_MOUSE<br>Q69ZY2_MOUSE   | Myosin-1;<br>Sodium bicarbonate cotransporter 3;<br>Endonuclease domain-containing 1 protein;                                                                                    | Myosin heavy chain 1;Myosin heavy chain 2x;Myosin heavy chain, skeletal muscle, adult 1;<br>Solute carrier family 4 member 7;                                                                                                                                        |

Table S7, Tholen et al.

| Non Prime Site | Prime Site                   | Modifications                             | Hyperscore | Mass error in ppm | Charge | Precursor neutral mass in Da | Fold change (log <sub>2</sub> ) of ASAPRatio | FC-error of ASAPRatio | Uniprot ID 1 | Uniprot ID 2                       | Protein Name 1                                                                               | Protein Name 2 |
|----------------|------------------------------|-------------------------------------------|------------|-------------------|--------|------------------------------|----------------------------------------------|-----------------------|--------------|------------------------------------|----------------------------------------------------------------------------------------------|----------------|
| LINEHRILNG     | RPPLGFLNPR                   | N-ter +34.06 Da                           | 30.5       | 48.0              | 3      | 1199.79                      | -0.11                                        | 0.01                  | TPP1_MOUSE   | Tripeptidyl-peptidase 1;           | Lysosomal pepstatin-insensitive protease;Tripeptidyl aminopeptidase;Tripeptidyl-peptidase 1; |                |
| LOAQRATFR      | RQISEDVDGPDNR                | N-ter +34.06 Da                           | 48.9       | 64.2              | 3      | 1533.86                      | 0.12                                         | 0.01                  | NEDD4_MOUSE  | E3 ubiquitin-protein ligase NEDD4; | Neural precursor cell expressed developmentally down-regulated protein 4;                    |                |
| KKWKEDVELY     | RQKVALPLGAEQLQESAR           | N-ter +34.06 Da, K +34.06 Da              | 27.0       | 87.8              | 4      | 1820.25                      | -2.32                                        | 0.12                  | APOA1_MOUSE  | Apolipoprotein A-I;                | Apolipoprotein A1;                                                                           |                |
| ENTEENRRFY     | RQLLLTADDR                   | N-ter +34.06 Da                           | 22.2       | 78.0              | 3      | 1233.82                      | -6.64                                        | 0.00                  | ALDOA_MOUSE  | Fructose-bisphosphate aldolase A;  | Aldolase 1;Muscle-type aldolase;                                                             |                |
| QGWWRPAADCA    | RSFAGAVTLSPVEAPR             | N-ter +34.06 Da                           | 19.8       | 42.0              | 3      | 1691.03                      | 0.11                                         | 0.02                  | Q3UN64_MOUSE |                                    |                                                                                              |                |
| TGTGTLILLV     | RSCULPGPGLINLYCSLGFKER       | N-ter +34.06 Da, K +34.06 Da, C +57.02 Da | 24.7       | 35.4              | 4      | 2730.63                      | -6.64                                        | 0.00                  | F6V339_MOUSE |                                    |                                                                                              |                |
| NTSIPeamER     | RSPVPGQSLHKKRR               | N-ter +28.03 Da, K +28.03 Da              | 24.3       | 47.7              | 3      | 1786.17                      | 0.86                                         | 0.06                  | CCD79_MOUSE  | E9QPF2_MOUSE                       | Coiled-coil domain-containing protein 79;                                                    |                |
| MKLFQ          | RSTPAITLENPDIKYPLR           | N-ter +28.03 Da, K +28.03 Da              | 42.0       | 58.2              | 4      | 2139.33                      | 1.20                                         | 0.12                  | NBSR3_MOUSE  | F2Z3V0_MOUSE                       | NADH-cytochrome b5 reductase 3;                                                              |                |
| GHKTPPEVPR     | RTEITIVKQESVLR               | N-ter +34.06 Da, K +34.06 Da              | 20.2       | 54.9              | 4      | 1836.25                      | -3.64                                        | 0.00                  | SEPT9_MOUSE  | A2A6U3_MOUSE                       | Septin-9;                                                                                    |                |
| PAQSAATLPA     | RTLETAAQMEGLFNR              | N-ter +28.03 Da                           | 45.7       | 48.6              | 3      | 1861.04                      | -0.62                                        | 0.06                  | SPTB2_MOUSE  | Spectrin beta chain, brain 1;      |                                                                                              |                |
| KTVTFRSYNS     | RTLPTDVTDWR                  | N-ter +34.06 Da                           | 31.1       | 51.3              | 3      | 1291.78                      | 0.26                                         | 0.02                  | CATS_MOUSE   | Q3UD32_MOUSE                       | Cathepsin S;                                                                                 |                |
| IWHHSFYNEL     | RVAPPEEHPDLLTEALPNKANR       | N-ter +34.06 Da, K +34.06 Da              | 62.9       | 54.5              | 4      | 2520.58                      | 0.65                                         | 0.03                  | ACT5_MOUSE   | ACTA_MOUSE                         | Actin, alpha skeletal muscle;                                                                |                |
| TGSQGQCQTV     | RVFEFMDTSTR                  | N-ter +34.06 Da                           | 21.7       | 54.6              | 3      | 1288.70                      | -0.34                                        | 0.03                  | RS28_MOUSE   | D3YVD9_MOUSE                       | 40S ribosomal protein S28;                                                                   |                |
| NVVGARSSW      | RVISSIEQKTER                 | N-ter +34.06 Da, K +34.06 Da              | 31.6       | 71.3              | 4      | 1513.03                      | -0.09                                        | 0.01                  | 1433B_MOUSE  | A2A5N1_MOUSE                       | 14-3-3 protein beta/alpha;                                                                   |                |
| LNGKLTGMAF     | RVPTPNVSVDDLTCR              | N-ter +28.03 Da, C +57.02 Da              | 39.0       | 42.2              | 3      | 1740.01                      | -0.43                                        | 0.02                  | G3P_MOUSE    | G3PT_MOUSE                         | Glyceraldehyde-3-phosphate dehydrogenase;                                                    |                |
| FYLKMGDDY      | RYLAEVATGDDKRR               | N-ter +34.06 Da, K +34.06 Da              | 33.6       | 80.0              | 4      | 1723.19                      | 0.83                                         | 0.06                  | 1433S_MOUSE  |                                    | 14-3-3 protein sigma;                                                                        |                |
| VQSGNLALAA     | SAAAVDAGMAMAGQSPVLR          | N-ter +34.06 Da                           | 57.4       | 29.7              | 3      | 1836.00                      | -0.94                                        | 0.07                  | PTB1_MOUSE   | Q92217_MOUSE                       | Polypyrimidine tract-binding protein 1;                                                      |                |
| EGNDIELVSN     | SAAIIQQATTVKNKDIR            | N-ter +28.03 Da, K +28.03 Da              | 30.5       | 63.7              | 4      | 1940.27                      | 0.90                                         | 0.05                  | RL9_MOUSE    |                                    | 60S ribosomal protein L9;                                                                    |                |
| GGGVGGPGAK     | SAAQAAAQTNNSAAGKQLR          | N-ter +28.03 Da, K +28.03 Da              | 63.2       | 69.3              | 3      | 1913.14                      | 1.25                                         | 0.33                  | PAIRB_MOUSE  |                                    | Plasminogen activator inhibitor 1 RNA-binding protein;                                       |                |
| YAATVARPST     | SAASTVPGYSEDGGALR            | N-ter +28.03 Da                           | 39.5       | 55.9              | 3      | 1664.89                      | 0.49                                         | 0.03                  | WIPI1_MOUSE  |                                    | WD40 repeat domain phosphoinositide-interacting protein 1;                                   |                |
| KEALLGRVAV     | SADPNVNVIVTR                 | N-ter +28.03 Da                           | 33.8       | 46.4              | 3      | 1408.83                      | 0.73                                         | 0.04                  | GDIR1_MOUSE  |                                    | Rho GDP-dissociation inhibitor 1;                                                            |                |
| LKAKLRNRN      | SAEEGEGVTEKSSQKESVQR         | N-ter +28.03 Da, K +28.03 Da              | 36.1       | 118.7             | 4      | 2365.44                      | -0.84                                        | 0.15                  | TB182_MOUSE  |                                    | 182 kDa tankyrase-1-binding protein;                                                         |                |
| QDEGAEPMGY     | SAELSSGILDDRNEEKR            | N-ter +28.03 Da, K +28.03 Da              | 58.7       | 62.5              | 4      | 2103.18                      | 0.56                                         | 0.02                  | EZR1_MOUSE   |                                    | Ezrin;                                                                                       |                |
| QDEGAEPMGY     | SAELSSGILDDR                 | N-ter +34.06 Da                           | 47.8       | 37.8              | 2      | 1424.77                      | 0.37                                         | 0.04                  | EZR1_MOUSE   |                                    | Ezrin;                                                                                       |                |
| QMAKRLSFS      | SAENEPVPLVGNWRPQVKGR         | N-ter +28.03 Da, K +28.03 Da              | 31.2       | 73.1              | 4      | 2579.59                      | 0.04                                         | 0.00                  | CAH3_MOUSE   |                                    | Carbonic anhydrase 3;                                                                        |                |
| DWGAWQKFTA     | SAGIQVVGDDTLVTNPKR           | N-ter +28.03 Da, K +28.03 Da              | 19.4       | 60.6              | 4      | 1925.17                      | 2.22                                         | 0.15                  | ENO4_MOUSE   | Q6PHC1_MOUSE                       | Alpha-enolase;                                                                               |                |
| MATRSVCVSRG    | SAGSAAAAGPVEAIR              | N-ter +28.03 Da                           | 56.5       | 26.4              | 2      | 1354.76                      | -0.25                                        | 0.01                  | ROLA1_MOUSE  |                                    | Bola-like protein 1;                                                                         |                |
| SQMSYGYDEK     | SAGVSVPGPMGSPGPR             | N-ter +28.03 Da                           | 51.6       | 56.0              | 3      | 1479.83                      | 0.35                                         | 0.02                  | COL1A1_MOUSE | F8WGB7_MOUSE                       | Collagen alpha-1(I) chain;                                                                   |                |
| AKKGGEEKGR     | SAINEVTR                     | N-ter +34.06 Da                           | 33.7       | 24.2              | 2      | 1021.62                      | -0.60                                        | 0.03                  | RL3_MOUSE    | D3YVU2_MOUSE                       | 60S ribosomal protein L31;                                                                   |                |
| FKKHGYSLY      | SAIQSDTSGDYR                 | N-ter +34.06 Da                           | 52.0       | 44.5              | 2      | 1332.70                      | -1.40                                        | 0.15                  | ANXA3_MOUSE  |                                    | Annexin A3;                                                                                  |                |
| VLELKYTGNA     | SALLILPDQGR                  | N-ter +34.06 Da                           | 41.6       | 23.2              | 2      | 1215.77                      | 3.47                                         | 0.31                  | SPA3K_MOUSE  |                                    | Serine protease inhibitor A3K;                                                               |                |
| PSPTLRDKAK     | SALPAQSAATLPAR               | N-ter +28.03 Da                           | 57.0       | 29.9              | 2      | 1380.81                      | -0.86                                        | 0.06                  | SPTB2_MOUSE  |                                    | Spectrin beta chain, brain 1;                                                                |                |
| HSKINFRDKR     | SALQSNINEWASQTTDGLKPEVTKDVER | N-ter +28.03 Da, K +28.03 Da              | 44.3       | 94.8              | 4      | 3085.89                      | -2.40                                        | 0.50                  | SERPH_MOUSE  |                                    | Serpin H1;                                                                                   |                |
| VLHIGSAHNR     | SAMPFTASAPSTR                | N-ter +34.06 Da                           | 31.1       | 58.1              | 3      | 1453.83                      | -0.40                                        | 0.02                  | PDL1_MOUSE   |                                    | PDZ and LIM domain protein 1;                                                                |                |
| RAQDVEPKSF     | SAPAAHAYGHETPLR              | N-ter +34.06 Da                           | 19.3       | 98.7              | 4      | 1611.00                      | 0.29                                         | 0.03                  | E9Q056_MOUSE | E9Q6Y2_MOUSE                       |                                                                                              |                |
| VTLINFVPVD     | SAPASSPQLSHDHTSR             | N-ter +28.03 Da                           | 55.3       | 96.0              | 4      | 1820.02                      | -0.18                                        | 0.04                  | DMD_MOUSE    | A2A922_MOUSE                       | Dystrophin;                                                                                  |                |
| TVLLSIQALL     | SAPNPDPDLDNVAEQWKTNEAQAIETAR | N-ter +28.03 Da, K +28.03 Da              | 55.2       | 81.0              | 4      | 3206.81                      | 1.66                                         | 0.14                  | UBE2N_MOUSE  |                                    | Bendless-like ubiquitin-conjugating enzyme;Ubc13;Ubiquitin carrier protein N;                |                |
| VPRASMCISIR    | SAPPKLASLKGVPEDAVETLAGSLGTR  | N-ter +28.03 Da, K +28.03 Da              | 49.4       | 76.4              | 4      | 2846.83                      | -0.25                                        | 0.03                  | ICAL_MOUSE   | Q921U7_MOUSE                       | Calpastatin;                                                                                 |                |
| KSMWEKGSVF     | SAPSASGTPNKETAGLKVGVSSR      | N-ter +34.06 Da, K +34.06 Da              | 30.8       | 62.2              | 4      | 2302.48                      | 2.63                                         | 0.28                  | Q8WC08_MOUSE | E9Q0M9_MOUSE                       |                                                                                              |                |
| AAAQSTVYAF     | SARPLTGGPEVSLGSLR            | N-ter +34.06 Da                           | 51.2       | 62.5              | 3      | 1730.10                      | -0.74                                        | 0.04                  | GPX1_MOUSE   |                                    | Glutathione peroxidase 1;                                                                    |                |
| SLPVKDLAVD     | SASPVYQAVIKTQSPKPEDEADEWAR   | N-ter +28.03 Da, K +28.03 Da              | 24.3       | 50.8              | 4      | 2888.60                      | 0.66                                         | 0.07                  | LDB3_MOUSE   | E9PYJ9_MOUSE                       | LIM domain-binding protein 3;                                                                |                |
| SCLVLAARHA     | SASSTNLKDVLSNLIPEQAR         | N-ter +34.06 Da, K +34.06 Da              | 23.4       | 98.6              | 4      | 2372.65                      | -2.56                                        | 0.90                  | CISY_MOUSE   |                                    | Citrate synthase, mitochondrial;                                                             |                |
| IKHDPSLQPW     | SASYDPGSAKTLINNGKTCR         | N-ter +34.06 Da, K +34.06 Da, C +57.02 Da | 28.7       | 65.1              | 4      | 2241.37                      | -1.00                                        | 0.08                  | CAH3_MOUSE   |                                    | Carbonic anhydrase 3;                                                                        |                |
| GAYGGLLKDF     | SATDLTEFAAR                  | N-ter +34.06 Da                           | 40.3       | 61.1              | 2      | 1214.71                      | -0.40                                        | 0.02                  | THIM_MOUSE   |                                    | 3-ketoacyl-CoA thiolase, mitochondrial;                                                      |                |
| M              | SATHHKTLPOGVR                | N-ter +34.06 Da, K +34.06 Da              | 34.1       | 16.2              | 3      | 1585.96                      | -6.64                                        | 0.00                  | LEG7_MOUSE   |                                    | Galectin-7;                                                                                  |                |
| QPQGAPEVRR     | SATISGSATNLASLTAALAKGDR      | N-ter +34.06 Da, K +34.06 Da              | 44.2       | 55.7              | 3      | 2243.40                      | 0.18                                         | 0.01                  | E9Q4K7_MOUSE |                                    |                                                                                              |                |

Table S7, Tholen et al.

| Non Prime Site                                                     | Prime Site                                                                                            | Modifications                                                                                                                      | Hyperscore                           | Mass error in ppm                     | Charge                | Precursor neutral mass in Da                        | Fold change (log <sub>2</sub> ) of ASAPRatio | FC-error of ASAPRatio                | Uniprot ID 1                                                             | Uniprot ID 2                                             | Protein Name 1                                                                                                                                    | Protein Name 2                                                                                                                                                                                                                                                                                                                                                                                                                     |
|--------------------------------------------------------------------|-------------------------------------------------------------------------------------------------------|------------------------------------------------------------------------------------------------------------------------------------|--------------------------------------|---------------------------------------|-----------------------|-----------------------------------------------------|----------------------------------------------|--------------------------------------|--------------------------------------------------------------------------|----------------------------------------------------------|---------------------------------------------------------------------------------------------------------------------------------------------------|------------------------------------------------------------------------------------------------------------------------------------------------------------------------------------------------------------------------------------------------------------------------------------------------------------------------------------------------------------------------------------------------------------------------------------|
| SLPAVVVETF<br>AYSPASWSSR                                           | SATVNGAVEGSAGTGR<br>SAVDLTCSSR                                                                        | N-ter +34.06 Da<br>N-ter +34.06 Da, C +57.02 Da                                                                                    | 52.1<br>30.1                         | 60.8<br>39.0                          | 3<br>2                | 1466.84<br>1041.57                                  | -0.22<br>-0.15                               | 0.01<br>0.01                         | BIN1_MOUSE<br>PKP3_MOUSE                                                 | Q6P1B9_MOUSE<br>E0CY75_MOUSE                             | Myc box-dependent-interacting protein 1;<br>Plakophilin-3;<br>Microtubule-associated serine/threonine-protein kinase 4;                           | Amphiphysin II;Amphiphysin-like protein;Bridging integrator 1;SH3 domain-containing protein 9;                                                                                                                                                                                                                                                                                                                                     |
| GGSKGPVDTF                                                         | SAVLTTQKQASDVLVQGEGR                                                                                  | N-ter +28.03 Da, K +28.03 Da                                                                                                       | 48.7                                 | 47.6                                  | 3                     | 2071.23                                             | 0.39                                         | 0.06                                 | MAST4_MOUSE                                                              | E9QP84_MOUSE                                             |                                                                                                                                                   | Complex III subunit 7;Complex III subunit VII;Ubiquinol-cytochrome c reductase complex 14 kDa protein;<br>Protein AF-1p;                                                                                                                                                                                                                                                                                                           |
| MAGR<br>EADPSNFANF                                                 | SAVSASSKWLDFGR<br>SAYPSEEDMIEWAKR                                                                     | N-ter +34.06 Da, K +34.06 Da<br>N-ter +34.06 Da, K +34.06 Da                                                                       | 34.9<br>30.3                         | 23.7<br>77.2                          | 3<br>3                | 1577.92<br>1879.09                                  | -1.94<br>-2.74                               | 0.22<br>0.37                         | QCR7_MOUSE<br>EPS15_MOUSE                                                | Q9CQB4_MOUSE                                             | Cytochrome b-c1 complex subunit 7;<br>Epidermal growth factor receptor substrate 15;                                                              |                                                                                                                                                                                                                                                                                                                                                                                                                                    |
| GTRKPKVDF                                                          | SCHLAQPNHVVVS                                                                                         | N-ter +34.06 Da, C +57.02 Da                                                                                                       | 54.6                                 | 87.3                                  | 4                     | 1708.05                                             | 0.56                                         | 0.05                                 | TRFE_MOUSE                                                               | E9Q035_MOUSE                                             | Serotransferrin;                                                                                                                                  | Beta-1 metal-binding globulin;Siderophilin;                                                                                                                                                                                                                                                                                                                                                                                        |
| TESTVKTTVF                                                         | SCNLGEKFDETTADGR                                                                                      | N-ter +34.06 Da, K +34.06 Da,<br>C +57.02 Da                                                                                       | 42.6                                 | 75.5                                  | 3                     | 1867.05                                             | -1.60                                        | 0.39                                 | FABP5_MOUSE                                                              | E9Q964_MOUSE                                             | Fatty acid-binding protein, epidermal;                                                                                                            | Epidermal-type fatty acid-binding protein;Fatty acid-binding protein 5;Keratinocyte lipid-binding protein;Psoriasis-associated fatty acid-binding protein homolog;                                                                                                                                                                                                                                                                 |
| TSSGTSTTHR                                                         | SCSKTITKTVTGPDGR                                                                                      | N-ter +28.03 Da, K +28.03 Da,<br>C +57.02 Da                                                                                       | 21.1                                 | 89.1                                  | 4                     | 1791.12                                             | 0.07                                         | 0.01                                 | Q99K47_MOUSE                                                             | E9PV24_MOUSE                                             |                                                                                                                                                   |                                                                                                                                                                                                                                                                                                                                                                                                                                    |
| AIGIDLGTTY                                                         | SCVGVFHGKVEIANDQGNR                                                                                   | N-ter +34.06 Da, K +34.06 Da,<br>C +57.02 Da                                                                                       | 57.8                                 | 63.1                                  | 4                     | 2395.42                                             | -1.47                                        | 0.12                                 | H571A_MOUSE                                                              | H571B_MOUSE                                              | Heat shock 70 kDa protein 1A;                                                                                                                     | Heat shock 70 kDa protein 3;Hsp68;<br>Cl-SDAP;NADH-ubiquinone oxidoreductase 9.6 kDa subunit;                                                                                                                                                                                                                                                                                                                                      |
| GTVTHLCRQY                                                         | SDAPPLTLGDIKDR                                                                                        | N-ter +34.06 Da, K +34.06 Da<br>N-ter +34.06 Da, K +34.06 Da,                                                                      | 46.9                                 | 46.7                                  | 3                     | 1564.98                                             | 0.04                                         | 0.00                                 | ACPM_MOUSE                                                               | F8WJ64_MOUSE                                             | Acyl carrier protein, mitochondrial;                                                                                                              |                                                                                                                                                                                                                                                                                                                                                                                                                                    |
| LTSQELTFGG<br>KIILCRERP<br>ESQASDSEGH                              | SDCTGNFCLFKSTKDLLFR<br>SDECGAGVFMGSHFDR<br>SDFSEGGQAVGAHR                                             | N-ter +34.06 Da, C +57.02 Da<br>N-ter +34.06 Da, C +57.02 Da<br>N-ter +28.03 Da                                                    | 22.6<br>66.9<br>47.7                 | 111.5<br>49.0<br>87.8                 | 4<br>3<br>3           | 2511.62<br>1804.86<br>1387.77                       | -2.18<br>-0.43<br>0.57                       | 0.20<br>0.05<br>0.03                 | TRFE_MOUSE<br>RS27A_MOUSE<br>E9Q019_MOUSE                                | E9Q035_MOUSE<br>FILA_MOUSE                               | Serotransferrin;<br>Ubiquitin-40S ribosomal protein S27a;                                                                                         | Beta-1 metal-binding globulin;Siderophilin;<br>Ubiquitin carboxyl extension protein 80;                                                                                                                                                                                                                                                                                                                                            |
| SVVGFRRDLF<br>KAGTEETILY                                           | SDGHSEFLKAASNLNLR<br>SDIDLKLAIEIR                                                                     | N-ter +28.03 Da, K +28.03 Da<br>N-ter +34.06 Da, K +34.06 Da                                                                       | 21.8<br>11.2                         | 57.4<br>67.0                          | 4<br>4                | 1686.97<br>1502.09                                  | -0.04<br>-0.97                               | 0.00<br>0.08                         | PDIA3_MOUSE<br>NIT2_MOUSE                                                |                                                          | Protein disulfide-isomerase A3;<br>Omega-amidase NIT2;<br>Pleckstrin homology domain-containing family O member 2;                                | 58 kDa glucose-regulated protein;58 kDa microsomal protein;Disulfide isomerase ER-60;Endoplasmic reticulum resident protein 60;<br>Nitrilase homolog 2;<br>Pleckstrin homology domain-containing family Q member 1;                                                                                                                                                                                                                |
| DSGPPVFAPL<br>GLTGNFAAQY                                           | SDISEDQPQEPFR<br>SDKGVSSGPGPMGLMGPR                                                                   | N-ter +34.06 Da<br>N-ter +28.03 Da, K +28.03 Da                                                                                    | 26.4<br>55.2                         | 32.4<br>47.5                          | 3<br>3                | 1530.79<br>1784.98                                  | 0.10<br>0.00                                 | 0.01<br>0.00                         | PKHO2_MOUSE<br>CO1A2_MOUSE                                               | E0CXI2_MOUSE                                             | Collagen alpha-2(I) chain;                                                                                                                        | Alpha-2 type I collagen;<br>Complex III subunit 4;Complex III subunit IV;Cytochrome b-c1 complex subunit 4;Ubiquinol-cytochrome-c reductase complex cytochrome c1 subunit;<br>Histone H1';Histone H1(0);MyD196;<br>SM22-beta;                                                                                                                                                                                                      |
| AVALHSAVSA<br>SKKSTDPKPY<br>KRSKENPRNF<br>TKQQTFTTTY<br>NVREATSEFA | SDLELHPPSPWWSHR<br>SDMIVAAIQAEKNR<br>SDNQLQEGKNVIGLQMGTRN<br>SDNQPVGLVQVEGER<br>SDPILYRPVAVALDTKGPEIR | N-ter +34.06 Da<br>N-ter +34.06 Da, K +34.06 Da<br>N-ter +34.06 Da, K +34.06 Da<br>N-ter +34.06 Da<br>N-ter +34.06 Da, K +34.06 Da | 30.7<br>63.5<br>45.3<br>56.2<br>23.3 | 102.9<br>64.5<br>78.6<br>33.2<br>51.9 | 4<br>3<br>4<br>3<br>4 | 1854.12<br>1613.03<br>2269.39<br>1837.00<br>2377.52 | 0.33<br>-0.07<br>1.55<br>-1.52<br>0.19       | 0.01<br>0.01<br>0.12<br>0.09<br>0.02 | CY1_MOUSE<br>H10_MOUSE<br>TAGL2_MOUSE<br>H571A_MOUSE<br>KPYM_MOUSE       |                                                          | Cytochrome c1, heme protein, mitochondrial;<br>Histone H1.0;<br>Transgelin-2;<br>Heat shock 70 kDa protein 1A;<br>Pyruvate kinase isozymes M1/M2; | Heat shock 70 kDa protein 3;Hsp68;<br>Pyruvate kinase muscle isozyme;<br>Insulin receptor substrate protein of 53 kDa;Insulin receptor tyrosine kinase 53 kDa substrate;                                                                                                                                                                                                                                                           |
| LSASKNLVI                                                          | SDPIGAKPLPVPPELAPVGR                                                                                  | N-ter +34.06 Da, K +34.06 Da                                                                                                       | 34.2                                 | 37.8                                  | 3                     | 2321.47                                             | 0.60                                         | 0.06                                 | BAIP2_MOUSE                                                              | B1A246_MOUSE                                             | Brain-specific angiogenesis inhibitor 1-associated protein 2;                                                                                     |                                                                                                                                                                                                                                                                                                                                                                                                                                    |
| SGGGLLVDF                                                          | SDSASAVLAPGSEDNFAR                                                                                    | N-ter +28.03 Da                                                                                                                    | 49.6                                 | 43.2                                  | 3                     | 1989.03                                             | 0.08                                         | 0.01                                 | AP2A2_MOUSE                                                              |                                                          | AP-2 complex subunit alpha-2;                                                                                                                     | 100 kDa coated vesicle protein C;Adapter-related protein complex 2 alpha-2 subunit;Adaptor protein complex AP-2 subunit alpha-2;Alpha-adaptin C;Alpha2-adaptin;Clathrin assembly protein complex 2 alpha-C large chain;Plasma membrane adaptor HAZ/AP2 adaptin alpha C subunit;<br>DNA-binding p52/p100 complex, 100 kDa subunit;Polypyrimidine tract-binding protein-associated-splicing factor;<br>Inhibitor of F(1)F(o)-ATPase; |
| GPGPRTEEKI<br>LQTRGFVSDS<br>RPRQSPSPQS<br>RPRQSPSPQS<br>MKVLQTRGFV | SDSEGFKANLSLLR<br>SDSMDTGAGSIR<br>SDSQVHSGVQVEAQR<br>SDSQVHSGVQVEGR<br>SDSSDSMDTGAGSIR                | N-ter +34.06 Da, K +34.06 Da<br>N-ter +34.06 Da<br>N-ter +28.03 Da<br>N-ter +28.03 Da<br>N-ter +34.06 Da                           | 24.0<br>41.4<br>57.4<br>45.3<br>42.3 | 61.3<br>52.4<br>75.4<br>83.0<br>69.5  | 3<br>2<br>3<br>3<br>3 | 1604.02<br>1229.64<br>1653.93<br>1511.86<br>1518.77 | 0.08<br>0.82<br>0.67<br>1.98<br>0.56         | 0.01<br>0.05<br>0.09<br>0.31<br>0.06 | SFPQ_MOUSE<br>ATIF1_MOUSE<br>F6TL02_MOUSE<br>E9Q019_MOUSE<br>ATIF1_MOUSE | Q9D879_MOUSE<br>FILA_MOUSE<br>FILA_MOUSE<br>Q9D879_MOUSE | Splicing factor, proline- and glutamine-rich;<br>ATPase inhibitor, mitochondrial;                                                                 | ATPase inhibitor, mitochondrial;                                                                                                                                                                                                                                                                                                                                                                                                   |
| KTPGPPPEIY                                                         | SDTQPSLQSTAKHVESR                                                                                     | N-ter +28.03 Da, K +28.03 Da                                                                                                       | 36.6                                 | 70.3                                  | 4                     | 2073.19                                             | 0.30                                         | 0.01                                 | CDV3_MOUSE                                                               | F8WGL9_MOUSE                                             | Protein CDV3;                                                                                                                                     | Inhibitor of F(1)F(o)-ATPase;<br>Carnitine deficiency-associated protein 3;Tyrosine-phosphorylated protein 36;                                                                                                                                                                                                                                                                                                                     |
| A<br>GNDISSGTVL                                                    | SDVLELTDENFESR<br>SDYVSGPPSGTGLHR                                                                     | N-ter +28.03 Da<br>N-ter +34.06 Da                                                                                                 | 57.8<br>41.7                         | 43.6<br>57.0                          | 2<br>3                | 1680.86<br>1619.90                                  | -0.04<br>-0.49                               | 0.00<br>0.03                         | PDIA3_MOUSE<br>PEBP1_MOUSE                                               | F6Q404_MOUSE                                             | Protein disulfide-isomerase A3;<br>Phosphatidylethanolamine-binding protein 1;                                                                    | 58 kDa glucose-regulated protein;58 kDa microsomal protein;Disulfide isomerase ER-60;Endoplasmic reticulum resident protein 60;<br>HCNPPp;                                                                                                                                                                                                                                                                                         |



Table S7, Tholen et al.

| Non Prime Site | Prime Site                | Modifications                             | Hyperscore | Mass error in ppm | Charge | Precursor neutral mass in Da | Fold change (log <sub>2</sub> ) of ASAPRatio | FC-error of ASAPRatio | Uniprot ID 1 | Uniprot ID 2 | Protein Name 1                                                                     | Protein Name 2                                                                                                                               |
|----------------|---------------------------|-------------------------------------------|------------|-------------------|--------|------------------------------|----------------------------------------------|-----------------------|--------------|--------------|------------------------------------------------------------------------------------|----------------------------------------------------------------------------------------------------------------------------------------------|
| RILGGVISAI     | SEAAAQYNPEPPPPR           | N-ter +34.06 Da                           | 34.8       | 55.5              | 3      | 1656.92                      | 0.25                                         | 0.01                  | CPNS1_MOUSE  | D3YW48_MOUSE | Calpain small subunit 1;                                                           | Calcium-activated neutral proteinase small subunit;Calcium-dependent protease small subunit 1;Calpain regulatory subunit;                    |
| GNIDDALQCY     | SEAIKLDQNHVLYSNR          | N-ter +34.06 Da, K +34.06 Da              | 28.6       | 64.0              | 4      | 2051.28                      | -0.67                                        | 0.03                  | STIP1_MOUSE  |              | Stress-induced-phosphoprotein 1;                                                   | Hsc70/Hsp90-organizing protein;                                                                                                              |
| RNCDSDATKA     | SEDFVDPWTVTR              | N-ter +28.03 Da                           | 32.8       | 60.7              | 2      | 1377.74                      | -0.15                                        | 0.01                  | SYWC_MOUSE   |              | Tryptophan--tRNA ligase, cytoplasmic;                                              | Tryptophanyl-tRNA synthetase;                                                                                                                |
| IDQDLSQNPFF    | SEDKTDKGIYVTR             | N-ter +28.03 Da, K +28.03 Da              | 20.7       | 94.1              | 4      | 1595.01                      | -0.79                                        | 0.05                  | TX1B3_MOUSE  |              | Tax1-binding protein 3;                                                            | Tax interaction protein 1;                                                                                                                   |
| FCPEEYVSPN     | SEDVGVGPKGDPGPGQPR        | N-ter +28.03 Da, K +28.03 Da              | 29.7       | 68.4              | 3      | 1933.09                      | 0.54                                         | 0.09                  | CO1A1_MOUSE  | F8WGB7_MOUSE | Collagen alpha-1(I) chain;                                                         | Alpha-1 type I collagen;                                                                                                                     |
| QVEEYIADLY     | SEEPGEEPAWVQTER           | N-ter +34.06 Da                           | 42.9       | 64.8              | 3      | 1906.00                      | -0.79                                        | 0.07                  | RCN3_MOUSE   | D3Z7T1_MOUSE | Reticulocalbin-3;                                                                  |                                                                                                                                              |
| RPANPNWGVF     | SEFGSSSPATR               | N-ter +34.06 Da                           | 45.0       | 47.6              | 2      | 1273.66                      | 1.26                                         | 0.13                  | Q99K47_MOUSE | E9PV24_MOUSE |                                                                                    |                                                                                                                                              |
| PTKETGWASF     | SEFTSSLSTKESLR            | N-ter +28.03 Da, K +28.03 Da              | 32.5       | 54.0              | 3      | 1626.93                      | -0.86                                        | 0.08                  | PP6R3_MOUSE  |              | Serine/threonine-protein phosphatase 6 regulatory subunit 3;                       | SAPS domain family member 3; Etk4;STE20-related kinase SMAK;STE20-related serine/threonine-protein kinase;Serine/threonine-protein kinase 2; |
| VTGAEARALG     | SEGEAAATEVDLER            | N-ter +34.06 Da                           | 32.7       | 56.1              | 3      | 1509.82                      | -0.47                                        | 0.03                  | SLK_MOUSE    |              | STE20-like serine/threonine-protein kinase;                                        |                                                                                                                                              |
| RGVSESQASD     | SEGHSDFSQAVGAHR           | N-ter +28.03 Da                           | 35.1       | 98.7              | 4      | 1797.98                      | 1.50                                         | 0.18                  | E9Q019_MOUSE | FILA_MOUSE   |                                                                                    | Plasma selenoprotein P;                                                                                                                      |
| GHLESCDTTA     | SEGLHLSLAQR               | N-ter +28.03 Da                           | 31.7       | 54.3              | 3      | 1237.75                      | 0.89                                         | 0.02                  | SEPP1_MOUSE  |              | Selenoprotein P;                                                                   |                                                                                                                                              |
| AVECHRGECCQ    | SEGVLFQGNR                | N-ter +28.03 Da                           | 41.7       | 37.7              | 2      | 1280.70                      | 0.98                                         | 0.06                  | HEMO_MOUSE   |              | Hemopexin;                                                                         |                                                                                                                                              |
| VCLLHEKTPV     | SEHVTKCCSGSLVER           | N-ter +34.06 Da, K +34.06 Da, C +57.02 Da | 29.2       | 101.1             | 4      | 1816.11                      | 0.00                                         | 0.00                  | ALBU_MOUSE   |              | Serum albumin;                                                                     |                                                                                                                                              |
| PSSSGAATV      | SEKPGPKAAEVGDDFLGDFVVGGER | N-ter +34.06 Da, K +34.06 Da              | 43.3       | 97.3              | 4      | 2620.68                      | -2.74                                        | 0.18                  | CLIP2_MOUSE  |              | CAP-Gly domain-containing linker protein 2;                                        | Cytoplasmic linker protein 115;Cytoplasmic linker protein 2;                                                                                 |
| ETFHARLASL     | SEKPPAIDWAYR              | N-ter +28.03 Da, K +28.03 Da              | 24.6       | 96.5              | 3      | 1651.00                      | -0.03                                        | 0.00                  | ATP5H_MOUSE  | B1ASE2_MOUSE | ATP synthase subunit d, mitochondrial;                                             |                                                                                                                                              |
| ETVAQKQLTV     | SEKTPVSEKTPVPAKR          | N-ter +28.03 Da, K +28.03 Da              | 21.6       | 95.8              | 4      | 1865.28                      | 1.28                                         | 0.14                  | LAD1_MOUSE   |              | Ladinin-1;                                                                         | Linear IgA disease antigen homolog;                                                                                                          |
| RDRHVLGLAR     | SELEEDIPEEDIISR           | N-ter +34.06 Da                           | 37.1       | 50.8              | 3      | 1920.08                      | 1.71                                         | 0.12                  | CO3_MOUSE    |              | Complement C3;                                                                     | HSE-MSF;                                                                                                                                     |
| KPPAKGPAKN     | SEPEEVIPIR                | N-ter +34.06 Da                           | 38.8       | 34.9              | 2      | 1175.67                      | 0.78                                         | 0.03                  | SYYC_MOUSE   | A2A7S7_MOUSE | Tyrosine--tRNA ligase, cytoplasmic;                                                | Tyrosyl-tRNA synthetase;                                                                                                                     |
| KRHYPKMNLA     | SEPQEVLIHIGSAHR           | N-ter +28.03 Da                           | 32.8       | 92.1              | 4      | 1701.02                      | 0.08                                         | 0.01                  | PDL1_MOUSE   |              | PDZ and LIM domain protein 1;                                                      | C-terminal LIM domain protein 1;Elfin;LIM domain protein CLP-36;                                                                             |
| SSQPNLSTSY     | SEQEYKAGGSPASYHGSTSPR     | N-ter +28.03 Da, K +28.03 Da              | 49.2       | 78.8              | 4      | 2308.25                      | -0.20                                        | 0.04                  | EPN2_MOUSE   | Q5NCM6_MOUSE | Epsin-2;                                                                           | EPS-15-interacting protein 2;Intersectin-EH-binding protein 2;                                                                               |
| PROPTVTSVC     | SESAQELAEQR               | N-ter +28.03 Da                           | 37.9       | 57.5              | 3      | 1331.71                      | 0.12                                         | 0.01                  | PDL5_MOUSE   | E9Q8P5_MOUSE | PDZ and LIM domain protein 5;                                                      | Enigma homolog;Enigma-like PDZ and LIM domains protein;                                                                                      |
| SPLRSPPLLG     | SESPYEDFLSADSKVLR         | N-ter +28.03 Da, K +28.03 Da              | 43.1       | 70.5              | 3      | 2055.16                      | -0.84                                        | 0.09                  | MAP1B_MOUSE  |              | Microtubule-associated protein 1B;                                                 | MAP1(X);MAP1.2;                                                                                                                              |
| SADROGRRGV     | SEQASDSEGHSDFSQAVGAHR     | N-ter +28.03 Da                           | 51.4       | 78.8              | 4      | 2502.26                      | 1.01                                         | 0.23                  | E9Q019_MOUSE | F7BVV1_MOUSE |                                                                                    |                                                                                                                                              |
| MEKLSKGMRF     | SEVATQYSEDKAR             | N-ter +28.03 Da, K +28.03 Da              | 51.4       | 92.4              | 3      | 1538.90                      | 1.07                                         | 0.12                  | PIN4_MOUSE   |              | Peptidyl-prolyl cis-trans isomerase NIMA-interacting 4;                            | Parvulin-14;Peptidyl-prolyl cis-trans isomerase Pin4;Rotamase Pin4;                                                                          |
| MTTLFCINVL     | SEVCGQDITTKHMLPTVLR       | N-ter +34.06 Da, K +34.06 Da, C +57.02 Da | 56.6       | 63.1              | 4      | 2252.37                      | 0.88                                         | 0.09                  | 2AAA_MOUSE   |              | Serine/threonine-protein phosphatase 2A 65 kDa regulatory subunit A alpha isoform; | PP2A subunit A isoform PR65-alpha;PP2A subunit A isoform R1-alpha;                                                                           |
| LLLLSGDAHS     | SEVPGAAAEGPGGSGVLGDR      | N-ter +34.06 Da                           | 55.9       | 43.0              | 3      | 1873.02                      | 0.43                                         | 0.02                  | CO024_MOUSE  |              |                                                                                    | UPF0480 protein C15orf24 homolog;                                                                                                            |
| WTHEVFSSRS     | SEVVLSDGDEYQR             | N-ter +28.03 Da                           | 39.8       | 63.3              | 3      | 1638.84                      | -0.81                                        | 0.07                  | E9Q616_MOUSE |              |                                                                                    |                                                                                                                                              |
| NAINLPLSI      | SFELDPEDTLLENEVR          | N-ter +34.06 Da                           | 40.6       | 67.1              | 3      | 2068.14                      | -2.32                                        | 0.58                  | PARVA_MOUSE  | Q3UF75_MOUSE | Alpha-parvin;                                                                      | Actopaxin;                                                                                                                                   |
| QLRKLFIGGL     | SFETTDDSL                 | N-ter +28.03 Da                           | 29.7       | 39.8              | 2      | 1197.60                      | -2.56                                        | 0.15                  | ROA3_MOUSE   | A2AL12_MOUSE | Heterogeneous nuclear ribonucleoprotein A3;                                        |                                                                                                                                              |
| ERDRITALKR     | SFEVEIEPPNSTPPR           | N-ter +34.06 Da                           | 40.1       | 48.7              | 3      | 1867.02                      | 0.42                                         | 0.01                  | SEPT9_MOUSE  | A2AGU3_MOUSE | Septin-9;                                                                          | SL3-3 integration site 1 protein;                                                                                                            |
| GISLPQVELA     | SFGEAGPEIVASAEAGTAGSR     | N-ter +34.06 Da                           | 47.6       | 46.3              | 3      | 2023.10                      | 1.36                                         | 0.06                  | PRAX_MOUSE   | Q6NVF7_MOUSE | Periaxin;                                                                          |                                                                                                                                              |
| ILSADSTVVG     | SFSPVSSDQGPR              | N-ter +34.06 Da                           | 27.2       | 60.1              | 3      | 1395.80                      | -0.23                                        | 0.01                  | E9Q056_MOUSE | E9Q6V2_MOUSE |                                                                                    |                                                                                                                                              |
| ISKAMGIMV      | SFVNDFER                  | N-ter +34.06 Da                           | 27.6       | 39.8              | 2      | 1159.65                      | -0.92                                        | 0.04                  | H2B1B_MOUSE  | H2B1C_MOUSE  | Histone H2B type 1-B;                                                              | h2B-143;                                                                                                                                     |
| VANAGTLSVI     | SFVLLASYVILFHLR           | N-ter +28.03 Da                           | 19.3       | 33.4              | 4      | 2003.26                      | 2.58                                         | 0.22                  | Q8VEZ3_MOUSE | D3Z4B7_MOUSE |                                                                                    |                                                                                                                                              |
| YDPGALVPSF     | SGALELKLQLSAEER           | N-ter +34.06 Da, K +34.06 Da              | 28.2       | 64.9              | 3      | 1840.18                      | -0.40                                        | 0.02                  | OLA1_MOUSE   |              | Obg-like ATPase 1;                                                                 | GTP-binding protein 9;                                                                                                                       |
| RNLHQSGLSF     | SGAQIDNNIPR               | N-ter +34.06 Da                           | 25.9       | 95.6              | 3      | 1218.76                      | -0.81                                        | 0.03                  | DPYL2_MOUSE  |              | Dihydropyrimidinase-related protein 2;                                             | Unc-33-like phosphoprotein 2;                                                                                                                |
| GEGLIKLNFF     | SGDAEDKADAEQPLER          | N-ter +34.06 Da, K +34.06 Da              | 40.8       | 72.7              | 3      | 1927.09                      | -0.12                                        | 0.01                  | RNH2C_MOUSE  | F6ZDT4_MOUSE | Ribonuclease H2 subunit C;                                                         | Ribonuclease H1 subunit C;                                                                                                                   |
| ANFQSQSTLY     | SGDDLVEALPKPCGCPGR        | N-ter +28.03 Da, K +28.03 Da, C +57.02 Da | 45.8       | 77.3              | 3      | 2023.14                      | -1.84                                        | 0.13                  | KNG1_MOUSE   | D3YT9_MOUSE  | Kininogen-1;                                                                       |                                                                                                                                              |
| NIDIRSAFRK     | SGEGQEDAGELDFSGLLKR       | N-ter +34.06 Da, K +34.06 Da              | 58.6       | 67.3              | 3      | 2075.22                      | -6.64                                        | 0.00                  | D3YT90_MOUSE | Q6P6L5_MOUSE |                                                                                    |                                                                                                                                              |
| VLDGADCIML     | SGETAKGDPYLEAVR           | N-ter +28.03 Da, K +28.03 Da              | 39.8       | 59.5              | 3      | 1647.94                      | 0.37                                         | 0.03                  | KPYM_MOUSE   |              | Pyruvate kinase isozymes M1/M2;                                                    | Pyruvate kinase muscle isozyme;                                                                                                              |
| KVFHILDKKD     | SGFIEEDGSLKGFSSDAR        | N-ter +34.06 Da, K +34.06 Da              | 53.7       | 60.3              | 3      | 2324.36                      | -0.76                                        | 0.13                  | PRVA_MOUSE   |              | Parvalbumin alpha;                                                                 |                                                                                                                                              |
| VTLHIVERYP     | SGFPDASSEGPEPTOGEAR       | N-ter +28.03 Da                           | 41.6       | 50.7              | 3      | 1945.97                      | -0.92                                        | 0.04                  | PTRF_MOUSE   | Q3U4N4_MOUSE | Polymerase I and transcript release factor;                                        | Cav-p60;Cavin-1;                                                                                                                             |
| QAPPVNRNLHQ    | SGFSLGAQIDNNIPR           | N-ter +34.06 Da                           | 43.7       | 45.8              | 3      | 1709.96                      | 2.87                                         | 0.20                  | DPYL2_MOUSE  |              | Dihydropyrimidinase-related protein 2;                                             | Unc-33-like phosphoprotein 2;                                                                                                                |
| RGAAVTRSMA     | SGGGVPTDEEQATGLER         | N-ter +28.03 Da                           | 52.2       | 58.7              | 3      | 1729.91                      | 0.01                                         | 0.00                  | COX5B_MOUSE  | Q9D881_MOUSE | Cytochrome c oxidase subunit 5B, mitochondrial;                                    | Cytochrome c oxidase polypeptide Vb;                                                                                                         |
| IREYKSKRQA     | SGGPVDIGPEYQQLDR          | N-ter +34.06 Da                           | 44.8       | 49.3              | 3      | 1879.01                      | 0.49                                         | 0.03                  | ATP5I_MOUSE  | E9QAD6_MOUSE | ATP synthase-coupling factor 6, mitochondrial;                                     |                                                                                                                                              |
| GRTTVVMTPR     | SGGSKDNLSPGLQCLTER        | N-ter +28.03 Da, K +28.03 Da, C +57.02 Da | 37.5       | 38.9              | 3      | 2071.12                      | 0.23                                         | 0.02                  | THRB_MOUSE   |              | Prothrombin;                                                                       | Coagulation factor II;                                                                                                                       |
| AIMARIAQFL     | SGIPETVPLSTVNR            | N-ter +28.03 Da                           | 30.9       | 43.9              | 3      | 1496.89                      | 0.20                                         | 0.01                  | THIKA_MOUSE  | THIKB_MOUSE  | 3-ketoacyl-CoA thiolase A, peroxisomal;                                            | Acetyl-CoA acyltransferase A;Beta-ketothiolase A;Peroxisomal 3-oxoacyl-CoA thiolase A;                                                       |
| GLSDPNLTL      | SGKDGQCPLVVEQVR           | N-ter +28.03 Da, K +28.03 Da, C +57.02 Da | 43.7       | 68.0              | 3      | 1727.02                      | -0.54                                        | 0.05                  | LR47_MOUSE   | F6YT33_MOUSE | Leucine-rich repeat-containing protein 47;                                         |                                                                                                                                              |
| VSVERALADE     | SGLDYSLSGGGVPVILVR        | N-ter +28.03 Da                           | 46.7       | 44.7              | 3      | 1861.08                      | 0.60                                         | 0.04                  | A2BFA6_MOUSE |              |                                                                                    |                                                                                                                                              |
| ETTALVCDNG     | SGLVKAGFAGDDAPR           | N-ter +34.06 Da, K +34.06 Da              | 32.7       | 66.2              | 3      | 1527.97                      | 0.87                                         | 0.09                  | ACTC_MOUSE   | ACTS_MOUSE   | Actin, alpha cardiac muscle 1;                                                     | Alpha-cardiac actin;                                                                                                                         |
| GKTVIRLPSG     | SGPASPTTGSVAIDIR          | N-ter +34.06 Da                           | 51.7       | 27.4              | 2      | 1448.81                      | 1.77                                         | 0.11                  | E9Q616_MOUSE |              |                                                                                    |                                                                                                                                              |

Table S7, Tholen et al.

| Non Prime Site                                                   | Prime Site                                                                                     | Modifications                                                                                                         | Hyperscore                           | Mass error in ppm                    | Charge                | Precursor neutral mass in Da                        | Fold change (log <sub>2</sub> ) of ASAPRatio | FC-error of ASAPRatio                | Uniprot ID 1                                                           | Uniprot ID 2                                             | Protein Name 1                                                                                                                                                                                        | Protein Name 2                                                                                                                                                                                                                                                    |
|------------------------------------------------------------------|------------------------------------------------------------------------------------------------|-----------------------------------------------------------------------------------------------------------------------|--------------------------------------|--------------------------------------|-----------------------|-----------------------------------------------------|----------------------------------------------|--------------------------------------|------------------------------------------------------------------------|----------------------------------------------------------|-------------------------------------------------------------------------------------------------------------------------------------------------------------------------------------------------------|-------------------------------------------------------------------------------------------------------------------------------------------------------------------------------------------------------------------------------------------------------------------|
| MLSVAAR<br>AAQYSDKGV5<br>SLSKERHQCT<br>TGAAAGKRKA<br>PSGVPKGDGR  | SGFPFVLSATS<br>SGPGPMGLMGR<br>SGPIVTLQGNKSTSPDPDWSSQLER<br>SGPPVSELTKAVAAASKER<br>SGQPGVPGAGVR | N-ter +28.03 Da<br>N-ter +28.03 Da<br>N-ter +34.06 Da, K +34.06 Da<br>N-ter +34.06 Da, K +34.06 Da<br>N-ter +34.06 Da | 40.7<br>38.7<br>35.8<br>23.2<br>40.1 | 33.4<br>52.6<br>68.8<br>26.6<br>49.3 | 2<br>2<br>4<br>4<br>3 | 1316.75<br>1183.65<br>2881.67<br>2041.32<br>1211.74 | 0.59<br>1.82<br>-0.30<br>-0.92<br>0.36       | 0.01<br>0.17<br>0.03<br>0.05<br>0.02 | UCRI_MOUSE<br>CO1A2_MOUSE<br>SYNP2_MOUSE<br>H12_MOUSE<br>CO1A2_MOUSE   | E0CXI2_MOUSE<br>D3YV9_MOUSE<br>H13_MOUSE<br>E9Q6U9_MOUSE | Cytochrome b-c1 complex subunit Rieske, mitochondrial;<br>Collagen alpha-2(I) chain;<br>Synaptodin-2;<br>Histone H1.2;<br>Collagen alpha-2(I) chain;                                                  | Complex III subunit 5;Cytochrome b-c1 complex subunit 5;Rieske iron-sulfur protein;Ubiquinol-cytochrome c reductase iron-sulfur subunit;<br>Alpha-2 type I collagen;<br>Myopodin;<br>H1 VAR.1;H1c;<br>Alpha-2 type I collagen;                                    |
| MYTPIQ                                                           | SGSPFASVQDPGLHIWR                                                                              | N-ter +34.06 Da                                                                                                       | 55.0                                 | 82.1                                 | 3                     | 1984.20                                             | -2.64                                        | 0.66                                 | CAPG_MOUSE                                                             | Q99L84_MOUSE                                             | Macrophage-capping protein;                                                                                                                                                                           | Actin regulatory protein CAP-G;Actin-capping protein GCAP39;Myc basic motif homolog 1;                                                                                                                                                                            |
| LTSFGTEASN                                                       | SGTLSQSNVAGSAFTQDTR                                                                            | N-ter +28.03 Da                                                                                                       | 46.2                                 | 74.2                                 | 3                     | 1954.08                                             | 0.21                                         | 0.01                                 | LS14A_MOUSE                                                            | A2BH69_MOUSE                                             | Protein LSM14 homolog A;                                                                                                                                                                              | Protein FAM61A;RNA-associated protein 55A;                                                                                                                                                                                                                        |
| HVVDPQLMTF                                                       | SGTNDPCALCSLHSGKIGGAQNR                                                                        | N-ter +28.03 Da, K +28.03 Da, C +57.02 Da                                                                             | 49.9                                 | 71.6                                 | 4                     | 2568.44                                             | -1.22                                        | 0.11                                 | MIF_MOUSE                                                              |                                                          | Macrophage migration inhibitory factor;                                                                                                                                                               | Delayed early response protein 6;Glycosylation-inhibiting factor;L-dopachrome isomerase;L-dopachrome tautomerase;Phenylpyruvate tautomerase;                                                                                                                      |
| ASSREGSPAR                                                       | SGTPVHCPSPIR                                                                                   | N-ter +34.06 Da, C +57.02 Da                                                                                          | 42.8                                 | 66.5                                 | 3                     | 1340.80                                             | -0.58                                        | 0.01                                 | BAG3_MOUSE                                                             |                                                          | BAG family molecular chaperone regulator 3;                                                                                                                                                           | Bcl-2-associated athanogene 3;Bcl-2-binding protein Bis;<br>2-phospho-D-glycerate hydro-lyase;Enolase 3;Muscle-specific enolase;Skeletal muscle enolase;                                                                                                          |
| DDWATWTSFL<br>ERHVAHGPKL<br>QGPPAPPNPF                           | SGVDIQGDDLTVTNPKR<br>SGVGPSQPTTVGTECGFVSR<br>SHLLEGELEYTKTIER                                  | N-ter +28.03 Da, K +28.03 Da<br>N-ter +34.06 Da, C +57.02 Da<br>N-ter +34.06 Da, K +34.06 Da                          | 65.9<br>45.8<br>48.7                 | 69.1<br>52.7<br>109.3                | 3<br>3<br>4           | 2082.28<br>2056.12<br>2114.38                       | 0.91<br>-0.30<br>0.77                        | 0.08<br>0.02<br>0.06                 | ENOB_MOUSE<br>F7CKA7_MOUSE<br>ADDG_MOUSE                               |                                                          | Beta-enolase;<br>Microtubule-associated protein;<br>Gamma-adducin;                                                                                                                                    | Adducin-like protein 70;<br>Complex III subunit 5;Cytochrome b-c1 complex subunit 5;Rieske iron-sulfur protein;Ubiquinol-cytochrome c reductase iron-sulfur subunit;<br>3D3/LYRIC;Lysine-rich CEACAM1 co-isolated protein;Metadherin;Metastasis adhesion protein; |
| GLNVASVRF                                                        | SHTDVKVPDFSDYR                                                                                 | N-ter +28.03 Da, K +28.03 Da                                                                                          | 35.1                                 | 49.7                                 | 4                     | 1720.93                                             | -0.03                                        | 0.00                                 | UCRI_MOUSE                                                             |                                                          | Cytochrome b-c1 complex subunit Rieske, mitochondrial;                                                                                                                                                | 47 kDa heat shock protein;Collagen-binding protein;Serine protease inhibitor J6;                                                                                                                                                                                  |
| KKKKKQGEDN                                                       | SHTQDTELEKDR                                                                                   | N-ter +28.03 Da, K +28.03 Da<br>N-ter +28.03 Da, K +28.03 Da, C +57.02 Da                                             | 26.8                                 | 104.3                                | 4                     | 1729.99                                             | 0.03                                         | 0.01                                 | LYRIC_MOUSE                                                            | F6ZSG0_MOUSE                                             | Protein LYRIC;                                                                                                                                                                                        |                                                                                                                                                                                                                                                                   |
| RSTCHNQNSM<br>ASTSQSRAA                                          | SICEEFSQADDKGCFR<br>SIFGAKPVDTAAR                                                              | N-ter +28.03 Da, K +28.03 Da<br>N-ter +28.03 Da, K +28.03 Da, C +57.02 Da                                             | 48.7<br>28.9                         | 74.5<br>72.0                         | 3<br>3                | 2132.09<br>1444.91                                  | 1.42<br>-0.30                                | 0.19<br>0.02                         | A2M_MOUSE<br>IF4B_MOUSE                                                | D3YW52_MOUSE<br>Q3TD8_MOUSE                              | Alpha-2-macroglobulin;<br>Eukaryotic translation initiation factor 4B;                                                                                                                                | Pregnancy zone protein;                                                                                                                                                                                                                                           |
| GLILPGILAK<br>SGFIEDELG                                          | SIGTSLDPCKDPTIR<br>SILKGFSSDAR                                                                 | N-ter +28.03 Da, K +28.03 Da<br>N-ter +28.03 Da, K +28.03 Da, C +57.02 Da                                             | 26.7<br>23.7                         | 71.9<br>56.4                         | 3<br>3                | 1601.92<br>1235.76                                  | 0.42<br>0.95                                 | 0.06<br>0.11                         | CDSN_MOUSE<br>PRVA_MOUSE                                               |                                                          | Corneodesmosin;<br>Parvalbumin alpha;                                                                                                                                                                 |                                                                                                                                                                                                                                                                   |
| NFRDKRSALQ<br>LQTRFPLDY<br>SQMEFSISL<br>NRHIAAKDHA<br>RTSPVPRQKR | SINEWASQTTDKGLPEVTKDVER<br>SIPFPTPTLTGR<br>SIQEPSAATVTSR<br>SIQMNVAEVD<br>SIVVSPILPENQR        | N-ter +28.03 Da, K +28.03 Da<br>N-ter +34.06 Da<br>N-ter +28.03 Da<br>N-ter +28.03 Da<br>N-ter +28.03 Da              | 34.2<br>29.6<br>43.7<br>40.7<br>38.8 | 73.8<br>42.2<br>53.0<br>60.0<br>50.2 | 4<br>3<br>3<br>2<br>3 | 2686.58<br>1517.93<br>1559.86<br>1288.72<br>1592.01 | -1.18<br>2.06<br>0.93<br>-0.62<br>0.36       | 0.14<br>0.08<br>0.03<br>0.03<br>0.06 | SERPH_MOUSE<br>UBP2L_MOUSE<br>CA198_MOUSE<br>RS21_MOUSE<br>CAD13_MOUSE |                                                          | Serin H1;<br>Ubiquitin-associated protein 2-like;<br>Uncharacterized protein C1orf198 homolog;<br>40S ribosomal protein S21;<br>Cadherin-13;<br>Scavenger receptor cysteine-rich type 1 protein M130; |                                                                                                                                                                                                                                                                   |
| IHQVYQEMD                                                        | SKADDLILLKSGVIQR                                                                               | N-ter +28.03 Da, K +28.03 Da<br>N-ter +28.03 Da, K +28.03 Da, C +57.02 Da                                             | 48.5                                 | 53.7                                 | 4                     | 1928.20                                             | 1.04                                         | 0.07                                 | C163A_MOUSE                                                            |                                                          |                                                                                                                                                                                                       |                                                                                                                                                                                                                                                                   |
| SEAGPAGAGE                                                       | SKCLPMVKVLDVAVR                                                                                | N-ter +28.03 Da, K +28.03 Da, C +57.02 Da                                                                             | 28.4                                 | 70.8                                 | 4                     | 1699.11                                             | 1.31                                         | 0.04                                 | TTHY_MOUSE                                                             |                                                          | Transthyretin;<br>Lamina-associated polypeptide 2, isoforms alpha/zeta;                                                                                                                               | Prealbumin;                                                                                                                                                                                                                                                       |
| NRPLAAGAN                                                        | SKGPPDFSSDEEREPTVLGSGASVGR                                                                     | N-ter +28.03 Da, K +28.03 Da                                                                                          | 61.8                                 | 62.3                                 | 4                     | 2813.56                                             | 1.18                                         | 0.04                                 | LAP2A_MOUSE                                                            | LAP2B_MOUSE                                              |                                                                                                                                                                                                       | Thymopoietin isoforms alpha/zeta;<br>Protein kinase C-like 1;Protein kinase C-like PKN;Protein-kinase C-related kinase 1;Serine-threonine protein kinase N;<br>Protein cypher;Protein oracle;Z-band alternatively spliced PDZ-motif protein;                      |
| PPPATHYSTL                                                       | SKPAPLTGLEVR                                                                                   | N-ter +34.06 Da, K +34.06 Da                                                                                          | 21.2                                 | 56.6                                 | 3                     | 1435.99                                             | -0.49                                        | 0.04                                 | PKN1_MOUSE                                                             | D6RH37_MOUSE                                             | Serine/threonine-protein kinase N1;                                                                                                                                                                   |                                                                                                                                                                                                                                                                   |
| PVYQAVIKTQ<br>ERSPQLSLAR                                         | SKPEDEADEWAR<br>SKPSPQLSAETPVAALPEFPR                                                          | N-ter +34.06 Da, K +34.06 Da<br>N-ter +34.06 Da, K +34.06 Da                                                          | 31.0<br>37.7                         | 44.6<br>57.9                         | 3<br>4                | 1499.82<br>2289.43                                  | -1.94<br>1.78                                | 0.22<br>0.24                         | LDB3_MOUSE<br>E9Q056_MOUSE                                             | E9PY9_MOUSE                                              | LIM domain-binding protein 3;                                                                                                                                                                         |                                                                                                                                                                                                                                                                   |
| LWSLVATLLG<br>VRLQLQSVDF                                         | SKWPEPVFGR<br>SLADAINTEFKNTR                                                                   | N-ter +28.03 Da, K +28.03 Da<br>N-ter +34.06 Da, K +34.06 Da                                                          | 32.7<br>29.0                         | 61.8<br>59.6                         | 3<br>3                | 1257.76<br>1647.03                                  | 0.07<br>-2.64                                | 0.00<br>0.33                         | MASP2_MOUSE<br>VIME_MOUSE                                              | A2AKJ2_MOUSE                                             | Mannan-binding lectin serine protease 2;<br>Vimentin;                                                                                                                                                 | MBL-associated serine protease 2;Mannose-binding protein-associated serine protease 2;                                                                                                                                                                            |
| ISRRLVSDG                                                        | SLAEVPEAKPVGILSGDFAR                                                                           | N-ter +28.03 Da, K +28.03 Da<br>N-ter +34.06 Da, K +34.06 Da, C +57.02 Da                                             | 24.4                                 | 76.9                                 | 4                     | 2324.49                                             | -0.15                                        | 0.01                                 | STEA3_MOUSE                                                            | E9QN92_MOUSE                                             | Metalloendopeptidase STEAP3;                                                                                                                                                                          | Dudulin-2;Protein nm1054;Six-transmembrane epithelial antigen of prostate 3;Tumor suppressor-activated pathway protein 6;                                                                                                                                         |
| MVRY                                                             | SLDPENPTKCKSR                                                                                  | N-ter +28.03 Da, K +28.03 Da, C +57.02 Da                                                                             | 25.0                                 | 95.9                                 | 4                     | 1720.13                                             | -0.30                                        | 0.02                                 | RL17_MOUSE                                                             | Q6ZWZ7_MOUSE                                             | 60S ribosomal protein L17;                                                                                                                                                                            |                                                                                                                                                                                                                                                                   |
| STVHEILCKL                                                       | SIEGDHSTPSAYGSKPYTNFDAER                                                                       | N-ter +28.03 Da, K +28.03 Da                                                                                          | 32.4                                 | 59.1                                 | 4                     | 2880.53                                             | 0.18                                         | 0.01                                 | ANXA2_MOUSE                                                            | B0V2N7_MOUSE                                             | Annexin A2;                                                                                                                                                                                           | Annexin II;Annexin-2;Calpactin I heavy chain;Calpactin-1 heavy chain;Chromobindin-8;Lipocortin II;Placental anticoagulant protein IV;Protein I;p36;                                                                                                               |

Table S7, Tholen et al.

| Non Prime Site | Prime Site                  | Modifications                                                                | Hyperscore | Mass error in ppm | Charge | Precursor neutral mass in Da | Fold change (log <sub>2</sub> ) of ASAPRatio | FC-error of ASAPRatio | Uniprot ID 1 | Uniprot ID 2 | Protein Name 1                                                                                           | Protein Name 2                                                                                                                                                     |
|----------------|-----------------------------|------------------------------------------------------------------------------|------------|-------------------|--------|------------------------------|----------------------------------------------|-----------------------|--------------|--------------|----------------------------------------------------------------------------------------------------------|--------------------------------------------------------------------------------------------------------------------------------------------------------------------|
| LRPPGGGSNF     | SLGFDEPAEQPVR               | N-ter +28.03 Da                                                              | 45.9       | 38.1              | 3      | 1471.79                      | 1.69                                         | 0.16                  | HN1_MOUSE    |              | Hematological and neurological expressed 1 protein;                                                      |                                                                                                                                                                    |
| FEHRLGEAAR     | SLGNAGNEIGR                 | N-ter +28.03 Da                                                              | 43.7       | 55.4              | 2      | 1114.63                      | -4.06                                        | 0.00                  | DMKN_MOUSE   | E9QLW7_MOUSE | Dermokine;                                                                                               | Epidermis-specific secreted protein SK30/SK89;                                                                                                                     |
| WYSERVLTEI     | SLGSLILVIR                  | N-ter +28.03 Da                                                              | 13.6       | 71.7              | 3      | 1309.96                      | 4.39                                         | 0.18                  | DYM_MOUSE    |              | Dymecilin;                                                                                               | Lysosomal pepstatin-insensitive protease;Tripeptidyl aminopeptidase;Tripeptidyl-peptidase 1;                                                                       |
| RPEPQQVGTV     | SLHLGVTPSVLR                | N-ter +28.03 Da                                                              | 30.2       | 52.7              | 3      | 1305.85                      | 0.71                                         | 0.07                  | TPP1_MOUSE   |              | Tripeptidyl-peptidase 1;                                                                                 | Delayed early response protein 6;Glycosylation-inhibiting factor;L-dopachrome isomerase;L-dopachrome tautomerase;Phenylpyruvate tautomerase;                       |
| SCRNDPCALC     | SLHSIGKIGGAQNR              | N-ter +34.06 Da, K +34.06 Da<br>N-ter +34.06 Da, K +34.06 Da,<br>C +57.02 Da | 21.4       | 76.8              | 4      | 1505.03                      | 0.57                                         | 0.04                  | MIF_MOUSE    |              | Macrophage migration inhibitory factor;                                                                  |                                                                                                                                                                    |
| ADESAANCDK     | SLHTLFGDKLCAIPNLR           | N-ter +28.03 Da, K +28.03 Da                                                 | 36.8       | 90.6              | 4      | 2022.36                      | 0.11                                         | 0.01                  | ALBU_MOUSE   |              | Serum albumin;                                                                                           |                                                                                                                                                                    |
| SIRSAPPKLA     | SLKGVVPEDAVETLAGSLGTR       | N-ter +28.03 Da, K +28.03 Da                                                 | 47.9       | 61.4              | 3      | 2154.32                      | -0.23                                        | 0.04                  | ICAL_MOUSE   | Q921U7_MOUSE | Calpastatin;                                                                                             | Calpain inhibitor;                                                                                                                                                 |
| DVDGVLVGGG     | SLKPEFVDIINAK               | N-ter +28.03 Da, K +28.03 Da                                                 | 51.0       | 75.2              | 3      | 1685.10                      | 1.16                                         | 0.10                  | TPIS_MOUSE   |              | Triosephosphate isomerase;                                                                               | Triose-phosphate isomerase;                                                                                                                                        |
| AMKANTMSNY     | SLLPASLLDHR                 | N-ter +34.06 Da                                                              | 34.4       | 88.4              | 3      | 1254.86                      | -1.22                                        | 0.11                  | ST2B1_MOUSE  | E9QKC1_MOUSE | Sulfotransferase family cytosolic 2B member 1;                                                           | Alcohol sulfotransferase;Hydroxysteroid sulfotransferase 2;                                                                                                        |
| QLIGIQDGLY     | SLIQDSGEVR                  | N-ter +28.03 Da                                                              | 34.5       | 35.2              | 2      | 1130.63                      | 0.70                                         | 0.03                  | IF5A1_MOUSE  |              | Eukaryotic translation initiation factor 5A-1;                                                           | Eukaryotic initiation factor 5A isoform 1;eIF-4D;                                                                                                                  |
| KDYEVDAATLK    | SLNNQIETLLPEGSR             | N-ter +34.06 Da                                                              | 59.5       | 37.1              | 3      | 1805.04                      | -1.06                                        | 0.09                  | CO1A2_MOUSE  | E9Q6U9_MOUSE | Collagen alpha-2(I) chain;                                                                               | Alpha-2 type I collagen;                                                                                                                                           |
| LLGSPRRSY      | SLPPHQKVLPLSLPTMQAGTIAR     | N-ter +28.03 Da, K +28.03 Da                                                 | 47.3       | 58.8              | 4      | 2581.59                      | -0.25                                        | 0.00                  | ODP2_MOUSE   |              | Dihydrolipoylysine-residue acetyltransferase component of pyruvate dehydrogenase complex, mitochondrial; | Dihydrolipoamide acetyltransferase component of pyruvate dehydrogenase complex;Pyruvate dehydrogenase complex component E2;                                        |
| QTPGMRRCCS     | SLPPIQAPSHPPPQPTQPR         | N-ter +34.06 Da                                                              | 43.9       | 76.8              | 4      | 2175.37                      | 1.06                                         | 0.03                  | RHG17_MOUSE  | F8WJ58_MOUSE | Rho GTPase-activating protein 17;                                                                        | Neuron-associated developmentally-regulated protein;Rho-type GTPase-activating protein 17; Embryo-dlg/synapse-associated protein 97;Synapse-associated protein 97; |
| VQPVTWIEIA     | SLPSTAVTSETLPGSLSPVKEYR     | N-ter +28.03 Da, K +28.03 Da                                                 | 43.1       | 76.5              | 4      | 2571.58                      | 0.58                                         | 0.02                  | DLG1_MOUSE   | E9Q9H0_MOUSE | Disks large homolog 1;                                                                                   |                                                                                                                                                                    |
| TALPTQQYAK     | SLPVSVPVWAFKEKR             | N-ter +34.06 Da, K +34.06 Da                                                 | 28.8       | 72.9              | 4      | 1844.31                      | 0.08                                         | 0.01                  | AKT1_MOUSE   | F6R8S6_MOUSE | Proline-rich AKT1 substrate 1;                                                                           |                                                                                                                                                                    |
| PSFSLPNCNR     | SLQEIQPPQATASR              | N-ter +28.03 Da                                                              | 38.5       | 16.6              | 3      | 1725.93                      | 0.00                                         | 0.00                  | HRG_MOUSE    |              | Histidine-rich glycoprotein;                                                                             | Histidine-rich glycoprotein;                                                                                                                                       |
| PVRNLHQSGF     | SLSGAQIDDNIPR               | N-ter +34.06 Da                                                              | 31.8       | 52.5              | 3      | 1418.83                      | 1.20                                         | 0.04                  | DPYL2_MOUSE  |              | Dihydropyrimidinase-related protein 2;                                                                   |                                                                                                                                                                    |
| TRGFVSDSD      | SLMDTGAGSIR                 | N-ter +34.06 Da                                                              | 32.5       | 39.7              | 2      | 1027.56                      | 0.54                                         | 0.04                  | ATF1_MOUSE   | Q9D879_MOUSE | ATPase inhibitor, mitochondrial;                                                                         | Inhibitor of F(1)F(0)-ATPase;                                                                                                                                      |
| ASGPENFQVG     | SLMPPAQQTISQGMHR            | N-ter +28.03 Da                                                              | 46.4       | 80.8              | 3      | 1824.02                      | -0.84                                        | 0.15                  | TLN1_MOUSE   | F8WGT0_MOUSE | Talin-1;                                                                                                 |                                                                                                                                                                    |
| NKEIFLRELI     | SLNASDALDKIR                | N-ter +28.03 Da, K +28.03 Da                                                 | 23.4       | 49.6              | 3      | 1244.73                      | 0.86                                         | 0.05                  | H590B_MOUSE  | ENPL_MOUSE   | Heat shock protein HSP 90-beta;                                                                          | Heat shock 84 kDa;Tumor-specific transplantation 84 kDa antigen;                                                                                                   |
| STAASRATTL     | SLNAVSLASTGLSLTKVDER        | N-ter +34.06 Da, K +34.06 Da                                                 | 59.0       | 64.5              | 3      | 2102.32                      | -0.79                                        | 0.11                  | PICA_MOUSE   |              | Phosphatidylinositol-binding clathrin assembly protein;                                                  |                                                                                                                                                                    |
| TPGHACTQKF     | SLNEEIAMATVTALRR            | N-ter +34.06 Da                                                              | 32.4       | 71.3              | 3      | 1695.04                      | -1.60                                        | 0.24                  | ALDOA_MOUSE  | Q9CPQ9_MOUSE | Fructose-bisphosphate aldolase A;                                                                        | Clathrin assembly lymphoid myeloid leukemia;                                                                                                                       |
| TPGHACTQKF     | SLNEEIAMATVTALR             | N-ter +34.06 Da                                                              | 48.3       | 35.2              | 2      | 1538.87                      | -1.74                                        | 0.17                  | ALDOA_MOUSE  | Q9CPQ9_MOUSE | Fructose-bisphosphate aldolase A;                                                                        | Aldolase 1;Muscle-type aldolase;                                                                                                                                   |
| DRDKPAQIRF     | SLNSAAKAVADAIR              | N-ter +28.03 Da, K +28.03 Da                                                 | 32.5       | 63.3              | 3      | 1441.92                      | 0.36                                         | 0.01                  | TCPD_MOUSE   |              | T-complex protein 1 subunit delta;                                                                       | Aldolase 1;Muscle-type aldolase;                                                                                                                                   |
| EQFLPMMQAI     | SLNNKDGQGYEDFVEGLR          | N-ter +34.06 Da, K +34.06 Da                                                 | 49.5       | 70.1              | 3      | 1995.14                      | -0.04                                        | 0.00                  | E9PWG4_MOUSE | MYL1_MOUSE   |                                                                                                          | A45;CCT-delta;                                                                                                                                                     |
| LLAACGSVTM     | SLNPGESSFDLADRLDPVEKIDR     | N-ter +34.06 Da, K +34.06 Da                                                 | 32.8       | 79.4              | 4      | 2527.52                      | -0.25                                        | 0.03                  | SODE_MOUSE   |              | Extracellular superoxide dismutase [Cu-Zn];                                                              |                                                                                                                                                                    |
| LLAACGSVTM     | SLNPGESSFDLADR              | N-ter +28.03 Da                                                              | 51.2       | 40.7              | 2      | 1421.70                      | 0.01                                         | 0.00                  | SODE_MOUSE   |              | Extracellular superoxide dismutase [Cu-Zn];                                                              |                                                                                                                                                                    |
| GGEVPKRYLL     | SLNQRERQYEHVVVGR            | N-ter +28.03 Da                                                              | 27.5       | 103.7             | 4      | 1912.15                      | 0.50                                         | 0.07                  | S14L4_MOUSE  |              | SEC14-like protein 4;                                                                                    |                                                                                                                                                                    |
| MKTLI          | SLNQTVDIPENVEITLTKGR        | N-ter +34.06 Da, K +34.06 Da                                                 | 55.3       | 55.7              | 3      | 2080.30                      | -2.25                                        | 0.21                  | RL9_MOUSE    | D3YYQ0_MOUSE | 60S ribosomal protein L9;                                                                                |                                                                                                                                                                    |
| ILEGNDIELV     | SLNSAALIQATTVKMKDIR         | N-ter +34.06 Da, K +34.06 Da                                                 | 34.3       | 57.2              | 4      | 2159.44                      | 3.16                                         | 0.20                  | RL9_MOUSE    |              | 60S ribosomal protein L9;                                                                                |                                                                                                                                                                    |
| KIPRHEVTEI     | SLNTOVETQPQKTVIR            | N-ter +28.03 Da, K +28.03 Da                                                 | 47.9       | 71.3              | 3      | 1700.03                      | 0.12                                         | 0.02                  | E9Q616_MOUSE |              |                                                                                                          |                                                                                                                                                                    |
| RSRCFGFTY      | SLNVEEADAAMAASPHAVDGNVTELKR | N-ter +28.03 Da, K +28.03 Da                                                 | 84.1       | 64.4              | 4      | 2737.51                      | -0.74                                        | 0.07                  | Q9CX86_MOUSE |              |                                                                                                          |                                                                                                                                                                    |
| LKLSPPVMLT     | SLNVHPVQLPFR                | N-ter +34.06 Da                                                              | 29.3       | 43.5              | 3      | 1326.82                      | 0.47                                         | 0.02                  | Q99M20_MOUSE |              |                                                                                                          | Alpha-1 protease inhibitor 1;Alpha-1-antiproteinase;Serine protease inhibitor 1-1;Serine protease inhibitor A1a;                                                   |
| QETDTSQKDK     | SPASHEIATNLGDFAIPLYR        | N-ter +34.06 Da                                                              | 60.4       | 57.3              | 3      | 2195.27                      | 0.03                                         | 0.01                  | A1AT1_MOUSE  | A1AT2_MOUSE  | Alpha-1-antitrypsin 1-1;                                                                                 |                                                                                                                                                                    |
| QETDTSQKDK     | SPASHEIATNLGDFALR           | N-ter +28.03 Da                                                              | 44.2       | 65.6              | 3      | 1826.05                      | -1.56                                        | 0.14                  | A1AT4_MOUSE  |              | Alpha-1-antitrypsin 1-4;                                                                                 | Alpha-1 protease inhibitor 4;Serine protease inhibitor 1-4;Serine protease inhibitor A1d;                                                                          |
| NSTPHMHSRC     | SLPDPGLTALLSDHR             | N-ter +28.03 Da                                                              | 61.2       | 79.0              | 3      | 1505.90                      | 0.18                                         | 0.02                  | HEMO_MOUSE   |              | Hemopexin;                                                                                               |                                                                                                                                                                    |
| MPGVGLPELG     | SLPGLPLPLPPR                | N-ter +28.03 Da<br>N-ter +28.03 Da, K +28.03 Da,<br>C +57.02 Da              | 35.0       | 37.1              | 3      | 1354.85                      | -0.38                                        | 0.01                  | GORS2_MOUSE  | A2AT9_MOUSE  | Golgi reassembly-stacking protein 2;                                                                     | Golgi reassembly-stacking protein of 55 kDa;                                                                                                                       |
| VESASGETLH     | SLPKVGQPGAAGPVSPMCPGR       | N-ter +28.03 Da, K +28.03 Da                                                 | 67.7       | 70.7              | 3      | 2005.17                      | 0.57                                         | 0.04                  | FETUA_MOUSE  |              | Alpha-2-HS-glycoprotein;                                                                                 | Countertrypsin;Fetuin-A;                                                                                                                                           |
| DSASQDNLNL     | SLPNKGVLSDFMTDVPVDPGVVHR    | N-ter +28.03 Da, K +28.03 Da                                                 | 39.4       | 99.9              | 4      | 2521.55                      | -3.84                                        | 0.00                  | TPD54_MOUSE  | Q3TUJ9_MOUSE | Tumor protein D54;                                                                                       | Tumor protein D52-like 2;                                                                                                                                          |
| SIGMPSLMYR     | SLPPGAGDTQVLPASR            | N-ter +28.03 Da                                                              | 28.0       | 30.5              | 3      | 1479.81                      | -0.03                                        | 0.00                  | F134C_MOUSE  |              | Protein FAM134C;                                                                                         |                                                                                                                                                                    |
| YPKRLEKELG     | SLPPGISLETIDAAFSQGSRR       | N-ter +34.06 Da, C +57.02 Da                                                 | 68.7       | 50.9              | 3      | 2182.19                      | 0.95                                         | 0.18                  | HEMO_MOUSE   |              | Hemopexin;                                                                                               |                                                                                                                                                                    |
| VGGSLSAESVG    | SLPPPAATPTPTPTPR            | N-ter +34.06 Da                                                              | 31.4       | 56.5              | 3      | 1520.93                      | 0.56                                         | 0.01                  | EPN1_MOUSE   |              | Epsin-1;                                                                                                 | EPS-15-interacting protein 1;Intersectin-EH-binding protein 1;                                                                                                     |
| DRSLINQLTSL    | SLPPPHGDLGAPQNPNAKAAGSR     | N-ter +28.03 Da, K +28.03 Da                                                 | 47.3       | 76.2              | 4      | 2291.35                      | -0.67                                        | 0.03                  | ITB4_MOUSE   | A2A864_MOUSE | Integrin beta-4;                                                                                         |                                                                                                                                                                    |
| RGKTKATKSC     | SLPPPPPEPTSEGR              | N-ter +34.06 Da                                                              | 50.1       | 54.6              | 3      | 1477.84                      | 0.65                                         | 0.06                  | BCAS1_MOUSE  | A2AVX1_MOUSE | Breast carcinoma-amplified sequence 1 homolog;                                                           | Novel amplified in breast cancer 1 homolog;                                                                                                                        |
| SNRRDRPRQP     | SLPSQSSDSQVHSGVQVEGR        | N-ter +28.03 Da                                                              | 35.9       | 68.9              | 3      | 1998.08                      | 1.34                                         | 0.33                  | F7BVV1_MOUSE | FILA_MOUSE   |                                                                                                          |                                                                                                                                                                    |

| Non Prime Site                                                                                | Prime Site                                                                                                                        | Modifications                                                                                                                                         | Hyperscore                                           | Mass error in ppm                                    | Charge                          | Precursor neutral mass in Da                                              | Fold change (log <sub>2</sub> ) of ASAPRatio           | FC-error of ASAPRatio                                | Uniprot ID 1                                                                                          | Uniprot ID 2                                | Protein Name 1                                                                              | Protein Name 2                                                                                                                                                                                                                    |
|-----------------------------------------------------------------------------------------------|-----------------------------------------------------------------------------------------------------------------------------------|-------------------------------------------------------------------------------------------------------------------------------------------------------|------------------------------------------------------|------------------------------------------------------|---------------------------------|---------------------------------------------------------------------------|--------------------------------------------------------|------------------------------------------------------|-------------------------------------------------------------------------------------------------------|---------------------------------------------|---------------------------------------------------------------------------------------------|-----------------------------------------------------------------------------------------------------------------------------------------------------------------------------------------------------------------------------------|
| PSMWQLWNMQ<br>QSGSGRPRR                                                                       | SPTPSSNPAGTPPPSPR<br>SPVHPESSEGEHSHVPPQR                                                                                          | N-ter +28.03 Da<br>N-ter +34.06 Da                                                                                                                    | 29.5<br>26.1                                         | 39.3<br>82.2                                         | 3<br>4                          | 1677.90<br>2120.21                                                        | 0.21<br>0.84                                           | 0.03<br>0.08                                         | RHG10_MOUSE<br>FILA2_MOUSE                                                                            | FILA2_MOUSE                                 | Rho GTPase-activating protein 10;<br>Filaggrin-2;                                           | PH and SH3 domain-containing rhoGAP protein;Rho-type GTPase-activating protein 10;<br>Intermediate filament-associated protein;<br>C-type lectin domain family 3 member B;Plasminogen kringle 4-binding protein;                  |
| TFHEASEDCI                                                                                    | SQGGTLGTQSELENEALFEYAR                                                                                                            | N-ter +34.06 Da                                                                                                                                       | 46.9                                                 | 44.9                                                 | 3                               | 2530.35                                                                   | -1.79                                                  | 0.12                                                 | TETN_MOUSE                                                                                            | Q8CF26_MOUSE                                | Tetranectin;                                                                                |                                                                                                                                                                                                                                   |
| QAVRINKEQV                                                                                    | SQLLPEKFAEQLIR                                                                                                                    | N-ter +34.06 Da, K +34.06 Da                                                                                                                          | 33.8                                                 | 69.7                                                 | 3                               | 1739.18                                                                   | -0.11                                                  | 0.01                                                 | SAMH1_MOUSE                                                                                           | Q6ZQM3_MOUSE                                | SAM domain and HD domain-containing protein 1;                                              | Interferon-gamma-inducible protein Mg11;<br>Ethylmalonic encephalopathy protein 1 homolog;Hepatoma subtracted clone one protein;                                                                                                  |
| AVVRVAGRRL<br>RRDRPRQPS                                                                       | SQQSASGAPVLLR<br>SQSSDSQVHSGVQVEGR                                                                                                | N-ter +28.03 Da<br>N-ter +28.03 Da                                                                                                                    | 49.0<br>59.8                                         | 30.3<br>70.3                                         | 2<br>3                          | 1340.78<br>1813.98                                                        | 0.44<br>-0.49                                          | 0.01<br>0.08                                         | ETHE1_MOUSE<br>F7BVV1_MOUSE                                                                           | FILA_MOUSE                                  | Protein ETHE1, mitochondrial;                                                               |                                                                                                                                                                                                                                   |
| RASGPGWRSH                                                                                    | SSAAAEASAALKVRPER                                                                                                                 | N-ter +34.06 Da, K +34.06 Da                                                                                                                          | 28.7                                                 | 75.5                                                 | 4                               | 1781.18                                                                   | 0.26                                                   | 0.01                                                 | ALAT2_MOUSE                                                                                           | D6RFQ8_MOUSE                                | Alanine aminotransferase 2;                                                                 | Glutamate pyruvate transaminase 2;Glutamic--alanine transaminase 2;Glutamic--pyruvic transaminase 2;<br>Carbonate dehydratase III;Carbonic anhydrase III;                                                                         |
| DQMAKLRSLF                                                                                    | SSAENPEPVLGNWRPPQVKGR                                                                                                             | N-ter +34.06 Da, K +34.06 Da                                                                                                                          | 46.2                                                 | 78.5                                                 | 4                               | 2678.70                                                                   | -0.84                                                  | 0.05                                                 | CAH3_MOUSE                                                                                            |                                             | Carbonic anhydrase 3;                                                                       |                                                                                                                                                                                                                                   |
| RSPGASRAAM                                                                                    | SSDAQWLTAEEER                                                                                                                     | N-ter +34.06 Da                                                                                                                                       | 51.9                                                 | 25.8                                                 | 2                               | 1425.73                                                                   | -0.01                                                  | 0.00                                                 | PHS2_MOUSE                                                                                            |                                             | Pterin-4-alpha-carbinolamine dehydratase 2;                                                 | 4-alpha-hydroxy-tetrahydropterin dehydratase 2;DcoH-like protein DCoHm;Dimerization cofactor of hepatocyte nuclear factor 1 from muscle;HNF-1-alpha dimerization cofactor; Proline-arginine-rich end leucine-rich repeat protein; |
| PNNLVAFHDF<br>VLQTRGFVSD<br>DRRQRPSFSQ                                                        | SSDLENVPHLR<br>SSDSMDTGAGSIR<br>SSDSQVHSGVQVEGR                                                                                   | N-ter +34.06 Da<br>N-ter +34.06 Da<br>N-ter +28.03 Da                                                                                                 | 27.3<br>48.8<br>46.4                                 | 47.3<br>46.3<br>78.4                                 | 3<br>2<br>3                     | 1299.76<br>1316.67<br>1598.89                                             | -1.47<br>0.84<br>0.77                                  | 0.08<br>0.04<br>0.10                                 | PRELP_MOUSE<br>ATIF1_MOUSE<br>E9Q019_MOUSE                                                            | Q9D879_MOUSE<br>FILA_MOUSE                  | Prolargin;<br>ATPase inhibitor, mitochondrial;                                              | Inhibitor of F(1)F(o)ATPase;                                                                                                                                                                                                      |
| GALAPTGPSA<br>SPRRSPVHPE<br>TWTHEVFSSR<br>TDEQALEDFH<br>IIRKVVQRQVD<br>M                      | SSEAPPLVNEVDKVR<br>SSEGEHSHVPPQR<br>SSEVLSGDDEYQVR<br>SSFGPISEVVVKDKR<br>SSGAIDTQQHEEVELR<br>SSGALLPKPQMR                         | N-ter +28.03 Da, K +28.03 Da<br>N-ter +34.06 Da<br>N-ter +34.06 Da<br>N-ter +28.03 Da, K +28.03 Da<br>N-ter +34.06 Da<br>N-ter +34.06 Da, K +34.06 Da | 55.2<br>41.1<br>41.3<br>52.2<br>52.7<br>27.6         | 68.4<br>74.0<br>57.4<br>68.0<br>77.4<br>60.4         | 3<br>3<br>3<br>3<br>3<br>3      | 1595.96<br>1473.84<br>1731.90<br>1674.05<br>1832.05<br>1351.91            | 1.00<br>0.77<br>-0.67<br>-0.58<br>-1.84<br>-0.23       | 0.07<br>0.05<br>0.06<br>0.03<br>0.26<br>0.02         | RPN1_MOUSE<br>FILA2_MOUSE<br>E9Q616_MOUSE<br>RBM3_MOUSE<br>ANK1_MOUSE<br>COX6C_MOUSE                  | FILA2_MOUSE                                 | Dolichyl-diphosphooligosaccharide--protein glycosyltransferase subunit 1;<br>Filaggrin-2;   | Dolichyl-diphosphooligosaccharide--protein glycosyltransferase 67 kDa subunit;Ribophorin I;Ribophorin-1;<br>Intermediate filament-associated protein;                                                                             |
| VVLLFETALL                                                                                    | SSGFSLEDPQTHSNR                                                                                                                   | N-ter +28.03 Da<br>N-ter +28.03 Da, K +28.03 Da,<br>C +57.02 Da                                                                                       | 51.3                                                 | 48.4                                                 | 3                               | 1688.86                                                                   | 0.56                                                   | 0.02                                                 | HS90B_MOUSE                                                                                           | Q71LX8_MOUSE                                | Heat shock protein HSP 90-beta;                                                             |                                                                                                                                                                                                                                   |
| CGLSDPNLT<br>DDGLADLFF<br>SSSANRRAGS                                                          | SSGKDGQCPVVEQVR<br>SSGPTMASAFTR<br>SSGSGVQASAGGLAADASR                                                                            | N-ter +28.03 Da<br>N-ter +34.06 Da<br>N-ter +28.03 Da                                                                                                 | 54.2<br>58.9<br>66.8                                 | 69.9<br>36.7<br>38.4                                 | 3<br>2<br>3                     | 1814.06<br>1357.72<br>1732.90                                             | 0.86<br>1.05<br>1.51                                   | 0.07<br>0.07<br>0.11                                 | LRC47_MOUSE<br>MAP4_MOUSE<br>E9Q019_MOUSE                                                             | F6YT33_MOUSE<br>E9QPW8_MOUSE<br>FILA_MOUSE  | Leucine-rich repeat-containing protein 47;<br>Microtubule-associated protein 4;             |                                                                                                                                                                                                                                   |
| GLVYRKVLV<br>PLGYPPVNSV<br>SSVATQTTL<br>KYDMEVKVQK<br>LRLDGNPLTQ                              | SSGRKSSAAGDVNLSVDIQR<br>SSHASSPYSSVQSPGASLAQSR<br>SSIPSHPTAGKIFR<br>SSKELEDMNQKLFDLR<br>SSLPPDMYECLR                              | N-ter +34.06 Da, K +34.06 Da<br>N-ter +34.06 Da<br>N-ter +28.03 Da, K +28.03 Da<br>N-ter +34.06 Da, K +34.06 Da<br>N-ter +34.06 Da, C +57.02 Da       | 13.6<br>26.0<br>23.5<br>27.0<br>24.0                 | 24.9<br>26.3<br>72.5<br>68.8<br>57.3                 | 4<br>3<br>4<br>4<br>3           | 2399.40<br>2587.34<br>1640.02<br>2054.30<br>1500.80                       | -2.25<br>0.26<br>0.07<br>-0.97<br>0.36                 | 0.11<br>0.01<br>0.01<br>0.11<br>0.01                 | MRP6_MOUSE<br>DLX1_MOUSE<br>A2AQ82_MOUSE<br>TNNI2_MOUSE<br>LUM1_MOUSE                                 | F8VPT2_MOUSE<br>A2AQ9_MOUSE<br>A2A6K0_MOUSE | Multidrug resistance-associated protein 6;<br>Homeobox protein DLX-1;                       | ATP-binding cassette sub-family C member 6;                                                                                                                                                                                       |
| QAYKALKDKY<br>ITSGDSLTV                                                                       | SSLSDISLLQIEPR<br>SSNTDFAFSLYR                                                                                                    | N-ter +34.06 Da<br>N-ter +28.03 Da                                                                                                                    | 53.1<br>26.8                                         | 57.7<br>101.6                                        | 3<br>3                          | 1678.03<br>1434.82                                                        | -0.67<br>-0.12                                         | 0.10<br>0.01                                         | TOM34_MOUSE<br>SPA3G_MOUSE                                                                            |                                             | Mitochondrial import receptor subunit TOM34;<br>Serine protease inhibitor A3G;              |                                                                                                                                                                                                                                   |
| PNHQKASSGK<br>APAPLSISVF                                                                      | SSPFKVSPLSFR<br>SSPQELGASLAQLVAQR                                                                                                 | N-ter +28.03 Da, K +28.03 Da<br>N-ter +28.03 Da                                                                                                       | 22.3<br>56.0                                         | 59.2<br>56.7                                         | 3<br>3                          | 1463.90<br>1782.06                                                        | -1.18<br>-1.52                                         | 0.11<br>0.17                                         | SDPR_MOUSE<br>6PGL_MOUSE                                                                              | Q8CBG6_MOUSE                                | Serum deprivation-response protein;<br>6-phosphogluconolactonase;                           | Cavin-2;Phosphatidylserine-binding protein;                                                                                                                                                                                       |
| AAHVAPRRSI                                                                                    | SSQQTIPPSAKYGGRR                                                                                                                  | N-ter +34.06 Da, K +34.06 Da                                                                                                                          | 36.1                                                 | 71.4                                                 | 3                               | 1644.04                                                                   | 0.12                                                   | 0.00                                                 | IDHG1_MOUSE                                                                                           |                                             | Isocitrate dehydrogenase [NAD] subunit gamma 1, mitochondrial;                              | Isocitrate dehydrogenase subunit gamma;NAD(+)-specific IDH subunit gamma;                                                                                                                                                         |
| CSDGGARGAN<br>QSSANRRAG<br>QSSANRRAG<br>RSRGRGFQFV<br>LWSVLPISFF<br>EVREAKPKLK<br>VGSQHPVPLGH | SSGNPLVYLDVGDQGPLGR<br>SSGSGVQASAGGLAADASR<br>SSGSGVQGTASAGGLAADASR<br>SSLPDICYR<br>SSVEEMAEASR<br>SSVETQPAEEYR<br>SSVVTTPGSPSLGR | N-ter +28.03 Da<br>N-ter +34.06 Da<br>N-ter +28.03 Da<br>N-ter +28.03 Da, C +57.02 Da<br>N-ter +34.06 Da<br>N-ter +34.06 Da<br>N-ter +34.06 Da        | 58.6<br>69.4<br>58.8<br>36.5<br>44.7<br>34.2<br>41.4 | 63.6<br>51.4<br>48.6<br>46.3<br>44.0<br>22.8<br>31.5 | 3<br>3<br>3<br>2<br>2<br>2<br>2 | 2129.21<br>1825.99<br>1849.97<br>1224.64<br>1228.64<br>1364.73<br>1377.81 | 0.53<br>2.38<br>0.93<br>0.08<br>-0.30<br>0.07<br>-0.64 | 0.01<br>0.32<br>0.12<br>0.01<br>0.02<br>0.00<br>0.08 | PPIF_MOUSE<br>FILA_MOUSE<br>E9Q019_MOUSE<br>CNBP_MOUSE<br>Q3URZ6_MOUSE<br>E41L2_MOUSE<br>E9Q056_MOUSE | F7BVV1_MOUSE                                | Peptidyl-prolyl cis-trans isomerase F, mitochondrial;<br>Filaggrin;                         | Cyclophilin F;Rotamase F;                                                                                                                                                                                                         |
| SPSGKSQRV                                                                                     | SSVYGASVSDDELKR                                                                                                                   | N-ter +34.06 Da, K +34.06 Da                                                                                                                          | 50.7                                                 | 50.3                                                 | 3                               | 1679.99                                                                   | -0.54                                                  | 0.03                                                 | CHCH3_MOUSE                                                                                           | Q9D9P1_MOUSE                                | Coiled-coil-helix-coiled-coil-helix domain-containing protein 3, mitochondrial;             |                                                                                                                                                                                                                                   |
| FVPMEENSIY                                                                                    | SSWQEVTEFPVIVQR                                                                                                                   | N-ter +34.06 Da                                                                                                                                       | 47.5                                                 | 67.5                                                 | 3                               | 1838.10                                                                   | -0.52                                                  | 0.02                                                 | DOK3_MOUSE                                                                                            |                                             | Docking protein 3;<br>Basement membrane-specific heparan sulfate proteoglycan core protein; | Downstream of tyrosine kinase 3;p62(dok)-like protein;                                                                                                                                                                            |
| ATLHVQVSGT                                                                                    | STAPVASIHPPQLTVQPQQAEFR                                                                                                           | N-ter +28.03 Da                                                                                                                                       | 32.3                                                 | 67.9                                                 | 4                               | 2586.53                                                                   | -1.89                                                  | 0.14                                                 | PGBM_MOUSE                                                                                            | B1B0C7_MOUSE                                |                                                                                             |                                                                                                                                                                                                                                   |
| LDKVKSATLS<br>SQHQGGGSGN                                                                      | STESTASGMQDEV<br>STFGEGHSSSHPLSSGQNESSGQSSR                                                                                       | N-ter +28.03 Da<br>N-ter +34.06 Da                                                                                                                    | 40.5<br>39.0                                         | 68.9<br>73.8                                         | 3<br>4                          | 1524.78<br>2908.52                                                        | -0.18<br>-2.18                                         | 0.02<br>0.60                                         | AKA12_MOUSE<br>FILA2_MOUSE                                                                            | F8WI21_MOUSE<br>E9QP23_MOUSE                | A-kinase anchor protein 12;<br>Filaggrin-2;                                                 | Germ cell lineage protein gercelin;Src-suppressed C kinase substrate;<br>Intermediate filament-associated protein;                                                                                                                |

Table S7, Tholen et al.

| Non Prime Site | Prime Site                   | Modifications                             | Hyperscore | Mass error in ppm | Charge | Precursor neutral mass in Da | Fold change (log <sub>2</sub> ) of ASAPRatio | FC-error of ASAPRatio | Uniprot ID 1 | Uniprot ID 2 | Protein Name 1                                                | Protein Name 2                                                                                                                                      |
|----------------|------------------------------|-------------------------------------------|------------|-------------------|--------|------------------------------|----------------------------------------------|-----------------------|--------------|--------------|---------------------------------------------------------------|-----------------------------------------------------------------------------------------------------------------------------------------------------|
| LFRAAVPSGA     | STGIYEALFLR                  | N-ter +28.03 Da                           | 44.6       | 32.0              | 2      | 1278.72                      | -0.11                                        | 0.00                  | ENOA_MOUSE   | ENOB_MOUSE   | Alpha-enolase;                                                | 2-phospho-D-glycerate hydro-lyase;Enolase 1;Non-neural enolase;                                                                                     |
| IHRAAAVAAM     | STGTFVVSQPLNYR               | N-ter +28.03 Da                           | 38.7       | 39.0              | 3      | 1595.89                      | 0.41                                         | 0.04                  | AL9A1_MOUSE  | Q3U367_MOUSE | 4-trimethylaminobutyraldehyde dehydrogenase;                  | Aldehyde dehydrogenase family 9 member A1;                                                                                                          |
| NKSVQKSGVR     | STHQAAVSKIDSR                | N-ter +34.06 Da, K +34.06 Da              | 32.1       | 88.1              | 4      | 1566.05                      | -0.23                                        | 0.02                  | Q8VC08_MOUSE | E9Q0M9_MOUSE |                                                               |                                                                                                                                                     |
| LCKLSLEGDH     | STPPSAYGSVKPTNFDAER          | N-ter +34.06 Da, K +34.06 Da              | 32.2       | 63.0              | 3      | 2254.30                      | -0.54                                        | 0.05                  | ANXA2_MOUSE  | B0V2N7_MOUSE | Annexin A2;                                                   | Annexin II;Annexin-2;Calpactin I heavy chain;Calpactin-1 heavy chain;Chromobindin-8;Lipocortin II;Placental anticoagulant protein IV;Protein I;p36; |
| QTSVAIGRSF     | STPQSOFQESSPVWKLGR           | N-ter +28.03 Da, K +28.03 Da              | 51.3       | 65.9              | 3      | 2117.23                      | 0.35                                         | 0.03                  | MCEE_MOUSE   |              | Methylmalonyl-CoA epimerase, mitochondrial;                   | DL-methylmalonyl-CoA racemase;                                                                                                                      |
| IQKSRHPKHL     | STPSSVPEPQDPAKLR             | N-ter +28.03 Da, K +28.03 Da              | 44.1       | 65.4              | 3      | 1851.10                      | 0.01                                         | 0.00                  | ARHG_C_MOUSE | F8VQ6_MOUSE  | Rho guanine nucleotide exchange factor 12;                    | Leukemia-associated RhoGEF;                                                                                                                         |
| IEEREGITVY     | STQFGYAKEADYVAHATQLR         | N-ter +34.06 Da, K +34.06 Da              | 41.3       | 59.4              | 4      | 2380.39                      | -1.09                                        | 0.09                  | HEBP1_MOUSE  | E9QKH1_MOUSE | Heme-binding protein 1;                                       | p22HBP;                                                                                                                                             |
| MAVNVY         | STSVTSDNLSR                  | N-ter +28.03 Da                           | 33.5       | 44.8              | 2      | 1193.64                      | -0.69                                        | 0.11                  | MARE1_MOUSE  |              | Microtubule-associated protein RP/EB family member 1;         | APC-binding protein EB1;End-binding protein 1;                                                                                                      |
| EKEYQPHVIV     | STTGPNPNTLTDLR               | N-ter +34.06 Da                           | 54.0       | 28.9              | 2      | 1553.83                      | -0.62                                        | 0.03                  | ADDA_MOUSE   | E9Q1K3_MOUSE | Alpha-adducin;                                                | Erythrocyte adducin subunit alpha;                                                                                                                  |
| IDSLATQKY      | SVAVKCATITPDEAR              | N-ter +34.06 Da, K +34.06 Da, C +57.02 Da | 40.0       | 54.0              | 3      | 1685.04                      | 1.35                                         | 0.11                  | IDHP_MOUSE   | D6RIL6_MOUSE | Isocitrate dehydrogenase [NADP], mitochondrial;               | ICD-H;IDP;NADP(+)-specific ICDH;Oxalosuccinate decarboxylase;                                                                                       |
| TAGTFKQRPY     | SVAVPFSQGLDDYGAR             | N-ter +34.06 Da                           | 30.6       | 59.0              | 3      | 1786.02                      | -0.01                                        | 0.00                  | BAIP2_MOUSE  | B1A246_MOUSE | Brain-specific angiogenesis inhibitor 1-associated protein 2; | Insulin receptor substrate protein of 53 kDa;Insulin receptor tyrosine kinase 53 kDa substrate;                                                     |
| SESCVLGFRY     | SVDIPLDKTVNKDVR              | N-ter +34.06 Da, K +34.06 Da              | 24.7       | 84.4              | 4      | 2046.43                      | -0.54                                        | 0.04                  | RL27_MOUSE   | A2AAQ0_MOUSE | 60S ribosomal protein L27;                                    |                                                                                                                                                     |
| SSSSSNFHI      | SVEESVDGKVVSR                | N-ter +28.03 Da, K +28.03 Da              | 47.8       | 72.9              | 3      | 1532.92                      | 1.16                                         | 0.15                  | K1C15_MOUSE  | B1A077_MOUSE | Keratin, type I cytoskeletal 15;                              | Cytokeratin-15;Keratin-15;                                                                                                                          |
| DLRHAFSPVA     | SVESASGETLHSPKVGQGAAGVPMCPGR | N-ter +28.03 Da, K +28.03 Da, C +57.02 Da | 43.7       | 56.7              | 4      | 3102.70                      | 1.74                                         | 0.12                  | FETUA_MOUSE  |              | Alpha-2-HS-glycoprotein;                                      | Countertryptin;Fetuin-A;                                                                                                                            |
| LESKSNKIVQ     | SVIQTAVDQFAR                 | N-ter +34.06 Da                           | 52.1       | 34.1              | 2      | 1367.81                      | -0.20                                        | 0.02                  | AKA12_MOUSE  |              | A-kinase anchor protein 12;                                   | Germ cell lineage protein gercelin;Src-suppressed C kinase substrate;                                                                               |
| AITARRQHLK     | SVMLQIAATELEKEESR            | N-ter +34.06 Da, K +34.06 Da              | 25.2       | 87.6              | 4      | 2157.40                      | -3.47                                        | 0.39                  | TNNI2_MOUSE  | A2A6K0_MOUSE | Troponin I, fast skeletal muscle;                             | Troponin I, fast-twitch isoform;                                                                                                                    |
| AITARRQHLK     | SVMLQIAATELEKEESR            | N-ter +28.03 Da, K +28.03 Da              | 38.4       | 72.6              | 3      | 1989.19                      | -1.32                                        | 0.20                  | TNNI2_MOUSE  | A2A6K0_MOUSE | Troponin I, fast skeletal muscle;                             | Troponin I, fast-twitch isoform;                                                                                                                    |
| ANAVSEAVVS     | SVNTVANKTVEEAEINVTGVVVR      | N-ter +34.06 Da, K +34.06 Da              | 49.3       | 70.5              | 4      | 2596.65                      | -0.32                                        | 0.05                  | SVUG_MOUSE   |              | Gamma-synuclein;                                              | Persyn;                                                                                                                                             |
| LQETKRLFR      | SVPAASGGDKAEAVR              | N-ter +34.06 Da, K +34.06 Da              | 27.0       | 60.3              | 3      | 1481.94                      | -0.12                                        | 0.01                  | NEB2_MOUSE   |              | Neurabin-2;                                                   | Neurabin-II;Protein phosphatase 1 regulatory subunit 9B;Spinophilin;                                                                                |
| TDQVEAHVQN     | SVPDDESKPASSNTQVEGEEAALLER   | N-ter +34.06 Da, K +34.06 Da              | 61.4       | 67.8              | 4      | 2954.66                      | -0.27                                        | 0.04                  | Q8VC08_MOUSE | E9Q0M9_MOUSE |                                                               |                                                                                                                                                     |
| GHPLYRKYML     | SVPHGIANEDIVSR               | N-ter +34.06 Da                           | 41.8       | 47.5              | 3      | 1526.90                      | 0.63                                         | 0.04                  | SH319_MOUSE  | F8W117_MOUSE | SH3 domain-containing protein 19;                             | Kryn;                                                                                                                                               |
| TKIFTASNVS     | SVPLPAENVTTIAGQR             | N-ter +28.03 Da                           | 41.5       | 35.6              | 3      | 1679.98                      | -0.74                                        | 0.06                  | UBP2L_MOUSE  | E9Q9Q3_MOUSE | Ubiquitin-associated protein 2-like;                          |                                                                                                                                                     |
| FQHVGTSLVFL    | SVTGEQYGNPIR                 | N-ter +28.03 Da                           | 30.9       | 74.2              | 3      | 1347.78                      | -0.69                                        | 0.03                  | SDF2L_MOUSE  |              | Stromal cell-derived factor 2-like protein 1;                 |                                                                                                                                                     |
| EFEKNGKGF      | SVVADTPELQR                  | N-ter +34.06 Da                           | 49.2       | 25.0              | 2      | 1247.72                      | 0.39                                         | 0.02                  | LASP1_MOUSE  | A2A6G6_MOUSE | LIM and SH3 domain protein 1;                                 | Metastatic lymph node gene 50 protein;                                                                                                              |
| VYSPLAHRAY     | SVVAGGPEVTLTPER              | N-ter +34.06 Da                           | 45.6       | 42.9              | 3      | 1544.93                      | 0.79                                         | 0.03                  | D2HDH_MOUSE  | E9QN44_MOUSE | D-2-hydroxyglutarate dehydrogenase, mitochondrial;            |                                                                                                                                                     |
| NAALPADPPA     | SVVVGPVVPR                   | N-ter +28.03 Da                           | 42.3       | 3.4               | 2      | 1134.72                      | 0.60                                         | 0.04                  | FETUA_MOUSE  |              | Alpha-2-HS-glycoprotein;                                      | Countertryptin;Fetuin-A;                                                                                                                            |
| ALNDNFVKLI     | SWYDNEYGSNR                  | N-ter +34.06 Da                           | 28.8       | 46.2              | 3      | 1586.76                      | -0.27                                        | 0.02                  | G3P_MOUSE    | F8WJL5_MOUSE | Glyceraldehyde-3-phosphate dehydrogenase;                     | Peptidyl-cysteine S-nitrosylase GAPDH;                                                                                                              |
| TAASSSLEK      | SYELPDGQVITIGNER             | N-ter +28.03 Da                           | 45.9       | 57.8              | 3      | 1818.02                      | 0.12                                         | 0.01                  | ACTB_MOUSE   | ACTA_MOUSE   | Actin, cytoplasmic 1;                                         | Beta-actin;                                                                                                                                         |
| QQPQQQMTS      | SYGGYKEAAPVSIQR              | N-ter +34.06 Da, K +34.06 Da              | 23.9       | 58.4              | 3      | 1790.10                      | 0.39                                         | 0.02                  | LASP1_MOUSE  | A2A6H0_MOUSE | LIM and SH3 domain protein 1;                                 | Metastatic lymph node gene 50 protein;                                                                                                              |
| GLGGNFASQM     | SYGYDEKSAGVSPGMPGSPGR        | N-ter +28.03 Da, K +28.03 Da              | 60.2       | 51.5              | 3      | 2350.25                      | 0.76                                         | 0.11                  | CO1A1_MOUSE  | F8WBG7_MOUSE | Collagen alpha-1(I) chain;                                    | Alpha-1 type I collagen;                                                                                                                            |
| VYLQNSHVHL     | SVYSKAESTEPEIAEQR            | N-ter +28.03 Da, K +28.03 Da              | 25.5       | 81.3              | 3      | 1850.09                      | 0.01                                         | 0.00                  | CSN1_MOUSE   | B1ATU4_MOUSE | COP9 signalosome complex subunit 1;                           | G protein pathway suppressor 1;JAB1-containing signalosome subunit 1;                                                                               |
| M              | SYGYSYGLGSGIR                | N-ter +28.03 Da                           | 47.7       | 74.3              | 3      | 1626.89                      | -0.60                                        | 0.03                  | KRAB2_MOUSE  | F8VQ65_MOUSE | Keratin-associated protein 8-2;                               | Glycine tyrosine-rich hair protein;High-glycine tyrosine keratin type 1 alpha;                                                                      |
| VALDFENEMA     | TAASSSLEKSYELPDGQVITIGNER    | N-ter +34.06 Da, K +34.06 Da              | 45.1       | 73.8              | 4      | 2819.69                      | 0.66                                         | 0.08                  | ACTC_MOUSE   | ACTA_MOUSE   | Actin, alpha cardiac muscle 1;                                | Alpha-cardiac actin;                                                                                                                                |
| KLHDDLCEKR     | TAATIATHDLQAVR               | N-ter +34.06 Da, K +34.06 Da              | 48.6       | 54.8              | 3      | 1500.93                      | 1.35                                         | 0.09                  | LRG47_MOUSE  | E9PV22_MOUSE | Leucine-rich repeat-containing protein 47;                    |                                                                                                                                                     |
| LQKRTGTGVD     | TAAVGAVDFISNADR              | N-ter +28.03 Da                           | 37.1       | 35.1              | 3      | 1533.83                      | 0.20                                         | 0.01                  | KCRM_MOUSE   |              | Creatine kinase M-type;                                       | Creatine kinase M chain;M-CK;                                                                                                                       |
| VYMAAVLEYL     | TAEILELAGNAAR                | N-ter +34.06 Da                           | 33.0       | 28.4              | 3      | 1361.81                      | -0.81                                        | 0.09                  | H2A1F_MOUSE  | H2A1H_MOUSE  | Histone H2A type 1-F;                                         |                                                                                                                                                     |
| GSWEFPFSGK     | TAESGELHGLTDEKFEVGVYR        | N-ter +34.06 Da, K +34.06 Da              | 35.2       | 65.2              | 4      | 2505.47                      | 0.10                                         | 0.01                  | TTHY_MOUSE   |              | Transthyretin;                                                | Prealbumin;                                                                                                                                         |
| ASEKMMGLVG     | TALEESRPGASVEGER             | N-ter +34.06 Da                           | 28.2       | 69.8              | 3      | 1721.00                      | -0.43                                        | 0.09                  | E9Q8T1_MOUSE |              |                                                               |                                                                                                                                                     |
| SEGEGNMSMR     | TALSDLYLEHLLQKR              | N-ter +28.03 Da, K +28.03 Da              | 22.3       | 89.8              | 4      | 1855.22                      | -1.29                                        | 0.09                  | EM55_MOUSE   | B7ZCM1_MOUSE | 55 kDa erythrocyte membrane protein;                          | Membrane protein, palmitoylated 1;                                                                                                                  |
| MCDDEET        | TALVCDNGSLVKAGFAGDDAPR       | N-ter +34.06 Da, K +34.06 Da, C +57.02 Da | 51.1       | 63.3              | 3      | 2358.38                      | 0.33                                         | 0.05                  | ACTC_MOUSE   | ACTS_MOUSE   | Actin, alpha cardiac muscle 1;                                | Alpha-cardiac actin;                                                                                                                                |
| CSRPRVGGRY     | TAPVGPVTTASAR                | N-ter +28.03 Da                           | 44.7       | 36.4              | 2      | 1254.74                      | -0.18                                        | 0.02                  | E9Q2E9_MOUSE |              |                                                               |                                                                                                                                                     |
| GAAAYTSGY      | TAQEYAAGTGASSTASAGR          | N-ter +28.03 Da                           | 35.7       | 55.5              | 3      | 1947.01                      | 1.20                                         | 0.20                  | DDX17_MOUSE  | Q3U741_MOUSE | Probable ATP-dependent RNA helicase DDX17;                    | DEAD box protein 17;                                                                                                                                |
| AKRREMERQF     | TAQNEEKGGMAGGPPALQDGLR       | N-ter +34.06 Da, K +34.06 Da              | 51.4       | 76.2              | 4      | 2670.52                      | -0.23                                        | 0.04                  | SYNP2_MOUSE  | D3YV9_MOUSE  | Synaptopodin-2;                                               | Myopodin;                                                                                                                                           |
| QDDWGAWQKF     | TASAGIQVVDLTVNPKR            | N-ter +28.03 Da, K +28.03 Da              | 94.0       | 71.1              | 3      | 2097.29                      | -0.79                                        | 0.08                  | ENOA_MOUSE   | Q6PHC1_MOUSE | Alpha-enolase;                                                | 2-phospho-D-glycerate hydro-lyase;Enolase 1;Non-neural enolase;                                                                                     |
| NMEERKALK      | TASDFSKMQYR                  | N-ter +34.06 Da, K +34.06 Da              | 21.3       | 70.7              | 3      | 1610.99                      | -1.52                                        | 0.17                  | GELS_MOUSE   |              | Gelsolin;                                                     | Actin-depolymerizing factor;Brevin;                                                                                                                 |
| EPVWAIGTGK     | TATPQQAQEVHEKLR              | N-ter +34.06 Da, K +34.06 Da              | 27.3       | 90.7              | 4      | 1803.19                      | 0.57                                         | 0.06                  | TPIS_MOUSE   | E0CXH5_MOUSE | Triosephosphate isomerase;                                    | Triose-phosphate isomerase;                                                                                                                         |
| VMDDFAQFLD     | TCCKAADKTCFSTEGPNLVTR        | N-ter +34.06 Da, K +34.06 Da, C +57.02 Da | 42.6       | 69.9              | 4      | 2632.50                      | 0.35                                         | 0.04                  | ALBU_MOUSE   |              | Serum albumin;                                                |                                                                                                                                                     |
| DTCCKAADKD     | TCFSTEGPNLVTR                | N-ter +34.06 Da, C +57.02 Da              | 42.8       | 49.1              | 3      | 1514.84                      | 0.35                                         | 0.03                  | ALBU_MOUSE   |              | Serum albumin;                                                |                                                                                                                                                     |
| RVSGEHMDLT     | TCPLAAGGQKEKLR               | N-ter +34.06 Da, K +34.06 Da, C +57.02 Da | 24.7       | 69.0              | 3      | 1596.02                      | -1.29                                        | 0.19                  | Q9D1B1_MOUSE |              |                                                               | Beta-2-globin;Hemoglobin beta-2 chain;Hemoglobin beta-minor chain;                                                                                  |
| MVHL           | TDAEKSAVSLWAKVNPDEVGGEALGR   | N-ter +28.03 Da, K +28.03 Da, C +57.02 Da | 45.8       | 84.4              | 4      | 2942.73                      | -6.64                                        | 0.00                  | HBB2_MOUSE   |              | Hemoglobin subunit beta-2;                                    |                                                                                                                                                     |

Table S7, Tholen et al.

| Non Prime Site | Prime Site                | Modifications                             | Hyperscore | Mass error in ppm | Charge | Precursor neutral mass in Da | Fold change (log <sub>2</sub> ) of ASAPRatio | FC-error of ASAPRatio | Uniprot ID 1 | Uniprot ID 2 | Protein Name 1                                                                              | Protein Name 2                                                                                                                                                                        |
|----------------|---------------------------|-------------------------------------------|------------|-------------------|--------|------------------------------|----------------------------------------------|-----------------------|--------------|--------------|---------------------------------------------------------------------------------------------|---------------------------------------------------------------------------------------------------------------------------------------------------------------------------------------|
| TYGTAATAAKAY   | TDDLGAAGVGGACLEDEASALR    | N-ter +28.03 Da, C +57.02 Da              | 63.7       | 62.4              | 3      | 2047.08                      | -0.45                                        | 0.04                  | WIPI2_MOUSE  | D3YWK1_MOUSE | WD repeat domain phosphoinositide-interacting protein 2;                                    |                                                                                                                                                                                       |
| ERRGFCCIFY     | TDEEPVKLLESR              | N-ter +28.03 Da, K +28.03 Da              | 17.5       | 42.3              | 4      | 1626.99                      | -0.36                                        | 0.02                  | HNRDL_MOUSE  | F6VQH5_MOUSE | Heterogeneous nuclear ribonucleoprotein D-like;                                             | JKT41-binding protein;                                                                                                                                                                |
| GDSLTVASSN     | TDFAFSLYR                 | N-ter +28.03 Da                           | 20.5       | 50.9              | 2      | 1146.63                      | 2.46                                         | 0.20                  | SPA3G_MOUSE  | D3Z450_MOUSE | Serine protease inhibitor A3G;<br>Tubulin polymerization-promoting protein family member 3; | Serine protease inhibitor 2A;                                                                                                                                                         |
| MAAS           | TDIAGLEESFR               | N-ter +28.03 Da                           | 40.9       | 47.3              | 2      | 1264.69                      | -0.79                                        | 0.03                  | TPPP3_MOUSE  |              |                                                                                             |                                                                                                                                                                                       |
| KTAHSFEQVL     | TDITDAIKLDSGVVVKR         | N-ter +34.06 Da, K +34.06 Da              | 25.3       | 53.6              | 4      | 1832.25                      | 0.12                                         | 0.01                  | DCLK1_MOUSE  | Q8BRN4_MOUSE | Serine/threonine-protein kinase DCLK1;                                                      | Doublecortin-like and CAM kinase-like 1; Doublecortin-like kinase 1;                                                                                                                  |
| INRVYKMYK      | TDLEKHSISDTSGDFR          | N-ter +34.06 Da, K +34.06 Da              | 31.7       | 59.6              | 3      | 1879.10                      | -0.40                                        | 0.04                  | ANXA2_MOUSE  | 80V2N7_MOUSE | Annexin A2;                                                                                 | Annexin II; Annexin-2; Calpactin I heavy chain; Calpactin-1 heavy chain; Chromobindin-8; Lipocortin II; Placental anticoagulant protein IV; Protein I; p36;                           |
| SRRTSQGVTL     | TDLQEAETIGR               | N-ter +34.06 Da, K +34.06 Da              | 32.0       | 64.9              | 3      | 1427.92                      | -0.03                                        | 0.00                  | MYPT1_MOUSE  |              | Protein phosphatase 1 regulatory subunit 12A;                                               | Myosin phosphatase-targeting subunit 1;                                                                                                                                               |
| AHVDHGKSTL     | TDSLVCCKAGIASAR           | N-ter +28.03 Da, K +28.03 Da, C +57.02 Da | 35.6       | 60.8              | 3      | 1616.99                      | 0.11                                         | 0.01                  | EF2_MOUSE    |              | Elongation factor 2;                                                                        |                                                                                                                                                                                       |
| PRHEVTEISN     | TDVETQPKTVIR              | N-ter +28.03 Da, K +28.03 Da              | 26.2       | 68.4              | 3      | 1498.94                      | 0.33                                         | 0.03                  | E9Q616_MOUSE |              |                                                                                             |                                                                                                                                                                                       |
| VSIEGYKTPY     | TDVNIIVTIR                | N-ter +34.06 Da                           | 33.5       | 33.6              | 2      | 1063.68                      | 1.18                                         | 0.06                  | IDH3A_MOUSE  |              | Isocitrate dehydrogenase [NAD] subunit alpha, mitochondrial;                                | Isocitrate dehydrogenase subunit alpha; NAD(+)-specific IC DH subunit alpha;                                                                                                          |
| KAVLDVAETG     | TEAAAATGVIGGIR            | N-ter +34.06 Da                           | 35.3       | 50.6              | 3      | 1319.83                      | 0.53                                         | 0.06                  | SPA3K_MOUSE  |              | Serine protease inhibitor A3K;                                                              | Contrapsin; SPI-2;                                                                                                                                                                    |
| ILQHLRMSMH     | TEAAEVLLER                | N-ter +34.06 Da                           | 32.4       | 33.5              | 2      | 1163.70                      | 1.43                                         | 0.14                  | HIBCH_MOUSE  | E0CX19_MOUSE | 3-hydroxyisobutyryl-CoA hydrolase, mitochondrial;                                           | 3-hydroxyisobutyryl-coenzyme A hydrolase; Glycine- and tyrosine-rich RNA-binding protein; NS1-associated protein 1; Synaptotagmin-binding, cytoplasmic RNA-interacting protein; pp68; |
| LFVRNLANTV     | TEEILEKFSQFGKLER          | N-ter +34.06 Da, K +34.06 Da              | 25.4       | 78.3              | 4      | 2142.41                      | -0.23                                        | 0.02                  | HNRPO_MOUSE  |              | Heterogeneous nuclear ribonucleoprotein Q;                                                  |                                                                                                                                                                                       |
| KDWSFYLAH      | TEFTPTTETDYACR            | N-ter +34.06 Da, C +57.02 Da              | 35.5       | 46.9              | 3      | 1724.86                      | 0.51                                         | 0.05                  | B2MG_MOUSE   | Q91XJ8_MOUSE | Beta-2-microglobulin;                                                                       |                                                                                                                                                                                       |
| QPPVLLPQLL     | TEGAELPDITR               | N-ter +34.06 Da                           | 39.5       | 35.7              | 2      | 1234.71                      | 0.08                                         | 0.00                  | TB182_MOUSE  |              | 182 kDa tankyrase-1-binding protein;                                                        |                                                                                                                                                                                       |
| AGNNWAKGHY     | TEGAELVDSVLDVVR           | N-ter +28.03 Da                           | 56.8       | 63.6              | 3      | 1628.97                      | -0.58                                        | 0.12                  | TB82A_MOUSE  | TBB2B_MOUSE  | Tubulin beta-2A chain;                                                                      |                                                                                                                                                                                       |
| DAEIPLVVCI     | TEGIPQQDMVR               | N-ter +28.03 Da                           | 36.8       | 41.3              | 2      | 1300.70                      | 0.82                                         | 0.05                  | SUCA_MOUSE   |              | Succinyl-CoA ligase [ADP/GDP-forming] subunit alpha, mitochondrial;                         | Succinyl-CoA synthetase subunit alpha; C1 domain-containing phosphatase and tensin homolog; Tensin-2;                                                                                 |
| SDSGHSSTLT     | TEHTAESPRPPPTAAER         | N-ter +34.06 Da                           | 33.8       | 104.9             | 4      | 1937.19                      | -0.76                                        | 0.12                  | TENC1_MOUSE  |              | Tensin-like C1 domain-containing phosphatase;                                               |                                                                                                                                                                                       |
| GAQKLTNTSF     | TEIEKQAQAVDKR             | N-ter +28.03 Da, K +28.03 Da              | 23.7       | 79.3              | 4      | 1599.03                      | -0.12                                        | 0.01                  | ARFG3_MOUSE  |              | ADP-ribosylation factor GTPase-activating protein 3;                                        |                                                                                                                                                                                       |
| KLEERHTLI      | TEMVALNPDFKPPADYKPPATR    | N-ter +34.06 Da, K +34.06 Da              | 41.5       | 62.9              | 4      | 2559.59                      | 0.78                                         | 0.02                  | SF01_MOUSE   | Q3UI45_MOUSE | Splicing factor 1;                                                                          | CW17; Mammalian branch point-binding protein; Transcription factor ZFM1; Zinc finger gene in MEN1 locus; Zinc finger protein 162;                                                     |
| REGEVEVLKA     | TEMVEVGPEDDEVGAER         | N-ter +34.06 Da                           | 54.0       | 41.3              | 3      | 1894.95                      | -0.58                                        | 0.07                  | PTRF_MOUSE   |              | Polymerase I and transcript release factor;                                                 | Cav-p60; Cavin-1;                                                                                                                                                                     |
| ICCSEPPVVK     | TEMVTISDASQR              | N-ter +34.06 Da                           | 36.5       | 57.5              | 3      | 1370.77                      | 0.36                                         | 0.01                  | E41L2_MOUSE  | Q80UE5_MOUSE | Band 4.1-like protein 2;                                                                    | Generally expressed protein 4.1;                                                                                                                                                      |
| KKRLETYYNA     | TEPVISFYDKR               | N-ter +34.06 Da, K +34.06 Da              | 29.1       | 62.5              | 3      | 1421.91                      | -0.23                                        | 0.01                  | KAD1_MOUSE   |              | Adenylate kinase isoenzyme 1;                                                               | ATP-AMP transphosphorylase 1; Myokinase;                                                                                                                                              |
| QLEEKEKLLA     | TEQEDAAVAKSKLR            | N-ter +28.03 Da, K +28.03 Da              | 25.1       | 94.9              | 4      | 1629.06                      | 0.99                                         | 0.05                  | RRBP1_MOUSE  | A2AVJ7_MOUSE | Ribosome-binding protein 1;                                                                 | Ribosome receptor protein;                                                                                                                                                            |
| AAPCIYWVPL     | TESQIVQKEAEQAEAR          | N-ter +28.03 Da, K +28.03 Da              | 27.3       | 68.2              | 3      | 1801.04                      | 0.50                                         | 0.07                  | ACINU_MOUSE  | B8J93_MOUSE  | Apoptotic chromatin condensation inducer in the nucleus;                                    |                                                                                                                                                                                       |
| VQAPPAPVTV     | TETPEPAMPVGVYRPPGAR       | N-ter +28.03 Da                           | 36.9       | 63.4              | 3      | 2040.14                      | 1.28                                         | 0.06                  | CDV3_MOUSE   | F8WGL9_MOUSE | Protein CDV3;                                                                               | Carnitine deficiency-associated protein 3; Tyrosine-phosphorylated protein 36;                                                                                                        |
| ESVRSVPGSSR    | TEVLVTPAGVASKR            | N-ter +34.06 Da, K +34.06 Da              | 42.4       | 35.0              | 3      | 1494.99                      | 2.09                                         | 0.11                  | LAD1_MOUSE   |              | Ladinin-1;                                                                                  | Linear IgA disease antigen homolog; Protein cypher; Protein oracle; Z-band alternatively spliced PDZ-motif protein;                                                                   |
| SFRILAQMTG     | TEYMQDPDEEALR             | N-ter +28.03 Da                           | 42.8       | 67.7              | 3      | 1623.82                      | -0.36                                        | 0.05                  | LDB3_MOUSE   | E9PYJ9_MOUSE | LIM domain-binding protein 3;                                                               | Contrapsin; SPI-2;                                                                                                                                                                    |
| KWKISFDPDQD    | TFESEFYLDEKR              | N-ter +34.06 Da, K +34.06 Da              | 55.6       | 67.5              | 3      | 1630.96                      | 0.45                                         | 0.04                  | SPA3K_MOUSE  | SPA3M_MOUSE  | Serine protease inhibitor A3K;                                                              |                                                                                                                                                                                       |
| IAPSNQVIML     | TFGKFDVEPDYCR             | N-ter +34.06 Da, K +34.06 Da, C +57.02 Da | 36.4       | 74.1              | 3      | 1802.03                      | -0.94                                        | 0.13                  | PCOC1_MOUSE  | D3YZE3_MOUSE | Procollagen C-endopeptidase enhancer 1;                                                     | P14; Procollagen COOH-terminal proteinase enhancer 1; Type 1 procollagen C-proteinase enhancer protein; Type I procollagen COOH-terminal proteinase enhancer;                         |
| MCTSFKENPT     | TFMGHLYHEVAR              | N-ter +34.06 Da                           | 25.3       | 36.9              | 4      | 1493.82                      | 0.61                                         | 0.02                  | ALBU_MOUSE   |              | Serum albumin;                                                                              |                                                                                                                                                                                       |
| VVFFFYPLDF     | TFVCPTEIIAIFSDR           | N-ter +34.06 Da, C +57.02 Da              | 36.1       | 55.2              | 3      | 1688.96                      | -0.34                                        | 0.05                  | PRDX1_MOUSE  | B1AXW6_MOUSE | Peroxioredoxin-1;                                                                           |                                                                                                                                                                                       |
| TGLPKRNEAK     | TGADTTAAGPLFQQRYPYSPGAVLR | N-ter +34.06 Da                           | 58.1       | 67.5              | 4      | 2604.56                      | -1.03                                        | 0.06                  | PQBP1_MOUSE  |              | Polyglutamine-binding protein 1;                                                            | 38 kDa nuclear protein containing a WW domain; Polyglutamine tract-binding protein 1;                                                                                                 |
| LIKEGDVVKR     | TGAIVDVPVGEELLGR          | N-ter +34.06 Da                           | 38.1       | 50.9              | 3      | 1658.03                      | 1.16                                         | 0.03                  | ATPA_MOUSE   | D3Z6F5_MOUSE | ATP synthase subunit alpha, mitochondrial;                                                  |                                                                                                                                                                                       |
| FKEAFLFDR      | TGCEKITLSQVGDVLR          | N-ter +34.06 Da, K +34.06 Da, C +57.02 Da | 49.8       | 59.8              | 3      | 1843.16                      | 0.12                                         | 0.01                  | E9PWG4_MOUSE | MYL1_MOUSE   |                                                                                             |                                                                                                                                                                                       |
| SFSQFTGSDG     | TGGDAAAPGAAGTQAEIPHR      | N-ter +34.06 Da                           | 67.8       | 74.6              | 3      | 1881.10                      | -0.03                                        | 0.00                  | LMAN1_MOUSE  |              | Protein ERGIC-53;                                                                           | ER-Golgi intermediate compartment 53 kDa protein; Lectin mannose-binding 1;p58;                                                                                                       |

Table S7, Tholen et al.

| Non Prime Site                                                      | Prime Site                                                                                              | Modifications                                                                                                                                                    | Hyperscore                           | Mass error in ppm                    | Charge                | Precursor neutral mass in Da                        | Fold change (log <sub>2</sub> ) of ASAPRatio | FC-error of ASAPRatio                | Uniprot ID 1                                                           | Uniprot ID 2                                                                 | Protein Name 1                                                                                                                                                               | Protein Name 2                                                                                                                                                                                                                          |
|---------------------------------------------------------------------|---------------------------------------------------------------------------------------------------------|------------------------------------------------------------------------------------------------------------------------------------------------------------------|--------------------------------------|--------------------------------------|-----------------------|-----------------------------------------------------|----------------------------------------------|--------------------------------------|------------------------------------------------------------------------|------------------------------------------------------------------------------|------------------------------------------------------------------------------------------------------------------------------------------------------------------------------|-----------------------------------------------------------------------------------------------------------------------------------------------------------------------------------------------------------------------------------------|
| LTRLRLQKRG                                                          | TGGVDTAAGVAVDISNADR                                                                                     | N-ter +34.06 Da                                                                                                                                                  | 74.8                                 | 50.3                                 | 3                     | 1969.10                                             | 0.79                                         | 0.05                                 | KCRM_MOUSE                                                             |                                                                              | Creatine kinase M-type;                                                                                                                                                      | Creatine kinase M chain;M-CK; Cysteine-rich protein 3;LIM domain protein, cardiac;Muscle LIM protein;                                                                                                                                   |
| KVCYAKNFGP<br>PRISVREPMQ                                            | TGIGFGGLTQQVEK<br>TGIKAVDSLVPIGR                                                                        | N-ter +28.03 Da, K +28.03 Da<br>N-ter +28.03 Da, K +28.03 Da                                                                                                     | 25.7<br>41.7                         | 60.2<br>53.5                         | 3<br>3                | 1775.09<br>1480.98                                  | -2.18<br>-0.15                               | 0.20<br>0.01                         | CSR3_MOUSE<br>ATPA_MOUSE                                               | D3Z6F5_MOUSE                                                                 | Cysteine and glycine-rich protein 3;<br>ATP synthase subunit alpha, mitochondrial;                                                                                           | 2-phospho-D-glycerate hydro-lyase;Enolase 1;Non-neural enolase;                                                                                                                                                                         |
| FRAAVPSGAS                                                          | TGIYEALER                                                                                               | N-ter +28.03 Da                                                                                                                                                  | 34.9                                 | 38.0                                 | 2                     | 1191.70                                             | 0.36                                         | 0.02                                 | ENOA_MOUSE                                                             | ENOB_MOUSE                                                                   | Alpha-enolase;                                                                                                                                                               | 12 kDa FK506-binding protein;FK506-binding protein 1A;Immunophilin FKBP12;Rotamase; Alpha-1 type I collagen;                                                                                                                            |
| KRGQTCVVHY<br>PAGKNGDRGE<br>HTVEKGGKHK<br>LHASNTRLQK                | TGMLEDGKFDSSR<br>TGPAGPAGIGPAGAR<br>TGNLHGLFGR<br>TGTAEMSSILEER                                         | N-ter +28.03 Da, K +28.03 Da<br>N-ter +34.06 Da<br>N-ter +34.06 Da<br>N-ter +34.06 Da                                                                            | 17.3<br>57.1<br>25.5<br>41.3         | 91.8<br>35.9<br>46.2<br>19.1         | 4<br>2<br>3<br>2      | 1653.99<br>1379.82<br>1201.73<br>1456.76            | -1.00<br>1.97<br>0.53<br>0.85                | 0.02<br>0.30<br>0.03<br>0.05         | FKB1A_MOUSE<br>CO1A1_MOUSE<br>CYC_MOUSE<br>ATPA_MOUSE                  | F8WGB7_MOUSE<br>D6R116_MOUSE                                                 | Peptidyl-prolyl cis-trans isomerase FKBP1A;<br>Collagen alpha-1(I) chain;<br>Cytochrome c, somatic;<br>ATP synthase subunit alpha, mitochondrial;                            | Carbonate dehydratase III;Carbonic anhydrase III;                                                                                                                                                                                       |
| IKTKGKEAFP                                                          | THFDP5CLFPACR                                                                                           | N-ter +28.03 Da, C +57.02 Da<br>N-ter +34.06 Da, K +34.06 Da, C +57.02 Da                                                                                        | 28.0                                 | 50.9                                 | 3                     | 1634.82                                             | 0.20                                         | 0.00                                 | CAH3_MOUSE                                                             |                                                                              | Carbonic anhydrase 3;<br>Electron transfer flavoprotein subunit alpha, mitochondrial;                                                                                        |                                                                                                                                                                                                                                         |
| ILETQKQFSY<br>EVKAQNGEFM<br>IFEVKSTAGD                              | THICAGASAFGNLLPR<br>THLKLQNTAFSPSR<br>THLGGEDFDNR                                                       | N-ter +28.03 Da, K +28.03 Da<br>N-ter +34.06 Da                                                                                                                  | 28.7<br>27.5<br>36.6                 | 54.1<br>99.0<br>73.2                 | 4<br>4<br>3           | 1880.17<br>1827.18<br>1293.71                       | -1.06<br>0.98<br>-3.06                       | 0.02<br>0.08<br>0.51                 | ETFA_MOUSE<br>Q8VCQ8_MOUSE<br>HS71A_MOUSE                              | F6T2Z7_MOUSE<br>HS71B_MOUSE                                                  | Heat shock 70 kDa protein 1A;<br>NADH dehydrogenase [ubiquinone] iron-sulfur protein 6, mitochondrial;                                                                       | Heat shock 70 kDa protein 3;Hsp68; Complex I-13kD-A;NADH-ubiquinone oxidoreductase 13 kDa-A subunit; Macrophage 23 kDa stress protein;Osteoblast-specific factor 3;Thioredoxin peroxidase 2;Thioredoxin-dependent peroxide reductase 2; |
| VQVSPSGEKI                                                          | THTGQVYDEKDYR                                                                                           | N-ter +34.06 Da, K +34.06 Da                                                                                                                                     | 24.5                                 | 95.5                                 | 4                     | 1679.02                                             | -1.15                                        | 0.15                                 | NDU5_MOUSE                                                             | D3YW32_MOUSE                                                                 |                                                                                                                                                                              |                                                                                                                                                                                                                                         |
| NIPUSDPKR                                                           | TIAQDYGLKADGEGISFR                                                                                      | N-ter +34.06 Da, K +34.06 Da                                                                                                                                     | 29.5                                 | 37.7                                 | 3                     | 2050.21                                             | -0.09                                        | 0.01                                 | PRDX1_MOUSE                                                            | B1AXW6_MOUSE                                                                 | Peroxioredoxin-1;                                                                                                                                                            |                                                                                                                                                                                                                                         |
| DTVQIQAGLR                                                          | TIEEAAPEIHR                                                                                             | N-ter +28.03 Da                                                                                                                                                  | 42.7                                 | 71.1                                 | 3                     | 1421.82                                             | 0.36                                         | 0.04                                 | CAC1S_MOUSE                                                            | A3KPC9_MOUSE                                                                 | Voltage-dependent L-type calcium channel subunit alpha-1S;                                                                                                                   | Calcium channel, L type, alpha-1 polypeptide, isoform 3, skeletal muscle;Voltage-gated calcium channel subunit alpha Cav1.1;                                                                                                            |
| GGDVAVFVXHT                                                         | TIFEVLPEKADR                                                                                            | N-ter +28.03 Da, K +28.03 Da                                                                                                                                     | 42.1                                 | 68.6                                 | 3                     | 1472.93                                             | 0.44                                         | 0.02                                 | TRFE_MOUSE                                                             | D3YFR8_MOUSE                                                                 | Serotransferrin;                                                                                                                                                             | Beta-1 metal-binding globulin;Siderophilin; Alpha-CP1;Heterogeneous nuclear ribonucleoprotein E1;                                                                                                                                       |
| LDAYSIQGQH<br>VKEVTEKYTH<br>RDAVTRQVR<br>SLSTFQQMMWI                | TISPLDLAKLNQVAR<br>TIDAVTHAAEGLGR<br>TIVEVQDGKVISSR<br>TKQYEAGPSIVHR                                    | N-ter +28.03 Da, K +28.03 Da<br>N-ter +34.06 Da<br>N-ter +28.03 Da, K +28.03 Da<br>N-ter +34.06 Da, K +34.06 Da                                                  | 30.5<br>39.7<br>52.3<br>45.6         | 65.7<br>66.5<br>61.3<br>80.6         | 3<br>3<br>3<br>4      | 1694.12<br>1544.94<br>1715.05<br>1797.11            | 0.11<br>-0.54<br>0.41<br>0.82                | 0.01<br>0.05<br>0.01<br>0.08         | PCBP1_MOUSE<br>FAM25_MOUSE<br>K1C17_MOUSE<br>ACT1_MOUSE                | D3YXP7_MOUSE                                                                 | Poly(rC)-binding protein 1;<br>Protein FAM25;<br>Keratin, type I cytoskeletal 17;<br>Actin, alpha skeletal muscle;                                                           | Cytokeratin-17;Keratin-17; Centromere protein E;Kinesin superfamily protein 10;Motor domain of KIF10; 27 kDa craniofacial protein;Bucantaur;Protein Cp27; Nucleolar protein family A member 2;snRNP protein NHP2;                       |
| NKVSLLDERE                                                          | TKTKQELSVTVR                                                                                            | N-ter +28.03 Da, K +28.03 Da                                                                                                                                     | 20.9                                 | 70.9                                 | 3                     | 1473.00                                             | 3.27                                         | 0.20                                 | CENPE_MOUSE                                                            | E9QK1_MOUSE                                                                  | Centromere-associated protein E;                                                                                                                                             |                                                                                                                                                                                                                                         |
| KPRESEKVKI                                                          | TKVDFPAGEEVR                                                                                            | N-ter +28.03 Da, K +28.03 Da<br>N-ter +34.06 Da, K +34.06 Da, C +57.02 Da                                                                                        | 28.7<br>45.4                         | 51.7<br>78.7                         | 3<br>4                | 1452.84<br>2407.43                                  | 2.21<br>-2.25                                | 0.11<br>0.43                         | CFDP1_MOUSE<br>NHP2_MOUSE                                              |                                                                              | Craniofacial development protein 1;<br>H/ACA ribonucleoprotein complex subunit 2;                                                                                            |                                                                                                                                                                                                                                         |
| M<br>ELLSQEFLLL                                                     | TKVKAPEESEAQAEGCSEER<br>TLEQKNIAVENEVR                                                                  | N-ter +34.06 Da, K +34.06 Da<br>N-ter +28.03 Da, K +28.03 Da, C +57.02 Da                                                                                        | 39.4<br>24.1                         | 61.6<br>56.9                         | 3<br>3                | 1710.10<br>1673.03                                  | 0.84<br>-0.45                                | 0.07<br>0.05                         | ASHWN_MOUSE<br>ALBU_MOUSE                                              |                                                                              | ASHwin;<br>Serum albumin;                                                                                                                                                    |                                                                                                                                                                                                                                         |
| SAANCDKLSLH                                                         | TLFGDKLCAIPNLR                                                                                          | N-ter +28.03 Da, K +28.03 Da, C +57.02 Da                                                                                                                        | 24.1                                 | 56.9                                 | 3                     | 1673.03                                             | -0.45                                        | 0.05                                 | ALBU_MOUSE                                                             |                                                                              | Serum albumin;                                                                                                                                                               |                                                                                                                                                                                                                                         |
| TGEFEKYYVA                                                          | TLGVEVHPLVFHTNR                                                                                         | N-ter +34.06 Da                                                                                                                                                  | 30.0                                 | 77.8                                 | 4                     | 1752.13                                             | -0.43                                        | 0.02                                 | RAN_MOUSE                                                              |                                                                              | GTP-binding nuclear protein Ran;                                                                                                                                             | GTPase Ran;Ras-like protein TC4;Ras-related nuclear protein;                                                                                                                                                                            |
| SLPSTAVTSE<br>WDGLDPLGKLY<br>LKNSPLVSRL<br>CNAHYPKQSF<br>SKIDSRLEQY | TLPGSLSPVVEKYR<br>TLVLTDPDAPSR<br>TLYDIAHTPGVAADLSHIETR<br>TMVADTPENLR<br>TNAIEGTKASKMPKPAASDLVPPAEGVVR | N-ter +28.03 Da, K +28.03 Da<br>N-ter +28.03 Da<br>N-ter +28.03 Da<br>N-ter +28.03 Da<br>N-ter +28.03 Da, K +28.03 Da, N-ter +34.06 Da, K +34.06 Da, C +57.02 Da | 41.5<br>48.8<br>38.5<br>45.5<br>25.9 | 67.4<br>36.5<br>75.5<br>37.2<br>58.9 | 3<br>2<br>3<br>2<br>4 | 1599.01<br>1311.75<br>2307.36<br>1273.68<br>2946.80 | 0.37<br>-1.06<br>0.00<br>-0.22<br>0.99       | 0.01<br>0.09<br>0.00<br>0.02<br>0.09 | DLG1_MOUSE<br>PEBP1_MOUSE<br>MDHM_MOUSE<br>LASP1_MOUSE<br>Q8VCQ8_MOUSE | E9Q9H0_MOUSE<br>D3Z1V4_MOUSE<br>Q9D141_MOUSE<br>QSSUH6_MOUSE<br>E9QQM9_MOUSE | Disks large homolog 1;<br>Phosphatidylethanolamine-binding protein 1;<br>Malate dehydrogenase, mitochondrial;<br>LIM and SH3 domain protein 1;                               | Embryo-dlg/synapse-associated protein 97;Synapse-associated protein 97; HCNPpp;                                                                                                                                                         |
| LVPEEKNLVK<br>VDKGVVPLAG                                            | TNCDLYKELGVEYGFQNALVLR<br>TNGETTTQGLDGLSER                                                              | N-ter +28.03 Da, K +28.03 Da, C +57.02 Da<br>N-ter +28.03 Da                                                                                                     | 46.7<br>36.4                         | 72.3<br>58.3                         | 4<br>3                | 2570.53<br>1705.91                                  | 0.07<br>0.60                                 | 0.02<br>0.06                         | ALBU_MOUSE<br>ALDOA_MOUSE                                              | Q9CPQ9_MOUSE                                                                 | Serum albumin;<br>Fructose-bisphosphate aldolase A;                                                                                                                          | Aldolase 1;Muscle-type aldolase; Protein 5-100E;S100 calcium-binding protein A3;                                                                                                                                                        |
| DYNKFM5VLD                                                          | TNKCDEVDFGEYVR                                                                                          | N-ter +28.03 Da, K +28.03 Da, C +57.02 Da                                                                                                                        | 39.0                                 | 59.0                                 | 3                     | 1786.93                                             | -0.34                                        | 0.03                                 | S10A3_MOUSE                                                            |                                                                              | Protein S100-A3;                                                                                                                                                             | Alpha-1 protease inhibitor 1;Alpha-1-antitrypsin 1-1;Serine protease inhibitor 1-1;Serine protease inhibitor A1a;                                                                                                                       |
| DQSPASHEIA                                                          | TNLGDFAI5LYR                                                                                            | N-ter +34.06 Da<br>N-ter +28.03 Da, K +28.03 Da, C +57.02 Da                                                                                                     | 57.6                                 | 38.2                                 | 2                     | 1402.82                                             | 1.25                                         | 0.26                                 | A1AT1_MOUSE                                                            | A1AT2_MOUSE                                                                  | Alpha-1-antitrypsin 1-1;                                                                                                                                                     |                                                                                                                                                                                                                                         |
| MAANAT<br>EDPNQFVPLN<br>M<br>SQSMNFSLMS<br>WKVRELVDKA               | TNPSQLLPLELVDKICGSR<br>TNPTVELEKR<br>TNSCCSPCCQPTCCR<br>TNTVGLGLPMSR<br>TNVMNYSIESKVR                   | N-ter +34.06 Da, K +34.06 Da, C +57.02 Da<br>N-ter +34.06 Da, K +34.06 Da<br>N-ter +34.06 Da, C +57.02 Da<br>N-ter +28.03 Da<br>N-ter +28.03 Da, K +28.03 Da     | 40.4<br>27.5<br>38.2<br>40.3<br>48.0 | 64.5<br>15.5<br>70.1<br>27.5<br>62.1 | 3<br>3<br>3<br>2<br>3 | 2195.34<br>1253.78<br>1980.86<br>1272.72<br>1824.06 | 0.18<br>-0.54<br>-1.06<br>1.37<br>-0.76      | 0.02<br>0.03<br>0.18<br>0.04<br>0.06 | LSM5_MOUSE<br>ADDG_MOUSE<br>Q9D3H7_MOUSE<br>EPN4_MOUSE<br>EPN4_MOUSE   | Q9D141_MOUSE<br>QSSUH6_MOUSE<br>QSSUH6_MOUSE                                 | U6 snRNA-associated Sm-like protein Lsm5;<br>Gamma-adducin;<br>Clathrin interactor 1;<br>Clathrin interactor 1;<br>Striated muscle-specific serine/threonine-protein kinase; | Adducin-like protein 70;                                                                                                                                                                                                                |
| NPSEKVFIRG<br>PGPYAQFSVN<br>KLTGMAFRVP                              | TPDSPAQPAAPR<br>TPLNPLNGPIYAR<br>TPNVSVDLTCR                                                            | N-ter +34.06 Da<br>N-ter +28.03 Da<br>N-ter +34.06 Da, C +57.02 Da                                                                                               | 25.4<br>39.8<br>31.6                 | 102.7<br>24.9<br>52.7                | 3<br>3<br>3           | 1311.83<br>1580.91<br>1393.82                       | -5.06<br>-1.43<br>-0.60                      | 0.00<br>0.12<br>0.03                 | SPEG_MOUSE<br>CRK_MOUSE<br>G3PT_MOUSE                                  | E9QQ25_MOUSE<br>F7D232_MOUSE<br>G3PT_MOUSE                                   | kinase;<br>Adapter molecule crk;<br>Glyceraldehyde-3-phosphate dehydrogenase;                                                                                                | Aortic preferentially expressed protein 1; Proto-oncogene c-Crk;p38; Peptidyl-cysteine S-nitrosylase GAPDH; C-type lectin domain family 3 member B;Plasminogen kringle 4-binding protein;                                               |
| DCISQGGTLG                                                          | TPQSELENEALFEYAR                                                                                        | N-ter +34.06 Da                                                                                                                                                  | 42.1                                 | 40.7                                 | 3                     | 1930.03                                             | 1.63                                         | 0.03                                 | TETN_MOUSE                                                             | Q8CFZ6_MOUSE                                                                 | Tetranectin;                                                                                                                                                                 |                                                                                                                                                                                                                                         |

Table S7, Tholen et al.

| Non Prime Site | Prime Site             | Modifications                             | Hyperscore | Mass error in ppm | Charge | Precursor neutral mass in Da | Fold change (log <sub>2</sub> ) of ASAPRatio | FC-error of ASAPRatio | Uniprot ID 1 | Uniprot ID 2 | Protein Name 1                                                           | Protein Name 2                                                                                                                                                     |
|----------------|------------------------|-------------------------------------------|------------|-------------------|--------|------------------------------|----------------------------------------------|-----------------------|--------------|--------------|--------------------------------------------------------------------------|--------------------------------------------------------------------------------------------------------------------------------------------------------------------|
| WRCVLKIGEH     | TPSALAIMENANVLAR       | N-ter +34.06 Da                           | 48.8       | 45.8              | 3      | 1704.02                      | 0.77                                         | 0.14                  | ALDOA_MOUSE  | A6ZI44_MOUSE | Fructose-bisphosphate aldolase A;                                        | Aldolase 1;Muscle-type aldolase;                                                                                                                                   |
| IDCQVITLMG     | TPSGTAEPYDGTAKR        | N-ter +28.03 Da, K +28.03 Da              | 23.3       | 68.3              | 3      | 1605.91                      | 0.77                                         | 0.09                  | BSDC1_MOUSE  |              | BSD domain-containing protein 1;                                         |                                                                                                                                                                    |
| GLPGSMGPPG     | TPSVDHGFLVTR           | N-ter +28.03 Da                           | 44.1       | 51.5              | 3      | 1355.79                      | 1.23                                         | 0.04                  | CO4A1_MOUSE  |              | Collagen alpha-1(IV) chain;                                              |                                                                                                                                                                    |
| LNRVCLLHEK     | TPVSEHVKCCSGSLVER      | N-ter +34.06 Da, K +34.06 Da, C +57.02 Da | 24.3       | 75.6              | 4      | 2113.25                      | 0.52                                         | 0.03                  | ALBU_MOUSE   |              | Serum albumin;                                                           |                                                                                                                                                                    |
| LLFIDNIFRF     | TQAGSEVSALLGR          | N-ter +34.06 Da                           | 35.3       | 20.3              | 2      | 1321.77                      | 0.43                                         | 0.01                  | ATPB_MOUSE   |              | ATP synthase subunit beta, mitochondrial;                                |                                                                                                                                                                    |
| MVKIVTVK       | TQAYPDQKPGTSGLR        | N-ter +28.03 Da, K +28.03 Da              | 24.1       | 74.1              | 3      | 1674.00                      | -0.52                                        | 0.05                  | PGM1_MOUSE   |              | Phosphoglucomutase-1;                                                    | Glucose phosphomutase 1;                                                                                                                                           |
| GFQNAILVRY     | TQKAPQVSTPTLVEAARNLGR  | N-ter +28.03 Da, K +28.03 Da              | 36.1       | 77.1              | 4      | 2292.47                      | -0.76                                        | 0.05                  | ALBU_MOUSE   |              | Serum albumin;                                                           |                                                                                                                                                                    |
| GFQNAILVRY     | TQKAPQVSTPTLVEAAR      | N-ter +28.03 Da, K +28.03 Da              | 59.6       | 66.8              | 3      | 1852.17                      | 0.50                                         | 0.02                  | ALBU_MOUSE   |              | Serum albumin;                                                           |                                                                                                                                                                    |
| PNMVTGPHAC     | TQKFSNEEIAMATVTLAR     | N-ter +34.06 Da, K +34.06 Da              | 39.7       | 56.2              | 3      | 2077.27                      | 0.76                                         | 0.12                  | ALDOA_MOUSE  | Q9CPQ9_MOUSE | Fructose-bisphosphate aldolase A;                                        | Aldolase 1;Muscle-type aldolase;                                                                                                                                   |
| DEESKPASSN     | TQVGEDEEAALLER         | N-ter +34.06 Da                           | 52.9       | 38.8              | 3      | 1592.87                      | 0.37                                         | 0.03                  | Q8VCQ8_MOUSE | E9QOM9_MOUSE |                                                                          | 52 kDa phosphoprotein;Lymphocyte-specific antigen WP34;S37 protein;                                                                                                |
| PPRSTEDRLT     | TQWREDEEEAAR           | N-ter +34.06 Da                           | 24.8       | 67.7              | 3      | 1681.89                      | -0.27                                        | 0.05                  | LSP1_MOUSE   | A2A6J7_MOUSE | Lymphocyte-specific protein 1;                                           |                                                                                                                                                                    |
| DQYELLCDLN     | TRKPVQDQEDCYLAR        | N-ter +28.03 Da, K +28.03 Da, C +57.02 Da | 34.7       | 93.3              | 4      | 1969.16                      | 0.61                                         | 0.04                  | TRFE_MOUSE   | E9Q035_MOUSE | Serotransferrin;                                                         | Beta-1 metal-binding globulin;Siderophilin;                                                                                                                        |
| TVCQPTCYQR     | TSCISTPAQVTCNRR        | N-ter +34.06 Da, C +57.02 Da              | 45.0       | 57.6              | 3      | 1627.88                      | -0.81                                        | 0.04                  | E9QZEE_MOUSE |              |                                                                          | La ribonucleoprotein domain family member 4B;La ribonucleoprotein domain family member 5;La-related protein 5;                                                     |
| M              | TSDDQAKVAPEAQAQR       | N-ter +28.03 Da, K +28.03 Da              | 33.5       | 72.2              | 3      | 1798.05                      | 0.04                                         | 0.01                  | LAR4B_MOUSE  |              | La-related protein 4B;                                                   |                                                                                                                                                                    |
| DIGDTEVPY      | TSFVKLLPLNDCR          | N-ter +34.06 Da, K +34.06 Da, C +57.02 Da | 39.2       | 66.5              | 3      | 1630.06                      | -0.76                                        | 0.08                  | COF2_MOUSE   |              | Cofilin-2;                                                               | Cofilin, muscle isoform; XP-C repair-complementing complex 58 kDa protein;                                                                                         |
| AATTTATTTT     | TSGGHPLEFLR            | N-ter +28.03 Da                           | 30.9       | 47.0              | 3      | 1240.72                      | 0.00                                         | 0.00                  | RD23B_MOUSE  | Q3TJ52_MOUSE | UV excision repair protein RAD23 homolog B;                              |                                                                                                                                                                    |
| RKAAGGAKRK     | TSGPPVSELITKAAVASKER   | N-ter +34.06 Da, K +34.06 Da              | 18.2       | 81.6              | 4      | 2142.49                      | -0.14                                        | 0.01                  | H14_MOUSE    |              | Histone H1.4;                                                            | H1 VAR.2;H1e;                                                                                                                                                      |
| LIIGDRQTGK     | TSIAIDTIINQKR          | N-ter +34.06 Da, K +34.06 Da              | 30.3       | 53.3              | 3      | 1540.04                      | 0.30                                         | 0.03                  | ATPA_MOUSE   | D3Z6F5_MOUSE | ATP synthase subunit alpha, mitochondrial;                               |                                                                                                                                                                    |
| VGLTSLRAVS     | TSSMGTLPKQVKIVEVGPR    | N-ter +28.03 Da, K +28.03 Da              | 15.7       | 63.7              | 4      | 2110.35                      | -0.43                                        | 0.03                  | HMGCL_MOUSE  |              | Hydroxymethylglutaryl-CoA lyase, mitochondrial;                          | 3-hydroxy-3-methylglutarate-CoA lyase;                                                                                                                             |
| LEAWYRHGR      | TSYSALSSEPSR           | N-ter +28.03 Da                           | 45.3       | 41.8              | 2      | 1311.69                      | -0.03                                        | 0.00                  | MECR_MOUSE   | A2A845_MOUSE | Trans-2-enoyl-CoA reductase, mitochondrial;                              |                                                                                                                                                                    |
| RGVHTSVASA     | TSVATKTKEQGPPSSEYIFER  | N-ter +34.06 Da, K +34.06 Da              | 48.1       | 67.0              | 4      | 2456.53                      | 0.87                                         | 0.04                  | OAT_MOUSE    |              | Ornithine aminotransferase, mitochondrial;                               | Ornithine-oxo-acid aminotransferase;                                                                                                                               |
| TRVSGEHMDL     | TTCLAAAGGQEQELR        | N-ter +34.06 Da, K +34.06 Da, C +57.02 Da | 40.7       | 67.3              | 3      | 1697.07                      | -0.32                                        | 0.02                  | Q9D1B1_MOUSE |              |                                                                          |                                                                                                                                                                    |
| LKGWSCCKRR     | TTDFSDFLSIVGCTKGR      | N-ter +34.06 Da, K +34.06 Da, C +57.02 Da | 38.4       | 70.9              | 3      | 1971.18                      | -2.74                                        | 0.55                  | CHR1_MOUSE   |              | Cysteine and histidine-rich domain-containing protein 1;                 | CHORD domain-containing protein 1;Protein morgana;                                                                                                                 |
| ADDLTPAPAP     | TTFAHLDAATVLSR         | N-ter +28.03 Da                           | 42.9       | 74.5              | 3      | 1559.95                      | 0.71                                         | 0.04                  | ATPB_MOUSE   |              | ATP synthase subunit beta, mitochondrial;                                |                                                                                                                                                                    |
| RTVHTTRVCL     | TTFMVQDQPDFQDR         | N-ter +34.06 Da                           | 45.9       | 53.5              | 3      | 1672.88                      | 0.33                                         | 0.06                  | THIOM_MOUSE  | Q3TUS3_MOUSE | Thioredoxin, mitochondrial;                                              | Thioredoxin-2;                                                                                                                                                     |
| LRVPHARKTG     | TTIAGLVFR              | N-ter +34.06 Da                           | 30.2       | 45.3              | 2      | 1010.68                      | 0.20                                         | 0.01                  | PSB10_MOUSE  |              | Proteasome subunit beta type-10;                                         | Low molecular mass protein 10;Macropain subunit MEC1-1;Multicatalytic endopeptidase complex subunit MEC1-1;Proteasome MEC1-1;Proteasome subunit beta-2;            |
| FKLPKARKTG     | TTIAGVVYKDIGVLGADTR    | N-ter +28.03 Da, K +28.03 Da              | 49.5       | 71.6              | 3      | 2004.27                      | 0.21                                         | 0.05                  | PSB7_MOUSE   |              | Proteasome subunit beta type-7;                                          | Macropain chain Z;Multicatalytic endopeptidase complex chain Z;Proteasome subunit Z;                                                                               |
| GGGDVAVFKH     | TTIFEVLPEKADR          | N-ter +28.03 Da, K +28.03 Da              | 51.3       | 69.4              | 3      | 1573.98                      | 0.20                                         | 0.02                  | TRFE_MOUSE   | D3YR8_MOUSE  | Serotransferrin;                                                         | Beta-1 metal-binding globulin;Siderophilin;                                                                                                                        |
| AQAVTAYIHK     | TTLESTPESASAR          | N-ter +34.06 Da                           | 46.0       | 37.8              | 2      | 1382.76                      | -0.76                                        | 0.08                  | PPR3A_MOUSE  |              | Protein phosphatase 1 regulatory subunit 3A;                             | Protein phosphatase 1 glycogen-associated regulatory subunit;Protein phosphatase type-1 glycogen targeting subunit;                                                |
| VVPLAGTNGE     | TTTQGLDGLSER           | N-ter +34.06 Da                           | 43.5       | 35.0              | 2      | 1310.73                      | 0.52                                         | 0.05                  | ALDOA_MOUSE  | Q9CPQ9_MOUSE | Fructose-bisphosphate aldolase A;                                        | Aldolase 1;Muscle-type aldolase;                                                                                                                                   |
| TIPTKQTQTF     | TTYSNDQPGVLQVYEGER     | N-ter +34.06 Da                           | 60.8       | 35.3              | 3      | 2202.18                      | -1.09                                        | 0.07                  | HS71A_MOUSE  | HS71B_MOUSE  | Heat shock 70 kDa protein 1A;                                            | Heat shock 70 kDa protein 3;Hsp68; Williams-Beuren syndrome chromosomal region 1 protein homolog;                                                                  |
| QRPRLQKPR      | TVATPLNQVANPNSAIFGARPR | N-ter +34.06 Da                           | 35.7       | 74.7              | 4      | 2384.49                      | -0.47                                        | 0.04                  | IF4H_MOUSE   | Q80U88_MOUSE | Eukaryotic translation initiation factor 4H;                             | Williams-Beuren syndrome chromosomal region 1 protein homolog;                                                                                                     |
| QRPRLQKPR      | TVATPLNQVANPNSAIFGGAR  | N-ter +34.06 Da                           | 64.6       | 50.8              | 3      | 2131.27                      | -1.09                                        | 0.09                  | IF4H_MOUSE   | Q80U88_MOUSE | Eukaryotic translation initiation factor 4H;                             | Williams-Beuren syndrome chromosomal region 1 protein homolog;                                                                                                     |
| MKM            | TVDFEELCKDSPR          | N-ter +28.03 Da, K +28.03 Da, C +57.02 Da | 26.3       | 83.3              | 3      | 1650.93                      | -0.45                                        | 0.05                  | ACAP2_MOUSE  | D4AFX6_MOUSE | Arf-GAP with coiled-coil, ANK repeat and PH domain-containing protein 2; | Centaurin-beta-2;                                                                                                                                                  |
| EKAKREVCSW     | TVGEDVNTDPWAGYR        | N-ter +34.06 Da                           | 44.7       | 46.5              | 3      | 1712.90                      | 0.01                                         | 0.00                  | AMP1_MOUSE   |              | Methionine aminopeptidase 1;                                             | Peptidase M 1;                                                                                                                                                     |
| QTVSTKSSN      | TVESTSLYMKVAAQGEVVR    | N-ter +28.03 Da, K +28.03 Da              | 25.6       | 64.0              | 3      | 2106.27                      | 1.47                                         | 0.16                  | SYEP_MOUSE   |              | Bifunctional glutamate/proline-tRNA ligase;                              |                                                                                                                                                                    |
| GCVAGDEESY     | TVFKDLFDPIQDR          | N-ter +34.06 Da, K +34.06 Da              | 47.0       | 74.4              | 3      | 1774.16                      | -0.12                                        | 0.03                  | KCRM_MOUSE   |              | Creatine kinase M-type;                                                  | Creatine kinase M chain;M-CK;                                                                                                                                      |
| TVKTESTVKT     | TVFSCNLGEKFDETTADGR    | N-ter +28.03 Da, K +28.03 Da, C +57.02 Da | 35.1       | 62.1              | 3      | 2202.16                      | 0.51                                         | 0.07                  | FABP5_MOUSE  | E9Q964_MOUSE | Fatty acid-binding protein, epidermal;                                   | Epidermal-type fatty acid-binding protein;Fatty acid-binding protein 5;Keratinocyte lipid-binding protein;Psoriasis-associated fatty acid-binding protein homolog; |
| QNADCPKNSG M   | TVGAVALDCR             | N-ter +34.06 Da, C +57.02 Da              | 40.1       | 28.0              | 2      | 1094.63                      | 1.26                                         | 0.11                  | ASGL1_MOUSE  |              | L-asparaginase;                                                          | Asparaginase-like protein 1;L-asparagine amidohydrolase;                                                                                                           |
|                | TVHNLVLFDR             | N-ter +28.03 Da                           | 24.7       | 48.6              | 3      | 1304.75                      | 0.31                                         | 0.02                  | TPPC1_MOUSE  | B1ASW5_MOUSE | Trafficking protein particle complex subunit 1;                          |                                                                                                                                                                    |
| KDVVDIYIFG     | TVIQEVKTSNVAR          | N-ter +28.03 Da, K +28.03 Da              | 33.1       | 74.2              | 3      | 1499.98                      | 0.41                                         | 0.04                  | ECHB_MOUSE   | D3YXU1_MOUSE | Trifunctional enzyme subunit beta, mitochondrial;                        | TP-beta;                                                                                                                                                           |
| NMKGNDISSG     | TVLSDYVGSPPSGTGLHR     | N-ter +34.06 Da                           | 45.2       | 67.4              | 3      | 1933.14                      | 0.10                                         | 0.01                  | PEBP1_MOUSE  |              | Phosphatidylethanolamine-binding protein 1;                              | HcNPPp;                                                                                                                                                            |
| VDIRKDLVAN     | TVLSGGTTPYGIADR        | N-ter +28.03 Da                           | 33.5       | 37.8              | 3      | 1665.90                      | 0.23                                         | 0.02                  | ACTB_MOUSE   | ACTG_MOUSE   | Actin, cytoplasmic 1;                                                    | Beta-actin;                                                                                                                                                        |



Table S7, Tholen et al.

| Non Prime Site                                                    | Prime Site                                                                                           | Modifications                                                                                                            | Hyperscore                           | Mass error in ppm                    | Charge                | Precursor neutral mass in Da                        | Fold change (log <sub>2</sub> ) of ASAPRatio | FC-error of ASAPRatio                | Uniprot ID 1                                                         | Uniprot ID 2                                | Protein Name 1                                                                                                                                                                                                   | Protein Name 2                                                                                                                                                                                                                                                                                                                                                                             |
|-------------------------------------------------------------------|------------------------------------------------------------------------------------------------------|--------------------------------------------------------------------------------------------------------------------------|--------------------------------------|--------------------------------------|-----------------------|-----------------------------------------------------|----------------------------------------------|--------------------------------------|----------------------------------------------------------------------|---------------------------------------------|------------------------------------------------------------------------------------------------------------------------------------------------------------------------------------------------------------------|--------------------------------------------------------------------------------------------------------------------------------------------------------------------------------------------------------------------------------------------------------------------------------------------------------------------------------------------------------------------------------------------|
| SAPRVSLAT<br>GWQSMVHEVW<br>SPGMKDLGA                              | TVSAPDLKSVR<br>TVVIPETEAARR<br>TWVVLGHSEK                                                            | N-ter +28.03 Da, K +28.03 Da<br>N-ter +34.06 Da<br>N-ter +34.06 Da                                                       | 22.0<br>29.9<br>25.0                 | 65.1<br>68.6<br>31.2                 | 3<br>3<br>3           | 1227.80<br>1402.93<br>1216.72                       | 2.21<br>0.93<br>-0.34                        | 0.17<br>0.07<br>0.01                 | F7CK47_MOUSE<br>COASY_MOUSE<br>TPIS_MOUSE                            | MAP4_MOUSE<br>E0CXH5_MOUSE                  | Microtubule-associated protein;<br>Bifunctional coenzyme A synthase;<br>Triosephosphate isomerase;                                                                                                               | Triose-phosphate isomerase;                                                                                                                                                                                                                                                                                                                                                                |
| QGQGDIPTFY                                                        | TYEGLSHLTAEGQATLER                                                                                   | N-ter +34.06 Da                                                                                                          | 44.1                                 | 66.4                                 | 3                     | 2138.21                                             | -6.64                                        | 0.00                                 | ICLN_MOUSE                                                           | Q923F1_MOUSE                                | Methylosome subunit pICln;                                                                                                                                                                                       | Chloride channel, nucleotide sensitive 1A;Chloride conductance regulatory protein ICln;Chloride ion current inducer protein;                                                                                                                                                                                                                                                               |
| NEETIKKRLE                                                        | TYNATEPVISFYDKR                                                                                      | N-ter +34.06 Da, K +34.06 Da                                                                                             | 52.6                                 | 68.4                                 | 3                     | 2034.21                                             | 0.20                                         | 0.02                                 | KAD1_MOUSE                                                           |                                             | Adenylate kinase isoenzyme 1;                                                                                                                                                                                    | ATP-AMP transphosphorylase 1;Myokinase;                                                                                                                                                                                                                                                                                                                                                    |
| NGTQICPNNL<br>VNOAQKEAEK<br>PLVPVPHQKV                            | VAHFDFSDLENVPHLR<br>VAHGVQTVGNQAGKETQR<br>VANSPPANADYQER                                             | N-ter +34.06 Da<br>N-ter +28.03 Da, K +28.03 Da<br>N-ter +28.03 Da                                                       | 37.4<br>37.0<br>43.0                 | 95.6<br>93.6<br>61.9                 | 4<br>4<br>3           | 2016.22<br>1935.21<br>1461.78                       | -0.27<br>0.80<br>-0.52                       | 0.02<br>0.14<br>0.07                 | PRELP_MOUSE<br>SBSN_MOUSE<br>E9PYJ9_MOUSE                            | E9QP82_MOUSE                                | Prolargin;<br>Suprabasin;                                                                                                                                                                                        | Proline-arginine-rich end leucine-rich repeat protein;                                                                                                                                                                                                                                                                                                                                     |
| MADEIAKAQ<br>EERSVNCGTM                                           | VAQPGGDTIFGKIIR<br>VAQPKNLEGYGFANLPNQVYR                                                             | N-ter +34.06 Da, K +34.06 Da<br>N-ter +28.03 Da, K +28.03 Da                                                             | 29.3<br>55.5                         | 68.3<br>70.9                         | 3<br>4                | 1639.12<br>2532.53                                  | -0.25<br>0.07                                | 0.02<br>0.01                         | HINT1_MOUSE<br>E9Q9F5_MOUSE                                          | B0R1E3_MOUSE                                | Histidine triad nucleotide-binding protein 1;                                                                                                                                                                    | Adenosine 5'-monophosphoramidase;Protein kinase C inhibitor 1;Protein kinase C-interacting protein 1;                                                                                                                                                                                                                                                                                      |
| AHQLFGRGFSF<br>VHTSVASATS                                         | VATGLMEDDGKPR<br>VATKTEGGPPSSEYIFER                                                                  | N-ter +34.06 Da, K +34.06 Da<br>N-ter +28.03 Da, K +28.03 Da                                                             | 32.0<br>35.6                         | 70.3<br>63.6                         | 3<br>4                | 1455.91<br>2250.33                                  | -0.12<br>0.85                                | 0.01<br>0.01                         | KS6A1_MOUSE<br>OAT_MOUSE                                             | Q505N6_MOUSE                                | Ribosomal protein S6 kinase alpha-1;<br>Ornithine aminotransferase, mitochondrial;                                                                                                                               | 90 kDa ribosomal protein S6 kinase 1;MAP kinase-activated protein kinase 1a;Ribosomal S6 kinase 1;<br>Ornithine-oxo-acid aminotransferase;<br>GTPase Ran;Ras-like protein TC4;Ras-related nuclear kinase-like 7;                                                                                                                                                                           |
| HLTGEFEKYY<br>VGPPEPTDCF                                          | VATLGVVEHPLVFLHTNR<br>VAVMHGETEGTVPGNALVVDPEKPFRR                                                    | N-ter +34.06 Da<br>N-ter +34.06 Da, K +34.06 Da                                                                          | 38.5<br>50.0                         | 35.8<br>75.5                         | 4<br>4                | 1922.16<br>2816.73                                  | -0.30<br>0.00                                | 0.05<br>0.00                         | RAN_MOUSE<br>EHD2_MOUSE                                              |                                             | GTP-binding nuclear protein Ran;<br>EH domain-containing protein 2;                                                                                                                                              | Biliverdin reductase B;Biliverdin-IX beta-reductase;NADPH-dependent diaphorase;NADPH-flavin reductase;                                                                                                                                                                                                                                                                                     |
| KILQESGLKY                                                        | VAVMPPHIGDQLPLTGAYTVLDGR                                                                             | N-ter +34.06 Da                                                                                                          | 47.1                                 | 77.5                                 | 4                     | 2541.55                                             | -1.52                                        | 0.04                                 | BLVRB_MOUSE                                                          | E9PZC4_MOUSE                                | Flavin reductase (NADPH);                                                                                                                                                                                        |                                                                                                                                                                                                                                                                                                                                                                                            |
| DDPEVQFSWF<br>DVDEYDENKF<br>PTLIAAQSN                             | VDDVEVHTAQTPQR<br>VDEEDGGDQAGPDEGEVDSCLR<br>VDELGCSHLGQSYESR                                         | N-ter +28.03 Da<br>N-ter +34.06 Da, C +57.02 Da<br>N-ter +34.06 Da, C +57.02 Da                                          | 19.0<br>66.2<br>37.5                 | 61.5<br>51.9<br>69.5                 | 3<br>3<br>3           | 1621.91<br>2439.15<br>1870.00                       | -0.20<br>-0.20<br>-3.47                      | 0.01<br>0.02<br>0.77                 | IGH1M_MOUSE<br>ARPC5_MOUSE<br>CO3A1_MOUSE                            | IGHG1_MOUSE<br>Q3UA72_MOUSE<br>Q5DTG2_MOUSE | Ig gamma-1 chain C region, membrane-bound form;<br>Actin-related protein 2/3 complex subunit 5;<br>Collagen alpha-1(III) chain;                                                                                  | Arp2/3 complex 16 kDa subunit;                                                                                                                                                                                                                                                                                                                                                             |
| LTIQLIQHFF                                                        | VDEYDPTIEDSYR                                                                                        | N-ter +34.06 Da                                                                                                          | 32.9                                 | 51.0                                 | 3                     | 1634.84                                             | 0.18                                         | 0.02                                 | RASH_MOUSE                                                           | RASK_MOUSE                                  | GTPase HRas;                                                                                                                                                                                                     | H-Ras-1;Transforming protein p21;c-H-ras;p21ras;                                                                                                                                                                                                                                                                                                                                           |
| PWFAGNKVTV<br>GNKYVPRAIL                                          | VDFLVYVDLQDHR<br>VDLEPGTMDSVR                                                                        | N-ter +34.06 Da<br>N-ter +28.03 Da                                                                                       | 58.8<br>35.4                         | 85.9<br>33.1                         | 3<br>2                | 1652.02<br>1345.70                                  | -1.18<br>-0.15                               | 0.19<br>0.02                         | GSTM2_MOUSE<br>TBB2A_MOUSE                                           | D3YX76_MOUSE<br>TBB2B_MOUSE                 | Glutathione S-transferase Mu 2;<br>Tubulin beta-2A chain;                                                                                                                                                        | GST 5-5;GST class-mu 2;Glutathione S-transferase pmGT2;                                                                                                                                                                                                                                                                                                                                    |
| AGKHVPRAVF                                                        | VDLEPTVIDEVR                                                                                         | N-ter +34.06 Da                                                                                                          | 41.9                                 | 43.8                                 | 2                     | 1417.85                                             | -0.03                                        | 0.00                                 | TBA1A_MOUSE                                                          | TBA1B_MOUSE                                 | Tubulin alpha-1A chain;                                                                                                                                                                                          | Alpha-tubulin 1;Alpha-tubulin isotype M-alpha-1;Tubulin alpha-1 chain;<br>Protein chuzhoi;Protein-tyrosine kinase 7;Pseudo tyrosine kinase receptor 7;Tyrosine-protein kinase-like 7;                                                                                                                                                                                                      |
| AEPHYMVLEY                                                        | VDLGDCLKQLR                                                                                          | N-ter +28.03 Da, K +28.03 Da                                                                                             | 19.4                                 | 78.6                                 | 3                     | 1358.90                                             | -0.49                                        | 0.10                                 | PTK7_MOUSE                                                           |                                             | Inactive tyrosine-protein kinase 7;                                                                                                                                                                              |                                                                                                                                                                                                                                                                                                                                                                                            |
| SPTESKDILL                                                        | VDLNSEIDTNQNSLR                                                                                      | N-ter +34.06 Da                                                                                                          | 41.0                                 | 44.6                                 | 3                     | 1750.97                                             | -0.22                                        | 0.01                                 | DAB2_MOUSE                                                           | E9QL31_MOUSE                                | Disabled homolog 2;                                                                                                                                                                                              | DOC-2;Mitogen-responsive phosphoprotein;<br>Alpha-tubulin 1;Alpha-tubulin isotype M-alpha-1;Tubulin alpha-1 chain;                                                                                                                                                                                                                                                                         |
| ASLRFDGLN<br>AAGGGGGENY<br>CTHVANFVSP                             | VDLTFEQTNLVPPYR<br>VDNKEVHTAWTQPR<br>VDPISLIVVQAKEADYIPR                                             | N-ter +34.06 Da<br>N-ter +28.03 Da, K +28.03 Da<br>N-ter +28.03 Da, K +28.03 Da<br>N-ter +28.03 Da, K +28.03 Da,         | 40.2<br>24.8<br>19.1                 | 44.8<br>73.0<br>49.3                 | 3<br>4<br>4           | 1825.07<br>1736.03<br>2181.35                       | 0.52<br>0.70<br>-0.79                        | 0.03<br>0.09<br>0.07                 | TBA1A_MOUSE<br>IGHG3_MOUSE<br>CD029_MOUSE                            | TBA1B_MOUSE<br>B7ZNF5_MOUSE                 | Tubulin alpha-1A chain;<br>Ig gamma-3 chain C region;<br>Uncharacterized protein C4orf29 homolog;                                                                                                                |                                                                                                                                                                                                                                                                                                                                                                                            |
| PVPEDKYTAL<br>KQSRMEKYV<br>LRLQKRTGG<br>EKLGGQGVQK<br>AKDTVMVTRTF | VDQEEKEDVKSCAEFVSGSCLR<br>VDSOTVQAHTVR<br>VDTAAGVAVFDSINADR<br>VDVPAADLSDQVPDQDSETR<br>VEDQEFHSSFEER | C +57.02 Da<br>N-ter +28.03 Da<br>N-ter +34.06 Da<br>N-ter +28.03 Da<br>N-ter +34.06 Da<br>N-ter +34.06 Da, K +34.06 Da, | 26.4<br>27.2<br>43.7<br>57.9<br>49.0 | 71.5<br>59.9<br>56.7<br>37.7<br>77.0 | 4<br>3<br>3<br>3<br>3 | 2623.47<br>1354.77<br>1754.01<br>2157.09<br>1784.98 | 0.36<br>0.20<br>0.37<br>0.49<br>-0.84        | 0.04<br>0.01<br>0.02<br>0.06<br>0.16 | ATP5H_MOUSE<br>SYNP2_MOUSE<br>KCRM_MOUSE<br>CO3_MOUSE<br>TITIN_MOUSE | B1ASE2_MOUSE<br>D3YV9_MOUSE                 | ATP synthase subunit d, mitochondrial;<br>Synaptopodin-2;<br>Creatine kinase M-type;<br>Complement C3;<br>Titin;                                                                                                 | Myopodin;<br>Creatine kinase M chain;M-CK;<br>HSE-MSF;<br>Connectin;<br>C-terminal LIM domain protein 1;Elfin;LIM domain protein CLP-36;<br>CCT-eta;<br>Cytokeratin-15;Keratin-15;<br>Actinin-associated LIM protein;Alpha-actinin-2-associated LIM protein;<br>Castor-related protein;<br>Cytosolic NADP+isocitrate dehydrogenase;IDP;NADP(+)-specific ICDH;Oxalosuccinate decarboxylase; |
| INLQKQGHPF<br>AEFLKQVKPY<br>SSSSNFHIS                             | VEDQIQCEKHAR<br>VEEGLHPQIIR<br>VEESVDGKVVSSR                                                         | C +57.02 Da<br>N-ter +28.03 Da<br>N-ter +28.03 Da, K +28.03 Da                                                           | 20.1<br>29.4<br>24.7                 | 99.1<br>76.1<br>80.1                 | 4<br>3<br>3           | 1615.01<br>1430.93<br>1445.89                       | 0.07<br>4.31<br>0.53                         | 0.01<br>0.16<br>0.07                 | PDL1_MOUSE<br>TCPH_MOUSE<br>K1C15_MOUSE                              | B1AQ77_MOUSE                                | PDZ and LIM domain protein 1;<br>T-complex protein 1 subunit eta;<br>Keratin, type I cytoskeletal 15;                                                                                                            |                                                                                                                                                                                                                                                                                                                                                                                            |
| LNLKQKGVFF<br>ICAKLSRQVV                                          | VEGELYCETHAR<br>VEKGAEAGSQAEQSPLHPR                                                                  | N-ter +34.06 Da, C +57.02 Da<br>N-ter +34.06 Da, K +34.06 Da                                                             | 45.0<br>59.2                         | 61.2<br>85.3                         | 3<br>4                | 1496.81<br>1987.25                                  | 0.51<br>1.27                                 | 0.07<br>0.10                         | PDL3_MOUSE<br>CASZ1_MOUSE                                            | B1AS47_MOUSE                                | PDZ and LIM domain protein 3;<br>Zinc finger protein castor homolog 1;                                                                                                                                           |                                                                                                                                                                                                                                                                                                                                                                                            |
| LIKEKLILPY                                                        | VELDLHSYDLGIENR                                                                                      | N-ter +34.06 Da                                                                                                          | 47.0                                 | 72.6                                 | 3                     | 1806.07                                             | -1.52                                        | 0.17                                 | IDHC_MOUSE                                                           | F8W1Y0_MOUSE                                | Isocitrate dehydrogenase [NADP] cytoplasmic;                                                                                                                                                                     |                                                                                                                                                                                                                                                                                                                                                                                            |
| MGVQ<br>EVEVLKATEM<br>EVEVLKATEM<br>AVQGGAAAPV<br>IDSSWELRVF      | VETISPGDGR<br>VEVGPEDDEVGAEATDLLR<br>VEVGPEDDEVGAEAR<br>VGAVQVPVGMPPMPQAPR<br>VGEEDEPAQSVTLR         | N-ter +28.03 Da<br>N-ter +28.03 Da<br>N-ter +28.03 Da<br>N-ter +34.06 Da<br>N-ter +28.03 Da                              | 21.8<br>36.2<br>60.8<br>43.0<br>42.9 | 38.3<br>69.1<br>34.0<br>29.1<br>56.7 | 2<br>3<br>2<br>3<br>3 | 1057.58<br>2383.32<br>1527.76<br>1862.07<br>1556.86 | 0.82<br>-0.79<br>-0.40<br>0.51<br>0.54       | 0.05<br>0.15<br>0.06<br>0.04<br>0.03 | FKB1A_MOUSE<br>PTRF_MOUSE<br>PTRF_MOUSE<br>SNRPA_MOUSE<br>URP2_MOUSE | Q1JUQ8_MOUSE                                | Peptidyl-prolyl cis-trans isomerase FKBP1A;<br>Polymerase I and transcript release factor;<br>Polymerase I and transcript release factor;<br>U1 small nuclear ribonucleoprotein A;<br>Fermitin family homolog 3; | 12 kDa FK506-binding protein;FK506-binding protein 1A;Immunophilin FKBP12;Rotamase;<br>Cav-p60;Cavin-1;<br>Cav-p60;Cavin-1;                                                                                                                                                                                                                                                                |

Table S7, Tholen et al.

| Non Prime Site | Prime Site               | Modifications                             | Hyperscore | Mass error in ppm | Charge | Precursor neutral mass in Da | Fold change (log <sub>2</sub> ) of ASAPRatio | FC-error of ASAPRatio | Uniprot ID 1 | Uniprot ID 2 | Protein Name 1                                                                     | Protein Name 2                                                                                                                                                                                                                                          |
|----------------|--------------------------|-------------------------------------------|------------|-------------------|--------|------------------------------|----------------------------------------------|-----------------------|--------------|--------------|------------------------------------------------------------------------------------|---------------------------------------------------------------------------------------------------------------------------------------------------------------------------------------------------------------------------------------------------------|
| M              | VGGEASAAVEKLVSGVR        | N-ter +34.06 Da, K +34.06 Da              | 20.9       | 61.6              | 3      | 1696.12                      | 0.10                                         | 0.01                  | C2AIL_MOUSE  |              | CDKN2AIP N-terminal-like protein;                                                  | CDKN2A-interacting protein N-terminal-like protein;                                                                                                                                                                                                     |
| GAHLVKKIF      | VGGIKEDTEEHHLR           | N-ter +28.03 Da, K +28.03 Da              | 18.3       | 93.5              | 4      | 1675.03                      | -0.27                                        | 0.03                  | ROA1_MOUSE   | ROA2_MOUSE   | Heterogeneous nuclear ribonucleoprotein A1;                                        | HDP-1;Helix-destabilizing protein;Single-strand-binding protein;Topoisomerase-inhibitor suppressed;hnRNP core protein A1; COP9 homolog;JAB1-containing signalosome subunit 8;                                                                           |
| SIADDFAAF      | VGLPVEEAVKGVLEQGWQADSTTR | N-ter +34.06 Da, K +34.06 Da              | 50.8       | 79.8              | 4      | 2636.66                      | -0.23                                        | 0.05                  | CSN8_MOUSE   |              | COP9 signalosome complex subunit 8;                                                |                                                                                                                                                                                                                                                         |
| HVAHGPKSG      | VGPSQPTTVGTECFVSR        | N-ter +34.06 Da, C +57.02 Da              | 35.5       | 50.2              | 3      | 1912.05                      | 0.82                                         | 0.03                  | F7CK47_MOUSE |              | Microtubule-associated protein;                                                    |                                                                                                                                                                                                                                                         |
| ASGETLHSPK     | VGQPGAAGPVSPMCPGR        | N-ter +34.06 Da, C +57.02 Da              | 54.5       | 52.5              | 3      | 1670.93                      | 0.19                                         | 0.01                  | FETUA_MOUSE  |              | Alpha-2-HS-glycoprotein;                                                           | Countertryptin;Fetuin-A;                                                                                                                                                                                                                                |
| ISSGTVLSDY     | VSGGPPSGTGLHR            | N-ter +34.06 Da                           | 34.0       | 67.0              | 3      | 1254.77                      | -0.52                                        | 0.05                  | PEBP1_MOUSE  |              | Phosphatidylethanolamine-binding protein 1;                                        | HCNPPp;                                                                                                                                                                                                                                                 |
| LVEAARNLGR     | VGTKCCTLPEDQR            | N-ter +28.03 Da, K +28.03 Da, C +57.02 Da | 23.0       | 62.5              | 3      | 1618.88                      | 0.90                                         | 0.06                  | ALBU_MOUSE   |              | Serum albumin;                                                                     |                                                                                                                                                                                                                                                         |
| M              | VGVKPVGSDPDFQPELSGAGSR   | N-ter +28.03 Da, K +28.03 Da              | 34.1       | 61.8              | 3      | 2254.30                      | 0.42                                         | 0.05                  | TXNL1_MOUSE  |              | Thioredoxin-like protein 1;                                                        | 32 kDa thioredoxin-related protein; Acetyl-CoA acyltransferase;Beta-ketothiolase;Mitochondrial 3-oxoacyl-CoA thiolase;                                                                                                                                  |
| AYLARHVGLR     | VGVPTEGALTNR             | N-ter +28.03 Da                           | 40.6       | 43.5              | 3      | 1454.87                      | -0.14                                        | 0.01                  | THIM_MOUSE   |              | 3-ketoacyl-CoA thiolase, mitochondrial;                                            |                                                                                                                                                                                                                                                         |
| GSGRSPRRSP     | VHPESSEGEHVSVPQR         | N-ter +28.03 Da                           | 37.2       | 93.3              | 4      | 1930.10                      | 0.31                                         | 0.03                  | FILA2_MOUSE  | E9QP23_MOUSE | Filaggrin-2;                                                                       | Intermediate filament-associated protein; Kidney-type arginase;Non-hepatic arginase;Type II arginase;                                                                                                                                                   |
| GQIPLVLR       | VHSAIVGAPFSR             | N-ter +34.06 Da                           | 35.5       | 44.9              | 3      | 1372.87                      | -0.76                                        | 0.09                  | ARGI2_MOUSE  |              | Arginase-2, mitochondrial;                                                         |                                                                                                                                                                                                                                                         |
| HIFASNDTF      | VHVTDLSGKETICR           | N-ter +28.03 Da, K +28.03 Da, C +57.02 Da | 19.7       | 80.3              | 4      | 1670.02                      | -0.04                                        | 0.01                  | RS14_MOUSE   | D3YVF4_MOUSE | 40S ribosomal protein S14;                                                         |                                                                                                                                                                                                                                                         |
| ARRQSRMEKY     | VISSGHAEALAR             | N-ter +34.06 Da                           | 32.0       | 67.8              | 3      | 1301.80                      | -0.47                                        | 0.05                  | SYNP0_MOUSE  | E9Q3E2_MOUSE | Synaptopodin;                                                                      |                                                                                                                                                                                                                                                         |
| KRNTHTRRKR     | VIGGKPANVGDYVPVQVAIKDGQR | N-ter +28.03 Da, K +28.03 Da              | 20.3       | 58.6              | 4      | 2551.54                      | 0.10                                         | 0.00                  | CFAL_MOUSE   |              | Complement factor I;                                                               | C3B/C4B inactivator;                                                                                                                                                                                                                                    |
| STGAAKAVGK     | VIPELNGKLTGMAFR          | N-ter +28.03 Da, K +28.03 Da              | 25.6       | 60.5              | 3      | 1701.07                      | -1.94                                        | 0.08                  | E9Q9E5_MOUSE | G3P_MOUSE    | Glyceraldehyde-3-phosphate dehydrogenase;                                          |                                                                                                                                                                                                                                                         |
| AIAEFARSL      | VIPNTLAVNAAQSDTLVAKLR    | N-ter +28.03 Da, K +28.03 Da              | 40.1       | 74.5              | 4      | 2364.51                      | 0.03                                         | 0.01                  | TCPA_MOUSE   |              | T-complex protein 1 subunit alpha;                                                 | CCT-alpha;Tailless complex polypeptide 1A;Tailless complex polypeptide 1B;                                                                                                                                                                              |
| TKFENAFSL      | VISQHSLLGNIR             | N-ter +28.03 Da                           | 26.0       | 29.6              | 3      | 1491.90                      | 0.35                                         | 0.01                  | ATPA_MOUSE   | D3Z6F5_MOUSE | ATP synthase subunit alpha, mitochondrial;                                         |                                                                                                                                                                                                                                                         |
| DVDLHLKGNP     | VKGEYDVTVPR              | N-ter +34.06 Da, K +34.06 Da              | 32.2       | 40.2              | 3      | 1329.85                      | 0.04                                         | 0.00                  | F7BRM2_MOUSE | E9Q616_MOUSE |                                                                                    |                                                                                                                                                                                                                                                         |
| M              | VKIVTVKTQAYPDQPKGTSGLR   | N-ter +34.06 Da, K +34.06 Da              | 16.0       | 59.3              | 4      | 2521.74                      | -1.25                                        | 0.12                  | PGM1_MOUSE   |              | Phosphoglucomutase-1;                                                              | Glucose phosphomutase 1;                                                                                                                                                                                                                                |
| E              | VKLVEGGGLVQPGGSLR        | N-ter +34.06 Da, K +34.06 Da              | 38.1       | 61.8              | 3      | 1949.28                      | -0.11                                        | 0.01                  | HVM17_MOUSE  | HVM18_MOUSE  | Ig heavy chain V region MOPC 47A;                                                  |                                                                                                                                                                                                                                                         |
| ITPIQTSLAY     | VKTSLSKQNNR              | N-ter +28.03 Da, K +28.03 Da              | 11.3       | 33.2              | 4      | 1486.90                      | 4.40                                         | 0.10                  | KCNH5_MOUSE  |              | Potassium voltage-gated channel subfamily H member 5;                              | Ether-a-go-go potassium channel 2;Voltage-gated potassium channel subunit Kv10.2;                                                                                                                                                                       |
| N              | VLASEPPIKGIK             | N-ter +34.06 Da, K +34.06 Da              | 21.5       | 29.2              | 3      | 1475.98                      | 4.69                                         | 0.43                  | KAD2_MOUSE   | F7BP55_MOUSE | Adenylate kinase 2, mitochondrial;                                                 | ATP-AMP transphosphorylase 2; 26S proteasome regulatory subunit RPN10;26S proteasome regulatory subunit SSA;Multiubiquitin chain-binding protein;                                                                                                       |
| M              | VLESTMVCDNSSEYMR         | N-ter +34.06 Da, C +57.02 Da              | 53.1       | 52.3              | 3      | 1966.01                      | 0.08                                         | 0.01                  | PSMD4_MOUSE  |              | 26S proteasome non-ATPase regulatory subunit 4;                                    |                                                                                                                                                                                                                                                         |
| M              | VLLESEQFLTELTR           | N-ter +28.03 Da                           | 44.6       | 52.8              | 3      | 1705.02                      | -1.06                                        | 0.15                  | SRP14_MOUSE  | A2AUM6_MOUSE | Signal recognition particle 14 kDa protein;                                        |                                                                                                                                                                                                                                                         |
| KQVPTANLEN     | VLPLAEDFTTEILSR          | N-ter +34.06 Da                           | 39.7       | 40.0              | 3      | 1636.00                      | -2.25                                        | 0.21                  | VTDB_MOUSE   |              | Vitamin D-binding protein;                                                         | Gc-globulin;Group-specific component; C-terminal LIM domain protein 1;Elfin;LIM domain protein CLP-36;                                                                                                                                                  |
| EPPKQSTFL      | VLQEILESDGKDPNPKSGFR     | N-ter +28.03 Da, K +28.03 Da              | 20.5       | 79.0              | 4      | 2369.45                      | 0.56                                         | 0.05                  | PDLI1_MOUSE  |              | PDZ and LIM domain protein 1;                                                      |                                                                                                                                                                                                                                                         |
| VDPNSRNSR      | VLRPPGGGSNFSLGFDEPAEQPVR | N-ter +34.06 Da                           | 47.4       | 80.2              | 4      | 2559.54                      | -1.60                                        | 0.19                  | HN1_MOUSE    |              | Hematological and neurological expressed 1 protein;                                |                                                                                                                                                                                                                                                         |
| HRMTTLFCIN     | VLSEVCGQDITTKHMLPTVLR    | N-ter +28.03 Da, K +28.03 Da, C +57.02 Da | 43.2       | 69.6              | 4      | 2452.49                      | 0.93                                         | 0.07                  | 2AAA_MOUSE   |              | Serine/threonine-protein phosphatase 2A 65 kDa regulatory subunit A alpha isoform; | PP2A subunit A isoform PR65-alpha;PP2A subunit A isoform R1-alpha;                                                                                                                                                                                      |
| PFMWNHGLY      | VLTCPSNLGTGLR            | N-ter +34.06 Da, C +57.02 Da              | 21.8       | 53.9              | 3      | 1420.87                      | 0.16                                         | 0.01                  | KCRM_MOUSE   |              | Creatine kinase M-type;                                                            | Creatine kinase M chain;M-CK;                                                                                                                                                                                                                           |
| LSKHNHMAK      | VLTPDLYNKLR              | N-ter +34.06 Da, K +34.06 Da              | 25.9       | 26.7              | 3      | 1398.92                      | -0.32                                        | 0.02                  | KCRM_MOUSE   |              | Creatine kinase M-type;                                                            |                                                                                                                                                                                                                                                         |
| GFGSLGLMST     | VLVCPDGKIEAAHGTVTR       | N-ter +28.03 Da, K +28.03 Da, C +57.02 Da | 21.6       | 70.9              | 4      | 2279.36                      | 0.61                                         | 0.05                  | IDHP_MOUSE   |              | Isocitrate dehydrogenase [NADP], mitochondrial;                                    | ICD-M;IDP;NADP(+)-specific                                                                                                                                                                                                                              |
| DQVIQFFIAL     | VNDPOPEHPLR              | N-ter +34.06 Da                           | 27.8       | 58.5              | 3      | 1334.79                      | 0.57                                         | 0.05                  | UB2L3_MOUSE  |              | Ubiquitin-conjugating enzyme E2 L3;                                                | ICDH;Oxalosuccinate decarboxylase; UbchM4;Ubiquitin carrier protein L3;Ubiquitin-protein ligase L3;                                                                                                                                                     |
| M              | VNFTVDQIR                | N-ter +28.03 Da                           | 27.7       | 11.3              | 2      | 1118.62                      | 1.29                                         | 0.07                  | EF2_MOUSE    |              | Elongation factor 2;                                                               |                                                                                                                                                                                                                                                         |
| KSAVSLWAK      | VNPDEVGGEALGR            | N-ter +34.06 Da                           | 34.7       | 29.6              | 2      | 1345.74                      | -0.04                                        | 0.00                  | HBB2_MOUSE   |              | Hemoglobin subunit beta-2;                                                         | Beta-2-globin;Hemoglobin beta-2 chain;Hemoglobin beta-minor chain;                                                                                                                                                                                      |
| M              | VNPTVFDDITADDEPLGR       | N-ter +28.03 Da                           | 61.6       | 39.2              | 2      | 2033.09                      | 0.53                                         | 0.12                  | PPIA_MOUSE   | E9Q1E3_MOUSE | Peptidyl-prolyl cis-trans isomerase A;                                             | Cyclophilin A;Cyclosporin A-binding protein;Rotamase A;SP18;                                                                                                                                                                                            |
| KAAVSCLWKG     | VNSDEVGGEALGR            | N-ter +34.06 Da                           | 21.3       | 34.0              | 2      | 1335.73                      | -0.25                                        | 0.02                  | HBB1_MOUSE   |              | Hemoglobin subunit beta-1;                                                         | Beta-1-globin;Hemoglobin beta-1 chain;Hemoglobin beta-major chain;                                                                                                                                                                                      |
| NGKLTGMAFR     | VPTPNVSVDLTCR            | N-ter +34.06 Da, C +57.02 Da              | 57.5       | 36.0              | 3      | 1589.92                      | -1.29                                        | 0.16                  | G3PT_MOUSE   | G3P_MOUSE    | Glyceraldehyde-3-phosphate dehydrogenase, testis-specific;                         | Spermatogenic cell-specific glyceraldehyde 3-phosphate dehydrogenase 2;Spermatogenic glyceraldehyde-3-phosphate dehydrogenase; Acireductone dioxygenase (Fe(2+)-requiring);Membrane-type 1 matrix metalloproteinase cytoplasmic tail-binding protein 1; |
| M              | VQAWYMDSTADPR            | N-ter +34.06 Da                           | 31.6       | 58.4              | 3      | 1701.89                      | 0.30                                         | 0.02                  | MTND_MOUSE   |              | 1,2-dihydroxy-3-keto-5-methylthiopentene dioxygenase;                              |                                                                                                                                                                                                                                                         |
| QVFEMKVEK      | VQKLDSEAEIQR             | N-ter +34.06 Da, K +34.06 Da              | 25.2       | 82.7              | 4      | 1645.16                      | 0.47                                         | 0.02                  | SEPT7_MOUSE  | E9Q9F5_MOUSE | Septin-7;                                                                          | CDC10 protein homolog;                                                                                                                                                                                                                                  |
| SGKGTQCEKI     | VQKYGYTHLSTGDLR          | N-ter +34.06 Da, K +34.06 Da              | 20.5       | 66.0              | 4      | 1918.22                      | 0.88                                         | 0.05                  | KAD1_MOUSE   |              | Adenylate kinase isoenzyme 1;                                                      | ATP-AMP transphosphorylase 1;Myokininase;                                                                                                                                                                                                               |
| LSGTAGVQSQI    | VQLQGSQALVK              | N-ter +28.03 Da, K +28.03 Da              | 44.7       | 35.6              | 3      | 1483.88                      | 0.89                                         | 0.09                  | HVMO0_MOUSE  |              | Ig heavy chain V region;                                                           | Anti-arsenate antibody;                                                                                                                                                                                                                                 |

Table S7, Tholen et al.

| Non Prime Site | Prime Site                 | Modifications                             | Hyperscore | Mass error in ppm | Charge | Precursor neutral mass in Da | Fold change (log <sub>2</sub> ) of ASAPRatio | FC-error of ASAPRatio | Uniprot ID 1 | Uniprot ID 2 | Protein Name 1                                          | Protein Name 2                                                                                                                                                                                                                                                                                 |
|----------------|----------------------------|-------------------------------------------|------------|-------------------|--------|------------------------------|----------------------------------------------|-----------------------|--------------|--------------|---------------------------------------------------------|------------------------------------------------------------------------------------------------------------------------------------------------------------------------------------------------------------------------------------------------------------------------------------------------|
| MSKALPLTKV     | VQNDAYTAPVLPSSVR           | N-ter +28.03 Da                           | 26.2       | 50.2              | 3      | 1744.00                      | -0.15                                        | 0.01                  | PDIP3_MOUSE  | Q3UDD3_MOUSE | Polymerase delta-interacting protein 3;                 | S6K1 Aly/REF-like target; Germ cell lineage protein gercelin;Src-suppressed C kinase substrate;                                                                                                                                                                                                |
| LELESKSNKI     | VQSVIQTAVDQFAR             | N-ter +28.03 Da                           | 26.3       | 47.1              | 3      | 1588.93                      | 0.10                                         | 0.00                  | AKA12_MOUSE  |              | A-kinase anchor protein 12;                             |                                                                                                                                                                                                                                                                                                |
| EMVAKQIPYD     | VQYSIDIYMER                | N-ter +34.06 Da                           | 26.2       | 25.1              | 3      | 1451.72                      | -3.32                                        | 0.33                  | B5THE2_MOUSE |              |                                                         |                                                                                                                                                                                                                                                                                                |
| RSIIRNVKGP     | VREGDVLTLLESER             | N-ter +34.06 Da                           | 48.3       | 78.6              | 3      | 1649.05                      | -0.84                                        | 0.08                  | RS28_MOUSE   |              | 40S ribosomal protein S28;                              |                                                                                                                                                                                                                                                                                                |
| TSVVRPFAKL     | VRPPVQVYIEGR               | N-ter +28.03 Da                           | 49.0       | 34.7              | 3      | 1496.90                      | 0.45                                         | 0.02                  | ATPO_MOUSE   | D3Z4J0_MOUSE | ATP synthase subunit O, mitochondrial;                  | Oligomycin sensitivity conferral protein;                                                                                                                                                                                                                                                      |
| FGTKGLAVTF     | VSDENDAKILNDVQDR           | N-ter +28.03 Da, K +28.03 Da              | 23.5       | 62.8              | 3      | 1886.06                      | -0.40                                        | 0.05                  | DX39A_MOUSE  | DX39B_MOUSE  | ATP-dependent RNA helicase DDX39A;                      | DEAD box protein 39;                                                                                                                                                                                                                                                                           |
| SEGNELLVQF     | VSDLSVTADGFSASYR           | N-ter +34.06 Da                           | 36.5       | 48.5              | 3      | 1707.94                      | 0.82                                         | 0.04                  | PCOC1_MOUSE  | D3YUE2_MOUSE | Procollagen C-endopeptidase enhancer 1;                 | P14;Procollagen COOH-terminal proteinase enhancer 1;Type 1 procollagen C-proteinase enhancer protein;Type I procollagen COOH-terminal proteinase enhancer;                                                                                                                                     |
| DNGMVLGEGE     | VSDNELQELSTQGSIR           | N-ter +34.06 Da                           | 49.0       | 58.0              | 3      | 1695.95                      | 0.52                                         | 0.04                  | CLUS_MOUSE   | E9Q9B8_MOUSE | Clusterin;                                              | Apolipoprotein J;Clustrin;Sulfated glycoprotein 2;                                                                                                                                                                                                                                             |
| GMKVLQTRGF     | VSDSSDSMDTGAGSIR           | N-ter +34.06 Da                           | 69.5       | 34.3              | 2      | 1617.79                      | 0.65                                         | 0.10                  | ATIF1_MOUSE  | Q9D879_MOUSE | ATPase inhibitor, mitochondrial;                        | Inhibitor of F(1)F(o)-ATPase; RNA exonuclease 2 homolog;Small fragment nuclease;                                                                                                                                                                                                               |
| GRRQGFGARG     | VSEGSAAAMAGESMAQR          | N-ter +28.03 Da                           | 60.1       | 62.8              | 3      | 1679.87                      | 0.03                                         | 0.00                  | ORN_MOUSE    |              | Oligoribonuclease, mitochondrial;                       |                                                                                                                                                                                                                                                                                                |
| IESTECRKR      | VSGEHMDLTTCLPAAGGQQEKLK    | N-ter +28.03 Da, K +28.03 Da, C +57.02 Da | 58.0       | 68.9              | 4      | 2553.44                      | 0.37                                         | 0.04                  | Q9D1B1_MOUSE |              |                                                         |                                                                                                                                                                                                                                                                                                |
| VWAAVPGKTF     | VSITPAEVGLVGVKDR           | N-ter +34.06 Da, K +34.06 Da              | 33.0       | 58.9              | 3      | 1707.16                      | -1.43                                        | 0.12                  | PROF1_MOUSE  | Q5SX49_MOUSE | Profilin-1;                                             | Profilin I; Lysosomal pepstatin-insensitive pretease;Tripeptidyl aminopeptidase;Tripeptidyl-peptidase I; DNA-binding p52/p100 complex, 100 kDa subunit;Polypyrimidine tract-binding protein-associated-splicing factor; 63 kDa FK506-binding protein;FK506-binding protein 9;FKBP65R;Rotamase; |
| QRPEPQQVGT     | VSLHLGVTPSVLR              | N-ter +34.06 Da                           | 34.8       | 54.4              | 3      | 1410.95                      | 0.19                                         | 0.04                  | TPP1_MOUSE   |              | Tripeptidyl-peptidase 1;                                |                                                                                                                                                                                                                                                                                                |
| ALSVRNLSPY     | VSNELLEAFSQFGPIER          | N-ter +28.03 Da                           | 45.0       | 59.0              | 3      | 2092.17                      | 0.94                                         | 0.20                  | SFPQ_MOUSE   |              | Splicing factor, proline- and glutamine-rich;           |                                                                                                                                                                                                                                                                                                |
| GQAAAPVLGLA    | VSSELQIQSQVFPDECPR         | N-ter +34.06 Da, C +57.02 Da              | 41.5       | 22.6              | 3      | 2152.12                      | -0.32                                        | 0.03                  | FKBP9_MOUSE  |              | Peptidyl-prolyl cis-trans isomerase FKBP9;              |                                                                                                                                                                                                                                                                                                |
| FSFVGEACKK     | VTFHVPSTLEVDKIIGR          | N-ter +28.03 Da, K +28.03 Da              | 22.4       | 99.1              | 4      | 1966.32                      | 1.14                                         | 0.06                  | DSC3_MOUSE   |              | Desmocollin-3;                                          |                                                                                                                                                                                                                                                                                                |
| SLAGNTFSAK     | VTGKEASCHDAVAGCPR          | N-ter +28.03 Da, K +28.03 Da, C +57.02 Da | 25.8       | 105.8             | 4      | 1870.08                      | -0.07                                        | 0.02                  | ISK3_MOUSE   |              | Serine protease inhibitor Kazal-type 3;                 | P12;Prostatic secretory glycoprotein;                                                                                                                                                                                                                                                          |
| ARQSRRTQGG     | VTLTDLQEAETIGR             | N-ter +34.06 Da, K +34.06 Da              | 22.4       | 67.3              | 3      | 1741.14                      | -0.11                                        | 0.01                  | MYPT1_MOUSE  |              | Protein phosphatase 1 regulatory subunit 12A;           | Myosin phosphatase-targeting subunit 1;                                                                                                                                                                                                                                                        |
| YSPLAHRAYS     | VWAGGPEVLTLPER             | N-ter +34.06 Da                           | 41.1       | 44.4              | 3      | 1457.89                      | 0.08                                         | 0.00                  | D2HDH_MOUSE  | E9QN44_MOUSE | D-2-hydroxyglutarate dehydrogenase, mitochondrial;      |                                                                                                                                                                                                                                                                                                |
| SPLPVIPIHQK    | VWANSAPANADYQER            | N-ter +34.06 Da                           | 37.0       | 76.8              | 3      | 1566.91                      | -0.81                                        | 0.09                  | E9PVJ9_MOUSE |              |                                                         | Myopodin;                                                                                                                                                                                                                                                                                      |
| STSQLVACTK     | VVAPTSSPVCQQLVEAGR         | N-ter +28.03 Da, C +57.02 Da              | 49.2       | 26.4              | 3      | 2167.19                      | 1.14                                         | 0.12                  | TLN1_MOUSE   | F8WGT0_MOUSE | Talin-1;                                                | Cold shock domain-containing protein A;Y-box protein 3;                                                                                                                                                                                                                                        |
| AKRQSRMEKY     | VVSDSTVQAHTVR              | N-ter +34.06 Da                           | 47.4       | 70.8              | 3      | 1459.89                      | 0.60                                         | 0.08                  | SNYP2_MOUSE  | D3YVY9_MOUSE | Synaptopodin-2;                                         | Chromosome region maintenance 1 protein homolog;                                                                                                                                                                                                                                               |
| VGDGETVEFD     | VVEGEGAEAAVNTGPDGVPVEGSR   | N-ter +28.03 Da, K +28.03 Da              | 49.2       | 68.9              | 4      | 2479.43                      | 0.80                                         | 0.09                  | DBPA_MOUSE   | F6TIF5_MOUSE | DNA-binding protein A;                                  |                                                                                                                                                                                                                                                                                                |
| SRMAKPEEVL     | VVENDQGEVVR                | N-ter +34.06 Da                           | 23.8       | 26.7              | 2      | 1276.72                      | 1.14                                         | 0.10                  | XPO1_MOUSE   |              | Exportin-1;                                             |                                                                                                                                                                                                                                                                                                |
| LIATEEGFKA     | VVGDEYLHFFHHR              | N-ter +28.03 Da                           | 36.4       | 94.3              | 4      | 1650.95                      | 1.02                                         | 0.11                  | LEG7_MOUSE   | Q9CRB1_MOUSE | Galectin-7;                                             |                                                                                                                                                                                                                                                                                                |
| DGVHNLKVPF     | VVQLSGHLAQETER             | N-ter +34.06 Da                           | 38.5       | 55.3              | 3      | 1599.97                      | 1.49                                         | 0.11                  | APDAA4_MOUSE |              | Apolipoprotein A-IV;                                    | Apolipoprotein A4;                                                                                                                                                                                                                                                                             |
| PKFLTPLMDR     | VVVAGYTAALNCAVR            | N-ter +34.06 Da, C +57.02 Da              | 43.2       | 31.6              | 3      | 1596.94                      | -1.60                                        | 0.10                  | MYPC2_MOUSE  | F8W134_MOUSE | Myosin-binding protein C, fast-type;                    | C-protein, skeletal muscle fast isoform;                                                                                                                                                                                                                                                       |
| AALPADPPAS     | VVVGPPVVPR                 | N-ter +34.06 Da                           | 26.8       | 26.7              | 2      | 1053.74                      | 0.42                                         | 0.02                  | FETUA_MOUSE  |              | Alpha-2-HS-glycoprotein;                                | Countertrypin;Fetuin-A; Serine-rich spermatocytes and round spermatid 59 kDa protein;p59scr; MMGL;Macrophage galactose/N-acetylgalactosamine-specific lectin;                                                                                                                                  |
| RCTVSLARYR     | VVVKEEMDASIKMKK            | N-ter +28.03 Da, K +28.03 Da              | 28.6       | 18.3              | 3      | 1874.13                      | 1.91                                         | 0.37                  | SPAS2_MOUSE  |              | Spermatogenesis-associated serine-rich protein 2;       |                                                                                                                                                                                                                                                                                                |
| FSLGLSLLLL     | VVVSVIGSQNSQLR             | N-ter +34.06 Da                           | 36.7       | 29.4              | 3      | 1518.94                      | 0.18                                         | 0.01                  | MMGL_MOUSE   | F8WHB7_MOUSE | Macrophage asialoglycoprotein-binding protein 1;        |                                                                                                                                                                                                                                                                                                |
| YSDSPGLHRY     | VWLVYEQEQPLSCDEPILSNKSGDNR | N-ter +34.06 Da, K +34.06 Da, C +57.02 Da | 55.7       | 75.0              | 4      | 3143.82                      | 4.27                                         | 0.29                  | PEBP1_MOUSE  | D3Z1V4_MOUSE | Phosphatidylethanolamine-binding protein 1;             | HCNPPp;                                                                                                                                                                                                                                                                                        |
| IWHNDKNSFL     | VWVNEEDHLR                 | N-ter +28.03 Da                           | 35.8       | 50.4              | 3      | 1323.72                      | -0.22                                        | 0.00                  | KCRM_MOUSE   |              | Creatine kinase M-type;                                 | Creatine kinase M chain;M-CK;                                                                                                                                                                                                                                                                  |
| GSVAGGAVYL     | VYDQELGSPDKSEAAALR         | N-ter +28.03 Da, K +28.03 Da              | 31.8       | 58.0              | 3      | 2046.18                      | 0.50                                         | 0.09                  | QIL1_MOUSE   |              | Protein QIL1;                                           |                                                                                                                                                                                                                                                                                                |
| SPGLHRYVWL     | VVEEQEQPLSCDEPILSNKSGDNR   | N-ter +34.06 Da, K +34.06 Da, C +57.02 Da | 46.0       | 76.6              | 4      | 2745.57                      | -2.74                                        | 0.55                  | PEBP1_MOUSE  | D3Z1V4_MOUSE | Phosphatidylethanolamine-binding protein 1;             | HCNPPp;                                                                                                                                                                                                                                                                                        |
| KIKGLVRAPQ     | VVILPPPAEQLSR              | N-ter +28.03 Da                           | 37.9       | 38.3              | 3      | 1509.91                      | -0.74                                        | 0.03                  | IGG2B_MOUSE  |              | Ig gamma-2B chain C region;                             |                                                                                                                                                                                                                                                                                                |
| DAEKAVSCL      | WAKVNPDEVGGEALGR           | N-ter +34.06 Da, K +34.06 Da              | 37.0       | 53.0              | 3      | 1765.07                      | -3.06                                        | 0.26                  | HBB2_MOUSE   |              | Hemoglobin subunit beta-2;                              | Beta-2-globin;Hemoglobin beta-2 chain;Hemoglobin beta-minor chain;                                                                                                                                                                                                                             |
| VSLYGNPURY     | WEIFPNTR                   | N-ter +28.03 Da                           | 24.0       | 46.3              | 2      | 1236.69                      | -1.89                                        | 0.21                  | PGS2_MOUSE   |              | Decorin;                                                | Bone proteoglycan II;PG-S2;PG40;                                                                                                                                                                                                                                                               |
| LLPQWPAASA     | WELTILHTNDVHSR             | N-ter +34.06 Da                           | 25.5       | 93.0              | 4      | 1754.10                      | 0.58                                         | 0.03                  | SNTD_MOUSE   |              | 5'-nucleotidase;                                        | Ecto-5'-nucleotidase;                                                                                                                                                                                                                                                                          |
| GVAGSLMAVA     | WFIITQEILTPFR              | N-ter +34.06 Da                           | 19.6       | 72.5              | 4      | 1907.25                      | 0.04                                         | 0.00                  | DOPP1_MOUSE  |              | Dolichyl pyrophosphatase 1;                             | Dolichyl pyrophosphatase 1;Protein 2-23;                                                                                                                                                                                                                                                       |
| DAEKAASVCL     | WGKVNDSDEGGEALGR           | N-ter +28.03 Da, K +28.03 Da              | 32.5       | 70.4              | 3      | 1729.00                      | -0.27                                        | 0.03                  | HBB1_MOUSE   |              | Hemoglobin subunit beta-1;                              | Beta-1-globin;Hemoglobin beta-1 chain;Hemoglobin beta-major chain;                                                                                                                                                                                                                             |
| LASLTFQQM      | WISKQYDESGPSIVHR           | N-ter +34.06 Da, K +34.06 Da              | 42.1       | 75.3              | 4      | 2098.27                      | 0.36                                         | 0.05                  | ACTB_MOUSE   | ACTG_MOUSE   | Actin, cytoplasmic 1;                                   | Beta-actin;                                                                                                                                                                                                                                                                                    |
| LASLTFQQM      | WITKQYDEAGPSIVHR           | N-ter +34.06 Da, K +34.06 Da              | 35.3       | 52.9              | 4      | 2096.24                      | 0.35                                         | 0.03                  | ACTS_MOUSE   |              | Actin, alpha skeletal muscle;                           | Alpha-actin-1;                                                                                                                                                                                                                                                                                 |
| KDTIARLPF      | WNEEIIAPKIKAGQR            | N-ter +34.06 Da, K +34.06 Da              | 26.1       | 83.0              | 4      | 1741.22                      | -0.97                                        | 0.10                  | PGAM2_MOUSE  |              | Phosphoglycerate mutase 2;                              | BPG-dependent PGAM 2;Muscle-specific phosphoglycerate mutase;Phosphoglycerate mutase isozyme M;                                                                                                                                                                                                |
| LAHFDRVMT      | WVFEEDIGGR                 | N-ter +34.06 Da                           | 31.0       | 57.1              | 2      | 1240.70                      | 3.12                                         | 0.10                  | GPDA_MOUSE   | E0CXN5_MOUSE | Glycerol-3-phosphate dehydrogenase [NAD+], cytoplasmic; |                                                                                                                                                                                                                                                                                                |

Table S7, Tholen et al.

| Non Prime Site                                                                                 | Prime Site                                                                                                                           | Modifications                                                                                                                                  | Hyperscore                                           | Mass error in ppm                                    | Charge                          | Precursor neutral mass in Da                                              | Fold change (log <sub>2</sub> ) of ASAPRatio             | FC-error of ASAPRatio                                | Uniprot ID 1                                                                                      | Uniprot ID 2                                                              | Protein Name 1                                                                                                                                                                                                                                     | Protein Name 2                                                                                                                                                                              |
|------------------------------------------------------------------------------------------------|--------------------------------------------------------------------------------------------------------------------------------------|------------------------------------------------------------------------------------------------------------------------------------------------|------------------------------------------------------|------------------------------------------------------|---------------------------------|---------------------------------------------------------------------------|----------------------------------------------------------|------------------------------------------------------|---------------------------------------------------------------------------------------------------|---------------------------------------------------------------------------|----------------------------------------------------------------------------------------------------------------------------------------------------------------------------------------------------------------------------------------------------|---------------------------------------------------------------------------------------------------------------------------------------------------------------------------------------------|
| SAAVLRPGLG<br>SNQGRYYEYP                                                                       | WYTVNSAYGDTIVMPCR<br>YAAGPSYGGR                                                                                                      | N-ter +28.03 Da, C +57.02 Da<br>N-ter +28.03 Da                                                                                                | 32.9<br>23.5                                         | 58.6<br>46.6                                         | 3<br>2                          | 2060.07<br>1025.54                                                        | 0.72<br>-0.03                                            | 0.11<br>0.01                                         | CD166_MOUSE<br>LPP_MOUSE                                                                          | Q5MPX5_MOUSE                                                              | CD166 antigen;<br>Lipoma-preferred partner homolog;                                                                                                                                                                                                | Activated leukocyte cell adhesion molecule;Protein DM-GRASP;<br>Myc-induced SUN domain-containing protein;NOL1/NOP2/Sun domain family member 2;<br>Thioredoxin domain-containing protein 7; |
| DPLFPPIEK<br>QSDGLWLVF<br>NSPLVRLTL                                                            | YALDPSFPR<br>YAPWCGHCQR<br>YDIAHTPGVAADLSHIETR                                                                                       | N-ter +28.03 Da<br>N-ter +28.03 Da, C +57.02 Da<br>N-ter +34.06 Da                                                                             | 30.1<br>22.6<br>27.1                                 | 48.6<br>66.9<br>58.8                                 | 2<br>3<br>4                     | 1092.61<br>1361.67<br>2099.21                                             | -2.06<br>-0.69<br>-0.67                                  | 0.00<br>0.10<br>0.09                                 | NSUN2_MOUSE<br>PDIAG_MOUSE<br>MDHM_MOUSE                                                          | Q3TML0_MOUSE                                                              | tRNA (cytosine(34)-C(5))-methyltransferase;<br>Protein disulfide-isomerase A6;<br>Malate dehydrogenase, mitochondrial;<br>Electron transfer flavoprotein subunit alpha, mitochondrial;<br>Glyceraldehyde-3-phosphate dehydrogenase;<br>Pleckstrin; |                                                                                                                                                                                             |
| LKSGENFKLL<br>NDFVFKLSW<br>LREDPAYLHW<br>VKCAQIEAKF<br>VNIIGGAGSYI<br>TWSFSEWQMA<br>PPLNPLISAN | YDLADQLHAAVGASR<br>YDNEYGYSNR<br>YDPAGGEDPLGAVHLR<br>YEEVHDLER<br>YEPQTEAPQVTGPIEVPVVR<br>YEPQGGSSYDYSYAGGR<br>YERPVLHLVALINTPVAGDIR | N-ter +34.06 Da<br>N-ter +34.06 Da<br>N-ter +34.06 Da<br>N-ter +34.06 Da<br>N-ter +28.03 Da, K +28.03 Da<br>N-ter +34.06 Da<br>N-ter +34.06 Da | 52.1<br>28.3<br>75.3<br>22.2<br>56.3<br>47.6<br>42.6 | 72.3<br>66.2<br>69.1<br>71.7<br>72.6<br>53.8<br>58.8 | 3<br>3<br>3<br>3<br>4<br>3<br>4 | 1619.96<br>1313.66<br>1699.99<br>1222.69<br>2392.47<br>1859.92<br>2266.48 | -0.60<br>-1.29<br>0.50<br>-3.47<br>0.89<br>-0.49<br>1.39 | 0.05<br>0.09<br>0.06<br>0.39<br>0.09<br>0.06<br>0.11 | ETFA_MOUSE<br>G3P_MOUSE<br>PLEK_MOUSE<br>NP1L1_MOUSE<br>CRIP2_MOUSE<br>HNRPK_MOUSE<br>COFA1_MOUSE | G3PT_MOUSE<br>Q8CAG6_MOUSE<br>NP1L4_MOUSE<br>E9Q8D6_MOUSE<br>A2AIJ7_MOUSE | Glyceraldehyde-3-phosphate dehydrogenase;<br>Nucleosome assembly protein 1-like 1;<br>Cysteine-rich protein 2;<br>Heterogeneous nuclear ribonucleoprotein K;<br>Collagen alpha-1(XV) chain;                                                        | Peptidyl-cysteine S-nitrosylase GAPDH;<br>Brain protein DN38;NAP-1-related protein;<br>Heart LIM protein;                                                                                   |
| LGLAAADPAI                                                                                     | YFKEQFLDGDWATNR                                                                                                                      | N-ter +28.03 Da, K +28.03 Da<br>N-ter +28.03 Da, K +28.03 Da, C +57.02 Da                                                                      | 43.1<br>19.7                                         | 64.6<br>70.4                                         | 3<br>3                          | 1945.06<br>1910.99                                                        | 1.64<br>0.12                                             | 0.22<br>0.02                                         | CALR_MOUSE<br>ALBU_MOUSE                                                                          |                                                                           | Calreticulin;<br>Serum albumin;                                                                                                                                                                                                                    | CRP55;Calregulin;Endoplasmic reticulum resident protein 60;HACBP;                                                                                                                           |
| LCAIPNLREN<br>QPQQQMTSS                                                                        | YELADCCTKQEPER<br>YGGYKEPAAPVSIQR                                                                                                    | N-ter +28.03 Da, K +28.03 Da, C +57.02 Da<br>N-ter +34.06 Da, K +34.06 Da                                                                      | 19.7<br>22.6                                         | 70.4<br>55.6                                         | 3<br>3                          | 1910.99<br>1703.06                                                        | 0.12<br>-0.25                                            | 0.02<br>0.02                                         | ALBU_MOUSE<br>LASP1_MOUSE                                                                         | A2A6H0_MOUSE                                                              | LIM and SH3 domain protein 1;<br>Swi5-dependent recombination DNA repair protein 1 homolog;                                                                                                                                                        | Metastatic lymph node gene 50 protein;                                                                                                                                                      |
| KLTLTLDIF<br>YEEALCLATH<br>AMGEPGRGP<br>LGGNFASQMS                                             | YGIDDDLLHYNR<br>YGLDIDLVIQR<br>YGLPGKDGEPGLDGFPGPR<br>YGYDEKSAGVSPVPMGPGSGPR                                                         | N-ter +28.03 Da<br>N-ter +28.03 Da<br>N-ter +28.03 Da, K +28.03 Da<br>N-ter +34.06 Da, K +34.06 Da                                             | 35.4<br>21.7<br>30.3<br>59.4                         | 43.4<br>44.8<br>45.9<br>56.4                         | 3<br>2<br>3<br>3                | 1519.81<br>1369.75<br>1984.10<br>2275.29                                  | -0.34<br>3.30<br>1.56<br>1.24                            | 0.03<br>0.15<br>0.13<br>0.19                         | SFR1_MOUSE<br>E9Q411_MOUSE<br>COP1A_MOUSE<br>CO1A1_MOUSE                                          | D3Z3G9_MOUSE<br>F8WGB7_MOUSE                                              | Collagen alpha-1(XIV) chain;<br>Collagen alpha-1(I) chain;                                                                                                                                                                                         | CLAC-P;<br>Alpha-1 type I collagen;                                                                                                                                                         |
| GTQCEKIVQK                                                                                     | YGYTHLSTGDLR                                                                                                                         | N-ter +34.06 Da                                                                                                                                | 38.8                                                 | 50.0                                                 | 3                               | 1528.89                                                                   | -1.32                                                    | 0.10                                                 | KAD1_MOUSE                                                                                        |                                                                           | Adenylate kinase isoenzyme 1;                                                                                                                                                                                                                      | ATP-AMP transphosphorylase 1;Myokinase;                                                                                                                                                     |
| KAIMTYVSSF<br>AKVNDLVATA                                                                       | YHAFSGAQKAETAANR<br>YKTIKTKLPLTLR                                                                                                    | N-ter +34.06 Da, K +34.06 Da<br>N-ter +34.06 Da, K +34.06 Da<br>N-ter +28.03 Da, K +28.03 Da, C +57.02 Da                                      | 29.9<br>14.5                                         | 98.0<br>85.6                                         | 4<br>4                          | 1789.13<br>1710.39                                                        | -1.60<br>-0.86                                           | 0.15<br>0.03                                         | ACTN1_MOUSE<br>COG3_MOUSE                                                                         | ACTN4_MOUSE<br>E9QL65_MOUSE                                               | Alpha-actinin-1;<br>Conserved oligomeric Golgi complex subunit 3;                                                                                                                                                                                  | Alpha-actinin cytoskeletal isoform;F-actin cross-linking protein;Non-muscle alpha-actinin-1;<br>Component of oligomeric Golgi complex 3;                                                    |
| VSADTRCHSC<br>AGLPTSLTL<br>KYQLVAGIKY                                                          | YKVPVLGCVDR<br>YLDNKNKINPDEYFKR<br>YLTLDIESTECR                                                                                      | N-ter +28.03 Da<br>N-ter +28.03 Da, K +28.03 Da<br>N-ter +34.06 Da, C +57.02 Da                                                                | 30.9<br>41.1<br>35.0                                 | 47.4<br>60.5<br>40.8                                 | 3<br>4<br>3                     | 1360.82<br>2212.29<br>1532.82                                             | 0.77<br>1.55<br>-1.25                                    | 0.01<br>0.06<br>0.15                                 | LY66C_MOUSE<br>LUM_MOUSE<br>Q9D181_MOUSE                                                          |                                                                           | Lymphocyte antigen 6 complex locus protein G6c;<br>Lumican;                                                                                                                                                                                        | Keratan sulfate proteoglycan lumican;                                                                                                                                                       |
| LGKLPFLAF                                                                                      | YMEKNQLEEVPSALPR                                                                                                                     | N-ter +34.06 Da, K +34.06 Da                                                                                                                   | 39.5                                                 | 61.8                                                 | 3                               | 1971.20                                                                   | 0.28                                                     | 0.02                                                 | PRELP_MOUSE                                                                                       |                                                                           | Prolargin;                                                                                                                                                                                                                                         | Proline-arginine-rich end leucine-rich repeat protein;                                                                                                                                      |
| ETIKRLETY                                                                                      | YNATEPVISFYDKR                                                                                                                       | N-ter +34.06 Da, K +34.06 Da                                                                                                                   | 29.1                                                 | 63.6                                                 | 3                               | 1770.08                                                                   | -1.03                                                    | 0.11                                                 | KAD1_MOUSE                                                                                        |                                                                           | Adenylate kinase isoenzyme 1;<br>WD repeat domain phosphoinositide-interacting protein 2;                                                                                                                                                          | ATP-AMP transphosphorylase 1;Myokinase;                                                                                                                                                     |
| VGASDGYLYM                                                                                     | YNLDPQEGGECALMR                                                                                                                      | N-ter +28.03 Da, C +57.02 Da                                                                                                                   | 43.1                                                 | 54.4                                                 | 3                               | 1779.89                                                                   | 0.85                                                     | 0.09                                                 | WIPI2_MOUSE                                                                                       | D3YWK1_MOUSE                                                              |                                                                                                                                                                                                                                                    |                                                                                                                                                                                             |
| DLAVDSASPV<br>DKAKELWDTL                                                                       | YQAVIKTQSKPEDEADEWAR<br>YQLETDKFEGEKLR                                                                                               | N-ter +34.06 Da, K +34.06 Da<br>N-ter +28.03 Da, K +28.03 Da                                                                                   | 16.1<br>19.5                                         | 59.9<br>77.3                                         | 4<br>4                          | 2465.48<br>2142.34                                                        | 0.00<br>2.04                                             | 0.00<br>0.21                                         | LDB3_MOUSE<br>TNNT3_MOUSE                                                                         | E9PYJ9_MOUSE<br>A2A6J0_MOUSE                                              | LIM domain-binding protein 3;<br>Troponin T, fast skeletal muscle;                                                                                                                                                                                 | Protein cypher;Protein oracle;Z-band alternatively spliced PDZ-motif protein;<br>Fast skeletal muscle troponin T;<br>NFAT pre-existing subunit;T-cell transcription factor NFAT1;           |
| SKSLSPGLLG<br>PGLTGNFAAQ<br>SPRRSQVHPE                                                         | YQQPSSLAAPGLADADR<br>YSDKGVSSGPGMGLMGPR<br>YSEGEAHSEVSQR                                                                             | N-ter +34.06 Da<br>N-ter +34.06 Da, K +34.06 Da<br>N-ter +34.06 Da                                                                             | 45.9<br>67.9<br>42.1                                 | 54.2<br>58.4<br>69.1                                 | 3<br>3<br>3                     | 1954.19<br>1960.13<br>1511.81                                             | -1.22<br>1.98<br>1.01                                    | 0.06<br>0.07<br>0.24                                 | NFAC2_MOUSE<br>CO1A2_MOUSE<br>FILA2_MOUSE                                                         | B5B2Q6_MOUSE<br>E0CX12_MOUSE<br>E9QPZ3_MOUSE                              | Nuclear factor of activated T-cells, cytoplasmic 2;<br>Collagen alpha-2(I) chain;<br>Filaggrin-2;                                                                                                                                                  | Alpha-2 type I collagen;<br>Intermediate filament-associated protein;                                                                                                                       |
| PAAAVCSIRC                                                                                     | YSHGSHETDEEFDR                                                                                                                       | N-ter +34.06 Da                                                                                                                                | 20.4                                                 | 113.2                                                | 4                               | 1812.98                                                                   | -0.09                                                    | 0.01                                                 | COX5A_MOUSE                                                                                       |                                                                           | Cytochrome c oxidase subunit 5A, mitochondrial;                                                                                                                                                                                                    | Cytochrome c oxidase polypeptide Va;<br>Alcohol sulfotransferase;Hydroxysteroid sulfotransferase 2;                                                                                         |
| AAMKANTMSN<br>CTFFLAVSGL                                                                       | YSLLPASLLDHR<br>YSSDDVIELTPSNFNR                                                                                                     | N-ter +28.03 Da<br>N-ter +34.06 Da                                                                                                             | 45.5<br>49.0                                         | 78.0<br>39.0                                         | 3<br>3                          | 1411.89<br>1977.03                                                        | 0.66<br>0.60                                             | 0.08<br>0.05                                         | ST2B1_MOUSE<br>PDIAG_MOUSE                                                                        | E9QKC1_MOUSE<br>Q3TML0_MOUSE                                              | Sulfotransferase family cytosolic 2B member 1;<br>Protein disulfide-isomerase A6;                                                                                                                                                                  | Thioredoxin domain-containing protein 7;<br>Sterile alpha motif domain-containing protein 4B;<br>Protein FAM121B;                                                                           |
| QIIHPIKA<br>SYMKIDELSL<br>NCCSRPVGGR<br>GAGNNAKAGH<br>YGFQNAILVR                               | YSVLQATPTAKDEGR<br>YSPVEGQSKYVEEPR<br>YTAPVGPVTTASAR<br>YTEGAEALVDSVLDVVR<br>YTQKAPQVSTPLVEAAR                                       | N-ter +28.03 Da, K +28.03 Da<br>N-ter +34.06 Da, K +34.06 Da<br>N-ter +28.03 Da<br>N-ter +34.06 Da<br>N-ter +28.03 Da, K +28.03 Da             | 36.4<br>22.7<br>42.0<br>63.2<br>53.4                 | 65.8<br>67.4<br>44.5<br>59.1<br>60.6                 | 3<br>3<br>3<br>3<br>3           | 1691.00<br>1835.10<br>1417.82<br>1798.06<br>2015.23                       | 0.12<br>-0.07<br>-0.22<br>-0.27<br>1.18                  | 0.01<br>0.01<br>0.03<br>0.03<br>0.14                 | SMAG2_MOUSE<br>APOO_MOUSE<br>E9Q2E9_MOUSE<br>TBB2B_MOUSE<br>ALBU_MOUSE                            | B1ASQ2_MOUSE                                                              | Protein Smaug homolog 2;<br>Apolipoprotein O;<br>Tubulin beta-2A chain;<br>Serum albumin;                                                                                                                                                          |                                                                                                                                                                                             |
| QKIGQPTLLL                                                                                     | YVDAGAETMTQR                                                                                                                         | N-ter +28.03 Da                                                                                                                                | 31.1                                                 | 70.5                                                 | 3                               | 1368.73                                                                   | 0.64                                                     | 0.03                                                 | KAD1_MOUSE                                                                                        |                                                                           | Adenylate kinase isoenzyme 1;                                                                                                                                                                                                                      | ATP-AMP transphosphorylase 1;Myokinase;<br>Alpha-tubulin 1;Alpha-tubulin isoform M-alpha-1;Tubulin alpha-1 chain;                                                                           |
| MYAKRAFVHW<br>HPFMWNEHLG<br>KAPEGEETF<br>DPALKYNVTVW                                           | YVGEEMEEGFSEAR<br>YVLTCPNSLGTGLR<br>YVSPDELEAQLQSDER<br>YVSSSPCAACADR                                                                | N-ter +28.03 Da<br>N-ter +28.03 Da, C +57.02 Da<br>N-ter +34.06 Da<br>N-ter +34.06 Da, C +57.02 Da                                             | 42.0<br>26.8<br>47.7<br>32.7                         | 67.8<br>49.8<br>46.0<br>67.4                         | 3<br>3<br>3<br>3                | 1716.85<br>1577.90<br>1912.02<br>1476.75                                  | 0.10<br>-1.18<br>0.77<br>-0.11                           | 0.02<br>0.08<br>0.06<br>0.03                         | TBA1A_MOUSE<br>KCRM_MOUSE<br>DNIC5_MOUSE<br>ABEC2_MOUSE                                           | TBA1B_MOUSE                                                               | Tubulin alpha-1A chain;<br>Creatine kinase M-type;<br>DnaJ homolog subfamily C member 5;<br>Probable C->U-editing enzyme APOBEC-2;                                                                                                                 | Creatine kinase M chain;M-CK;<br>Cysteine string protein;                                                                                                                                   |
| SLWKFETSKY<br>LQKRPKPDEK                                                                       | YVTIIDAPGHR<br>YVSSSIWGTPCGLDR                                                                                                       | N-ter +34.06 Da<br>N-ter +34.06 Da, C +57.02 Da                                                                                                | 41.5<br>23.3                                         | 50.5<br>88.1                                         | 3<br>4                          | 1274.78<br>1910.04                                                        | 0.41<br>-6.64                                            | 0.01<br>0.00                                         | EF1A1_MOUSE<br>DCOR_MOUSE                                                                         | D3Z3I8_MOUSE<br>Q8CIC5_MOUSE                                              | Elongation factor 1-alpha 1;<br>Ornithine decarboxylase;                                                                                                                                                                                           | Elongation factor Tu;Eukaryotic elongation factor 1 A-1;                                                                                                                                    |

---

| Non Prime Site | Prime Site | Modifications | Hyperscore | Mass error<br>in ppm | Charge | Precursor<br>neutral mass<br>in Da | Fold change<br>(log <sub>2</sub> ) of<br>ASAPRatio | FC-error of<br>ASAPRatio | Uniprot ID 1 | Uniprot ID 2 | Protein Name 1 | Protein Name 2 |
|----------------|------------|---------------|------------|----------------------|--------|------------------------------------|----------------------------------------------------|--------------------------|--------------|--------------|----------------|----------------|
|----------------|------------|---------------|------------|----------------------|--------|------------------------------------|----------------------------------------------------|--------------------------|--------------|--------------|----------------|----------------|

---

---

| Non Prime Site | Prime Site | Modifications | Hyperscore | Mass error<br>in ppm | Charge | Precursor<br>neutral mass<br>in Da | Fold change<br>(log <sub>2</sub> ) of<br>ASAPRatio | FC-error of<br>ASAPRatio | Uniprot ID 1 | Uniprot ID 2 | Protein Name 1 | Protein Name 2 |
|----------------|------------|---------------|------------|----------------------|--------|------------------------------------|----------------------------------------------------|--------------------------|--------------|--------------|----------------|----------------|
|----------------|------------|---------------|------------|----------------------|--------|------------------------------------|----------------------------------------------------|--------------------------|--------------|--------------|----------------|----------------|

---

---

| Non Prime Site | Prime Site | Modifications | Hyperscore | Mass error<br>in ppm | Charge | Precursor<br>neutral mass<br>in Da | Fold change<br>(log <sub>2</sub> ) of<br>ASAPRatio | FC-error of<br>ASAPRatio | Uniprot ID 1 | Uniprot ID 2 | Protein Name 1 | Protein Name 2 |
|----------------|------------|---------------|------------|----------------------|--------|------------------------------------|----------------------------------------------------|--------------------------|--------------|--------------|----------------|----------------|
|----------------|------------|---------------|------------|----------------------|--------|------------------------------------|----------------------------------------------------|--------------------------|--------------|--------------|----------------|----------------|

---

---

| Non Prime Site | Prime Site | Modifications | Hyperscore | Mass error<br>in ppm | Charge | Precursor<br>neutral mass<br>in Da | Fold change<br>(log <sub>2</sub> ) of<br>ASAPRatio | FC-error of<br>ASAPRatio | Uniprot ID 1 | Uniprot ID 2 | Protein Name 1 | Protein Name 2 |
|----------------|------------|---------------|------------|----------------------|--------|------------------------------------|----------------------------------------------------|--------------------------|--------------|--------------|----------------|----------------|
|----------------|------------|---------------|------------|----------------------|--------|------------------------------------|----------------------------------------------------|--------------------------|--------------|--------------|----------------|----------------|

---



Table S7, Tholen et al.

---

| Non Prime Site | Prime Site | Modifications | Hyperscore | Mass error<br>in ppm | Charge | Precursor<br>neutral mass<br>in Da | Fold change<br>(log <sub>2</sub> ) of<br>ASAPRatio | FC-error of<br>ASAPRatio | Uniprot ID 1 | Uniprot ID 2 | Protein Name 1 | Protein Name 2 |
|----------------|------------|---------------|------------|----------------------|--------|------------------------------------|----------------------------------------------------|--------------------------|--------------|--------------|----------------|----------------|
|----------------|------------|---------------|------------|----------------------|--------|------------------------------------|----------------------------------------------------|--------------------------|--------------|--------------|----------------|----------------|

---

Table S7, Tholen et al.

---

| Non Prime Site | Prime Site | Modifications | Hyperscore | Mass error<br>in ppm | Charge | Precursor<br>neutral mass<br>in Da | Fold change<br>(log <sub>2</sub> ) of<br>ASAPRatio | FC-error of<br>ASAPRatio | Uniprot ID 1 | Uniprot ID 2 | Protein Name 1 | Protein Name 2 |
|----------------|------------|---------------|------------|----------------------|--------|------------------------------------|----------------------------------------------------|--------------------------|--------------|--------------|----------------|----------------|
|----------------|------------|---------------|------------|----------------------|--------|------------------------------------|----------------------------------------------------|--------------------------|--------------|--------------|----------------|----------------|

---

---

| Non Prime Site | Prime Site | Modifications | Hyperscore | Mass error<br>in ppm | Charge | Precursor<br>neutral mass<br>in Da | Fold change<br>(log <sub>2</sub> ) of<br>ASAPRatio | FC-error of<br>ASAPRatio | Uniprot ID 1 | Uniprot ID 2 | Protein Name 1 | Protein Name 2 |
|----------------|------------|---------------|------------|----------------------|--------|------------------------------------|----------------------------------------------------|--------------------------|--------------|--------------|----------------|----------------|
|----------------|------------|---------------|------------|----------------------|--------|------------------------------------|----------------------------------------------------|--------------------------|--------------|--------------|----------------|----------------|

---

Table S7, Tholen et al.

---

| Non Prime Site | Prime Site | Modifications | Hyperscore | Mass error<br>in ppm | Charge | Precursor<br>neutral mass<br>in Da | Fold change<br>(log <sub>2</sub> ) of<br>ASAPRatio | FC-error of<br>ASAPRatio | Uniprot ID 1 | Uniprot ID 2 | Protein Name 1 | Protein Name 2 |
|----------------|------------|---------------|------------|----------------------|--------|------------------------------------|----------------------------------------------------|--------------------------|--------------|--------------|----------------|----------------|
|----------------|------------|---------------|------------|----------------------|--------|------------------------------------|----------------------------------------------------|--------------------------|--------------|--------------|----------------|----------------|

---

Table S7, Tholen et al.

---

| Non Prime Site | Prime Site | Modifications | Hyperscore | Mass error<br>in ppm | Charge | Precursor<br>neutral mass<br>in Da | Fold change<br>(log <sub>2</sub> ) of<br>ASAPRatio | FC-error of<br>ASAPRatio | Uniprot ID 1 | Uniprot ID 2 | Protein Name 1 | Protein Name 2 |
|----------------|------------|---------------|------------|----------------------|--------|------------------------------------|----------------------------------------------------|--------------------------|--------------|--------------|----------------|----------------|
|----------------|------------|---------------|------------|----------------------|--------|------------------------------------|----------------------------------------------------|--------------------------|--------------|--------------|----------------|----------------|

---

Table S7, Tholen et al.

---

| Non Prime Site | Prime Site | Modifications | Hyperscore | Mass error<br>in ppm | Charge | Precursor<br>neutral mass<br>in Da | Fold change<br>(log <sub>2</sub> ) of<br>ASAPRatio | FC-error of<br>ASAPRatio | Uniprot ID 1 | Uniprot ID 2 | Protein Name 1 | Protein Name 2 |
|----------------|------------|---------------|------------|----------------------|--------|------------------------------------|----------------------------------------------------|--------------------------|--------------|--------------|----------------|----------------|
|----------------|------------|---------------|------------|----------------------|--------|------------------------------------|----------------------------------------------------|--------------------------|--------------|--------------|----------------|----------------|

---

---

| Non Prime Site | Prime Site | Modifications | Hyperscore | Mass error<br>in ppm | Charge | Precursor<br>neutral mass<br>in Da | Fold change<br>(log <sub>2</sub> ) of<br>ASAPRatio | FC-error of<br>ASAPRatio | Uniprot ID 1 | Uniprot ID 2 | Protein Name 1 | Protein Name 2 |
|----------------|------------|---------------|------------|----------------------|--------|------------------------------------|----------------------------------------------------|--------------------------|--------------|--------------|----------------|----------------|
|----------------|------------|---------------|------------|----------------------|--------|------------------------------------|----------------------------------------------------|--------------------------|--------------|--------------|----------------|----------------|

---

---

| Non Prime Site | Prime Site | Modifications | Hyperscore | Mass error<br>in ppm | Charge | Precursor<br>neutral mass<br>in Da | Fold change<br>(log <sub>2</sub> ) of<br>ASAPRatio | FC-error of<br>ASAPRatio | Uniprot ID 1 | Uniprot ID 2 | Protein Name 1 | Protein Name 2 |
|----------------|------------|---------------|------------|----------------------|--------|------------------------------------|----------------------------------------------------|--------------------------|--------------|--------------|----------------|----------------|
|----------------|------------|---------------|------------|----------------------|--------|------------------------------------|----------------------------------------------------|--------------------------|--------------|--------------|----------------|----------------|

---



Table S7, Tholen et al.

---

| Non Prime Site | Prime Site | Modifications | Hyperscore | Mass error<br>in ppm | Charge | Precursor<br>neutral mass<br>in Da | Fold change<br>(log <sub>2</sub> ) of<br>ASAPRatio | FC-error of<br>ASAPRatio | Uniprot ID 1 | Uniprot ID 2 | Protein Name 1 | Protein Name 2 |
|----------------|------------|---------------|------------|----------------------|--------|------------------------------------|----------------------------------------------------|--------------------------|--------------|--------------|----------------|----------------|
|----------------|------------|---------------|------------|----------------------|--------|------------------------------------|----------------------------------------------------|--------------------------|--------------|--------------|----------------|----------------|

---

Table S7, Tholen et al.

---

| Non Prime Site | Prime Site | Modifications | Hyperscore | Mass error<br>in ppm | Charge | Precursor<br>neutral mass<br>in Da | Fold change<br>(log <sub>2</sub> ) of<br>ASAPRatio | FC-error of<br>ASAPRatio | Uniprot ID 1 | Uniprot ID 2 | Protein Name 1 | Protein Name 2 |
|----------------|------------|---------------|------------|----------------------|--------|------------------------------------|----------------------------------------------------|--------------------------|--------------|--------------|----------------|----------------|
|----------------|------------|---------------|------------|----------------------|--------|------------------------------------|----------------------------------------------------|--------------------------|--------------|--------------|----------------|----------------|

---

---

| Non Prime Site | Prime Site | Modifications | Hyperscore | Mass error<br>in ppm | Charge | Precursor<br>neutral mass<br>in Da | Fold change<br>(log <sub>2</sub> ) of<br>ASAPRatio | FC-error of<br>ASAPRatio | Uniprot ID 1 | Uniprot ID 2 | Protein Name 1 | Protein Name 2 |
|----------------|------------|---------------|------------|----------------------|--------|------------------------------------|----------------------------------------------------|--------------------------|--------------|--------------|----------------|----------------|
|----------------|------------|---------------|------------|----------------------|--------|------------------------------------|----------------------------------------------------|--------------------------|--------------|--------------|----------------|----------------|

---

---

| Non Prime Site | Prime Site | Modifications | Hyperscore | Mass error<br>in ppm | Charge | Precursor<br>neutral mass<br>in Da | Fold change<br>(log <sub>2</sub> ) of<br>ASAPRatio | FC-error of<br>ASAPRatio | Uniprot ID 1 | Uniprot ID 2 | Protein Name 1 | Protein Name 2 |
|----------------|------------|---------------|------------|----------------------|--------|------------------------------------|----------------------------------------------------|--------------------------|--------------|--------------|----------------|----------------|
|----------------|------------|---------------|------------|----------------------|--------|------------------------------------|----------------------------------------------------|--------------------------|--------------|--------------|----------------|----------------|

---

---

| Non Prime Site | Prime Site | Modifications | Hyperscore | Mass error<br>in ppm | Charge | Precursor<br>neutral mass<br>in Da | Fold change<br>(log <sub>2</sub> ) of<br>ASAPRatio | FC-error of<br>ASAPRatio | Uniprot ID 1 | Uniprot ID 2 | Protein Name 1 | Protein Name 2 |
|----------------|------------|---------------|------------|----------------------|--------|------------------------------------|----------------------------------------------------|--------------------------|--------------|--------------|----------------|----------------|
|----------------|------------|---------------|------------|----------------------|--------|------------------------------------|----------------------------------------------------|--------------------------|--------------|--------------|----------------|----------------|

---

---

| Non Prime Site | Prime Site | Modifications | Hyperscore | Mass error<br>in ppm | Charge | Precursor<br>neutral mass<br>in Da | Fold change<br>(log <sub>2</sub> ) of<br>ASAPRatio | FC-error of<br>ASAPRatio | Uniprot ID 1 | Uniprot ID 2 | Protein Name 1 | Protein Name 2 |
|----------------|------------|---------------|------------|----------------------|--------|------------------------------------|----------------------------------------------------|--------------------------|--------------|--------------|----------------|----------------|
|----------------|------------|---------------|------------|----------------------|--------|------------------------------------|----------------------------------------------------|--------------------------|--------------|--------------|----------------|----------------|

---

Table S7, Tholen et al.

---

| Non Prime Site | Prime Site | Modifications | Hyperscore | Mass error<br>in ppm | Charge | Precursor<br>neutral mass<br>in Da | Fold change<br>(log <sub>2</sub> ) of<br>ASAPRatio | FC-error of<br>ASAPRatio | Uniprot ID 1 | Uniprot ID 2 | Protein Name 1 | Protein Name 2 |
|----------------|------------|---------------|------------|----------------------|--------|------------------------------------|----------------------------------------------------|--------------------------|--------------|--------------|----------------|----------------|
|----------------|------------|---------------|------------|----------------------|--------|------------------------------------|----------------------------------------------------|--------------------------|--------------|--------------|----------------|----------------|

---

---

| Non Prime Site | Prime Site | Modifications | Hyperscore | Mass error<br>in ppm | Charge | Precursor<br>neutral mass<br>in Da | Fold change<br>(log <sub>2</sub> ) of<br>ASAPRatio | FC-error of<br>ASAPRatio | Uniprot ID 1 | Uniprot ID 2 | Protein Name 1 | Protein Name 2 |
|----------------|------------|---------------|------------|----------------------|--------|------------------------------------|----------------------------------------------------|--------------------------|--------------|--------------|----------------|----------------|
|----------------|------------|---------------|------------|----------------------|--------|------------------------------------|----------------------------------------------------|--------------------------|--------------|--------------|----------------|----------------|

---



---

| Non Prime Site | Prime Site | Modifications | Hyperscore | Mass error<br>in ppm | Charge | Precursor<br>neutral mass<br>in Da | Fold change<br>(log <sub>2</sub> ) of<br>ASAPRatio | FC-error of<br>ASAPRatio | Uniprot ID 1 | Uniprot ID 2 | Protein Name 1 | Protein Name 2 |
|----------------|------------|---------------|------------|----------------------|--------|------------------------------------|----------------------------------------------------|--------------------------|--------------|--------------|----------------|----------------|
|----------------|------------|---------------|------------|----------------------|--------|------------------------------------|----------------------------------------------------|--------------------------|--------------|--------------|----------------|----------------|

---

---

| Non Prime Site | Prime Site | Modifications | Hyperscore | Mass error<br>in ppm | Charge | Precursor<br>neutral mass<br>in Da | Fold change<br>(log <sub>2</sub> ) of<br>ASAPRatio | FC-error of<br>ASAPRatio | Uniprot ID 1 | Uniprot ID 2 | Protein Name 1 | Protein Name 2 |
|----------------|------------|---------------|------------|----------------------|--------|------------------------------------|----------------------------------------------------|--------------------------|--------------|--------------|----------------|----------------|
|----------------|------------|---------------|------------|----------------------|--------|------------------------------------|----------------------------------------------------|--------------------------|--------------|--------------|----------------|----------------|

---

---

| Non Prime Site | Prime Site | Modifications | Hyperscore | Mass error<br>in ppm | Charge | Precursor<br>neutral mass<br>in Da | Fold change<br>(log <sub>2</sub> ) of<br>ASAPRatio | FC-error of<br>ASAPRatio | Uniprot ID 1 | Uniprot ID 2 | Protein Name 1 | Protein Name 2 |
|----------------|------------|---------------|------------|----------------------|--------|------------------------------------|----------------------------------------------------|--------------------------|--------------|--------------|----------------|----------------|
|----------------|------------|---------------|------------|----------------------|--------|------------------------------------|----------------------------------------------------|--------------------------|--------------|--------------|----------------|----------------|

---

Table S7, Tholen et al.

---

| Non Prime Site | Prime Site | Modifications | Hyperscore | Mass error<br>in ppm | Charge | Precursor<br>neutral mass<br>in Da | Fold change<br>(log <sub>2</sub> ) of<br>ASAPRatio | FC-error of<br>ASAPRatio | Uniprot ID 1 | Uniprot ID 2 | Protein Name 1 | Protein Name 2 |
|----------------|------------|---------------|------------|----------------------|--------|------------------------------------|----------------------------------------------------|--------------------------|--------------|--------------|----------------|----------------|
|----------------|------------|---------------|------------|----------------------|--------|------------------------------------|----------------------------------------------------|--------------------------|--------------|--------------|----------------|----------------|

---

Table S7, Tholen et al.

---

| Non Prime Site | Prime Site | Modifications | Hyperscore | Mass error<br>in ppm | Charge | Precursor<br>neutral mass<br>in Da | Fold change<br>(log <sub>2</sub> ) of<br>ASAPRatio | FC-error of<br>ASAPRatio | Uniprot ID 1 | Uniprot ID 2 | Protein Name 1 | Protein Name 2 |
|----------------|------------|---------------|------------|----------------------|--------|------------------------------------|----------------------------------------------------|--------------------------|--------------|--------------|----------------|----------------|
|----------------|------------|---------------|------------|----------------------|--------|------------------------------------|----------------------------------------------------|--------------------------|--------------|--------------|----------------|----------------|

---

---

| Non Prime Site | Prime Site | Modifications | Hyperscore | Mass error<br>in ppm | Charge | Precursor<br>neutral mass<br>in Da | Fold change<br>(log <sub>2</sub> ) of<br>ASAPRatio | FC-error of<br>ASAPRatio | Uniprot ID 1 | Uniprot ID 2 | Protein Name 1 | Protein Name 2 |
|----------------|------------|---------------|------------|----------------------|--------|------------------------------------|----------------------------------------------------|--------------------------|--------------|--------------|----------------|----------------|
|----------------|------------|---------------|------------|----------------------|--------|------------------------------------|----------------------------------------------------|--------------------------|--------------|--------------|----------------|----------------|

---

---

| Non Prime Site | Prime Site | Modifications | Hyperscore | Mass error<br>in ppm | Charge | Precursor<br>neutral mass<br>in Da | Fold change<br>(log <sub>2</sub> ) of<br>ASAPRatio | FC-error of<br>ASAPRatio | Uniprot ID 1 | Uniprot ID 2 | Protein Name 1 | Protein Name 2 |
|----------------|------------|---------------|------------|----------------------|--------|------------------------------------|----------------------------------------------------|--------------------------|--------------|--------------|----------------|----------------|
|----------------|------------|---------------|------------|----------------------|--------|------------------------------------|----------------------------------------------------|--------------------------|--------------|--------------|----------------|----------------|

---

---

| Non Prime Site | Prime Site | Modifications | Hyperscore | Mass error<br>in ppm | Charge | Precursor<br>neutral mass<br>in Da | Fold change<br>(log <sub>2</sub> ) of<br>ASAPRatio | FC-error of<br>ASAPRatio | Uniprot ID 1 | Uniprot ID 2 | Protein Name 1 | Protein Name 2 |
|----------------|------------|---------------|------------|----------------------|--------|------------------------------------|----------------------------------------------------|--------------------------|--------------|--------------|----------------|----------------|
|----------------|------------|---------------|------------|----------------------|--------|------------------------------------|----------------------------------------------------|--------------------------|--------------|--------------|----------------|----------------|

---



Table S7, Tholen et al.

---

| Non Prime Site | Prime Site | Modifications | Hyperscore | Mass error<br>in ppm | Charge | Precursor<br>neutral mass<br>in Da | Fold change<br>(log <sub>2</sub> ) of<br>ASAPRatio | FC-error of<br>ASAPRatio | Uniprot ID 1 | Uniprot ID 2 | Protein Name 1 | Protein Name 2 |
|----------------|------------|---------------|------------|----------------------|--------|------------------------------------|----------------------------------------------------|--------------------------|--------------|--------------|----------------|----------------|
|----------------|------------|---------------|------------|----------------------|--------|------------------------------------|----------------------------------------------------|--------------------------|--------------|--------------|----------------|----------------|

---

---

| Non Prime Site | Prime Site | Modifications | Hyperscore | Mass error<br>in ppm | Charge | Precursor<br>neutral mass<br>in Da | Fold change<br>(log <sub>2</sub> ) of<br>ASAPRatio | FC-error of<br>ASAPRatio | Uniprot ID 1 | Uniprot ID 2 | Protein Name 1 | Protein Name 2 |
|----------------|------------|---------------|------------|----------------------|--------|------------------------------------|----------------------------------------------------|--------------------------|--------------|--------------|----------------|----------------|
|----------------|------------|---------------|------------|----------------------|--------|------------------------------------|----------------------------------------------------|--------------------------|--------------|--------------|----------------|----------------|

---

---

| Non Prime Site | Prime Site | Modifications | Hyperscore | Mass error<br>in ppm | Charge | Precursor<br>neutral mass<br>in Da | Fold change<br>(log <sub>2</sub> ) of<br>ASAPRatio | FC-error of<br>ASAPRatio | Uniprot ID 1 | Uniprot ID 2 | Protein Name 1 | Protein Name 2 |
|----------------|------------|---------------|------------|----------------------|--------|------------------------------------|----------------------------------------------------|--------------------------|--------------|--------------|----------------|----------------|
|----------------|------------|---------------|------------|----------------------|--------|------------------------------------|----------------------------------------------------|--------------------------|--------------|--------------|----------------|----------------|

---

Table S7, Tholen et al.

---

| Non Prime Site | Prime Site | Modifications | Hyperscore | Mass error<br>in ppm | Charge | Precursor<br>neutral mass<br>in Da | Fold change<br>(log <sub>2</sub> ) of<br>ASAPRatio | FC-error of<br>ASAPRatio | Uniprot ID 1 | Uniprot ID 2 | Protein Name 1 | Protein Name 2 |
|----------------|------------|---------------|------------|----------------------|--------|------------------------------------|----------------------------------------------------|--------------------------|--------------|--------------|----------------|----------------|
|----------------|------------|---------------|------------|----------------------|--------|------------------------------------|----------------------------------------------------|--------------------------|--------------|--------------|----------------|----------------|

---

Table S7, Tholen et al.

---

| Non Prime Site | Prime Site | Modifications | Hyperscore | Mass error<br>in ppm | Charge | Precursor<br>neutral mass<br>in Da | Fold change<br>(log <sub>2</sub> ) of<br>ASAPRatio | FC-error of<br>ASAPRatio | Uniprot ID 1 | Uniprot ID 2 | Protein Name 1 | Protein Name 2 |
|----------------|------------|---------------|------------|----------------------|--------|------------------------------------|----------------------------------------------------|--------------------------|--------------|--------------|----------------|----------------|
|----------------|------------|---------------|------------|----------------------|--------|------------------------------------|----------------------------------------------------|--------------------------|--------------|--------------|----------------|----------------|

---

---

| Non Prime Site | Prime Site | Modifications | Hyperscore | Mass error<br>in ppm | Charge | Precursor<br>neutral mass<br>in Da | Fold change<br>(log <sub>2</sub> ) of<br>ASAPRatio | FC-error of<br>ASAPRatio | Uniprot ID 1 | Uniprot ID 2 | Protein Name 1 | Protein Name 2 |
|----------------|------------|---------------|------------|----------------------|--------|------------------------------------|----------------------------------------------------|--------------------------|--------------|--------------|----------------|----------------|
|----------------|------------|---------------|------------|----------------------|--------|------------------------------------|----------------------------------------------------|--------------------------|--------------|--------------|----------------|----------------|

---

Table S7, Tholen et al.

---

| Non Prime Site | Prime Site | Modifications | Hyperscore | Mass error<br>in ppm | Charge | Precursor<br>neutral mass<br>in Da | Fold change<br>(log <sub>2</sub> ) of<br>ASAPRatio | FC-error of<br>ASAPRatio | Uniprot ID 1 | Uniprot ID 2 | Protein Name 1 | Protein Name 2 |
|----------------|------------|---------------|------------|----------------------|--------|------------------------------------|----------------------------------------------------|--------------------------|--------------|--------------|----------------|----------------|
|----------------|------------|---------------|------------|----------------------|--------|------------------------------------|----------------------------------------------------|--------------------------|--------------|--------------|----------------|----------------|

---

Table S7, Tholen et al.

---

| Non Prime Site | Prime Site | Modifications | Hyperscore | Mass error<br>in ppm | Charge | Precursor<br>neutral mass<br>in Da | Fold change<br>(log <sub>2</sub> ) of<br>ASAPRatio | FC-error of<br>ASAPRatio | Uniprot ID 1 | Uniprot ID 2 | Protein Name 1 | Protein Name 2 |
|----------------|------------|---------------|------------|----------------------|--------|------------------------------------|----------------------------------------------------|--------------------------|--------------|--------------|----------------|----------------|
|----------------|------------|---------------|------------|----------------------|--------|------------------------------------|----------------------------------------------------|--------------------------|--------------|--------------|----------------|----------------|

---



Table S7, Tholen et al.

---

| Non Prime Site | Prime Site | Modifications | Hyperscore | Mass error<br>in ppm | Charge | Precursor<br>neutral mass<br>in Da | Fold change<br>(log <sub>2</sub> ) of<br>ASAPRatio | FC-error of<br>ASAPRatio | Uniprot ID 1 | Uniprot ID 2 | Protein Name 1 | Protein Name 2 |
|----------------|------------|---------------|------------|----------------------|--------|------------------------------------|----------------------------------------------------|--------------------------|--------------|--------------|----------------|----------------|
|----------------|------------|---------------|------------|----------------------|--------|------------------------------------|----------------------------------------------------|--------------------------|--------------|--------------|----------------|----------------|

---

---

| Non Prime Site | Prime Site | Modifications | Hyperscore | Mass error<br>in ppm | Charge | Precursor<br>neutral mass<br>in Da | Fold change<br>(log <sub>2</sub> ) of<br>ASAPRatio | FC-error of<br>ASAPRatio | Uniprot ID 1 | Uniprot ID 2 | Protein Name 1 | Protein Name 2 |
|----------------|------------|---------------|------------|----------------------|--------|------------------------------------|----------------------------------------------------|--------------------------|--------------|--------------|----------------|----------------|
|----------------|------------|---------------|------------|----------------------|--------|------------------------------------|----------------------------------------------------|--------------------------|--------------|--------------|----------------|----------------|

---

Table S7, Tholen et al.

---

| Non Prime Site | Prime Site | Modifications | Hyperscore | Mass error<br>in ppm | Charge | Precursor<br>neutral mass<br>in Da | Fold change<br>(log <sub>2</sub> ) of<br>ASAPRatio | FC-error of<br>ASAPRatio | Uniprot ID 1 | Uniprot ID 2 | Protein Name 1 | Protein Name 2 |
|----------------|------------|---------------|------------|----------------------|--------|------------------------------------|----------------------------------------------------|--------------------------|--------------|--------------|----------------|----------------|
|----------------|------------|---------------|------------|----------------------|--------|------------------------------------|----------------------------------------------------|--------------------------|--------------|--------------|----------------|----------------|

---

---

| Non Prime Site | Prime Site | Modifications | Hyperscore | Mass error<br>in ppm | Charge | Precursor<br>neutral mass<br>in Da | Fold change<br>(log <sub>2</sub> ) of<br>ASAPRatio | FC-error of<br>ASAPRatio | Uniprot ID 1 | Uniprot ID 2 | Protein Name 1 | Protein Name 2 |
|----------------|------------|---------------|------------|----------------------|--------|------------------------------------|----------------------------------------------------|--------------------------|--------------|--------------|----------------|----------------|
|----------------|------------|---------------|------------|----------------------|--------|------------------------------------|----------------------------------------------------|--------------------------|--------------|--------------|----------------|----------------|

---

Table S7, Tholen et al.

---

| Non Prime Site | Prime Site | Modifications | Hyperscore | Mass error<br>in ppm | Charge | Precursor<br>neutral mass<br>in Da | Fold change<br>(log <sub>2</sub> ) of<br>ASAPRatio | FC-error of<br>ASAPRatio | Uniprot ID 1 | Uniprot ID 2 | Protein Name 1 | Protein Name 2 |
|----------------|------------|---------------|------------|----------------------|--------|------------------------------------|----------------------------------------------------|--------------------------|--------------|--------------|----------------|----------------|
|----------------|------------|---------------|------------|----------------------|--------|------------------------------------|----------------------------------------------------|--------------------------|--------------|--------------|----------------|----------------|

---
