# Supplementary material
Source: PubMed Central journal article supplement (PMC3591655)
Supplement: supp_M112.017962_mcp.M112.017962-10.pdf [file supp_M112.017962_mcp.M112.017962-10.pdf]

| Non Prime Site                                                                        | Prime Site                                                                                                                          | Modifications                                                                                                                                                                                      | Hyperscore                                           | Mass error in ppm                                    | Charge                          | Precursor neutral mass in Da                                              | Fold change (log <sub>2</sub> ) of ASAPRatio              | FC-error of ASAPRatio                                | Uniprot ID 1                                                                                    | Uniprot ID 2                 | Protein Name 1                                                                                                                                                                                                                  | Protein Name 2                                                                                                                                                                                                                                                                    | Quantile                                                                                              |
|---------------------------------------------------------------------------------------|-------------------------------------------------------------------------------------------------------------------------------------|----------------------------------------------------------------------------------------------------------------------------------------------------------------------------------------------------|------------------------------------------------------|------------------------------------------------------|---------------------------------|---------------------------------------------------------------------------|-----------------------------------------------------------|------------------------------------------------------|-------------------------------------------------------------------------------------------------|------------------------------|---------------------------------------------------------------------------------------------------------------------------------------------------------------------------------------------------------------------------------|-----------------------------------------------------------------------------------------------------------------------------------------------------------------------------------------------------------------------------------------------------------------------------------|-------------------------------------------------------------------------------------------------------|
| GLLGLAAADP                                                                            | AIFYKEQFLDGDWATNR                                                                                                                   | N-ter +28.03 Da, K +28.03 Da                                                                                                                                                                       | 26.4                                                 | 91.9                                                 | 3                               | 2129.25                                                                   | -6.64                                                     | 0.00                                                 | CALR_MOUSE                                                                                      |                              | Calreticulin;                                                                                                                                                                                                                   | CRP55;Calregulin;Endoplasmic reticulum resident protein 60;HACBP;                                                                                                                                                                                                                 | 0.00 - 0.15                                                                                           |
| DPHRCEKAMT<br>TAVKVAGSVA                                                              | AKGGDVSVCEIYWR<br>AKLPSLLVDR                                                                                                        | N-ter +28.03 Da, K +28.03 Da, C +57.02 Da<br>N-ter +34.06 Da, K +34.06 Da                                                                                                                          | 32.6<br>28.8                                         | 78.8<br>46.9                                         | 3<br>3                          | 1581.89<br>1352.93                                                        | -2.25<br>0.58                                             | 0.21<br>0.01                                         | CX681_MOUSE<br>STBD1_MOUSE                                                                      | Q147V6_MOUSE                 | Cytochrome c oxidase subunit 6B1;<br>Starch-binding domain-containing protein 1;                                                                                                                                                | Cytochrome c oxidase subunit Vlb isoform 1;<br>Genethonin-1;<br>Beta-2-globin;Hemoglobin beta-2 chain;Hemoglobin beta-minor chain;<br>SR type 1;Steroid 5-alpha-reductase 1;<br>Heparin-binding protein 44;Low density lipoprotein receptor-related protein-associated protein 1; | 0.00 - 0.15<br>0.25 - 0.75                                                                            |
| AEKSAVSLCW<br>ASWSLQGVVF                                                              | AKVNPDEVGGEALGR<br>ALFTLCALFTR                                                                                                      | N-ter +28.03 Da, K +28.03 Da<br>N-ter +34.06 Da, C +57.02 Da                                                                                                                                       | 43.3<br>26.6                                         | 76.1<br>4.6                                          | 3<br>3                          | 1566.96<br>1345.77                                                        | 0.89<br>-1.69                                             | 0.07<br>0.38                                         | HBB2_MOUSE<br>SSA1_MOUSE                                                                        |                              | Hemoglobin subunit beta-2;<br>3-oxo-5-alpha-steroid 4-dehydrogenase 1;                                                                                                                                                          |                                                                                                                                                                                                                                                                                   | 0.75 - 0.85<br>0.00 - 0.15                                                                            |
| RKDAQMVHNS                                                                            | ALNEDTQDELGDPR                                                                                                                      | N-ter +34.06 Da                                                                                                                                                                                    | 33.1                                                 | 69.4                                                 | 3                               | 1605.88                                                                   | 0.94                                                      | 0.09                                                 | AMRP_MOUSE                                                                                      | F6Y09_MOUSE                  | Alpha-2-macroglobulin receptor-associated protein;                                                                                                                                                                              |                                                                                                                                                                                                                                                                                   | 0.75 - 0.85                                                                                           |
| ERHRTLTEMV<br>AVGPVPTANA<br>SLVSQMIQLA                                                | ALNPDPFKPADYKPPATR<br>ALPADPPASVIVVGPVVVPR<br>ALSEASQTDPDPSGPPPR                                                                    | N-ter +28.03 Da, K +28.03 Da<br>N-ter +28.03 Da<br>N-ter +34.06 Da                                                                                                                                 | 17.8<br>51.7<br>61.8                                 | 70.9<br>77.1<br>67.7                                 | 4<br>3<br>3                     | 2081.28<br>1867.24<br>1642.95                                             | 1.41<br>0.32<br>-0.92                                     | 0.09<br>0.02<br>0.04                                 | SFO1_MOUSE<br>FETUA_MOUSE<br>F134C_MOUSE                                                        | Q3U45_MOUSE                  | Splicing factor 1;<br>Alpha-2-HS-glycoprotein;<br>Protein FAM134C;                                                                                                                                                              |                                                                                                                                                                                                                                                                                   | 0.75 - 0.85<br>0.25 - 0.75<br>0.15 - 0.25                                                             |
| KTDQVIQIFI<br>GMLPEKDCRY                                                              | ALVNDPQPEHPLR<br>ALYDASFETKESR                                                                                                      | N-ter +28.03 Da<br>N-ter +28.03 Da, K +28.03 Da<br>N-ter +28.03 Da, K +28.03 Da, C +57.02 Da                                                                                                       | 40.6<br>25.9<br>25.3                                 | 58.6<br>75.6<br>51.1                                 | 3<br>3<br>4                     | 1512.89<br>1571.90<br>2994.50                                             | 1.50<br>-0.92<br>4.59                                     | 0.08<br>0.05<br>0.26                                 | UB2L3_MOUSE<br>DEST_MOUSE<br>E9QG06_MOUSE                                                       |                              | Ubiquitin-conjugating enzyme E2 L3;<br>Destrin;                                                                                                                                                                                 |                                                                                                                                                                                                                                                                                   | 0.85 - 1.00<br>0.15 - 0.25                                                                            |
| VQMGAVDLLG<br>LALAFGLAHA                                                              | AMDDDIJALVVVDSGSMCKAGFAGDDAPR<br>AMEGPPWKTVAIAADR                                                                                   | N-ter +34.06 Da, K +34.06 Da                                                                                                                                                                       | 27.1                                                 | 58.8                                                 | 3                               | 1683.04                                                                   | 0.15                                                      | 0.00                                                 | AZAEN9_MOUSE                                                                                    | Q9D3H2_MOUSE                 |                                                                                                                                                                                                                                 |                                                                                                                                                                                                                                                                                   | 0.85 - 1.00<br>0.25 - 0.75                                                                            |
| PREIFKQKER<br>SPVSSGVNLF<br>EAVVSSVNTV<br>CDIDIRKDLV<br>HHSFYNELRV<br>QSKGQWLTLT<br>M | AMSTTSVTSQQPKLR<br>ANDGSFLEFKR<br>ANKTVEEENIVVTTGVVR<br>ANNVMSGTMTMYPIADR<br>APEEHPHTLLEAPLNPKANR<br>APLDTINVHLR<br>APNVLASEPEIKGIR | N-ter +28.03 Da, K +28.03 Da<br>N-ter +28.03 Da, K +28.03 Da<br>N-ter +34.06 Da, K +34.06 Da<br>N-ter +34.06 Da<br>N-ter +28.03 Da, K +28.03 Da<br>N-ter +28.03 Da<br>N-ter +28.03 Da, K +28.03 Da | 34.8<br>23.2<br>27.2<br>36.7<br>38.9<br>37.6<br>43.7 | 99.5<br>87.0<br>82.7<br>49.0<br>70.1<br>56.8<br>66.2 | 3<br>3<br>3<br>3<br>3<br>3<br>3 | 1706.07<br>1451.90<br>2096.39<br>1888.00<br>2253.37<br>1275.80<br>1746.12 | -2.12<br>-0.30<br>-1.09<br>-3.84<br>1.06<br>-0.12<br>0.73 | 0.37<br>0.02<br>0.07<br>0.55<br>0.09<br>0.01<br>0.07 | DBNL_MOUSE<br>CS043_MOUSE<br>SYUG_MOUSE<br>ACTA_MOUSE<br>ACTC_MOUSE<br>LYAG_MOUSE<br>KAD2_MOUSE | ACTA_MOUSE                   | Drebrin-like protein;<br>Uncharacterized protein C19orf43 homolog;<br>Gamma-synuclein;<br>Actin, alpha skeletal muscle;<br>Actin, alpha cardiac muscle 1;<br>Lysosomal alpha-glucosidase;<br>Adenylate kinase 2, mitochondrial; | Actin-binding protein 1;SH3 domain-containing protein 7;<br>Persyn;<br>Alpha-actin-1;<br>Alpha-cardiac actin;<br>Acid maltase;<br>ATP-AMP transphosphorylase 2;                                                                                                                   | 0.00 - 0.15<br>0.25 - 0.75<br>0.15 - 0.25<br>0.00 - 0.15<br>0.75 - 0.85<br>0.25 - 0.75<br>0.25 - 0.75 |
| TSQLTAFPLG                                                                            | APPPWPIQDSSGPELGSR                                                                                                                  | N-ter +34.06 Da                                                                                                                                                                                    | 50.1                                                 | 58.5                                                 | 3                               | 2021.16                                                                   | 0.54                                                      | 0.02                                                 | GORS1_MOUSE                                                                                     |                              | Golgi reassembly-stacking protein 1;                                                                                                                                                                                            | Golgi peripheral membrane protein p65;Golgi reassembly-stacking protein of 65 kDa;                                                                                                                                                                                                | 0.25 - 0.75                                                                                           |
| ATSASGALLS<br>VAGPOPAQTG<br>NAILVRYTQK<br>TISKIKGLRV<br>M                             | APPSGPPISGVSGETTYDITR<br>APOGSLGELYFER<br>APOVSTPTLVEAAR<br>APQVYILPPAEQLSR<br>APVEHVADAGAFLR                                       | N-ter +34.06 Da<br>N-ter +34.06 Da<br>N-ter +28.03 Da<br>N-ter +34.06 Da<br>N-ter +28.03 Da                                                                                                        | 51.7<br>44.3<br>42.0<br>43.1<br>29.0                 | 68.1<br>53.8<br>43.8<br>52.7<br>69.8                 | 3<br>3<br>3<br>3<br>3           | 2153.27<br>1499.86<br>1466.87<br>1812.13<br>1578.96                       | -0.25<br>1.68<br>0.28<br>-0.79<br>-1.32                   | 0.03<br>0.06<br>0.01<br>0.01<br>0.10                 | PRRC1_MOUSE<br>FRIL1_MOUSE<br>ALBU_MOUSE<br>IGG2B_MOUSE<br>NOB1_MOUSE                           | Q9CFX4_MOUSE<br>F6YBB8_MOUSE | Protein PRRC1;<br>Ferritin light chain 1;<br>Serum albumin;<br>Ig gamma-2B chain C region;<br>RNA-binding protein NOB1;                                                                                                         | Proline-rich and coiled-coil-containing protein 1;<br>Ferritin L subunit 1;                                                                                                                                                                                                       | 0.25 - 0.75<br>0.85 - 1.00<br>0.25 - 0.75<br>0.15 - 0.25<br>0.15 - 0.25                               |
| LLATVWHGQG<br>NLQSRFRIL<br>GRVQEPKPGM                                                 | APVIEPSPGPELVPEGETVTLR<br>AQMGTGEYMQDPDEEAR<br>ARPAPASPAARFPHTQGQRLR                                                                | N-ter +28.03 Da<br>N-ter +34.06 Da<br>N-ter +34.06 Da                                                                                                                                              | 49.2<br>23.4<br>34.3                                 | 52.3<br>26.0<br>37.6                                 | 3<br>3<br>4                     | 2316.38<br>2118.00<br>2344.41                                             | 0.03<br>-2.25<br>-2.40                                    | 0.01<br>0.21<br>0.13                                 | CSF1R_MOUSE<br>E9PYJ9_MOUSE<br>KIFC3_MOUSE                                                      | Q3TBH6_MOUSE<br>LDB3_MOUSE   | Macrophage colony-stimulating factor 1 receptor;<br>Kinesin-like protein KIFC3;                                                                                                                                                 | CSF-1 receptor;Proto-oncogene c-Fms;                                                                                                                                                                                                                                              | 0.25 - 0.75<br>0.00 - 0.15<br>0.00 - 0.15                                                             |
| SVQSGNLALA<br>SPCLLRVHL                                                               | ASAAAVDAGMAMAGQSPVLR<br>ASAFGSSTESLVAR                                                                                              | N-ter +28.03 Da<br>N-ter +34.06 Da                                                                                                                                                                 | 34.7<br>49.3                                         | 37.9<br>25.5                                         | 3<br>2                          | 1901.02<br>1415.78                                                        | 1.25<br>0.01                                              | 0.03<br>0.00                                         | PTBP1_MOUSE<br>THEM5_MOUSE                                                                      | Q922I7_MOUSE                 | Poly(pyrimidine) tract-binding protein 1;<br>Thioesterase superfamily member 5;                                                                                                                                                 | Heterogeneous nuclear ribonucleoprotein I;                                                                                                                                                                                                                                        | 0.75 - 0.85<br>0.25 - 0.75                                                                            |
| GNTGFSAGLD<br>SSCLVLAARH<br>KNVREATESF                                                | ASAQTSHELTPINDLIGCIGR<br>ASASNTLNKDLVSLNLPKEQAR<br>ASDPILYRPAVALDTKGPEIR                                                            | N-ter +34.06 Da, C +57.02 Da<br>N-ter +34.06 Da, K +34.06 Da<br>N-ter +28.03 Da, K +28.03 Da                                                                                                       | 29.6<br>28.2<br>23.7                                 | 31.3<br>70.3<br>77.7                                 | 4<br>4<br>4                     | 2500.40<br>2443.62<br>2436.56                                             | -3.18<br>-0.20<br>-1.09                                   | 0.58<br>0.02<br>0.07                                 | PCBP2_MOUSE<br>CISY_MOUSE<br>KPYM_MOUSE                                                         |                              | Poly(rC)-binding protein 2;<br>Citrate synthase, mitochondrial;<br>Pyruvate kinase isozymes M1/M2;                                                                                                                              | Alpha-CP2;CTBP;Putative heterogeneous nuclear ribonucleoprotein X;                                                                                                                                                                                                                | 0.00 - 0.15<br>0.25 - 0.75<br>0.15 - 0.25                                                             |
| LALLVRSTAP<br>ENNVGVCHIF                                                              | ASFFGENHLEVPVPSALTR<br>ASFNDFVHVHTDLSGKETICR                                                                                        | N-ter +28.03 Da<br>N-ter +28.03 Da, K +28.03 Da, C +57.02 Da                                                                                                                                       | 33.1<br>39.7                                         | 73.3<br>102.2                                        | 3<br>4                          | 2098.24<br>2452.46                                                        | -1.89<br>-4.64                                            | 0.42<br>1.16                                         | CSPG4_MOUSE<br>RS14_MOUSE                                                                       | D3YVF4_MOUSE                 | Chondroitin sulfate proteoglycan 4;<br>40S ribosomal protein S14;                                                                                                                                                               | Chondroitin sulfate proteoglycan NG2;Proteoglycan AN2;                                                                                                                                                                                                                            | 0.00 - 0.15                                                                                           |
| ARGAAVTRSM                                                                            | ASGGGVPTDEEQATGLER                                                                                                                  | N-ter +28.03 Da                                                                                                                                                                                    | 51.7                                                 | 69.4                                                 | 3                               | 1800.97                                                                   | -0.60                                                     | 0.03                                                 | COX5B_MOUSE                                                                                     | Q9D881_MOUSE                 | Cytochrome c oxidase subunit 5B, mitochondrial;                                                                                                                                                                                 | Cytochrome c oxidase polypeptide Vb;<br>Aldehyde dehydrogenase family 5 member A1;NAD(+)-dependent succinic semialdehyde dehydrogenase;                                                                                                                                           | 0.25 - 0.75                                                                                           |
| EPAGTPRRSY                                                                            | ASGPGGLHADLLR                                                                                                                       | N-ter +34.06 Da                                                                                                                                                                                    | 29.7                                                 | 31.2                                                 | 3                               | 1296.78                                                                   | -0.15                                                     | 0.00                                                 | SSDH_MOUSE                                                                                      |                              | Succinate-semialdehyde dehydrogenase, mitochondrial;                                                                                                                                                                            |                                                                                                                                                                                                                                                                                   | 0.25 - 0.75                                                                                           |
| DIQVKELEKR<br>QEVRCLEERSY                                                             | ASGQAFELISPR<br>ASKPTLNEVIVSAIR                                                                                                     | N-ter +28.03 Da<br>N-ter +28.03 Da, K +28.03 Da                                                                                                                                                    | 23.2<br>44.7                                         | 87.5<br>75.7                                         | 3<br>3                          | 1415.90<br>1752.18                                                        | 5.05<br>-0.15                                             | 0.22<br>0.01                                         | STMN1_MOUSE<br>THIL_MOUSE                                                                       | D3Z1Z8_MOUSE                 | Stathmin;<br>Acetyl-CoA acetyltransferase, mitochondrial;                                                                                                                                                                       | Leukemia-associated gene protein;Leukemia-associated phosphoprotein p18;Metablastin;Oncoprotein p18;Phosphoprotein p19;Proslin;Protein Pr22;pp17;                                                                                                                                 | 0.85 - 1.00<br>0.25 - 0.75                                                                            |
| SSSPVKGYW<br>TGAEDTRMPP<br>VYSSAKNSS                                                  | ASLDASTQTTHELTPNNGIICIGR<br>ASLEQSLASPKISVR<br>ASNTQDGVGSLCSR                                                                       | N-ter +28.03 Da, C +57.02 Da<br>N-ter +28.03 Da, K +28.03 Da<br>N-ter +28.03 Da, C +57.02 Da                                                                                                       | 43.4<br>29.3<br>25.8                                 | 76.2<br>58.8<br>77.7                                 | 4<br>3<br>3                     | 2822.68<br>1770.09<br>1478.79                                             | -1.40<br>-3.64<br>0.21                                    | 0.26<br>0.46<br>0.02                                 | PCBP1_MOUSE<br>Q3URZ6_MOUSE<br>PAXI_MOUSE                                                       | F7DBB3_MOUSE<br>F8VQ28_MOUSE | Poly(rC)-binding protein 1;<br>Paxillin;                                                                                                                                                                                        | Alpha-CP1;Heterogeneous nuclear ribonucleoprotein E1;                                                                                                                                                                                                                             | 0.15 - 0.25<br>0.00 - 0.15<br>0.25 - 0.75                                                             |
| M                                                                                     | ASQTQGIQQLQAEKR                                                                                                                     | N-ter +28.03 Da, K +28.03 Da                                                                                                                                                                       | 33.1                                                 | 14.1                                                 | 3                               | 1854.06                                                                   | 4.26                                                      | 0.31                                                 | VATG2_MOUSE                                                                                     |                              | V-type proton ATPase subunit G 2;                                                                                                                                                                                               | V-ATPase 13 kDa subunit 2;Vacuolar proton pump subunit G 2;                                                                                                                                                                                                                       | 0.85 - 1.00                                                                                           |

Table S8, Tholen et al.

| Non Prime Site | Prime Site                      | Modifications                             | Hyperscore | Mass error in ppm | Charge | Precursor neutral mass in Da | Fold change (log <sub>2</sub> ) of ASAPRatio | FC-error of ASAPRatio | Uniprot ID 1 | Uniprot ID 2 | Protein Name 1                                                                       | Protein Name 2                                                                                                                                                 | Quantile    |
|----------------|---------------------------------|-------------------------------------------|------------|-------------------|--------|------------------------------|----------------------------------------------|-----------------------|--------------|--------------|--------------------------------------------------------------------------------------|----------------------------------------------------------------------------------------------------------------------------------------------------------------|-------------|
| MKAARFVMS      | ASSLSSASLVPR                    | N-ter +34.06 Da                           | 41.1       | 23.9              | 2      | 1207.73                      | 0.25                                         | 0.01                  | PKD4_MOUSE   |              | [Pyruvate dehydrogenase [lipoamide]] kinase isozyme 4, mitochondrial;                | Pyruvate dehydrogenase kinase isoform 4; Alpha-CP1;Heterogeneous nuclear ribonucleoprotein E1;                                                                 | 0.25 - 0.75 |
| EVKGYWASLD     | ASTQTTHELTPNNLIGCIGR            | N-ter +34.06 Da, C +57.02 Da              | 38.3       | 21.6              | 3      | 2442.36                      | -0.17                                        | 0.03                  | PCBP1_MOUSE  |              | Poly(rC)-binding protein 1; WD repeat domain phosphoinositide-interacting protein 2; |                                                                                                                                                                | 0.25 - 0.75 |
| WTGYFVKVLM     | ASTSYLPSQVTEMFNQGR              | N-ter +34.06 Da                           | 27.9       | 76.8              | 3      | 2049.16                      | -3.84                                        | 0.55                  | WIPI2_MOUSE  | D3YWK1_MOUSE |                                                                                      |                                                                                                                                                                | 0.00 - 0.15 |
| IREGEVEVLK     | ATEMVEVGPEDDEVGAER              | N-ter +34.06 Da                           | 49.1       | 69.6              | 3      | 1966.04                      | -0.84                                        | 0.12                  | PTRF_MOUSE   |              | Polymerase I and transcript release factor;                                          | Cav-p60;Cavin-1;                                                                                                                                               | 0.15 - 0.25 |
| NWYKMGQLVL     | ATIEKIPFESAFR                   | N-ter +34.06 Da, K +34.06 Da              | 25.5       | 67.9              | 3      | 1576.04                      | -0.43                                        | 0.04                  | FACR2_MOUSE  |              | Fatty acyl-CoA reductase 2;                                                          | Male sterility domain-containing protein 1;                                                                                                                    | 0.25 - 0.75 |
| VIQHRPSQY      | ATLDVYNPFENR                    | N-ter +34.06 Da                           | 21.6       | 50.5              | 3      | 1471.83                      | -1.18                                        | 0.08                  | SCAM3_MOUSE  | Q3UXS0_MOUSE | Secretory carrier-associated membrane protein 3;                                     |                                                                                                                                                                | 0.15 - 0.25 |
| KHKKEKAVTI     | ATPATAAPAASVSAATTTSAQEEPAAPAEPR | N-ter +28.03 Da                           | 45.8       | 78.0              | 4      | 2833.63                      | -1.94                                        | 0.30                  | SRRM1_MOUSE  | A2A8V8_MOUSE | Serine/arginine repetitive matrix protein 1;                                         | Plenty-of-prolines 101;                                                                                                                                        | 0.00 - 0.15 |
| SSSAPRVSR      | ATTVSAPDLKSVR                   | N-ter +34.06 Da, K +34.06 Da              | 44.1       | 82.2              | 3      | 1411.98                      | -1.03                                        | 0.08                  | F7CK47_MOUSE | MAP4_MOUSE   | Microtubule-associated protein;                                                      |                                                                                                                                                                | 0.15 - 0.25 |
| SDTTTPKLL      | AVAATAPPDAPNREEVFDER            | N-ter +28.03 Da                           | 28.4       | 100.0             | 4      | 2182.28                      | -1.40                                        | 0.29                  | VINC_MOUSE   |              | Vinculin;                                                                            | Metavinclin;                                                                                                                                                   | 0.15 - 0.25 |
| QERQTAQVL      | AVADKVKEDSQVPATQLQR             | N-ter +28.03 Da, K +28.03 Da              | 33.2       | 80.3              | 4      | 2267.43                      | -0.58                                        | 0.03                  | AKA12_MOUSE  |              | A-kinase anchor protein 12;                                                          |                                                                                                                                                                | 0.25 - 0.75 |
| QLAAQPSTYL     | AVAELENVSGKYFDGLR               | N-ter +28.03 Da, K +28.03 Da              | 27.2       | 89.8              | 3      | 2052.24                      | -3.18                                        | 0.58                  | RDH13_MOUSE  |              | Retinol dehydrogenase 13;                                                            |                                                                                                                                                                | 0.00 - 0.15 |
| DDGLADLFLV     | AVEEQSYCEYSGSR                  | N-ter +34.06 Da, C +57.02 Da              | 48.6       | 79.2              | 3      | 1667.86                      | -2.94                                        | 0.45                  | E9PX16_MOUSE |              |                                                                                      |                                                                                                                                                                | 0.00 - 0.15 |
| IIPASTGAAK     | AVGKVIPELNKLGTMAFR              | N-ter +28.03 Da, K +28.03 Da              | 37.7       | 79.3              | 4      | 2084.38                      | 0.01                                         | 0.00                  | G3P_MOUSE    | F8WJL5_MOUSE | Glyceraldehyde-3-phosphate dehydrogenase;                                            | Peptidyl-cysteine S-nitrosylase GAPDH;                                                                                                                         | 0.25 - 0.75 |
| MGASGRLLR      | AVIMGAPSGKGTVSSR                | N-ter +34.06 Da, K +34.06 Da              | 38.7       | 82.1              | 3      | 1642.09                      | -0.30                                        | 0.06                  | KAD3_MOUSE   |              | GTP:AMP phosphotransferase, mitochondrial;                                           | Adenylate kinase 3;Adenylate kinase 3 alpha-like 1;                                                                                                            | 0.25 - 0.75 |
| QRLYAREATQ     | AVLDKPETLSSDASTR                | N-ter +28.03 Da, K +28.03 Da              | 19.3       | 90.9              | 3      | 1745.08                      | -4.32                                        | 0.86                  | ACADV_MOUSE  |              | Very long-chain specific acyl-CoA dehydrogenase, mitochondrial;                      | MVLCAD;                                                                                                                                                        | 0.00 - 0.15 |
| GPEPTTDCFV     | AVMHGETEGTVPGNALVVDPEKPFRR      | N-ter +28.03 Da, K +28.03 Da              | 35.6       | 66.0              | 4      | 2705.56                      | 0.41                                         | 0.02                  | EHD2_MOUSE   |              | EH domain-containing protein 2;                                                      |                                                                                                                                                                | 0.25 - 0.75 |
| RSLVIPNTL      | AVNAAQDSTDLVAKLR                | N-ter +28.03 Da, K +28.03 Da              | 41.5       | 59.9              | 3      | 1727.06                      | 1.20                                         | 0.08                  | TCPA_MOUSE   |              | T-complex protein 1 subunit alpha;                                                   | CCT-alpha;Tailless complex polypeptide 1A;Tailless complex polypeptide 1B;                                                                                     | 0.75 - 0.85 |
| VLTFGFMTL      | AVPIAQKSEQSLNEALMR              | N-ter +28.03 Da, K +28.03 Da              | 33.1       | 92.8              | 4      | 2224.40                      | 0.12                                         | 0.01                  | Q542V8_MOUSE | D3Z3K5_MOUSE |                                                                                      |                                                                                                                                                                | 0.25 - 0.75 |
| QKEKSPDQCS     | AVPNTPPSTPVKLEELDPQEPSTR        | N-ter +28.03 Da, K +28.03 Da              | 30.9       | 72.9              | 4      | 2657.58                      | 0.16                                         | 0.02                  | ADDA_MOUSE   |              | Alpha-adducin;                                                                       | Erythrocyte adducin subunit alpha;                                                                                                                             | 0.25 - 0.75 |
| LSLEVQELQA     | AVRPLQLLGTCAELCR                | N-ter +34.06 Da, C +57.02 Da              | 56.0       | 55.5              | 3      | 1890.14                      | -0.94                                        | 0.11                  | Q8BT6_MOUSE  |              |                                                                                      |                                                                                                                                                                | 0.15 - 0.25 |
| ERNEWQKFL      | AVSQNPQDVLTPVPTGQSQEEAAGDQDDLR  | N-ter +28.03 Da                           | 42.9       | 81.4              | 4      | 3139.76                      | -1.89                                        | 0.21                  | GOGA2_MOUSE  | E9PUQ5_MOUSE | Golgin subfamily A member 2;                                                         | 130 kDa cis-Golgi matrix protein;                                                                                                                              | 0.00 - 0.15 |
| TGQAAPVLGL     | AVSSELIQQSFPVDECPR              | N-ter +34.06 Da, C +57.02 Da              | 51.9       | 55.7              | 3      | 2223.23                      | -0.40                                        | 0.03                  | FKBP9_MOUSE  |              | Peptidyl-prolyl cis-trans isomerase FKBP9;                                           | 63 kDa FK506-binding protein;FK506-binding protein 9;FKBP65R5;Rotamase;                                                                                        | 0.25 - 0.75 |
| VNVKTSASR      | AVSSLATKGGPSEVR                 | N-ter +34.06 Da, K +34.06 Da              | 20.7       | 96.8              | 3      | 1597.10                      | 0.37                                         | 0.07                  | DCLK1_MOUSE  | Q8BRN4_MOUSE | Serine/threonine-protein kinase DCLK1;                                               | 1;Doublecortin-like kinase 1;                                                                                                                                  | 0.25 - 0.75 |
| LSKDJANTW      | AVTVDFPCSTNAKR                  | N-ter +28.03 Da, K +28.03 Da, C +57.02 Da | 25.1       | 101.1             | 3      | 1570.97                      | -2.74                                        | 0.37                  | PPR3A_MOUSE  |              | Protein phosphatase 1 regulatory subunit 3A;                                         | Protein phosphatase 1 glycogen-associated regulatory subunit;Protein phosphatase type-1 glycogen targeting subunit;                                            | 0.00 - 0.15 |
| LWSAVGASNM     | AVVTCGSVVKLLNTR                 | N-ter +34.06 Da, K +34.06 Da, C +57.02 Da | 31.2       | 46.6              | 3      | 1684.11                      | 0.53                                         | 0.07                  | SDF2_MOUSE   |              | Stromal cell-derived factor 2;                                                       |                                                                                                                                                                | 0.25 - 0.75 |
| TISLQMGTK      | CASQVGMTAPGTR                   | N-ter +34.06 Da, C +57.02 Da              | 28.9       | 63.8              | 3      | 1368.76                      | -0.17                                        | 0.01                  | CNN2_MOUSE   | D3Z7R6_MOUSE | Calponin-2;                                                                          | Calponin H2, smooth muscle;Neutral calponin;                                                                                                                   | 0.25 - 0.75 |
| ARNLGRVGTK     | CCTLPEDQR                       | N-ter +34.06 Da, C +57.02 Da              | 33.6       | 57.5              | 2      | 1211.62                      | 0.29                                         | 0.05                  | ALBU_MOUSE   |              | Serum albumin;                                                                       |                                                                                                                                                                | 0.25 - 0.75 |
| MEPYS          | CDTFVALPPTVGNR                  | N-ter +34.06 Da, C +57.02 Da              | 37.3       | 45.0              | 3      | 1650.94                      | -0.45                                        | 0.01                  | SCRN3_MOUSE  | A2AWQ9_MOUSE | Secernin-3;                                                                          |                                                                                                                                                                | 0.25 - 0.75 |
| M              | CEEETLALVCDNGSLCKAGFAGDDAPR     | N-ter +28.03 Da, K +28.03 Da, C +57.02 Da | 23.8       | 56.5              | 4      | 3055.50                      | 4.17                                         | 0.39                  | ACTH_MOUSE   | D3ZY0_MOUSE  | Actin, gamma-enteric smooth muscle;                                                  | Alpha-actin-3;Gamma-2-actin;Smooth muscle gamma-actin;                                                                                                         | 0.85 - 1.00 |
| HNLPLGRFCE     | CEIGYELDR                       | N-ter +28.03 Da, C +57.02 Da              | 32.0       | 84.6              | 2      | 1181.64                      | 0.12                                         | 0.02                  | FBN1_MOUSE   | A2AQ53_MOUSE | Fibrillin-1;                                                                         |                                                                                                                                                                | 0.25 - 0.75 |
| WLLDHCQESY     | CEPTVCQPTCYQR                   | N-ter +28.03 Da, C +57.02 Da              | 41.6       | 90.3              | 3      | 1725.88                      | 3.83                                         | 1.04                  | E9QZ9_MOUSE  |              |                                                                                      |                                                                                                                                                                | 0.85 - 1.00 |
| TCCKAADKDT     | CFSTEGPNLVTR                    | N-ter +28.03 Da, C +57.02 Da              | 31.3       | 64.7              | 3      | 1407.77                      | -0.34                                        | 0.02                  | ALBU_MOUSE   |              | Serum albumin;                                                                       |                                                                                                                                                                | 0.25 - 0.75 |
| SGGAAGATSL     | CFVYPLDFAR                      | N-ter +34.06 Da, C +57.02 Da              | 32.1       | 44.9              | 2      | 1320.73                      | -1.94                                        | 0.15                  | ADT1_MOUSE   | ADT2_MOUSE   | ADP/ATP translocase 1;                                                               | ADP.ATP carrier protein 1;ADP.ATP carrier protein, heart/skeletal muscle isoform T1;Adenine nucleotide translocator 1;Solute carrier family 25 member 4;mANC1; | 0.00 - 0.15 |
| QAGRFRHNL      | CGEEQGAADALHFNPR                | N-ter +28.03 Da, C +57.02 Da              | 66.2       | 72.0              | 3      | 1798.94                      | 1.46                                         | 0.15                  | LEG7_MOUSE   | Q9CRB1_MOUSE | Galectin-7;                                                                          |                                                                                                                                                                | 0.85 - 1.00 |
| SRTTSTSTM      | CGYYGNYGGGR                     | N-ter +28.03 Da, C +57.02 Da              | 30.7       | 60.4              | 2      | 1356.64                      | 1.26                                         | 0.10                  | KR168_MOUSE  | O09048_MOUSE | Keratin-associated protein 16-8;                                                     | Keratin-associated protein 16.8;                                                                                                                               | 0.75 - 0.85 |
| CRVPITPENP     | CKEIHGTSSEPEMLSHTR              | N-ter +34.06 Da, K +34.06 Da, C +57.02 Da | 18.5       | 87.5              | 4      | 2298.40                      | -2.00                                        | 0.40                  | RN219_MOUSE  |              | RING finger protein 219;                                                             |                                                                                                                                                                | 0.00 - 0.15 |
| CQVGGISTV      | CQPVGGISTVCQPTCGVSR             | N-ter +28.03 Da, C +57.02 Da              | 37.6       | 55.3              | 3      | 2090.09                      | 2.29                                         | 0.13                  | E9QZ9_MOUSE  |              |                                                                                      |                                                                                                                                                                | 0.85 - 1.00 |
| KPTDGASSN      | CVTDIHLVR                       | N-ter +28.03 Da, C +57.02 Da              | 33.0       | 68.0              | 3      | 1226.73                      | 2.29                                         | 0.11                  | NASP_MOUSE   | B1AU75_MOUSE | Nuclear autoantigenic sperm protein;                                                 |                                                                                                                                                                | 0.85 - 1.00 |
| AEFKAADFDMF    | DADGGGDISVKELGTVMR              | N-ter +34.06 Da, K +34.06 Da              | 32.4       | 88.0              | 3      | 1887.17                      | 0.01                                         | 0.00                  | TNNC2_MOUSE  |              | Troponin C, skeletal muscle;                                                         | STNC;                                                                                                                                                          | 0.25 - 0.75 |
| MQN            | DAGEFVDLVPR                     | N-ter +34.06 Da                           | 33.8       | 73.3              | 3      | 1413.84                      | 1.41                                         | 0.06                  | RS21_MOUSE   |              | 40S ribosomal protein S21;                                                           |                                                                                                                                                                | 0.75 - 0.85 |
| LGVKSQKLL      | DAVDYIPVPTR                     | N-ter +34.06 Da                           | 44.4       | 30.2              | 2      | 1379.79                      | 1.63                                         | 0.11                  | EFTU_MOUSE   | D3YVN7_MOUSE | Elongation factor Tu, mitochondrial;                                                 |                                                                                                                                                                | 0.85 - 1.00 |
| LPLLARLSAG     | DCPCSEALCQPIR                   | N-ter +28.03 Da, C +57.02 Da              | 43.3       | 56.6              | 3      | 1703.84                      | 1.43                                         | 0.13                  | DIAC_MOUSE   |              | Di-N-acetylchitobiase;                                                               |                                                                                                                                                                | 0.75 - 0.85 |
| RPKVKREVKV     | DCSEYLALSKR                     | N-ter +34.06 Da, K +34.06 Da, C +57.02 Da | 19.8       | 82.1              | 3      | 1408.88                      | 1.05                                         | 0.06                  | Q8BM18_MOUSE | Q148R4_MOUSE |                                                                                      |                                                                                                                                                                | 0.75 - 0.85 |
| IFKAVLVTG      | DDEATLADNCKMCTR                 | N-ter +34.06 Da, K +34.06 Da, C +57.02 Da | 39.8       | 94.4              | 3      | 1980.13                      | -2.94                                        | 0.45                  | IGJ_MOUSE    |              | Immunoglobulin J chain;                                                              |                                                                                                                                                                | 0.00 - 0.15 |

Table S8, Tholen et al.

| Non Prime Site                                                                   | Prime Site                                                                                                       | Modifications                                                                                                                                         | Hyperscore                                   | Mass error in ppm                             | Charge                     | Precursor neutral mass in Da                                   | Fold change (log <sub>2</sub> ) of ASAPRatio    | FC-error of ASAPRatio                        | Uniprot ID 1                                                                        | Uniprot ID 2                                              | Protein Name 1                                                                                                                                                                   | Protein Name 2                                                                                                                                                                                                                                                                          | Quantile                                                                               |
|----------------------------------------------------------------------------------|------------------------------------------------------------------------------------------------------------------|-------------------------------------------------------------------------------------------------------------------------------------------------------|----------------------------------------------|-----------------------------------------------|----------------------------|----------------------------------------------------------------|-------------------------------------------------|----------------------------------------------|-------------------------------------------------------------------------------------|-----------------------------------------------------------|----------------------------------------------------------------------------------------------------------------------------------------------------------------------------------|-----------------------------------------------------------------------------------------------------------------------------------------------------------------------------------------------------------------------------------------------------------------------------------------|----------------------------------------------------------------------------------------|
| VLLTFGFVRA<br>MTEAEQQQLI                                                         | DDEVDVDTGVEEDLGKSR<br>DDHFLFDKVPSPLLASGMAR                                                                       | N-ter +34.06 Da, K +34.06 Da<br>N-ter +34.06 Da, K +34.06 Da                                                                                          | 73.1<br>30.3                                 | 68.4<br>117.7                                 | 3<br>4                     | 2045.15<br>2396.60                                             | 0.62<br>-0.06                                   | 0.09<br>0.00                                 | ENPL_MOUSE<br>KCRM_MOUSE                                                            | KCRB_MOUSE                                                | Endoplasmic reticulum resident protein 99;Heat shock protein 90 kDa beta member 1;Polymorphic tumor rejection antigen 1;Tumor rejection antigen gp96;<br>Creatine kinase M-type; | 94 kDa glucose-regulated protein;Endoplasmic reticulum resident protein 99;Heat shock protein 90 kDa beta member 1;Polymorphic tumor rejection antigen 1;Tumor rejection antigen gp96;<br>Creatine kinase M chain;M-CK;                                                                 | 0.25 - 0.75<br>0.25 - 0.75                                                             |
| PPPCPGRELF<br>DSELSTSELE<br>EDEYTESYSD                                           | DDPSVYNIQNLDKAR<br>DDISIMGYKLDQTDVQIMAR<br>DDSNMEDYPPQSANPMNSLLSLYR                                              | N-ter +28.03 Da, K +28.03 Da<br>N-ter +34.06 Da, K +34.06 Da<br>N-ter +28.03 Da                                                                       | 38.7<br>23.1<br>21.0                         | 76.0<br>43.7<br>69.3                          | 3<br>3<br>4                | 1803.05<br>2466.38<br>2986.50                                  | 1.87<br>-1.94<br>6.66                           | 0.12<br>0.30<br>0.85                         | SHC1_MOUSE<br>SLAI1_MOUSE<br>NLV_MOUSE                                              | F7D4S5_MOUSE                                              | SHC-transforming protein 1;<br>SLAIN motif-containing protein 1;<br>Nuclear valosin-containing protein-like;                                                                     | SHC-transforming protein A;Src homology 2 domain-containing-transforming protein C1;<br>Creatine kinase M chain;M-CK;                                                                                                                                                                   | 0.85 - 1.00<br>0.00 - 0.15<br>0.85 - 1.00                                              |
| TNLRDDIMRL                                                                       | DDTVHVVIATPGR                                                                                                    | N-ter +28.03 Da                                                                                                                                       | 22.0                                         | 96.4                                          | 3                          | 1406.89                                                        | 2.21                                            | 0.34                                         | DDX6_MOUSE                                                                          |                                                           | Probable ATP-dependent RNA helicase DDX6;                                                                                                                                        | ATP-dependent RNA helicase p54;DEAD box protein 6;Oncogene RCK homolog;                                                                                                                                                                                                                 | 0.85 - 1.00                                                                            |
| TWKLVSENF                                                                        | DDYMKEVGVGFATR                                                                                                   | N-ter +34.06 Da, K +34.06 Da                                                                                                                          | 36.2                                         | 77.0                                          | 3                          | 1654.99                                                        | -0.03                                           | 0.00                                         | FABP4_MOUSE                                                                         |                                                           | Fatty acid-binding protein, adipocyte;                                                                                                                                           | 3T3-L1 lipid-binding protein;Adipocyte lipid-binding protein;Adipocyte-type fatty acid-binding protein;Fatty acid-binding protein 4;Myelin P2 protein homolog;P15;P2 adipocyte protein;Protein 422;                                                                                     | 0.25 - 0.75                                                                            |
| DVIRNAFACF                                                                       | DEEATGIQEDYLR                                                                                                    | N-ter +28.03 Da                                                                                                                                       | 27.0                                         | 41.9                                          | 3                          | 1666.84                                                        | 0.85                                            | 0.05                                         | ML12B_MOUSE                                                                         |                                                           | Myosin regulatory light chain 12B;                                                                                                                                               | Myosin regulatory light chain 2-B, smooth muscle isoform;Myosin regulatory light chain 20 kDa;Myosin regulatory light chain MRLC2;                                                                                                                                                      | 0.25 - 0.75                                                                            |
| KAVLSAEKLR<br>IENHEGVRFR<br>NFASQMSYGY<br>DKDKSGFIEE<br>DDFRFASAGD<br>SASNRHIAAK | DEEVHTGLGELLR<br>DEILEASDGIMVAR<br>DEKSAGVSPVPGMGPSPGR<br>DELGSLKGFSSDAR<br>DGIIVVWNAQTGEKLELR<br>DHASIQMNVAEVDR | N-ter +28.03 Da<br>N-ter +34.06 Da<br>N-ter +34.06 Da, K +34.06 Da<br>N-ter +28.03 Da, K +28.03 Da<br>N-ter +28.03 Da, K +28.03 Da<br>N-ter +28.03 Da | 37.2<br>42.8<br>36.0<br>25.2<br>16.7<br>33.8 | 71.2<br>68.4<br>75.3<br>90.1<br>112.4<br>94.7 | 3<br>3<br>3<br>3<br>4<br>3 | 1494.87<br>1551.91<br>1892.15<br>1650.01<br>2209.50<br>1611.92 | 1.51<br>-1.03<br>-2.40<br>-0.17<br>2.04<br>0.14 | 0.15<br>0.04<br>0.25<br>0.03<br>0.10<br>0.02 | SERPH_MOUSE<br>KPYM_MOUSE<br>CO1A1_MOUSE<br>PRVA_MOUSE<br>WDR41_MOUSE<br>RS21_MOUSE | F8WGB7_MOUSE                                              | Serpin H1;<br>Pyruvate kinase isozymes M1/M2;<br>Collagen alpha-1(I) chain;<br>Parvalbumin alpha;<br>WD repeat-containing protein 41;<br>40S ribosomal protein S21;              | 47 kDa heat shock protein;Collagen-binding protein;Serine protease inhibitor J6;<br>Pyruvate kinase muscle isozyme;<br>Alpha-1 type I collagen;                                                                                                                                         | 0.85 - 1.00<br>0.15 - 0.25<br>0.00 - 0.15<br>0.25 - 0.75<br>0.85 - 1.00<br>0.25 - 0.75 |
| MDD<br>LLFWIPASRG<br>LLLWFPGARC<br>PMSRRTEISI<br>QQLDHDFLF                       | DIAALVVDNGSGMCKAGFAGDDAPR<br>DILLTQSPALVSPGER<br>DIQMOTSPSSLASLGER<br>DISSKQVESTASAGPSR<br>DKPVPSPLLASGMAR       | +57.02 Da<br>N-ter +28.03 Da<br>N-ter +28.03 Da<br>N-ter +28.03 Da<br>N-ter +28.03 Da, K +28.03 Da<br>N-ter +34.06 Da, K +34.06 Da                    | 49.4<br>49.6<br>56.8<br>40.7<br>37.5         | 87.1<br>73.1<br>73.8<br>88.0<br>49.2          | 4<br>3<br>3<br>3<br>3      | 2562.44<br>1923.21<br>1934.08<br>1846.11<br>1622.07            | -0.49<br>-0.62<br>-1.03<br>-0.79<br>0.83        | 0.09<br>0.11<br>0.19<br>0.12<br>0.07         | ACTB_MOUSE<br>KV5A9_MOUSE<br>KV5A7_MOUSE<br>SEPT9_MOUSE<br>KCRM_MOUSE               | E9Q1F2_MOUSE<br>KV5A8_MOUSE<br>A2A6U3_MOUSE<br>KCRB_MOUSE | Actin, cytoplasmic 1;<br>Ig kappa chain V-V region L7;<br>Ig kappa chain V-V region MOPC 41;<br>Septin-9;<br>Creatine kinase M-type;                                             | Beta-actin;                                                                                                                                                                                                                                                                             | 0.25 - 0.75<br>0.25 - 0.75<br>0.15 - 0.25<br>0.15 - 0.25<br>0.25 - 0.75                |
| NRVYKEMYKT<br>KQEVNENFAI                                                         | DLEKDIISDTSGDFR<br>DLIAQQPVEVEHR                                                                                 | N-ter +34.06 Da, K +34.06 Da<br>N-ter +28.03 Da                                                                                                       | 24.2<br>24.2                                 | 75.8<br>86.9                                  | 3<br>3                     | 1778.07<br>1675.01                                             | -1.89<br>-0.69                                  | 0.14<br>0.10                                 | ANXA2_MOUSE<br>NDU56_MOUSE                                                          | B0V2N7_MOUSE<br>D3YW32_MOUSE                              | Annexin A2;<br>NADH dehydrogenase [ubiquinone] iron-sulfur protein 6, mitochondrial;<br>NADH dehydrogenase [ubiquinone] flavoprotein 3, mitochondrial;                           | Annexin II;Annexin-2;Calpactin I heavy chain;Calpactin-1 heavy chain;Chromobindin-8;Lipocortin II;Placental anticoagulant protein IV;Protein I;p36;<br>Complex I-13kD-A;NADH-ubiquinone oxidoreductase 13 kDa-A subunit;<br>Complex I-9kD;NADH-ubiquinone oxidoreductase 9 kDa subunit; | 0.00 - 0.15<br>0.25 - 0.75                                                             |
| HHDYNTYTLF<br>GGSLSVLMAR<br>LTSSESRPTR                                           | DLNLDLSKFR<br>DLPAAAAPAGPASFAR<br>DLSSDLSLASKIVK                                                                 | N-ter +34.06 Da, K +34.06 Da<br>N-ter +28.03 Da<br>N-ter +28.03 Da, K +28.03 Da<br>N-ter +34.06 Da, K +34.06 Da, C +57.02 Da                          | 24.3<br>52.5<br>43.6<br>42.8                 | 50.2<br>64.2<br>76.2<br>67.6                  | 3<br>3<br>3<br>3           | 1287.85<br>1509.89<br>1634.04<br>1925.20                       | -0.86<br>4.97<br>1.31<br>2.33                   | 0.09<br>0.80<br>0.18<br>0.20                 | NDUV3_MOUSE<br>6PGL_MOUSE<br>A2M_MOUSE<br>Q9D1B1_MOUSE                              | Q3U422_MOUSE<br>Q8CBG6_MOUSE<br>D3YW52_MOUSE              | mitochondrial;<br>6-phosphogluconolactonase;<br>Alpha-2-macroglobulin;                                                                                                           | Pregnancy zone protein;                                                                                                                                                                                                                                                                 | 0.15 - 0.25<br>0.85 - 1.00<br>0.75 - 0.85<br>0.85 - 1.00                               |
| CEEETALVC<br>DDEETALVC<br>NKNMKRQKSL<br>QDSILMKDKS<br>KSKENPRFIS                 | DNGSGLCKAGFAGDDAPR<br>DNGSGLVKAGFAGDDAPR<br>DNLLKVTPEVNR<br>DNLYNIIINR<br>DNQLQEGKNVIGLQMGNTNR                   | N-ter +28.03 Da, K +28.03 Da<br>N-ter +28.03 Da, K +28.03 Da<br>N-ter +28.03 Da, K +28.03 Da<br>N-ter +28.03 Da<br>N-ter +28.03 Da, K +28.03 Da       | 38.0<br>49.5<br>30.8<br>21.6<br>36.2         | 96.3<br>83.9<br>74.9<br>88.1<br>68.6          | 3<br>3<br>3<br>3<br>3      | 1863.04<br>1802.05<br>1452.94<br>1275.77<br>2170.27            | -3.18<br>-1.29<br>1.65<br>0.43<br>0.61          | 0.58<br>0.16<br>0.13<br>0.01<br>0.07         | ACTA_MOUSE<br>ACTC_MOUSE<br>SCEL_MOUSE<br>HSF3_MOUSE<br>TAGL2_MOUSE                 | ACTH_MOUSE<br>ACTS_MOUSE                                  | Actin, aortic smooth muscle;<br>Actin, alpha cardiac muscle 1;<br>Sciellin;<br>Heat shock factor protein 3;<br>Transgelin-2;                                                     | Alpha-actin-2;<br>Alpha-cardiac actin;                                                                                                                                                                                                                                                  | 0.00 - 0.15<br>0.15 - 0.25<br>0.85 - 1.00<br>0.25 - 0.75<br>0.25 - 0.75                |
| LLGLLGLAAA<br>LLTACLASRA<br>VPTANAALPA                                           | DPAIYFKEQLDGDWATNR<br>DPASTLPDIQVENFSES<br>DPPASVVVGVVPR                                                         | N-ter +28.03 Da, K +28.03 Da<br>N-ter +34.06 Da<br>N-ter +28.03 Da                                                                                    | 27.9<br>51.0<br>50.3                         | 96.5<br>66.3<br>75.4                          | 4<br>3<br>3                | 2341.36<br>2166.21<br>1515.00                                  | -1.47<br>-0.30<br>0.74                          | 0.12<br>0.05<br>0.05                         | CALR_MOUSE<br>AMB_MOUSE<br>FETUA_MOUSE                                              |                                                           | Calreticulin;<br>Protein AMBP;<br>Alpha-2-HS-glycoprotein;                                                                                                                       | Calreticulin;<br>Protein AMBP;<br>Alpha-2-HS-glycoprotein;                                                                                                                                                                                                                              | 0.15 - 0.25<br>0.25 - 0.75<br>0.25 - 0.75                                              |
| PTSYPEPSKL<br>LLVILPATGS                                                         | DPTSVTLPKPEIR<br>DPVLCFTQYEESGR                                                                                  | N-ter +34.06 Da, K +34.06 Da<br>N-ter +34.06 Da, C +57.02 Da                                                                                          | 24.1<br>45.7                                 | 84.5<br>67.5                                  | 3<br>3                     | 1554.04<br>1820.97                                             | 0.68<br>0.57                                    | 0.04<br>0.02                                 | MA2B_MOUSE<br>PRZB1_MOUSE                                                           |                                                           | Lysosomal alpha-mannosidase;<br>Properdin;                                                                                                                                       | Lysosomal alpha-mannosidase;<br>Mannosidase alpha class 2B member 1;Mannosidase alpha-B;<br>Complement factor P;                                                                                                                                                                        | 0.25 - 0.75<br>0.25 - 0.75                                                             |
| SWASRNEAAP<br>GLPGLAGLHG                                                         | DQDEIDCLPLGAKQPSFR<br>DQGAGPVGPAQPR                                                                              | N-ter +28.03 Da, K +28.03 Da, C +57.02 Da<br>N-ter +28.03 Da                                                                                          | 38.3<br>46.6                                 | 53.2<br>47.1                                  | 3<br>2                     | 2144.17<br>1302.73                                             | 0.19<br>-0.11                                   | 0.01<br>0.01                                 | PPGB_MOUSE<br>CO1A2_MOUSE                                                           | A2A5I9_MOUSE<br>E9Q6U9_MOUSE                              | Lysosomal protective protein;<br>Collagen alpha-2(I) chain;                                                                                                                      | Carboxypeptidase C;Carboxypeptidase L;Cathepsin A;Protective protein cathepsin A;Protective protein for beta-galactosidase; Alpha-2 type I collagen;<br>Alpha-1 protease inhibitor 1;Alpha-1-antiproteinase;Serine protease inhibitor 1-1;Serine protease inhibitor A1a;                | 0.25 - 0.75<br>0.25 - 0.75                                                             |
| DVQETDTSQK                                                                       | DQSPASHEIATNLGDFAIPLYR                                                                                           | N-ter +28.03 Da                                                                                                                                       | 64.9                                         | 71.3                                          | 3                          | 2432.37                                                        | 0.28                                            | 0.08                                         | A1AT1_MOUSE                                                                         | A1AT2_MOUSE                                               | Alpha-1-antitrypsin 1-1;                                                                                                                                                         | Alpha-1-antitrypsin 1-1;                                                                                                                                                                                                                                                                | 0.25 - 0.75                                                                            |

| Non Prime Site | Prime Site                        | Modifications                             | Hyperscore | Mass error in ppm | Charge | Precursor neutral mass in Da | Fold change (log <sub>2</sub> ) of ASAPRatio | FC-error of ASAPRatio | Uniprot ID 1 | Uniprot ID 2 | Protein Name 1                                                  | Protein Name 2                                                                                                                                             | Quantile    |
|----------------|-----------------------------------|-------------------------------------------|------------|-------------------|--------|------------------------------|----------------------------------------------|-----------------------|--------------|--------------|-----------------------------------------------------------------|------------------------------------------------------------------------------------------------------------------------------------------------------------|-------------|
| DVQETDTSQK     | DQSPASHEIATNLGDFALR               | N-ter +34.06 Da                           | 45.4       | 65.8              | 3      | 2075.19                      | -0.94                                        | 0.05                  | A1AT4_MOUSE  |              | Alpha-1-antitrypsin 1-4;                                        | Alpha-1 protease inhibitor 4;Serine protease inhibitor 1-4;Serine protease inhibitor A1d;                                                                  | 0.15 - 0.25 |
| EGSSNVFSMF     | DQTQIQEFKEAFTVIDQNR               | N-ter +28.03 Da, K +28.03 Da              | 44.8       | 92.8              | 4      | 2365.41                      | -2.74                                        | 0.37                  | MLRS_MOUSE   | F6ULR7_MOUSE | Myosin regulatory light chain 2, skeletal muscle isoform;       | Fast skeletal myosin light chain 2;MLC2F;                                                                                                                  | 0.00 - 0.15 |
| FWSLLAICAS     | DSFRDQAVAIMR                      | N-ter +34.06 Da                           | 29.1       | 52.8              | 3      | 1441.83                      | -0.36                                        | 0.03                  | DPEP1_MOUSE  |              | Dipeptidase 1;                                                  | Membrane-bound dipeptidase 1;Microsomal dipeptidase;Renal dipeptidase;                                                                                     | 0.25 - 0.75 |
| QTRGFVSDSS     | DSMDTGAGSIR                       | N-ter +28.03 Da                           | 40.0       | 77.5              | 2      | 1136.60                      | 0.94                                         | 0.04                  | ATIF1_MOUSE  | Q9D879_MOUSE | ATPase inhibitor, mitochondrial;                                | Inhibitor of F(1)F(o)-ATPase;                                                                                                                              | 0.75 - 0.85 |
| PRQPSQSS       | DSQVHSGVQVEGR                     | N-ter +28.03 Da                           | 38.7       | 101.1             | 3      | 1424.85                      | 2.94                                         | 0.45                  | E9Q019_MOUSE | FILA_MOUSE   |                                                                 |                                                                                                                                                            | 0.85 - 1.00 |
| KVLQTRGFVS     | DSSDSMDTGAGSIR                    | N-ter +34.06 Da                           | 46.7       | 52.1              | 2      | 1431.71                      | 2.11                                         | 0.20                  | ATIF1_MOUSE  | Q9D879_MOUSE | ATPase inhibitor, mitochondrial;                                | Inhibitor of F(1)F(o)-ATPase;                                                                                                                              | 0.85 - 1.00 |
| DVEPTYCRY      | DSVSFNGAVSDDSKR                   | N-ter +28.03 Da, K +28.03 Da              | 61.0       | 85.5              | 3      | 1738.00                      | -0.07                                        | 0.01                  | PCOC1_MOUSE  | D3ZE3_MOUSE  | Procollagen C-endopeptidase enhancer 1;                         | P14;Procollagen COOH-terminal proteinase enhancer 1;Type 1 procollagen C-proteinase enhancer protein;Type 1 procollagen COOH-terminal proteinase enhancer; | 0.25 - 0.75 |
| QGVVMVGMGQK    | DSYVGDQAQSKR                      | N-ter +34.06 Da, K +34.06 Da              | 31.3       | 96.3              | 3      | 1421.88                      | 0.30                                         | 0.06                  | ACTC_MOUSE   | ACTA_MOUSE   | Actin, alpha cardiac muscle 1;                                  | Alpha-cardiac actin;                                                                                                                                       | 0.25 - 0.75 |
| RHNRIKEIGA     | DTFSQLGSLQALDLSWNAIR              | N-ter +34.06 Da                           | 42.1       | 48.9              | 3      | 2268.31                      | -3.32                                        | 0.66                  | LGR6_MOUSE   | D3Z6S4_MOUSE | Leucine-rich repeat-containing G-protein coupled receptor 6;    |                                                                                                                                                            | 0.00 - 0.15 |
| PKKQALYLMF     | DTPQESPVKSPPPR                    | N-ter +28.03 Da, K +28.03 Da              | 29.9       | 96.7              | 3      | 1592.01                      | 0.60                                         | 0.06                  | TACC2_MOUSE  | E9Q8T1_MOUSE | Transforming acidic coiled-coil-containing protein 2;           | D4;Rho-GDI beta;                                                                                                                                           | 0.25 - 0.75 |
| LTKYKTLTG      | DVPVVDPTVFNVTVTR                  | N-ter +34.06 Da                           | 54.2       | 70.7              | 3      | 1812.15                      | -1.22                                        | 0.17                  | GDIR2_MOUSE  |              | Rho GDP-dissociation inhibitor 2;                               | Alpha-1 protease inhibitor 1;Alpha-1-antiprotease;Serine protease inhibitor 1-1;Serine protease inhibitor A1a;                                             | 0.15 - 0.25 |
| CCLVP5FLAE     | DVQETDTSQKQSPASHEIATNLGDFAIISLYR  | N-ter +34.06 Da, K +34.06 Da              | 46.7       | 84.6              | 4      | 3604.10                      | -1.40                                        | 0.18                  | A1AT1_MOUSE  | A1AT2_MOUSE  | Alpha-1-antitrypsin 1-1;                                        |                                                                                                                                                            | 0.15 - 0.25 |
| LVLILKGVQC     | DVQLVESGGGLVQPGGSR                | N-ter +28.03 Da                           | 43.9       | 33.4              | 3      | 1781.99                      | 0.03                                         | 0.00                  | HVM16_MOUSE  |              | Ig heavy chain V region MOPC 21;                                |                                                                                                                                                            | 0.25 - 0.75 |
| TDKPLRLPLQ     | DVYKIGGIGTVPVGR                   | N-ter +28.03 Da, K +28.03 Da              | 50.0       | 73.1              | 3      | 1586.03                      | -0.11                                        | 0.01                  | EF1A1_MOUSE  | EF1A2_MOUSE  | Elongation factor 1-alpha 1;                                    | Elongation factor Tu;Eukaryotic elongation factor 1 A-1;                                                                                                   | 0.25 - 0.75 |
| LVFAPVGVQK     | DWLSLSLPHR                        | N-ter +34.06 Da                           | 34.3       | 84.1              | 3      | 1256.81                      | -0.84                                        | 0.03                  | Q9EQY5_MOUSE | D3YYJ5_MOUSE |                                                                 |                                                                                                                                                            | 0.15 - 0.25 |
| HSGALQRQKR     | DWWIPPINPENSIR                    | N-ter +28.03 Da                           | 29.3       | 60.4              | 3      | 1676.99                      | 1.04                                         | 0.14                  | CADH2_MOUSE  | D3YYT0_MOUSE | Cadherin-2;                                                     | Neural cadherin;                                                                                                                                           | 0.75 - 0.85 |
| VLHFGIAVLY     | EACCVLLLWLLALFISQIPR              | N-ter +28.03 Da, C +57.02 Da              | 32.4       | 56.7              | 4      | 2428.48                      | 4.06                                         | 0.38                  | MFS6L_MOUSE  |              | Major facilitator superfamily domain-containing protein 6-like; |                                                                                                                                                            | 0.85 - 1.00 |
| DGSSAGTLL      | EALDCILPPTRPDKPLR                 | N-ter +34.06 Da, K +34.06 Da, C +57.02 Da | 31.4       | 72.2              | 4      | 2159.40                      | 1.58                                         | 0.06                  | EF1A1_MOUSE  | D3YZ68_MOUSE | Elongation factor 1-alpha 1;                                    | Elongation factor Tu;Eukaryotic elongation factor 1 A-1;                                                                                                   | 0.85 - 1.00 |
| FEGRSRRRR      | EAPKVVVEEQSR                      | N-ter +28.03 Da, K +28.03 Da              | 22.1       | 37.1              | 3      | 1455.81                      | 0.14                                         | 0.00                  | CO4B_MOUSE   |              | Complement C4-B;                                                |                                                                                                                                                            | 0.25 - 0.75 |
| GSYYEKPTQ      | EAPQVTGPIEVPVVR                   | N-ter +28.03 Da                           | 38.4       | 26.2              | 3      | 1617.95                      | -0.74                                        | 0.04                  | CRIP2_MOUSE  |              | Cysteine-rich protein 2;                                        | Heart LIM protein;                                                                                                                                         | 0.25 - 0.75 |
| GTEAAATVF      | EAVPMSMPPILR                      | N-ter +28.03 Da                           | 29.5       | 87.0              | 3      | 1367.85                      | -0.04                                        | 0.00                  | A1AT2_MOUSE  |              | Alpha-1-antitrypsin 1-2;                                        | Alpha-1 protease inhibitor 2;Alpha-1-antiprotease;Serine protease inhibitor 1-2;Serine protease inhibitor A1b;                                             | 0.25 - 0.75 |
| LGTPRLGVQK     | EDGLDFPEYDGVDR                    | N-ter +34.06 Da                           | 39.9       | 20.8              | 2      | 1659.78                      | -1.18                                        | 0.14                  | CASQ1_MOUSE  | E9Q489_MOUSE | Calsequestrin-1;                                                | Calsequestrin, skeletal muscle isoform;                                                                                                                    | 0.15 - 0.25 |
| PKLPGRVAFG     | EDIDLPEFDAR                       | N-ter +34.06 Da                           | 38.8       | 38.3              | 2      | 1453.77                      | -5.64                                        | 0.00                  | CATB_MOUSE   |              | Cathepsin B;                                                    | Cathepsin B1;                                                                                                                                              | 0.00 - 0.15 |
| GATALLTHGQ     | EDIPEVSCIHNGLR                    | N-ter +34.06 Da, C +57.02 Da              | 46.4       | 72.7              | 3      | 1671.97                      | 0.76                                         | 0.04                  | CO1A1_MOUSE  | F8WGB7_MOUSE | Collagen alpha-1(I) chain;                                      | Alpha-1 type I collagen;                                                                                                                                   | 0.25 - 0.75 |
| SHIDKTLMLN     | EDKPADDDYSAVLQR                   | N-ter +34.06 Da, K +34.06 Da              | 33.5       | 82.8              | 3      | 1674.03                      | -1.47                                        | 0.16                  | SRCA_MOUSE   |              | Sarcalumenin;                                                   |                                                                                                                                                            | 0.15 - 0.25 |
| TLTAVHDAIL     | EDLVFSEIVGKR                      | N-ter +34.06 Da, K +34.06 Da              | 44.9       | 75.4              | 3      | 1556.04                      | 2.38                                         | 0.23                  | RS7_MOUSE    | F6SVV1_MOUSE | 40S ribosomal protein S7;                                       |                                                                                                                                                            | 0.85 - 1.00 |
| LGTLPARAAH     | EDPVEKIVIEGFSR                    | N-ter +34.06 Da, K +34.06 Da              | 31.4       | 97.8              | 3      | 1572.04                      | 0.43                                         | 0.02                  | SBSN_MOUSE   | E9QP82_MOUSE | Suprabasin;                                                     |                                                                                                                                                            | 0.25 - 0.75 |
| LCCLVPSFLA     | EDVQETDTSQKQSPASHEIATNLGDFAIISLYR | N-ter +34.06 Da, K +34.06 Da              | 31.3       | 86.9              | 4      | 3733.16                      | -1.69                                        | 0.76                  | A1AT1_MOUSE  | A1AT2_MOUSE  | Alpha-1-antitrypsin 1-1;                                        | Alpha-1 protease inhibitor 1;Alpha-1-antiprotease;Serine protease inhibitor 1-1;Serine protease inhibitor A1a;                                             | 0.00 - 0.15 |
| LCCLVPSFLA     | EDVQETDTSQKQSPASHEIATNLGDFALR     | N-ter +34.06 Da, K +34.06 Da              | 47.7       | 44.3              | 3      | 3369.81                      | -0.81                                        | 0.06                  | A1AT4_MOUSE  |              | Alpha-1-antitrypsin 1-4;                                        | Alpha-1 protease inhibitor 4;Serine protease inhibitor 1-4;Serine protease inhibitor A1d;                                                                  | 0.15 - 0.25 |
| ARQASRSTAY     | EDYHHPPRR                         | N-ter +28.03 Da                           | 24.9       | 71.3              | 3      | 1363.72                      | 2.04                                         | 0.32                  | Q8VHMS_MOUSE |              |                                                                 |                                                                                                                                                            | 0.85 - 1.00 |
| LVQDVANNTN     | EEAGDGTTTATVLR                    | N-ter +34.06 Da                           | 32.0       | 75.8              | 3      | 1524.90                      | -0.04                                        | 0.00                  | CH60_MOUSE   | D3Z2F2_MOUSE | 60 kDa heat shock protein, mitochondrial;                       | 60 kDa chaperonin;Chaperonin 60;HSP-65;Heat shock protein 60;Mitochondrial matrix protein P1;                                                              | 0.25 - 0.75 |
| SGLLLTGTQ      | EEAQEIDCNDEAVQAVDSLKLNAR          | N-ter +28.03 Da, K +28.03 Da, C +57.02 Da | 46.7       | 111.6             | 4      | 3146.91                      | -5.18                                        | 0.58                  | Q6S9I3_MOUSE | Q6S9I2_MOUSE |                                                                 |                                                                                                                                                            | 0.00 - 0.15 |
| M              | EEEIAALVIDNGSMCKAGFAGDDAPR        | N-ter +28.03 Da, K +28.03 Da, C +57.02 Da | 28.6       | 55.2              | 4      | 2979.54                      | 0.71                                         | 0.05                  | ACTG_MOUSE   | B1ATY1_MOUSE | Actin, cytoplasmic 2;                                           | Gamma-actin;                                                                                                                                               | 0.25 - 0.75 |
| EDEKAAAEIY     | EEFLAAFEGSDGNKVKTFVR              | N-ter +28.03 Da, K +28.03 Da              | 30.7       | 75.4              | 4      | 2327.39                      | 0.70                                         | 0.06                  | SR140_MOUSE  | E9QM87_MOUSE | U2 snRNP-associated SURP motif-containing protein;              | associated protein SR140;                                                                                                                                  | 0.25 - 0.75 |
| GHACTQKFSN     | EEIAMATVTALR                      | N-ter +28.03 Da                           | 44.5       | 29.2              | 2      | 1331.75                      | -0.45                                        | 0.04                  | ALDOA_MOUSE  | ALDOC_MOUSE  | Fructose-bisphosphate aldolase A;                               | Aldolase 1;Muscle-type aldolase;                                                                                                                           | 0.25 - 0.75 |
| MPCKI          | EEIKDFLLTAR                       | N-ter +34.06 Da, K +34.06 Da              | 29.5       | 58.9              | 3      | 1401.93                      | 0.14                                         | 0.01                  | RL38_MOUSE   |              | 60S ribosomal protein L38;                                      |                                                                                                                                                            | 0.25 - 0.75 |
| LLLSGELYA      | EEKQCDPFTVENGR                    | N-ter +34.06 Da, K +34.06 Da, C +57.02 Da | 32.7       | 66.3              | 3      | 1776.00                      | 0.21                                         | 0.02                  | F13B_MOUSE   | B1AY02_MOUSE | Coagulation factor XIII B chain;                                | Protein-glutamine gamma-glutamyltransferase B chain;Transglutaminase B chain;                                                                              | 0.25 - 0.75 |
| PHLSYKEAF      | EEMEGTSPSPHVSAR                   | N-ter +28.03 Da                           | 66.4       | 100.5             | 3      | 1825.02                      | -0.25                                        | 0.04                  | E9Q056_MOUSE | E9Q6Y2_MOUSE |                                                                 |                                                                                                                                                            | 0.25 - 0.75 |
| ERGNPVIQW      | EEVEDASEEAPLRDR                   | N-ter +34.06 Da                           | 30.0       | 77.1              | 3      | 1777.99                      | -2.18                                        | 0.20                  | SRCA_MOUSE   |              | Sarcalumenin;                                                   |                                                                                                                                                            | 0.00 - 0.15 |
| ERGNPVIQW      | EEVEDASEEAPLR                     | N-ter +34.06 Da                           | 56.6       | 40.8              | 2      | 1506.79                      | -1.52                                        | 0.17                  | SRCA_MOUSE   |              | Sarcalumenin;                                                   |                                                                                                                                                            | 0.00 - 0.15 |
| AVLSAEKLRD     | EEVHTGLGELLR                      | N-ter +34.06 Da                           | 24.4       | 57.8              | 3      | 1385.85                      | 0.71                                         | 0.06                  | SERPH_MOUSE  |              | Serpin H1;                                                      | 47 kDa heat shock protein;Collagen-binding protein;Serine protease inhibitor J6;                                                                           | 0.25 - 0.75 |

Table S8, Tholen et al.

| Non Prime Site | Prime Site             | Modifications                             | Hyperscore | Mass error in ppm | Charge | Precursor neutral mass in Da | Fold change (log <sub>2</sub> ) of ASAPRatio | FC-error of ASAPRatio | Uniprot ID 1 | Uniprot ID 2 | Protein Name 1                                                 | Protein Name 2                                                                                                                                             | Quantile    |
|----------------|------------------------|-------------------------------------------|------------|-------------------|--------|------------------------------|----------------------------------------------|-----------------------|--------------|--------------|----------------------------------------------------------------|------------------------------------------------------------------------------------------------------------------------------------------------------------|-------------|
| FRHACVPVDF     | EEHVSSNADEEDIR         | N-ter +28.03 Da                           | 45.4       | 79.5              | 3      | 1755.93                      | 1.09                                         | 0.18                  | IDHG1_MOUSE  | Q3TKM5_MOUSE | Isocitrate dehydrogenase [NAD] subunit gamma 1, mitochondrial; | Isocitric dehydrogenase subunit gamma;NAD(+)-specific ICDB subunit gamma;                                                                                  | 0.75 - 0.85 |
| TEEHLRDYF      | EYKIDTIEITDR           | N-ter +34.06 Da, K +34.06 Da              | 34.4       | 79.8              | 3      | 1862.18                      | -0.04                                        | 0.01                  | ROA2_MOUSE   | F6U106_MOUSE | Heterogeneous nuclear ribonucleoproteins A2/B1;                |                                                                                                                                                            | 0.25 - 0.75 |
| EVTDRAYTGR     | EFDDLPLAEQR            | N-ter +28.03 Da                           | 28.5       | 49.2              | 3      | 1359.73                      | 0.16                                         | 0.00                  | AT2A1_MOUSE  |              | Sarcoplasmic/endoplasmic reticulum calcium ATPase 1;           | Calcium pump 1;Calcium-transporting ATPase sarcoplasmic reticulum type, fast twitch skeletal muscle isoform;Endoplasmic reticulum class 1/2 Ca(2+) ATPase; | 0.25 - 0.75 |
| RLSLESEGAN     | EGATAAPELSALEEAFR      | N-ter +28.03 Da                           | 45.2       | 30.9              | 2      | 1788.95                      | 0.71                                         | 0.14                  | TPPP_MOUSE   |              | Tubulin polymerization-promoting protein;                      |                                                                                                                                                            | 0.25 - 0.75 |
| IIRNVKGPVQ     | EGDVLTLLESER           | N-ter +28.03 Da                           | 45.5       | 37.8              | 2      | 1387.77                      | 0.99                                         | 0.06                  | RS28_MOUSE   | D3YVD9_MOUSE | 40S ribosomal protein S28;                                     |                                                                                                                                                            | 0.75 - 0.85 |
| KKAGHPFMWN     | EHLGYVLTCPNSLGTGLR     | N-ter +28.03 Da, C +57.02 Da              | 42.6       | 81.7              | 3      | 2014.20                      | -2.84                                        | 0.61                  | KCRM_MOUSE   |              | Creatine kinase M-type;                                        | Creatine kinase M chain;M-CK;                                                                                                                              | 0.00 - 0.15 |
| DAYGPPSNFL     | EIDVSNPQTVGVGR         | N-ter +28.03 Da                           | 27.9       | 45.8              | 3      | 1497.85                      | 0.88                                         | 0.06                  | SNX3_MOUSE   | Q78ZM0_MOUSE | Sorting nexin-3;                                               |                                                                                                                                                            | 0.75 - 0.85 |
| DPLNLGRTL      | EIPGSSDPNIVPDGDFSSLVR  | N-ter +28.03 Da                           | 35.8       | 74.1              | 3      | 2228.26                      | 0.38                                         | 0.04                  | CO4B_MOUSE   |              | Complement C4-B;                                               |                                                                                                                                                            | 0.25 - 0.75 |
| NLVKTNCDLY     | EKLGEYGFQNAILVR        | N-ter +28.03 Da, K +28.03 Da              | 29.7       | 71.2              | 3      | 1792.12                      | -0.49                                        | 0.02                  | ALBU_MOUSE   |              | Serum albumin;                                                 |                                                                                                                                                            | 0.25 - 0.75 |
| LLAVLPTTTA     | EKNIGDIYSLTVDSR        | N-ter +34.06 Da, K +34.06 Da              | 45.9       | 57.5              | 3      | 1777.09                      | 1.08                                         | 0.06                  | Q9DBK8_MOUSE | Q8C7G9_MOUSE |                                                                |                                                                                                                                                            | 0.75 - 0.85 |
| KLPSLAFLYM     | EKNQLEEVPSALPR         | N-ter +34.06 Da, K +34.06 Da              | 33.2       | 67.8              | 3      | 1677.09                      | -0.52                                        | 0.04                  | PRELP_MOUSE  |              | Prolargin;                                                     | Proline-arginine-rich end leucine-rich repeat protein;                                                                                                     | 0.25 - 0.75 |
| NIGGAGSYIY     | EKPQTEAPQVTGPIEVPVVR   | N-ter +28.03 Da, K +28.03 Da              | 21.4       | 66.2              | 4      | 2229.38                      | 3.43                                         | 0.11                  | CRIP2_MOUSE  |              | Cysteine-rich protein 2;                                       | Heart LIM protein;                                                                                                                                         | 0.85 - 1.00 |
| AIPNLRNYG      | ELADCTKQEPER           | N-ter +28.03 Da, K +28.03 Da              | 29.2       | 73.7              | 3      | 1424.94                      | 0.43                                         | 0.03                  | ALBU_MOUSE   |              | Serum albumin;                                                 |                                                                                                                                                            | 0.00 - 0.15 |
| HIFCNCSN       | ELALPSPYKPVPR          | N-ter +28.03 Da, K +28.03 Da              | 29.2       | 73.7              | 3      | 1424.94                      | 0.43                                         | 0.03                  | RUN_MOUSE    |              | RUN and FYVE domain-containing protein 1;                      | Rab4-interacting protein;                                                                                                                                  | 0.25 - 0.75 |
| SAKSGDELQD     | ELFELLGPEGLDLIEKLLQNR  | N-ter +34.06 Da, K +34.06 Da              | 19.9       | 66.9              | 4      | 2506.64                      | -3.84                                        | 0.00                  | E9PZJ8_MOUSE |              |                                                                |                                                                                                                                                            | 0.00 - 0.15 |
| KPGAVQETTF     | ELGGDVHSGTALPASR       | N-ter +28.03 Da                           | 41.0       | 101.7             | 3      | 1593.97                      | -0.62                                        | 0.07                  | AFAD_MOUSE   | E9PYX7_MOUSE | Afadin;                                                        | Protein AF-6;                                                                                                                                              | 0.25 - 0.75 |
| QKRRKNDLDM     | ELQALDHSFEAR           | N-ter +34.06 Da                           | 34.5       | 68.4              | 3      | 1561.94                      | 0.25                                         | 0.02                  | TNNT3_MOUSE  | A2A6J0_MOUSE | Troponin T, fast skeletal muscle;                              | Fast skeletal muscle troponin T;                                                                                                                           | 0.25 - 0.75 |
| RQMRHRSLAR     | ELSGTIKEILTAQSGVGNVDGR | N-ter +28.03 Da, K +28.03 Da, C +57.02 Da | 39.3       | 84.1              | 4      | 2459.48                      | 1.42                                         | 0.15                  | RL12_MOUSE   |              | 60S ribosomal protein L12;                                     |                                                                                                                                                            | 0.75 - 0.85 |
| QTTALMAHLF     | EMGFCDRQLNLRLLR        | N-ter +28.03 Da, C +57.02 Da              | 28.2       | 56.7              | 3      | 1948.12                      | 1.55                                         | 0.09                  | NBR1_MOUSE   | A2A4N8_MOUSE | Next to BRCA1 gene 1 protein;                                  | Membrane component chromosome 17 surface marker 2 homolog;Neighbor of BRCA1 gene 1 protein;                                                                | 0.85 - 1.00 |
| TDKHKTDLNF     | ENLKGDDLDLPNVLSR       | N-ter +34.06 Da, K +34.06 Da              | 39.3       | 68.5              | 3      | 2059.23                      | -1.56                                        | 0.14                  | KCRM_MOUSE   |              | Creatine kinase M-type;                                        | Creatine kinase M chain;M-CK;                                                                                                                              | 0.00 - 0.15 |
| DLLLTPEMF      | ENPLYGVSVPFKLVR        | N-ter +28.03 Da, K +28.03 Da              | 27.1       | 66.6              | 3      | 1945.20                      | -0.38                                        | 0.03                  | SHIP1_MOUSE  |              | Phosphatidylinositol-3,4,5-trisphosphate 5-phosphatase 1;      | Inositol polyphosphate-5-phosphatase of 145 kDa;SH2 domain-containing inositol-5'-phosphatase 1;p150Ship;                                                  | 0.25 - 0.75 |
| DKLCAIPNLR     | ENYGELADCTKQEPER       | N-ter +28.03 Da, K +28.03 Da, C +57.02 Da | 37.1       | 96.4              | 3      | 2154.14                      | -2.64                                        | 0.50                  | ALBU_MOUSE   |              | Serum albumin;                                                 |                                                                                                                                                            | 0.00 - 0.15 |
| TGHFMGKSL      | EPPSLSLVGTAPPNTR       | N-ter +28.03 Da                           | 29.2       | 61.8              | 3      | 1760.06                      | 0.35                                         | 0.01                  | NMB_MOUSE    | D3Z621_MOUSE | Neurodin-B;                                                    |                                                                                                                                                            | 0.25 - 0.75 |
| LRSLFSAEN      | EPVPVLVGNWRPPQVKGR     | N-ter +34.06 Da, K +34.06 Da              | 23.7       | 67.6              | 4      | 2190.45                      | -0.43                                        | 0.01                  | CAH3_MOUSE   |              | Carbonic anhydrase 3;                                          | Carbonate dehydratase III;Carbonic anhydrase III;                                                                                                          | 0.25 - 0.75 |
| LQLVSWTLAA     | EPVDVLEAWGVHR          | N-ter +28.03 Da                           | 46.1       | 92.9              | 3      | 1533.94                      | 0.96                                         | 0.07                  | Q9JL12_MOUSE |              |                                                                |                                                                                                                                                            | 0.75 - 0.85 |
| LLWAAACAQS     | EQDFYDFKAVNIR          | N-ter +28.03 Da, K +28.03 Da              | 20.5       | 59.9              | 3      | 1699.96                      | -1.03                                        | 0.13                  | GPX7_MOUSE   | E9PVY3_MOUSE | Glutathione peroxidase 7;                                      |                                                                                                                                                            | 0.15 - 0.25 |
| LIWDMGVLG      | EQEVDNELQELSTQGSR      | N-ter +28.03 Da                           | 58.6       | 45.5              | 3      | 2076.06                      | 1.16                                         | 0.07                  | CLU5_MOUSE   | E9Q988_MOUSE | Clusterin;                                                     | Apolipoprotein J;Clustrin;Sulfated glycoprotein 2;                                                                                                         | 0.75 - 0.85 |
| GPPGSPGSPG     | EQQPSGASGPAGPR         | N-ter +34.06 Da                           | 41.3       | 9.7               | 2      | 1300.67                      | -0.54                                        | 0.05                  | CO1A1_MOUSE  | F8WGB7_MOUSE | Collagen alpha-1(I) chain;                                     | Alpha-1 type I collagen;                                                                                                                                   | 0.25 - 0.75 |
| TLFQSPFIGM     | ESAGIHETTYNSIMKCDIDIR  | N-ter +28.03 Da, K +28.03 Da, C +57.02 Da | 26.1       | 66.9              | 4      | 2508.37                      | -1.12                                        | 0.15                  | ACTC_MOUSE   | ACTA_MOUSE   | Actin, alpha cardiac muscle 1;                                 | Alpha-cardiac actin;                                                                                                                                       | 0.15 - 0.25 |
| RTLPRDAVEK     | ESALSPEGDVQR           | N-ter +34.06 Da                           | 30.9       | 75.3              | 3      | 1320.77                      | -0.86                                        | 0.05                  | PCOC1_MOUSE  | D3YUE2_MOUSE | Procollagen C-endopeptidase enhancer 1;                        | P14;Procollagen COOH-terminal proteinase enhancer 1;Type 1 procollagen C-proteinase enhancer protein;Type 1 procollagen COOH-terminal proteinase enhancer; | 0.15 - 0.25 |
| GPRGERGTPG     | ESGAAGSPGIGSR          | N-ter +34.06 Da                           | 55.3       | 48.1              | 2      | 1275.72                      | 1.44                                         | 0.23                  | CO1A2_MOUSE  | E9Q6U9_MOUSE | Collagen alpha-2(I) chain;                                     | Alpha-2 type I collagen;                                                                                                                                   | 0.85 - 1.00 |
| FIVFYSKSC      | ESLQTSLLHAAR           | N-ter +28.03 Da                           | 38.0       | 53.8              | 3      | 1352.81                      | 1.48                                         | 0.07                  | F8VQ07_MOUSE |              |                                                                |                                                                                                                                                            | 0.85 - 1.00 |
| RSPRRSPVHP     | ESSEGEHVSVPQR          | N-ter +34.06 Da                           | 30.7       | 90.5              | 3      | 1602.92                      | -5.64                                        | 2.82                  | FILA2_MOUSE  | FILA2_MOUSE  | Filaggrin-2;                                                   | Intermediate filament-associated protein;                                                                                                                  | 0.00 - 0.15 |
| GPAGKNGDRG     | ETGPAGPAGPIGAGAR       | N-ter +28.03 Da                           | 42.7       | 51.5              | 3      | 1502.86                      | 1.47                                         | 0.09                  | CO1A1_MOUSE  |              | Collagen alpha-1(I) chain;                                     | Alpha-1 type I collagen;                                                                                                                                   | 0.85 - 1.00 |
| RRSGRLLTRW     | ETTSIPEAGEGQIR         | N-ter +34.06 Da                           | 38.4       | 62.6              | 3      | 1607.92                      | 0.75                                         | 0.08                  | ISCA2_MOUSE  |              | Iron-sulfur cluster assembly 2 homolog, mitochondrial;         | HESB-like domain-containing protein 1;                                                                                                                     | 0.25 - 0.75 |
| LASLLSGQA      | EVEDASEEAPLR           | N-ter +34.06 Da                           | 42.4       | 48.3              | 2      | 1377.75                      | -1.64                                        | 0.10                  | SRCA_MOUSE   |              | Sarcalumenin;                                                  |                                                                                                                                                            | 0.00 - 0.15 |
| FSRGLSNAER     | EVGKALEGINNGITQAGR     | N-ter +34.06 Da, K +34.06 Da              | 43.4       | 48.2              | 3      | 1894.18                      | -1.32                                        | 0.13                  | SBSN_MOUSE   | E9QP82_MOUSE | Suprabasin;                                                    |                                                                                                                                                            | 0.15 - 0.25 |
| VLSAEKLRDE     | EVHTGLGELLR            | N-ter +34.06 Da                           | 38.0       | 48.5              | 3      | 1256.79                      | 0.70                                         | 0.07                  | SERPH_MOUSE  |              |                                                                | 47 kDa heat shock protein;Collagen-binding protein;Serine protease inhibitor J6;                                                                           | 0.25 - 0.75 |
| RLVDSGSLA      | EVPKEAPKVGILGSGDFAR    | N-ter +34.06 Da, K +34.06 Da              | 42.1       | 61.3              | 4      | 2071.38                      | 0.92                                         | 0.07                  | STEA3_MOUSE  | E9QN92_MOUSE | Metalloendopeptidase STEAP3;                                   | Dudulin-2;Protein nm1054;Six-transmembrane epithelial antigen of prostate 3;Tumor suppressor-activated pathway protein 6;                                  | 0.75 - 0.85 |
| LMAVVIGINS     | EVQLQQSGAELVR          | N-ter +34.06 Da                           | 40.8       | 39.9              | 3      | 1489.89                      | 0.31                                         | 0.02                  | HVM02_MOUSE  |              | Ig heavy chain V region 93G7;                                  |                                                                                                                                                            | 0.25 - 0.75 |
| DKRSALQISN     | EWASQTTDGKLPVTKDVER    | N-ter +34.06 Da, K +34.06 Da              | 33.3       | 82.0              | 4      | 2390.51                      | 0.89                                         | 0.09                  | SERPH_MOUSE  |              |                                                                | 47 kDa heat shock protein;Collagen-binding protein;Serine protease inhibitor J6;                                                                           | 0.75 - 0.85 |
| VTASKAIEK      | EYQPHVIVSTTGNPNTLDR    | N-ter +34.06 Da                           | 26.6       | 112.4             | 4      | 2519.57                      | -2.40                                        | 0.13                  | ADDA_MOUSE   | E9Q1K3_MOUSE | Alpha-adducin;                                                 | Erythrocyte adducin subunit alpha;                                                                                                                         | 0.00 - 0.15 |



| Non Prime Site                                              | Prime Site                                                                                                                         | Modifications                                                                                                                                                                                      | Hyperscore                                  | Mass error in ppm                           | Charge                     | Precursor neutral mass in Da                                   | Fold change (log <sub>2</sub> ) of ASAPRatio  | FC-error of ASAPRatio                        | Uniprot ID 1                                                                          | Uniprot ID 2                                 | Protein Name 1                                                                                                                                                                               | Protein Name 2                                                                                                                                                                                                                                                      | Quantile                                                                               |
|-------------------------------------------------------------|------------------------------------------------------------------------------------------------------------------------------------|----------------------------------------------------------------------------------------------------------------------------------------------------------------------------------------------------|---------------------------------------------|---------------------------------------------|----------------------------|----------------------------------------------------------------|-----------------------------------------------|----------------------------------------------|---------------------------------------------------------------------------------------|----------------------------------------------|----------------------------------------------------------------------------------------------------------------------------------------------------------------------------------------------|---------------------------------------------------------------------------------------------------------------------------------------------------------------------------------------------------------------------------------------------------------------------|----------------------------------------------------------------------------------------|
| MSDN<br>ACGSVYMSNP                                          | GELEFDKPPAPPVR<br>GESSFDLADR                                                                                                       | N-ter +28.03 Da, K +28.03 Da<br>N-ter +34.06 Da                                                                                                                                                    | 31.6<br>44.5                                | 96.7<br>53.5                                | 3<br>2                     | 1459.95<br>1129.61                                             | 2.66<br>-0.56                                 | 0.19<br>0.05                                 | PAK2_MOUSE<br>SODE_MOUSE                                                              |                                              | Serine/threonine-protein kinase PAK 2;<br>Extracellular superoxide dismutase [Cu-Zn];                                                                                                        | Gamma-PAK;p21-activated kinase 2;                                                                                                                                                                                                                                   | 0.85 - 1.00<br>0.25 - 0.75                                                             |
| AWSKDINAYN<br>KGVVPLAGTN                                    | GETPTEKLPFPIIDDKGR<br>GETTTQGLDGLSER                                                                                               | N-ter +34.06 Da, K +34.06 Da<br>N-ter +28.03 Da<br>N-ter +34.06 Da, K +34.06 Da, C +57.02 Da                                                                                                       | 23.5<br>42.5                                | 81.4<br>67.6                                | 4<br>3                     | 2114.42<br>1490.82                                             | 0.40<br>-0.34                                 | 0.05<br>0.04                                 | PRDX6_MOUSE<br>ALDOA_MOUSE                                                            | Q6GT24_MOUSE<br>Q9CPQ9_MOUSE                 | Peroxioredoxin-6;<br>Fructose-bisphosphate aldolase A;                                                                                                                                       | 1-Cys peroxioredoxin;Acidic calcium-independent phospholipase A2;Antioxidant protein 2;Non-selenium glutathione peroxidase;<br>Aldolase 1;Muscle-type aldolase;                                                                                                     | 0.25 - 0.75<br>0.25 - 0.75                                                             |
| KDLTELSRF<br>DLHLKGNPKV                                     | GEVVDCTIKTDPVTGR<br>GEYDVTVPR                                                                                                      | N-ter +28.03 Da, K +28.03 Da<br>N-ter +34.06 Da, K +34.06 Da, C +57.02 Da<br>N-ter +34.06 Da                                                                                                       | 28.0<br>33.4                                | 87.9<br>44.0                                | 3<br>2                     | 1814.15<br>1068.61                                             | -0.89<br>0.01                                 | 0.10<br>0.00                                 | HNRDL_MOUSE<br>E9Q616_MOUSE                                                           | F6VQH5_MOUSE<br>F7BRM2_MOUSE                 | Heterogeneous nuclear ribonucleoprotein D-like;<br>E9Q616_MOUSE                                                                                                                              | JKT41-binding protein;                                                                                                                                                                                                                                              | 0.15 - 0.25<br>0.25 - 0.75                                                             |
| SKQNLNPKV<br>TLFGPKGVNI                                     | GFCSGSGR<br>GGAGSYIYKPPQTEAPQVTGPIEVPVVR                                                                                           | N-ter +34.06 Da, C +57.02 Da<br>N-ter +28.03 Da, K +28.03 Da                                                                                                                                       | 8.0<br>48.1                                 | 43.9<br>86.8                                | 2<br>4                     | 860.44<br>2997.84                                              | -2.94<br>-1.32                                | 0.23<br>0.10                                 | ALG13_MOUSE<br>CRIP2_MOUSE                                                            |                                              | UDP-N-acetylglucosamine transferase subunit ALG13 homolog;<br>Cysteine-rich protein 2;                                                                                                       | Asparagine-linked glycosylation 13 homolog;Glycosyltransferase 28 domain-containing protein 1;<br>Heart LIM protein;                                                                                                                                                | 0.00 - 0.15<br>0.15 - 0.25                                                             |
| GGNFGFGDSR<br>SNIAKAAWGKI                                   | GGGNFGPGPGSNFR<br>GGHGAEGAEALER                                                                                                    | N-ter +28.03 Da<br>N-ter +34.06 Da                                                                                                                                                                 | 48.6<br>53.6                                | 115.6<br>85.3                               | 3<br>3                     | 1404.82<br>1449.83                                             | 1.01<br>-0.36                                 | 0.05<br>0.04                                 | ROA2_MOUSE<br>HBA_MOUSE                                                               | F6U106_MOUSE<br>Q91V88_MOUSE                 | Heterogeneous nuclear ribonucleoproteins A2/B1;<br>Hemoglobin subunit alpha;                                                                                                                 | Alpha-globin;Hemoglobin alpha chain;<br>Adapter-related protein complex 1 subunit beta-1;Adaptor protein complex AP-1 subunit beta-1;Beta-1-adaptin;Beta-adaptin 1;Clathrin assembly protein complex 1 beta large chain;Golgi adaptor HA1/AP1 adaptin beta subunit; | 0.75 - 0.85<br>0.25 - 0.75                                                             |
| VQMGAVDLLG<br>YGGGGGGYGG<br>GHPTSPRRPP                      | GGDLSDIGSNFGAPASVAAPAPAR<br>GGSGYGGGGGGYGGEGYSISPNYSR<br>GGSIITVYKPIR                                                              | N-ter +28.03 Da<br>N-ter +34.06 Da<br>N-ter +28.03 Da, K +28.03 Da                                                                                                                                 | 49.4<br>23.4<br>26.9                        | 76.5<br>66.2<br>60.6                        | 4<br>4<br>3                | 2496.45<br>2460.24<br>1487.96                                  | 0.19<br>-6.64<br>0.01                         | 0.02<br>0.00<br>0.00                         | AP1B1_MOUSE<br>E9QNN1_MOUSE<br>MAP2B_MOUSE                                            | Q5VGS5_MOUSE                                 | AP-1 complex subunit beta-1;<br>Epididymis-specific alpha-mannosidase;                                                                                                                       | Mannosidase alpha class 2B member 2;<br>Cytokeratin-1B;Embryonic type II keratin-1;Keratin-77;Type-II keratin Kb39;<br>Metastatic lymph node gene 50 protein;<br>Scaffold attachment factor A;                                                                      | 0.25 - 0.75<br>0.00 - 0.15<br>0.25 - 0.75                                              |
| GFSSRSLYL<br>PQQQMTSSY<br>DEEEGAGDEN                        | GGSKIFGNLVGR<br>GGYKPAAPVSIQR<br>GHGEQQSQPPAAAAQQPSQQR                                                                             | N-ter +28.03 Da, K +28.03 Da<br>N-ter +28.03 Da, K +28.03 Da<br>N-ter +28.03 Da<br>N-ter +34.06 Da, K +34.06 Da, C +57.02 Da                                                                       | 42.1<br>42.4<br>19.3                        | 63.7<br>90.7<br>118.7                       | 3<br>3<br>4                | 1346.85<br>1527.98<br>2356.41                                  | -0.06<br>0.62<br>1.70                         | 0.00<br>0.11<br>0.27                         | K2C1B_MOUSE<br>LASP1_MOUSE<br>HNRPU_MOUSE                                             | A2A6H0_MOUSE                                 | Keratin, type II cytoskeletal 1b;<br>LIM and SH3 domain protein 1;<br>Heterogeneous nuclear ribonucleoprotein U;                                                                             |                                                                                                                                                                                                                                                                     | 0.25 - 0.75<br>0.25 - 0.75<br>0.85 - 1.00                                              |
| VCYGRRYGPK                                                  | GIGFGQAGCLSTDTGHEHLGLQFQKSPKPAR                                                                                                    | N-ter +34.06 Da, K +34.06 Da, C +57.02 Da                                                                                                                                                          | 67.3                                        | 65.8                                        | 4                          | 3281.90                                                        | -0.01                                         | 0.00                                         | CSR3_MOUSE                                                                            |                                              | Cysteine and glycine-rich protein 3;                                                                                                                                                         |                                                                                                                                                                                                                                                                     | 0.25 - 0.75                                                                            |
| NIKRNDFQL<br>LTVPCILGQN<br>GISTVCQPVG<br>ARYASICQQN<br>M    | GIQDGVLSLLQDSGEVR<br>GISDVVKVLTPEFEAR<br>GISTVCQPTGVSFR<br>GIVRIVEPELPGDDHDLKX<br>GKDYIQTGLAR                                      | N-ter +34.06 Da<br>N-ter +34.06 Da, K +34.06 Da<br>N-ter +28.03 Da, C +57.02 Da<br>N-ter +28.03 Da, K +28.03 Da<br>N-ter +34.06 Da, K +34.06 Da                                                    | 49.4<br>45.1<br>28.0<br>45.2<br>35.8        | 69.6<br>57.7<br>80.7<br>81.6<br>46.6        | 3<br>3<br>3<br>4<br>3      | 1883.12<br>1910.21<br>1548.86<br>2267.44<br>1451.91            | 1.01<br>-0.69<br>1.07<br>-0.81<br>2.15        | 0.09<br>0.09<br>0.04<br>0.10<br>0.19         | IF5A1_MOUSE<br>LDHA_MOUSE<br>E9Q2E9_MOUSE<br>ALDOA_MOUSE<br>DNIB1_MOUSE               |                                              | Eukaryotic translation initiation factor 5A-1;<br>L-lactate dehydrogenase A chain;<br>E9Q2E9_MOUSE<br>Fructose-bisphosphate aldolase A;<br>DnaJ homolog subfamily B member 1;                | Eukaryotic initiation factor 5A isoform 1;eIF-4D;<br>LDH muscle subunit;<br>Aldolase 1;Muscle-type aldolase;<br>Heat shock 40 kDa protein 1;                                                                                                                        | 0.75 - 0.85<br>0.00 - 0.15<br>0.75 - 0.85<br>0.15 - 0.25<br>0.85 - 1.00                |
| PSNQVIMLTF<br>KAENGLVIN                                     | GKFDVEPDTYCR<br>GKPIITFQER                                                                                                         | N-ter +34.06 Da, K +34.06 Da, C +57.02 Da<br>N-ter +28.03 Da, K +28.03 Da                                                                                                                          | 29.9<br>29.8                                | 68.1<br>52.2                                | 3<br>3                     | 1553.89<br>1243.79                                             | -6.64<br>-0.36                                | 0.00<br>0.01                                 | PCOC1_MOUSE<br>G3P_MOUSE                                                              | D3Y2E3_MOUSE<br>F8WJL5_MOUSE                 | Procollagen C-endopeptidase enhancer 1;<br>Glyceraldehyde-3-phosphate dehydrogenase;                                                                                                         |                                                                                                                                                                                                                                                                     | 0.00 - 0.15<br>0.25 - 0.75                                                             |
| AEKAAVSCWLW                                                 | GKVNSEVGGALGR                                                                                                                      | N-ter +34.06 Da, K +34.06 Da                                                                                                                                                                       | 45.1                                        | 77.9                                        | 3                          | 1554.98                                                        | -0.01                                         | 0.00                                         | HBB1_MOUSE                                                                            |                                              | Hemoglobin subunit beta-1;<br>Potassium voltage-gated channel subfamily A member 7;                                                                                                          | Beta-1-globin;Hemoglobin beta-1 chain;Hemoglobin beta-major chain;                                                                                                                                                                                                  | 0.25 - 0.75                                                                            |
| PDFRDRDDP                                                   | GLAPVAATGPFLAR                                                                                                                     | N-ter +34.06 Da                                                                                                                                                                                    | 19.0                                        | 84.6                                        | 3                          | 1444.98                                                        | -1.94                                         | 0.15                                         | KCNA7_MOUSE                                                                           |                                              | Voltage-gated potassium channel subunit Kv1.7;<br>Carboxypeptidase N 83 kDa chain;Carboxypeptidase N large subunit;Carboxypeptidase N polypeptide 2;Carboxypeptidase N regulatory subunit;   |                                                                                                                                                                                                                                                                     | 0.00 - 0.15<br>0.25 - 0.75<br>0.25 - 0.75                                              |
| NPGHLSFRAL<br>VTVVRNLEY<br>SGLQGLPLA                        | GLDEGEPAGSWDLTVEGR<br>GLDPCSVAAILQQR<br>GLHGDDQAGPVGVPAGPR                                                                         | N-ter +34.06 Da<br>N-ter +28.03 Da, C +57.02 Da<br>N-ter +28.03 Da                                                                                                                                 | 36.0<br>37.7<br>38.6                        | 81.1<br>25.7<br>80.7                        | 3<br>3<br>3                | 1921.08<br>1554.86<br>1666.99                                  | -0.04<br>-0.14<br>1.16                        | 0.00<br>0.00<br>0.07                         | CPN2_MOUSE<br>EIF2D_MOUSE<br>CO1A2_MOUSE                                              | E9PUG7_MOUSE<br>E9Q6U9_MOUSE                 | Carboxypeptidase N subunit 2;<br>Eukaryotic translation initiation factor 2D;<br>Collagen alpha-2(I) chain;<br>Glycerol-3-phosphate dehydrogenase [NAD+], cytoplasmic;                       |                                                                                                                                                                                                                                                                     | 0.25 - 0.75<br>0.25 - 0.75<br>0.75 - 0.85                                              |
| LIKVDGEGPN                                                  | GLKJSEVIGER                                                                                                                        | N-ter +34.06 Da, K +34.06 Da                                                                                                                                                                       | 35.8                                        | 43.2                                        | 3                          | 1380.96                                                        | -0.43                                         | 0.01                                         | GPDA_MOUSE                                                                            | E0CXN5_MOUSE                                 |                                                                                                                                                                                              |                                                                                                                                                                                                                                                                     | 0.25 - 0.75                                                                            |
| TASHCLARGF                                                  | GLLSNPADGVAWTCFR                                                                                                                   | N-ter +34.06 Da, C +57.02 Da                                                                                                                                                                       | 48.3                                        | 74.8                                        | 3                          | 1854.07                                                        | -2.00                                         | 0.16                                         | CAF17_MOUSE                                                                           | B2FDE8_MOUSE                                 | Putative transferase CAF17 homolog, mitochondrial;                                                                                                                                           | Iron-sulfur cluster assembly factor homolog;<br>GCS heavy chain;Gamma-ECS;Gamma-glutamylcysteine synthetase;                                                                                                                                                        | 0.00 - 0.15                                                                            |
| M<br>M<br>NSQAFSTNA<br>ERRRLAERY<br>KGYMRPTKSR<br>SSNTDSSSP | GLLSQGSPLSWEETQR<br>GLPKGPEGQGLPEVETR<br>GLPPSYETIKEEYGVTELGEPSNSAVVR<br>GLTLDPEADSEYLSR<br>GLTDPKPSASQER<br>GNSHTSSSSSSSSSSSSSSSR | N-ter +28.03 Da<br>N-ter +34.06 Da, K +34.06 Da<br>N-ter +34.06 Da, K +34.06 Da<br>N-ter +34.06 Da<br>N-ter +34.06 Da, K +34.06 Da<br>N-ter +28.03 Da<br>N-ter +28.03 Da, K +28.03 Da, C +57.02 Da | 47.8<br>31.1<br>23.8<br>41.8<br>30.9<br>9.3 | 45.7<br>49.8<br>92.0<br>28.6<br>97.8<br>9.4 | 3<br>3<br>4<br>2<br>3<br>4 | 1815.00<br>1831.14<br>3088.91<br>1698.90<br>1566.06<br>2177.91 | 0.52<br>0.16<br>4.86<br>0.62<br>-0.56<br>2.87 | 0.04<br>0.00<br>1.08<br>0.05<br>0.04<br>0.35 | GSH1_MOUSE<br>CCD93_MOUSE<br>IFM2_MOUSE<br>SVIL_MOUSE<br>F7CK47_MOUSE<br>E9PXS2_MOUSE | E9Q9A4_MOUSE<br>Q8K4L2_MOUSE<br>F7DF66_MOUSE | Glutamate--cysteine ligase catalytic subunit;<br>Coiled-coil domain-containing protein 93;<br>Interferon-induced transmembrane protein 2;<br>Supervillin;<br>Microtubule-associated protein; |                                                                                                                                                                                                                                                                     | 0.25 - 0.75<br>0.25 - 0.75<br>0.85 - 1.00<br>0.25 - 0.75<br>0.25 - 0.75<br>0.85 - 1.00 |
| LAGLVFVSEA<br>SMPDVLHLK<br>DEEEPLPACN<br>QDHPSSMGVY         | GPAGAGESKCLPMVKVLDVAVR<br>GPNVKGEYDVTVPR<br>GPTPAPASPAAEVGSQEEALSSSAQSPGR<br>QQESGGFSGPGENR                                        | N-ter +28.03 Da, K +28.03 Da, C +57.02 Da<br>N-ter +28.03 Da, K +28.03 Da<br>N-ter +28.03 Da<br>N-ter +34.06 Da                                                                                    | 34.0<br>27.1<br>36.5<br>48.8                | 69.5<br>79.2<br>78.0<br>88.8                | 3<br>3<br>4<br>3           | 2238.38<br>1585.97<br>2763.55<br>1411.78                       | 0.77<br>-0.23<br>-2.06<br>0.53                | 0.04<br>0.00<br>0.17<br>0.05                 | TTHY_MOUSE<br>E9Q616_MOUSE<br>D3Z6Q9_MOUSE<br>EWS_MOUSE                               | F7BRM2_MOUSE                                 | Transthyretin;                                                                                                                                                                               | Prealbumin;                                                                                                                                                                                                                                                         | 0.25 - 0.75<br>0.25 - 0.75<br>0.00 - 0.15<br>0.25 - 0.75                               |
| MYIFVHWQF                                                   | GLDQHPIDGYLSHTELAPLR                                                                                                               | N-ter +34.06 Da                                                                                                                                                                                    | 39.9                                        | 65.4                                        | 4                          | 2393.41                                                        | -0.01                                         | 0.00                                         | SPRC_MOUSE                                                                            | Q5NCU4_MOUSE                                 | SPARC;                                                                                                                                                                                       | Basement-membrane protein 40;Osteonectin;Secreted protein acidic and rich in cysteine;                                                                                                                                                                              | 0.25 - 0.75                                                                            |



Table S8, Tholen et al.

| Non Prime Site | Prime Site                   | Modifications                                                | Hyperscore | Mass error in ppm | Charge | Precursor neutral mass in Da | Fold change (log <sub>2</sub> ) of ASAPRatio | FC-error of ASAPRatio | Uniprot ID 1 | Uniprot ID 2 | Protein Name 1                                                                               | Protein Name 2                                                                                                                                                                                                                                                                  | Quantile    |
|----------------|------------------------------|--------------------------------------------------------------|------------|-------------------|--------|------------------------------|----------------------------------------------|-----------------------|--------------|--------------|----------------------------------------------------------------------------------------------|---------------------------------------------------------------------------------------------------------------------------------------------------------------------------------------------------------------------------------------------------------------------------------|-------------|
| KHAPPPAAVN     | GQPPPEPSAPAKVVR              | N-ter +28.03 Da, K +28.03 Da                                 | 19.0       | 98.5              | 3      | 1585.06                      | 2.20                                         | 0.27                  | LARP1_MOUSE  |              | La-related protein 1;                                                                        | La ribonucleoprotein domain family member 1; Syndet; Vesicle-membrane fusion protein SNAP-23;                                                                                                                                                                                   | 0.85 - 1.00 |
| VSKQPSRITN     | GQPQQTGAASGGYIKR             | N-ter +34.06 Da, K +34.06 Da                                 | 34.4       | 80.4              | 3      | 1787.14                      | 0.61                                         | 0.10                  | SNP23_MOUSE  | Q9D3L3_MOUSE | Synaptosomal-associated protein 23;                                                          |                                                                                                                                                                                                                                                                                 | 0.25 - 0.75 |
|                |                              |                                                              |            |                   |        |                              |                                              |                       |              |              | Lipoamide acyltransferase component of branched-chain alpha-keto acid dehydrogenase complex; | Branched-chain alpha-keto acid dehydrogenase complex component E2; Dihydroipoamide acetyltransferase component of branched-chain alpha-keto acid dehydrogenase complex; Dihydroipoamide branched chain transacylase; Dihydrolipoylysine-residue (2-methylpropanoyl)transferase; | 0.25 - 0.75 |
| HSLRTAAVLQ     | GQVVQFKLSDIGEGIR             | N-ter +34.06 Da, K +34.06 Da                                 | 45.7       | 44.3              | 3      | 1813.15                      | 0.07                                         | 0.01                  | ODB2_MOUSE   |              | mitochondrial;                                                                               |                                                                                                                                                                                                                                                                                 | 0.25 - 0.75 |
| NDLTYLPEWE     | GRVPDSIDYR                   | N-ter +28.03 Da<br>N-ter +34.06 Da, K +34.06 Da, C +57.02 Da | 27.3       | 66.8              | 3      | 1204.70                      | -0.36                                        | 0.04                  | CATK_MOUSE   |              | Cathepsin K;                                                                                 |                                                                                                                                                                                                                                                                                 | 0.25 - 0.75 |
| EETALVCDN      | GSGLCKAGFAGDDAPR             | N-ter +28.03 Da, K +28.03 Da                                 | 25.0       | 11.5              | 3      | 1645.87                      | -6.64                                        | 0.00                  | ACTA_MOUSE   | ACTH_MOUSE   | Actin, aortic smooth muscle;                                                                 | Alpha-actin-2;                                                                                                                                                                                                                                                                  | 0.00 - 0.15 |
| EETALVCDN      | GSGLVKAGFAGDDAPR             | N-ter +28.03 Da, K +28.03 Da                                 | 43.8       | 89.7              | 3      | 1572.97                      | -0.86                                        | 0.14                  | ACTC_MOUSE   | ACTS_MOUSE   | Actin, alpha cardiac muscle 1;                                                               | Alpha-cardiac actin;                                                                                                                                                                                                                                                            | 0.15 - 0.25 |
| HPTSPRRPG      | GSITIVPKIIR                  | N-ter +28.03 Da, K +28.03 Da                                 | 37.6       | 89.5              | 3      | 1430.98                      | 0.39                                         | 0.02                  | MA2B2_MOUSE  |              | Epididymis-specific alpha-mannosidase;                                                       | Mannosidase alpha class 2B member 2;                                                                                                                                                                                                                                            | 0.25 - 0.75 |
| GGRPAMEPGN     | GSLDLGGDAAGR                 | N-ter +28.03 Da                                              | 52.9       | 59.9              | 2      | 1115.62                      | 1.98                                         | 0.03                  | HNRPU_MOUSE  |              | Heterogeneous nuclear ribonucleoprotein U;                                                   | Scaffold attachment factor A;                                                                                                                                                                                                                                                   | 0.85 - 1.00 |
| M              | GSSQVIEIPGGGTGEGYHLR         | N-ter +28.03 Da                                              | 62.4       | 69.5              | 3      | 2057.16                      | 0.47                                         | 0.07                  | GORS2_MOUSE  | A2AT18_MOUSE | Golgi reassembly-stacking protein 2;                                                         | Golgi reassembly-stacking protein of 55 kDa;                                                                                                                                                                                                                                    | 0.25 - 0.75 |
| GQSSSANRRA     | GSSSGVQVQASAGGLAASDR         | N-ter +28.03 Da                                              | 68.0       | 61.6              | 3      | 1877.00                      | 2.27                                         | 0.31                  | FILA_MOUSE   | F7BVV1_MOUSE | Filaggrin;                                                                                   |                                                                                                                                                                                                                                                                                 | 0.85 - 1.00 |
|                |                              |                                                              |            |                   |        |                              |                                              |                       |              |              |                                                                                              | CW17; Mammalian branch point-binding protein; Transcription factor ZFM1; Zinc finger gene in MEN1 locus; Zinc finger protein 162;                                                                                                                                               |             |
| HGPPMDQYL      | GSTPVGSGVYR                  | N-ter +34.06 Da                                              | 39.2       | 49.1              | 2      | 1112.66                      | 0.72                                         | 0.06                  | SF01_MOUSE   | Q3UI45_MOUSE | Splicing factor 1;                                                                           |                                                                                                                                                                                                                                                                                 | 0.25 - 0.75 |
| ALERGARGGP     | GSVELAHLHGILR                | N-ter +28.03 Da                                              | 24.5       | 81.8              | 3      | 1428.94                      | 6.73                                         | 0.37                  | FGF20_MOUSE  |              | Fibroblast growth factor 20;                                                                 |                                                                                                                                                                                                                                                                                 | 0.85 - 1.00 |
| VRNIKSMWEK     | GSVFSAPSASGTPNKETAGLKVGVSSR  | N-ter +28.03 Da, K +28.03 Da                                 | 26.3       | 70.1              | 4      | 2674.62                      | 0.33                                         | 0.03                  | Q8VCQ8_MOUSE | E9Q0M9_MOUSE |                                                                                              |                                                                                                                                                                                                                                                                                 | 0.25 - 0.75 |
|                |                              |                                                              |            |                   |        |                              |                                              |                       |              |              |                                                                                              | Annexin II; Annexin-2; Calpactin I heavy chain; Calpactin-1 heavy chain; Chromobindin-8; Lipocortin II; Placental anticoagulant protein IV; Protein I p36;                                                                                                                      | 0.25 - 0.75 |
| GDHSTPSSAY     | GSVKPYNTFAER                 | N-ter +28.03 Da, K +28.03 Da                                 | 37.5       | 67.1              | 3      | 1538.88                      | -0.34                                        | 0.06                  | ANXA2_MOUSE  | B0V2N7_MOUSE | Annexin A2;                                                                                  |                                                                                                                                                                                                                                                                                 | 0.25 - 0.75 |
| ISTSVCLRAH     | GSVKSSEDYAFPTYADR            | N-ter +28.03 Da, K +28.03 Da                                 | 48.0       | 81.2              | 3      | 1960.12                      | -1.64                                        | 0.21                  | COX41_MOUSE  |              | Cytochrome c oxidase subunit 4 isoform 1, mitochondrial;                                     | Cytochrome c oxidase polypeptide IV; Cytochrome c oxidase subunit IV isoform 1; Protein cypher; Protein oracle; Z-band alternatively spliced PDZ-motif protein;                                                                                                                 | 0.00 - 0.15 |
| RSFRILAQMT     | GTEYMQDPDEEALRR              | N-ter +28.03 Da                                              | 19.9       | 78.8              | 3      | 1836.98                      | 2.29                                         | 0.24                  | LDB3_MOUSE   | E9PYJ9_MOUSE | LIM domain-binding protein 3;                                                                |                                                                                                                                                                                                                                                                                 | 0.85 - 1.00 |
| RSFRILAQMT     | GTEYMQDPDEEALR               | N-ter +28.03 Da                                              | 30.3       | 87.7              | 3      | 1680.88                      | 0.00                                         | 0.00                  | E9PYJ9_MOUSE | LDB3_MOUSE   |                                                                                              |                                                                                                                                                                                                                                                                                 | 0.25 - 0.75 |
| ILTRLRLQKR     | GTGGVDTAAVAVFDISNADR         | N-ter +28.03 Da<br>N-ter +34.06 Da, K +34.06 Da, C +57.02 Da | 75.0       | 71.4              | 3      | 2020.13                      | 2.01                                         | 0.12                  | KCRM_MOUSE   |              | Creatine kinase M-type;                                                                      | Creatine kinase M chain; M-CK;                                                                                                                                                                                                                                                  | 0.85 - 1.00 |
| VEAARNLRV      | GTKCCTLPEDQR                 | N-ter +28.03 Da                                              | 26.5       | 43.8              | 3      | 1531.84                      | -3.06                                        | 0.26                  | ALBU_MOUSE   |              | Serum albumin;                                                                               |                                                                                                                                                                                                                                                                                 | 0.00 - 0.15 |
| SVCVHLRNL      | GTLDNPSLDETAYER              | N-ter +28.03 Da                                              | 39.9       | 72.9              | 3      | 1794.96                      | 0.60                                         | 0.08                  | FRDA_MOUSE   | E9QZP9_MOUSE | Frataxin, mitochondrial;                                                                     |                                                                                                                                                                                                                                                                                 | 0.25 - 0.75 |
| FDQTTISLQM     | GTNKGASQAGMLPAGTR            | N-ter +28.03 Da, K +28.03 Da                                 | 33.1       | 59.9              | 3      | 1671.97                      | 1.40                                         | 0.07                  | CNN3_MOUSE   |              | Calponin-3;                                                                                  | Calponin; acidic isoform;                                                                                                                                                                                                                                                       | 0.75 - 0.85 |
| TIDCDVITLM     | GTPSGTAEPYDGTAKAR            | N-ter +34.06 Da, K +34.06 Da                                 | 42.8       | 49.6              | 3      | 1674.97                      | 0.55                                         | 0.05                  | BSDC1_MOUSE  |              | BSD domain-containing protein 1;                                                             |                                                                                                                                                                                                                                                                                 | 0.25 - 0.75 |
| QRRSIIIRLF     | GTSPPAAEVTSPPEPALEAPAR       | N-ter +34.06 Da                                              | 41.9       | 71.7              | 3      | 2346.40                      | 0.12                                         | 0.01                  | PARF_MOUSE   |              | Putative GTP-binding protein Parf;                                                           |                                                                                                                                                                                                                                                                                 | 0.25 - 0.75 |
| RLRLKRGRTG     | GVDTAAVAVFDISNADR            | N-ter +34.06 Da                                              | 58.1       | 51.9              | 3      | 1811.02                      | 0.16                                         | 0.01                  | KCRM_MOUSE   |              | Creatine kinase M-type;                                                                      | Creatine kinase M chain; M-CK;                                                                                                                                                                                                                                                  | 0.25 - 0.75 |
| LDHGRTLREQ     | GVEEHETLLLR                  | N-ter +28.03 Da                                              | 35.6       | 48.2              | 3      | 1322.78                      | 0.18                                         | 0.01                  | TLN1_MOUSE   | A2AIM2_MOUSE | Talin-1;                                                                                     |                                                                                                                                                                                                                                                                                 | 0.25 - 0.75 |
| EYVSPNSEDV     | GVEGKGDGPGQGR                | N-ter +28.03 Da, K +28.03 Da                                 | 34.5       | 95.4              | 3      | 1502.93                      | 1.10                                         | 0.38                  | CO1A1_MOUSE  | F8WGB7_MOUSE | Collagen alpha-1(I) chain;                                                                   | Alpha-1 type I collagen;                                                                                                                                                                                                                                                        | 0.75 - 0.85 |
|                |                              |                                                              |            |                   |        |                              |                                              |                       |              |              |                                                                                              | 12.6 kDa FK506-binding protein; FK506-binding protein 1B; Immunophilin FKBP12.6; Rotamase;                                                                                                                                                                                      | 0.25 - 0.75 |
| M              | GVEIETISPGDGR                | N-ter +28.03 Da                                              | 31.3       | 65.7              | 3      | 1356.78                      | 0.35                                         | 0.02                  | FKB1B_MOUSE  |              | Peptidyl-prolyl cis-trans isomerase FKBP1B;                                                  |                                                                                                                                                                                                                                                                                 | 0.25 - 0.75 |
|                |                              |                                                              |            |                   |        |                              |                                              |                       |              |              |                                                                                              | Calcium-activated neutral proteinase small subunit; Calcium-dependent protease small subunit; Calcium-dependent protease small subunit 1; Calpain regulatory subunit; Low molecular mass dual specificity phosphatase 3;                                                        | 0.25 - 0.75 |
| GGGTAMRILG     | GVISAISEAAQYNEPPPPR          | N-ter +34.06 Da                                              | 37.6       | 84.6              | 4      | 2197.34                      | 0.10                                         | 0.00                  | CPNS1_MOUSE  | D3YW48_MOUSE | Calpain small subunit 1;                                                                     |                                                                                                                                                                                                                                                                                 | 0.25 - 0.75 |
| M              | GVQPNNFWSVLPGR               | N-ter +28.03 Da                                              | 33.0       | 57.6              | 3      | 1580.94                      | 0.65                                         | 0.08                  | DUS23_MOUSE  |              | Dual specificity protein phosphatase 23;                                                     |                                                                                                                                                                                                                                                                                 | 0.25 - 0.75 |
|                |                              |                                                              |            |                   |        |                              |                                              |                       |              |              |                                                                                              | 12 kDa FK506-binding protein; FK506-binding protein 1A; Immunophilin FKBP12; Rotamase;                                                                                                                                                                                          | 0.85 - 1.00 |
| M              | GVQVETISPGDGR                | N-ter +28.03 Da                                              | 44.9       | 51.8              | 2      | 1341.76                      | 1.53                                         | 0.05                  | FKB1A_MOUSE  | Q1JUQ8_MOUSE | Peptidyl-prolyl cis-trans isomerase FKBP1A;                                                  |                                                                                                                                                                                                                                                                                 | 0.85 - 1.00 |
| WQEGDKVIRP     | GVSQAGEEMEQFGGQVGR           | N-ter +28.03 Da                                              | 50.6       | 42.9              | 3      | 1835.93                      | 0.45                                         | 0.04                  | SBSN_MOUSE   | E9QP82_MOUSE | Suprabasin;                                                                                  |                                                                                                                                                                                                                                                                                 | 0.25 - 0.75 |
| GNFAAQYSDK     | GVSSGPGMGLMGR                | N-ter +28.03 Da                                              | 57.6       | 30.7              | 2      | 1426.75                      | 0.11                                         | 0.00                  | CO1A2_MOUSE  | E0CXI2_MOUSE | Collagen alpha-2(I) chain;                                                                   | Alpha-2 type I collagen;                                                                                                                                                                                                                                                        | 0.25 - 0.75 |
| RAMSLSDALK     | GVTDNVDTVVHYVPLPR            | N-ter +34.06 Da                                              | 38.7       | 72.1              | 3      | 2013.26                      | -1.79                                        | 0.25                  | PLIN1_MOUSE  |              | Perilipin-1;                                                                                 | Lipid droplet-associated protein; Perilipin A;                                                                                                                                                                                                                                  | 0.00 - 0.15 |
| MSN            | GYEDHMAEDCR                  | N-ter +28.03 Da, C +57.02 Da                                 | 35.3       | 99.8              | 3      | 1409.67                      | 7.24                                         | 1.54                  | ELAV1_MOUSE  |              | ELAV-like protein 1;                                                                         | Elav-like generic protein; Hu-antigen R; MelG;                                                                                                                                                                                                                                  | 0.85 - 1.00 |
| QQQQTSSYG      | GKYEPAAPVSIQR                | N-ter +28.03 Da, K +28.03 Da                                 | 44.5       | 58.3              | 3      | 1470.91                      | -0.92                                        | 0.05                  | LASP1_MOUSE  | A2AGH0_MOUSE | LIM and SH3 domain protein 1;                                                                | Metastatic lymph node gene 50 protein;                                                                                                                                                                                                                                          | 0.15 - 0.25 |
| KGHRGLPLGK     | GYSGLQGLPLAGLHGDDQAPVPGVAGPR | N-ter +28.03 Da                                              | 41.3       | 102.6             | 4      | 2780.72                      | -1.89                                        | 0.28                  | CO1A2_MOUSE  | E9Q6U9_MOUSE | Collagen alpha-2(I) chain;                                                                   | Alpha-2 type I collagen;                                                                                                                                                                                                                                                        | 0.00 - 0.15 |
| TQCEKIVQKY     | GYTHLSTGDLR                  | N-ter +34.06 Da                                              | 42.9       | 57.1              | 3      | 1365.82                      | -1.15                                        | 0.13                  | KAD1_MOUSE   |              | Adenylate kinase isoenzyme 1;                                                                | ATP-AMP transphosphorylase 1; Myokinase;                                                                                                                                                                                                                                        | 0.15 - 0.25 |
| SRVTRGRSIK     | GTYLPPHCSR                   | N-ter +34.06 Da, C +57.02 Da                                 | 24.7       | 92.6              | 3      | 1220.73                      | -2.40                                        | 0.50                  | KCRM_MOUSE   |              | Creatine kinase M-type;                                                                      | Creatine kinase M chain; M-CK;                                                                                                                                                                                                                                                  | 0.00 - 0.15 |





| Non Prime Site                                      | Prime Site                                                                 | Modifications                                                                                                                | Hyperscore                   | Mass error in ppm            | Charge           | Precursor neutral mass in Da             | Fold change (log <sub>2</sub> ) of ASAPRatio | FC-error of ASAPRatio        | Uniprot ID 1                                            | Uniprot ID 2                                 | Protein Name 1                                                                                                                               | Protein Name 2                                                                                                                                                                                                                                                                     | Quantile                                                                                              |
|-----------------------------------------------------|----------------------------------------------------------------------------|------------------------------------------------------------------------------------------------------------------------------|------------------------------|------------------------------|------------------|------------------------------------------|----------------------------------------------|------------------------------|---------------------------------------------------------|----------------------------------------------|----------------------------------------------------------------------------------------------------------------------------------------------|------------------------------------------------------------------------------------------------------------------------------------------------------------------------------------------------------------------------------------------------------------------------------------|-------------------------------------------------------------------------------------------------------|
| KCCTLPEDQR                                          | LPCVEDYLSAILNR                                                             | N-ter +28.03 Da, C +57.02 Da<br>N-ter +34.06 Da, K +34.06 Da, C +57.02 Da                                                    | 31.3                         | 73.2                         | 3                | 1690.00                                  | 2.41                                         | 0.33                         | ALBU_MOUSE                                              |                                              | Serum albumin;                                                                                                                               |                                                                                                                                                                                                                                                                                    | 0.85 - 1.00                                                                                           |
| M                                                   | LPNTGKLAGCTVITGASR                                                         |                                                                                                                              | 23.7                         | 71.4                         | 4                | 2161.36                                  | -2.00                                        | 0.16                         | HSDL2_MOUSE                                             | E9PYC8_MOUSE                                 | Hydroxysteroid dehydrogenase-like protein 2;<br>WD repeat domain phosphoinositide-interacting protein 2;                                     |                                                                                                                                                                                                                                                                                    | 0.00 - 0.15                                                                                           |
| GKVLMASTSY<br>ALLCAGRAQG                            | LPSQVTEFNFQGR<br>LQCCEYGVPIETSCPAVTCR                                      | N-ter +28.03 Da<br>N-ter +34.06 Da, C +57.02 Da                                                                              | 33.6<br>57.7                 | 48.3<br>29.2                 | 3<br>3           | 1533.84<br>2596.24                       | 0.77<br>-1.43                                | 0.04<br>0.08                 | WIPI2_MOUSE<br>LY6C1_MOUSE                              | D3YWK1_MOUSE<br>LY6C2_MOUSE                  | Lymphocyte antigen G6C1;                                                                                                                     |                                                                                                                                                                                                                                                                                    | 0.25 - 0.75<br>0.15 - 0.25                                                                            |
| PRKIISLSQL                                          | LQEDSLNVADLSSLR                                                            | N-ter +34.06 Da                                                                                                              | 27.9                         | 61.1                         | 3                | 1693.01                                  | 0.49                                         | 0.01                         | PSME2_MOUSE                                             | E0CZ90_MOUSE                                 | Proteasome activator complex subunit 2;                                                                                                      | 11S regulator complex subunit beta;Activator of multicatalytic protease subunit 2;Proteasome activator 28 subunit beta;<br>C-terminal LIM domain protein 1;Elfin;LIM domain protein CLP-36;                                                                                        | 0.25 - 0.75                                                                                           |
| PPKQSTSLV<br>ARRQHLKSLV<br>DESTGSIARR<br>DESTGSIARR | LQEIIESDGGKDPNKPSPGFR<br>LQIAATELEKEESR<br>LQSIGTENTEENRR<br>LQSIGTENTEENR | N-ter +28.03 Da, K +28.03 Da<br>N-ter +28.03 Da, K +28.03 Da<br>N-ter +28.03 Da<br>N-ter +28.03 Da                           | 21.0<br>35.6<br>19.3<br>26.6 | 98.6<br>79.3<br>81.2<br>70.4 | 4<br>3<br>3<br>3 | 2270.41<br>1672.04<br>1673.97<br>1571.84 | -2.32<br>1.35<br>1.58<br>3.19                | 0.23<br>0.09<br>0.17<br>0.14 | PDL1_MOUSE<br>TNNI2_MOUSE<br>ALDOA_MOUSE<br>ALDOA_MOUSE | A2A6K0_MOUSE<br>Q9CPQ9_MOUSE<br>Q9CPQ9_MOUSE | PDZ and LIM domain protein 1;<br>Troponin I, fast skeletal muscle;<br>Fructose-bisphosphate aldolase A;<br>Fructose-bisphosphate aldolase A; |                                                                                                                                                                                                                                                                                    | 0.00 - 0.15<br>0.75 - 0.85<br>0.85 - 1.00<br>0.85 - 1.00                                              |
| ALSVPDSRA<br>HSGITESQEF                             | LRPGDCEVCISYLGR<br>LSGGAOSSSKSPSESR                                        | N-ter +34.06 Da, C +57.02 Da<br>N-ter +34.06 Da, K +34.06 Da                                                                 | 59.6<br>27.0                 | 63.3<br>85.0                 | 3<br>3           | 1828.03<br>1769.08                       | 1.54<br>-2.84                                | 0.19<br>0.41                 | MANF_MOUSE<br>E9Q8I5_MOUSE                              | Q3TMX5_MOUSE                                 | Mesencephalic astrocyte-derived neurotrophic factor;                                                                                         | Arginine-rich protein;Protein ARMET;                                                                                                                                                                                                                                               | 0.85 - 1.00<br>0.00 - 0.15                                                                            |
| ASCRAHLTM                                           | LSLDFLDDVRR                                                                | N-ter +34.06 Da                                                                                                              | 24.8                         | 50.8                         | 3                | 1512.90                                  | -1.47                                        | 0.21                         | SC11A_MOUSE                                             | D3Z569_MOUSE                                 | Signal peptidase complex catalytic subunit SEC11A;                                                                                           | Endopeptidase SP18;Microsomal signal peptidase 18 kDa subunit;SEC11 homolog A;SEC11-like protein 1;SPC18;Sid 2895;<br>GCS heavy chain;Gamma-ECS;Gamma-glutamylcysteine synthetase;                                                                                                 | 0.15 - 0.25<br>0.25 - 0.75                                                                            |
| MGL                                                 | LSQGSPLSWEETQR                                                             | N-ter +28.03 Da                                                                                                              | 39.3                         | 51.2                         | 3                | 1644.90                                  | 0.18                                         | 0.01                         | GSH1_MOUSE                                              |                                              | Glutamate-cysteine ligase catalytic subunit;                                                                                                 | AKAP expressed in kidney and lung;Protein kinase A-anchoring protein 2;<br>Creatine kinase M-type;<br>Protein QLL1;                                                                                                                                                                | 0.25 - 0.75<br>0.25 - 0.75<br>0.25 - 0.75                                                             |
| DQFSRVNVS<br>GIWHNDNKSF<br>KGSVAGGAVY               | LTQEELSDGLDELVSR<br>LWVVNEEDHLR<br>LVYDQELLGSPDKSEAAALR                    | N-ter +28.03 Da<br>N-ter +28.03 Da<br>N-ter +34.06 Da, K +34.06 Da                                                           | 47.4<br>42.3<br>21.8         | 56.6<br>57.2<br>70.6         | 3<br>3<br>3      | 1831.02<br>1436.82<br>2171.36            | 0.67<br>-0.76<br>-0.45                       | 0.03<br>0.06<br>0.05         | AKAP2_MOUSE<br>KCRM_MOUSE<br>QLL1_MOUSE                 | A2AP18_MOUSE                                 | A-kinase anchor protein 2;<br>Creatine kinase M-type;<br>Protein QLL1;                                                                       |                                                                                                                                                                                                                                                                                    | 0.25 - 0.75<br>0.15 - 0.25<br>0.25 - 0.75                                                             |
| AGNKVTVYDF<br>SCTFLAVSG                             | LVYDVLQDHR<br>LYSSDDVIELPSNFNR                                             | N-ter +34.06 Da<br>N-ter +34.06 Da                                                                                           | 28.4<br>52.2                 | 63.7<br>60.0                 | 3<br>3           | 1290.80<br>2090.16                       | -0.94<br>0.10                                | 0.05<br>0.01                 | GSTM2_MOUSE<br>PDIAB_MOUSE                              | GSTM6_MOUSE                                  | Glutathione S-transferase Mu 2;<br>Protein disulfide-isomerase A6;                                                                           | GST 5-5;GST class-mu 2;Glutathione S-transferase pmGT2;<br>Thioredoxin domain-containing protein 7;                                                                                                                                                                                | 0.15 - 0.25<br>0.25 - 0.75                                                                            |
| TARGAAVTRS<br>EQEDNAIKAI                            | MASGGVPTDEEQATGLER<br>MEIPKTLQTAADGTR                                      | N-ter +28.03 Da<br>N-ter +28.03 Da, K +28.03 Da                                                                              | 44.7<br>28.0                 | 64.6<br>87.8                 | 3<br>3           | 1932.01<br>1816.10                       | -1.18<br>2.09                                | 0.05<br>0.20                 | COX5B_MOUSE<br>E9PVX6_MOUSE                             | Q9D881_MOUSE                                 | Cytochrome c oxidase subunit 5B, mitochondrial;                                                                                              | Cytochrome c oxidase polypeptide Vb;                                                                                                                                                                                                                                               | 0.15 - 0.25<br>0.85 - 1.00                                                                            |
| GKPLSLAFLY<br>GEHTPSALAI<br>SLLLSVQGY               | MEKNQLEEVPSALPR<br>MENANVLAR<br>MEQASKTVQDALSSVQESDIJAVVAR                 | N-ter +34.06 Da, K +34.06 Da<br>N-ter +34.06 Da<br>N-ter +34.06 Da, K +34.06 Da<br>N-ter +34.06 Da, K +34.06 Da, C +57.02 Da | 32.0<br>26.7<br>31.0         | 67.0<br>57.9<br>99.1         | 3<br>2<br>4      | 1808.14<br>1050.63<br>2729.72            | 0.01<br>-0.01<br>-2.84                       | 0.00<br>0.00<br>0.20         | PRELP_MOUSE<br>ALDOA_MOUSE<br>APOC3_MOUSE               | Q9CPQ9_MOUSE<br>E9QP56_MOUSE                 | Prolargin;<br>Fructose-bisphosphate aldolase A;<br>Apolipoprotein C-III;                                                                     |                                                                                                                                                                                                                                                                                    | 0.25 - 0.75<br>0.25 - 0.75<br>0.00 - 0.15                                                             |
| ETLQPSFIG                                           | MESAGIHETTYNSIMKCDIDIR                                                     | N-ter +34.06 Da, K +34.06 Da, C +57.02 Da                                                                                    | 23.7                         | 59.9                         | 4                | 2651.46                                  | -0.23                                        | 0.03                         | ACTC_MOUSE                                              | ACTA_MOUSE                                   | Actin, alpha cardiac muscle 1;                                                                                                               | Alpha-cardiac actin;                                                                                                                                                                                                                                                               | 0.25 - 0.75                                                                                           |
| DTPKQALYL<br>KLEWIKAFEN                             | MFDTPQESPVKSPVPR<br>MHLETLVLSLPR                                           | N-ter +28.03 Da, K +28.03 Da<br>N-ter +34.06 Da                                                                              | 26.0<br>29.3                 | 72.3<br>49.1                 | 3<br>3           | 1870.10<br>1505.92                       | 0.71<br>0.71                                 | 0.08<br>0.02                 | TACC2_MOUSE<br>Q9D1Q5_MOUSE                             | E9Q8T1_MOUSE                                 | Transforming acidic coiled-coil-containing protein 2;                                                                                        |                                                                                                                                                                                                                                                                                    | 0.25 - 0.75<br>0.25 - 0.75                                                                            |
| SVILQHLRMS                                          | MHTEAAEVLLER                                                               | N-ter +28.03 Da                                                                                                              | 41.7                         | 107.5                        | 3                | 1425.88                                  | -0.76                                        | 0.03                         | HIBCH_MOUSE                                             | E0CX19_MOUSE                                 | 3-hydroxyisobutyryl-CoA hydrolase, mitochondrial;                                                                                            | 3-hydroxyisobutyryl-coenzyme A hydrolase;                                                                                                                                                                                                                                          | 0.15 - 0.25                                                                                           |
| WAATPKQGR                                           | MKVFVTGPLPAEGR<br>MLGAPEEADANEEGVR                                         | N-ter +28.03 Da, K +28.03 Da<br>N-ter +34.06 Da                                                                              | 33.1<br>49.9                 | 83.9<br>63.5                 | 3<br>3           | 1557.01<br>1720.92                       | -0.67<br>0.49                                | 0.07<br>0.03                 | GRHPR_MOUSE<br>CYTC_MOUSE                               | D6REG4_MOUSE<br>A2APX3_MOUSE                 | Glyoxylate reductase/hydroxypruvurate reductase;<br>Cystatin-C;                                                                              | Cystatin-3;<br>Calgizzarin;Endothelial monocyte-activating polypeptide;Protein S100-C;S100 calcium-binding protein A11;                                                                                                                                                            | 0.25 - 0.75<br>0.25 - 0.75                                                                            |
| QLSKTEFLSF                                          | MNTELAFTKNQKDPGVLDLR                                                       | N-ter +28.03 Da, K +28.03 Da                                                                                                 | 26.9                         | 83.2                         | 4                | 2331.42                                  | 0.60                                         | 0.06                         | S10AB_MOUSE                                             | F6S135_MOUSE                                 | Protein S100-A11;                                                                                                                            |                                                                                                                                                                                                                                                                                    | 0.25 - 0.75                                                                                           |
| LPYNPMMVVM                                          | MPPPPPVSTAVQPPGAPPVR                                                       | N-ter +28.03 Da                                                                                                              | 34.5                         | 26.3                         | 3                | 2116.21                                  | 2.36                                         | 0.10                         | DVL2_MOUSE                                              |                                              | Segment polarity protein dishevelled homolog DVL-2;                                                                                          | DSH homolog 2;<br>Protein cypher;Protein oracle;Z-band alternatively spliced PDZ-motif protein;                                                                                                                                                                                    | 0.85 - 1.00<br>0.75 - 0.85<br>0.85 - 1.00                                                             |
| ILAQMTGTEY                                          | MQDPDEALRR<br>MQQVEASLQPETLR                                               | N-ter +34.06 Da<br>N-ter +28.03 Da                                                                                           | 25.2<br>26.8                 | 83.2<br>52.6                 | 3<br>3           | 1392.80<br>1656.94                       | 1.13<br>1.87                                 | 0.13<br>0.11                 | LDB3_MOUSE<br>SPA3G_MOUSE                               | E9PYJ9_MOUSE<br>SPA3C_MOUSE                  | LIM domain-binding protein 3;<br>Serine protease inhibitor A3G;                                                                              | Serine protease inhibitor 2A;<br>Protein phosphatase 2B regulatory subunit 1;Protein phosphatase 3 regulatory subunit B alpha isoform 1;<br>Alpha-1 type I collagen;<br>Tumor protein D52-like 2;<br>Protein cypher;Protein oracle;Z-band alternatively spliced PDZ-motif protein; | 0.75 - 0.85<br>0.75 - 0.85<br>0.25 - 0.75<br>0.25 - 0.75<br>0.00 - 0.15<br>0.75 - 0.85<br>0.25 - 0.75 |
| NSGSLSEEF<br>PGLGGNFASQ<br>SPNKGVLSDF               | MSLPELQQNPLVQR<br>MSYGYDEKASGVSPGPMGSPGR<br>MTDVPVDPGVVHR                  | N-ter +34.06 Da<br>N-ter +34.06 Da, K +34.06 Da<br>N-ter +28.03 Da                                                           | 38.6<br>53.8<br>54.6         | 59.9<br>60.3<br>87.4         | 3<br>3<br>3      | 1686.04<br>2493.38<br>1448.87            | 0.41<br>-0.34<br>-0.23                       | 0.02<br>0.06<br>0.03         | CANB1_MOUSE<br>C01A1_MOUSE<br>Q3TUJ9_MOUSE              | F8WGB7_MOUSE                                 | Calcineurin subunit B type 1;<br>Collagen alpha-1(I) chain;<br>Tumor protein D54;                                                            |                                                                                                                                                                                                                                                                                    | 0.25 - 0.75<br>0.25 - 0.75<br>0.25 - 0.75                                                             |
| QSRFRILAQ<br>QSRFRILAQ<br>PTSGMIGNLS                | MTGTEYMQDPDEEALRR<br>MTGTEYMQDPDEEALR<br>MTPELSSAHNVIVTER                  | N-ter +28.03 Da<br>N-ter +28.03 Da<br>N-ter +28.03 Da                                                                        | 22.4<br>41.0<br>35.7         | 76.9<br>41.5<br>64.1         | 3<br>3<br>3      | 2069.08<br>1912.90<br>1811.04            | -6.64<br>1.42<br>-0.42                       | 0.00<br>0.22<br>0.01         | LDB3_MOUSE<br>E9PYJ9_MOUSE<br>D5G1A_MOUSE               | E9PYJ9_MOUSE<br>LDB3_MOUSE                   | LIM domain-binding protein 3;<br>LIM domain-binding protein 3;<br>Desmoglein-1-alpha;                                                        | DG1;DG1;Desmosomal glycoprotein I;<br>Alpha-tubulin 1;Alpha-tubulin isotype M-alpha-1;Tubulin alpha-1 chain;                                                                                                                                                                       | 0.00 - 0.15<br>0.75 - 0.85<br>0.25 - 0.75                                                             |
| TLEHSDCAF<br>DHHIVPLTA<br>EIFKAGHPF                 | MVDNEAIYDRC<br>MVIENDAGDER<br>MWNHGLGYLTCPSNLGTLGR                         | N-ter +34.06 Da, C +57.02 Da<br>N-ter +34.06 Da<br>N-ter +34.06 Da, C +57.02 Da                                              | 32.5<br>32.4<br>37.4         | 36.5<br>59.6<br>70.6         | 3<br>2<br>3      | 1531.78<br>1281.69<br>2451.40            | -0.52<br>0.72<br>-4.32                       | 0.02<br>0.05<br>0.86         | TBA1A_MOUSE<br>ITH2_MOUSE<br>KCRM_MOUSE                 | TBA1B_MOUSE                                  | Tubulin alpha-1A chain;<br>Inter-alpha-trypsin inhibitor heavy chain H2;<br>Creatine kinase M-type;                                          |                                                                                                                                                                                                                                                                                    | 0.25 - 0.75<br>0.25 - 0.75<br>0.00 - 0.15                                                             |
| TIKRLETTY                                           | NATEPVISFYDKR                                                              | N-ter +34.06 Da, K +34.06 Da                                                                                                 | 38.2                         | 69.7                         | 3                | 1607.01                                  | 0.68                                         | 0.08                         | KAD1_MOUSE                                              |                                              | Adenylate kinase isoenzyme 1;                                                                                                                | ATP-AMP transphosphorylase 1;Myokinase;                                                                                                                                                                                                                                            | 0.25 - 0.75                                                                                           |
| TGGRTTWTART                                         | NATLSVEPEGR                                                                | N-ter +28.03 Da                                                                                                              | 36.9                         | 50.3                         | 2                | 1199.68                                  | -0.32                                        | 0.02                         | ACOT2_MOUSE                                             |                                              | Acyl-coenzyme A thioesterase 2, mitochondrial;                                                                                               | Acyl coenzyme A thioester hydrolase;MTE-1;Very-long-chain acyl-CoA thioesterase;                                                                                                                                                                                                   | 0.25 - 0.75                                                                                           |





| Non Prime Site                                                                                  | Prime Site                                                                                                                                                      | Modifications                                                                                                                                                            | Hyperscore                                           | Mass error in ppm                                    | Charge                          | Precursor neutral mass in Da                                              | Fold change (log <sub>2</sub> ) of ASAPRatio              | FC-error of ASAPRatio                                | Uniprot ID 1                                                                                          | Uniprot ID 2                                                           | Protein Name 1                                                                                                                                                                                                | Protein Name 2                                                                                                                                                             | Quantile                                                                                              |
|-------------------------------------------------------------------------------------------------|-----------------------------------------------------------------------------------------------------------------------------------------------------------------|--------------------------------------------------------------------------------------------------------------------------------------------------------------------------|------------------------------------------------------|------------------------------------------------------|---------------------------------|---------------------------------------------------------------------------|-----------------------------------------------------------|------------------------------------------------------|-------------------------------------------------------------------------------------------------------|------------------------------------------------------------------------|---------------------------------------------------------------------------------------------------------------------------------------------------------------------------------------------------------------|----------------------------------------------------------------------------------------------------------------------------------------------------------------------------|-------------------------------------------------------------------------------------------------------|
| KTMIVHDVE<br>DSPERELIS                                                                          | SEPAMTPKSEGLTVLR<br>SEPSPAVTPVPTTLIAPR                                                                                                                          | N-ter +28.03 Da, K +28.03 Da<br>N-ter +34.06 Da                                                                                                                          | 27.6<br>44.2                                         | 80.9<br>84.5                                         | 3<br>3                          | 1771.10<br>1967.28                                                        | -0.34<br>-1.03                                            | 0.02<br>0.11                                         | M4K4_MOUSE<br>SNX2_MOUSE                                                                              | B7ZNR9_MOUSE                                                           | Mitogen-activated protein kinase kinase kinase kinase 4;<br>Sorting nexin-2;                                                                                                                                  | HPK/GCK-like kinase HGK;MAPK/ERK kinase kinase kinase 4;Nck-interacting kinase;                                                                                            | 0.25 - 0.75<br>0.15 - 0.25                                                                            |
| PRQPTVTSVC<br>LLLLSGDAHS<br>WTHEVFSSRS                                                          | SESAQELAEGQR<br>SEVPGAAAEGPGGSVGLGDR<br>SEVLSGGDEDDYQR                                                                                                          | N-ter +28.03 Da<br>N-ter +34.06 Da<br>N-ter +34.06 Da                                                                                                                    | 33.3<br>45.8<br>37.1                                 | 72.9<br>48.8<br>80.6                                 | 3<br>3<br>3                     | 1331.73<br>1873.03<br>1644.90                                             | 0.65<br>-0.45<br>-1.52                                    | 0.03<br>0.02<br>0.17                                 | PDU5_MOUSE<br>CO024_MOUSE<br>E9Q616_MOUSE                                                             | E9Q8P5_MOUSE                                                           | PDZ and LIM domain protein 5;<br>UPFD480 protein C15orf24 homolog;                                                                                                                                            | Enigma homolog;Enigma-like PDZ and LIM domains protein;                                                                                                                    | 0.25 - 0.75<br>0.25 - 0.75<br>0.00 - 0.15                                                             |
| ANEVEAVKVH<br>GLVRGQKVLV<br>RNLHQSGFSL                                                          | SFPTLKFFPASADR<br>SGAPIKIPVGPETLGR<br>SGAQIDNNIPR                                                                                                               | N-ter +28.03 Da, K +28.03 Da<br>N-ter +34.06 Da, K +34.06 Da<br>N-ter +28.03 Da<br>N-ter +34.06 Da, K +34.06 Da, C +57.02 Da                                             | 23.2<br>37.8<br>35.1                                 | 66.9<br>59.3<br>52.8                                 | 3<br>3<br>2                     | 1638.99<br>1659.13<br>1212.67                                             | 0.04<br>0.37<br>1.12                                      | 0.00<br>0.01<br>0.05                                 | PDIA1_MOUSE<br>ATPB_MOUSE<br>DPYL2_MOUSE                                                              | E9Q8G8_MOUSE                                                           | Protein disulfide-isomerase;<br>ATP synthase subunit beta, mitochondrial;<br>Dihydropyrimidinase-related protein 2;                                                                                           | Cellular thyroid hormone-binding protein;Endoplasmic reticulum resident protein 59;Prolyl 4-hydroxylase subunit beta;p55;                                                  | 0.25 - 0.75<br>0.25 - 0.75<br>0.75 - 0.85                                                             |
| KLEDGPKFL<br>AAASWRPVSA<br>SHORAAADSQN<br>NIDIRSAFKR<br>VLDGADCI ML<br>KVFHILDKDK<br>QAPPVRLNHQ | SGDAIIVDMVPGKPMCVESFSDYPLGR<br>SGEEFVPGQSAADILSGAASR<br>SGEGNTSAEESFSQEVAR<br>SGEGQADAGELDFSGLLKR<br>SGETAKGDYPLEAVR<br>SGFIEEDELKILGFSDDAR<br>SGFSLSGAQIDNNIPR | N-ter +28.03 Da<br>N-ter +28.03 Da<br>N-ter +28.03 Da<br>N-ter +34.06 Da, K +34.06 Da<br>N-ter +34.06 Da, K +34.06 Da<br>N-ter +28.03 Da, K +28.03 Da<br>N-ter +34.06 Da | 49.4<br>61.6<br>52.0<br>50.4<br>32.5<br>32.0<br>33.7 | 79.6<br>65.4<br>71.8<br>74.8<br>86.3<br>68.3<br>53.4 | 4<br>3<br>3<br>3<br>3<br>3<br>3 | 3062.76<br>2163.17<br>1941.01<br>2075.24<br>1660.05<br>2312.31<br>1709.97 | -1.79<br>-1.12<br>2.32<br>-2.32<br>-0.89<br>-0.45<br>2.47 | 0.31<br>0.24<br>0.29<br>0.12<br>0.15<br>0.08<br>0.19 | EF1A1_MOUSE<br>OFUT2_MOUSE<br>Q7M739_MOUSE<br>D3YU50_MOUSE<br>KPYM_MOUSE<br>PRVA_MOUSE<br>DPYL2_MOUSE | E9PZ23_MOUSE<br>Q6P65_MOUSE                                            | Elongation factor 1-alpha 1;<br>GDP-fucose protein O-fucosyltransferase 2;<br>Elongation factor 1-alpha 1;<br>Pyruvate kinase isozymes M1/M2;<br>Parvalbumin alpha;<br>Dihydropyrimidinase-related protein 2; | Unc-33-like phosphoprotein 2;<br>Elongation factor Tu;Eukaryotic elongation factor 1 A-1;<br>Peptide-O-fucosyltransferase 2;                                               | 0.00 - 0.15<br>0.15 - 0.25<br>0.85 - 1.00<br>0.00 - 0.15<br>0.15 - 0.25<br>0.25 - 0.75<br>0.85 - 1.00 |
| RGAAVTRMA<br>RKDLANTVL<br>VSVERALADE<br>ETTALCDNG<br>GKTVIRLPSG<br>AAQYSDKGV<br>SLSKERHQCT      | SGGGVPTDEEQATGLER<br>SGGTTMYPGIADR<br>SGLDYSLSGGGGVPLVLR<br>SGLVKAGFAGDDAPR<br>SGPASPTTGSVDIR<br>SGPGMGLMGPR<br>SGPIVTLQNGDKSTPDDWSSQLER                        | N-ter +34.06 Da<br>N-ter +34.06 Da<br>N-ter +34.06 Da<br>N-ter +34.06 Da, K +34.06 Da<br>N-ter +34.06 Da<br>N-ter +34.06 Da<br>N-ter +34.06 Da, K +34.06 Da              | 43.3<br>40.2<br>60.8<br>30.0<br>68.4<br>42.9<br>38.7 | 67.1<br>51.7<br>59.2<br>63.6<br>43.3<br>54.0<br>82.6 | 3<br>2<br>3<br>3<br>2<br>2<br>4 | 1735.96<br>1358.74<br>1867.14<br>1527.97<br>1448.83<br>1189.68<br>2881.71 | -0.79<br>-0.60<br>0.49<br>0.39<br>0.12<br>-1.18<br>-0.15  | 0.05<br>0.03<br>0.04<br>0.03<br>0.02<br>0.05<br>0.02 | COX5B_MOUSE<br>ACTS_MOUSE<br>A2BFA6_MOUSE<br>ACTC_MOUSE<br>E9Q616_MOUSE<br>CO1A2_MOUSE<br>SYNP2_MOUSE | Q9D881_MOUSE<br>ACTA_MOUSE<br>ACTA_MOUSE<br>ACTS_MOUSE<br>D3YVV9_MOUSE | Cytochrome c oxidase subunit 5B, mitochondrial;<br>Actin, alpha skeletal muscle;<br>Actin, alpha cardiac muscle 1;<br>Synaptopodin-2;                                                                         | Cytochrome c oxidase polypeptide Vb;<br>Alpha-actin-1;                                                                                                                     | 0.15 - 0.25<br>0.25 - 0.75<br>0.25 - 0.75<br>0.25 - 0.75<br>0.25 - 0.75<br>0.15 - 0.25<br>0.25 - 0.75 |
| FFTGLVKMYH<br>PSGVPKQDGR<br>SSANRRAGSS                                                          | SGPVVAMVWEGLNVVKTGR<br>SQQPGVPGAGVR<br>SGSGVQASAGGLAADASR                                                                                                       | N-ter +34.06 Da, K +34.06 Da<br>N-ter +28.03 Da<br>N-ter +28.03 Da                                                                                                       | 21.0<br>33.8<br>67.3                                 | 75.4<br>50.1<br>62.4                                 | 3<br>2<br>3                     | 2066.35<br>1205.71<br>1645.90                                             | -0.25<br>0.14<br>1.63                                     | 0.01<br>0.01<br>0.14                                 | NDKA_MOUSE<br>CO1A2_MOUSE<br>FILA_MOUSE                                                               | NDK8_MOUSE<br>E9Q6U9_MOUSE<br>F7BVV1_MOUSE                             | Nucleoside diphosphate kinase A;<br>Collagen alpha-2(I) chain;<br>Filaggrin;                                                                                                                                  | Alpha-2 type I collagen;<br>Myopodin;<br>Metastasis inhibition factor NM23;NDPK-A;Tumor metastatic process-associated protein;nm23-M1;                                     | 0.25 - 0.75<br>0.25 - 0.75<br>0.85 - 1.00                                                             |
| MYTPIQ                                                                                          | SGSPFPASVQDPLHIWR                                                                                                                                               | N-ter +34.06 Da                                                                                                                                                          | 23.2                                                 | 82.0                                                 | 3                               | 1984.20                                                                   | -1.52                                                     | 0.39                                                 | CAPG_MOUSE                                                                                            | Q99L84_MOUSE                                                           | Macrophage-capping protein;                                                                                                                                                                                   | Actin regulatory protein CAP-G;Actin-capping protein GCAP39;Myc basic motif homolog 1;                                                                                     | 0.00 - 0.15                                                                                           |
| ASSREGSPAR<br>MA                                                                                | SGTPVHCPSPIR<br>SGVAVSDGVKIVFNDMKVR                                                                                                                             | N-ter +34.06 Da, C +57.02 Da<br>N-ter +28.03 Da, K +28.03 Da                                                                                                             | 41.7<br>21.4                                         | 53.8<br>115.1                                        | 3<br>4                          | 1340.78<br>2104.41                                                        | 0.26<br>4.16                                              | 0.01<br>0.25                                         | BAG3_MOUSE<br>COF1_MOUSE                                                                              | E9Q1T2_MOUSE                                                           | BAG family molecular chaperone regulator 3;<br>Cofilin-1;                                                                                                                                                     | Bcl-2-associated athanogene 3;Bcl-2-binding protein Bts;<br>Cofilin, non-muscle isoform;<br>Alpha-1 protease inhibitor 1;Alpha-1-antiprotease;Serine protease inhibitor 1- | 0.25 - 0.75<br>0.85 - 1.00                                                                            |
| DTSQKQDSPA                                                                                      | SHEIATNLGDFAI SLYR                                                                                                                                              | N-ter +34.06 Da<br>N-ter +28.03 Da, K +28.03 Da, C +57.02 Da                                                                                                             | 45.5                                                 | 76.5                                                 | 3                               | 1940.17                                                                   | 0.25                                                      | 0.03                                                 | A1AT1_MOUSE                                                                                           | A1AT2_MOUSE                                                            | Alpha-1-antitrypsin 1-1;                                                                                                                                                                                      | 1;Serine protease inhibitor A1a;                                                                                                                                           | 0.25 - 0.75                                                                                           |
| RSTCHNQNSM<br>ASTSQSSRAA<br>LQTRFPLDY                                                           | SICEEFSQADKGCFCFR<br>SIFGGAKPVDTAAR<br>SIPFPTPTTLTGR                                                                                                            | N-ter +34.06 Da<br>N-ter +34.06 Da, K +34.06 Da<br>N-ter +28.03 Da                                                                                                       | 45.9<br>24.9<br>26.7                                 | 79.9<br>83.4<br>60.3                                 | 3<br>3<br>3                     | 2132.10<br>1456.99<br>1511.93                                             | -4.32<br>2.47<br>2.49                                     | 0.86<br>0.47<br>0.12                                 | A2M_MOUSE<br>IF48_MOUSE<br>UBP2L_MOUSE                                                                | D3YW52_MOUSE<br>Q3TDD8_MOUSE<br>E9PZA1_MOUSE                           | Alpha-2-macroglobulin;<br>Eukaryotic translation initiation factor 4B;<br>Ubiquitin-associated protein 2-like;                                                                                                | Pregnancy zone protein;                                                                                                                                                    | 0.00 - 0.15<br>0.85 - 1.00<br>0.85 - 1.00                                                             |
| LSEKISSVQ<br>RTSPVPRQKR<br>LGSSCEEIFY                                                           | SIVPALEIANHR<br>SIVVSPILIPENQR<br>SKDSEGSWFR                                                                                                                    | N-ter +28.03 Da<br>N-ter +34.06 Da<br>N-ter +34.06 Da, K +34.06 Da                                                                                                       | 31.4<br>41.1<br>23.3                                 | 57.6<br>95.7<br>92.7                                 | 3<br>3<br>3                     | 1417.89<br>1598.12<br>1265.79                                             | 1.18<br>-0.14<br>-6.64                                    | 0.08<br>0.01<br>0.00                                 | CH60_MOUSE<br>CAD13_MOUSE<br>NIPS1_MOUSE                                                              | Q5SVG6_MOUSE                                                           | 60 kDa heat shock protein, mitochondrial;<br>Cadherin-13;<br>Protein NipSnap homolog 1;                                                                                                                       | 60 kDa chaperonin;Chaperonin 60;HSP-65;Heat shock protein 60;Mitochondrial matrix protein P1;<br>Heart cadherin;Truncated cadherin;                                        | 0.75 - 0.85<br>0.25 - 0.75<br>0.00 - 0.15                                                             |
| NRPLAAGAN                                                                                       | SKGPPDFSSDEEREPTVLGSGASVGR                                                                                                                                      | N-ter +28.03 Da, K +28.03 Da                                                                                                                                             | 51.5                                                 | 79.8                                                 | 4                               | 2813.61                                                                   | -0.56                                                     | 0.07                                                 | LAP2A_MOUSE                                                                                           | LAP2B_MOUSE                                                            | Lamina-associated polypeptide 2, isoforms alpha/zeta;                                                                                                                                                         | Thymopoietin isoforms alpha/zeta;                                                                                                                                          | 0.25 - 0.75                                                                                           |
| KIGGAQNRNY                                                                                      | SKLLCGLLSDR                                                                                                                                                     | N-ter +28.03 Da, K +28.03 Da, C +57.02 Da                                                                                                                                | 30.7                                                 | 47.5                                                 | 3                               | 1316.81                                                                   | -0.20                                                     | 0.01                                                 | MIF_MOUSE                                                                                             |                                                                        | Macrophage migration inhibitory factor;                                                                                                                                                                       | Delayed early response protein 6;Glycosylation-inhibiting factor;L-dopachrome isomerase;L-dopachrome tautomerase;Phenylpyruvate tautomerase;                               | 0.25 - 0.75                                                                                           |
| PPPATHYSTL                                                                                      | SKPAPLTGTLVLR                                                                                                                                                   | N-ter +28.03 Da, K +28.03 Da                                                                                                                                             | 30.1                                                 | 52.9                                                 | 3                               | 1423.92                                                                   | 1.73                                                      | 0.19                                                 | PKN1_MOUSE                                                                                            | D6RH37_MOUSE                                                           | Serine/threonine-protein kinase N1;                                                                                                                                                                           | Protein kinase C-like 1;Protein kinase C-like PKN;Protein-kinase C-related kinase 1;Serine-threonine protein kinase N;                                                     | 0.85 - 1.00                                                                                           |
| TITESMDML                                                                                       | SKVEAANFR                                                                                                                                                       | N-ter +34.06 Da, K +34.06 Da                                                                                                                                             | 12.6                                                 | 66.7                                                 | 2                               | 1088.73                                                                   | -6.64                                                     | 0.00                                                 | GGT7_MOUSE                                                                                            |                                                                        | Gamma-glutamyltransferase 7;                                                                                                                                                                                  | Gamma-glutamyltransferase-like 3;Gamma-glutamyltranspeptidase 7;                                                                                                           | 0.00 - 0.15                                                                                           |
| LWSLVATLLG                                                                                      | SKWPEPVFGR                                                                                                                                                      | N-ter +34.06 Da, K +34.06 Da                                                                                                                                             | 27.9                                                 | 53.6                                                 | 3                               | 1269.82                                                                   | 0.03                                                      | 0.00                                                 | MASP2_MOUSE                                                                                           |                                                                        | Mannan-binding lectin serine protease 2;                                                                                                                                                                      | MBL-associated serine protease 2;Mannose-binding protein-associated serine protease 2;                                                                                     | 0.25 - 0.75                                                                                           |
| ISRRLVSDG                                                                                       | SLAEVPEAKVGVILGSGDFAR                                                                                                                                           | N-ter +28.03 Da, K +28.03 Da                                                                                                                                             | 21.2                                                 | 85.8                                                 | 4                               | 2324.51                                                                   | 1.47                                                      | 0.16                                                 | STEA3_MOUSE                                                                                           | E9QN92_MOUSE                                                           | Metalloreductase STEAP3;                                                                                                                                                                                      | Dudulin-2;Protein nm1054;Six-transmembrane epithelial antigen of prostate 3;Tumor suppressor-activated pathway protein 6;                                                  | 0.85 - 1.00                                                                                           |

| Non Prime Site                                                                 | Prime Site                                                                                                               | Modifications                                                                                                                                                      | Hyperscore                                   | Mass error in ppm                            | Charge                     | Precursor neutral mass in Da                                   | Fold change (log <sub>2</sub> ) of ASAPRatio  | FC-error of ASAPRatio                        | Uniprot ID 1                                                                         | Uniprot ID 2                                 | Protein Name 1                                                                                                                                                                      | Protein Name 2                                                                                                                                                                                                                   | Quantile                                                                               |
|--------------------------------------------------------------------------------|--------------------------------------------------------------------------------------------------------------------------|--------------------------------------------------------------------------------------------------------------------------------------------------------------------|----------------------------------------------|----------------------------------------------|----------------------------|----------------------------------------------------------------|-----------------------------------------------|----------------------------------------------|--------------------------------------------------------------------------------------|----------------------------------------------|-------------------------------------------------------------------------------------------------------------------------------------------------------------------------------------|----------------------------------------------------------------------------------------------------------------------------------------------------------------------------------------------------------------------------------|----------------------------------------------------------------------------------------|
| STVHEILCKL<br>NEMATAASSS                                                       | SLEGDHSTPPSAYGSVKPYTFNDAER<br>SLEKSYELPDGGQVITIGNER                                                                      | N-ter +28.03 Da, K +28.03 Da<br>N-ter +34.06 Da, K +34.06 Da                                                                                                       | 30.1<br>45.2                                 | 66.4<br>78.1                                 | 4<br>3                     | 2880.55<br>2315.45                                             | 0.07<br>-1.79                                 | 0.01<br>0.25                                 | ANXA2_MOUSE<br>ACTC_MOUSE                                                            | BOV2N7_MOUSE<br>ACTA_MOUSE                   | Annexin A2;<br>Actin, alpha cardiac muscle 1;                                                                                                                                       | Annexin II;Annexin-2;Calpactin I heavy chain;Calpactin-1 heavy chain;Chromobindin-8;Lipocortin II;Placental anticoagulant protein IV;Protein I;p36;<br>Alpha-cardiac actin;<br>Carbonate dehydratase III;Carbonic anhydrase III; | 0.25 - 0.75<br>0.00 - 0.15                                                             |
| VSSDQMAKLR                                                                     | SLFSSAENEPVPLVGNWRPPQPVKGR                                                                                               | N-ter +28.03 Da, K +28.03 Da                                                                                                                                       | 33.8                                         | 103.9                                        | 4                          | 3013.93                                                        | -2.00                                         | 0.24                                         | CAH3_MOUSE                                                                           |                                              | Carbonic anhydrase 3;                                                                                                                                                               | Carbonate dehydratase III;Carbonic anhydrase III;                                                                                                                                                                                | 0.00 - 0.15                                                                            |
| FEHRLGEAAR                                                                     | SLGNAGNEIGR                                                                                                              | N-ter +28.03 Da                                                                                                                                                    | 44.2                                         | 62.9                                         | 2                          | 1114.64                                                        | -1.06                                         | 0.11                                         | DMKN_MOUSE                                                                           | E9QLW7_MOUSE                                 | Dermokine;                                                                                                                                                                          | Epidermis-specific secreted protein SK30/SK89;                                                                                                                                                                                   | 0.15 - 0.25                                                                            |
| SLPQNQPFV                                                                      | SLGTGQVIKWDQGLGMCEGEKR                                                                                                   | N-ter +34.06 Da, K +34.06 Da, C +57.02 Da                                                                                                                          | 31.7                                         | 109.6                                        | 4                          | 2720.78                                                        | -3.32                                         | 0.33                                         | FKBP2_MOUSE                                                                          |                                              | Peptidyl-prolyl cis-trans isomerase FKBP2;                                                                                                                                          | 13 kDa FK506-binding protein;FK506-binding protein 2;Immunophilin FKBP13;Rotamase;<br>Lysosomal pepstatin-insensitive protease;Tripeptidyl aminopeptidase;Tripeptidyl-peptidase I;                                               | 0.00 - 0.15                                                                            |
| RPEPQQVTV<br>SIRSAPPKLA                                                        | SLHLGVTPSVLR<br>SLKGVPEADAVETLAGSLGTR                                                                                    | N-ter +28.03 Da<br>N-ter +34.06 Da, K +34.06 Da                                                                                                                    | 30.7<br>48.5                                 | 33.7<br>80.9                                 | 3<br>3                     | 1305.82<br>2166.43                                             | -0.38<br>-0.79                                | 0.04<br>0.12                                 | TPP1_MOUSE<br>ICAL_MOUSE                                                             | Q921U7_MOUSE                                 | Tripeptidyl-peptidase 1;<br>Calpastatin;                                                                                                                                            | Tripeptidyl-peptidase 1;<br>Calpain inhibitor;<br>Alcohol sulfotransferase;Hydroxysteroid sulfotransferase 2;                                                                                                                    | 0.25 - 0.75<br>0.15 - 0.25                                                             |
| AMKANTMSNY<br>LSPQTKRAKR                                                       | SLLPASLLDHR<br>SLLSGETGSLPGNYLVIPIYSGR                                                                                   | N-ter +34.06 Da<br>N-ter +34.06 Da                                                                                                                                 | 45.4<br>29.9                                 | 63.0<br>44.7                                 | 3<br>3                     | 1254.83<br>2442.40                                             | -1.64<br>-3.18                                | 0.05<br>0.58                                 | STZB1_MOUSE<br>MYOM1_MOUSE                                                           | E9QK1_MOUSE                                  | Sulfotransferase family cytosolic 2B member 1;<br>Myomesin-1;                                                                                                                       | Sulfotransferase;<br>Myomesin family member 1;Skelemin;                                                                                                                                                                          | 0.00 - 0.15<br>0.00 - 0.15                                                             |
| FQTSSFSAM<br>RLLSGETG                                                          | SLPGAPTASSGTAAYALPNR<br>SLPGNYLVIPIYSGR                                                                                  | N-ter +28.03 Da<br>N-ter +34.06 Da                                                                                                                                 | 32.5<br>44.9                                 | 59.8<br>32.7                                 | 3<br>2                     | 2026.17<br>1568.93                                             | -0.58<br>-0.12                                | 0.06<br>0.01                                 | ARNT_MOUSE<br>MYOM1_MOUSE                                                            | Q3ULM2_MOUSE                                 | Aryl hydrocarbon receptor nuclear translocator;<br>Myomesin-1;                                                                                                                      | Dioxin receptor, nuclear translocator;Hypoxia-inducible factor 1-beta;<br>Myomesin family member 1;Skelemin;                                                                                                                     | 0.25 - 0.75<br>0.25 - 0.75                                                             |
| LLGSPRRSY                                                                      | SLPPHQVPLPSLPTMQAGTIAR                                                                                                   | N-ter +28.03 Da, K +28.03 Da                                                                                                                                       | 44.6                                         | 55.2                                         | 4                          | 2581.58                                                        | -0.58                                         | 0.01                                         | ODP2_MOUSE                                                                           |                                              | Dihydrolipoyllysine-residue acetyltransferase component of pyruvate dehydrogenase complex, mitochondrial;                                                                           | Dihydrolipoamide acetyltransferase component of pyruvate dehydrogenase complex;Pyruvate dehydrogenase complex component E2;                                                                                                      | 0.25 - 0.75                                                                            |
| QTPGMRRCSS<br>TDPKFDQTTI                                                       | SLPPIQAPSHPPPQPTQPR<br>SLQMGTKNGASQAGMLAPGTR                                                                             | N-ter +28.03 Da<br>N-ter +34.06 Da, K +34.06 Da                                                                                                                    | 35.5<br>39.7                                 | 44.4<br>101.8                                | 4<br>4                     | 2169.27<br>2143.37                                             | 1.20<br>1.78                                  | 0.04<br>0.13                                 | RHG17_MOUSE<br>CNN3_MOUSE                                                            | F8WJ58_MOUSE                                 | Rho GTPase-activating protein 17;<br>Calponin-3;                                                                                                                                    | Neuron-associated developmentally-regulated protein;Rho-type GTPase-activating protein 17;<br>Calponin, acidic isoform;                                                                                                          | 0.75 - 0.85<br>0.85 - 1.00                                                             |
| ASVILQHRM<br>ASGPFNFQVG                                                        | SMHTEAAEVLIER<br>SMPPAQQTISQGMHR                                                                                         | N-ter +34.06 Da<br>N-ter +34.06 Da                                                                                                                                 | 54.7<br>62.0                                 | 60.8<br>85.6                                 | 3<br>3                     | 1518.89<br>1830.07                                             | -1.40<br>-4.32                                | 0.11<br>0.86                                 | HIBCH_MOUSE<br>TLN1_MOUSE                                                            | E0CX19_MOUSE<br>F8WGT0_MOUSE                 | 3-hydroxyisobutyryl-CoA hydrolase, mitochondrial;<br>Talin-1;                                                                                                                       | 3-hydroxyisobutyryl-coenzyme A hydrolase;<br>Phosphatidylinositol-binding clathrin assembly protein;                                                                                                                             | 0.15 - 0.25<br>0.00 - 0.15                                                             |
| STAASRATL<br>TPGHACTQK<br>EQFLPMMQAI                                           | SNAVSSLASTGLSLTKVDER<br>SNEEIAMATVTLR<br>SNNKDQGGYEDFVEGLR                                                               | N-ter +28.03 Da, K +28.03 Da<br>N-ter +28.03 Da<br>N-ter +28.03 Da, K +28.03 Da                                                                                    | 32.9<br>36.7<br>77.0                         | 78.9<br>41.8<br>48.0                         | 3<br>3<br>3                | 2090.29<br>1532.85<br>1983.03                                  | 1.15<br>-0.20<br>0.70                         | 0.09<br>0.02<br>0.10                         | PICA_MOUSE<br>ALDOA_MOUSE<br>MYL1_MOUSE                                              | Q9CPQ9_MOUSE<br>E9PWG4_MOUSE                 | Fructose-bisphosphate aldolase A;<br>Myosin light chain 1/3, skeletal muscle isoform;                                                                                               | Clathrin assembly lymphoid myeloid leukemia; Aldolase 1;Muscle-type aldolase;<br>Myosin light chain alkali 1/2;                                                                                                                  | 0.75 - 0.85<br>0.25 - 0.75<br>0.25 - 0.75                                              |
| KSFVNLGKD<br>LLAACGSVTM<br>TSGDSLTVAS<br>KIPRHVEVEI<br>LHPTLILAQ<br>RSIISRLFGT | SNNLCLHFNPR<br>SNPGESSFDLADRLDPVEKIDR<br>SNTDFAFSLYR<br>SNTDVEVTPQPKTVIR<br>SNVDELGCSHLGQSYESR<br>SPAEEVTPSPPEPAPALEAPAR | N-ter +34.06 Da, C +57.02 Da<br>N-ter +34.06 Da, K +34.06 Da<br>N-ter +28.03 Da<br>N-ter +34.06 Da, K +34.06 Da<br>N-ter +28.03 Da, C +57.02 Da<br>N-ter +28.03 Da | 26.8<br>25.5<br>42.0<br>41.2<br>45.7<br>27.1 | 56.4<br>70.0<br>68.8<br>94.7<br>69.3<br>54.8 | 3<br>4<br>2<br>3<br>3<br>3 | 1404.79<br>2527.50<br>1347.74<br>1712.14<br>2065.06<br>2182.25 | -0.56<br>0.16<br>4.33<br>0.10<br>0.79<br>1.09 | 0.03<br>0.02<br>1.41<br>0.01<br>0.12<br>0.04 | LEG1_MOUSE<br>SODE_MOUSE<br>SPA3G_MOUSE<br>E9Q616_MOUSE<br>CO3A1_MOUSE<br>PARF_MOUSE |                                              | Galectin-1;<br>Extracellular superoxide dismutase [Cu-Zn];<br>Serrine protease inhibitor A3G;<br>E9Q616_MOUSE<br>Collagen alpha-1(III) chain;<br>Putative GTP-binding protein Parf; | 14 kDa lectin;Beta-galactoside-binding lectin L-14-I;Galactin;Lactose-binding lectin 1;Lectin galactoside-binding soluble 1;S-Lac lectin 1;                                                                                      | 0.25 - 0.75<br>0.25 - 0.75<br>0.85 - 1.00<br>0.25 - 0.75<br>0.25 - 0.75<br>0.75 - 0.85 |
| QETDTSQKDQ<br>NSTHPMHSRC                                                       | SPASHEIATNLGDFALR<br>SPDPGLTALLSDHR                                                                                      | N-ter +34.06 Da<br>N-ter +28.03 Da                                                                                                                                 | 46.9<br>64.7                                 | 59.7<br>67.7                                 | 3<br>3                     | 1832.07<br>1505.89                                             | 0.03<br>0.79                                  | 0.00<br>0.08                                 | A1AT4_MOUSE<br>HEMO_MOUSE                                                            |                                              | Alpha-1-antitrypsin 1-4;<br>Hemopexin;                                                                                                                                              | Alpha-1 protease inhibitor 4;Serrine protease inhibitor 1-4;Serrine protease inhibitor A1d;                                                                                                                                      | 0.25 - 0.75<br>0.25 - 0.75                                                             |
| MPGVGLPELG                                                                     | SPGLPLPSLPPR                                                                                                             | N-ter +34.06 Da                                                                                                                                                    | 32.0                                         | 60.9                                         | 3                          | 1360.91                                                        | -0.06                                         | 0.00                                         | GORS2_MOUSE                                                                          | A2AT19_MOUSE                                 | Golgi reassembly-stacking protein 2;                                                                                                                                                | Golgi reassembly-stacking protein of 55 kDa;                                                                                                                                                                                     | 0.25 - 0.75                                                                            |
| RGKTKATKSC<br>KEEQAPPMLG                                                       | SPPPPPPEPTSEGR<br>SQEGHLVEEVLIR                                                                                          | N-ter +34.06 Da<br>N-ter +34.06 Da                                                                                                                                 | 50.9<br>24.1                                 | 73.9<br>45.8                                 | 3<br>3                     | 1477.87<br>1541.93                                             | 0.42<br>-1.89                                 | 0.03<br>0.14                                 | BCAS1_MOUSE<br>SYNP2_MOUSE                                                           | A2AVX1_MOUSE<br>D3YV9_MOUSE                  | Breast carcinoma-amplified sequence 1 homolog;<br>Synaptopodin-2;                                                                                                                   | Novel amplified in breast cancer 1 homolog;<br>Myopodin;                                                                                                                                                                         | 0.25 - 0.75<br>0.00 - 0.15                                                             |
| PVRNRKVVYD                                                                     | SQFQESDDADEYGR                                                                                                           | N-ter +34.06 Da                                                                                                                                                    | 47.3                                         | 80.9                                         | 3                          | 1794.89                                                        | 1.25                                          | 0.23                                         | NUCK5_MOUSE                                                                          |                                              | Nuclear ubiquitous casein and cyclin-dependent kinases substrate;                                                                                                                   | JC7;                                                                                                                                                                                                                             | 0.75 - 0.85                                                                            |
| TFLPRKIISL<br>GSYSQAPSQY<br>ISKVRVHIQ                                          | SQLLQEDSLNVADLSSLR<br>SQSSSYGQSSFR<br>SRGESQEVALPSR                                                                      | N-ter +28.03 Da<br>N-ter +34.06 Da<br>N-ter +34.06 Da                                                                                                              | 57.9<br>27.5<br>35.9                         | 67.2<br>88.5<br>82.5                         | 3<br>3<br>3                | 2015.19<br>1609.90<br>1448.90                                  | -3.84<br>-1.32<br>-0.30                       | 0.55<br>0.10<br>0.02                         | PSME2_MOUSE<br>EWS_MOUSE<br>Q3UR26_MOUSE                                             | E0CZ90_MOUSE<br>Q5SU58_MOUSE<br>F7DBB3_MOUSE | Proteasome activator complex subunit 2;<br>RNA-binding protein EWS;                                                                                                                 | 11S regulator complex subunit beta;Activator of multicatalytic protease subunit 2;Proteasome activator 28 subunit beta;                                                                                                          | 0.00 - 0.15<br>0.15 - 0.25<br>0.25 - 0.75                                              |
| DQMAKLRSLF                                                                     | SSAENEPVPLVGNWRPPQPVKGR                                                                                                  | N-ter +28.03 Da, K +28.03 Da                                                                                                                                       | 33.4                                         | 95.0                                         | 4                          | 2666.68                                                        | 1.26                                          | 0.14                                         | CAH3_MOUSE                                                                           |                                              | Carbonic anhydrase 3;                                                                                                                                                               | Carbonate dehydratase III;Carbonic anhydrase III;                                                                                                                                                                                | 0.75 - 0.85                                                                            |
| RSPGASRAAM<br>VLQTRGFVSD                                                       | SSDAQWLTAER<br>SSDSMDTGAGSIR                                                                                             | N-ter +34.06 Da<br>N-ter +34.06 Da                                                                                                                                 | 43.8<br>47.2                                 | 32.8<br>51.7                                 | 2<br>2                     | 1425.74<br>1316.68                                             | -0.60<br>0.84                                 | 0.06<br>0.07                                 | PHS2_MOUSE<br>ATIF1_MOUSE                                                            | Q9D879_MOUSE                                 | Pterin-4-alpha-carbinolamine dehydratase 2;<br>ATPase inhibitor, mitochondrial;                                                                                                     | 4-alpha-hydroxy-tetrahydropterin dehydratase 2;DcoH-like protein DcoHm;Dimerization cofactor of hepatocyte nuclear factor 1 from muscle;HNF-1-alpha dimerization cofactor;<br>Inhibitor of F(1)(alpha)-ATPase;                   | 0.25 - 0.75<br>0.25 - 0.75                                                             |





| Non Prime Site                                      | Prime Site                                                                      | Modifications                                                                                                                             | Hyperscore                   | Mass error in ppm            | Charge           | Precursor neutral mass in Da             | Fold change (log <sub>2</sub> ) of ASAPRatio | FC-error of ASAPRatio        | Uniprot ID 1                                            | Uniprot ID 2                               | Protein Name 1                                                                                                            | Protein Name 2                                                                                                                                                                                                                                              | Quantile                                                 |
|-----------------------------------------------------|---------------------------------------------------------------------------------|-------------------------------------------------------------------------------------------------------------------------------------------|------------------------------|------------------------------|------------------|------------------------------------------|----------------------------------------------|------------------------------|---------------------------------------------------------|--------------------------------------------|---------------------------------------------------------------------------------------------------------------------------|-------------------------------------------------------------------------------------------------------------------------------------------------------------------------------------------------------------------------------------------------------------|----------------------------------------------------------|
| LQKRTGGVD<br>GSWEFFASGK                             | TAAVGAVFDSINADR<br>TAESGELHLGLTTDEKFEVGVYR                                      | N-ter +28.03 Da<br>N-ter +34.06 Da, K +34.06 Da                                                                                           | 44.7<br>36.9                 | 42.4<br>69.7                 | 3<br>4           | 1533.84<br>2505.48                       | -0.12<br>-0.32                               | 0.00<br>0.05                 | KCRM_MOUSE<br>TTHY_MOUSE                                |                                            | Creatine kinase M-type;<br>Transthyretin;                                                                                 | Creatine kinase M chain;M-CK;<br>Prealbumin;<br>V-ATPase 28 kDa accessory protein;Vacuolar proton pump subunit D;                                                                                                                                           | 0.25 - 0.75<br>0.25 - 0.75                               |
| AFLSLAEAKF<br>NEDLSEKIF<br>DTCKAAADKD               | TAGDFSTTVIQNVNKAQVKIR<br>TASNVSVPPLAENVITTAGQR<br>TCFSTEGPNLVTR                 | N-ter +28.03 Da, K +28.03 Da<br>N-ter +28.03 Da<br>N-ter +28.03 Da, C +57.02 Da<br>N-ter +34.06 Da, K +34.06 Da, C +57.02 Da              | 30.8<br>46.5<br>42.3         | 78.1<br>57.5<br>36.7         | 4<br>3<br>2      | 2373.52<br>2239.31<br>1508.79            | -0.17<br>0.60<br>1.15                        | 0.01<br>0.06<br>0.11         | VATD_MOUSE<br>UBP2L_MOUSE<br>ALBU_MOUSE                 | E9Q0D9_MOUSE<br>E9Q3Q3_MOUSE               | V-type proton ATPase subunit D;<br>Ubiquitin-associated protein 2-like;<br>Serum albumin;                                 |                                                                                                                                                                                                                                                             | 0.25 - 0.75<br>0.25 - 0.75<br>0.75 - 0.85                |
| MVHL                                                | TDAEKAASVSLWGKVSDEVGGALGR                                                       | N-ter +34.06 Da, K +34.06 Da, C +57.02 Da                                                                                                 | 43.8                         | 74.9                         | 4                | 2920.76                                  | 0.24                                         | 0.03                         | HBB1_MOUSE                                              |                                            | Hemoglobin subunit beta-1;                                                                                                | Beta-1-globin;Hemoglobin beta-1 chain;Hemoglobin beta-major chain;                                                                                                                                                                                          | 0.25 - 0.75                                              |
| MVHL                                                | TDAEKASVSLWAKVNPDEVGGALGR                                                       | N-ter +34.06 Da, K +34.06 Da, C +57.02 Da                                                                                                 | 46.4                         | 104.5                        | 4                | 2960.89                                  | -5.06                                        | 0.00                         | HBB2_MOUSE                                              |                                            | Hemoglobin subunit beta-2;<br>WD repeat domain phosphoinositide-interacting protein 2;                                    | Beta-2-globin;Hemoglobin beta-2 chain;Hemoglobin beta-minor chain;                                                                                                                                                                                          | 0.00 - 0.15                                              |
| TYGTAALKAY                                          | TDDLGAVGAGCLEDEASALR                                                            | N-ter +28.03 Da, C +57.02 Da                                                                                                              | 61.3                         | 74.7                         | 3                | 2047.11                                  | -0.97                                        | 0.08                         | WIPI2_MOUSE                                             | D3YWK1_MOUSE                               |                                                                                                                           |                                                                                                                                                                                                                                                             | 0.15 - 0.25                                              |
| RELPSFLGER                                          | TDEAAFQKVMNSLDSNR                                                               | N-ter +28.03 Da, K +28.03 Da                                                                                                              | 26.3                         | 80.0                         | 3                | 1981.12                                  | 1.20                                         | 0.18                         | S10A4_MOUSE                                             | D3YU9_MOUSE                                | Protein S100-A4;                                                                                                          | Metastasin;Metastatic cell protein;PEL98;Placental calcium-binding protein;Protein 18A2;Protein Mts1;S100 calcium-binding protein A4;                                                                                                                       | 0.75 - 0.85                                              |
| VLKAMKGLG<br>AESGELHGLT                             | TDDESIINLLTSR<br>TDEKFEVGVYR                                                    | N-ter +34.06 Da<br>N-ter +28.03 Da, K +28.03 Da                                                                                           | 34.1<br>21.6                 | 55.6<br>96.1                 | 3<br>3           | 1509.89<br>1397.85                       | -0.18<br>1.12                                | 0.03<br>0.05                 | ANXA5_MOUSE<br>TTHY_MOUSE                               |                                            | Annexin A5;<br>Transthyretin;                                                                                             | Anchorin CII;Annexin V;Annexin-5;Calphobindin I;Endonexin II;Lipocortin V;Placental anticoagulant protein 4;Placental anticoagulant protein I;Thromboplastin inhibitor;Vascular anticoagulant-alpha;                                                        | 0.25 - 0.75<br>0.75 - 0.85                               |
| INRVKEMKY<br>GGYKPTDKHK<br>SRRSTQGVTL               | TDEKDIISDTSQDFR<br>TDLNHNELKGGDDLPNVLSLR<br>TDLQEAETIGR                         | N-ter +34.06 Da, K +34.06 Da<br>N-ter +28.03 Da, K +28.03 Da<br>N-ter +34.06 Da, K +34.06 Da<br>N-ter +34.06 Da, K +34.06 Da, C +57.02 Da | 26.3<br>38.2<br>25.8         | 62.0<br>75.4<br>68.1         | 3<br>4<br>3      | 1879.10<br>2627.48<br>1427.92            | -0.79<br>0.51<br>1.05                        | 0.11<br>0.08<br>0.12         | ANXA2_MOUSE<br>KCRM_MOUSE<br>MYPT1_MOUSE                | BOV2N7_MOUSE                               | Annexin A2;<br>Creatine kinase M-type;<br>Protein phosphatase 1 regulatory subunit 12A;                                   |                                                                                                                                                                                                                                                             | 0.15 - 0.25<br>0.25 - 0.75<br>0.75 - 0.85                |
| AHVDHGKSTL<br>ILSVASTVMT<br>PRHEVTEISN<br>LRQIKNEVQ | TDSLVCAGIASAR<br>TDTEDEKGFLEGGVGR<br>TDVETQPKTVIR<br>TDVSDTKHQTLQGVAFPISR       | N-ter +34.06 Da, K +34.06 Da<br>N-ter +28.03 Da, K +28.03 Da<br>N-ter +28.03 Da, K +28.03 Da<br>N-ter +28.03 Da, K +28.03 Da              | 29.1<br>33.5<br>21.7<br>41.1 | 64.8<br>94.3<br>89.9<br>48.8 | 3<br>3<br>3<br>4 | 1629.06<br>1864.13<br>1498.97<br>2354.37 | 1.10<br>-2.40<br>0.42<br>-1.47               | 0.06<br>0.63<br>0.08<br>0.16 | EF2_MOUSE<br>Q99K47_MOUSE<br>E9Q616_MOUSE<br>TWF1_MOUSE | E9PV24_MOUSE                               | Elongation factor 2;<br><br>Twinfilin-1;                                                                                  |                                                                                                                                                                                                                                                             | 0.75 - 0.85<br>0.00 - 0.15<br>0.25 - 0.75<br>0.15 - 0.25 |
| WLLCALGLQA                                          | TEALPSAPALPGGAACLSR                                                             | N-ter +34.06 Da, C +57.02 Da                                                                                                              | 42.2                         | 63.8                         | 3                | 2130.22                                  | 1.59                                         | 0.20                         | SPIT1_MOUSE                                             |                                            | Kunitz-type protease inhibitor 1;<br>cAMP-dependent protein kinase type I-alpha regulatory subunit;                       | Hepatocyte growth factor activator inhibitor type 1;                                                                                                                                                                                                        | 0.85 - 1.00                                              |
| RRGASIAEYV<br>KDWSPYLAH<br>AGNWNWAGHY               | TEEDAASYVR<br>TEFTPTETDYACR<br>TEGAELVDSLVGVYR                                  | N-ter +34.06 Da<br>N-ter +28.03 Da, C +57.02 Da<br>N-ter +28.03 Da                                                                        | 29.8<br>26.9<br>51.8         | 56.7<br>49.2<br>67.3         | 2<br>3<br>3      | 1173.64<br>1718.83<br>1628.97            | 0.00<br>2.61<br>0.20                         | 0.00<br>0.21<br>0.04         | KAP0_MOUSE<br>B2MG_MOUSE<br>TBB2A_MOUSE                 | A2A169_MOUSE<br>Q91X8_MOUSE<br>TBB2B_MOUSE | Beta-2-microglobulin;<br>Tubulin beta-2A chain;                                                                           |                                                                                                                                                                                                                                                             | 0.25 - 0.75<br>0.85 - 1.00<br>0.25 - 0.75                |
| VTEEAASAAQ                                          | TEGPSTPSSFPAQEHR                                                                | N-ter +34.06 Da                                                                                                                           | 29.9                         | 101.9                        | 3                | 1890.09                                  | -2.06                                        | 0.43                         | AKA12_MOUSE                                             |                                            | A-kinase anchor protein 12;                                                                                               | Germ cell lineage protein gercelin;Src-suppressed C kinase substrate;                                                                                                                                                                                       | 0.00 - 0.15                                              |
| KLEERHTLI                                           | TEMVVALNPDFKPPADYKPPATR                                                         | N-ter +34.06 Da, K +34.06 Da                                                                                                              | 39.0                         | 73.1                         | 4                | 2559.61                                  | 0.40                                         | 0.06                         | SFO1_MOUSE                                              | Q3U45_MOUSE                                | Splicing factor 1;                                                                                                        | CW17;Mammalian branch point-binding protein;Transcription factor ZFM1;Zinc finger gene in MEN1 locus;Zinc finger protein 162;                                                                                                                               | 0.25 - 0.75                                              |
| KKRLETYNA<br>ETGAGISETV<br>ESVRSPPSSR<br>TLNAANVPAG | TEPVISFYDKR<br>TETTIVTETTIVTETPENQSLIMKLR<br>TEVLVTPAGVASKR<br>TEVVCAPPTAYIDFAR | N-ter +28.03 Da, K +28.03 Da<br>N-ter +28.03 Da, K +28.03 Da<br>N-ter +34.06 Da, K +34.06 Da<br>N-ter +28.03 Da, C +57.02 Da              | 26.7<br>41.2<br>52.7<br>45.1 | 55.7<br>95.4<br>55.7<br>56.9 | 3<br>4<br>3<br>3 | 1409.83<br>3007.81<br>1495.02<br>1837.01 | 0.68<br>0.28<br>1.73<br>1.04                 | 0.06<br>0.03<br>0.18<br>0.09 | KAD1_MOUSE<br>PP1RB_MOUSE<br>LAD1_MOUSE<br>TPIS_MOUSE   |                                            | Adenylate kinase isoenzyme 1;<br>Protein phosphatase 1 regulatory subunit 11;<br>Ladinin-1;<br>Triosephosphate isomerase; | ATP-AMP transphosphorylase 1;Myokinase;<br>T-complex testis expressed protein 5;<br>Linear IgA disease antigen homolog;<br>Triose-phosphate isomerase;                                                                                                      | 0.25 - 0.75<br>0.25 - 0.75<br>0.85 - 1.00<br>0.75 - 0.85 |
| SFRILAQMTG<br>SFRILAQMTG                            | TEYMQDPEDEALRR<br>TEYMQDPEDEALR                                                 | N-ter +28.03 Da<br>N-ter +34.06 Da                                                                                                        | 27.2<br>37.5                 | 75.6<br>85.6                 | 3<br>3           | 1779.94<br>1629.88                       | -0.01<br>-0.52                               | 0.00<br>0.07                 | LDB3_MOUSE<br>E9PYJ9_MOUSE                              | E9PYJ9_MOUSE<br>LDB3_MOUSE                 | LIM domain-binding protein 3;                                                                                             | Protein cypher;Protein oracle;Z-band alternatively spliced PDZ-motif protein;                                                                                                                                                                               | 0.25 - 0.75<br>0.25 - 0.75                               |
| IAPSNQVIML                                          | TFGKDFVEPTYCR                                                                   | N-ter +28.03 Da, K +28.03 Da, C +57.02 Da                                                                                                 | 41.2                         | 64.5                         | 3                | 1789.95                                  | -0.62                                        | 0.06                         | PCOC1_MOUSE                                             | D3YE3_MOUSE                                | Procollagen C-endopeptidase enhancer 1;                                                                                   | P14;Procollagen COOH-terminal proteinase enhancer 1;Type 1 procollagen C-proteinase enhancer protein;Type I procollagen COOH-terminal proteinase enhancer;<br>Metastasis inhibition factor NM23;NDPK-A;Tumor metastatic process-associated protein;nm23-M1; | 0.25 - 0.75                                              |
| MANSER<br>VTTLDIVRAN                                | TFIAIKPDGVQR<br>TFVAELKGLDPR                                                    | N-ter +28.03 Da, K +28.03 Da<br>N-ter +34.06 Da, K +34.06 Da<br>N-ter +28.03 Da, K +28.03 Da, C +57.02 Da                                 | 28.0<br>26.2                 | 74.7<br>87.7                 | 3<br>3           | 1399.92<br>1484.03                       | 0.52<br>-0.23                                | 0.05<br>0.01                 | NDKA_MOUSE<br>MDHM_MOUSE                                | NDKB_MOUSE                                 | Nucleoside diphosphate kinase A;<br>Malate dehydrogenase, mitochondrial;                                                  |                                                                                                                                                                                                                                                             | 0.25 - 0.75<br>0.25 - 0.75                               |
| FKEAFLFDR<br>LTRLRLQKRG                             | TGECKITLSQVGDVLR<br>TGGVDVTAAGVAFDINADR                                         | N-ter +34.06 Da<br>N-ter +34.06 Da                                                                                                        | 41.7<br>58.9                 | 66.8<br>56.8                 | 3<br>3           | 1831.11<br>1969.11                       | 0.55<br>0.62                                 | 0.03<br>0.04                 | MYL1_MOUSE<br>KCRM_MOUSE                                | E9PWG4_MOUSE                               | Myosin light chain 1/3, skeletal muscle isoform;<br>Creatine kinase M-type;                                               | Myosin light chain alkali 1/2;<br>Creatine kinase M chain;M-CK;                                                                                                                                                                                             | 0.25 - 0.75<br>0.25 - 0.75                               |
| KVCYAKNGFP                                          | TGIGFGLTQVQVEKK                                                                 | N-ter +28.03 Da, K +28.03 Da                                                                                                              | 25.6                         | 65.9                         | 3                | 1775.10                                  | -0.22                                        | 0.02                         | CSR3_MOUSE                                              |                                            | Cysteine and glycine-rich protein 3;                                                                                      | Cysteine-rich protein 3;LIM domain protein, cardiac;Muscle LIM protein;                                                                                                                                                                                     | 0.25 - 0.75                                              |
| FRAAVPSGAS<br>PAGKNGDRGE<br>HTVEKGGKHK              | TGIYEALER<br>TGPAGPAGPIGPAR<br>TGPNLHGLFGR                                      | N-ter +28.03 Da<br>N-ter +28.03 Da<br>N-ter +34.06 Da                                                                                     | 42.4<br>40.0<br>30.8         | 32.1<br>48.8<br>57.2         | 2<br>2<br>3      | 1191.69<br>1373.81<br>1201.75            | 0.04<br>1.35<br>0.25                         | 0.00<br>0.10<br>0.02         | ENOA_MOUSE<br>CO1A1_MOUSE<br>CYC_MOUSE                  | ENOB_MOUSE<br>F8WGB7_MOUSE                 | Alpha-enolase;<br>Collagen alpha-1(I) chain;<br>Cytochrome c, somatic;                                                    | 1;Non-neural enolase;<br>Alpha-1 type I collagen;                                                                                                                                                                                                           | 0.25 - 0.75<br>0.75 - 0.85<br>0.25 - 0.75                |

| Non Prime Site | Prime Site            | Modifications                             | Hyperscore | Mass error in ppm | Charge | Precursor neutral mass in Da | Fold change (log <sub>2</sub> ) of ASAPRatio | FC-error of ASAPRatio | Uniprot ID 1 | Uniprot ID 2 | Protein Name 1                                        | Protein Name 2                                                                                                                                      | Quantile    |
|----------------|-----------------------|-------------------------------------------|------------|-------------------|--------|------------------------------|----------------------------------------------|-----------------------|--------------|--------------|-------------------------------------------------------|-----------------------------------------------------------------------------------------------------------------------------------------------------|-------------|
| LHASNRLQK      | TGTAEMSSILEER         | N-ter +28.03 Da                           | 45.2       | 27.9              | 2      | 1450.74                      | 1.53                                         | 0.09                  | ATPA_MOUSE   | D6R16_MOUSE  | ATP synthase subunit alpha, mitochondrial;            |                                                                                                                                                     | 0.85 - 1.00 |
| VHKAVLDVAE     | TGTEAAAATGVIGIR       | N-ter +34.06 Da                           | 48.1       | 37.5              | 3      | 1477.89                      | 0.89                                         | 0.05                  | SPA3K_MOUSE  |              | Serine protease inhibitor A3K;                        | Contrapsin;SPI-2;                                                                                                                                   | 0.75 - 0.85 |
| IKTKGKEAFP     | THFDPSCLFPACR         | N-ter +28.03 Da, C +57.02 Da              | 36.8       | 79.5              | 3      | 1634.86                      | -0.22                                        | 0.01                  | CAH3_MOUSE   |              | Carbonic anhydrase 3;                                 | Carbonate dehydratase III;Carbonic anhydrase III;                                                                                                   | 0.25 - 0.75 |
| GGDVAFVKHT     | TIFEVLPEKADR          | N-ter +28.03 Da, K +28.03 Da              | 37.9       | 68.7              | 3      | 1472.93                      | 0.66                                         | 0.05                  | TRFE_MOUSE   | D3YR8_MOUSE  | Serotransferrin;                                      | Beta-1 metal-binding globulin;Siderophilin;                                                                                                         | 0.25 - 0.75 |
| M              | TIGSMENVEFTSEKGR      | N-ter +34.06 Da, K +34.06 Da              | 51.1       | 61.4              | 3      | 2008.18                      | -1.52                                        | 0.13                  | SMYD1_MOUSE  |              | SET and MYND domain-containing protein 1;             | CD8b-opposite;Zinc finger protein BOP;                                                                                                              | 0.00 - 0.15 |
| EQLVDEGLVK     | TIGVSNFNLQIER         | N-ter +34.06 Da                           | 22.9       | 62.3              | 3      | 1621.01                      | -1.22                                        | 0.14                  | ALDR_MOUSE   |              | Aldose reductase;                                     | Aldehyde reductase;                                                                                                                                 | 0.15 - 0.25 |
| LSQSPQGRVM     | TIPYQMPASSVICAGGQDR   | N-ter +28.03 Da, C +57.02 Da              | 51.7       | 61.8              | 3      | 2272.24                      | 1.34                                         | 0.11                  | PCBP1_MOUSE  |              | Poly(rC)-binding protein 1;                           | Alpha-CP1;Heterogeneous nuclear ribonucleoprotein E1;                                                                                               | 0.75 - 0.85 |
| LDAYSIQGH      | TISPLDLAKLNQVAR       | N-ter +28.03 Da, K +28.03 Da              | 24.5       | 57.6              | 3      | 1694.11                      | 0.14                                         | 0.01                  | PCBP1_MOUSE  |              | Poly(rC)-binding protein 1;                           | Alpha-CP1;Heterogeneous nuclear ribonucleoprotein E1;                                                                                               | 0.25 - 0.75 |
| DALNIETAVK     | TKGVDEVTIVNLTNR       | N-ter +34.06 Da, K +34.06 Da              | 48.7       | 82.6              | 3      | 1839.26                      | -0.20                                        | 0.01                  | ANXA2_MOUSE  | B0V2N7_MOUSE | Annexin A2;                                           | Annexin II;Annexin-2;Calpactin I heavy chain;Calpactin-1 heavy chain;Chromobindin-8;Lipocortin II;Placental anticoagulant protein IV;Protein I;p36; | 0.25 - 0.75 |
| KPRESEKVKI     | TKVDFDFAGEEVR         | N-ter +28.03 Da, K +28.03 Da              | 38.5       | 27.8              | 3      | 1452.80                      | 0.77                                         | 0.02                  | CFDP1_MOUSE  |              | Craniofacial development protein 1;                   | 27 kDa craniofacial protein;Buccantaur;Protein Cp27;                                                                                                | 0.25 - 0.75 |
| NLDPLNLLGR     | TLEIPGSSDPNIVPDGFSSLR | N-ter +28.03 Da                           | 29.2       | 68.4              | 3      | 2442.40                      | -0.17                                        | 0.04                  | CO4B_MOUSE   |              | Complement C4-B;                                      |                                                                                                                                                     | 0.25 - 0.75 |
| ELLSQFLLH      | TLEQXNIAVENEVR        | N-ter +34.06 Da, K +34.06 Da              | 29.1       | 101.4             | 3      | 1710.17                      | -0.69                                        | 0.09                  | ASHWN_MOUSE  |              | Ashwin;                                               |                                                                                                                                                     | 0.25 - 0.75 |
| SAANCKSLH      | TFLGDKLCAIPNLR        | N-ter +28.03 Da, K +28.03 Da, C +57.02 Da | 22.8       | 38.8              | 3      | 1673.00                      | 0.54                                         | 0.04                  | ALBU_MOUSE   |              | Serum albumin;                                        |                                                                                                                                                     | 0.25 - 0.75 |
| SLPSTAVTSE     | TLPGLSPPVEKYR         | N-ter +28.03 Da, K +28.03 Da              | 27.4       | 80.3              | 3      | 1599.03                      | 2.33                                         | 0.13                  | DLG1_MOUSE   | E9Q9H_MOUSE  | Disks large homolog 1;                                | Embryo-dlg/synapse-associated protein 97;Synapse-associated protein 97;                                                                             | 0.85 - 1.00 |
| NPWEKARPEF     | TLPVHFYGR             | N-ter +34.06 Da                           | 29.0       | 45.3              | 3      | 1122.69                      | -1.69                                        | 0.16                  | PYGM_MOUSE   | E9PUM3_MOUSE | Glycogen phosphorylase, muscle form;                  | Myophosphorylase;                                                                                                                                   | 0.00 - 0.15 |
| WDGLDPGKLY     | TLVLTPDAPSR           | N-ter +28.03 Da                           | 49.9       | 38.7              | 2      | 1311.75                      | 0.99                                         | 0.05                  | PEBP1_MOUSE  | D3ZLV4_MOUSE | Phosphatidylethanolamine-binding protein 1;           | HCNPPP;                                                                                                                                             | 0.75 - 0.85 |
| CNAHYPKGSF     | TMVADTPENLR           | N-ter +34.06 Da                           | 37.1       | 47.4              | 2      | 1279.73                      | 0.14                                         | 0.02                  | LASP1_MOUSE  | A2A6G_MOUSE  | LIM and SH3 domain protein 1;                         | Metastatic lymph node gene 50 protein;                                                                                                              | 0.25 - 0.75 |
| VDKGVVPLAG     | TNGETTTGLDGLSER       | N-ter +28.03 Da                           | 40.4       | 66.1              | 3      | 1705.92                      | 0.03                                         | 0.01                  | ALDOA_MOUSE  | Q9CPQ_MOUSE  | Fructose-bisphosphate aldolase A;                     | Aldolase 1;Muscle-type aldolase;                                                                                                                    | 0.25 - 0.75 |
| DQSPASHEIA     | TNLGDFALSYR           | N-ter +28.03 Da                           | 52.4       | 44.8              | 2      | 1396.80                      | 0.68                                         | 0.11                  | A1AT2_MOUSE  | A1AT1_MOUSE  | Alpha-1-antitrypsin 1-2;                              | Alpha-1-protease inhibitor 2;Alpha-1-antiprotease;Serine protease inhibitor 1-2;Serine protease inhibitor A1b;                                      | 0.25 - 0.75 |
| EDPNQVPLN      | TNPTVELEKR            | N-ter +34.06 Da, K +34.06 Da              | 32.7       | 26.8              | 3      | 1253.80                      | -0.40                                        | 0.02                  | ADDG_MOUSE   |              | Gamma-adducin;                                        | Adducin-like protein 70;                                                                                                                            | 0.25 - 0.75 |
| MALLISLPGE     | TPAMAQILLLSACLHAGNSAR | N-ter +34.06 Da, C +57.02 Da              | 24.9       | 66.1              | 4      | 2428.48                      | -5.64                                        | 0.00                  | PILR2_MOUSE  | F8WHI2_MOUSE | Paired immunoglobulin-like type 2 receptor beta-2;    | Activating receptor PILR-beta-2;                                                                                                                    | 0.00 - 0.15 |
| SRLTYDIAH      | TPGVAADLSHIETR        | N-ter +28.03 Da                           | 39.8       | 45.6              | 3      | 1493.85                      | 0.49                                         | 0.02                  | MDHM_MOUSE   |              | Malate dehydrogenase, mitochondrial;                  |                                                                                                                                                     | 0.25 - 0.75 |
| WRCLKIGEH      | TPSALAIEMANVLAR       | N-ter +28.03 Da                           | 39.1       | 57.2              | 3      | 1698.01                      | 0.43                                         | 0.08                  | ALDOA_MOUSE  | A6Z44_MOUSE  | Fructose-bisphosphate aldolase A;                     | Aldolase 1;Muscle-type aldolase;                                                                                                                    | 0.25 - 0.75 |
| GLPGSMGPPG     | TPSVDHGFLVTR          | N-ter +28.03 Da                           | 26.9       | 73.8              | 3      | 1355.82                      | 2.04                                         | 0.04                  | CO4A1_MOUSE  |              | Collagen alpha-1(IV) chain;                           |                                                                                                                                                     | 0.85 - 1.00 |
| MVKIVTVK       | TQAYPDQKPGTSGLR       | N-ter +34.06 Da, K +34.06 Da              | 26.6       | 86.3              | 3      | 1686.08                      | -1.89                                        | 0.21                  | PGM1_MOUSE   |              | Phosphoglucomutase-1;                                 | Glucose phosphomutase 1;                                                                                                                            | 0.00 - 0.15 |
| GFQNALVRY      | TQKAPQVSTPLVEAAR      | N-ter +34.06 Da, K +34.06 Da              | 39.0       | 53.2              | 3      | 1864.21                      | 0.29                                         | 0.02                  | ALBU_MOUSE   |              | Serum albumin;                                        |                                                                                                                                                     | 0.25 - 0.75 |
| PNMVTTPGHAC    | TQKFSNEEIAMATVTR      | N-ter +34.06 Da, K +34.06 Da              | 39.5       | 56.0              | 3      | 2077.27                      | 0.33                                         | 0.05                  | ALDOA_MOUSE  | Q9CPQ_MOUSE  | Fructose-bisphosphate aldolase A;                     | Aldolase 1;Muscle-type aldolase;                                                                                                                    | 0.25 - 0.75 |
| LNVDPGARAR     | TQLSQLSTR             | N-ter +28.03 Da                           | 34.6       | 58.1              | 2      | 1060.65                      | 0.11                                         | 0.00                  | KLC3_MOUSE   |              | Kinesin light chain 3;                                |                                                                                                                                                     | 0.25 - 0.75 |
| DEESKPASSN     | TQVEGDEEAALLER        | N-ter +28.03 Da                           | 64.0       | 26.8              | 2      | 1586.82                      | 1.71                                         | 0.14                  | Q8VCQ8_MOUSE | E9Q0M9_MOUSE |                                                       |                                                                                                                                                     | 0.85 - 1.00 |
| TVCQCTCYQR     | TSCISTPAQVTCNR        | N-ter +28.03 Da, C +57.02 Da              | 36.8       | 67.5              | 3      | 1621.87                      | 6.07                                         | 0.37                  | E9Q2E9_MOUSE |              |                                                       |                                                                                                                                                     | 0.85 - 1.00 |
| M              | TSDDQAKVVAEPOAQR      | N-ter +28.03 Da, K +28.03 Da              | 29.3       | 92.0              | 3      | 1798.09                      | -0.25                                        | 0.04                  | LAR4B_MOUSE  |              | La-related protein 4B;                                | La ribonucleoprotein domain family member 4B;La ribonucleoprotein domain family member 5;La-related protein 5;                                      | 0.25 - 0.75 |
| AATTTATTTT     | TSGGHPLEFLR           | N-ter +28.03 Da                           | 17.8       | 68.3              | 3      | 1240.74                      | 0.01                                         | 0.00                  | RD23B_MOUSE  | Q3TJ52_MOUSE | UV excision repair protein RAD23 homolog B;           | XP-C repair-complementing complex 58 kDa protein;                                                                                                   | 0.25 - 0.75 |
| LIIGDRQTGK     | TSIADTIINQKR          | N-ter +34.06 Da, K +34.06 Da              | 26.4       | 51.5              | 3      | 1540.04                      | 0.65                                         | 0.05                  | ATPA_MOUSE   | D3Z6F5_MOUSE | ATP synthase subunit alpha, mitochondrial;            |                                                                                                                                                     | 0.25 - 0.75 |
| VGLTSLRAVS     | TSSMGLPKQVKIVEVGR     | N-ter +28.03 Da, K +28.03 Da              | 24.1       | 87.7              | 4      | 2110.40                      | -0.15                                        | 0.02                  | HMGCL_MOUSE  |              | Hydroxymethylglutaryl-CoA lyase, mitochondrial;       | 3-hydroxy-3-methylgluturate-CoA lyase;                                                                                                              | 0.25 - 0.75 |
| LEAWYRHGRT     | TSSYSALSEPSR          | N-ter +28.03 Da                           | 43.6       | 54.9              | 2      | 1311.70                      | -0.25                                        | 0.03                  | MCCR_MOUSE   | A2A845_MOUSE | Trans-2-enoyl-CoA reductase, mitochondrial;           |                                                                                                                                                     | 0.25 - 0.75 |
| RTVHTRVCL      | TTFNVDQGFDFQDR        | N-ter +28.03 Da                           | 37.6       | 37.5              | 3      | 1666.82                      | 0.99                                         | 0.03                  | THIOM_MOUSE  | Q3TUS3_MOUSE | Thioredoxin, mitochondrial;                           | Thioredoxin-2;                                                                                                                                      | 0.75 - 0.85 |
| FKLPKARKTG     | TTIAGVVYKDGIVLGADTR   | N-ter +34.06 Da, K +34.06 Da              | 32.4       | 70.5              | 3      | 2016.33                      | 0.64                                         | 0.03                  | PSB7_MOUSE   |              | Proteasome subunit beta type-7;                       | Macropain chain Z;Multicatalytic endopeptidase complex chain Z;Proteasome subunit Z;                                                                | 0.25 - 0.75 |
| GGDVAFVKH      | TTIFEVLPEKADR         | N-ter +28.03 Da, K +28.03 Da              | 45.2       | 67.3              | 3      | 1573.98                      | 1.07                                         | 0.17                  | TRFE_MOUSE   | D3YR8_MOUSE  | Serotransferrin;                                      | Beta-1 metal-binding globulin;Siderophilin;                                                                                                         | 0.75 - 0.85 |
| AQAVTAYIK      | TTLESTPESASR          | N-ter +28.03 Da                           | 38.9       | 46.9              | 2      | 1376.74                      | -0.12                                        | 0.01                  | PPR3A_MOUSE  |              | Protein phosphatase 1 regulatory subunit 3A;          | Protein phosphatase 1 glycogen-associated regulatory subunit;Protein phosphatase type-1 glycogen targeting subunit;                                 | 0.25 - 0.75 |
| VPLAGNGET      | TTQGLDGLSER           | N-ter +34.06 Da                           | 27.1       | 55.4              | 2      | 1209.71                      | 0.16                                         | 0.01                  | ALDOA_MOUSE  | Q9CPQ_MOUSE  | Fructose-bisphosphate aldolase A;                     | Aldolase 1;Muscle-type aldolase;                                                                                                                    | 0.25 - 0.75 |
| AAATTTATTT     | TTSGGHPLEFLR          | N-ter +28.03 Da                           | 29.5       | 74.1              | 3      | 1341.80                      | 0.06                                         | 0.00                  | RD23B_MOUSE  | Q3TJ52_MOUSE | UV excision repair protein RAD23 homolog B;           |                                                                                                                                                     | 0.25 - 0.75 |
| VVPLAGNNGE     | TTTQGLDGLSER          | N-ter +34.06 Da                           | 41.0       | 46.2              | 2      | 1310.75                      | 0.20                                         | 0.01                  | ALDOA_MOUSE  | Q9CPQ_MOUSE  | Fructose-bisphosphate aldolase A;                     | Aldolase 1;Muscle-type aldolase;                                                                                                                    | 0.25 - 0.75 |
| QRPLRLQKPR     | TVATPLNQVANPNSAIFGGAR | N-ter +34.06 Da                           | 52.0       | 49.9              | 3      | 2131.27                      | 0.74                                         | 0.05                  | IF4H_MOUSE   | Q80U88_MOUSE | Eukaryotic translation initiation factor 4H;          | 1 protein homolog;                                                                                                                                  | 0.25 - 0.75 |
| EKAKREVCSW     | TVEGDVNTDPWAGYR       | N-ter +28.03 Da                           | 39.1       | 49.9              | 3      | 1706.88                      | 0.29                                         | 0.04                  | AMPM1_MOUSE  |              | Methionine aminopeptidase 1;                          | Peptidase M 1;                                                                                                                                      | 0.25 - 0.75 |
| LRGENLVSM      | TVEGPPPKDGTGIAR       | N-ter +28.03 Da, K +28.03 Da              | 26.9       | 113.6             | 3      | 1492.99                      | 2.75                                         | 0.62                  | RSMB_MOUSE   | RSMN_MOUSE   | Small nuclear ribonucleoprotein-associated protein B; | Sm protein B;                                                                                                                                       | 0.85 - 1.00 |
| GCVAGDEESY     | TVFKDLDFPIQDR         | N-ter +28.03 Da, K +28.03 Da              | 48.3       | 36.7              | 3      | 1762.03                      | -0.17                                        | 0.04                  | KCRM_MOUSE   |              | Creatine kinase M-type;                               | Creatine kinase M chain;M-CK;                                                                                                                       | 0.25 - 0.75 |

| Non Prime Site                                                                 | Prime Site                                                                                                                          | Modifications                                                                                                                                                                   | Hyperscore                                   | Mass error in ppm                            | Charge                     | Precursor neutral mass in Da                                   | Fold change (log <sub>2</sub> ) of ASAPRatio      | FC-error of ASAPRatio                        | Uniprot ID 1                                                                         | Uniprot ID 2                 | Protein Name 1                                                                                                                                                          | Protein Name 2                                                                                                                                                                                                                  | Quantile                                                                               |
|--------------------------------------------------------------------------------|-------------------------------------------------------------------------------------------------------------------------------------|---------------------------------------------------------------------------------------------------------------------------------------------------------------------------------|----------------------------------------------|----------------------------------------------|----------------------------|----------------------------------------------------------------|---------------------------------------------------|----------------------------------------------|--------------------------------------------------------------------------------------|------------------------------|-------------------------------------------------------------------------------------------------------------------------------------------------------------------------|---------------------------------------------------------------------------------------------------------------------------------------------------------------------------------------------------------------------------------|----------------------------------------------------------------------------------------|
| QNADCPKNSG                                                                     | TVGAVALDCR                                                                                                                          | N-ter +34.06 Da, C +57.02 Da<br>N-ter +28.03 Da, K +28.03 Da, C +57.02 Da                                                                                                       | 36.8                                         | 54.3                                         | 2                          | 1094.66                                                        | -2.06                                             | 0.17                                         | ASGL1_MOUSE                                                                          |                              | L-asparaginase;                                                                                                                                                         | Asparaginase-like protein 1;L-asparagine amidohydroxylase;                                                                                                                                                                      | 0.00 - 0.15                                                                            |
| VDNPGHPFIM<br>M                                                                | TVGCVAGDEESYTVFKDLFDPIIQDR<br>TVHNLVLFDR                                                                                            | N-ter +34.06 Da                                                                                                                                                                 | 57.3<br>33.3                                 | 91.5<br>57.3                                 | 4<br>3                     | 3029.75<br>1310.80                                             | -3.32<br>-0.84                                    | 0.33<br>0.08                                 | KCRM_MOUSE<br>TPPC1_MOUSE                                                            | B1ASW5_MOUSE                 | Creatine kinase M-type;<br>Trafficking protein particle complex subunit 1;                                                                                              | Creatine kinase M chain;M-CK;                                                                                                                                                                                                   | 0.00 - 0.15<br>0.15 - 0.25                                                             |
| KDVVVYIFG                                                                      | TVIQEVKTSNVAR                                                                                                                       | N-ter +34.06 Da, K +34.06 Da                                                                                                                                                    | 30.3                                         | 93.9                                         | 3                          | 1512.07                                                        | 0.56                                              | 0.06                                         | ECHB_MOUSE                                                                           | D3YXU1_MOUSE                 | Trifunctional enzyme subunit beta, mitochondrial;                                                                                                                       | TP-beta;                                                                                                                                                                                                                        | 0.25 - 0.75                                                                            |
| GNNITVKTES<br>TSLPFLLEIL<br>VDIRKDLVAN<br>VVQVPSAYQK<br>ASLPPDPPL              | TVKTVFVSCNLGKFDETTADGR<br>TVLPPEVHSR<br>TVLSGGTTMYPGIADR<br>TVPIEAVTSKSNIR<br>TVPQTHNAR                                             | N-ter +28.03 Da, K +28.03 Da, C +57.02 Da<br>N-ter +34.06 Da<br>N-ter +34.06 Da<br>N-ter +28.03 Da, K +28.03 Da<br>N-ter +34.06 Da                                              | 47.0<br>30.7<br>40.1<br>24.2<br>11.3         | 75.9<br>69.6<br>74.7<br>51.0<br>22.4         | 4<br>3<br>3<br>3<br>2      | 2659.52<br>1199.76<br>1671.94<br>1671.04<br>1056.61            | 1.65<br>-0.64<br>0.07<br>0.90<br>-1.12            | 0.23<br>0.03<br>0.01<br>0.03<br>0.02         | FABP5_MOUSE<br>TNPO3_MOUSE<br>ACTB_MOUSE<br>SRCB_MOUSE<br>Q9QU1_MOUSE                | E9Q964_MOUSE                 | Fatty acid-binding protein, epidermal;<br>Transportin-3;<br>Actin, cytoplasmic 1;<br>Src substrate cortactin;                                                           | Fatty acid-binding protein;Fatty acid-binding protein 5;Keratinocyte lipid-binding protein;Psoriasis-associated fatty acid-binding protein homolog;                                                                             | 0.85 - 1.00<br>0.25 - 0.75<br>0.25 - 0.75<br>0.75 - 0.85<br>0.15 - 0.25                |
| RQRPEPQVQG<br>YSFPVKIKK<br>SPGMKDLGA                                           | TVSLHLGVTSPVLR<br>TWKVFELGINDFSR<br>TWWVLGHSER                                                                                      | N-ter +34.06 Da<br>N-ter +28.03 Da, K +28.03 Da<br>N-ter +34.06 Da                                                                                                              | 33.7<br>32.2<br>30.0                         | 70.4<br>90.6<br>58.0                         | 3<br>3<br>3                | 1512.03<br>1864.16<br>1216.75                                  | -0.45<br>0.82<br>-0.69                            | 0.02<br>0.07<br>0.01                         | TPP1_MOUSE<br>MDHC_MOUSE<br>TPIS_MOUSE                                               |                              | Tripeptidyl-peptidase 1;<br>Malate dehydrogenase, cytoplasmic;<br>Triosephosphate isomerase;                                                                            | Tripeptidyl aminopeptidase;Tripeptidyl-peptidase 1;<br>Cytosolic malate dehydrogenase;<br>Triose-phosphate isomerase;                                                                                                           | 0.25 - 0.75<br>0.25 - 0.75<br>0.25 - 0.75                                              |
| NEETIKRLE<br>TPKGVGRHST<br>VSGRQQLVEL<br>SEAVVSSVNT<br>PLPVIHQKV<br>TSQLVACTKV | TYYNATEPVISFYDKR<br>VAAASPSHEAKGLVISPEGLSPA<br>VAEQADLEQAFSPSPDPCVDR<br>VANKTVEEAENIVTTGVVR<br>VANS PANADYQER<br>VAPTISPVCQEQLVEAGR | N-ter +34.06 Da, K +34.06 Da<br>N-ter +28.03 Da, K +28.03 Da<br>N-ter +28.03 Da, C +57.02 Da<br>N-ter +28.03 Da, K +28.03 Da<br>N-ter +34.06 Da<br>N-ter +28.03 Da, C +57.02 Da | 34.4<br>21.0<br>42.6<br>34.1<br>35.9<br>42.1 | 76.4<br>55.9<br>74.7<br>99.5<br>64.4<br>57.1 | 3<br>4<br>4<br>4<br>3<br>3 | 2034.23<br>2555.55<br>2376.23<br>2183.43<br>1467.81<br>2068.18 | -1.22<br>2.67<br>-0.25<br>-0.58<br>-0.20<br>-0.54 | 0.14<br>0.13<br>0.05<br>0.05<br>0.02<br>0.04 | KAD1_MOUSE<br>ACD10_MOUSE<br>APUS_MOUSE<br>SYU9_MOUSE<br>E9PYJ9_MOUSE<br>TLN1_MOUSE  | D3Z7X0_MOUSE                 | Adenylate kinase isoenzyme 1;<br>Acyl-CoA dehydrogenase family member 10;<br>Apoptosis inhibitor 5;<br>Gamma-synuclein;                                                 | ATP-AMP transphosphorylase 1;Myokinase;<br>AAC-11;<br>Persyn;                                                                                                                                                                   | 0.15 - 0.25<br>0.85 - 1.00<br>0.25 - 0.75<br>0.25 - 0.75<br>0.25 - 0.75<br>0.25 - 0.75 |
| MADEIAKAQ<br>VGPEPTDCF                                                         | VAQPGGDTIFGKIIR<br>VAVMHGTEGTVPGNALVVDPEKPF                                                                                         | N-ter +34.06 Da, K +34.06 Da<br>N-ter +28.03 Da, K +28.03 Da                                                                                                                    | 26.4<br>43.4                                 | 51.6<br>51.9                                 | 3<br>4                     | 1639.09<br>2804.60                                             | -0.38<br>1.40                                     | 0.02<br>0.07                                 | HINT1_MOUSE<br>EHD2_MOUSE                                                            | B0R1E3_MOUSE                 | Histidine triad nucleotide-binding protein 1;<br>EH domain-containing protein 2;                                                                                        | Adenosine 5'-monophosphoramidase;Protein kinase C inhibitor 1;Protein kinase C-interacting protein 1;                                                                                                                           | 0.25 - 0.75<br>0.75 - 0.85                                                             |
| SPDSLFTAKF<br>GGRGAGDSGC                                                       | VAYDEEEDYGPAGPNSYSGAGTAVGAYDAPR<br>VDAYALCDALGRPAVGGGGEWR                                                                           | N-ter +28.03 Da<br>N-ter +28.03 Da, C +57.02 Da<br>N-ter +34.06 Da, K +34.06 Da, C +57.02 Da                                                                                    | 49.4<br>17.3<br>18.0                         | 85.7<br>112.5<br>49.8                        | 4<br>4<br>3                | 3392.75<br>2416.47<br>1507.91                                  | -2.84<br>1.74<br>0.33                             | 0.41<br>0.21<br>0.02                         | AFAD_MOUSE<br>RAIN_MOUSE<br>Q8BM18_MOUSE                                             | F7C3I9_MOUSE                 | Afadin;<br>Ras-interacting protein 1;                                                                                                                                   | Protein AF-6;                                                                                                                                                                                                                   | 0.00 - 0.15<br>0.85 - 1.00<br>0.25 - 0.75                                              |
| FRPKVKREKV<br>LTIQLIHNH<br>AGKHVPRAVF                                          | VDCSEYLALSKR<br>VDEYDPTIEDSYR<br>VDLEPTVIDEVR                                                                                       | N-ter +28.03 Da<br>N-ter +28.03 Da<br>N-ter +34.06 Da                                                                                                                           | 18.0<br>32.0<br>48.3                         | 49.8<br>70.9<br>46.1                         | 3<br>3<br>2                | 1507.91<br>1628.84<br>1417.85                                  | 0.33<br>0.60<br>1.55                              | 0.02<br>0.09<br>0.15                         | Q8BM18_MOUSE<br>RASH_MOUSE<br>TBA1A_MOUSE                                            | Q148R4_MOUSE                 | GTase HRas;<br>Tubulin alpha-1A chain;                                                                                                                                  | H-Ras-1;Transforming protein p21;c-H-ras;p21ras;<br>Alpha-tubulin 1;Alpha-tubulin isotype M-alpha-1;Tubulin alpha-1 chain;<br>Protein cypher;Protein oracle;Z-band alternatively spliced PDZ-motif protein;                     | 0.25 - 0.75<br>0.25 - 0.75<br>0.85 - 1.00                                              |
| LASLPVKDLA<br>LRLQKRGTTG<br>EKLGGQGVQK                                         | VDSASPVYQAVIKTQSKPEDEADEWAR<br>VDTAAVGAVFDISNADR<br>VDVPAADLSDQVPDQSETR                                                             | N-ter +34.06 Da, K +34.06 Da<br>N-ter +34.06 Da<br>N-ter +28.03 Da                                                                                                              | 24.6<br>40.0<br>50.7                         | 81.7<br>68.3<br>63.5                         | 4<br>3<br>3                | 3120.90<br>1754.03<br>2157.14                                  | -1.94<br>0.31<br>-0.30                            | 0.22<br>0.02<br>0.06                         | LDB3_MOUSE<br>KCRM_MOUSE<br>CO3_MOUSE                                                | E9PYJ9_MOUSE                 | LIM domain-binding protein 3;<br>Creatine kinase M-type;<br>Complement C3;                                                                                              | Creatine kinase M chain;M-CK;<br>HSE-MSF;                                                                                                                                                                                       | 0.00 - 0.15<br>0.25 - 0.75<br>0.25 - 0.75                                              |
| LNKQKGYFF                                                                      | VEGELYCETHAR                                                                                                                        | N-ter +28.03 Da, C +57.02 Da                                                                                                                                                    | 42.0                                         | 87.9                                         | 3                          | 1490.81                                                        | 0.45                                              | 0.08                                         | PDL3_MOUSE                                                                           |                              | PDZ and LIM domain protein 3;                                                                                                                                           | Actinin-associated LIM protein;Alpha-actinin-2-associated LIM protein;                                                                                                                                                          | 0.25 - 0.75                                                                            |
| LIKEKILPY                                                                      | VELDLHSYDLGIENR                                                                                                                     | N-ter +28.03 Da                                                                                                                                                                 | 39.6                                         | 84.9                                         | 3                          | 1800.06                                                        | 0.30                                              | 0.02                                         | IDHC_MOUSE                                                                           | F8W1Y0_MOUSE                 | Isocitrate dehydrogenase [NADP] cytoplasmic;                                                                                                                            | Cytosolic NADP-isocitrate dehydrogenase;DP;NADP(+)-specific ICDH;Oxalosuccinate decarboxylase;                                                                                                                                  | 0.25 - 0.75                                                                            |
| AAAAAAVAV<br>EEVANPLLT<br>EVEVLKATEM<br>CVAAGDEEY<br>AVQGGAAAPM<br>AVQGGAAAPV  | VESMVTATEVAPPPVEVPIR<br>VEVEYPENAILDLTR<br>VEVGPEDEVGAEAR<br>VFKDLFDPIIQDR<br>VGAVQVPLVGMPPMPQAPR<br>VGAVQVPLVGMPPMPQAPR            | N-ter +28.03 Da<br>N-ter +28.03 Da<br>N-ter +28.03 Da<br>N-ter +34.06 Da, K +34.06 Da<br>N-ter +28.03 Da<br>N-ter +34.06 Da                                                     | 42.1<br>38.9<br>57.9<br>32.0<br>31.8<br>49.3 | 80.8<br>69.6<br>45.4<br>79.1<br>60.2<br>59.3 | 4<br>3<br>2<br>3<br>3<br>3 | 2342.45<br>1788.06<br>1527.78<br>1673.12<br>1872.12<br>1862.12 | 1.95<br>0.70<br>0.86<br>-0.49<br>2.93<br>1.36     | 0.14<br>0.06<br>0.12<br>0.03<br>0.20<br>0.10 | CHD4_MOUSE<br>ITIH3_MOUSE<br>PTRF_MOUSE<br>KCRM_MOUSE<br>F8VQ88_MOUSE<br>SNRPA_MOUSE | E9QA55_MOUSE<br>E9PVS1_MOUSE | Chromodomain-helicase-DNA-binding protein 4;<br>Inter-alpha-trypsin inhibitor heavy chain H3;<br>Polymerase I and transcript release factor;<br>Creatine kinase M-type; | Chromodomain-helicase-DNA-binding protein 4;<br>Inter-alpha-trypsin inhibitor heavy chain H3;<br>Cav-p60;Cavin-1;<br>Creatine kinase M chain;M-CK;                                                                              | 0.85 - 1.00<br>0.25 - 0.75<br>0.25 - 0.75<br>0.25 - 0.75<br>0.85 - 1.00<br>0.75 - 0.85 |
| YAKRAFVHWY<br>ASGETLHSPK<br>M                                                  | VGEGMEEGEFSER<br>VGQPGAAGPVSPMCPGR<br>VGVKPVGSDPDFQPELSGAGSR                                                                        | N-ter +34.06 Da<br>N-ter +34.06 Da, C +57.02 Da<br>N-ter +28.03 Da, K +28.03 Da                                                                                                 | 47.0<br>53.8<br>35.2                         | 41.2<br>71.0<br>76.2                         | 2<br>3<br>3                | 1559.76<br>1670.96<br>2254.33                                  | 0.42<br>-0.45<br>-1.60                            | 0.06<br>0.03<br>0.29                         | TBA1A_MOUSE<br>FETUA_MOUSE<br>TXNL1_MOUSE                                            | TBA1B_MOUSE                  | Tubulin alpha-1A chain;<br>Alpha-2-HS-glycoprotein;<br>Thioredoxin-like protein 1;                                                                                      | Alpha-tubulin 1;Alpha-tubulin isotype M-alpha-1;Tubulin alpha-1 chain;<br>Countertrypsin;Fetuin-A;<br>32 kDa thioredoxin-related protein;<br>Acetyl-CoA acyltransferase;Beta-ketothiolase;Mitochondrial 3-oxoacyl-CoA thiolase; | 0.25 - 0.75<br>0.25 - 0.75<br>0.00 - 0.15                                              |
| AYLARHVGLR<br>TKFENAFLSH<br>DVDLHLKGNP<br>M<br>E                               | VGVPTETGALTNR<br>VISQHSLSGNIR<br>VKGEYDVTVP<br>VKLTAEIEQAAQYTNVAVR<br>VKLVESGGGLVQPGGSLR                                            | N-ter +28.03 Da<br>N-ter +28.03 Da<br>N-ter +28.03 Da, K +28.03 Da<br>N-ter +28.03 Da, K +28.03 Da<br>N-ter +28.03 Da, K +28.03 Da                                              | 34.3<br>31.0<br>38.7<br>43.9<br>36.3         | 29.4<br>47.8<br>58.8<br>95.8<br>62.2         | 3<br>3<br>3<br>4<br>3      | 1454.85<br>1491.92<br>1317.81<br>2173.42<br>1937.22            | 0.74<br>0.43<br>-0.45<br>0.49<br>0.50             | 0.05<br>0.02<br>0.04<br>0.08<br>0.06         | THIM_MOUSE<br>ATPA_MOUSE<br>E9Q616_MOUSE<br>RU2A_MOUSE<br>HVM17_MOUSE                | D3Z6F5_MOUSE<br>F7BRM2_MOUSE | 3-ketoacyl-CoA thiolase, mitochondrial;<br>ATP synthase subunit alpha, mitochondrial;                                                                                   |                                                                                                                                                                                                                                 | 0.25 - 0.75<br>0.25 - 0.75<br>0.25 - 0.75<br>0.25 - 0.75<br>0.25 - 0.75                |
| FFVKNMISNQ<br>N<br>FSPYHEGEV                                                   | VKNLGGGGSEKKEGGTSPDAAAKGMTR<br>VLAASEPEIKGIR<br>VLDDGGEVDLGLNYER                                                                    | N-ter +34.06 Da, K +34.06 Da<br>N-ter +34.06 Da, K +34.06 Da<br>N-ter +28.03 Da                                                                                                 | 19.8<br>20.3<br>46.8                         | 52.1<br>62.5<br>61.0                         | 4<br>3<br>3                | 3177.95<br>1476.03<br>1906.01                                  | -5.64<br>0.88<br>0.39                             | 0.00<br>0.16<br>0.02                         | CPLX4_MOUSE<br>KAD2_MOUSE<br>PYR1_MOUSE                                              | F7BP55_MOUSE                 | Complexin-4;<br>Adenylate kinase 2, mitochondrial;<br>CTP synthase 1;                                                                                                   | Complexin IV;<br>ATP-AMP transphosphorylase 2;<br>CTP synthetase 1;UTP-ammonia ligase 1;                                                                                                                                        | 0.00 - 0.15<br>0.75 - 0.85<br>0.25 - 0.75                                              |

| Non Prime Site | Prime Site                  | Modifications                             | Hyperscore | Mass error in ppm | Charge | Precursor neutral mass in Da | Fold change (log <sub>2</sub> ) of ASAPRatio | FC-error of ASAPRatio | Uniprot ID 1 | Uniprot ID 2 | Protein Name 1                                                                     | Protein Name 2                                                                                                                                             | Quantile    |
|----------------|-----------------------------|-------------------------------------------|------------|-------------------|--------|------------------------------|----------------------------------------------|-----------------------|--------------|--------------|------------------------------------------------------------------------------------|------------------------------------------------------------------------------------------------------------------------------------------------------------|-------------|
| LYASGRITGI     | VLDSDGDVYTHNVPIYEGALPHAIMR  | N-ter +28.03 Da                           | 52.8       | 99.8              | 4      | 2851.72                      | -2.84                                        | 0.20                  | ACTC_MOUSE   | ACTA_MOUSE   | Actin, alpha cardiac muscle 1;                                                     | Alpha-cardiac actin;<br>26S proteasome regulatory subunit RPN10;26S proteasome regulatory subunit                                                          | 0.00 - 0.15 |
| M              | VLESTMVQVDNSEMYR            | N-ter +34.06 Da, C +57.02 Da              | 48.3       | 52.1              | 3      | 1966.01                      | 1.80                                         | 0.22                  | P5MD4_MOUSE  |              | 26S proteasome non-ATPase regulatory subunit 4;                                    | SSA;Multiubiquitin chain-binding protein;                                                                                                                  | 0.85 - 1.00 |
| WAAEANLVL      | VLPGSEGESEPLTPALGEAAR       | N-ter +28.03 Da                           | 44.4       | 67.8              | 3      | 2107.22                      | 4.03                                         | 0.38                  | IRGQ_MOUSE   |              | Immunity-related GTPase family Q protein;                                          |                                                                                                                                                            | 0.85 - 1.00 |
| EPPKQSTFL      | VLQEILESDGKGDPNKPSGFR       | N-ter +28.03 Da, K +28.03 Da              | 21.7       | 80.8              | 4      | 2369.45                      | 0.20                                         | 0.02                  | PDL1_MOUSE   |              | PDZ and LIM domain protein 1;                                                      | C-terminal LIM domain protein 1;Elfin;LIM domain protein CLP-36;                                                                                           | 0.25 - 0.75 |
| HRMTTLFCIN     | VLSEVCGDITTKHMLPTVLR        | N-ter +28.03 Da, K +28.03 Da, C +57.02 Da | 42.6       | 85.4              | 4      | 2452.53                      | 0.72                                         | 0.07                  | ZAAA_MOUSE   |              | Serine/threonine-protein phosphatase 2A 65 kDa regulatory subunit A alpha isoform; | PP2A subunit A isoform PR65-alpha;PP2A subunit A isoform R1-alpha;                                                                                         | 0.25 - 0.75 |
| M              | VLSNEPAASAAEEVEDDALVR       | N-ter +34.06 Da                           | 66.9       | 68.2              | 3      | 2347.32                      | -1.89                                        | 0.21                  | TBCD_MOUSE   |              | Tubulin-specific chaperone D;                                                      | Beta-tubulin cofactor D;Tubulin-folding cofactor D;                                                                                                        | 0.00 - 0.15 |
| PFMWNEHLGY     | VLTCPSNLGTGLR               | N-ter +34.06 Da, C +57.02 Da              | 29.8       | 37.3              | 3      | 1420.84                      | 0.40                                         | 0.04                  | KCRM_MOUSE   |              | Creatine kinase M-type;                                                            | Creatine kinase M chain;M-CK;                                                                                                                              | 0.25 - 0.75 |
| LSKHNNHMAK     | VLTPDLYNKLR                 | N-ter +34.06 Da, K +34.06 Da              | 30.3       | 77.0              | 3      | 1398.99                      | 0.33                                         | 0.03                  | KCRM_MOUSE   |              | Creatine kinase M-type;                                                            | Creatine kinase M chain;M-CK;                                                                                                                              | 0.25 - 0.75 |
| VTECVKQICL     | VMLETLSQSPQGR               | N-ter +28.03 Da                           | 28.1       | 52.8              | 3      | 1472.84                      | 0.86                                         | 0.06                  | PCBP1_MOUSE  |              | Poly(rC)-binding protein 1;                                                        | Alpha-CP1;Heterogeneous nuclear ribonucleoprotein E1;                                                                                                      | 0.25 - 0.75 |
| KKLRPDGSEV     | VNAIQVPGPPRQLVEELQSR        | N-ter +28.03 Da                           | 24.8       | 69.1              | 4      | 2576.60                      | 0.60                                         | 0.04                  | MIB2_MOUSE   |              | E3 ubiquitin-protein ligase MIB2;                                                  | Dystrophin-like protein;Mind bomb homolog 2;Skatrophin;                                                                                                    | 0.25 - 0.75 |
| DQVIQFIAL      | VNDPQPEHLR                  | N-ter +28.03 Da                           | 20.9       | 91.9              | 3      | 1328.81                      | 1.47                                         | 0.14                  | UB2L3_MOUSE  |              | Ubiquitin-conjugating enzyme E2 L3;                                                | UbcM4;Ubiquitin carrier protein L3;Ubiquitin-protein ligase L3;                                                                                            | 0.85 - 1.00 |
| M              | VNPTVFFDITADDEPLGR          | N-ter +28.03 Da                           | 54.1       | 44.9              | 3      | 2033.10                      | 0.99                                         | 0.17                  | PP1A_MOUSE   | E9Q1E3_MOUSE | Peptidyl-prolyl cis-trans isomerase A;                                             | Cyclophilin A;Cyclosporin A-binding protein;Rotamase A;SP18;                                                                                               | 0.75 - 0.85 |
| RASSSTINLM     | VNTEPLFTKTDICKLSR           | N-ter +34.06 Da, K +34.06 Da, C +57.02 Da | 25.7       | 85.7              | 4      | 2236.53                      | -1.03                                        | 0.13                  | E9PWQ3_MOUSE | F6R0L1_MOUSE |                                                                                    |                                                                                                                                                            | 0.15 - 0.25 |
| NGKLTGMAFR     | VPTPNVSVVDLTCR              | N-ter +28.03 Da, C +57.02 Da              | 43.4       | 32.0              | 3      | 1583.88                      | 1.45                                         | 0.10                  | G3PT_MOUSE   | G3P_MOUSE    | Glyceraldehyde-3-phosphate dehydrogenase, testis-specific;                         | Spermatogenic cell-specific glyceraldehyde 3-phosphate dehydrogenase 2;Spermatogenic glyceraldehyde-3-phosphate dehydrogenase;                             | 0.85 - 1.00 |
| M              | VQAWYMDDESTADPR             | N-ter +34.06 Da                           | 31.7       | 58.5              | 3      | 1701.89                      | 0.37                                         | 0.04                  | MTND_MOUSE   |              | 1,2-dihydroxy-3-keto-5-methylthiopentene oxoxygenase;                              | metalloproteinase cytoplasmic tail-binding protein 1;                                                                                                      | 0.25 - 0.75 |
| LSGTAGVQSQ     | VQLQQSGAELVK                | N-ter +28.03 Da, K +28.03 Da              | 44.8       | 27.9              | 3      | 1483.87                      | 1.37                                         | 0.06                  | HVM00_MOUSE  |              | Ig heavy chain V region;                                                           | Anti-arsenate antibody;                                                                                                                                    | 0.75 - 0.85 |
| ERTISKIKGL     | VRAPQVYILPPAEQLSR           | N-ter +34.06 Da                           | 40.6       | 68.6              | 3      | 2067.35                      | -0.15                                        | 0.01                  | IGG2B_MOUSE  |              | Ig gamma-2B chain C region;                                                        |                                                                                                                                                            | 0.25 - 0.75 |
| FYADHPFIFL     | VRDNQSGSLIFIGR              | N-ter +34.06 Da                           | 53.6       | 58.3              | 3      | 1594.99                      | 0.14                                         | 0.01                  | SERPH_MOUSE  |              | Serpin H1;                                                                         | 47 kDa heat shock protein;Collagen-binding protein;Serine protease inhibitor J6;                                                                           | 0.25 - 0.75 |
| RSIIRNVKGP     | VREGDVLTLLESESR             | N-ter +28.03 Da                           | 47.4       | 92.8              | 3      | 1643.04                      | -0.32                                        | 0.04                  | RS28_MOUSE   |              | 40S ribosomal protein S28;                                                         |                                                                                                                                                            | 0.25 - 0.75 |
| TSVVRPFAKL     | VRPPVQVYIEGR                | N-ter +28.03 Da                           | 45.6       | 43.0              | 3      | 1496.91                      | -0.62                                        | 0.04                  | ATPD_MOUSE   | D3Z4J0_MOUSE | ATP synthase subunit O, mitochondrial;                                             | Oligomycin sensitivity conferral protein;                                                                                                                  | 0.25 - 0.75 |
| VGENKASAK      | VSDAISTQPVVDHEFDVAVVGGAGGLR | N-ter +34.06 Da                           | 39.5       | 83.6              | 4      | 2962.77                      | -4.32                                        | 0.86                  | DHSA_MOUSE   |              | Succinate dehydrogenase [ubiquinone] flavoprotein subunit, mitochondrial;          | Flavoprotein subunit of complex II;                                                                                                                        | 0.00 - 0.15 |
| SEGNELLVQE     | VSDLSVTADGFSASYR            | N-ter +34.06 Da                           | 40.1       | 65.6              | 3      | 1707.96                      | 0.12                                         | 0.01                  | PCOC1_MOUSE  | D3YUE2_MOUSE | Procollagen C-endopeptidase enhancer 1;                                            | P14;Procollagen COOH-terminal proteinase enhancer 1;Type 1 procollagen C-proteinase enhancer protein;Type 1 procollagen COOH-terminal proteinase enhancer; | 0.25 - 0.75 |
| DNGMVLGEQE     | VSDNELQELSTQSGR             | N-ter +34.06 Da                           | 43.8       | 61.6              | 3      | 1695.95                      | 0.86                                         | 0.08                  | CLUS_MOUSE   | E9Q9B8_MOUSE | Clusterin;                                                                         | Apolipoprotein J;Clustrin;Sulfated glycoprotein 2;                                                                                                         | 0.25 - 0.75 |
| GMKVLIQTRGF    | VSDSDSDMTGAGSIR             | N-ter +28.03 Da                           | 65.3       | 50.7              | 2      | 1611.79                      | 1.17                                         | 0.18                  | ATIF1_MOUSE  | Q9D879_MOUSE | ATPase inhibitor, mitochondrial;                                                   | Inhibitor of F(1)F(o)-ATPase;                                                                                                                              | 0.75 - 0.85 |
| GRRGQFGARG     | VSEGSAAAMAGESMAQR           | N-ter +28.03 Da                           | 53.2       | 63.0              | 3      | 1679.87                      | 0.07                                         | 0.01                  | ORN_MOUSE    |              | Oligoribonuclease, mitochondrial;                                                  | RNA exonuclease 2 homolog;Small fragment nuclease;                                                                                                         | 0.25 - 0.75 |
| IESTECKRTR     | VSGEHMDLTTCPAAGGQKQLR       | N-ter +28.03 Da, K +28.03 Da, C +57.02 Da | 41.4       | 83.0              | 4      | 2553.48                      | 0.93                                         | 0.11                  | Q9D1B1_MOUSE |              |                                                                                    |                                                                                                                                                            | 0.75 - 0.85 |
| VWAAVPGKTF     | VSITPAEVGVLVGKDR            | N-ter +34.06 Da, K +34.06 Da              | 30.1       | 51.2              | 3      | 1707.14                      | 0.37                                         | 0.03                  | PROF1_MOUSE  | Q5X49_MOUSE  | Profilin-1;                                                                        | Profilin I;                                                                                                                                                | 0.25 - 0.75 |
| ALSVRNLSPY     | VSNELLEAFSQFGPIER           | N-ter +28.03 Da                           | 48.0       | 73.7              | 3      | 2092.20                      | 0.29                                         | 0.04                  | SFPQ_MOUSE   |              | Splicing factor, proline- and glutamine-rich;                                      | DNA-binding p52/p100 complex, 100 kDa subunit;Polypyrimidine tract-binding protein-associated-splicing factor;                                             | 0.25 - 0.75 |
| GQAAAPVLGLA    | VSSELQIQQSFVPDECPR          | N-ter +34.06 Da, C +57.02 Da              | 42.0       | 32.2              | 3      | 2152.14                      | -0.58                                        | 0.02                  | FKBP9_MOUSE  |              | Peptidyl-prolyl cis-trans isomerase FKBP9;                                         | 63 kDa FK506-binding protein;FK506-binding protein 9;FKBP6SR5;Rotamase;                                                                                    | 0.25 - 0.75 |
| RDDGLADLFL     | VSSGPTNASAFTR               | N-ter +28.03 Da                           | 36.6       | 51.1              | 2      | 1450.78                      | -0.15                                        | 0.02                  | MAP4_MOUSE   | E9QPW8_MOUSE | Microtubule-associated protein 4;                                                  |                                                                                                                                                            | 0.25 - 0.75 |
| MKAATPVV       | VTAAAPAMEPGPSVSPGSPR        | N-ter +28.03 Da                           | 25.0       | 66.8              | 3      | 1906.09                      | 0.24                                         | 0.01                  | F6U6G6_MOUSE |              |                                                                                    | Porphobilinogen synthase;                                                                                                                                  | 0.25 - 0.75 |
| SASNLYPIF      | VTDVPDDVQPIASLPGVAR         | N-ter +28.03 Da                           | 44.9       | 74.4              | 3      | 1976.20                      | -0.14                                        | 0.01                  | HEM2_MOUSE   |              | Delta-aminolevulinic acid dehydratase;                                             |                                                                                                                                                            | 0.25 - 0.75 |
| M              | VTEQEIEAGKTLVDPKQLQAR       | N-ter +28.03 Da, K +28.03 Da              | 19.7       | 87.2              | 4      | 2646.73                      | -1.40                                        | 0.18                  | DOHH_MOUSE   | D3Z7J7_MOUSE | Deoxyhypusine hydroxylase;                                                         | Deoxyhypusine dioxygenase;Deoxyhypusine monoxygenase;                                                                                                      | 0.15 - 0.25 |
| ARQSRRTQGG     | VTLDLQEAETIGR               | N-ter +34.06 Da, K +34.06 Da              | 19.8       | 56.3              | 3      | 1741.12                      | -0.69                                        | 0.07                  | MYPT1_MOUSE  |              | Protein phosphatase 1 regulatory subunit 12A;                                      | Myosin phosphatase-targeting subunit 1;                                                                                                                    | 0.25 - 0.75 |
| SPLPVIHQK      | VVANSPANADYQER              | N-ter +34.06 Da                           | 49.6       | 79.2              | 3      | 1566.91                      | -0.38                                        | 0.04                  | E9PVJ9_MOUSE |              |                                                                                    |                                                                                                                                                            | 0.25 - 0.75 |
| STSQLVACTK     | VVAPTSSPVCQEQLEVEAGR        | N-ter +34.06 Da, C +57.02 Da              | 47.6       | 53.5              | 3      | 2173.28                      | 0.31                                         | 0.04                  | TLN1_MOUSE   | F8WGT0_MOUSE | Talin-1;                                                                           |                                                                                                                                                            | 0.25 - 0.75 |
| IINVKQFAKF     | VVDLSQVAPTDIEEGMR           | N-ter +28.03 Da                           | 54.9       | 85.4              | 3      | 2001.14                      | 1.88                                         | 0.34                  | PRS7_MOUSE   | Q8BVQ9_MOUSE | 26S protease regulatory subunit 7;                                                 | RPT1;Proteasome 26S subunit ATPase 2;Protein M5S1;                                                                                                         | 0.85 - 1.00 |
| AKRQSRMEKY     | VVDSDTVQAHTVR               | N-ter +34.06 Da                           | 46.5       | 91.3              | 3      | 1459.92                      | 0.15                                         | 0.02                  | SYNP2_MOUSE  | D3YV9_MOUSE  | Synaptodin-2;                                                                      | Myopodin;                                                                                                                                                  | 0.25 - 0.75 |

| Non Prime Site | Prime Site              | Modifications                | Hyperscore | Mass error in ppm | Charge | Precursor neutral mass in Da | Fold change (log <sub>2</sub> ) of ASAPRatio | FC-error of ASAPRatio | Uniprot ID 1 | Uniprot ID 2 | Protein Name 1                                                                                         | Protein Name 2                                                                                                                                    | Quantile    |
|----------------|-------------------------|------------------------------|------------|-------------------|--------|------------------------------|----------------------------------------------|-----------------------|--------------|--------------|--------------------------------------------------------------------------------------------------------|---------------------------------------------------------------------------------------------------------------------------------------------------|-------------|
| SRMAKPEEVL     | VVENDQGEVVR             | N-ter +28.03 Da              | 20.3       | 40.9              | 2      | 1270.70                      | 0.99                                         | 0.08                  | XPO1_MOUSE   |              | Exportin-1;                                                                                            | Chromosome region maintenance 1 protein homolog;                                                                                                  | 0.75 - 0.85 |
| MFWIPASSSD     | VVMTQTPLSLVPSLGDQASISCR | N-ter +34.06 Da, C +57.02 Da | 58.9       | 49.7              | 3      | 2607.48                      | -1.56                                        | 0.32                  | KV2A7_MOUSE  |              | Ig kappa chain V-II region 26-10;                                                                      |                                                                                                                                                   | 0.00 - 0.15 |
| IWHNDNKSFL     | VWVNEEDHLR              | N-ter +34.06 Da              | 20.7       | 71.2              | 3      | 1329.78                      | -1.18                                        | 0.03                  | KCRM_MOUSE   |              | Creatine kinase M-type;                                                                                | Creatine kinase M chain;M-CK;                                                                                                                     | 0.15 - 0.25 |
| KIKGLVRAPQ     | VYLPPPAEQLSR            | N-ter +34.06 Da              | 36.4       | 50.7              | 3      | 1515.96                      | -0.69                                        | 0.05                  | IGG2B_MOUSE  |              | Ig gamma-2B chain C region;                                                                            |                                                                                                                                                   | 0.25 - 0.75 |
| SPDDDLGSSN     | WEAADLGNEER             | N-ter +28.03 Da              | 32.5       | 57.1              | 2      | 1316.68                      | 4.94                                         | 0.75                  | SMAP_MOUSE   | D6RI64_MOUSE | Small acidic protein;                                                                                  | Sid 2057;                                                                                                                                         | 0.85 - 1.00 |
| DAEKAAVSCL     | WGKVNSEVGEALGR          | N-ter +34.06 Da, K +34.06 Da | 22.5       | 58.3              | 3      | 1741.04                      | -3.84                                        | 0.00                  | HBB1_MOUSE   |              | Hemoglobin subunit beta-1;                                                                             | Beta-1-globin;Hemoglobin beta-1 chain;Hemoglobin beta-major chain;                                                                                | 0.00 - 0.15 |
| LAHFDPRVTM     | WVFEEDIGGR              | N-ter +34.06 Da              | 32.3       | 27.8              | 2      | 1240.66                      | 2.66                                         | 0.24                  | GPDA_MOUSE   | E0CXN5_MOUSE | Glycerol-3-phosphate dehydrogenase [NAD+], cytoplasmic;                                                |                                                                                                                                                   | 0.85 - 1.00 |
| LNDNFVKLIS     | WYDNEYGYSNR             | N-ter +28.03 Da              | 26.3       | 77.5              | 3      | 1493.74                      | 0.32                                         | 0.04                  | G3P_MOUSE    | G3PT_MOUSE   | Glyceraldehyde-3-phosphate dehydrogenase; Electron transfer flavoprotein subunit alpha, mitochondrial; | Peptidyl-cysteine S-nitrosylase GAPDH;                                                                                                            | 0.25 - 0.75 |
| LKSGENFKLL     | YDLADQLHAAVGASR         | N-ter +28.03 Da              | 41.8       | 81.2              | 3      | 1613.95                      | 0.47                                         | 0.06                  | ETFA_MOUSE   |              |                                                                                                        |                                                                                                                                                   | 0.25 - 0.75 |
| LREDPAYLHY     | YDPAGGEDPLGAVHLR        | N-ter +28.03 Da              | 61.6       | 68.2              | 3      | 1693.96                      | 0.60                                         | 0.06                  | PLEK_MOUSE   | Q8CAG6_MOUSE | Plectstrin;                                                                                            |                                                                                                                                                   | 0.25 - 0.75 |
| VNIGGAGSYI     | YEQPTEAPQVTGPIEVPVVR    | N-ter +34.06 Da, K +34.06 Da | 47.9       | 90.6              | 4      | 2404.58                      | 4.92                                         | 1.00                  | CRIP2_MOUSE  |              | Cysteine-rich protein 2;                                                                               | Heart LIM protein;                                                                                                                                | 0.85 - 1.00 |
| AASSSLEKS      | YELPDGQVITIGNER         | N-ter +34.06 Da              | 36.6       | 60.2              | 3      | 1737.02                      | -0.40                                        | 0.03                  | ACT5_MOUSE   | ACTA_MOUSE   | Actin, alpha skeletal muscle;                                                                          | Alpha-actin-1;                                                                                                                                    | 0.25 - 0.75 |
| TWSPSEWQMA     | YEPQGGSGYDYSYAGGR       | N-ter +28.03 Da              | 39.3       | 69.0              | 3      | 1853.91                      | -0.06                                        | 0.01                  | HNRPK_MOUSE  | E9Q8D6_MOUSE | Heterogeneous nuclear ribonucleoprotein K;                                                             | CRP55;Calregulin;Endoplasmic reticulum resident protein 60;HACBP;                                                                                 | 0.25 - 0.75 |
| LGAAADPAI      | YFKEQFLDGDWNTNR         | N-ter +34.06 Da, K +34.06 Da | 34.5       | 66.4              | 3      | 1957.13                      | 1.28                                         | 0.16                  | CALR_MOUSE   |              | Calreticulin; Swi5-dependent recombination DNA repair protein 1 homolog;                               |                                                                                                                                                   | 0.75 - 0.85 |
| KLTLELIDF      | YGIDNLLHYNR             | N-ter +28.03 Da              | 29.1       | 63.8              | 3      | 1519.84                      | -0.81                                        | 0.11                  | SFR1_MOUSE   |              |                                                                                                        | Meiosis protein 5 homolog;                                                                                                                        | 0.15 - 0.25 |
| LGGNFASQMS     | YGYDEKSAGVSPGPMGSPGR    | N-ter +34.06 Da, K +34.06 Da | 42.5       | 45.6              | 3      | 2275.26                      | -5.64                                        | 0.00                  | CO1A1_MOUSE  | F8WGB7_MOUSE | Collagen alpha-1(I) chain;                                                                             | Alpha-1 type I collagen;                                                                                                                          | 0.00 - 0.15 |
| GTQCEKIVQK     | YGYTHLSTGDLR            | N-ter +34.06 Da              | 25.7       | 49.6              | 3      | 1528.89                      | -0.30                                        | 0.02                  | KAD1_MOUSE   |              | Adenylate kinase isoenzyme 1;                                                                          | ATP-AMP transphosphorylase 1;Myokinase;                                                                                                           | 0.25 - 0.75 |
| ENQKFNFSVL     | YKEDVSPGTAIKGTPEMLR     | N-ter +28.03 Da, K +28.03 Da | 20.2       | 87.2              | 4      | 2175.35                      | 0.81                                         | 0.04                  | A2AQ82_MOUSE | A2AQA9_MOUSE |                                                                                                        |                                                                                                                                                   | 0.25 - 0.75 |
| QQQMTSSYVG     | YKEPAAPVSIQR            | N-ter +28.03 Da, K +28.03 Da | 30.3       | 84.3              | 3      | 1413.92                      | 1.47                                         | 0.14                  | LASP1_MOUSE  | A2AGH0_MOUSE | LIM and SH3 domain protein 1; WD repeat domain phosphoinositide-interacting protein 2;                 | Metastatic lymph node gene 50 protein;                                                                                                            | 0.85 - 1.00 |
| FGKVLMASTS     | YLP5QVTEMFNQGR          | N-ter +28.03 Da              | 31.6       | 53.7              | 3      | 1696.92                      | 1.51                                         | 0.19                  | WIPI2_MOUSE  | D3YWK1_MOUSE |                                                                                                        |                                                                                                                                                   | 0.85 - 1.00 |
| LGKPLSFL       | YMEKNQLEEVPSALPR        | N-ter +28.03 Da, K +28.03 Da | 40.9       | 79.6              | 3      | 1959.17                      | -0.43                                        | 0.03                  | PRELP_MOUSE  |              | Prolargin; WD repeat domain phosphoinositide-interacting protein 2;                                    | Proline-arginine-rich end leucine-rich repeat protein;                                                                                            | 0.25 - 0.75 |
| VGASDGYLYM     | YNLDPQEGGECALMR         | N-ter +34.06 Da, C +57.02 Da | 37.0       | 76.6              | 3      | 1785.96                      | 1.48                                         | 0.20                  | WIPI2_MOUSE  | D3YWK1_MOUSE |                                                                                                        |                                                                                                                                                   | 0.85 - 1.00 |
| PLGSTIPMAY     | YVPGIYPPGSAVLVEGGYDAGAR | N-ter +28.03 Da              | 38.9       | 67.4              | 3      | 2432.40                      | 1.12                                         | 0.13                  | DAZ2_MOUSE   |              | DAZ-associated protein 2;                                                                              | Deleted in azoospermia-associated protein 2;Proline-rich protein expressed in brain; NFAT pre-existing subunit;T-cell transcription factor NFAT1; | 0.75 - 0.85 |
| SKSLSPGLLG     | YQQPSLLAAPLGLADHR       | N-ter +28.03 Da              | 32.6       | 76.5              | 3      | 1948.20                      | 1.21                                         | 0.06                  | NFAC2_MOUSE  | B5B2Q6_MOUSE | Nuclear factor of activated T-cells, cytoplasmic 2;                                                    |                                                                                                                                                   | 0.75 - 0.85 |
| PGLTGNFAAQ     | YSDKGVSSGGPMGLMGR       | N-ter +28.03 Da, K +28.03 Da | 60.4       | 77.4              | 3      | 1948.11                      | -2.00                                        | 0.08                  | CO1A2_MOUSE  | E0CXI2_MOUSE | Collagen alpha-2(I) chain;                                                                             | Alpha-2 type I collagen;                                                                                                                          | 0.00 - 0.15 |
| AAMKANTMSN     | YSLLPASLLDHR            | N-ter +28.03 Da              | 57.0       | 90.9              | 3      | 1411.91                      | 2.03                                         | 0.13                  | ST2B1_MOUSE  | E9QKC1_MOUSE | Sulfotransferase family cytosolic 2B member 1;                                                         | Sulfotransferase 2;                                                                                                                               | 0.85 - 1.00 |
| CTFFLAVSGL     | YSSDDVIELTSPNFNR        | N-ter +34.06 Da              | 38.8       | 59.3              | 3      | 1977.07                      | 0.40                                         | 0.04                  | PDI6_MOUSE   | Q3TML0_MOUSE | Protein disulfide-isomerase A6;                                                                        | Thioredoxin domain-containing protein 7; Actinin-associated LIM protein;Alpha-actinin-2-associated LIM protein;                                   | 0.25 - 0.75 |
| SASYNPIGL      | YSTSNIQDALHGQLR         | N-ter +34.06 Da              | 31.0       | 58.7              | 3      | 1736.01                      | 0.16                                         | 0.01                  | PDLI3_MOUSE  |              | PDZ and LIM domain protein 3;                                                                          | Sterile alpha motif domain-containing protein 4B;                                                                                                 | 0.25 - 0.75 |
| QQIIITPIKA     | YSVLQATPTAKDEGR         | N-ter +28.03 Da, K +28.03 Da | 37.6       | 97.2              | 3      | 1691.05                      | -1.15                                        | 0.10                  | SMAG2_MOUSE  |              | Protein Smaug homolog 2;                                                                               |                                                                                                                                                   | 0.15 - 0.25 |
| GAGNNWAKGH     | YTEGAEVLDSVLDVVR        | N-ter +28.03 Da              | 53.2       | 68.5              | 3      | 1792.05                      | 0.00                                         | 0.00                  | TBB2A_MOUSE  | TBB2B_MOUSE  | Tubulin beta-2A chain;                                                                                 |                                                                                                                                                   | 0.25 - 0.75 |
| RSESIYEML      | YTPPEPNGMASEVTEKER      | N-ter +28.03 Da, K +28.03 Da | 26.9       | 91.4              | 3      | 2122.18                      | -1.94                                        | 0.37                  | E9Q3A1_MOUSE | E9Q6H8_MOUSE |                                                                                                        |                                                                                                                                                   | 0.00 - 0.15 |
| QKIGQPTLL      | YVDAGAETMTQR            | N-ter +34.06 Da              | 38.4       | 85.8              | 3      | 1374.78                      | 0.79                                         | 0.08                  | KAD1_MOUSE   |              | Adenylate kinase isoenzyme 1;                                                                          | ATP-AMP transphosphorylase 1;Myokinase;                                                                                                           | 0.25 - 0.75 |
| MYAKRAFVHW     | YVGEGMEEGFSEAR          | N-ter +28.03 Da              | 17.8       | 29.7              | 2      | 1716.78                      | 2.97                                         | 0.40                  | TBA1A_MOUSE  | TBA1B_MOUSE  | Tubulin alpha-1A chain;                                                                                | Alpha-tubulin 1;Alpha-tubulin isotype M-alpha-1;Tubulin alpha-1 chain;                                                                            | 0.85 - 1.00 |
| KAPEGETEF      | YVSPEDLEAQLQSDER        | N-ter +34.06 Da              | 52.8       | 59.2              | 3      | 1912.04                      | 1.22                                         | 0.12                  | DNJC5_MOUSE  |              | Onaj homolog subfamily C member 5;                                                                     | Cysteine string protein;                                                                                                                          | 0.75 - 0.85 |
| SLWKFETSKY     | YVTIIDAPGHR             | N-ter +34.06 Da              | 36.7       | 59.6              | 3      | 1274.80                      | 1.14                                         | 0.03                  | EF1A1_MOUSE  | D3Z3I8_MOUSE | Elongation factor 1-alpha 1;                                                                           | Elongation factor Tu;Eukaryotic elongation factor 1 A-1;                                                                                          | 0.75 - 0.85 |
| NRPFAAERL      | YYSMKAGTDDSTLVR         | N-ter +28.03 Da, K +28.03 Da | 17.9       | 110.9             | 3      | 1819.08                      | -2.47                                        | 0.28                  | ANXA7_MOUSE  | F8WGC2_MOUSE | Annexin A7;                                                                                            | Annexin VII;Annexin-7;Synexin;                                                                                                                    | 0.00 - 0.15 |
