# Supplementary material
Source: PubMed Central journal article supplement (PMC3591655)
Supplement: supp_M112.017962_mcp.M112.017962-11.pdf [file supp_M112.017962_mcp.M112.017962-11.pdf]

**Table S9:** Dimethylated (naturally unmodified) N-termini identified in both replicates of the TAILS experiment comparing wild-type and *Ctsb*<sup>-/-</sup> skin.

| Non Prime Site | Prime Site              | Fold change (log <sub>2</sub> )<br>of ASAPRatio<br>(replicate 1) | Fold change (log <sub>2</sub> ) of<br>ASAPRatio<br>(replicate 2) | Uniprot ID  | Protein Name                                          |
|----------------|-------------------------|------------------------------------------------------------------|------------------------------------------------------------------|-------------|-------------------------------------------------------|
| M              | VQAWYMEDESTADPR         | 0.30                                                             | 0.37                                                             | MTND_MOUSE  | 1,2-dihydroxy-3-keto-5-methylthiopentene dioxygenase; |
| M              | VLESTMVCVDNSEYMR        | 0.08                                                             | 1.80                                                             | PSMD4_MOUSE | 26S proteasome non-ATPase regulatory subunit 4;       |
| SVILQHLRMS     | MHTEAAEVLLER            | 0.18                                                             | -0.76                                                            | HIBCH_MOUSE | 3-hydroxyisobutyryl-CoA hydrolase, mitochondrial;     |
| AYLARHVGLR     | VGVPETGALTNR            | -0.14                                                            | 0.74                                                             | THIM_MOUSE  | 3-ketoacyl-CoA thiolase, mitochondrial;               |
| MQN            | DAGEFVDLYVPR            | 1.35                                                             | 1.41                                                             | RS21_MOUSE  | 40S ribosomal protein S21;                            |
| SASNRIIAAK     | DHASIQMNVAEVDR          | -0.79                                                            | 0.14                                                             | RS21_MOUSE  | 40S ribosomal protein S21;                            |
| FVPNDGCLNF     | IEENDEVLVAGFGR          | 0.21                                                             | 1.75                                                             | RS23_MOUSE  | 40S ribosomal protein S23;                            |
| IIRNVKGPVQ     | EGDVLTLLESER            | 0.44                                                             | 0.99                                                             | RS28_MOUSE  | 40S ribosomal protein S28;                            |
| RSIIRNVKGP     | VREGDVLTLLESER          | -0.84                                                            | -0.32                                                            | RS28_MOUSE  | 40S ribosomal protein S28;                            |
| TLTAVHDAIL     | EDLVFPSEIVGKR           | 0.58                                                             | 2.38                                                             | RS7_MOUSE   | 40S ribosomal protein S7;                             |
| RTLTAVHDAI     | LEDLVFPSEIVGKR          | 0.39                                                             | 3.17                                                             | RS7_MOUSE   | 40S ribosomal protein S7;                             |
| IHRAAAVAAM     | STGTFFVVSQPLNYR         | 0.41                                                             | 0.04                                                             | AL9A1_MOUSE | 4-trimethylaminobutyraldehyde dehydrogenase;          |
| RQMRHRSLAR     | ELSGTIKEILGTAQSVGCNVDGR | -0.20                                                            | 1.42                                                             | RL12_MOUSE  | 60S ribosomal protein L12;                            |
| SLARELSGTI     | KEILGTAQSVGCNVDGR       | 0.73                                                             | 1.43                                                             | RL12_MOUSE  | 60S ribosomal protein L12;                            |
| MPCKI          | EEIKDFLLTAR             | 0.31                                                             | 0.14                                                             | RL38_MOUSE  | 60S ribosomal protein L38;                            |
| QEVRCLETSY     | ASKPTLNEVVIVSAIR        | 0.58                                                             | -0.15                                                            | THIL_MOUSE  | Acetyl-CoA acetyltransferase, mitochondrial;          |
| QGVMVGMGQK     | DSYVGDEAQSKR            | -1.15                                                            | 0.30                                                             | ACTC_MOUSE  | Actin, alpha cardiac muscle 1;                        |
| EETALVCDN      | GSGLVKAGFAGDDAPR        | 0.67                                                             | -0.86                                                            | ACTC_MOUSE  | Actin, alpha cardiac muscle 1;                        |
| ETTALVCDNG     | SGLVKAGFAGDDAPR         | 0.87                                                             | 0.39                                                             | ACTC_MOUSE  | Actin, alpha cardiac muscle 1;                        |
| CDIDIRKDLY     | ANNVMSGGTTMYPGIADR      | -2.84                                                            | -3.84                                                            | ACTS_MOUSE  | Actin, alpha skeletal muscle;                         |
| VCDNGSGLCK     | AGFAGDDAPR              | -0.69                                                            | -0.64                                                            | ACTA_MOUSE  | Actin, aortic smooth muscle;                          |
| HHSFYNELRV     | APEEHPTLLTEAPLNPKANR    | 3.03                                                             | 1.06                                                             | ACTA_MOUSE  | Actin, aortic smooth muscle;                          |
| TAASSSLEK      | SYELPDGQVITIGNER        | 0.12                                                             | 0.00                                                             | ACTB_MOUSE  | Actin, cytoplasmic 1;                                 |
| VDIRKDLYAN     | TVLSGGTTMYPGIADR        | 0.23                                                             | 0.07                                                             | ACTB_MOUSE  | Actin, cytoplasmic 1;                                 |
| GTVTHLCRQY     | SDAPPLTLDGIKDR          | 0.04                                                             | 0.94                                                             | ACPM_MOUSE  | Acyl carrier protein, mitochondrial;                  |
| TGGRTTWARD     | NATLSVEPEGR             | 0.76                                                             | -0.32                                                            | ACOT2_MOUSE | Acyl-coenzyme A thioesterase 2, mitochondrial;        |
| M              | APNVLASEPEIPKGIR        | -0.23                                                            | 0.73                                                             | KAD2_MOUSE  | Adenylate kinase 2, mitochondrial;                    |
| N              | VLASEPEIPKGIR           | 4.69                                                             | 0.88                                                             | KAD2_MOUSE  | Adenylate kinase 2, mitochondrial;                    |
| TQCEKIVQKY     | GYTHLSTGDLLR            | -1.84                                                            | -1.15                                                            | KAD1_MOUSE  | Adenylate kinase isoenzyme 1;                         |
| TIKKRLETTY     | NATEPVISFYDKR           | -1.74                                                            | 0.68                                                             | KAD1_MOUSE  | Adenylate kinase isoenzyme 1;                         |
| GTQCEKIVQK     | YGYTHLSTGDLLR           | -1.32                                                            | -0.30                                                            | KAD1_MOUSE  | Adenylate kinase isoenzyme 1;                         |
| KKRLETTYNA     | TVPVISFYDKR             | -0.23                                                            | 0.68                                                             | KAD1_MOUSE  | Adenylate kinase isoenzyme 1;                         |
| NEETIKRLE      | TYYNATEPVISFYDKR        | 0.20                                                             | -1.22                                                            | KAD1_MOUSE  | Adenylate kinase isoenzyme 1;                         |
| QKIGQPTELL     | YVDAGAETMTQR            | 0.64                                                             | 0.79                                                             | KAD1_MOUSE  | Adenylate kinase isoenzyme 1;                         |
| RTFGTTGERR     | AGEEAADSPPELPR          | -0.20                                                            | 0.32                                                             | ADXL_MOUSE  | Adrenodoxin-like protein, mitochondrial;              |

Table S9, Tholen et al.

| Non Prime Site | Prime Site                      | Fold change (log <sub>2</sub> )<br>of ASAPRatio<br>(replicate 1) | Fold change (log <sub>2</sub> ) of<br>ASAPRatio<br>(replicate 2) | Uniprot ID  | Protein Name                                       |
|----------------|---------------------------------|------------------------------------------------------------------|------------------------------------------------------------------|-------------|----------------------------------------------------|
| QERQTQAVLQ     | AVADKVKEDSQVPATQTLQR            | -0.01                                                            | -0.58                                                            | AKA12_MOUSE | A-kinase anchor protein 12;                        |
| LDKVKSATLS     | STESTASGMQDEVR                  | -0.18                                                            | -0.56                                                            | AKA12_MOUSE | A-kinase anchor protein 12;                        |
| LESKSNKIVQ     | SVIQTAVDQFAR                    | -0.20                                                            | -0.84                                                            | AKA12_MOUSE | A-kinase anchor protein 12;                        |
| DQFSRSVNVS     | LTQEELDSGLDELSVR                | 0.50                                                             | 0.67                                                             | AKAP2_MOUSE | A-kinase anchor protein 2;                         |
| DVQETDTSQK     | DQSPASHEIATNLGDFAIPLYR          | 0.00                                                             | 0.28                                                             | A1AT1_MOUSE | Alpha-1-antitrypsin 1-1;                           |
| PASHEIATNL     | GDFAIPLYR                       | 0.87                                                             | 1.12                                                             | A1AT1_MOUSE | Alpha-1-antitrypsin 1-1;                           |
| DQSPASHEIA     | TNLGDFAIPLYR                    | 1.25                                                             | 0.68                                                             | A1AT1_MOUSE | Alpha-1-antitrypsin 1-1;                           |
| EDVQETDTSQ     | KDQSPASHEIATNLGDFAIPLYR         | -5.64                                                            | -1.79                                                            | A1AT2_MOUSE | Alpha-1-antitrypsin 1-2;                           |
| GTEAAAATVF     | EAVPMSMPPILR                    | -0.30                                                            | -0.04                                                            | A1AT2_MOUSE | Alpha-1-antitrypsin 1-2;                           |
| QETDTSQKQDQ    | SPASHEIATNLGDFALR               | -1.56                                                            | 0.03                                                             | A1AT4_MOUSE | Alpha-1-antitrypsin 1-4;                           |
| DVQETDTSQK     | DQSPASHEIATNLGDFALR             | 0.03                                                             | -0.94                                                            | A1AT4_MOUSE | Alpha-1-antitrypsin 1-4;                           |
| VPTANAALPA     | DPPASVVVGPVVVPR                 | 1.77                                                             | 0.74                                                             | FETUA_MOUSE | Alpha-2-HS-glycoprotein;                           |
| DLRHAFSPVA     | SVESASGETLHSPKVGQPGAAGPVSPMCPGR | 1.74                                                             | -1.40                                                            | FETUA_MOUSE | Alpha-2-HS-glycoprotein;                           |
| ASGETLHSPK     | VGQPGAAGPVSPMCPGR               | 0.19                                                             | -0.45                                                            | FETUA_MOUSE | Alpha-2-HS-glycoprotein;                           |
| RKDAQMVHSN     | ALNEDTQDELGDPR                  | 0.43                                                             | 0.94                                                             | AMRP_MOUSE  | Alpha-2-macroglobulin receptor-associated protein; |
| LTSESSRPTR     | DLSSSDLSTASKIVK                 | 0.28                                                             | 1.31                                                             | A2M_MOUSE   | Alpha-2-macroglobulin;                             |
| FRAMGVPMMG     | LDYSDEINQVVEVR                  | 0.00                                                             | -0.49                                                            | A2M_MOUSE   | Alpha-2-macroglobulin;                             |
| RSTCHNQNSM     | SICEEFSQQADDKGCFR               | 1.42                                                             | -4.32                                                            | A2M_MOUSE   | Alpha-2-macroglobulin;                             |
| LFRAAVPSGA     | STGIYEALRLR                     | -0.11                                                            | 1.00                                                             | ENOA_MOUSE  | Alpha-enolase;                                     |
| FRAAVPSGAS     | TGIYEALRLR                      | 0.36                                                             | 0.04                                                             | ENOA_MOUSE  | Alpha-enolase;                                     |
| IIRKVVRQVD     | SSGAIDTQQHEEVELR                | -1.84                                                            | -1.32                                                            | ANK1_MOUSE  | Ankyrin-1;                                         |
| GDHSTPPSAY     | GSVKPYTNFDAER                   | 1.40                                                             | -0.34                                                            | ANXA2_MOUSE | Annexin A2;                                        |
| STVHEILCKL     | SLEGDHSTPPSAYGSVKPYTNFDAER      | 0.18                                                             | 0.07                                                             | ANXA2_MOUSE | Annexin A2;                                        |
| INRVYKEMYK     | TDLEKDIISDTSGDFR                | -0.40                                                            | -0.79                                                            | ANXA2_MOUSE | Annexin A2;                                        |
| YVSDAFHKAF     | LEVNEEGSEAAASTSVVITGR           | 0.31                                                             | 0.15                                                             | ANT3_MOUSE  | Antithrombin-III;                                  |
| GALGCAICHG     | NPVDDICIAKPR                    | 0.78                                                             | 0.96                                                             | ANT3_MOUSE  | Antithrombin-III;                                  |
| ESEGIGDSNF     | GAPSASVAAAPAPAR                 | 0.59                                                             | -0.42                                                            | AP1B1_MOUSE | AP-1 complex subunit beta-1;                       |
| PSPGEALHHL     | LDLPCTPPPPAPIPSVR               | 0.01                                                             | 0.76                                                             | AP1G2_MOUSE | AP-1 complex subunit gamma-like 2;                 |
| SGGGLLVDFV     | SDSASAVAPLAPGSEDNFAR            | 0.08                                                             | -0.62                                                            | AP2A2_MOUSE | AP-2 complex subunit alpha-2;                      |
| SSSLGQQLNL     | NLLENWDTLGTSTVSQLQER            | -0.36                                                            | 0.29                                                             | APOA1_MOUSE | Apolipoprotein A-I;                                |
| SLLGGSVQGY     | MEQASKTVQDALSSVQESDIAVVAR       | -1.00                                                            | -2.84                                                            | APOC3_MOUSE | Apolipoprotein C-III;                              |
| ELLSQEFLLL     | TLEQKNIAVENEVR                  | 0.84                                                             | -0.69                                                            | ASHWN_MOUSE | Ashwin;                                            |
| SMSSGLEFVS     | HNPPEAAAPPVAR                   | 0.31                                                             | 0.72                                                             | ATX2_MOUSE  | Ataxin-2;                                          |
| NLHASNTRLQ     | KTGTAEMSSILEER                  | 0.74                                                             | 0.39                                                             | ATPA_MOUSE  | ATP synthase subunit alpha, mitochondrial;         |
| RNLHASNTRL     | QKTGTAEMSSILEER                 | 0.18                                                             | -1.94                                                            | ATPA_MOUSE  | ATP synthase subunit alpha, mitochondrial;         |
| LHASNTRLQK     | TGTAEMSSILEER                   | 0.85                                                             | 1.53                                                             | ATPA_MOUSE  | ATP synthase subunit alpha, mitochondrial;         |
| LIIGDRQTGK     | TSIAIDTIINQKR                   | 0.30                                                             | 0.65                                                             | ATPA_MOUSE  | ATP synthase subunit alpha, mitochondrial;         |

Table S9, Tholen et al.

| Non Prime Site | Prime Site                   | Fold change (log <sub>2</sub> ) of ASAPRatio (replicate 1) | Fold change (log <sub>2</sub> ) of ASAPRatio (replicate 2) | Uniprot ID  | Protein Name                                                                          |
|----------------|------------------------------|------------------------------------------------------------|------------------------------------------------------------|-------------|---------------------------------------------------------------------------------------|
| TKFENAFSLH     | VISQHQSLGNIR                 | 0.35                                                       | 0.43                                                       | ATPA_MOUSE  | ATP synthase subunit alpha, mitochondrial;                                            |
| TSVVRPFAKL     | VRPPVQVYIEGR                 | 0.45                                                       | -0.62                                                      | ATPO_MOUSE  | ATP synthase subunit O, mitochondrial;                                                |
| QTRGFVSDSS     | DSMDTGAGSIR                  | 1.06                                                       | 0.94                                                       | ATIF1_MOUSE | ATPase inhibitor, mitochondrial;                                                      |
| KVLQTRGFVS     | DSSDSMDTGAGSIR               | 1.14                                                       | 2.11                                                       | ATIF1_MOUSE | ATPase inhibitor, mitochondrial;                                                      |
| LQTRGFVSDS     | SDSMDTGAGSIR                 | 0.82                                                       | 0.54                                                       | ATIF1_MOUSE | ATPase inhibitor, mitochondrial;                                                      |
| MKVLQTRGFV     | SDSSDSMDTGAGSIR              | 0.56                                                       | 1.14                                                       | ATIF1_MOUSE | ATPase inhibitor, mitochondrial;                                                      |
| VLQTRGFVSD     | SSDSMDTGAGSIR                | 0.84                                                       | 0.84                                                       | ATIF1_MOUSE | ATPase inhibitor, mitochondrial;                                                      |
| GMKVLQTRGF     | VSDSSDSMDTGAGSIR             | 0.65                                                       | 1.17                                                       | ATIF1_MOUSE | ATPase inhibitor, mitochondrial;                                                      |
| ENALGLDQQF     | AGLDLNSSDNQSGGSTASKGR        | 0.00                                                       | -4.32                                                      | DDX3X_MOUSE | ATP-dependent RNA helicase DDX3X;                                                     |
| ASSREGSPAR     | SGTPVHCPSPIR                 | -0.58                                                      | 0.26                                                       | BAG3_MOUSE  | BAG family molecular chaperone regulator 3;                                           |
| EVREAKPALK     | SSVETQPAEEVR                 | 0.07                                                       | 0.20                                                       | E41L2_MOUSE | Band 4.1-like protein 2;                                                              |
| KDWSFYLAH      | TEFTPTETDTYACR               | 0.51                                                       | 2.61                                                       | B2MG_MOUSE  | Beta-2-microglobulin;                                                                 |
| MATRSCVSRG     | SAGSAAAGPVEAAIR              | -0.25                                                      | -0.15                                                      | BOLA1_MOUSE | Bola-like protein 1;<br>Brain-specific angiogenesis inhibitor 1-associated protein 2; |
| LSASKSNLVI     | SDPIPGAKPLPVPELAPFVGR        | 0.60                                                       | 0.76                                                       | BAIP2_MOUSE |                                                                                       |
| RGKTKATKSC     | SPPPPPEPTSEGR                | 0.65                                                       | 0.42                                                       | BCAS1_MOUSE | Breast carcinoma-amplified sequence 1 homolog;                                        |
| TIDCDVITLM     | GTPSGTAEPYDGTKAR             | 0.44                                                       | 0.55                                                       | BSDC1_MOUSE | BSD domain-containing protein 1;                                                      |
| TGTGTLILLV     | LDVNDNAPIPEPR                | 0.95                                                       | 1.11                                                       | CADH1_MOUSE | Cadherin-1;                                                                           |
| LLSQVLLVTS     | ADDLECTPGFQR                 | 0.04                                                       | -0.36                                                      | CAD13_MOUSE | Cadherin-13;                                                                          |
| RTSPVPRQKR     | SIVVSPILIPENQR               | 0.36                                                       | -0.14                                                      | CAD13_MOUSE | Cadherin-13;                                                                          |
| NSGSLVVEEF     | MSLPELQQNPLVQR               | -0.74                                                      | 0.41                                                       | CANB1_MOUSE | Calcineurin subunit B type 1;                                                         |
| AMRILGGVIS     | AISEAAAQYNPEPPPPR            | 0.00                                                       | 0.25                                                       | CPNS1_MOUSE | Calpain small subunit 1;                                                              |
| RSAPPKLASL     | KGVVPEDAVETLAGSLGTR          | 0.08                                                       | -1.12                                                      | ICAL_MOUSE  | Calpastatin;                                                                          |
| VVLDPMYSTY     | LEALGIKEGTIPPEYR             | 1.06                                                       | 0.64                                                       | ICAL_MOUSE  | Calpastatin;                                                                          |
| VPRASMCSIR     | SAPPKLASLKGVVPEDAVETLAGSLGTR | -0.25                                                      | 0.83                                                       | ICAL_MOUSE  | Calpastatin;                                                                          |
| SIRSAPPKLA     | SLKGVVPEDAVETLAGSLGTR        | -0.23                                                      | -0.79                                                      | ICAL_MOUSE  | Calpastatin;                                                                          |
| TISLQMGTNK     | CASQVGMTAPGTR                | -0.38                                                      | -0.17                                                      | CNN2_MOUSE  | Calponin-2;                                                                           |
| TISLQMGTNK     | GASQAGMLAPGTR                | -0.47                                                      | -0.11                                                      | CNN3_MOUSE  | Calponin-3;                                                                           |
| FDQTTISLQM     | GTNKGASQAGMLAPGTR            | 0.88                                                       | 1.40                                                       | CNN3_MOUSE  | Calponin-3;                                                                           |
| LAAADPAIYF     | KEQFLDGDWNTNR                | -1.56                                                      | 0.28                                                       | CALR_MOUSE  | Calreticulin;                                                                         |
| LLGLLGLAAA     | DPAIYFKEQFLDGDWNTNR          | -0.43                                                      | -1.47                                                      | CALR_MOUSE  | Calreticulin;                                                                         |
| LGLAAADPAI     | YFKEQFLDGDWNTNR              | 1.64                                                       | 1.28                                                       | CALR_MOUSE  | Calreticulin;                                                                         |
| LGTPLRGVQG     | EDGLDFPEYDGVDR               | -0.92                                                      | -1.18                                                      | CASQ1_MOUSE | Calsequestrin-1;                                                                      |
| PSSSGAATTV     | SEKPGKAAEVGDDFLGDFVVGGER     | -2.74                                                      | -2.06                                                      | CLIP2_MOUSE | CAP-Gly domain-containing linker protein 2;                                           |
| QMAKLRSLSF     | SAENEPVPLVGNWRPPQPVKGR       | 0.04                                                       | -0.38                                                      | CAH3_MOUSE  | Carbonic anhydrase 3;                                                                 |
| DQMAKLRSLSF    | SSAENEPVPLVGNWRPPQPVKGR      | -0.84                                                      | 1.26                                                       | CAH3_MOUSE  | Carbonic anhydrase 3;                                                                 |
| IKTKGKEAPF     | THFDPSCFLPACR                | 0.20                                                       | -0.22                                                      | CAH3_MOUSE  | Carbonic anhydrase 3;                                                                 |

Table S9, Tholen et al.

| Non Prime Site | Prime Site               | Fold change (log <sub>2</sub> ) of ASAPRatio (replicate 1) | Fold change (log <sub>2</sub> ) of ASAPRatio (replicate 2) | Uniprot ID  | Protein Name                                                                    |
|----------------|--------------------------|------------------------------------------------------------|------------------------------------------------------------|-------------|---------------------------------------------------------------------------------|
| M              | KLNFSGLR                 | 0.42                                                       | -0.49                                                      | CBR2_MOUSE  | Carbonyl reductase [NADPH] 2;                                                   |
| NPGHLSFRAL     | GLDEGEPAGSWDLTVEGR       | -1.25                                                      | -0.04                                                      | CPN2_MOUSE  | Carboxypeptidase N subunit 2;                                                   |
| MAWNETADLG     | LDIGAQGEALGYR            | 0.71                                                       | -0.20                                                      | CTNB1_MOUSE | Catenin beta-1;                                                                 |
| PKLPGRVAFG     | EDIDLPEFDAR              | -5.64                                                      | -5.64                                                      | CATB_MOUSE  | Cathepsin B;                                                                    |
| KTVTFRSYSN     | RTLPTVDWR                | 0.26                                                       | -0.54                                                      | CATS_MOUSE  | Cathepsin S;                                                                    |
| SCLVLAARHA     | SASSTNLKDVLSNLPKEQAR     | -2.56                                                      | -1.40                                                      | CISY_MOUSE  | Citrate synthase, mitochondrial;                                                |
| LIWDNGMVLG     | EQEVSDNELQELSTQGSR       | -0.18                                                      | 1.16                                                       | CLUS_MOUSE  | Clusterin;                                                                      |
| DNGMVLGEQE     | VSDNELQELSTQGSR          | 0.52                                                       | 0.86                                                       | CLUS_MOUSE  | Clusterin;                                                                      |
| APPWKDSKKF     | KDAPDGPVVLTVDGR          | -6.64                                                      | -6.64                                                      | FA12_MOUSE  | Coagulation factor XII;                                                         |
| LLILSGELYA     | EKQCDFPTVENGR            | -0.12                                                      | 0.21                                                       | F13B_MOUSE  | Coagulation factor XIII B chain;                                                |
| RRAPAAQPPA     | AAAPSAVGSPAAAPR          | 0.23                                                       | -0.45                                                      | CHCH2_MOUSE | Coiled-coil-helix-coiled-coil-helix domain-containing protein 2, mitochondrial; |
| MRAAPR         | RAPAAQPPAAAAPSAVGSPAAAPR | -0.27                                                      | 10.41                                                      | CHCH2_MOUSE | Coiled-coil-helix-coiled-coil-helix domain-containing protein 2, mitochondrial; |
| NFASQMSYGY     | DEKSAGVSVPGPMGPGSPR      | -0.38                                                      | -2.40                                                      | CO1A1_MOUSE | Collagen alpha-1(I) chain;                                                      |
| GATALLTHGQ     | EDIPEVSCIHNGLR           | -0.92                                                      | 0.76                                                       | CO1A1_MOUSE | Collagen alpha-1(I) chain;                                                      |
| GPAGKNGDRG     | ETGPAGPAGPIGPAGAR        | 2.64                                                       | 1.47                                                       | CO1A1_MOUSE | Collagen alpha-1(I) chain;                                                      |
| PGPVGPAGKN     | GDRGETGPAGPAGPIGPAGAR    | 2.32                                                       | 1.54                                                       | CO1A1_MOUSE | Collagen alpha-1(I) chain;                                                      |
| EYVSPNSEDV     | GVEGPKGDPGPQGPR          | 0.77                                                       | 1.10                                                       | CO1A1_MOUSE | Collagen alpha-1(I) chain;                                                      |
| PGLGGNFASQ     | MSYGYDEKSAGVSVPGPMGPGSPR | 0.88                                                       | -0.34                                                      | CO1A1_MOUSE | Collagen alpha-1(I) chain;                                                      |
| LGATALLTHG     | QEDIPEVSCIHNGLR          | 0.25                                                       | -2.84                                                      | CO1A1_MOUSE | Collagen alpha-1(I) chain;                                                      |
| SQMSYGYDEK     | SAGVSVPGPMGPGSPR         | 0.35                                                       | 0.04                                                       | CO1A1_MOUSE | Collagen alpha-1(I) chain;                                                      |
| PAGKNGDRGE     | TGPAGPAGPIGPAGAR         | 1.97                                                       | 1.35                                                       | CO1A1_MOUSE | Collagen alpha-1(I) chain;                                                      |
| LGGNFASQMS     | YGYDEKSAGVSVPGPMGPGSPR   | 1.24                                                       | -5.64                                                      | CO1A1_MOUSE | Collagen alpha-1(I) chain;                                                      |
| LLHPTLILAQ     | QSNVDELGCShLGQSYESR      | 0.82                                                       | 0.03                                                       | CO3A1_MOUSE | Collagen alpha-1(III) chain;                                                    |
| GLPGSMGPPG     | TPSVDHGFLVTR             | 1.23                                                       | 2.04                                                       | CO4A1_MOUSE | Collagen alpha-1(IV) chain;                                                     |
| GPRGERGTPG     | ESGAAGPSGPIGSR           | 1.18                                                       | 1.44                                                       | CO1A2_MOUSE | Collagen alpha-2(I) chain;                                                      |
| GNFAAQYSDK     | GVSSGPGPMGLMGPR          | 0.38                                                       | 0.11                                                       | CO1A2_MOUSE | Collagen alpha-2(I) chain;                                                      |
| GLTGNFAAQY     | SDKGVSSGPGPMGLMGPR       | 0.00                                                       | -0.06                                                      | CO1A2_MOUSE | Collagen alpha-2(I) chain;                                                      |
| AAQYSDKGVS     | SGPGPMGLMGPR             | 1.82                                                       | -1.18                                                      | CO1A2_MOUSE | Collagen alpha-2(I) chain;                                                      |
| PSGPVGDGR      | SGQPGVPAGVR              | 0.36                                                       | 0.14                                                       | CO1A2_MOUSE | Collagen alpha-2(I) chain;                                                      |
| PGLTGNFAAQ     | YSDKGVSSGPGPMGLMGPR      | 1.98                                                       | -2.00                                                      | CO1A2_MOUSE | Collagen alpha-2(I) chain;                                                      |
| EKLGQGGVQK     | VDVPAADLSDQVPDTSR        | 0.49                                                       | -0.30                                                      | CO3_MOUSE   | Complement C3;                                                                  |
| DPLNNLGRRL     | EIPGSSDPNIVPDGDFSSLVR    | 0.59                                                       | 0.38                                                       | CO4B_MOUSE  | Complement C4-B;                                                                |
| AAVCAQPRGR     | ILGGQEAAAAR              | 0.04                                                       | 0.16                                                       | CFAD_MOUSE  | Complement factor D;                                                            |
| KPRESEKVKI     | TKVDFAGEEVR              | 2.21                                                       | 0.77                                                       | CFDP1_MOUSE | Craniofacial development protein 1;                                             |
| AGDEESYDVF     | KDLFDPIIEER              | -0.12                                                      | 0.21                                                       | KCRB_MOUSE  | Creatine kinase B-type;                                                         |

Table S9, Tholen et al.

| Non Prime Site | Prime Site                      | Fold change (log <sub>2</sub> ) of ASAPRatio (replicate 1) | Fold change (log <sub>2</sub> ) of ASAPRatio (replicate 2) | Uniprot ID  | Protein Name                                                                                              |
|----------------|---------------------------------|------------------------------------------------------------|------------------------------------------------------------|-------------|-----------------------------------------------------------------------------------------------------------|
| QQLIDHFLF      | DKPVSPLLLASGMAR                 | 0.35                                                       | 0.83                                                       | KCRM_MOUSE  | Creatine kinase M-type;                                                                                   |
| GIWHNDNKSF     | LVVWNEEDHLR                     | -1.06                                                      | -0.76                                                      | KCRM_MOUSE  | Creatine kinase M-type;                                                                                   |
| KKAGHPFMWN     | EHLGYVLTCPNLTGLR                | 0.01                                                       | -2.84                                                      | KCRM_MOUSE  | Creatine kinase M-type;                                                                                   |
| QQQLIDHFL      | FDKPVSPLLLASGMAR                | 0.67                                                       | -1.25                                                      | KCRM_MOUSE  | Creatine kinase M-type;                                                                                   |
| ILTRLRLQKR     | GTGGVDTAAVGAVFDISNADR           | 1.86                                                       | 2.01                                                       | KCRM_MOUSE  | Creatine kinase M-type;                                                                                   |
| RLRLQKRG       | GVDTAAVGAVFDISNADR              | 0.21                                                       | 0.16                                                       | KCRM_MOUSE  | Creatine kinase M-type;                                                                                   |
| AGDEESYTVF     | KDLFDPIIQDR                     | -0.45                                                      | -0.94                                                      | KCRM_MOUSE  | Creatine kinase M-type;                                                                                   |
| KHKTDLNHEN     | LKGGDDLPNYVLSSR                 | 0.20                                                       | -0.89                                                      | KCRM_MOUSE  | Creatine kinase M-type;                                                                                   |
| LQKRGTTGGVD    | TAAVGAVFDISNADR                 | 0.20                                                       | -0.12                                                      | KCRM_MOUSE  | Creatine kinase M-type;                                                                                   |
| LTRLRLQKRG     | TGGVDTAAVGAVFDISNADR            | 0.79                                                       | 0.62                                                       | KCRM_MOUSE  | Creatine kinase M-type;                                                                                   |
| GCVAGDEESY     | TVFKDLFDPIIQDR                  | -0.12                                                      | -0.17                                                      | KCRM_MOUSE  | Creatine kinase M-type;                                                                                   |
| LRLQKRGTTGG    | VDTAAVGAVFDISNADR               | 0.37                                                       | 0.31                                                       | KCRM_MOUSE  | Creatine kinase M-type;                                                                                   |
| PFMWNEHLGY     | VLTCPNLTGLR                     | 0.16                                                       | 0.40                                                       | KCRM_MOUSE  | Creatine kinase M-type;                                                                                   |
| LSKHNNHMAK     | VLTPDLYNKLK                     | -0.32                                                      | 0.33                                                       | KCRM_MOUSE  | Creatine kinase M-type;                                                                                   |
| IWHNDNKSFL     | VVWNEEDHLR                      | -0.22                                                      | -1.18                                                      | KCRM_MOUSE  | Creatine kinase M-type;                                                                                   |
| AGDEESYEVF     | ADLFDPIIKLR                     | -0.43                                                      | 0.37                                                       | KCRS_MOUSE  | Creatine kinase S-type, mitochondrial;                                                                    |
| ATPKQGPRML     | GAPEEADANEEGVR                  | 0.60                                                       | 0.47                                                       | CYTC_MOUSE  | Cystatin-C;                                                                                               |
| WAATPKQGPR     | MLGAPEEADANEEGVR                | -0.12                                                      | 0.49                                                       | CYTC_MOUSE  | Cystatin-C;                                                                                               |
| KVCYAKNFGP     | TGIGFGGLTQQVEKK                 | -2.18                                                      | -0.22                                                      | CSRP3_MOUSE | Cysteine and glycine-rich protein 3;                                                                      |
| VCYGRRYGP      | GIGFGQGAGCLSTDTGEHLGLQFQQSPKPAR | 0.07                                                       | -0.01                                                      | CSRP3_MOUSE | Cysteine and glycine-rich protein 3;                                                                      |
| GSYIEKPQT      | EAPQVTGPIEVPVVR                 | 1.25                                                       | -0.74                                                      | CRIP2_MOUSE | Cysteine-rich protein 2;                                                                                  |
| NIGGAGSYI      | EKPQTEAPQVTGPIEVPVVR            | 0.70                                                       | 3.43                                                       | CRIP2_MOUSE | Cysteine-rich protein 2;                                                                                  |
| VNIGGAGSYI     | YEKQTEAPQVTGPIEVPVVR            | 0.89                                                       | 4.92                                                       | CRIP2_MOUSE | Cysteine-rich protein 2;                                                                                  |
| EDERKMLTGS     | GDPKEEEEEELVDPLTTVR             | -0.14                                                      | -0.04                                                      | QCR6_MOUSE  | Cytochrome b-c1 complex subunit 6, mitochondrial;                                                         |
| ISTSVCLRAH     | GSVVKSEDYAFPTYADR               | 0.64                                                       | -1.64                                                      | COX41_MOUSE | Cytochrome c oxidase subunit 4 isoform 1, mitochondrial;                                                  |
| EEFDARWVTY     | FNKPDIDAWELR                    | -1.79                                                      | -0.30                                                      | COX5A_MOUSE | Cytochrome c oxidase subunit 5A, mitochondrial;                                                           |
| ARGAAVTRSM     | ASGGGVPTDEEQATGLER              | -0.11                                                      | -0.60                                                      | COX5B_MOUSE | Cytochrome c oxidase subunit 5B, mitochondrial;                                                           |
| TARGAAVTRS     | MASGGGVPTDEEQATGLER             | -0.45                                                      | -1.18                                                      | COX5B_MOUSE | Cytochrome c oxidase subunit 5B, mitochondrial;                                                           |
| RGAAVTRSM      | SGGGVPTDEEQATGLER               | 0.01                                                       | -0.79                                                      | COX5B_MOUSE | Cytochrome c oxidase subunit 5B, mitochondrial;                                                           |
| DFHRCEKAMT     | AKGGDVSVCWEYR                   | -1.29                                                      | -2.25                                                      | CX6B1_MOUSE | Cytochrome c oxidase subunit 6B1;                                                                         |
| HTVEKGGKHK     | TGPNLHGLFGR                     | 0.53                                                       | 0.25                                                       | CYC_MOUSE   | Cytochrome c, somatic;                                                                                    |
| VYSPLAHRAY     | SVVAGGPEVTLTPER                 | 0.79                                                       | 0.52                                                       | D2HDH_MOUSE | D-2-hydroxyglutarate dehydrogenase, mitochondrial;                                                        |
| FEHRLGEAAR     | SLGNAGNEIGR                     | -4.06                                                      | -1.06                                                      | DMKN_MOUSE  | Dermokine;                                                                                                |
| GMLPEKDCRY     | ALYDASFETKESR                   | -1.25                                                      | -0.92                                                      | DEST_MOUSE  | Dextrin;                                                                                                  |
| LLGSPRRSY      | SLPPHQKVLPLSLPTMQAGTIAR         | -0.25                                                      | -0.58                                                      | ODP2_MOUSE  | Dihydrolipoyllysine-residue acetyltransferase component of pyruvate dehydrogenase complex, mitochondrial; |

Table S9, Tholen et al.

| Non Prime Site | Prime Site                | Fold change (log <sub>2</sub> ) of ASAPRatio (replicate 1) | Fold change (log <sub>2</sub> ) of ASAPRatio (replicate 2) | Uniprot ID  | Protein Name                                                                                                      |
|----------------|---------------------------|------------------------------------------------------------|------------------------------------------------------------|-------------|-------------------------------------------------------------------------------------------------------------------|
| RFFQTTAVCK     | NDVITVQTPAFAESVTEGDVR     | 0.35                                                       | 0.30                                                       | ODO2_MOUSE  | Dihydrolipoyllysine-residue succinyltransferase component of 2-oxoglutarate dehydrogenase complex, mitochondrial; |
| RNLHQSGFSL     | SGAQIDDNIPR               | -0.81                                                      | 1.12                                                       | DPYL2_MOUSE | Dihydropyrimidinase-related protein 2;                                                                            |
| QAPPVRNLHQ     | SGFSLGAQIDDNIPR           | 2.87                                                       | 2.47                                                       | DPYL2_MOUSE | Dihydropyrimidinase-related protein 2;                                                                            |
| LPLLARLSAG     | DCPCSEAALCQPIR            | 0.52                                                       | 1.43                                                       | DIAC_MOUSE  | Di-N-acetylchitobiase;                                                                                            |
| APMTDEIQQQ     | ILNLPESWDWR               | 0.52                                                       | 1.77                                                       | CATC_MOUSE  | Dipeptidyl peptidase 1;                                                                                           |
| SLPSTAVTSE     | TLPGSLSPPEKYR             | 0.37                                                       | 2.33                                                       | DLG1_MOUSE  | Disks large homolog 1;                                                                                            |
| M              | GKDYYQTLGLAR              | 0.43                                                       | 2.15                                                       | DNJB1_MOUSE | DnaJ homolog subfamily B member 1;                                                                                |
| KAPEGEETEF     | YVSPEDLEAQLQSDER          | 0.77                                                       | 1.22                                                       | DNJC5_MOUSE | DnaJ homolog subfamily C member 5;                                                                                |
| FVPMEENSIY     | SSWQEVTEFPVIVQR           | -0.52                                                      | -0.07                                                      | DOK3_MOUSE  | Docking protein 3;                                                                                                |
| PREIFKQKER     | AMSTTSVTSSQPGKLR          | -1.18                                                      | -2.12                                                      | DBNL_MOUSE  | Drebrin-like protein;                                                                                             |
| M              | GVQPPNFSWVLPGR            | 0.10                                                       | 0.65                                                       | DUS23_MOUSE | Dual specificity protein phosphatase 23;                                                                          |
| LQAQRAFTTR     | RQISEDVDGPDNR             | 0.12                                                       | 0.19                                                       | NEDD4_MOUSE | E3 ubiquitin-protein ligase NEDD4;                                                                                |
| GPEPTTDCFV     | AVMHGETEGTVPGNALVVDPEKPF  | 0.03                                                       | 0.41                                                       | EHD2_MOUSE  | EH domain-containing protein 2;                                                                                   |
| VGPEPTTDCF     | VAVMHGETEGTVPGNALVVDPEKPF | 0.00                                                       | 1.40                                                       | EHD2_MOUSE  | EH domain-containing protein 2;                                                                                   |
| LKSGENFKLL     | YDLADQLHAAVGASR           | -0.60                                                      | 0.47                                                       | ETFA_MOUSE  | Electron transfer flavoprotein subunit alpha, mitochondrial;                                                      |
| QADCAVLIVA     | AGVGFEFAGISKNGQTR         | 0.33                                                       | 0.32                                                       | EF1A1_MOUSE | Elongation factor 1-alpha 1;                                                                                      |
| TDKPLRLPLQ     | DVYKIGGIGTVPVGR           | -0.14                                                      | -0.11                                                      | EF1A1_MOUSE | Elongation factor 1-alpha 1;                                                                                      |
| DGSASGTTLL     | EALDCILPPTPTDKPLR         | 1.49                                                       | 1.58                                                       | EF1A1_MOUSE | Elongation factor 1-alpha 1;                                                                                      |
| PLRLPLQDVY     | KIGGIGTVPVGR              | 0.73                                                       | 1.31                                                       | EF1A1_MOUSE | Elongation factor 1-alpha 1;                                                                                      |
| KDGSASGTTL     | LEALDCILPPTPTDKPLR        | 0.73                                                       | 0.95                                                       | EF1A1_MOUSE | Elongation factor 1-alpha 1;                                                                                      |
| PTDKPLRLPL     | QDVYKIGGIGTVPVGR          | -0.22                                                      | -0.15                                                      | EF1A1_MOUSE | Elongation factor 1-alpha 1;                                                                                      |
| LGRFAVRDMR     | QTVAVGVKAVDK              | 0.18                                                       | 1.73                                                       | EF1A1_MOUSE | Elongation factor 1-alpha 1;                                                                                      |
| SLWKFETSKY     | YVTIIDAPGHR               | 0.41                                                       | 1.14                                                       | EF1A1_MOUSE | Elongation factor 1-alpha 1;                                                                                      |
| KEGNASGVSL     | LEALDTILPPTPTDKPLR        | 0.95                                                       | 0.00                                                       | EF1A2_MOUSE | Elongation factor 1-alpha 2;                                                                                      |
| AHVDHGKSTL     | TDSLVCAGIIASAR            | 0.11                                                       | 1.10                                                       | EF2_MOUSE   | Elongation factor 2;                                                                                              |
| LGVKSQKLL      | DAVDYIPVPTR               | 0.19                                                       | 1.63                                                       | EFTU_MOUSE  | Elongation factor Tu, mitochondrial;                                                                              |
| VLLTFGFVRA     | DDEVDVDGTVEEDLGKSR        | 0.14                                                       | 0.62                                                       | ENPL_MOUSE  | Endoplasmic reticulum protein 1;                                                                                  |
| HPTSPRPPG      | GSIIIVYPKEIR              | 0.54                                                       | 0.39                                                       | MA2B2_MOUSE | Epididymis-specific alpha-mannosidase;                                                                            |
| RQYFYRYITD     | QEYIYSIHTR                | 0.50                                                       | 0.37                                                       | MA2B2_MOUSE | Epididymis-specific alpha-mannosidase;                                                                            |
| RYLSPKYIKM     | FVLDEADEMLSR              | 0.58                                                       | 0.71                                                       | IF4A1_MOUSE | Eukaryotic initiation factor 4A-I;                                                                                |
| IQNLHSFDPF     | ADASKGDDLLPAGTEDYIHIR     | 0.90                                                       | 0.86                                                       | EIF1_MOUSE  | Eukaryotic translation initiation factor 1;                                                                       |
| IQNLQSFDPF     | ADATKGGDDLLPAGTEDYIHIR    | 1.99                                                       | 1.47                                                       | EIF1B_MOUSE | Eukaryotic translation initiation factor 1b;                                                                      |
| M              | AGGEAGVTLGQPILSR          | 5.53                                                       | 2.75                                                       | IF2H_MOUSE  | Eukaryotic translation initiation factor 2 subunit 3, Y-linked;                                                   |

Table S9, Tholen et al.

| Non Prime Site | Prime Site             | Fold change (log <sub>2</sub> ) | Fold change (log <sub>2</sub> ) of | Uniprot ID  | Protein Name                                   |
|----------------|------------------------|---------------------------------|------------------------------------|-------------|------------------------------------------------|
|                |                        | of ASAPRatio<br>(replicate 1)   | ASAPRatio<br>(replicate 2)         |             |                                                |
| VTVVRNLETY     | GLDPCSVAAILQQR         | 0.63                            | -0.14                              | EIF2D_MOUSE | Eukaryotic translation initiation factor 2D;   |
| ASTSQSSRAA     | SIFGGAKPVDTAAR         | -0.30                           | 2.47                               | IF4B_MOUSE  | Eukaryotic translation initiation factor 4B;   |
| QRRLQLKPR      | TVATPLNQVANPNSAIFGGAR  | -1.09                           | 0.74                               | IF4H_MOUSE  | Eukaryotic translation initiation factor 4H;   |
| NIKRNDFQLI     | GIQDGYLSLLQDSGEVR      | -2.12                           | 1.01                               | IF5A1_MOUSE | Eukaryotic translation initiation factor 5A-1; |
| KQDFDENDIL     | RELEELSLEAQGIR         | 4.04                            | 5.09                               | IF2P_MOUSE  | Eukaryotic translation initiation factor 5B;   |
| SRMAKPEEVL     | VVENDQGEVVR            | 1.14                            | 0.99                               | XPO1_MOUSE  | Exportin-1;                                    |
| ACGSVTMSNP     | GESSFDLADR             | -0.01                           | -0.56                              | SODE_MOUSE  | Extracellular superoxide dismutase [Cu-Zn];    |
| LLAACGSVTM     | SNPGESSFDLADRLDPVEKIDR | -0.25                           | 0.16                               | SODE_MOUSE  | Extracellular superoxide dismutase [Cu-Zn];    |
| GPPPPAGGGG     | GAAGAGGGPPPGPPGAGDR    | -0.52                           | -0.03                              | FUBP2_MOUSE | Far upstream element-binding protein 2;        |
| TWKLVSSENF     | DDYMKEVGVGFATR         | -1.18                           | -0.03                              | FABP4_MOUSE | Fatty acid-binding protein, adipocyte;         |
| TESTVKTTFV     | SCNLGKFEDETTADGR       | -1.60                           | 2.01                               | FABP5_MOUSE | Fatty acid-binding protein, epidermal;         |
| VAGPQPAQTG     | APQGSGLGEYLFER         | 0.64                            | 1.68                               | FRIL1_MOUSE | Ferritin light chain 1;                        |
| RVAGPQPAQT     | GAPQGSGLGEYLFER        | -0.36                           | 0.82                               | FRIL1_MOUSE | Ferritin light chain 1;                        |
| HNLPLGRCE      | CEIGYELDR              | 1.14                            | 0.12                               | FBN1_MOUSE  | Fibrillin-1;                                   |
| AGSSSGSVQ      | GASAGGLAADASR          | 2.12                            | 0.32                               | FILA_MOUSE  | Filaggrin;                                     |
| GQSSANRRA      | GSSSGSVQGASAGGLAADASR  | 1.52                            | 2.27                               | FILA_MOUSE  | Filaggrin;                                     |
| QSSANRRAG      | SSSGSVQGASAGGLAADASR   | 2.38                            | 2.43                               | FILA_MOUSE  | Filaggrin;                                     |
| RSPRRSPVHP     | ESSEGEHSHVVPQR         | 0.93                            | -5.64                              | FILA2_MOUSE | Filaggrin-2;                                   |
| SPRRSPVHPE     | SSEGEHSHVVPQR          | 0.77                            | 0.06                               | FILA2_MOUSE | Filaggrin-2;                                   |
| SVCVHRLRN      | GTLDNPSLDETAYER        | 0.26                            | 0.60                               | FRDA_MOUSE  | Frataxin, mitochondrial;                       |
| QSCVHRLRN      | LGTLDNPSLDETAYER       | 0.70                            | 1.02                               | FRDA_MOUSE  | Frataxin, mitochondrial;                       |
| GHACTQKFSN     | EEIAMATVTALR           | 0.20                            | -0.45                              | ALDOA_MOUSE | Fructose-bisphosphate aldolase A;              |
| KGVVPLAGTN     | GETTTQGLDGLSER         | 0.28                            | -0.34                              | ALDOA_MOUSE | Fructose-bisphosphate aldolase A;              |
| ARYASICQQN     | GIVPIVEILPDGDHDLKR     | 0.07                            | -0.81                              | ALDOA_MOUSE | Fructose-bisphosphate aldolase A;              |
| TPGHACTQKF     | SNEEIAMATVTALR         | -1.74                           | -0.20                              | ALDOA_MOUSE | Fructose-bisphosphate aldolase A;              |
| RYASICQQNG     | IVPIVEILPDGDHDLKR      | 1.01                            | 0.60                               | ALDOA_MOUSE | Fructose-bisphosphate aldolase A;              |
| VDKGVVPLAG     | TNGETTTQGLDGLSER       | 0.60                            | 0.03                               | ALDOA_MOUSE | Fructose-bisphosphate aldolase A;              |
| WRCVLKIGEH     | TPSALAIMENANVLAR       | 0.77                            | 0.43                               | ALDOA_MOUSE | Fructose-bisphosphate aldolase A;              |
| PNMVTGPHAC     | TQKFSNEEIAMATVTALR     | 0.76                            | 0.33                               | ALDOA_MOUSE | Fructose-bisphosphate aldolase A;              |
| VVPLAGTNGE     | TTTQGLDGLSER           | 0.52                            | 0.20                               | ALDOA_MOUSE | Fructose-bisphosphate aldolase A;              |
| M              | ACGLVASNLNLKPGECKVVR   | 0.21                            | 0.07                               | LEG1_MOUSE  | Galectin-1;                                    |
| QAGRFHVNL      | CGEEQGADAALHFNPR       | 1.44                            | 1.46                               | LEG7_MOUSE  | Galectin-7;                                    |
| AGRFHVNL       | GEEQGADAALHFNPR        | 1.31                            | 1.43                               | LEG7_MOUSE  | Galectin-7;                                    |
| M              | SATHHKTSLPQGVVR        | -6.64                           | -3.32                              | LEG7_MOUSE  | Galectin-7;                                    |
| DQAGRFHVNL     | LCGEEQGADAALHFNPR      | 1.00                            | -4.64                              | LEG7_MOUSE  | Galectin-7;                                    |
| PDQAGRFHVNL    | LLCGEEQGADAALHFNPR     | -0.32                           | 0.67                               | LEG7_MOUSE  | Galectin-7;                                    |
| EDPNQFVPLN     | TNPTEVLEKR             | -0.54                           | -0.40                              | ADDG_MOUSE  | Gamma-adducin;                                 |

Table S9, Tholen et al.

| Non Prime Site | Prime Site                  | Fold change (log <sub>2</sub> ) of ASAPRatio (replicate 1) | Fold change (log <sub>2</sub> ) of ASAPRatio (replicate 2) | Uniprot ID  | Protein Name                                               |
|----------------|-----------------------------|------------------------------------------------------------|------------------------------------------------------------|-------------|------------------------------------------------------------|
| M              | GLLSQGSPLSWEETQR            | 0.77                                                       | 0.52                                                       | GSH1_MOUSE  | Glutamate--cysteine ligase catalytic subunit;              |
| LLWAAACAQS     | EQDFYDFKAVNIR               | -0.32                                                      | -1.03                                                      | GPX7_MOUSE  | Glutathione peroxidase 7;                                  |
| AGNKVTYVDF     | LVYDVLQHR                   | -0.36                                                      | -0.94                                                      | GSTM2_MOUSE | Glutathione S-transferase Mu 2;                            |
| NGKLTGMAFR     | VPTPNVSVVDLTCR              | -1.29                                                      | 1.45                                                       | G3PT_MOUSE  | Glyceraldehyde-3-phosphate dehydrogenase, testis-specific; |
| IIPASTGAAK     | AVGKVIPELNGKLTGMAFR         | -1.56                                                      | 0.01                                                       | G3P_MOUSE   | Glyceraldehyde-3-phosphate dehydrogenase;                  |
| IALNDNFVKL     | ISWYDNEYGYSNR               | -1.56                                                      | 1.28                                                       | G3P_MOUSE   | Glyceraldehyde-3-phosphate dehydrogenase;                  |
| LNGKLTGMAF     | RVPTPNVSVVDLTCR             | -0.43                                                      | 0.31                                                       | G3P_MOUSE   | Glyceraldehyde-3-phosphate dehydrogenase;                  |
| ALNDNFVKLI     | SWYDNEYGYSNR                | -0.27                                                      | 0.75                                                       | G3P_MOUSE   | Glyceraldehyde-3-phosphate dehydrogenase;                  |
| LAHFDPRVTM     | WVFEEDIGGR                  | 3.12                                                       | 2.66                                                       | GPDA_MOUSE  | Glycerol-3-phosphate dehydrogenase [NAD+], cytoplasmic;    |
|                | MKVFTGPLPAEGR               | 0.52                                                       | -0.67                                                      | GRHPR_MOUSE | Glyoxylate reductase/hydroxypyruvate reductase;            |
| TSQLTAFPLG     | APPPWPIQDSSGPELGSR          | 0.08                                                       | 0.54                                                       | GORS1_MOUSE | Golgi reassembly-stacking protein 1;                       |
| MPGVGLPELG     | SPGLPPLSLPPR                | -0.38                                                      | -0.06                                                      | GORS2_MOUSE | Golgi reassembly-stacking protein 2;                       |
| LTIQLIQNHF     | VDEYDPTIEDSYR               | 0.18                                                       | 0.60                                                       | RASH_MOUSE  | GTPase HRas;                                               |
| PKHPVDQVQR     | IIGGSMDAKGSFPWQAK           | -0.86                                                      | 0.12                                                       | HPT_MOUSE   | Haptoglobin;                                               |
| TKQTQFTTY      | SDNQPGVLIQVYEGER            | -1.52                                                      | 0.39                                                       | HS71A_MOUSE | Heat shock 70 kDa protein 1A;                              |
| VVLLFETALL     | SSGFSLEDPQTHSNR             | 0.56                                                       | 1.66                                                       | HS90B_MOUSE | Heat shock protein HSP 90-beta;                            |
| VLRPPGGGSN     | FSLGFDEPAEQPVR              | 0.84                                                       | 0.79                                                       | HN1_MOUSE   | Hematological and neurological expressed 1 protein;        |
| RPPGGGSNFS     | LGDFEPAEQPVR                | 1.32                                                       | 2.00                                                       | HN1_MOUSE   | Hematological and neurological expressed 1 protein;        |
| SNIKAAWGKI     | GGHGAEYGAELER               | -0.62                                                      | -0.36                                                      | HBA_MOUSE   | Hemoglobin subunit alpha;                                  |
| AEKAAVSCLW     | GKVNSDEVGGEALGR             | 0.00                                                       | -0.01                                                      | HBB1_MOUSE  | Hemoglobin subunit beta-1;                                 |
| DAEKAAVSCL     | WGKVNSDEVGGEALGR            | -0.27                                                      | -3.84                                                      | HBB1_MOUSE  | Hemoglobin subunit beta-1;                                 |
| AEKSAVSCLW     | AKVNPDEVGGEALGR             | -0.94                                                      | 0.89                                                       | HBB2_MOUSE  | Hemoglobin subunit beta-2;                                 |
| MVHL           | TDAEKSAVSCLWAKVNPDEVGGEALGR | -6.64                                                      | -5.06                                                      | HBB2_MOUSE  | Hemoglobin subunit beta-2;                                 |
| NSTHPMHSRC     | SPDPGLTALLSDHR              | 0.18                                                       | 0.79                                                       | HEMO_MOUSE  | Hemopexin;                                                 |
| KDLTEYLSRF     | GEVVDCTIKTDPVTGR            | 1.14                                                       | -0.89                                                      | HNRDL_MOUSE | Heterogeneous nuclear ribonucleoprotein D-like;            |
| IPTLEEQHY      | KGSDFDCELR                  | -0.92                                                      | -0.94                                                      | HNRPK_MOUSE | Heterogeneous nuclear ribonucleoprotein K;                 |
| TWSPSEWQMA     | YEPQGGSGYDYSYAGGR           | -0.49                                                      | -0.06                                                      | HNRPK_MOUSE | Heterogeneous nuclear ribonucleoprotein K;                 |
| GGRPAMEPGN     | GSLDLGGDAAGR                | 1.63                                                       | 1.98                                                       | HNRPU_MOUSE | Heterogeneous nuclear ribonucleoprotein U;                 |
| TEEHHLRDYF     | EEYGKIDTIEIITDR             | 2.10                                                       | -0.04                                                      | ROA2_MOUSE  | Heterogeneous nuclear ribonucleoproteins A2/B1;            |
| GGNFGGDSR      | GGGGNFGPGPGSNFR             | -0.25                                                      | 1.01                                                       | ROA2_MOUSE  | Heterogeneous nuclear ribonucleoproteins A2/B1;            |
| MADEIAKAQ      | VAQPGGDITFGKIIR             | -0.25                                                      | -0.38                                                      | HINT1_MOUSE | Histidine triad nucleotide-binding protein 1;              |
|                |                             |                                                            |                                                            |             | Histidine triad nucleotide-binding protein 2,              |
| GARGAQVRGN     | AGVSDGSEVAKAQKAAPGGASPTIFSR | -0.07                                                      | -0.23                                                      | HINT2_MOUSE | mitochondrial;                                             |
| SKKSTDHPKY     | SDMIVAAIQAEKNR              | -0.07                                                      | 0.44                                                       | H10_MOUSE   | Histone H1.0;                                              |
| VGLTSLRAVS     | TSSMGTLPKQVKIVEGPR          | -0.43                                                      | -0.15                                                      | HMGCL_MOUSE | Hydroxymethylglutaryl-CoA lyase, mitochondrial;            |



Table S9, Tholen et al.

| Non Prime Site | Prime Site                | Fold change (log <sub>2</sub> )<br>of ASAPRatio<br>(replicate 1) | Fold change (log <sub>2</sub> ) of<br>ASAPRatio<br>(replicate 2) | Uniprot ID  | Protein Name                                                                                                                |
|----------------|---------------------------|------------------------------------------------------------------|------------------------------------------------------------------|-------------|-----------------------------------------------------------------------------------------------------------------------------|
| KIKGLVRAPQ     | VYILPPPAEQLSR             | -0.74                                                            | -0.69                                                            | IGG2B_MOUSE | Ig gamma-2B chain C region;                                                                                                 |
| LMAVVGINS      | EVQLQQSGAELVR             | 0.60                                                             | 0.31                                                             | HVM02_MOUSE | Ig heavy chain V region 93G7;                                                                                               |
| LVLILKGVQC     | DVQLVESGGGLVQPGGSR        | 3.69                                                             | 0.03                                                             | HVM16_MOUSE | Ig heavy chain V region MOPC 21;                                                                                            |
| E              | VKLVESGGGLVQPGGSLR        | -0.11                                                            | 0.50                                                             | HVM17_MOUSE | Ig heavy chain V region MOPC 47A;                                                                                           |
| LSGTAGVQSQ     | VQLQQSGAELVK              | 0.89                                                             | 1.37                                                             | HVM00_MOUSE | Ig heavy chain V region;                                                                                                    |
|                | NIVLTQSPASLAVSLGQR        | 3.49                                                             | 1.21                                                             | KV3A9_MOUSE | Ig kappa chain V-III region MOPC 63;                                                                                        |
| LLWVPGSTGD     | IVLTQSPASLAVSLGQR         | 0.50                                                             | -0.30                                                            | KV3A1_MOUSE | Ig kappa chain V-III region PC 2880/PC 1229;                                                                                |
| D              | IQMTQTPSSLSASLGDR         | -3.84                                                            | -1.29                                                            | KV5AF_MOUSE | Ig kappa chain V-V region HP 91A3;                                                                                          |
| LLFWIPASRG     | DILLTQSPAILSVSPGER        | -0.45                                                            | -0.62                                                            | KV5A9_MOUSE | Ig kappa chain V-V region L7;                                                                                               |
| D              | IQMTQTSSLSASLGDR          | 1.23                                                             | -0.25                                                            | KV5AA_MOUSE | Ig kappa chain V-V region MOPC 173;                                                                                         |
| ILLWLYGADG     | NIVMTQSPKMSMSVGER         | -1.06                                                            | -1.56                                                            | KV5A2_MOUSE | Ig kappa chain V-V region MOPC 21;                                                                                          |
| LLLWFPGARC     | DIQMTQSPSSLSASLGER        | 0.45                                                             | -1.03                                                            | KV5A7_MOUSE | Ig kappa chain V-V region MOPC 41;                                                                                          |
| IFVKAVLVTG     | DDEATILADNCKMCTR          | -0.84                                                            | -2.94                                                            | IGJ_MOUSE   | Immunoglobulin J chain;                                                                                                     |
| RRSGRLLTRW     | ETTSSIPEAGEGQIR           | 0.39                                                             | 0.75                                                             | ISCA2_MOUSE | Iron-sulfur cluster assembly 2 homolog, mitochondrial;<br>Isocitrate dehydrogenase [NAD] subunit gamma 1,<br>mitochondrial; |
| FRHACVPVDF     | EEVHVSSNADEEDIR           | 1.01                                                             | 1.09                                                             | IDHG1_MOUSE | Isocitrate dehydrogenase [NAD] subunit gamma 1,<br>mitochondrial;                                                           |
| AAHVAPRRSI     | SSQQTIPPSAKYGGGR          | 0.12                                                             | 0.06                                                             | IDHG1_MOUSE | Isocitrate dehydrogenase [NAD] subunit gamma 1,<br>mitochondrial;                                                           |
| LIKEKLILPY     | VELDLHSYDLGIENR           | -1.52                                                            | 0.30                                                             | IDHC_MOUSE  | Isocitrate dehydrogenase [NADP] cytoplasmic;                                                                                |
| SSSSSNFHI      | SVEESVDGKVVSSR            | 1.16                                                             | 2.18                                                             | K1C15_MOUSE | Keratin, type I cytoskeletal 15;                                                                                            |
| GFSSRSLYSL     | GGSKSIFGNLVGR             | -0.30                                                            | -0.06                                                            | K2C1B_MOUSE | Keratin, type II cytoskeletal 1b;                                                                                           |
| SRTTSTTSTM     | CGYYGNYYGGR               | -1.43                                                            | 1.26                                                             | KR168_MOUSE | Keratin-associated protein 16-8;                                                                                            |
| ESVRSPGSSR     | TEVLVTPAGVASKR            | 2.09                                                             | 1.73                                                             | LAD1_MOUSE  | Ladinin-1;                                                                                                                  |
| NRPLAAGAN      | SKGPPDFSSDEEREPTVLSGASVGR | 1.18                                                             | -0.56                                                            | LAP2A_MOUSE | Lamina-associated polypeptide 2, isoforms alpha/zeta;                                                                       |
| M              | TSDQDAKVVAEPQAQR          | 0.04                                                             | -0.25                                                            | LAR4B_MOUSE | La-related protein 4B;                                                                                                      |
| QNADCPKNSG     | TVGAVALDCR                | 1.26                                                             | -2.06                                                            | ASGL1_MOUSE | L-asparaginase;                                                                                                             |
| LLLPPNAYA      | ADTPGEATPPPR              | 0.67                                                             | -0.14                                                            | MESD_MOUSE  | LDLR chaperone MESD;                                                                                                        |
| CGLSDPNLTL     | SSGKDGQCPLVVEQVR          | 0.86                                                             | 1.29                                                             | LRC47_MOUSE | Leucine-rich repeat-containing protein 47;                                                                                  |
| PQQQQMTSSY     | GGYKEPAAPVSIQR            | 0.11                                                             | 0.62                                                             | LASP1_MOUSE | LIM and SH3 domain protein 1;                                                                                               |
| QQQQMTSSYG     | GYKEPAAPVSIQR             | -0.03                                                            | -0.92                                                            | LASP1_MOUSE | LIM and SH3 domain protein 1;                                                                                               |
| QQMTSSYGGY     | KEPAAPVSIQR               | 0.42                                                             | 1.01                                                             | LASP1_MOUSE | LIM and SH3 domain protein 1;                                                                                               |
| CNAHYPKQSF     | TMVADTPENLR               | -0.22                                                            | 0.14                                                             | LASP1_MOUSE | LIM and SH3 domain protein 1;                                                                                               |
| ILAQMTGTEY     | MQDPDEEALRR               | 1.27                                                             | 1.13                                                             | LDB3_MOUSE  | LIM domain-binding protein 3;                                                                                               |
| QSRFRILAQ      | MTGTEYMQDPDEEALRR         | 0.11                                                             | -6.64                                                            | LDB3_MOUSE  | LIM domain-binding protein 3;                                                                                               |
| QSRFRILAQ      | MTGTEYMQDPDEEALR          | -0.01                                                            | 1.42                                                             | LDB3_MOUSE  | LIM domain-binding protein 3;                                                                                               |
| SFRILAQMTG     | TEYMQDPDEEALR             | -0.36                                                            | -0.52                                                            | LDB3_MOUSE  | LIM domain-binding protein 3;                                                                                               |

Table S9, Tholen et al.

| Non Prime Site | Prime Site             | Fold change (log <sub>2</sub> ) of ASAPRatio (replicate 1) | Fold change (log <sub>2</sub> ) of ASAPRatio (replicate 2) | Uniprot ID   | Protein Name                                                                                                |
|----------------|------------------------|------------------------------------------------------------|------------------------------------------------------------|--------------|-------------------------------------------------------------------------------------------------------------|
| HSLRTAAVLQ     | GQVVQFKLSDIGEGIR       | 0.35                                                       | 0.07                                                       | ODB2_MOUSE   | Lipoamide acyltransferase component of branched-chain alpha-keto acid dehydrogenase complex, mitochondrial; |
| IWTRRHPVQG     | ADLVQDLSISTCR          | 0.04                                                       | -0.40                                                      | LYVE1_MOUSE  | Lymphatic vessel endothelial hyaluronic acid receptor 1;                                                    |
| ALLCAGRAQG     | LQCYECYGVPIETSCPAVTCR  | 0.50                                                       | -1.43                                                      | LY6C1_MOUSE  | Lymphocyte antigen 6C1;                                                                                     |
| QSKGQWLTLE     | APLDTINVHLR            | 0.63                                                       | -0.12                                                      | LYAG_MOUSE   | Lysosomal alpha-glucosidase;                                                                                |
| PTSYPEPSKL     | DPTSVTLKPMER           | 0.76                                                       | 0.68                                                       | MA2B1_MOUSE  | Lysosomal alpha-mannosidase;                                                                                |
| GPTSYPEPSK     | LDPTSVTLKPMER          | 0.36                                                       | 0.39                                                       | MA2B1_MOUSE  | Lysosomal alpha-mannosidase;                                                                                |
| SWASRNEAAP     | DQDEIDCLPLGAKQPSFR     | -0.11                                                      | 0.19                                                       | PPGB_MOUSE   | Lysosomal protective protein;                                                                               |
| LLATVWHGQG     | APVIEPSGPELVVEPGETVTLR | -0.11                                                      | 0.03                                                       | CSF1R_MOUSE  | Macrophage colony-stimulating factor 1 receptor;                                                            |
| MYTPIPQ        | SGSPFPASVQDPGLHIWR     | -2.64                                                      | -1.52                                                      | CAPG_MOUSE   | Macrophage-capping protein;                                                                                 |
| LWVSLVATLLG    | SKWPEPVFGR             | 0.07                                                       | 0.03                                                       | MASP2_MOUSE  | Mannan-binding lectin serine protease 2;                                                                    |
| ALSVLPDSRA     | LRPGDCEVCISYLGR        | 1.20                                                       | 1.54                                                       | MANF_MOUSE   | Mesencephalic astrocyte-derived neurotrophic factor;                                                        |
| ISRRLVSDSG     | SLAEVPKEAPKVGILGSGDFAR | -0.15                                                      | 1.47                                                       | STEA3_MOUSE  | Metalloreductase STEAP3;                                                                                    |
| EKAKREVCSW     | TVEGDVNTDPWAGYR        | 0.01                                                       | 0.29                                                       | AMPM1_MOUSE  | Methionine aminopeptidase 1;                                                                                |
| QTSVAIGRSF     | STPQSQFQESSPVWKLGR     | 0.35                                                       | 0.10                                                       | MCEE_MOUSE   | Methylmalonyl-CoA epimerase, mitochondrial;                                                                 |
| HRDDGLADLL     | FVSSGPTNASAFTR         | 0.08                                                       | 0.07                                                       | MAP4_MOUSE   | Microtubule-associated protein 4;                                                                           |
| DDGLADLLFV     | SSGPTNASAFTR           | 1.05                                                       | 1.92                                                       | MAP4_MOUSE   | Microtubule-associated protein 4;                                                                           |
| KGYMRPTKSR     | GLTPDLPKASQER          | -0.32                                                      | -0.56                                                      | F7CK47_MOUSE | Microtubule-associated protein;                                                                             |
| GGSKGPVDTF     | SAVLTTQGKASDVLVQGEGR   | 0.39                                                       | -0.30                                                      | MAST4_MOUSE  | Microtubule-associated serine/threonine-protein kinase 4;                                                   |
| KKLNKLSFLY     | LDHNDLESVPPNLPESLR     | -0.15                                                      | -2.00                                                      | MIME_MOUSE   | Mimecan;                                                                                                    |
| AQAYKALKDY     | KSSLSDISLLQIEPR        | 0.77                                                       | 0.18                                                       | TOM34_MOUSE  | Mitochondrial import receptor subunit TOM34;                                                                |
| QAYKALKDYK     | SSLSDISLLQIEPR         | -0.67                                                      | 0.32                                                       | TOM34_MOUSE  | Mitochondrial import receptor subunit TOM34;                                                                |
| DIKSKTYQVM     | RDYEQAGSAAPSVFSR       | 1.04                                                       | 1.04                                                       | MSTN1_MOUSE  | Musculoskeletal embryonic nuclear protein 1;                                                                |
| SLPAVVVETF     | SATVNGAVEGSAGTGR       | -0.22                                                      | 0.06                                                       | BIN1_MOUSE   | Myc box-dependent-interacting protein 1;                                                                    |
| LPMMQAISSN     | KDQGGYEDFVEGLR         | 0.56                                                       | 0.06                                                       | MYL1_MOUSE   | Myosin light chain 1/3, skeletal muscle isoform;                                                            |
| EGSSNVFSMF     | DQTQIQEFKEAFTVIDQNR    | 0.16                                                       | -2.74                                                      | MLRS_MOUSE   | Myosin regulatory light chain 2, skeletal muscle isoform;                                                   |
| MFDQTQIQEF     | KEAFTVIDQNR            | 0.23                                                       | 1.32                                                       | MLRS_MOUSE   | Myosin regulatory light chain 2, skeletal muscle isoform;                                                   |
| LDPEGKGTIK     | KQFLEELLTTCQDR         | -0.92                                                      | 0.28                                                       | MLRS_MOUSE   | Myosin regulatory light chain 2, skeletal muscle isoform;                                                   |
| VFSMFDQTQI     | QEFKEAFTVIDQNR         | -0.14                                                      | 0.72                                                       | MLRS_MOUSE   | Myosin regulatory light chain 2, skeletal muscle isoform;                                                   |
| RNLHKTAVHN     | GAGGALFVHR             | 0.37                                                       | -0.34                                                      | NDUV2_MOUSE  | NADH dehydrogenase [ubiquinone] flavoprotein 2, mitochondrial;                                              |
| PFAGGGYRLG     | AAPEEESAYVAGER         | -0.20                                                      | -2.47                                                      | NSF1C_MOUSE  | NSFL1 cofactor p47;                                                                                         |
| KPTDGASSSN     | CVTDISHLVR             | 0.78                                                       | 2.29                                                       | NASP_MOUSE   | Nuclear autoantigenic sperm protein;                                                                        |
| SKSLSPGLLG     | YQQPSLLAAPLGLADAHR     | -1.22                                                      | 1.21                                                       | NFAC2_MOUSE  | Nuclear factor of activated T-cells, cytoplasmic 2;                                                         |
| SVTREDGQY      | AAYSNAVGAAYSSAR        | -6.64                                                      | -4.64                                                      | OBSCN_MOUSE  | Obscurin;                                                                                                   |
| GRRGQFGARG     | VSEGSAAAMAAGESMAQR     | 0.03                                                       | 0.07                                                       | ORN_MOUSE    | Oligoribonuclease, mitochondrial;                                                                           |

Table S9, Tholen et al.

| Non Prime Site | Prime Site              | Fold change (log <sub>2</sub> ) of ASAPRatio (replicate 1) | Fold change (log <sub>2</sub> ) of ASAPRatio (replicate 2) | Uniprot ID  | Protein Name                                            |
|----------------|-------------------------|------------------------------------------------------------|------------------------------------------------------------|-------------|---------------------------------------------------------|
| LQGGGLGPLS     | LLPPDLPDLEPECR          | 0.67                                                       | 0.63                                                       | OSTM1_MOUSE | Osteopetrosis-associated transmembrane protein 1;       |
| LEITESQSAD     | AEP PPPPKPDL SR         | -0.14                                                      | 0.66                                                       | ZDHC5_MOUSE | Palmitoyltransferase ZDHC5;                             |
| KVFHILDKDK     | SGFIEDELGSILKGFSSDAR    | -0.76                                                      | -0.45                                                      | PRVA_MOUSE  | Parvalbumin alpha;                                      |
| EPPKQSTSFL     | VLQEILESDGKGDPNKPSGFR   | 0.56                                                       | 0.20                                                       | PDLI1_MOUSE | PDZ and LIM domain protein 1;                           |
| LNLKQKGYFF     | VEGELYCETHAR            | 0.51                                                       | 0.45                                                       | PDLI3_MOUSE | PDZ and LIM domain protein 3;                           |
| PRQPTVTSVC     | SESAQELAEGQR            | 0.12                                                       | 0.65                                                       | PDLI5_MOUSE | PDZ and LIM domain protein 5;                           |
| MVNPTVF        | FDITADDEPLGR            | -0.86                                                      | 1.70                                                       | PPIA_MOUSE  | Peptidyl-prolyl cis-trans isomerase A;                  |
| M              | VNPTVFFDITADDEPLGR      | 0.53                                                       | 0.99                                                       | PPIA_MOUSE  | Peptidyl-prolyl cis-trans isomerase A;                  |
| KGPKVTVKVY     | FDLQIGDES VGR           | -0.04                                                      | -0.67                                                      | PPIB_MOUSE  | Peptidyl-prolyl cis-trans isomerase B;                  |
| M              | GVQVETISPGDGR           | 1.27                                                       | 1.53                                                       | FKB1A_MOUSE | Peptidyl-prolyl cis-trans isomerase FKBP1A;             |
| M              | GVEIETISPGDGR           | -0.27                                                      | 0.35                                                       | FKB1B_MOUSE | Peptidyl-prolyl cis-trans isomerase FKBP1B;             |
| GQAAPVLGLA     | VSSELQIQSFVPDECP R      | -0.32                                                      | -0.58                                                      | FKBP9_MOUSE | Peptidyl-prolyl cis-trans isomerase FKBP9;              |
| MSMN           | KGPTLLDGDLP EQENVLQR    | 0.04                                                       | 0.97                                                       | PLIN1_MOUSE | Perilipin-1;                                            |
| LSLMEPESEF     | RDIDNPSAE AER           | 2.62                                                       | 2.41                                                       | PLIN1_MOUSE | Perilipin-1;                                            |
| WDGLDPGKLY     | TLVLTDPDAPSR            | -1.06                                                      | 0.99                                                       | PEBP1_MOUSE | Phosphatidylethanolamine-binding protein 1;             |
| STAASRATTL     | SNAVSSLASTGLSLTKVDER    | -0.79                                                      | 1.15                                                       | PICA_MOUSE  | Phosphatidylinositol-binding clathrin assembly protein; |
| MVKIVTVK       | TQAYPDQKPGTSGLR         | -0.52                                                      | -1.89                                                      | PGM1_MOUSE  | Phosphoglucomutase-1;                                   |
| GGVGGPGAK      | SAAQAAAQ TNSNAAGKQLR    | 1.25                                                       | 0.07                                                       | PAIRB_MOUSE | Plasminogen activator inhibitor 1 RNA-binding protein;  |
| LREDPAYLHY     | YDPAGGEDPLGAVHLR        | 0.50                                                       | 0.60                                                       | PLEK_MOUSE  | Pleckstrin;                                             |
| EVKGYWASLD     | ASTQTTHELTIPNNLIGCIGR   | -0.67                                                      | -0.17                                                      | PCBP1_MOUSE | Poly(rC)-binding protein 1;                             |
| LDAYSIQGQH     | TISPLDLAKLNQVAR         | 0.11                                                       | 0.14                                                       | PCBP1_MOUSE | Poly(rC)-binding protein 1;                             |
| IREGEVEVLK     | ATEMVEVGPEDDEVGAER      | -0.23                                                      | -0.84                                                      | PTRF_MOUSE  | Polymerase I and transcript release factor;             |
| KIREGEVEVL     | KATEMVEVGPEDDEVGAER     | -0.84                                                      | -1.64                                                      | PTRF_MOUSE  | Polymerase I and transcript release factor;             |
| EVEVLKATEM     | VEVGPEDDEVGAER          | -0.40                                                      | 0.86                                                       | PTRF_MOUSE  | Polymerase I and transcript release factor;             |
| SVQSGNLALA     | ASAAAVDAGMAMAGQSPVLR    | 0.26                                                       | 1.25                                                       | PTBP1_MOUSE | Polypyrimidine tract-binding protein 1;                 |
| AAAAAASRI      | AIPGLAGAGNSVLLVSNL NPER | -1.89                                                      | -0.60                                                      | PTBP1_MOUSE | Polypyrimidine tract-binding protein 1;                 |
| TNLRDDIMRL     | DDTVHVVIATPGR           | 2.00                                                       | 2.21                                                       | DDX6_MOUSE  | Probable ATP-dependent RNA helicase DDX6;               |
| DVEPD TYCRY    | DSVSVFNGAVSDDSKR        | -0.23                                                      | -0.07                                                      | PCOC1_MOUSE | Procollagen C-endopeptidase enhancer 1;                 |
| PSNQVIMLTF     | GKFDVEPD TYCR           | -1.47                                                      | -6.64                                                      | PCOC1_MOUSE | Procollagen C-endopeptidase enhancer 1;                 |
| IAPSNQVIML     | TFGKFDVEPD TYCR         | -0.94                                                      | -0.62                                                      | PCOC1_MOUSE | Procollagen C-endopeptidase enhancer 1;                 |
| SEGNELLVQF     | VSDL SVTADGFSASYR       | 0.82                                                       | 0.12                                                       | PCOC1_MOUSE | Procollagen C-endopeptidase enhancer 1;                 |
| VWAAVPGKTF     | VSITPAEVGVLVGKDR        | -1.43                                                      | 0.37                                                       | PROF1_MOUSE | Profilin-1;                                             |
| GKLPSLAFLY     | MEKNQLEEVPSALPR         | -0.97                                                      | 0.01                                                       | PRELP_MOUSE | Prolargin;                                              |
| LGKLPSLAFL     | YMEKNQLEEVPSALPR        | 0.28                                                       | -0.43                                                      | PRELP_MOUSE | Prolargin;                                              |
| LLVILPATGS     | DPVLCFTQYEESGR          | 0.49                                                       | 0.57                                                       | PROP_MOUSE  | Properdin;                                              |
| PRKIISLSQL     | LQEDSLNVADLSSLR         | 0.35                                                       | 0.49                                                       | PSME2_MOUSE | Proteasome activator complex subunit 2;                 |
| FKLPKARKTG     | TTIAGVVYKDGIVLGADTR     | 0.21                                                       | 0.64                                                       | PSB7_MOUSE  | Proteasome subunit beta type-7;                         |

Table S9, Tholen et al.

| Non Prime Site | Prime Site             | Fold change (log <sub>2</sub> )<br>of ASAPRatio<br>(replicate 1) | Fold change (log <sub>2</sub> ) of<br>ASAPRatio<br>(replicate 2) | Uniprot ID  | Protein Name                                     |
|----------------|------------------------|------------------------------------------------------------------|------------------------------------------------------------------|-------------|--------------------------------------------------|
| LLTACLASRA     | DPASTLPDIQVQENFSESR    | 0.39                                                             | -0.30                                                            | AMBP_MOUSE  | Protein AMBP;                                    |
| A              | SDVLELTDENFESR         | -0.04                                                            | 0.77                                                             | PDIA3_MOUSE | Protein disulfide-isomerase A3;                  |
| SCTFFLAVSG     | LYSSDDVIELTPSNFNR      | 0.16                                                             | 0.10                                                             | PDIA6_MOUSE | Protein disulfide-isomerase A6;                  |
| CTFFLAVSGL     | YSSDDVIELTPSNFNR       | 0.60                                                             | 0.40                                                             | PDIA6_MOUSE | Protein disulfide-isomerase A6;                  |
| SLVSQGMQIL     | ALSEASQTDPSGPPPR       | -0.25                                                            | -0.92                                                            | F134C_MOUSE | Protein FAM134C;                                 |
| VARGKLVLL      | FKEETEIPAR             | 0.01                                                             | 1.23                                                             | PRDBP_MOUSE | Protein kinase C delta-binding protein;          |
| VREKEAQPPE     | AEAPGVDLILPEGR         | -0.36                                                            | 0.57                                                             | NIBAN_MOUSE | Protein Niban;                                   |
| SRRSTQGVTL     | TDLQEAETIGR            | -0.03                                                            | 1.05                                                             | MYPT1_MOUSE | Protein phosphatase 1 regulatory subunit 12A;    |
| ARQSRRSTQG     | VTLTDLQEAETIGR         | -0.11                                                            | -0.69                                                            | MYPT1_MOUSE | Protein phosphatase 1 regulatory subunit 12A;    |
| LSKDITANTW     | AVTVDPSTNAKR           | -6.64                                                            | -2.74                                                            | PPR3A_MOUSE | Protein phosphatase 1 regulatory subunit 3A;     |
| AQAVTAYIIK     | TTLESTPESASAR          | -0.76                                                            | -0.12                                                            | PPR3A_MOUSE | Protein phosphatase 1 regulatory subunit 3A;     |
| ATSASGALLS     | APPSGPPISGFSVGTTYDITR  | -0.12                                                            | -0.25                                                            | PRRC1_MOUSE | Protein PRRC1;                                   |
| KGSVAGGAVY     | LVYDQELLGSPDKSEAALR    | 0.16                                                             | -0.45                                                            | QIL1_MOUSE  | Protein QIL1;                                    |
| QLSKTEFLSF     | MNTELAFTKNQKDPGVLDLR   | -0.11                                                            | 0.60                                                             | S10AB_MOUSE | Protein S100-A11;                                |
| YNKFMSVLDL     | NKDCEVDFGEYVR          | 0.99                                                             | 1.74                                                             | S10A3_MOUSE | Protein S100-A3;                                 |
| QQIITPIKA      | YSVLQATPTAKDEGR        | 0.12                                                             | -1.15                                                            | SMAG2_MOUSE | Protein Smaug homolog 2;                         |
| RSPGASRAAM     | SSDAQWLTAEEER          | -0.01                                                            | -0.60                                                            | PHS2_MOUSE  | Pterin-4-alpha-carbinolamine dehydratase 2;      |
| EQALEDFHSS     | FGPISEVVVKDR           | 1.73                                                             | 1.95                                                             | RBM3_MOUSE  | Putative RNA-binding protein 3;                  |
| TDEQALEDFH     | SSFGPISEVVVKDR         | -0.58                                                            | -2.25                                                            | RBM3_MOUSE  | Putative RNA-binding protein 3;                  |
| VLDGADCIML     | SGETAKGDYPLEAVR        | 0.37                                                             | -0.89                                                            | KPYM_MOUSE  | Pyruvate kinase isozymes M1/M2;                  |
| KNVREATESF     | ASDPILYRPVAVALDTKGPEIR | -1.18                                                            | -1.09                                                            | KPYM_MOUSE  | Pyruvate kinase isozymes M1/M2;                  |
| IENHEGVRRF     | DEILEASDGIMVAR         | -1.18                                                            | -1.03                                                            | KPYM_MOUSE  | Pyruvate kinase isozymes M1/M2;                  |
| QVEEYIADLY     | SEEPGEEPAWVQTER        | -0.79                                                            | 0.01                                                             | RCN3_MOUSE  | Reticulocalbin-3;                                |
| LTKYKKTLLG     | DVPVVADPTVPNVTVTR      | -0.52                                                            | -1.22                                                            | GDIR2_MOUSE | Rho GDP-dissociation inhibitor 2;                |
| SLTKYKKTLL     | GDVPVVADPTVPNVTVTR     | 0.43                                                             | -0.97                                                            | GDIR2_MOUSE | Rho GDP-dissociation inhibitor 2;                |
| QTPGMRRCSS     | SLPPIQAPSHPPQPPTQPR    | 1.06                                                             | 1.20                                                             | RHG17_MOUSE | Rho GTPase-activating protein 17;                |
| QDHPSSMGVY     | GQESGGFSGPGENR         | 0.54                                                             | 0.53                                                             | EWS_MOUSE   | RNA-binding protein EWS;                         |
| M              | APVEHVADAGAFRL         | -0.54                                                            | -1.32                                                            | NOB1_MOUSE  | RNA-binding protein NOB1;                        |
| ERGNPVIAQW     | EEVEDASEEAPLRDR        | 0.00                                                             | -2.18                                                            | SRCA_MOUSE  | Sarcalumenin;                                    |
| ERGNPVIAQW     | EEVEDASEEAPLR          | 2.17                                                             | -1.52                                                            | SRCA_MOUSE  | Sarcalumenin;                                    |
| LASLLSGQA      | EVEDASEEAPLR           | -0.76                                                            | -1.64                                                            | SRCA_MOUSE  | Sarcalumenin;                                    |
| MEPYS          | CDTFVALPPATVGNR        | 0.52                                                             | -0.45                                                            | SCRN3_MOUSE | Secernin-3;                                      |
| VIQHRPSQQY     | ATLDVYNPFENR           | -0.15                                                            | -1.18                                                            | SCAM3_MOUSE | Secretory carrier-associated membrane protein 3; |
| VLELKYTGNA     | SALLILPDQGR            | 3.47                                                             | 5.48                                                             | SPA3K_MOUSE | Serine protease inhibitor A3K;                   |
| PFPATHYSTL     | SKPAPLTGTLEVR          | -0.49                                                            | 1.73                                                             | PKN1_MOUSE  | Serine/threonine-protein kinase N1;              |
| MSDN           | GELEDKPPAPPVR          | 1.31                                                             | 2.66                                                             | PAK2_MOUSE  | Serine/threonine-protein kinase PAK 2;           |

Table S9, Tholen et al.

| Non Prime Site | Prime Site                 | Fold change (log <sub>2</sub> ) of ASAPRatio (replicate 1) | Fold change (log <sub>2</sub> ) of ASAPRatio (replicate 2) | Uniprot ID   | Protein Name                                                                       |
|----------------|----------------------------|------------------------------------------------------------|------------------------------------------------------------|--------------|------------------------------------------------------------------------------------|
| HRMTTLFCIN     | VLSEVCGQDITTKHMLPTVLR      | 0.93                                                       | 0.72                                                       | 2AAA_MOUSE   | Serine/threonine-protein phosphatase 2A 65 kDa regulatory subunit A alpha isoform; |
| PTKETGWASF     | SEFTSSLSTKESLR             | -0.86                                                      | -3.18                                                      | PP6R3_MOUSE  | Serine/threonine-protein phosphatase 6 regulatory subunit 3;                       |
| GGDVAFVKHT     | TIFEVLPEKADR               | 0.44                                                       | 0.66                                                       | TRFE_MOUSE   | Serotransferrin;                                                                   |
| GGGDVAFVKH     | TTIFEVLPEKADR              | 0.20                                                       | 1.07                                                       | TRFE_MOUSE   | Serotransferrin;                                                                   |
| KAVLSAEKLR     | DEEVHTGLGELLR              | 1.05                                                       | 1.51                                                       | SERPH_MOUSE  | Serpin H1;                                                                         |
| VLSAEKLRDE     | EVHTGLGELLR                | 0.68                                                       | 0.70                                                       | SERPH_MOUSE  | Serpin H1;                                                                         |
| DKRSALQSIN     | EWASQTTDQKLEVTKDVER        | 0.51                                                       | 0.89                                                       | SERPH_MOUSE  | Serpin H1;                                                                         |
| RDKRSALQSI     | NEWASQTTDQKLEVTKDVER       | 0.16                                                       | -2.64                                                      | SERPH_MOUSE  | Serpin H1;                                                                         |
| HSKINFRDKR     | SALQSINEWASQTTDQKLEVTKDVER | -2.40                                                      | -3.18                                                      | SERPH_MOUSE  | Serpin H1;                                                                         |
| NAILVRYTQK     | APQVSTPTLVEAAR             | -0.45                                                      | 0.28                                                       | ALBU_MOUSE   | Serum albumin;                                                                     |
| ARNLGRVGTK     | CCTLPEDQR                  | -0.18                                                      | 0.29                                                       | ALBU_MOUSE   | Serum albumin;                                                                     |
| TCKAADKDT      | CFSTEGPNLVTR               | -0.04                                                      | -0.34                                                      | ALBU_MOUSE   | Serum albumin;                                                                     |
| NLVKTNCDLY     | EKLGEYGFQNAIVR             | -0.58                                                      | -0.49                                                      | ALBU_MOUSE   | Serum albumin;                                                                     |
| DKLCAIPNLR     | ENYGELADCCTKQEPER          | 2.83                                                       | -2.64                                                      | ALBU_MOUSE   | Serum albumin;                                                                     |
| AANCDKSLHT     | LFGDKLCAIPNLR              | 0.03                                                       | 0.47                                                       | ALBU_MOUSE   | Serum albumin;                                                                     |
| KCCTLPEDQR     | LPCVEDYLSAILNR             | 3.27                                                       | 2.41                                                       | ALBU_MOUSE   | Serum albumin;                                                                     |
| AIPNLRENYG     | ELADCCTKQEPER              | -3.84                                                      | -2.74                                                      | ALBU_MOUSE   | Serum albumin;                                                                     |
| DTCKAADKD      | TCFSTEGPNLVTR              | 0.35                                                       | 1.15                                                       | ALBU_MOUSE   | Serum albumin;                                                                     |
| SAANCDKSLH     | TLFGDKLCAIPNLR             | -0.45                                                      | 0.54                                                       | ALBU_MOUSE   | Serum albumin;                                                                     |
| GFQNAIVRY      | TQKAPQVSTPTLVEAAR          | 0.50                                                       | 0.29                                                       | ALBU_MOUSE   | Serum albumin;                                                                     |
| GHPLYRKYML     | SVPHGIANEDIVSR             | 0.63                                                       | 0.73                                                       | SH319_MOUSE  | SH3 domain-containing protein 19;                                                  |
| PPPCGRELF      | DDPSYVNIQNLDKAR            | 0.25                                                       | 1.87                                                       | SHC1_MOUSE   | SHC-transforming protein 1;                                                        |
| LNDGDISLTY     | GDSTVNTESATASAPR           | 0.77                                                       | -0.42                                                      | BOQZV3_MOUSE | Sodium/hydrogen exchanger;                                                         |
| GKALKRQLPF     | RGDEGIFEEFIEER             | -0.32                                                      | -0.12                                                      | SNX12_MOUSE  | Sorting nexin-12;                                                                  |
| DAYGPPSNFL     | EIDVSNPQTVGVGR             | 0.36                                                       | 0.88                                                       | SNX3_MOUSE   | Sorting nexin-3;                                                                   |
| NDAYGPPSNF     | LEIDVSNPQTVGVGR            | -0.92                                                      | -0.67                                                      | SNX3_MOUSE   | Sorting nexin-3;                                                                   |
| GKAFLRQLPF     | RGDDGIFDDNFIEER            | -0.18                                                      | 0.35                                                       | SNX3_MOUSE   | Sorting nexin-3;                                                                   |
| MYIFPVHWQF     | GQLDQHPIIDGYLSHTEAPLR      | -0.12                                                      | -0.01                                                      | SPRC_MOUSE   | SPARC;                                                                             |
| ERHTLITEMV     | ALNPDFKPPADYKPPATR         | 0.60                                                       | 1.41                                                       | SF01_MOUSE   | Splicing factor 1;                                                                 |
| HGPPMDQYL      | GSTPVGSGVYR                | 0.61                                                       | 0.72                                                       | SF01_MOUSE   | Splicing factor 1;                                                                 |
| KLEERHTLI      | TEMVVALNPDKPPADYKPPATR     | 0.78                                                       | 0.40                                                       | SF01_MOUSE   | Splicing factor 1;                                                                 |
| ALSVRNLSPY     | VSNELLEAFSQFGPIER          | 0.94                                                       | 0.29                                                       | SFPQ_MOUSE   | Splicing factor, proline- and glutamine-rich;                                      |
| LWSAVGASNM     | AVVTCGSVVLLNTR             | -0.32                                                      | 0.53                                                       | SDF2_MOUSE   | Stromal cell-derived factor 2;                                                     |
| FQHVGTSVFL     | SVTGEQYGNPIR               | -0.69                                                      | -0.25                                                      | SDF2L_MOUSE  | Stromal cell-derived factor 2-like protein 1;                                      |
| EPAGTPRRSY     | ASGPGGLHADLLR              | 0.63                                                       | -0.15                                                      | SSDH_MOUSE   | Succinate-semialdehyde dehydrogenase, mitochondrial;                               |

Table S9, Tholen et al.

| Non Prime Site | Prime Site                | Fold change (log <sub>2</sub> ) of ASAPRatio (replicate 1) | Fold change (log <sub>2</sub> ) of ASAPRatio (replicate 2) | Uniprot ID  | Protein Name                                               |
|----------------|---------------------------|------------------------------------------------------------|------------------------------------------------------------|-------------|------------------------------------------------------------|
| AMKANTMSNY     | SLLPASLLDHR               | -1.22                                                      | -1.64                                                      | ST2B1_MOUSE | Sulfotransferase family cytosolic 2B member 1;             |
| AAMKANTMSN     | YLLPASLLDHR               | 0.66                                                       | 2.03                                                       | ST2B1_MOUSE | Sulfotransferase family cytosolic 2B member 1;             |
| ERRRQLAEKY     | GLTLDPEADSEYLSR           | 0.42                                                       | 0.62                                                       | SVIL_MOUSE  | Supervillin;                                               |
| LGTLPARAAH     | EDPVEKVIIEGFSR            | 0.51                                                       | 0.43                                                       | SBSN_MOUSE  | Suprabasin;                                                |
| FSRGLSNAER     | EVGKALEGINNGITQAGR        | -0.43                                                      | -1.32                                                      | SBSN_MOUSE  | Suprabasin;                                                |
| WQEGDKVIRP     | GVSQAGEEMEQFGQGV          | 0.01                                                       | 0.45                                                       | SBSN_MOUSE  | Suprabasin;                                                |
| KLTLELIDF      | YGIDNLLHYNR               | -0.34                                                      | -0.81                                                      | SFR1_MOUSE  | Swi5-dependent recombination DNA repair protein 1 homolog; |
| SLSKERHQCT     | SGPIVTLQGNKSTSPDPDWSSQLER | -0.30                                                      | -0.15                                                      | SYNP2_MOUSE | Synaptopodin-2;                                            |
| AKRQSRMEKY     | VVDSDTVQAHTVR             | 0.60                                                       | 0.15                                                       | SYNP2_MOUSE | Synaptopodin-2;                                            |
| VSKQPSRITN     | GQPQQTTGAASGGYIKR         | 0.61                                                       | 0.61                                                       | SNP23_MOUSE | Synaptosomal-associated protein 23;                        |
| LDHGRTLREQ     | GVEEHETLLLR               | 1.08                                                       | 0.18                                                       | TLN1_MOUSE  | Talin-1;                                                   |
| ASGPENFQVG     | SMPPAQQQITSGQMHR          | -0.84                                                      | -4.32                                                      | TLN1_MOUSE  | Talin-1;                                                   |
| STSQLVACTK     | VVAPTISPVQCQLVEAGR        | 1.14                                                       | 0.31                                                       | TLN1_MOUSE  | Talin-1;                                                   |
| SPCLLPRVHL     | ASAFGSSTESLVAR            | 1.04                                                       | 0.01                                                       | THEM5_MOUSE | Thioesterase superfamily member 5;                         |
| LWVLGLPAHG     | LEVAEDSGHPWR              | -0.15                                                      | 0.01                                                       | TXD15_MOUSE | Thioredoxin domain-containing protein 15;                  |
| RTVHTTRVCL     | TTFNVQDGPDFQDR            | 0.33                                                       | 0.99                                                       | THIOM_MOUSE | Thioredoxin, mitochondrial;                                |
| M              | VGVKPVGSDPDFQPELSGAGSR    | 0.42                                                       | -1.60                                                      | TXNL1_MOUSE | Thioredoxin-like protein 1;                                |
| M              | TVHNLVLFDR                | 0.31                                                       | -0.84                                                      | TPPC1_MOUSE | Trafficking protein particle complex subunit 1;            |
| LEAWYRHGRT     | TSSYSALSSEPSR             | -0.03                                                      | -0.25                                                      | MECR_MOUSE  | Trans-2-enoyl-CoA reductase, mitochondrial;                |
| AEKNAPAIIF     | IDELDAIAPKR               | -0.79                                                      | 0.63                                                       | TERA_MOUSE  | Transitional endoplasmic reticulum ATPase;                 |
| EIFDKARVLF     | FDELDSIAKAR               | -1.25                                                      | 0.99                                                       | TERA_MOUSE  | Transitional endoplasmic reticulum ATPase;                 |
| LLGPSSVLG      | ISFHLPVNSR                | 0.10                                                       | -1.03                                                      | TMEDA_MOUSE | Transmembrane emp24 domain-containing protein 10;          |
| LAGLVFVSEA     | GPAGAGESKCLPMVKVLDVAVR    | -0.11                                                      | 0.77                                                       | TTHY_MOUSE  | Transthyretin;                                             |
| GSWEPFASGK     | TAESGELHGLTTDEKFEVGVYR    | 0.10                                                       | -0.32                                                      | TTHY_MOUSE  | Transthyretin;                                             |
| TLGISPFHEF     | ADVFTANDSGHR              | -1.79                                                      | 1.09                                                       | TTHY_MOUSE  | Transthyretin;                                             |
| KSPEERTIEY     | LEEAVNFAKGLADR            | -0.49                                                      | 0.00                                                       | ECHA_MOUSE  | Trifunctional enzyme subunit alpha, mitochondrial;         |
| KDVVDYIIFG     | TVIQEVKTSNVAR             | 0.41                                                       | 0.56                                                       | ECHB_MOUSE  | Trifunctional enzyme subunit beta, mitochondrial;          |
| SPGMIKDLGA     | TWVVLGHSER                | -0.34                                                      | -0.69                                                      | TPIS_MOUSE  | Triosephosphate isomerase;                                 |
| LINEHRILNG     | RPPLGFLNPR                | -0.11                                                      | -0.56                                                      | TPP1_MOUSE  | Tripeptidyl-peptidase 1;                                   |
| RPEPQQVGTV     | SLHLGVTPSVLR              | 0.71                                                       | -0.38                                                      | TPP1_MOUSE  | Tripeptidyl-peptidase 1;                                   |
| VVKGEKILPV     | FDEPPNPTNVEESLKR          | -1.18                                                      | 0.06                                                       | TMOD3_MOUSE | Tropomodulin-3;                                            |
| AEFKAADFDMF    | DADGGGDISVKELGTVMR        | 1.54                                                       | 0.01                                                       | TNNC2_MOUSE | Troponin C, skeletal muscle;                               |
| ARRQHLKSVM     | LQIAATELEKEESR            | 0.33                                                       | 1.35                                                       | TNNI2_MOUSE | Troponin I, fast skeletal muscle;                          |
| AITARRQHLK     | SVMLQIAATELEKEESR         | -1.32                                                      | -1.40                                                      | TNNI2_MOUSE | Troponin I, fast skeletal muscle;                          |
| QKKRQNKDLM     | ELQALIDSHFEAR             | -0.49                                                      | 0.25                                                       | TNNT3_MOUSE | Troponin T, fast skeletal muscle;                          |
| TLEHSDCAF      | MVDNEAIYDICR              | -0.81                                                      | -0.52                                                      | TBA1A_MOUSE | Tubulin alpha-1A chain;                                    |

Table S9, Tholen et al.

| Non Prime Site | Prime Site             | Fold change (log <sub>2</sub> ) of ASAPRatio (replicate 1) | Fold change (log <sub>2</sub> ) of ASAPRatio (replicate 2) | Uniprot ID   | Protein Name                                             |
|----------------|------------------------|------------------------------------------------------------|------------------------------------------------------------|--------------|----------------------------------------------------------|
| AGKHVPRAVF     | VDLEPTVIDEVR           | -0.03                                                      | 1.55                                                       | TBA1A_MOUSE  | Tubulin alpha-1A chain;                                  |
| MYAKRAVHW      | YVGEEMEEGEFSEAR        | 0.10                                                       | 2.97                                                       | TBA1A_MOUSE  | Tubulin alpha-1A chain;                                  |
| AGNNWAKGHY     | TEGAELVDSVLDVVR        | -0.58                                                      | 0.20                                                       | TBB2A_MOUSE  | Tubulin beta-2A chain;                                   |
| GAGNNWAKGH     | YTEGAELVDSVLDVVR       | -0.27                                                      | 0.00                                                       | TBB2A_MOUSE  | Tubulin beta-2A chain;                                   |
| RLSESEGAN      | EGATAAPELSALEEAFR      | 0.25                                                       | 0.71                                                       | TPPP_MOUSE   | Tubulin polymerization-promoting protein;                |
| SPNKGVLSDF     | MTDVPVDPGVVHR          | -0.94                                                      | -0.23                                                      | TPD54_MOUSE  | Tumor protein D54;                                       |
| AVQGGAAAPV     | VGAVQVPVPGMPPMPQAPR    | 0.51                                                       | 1.36                                                       | SNRPA_MOUSE  | U1 small nuclear ribonucleoprotein A;                    |
| EDEKAAAEIY     | EEFLAAFEGSDGNKVKTFVR   | 0.29                                                       | 0.70                                                       | SR140_MOUSE  | U2 snRNP-associated SURP motif-containing protein;       |
| LDRHANTIRL     | FVLLPEQSPGYSKR         | -0.92                                                      | -0.94                                                      | UBP47_MOUSE  | Ubiquitin carboxyl-terminal hydrolase 47;                |
| LQTRFPLDYY     | SIPFPTPTTLTGR          | 2.06                                                       | 2.49                                                       | UBP2L_MOUSE  | Ubiquitin-associated protein 2-like;                     |
| TKIFTASNVS     | SVPLPAENVITITAGQR      | -0.74                                                      | 0.01                                                       | UBP2L_MOUSE  | Ubiquitin-associated protein 2-like;                     |
| KTDQVIQFFI     | ALVNDPQPEHPLR          | -0.09                                                      | 1.50                                                       | UB2L3_MOUSE  | Ubiquitin-conjugating enzyme E2 L3;                      |
| DQVIQFFIAL     | VNDPQPEHPLR            | 0.57                                                       | 1.47                                                       | UB2L3_MOUSE  | Ubiquitin-conjugating enzyme E2 L3;                      |
| SPVSSGVNLF     | ANDGSFLELFKR           | 0.01                                                       | -0.30                                                      | CS043_MOUSE  | Uncharacterized protein C19orf43 homolog;                |
| LLLLSGDAHS     | SEVPGAAAEGPGSGVGLGDR   | 0.43                                                       | -0.45                                                      | CO024_MOUSE  | UPF0480 protein C15orf24 homolog;                        |
| APVAPCENKF     | AEDSAEAAVSPESR         | 0.99                                                       | 0.62                                                       | CA174_MOUSE  | UPF0688 protein C1orf174 homolog;                        |
| IGEEAPQMNY     | IQVTPQEKEAIER          | 0.30                                                       | 0.50                                                       | RD23A_MOUSE  | UV excision repair protein RAD23 homolog A;              |
| AATTTATTTT     | TSGGHPLFLR             | 0.00                                                       | 0.01                                                       | RD23B_MOUSE  | UV excision repair protein RAD23 homolog B;              |
| LRAMRGIVNG     | AAPELVPVPTGGPMAGAR     | 0.19                                                       | -0.89                                                      | VATB2_MOUSE  | V-type proton ATPase subunit B, brain isoform;           |
| M              | ASQTQGIQQLQAEKR        | 5.36                                                       | 4.26                                                       | VATG2_MOUSE  | V-type proton ATPase subunit G 2;                        |
| TYGTAAAKAY     | TDDLGAVGGACLEDEASALR   | -0.45                                                      | -0.97                                                      | WIPI2_MOUSE  | WD repeat domain phosphoinositide-interacting protein 2; |
| WTGYFGKVLIM    | ASTSYLPSQVTEMFNQGR     | -2.94                                                      | -3.84                                                      | WIPI2_MOUSE  | WD repeat domain phosphoinositide-interacting protein 2; |
| VGASDGYLYM     | YNLDPQEGGECALMR        | 0.85                                                       | 1.48                                                       | WIPI2_MOUSE  | WD repeat domain phosphoinositide-interacting protein 2; |
| MSFSADQI       | ADFKEAFLLFDR           | 0.41                                                       | 0.01                                                       | E9PWG4_MOUSE |                                                          |
| ALPSRMERWS     | ADPLAPGAFCTQIVR        | 0.29                                                       | 0.39                                                       | Q3URZ6_MOUSE |                                                          |
| SLQLVSWTLA     | AEPVDVLEAWGVHR         | 0.25                                                       | 0.54                                                       | Q9JLI2_MOUSE |                                                          |
| ARSKPSPQLS     | AETPVAALPEFPR          | -0.23                                                      | -0.11                                                      | E9Q0S6_MOUSE |                                                          |
| PKHLSRRTL      | AFPQVMPPQAR            | 0.90                                                       | 1.83                                                       | Q3U422_MOUSE |                                                          |
| RGQSSANRR      | AGSSSGSGVQASAGGLAADASR | 2.40                                                       | 0.90                                                       | E9Q019_MOUSE |                                                          |
| LALAFGLAHA     | AMEGPWKTVAIAADR        | 0.79                                                       | 0.15                                                       | A2AEN9_MOUSE |                                                          |
| NLQSRFRIL      | AQMTGTTEYMQDPDEEALR    | -0.40                                                      | -2.25                                                      | E9PYJ9_MOUSE |                                                          |
| VLTGFGMTLC     | AVPIAQKSEPQSLNEALMR    | 0.08                                                       | 0.12                                                       | Q542V8_MOUSE |                                                          |
| LSLEVQELQA     | AVRPLQLLGTCAELCR       | -0.27                                                      | -0.94                                                      | Q8BTE6_MOUSE |                                                          |
| WLLDHCQESY     | CEPTCQPTCYQR           | 1.09                                                       | 3.83                                                       | E9Q2E9_MOUSE |                                                          |

Table S9, Tholen et al.

| Non Prime Site | Prime Site                  | Fold change (log <sub>2</sub> ) of ASAPRatio (replicate 1) | Fold change (log <sub>2</sub> ) of ASAPRatio (replicate 2) | Uniprot ID   | Protein Name |
|----------------|-----------------------------|------------------------------------------------------------|------------------------------------------------------------|--------------|--------------|
| CQQVGGISTV     | CQPVGGISTVCQPTCGVSR         | 0.26                                                       | 2.29                                                       | E9Q2E9_MOUSE |              |
| HHDYNTYTFI     | DLNLDLSKFR                  | 1.39                                                       | -0.86                                                      | Q3U422_MOUSE |              |
| RKTRVSGEHM     | DLTTCPLAAGGQKEKLR           | 0.58                                                       | 2.33                                                       | Q9D1B1_MOUSE |              |
| PRQPSPSQSS     | DSQVHSGVQVEGR               | 0.88                                                       | 2.94                                                       | F6TL02_MOUSE |              |
| LVFAPVGVQS     | DWLSISLPHR                  | -0.49                                                      | -0.84                                                      | Q9EQY5_MOUSE |              |
| PHLHSYKEAF     | EEMEGTSPSSPPHSVAR           | 0.31                                                       | -0.25                                                      | E9Q0S6_MOUSE |              |
| LLAVLPTTTA     | EKNNGIDIYSLTVDSR            | 1.29                                                       | 1.08                                                       | Q9DBK8_MOUSE |              |
| KLPSLAFLYM     | EKNQLEEVPSALPR              | 0.38                                                       | -0.52                                                      | PRELP_MOUSE  |              |
| LQLVSWTLAA     | EPVDVLEAWGVHR               | 0.28                                                       | 0.96                                                       | Q9JLI2_MOUSE |              |
| KSIIMYLTSI     | FEVLPQQVTIDAIR              | 0.14                                                       | -0.18                                                      | Q3TR59_MOUSE |              |
| LLRGPPVARA     | GAGAVGAGPVVR                | -0.12                                                      | 0.06                                                       | Q6PE62_MOUSE |              |
| TMRQTYPLQR     | GDEAATLLENLASER             | 0.31                                                       | 0.54                                                       | E9Q492_MOUSE |              |
| VLGVSEPVLA     | GDVSSCDNPSGTEPSGTNR         | 0.39                                                       | 0.21                                                       | Q9D140_MOUSE |              |
| DLHLKGNPK      | GEYDVTVPR                   | -0.69                                                      | 0.01                                                       | F7BRM2_MOUSE |              |
| SMPDVLHLK      | GPNVKGEYDVTVPR              | -0.15                                                      | -0.23                                                      | E9Q616_MOUSE |              |
| IPRHEVTEIS     | NTDVETQPGKTIVR              | -0.15                                                      | 0.53                                                       | E9Q616_MOUSE |              |
| HGYAAGQTW      | QEGDKVIRPGVSOAGEEMEQQFGQVGR | 0.44                                                       | 0.60                                                       | E9QPB2_MOUSE |              |
| RSSNRDRPR      | QPSPSQSSDSQVHSGVQVEGR       | 1.06                                                       | -1.32                                                      | F7BVV1_MOUSE |              |
| VETQPGKTVI     | RLPSGSGPASPTTGSVAVDIR       | -0.12                                                      | 0.11                                                       | E9Q616_MOUSE |              |
| KSMWEKGSVF     | SAPSASGTPNKETAGLKVGVSSR     | 2.63                                                       | 1.52                                                       | Q8VCQ8_MOUSE |              |
| ESQASDSEGH     | SDFSEQAQVGAHR               | 0.57                                                       | 1.90                                                       | E9Q019_MOUSE |              |
| RPRQPSPSQS     | SDSQVHSGVQVEAQR             | 0.67                                                       | -1.64                                                      | F6TL02_MOUSE |              |
| RPRQPSPSQS     | SDSQVHSGVQVEGR              | 1.98                                                       | -0.76                                                      | E9Q019_MOUSE |              |
| RPANPNWGVF     | SEFGDSSSPATR                | 1.26                                                       | 1.55                                                       | Q99K47_MOUSE |              |
| WTHEVFSSRS     | SEVVLSGDDEDYQR              | -0.81                                                      | -1.52                                                      | E9Q616_MOUSE |              |
| VSVERALADE     | SGLDTYLSGGGGVPVLVR          | 0.60                                                       | 0.49                                                       | A2BFA6_MOUSE |              |
| GKTIVRLPSG     | SGPASPTTGSVAVDIR            | 1.77                                                       | 0.12                                                       | E9Q616_MOUSE |              |
| EQFLPMMQAI     | SNNKDQGGYEDFVEGLR           | -0.04                                                      | 0.70                                                       | E9PWG4_MOUSE |              |
| KIPRHEVTEI     | SNTDVETQPGKTIVR             | 0.12                                                       | 0.10                                                       | E9Q616_MOUSE |              |
| DRPRQPSPSQ     | SSDSQVHSGVQVEGR             | 0.77                                                       | -4.64                                                      | E9Q019_MOUSE |              |
| LWSWLPSIGF     | SSVEEMAAESR                 | -0.30                                                      | 0.26                                                       | Q3URZ6_MOUSE |              |
| PRHEVTEISN     | TDVETQPGKTIVR               | 0.33                                                       | 0.42                                                       | E9Q616_MOUSE |              |
| FKEAFLLFDR     | TGECKITLSQVGDVLR            | 0.12                                                       | 0.55                                                       | E9PWG4_MOUSE |              |
| DEESKPASSN     | TQVEGDDEEAALLER             | 0.37                                                       | 1.71                                                       | Q8VCQ8_MOUSE |              |
| TVCQPTCYQR     | TSCISTPAQVTCNR              | -0.81                                                      | 6.07                                                       | E9Q2E9_MOUSE |              |
| PLPVIHQKV      | VANSPANADYQER               | -0.52                                                      | -0.20                                                      | E9PYJ9_MOUSE |              |
| DVDLHLKGNP     | VKGEYDVTVPR                 | 0.04                                                       | -0.45                                                      | F7BRM2_MOUSE |              |



Table S9, Tholen et al.

| <b>Non Prime Site</b> | <b>Prime Site</b>           | <b>Fold change (log<sub>2</sub>) of ASAPRatio (replicate 1)</b> | <b>Fold change (log<sub>2</sub>) of ASAPRatio (replicate 2)</b> | <b>Uniprot ID</b> | <b>Protein Name</b> |
|-----------------------|-----------------------------|-----------------------------------------------------------------|-----------------------------------------------------------------|-------------------|---------------------|
| IESTECRKTR            | VSGEHMDLTTCPLAAGGQKEKLR     | 0.37                                                            | 0.93                                                            | Q9D1B1_MOUSE      |                     |
| YGGGGGGGYG            | GGSGGYGGGGGGYGGGEGYSISPNSYR | -5.64                                                           | -6.64                                                           | E9QNN1_MOUSE      |                     |
| SPLPVIHQK             | VVANSPANADYQER              | -0.81                                                           | -0.38                                                           | E9PYJ9_MOUSE      |                     |
| NIDIRSAFKR            | SGEGQEDAGELDFSGLLKR         | -6.64                                                           | -2.32                                                           | D3YU50_MOUSE      |                     |
| SGLLLLTQG             | EEAQEIDCNDEAVFQAVDASLKKLNAR | -1.84                                                           | -3.18                                                           | Q6S9I3_MOUSE      |                     |
