# Supplementary material
Source: PubMed Central journal article supplement (PMC3591655)
Supplement: supp_M112.017962_mcp.M112.017962-12.pdf [file supp_M112.017962_mcp.M112.017962-12.pdf]

**Table S10:** Dimethylated (naturally unmodified) N-termini identified in the TAILS experiment comparing wild-type and *Cts1<sup>Δ</sup>* skin (replicate 1). This is a comprehensive, non redundant listing. Up to two potential protein IDs per peptide are stated.

| Non Prime Site | Prime Site               | Modifications                             | Hyperscore | Mass error in ppm | Charge | Precursor neutral mass in Da | Fold change (log <sub>2</sub> ) of ASAPRatio | FC-error of ASAPRatio | Uniprot ID 1 | Uniprot ID 2 | Protein Name 1                                                      | Protein Name 2                                                                                                 | Quantile    |
|----------------|--------------------------|-------------------------------------------|------------|-------------------|--------|------------------------------|----------------------------------------------|-----------------------|--------------|--------------|---------------------------------------------------------------------|----------------------------------------------------------------------------------------------------------------|-------------|
| CGTCGQPADK     | AAGGAGAQQVSSISSGASSVTVTR | N-ter +28.03 Da                           | 95.9       | 44.6              | 3      | 2249.23                      | 0.18                                         | 0.05                  | LMNA_MOUSE   |              | Prelamin-A/C;                                                       | Hematopoietic cell-specific LYN substrate                                                                      | 0.25 - 0.75 |
| YGVEKDRDK      | AALGYDYKGETEKHEQSR       | N-ter +28.03 Da, K +28.03 Da              | 18.4       | 63.3              | 4      | 2165.21                      | -0.89                                        | 0.28                  | HCLS1_MOUSE  |              | Hematopoietic lineage cell-specific protein;                        | 1;LckBP1;                                                                                                      | 0.15 - 0.25 |
| NAVGPVPTAN     | AALPADPPASVVVGPVVPR      | N-ter +28.03 Da                           | 55.9       | 41.2              | 3      | 1938.21                      | -0.22                                        | 0.03                  | FETUA_MOUSE  |              | Alpha-2-HS-glycoprotein;                                            | Countertrypsin;Fetuin-A;                                                                                       | 0.25 - 0.75 |
| NTLHLDVYMA     | AANLFAQTYLTGSQDR         | N-ter +28.03 Da                           | 46.2       | 49.9              | 3      | 1840.00                      | -0.07                                        | 0.01                  | UBA1_MOUSE   |              | Ubiquitin-like modifier-activating enzyme 1;                        | Ubiquitin-activating enzyme E1;Ubiquitin-activating enzyme E1 X;Ubiquitin-like modifier-activating enzyme 1 X; | 0.25 - 0.75 |
| CLGELICTLN     | AANVPAGTEVVCAPPTAYIDFAR  | N-ter +28.03 Da, C +57.02 Da              | 48.4       | 39.0              | 3      | 2417.30                      | 0.93                                         | 0.17                  | TPIS_MOUSE   |              | Triosephosphate isomerase;                                          | Triose-phosphate isomerase;                                                                                    | 0.25 - 0.75 |
| LRAMRGVING     | AAPELPVPTGGPMAGAR        | N-ter +28.03 Da                           | 37.5       | 47.7              | 3      | 1618.93                      | -0.29                                        | 0.02                  | VATB2_MOUSE  |              | V-type proton ATPase subunit B, brain isoform;                      | Endomembrane proton pump 58 kDa subunit;Vacuolar proton pump subunit B 2;                                      | 0.25 - 0.75 |
| EKERALYAD      | AAPGDKLLHYDPR            | N-ter +34.06 Da, K +34.06 Da              | 25.9       | 57.8              | 4      | 1804.13                      | -1.32                                        | 0.20                  | SRCA_MOUSE   |              | Sarcolumenin;                                                       |                                                                                                                | 0.15 - 0.25 |
| LERKPAAGLS     | AAPVPPAAPALLDFSDVPPAPR   | N-ter +28.03 Da                           | 29.7       | 59.4              | 4      | 2370.40                      | -0.22                                        | 0.05                  | RTN4_MOUSE   | Q8BHFS_MOUSE | Reticulon-4;                                                        | Neurite outgrowth inhibitor;                                                                                   | 0.25 - 0.75 |
| YALSSPLQLL     | AAQASSSTPVVTR            | N-ter +28.03 Da                           | 29.3       | 46.7              | 3      | 1414.84                      | -0.11                                        | 0.01                  | FOXK1_MOUSE  | E9Q4K6_MOUSE | Forkhead box protein K1;                                            | Myocyte nuclear factor;                                                                                        | 0.25 - 0.75 |
| NSVQSGNLAL     | AASAAVAVDAGMAMAGQSPVLR   | N-ter +28.03 Da                           | 61.8       | 43.9              | 3      | 1972.07                      | 0.20                                         | 0.04                  | PTB1_MOUSE   | Q92Z17_MOUSE | Polypyrimidine tract-binding protein 1;                             | Heterogeneous nuclear ribonucleoprotein I;                                                                     | 0.25 - 0.75 |
| ASASTSQSSR     | AASIFGGAKPVDTAAR         | N-ter +34.06 Da, K +34.06 Da              | 39.3       | 39.9              | 3      | 1599.01                      | 1.37                                         | 0.38                  | IF4B_MOUSE   | Q3TDD8_MOUSE | Eukaryotic translation initiation factor 4B;                        |                                                                                                                | 0.75 - 0.85 |
| QKRGTGGVDT     | AATGSVDFISNDR            | N-ter +28.03 Da                           | 35.9       | 48.1              | 3      | 1492.82                      | 0.68                                         | 0.05                  | KCRU_MOUSE   |              | Creatine kinase U-type, mitochondrial;                              | Acidic-type mitochondrial creatine kinase;Ubiquitous mitochondrial creatine kinase;                            | 0.25 - 0.75 |
| DLYTAKGLFR     | AAVPSGASTGIYEALER        | N-ter +34.06 Da                           | 51.9       | 47.3              | 3      | 1838.09                      | -0.49                                        | 0.08                  | ENOA_MOUSE   | ENOB_MOUSE   | Alpha-enolase;                                                      |                                                                                                                | 0.25 - 0.75 |
| LTARDEARLR     | AAVQQLQAEGLSPR           | N-ter +28.03 Da                           | 35.5       | 42.9              | 3      | 1494.88                      | 0.31                                         | 0.02                  | Q8K354_MOUSE |              |                                                                     | 2-phospho-D-glycerate hydro-lyase;Enolase 1;Non-neural enolase;                                                | 0.25 - 0.75 |
| LWLLPSLALA     | AAVTEPADLEYTEVPR         | N-ter +28.03 Da                           | 59.4       | 49.3              | 3      | 1787.98                      | 2.69                                         | 0.82                  | Q8BVL6_MOUSE |              |                                                                     |                                                                                                                | 0.85 - 1.00 |
| LSGEDKSNK      | AAWGKIGHGAEYGAELER       | N-ter +34.06 Da, K +34.06 Da              | 44.8       | 56.7              | 4      | 2110.24                      | -2.74                                        | 0.18                  | HBA_MOUSE    | Q91V88_MOUSE | Hemoglobin subunit alpha;                                           | Alpha-globin;Hemoglobin alpha chain;                                                                           | 0.00 - 0.15 |
| SVTREDSQY      | AAYSNAVGAAYSSAR          | N-ter +34.06 Da                           | 37.7       | 46.0              | 3      | 1604.91                      | -4.64                                        | 1.16                  | OBSCN_MOUSE  | E9QQ96_MOUSE | Obscurin;                                                           | Obscurin-RhoGEF;Obscurin-myosin light chain kinase;                                                            | 0.00 - 0.15 |
| GPQQLTRVR      | ACGLNFADLMGR             | N-ter +28.03 Da, C +57.02 Da              | 49.0       | 43.6              | 2      | 1351.70                      | 2.06                                         | 0.61                  | VAT1_MOUSE   |              | Synaptic vesicle membrane protein VAT-1 homolog;                    |                                                                                                                | 0.85 - 1.00 |
| IQNLHSFDFP     | ADASKGDOLLPAGETEDYHIR    | N-ter +28.03 Da, K +28.03 Da              | 73.9       | 64.1              | 4      | 2312.31                      | 0.67                                         | 0.19                  | E1F1_MOUSE   |              | Eukaryotic translation initiation factor 1;                         | Protein translation factor SUI1 homolog;                                                                       | 0.25 - 0.75 |
| MSFSAQDI       | ADFKEAFLFDR              | N-ter +34.06 Da, K +34.06 Da              | 34.9       | 52.9              | 3      | 1538.96                      | -3.84                                        | 2.19                  | E9PWG4_MOUSE |              |                                                                     |                                                                                                                | 0.00 - 0.15 |
| LASSASAEFF     | ADIALAPMEAAKVR           | N-ter +28.03 Da, K +28.03 Da              | 36.7       | 47.2              | 3      | 1510.93                      | 0.39                                         | 0.06                  | MPCP_MOUSE   |              | Phosphate carrier protein, mitochondrial;                           | Phosphate transport protein;Solute carrier family 25 member 3;                                                 | 0.25 - 0.75 |
| DGETEERIR      | ADIVENQVMDTR             | N-ter +28.03 Da                           | 32.2       | 53.8              | 3      | 1417.76                      | -1.18                                        | 0.16                  | GSTM1_MOUSE  | A2AE89_MOUSE | Glutathione S-transferase Mu 1;                                     | GST 1-1;GST class-mu 1;Glutathione S-transferase G78.7;pmGT10;                                                 | 0.15 - 0.25 |
| AGDEESEYVF     | ADLDFPVIKLR              | N-ter +28.03 Da, K +28.03 Da              | 30.0       | 51.6              | 3      | 1341.87                      | -2.56                                        | 0.60                  | KCRS_MOUSE   |              | Creatine kinase S-type, mitochondrial;                              | Basic-type mitochondrial creatine kinase;Sarcomeric mitochondrial creatine kinase;                             | 0.00 - 0.15 |
| IWTTRHPVQG     | ADLVQDLISICTR            | N-ter +34.06 Da, C +57.02 Da              | 38.6       | 48.2              | 3      | 1510.86                      | -0.81                                        | 0.14                  | LYVE1_MOUSE  |              | Lymphatic vessel endothelial hyaluronin acid receptor 1;            | Cell surface retention sequence-binding protein 1;                                                             | 0.15 - 0.25 |
| EKEKEPVQDI     | ADVNLPLPECFYAVSR         | N-ter +28.03 Da, C +57.02 Da              | 35.0       | 56.1              | 3      | 1878.04                      | 0.98                                         | 0.23                  | STAP1_MOUSE  | E9PYX8_MOUSE | Signal-transducing adaptor protein 1;                               | Extracellular link domain-containing protein 1;                                                                | 0.75 - 0.85 |
| VREKEAQPLE     | AEAPGVDLGLPEGR           | N-ter +28.03 Da                           | 39.6       | 47.2              | 3      | 1520.89                      | 0.15                                         | 0.01                  | NIBAN_MOUSE  |              | Protein Niban;                                                      | Stem cell adaptor protein 1;                                                                                   | 0.25 - 0.75 |
| RSTGVVNIPA     | AECLDEYEDDEAGQKER        | N-ter +28.03 Da, K +28.03 Da, C +57.02 Da | 55.6       | 48.8              | 3      | 2112.00                      | 0.30                                         | 0.10                  | PAWR_MOUSE   |              | PRKC apoptosis WT1 regulator protein;                               | Prostate apoptosis response 4 protein;                                                                         | 0.25 - 0.75 |
| SLQLVSWTLA     | AEPPVDVLEAWGVHR          | N-ter +28.03 Da                           | 61.7       | 49.8              | 3      | 1604.91                      | 0.77                                         | 0.12                  | Q9IUJ2_MOUSE |              |                                                                     |                                                                                                                | 0.25 - 0.75 |
| QLWYKARYTE     | AERARGRPLGAVDKYRLR       | N-ter +34.06 Da, K +34.06 Da              | 11.2       | 28.7              | 4      | 2151.38                      | -5.64                                        | 2.82                  | SIX4_MOUSE   |              | Homeobox protein SIX4;                                              | Sine oculis homeobox homolog 4;Skeletal muscle-specific ARE-binding protein AREC3;                             | 0.00 - 0.15 |
| QVQTVQISTI     | AESEDSQESVDSVTSQKR       | N-ter +34.06 Da, K +34.06 Da              | 56.2       | 46.3              | 3      | 2164.14                      | -1.60                                        | 0.53                  | CREB1_MOUSE  | Q62347_MOUSE | Cyclic AMP-responsive element-binding protein 1;                    |                                                                                                                | 0.00 - 0.15 |
| HHAFQGRDM      | AETFDQGAHAFQGGGR         | N-ter +28.03 Da                           | 41.0       | 67.3              | 4      | 1812.95                      | -0.45                                        | 0.12                  | S8SN_MOUSE   | E9QP82_MOUSE | Suprabasin;                                                         |                                                                                                                | 0.25 - 0.75 |
| GAVISESTPI     | AETIKASSNESLVANR         | N-ter +28.03 Da, K +28.03 Da              | 37.3       | 47.4              | 3      | 1745.01                      | -0.84                                        | 0.16                  | LAP2B_MOUSE  | Q3TNH0_MOUSE | Lamina-associated polypeptide 2, isoforms beta/delta/epsilon/gamma; | Thymopoietin isoforms beta/delta/epsilon/gamma;                                                                | 0.15 - 0.25 |
| ARSKPSPQLS     | AETPVAALPEFPR            | N-ter +28.03 Da                           | 37.0       | 43.4              | 3      | 1424.83                      | -0.36                                        | 0.06                  | E9Q056_MOUSE |              |                                                                     |                                                                                                                | 0.25 - 0.75 |
| GVKVLAFSL      | AEVQVAVGPGQR             | N-ter +28.03 Da                           | 32.9       | 40.3              | 3      | 1292.74                      | 2.08                                         | 0.26                  | CAND2_MOUSE  |              | Cullin-associated NEDD8-dissociated protein 2;                      | Cullin-associated and neddylation-dissociated protein 2;TBP-interacting protein of 120 kDa B;p120 CAND2;       | 0.85 - 1.00 |
| GLDNVHKQRV     | AEVLNDPESMEKR            | N-ter +28.03 Da, K +28.03 Da              | 37.5       | 51.1              | 3      | 1572.86                      | -0.92                                        | 0.09                  | KLC1_MOUSE   | Q5UE59_MOUSE | Kinesin light chain 1;                                              |                                                                                                                | 0.15 - 0.25 |
| ISLEVSRSGR     | AEVSTHLSQSPR             | N-ter +34.06 Da                           | 29.1       | 45.6              | 3      | 1427.86                      | 0.68                                         | 0.05                  | SYNEM_MOUSE  | F6VN34_MOUSE | Synemin;                                                            | Desmuslin;                                                                                                     | 0.25 - 0.75 |
| ATEEDIHDKR     | AEYGEIKNIHLNDR           | N-ter +34.06 Da, K +34.06 Da              | 24.3       | 59.0              | 4      | 1852.16                      | -1.89                                        | 0.14                  | RBM8A_MOUSE  |              | RNA-binding protein 8A;                                             | RNA-binding motif protein 8A;Ribonucleoprotein RBM8A;                                                          | 0.00 - 0.15 |
| PKHLRSKTLV     | AFQKVMPPQAR              | N-ter +28.03 Da, K +28.03 Da              | 34.1       | 38.6              | 3      | 1521.91                      | 0.33                                         | 0.02                  | Q3U422_MOUSE |              |                                                                     |                                                                                                                | 0.25 - 0.75 |
| SSVLTPTPPQ     | AFTVIDQNR                | N-ter +34.06 Da                           | 29.2       | 32.9              | 2      | 1096.64                      | -0.30                                        | 0.02                  | MLRS_MOUSE   | F6ULR7_MOUSE | Myosin regulatory light chain 2, skeletal muscle isoform;           | Fast skeletal myosin light chain 2;MLC2F;                                                                      | 0.25 - 0.75 |
| DFRHMTMHVGR    | AGDAFGDTSFLTSKAR         | N-ter +28.03 Da, K +28.03 Da              | 44.5       | 52.8              | 3      | 1698.95                      | 0.49                                         | 0.04                  | BORG4_MOUSE  | A2A6Q2_MOUSE | Cdc42 effector protein 4;                                           | Binder of rho GTPases 4;                                                                                       | 0.25 - 0.75 |
| RTFGTTGERR     | AGEEAADSPELPR            | N-ter +34.06 Da                           | 35.2       | 55.3              | 3      | 1374.76                      | -0.43                                        | 0.04                  | ADKL_MOUSE   |              | Adrenodoxin-like protein, mitochondrial;                            | Ferredoxin-1-like protein;                                                                                     | 0.25 - 0.75 |
| DKVIRPGVSK     | AGEEMEQQFGQVGR           | N-ter +28.03 Da                           | 32.9       | 58.2              | 3      | 1464.75                      | -0.20                                        | 0.01                  | S8SN_MOUSE   | E9QP82_MOUSE | Suprabasin;                                                         |                                                                                                                | 0.25 - 0.75 |
| VCDNGLSLCK     | AGFAGDDAPR               | N-ter +34.06 Da                           | 35.7       | 38.7              | 2      | 1009.54                      | -0.12                                        | 0.01                  | ACTB_MOUSE   | ACTB_MOUSE   | Actin, aortic smooth muscle;                                        | Alpha-actin-2;                                                                                                 | 0.25 - 0.75 |
| M              | AGGEGGVTLGQPHLSR         | N-ter +28.03 Da                           | 35.0       | 47.6              | 3      | 1562.89                      | -0.64                                        | 0.10                  | IF2G_MOUSE   | A2AAW9_MOUSE | Eukaryotic translation initiation factor 2 subunit 3, X-linked;     | Eukaryotic translation initiation factor 2 subunit gamma, X-linked;                                            | 0.25 - 0.75 |

| Non Prime Site | Prime Site                   | Modifications                             | Hyperscore | Mass error in ppm | Charge | Precursor neutral mass in Da | Fold change (log <sub>2</sub> ) of ASAPRatio | FC-error of ASAPRatio | Uniprot ID 1 | Uniprot ID 2 | Protein Name 1                                                                            | Protein Name 2                                                                                                                     | Quantile    |
|----------------|------------------------------|-------------------------------------------|------------|-------------------|--------|------------------------------|----------------------------------------------|-----------------------|--------------|--------------|-------------------------------------------------------------------------------------------|------------------------------------------------------------------------------------------------------------------------------------|-------------|
| YSGLQGLPGL     | AGLHGDQAGPVPVGPAGPR          | N-ter +34.06 Da                           | 47.5       | 47.2              | 3      | 1744.01                      | -2.40                                        | 0.50                  | CO1A2_MOUSE  | E9Q6U9_MOUSE | Collagen alpha-2(I) chain;                                                                | Alpha-2 type I collagen;                                                                                                           | 0.00 - 0.15 |
| MERGMFGGSF     | AGSFGGAGGHPGVAR              | N-ter +28.03 Da                           | 45.7       | 47.6              | 3      | 1395.77                      | -0.86                                        | 0.08                  | HNRPM_MOUSE  | B8JK32_MOUSE | Heterogeneous nuclear ribonucleoprotein M;                                                |                                                                                                                                    | 0.15 - 0.25 |
| RGQSSANRR      | AGSSGSGVQASAGLAADASR         | N-ter +34.06 Da                           | 79.2       | 37.2              | 3      | 1954.03                      | 0.48                                         | 0.14                  | FILA_MOUSE   | F7BVV1_MOUSE | Filaggrin;                                                                                |                                                                                                                                    | 0.25 - 0.75 |
| IKVDKGVVPL     | AGTNGETTQDGLDLSER            | N-ter +34.06 Da                           | 41.7       | 45.3              | 3      | 1839.99                      | -2.64                                        | 0.33                  | ALDOA_MOUSE  | Q9CPQ9_MOUSE | Fructose-bisphosphate aldolase A;                                                         | Aldolase 1;Muscle-type aldolase;                                                                                                   | 0.00 - 0.15 |
| QADCAVLIVA     | AGVGEFEAGISKNGQTR            | N-ter +28.03 Da, K +28.03 Da              | 37.7       | 46.1              | 3      | 1776.00                      | -1.89                                        | 0.21                  | EF1A1_MOUSE  | EF1A2_MOUSE  | Elongation factor 1-alpha 1; Histidine triad nucleotide-binding protein 2, mitochondrial; | Elongation factor Tu;Eukaryotic elongation factor 1 A-1;                                                                           | 0.00 - 0.15 |
| GARGAQVRGN     | AGVSDGSEVAKAQAAPGGASPTIFSR   | N-ter +28.03 Da, K +28.03 Da              | 21.8       | 56.1              | 4      | 2642.55                      | 0.52                                         | 0.13                  | HINT2_MOUSE  |              | HINT3;                                                                                    |                                                                                                                                    | 0.25 - 0.75 |
| QMSYGYDEKS     | AGVSVPGPMGPGSPR              | N-ter +34.06 Da                           | 38.8       | 56.4              | 3      | 1398.83                      | -2.18                                        | 0.30                  | CO1A1_MOUSE  | F8WGB7_MOUSE | Collagen alpha-1(I) chain;                                                                | Alpha-1 type I collagen;                                                                                                           | 0.00 - 0.15 |
| VLLGLTPARA     | AHEDPVEKVIIEGFSR             | N-ter +28.03 Da, K +28.03 Da              | 35.0       | 68.0              | 4      | 1768.04                      | 0.23                                         | 0.06                  | SBSN_MOUSE   | E9QP82_MOUSE | Suprabasin;                                                                               |                                                                                                                                    | 0.25 - 0.75 |
| IMELINNAK      | AHGGYSVFAGVGER               | N-ter +28.03 Da                           | 26.4       | 57.8              | 3      | 1433.79                      | 1.29                                         | 0.11                  | ATP_MOUSE    |              | ATP synthase subunit beta, mitochondrial;                                                 |                                                                                                                                    | 0.75 - 0.85 |
| RAISTSVCLR     | AHGSVVKSEDIYAFPTYARR         | N-ter +34.06 Da, K +34.06 Da              | 25.1       | 65.6              | 4      | 2336.37                      | -0.81                                        | 0.14                  | COX41_MOUSE  |              | Cytochrome c oxidase subunit 4 isoform 1, mitochondrial;                                  | Cytochrome c oxidase polypeptide IV;Cytochrome c oxidase subunit IV isoform 1;                                                     | 0.15 - 0.25 |
| RAISTSVCLR     | AHGSVVKSEDIYAFPTYARR         | N-ter +34.06 Da, K +34.06 Da              | 29.2       | 61.7              | 4      | 2180.25                      | -1.09                                        | 0.19                  | COX41_MOUSE  |              | Cytochrome c oxidase subunit 4 isoform 1, mitochondrial;                                  | Cytochrome c oxidase polypeptide IV;Cytochrome c oxidase subunit IV isoform 1;                                                     | 0.15 - 0.25 |
| SELLHSITLL     | AHLTGDIIQGSATSLR             | N-ter +28.03 Da                           | 39.0       | 55.8              | 3      | 1768.05                      | 0.66                                         | 0.11                  | HIP1_MOUSE   |              | Huntingtin-interacting protein 1;                                                         | Huntingtin-interacting protein I;                                                                                                  | 0.25 - 0.75 |
| FSKOWSYFIL     | AHTEFTPTETDTYACR             | N-ter +28.03 Da, C +57.02 Da              | 53.6       | 54.8              | 3      | 1926.95                      | -0.89                                        | 0.23                  | B2MG_MOUSE   | Q91XJ8_MOUSE | Beta-2-microglobulin;                                                                     |                                                                                                                                    | 0.15 - 0.25 |
| DRQKEVNEF      | AIDLIAQPVNEVEHR              | N-ter +28.03 Da                           | 49.4       | 46.3              | 3      | 1859.08                      | -1.00                                        | 0.16                  | NDU56_MOUSE  | D3YV32_MOUSE | NADH dehydrogenase [ubiquinone] iron-sulfur protein 6, mitochondrial;                     | Complex I-13kD-A;NADH-ubiquinone oxidoreductase 13 kDa-A subunit;                                                                  | 0.15 - 0.25 |
| RPRGPASYKR     | AIGEDFVLLKER                 | N-ter +28.03 Da, K +28.03 Da              | 24.5       | 53.2              | 3      | 1444.91                      | 0.52                                         | 0.08                  | MINK1_MOUSE  | E9Q2Q5_MOUSE | Missshapen-like kinase 1;                                                                 | Complex I-13kD-A;NADH-ubiquinone oxidoreductase 13 kDa-A subunit;                                                                  | 0.25 - 0.75 |
| EAAGNKYVPR     | AILVDLEPGTMDSVLR             | N-ter +28.03 Da                           | 32.7       | 49.6              | 3      | 1642.94                      | -1.22                                        | 0.17                  | TBB2A_MOUSE  | TBB2B_MOUSE  | Tubulin beta-2A chain;                                                                    | GCK family kinase MINK;MAPK/ERK kinase kinase 6;Missshapen/NIK-related kinase;Mitogen-activated protein kinase kinase kinase 6;    | 0.15 - 0.25 |
| EFEQLPMMQ      | AISNKKDQGGYEDFVEGLR          | N-ter +34.06 Da, K +34.06 Da              | 32.2       | 46.7              | 3      | 2179.22                      | 0.37                                         | 0.11                  | MYL1_MOUSE   | E9PWG4_MOUSE | Myosin light chain 1/3, skeletal muscle isoform;                                          | Myosin light chain alkali 1/2; Cathepsin C;Cathepsin J;Dipeptidyl peptidase I;Dipeptidyl transferase;                              | 0.25 - 0.75 |
| FFKYVERGHT     | AISYCHETMTGWVHDVLR           | N-ter +28.03 Da, C +57.02 Da              | 34.9       | 68.6              | 4      | 2259.21                      | 2.72                                         | 1.07                  | CATC_MOUSE   | D3Z220_MOUSE | Dipeptidyl peptidase 1;                                                                   | I;Dipeptidyl transferase;                                                                                                          | 0.85 - 1.00 |
| IVEGLMTTVH     | AITATQKTVDGSPSKLWR           | N-ter +34.06 Da, K +34.06 Da              | 22.9       | 53.6              | 4      | 2030.35                      | -0.25                                        | 0.05                  | G3P_MOUSE    | F8WJL5_MOUSE | Glyceraldehyde-3-phosphate dehydrogenase;                                                 | Peptidyl-cysteine S-nitrosylase GAPDH;                                                                                             | 0.25 - 0.75 |
| RVLLPEGGIT     | AIVFLEPLEAR                  | N-ter +28.03 Da                           | 23.5       | 73.3              | 3      | 1413.89                      | 1.14                                         | 0.17                  | RBM19_MOUSE  |              | Probable RNA-binding protein 19;                                                          | RNA-binding motif protein 19;                                                                                                      | 0.75 - 0.85 |
| LLPLLAGAQA     | AIVFIKEPSQDALQGR             | N-ter +34.06 Da, K +34.06 Da              | 23.1       | 47.7              | 3      | 1926.21                      | 1.05                                         | 0.21                  | PTK7_MOUSE   | Q3V2W2_MOUSE | Inactive tyrosine-protein kinase 7;                                                       | 7;Pseudo tyrosine kinase receptor 7;Tyrosine-protein kinase-like 7;                                                                | 0.75 - 0.85 |
| GEDFSETLTR     | AKFEELNMDLFR                 | N-ter +28.03 Da, K +28.03 Da              | 35.4       | 60.2              | 3      | 1567.90                      | 1.46                                         | 0.28                  | GRP78_MOUSE  |              | 78 kDa glucose-regulated protein;                                                         | Heat shock 70 kDa protein 5;Immunoglobulin heavy chain-binding protein;                                                            | 0.75 - 0.85 |
| PDLSKHNNHM     | AKVLTPLDYNKLR                | N-ter +34.06 Da, K +34.06 Da              | 18.9       | 54.1              | 4      | 1632.17                      | 0.53                                         | 0.08                  | KCRM_MOUSE   |              | Creatine kinase M-type;                                                                   | Creatine kinase M chain;M-CK;                                                                                                      | 0.25 - 0.75 |
| FAPQLSVQK      | ALDLDPSKTVNNGAIALHPLGGSGSR   | N-ter +28.03 Da, K +28.03 Da              | 42.0       | 60.7              | 4      | 2702.60                      | 0.68                                         | 0.20                  | THIM_MOUSE   |              | 3-ketoacyl-CoA thiolase, mitochondrial;                                                   | Acetyl-CoA acyltransferase;Beta-ketothiolase;Mitochondrial 3-oxoacyl-CoA thiolase;                                                 | 0.25 - 0.75 |
| RQNKDLMELQ     | ALIDSHFEAR                   | N-ter +34.06 Da                           | 28.8       | 51.8              | 3      | 1191.71                      | -0.81                                        | 0.03                  | TNNT3_MOUSE  | A2A6J0_MOUSE | Troponin T, fast skeletal muscle;                                                         | Fast skeletal muscle troponin T; Heparin-binding protein 44;Low density lipoprotein receptor-related protein-associated protein 1; | 0.15 - 0.25 |
| RKDAQMVHNS     | ALNEDTQDELGDPR               | N-ter +28.03 Da                           | 35.5       | 49.5              | 3      | 1599.82                      | -0.89                                        | 0.13                  | AMRP_MOUSE   | F6SY09_MOUSE | Alpha-2-macroglobulin receptor-associated protein;                                        | ATP-dependent helicase ATRX;HP1 alpha-interacting protein;HP1-BP38 protein;Heterochromatin protein 2;X-linked nuclear protein;     | 0.15 - 0.25 |
| QTPYIPFNLG     | ALSAMSNQLEDLINOGR            | N-ter +34.06 Da                           | 24.3       | 51.9              | 4      | 2021.15                      | -2.00                                        | 0.32                  | ATRX_MOUSE   |              | Transcriptional regulator ATRX;                                                           | UbcM4;Ubiquitin carrier protein L3;Ubiquitin-protein ligase L3;                                                                    | 0.00 - 0.15 |
| KTDQVIQFFI     | ALVNDPQPEHLR                 | N-ter +28.03 Da                           | 47.7       | 42.4              | 3      | 1512.87                      | 4.25                                         | 0.95                  | UBZL3_MOUSE  |              | Ubiquitin-conjugating enzyme E2 L3;                                                       |                                                                                                                                    | 0.85 - 1.00 |
| TLNAANVPAG     | AMDDDIALVVDNGSGMCKAGFAGDDAPR | N-ter +28.03 Da, K +28.03 Da, C +57.02 Da | 23.6       | 30.5              | 4      | 2994.44                      | 1.82                                         | 0.55                  | E9Q606_MOUSE |              |                                                                                           |                                                                                                                                    | 0.85 - 1.00 |
| LALAFGLAHA     | AMEGPWKTVAIAADR              | N-ter +34.06 Da, K +34.06 Da              | 34.7       | 45.0              | 3      | 1683.02                      | 2.48                                         | 0.29                  | A2AEN9_MOUSE | Q9D3H2_MOUSE | Sodium/potassium-transporting ATPase subunit beta-3;                                      | Sodium/potassium-dependent ATPase subunit beta-3;                                                                                  | 0.85 - 1.00 |
| LAALFTTMMW     | AMLQTLNDEVPKYR               | N-ter +28.03 Da, K +28.03 Da              | 49.0       | 47.1              | 3      | 1733.00                      | 0.25                                         | 0.04                  | AT1B3_MOUSE  |              |                                                                                           |                                                                                                                                    | 0.25 - 0.75 |
| IRYREPRRML     | AMPLDLDALSPER                | N-ter +28.03 Da                           | 47.6       | 51.1              | 3      | 1583.87                      | 0.98                                         | 0.09                  | RM55_MOUSE   |              | 395 ribosomal protein L55, mitochondrial;                                                 |                                                                                                                                    | 0.75 - 0.85 |
| EPKRRSARLS     | AMPVPTPELKPGR                | N-ter +28.03 Da, K +28.03 Da              | 24.2       | 56.7              | 4      | 1694.09                      | -0.25                                        | 0.03                  | HMGNS_MOUSE  |              | High mobility group nucleosome-binding domain-containing protein 5;                       | Nucleosome-binding protein 1;Nucleosome-binding protein 45;Protein GARP45;                                                         | 0.25 - 0.75 |
| PREIFKQKER     | AMSTTSVTSSQPKLR              | N-ter +28.03 Da, K +28.03 Da              | 42.6       | 37.7              | 3      | 1705.97                      | 1.70                                         | 0.58                  | DBNL_MOUSE   |              | Drebrin-like protein;                                                                     | Actin-binding protein 1;SH3 domain-containing protein 7;                                                                           | 0.85 - 1.00 |
| SPVSSGVNLF     | ANDGSFLEFKR                  | N-ter +28.03 Da, K +28.03 Da              | 42.1       | 57.9              | 3      | 1451.86                      | 0.84                                         | 0.21                  | CS043_MOUSE  |              | Uncharacterized protein C19orf43 homolog;                                                 |                                                                                                                                    | 0.25 - 0.75 |
| QPISNVRAIQ     | ANINIPMGAFRPGAGQPPR          | N-ter +28.03 Da                           | 24.6       | 48.7              | 3      | 1991.15                      | 0.21                                         | 0.02                  | SMPX_MOUSE   |              | Small muscular protein;                                                                   | Stretch-responsive skeletal muscle protein;                                                                                        | 0.25 - 0.75 |
| NPEESIEDIY     | ANIPDLPSYIPSR                | N-ter +28.03 Da                           | 34.5       | 44.4              | 3      | 1556.89                      | -0.27                                        | 0.02                  | PALMD_MOUSE  | Q3UV77_MOUSE | Palmdelphin;                                                                              |                                                                                                                                    | 0.25 - 0.75 |
| CDIDIRKLDY     | ANNVMMSGTTMYPGIADR           | N-ter +28.03 Da                           | 26.1       | 56.3              | 3      | 1881.98                      | -2.64                                        | 0.66                  | ACT5_MOUSE   |              | Actin, alpha skeletal muscle;                                                             | Alpha-actin-1;                                                                                                                     | 0.00 - 0.15 |
| SPSEIGPMP      | ANQDTIFEGIGGPR               | N-ter +34.06 Da                           | 40.8       | 47.3              | 3      | 1507.86                      | -3.47                                        | 0.39                  | COSA1_MOUSE  |              | Collagen alpha-1(V) chain;                                                                |                                                                                                                                    | 0.00 - 0.15 |
| FGVTTLDVWR     | ANTFVAELKGLDPR               | N-ter +28.03 Da, K +28.03 Da              | 38.0       | 46.6              | 3      | 1657.00                      | 1.00                                         | 0.09                  | MDHM_MOUSE   |              | Malate dehydrogenase, mitochondrial;                                                      |                                                                                                                                    | 0.75 - 0.85 |
| CDVDIRKLDY     | ANTVLSGGTTMYPGIADR           | N-ter +28.03 Da                           | 34.6       | 54.6              | 3      | 1851.02                      | -0.45                                        | 0.07                  | ACTB_MOUSE   | ACTG_MOUSE   | Actin, cytoplasmic 1;                                                                     | Beta-actin;                                                                                                                        | 0.25 - 0.75 |
| DLSKVLFICT     | ANVIDTIPELR                  | N-ter +28.03 Da                           | 38.3       | 22.3              | 2      | 1364.80                      | 0.86                                         | 0.06                  | LONM_MOUSE   | E9Q120_MOUSE | Lon protease homolog, mitochondrial;                                                      | Lon protease-like protein;Mitochondrial ATP-dependent protease Lon;Serine protease 15;                                             | 0.25 - 0.75 |

Table S10, Tholen et al.

| Non Prime Site                                        | Prime Site                                                                               | Modifications                                                                                                   | Hyperscore                   | Mass error in ppm            | Charge           | Precursor neutral mass in Da             | Fold change (log <sub>2</sub> ) of ASAPRatio | FC-error of ASAPRatio        | Uniprot ID 1                                              | Uniprot ID 2                              | Protein Name 1                                                                                                                                      | Protein Name 2                                                                                                                          | Quantile                                                 |
|-------------------------------------------------------|------------------------------------------------------------------------------------------|-----------------------------------------------------------------------------------------------------------------|------------------------------|------------------------------|------------------|------------------------------------------|----------------------------------------------|------------------------------|-----------------------------------------------------------|-------------------------------------------|-----------------------------------------------------------------------------------------------------------------------------------------------------|-----------------------------------------------------------------------------------------------------------------------------------------|----------------------------------------------------------|
| QSQWQKVKDF                                            | ANVVVDVAVKDSGR                                                                           | N-ter +28.03 Da, K +28.03 Da                                                                                    | 19.0                         | 49.2                         | 3                | 1448.83                                  | 1.32                                         | 0.08                         | APOA1_MOUSE                                               | Q8BPD5_MOUSE                              | Apolipoprotein A-I;                                                                                                                                 | Apolipoprotein A1;                                                                                                                      | 0.75 - 0.85                                              |
| LLSWASRNEA<br>HTFYNELRV                               | APDQDEIDCLPGLAKQPSFR<br>APEEHPVLLTEAPLNPKANR                                             | N-ter +28.03 Da, K +28.03 Da, C +57.02 Da<br>N-ter +28.03 Da, K +28.03 Da                                       | 38.4<br>50.1                 | 59.5<br>58.0                 | 4<br>4           | 2312.28<br>2251.36                       | 0.96<br>1.35                                 | 0.12<br>0.15                 | PPGB_MOUSE<br>ACTB_MOUSE                                  | A2A5J9_MOUSE<br>ACTG_MOUSE                | Lysosomal protective protein;<br>Actin, cytoplasmic 1;                                                                                              | Carboxypeptidase C;Carboxypeptidase L;Cathepsin A;Protective protein cathepsin A;Protective protein for beta-galactosidase; Beta-actin; | 0.75 - 0.85<br>0.75 - 0.85                               |
| LRRFMQTFVL                                            | APEGSVANKFYVHNDIFR                                                                       | N-ter +28.03 Da, K +28.03 Da                                                                                    | 27.2                         | 59.7                         | 4                | 2119.21                                  | 0.62                                         | 0.07                         | G3BP1_MOUSE                                               | Q3UR88_MOUSE                              | Ras GTPase-activating protein-binding protein 1;                                                                                                    | ATP-dependent DNA helicase VIII;GAP SH3 domain-binding protein 1;HDH-VIII;                                                              | 0.25 - 0.75                                              |
| SQPESLPAM                                             | APLPDSDPDQPALLLAR<br>APNVLASEPEIPKGIK                                                    | N-ter +28.03 Da<br>N-ter +28.03 Da, K +28.03 Da                                                                 | 26.2<br>40.8                 | 54.5<br>32.8                 | 3<br>3           | 1816.07<br>1746.06                       | -0.42<br>1.42                                | 0.04<br>0.19                 | C2D1B_MOUSE<br>KAD2_MOUSE                                 |                                           | Coiled-coil and C2 domain-containing protein 1B;<br>Adenylate kinase 2, mitochondrial;                                                              | Five prime repressor element under dual repression-binding protein 2;<br>ATP-AMP transphosphorylase 2;                                  | 0.25 - 0.75<br>0.75 - 0.85                               |
| ATSASGALLS<br>VAGPQPAQTG<br>NAILRVYTKG                | APPSGPPISGFSVGTYYDITR<br>APQGLSLEYLFR<br>APQVSTPTLVEAAR                                  | N-ter +28.03 Da<br>N-ter +28.03 Da<br>N-ter +28.03 Da                                                           | 59.4<br>42.2<br>39.4         | 39.8<br>52.2<br>43.5         | 3<br>3<br>3      | 2147.18<br>1493.83<br>1466.87            | -0.81<br>1.01<br>-2.12                       | 0.13<br>0.08<br>0.37         | PRRC1_MOUSE<br>FRIL1_MOUSE<br>ALBU_MOUSE                  | Q9CPX4_MOUSE                              | Protein PRRC1;<br>Ferritin light chain 1;<br>Serum albumin;                                                                                         | Proline-rich and coiled-coil-containing protein 1;<br>Ferritin L subunit 1;                                                             | 0.15 - 0.25<br>0.75 - 0.85<br>0.00 - 0.15                |
| LLATVWHGQG                                            | APVIEPSGPELVPEGETVTLR                                                                    | N-ter +34.06 Da                                                                                                 | 62.7                         | 43.6                         | 3                | 2322.39                                  | -0.14                                        | 0.04                         | CSF1R_MOUSE                                               | Q3TBH6_MOUSE                              | Macrophage colony-stimulating factor 1 receptor;                                                                                                    | CSF-1 receptor;Proto-oncogene c-Fms;                                                                                                    | 0.25 - 0.75                                              |
| DMTSKFLTAL                                            | AQDGVINEEALSVELDR                                                                        | N-ter +28.03 Da                                                                                                 | 63.8                         | 47.2                         | 3                | 1986.08                                  | 2.22                                         | 0.38                         | PDC6I_MOUSE                                               | B8JL8_MOUSE                               | Programmed cell death 6-interacting protein;                                                                                                        | ALG-2-interacting protein 1;ALG-2-interacting protein X;E2F1-inducible protein;Eig2;                                                    | 0.85 - 1.00                                              |
| ITQQASMTSL                                            | AQGPGTSAITFPPEEQDPR                                                                      | N-ter +34.06 Da<br>N-ter +28.03 Da, K +28.03 Da, C +57.02 Da                                                    | 38.8<br>30.1                 | 48.2<br>46.1                 | 3<br>3           | 2164.15<br>1399.78                       | -0.64<br>-3.47                               | 0.15<br>0.39                 | PRRC1_MOUSE<br>2AAA_MOUSE                                 |                                           | Protein PRRC1;<br>Serine/threonine-protein phosphatase 2A 65 kDa regulatory subunit A alpha isoform;                                                | Proline-rich and coiled-coil-containing protein 1;<br>PP2A subunit A isoform PR65-alpha;PP2A subunit A isoform R1-alpha;                | 0.25 - 0.75<br>0.00 - 0.15                               |
| TIEHLLPFL                                             | AQLKDECPVFR                                                                              | N-ter +28.03 Da                                                                                                 | 48.2                         | 47.1                         | 3                | 2112.01                                  | 1.25                                         | 0.33                         | LDB3_MOUSE                                                | E9PYJ9_MOUSE                              | LIM domain-binding protein 3;                                                                                                                       | Protein cypher;Protein oracle;Z-band alternatively spliced PDZ-motif protein;                                                           | 0.75 - 0.85                                              |
| NLQSRFRIL                                             | AQMTGTGYMQDPEEALR                                                                        | N-ter +28.03 Da                                                                                                 | 48.2                         | 47.1                         | 3                | 2112.01                                  | 1.25                                         | 0.33                         | LDB3_MOUSE                                                | E9PYJ9_MOUSE                              | LIM domain-binding protein 3;                                                                                                                       | ATP-AMP transphosphorylase;Adenylate kinase 3-like;                                                                                     | 0.25 - 0.75                                              |
| LARAPLCERI                                            | AQNFGQLHLSGGHLLR                                                                         | N-ter +28.03 Da                                                                                                 | 60.6                         | 60.7                         | 4                | 1805.08                                  | 0.66                                         | 0.08                         | KAD4_MOUSE                                                | A2ARF6_MOUSE                              | Adenylate kinase isoenzyme 4, mitochondrial;<br>Coiled-coil-helix-coiled-coil-helix domain-containing protein 2, mitochondrial;                     | Heat shock 70 kDa protein 8;                                                                                                            | 0.15 - 0.25<br>0.25 - 0.75                               |
| MRAAPRRAPA<br>GIDFYTSIR<br>SPCLLPRVHL<br>QGRRGVSESEQ  | AQPAAAAAPSVAAGSAAAPR<br>ARFELNADLFR<br>ASAFGSSTESLVAR<br>ASDSEGHSDSDFEQAVGAHR            | N-ter +34.06 Da<br>N-ter +28.03 Da<br>N-ter +34.06 Da<br>N-ter +28.03 Da                                        | 60.6<br>39.2<br>48.5<br>51.7 | 60.4<br>66.5<br>35.5<br>60.2 | 3<br>3<br>2<br>4 | 1791.09<br>1507.88<br>1415.80<br>2071.02 | -1.43<br>0.77<br>-0.12<br>1.68               | 0.39<br>0.08<br>0.02<br>0.43 | CHCH2_MOUSE<br>HSP7C_MOUSE<br>THEM5_MOUSE<br>E9Q019_MOUSE | B2RPU8_MOUSE<br>HSP72_MOUSE<br>FILA_MOUSE | Heat shock cognate 71 kDa protein;<br>Thioesterase superfamily member 5;                                                                            | Heat shock 70 kDa protein 8;                                                                                                            | 0.25 - 0.75<br>0.25 - 0.75<br>0.85 - 1.00                |
| GKRHPYKMNL                                            | ASEPQEVLIHIGSAHNR                                                                        | N-ter +28.03 Da<br>N-ter +28.03 Da, K +28.03 Da, C +57.02 Da                                                    | 38.4<br>64.8                 | 50.7<br>58.8                 | 4<br>4           | 1771.99<br>2452.35                       | 2.92<br>2.02                                 | 0.31<br>0.68                 | PDU11_MOUSE<br>RS14_MOUSE                                 |                                           | PDZ and LIM domain protein 1;<br>40S ribosomal protein S14;                                                                                         | C-terminal LIM domain protein 1;Elfin;LIM domain protein CLP-36;                                                                        | 0.85 - 1.00<br>0.85 - 1.00                               |
| ENNVGVCHIF                                            | ASFNDTFVHVHDLGSKETICR                                                                    | N-ter +28.03 Da, K +28.03 Da, C +57.02 Da                                                                       | 64.8                         | 58.8                         | 4                | 2452.35                                  | 2.02                                         | 0.68                         | RS14_MOUSE                                                | D3YVF4_MOUSE                              | 40S ribosomal protein S14;                                                                                                                          |                                                                                                                                         | 0.85 - 1.00                                              |
| KSPQVILVNM<br>ENAFRSRGG                               | ASFPECTAAAIKAIK<br>ASGDKAEAGAPQVEAGKR                                                    | N-ter +28.03 Da<br>N-ter +28.03 Da, K +28.03 Da                                                                 | 37.3<br>31.1                 | 49.6<br>61.4                 | 3<br>4           | 1660.98<br>1883.09                       | -0.30<br>2.09                                | 0.04<br>0.39                 | RRFM_MOUSE<br>Q8VCQ8_MOUSE                                | E9Q0M9_MOUSE                              | Ribosome-recycling factor, mitochondrial;                                                                                                           | Ribosome-releasing factor, mitochondrial;                                                                                               | 0.25 - 0.75<br>0.85 - 1.00                               |
| ARGAAVTRSM                                            | ASGGGVPTDEEQATGLER                                                                       | N-ter +28.03 Da                                                                                                 | 40.7                         | 50.4                         | 3                | 1800.94                                  | -0.22                                        | 0.02                         | COX5B_MOUSE                                               | Q9D881_MOUSE                              | Cytochrome c oxidase subunit 5B, mitochondrial;                                                                                                     | Cytochrome c oxidase polypeptide Vb;<br>Aldehyde dehydrogenase family 5 member A1;NAD(+)-dependent succinic semialdehyde dehydrogenase; | 0.25 - 0.75                                              |
| EPAGTPRRSY<br>KTGAAAGKRK<br>QEVRCLEERSY<br>ADPAKVEAFQ | ASGPGGLHADLLR<br>ASGPPVSELITKAVAASKER<br>ASKPTLNEVVIVSAIR<br>ASLSKLDGVYVNDVAFGTAHR       | N-ter +28.03 Da<br>N-ter +28.03 Da, K +28.03 Da<br>N-ter +34.06 Da, K +34.06 Da<br>N-ter +28.03 Da, K +28.03 Da | 42.4<br>30.6<br>38.6<br>56.4 | 53.3<br>70.1<br>47.0<br>62.2 | 3<br>4<br>3<br>4 | 1290.77<br>2094.35<br>1764.20<br>2176.26 | 0.01<br>0.26<br>-0.43<br>-0.45               | 0.00<br>0.01<br>0.06<br>0.06 | SSDH_MOUSE<br>H12_MOUSE<br>THL1_MOUSE<br>PGK1_MOUSE       | H13_MOUSE                                 | Succinate-semialdehyde dehydrogenase, mitochondrial;<br>Histone H1.2;<br>Acetyl-CoA acetyltransferase, mitochondrial;<br>Phosphoglycerate kinase 1; | H1 VAR.1;H1C;<br>Acetoacetyl-CoA thiolase;                                                                                              | 0.25 - 0.75<br>0.25 - 0.75<br>0.25 - 0.75<br>0.25 - 0.75 |
| QHSSKFMVLV<br>M                                       | ASNQPEQDFWAINDR<br>ASQTQGIQQLLQAEKR                                                      | N-ter +28.03 Da<br>N-ter +28.03 Da, K +28.03 Da                                                                 | 39.3<br>28.1                 | 51.6<br>28.9                 | 3<br>3           | 1817.93<br>1854.09                       | 0.83<br>2.48                                 | 0.11<br>0.44                 | ATAD3_MOUSE<br>VATG2_MOUSE                                |                                           | ATPase family AAA domain-containing protein 3;<br>V-type proton ATPase subunit G 2;                                                                 | AAA-ATPase TOB3;<br>V-ATPase 13 kDa subunit 2;Vacuolar proton pump subunit G 2;                                                         | 0.25 - 0.75<br>0.85 - 1.00                               |
| RSALQSIW<br>GLLDWPOGTG                                | ASQTDGKLEPVTKDVER<br>ASQVTEGDKVKVER                                                      | N-ter +34.06 Da, K +34.06 Da<br>N-ter +28.03 Da, K +28.03 Da                                                    | 20.4<br>28.7                 | 57.4<br>60.9                 | 4<br>4           | 2075.32<br>1742.10                       | -0.49<br>-0.03                               | 0.04<br>0.00                 | SERPH_MOUSE<br>ETFB_MOUSE                                 |                                           | Serpin H1;<br>Electron transfer flavoprotein subunit beta;                                                                                          | 47 kDa heat shock protein;Collagen-binding protein;Serine protease inhibitor J6;                                                        | 0.25 - 0.75<br>0.25 - 0.75                               |
| TTL5NAVSSL                                            | ASTGLSLTKDVER                                                                            | N-ter +28.03 Da, K +28.03 Da                                                                                    | 25.9                         | 44.4                         | 3                | 1431.86                                  | -0.45                                        | 0.09                         | PICA_MOUSE                                                |                                           | Phosphatidylinositol-binding clathrin assembly protein;                                                                                             | Clathrin assembly lymphoid myeloid leukemia; HLA-B-associated transcript 2;Proline-rich and coiled-coil-containing protein 2A;          | 0.25 - 0.75                                              |
| DGKPPSLTLA<br>YVALDFENEM<br>NGQNSRPKI<br>IREGEVEVLK   | ASTPGPEELTAATVPPPPR<br>ATAASSSSLEKSYELPDGQVITIGNER<br>ATALPDDIITR<br>ATEMVEVGPEDDEVGAEAR | N-ter +28.03 Da<br>N-ter +28.03 Da, K +28.03 Da<br>N-ter +28.03 Da<br>N-ter +28.03 Da                           | 38.8<br>45.9<br>27.5<br>53.3 | 37.6<br>53.4<br>45.6<br>55.0 | 3<br>4<br>3<br>3 | 2016.13<br>2878.61<br>1340.79<br>1959.98 | -0.36<br>3.02<br>0.21<br>1.02                | 0.03<br>0.89<br>0.01<br>0.22 | PRC2A_MOUSE<br>ACTC_MOUSE<br>DNIC1_MOUSE<br>PTRF_MOUSE    | ACTA_MOUSE<br>F6ZL86_MOUSE                | Protein PRC2A;<br>Actin, alpha cardiac muscle 1;<br>Dnaj homolog subfamily C member 1;<br>Polymerase I and transcript release factor;               | Alpha-cardiac actin;<br>Dnaj protein homolog MTJ1;<br>Cav-p60;Cavin-1;                                                                  | 0.25 - 0.75<br>0.85 - 1.00<br>0.25 - 0.75<br>0.75 - 0.85 |
| KRGTGGVDTA<br>NWWKMGQLVL                              | ATGSVFDISNLDLR<br>ATIEKIPFESAFR                                                          | N-ter +28.03 Da<br>N-ter +28.03 Da, K +28.03 Da                                                                 | 40.5<br>22.2                 | 51.2<br>53.6                 | 3<br>3           | 1421.79<br>1563.95                       | 0.71<br>0.91                                 | 0.07<br>0.13                 | KCRU_MOUSE<br>FACR2_MOUSE                                 |                                           | Creatine kinase U-type, mitochondrial;<br>Fatty acyl-CoA reductase 2;                                                                               | Acidic-type mitochondrial creatine kinase;Ubiquitous mitochondrial creatine kinase;<br>Male sterility domain-containing protein 1;      | 0.25 - 0.75<br>0.25 - 0.75                               |
| VIQHRSQYQY                                            | ATLDVYNPFENR                                                                             | N-ter +28.03 Da                                                                                                 | 24.5                         | 55.8                         | 3                | 1465.80                                  | 0.03                                         | 0.01                         | SCAM3_MOUSE                                               | Q3UXS0_MOUSE                              | Secretory carrier-associated membrane protein 3;                                                                                                    |                                                                                                                                         | 0.25 - 0.75                                              |
| LTGEFEKKVY                                            | ATLGEVHPLVVFHTNR                                                                         | N-ter +28.03 Da                                                                                                 | 33.7                         | 55.7                         | 4                | 1817.10                                  | -0.49                                        | 0.06                         | RAN_MOUSE                                                 |                                           | GTP-binding nuclear protein Ran;                                                                                                                    | GTPase Ran;Ras-like protein TC4;Ras-related nuclear protein;                                                                            | 0.25 - 0.75                                              |

| Non Prime Site | Prime Site                    | Modifications                             | Hyperscore | Mass error in ppm | Charge | Precursor neutral mass in Da | Fold change (log <sub>2</sub> ) of ASAPRatio | FC-error of ASAPRatio | Uniprot ID 1 | Uniprot ID 2 | Protein Name 1                                | Protein Name 2                                                                                                                             | Quantile    |
|----------------|-------------------------------|-------------------------------------------|------------|-------------------|--------|------------------------------|----------------------------------------------|-----------------------|--------------|--------------|-----------------------------------------------|--------------------------------------------------------------------------------------------------------------------------------------------|-------------|
| DTLHRVKMIM     | ATNRPDTLDPALLRPGR             | N-ter +28.03 Da                           | 21.4       | 59.2              | 4      | 1890.16                      | 1.22                                         | 0.15                  | PRS10_MOUSE  |              | 26S protease regulatory subunit 10B;          | 26S proteasome AAA-ATPase subunit RPT4;Proteasome 26S subunit ATPase 6;Proteasome subunit p42;                                             | 0.75 - 0.85 |
| KHKKEKAVTI     | ATPATAAPAASAAITTSQAEEPAAPAEPR | N-ter +28.03 Da                           | 57.5       | 43.7              | 4      | 2833.53                      | -1.69                                        | 0.11                  | SRRM1_MOUSE  | A2A8V8_MOUSE | Serine/arginine repetitive matrix protein 1;  | Plenty-of-prolines 101; Germ cell lineage protein gercelin;Src-suppressed C kinase substrate;                                              | 0.00 - 0.15 |
| HLAQGSETVQ     | ATPESLEVPEVTEVDVR             | N-ter +34.06 Da                           | 45.2       | 42.5              | 3      | 1919.04                      | -0.81                                        | 0.13                  | AKA12_MOUSE  |              | A-kinase anchor protein 12;                   |                                                                                                                                            | 0.15 - 0.25 |
| GRRDSKSPTK     | ATPLPAEGKKNLTLR               | N-ter +28.03 Da, K +28.03 Da              | 24.9       | 56.1              | 4      | 1579.03                      | -0.20                                        | 0.02                  | E41L2_MOUSE  |              | Band 4.1-like protein 2;                      | Generally expressed protein 4.1;                                                                                                           | 0.25 - 0.75 |
| AVAAAAATTT     | ATTTTTSGGHPLFLR               | N-ter +34.06 Da                           | 30.4       | 49.1              | 3      | 1722.00                      | 0.20                                         | 0.02                  | RD23B_MOUSE  | Q3TJ52_MOUSE | UV excision repair protein RAD23 homolog B;   | XP-C repair-complementing complex 58 kDa protein;                                                                                          | 0.25 - 0.75 |
| QERQTOAVLQ     | AVADKVKEDSQVPTQLQR            | N-ter +34.06 Da, K +34.06 Da              | 34.8       | 48.1              | 4      | 2285.45                      | -1.56                                        | 0.32                  | AKA12_MOUSE  |              | A-kinase anchor protein 12;                   | Germ cell lineage protein gercelin;Src-suppressed C kinase substrate;                                                                      | 0.00 - 0.15 |
| QLAAQPSTYL     | AVAEELNVSGKYFDGLR             | N-ter +28.03 Da, K +28.03 Da              | 48.0       | 49.2              | 3      | 2052.15                      | 1.67                                         | 0.29                  | RDH13_MOUSE  |              | Retinol dehydrogenase 13;                     |                                                                                                                                            | 0.85 - 1.00 |
| LLENMEGLFL     | AVDEIVDGGVILESDPQQVVRH        | N-ter +28.03 Da                           | 70.3       | 62.4              | 4      | 2402.39                      | 2.66                                         | 0.64                  | COPZ1_MOUSE  | Q8R3M1_MOUSE | Coatomer subunit zeta-1;                      | Zeta-1-coat protein;                                                                                                                       | 0.85 - 1.00 |
| QKIGQPSTLL     | AVEEQYCEYSGSR                 | N-ter +34.06 Da, C +57.02 Da              | 45.2       | 40.6              | 3      | 1667.80                      | -1.52                                        | 0.43                  | E9PX16_MOUSE |              |                                               |                                                                                                                                            | 0.00 - 0.15 |
| LQFFNLDFTL     | AVFHPETSTIQGLEGR              | N-ter +28.03 Da                           | 34.4       | 49.5              | 3      | 1769.00                      | 1.23                                         | 0.15                  | FR10P_MOUSE  |              | FGFR1 oncogene partner;                       |                                                                                                                                            | 0.75 - 0.85 |
| KRGTVGVDTA     | AVGAVFDISNADR                 | N-ter +34.06 Da                           | 36.7       | 48.7              | 3      | 1367.79                      | -2.18                                        | 0.30                  | KCRM_MOUSE   |              | Creatine kinase M-type;                       | Creatine kinase M chain;M-CK;                                                                                                              | 0.00 - 0.15 |
| IIPASTGAAK     | AVGKVIPELNGKLTGMAFR           | N-ter +28.03 Da, K +28.03 Da              | 38.8       | 60.5              | 4      | 2084.34                      | -1.52                                        | 0.26                  | G3P_MOUSE    | F8WJL5_MOUSE | Glyceraldehyde-3-phosphate dehydrogenase;     | Peptidyl-cysteine S-nitrosylase GAPDH;                                                                                                     | 0.00 - 0.15 |
| GERGLPGPPG     | AVGPAGKDGEGAQAGPAGPAGER       | N-ter +34.06 Da, K +34.06 Da              | 54.0       | 47.2              | 4      | 2312.32                      | -1.74                                        | 0.41                  | CO1A1_MOUSE  | F8WGB7_MOUSE | Collagen alpha-1(I) chain;                    | Alpha-1 type I collagen;                                                                                                                   | 0.00 - 0.15 |
| EATGGKYVPR     | AVLVDLPEGTMDSVR               | N-ter +28.03 Da                           | 36.3       | 49.5              | 3      | 1628.93                      | -0.52                                        | 0.04                  | TBB2C_MOUSE  | TBB4_MOUSE   | Tubulin beta-4B chain;                        | Tubulin beta-2C chain;                                                                                                                     | 0.25 - 0.75 |
| GPEPTTDCVF     | AVMHGETGETVPGNALVVDPEKPFRR    | N-ter +28.03 Da, K +28.03 Da              | 56.3       | 54.7              | 4      | 2705.53                      | 3.41                                         | 0.58                  | EHD2_MOUSE   |              | EH domain-containing protein 2;               |                                                                                                                                            | 0.85 - 1.00 |
| SSLLSPMSVN     | AVMKVIDPATATVLDLR             | N-ter +28.03 Da, K +28.03 Da              | 45.1       | 40.8              | 3      | 1842.10                      | -0.27                                        | 0.03                  | TCFD_MOUSE   |              | T-complex protein 1 subunit delta;            | A45;CCT-delta; CCT-alpha;Tailless complex polypeptide 1A;                                                                                  | 0.25 - 0.75 |
| RSLVIPNTL      | AVNAAQDSTDLVAKLR              | N-ter +28.03 Da, K +28.03 Da              | 41.8       | 41.2              | 3      | 1727.03                      | 0.52                                         | 0.04                  | TCPA_MOUSE   |              | T-complex protein 1 subunit alpha;            | CT-alpha;Tailless complex polypeptide 1A;                                                                                                  | 0.25 - 0.75 |
| VLTFGQMLTC     | AVPIAQKSEPOSLSNEALMR          | N-ter +28.03 Da, K +28.03 Da              | 34.8       | 58.6              | 4      | 2224.32                      | 0.80                                         | 0.31                  | Q542V8_MOUSE | D3Z3K5_MOUSE |                                               |                                                                                                                                            | 0.25 - 0.75 |
| LSLEVLELQA     | AVRPLQLLGTCAELCR              | N-ter +28.03 Da, K +28.03 Da, C +57.02 Da | 69.6       | 45.0              | 3      | 1884.09                      | -0.30                                        | 0.06                  | Q8BTE6_MOUSE |              |                                               |                                                                                                                                            | 0.25 - 0.75 |
| AVPDKTVKWC     | AVSEHENTKCISFR                | N-ter +28.03 Da, C +57.02 Da              | 24.3       | 73.5              | 4      | 1732.98                      | -0.14                                        | 0.02                  | TRFE_MOUSE   | D3YVR8_MOUSE | Serotransferrin;                              | Beta-1 metal-binding globulin;Siderophilin;                                                                                                | 0.25 - 0.75 |
| MDIQGDPKYR     | AVSEQGVCTLEIR                 | N-ter +28.03 Da, C +57.02 Da              | 31.4       | 52.5              | 3      | 1488.84                      | -0.36                                        | 0.03                  | MY8PH_MOUSE  |              | Myosin-binding protein H;                     | H-protein;                                                                                                                                 | 0.25 - 0.75 |
| LQSEMLSLTL     | AVSKEKEEETSPODTSIPR           | N-ter +28.03 Da, K +28.03 Da              | 34.9       | 62.1              | 4      | 2215.26                      | 1.34                                         | 0.33                  | E9Q705_MOUSE |              |                                               |                                                                                                                                            | 0.75 - 0.85 |
| TGQAAPVLGL     | AVSSELIQSQSFVDPDEPR           | N-ter +28.03 Da, C +57.02 Da              | 48.9       | 46.2              | 3      | 2217.18                      | 1.26                                         | 0.18                  | FKBP9_MOUSE  |              | Peptidyl-prolyl cis-trans isomerase FKBP9;    | 63 kDa FK506-binding protein;FK506-binding protein 9;FKBP65R;Rotamase;                                                                     | 0.75 - 0.85 |
| TEEQGPEEDQ     | AVSVFSGDPEGSALHEKSLR          | N-ter +28.03 Da, K +28.03 Da              | 22.8       | 46.3              | 4      | 2141.21                      | -1.47                                        | 0.16                  | F22403_MOUSE |              |                                               |                                                                                                                                            | 0.15 - 0.25 |
| FISNPNSIIL     | AVTAANTDMATSEALKISR           | N-ter +28.03 Da, K +28.03 Da              | 44.8       | 42.3              | 3      | 2005.14                      | 0.30                                         | 0.06                  | DNM1L_MOUSE  | E9PUD2_MOUSE | Dynamin-1-like protein;                       | Dynamin family member proline-rich carboxyl-terminal domain less;Dynamin-related protein 1;                                                | 0.25 - 0.75 |
| LLIATEEGFK     | AVVGDDEVYLFHHR                | N-ter +34.06 Da                           | 34.6       | 64.0              | 4      | 1727.97                      | -0.09                                        | 0.03                  | LEG7_MOUSE   | Q9CR81_MOUSE | Galectin-7;                                   |                                                                                                                                            | 0.25 - 0.75 |
| ITKHNDDEQY     | AWESSAGSFTVR                  | N-ter +28.03 Da                           | 36.4       | 51.4              | 2      | 1381.73                      | -2.00                                        | 0.24                  | H590A_MOUSE  | H590B_MOUSE  | Heat shock protein HSP 90-alpha;              | Heat shock 86 kDa;Tumor-specific transplantation 86 kDa antigen;                                                                           | 0.00 - 0.15 |
| SGEDKSNKA      | AWGKIGGHGAEYGAELER            | N-ter +34.06 Da, K +34.06 Da              | 52.4       | 58.8              | 4      | 2039.21                      | -2.12                                        | 0.28                  | HBA_MOUSE    | Q91V88_MOUSE | Hemoglobin subunit alpha;                     | Alpha-globin;Hemoglobin alpha chain;                                                                                                       | 0.00 - 0.15 |
| GDMVPAISL      | AYEQAESDIMKR                  | N-ter +28.03 Da, K +28.03 Da              | 23.7       | 52.7              | 3      | 1495.81                      | -1.60                                        | 0.15                  | AT1A1_MOUSE  | E9QAV3_MOUSE |                                               | Sodium pump subunit alpha-1;                                                                                                               | 0.00 - 0.15 |
| IFGDYIERLW     | AYLTIEQLLEKR                  | N-ter +28.03 Da, K +28.03 Da              | 40.1       | 48.5              | 3      | 1531.97                      | 2.79                                         | 0.57                  | ITIH3_MOUSE  | F6ZJX7_MOUSE | Inter-alpha-trypsin inhibitor heavy chain H3; |                                                                                                                                            | 0.85 - 1.00 |
| LGEMLHEPTN     | CAPYNTSDTETSNNYR              | N-ter +34.06 Da, C +57.02 Da              | 22.0       | 68.2              | 3      | 2027.01                      | -6.64                                        | 0.00                  | Q6DFU8_MOUSE |              |                                               |                                                                                                                                            | 0.00 - 0.15 |
| ARNLGRVGTK     | CCTLPEQDR                     | N-ter +28.03 Da, C +57.02 Da              | 33.6       | 37.6              | 2      | 1205.56                      | 1.09                                         | 0.22                  | ALBU_MOUSE   |              | Serum albumin;                                |                                                                                                                                            | 0.75 - 0.85 |
| CDDEETLTA      | CDNGSLVKAGFAGDAPR             | N-ter +28.03 Da, K +28.03 Da, C +57.02 Da | 62.6       | 46.4              | 3      | 1962.02                      | 0.61                                         | 0.17                  | ACTC_MOUSE   | ACTS_MOUSE   | Actin, alpha cardiac muscle 1;                | Alpha-cardiac actin;                                                                                                                       | 0.25 - 0.75 |
| KVLLSICSLL     | CDPNPDDPLVPEIAR               | N-ter +28.03 Da, C +57.02 Da              | 29.9       | 54.7              | 3      | 1734.92                      | -0.43                                        | 0.05                  | UB2D2_MOUSE  | UB2D3_MOUSE  | Ubiquitin-conjugating enzyme E2 D2;           | Ubiquitin carrier protein D2;Ubiquitin-conjugating enzyme E2(17)KB 2;Ubiquitin-conjugating enzyme E2-17 kDa 2;Ubiquitin-protein ligase D2; | 0.25 - 0.75 |
| MEPYS          | CDTFVALPPATVGNR               | N-ter +34.06 Da, C +57.02 Da              | 33.5       | 41.6              | 3      | 1650.93                      | -0.97                                        | 0.04                  | SCRN3_MOUSE  | A2AWQ9_MOUSE | Secernin-3;                                   |                                                                                                                                            | 0.15 - 0.25 |
| HNLPLGRFCE     | CEIGYELDR                     | N-ter +28.03 Da, C +57.02 Da              | 40.1       | 57.1              | 2      | 1181.61                      | 1.89                                         | 0.28                  | FBN1_MOUSE   | A2AQ53_MOUSE | Fibrillin-1;                                  |                                                                                                                                            | 0.85 - 1.00 |
| VTVAFNARD      | CFLHLPR                       | N-ter +34.06 Da, C +57.02 Da              | 29.9       | 64.2              | 2      | 975.62                       | -4.64                                        | 1.16                  | PEX1_MOUSE   |              | Peroxisome biogenesis factor 1;               | Peroxin-1;                                                                                                                                 | 0.00 - 0.15 |
| QAGRFRHVNL     | CGEEQGADAAALHFNPR             | N-ter +28.03 Da, C +57.02 Da              | 90.5       | 48.4              | 3      | 1798.89                      | 1.99                                         | 0.54                  | Q9CRB1_MOUSE | LEG7_MOUSE   |                                               |                                                                                                                                            | 0.85 - 1.00 |
| DDFAQFLDTC     | CKAADKDCFTSTEGPNLVTR          | N-ter +28.03 Da, C +57.02 Da              | 31.2       | 66.0              | 4      | 2353.30                      | 0.59                                         | 0.06                  | ALBU_MOUSE   |              | Serum albumin;                                |                                                                                                                                            | 0.25 - 0.75 |
| GNSTHPMHSR     | CSPDPGLTALLSDHR               | N-ter +28.03 Da, C +57.02 Da              | 45.3       | 63.3              | 3      | 1665.92                      | 2.64                                         | 0.51                  | HEMO_MOUSE   |              | Hemopexin;                                    |                                                                                                                                            | 0.85 - 1.00 |
| FNIFYELFTM     | CTSITTEDEKGLHLHGR             | N-ter +28.03 Da, K +28.03 Da, C +57.02 Da | 41.0       | 57.2              | 4      | 2021.15                      | -0.07                                        | 0.02                  | ASAH1_MOUSE  | D3Z015_MOUSE | Acid ceramidase;                              | Acylsphingosine deacylase;N-acylsphingosine amidohydrolase;                                                                                | 0.25 - 0.75 |
| NLLQHIGTNL     | CVIGDGSGLTGANIFR              | N-ter +28.03 Da, C +57.02 Da              | 38.1       | 44.2              | 3      | 1663.91                      | -0.17                                        | 0.02                  | K6PL_MOUSE   |              | 6-phosphofructokinase, liver type;            | Phosphofructo-1-kinase isozyme B;Phosphofructokinase 1;Phosphohexokinase;                                                                  | 0.25 - 0.75 |
| KPTDGASSSN     | CYTDISHLVR                    | N-ter +28.03 Da, C +57.02 Da              | 43.3       | 64.6              | 3      | 1226.72                      | 0.86                                         | 0.12                  | NASP_MOUSE   | B1AU75_MOUSE | Nuclear autoantigenic sperm protein;          |                                                                                                                                            | 0.25 - 0.75 |
| MQN            | DAGEFVDLVPR                   | N-ter +28.03 Da                           | 35.1       | 51.5              | 3      | 1407.78                      | 0.00                                         | 0.00                  | RS21_MOUSE   |              | 40S ribosomal protein S21;                    |                                                                                                                                            | 0.25 - 0.75 |
| LGVSQVQLL      | DAVDYIPVPR                    | N-ter +28.03 Da                           | 17.4       | 48.7              | 3      | 1373.79                      | 3.76                                         | 1.10                  | EFTU_MOUSE   | D3YVN7_MOUSE | Elongation factor Tu, mitochondrial;          |                                                                                                                                            | 0.85 - 1.00 |
| PPQCRFPFPG     | DAVERPRPPPGPPWSPR             | N-ter +34.06 Da                           | 28.9       | 60.9              | 4      | 2195.31                      | -4.06                                        | 1.35                  | PDCD7_MOUSE  | Q3U2X6_MOUSE | Programmed cell death protein 7;              | ES18;                                                                                                                                      | 0.00 - 0.15 |
| ASGTTLEAL      | DCILPPTRPDTPKPLR              | N-ter +34.06 Da, K +34.06 Da, C +57.02 Da | 24.1       | 69.5              | 4      | 1846.21                      | -2.25                                        | 0.11                  | EF1A1_MOUSE  | D3Y268_MOUSE | Elongation factor 1-alpha 1;                  | Elongation factor Tu;Eukaryotic elongation factor 1A-1;                                                                                    | 0.00 - 0.15 |
| LPLLARLSAG     | DCPCSEAAALCQPIR               | N-ter +34.06 Da, C +57.02 Da              | 47.3       | 60.9              | 3      | 1709.88                      | -0.81                                        | 0.14                  | DIAC_MOUSE   |              | Di-N-acetylchitobiase;                        |                                                                                                                                            | 0.15 - 0.25 |
| ESAAKDEAVF     | DDEVAPDAAAENCLAER             | N-ter +28.03 Da, C +57.02 Da              | 49.3       | 52.8              | 3      | 1872.91                      | 0.81                                         | 0.23                  | E9PVP1_MOUSE |              |                                               |                                                                                                                                            | 0.25 - 0.75 |

| Non Prime Site                                                          | Prime Site                                                                                                                    | Modifications                                                                                                                                                      | Hyperscore                                   | Mass error in ppm                            | Charge                     | Precursor neutral mass in Da                                   | Fold change (log <sub>2</sub> ) of ASAPRatio    | FC-error of ASAPRatio                        | Uniprot ID 1                                                                        | Uniprot ID 2                                 | Protein Name 1                                                                                                                                                                      | Protein Name 2                                                                                                                                                                                                                  | Quantile                                                                               |
|-------------------------------------------------------------------------|-------------------------------------------------------------------------------------------------------------------------------|--------------------------------------------------------------------------------------------------------------------------------------------------------------------|----------------------------------------------|----------------------------------------------|----------------------------|----------------------------------------------------------------|-------------------------------------------------|----------------------------------------------|-------------------------------------------------------------------------------------|----------------------------------------------|-------------------------------------------------------------------------------------------------------------------------------------------------------------------------------------|---------------------------------------------------------------------------------------------------------------------------------------------------------------------------------------------------------------------------------|----------------------------------------------------------------------------------------|
| VLLTFGFVRA<br>AKLAEQAERY                                                | DDEVDVDTVEEDLGKSR<br>DDMAAAMKAVTEQGHLSNEER                                                                                    | N-ter +28.03 Da, K +28.03 Da<br>N-ter +28.03 Da, K +28.03 Da                                                                                                       | 58.2<br>50.6                                 | 49.6<br>62.1                                 | 3<br>4                     | 2033.04<br>2487.29                                             | 2.25<br>5.22                                    | 0.60<br>1.51                                 | ENPL_MOUSE<br>1433B_MOUSE                                                           | A2A5N1_MOUSE                                 | Endoplasmic reticulum resident protein 99;Heat shock protein 90 kDa beta member 1;Polymorphic tumor rejection antigen 1;Tumor rejection antigen gp96;<br>14-3-3 protein beta/alpha; | 94 kDa glucose-regulated protein;Endoplasmic reticulum resident protein 99;Heat shock protein 90 kDa beta member 1;Polymorphic tumor rejection antigen 1;Tumor rejection antigen gp96;<br>Protein kinase C inhibitor protein 1; | 0.85 - 1.00<br>0.85 - 1.00                                                             |
| AKLAEQAERY<br>AAGGGGGENY                                                | DDMAACMKSVTEQGAELSNEER<br>DDPHKTPASPVVHIR                                                                                     | N-ter +28.03 Da, K +28.03 Da, C +57.02 Da<br>N-ter +28.03 Da, K +28.03 Da                                                                                          | 49.8<br>37.0                                 | 51.5<br>59.2                                 | 4<br>4                     | 2526.23<br>1724.04                                             | 3.17<br>-0.01                                   | 1.33<br>0.00                                 | 1433Z_MOUSE<br>HNRPL_MOUSE                                                          | D3YXF4_MOUSE<br>E9Q8W8_MOUSE                 | 14-3-3 protein zeta/delta;<br>Heterogeneous nuclear ribonucleoprotein L;                                                                                                            | Protein kinase C inhibitor protein 1;SEZ-2;                                                                                                                                                                                     | 0.85 - 1.00<br>0.25 - 0.75                                                             |
| VVWEKRSIGY                                                              | DDTDESHCVHEIESR                                                                                                               | N-ter +28.03 Da, C +57.02 Da                                                                                                                                       | 36.2                                         | 57.5                                         | 4                          | 1855.87                                                        | 2.04                                            | 0.68                                         | PLIN2_MOUSE                                                                         |                                              | Perilipin-2;                                                                                                                                                                        | Adipophilin;Adipose differentiation-related protein;                                                                                                                                                                            | 0.85 - 1.00                                                                            |
| LAAGPRPSLG<br>DVIRNAFACF                                                | DEAIHCPCSEKRLAR<br>DEEAIGTIQEDYLR                                                                                             | N-ter +28.03 Da, K +28.03 Da, C +57.02 Da<br>N-ter +28.03 Da                                                                                                       | 27.3<br>34.5                                 | 55.8<br>44.7                                 | 4<br>3                     | 1967.03<br>1678.88                                             | -0.45<br>1.25                                   | 0.06<br>0.25                                 | IBP4_MOUSE<br>Q6ZWQ9_MOUSE                                                          |                                              | Insulin-like growth factor-binding protein 4;                                                                                                                                       |                                                                                                                                                                                                                                 | 0.25 - 0.75<br>0.75 - 0.85                                                             |
| DVIRNAFACF                                                              | DEEASGFHEDHLR                                                                                                                 | N-ter +28.03 Da                                                                                                                                                    | 48.7                                         | 58.8                                         | 4                          | 1681.87                                                        | 1.47                                            | 0.31                                         | MYL9_MOUSE                                                                          |                                              | Myosin regulatory light polypeptide 9;                                                                                                                                              | Myosin regulatory light chain 2, smooth muscle isoform;Myosin regulatory light chain 9;                                                                                                                                         | 0.75 - 0.85                                                                            |
| DVIRNAFACF                                                              | DEEATGTIQEDYLR                                                                                                                | N-ter +28.03 Da                                                                                                                                                    | 35.4                                         | 45.5                                         | 3                          | 1666.84                                                        | 3.93                                            | 1.13                                         | ML12B_MOUSE                                                                         |                                              | Myosin regulatory light chain 12B;                                                                                                                                                  | Myosin regulatory light chain 2-B, smooth muscle isoform;Myosin regulatory light chain 20 kDa;Myosin regulatory light chain MRLC2;                                                                                              | 0.85 - 1.00                                                                            |
| KAVLSAEKLR<br>VIGAVVDVQF                                                | DEEVTGLGELLR<br>DEGLPPILNALEVQGR                                                                                              | N-ter +28.03 Da<br>N-ter +28.03 Da                                                                                                                                 | 40.4<br>45.9                                 | 47.0<br>46.7                                 | 3<br>3                     | 1494.84<br>1748.03                                             | 1.73<br>-0.23                                   | 0.24<br>0.06                                 | SERPH_MOUSE<br>ATPB_MOUSE                                                           |                                              | Serpin H1;<br>ATP synthase subunit beta, mitochondrial;                                                                                                                             | 47 kDa heat shock protein;Collagen-binding protein;Serine protease inhibitor J6;                                                                                                                                                | 0.85 - 1.00<br>0.25 - 0.75                                                             |
| QTRDQLTIV<br>NFASQMSYGY<br>DKDKSGFIEE<br>NYPKDNKRKM                     | DEKLDITLTVPEEHKTR<br>DEKSAGVSVPGMGPSPGR<br>DELGSLKGFSSDAR<br>DETASSAVKVKR                                                     | N-ter +34.06 Da, K +34.06 Da<br>N-ter +34.06 Da, K +34.06 Da<br>N-ter +34.06 Da, K +34.06 Da<br>N-ter +28.03 Da, K +28.03 Da                                       | 49.4<br>39.4<br>33.6<br>26.7                 | 65.6<br>37.0<br>54.2<br>67.4                 | 4<br>4<br>3<br>4           | 2396.56<br>1892.08<br>1662.02<br>1488.92                       | -2.06<br>-3.06<br>-2.94<br>1.57                 | 0.69<br>0.26<br>2.26<br>0.31                 | NDUS4_MOUSE<br>CO1A1_MOUSE<br>PRVA_MOUSE<br>TADBP_MOUSE                             | E9QPX3_MOUSE<br>F8WGB7_MOUSE<br>Q8R0B4_MOUSE | NADH dehydrogenase [ubiquinone] iron-sulfur protein 4, mitochondrial;<br>Collagen alpha-1(I) chain;<br>Parvalbumin alpha;<br>TAR DNA-binding protein 43;                            | Complex I-18 kDa;Complex I-AQDQ;NADH-ubiquinone oxidoreductase 18 kDa subunit; Alpha-1 type I collagen;                                                                                                                         | 0.00 - 0.15<br>0.00 - 0.15<br>0.00 - 0.15<br>0.75 - 0.85                               |
| MTDAAVSFAK<br>SQASDSEGHS                                                | DFLAGGVAASIKTAVAPIER<br>DFSEGGVAQGAHR                                                                                         | N-ter +28.03 Da, K +28.03 Da<br>N-ter +28.03 Da                                                                                                                    | 23.7<br>47.7                                 | 54.7<br>54.6                                 | 4<br>3                     | 2112.31<br>1300.69                                             | 2.66<br>-1.94                                   | 0.95<br>0.22                                 | ADT2_MOUSE<br>FILA_MOUSE                                                            | F7BVV1_MOUSE                                 | ADP/ATP translocase 2;<br>Filaggrin;                                                                                                                                                | ADP,ATP carrier protein 2;Adenine nucleotide translocator 2;Solute carrier family 25 member 5;                                                                                                                                  | 0.85 - 1.00<br>0.00 - 0.15                                                             |
| GKSTTKRRR<br>VFKVPMLNPN<br>SASNRIIAK                                    | DGDKLVVECVKMGVTSTR<br>DGVIVGNRYR<br>DHASIQMNVAEVDR                                                                            | N-ter +28.03 Da, K +28.03 Da, C +57.02 Da<br>N-ter +28.03 Da<br>N-ter +34.06 Da                                                                                    | 40.0<br>9.3<br>45.3                          | 60.1<br>65.6<br>62.0                         | 4<br>2<br>3                | 2077.22<br>1019.61<br>1617.90                                  | 3.05<br>-1.43<br>-0.38                          | 0.53<br>0.12<br>0.07                         | FABP4_MOUSE<br>CBPC2_MOUSE<br>RS21_MOUSE                                            | C8PC3_MOUSE                                  | Fatty acid-binding protein, adipocyte;<br>Cytosolic carboxypeptidase 2;<br>40S ribosomal protein S21;                                                                               | 3T3-L1 lipid-binding protein;Adipocyte lipid-binding protein;Adipocyte-type fatty acid-binding protein;Fatty acid-binding protein 4;Myelin P2 protein homolog;P15;P2 adipocyte protein;Protein 422;                             | 0.85 - 1.00<br>0.15 - 0.25<br>0.25 - 0.75                                              |
| MDD<br>KLPGRVAFGE<br>LGGNSSPSAK<br>LLWFPGKIC<br>LLFWIPASRG<br>LLWVFGARC | DIAALVVDNGSGMKAGFAGDDAPR<br>DIDLPEFTDAR<br>DIKKILDSVGEADDDR<br>DIKMTQSPSSMYASLGER<br>DILLTQSPAILSVSPGER<br>DIQMTQSPSSLSASLGER | N-ter +28.03 Da, K +28.03 Da, C +57.02 Da<br>N-ter +28.03 Da<br>N-ter +28.03 Da, K +28.03 Da<br>N-ter +28.03 Da, K +28.03 Da<br>N-ter +28.03 Da<br>N-ter +28.03 Da | 30.1<br>48.5<br>48.5<br>54.0<br>50.5<br>49.6 | 54.4<br>41.5<br>55.1<br>54.0<br>46.2<br>45.1 | 4<br>2<br>3<br>3<br>3<br>3 | 2562.36<br>1318.70<br>1985.18<br>2056.11<br>1923.16<br>1934.03 | 1.92<br>3.16<br>3.55<br>-1.09<br>-3.18<br>-3.18 | 0.59<br>0.74<br>1.52<br>0.19<br>1.45<br>0.87 | ACTB_MOUSE<br>CATB_MOUSE<br>RLA2_MOUSE<br>KV5A5_MOUSE<br>KV5A9_MOUSE<br>KV5A7_MOUSE | E9Q1F2_MOUSE                                 | Actin, cytoplasmic 1;<br>Cathepsin B;<br>60S acidic ribosomal protein P2;<br>Ig kappa chain V-V region T1;<br>Ig kappa chain V-V region L7;<br>Ig kappa chain V-V region MOPC 41;   | Beta-actin;<br>Cathepsin B1;                                                                                                                                                                                                    | 0.85 - 1.00<br>0.85 - 1.00<br>0.85 - 1.00<br>0.15 - 0.25<br>0.00 - 0.15<br>0.00 - 0.15 |
| MVNPVTFF<br>MLLWLSGVEG<br>LDWTLYQLET                                    | DITADDEPLGR<br>DIVMTQSHKFMSTSVGDR<br>DKFEFGKELKR                                                                              | N-ter +34.06 Da<br>N-ter +28.03 Da, K +28.03 Da<br>N-ter +34.06 Da, K +34.06 Da                                                                                    | 39.1<br>44.3<br>16.1                         | 29.5<br>66.1<br>66.5                         | 2<br>4<br>4                | 1234.66<br>2094.16<br>1532.11                                  | -0.09<br>-1.52<br>-1.22                         | 0.01<br>0.39<br>0.37                         | PPIA_MOUSE<br>KV5A1_MOUSE<br>TNNT3_MOUSE                                            | E9Q1E3_MOUSE                                 | Peptidyl-prolyl cis-trans isomerase A;<br>Ig kappa chain V19-17;<br>Troponin T, fast skeletal muscle;                                                                               | Cyclophilin A;Cyclosporin A-binding protein;Rotamase A;SP18;<br>Ig kappa chain V-V region MPC11;<br>Fast skeletal muscle troponin T;                                                                                            | 0.25 - 0.75<br>0.00 - 0.15<br>0.15 - 0.25                                              |
| QQIDDHFLF                                                               | DKPVSPLLTAAAGMAR                                                                                                              | N-ter +28.03 Da, K +28.03 Da                                                                                                                                       | 31.4                                         | 50.4                                         | 3                          | 1581.97                                                        | 0.21                                            | 0.03                                         | KCRU_MOUSE                                                                          | A2ARP5_MOUSE                                 | Creatine kinase U-type, mitochondrial;                                                                                                                                              | Acidic-type mitochondrial creatine kinase;Ubiquitous mitochondrial creatine kinase; Annexin I;Annexin-1;Calpactin II;Calpactin-2;Chromobindin-9;Lipocortin I;Phospholipase A2 inhibitory protein;p35;                           | 0.25 - 0.75                                                                            |
| NRVYREELKR                                                              | DLAKDITSSTSGDFR                                                                                                               | N-ter +28.03 Da, K +28.03 Da                                                                                                                                       | 52.3                                         | 49.0                                         | 3                          | 1695.92                                                        | 0.11                                            | 0.02                                         | ANXA1_MOUSE                                                                         | E9QA30_MOUSE                                 | Annexin A1;                                                                                                                                                                         |                                                                                                                                                                                                                                 | 0.25 - 0.75                                                                            |
| KDASVGVFFR                                                              | DLFSDGHSEFLKAASNLR                                                                                                            | N-ter +28.03 Da, K +28.03 Da                                                                                                                                       | 26.1                                         | 63.3                                         | 4                          | 2062.18                                                        | 3.26                                            | 0.80                                         | PDIA3_MOUSE                                                                         |                                              | Protein disulfide-isomerase A3;<br>NADH dehydrogenase [ubiquinone] iron-sulfur protein 6, mitochondrial;                                                                            | 58 kDa glucose-regulated protein;58 kDa microsomal protein;Disulfide isomerase ER-60;Endoplasmic reticulum resident protein 57;Endoplasmic reticulum resident protein 60;                                                       | 0.85 - 1.00                                                                            |
| QKEVNFAL<br>TKVNKECCHG                                                  | DUIAQPVNEVEHR<br>DLLECADDR                                                                                                    | N-ter +28.03 Da<br>N-ter +28.03 Da, C +57.02 Da                                                                                                                    | 36.1<br>27.2                                 | 45.6<br>76.1                                 | 3<br>2                     | 1674.95<br>1133.59                                             | -0.94<br>0.51                                   | 0.11<br>0.04                                 | NDUSE_MOUSE<br>ALBU_MOUSE                                                           | D3YW32_MOUSE                                 | Serum albumin;<br>NADH dehydrogenase [ubiquinone] flavoprotein 3, mitochondrial;                                                                                                    | Complex I-13kD-A;NADH-ubiquinone oxidoreductase 13 kDa-A subunit;                                                                                                                                                               | 0.15 - 0.25<br>0.25 - 0.75                                                             |
| HHDYNTYFL<br>GGSLVSMLAR                                                 | DLNLDSLKFR<br>DLPAAAAPAGPASFAR                                                                                                | N-ter +34.06 Da, K +34.06 Da<br>N-ter +28.03 Da                                                                                                                    | 24.9<br>45.7                                 | 56.4<br>41.2                                 | 3<br>3                     | 1287.86<br>1509.86                                             | 0.59<br>3.09                                    | 0.13<br>0.44                                 | NDUV3_MOUSE<br>6PGL_MOUSE                                                           | Q3U422_MOUSE<br>Q8CBG6_MOUSE                 | 6-phosphogluconolactonase;                                                                                                                                                          | Complex I-9kD;NADH-ubiquinone oxidoreductase 9 kDa subunit;                                                                                                                                                                     | 0.25 - 0.75<br>0.85 - 1.00                                                             |

| Non Prime Site | Prime Site                | Modifications                             | Hyperscore | Mass error in ppm | Charge | Precursor neutral mass in Da | Fold change (log <sub>2</sub> ) of ASAPRatio | FC-error of ASAPRatio | Uniprot ID 1 | Uniprot ID 2 | Protein Name 1                                                                  | Protein Name 2                                                                                                                                                            | Quantile    |
|----------------|---------------------------|-------------------------------------------|------------|-------------------|--------|------------------------------|----------------------------------------------|-----------------------|--------------|--------------|---------------------------------------------------------------------------------|---------------------------------------------------------------------------------------------------------------------------------------------------------------------------|-------------|
| PRTLASPKKK     | DLSEIEIQQKLEAAEER         | N-ter +28.03 Da, K +28.03 Da              | 30.0       | 69.0              | 4      | 2084.28                      | 2.23                                         | 0.75                  | STMN1_MOUSE  | STMN2_MOUSE  | Stathmin;                                                                       | Leukemia-associated gene protein;Leukemia-associated phosphoprotein p18;Metablastin;Oncoprotein 18;Phosphoprotein p19;Prosolin;Protein Pr22;pp17;                         | 0.85 - 1.00 |
| LTSESSRPTR     | DLSSSDLSTASKIVK           | N-ter +28.03 Da, K +28.03 Da              | 51.2       | 51.9              | 3      | 1634.00                      | 1.31                                         | 0.44                  | A2M_MOUSE    | D3YW52_MOUSE | Alpha-2-macroglobulin;                                                          | Pregnancy zone protein;                                                                                                                                                   | 0.75 - 0.85 |
| LTSESSRPTR     | DLSSSDLSTASK              | N-ter +28.03 Da, K +28.03 Da              | 38.7       | 31.6              | 2      | 1265.67                      | -0.54                                        | 0.07                  | A2M_MOUSE    | D3YW52_MOUSE | Alpha-2-macroglobulin;                                                          | Pregnancy zone protein;                                                                                                                                                   | 0.25 - 0.75 |
| IMKCDIDIRK     | DLYANNVMSGTTMYPGIADR      | N-ter +28.03 Da                           | 50.0       | 55.5              | 3      | 2273.17                      | 3.92                                         | 1.08                  | ACTS_MOUSE   |              | Actin, alpha skeletal muscle;                                                   | Alpha-actin-1;                                                                                                                                                            | 0.85 - 1.00 |
| GAHAFGQGR      | DMAETFDQGAHAFGQGR         | N-ter +28.03 Da                           | 45.4       | 59.6              | 4      | 2059.02                      | 0.06                                         | 0.02                  | SBSN_MOUSE   | E9QP82_MOUSE | Suprabasin;                                                                     |                                                                                                                                                                           | 0.25 - 0.75 |
| DDEETALVLC     | DNGSLVKAGFAGDGDAPR        | N-ter +28.03 Da, K +28.03 Da              | 54.3       | 48.3              | 3      | 1801.98                      | -1.25                                        | 0.21                  | ACTC_MOUSE   | ACTS_MOUSE   | Actin, alpha cardiac muscle 1;                                                  | Alpha-cardiac actin;                                                                                                                                                      | 0.15 - 0.25 |
| WPDARGIWHN     | DNKSLVWVNEEDHLR           | N-ter +34.06 Da, K +34.06 Da              | 48.4       | 70.4              | 4      | 2068.25                      | -1.32                                        | 0.33                  | KCRM_MOUSE   |              | Creatine kinase M-type;                                                         | Creatine kinase M chain;M-CK;                                                                                                                                             | 0.15 - 0.25 |
| LPTSLTLYL      | DNNKISNIPDEYFKR           | N-ter +28.03 Da, K +28.03 Da              | 29.1       | 65.9              | 4      | 1936.13                      | -1.09                                        | 0.12                  | LUM_MOUSE    |              | Lumican;                                                                        | Keratan sulfate proteoglycan lumican;                                                                                                                                     | 0.15 - 0.25 |
| LLTACLASRA     | DPASTLPDIQVENFSESR        | N-ter +34.06 Da                           | 48.1       | 47.7              | 3      | 2166.17                      | -0.23                                        | 0.04                  | AMBP_MOUSE   |              | Protein AMBP;                                                                   |                                                                                                                                                                           | 0.25 - 0.75 |
| VPTANAALPA     | DPPASVVVGPVVVPR           | N-ter +34.06 Da                           | 51.6       | 43.1              | 3      | 1520.98                      | -0.32                                        | 0.04                  | FETUA_MOUSE  |              | Alpha-2-HS-glycoprotein;                                                        | Countertryptin;Fetuin-A;                                                                                                                                                  | 0.25 - 0.75 |
| LLVLPATGS      | DPVLCFTQYEESSGR           | N-ter +34.06 Da, C +57.02 Da              | 43.2       | 49.2              | 3      | 1820.94                      | 0.26                                         | 0.01                  | PROP_MOUSE   |              | Properdin;                                                                      | Complement factor P;                                                                                                                                                      | 0.25 - 0.75 |
| SWASRNEAAP     | DQDEIDCLPLAKQPSFR         | N-ter +28.03 Da, K +28.03 Da, C +57.02 Da | 57.0       | 51.0              | 3      | 2144.17                      | 1.32                                         | 0.29                  | PPGB_MOUSE   | A2A5I9_MOUSE | Lysosomal protective protein;                                                   | Carboxypeptidase C;Carboxypeptidase L;Cathepsin A;Protective protein cathepsin A;Protective protein for beta-galactosidase;                                               | 0.75 - 0.85 |
| IFLLYKIVRG     | DQPASGSDNDDEPPPLPR        | N-ter +34.06 Da                           | 28.7       | 48.8              | 3      | 2025.01                      | -0.64                                        | 0.05                  | PGRCL_MOUSE  | Q3TFP8_MOUSE | Membrane associated progesterone receptor component 1;                          |                                                                                                                                                                           | 0.25 - 0.75 |
| DVQETDTSQK     | DQSPASHEIATNLGDFALR       | N-ter +28.03 Da                           | 53.1       | 50.9              | 3      | 2069.12                      | -2.40                                        | 0.76                  | A1AT4_MOUSE  |              | Alpha-1-antitrypsin 1-4;                                                        | Alpha-1 protease inhibitor 4;Serine protease inhibitor 1-4;Serine protease inhibitor A1d;                                                                                 | 0.00 - 0.15 |
| EGSSNVFSMF     | DQIQQEFKEAFTVIDQNR        | N-ter +34.06 Da, K +34.06 Da              | 41.6       | 50.6              | 4      | 2377.38                      | -0.71                                        | 0.49                  | MLRS_MOUSE   | F6ULR7_MOUSE | Myosin regulatory light chain 2, skeletal muscle isoform;                       | Fast skeletal myosin light chain 2;MLC2f;                                                                                                                                 | 0.25 - 0.75 |
| FEVLPEKADR     | DQYELCLDNTR               | N-ter +28.03 Da, C +57.02 Da              | 34.7       | 66.2              | 3      | 1566.84                      | 1.53                                         | 0.20                  | TRFE_MOUSE   | E9Q035_MOUSE | Serotransferrin;                                                                | Beta-1 metal-binding globulin;Siderophilin;                                                                                                                               | 0.75 - 0.85 |
| GPVGPAGKNG     | DRGETGPAGPAGPIGAGAR       | N-ter +34.06 Da                           | 54.5       | 43.9              | 3      | 1837.05                      | -2.64                                        | 0.50                  | CO1A1_MOUSE  | F8WGB7_MOUSE | Collagen alpha-1(I) chain;                                                      | Alpha-1 type I collagen;                                                                                                                                                  | 0.00 - 0.15 |
| ASGRTTGIVL     | DSGGDVTNHPYIYGALPHAIMR    | N-ter +28.03 Da                           | 62.0       | 59.7              | 4      | 2639.44                      | 1.72                                         | 0.56                  | ACTC_MOUSE   | ACTA_MOUSE   | Actin, alpha cardiac muscle 1;                                                  | Alpha-cardiac actin;                                                                                                                                                      | 0.85 - 1.00 |
| PRQPSQSS       | DSQVHSGVQVEGR             | N-ter +28.03 Da                           | 28.8       | 44.0              | 3      | 1424.76                      | 0.12                                         | 0.01                  | FILA_MOUSE   | F7BVV1_MOUSE | Filaggrin;                                                                      |                                                                                                                                                                           | 0.25 - 0.75 |
| DVEPDTYCRY     | DSVSFVNGAVSDDSKR          | N-ter +34.06 Da, K +34.06 Da              | 64.9       | 44.7              | 3      | 1750.00                      | -0.30                                        | 0.06                  | PCOC1_MOUSE  | D3ZE3_MOUSE  | Procollagen C-endopeptidase enhancer 1;                                         | P14;Procollagen COOH-terminal proteinase enhancer 1;Type I procollagen C-proteinase enhancer protein;Type I procollagen COOH-terminal proteinase enhancer;                | 0.25 - 0.75 |
| QGVVMGMGQK     | DSYVGDEAQSRR              | N-ter +28.03 Da, K +28.03 Da              | 31.9       | 63.8              | 3      | 1409.77                      | 2.20                                         | 0.45                  | ACTC_MOUSE   | ACTA_MOUSE   | Actin, alpha cardiac muscle 1;                                                  | Alpha-cardiac actin;                                                                                                                                                      | 0.85 - 1.00 |
| IEKKRILKR      | DTDLEDELEPDR              | N-ter +28.03 Da                           | 32.7       | 53.9              | 3      | 1570.78                      | 2.12                                         | 0.42                  | PROD_MOUSE   |              | Vitamin K-dependent protein C;                                                  | Anticoagulant protein C;Autoprothrombin IIA;Blood coagulation factor XIV;                                                                                                 | 0.85 - 1.00 |
| PHKNMFTVNR     | DTGVISVLTSLDR             | N-ter +28.03 Da                           | 34.4       | 51.4              | 3      | 1459.86                      | 1.66                                         | 0.68                  | CADH1_MOUSE  |              | Cadherin-1;                                                                     | ARC-1;Epithelial cadherin;Uvomorulin;                                                                                                                                     | 0.85 - 1.00 |
| ASGVSLLEAL     | DTILPPTPTDKPLR            | N-ter +34.06 Da, K +34.06 Da              | 23.4       | 56.8              | 4      | 1787.20                      | -1.89                                        | 0.21                  | EF1A2_MOUSE  | B72BW3_MOUSE | Elongation factor 1-alpha 2;                                                    | Eukaryotic elongation factor 1 A-2;Statin-S1;                                                                                                                             | 0.00 - 0.15 |
| WGMKMGDFP      | DTIQCADVHLVPR             | N-ter +28.03 Da, C +57.02 Da              | 23.6       | 72.5              | 3      | 1550.90                      | 2.34                                         | 0.20                  | O88301_MOUSE | Q91Y82_MOUSE |                                                                                 |                                                                                                                                                                           | 0.85 - 1.00 |
| TAGKHGDSLR     | DTKNEIAELTR               | N-ter +28.03 Da, K +28.03 Da              | 41.9       | 48.2              | 3      | 1344.79                      | -0.54                                        | 0.10                  | K2C79_MOUSE  |              | Keratin, type II cytoskeletal 79;                                               | Cytokeratin-79;Keratin-79;Type-II keratin Kb38;                                                                                                                           | 0.25 - 0.75 |
| CPPEKSKRR      | DTQSNELIEINPQTEGKVYTR     | N-ter +28.03 Da, K +28.03 Da              | 44.4       | 60.1              | 4      | 2490.41                      | 0.66                                         | 0.15                  | COGAI_MOUSE  | A3KRV3_MOUSE | Collagen alpha-1(XVI) chain;                                                    | Alpha-1 type I collagen;                                                                                                                                                  | 0.25 - 0.75 |
| PEEYVSPNSE     | DVGVEGPKDPPGQGR           | N-ter +28.03 Da, K +28.03 Da              | 28.8       | 43.5              | 3      | 1716.95                      | -0.49                                        | 0.10                  | CO1A1_MOUSE  | F8WGB7_MOUSE | Collagen alpha-1(I) chain;                                                      |                                                                                                                                                                           | 0.25 - 0.75 |
| AS             | DVLELTDENFESR             | N-ter +28.03 Da                           | 41.9       | 57.6              | 3      | 1593.84                      | 0.55                                         | 0.09                  | PDIA3_MOUSE  | F6Q404_MOUSE | Protein disulfide-isomerase A3;                                                 | 58 kDa glucose-regulated protein;58 kDa microsomal protein;Disulfide isomerase ER-60;Endoplasmic reticulum resident protein 57;Endoplasmic reticulum resident protein 60; | 0.25 - 0.75 |
| LTKYKTLTG      | DVPVVDPTVPVTVTR           | N-ter +28.03 Da                           | 52.1       | 52.2              | 3      | 1806.08                      | 0.40                                         | 0.14                  | GDIR2_MOUSE  |              | Rho GDP-dissociation inhibitor 2;                                               | D4;Rho-GDI beta;                                                                                                                                                          | 0.25 - 0.75 |
| LVLLKGVQC      | DVLQVESGGGLVQPQGSRR       | N-ter +28.03 Da                           | 49.7       | 48.0              | 3      | 1782.01                      | -3.18                                        | 0.87                  | HVM16_MOUSE  |              | Ig heavy chain V region MOPC 21;                                                |                                                                                                                                                                           | 0.00 - 0.15 |
| SVGDGETVEF     | DVVEGEKAEAAANTVPGDVPVEGSR | N-ter +34.06 Da, K +34.06 Da              | 61.4       | 54.1              | 4      | 2606.49                      | -3.06                                        | 0.77                  | DBPA_MOUSE   | F6TIF5_MOUSE | DNA-binding protein A;                                                          | Cold shock domain-containing protein A;Y-box protein 3;                                                                                                                   | 0.00 - 0.15 |
| RYAWVKRQLV     | DYEEKYGR                  | N-ter +28.03 Da, K +28.03 Da              | 30.3       | 25.3              | 2      | 1114.56                      | 2.86                                         | 0.48                  | VP53_MOUSE   | E9PGX9_MOUSE | Vacuolar protein sorting-associated protein 53 homolog;                         |                                                                                                                                                                           | 0.85 - 1.00 |
| LQREKEFKAK     | EAAALSHSGSCSEVEKETR       | N-ter +28.03 Da, K +28.03 Da, C +57.02 Da | 42.1       | 58.1              | 4      | 2160.14                      | -0.64                                        | 0.16                  | VATG1_MOUSE  |              | V-type proton ATPase subunit G 1;                                               | V-ATPase 13 kDa subunit 1;Vacuolar proton pump subunit G 1;                                                                                                               | 0.25 - 0.75 |
| VLHFGIIVLY     | EACCVVLLWLLALFSLQIPR      | N-ter +28.03 Da, C +57.02 Da              | 30.1       | 38.7              | 4      | 2428.43                      | 3.19                                         | 0.50                  | MFS6L_MOUSE  |              | Major facilitator superfamily domain-containing protein 6-like;                 |                                                                                                                                                                           | 0.85 - 1.00 |
| GTASTRRVTF     | EADENENITVVKGIR           | N-ter +28.03 Da, K +28.03 Da              | 28.8       | 50.4              | 3      | 1742.01                      | 0.53                                         | 0.10                  | CHCH3_MOUSE  | Q9D9P1_MOUSE | Coiled-coil-helix-coiled-coil-helix domain-containing protein 3, mitochondrial; |                                                                                                                                                                           | 0.25 - 0.75 |
| FDQTQIQEFK     | EAFITVIDQNR               | N-ter +34.06 Da                           | 40.8       | 33.6              | 2      | 1225.69                      | -2.32                                        | 0.23                  | MLRS_MOUSE   | F6ULR7_MOUSE | Myosin regulatory light chain 2, skeletal muscle isoform;                       | Fast skeletal myosin light chain 2;MLC2f;                                                                                                                                 | 0.00 - 0.15 |
| DGSASGTTLL     | EALDCILPPTPTDKPLR         | N-ter +34.06 Da, K +34.06 Da, C +57.02 Da | 36.9       | 60.0              | 4      | 2159.37                      | -1.79                                        | 0.12                  | EF1A1_MOUSE  | D3Y268_MOUSE | Elongation factor 1-alpha 1;                                                    | Elongation factor Tu;Eukaryotic elongation factor 1 A-1;                                                                                                                  | 0.00 - 0.15 |
| EGNASGVSLL     | EALDTLPTPTPTDKPLR         | N-ter +34.06 Da, K +34.06 Da              | 37.5       | 56.7              | 4      | 2100.38                      | -4.32                                        | 0.00                  | EF1A2_MOUSE  | B72BW3_MOUSE | Elongation factor 1-alpha 2;                                                    | Eukaryotic elongation factor 1 A-2;Statin-S1;                                                                                                                             | 0.00 - 0.15 |
| KKQQEVVGL      | EANKIDFKELDIAGDEDNR       | N-ter +28.03 Da, K +28.03 Da              | 31.4       | 77.3              | 4      | 2275.31                      | -0.86                                        | 0.20                  | SH3BG_MOUSE  | F7ABS0_MOUSE | SH3 domain-binding glutamic acid-rich protein;                                  |                                                                                                                                                                           | 0.15 - 0.25 |
| FEGRRSRRRR     | EAPKVVVEEQESR             | N-ter +34.06 Da, K +34.06 Da              | 44.2       | 45.0              | 3      | 1467.89                      | -0.52                                        | 0.07                  | COAB_MOUSE   |              | Complement C4-B;                                                                |                                                                                                                                                                           | 0.25 - 0.75 |

Table S10, Tholen et al.

| Non Prime Site | Prime Site                        | Modifications                             | Hyperscore | Mass error in ppm | Charge | Precursor neutral mass in Da | Fold change (log <sub>2</sub> ) of ASAPRatio | FC-error of ASAPRatio | Uniprot ID 1 | Uniprot ID 2 | Protein Name 1                                                 | Protein Name 2                                                                                                                                             | Quantile    |
|----------------|-----------------------------------|-------------------------------------------|------------|-------------------|--------|------------------------------|----------------------------------------------|-----------------------|--------------|--------------|----------------------------------------------------------------|------------------------------------------------------------------------------------------------------------------------------------------------------------|-------------|
| GTEAAAATVF     | EAVPMSMPPILR                      | N-ter +28.03 Da                           | 25.1       | 47.2              | 3      | 1367.80                      | 0.53                                         | 0.10                  | A1AT2_MOUSE  |              | Alpha-1-antitrypsin 1-2;                                       | Alpha-1 protease inhibitor 2;Alpha-1-antiprotease;Serine protease inhibitor 1-2;Serine protease inhibitor A1b;                                             | 0.25 - 0.75 |
| VRSLTMVEDN     | EDDDEGDELLHHHR                    | N-ter +28.03 Da                           | 41.6       | 62.9              | 4      | 1872.91                      | 2.84                                         | 0.70                  | LMNA_MOUSE   |              | Prelamin-A/C;                                                  |                                                                                                                                                            | 0.85 - 1.00 |
| LGTPRLGVQG     | EDGLDFPEYDGVDR                    | N-ter +34.06 Da                           | 37.9       | 49.2              | 3      | 1659.83                      | -0.32                                        | 0.06                  | CASQ1_MOUSE  | E9Q489_MOUSE | Calsequestrin-1;                                               | Calsequestrin, skeletal muscle isoform;                                                                                                                    | 0.25 - 0.75 |
| GTDFITGKKY     | EDICPSTHMDVPIKIR                  | N-ter +28.03 Da, K +28.03 Da, C +57.02 Da | 46.2       | 61.4              | 4      | 2081.13                      | -1.47                                        | 0.33                  | IF5A1_MOUSE  | IF5A2_MOUSE  | Eukaryotic translation initiation factor 5A-1;                 | Eukaryotic initiation factor 5A isoform 1;eIF-4D;                                                                                                          | 0.15 - 0.25 |
| PKLPGRVAFG     | EDIDLPEFDAR                       | N-ter +28.03 Da                           | 36.5       | 48.6              | 3      | 1447.75                      | 2.11                                         | 0.31                  | CATB_MOUSE   |              | Cathepsin B;                                                   | Cathepsin B1;                                                                                                                                              | 0.85 - 1.00 |
| GATALLTHGQ     | EDIPEVSCIHNGLR                    | N-ter +34.06 Da, C +57.02 Da              | 52.6       | 44.5              | 3      | 1671.92                      | -0.94                                        | 0.16                  | CO1A1_MOUSE  | F8WGB7_MOUSE | Collagen alpha-1(I) chain;                                     | Alpha-1 type I collagen;                                                                                                                                   | 0.15 - 0.25 |
| TLTAVHDAIL     | EDLVFPEIVGKIR                     | N-ter +28.03 Da, K +28.03 Da              | 48.3       | 53.0              | 3      | 1543.94                      | 1.25                                         | 0.24                  | RS7_MOUSE    | F6SVV1_MOUSE | 40S ribosomal protein S7;                                      |                                                                                                                                                            | 0.75 - 0.85 |
| RKLVRSMTM      | EDNEDDEDGELLHHHR                  | N-ter +34.06 Da                           | 51.7       | 63.7              | 4      | 2237.07                      | -2.18                                        | 0.60                  | LMNA_MOUSE   |              | Prelamin-A/C;                                                  |                                                                                                                                                            | 0.00 - 0.15 |
| LGTLPARAAH     | EDPVEKVIIEGFSR                    | N-ter +28.03 Da, K +28.03 Da              | 27.3       | 53.0              | 3      | 1559.90                      | 0.33                                         | 0.01                  | SBSN_MOUSE   | E9QP82_MOUSE | Suprabasin;                                                    |                                                                                                                                                            | 0.25 - 0.75 |
| LCCLVPSFLA     | EDVQETDTSQKQSPASHEIATNLGDFAIISLYR | N-ter +34.06 Da, K +34.06 Da              | 50.6       | 50.0              | 4      | 3733.03                      | -2.12                                        | 1.57                  | A1AT1_MOUSE  | A1AT2_MOUSE  | Alpha-1-antitrypsin 1-1;                                       | Alpha-1 protease inhibitor 1;Alpha-1-antiprotease;Serine protease inhibitor 1-1;Serine protease inhibitor A1a;                                             | 0.00 - 0.15 |
| LCCLVPSFLA     | EDVQETDTSQKQSPASHEIATNLGDFALR     | N-ter +34.06 Da, K +34.06 Da              | 39.8       | 53.6              | 4      | 3369.84                      | -1.40                                        | 0.44                  | A1AT4_MOUSE  |              | Alpha-1-antitrypsin 1-4;                                       | Alpha-1 protease inhibitor 4;Serine protease inhibitor 1-4;Serine protease inhibitor A1d;                                                                  | 0.15 - 0.25 |
| LAKYNQLMRI     | EEALGDKAVFAGR                     | N-ter +34.06 Da, K +34.06 Da              | 21.8       | 44.4              | 3      | 1429.88                      | -5.06                                        | 1.69                  | ENOB_MOUSE   |              | Beta-enolase;                                                  |                                                                                                                                                            | 0.00 - 0.15 |
| IDSHFEARKK     | EEEEELIALKER                      | N-ter +28.03 Da, K +28.03 Da              | 31.5       | 50.3              | 3      | 1413.84                      | -1.84                                        | 0.26                  | TNNT3_MOUSE  | A2A6J0_MOUSE | Troponin T, fast skeletal muscle;                              | Fast skeletal muscle troponin T;                                                                                                                           | 0.00 - 0.15 |
| SFYNELRVAP     | EEHPTLLEAPLNPKANR                 | N-ter +28.03 Da, K +28.03 Da              | 43.0       | 55.6              | 4      | 2085.24                      | -1.32                                        | 0.17                  | ACT5_MOUSE   | ACTA_MOUSE   | Actin, alpha skeletal muscle;                                  | Alpha-actin-1;                                                                                                                                             | 0.15 - 0.25 |
| TFYNELRVAP     | EEHPVLLLEAPLNPKANR                | N-ter +28.03 Da, K +28.03 Da              | 31.8       | 57.8              | 4      | 2083.26                      | 1.58                                         | 0.15                  | ACTB_MOUSE   | ACTG_MOUSE   | Actin, cytoplasmic 1;                                          | Beta-actin;                                                                                                                                                | 0.75 - 0.85 |
| MPCKI          | EEIKDFLLTAR                       | N-ter +28.03 Da, K +28.03 Da              | 25.6       | 57.4              | 3      | 1389.87                      | -5.64                                        | 0.00                  | RL38_MOUSE   |              | 60S ribosomal protein L38;                                     |                                                                                                                                                            | 0.00 - 0.15 |
| QQQFVEGVRM     | EEIVEGCTGALHILAR                  | N-ter +28.03 Da, C +57.02 Da              | 30.3       | 41.3              | 3      | 1795.00                      | 0.65                                         | 0.08                  | CTN1_MOUSE   | PLAK_MOUSE   | Catenin beta-1;                                                | Beta-catenin;                                                                                                                                              | 0.25 - 0.75 |
| WWNPQEKTI      | EEQLDEEHLESHR                     | N-ter +28.03 Da                           | 28.6       | 67.8              | 4      | 1677.87                      | 0.12                                         | 0.03                  | AKAP2_MOUSE  | A2AP18_MOUSE | A-kinase anchor protein 2;                                     | AKAP expressed in kidney and lung;Protein kinase A-anchoring protein 2;                                                                                    | 0.25 - 0.75 |
| PPSVGVADKK     | EETQPPVALKKEGIR                   | N-ter +28.03 Da, K +28.03 Da              | 17.6       | 49.0              | 4      | 1778.12                      | -0.34                                        | 0.04                  | PAIRB_MOUSE  |              | Plasminogen activator inhibitor 1 RNA-binding protein;         | PAI1 RNA-binding protein 1;SERPINE1 mRNA-binding protein 1;                                                                                                | 0.25 - 0.75 |
| ERGNPVIAQW     | EEVEDASEEAPLR                     | N-ter +34.06 Da                           | 47.0       | 44.6              | 3      | 1506.79                      | 3.66                                         | 0.55                  | SRC_MOUSE    |              | Sarcalumenin;                                                  |                                                                                                                                                            | 0.85 - 1.00 |
| FRHACVPVDF     | EEVHVSSNADEEDIR                   | N-ter +28.03 Da                           | 67.4       | 50.7              | 3      | 1755.88                      | -0.12                                        | 0.03                  | IDHG1_MOUSE  | Q3TKM5_MOUSE | Isocitrate dehydrogenase [NAD] subunit gamma 1, mitochondrial; | Isocitrate dehydrogenase subunit gamma;NAD(+)-specific ICODH subunit gamma;                                                                                | 0.25 - 0.75 |
| TEEHLRDYF      | EEYGKIDTIEITDR                    | N-ter +28.03 Da, K +28.03 Da              | 34.4       | 47.8              | 3      | 1850.06                      | -1.06                                        | 0.15                  | ROA2_MOUSE   | F6U106_MOUSE | Heterogeneous nuclear ribonucleoproteins A2/B1;                |                                                                                                                                                            | 0.15 - 0.25 |
| EVTDRAYTGR     | EFDDLPLAEQR                       | N-ter +28.03 Da                           | 23.8       | 62.1              | 3      | 1359.75                      | -0.23                                        | 0.01                  | AT2A1_MOUSE  |              | Sarcoplasmic/endoplasmic reticulum calcium ATPase 1;           | Calcium pump 1;Calcium-transporting ATPase sarcoplasmic reticulum type, fast twitch skeletal muscle isoform;Endoplasmic reticulum class 1/2 Ca(2+) ATPase; | 0.25 - 0.75 |
| FSMFDQTIQ      | EFKEAFTVIDQNR                     | N-ter +34.06 Da, K +34.06 Da              | 44.0       | 48.5              | 3      | 1664.00                      | -0.49                                        | 0.13                  | MLRS_MOUSE   | F6ULR7_MOUSE | Myosin regulatory light chain 2, skeletal muscle isoform;      | Fast skeletal myosin light chain 2;MLC2f;                                                                                                                  | 0.25 - 0.75 |
| RLSESEGAN      | EGATAAPELSALEEAFRR                | N-ter +28.03 Da                           | 26.5       | 52.0              | 3      | 1945.09                      | 0.57                                         | 0.17                  | TPPP_MOUSE   |              | Tubulin polymerization-promoting protein;                      |                                                                                                                                                            | 0.25 - 0.75 |
| RLSESEGAN      | EGATAAPELSALEEAFR                 | N-ter +28.03 Da                           | 35.9       | 47.8              | 3      | 1788.98                      | 1.75                                         | 0.58                  | TPPP_MOUSE   |              | Tubulin polymerization-promoting protein;                      |                                                                                                                                                            | 0.85 - 1.00 |
| IIRNVKGPVQ     | EGDVLTLLESER                      | N-ter +28.03 Da                           | 42.3       | 58.3              | 2      | 1387.80                      | 1.38                                         | 0.13                  | RS28_MOUSE   | D3YVD9_MOUSE | 40S ribosomal protein S28;                                     |                                                                                                                                                            | 0.75 - 0.85 |
| SYFPRGLKYR     | EGGVESAFHKTTSGATPAAIR             | N-ter +28.03 Da, K +28.03 Da              | 32.3       | 57.6              | 4      | 2142.23                      | 0.75                                         | 0.11                  | Q99L84_MOUSE | D3YZN3_MOUSE |                                                                |                                                                                                                                                            | 0.25 - 0.75 |
| GVSESQASDS     | EGHSDFSEGOAVGAHR                  | N-ter +28.03 Da                           | 49.6       | 67.4              | 4      | 1710.89                      | 1.36                                         | 0.31                  | F78VV1_MOUSE | FILA_MOUSE   |                                                                |                                                                                                                                                            | 0.75 - 0.85 |
| AGSAIHWREP     | EGKEVVDVYVTR                      | N-ter +28.03 Da, K +28.03 Da              | 39.3       | 55.0              | 3      | 1535.88                      | -0.49                                        | 0.01                  | RISC_MOUSE   | Q3USP4_MOUSE | Retinoid-inducible serine carboxypeptidase;                    | Serine carboxypeptidase 1;                                                                                                                                 | 0.25 - 0.75 |
| RFMQTFVLAP     | EGSVANKFYVHNDIFR                  | N-ter +28.03 Da, K +28.03 Da              | 27.6       | 59.2              | 4      | 1951.11                      | 1.01                                         | 0.13                  | G38P1_MOUSE  | Q3UR88_MOUSE | Ras GTPase-activating protein-binding protein 1;               | Golgi peripheral membrane protein p65;Golgi reassembly-stacking protein of 65 kDa;                                                                         | 0.75 - 0.85 |
| KKAGHPFMWN     | EHLGYVLTCPNSLGTGLR                | N-ter +28.03 Da, C +57.02 Da              | 54.0       | 44.3              | 3      | 2014.12                      | -0.97                                        | 0.21                  | KCRM_MOUSE   |              | Creatine kinase M-type;                                        | Creatine kinase M chain;M-CK;                                                                                                                              | 0.15 - 0.25 |
| MNHLLLUKQF     | EHLNHQNPNTFESR                    | N-ter +28.03 Da                           | 25.1       | 63.6              | 4      | 1749.93                      | 1.46                                         | 0.45                  | NUC2_MOUSE   |              | Nucleobindin-2;                                                | DNA-binding protein NEFA;                                                                                                                                  | 0.75 - 0.85 |
| FYNELRVAPE     | EHPVLLLEAPLNPKANR                 | N-ter +28.03 Da, K +28.03 Da              | 25.1       | 51.8              | 4      | 1956.18                      | -0.18                                        | 0.02                  | ACT5_MOUSE   | ACTA_MOUSE   | Actin, alpha skeletal muscle;                                  | Alpha-actin-1;                                                                                                                                             | 0.25 - 0.75 |
| CLLHEKTPVS     | EHVTKCCSGSLVER                    | N-ter +28.03 Da, K +28.03 Da, C +57.02 Da | 35.5       | 53.0              | 3      | 1716.92                      | 2.94                                         | 0.54                  | ALBU_MOUSE   |              | Serum albumin;                                                 |                                                                                                                                                            | 0.85 - 1.00 |
| RKLPQRQLRV     | EIAQDFKTLDR                       | N-ter +28.03 Da, K +28.03 Da              | 26.2       | 54.5              | 3      | 1390.82                      | -0.18                                        | 0.02                  | H31_MOUSE    | H32_MOUSE    | Histone H3.1;                                                  |                                                                                                                                                            | 0.25 - 0.75 |
| FILKARSTVR     | EIDPQNDLFTLR                      | N-ter +28.03 Da                           | 29.0       | 55.1              | 3      | 1487.84                      | 0.60                                         | 0.06                  | DLR1_MOUSE   | A2AVR9_MOUSE | Dynein light chain roadblock-type 1;                           | Dynein light chain 2A, cytoplasmic;                                                                                                                        | 0.25 - 0.75 |
| MGYMAAKKHL     | EINPDHPIVETLR                     | N-ter +28.03 Da                           | 48.3       | 54.6              | 3      | 1559.92                      | -0.52                                        | 0.04                  | H590B_MOUSE  | Q71LX8_MOUSE | Heat shock protein HSP 90-beta;                                | Heat shock 84 kDa;Tumor-specific transplantation 84 kDa antigen;                                                                                           | 0.25 - 0.75 |
| IILFDAHKL      | EISDEFSEIAGLR                     | N-ter +28.03 Da                           | 27.1       | 55.1              | 3      | 1563.86                      | -1.09                                        | 0.14                  | EHD2_MOUSE   | Q8R2X0_MOUSE | EH domain-containing protein 2;                                |                                                                                                                                                            | 0.15 - 0.25 |
| GEATWSGSEF     | EISFPDSPGAQAQADHLPR               | N-ter +28.03 Da                           | 54.5       | 44.4              | 3      | 2063.10                      | 0.59                                         | 0.13                  | GORS1_MOUSE  |              | Golgi reassembly-stacking protein 1;                           |                                                                                                                                                            | 0.25 - 0.75 |
| YPGIADRMQK     | EITALAPSTMKIKIAPPPEP              | N-ter +28.03 Da, K +28.03 Da              | 40.5       | 61.5              | 4      | 2262.48                      | 4.85                                         | 1.18                  | ACTC_MOUSE   | ACTA_MOUSE   | Actin, alpha cardiac muscle 1;                                 | Alpha-cardiac actin;                                                                                                                                       | 0.85 - 1.00 |
| KMGLQLVATI     | EKIPFESAFR                        | N-ter +28.03 Da, K +28.03 Da              | 34.5       | 53.3              | 3      | 1278.77                      | 0.98                                         | 0.08                  | FACR2_MOUSE  |              | Fatty acyl-CoA reductase 2;                                    | Male sterility domain-containing protein 1;                                                                                                                | 0.75 - 0.85 |
| NLVKTNCDLY     | EKLGEYGFQNALVR                    | N-ter +28.03 Da, K +28.03 Da              | 49.2       | 38.3              | 3      | 1792.06                      | -0.32                                        | 0.03                  | ALBU_MOUSE   |              | Serum albumin;                                                 |                                                                                                                                                            | 0.25 - 0.75 |
| LLAVLPTTTA     | EKNGIDYSLTVDSR                    | N-ter +28.03 Da, K +28.03 Da              | 39.2       | 61.3              | 3      | 1765.03                      | 0.57                                         | 0.03                  | Q9DBK8_MOUSE | Q8C7G9_MOUSE |                                                                |                                                                                                                                                            | 0.25 - 0.75 |
| KLPSLFLYIM     | EKNQLFEVPSALPR                    | N-ter +28.03 Da, K +28.03 Da              | 38.4       | 38.1              | 3      | 1664.97                      | -1.32                                        | 0.20                  | PRELP_MOUSE  |              | Prolargin;                                                     | Proline-arginine-rich end leucine-rich repeat protein;                                                                                                     | 0.15 - 0.25 |
| MEVKVQKSSK     | ELEDMMNQLFDLDR                    | N-ter +28.03 Da, K +28.03 Da              | 35.4       | 49.9              | 3      | 1705.96                      | -0.89                                        | 0.13                  | TNNI2_MOUSE  | A2A6K0_MOUSE | Troponin I, fast skeletal muscle;                              | Troponin I, fast-twitch isoform;                                                                                                                           | 0.15 - 0.25 |
| KDKSGFIEED     | ELGSILKGFSSDAR                    | N-ter +28.03 Da, K +28.03 Da              | 25.4       | 46.4              | 3      | 1534.91                      | -1.47                                        | 0.29                  | PRVA_MOUSE   |              | Parvalbumin alpha;                                             |                                                                                                                                                            | 0.15 - 0.25 |

| Non Prime Site | Prime Site             | Modifications                             | Hyperscore | Mass error in ppm | Charge | Precursor neutral mass in Da | Fold change (log <sub>2</sub> ) of ASAPRatio | FC-error of ASAPRatio | Uniprot ID 1 | Uniprot ID 2 | Protein Name 1                                                                  | Protein Name 2                                                                                                                                                                                      | Quantile    |
|----------------|------------------------|-------------------------------------------|------------|-------------------|--------|------------------------------|----------------------------------------------|-----------------------|--------------|--------------|---------------------------------------------------------------------------------|-----------------------------------------------------------------------------------------------------------------------------------------------------------------------------------------------------|-------------|
| FYSNKEIFLR     | ELISNASDALDKIR         | N-ter +28.03 Da, K +28.03 Da              | 51.1       | 46.6              | 3      | 1599.96                      | 0.79                                         | 0.14                  | HS90B_MOUSE  | ENPL_MOUSE   | Heat shock protein HSP 90-beta;                                                 | Heat shock 84 kDa;Tumor-specific transplantation 84 kDa antigen;                                                                                                                                    | 0.25 - 0.75 |
| LTPKKYEGGR     | ELNDFISYLQR            | N-ter +28.03 Da                           | 31.4       | 51.5              | 3      | 1424.80                      | -0.22                                        | 0.05                  | PDIA3_MOUSE  |              | Protein disulfide-isomerase A3;                                                 | 58 kDa glucose-regulated protein;58 kDa microsomal protein;Disulfide isomerase ER-60;Endoplasmic reticulum resident protein 57;Endoplasmic reticulum resident protein 60;                           | 0.25 - 0.75 |
| ASSSLEKSY      | ELPDGQVITIGNER         | N-ter +28.03 Da                           | 32.9       | 46.3              | 3      | 1567.89                      | 0.91                                         | 0.08                  | ACTB_MOUSE   | ACTA_MOUSE   | Actin, cytoplasmic 1;                                                           | Beta-actin;                                                                                                                                                                                         | 0.25 - 0.75 |
| EGAEPMGYSA     | ELSGEILDRNEEKR         | N-ter +28.03 Da, K +28.03 Da              | 27.6       | 62.0              | 4      | 1945.10                      | -0.97                                        | 0.08                  | EZR1_MOUSE   |              | Ezrin;                                                                          | Cytovillin;Villin-2;p81;                                                                                                                                                                            | 0.15 - 0.25 |
| NVFGKESKKK     | ELVNNLGEIVQKIER        | N-ter +28.03 Da, K +28.03 Da              | 39.0       | 39.3              | 3      | 1873.10                      | -0.58                                        | 0.05                  | EHD1_MOUSE   | F6Y7R7_MOUSE | EH domain-containing protein 1;                                                 | PAST homolog 1;                                                                                                                                                                                     | 0.25 - 0.75 |
| LGQQLNLL       | ENWDTLGTVSQIQER        | N-ter +28.03 Da                           | 45.5       | 48.1              | 3      | 1890.00                      | 2.09                                         | 0.42                  | APOA1_MOUSE  | Q8BPD5_MOUSE | Apolipoprotein A-I;                                                             | Apolipoprotein A1;                                                                                                                                                                                  | 0.85 - 1.00 |
| DKLCAIPNLR     | ENYGELADCCTKQEPER      | N-ter +28.03 Da, K +28.03 Da, C +57.02 Da | 45.2       | 40.8              | 3      | 2154.02                      | 3.44                                         | 0.75                  | ALBU_MOUSE   |              | Serum albumin;                                                                  |                                                                                                                                                                                                     | 0.85 - 1.00 |
| FSAGSAIHWR     | EPEGKEVWDYVTVR         | N-ter +28.03 Da, K +28.03 Da              | 12.5       | 51.4              | 3      | 1761.98                      | 0.06                                         | 0.01                  | RISC_MOUSE   | Q3U5P4_MOUSE | Retinoid-inducible serine carboxypeptidase;                                     | Serine carboxypeptidase 1;                                                                                                                                                                          | 0.25 - 0.75 |
| KDCKEPRKR      | EQCCYNCCKPGHLLAR       | N-ter +28.03 Da, K +28.03 Da, C +57.02 Da | 25.6       | 65.0              | 4      | 1904.97                      | -0.36                                        | 0.18                  | CNBP_MOUSE   | D3YF6_MOUSE  | Cellular nucleic acid-binding protein;                                          | Zinc finger protein 9;                                                                                                                                                                              | 0.25 - 0.75 |
| LLWAAACAQS     | EQDFYDFKAVNIR          | N-ter +28.03 Da, K +28.03 Da              | 28.8       | 52.3              | 3      | 1699.95                      | -0.62                                        | 0.11                  | GPX7_MOUSE   | E9PVY3_MOUSE | Glutathione peroxidase 7;                                                       |                                                                                                                                                                                                     | 0.25 - 0.75 |
| LIWDNGMVLG     | EQEVSDFNEQLSELSTQSSR   | N-ter +34.06 Da                           | 61.1       | 43.6              | 3      | 2082.08                      | 2.10                                         | 0.48                  | CLU3_MOUSE   | E9Q9B8_MOUSE | Clusterin;                                                                      | Apolipoprotein J;Clustrin;Sulfated glycoprotein 2;                                                                                                                                                  | 0.85 - 1.00 |
| KGKSCRTITF     | EQFQEALEELAKKR         | N-ter +28.03 Da, K +28.03 Da              | 32.6       | 66.4              | 4      | 1802.11                      | -0.30                                        | 0.07                  | TPPP_MOUSE   |              | Tubulin polymerization-promoting protein;                                       |                                                                                                                                                                                                     | 0.25 - 0.75 |
| TLFQPSFIGM     | ESAGIHETTYNSIMKCDIDIR  | N-ter +28.03 Da, K +28.03 Da, C +57.02 Da | 39.2       | 54.9              | 4      | 2508.34                      | 0.77                                         | 0.17                  | ACTC_MOUSE   | ACTA_MOUSE   | Actin, alpha cardiac muscle 1;                                                  | Alpha-cardiac actin;                                                                                                                                                                                | 0.25 - 0.75 |
| LQVFRQFVRH     | ESEVASSVLVLR           | N-ter +28.03 Da                           | 41.4       | 30.9              | 2      | 1345.75                      | 3.98                                         | 0.76                  | SSBP_MOUSE   | Q8R2K3_MOUSE | Single-stranded DNA-binding protein, mitochondrial;                             |                                                                                                                                                                                                     | 0.85 - 1.00 |
| VSEAGPAGAG     | ESKCPMLVKKVLDVAVR      | N-ter +34.06 Da, K +34.06 Da, C +57.02 Da | 24.5       | 62.5              | 4      | 1846.24                      | 0.65                                         | 0.03                  | TTHY_MOUSE   |              | Transthyretin;                                                                  | Prealbumin;                                                                                                                                                                                         | 0.25 - 0.75 |
| LSIFVSGCFS     | ESPTKVQLVGGAAHR        | N-ter +28.03 Da, K +28.03 Da              | 22.2       | 60.9              | 4      | 1533.96                      | 0.16                                         | 0.04                  | CDS1_MOUSE   |              | CDS5 antigen-like;                                                              | Apoptosis inhibitor expressed by macrophages;Apoptosis inhibitory 6;CT-2;SP-alpha;                                                                                                                  | 0.25 - 0.75 |
| ADROGRRGVS     | ESQASDSEGHSDSEGAQVAAHR | N-ter +28.03 Da                           | 57.0       | 65.9              | 4      | 2415.19                      | -0.56                                        | 0.25                  | E9Q019_MOUSE | F7BVV1_MOUSE |                                                                                 |                                                                                                                                                                                                     | 0.25 - 0.75 |
| GRYDATSQY      | ESVMKTEPSVAEYTVR       | N-ter +28.03 Da, K +28.03 Da              | 34.2       | 48.8              | 3      | 1881.05                      | -0.43                                        | 0.07                  | DNIC3_MOUSE  |              | Dnaj homolog subfamily C member 3;                                              | Interferon-induced, double-stranded RNA-activated protein kinase inhibitor;Protein kinase inhibitor of 58 kDa;                                                                                      | 0.25 - 0.75 |
| HAFQGRDMA      | ETFDQGAHHAFQGGRR       | N-ter +28.03 Da                           | 34.2       | 61.0              | 4      | 1741.90                      | 0.33                                         | 0.08                  | SBSN_MOUSE   | E9QP82_MOUSE | Suprabasin;                                                                     |                                                                                                                                                                                                     | 0.25 - 0.75 |
| GPAGKNGDRG     | ETGPAAGPAGPIGAGAR      | N-ter +34.06 Da                           | 40.5       | 41.3              | 3      | 1508.88                      | 0.26                                         | 0.04                  | CO1A1_MOUSE  | F8WGB7_MOUSE | Collagen alpha-1(I) chain;                                                      | Alpha-1 type I collagen;                                                                                                                                                                            | 0.25 - 0.75 |
| LPTFSNLNR      | ETNLESPLVDTHSKR        | N-ter +28.03 Da, K +28.03 Da              | 19.6       | 59.8              | 4      | 1894.13                      | 0.63                                         | 0.05                  | VIME_MOUSE   | E9PZV5_MOUSE | Vimentin;                                                                       |                                                                                                                                                                                                     | 0.25 - 0.75 |
| RRSGRLLTRW     | ETTSIPEAGEGQIR         | N-ter +34.06 Da                           | 40.3       | 44.6              | 3      | 1607.89                      | 0.43                                         | 0.08                  | ISCA2_MOUSE  |              | Iron-sulfur cluster assembly 2 homolog, mitochondrial;                          | HESB-like domain-containing protein 1;                                                                                                                                                              | 0.25 - 0.75 |
| VQGRSRLVL      | EVAQHLGESTVR           | N-ter +28.03 Da                           | 34.4       | 47.8              | 3      | 1352.77                      | 0.54                                         | 0.03                  | ATPB_MOUSE   |              | ATP synthase subunit beta, mitochondrial;                                       |                                                                                                                                                                                                     | 0.25 - 0.75 |
| LASLLSGQA      | EVEDASEEAPLR           | N-ter +28.03 Da                           | 31.7       | 51.2              | 3      | 1371.72                      | 0.71                                         | 0.07                  | SRCB_MOUSE   |              | Sarcalumenin;                                                                   |                                                                                                                                                                                                     | 0.25 - 0.75 |
| FSRGLSNAER     | EVGKALEGINGITQAGR      | N-ter +28.03 Da, K +28.03 Da              | 54.9       | 36.1              | 3      | 1882.10                      | -1.18                                        | 0.16                  | SBSN_MOUSE   | E9QP82_MOUSE | Suprabasin;                                                                     |                                                                                                                                                                                                     | 0.15 - 0.25 |
| LAPSLWLHRF     | EVIDDLNHWHDATKLR       | N-ter +28.03 Da, K +28.03 Da              | 32.0       | 70.1              | 4      | 2017.18                      | -0.20                                        | 0.02                  | APRV1_MOUSE  |              | Retroviral-like aspartic protease 1;                                            | Skin-specific retroviral-like aspartic protease;TPA-inducible aspartic proteinase-like protein;                                                                                                     | 0.25 - 0.75 |
| LTKLPGYPVK     | EVKCDMEVSCPEGYTCR      | N-ter +34.06 Da, K +34.06 Da, C +57.02 Da | 45.1       | 47.6              | 3      | 2347.12                      | 0.99                                         | 0.36                  | GRN_MOUSE    | Q3U9N4_MOUSE | Granulins;                                                                      | PC cell-derived growth factor;Proepithelin;                                                                                                                                                         | 0.75 - 0.85 |
| GAGFRPKVKR     | EKVDCSEYLALSKR         | N-ter +28.03 Da, K +28.03 Da, C +57.02 Da | 36.2       | 60.6              | 4      | 1880.12                      | -0.71                                        | 0.07                  | Q148R4_MOUSE | Q8BM18_MOUSE |                                                                                 |                                                                                                                                                                                                     | 0.25 - 0.75 |
| GAGFRPKVKR     | EKVDCSEYLALSK          | N-ter +28.03 Da, K +28.03 Da, C +57.02 Da | 33.9       | 80.1              | 3      | 1724.05                      | -0.32                                        | 0.04                  | Q8BM18_MOUSE | Q148R4_MOUSE |                                                                                 |                                                                                                                                                                                                     | 0.25 - 0.75 |
| VLMDFQVKA      | EVLDMAENAFDDEYLKCKSR   | N-ter +28.03 Da, K +28.03 Da, C +57.02 Da | 61.3       | 58.4              | 4      | 2516.34                      | -0.43                                        | 0.15                  | NAR3_MOUSE   | E9Q1U7_MOUSE | Ecto-ADP-ribosyltransferase 3;                                                  | Mono(ADP-ribosyl)transferase 3;NAD(P)(+)-arginine ADP-ribosyltransferase 3;                                                                                                                         | 0.25 - 0.75 |
| HCSPSVGLS      | EVQALVAGKPNMTR         | N-ter +28.03 Da, K +28.03 Da              | 26.6       | 62.6              | 3      | 1568.97                      | -2.47                                        | 0.55                  | BTBD7_MOUSE  |              | BTB/POZ domain-containing protein 7;                                            |                                                                                                                                                                                                     | 0.00 - 0.15 |
| LMAAVIGINS     | EVQLQQSGAELVR          | N-ter +34.06 Da                           | 31.2       | 39.4              | 3      | 1489.89                      | -0.74                                        | 0.12                  | HVM02_MOUSE  |              | Ig heavy chain V region 93G7;                                                   |                                                                                                                                                                                                     | 0.25 - 0.75 |
| VNNMVFVKY      | EYVAAAELVGLIQYITER     | N-ter +34.06 Da                           | 22.6       | 18.5              | 4      | 2255.30                      | -0.36                                        | 0.05                  | PRKC_MOUSE   |              | DNA-dependent protein kinase catalytic subunit;                                 | p460;                                                                                                                                                                                               | 0.25 - 0.75 |
| TFQQMWSKQ      | EYDEAGPSIVHR           | N-ter +28.03 Da                           | 51.6       | 56.5              | 3      | 1399.75                      | -0.43                                        | 0.05                  | ACTC_MOUSE   | ACTA_MOUSE   | Actin, alpha cardiac muscle 1;                                                  | Alpha-cardiac actin;                                                                                                                                                                                | 0.25 - 0.75 |
| ASRVLASRN      | FANDATFEIKCDLHR        | N-ter +34.06 Da, K +34.06 Da, C +57.02 Da | 32.0       | 59.0              | 4      | 2066.27                      | 1.65                                         | 0.27                  | ODPA_MOUSE   |              | Pyruvate dehydrogenase E1 component subunit alpha, somatic form, mitochondrial; | PDHE1-A type I;                                                                                                                                                                                     | 0.85 - 1.00 |
| LLTQPGDWTL     | FAPTNDAFKGMTSEER       | N-ter +28.03 Da, K +28.03 Da              | 29.6       | 52.2              | 3      | 1855.97                      | -0.18                                        | 0.04                  | POSTN_MOUSE  |              | Periostin;                                                                      | Osteoblast-specific factor 2;                                                                                                                                                                       | 0.25 - 0.75 |
| SLGRDGHFTL     | FAPTNEAFKLPK           | N-ter +28.03 Da, K +28.03 Da              | 23.3       | 50.0              | 3      | 1574.92                      | 0.20                                         | 0.02                  | POSTN_MOUSE  |              | Periostin;                                                                      | Osteoblast-specific factor 2;                                                                                                                                                                       | 0.25 - 0.75 |
| LDYVMAAANL     | FAQTYGLTGSQDR          | N-ter +28.03 Da                           | 37.0       | 48.6              | 3      | 1470.78                      | 0.26                                         | 0.05                  | UBA1_MOUSE   |              | Ubiquitin-like modifier-activating enzyme 1;                                    | Ubiquitin-activating enzyme E1;Ubiquitin-activating enzyme 1 X;                                                                                                                                     | 0.25 - 0.75 |
| GTWKLVSSEN     | FDDYMKVGVGFATR         | N-ter +28.03 Da, K +28.03 Da              | 25.8       | 50.9              | 3      | 1789.96                      | -0.49                                        | 0.09                  | FABP4_MOUSE  |              | Fatty acid-binding protein, adipocyte;                                          | 3T3-L1 lipid-binding protein;Adipocyte lipid-binding protein;Adipocyte-type fatty acid-binding protein;Fatty acid-binding protein 4;Myelin P2 protein homolog;P15;P2 adipocyte protein;Protein 422; | 0.25 - 0.75 |
| EIFDKARVLF     | FDELDSIAKAR            | N-ter +28.03 Da, K +28.03 Da              | 19.7       | 50.0              | 3      | 1319.77                      | 1.77                                         | 0.29                  | TERA_MOUSE   |              | Transitional endoplasmic reticulum ATPase;                                      | 15S Mg(2+)-ATPase p97 subunit;Valosin-containing protein;                                                                                                                                           | 0.85 - 1.00 |



Table S10, Tholen et al.

| Non Prime Site | Prime Site               | Modifications                             | Hyperscore | Mass error in ppm | Charge | Precursor neutral mass in Da | Fold change (log <sub>2</sub> ) of ASAPRatio | FC-error of ASAPRatio | Uniprot ID 1 | Uniprot ID 2 | Protein Name 1                                                                   | Protein Name 2                                                                                                                                                                                                   | Quantile    |
|----------------|--------------------------|-------------------------------------------|------------|-------------------|--------|------------------------------|----------------------------------------------|-----------------------|--------------|--------------|----------------------------------------------------------------------------------|------------------------------------------------------------------------------------------------------------------------------------------------------------------------------------------------------------------|-------------|
| ESEKVKITKV     | FDFAEEVVR                | N-ter +34.06 Da                           | 25.4       | 49.3              | 2      | 1102.61                      | 0.06                                         | 0.01                  | CFDP1_MOUSE  |              | Craniofacial development protein 1;                                              | 27 kDa craniofacial protein;Buccentaur;Protein Cq27;                                                                                                                                                             | 0.25 - 0.75 |
| MVNPPTVF       | FDITADDEPLGR             | N-ter +34.06 Da                           | 32.6       | 44.3              | 3      | 1381.76                      | 2.04                                         | 0.40                  | PPIA_MOUSE   | E9Q1E3_MOUSE | Peptidyl-prolyl cis-trans isomerase A;                                           | Cyclophilin A;Cyclosporin A-binding protein;Rotamase A;SP18;                                                                                                                                                     | 0.85 - 1.00 |
| KDGRHCCLKC     | FDKFCANTCVDCR            | N-ter +34.06 Da, K +34.06 Da, C +57.02 Da | 41.0       | 48.3              | 3      | 1759.90                      | -3.47                                        | 1.16                  | FHL1_MOUSE   | A2AE8_MOUSE  | Four and a half LIM domains protein 1;                                           | Kyot;RBP-associated molecule 14-1;Skeletal muscle LIM-protein 1;                                                                                                                                                 | 0.00 - 0.15 |
| QQQLIDHFL      | FDKPVSPLLTAAGMAR         | N-ter +28.03 Da, K +28.03 Da              | 36.2       | 44.3              | 3      | 1729.04                      | 0.71                                         | 0.10                  | KCRU_MOUSE   | A2ARP5_MOUSE | Creatine kinase U-type, mitochondrial;                                           | Acidic-type mitochondrial creatine kinase;Ubiquitous mitochondrial creatine kinase;                                                                                                                              | 0.25 - 0.75 |
| SYTSLGFF       | FDRDDVALEGVGHFFR         | N-ter +28.03 Da                           | 58.0       | 78.7              | 4      | 1907.08                      | 3.09                                         | 0.46                  | FRIL1_MOUSE  | FRIL2_MOUSE  | Ferritin light chain 1;                                                          | Ferritin L subunit 1;                                                                                                                                                                                            | 0.85 - 1.00 |
| TEGVKGAKNF     | FEAKVQAINVSSR            | N-ter +28.03 Da, K +28.03 Da              | 30.3       | 45.4              | 3      | 1503.91                      | 0.21                                         | 0.04                  | EFHD2_MOUSE  | Q8C845_MOUSE | EF-hand domain-containing protein D2;                                            | Swiprosin-1;                                                                                                                                                                                                     | 0.25 - 0.75 |
| TGAEQVSLT      | FEDVAFLTR                | N-ter +28.03 Da                           | 29.3       | 70.4              | 2      | 1223.74                      | 4.48                                         | 0.73                  | Z354A_MOUSE  | Z354B_MOUSE  | Zinc finger protein 354A;                                                        | Kidney, ischemia, and developmentally-regulated protein 1;Renal transcription factor Kid-1;Transcription factor 17;                                                                                              | 0.85 - 1.00 |
| DTEYNLRDY      | FEKYGKIEVEMEDR           | N-ter +34.06 Da, K +34.06 Da              | 28.7       | 58.7              | 4      | 2088.29                      | -0.86                                        | 0.08                  | ROA3_MOUSE   | A2AL12_MOUSE | Heterogeneous nuclear ribonucleoprotein A3;                                      |                                                                                                                                                                                                                  | 0.15 - 0.25 |
| GTVSSRIKX      | FELKHLSSGDLR             | N-ter +28.03 Da, K +28.03 Da              | 30.6       | 65.2              | 4      | 1569.99                      | -1.25                                        | 0.27                  | KAD3_MOUSE   |              | GTP:AMP phosphotransferase, mitochondrial;                                       | Adenylate kinase 3;Adenylate kinase 3 alpha-like 1;                                                                                                                                                              | 0.15 - 0.25 |
| RRSRGFVY       | FENVDDAKEAKER            | N-ter +34.06 Da, K +34.06 Da              | 20.6       | 46.3              | 4      | 1652.00                      | -1.52                                        | 0.26                  | TRA2B_MOUSE  | F8WJG3_MOUSE | Transformer-2 protein homolog beta;                                              | Silica-induced gene 41 protein;Splicing factor, arginine/serine-rich 10;Transformer-2 protein homolog B;                                                                                                         | 0.00 - 0.15 |
| LSCIAMMCNE     | FFEGCPDKEPR              | N-ter +28.03 Da, K +28.03 Da, C +57.02 Da | 24.3       | 63.3              | 3      | 1436.77                      | 0.51                                         | 0.07                  | S10A4_MOUSE  | D3YUT9_MOUSE | Protein S100-A4;                                                                 | Metastasin;Metastatic cell protein;PEL98;Placental calcium-binding protein;Protein 18A2;Protein Mts1;S100 calcium-binding protein A4;                                                                            | 0.25 - 0.75 |
| EDRQAGP        | FGDEKEDAGPQQEAAAR        | N-ter +34.06 Da, K +34.06 Da              | 24.7       | 67.6              | 3      | 1872.06                      | -3.18                                        | 0.29                  | USBP1_MOUSE  |              | Usher syndrome type-1C protein-binding protein 1;                                |                                                                                                                                                                                                                  | 0.00 - 0.15 |
| GGPKLPGRVA     | FGEDIDLPEFDAR            | N-ter +28.03 Da                           | 31.0       | 53.5              | 3      | 1651.86                      | 1.29                                         | 0.25                  | CATB_MOUSE   |              | Cathepsin B;                                                                     | Cathepsin B1;                                                                                                                                                                                                    | 0.75 - 0.85 |
| DEKLRKR        | FGIVTSSAGTGTTEDEAKKR     | N-ter +34.06 Da, K +34.06 Da              | 51.3       | 52.1              | 4      | 2257.38                      | -0.84                                        | 0.16                  | SARNP_MOUSE  |              | SAP domain-containing ribonucleoprotein;                                         | Nuclear protein Hcc-1;                                                                                                                                                                                           | 0.15 - 0.25 |
| SGFLAGFSL      | FGLGSEPAAGEAEVSDGGTVDLR  | N-ter +28.03 Da                           | 79.6       | 44.5              | 3      | 2332.22                      | -0.20                                        | 0.02                  | IMPA3_MOUSE  |              | Inositol monophosphatase 3;                                                      | Golgi 3-prime phosphoadenosine 5-prime phosphate 3-prime phosphatase;Inositol monophosphatase domain-containing protein 1;Inositol-1(or 4)-monophosphatase 3;Myo-inositol monophosphatase A3;                    | 0.25 - 0.75 |
| EQALEDHSS      | FGPISEVVVKDR             | N-ter +28.03 Da, K +28.03 Da              | 36.3       | 48.8              | 3      | 1499.94                      | 0.07                                         | 0.01                  | RBM3_MOUSE   | Q8BG13_MOUSE | Putative RNA-binding protein 3;                                                  | RNA-binding motif protein 3;                                                                                                                                                                                     | 0.25 - 0.75 |
| QYREVAFAAQ     | FGSDLAATQQLSR            | N-ter +28.03 Da                           | 30.6       | 59.0              | 3      | 1648.94                      | 0.72                                         | 0.11                  | ATPA_MOUSE   | D3Z6F5_MOUSE | ATP synthase subunit alpha, mitochondrial;                                       |                                                                                                                                                                                                                  | 0.25 - 0.75 |
| TQICPNLVA      | FHDSSDLENVPHLR           | N-ter +28.03 Da                           | 39.0       | 66.9              | 4      | 1840.01                      | 3.13                                         | 0.86                  | PRELP_MOUSE  |              | Prolargin;                                                                       | Proline-arginine-rich end leucine-rich repeat protein;                                                                                                                                                           | 0.85 - 1.00 |
| PVNGSSMQSL     | FIEIHSVSAKNR             | N-ter +28.03 Da, K +28.03 Da              | 23.6       | 65.3              | 4      | 1584.97                      | 0.48                                         | 0.07                  | SKT_MOUSE    | E9QAU4_MOUSE | Sickle tail protein;                                                             | Enhancer trap locus 4;                                                                                                                                                                                           | 0.25 - 0.75 |
| AAEGFKGKIL     | FIFDSDHTDNQR             | N-ter +28.03 Da                           | 45.4       | 57.4              | 3      | 1634.86                      | 2.05                                         | 0.35                  | PDIA1_MOUSE  |              | Protein disulfide-isomerase;                                                     | Cellular thyroid hormone-binding protein;Endoplasmic reticulum resident protein 59;Prolyl 4-hydroxylase subunit beta;p55;                                                                                        | 0.85 - 1.00 |
| EQLNVIKIL      | FIPLSQDLLENLKAEEVAR      | N-ter +28.03 Da, K +28.03 Da              | 25.1       | 55.7              | 4      | 2154.36                      | 3.04                                         | 0.81                  | K0664_MOUSE  |              | Protein KIAA0664;                                                                |                                                                                                                                                                                                                  | 0.85 - 1.00 |
| SMFDQIQE       | FKEAFTVIDQNR             | N-ter +28.03 Da, K +28.03 Da              | 47.3       | 51.1              | 3      | 1522.89                      | -0.29                                        | 0.06                  | MLRS_MOUSE   | F6ULR7_MOUSE | Myosin regulatory light chain 2, skeletal muscle isoform;                        | Fast skeletal myosin light chain 2;MLC2F;                                                                                                                                                                        | 0.25 - 0.75 |
| VARGKLHLL      | FKEETEIPAR               | N-ter +28.03 Da, K +28.03 Da              | 38.1       | 50.1              | 3      | 1274.75                      | 2.56                                         | 0.59                  | PRDBP_MOUSE  |              | Protein kinase C delta-binding protein;                                          | Cavin-3;Serum deprivation response factor-related gene product that binds to C-kinase;                                                                                                                           | 0.85 - 1.00 |
| AQKQLPAL       | FKLDNQDFGDHATLKR         | N-ter +28.03 Da, K +28.03 Da              | 20.8       | 35.0              | 4      | 1988.12                      | -2.64                                        | 0.33                  | A2AP_MOUSE   | Q5ND35_MOUSE | Alpha-2-antiplasmin;                                                             | Alpha-2-plasmin inhibitor;Serpin F2;                                                                                                                                                                             | 0.00 - 0.15 |
| PEGKTIKQ       | FLEELLTQCDR              | N-ter +28.03 Da, C +57.02 Da              | 24.7       | 87.1              | 3      | 1551.90                      | -0.97                                        | 0.08                  | MLRS_MOUSE   |              | Myosin regulatory light chain 2, skeletal muscle isoform;                        | Fast skeletal myosin light chain 2;MLC2F;                                                                                                                                                                        | 0.15 - 0.25 |
| HAQLAYCVVQ     | FLEKDTLTPVIR             | N-ter +28.03 Da, K +28.03 Da              | 27.3       | 28.4              | 3      | 1717.01                      | -0.17                                        | 0.02                  | ZASA_MOUSE   | F6VYL0_MOUSE | Serine/threonine-protein phosphatase 2A 56 kDa regulatory subunit alpha isoform; | PP2A B subunit isoform B'-alpha;PP2A B subunit isoform B56-alpha;PP2A B subunit isoform PR61-alpha;PP2A B subunit isoform R5-alpha;NEDD8 carrier protein;NEDD8 protein ligase;Ubiquitin-conjugating enzyme E2 M; | 0.25 - 0.75 |
| NSIYGLQYL      | FLEPNPEDPLNKEAEVLQNNR    | N-ter +28.03 Da, K +28.03 Da              | 31.2       | 51.7              | 4      | 2592.45                      | 2.50                                         | 0.33                  | UBC12_MOUSE  | F7CDT0_MOUSE | NEDD8-conjugating enzyme Ubc12;                                                  |                                                                                                                                                                                                                  | 0.85 - 1.00 |
| LGFGNNLNYM     | FLETLALENHGLAR           | N-ter +28.03 Da                           | 50.1       | 47.1              | 3      | 1610.95                      | -0.07                                        | 0.01                  | ITH3_MOUSE   | E9PVS1_MOUSE | Inter-alpha-trypsin inhibitor heavy chain H3;                                    |                                                                                                                                                                                                                  | 0.25 - 0.75 |
| LAQNERCLHM     | FLQDEIHKSYTPSKIR         | N-ter +28.03 Da, K +28.03 Da              | 30.4       | 58.0              | 4      | 2136.31                      | -0.01                                        | 0.00                  | SNX3_MOUSE   | Q78ZM0_MOUSE | Sorting nexin-3;                                                                 | SDP3 protein;                                                                                                                                                                                                    | 0.25 - 0.75 |
| FALYKPTVDL     | FLQLVDSGKVDPEAR          | N-ter +28.03 Da, K +28.03 Da              | 33.6       | 46.7              | 3      | 1631.96                      | -0.92                                        | 0.09                  | LPPRC_MOUSE  |              | Leucine-rich PPR motif-containing protein, mitochondrial;                        | 130 kDa leucine-rich protein;                                                                                                                                                                                    | 0.15 - 0.25 |
| VFGVCHIFAS     | FNDTFVHTDLSGKETICR       | N-ter +28.03 Da, K +28.03 Da, C +57.02 Da | 41.0       | 67.3              | 4      | 2294.29                      | 0.15                                         | 0.03                  | RS14_MOUSE   | D3YVF4_MOUSE | 40S ribosomal protein S14;                                                       |                                                                                                                                                                                                                  | 0.25 - 0.75 |
| EEFDARWVY      | FNKPDIDAWELR             | N-ter +34.06 Da, K +34.06 Da              | 34.3       | 54.2              | 3      | 1570.96                      | -0.97                                        | 0.23                  | COX5A_MOUSE  |              | Cytochrome c oxidase subunit 5A, mitochondrial;                                  | Cytochrome c oxidase polypeptide Va;Gamma-glutamyl leukotrienase;Gamma-glutamyltransferase-like activity 1;Gamma-glutamyltranspeptidase 5;                                                                       | 0.15 - 0.25 |
| SKGHVEYEPK     | FNQEVQKGLQDR             | N-ter +28.03 Da, K +28.03 Da              | 18.5       | 114.6             | 4      | 1516.97                      | -0.97                                        | 0.08                  | GGT5_MOUSE   | Q8C7B4_MOUSE | Gamma-glutamyltransferase 5;                                                     |                                                                                                                                                                                                                  | 0.15 - 0.25 |
| GDKGDQGLAG     | FPGSPGKEGKGSAGTGMGPGSPGR | N-ter +28.03 Da, K +28.03 Da              | 24.4       | 23.7              | 4      | 2522.32                      | 0.86                                         | 0.13                  | COA1_MOUSE   |              | Collagen alpha-1(V) chain;                                                       |                                                                                                                                                                                                                  | 0.25 - 0.75 |
| EAASGALSMF     | FQGEETENEENLSEKAGLDR     | N-ter +28.03 Da, K +28.03 Da              | 45.0       | 61.5              | 4      | 2593.41                      | 2.27                                         | 0.60                  | A2AIX1_MOUSE | E9QAT4_MOUSE |                                                                                  |                                                                                                                                                                                                                  | 0.85 - 1.00 |

| Non Prime Site | Prime Site              | Modifications                             | Hyperscore | Mass error in ppm | Charge | Precursor neutral mass in Da | Fold change (log <sub>2</sub> ) of ASAPRatio | FC-error of ASAPRatio | Uniprot ID 1 | Uniprot ID 2 | Protein Name 1                                        | Protein Name 2                                                                                                                                                                                      | Quantile    |
|----------------|-------------------------|-------------------------------------------|------------|-------------------|--------|------------------------------|----------------------------------------------|-----------------------|--------------|--------------|-------------------------------------------------------|-----------------------------------------------------------------------------------------------------------------------------------------------------------------------------------------------------|-------------|
| IILEYQHGA      | FQSGQVLSALPR            | N-ter +34.06 Da                           | 23.7       | 43.9              | 3      | 1335.83                      | -0.74                                        | 0.09                  | CBBP2_MOUSE  |              | Carboxypeptidase B2;                                  | Carboxypeptidase R;Carboxypeptidase                                                                                                                                                                 | 0.25 - 0.75 |
| ELNGKLTGMA     | FRVPTPNVSVDLTCR         | N-ter +28.03 Da, C +57.02 Da              | 47.4       | 56.2              | 3      | 1887.11                      | 1.57                                         | 0.21                  | G3P_MOUSE    | G3PT_MOUSE   | Glyceraldheyde-3-phosphate dehydrogenase;             | Peptidyl-cysteine S-nitrosylase GAPDH;                                                                                                                                                              | 0.75 - 0.85 |
| QASDSEGHSD     | FSEQAQVAHHR             | N-ter +28.03 Da                           | 32.0       | 52.9              | 3      | 1185.65                      | 3.51                                         | 0.85                  | FILA_MOUSE   | F7BVV1_MOUSE | Flaggrin;                                             |                                                                                                                                                                                                     | 0.85 - 1.00 |
| VLRPPGGGSN     | FSLGFDEPAEQVVR          | N-ter +28.03 Da                           | 35.7       | 48.6              | 3      | 1618.88                      | 0.03                                         | 0.00                  | HN1_MOUSE    |              | Hematological and neurological expressed 1 protein;   |                                                                                                                                                                                                     | 0.25 - 0.75 |
| QLQDMGLIDL     | FSPEKSQLPGVAGGR         | N-ter +28.03 Da, K +28.03 Da              | 24.6       | 45.1              | 3      | 1698.02                      | 0.63                                         | 0.14                  | ANT3_MOUSE   |              | Antithrombin-III;                                     | Serpin C1;                                                                                                                                                                                          | 0.25 - 0.75 |
| MIASHMIACL     | FTELNQNVQVQVQYLYHMR     | N-ter +28.03 Da, K +28.03 Da              | 50.6       | 75.6              | 4      | 2609.50                      | 1.38                                         | 0.22                  | HKK2_MOUSE   |              | Hexokinase-2;                                         | Hexokinase type II;                                                                                                                                                                                 | 0.75 - 0.85 |
| VLLFDINFR      | FTQAGSEVALLGR           | N-ter +28.03 Da                           | 48.1       | 42.6              | 3      | 1462.84                      | 0.25                                         | 0.02                  | ATPB_MOUSE   |              | ATP synthase subunit beta, mitochondrial;             |                                                                                                                                                                                                     | 0.25 - 0.75 |
| PGAHUVKKI      | FVGGIKEDTEEHLR          | N-ter +34.06 Da, K +34.06 Da              | 23.8       | 66.0              | 4      | 1834.12                      | -2.64                                        | 0.83                  | ROA1_MOUSE   | ROA2_MOUSE   | Heterogeneous nuclear ribonucleoprotein A1;           |                                                                                                                                                                                                     | 0.00 - 0.15 |
| RYLSPKYIKM     | FVLDEADEMLR             | N-ter +28.03 Da                           | 50.7       | 51.6              | 3      | 1451.77                      | 0.61                                         | 0.12                  | IF4A2_MOUSE  | IF4A2_MOUSE  | Eukaryotic initiation factor 4A-I;                    | ATP-dependent RNA helicase eIF4A-1;                                                                                                                                                                 | 0.25 - 0.75 |
| RTSTASVPLN     | FVPLTNPKEVQEMR          | N-ter +28.03 Da, K +28.03 Da              | 30.1       | 46.0              | 3      | 1857.07                      | 0.04                                         | 0.01                  | ADDA_MOUSE   | ESQ1K3_MOUSE | Alpha-adducin;                                        | Erythrocyte adducin subunit alpha;                                                                                                                                                                  | 0.25 - 0.75 |
| LNTSFKHFIF     | FVQEFNLIDRR             | N-ter +28.03 Da                           | 22.8       | 52.9              | 3      | 1463.87                      | 0.74                                         | 0.12                  | MOL1A_MOUSE  | MOL1B_MOUSE  | MOB kinase activator 1B;                              | HDP-1;Helix-destabilizing protein;Single-strand-binding protein;Topoisomerase-inhibitor                                                                                                             | 0.25 - 0.75 |
| HRDDGLADLL     | FVSSGPTNASAFTR          | N-ter +28.03 Da                           | 40.2       | 48.7              | 3      | 1597.85                      | -0.92                                        | 0.10                  | MAP4_MOUSE   | E9QPW8_MOUSE | Microtubule-associated protein 4;                     | suppressed;hnRNP core protein A1;                                                                                                                                                                   | 0.15 - 0.25 |
| GMRSRGRGFQ     | FVSSSLPDICVR            | N-ter +28.03 Da, C +57.02 Da              | 24.2       | 59.4              | 3      | 1470.81                      | -0.38                                        | 0.02                  | CNBP_MOUSE   | D3YF6_MOUSE  | Cellular nucleic acid-binding protein;                | Zinc finger protein 9;                                                                                                                                                                              | 0.25 - 0.75 |
| NFDYHDHAFI     | GAEAKSFDQLTPESKER       | N-ter +28.03 Da, K +28.03 Da              | 27.7       | 61.1              | 4      | 2234.24                      | 0.65                                         | 0.09                  | CALL_MOUSE   | Q6XU8_MOUSE  | Calumenin;                                            | Crocalbin;                                                                                                                                                                                          | 0.25 - 0.75 |
| NNWAKGHYTE     | GAEVDSVLDVVR            | N-ter +28.03 Da                           | 34.1       | 46.4              | 3      | 1398.84                      | -0.74                                        | 0.16                  | TBB2C_MOUSE  | TBB2A_MOUSE  | Tubulin beta-4B chain;                                | Tubulin beta-2C chain;                                                                                                                                                                              | 0.25 - 0.75 |
| NPLKNSGIEH     | GAFQGLKLSYIR            | N-ter +28.03 Da, K +28.03 Da              | 28.0       | 47.2              | 3      | 1494.93                      | 0.12                                         | 0.00                  | PGS2_MOUSE   |              | Decorin;                                              | Bone proteoglycan II;PG-S2;PG40;                                                                                                                                                                    | 0.25 - 0.75 |
| LLRGPVVARA     | GAGAVGAGPVVR            | N-ter +28.03 Da                           | 51.8       | 33.4              | 2      | 1037.63                      | -1.36                                        | 0.14                  | Q6PE62_MOUSE |              |                                                       |                                                                                                                                                                                                     | 0.15 - 0.25 |
| MSVFGKLF       | GAGGGKAGKGGPTPQEIQR     | N-ter +28.03 Da, K +28.03 Da              | 33.5       | 49.9              | 4      | 1920.15                      | 2.33                                         | 0.66                  | CHM4B_MOUSE  |              | Charged multivesicular body protein 4b;               | Chromatin-modifying protein 4b;                                                                                                                                                                     | 0.85 - 1.00 |
| PPGADKAAEA     | GAGSATEFQFR             | N-ter +28.03 Da                           | 48.0       | 50.1              | 2      | 1197.64                      | -0.97                                        | 0.08                  | RS10_MOUSE   |              | 40S ribosomal protein S10;                            |                                                                                                                                                                                                     | 0.15 - 0.25 |
| ATPKQGRML      | GAPAEADANEEGVRR         | N-ter +34.06 Da                           | 31.5       | 52.3              | 3      | 1632.88                      | -2.74                                        | 0.73                  | CYT1_MOUSE   | A2APX3_MOUSE | Cystatin-C;                                           | Cystatin-3;                                                                                                                                                                                         | 0.00 - 0.15 |
| RVAGPQPAQT     | GAPQGLSEGLFGR           | N-ter +28.03 Da                           | 41.6       | 49.0              | 3      | 1550.85                      | 2.25                                         | 0.31                  | FRL1_MOUSE   | Q9CPX4_MOUSE | Ferritin light chain 1;                               | Ferritin L subunit 1;                                                                                                                                                                               | 0.25 - 0.75 |
| TISLQMGTKN     | GASQAQMLAPGTR           | N-ter +28.03 Da                           | 49.3       | 32.4              | 2      | 1243.68                      | 0.95                                         | 0.10                  | CNN3_MOUSE   |              | Calponin-3;                                           | Calponin, acidic isoform;                                                                                                                                                                           | 0.75 - 0.85 |
| GTGGVDAAV      | GAVFDISNADR             | N-ter +34.06 Da                           | 42.8       | 41.9              | 2      | 1197.67                      | -2.00                                        | 0.08                  | KCRM_MOUSE   |              | Creatine kinase M-type;                               | Creatine kinase M chain;M-CK;                                                                                                                                                                       | 0.00 - 0.15 |
| AYGRSPMVAF     | GAVGFDPHPHMR            | N-ter +28.03 Da                           | 30.2       | 54.8              | 3      | 1307.72                      | -0.30                                        | 0.02                  | TLF3_MOUSE   | Q3TY99_MOUSE | Transducin-like enhancer protein 3;                   |                                                                                                                                                                                                     | 0.25 - 0.75 |
| GKSGSAGVSK     | GAVSAEQVIAGFNR          | N-ter +28.03 Da                           | 39.6       | 49.3              | 3      | 1445.83                      | 0.33                                         | 0.02                  | PFDF_MOUSE   | F8WJ30_MOUSE | Prefoldin subunit 2;                                  |                                                                                                                                                                                                     | 0.25 - 0.75 |
| DYKSAHKGFK     | GAYDAQTGLSKIFKLGGR      | N-ter +34.06 Da, K +34.06 Da              | 23.1       | 75.1              | 4      | 1983.35                      | -2.12                                        | 0.55                  | F7A0B0_MOUSE | F6RT34_MOUSE |                                                       |                                                                                                                                                                                                     | 0.00 - 0.15 |
| SRKRELKEVF     | GDDSEISKSSGVKKR         | N-ter +28.03 Da, K +28.03 Da              | 23.3       | 69.4              | 4      | 1833.11                      | 1.78                                         | 0.54                  | PRP3_MOUSE   |              |                                                       | Pre-mRNA-splicing factor 3;                                                                                                                                                                         | 0.85 - 1.00 |
| RGARINVMNR     | GDDTPLHLAASHGHR         | N-ter +28.03 Da                           | 21.9       | 71.6              | 4      | 1610.91                      | -0.07                                        | 0.01                  | ILK_MOUSE    | D3YZAS_MOUSE | Integrin-linked protein kinase;                       |                                                                                                                                                                                                     | 0.25 - 0.75 |
| LASYAVQSKY     | GDFNKEVHKSGLAGDKLLPQR   | N-ter +34.06 Da, K +34.06 Da              | 41.1       | 64.5              | 4      | 2607.71                      | -4.06                                        | 0.68                  | MOES_MOUSE   |              | Moesin;                                               | Membrane-organizing extension spike protein;                                                                                                                                                        | 0.00 - 0.15 |
| CFSGMSDHRH     | GDGSSFSQSTTGHCVHMR      | N-ter +28.03 Da, C +57.02 Da              | 34.0       | 51.2              | 4      | 1947.93                      | 0.66                                         | 0.24                  | HNRH2_MOUSE  |              | Heterogeneous nuclear ribonucleoprotein H2;           | Heterogeneous nuclear ribonucleoprotein H';                                                                                                                                                         | 0.25 - 0.75 |
| CFSGMSDHRH     | GDGGSFTQSTTGHCVHMR      | N-ter +28.03 Da, C +57.02 Da              | 48.8       | 60.8              | 4      | 1961.97                      | 0.26                                         | 0.07                  | HNRH1_MOUSE  | Q8C2Q7_MOUSE | Heterogeneous nuclear ribonucleoprotein H;            |                                                                                                                                                                                                     | 0.25 - 0.75 |
| KSTTIKRRD      | GDKLVECVMKGVSTSR        | N-ter +28.03 Da, K +28.03 Da, C +57.02 Da | 32.8       | 52.3              | 4      | 1962.17                      | -0.86                                        | 0.08                  | FABP4_MOUSE  |              | Fatty acid-binding protein, adipocyte;                | 3T3-L1 lipid-binding protein;Adipocyte lipid-binding protein;Adipocyte-type fatty acid-binding protein;Fatty acid-binding protein 4;Myelin P2 protein homolog;P15;P2 adipocyte protein;Protein 422; | 0.15 - 0.25 |
| EDERKMLTGS     | GDPKEEEELVDPLTTR        | N-ter +34.06 Da, K +34.06 Da              | 43.9       | 47.0              | 3      | 2252.28                      | -0.20                                        | 0.04                  | QCR6_MOUSE   |              | Cytochrome b-c1 complex subunit 6, mitochondrial;     |                                                                                                                                                                                                     | 0.25 - 0.75 |
| PGVPVAGKGN     | GDRGETGPAGPAGPIGAPGAR   | N-ter +28.03 Da                           | 68.3       | 39.9              | 3      | 1888.03                      | -2.00                                        | 0.40                  | CO1A1_MOUSE  | F8WGB7_MOUSE | Collagen alpha-1(I) chain;                            | Alpha-1 type I collagen;                                                                                                                                                                            | 0.00 - 0.15 |
| LSSANPVRRM     | GDSASKVISAEALPR         | N-ter +28.03 Da, K +28.03 Da              | 66.1       | 45.4              | 3      | 1742.00                      | -0.30                                        | 0.03                  | MSRA_MOUSE   |              | Mitochondrial peptide methionine sulfoxide reductase; | Peptide-methionine (S)-S-oxide reductase;Protein-methionine-S-oxide reductase;                                                                                                                      | 0.25 - 0.75 |
| CLSGMYDRHY     | GDSEFTVQSTTGHCVHMR      | N-ter +28.03 Da, C +57.02 Da              | 40.0       | 61.8              | 4      | 2076.04                      | 1.04                                         | 0.37                  | HNRPF_MOUSE  |              | Heterogeneous nuclear ribonucleoprotein F;            |                                                                                                                                                                                                     | 0.75 - 0.85 |
| DNLNKGSKVK     | GDVDSIGPKLEGDIKVR       | N-ter +28.03 Da, K +28.03 Da              | 26.1       | 56.7              | 4      | 1978.22                      | -0.67                                        | 0.13                  | E9Q616_MOUSE |              |                                                       |                                                                                                                                                                                                     | 0.25 - 0.75 |
| SLTKYKTLI      | GDVPPVADPTVFNVTTR       | N-ter +28.03 Da                           | 57.1       | 46.6              | 3      | 1863.10                      | -0.49                                        | 0.13                  | GDIR2_MOUSE  |              | Rho GDP-dissociation inhibitor 2;                     | D4;Rho-GDI beta;                                                                                                                                                                                    | 0.25 - 0.75 |
| PGPAGASGDR     | GEAGAAGPSGAPGR          | N-ter +28.03 Da                           | 45.4       | 48.6              | 3      | 1278.69                      | 4.45                                         | 1.66                  | CO1A2_MOUSE  | E9Q6U9_MOUSE | Collagen alpha-2(I) chain;                            | Alpha-2 type I collagen;                                                                                                                                                                            | 0.85 - 1.00 |
| KEAFLFDTR      | GECKITLSQVGDVLR         | N-ter +34.06 Da, K +34.06 Da, C +57.02 Da | 48.4       | 31.3              | 3      | 1742.06                      | 0.77                                         | 0.10                  | MYL1_MOUSE   | E9PWG4_MOUSE | Myosin light chain 1/3, skeletal muscle isoform;      | Myosin light chain alkali 1/2;                                                                                                                                                                      | 0.25 - 0.75 |
| PPDAAVECHR     | GECDQSEGLVFFQGNR        | N-ter +28.03 Da, C +57.02 Da              | 44.1       | 44.2              | 3      | 1754.88                      | 1.49                                         | 0.20                  | HEMOM_MOUSE  |              | Hemopexin;                                            |                                                                                                                                                                                                     | 0.75 - 0.85 |
| PKPLPGRVAF     | GEDIDLPEPFDAR           | N-ter +28.03 Da                           | 30.8       | 51.0              | 3      | 1504.78                      | 0.32                                         | 0.03                  | CATB_MOUSE   |              | Cathepsin B;                                          | Cathepsin B1;                                                                                                                                                                                       | 0.25 - 0.75 |
| PDGRRRRRR      | GEEGHDPKEPEQLR          | N-ter +28.03 Da, K +28.03 Da              | 17.4       | 69.1              | 4      | 1675.93                      | -1.43                                        | 0.39                  | CATB_MOUSE   | A2AL12_MOUSE | Heterogeneous nuclear ribonucleoprotein A3;           |                                                                                                                                                                                                     | 0.15 - 0.25 |
| AGRFBVNLIC     | GEEQDAAALHFNPR          | N-ter +34.06 Da                           | 72.5       | 55.7              | 3      | 1644.90                      | 0.26                                         | 0.06                  | LEG7_MOUSE   | Q9CR81_MOUSE | Galectin-7;                                           |                                                                                                                                                                                                     | 0.25 - 0.75 |
| GGSGNSTGF      | GEHGSSHPLPSSGQNESSGQSSR | N-ter +34.06 Da                           | 17.6       | 55.3              | 4      | 2516.27                      | -2.64                                        | 0.99                  | FILA2_MOUSE  | EQPZ3_MOUSE  | Filaggrin-2;                                          | Intermediate filament-associated protein;                                                                                                                                                           | 0.00 - 0.15 |
| STECKRTRYS     | GEHMDLTTCPLAAGQOQEKLR   | N-ter +28.03 Da, K +28.03 Da, C +57.02 Da | 36.4       | 56.8              | 4      | 2367.30                      | 3.36                                         | 0.33                  | Q9D1B1_MOUSE |              |                                                       |                                                                                                                                                                                                     | 0.85 - 1.00 |
| DLNFKGPKLK     | GEIDASVPMEADLR          | N-ter +34.06 Da                           | 36.5       | 57.3              | 3      | 1664.91                      | -0.42                                        | 0.06                  | E9Q616_MOUSE |              |                                                       |                                                                                                                                                                                                     | 0.25 - 0.75 |
| EKIREYFGQF     | GEIEAIELPDPLKLNKR       | N-ter +34.06 Da, K +34.06 Da              | 23.2       | 41.6              | 4      | 2036.36                      | -3.64                                        | 0.91                  | ROAA_MOUSE   | Q8DXR6_MOUSE | Heterogeneous nuclear ribonucleoprotein A/B;          | CarG-binding factor-A;                                                                                                                                                                              | 0.00 - 0.15 |
| MSDN           | GELEDPPAPVPR            | N-ter +28.03 Da, K +28.03 Da              | 32.2       | 49.2              | 3      | 1459.88                      | 0.74                                         | 0.10                  | PAK2_MOUSE   |              | Serine/threonine-protein kinase PAK 2;                | Gamma-PAK;p21-activated kinase 2;                                                                                                                                                                   | 0.25 - 0.75 |
| ACGSVMTSNP     | GESSFDLADRLDPVEKIDR     | N-ter +34.06 Da, K +34.06 Da              | 34.4       | 65.5              | 4      | 2229.34                      | 0.19                                         | 0.05                  | SODE_MOUSE   |              | Extracellular superoxide dismutase [Cu-Zn];           |                                                                                                                                                                                                     | 0.25 - 0.75 |
| ACGSVMTSNP     | GESSFDLADR              | N-ter +28.03 Da                           | 47.5       | 44.1              | 2      | 1123.56                      | -0.71                                        | 0.05                  | SODE_MOUSE   |              | Extracellular superoxide dismutase [Cu-Zn];           |                                                                                                                                                                                                     | 0.25 - 0.75 |

Table S10, Tholen et al.

| Non Prime Site | Prime Site                | Modifications                             | Hyperscore | Mass error in ppm | Charge | Precursor neutral mass in Da | Fold change (log <sub>2</sub> ) of ASAPRatio | FC-error of ASAPRatio | Uniprot ID 1 | Uniprot ID 2 | Protein Name 1                                                                                             | Protein Name 2                                                                                                                                                                                                              | Quantile    |
|----------------|---------------------------|-------------------------------------------|------------|-------------------|--------|------------------------------|----------------------------------------------|-----------------------|--------------|--------------|------------------------------------------------------------------------------------------------------------|-----------------------------------------------------------------------------------------------------------------------------------------------------------------------------------------------------------------------------|-------------|
| DCTKVKYRC      | GETGHVAINCKTSEVNCYR       | N-ter +28.03 Da, K +28.03 Da, C +57.02 Da | 54.4       | 64.2              | 4      | 2337.23                      | 0.35                                         | 0.15                  | CNBP_MOUSE   |              | Cellular nucleic acid-binding protein;                                                                     | Zinc finger protein 9;                                                                                                                                                                                                      | 0.25 - 0.75 |
| VGPAGKNGDR     | GETGPAGPAGPIGAPGAR        | N-ter +28.03 Da                           | 63.7       | 42.2              | 3      | 1559.87                      | 1.76                                         | 0.26                  | CO1A1_MOUSE  | F8WGB7_MOUSE | Collagen alpha-1(I) chain;                                                                                 | Alpha-1 type I collagen;                                                                                                                                                                                                    | 0.85 - 1.00 |
| NVVKTGRVML     | GETNPADSKPGTIR            | N-ter +28.03 Da, K +28.03 Da              | 38.1       | 52.8              | 3      | 1497.86                      | 0.37                                         | 0.11                  | NDKA_MOUSE   | NDK8_MOUSE   | Nucleoside diphosphate kinase A;                                                                           | Tumor metastatic process-associated protein;nm23-M1;                                                                                                                                                                        | 0.25 - 0.75 |
| KGVVPLAGTN     | GETTQGLDGLSER             | N-ter +28.03 Da                           | 37.8       | 42.1              | 3      | 1490.78                      | -0.97                                        | 0.17                  | ALDOA_MOUSE  | Q9CPQ9_MOUSE | Fructose-bisphosphate aldolase A;                                                                          | Aldolase 1;Muscle-type aldolase;                                                                                                                                                                                            | 0.15 - 0.25 |
| KDLKDYFTKF     | GEVVDCTIKMDPNTGR          | N-ter +34.06 Da, K +34.06 Da, C +57.02 Da | 29.3       | 52.3              | 3      | 1859.05                      | -1.94                                        | 0.37                  | ROAA_MOUSE   | Q80XR6_MOUSE | Heterogeneous nuclear ribonucleoprotein A/B;                                                               | CarG-binding factor-A;                                                                                                                                                                                                      | 0.00 - 0.15 |
| KDLTEVLSRF     | GEVVDCTIKDPVTGR           | N-ter +34.06 Da, K +34.06 Da, C +57.02 Da | 37.1       | 39.3              | 3      | 1814.06                      | -2.32                                        | 0.46                  | HNRDL_MOUSE  | F6VQH5_MOUSE | Heterogeneous nuclear ribonucleoprotein D-like;                                                            | JKT41-binding protein;                                                                                                                                                                                                      | 0.00 - 0.15 |
| KDLKDYFSKF     | GEVVDCTIKLDPITGR          | N-ter +34.06 Da, K +34.06 Da, C +57.02 Da | 41.5       | 43.9              | 3      | 1840.12                      | -1.64                                        | 0.15                  | HNRPD_MOUSE  | E9Q5B6_MOUSE | Heterogeneous nuclear ribonucleoprotein D0;                                                                | AU-rich element RNA-binding protein 1;                                                                                                                                                                                      | 0.00 - 0.15 |
| LIKVDNKKL      | GEWVGLCKIDR               | N-ter +28.03 Da, K +28.03 Da, C +57.02 Da | 31.1       | 64.9              | 3      | 1387.82                      | 1.90                                         | 0.31                  | RS12_MOUSE   | D3Z6B6_MOUSE | 40S ribosomal protein S12;                                                                                 |                                                                                                                                                                                                                             | 0.85 - 1.00 |
| KHCSQVDSVR     | GFGKGFVQMDR               | N-ter +28.03 Da, K +28.03 Da              | 26.6       | 50.4              | 3      | 1353.76                      | 0.04                                         | 0.01                  | SRC8_MOUSE   | Q921L6_MOUSE | Src substrate cactin;                                                                                      |                                                                                                                                                                                                                             | 0.25 - 0.75 |
| CDLYEKLGEY     | GFQNALIVR                 | N-ter +28.03 Da                           | 39.9       | 31.0              | 2      | 1044.64                      | -2.00                                        | 0.24                  | ALBU_MOUSE   |              | Serum albumin;                                                                                             |                                                                                                                                                                                                                             | 0.00 - 0.15 |
| DPGYPRNISE     | GFSGIPDNVDAAFALPAHR       | N-ter +34.06 Da                           | 24.2       | 91.8              | 4      | 1988.22                      | -6.64                                        | 0.00                  | VTNC_MOUSE   |              | Vitronectin;                                                                                               | S-protein;Serum-spreading factor;                                                                                                                                                                                           | 0.00 - 0.15 |
| KEEFEKNKKG     | GFSVVAADTPELQR            | N-ter +28.03 Da                           | 25.7       | 50.5              | 3      | 1445.82                      | 0.88                                         | 0.10                  | LASP1_MOUSE  | A2A6G6_MOUSE | LIM and SH3 domain protein 1;                                                                              | Metastatic lymph node gene 50 protein;                                                                                                                                                                                      | 0.25 - 0.75 |
| KVLEVPALSL     | GGAISGAHLKEASGELR         | N-ter +28.03 Da, K +28.03 Da              | 24.5       | 61.4              | 4      | 1837.08                      | -1.25                                        | 0.12                  | SYNEM_MOUSE  | F6VN34_MOUSE | Synemin;                                                                                                   | Desmuslin;                                                                                                                                                                                                                  | 0.15 - 0.25 |
| KTDLNDPNLQ     | GGDDLDPNVYLSR             | N-ter +34.06 Da                           | 40.8       | 49.2              | 3      | 1540.83                      | -1.64                                        | 0.10                  | KCRM_MOUSE   | KCRB_MOUSE   | Creatine kinase M-type;                                                                                    | Creatine kinase M chain;M-CK;                                                                                                                                                                                               | 0.00 - 0.15 |
| GGNFGFGDSR     | GGGGNFGPGGPNFR            | N-ter +28.03 Da                           | 47.7       | 69.3              | 3      | 1404.75                      | -0.79                                        | 0.08                  | ROA2_MOUSE   | F6U106_MOUSE | Heterogeneous nuclear ribonucleoproteins A2/B1;                                                            |                                                                                                                                                                                                                             | 0.25 - 0.75 |
| MN             | GGGKAKEKTPSEANLQEEVVR     | N-ter +28.03 Da, K +28.03 Da              | 42.2       | 67.5              | 4      | 2455.38                      | 2.26                                         | 0.60                  | RBPMS_MOUSE  | Q9CPUS_MOUSE | RNA-binding protein with multiple splicing;                                                                | Heart and RRM expressed sequence;                                                                                                                                                                                           | 0.85 - 1.00 |
| SNKAAWGGKI     | GGHGAEYGAELER             | N-ter +34.06 Da                           | 56.9       | 52.5              | 3      | 1449.78                      | -1.74                                        | 0.17                  | HBA_MOUSE    | Q91V88_MOUSE | Hemoglobin subunit alpha;                                                                                  | Alpha-globin;Hemoglobin alpha chain;                                                                                                                                                                                        | 0.00 - 0.15 |
| AHLIVKIFV      | GGIKEDTEEHLR              | N-ter +34.06 Da, K +34.06 Da              | 19.4       | 68.7              | 4      | 1587.97                      | -0.58                                        | 0.15                  | ROA1_MOUSE   | ROA2_MOUSE   | Heterogeneous nuclear ribonucleoprotein A1;                                                                | HDP-1;Helix-destabilizing protein;Single-strand-binding protein;Topoisomerase-inhibitor suppressed;hnRNP core protein A1;                                                                                                   | 0.25 - 0.75 |
| VQMGAVDLLG     | GGDLSLIGDSNFGAPASVAAPAPAR | N-ter +28.03 Da                           | 60.8       | 36.0              | 3      | 2496.35                      | 0.14                                         | 0.05                  | AP1B1_MOUSE  | Q5SVG5_MOUSE | AP-1 complex subunit beta-1;                                                                               | Adapter-related protein complex 1 subunit beta-1;Adaptor protein complex AP-1 subunit beta-1;Beta-1-adaptin;Beta-adaptin 1;Clathrin assembly protein complex 1 beta large chain;Golgi adaptor HA1/AP1 adaptin beta subunit; | 0.25 - 0.75 |
| GGGTAMRIL      | GGVISAIEAAQYNPEPPPPR      | N-ter +28.03 Da                           | 52.7       | 51.4              | 4      | 2248.26                      | 1.51                                         | 0.13                  | CPNS1_MOUSE  | D3YW48_MOUSE | Calpain small subunit 1;                                                                                   | Calcium-activated neutral proteinase small subunit;Calcium-dependent protease small subunit;Calcium-dependent protease small subunit 1;Calpain regulatory subunit;                                                          | 0.75 - 0.85 |
| PQQQMTSSY      | GGYKEPAAPVSIQR            | N-ter +28.03 Da, K +28.03 Da              | 55.3       | 42.3              | 3      | 1527.91                      | 0.81                                         | 0.22                  | LASP1_MOUSE  | A2A6H0_MOUSE | LIM and SH3 domain protein 1;                                                                              | Metastatic lymph node gene 50 protein;                                                                                                                                                                                      | 0.25 - 0.75 |
| TFGLGSKSK      | GHYEVTGSDEAGLQGGVSLASKKSR | N-ter +28.03 Da, K +28.03 Da              | 48.4       | 57.9              | 4      | 2974.71                      | 0.83                                         | 0.37                  | E9Q1H8_MOUSE | E9Q616_MOUSE |                                                                                                            |                                                                                                                                                                                                                             | 0.25 - 0.75 |
| PLAKLAAEK      | GIDLTVKGTGPEGR            | N-ter +28.03 Da, K +28.03 Da              | 23.4       | 47.0              | 3      | 1582.94                      | 0.72                                         | 0.08                  | ODP2_MOUSE   |              | Dihydrodipolyllysine-residue acetyltransferase component of pyruvate dehydrogenase complex, mitochondrial; | Dihydrodipolamide acetyltransferase component of pyruvate dehydrogenase complex;Pyruvate dehydrogenase complex component E2;                                                                                                | 0.25 - 0.75 |
| IAHRIVAPGK     | GILAADSTGSIAKR            | N-ter +34.06 Da, K +34.06 Da              | 41.3       | 41.8              | 3      | 1555.99                      | -0.17                                        | 0.02                  | ALDOA_MOUSE  | A6ZI44_MOUSE | Fructose-bisphosphate aldolase A;                                                                          | Aldolase 1;Muscle-type aldolase;                                                                                                                                                                                            | 0.25 - 0.75 |
| NIKRNDFQLI     | GIQDGYLSLLQDSGEVR         | N-ter +28.03 Da                           | 54.2       | 48.9              | 3      | 1877.04                      | -0.18                                        | 0.07                  | IF5A1_MOUSE  |              | Eukaryotic translation initiation factor 5A-1;                                                             | Eukaryotic initiation factor 5A isoform 1;eIF-4D;                                                                                                                                                                           | 0.25 - 0.75 |
| LSVPCILGQN     | GISDVKVLTPEEAR            | N-ter +34.06 Da, K +34.06 Da              | 60.8       | 44.0              | 3      | 1910.18                      | -0.84                                        | 0.11                  | LDHA_MOUSE   |              | L-lactate dehydrogenase A chain;                                                                           | LDH muscle subunit;                                                                                                                                                                                                         | 0.15 - 0.25 |
| MD             | GIVPDIAGVTKR              | N-ter +28.03 Da, K +28.03 Da              | 42.9       | 51.0              | 3      | 1280.85                      | 1.35                                         | 0.16                  | PTBP1_MOUSE  | Q922I7_MOUSE | Poly(pyrimidine tract-binding protein 1);                                                                  | Heterogeneous nuclear ribonucleoprotein I;                                                                                                                                                                                  | 0.75 - 0.85 |
| ARYASICQQN     | GIVRIVEPELPGDHDHLKR       | N-ter +34.06 Da, K +34.06 Da              | 47.9       | 54.3              | 4      | 2279.44                      | -0.79                                        | 0.16                  | ALDOA_MOUSE  | ALDOC_MOUSE  | Fructose-bisphosphate aldolase A;                                                                          | Aldolase 1;Muscle-type aldolase;                                                                                                                                                                                            | 0.25 - 0.75 |
| EKLKRRKEEF     | GIVTSSAGTGTEDTEAKKR       | N-ter +28.03 Da, K +28.03 Da              | 40.8       | 59.6              | 4      | 2092.23                      | -1.00                                        | 0.28                  | SARNP_MOUSE  |              | SAP domain-containing ribonucleoprotein;                                                                   | Nuclear protein Hcc-1;                                                                                                                                                                                                      | 0.15 - 0.25 |
| TVLSRAIAEL     | GIVPAVDPLDTSR             | N-ter +28.03 Da                           | 41.0       | 45.6              | 3      | 1517.84                      | 0.97                                         | 0.11                  | ATPB_MOUSE   |              | ATP synthase subunit beta, mitochondrial;                                                                  |                                                                                                                                                                                                                             | 0.75 - 0.85 |
| SFYQDHEAFL     | GKEDSKTFDQLSPDESKER       | N-ter +28.03 Da, K +28.03 Da              | 30.8       | 63.2              | 4      | 2307.31                      | -0.18                                        | 0.04                  | RCN1_MOUSE   |              | Reticulocalbin-1;                                                                                          |                                                                                                                                                                                                                             | 0.25 - 0.75 |
| RWKTMSAKEK     | GKFEDMAKADKAR             | N-ter +28.03 Da, K +28.03 Da              | 25.4       | 70.0              | 4      | 1577.97                      | 1.04                                         | 0.21                  | HMG81_MOUSE  | D3YVC6_MOUSE | High mobility group protein B1;                                                                            | High mobility group protein 1;                                                                                                                                                                                              | 0.75 - 0.85 |
| HHLRDYFEY      | GKIDTIEIHDR               | N-ter +28.03 Da, K +28.03 Da              | 34.4       | 50.4              | 3      | 1428.89                      | -1.60                                        | 0.19                  | ROA2_MOUSE   | F6U106_MOUSE | Heterogeneous nuclear ribonucleoproteins A2/B1;                                                            |                                                                                                                                                                                                                             | 0.00 - 0.15 |
| YNLRDYFEKY     | GKIEFIEVMEDR              | N-ter +28.03 Da, K +28.03 Da              | 37.6       | 50.5              | 3      | 1474.84                      | -1.36                                        | 0.14                  | ROA3_MOUSE   | A2AL12_MOUSE | Heterogeneous nuclear ribonucleoprotein A3;                                                                |                                                                                                                                                                                                                             | 0.15 - 0.25 |
| EDKSNIAKAW     | GKIGGHGAYGAELER           | N-ter +34.06 Da, K +34.06 Da              | 27.4       | 55.9              | 4      | 1782.07                      | -3.18                                        | 0.58                  | HBA_MOUSE    | Q91V88_MOUSE | Hemoglobin subunit alpha;                                                                                  | Alpha-globin;Hemoglobin alpha chain;                                                                                                                                                                                        | 0.00 - 0.15 |
| KAENGLVIN      | GKPIPIFQER                | N-ter +34.06 Da, K +34.06 Da              | 29.6       | 46.1              | 3      | 1255.85                      | -1.79                                        | 0.19                  | G3P_MOUSE    | F8WJL5_MOUSE | Glyceraldehyde-3-phosphate dehydrogenase;                                                                  | Peptidyl-cysteine S-nitrosylase GAPDH;                                                                                                                                                                                      | 0.00 - 0.15 |
| SWLDGKHVVF     | GKVLGMDVVR                | N-ter +34.06 Da, K +34.06 Da              | 34.8       | 50.4              | 3      | 1269.84                      | -0.94                                        | 0.05                  | PPIB_MOUSE   |              | Peptidyl-prolyl cis-trans isomerase B;                                                                     | CYP-51;Cyclophilin B;Rotamase B;5-cyclophilin;                                                                                                                                                                              | 0.15 - 0.25 |
| QDKRKQISVR     | GLAGVENVSELKKNFNR         | N-ter +28.03 Da, K +28.03 Da              | 37.3       | 61.3              | 4      | 1958.21                      | -2.47                                        | 0.28                  | PYGM_MOUSE   | E9PUM3_MOUSE | Glycogen phosphorylase, muscle form;                                                                       | Myophosphorylase;                                                                                                                                                                                                           | 0.00 - 0.15 |
| FSKYLALNGR     | GLDVKQAFNPEGEFQR          | N-ter +28.03 Da, K +28.03 Da              | 34.7       | 51.9              | 3      | 1890.06                      | -1.22                                        | 0.17                  | MYOTI_MOUSE  |              | Myotilin;                                                                                                  | Myofibrillar titin-like Ig domains protein;Titin immunoglobulin domain protein;                                                                                                                                             | 0.15 - 0.25 |
| KTFSEHLSDF     | GLESTTGEVPPVAIR           | N-ter +28.03 Da                           | 42.7       | 42.3              | 3      | 1554.93                      | -0.81                                        | 0.07                  | PDIA3_MOUSE  |              | Protein disulfide-isomerase A3;                                                                            | 58 kDa glucose-regulated protein;58 kDa microsomal protein;Disulfide isomerase ER-60;Endoplasmic reticulum resident protein 57;Endoplasmic reticulum resident protein 60;                                                   | 0.15 - 0.25 |

Table S10, Tholen et al.

| Non Prime Site | Prime Site                  | Modifications                             | Hyperscore | Mass error in ppm | Charge | Precursor neutral mass in Da | Fold change (log <sub>2</sub> ) of ASAPRatio | FC-error of ASAPRatio | Uniprot ID 1 | Uniprot ID 2 | Protein Name 1                                                                                              | Protein Name 2                                                                                                                                                                   | Quantile    |
|----------------|-----------------------------|-------------------------------------------|------------|-------------------|--------|------------------------------|----------------------------------------------|-----------------------|--------------|--------------|-------------------------------------------------------------------------------------------------------------|----------------------------------------------------------------------------------------------------------------------------------------------------------------------------------|-------------|
| PWINTPKKQG     | GLGPMNIPUSDPKR              | N-ter +28.03 Da, K +28.03 Da              | 39.7       | 58.0              | 3      | 1663.05                      | -0.30                                        | 0.06                  | PRDX1_MOUSE  | B1AXW6_MOUSE | Peroxiredoxin-1;                                                                                            | Macrophage 23 kDa stress protein;Osteoblast-specific factor 3;Thioredoxin peroxidase 2;                                                                                          | 0.25 - 0.75 |
| MFGGLSSWL      | GLKPPGAAAEIEEPPSR           | N-ter +28.03 Da, K +28.03 Da              | 49.7       | 46.4              | 3      | 1847.03                      | 1.46                                         | 0.24                  | SYAP1_MOUSE  |              | Synapse-associated protein 1;                                                                               | Thioredoxin-dependent peroxide reductase 2;                                                                                                                                      | 0.75 - 0.85 |
| YLECSALTQR     | GLKTVFDEAIR                 | N-ter +28.03 Da, K +28.03 Da              | 34.5       | 55.1              | 3      | 1303.82                      | -0.04                                        | 0.01                  | RAC1_MOUSE   | RAC2_MOUSE   | Ras-related G3 botulinum toxin substrate 1;                                                                 | p21-Rac1;                                                                                                                                                                        | 0.25 - 0.75 |
| M              | GLLSQGSPLSWEETQR            | N-ter +28.03 Da                           | 44.6       | 47.2              | 3      | 1815.00                      | -0.03                                        | 0.00                  | GS11_MOUSE   |              | Glutamate-cysteine ligase catalytic subunit;                                                                | GCS heavy chain;Gamma-ECS;Gamma-glutamylcysteine synthetase;                                                                                                                     | 0.25 - 0.75 |
| QPRGSLRSVR     | GLSAPSCPLDDKTEASAR          | N-ter +28.03 Da, K +28.03 Da, C +57.02 Da | 41.3       | 41.1              | 3      | 1987.05                      | 3.29                                         | 0.70                  | PLIN1_MOUSE  |              | Perilipin-1;                                                                                                | Lipid droplet-associated protein;Perilipin A;                                                                                                                                    | 0.85 - 1.00 |
| LSLPCILNAR     | GLTSVINQKDKDEVAQLR          | N-ter +28.03 Da, K +28.03 Da              | 26.6       | 51.8              | 4      | 2210.38                      | 0.66                                         | 0.09                  | LDHB_MOUSE   |              | L-lactate dehydrogenase B chain;                                                                            | LDH heart subunit;                                                                                                                                                               | 0.25 - 0.75 |
| KAGYTDQVVI     | GMDVAASEFYR                 | N-ter +34.06 Da                           | 49.1       | 43.3              | 2      | 1278.67                      | -4.64                                        | 1.16                  | ENO1_MOUSE   | ENO2_MOUSE   | Alpha-enolase;                                                                                              | 2-phospho-D-glycerate hydro-lyase;Enolase 1;Non-neural enolase;                                                                                                                  | 0.00 - 0.15 |
| RAVHVWYVGE     | GMEEGEFSEAR                 | N-ter +28.03 Da                           | 38.1       | 33.8              | 2      | 1268.58                      | 0.42                                         | 0.09                  | TBA1A_MOUSE  | TBA1B_MOUSE  | Tubulin alpha-1A chain;                                                                                     | Alpha-tubulin 1;Alpha-tubulin isotype M-alpha-1;Tubulin alpha-1 chain;                                                                                                           | 0.25 - 0.75 |
| PETLFQPSFI     | GMESAGIHETTYNSIMKCDIDIR     | N-ter +28.03 Da, K +28.03 Da, C +57.02 Da | 39.9       | 69.9              | 4      | 2696.45                      | 4.60                                         | 1.55                  | ACT5_MOUSE   | ACTA_MOUSE   | Actin, alpha skeletal muscle;                                                                               | Alpha-actin-1;                                                                                                                                                                   | 0.85 - 1.00 |
| GRPRHQVMVM     | GMGQKDSYVGEAQSQR            | N-ter +34.06 Da, K +34.06 Da              | 37.7       | 55.4              | 4      | 1957.15                      | 1.01                                         | 0.32                  | ACT5_MOUSE   | ACTA_MOUSE   | Actin, alpha skeletal muscle;                                                                               | Alpha-actin-1;                                                                                                                                                                   | 0.75 - 0.85 |
| ANRIVLDFRR     | GNDVAFHFNPR                 | N-ter +28.03 Da                           | 37.7       | 81.2              | 3      | 1300.74                      | 0.51                                         | 0.10                  | LEG3_MOUSE   | Q8C253_MOUSE | Galectin-3;                                                                                                 | 35 kDa lectin;Carbohydrate-binding protein 35;Galactose-specific lectin 3;IgE-binding protein;L-34 galactoside-binding lectin;Laminin-binding protein;Lectin L-29;Mac-2 antigen; | 0.25 - 0.75 |
| IFAREILDSR     | GNPTVEVDLHTAKGR             | N-ter +28.03 Da, K +28.03 Da              | 27.2       | 60.4              | 4      | 1648.99                      | 0.06                                         | 0.01                  | ENO2_MOUSE   | Q5SX59_MOUSE | Beta-enolase;                                                                                               | 2-phospho-D-glycerate hydro-lyase;Enolase 3;Muscle-specific enolase;Skeletal muscle enolase;                                                                                     | 0.25 - 0.75 |
| LAGLVFVSEA     | GPAGAGESKCLPMVKLVDAVR       | N-ter +28.03 Da, K +28.03 Da, C +57.02 Da | 25.1       | 53.0              | 4      | 2256.44                      | 0.38                                         | 0.02                  | TTHY_MOUSE   |              | Transthyretin;                                                                                              | Prealbumin;                                                                                                                                                                      | 0.25 - 0.75 |
| IGIPGRPGPQ     | GPPGAGEKGLPGEKGPQGPAGR      | N-ter +28.03 Da, K +28.03 Da              | 30.2       | 35.1              | 3      | 2194.26                      | 1.31                                         | 0.19                  | COSA1_MOUSE  |              | Collagen alpha-1(V) chain;                                                                                  |                                                                                                                                                                                  | 0.75 - 0.85 |
| NPGIGTQGR      | GPPGAPGSPGSRPGSPGPPGSPGR    | N-ter +34.06 Da                           | 25.3       | 60.7              | 4      | 2339.32                      | -3.06                                        | 0.51                  | COE1_MOUSE   | B7ZNH7_MOUSE | Collagen alpha-1(XIV) chain;                                                                                |                                                                                                                                                                                  | 0.00 - 0.15 |
| QDHPSSMGVY     | GQESGGFSGPGENR              | N-ter +34.06 Da                           | 33.4       | 48.5              | 3      | 1411.72                      | -2.47                                        | 0.28                  | EWS_MOUSE    | Q5SU8_MOUSE  | RNA-binding protein EWS;                                                                                    |                                                                                                                                                                                  | 0.00 - 0.15 |
| ATEEKIREVF     | GQFGEIEAELPIDKLNKR          | N-ter +34.06 Da, K +34.06 Da              | 42.7       | 56.9              | 4      | 2368.56                      | -1.94                                        | 0.45                  | ROAA_MOUSE   | Q8XR6_MOUSE  | Heterogeneous nuclear ribonucleoprotein A/B;                                                                | CarG-binding factor-A;                                                                                                                                                           | 0.00 - 0.15 |
| PRHQVMVMGM     | GQKDSYVGEAQSQR              | N-ter +28.03 Da, K +28.03 Da              | 23.4       | 62.7              | 4      | 1750.99                      | -0.79                                        | 0.20                  | ACT5_MOUSE   | ACTA_MOUSE   | Actin, alpha skeletal muscle;                                                                               | Alpha-actin-1;                                                                                                                                                                   | 0.25 - 0.75 |
| AMDGTGLVLR     | GQKVLDSGAPIKVPGETLGR        | N-ter +28.03 Da, K +28.03 Da              | 54.7       | 63.0              | 4      | 2315.50                      | -1.12                                        | 0.20                  | ATP8_MOUSE   |              | ATP synthase subunit beta, mitochondrial;                                                                   |                                                                                                                                                                                  | 0.15 - 0.25 |
| MYIFVHWQF      | GLLDQHPIDGYSHTLAPLR         | N-ter +28.03 Da                           | 48.7       | 66.7              | 4      | 2387.38                      | 0.75                                         | 0.20                  | SPRC_MOUSE   | Q5NCU4_MOUSE | SPARC;                                                                                                      | Basement-membrane protein 40;Osteonectin;Secreted protein acidic and rich in cysteine;                                                                                           | 0.25 - 0.75 |
| ARGDLGPF5R     | GQMQRPFEDASALR              | N-ter +28.03 Da, K +28.03 Da              | 42.7       | 49.1              | 3      | 1779.99                      | -0.22                                        | 0.12                  | PIN1_MOUSE   |              | Peptidyl-prolyl cis-trans isomerase NIMA-interacting 1;                                                     | Peptidyl-prolyl cis-trans isomerase Pin1;                                                                                                                                        | 0.25 - 0.75 |
| GGTDIISCFM     | GQNSIPVVKGEIQAR             | N-ter +28.03 Da, K +28.03 Da              | 32.2       | 43.4              | 3      | 1802.05                      | 0.41                                         | 0.08                  | AACS_MOUSE   |              | Acetoacetyl-CoA synthetase;                                                                                 |                                                                                                                                                                                  | 0.25 - 0.75 |
| FQLRSICYLL     | GQPEPLAPGTTLPADR            | N-ter +28.03 Da                           | 42.2       | 37.8              | 3      | 1743.98                      | 0.52                                         | 0.05                  | RN123_MOUSE  | Q05CH9_MOUSE | E3 ubiquitin-protein ligase RN123;                                                                          | Kip1 ubiquitination-promoting complex protein 1;RING finger protein 123;                                                                                                         | 0.25 - 0.75 |
| VSKQSRITN      | GQPQQTGAASGGYIKR            | N-ter +28.03 Da, K +28.03 Da              | 36.6       | 49.7              | 3      | 1775.02                      | 0.16                                         | 0.02                  | SNP23_MOUSE  | Q9D3L3_MOUSE | Synaptosomal-associated protein 23;                                                                         | Syndet;Vesicle-membrane fusion protein SNAP-23;                                                                                                                                  | 0.25 - 0.75 |
| HSLRTAAVLQ     | GQVVQFKLSDIGEGIR            | N-ter +28.03 Da, K +28.03 Da              | 39.2       | 37.4              | 3      | 1801.08                      | 0.91                                         | 0.13                  | ODB2_MOUSE   |              | Lipoamide acyltransferase component of branched-chain alpha-keto acid dehydrogenase complex, mitochondrial; | Regulator of ubiquitous kinase;SH3-containing, expressed in tumorigenic astrocytes;                                                                                              | 0.25 - 0.75 |
| EGPVGLGID      | GRPGIGPAGPR                 | N-ter +34.06 Da                           | 33.4       | 47.3              | 3      | 1164.75                      | -2.47                                        | 0.41                  | CO1A2_MOUSE  | E9Q6U9_MOUSE | Collagen alpha-2(I) chain;                                                                                  | Alpha-cardiac actin;                                                                                                                                                             | 0.00 - 0.15 |
| RGDSPKIDLA     | GSALSGLDKLDSLR              | N-ter +34.06 Da, K +34.06 Da              | 29.5       | 57.8              | 3      | 1614.02                      | 0.21                                         | 0.04                  | SH3K1_MOUSE  | B0R0Y8_MOUSE | SH3 domain-containing kinase-binding protein 1;                                                             |                                                                                                                                                                                  | 0.25 - 0.75 |
| YREVAFAQF      | GSDLDAATQQLSLR              | N-ter +28.03 Da                           | 43.6       | 48.5              | 3      | 1501.85                      | -0.58                                        | 0.07                  | ATPA_MOUSE   | D3Z6F5_MOUSE | ATP synthase subunit alpha, mitochondrial;                                                                  |                                                                                                                                                                                  | 0.25 - 0.75 |
| AQAAVASHNM     | GSDSLYYFR                   | N-ter +28.03 Da                           | 33.1       | 50.1              | 2      | 1134.59                      | -1.43                                        | 0.16                  | Q9D1B1_MOUSE |              |                                                                                                             |                                                                                                                                                                                  | 0.15 - 0.25 |
| DYSQQGHVSS     | GSEVTCQCCDLCNER             | N-ter +28.03 Da, C +57.02 Da              | 46.8       | 55.3              | 3      | 1983.92                      | 2.36                                         | 0.81                  | LY6D_MOUSE   |              | Lymphocyte antigen 6D;                                                                                      | Thymocyte B-cell antigen;                                                                                                                                                        | 0.85 - 1.00 |
| EETALVCDN      | GSGLVKAGFAGDDAPR            | N-ter +28.03 Da, K +28.03 Da              | 50.7       | 47.0              | 3      | 1572.90                      | -0.12                                        | 0.03                  | ACTC_MOUSE   | ACTS_MOUSE   | Actin, alpha cardiac muscle 1;                                                                              | Alpha-cardiac actin;                                                                                                                                                             | 0.25 - 0.75 |
| HPTSPRRPPG     | GSIIITVPKEIR                | N-ter +28.03 Da, K +28.03 Da              | 52.1       | 37.4              | 3      | 1430.90                      | 0.86                                         | 0.10                  | MAZ2_MOUSE   |              | Epididymis-specific alpha-mannosidase;                                                                      | Mannosidase alpha class 2B member 2;                                                                                                                                             | 0.25 - 0.75 |
| GGRPAMEPGN     | GSLDLGDAAGR                 | N-ter +28.03 Da                           | 59.7       | 47.6              | 2      | 1115.61                      | 2.65                                         | 0.18                  | HNRPU_MOUSE  |              | Heterogeneous nuclear ribonucleoprotein U;                                                                  | Scaffold attachment factor A;                                                                                                                                                    | 0.85 - 1.00 |
| DYLGRAGSPR     | GSPLAEGPQAFFPER             | N-ter +28.03 Da                           | 34.0       | 52.9              | 3      | 1629.90                      | -2.00                                        | 0.24                  | IASRP_MOUSE  |              | RelA-associated inhibitor;                                                                                  | Inhibitor of ASPP protein;Nf-kB-interacting protein 1;PPP1R13B-like protein;                                                                                                     | 0.00 - 0.15 |
| M              | GSSQSVEIPGGTEGYHVL          | N-ter +28.03 Da                           | 59.7       | 44.8              | 3      | 2057.11                      | 0.12                                         | 0.02                  | GORS2_MOUSE  | A2AT8_MOUSE  | Golgi reassembly-stacking protein 2;                                                                        | Golgi reassembly-stacking protein of 55 kDa;                                                                                                                                     | 0.25 - 0.75 |
| GQSSSANRRA     | GSSSGSGVQASAGGLAADASR       | N-ter +28.03 Da                           | 79.3       | 40.0              | 3      | 1876.96                      | 1.11                                         | 0.16                  | FILA_MOUSE   | F7BVV1_MOUSE | Filaggrin;                                                                                                  |                                                                                                                                                                                  | 0.75 - 0.85 |
| EFLRELSFGR     | GSTAPVGGSGFPITTPR           | N-ter +28.03 Da                           | 39.9       | 48.0              | 3      | 1628.93                      | 0.14                                         | 0.01                  | PDI6_MOUSE   | Q3TML0_MOUSE | Protein disulfide-isomerase A6;                                                                             | Thioredoxin domain-containing protein 7;                                                                                                                                         | 0.25 - 0.75 |
| HGPPMDQYL      | GSTPVGSGVYR                 | N-ter +28.03 Da                           | 39.3       | 40.2              | 2      | 1106.62                      | 0.25                                         | 0.02                  | SF01_MOUSE   | Q3UI45_MOUSE | Splicing factor 1;                                                                                          | CW17;Mammalian branch point-binding protein;Transcription factor ZFM1;Zinc finger gene in MEN1 locus;Zinc finger protein 162;                                                    | 0.25 - 0.75 |
| VRNIKSMWEK     | GVSFASAPASGTPNKETAGLKVGVSSR | N-ter +28.03 Da, K +28.03 Da              | 54.9       | 57.8              | 4      | 2674.58                      | 2.08                                         | 0.61                  | Q8VCQ8_MOUSE | E9Q0M9_MOUSE |                                                                                                             |                                                                                                                                                                                  | 0.85 - 1.00 |

| Non Prime Site                                                                 | Prime Site                                                                                                  | Modifications                                                                                                                                                      | Hyperscore                                   | Mass error in ppm                            | Charge                     | Precursor neutral mass in Da                                   | Fold change (log <sub>2</sub> ) of ASAPRatio  | FC-error of ASAPRatio                        | Uniprot ID 1                                                                       | Uniprot ID 2                                                            | Protein Name 1                                                                                                                                             | Protein Name 2                                                                                                                                                                       | Quantile                                                                               |
|--------------------------------------------------------------------------------|-------------------------------------------------------------------------------------------------------------|--------------------------------------------------------------------------------------------------------------------------------------------------------------------|----------------------------------------------|----------------------------------------------|----------------------------|----------------------------------------------------------------|-----------------------------------------------|----------------------------------------------|------------------------------------------------------------------------------------|-------------------------------------------------------------------------|------------------------------------------------------------------------------------------------------------------------------------------------------------|--------------------------------------------------------------------------------------------------------------------------------------------------------------------------------------|----------------------------------------------------------------------------------------|
| GDHSTPPSAY<br>ILTRLRLQKR                                                       | GSVKPYTNFDAER<br>GTGGVDTAAVAVFDISNADR                                                                       | N-ter +28.03 Da, K +28.03 Da<br>N-ter +28.03 Da<br>N-ter +28.03 Da, K +28.03 Da, C +57.02 Da                                                                       | 47.5<br>71.0                                 | 52.8<br>45.8                                 | 3<br>3                     | 1538.85<br>2020.08                                             | -0.09<br>1.75                                 | 0.02<br>0.40                                 | ANXA2_MOUSE<br>KCRM_MOUSE                                                          | BOV2N7_MOUSE                                                            | Annexin A2;<br>Creatine kinase M-type;                                                                                                                     | Annexin II;Annexin-2;Calpactin I heavy chain;Calpactin-1 heavy chain;Chromobindin-8;Lipocortin II;Placental anticoagulant protein IV;Protein I;p36;<br>Creatine kinase M chain;M-CK; | 0.25 - 0.75<br>0.85 - 1.00                                                             |
| VEAARNLGRV<br>SVCVHLRNL                                                        | GTKCCTLPEDQR<br>GTLDPSSLDETAYER                                                                             | N-ter +28.03 Da, K +28.03 Da, C +57.02 Da<br>N-ter +34.06 Da                                                                                                       | 23.3<br>40.1                                 | 87.9<br>51.2                                 | 3<br>3                     | 1519.85<br>1800.95                                             | 1.86<br>-0.14                                 | 0.34<br>0.02                                 | ALBU_MOUSE<br>FRDA_MOUSE                                                           | E9Q2P9_MOUSE                                                            | Serum albumin;<br>Frataxin, mitochondrial;                                                                                                                 |                                                                                                                                                                                      | 0.85 - 1.00<br>0.25 - 0.75                                                             |
| RKNKMASNIF<br>TIDCDITLM<br>QRRSISRFL                                           | GTPEENPPSWAKSAGSKSSGGR<br>GTPSGTAEPYDGTAKAR<br>GTPSPAIVTPSPPEPAPALEAPAR                                     | N-ter +34.06 Da, K +34.06 Da<br>N-ter +28.03 Da, K +28.03 Da<br>N-ter +28.03 Da                                                                                    | 33.5<br>47.7<br>46.9                         | 56.8<br>49.5<br>47.1                         | 4<br>3<br>3                | 2288.35<br>1662.90<br>2340.31                                  | 0.07<br>0.23<br>-0.71                         | 0.01<br>0.08<br>0.06                         | HN1_MOUSE<br>BSDC1_MOUSE<br>PARF_MOUSE                                             |                                                                         | Hematological and neurological expressed 1 protein;<br>BSD domain-containing protein 1;<br>Putative GTP-binding protein Parf;                              |                                                                                                                                                                                      | 0.25 - 0.75<br>0.25 - 0.75<br>0.25 - 0.75                                              |
| AALHKAIMVK<br>LDHGRTLREQ                                                       | GVDEATHIDILTKR<br>GVEEHETLLLR                                                                               | N-ter +28.03 Da, K +28.03 Da<br>N-ter +34.06 Da                                                                                                                    | 54.3<br>25.3                                 | 49.6<br>60.3                                 | 3<br>3                     | 1599.00<br>1328.83                                             | 0.90<br>-0.74                                 | 0.38<br>0.04                                 | ANXA1_MOUSE<br>TLN1_MOUSE                                                          | E9QA30_MOUSE<br>A2AIM2_MOUSE                                            | Annexin A1;<br>Talin-1;                                                                                                                                    | Annexin I;Annexin-1;Calpactin II;Calpactin-2;Chromobindin-9;Lipocortin I;Phospholipase A2 inhibitory protein;p35;                                                                    | 0.25 - 0.75<br>0.25 - 0.75                                                             |
| SGNRLDGKKK                                                                     | GVPEPSPKPGDIKR                                                                                              | N-ter +28.03 Da, K +28.03 Da                                                                                                                                       | 23.5                                         | 51.8                                         | 4                          | 1760.11                                                        | 0.03                                          | 0.00                                         | UFD1_MOUSE                                                                         |                                                                         | Ubiquitin fusion degradation protein 1 homolog;                                                                                                            |                                                                                                                                                                                      | 0.25 - 0.75                                                                            |
| ADCAVLIVAA<br>AVPVFDLIL                                                        | GVGEFFAGISKNGQTR<br>GVGPDGHTCSLFPDHPHLLQER                                                                  | N-ter +34.06 Da, K +34.06 Da<br>N-ter +28.03 Da, C +57.02 Da                                                                                                       | 26.4<br>46.3                                 | 52.7<br>65.6                                 | 3<br>4                     | 1717.03<br>2359.29                                             | -1.25<br>3.11                                 | 0.12<br>0.31                                 | EF1A1_MOUSE<br>6PGL_MOUSE                                                          | EF1A2_MOUSE<br>Q8CBG6_MOUSE                                             | Elongation factor 1-alpha 1;<br>Elongation factor 1-alpha 1;                                                                                               | Elongation factor Tu;Eukaryotic elongation factor 1 A-1;                                                                                                                             | 0.15 - 0.25<br>0.85 - 1.00                                                             |
| GGGTAMRILG<br>KESCLTPKLD<br>PSIVGRPRHQ                                         | GVISAISEAAAQYNEPPPPR<br>GVKEKALVSSVR<br>GVMVGMGQKDSYVGEAQSKR                                                | N-ter +28.03 Da<br>N-ter +28.03 Da, K +28.03 Da<br>N-ter +28.03 Da, K +28.03 Da                                                                                    | 45.7<br>20.4<br>44.8                         | 52.7<br>59.3<br>61.0                         | 4<br>3<br>4                | 2191.24<br>1355.93<br>2325.29                                  | 0.39<br>1.14<br>0.52                          | 0.03<br>0.29<br>0.09                         | CPN1_MOUSE<br>ALBU_MOUSE<br>ACT5_MOUSE                                             | D3YW48_MOUSE                                                            | Calpain small subunit 1;<br>Serum albumin;<br>Actin, alpha skeletal muscle;                                                                                | Calcium-activated neutral proteinase small subunit;Calcium-dependent protease small subunit;Calcium-dependent protease small subunit 1;Calpain regulatory subunit;                   | 0.25 - 0.75<br>0.75 - 0.85<br>0.25 - 0.75                                              |
| YTLGKVLQIV                                                                     | GVNKMDSTPEPYSQKR                                                                                            | N-ter +28.03 Da, K +28.03 Da                                                                                                                                       | 35.5                                         | 68.0                                         | 4                          | 1920.11                                                        | -3.06                                         | 0.51                                         | EF1A1_MOUSE                                                                        | D3Z3I8_MOUSE                                                            | Elongation factor 1-alpha 1;<br>Cleavage and polyadenylation specificity factor subunit 5;                                                                 | Elongation factor Tu;Eukaryotic elongation factor 1 A-1;<br>Nucleoside diphosphate-linked moiety X motif 21;                                                                         | 0.00 - 0.15<br>0.25 - 0.75                                                             |
| PNRSQTGWPR<br>RGERGPFGER                                                       | GVNQFGNKYIQTKPLTLER<br>GVQPPGPAQPR                                                                          | N-ter +28.03 Da, K +28.03 Da<br>N-ter +28.03 Da                                                                                                                    | 32.0<br>63.6                                 | 50.8<br>30.3                                 | 4<br>2                     | 2417.47<br>1116.64                                             | 0.06<br>0.71                                  | 0.01<br>0.09                                 | CP5F5_MOUSE<br>CO1A1_MOUSE                                                         | F8WGB7_MOUSE                                                            | Collagen alpha-1(I) chain;                                                                                                                                 | Alpha-1 type I collagen;                                                                                                                                                             | 0.25 - 0.75<br>0.25 - 0.75                                                             |
| M                                                                              | GVQVETISPGDGR                                                                                               | N-ter +28.03 Da                                                                                                                                                    | 31.4                                         | 44.4                                         | 3                          | 1341.75                                                        | -0.25                                         | 0.04                                         | FKB1A_MOUSE                                                                        | Q1JUQ8_MOUSE                                                            | Peptidyl-prolyl cis-trans isomerase FKBP1A;<br>NADH dehydrogenase [ubiquinone] iron-sulfur protein 6, mitochondrial;                                       | 12 kDa FK506-binding protein;FK506-binding protein 1A;Immunophilin FKBP12;Rotamase; Complex I-13kD-A;NADH-ubiquinone oxidoreductase 13 kDa-A subunit;                                | 0.25 - 0.75<br>0.00 - 0.15                                                             |
| LTLPRAARGF                                                                     | GVQVSPSGEKITHGQVYDEKDYR                                                                                     | N-ter +34.06 Da, K +34.06 Da                                                                                                                                       | 39.9                                         | 56.0                                         | 4                          | 2794.66                                                        | -1.79                                         | 0.68                                         | NDU56_MOUSE                                                                        | D3YW32_MOUSE                                                            | Histidine triad nucleotide-binding protein 2, mitochondrial;                                                                                               | HINT-3;                                                                                                                                                                              | 0.25 - 0.75<br>0.85 - 1.00                                                             |
| ARGAQVRGNA<br>GSSADRQGR<br>GNFAAQYSDK                                          | GVSDGSEVAKAQAAPGASPTIFSR<br>GVSEQASDSEGHDFSEGGQAVGAHR<br>GVSSGPGPMGLMGR                                     | N-ter +28.03 Da, K +28.03 Da<br>N-ter +28.03 Da<br>N-ter +34.06 Da                                                                                                 | 27.9<br>63.2<br>59.2                         | 56.1<br>63.9<br>55.9                         | 4<br>4<br>3                | 2571.51<br>2658.32<br>1432.82                                  | 0.43<br>2.79<br>-1.74                         | 0.15<br>1.27<br>0.12                         | HINT2_MOUSE<br>E9Q019_MOUSE<br>EOCXI2_MOUSE                                        | F7BVV1_MOUSE                                                            | Collagen alpha-2(I) chain;                                                                                                                                 | Alpha-2 type I collagen;                                                                                                                                                             | 0.00 - 0.15<br>0.85 - 1.00<br>0.00 - 1.00                                              |
| HQALKGFSSK                                                                     | GVTSVSIQFHSPDLAIR                                                                                           | N-ter +28.03 Da                                                                                                                                                    | 50.5                                         | 51.0                                         | 3                          | 1854.09                                                        | 1.56                                          | 0.18                                         | IC1_MOUSE                                                                          | A2ATR8_MOUSE                                                            | Plasma protease C1 inhibitor;                                                                                                                              | C1 esterase inhibitor;C1-inhibiting factor;Serpin G1;                                                                                                                                | 0.75 - 0.85                                                                            |
| LIPEYLFIR<br>GNFASQMSY<br>QQQQMTSSYG<br>DYLKMLTER<br>DYLKMLTER                 | GVVDSIDLPLNISR<br>GYDEKSAGVSVPGMGPSGPR<br>GYKEPAAPVSIQR<br>GYSFTTTER<br>GYSFVTTTER                          | N-ter +28.03 Da<br>N-ter +34.06 Da, K +34.06 Da<br>N-ter +34.06 Da, K +34.06 Da<br>N-ter +28.03 Da<br>N-ter +28.03 Da                                              | 30.5<br>27.6<br>34.9<br>34.4<br>34.7         | 48.6<br>43.8<br>31.2<br>31.9<br>39.0         | 3<br>3<br>3<br>2<br>2      | 1540.88<br>2112.19<br>1482.93<br>1159.59<br>1157.62            | 0.14<br>-1.89<br>2.06<br>-2.74<br>1.90        | 0.01<br>0.35<br>0.37<br>0.18<br>0.20         | H590A_MOUSE<br>CO1A1_MOUSE<br>LASP1_MOUSE<br>ACTB_MOUSE<br>ACTC_MOUSE              | H590B_MOUSE<br>F8WGB7_MOUSE<br>A2AGH0_MOUSE<br>ACTG_MOUSE<br>ACTA_MOUSE | Heat shock protein HSP 90-alpha;<br>Collagen alpha-1(I) chain;<br>LIM and SH3 domain protein 1;<br>Actin, cytoplasmic 1;<br>Actin, alpha cardiac muscle 1; | Heat shock 86 kDa;Tumor-specific transplantation 86 kDa antigen;<br>Alpha-1 type I collagen;<br>Metastatic lymph node gene 50 protein;<br>Beta-actin;<br>Alpha-cardiac actin;        | 0.25 - 0.75<br>0.00 - 0.15<br>0.85 - 1.00<br>0.00 - 0.15<br>0.85 - 1.00                |
| TQCARIVEKY                                                                     | GYTHLSAGELLR                                                                                                | N-ter +28.03 Da                                                                                                                                                    | 27.0                                         | 71.8                                         | 3                          | 1343.82                                                        | -0.20                                         | 0.03                                         | KCY_MOUSE                                                                          |                                                                         | UMP-CMP kinase;                                                                                                                                            |                                                                                                                                                                                      | 0.25 - 0.75                                                                            |
| TQCEKIVQKY<br>SRVRTGRSJK<br>SDHRTYDLR                                          | GYTHLSTGDLRL<br>GYTLPPHCSR<br>HAFSPVASVESASGETLHSPK                                                         | N-ter +28.03 Da<br>N-ter +34.06 Da, C +57.02 Da<br>N-ter +28.03 Da, K +28.03 Da                                                                                    | 42.1<br>33.2<br>55.1                         | 51.1<br>51.6<br>68.3                         | 3<br>3<br>4                | 1359.78<br>1220.68<br>2193.26                                  | -0.79<br>-4.06<br>-0.45                       | 0.19<br>0.68<br>0.06                         | KAD1_MOUSE<br>KCRM_MOUSE<br>FETUA_MOUSE                                            |                                                                         | Adenylate kinase isoenzyme 1;<br>Creatine kinase M-type;<br>Alpha-2-HS-glycoprotein;                                                                       | ATP-AMP transphosphorylase 1;Myokinase;<br>Creatine kinase M chain;M-CK;<br>Countertrypsin;Fetuin-A;<br>ICD-M;IDP;NADP(+)-specific ICDH;Oxalosuccinate decarboxylase;                | 0.25 - 0.75<br>0.00 - 0.15<br>0.25 - 0.75                                              |
| GWTKPITIGR<br>GIVEGLMTTV<br>GKKSQDDVAR                                         | HAHGDQYKATDFVDR<br>HAITATQKTVDPGSGKLWR<br>HAQVSSSSIVSLGIGDR                                                 | N-ter +28.03 Da, K +28.03 Da<br>N-ter +28.03 Da, K +28.03 Da<br>N-ter +28.03 Da                                                                                    | 26.5<br>27.8<br>55.5                         | 69.2<br>59.2<br>45.4                         | 4<br>4<br>3                | 1914.07<br>2149.33<br>1823.07                                  | -0.56<br>-0.42<br>3.59                        | 0.12<br>0.06<br>0.37                         | IDHP_MOUSE<br>G3P_MOUSE<br>E9PWQ3_MOUSE                                            | D6RIL6_MOUSE<br>F8WJL5_MOUSE<br>D3YWD1_MOUSE                            | Isocitrate dehydrogenase [NADP], mitochondrial;<br>Glyceraldehyde-3-phosphate dehydrogenase;                                                               | decarboxylase;<br>Peptidyl-cysteine S-nitrosylase GAPDH;                                                                                                                             | 0.25 - 0.75<br>0.25 - 0.75<br>0.85 - 1.00                                              |
| KGTFASEL                                                                       | HCDKLHVDPENFR                                                                                               | N-ter +28.03 Da, K +28.03 Da, C +57.02 Da                                                                                                                          | 23.3                                         | 63.8                                         | 4                          | 1721.94                                                        | 2.71                                          | 0.81                                         | HBB1_MOUSE                                                                         | HBB2_MOUSE                                                              | Hemoglobin subunit beta-1;                                                                                                                                 | Beta-1-globin;Hemoglobin beta-1 chain;Hemoglobin beta-major chain;                                                                                                                   | 0.85 - 1.00                                                                            |
| QICPNLIVAF<br>RQIRTKVMDV<br>YGHYEPGEF<br>LLGLPARAA<br>YWKTLGISPF<br>PTDKHKTDLN | HDFSSDLENVPHLR<br>HDGKVVSTHEQVLR<br>HDVEDAETYKMLAR<br>HEDPVKEVGFGR<br>HEFADVVFANDSGHR<br>HENLKGDDLDPNVYSSLR | N-ter +28.03 Da<br>N-ter +28.03 Da, K +28.03 Da<br>N-ter +28.03 Da, K +28.03 Da<br>N-ter +34.06 Da, K +34.06 Da<br>N-ter +28.03 Da<br>N-ter +34.06 Da, K +34.06 Da | 30.3<br>25.2<br>19.6<br>44.8<br>34.9<br>43.3 | 78.1<br>68.4<br>54.6<br>68.3<br>84.8<br>60.4 | 3<br>4<br>4<br>4<br>4<br>4 | 1692.95<br>1660.02<br>1889.08<br>1709.06<br>1829.01<br>2196.28 | 0.20<br>1.48<br>0.57<br>0.53<br>3.59<br>-1.25 | 0.04<br>0.37<br>0.07<br>0.03<br>0.56<br>0.12 | PRELP_MOUSE<br>K1C14_MOUSE<br>RCN3_MOUSE<br>SBSN_MOUSE<br>TTHY_MOUSE<br>KCRM_MOUSE |                                                                         | Prolargin;<br>Keratin, type I cytoskeletal 14;<br>Reticulocalbin-3;<br>Suprabasin;<br>Transthyretin;<br>Creatine kinase M-type;                            |                                                                                                                                                                                      | 0.25 - 0.75<br>0.75 - 0.85<br>0.25 - 0.75<br>0.25 - 0.75<br>0.85 - 1.00<br>0.15 - 0.25 |

| Non Prime Site | Prime Site               | Modifications                                                             | Hyperscore | Mass error in ppm | Charge | Precursor neutral mass in Da | Fold change (log <sub>2</sub> ) of ASAPRatio | FC-error of ASAPRatio | Uniprot ID 1 | Uniprot ID 2 | Protein Name 1                                    | Protein Name 2                                                                                                            | Quantile    |
|----------------|--------------------------|---------------------------------------------------------------------------|------------|-------------------|--------|------------------------------|----------------------------------------------|-----------------------|--------------|--------------|---------------------------------------------------|---------------------------------------------------------------------------------------------------------------------------|-------------|
| HRWRPYSLSL     | HGIEGAFSGSGAKTVIPR       | N-ter +28.03 Da, K +28.03 Da<br>N-ter +28.03 Da, K +28.03 Da, C +57.02 Da | 21.6       | 48.8              | 4      | 1839.09                      | 5.06                                         | 0.61                  | CNDP2_MOUSE  | F6XEL6_MOUSE | Cytosolic non-specific dipeptidase;               | CNDP dipeptidase 2;Glutamate carboxypeptidase-like protein 1;                                                             | 0.85 - 1.00 |
| LIGALGCAIC     | HGNPVDVDCIAKPR           | N-ter +28.03 Da                                                           | 15.4       | 56.3              | 4      | 1646.95                      | -0.52                                        | 0.08                  | ANT3_MOUSE   |              | Antithrombin-III;                                 | Serpin C1;                                                                                                                | 0.25 - 0.75 |
| ENLATAFTIL     | HHPEFTPDQPTER            | N-ter +28.03 Da                                                           | 36.0       | 56.9              | 3      | 1617.85                      | 0.89                                         | 0.20                  | TXLNB_MOUSE  |              | Beta-taxilin;                                     | Muscle-derived protein 77;                                                                                                | 0.25 - 0.75 |
| TNWDDMEKIW     | HHTFYNELR                | N-ter +28.03 Da                                                           | 21.8       | 61.3              | 3      | 1243.69                      | 0.37                                         | 0.03                  | ACTC_MOUSE   | ACTB_MOUSE   | Actin, alpha cardiac muscle 1;                    | Alpha-cardiac actin;                                                                                                      | 0.25 - 0.75 |
| LLSRPKHKS      | HHVLVIENKYMR             | N-ter +28.03 Da, K +28.03 Da                                              | 28.2       | 65.4              | 4      | 1593.99                      | 0.57                                         | 0.07                  | MA2B1_MOUSE  |              | Lysosomal alpha-mannosidase;                      | Mannosidase alpha class 2B member 1;Mannosidase alpha-B;                                                                  | 0.25 - 0.75 |
| MEDVTL         | HIVERPYSFPDASSEPEPTQGEAR | N-ter +28.03 Da                                                           | 55.0       | 61.2              | 4      | 2840.51                      | 7.76                                         | 2.75                  | PTRF_MOUSE   | Q3U4N4_MOUSE | Polymerase I and transcript release factor;       | Cav-p60;Cavin-1;                                                                                                          | 0.85 - 1.00 |
| LRLALQALQEQ    | HKAEIITVSDGR             | N-ter +28.03 Da, K +28.03 Da                                              | 25.0       | 46.4              | 3      | 1380.84                      | -1.36                                        | 0.17                  | VP525_MOUSE  | A2A4J8_MOUSE | Vacuolar protein-sorting-associated protein 25;   | ESCRT-II complex subunit VPS25;                                                                                           | 0.15 - 0.25 |
| STMGYMMAK      | HLEINPDHPIVETLR          | N-ter +28.03 Da                                                           | 32.3       | 76.0              | 4      | 1810.11                      | 2.48                                         | 0.22                  | H590B_MOUSE  | Q71X8_MOUSE  | Heat shock protein HSP 90-beta;                   | Heat shock 84 kDa;Tumor-specific transplantation 84 kDa antigen;                                                          | 0.85 - 1.00 |
| PMGRGKTIVL     | HLKEDQTEYLEER            | N-ter +28.03 Da, K +28.03 Da                                              | 20.6       | 61.9              | 4      | 1744.97                      | 1.55                                         | 0.16                  | H590B_MOUSE  | H590A_MOUSE  | Heat shock protein HSP 90-beta;                   | Heat shock 84 kDa;Tumor-specific transplantation 84 kDa antigen;                                                          | 0.75 - 0.85 |
| GTFLEYYSRR     | HPDYVSLLLR               | N-ter +28.03 Da                                                           | 35.2       | 65.0              | 3      | 1326.82                      | 2.97                                         | 0.19                  | ALBU_MOUSE   |              | Serum albumin;                                    |                                                                                                                           | 0.85 - 1.00 |
| NRSLRHNHIR     | HPEYDYSNDMLLLR           | N-ter +34.06 Da                                                           | 40.5       | 51.1              | 3      | 1798.97                      | -3.64                                        | 0.46                  | K1K89_MOUSE  |              | Kallikrein 1-related peptidase b9;                | Epidermal growth factor-binding protein type C;Glandular kallikrein K9;Tissue kallikrein-9;                               | 0.00 - 0.15 |
| GLCLQLLSLA     | HPHQDIDLNVTCR            | N-ter +28.03 Da, C +57.02 Da                                              | 54.9       | 52.4              | 3      | 1644.90                      | 0.82                                         | 0.14                  | A2APM2_MOUSE | A2APM5_MOUSE |                                                   |                                                                                                                           | 0.25 - 0.75 |
| SPOTIKTTAR     | HQDLDFKFKVNPVLTNNQR      | N-ter +28.03 Da, K +28.03 Da                                              | 24.9       | 61.0              | 4      | 2477.49                      | 1.12                                         | 0.13                  | SCEL_MOUSE   | Q14DQ7_MOUSE | Sciellin;                                         |                                                                                                                           | 0.75 - 0.85 |
| VFPISVGRPG     | HQGVMMVMGMQKDSYVGEAQSKR  | N-ter +28.03 Da, K +28.03 Da                                              | 67.5       | 62.3              | 4      | 2590.42                      | 3.54                                         | 0.69                  | ACTA_MOUSE   | ACTB_MOUSE   | Actin, aortic smooth muscle;                      | Alpha-actin-2;                                                                                                            | 0.85 - 1.00 |
| SESQASDSEF     | HSDFSEGAAGAHNR           | N-ter +28.03 Da                                                           | 53.9       | 55.2              | 3      | 1524.79                      | 2.92                                         | 0.98                  | F78VV1_MOUSE | FILA_MOUSE   |                                                   |                                                                                                                           | 0.85 - 1.00 |
| PSPLAVPRRA     | HSILPVDDIDINGLNEEQQLR    | N-ter +28.03 Da, K +28.03 Da                                              | 63.1       | 61.0              | 4      | 2488.44                      | 0.63                                         | 0.12                  | IVD_MOUSE    |              | Isovaleryl-CoA dehydrogenase, mitochondrial;      |                                                                                                                           | 0.25 - 0.75 |
| QAQQAMDVQL     | HSPAFQFPDVFLLR           | N-ter +28.03 Da                                                           | 37.7       | 50.3              | 3      | 1702.93                      | 0.04                                         | 0.03                  | CLUS_MOUSE   |              | Clusterin;                                        | Apolipoprotein J;Clustrin;Sulfated glycoprotein 2;                                                                        | 0.25 - 0.75 |
| LILPYVELDL     | HSYDLGIENR               | N-ter +28.03 Da                                                           | 39.3       | 62.7              | 3      | 1230.68                      | 0.88                                         | 0.08                  | IDHC_MOUSE   | F8WIY0_MOUSE | Isocitrate dehydrogenase [NADP] cytoplasmic;      |                                                                                                                           | 0.25 - 0.75 |
| VILQHLRMSM     | HTEAAEVLLEER             | N-ter +28.03 Da                                                           | 35.9       | 48.3              | 3      | 1294.75                      | -0.79                                        | 0.05                  | HIBCH_MOUSE  | E0CX19_MOUSE | 3-hydroxyisobutyryl-CoA hydrolase, mitochondrial; | 3-hydroxyisobutyryl-coenzyme A hydrolase; Acylcholine acylhydrolase;Butyrylcholine esterase;Choline esterase;             | 0.25 - 0.75 |
| LLLCMPFGKS     | HTEEDFIITTKTR            | N-ter +28.03 Da, K +28.03 Da                                              | 24.8       | 72.8              | 4      | 1703.01                      | 1.03                                         | 0.08                  | CHLE_MOUSE   |              | Cholinesterase;                                   | I;Pseudocholinesterase;                                                                                                   | 0.75 - 0.85 |
| SCLDHVISYY     | HVASDTEKHIR              | N-ter +28.03 Da, K +28.03 Da                                              | 31.1       | 50.8              | 3      | 1323.82                      | 0.77                                         | 0.13                  | EXOC7_MOUSE  | A2AAN4_MOUSE | Exocyst complex component 7;                      | Exocyst complex component Exo70;                                                                                          | 0.25 - 0.75 |
| KHGGPADEER     | HVGDLEGNVTAGKDGVANVSIEDR | N-ter +28.03 Da, K +28.03 Da                                              | 60.0       | 61.2              | 4      | 2378.36                      | 1.42                                         | 0.26                  | SODC_MOUSE   |              | Superoxide dismutase [Cu-Zn];                     |                                                                                                                           | 0.75 - 0.85 |
| GMYPDQAGRF     | HVNLLCGEEGADAAHLFNPR     | N-ter +28.03 Da, C +57.02 Da                                              | 48.5       | 60.4              | 4      | 2375.29                      | 1.96                                         | 0.33                  | Q9CRB1_MOUSE | LEG7_MOUSE   |                                                   |                                                                                                                           | 0.85 - 1.00 |
| QPRNWLFLAC     | HVTNEVAQLQGGGR           | N-ter +28.03 Da                                                           | 57.2       | 46.8              | 3      | 1548.91                      | -0.27                                        | 0.04                  | BR44L_MOUSE  | D3Z5S0_MOUSE | Brain protein 44-like protein;                    |                                                                                                                           | 0.25 - 0.75 |
| HRSGETEDTF     | IADLVVGLCTGQKKTGAPCR     | N-ter +34.06 Da, K +34.06 Da, C +57.02 Da                                 | 44.4       | 55.4              | 4      | 2196.36                      | -1.40                                        | 0.22                  | ENOB_MOUSE   | ENOA_MOUSE   | Beta-enolase;                                     | 2-phospho-D-glycerate hydro-lyase;Enolase 3;Muscle-specific enolase;Skeletal muscle enolase;                              | 0.15 - 0.25 |
| LDATTVLSRA     | IAELGIYPVAVDPLDSTSR      | N-ter +28.03 Da                                                           | 48.3       | 42.3              | 3      | 1944.10                      | 0.99                                         | 0.30                  | ATPB_MOUSE   |              | ATP synthase subunit beta, mitochondrial;         |                                                                                                                           | 0.75 - 0.85 |
| FPKKSRTAR      | IASDEEIIQGTDAVIOQLER     | N-ter +28.03 Da, K +28.03 Da                                              | 38.1       | 64.7              | 4      | 2285.32                      | -2.74                                        | 0.55                  | PALLD_MOUSE  |              | Palladin;                                         |                                                                                                                           | 0.00 - 0.15 |
| DIFTGKKYED     | ICPSTHNMVDPNIKR          | N-ter +28.03 Da, K +28.03 Da, C +57.02 Da                                 | 27.0       | 62.8              | 4      | 1837.05                      | -1.79                                        | 0.25                  | IF5A1_MOUSE  | IF5A2_MOUSE  | Eukaryotic translation initiation factor 5A-1;    | Eukaryotic initiation factor 5A isoform 1;eIF-4D; 15S Mg(2+)-ATPase p97 subunit;Valosin-containing protein;               | 0.00 - 0.15 |
| AEKNAPAIIF     | IDELDAIAPKR              | N-ter +28.03 Da, K +28.03 Da                                              | 32.1       | 42.3              | 3      | 1295.80                      | 0.85                                         | 0.08                  | TERRA_MOUSE  |              | Transitional endoplasmic reticulum ATPase;        |                                                                                                                           | 0.25 - 0.75 |
| ESDAADIVFL     | IDSDDAVKPDGIAHIR         | N-ter +28.03 Da, K +28.03 Da                                              | 38.2       | 60.8              | 4      | 1749.05                      | -0.01                                        | 0.00                  | E9PWQ3_MOUSE | D3YWD1_MOUSE |                                                   |                                                                                                                           | 0.25 - 0.75 |
| EAPVGVETDL     | IDVGFDDVKKGGPGR          | N-ter +34.06 Da, K +34.06 Da                                              | 28.9       | 61.2              | 4      | 1762.16                      | 1.04                                         | 0.33                  | IST1_MOUSE   | Q8BHC2_MOUSE | IST1 homolog;                                     |                                                                                                                           | 0.75 - 0.85 |
| RLAKYNQLMR     | IEEALGDKAVFAGR           | N-ter +28.03 Da, K +28.03 Da                                              | 30.4       | 35.0              | 3      | 1530.89                      | -0.25                                        | 0.06                  | ENOB_MOUSE   |              | Beta-enolase;                                     | 2-phospho-D-glycerate hydro-lyase;Enolase 3;Muscle-specific enolase;Skeletal muscle enolase;                              | 0.25 - 0.75 |
| FVPNDGCLNF     | IEENDEVLVAGFGR           | N-ter +34.06 Da                                                           | 41.8       | 45.9              | 3      | 1580.90                      | 0.87                                         | 0.11                  | RS23_MOUSE   | Q9CZ15_MOUSE | 40S ribosomal protein S23;                        |                                                                                                                           | 0.25 - 0.75 |
| EGNKEQIQKI     | IETLSQQLQAKGKELNEFR      | N-ter +34.06 Da, K +34.06 Da                                              | 26.0       | 53.3              | 4      | 2333.51                      | -1.43                                        | 0.19                  | PF02_MOUSE   |              | Prefoldin subunit 2;                              |                                                                                                                           | 0.15 - 0.25 |
| AEFGKGIKLF     | IFIDSHTDNQR              | N-ter +28.03 Da                                                           | 27.6       | 76.2              | 3      | 1487.81                      | -0.06                                        | 0.01                  | PDIA1_MOUSE  |              | Protein disulfide-isomerase;                      | Cellular thyroid hormone-binding protein;Endoplasmic reticulum resident protein 59;Prolyl 4-hydroxylase subunit beta;p55; | 0.25 - 0.75 |
| R              | IFQTTERFPIQKLF           | N-ter +34.06 Da, K +34.06 Da                                              | 27.8       | 28.1              | 4      | 2248.41                      | -2.12                                        | 1.20                  | F7D9Q0_MOUSE |              |                                                   |                                                                                                                           | 0.00 - 0.15 |
| KSNIKAAWGW     | IGGHGAEYGAELER           | N-ter +34.06 Da                                                           | 54.4       | 51.5              | 3      | 1562.87                      | -2.06                                        | 0.43                  | HBA_MOUSE    | Q91V88_MOUSE | Hemoglobin subunit alpha;                         | Alpha-globin;Hemoglobin alpha chain;                                                                                      | 0.00 - 0.15 |
| VPRKCSASNR     | IIAAKDHASIQMNVVAEVDNR    | N-ter +28.03 Da, K +28.03 Da                                              | 21.6       | 56.3              | 4      | 2136.26                      | 0.11                                         | 0.01                  | RS21_MOUSE   |              | 40S ribosomal protein S21;                        |                                                                                                                           | 0.25 - 0.75 |
| PKHPVDQVQR     | IIGGSMDAKGSFFWQAK        | N-ter +28.03 Da, K +28.03 Da                                              | 15.0       | 43.4              | 3      | 1876.07                      | 0.37                                         | 0.08                  | HPT_MOUSE    |              | Haptoglobin;                                      |                                                                                                                           | 0.25 - 0.75 |
| GTIAGLNVLFR    | IIINEPTAAAIAGLDKK        | N-ter +28.03 Da, K +28.03 Da                                              | 32.1       | 33.0              | 3      | 1871.14                      | 0.33                                         | 0.03                  | HSP7C_MOUSE  | HSP72_MOUSE  | Heat shock cognate 71 kDa protein;                | Heat shock 70 kDa protein 8;                                                                                              | 0.25 - 0.75 |
| MSFSKDWSLY     | IIAHTFTPTTDTYACR         | N-ter +34.06 Da, C +57.02 Da                                              | 40.5       | 48.0              | 3      | 2159.15                      | -0.32                                        | 0.11                  | B2MG_MOUSE   | Q91XJ8_MOUSE | Beta-2-microglobulin;                             |                                                                                                                           | 0.25 - 0.75 |
| IYSQVGSKKK     | IIATPPQEDAPSVDIANIR      | N-ter +28.03 Da                                                           | 32.5       | 11.9              | 3      | 2047.12                      | 1.08                                         | 0.21                  | TKT_MOUSE    |              | Transketolase;                                    | P68;                                                                                                                      | 0.75 - 0.85 |
| VEKSAFAFK      | ILDPAAYQVKGGKVR          | N-ter +34.06 Da, K +34.06 Da                                              | 23.5       | 50.8              | 4      | 1760.19                      | -2.12                                        | 0.09                  | D3YU50_MOUSE | Q6P6L5_MOUSE |                                                   |                                                                                                                           | 0.00 - 0.15 |
| AAVCAQPRGR     | ILGGQEAAAHAR             | N-ter +34.06 Da                                                           | 35.3       | 49.6              | 3      | 1226.76                      | -1.00                                        | 0.34                  | CFAD_MOUSE   |              | Complement factor D;                              | 28 kDa adipocyte protein;Adipsin;C3 convertase activator;Properdin factor D;                                              | 0.15 - 0.25 |
| APMTDEIQQQ     | ILNLPESWDWR              | N-ter +28.03 Da                                                           | 36.0       | 38.2              | 2      | 1455.81                      | 1.61                                         | 0.54                  | CATC_MOUSE   | D3Z220_MOUSE | Dipeptidyl peptidase 1;                           | l;Dipeptidyl transferase;                                                                                                 | 0.75 - 0.85 |
| FTVNRPLFF      | IMEDTIGVPLFVGSVR         | N-ter +28.03 Da                                                           | 38.7       | 48.1              | 3      | 1760.04                      | 1.32                                         | 0.22                  | A2AP_MOUSE   |              | Alpha-2-antiplasmin;                              | Alpha-2-plasmin inhibitor;Serpin F2;                                                                                      | 0.75 - 0.85 |
| YTTISVPQML     | INLWGSTKTIYSYLR          | N-ter +28.03 Da, K +28.03 Da                                              | 27.9       | 38.5              | 3      | 1707.04                      | -1.43                                        | 0.12                  | Q8VEY4_MOUSE |              |                                                   |                                                                                                                           | 0.15 - 0.25 |

Table S10, Tholen et al.

| Non Prime Site                                                                               | Prime Site                                                                                                                        | Modifications                                                                                                                                                                                                                                                                          | Hyperscore                                           | Mass error in ppm                                    | Charge                          | Precursor neutral mass in Da                                              | Fold change (log <sub>2</sub> ) of ASAPRatio             | FC-error of ASAPRatio                                | Uniprot ID 1                                                                                       | Uniprot ID 2                                                                                                                   | Protein Name 1                                                                                                                                                                                                                                                                          | Protein Name 2                                                                                                  | Quantile                                                                |
|----------------------------------------------------------------------------------------------|-----------------------------------------------------------------------------------------------------------------------------------|----------------------------------------------------------------------------------------------------------------------------------------------------------------------------------------------------------------------------------------------------------------------------------------|------------------------------------------------------|------------------------------------------------------|---------------------------------|---------------------------------------------------------------------------|----------------------------------------------------------|------------------------------------------------------|----------------------------------------------------------------------------------------------------|--------------------------------------------------------------------------------------------------------------------------------|-----------------------------------------------------------------------------------------------------------------------------------------------------------------------------------------------------------------------------------------------------------------------------------------|-----------------------------------------------------------------------------------------------------------------|-------------------------------------------------------------------------|
| GAIEECVSR<br>D<br>KPHEAGTAF<br>QGVRVGTVMR                                                    | IPVPRPSSIEEFFIVK<br>IQMTQTTSLSASLGD<br>IQTQQLHAAMADTFLEHMCR<br>IRGMVDPQAGR                                                        | N-ter +28.03 Da, K +28.03 Da<br>N-ter +34.06 Da<br>N-ter +28.03 Da, C +57.02 Da<br>N-ter +28.03 Da                                                                                                                                                                                     | 21.1<br>45.0<br>55.9<br>35.1                         | 75.6<br>44.3<br>62.7<br>59.7                         | 4<br>3<br>4<br>3                | 1877.24<br>1944.06<br>2428.30<br>1226.73                                  | 0.65<br>-1.79<br>0.06<br>-0.01                           | 0.10<br>0.74<br>0.01<br>0.00                         | GWL_MOUSE<br>KV5AA_MOUSE<br>KPYM_MOUSE<br>Q9CRB1_MOUSE                                             | KV5AB_MOUSE                                                                                                                    | Serine/threonine-protein kinase greatwall;<br>Ig kappa chain V-V region MOPC 173;<br>Pyruvate kinase isozymes M1/M2;                                                                                                                                                                    | Microtubule-associated serine/threonine-protein kinase-like;<br>Pyruvate kinase muscle isozyme;                 | 0.25 - 0.75<br>0.00 - 0.15<br>0.25 - 0.75<br>0.25 - 0.75                |
| LLGPPSVLG<br>ASLSTFQQMW                                                                      | ISFHLPVNSR<br>ISKQEYDESGPSIVHR                                                                                                    | N-ter +28.03 Da<br>N-ter +28.03 Da, K +28.03 Da                                                                                                                                                                                                                                        | 30.2<br>35.5                                         | 55.4<br>59.0                                         | 3<br>4                          | 1196.73<br>1900.08                                                        | -0.94<br>0.99                                            | 0.20<br>0.17                                         | TMEDA_MOUSE<br>ACTB_MOUSE                                                                          | ACTG_MOUSE                                                                                                                     | Transmembrane emp24 domain-containing protein 10;<br>Actin, cytoplasmic 1;                                                                                                                                                                                                              | 21 kDa transmembrane-trafficking protein;Transmembrane protein Tmp21;p24 family protein delta-1;<br>Beta-actin; | 0.15 - 0.25<br>0.75 - 0.85                                              |
| SNKEIFLREL<br>IALNDFVKL                                                                      | ISNASDALDKIR<br>ISWYDNEYGSNR                                                                                                      | N-ter +28.03 Da, K +28.03 Da<br>N-ter +28.03 Da<br>N-ter +28.03 Da, K +28.03 Da, C +57.02 Da                                                                                                                                                                                           | 22.2<br>37.0<br>29.9                                 | 44.6<br>54.9<br>56.4                                 | 3<br>3<br>4                     | 1357.82<br>1693.83<br>2425.29                                             | 3.48<br>2.31<br>-0.06                                    | 0.58<br>1.11<br>0.03                                 | H590B_MOUSE<br>G3P_MOUSE<br>Q148R4_MOUSE                                                           | ENPL_MOUSE<br>F8WJ5_MOUSE                                                                                                      | Heat shock protein HSP 90-beta;<br>Glyceroldehyde-3-phosphate dehydrogenase;                                                                                                                                                                                                            | Heat shock 84 kDa;Tumor-specific transplantation 84 kDa antigen;<br>Peptidyl-cysteine S-nitrosylase GAPDH;      | 0.85 - 1.00<br>0.85 - 1.00                                              |
| RRKKEGENQR<br>KKELSDIAHR<br>DAVTRQVRT<br>SICQQNGIVP<br>LLWVPGSTGD                            | ITSGESSGGNPKAKDECAQYR<br>IVAPGKGLADESTGSIKR<br>IVEEVQDGKVISSR<br>IVEFEIPDGDHDLKR<br>IVLTQSPASLAVSLGQR                             | N-ter +28.03 Da, K +28.03 Da<br>N-ter +34.06 Da                                                                                                                                        | 43.7<br>26.3<br>23.7<br>62.3                         | 48.3<br>46.5<br>70.4<br>42.6                         | 3<br>3<br>4<br>3                | 2137.35<br>1613.97<br>1901.17<br>1888.16                                  | 0.72<br>4.48<br>-0.64<br>-1.64                           | 0.15<br>1.33<br>0.04<br>0.67                         | ALDOA_MOUSE<br>K1C17_MOUSE<br>ALDOA_MOUSE<br>KV3A1_MOUSE                                           | A6Z144_MOUSE<br>D3YXP7_MOUSE<br>ALDOC_MOUSE<br>KV3A2_MOUSE                                                                     | Fructose-bisphosphate aldolase A;<br>Keratin, type I cytoskeletal 17;<br>Fructose-bisphosphate aldolase A;<br>Ig kappa chain V-III region PC 2880/PC 1229;                                                                                                                              | Aldolase 1;Muscle-type aldolase;<br>Cytokeratin-17;Keratin-17;<br>Aldolase 1;Muscle-type aldolase;              | 0.25 - 0.75<br>0.25 - 0.75<br>0.85 - 1.00<br>0.25 - 0.75<br>0.00 - 0.15 |
| GSKGQTQCEK<br>LTAASEACL<br>GVNIGGAGSY<br>VTHGQVGVGK                                          | IVQKYGYTHLSTGDLRL<br>IVSDETIKNR<br>IYEKPTQTEAPQVTGPIEVPVVR<br>KAEAVATVVAADVQAR                                                    | N-ter +28.03 Da, K +28.03 Da<br>N-ter +34.06 Da, K +34.06 Da<br>N-ter +34.06 Da, K +34.06 Da<br>N-ter +28.03 Da, K +28.03 Da                                                                                                                                                           | 24.3<br>20.4<br>47.0<br>56.0                         | 54.5<br>39.9<br>52.9<br>41.5                         | 4<br>3<br>4<br>3                | 2019.23<br>2137.94<br>2517.58<br>1654.01                                  | -0.42<br>-1.22<br>-1.94<br>-0.81                         | 0.06<br>0.26<br>0.75<br>0.09                         | KAD1_MOUSE<br>TCFH_MOUSE<br>CRIP2_MOUSE<br>TTIN_MOUSE                                              | E9Q8M7_MOUSE                                                                                                                   | Adenylate kinase isoenzyme 1;<br>T-complex protein 1 subunit eta;<br>Cysteine-rich protein 2;<br>Titin;                                                                                                                                                                                 | ATP-AMP transphosphorylase 1;Myokinase;<br>CCT-eta;<br>Heart LIM protein;<br>Connectin;                         | 0.25 - 0.75<br>0.15 - 0.25<br>0.00 - 0.15<br>0.15 - 0.25                |
| DGRADAIEVLR<br>QNAILVRYTQ<br>KIREGEVEVL<br>APPWKDSKFF<br>DEPOSQWDVKV                         | KAMKGLGTEDESINLLTSR<br>KAPQVSTPLVEAAR<br>KATEMVEVGPEDDEVGAEAR<br>KDAPDGPVTLVDGR<br>KDFANVYDAVKDSSGR                               | N-ter +28.03 Da, K +28.03 Da<br>N-ter +28.03 Da, K +28.03 Da                                                                                                                           | 33.3<br>45.6<br>65.0<br>37.9<br>26.1                 | 76.9<br>37.7<br>42.4<br>46.6<br>63.2                 | 4<br>3<br>3<br>3<br>4           | 2245.41<br>1623.00<br>2116.09<br>1695.00<br>1867.10                       | 0.87<br>0.11<br>-0.29<br>0.00<br>-0.45                   | 0.15<br>0.01<br>0.04<br>0.00<br>0.05                 | ANXAS_MOUSE<br>ALBU_MOUSE<br>PTRF_MOUSE<br>F612_MOUSE<br>APOA1_MOUSE                               | Annexin A5;<br>Serum albumin;<br>Polymerase I and transcript release factor;<br>Coagulation factor XII;<br>Apolipoprotein A-I; | Anchorin CII;Annexin V;Annexin-5;Calphobindin I;Endonexin II;Lipocortin V;Placental anticoagulant protein 4;Placental anticoagulant protein I;Thromboplastin inhibitor;Vascular anticoagulant-alpha;                                                                                    | 0.25 - 0.75<br>0.25 - 0.75<br>0.25 - 0.75<br>0.00 - 0.15<br>0.25 - 0.75                                         |                                                                         |
| YKNSKFHRVI<br>LNCESFKQRR<br>CSANSRIIAA                                                       | KDFMIQGDGFR<br>KDGDFICPDSSTSSVCGTDGKTYR<br>KDHASIQMNVAEVDR                                                                        | N-ter +34.06 Da, K +34.06 Da<br>N-ter +28.03 Da, K +28.03 Da, C +57.02 Da<br>N-ter +34.06 Da, K +34.06 Da<br>N-ter +34.06 Da, K +34.06 Da, C +57.02 Da                                                                                                                                 | 32.3<br>50.2<br>60.4                                 | 50.3<br>60.8<br>55.4                                 | 3<br>4<br>3                     | 1481.87<br>2649.37<br>1780.06                                             | -3.47<br>0.01<br>-1.52                                   | 0.77<br>0.00<br>0.35                                 | PPIB_MOUSE<br>Q148R4_MOUSE<br>RS21_MOUSE                                                           | Q8BM18_MOUSE                                                                                                                   | Peptidyl-prolyl cis-trans isomerase B;<br>40S ribosomal protein S21;                                                                                                                                                                                                                    | CYP-S1;Cyclophilin B;Rotamase B;S-cyclophilin;                                                                  | 0.00 - 0.15<br>0.25 - 0.75<br>0.00 - 0.15                               |
| AGELHLEICL<br>AGDEESYTVF<br>LSKRPEEPPR<br>LPMMQAISNN                                         | KDLEEDHACIPIKSDPVVSYR<br>KDLFDPIQDR<br>KDPSSNDPLTETIR<br>KQGGYEDFVEGLR                                                            | N-ter +28.03 Da, K +28.03 Da<br>N-ter +28.03 Da, K +28.03 Da<br>N-ter +28.03 Da, K +28.03 Da<br>N-ter +34.06 Da, K +34.06 Da, C +57.02 Da                                                                                                                                              | 35.3<br>29.7<br>24.1<br>36.0                         | 59.8<br>61.9<br>65.1<br>49.0                         | 4<br>3<br>3<br>3                | 2734.73<br>1414.87<br>1627.95<br>1679.96                                  | -0.01<br>0.31<br>1.37<br>0.03                            | 0.00<br>0.03<br>0.09<br>0.01                         | EF2_MOUSE<br>KCRM_MOUSE<br>MUG1_MOUSE<br>E9PWG4_MOUSE                                              | MYL1_MOUSE                                                                                                                     | Elongation factor 2;<br>Creatine kinase M-type;<br>Muringlobulin-1;<br>E9PWG4_MOUSE                                                                                                                                                                                                     | Creatine kinase M chain;M-CK;                                                                                   | 0.25 - 0.75<br>0.25 - 0.75<br>0.75 - 0.85<br>0.25 - 0.75                |
| FLDTCCAAD<br>MAF                                                                             | KDTCFSTEGPNLVR<br>KDTGKTPVEVAIHR                                                                                                  | N-ter +28.03 Da, K +28.03 Da<br>N-ter +28.03 Da, K +28.03 Da                                                                                                                                                                                                                           | 51.0<br>32.1                                         | 53.3<br>56.0                                         | 3<br>4                          | 1779.98<br>1860.15                                                        | 0.32<br>1.81                                             | 0.07<br>0.34                                         | ALBU_MOUSE<br>RS20_MOUSE                                                                           | Serum albumin;<br>40S ribosomal protein S20;                                                                                   | 0.25 - 0.75<br>0.85 - 1.00                                                                                                                                                                                                                                                              |                                                                                                                 |                                                                         |
| CLLYRGDVIP<br>MFDQTQIQEF<br>TQDHISVYKQ                                                       | KDVNAAIATIKTR<br>KEAFTVIDQNR<br>KEAIGQGTPIPLDPEVKR                                                                                | N-ter +28.03 Da, K +28.03 Da<br>N-ter +28.03 Da, K +28.03 Da<br>N-ter +34.06 Da, K +34.06 Da, C +57.02 Da                                                                                                                                                                              | 29.7<br>27.1<br>37.9<br>27.7                         | 63.9<br>46.6<br>62.2<br>70.9                         | 4<br>3<br>4<br>4                | 1640.14<br>1375.81<br>2031.30<br>1945.01                                  | 0.45<br>-1.43<br>1.66<br>0.07                            | 0.09<br>0.23<br>0.09<br>0.02                         | TBA1A_MOUSE<br>MLR5_MOUSE<br>A2AQ82_MOUSE<br>ALBU_MOUSE                                            | TBA1B_MOUSE<br>F6ULR7_MOUSE<br>A2AQ9_MOUSE                                                                                     | Tubulin alpha-1A chain;<br>Myosin regulatory light chain 2, skeletal muscle isoform;                                                                                                                                                                                                    | Alpha-tubulin 1;Alpha-tubulin isotype M-alpha-1;Tubulin alpha-1 chain;                                          | 0.25 - 0.75<br>0.15 - 0.25<br>0.85 - 1.00                               |
| KLATDLTKVN<br>NESEKRELVF<br>NQKNFSSVLY                                                       | KECCGDLLECADDR<br>KEDGQEYAQVKMLGNR<br>KEDVSPGTGAIKTPPEMLR                                                                         | N-ter +28.03 Da, K +28.03 Da<br>N-ter +34.06 Da, K +34.06 Da<br>N-ter +28.03 Da, K +28.03 Da                                                                                                                                                                                           | 27.0<br>36.3                                         | 70.2<br>54.8                                         | 4<br>4                          | 2137.36<br>2012.21                                                        | -1.74<br>0.33                                            | 0.17<br>0.02                                         | IF1AX_MOUSE<br>A2AQ82_MOUSE                                                                        | IF1A_MOUSE<br>A2AQ9_MOUSE                                                                                                      | Serum albumin;<br>Eukaryotic translation initiation factor 1A, X-chromosomal;                                                                                                                                                                                                           | Eukaryotic translation initiation factor 4C;                                                                    | 0.25 - 0.75<br>0.00 - 0.15<br>0.25 - 0.75                               |
| EKSCLDWESF<br>QSELSQVRY<br>ALEPASAQA                                                         | KEEEGIEELAIHR<br>KEEFKNGKGSFVADTPELOR<br>KEELAAAMVR                                                                               | N-ter +28.03 Da, K +28.03 Da<br>N-ter +34.06 Da, K +34.06 Da<br>N-ter +34.06 Da, K +34.06 Da                                                                                                                                                                                           | 19.4<br>32.8<br>18.1                                 | 55.6<br>65.8<br>91.8                                 | 4<br>4<br>3                     | 1779.02<br>2805.86<br>1184.83                                             | -0.18<br>-0.06<br>0.31                                   | 0.02<br>0.02<br>0.05                                 | CFDP1_MOUSE<br>LASP1_MOUSE<br>RASL3_MOUSE                                                          | A2AG66_MOUSE<br>D3Z6Z7_MOUSE                                                                                                   | Craniofacial development protein 1;<br>LIM and SH3 domain protein 1;<br>RAS protein activator like-3;                                                                                                                                                                                   | 27 kDa craniofacial protein;Bucentaur;Protein Cp27;<br>Metastatic lymph node gene 50 protein;                   | 0.25 - 0.75<br>0.25 - 0.75<br>0.25 - 0.75                               |
| DEATDGGGDN<br>SLARELSGTI<br>NIGVAVAFN<br>DMEVKVQKSS<br>AEQEELERQM<br>QOMTSSYGGY<br>DLSAKIEFS | KEGEDSSVHYDDKAIER<br>KEILGTAQSGCNDVGR<br>KELDPVQKLFVDKIR<br>KELEDNMNQLFDLR<br>KELQAANENKQQLVESR<br>KEPAAPVSIQR<br>KEQQEDFKEAFLFDR | N-ter +28.03 Da, K +28.03 Da<br>N-ter +34.06 Da, K +34.06 Da, C +57.02 Da<br>N-ter +34.06 Da, K +34.06 Da<br>N-ter +34.06 Da, K +34.06 Da<br>N-ter +28.03 Da, K +28.03 Da<br>N-ter +28.03 Da, K +28.03 Da<br>N-ter +34.06 Da, K +34.06 Da<br>N-ter +28.03 Da, K +28.03 Da, C +57.02 Da | 31.2<br>57.9<br>18.4<br>40.9<br>42.1<br>23.6<br>28.4 | 60.2<br>41.8<br>71.7<br>56.0<br>53.9<br>47.3<br>60.8 | 4<br>3<br>4<br>4<br>4<br>3<br>4 | 2174.22<br>1871.10<br>1963.46<br>1880.20<br>1297.29<br>1250.79<br>2144.33 | 0.38<br>-0.67<br>0.47<br>-1.22<br>0.15<br>-0.06<br>-5.64 | 0.09<br>0.16<br>0.08<br>0.20<br>0.03<br>0.01<br>0.00 | CHD4_MOUSE<br>RL12_MOUSE<br>ATP5J_MOUSE<br>TNNI2_MOUSE<br>SWP70_MOUSE<br>LASP1_MOUSE<br>MYL1_MOUSE | E9QAS5_MOUSE<br>E9QAD6_MOUSE<br>E9QAD6_MOUSE<br>D3Z6Z7_MOUSE<br>A2AG6H_MOUSE<br>E0CZ30_MOUSE                                   | Chromodomain-helicase-DNA-binding protein 4;<br>60S ribosomal protein L12;<br>ATP synthase-coupling factor 6, mitochondrial;<br>Troponin I, fast skeletal muscle;<br>Switch-associated protein 70;<br>LIM and SH3 domain protein 1;<br>Myosin light chain 1/3, skeletal muscle isoform; | 0.25 - 0.75<br>0.25 - 0.75<br>0.25 - 0.75<br>0.15 - 0.25<br>0.25 - 0.75<br>0.25 - 0.75<br>0.00 - 0.15           |                                                                         |
| LLTKLPGYV<br>LEEVTKMKQIC<br>QEHEKGVRSW                                                       | KEVKCDMEVSCPGEVTCR<br>KEVYENYPAYDLTER<br>KGDSPVANGAEPAGQR                                                                         | N-ter +28.03 Da, K +28.03 Da, C +57.02 Da<br>N-ter +34.06 Da, K +34.06 Da<br>N-ter +28.03 Da, K +28.03 Da                                                                                                                                                                              | 46.7<br>41.4<br>27.8                                 | 55.2<br>42.1<br>33.1                                 | 4<br>3<br>3                     | 2491.21<br>1957.09<br>1723.91                                             | 2.30<br>-1.52<br>0.58                                    | 0.73<br>0.26<br>0.05                                 | GRN_MOUSE<br>DEK_MOUSE<br>EPN3_MOUSE                                                               | Q3U9N4_MOUSE<br>E9Q1Q2_MOUSE                                                                                                   | Granulins;<br>Protein DEK;<br>Epsin-3;                                                                                                                                                                                                                                                  | PC cell-derived growth factor;Proepithelin;<br>EPS-15-interacting protein 3;                                    | 0.85 - 1.00<br>0.00 - 0.15<br>0.25 - 0.75                               |

| Non Prime Site | Prime Site              | Modifications                             | Hyperscore | Mass error in ppm | Charge | Precursor neutral mass in Da | Fold change (log <sub>2</sub> ) of ASAPRatio | FC-error of ASAPRatio | Uniprot ID 1 | Uniprot ID 2 | Protein Name 1                                            | Protein Name 2                                                                                                                                      | Quantile    |
|----------------|-------------------------|-------------------------------------------|------------|-------------------|--------|------------------------------|----------------------------------------------|-----------------------|--------------|--------------|-----------------------------------------------------------|-----------------------------------------------------------------------------------------------------------------------------------------------------|-------------|
| EIVPVLVSSR     | KGLTEVKIDFFPR           | N-ter +28.03 Da, K +28.03 Da              | 38.1       | 68.6              | 4      | 1615.05                      | 0.35                                         | 0.04                  | THIC_MOUSE   | Q80X81_MOUSE | Acetyl-CoA acetyltransferase, cytosolic;                  | Cytosolic acetoacetyl-CoA thiolase;                                                                                                                 | 0.25 - 0.75 |
| ISMPDVLNDF     | KGPKLKGDEIASVPEMEADLR   | N-ter +28.03 Da, K +28.03 Da              | 26.6       | 81.5              | 4      | 2394.52                      | 0.10                                         | 0.01                  | E9Q616_MOUSE |              |                                                           |                                                                                                                                                     | 0.25 - 0.75 |
| MSMN           | KGPTLDGDLPEQENVLQR      | N-ter +28.03 Da, K +28.03 Da              | 46.8       | 59.5              | 4      | 2177.30                      | 0.21                                         | 0.04                  | PLIN1_MOUSE  |              | Perilipin-1;                                              | Lipid droplet-associated protein;Perilipin A;                                                                                                       | 0.25 - 0.75 |
| RIGRGRFR       | KGVAINMVTEEDKR          | N-ter +28.03 Da, K +28.03 Da              | 31.5       | 53.4              | 4      | 1673.01                      | -0.71                                        | 0.08                  | IF4A1_MOUSE  |              | Eukaryotic initiation factor 4A-I;                        | ATP-dependent RNA helicase eIF4A-1;                                                                                                                 | 0.25 - 0.75 |
| AAAAAVYQTQ     | KHSPQEAHPVQYER          | N-ter +28.03 Da, K +28.03 Da              | 22.7       | 67.8              | 4      | 1761.02                      | 0.63                                         | 0.11                  | CNTRF_MOUSE  | Q9D586_MOUSE | Ciliary neurotrophic factor receptor subunit alpha;       |                                                                                                                                                     | 0.25 - 0.75 |
| DKSNKAAWG      | KIGGHGAEGAEALER         | N-ter +34.06 Da, K +34.06 Da              | 33.7       | 53.9              | 4      | 1725.04                      | -0.97                                        | 0.08                  | HBA_MOUSE    | Q91V88_MOUSE | Hemoglobin subunit alpha;                                 | Alpha-globin;Hemoglobin alpha chain;                                                                                                                | 0.15 - 0.25 |
| NSSPSAKDIK     | KILDSVGEADDDR           | N-ter +28.03 Da, K +28.03 Da              | 40.3       | 48.1              | 3      | 1600.91                      | -0.89                                        | 0.15                  | RLA2_MOUSE   |              | 60S acidic ribosomal protein P2;                          |                                                                                                                                                     | 0.15 - 0.25 |
| QSNVNLAKFR     | KIQHELEEAER             | N-ter +34.06 Da, K +34.06 Da              | 27.7       | 50.3              | 4      | 1577.95                      | -2.56                                        | 0.45                  | MYH4_MOUSE   | MYH1_MOUSE   | Myosin-4;                                                 | Myosin heavy chain 2b;Myosin heavy chain 4;                                                                                                         | 0.00 - 0.15 |
| QDAYVLLSEK     | KISSVQSIIVPALEIANHR     | N-ter +28.03 Da, K +28.03 Da              | 46.6       | 59.8              | 4      | 2088.33                      | 1.36                                         | 0.08                  | CH60_MOUSE   |              | 60 kDa heat shock protein, mitochondrial;                 |                                                                                                                                                     | 0.75 - 0.85 |
| EDTMTEVKAY     | KKELEEQLGPVAEETR        | N-ter +28.03 Da, K +28.03 Da              | 28.1       | 58.3              | 4      | 1939.18                      | 0.06                                         | 0.00                  | APOE_MOUSE   | E9Q327_MOUSE | Apolipoprotein E;                                         |                                                                                                                                                     | 0.25 - 0.75 |
| STFKNTEISF     | KLGVFEDEITADDR          | N-ter +28.03 Da, K +28.03 Da              | 30.3       | 55.0              | 3      | 1662.94                      | 0.45                                         | 0.10                  | FABP4_MOUSE  |              | Fatty acid-binding protein, adipocyte;                    |                                                                                                                                                     | 0.25 - 0.75 |
| DYISDLDLQR     | KLLSVVDDEAFIR           | N-ter +28.03 Da, K +28.03 Da              | 37.8       | 56.5              | 3      | 1623.98                      | -1.22                                        | 0.11                  | PYGM_MOUSE   | E9PUM3_MOUSE | Glycogen phosphorylase, muscle form;                      | Myophosphorylase;                                                                                                                                   | 0.15 - 0.25 |
| QRGAIVIKAR     | KLSSAMSAAKAIADHIR       | N-ter +28.03 Da, K +28.03 Da              | 29.5       | 63.5              | 4      | 1853.17                      | 0.51                                         | 0.05                  | MDHC_MOUSE   |              | Malate dehydrogenase, cytoplasmic;                        | Cytosolic malate dehydrogenase;                                                                                                                     | 0.25 - 0.75 |
| SDRKYEVAR      | KLIVILEGELER            | N-ter +28.03 Da, K +28.03 Da              | 35.6       | 50.0              | 3      | 1353.89                      | 2.20                                         | 0.24                  | TPM2_MOUSE   | A2AIM4_MOUSE | Tropomyosin beta chain;                                   | Beta-tropomyosin;Tropomyosin-2;                                                                                                                     | 0.85 - 1.00 |
| GPSAGDVEAI     | KNAIANASTLAEVER         | N-ter +34.06 Da, K +34.06 Da              | 34.6       | 48.6              | 3      | 1654.05                      | 0.15                                         | 0.02                  | RU2A_MOUSE   |              | U2 small nuclear ribonucleoprotein A';                    |                                                                                                                                                     | 0.25 - 0.75 |
| M              | KNPFAHLAEPLDAAQPKR      | N-ter +34.06 Da, K +34.06 Da              | 68.8       | 74.4              | 4      | 2292.50                      | 0.23                                         | 0.02                  | ACOC_MOUSE   | Q8VDC3_MOUSE | Cytoplasmic aconitate hydratase;                          | Citrate hydro-lyase;Iron regulatory protein                                                                                                         | 0.25 - 0.75 |
| MKKKILAEER     | KPLNIDHLSDDKLR          | N-ter +34.06 Da, K +34.06 Da              | 19.1       | 49.1              | 4      | 1765.18                      | -1.74                                        | 0.35                  | TNNT3_MOUSE  | A2A6J0_MOUSE | Troponin T, fast skeletal muscle;                         | Fast skeletal muscle troponin T;                                                                                                                    | 0.00 - 0.15 |
| M              | KPPAACAGDVVDAASPSTVNHRL | N-ter +28.03 Da, K +28.03 Da, C +57.02 Da | 71.6       | 58.0              | 4      | 2459.40                      | 0.99                                         | 0.20                  | THOP1_MOUSE  |              | Thimet oligopeptidase;                                    |                                                                                                                                                     | 0.75 - 0.85 |
| LSTFQMQWIS     | KQEYDEAGPSIVHR          | N-ter +28.03 Da, K +28.03 Da              | 49.0       | 63.6              | 4      | 1863.97                      | -0.52                                        | 0.09                  | ACTA_MOUSE   | ACTA_MOUSE   | Actin, alpha skeletal muscle;                             | Alpha-actin-1;                                                                                                                                      | 0.25 - 0.75 |
| LSTFQMQWIS     | KQEYDESGPSIVHR          | N-ter +28.03 Da, K +28.03 Da              | 44.4       | 62.0              | 4      | 1699.96                      | 0.55                                         | 0.07                  | ACTB_MOUSE   | ACTG_MOUSE   | Actin, cytoplasmic 1;                                     | Beta-actin;                                                                                                                                         | 0.25 - 0.75 |
| DTGMNHLLL      | KQFELNHQNPMTFESR        | N-ter +28.03 Da, K +28.03 Da              | 32.4       | 65.9              | 4      | 2181.22                      | 3.24                                         | 1.37                  | NUCB2_MOUSE  |              | Nucleobindin-2;                                           | DNA-binding protein NEFA;                                                                                                                           | 0.85 - 1.00 |
| LDPEGKTIK      | KQFLEELLTQCDDR          | N-ter +28.03 Da, K +28.03 Da, C +57.02 Da | 55.0       | 56.6              | 3      | 1836.05                      | 0.66                                         | 0.13                  | MLRS_MOUSE   |              | Myosin regulatory light chain 2, skeletal muscle isoform; | Fast skeletal myosin light chain 2;MLC2F;                                                                                                           | 0.25 - 0.75 |
| FKRSTPFFNW     | KQIEGSDLSLQKR           | N-ter +28.03 Da, K +28.03 Da              | 38.0       | 47.6              | 4      | 1672.03                      | -0.45                                        | 0.05                  | DMKN_MOUSE   | E9QLW7_MOUSE | Dermokine;                                                | Epidermis-specific secreted protein SK30/SK89;                                                                                                      | 0.25 - 0.75 |
| FVREPPIMVT     | KQLEDMNAYCGER           | N-ter +34.06 Da, K +34.06 Da, C +57.02 Da | 38.7       | 57.0              | 3      | 1680.92                      | -4.06                                        | 0.68                  | D3YU50_MOUSE | Q6P6L5_MOUSE |                                                           |                                                                                                                                                     | 0.00 - 0.15 |
| AGLILPGILA     | KSIGTLDSPCKDPTR         | N-ter +28.03 Da, K +28.03 Da, C +57.02 Da | 20.1       | 55.8              | 4      | 1776.13                      | 0.53                                         | 0.14                  | CDSN_MOUSE   |              | Corneodesmosin;                                           |                                                                                                                                                     | 0.25 - 0.75 |
| ATAASSSLE      | KSVELPDGQVITIGNER       | N-ter +28.03 Da, K +28.03 Da              | 46.6       | 48.4              | 3      | 1974.14                      | 1.84                                         | 0.31                  | ACTC_MOUSE   | ACTA_MOUSE   | Actin, alpha cardiac muscle 1;                            | Alpha-cardiac actin;                                                                                                                                | 0.85 - 1.00 |
| EINRVVKEMY     | KTDLEKDIISDTSGDFR       | N-ter +28.03 Da, K +28.03 Da              | 38.6       | 61.3              | 4      | 2023.17                      | 0.41                                         | 0.06                  | ANXA2_MOUSE  | B0V2N7_MOUSE | Annexin A2;                                               | Annexin II;Annexin-2;Calpactin I heavy chain;Calpactin-1 heavy chain;Chromobindin-8;Lipocortin II;Placental anticoagulant protein IV;Protein I p36; | 0.25 - 0.75 |
| DFHLLNEVN      | KTDPGILKLTENR           | N-ter +28.03 Da, K +28.03 Da              | 23.8       | 54.2              | 4      | 1568.01                      | -1.29                                        | 0.19                  | Q3UWK8_MOUSE |              |                                                           |                                                                                                                                                     | 0.15 - 0.25 |
| NLHASNRLQ      | KTGTAEMSSILEER          | N-ter +34.06 Da, K +34.06 Da              | 45.9       | 48.5              | 3      | 1618.97                      | -0.40                                        | 0.08                  | ATPA_MOUSE   | D6R16_MOUSE  | ATP synthase subunit alpha, mitochondrial;                |                                                                                                                                                     | 0.25 - 0.75 |
| HLEEVVLAML     | KTPAQFDADLR             | N-ter +28.03 Da, K +28.03 Da              | 43.4       | 54.9              | 3      | 1445.83                      | 0.77                                         | 0.05                  | ANXA1_MOUSE  | E9QA30_MOUSE | Annexin A1;                                               | Annexin I;Annexin-2;Calpactin II;Calpactin-2;Chromobindin-9;Lipocortin I;Phospholipase A2 inhibitory protein;p35;                                   | 0.25 - 0.75 |
| EEGPRKDG       | KVDVVGATGQAGGSCSR       | N-ter +28.03 Da, K +28.03 Da, C +57.02 Da | 55.0       | 41.3              | 3      | 1774.97                      | 1.52                                         | 0.39                  | IF4B_MOUSE   | Q3TDD8_MOUSE | Eukaryotic translation initiation factor 4B;              |                                                                                                                                                     | 0.75 - 0.85 |
| GILHENFQTL     | KVEDNFEDIKPPVR          | N-ter +28.03 Da, K +28.03 Da              | 32.0       | 56.0              | 4      | 1983.21                      | 1.36                                         | 0.14                  | DC1L1_MOUSE  |              | Cytoplasmic dynein 1 light intermediate chain 1;          | Dynein light chain A,Dynein light intermediate chain 1, cytosolic;                                                                                  | 0.75 - 0.85 |
| AKLSDGVAVL     | KVGGTSDVVEKDKDR         | N-ter +28.03 Da, K +28.03 Da              | 27.0       | 73.6              | 4      | 1872.17                      | 2.31                                         | 0.70                  | CH60_MOUSE   |              | 60 kDa heat shock protein, mitochondrial;                 |                                                                                                                                                     | 0.85 - 1.00 |
| LSPMSVNAV      | KVIDPATATSVDLR          | N-ter +28.03 Da, K +28.03 Da              | 42.7       | 43.6              | 3      | 1540.95                      | -0.03                                        | 0.00                  | TCPD_MOUSE   |              | T-complex protein 1 subunit delta;                        | A45;CCT-delta;                                                                                                                                      | 0.25 - 0.75 |
| SINQGLDLRL     | KVSHQGYGSTTEFEPR        | N-ter +28.03 Da, K +28.03 Da              | 22.4       | 63.1              | 4      | 2007.10                      | -0.34                                        | 0.10                  | AMRP_MOUSE   | F6WMD1_MOUSE | Alpha-2-macroglobulin receptor-associated protein;        |                                                                                                                                                     | 0.25 - 0.75 |
| NPNRVAQTK      | KVTQLDLDPKELSR          | N-ter +28.03 Da, K +28.03 Da              | 26.9       | 57.0              | 4      | 1782.13                      | -0.74                                        | 0.14                  | HAP28_MOUSE  |              | 28 kDa heat- and acid-stable phosphoprotein;              |                                                                                                                                                     | 0.25 - 0.75 |
| RQELKARAY      | LAEKYEWDAEAR            | N-ter +34.06 Da, K +34.06 Da              | 30.4       | 48.5              | 3      | 1646.97                      | -1.74                                        | 0.29                  | EF2_MOUSE    |              | Elongation factor 2;                                      |                                                                                                                                                     | 0.00 - 0.15 |
| EQMRESLAQR     | LAELKSNPTLNEYHTR        | N-ter +28.03 Da, K +28.03 Da              | 33.0       | 55.3              | 4      | 1941.14                      | 0.39                                         | 0.04                  | APOA1_MOUSE  | Q8BPDS_MOUSE | Apolipoprotein A-1;                                       | Apolipoprotein A1;                                                                                                                                  | 0.25 - 0.75 |
| KMSPAKSIND     | LAPPEWDWR               | N-ter +28.03 Da                           | 27.6       | 63.3              | 2      | 1196.67                      | 1.21                                         | 0.19                  | CATF_MOUSE   |              | Cathepsin F;                                              |                                                                                                                                                     | 0.75 - 0.85 |
| FDMTSKFLTA     | LAQGVINEEALSVELDR       | N-ter +28.03 Da                           | 59.4       | 38.5              | 3      | 2099.16                      | 0.64                                         | 0.14                  | PDC61_MOUSE  | B8JL8_MOUSE  | Programmed cell death 6-interacting protein;              | ALG-2-interacting protein 1;ALG-2-interacting protein X;E2F1-inducible protein;Eig2;                                                                | 0.25 - 0.75 |
| DALKRGLREH     | LCEQQAEALDYLCGR         | N-ter +34.06 Da, C +57.02 Da              | 34.0       | 79.0              | 3      | 1787.98                      | -3.32                                        | 1.00                  | FA65C_MOUSE  |              | Protein FAM65C;                                           |                                                                                                                                                     | 0.00 - 0.15 |



| Non Prime Site | Prime Site             | Modifications                                                             | Hyperscore | Mass error in ppm | Charge | Precursor neutral mass in Da | Fold change (log <sub>2</sub> ) of ASAPRatio | FC-error of ASAPRatio | Uniprot ID 1 | Uniprot ID 2 | Protein Name 1                                                        | Protein Name 2                                                                                                                                                            | Quantile    |
|----------------|------------------------|---------------------------------------------------------------------------|------------|-------------------|--------|------------------------------|----------------------------------------------|-----------------------|--------------|--------------|-----------------------------------------------------------------------|---------------------------------------------------------------------------------------------------------------------------------------------------------------------------|-------------|
| DOAGRFHVNL     | LCGEEQGADAAALHFNPR     | N-ter +28.03 Da, C +57.02 Da                                              | 66.1       | 52.8              | 3      | 1911.99                      | -0.54                                        | 0.16                  | Q9CRB1_MOUSE | LEG7_MOUSE   |                                                                       |                                                                                                                                                                           | 0.25 - 0.75 |
| NRVMMVAKKF     | LDAGHKLNFVAASR         | N-ter +34.06 Da, K +34.06 Da<br>N-ter +34.06 Da, K +34.06 Da, C +57.02 Da | 25.3       | 60.8              | 4      | 1566.03                      | -2.56                                        | 0.30                  | PDIA3_MOUSE  |              | Protein disulfide-isomerase A3;                                       | 58 kDa glucose-regulated protein;58 kDa microsomal protein;Disulfide isomerase ER-60;Endoplasmic reticulum resident protein 57;Endoplasmic reticulum resident protein 60; | 0.00 - 0.15 |
| SASGTLLLEA     | LDLILPPTPTDKPLR        | N-ter +28.03 Da, C +57.02 Da                                              | 21.0       | 49.5              | 4      | 1959.26                      | -2.40                                        | 0.13                  | EF1A1_MOUSE  | D3Y268_MOUSE | Elongation factor 1-alpha 1;                                          | Factor 1 A-1;                                                                                                                                                             | 0.00 - 0.15 |
| LSYSKIKHLR     | LDGNPLTQSSLPDMEYCLR    | N-ter +28.03 Da, C +57.02 Da                                              | 42.8       | 54.1              | 3      | 2333.23                      | 3.62                                         | 0.20                  | LUM_MOUSE    |              | Lumican;                                                              | Keratan sulfate proteoglycan lumican;                                                                                                                                     | 0.85 - 1.00 |
| ADTFLEHMCR     | LDIDSAPITAR            | N-ter +28.03 Da                                                           | 40.8       | 35.9              | 2      | 1198.70                      | 0.88                                         | 0.08                  | KPYM_MOUSE   |              | Pyruvate kinase isozymes M1/M2;                                       | Pyruvate kinase muscle isozyme;                                                                                                                                           | 0.25 - 0.75 |
| PLQKERGVKL     | LDISELNTVGAGR          | N-ter +28.03 Da                                                           | 29.5       | 41.0              | 3      | 1371.79                      | 0.03                                         | 0.00                  | NELFA_MOUSE  |              | Negative elongation factor A;                                         | Wolf-Hirschhorn syndrome candidate 2 homolog;                                                                                                                             | 0.25 - 0.75 |
| LAKMFKPQAL     | LDKAKTNQGWLDSSR        | N-ter +34.06 Da, K +34.06 Da                                              | 27.2       | 54.7              | 4      | 1820.16                      | -2.84                                        | 0.20                  | FERM2_MOUSE  | A6X941_MOUSE | Fermitin family homolog 2;                                            | Kindlin-2;Pleckstrin homology domain-containing family C member 1;                                                                                                        | 0.00 - 0.15 |
| QHHDYNTYTF     | LDLNLDSLKFR            | N-ter +28.03 Da, K +28.03 Da                                              | 24.5       | 59.3              | 3      | 1388.89                      | -5.64                                        | 2.82                  | NDUV3_MOUSE  | Q3U422_MOUSE | NADH dehydrogenase [ubiquinone] flavoprotein 3, mitochondrial;        | Complex I-9kD;NADH-ubiquinone oxidoreductase 9 kDa subunit;                                                                                                               | 0.00 - 0.15 |
| PSPEGALHL      | LDLPCTPPPPAPIPSVR      | N-ter +28.03 Da, C +57.02 Da                                              | 46.7       | 48.9              | 3      | 1854.10                      | 1.66                                         | 0.19                  | AP1G2_MOUSE  |              | AP-1 complex subunit gamma-like 2;                                    | Gamma2-adaptin;                                                                                                                                                           | 0.85 - 1.00 |
| SGTRSSELC      | LDLPEAPDDPAALETR       | N-ter +28.03 Da                                                           | 29.6       | 41.7              | 3      | 1749.95                      | -0.52                                        | 0.07                  | KANK2_MOUSE  |              | KN motif and ankyrin repeat domain-containing protein 2;              | Ankyrin repeat domain-containing protein 25;                                                                                                                              | 0.25 - 0.75 |
| GLPTSLTLY      | LDNNKISNPDEYFKR        | N-ter +28.03 Da, K +28.03 Da                                              | 25.9       | 57.8              | 4      | 2049.21                      | 0.71                                         | 0.12                  | LUM_MOUSE    |              | Lumican;                                                              | Keratan sulfate proteoglycan lumican;                                                                                                                                     | 0.25 - 0.75 |
| EKSAAFAKI      | LDPAYQVQKGGKVR         | N-ter +34.06 Da, K +34.06 Da                                              | 19.9       | 59.6              | 4      | 1647.12                      | -3.18                                        | 0.58                  | D3YU50_MOUSE | Q6P6L5_MOUSE |                                                                       |                                                                                                                                                                           | 0.00 - 0.15 |
| SPSAKDIKI      | LDVSGIEADDDR           | N-ter +28.03 Da                                                           | 51.9       | 45.7              | 2      | 1331.68                      | -1.03                                        | 0.08                  | RLA2_MOUSE   |              | 60S acidic ribosomal protein P2;                                      |                                                                                                                                                                           | 0.15 - 0.25 |
| KTMVDDFAQF     | LDTCKAADKDTCFSTEGPNLVR | N-ter +28.03 Da, K +28.03 Da, C +57.02 Da                                 | 42.0       | 61.2              | 4      | 2842.50                      | 2.87                                         | 0.86                  | ALBU_MOUSE   |              | Serum albumin;                                                        |                                                                                                                                                                           | 0.85 - 1.00 |
| NASGVSLLEA     | LDLILPPTPTDKPLR        | N-ter +34.06 Da, K +34.06 Da                                              | 25.3       | 39.9              | 4      | 1900.25                      | -2.74                                        | 0.18                  | EF1A2_MOUSE  | B7ZBW3_MOUSE | Elongation factor 1-alpha 2;                                          | Eukaryotic elongation factor 1 A-2;Statin-S1;                                                                                                                             | 0.00 - 0.15 |
| KGQWLTLLEA     | LDLTLNHLR              | N-ter +28.03 Da                                                           | 32.0       | 55.6              | 3      | 1107.70                      | -0.01                                        | 0.01                  | LYAG_MOUSE   |              | Lysosomal alpha-glucosidase;                                          | Acid maltase;                                                                                                                                                             | 0.25 - 0.75 |
| VEPEMLPTQV     | LDTYQEATVEKTLR         | N-ter +34.06 Da, K +34.06 Da                                              | 22.6       | 52.8              | 4      | 1896.24                      | -1.64                                        | 0.21                  | TITIN_MOUSE  | F6ZV7_MOUSE  | Titin;                                                                | Connectin;                                                                                                                                                                | 0.00 - 0.15 |
| TGTGTLVLL      | LDVNDNAPIPEPR          | N-ter +28.03 Da                                                           | 29.6       | 63.9              | 3      | 1476.85                      | 2.84                                         | 0.31                  | CADH1_MOUSE  |              | Cadherin-1;                                                           | ARC-1;Epithelial cadherin;Uvomorulin;                                                                                                                                     | 0.85 - 1.00 |
| HGHHPHGDF      | LDYGPCDPPSNSQELKQYHR   | N-ter +28.03 Da, K +28.03 Da, C +57.02 Da                                 | 31.2       | 60.5              | 4      | 2516.33                      | -0.20                                        | 0.04                  | HRG_MOUSE    |              | Histidine-rich glycoprotein;                                          | Histidine-proline-rich glycoprotein;                                                                                                                                      | 0.25 - 0.75 |
| KDGASGTTL      | LEALDCLPPTPTDKPLR      | N-ter +28.03 Da, K +28.03 Da, C +57.02 Da                                 | 38.3       | 61.3              | 4      | 2260.40                      | -2.74                                        | 0.18                  | EF1A1_MOUSE  | D3Y268_MOUSE | Elongation factor 1-alpha 1;                                          | Elongation factor Tu;Eukaryotic elongation factor 1 A-1;                                                                                                                  | 0.00 - 0.15 |
| KEGNASGVL      | LEALDILPPTPTDKPLR      | N-ter +34.06 Da, K +34.06 Da                                              | 39.5       | 63.3              | 4      | 2213.48                      | -3.84                                        | 0.55                  | EF1A2_MOUSE  | B7ZBW3_MOUSE | Elongation factor 1-alpha 2;                                          | Eukaryotic elongation factor 1 A-2;Statin-S1;                                                                                                                             | 0.00 - 0.15 |
| VLPDMYSTY      | LEALGIKEGTIPPEYR       | N-ter +28.03 Da, K +28.03 Da                                              | 27.0       | 50.4              | 3      | 1841.12                      | -0.45                                        | 0.02                  | ICAL_MOUSE   | Q921U7_MOUSE | Calpastatin;                                                          | Calpain inhibitor;                                                                                                                                                        | 0.25 - 0.75 |
| PLLLCEGAQA     | LECYSCVQKADGCSPPHR     | N-ter +28.03 Da, K +28.03 Da, C +57.02 Da                                 | 58.1       | 66.8              | 4      | 2237.12                      | 2.97                                         | 0.93                  | LYPD3_MOUSE  |              | Ly6/PLAUR domain-containing protein 3;                                | GPI-anchored metastasis-associated protein C4.4A homolog;                                                                                                                 | 0.85 - 1.00 |
| EKGKTIKKQF     | LEELLTQCDR             | N-ter +34.06 Da, C +57.02 Da                                              | 24.8       | 31.1              | 3      | 1410.77                      | -1.56                                        | 0.18                  | MLRS_MOUSE   |              | Myosin regulatory light chain 2, skeletal muscle isoform;             | Fast skeletal myosin light chain 2;MLC2F;                                                                                                                                 | 0.00 - 0.15 |
| DFDENDILRE     | LEELSLEAQGIR           | N-ter +28.03 Da                                                           | 31.0       | 47.8              | 3      | 1384.82                      | 0.20                                         | 0.02                  | IF2P_MOUSE   |              | Eukaryotic translation initiation factor 5B;                          | Translation initiation factor IF-2;                                                                                                                                       | 0.25 - 0.75 |
| NDAYGPPSNF     | LEIDVSNPQTIVGVGR       | N-ter +34.06 Da                                                           | 34.9       | 42.3              | 3      | 1616.96                      | -1.12                                        | 0.12                  | SNX3_MOUSE   | Q78ZM0_MOUSE | Sorting nexin-3;                                                      | SOP3 protein;                                                                                                                                                             | 0.15 - 0.25 |
| YRIWRDTANW     | LEINPETGAIFTR          | N-ter +28.03 Da                                                           | 42.0       | 41.4              | 3      | 1487.86                      | -2.00                                        | 0.24                  | CADH1_MOUSE  |              | Cadherin-1;                                                           | ARC-1;Epithelial cadherin;Uvomorulin;                                                                                                                                     | 0.00 - 0.15 |
| TFLRMHHVLL     | LEVQVLEGLQCPESGR       | N-ter +28.03 Da, C +57.02 Da                                              | 43.0       | 44.6              | 3      | 1929.04                      | 0.37                                         | 0.08                  | TR112_MOUSE  |              | tRNA methyltransferase 112 homolog;                                   | TRM112-like protein;                                                                                                                                                      | 0.25 - 0.75 |
| AANDCKSLHT     | LFGDKLCAIPNLR          | N-ter +34.06 Da, K +34.06 Da, C +57.02 Da                                 | 15.0       | 51.2              | 3      | 1584.03                      | -0.32                                        | 0.04                  | ALBU_MOUSE   |              | Serum albumin;                                                        |                                                                                                                                                                           | 0.25 - 0.75 |
| LPEGTPEKY      | LGAEYMQSVGNMR          | N-ter +28.03 Da                                                           | 24.6       | 68.4              | 3      | 1482.80                      | -0.12                                        | 0.01                  | TRFE_MOUSE   | E9Q035_MOUSE | Serotransferrin;                                                      | Beta-1 metal-binding globulin;Siderophilin;                                                                                                                               | 0.25 - 0.75 |
| SPASHEIATN     | LGDFAISLYR             | N-ter +34.06 Da                                                           | 15.0       | 43.3              | 2      | 1187.73                      | 0.66                                         | 0.17                  | A1AT1_MOUSE  | A1AT2_MOUSE  | Alpha-1-antitrypsin 1-1;                                              | Alpha-1 protease inhibitor 1;Alpha-1-antipeptidase;Serine protease inhibitor 1-1;Serine protease inhibitor A1a;                                                           | 0.25 - 0.75 |
| TVKTVFVFCN     | LGEKFEDETTADGR         | N-ter +28.03 Da, K +28.03 Da                                              | 24.1       | 58.0              | 3      | 1493.82                      | -6.64                                        | 0.00                  | FABP5_MOUSE  | E9Q964_MOUSE | Fatty acid-binding protein, epidermal;                                | Epidermal-type fatty acid-binding protein;Fatty acid-binding protein 5;Keratinocyte lipid-binding protein;Psoriasis-associated fatty acid-binding protein homolog;        | 0.00 - 0.15 |
| DAQSVLDAKE     | LGMEEPRVSSR            | N-ter +34.06 Da                                                           | 22.4       | 111.3             | 3      | 1357.84                      | -3.64                                        | 0.91                  | ARHL2_MOUSE  |              | Poly(ADP-ribose) glycohydrolase ARH3;                                 | ADP-ribosylhydrolase 3;[Protein ADP-ribosylarginine] hydrolase-like protein 2;                                                                                            | 0.00 - 0.15 |
| PEPQQVGTVS     | LHLGVTPSVLR            | N-ter +34.06 Da                                                           | 27.6       | 51.6              | 3      | 1224.84                      | -0.18                                        | 0.05                  | TPP1_MOUSE   |              | Tripeptidyl-peptidase 1;                                              | protease;Tripeptidyl aminopeptidase;Tripeptidyl-peptidase I;                                                                                                              | 0.25 - 0.75 |
| RALGVDRWRR     | LHTVYQSVELPETHQMLR     | N-ter +34.06 Da                                                           | 38.5       | 50.5              | 4      | 2214.28                      | 0.71                                         | 0.10                  | ACADS_MOUSE  |              | Short-chain specific acyl-CoA dehydrogenase, mitochondrial;           | Butyryl-CoA dehydrogenase;                                                                                                                                                | 0.25 - 0.75 |
| KHKTDLNHEN     | LKGGDLDPNYVLSR         | N-ter +34.06 Da, K +34.06 Da                                              | 46.8       | 37.1              | 3      | 1816.07                      | -1.12                                        | 0.12                  | KCRM_MOUSE   |              | Creatine kinase M-type;                                               | Creatine kinase M chain;M-CK;                                                                                                                                             | 0.15 - 0.25 |
| GQLLCSALYA     | LKGGMLFPKESPSR         | N-ter +28.03 Da, K +28.03 Da                                              | 26.8       | 57.1              | 4      | 1630.02                      | -0.18                                        | 0.03                  | BGLR_MOUSE   | Q99JK6_MOUSE | Beta-glucuronidase;                                                   |                                                                                                                                                                           | 0.25 - 0.75 |
| GCLVLPVGEA     | LKGPKEISGFEGDVTSLR     | N-ter +28.03 Da, K +28.03 Da                                              | 27.5       | 86.1              | 4      | 2016.30                      | -0.45                                        | 0.07                  | CLM9_MOUSE   |              | CMRF35-like molecule 9;                                               | CD300 antigen-like family member G;Nepmucin;                                                                                                                              | 0.25 - 0.75 |
| ELDGGLETLR     | LKLPVAVTADLR           | N-ter +28.03 Da, K +28.03 Da                                              | 35.3       | 46.2              | 3      | 1350.92                      | 2.40                                         | 0.36                  | ETFB_MOUSE   |              | Electron transfer flavoprotein subunit beta;                          |                                                                                                                                                                           | 0.85 - 1.00 |
| PDOAGRFHVNL    | LLCGEEQGADAAALHFNPR    | N-ter +28.03 Da, C +57.02 Da                                              | 68.4       | 54.2              | 3      | 2025.08                      | 0.85                                         | 0.33                  | LEG7_MOUSE   | Q9CRB1_MOUSE | Galectin-7;                                                           |                                                                                                                                                                           | 0.25 - 0.75 |
| KKILARRKP      | LNIDHLSDDKLR           | N-ter +34.06 Da, K +34.06 Da                                              | 25.4       | 59.2              | 4      | 1505.97                      | -1.64                                        | 0.41                  | TNNT3_MOUSE  | A2A6J0_MOUSE | Troponin T, fast skeletal muscle;                                     | Fast skeletal muscle troponin T;                                                                                                                                          | 0.00 - 0.15 |
| QVLVQSSSN      | LPDTSIPGGSTPTVQTPQLETR | N-ter +28.03 Da                                                           | 46.5       | 54.4              | 3      | 2421.41                      | -2.12                                        | 0.46                  | PGBM_MOUSE   | B1B0C7_MOUSE | Basement membrane-specific heparan sulfate proteoglycan core protein; |                                                                                                                                                                           | 0.00 - 0.15 |

| Non Prime Site | Prime Site                | Modifications                             | Hyperscore | Mass error in ppm | Charge | Precursor neutral mass in Da | Fold change (log <sub>2</sub> ) of ASAPRatio | FC-error of ASAPRatio | Uniprot ID 1 | Uniprot ID 2 | Protein Name 1                                                           | Protein Name 2                                                                                                                                                            | Quantile    |
|----------------|---------------------------|-------------------------------------------|------------|-------------------|--------|------------------------------|----------------------------------------------|-----------------------|--------------|--------------|--------------------------------------------------------------------------|---------------------------------------------------------------------------------------------------------------------------------------------------------------------------|-------------|
| PRKIISLSQL     | LQEDSLNVADLSSLR           | N-ter +28.03 Da                           | 54.5       | 43.4              | 3      | 1686.95                      | 0.40                                         | 0.06                  | PSME2_MOUSE  | E0C290_MOUSE | Proteasome activator complex subunit 2;                                  | 11S regulator complex subunit beta;Activator of multicatalytic protease subunit 2;Proteasome activator 28 subunit beta;                                                   | 0.25 - 0.75 |
| SRDGKALEQF     | LQEYFDGNLKR               | N-ter +34.06 Da, K +34.06 Da              | 28.9       | 40.1              | 3      | 1449.88                      | -1.60                                        | 0.34                  | PDIA3_MOUSE  |              | Protein disulfide-isomerase A3;                                          | 58 kDa glucose-regulated protein;58 kDa microsomal protein;Disulfide isomerase ER-60;Endoplasmic reticulum resident protein 57;Endoplasmic reticulum resident protein 60; | 0.00 - 0.15 |
| ARRQHLKSVM     | LQIAATELEKEESR            | N-ter +28.03 Da, K +28.03 Da              | 23.3       | 57.4              | 3      | 1672.00                      | 0.62                                         | 0.07                  | TNNI2_MOUSE  | A2AGK0_MOUSE | Troponin I, fast skeletal muscle;                                        | Troponin I, fast-twitch isoform;                                                                                                                                          | 0.25 - 0.75 |
| PAAGMRRRRR     | LQQEDGISFEYHR             | N-ter +28.03 Da                           | 31.2       | 49.6              | 3      | 1648.87                      | 0.38                                         | 0.06                  | CBPE_MOUSE   |              | Carboxypeptidase E;                                                      | Carboxypeptidase H;Enkephalin convertase;Prohormone-processing carboxypeptidase;                                                                                          | 0.25 - 0.75 |
| DESTGSIAGR     | LQSIGTENTEENRR            | N-ter +28.03 Da                           | 26.1       | 49.8              | 3      | 1673.92                      | 2.72                                         | 0.38                  | ALDOA_MOUSE  | Q9CPQ9_MOUSE | Fructose-bisphosphate aldolase A;                                        | Aldolase 1;Muscle-type aldolase;                                                                                                                                          | 0.85 - 1.00 |
| DESTGSIAGR     | LQSIGTENTEENR             | N-ter +28.03 Da                           | 33.7       | 48.0              | 3      | 1517.80                      | 0.52                                         | 0.04                  | ALDOA_MOUSE  | Q9CPQ9_MOUSE | Fructose-bisphosphate aldolase A;                                        | Aldolase 1;Muscle-type aldolase;                                                                                                                                          | 0.25 - 0.75 |
| NTFYSNKEIF     | LREUSNASDALDKIR           | N-ter +28.03 Da, K +28.03 Da              | 38.2       | 59.1              | 4      | 1869.18                      | 0.32                                         | 0.05                  | H590B_MOUSE  | ENPL_MOUSE   | Heat shock protein HSP 90-beta;                                          | Heat shock 84 kDa;Tumor-specific transplantation 84 kDa antigen;                                                                                                          | 0.25 - 0.75 |
| FGDKLCAIPN     | LRENYGELADCTCKEPPER       | N-ter +28.03 Da, K +28.03 Da, C +57.02 Da | 45.9       | 63.2              | 4      | 2423.27                      | 0.43                                         | 0.10                  | ALBU_MOUSE   |              | Serum albumin;                                                           |                                                                                                                                                                           | 0.25 - 0.75 |
| LPLPTFSSLN     | LRETNLESPLVDTHSKR         | N-ter +28.03 Da, K +28.03 Da              | 24.4       | 60.9              | 4      | 2163.33                      | 1.48                                         | 0.20                  | VIME_MOUSE   | E9PZV5_MOUSE | Vimentin;                                                                |                                                                                                                                                                           | 0.75 - 0.85 |
| ALSVLPDSRA     | LRPGDCEVCISYLGR           | N-ter +34.06 Da, C +57.02 Da              | 55.3       | 52.9              | 3      | 1828.02                      | 0.74                                         | 0.20                  | MANF_MOUSE   | Q3TMX5_MOUSE | Mesencephalic astrocyte-derived neurotrophic factor;                     | Arginine-rich protein;Protein ARMET;                                                                                                                                      | 0.25 - 0.75 |
| DIEPVEGRYM     | LSGGSDGVVVLVDLENASR       | N-ter +28.03 Da                           | 27.3       | 51.2              | 3      | 1978.10                      | -0.42                                        | 0.08                  | ERCC8_MOUSE  | D3YU16_MOUSE | DNA excision repair protein ERCC-8;                                      | Cockayne syndrome WD repeat protein CSA homolog;                                                                                                                          | 0.25 - 0.75 |
| KAEEKGHDL      | LSKVTLKNR                 | N-ter +28.03 Da, K +28.03 Da              | 17.8       | 65.9              | 3      | 1254.92                      | 6.71                                         | 1.67                  | FILL1_MOUSE  | E0CYM1_MOUSE | Filamin A-interacting protein 1-like;                                    | Protein down-regulated in ovarian cancer 1 homolog;                                                                                                                       | 0.85 - 1.00 |
| FQLIGIQDGY     | LSLLQDSGEVR               | N-ter +34.06 Da                           | 25.7       | 38.8              | 2      | 1249.76                      | -2.84                                        | 0.20                  | IF5A1_MOUSE  |              | Eukaryotic translation initiation factor 5A-1;                           | Eukaryotic initiation factor 5A isoform 1;eIF-4D;                                                                                                                         | 0.00 - 0.15 |
| LLVTLCQCSHA    | LSPTNCDASEPLAEKVLVDLINKGR | N-ter +34.06 Da, K +34.06 Da, C +57.02 Da | 39.7       | 58.9              | 4      | 2741.71                      | 0.93                                         | 0.47                  | HRG_MOUSE    |              | Histidine-rich glycoprotein;                                             | Histidine-proline-rich glycoprotein;                                                                                                                                      | 0.25 - 0.75 |
| RVAPEEHPTL     | LTEAPLNPKANR              | N-ter +28.03 Da, K +28.03 Da              | 23.0       | 57.1              | 3      | 1378.87                      | 1.91                                         | 0.35                  | ACTC_MOUSE   | ACTA_MOUSE   | Actin, alpha cardiac muscle 1;                                           | Alpha-cardiac actin;                                                                                                                                                      | 0.85 - 1.00 |
| LLIATGPTTA     | LTEDEKQTMVDLHNQYR         | N-ter +28.03 Da, K +28.03 Da              | 23.0       | 62.5              | 4      | 2175.20                      | 0.42                                         | 0.11                  | PI16_MOUSE   | D3Z6T6_MOUSE | Peptidase inhibitor 16;                                                  | Cysteine-rich protease inhibitor;                                                                                                                                         | 0.25 - 0.75 |
| GDYIERLWAY     | LTIEQLLEKR                | N-ter +28.03 Da, K +28.03 Da              | 22.3       | 50.8              | 3      | 1297.86                      | 3.50                                         | 1.38                  | ITH3_MOUSE   | F6ZJ7_MOUSE  | Inter-alpha-trypsin inhibitor heavy chain H3;                            |                                                                                                                                                                           | 0.85 - 1.00 |
| LLKNSPLVSR     | LTLYDIAHTPGVAADLSHIETR    | N-ter +28.03 Da                           | 72.9       | 58.9              | 4      | 2420.41                      | -6.64                                        | 0.00                  | MDHM_MOUSE   |              | Malate dehydrogenase, mitochondrial;                                     |                                                                                                                                                                           | 0.00 - 0.15 |
| ALTITASVQA     | LTPHYLTQKQDVER            | N-ter +28.03 Da, K +28.03 Da              | 20.6       | 65.4              | 4      | 1756.07                      | -0.71                                        | 0.13                  | RPN2_MOUSE   | A2ACG7_MOUSE | Dolichyl-diphosphooligosaccharide-protein glycosyltransferase subunit 2; | Dolichyl-diphosphooligosaccharide-protein glycosyltransferase 63 kDa subunit;Ribophorin II;Ribophorin-2;                                                                  | 0.25 - 0.75 |
| MEVNRKDIVF     | LVDGSSLSGPSNFAIR          | N-ter +28.03 Da                           | 29.1       | 46.8              | 3      | 1760.99                      | -0.52                                        | 0.03                  | E9PWQ3_MOUSE | D3YWD1_MOUSE |                                                                          |                                                                                                                                                                           | 0.25 - 0.75 |
| GMDGSLERV      | LVGELLTSPEVDERPCR         | N-ter +34.06 Da, C +57.02 Da              | 22.5       | 58.8              | 4      | 2116.27                      | -3.06                                        | 0.51                  | DEN5A_MOUSE  |              | DENN domain-containing protein 5A;                                       | Rab6-interacting protein 1;                                                                                                                                               | 0.00 - 0.15 |
| ALEVQGRDSR     | LVLEVAQHLGESTVR           | N-ter +28.03 Da                           | 46.9       | 48.5              | 3      | 1678.02                      | 0.36                                         | 0.05                  | ATPB_MOUSE   |              | ATP synthase subunit beta, mitochondrial;                                |                                                                                                                                                                           | 0.25 - 0.75 |
| TDQVIQFFIA     | LVNDPQPPEHLR              | N-ter +28.03 Da                           | 38.9       | 49.5              | 3      | 1441.84                      | 0.43                                         | 0.04                  | UB2L3_MOUSE  |              | Ubiquitin-conjugating enzyme E2 L3;                                      | UbcM4;Ubiquitin carrier protein L3;Ubiquitin-protein ligase L3;                                                                                                           | 0.25 - 0.75 |
| EVGGEALGRL     | LVVYPWTQR                 | N-ter +28.03 Da                           | 17.4       | 31.2              | 2      | 1188.70                      | 0.64                                         | 0.10                  | HBB1_MOUSE   | HBB2_MOUSE   | Hemoglobin subunit beta-1;                                               | Beta-1-globin;Hemoglobin beta-1 chain;Hemoglobin beta-major chain;                                                                                                        | 0.25 - 0.75 |
| GIWHNDNKSF     | LVVVNEEDHLR               | N-ter +28.03 Da                           | 46.5       | 56.4              | 3      | 1436.82                      | -1.56                                        | 0.23                  | KCRM_MOUSE   |              | Creatine kinase M-type;                                                  | Creatine kinase M chain;M-CK;                                                                                                                                             | 0.00 - 0.15 |
| KGSVAGGAVY     | LVYDQELGPSDKSEAAALR       | N-ter +34.06 Da, K +34.06 Da              | 39.2       | 47.3              | 3      | 2171.31                      | -1.84                                        | 0.26                  | QIL1_MOUSE   |              | Protein QIL1;                                                            |                                                                                                                                                                           | 0.00 - 0.15 |
| LRVPPRMDYR     | LYLGHNVYTAIR              | N-ter +28.03 Da                           | 40.2       | 50.6              | 3      | 1446.87                      | 1.62                                         | 0.22                  | TRFE_MOUSE   | E9Q035_MOUSE | Serotransferrin;                                                         | Beta-1 metal-binding globulin;Siderophilin;                                                                                                                               | 0.75 - 0.85 |
| VLGKPLSLAF     | LYMEKNLEEVPSALPR          | N-ter +34.06 Da, K +34.06 Da              | 20.1       | 45.1              | 3      | 2084.26                      | 0.19                                         | 0.04                  | PRELP_MOUSE  |              | Prolargin;                                                               | Proline-arginine-rich end leucine-rich repeat protein;                                                                                                                    | 0.25 - 0.75 |
| SCTFFLAVSG     | LYSSDDVIELTPSNFNR         | N-ter +28.03 Da                           | 49.6       | 50.8              | 3      | 2084.11                      | 0.37                                         | 0.08                  | PDIA6_MOUSE  | Q3TML0_MOUSE | Protein disulfide-isomerase A6;                                          | Thioredoxin domain-containing protein 7;                                                                                                                                  | 0.25 - 0.75 |
| EQKIGQPTLL     | LYVDAGAETMTOR             | N-ter +28.03 Da                           | 45.1       | 54.3              | 3      | 1481.80                      | -0.36                                        | 0.06                  | KAD1_MOUSE   |              | Adenylate kinase isoenzyme 1;                                            | ATP-AMP transphosphorylase 1;Myokinase;                                                                                                                                   | 0.25 - 0.75 |
| AHHAFGQGRD     | MAETFDQGAHHAFFGQGR        | N-ter +28.03 Da                           | 50.1       | 69.1              | 4      | 1944.00                      | 0.29                                         | 0.07                  | SBSN_MOUSE   | E9QP82_MOUSE | Suprabasin;                                                              |                                                                                                                                                                           | 0.25 - 0.75 |
| AREHAPSIIF     | MDEIDSIGSSR               | N-ter +28.03 Da                           | 32.8       | 38.2              | 2      | 1236.61                      | -0.29                                        | 0.02                  | PR58_MOUSE   | E9Q0L5_MOUSE | 26S protease regulatory subunit 8;                                       | 26S proteasome AAA-ATPase subunit RPT6;Proteasome 26S subunit ATPase 5;Proteasome subunit p45;p45/SUG;                                                                    | 0.25 - 0.75 |
| LKKAIKLVV      | MDSALEALSGLIGKVPBMWAKR    | N-ter +28.03 Da, K +28.03 Da              | 20.9       | 38.2              | 4      | 2685.56                      | 1.06                                         | 0.32                  | DYH12_MOUSE  | F6V109_MOUSE | Dynein heavy chain 12, axonemal;                                         | Axonemal beta dynein heavy chain 12;Axonemal dynein heavy chain 12-like protein;Axonemal dynein heavy chain 7-like protein;Ciliary dynein heavy chain 12;                 | 0.75 - 0.85 |
| SKMFEELKNR     | MDVLAQEVALLEK             | N-ter +28.03 Da, K +28.03 Da              | 42.4       | 49.4              | 3      | 1670.05                      | -1.64                                        | 0.31                  | TETN_MOUSE   | Q8CFZ6_MOUSE | Tetranectin;                                                             | C-type lectin domain family 3 member B;Plasminogen kringle 4-binding protein;                                                                                             | 0.00 - 0.15 |
| GKPLSLAF       | MEKNLEEVPSALPR            | N-ter +34.06 Da, K +34.06 Da              | 42.4       | 43.0              | 3      | 1808.09                      | -0.01                                        | 0.00                  | PRELP_MOUSE  |              | Prolargin;                                                               | Proline-arginine-rich end leucine-rich repeat protein;                                                                                                                    | 0.25 - 0.75 |
| KKPFELGKL      | MELHGGEGSSGKAAGDETGAIKVER | N-ter +34.06 Da, K +34.06 Da              | 41.8       | 62.8              | 4      | 2474.45                      | -2.84                                        | 1.42                  | R53A_MOUSE   | D3Z7W7_MOUSE | 40S ribosomal protein S3a;                                               | Protein TU-11;                                                                                                                                                            | 0.00 - 0.15 |
| ETLFPQFSFIG    | MESAGIHETTYNSIMKCDIDIR    | N-ter +28.03 Da, K +28.03 Da, C +57.02 Da | 33.9       | 62.6              | 4      | 2639.41                      | 2.83                                         | 0.70                  | ACTC_MOUSE   | ACTA_MOUSE   | Actin, alpha cardiac muscle 1;                                           | Alpha-cardiac actin;                                                                                                                                                      | 0.85 - 1.00 |
| DTPKKQALYL     | MFDTPQESPVKSPVVR          | N-ter +28.03 Da, K +28.03 Da              | 33.3       | 41.7              | 3      | 1870.04                      | 0.21                                         | 0.02                  | TACC2_MOUSE  | E9Q8T1_MOUSE | Transforming acidic coiled-coil-containing protein 2;                    |                                                                                                                                                                           | 0.25 - 0.75 |
| TYGICRAIRR     | MGESDDSLR                 | N-ter +28.03 Da                           | 26.3       | 32.3              | 2      | 1149.57                      | 0.35                                         | 0.04                  | RS21_MOUSE   |              | 40S ribosomal protein S21;                                               |                                                                                                                                                                           | 0.25 - 0.75 |
| RPRHQGVVMG     | MGQKDCYVGEAQSKR           | N-ter +34.06 Da, K +34.06 Da, C +57.02 Da | 26.0       | 63.4              | 4      | 1973.15                      | 0.99                                         | 0.45                  | ACTBL_MOUSE  |              | Beta-actin-like protein 2;                                               | Kappa-actin;                                                                                                                                                              | 0.75 - 0.85 |

| Non Prime Site | Prime Site                 | Modifications                             | Hyperscore | Mass error in ppm | Charge | Precursor neutral mass in Da | Fold change (log <sub>2</sub> ) of ASAPRatio | FC-error of ASAPRatio | Uniprot ID 1 | Uniprot ID 2 | Protein Name 1                                                                                                | Protein Name 2                                                                                                                                                     | Quantile    |
|----------------|----------------------------|-------------------------------------------|------------|-------------------|--------|------------------------------|----------------------------------------------|-----------------------|--------------|--------------|---------------------------------------------------------------------------------------------------------------|--------------------------------------------------------------------------------------------------------------------------------------------------------------------|-------------|
| RPRHQGVVMVG    | MGQKDSYVGDEAQSQR           | N-ter +34.06 Da, K +34.06 Da              | 25.7       | 60.6              | 4      | 1900.14                      | 1.08                                         | 0.30                  | ACTS_MOUSE   | ACTA_MOUSE   | Actin, alpha skeletal muscle;                                                                                 | Alpha-actin-1;                                                                                                                                                     | 0.75 - 0.85 |
| SVILQHLRMS     | MHTEAAEVLLER               | N-ter +34.06 Da                           | 44.1       | 52.8              | 3      | 1431.84                      | 0.03                                         | 0.01                  | HIBCH_MOUSE  | E0CX19_MOUSE | 3-hydroxyisobutyryl-CoA hydrolase, mitochondrial; CKL-like MARVEL transmembrane domain-containing protein 2B; | 3-hydroxyisobutyryl-coenzyme A hydrolase;                                                                                                                          | 0.25 - 0.75 |
| RELVPVYLTG     | MILMGVTFAFISIDLCLR         | N-ter +28.03 Da, C +57.02 Da              | 26.4       | 76.9              | 4      | 2221.37                      | 1.48                                         | 0.19                  | CLF2B_MOUSE  |              |                                                                                                               | Chemokine-like factor superfamily member 2B;                                                                                                                       | 0.75 - 0.85 |
| AGNKLAMQEF     | MILPVGASSFKAEAMR           | N-ter +34.06 Da, K +34.06 Da              | 34.6       | 49.3              | 3      | 1704.06                      | -0.06                                        | 0.01                  | ENOB_MOUSE   | Q5SX59_MOUSE | Beta-enolase;                                                                                                 |                                                                                                                                                                    | 0.25 - 0.75 |
|                | MKQLPILEPGDKPR             | N-ter +28.03 Da, K +28.03 Da              | 26.2       | 56.8              | 4      | 1705.09                      | -0.20                                        | 0.02                  | RABEK_MOUSE  | BOR054_MOUSE | Rab9 effector protein with kelch motifs;                                                                      |                                                                                                                                                                    | 0.25 - 0.75 |
|                | MKVFTVGPLPAEGR             | N-ter +34.06 Da, K +34.06 Da              | 33.0       | 48.7              | 3      | 1569.02                      | -0.74                                        | 0.16                  | GRHPR_MOUSE  | D6REG4_MOUSE | Glyoxylate reductase/hydroxyypyruvate reductase;                                                              |                                                                                                                                                                    | 0.25 - 0.75 |
| TARRQHLSKV     | MLQJAATELEKESRR            | N-ter +34.06 Da, K +34.06 Da              | 21.2       | 58.3              | 4      | 1971.22                      | -2.12                                        | 0.09                  | TNNI2_MOUSE  | A2A6K0_MOUSE | Troponin I, fast skeletal muscle;                                                                             | Troponin I, fast-twitch isoform;                                                                                                                                   | 0.00 - 0.15 |
|                |                            |                                           |            |                   |        |                              |                                              |                       |              |              |                                                                                                               |                                                                                                                                                                    |             |
| QLSKTEFLSF     | MNTELAFTKNQKDPGLVDR        | N-ter +28.03 Da, K +28.03 Da              | 26.5       | 56.1              | 4      | 2331.36                      | 2.11                                         | 0.44                  | S10AB_MOUSE  | F6S3J5_MOUSE | Protein S100-A11;                                                                                             |                                                                                                                                                                    | 0.85 - 1.00 |
|                |                            |                                           |            |                   |        |                              |                                              |                       |              |              |                                                                                                               |                                                                                                                                                                    |             |
| ILAQMTGTEY     | MQDPDEALRR                 | N-ter +34.06 Da                           | 27.3       | 57.3              | 3      | 1392.77                      | 0.33                                         | 0.07                  | LDB3_MOUSE   | E9PYJ9_MOUSE | LIM domain-binding protein 3;                                                                                 |                                                                                                                                                                    | 0.25 - 0.75 |
| TTMYPGIADR     | MQKEITALAPSTMKIIAPPER      | N-ter +28.03 Da, K +28.03 Da              | 41.1       | 62.4              | 4      | 2677.73                      | 2.31                                         | 0.36                  | ACTS_MOUSE   | ACTA_MOUSE   | Actin, alpha skeletal muscle;                                                                                 | Alpha-actin-1;                                                                                                                                                     | 0.85 - 1.00 |
| TTMYPGIADR     | MQKEITALAPSTMKIK           | N-ter +28.03 Da, K +28.03 Da              | 30.7       | 56.9              | 4      | 1901.22                      | 3.79                                         | 0.81                  | ACTC_MOUSE   | ACTA_MOUSE   | Actin, alpha cardiac muscle 1;                                                                                | Alpha-cardiac actin;                                                                                                                                               | 0.85 - 1.00 |
| TTMYPGIADR     | MQKEITALAPSTMK             | N-ter +28.03 Da, K +28.03 Da              | 44.6       | 41.7              | 3      | 1631.97                      | 0.75                                         | 0.09                  | ACTC_MOUSE   | ACTA_MOUSE   | Actin, alpha cardiac muscle 1;                                                                                | Alpha-cardiac actin;                                                                                                                                               | 0.25 - 0.75 |
| RIALQEDTNR     | MSANALAIIVFAPCILR          | N-ter +28.03 Da, C +57.02 Da              | 19.0       | 63.2              | 3      | 1774.08                      | -0.14                                        | 0.02                  | MYO9A_MOUSE  | D3Z3A8_MOUSE | Myosin-Ix;                                                                                                    | Unconventional myosin-9a;                                                                                                                                          | 0.25 - 0.75 |
|                |                            |                                           |            |                   |        |                              |                                              |                       |              |              |                                                                                                               | Protein phosphatase 2B regulatory subunit 1;Protein phosphatase 3 regulatory subunit B alpha isoform 1;                                                            |             |
| NSGSLVEEF      | MSLPELQQNPLVQR             | N-ter +28.03 Da                           | 35.9       | 43.7              | 3      | 1679.98                      | 0.60                                         | 0.04                  | CANB1_MOUSE  |              | Calcineurin subunit B type 1;                                                                                 |                                                                                                                                                                    | 0.25 - 0.75 |
| PGLGGNFASQ     | MSYGYDEKASAGVSPGPMGPSGR    | N-ter +28.03 Da, K +28.03 Da              | 57.6       | 48.5              | 3      | 2481.29                      | -3.18                                        | 0.87                  | CO1A1_MOUSE  | F8WGB7_MOUSE | Collagen alpha-1(I) chain;                                                                                    | Alpha-1 type 1 collagen;                                                                                                                                           | 0.00 - 0.15 |
| IVGRPRHOGV     | MVGMGQKDSYVGDEAQSQR        | N-ter +28.03 Da, K +28.03 Da              | 23.5       | 71.4              | 4      | 2169.21                      | 0.07                                         | 0.02                  | ACTS_MOUSE   | ACTA_MOUSE   | Actin, alpha skeletal muscle;                                                                                 | Alpha-actin-1;                                                                                                                                                     | 0.25 - 0.75 |
| DHHIVTPLTA     | MVIEADGDER                 | N-ter +28.03 Da                           | 33.0       | 33.7              | 2      | 1275.62                      | 1.38                                         | 0.08                  | ITIH2_MOUSE  |              | Inter-alpha-trypsin inhibitor heavy chain H2;                                                                 |                                                                                                                                                                    | 0.75 - 0.85 |
| ISKEWGFTKF     | NADEFEDMVAEKR              | N-ter +28.03 Da, K +28.03 Da              | 25.5       | 51.8              | 3      | 1608.83                      | -0.22                                        | 0.05                  | RL10_MOUSE   |              | 60S ribosomal protein L10;                                                                                    | Protein QM homolog;                                                                                                                                                | 0.25 - 0.75 |
|                |                            |                                           |            |                   |        |                              |                                              |                       |              |              |                                                                                                               |                                                                                                                                                                    |             |
| TIKKRLETTY     | NATEPVISFYDKR              | N-ter +28.03 Da, K +28.03 Da              | 34.8       | 44.3              | 3      | 1594.91                      | -0.38                                        | 0.05                  | KAD1_MOUSE   |              | Adenylate kinase isoenzyme 1;                                                                                 | ATP-AMP transphosphorylase 1;Myokinase;                                                                                                                            | 0.25 - 0.75 |
| TGGRRTWART     | NATLSVEPEGR                | N-ter +28.03 Da                           | 42.5       | 38.0              | 2      | 1199.66                      | -0.47                                        | 0.05                  | ACOT2_MOUSE  |              | Acyl-coenzyme A thioesterase 2, mitochondrial;                                                                | Acyl coenzyme A thioesterase;MTE-1;Very-long-chain acyl-CoA thioesterase;                                                                                          | 0.25 - 0.75 |
|                |                            |                                           |            |                   |        |                              |                                              |                       |              |              |                                                                                                               |                                                                                                                                                                    |             |
| FGVCHIFASF     | NDTFVHVDTLSGKETICR         | N-ter +28.03 Da, K +28.03 Da, C +57.02 Da | 25.3       | 64.1              | 4      | 2147.21                      | -0.07                                        | 0.01                  | RS14_MOUSE   | D3YVF4_MOUSE | 40S ribosomal protein S14;                                                                                    |                                                                                                                                                                    | 0.25 - 0.75 |
| FSKYLALNGR     | NDVGVTSASLAPGPSR           | N-ter +28.03 Da                           | 25.5       | 56.9              | 3      | 1651.95                      | -0.79                                        | 0.03                  | E9Q2R7_MOUSE |              |                                                                                                               |                                                                                                                                                                    | 0.25 - 0.75 |
|                |                            |                                           |            |                   |        |                              |                                              |                       |              |              |                                                                                                               |                                                                                                                                                                    |             |
| RDKRSALQSI     | NEWASQTTDGKLEPKVDKVER      | N-ter +34.06 Da, K +34.06 Da              | 39.8       | 59.4              | 4      | 2504.51                      | -2.18                                        | 0.50                  | SERPH_MOUSE  |              | Serpin H1;                                                                                                    | 47 kDa heat shock protein;Collagen-binding protein;Serine protease inhibitor I6;                                                                                   | 0.00 - 0.15 |
|                |                            |                                           |            |                   |        |                              |                                              |                       |              |              |                                                                                                               | Bone morphogenetic protein-binding endothelial cell precursor-derived regulator;Protein crossveinless-2;                                                           |             |
| KRDDLIGDGD     | NFKFDVDDFAESWR             | N-ter +28.03 Da, K +28.03 Da              | 25.9       | 58.3              | 3      | 1830.96                      | 2.46                                         | 0.50                  | BMPER_MOUSE  |              | BMP-binding endothelial regulator protein;                                                                    |                                                                                                                                                                    | 0.85 - 1.00 |
| DHPMLPNYK      | NFKGTIQELGQNYAVSGEIFVDR    | N-ter +28.03 Da, K +28.03 Da              | 22.7       | 41.1              | 4      | 2867.60                      | 4.37                                         | 1.03                  | TOP2B_MOUSE  | F6U5K2_MOUSE | DNA topoisomerase 2-beta;                                                                                     | DNA topoisomerase II, beta isozyme;                                                                                                                                | 0.85 - 1.00 |
|                |                            |                                           |            |                   |        |                              |                                              |                       |              |              |                                                                                                               | Phosphatase 2A inhibitor I2PP2A;Template-activating factor I;                                                                                                      |             |
| IPNFVWTFV      | NHPQVALLGDEEEDHEALYLR      | N-ter +28.03 Da                           | 41.5       | 57.3              | 4      | 2548.40                      | 3.96                                         | 0.83                  | SET_MOUSE    | A2BE93_MOUSE | Protein SET;                                                                                                  |                                                                                                                                                                    | 0.85 - 1.00 |
|                |                            |                                           |            |                   |        |                              |                                              |                       |              |              |                                                                                                               |                                                                                                                                                                    |             |
| TVRLPFGCHK     | NICSLTIQIKIPR              | N-ter +28.03 Da, K +28.03 Da, C +57.02 Da | 29.9       | 98.5              | 3      | 1599.08                      | 0.49                                         | 0.05                  | WIPI2_MOUSE  | D3YWK1_MOUSE | WD repeat domain phosphoinositide-interacting protein 2;                                                      |                                                                                                                                                                    | 0.25 - 0.75 |
| ILLWLYGADG     | NIVMTQSPKSMMSVGER          | N-ter +34.06 Da, K +34.06 Da              | 35.8       | 43.7              | 3      | 2049.16                      | -1.32                                        | 0.20                  | KV5A2_MOUSE  |              | Ig kappa chain V-V region MOPC 21;                                                                            |                                                                                                                                                                    | 0.15 - 0.25 |
| FLPMMQAISN     | NKDQGGYEDFVEGLR            | N-ter +34.06 Da, K +34.06 Da              | 45.4       | 47.5              | 3      | 1794.01                      | -1.12                                        | 0.34                  | E9PWG4_MOUSE | MYL1_MOUSE   |                                                                                                               |                                                                                                                                                                    | 0.15 - 0.25 |
| KAAQAQAVASY    | NMGSDSLYFR                 | N-ter +28.03 Da                           | 29.0       | 39.9              | 2      | 1379.67                      | 2.23                                         | 0.50                  | Q9D1B1_MOUSE |              |                                                                                                               |                                                                                                                                                                    | 0.85 - 1.00 |
|                |                            |                                           |            |                   |        |                              |                                              |                       |              |              |                                                                                                               |                                                                                                                                                                    |             |
| GALGCAICHG     | NPVDDICIAKPR               | N-ter +34.06 Da, K +34.06 Da, C +57.02 Da | 22.2       | 39.6              | 3      | 1464.90                      | -0.36                                        | 0.03                  | ANT3_MOUSE   |              | Antithrombin-III;                                                                                             | Serpin C1;                                                                                                                                                         | 0.25 - 0.75 |
|                |                            |                                           |            |                   |        |                              |                                              |                       |              |              |                                                                                                               | Proline-arginine-rich end leucine-rich repeat protein;                                                                                                             |             |
| PSLAFLYMEK     | NQLLEVPALPR                | N-ter +28.03 Da                           | 33.2       | 35.2              | 2      | 1379.79                      | 0.30                                         | 0.02                  | PRELP_MOUSE  |              | Prolargin;                                                                                                    |                                                                                                                                                                    | 0.25 - 0.75 |
| SGDSLTVASS     | NTDFAFSLYR                 | N-ter +28.03 Da                           | 33.8       | 51.2              | 2      | 1260.68                      | -1.09                                        | 0.19                  | SPA3G_MOUSE  | D3Z450_MOUSE | Serine protease inhibitor A3G;                                                                                | Serine protease inhibitor 2A;                                                                                                                                      | 0.15 - 0.25 |
| DIDSAPITAR     | NTGIICITGPASR              | N-ter +28.03 Da, C +57.02 Da              | 31.1       | 56.6              | 3      | 1386.81                      | 0.08                                         | 0.01                  | KPYM_MOUSE   |              | Pyruvate kinase isozymes M1/M2;                                                                               | Pyruvate kinase muscle isozyme;                                                                                                                                    | 0.25 - 0.75 |
|                |                            |                                           |            |                   |        |                              |                                              |                       |              |              |                                                                                                               | Cell surface antigen CD96;T cell-activated increased late expression protein;                                                                                      |             |
| SNSSMTTKDG     | NYLEASSGTDAKNSSR           | N-ter +34.06 Da, K +34.06 Da              | 28.4       | 66.7              | 3      | 1767.02                      | -2.18                                        | 0.20                  | TACT_MOUSE   |              | T-cell surface protein tactile;                                                                               |                                                                                                                                                                    | 0.00 - 0.15 |
|                |                            |                                           |            |                   |        |                              |                                              |                       |              |              |                                                                                                               |                                                                                                                                                                    |             |
|                |                            |                                           |            |                   |        |                              |                                              |                       |              |              |                                                                                                               |                                                                                                                                                                    |             |
|                |                            |                                           |            |                   |        |                              |                                              |                       |              |              |                                                                                                               |                                                                                                                                                                    |             |
| IGKIGGAQNR     | NYSKLLCGLLSDR              | N-ter +28.03 Da, K +28.03 Da, C +57.02 Da | 38.7       | 60.2              | 3      | 1593.95                      | 1.92                                         | 0.30                  | MIF_MOUSE    |              | Macrophage migration inhibitory factor;                                                                       | Delayed early response protein 6;Glycosylation-inhibiting factor;L-dopachrome isomerase;L-dopachrome tautomerase;Phenylpyruvate tautomerase;                       | 0.85 - 1.00 |
| DKIREYKSKR     | QASGGPVDIGPEYQQDLDR        | N-ter +28.03 Da                           | 46.2       | 46.6              | 3      | 2072.08                      | -1.74                                        | 0.17                  | ATP5J_MOUSE  | E9QAD6_MOUSE | ATP synthase-coupling factor 6, mitochondrial;                                                                |                                                                                                                                                                    | 0.00 - 0.15 |
|                |                            |                                           |            |                   |        |                              |                                              |                       |              |              |                                                                                                               |                                                                                                                                                                    |             |
|                |                            |                                           |            |                   |        |                              |                                              |                       |              |              |                                                                                                               |                                                                                                                                                                    |             |
|                |                            |                                           |            |                   |        |                              |                                              |                       |              |              |                                                                                                               |                                                                                                                                                                    |             |
| GRKTETVCTF     | QDQALVHQHQWDGKESTITR       | N-ter +28.03 Da, K +28.03 Da              | 34.1       | 55.0              | 4      | 2352.31                      | 1.54                                         | 0.32                  | FABP5_MOUSE  |              | Fatty acid-binding protein, epidermal;                                                                        | Epidermal-type fatty acid-binding protein;Fatty acid-binding protein 5;Keratinocyte lipid-binding protein;Psoriasis-associated fatty acid-binding protein homolog; | 0.75 - 0.85 |
| ESQVLDEQTY     | QEDEPTIASPVGWPR            | N-ter +28.03 Da                           | 38.3       | 30.1              | 3      | 1708.89                      | 0.45                                         | 0.03                  | ETV6_MOUSE   | Q80WR3_MOUSE |                                                                                                               |                                                                                                                                                                    | 0.25 - 0.75 |
|                |                            |                                           |            |                   |        |                              |                                              |                       |              |              |                                                                                                               |                                                                                                                                                                    |             |
| VFSMFQDTQJ     | QEFKEAFTVIDQNR             | N-ter +34.06 Da, K +34.06 Da              | 47.9       | 42.0              | 3      | 1792.05                      | -2.94                                        | 0.68                  | MLRS_MOUSE   | F6ULR7_MOUSE | Myosin regulatory light chain 2, skeletal muscle isoform;                                                     |                                                                                                                                                                    | 0.00 - 0.15 |
| HGYAAAGQTW     | QEGDKVIRPVGVSQAGEEMEQFGQGV | N-ter +28.03 Da, K +28.03 Da              | 39.7       | 63.0              | 4      | 2886.61                      | 0.90                                         | 0.29                  | E9QP82_MOUSE |              |                                                                                                               | Fast skeletal myosin light chain 2;MLC2F;                                                                                                                          | 0.25 - 0.75 |

Table S10, Tholen et al.

| Non Prime Site | Prime Site                | Modifications                             | Hyperscore | Mass error in ppm | Charge | Precursor neutral mass in Da | Fold change (log <sub>2</sub> ) of ASAPRatio | FC-error of ASAPRatio | Uniprot ID 1 | Uniprot ID 2 | Protein Name 1                                                                  | Protein Name 2                                                                                                                                                                                       | Quantile    |
|----------------|---------------------------|-------------------------------------------|------------|-------------------|--------|------------------------------|----------------------------------------------|-----------------------|--------------|--------------|---------------------------------------------------------------------------------|------------------------------------------------------------------------------------------------------------------------------------------------------------------------------------------------------|-------------|
| LLTSRSNAQR     | QEIAQEFKTLFGR             | N-ter +28.03 Da, K +28.03 Da              | 44.5       | 51.0              | 3      | 1621.97                      | 2.05                                         | 0.17                  | ANXAS_MOUSE  |              | Annexin A5;                                                                     | Ancholin CII;Annexin V;Annexin-5;Calphobindin I;Endonexin II;Lipocortin V;Placental anticoagulant protein 4;Placental anticoagulant protein I;Thromboplastin inhibitor;Vascular anticoagulant-alpha; | 0.85 - 1.00 |
| STFQQMWISK     | QEYDEAGPSIVHR             | N-ter +28.03 Da                           | 45.4       | 47.9              | 3      | 1527.81                      | -0.89                                        | 0.10                  | ACTC_MOUSE   | ACTA_MOUSE   | Actin, alpha cardiac muscle 1;                                                  | Alpha-cardiac actin;                                                                                                                                                                                 | 0.15 - 0.25 |
| RQFYRYITD      | QEYIYSIHR                 | N-ter +28.03 Da                           | 31.5       | 56.1              | 3      | 1336.75                      | -1.15                                        | 0.05                  | MAZB2_MOUSE  | F6TMZ3_MOUSE | Epididymis-specific alpha-mannosidase;                                          | Mannosidase alpha class 2B member 2;                                                                                                                                                                 | 0.15 - 0.25 |
| FHVNLLCGEE     | QGADAALHFNPR              | N-ter +28.03 Da                           | 28.6       | 73.4              | 3      | 1323.77                      | 0.21                                         | 0.02                  | O9CRB1_MOUSE | LEG7_MOUSE   |                                                                                 |                                                                                                                                                                                                      | 0.25 - 0.75 |
| KDLVASVPDM     | QGDGEDNHVDGDKGPR          | N-ter +34.06 Da, K +34.06 Da              | 9.2        | 90.0              | 3      | 1763.01                      | -2.94                                        | 0.91                  | NC2A_MOUSE   | D3YYC2_MOUSE | Dr1-associated corepressor;                                                     | Dr1-associated protein 1;Negative co-factor 2-alpha;                                                                                                                                                 | 0.00 - 0.15 |
| RRQHLKSVML     | QJAATELEKEESR             | N-ter +28.03 Da, K +28.03 Da              | 27.9       | 51.0              | 3      | 1558.90                      | -0.67                                        | 0.05                  | TNNI2_MOUSE  | A2AGK0_MOUSE | Troponin I, fast skeletal muscle;                                               | Troponin I, fast-twitch isoform;                                                                                                                                                                     | 0.25 - 0.75 |
| RNLHASNTRL     | QKTGTAEMSSILEER           | N-ter +28.03 Da, K +28.03 Da              | 52.1       | 52.2              | 3      | 1734.97                      | -0.81                                        | 0.14                  | ATPA_MOUSE   | D6RJ16_MOUSE | ATP synthase subunit alpha, mitochondrial;                                      |                                                                                                                                                                                                      | 0.15 - 0.25 |
| KWKEDVELYR     | QKVAPLGAELQESAR           | N-ter +28.03 Da, K +28.03 Da              | 48.7       | 44.0              | 3      | 1652.00                      | -0.20                                        | 0.02                  | APOA1_MOUSE  | Q8BPD5_MOUSE | Apolipoprotein A-I;                                                             | Apolipoprotein A1;                                                                                                                                                                                   | 0.25 - 0.75 |
| DEEKMEIQEM     | QLKEAKHIAEDSDR            | N-ter +28.03 Da, K +28.03 Da              | 22.6       | 62.8              | 4      | 1723.04                      | 0.40                                         | 0.09                  | TPM2_MOUSE   | A2AIM4_MOUSE | Tropomyosin beta chain;                                                         | Beta-tropomyosin;Tropomyosin-2;                                                                                                                                                                      | 0.25 - 0.75 |
| NTEENRRFYR     | QLLLTADDR                 | N-ter +28.03 Da                           | 37.2       | 34.5              | 2      | 1071.63                      | 1.84                                         | 0.14                  | ALDOA_MOUSE  | Q9CPQ9_MOUSE | Fructose-bisphosphate aldolase A;                                               | Aldolase 1;Muscle-type aldolase;                                                                                                                                                                     | 0.85 - 1.00 |
| LYKPVTDLFL     | QLVDSGVKDEAR              | N-ter +28.03 Da, K +28.03 Da              | 26.7       | 47.1              | 3      | 1371.80                      | -0.60                                        | 0.08                  | LPFRC_MOUSE  |              |                                                                                 | 130 kDa leucine-rich protein;                                                                                                                                                                        | 0.25 - 0.75 |
| MTTASPSQVR     | QNYHQDAEAANR              | N-ter +28.03 Da                           | 38.0       | 48.7              | 3      | 1556.81                      | -2.84                                        | 0.41                  | FRIH_MOUSE   |              | Ferritin heavy chain;                                                           |                                                                                                                                                                                                      | 0.00 - 0.15 |
| FRRRDKDTE      | QPGEVSALGGQPAR            | N-ter +34.06 Da                           | 24.0       | 66.4              | 3      | 1399.86                      | -2.40                                        | 0.50                  | KCNH2_MOUSE  | Q53Z09_MOUSE | Potassium voltage-gated channel subfamily H member 2;                           | Ether-a-go-go-related gene potassium channel 1;Voltage-gated potassium channel subunit Kv11.1;                                                                                                       | 0.00 - 0.15 |
| QSLPSSHGPPS    | QPGLPAVLSSPPLSPR          | N-ter +28.03 Da                           | 26.4       | 48.8              | 4      | 1827.12                      | 4.13                                         | 0.93                  | CB071_MOUSE  |              | Uncharacterized protein C2orf71 homolog;                                        |                                                                                                                                                                                                      | 0.85 - 1.00 |
| LQPNQLGPPS     | QPHLSVSSAANGHLGR          | N-ter +34.06 Da                           | 23.4       | 61.8              | 3      | 1664.00                      | -3.84                                        | 1.64                  | NOTC1_MOUSE  | Q7TQ50_MOUSE | Neurogenic locus notch homolog protein 1;                                       | Notch A;mt14;p300;                                                                                                                                                                                   | 0.00 - 0.15 |
| LLALQPALGS     | QPPSASSSHSMGSSR           | N-ter +28.03 Da                           | 25.0       | 67.1              | 3      | 1529.79                      | 1.62                                         | 0.17                  | V510L_MOUSE  |              | V-set and immunoglobulin domain-containing protein 10-like;                     |                                                                                                                                                                                                      | 0.75 - 0.85 |
| LLHPTLLAQ      | QSNVDELGCSHLGQSYESR       | N-ter +34.06 Da, C +57.02 Da              | 59.8       | 42.6              | 3      | 2199.10                      | -1.74                                        | 0.52                  | CO3A1_MOUSE  | Q5DTG2_MOUSE | Collagen alpha-1(III) chain;                                                    |                                                                                                                                                                                                      | 0.00 - 0.15 |
| LGRFAVRDMR     | QTVAVGVIAVDKK             | N-ter +28.03 Da, K +28.03 Da              | 31.2       | 56.1              | 4      | 1567.10                      | 1.11                                         | 0.17                  | EF1A1_MOUSE  |              | Elongation factor 1-alpha 1;                                                    | Elongation factor Tu;Eukaryotic elongation factor 1 A-1;                                                                                                                                             | 0.75 - 0.85 |
| EKVIVPNMEF     | RAADEEAFEDNSEEYR          | N-ter +28.03 Da                           | 52.2       | 53.4              | 3      | 2071.02                      | 4.27                                         | 1.04                  | XPO2_MOUSE   | E9QAX7_MOUSE | Exportin-2;                                                                     | Chromosome segregation 1-like protein;Importin-alpha re-exporter;                                                                                                                                    | 0.85 - 1.00 |
| RRGQSSANR      | RAGSSSGVQVASAGGLAADASRR   | N-ter +34.06 Da                           | 39.3       | 56.2              | 4      | 2266.29                      | -2.12                                        | 0.65                  | F78VV1_MOUSE | FILA_MOUSE   | Filaggrin;                                                                      |                                                                                                                                                                                                      | 0.00 - 0.15 |
| RRGQSSANR      | RAGSSSGVQVASAGGLAADASR    | N-ter +28.03 Da                           | 79.1       | 48.8              | 3      | 2104.13                      | -1.03                                        | 0.40                  | FILA_MOUSE   | F78VV1_MOUSE | Filaggrin;                                                                      |                                                                                                                                                                                                      | 0.15 - 0.25 |
| QYHVAVSLCQ     | RAKAMSHFPESEYR            | N-ter +28.03 Da, K +28.03 Da              | 30.0       | 63.2              | 4      | 1976.15                      | -0.43                                        | 0.05                  | ACON_MOUSE   |              | Aconitate hydratase, mitochondrial;                                             | Citrate hydro-lyase;                                                                                                                                                                                 | 0.25 - 0.75 |
| MRAAPR         | RAPAAQPPAAAPSVAAGSAPAAAPR | N-ter +34.06 Da                           | 61.9       | 41.3              | 4      | 2186.30                      | 1.96                                         | 0.44                  | CHCH2_MOUSE  | B2RPU8_MOUSE | Coiled-coil-helix-coiled-coil-helix domain-containing protein 2, mitochondrial; |                                                                                                                                                                                                      | 0.85 - 1.00 |
| PFYLRPFSFL     | RAPSWIOTGLSEMR            | N-ter +28.03 Da                           | 40.4       | 47.5              | 3      | 1645.90                      | -1.40                                        | 0.18                  | CRYAB_MOUSE  |              | Alpha-crystallin B chain;                                                       | Alpha(B)-crystallin;P23;                                                                                                                                                                             | 0.15 - 0.25 |
| PVPVQPSWLR     | RASAPLPGFSAPGR            | N-ter +28.03 Da                           | 40.0       | 54.3              | 3      | 1410.85                      | -0.89                                        | 0.15                  | HSPB6_MOUSE  |              | Heat shock protein beta-6;                                                      |                                                                                                                                                                                                      | 0.15 - 0.25 |
| VSSSLPDICY     | RCGESHLAKDCDLQEDACYNCR    | N-ter +28.03 Da, K +28.03 Da, C +57.02 Da | 44.8       | 60.2              | 4      | 2926.40                      | -0.01                                        | 0.01                  | D3YFF6_MOUSE |              |                                                                                 |                                                                                                                                                                                                      | 0.25 - 0.75 |
| RRASALAQL      | RCILDSELEGR               | N-ter +28.03 Da, C +57.02 Da              | 33.4       | 42.2              | 3      | 1487.84                      | 0.60                                         | 0.06                  | KBL_MOUSE    | E9PWY6_MOUSE | 2-amino-3-ketobutyrate coenzyme A ligase, mitochondrial;                        | Aminoacetone synthase;Glycine acetyltransferase;                                                                                                                                                     | 0.25 - 0.75 |
| AAGFNKLGML     | RDDTLHETEDVKEAIR          | N-ter +34.06 Da, K +34.06 Da              | 21.0       | 54.6              | 4      | 1994.18                      | 0.11                                         | 0.02                  | QCR7_MOUSE   | Q9CQB4_MOUSE | Cytochrome b-c1 complex subunit 7;                                              | Complex III subunit 7;Complex III subunit VII;Ubiquinol-cytochrome c reductase complex 14 kDa protein;                                                                                               | 0.25 - 0.75 |
| KEMKESIKKF     | RDEAKKLEESDALQEAR         | N-ter +28.03 Da, K +28.03 Da              | 31.6       | 74.2              | 4      | 2071.24                      | 0.08                                         | 0.03                  | TIM44_MOUSE  | F7C189_MOUSE | Mitochondrial import inner membrane translocase subunit TIM44;                  |                                                                                                                                                                                                      | 0.25 - 0.75 |
| AKAVLSAEKL     | RDEEVHTGLGELLR            | N-ter +34.06 Da                           | 29.9       | 55.6              | 3      | 1656.99                      | 1.34                                         | 0.17                  | SERPH_MOUSE  |              | Serpin H1;                                                                      | 47 kDa heat shock protein;Collagen-binding protein;Serine protease inhibitor J6;                                                                                                                     | 0.75 - 0.85 |
| LSLMPESEF      | RDIDNPSAEAR               | N-ter +28.03 Da                           | 28.2       | 73.0              | 3      | 1399.77                      | 0.63                                         | 0.11                  | PLIN1_MOUSE  |              | Perilipin-1;                                                                    | Lipid droplet-associated protein;Perilipin A;                                                                                                                                                        | 0.25 - 0.75 |
| APSDNRVTSF     | RDLIHDQDEEEEEEQGR         | N-ter +28.03 Da                           | 53.6       | 66.5              | 4      | 2283.14                      | -0.36                                        | 0.13                  | NSF1C_MOUSE  | A2AT02_MOUSE | NSF1 cofactor p47;                                                              | p97 cofactor p47;                                                                                                                                                                                    | 0.25 - 0.75 |
| DIKSKTYQVM     | RDYEQAGSAAAPSVFSR         | N-ter +28.03 Da                           | 72.4       | 58.2              | 3      | 1767.96                      | -1.64                                        | 0.31                  | MSTN1_MOUSE  |              | Musculoskeletal embryonic nuclear protein 1;                                    |                                                                                                                                                                                                      | 0.00 - 0.15 |
| LVKDRNVATP     | RDYFALAHTRVDRHLVGR        | N-ter +28.03 Da                           | 36.7       | 27.4              | 4      | 2216.22                      | 5.97                                         | 1.65                  | PYGL_MOUSE   | PYGM_MOUSE   | Glycogen phosphorylase, liver form;                                             |                                                                                                                                                                                                      | 0.85 - 1.00 |
| SIIRNVKGPV     | REGDVLTLLESER             | N-ter +28.03 Da                           | 35.6       | 56.8              | 3      | 1543.91                      | -0.67                                        | 0.09                  | RS28_MOUSE   |              | 40S ribosomal protein S28;                                                      |                                                                                                                                                                                                      | 0.25 - 0.75 |
| MSYFPRGLKY     | REGVESAFHKTTSGATPAAIR     | N-ter +28.03 Da, K +28.03 Da              | 33.1       | 65.9              | 4      | 2298.36                      | 0.03                                         | 0.01                  | Q99LB4_MOUSE | D3YZN3_MOUSE |                                                                                 |                                                                                                                                                                                                      | 0.25 - 0.75 |
| QAQPNANEDY     | REGPCAVNLVLR              | N-ter +28.03 Da, C +57.02 Da              | 35.2       | 52.6              | 3      | 1410.85                      | -0.06                                        | 0.01                  | STK39_MOUSE  |              | STE20/SPS1-related proline-alanine-rich protein kinase;                         | Serine/threonine-protein kinase 39;                                                                                                                                                                  | 0.25 - 0.75 |
| IRKLPFQRLV     | REIAQDFKTDLR              | N-ter +34.06 Da, K +34.06 Da              | 33.5       | 63.3              | 4      | 1559.01                      | -0.81                                        | 0.11                  | H31_MOUSE    | H32_MOUSE    | Histone H3.1;                                                                   |                                                                                                                                                                                                      | 0.15 - 0.25 |
| KQIQKLEXRV     | RELEGEVENEQKR             | N-ter +34.06 Da, K +34.06 Da              | 33.3       | 64.6              | 4      | 1683.03                      | -3.06                                        | 1.02                  | MYH1_MOUSE   | MYH8_MOUSE   | Myosin-1;                                                                       | Myosin heavy chain 1;Myosin heavy chain 2x;Myosin heavy chain, skeletal muscle, adult 1;                                                                                                             | 0.00 - 0.15 |
| TFYSNKIFL      | RELISNASDALDKIR           | N-ter +28.03 Da, K +28.03 Da              | 42.3       | 67.3              | 4      | 1756.10                      | -0.09                                        | 0.01                  | H590B_MOUSE  | ENPL_MOUSE   | Heat shock protein HSP 90-beta;                                                 | Heat shock 84 kDa;Tumor-specific transplantation 84 kDa antigen;                                                                                                                                     | 0.25 - 0.75 |
| TFYSNKIFL      | RELISNDSALDKIR            | N-ter +28.03 Da, K +28.03 Da              | 26.2       | 56.9              | 4      | 1772.08                      | 0.79                                         | 0.07                  | H590A_MOUSE  | B7ZC49_MOUSE | Heat shock protein HSP 90-alpha;                                                | Heat shock 86 kDa;Tumor-specific transplantation 86 kDa antigen;                                                                                                                                     | 0.25 - 0.75 |
| ITNHDEYSLR     | RELMEKKDEGTGLR            | N-ter +28.03 Da, K +28.03 Da              | 22.7       | 65.4              | 4      | 1975.17                      | -0.62                                        | 0.26                  | TLN1_MOUSE   | A2AIM2_MOUSE | Talin-1;                                                                        |                                                                                                                                                                                                      | 0.25 - 0.75 |
| GFSAGSAIHW     | REPEKGEVWDYVTVR           | N-ter +28.03 Da, K +28.03 Da              | 31.0       | 62.4              | 4      | 1918.11                      | 0.74                                         | 0.11                  | RISC_MOUSE   | Q3USP4_MOUSE | Retinoid-inducible serine carboxypeptidase;                                     | Serine carboxypeptidase 1;                                                                                                                                                                           | 0.25 - 0.75 |
| SPFRKDKSPV     | REPIDLNTPER               | N-ter +28.03 Da                           | 24.1       | 52.7              | 3      | 1495.84                      | -0.18                                        | 0.02                  | RBM39_MOUSE  | Q3U313_MOUSE | RNA-binding protein 39;                                                         | Coactivator of activating protein 1 and estrogen receptors;RNA-binding motif protein 39;RNA-binding region-containing protein 2;Transcription coactivator CAPER;                                     | 0.25 - 0.75 |

Table S10, Tholen et al.

| Non Prime Site | Prime Site                 | Modifications                             | Hyperscore | Mass error in ppm | Charge | Precursor neutral mass in Da | Fold change (log <sub>2</sub> ) of ASAPRatio | FC-error of ASAPRatio | Uniprot ID 1 | Uniprot ID 2 | Protein Name 1                                                 | Protein Name 2                                                                                                                                                                                     | Quantile    |
|----------------|----------------------------|-------------------------------------------|------------|-------------------|--------|------------------------------|----------------------------------------------|-----------------------|--------------|--------------|----------------------------------------------------------------|----------------------------------------------------------------------------------------------------------------------------------------------------------------------------------------------------|-------------|
| DEKCSSTELFV    | REPPIMVTKQLEDMNAYCGER      | N-ter +34.06 Da, K +34.06 Da, C +57.02 Da | 49.8       | 62.5              | 4      | 2604.48                      | -6.64                                        | 0.00                  | D3YU50_MOUSE | Q6P6L5_MOUSE |                                                                | Autophagy-related protein LC3 B;Autophagy-related ubiquitin-like modifier LC3 B;MAP1 light chain 3-like protein 2;MAP1A/MAP1B light chain 3 B;Microtubule-associated protein 1 light chain 3 beta; | 0.00 - 0.15 |
| EQRVEDVRLI     | REQHPTKIPVIER              | N-ter +34.06 Da, K +34.06 Da              | 26.4       | 62.6              | 4      | 1783.22                      | -1.36                                        | 0.28                  | MLP3B_MOUSE  |              | Microtubule-associated proteins 1A/1B light chain 3B;          |                                                                                                                                                                                                    | 0.15 - 0.25 |
| PLPTFSSLNL     | RETNLESLPLVDTHSKR          | N-ter +28.03 Da, K +28.03 Da              | 32.0       | 61.7              | 4      | 2050.24                      | 2.62                                         | 0.29                  | VIME_MOUSE   | E9PZV5_MOUSE | Vimentin;                                                      |                                                                                                                                                                                                    | 0.85 - 1.00 |
| AKVQAINVSS     | RFEEIEKAQEER               | N-ter +28.03 Da, K +28.03 Da              | 34.8       | 62.2              | 4      | 1747.98                      | 0.33                                         | 0.06                  | Q8C845_MOUSE | EFHD2_MOUSE  |                                                                |                                                                                                                                                                                                    | 0.25 - 0.75 |
| GKAFLRQLPF     | RGDDGIFDDNFIEER            | N-ter +28.03 Da                           | 49.5       | 58.7              | 3      | 1824.93                      | -0.01                                        | 0.00                  | SNX3_MOUSE   | Q78ZM0_MOUSE | Sorting nexin-3;                                               | SDP3 protein;                                                                                                                                                                                      | 0.25 - 0.75 |
| GKALKRQLPF     | RGDEGIFEEFIEER             | N-ter +34.06 Da                           | 55.0       | 62.2              | 3      | 1846.01                      | -0.06                                        | 0.01                  | SNX12_MOUSE  | Q6ZWQ5_MOUSE | Sorting nexin-12;                                              | SDP8 protein;                                                                                                                                                                                      | 0.25 - 0.75 |
| APGPAGASGD     | RGEAGAAAGSPGAPGR           | N-ter +28.03 Da                           | 34.2       | 19.9              | 3      | 1434.76                      | 1.43                                         | 0.32                  | CO1A2_MOUSE  | E9Q6U9_MOUSE | Collagen alpha-2(I) chain;                                     | Alpha-2 type I collagen;                                                                                                                                                                           | 0.75 - 0.85 |
| PVGPAGKNGD     | RGETGPAGPAGPIGAGAR         | N-ter +34.06 Da                           | 75.6       | 48.5              | 3      | 1722.02                      | -2.64                                        | 0.50                  | CO1A1_MOUSE  | F8WGB7_MOUSE | Collagen alpha-1(I) chain;                                     | Alpha-1 type I collagen;                                                                                                                                                                           | 0.00 - 0.15 |
| KETRANRAKR     | RGGGGHDAKGNVCGSR           | N-ter +28.03 Da, K +28.03 Da, C +57.02 Da | 37.2       | 68.8              | 4      | 1850.06                      | 2.60                                         | 0.74                  | FBN1_MOUSE   | A2AQ53_MOUSE | Fibrillin-1;                                                   |                                                                                                                                                                                                    | 0.85 - 1.00 |
| M              | RGQVGLSPQQEAALAR           | N-ter +28.03 Da                           | 53.5       | 53.8              | 3      | 2011.14                      | 1.69                                         | 0.39                  | S14L4_MOUSE  |              | SEC14-like protein 4;                                          |                                                                                                                                                                                                    | 0.85 - 1.00 |
| EILTRLRLQK     | RGTGGVDTAAVAVFDISNADR      | N-ter +34.06 Da                           | 82.8       | 52.6              | 3      | 2182.23                      | -5.64                                        | 2.82                  | KCRM_MOUSE   |              | Creatine kinase M-type;                                        | Creatine kinase M chain;M-CK;                                                                                                                                                                      | 0.00 - 0.15 |
| IGSSADRQGR     | RGVSESQASDESGHDFSEGOAVGAHR | N-ter +28.03 Da                           | 79.2       | 58.3              | 4      | 2814.42                      | 3.43                                         | 1.31                  | F7BVV1_MOUSE | E9Q019_MOUSE |                                                                |                                                                                                                                                                                                    | 0.85 - 1.00 |
| CGCDFSLTVR     | RHHCHACGKIVCR              | N-ter +34.06 Da, K +34.06 Da, C +57.02 Da | 17.8       | 42.7              | 4      | 1757.99                      | -3.47                                        | 0.77                  | FGD5_MOUSE   | E9QLU9_MOUSE | FYVE, RhoGEF and PH domain-containing protein 5;               |                                                                                                                                                                                                    | 0.00 - 0.15 |
| LGTFLYEYSR     | RHPDYYSVLLLR               | N-ter +28.03 Da                           | 26.6       | 36.6              | 3      | 1482.89                      | -0.40                                        | 0.04                  | ALBU_MOUSE   |              | Serum albumin;                                                 |                                                                                                                                                                                                    | 0.25 - 0.75 |
| AGTIAGLNLV     | RIINEPTAAAIAYGLDKKVAER     | N-ter +28.03 Da, K +28.03 Da              | 62.1       | 62.4              | 4      | 2539.61                      | 1.64                                         | 0.13                  | HSP7C_MOUSE  | Q504P4_MOUSE | Heat shock cognate 71 kDa protein;                             | Heat shock 70 kDa protein 8;                                                                                                                                                                       | 0.75 - 0.85 |
| TFKNYKRNW      | RIVEDEPNKICEADR            | N-ter +28.03 Da, K +28.03 Da, C +57.02 Da | 28.6       | 70.1              | 4      | 1899.09                      | 1.58                                         | 0.26                  | XPO2_MOUSE   | E9QA7_MOUSE  | Exportin-2;                                                    | protein;importin-alpha re-exporter;                                                                                                                                                                | 0.75 - 0.85 |
| GGISETRIEK     | RIVITGDAALDHDQALQAIAR      | N-ter +28.03 Da                           | 47.8       | 64.4              | 4      | 2274.39                      | -0.36                                        | 0.03                  | E41L2_MOUSE  | Q811B2_MOUSE | Band 4.1-like protein 2;                                       | Generally expressed protein 4.1;                                                                                                                                                                   | 0.25 - 0.75 |
| DARGHRPVDR     | RKEEPPSLRAPPPIGGGYR        | N-ter +28.03 Da, K +28.03 Da              | 20.2       | 49.5              | 4      | 2316.39                      | -0.22                                        | 0.04                  | FIBB_MOUSE   |              | Fibrinogen beta chain;                                         |                                                                                                                                                                                                    | 0.25 - 0.75 |
| MPLGLGR        | RKKAPPLVENEAEPSR           | N-ter +28.03 Da, K +28.03 Da              | 34.0       | 57.8              | 4      | 2033.24                      | 2.47                                         | 0.69                  | GIPC1_MOUSE  |              | PDZ domain-containing protein GIPC1;                           | GAIP C-terminus-interacting protein;RGS-GAIP-interacting protein;RGS19-interacting protein 1;SemaF cytoplasmic domain-associated protein 1;Synectin;                                               | 0.85 - 1.00 |
| LLALAGLLQA     | RLLLPQQAQGECDR             | N-ter +28.03 Da, C +57.02 Da              | 48.7       | 46.9              | 3      | 1787.00                      | -2.64                                        | 0.66                  | ENDD1_MOUSE  | Q692Y2_MOUSE | Endonuclease domain-containing 1 protein;                      |                                                                                                                                                                                                    | 0.00 - 0.15 |
| RAAPRQSSSF     | RLLQALEAEER                | N-ter +28.03 Da                           | 39.2       | 51.5              | 3      | 1483.88                      | 0.45                                         | 0.04                  | PDL1_MOUSE   | F7C957_MOUSE | PDZ and LIM domain protein 2;                                  | PDZ-LIM protein mystique;                                                                                                                                                                          | 0.25 - 0.75 |
| VETQPQKTVI     | RLPSGSGPASPTTGSVDIR        | N-ter +34.06 Da                           | 52.0       | 54.2              | 3      | 1959.17                      | -1.79                                        | 0.55                  | E9Q616_MOUSE |              |                                                                |                                                                                                                                                                                                    | 0.00 - 0.15 |
| APAAGMRRRR     | RLQQEDGISFEYHR             | N-ter +28.03 Da                           | 48.4       | 52.2              | 3      | 1804.98                      | 2.12                                         | 0.33                  | CBPE_MOUSE   |              | Carboxypeptidase H;Enkephalin convertase;Prohormone-processing |                                                                                                                                                                                                    | 0.85 - 1.00 |
| ADESTGSIK      | RLQSIGTENTEENR             | N-ter +34.06 Da                           | 19.0       | 59.7              | 4      | 1836.08                      | -1.47                                        | 0.45                  | ALDOA_MOUSE  | Q9CPQ9_MOUSE | Fructose-bisphosphate aldolase A;                              | Carboxypeptidase;                                                                                                                                                                                  | 0.85 - 1.00 |
| ADESTGSIK      | RLQSIGTENTEENR             | N-ter +28.03 Da                           | 37.3       | 47.1              | 3      | 1673.91                      | 0.39                                         | 0.06                  | ALDOA_MOUSE  | Q9CPQ9_MOUSE | Fructose-bisphosphate aldolase A;                              | Aldolase 1;Muscle-type aldolase;                                                                                                                                                                   | 0.15 - 0.25 |
| KTYGICRAIR     | RMGESDSSILR                | N-ter +34.06 Da                           | 31.4       | 68.1              | 3      | 1311.76                      | -0.92                                        | 0.09                  | RS21_MOUSE   |              | 40S ribosomal protein S21;                                     | Aldolase 1;Muscle-type aldolase;                                                                                                                                                                   | 0.25 - 0.75 |
| IIPRHLQLAI     | RNDEELNKLGR                | N-ter +28.03 Da, K +28.03 Da              | 27.7       | 66.4              | 4      | 1511.94                      | 0.06                                         | 0.01                  | H2A1F_MOUSE  | H2A1H_MOUSE  | Histone H2A type 1-F;                                          |                                                                                                                                                                                                    | 0.15 - 0.25 |
| GMDVAASEFY     | RNGKYDLKFPDPPAR            | N-ter +34.06 Da, K +34.06 Da              | 25.1       | 65.7              | 4      | 2095.29                      | -2.18                                        | 0.40                  | ENOB_MOUSE   |              | Beta-enolase;                                                  | 2-phospho-D-glycerate hydro-lyase;Enolase 3;Muscle-specific enolase;Skeletal muscle enolase;                                                                                                       | 0.00 - 0.15 |
| MFLPILQHS      | RNKEQGTDFVFEGLR            | N-ter +28.03 Da, K +28.03 Da              | 23.9       | 54.6              | 3      | 1996.11                      | 1.25                                         | 0.16                  | MYL4_MOUSE   | Q9CZ19_MOUSE | Myosin light chain 4;                                          | MLC1EMB;Myosin light chain 1, atrial/fetal isoform;                                                                                                                                                | 0.75 - 0.85 |
| SVVRPFAKLV     | RPPVQVYGIETR               | N-ter +34.06 Da                           | 30.6       | 34.5              | 3      | 1403.86                      | -2.40                                        | 0.13                  | ATPO_MOUSE   | D3Z4J0_MOUSE | ATP synthase subunit O, mitochondrial;                         | Oligomycin sensitivity conferral protein;                                                                                                                                                          | 0.00 - 0.15 |
| VDKIREYKSK     | RQASGGPVDIGPEYQDLDLR       | N-ter +28.03 Da                           | 73.8       | 50.6              | 3      | 2228.19                      | 3.98                                         | 0.97                  | ATP5I_MOUSE  | E9QAD6_MOUSE | ATP synthase-coupling factor 6, mitochondrial;                 |                                                                                                                                                                                                    | 0.85 - 1.00 |
| QDIAKMLPLL     | RQELESVEAGVQGGAFEGTR       | N-ter +28.03 Da                           | 66.8       | 53.1              | 3      | 2276.22                      | 4.63                                         | 1.63                  | EHD2_MOUSE   | Q8R2X0_MOUSE | EH domain-containing protein 2;                                |                                                                                                                                                                                                    | 0.85 - 1.00 |
| LQAQRAFTTR     | RQISEDVDGPDNR              | N-ter +34.06 Da                           | 48.7       | 38.4              | 3      | 1533.82                      | -0.84                                        | 0.09                  | NEDD4_MOUSE  |              | E3 ubiquitin-protein ligase NEDD4;                             | Neural precursor cell expressed developmentally down-regulated protein 4;                                                                                                                          | 0.15 - 0.25 |
| GRSSNRDRP      | RQPSPSSQSSQVHSGVQVEGR      | N-ter +28.03 Da                           | 44.5       | 63.1              | 4      | 2379.30                      | 0.87                                         | 0.25                  | E9Q019_MOUSE | F7BVV1_MOUSE |                                                                |                                                                                                                                                                                                    | 0.25 - 0.75 |
| PNIDIRSAFK     | RSFEGGEDAGELDFGLLKR        | N-ter +34.06 Da, K +34.06 Da              | 53.6       | 65.2              | 4      | 2231.33                      | -2.32                                        | 0.23                  | D3YU50_MOUSE | Q6P6L5_MOUSE |                                                                |                                                                                                                                                                                                    | 0.00 - 0.15 |
| AAGGGGGENY     | RSPVHPESSEDEHVSIPQR        | N-ter +28.03 Da                           | 50.2       | 68.0              | 4      | 2342.28                      | -0.62                                        | 0.12                  | E9QPZ3_MOUSE |              |                                                                |                                                                                                                                                                                                    | 0.25 - 0.75 |
| SQSGSGRSPR     | RSPVHPESSEGEHVSVPQR        | N-ter +34.06 Da                           | 46.3       | 62.3              | 4      | 2276.28                      | -1.56                                        | 0.41                  | FILA2_MOUSE  | E9QPZ3_MOUSE | Filaggrin-2;                                                   | Intermediate filament-associated protein;                                                                                                                                                          | 0.00 - 0.15 |
| SQDCSPATSR     | RSSVSGISLEDNR              | N-ter +28.03 Da                           | 34.4       | 53.4              | 3      | 1446.82                      | 0.32                                         | 0.03                  | PDL1_MOUSE   | A8Y5C3_MOUSE | PDZ and LIM domain protein 4;                                  | LIM protein RIL;Reversion-induced LIM protein; Metastasin;Metastatic cell protein;PEL98;Placental calcium-binding protein;Protein 18A2;Protein Mts1;S100 calcium-binding protein A4;               | 0.25 - 0.75 |
| TRELPSFLGE     | RTDEAAQKVMNSLDSNR          | N-ter +28.03 Da, K +28.03 Da              | 44.8       | 61.9              | 4      | 2137.19                      | 0.57                                         | 0.07                  | S100A4_MOUSE | D3YU9_MOUSE  | Protein S100-A4;                                               | General transcription factor TFIIIB;RNA polymerase II alpha initiation factor;                                                                                                                     | 0.25 - 0.75 |
| YMASQASAEK     | RTQKEIGDIAGVADVTIR         | N-ter +28.03 Da, K +28.03 Da              | 25.7       | 61.0              | 4      | 1997.25                      | -0.36                                        | 0.02                  | TF2B_MOUSE   |              | Transcription initiation factor IIB;                           |                                                                                                                                                                                                    | 0.25 - 0.75 |
| IWHHSFYNEL     | RVAPPEEHTLLTEAPLNPKANR     | N-ter +28.03 Da, K +28.03 Da              | 64.5       | 52.2              | 4      | 2508.51                      | 3.30                                         | 0.19                  | ACTA_MOUSE   | ACTC_MOUSE   | Actin, aortic smooth muscle;                                   | Alpha-actin-2;                                                                                                                                                                                     | 0.85 - 1.00 |
| IWHHTFYNEL     | RVAPPEEHPVLLTEAPLNPKANR    | N-ter +28.03 Da, K +28.03 Da              | 58.1       | 61.3              | 4      | 2506.56                      | 4.28                                         | 0.40                  | ACTB_MOUSE   | ACTG_MOUSE   | Actin, cytoplasmic 1;                                          | Beta-actin;                                                                                                                                                                                        | 0.85 - 1.00 |
| MATL           | RVHPEAQAKVDVFR             | N-ter +28.03 Da, K +28.03 Da              | 21.4       | 69.0              | 4      | 1707.08                      | -0.84                                        | 0.14                  | PSME1_MOUSE  |              | Proteasome activator complex subunit 1;                        | 11S regulator complex subunit alpha;Activator of multicatalytic protease subunit 1;Proteasome activator 28 subunit alpha;                                                                          | 0.15 - 0.25 |
| NVVGARRSSW     | RVISSIEQKTER               | N-ter +28.03 Da, K +28.03 Da              | 30.2       | 60.1              | 4      | 1500.95                      | 1.87                                         | 0.35                  | 1433B_MOUSE  | A2A5N1_MOUSE | 14-3-3 protein beta/alpha;                                     | Protein kinase C inhibitor protein 1;                                                                                                                                                              | 0.85 - 1.00 |
| LNGKLTGMAF     | RVPTPNVSVVDLTCR            | N-ter +28.03 Da, C +57.02 Da              | 48.4       | 43.8              | 3      | 1740.01                      | 0.48                                         | 0.04                  | G3P_MOUSE    | G3PT_MOUSE   | Glyceraldehyde-3-phosphate dehydrogenase;                      | Peptidyl-cysteine 5-nitrosylase GAPDH;                                                                                                                                                             | 0.25 - 0.75 |

| Non Prime Site | Prime Site                 | Modifications                             | Hyperscore | Mass error in ppm | Charge | Precursor neutral mass in Da | Fold change (log <sub>2</sub> ) of ASAPRatio | FC-error of ASAPRatio | Uniprot ID 1 | Uniprot ID 2 | Protein Name 1                                                      | Protein Name 2                                                                                                                                                            | Quantile    |
|----------------|----------------------------|-------------------------------------------|------------|-------------------|--------|------------------------------|----------------------------------------------|-----------------------|--------------|--------------|---------------------------------------------------------------------|---------------------------------------------------------------------------------------------------------------------------------------------------------------------------|-------------|
| ESLGLSPSEV     | RVTHVHGCGEDGVATR           | N-ter +34.06 Da, C +57.02 Da              | 18.5       | 72.6              | 4      | 1885.08                      | -1.43                                        | 0.12                  | ZKSC3_MOUSE  | QSRJ53_MOUSE | Zinc finger protein with KRAB and SCAN domains 3;                   | SCAN-KRAB-zinc finger protein;Zinc finger protein 306;Zinc finger protein 307;Zinc finger protein 47 homolog;                                                             | 0.15 - 0.25 |
| VVFHYRAARD     | RYALTFAEQEACTR             | N-ter +34.06 Da, C +57.02 Da              | 12.8       | 65.6              | 4      | 1718.98                      | -1.89                                        | 0.42                  | NCAN_MOUSE   |              | Neurocan core protein;                                              | Chondroitin sulfate proteoglycan 3;                                                                                                                                       | 0.00 - 0.15 |
| GPYDRPRTAR     | RYIGIVKQAGLDR              | N-ter +28.03 Da, K +28.03 Da              | 29.3       | 54.8              | 4      | 1544.00                      | 0.47                                         | 0.05                  | HNRPF_MOUSE  |              | Heterogeneous nuclear ribonucleoprotein F;                          |                                                                                                                                                                           | 0.25 - 0.75 |
| FLYKMGDDYY     | RYLAEVATGDDKKR             | N-ter +28.03 Da, K +28.03 Da              | 37.0       | 64.8              | 4      | 1705.06                      | 0.89                                         | 0.14                  | 14335_MOUSE  |              | 14-3-3 protein sigma;                                               | Stratifin;                                                                                                                                                                | 0.25 - 0.75 |
| GGGVGGPGAK     | SAAQAAAQNTNSNAAGKQLR       | N-ter +34.06 Da, K +34.06 Da              | 43.5       | 46.4              | 3      | 1925.16                      | -4.06                                        | 1.35                  | PAIRB_MOUSE  |              | Plasminogen activator inhibitor 1 RNA-binding protein;              | PAI1 RNA-binding protein 1;SERPINE1 mRNA-binding protein 1;                                                                                                               | 0.00 - 0.15 |
| QDEGAEPMGY     | SAELSSSEGILDRNEEKR         | N-ter +34.06 Da, K +34.06 Da              | 51.9       | 61.5              | 4      | 2115.24                      | 0.64                                         | 0.12                  | EZRI_MOUSE   |              | Ezrin;                                                              | Cytovillin;Villin-2;p81;                                                                                                                                                  | 0.25 - 0.75 |
| QDEGAEPMGY     | SAELSSSEGILDDR             | N-ter +28.03 Da                           | 42.5       | 46.3              | 3      | 1418.75                      | 0.03                                         | 0.00                  | EZRI_MOUSE   |              | Ezrin;                                                              | Cytovillin;Villin-2;p81;                                                                                                                                                  | 0.25 - 0.75 |
| QHQGIPVFF      | SAGIGDVLVEEVR              | N-ter +28.03 Da                           | 28.2       | 52.4              | 3      | 1384.83                      | 0.42                                         | 0.10                  | SNT3_MOUSE   |              | Cytosolic 5'-nucleotidase 3;                                        | Cytosolic 5'-nucleotidase III;Lupin;Pyrimidine 5'-nucleotidase 1;                                                                                                         | 0.25 - 0.75 |
| LFQPSFIGME     | SAGIHETYSIMKCDIDIR         | N-ter +28.03 Da, K +28.03 Da, C +57.02 Da | 38.0       | 62.4              | 4      | 2379.31                      | 1.04                                         | 0.17                  | ACT5_MOUSE   | ACTA_MOUSE   | Actin, alpha skeletal muscle;                                       | Alpha-actin-1;                                                                                                                                                            | 0.75 - 0.85 |
| MATRSVCVSRG    | SAGSAAAGPVEAAR             | N-ter +28.03 Da                           | 42.2       | 42.3              | 3      | 1354.78                      | -0.12                                        | 0.01                  | BOLA1_MOUSE  |              | BOLA-like protein 1;                                                |                                                                                                                                                                           | 0.25 - 0.75 |
| SQMSYGYDEK     | SAGVSVPGMPGSPGR            | N-ter +28.03 Da                           | 49.5       | 39.4              | 3      | 1479.81                      | -2.74                                        | 0.37                  | CO1A1_MOUSE  | F8WGB7_MOUSE | Collagen alpha-1(I) chain;                                          | Alpha-1 type I collagen;                                                                                                                                                  | 0.00 - 0.15 |
| VLELYKTGNA     | SALLLPDQGR                 | N-ter +34.06 Da                           | 42.2       | 34.1              | 2      | 1215.78                      | -1.64                                        | 0.57                  | SPA3K_MOUSE  |              | Serine protease inhibitor A3K;                                      | Contrapsin;SPI-2;                                                                                                                                                         | 0.00 - 0.15 |
| VLHIGSAHNR     | SAMPFTASPAPSTR             | N-ter +28.03 Da                           | 28.5       | 44.2              | 3      | 1447.78                      | 0.84                                         | 0.08                  | PDU1_MOUSE   |              | PD2 and LIM domain protein 1;                                       | C-terminal LIM domain protein 1;Elfin;LIM domain protein CLP-36;                                                                                                          | 0.25 - 0.75 |
| QEPKRSARL      | SAMPVPFTEPKPKR             | N-ter +28.03 Da, K +28.03 Da              | 30.7       | 60.1              | 4      | 1781.13                      | 0.82                                         | 0.07                  | HMG5_MOUSE   |              | High mobility group nucleosome-binding domain-containing protein 5; | Nucleosome-binding protein 1;Nucleosome-binding protein 45;Protein GARP45;                                                                                                | 0.25 - 0.75 |
| VTLINFWPVD     | SAPASSQLSHDDTHSR           | N-ter +28.03 Da                           | 51.2       | 63.4              | 4      | 1819.96                      | 0.00                                         | 0.00                  | DMD_MOUSE    | A2A922_MOUSE | Dystrophin;                                                         |                                                                                                                                                                           | 0.25 - 0.75 |
| AVNSSYKRR      | SAPCEDPFPKAKLR             | N-ter +28.03 Da, K +28.03 Da, C +57.02 Da | 30.8       | 45.9              | 3      | 1757.00                      | -0.89                                        | 0.17                  | E9Q3G8_MOUSE |              |                                                                     |                                                                                                                                                                           | 0.15 - 0.25 |
| VPRASMSCSR     | SAPPKLASLKGVPEDAVETLAGSLGR | N-ter +28.03 Da, K +28.03 Da              | 44.3       | 54.5              | 4      | 2846.77                      | 0.86                                         | 0.48                  | ICAL_MOUSE   | Q921U7_MOUSE | Calpastatin;                                                        | Calpain inhibitor;                                                                                                                                                        | 0.25 - 0.75 |
| KSMWEKVSF      | SAPSASGTPNKETAGLKVGVSSR    | N-ter +28.03 Da, K +28.03 Da              | 36.9       | 54.5              | 4      | 2284.36                      | 0.08                                         | 0.02                  | Q8VCQ8_MOUSE | E9Q0M9_MOUSE |                                                                     |                                                                                                                                                                           | 0.25 - 0.75 |
| FEQQVQAAAY     | SASKGGIVGMLPIAR            | N-ter +34.06 Da, K +34.06 Da              | 35.4       | 40.7              | 3      | 1625.06                      | -0.30                                        | 0.02                  | Q99N15_MOUSE | A2AFQ2_MOUSE |                                                                     |                                                                                                                                                                           | 0.25 - 0.75 |
| SCLVLAARHA     | SASSTNLKDVLSNLIPIKEQAR     | N-ter +34.06 Da, K +34.06 Da              | 22.1       | 58.4              | 4      | 2372.55                      | 0.14                                         | 0.05                  | CISY_MOUSE   |              | Citrate synthase, mitochondrial;                                    |                                                                                                                                                                           | 0.25 - 0.75 |
| RYEDMAAFMK     | SAVEKGEELSCER              | N-ter +28.03 Da, K +28.03 Da, C +57.02 Da | 28.3       | 54.1              | 3      | 1677.88                      | 0.26                                         | 0.05                  | 14335_MOUSE  |              | 14-3-3 protein sigma;                                               | Stratifin;                                                                                                                                                                | 0.25 - 0.75 |
| GEARDRTYRR     | SAVPPGADKAEAGASGATFQFR     | N-ter +28.03 Da, K +28.03 Da              | 50.9       | 56.5              | 4      | 2475.42                      | 1.16                                         | 0.11                  | RS10_MOUSE   |              | 40S ribosomal protein S10;                                          |                                                                                                                                                                           | 0.75 - 0.85 |
| GTRKPKVDAF     | SCHLAQAPNHVVVSR            | N-ter +34.06 Da, C +57.02 Da              | 45.4       | 58.5              | 4      | 1708.00                      | -0.52                                        | 0.10                  | TRFE_MOUSE   | E9Q035_MOUSE | Serotransferrin;                                                    | Beta-1 metal-binding globulin;Siderophilin;                                                                                                                               | 0.25 - 0.75 |
| TQCCAEADKE     | SCLTPKLDGVKEKALVSSVR       | N-ter +28.03 Da, K +28.03 Da, C +57.02 Da | 25.8       | 61.3              | 4      | 2298.48                      | -0.29                                        | 0.03                  | ALBU_MOUSE   |              | Serum albumin;                                                      |                                                                                                                                                                           | 0.25 - 0.75 |
| TESTVKTTF      | SCNLGEKFDETTADGR           | N-ter +28.03 Da, K +28.03 Da, C +57.02 Da | 40.1       | 47.4              | 3      | 1854.93                      | 1.56                                         | 0.24                  | FABP5_MOUSE  | E9Q964_MOUSE | Fatty acid-binding protein, epidermal;                              | Epidermal-type fatty acid-binding protein;Fatty acid-binding protein 5;Keratinocyte lipid-binding protein;Psoriasis-associated fatty acid-binding protein homolog;        | 0.75 - 0.85 |
| LWALLTPAEA     | SCQGIQCAPGQR               | N-ter +28.03 Da, C +57.02 Da              | 27.1       | 48.5              | 3      | 1388.70                      | 0.77                                         | 0.22                  | E9PVG8_MOUSE |              |                                                                     |                                                                                                                                                                           | 0.25 - 0.75 |
| AIGIDLTTY      | SCVGVFGHGKVEIANDQGNR       | N-ter +28.03 Da, K +28.03 Da, C +57.02 Da | 52.6       | 54.6              | 4      | 2383.34                      | 1.64                                         | 0.15                  | H571A_MOUSE  | HS71B_MOUSE  | Heat shock 70 kDa protein 1A;                                       | Heat shock 70 kDa protein 3;Hsp68;                                                                                                                                        | 0.75 - 0.85 |
| AARDKEIFG      | SDADSEDDADSDDEDR           | N-ter +34.06 Da                           | 16.6       | 81.7              | 3      | 1789.79                      | -2.74                                        | 0.73                  | PAF1_MOUSE   |              | RNA polymerase II-associated factor 1 homolog;                      |                                                                                                                                                                           | 0.00 - 0.15 |
| GTVTHLCRQY     | SDAPPLLDGKIDR              | N-ter +28.03 Da, K +28.03 Da              | 45.6       | 40.2              | 3      | 1552.91                      | 0.88                                         | 0.05                  | ACPM_MOUSE   | F8WJ64_MOUSE | Acyl carrier protein, mitochondrial;                                | Ci-SDAP;NADH-ubiquinone oxidoreductase 9.6 kDa subunit;                                                                                                                   | 0.25 - 0.75 |
| KIIRLCREPR     | SDECGAGVFMGSHFDR           | N-ter +28.03 Da, C +57.02 Da              | 54.4       | 63.9              | 3      | 1798.86                      | 0.29                                         | 0.07                  | RS27A_MOUSE  |              | Ubiquitin-40S ribosomal protein S27a;                               | Ubiquitin carboxyl extension protein 80;                                                                                                                                  | 0.25 - 0.75 |
| QIGAKFWEVI     | SDEHGIDPTGTYHGDSLDQLDR     | N-ter +28.03 Da                           | 54.3       | 61.2              | 4      | 2455.24                      | 2.09                                         | 0.74                  | TBB5_MOUSE   |              | Tubulin beta-5 chain;                                               |                                                                                                                                                                           | 0.85 - 1.00 |
| QIGAKFWEVI     | SDEHGIDPTGTYHGDSLDQLER     | N-ter +28.03 Da                           | 54.2       | 59.7              | 4      | 2469.25                      | 1.22                                         | 0.23                  | TBB2C_MOUSE  | TBB4_MOUSE   | Tubulin beta-4B chain;                                              | Tubulin beta-2C chain;                                                                                                                                                    | 0.75 - 0.85 |
| ASRKTFSEL      | SDFGLESTTEGPVVVAIR         | N-ter +28.03 Da                           | 47.7       | 42.0              | 3      | 1904.07                      | 0.60                                         | 0.14                  | PDI3_MOUSE   |              | Protein disulfide-isomerase A3;                                     | 58 kDa glucose-regulated protein;58 kDa microsomal protein;Disulfide isomerase ER-60;Endoplasmic reticulum resident protein 57;Endoplasmic reticulum resident protein 60; | 0.25 - 0.75 |
| SPTRSVTSPI     | SDFPAPPYSAVSPPEAFSR        | N-ter +34.06 Da                           | 26.9       | 81.0              | 3      | 2249.30                      | 0.33                                         | 0.07                  | SYNP2_MOUSE  | D3YVV9_MOUSE | Synaptodin-2;                                                       | Myopodin;                                                                                                                                                                 | 0.25 - 0.75 |
| ESQASDSEGH     | SDFSEGAQVGAHR              | N-ter +28.03 Da                           | 46.8       | 58.5              | 3      | 1387.73                      | -0.30                                        | 0.03                  | FILA_MOUSE   | F7BVV1_MOUSE | Filaggrin;                                                          |                                                                                                                                                                           | 0.25 - 0.75 |
| TKDLGGNAK      | SDFTEEICR                  | N-ter +28.03 Da, C +57.02 Da              | 36.2       | 41.3              | 2      | 1183.57                      | 0.60                                         | 0.07                  | IDH3A_MOUSE  |              | Isocitrate dehydrogenase [NAD] subunit alpha, mitochondrial;        | Isocitric dehydrogenase subunit alpha;NAD(+)-specific ICDH subunit alpha;                                                                                                 | 0.25 - 0.75 |
| ALYTAMKFGF     | SDKESILELITSR              | N-ter +28.03 Da, K +28.03 Da              | 30.5       | 48.0              | 3      | 1545.94                      | 1.47                                         | 0.43                  | ANXA6_MOUSE  | F8WIT2_MOUSE | Annexin A6;                                                         | 67 kDa calelectrin;Annexin VI;Annexin-6;Calphobindin-II;Chromobindin-20;Lipocortin VI;Protein III;p68;p70;                                                                | 0.75 - 0.85 |
| SRDEFNTCP      | SDKEVEIAYSVAKR             | N-ter +28.03 Da, K +28.03 Da              | 32.1       | 56.7              | 4      | 1793.06                      | 0.16                                         | 0.01                  | CLIC4_MOUSE  |              | Chloride intracellular channel protein 4;                           |                                                                                                                                                                           | 0.25 - 0.75 |
| GLTGNFAAQY     | SDKGVSSGPGMLGMGR           | N-ter +28.03 Da, K +28.03 Da              | 65.3       | 50.4              | 3      | 1784.98                      | -1.52                                        | 0.13                  | CO1A2_MOUSE  | E0CXI2_MOUSE | Collagen alpha-2(I) chain;                                          | Alpha-2 type I collagen;                                                                                                                                                  | 0.00 - 0.15 |
| AVALHSVA       | SDLELHPPSPWWSHR            | N-ter +34.06 Da                           | 38.4       | 64.4              | 4      | 1854.05                      | -0.67                                        | 0.04                  | CY1_MOUSE    |              | Cytochrome c1, heme protein, mitochondrial;                         |                                                                                                                                                                           | 0.25 - 0.75 |
| HLSRSRPSA      | SDLPQELVDQKCLLQKYTHR       | N-ter +34.06 Da, K +34.06 Da, C +57.02 Da | 36.4       | 59.2              | 4      | 2701.66                      | -1.47                                        | 0.37                  | CFAI_MOUSE   |              | Complement factor I;                                                | C3B/C4B inactivator;                                                                                                                                                      | 0.15 - 0.25 |
| RERKNSITEI     | SDNEDELLEYHR               | N-ter +28.03 Da                           | 23.8       | 63.5              | 3      | 1546.79                      | 2.26                                         | 0.59                  | PHL1_MOUSE   | D32OX5_MOUSE | Pleckstrin homology-like domain family B member 1;                  | Protein LLS-alpha;                                                                                                                                                        | 0.85 - 1.00 |
| KSKENPRNF      | SDNQLQEGKNIQVGLQMGNTNR     | N-ter +28.03 Da, K +28.03 Da              | 46.7       | 51.2              | 4      | 2257.26                      | 0.21                                         | 0.04                  | TAGL2_MOUSE  |              | Transgelin-2;                                                       | SM22-beta;                                                                                                                                                                | 0.25 - 0.75 |

| Non Prime Site                                                   | Prime Site                                                                             | Modifications                                                                                                         | Hyperscore                           | Mass error in ppm                    | Charge                | Precursor neutral mass in Da                        | Fold change (log <sub>2</sub> ) of ASAPRatio | FC-error of ASAPRatio                | Uniprot ID 1                                                           | Uniprot ID 2                                                 | Protein Name 1                                                                                                                             | Protein Name 2                                                                                                                                                                                                                                                                  | Quantile                                                                |
|------------------------------------------------------------------|----------------------------------------------------------------------------------------|-----------------------------------------------------------------------------------------------------------------------|--------------------------------------|--------------------------------------|-----------------------|-----------------------------------------------------|----------------------------------------------|--------------------------------------|------------------------------------------------------------------------|--------------------------------------------------------------|--------------------------------------------------------------------------------------------------------------------------------------------|---------------------------------------------------------------------------------------------------------------------------------------------------------------------------------------------------------------------------------------------------------------------------------|-------------------------------------------------------------------------|
| TKQQTFTTY<br>NVREATESFA                                          | SDNQPGVLIQVYEGER<br>SDPILYRPVAVALDTKGPEIR                                              | N-ter +28.03 Da<br>N-ter +28.03 Da, K +28.03 Da                                                                       | 59.0<br>22.6                         | 48.1<br>60.4                         | 3<br>4                | 1831.00<br>2365.48                                  | 0.23<br>-0.07                                | 0.02<br>0.01                         | H571A_MOUSE<br>KPYM_MOUSE                                              | H571B_MOUSE                                                  | Heat shock 70 kDa protein 1A;<br>Pyruvate kinase isozymes M1/M2;                                                                           | Heat shock 70 kDa protein 3;Hsp68;<br>Pyruvate kinase muscle isozyme;                                                                                                                                                                                                           | 0.25 - 0.75<br>0.25 - 0.75                                              |
| SGGGLLVDF                                                        | SDSASAVAPLAGSEDNFAR                                                                    | N-ter +34.06 Da                                                                                                       | 46.4                                 | 53.0                                 | 3                     | 1995.08                                             | -0.25                                        | 0.05                                 | AP2A2_MOUSE                                                            |                                                              | AP-2 complex subunit alpha-2;                                                                                                              | 100 kDa coated vesicle protein C;Adapter-related protein complex 2 alpha-2 subunit;Adaptor protein complex AP-2 subunit alpha-2;Alpha-adaptin C;Alpha2-adaptin;Clathrin assembly protein complex 2 alpha-C large chain;Plasma membrane adaptor HAZ/AP2 adaptin alpha C subunit; | 0.25 - 0.75                                                             |
| HRQSKLSSD<br>LQTRGFVSDS<br>RPRQSPSPQS<br>MKVLQTRGFV              | SDSGSGQVQGR<br>SDSMDTGAGSIR<br>SDSQVHSGVQVEGR<br>SDSSDSMDTGAGSIR                       | N-ter +28.03 Da<br>N-ter +28.03 Da<br>N-ter +34.06 Da<br>N-ter +28.03 Da                                              | 21.3<br>40.7<br>49.4<br>33.9         | 100.6<br>39.7<br>48.3<br>49.0        | 2<br>3<br>3<br>3      | 1104.63<br>1223.59<br>1517.84<br>1512.71            | 0.07<br>-0.32<br>-0.03<br>-1.74              | 0.03<br>0.02<br>0.01<br>0.17         | SNPC1_MOUSE<br>ATIF1_MOUSE<br>FILA_MOUSE<br>ATIF1_MOUSE                | Q9D879_MOUSE<br>F7BVV1_MOUSE<br>Q9D879_MOUSE                 | snRNA-activating protein complex subunit 1;<br>ATPase inhibitor, mitochondrial;<br>Filaggrin;<br>ATPase inhibitor, mitochondrial;          | 43 kDa subunit;<br>Inhibitor of F(1)F(o)-ATPase;<br>Carnitine deficiency-associated protein 3;Tyrosine-phosphorylated protein 36;                                                                                                                                               | 0.25 - 0.75<br>0.25 - 0.75<br>0.25 - 0.75<br>0.00 - 0.15                |
| KTPQGPEIY                                                        | SDTFPFLSQSTAKHVESR                                                                     | N-ter +28.03 Da, K +28.03 Da                                                                                          | 36.9                                 | 63.7                                 | 4                     | 2073.18                                             | -0.38                                        | 0.02                                 | CDV3_MOUSE                                                             | F8WGL9_MOUSE                                                 | Protein CDV3;                                                                                                                              |                                                                                                                                                                                                                                                                                 | 0.25 - 0.75                                                             |
| A                                                                | SDVLELTDENFESR                                                                         | N-ter +28.03 Da                                                                                                       | 46.5                                 | 52.8                                 | 3                     | 1680.87                                             | 2.31                                         | 0.75                                 | PDIA3_MOUSE                                                            | F6Q404_MOUSE                                                 | Protein disulfide-isomerase A3;                                                                                                            | 58 kDa glucose-regulated protein;58 kDa microsomal protein;Disulfide isomerase ER-60;Endoplasmic reticulum resident protein 57;Endoplasmic reticulum resident protein 60;                                                                                                       | 0.85 - 1.00                                                             |
| RILGVISAI                                                        | SEAAAQYNPEPPPPR                                                                        | N-ter +28.03 Da                                                                                                       | 38.9                                 | 40.0                                 | 3                     | 1650.87                                             | 0.01                                         | 0.00                                 | CPNS1_MOUSE                                                            | D3YW48_MOUSE                                                 | Calpain small subunit 1;                                                                                                                   |                                                                                                                                                                                                                                                                                 | 0.25 - 0.75                                                             |
| KKGFVLHKS                                                        | SEEAHAEDSVMDDHFR                                                                       | N-ter +28.03 Da                                                                                                       | 58.1                                 | 64.4                                 | 4                     | 1923.94                                             | 1.01                                         | 0.38                                 | PAIRB_MOUSE                                                            |                                                              | Plasminogen activator inhibitor 1 RNA-binding protein;                                                                                     | PAI1 RNA-binding protein 1;SERPINE1 mRNA-binding protein 1;                                                                                                                                                                                                                     | 0.75 - 0.85                                                             |
| VDYRTRVLI<br>RPNPNWGWG                                           | SEEEELDTKLTR<br>SEFGDSSSPATR                                                           | N-ter +28.03 Da, K +28.03 Da<br>N-ter +28.03 Da                                                                       | 27.4<br>42.7                         | 49.5<br>37.2                         | 3<br>2                | 1504.84<br>1267.61                                  | -2.06<br>0.01                                | 0.17<br>0.00                         | PEA15_MOUSE<br>Q99K47_MOUSE                                            | E9PV24_MOUSE                                                 | Astrocytic phosphoprotein PEA-15;<br>Serine/threonine-protein phosphatase 6 regulatory subunit 3;                                          | 15 kDa phosphoprotein enriched in astrocytes;                                                                                                                                                                                                                                   | 0.00 - 0.15<br>0.25 - 0.75                                              |
| PTKETGWASF<br>PRRSPVHES<br>RGVSEQASD                             | SEFTSSSLTKESLR<br>SEGEHVSVPQR<br>SEGHSDFSEGOAVGAHR                                     | N-ter +34.06 Da, K +34.06 Da<br>N-ter +28.03 Da<br>N-ter +28.03 Da                                                    | 42.9<br>28.9<br>45.3                 | 44.8<br>67.6<br>63.0                 | 3<br>3<br>4           | 1638.98<br>1380.76<br>1797.92                       | 0.25<br>-0.01<br>2.75                        | 0.09<br>0.00<br>0.74                 | PP6R3_MOUSE<br>FILA2_MOUSE<br>E9Q019_MOUSE                             | FILA2_MOUSE<br>FILA_MOUSE                                    | Filaggrin-2;                                                                                                                               | SAPS domain family member 3;<br>Intermediate filament-associated protein;                                                                                                                                                                                                       | 0.25 - 0.75<br>0.25 - 0.75<br>0.85 - 1.00                               |
| CEFQDAYVLL<br>RRDHVLGLAR<br>KQYAPRCVC                            | SEKKISSVQSPVALEIANHR<br>SELEEDIIPEEDIIR<br>SEPIPEPGRDETIVR                             | N-ter +28.03 Da, K +28.03 Da<br>N-ter +34.06 Da<br>N-ter +28.03 Da                                                    | 57.6<br>44.5<br>30.1                 | 70.7<br>45.0<br>47.4                 | 4<br>3<br>3           | 2460.58<br>1920.07<br>1739.93                       | 1.45<br>-0.89<br>0.93                        | 0.17<br>0.17<br>0.11                 | CH60_MOUSE<br>CO3_MOUSE<br>ZYX_MOUSE                                   | Q7TQE2_MOUSE                                                 | 60 kDa heat shock protein, mitochondrial;<br>Complement C3;<br>Zyxin;                                                                      |                                                                                                                                                                                                                                                                                 | 0.75 - 0.85<br>0.15 - 0.25<br>0.25 - 0.75                               |
| KRHPYKMNLA<br>DSPERELLS                                          | SEPQEVLIHGSANHR<br>SEPSPAVTPVPTTLIAPR                                                  | N-ter +28.03 Da<br>N-ter +28.03 Da                                                                                    | 23.4<br>44.3                         | 64.6<br>40.6                         | 4<br>3                | 1700.97<br>1961.16                                  | -0.09<br>0.71                                | 0.01<br>0.10                         | PDL1_MOUSE<br>SNX2_MOUSE                                               |                                                              | PDZ and LIM domain protein 1;<br>Sorting nexin-2;                                                                                          | LIM domain protein CLP-36;                                                                                                                                                                                                                                                      | 0.25 - 0.75<br>0.25 - 0.75                                              |
| SSQPNLSTYS                                                       | SEQEYGGKAGGSPASYHGSTSPR                                                                | N-ter +28.03 Da, K +28.03 Da                                                                                          | 30.7                                 | 58.3                                 | 4                     | 2308.21                                             | -0.29                                        | 0.07                                 | EPN2_MOUSE                                                             | Q5NCM6_MOUSE                                                 | Epsin-2;                                                                                                                                   | EPS-15-interacting protein 2;Intersectin-EH-binding protein 2;                                                                                                                                                                                                                  | 0.25 - 0.75                                                             |
| PRQPTVTSVC<br>SPLRSPPLLG<br>SADROGRRGV                           | SESAQELAEQQR<br>SESPYEDFLSADSKVLR<br>SESQASDSEGHSDFSEGOAVGAHR                          | N-ter +28.03 Da<br>N-ter +28.03 Da, K +28.03 Da<br>N-ter +28.03 Da                                                    | 38.2<br>40.9<br>55.7                 | 55.0<br>63.3<br>63.9                 | 3<br>3<br>4           | 1331.71<br>2055.15<br>2502.22                       | -0.07<br>0.06<br>0.90                        | 0.01<br>0.01<br>0.29                 | PDL5_MOUSE<br>MAP18_MOUSE<br>E9Q019_MOUSE                              | E9Q8P5_MOUSE<br>F7BVV1_MOUSE                                 | PDZ and LIM domain protein 5;<br>Microtubule-associated protein 1B;                                                                        | Enigma homolog;Enigma-like PDZ and LIM domains protein;                                                                                                                                                                                                                         | 0.25 - 0.75<br>0.25 - 0.75<br>0.25 - 0.75                               |
| MEKLSGMRF                                                        | SEVATQYSEDKAR                                                                          | N-ter +34.06 Da, K +34.06 Da<br>N-ter +28.03 Da, K +28.03 Da, C +57.02 Da                                             | 34.4                                 | 39.5                                 | 3                     | 1550.88                                             | -1.52                                        | 0.22                                 | PIN4_MOUSE                                                             |                                                              | Peptidyl-prolyl cis-trans isomerase NIMA-interacting 4; Serine/threonine-protein phosphatase 2A 65 kDa regulatory subunit A alpha isoform; | Parvulin-14;Peptidyl-prolyl cis-trans isomerase Pin4;Rotamase Pin4;                                                                                                                                                                                                             | 0.00 - 0.15                                                             |
| MITTLFCINVL                                                      | SEVCGQDITTKHMLPTVLR                                                                    | N-ter +28.03 Da, K +28.03 Da, C +57.02 Da                                                                             | 37.9                                 | 61.7                                 | 4                     | 2240.30                                             | 0.11                                         | 0.01                                 | ZAAA_MOUSE                                                             |                                                              |                                                                                                                                            | PP2A subunit A isoform PR65-alpha;PP2A subunit A isoform R1-alpha;                                                                                                                                                                                                              | 0.25 - 0.75                                                             |
| KVLIRIMVSR<br>WTHVFSSRS<br>ERDRITALK<br>GISLPQVELA<br>DEQALEDHFS | SEVDMKLR<br>SEVVLSDGDEDDYQR<br>SFEVEIEPPNTPPR<br>SFGAGPEIVAPSAEATAGSR<br>SFGPISVVVVKDR | N-ter +28.03 Da, K +28.03 Da<br>N-ter +28.03 Da<br>N-ter +28.03 Da<br>N-ter +34.06 Da<br>N-ter +28.03 Da, K +28.03 Da | 17.8<br>44.5<br>33.2<br>39.5<br>32.6 | 51.9<br>47.3<br>60.3<br>45.6<br>53.3 | 3<br>3<br>3<br>3<br>3 | 1145.71<br>1638.82<br>1855.01<br>2023.10<br>1586.99 | 2.08<br>-0.03<br>0.40<br>-0.38<br>-0.30      | 0.19<br>0.01<br>0.01<br>0.05<br>0.03 | ANXA2_MOUSE<br>E9Q616_MOUSE<br>SEPT9_MOUSE<br>PRAX_MOUSE<br>RBM3_MOUSE | BOV2N5_MOUSE<br>A2A6U3_MOUSE<br>Q6NVF7_MOUSE<br>Q8BG13_MOUSE | Annexin A2;<br>Septin-9;<br>Periaxin;<br>Putative RNA-binding protein 3;                                                                   | Annexin I;Annexin-2;Calpactin I heavy chain;Calpactin-1 heavy chain;Chromobindin-8;Lipocortin II;Placental anticoagulant protein IV;Protein I;p36;                                                                                                                              | 0.85 - 1.00<br>0.25 - 0.75<br>0.25 - 0.75<br>0.25 - 0.75<br>0.25 - 0.75 |
| ANEVEAVKVH<br>ETPSQRATR                                          | SFPTLKFPPASADR<br>SGAQASSTPLSPTR                                                       | N-ter +28.03 Da, K +28.03 Da<br>N-ter +28.03 Da                                                                       | 30.5<br>28.3                         | 53.8<br>37.9                         | 3<br>3                | 1638.96<br>1386.76                                  | -1.29<br>2.00                                | 0.09<br>0.37                         | PDIA1_MOUSE<br>LMNA_MOUSE                                              | E9Q8G8_MOUSE<br>D3YUF7_MOUSE                                 | Protein disulfide-isomerase;<br>Prelamin-A/C;                                                                                              | Cellular thyroid hormone-binding protein;Endoplasmic reticulum resident protein 59;Prolyl 4-hydroxylase subunit beta;p55;                                                                                                                                                       | 0.15 - 0.25<br>0.85 - 1.00                                              |
| GPEANVGPYG<br>SHQRAADSQN                                         | SGDSAPLQEAMAVLQHHDVAVSGTAR<br>SGEGNTSAAESSFSQEVAR                                      | N-ter +28.03 Da<br>N-ter +28.03 Da                                                                                    | 52.2<br>46.3                         | 51.6<br>39.1                         | 4<br>3                | 2575.38<br>1940.95                                  | -1.47<br>0.20                                | 0.49<br>0.04                         | MA2B1_MOUSE<br>Q7M739_MOUSE                                            | E9PZZ3_MOUSE                                                 | Lysosomal alpha-mannosidase;                                                                                                               | Lysosomal acid alpha-mannosidase;Mannosidase alpha class 2B member 1;Mannosidase alpha-B;                                                                                                                                                                                       | 0.15 - 0.25<br>0.25 - 0.75                                              |

| Non Prime Site | Prime Site                  | Modifications                                                             | Hyperscore | Mass error in ppm | Charge | Precursor neutral mass in Da | Fold change (log <sub>2</sub> ) of ASAPRatio | FC-error of ASAPRatio | Uniprot ID 1 | Uniprot ID 2 | Protein Name 1                                                                                                                                        | Protein Name 2                                                                                                                                                                         | Quantile    |
|----------------|-----------------------------|---------------------------------------------------------------------------|------------|-------------------|--------|------------------------------|----------------------------------------------|-----------------------|--------------|--------------|-------------------------------------------------------------------------------------------------------------------------------------------------------|----------------------------------------------------------------------------------------------------------------------------------------------------------------------------------------|-------------|
| NIDIRSAFKR     | SGEQDADAGELDFSGLLKR         | N-ter +34.06 Da, K +34.06 Da<br>N-ter +28.03 Da, K +28.03 Da, C +57.02 Da | 42.3       | 50.1              | 3      | 2075.18                      | -0.79                                        | 0.15                  | D3YU50_MOUSE | Q6P6L5_MOUSE |                                                                                                                                                       |                                                                                                                                                                                        | 0.25 - 0.75 |
| ESTECRTRV      | SGEHMDLTTCPAAGGQQEKLK       | N-ter +28.03 Da, K +28.03 Da, C +57.02 Da                                 | 40.7       | 58.3              | 4      | 2454.34                      | 3.28                                         | 0.31                  | Q9D1B1_MOUSE |              |                                                                                                                                                       |                                                                                                                                                                                        | 0.85 - 1.00 |
| EPFASGKTA      | SGELHGLTTDEKFEVGVYR         | N-ter +28.03 Da, K +28.03 Da                                              | 52.7       | 60.7              | 4      | 2192.25                      | -2.32                                        | 0.35                  | THY_MOUSE    |              | Transthyretin;                                                                                                                                        | Prealbumin;                                                                                                                                                                            | 0.00 - 0.15 |
| VLDGADCIML     | SGETAKGDYPLEAVR             | N-ter +34.06 Da, K +34.06 Da                                              | 33.0       | 40.2              | 3      | 1659.98                      | -1.09                                        | 0.14                  | KPYM_MOUSE   |              | Pyruvate kinase isozymes M1/M2;                                                                                                                       | Pyruvate kinase muscle isozyme;                                                                                                                                                        | 0.15 - 0.25 |
| EQFRQLQGN      | SGEVESHFLFEKSLR             | N-ter +28.03 Da, K +28.03 Da                                              | 28.1       | 60.4              | 4      | 1873.11                      | 0.53                                         | 0.06                  | APOA4_MOUSE  |              | Apolipoprotein A-IV;                                                                                                                                  | Apolipoprotein A4;                                                                                                                                                                     | 0.25 - 0.75 |
| PLPPTAQGN      | SGSGAPGLAAAIAAGAKLR         | N-ter +28.03 Da, K +28.03 Da                                              | 43.8       | 47.0              | 3      | 1680.05                      | -0.76                                        | 0.12                  | VASP_MOUSE   |              | Vasodilator-stimulated phosphoprotein;                                                                                                                |                                                                                                                                                                                        | 0.25 - 0.75 |
| RKDLANTVL      | SGGTTMPYGIADR               | N-ter +28.03 Da                                                           | 44.5       | 39.6              | 2      | 1352.69                      | -0.42                                        | 0.08                  | ACTB_MOUSE   | ACTA_MOUSE   | Actin, cytoplasmic 1;                                                                                                                                 | Beta-actin;                                                                                                                                                                            | 0.25 - 0.75 |
| AIMARIAQFL     | SGIPETVPLSTVNR              | N-ter +28.03 Da                                                           | 34.1       | 41.7              | 3      | 1496.88                      | 0.45                                         | 0.04                  | THIKA_MOUSE  | THIKB_MOUSE  | 3-ketoacyl-CoA thiolase A, peroxisomal;                                                                                                               | Acetyl-CoA acyltransferase A;Beta-ketothiolase A;                                                                                                                                      | 0.25 - 0.75 |
| HRGLPLGKGY     | SGLQGLPLAGLHGDQAGPVPVGPAGPR | N-ter +34.06 Da                                                           | 51.1       | 55.1              | 4      | 2566.52                      | -1.74                                        | 0.52                  | CO1A2_MOUSE  | E9Q6U9_MOUSE | Collagen alpha-2(I) chain;                                                                                                                            | Alpha-2 type I collagen;                                                                                                                                                               | 0.00 - 0.15 |
| ETTALVCDNG     | SGLVKAGFAGDDAPR             | N-ter +28.03 Da, K +28.03 Da                                              | 45.3       | 41.8              | 3      | 1515.87                      | 0.49                                         | 0.11                  | ACTC_MOUSE   | ACTS_MOUSE   | Actin, alpha cardiac muscle 1;                                                                                                                        | Alpha-cardiac actin;                                                                                                                                                                   | 0.25 - 0.75 |
| DNG            | SGMCKAGFAGDDAPR             | N-ter +28.03 Da, K +28.03 Da, C +57.02 Da                                 | 43.4       | 56.6              | 3      | 1594.81                      | -1.03                                        | 0.23                  | ACTB_MOUSE   | ACTG_MOUSE   | Actin, cytoplasmic 1;                                                                                                                                 | Beta-actin;                                                                                                                                                                            | 0.15 - 0.25 |
| AAQYSDKGV      | SGPPMGLMGPR                 | N-ter +34.06 Da                                                           | 32.5       | 43.5              | 2      | 1189.67                      | -2.74                                        | 0.18                  | CO1A2_MOUSE  | E0CXI2_MOUSE | Collagen alpha-2(I) chain;                                                                                                                            | Alpha-2 type I collagen;                                                                                                                                                               | 0.00 - 0.15 |
| SPSLPPSAKR     | SGQKPLVDVHAEALDR            | N-ter +28.03 Da, K +28.03 Da                                              | 25.3       | 60.1              | 4      | 1806.07                      | 0.87                                         | 0.10                  | DC1L1_MOUSE  |              | Cytoplasmic dynein 1 light intermediate chain 1;                                                                                                      | Dynein light chain A;Dynein light intermediate chain 1, cytosolic;                                                                                                                     | 0.25 - 0.75 |
| PSGPVKDGR      | SGQPVPVGPAGVR               | N-ter +34.06 Da                                                           | 39.1       | 26.2              | 2      | 1211.72                      | -0.17                                        | 0.02                  | CO1A2_MOUSE  | E9Q6U9_MOUSE | Collagen alpha-2(I) chain;                                                                                                                            | Alpha-2 type I collagen;                                                                                                                                                               | 0.25 - 0.75 |
| CWLAVGHSNG     | SGSSKEGNECLSKTR             | N-ter +28.03 Da, K +28.03 Da, C +57.02 Da                                 | 19.6       | 73.3              | 4      | 1836.08                      | 4.46                                         | 1.00                  | E9PYU6_MOUSE |              |                                                                                                                                                       |                                                                                                                                                                                        | 0.85 - 1.00 |
| HVVPDQLMTF     | SGTNDPCALCSLHIGKIGKAQNR     | N-ter +28.03 Da, K +28.03 Da, C +57.02 Da                                 | 43.9       | 69.1              | 4      | 2568.43                      | 1.20                                         | 0.21                  | MIF_MOUSE    |              | Macrophage migration inhibitory factor;                                                                                                               | Delayed early response protein 6;Glycosylation-inhibiting factor;L-dopachrome isomerase;L-dopachrome tautomerase;Phenylpyruvate tautomerase;                                           | 0.75 - 0.85 |
| ASSREGSPAR     | SGTPVHCPSPIR                | N-ter +34.06 Da, C +57.02 Da                                              | 32.4       | 44.4              | 3      | 1340.77                      | 0.69                                         | 0.04                  | BAG3_MOUSE   |              | BAG family molecular chaperone regulator 3;                                                                                                           | Bcl-2-associated athanogene 3;Bcl-2-binding protein Bis;                                                                                                                               | 0.25 - 0.75 |
| SVQVPEFTPK     | SGVKIHVSQELQSANASVDDSR      | N-ter +28.03 Da, K +28.03 Da                                              | 57.1       | 59.4              | 4      | 2497.39                      | 2.60                                         | 0.58                  | UBA1_MOUSE   |              | Ubiquitin-like modifier-activating enzyme 1;                                                                                                          | Ubiquitin-activating enzyme E1;Ubiquitin-activating enzyme E1 X;Ubiquitin-like modifier-activating enzyme 1 X;                                                                         | 0.85 - 1.00 |
| VVLFETATLR     | SGYLLPDTKAYGDR              | N-ter +28.03 Da, K +28.03 Da                                              | 27.2       | 44.0              | 3      | 1610.90                      | -0.54                                        | 0.05                  | ENPL_MOUSE   |              | Endoplasmic reticulum resident protein 99;Heat shock protein 90 kDa beta member 1;Polymorphic tumor rejection antigen 1;Tumor rejection antigen gp96; | 94 kDa glucose-regulated protein;Endoplasmic reticulum resident protein 99;Heat shock protein 90 kDa beta member 1;Polymorphic tumor rejection antigen 1;Tumor rejection antigen gp96; | 0.25 - 0.75 |
| DTSQKQDSPA     | SHEIATNLGDFALSR             | N-ter +34.06 Da                                                           | 34.7       | 40.8              | 3      | 1940.10                      | 0.08                                         | 0.04                  | A1AT1_MOUSE  | A1AT2_MOUSE  | Alpha-1-antitrypsin 1-1;                                                                                                                              | Alpha-1 protease inhibitor 1;Alpha-1-antiprotease;Serine protease inhibitor 1-1;Serine protease inhibitor A1a;                                                                         | 0.25 - 0.75 |
| DTSQKQDSPA     | SHEIATNLGDFALSR             | N-ter +28.03 Da                                                           | 23.4       | 47.5              | 3      | 1570.89                      | -2.32                                        | 0.58                  | A1AT4_MOUSE  |              | Alpha-1-antitrypsin 1-4;                                                                                                                              | Alpha-1 protease inhibitor 4;Serine protease inhibitor 1-4;Serine protease inhibitor A1d;                                                                                              | 0.00 - 0.15 |
| QGPAPPNPF      | SHLLEGELEYTKTIER            | N-ter +34.06 Da, K +34.06 Da                                              | 34.5       | 65.7              | 4      | 2114.29                      | 4.26                                         | 0.57                  | ADDG_MOUSE   |              | Gamma-adducin;                                                                                                                                        | Adducin-like protein 70;                                                                                                                                                               | 0.85 - 1.00 |
| GLNPVAVSRF     | SHTDVKVPDFSDYRR             | N-ter +28.03 Da, K +28.03 Da                                              | 23.7       | 70.9              | 4      | 1877.08                      | -1.60                                        | 0.15                  | UCRI_MOUSE   |              | Cytochrome b-c1 complex subunit Rieske, mitochondrial;                                                                                                | Complex III subunit 5;Cytochrome b-c1 complex subunit 5;Rieske iron-sulfur protein;Ubiquinol-cytochrome c reductase iron-sulfur subunit;                                               | 0.00 - 0.15 |
| GLNPVAVSRF     | SHTDVKVPDFSDYR              | N-ter +28.03 Da, K +28.03 Da                                              | 30.0       | 69.7              | 4      | 1720.96                      | -1.36                                        | 0.17                  | UCRI_MOUSE   |              | Cytochrome b-c1 complex subunit Rieske, mitochondrial;                                                                                                | Complex III subunit 5;Cytochrome b-c1 complex subunit 5;Rieske iron-sulfur protein;Ubiquinol-cytochrome c reductase iron-sulfur subunit;                                               | 0.15 - 0.25 |
| RSTCHNQNSM     | SICEEFSQADDKGCFR            | N-ter +28.03 Da, K +28.03 Da, C +57.02 Da                                 | 52.5       | 41.4              | 3      | 2132.02                      | 0.55                                         | 0.15                  | A2M_MOUSE    | D3YW52_MOUSE | Alpha-2-macroglobulin;                                                                                                                                | Pregnancy zone protein;                                                                                                                                                                | 0.25 - 0.75 |
| NQQEGVCPGE     | SIDNSPVKWCALSHLER           | N-ter +28.03 Da, K +28.03 Da, C +57.02 Da                                 | 25.3       | 69.0              | 4      | 2067.20                      | -0.15                                        | 0.03                  | TRFE_MOUSE   | E9Q035_MOUSE | Serotransferrin;                                                                                                                                      | Beta-1 metal-binding globulin;Siderophilin;                                                                                                                                            | 0.25 - 0.75 |
| ASTSQSRAA      | SIFGGAKPVDTAAR              | N-ter +28.03 Da, K +28.03 Da                                              | 27.8       | 50.3              | 3      | 1444.88                      | -1.18                                        | 0.14                  | IF4B_MOUSE   | E9P2A1_MOUSE | Eukaryotic translation initiation factor 4B;                                                                                                          |                                                                                                                                                                                        | 0.15 - 0.25 |
| GLILPILAK      | SIGTLDPCCKDPTDR             | N-ter +28.03 Da, K +28.03 Da, C +57.02 Da                                 | 21.8       | 51.3              | 3      | 1601.89                      | 1.76                                         | 0.44                  | CDSN_MOUSE   |              | Corneodesmosin;                                                                                                                                       |                                                                                                                                                                                        | 0.85 - 1.00 |
| QLPNQVLES      | SIIDTGPLISGAKQR             | N-ter +28.03 Da, K +28.03 Da                                              | 39.4       | 40.6              | 3      | 1611.00                      | -0.17                                        | 0.04                  | EHD2_MOUSE   | Q8R2X0_MOUSE | EH domain-containing protein 2;                                                                                                                       |                                                                                                                                                                                        | 0.25 - 0.75 |
| SAGIHETTYN     | SIMKCDIDIR                  | N-ter +28.03 Da, K +28.03 Da, C +57.02 Da                                 | 28.3       | 52.3              | 3      | 1305.75                      | 0.25                                         | 0.04                  | ACTC_MOUSE   | ACTA_MOUSE   | Actin, alpha cardiac muscle 1;                                                                                                                        | Alpha-cardiac actin;                                                                                                                                                                   | 0.25 - 0.75 |
| LQTRFLDY       | SIPFPPTTTLTR                | N-ter +28.03 Da                                                           | 25.8       | 36.1              | 3      | 1511.89                      | 1.22                                         | 0.14                  | UBP2L_MOUSE  | E9P2A1_MOUSE | Ubiquitin-associated protein 2-like;                                                                                                                  |                                                                                                                                                                                        | 0.75 - 0.85 |
| SVATQQTL       | SIPSHPSTAGKIFR              | N-ter +28.03 Da, K +28.03 Da                                              | 18.3       | 60.6              | 4      | 1552.97                      | 0.61                                         | 0.06                  | A2AQ82_MOUSE | A2AQ9_MOUSE  |                                                                                                                                                       |                                                                                                                                                                                        | 0.25 - 0.75 |
| WAAPVKGTFV     | SITPAEAVGLVGDNR             | N-ter +28.03 Da, K +28.03 Da                                              | 31.7       | 40.5              | 3      | 1595.99                      | 0.47                                         | 0.03                  | PROF1_MOUSE  | Q5SX49_MOUSE | Profilin-1;                                                                                                                                           | Profilin 1;                                                                                                                                                                            | 0.25 - 0.75 |
| QLPKVNKNKN     | SIVDPKVIHVGVDVAVSR          | N-ter +28.03 Da, K +28.03 Da                                              | 31.1       | 57.1              | 4      | 2273.40                      | 0.65                                         | 0.05                  | PLCD1_MOUSE  |              | 1-phosphatidylinositol-4,5-bisphosphate phosphodiesterase delta-1;                                                                                    | Phosphoinositide phospholipase C-delta-1;Phospholipase C-delta-1;                                                                                                                      | 0.25 - 0.75 |
| RTSPVPRQKR     | SIVVSPILIPENQR              | N-ter +28.03 Da                                                           | 35.2       | 45.8              | 3      | 1592.00                      | 0.38                                         | 0.11                  | CAD13_MOUSE  |              | Cadherin-13;                                                                                                                                          | Heart cadherin;Truncated cadherin;                                                                                                                                                     | 0.25 - 0.75 |
| IHQVQVQEMD     | SKADDLCLKSSGVIQR            | N-ter +28.03 Da, K +28.03 Da                                              | 44.7       | 61.7              | 4      | 1928.21                      | -0.76                                        | 0.08                  | C163A_MOUSE  |              | Scavenger receptor cysteine-rich type 1 protein M130;                                                                                                 |                                                                                                                                                                                        | 0.25 - 0.75 |
| LLLYAAYAGA     | SKAELHYPPQGEHR              | N-ter +28.03 Da, K +28.03 Da                                              | 19.8       | 67.1              | 4      | 1735.98                      | 2.91                                         | 0.60                  | RCN2_MOUSE   | D6RHL9_MOUSE | Reticulocalbin-2;                                                                                                                                     | Taipoxin-associated calcium-binding protein 49;                                                                                                                                        | 0.85 - 1.00 |
| QALEGLILEK     | SKDQEDAMGGVAQAEQAEQHSVIMR   | N-ter +34.06 Da, K +34.06 Da                                              | 24.2       | 39.5              | 4      | 2911.52                      | -3.06                                        | 0.77                  | E9Q4L7_MOUSE |              |                                                                                                                                                       |                                                                                                                                                                                        | 0.00 - 0.15 |
| IDLSAKIEF      | SKEQEQDFKFAFLFDR            | N-ter +34.06 Da, K +34.06 Da                                              | 26.6       | 61.7              | 4      | 2231.37                      | -0.56                                        | 0.12                  | MYL1_MOUSE   | E0CZ30_MOUSE | Myosin light chain 1/3, skeletal muscle isoform;                                                                                                      | Myosin light chain alkali 1/2;                                                                                                                                                         | 0.25 - 0.75 |



| Non Prime Site | Prime Site                 | Modifications                             | Hyperscore | Mass error in ppm | Charge | Precursor neutral mass in Da | Fold change (log <sub>2</sub> ) of ASAPRatio | FC-error of ASAPRatio | Uniprot ID 1 | Uniprot ID 2 | Protein Name 1                                                                                            | Protein Name 2                                                                                                                                                              | Quantile    |
|----------------|----------------------------|-------------------------------------------|------------|-------------------|--------|------------------------------|----------------------------------------------|-----------------------|--------------|--------------|-----------------------------------------------------------------------------------------------------------|-----------------------------------------------------------------------------------------------------------------------------------------------------------------------------|-------------|
| AAVSTAQPIL     | SKLEPQIATASEYahr           | N-ter +28.03 Da, K +28.03 Da              | 35.4       | 54.4              | 4      | 1856.08                      | -0.34                                        | 0.03                  | PLIN3_MOUSE  |              |                                                                                                           | Cargo selection protein TIP47;Mannose-6-phosphate receptor-binding protein 1;                                                                                               | 0.25 - 0.75 |
| AKVEAFQASL     | SKLGDVYVNDafgTAHR          | N-ter +28.03 Da, K +28.03 Da              | 22.6       | 80.0              | 4      | 1905.13                      | -0.84                                        | 0.06                  | PGK1_MOUSE   | PGK2_MOUSE   | Phosphoglycerate kinase 1;                                                                                |                                                                                                                                                                             | 0.15 - 0.25 |
| QNTVRSFMKR     | SKLGPYNEELR                | N-ter +28.03 Da, K +28.03 Da              | 34.4       | 44.1              | 3      | 1360.79                      | 0.74                                         | 0.10                  | TBCB_MOUSE   |              | Tubulin-folding cofactor B;                                                                               | Cytoskeleton-associated protein 1;Cytoskeleton-associated protein CkAP1;Tubulin-specific chaperone B;                                                                       | 0.25 - 0.75 |
| ERSPLQSLAR     | SKPSPQLSAETPVAALPEFPR      | N-ter +28.03 Da, K +28.03 Da              | 49.3       | 58.2              | 4      | 2277.37                      | 0.08                                         | 0.02                  | E9Q056_MOUSE |              |                                                                                                           |                                                                                                                                                                             | 0.25 - 0.75 |
| SLSTFQQMWI     | SKQEYDESGPSIVHR            | N-ter +28.03 Da, K +28.03 Da              | 39.4       | 65.7              | 4      | 1787.00                      | 0.20                                         | 0.02                  | ACTB_MOUSE   | ACTG_MOUSE   | Actin, cytoplasmic 1;                                                                                     | Beta-actin;                                                                                                                                                                 | 0.25 - 0.75 |
| LWSLVATLLG     | SKWPEPVFGR                 | N-ter +34.06 Da, K +34.06 Da              | 25.6       | 47.8              | 3      | 1269.81                      | -0.07                                        | 0.01                  | MASP2_MOUSE  |              | Mannan-binding lectin serine protease 2;                                                                  | MBL-associated serine protease 2;Mannose-binding protein-associated serine protease 2;                                                                                      | 0.25 - 0.75 |
| ISRRVLVSDG     | SLAEVPKEAPKVGILSGDFAR      | N-ter +34.06 Da, K +34.06 Da              | 24.1       | 54.3              | 4      | 2342.53                      | -0.60                                        | 0.15                  | STEA3_MOUSE  | E9QN92_MOUSE | Metalloreductase STEAP3;                                                                                  | Dudulin-2;Protein nm1054;Six-transmembrane epithelial antigen of prostate 3;Tumor suppressor-activated pathway protein 6;                                                   | 0.25 - 0.75 |
| NIGAARPIKR     | SLEDLDLVIAGKKAR            | N-ter +28.03 Da, K +28.03 Da              | 24.1       | 62.9              | 4      | 1711.13                      | 0.71                                         | 0.14                  | ARISB_MOUSE  |              | AT-rich interactive domain-containing protein 5B;                                                         | Developmentally and sexually retarded with transient immune abnormalities protein;MRF1-like;Modulator recognition factor protein 2;                                         | 0.25 - 0.75 |
| STVHEILCKL     | SLEGDHTSPPSAYGSVKPYTNFDAER | N-ter +34.06 Da, K +34.06 Da              | 40.7       | 58.8              | 4      | 2892.59                      | 1.02                                         | 0.20                  | ANXA2_MOUSE  | BOVZN7_MOUSE | Annexin A2;                                                                                               | Annexin I;Annexin-2;Calpactin I heavy chain;Calpactin-1 heavy chain;Chromobindin-8;Lipoprotein II;Placental anticoagulant protein IV;Protein I;p36;                         | 0.75 - 0.85 |
| LPKFSISMDN     | SLEHILPELGR                | N-ter +28.03 Da                           | 30.4       | 50.2              | 3      | 1403.88                      | 0.77                                         | 0.10                  | SPA3F_MOUSE  | SPA3G_MOUSE  | Serine protease inhibitor A3F;                                                                            |                                                                                                                                                                             | 0.25 - 0.75 |
| NEMATAASSS     | SLEKSYELPDGQVITIGNER       | N-ter +28.03 Da, K +28.03 Da              | 58.4       | 46.7              | 3      | 2303.31                      | 1.29                                         | 0.17                  | ACTC_MOUSE   | ACTA_MOUSE   | Actin, alpha cardiac muscle 1;                                                                            | Alpha-cardiac actin;                                                                                                                                                        | 0.75 - 0.85 |
| LRPPGGGSNF     | SLGFDEPAEQPVR              | N-ter +34.06 Da                           | 36.1       | 43.6              | 3      | 1477.83                      | 0.35                                         | 0.11                  | HN1_MOUSE    |              | Hematological and neurological expressed 1 protein;                                                       |                                                                                                                                                                             | 0.25 - 0.75 |
| FEHRLGEAAR     | SLGNAGNEIGR                | N-ter +28.03 Da                           | 37.2       | 34.0              | 2      | 1114.61                      | -0.94                                        | 0.13                  | DMKN_MOUSE   | E9QLW7_MOUSE | Dermokine;                                                                                                | Epidermis-specific secreted protein SK30/SK89; Lysosomal pepstatin-insensitive protease;Tripeptidyl aminopeptidase;Tripeptidyl-peptidase I;                                 | 0.15 - 0.25 |
| RPEPQQVGTV     | SLHLGVTPSVLR               | N-ter +34.06 Da                           | 22.5       | 48.0              | 3      | 1311.87                      | 0.77                                         | 0.17                  | TPP1_MOUSE   |              | Tripeptidyl-peptidase 1;                                                                                  |                                                                                                                                                                             | 0.25 - 0.75 |
| ADESAANCDK     | SLHTLFGDKLCAIPNLR          | N-ter +28.03 Da, K +28.03 Da, C +57.02 Da | 29.5       | 60.6              | 4      | 2010.23                      | 1.07                                         | 0.20                  | ALBU_MOUSE   |              | Serum albumin;                                                                                            |                                                                                                                                                                             | 0.75 - 0.85 |
| SLTVIHDFLF     | SLKESPEKFOIEAMFPR          | N-ter +28.03 Da, K +28.03 Da              | 43.0       | 64.9              | 4      | 2103.27                      | -1.89                                        | 0.21                  | FAF2_MOUSE   |              | FAS-associated factor 2;                                                                                  | UBX domain-containing protein 8;                                                                                                                                            | 0.00 - 0.15 |
| SIRSAPPKLA     | SLKGVVPEDAVETLAGSLGTR      | N-ter +34.06 Da, K +34.06 Da              | 52.9       | 48.1              | 3      | 2166.36                      | 0.93                                         | 0.50                  | ICAL_MOUSE   | Q921U7_MOUSE | Calpastatin;                                                                                              | Calpain inhibitor; Alcohol sulfotransferase;Hydroxysteroid sulfotransferase 2;                                                                                              | 0.25 - 0.75 |
| AMKANTMSNY     | SLLPASLLDHR                | N-ter +28.03 Da                           | 44.8       | 66.1              | 3      | 1248.80                      | 3.02                                         | 0.54                  | STZB1_MOUSE  | E9QKC1_MOUSE | Sulfotransferase family cytosolic 2B member 1;                                                            |                                                                                                                                                                             | 0.85 - 1.00 |
| QLIGIQDGYL     | SLLQDSGEVR                 | N-ter +34.06 Da                           | 48.4       | 24.9              | 2      | 1136.65                      | -0.38                                        | 0.05                  | IF5A1_MOUSE  |              | Eukaryotic translation initiation factor 5A-1;                                                            | Eukaryotic initiation factor 5A isoform 1;eIF-4D;                                                                                                                           | 0.25 - 0.75 |
| RSPLQLLGR      | SLPEGVVDGIEVYTKISCKVTSR    | N-ter +28.03 Da, K +28.03 Da, C +57.02 Da | 59.9       | 52.3              | 4      | 2707.59                      | 0.81                                         | 0.46                  | ITIH3_MOUSE  | E9PVS1_MOUSE | Inter-alpha-trypsin inhibitor heavy chain H3;                                                             |                                                                                                                                                                             | 0.25 - 0.75 |
| SGLSVEEFM      | SLPELQQNPLVQR              | N-ter +28.03 Da                           | 36.4       | 41.1              | 3      | 1548.93                      | -0.79                                        | 0.03                  | CANB1_MOUSE  |              | Calcineurin subunit B type 1;                                                                             | Protein phosphatase 2B regulatory subunit 1;Protein phosphatase 3 regulatory subunit B alpha isoform 1;                                                                     | 0.25 - 0.75 |
| FQTSSFSFAM     | SLPGAPTASSGTAAYPALPNR      | N-ter +28.03 Da                           | 35.1       | 40.5              | 3      | 2026.13                      | -3.06                                        | 0.77                  | ARNT_MOUSE   | Q3ULM2_MOUSE | Aryl hydrocarbon receptor nuclear translocator;                                                           | Dioxin receptor, nuclear translocator;Hypoxia-inducible factor 1-beta;                                                                                                      | 0.00 - 0.15 |
| LLGSPRRSY      | SLPHQKVPPLPSLPTMQAGTIAR    | N-ter +28.03 Da, K +28.03 Da              | 45.1       | 61.5              | 4      | 2581.60                      | 1.12                                         | 0.04                  | ODP2_MOUSE   |              | Dihydrolipoyllysine-residue acetyltransferase component of pyruvate dehydrogenase complex, mitochondrial; | Dihydrolipoamide acetyltransferase component of pyruvate dehydrogenase complex;Pyruvate dehydrogenase complex component E2;                                                 | 0.75 - 0.85 |
| ACFATKDGK      | SLTKDLGNNAKSDFTTEICR       | N-ter +28.03 Da, K +28.03 Da, C +57.02 Da | 39.1       | 68.4              | 4      | 2484.37                      | 4.19                                         | 0.98                  | IDH3A_MOUSE  |              | Isocitrate dehydrogenase [NAD] subunit alpha, mitochondrial;                                              | Isocitric dehydrogenase subunit alpha;NAD(+)-specific ICDH subunit alpha; Heparin-binding protein 44;Low density lipoprotein receptor-related protein-associated protein 1; | 0.85 - 1.00 |
| DGRKDAQMVH     | SNALNEDTQDELGDPR           | N-ter +28.03 Da                           | 38.5       | 63.0              | 3      | 1800.93                      | -0.64                                        | 0.09                  | AMRP_MOUSE   | F6SY09_MOUSE | Alpha-2-macroglobulin receptor-associated protein;                                                        | Heat shock 84 kDa;Tumor-specific transplantation 84 kDa antigen;                                                                                                            | 0.25 - 0.75 |
| NKEIFLRELI     | SNASDALDKIR                | N-ter +28.03 Da, K +28.03 Da              | 23.8       | 47.2              | 3      | 1244.73                      | 2.62                                         | 0.15                  | H590B_MOUSE  | ENPL_MOUSE   | Heat shock protein HSP 90-beta; Phosphatidylinositol-binding clathrin assembly protein;                   |                                                                                                                                                                             | 0.85 - 1.00 |
| STAASRATTL     | SNAVSSTGLSLTKVDER          | N-ter +28.03 Da, K +28.03 Da              | 52.0       | 46.1              | 3      | 2090.22                      | 0.07                                         | 0.01                  | PICA_MOUSE   |              |                                                                                                           | Clathrin assembly lymphoid myeloid leukemia;                                                                                                                                | 0.25 - 0.75 |
| TPGHACTQKF     | SNEEIAMATVTALR             | N-ter +28.03 Da                           | 43.0       | 46.7              | 3      | 1532.86                      | -1.32                                        | 0.20                  | ALDOA_MOUSE  | Q9CPQ9_MOUSE | Fructose-bisphosphate aldolase A;                                                                         | Aldolase 1;Muscle-type aldolase;                                                                                                                                            | 0.15 - 0.25 |
| DKDDLVTTEL     | SNEELLQLVLR                | N-ter +34.06 Da                           | 28.5       | 39.3              | 3      | 1348.79                      | -0.89                                        | 0.07                  | LAP2A_MOUSE  | LAP2B_MOUSE  | Lamina-associated polypeptide 2, isoforms alpha/zeta;                                                     | Thymopoietin isoforms alpha/zeta; 56 kDa cytokeratin;Cytokeratin-10;Keratin, type I cytoskeletal 59 kDa;Keratin-10;                                                         | 0.15 - 0.25 |
| KSKELTVID      | SNIEQMSSHSEITELR           | N-ter +28.03 Da, K +28.03 Da              | 33.6       | 60.5              | 4      | 2044.15                      | -0.27                                        | 0.02                  | K1C10_MOUSE  | A2A513_MOUSE | Keratin, type I cytoskeletal 10;                                                                          |                                                                                                                                                                             | 0.25 - 0.75 |
| EQFLPMMQAI     | SNNKDQGGYEDFVEGLR          | N-ter +28.03 Da, K +28.03 Da              | 63.7       | 50.3              | 3      | 1983.03                      | -2.32                                        | 0.70                  | MYL1_MOUSE   | E9PWG4_MOUSE | Myosin light chain 1/3, skeletal muscle isoform;                                                          | Myosin light chain alkali 1/2;                                                                                                                                              | 0.00 - 0.15 |
| KSFVNLNGKD     | SNNLCLHFNPR                | N-ter +28.03 Da, C +57.02 Da              | 36.3       | 51.7              | 3      | 1398.76                      | -0.52                                        | 0.06                  | LEG1_MOUSE   |              | Galectin-1;                                                                                               | 14 kDa lectin;Beta-galactoside-binding lectin L-14-I;Galaplin;Lactose-binding lectin 1;Lectin galactoside-binding soluble 1;S-Lac lectin 1;                                 | 0.25 - 0.75 |
| LLAACGSVTM     | SNPGESSFLADRLDPVEKIDR      | N-ter +28.03 Da, K +28.03 Da              | 44.8       | 59.7              | 4      | 2515.41                      | 0.94                                         | 0.24                  | SODE_MOUSE   |              | Extracellular superoxide dismutase [Cu-Zn];                                                               |                                                                                                                                                                             | 0.25 - 0.75 |

| Non Prime Site | Prime Site                  | Modifications                             | Hyperscore | Mass error in ppm | Charge | Precursor neutral mass in Da | Fold change (log <sub>2</sub> ) of ASAPRatio | FC-error of ASAPRatio | Uniprot ID 1 | Uniprot ID 2 | Protein Name 1                                                            | Protein Name 2                                                                                                          | Quantile    |
|----------------|-----------------------------|-------------------------------------------|------------|-------------------|--------|------------------------------|----------------------------------------------|-----------------------|--------------|--------------|---------------------------------------------------------------------------|-------------------------------------------------------------------------------------------------------------------------|-------------|
| ILEGNDIELV     | SNSAAUIQQATTYKNDKDR         | N-ter +28.03 Da, K +28.03 Da              | 31.4       | 56.7              | 4      | 2141.34                      | 0.06                                         | 0.01                  | RL9_MOUSE    |              | 60S ribosomal protein L9;                                                 |                                                                                                                         | 0.25 - 0.75 |
| TSGDSLTVAS     | SNTDFAFSLYR                 | N-ter +28.03 Da                           | 49.4       | 38.0              | 2      | 1347.70                      | 2.52                                         | 0.58                  | SPA3G_MOUSE  | D3Z450_MOUSE | Serine protease inhibitor A3G;                                            | Serine protease inhibitor 2A;                                                                                           | 0.85 - 1.00 |
| KIPRHVETEI     | SNTDVEOTGPKTVIR             | N-ter +34.06 Da, K +34.06 Da              | 45.1       | 43.1              | 3      | 1712.05                      | -1.40                                        | 0.33                  | E9Q616_MOUSE |              |                                                                           |                                                                                                                         | 0.15 - 0.25 |
| RSRCFGFVTY     | SNVEEADAAAMAASHAVDGNTEVELKR | N-ter +28.03 Da, K +28.03 Da              | 104.1      | 59.3              | 4      | 2737.50                      | 0.40                                         | 0.12                  | Q9CX86_MOUSE |              |                                                                           |                                                                                                                         | 0.25 - 0.75 |
| QETDTSQKDK     | SPASHEIATNLGDFALR           | N-ter +28.03 Da                           | 39.1       | 57.6              | 3      | 1826.04                      | -3.06                                        | 0.77                  | A1AT4_MOUSE  |              | Alpha-1-antitrypsin 1-4;                                                  | Alpha-1 protease inhibitor 4;Serine protease inhibitor 1-4;Serine protease inhibitor A1d;                               | 0.00 - 0.15 |
| NSTHPMHSRC     | SPDPLTALLSDHR               | N-ter +28.03 Da                           | 75.1       | 47.1              | 3      | 1505.85                      | 0.00                                         | 0.00                  | HEMO_MOUSE   |              | Hemopexin;                                                                |                                                                                                                         | 0.25 - 0.75 |
| YPKRLEKELG     | SPPGISLETIDAAFSCPGSSR       | N-ter +28.03 Da, C +57.02 Da              | 56.9       | 43.9              | 3      | 2176.14                      | -0.42                                        | 0.16                  | HEMO_MOUSE   |              | Hemopexin;                                                                |                                                                                                                         | 0.25 - 0.75 |
| LVTLCSHAL      | SPTNCDASEPLAEKVLINKGR       | N-ter +28.03 Da, K +28.03 Da, C +57.02 Da | 26.8       | 56.4              | 4      | 2610.52                      | 3.77                                         | 1.76                  | HRG_MOUSE    |              | Histidine-rich glycoprotein;                                              | Histidine-proline-rich glycoprotein;                                                                                    | 0.85 - 1.00 |
| QSGSRRPRR      | SPVHPESSEGEESVVPQR          | N-ter +28.03 Da                           | 37.3       | 58.4              | 4      | 2114.13                      | -1.74                                        | 0.41                  | FILA2_MOUSE  | FILA2_MOUSE  | Filaggrin-2;                                                              | Intermediate filament-associated protein;                                                                               | 0.00 - 0.15 |
| DGDLGNLSL      | SPVQADVVFPR                 | N-ter +28.03 Da                           | 26.7       | 41.4              | 3      | 1305.73                      | 0.00                                         | 0.00                  | LEGLA_MOUSE  | E9QAC6_MOUSE | Galectin-related protein A;                                               | Lectin galactoside-binding-like protein A;                                                                              | 0.25 - 0.75 |
| M              | SQAQFDKAAAEVKK              | N-ter +28.03 Da, K +28.03 Da              | 25.6       | 56.4              | 4      | 1690.98                      | -0.06                                        | 0.01                  | ACBP_MOUSE   |              | Acyl-CoA-binding protein;                                                 | Diazepam-binding inhibitor;Endozepine;                                                                                  | 0.25 - 0.75 |
| DRQGRRGVSE     | SQASDSEGHSDFSEGGAVGAHR      | N-ter +28.03 Da                           | 44.8       | 65.7              | 4      | 2286.14                      | 1.67                                         | 0.82                  | E9Q019_MOUSE | F7BVV1_MOUSE |                                                                           |                                                                                                                         | 0.85 - 1.00 |
| YGSGLSGYL      | SQDTSVSPCKSDQSKAR           | N-ter +28.03 Da, K +28.03 Da, C +57.02 Da | 26.1       | 64.9              | 4      | 1976.13                      | -0.12                                        | 0.03                  | CATD_MOUSE   | Q8C243_MOUSE | Cathepsin D;                                                              |                                                                                                                         | 0.25 - 0.75 |
| PVRNRKVDVY     | SQFQESDDADEDYGR             | N-ter +34.06 Da                           | 49.4       | 60.7              | 3      | 1794.85                      | 0.99                                         | 0.35                  | NUCK5_MOUSE  |              | Nuclear ubiquitously casein and cyclin-dependent kinases substrate;       | JC7;                                                                                                                    | 0.75 - 0.85 |
| FENAFLSHVI     | SQHQLSLGNIR                 | N-ter +28.03 Da                           | 33.7       | 46.9              | 3      | 1279.76                      | -0.56                                        | 0.04                  | ATPA_MOUSE   | D3Z6F5_MOUSE | ATP synthase subunit alpha, mitochondrial;                                |                                                                                                                         | 0.25 - 0.75 |
| TFLPKRIKL      | SLLQEDSLNVDLSSLR            | N-ter +28.03 Da                           | 49.3       | 42.8              | 3      | 2015.14                      | 0.06                                         | 0.01                  | PSME2_MOUSE  | E0CZ90_MOUSE | Proteasome activator complex subunit 2;                                   | 11S regulator complex subunit beta;Activator of multicatalytic protease subunit 2;Proteasome activator 28 subunit beta; | 0.25 - 0.75 |
| AVVRVGRRL      | SQQSASGAPVLLR               | N-ter +34.06 Da                           | 49.3       | 47.1              | 3      | 1346.84                      | 0.37                                         | 0.04                  | ETHE1_MOUSE  |              | Protein ETHE1, mitochondrial;                                             | Ethylmalonic encephalopathy protein 1 homolog;Hepatoma subtracted clone one protein;                                    | 0.25 - 0.75 |
| RDRPRQPSP      | SQSSDSQVHSGVQVEGR           | N-ter +34.06 Da                           | 58.9       | 43.2              | 3      | 1819.97                      | 2.19                                         | 0.61                  | FILA_MOUSE   | F7BVV1_MOUSE | Filaggrin;                                                                |                                                                                                                         | 0.85 - 1.00 |
| QKIFAREILD     | SRGNPTVEVDLHTAKGR           | N-ter +28.03 Da, K +28.03 Da              | 28.4       | 67.5              | 4      | 1892.15                      | -0.30                                        | 0.07                  | ENOB_MOUSE   | Q5X59_MOUSE  | Beta-enolase;                                                             | 2-phospho-D-glycerate hydro-lyase;Enolase 3;Muscle-specific enolase;Skeletal muscle enolase;                            | 0.25 - 0.75 |
| RASGPWGRSH     | SSAAEASAALKVRPER            | N-ter +34.06 Da, K +34.06 Da              | 26.5       | 46.3              | 4      | 1781.13                      | -1.52                                        | 0.17                  | ALAT2_MOUSE  | D6RFQ8_MOUSE | Alanine aminotransferase 2;                                               |                                                                                                                         | 0.00 - 0.15 |
| QFLVLVLAGR     | SSDAVAGPASSLQR              | N-ter +28.03 Da, K +28.03 Da              | 44.5       | 49.7              | 3      | 1528.90                      | 0.99                                         | 0.10                  | E9PWQ3_MOUSE | D3YWD1_MOUSE |                                                                           |                                                                                                                         | 0.75 - 0.85 |
| VLQTRGFVSD     | SSDSMDTGAISLR               | N-ter +28.03 Da                           | 55.8       | 49.4              | 2      | 1310.63                      | 0.06                                         | 0.00                  | ATIF1_MOUSE  | Q8D879_MOUSE | ATPase inhibitor, mitochondrial;                                          | Inhibitor of F(1)F(o)-ATPase;                                                                                           | 0.25 - 0.75 |
| DRPRQPSPSQ     | SSDQVHSGVQVEGR              | N-ter +28.03 Da                           | 60.6       | 42.3              | 3      | 1598.83                      | 0.60                                         | 0.11                  | FILA_MOUSE   | F7BVV1_MOUSE | Filaggrin;                                                                |                                                                                                                         | 0.25 - 0.75 |
| GALAPTGPSA     | SSEAPPLVNEVKR               | N-ter +28.03 Da, K +28.03 Da              | 46.4       | 51.9              | 3      | 1595.93                      | -1.36                                        | 0.21                  | RPN1_MOUSE   |              | Dolichyl-diphosphooligosaccharide--protein glycosyltransferase subunit 1; | Dolichyl-diphosphooligosaccharide--protein glycosyltransferase 67 kDa subunit;Ribophorin I;Ribophorin-1;                | 0.15 - 0.25 |
| SPRRSPVHPE     | SSEGEHSVVPQR                | N-ter +34.06 Da                           | 45.3       | 48.3              | 3      | 1473.80                      | 0.06                                         | 0.01                  | FILA2_MOUSE  | E9QPZ3_MOUSE | Filaggrin-2;                                                              | Intermediate filament-associated protein;                                                                               | 0.25 - 0.75 |
| TWTHEVLESFR    | SSEVLVSGDDEYQKR             | N-ter +28.03 Da                           | 37.7       | 57.3              | 3      | 1725.87                      | 0.89                                         | 0.12                  | E9Q616_MOUSE |              |                                                                           |                                                                                                                         | 0.25 - 0.75 |
| TDEQALDEHF     | SSFGPISEVVVKDR              | N-ter +28.03 Da, K +28.03 Da              | 48.9       | 50.1              | 3      | 1674.02                      | -1.36                                        | 0.21                  | RBM3_MOUSE   | Q8B813_MOUSE | Putative RNA-binding protein 3;                                           | RNA-binding motif protein 3;                                                                                            | 0.15 - 0.25 |
| SDVQTAVKTN     | SSFIQGFVDHVKEDCDR           | N-ter +28.03 Da, K +28.03 Da, C +57.02 Da | 33.2       | 65.4              | 4      | 2094.12                      | 0.08                                         | 0.01                  | SAP_MOUSE    | Q8BFQ1_MOUSE | Sulfated glycoprotein 1;                                                  | Prosaposin;                                                                                                             | 0.25 - 0.75 |
| VVLLFETALL     | SSGFSLDPQTHSNR              | N-ter +28.03 Da                           | 65.4       | 51.4              | 3      | 1688.86                      | 3.89                                         | 0.49                  | H590B_MOUSE  | Q71LX8_MOUSE | Heat shock protein HSP 90-beta;                                           | Heat shock 84 kDa;Tumor-specific transplantation 84 kDa antigen;                                                        | 0.85 - 1.00 |
| CGLSDPNLTL     | SSGKDGCPLVVEQVR             | N-ter +34.06 Da, K +34.06 Da, C +57.02 Da | 47.6       | 32.5              | 3      | 1826.06                      | 0.80                                         | 0.12                  | LRC47_MOUSE  | F6Y733_MOUSE | Leucine-rich repeat-containing protein 47;                                |                                                                                                                         | 0.25 - 0.75 |
| YTENGGGGQY     | SSGAPASPETQGKANVTR          | N-ter +34.06 Da, K +34.06 Da              | 39.1       | 59.4              | 3      | 1811.09                      | -0.58                                        | 0.22                  | CD34_MOUSE   |              | Hematopoietic progenitor cell antigen CD34;                               |                                                                                                                         | 0.25 - 0.75 |
| DGGLADLLEFV    | SSGPTNASAFTR                | N-ter +28.03 Da                           | 58.4       | 42.3              | 2      | 1351.69                      | 2.07                                         | 0.37                  | MAP4_MOUSE   | E9QPW8_MOUSE | Microtubule-associated protein 4;                                         |                                                                                                                         | 0.85 - 1.00 |
| PLGYPVYNSV     | SSHASSPYISSVQSPGSASLAQSR    | N-ter +34.06 Da                           | 27.3       | 27.2              | 3      | 2587.34                      | -1.47                                        | 0.25                  | DLX1_MOUSE   |              | Homeobox protein DLX-1;                                                   |                                                                                                                         | 0.15 - 0.25 |
| GGORAIAWRVL    | SSIEQKSNEEGSEKGPVKEYR       | N-ter +28.03 Da, K +28.03 Da              | 20.2       | 56.4              | 4      | 2750.52                      | 2.96                                         | 1.24                  | 14335_MOUSE  |              | 14-3-3 protein sigma;                                                     | Stratifin;                                                                                                              | 0.85 - 1.00 |
| DLKTGESVLL     | SSIPSPDDFKSTGIKYVEDR        | N-ter +28.03 Da, K +28.03 Da              | 30.2       | 55.7              | 4      | 2437.41                      | 3.18                                         | 0.87                  | PALMD_MOUSE  | Q3UV77_MOUSE | Palmdelphin;                                                              |                                                                                                                         | 0.85 - 1.00 |
| SSVATQQTLL     | SSIPSPHSTAGKIFR             | N-ter +34.06 Da, K +34.06 Da              | 27.2       | 56.0              | 4      | 1652.06                      | 0.60                                         | 0.11                  | A2AQ82_MOUSE | A2AQ9_MOUSE  |                                                                           |                                                                                                                         | 0.25 - 0.75 |
| KYDMEVKVQK     | SSKELEDMNQKLFDLR            | N-ter +28.03 Da, K +28.03 Da              | 33.9       | 60.0              | 4      | 2036.18                      | 0.29                                         | 0.05                  | TNNI2_MOUSE  | A2A6K0_MOUSE | Troponin I, fast skeletal muscle;                                         | Troponin I, fast-twitch isoform;                                                                                        | 0.25 - 0.75 |
| HVVSVYKPRY     | SLSLNHYKPR                  | N-ter +28.03 Da, K +28.03 Da              | 22.7       | 60.4              | 3      | 1342.82                      | 0.38                                         | 0.11                  | CLYBL_MOUSE  |              | Citrate lyase subunit beta-like protein, mitochondrial;                   |                                                                                                                         | 0.25 - 0.75 |
| PNHQKASSGK     | SSPFKVSPSFR                 | N-ter +28.03 Da, K +28.03 Da              | 30.2       | 55.8              | 3      | 1463.90                      | 1.69                                         | 0.08                  | SDPR_MOUSE   |              | Serum deprivation-response protein;                                       | Cavin-2;Phosphatidylserine-binding protein;                                                                             | 0.85 - 1.00 |
| GGLLRLLGVR     | SSAPVSPNVNR                 | N-ter +28.03 Da                           | 41.8       | 17.7              | 2      | 1198.65                      | 0.53                                         | 0.09                  | PYC_MOUSE    | E9QPD7_MOUSE | Pyruvate carboxylase, mitochondrial;                                      | Pyruvic carboxylase;                                                                                                    | 0.25 - 0.75 |
| DDVARHGQRR     | SSGIVSLGIGDR                | N-ter +28.03 Da                           | 56.9       | 36.7              | 2      | 1274.73                      | -0.43                                        | 0.02                  | E9PWQ3_MOUSE | D3YWD1_MOUSE |                                                                           |                                                                                                                         | 0.25 - 0.75 |
| RSRGRGQFV      | SSSLPDIQYR                  | N-ter +28.03 Da, C +57.02 Da              | 42.1       | 40.1              | 2      | 1224.63                      | 2.00                                         | 0.43                  | CNBP_MOUSE   | D3YF6_MOUSE  | Cellular nucleic acid-binding protein;                                    | Zinc finger protein 9;                                                                                                  | 0.85 - 1.00 |
| LVLAARHASA     | SSTNLKVDLSNLPKEQAR          | N-ter +28.03 Da, K +28.03 Da              | 23.6       | 66.9              | 4      | 2196.39                      | 0.60                                         | 0.14                  | C15V_MOUSE   |              | Citrate synthase, mitochondrial;                                          |                                                                                                                         | 0.25 - 0.75 |
| KCLPLCAPRC     | SSTSAPVQITHTYVHPR           | N-ter +28.03 Da                           | 36.7       | 57.1              | 4      | 2009.15                      | 0.19                                         | 0.02                  | ETFD_MOUSE   |              | Electron transfer flavoprotein-ubiquinone oxidoreductase, mitochondrial;  | Electron-transferring-flavoprotein dehydrogenase;                                                                       | 0.25 - 0.75 |
| GPTSNWARRQ     | SSVAQPSLHTAQKPR             | N-ter +28.03 Da, K +28.03 Da              | 27.7       | 54.7              | 4      | 1662.01                      | -0.12                                        | 0.02                  | GATB_MOUSE   | Q3TLZ6_MOUSE | Glutamyl-tRNA(Gln) amidotransferase subunit B, mitochondrial;             | Cytochrome oxidase assembly factor PET112 homolog;                                                                      | 0.25 - 0.75 |
| LWSWLPSIFG     | SSVEEMAESR                  | N-ter +28.03 Da                           | 36.3       | 49.4              | 2      | 1222.61                      | -0.81                                        | 0.07                  | Q3URZ6_MOUSE | F7DBB3_MOUSE |                                                                           |                                                                                                                         | 0.15 - 0.25 |
| EVREKPAK       | SSVETQPAEVR                 | N-ter +28.03 Da                           | 57.0       | 35.1              | 2      | 1358.72                      | 0.93                                         | 0.12                  | E41L2_MOUSE  | Q811B2_MOUSE | Band 4.1-like protein 2;                                                  | Generally expressed protein 4.1;                                                                                        | 0.25 - 0.75 |
| YQCLVVSRL      | SSVEYEPKETFDKILIANR         | N-ter +28.03 Da, K +28.03 Da              | 29.0       | 62.6              | 4      | 2478.53                      | 0.21                                         | 0.04                  | PCCA_MOUSE   | D3YZC0_MOUSE | Propionyl-CoA carboxylase alpha chain, mitochondrial;                     | Propanoyl-CoA:carbon dioxide ligase subunit alpha;                                                                      | 0.25 - 0.75 |

Table S10, Tholen et al.

| Non Prime Site                                                     | Prime Site                                                                                                 | Modifications                                                                                                                                      | Hyperscore                           | Mass error in ppm                    | Charge                | Precursor neutral mass in Da                        | Fold change (log <sub>2</sub> ) of ASAPRatio | FC-error of ASAPRatio                | Uniprot ID 1                                                             | Uniprot ID 2                                                 | Protein Name 1                                                                                                                                                        | Protein Name 2                                                                                                                                                                                           | Quantile                                                                |                                                                         |
|--------------------------------------------------------------------|------------------------------------------------------------------------------------------------------------|----------------------------------------------------------------------------------------------------------------------------------------------------|--------------------------------------|--------------------------------------|-----------------------|-----------------------------------------------------|----------------------------------------------|--------------------------------------|--------------------------------------------------------------------------|--------------------------------------------------------------|-----------------------------------------------------------------------------------------------------------------------------------------------------------------------|----------------------------------------------------------------------------------------------------------------------------------------------------------------------------------------------------------|-------------------------------------------------------------------------|-------------------------------------------------------------------------|
| SPSGKSKQRY                                                         | SSVYGASVSDKDKR                                                                                             | N-ter +28.03 Da, K +28.03 Da                                                                                                                       | 66.0                                 | 48.9                                 | 3                     | 1667.92                                             | -0.17                                        | 0.03                                 | CHCH3_MOUSE                                                              | Q9D9P1_MOUSE                                                 | Coiled-coil-helix-coiled-coil-helix domain-containing protein 3, mitochondrial;                                                                                       |                                                                                                                                                                                                          | 0.25 - 0.75                                                             |                                                                         |
| LDKVKSATLS                                                         | STESTASGMQDEVR                                                                                             | N-ter +34.06 Da                                                                                                                                    | 46.4                                 | 60.1                                 | 3                     | 1530.80                                             | -0.76                                        | 0.09                                 | AKA12_MOUSE                                                              | F8W121_MOUSE                                                 | A-kinase anchor protein 12;                                                                                                                                           | Germ cell lineage protein gercelin;Src-suppressed C kinase substrate; E3 SUMO-protein ligase TRIM28;KRAB-A-interacting protein;KRIP-1;Tripartite motif-containing protein 28;                            | 0.25 - 0.75                                                             |                                                                         |
| KIVAERPBTN                                                         | STGPGPMAPPR                                                                                                | N-ter +28.03 Da                                                                                                                                    | 40.4                                 | 31.9                                 | 2                     | 1094.59                                             | -0.30                                        | 0.02                                 | TIF1B_MOUSE                                                              |                                                              | Transcription intermediary factor 1-beta;                                                                                                                             |                                                                                                                                                                                                          | 0.25 - 0.75                                                             |                                                                         |
| IHRAAAVAAM<br>NKSVQKSGVR                                           | STGTFFVVSQPLNYR<br>STHQAAVSVSKIDSR                                                                         | N-ter +34.06 Da<br>N-ter +28.03 Da, K +28.03 Da                                                                                                    | 44.7<br>38.3                         | 45.2<br>61.0                         | 3<br>4                | 1601.94<br>1553.95                                  | -0.58<br>1.13                                | 0.07<br>0.23                         | AL9A1_MOUSE<br>Q8VCQ8_MOUSE                                              | Q3U367_MOUSE<br>E9Q0M9_MOUSE                                 | 4-trimethylaminobutyraldehyde dehydrogenase;                                                                                                                          | Aldehyde dehydrogenase family 9 member A1;                                                                                                                                                               | 0.25 - 0.75<br>0.75 - 0.85                                              |                                                                         |
| LPGPPPATHY                                                         | STLSKPAPLGTLEVR                                                                                            | N-ter +28.03 Da, K +28.03 Da                                                                                                                       | 35.5                                 | 29.6                                 | 3                     | 1725.05                                             | -2.56                                        | 0.30                                 | PKN1_MOUSE                                                               | D6RH37_MOUSE                                                 | Serine/threonine-protein kinase N1;                                                                                                                                   | Protein kinase C-like 1;Protein kinase C-like PKN;Protein-kinase C-related kinase 1;Serine-threonine protein kinase N;                                                                                   | 0.00 - 0.15                                                             |                                                                         |
| LCKLSLEGDH                                                         | STPPSAYGSVKPYTNFDAER                                                                                       | N-ter +28.03 Da, K +28.03 Da                                                                                                                       | 28.7                                 | 40.7                                 | 3                     | 2242.18                                             | 0.61                                         | 0.10                                 | ANXA2_MOUSE                                                              | B0V2N7_MOUSE                                                 | Annexin A2;                                                                                                                                                           | Annexin II;Annexin-2;Calpactin I heavy chain;Calpactin-1 heavy chain;Chromobindin-8;Lipoprotein II;Placental anticoagulant protein IV;Protein I;p36;                                                     | 0.25 - 0.75                                                             |                                                                         |
| LVGLTSRAV<br>GVHTSVASAT                                            | STSSMGLTPKQVKIVEGPR<br>SVATKKTEQPPSEYIFER                                                                  | N-ter +28.03 Da, K +28.03 Da<br>N-ter +28.03 Da, K +28.03 Da                                                                                       | 24.7<br>38.7                         | 57.7<br>60.0                         | 4<br>4                | 2197.38<br>2337.36                                  | 1.09<br>-2.00                                | 0.17<br>0.24                         | HMGCL_MOUSE<br>OAT_MOUSE                                                 |                                                              | Hydroxymethylglutaryl-CoA lyase, mitochondrial; Ornithine aminotransferase, mitochondrial;                                                                            | 3-hydroxy-3-methylglutarate-CoA lyase; Ornithine-oxo-acid aminotransferase;                                                                                                                              | 0.75 - 0.85<br>0.00 - 0.15                                              |                                                                         |
| SSAFTEDKLV<br>GNRGEFPGAG                                           | SVFVTVITPMLNPIVYTLR<br>SVGPGVAVGPR                                                                         | N-ter +34.06 Da<br>N-ter +28.03 Da                                                                                                                 | 26.9<br>42.0                         | 77.5<br>24.7                         | 4<br>2                | 2260.45<br>1022.61                                  | -2.40<br>-4.32                               | 0.76<br>0.86                         | OL142_MOUSE<br>E9Q6U9_MOUSE                                              | Q8VG62_MOUSE<br>E9Q6U9_MOUSE                                 | Olfactory receptor 142; Olfactory receptor 219;                                                                                                                       | Olfactory receptor 227-2;Olfactory receptor 4C; Alpha-2 type I collagen;                                                                                                                                 | 0.00 - 0.15<br>0.00 - 0.15                                              |                                                                         |
| LESKSNKIVQ<br>AITARRQHLK<br>AITARRQHLK<br>TDQVEAHVQN<br>TKIFASNVS  | SVIQTAVDQFAR<br>SVMQLQAAETEKEESRR<br>SVMQLQAAETEKEESRR<br>SVPDEESKPASNTQVEGDEEAALLER<br>SVLPAENVTITAGQR    | N-ter +28.03 Da<br>N-ter +28.03 Da, K +28.03 Da<br>N-ter +34.06 Da, K +34.06 Da<br>N-ter +28.03 Da, K +28.03 Da<br>N-ter +28.03 Da                 | 37.8<br>23.4<br>49.3<br>64.5<br>45.4 | 57.7<br>57.9<br>48.1<br>57.9<br>48.5 | 3<br>3<br>3<br>3<br>3 | 1361.81<br>2145.27<br>2001.21<br>2942.57<br>1680.00 | -1.18<br>0.90<br>0.99<br>0.59<br>-4.32       | 0.08<br>0.06<br>0.13<br>0.13<br>0.86 | AKA12_MOUSE<br>TNN12_MOUSE<br>TNN12_MOUSE<br>Q8VCQ8_MOUSE<br>UBP2L_MOUSE | A2A6K0_MOUSE<br>A2A6K0_MOUSE<br>E9Q0M9_MOUSE<br>E9Q0M9_MOUSE | A-kinase anchor protein 12; Troponin I, fast skeletal muscle; Troponin I, fast skeletal muscle; Troponin I, fast-twitch isoform; Ubiquitin-associated protein 2-like; | Troponin I, fast-twitch isoform; Troponin I, fast-twitch isoform; Troponin I, fast-twitch isoform;                                                                                                       | 0.15 - 0.25<br>0.25 - 0.75<br>0.75 - 0.85<br>0.25 - 0.75<br>0.00 - 0.15 |                                                                         |
| VEPDTYCRYD<br>RYDDMAACMK<br>ALINDFVKLI                             | SVSVFNGAVSDDSKR<br>SVTEQGAELSNERR<br>SWYDNEYGSNR                                                           | N-ter +28.03 Da, K +28.03 Da<br>N-ter +28.03 Da<br>N-ter +28.03 Da<br>N-ter +28.03 Da, K +28.03 Da, C                                              | 47.9<br>46.7<br>34.6                 | 44.2<br>50.7<br>46.0                 | 3<br>3<br>3           | 1622.90<br>1575.82<br>1580.73                       | -1.74<br>0.12<br>4.76                        | 0.17<br>0.01<br>0.83                 | PCOC1_MOUSE<br>1433Z_MOUSE<br>G3P_MOUSE                                  | D3Y2E3_MOUSE<br>D3YXF4_MOUSE<br>F8W1L5_MOUSE                 | Procollagen C-endopeptidase enhancer 1; 14-3-3 protein zeta/delta; Glyceraldehyde-3-phosphate dehydrogenase;                                                          | P14;Procollagen COOH-terminal proteinase enhancer 1;Type I procollagen C-proteinase enhancer protein;Type I procollagen COOH-terminal proteinase enhancer;                                               | 0.00 - 0.15<br>0.25 - 0.75<br>0.85 - 1.00                               |                                                                         |
| HDPQLQPWSA<br>TAASSSLEK<br>QQPQQQMQMS<br>GLGGNFASQM                | SYDPGSAKTIINNGKTCR<br>SYELPDGVQVITIGNER<br>SYGGYKPAAPVSIQR<br>SYGVDEKSGAVSVGPMPGSPGR                       | +57.02 Da<br>N-ter +28.03 Da<br>N-ter +28.03 Da, K +28.03 Da<br>N-ter +34.06 Da, K +34.06 Da                                                       | 14.6<br>41.9<br>28.7<br>68.3         | 60.7<br>51.9<br>40.1<br>45.4         | 4<br>3<br>3<br>3      | 2065.19<br>1818.01<br>1778.01<br>2362.30            | -0.71<br>0.19<br>-1.00<br>-0.74              | 0.11<br>0.02<br>0.16<br>0.21         | CAH3_MOUSE<br>ACTB_MOUSE<br>LASP1_MOUSE<br>CO1A1_MOUSE                   | ACTA_MOUSE<br>A2A6H0_MOUSE<br>F8WGB7_MOUSE                   | Carbonic anhydrase 3; Actin, cytoplasmic 1; LIM and SH3 domain protein 1; Collagen alpha-2(I) chain;                                                                  | Carbonic anhydrase III; Beta-actin; Metastatic lymph node gene 50 protein; Alpha-1 type I collagen;                                                                                                      | 0.25 - 0.75<br>0.25 - 0.75<br>0.15 - 0.25<br>0.25 - 0.75                |                                                                         |
| VYLQNSHVHL<br>VALDFENEMA<br>LQKRGTGVD<br>VYMAAVLYL<br>GSWEPFASGK   | SYVSKAESTPEIAEQR<br>TAASSSLEKSYELPDGVQVITIGNER<br>TAAVGAVDFISNADR<br>TAEILELAGNAAR<br>TAESGELHLTTDEKFEVGYR | N-ter +28.03 Da, K +28.03 Da<br>N-ter +28.03 Da, K +28.03 Da<br>N-ter +34.06 Da<br>N-ter +34.06 Da<br>N-ter +28.03 Da, K +28.03 Da                 | 35.6<br>42.7<br>45.8<br>34.1<br>41.6 | 41.2<br>59.9<br>45.6<br>48.8<br>66.4 | 3<br>4<br>3<br>3<br>4 | 1850.02<br>2807.59<br>1539.88<br>1361.84<br>2493.40 | -0.36<br>1.87<br>-0.09<br>-0.47<br>0.65      | 0.04<br>0.50<br>0.01<br>0.03<br>0.15 | CSN1_MOUSE<br>ACTC_MOUSE<br>KCRM_MOUSE<br>H2A1F_MOUSE<br>TTHY_MOUSE      | B1ATU4_MOUSE<br>ACTA_MOUSE<br>H2A1F_MOUSE                    | COP9 signalosome complex subunit 1; Actin, alpha cardiac muscle 1; Creatine kinase M-type; Histone H2A type 1-F; Transthyretin;                                       | COP9 signalosome subunit 1; Alpha-cardiac actin; Creatine kinase M chain;M-CK;                                                                                                                           | 0.25 - 0.75<br>0.85 - 1.00<br>0.25 - 0.75<br>0.25 - 0.75<br>0.25 - 0.75 |                                                                         |
| AAFSLAEAFK<br>IEDGIFEVKS<br>EQLAAELAEY<br>GAORMFPMNR<br>GPLVEQGRQR | TAGDFSTVIQNVNKAQVKIR<br>TAGDTHLGGEDFDNR<br>TAKIALLEEAR<br>TAKPFLGSMNQPAAPSPTR<br>TANLIGAGAAQPLR            | N-ter +28.03 Da, K +28.03 Da<br>N-ter +28.03 Da<br>N-ter +28.03 Da, K +28.03 Da<br>N-ter +28.03 Da, K +28.03 Da<br>N-ter +28.03 Da                 | 50.8<br>46.0<br>36.0<br>39.5<br>44.8 | 58.8<br>53.6<br>43.7<br>60.3<br>38.7 | 4<br>3<br>3<br>4<br>3 | 2373.48<br>1631.81<br>1269.82<br>2173.27<br>1266.75 | 1.60<br>0.86<br>-0.94<br>1.06<br>-1.09       | 0.29<br>0.24<br>0.07<br>0.16<br>0.12 | VATD_MOUSE<br>HSP7C_MOUSE<br>EZRI_MOUSE<br>SYNP2_MOUSE<br>APOE_MOUSE     | E9Q0D9_MOUSE<br>HS71A_MOUSE<br>E9Q0M9_MOUSE<br>D3YVV9_MOUSE  | V-type proton ATPase subunit D; Heat shock cognate 71 kDa protein; Ezrin; Synaptopodin-2; Apolipoprotein E;                                                           |                                                                                                                                                                                                          | 2-phospho-D-glycerate hydro-lyase;Enolase 1;Non-neural enolase; Restin; | 0.75 - 0.85<br>0.25 - 0.75<br>0.15 - 0.25<br>0.75 - 0.85<br>0.15 - 0.25 |
| QDDWGAWQKF<br>ATPQSNLTK<br>NEDLSLTKIF<br>EPVWAIQTGK                | TASAGIQVGGDDLTVTNPKR<br>TASESINLSEAGSVKGER<br>TASNSVSVLPANVTITAGQR<br>TATPQQAQEVHEKLR                      | N-ter +28.03 Da, K +28.03 Da<br>N-ter +28.03 Da, K +28.03 Da<br>N-ter +28.03 Da<br>N-ter +34.06 Da, K +34.06 Da<br>N-ter +34.06 Da, K +34.06 Da, C | 84.5<br>34.9<br>41.6<br>29.8         | 42.3<br>39.8<br>40.7<br>51.0         | 3<br>3<br>3<br>4      | 2097.23<br>2133.21<br>2239.27<br>1803.12            | 0.63<br>0.25<br>0.52<br>0.32                 | 0.09<br>0.04<br>0.10<br>0.08         | ENOA_MOUSE<br>CLIP1_MOUSE<br>UBP2L_MOUSE<br>TPIS_MOUSE                   | Q6PHC1_MOUSE<br>Q8COS5_MOUSE<br>E9Q0M9_MOUSE<br>E0CXH5_MOUSE | Alpha-enolase; CAP-Gly domain-containing linker protein 1; Ubiquitin-associated protein 2-like; Triosephosphate isomerase;                                            |                                                                                                                                                                                                          | 0.25 - 0.75<br>0.25 - 0.75<br>0.25 - 0.75<br>0.25 - 0.75                |                                                                         |
| VMDDFAAKLD<br>DTCKAAADKD                                           | TCCKAADKTCFSTGPNLVTR<br>TCFSTGPNLVTR                                                                       | +57.02 Da<br>N-ter +34.06 Da, C +57.02 Da<br>N-ter +28.03 Da, K +28.03 Da, C<br>+57.02 Da                                                          | 53.9<br>39.7                         | 51.4<br>44.6                         | 4<br>3                | 2632.45<br>1514.83                                  | 0.93<br>0.86                                 | 0.17<br>0.18                         | ALBU_MOUSE<br>ALBU_MOUSE                                                 |                                                              | Serum albumin; Serum albumin;                                                                                                                                         |                                                                                                                                                                                                          | 0.25 - 0.75<br>0.25 - 0.75                                              |                                                                         |
| RVSGEHMDLT                                                         | TCPLAAGGQKELR                                                                                              | N-ter +28.03 Da, K +28.03 Da, C<br>+57.02 Da                                                                                                       | 37.2                                 | 50.7                                 | 3                     | 1583.93                                             | 2.68                                         | 0.59                                 | Q9D1B1_MOUSE                                                             |                                                              |                                                                                                                                                                       | Beta-1-globin;Hemoglobin beta-1 chain;Hemoglobin beta-major chain; Metastasin;Metastatic cell protein;PEL98;Placental calcium-binding protein;Protein 18A2;Protein Mts1;S100 calcium-binding protein A4; | 0.85 - 1.00                                                             |                                                                         |
| MVHL                                                               | TDAEKAAVSLGWKVNDSVGGGALGR                                                                                  | N-ter +28.03 Da, K +28.03 Da, C<br>+57.02 Da                                                                                                       | 63.5                                 | 56.3                                 | 4                     | 2902.61                                             | -1.25                                        | 0.36                                 | HBB1_MOUSE                                                               |                                                              | Hemoglobin subunit beta-1;                                                                                                                                            |                                                                                                                                                                                                          | 0.15 - 0.25                                                             |                                                                         |
| RELPSFLGER                                                         | TDEAAFQKVMNLDSNR                                                                                           | N-ter +28.03 Da, K +28.03 Da                                                                                                                       | 19.8                                 | 53.9                                 | 3                     | 1981.06                                             | 2.02                                         | 0.39                                 | S10A4_MOUSE                                                              | D3YUT9_MOUSE                                                 | Protein S100-A4;                                                                                                                                                      |                                                                                                                                                                                                          | 0.85 - 1.00                                                             |                                                                         |
| ERRGFCFITY                                                         | TDEEPVKLLESR                                                                                               | N-ter +34.06 Da, K +34.06 Da                                                                                                                       | 20.8                                 | 49.6                                 | 4                     | 1645.10                                             | -2.18                                        | 0.30                                 | HNRDL_MOUSE                                                              | F6VQH5_MOUSE                                                 | Heterogeneous nuclear ribonucleoprotein D-like;                                                                                                                       | JKT41-binding protein;                                                                                                                                                                                   | 0.00 - 0.15                                                             |                                                                         |

| Non Prime Site | Prime Site             | Modifications                             | Hyperscore | Mass error in ppm | Charge | Precursor neutral mass in Da | Fold change (log <sub>2</sub> ) of ASAPRatio | FC-error of ASAPRatio | Uniprot ID 1 | Uniprot ID 2 | Protein Name 1                                | Protein Name 2                                                                                                                                                                                                              | Quantile    |
|----------------|------------------------|-------------------------------------------|------------|-------------------|--------|------------------------------|----------------------------------------------|-----------------------|--------------|--------------|-----------------------------------------------|-----------------------------------------------------------------------------------------------------------------------------------------------------------------------------------------------------------------------------|-------------|
| QLKKAMEGAG     | TDEKTUEILATR           | N-ter +28.03 Da, K +28.03 Da              | 28.1       | 41.8              | 3      | 1557.96                      | -1.74                                        | 0.41                  | ANXA6_MOUSE  | F8WITZ_MOUSE | Annexin A6;                                   | 67 kDa calelectrin;Annexin VI;Annexin-6;Calphobindin-II;Chromobindin-20;Lipocortin VI;Protein III;p68;p70;                                                                                                                  | 0.00 - 0.15 |
| ELKHALKGAG     | TDEKVLTEIIASR          | N-ter +28.03 Da, K +28.03 Da              | 31.1       | 49.2              | 3      | 1529.94                      | -0.30                                        | 0.05                  | ANXA5_MOUSE  |              | Annexin A5;                                   | Anchorin CII;Annexin V;Annexin-5;Calphobindin I;Endonexin II;Lipocortin V;Placental anticoagulant protein 4;Placental anticoagulant protein I;Thromboplastin inhibitor;Vascular anticoagulant alpha;                        | 0.25 - 0.75 |
| SVSMIASRKP     | TDGASSNCVTDISHLVR      | N-ter +28.03 Da, C +57.02 Da              | 63.7       | 52.8              | 3      | 1946.02                      | 0.93                                         | 0.20                  | NASP_MOUSE   | B1AU75_MOUSE | Nuclear autoantigenic sperm protein;          |                                                                                                                                                                                                                             | 0.25 - 0.75 |
| INRVYKEMYK     | TDLEKDIISDTSGDFR       | N-ter +28.03 Da, K +28.03 Da              | 46.0       | 53.6              | 3      | 1867.02                      | 0.49                                         | 0.08                  | ANXA2_MOUSE  | B0VZNT_MOUSE | Annexin A2;                                   | Annexin II;Annexin-2;Calpactin I heavy chain;Calpactin-1 heavy chain;Chromobindin-8;Lipocortin II;Placental anticoagulant protein IV;Protein I;p36;                                                                         | 0.25 - 0.75 |
| GGYKPTDKHK     | TDLNHENLKGDDLPNVLSSR   | N-ter +28.03 Da, K +28.03 Da              | 41.5       | 54.4              | 4      | 2627.43                      | -0.52                                        | 0.13                  | KCRM_MOUSE   |              | Creatine kinase M-type;                       | Creatine kinase M chain;M-CK;                                                                                                                                                                                               | 0.25 - 0.75 |
| SRRTSQGVKL     | TDLQEAETIGTR           | N-ter +34.06 Da, K +34.06 Da              | 25.3       | 46.1              | 3      | 1427.89                      | 0.53                                         | 0.11                  | MYPT1_MOUSE  |              | Protein phosphatase 1 regulatory subunit 12A; | Myosin phosphatase-targeting subunit 1;                                                                                                                                                                                     | 0.25 - 0.75 |
| ADFAEITKLA     | TDLTKNVKECCHGDLLCADDR  | N-ter +28.03 Da, K +28.03 Da, C +57.02 Da | 33.0       | 65.6              | 4      | 2732.44                      | 1.55                                         | 0.52                  | ALBU_MOUSE   |              | Serum albumin;                                |                                                                                                                                                                                                                             | 0.75 - 0.85 |
| AHVDHKGSTL     | TDLSLVCKAGIASAR        | N-ter +34.06 Da, K +34.06 Da, C +57.02 Da | 29.0       | 43.9              | 3      | 1629.03                      | -1.00                                        | 0.14                  | EF2_MOUSE    |              | Elongation factor 2;                          |                                                                                                                                                                                                                             | 0.15 - 0.25 |
| ILSVASTVWT     | TDTEDKGFLSEGGGVR       | N-ter +34.06 Da, K +34.06 Da              | 36.0       | 39.3              | 3      | 1864.02                      | 0.77                                         | 0.19                  | Q99K47_MOUSE | E9PV24_MOUSE |                                               |                                                                                                                                                                                                                             | 0.25 - 0.75 |
| PRHEVTEISN     | TDVETQPGKTVIR          | N-ter +28.03 Da, K +28.03 Da              | 33.7       | 46.1              | 3      | 1498.90                      | 0.94                                         | 0.17                  | E9Q616_MOUSE |              |                                               |                                                                                                                                                                                                                             | 0.25 - 0.75 |
| NASAEAIIG      | TDVLQDHNALDFEHR        | N-ter +28.03 Da                           | 55.3       | 59.3              | 4      | 1936.06                      | 0.86                                         | 0.12                  | APRV1_MOUSE  |              | Retroviral-like aspartic protease 1;          | Skin-specific retroviral-like aspartic protease;TPA-inducible aspartic proteinase-like protein;                                                                                                                             | 0.25 - 0.75 |
| KAVLDVAETG     | TEAAAATVIGGIR          | N-ter +34.06 Da                           | 36.4       | 43.4              | 3      | 1319.82                      | -1.15                                        | 0.18                  | SPAK3_MOUSE  |              | Serine protease inhibitor A3K;                | Contrapsin;SPI-2;                                                                                                                                                                                                           | 0.15 - 0.25 |
| WLLCALGLQA     | TEAELPSAPALPGGAACLSR   | N-ter +28.03 Da, C +57.02 Da              | 47.4       | 44.2              | 3      | 2124.15                      | 1.12                                         | 0.12                  | SPIT1_MOUSE  |              | Kunitz-type protease inhibitor 1;             | Hepatocyte growth factor activator inhibitor type 1;                                                                                                                                                                        | 0.75 - 0.85 |
| AGSYIEKPKQ     | TEAPQVTGPVIVVVR        | N-ter +28.03 Da                           | 48.4       | 50.6              | 3      | 1719.04                      | 0.04                                         | 0.01                  | CRIP2_MOUSE  |              | Cysteine-rich protein 2;                      | Heart LIM protein;                                                                                                                                                                                                          | 0.25 - 0.75 |
| QEPGQIVETY     | TEEDPEGAMSVSVETDDGTTR  | N-ter +28.03 Da                           | 63.8       | 48.1              | 3      | 2453.19                      | 0.75                                         | 0.20                  | CTND1_MOUSE  | E9Q829_MOUSE | Catenin delta-1;                              | Cadherin-associated Src substrate;p120 catenin;p120(cas);                                                                                                                                                                   | 0.25 - 0.75 |
| LFVRNLANTV     | TEEILEKFSQFGKLER       | N-ter +34.06 Da, K +34.06 Da              | 20.4       | 64.5              | 4      | 2142.38                      | -2.18                                        | 0.20                  | HNRPO_MOUSE  |              | Heterogeneous nuclear ribonucleoprotein Q;    | Skin-specific retroviral-like aspartic protease;TPA-inducible aspartic proteinase-like protein;                                                                                                                             | 0.00 - 0.15 |
| QPPVLLPQLL     | TEGALPDITR             | N-ter +28.03 Da                           | 40.4       | 34.9              | 2      | 1228.67                      | -1.22                                        | 0.06                  | TB182_MOUSE  |              | 182 kDa tankyrase-1-binding protein;          | Contrapsin;SPI-2;                                                                                                                                                                                                           | 0.15 - 0.25 |
| VIRFQPGETL     | TEILETPATNQEAEHQK      | N-ter +28.03 Da                           | 46.0       | 30.1              | 3      | 2123.08                      | -0.43                                        | 0.08                  | IQGA1_MOUSE  | F6ZJ80_MOUSE | Ras GTPase-activating-like protein IQGAP1;    | Hepatocyte growth factor activator inhibitor type 1;                                                                                                                                                                        | 0.25 - 0.75 |
| SKTEFLFMN      | TELAFTKNQKDPGVLDLR     | N-ter +28.03 Da, K +28.03 Da              | 27.6       | 57.5              | 4      | 2086.26                      | 2.39                                         | 0.50                  | S10AB_MOUSE  | F6SJ35_MOUSE | Protein S100-A11;                             | Calgizarin;Endothelial monocyte-activating polypeptide;Protein S100-C;S100 calcium-binding protein A11;                                                                                                                     | 0.85 - 1.00 |
| NVNLAQRITF     | TEMDSHEEKVFR           | N-ter +28.03 Da, K +28.03 Da              | 19.8       | 59.3              | 4      | 1562.83                      | -1.18                                        | 0.27                  | COPD_MOUSE   |              | Coatmer subunit delta;                        | Archain;Delta-coat protein;                                                                                                                                                                                                 | 0.15 - 0.25 |
| KLEERHTLI      | TEMVANLPDFKPPADYKPPATR | N-ter +28.03 Da, K +28.03 Da              | 35.5       | 63.4              | 4      | 2541.49                      | -0.71                                        | 0.13                  | SFO1_MOUSE   | Q3U145_MOUSE | Splicing factor 1;                            | CW17;Mammalian branch point-binding protein;Transcription factor ZFM1;Zinc finger gene in MEN1 locus;Zinc finger protein 162;                                                                                               | 0.25 - 0.75 |
| REGEVEVLKA     | TEMVVEVGPEDDEVGAER     | N-ter +28.03 Da                           | 46.3       | 46.6              | 3      | 1888.92                      | 1.14                                         | 0.33                  | PTRF_MOUSE   |              | Polymerase I and transcript release factor;   | Cav-p60;Cavin-1;                                                                                                                                                                                                            | 0.75 - 0.85 |
| QLEEKELLA      | TEQEDAIVAASKLR         | N-ter +28.03 Da, K +28.03 Da              | 13.0       | 55.3              | 4      | 1629.00                      | -1.36                                        | 0.31                  | RRBP1_MOUSE  | A2AVJ7_MOUSE | Ribosome-binding protein 1;                   | Ribosome receptor protein;                                                                                                                                                                                                  | 0.15 - 0.25 |
| AAPCIYWLPL     | TESQIVQKEAEQAEAR       | N-ter +28.03 Da, K +28.03 Da              | 27.2       | 49.8              | 3      | 1801.01                      | 0.72                                         | 0.17                  | ACINU_MOUSE  | B8J9J3_MOUSE | Adaptin-1;                                    | Linear IgA disease antigen homolog;                                                                                                                                                                                         | 0.25 - 0.75 |
| ESVRSPPSSR     | TEVLVTPAGVASKR         | N-ter +28.03 Da, K +28.03 Da              | 34.2       | 17.2              | 3      | 1482.90                      | 1.08                                         | 0.11                  | LAD1_MOUSE   |              | Ladimirin-1;                                  | Triose-phosphate isomerase;                                                                                                                                                                                                 | 0.75 - 0.85 |
| TLNAANVPAG     | TEVVCAPPTAYIDFAR       | N-ter +28.03 Da, C +57.02 Da              | 50.0       | 55.1              | 3      | 1837.01                      | -1.25                                        | 0.18                  | TPIS_MOUSE   |              | Triosephosphate isomerase;                    | Protein cypher;Protein oracle;Z-band alternatively spliced PDZ-motif protein;                                                                                                                                               | 0.15 - 0.25 |
| SFRILAQMTG     | TEYMQDPDEEALRR         | N-ter +28.03 Da                           | 29.5       | 45.0              | 3      | 1779.89                      | 0.59                                         | 0.14                  | LDB3_MOUSE   | E9PYJ9_MOUSE | LIM domain-binding protein 3;                 | Protein cypher;Protein oracle;Z-band alternatively spliced PDZ-motif protein;                                                                                                                                               | 0.25 - 0.75 |
| DDLTDPAATG     | TEFAHLDATTVLSR         | N-ter +28.03 Da                           | 38.0       | 60.7              | 3      | 1458.87                      | -1.12                                        | 0.15                  | ATPB_MOUSE   |              | ATP synthase subunit beta, mitochondrial;     |                                                                                                                                                                                                                             | 0.15 - 0.25 |
| AFGQGRDMAE     | TFDQGAHAFGQGGGR        | N-ter +28.03 Da                           | 28.6       | 65.9              | 4      | 1612.86                      | 1.13                                         | 0.21                  | SBSN_MOUSE   | E9QP82_MOUSE | Suprabasin;                                   |                                                                                                                                                                                                                             | 0.75 - 0.85 |
| KWKISFPDQD     | TFESEFYLDEKR           | N-ter +28.03 Da, K +28.03 Da              | 54.7       | 48.1              | 3      | 1618.87                      | -1.89                                        | 0.42                  | SPAK3_MOUSE  | SPA3M_MOUSE  | Serine protease inhibitor A3K;                | Contrapsin;SPI-2;                                                                                                                                                                                                           | 0.00 - 0.15 |
| MANSER         | TFIAIKPDGVQR           | N-ter +34.06 Da, K +34.06 Da              | 27.0       | 45.7              | 3      | 1411.95                      | 1.23                                         | 0.18                  | NDKA_MOUSE   | NDKB_MOUSE   | Nucleoside diphosphate kinase A;              | Metastasis inhibition factor NM23;NDPK-A;Tumor metastatic process-associated protein;nm23-M1;                                                                                                                               | 0.75 - 0.85 |
| ADGRKTETVC     | TFQDQALVQHQWQDQKSTITR  | N-ter +28.03 Da, K +28.03 Da              | 58.1       | 65.4              | 4      | 2600.47                      | 1.93                                         | 0.43                  | FABP5_MOUSE  |              | Fatty acid-binding protein, epidermal;        | Epidermal-type fatty acid-binding protein;Fatty acid-binding protein 5;Keratinocyte lipid-binding protein;Psoriasis-associated fatty acid-binding protein homolog;                                                          | 0.85 - 1.00 |
| VTTLDIVRAN     | TFVAELKGLDPAR          | N-ter +28.03 Da, K +28.03 Da              | 29.8       | 55.7              | 3      | 1471.92                      | 0.07                                         | 0.02                  | MDHM_MOUSE   |              | Malate dehydrogenase, mitochondrial;          |                                                                                                                                                                                                                             | 0.25 - 0.75 |
| QPDMAIMAVN     | TFVKDCEDPNPLIR         | N-ter +28.03 Da, K +28.03 Da, C +57.02 Da | 22.3       | 44.8              | 3      | 1758.98                      | -3.47                                        | 0.39                  | AP1B1_MOUSE  | Q8CC13_MOUSE | AP-1 complex subunit beta-1;                  | Adapter-related protein complex 1 subunit beta-1;Adaptor protein complex AP-1 subunit beta-1;Beta-1-adaptin;Beta-adaptin 1;Clathrin assembly protein complex 1 beta large chain;Golgi adaptor HA1/AP1 adaptin beta subunit; | 0.00 - 0.15 |
| PSVWAAVPGK     | TFVSTPAEVGLVGVKDR      | N-ter +28.03 Da, K +28.03 Da              | 57.7       | 44.1              | 3      | 1943.19                      | 0.53                                         | 0.10                  | PROF1_MOUSE  | Q5SX49_MOUSE | Profilin-1;                                   | Profilin I;                                                                                                                                                                                                                 | 0.25 - 0.75 |

Table S10, Tholen et al.

| Non Prime Site | Prime Site                | Modifications                             | Hyperscore | Mass error in ppm | Charge | Precursor neutral mass in Da | Fold change (log <sub>2</sub> ) of ASAPRatio | FC-error of ASAPRatio | Uniprot ID 1 | Uniprot ID 2 | Protein Name 1                                            | Protein Name 2                                                                                                                                      | Quantile    |
|----------------|---------------------------|-------------------------------------------|------------|-------------------|--------|------------------------------|----------------------------------------------|-----------------------|--------------|--------------|-----------------------------------------------------------|-----------------------------------------------------------------------------------------------------------------------------------------------------|-------------|
| LKEGDVVKR      | TGAIQVDPVGEELLGR          | N-ter +34.06 Da                           | 40.4       | 52.1              | 3      | 1658.03                      | 2.60                                         | 0.67                  | ATPA_MOUSE   | D3Z6F5_MOUSE | ATP synthase subunit alpha, mitochondrial;                |                                                                                                                                                     | 0.85 - 1.00 |
| FKEAFLFDR      | TGCEKITLSQVGDVLR          | N-ter +34.06 Da, K +34.06 Da, C +57.02 Da | 51.8       | 12.8              | 3      | 1843.07                      | -4.64                                        | 1.16                  | MYL1_MOUSE   | E9PWG4_MOUSE | Myosin light chain 1/3, skeletal muscle isoform;          | Myosin light chain alkali 1/2; ER-Golgi intermediate compartment 53 kDa protein;Lectin mannose-binding 1;p58;                                       | 0.00 - 0.15 |
| SFSQFTGSDG     | TGGDAAAPGAAGTQALPHR       | N-ter +28.03 Da                           | 52.1       | 49.9              | 3      | 1875.02                      | -0.60                                        | 0.09                  | LMAN1_MOUSE  |              | Protein ERGIC-53;                                         | Creatine kinase M chain;M-CK;                                                                                                                       | 0.25 - 0.75 |
| LTRLRLQKRG     | TGGVDTAAVGAVFDSINADR      | N-ter +34.06 Da                           | 70.9       | 49.4              | 3      | 1969.09                      | 0.20                                         | 0.04                  | KCRM_MOUSE   |              | Creatine kinase M-type;                                   |                                                                                                                                                     | 0.25 - 0.75 |
| SSKDAIKKLL     | TGIKHELQANCYEEVKDR        | N-ter +28.03 Da, K +28.03 Da, C +57.02 Da | 26.5       | 63.6              | 4      | 2273.29                      | 0.35                                         | 0.08                  | COF1_MOUSE   | F8WGL3_MOUSE | Cofilin-1;                                                | Cofilin, non-muscle isoform;                                                                                                                        | 0.25 - 0.75 |
| PAGKNGDRGE     | TGPAGPAGPIGAGAR           | N-ter +28.03 Da                           | 47.2       | 41.2              | 3      | 1373.80                      | -3.47                                        | 0.77                  | CO1A1_MOUSE  | F8WBG7_MOUSE | Collagen alpha-1(I) chain;                                | Alpha-1 type I collagen;                                                                                                                            | 0.00 - 0.15 |
| HTVEKGGKHK     | TGPNLHGLFGR               | N-ter +34.06 Da                           | 30.2       | 54.6              | 3      | 1201.74                      | -0.42                                        | 0.04                  | CYC_MOUSE    |              | Cytochrome c, somatic;                                    |                                                                                                                                                     | 0.25 - 0.75 |
| VHKAVLDVAE     | TGTEAAAATGVIGGIR          | N-ter +28.03 Da                           | 48.9       | 47.1              | 3      | 1471.87                      | -3.64                                        | 0.46                  | SPA3K_MOUSE  |              | Serine protease inhibitor A3K;                            | Contrapsin;SPI-2;                                                                                                                                   | 0.00 - 0.15 |
| KCLPLCAPRC     | TGTQLPTKIDPEQK            | N-ter +28.03 Da, K +28.03 Da              | 13.9       | 52.6              | 4      | 1639.01                      | -1.74                                        | 0.35                  | F6XZJ7_MOUSE |              |                                                           |                                                                                                                                                     | 0.00 - 0.15 |
| NVARLNFSHG     | THEYHAETIKNVR             | N-ter +28.03 Da, K +28.03 Da              | 26.8       | 67.0              | 4      | 1652.97                      | 0.35                                         | 0.07                  | KPYM_MOUSE   |              | Pyruvate kinase isozymes M1/M2;                           | Pyruvate kinase muscle isozyme; Carbonate dehydratase III;Carbonic anhydrase III;                                                                   | 0.25 - 0.75 |
| IKTKGKEAPF     | THFDPSCLFPACR             | N-ter +28.03 Da, C +57.02 Da              | 31.7       | 49.7              | 3      | 1634.82                      | -0.32                                        | 0.02                  | CAH3_MOUSE   |              | Carbonic anhydrase 3;                                     |                                                                                                                                                     | 0.25 - 0.75 |
| IFEVKTAGD      | THLGGEDFDNR               | N-ter +28.03 Da                           | 38.9       | 58.7              | 3      | 1287.66                      | 1.07                                         | 0.19                  | HS71A_MOUSE  | HS71B_MOUSE  | Heat shock 70 kDa protein 1A;                             | Heat shock 70 kDa protein 3;Hsp68;                                                                                                                  | 0.75 - 0.85 |
| CEKIVQKYG      | THLSTGDLR                 | N-ter +28.03 Da                           | 30.3       | 51.1              | 3      | 1139.69                      | 0.77                                         | 0.05                  | KAD1_MOUSE   |              | Adenylate kinase isoenzyme 1;                             | ATP-AMP transphosphorylase 1;Myokinase;                                                                                                             | 0.25 - 0.75 |
| AQHLGESTVR     | TIAMDGETGLVR              | N-ter +28.03 Da                           | 40.3       | 38.5              | 2      | 1289.71                      | 0.66                                         | 0.10                  | ATPB_MOUSE   |              | ATP synthase subunit beta, mitochondrial;                 |                                                                                                                                                     | 0.25 - 0.75 |
| NIPILSPDKR     | TIAQDYGVKKADEGISFR        | N-ter +28.03 Da, K +28.03 Da              | 33.2       | 45.1              | 3      | 2038.17                      | 0.56                                         | 0.13                  | PRDX1_MOUSE  | B1AXW6_MOUSE | Peroxioredoxin-1;                                         | Macrophage 23 kDa stress protein;Osteoblast-specific factor 3;Thioredoxin peroxidase 2;Thioredoxin-dependent peroxide reductase 2;                  | 0.25 - 0.75 |
| GGDVAVFVKT     | TIFEVLPEKADR              | N-ter +28.03 Da, K +28.03 Da              | 40.5       | 51.2              | 3      | 1472.90                      | 0.32                                         | 0.06                  | TRFE_MOUSE   | D3YXR8_MOUSE | Serotransferrin;                                          | Beta-1 metal-binding globulin;Siderophilin;                                                                                                         | 0.25 - 0.75 |
| FKVLDPGEGK     | TIKKQFLELLTTQCDR          | N-ter +28.03 Da, K +28.03 Da, C +57.02 Da | 31.3       | 62.2              | 4      | 2206.34                      | 0.55                                         | 0.05                  | MLRS_MOUSE   |              | Myosin regulatory light chain 2, skeletal muscle isoform; | Fast skeletal myosin light chain 2;MLC2F;                                                                                                           | 0.25 - 0.75 |
| AEVVRKDKKE     | TIQDTQEELKGGAAKR          | N-ter +28.03 Da, K +28.03 Da              | 31.7       | 58.3              | 4      | 1957.16                      | -0.89                                        | 0.12                  | E41L2_MOUSE  | Q811B2_MOUSE | Band 4.1-like protein 2;                                  | Generally expressed protein 4.1;                                                                                                                    | 0.15 - 0.25 |
| TIERKDLQYI     | TISKEELSSGDSLDPDWKR       | N-ter +28.03 Da, K +28.03 Da              | 39.0       | 63.7              | 4      | 2315.35                      | -0.30                                        | 0.04                  | AFAD_MOUSE   | F7C3I9_MOUSE | Afadin;                                                   | Protein AF-6;                                                                                                                                       | 0.25 - 0.75 |
| PRFNAHGDN      | TIVCNTKEDGTWGTEHR         | N-ter +28.03 Da, K +28.03 Da, C +57.02 Da | 37.5       | 63.7              | 4      | 2059.11                      | -0.20                                        | 0.03                  | LEG1_MOUSE   |              | Galectin-1;                                               | 14-kDa lectin;Beta-galactoside-binding lectin L-14-I;Galaptin;Lactose-binding lectin 1;Lectin galactoside-binding soluble 1;S-Lac lectin 1;         | 0.25 - 0.75 |
| RDAVTRQVR      | TIVEVQDGKVISSR            | N-ter +28.03 Da, K +28.03 Da              | 45.0       | 46.0              | 3      | 1715.03                      | 4.82                                         | 1.26                  | K1C17_MOUSE  | D3YXP7_MOUSE | Keratin, type I cytoskeletal 17;                          | Cytokeratin-17;Keratin-17;                                                                                                                          | 0.85 - 1.00 |
| ILLDALDKIK     | TKGKEAPFTHFDPSCLFPACR     | N-ter +28.03 Da, K +28.03 Da, C +57.02 Da | 27.5       | 67.7              | 4      | 2549.43                      | -0.25                                        | 0.02                  | CAH3_MOUSE   |              | Carbonic anhydrase 3;                                     | Carbonate dehydratase III;Carbonic anhydrase III;                                                                                                   | 0.25 - 0.75 |
| SLSTFQQMWI     | TKQEYDEAGPSIVHR           | N-ter +28.03 Da, K +28.03 Da              | 50.4       | 55.3              | 4      | 1785.00                      | -0.47                                        | 0.09                  | ACTS_MOUSE   |              | Actin, alpha skeletal muscle;                             | Alpha-actin-1;                                                                                                                                      | 0.25 - 0.75 |
| AALTOAKSQR     | TKQSTVLAPVIDLKR           | N-ter +28.03 Da, K +28.03 Da              | 27.1       | 64.8              | 4      | 1752.20                      | 0.40                                         | 0.02                  | SPPF45_MOUSE | A2AP40_MOUSE | Splicing factor 45;                                       | 45 kDa-splicing factor;RNA-binding motif protein 17;                                                                                                | 0.25 - 0.75 |
| VFEVFAFARG     | TKSLMDVEVKATSR            | N-ter +28.03 Da, K +28.03 Da              | 26.5       | 64.4              | 4      | 1648.03                      | -1.36                                        | 0.14                  | PGK1_MOUSE   |              | Phosphoglycerate kinase 1;                                |                                                                                                                                                     | 0.15 - 0.25 |
| YFIQVMKEYL     | TRVDKLDAESLR              | N-ter +28.03 Da, K +28.03 Da              | 32.0       | 54.1              | 4      | 1544.96                      | 1.90                                         | 0.31                  | CLH_MOUSE    | Q55XR6_MOUSE | Clathrin heavy chain 1;                                   |                                                                                                                                                     | 0.85 - 1.00 |
| AEITKLATDL     | TKVNKECCHGDLLCADDR        | N-ter +28.03 Da, K +28.03 Da, C +57.02 Da | 40.9       | 62.5              | 4      | 2421.35                      | 0.82                                         | 0.27                  | ALBU_MOUSE   |              | Serum albumin;                                            |                                                                                                                                                     | 0.25 - 0.75 |
| QLVAGIKYK      | TLDIESTECR                | N-ter +28.03 Da, C +57.02 Da              | 33.8       | 33.3              | 2      | 1250.62                      | 0.50                                         | 0.05                  | Q9D1B1_MOUSE |              |                                                           |                                                                                                                                                     | 0.25 - 0.75 |
| NLDPLNNLGR     | TLEIPGSSDPNIVPDGDFSSSLVR  | N-ter +28.03 Da                           | 39.3       | 47.1              | 3      | 2442.34                      | 0.52                                         | 0.23                  | CO4B_MOUSE   |              | Complement C4-B;                                          |                                                                                                                                                     | 0.25 - 0.75 |
| ELLSQFLLL      | TLEQKNIAVENEVR            | N-ter +28.03 Da, K +28.03 Da              | 35.8       | 49.6              | 3      | 1698.02                      | 1.95                                         | 0.40                  | ASHWN_MOUSE  |              | Ashwin;                                                   |                                                                                                                                                     | 0.85 - 1.00 |
| SAANCKSLH      | TLFGDKLCAIPNLR            | N-ter +28.03 Da, K +28.03 Da, C +57.02 Da | 28.2       | 42.7              | 3      | 1673.01                      | -3.18                                        | 0.29                  | ALBU_MOUSE   |              | Serum albumin;                                            |                                                                                                                                                     | 0.00 - 0.15 |
| TGFEKKYVA      | TLGVEVHPLVFHTNR           | N-ter +28.03 Da                           | 24.2       | 65.9              | 4      | 1746.07                      | -0.36                                        | 0.04                  | RAN_MOUSE    |              | GTP-binding nuclear protein Ran;                          | GTPase Ran;Ras-like protein TC4;Ras-related nuclear protein;                                                                                        | 0.25 - 0.75 |
| ELRVAPPEHP     | TLLEAPLNPKANR             | N-ter +28.03 Da, K +28.03 Da              | 34.2       | 36.8              | 3      | 1592.98                      | 0.15                                         | 0.03                  | ACTC_MOUSE   | ACTA_MOUSE   | Actin, alpha cardiac muscle 1;                            | Alpha-cardiac actin;                                                                                                                                | 0.25 - 0.75 |
| GTGSLSLPT      | TLPENALLSVEASGSAQENMPLARR | N-ter +34.06 Da                           | 24.6       | 50.2              | 4      | 2774.58                      | -2.74                                        | 1.10                  | CH076_MOUSE  |              | Uncharacterized protein C8orf76 homolog;                  |                                                                                                                                                     | 0.00 - 0.15 |
| SLPSTAVTSE     | TLPGSLSPVVEKYR            | N-ter +28.03 Da, K +28.03 Da              | 27.4       | 53.0              | 3      | 1598.99                      | -0.62                                        | 0.05                  | DLG1_MOUSE   | E9Q9H0_MOUSE | Disks large homolog 1;                                    | Embryo-dlg/synapse-associated protein 97;Synapse-associated protein 97;                                                                             | 0.25 - 0.75 |
| GKAPFALQVNI    | TLPLNFDKAGDHR             | N-ter +28.03 Da, K +28.03 Da              | 21.2       | 59.0              | 4      | 1538.91                      | 1.04                                         | 0.12                  | A2M_MOUSE    | D3YV52_MOUSE | Alpha-2-macroglobulin;                                    | Pregnancy zone protein;                                                                                                                             | 0.75 - 0.85 |
| PFKLRSRKQR     | TLSMIEEIR                 | N-ter +28.03 Da                           | 38.1       | 43.1              | 2      | 1247.70                      | 0.83                                         | 0.11                  | AKAP2_MOUSE  | A2AP18_MOUSE | A-kinase anchor protein 2;                                | AKAP expressed in kidney and lung;Protein kinase A-anchoring protein 2;                                                                             | 0.25 - 0.75 |
| WDLGDPGKLY     | TLVLTDPDAPSR              | N-ter +28.03 Da                           | 46.4       | 34.3              | 2      | 1311.75                      | 2.47                                         | 0.36                  | PEBP1_MOUSE  | D3Z1V4_MOUSE | Phosphatidylethanolamine-binding protein 1;               | HCNPPpp;                                                                                                                                            | 0.85 - 1.00 |
| YANTVLSGGT     | TMYPGIADR                 | N-ter +28.03 Da                           | 33.9       | 45.3              | 2      | 1050.56                      | 0.26                                         | 0.01                  | ACTC_MOUSE   | ACTA_MOUSE   | Actin, alpha cardiac muscle 1;                            | Alpha-cardiac actin;                                                                                                                                | 0.25 - 0.75 |
| VDKGVVPLAG     | TNGETTTQGLDGLSER          | N-ter +28.03 Da                           | 40.1       | 56.0              | 3      | 1705.91                      | -1.25                                        | 0.45                  | ALDOA_MOUSE  | Q9CPQ9_MOUSE | Fructose-bisphosphate aldolase A;                         | Aldolase 1;Muscle-type aldolase;                                                                                                                    | 0.15 - 0.25 |
| PTFSSLNLR      | TNLESPLVDTHSKR            | N-ter +28.03 Da, K +28.03 Da              | 24.4       | 65.3              | 4      | 1765.09                      | 1.56                                         | 0.13                  | VIME_MOUSE   | E9PZV5_MOUSE | Vimentin;                                                 |                                                                                                                                                     | 0.75 - 0.85 |
| DQSPASHEIA     | TNLGDFAISLYR              | N-ter +28.03 Da                           | 53.6       | 37.5              | 2      | 1396.79                      | -1.03                                        | 0.29                  | A1AT2_MOUSE  | A1AT1_MOUSE  | Alpha-1-antitrypsin 1-2;                                  | Alpha-1 protease inhibitor 2;Alpha-1-antiproteinase;Serine protease inhibitor 1-2;Serine protease inhibitor A1b;                                    | 0.15 - 0.25 |
| DSLEIICSR      | TNQLQEINR                 | N-ter +28.03 Da                           | 30.7       | 46.5              | 3      | 1271.71                      | 0.53                                         | 0.04                  | ANXA2_MOUSE  | BOV2N7_MOUSE | Annexin A2;                                               | Annexin II;Annexin-2;Calpactin I heavy chain;Calpactin-1 heavy chain;Chromobindin-8;Lipocortin II;Placental anticoagulant protein IV;Protein t;p36; | 0.25 - 0.75 |
| SRLTYDIAH      | TPGVAADLSHIETR            | N-ter +34.06 Da                           | 32.2       | 33.0              | 3      | 1499.87                      | 0.24                                         | 0.03                  | MDHM_MOUSE   |              | Malate dehydrogenase, mitochondrial;                      |                                                                                                                                                     | 0.25 - 0.75 |
| KTIIPLSQC      | TPKVDFPDQDLTLTGR          | N-ter +28.03 Da, K +28.03 Da              | 52.8       | 39.4              | 3      | 1942.13                      | -0.25                                        | 0.01                  | MDHM_MOUSE   |              | Malate dehydrogenase, mitochondrial;                      |                                                                                                                                                     | 0.25 - 0.75 |
| PGPYAQPSVN     | TPLPQLNGPIYAR             | N-ter +28.03 Da                           | 26.7       | 40.0              | 3      | 1580.93                      | -0.60                                        | 0.04                  | CRK_MOUSE    | F7D232_MOUSE | Adapter molecule crk;                                     | Proto-oncogene c-Crk;p38;                                                                                                                           | 0.25 - 0.75 |
| WRCVLKIGEH     | TPSALAIMENANVLAR          | N-ter +34.06 Da                           | 45.9       | 43.6              | 3      | 1704.02                      | 0.12                                         | 0.05                  | ALDOA_MOUSE  | A6Z144_MOUSE | Fructose-bisphosphate aldolase A;                         | Aldolase 1;Muscle-type aldolase;                                                                                                                    | 0.25 - 0.75 |

Table S10, Tholen et al.

| Non Prime Site | Prime Site              | Modifications                                                | Hyperscore | Mass error in ppm | Charge | Precursor neutral mass in Da | Fold change (log <sub>2</sub> ) of ASAPRatio | FC-error of ASAPRatio | Uniprot ID 1 | Uniprot ID 2 | Protein Name 1                                        | Protein Name 2                                                                                                                                                                                       | Quantile    |
|----------------|-------------------------|--------------------------------------------------------------|------------|-------------------|--------|------------------------------|----------------------------------------------|-----------------------|--------------|--------------|-------------------------------------------------------|------------------------------------------------------------------------------------------------------------------------------------------------------------------------------------------------------|-------------|
| GLPGSMGPPG     | TPSVDHGFLVTR            | N-ter +28.03 Da<br>N-ter +34.06 Da, K +34.06 Da, C +57.02 Da | 36.1       | 46.8              | 3      | 1355.78                      | 0.24                                         | 0.03                  | CO4A1_MOUSE  |              | Collagen alpha-1(V) chain;                            |                                                                                                                                                                                                      | 0.25 - 0.75 |
| LNRVCLLHK      | TPVSEHVTKCCGSLVER       | N-ter +28.03 Da, K +28.03 Da                                 | 37.6       | 59.3              | 4      | 2113.22                      | 1.27                                         | 0.28                  | ALBU_MOUSE   |              | Serum albumin;                                        |                                                                                                                                                                                                      | 0.75 - 0.85 |
| GFOALILVRY     | TQKAPQVSTPLVEAAR        | N-ter +28.03 Da, K +28.03 Da                                 | 57.2       | 18.3              | 3      | 1852.08                      | -0.71                                        | 0.12                  | ALBU_MOUSE   |              | Serum albumin;                                        |                                                                                                                                                                                                      | 0.25 - 0.75 |
| PNNMVTGPAC     | TQKFSNEEIAMATVYTLAR     | N-ter +28.03 Da, K +28.03 Da                                 | 34.7       | 45.2              | 3      | 2065.18                      | 0.80                                         | 0.15                  | ALDOA_MOUSE  | Q9CPQ9_MOUSE | Fructose-bisphosphate aldolase A;                     | Aldolase 1;Muscle-type aldolase;                                                                                                                                                                     | 0.25 - 0.75 |
| LMITVHAIITA    | TQKTVDGPFGKLR           | N-ter +34.06 Da, K +34.06 Da                                 | 18.8       | 55.5              | 4      | 1674.12                      | -0.62                                        | 0.10                  | G3P_MOUSE    | F8WJL5_MOUSE | Glyceraldehyde-3-phosphate dehydrogenase;             | Peptidyl-cysteine S-nitrosylase GAPDH;                                                                                                                                                               | 0.25 - 0.75 |
| RMRTHVDLSR     | TQLAPHSEQMR             | N-ter +28.03 Da                                              | 26.6       | 57.5              | 3      | 1324.73                      | -3.06                                        | 0.51                  | APOA1_MOUSE  | Q8BPDS_MOUSE | Apolipoprotein A-I;                                   | Apolipoprotein A1;                                                                                                                                                                                   | 0.00 - 0.15 |
| DEESKPASSN     | TQVGEDEEAALLER          | N-ter +28.03 Da                                              | 45.0       | 46.1              | 3      | 1586.85                      | 1.92                                         | 0.33                  | Q8VC08_MOUSE | E9QOM9_MOUSE |                                                       |                                                                                                                                                                                                      | 0.85 - 1.00 |
| PPRSTEDRLT     | TQWREDEEEAAR            | N-ter +28.03 Da                                              | 40.0       | 52.2              | 3      | 1675.83                      | 1.98                                         | 0.55                  | LSP1_MOUSE   | A2A6J7_MOUSE | Lymphocyte-specific protein 1;                        | 52 kDa phosphoprotein;Lymphocyte-specific antigen WP34;S37 protein;                                                                                                                                  | 0.85 - 1.00 |
| VVYLETETLV     | TREAVTEILGIEPDR         | N-ter +28.03 Da                                              | 51.6       | 57.3              | 3      | 1726.02                      | -0.52                                        | 0.06                  | TSN_MOUSE    |              | Translin;                                             |                                                                                                                                                                                                      | 0.25 - 0.75 |
| MA             | TRGTVTDFPGDGR           | N-ter +28.03 Da<br>N-ter +28.03 Da, K +28.03 Da, C +57.02 Da | 32.0       | 52.7              | 3      | 1552.85                      | -0.74                                        | 0.09                  | ANXA5_MOUSE  |              | Annexin A5;                                           | Anchorin CII;Annexin V;Annexin-5;Calphobindin I;Endonexin II;Lipocortin V;Placental anticoagulant protein 4;Placental anticoagulant protein I;Thromboplastin inhibitor;Vascular anticoagulant-alpha; | 0.25 - 0.75 |
| DQVELLCLDN     | TRKPVDDQEDCYLAR         | N-ter +28.03 Da, K +28.03 Da                                 | 34.5       | 68.8              | 4      | 1969.11                      | -0.58                                        | 0.11                  | TRFE_MOUSE   | E9Q035_MOUSE | Serotransferrin;                                      | Beta-1 metal-binding globulin;Siderophilin;                                                                                                                                                          | 0.25 - 0.75 |
| AAAMNLASAR     | TSAIAPSVNLADSR          | N-ter +28.03 Da                                              | 39.2       | 43.0              | 3      | 1428.82                      | -0.79                                        | 0.11                  | SRRM2_MOUSE  | E9QMJ6_MOUSE | Serine/arginine repetitive matrix protein 2;          |                                                                                                                                                                                                      | 0.25 - 0.75 |
| AALHFNPLRD     | TSEVVFNTKEQGKWGR        | N-ter +28.03 Da, K +28.03 Da                                 | 21.4       | 61.3              | 4      | 1949.16                      | 0.20                                         | 0.02                  | Q9CRB1_MOUSE | D3Z141_MOUSE |                                                       |                                                                                                                                                                                                      | 0.25 - 0.75 |
| FERPEAEAMC     | TSFKENPTTFMGHYLHEVAR    | N-ter +28.03 Da, K +28.03 Da                                 | 30.4       | 66.3              | 4      | 2420.36                      | 2.24                                         | 0.31                  | ALBU_MOUSE   |              | Serum albumin;                                        |                                                                                                                                                                                                      | 0.85 - 1.00 |
| LIIGDRQTKG     | TSIAIDTIINQKR           | N-ter +28.03 Da, K +28.03 Da                                 | 39.1       | 42.3              | 3      | 1527.96                      | -0.34                                        | 0.07                  | ATPA_MOUSE   | D3Z6F5_MOUSE | ATP synthase subunit alpha, mitochondrial;            |                                                                                                                                                                                                      | 0.25 - 0.75 |
| LTTSESLCCE     | TSSFSDKYGLGHVTEPR       | N-ter +28.03 Da, K +28.03 Da                                 | 25.3       | 65.2              | 4      | 1936.10                      | -1.22                                        | 0.06                  | PLIN4_MOUSE  |              | Perilipin-4;                                          | Adipocyte protein S3-12;                                                                                                                                                                             | 0.15 - 0.25 |
| VGLTSLRAVS     | TSSMGLTPKQKIVEVGR       | N-ter +28.03 Da, K +28.03 Da                                 | 20.4       | 64.0              | 4      | 2110.35                      | 0.40                                         | 0.09                  | HMGCL_MOUSE  |              | Hydroxymethylglutaryl-CoA lyase, mitochondrial;       | 3-hydroxy-3-methylglutarate-CoA lyase;                                                                                                                                                               | 0.25 - 0.75 |
| SLPKAALIRN     | TSSMTEGLQPASVVLP        | N-ter +34.06 Da                                              | 36.9       | 53.8              | 3      | 1905.15                      | -1.43                                        | 0.23                  | CN159_MOUSE  | E9QMK9_MOUSE | UPF0317 protein C14orf159 homolog, mitochondrial;     |                                                                                                                                                                                                      | 0.15 - 0.25 |
| VYQQPQQQM      | TSSYGGYKEPAAPVSIQR      | N-ter +28.03 Da, K +28.03 Da                                 | 24.9       | 53.4              | 3      | 1966.12                      | -0.92                                        | 0.21                  | LASP1_MOUSE  | A2A6H0_MOUSE | LIM and SH3 domain protein 1;                         | Metastatic lymph node gene 50 protein;                                                                                                                                                               | 0.15 - 0.25 |
| LEAWYRHGRT     | TSSYSALSPEPR            | N-ter +34.06 Da                                              | 44.6       | 33.6              | 2      | 1317.71                      | -0.01                                        | 0.00                  | MECR_MOUSE   | A2A845_MOUSE | Trans-2-enoyl-CoA reductase, mitochondrial;           |                                                                                                                                                                                                      | 0.25 - 0.75 |
| RGVHTSVASA     | TSVATKTEQGPSPSEYIFER    | N-ter +28.03 Da, K +28.03 Da                                 | 51.3       | 52.7              | 4      | 2438.40                      | -0.84                                        | 0.15                  | OAT_MOUSE    |              | Ornithine aminotransferase, mitochondrial;            | Ornithine-oxo-acid aminotransferase;                                                                                                                                                                 | 0.15 - 0.25 |
| APQRPIATQR     | TTAAPKAGPVMVR           | N-ter +28.03 Da, K +28.03 Da                                 | 20.2       | 50.0              | 3      | 1311.80                      | 0.66                                         | 0.17                  | MARE1_MOUSE  |              | Microtubule-associated protein RP/EB family member 1; | APC-binding protein EB1;End-binding protein 1;                                                                                                                                                       | 0.25 - 0.75 |
| MCDDEE         | TTALVCDNCGSLVKAGFAGDAPR | N-ter +28.03 Da, K +28.03 Da, C +57.02 Da                    | 56.2       | 57.8              | 4      | 2447.35                      | 0.71                                         | 0.19                  | ACTC_MOUSE   | ACTS_MOUSE   | Actin, alpha cardiac muscle 1;                        | Alpha-cardiac actin;                                                                                                                                                                                 | 0.25 - 0.75 |
| TRVSGEHMDL     | TTCPPLAAGGQEQELR        | N-ter +28.03 Da, K +28.03 Da, C +57.02 Da                    | 51.8       | 46.8              | 3      | 1684.97                      | 1.77                                         | 0.47                  | Q9D1B1_MOUSE |              |                                                       |                                                                                                                                                                                                      | 0.85 - 1.00 |
| ADDLTDAPAA     | TTFAHLDAITVLSR          | N-ter +28.03 Da                                              | 50.9       | 52.8              | 3      | 1559.91                      | -0.71                                        | 0.08                  | ATPB_MOUSE   |              | ATP synthase subunit beta, mitochondrial;             |                                                                                                                                                                                                      | 0.25 - 0.75 |
| AMCTSFKENP     | TTFMGHYHLEVAR           | N-ter +28.03 Da                                              | 31.2       | 70.4              | 4      | 1588.89                      | 0.86                                         | 0.07                  | ALBU_MOUSE   |              | Serum albumin;                                        |                                                                                                                                                                                                      | 0.25 - 0.75 |
| RTVHTTRVCL     | TTFNVQDGPFQDR           | N-ter +34.06 Da                                              | 45.9       | 53.9              | 3      | 1672.88                      | 0.85                                         | 0.21                  | THIOM_MOUSE  | Q3TUS3_MOUSE | Thioredoxin, mitochondrial;                           | Thioredoxin-2;                                                                                                                                                                                       | 0.25 - 0.75 |
| LRVPHARKTG     | TTIAGLVFR               | N-ter +28.03 Da                                              | 25.8       | 40.4              | 2      | 1004.64                      | 2.10                                         | 0.59                  | PSB10_MOUSE  |              |                                                       | Low molecular mass protein 10;Macropain subunit MECl-1;Multicatalytic endopeptidase complex subunit MECl-1;Proteasome MECl-1;Proteasome subunit beta-2i;                                             | 0.85 - 1.00 |
| FKLPKARKTG     | TTIAGVVYKDGIVLGADTR     | N-ter +34.06 Da, K +34.06 Da                                 | 33.7       | 47.3              | 3      | 2016.28                      | 1.66                                         | 0.32                  | PSB7_MOUSE   |              |                                                       | Macropain chain Z;Multicatalytic endopeptidase complex chain Z;Proteasome subunit Z;                                                                                                                 | 0.85 - 1.00 |
| GGGDVAVFKH     | TTIFEVLPEKADR           | N-ter +28.03 Da, K +28.03 Da                                 | 45.3       | 47.4              | 3      | 1573.95                      | 0.37                                         | 0.08                  | TRFE_MOUSE   | D3YR8_MOUSE  | Serotransferrin;                                      | Beta-1 metal-binding globulin;Siderophilin;                                                                                                                                                          | 0.25 - 0.75 |
| LYANTVLSGG     | TTMYPGIADR              | N-ter +34.06 Da                                              | 26.4       | 31.8              | 2      | 1157.63                      | -4.64                                        | 1.16                  | ACTA_MOUSE   | ACTB_MOUSE   | Actin, aortic smooth muscle;                          | Alpha-actin-2;                                                                                                                                                                                       | 0.00 - 0.15 |
| EIIANDQGNR     | TTPSYVAFTDTER           | N-ter +28.03 Da                                              | 40.9       | 59.4              | 2      | 1514.82                      | 1.24                                         | 0.21                  | HS71A_MOUSE  | HS71B_MOUSE  | Heat shock 70 kDa protein 1A;                         | Heat shock 70 kDa protein 3;Hsp68;                                                                                                                                                                   | 0.75 - 0.85 |
| ISAVEQTAQR     | TTTTAVHIQPAQEQAR        | N-ter +28.03 Da                                              | 36.4       | 53.8              | 3      | 1779.02                      | 0.29                                         | 0.05                  | TITIN_MOUSE  | Q8BUJ6_MOUSE | Titin;                                                | Connectin;                                                                                                                                                                                           | 0.25 - 0.75 |
| ITVKTESTVK     | TTVFSCNLGKEDTADGR       | N-ter +28.03 Da, K +28.03 Da, C +57.02 Da                    | 25.4       | 45.1              | 3      | 2303.18                      | 2.59                                         | 0.71                  | FABP5_MOUSE  | E9Q964_MOUSE | Fatty acid-binding protein, epidermal;                | Epidermal-type fatty acid-binding protein;Fatty acid-binding protein 5;Keratinocyte lipid-binding protein;Psoriasis-associated fatty acid-binding protein homolog;                                   | 0.85 - 1.00 |
| DFEHFLPMLQ     | TVAKNKDQGTEDYVEGLR      | N-ter +28.03 Da, K +28.03 Da                                 | 30.3       | 62.7              | 4      | 2269.30                      | 0.31                                         | 0.03                  | MYL6_MOUSE   | E9QLM0_MOUSE | Myosin light polypeptide 6;                           | 17 kDa myosin light chain;Myosin light chain 3;Myosin light chain alkali 3;Smooth muscle and nonmuscle myosin light chain alkali 6;                                                                  | 0.25 - 0.75 |
| QRPRQLKPR      | TVATPLNQVANPNSAIFGGARPR | N-ter +28.03 Da                                              | 39.9       | 49.1              | 3      | 2378.40                      | 1.77                                         | 0.43                  | IF4H_MOUSE   | Q80U88_MOUSE | Eukaryotic translation initiation factor 4H;          | Williams-Beuren syndrome chromosomal region 1 protein homolog;                                                                                                                                       | 0.85 - 1.00 |
| QRPRQLKPR      | TVATPLNQVANPNSAIFGGAR   | N-ter +28.03 Da                                              | 63.4       | 43.9              | 3      | 2125.22                      | 1.18                                         | 0.32                  | IF4H_MOUSE   | Q80U88_MOUSE | Eukaryotic translation initiation factor 4H;          | Williams-Beuren syndrome chromosomal region 1 protein homolog;                                                                                                                                       | 0.75 - 0.85 |
| EKAKREVCWSV    | TVEGDVNTDPWAGYR         | N-ter +28.03 Da                                              | 32.4       | 53.6              | 3      | 1706.88                      | -0.40                                        | 0.04                  | AMPM1_MOUSE  |              | Methionine aminopeptidase 1;                          | Peptidase M 1;                                                                                                                                                                                       | 0.25 - 0.75 |
| QTVSTKSSSN     | TVESTSLYNKVAQGEVVR      | N-ter +28.03 Da, K +28.03 Da                                 | 26.8       | 31.4              | 3      | 2106.20                      | 2.09                                         | 0.18                  | SYEP_MOUSE   |              | Bifunctional glutamate/proline-tRNA ligase;           | Bifunctional aminoacyl-tRNA synthetase;                                                                                                                                                              | 0.85 - 1.00 |
| REILDSRGNP     | TVEVDLHTAKGR            | N-ter +34.06 Da, K +34.06 Da                                 | 23.4       | 52.7              | 3      | 1392.91                      | -1.89                                        | 0.42                  | ENOB_MOUSE   | Q5X59_MOUSE  | Beta-enolase;                                         | 2-phospho-D-glycerate hydro-lyase;Enolase 3;Muscle-specific enolase;Skeletal muscle enolase;                                                                                                         | 0.00 - 0.15 |
| GCVAGDEESY     | TVFKDLFDPIQDR           | N-ter +28.03 Da, K +28.03 Da                                 | 44.6       | 50.4              | 3      | 1762.06                      | 0.04                                         | 0.02                  | KCRM_MOUSE   |              | Creatine kinase M-type;                               | Creatine kinase M chain;M-CK;                                                                                                                                                                        | 0.25 - 0.75 |

| Non Prime Site                                                                                                                        | Prime Site                                                                                                                                                                                                            | Modifications                                                                                                                                                                                                                                                                               | Hyperscore                                                                           | Mass error in ppm                                                                    | Charge                                              | Precursor neutral mass in Da                                                                                          | Fold change (log <sub>2</sub> ) of ASAPRatio                                          | FC-error of ASAPRatio                                                                | Uniprot ID 1                                                                                                                                                   | Uniprot ID 2                                                 | Protein Name 1                                                                                                                                                                                                                                                                                                                                                                              | Protein Name 2                                                                                                                                                                                      | Quantile                                                                                                                                           |
|---------------------------------------------------------------------------------------------------------------------------------------|-----------------------------------------------------------------------------------------------------------------------------------------------------------------------------------------------------------------------|---------------------------------------------------------------------------------------------------------------------------------------------------------------------------------------------------------------------------------------------------------------------------------------------|--------------------------------------------------------------------------------------|--------------------------------------------------------------------------------------|-----------------------------------------------------|-----------------------------------------------------------------------------------------------------------------------|---------------------------------------------------------------------------------------|--------------------------------------------------------------------------------------|----------------------------------------------------------------------------------------------------------------------------------------------------------------|--------------------------------------------------------------|---------------------------------------------------------------------------------------------------------------------------------------------------------------------------------------------------------------------------------------------------------------------------------------------------------------------------------------------------------------------------------------------|-----------------------------------------------------------------------------------------------------------------------------------------------------------------------------------------------------|----------------------------------------------------------------------------------------------------------------------------------------------------|
| QNAQCPKNSG<br>NCGIVEGLMT                                                                                                              | TVGAVALDCR<br>TVHAITATKQTVDPGSPGLKWR                                                                                                                                                                                  | N-ter +28.03 Da, C +57.02 Da<br>N-ter +34.06 Da, K +34.06 Da                                                                                                                                                                                                                                | 32.8<br>41.4                                                                         | 75.7<br>56.7                                                                         | 2<br>4                                              | 1088.65<br>2367.55                                                                                                    | -1.12<br>-0.71                                                                        | 0.10<br>0.11                                                                         | ASGL1_MOUSE<br>G3P_MOUSE                                                                                                                                       |                                                              | L-asparaginase;<br>Glyceraldehyde-3-phosphate dehydrogenase;                                                                                                                                                                                                                                                                                                                                | Asparaginase-like protein 1;L-asparagine amidohydrolase;<br>Peptidyl-cysteine 5-nitrosylase GAPDH;<br>60 kDa chaperonin;Chaperonin 60;HSP-65;Heat shock protein 60;Mitochondrial matrix protein P1; | 0.15 - 0.25<br>0.25 - 0.75                                                                                                                         |
| VAVTMGPKGR                                                                                                                            | TVIEQSWGSPKVTGKGVTVAK                                                                                                                                                                                                 | N-ter +28.03 Da, K +28.03 Da                                                                                                                                                                                                                                                                | 41.5                                                                                 | 60.8                                                                                 | 4                                                   | 2454.56                                                                                                               | 2.03                                                                                  | 0.38                                                                                 | CH60_MOUSE                                                                                                                                                     | D3Z2F2_MOUSE                                                 | 60 kDa heat shock protein, mitochondrial;                                                                                                                                                                                                                                                                                                                                                   |                                                                                                                                                                                                     | 0.85 - 1.00                                                                                                                                        |
| KDVVDYIFG<br>VETELRGVCD<br>VDIRKDLNAN                                                                                                 | TVIQEVKTSNVAR<br>TVLGLDLSHLIKAGDAESR<br>TVLSGGTTMPGDIADR                                                                                                                                                              | N-ter +28.03 Da, K +28.03 Da<br>N-ter +28.03 Da, K +28.03 Da<br>N-ter +28.03 Da                                                                                                                                                                                                             | 30.0<br>30.2<br>37.1                                                                 | 47.7<br>94.1<br>47.5                                                                 | 3<br>4<br>3                                         | 1499.94<br>2107.36<br>1665.92                                                                                         | 0.90<br>1.29<br>0.06                                                                  | 0.17<br>0.25<br>0.01                                                                 | ECHB_MOUSE<br>14335_MOUSE<br>ACTB_MOUSE                                                                                                                        | D3YXU1_MOUSE<br>ACTG_MOUSE                                   | Trifunctional enzyme subunit beta, mitochondrial;<br>14-3-3 protein sigma;<br>Actin, cytoplasmic 1;                                                                                                                                                                                                                                                                                         | TP-Beta;<br>Stratifin;<br>Beta-actin;                                                                                                                                                               | 0.25 - 0.75<br>0.75 - 0.85<br>0.25 - 0.75                                                                                                          |
| RQRPEPQVQG                                                                                                                            | TVSLHLGVTPSVLR                                                                                                                                                                                                        | N-ter +28.03 Da                                                                                                                                                                                                                                                                             | 44.1                                                                                 | 48.8                                                                                 | 3                                                   | 1505.97                                                                                                               | 0.40                                                                                  | 0.07                                                                                 | TPP1_MOUSE                                                                                                                                                     |                                                              | Tripeptidyl-peptidase 1;                                                                                                                                                                                                                                                                                                                                                                    |                                                                                                                                                                                                     | 0.25 - 0.75                                                                                                                                        |
| IVWLLKPEM<br>VCPSNFYFCK                                                                                                               | TVSSDQMAKLR<br>TVTSVEPLNGLNLR                                                                                                                                                                                         | N-ter +34.06 Da, K +34.06 Da<br>N-ter +28.03 Da                                                                                                                                                                                                                                             | 24.0<br>40.7                                                                         | 42.0<br>41.8                                                                         | 3<br>3                                              | 1302.81<br>1525.91                                                                                                    | 0.41<br>2.12                                                                          | 0.06<br>0.31                                                                         | CAH3_MOUSE<br>LY6D_MOUSE                                                                                                                                       |                                                              | Carbonic anhydrase 3;<br>Lymphocyte antigen 6D;                                                                                                                                                                                                                                                                                                                                             | Carbonate dehydratase III;Carbonic anhydrase III;<br>Thymocyte B-cell antigen;<br>AKAP expressed in kidney and lung;Protein kinase A-anchoring protein 2;                                           | 0.25 - 0.75<br>0.85 - 1.00                                                                                                                         |
| GEFTSARAVL<br>SPGMKDLGA                                                                                                               | TVVKDEDHIGLDQFSR<br>TWVVLGHSEER                                                                                                                                                                                       | N-ter +28.03 Da, K +28.03 Da<br>N-ter +28.03 Da                                                                                                                                                                                                                                             | 26.2<br>41.5                                                                         | 58.8<br>48.3                                                                         | 4<br>3                                              | 1914.10<br>1210.70                                                                                                    | 1.22<br>-0.32                                                                         | 0.19<br>0.03                                                                         | AKAP2_MOUSE<br>TPIS_MOUSE                                                                                                                                      | A2API8_MOUSE<br>E0CXH5_MOUSE                                 | A-kinase anchor protein 2;<br>Triosephosphate isomerase;                                                                                                                                                                                                                                                                                                                                    | kinase A-anchoring protein 2;<br>Triose-phosphate isomerase;                                                                                                                                        | 0.75 - 0.85<br>0.25 - 0.75                                                                                                                         |
| QGQGDPIFFY<br>VSGRQQQLVEL<br>MGNHNTLRLR<br>KNCGHRFLVL<br>WHHSFYNELR<br>WHHTFYNELR<br>EERSVNCGTM                                       | TYEEGLSHLTAEGQATLER<br>VAEQADLEQAFSPSPDPCVDR<br>VAGPQPAQTGAPQGLSLEYLFEER<br>VANQDFVENLVR<br>VAPEHPHTLLTEAPLNPKANR<br>VAPEHPVLLTEAPLNPKANR<br>VAQPKNLEGVYGFANLPNQVYR                                                   | N-ter +34.06 Da<br>N-ter +28.03 Da, C +57.02 Da<br>N-ter +28.03 Da<br>N-ter +28.03 Da<br>N-ter +28.03 Da, K +28.03 Da<br>N-ter +28.03 Da, K +28.03 Da<br>N-ter +28.03 Da, K +28.03 Da                                                                                                       | 29.0<br>53.3<br>53.1<br>48.4<br>41.1<br>52.4<br>52.1                                 | 55.8<br>43.5<br>42.3<br>51.2<br>55.7<br>57.5<br>56.0                                 | 3<br>3<br>3<br>3<br>4<br>4<br>4                     | 2138.19<br>2376.16<br>2400.31<br>1529.90<br>2352.41<br>2350.44<br>2532.49                                             | -1.89<br>2.44<br>3.27<br>0.59<br>4.38<br>3.47<br>1.21                                 | 0.28<br>0.76<br>0.77<br>0.03<br>0.81<br>0.75<br>0.22                                 | ICLN_MOUSE<br>API5_MOUSE<br>FRIL1_MOUSE<br>TOM1_MOUSE<br>ACTC_MOUSE<br>ACTB_MOUSE<br>E9Q9F5_MOUSE                                                              | Q923F1_MOUSE<br>Q9CPX4_MOUSE<br>Q3UDC3_MOUSE<br>ACTG_MOUSE   | Methylosome subunit pICln;<br>Apoptosis inhibitor 5;<br>Ferritin light chain 1;<br>Target of Myb protein 1;<br>Actin, alpha cardiac muscle 1;<br>Actin, cytoplasmic 1;                                                                                                                                                                                                                      | Chloride channel, nucleotide sensitive 1A;Chloride conductance regulatory protein ICl;Chloride ion current inducer protein; AAC-11;<br>Ferritin L subunit 1;                                        | 0.00 - 0.15<br>0.85 - 1.00<br>0.85 - 1.00<br>0.25 - 0.75<br>0.85 - 1.00<br>0.85 - 1.00<br>0.75 - 0.85                                              |
| AHQLFGRF5F                                                                                                                            | VATGLMEDDGKPR                                                                                                                                                                                                         | N-ter +28.03 Da, K +28.03 Da                                                                                                                                                                                                                                                                | 37.3                                                                                 | 62.8                                                                                 | 3                                                   | 1443.83                                                                                                               | -0.52                                                                                 | 0.09                                                                                 | K56A1_MOUSE                                                                                                                                                    | Q505N6_MOUSE                                                 | Ribosomal protein S6 kinase alpha-1;<br>kinase-activated protein kinase 1a;Ribosomal S6 kinase 1;                                                                                                                                                                                                                                                                                           |                                                                                                                                                                                                     | 0.25 - 0.75                                                                                                                                        |
| HLTGEFEKYY<br>VGPPEPTDCF<br>DVDEYDENKF<br>EYKRDIVFL<br>LMDVGNMGQS                                                                     | VATLGEVHPVLFHTNR<br>VAVMHGTEGTVPGNALVWDPKPFPR<br>VDEEDGGDQAGPDEGEVDSCLR<br>VDGSSSLGSPNFNAIR<br>VDISGLQLALAEAR                                                                                                         | N-ter +34.06 Da<br>N-ter +28.03 Da, K +28.03 Da<br>N-ter +28.03 Da, C +57.02 Da<br>N-ter +28.03 Da<br>N-ter +34.06 Da                                                                                                                                                                       | 41.8<br>51.8<br>61.7<br>39.0<br>19.4                                                 | 61.7<br>42.4<br>54.7<br>54.9<br>100.8                                                | 4<br>4<br>3<br>3<br>3                               | 1922.21<br>2804.61<br>2433.09<br>1647.91<br>1417.98                                                                   | -1.03<br>0.71<br>0.51<br>0.53<br>-3.18                                                | 0.15<br>0.15<br>0.21<br>0.03<br>0.29                                                 | RAN_MOUSE<br>EH02_MOUSE<br>ARPC5_MOUSE<br>E9PWQ3_MOUSE<br>CB029_MOUSE                                                                                          | Q3UA72_MOUSE<br>D3YWD1_MOUSE                                 | GTP-binding nuclear protein Ran;<br>EH domain-containing protein 2;<br>Actin-related protein 2/3 complex subunit 5;<br>UPF0760 protein C2orf29 homolog;                                                                                                                                                                                                                                     |                                                                                                                                                                                                     | 0.15 - 0.25<br>0.25 - 0.75<br>0.25 - 0.75<br>0.25 - 0.75<br>0.00 - 0.15                                                                            |
| AGKHVPRAVF                                                                                                                            | VDLEPTVIDEVR                                                                                                                                                                                                          | N-ter +28.03 Da                                                                                                                                                                                                                                                                             | 27.6                                                                                 | 45.4                                                                                 | 3                                                   | 1411.82                                                                                                               | 2.35                                                                                  | 0.36                                                                                 | TBA1A_MOUSE                                                                                                                                                    | TBA1B_MOUSE                                                  | Tubulin alpha-1A chain;                                                                                                                                                                                                                                                                                                                                                                     | Alpha-tubulin 1;Alpha-tubulin isotype M-alpha-1;Tubulin alpha-1 chain;                                                                                                                              | 0.85 - 1.00                                                                                                                                        |
| SPTESKDILL                                                                                                                            | VDLNSEIDTNQNSLR                                                                                                                                                                                                       | N-ter +28.03 Da                                                                                                                                                                                                                                                                             | 47.0                                                                                 | 48.6                                                                                 | 3                                                   | 1744.94                                                                                                               | -0.64                                                                                 | 0.09                                                                                 | DAB2_MOUSE                                                                                                                                                     | E9QL31_MOUSE                                                 | Disabled homolog 2;                                                                                                                                                                                                                                                                                                                                                                         | DOC-2;Mitogen-responsive phosphoprotein; 265 proteasome AAA-ATPase subunit RPT1;Proteasome 265 subunit ATPase 2;Protein MSS1;                                                                       | 0.25 - 0.75                                                                                                                                        |
| INVKQFAKFV                                                                                                                            | VDSLQVAPTIDIEGMR                                                                                                                                                                                                      | N-ter +28.03 Da                                                                                                                                                                                                                                                                             | 44.7                                                                                 | 53.0                                                                                 | 3                                                   | 1902.00                                                                                                               | 0.38                                                                                  | 0.05                                                                                 | PRS7_MOUSE                                                                                                                                                     | Q8BVQ9_MOUSE                                                 | 26S protease regulatory subunit 7;                                                                                                                                                                                                                                                                                                                                                          | Alpha-tubulin 1;Alpha-tubulin isotype M-alpha-1;Tubulin alpha-1 chain;                                                                                                                              | 0.25 - 0.75                                                                                                                                        |
| ASLRFQDALN<br>MNGTRNWCTL<br>EKLGGQGVQK<br>MRKLVRSLTM<br>AVTTROVRTI                                                                    | VDLTFEQTNLVPPYR<br>VDVHPSQATGSDVILR<br>VDVPAADLSDQVPDSETR<br>VEDNEDDDEGELHHR<br>VEEVQDGKVISSR                                                                                                                         | N-ter +28.03 Da<br>N-ter +28.03 Da<br>N-ter +28.03 Da<br>N-ter +34.06 Da<br>N-ter +28.03 Da, K +28.03 Da                                                                                                                                                                                    | 46.9<br>51.0<br>55.6<br>59.1<br>26.2                                                 | 53.1<br>45.7<br>51.6<br>72.3<br>49.9                                                 | 3<br>3<br>3<br>3<br>3                               | 1819.05<br>1850.04<br>2157.12<br>2336.17<br>1500.89                                                                   | -0.25<br>-1.03<br>0.81<br>-1.00<br>1.64                                               | 0.04<br>0.19<br>0.24<br>0.38<br>0.31                                                 | TBA1A_MOUSE<br>TUFT1_MOUSE<br>CO3_MOUSE<br>LMNA_MOUSE<br>K1C17_MOUSE                                                                                           | TBA1B_MOUSE<br>D6RGP4_MOUSE                                  | Tubulin alpha-1A chain;<br>Tuftelin;<br>Complement C3;<br>Prelamin-A/C;<br>Keratin, type I cytoskeletal 17;                                                                                                                                                                                                                                                                                 |                                                                                                                                                                                                     | 0.25 - 0.75<br>0.15 - 0.25<br>0.25 - 0.75<br>0.15 - 0.25<br>0.75 - 0.85                                                                            |
| LNLKQKGYFF<br>M<br>ICAKLSRQVV<br>NEWRRPIHQ<br>EVEANPLLTN<br>EVEVLKATEM<br>SEEEIEAFR<br>GYEDFVEGLR<br>AVQGGAAAPV<br>MRGQ<br>ELRGFDGVVC | VEGELYCETHAR<br>VEKEEAGGGGGGSEEEAAQYDR<br>VEKGAEGSQAEQSPHPR<br>VESVDDKSSYFSMDSAEGR<br>VEVEYPENAILDLTR<br>VEVGPEDDEVGAER<br>VFDKNGNYISAELR<br>VFDKEGNGTVMGAELR<br>VGAVQVPVGMPPMPQAPR<br>VGDLSPPQQEALAR<br>VGGDGSASEAAR | N-ter +28.03 Da, C +57.02 Da<br>N-ter +28.03 Da, K +28.03 Da<br>N-ter +28.03 Da, K +28.03 Da<br>N-ter +28.03 Da, K +28.03 Da<br>N-ter +28.03 Da<br>N-ter +28.03 Da<br>N-ter +28.03 Da, K +28.03 Da<br>N-ter +28.03 Da, K +28.03 Da<br>N-ter +34.06 Da<br>N-ter +28.03 Da<br>N-ter +28.03 Da | 46.0<br>81.5<br>51.7<br>19.9<br>53.3<br>39.0<br>43.8<br>28.3<br>48.2<br>40.7<br>28.9 | 46.7<br>37.5<br>55.9<br>48.4<br>51.7<br>38.3<br>49.9<br>36.8<br>39.6<br>42.4<br>57.9 | 3<br>4<br>4<br>4<br>3<br>3<br>3<br>3<br>3<br>3<br>2 | 1490.75<br>2450.21<br>1975.12<br>2221.09<br>1788.02<br>1527.76<br>1810.02<br>1777.97<br>1862.09<br>1538.87<br>1103.58 | -1.74<br>3.31<br>0.18<br>0.79<br>1.09<br>0.57<br>1.65<br>0.58<br>0.04<br>0.91<br>1.50 | 0.35<br>1.33<br>0.05<br>0.25<br>0.26<br>0.08<br>0.23<br>0.02<br>0.01<br>0.14<br>0.14 | PDLJ3_MOUSE<br>SAE1_MOUSE<br>CASZ1_MOUSE<br>TRI29_MOUSE<br>ITHH3_MOUSE<br>PTRF_MOUSE<br>CALM_MOUSE<br>MYL1_MOUSE<br>SNRPA_MOUSE<br>S14L4_MOUSE<br>A2AQH1_MOUSE | B1A547_MOUSE<br>E9PVS1_MOUSE<br>Q3UKW2_MOUSE<br>D3Z0S6_MOUSE | PDZ and LIM domain protein 3;<br>SUMO-activating enzyme subunit 1;<br>Zinc finger protein castor homolog 1;<br>Tripartite motif-containing protein 29;<br>Inter-alpha-trypsin inhibitor heavy chain H3;<br>Polymerase I and transcript release factor;<br>Calmodulin;<br>Myosin light chain 1/3, skeletal muscle isoform;<br>U1 small nuclear ribonucleoprotein A;<br>SEC14-like protein 4; | Actinin-associated LIM protein;Alpha-actinin-2-associated LIM protein;<br>Ubiquitin-like 1-activating enzyme E1A;<br>Castor-related protein;<br>Cav-p60;Cavin-1;                                    | 0.00 - 0.15<br>0.85 - 1.00<br>0.25 - 0.75<br>0.25 - 0.75<br>0.75 - 0.85<br>0.25 - 0.75<br>0.75 - 0.85<br>0.25 - 0.75<br>0.25 - 0.75<br>0.75 - 0.85 |
| M                                                                                                                                     | VGGEASAAVEKLVSGV                                                                                                                                                                                                      | N-ter +28.03 Da, K +28.03 Da                                                                                                                                                                                                                                                                | 22.1                                                                                 | 43.8                                                                                 | 3                                                   | 1684.03                                                                                                               | -0.03                                                                                 | 0.00                                                                                 | C2AIL_MOUSE                                                                                                                                                    |                                                              | CDKN2AIP N-terminal-like protein;                                                                                                                                                                                                                                                                                                                                                           | CDKN2A-interacting protein N-terminal-like protein;                                                                                                                                                 | 0.25 - 0.75                                                                                                                                        |
| GAHLVKKIF<br>LVEAARNLGR<br>QRHSGPSSYK                                                                                                 | VGGIKEDTEEHLR<br>VGTKCCTLPEDQR<br>VGMTSEKFDCHYCR                                                                                                                                                                      | N-ter +28.03 Da, K +28.03 Da<br>N-ter +28.03 Da, K +28.03 Da, C +57.02 Da<br>N-ter +34.06 Da, K +34.06 Da, C +57.02 Da                                                                                                                                                                      | 18.5<br>33.3<br>20.3                                                                 | 70.9<br>44.2<br>62.0                                                                 | 4<br>3<br>4                                         | 1674.99<br>1618.85<br>1856.98                                                                                         | -1.94<br>0.81<br>-5.06                                                                | 0.52<br>0.27<br>1.69                                                                 | ROA1_MOUSE<br>ALBU_MOUSE<br>AZAEX8_MOUSE                                                                                                                       | ROA2_MOUSE                                                   | Heterogeneous nuclear ribonucleoprotein A1;<br>Serum albumin;                                                                                                                                                                                                                                                                                                                               | HDP-1;Helix-destabilizing protein;Single-strand-binding protein;Topoisomerase-inhibitor suppressed;hnRNP core protein A1;                                                                           | 0.00 - 0.15<br>0.25 - 0.75<br>0.00 - 0.15                                                                                                          |

Table S10, Tholen et al.

| Non Prime Site | Prime Site                | Modifications                             | Hyperscore | Mass error in ppm | Charge | Precursor neutral mass in Da | Fold change (log <sub>2</sub> ) of ASAPRatio | FC-error of ASAPRatio | Uniprot ID 1 | Uniprot ID 2 | Protein Name 1                                             | Protein Name 2                                                                                                                                                                                                                                            | Quantile    |
|----------------|---------------------------|-------------------------------------------|------------|-------------------|--------|------------------------------|----------------------------------------------|-----------------------|--------------|--------------|------------------------------------------------------------|-----------------------------------------------------------------------------------------------------------------------------------------------------------------------------------------------------------------------------------------------------------|-------------|
| M              | VGVPKVGSDPDFQPELSGAGSR    | N-ter +28.03 Da, K +28.03 Da              | 21.5       | 52.3              | 4      | 2254.28                      | 3.07                                         | 0.53                  | TXNL1_MOUSE  |              | Thioredoxin-like protein 1;                                | 32 kDa thioredoxin-related protein; Acetyl-CoA acyltransferase; Beta-ketothiolase; Mitochondrial 3-oxoacyl-CoA thiolase;                                                                                                                                  | 0.85 - 1.00 |
| AYLARHVGLR     | VGVPTEGTGALTNR            | N-ter +28.03 Da                           | 37.5       | 47.5              | 3      | 1454.88                      | 0.12                                         | 0.01                  | THIM_MOUSE   |              | 3-ketoacyl-CoA thiolase, mitochondrial;                    |                                                                                                                                                                                                                                                           | 0.25 - 0.75 |
| TEAAAQAAYL     | VGVSDFPNSQAGQQQLVEPTQFAR  | N-ter +28.03 Da                           | 51.6       | 52.5              | 4      | 2412.33                      | 3.04                                         | 0.61                  | TLN1_MOUSE   | F8WGT0_MOUSE | Talin-1;                                                   |                                                                                                                                                                                                                                                           | 0.85 - 1.00 |
| GIFTGARVFF     | VHEGYQGLVDGGHEIR          | N-ter +34.06 Da                           | 46.1       | 62.1              | 4      | 1799.03                      | -3.47                                        | 0.39                  | K6PF_MOUSE   |              | 6-phosphofructokinase, muscle type;                        | Phosphofructo-1-kinase isozyme A; Phosphofructokinase 1; Phosphohexokinase;                                                                                                                                                                               | 0.00 - 0.15 |
| GSGRSPRRSP     | VHPESSEGEHSHVVPQR         | N-ter +28.03 Da                           | 38.2       | 61.8              | 4      | 1930.04                      | -0.64                                        | 0.11                  | FILA2_MOUSE  | E9QPZ3_MOUSE | Filaggrin-2;                                               | Intermediate filament-associated protein;                                                                                                                                                                                                                 | 0.25 - 0.75 |
| HIFASFNDF      | VHVTDLSGKETICR            | N-ter +28.03 Da, K +28.03 Da, C +57.02 Da | 24.4       | 61.3              | 4      | 1669.98                      | 0.06                                         | 0.01                  | RS14_MOUSE   | D3YVF4_MOUSE | 40S ribosomal protein S14;                                 |                                                                                                                                                                                                                                                           | 0.25 - 0.75 |
| ARRQSRMEKY     | VISSGHAELAR               | N-ter +34.06 Da                           | 26.2       | 55.4              | 3      | 1301.79                      | -3.06                                        | 0.51                  | SYNP0_MOUSE  | E9Q3E2_MOUSE | Synaptopodin;                                              |                                                                                                                                                                                                                                                           | 0.00 - 0.15 |
| KRNTHTRRKR     | VIGGKPNVGDYDPWQVAIKDGQR   | N-ter +28.03 Da, K +28.03 Da              | 19.9       | 65.0              | 4      | 2551.56                      | -1.06                                        | 0.13                  | CFAI_MOUSE   |              | Complement factor I;                                       | C3B/C4B inactivator;                                                                                                                                                                                                                                      | 0.15 - 0.25 |
| FGYKNSFHR      | VIKDFMIQGGDFTR            | N-ter +34.06 Da, K +34.06 Da              | 42.5       | 47.0              | 3      | 1694.03                      | -2.94                                        | 0.45                  | PPIB_MOUSE   |              | Peptidyl-prolyl cis-trans isomerase B;                     | CYP-51; Cyclophilin B; Rotamase B; Cyclophilin;                                                                                                                                                                                                           | 0.00 - 0.15 |
| STGAAKAVGK     | VIPELNGKLTGMAFR           | N-ter +28.03 Da, K +28.03 Da              | 27.1       | 40.8              | 3      | 1701.03                      | 0.01                                         | 0.00                  | G3P_MOUSE    | F8WJL5_MOUSE | Glyceraldehyde-3-phosphate dehydrogenase;                  | Peptidyl-cysteine S-nitrosylase GAPDH;                                                                                                                                                                                                                    | 0.25 - 0.75 |
| GVANVSIDDR     | VISLSGHSIIGR              | N-ter +28.03 Da                           | 40.8       | 50.1              | 3      | 1394.86                      | -0.52                                        | 0.11                  | SODC_MOUSE   |              | Superoxide dismutase [Cu-Zn];                              |                                                                                                                                                                                                                                                           | 0.25 - 0.75 |
| TKFENAFSLH     | VISQHSLSLGNIR             | N-ter +28.03 Da                           | 36.1       | 42.6              | 3      | 1491.92                      | 0.81                                         | 0.10                  | ATPA_MOUSE   | D3Z6F5_MOUSE | ATP synthase subunit alpha, mitochondrial;                 |                                                                                                                                                                                                                                                           | 0.25 - 0.75 |
| DVAALHKAIM     | VKGVEADIHTLTKR            | N-ter +28.03 Da, K +28.03 Da              | 24.5       | 75.7              | 4      | 1854.26                      | -0.58                                        | 0.21                  | ANXA1_MOUSE  | E9QA30_MOUSE | Annexin A1;                                                | Annexin I; Annexin-1; Calpactin I; Calpactin-2; Chromobindin-9; Lipocortin I; Phospholipase A2 inhibitory protein; p35;                                                                                                                                   | 0.25 - 0.75 |
| E              | VKLVESGGGLVPGGSLR         | N-ter +28.03 Da, K +28.03 Da              | 43.9       | 40.9              | 3      | 1937.17                      | -0.54                                        | 0.07                  | HVM17_MOUSE  | HVM18_MOUSE  | Ig heavy chain V region MOPC 47A;                          |                                                                                                                                                                                                                                                           | 0.25 - 0.75 |
| LYASGRITGI     | VLDSDGVTHTNPIYEGYALPHAIMR | N-ter +28.03 Da                           | 51.1       | 69.0              | 4      | 2851.63                      | 3.70                                         | 0.66                  | ACTC_MOUSE   | ACTA_MOUSE   | Actin, alpha cardiac muscle 1;                             | Alpha-cardiac actin;                                                                                                                                                                                                                                      | 0.85 - 1.00 |
| M              | VLESTMVCDNSEMYR           | N-ter +28.03 Da, C +57.02 Da              | 47.4       | 66.7              | 3      | 1960.00                      | 1.58                                         | 0.34                  | PSMD4_MOUSE  |              | 26S proteasome non-ATPase regulatory subunit 4;            |                                                                                                                                                                                                                                                           | 0.75 - 0.85 |
| LEVQGRDSRL     | VLEVAQLGESTVR             | N-ter +28.03 Da                           | 46.5       | 30.0              | 3      | 1564.90                      | 0.39                                         | 0.07                  | ATPB_MOUSE   |              | ATP synthase subunit beta, mitochondrial;                  |                                                                                                                                                                                                                                                           | 0.25 - 0.75 |
| EPPKQSTFSL     | VLQEILESDGKDPNKPFGFR      | N-ter +28.03 Da, K +28.03 Da              | 35.9       | 60.0              | 4      | 2369.40                      | 1.25                                         | 0.22                  | PDL1_MOUSE   |              | PDZ and LIM domain protein 1;                              | C-terminal LIM domain protein CLP-36; LIM domain protein CLP-36;                                                                                                                                                                                          | 0.75 - 0.85 |
| M              | VLSNEPAASAAEEVEDDALVR     | N-ter +28.03 Da                           | 58.7       | 51.0              | 3      | 2341.25                      | -0.97                                        | 0.13                  | TBCD_MOUSE   |              | Tubulin-specific chaperone D;                              | Beta-tubulin cofactor D; Tubulin-folding cofactor D;                                                                                                                                                                                                      | 0.15 - 0.25 |
| IAEGVPQLLI     | VLTAEPGDDVVR              | N-ter +28.03 Da                           | 32.7       | 30.4              | 2      | 1285.69                      | 2.50                                         | 0.36                  | E9PWQ3_MOUSE | D3YWD1_MOUSE |                                                            |                                                                                                                                                                                                                                                           | 0.85 - 1.00 |
| PFMWNHGLGY     | VLTCPSNLGTGLR             | N-ter +34.06 Da, C +57.02 Da              | 28.7       | 48.0              | 3      | 1420.86                      | -0.58                                        | 0.09                  | KCRM_MOUSE   |              | Creatine kinase M-type;                                    | Creatine kinase M chain; M-CK;                                                                                                                                                                                                                            | 0.25 - 0.75 |
| LSKHNNHMAK     | VLTPDLYNKLRL              | N-ter +28.03 Da, K +28.03 Da              | 18.8       | 45.3              | 3      | 1386.89                      | -1.94                                        | 0.52                  | KCRM_MOUSE   |              | Creatine kinase M-type;                                    | Creatine kinase M chain; M-CK;                                                                                                                                                                                                                            | 0.00 - 0.15 |
| DRNLAENISR     | VLYPDNFPEGKELR            | N-ter +28.03 Da, K +28.03 Da              | 33.8       | 57.2              | 3      | 1896.09                      | -1.03                                        | 0.11                  | PYGB_MOUSE   | PYGB_MOUSE   | Glycogen phosphorylase, liver form;                        |                                                                                                                                                                                                                                                           | 0.15 - 0.25 |
| IPESLKNMILL    | VMDTAEIFHSADAR            | N-ter +28.03 Da                           | 53.9       | 48.7              | 3      | 1589.83                      | 1.37                                         | 0.30                  | Q6DF21_MOUSE |              |                                                            | Metastasis inhibition factor NM23; NDPK-A; Tumor metastatic process-associated protein; nm23-M1;                                                                                                                                                          | 0.75 - 0.85 |
| EGLNVKTKGR     | VMLGETNPADSKPGTIR         | N-ter +28.03 Da, K +28.03 Da              | 29.0       | 45.7              | 3      | 1841.06                      | -1.52                                        | 0.22                  | NDKA_MOUSE   | NDKB_MOUSE   | Nucleoside diphosphate kinase A;                           |                                                                                                                                                                                                                                                           | 0.00 - 0.15 |
| SIVGRPRHQG     | VMMVGMGQKDSYVGEAQSKR      | N-ter +28.03 Da, K +28.03 Da              | 30.3       | 63.6              | 4      | 2268.27                      | -0.89                                        | 0.17                  | ACT5_MOUSE   | ACTA_MOUSE   | Actin, alpha skeletal muscle;                              | Alpha-actin-1;                                                                                                                                                                                                                                            | 0.15 - 0.25 |
| DQVIQFFIAL     | VNDPQPEHPLR               | N-ter +28.03 Da                           | 31.8       | 49.1              | 3      | 1328.75                      | 1.50                                         | 0.26                  | UB2L3_MOUSE  |              | Ubiquitin-conjugating enzyme E2 L3;                        | Ubiquitin-protein ligase L3;                                                                                                                                                                                                                              | 0.75 - 0.85 |
| KIPNFVWVTF     | VNHFPQVSALLGEDEEALHYLTR   | N-ter +28.03 Da                           | 57.3       | 53.7              | 4      | 2647.47                      | 1.57                                         | 0.53                  | SET_MOUSE    | A2B93_MOUSE  | Protein SET;                                               | Phosphatase 2A inhibitor I2PP2A; Template-activating factor I;                                                                                                                                                                                            | 0.75 - 0.85 |
| KSAVSLWLAK     | VNPDEVGGEALGR             | N-ter +34.06 Da                           | 36.0       | 36.9              | 2      | 1345.75                      | 0.19                                         | 0.03                  | HBB2_MOUSE   |              | Hemoglobin subunit beta-2;                                 | Beta-2-globin; Hemoglobin beta-2 chain; Hemoglobin beta-minor chain;                                                                                                                                                                                      | 0.25 - 0.75 |
| M              | VNPTVFFDITADDEPLGR        | N-ter +28.03 Da                           | 55.1       | 47.4              | 3      | 2033.11                      | 0.43                                         | 0.16                  | PPIA_MOUSE   | E9Q1E3_MOUSE | Peptidyl-prolyl cis-trans isomerase A;                     | Cyclophilin A; Cyclosporin A-binding protein; Rotamase A; SP18;                                                                                                                                                                                           | 0.25 - 0.75 |
| KAASVSLWGK     | VNSDEVGGEALGR             | N-ter +28.03 Da                           | 41.0       | 76.7              | 3      | 1329.75                      | 1.12                                         | 0.12                  | HBB1_MOUSE   |              | Hemoglobin subunit beta-1;                                 | Beta-1-globin; Hemoglobin beta-1 chain; Hemoglobin beta-major chain;                                                                                                                                                                                      | 0.75 - 0.85 |
| EAGERRKGTD     | VNVFTILTISR               | N-ter +28.03 Da                           | 33.0       | 80.7              | 3      | 1277.84                      | -0.22                                        | 0.03                  | ANXA1_MOUSE  | E9QA30_MOUSE | Annexin A1;                                                | Annexin I; Annexin-1; Calpactin I; Calpactin-2; Chromobindin-9; Lipocortin I; Phospholipase A2 inhibitory protein; p35;                                                                                                                                   | 0.25 - 0.75 |
| NGKLTGMAFR     | VPTLNVSVDLTCR             | N-ter +28.03 Da, C +57.02 Da              | 28.4       | 24.3              | 3      | 1599.90                      | 0.12                                         | 0.01                  | D3Z1B7_MOUSE |              | Glyceraldehyde-3-phosphate dehydrogenase;                  |                                                                                                                                                                                                                                                           | 0.25 - 0.75 |
| NGKLTGMAFR     | VPTPNVSVDLTCR             | N-ter +28.03 Da, C +57.02 Da              | 46.7       | 45.4              | 3      | 1583.91                      | 2.71                                         | 0.30                  | G3PT_MOUSE   | G3P_MOUSE    | Glyceraldehyde-3-phosphate dehydrogenase, testis-specific; | Spermatogenic cell-specific glyceraldehyde 3-phosphate dehydrogenase 2; Spermatogenic glyceraldehyde-3-phosphate dehydrogenase; Acireductone dioxygenase (Fe(2+)-requiring); Membrane-type 1 matrix metalloproteinase cytoplasmic tail-binding protein 1; | 0.85 - 1.00 |
| M              | VQAWYMDSTADPR             | N-ter +28.03 Da                           | 22.3       | 59.4              | 3      | 1695.86                      | 0.25                                         | 0.04                  | MTND_MOUSE   |              |                                                            |                                                                                                                                                                                                                                                           | 0.25 - 0.75 |
| SGKGTQCEKI     | VQKYGYTHLSTGDLLR          | N-ter +34.06 Da, K +34.06 Da              | 24.5       | 50.9              | 4      | 1918.19                      | -0.30                                        | 0.02                  | KAD1_MOUSE   |              | Adenylate kinase isoenzyme 1;                              | ATP-AMP transphosphorylase 1; Myokinase;                                                                                                                                                                                                                  | 0.25 - 0.75 |
| LSGTAGVQSQ     | VQLQQSGAELVK              | N-ter +28.03 Da, K +28.03 Da              | 40.4       | 28.6              | 3      | 1483.87                      | 0.04                                         | 0.01                  | HVM0_MOUSE   |              | Ig heavy chain V region;                                   | Anti-arsonate antibody;                                                                                                                                                                                                                                   | 0.25 - 0.75 |
| FYADHPFIL      | VRDNQSGSLIFIGR            | N-ter +34.06 Da                           | 51.5       | 46.2              | 3      | 1594.97                      | -0.92                                        | 0.16                  | SERPH_MOUSE  |              | Serpin H1;                                                 | 47 kDa heat shock protein; Collagen-binding protein; Serine protease inhibitor J6;                                                                                                                                                                        | 0.15 - 0.25 |
| RSIIRNVKGP     | VREGDVLTLLESER            | N-ter +28.03 Da                           | 41.3       | 58.3              | 3      | 1642.98                      | 3.10                                         | 1.20                  | RS28_MOUSE   |              | 40S ribosomal protein S28;                                 |                                                                                                                                                                                                                                                           | 0.85 - 1.00 |
| KKQIQKLEXR     | VRELEGEVENEQKR            | N-ter +34.06 Da, K +34.06 Da              | 28.0       | 51.9              | 4      | 1782.08                      | -3.32                                        | 1.00                  | MYH1_MOUSE   | MYH8_MOUSE   | Myosin-1;                                                  | Myosin heavy chain 1; Myosin heavy chain 2x; Myosin heavy chain, skeletal muscle, adult 1;                                                                                                                                                                | 0.00 - 0.15 |



Table S10, Tholen et al.

| Non Prime Site                                                                   | Prime Site                                                                                                            | Modifications                                                                                                                                         | Hyperscore                                   | Mass error in ppm                            | Charge                     | Precursor neutral mass in Da                                   | Fold change (log <sub>2</sub> ) of ASAPRatio      | FC-error of ASAPRatio                        | Uniprot ID 1                                                                         | Uniprot ID 2                                                           | Protein Name 1                                                                                                                                      | Protein Name 2                                                                                                                                                 | Quantile                                                                |
|----------------------------------------------------------------------------------|-----------------------------------------------------------------------------------------------------------------------|-------------------------------------------------------------------------------------------------------------------------------------------------------|----------------------------------------------|----------------------------------------------|----------------------------|----------------------------------------------------------------|---------------------------------------------------|----------------------------------------------|--------------------------------------------------------------------------------------|------------------------------------------------------------------------|-----------------------------------------------------------------------------------------------------------------------------------------------------|----------------------------------------------------------------------------------------------------------------------------------------------------------------|-------------------------------------------------------------------------|
| KKIQKLEAR                                                                        | VRELENEVEQKR                                                                                                          | N-ter +34.06 Da, K +34.06 Da<br>N-ter +34.06 Da, K +34.06 Da, C +57.02 Da                                                                             | 35.6                                         | 50.8                                         | 4                          | 1839.11                                                        | -1.36                                             | 0.17                                         | MYH4_MOUSE                                                                           |                                                                        | Myosin-4;                                                                                                                                           | Myosin heavy chain 2b;Myosin heavy chain 4;                                                                                                                    | 0.15 - 0.25                                                             |
| GDEKCTELF                                                                        | VREPPIMVTKLEEDMNAICGER                                                                                                |                                                                                                                                                       | 62.9                                         | 62.9                                         | 4                          | 2703.55                                                        | -5.64                                             | 2.82                                         | D3YU50_MOUSE                                                                         | Q6P6L5_MOUSE                                                           |                                                                                                                                                     | Apolipoprotein J;Clustrin;Sulfated glycoprotein 2;                                                                                                             | 0.00 - 0.15                                                             |
| DNGMVLGEQE<br>GMKVLQTRGF                                                         | VSDNELQELSTQGSR<br>VSDSSDSMDTGAGSIR                                                                                   | N-ter +28.03 Da<br>N-ter +34.06 Da                                                                                                                    | 45.6<br>29.9                                 | 49.2<br>46.6                                 | 3<br>3                     | 1689.90<br>1617.81                                             | -0.62<br>-0.67                                    | 0.09<br>0.10                                 | CLUS_MOUSE<br>ATIF1_MOUSE                                                            | E9Q988_MOUSE<br>Q9D879_MOUSE                                           | Clusterin;<br>ATPase inhibitor, mitochondrial;                                                                                                      | Inhibitor of F(1)F(o)-ATPase;<br>RNA exonuclease 2 homolog;Small fragment nuclease;                                                                            | 0.25 - 0.75<br>0.25 - 0.75                                              |
| GRRGQFGARG<br>SSADROGRRG                                                         | VSEGAAMAAGESMAQR<br>VSESQASDSEGHDFSEGOAVGAHR                                                                          | N-ter +28.03 Da<br>N-ter +28.03 Da                                                                                                                    | 61.1<br>67.9                                 | 48.4<br>59.9                                 | 3<br>4                     | 1679.84<br>2601.29                                             | -0.71<br>3.27                                     | 0.12<br>1.40                                 | ORN_MOUSE<br>E9Q019_MOUSE                                                            | F7BVV1_MOUSE                                                           | Oligoribonuclease, mitochondrial;                                                                                                                   |                                                                                                                                                                | 0.25 - 0.75<br>0.85 - 1.00                                              |
| LYASGRITGI                                                                       | VSFELFADKVPKTAENFR                                                                                                    | N-ter +28.03 Da, K +28.03 Da<br>N-ter +28.03 Da, K +28.03 Da, C +57.02 Da                                                                             | 23.3                                         | 62.6                                         | 4                          | 2181.32                                                        | 1.26                                              | 0.15                                         | PPIA_MOUSE                                                                           |                                                                        | Peptidyl-prolyl cis-trans isomerase A;                                                                                                              | Cyclophilin A;Cyclosporin A-binding protein;Rotamase A;SP18;                                                                                                   | 0.75 - 0.85                                                             |
| IESTECKRTR<br>VWAAVPGKTF<br>GPLFLPKYTL<br>SYGYDEKSAG<br>EERHVGDGLN<br>SASNLIPIF  | VSGEHMDLTTCPAAGGQQEKLK<br>VSITPAEVLVGVKDR<br>VSTVSGMVFSEGAQR<br>VSVPGPMGSPGR<br>VTAGKDGVANVSDIR<br>VTDVDDVQPIASLPGVAR | N-ter +28.03 Da, K +28.03 Da<br>N-ter +28.03 Da, K +28.03 Da<br>N-ter +34.06 Da<br>N-ter +34.06 Da<br>N-ter +28.03 Da, K +28.03 Da<br>N-ter +28.03 Da | 59.4<br>31.9<br>36.8<br>39.6<br>19.1<br>30.8 | 57.5<br>49.2<br>50.1<br>27.6<br>43.0<br>41.1 | 4<br>3<br>3<br>2<br>3<br>3 | 2553.41<br>1695.08<br>1716.94<br>1270.73<br>1685.97<br>1976.14 | 2.68<br>-0.25<br>-0.43<br>-4.64<br>-1.56<br>-0.67 | 0.74<br>0.04<br>0.03<br>1.16<br>0.32<br>0.09 | Q9D1B1_MOUSE<br>PROF1_MOUSE<br>RBP1_MOUSE<br>CO1A1_MOUSE<br>SODC_MOUSE<br>HEM2_MOUSE | Q5X49_MOUSE<br>A2AVJ7_MOUSE<br>F8WGB7_MOUSE                            | Profilin-1;<br>Ribosome-binding protein 1;<br>Collagen alpha-1(I) chain;<br>Superoxide dismutase [Cu-Zn];<br>Delta-aminolevulinic acid dehydratase; | Profilin I;<br>Ribosome receptor protein;<br>Alpha-1 type I collagen;<br>0.00 - 0.15<br>0.25 - 0.75                                                            | 0.85 - 1.00<br>0.25 - 0.75<br>0.25 - 0.75<br>0.00 - 0.15<br>0.25 - 0.75 |
| LVAAMQPRML                                                                       | VTFDEELRPLVSVR                                                                                                        | N-ter +28.03 Da                                                                                                                                       | 13.8                                         | 50.8                                         | 3                          | 1784.07                                                        | 0.83                                              | 0.13                                         | PSMD2_MOUSE                                                                          | Q80V77_MOUSE                                                           | 26S proteasome non-ATPase regulatory subunit 2;                                                                                                     | 26S proteasome regulatory subunit RPN1;26S proteasome regulatory subunit p97;                                                                                  | 0.25 - 0.75                                                             |
| LWKFETSKYY                                                                       | VTIIDAPGHR                                                                                                            | N-ter +34.06 Da                                                                                                                                       | 36.2                                         | 46.4                                         | 3                          | 1111.71                                                        | -5.06                                             | 0.00                                         | EF1A1_MOUSE                                                                          | D3Z3I8_MOUSE                                                           | Elongation factor 1-alpha 1;                                                                                                                        | Elongation factor Tu;Eukaryotic elongation factor 1 A-1;                                                                                                       | 0.00 - 0.15                                                             |
| PNRVAQTKK                                                                        | VTQLDLDPKELSR                                                                                                         | N-ter +28.03 Da, K +28.03 Da                                                                                                                          | 20.4                                         | 49.1                                         | 3                          | 1625.98                                                        | 1.06                                              | 0.08                                         | HAP28_MOUSE                                                                          |                                                                        | 28 kDa heat- and acid-stable phosphoprotein;                                                                                                        | PDGF-associated protein;PDGFA-associated protein 1;                                                                                                            | 0.75 - 0.85                                                             |
| YSPLAHRAYS<br>SPLPVPKQ<br>STSQVACTK<br>M                                         | VVAGGPEVLTPER<br>VVANSPANADYQER<br>VVAPITSSPVCQEQLEAGR<br>VVEHPEFLKAGKEPLQIWR                                         | N-ter +34.06 Da<br>N-ter +34.06 Da<br>N-ter +28.03 Da, C +57.02 Da<br>N-ter +34.06 Da, K +34.06 Da                                                    | 33.3<br>38.5<br>55.2<br>17.6                 | 33.4<br>49.1<br>44.1<br>59.3                 | 3<br>3<br>3<br>4           | 1457.88<br>1566.86<br>2167.23<br>2434.60                       | -1.94<br>-1.89<br>2.38<br>0.26                    | 0.15<br>0.35<br>0.72<br>0.02                 | D2HDH_MOUSE<br>E9PYJ9_MOUSE<br>TLN1_MOUSE<br>GELS_MOUSE                              | E9QN44_MOUSE<br>F8WGT0_MOUSE<br>A6PW55_MOUSE                           | D-2-hydroxyglutarate dehydrogenase, mitochondrial;<br>Talin-1;<br>Gelsolin;                                                                         |                                                                                                                                                                | 0.00 - 0.15<br>0.00 - 0.15<br>0.85 - 1.00<br>0.25 - 0.75                |
| LNKNRHPNLF<br>RGENLVVME<br>LIATEEGFKA                                            | VVEKDTTINEIEDTR<br>VVETLQEVTLR<br>VVGDDYLFHHR                                                                         | N-ter +28.03 Da, K +28.03 Da<br>N-ter +28.03 Da<br>N-ter +28.03 Da                                                                                    | 33.7<br>39.6<br>39.0                         | 46.3<br>40.0<br>66.8                         | 3<br>3<br>4                | 1964.10<br>1442.86<br>1650.90                                  | 1.51<br>-0.25<br>0.42                             | 0.19<br>0.02<br>0.15                         | VATF_MOUSE<br>GSDMA_MOUSE<br>LEG7_MOUSE                                              | Q9CR81_MOUSE                                                           | V-type proton ATPase subunit F;<br>Gasdermin-A;<br>Galectin-7;                                                                                      |                                                                                                                                                                | 0.75 - 0.85<br>0.25 - 0.75<br>0.25 - 0.75                               |
| TRAERREVER<br>GESLQALFJA                                                         | VVDALSLKGDLAGR<br>VVVPDESPLSWAQR                                                                                      | N-ter +28.03 Da, K +28.03 Da<br>N-ter +28.03 Da, K +28.03 Da                                                                                          | 24.6<br>39.8                                 | 40.0<br>54.7                                 | 3<br>3                     | 1625.02<br>1865.14                                             | -0.17<br>2.24                                     | 0.02<br>0.21                                 | KCRU_MOUSE<br>ACSL1_MOUSE                                                            | A2ARP5_MOUSE<br>D3Z041_MOUSE                                           | Creatine kinase U-type, mitochondrial;<br>Long-chain-fatty-acid--CoA ligase 1;                                                                      | Acidic-type mitochondrial creatine kinase;Ubiquitous mitochondrial creatine kinase;                                                                            | 0.25 - 0.75<br>0.85 - 1.00                                              |
| FSLGLSLLL<br>GSVAGGAYVL                                                          | VVSVIGSQNSQLR<br>VVDQELLGPKDSEALR                                                                                     | N-ter +28.03 Da<br>N-ter +28.03 Da, K +28.03 Da                                                                                                       | 32.1<br>30.1                                 | 35.7<br>43.7                                 | 3<br>3                     | 1512.92<br>2046.15                                             | 1.78<br>1.16                                      | 0.18<br>0.32                                 | MMGL_MOUSE<br>QIL1_MOUSE                                                             | F8WHB7_MOUSE                                                           | Macrophage asialoglycoprotein-binding protein 1;<br>Protein QIL1;                                                                                   | MMGL;Macrophage galactose/N-acetylgalactosamine-specific lectin;                                                                                               | 0.85 - 1.00<br>0.75 - 0.85                                              |
| DAEKSAVSL<br>LLPQWPAASA<br>GEDKSNKAA                                             | WAKVNPDEVGGEALGR<br>WELTLHTNDVHSR<br>WKGIGGHGAEGAEALER                                                                | N-ter +28.03 Da, K +28.03 Da<br>N-ter +28.03 Da<br>N-ter +34.06 Da, K +34.06 Da                                                                       | 46.6<br>30.2<br>36.6                         | 55.5<br>65.9<br>53.3                         | 3<br>3<br>4                | 1753.01<br>1748.02<br>1968.15                                  | -2.32<br>-0.42<br>-0.43                           | 0.46<br>0.08<br>0.04                         | HBB2_MOUSE<br>SNTB_MOUSE<br>HBA_MOUSE                                                | Q91V88_MOUSE                                                           | Hemoglobin subunit beta-2;<br>5'-nucleotidase;<br>Hemoglobin subunit alpha;                                                                         | Beta-2-globin;Hemoglobin beta-2 chain;Hemoglobin beta-minor chain;<br>Ecto-5'-nucleotidase;<br>Alpha-globin;Hemoglobin alpha chain;                            | 0.00 - 0.15<br>0.25 - 0.75<br>0.25 - 0.75                               |
| DAEKAASVCL<br>LASLSTFQQM<br>LASLSTFQQM<br>LASLSTFQQM<br>TYRIWRDTAN               | WGKVNSEVVGGEALGR<br>WISKQYDEAGPSIVHR<br>WISKQYDESGPSIVHR<br>WITKQYDEAGPSIVHR<br>WLEINPETGAIFTR                        | N-ter +28.03 Da, K +28.03 Da<br>N-ter +28.03 Da, K +28.03 Da<br>N-ter +34.06 Da, K +34.06 Da<br>N-ter +34.06 Da, K +34.06 Da<br>N-ter +28.03 Da       | 35.9<br>24.9<br>31.9<br>35.5<br>41.2         | 49.4<br>65.9<br>52.7<br>56.3<br>49.4         | 3<br>4<br>4<br>4<br>3      | 1728.97<br>2070.19<br>2098.22<br>2096.25<br>1673.96            | 1.38<br>-1.43<br>0.20<br>-1.25<br>-0.40           | 0.35<br>0.23<br>0.05<br>0.18<br>0.07         | HBB1_MOUSE<br>ACTA_MOUSE<br>ACTB_MOUSE<br>ACTS_MOUSE<br>CAOH1_MOUSE                  | ACTC_MOUSE<br>ACTG_MOUSE                                               | Hemoglobin subunit beta-1;<br>Actin, aortic smooth muscle;<br>Actin, cytoplasmic 1;<br>Actin, alpha skeletal muscle;<br>Cadherin-1;                 | Beta-1-globin;Hemoglobin beta-1 chain;Hemoglobin beta-major chain;<br>Alpha-actin-2;<br>Beta-actin;<br>Alpha-actin-1;<br>ARC-1;Epithelial cadherin;Uvomorulin; | 0.75 - 0.85<br>0.15 - 0.25<br>0.25 - 0.75<br>0.15 - 0.25<br>0.25 - 0.75 |
| VRCAAQRDGT                                                                       | WLHSDKFTLKVR                                                                                                          | N-ter +28.03 Da, K +28.03 Da                                                                                                                          | 23.9                                         | 40.6                                         | 4                          | 1613.01                                                        | -0.76                                             | 0.05                                         | KIT_MOUSE                                                                            | Q8C8K9_MOUSE                                                           | Mast/stem cell growth factor receptor Kit;<br>Glycerol-3-phosphate dehydrogenase [NAD+], cytoplasmic;                                               | Proto-oncogene c-Kit;Tyrosine-protein kinase Kit;                                                                                                              | 0.25 - 0.75                                                             |
| LAHFDPRVTM<br>FQQMWISKQE<br>NSPLVSRILT<br>LREDPAYLHY<br>VNIIGGAGSYI<br>AASSSLEKS | VWFEEIDGGR<br>YDESGPSIVHR<br>YDIAHTPGVAADLSHIETR<br>YDPAGGEDPLGAVHLR<br>YEKPTQEAQVPTGPIEVPVVR<br>YELPDGQVITIGNER      | N-ter +28.03 Da<br>N-ter +28.03 Da<br>N-ter +28.03 Da<br>N-ter +34.06 Da<br>N-ter +28.03 Da, K +28.03 Da<br>N-ter +28.03 Da                           | 32.1<br>34.8<br>40.0<br>73.0<br>52.6<br>49.0 | 59.9<br>50.7<br>60.9<br>56.2<br>54.0<br>47.7 | 2<br>3<br>3<br>4<br>3<br>3 | 1234.67<br>1286.69<br>2093.18<br>1699.97<br>2392.43<br>1730.97 | -0.71<br>0.28<br>-1.60<br>0.52<br>1.44<br>0.51    | 0.08<br>0.05<br>0.34<br>0.11<br>0.50<br>0.10 | GPDA_MOUSE<br>ACTB_MOUSE<br>MDHM_MOUSE<br>PLEK_MOUSE<br>CRIP2_MOUSE<br>ACTB_MOUSE    | E0CXN5_MOUSE<br>ACTG_MOUSE<br>ACTG_MOUSE<br>Q8CAG6_MOUSE<br>ACTA_MOUSE | cytoplasmic;<br>Actin, cytoplasmic 1;<br>Malate dehydrogenase, mitochondrial;<br>Plectstrin;<br>Cysteine-rich protein 2;<br>Actin, cytoplasmic 1;   | Beta-actin;<br>0.25 - 0.75<br>0.00 - 0.15<br>0.25 - 0.75<br>0.75 - 0.85<br>0.25 - 0.75                                                                         |                                                                         |
| DWLKNVLVTL<br>PPLNPLSAN                                                          | YERDEGNLLTEKQKLR<br>YERPVHLVALNTPVAGDIR                                                                               | N-ter +28.03 Da, K +28.03 Da<br>N-ter +28.03 Da                                                                                                       | 33.9<br>40.4                                 | 58.7<br>63.5                                 | 4<br>4                     | 2189.31<br>2260.41                                             | -0.52<br>1.93                                     | 0.12<br>0.20                                 | SPRC_MOUSE<br>COFA1_MOUSE                                                            | Q5NCU4_MOUSE<br>A2AJY7_MOUSE                                           | SPARC;<br>Collagen alpha-1(XV) chain;                                                                                                               |                                                                                                                                                                | 0.25 - 0.75<br>0.85 - 1.00                                              |
| LGLAAADPAI                                                                       | YFKEQFLDGDWNTNR                                                                                                       | N-ter +28.03 Da, K +28.03 Da                                                                                                                          | 47.4                                         | 58.8                                         | 3                          | 1945.05                                                        | 4.00                                              | 1.82                                         | CALR_MOUSE                                                                           |                                                                        | Calreticulin;                                                                                                                                       | CRP55;Calregulin;Endoplasmic reticulum resident protein 60;HACBP;                                                                                              | 0.85 - 1.00                                                             |
| GKFLVSSGKF<br>PQQQQMTSS                                                          | YGDLEKDKLQTSQDAR<br>YGYKPEAAPVSIQR                                                                                    | N-ter +28.03 Da, K +28.03 Da<br>N-ter +28.03 Da, K +28.03 Da                                                                                          | 31.2<br>22.5                                 | 57.6<br>44.5                                 | 4<br>3                     | 2007.14<br>1690.98                                             | 3.28<br>0.58                                      | 0.95<br>0.12                                 | CALR_MOUSE<br>LASP1_MOUSE                                                            | A2A6H0_MOUSE                                                           | Calreticulin;<br>LIM and SH3 domain protein 1;                                                                                                      | CRP55;Calregulin;Endoplasmic reticulum resident protein 60;HACBP;<br>Metastatic lymph node gene 50 protein;                                                    | 0.85 - 1.00<br>0.25 - 0.75                                              |
| KLTLTELDF<br>LADQNKORY                                                           | YGIDNLLHYNR<br>YGINDPVADKLLKR                                                                                         | N-ter +28.03 Da<br>N-ter +28.03 Da, K +28.03 Da                                                                                                       | 38.3<br>26.9                                 | 53.3<br>61.2                                 | 3<br>4                     | 1519.82<br>1685.09                                             | -0.71<br>-0.14                                    | 0.14<br>0.02                                 | SFR1_MOUSE<br>RBM22_MOUSE                                                            |                                                                        | Swi5-dependent recombination DNA repair protein 1 homolog;<br>Pre-mRNA-splicing factor RBM22;                                                       | Meiosis lymph 5 homolog;<br>RNA-binding motif protein 22;                                                                                                      | 0.25 - 0.75<br>0.25 - 0.75                                              |

| Non Prime Site | Prime Site               | Modifications                             | Hyperscore | Mass error in ppm | Charge | Precursor neutral mass in Da | Fold change (log <sub>2</sub> ) of ASAPRatio | FC-error of ASAPRatio | Uniprot ID 1 | Uniprot ID 2 | Protein Name 1                                           | Protein Name 2                                                                                                                                       | Quantile    |
|----------------|--------------------------|-------------------------------------------|------------|-------------------|--------|------------------------------|----------------------------------------------|-----------------------|--------------|--------------|----------------------------------------------------------|------------------------------------------------------------------------------------------------------------------------------------------------------|-------------|
| LGGNFASQMS     | YGYDEKSAAGVSVPGPMGPGSGPR | N-ter +34.06 Da, K +34.06 Da              | 50.2       | 42.8              | 3      | 2275.26                      | -3.32                                        | 1.00                  | CO1A1_MOUSE  | F8WGB7_MOUSE | Collagen alpha-1(I) chain;                               | Alpha-1 type I collagen;                                                                                                                             | 0.00 - 0.15 |
| GTQCEKIVQK     | YGYTHLSTGDLR             | N-ter +34.06 Da                           | 38.1       | 49.4              | 3      | 1528.89                      | 1.64                                         | 0.36                  | KAD1_MOUSE   |              | Adenylyate kinase isoenzyme 1;                           | ATP-AMP transphosphorylase 1;Myokinase;                                                                                                              | 0.75 - 0.85 |
| KAIMTVSSVF     | YHAFSGAQAETAANR          | N-ter +28.03 Da, K +28.03 Da              | 51.1       | 56.5              | 4      | 1776.99                      | 1.66                                         | 0.42                  | ACTN1_MOUSE  | ACTN4_MOUSE  | Alpha-actinin-1;                                         | Alpha-actinin cytoskeletal isoform;F-actin cross-linking protein;Non-muscle alpha-actinin-1;                                                         | 0.85 - 1.00 |
| DIDRVPFNS      | YIDGVTMEEATVSGILGKR      | N-ter +28.03 Da, K +28.03 Da              | 44.1       | 47.7              | 3      | 2094.20                      | 0.33                                         | 0.09                  | ZCCHV_MOUSE  | D3ZS1_MOUSE  | Zinc finger CCCH-type antiviral protein 1;               |                                                                                                                                                      | 0.25 - 0.75 |
| TPDKPSPNMF     | YIDPEKGDIVTVSPALLDR      | N-ter +28.03 Da, K +28.03 Da              | 37.7       | 54.2              | 3      | 2255.36                      | 1.53                                         | 0.63                  | CAD13_MOUSE  |              | Cadherin-13;                                             | Heart cadherin;Truncated cadherin;                                                                                                                   | 0.75 - 0.85 |
| HGSNGRSKTD     | YKGLEEEGEGNKQLNR         | N-ter +28.03 Da, K +28.03 Da              | 27.0       | 59.3              | 4      | 2076.17                      | 1.23                                         | 0.22                  | E9Q019_MOUSE |              |                                                          |                                                                                                                                                      | 0.75 - 0.85 |
| QEINRVKEM      | YKTDLKDIISDTSDFDR        | N-ter +28.03 Da, K +28.03 Da              | 45.7       | 60.5              | 4      | 2186.24                      | 0.43                                         | 0.05                  | ANXA2_MOUSE  | BOV2N7_MOUSE | Annexin A2;                                              | Annexin II;Annexin-2;Calpactin I heavy chain;Calpactin-1 heavy chain;Chromobindin-8;Lipoprotein II;Placental anticoagulant protein IV;Protein I;p36; | 0.25 - 0.75 |
| AGLPTSLTL      | YLDNKNKISINPDEYFKR       | N-ter +34.06 Da, K +34.06 Da              | 35.5       | 62.7              | 4      | 2230.39                      | -2.40                                        | 0.88                  | LUM_MOUSE    |              | Lumican;                                                 | Keratan sulfate proteoglycan lumican;                                                                                                                | 0.00 - 0.15 |
| KYQLVAGIKY     | YLTLDIESTECR             | N-ter +28.03 Da, C +57.02 Da              | 29.1       | 51.6              | 3      | 1526.81                      | -0.56                                        | 0.05                  | Q901B1_MOUSE |              |                                                          |                                                                                                                                                      | 0.25 - 0.75 |
| LGKLPALFL      | YMEKNQLEEVPSALPR         | N-ter +34.06 Da, K +34.06 Da              | 45.4       | 45.7              | 3      | 1971.17                      | 2.07                                         | 0.27                  | PRELP_MOUSE  |              | Prolargin;                                               | Proline-arginine-rich end leucine-rich repeat protein;                                                                                               | 0.85 - 1.00 |
| ETIKKRELY      | YNATEPVISFYDKR           | N-ter +34.06 Da, K +34.06 Da              | 41.0       | 38.8              | 3      | 1770.03                      | -0.86                                        | 0.19                  | KAD1_MOUSE   |              | Adenylyate kinase isoenzyme 1;                           | ATP-AMP transphosphorylase 1;Myokinase;                                                                                                              | 0.15 - 0.25 |
| VGASDGYLYM     | YNLDPQEGEGCALMR          | N-ter +28.03 Da, C +57.02 Da              | 36.5       | 73.3              | 3      | 1779.92                      | -0.03                                        | 0.01                  | WIPI2_MOUSE  | D3YWK1_MOUSE | WD repeat domain phosphoinositide-interacting protein 2; |                                                                                                                                                      | 0.25 - 0.75 |
| STSSPVFHPK     | YQACSGPLPHR              | N-ter +28.03 Da, C +57.02 Da              | 35.2       | 50.2              | 3      | 1425.79                      | 0.48                                         | 0.04                  | Q99M20_MOUSE |              |                                                          |                                                                                                                                                      | 0.25 - 0.75 |
| GRKSGKGYI      | YQEGSKNKSLENSEMDNILANLR  | N-ter +28.03 Da, K +28.03 Da              | 26.8       | 77.6              | 4      | 2607.54                      | 1.94                                         | 0.32                  | ECHA_MOUSE   |              | Trifunctional enzyme subunit alpha, mitochondrial;       | TP-alpha;                                                                                                                                            | 0.85 - 1.00 |
| DKAKELWDTL     | YQLETDKFEFGEKLR          | N-ter +34.06 Da, K +34.06 Da              | 23.0       | 63.1              | 4      | 2166.44                      | -2.94                                        | 0.45                  | TNNT3_MOUSE  | A2A6J0_MOUSE | Troponin T, fast skeletal muscle;                        | Troponin T;                                                                                                                                          | 0.00 - 0.15 |
| RLMEIYQEL      | YRPPVLDALGR              | N-ter +28.03 Da                           | 36.0       | 51.8              | 3      | 1380.86                      | 1.03                                         | 0.13                  | E9Q005_MOUSE | E9PVA8_MOUSE |                                                          |                                                                                                                                                      | 0.75 - 0.85 |
| PGLTGNFAAQ     | YSDKGVSSGPGMGLMGR        | N-ter +28.03 Da, K +28.03 Da              | 69.9       | 43.5              | 3      | 1948.04                      | -2.40                                        | 0.50                  | CO1A2_MOUSE  | E0CXI2_MOUSE | Collagen alpha-2(I) chain;                               | Alpha-2 type I collagen;                                                                                                                             | 0.00 - 0.15 |
| VQVEEYIDL      | YSEEPGEEPAWVQTER         | N-ter +28.03 Da                           | 51.0       | 49.1              | 3      | 2063.01                      | 0.32                                         | 0.05                  | RCN3_MOUSE   | D3ZT1_MOUSE  | Reticulocalbin-3;                                        |                                                                                                                                                      | 0.25 - 0.75 |
| SPRRSQVHPE     | YSEGEAHSEVSQR            | N-ter +28.03 Da                           | 18.8       | 46.9              | 3      | 1505.75                      | -0.14                                        | 0.05                  | FILA2_MOUSE  | E9QPZ3_MOUSE | Filaggrin-2;                                             | Intermediate filament-associated protein;                                                                                                            | 0.25 - 0.75 |
| AAMKANTMSN     | YSLLPASLLDHR             | N-ter +28.03 Da                           | 55.8       | 50.5              | 3      | 1411.85                      | 2.80                                         | 0.79                  | STZB1_MOUSE  | E9QK1_MOUSE  | Sulfotransferase family cytosolic 2B member 1;           | Alcohol sulfotransferase;Hydroxysteroid sulfotransferase 2;                                                                                          | 0.85 - 1.00 |
| FIHHLLAYL      | YSSADQSSLMEEAEQAQR       | N-ter +28.03 Da                           | 61.6       | 54.2              | 3      | 2144.05                      | 1.38                                         | 0.34                  | DYN2_MOUSE   | Q91Z39_MOUSE | Dynamin-2;                                               | Dynamin UDNM;                                                                                                                                        | 0.75 - 0.85 |
| CTFFLAVSGL     | YSSDDVIELTPSNFNR         | N-ter +28.03 Da                           | 50.2       | 48.6              | 3      | 1971.02                      | 1.43                                         | 0.21                  | PDIAG_MOUSE  | Q3TML0_MOUSE | Protein disulfide-isomerase A6;                          | Thioredoxin domain-containing protein 7;                                                                                                             | 0.75 - 0.85 |
| SYMKIDELSL     | YSVPEGQSKYVEEPR          | N-ter +28.03 Da, K +28.03 Da              | 24.7       | 41.7              | 3      | 1822.99                      | -0.01                                        | 0.00                  | APOO_MOUSE   | B1ASQ2_MOUSE | Apolipoprotein O;                                        | Protein FAM121B;                                                                                                                                     | 0.25 - 0.75 |
| YGFQNALVR      | YTQKAPQVSTPTLVEAAR       | N-ter +28.03 Da, K +28.03 Da              | 66.2       | 43.0              | 3      | 2015.19                      | 3.52                                         | 0.54                  | ALBU_MOUSE   |              | Serum albumin;                                           |                                                                                                                                                      | 0.85 - 1.00 |
| QKIGQPTLL      | YVDAGAETMTQR             | N-ter +34.06 Da                           | 42.4       | 52.3              | 3      | 1374.74                      | 1.56                                         | 0.40                  | KAD1_MOUSE   |              | Adenylyate kinase isoenzyme 1;                           | ATP-AMP transphosphorylase 1;Myokinase;                                                                                                              | 0.75 - 0.85 |
| MYAKRAFVHW     | YVGEEMEEGFSEAR           | N-ter +28.03 Da                           | 44.6       | 50.2              | 3      | 1716.82                      | 5.27                                         | 1.31                  | TBA1A_MOUSE  | TBA1B_MOUSE  | Tubulin alpha-1A chain;                                  | Alpha-tubulin 1;Alpha-tubulin isotype M-alpha-1;Tubulin alpha-1 chain;                                                                               | 0.85 - 1.00 |
| LGGADSGAA      | YVLEQASSHIGNSTQAAVR      | N-ter +28.03 Da                           | 48.8       | 39.8              | 3      | 2058.13                      | 1.36                                         | 0.27                  | ATLA3_MOUSE  | E9PYT3_MOUSE | Atlastin-3;                                              |                                                                                                                                                      | 0.75 - 0.85 |
| HPFMWNEHLG     | YVLTCPNSLGTGLR           | N-ter +34.06 Da, C +57.02 Da              | 31.0       | 43.6              | 3      | 1583.92                      | -2.56                                        | 0.15                  | KCRM_MOUSE   |              | Creatine kinase M-type;                                  | Creatine kinase M chain;M-CK;                                                                                                                        | 0.00 - 0.15 |
| AFRPMEVANF     | YYEPDCLAYGAKAAR          | N-ter +28.03 Da, K +28.03 Da, C +57.02 Da | 39.9       | 59.1              | 3      | 1802.97                      | -0.64                                        | 0.09                  | CEBPB_MOUSE  |              | CCAAT/enhancer-binding protein beta;                     | AGP/EBP;Interleukin-6-dependent-binding protein;Liver-enriched transcriptional activator;                                                            | 0.25 - 0.75 |
| LQKRPKPDEK     | YYSSIIWGPTCDGLDR         | N-ter +34.06 Da, C +57.02 Da              | 25.7       | 101.6             | 4      | 1910.07                      | -6.64                                        | 0.00                  | DCOR_MOUSE   | Q8CIC5_MOUSE | Ornithine decarboxylase;                                 |                                                                                                                                                      | 0.00 - 0.15 |
