# Supplementary material
Source: PubMed Central journal article supplement (PMC3591655)
Supplement: supp_M112.017962_mcp.M112.017962-13.pdf [file supp_M112.017962_mcp.M112.017962-13.pdf]

**Table S11:** Dimethylated (naturally unmodified) N-termini identified in the TAILS experiment comparing wild-type and *Ctsf*<sup>-/-</sup> skin (replicate 2). This is a comprehensive, non redundant listing. Up to two potential protein IDs per peptide are stated.

| Non Prime Site                                                                                | Prime Site                                                                                                                                     | Modifications                                                                                                                                                      | Hyperscore                                           | Mass error<br>in ppm                                 | Charge                          | Precursor<br>neutral mass<br>in Da                                        | Fold change<br>(log <sub>2</sub> ) of<br>ASAPRatio            | FC-error of<br>ASAPRatio                                    | Uniprot ID 1                                                                                           | Uniprot ID 2                 | Protein Name 1                                                                                                                                                                | Protein Name 2                                                                                                                                                                                                                                              | Quantile                                                                                              |
|-----------------------------------------------------------------------------------------------|------------------------------------------------------------------------------------------------------------------------------------------------|--------------------------------------------------------------------------------------------------------------------------------------------------------------------|------------------------------------------------------|------------------------------------------------------|---------------------------------|---------------------------------------------------------------------------|---------------------------------------------------------------|-------------------------------------------------------------|--------------------------------------------------------------------------------------------------------|------------------------------|-------------------------------------------------------------------------------------------------------------------------------------------------------------------------------|-------------------------------------------------------------------------------------------------------------------------------------------------------------------------------------------------------------------------------------------------------------|-------------------------------------------------------------------------------------------------------|
| NNTLHLDVYM<br>KKTVVEEKR                                                                       | AAANLFAQTYGLTGSQDR<br>AAEELKSLVAPQR                                                                                                            | N-ter +28.03 Da<br>N-ter +34.06 Da, K +34.06 Da                                                                                                                    | 49.1<br>28.9                                         | 43.7<br>45.9                                         | 3<br>3                          | 1911.03<br>1464.96                                                        | 1.561<br>-1.515                                               | 0.148<br>0.216                                              | UBA1_MOUSE<br>TITIN_MOUSE                                                                              | E9Q8K5_MOUSE                 | Ubiquitin-like modifier-activating enzyme 1;<br>Titin;                                                                                                                        | Ubiquitin-activating enzyme E1; Ubiquitin-activating enzyme E1 X; Ubiquitin-like modifier-activating enzyme 1 X;<br>Connectin;<br>Procollagen I N-proteinase; Procollagen I/II amino propeptide-processing enzyme; Procollagen N-endopeptidase;             | 0.75 - 0.85<br>0.15 - 0.25                                                                            |
| TAGAGVRARR<br>MRVYASYLL<br>NAVGPVPTAN                                                         | AALDQTSGLPGGAQAQDPGGR<br>AALGGNSSPSAKDIKKILDVSGIEADDDR<br>AALPADPPASVVGPPVVPR                                                                  | N-ter +34.06 Da<br>N-ter +28.03 Da, K +28.03 Da<br>N-ter +28.03 Da                                                                                                 | 39.5<br>31.5<br>74.2                                 | 45.4<br>81.8<br>44.5                                 | 3<br>3<br>3                     | 1872.04<br>3053.87<br>1938.22                                             | -0.916<br>-3.322<br>-0.761                                    | 0.121<br>0.997<br>0.155                                     | ATS2_MOUSE<br>RLA2_MOUSE<br>FETUA_MOUSE                                                                |                              | A disintegrin and metalloproteinase with thrombospondin motifs 2;<br>60S acidic ribosomal protein P2;<br>Alpha-2-HS-glycoprotein;                                             | Countertryppin; Fetuin-A;<br>Ubiquitin-activating enzyme E1; Ubiquitin-activating enzyme E1 X; Ubiquitin-like modifier-activating enzyme 1 X;<br>Endomembrane proton pump 58 kDa subunit; Vacuolar proton pump subunit B 2;<br>Neurite outgrowth inhibitor; | 0.25 - 0.75<br>0.00 - 0.15<br>0.25 - 0.75                                                             |
| NTLHLDVYMA                                                                                    | AANLFAQTYGLTGSQDR                                                                                                                              | N-ter +28.03 Da                                                                                                                                                    | 30.2                                                 | 47.3                                                 | 3                               | 1840.00                                                                   | -0.737                                                        | 0.074                                                       | UBA1_MOUSE                                                                                             |                              | Ubiquitin-like modifier-activating enzyme 1;                                                                                                                                  | Ubiquitin-like modifier-activating enzyme 1 X;<br>Endomembrane proton pump 58 kDa subunit; Vacuolar proton pump subunit B 2;<br>Neurite outgrowth inhibitor;                                                                                                | 0.25 - 0.75                                                                                           |
| LRAMRGINVNG<br>LERKPAAGLS<br>ASASTSQSSR<br>QTQDPLYGYF<br>TDPRVQKAAQ<br>QRKTDWSSL<br>LTARDEARR | AAPELVPVTGGPMAGAR<br>AAPVPPAAAPLLDSSSDVPPAPR<br>AASIFGGAKPVDTAAR<br>AAVAGQDQIDADELQR<br>AAVASYNMGSGLSYFRR<br>AAVETPVPSDLQAQR<br>AAVQQLQAEGLSPR | N-ter +28.03 Da<br>N-ter +28.03 Da<br>N-ter +34.06 Da, K +34.06 Da<br>N-ter +28.03 Da<br>N-ter +28.03 Da<br>N-ter +28.03 Da<br>N-ter +28.03 Da                     | 39.9<br>41.6<br>34.9<br>55.9<br>46.6<br>29.6<br>41.5 | 48.1<br>49.6<br>60.4<br>45.2<br>64.5<br>16.6<br>38.5 | 3<br>4<br>3<br>3<br>3<br>3<br>3 | 1618.93<br>2370.38<br>1599.04<br>1783.95<br>1942.02<br>1608.87<br>1494.87 | 0.124<br>0.214<br>3.005<br>-0.667<br>2.043<br>-1.059<br>0.556 | 0.023<br>0.059<br>0.842<br>0.064<br>0.248<br>0.243<br>0.038 | VATB2_MOUSE<br>RTN4_MOUSE<br>IF48_MOUSE<br>SORCN_MOUSE<br>Q9D1B1_MOUSE<br>Q6NZR5_MOUSE<br>Q8K354_MOUSE |                              | V-type proton ATPase subunit B, brain isoform;<br>Reticulon-4;<br>Eukaryotic translation initiation factor 4B;<br>Sorcin;                                                     | Beta-1-globin; Hemoglobin beta-1 chain; Hemoglobin beta-major chain;                                                                                                                                                                                        | 0.25 - 0.75<br>0.25 - 0.75<br>0.85 - 1.00<br>0.25 - 0.75<br>0.85 - 1.00<br>0.15 - 0.25<br>0.25 - 0.75 |
| MVHLTDAEK<br>LWLLPSLALA                                                                       | AAVSCLWGWKVNSEVVGGEALGR<br>AAVTEPADLEYTEVPR                                                                                                    | N-ter +28.03 Da, K +28.03 Da, C +57.02 Da<br>N-ter +28.03 Da                                                                                                       | 54.0<br>58.8                                         | 63.5<br>51.6                                         | 4<br>3                          | 2330.32<br>1787.99                                                        | 0.941<br>1.86                                                 | 0.167<br>0.497                                              | HBB1_MOUSE<br>Q8BVL6_MOUSE                                                                             |                              | Hemoglobin subunit beta-1;                                                                                                                                                    | Beta-1-globin; Hemoglobin beta-1 chain; Hemoglobin beta-major chain;                                                                                                                                                                                        | 0.25 - 0.75<br>0.85 - 1.00                                                                            |
| SVTRESGQY<br>IQNLHSDPF<br>LCVFSVQTQA<br>LLSQVLLVTS<br>SKEWGFTKFN<br>PKKSMKMTMY                | AAISNAVGAAYSSAR<br>ADASKGDLLPAGTEDYIHIR<br>ADDYDEPTDLDAR<br>ADDDLECTGFQFR<br>ADEFEDMVAEKR<br>ADEVESQKLSIR                                      | N-ter +34.06 Da<br>N-ter +28.03 Da, K +28.03 Da<br>N-ter +28.03 Da<br>N-ter +34.06 Da, C +57.02 Da<br>N-ter +34.06 Da, K +34.06 Da<br>N-ter +34.06 Da, K +34.06 Da | 37.9<br>64.9<br>37.2<br>25.6<br>20.1<br>21.8         | 62.4<br>75.3<br>79.3<br>54.7<br>84.0<br>59.7         | 3<br>3<br>3<br>3<br>3<br>3      | 1604.94<br>2312.34<br>1724.84<br>1441.75<br>1506.89<br>1441.93            | -3.837<br>0.864<br>-0.943<br>0.926<br>-1.837<br>2.104         | 0.548<br>0.161<br>0.181<br>0.175<br>0.328<br>0.142          | OBSCN_MOUSE<br>EIF1_MOUSE<br>RIBB_MOUSE<br>CAD13_MOUSE<br>RLI1_MOUSE<br>CQO85_MOUSE                    | E9Q96_MOUSE                  | Obscurin;<br>Eukaryotic translation initiation factor 1;<br>Fibrinogen beta chain;<br>Cadherin-13;<br>60S ribosomal protein L10;<br>Uncharacterized protein C17orf85 homolog; | Obscurin-RhoGEF; Obscurin-myosin light chain kinase;<br>Protein translation factor SUI1 homolog;<br>Fibrinogen beta chain;<br>Heart cadherin; Truncated cadherin;<br>Protein QM homolog;                                                                    | 0.00 - 0.15<br>0.25 - 0.75<br>0.15 - 0.25<br>0.25 - 0.75<br>0.00 - 0.15<br>0.85 - 1.00                |
| AGDEESEYEVF                                                                                   | ADLFDPVIKLR                                                                                                                                    | N-ter +34.06 Da, K +34.06 Da                                                                                                                                       | 30.9                                                 | 50.0                                                 | 3                               | 1353.93                                                                   | -3.837                                                        | 0.548                                                       | KCRS_MOUSE                                                                                             |                              | Creatine kinase S-type, mitochondrial;                                                                                                                                        | Basic-type mitochondrial creatine kinase; Sarcomeric mitochondrial creatine kinase;                                                                                                                                                                         | 0.00 - 0.15                                                                                           |
| IWTTRHPVQG                                                                                    | ADLVQDLISICTR                                                                                                                                  | N-ter +34.06 Da, C +57.02 Da                                                                                                                                       | 41.4                                                 | 48.6                                                 | 3                               | 1510.86                                                                   | 0.014                                                         | 0.002                                                       | LYVE1_MOUSE                                                                                            |                              | Lymphatic vessel endothelial hyaluronan receptor 1;                                                                                                                           | Cell surface retention sequence-binding protein 1; Extracellular link domain-containing protein 1;                                                                                                                                                          | 0.25 - 0.75                                                                                           |
| RFDYPQGDFP<br>IQTQLQHAAM                                                                      | ADMGPPHHHPGHR<br>ADTFLEHMCRR                                                                                                                   | N-ter +34.06 Da<br>N-ter +28.03 Da, C +57.02 Da                                                                                                                    | 22.3<br>21.9                                         | 65.4<br>58.2                                         | 3<br>3                          | 1478.81<br>1306.66                                                        | -6.644<br>0.791                                               | 0.001<br>0.128                                              | CHERP_MOUSE<br>KPYM_MOUSE                                                                              |                              | Calcium homeostasis endoplasmic reticulum protein;<br>Pyruvate kinase isozymes M1/M2;                                                                                         | SR-related CTD-associated factor 6;<br>Pyruvate kinase muscle isozyme;<br>Mesoderm development candidate 2; Mesoderm development protein;                                                                                                                   | 0.00 - 0.15<br>0.25 - 0.75<br>0.25 - 0.75                                                             |
| LLLPPNAY<br>TLGISPFHEF<br>VREKEAQPLE                                                          | ADTPGEATPPPR<br>ADVVFANDSGHR<br>EAEPGVDLGILPEGR                                                                                                | N-ter +28.03 Da<br>N-ter +28.03 Da<br>N-ter +28.03 Da                                                                                                              | 24.5<br>45.3<br>39.7                                 | 53.0<br>64.2<br>44.2                                 | 3<br>3<br>3                     | 1235.68<br>1415.77<br>1520.89                                             | 0.07<br>-0.737<br>0.111                                       | 0.008<br>0.074<br>0.022                                     | MESD_MOUSE<br>TTHY_MOUSE<br>NIBAN_MOUSE                                                                | D3YVR4_MOUSE                 | LDL chaperone MESD;<br>Transthyretin;<br>Protein Niban;                                                                                                                       | Prealbumin;<br>Protein FAM129A;<br>Transplantation antigen P198; Tum-P198 antigen;                                                                                                                                                                          | 0.25 - 0.75<br>0.25 - 0.75<br>0.25 - 0.75                                                             |
| M<br>RNRESRIRRD                                                                               | AEGQVLLVDR<br>AEKELCKEFENQVR                                                                                                                   | N-ter +28.03 Da<br>N-ter +28.03 Da, K +28.03 Da, C +57.02 Da                                                                                                       | 46.8<br>20.6                                         | 19.1<br>76.1                                         | 2<br>4                          | 1183.68<br>1863.10                                                        | -0.322<br>0.566                                               | 0.032<br>0.096                                              | RL13A_MOUSE<br>Q148R4_MOUSE                                                                            | Q3TDS9_MOUSE                 | 60S ribosomal protein L13a;                                                                                                                                                   | Transplantation antigen P198; Tum-P198 antigen;                                                                                                                                                                                                             | 0.25 - 0.75<br>0.25 - 0.75                                                                            |
| AGDEEYEVF<br>SLQLVSWTALA                                                                      | AELFDVPIQER<br>AEPVDVLEAWGVHR                                                                                                                  | N-ter +34.06 Da<br>N-ter +28.03 Da<br>N-ter +28.03 Da, K +28.03 Da, C +57.02 Da                                                                                    | 30.1<br>68.5<br>33.3                                 | 50.9<br>66.2<br>54.8                                 | 3<br>3<br>3                     | 1349.81<br>1604.94<br>1482.90                                             | 8.239<br>-0.269<br>-1.474                                     | 0.374<br>0.023<br>0.164                                     | KCRU_MOUSE<br>Q9JLJ2_MOUSE<br>TNPO1_MOUSE                                                              | B0R0F0_MOUSE                 | Creatine kinase U-type, mitochondrial;                                                                                                                                        | Acidic-type mitochondrial creatine kinase; Ubiquitous mitochondrial creatine kinase;                                                                                                                                                                        | 0.85 - 1.00<br>0.25 - 0.75                                                                            |
| LEACEFWLTL                                                                                    | AEQPICKDVLVR                                                                                                                                   | N-ter +28.03 Da, K +28.03 Da, C +57.02 Da                                                                                                                          | 33.3                                                 | 54.8                                                 | 3                               | 1482.90                                                                   | -1.474                                                        | 0.164                                                       | TNPO1_MOUSE                                                                                            |                              | Transportin-1;                                                                                                                                                                | Importin beta-2; Karyopherin beta-2;<br>Protein phosphatase 1 myosin-binding subunit of 85 kDa;                                                                                                                                                             | 0.15 - 0.25<br>0.25 - 0.75<br>0.25 - 0.75                                                             |
| ERATQRQERF<br>HHAFGQGRDM<br>ARSKPSPQLS                                                        | AERPALLELER<br>AETFQGAHHAFAQGQGR<br>AETPVAALEPFR                                                                                               | N-ter +34.06 Da<br>N-ter +34.06 Da<br>N-ter +34.06 Da                                                                                                              | 31.9<br>34.4<br>22.1                                 | 61.4<br>72.2<br>50.6                                 | 3<br>4<br>3                     | 1329.86<br>1818.99<br>1430.87                                             | -1.218<br>-0.837<br>-0.474                                    | 0.057<br>0.209<br>0.066                                     | PP12C_MOUSE<br>SBSN_MOUSE<br>E9Q056_MOUSE                                                              | F6XWD4_MOUSE<br>E9QP82_MOUSE | Protein phosphatase 1 regulatory subunit 12C;<br>Suprabasin;                                                                                                                  | Protein phosphatase 1 myosin-binding subunit of 85 kDa;                                                                                                                                                                                                     | 0.15 - 0.25<br>0.25 - 0.75<br>0.25 - 0.75                                                             |
| GVKVLAFSL<br>GLDNVHKQRV<br>ISLEVSRGR<br>PKHLSRKTIV                                            | AEVQVAGVGPQQR<br>AEVLNDPESMEKR<br>AEVSTHLSQSGR<br>AFPOKVMPPQAR                                                                                 | N-ter +28.03 Da<br>N-ter +34.06 Da, K +34.06 Da<br>N-ter +34.06 Da<br>N-ter +28.03 Da, K +28.03 Da                                                                 | 37.6<br>36.5<br>35.1<br>36.0                         | 36.7<br>57.4<br>64.2<br>45.0                         | 3<br>3<br>3<br>3                | 1292.73<br>1584.94<br>1427.89<br>1521.92                                  | 1.014<br>-1.218<br>-0.184<br>0.993                            | 0.05<br>0.142<br>0.015<br>0.04                              | CAND2_MOUSE<br>KLC1_MOUSE<br>SYNEM_MOUSE<br>Q3U422_MOUSE                                               | Q5UE9_MOUSE<br>F6VN34_MOUSE  | Cullin-associated NEDD8-dissociated protein 2;<br>Kinesin light chain 1;<br>Synemin;                                                                                          | Cullin-associated and neddylation-dissociated protein 2; TBP-interacting protein of 120 kDa<br>Bp120 CAND2;<br>Desmuslin;                                                                                                                                   | 0.25 - 0.75<br>0.15 - 0.25<br>0.25 - 0.75<br>0.25 - 0.75                                              |
| TGASTSSHCK<br>DFRHTMHVGR<br>RTFGTGGRR<br>DKVIRPGVQSQ<br>VCDNGSGLCK                            | AGAVTSSASLSPALAKGTQR<br>AGDAFGDTSFLTSKAR<br>AGEEAADSPERP<br>AGEEMEQFGQVPR<br>AGFAGDDAPR                                                        | N-ter +28.03 Da, K +28.03 Da<br>N-ter +28.03 Da, K +28.03 Da<br>N-ter +28.03 Da<br>N-ter +28.03 Da<br>N-ter +34.06 Da                                              | 55.0<br>45.6<br>56.7<br>27.5<br>43.1                 | 54.3<br>59.6<br>35.0<br>54.0<br>35.5                 | 3<br>3<br>2<br>3<br>2           | 2015.21<br>1698.96<br>1368.70<br>1464.75<br>1009.54                       | 3.695<br>1.007<br>-0.184<br>1.57<br>0.111                     | 0.79<br>0.11<br>0.013<br>0.095<br>0.013                     | TCOF_MOUSE<br>BORG4_MOUSE<br>ADXL_MOUSE<br>SBSN_MOUSE<br>ACTA_MOUSE                                    | Q05C0_MOUSE<br>A2A6Q2_MOUSE  | Treacle protein;<br>Cdc42 effector protein 4;<br>Adrenodoxin-like protein, mitochondrial;<br>Suprabasin;                                                                      | Treacher Collins syndrome protein homolog;<br>Binder of rho GTPases 4;<br>Ferrodoxin-1-like protein;                                                                                                                                                        | 0.85 - 1.00<br>0.25 - 0.75<br>0.25 - 0.75<br>0.75 - 0.85<br>0.25 - 0.75                               |

| Non Prime Site | Prime Site                   | Modifications                | Hyperscore | Mass error in ppm | Charge | Precursor neutral mass in Da | Fold change (log <sub>2</sub> ) of ASAPRatio | FC-error of ASAPRatio | Uniprot ID 1 | Uniprot ID 2 | Protein Name 1                                                      | Protein Name 2                                                                                                                                                                                                                                                                              | Quantile    |
|----------------|------------------------------|------------------------------|------------|-------------------|--------|------------------------------|----------------------------------------------|-----------------------|--------------|--------------|---------------------------------------------------------------------|---------------------------------------------------------------------------------------------------------------------------------------------------------------------------------------------------------------------------------------------------------------------------------------------|-------------|
| M              | AGGEAGVTLGQPHLSR             | N-ter +28.03 Da              | 43.3       | 29.6              | 3      | 1576.88                      | -0.396                                       | 0.052                 | IF2H_MOUSE   |              | Eukaryotic translation initiation factor 2 subunit 3, Y-linked;     | Eukaryotic translation initiation factor 2 subunit gamma, Y-linked;                                                                                                                                                                                                                         | 0.25 - 0.75 |
| GKLFGAGGGK     | AGKGGPTPQEAIDR               | N-ter +28.03 Da, K +28.03 Da | 27.2       | 43.1              | 3      | 1464.87                      | 0.782                                        | 0.136                 | CHM48_MOUSE  |              | Charged multivesicular body protein 4b;                             | Chromatin-modifying protein 4b;                                                                                                                                                                                                                                                             | 0.25 - 0.75 |
| YSGLQGLPGL     | AGLHGDQAGPVPGPAGPR           | N-ter +34.06 Da              | 41.7       | 63.4              | 3      | 1744.03                      | -2.252                                       | 0.214                 | CO1A2_MOUSE  | E9Q6U9_MOUSE | Collagen alpha-2(I) chain;                                          | Alpha-2 type I collagen;                                                                                                                                                                                                                                                                    | 0.00 - 0.15 |
| RGSSSANRR      | AGSSSGSQVQASAGGLAADASR       | N-ter +34.06 Da              | 74.9       | 37.5              | 3      | 1954.03                      | 0.651                                        | 0.381                 | FILA_MOUSE   | F7BVV1_MOUSE | Filaggrin;                                                          |                                                                                                                                                                                                                                                                                             | 0.25 - 0.75 |
| QADCAVLIVA     | AGVGEFEAGISKNGQTR            | N-ter +34.06 Da, K +34.06 Da | 34.7       | 54.7              | 3      | 1788.08                      | -1.218                                       | 0.113                 | EF1A1_MOUSE  | EF1A2_MOUSE  | Elongation factor 1-alpha 1;                                        | Elongation factor Tu;Eukaryotic elongation factor 1 A-1;                                                                                                                                                                                                                                    | 0.15 - 0.25 |
| HLDKLGTVF      | AGVLDKKEGPAEELR              | N-ter +28.03 Da, K +28.03 Da | 26.9       | 53.6              | 3      | 1595.94                      | 1.444                                        | 0.191                 | DHB2_MOUSE   |              | Estradiol 17-beta-dehydrogenase 2;                                  | 17-beta-hydroxysteroid dehydrogenase type 2;Testosterone 17-beta-dehydrogenase;                                                                                                                                                                                                             | 0.75 - 0.85 |
| GARGAQVRGN     | AGVSDGSEVAKAQAAPGGASPTIFSR   | N-ter +28.03 Da, K +28.03 Da | 25.9       | 75.6              | 4      | 2642.60                      | 0.333                                        | 0.082                 | HINT2_MOUSE  |              | Histidine triad nucleotide-binding protein 2, mitochondrial;        | HINT-3;                                                                                                                                                                                                                                                                                     | 0.25 - 0.75 |
| VLLGLTPARA     | AHEDPVEKVIIEGFSR             | N-ter +28.03 Da, K +28.03 Da | 37.3       | 85.2              | 4      | 1768.07                      | 0.918                                        | 0.024                 | SBSN_MOUSE   | E9QP82_MOUSE | Suprabasin;                                                         |                                                                                                                                                                                                                                                                                             | 0.25 - 0.75 |
| RAISTSVCLR     | AHGSVVKSEDIYAFPTYADRR        | N-ter +28.03 Da, K +28.03 Da | 20.4       | 71.5              | 4      | 2324.32                      | -0.761                                       | 0.103                 | COX41_MOUSE  |              | Cytochrome c oxidase subunit 4 isoform 1, mitochondrial;            | Cytochrome c oxidase polypeptide IV;Cytochrome c oxidase subunit IV isoform 1;                                                                                                                                                                                                              | 0.25 - 0.75 |
| RAISTSVCLR     | AHGSVVKSEDIYAFPTYADR         | N-ter +28.03 Da, K +28.03 Da | 24.8       | 55.5              | 4      | 2168.17                      | 0.029                                        | 0.006                 | COX41_MOUSE  |              | Cytochrome c oxidase subunit 4 isoform 1, mitochondrial;            | Cytochrome c oxidase polypeptide IV;Cytochrome c oxidase subunit IV isoform 1;                                                                                                                                                                                                              | 0.25 - 0.75 |
| SELLHSITLL     | AHLTGDITIQGSATSLR            | N-ter +28.03 Da              | 49.9       | 62.6              | 3      | 1768.06                      | 0.731                                        | 0.092                 | HIP1_MOUSE   |              | Huntingtin-interacting protein 1;                                   | Huntingtin-interacting protein I;                                                                                                                                                                                                                                                           | 0.25 - 0.75 |
| EAAKNKYVPR     | AILVDEPGETMDSVR              | N-ter +28.03 Da              | 32.9       | 54.7              | 3      | 1642.95                      | 2.118                                        | 0.356                 | TBB2A_MOUSE  | TBB2B_MOUSE  | Tubulin beta-2A chain;                                              |                                                                                                                                                                                                                                                                                             | 0.85 - 1.00 |
| PNFASPVITL     | AIPENTNIGSLFPIPLATDR         | N-ter +28.03 Da              | 45.8       | 42.9              | 3      | 2166.26                      | 3.3                                          | 1.102                 | Q8CFX3_MOUSE | F7BJK1_MOUSE |                                                                     |                                                                                                                                                                                                                                                                                             | 0.85 - 1.00 |
| AAAAAASRI      | AIPGLAGAGNSVLLVSNLNPFR       | N-ter +28.03 Da              | 58.6       | 48.1              | 3      | 2189.32                      | 1.029                                        | 0.373                 | PTBP1_MOUSE  | Q92Z17_MOUSE | Polypyrimidine tract-binding protein 1;                             | Heterogeneous nuclear ribonucleoprotein I;                                                                                                                                                                                                                                                  | 0.25 - 0.75 |
| AMRILGGVIS     | AISEAAAQNPPEPPPPR            | N-ter +34.06 Da              | 50.8       | 49.2              | 3      | 1841.04                      | 0.111                                        | 0.014                 | CPNS1_MOUSE  | D3YW48_MOUSE | Calpain small subunit 1;                                            | Calcium-activated neutral proteinase small subunit;Calcium-dependent protease small subunit;Calcium-dependent protease small subunit 1;Calpain regulatory subunit;                                                                                                                          | 0.25 - 0.75 |
| EFEQLPMMQ      | AISNNKDDGGYEDFVEGLR          | N-ter +34.06 Da, K +34.06 Da | 28.6       | 55.3              | 3      | 2179.24                      | 0.496                                        | 0.102                 | MYL1_MOUSE   | E9PWG4_MOUSE | Myosin light chain 1/3, skeletal muscle isoform;                    | Myosin light chain alkali 1/2;                                                                                                                                                                                                                                                              | 0.25 - 0.75 |
| IVEGLMTTVH     | AITATQKTVDGSGKLR             | N-ter +28.03 Da, K +28.03 Da | 20.9       | 58.3              | 4      | 2012.26                      | -0.396                                       | 0.073                 | G3P_MOUSE    | F8WJL5_MOUSE | Glyceraldehyde-3-phosphate dehydrogenase;                           | Peptidyl-cysteine S-nitrosylase GAPDH;                                                                                                                                                                                                                                                      | 0.25 - 0.75 |
| RVLLEGGIT      | AIVFLEPLEAR                  | N-ter +28.03 Da              | 23.6       | 55.5              | 3      | 1413.87                      | 3.377                                        | 0.468                 | RBM19_MOUSE  |              | Probable RNA-binding protein 19;                                    | RNA-binding motif protein 19;                                                                                                                                                                                                                                                               | 0.85 - 1.00 |
| LLPLLAGAQA     | AIVFIKEPSSDQALQGR            | N-ter +34.06 Da, K +34.06 Da | 22.0       | 50.4              | 3      | 1926.22                      | 2.501                                        | 0.376                 | PTK7_MOUSE   | Q3V2W2_MOUSE | Inactive tyrosine-protein kinase 7;                                 | 7;Pseudo tyrosine kinase receptor 7;Tyrosine-protein kinase-like 7;                                                                                                                                                                                                                         | 0.85 - 1.00 |
| PDLXKHNHMH     | AKVLTPLDYNKLR                | N-ter +34.06 Da, K +34.06 Da | 19.7       | 58.9              | 4      | 1632.18                      | 0.043                                        | 0.005                 | KCRM_MOUSE   |              | Creatine kinase M-type;                                             | Creatine kinase M chain;M-CK;                                                                                                                                                                                                                                                               | 0.25 - 0.75 |
| AEKSAVCLW      | AKVNPDEVGGEALGR              | N-ter +28.03 Da, K +28.03 Da | 55.5       | 62.4              | 3      | 1566.93                      | 1.895                                        | 0.148                 | HBB2_MOUSE   |              | Hemoglobin subunit beta-2;                                          | Beta-2-globin;Hemoglobin beta-2 chain;Hemoglobin beta-minor chain;                                                                                                                                                                                                                          | 0.85 - 1.00 |
| LSNAEREVVK     | ALEGINNGITQAGR               | N-ter +28.03 Da              | 23.2       | 32.8              | 3      | 1440.82                      | 0.322                                        | 0.023                 | SBSN_MOUSE   | E9QP82_MOUSE | Suprabasin;                                                         |                                                                                                                                                                                                                                                                                             | 0.25 - 0.75 |
| MRYVASYLVA     | ALGGNSPSSAKDIKKILDVSGIEADDDR | N-ter +28.03 Da, K +28.03 Da | 29.5       | 89.7              | 4      | 2982.86                      | -2.396                                       | 0.504                 | RLA2_MOUSE   |              | 60S acidic ribosomal protein P2;                                    |                                                                                                                                                                                                                                                                                             | 0.00 - 0.15 |
| RQNKDLMELQ     | ALIDSHFEAR                   | N-ter +34.06 Da              | 29.4       | 69.5              | 3      | 1191.73                      | -1.218                                       | 0.057                 | TNNT3_MOUSE  | A2A6J0_MOUSE | Troponin T, fast skeletal muscle;                                   | Fast skeletal muscle troponin T;                                                                                                                                                                                                                                                            | 0.15 - 0.25 |
| MLAQSNPQLF     | ALIGTQANVTKELEK              | N-ter +28.03 Da, K +28.03 Da | 34.1       | 62.7              | 3      | 1698.07                      | 1.367                                        | 0.196                 | SELO_MOUSE   | A4FUU9_MOUSE | Selenoprotein O;                                                    |                                                                                                                                                                                                                                                                                             | 0.75 - 0.85 |
| RKDAQMVHSH     | ALNEDTQDELGDPR               | N-ter +34.06 Da              | 28.0       | 56.9              | 3      | 1605.86                      | -0.396                                       | 0.047                 | AMRP_MOUSE   | F6SY09_MOUSE | Alpha-2-macroglobulin receptor-associated protein;                  | Heparin-binding protein 44;Low density lipoprotein receptor-related protein-associated protein 1;                                                                                                                                                                                           | 0.25 - 0.75 |
| KNERVQKHLK     | ALTSELANAR                   | N-ter +28.03 Da              | 40.3       | 29.0              | 2      | 1072.62                      | -1                                           | 0.06                  | MOES_MOUSE   |              | Moesin;                                                             | Membrane-organizing extension spike protein;                                                                                                                                                                                                                                                | 0.15 - 0.25 |
| KTDQVIQFFI     | ALVNDPQPEHLR                 | N-ter +28.03 Da              | 45.5       | 59.6              | 3      | 1512.90                      | 2.198                                        | 0.321                 | UB2L3_MOUSE  |              | Ubiquitin-conjugating enzyme E2 L3;                                 | UbcM4;Ubiquitin carrier protein L3;Ubiquitin-protein ligase L3;                                                                                                                                                                                                                             | 0.85 - 1.00 |
| LAAVAGCVRA     | AMDECADEGRRPQR               | N-ter +28.03 Da, C +57.02 Da | 17.0       | 70.7              | 3      | 1618.80                      | -0.556                                       | 0.164                 | LAMC1_MOUSE  | F8VQJ3_MOUSE | Laminin subunit gamma-1;                                            | Laminin B2 chain;Laminin-1 subunit gamma;Laminin-10 subunit gamma;Laminin-11 subunit gamma;Laminin-2 subunit gamma;Laminin-3 subunit gamma;Laminin-4 subunit gamma;Laminin-6 subunit gamma;Laminin-7 subunit gamma;Laminin-8 subunit gamma;Laminin-9 subunit gamma;S-laminin subunit gamma; | 0.25 - 0.75 |
| LALAFGLAHA     | AMEGPWKTVIAAADR              | N-ter +28.03 Da, K +28.03 Da | 26.7       | 68.1              | 3      | 1671.00                      | 2.409                                        | 0.209                 | AZANEN_MOUSE | Q9D3H2_MOUSE |                                                                     |                                                                                                                                                                                                                                                                                             | 0.85 - 1.00 |
| EPKRRSARLS     | AMPVPFTPELKPKR               | N-ter +28.03 Da, K +28.03 Da | 20.1       | 64.2              | 4      | 1694.10                      | -0.837                                       | 0.045                 | HMGNS_MOUSE  |              | High mobility group nucleosome-binding domain-containing protein 5; | Nucleosome-binding protein 1;Nucleosome-binding protein 45;Protein GARP45;                                                                                                                                                                                                                  | 0.25 - 0.75 |
| EVDYGLRVQ      | AMQISEKEDDDNEKR              | N-ter +28.03 Da, K +28.03 Da | 25.1       | 85.2              | 4      | 1891.06                      | -0.599                                       | 0.136                 | CDV3_MOUSE   |              | Protein CDV3;                                                       | Carnitine deficiency-associated protein 3;Tyrosine-phosphorylated protein 36;                                                                                                                                                                                                               | 0.25 - 0.75 |
| PREFKQKER      | AMSTTSVTSSQPGKLR             | N-ter +28.03 Da, K +28.03 Da | 47.9       | 61.0              | 3      | 1706.01                      | 2.446                                        | 0.75                  | DBNL_MOUSE   |              | Drebrin-like protein;                                               | Actin-binding protein 1;SH3 domain-containing protein 7;                                                                                                                                                                                                                                    | 0.85 - 1.00 |
| SPVSSGVNLF     | ANDGSFLEFKR                  | N-ter +34.06 Da, K +34.06 Da | 36.5       | 70.7              | 3      | 1463.94                      | -0.889                                       | 0.165                 | CSO43_MOUSE  |              | Uncharacterized protein C19orf43 homolog;                           |                                                                                                                                                                                                                                                                                             | 0.25 - 0.75 |
| QPISVRAIQ      | ANINIPMGAFRRPAGQPPR          | N-ter +28.03 Da              | 24.4       | 51.8              | 3      | 1991.16                      | 0.322                                        | 0.041                 | SMPX_MOUSE   |              | Small muscular protein;                                             | Stretch-responsive skeletal muscle protein;                                                                                                                                                                                                                                                 | 0.25 - 0.75 |
| NPEESIEDLY     | ANIPDLSSYIPSR                | N-ter +34.06 Da              | 34.3       | 39.0              | 3      | 1562.91                      | -1.12                                        | 0.073                 | PALMD_MOUSE  | Q3UVT7_MOUSE | Palmdelphin;                                                        |                                                                                                                                                                                                                                                                                             | 0.15 - 0.25 |
| CDIDIRKDLV     | ANNVMSGGTMYPGIADR            | N-ter +28.03 Da              | 30.1       | 61.2              | 3      | 1881.99                      | -4.322                                       | 0.864                 | ACT5_MOUSE   |              | Actin, alpha skeletal muscle;                                       | Alpha-actin-1;                                                                                                                                                                                                                                                                              | 0.00 - 0.15 |
| SPSEIGPGMP     | ANQDTIFEGIGGPR               | N-ter +34.06 Da              | 61.3       | 32.6              | 2      | 1507.83                      | -2.556                                       | 0.15                  | COSA1_MOUSE  |              | Collagen alpha-1(V) chain;                                          |                                                                                                                                                                                                                                                                                             | 0.00 - 0.15 |



Table S11, Tholen et al.

| Non Prime Site | Prime Site                     | Modifications                             | Hyperscore | Mass error in ppm | Charge | Precursor neutral mass in Da | Fold change (log <sub>2</sub> ) of ASAPRatio | FC-error of ASAPRatio | Uniprot ID 1 | Uniprot ID 2 | Protein Name 1                                          | Protein Name 2                                                                                                                                                                                      | Quantile    |
|----------------|--------------------------------|-------------------------------------------|------------|-------------------|--------|------------------------------|----------------------------------------------|-----------------------|--------------|--------------|---------------------------------------------------------|-----------------------------------------------------------------------------------------------------------------------------------------------------------------------------------------------------|-------------|
| VIQHRPSQQY     | ATLDVYNPFENR                   | N-ter +34.06 Da                           | 33.7       | 62.0              | 3      | 1471.84                      | 0.202                                        | 0.028                 | SCAM3_MOUSE  | Q3UXS0_MOUSE | Secretory carrier-associated membrane protein 3;        |                                                                                                                                                                                                     | 0.25 - 0.75 |
| KHKKEKAVTI     | ATPATAAPAAVAASATTTSAQEPEAAAEPR | N-ter +34.06 Da                           | 62.9       | 53.4              | 4      | 2839.59                      | -0.535                                       | 0.078                 | SRRM1_MOUSE  | A2A8V8_MOUSE | Serine/arginine repetitive matrix protein 1;            | Plenty-of-prolines 101;<br>Germ cell lineage protein gercelin;Src-suppressed C kinase substrate;                                                                                                    | 0.25 - 0.75 |
| HLAQSSEVTVQ    | ATPESLEVPEVTEVDVDR             | N-ter +34.06 Da                           | 34.1       | 58.5              | 3      | 1919.07                      | -2.737                                       | 0.547                 | AKA12_MOUSE  |              | A-kinase anchor protein 12;                             | Generally expressed protein 4.1;                                                                                                                                                                    | 0.00 - 0.15 |
| GRRDSKSPTK     | ATPLPAEKKNTLR                  | N-ter +34.06 Da, K +34.06 Da              | 21.6       | 55.1              | 4      | 1597.13                      | -0.916                                       | 0.086                 | E41L2_MOUSE  |              | Band 4.1-like protein 2;                                | Cargo selection protein TIP47;Mannose-6-phosphate receptor-binding protein 1;                                                                                                                       | 0.25 - 0.75 |
| PLTEAELALI     | ATPPEDSDMASLQQQR               | N-ter +28.03 Da                           | 51.7       | 49.0              | 3      | 1800.92                      | 2.417                                        | 0.339                 | PLIN3_MOUSE  |              | Perilipin-3;                                            |                                                                                                                                                                                                     | 0.85 - 1.00 |
| LSTVASTDIL     | ATVLEEMPPFER                   | N-ter +28.03 Da                           | 35.3       | 58.0              | 3      | 1542.86                      | -0.12                                        | 0.013                 | AP2A1_MOUSE  | AP2A2_MOUSE  | AP-2 complex subunit alpha-1;                           |                                                                                                                                                                                                     | 0.25 - 0.75 |
| AMGVAVPAQAL    | AVAASGPGSSFR                   | N-ter +28.03 Da                           | 37.2       | 32.4              | 2      | 1133.62                      | 1.227                                        | 0.142                 | A2M_MOUSE    | D3YW52_MOUSE | Alpha-2-macroglobulin;                                  |                                                                                                                                                                                                     | 0.75 - 0.85 |
| SDTTTRIKLL     | AVAATAPPDAPNREEVFDER           | N-ter +28.03 Da                           | 34.6       | 45.8              | 3      | 2182.17                      | 2.7                                          | 0.357                 | WINC_MOUSE   |              | Vinculin;                                               |                                                                                                                                                                                                     | 0.85 - 1.00 |
| HQITHQAMVA     | AVASAAAGQVQVGFPTAPTR           | N-ter +28.03 Da                           | 39.3       | 34.8              | 3      | 1924.08                      | 0.014                                        | 0.002                 | Q3TDI4_MOUSE |              |                                                         |                                                                                                                                                                                                     | 0.25 - 0.75 |
| ADEDALRKIR     | AVEEQIEYLQKK                   | N-ter +28.03 Da, K +28.03 Da              | 14.1       | 54.2              | 3      | 1560.96                      | -1.556                                       | 0.229                 | BRE1A_MOUSE  |              | E3 ubiquitin-protein ligase BRE1A;                      |                                                                                                                                                                                                     | 0.15 - 0.25 |
| QKIGQPTLLL     | AVEEQVSCYSGSR                  | N-ter +34.06 Da, C +57.02 Da              | 48.8       | 53.6              | 3      | 1667.82                      | -1.152                                       | 0.23                  | E9PX16_MOUSE |              |                                                         |                                                                                                                                                                                                     | 0.15 - 0.25 |
| IIPASTGAAK     | AVGKIVPELNGKLTMAFR             | N-ter +28.03 Da, K +28.03 Da              | 34.4       | 82.9              | 4      | 2084.39                      | 1.632                                        | 0.168                 | G3P_MOUSE    | F8WIL5_MOUSE | Glyceraldehyde-3-phosphate dehydrogenase;               | Peptidyl-cysteine S-nitrosylase GAPDH;                                                                                                                                                              | 0.75 - 0.85 |
| KMVEEIGVEL     | AVLDLPLPEDELAR                 | N-ter +28.03 Da                           | 22.6       | 51.9              | 3      | 1692.98                      | 0.227                                        | 0.023                 | HYOU1_MOUSE  |              | Hypoxia up-regulated protein 1;                         |                                                                                                                                                                                                     | 0.25 - 0.75 |
| GPEPTDCFV      | AVMHGETGTVPGNALVVDPEKFFR       | N-ter +28.03 Da, K +28.03 Da              | 55.9       | 64.1              | 4      | 2705.56                      | 2.141                                        | 0.325                 | EHD2_MOUSE   |              | EH domain-containing protein 2;                         |                                                                                                                                                                                                     | 0.85 - 1.00 |
| SSLLSPMSVN     | AVMKVIDPATATSVDLR              | N-ter +28.03 Da, K +28.03 Da              | 46.7       | 73.8              | 3      | 1842.16                      | 2.141                                        | 0.913                 | TCPD_MOUSE   |              | T-complex protein 1 subunit delta;                      | A45;CCT-delta;                                                                                                                                                                                      | 0.85 - 1.00 |
| VLTFGFMFLC     | AVPIAQKSEPQSLNEALMR            | N-ter +34.06 Da, K +34.06 Da              | 31.5       | 58.4              | 4      | 2236.38                      | 1.043                                        | 0.157                 | Q542V8_MOUSE | D3ZK5_MOUSE  |                                                         |                                                                                                                                                                                                     | 0.25 - 0.75 |
| TIAAPELLAC     | AVQEEWLDIPSKLDNR               | N-ter +28.03 Da, K +28.03 Da              | 51.5       | 68.3              | 3      | 1968.17                      | 0.251                                        | 0.021                 | E9Q7D5_MOUSE |              |                                                         |                                                                                                                                                                                                     | 0.25 - 0.75 |
| LSLEVEQLQA     | AVRPLQLLGTCAELCR               | N-ter +34.06 Da, C +57.02 Da              | 62.0       | 71.2              | 3      | 1890.17                      | -0.136                                       | 0.022                 | Q8BTE6_MOUSE |              |                                                         |                                                                                                                                                                                                     | 0.25 - 0.75 |
| MIDIQDPKYR     | AVSEQGVCTLEIR                  | N-ter +28.03 Da, C +57.02 Da              | 28.4       | 38.9              | 3      | 1488.82                      | -0.713                                       | 0.047                 | MYBPH_MOUSE  |              | Myosin-binding protein H;                               | H-protein;                                                                                                                                                                                          | 0.25 - 0.75 |
| LQSELSMTL      | AVSKEEEETSPTSIPR               | N-ter +28.03 Da, K +28.03 Da              | 25.9       | 77.0              | 4      | 2215.29                      | -0.786                                       | 0.081                 | E9Q7D5_MOUSE |              |                                                         |                                                                                                                                                                                                     | 0.25 - 0.75 |
| AASRATLSN      | AVSSLASTGLSLTKVDER             | N-ter +34.06 Da, K +34.06 Da              | 48.1       | 52.8              | 3      | 1901.21                      | -0.184                                       | 0.029                 | PICA_MOUSE   |              | Phosphatidylinositol-binding clathrin assembly protein; |                                                                                                                                                                                                     | 0.25 - 0.75 |
| VNVKTSASR      | AVSSLATKAGPSEVR                | N-ter +28.03 Da, K +28.03 Da              | 32.3       | 52.1              | 3      | 1584.97                      | 1.718                                        | 0.397                 | DCLK1_MOUSE  | Q8BRN4_MOUSE | Serine/threonine-protein kinase DCLK1;                  | Clathrin assembly lymphoid myeloid leukemia; Doublecortin-like and CAM kinase-like 1;Doublecortin-like kinase 1;                                                                                    | 0.75 - 0.85 |
| FISNPNIL       | AVTAANTDMATSEALKISR            | N-ter +28.03 Da, K +28.03 Da              | 65.8       | 49.5              | 3      | 2005.15                      | 1.239                                        | 0.241                 | DNM1L_MOUSE  | E9PUD2_MOUSE | Dynamin-1-like protein;                                 | Dynamin family member proline-rich carboxyl-terminal domain less;Dynamin-related protein 1;                                                                                                         | 0.75 - 0.85 |
| LWSAVGASNM     | AVVTCGSVKVLLNTR                | N-ter +28.03 Da, K +28.03 Da, C +57.02 Da | 26.7       | 44.6              | 3      | 1672.05                      | -0.644                                       | 0.06                  | SDF2_MOUSE   |              | Stromal cell-derived factor 2;                          |                                                                                                                                                                                                     | 0.25 - 0.75 |
| IFGDYIERLW     | AYLTIEQLLEKR                   | N-ter +28.03 Da, K +28.03 Da              | 41.3       | 61.8              | 3      | 1531.99                      | 1.322                                        | 0.233                 | ITH3_MOUSE   | F6ZJ7_MOUSE  | Inter-alpha-trypsin inhibitor heavy chain H3;           |                                                                                                                                                                                                     | 0.75 - 0.85 |
| ARNLGRVGTK     | CCTLPEDQR                      | N-ter +28.03 Da, C +57.02 Da              | 33.8       | 41.6              | 2      | 1205.57                      | 0.766                                        | 0.117                 | ALBU_MOUSE   |              | Serum albumin;                                          |                                                                                                                                                                                                     | 0.25 - 0.75 |
| MEPYS          | CDTFVALPVTGNGR                 | N-ter +34.06 Da, C +57.02 Da              | 30.6       | 52.4              | 3      | 1650.95                      | -1.12                                        | 0.049                 | SCRN3_MOUSE  | A2AWQ9_MOUSE | Secernin-3;                                             |                                                                                                                                                                                                     | 0.15 - 0.25 |
| QAGRFVHNL      | CGEEQGAADALHFNPR               | N-ter +28.03 Da, C +57.02 Da              | 74.5       | 73.3              | 3      | 1798.94                      | 2.485                                        | 0.484                 | Q9CRB1_MOUSE | LEG7_MOUSE   |                                                         |                                                                                                                                                                                                     | 0.85 - 1.00 |
| DDFAQFLDTC     | CKAADKDTCFSTEGPNLVTR           | N-ter +28.03 Da, C +57.02 Da              | 29.9       | 73.8              | 4      | 2353.31                      | -0.12                                        | 0.033                 | ALBU_MOUSE   |              | Serum albumin;                                          |                                                                                                                                                                                                     | 0.25 - 0.75 |
| GNSTHPMHSR     | CSPDPGLTALLSDHR                | N-ter +28.03 Da, C +57.02 Da              | 48.8       | 72.9              | 3      | 1665.94                      | 1.433                                        | 0.175                 | HEMO_MOUSE   |              | Hemopexin;                                              |                                                                                                                                                                                                     | 0.75 - 0.85 |
| KPTDGASSNS     | CVTDISHLVR                     | N-ter +28.03 Da, C +57.02 Da              | 38.2       | 69.7              | 3      | 1226.73                      | 1.395                                        | 0.244                 | NASP_MOUSE   | B1AU75_MOUSE | Nuclear autoantigenic sperm protein;                    |                                                                                                                                                                                                     | 0.75 - 0.85 |
| AEFKAADFMD     | DADGGDISVVKELGTVMR             | N-ter +34.06 Da, K +34.06 Da              | 43.0       | 47.0              | 3      | 1887.09                      | -6.644                                       | 0.001                 | TNRC2_MOUSE  |              | Troponin C, skeletal muscle;                            | STNC;                                                                                                                                                                                               | 0.00 - 0.15 |
| FKLEENYNMN     | DALYKLGMTDAFGGR                | N-ter +34.06 Da, K +34.06 Da              | 34.9       | 56.4              | 3      | 1682.01                      | -1.889                                       | 0.28                  | SPB6_MOUSE   | F8WIV2_MOUSE | Serpin B6;                                              | Placental thrombin inhibitor;Proteinase inhibitor 6;                                                                                                                                                | 0.00 - 0.15 |
| LGKVSQVQLL     | DAVDYVIPVTR                    | N-ter +34.06 Da                           | 22.7       | 50.0              | 3      | 1379.82                      | 1.828                                        | 0.525                 | EFTU_MOUSE   | D3YVN7_MOUSE | Elongation factor Tu, mitochondrial;                    |                                                                                                                                                                                                     | 0.85 - 1.00 |
| ASGTTLEAL      | DCILPPTRPDKPLR                 | N-ter +28.03 Da, K +28.03 Da, C +57.02 Da | 23.1       | 52.9              | 4      | 1834.11                      | -2.12                                        | 0.184                 | EF1A1_MOUSE  | D3Y268_MOUSE | Elongation factor 1-alpha 1;                            | Elongation factor Tu;Eukaryotic elongation factor 1 A-1;                                                                                                                                            | 0.00 - 0.15 |
| LPLLARLSAG     | DCPCSEALCQPIR                  | N-ter +28.03 Da, C +57.02 Da              | 49.3       | 48.7              | 3      | 1703.83                      | 0.496                                        | 0.183                 | DIAC_MOUSE   |              | Di-N-acetylchitobiose;                                  |                                                                                                                                                                                                     | 0.25 - 0.75 |
| ESAAKDEAVF     | DDEVAPDAAEAENCLAER             | N-ter +28.03 Da, C +57.02 Da              | 50.5       | 65.1              | 3      | 1872.94                      | -0.184                                       | 0.046                 | E9PV1_MOUSE  |              |                                                         |                                                                                                                                                                                                     | 0.25 - 0.75 |
| VLLTFGVARR     | DDEVDVDTVEEDLGKSR              | N-ter +34.06 Da, K +34.06 Da              | 57.1       | 48.7              | 3      | 2045.11                      | 1.852                                        | 0.405                 | ENPL_MOUSE   |              | Endoplasmic;                                            |                                                                                                                                                                                                     | 0.85 - 1.00 |
| QARLKLVRAR     | DDLITDLLNEAKQR                 | N-ter +28.03 Da, K +28.03 Da              | 34.4       | 69.6              | 3      | 1699.03                      | 0.454                                        | 0.146                 | VATE1_MOUSE  |              | V-type proton ATPase subunit E 1;                       |                                                                                                                                                                                                     | 0.25 - 0.75 |
| AAGGGGENY      | DDPHKTPASVVHIR                 | N-ter +34.06 Da, K +34.06 Da              | 30.7       | 71.7              | 4      | 1736.13                      | -1.218                                       | 0.113                 | HNRPL_MOUSE  | E9Q8W8_MOUSE | Heterogeneous nuclear ribonucleoprotein L;              |                                                                                                                                                                                                     | 0.15 - 0.25 |
| PPPCPGREL      | DDPSYVNIQLDKAR                 | N-ter +28.03 Da, K +28.03 Da              | 44.3       | 61.3              | 3      | 1803.03                      | 0.111                                        | 0.007                 | SHC1_MOUSE   |              | SHC-transforming protein 1;                             | SHC-transforming protein A;Src homology 2 domain-containing-transforming protein C1;                                                                                                                | 0.25 - 0.75 |
| EDDEERGEV      | DDVDHAAVSSPQR                  | N-ter +28.03 Da                           | 39.5       | 60.6              | 3      | 1520.81                      | -1.059                                       | 0.11                  | SKAP2_MOUSE  |              | Src kinase-associated phosphoprotein 2;                 | Pyk2/RAFTK-associated protein;SKAP55 homolog;Src family-associated phosphoprotein 2;Src kinase-associated phosphoprotein 55-related protein;Src-associated adapter protein with PH and SH3 domains; | 0.15 - 0.25 |

| Non Prime Site | Prime Site                | Modifications                             | Hyperscore | Mass error in ppm | Charge | Precursor neutral mass in Da | Fold change (log <sub>2</sub> ) of ASAPRatio | FC-error of ASAPRatio | Uniprot ID 1 | Uniprot ID 2                       | Protein Name 1                                                                                                                     | Protein Name 2                                                                                                                                                                                      | Quantile    |
|----------------|---------------------------|-------------------------------------------|------------|-------------------|--------|------------------------------|----------------------------------------------|-----------------------|--------------|------------------------------------|------------------------------------------------------------------------------------------------------------------------------------|-----------------------------------------------------------------------------------------------------------------------------------------------------------------------------------------------------|-------------|
| DVIRNAFACF     | DEEAIGTIQEDYLR            | N-ter +28.03 Da                           | 34.5       | 56.8              | 3      | 1678.90                      | 1.705                                        | 0.288                 | Q6ZW09_MOUSE |                                    |                                                                                                                                    |                                                                                                                                                                                                     | 0.75 - 0.85 |
| DVIRNAFACF     | DEEATGTIQEDYLR            | N-ter +28.03 Da                           | 33.7       | 49.9              | 3      | 1666.85                      | 1.475                                        | 0.324                 | ML12B_MOUSE  | Myosin regulatory light chain 12B; | Myosin regulatory light chain 2-B, smooth muscle isoform;Myosin regulatory light chain 20 kDa;Myosin regulatory light chain MRLC2; |                                                                                                                                                                                                     | 0.75 - 0.85 |
| KAVLSAEKLR     | DEEVTHTGLGELLR            | N-ter +28.03 Da                           | 33.8       | 45.8              | 3      | 1494.84                      | 1.546                                        | 0.222                 | SERPH_MOUSE  | Serpin H1;                         | 47 kDa heat shock protein;Collagen-binding protein;Serine protease inhibitor J6;                                                   |                                                                                                                                                                                                     | 0.75 - 0.85 |
| QTRDTQLITV     | DEKLDITLTVGPEEHKTR        | N-ter +34.06 Da, K +34.06 Da              | 27.3       | 84.4              | 4      | 2396.60                      | -0.578                                       | 0.069                 | NDUS4_MOUSE  | E9QPX3_MOUSE                       | NADH dehydrogenase [ubiquinone] iron-sulfur protein 4, mitochondrial;                                                              | Complex I-18 kDa;Complex I-AQDQ;NADH-ubiquinone oxidoreductase 18 kDa subunit;                                                                                                                      | 0.25 - 0.75 |
| NFASQMSYGY     | DEKSAGVSVPGPMGPSGPR       | N-ter +34.06 Da, K +34.06 Da              | 32.6       | 50.2              | 3      | 1892.10                      | -3.059                                       | 0.255                 | CO1A1_MOUSE  | F8WGB7_MOUSE                       | Collagen alpha-1(I) chain;                                                                                                         | Alpha-1 type I collagen;                                                                                                                                                                            | 0.00 - 0.15 |
| GSQAWHVWQQ     | DEPOSQWDKVKDFANVYVDVKDSGR | N-ter +34.06 Da, K +34.06 Da              | 33.5       | 82.2              | 4      | 3131.94                      | -3.644                                       | 0.911                 | APOA1_MOUSE  | Q8BP45_MOUSE                       | Apolipoprotein A-1;                                                                                                                | Apolipoprotein A1;                                                                                                                                                                                  | 0.00 - 0.15 |
| SGFSKGFQFK     | DETEQALANER               | N-ter +28.03 Da                           | 44.8       | 78.9              | 2      | 1302.71                      | -0.578                                       | 0.086                 | DDX46_MOUSE  | F8WHR6_MOUSE                       | Probable ATP-dependent RNA helicase DDX46;                                                                                         | DEAD box protein 46;                                                                                                                                                                                | 0.25 - 0.75 |
| YKGWYFEMVM     | DEVAPFLTAQATHLR           | N-ter +34.06 Da                           | 24.4       | 45.0              | 4      | 1702.00                      | -2.556                                       | 0.301                 | E9PZQ0_MOUSE |                                    |                                                                                                                                    | DEAD box protein 46;                                                                                                                                                                                | 0.00 - 0.15 |
| RLFVYGDGAN     | DFCPMGLLAGGDVAFPRR        | N-ter +34.06 Da, C +57.02 Da              | 28.2       | 38.4              | 3      | 2012.10                      | -2.322                                       | 0.464                 | PHOP1_MOUSE  |                                    | Phosphoethanolamine/phosphocholine phosphatase;                                                                                    |                                                                                                                                                                                                     | 0.00 - 0.15 |
| ELKGTVCAAN     | DFNPDADAKALR              | N-ter +28.03 Da, K +28.03 Da              | 22.7       | 97.7              | 3      | 1387.85                      | -0.044                                       | 0.006                 | ANKA6_MOUSE  | F8WIT2_MOUSE                       | Annexin A6;                                                                                                                        | 67 kDa calelectrin;Annexin VI;Annexin-6;Calphobindin-II;Chromobindin-20;Lipocortin VI;Protein III;p68;p70;                                                                                          | 0.25 - 0.75 |
| SQASDSEGH5     | DFSEGOAVGAHR              | N-ter +28.03 Da                           | 16.3       | 67.7              | 3      | 1300.70                      | -2.252                                       | 0.322                 | FILA_MOUSE   | F7BVV1_MOUSE                       | Filaggrin;                                                                                                                         |                                                                                                                                                                                                     | 0.00 - 0.15 |
| GKSTTKRKR      | DGDKLVVECVMKGVYSTR        | N-ter +28.03 Da, K +28.03 Da, C +57.02 Da | 25.6       | 91.4              | 4      | 2077.28                      | 0                                            | 0.001                 | FABP4_MOUSE  |                                    | Fatty acid-binding protein, adipocyte;                                                                                             | 3T3-L1 lipid-binding protein;Adipocyte lipid-binding protein;Adipocyte-type fatty acid-binding protein;Fatty acid-binding protein 4;Myelin P2 protein homolog;P15;P2 adipocyte protein;Protein 422; | 0.25 - 0.75 |
| GLVAGMASLL     | DGGGAGGGGAGGAGAAGGGPDR    | N-ter +34.06 Da                           | 24.6       | 52.4              | 3      | 1978.01                      | -2.474                                       | 0.825                 | ONEC3_MOUSE  |                                    | One cut domain family member 3;                                                                                                    | ONECUT-3;                                                                                                                                                                                           | 0.00 - 0.15 |
| VSSGVNLFAN     | DGSFLEFKR                 | N-ter +28.03 Da, K +28.03 Da              | 25.9       | 73.6              | 3      | 1266.79                      | -0.252                                       | 0.087                 | CS043_MOUSE  |                                    | Uncharacterized protein C19orf43 homolog;                                                                                          |                                                                                                                                                                                                     | 0.25 - 0.75 |
| LGLLQSGIRA     | DGTEASCGAVIQPR            | N-ter +28.03 Da, C +57.02 Da              | 23.2       | 56.0              | 3      | 1487.79                      | 2.036                                        | 0.293                 | PRSS8_MOUSE  | Q99L44_MOUSE                       | Prostasin;                                                                                                                         | Channel-activating protease 1;Serine protease 8;                                                                                                                                                    | 0.85 - 1.00 |
| SASNRIIAK      | DHASIQMNVAEVDR            | N-ter +28.03 Da                           | 47.9       | 80.9              | 3      | 1611.90                      | 0.454                                        | 0.099                 | RS21_MOUSE   |                                    | 40S ribosomal protein S21;                                                                                                         |                                                                                                                                                                                                     | 0.25 - 0.75 |
| ASSASAFFA      | DIALAPMEAAYKVR            | N-ter +28.03 Da, K +28.03 Da              | 40.5       | 58.1              | 3      | 1439.90                      | 1.189                                        | 0.104                 | MPCP_MOUSE   |                                    | Phosphate carrier protein, mitochondrial;                                                                                          | Phosphate transport protein;Solute carrier family 25 member 3;                                                                                                                                      | 0.75 - 0.85 |
| KLPGRVAFGE     | DIDLPETFDAR               | N-ter +28.03 Da                           | 44.0       | 20.7              | 2      | 1318.67                      | 2.592                                        | 0.529                 | CATB_MOUSE   |                                    | Cathepsin B;                                                                                                                       | Cathepsin B1;                                                                                                                                                                                       | 0.85 - 1.00 |
| LLWFFPGIKC     | DIKMTQSPSSMYASLGER        | N-ter +28.03 Da, K +28.03 Da              | 55.9       | 57.5              | 3      | 2056.12                      | -0.252                                       | 0.045                 | KV5A5_MOUSE  | KV5A6_MOUSE                        | Ig kappa chain V-V region T1;                                                                                                      |                                                                                                                                                                                                     | 0.25 - 0.75 |
| LLFWIPASRG     | DILLTQSPALISVSPGER        | N-ter +28.03 Da                           | 50.8       | 47.5              | 3      | 1923.16                      | -0.556                                       | 0.262                 | KV5A8_MOUSE  |                                    | Ig kappa chain V-V region L7;                                                                                                      |                                                                                                                                                                                                     | 0.25 - 0.75 |
| RGLALRAVAR     | DIQEGADMLMVKPLPLDMVDR     | N-ter +28.03 Da, K +28.03 Da              | 26.0       | 51.9              | 4      | 2546.43                      | 3.437                                        | 1.304                 | HEM2_MOUSE   |                                    | Delta-aminolevulinic acid dehydratase;                                                                                             | Porphobilinogen synthase;                                                                                                                                                                           | 0.85 - 1.00 |
| LLWFFPGARC     | DIQMTQSPSSLASLGER         | N-ter +28.03 Da                           | 56.1       | 45.3              | 3      | 1934.03                      | -0.862                                       | 0.172                 | KV5A7_MOUSE  | KV5A8_MOUSE                        | Ig kappa chain V-V region MOPC 41;                                                                                                 |                                                                                                                                                                                                     | 0.25 - 0.75 |
| LSLLAARANA     | DISMEACCTDGNQMANQHR       | N-ter +28.03 Da, C +57.02 Da              | 53.3       | 59.7              | 4      | 2265.04                      | -0.074                                       | 0.02                  | FBLN1_MOUSE  |                                    | Fibulin-1;                                                                                                                         | Basement-membrane protein 90;                                                                                                                                                                       | 0.25 - 0.75 |
| LLLLGPVAA      | DITDGNSEHLKR              | N-ter +28.03 Da, K +28.03 Da              | 24.2       | 70.0              | 3      | 1439.84                      | -0.044                                       | 0.006                 | LMAN2_MOUSE  |                                    | Vesicular integral-membrane protein VIP36;                                                                                         | Lectin mannose-binding 2;Vesicular integral-membrane protein 36;                                                                                                                                    | 0.25 - 0.75 |
| MLLWLSGVEG     | DIVMTQSHKFMSTVSGDR        | N-ter +28.03 Da, K +28.03 Da              | 38.3       | 69.9              | 4      | 2094.17                      | -0.535                                       | 0.093                 | KV5A1_MOUSE  |                                    | Ig kappa chain V19-17;                                                                                                             | Ig kappa chain V-V region MPC11;                                                                                                                                                                    | 0.25 - 0.75 |
| QLDTCCKAA      | DKDCTCFSTEGPNLVTR         | N-ter +28.03 Da, K +28.03 Da, C +57.02 Da | 37.3       | 46.5              | 3      | 1895.00                      | 0.333                                        | 0.045                 | ALBU_MOUSE   |                                    | Serum albumin;                                                                                                                     |                                                                                                                                                                                                     | 0.25 - 0.75 |
| QQLIDDDFLF     | DKPVSPLLAAGMAR            | N-ter +28.03 Da, K +28.03 Da              | 26.8       | 53.9              | 3      | 1581.98                      | 0.163                                        | 0.009                 | KCRU_MOUSE   | A2ARP5_MOUSE                       | Creatine kinase U-type, mitochondrial;                                                                                             | Acidic-type mitochondrial creatine kinase;Ubiquitous mitochondrial creatine kinase;                                                                                                                 | 0.25 - 0.75 |
| NRVYREELKR     | DLAKDITSSTSGDPR           | N-ter +28.03 Da, K +28.03 Da              | 29.2       | 70.7              | 3      | 1695.95                      | -0.454                                       | 0.087                 | ANXA1_MOUSE  | E9QA30_MOUSE                       | Annexin A1;                                                                                                                        | Annexin I;Annexin-1;Calpactin II;Calpactin-2;Chromobindin-9;Lipocortin I;Phospholipase A2 inhibitory protein;p35;                                                                                   | 0.25 - 0.75 |
| GKHVPRAVVF     | DLEPTVIDEVR               | N-ter +28.03 Da                           | 41.5       | 22.4              | 2      | 1312.72                      | 1.556                                        | 0.307                 | TBA1A_MOUSE  | TBA1B_MOUSE                        | Tubulin alpha-1A chain;                                                                                                            | Alpha-tubulin 1;Alpha-tubulin isotype M-alpha-1;Tubulin alpha-1 chain;                                                                                                                              | 0.75 - 0.85 |
| HHDYNTYFL      | DLNLDLSKFR                | N-ter +34.06 Da, K +34.06 Da              | 27.0       | 63.2              | 3      | 1287.86                      | -2.252                                       | 0.429                 | NDUV3_MOUSE  | Q3U422_MOUSE                       | NADH dehydrogenase [ubiquinone] flavoprotein 3, mitochondrial;                                                                     | Complex I-9kD;NADH-ubiquinone oxidoreductase 9 kDa subunit;                                                                                                                                         | 0.00 - 0.15 |
| SPGEAIUHL      | DLPCTPPPPAIPISVR          | N-ter +28.03 Da, C +57.02 Da              | 42.7       | 40.8              | 3      | 1740.99                      | 3.342                                        | 0.26                  | AP1G2_MOUSE  |                                    | AP-1 complex subunit gamma-like 2;                                                                                                 | Gamma2-adaptin;                                                                                                                                                                                     | 0.85 - 1.00 |
| ALANAAGHLD     | DLPGLSALSALDHAHLR         | N-ter +28.03 Da, K +28.03 Da              | 31.3       | 69.4              | 4      | 1969.25                      | 1.766                                        | 0.099                 | HBA_MOUSE    | Q91V88_MOUSE                       | Hemoglobin subunit alpha;                                                                                                          | Alpha-globin;Hemoglobin alpha chain;                                                                                                                                                                | 0.75 - 0.85 |
| PRTLASPKKK     | DLSLEEQKLEAAEER           | N-ter +34.06 Da, K +34.06 Da              | 24.1       | 85.2              | 4      | 2102.41                      | 0.422                                        | 0.063                 | STMN1_MOUSE  | STMN2_MOUSE                        | Stathmin;                                                                                                                          | Leukemia-associated gene protein;Leukemia-associated phosphoprotein p18;Metablastin;Oncoprotein p18;Phosphoprotein p19;Protein 18;Protein 18;pp17;                                                  | 0.25 - 0.75 |
| LTSESSRPTR     | DLSSSDLTASKIVK            | N-ter +34.06 Da, K +34.06 Da              | 45.3       | 53.5              | 3      | 1652.10                      | 0.585                                        | 0.113                 | A2M_MOUSE    | D3YW52_MOUSE                       | Alpha-2-macroglobulin;                                                                                                             | Pregnancy zone protein;                                                                                                                                                                             | 0.25 - 0.75 |
| LTSESSRPTR     | DLSSSDLTASK               | N-ter +28.03 Da, K +28.03 Da              | 47.0       | 34.3              | 2      | 1265.68                      | 0.214                                        | 0.057                 | A2M_MOUSE    | D3YW52_MOUSE                       | Alpha-2-macroglobulin;                                                                                                             | Pregnancy zone protein;                                                                                                                                                                             | 0.25 - 0.75 |
| RKTRVSGEHM     | DLTTCPLAAGGQQEKLK         | N-ter +28.03 Da, K +28.03 Da, C +57.02 Da | 25.0       | 59.6              | 4      | 1913.12                      | 1.227                                        | 0.131                 | Q901B1_MOUSE |                                    |                                                                                                                                    |                                                                                                                                                                                                     | 0.75 - 0.85 |
| KAKKAANAKK     | DLVSSKMFEELKLR            | N-ter +28.03 Da, K +28.03 Da              | 21.2       | 78.2              | 4      | 1779.10                      | 1.683                                        | 0.283                 | TETN_MOUSE   | Q8CFZ6_MOUSE                       | Tetranectin;                                                                                                                       | C-type lectin domain family 3 member B;Plasminogen kringle 4-binding protein;                                                                                                                       | 0.75 - 0.85 |
| IMKCDIDIRK     | DLVANNVMSGGTMYPGIADR      | N-ter +28.03 Da                           | 52.2       | 47.3              | 3      | 2273.15                      | 4.723                                        | 1.255                 | ACT5_MOUSE   |                                    | Actin, alpha skeletal muscle;                                                                                                      | Alpha-actin-1;                                                                                                                                                                                      | 0.85 - 1.00 |
| GAHHAFGQGR     | DMAETFDQGAHHAFGQGR        | N-ter +34.06 Da                           | 41.8       | 92.3              | 4      | 2065.12                      | 0.496                                        | 0.134                 | S6SN_MOUSE   | E9QP82_MOUSE                       | Suprabasin;                                                                                                                        |                                                                                                                                                                                                     | 0.25 - 0.75 |
| KGKGRREKEY     | DMVYDCSHTVAQVR            | N-ter +34.06 Da, C +57.02 Da              | 26.9       | 49.1              | 3      | 1677.87                      | -2.556                                       | 0.451                 | DLFL3_MOUSE  |                                    | Olfactomedin-like protein 3;                                                                                                       |                                                                                                                                                                                                     | 0.00 - 0.15 |





Table S11, Tholen et al.

| Non Prime Site                                                   | Prime Site                                                                         | Modifications                                                                                                                                                      | Hyperscore                           | Mass error<br>in ppm                 | Charge                | Precursor<br>neutral mass<br>in Da                  | Fold change<br>(log <sub>2</sub> ) of<br>ASAPRatio | FC-error of<br>ASAPRatio                  | Uniprot ID 1                                                          | Uniprot ID 2                                 | Protein Name 1                                                                                                                                | Protein Name 2                                                                                                                                                                                                                               | Quantile                                                                |
|------------------------------------------------------------------|------------------------------------------------------------------------------------|--------------------------------------------------------------------------------------------------------------------------------------------------------------------|--------------------------------------|--------------------------------------|-----------------------|-----------------------------------------------------|----------------------------------------------------|-------------------------------------------|-----------------------------------------------------------------------|----------------------------------------------|-----------------------------------------------------------------------------------------------------------------------------------------------|----------------------------------------------------------------------------------------------------------------------------------------------------------------------------------------------------------------------------------------------|-------------------------------------------------------------------------|
| KDCKEKPKER<br>LLWAAACAQS                                         | EQQCCYNGKPGHLAR<br>EQDFYDFKAVNIR                                                   | N-ter +28.03 Da, K +28.03 Da, C<br>+57.02 Da<br>N-ter +28.03 Da, K +28.03 Da                                                                                       | 27.7<br>19.5                         | 79.7<br>66.6                         | 4<br>3                | 1905.00<br>1699.97                                  | 0.84<br>-0.396                                     | 0.338<br>0.089                            | CNBP_MOUSE<br>GPX7_MOUSE                                              | D3YF6_MOUSE<br>E9PVY3_MOUSE                  | Cellular nucleic acid-binding protein;<br>Glutathione peroxidase 7;                                                                           | Zinc finger protein 9;<br>Apolipoprotein J;Clustrin;Sulfated glycoprotein<br>2;                                                                                                                                                              | 0.25 - 0.75<br>0.25 - 0.75                                              |
| LIWDNGMVLG<br>KKGKSCRTTF                                         | EQEVSDNELQELSTQGSR<br>EQEQAELELAKKR                                                | N-ter +28.03 Da<br>N-ter +34.06 Da, K +34.06 Da                                                                                                                    | 59.0<br>29.5                         | 46.0<br>83.1                         | 3<br>4                | 2076.06<br>1820.24                                  | 1.124<br>-1.69                                     | 0.201<br>0.218                            | CLUS_MOUSE<br>TPPP_MOUSE                                              | E9Q9B8_MOUSE                                 | Clusterin;<br>Tubulin polymerization-promoting protein;                                                                                       |                                                                                                                                                                                                                                              | 0.75 - 0.85<br>0.00 - 0.15                                              |
| KRSRWNQDTM                                                       | EQKTVPGMPTVIPPLTR                                                                  | N-ter +28.03 Da, K +28.03 Da                                                                                                                                       | 51.3                                 | 54.3                                 | 3                     | 2089.31                                             | -0.358                                             | 0.023                                     | SFO1_MOUSE                                                            | Q3U145_MOUSE                                 | Splicing factor 1;                                                                                                                            | CW17;Mammalian branch point-binding<br>protein;Transcription factor ZFM1;Zinc finger<br>gene in MEN1 locus;Zinc finger protein 162;                                                                                                          | 0.25 - 0.75                                                             |
| LQVFRQVVRH<br>MCAQLPNQVL                                         | ESEVASSLVLER<br>ESISIIDTPGILSGAKQR                                                 | N-ter +28.03 Da<br>N-ter +28.03 Da, K +28.03 Da<br>N-ter +28.03 Da, K +28.03 Da, C<br>+57.02 Da                                                                    | 32.4<br>41.5                         | 34.5<br>57.2                         | 2<br>3                | 1345.76<br>1940.21                                  | 5.271<br>2.021                                     | 0.984<br>0.309                            | SSBP_MOUSE<br>EHD2_MOUSE                                              | Q8R2K3_MOUSE<br>Q8R2X0_MOUSE                 | Single-stranded DNA-binding protein, mitochondrial;<br>EH domain-containing protein 2;                                                        |                                                                                                                                                                                                                                              | 0.85 - 1.00<br>0.85 - 1.00                                              |
| VSEAGPAGAG                                                       | ESKCPMLVKVLDADR                                                                    | N-ter +28.03 Da, K +28.03 Da, C<br>+57.02 Da                                                                                                                       | 21.5                                 | 85.9                                 | 4                     | 1828.19                                             | 0.669                                              | 0.017                                     | TTHY_MOUSE                                                            |                                              | Transthyretin;                                                                                                                                | Prealbumin;<br>Apoptosis inhibitor expressed by<br>macrophages;Apoptosis inhibitory 6;CT-2;SP-<br>alpha;                                                                                                                                     | 0.25 - 0.75                                                             |
| LSIFVGSCFS                                                       | ESPTKVQLVGGahr                                                                     | N-ter +34.06 Da, K +34.06 Da                                                                                                                                       | 35.8                                 | 79.8                                 | 4                     | 1546.05                                             | -0.943                                             | 0.163                                     | CD5L_MOUSE                                                            |                                              | CD5 antigen-like;                                                                                                                             | Interferon-induced, double-stranded RNA-<br>activated protein kinase inhibitor;Protein kinase<br>inhibitor of 58 kDa;                                                                                                                        | 0.15 - 0.25                                                             |
| GRYTDATSKY<br>HAFGQGRDMA<br>GPAKGNGDRG                           | ESVMKTEPSVAEYTVR<br>ETFDQGAHHAFGQGGRR<br>ETGPAAGAPGIPAGAR                          | N-ter +28.03 Da, K +28.03 Da<br>N-ter +28.03 Da<br>N-ter +34.06 Da                                                                                                 | 27.0<br>22.2<br>39.0                 | 58.3<br>83.7<br>46.0                 | 3<br>4<br>3           | 1881.07<br>1741.94<br>1508.89                       | -0.713<br>1.189<br>-0.152                          | 0.129<br>0.318<br>0.01                    | DNIC3_MOUSE<br>S8SN_MOUSE<br>CO1A1_MOUSE                              | E9QP82_MOUSE<br>F8WGB7_MOUSE                 | DnaJ homolog subfamily C member 3;<br>Suprabasin;<br>Collagen alpha-1(I) chain;                                                               | Alpha-1 type I collagen;                                                                                                                                                                                                                     | 0.25 - 0.75<br>0.75 - 0.85<br>0.25 - 0.75                               |
| RRSGRLLTRW<br>VQGRDSRLV<br>LASLLSGGA<br>SGTKVGIQLP<br>FSRGLSNAER | ETTSIPEAGEGQIR<br>EVAQHLGESTVR<br>EVEDASEEAAPLR<br>EVELSVSTK<br>EVGKALEGINNGITQAGR | N-ter +28.03 Da<br>N-ter +28.03 Da<br>N-ter +28.03 Da<br>N-ter +34.06 Da, K +34.06 Da<br>N-ter +28.03 Da, K +28.03 Da                                              | 31.5<br>28.2<br>38.2<br>24.3<br>57.1 | 47.2<br>59.3<br>61.1<br>58.3<br>36.0 | 3<br>3<br>3<br>3<br>3 | 1601.87<br>1352.79<br>1371.74<br>1349.93<br>1882.10 | 0.39<br>1.753<br>-0.434<br>0.422<br>-1.218         | 0.054<br>0.182<br>0.029<br>0.104<br>0.142 | ISCA2_MOUSE<br>ATPB_MOUSE<br>SRCA_MOUSE<br>E9Q616_MOUSE<br>S8SN_MOUSE | E9Q1H8_MOUSE<br>E9QP82_MOUSE                 | Iron-sulfur cluster assembly 2 homolog, mitochondrial;<br>ATP synthase subunit beta, mitochondrial;<br>Sarcalumenin;                          | HE5B-like domain-containing protein 1;<br>ATP synthase subunit beta, mitochondrial;                                                                                                                                                          | 0.25 - 0.75<br>0.75 - 0.85<br>0.25 - 0.75<br>0.25 - 0.75<br>0.15 - 0.25 |
| VLSAELRDE<br>TCKVEHDEQA                                          | EVHTGLGELLR<br>EVIETHVLVTEHOR                                                      | N-ter +28.03 Da<br>N-ter +28.03 Da<br>N-ter +28.03 Da, K +28.03 Da, C<br>+57.02 Da                                                                                 | 39.1<br>25.1                         | 67.1<br>54.9                         | 3<br>3                | 1250.78<br>1818.06                                  | 0.151<br>1.444                                     | 0.014<br>0.143                            | SERPH_MOUSE<br>QGf5F2_MOUSE                                           |                                              | Serpin H1;                                                                                                                                    | 47 kDa heat shock protein;Collagen-binding<br>protein;Serine protease inhibitor J6;                                                                                                                                                          | 0.25 - 0.75<br>0.75 - 0.85                                              |
| LTKLPGYPVK<br>GAGFRPKVKR                                         | EVKCDMEVSPCEPYTCCR<br>EVKVDCEYLALSRR                                               | N-ter +28.03 Da, K +28.03 Da, C<br>+57.02 Da<br>N-ter +28.03 Da, K +28.03 Da, C<br>+57.02 Da                                                                       | 54.6<br>23.6                         | 54.2<br>50.8                         | 3<br>4                | 2335.07<br>1880.10                                  | 1.124<br>-1.599                                    | 0.299<br>0.048                            | GRN_MOUSE<br>Q148R4_MOUSE                                             | Q3U9N4_MOUSE<br>Q8BM18_MOUSE                 | Granulins;                                                                                                                                    | PC cell-derived growth factor;Proepithelin;                                                                                                                                                                                                  | 0.75 - 0.85                                                             |
| VLMDFQVKA<br>LMAVVGINS<br>TNCDLYEKLG<br>RSFSTSIVRP               | EVLDMAENAFDEYLLKCKSR<br>EVQLQSQGAELVR<br>EYFGNAILVR<br>FAKLVRPPVQYVIGIEGR          | N-ter +34.06 Da, K +34.06 Da, C<br>+57.02 Da<br>N-ter +34.06 Da<br>N-ter +28.03 Da<br>N-ter +34.06 Da, K +34.06 Da<br>N-ter +28.03 Da, K +28.03 Da, C<br>+57.02 Da | 49.1<br>41.4<br>40.6<br>30.3         | 81.2<br>41.5<br>32.0<br>60.5         | 4<br>3<br>2<br>4      | 2534.49<br>1489.89<br>1336.76<br>1996.35            | -2.556<br>-0.599<br>-1.322<br>0.333                | 0.902<br>0.073<br>0.165<br>0.04           | NAR3_MOUSE<br>HVM02_MOUSE<br>ALBU_MOUSE<br>ATPO_MOUSE                 | E9Q1U7_MOUSE                                 | Ecto-ADP-ribosyltransferase 3;<br>Ig heavy chain V region 93G7;<br>Serum albumin;                                                             | Mono(ADP-ribosyl)transferase 3;NAD(P)(+)-<br>arginine ADP-ribosyltransferase 3;                                                                                                                                                              | 0.00 - 0.15<br>0.25 - 0.75<br>0.15 - 0.25<br>0.25 - 0.75                |
| ASRVLVASRN<br>ELSCPLCLQL                                         | FANDATFEIKKCDLHR<br>FDAPVTAECGH5FCR                                                | N-ter +28.03 Da, K +34.06 Da, C<br>+57.02 Da<br>N-ter +28.03 Da, C +57.02 Da                                                                                       | 25.9<br>46.8                         | 64.0<br>55.0                         | 4<br>3                | 2048.18<br>1780.86                                  | 0.345<br>2.592                                     | 0.052<br>0.959                            | ODPA_MOUSE<br>TRI72_MOUSE                                             |                                              | Pyruvate dehydrogenase E1 component subunit alpha,<br>somatic form, mitochondrial;<br>Tripartite motif-containing protein 72;                 | PDHE1-A type I;<br>Mitsugumin-53;                                                                                                                                                                                                            | 0.25 - 0.75<br>0.85 - 1.00                                              |
| MVNPVTF<br>YEDFVEGLRV<br>QQQLQIDHFL                              | FDITADDEPLGR<br>FDKEGNGTVMGAELR<br>FDKPVSPLLLASGMAR                                | N-ter +28.03 Da<br>N-ter +34.06 Da, K +34.06 Da<br>N-ter +34.06 Da, K +34.06 Da                                                                                    | 49.4<br>43.3<br>33.1                 | 41.5<br>70.6<br>57.7                 | 2<br>3<br>3           | 1375.72<br>1691.02<br>1769.16                       | 1.245<br>-1.837<br>-1                              | 0.231<br>0.262<br>0.08                    | PPIA_MOUSE<br>MYL1_MOUSE<br>KCRM_MOUSE                                | E9Q1E3_MOUSE<br>MYL3_MOUSE<br>KCRB_MOUSE     | Peptidyl-prolyl cis-trans isomerase A;<br>Myosin light chain 1/3, skeletal muscle isoform;<br>Creatine kinase M-type;                         | Cyclophilin A;Cyclosporin A-binding<br>protein;Rotamase A;SP18;<br>Myosin light chain alkali 1/2;<br>Creatine kinase M chain;M-CK;                                                                                                           | 0.75 - 0.85<br>0.00 - 0.15<br>0.15 - 0.25                               |
| SVLVYLAP<br>AEGSNVPSFM                                           | FDNEQSDLVHR<br>FDQQTQEQFKAFTVIDONR                                                 | N-ter +28.03 Da<br>N-ter +34.06 Da, K +34.06 Da                                                                                                                    | 29.2<br>60.0                         | 92.8<br>64.3                         | 3<br>4                | 1386.78<br>2524.49                                  | -0.862<br>-1.515                                   | 0.188<br>0.563                            | PSD12_MOUSE<br>F6ULR7_MOUSE                                           | B1AT36_MOUSE<br>MLRS_MOUSE                   | 26S proteasome regulatory subunit 12;<br>26S proteasome non-ATPase regulatory subunit 12;                                                     | 26S proteasome regulatory subunit RPNS;26S<br>proteasome regulatory subunit p55;                                                                                                                                                             | 0.25 - 0.75<br>0.15 - 0.25                                              |
| TPKKQALYLM<br>TEGVKAGNF<br>DTEEYNLRDY                            | FDPQESPVSKPPVR<br>FEAKVQAINVSSR<br>FEYKGIETIEMEDR                                  | N-ter +28.03 Da, K +28.03 Da<br>N-ter +34.06 Da, K +34.06 Da<br>N-ter +34.06 Da, K +34.06 Da                                                                       | 32.4<br>28.3<br>30.2                 | 49.8<br>50.4<br>74.3                 | 3<br>3<br>4           | 1739.01<br>1515.98<br>2088.32                       | 1.07<br>0.485<br>-1.837                            | 0.066<br>0.083<br>0.262                   | TACC2_MOUSE<br>EHD2_MOUSE<br>ROA3_MOUSE                               | E9Q8T1_MOUSE<br>Q8C845_MOUSE<br>A2AL12_MOUSE | Transforming acidic coiled-coil-containing protein 2;<br>EF-hand domain-containing protein D2;<br>Heterogeneous nuclear ribonucleoprotein A3; | Swiprosin-1;                                                                                                                                                                                                                                 | 0.25 - 0.75<br>0.25 - 0.75<br>0.00 - 0.15                               |
| KAVKDLVLL                                                        | FETALLSGFSLEDPOQHSNR                                                               | N-ter +28.03 Da                                                                                                                                                    | 39.3                                 | 70.2                                 | 4                     | 2363.31                                             | 3.714                                              | 0.589                                     | H590B_MOUSE                                                           | Q71LX8_MOUSE                                 | Heat shock protein HSP 90-beta;                                                                                                               | Heat shock 84 kDa;Tumor-specific<br>transplantation 84 kDa antigen;<br>Metastasin;Metastatic cell<br>protein;PEL98;Placental calcium-binding<br>protein;Protein 18A2;Protein Mts1;S100 calcium-<br>binding protein A4;                       | 0.85 - 1.00                                                             |
| LSCIAMMCNE                                                       | FFEGCPDKEPR                                                                        | N-ter +28.03 Da, K +28.03 Da, C<br>+57.02 Da                                                                                                                       | 24.0                                 | 72.2                                 | 3                     | 1436.78                                             | 0.299                                              | 0.029                                     | S10A4_MOUSE                                                           | D3YU9_MOUSE                                  | Protein S100-A4;                                                                                                                              | Adapter-related protein complex 1 subunit beta-<br>1;Adaptor protein complex AP-1 subunit beta-<br>1;Beta-1-adaptin;Beta-adaptin 1;Clathrin<br>assembly protein complex 1 beta large<br>chain;Golgi adaptor HA1/AP1 adaptin beta<br>subunit; | 0.25 - 0.75                                                             |
| DESEGIQDSN<br>GGPKLPGRVA<br>DEKLRKRKR<br>EQALEDHFS               | FGAPSASVAAPAPAR<br>FGEDIDLPEFDAR<br>FGIVTSSAGTGTTEDTEAKKR<br>FGPISEVVVKDR          | N-ter +28.03 Da<br>N-ter +28.03 Da<br>N-ter +28.03 Da, K +28.03 Da<br>N-ter +34.06 Da, K +34.06 Da                                                                 | 29.5<br>31.3<br>46.0<br>34.8         | 40.6<br>60.7<br>73.8<br>53.0         | 3<br>3<br>4<br>3      | 1467.84<br>1651.87<br>2239.34<br>1512.02            | 3.398<br>1.373<br>-0.644<br>-1.474                 | 0.587<br>0.191<br>0.091<br>0.205          | AP1B1_MOUSE<br>CATB_MOUSE<br>SARNP_MOUSE<br>RBM3_MOUSE                | Q8CC13_MOUSE                                 | AP-1 complex subunit beta-1;<br>Cathepsin B;<br>SAP domain-containing ribonucleoprotein;<br>Putative RNA-binding protein 3;                   | Cathepsin B1;<br>Nuclear protein Hcc-1;<br>RNA-binding motif protein 3;                                                                                                                                                                      | 0.85 - 1.00<br>0.75 - 0.85<br>0.25 - 0.75<br>0.15 - 0.25                |



Table S11, Tholen et al.

| Non Prime Site | Prime Site                | Modifications                             | Hyperscore | Mass error in ppm | Charge | Precursor neutral mass in Da | Fold change (log <sub>2</sub> ) of ASAPRatio | FC-error of ASAPRatio | Uniprot ID 1 | Uniprot ID 2 | Protein Name 1                                                              | Protein Name 2                                                                                                                                                                                                                   | Quantile    |
|----------------|---------------------------|-------------------------------------------|------------|-------------------|--------|------------------------------|----------------------------------------------|-----------------------|--------------|--------------|-----------------------------------------------------------------------------|----------------------------------------------------------------------------------------------------------------------------------------------------------------------------------------------------------------------------------|-------------|
| LYCKVCYAKN     | FGPTGIGFGGLTQQVEKK        | N-ter +28.03 Da, K +28.03 Da              | 21.0       | 55.8              | 3      | 2076.24                      | 1.163                                        | 0.073                 | CSR3_MOUSE   |              | Cysteine and glycine-rich protein 3;                                        | Cysteine-rich protein 3; LIM domain protein, cardiac; Muscle LIM protein;                                                                                                                                                        | 0.75 - 0.85 |
| QYREVAFAAQ     | FQSDLDAAATQQLLRS          | N-ter +28.03 Da                           | 40.4       | 61.1              | 3      | 1648.94                      | -0.34                                        | 0.047                 | ATPA_MOUSE   | D3Z6F5_MOUSE | ATP synthase subunit alpha, mitochondrial;                                  |                                                                                                                                                                                                                                  | 0.25 - 0.75 |
| TQICPNNLVA     | FHFSSDLENVPHLR            | N-ter +28.03 Da                           | 32.1       | 76.9              | 4      | 1840.03                      | 2.511                                        | 0.396                 | PRELP_MOUSE  |              | Prolargin;                                                                  | Proline-arginine-rich end leucine-rich repeat protein;                                                                                                                                                                           | 0.85 - 1.00 |
| GVVPLEARRA     | FHMTKMDLPGSYPR            | N-ter +28.03 Da, K +28.03 Da              | 33.7       | 72.8              | 4      | 1734.99                      | 0.098                                        | 0.003                 | NDUB8_MOUSE  | Q3V406_MOUSE | NADH dehydrogenase [ubiquinone] 1 beta subcomplex subunit 8, mitochondrial; | Complex I-ASH1; NADH-ubiquinone oxidoreductase ASH1 subunit;                                                                                                                                                                     | 0.25 - 0.75 |
| EVRTGTYRQL     | FHPEQLITKEDAANNYAR        | N-ter +28.03 Da, K +28.03 Da              | 32.1       | 78.2              | 4      | 2229.29                      | 1.531                                        | 0.164                 | TBA1A_MOUSE  | TBA1B_MOUSE  | Tubulin alpha-1A chain;                                                     | Alpha-tubulin 1; Alpha-tubulin isotype M-alpha-1; Tubulin alpha-1 chain;                                                                                                                                                         | 0.75 - 0.85 |
| SMFDQIQIE      | FKEAFTVIDQNR              | N-ter +28.03 Da, K +28.03 Da              | 44.4       | 59.6              | 3      | 1522.91                      | -1.218                                       | 0.198                 | MLRS_MOUSE   | F6ULR7_MOUSE | Myosin regulatory light chain 2, skeletal muscle isoform;                   | Fast skeletal myosin light chain 2; MLC2F;                                                                                                                                                                                       | 0.15 - 0.25 |
| AVSFIFMTF      | FKGFDLPEQECLDKDYR         | N-ter +28.03 Da, K +28.03 Da, C +57.02 Da | 35.0       | 76.9              | 4      | 2256.30                      | 0.546                                        | 0.116                 | Q61635_MOUSE |              | Myosin regulatory light chain 2, skeletal muscle isoform;                   |                                                                                                                                                                                                                                  | 0.25 - 0.75 |
| PEGKTIKQ       | FLEELLTQCDR               | N-ter +34.06 Da, C +57.02 Da              | 26.4       | 58.2              | 3      | 1557.88                      | -0.761                                       | 0.064                 | MLRS_MOUSE   |              | Myosin regulatory light chain 2, skeletal muscle isoform;                   | Fast skeletal myosin light chain 2; MLC2F;                                                                                                                                                                                       | 0.25 - 0.75 |
| DAPPNARLFS     | FLEPGAETGLVSR             | N-ter +28.03 Da                           | 48.7       | 50.6              | 3      | 1515.91                      | 0.766                                        | 0.09                  | Q91XX1_MOUSE |              |                                                                             |                                                                                                                                                                                                                                  | 0.25 - 0.75 |
| EEDDARWVTV     | FNKPDIDAWELR              | N-ter +34.06 Da, K +34.06 Da              | 39.1       | 72.6              | 3      | 1570.99                      | -1.218                                       | 0.17                  | COX5A_MOUSE  |              | Cytochrome c oxidase subunit 5A, mitochondrial;                             | Cytochrome c oxidase polypeptide Va;                                                                                                                                                                                             | 0.15 - 0.25 |
| GDKQDQGLAG     | FPSPGKGEKGSAGTPGMPGSPGPR  | N-ter +28.03 Da, K +28.03 Da              | 21.0       | 38.5              | 4      | 2522.36                      | 1.753                                        | 0.208                 | CO4A1_MOUSE  |              | Collagen alpha-1(I) chain;                                                  |                                                                                                                                                                                                                                  | 0.75 - 0.85 |
| EAASGALSMF     | FQGEETENEENLSEKAGLDKR     | N-ter +28.03 Da, K +28.03 Da              | 44.3       | 68.8              | 4      | 2593.43                      | 1.848                                        | 0.334                 | AZAI1_MOUSE  | E9QAT4_MOUSE |                                                                             |                                                                                                                                                                                                                                  | 0.85 - 1.00 |
| QASDSEHSD      | FSEGAQAIVHR               | N-ter +28.03 Da                           | 30.7       | 60.1              | 3      | 1185.66                      | 3.446                                        | 1.201                 | FILA_MOUSE   | F7BVV1_MOUSE | Filaggrin;                                                                  |                                                                                                                                                                                                                                  | 0.85 - 1.00 |
| VLRPPGGSSD     | FSLGFDEPAEQPVR            | N-ter +28.03 Da                           | 46.3       | 53.1              | 3      | 1618.88                      | 0.496                                        | 0.049                 | HN1_MOUSE    |              | Hematological and neurological expressed 1 protein;                         |                                                                                                                                                                                                                                  | 0.25 - 0.75 |
| QLQDMGIDL      | FSPEKSQLPGIVAGGR          | N-ter +28.03 Da, K +28.03 Da              | 28.0       | 63.8              | 3      | 1698.06                      | 1.669                                        | 0.205                 | ANT3_MOUSE   |              | Antithrombin-III;                                                           | Serpin C1;                                                                                                                                                                                                                       | 0.75 - 0.85 |
| MIASHMIACL     | FTELNQNVQVKVDQYLHYMR      | N-ter +28.03 Da, K +28.03 Da              | 34.3       | 80.5              | 4      | 2609.52                      | -0.059                                       | 0.003                 | HXX2_MOUSE   |              | Hexokinase-2;                                                               | Hexokinase type II;                                                                                                                                                                                                              | 0.25 - 0.75 |
| LSFMNTEALAA    | FTKNKQDPGVLDLR            | N-ter +34.06 Da, K +34.06 Da              | 23.2       | 71.5              | 4      | 1619.10                      | 1.422                                        | 0.239                 | S10AB_MOUSE  | F6S1J5_MOUSE | Protein S100-A11;                                                           |                                                                                                                                                                                                                                  | 0.75 - 0.85 |
| LLMTPCYTAN     | FVAPEVLKR                 | N-ter +28.03 Da, K +28.03 Da              | 18.1       | 69.0              | 3      | 1113.77                      | 0.401                                        | 0.039                 | K56A1_MOUSE  | K56A2_MOUSE  | Ribosomal protein S6 kinase alpha-1;                                        | 90 kDa ribosomal protein S6 kinase 1; MAP kinase-activated protein kinase 1a; Ribosomal S6 kinase 1;                                                                                                                             | 0.25 - 0.75 |
| ILLDLAVCKG     | FVEDLNEFSKDNR             | N-ter +28.03 Da, K +28.03 Da              | 29.8       | 69.7              | 3      | 1667.93                      | -0.396                                       | 0.031                 | TMX3_MOUSE   |              | Protein disulfide-isomerase TMX3;                                           | Thioredoxin domain-containing protein 10; Thioredoxin-related transmembrane protein 3;                                                                                                                                           | 0.25 - 0.75 |
| LNVQNKSSY      | FVEWIPNNVKTAVCDIPPR       | N-ter +28.03 Da, K +28.03 Da, C +57.02 Da | 39.1       | 60.0              | 4      | 2310.36                      | 4.915                                        | 0.43                  | T8B5_MOUSE   | T8B2A_MOUSE  | Tubulin beta-5 chain;                                                       |                                                                                                                                                                                                                                  | 0.85 - 1.00 |
| RYLSPKVIKIM    | FVLDEADEMLSR              | N-ter +28.03 Da                           | 41.1       | 42.4              | 2      | 1451.76                      | -0.252                                       | 0.048                 | IF4A1_MOUSE  | IF4A2_MOUSE  | Eukaryotic initiation factor 4A-I;                                          | ATP-dependent RNA helicase eIF4A-1;                                                                                                                                                                                              | 0.25 - 0.75 |
| RTSTSAVPLN     | FVPLATNPKEVQEMR           | N-ter +34.06 Da, K +34.06 Da              | 24.3       | 59.2              | 3      | 1869.16                      | -0.713                                       | 0.094                 | ADDA_MOUSE   | E9Q1K3_MOUSE | Alpha-adducin;                                                              | Erythrocyte adducin subunit alpha;                                                                                                                                                                                               | 0.25 - 0.75 |
| KKTDLCPIYI     | FVQPPSLDVLQQR             | N-ter +28.03 Da                           | 34.3       | 34.7              | 3      | 1554.89                      | 0.678                                        | 0.038                 | KGUA_MOUSE   | Q564G0_MOUSE | Guanylate kinase;                                                           | GMP kinase;                                                                                                                                                                                                                      | 0.25 - 0.75 |
| PSGKLRWDGH     | GAAQNIIPASTGAAKAVGK       | N-ter +28.03 Da, K +28.03 Da              | 38.1       | 53.4              | 3      | 1808.15                      | 0.163                                        | 0.015                 | G3P_MOUSE    | F8W1L5_MOUSE | Glycerate kinase;                                                           | Peptidyl-cysteine S-nitrosylase GAPDH;                                                                                                                                                                                           | 0.25 - 0.75 |
| LLRGGPVAARA    | GAGAVGAGPVVR              | N-ter +34.06 Da                           | 44.1       | 22.2              | 2      | 1043.65                      | -0.434                                       | 0.053                 | G6PE62_MOUSE |              |                                                                             |                                                                                                                                                                                                                                  | 0.25 - 0.75 |
| MSVFKLF        | GAGGGKAGKGGPPTQEIQR       | N-ter +28.03 Da, K +28.03 Da              | 33.7       | 84.9              | 4      | 1920.22                      | 0.848                                        | 0.094                 | CHM4B_MOUSE  |              | Charged multivesicular body protein 4b;                                     | Chromatin-modifying protein 4b;                                                                                                                                                                                                  | 0.25 - 0.75 |
| VLEVPALSLG     | GAGSALHKEEASGELR          | N-ter +34.06 Da, K +34.06 Da              | 27.4       | 70.0              | 4      | 1792.14                      | -1.943                                       | 0.149                 | SYNEM_MOUSE  | F6VN34_MOUSE | Synemin;                                                                    | Desmuslin;                                                                                                                                                                                                                       | 0.00 - 0.15 |
| SMVAQAMGVY     | GALTKAPVPGAQNSQSR         | N-ter +28.03 Da, K +28.03 Da              | 52.0       | 70.1              | 3      | 1824.11                      | -1.358                                       | 0.348                 | STM1L2_MOUSE |              | Stomatin-like protein 2;                                                    |                                                                                                                                                                                                                                  | 0.15 - 0.25 |
| STVTPGSSGK     | GANLPCPGKVSAAALR          | N-ter +28.03 Da, K +28.03 Da, C +57.02 Da | 26.5       | 64.3              | 3      | 1623.00                      | 0.251                                        | 0.027                 | TCOF_MOUSE   | Q05CS0_MOUSE | Treacle protein;                                                            | Treachers Collins syndrome protein homologue;                                                                                                                                                                                    | 0.25 - 0.75 |
| RVAGPQPAQT     | GAPQGSGLGYLFER            | N-ter +34.06 Da                           | 38.4       | 65.0              | 3      | 1556.91                      | 1.945                                        | 0.232                 | FRIL1_MOUSE  | Q9CPX4_MOUSE | Ferritin light chain 1;                                                     | Ferritin L subunit 1;                                                                                                                                                                                                            | 0.85 - 1.00 |
| ESEGIGDSNF     | GAPSASVAAAPAPAR           | N-ter +28.03 Da                           | 25.2       | 36.4              | 3      | 1320.76                      | 1.157                                        | 0.529                 | AP1B1_MOUSE  | Q8CC13_MOUSE | AP-1 complex subunit beta-1;                                                | Adapter-related protein complex 1 subunit beta-1; Adaptor protein complex AP-1 subunit beta-1; Beta-1-adaptin; Beta-adaptin 1; Clathrin assembly protein complex 1 beta large chain; Golgi adaptor HA1/AP1 adaptin beta subunit; | 0.75 - 0.85 |
| TISLQMGNTN     | GASQAGMLAPGTR             | N-ter +28.03 Da                           | 61.8       | 36.9              | 2      | 1243.68                      | 0.098                                        | 0.012                 | CNN3_MOUSE   |              | Calponin-3;                                                                 | Calponin, acidic isoform;                                                                                                                                                                                                        | 0.25 - 0.75 |
| GKSQSGSAGK     | GAVSAEQVIAGFNR            | N-ter +28.03 Da                           | 30.4       | 54.2              | 3      | 1445.84                      | -0.12                                        | 0.012                 | PF2D2_MOUSE  | F8W1J0_MOUSE | Prefoldin subunit 2;                                                        |                                                                                                                                                                                                                                  | 0.25 - 0.75 |
| DYKSAHKFK      | GAYDAQGLSLKIFLGGRR        | N-ter +34.06 Da, K +34.06 Da              | 24.4       | 100.4             | 4      | 1983.40                      | -0.515                                       | 0.088                 | F7A0B0_MOUSE | F8RT34_MOUSE |                                                                             |                                                                                                                                                                                                                                  | 0.25 - 0.75 |
| TDLNPNLQGG     | GDDLDPNVLSSR              | N-ter +34.06 Da                           | 29.5       | 47.5              | 3      | 1483.81                      | -1.322                                       | 0.066                 | KCRM_MOUSE   | KCRB_MOUSE   | Creatine kinase M-type;                                                     | Creatine kinase M chain; M-CK;                                                                                                                                                                                                   | 0.15 - 0.25 |
| FTASAGIQVV     | GDDLTVTNPKR               | N-ter +34.06 Da, K +34.06 Da              | 31.7       | 51.3              | 3      | 1282.82                      | -3.644                                       | 0.456                 | ENOA_MOUSE   | ENOB_MOUSE   | Alpha-enolase;                                                              |                                                                                                                                                                                                                                  | 0.00 - 0.15 |
| QILGWGKMEN     | GDFPDTIQCADVHLVPR         | N-ter +28.03 Da, C +57.02 Da              | 53.7       | 65.5              | 3      | 1967.09                      | 2.198                                        | 0.426                 | O88301_MOUSE | Q91Y82_MOUSE |                                                                             | Complex III subunit 6; Complex III subunit VIII; Cytochrome c1 non-heme 11 kDa protein; Mitochondrial hinge protein; Ubiquinol-cytochrome c reductase complex 11 kDa protein;                                                    | 0.85 - 1.00 |
| EDERKMLTGS     | GDPKEEEEEELVDPLTVR        | N-ter +34.06 Da, K +34.06 Da              | 53.1       | 59.6              | 3      | 2252.30                      | -0.269                                       | 0.039                 | QCR6_MOUSE   |              | Cytochrome b-c1 complex subunit 6, mitochondrial;                           |                                                                                                                                                                                                                                  | 0.25 - 0.75 |
| VGAPPGAGAS     | GDRGEAGAAGPSGAPGR         | N-ter +34.06 Da                           | 36.0       | 61.9              | 3      | 1612.91                      | -2.184                                       | 1.092                 | CO1A2_MOUSE  | E9Q6U9_MOUSE | Collagen alpha-2(I) chain;                                                  | Alpha-2 type I collagen;                                                                                                                                                                                                         | 0.00 - 0.15 |
| PGVPAGGAKN     | GDRGETGPAGPAGPIGAGAR      | N-ter +28.03 Da                           | 58.5       | 69.9              | 3      | 1888.09                      | -2.837                                       | 0.608                 | CO1A1_MOUSE  | F8WGB7_MOUSE | Collagen alpha-1(I) chain;                                                  | Alpha-1 type I collagen;                                                                                                                                                                                                         | 0.00 - 0.15 |
| GTPIWDWEQY     | GDSGSDGGDGGSPCPSEAATLTKER | N-ter +28.03 Da, K +28.03 Da, C +57.02 Da | 53.0       | 67.0              | 4      | 2607.31                      | 0.766                                        | 0.234                 | NIB1L1_MOUSE |              | Niban-like protein 1;                                                       | Protein FAM129B;                                                                                                                                                                                                                 | 0.25 - 0.75 |
| DNLKGGKVK      | GDVDISGPKLEGDIKIVPR       | N-ter +34.06 Da, K +34.06 Da              | 16.5       | 65.3              | 4      | 1996.34                      | -0.811                                       | 0.071                 | E9Q616_MOUSE |              |                                                                             |                                                                                                                                                                                                                                  | 0.25 - 0.75 |
| IRNWKPVQEQ     | GDVLTLESER                | N-ter +28.03 Da                           | 41.5       | 35.7              | 2      | 1258.72                      | -1.889                                       | 0.35                  | RS28_MOUSE   | D3YVD9_MOUSE | 40S ribosomal protein S28;                                                  |                                                                                                                                                                                                                                  | 0.00 - 0.15 |
| SLTKYKXTLL     | GDVPPVAVDPTVNVVTVTR       | N-ter +28.03 Da                           | 59.2       | 50.3              | 3      | 1863.10                      | 0.367                                        | 0.111                 | GDIR2_MOUSE  |              | Rho GDP-dissociation inhibitor 2;                                           | D4; Rho-GDI beta;                                                                                                                                                                                                                | 0.25 - 0.75 |
| VLGVSEPVALA    | GDVSSCDNPGSPGTSGNR        | N-ter +34.06 Da, C +57.02 Da              | 52.1       | 54.2              | 3      | 1969.96                      | 0.956                                        | 0.33                  | Q90140_MOUSE |              |                                                                             |                                                                                                                                                                                                                                  | 0.25 - 0.75 |



Table S11, Tholen et al.

| Non Prime Site                                                                                | Prime Site                                                                                                           | Modifications                                                                                                                                                                         | Hyperscore                                           | Mass error in ppm                                    | Charge                          | Precursor neutral mass in Da                                              | Fold change (log <sub>2</sub> ) of ASAPRatio                 | FC-error of ASAPRatio                                     | Uniprot ID 1                                                                                       | Uniprot ID 2                                              | Protein Name 1                                                                                                                                                                                                                                                                                                                              | Protein Name 2                                                                                                                                                                                                                                                                                                 | Quantile                                                                                              |
|-----------------------------------------------------------------------------------------------|----------------------------------------------------------------------------------------------------------------------|---------------------------------------------------------------------------------------------------------------------------------------------------------------------------------------|------------------------------------------------------|------------------------------------------------------|---------------------------------|---------------------------------------------------------------------------|--------------------------------------------------------------|-----------------------------------------------------------|----------------------------------------------------------------------------------------------------|-----------------------------------------------------------|---------------------------------------------------------------------------------------------------------------------------------------------------------------------------------------------------------------------------------------------------------------------------------------------------------------------------------------------|----------------------------------------------------------------------------------------------------------------------------------------------------------------------------------------------------------------------------------------------------------------------------------------------------------------|-------------------------------------------------------------------------------------------------------|
| PETLFPQFSI<br>GRPRHQGMVM                                                                      | GMESAGIHETTYNSIMKCDIR<br>GMGQKDSYVGEAQSQR                                                                            | N-ter +28.03 Da, K +28.03 Da, C +57.02 Da<br>N-ter +34.06 Da, K +34.06 Da<br>N-ter +28.03 Da, K +28.03 Da, C +57.02 Da                                                                | 34.2<br>47.3                                         | 74.5<br>69.1                                         | 4<br>4                          | 2696.46<br>1957.18                                                        | 4.469<br>0.227                                               | 1.736<br>0.056                                            | ACTA_MOUSE<br>ACTS_MOUSE                                                                           | ACTC_MOUSE<br>ACTA_MOUSE                                  | Actin, aortic smooth muscle;<br>Actin, alpha skeletal muscle;                                                                                                                                                                                                                                                                               | Alpha-actin-2;<br>Alpha-actin-1;                                                                                                                                                                                                                                                                               | 0.85 - 1.00<br>0.25 - 0.75                                                                            |
| LAGLVFVSEA<br>AGKHGNRGE<br>PGLPEKGDH<br>SMPDVLHLK                                             | GPAGAGESKCLMVKVLDVAVR<br>GPAGSVGVGAVGPR<br>PGIPGGIPLGPPGPR<br>GNPVKGEYDVTVPR                                         | N-ter +28.03 Da<br>N-ter +34.06 Da<br>N-ter +28.03 Da, K +34.06 Da                                                                                                                    | 26.7<br>48.8<br>20.6<br>20.1                         | 76.5<br>25.4<br>59.2<br>59.6                         | 4<br>2<br>3<br>3                | 2238.39<br>1304.75<br>1569.02<br>1598.01                                  | 0.163<br>0.111<br>-3.644<br>-0.152                           | 0.001<br>0.009<br>0.456<br>0.01                           | THY_MOUSE<br>CO1A2_MOUSE<br>B1AVKS_MOUSE<br>E9Q616_MOUSE                                           | E9Q6U9_MOUSE<br>E9Q511_MOUSE<br>F7BRM2_MOUSE              | Transthyretin;<br>Collagen alpha-2(I) chain;<br>Cold-inducible RNA-binding protein;                                                                                                                                                                                                                                                         | Prealbumin;<br>Alpha-2 type I collagen;                                                                                                                                                                                                                                                                        | 0.25 - 0.75<br>0.25 - 0.75<br>0.00 - 0.15<br>0.25 - 0.75                                              |
| QALEQVFSKY                                                                                    | GQSEVVVVKDR                                                                                                          | N-ter +34.06 Da, K +34.06 Da                                                                                                                                                          | 28.4                                                 | 52.4                                                 | 3                               | 1395.94                                                                   | 0.367                                                        | 0.054                                                     | CIRBP_MOUSE                                                                                        | D3YU80_MOUSE                                              | Basement-membrane protein 40;Osteonectin;Secreted protein acidic and rich in cysteine;                                                                                                                                                                                                                                                      | A18 hnRNP;Glycine-rich RNA-binding protein                                                                                                                                                                                                                                                                     | 0.25 - 0.75                                                                                           |
| MYIFPVHWQF                                                                                    | QLDQHPIDIGVLSHTELAPlR                                                                                                | N-ter +34.06 Da                                                                                                                                                                       | 38.7                                                 | 77.2                                                 | 4                               | 2393.44                                                                   | -1.089                                                       | 0.046                                                     | SPRC_MOUSE                                                                                         | Q5NCU4_MOUSE                                              | SPARC;                                                                                                                                                                                                                                                                                                                                      |                                                                                                                                                                                                                                                                                                                | 0.15 - 0.25                                                                                           |
| FQLRSICYLL                                                                                    | GQPEPLAGTTLPAPDR                                                                                                     | N-ter +28.03 Da                                                                                                                                                                       | 33.3                                                 | 43.4                                                 | 3                               | 1743.99                                                                   | 0                                                            | 0.001                                                     | RN123_MOUSE                                                                                        | Q05CH9_MOUSE                                              | E3 ubiquitin-protein ligase RNF123;                                                                                                                                                                                                                                                                                                         | Kip1 ubiquitination-promoting complex protein 1;RING finger protein 123;                                                                                                                                                                                                                                       | 0.25 - 0.75                                                                                           |
| VSKQPSRITN                                                                                    | GQPQQTGAASGGYIKR                                                                                                     | N-ter +28.03 Da, K +28.03 Da                                                                                                                                                          | 40.9                                                 | 57.1                                                 | 3                               | 1775.03                                                                   | 0.163                                                        | 0.032                                                     | SNP23_MOUSE                                                                                        | Q9D3L3_MOUSE                                              | Synaptosomal-associated protein 23;                                                                                                                                                                                                                                                                                                         | Syndet;Vesicle-membrane fusion protein SNAP-23;                                                                                                                                                                                                                                                                | 0.25 - 0.75                                                                                           |
| HSLRTAAVLQ<br>EGPVGLPGID<br>YREVAFAAFQ<br>DYSQQGHVSS<br>EETLALVCDN<br>HPTSPRRPG<br>GGRPAMEPGN | GQVQFKLSDIGEGIR<br>GRPGIGPAGPR<br>GSDLAATQQLSR<br>GSEVTQCQDILCNER<br>GSLVKAGFAGDDAPR<br>GSIIIVYKPEIR<br>GSLDLGDAAAGR | N-ter +34.06 Da, K +34.06 Da<br>N-ter +34.06 Da<br>N-ter +28.03 Da<br>N-ter +28.03 Da, C +57.02 Da<br>N-ter +28.03 Da, K +28.03 Da<br>N-ter +28.03 Da, K +28.03 Da<br>N-ter +34.06 Da | 39.0<br>28.0<br>34.7<br>38.3<br>41.5<br>48.7<br>56.1 | 46.6<br>58.2<br>50.0<br>47.9<br>59.8<br>53.8<br>24.0 | 3<br>3<br>3<br>3<br>3<br>3<br>2 | 1813.16<br>1164.76<br>1501.85<br>1983.90<br>1572.92<br>1430.93<br>1121.62 | 0.202<br>-2.474<br>-0.535<br>5.35<br>-1.12<br>0.536<br>2.759 | 0.025<br>0.275<br>0.062<br>1.34<br>0.243<br>0.074<br>0.11 | ODB2_MOUSE<br>CO1A2_MOUSE<br>ATPA_MOUSE<br>LY6D_MOUSE<br>ACTC_MOUSE<br>MAR2B2_MOUSE<br>HNRPU_MOUSE | E9Q6U9_MOUSE<br>D3ZGF5_MOUSE<br>ACTS_MOUSE                | Lipoamide acyltransferase component of branched-chain alpha-keto acid dehydrogenase complex, mitochondrial;<br>Collagen alpha-2(I) chain;<br>ATP synthase subunit alpha, mitochondrial;<br>Lymphocyte antigen 6D;<br>Actin, alpha cardiac muscle 1;<br>Epididymis-specific alpha-mannosidase;<br>Heterogeneous nuclear ribonucleoprotein U; | Branched-chain alpha-keto acid dehydrogenase complex component E2;Dihydropyridinyl acetyltransferase component of branched-chain alpha-keto acid dehydrogenase complex;Dihydropyridinyl branched chain transacylase;Dihydropyridinyllysine-residue (2-methylpropanoyl)transferase;<br>Alpha-2 type I collagen; | 0.25 - 0.75<br>0.00 - 0.15<br>0.25 - 0.75<br>0.85 - 1.00<br>0.15 - 0.25<br>0.25 - 0.75<br>0.85 - 1.00 |
| M                                                                                             | GSSQVIEPGGTGEYHVLN                                                                                                   | N-ter +28.03 Da                                                                                                                                                                       | 63.9                                                 | 49.9                                                 | 3                               | 2057.12                                                                   | 0.757                                                        | 0.108                                                     | GORS2_MOUSE                                                                                        | A2AT18_MOUSE                                              | Golgi reassembly-stacking protein 2;                                                                                                                                                                                                                                                                                                        | Golgi reassembly-stacking protein of 55 kDa; Heparin-binding protein 44;Low density lipoprotein receptor-related protein-associated protein 1;                                                                                                                                                                 | 0.25 - 0.75                                                                                           |
| RLRKVSHQGY                                                                                    | GSTTEFEPR                                                                                                            | N-ter +34.06 Da                                                                                                                                                                       | 38.4                                                 | 40.2                                                 | 2                               | 1185.62                                                                   | -0.667                                                       | 0.095                                                     | AMRP_MOUSE                                                                                         | F6WMD1_MOUSE                                              | Alpha-2-macroglobulin receptor-associated protein;                                                                                                                                                                                                                                                                                          | Annexin II;Annexin-2;Calpactin I heavy chain;Calpactin-1 heavy chain;Chromobindin-8;Lipoprotein II;Placental anticoagulant protein IV;Protein I p36;                                                                                                                                                           | 0.25 - 0.75                                                                                           |
| GDHSTPPSAY<br>AFSLFDKDG<br>SVCVHRLNL                                                          | GSKPYTNFDAER<br>GTITTKELGTVMR<br>GTLNPPSSLDATAYER                                                                    | N-ter +28.03 Da, K +28.03 Da<br>N-ter +28.03 Da, K +28.03 Da<br>N-ter +34.06 Da                                                                                                       | 46.9<br>24.8<br>43.4                                 | 68.7<br>49.0<br>50.7                                 | 3<br>3<br>3                     | 1538.88<br>1461.89<br>1800.95                                             | -0.599<br>-3.837<br>0.138                                    | 0.118<br>0.548<br>0.021                                   | ANXA2_MOUSE<br>CALM_MOUSE<br>FRDA_MOUSE                                                            | BOV2N7_MOUSE<br>Q3UKW2_MOUSE<br>E9Q2P9_MOUSE              | Annexin A2;<br>Calmodulin;<br>Frataxin, mitochondrial;                                                                                                                                                                                                                                                                                      |                                                                                                                                                                                                                                                                                                                | 0.25 - 0.75<br>0.00 - 0.15<br>0.25 - 0.75                                                             |
| RKNKMASNIF<br>TIDCDVITLM<br>QEFQHYPAMG                                                        | GTPEENPPSWAKSAGSASSGR<br>GTSPGTAEPYDGTAKR<br>GVAPQALAVAASGGPSFR                                                      | N-ter +28.03 Da, K +28.03 Da<br>N-ter +28.03 Da, K +28.03 Da<br>N-ter +34.06 Da                                                                                                       | 22.3<br>42.6<br>61.1                                 | 72.8<br>64.8<br>50.8                                 | 4<br>3<br>3                     | 2270.29<br>1662.93<br>1776.07                                             | -0.184<br>2.011<br>-0.943                                    | 0.008<br>0.444<br>0.218                                   | HN1_MOUSE<br>BSDC1_MOUSE<br>A2M_MOUSE                                                              | D3YW52_MOUSE                                              | Hematological and neurological expressed 1 protein;<br>BSD domain-containing protein 1;<br>Alpha-2-macroglobulin;                                                                                                                                                                                                                           | Pregnancy zone protein;                                                                                                                                                                                                                                                                                        | 0.25 - 0.75<br>0.85 - 1.00<br>0.15 - 0.25                                                             |
| KNKKSELWL                                                                                     | GVDALGLNIQEONDR                                                                                                      | N-ter +34.06 Da                                                                                                                                                                       | 40.2                                                 | 30.0                                                 | 3                               | 1709.93                                                                   | 1.333                                                        | 0.074                                                     | MOES_MOUSE                                                                                         |                                                           | Moesin;                                                                                                                                                                                                                                                                                                                                     | Membrane-organizing extension spike protein; Annexin I;Annexin-1;Calpactin I;Calpactin-2;Chromobindin-9;Lipoprotein I;Phospholipase A2 inhibitory protein;p35;                                                                                                                                                 | 0.75 - 0.85                                                                                           |
| ALHKAIMVK<br>LDHGRTLREQ                                                                       | GVDEATIDILTKR<br>GVVEHETLLR                                                                                          | N-ter +28.03 Da, K +28.03 Da<br>N-ter +34.06 Da                                                                                                                                       | 56.8<br>30.7                                         | 68.9<br>71.1                                         | 3<br>3                          | 1599.04<br>1328.85                                                        | 0.911<br>-0.811                                              | 0.296<br>0.057                                            | ANXA1_MOUSE<br>TLN1_MOUSE                                                                          | E9QA30_MOUSE<br>A2AIM2_MOUSE                              | Annexin A1;<br>Talin-1;                                                                                                                                                                                                                                                                                                                     |                                                                                                                                                                                                                                                                                                                | 0.25 - 0.75<br>0.25 - 0.75                                                                            |
| M                                                                                             | GVEIETISPGDGR                                                                                                        | N-ter +28.03 Da                                                                                                                                                                       | 28.5                                                 | 72.7                                                 | 3                               | 1356.79                                                                   | 0.251                                                        | 0.013                                                     | FKB1B_MOUSE                                                                                        |                                                           | Peptidyl-prolyl cis-trans isomerase FKB1B;                                                                                                                                                                                                                                                                                                  | 12.6 kDa FK506-binding protein;FK506-binding protein 1B;Immunophilin FKBP12.6;Rotamase;                                                                                                                                                                                                                        | 0.25 - 0.75                                                                                           |
| SGNRLDGGKK                                                                                    | GVEPSPPIKPGDIKR                                                                                                      | N-ter +28.03 Da, K +28.03 Da                                                                                                                                                          | 21.2                                                 | 66.9                                                 | 4                               | 1760.14                                                                   | -0.286                                                       | 0.014                                                     | UFD1_MOUSE                                                                                         |                                                           | Ubiquitin fusion degradation protein 1 homolog;                                                                                                                                                                                                                                                                                             | Elongation factor Tu;Eukaryotic elongation factor 1 A-1;                                                                                                                                                                                                                                                       | 0.25 - 0.75                                                                                           |
| ADCAVLVA<br>AVPVFDLIL<br>PSIVGRPRHQ<br>VIKKYTKIID                                             | GVGFEAGISKNGQTR<br>GVGPDGHTCSLFPDHPQLQER<br>GVMVGMGQKDSYVGEAQSQR<br>GVPVITEKQTR                                      | N-ter +34.06 Da, K +34.06 Da<br>N-ter +28.03 Da, C +57.02 Da<br>N-ter +28.03 Da, K +28.03 Da<br>N-ter +28.03 Da, K +28.03 Da                                                          | 39.1<br>43.3<br>43.4<br>21.6                         | 68.9<br>82.9<br>72.2<br>53.8                         | 3<br>4<br>3<br>3                | 1717.06<br>2359.33<br>2325.31<br>1411.88                                  | -1.396<br>2.163<br>0.111<br>-0.089                           | 0.11<br>0.304<br>0.017<br>0.013                           | EF1A1_MOUSE<br>6PGL_MOUSE<br>ACTA_MOUSE<br>POSTN_MOUSE                                             | EF1A2_MOUSE<br>Q8CBG6_MOUSE<br>ACTA_MOUSE<br>F7C9H0_MOUSE | Elongation factor 1-alpha 1;<br>6-phosphogluconolactonase;<br>Actin, cytoplasmic 1;<br>Periostin;                                                                                                                                                                                                                                           | Beta-actin;<br>Osteoblast-specific factor 2;<br>Low molecular mass dual specificity phosphatase 3;                                                                                                                                                                                                             | 0.15 - 0.25<br>0.85 - 1.00<br>0.25 - 0.75<br>0.25 - 0.75                                              |
| M                                                                                             | GVQPPNFSWWLPGR<br>AQKEAEKVAH                                                                                         | N-ter +34.06 Da<br>N-ter +34.06 Da, K +34.06 Da                                                                                                                                       | 39.4<br>23.2                                         | 62.2<br>50.9                                         | 3<br>3                          | 1586.98<br>1640.01                                                        | -0.152<br>-1.474                                             | 0.022<br>0.655                                            | DUS23_MOUSE<br>SBSN_MOUSE                                                                          | E9QP82_MOUSE                                              | Dual specificity protein phosphatase 23;<br>Suprabasin;                                                                                                                                                                                                                                                                                     |                                                                                                                                                                                                                                                                                                                | 0.25 - 0.75<br>0.15 - 0.25                                                                            |
| M                                                                                             | GVQVETISPGDGR                                                                                                        | N-ter +34.06 Da                                                                                                                                                                       | 48.3                                                 | 37.6                                                 | 2                               | 1347.77                                                                   | 1.526                                                        | 0.101                                                     | FKB1A_MOUSE                                                                                        | Q1JUQ8_MOUSE                                              | Peptidyl-prolyl cis-trans isomerase FKBP1A; Histidine triad nucleotide-binding protein 2,                                                                                                                                                                                                                                                   | 12 kDa FK506-binding protein;FK506-binding protein 1A;Immunophilin FKBP12;Rotamase;                                                                                                                                                                                                                            | 0.75 - 0.85                                                                                           |
| ARGAQRVNGA<br>WQEGDKVIRP<br>GNFAAQYSDK                                                        | GVSOGSEVAKAQAAPGASPTIFSR<br>GVSQAGEMEQFGQGR<br>GVSSGGPMGLMGR                                                         | N-ter +34.06 Da, K +34.06 Da<br>N-ter +28.03 Da<br>N-ter +34.06 Da                                                                                                                    | 30.7<br>59.3<br>66.2                                 | 74.3<br>43.6<br>28.1                                 | 4<br>3<br>2                     | 2589.65<br>1835.93<br>1432.78                                             | -0.515<br>0.299<br>-2.322                                    | 0.125<br>0.036<br>0.232                                   | HINT2_MOUSE<br>SBSN_MOUSE<br>CO1A2_MOUSE                                                           | E9QP82_MOUSE<br>EOCX2_MOUSE                               | Suprabasin;<br>Collagen alpha-2(I) chain;                                                                                                                                                                                                                                                                                                   | HINT-3;                                                                                                                                                                                                                                                                                                        | 0.25 - 0.75<br>0.25 - 0.75<br>0.00 - 0.15                                                             |



| Non Prime Site                                                                  | Prime Site                                                                                                                  | Modifications                                                                                                                                                                                             | Hyperscore                                   | Mass error in ppm                            | Charge                     | Precursor neutral mass in Da                                   | Fold change (log <sub>2</sub> ) of ASAPRatio           | FC-error of ASAPRatio                              | Uniprot ID 1                                                                       | Uniprot ID 2                                | Protein Name 1                                                                                                                                                                       | Protein Name 2                                                                                                                                                                                      | Quantile                                                                |
|---------------------------------------------------------------------------------|-----------------------------------------------------------------------------------------------------------------------------|-----------------------------------------------------------------------------------------------------------------------------------------------------------------------------------------------------------|----------------------------------------------|----------------------------------------------|----------------------------|----------------------------------------------------------------|--------------------------------------------------------|----------------------------------------------------|------------------------------------------------------------------------------------|---------------------------------------------|--------------------------------------------------------------------------------------------------------------------------------------------------------------------------------------|-----------------------------------------------------------------------------------------------------------------------------------------------------------------------------------------------------|-------------------------------------------------------------------------|
| LLGPSVVLG                                                                       | ISFHLPVNSR                                                                                                                  | N-ter +28.03 Da                                                                                                                                                                                           | 27.6                                         | 65.3                                         | 3                          | 1196.75                                                        | -0.184                                                 | 0.029                                              | TMEDA_MOUSE                                                                        |                                             | Transmembrane emp24 domain-containing protein 10;                                                                                                                                    | 21 kDa transmembrane-trafficking protein;Transmembrane protein Tmp21;p24 family protein delta-1;                                                                                                    | 0.25 - 0.75                                                             |
| SNKEIFLREL                                                                      | ISNASDALDKIR                                                                                                                | N-ter +28.03 Da, K +28.03 Da                                                                                                                                                                              | 23.0                                         | 57.9                                         | 3                          | 1357.84                                                        | 2.189                                                  | 0.346                                              | H590B_MOUSE                                                                        | ENPL_MOUSE                                  | Heat shock protein HSP 90-beta;                                                                                                                                                      | Heat shock 84 kDa;Tumor-specific transplantation 84 kDa antigen;                                                                                                                                    | 0.85 - 1.00                                                             |
| LAHVAPRRS<br>IALNDFVKL                                                          | ISSQQTIPSAKYGGR<br>ISWYDNEYYSNR                                                                                             | N-ter +34.06 Da, K +34.06 Da<br>N-ter +28.03 Da                                                                                                                                                           | 37.4<br>33.3                                 | 62.8<br>52.2                                 | 3<br>3                     | 1757.12<br>1693.83                                             | -1.434<br>2.826                                        | 0.155<br>0.319                                     | IDHG1_MOUSE<br>G3P_MOUSE                                                           | F8WJL5_MOUSE                                | Isocitrate dehydrogenase [NAD] subunit gamma 1, mitochondrial;                                                                                                                       | Isocitric dehydrogenase subunit gamma;NAD(+)-specific ICDH subunit gamma;                                                                                                                           | 0.15 - 0.25                                                             |
| FKEYVRGHTA                                                                      | ISYCHETMTGWVHVDLGR                                                                                                          | N-ter +28.03 Da, C +57.02 Da<br>N-ter +28.03 Da, K +28.03 Da, C +57.02 Da                                                                                                                                 | 41.4<br>31.1                                 | 94.5<br>79.7                                 | 4<br>4                     | 2188.23<br>2425.35                                             | -2.556<br>1.202                                        | 0.451                                              | CATC_MOUSE                                                                         | D3Z220_MOUSE                                | Dipeptidyl peptidase 1;                                                                                                                                                              |                                                                                                                                                                                                     | 0.00 - 0.15                                                             |
| RKRKEGENQR<br>KKELSDIAHR<br>DAVTRQVVRT<br>LLWVPGSTGD                            | ITSGESSGGNPKAKDECAQYR<br>IVAPGKILADESTGSIKR<br>IVEEVQDGKVISSR<br>IVLTQSPASLAVSLGQR                                          | N-ter +28.03 Da, K +28.03 Da<br>N-ter +28.03 Da, K +28.03 Da<br>N-ter +28.03 Da, K +28.03 Da<br>N-ter +34.06 Da                                                                                           | 39.7<br>28.6<br>54.2                         | 56.0<br>55.8<br>43.4                         | 4<br>3<br>3                | 2137.37<br>1613.99<br>1888.17                                  | 1.257<br>4.717<br>-2.252                               | 0.512<br>0.116<br>0.906<br>0.965                   | Q148R4_MOUSE<br>ALDOA_MOUSE<br>K1C17_MOUSE<br>KV3A1_MOUSE                          | A6Z144_MOUSE<br>D3YXP7_MOUSE<br>KV3A2_MOUSE | Fructose-bisphosphate aldolase A;<br>Keratin, type I cytoskeletal 17;<br>Ig kappa chain V-II region PC 2880/PC 1229;                                                                 | Aldolase 1;Muscle-type aldolase;<br>Cytokeratin-17;Keratin-17;                                                                                                                                      | 0.75 - 0.85<br>0.75 - 0.85<br>0.85 - 1.00<br>0.00 - 0.15                |
| EANLLTWQGL                                                                      | IVDPNPPYDKGAFR                                                                                                              | N-ter +28.03 Da, K +28.03 Da                                                                                                                                                                              | 31.1                                         | 54.3                                         | 3                          | 1643.96                                                        | 1.82                                                   | 0.134                                              | UBZL3_MOUSE                                                                        | D3Y253_MOUSE                                | Ubiquitin-conjugating enzyme E2 L3;                                                                                                                                                  | UbcM4;Ubiquitin carrier protein L3;Ubiquitin-protein ligase L3;                                                                                                                                     | 0.85 - 1.00                                                             |
| GSKGTOCEK<br>GVNIGGAGSY<br>GTSSLKRTRK<br>QNAILVRYTQ<br>KIREGEVEVL<br>APPWKDSKFF | IVQKYGYTHLSTGDLR<br>IYEKPQTEAPQVTGPVPPVVR<br>KAPAPPSKTPLAQTDER<br>KAPQVSTPLVEAAR<br>KATEMVEVGPEDDEVGAEAR<br>KDAPDGPTVLTVDGR | N-ter +28.03 Da, K +28.03 Da<br>N-ter +28.03 Da, K +28.03 Da<br>N-ter +28.03 Da, K +28.03 Da<br>N-ter +34.06 Da, K +34.06 Da<br>N-ter +28.03 Da, K +28.03 Da<br>N-ter +28.03 Da, K +28.03 Da              | 20.6<br>40.7<br>23.8<br>37.3<br>57.1<br>42.2 | 63.9<br>55.3<br>75.3<br>48.9<br>48.8<br>54.5 | 4<br>4<br>4<br>3<br>3<br>3 | 2019.24<br>2505.52<br>1890.20<br>1635.08<br>2116.10<br>1695.01 | 0.623<br>-0.434<br>-0.535<br>0.251<br>-1.184<br>-6.644 | 0.069<br>0.029<br>0.054<br>0.027<br>0.108<br>0.001 | KAD1_MOUSE<br>CRIP2_MOUSE<br>COBL1_MOUSE<br>ALBU_MOUSE<br>PTRF_MOUSE<br>FA12_MOUSE |                                             | Adenylate kinase isoenzyme 1;<br>Cysteine-rich protein 2;<br>Cordon-bleu protein-like 1;<br>Serum albumin;<br>Polymerase I and transcript release factor;<br>Coagulation factor XII; | ATP-AMP transphosphorylase 1;Myokinase;<br>Heart LIM protein;<br>Cobl-related protein 1;                                                                                                            | 0.25 - 0.75<br>0.25 - 0.75<br>0.25 - 0.75<br>0.15 - 0.25<br>0.00 - 0.15 |
| YKNSFKHRVI<br>FGQVIRAMIK                                                        | KDFMIQGGDFTR<br>KDGKMNAAIKMLKEYASENDRH                                                                                      | N-ter +34.06 Da, K +34.06 Da<br>N-ter +34.06 Da, K +34.06 Da<br>N-ter +28.03 Da, K +28.03 Da, C +57.02 Da                                                                                                 | 33.5<br>20.1                                 | 70.8<br>24.8                                 | 3<br>4                     | 1481.90<br>2831.72                                             | -4.644<br>-4.059                                       | 1.161<br>0.677                                     | PIIB_MOUSE<br>TIE1_MOUSE                                                           |                                             | Peptidyl-prolyl cis-trans isomerase B;<br>Tyrosine-protein kinase receptor Tie-1;                                                                                                    | CYP-51;Cyclophilin B;Rotamase B;S-cyclophilin;                                                                                                                                                      | 0.00 - 0.15<br>0.00 - 0.15                                              |
| AGELHLEICL<br>AGDEESYDFV<br>AGDEESYTVF<br>LPMMQAISNN                            | KDLEEDHACIPIKSDPVVSYR<br>KDLFDPHIEER<br>KDLFDPHIEER<br>KDLFDPHIEER<br>KDLFDPHIEER<br>KDLFDPHIEER                            | N-ter +28.03 Da, K +28.03 Da<br>N-ter +34.06 Da, K +34.06 Da<br>N-ter +28.03 Da, K +28.03 Da, C +57.02 Da | 31.0<br>31.1<br>31.7<br>46.0                 | 54.9<br>63.9<br>67.8<br>73.3                 | 4<br>3<br>3<br>3           | 2710.59<br>1441.94<br>1426.94<br>1680.00                       | 0.322<br>-0.578<br>-3.184<br>-2.059                    | 0.059<br>0.026<br>0.289<br>0.601                   | EF2_MOUSE<br>KCRB_MOUSE<br>KCRM_MOUSE<br>MYL1_MOUSE                                | E9PWG4_MOUSE                                | Elongation factor 2;<br>Creatine kinase B-type;<br>Creatine kinase M-type;<br>Myosin light chain 1/3, skeletal muscle isoform;                                                       | B-Ck;Creatine kinase B chain;<br>Creatine kinase M chain;M-CK;<br>Myosin light chain alkali 1/2;                                                                                                    | 0.25 - 0.75<br>0.00 - 0.15<br>0.25 - 0.75<br>0.00 - 0.15                |
| FLDTCCKAAD<br>MAF<br>MAF<br>MSVSR                                               | KDTCFSTEGPNLVTR<br>KDTGKTPVEVAIHR<br>KDWSSALSSLR                                                                            | N-ter +28.03 Da, K +28.03 Da<br>N-ter +28.03 Da, K +28.03 Da<br>N-ter +28.03 Da, K +28.03 Da<br>N-ter +28.03 Da, K +28.03 Da                                                                              | 47.2<br>35.4<br>21.9                         | 78.3<br>66.8<br>65.8                         | 3<br>4<br>3                | 1780.02<br>1860.17<br>1288.80                                  | 0.971<br>-0.218<br>0.506                               | 0.203<br>0.03<br>0.071                             | ALBU_MOUSE<br>RS20_MOUSE<br>LAD1_MOUSE                                             |                                             | Serum albumin;<br>40S ribosomal protein S20;<br>Ladinin-1;<br>Myosin regulatory light chain 2, skeletal muscle isoform;                                                              |                                                                                                                                                                                                     | 0.25 - 0.75<br>0.25 - 0.75<br>0.25 - 0.75<br>0.25 - 0.75                |
| MFDQQTQJEF                                                                      | KEAFTVIDQNR                                                                                                                 | N-ter +28.03 Da, K +28.03 Da<br>N-ter +28.03 Da, K +28.03 Da, C +57.02 Da                                                                                                                                 | 38.1<br>29.5                                 | 53.0<br>84.0                                 | 3<br>4                     | 1375.82<br>1932.98                                             | -2.322<br>-0.184                                       | 0.348<br>0.052                                     | MLRS_MOUSE<br>ALBU_MOUSE                                                           | F6ULR7_MOUSE                                |                                                                                                                                                                                      | Fast skeletal myosin light chain 2,MLC2F;                                                                                                                                                           | 0.00 - 0.15                                                             |
| KLATDLTKVN<br>QPSDPTQTI                                                         | KECCHGDLLCADDR<br>KEEDIVEDGWTIVR                                                                                            | N-ter +28.03 Da, K +28.03 Da<br>N-ter +34.06 Da, K +34.06 Da                                                                                                                                              | 29.5<br>46.0                                 | 84.0<br>67.3                                 | 4<br>3                     | 1932.98<br>1756.09                                             | -0.184<br>-1.322                                       | 0.052<br>0.198                                     | ALBU_MOUSE<br>TSR2_MOUSE                                                           |                                             | Serum albumin;<br>Pre-rRNA-processing protein TSR2 homolog;                                                                                                                          |                                                                                                                                                                                                     | 0.25 - 0.75<br>0.15 - 0.25                                              |
| EKSKLDWESF<br>SQQTLEWY                                                          | KEEGIGEELAIHR<br>KEHISTTKVPEQPR                                                                                             | N-ter +28.03 Da, K +28.03 Da<br>N-ter +34.06 Da, K +34.06 Da<br>N-ter +28.03 Da, K +28.03 Da, C +57.02 Da                                                                                                 | 21.4<br>23.6                                 | 80.6<br>73.2                                 | 4<br>4                     | 1779.06<br>1751.21                                             | -0.358<br>-1.434                                       | 0.032<br>0.426                                     | CFDP1_MOUSE<br>TITN_MOUSE                                                          | E9Q8M7_MOUSE                                | Craniofacial development protein 1;<br>Titin;                                                                                                                                        | 27 kDa craniofacial protein;Bucentaur;Protein Cp27;<br>Connectin;                                                                                                                                   | 0.25 - 0.75<br>0.15 - 0.25                                              |
| SLARELSGTI<br>DMEVKVQKSS<br>QQMTSSYGVY                                          | KEILGTAQSGVCNDVGR<br>KELEDMNQKLFDR<br>KEPAAPVSIQR                                                                           | N-ter +28.03 Da, K +28.03 Da<br>N-ter +34.06 Da, K +34.06 Da<br>N-ter +28.03 Da, K +28.03 Da                                                                                                              | 51.4<br>32.3<br>21.4                         | 64.2<br>66.4<br>65.2                         | 3<br>4<br>3                | 1859.08<br>1880.22<br>1250.82                                  | -1.089<br>-1.556<br>-0.168                             | 0.185<br>0.137<br>0.205                            | RL12_MOUSE<br>TNNT2_MOUSE<br>LASP1_MOUSE                                           | A2A6K0_MOUSE<br>A2A6H0_MOUSE                | 60S ribosomal protein L12;<br>Troponin I, fast skeletal muscle;<br>LIM and SH3 domain protein 1;                                                                                     | Troponin I, fast-twitch isoform;<br>Metastatic lymph node gene 50 protein;                                                                                                                          | 0.15 - 0.25<br>0.15 - 0.25<br>0.25 - 0.75                               |
| VSSNFDDYV                                                                       | KEVGVGFATR                                                                                                                  | N-ter +28.03 Da, K +28.03 Da<br>N-ter +28.03 Da, K +28.03 Da, C +57.02 Da                                                                                                                                 | 23.1<br>43.4                                 | 83.6<br>68.8                                 | 3<br>4                     | 1118.74<br>2491.24                                             | -0.074<br>2.658                                        | 0.008<br>0.552                                     | FABP4_MOUSE                                                                        |                                             | Fatty acid-binding protein, adipocyte;                                                                                                                                               | 3T3-L1 lipid-binding protein;Adipocyte lipid-binding protein;Adipocyte-type fatty acid-binding protein;Fatty acid-binding protein 4;Myelin P2 protein homolog;P15;P2 adipocyte protein;Protein 422; | 0.25 - 0.75                                                             |
| LLTKLPGPV<br>LEEVTKMCIQ<br>M<br>GSNSKRSTDY                                      | KEVKCDMEVSCPEYTCRR<br>KEVYENYPAIDLTR<br>KFNPFVTSDR<br>KGLLEEKGEGNKQLNR                                                      | N-ter +34.06 Da, K +34.06 Da<br>N-ter +34.06 Da, K +34.06 Da<br>N-ter +34.06 Da, K +34.06 Da<br>N-ter +28.03 Da, K +28.03 Da                                                                              | 37.8<br>31.0<br>29.4                         | 66.6<br>69.5<br>93.1                         | 3<br>3<br>4                | 1957.14<br>1408.88<br>1913.16                                  | -3.059<br>0.227<br>1.257                               | 0.51<br>0.041<br>0.184                             | DEK_MOUSE<br>L26_MOUSE<br>E9Q019_MOUSE                                             | Q3U9N4_MOUSE<br>D3Z3Q9_MOUSE                | Granulins;<br>Protein DEK;<br>60S ribosomal protein L26;                                                                                                                             | PC cell-derived growth factor;Proepithelin;                                                                                                                                                         | 0.85 - 1.00<br>0.00 - 0.15<br>0.25 - 0.75<br>0.75 - 0.85                |
| MSMN                                                                            | KGPTLGDGLPEQENVLQR                                                                                                          | N-ter +28.03 Da, K +28.03 Da<br>N-ter +28.03 Da, K +28.03 Da, C +57.02 Da                                                                                                                                 | 50.3<br>28.8                                 | 80.8<br>74.8                                 | 4<br>3                     | 2177.34<br>1281.70                                             | 0.993<br>-1.943                                        | 0.23<br>0.224                                      | PLIN1_MOUSE<br>HNRPK_MOUSE                                                         |                                             | Perilipin-1;                                                                                                                                                                         | Lipid droplet-associated protein;Perilipin A;                                                                                                                                                       | 0.25 - 0.75                                                             |
| IPTLEEQHY<br>RSAPPKLKL                                                          | KGSDFDCELR<br>KGVVPEDAVETLAGSLGTR                                                                                           | N-ter +28.03 Da, K +28.03 Da<br>N-ter +28.03 Da, K +28.03 Da                                                                                                                                              | 57.7                                         | 58.6                                         | 3                          | 1954.19                                                        | -1.059                                                 | 0.044                                              | ICAL_MOUSE                                                                         | Q921U7_MOUSE                                | Heterogeneous nuclear ribonucleoprotein K;<br>Calpastatin;                                                                                                                           | Calpain inhibitor;<br>Elongation factor Tu;Eukaryotic elongation factor 1 A-1;                                                                                                                      | 0.00 - 0.15<br>0.15 - 0.25                                              |
| PLRLPLQDVS<br>SLERQAGQIK                                                        | KIGGIGTVPVGR<br>KLEVNAAELLR                                                                                                 | N-ter +34.06 Da, K +34.06 Da<br>N-ter +28.03 Da, K +28.03 Da                                                                                                                                              | 24.1<br>34.8                                 | 47.3<br>54.7                                 | 3<br>3                     | 1220.88<br>1368.87                                             | -0.69<br>0.084                                         | 0.156<br>0.007                                     | EF1A1_MOUSE<br>PTRF_MOUSE                                                          | EF1A2_MOUSE<br>Q3U4N4_MOUSE                 | Elongation factor 1-alpha 1;<br>Polymerase I and transcript release factor;                                                                                                          | Cav-p60;Cavin-1;<br>Beta-1-globin;Hemoglobin beta-1 chain;Hemoglobin beta-major chain;                                                                                                              | 0.25 - 0.75<br>0.25 - 0.75                                              |
| FASLSLHCD                                                                       | KLHVDPENFR                                                                                                                  | N-ter +28.03 Da, K +28.03 Da                                                                                                                                                                              | 23.3                                         | 58.7                                         | 3                          | 1309.79                                                        | 1.88                                                   | 0.24                                               | HBB1_MOUSE                                                                         | HBB2_MOUSE                                  | Hemoglobin subunit beta-1;                                                                                                                                                           | Adipocyte protein P27;Lung carbonyl reductase;NADPH-dependent carbonyl reductase 2;                                                                                                                 | 0.85 - 1.00                                                             |
| M                                                                               | KLNFSGLR                                                                                                                    | N-ter +34.06 Da, K +34.06 Da                                                                                                                                                                              | 32.6                                         | 54.2                                         | 3                          | 1132.77                                                        | 0.227                                                  | 0.021                                              | CBR2_MOUSE                                                                         |                                             | Carbonyl reductase [NADPH] 2;                                                                                                                                                        | Carbonyl reductase 2;                                                                                                                                                                               | 0.25 - 0.75                                                             |

| Non Prime Site                        | Prime Site                                     | Modifications                             | Hyperscore | Mass error<br>in ppm | Charge | Precursor<br>neutral mass<br>in Da | Fold change<br>(log <sub>2</sub> ) of<br>ASAPRatio | FC-error of<br>ASAPRatio | Uniprot ID 1 | Uniprot ID 2 | Protein Name 1                                              | Protein Name 2                                                                                                                                      | Quantile    |
|---------------------------------------|------------------------------------------------|-------------------------------------------|------------|----------------------|--------|------------------------------------|----------------------------------------------------|--------------------------|--------------|--------------|-------------------------------------------------------------|-----------------------------------------------------------------------------------------------------------------------------------------------------|-------------|
| QHRRWRLHCL                            | KLQPLSPVSDIEISR                                | N-ter +28.03 Da, K +28.03 Da              | 41.0       | 46.0                 | 3      | 1834.14                            | -1.786                                             | 0.185                    | C1TM_MOUSE   |              | Monofunctional C1-tetrahydrofolate synthase, mitochondrial; | Formyltetrahydrofolate synthetase;                                                                                                                  | 0.00 - 0.15 |
| MSTVHEILC<br>M                        | KLSLEGHDHSTPPSAYGSKVPTNFDAER                   | N-ter +28.03 Da, K +28.03 Da              | 31.1       | 57.3                 | 4      | 3149.75                            | -0.811                                             | 0.071                    | ANXA2_MOUSE  | BOV2N7_MOUSE | Annexin A2;                                                 | Annexin II;Annexin-2;Calpactin I heavy chain;Calpactin-1 heavy chain;Chromobindin-8;Lipocortin II;Placental anticoagulant protein IV;Protein I;p36; | 0.25 - 0.75 |
| GPSAGDVEAI                            | KNAIANASTLAEVER                                | N-ter +28.03 Da, K +28.03 Da              | 25.2       | 72.5                 | 3      | 1117.73                            | 0.275                                              | 0.036                    | WDR82_MOUSE  |              | WD repeat-containing protein 82;                            |                                                                                                                                                     | 0.25 - 0.75 |
|                                       |                                                | N-ter +34.06 Da, K +34.06 Da              | 41.1       | 59.0                 | 3      | 1654.07                            | -1.286                                             | 0.125                    | RU2A_MOUSE   |              | U2 small nuclear ribonucleoprotein A';                      |                                                                                                                                                     | 0.15 - 0.25 |
|                                       |                                                | N-ter +34.06 Da, K +34.06 Da, C +57.02 Da | 38.1       | 84.2                 | 4      | 2445.59                            | -2.556                                             | 0.301                    | SYNC_MOUSE   |              | Asparagine-tRNA ligase, cytoplasmic;                        | Asparaginyl-tRNA synthetase;                                                                                                                        | 0.00 - 0.15 |
| M                                     | KPPAACAGDVDDAASPASTVNHLR                       | N-ter +28.03 Da, K +28.03 Da, C +57.02 Da | 48.2       | 61.1                 | 4      | 2459.41                            | 0.807                                              | 0.078                    | THOP1_MOUSE  |              | Thimet oligopeptidase;                                      |                                                                                                                                                     | 0.25 - 0.75 |
|                                       |                                                | N-ter +28.03 Da, K +28.03 Da, C +57.02 Da | 41.0       | 63.2                 | 3      | 1711.93                            | 1.96                                               | 0.262                    | TRFE_MOUSE   | E9Q035_MOUSE | Serotransferrin;                                            | Beta-1 metal-binding globulin;Siderophilin;                                                                                                         | 0.85 - 1.00 |
| YELLCLDNT<br>QLIDDHFLFD               | KPVQDYEDCYLAR                                  | N-ter +34.06 Da, K +34.06 Da              | 40.7       | 39.1                 | 3      | 1507.02                            | -0.415                                             | 0.066                    | KCRM_MOUSE   | KCRB_MOUSE   | Creatine kinase M-type;                                     | Creatine kinase M chain;M-CK;                                                                                                                       | 0.25 - 0.75 |
| LSTFQQMVIS                            | KQEYDEAGPSIVHR                                 | N-ter +28.03 Da, K +28.03 Da              | 55.4       | 80.7                 | 4      | 1683.99                            | -0.737                                             | 0.074                    | ACTS_MOUSE   | ACTA_MOUSE   | Actin, alpha skeletal muscle;                               | Alpha-actin-1;                                                                                                                                      | 0.25 - 0.75 |
|                                       |                                                | N-ter +28.03 Da, K +28.03 Da, C +57.02 Da | 53.3       | 73.7                 | 3      | 1836.08                            | -1.029                                             | 0.21                     | MLRS_MOUSE   |              | Myosin regulatory light chain 2, skeletal muscle isoform;   | Fast skeletal myosin light chain 2;MLC2F;                                                                                                           | 0.15 - 0.25 |
|                                       |                                                | N-ter +34.06 Da, K +34.06 Da, C +57.02 Da | 24.7       | 68.9                 | 3      | 1680.94                            | -5.059                                             | 1.686                    | D3YU50_MOUSE | Q6P6L5_MOUSE |                                                             |                                                                                                                                                     | 0.00 - 0.15 |
| FVREPPIMVT<br>DFHLLLEVN<br>NLHASNTRLQ | KQLEDMMAYCGER<br>KTDPGILKTEMR<br>KTGTAEMSSLEER | N-ter +28.03 Da, K +28.03 Da              | 21.1       | 57.8                 | 4      | 1568.02                            | -1.434                                             | 0.039                    | Q3UWK8_MOUSE |              |                                                             |                                                                                                                                                     | 0.15 - 0.25 |
|                                       |                                                | N-ter +34.06 Da, K +34.06 Da              | 36.9       | 62.1                 | 3      | 1618.99                            | -0.761                                             | 0.103                    | ATPA_MOUSE   | D6RU16_MOUSE | ATP synthase subunit alpha, mitochondrial;                  |                                                                                                                                                     | 0.25 - 0.75 |
|                                       |                                                | N-ter +28.03 Da, K +28.03 Da              | 47.7       | 69.2                 | 3      | 1445.85                            | 0.766                                              | 0.036                    | ANXA1_MOUSE  | E9QA30_MOUSE | Annexin A1;                                                 | Annexin I;Annexin-1;Calpactin II;Calpactin-2;Chromobindin-9;Lipocortin I;Phospholipase A2 inhibitory protein;p35;                                   | 0.25 - 0.75 |
| SASPQYQAVI<br>VVSSVNTVAN              | KTQSKPEDEADEWAR<br>KTVEEAENIVTTGVVR            | N-ter +34.06 Da, K +34.06 Da              | 30.3       | 72.0                 | 4      | 1891.15                            | -3.322                                             | 0.664                    | LDB3_MOUSE   | E9PYJ9_MOUSE | LIM domain-binding protein 3;                               | Protein cypher;Protein oracle;Z-band alternatively spliced PDZ-motif protein;                                                                       | 0.00 - 0.15 |
|                                       |                                                | N-ter +34.06 Da, K +34.06 Da              | 39.6       | 49.8                 | 3      | 1911.23                            | 0.566                                              | 0.073                    | SYUG_MOUSE   |              | Gamma-synuclein;                                            | Persyn;                                                                                                                                             | 0.25 - 0.75 |
|                                       |                                                | N-ter +28.03 Da, K +28.03 Da, C +57.02 Da | 51.6       | 66.5                 | 3      | 1775.02                            | 0.766                                              | 0.203                    | IF4B_MOUSE   | Q3TDD8_MOUSE | Eukaryotic translation initiation factor 4B;                |                                                                                                                                                     | 0.25 - 0.75 |
|                                       |                                                | N-ter +28.03 Da, K +28.03 Da              | 24.1       | 56.9                 | 4      | 1983.22                            | -0.029                                             | 0.002                    | DC1L1_MOUSE  |              | Cytoplasmic dynein 1 light intermediate chain 1;            | Dynein light chain A;Dynein light intermediate chain 1, cytosolic;                                                                                  | 0.25 - 0.75 |
| QFVWDWPTGF<br>LSPMSVNAVAM             | KVGINYQPPTVPGDLAKVQR<br>KVIDPATATVDLIR         | N-ter +28.03 Da, K +28.03 Da              | 29.5       | 79.9                 | 4      | 2419.59                            | -2.556                                             | 0.451                    | TBA1A_MOUSE  | TBA1B_MOUSE  | Tubulin alpha-1A chain;                                     | Alpha-tubulin 1;Alpha-tubulin isotype M-alpha-1;Tubulin alpha-1 chain;                                                                              | 0.00 - 0.15 |
|                                       |                                                | N-ter +28.03 Da, K +28.03 Da              | 33.4       | 23.4                 | 3      | 1540.92                            | 2.036                                              | 0.447                    | TCPD_MOUSE   |              | T-complex protein 1 subunit delta;                          | A5;CCT-delta;                                                                                                                                       | 0.85 - 1.00 |
|                                       |                                                | N-ter +28.03 Da, K +28.03 Da              | 23.9       | 61.7                 | 4      | 1782.13                            | -0.168                                             | 0.026                    | HAP28_MOUSE  |              | 28 kDa heat- and acid-stable phosphoprotein;                | PDGF-associated protein;PDGFA-associated protein 1;                                                                                                 | 0.25 - 0.75 |
| NPNRVAQTK<br>NV                       | KVTQLDLDGPKELSR<br>LASEPEIKGIR                 | N-ter +28.03 Da, K +28.03 Da              | 27.5       | 61.3                 | 3      | 1364.89                            | 2.021                                              | 0.304                    | KAD2_MOUSE   | F7BP55_MOUSE | Adenylate kinase 2, mitochondrial;                          | ATP-AMP transphosphorylase 2;                                                                                                                       | 0.85 - 1.00 |
| DALKRGLRE<br>DQAGRFHVLN               | LCEQQAELDYLCGR<br>LCGEEQGADAAALHFNPR           | N-ter +34.06 Da, K +57.02 Da              | 26.1       | 81.8                 | 3      | 1787.99                            | -5.059                                             | 1.686                    | FA65C_MOUSE  |              | Protein FAM65C;                                             |                                                                                                                                                     | 0.00 - 0.15 |
| HGCLNTLGSF<br>ELGVKSVQKL              | LCSCPMLVGLDGR<br>LDAVDITYVPVTR                 | N-ter +28.03 Da, C +57.02 Da              | 70.6       | 69.9                 | 3      | 1912.02                            | 1.208                                              | 0.329                    | Q9CRB1_MOUSE | LEG7_MOUSE   |                                                             |                                                                                                                                                     | 0.75 - 0.85 |
| KTNKPRLPF<br>PSPGEALHL                | LDIAPLDIGGADQEFR<br>LDLPCPTPPPAPIPVSR          | N-ter +34.06 Da                           | 33.6       | 80.2                 | 3      | 1727.05                            | -3.644                                             | 0.456                    | EGFL8_MOUSE  | E9QA36_MOUSE | Epidermal growth factor-like protein 8;                     |                                                                                                                                                     | 0.00 - 0.15 |
|                                       |                                                | N-ter +28.03 Da                           | 20.1       | 48.3                 | 3      | 1486.87                            | 0.604                                              | 0.159                    | EFTU_MOUSE   | D3YVN7_MOUSE | Elongation factor Tu, mitochondrial;                        |                                                                                                                                                     | 0.25 - 0.75 |
|                                       |                                                | N-ter +34.06 Da                           | 60.8       | 45.7                 | 3      | 1763.01                            | -2.837                                             | 1.013                    | CO1A2_MOUSE  | E9Q6U9_MOUSE | Collagen alpha-2(I) chain;                                  | Alpha-2 type I collagen;                                                                                                                            | 0.00 - 0.15 |
|                                       |                                                | N-ter +28.03 Da, C +57.02 Da              | 49.7       | 43.5                 | 3      | 1854.09                            | 1.903                                              | 0.122                    | AP1G2_MOUSE  |              | AP-1 complex subunit gamma-like 2;                          | Gamma2-adaptin;                                                                                                                                     | 0.85 - 1.00 |
|                                       |                                                | N-ter +28.03 Da, K +28.03 Da              | 35.3       | 55.5                 | 3      | 1655.02                            | 1.064                                              | 0.209                    | MA2B1_MOUSE  |              | Lysosomal alpha-mannosidase;                                | Lysoosomal acid alpha-mannosidase;Mannosidase alpha class 2B member 1;Mannosidase alpha-B;                                                          | 0.25 - 0.75 |
| GPTSYPESP<br>KLKGSAPSDM               | LDPTSVLTKMEIR<br>LDSLTIPELKDHLR                | N-ter +28.03 Da, K +28.03 Da              | 12.6       | 75.8                 | 4      | 1818.23                            | 0.057                                              | 0.004                    | URP2_MOUSE   |              | Fermitin family homolog 3;                                  | Kindlin-3;Unc-112-related protein 2;                                                                                                                | 0.25 - 0.75 |
| SPSAKDIKI<br>TGTGTLVLL                | LDSVGEIADDOR<br>LDVNDNAPIPEPR                  | N-ter +28.03 Da                           | 51.5       | 41.5                 | 2      | 1331.68                            | -1.184                                             | 0.135                    | RLA2_MOUSE   |              | 60S acidic ribosomal protein P2;                            |                                                                                                                                                     | 0.15 - 0.25 |
|                                       |                                                | N-ter +28.03 Da                           | 30.2       | 51.8                 | 3      | 1476.83                            | 3.581                                              | 0.293                    | CADH1_MOUSE  |              | Cadherin-1;                                                 | ARC-1;Epithelial cadherin;Uvomorulin;                                                                                                               | 0.85 - 1.00 |
|                                       |                                                | N-ter +34.06 Da                           | 30.4       | 52.9                 | 3      | 1550.90                            | -1.434                                             | 0.116                    | DPTOR_MOUSE  | B2ZRS5_MOUSE | DEP domain-containing mTOR-interacting protein;             | DEP domain-containing protein 6;                                                                                                                    | 0.15 - 0.25 |
| KDGSASGTTL                            | LEALDCLIPTRPTDKPLR                             | N-ter +28.03 Da, K +28.03 Da, C +57.02 Da | 38.9       | 83.6                 | 4      | 2260.45                            | -2.644                                             | 0.165                    | EF1A1_MOUSE  | D3Y268_MOUSE | Elongation factor 1-alpha 1;                                | Elongation factor Tu;Eukaryotic elongation factor 1 A-1;                                                                                            | 0.00 - 0.15 |
|                                       |                                                | N-ter +34.06 Da, K +34.06 Da              | 27.7       | 58.0                 | 4      | 2213.47                            | -2.556                                             | 0.301                    | EF1A2_MOUSE  | B7ZBW3_MOUSE | Elongation factor 1-alpha 2;                                | Eukaryotic elongation factor 1 A-2;Statin-S1;                                                                                                       | 0.00 - 0.15 |
| KEGNASGVL<br>VVLDPMYSTY               | LEALDILPTRPTDKPLR<br>LEALGIEGKTIPEYR           | N-ter +28.03 Da, K +28.03 Da              | 26.5       | 54.2                 | 3      | 1841.13                            | -0.556                                             | 0.049                    | ICAL_MOUSE   | Q921U7_MOUSE | Calpastatin;                                                | Calpain inhibitor;                                                                                                                                  | 0.25 - 0.75 |
|                                       |                                                | N-ter +28.03 Da, K +28.03 Da, C +57.02 Da | 56.8       | 80.5                 | 4      | 2237.15                            | 2.233                                              | 0.565                    | LYPD3_MOUSE  |              | Ly6/PLAUR domain-containing protein 3;                      | GPI-anchored metastasis-associated protein C4.4A homolog;                                                                                           | 0.85 - 1.00 |
| PLLCEGAQA<br>RTLTAVHDAI               | LECYSCVQKADDDGCSPHR<br>LEDLVFSPVIVGKR          | N-ter +28.03 Da, K +28.03 Da              | 43.7       | 56.5                 | 3      | 1657.04                            | -0.889                                             | 0.115                    | R57_MOUSE    | F6SVV1_MOUSE | Myosin regulatory light chain 2, skeletal muscle isoform;   |                                                                                                                                                     | 0.25 - 0.75 |
|                                       |                                                | N-ter +34.06 Da, C +57.02 Da              | 41.2       | 23.5                 | 2      | 1410.76                            | -3.059                                             | 0.255                    | MLRS_MOUSE   |              |                                                             | Fast skeletal myosin light chain 2;MLC2F;                                                                                                           | 0.00 - 0.15 |
|                                       |                                                | N-ter +34.06 Da, K +34.06 Da              | 28.4       | 53.8                 | 3      | 1699.09                            | -1.358                                             | 0.139                    | ECHA_MOUSE   |              | Trifunctional enzyme subunit alpha, mitochondrial;          | TP-alpha;                                                                                                                                           | 0.15 - 0.25 |
| KSPEERTIEY<br>NDAYGPPSNF              | LEEVAVNAFKGLADR<br>LEIDVSNPQTGVGR              | N-ter +34.06 Da                           | 34.7       | 49.7                 | 3      | 1616.98                            | -2                                                 | 0.64                     | SNX3_MOUSE   | Q78ZM0_MOUSE | Sorting nexin-3;                                            | SDP3 protein;                                                                                                                                       | 0.00 - 0.15 |
| YRIWRDANW<br>PRKIQTVP                 | LEINPETGAIFTR<br>LEPHLDPEAAEQIR                | N-ter +28.03 Da                           | 40.9       | 55.1                 | 3      | 1487.88                            | -2.556                                             | 0.301                    | CADH1_MOUSE  |              | Cadherin-1;                                                 | ARC-1;Epithelial cadherin;Uvomorulin;                                                                                                               | 0.00 - 0.15 |
|                                       |                                                | N-ter +34.06 Da                           | 39.7       | 58.5                 | 3      | 1650.98                            | -1.889                                             | 0.14                     | PPR1A_MOUSE  |              | Protein phosphatase 1 regulatory subunit 1A;                | Protein phosphatase inhibitor 1;                                                                                                                    | 0.00 - 0.15 |
|                                       |                                                | N-ter +34.06 Da, C +57.02 Da              | 30.8       | 38.7                 | 3      | 1877.97                            | -3.322                                             | 0.664                    | DLGP4_MOUSE  | B7ZNS2_MOUSE | Disks large-associated protein 4;                           | PSD-95/SAP90-binding protein 4;SAP90/PSD-95-associated protein 4;                                                                                   | 0.00 - 0.15 |
| ASSLPPDPW<br>AANDCKSLHT               | LETSSSSPAEPAPQACGR<br>LFGDKLCAINLR             | N-ter +28.03 Da, K +28.03 Da, C +57.02 Da | 17.0       | 61.6                 | 3      | 1571.99                            | -0.269                                             | 0.032                    | ALBU_MOUSE   |              | Serum albumin;                                              |                                                                                                                                                     | 0.25 - 0.75 |

| Non Prime Site | Prime Site               | Modifications                                                             | Hyperscore | Mass error in ppm | Charge | Precursor neutral mass in Da | Fold change (log <sub>2</sub> ) of ASAPRatio | FC-error of ASAPRatio | Uniprot ID 1 | Uniprot ID 2 | Protein Name 1                                                        | Protein Name 2                                                                                                                                                            | Quantile    |
|----------------|--------------------------|---------------------------------------------------------------------------|------------|-------------------|--------|------------------------------|----------------------------------------------|-----------------------|--------------|--------------|-----------------------------------------------------------------------|---------------------------------------------------------------------------------------------------------------------------------------------------------------------------|-------------|
| SPASHEIATN     | LGDFAI5LYR               | N-ter +34.06 Da                                                           | 19.9       | 36.3              | 2      | 1187.72                      | 0.705                                        | 0.138                 | A1AT1_MOUSE  | A1AT2_MOUSE  | Alpha-1-antitrypsin 1-1;                                              | Alpha-1 protease inhibitor 1;Alpha-1-antiproteinase;Serine protease inhibitor 1-1;Serine protease inhibitor A1a;                                                          | 0.25 - 0.75 |
| TVKTFVFCN      | LGEKFDETTADGR            | N-ter +28.03 Da, K +28.03 Da                                              | 24.0       | 69.5              | 3      | 1493.84                      | -6.644                                       | 0.001                 | FABP5_MOUSE  | E9Q964_MOUSE | Fatty acid-binding protein, epidermal;                                | Epidermal-type fatty acid-binding protein;Fatty acid-binding protein 5;Keratinocyte lipid-binding protein;Psoriasis-associated fatty acid-binding protein homolog;        | 0.00 - 0.15 |
| Q5VCVHLRN      | LGTLNPS5LDETAER          | N-ter +34.06 Da                                                           | 41.6       | 44.2              | 3      | 1914.03                      | -1.396                                       | 0.331                 | FRDA_MOUSE   | E9Q2P9_MOUSE | Frataxin, mitochondrial;                                              | 0.15 - 0.25                                                                                                                                                               |             |
| IMSLKRMLEK     | LGVPKTHLEKRLIR           | N-ter +34.06 Da, K +34.06 Da                                              | 8.0        | 80.9              | 4      | 1874.46                      | -2.252                                       | 0.107                 | AIF1_MOUSE   | Q9EQW9_MOUSE | Allograft inflammatory factor 1;                                      | Ionized calcium-binding adapter molecule 1; Lysosomal pepstatin-insensitive protease;Tripeptidyl aminopeptidase;Tripeptidyl-peptidase I;                                  | 0.00 - 0.15 |
| PEPQGVTVS      | LHLGVTPSVLR              | N-ter +28.03 Da<br>N-ter +28.03 Da, K +28.03 Da, C +57.02 Da              | 25.8       | 65.5              | 3      | 1218.82                      | 0.993                                        | 0.1                   | TPP1_MOUSE   |              | Tripeptidyl-peptidase 1;                                              |                                                                                                                                                                           | 0.25 - 0.75 |
| DESAANCCKS     | LHTLFGDKLCIPNLR          |                                                                           | 20.6       | 93.9              | 4      | 1923.26                      | -0.168                                       | 0.011                 | ALBU_MOUSE   |              | Serum albumin;                                                        |                                                                                                                                                                           | 0.25 - 0.75 |
| RALGVRDWR      | LHTVYQSVELPETHQMLR       | N-ter +34.06 Da                                                           | 37.4       | 66.0              | 4      | 2214.31                      | 0.275                                        | 0.03                  | ACADS_MOUSE  |              | Short-chain specific acyl-CoA dehydrogenase, mitochondrial;           | Butyryl-CoA dehydrogenase;                                                                                                                                                | 0.25 - 0.75 |
| KHKTDLNHEN     | LKGGDDLDPNVVLSSR         | N-ter +34.06 Da, K +34.06 Da                                              | 57.2       | 65.4              | 3      | 1816.12                      | -1.943                                       | 0.299                 | KCRM_MOUSE   |              | Creatine kinase M-type;                                               | Creatine kinase M chain;M-CK;                                                                                                                                             | 0.00 - 0.15 |
| GCLVLPGYEA     | LKGPKEISGFEGDVTSLR       | N-ter +28.03 Da, K +28.03 Da                                              | 41.4       | 71.9              | 4      | 2016.27                      | -0.667                                       | 0.074                 | CLM9_MOUSE   |              | CMRF35-like molecule 9;                                               | CD300 antigen-like family member G;Nepmucin;                                                                                                                              | 0.25 - 0.75 |
| PRLSISGEYN     | LKTLMSPLGITR             | N-ter +28.03 Da, K +28.03 Da                                              | 34.4       | 59.7              | 3      | 1384.93                      | -0.34                                        | 0.056                 | A1AT4_MOUSE  | A1AT1_MOUSE  | Alpha-1-antitrypsin 1-4;                                              | Alpha-1 protease inhibitor 4;Serine protease inhibitor 1-4;Serine protease inhibitor A1d;                                                                                 | 0.25 - 0.75 |
| PDQAGRHFVN     | LLCGEEQGADAAALHFNPR      | N-ter +28.03 Da, C +57.02 Da                                              | 53.0       | 50.2              | 3      | 2025.08                      | 0.516                                        | 0.076                 | LEG7_MOUSE   | Q9CRB1_MOUSE | Galectin-7;                                                           |                                                                                                                                                                           | 0.25 - 0.75 |
| IKKLELRSM      | LMEQDDPVAVTVR            | N-ter +28.03 Da                                                           | 9.4        | 113.6             | 4      | 1499.94                      | 5.681                                        | 0.243                 | NOC3_MOUSE   |              | Nucleolar complex protein 3 homolog;                                  | Nucleolar complex-associated protein 3-like protein;                                                                                                                      | 0.85 - 1.00 |
| KKILAERRKP     | LNIDHLSDDKLR             | N-ter +34.06 Da, K +34.06 Da                                              | 18.0       | 46.4              | 4      | 1505.95                      | -3.184                                       | 0.289                 | TNNT3_MOUSE  | A2A6J0_MOUSE | Troponin T, fast skeletal muscle;                                     | Troponin I, fast-twitch isoform; Fast skeletal muscle troponin T;                                                                                                         | 0.00 - 0.15 |
| QVLVQSSSN      | LPDTSIPGGSTPTVQVTPQLETR  | N-ter +28.03 Da                                                           | 28.9       | 61.1              | 4      | 2421.42                      | 1.766                                        | 0.301                 | PGBM_MOUSE   | B1B0C7_MOUSE | Basement membrane-specific heparan sulfate proteoglycan core protein; |                                                                                                                                                                           | 0.75 - 0.85 |
| PRKIISLSQL     | LQEDSLNVDLSSLR           | N-ter +28.03 Da                                                           | 49.3       | 70.0              | 3      | 1687.00                      | 1.444                                        | 0.143                 | PSME2_MOUSE  | E0C290_MOUSE | Proteasome activator complex subunit 2;                               | 11S regulator complex subunit beta;Activator of multicatalytic protease subunit 2;Proteasome activator 28 subunit beta;                                                   | 0.75 - 0.85 |
| SRDGKALEQF     | LQEYFDGNLKR              | N-ter +34.06 Da, K +34.06 Da                                              | 21.7       | 74.5              | 3      | 1449.93                      | -1.12                                        | 0.195                 | PDI3_MOUSE   |              | Protein disulfide-isomerase A3;                                       | 58 kDa glucose-regulated protein;58 kDa microsomal protein;Disulfide isomerase ER-60;Endoplasmic reticulum resident protein 57;Endoplasmic reticulum resident protein 60; | 0.15 - 0.25 |
| ARRQHLK5VM     | LQIAATELEKEESR           | N-ter +28.03 Da, K +28.03 Da                                              | 25.8       | 57.6              | 3      | 1672.00                      | 0.84                                         | 0.066                 | TNNI2_MOUSE  | A2A6K0_MOUSE | Troponin I, fast skeletal muscle;                                     | Troponin I, fast-twitch isoform;                                                                                                                                          | 0.25 - 0.75 |
| DESTG5IAKR     | LQSIGTENTEENNR           | N-ter +28.03 Da                                                           | 29.5       | 67.1              | 3      | 1673.95                      | 1.77                                         | 0.317                 | ALDOA_MOUSE  | Q9CPQ9_MOUSE | Fructose-bisphosphate aldolase A;                                     | Aldolase 1;Muscle-type aldolase; Heat shock 84 kDa;Tumor-specific transplantation 84 kDa antigen;                                                                         | 0.85 - 1.00 |
| NTFYSNKEIF     | LRELSNASDALKIR           | N-ter +28.03 Da, K +28.03 Da<br>N-ter +34.06 Da, K +34.06 Da, C +57.02 Da | 42.1       | 64.9              | 4      | 1869.19                      | 0.465                                        | 0.064                 | H590B_MOUSE  | ENPL_MOUSE   | Heat shock protein HSP 90-beta;                                       |                                                                                                                                                                           | 0.25 - 0.75 |
| FGDKLCAIPN     | LRENGELADCTKQEPER        |                                                                           | 45.7       | 70.6              | 4      | 2435.36                      | -0.105                                       | 0.023                 | ALBU_MOUSE   |              | Serum albumin;                                                        | Carbonate dehydratase III;Carbonic anhydrase III;                                                                                                                         | 0.25 - 0.75 |
| VFDDTYDRSM     | LRGGPLSGPYR              | N-ter +28.03 Da                                                           | 33.7       | 58.7              | 3      | 1199.75                      | -0.599                                       | 0.018                 | CAH3_MOUSE   |              | Carbonic anhydrase 3;                                                 |                                                                                                                                                                           | 0.25 - 0.75 |
| ALSVLPSDRA     | LRPDCCEVICSYLGR          | N-ter +28.03 Da, C +57.02 Da                                              | 51.1       | 70.0              | 3      | 1822.01                      | 0.014                                        | 0.003                 | MANF_MOUSE   | Q3TMX5_MOUSE | Mesencephalic astrocyte-derived neurotrophic factor;                  | Arginine-rich protein;Protein ARMET;                                                                                                                                      | 0.25 - 0.75 |
| KTVRGC5KVL     | LRPQTSEEVQILR            | N-ter +34.06 Da                                                           | 34.6       | 36.2              | 3      | 1689.03                      | -0.168                                       | 0.077                 | D2HDH_MOUSE  | E9QN44_MOUSE | D-2-hydroxyglutarate dehydrogenase, mitochondrial;                    |                                                                                                                                                                           | 0.25 - 0.75 |
| MERQVIL        | LSEPQEAALYR              | N-ter +28.03 Da                                                           | 34.2       | 55.7              | 3      | 1374.79                      | 0.575                                        | 0.023                 | APEH_MOUSE   |              | Acylamino-acid-releasing enzyme;                                      | Acyl-peptide hydrolase;Acylaminoacyl-peptidase;                                                                                                                           | 0.25 - 0.75 |
| GPAPAAQAPD     | LSGTLESIPDKLKEFGNTLEDKAR | N-ter +28.03 Da, K +28.03 Da                                              | 19.8       | 86.6              | 4      | 2772.77                      | -2.837                                       | 0.405                 | APOC1_MOUSE  |              | Apolipoprotein C-1;                                                   | Apolipoprotein C1;                                                                                                                                                        | 0.00 - 0.15 |
| FQLIGIQDGY     | LSLLQDSGEVR              | N-ter +34.06 Da                                                           | 29.1       | 26.7              | 2      | 1249.74                      | -2.252                                       | 0.107                 | IF5A1_MOUSE  |              | Eukaryotic translation initiation factor 5A-1;                        | Eukaryotic initiation factor 5A isoform 1;eIF-4D;                                                                                                                         | 0.00 - 0.15 |
| QKVLSLKQIL     | LSTEEEDSGAGPPR           | N-ter +28.03 Da                                                           | 47.2       | 51.0              | 3      | 1342.71                      | -1.286                                       | 0.251                 | ARHG1_MOUSE  | E9PUF7_MOUSE | Rho guanine nucleotide exchange factor 1;                             | Lbc's second cousin;Lymphoid blast crisis-like 2;                                                                                                                         | 0.15 - 0.25 |
| PERSTSIHM      | LTDGDANTGESRPEKIQENVR    | N-ter +28.03 Da, K +28.03 Da                                              | 25.8       | 77.8              | 4      | 2384.38                      | 1.367                                        | 0.265                 | ITH3_MOUSE   | E9PV51_MOUSE | Inter-alpha-trypsin inhibitor heavy chain H3;                         |                                                                                                                                                                           | 0.75 - 0.85 |
| LLIATGPPTA     | LTEDEKQTMVDLHNQYR        | N-ter +28.03 Da, K +28.03 Da                                              | 31.7       | 69.5              | 4      | 2175.21                      | 0.949                                        | 0.207                 | PI16_MOUSE   | D3Z6T6_MOUSE | Peptidase inhibitor 16;                                               | Cysteine-rich protease inhibitor;                                                                                                                                         | 0.25 - 0.75 |
| GDYIERLWAY     | LTIIEQLLEKR              | N-ter +28.03 Da, K +28.03 Da                                              | 19.5       | 79.3              | 3      | 1297.90                      | 2.322                                        | 0.738                 | ITH3_MOUSE   | F6ZKJ7_MOUSE | Inter-alpha-trypsin inhibitor heavy chain H3;                         |                                                                                                                                                                           | 0.85 - 1.00 |
| MEVNRD5VIF     | LVDGSSSLGSPNFAIR         | N-ter +28.03 Da                                                           | 42.0       | 55.1              | 3      | 1761.00                      | 0.111                                        | 0.005                 | E9PWQ3_MOUSE | D3YWD1_MOUSE |                                                                       |                                                                                                                                                                           | 0.25 - 0.75 |
| TALVCNDGSG     | LVKAGFAGDDAPR            | N-ter +34.06 Da, K +34.06 Da                                              | 30.3       | 56.1              | 3      | 1383.89                      | -0.644                                       | 0.05                  | ACTC_MOUSE   | ACTS_MOUSE   | Actin, alpha cardiac muscle 1;                                        | Alpha-cardiac actin; ATP-dependent helicase RENT1;Nonsense mRNA reducing factor 1;Up-frameshift suppressor 1 homolog;                                                     | 0.25 - 0.75 |
| LIQDRCLFSW     | LVKIPSEQELR              | N-ter +28.03 Da, K +28.03 Da                                              | 23.8       | 41.1              | 3      | 1494.94                      | 0.714                                        | 0.017                 | RENT1_MOUSE  |              | Regulator of nonsense transcripts 1;                                  |                                                                                                                                                                           | 0.25 - 0.75 |
| GIWHNDN5KF     | LWVNEEDHLR               | N-ter +28.03 Da                                                           | 39.7       | 76.3              | 3      | 1436.85                      | -1.889                                       | 0.14                  | KCRM_MOUSE   |              | Creatine kinase M-type;                                               | Creatine kinase M chain;M-CK;                                                                                                                                             | 0.00 - 0.15 |
| KG5VAGGAVY     | LVDQQLLGP5DK5EALR        | N-ter +34.06 Da, K +34.06 Da                                              | 26.4       | 54.9              | 3      | 2171.33                      | -1.396                                       | 0.147                 | QIL1_MOUSE   |              | Protein QIL1;                                                         |                                                                                                                                                                           | 0.15 - 0.25 |
| VLGKPLSLAF     | LYMEKNQLEEVP5ALPR        | N-ter +28.03 Da, K +28.03 Da                                              | 33.6       | 55.9              | 3      | 2072.21                      | -2.322                                       | 0.348                 | PRELP_MOUSE  |              | Prolargin;                                                            | Proline-arginine-rich end leucine-rich repeat protein;                                                                                                                    | 0.00 - 0.15 |
| SCTFFLAVSG     | LYSSDDVIELT5PNFNR        | N-ter +34.06 Da                                                           | 64.0       | 51.8              | 3      | 2090.15                      | 0.585                                        | 0.105                 | PDI6_MOUSE   | Q3TML0_MOUSE | Protein disulfide-isomerase A6;                                       | Thioredoxin domain-containing protein 7;                                                                                                                                  | 0.25 - 0.75 |

Table S11, Tholen et al.

| Non Prime Site | Prime Site              | Modifications                             | Hyperscore | Mass error in ppm | Charge | Precursor neutral mass in Da | Fold change (log <sub>2</sub> ) of ASAPRatio | FC-error of ASAPRatio | Uniprot ID 1 | Uniprot ID 2 | Protein Name 1                                            | Protein Name 2                                                                                                                                                        | Quantile    |
|----------------|-------------------------|-------------------------------------------|------------|-------------------|--------|------------------------------|----------------------------------------------|-----------------------|--------------|--------------|-----------------------------------------------------------|-----------------------------------------------------------------------------------------------------------------------------------------------------------------------|-------------|
| TARGAAVTRS     | MASGGGVPTDEEQATGLER     | N-ter +28.03 Da                           | 50.4       | 48.6              | 3      | 1931.98                      | -0.234                                       | 0.055                 | COX5B_MOUSE  | Q9D881_MOUSE | Cytochrome c oxidase subunit 5B, mitochondrial;           | Cytochrome c oxidase polypeptide Vb;                                                                                                                                  | 0.25 - 0.75 |
| GCKNEKIAFI     | MDESNDVDSGFLER          | N-ter +28.03 Da                           | 35.4       | 73.6              | 3      | 1638.88                      | 2.956                                        | 0.518                 | DYHCL_MOUSE  |              | Cytoplasmic dynein 1 heavy chain 1;                       | Cytoplasmic dynein heavy chain 1; Dynein heavy chain, cytosolic;                                                                                                      | 0.85 - 1.00 |
| SKMFEELKNR     | MDVLAQEVALLKEK          | N-ter +28.03 Da, K +28.03 Da              | 37.1       | 67.8              | 3      | 1670.08                      | -0.029                                       | 0.003                 | TETN_MOUSE   | Q8CFZ6_MOUSE | Tetranectin;                                              | C-type lectin domain family 3 member B; Plasminogen kringle 4-binding protein;                                                                                        | 0.25 - 0.75 |
| GKPLSLAFLY     | MEKNQLLEVPASALPR        | N-ter +34.06 Da, K +34.06 Da              | 38.0       | 46.0              | 3      | 1808.10                      | -0.184                                       | 0.019                 | PRELP_MOUSE  |              | Prolargin;                                                | Proline-arginine-rich end leucine-rich repeat protein;                                                                                                                | 0.25 - 0.75 |
| DTPKKQALYL     | MFDTPQESPVKSPVPR        | N-ter +28.03 Da, K +28.03 Da              | 39.0       | 51.7              | 3      | 1870.06                      | 0.516                                        | 0.061                 | TACC2_MOUSE  | E9Q8T1_MOUSE | Transforming acidic coiled-coil-containing protein 2;     |                                                                                                                                                                       | 0.25 - 0.75 |
| VAIVDDPRYL     | MFSNQVCTLEIR            | N-ter +28.03 Da, C +57.02 Da              | 35.1       | 51.4              | 3      | 1581.85                      | -0.515                                       | 0.037                 | D3YU50_MOUSE | Q6P6L5_MOUSE |                                                           |                                                                                                                                                                       | 0.25 - 0.75 |
| RPRHGQVMVG     | MGQKDCYVGEAQSKR         | N-ter +34.06 Da, K +34.06 Da, C +57.02 Da | 23.0       | 85.3              | 4      | 1973.19                      | 0.506                                        | 0.167                 | ACTBL_MOUSE  |              | Beta-actin-like protein 2;                                | Kappa-actin;                                                                                                                                                          | 0.25 - 0.75 |
| RPRHGQVMVG     | MGQKDSYVGEAQSKR         | N-ter +28.03 Da, K +28.03 Da              | 16.4       | 75.4              | 4      | 1882.07                      | 0.07                                         | 0.017                 | ACTB_MOUSE   | ACTA_MOUSE   | Actin, cytoplasmic 1;                                     | Beta-actin;                                                                                                                                                           | 0.25 - 0.75 |
| TQMVFSLSGF     | MIECVLGVMAYDR           | N-ter +34.06 Da, C +57.02 Da              | 28.3       | 56.1              | 3      | 1702.96                      | -5.059                                       | 1.686                 | AZASV3_MOUSE |              |                                                           |                                                                                                                                                                       | 0.00 - 0.15 |
| KALVSSVRQR     | MKCSSMQKFGER            | N-ter +28.03 Da, K +28.03 Da, C +57.02 Da | 20.0       | 78.7              | 4      | 1571.89                      | 0.918                                        | 0.112                 | ALBU_MOUSE   |              | Serum albumin;                                            |                                                                                                                                                                       | 0.25 - 0.75 |
|                | MKVFTVGTPLPAEGR         | N-ter +34.06 Da, K +34.06 Da              | 33.1       | 63.0              | 3      | 1569.04                      | -0.152                                       | 0.025                 | GRHPR_MOUSE  | D6REG4_MOUSE | Glyoxylate reductase/hydroxyypyruvate reductase;          |                                                                                                                                                                       | 0.25 - 0.75 |
| AAQTLTGAK      | MLQQEKGHPAQLR           | N-ter +28.03 Da, K +28.03 Da              | 21.1       | 85.6              | 4      | 1591.00                      | -3.322                                       | 0.997                 | P5CR3_MOUSE  |              | Pyrroline-5-carboxylate reductase 3;                      | Pyrroline-5-carboxylate reductase-like protein; Calgizzarin; Endothelial monocyte-activating polypeptide; Protein S100-C; S100 calcium-binding protein A11;           | 0.00 - 0.15 |
| QLSKTEFLSF     | MNTELAFTKNQKDPGVLDLR    | N-ter +34.06 Da, K +34.06 Da              | 27.6       | 66.4              | 4      | 2349.48                      | 1.091                                        | 0.149                 | S10AB_MOUSE  | F6S35_MOUSE  | Protein S100-A11;                                         | Protein cypher; Protein oracle; Z-band alternatively spliced PDZ-motif protein;                                                                                       | 0.75 - 0.85 |
| ILAQMTGTEY     | MQDPDEEALRR             | N-ter +34.06 Da                           | 28.0       | 68.3              | 3      | 1392.78                      | -2.252                                       | 0.429                 | LDB3_MOUSE   | E9PY9_MOUSE  | LIM domain-binding protein 3;                             |                                                                                                                                                                       | 0.00 - 0.15 |
| ILAHLTGTEF     | MQDPDEEFMKSR            | N-ter +34.06 Da, K +34.06 Da              | 20.5       | 65.7              | 4      | 1742.04                      | -3.322                                       | 0.332                 | Q8BVI7_MOUSE |              |                                                           |                                                                                                                                                                       | 0.00 - 0.15 |
| TTMYPGIADR     | MQKEITALAPSTMKIAPP      | N-ter +28.03 Da, K +28.03 Da              | 32.7       | 52.0              | 4      | 2677.70                      | -0.837                                       | 0.09                  | ACTB_MOUSE   | ACTA_MOUSE   | Actin, cytoplasmic 1;                                     | Beta-actin;                                                                                                                                                           | 0.25 - 0.75 |
| TTMYPGIADR     | MQKEITALAPSTMKIK        | N-ter +28.03 Da, K +28.03 Da              | 26.9       | 66.1              | 4      | 1901.24                      | 2.895                                        | 0.358                 | ACTA_MOUSE   | ACTB_MOUSE   | Actin, aortic smooth muscle;                              | Alpha-actin-2;                                                                                                                                                        | 0.85 - 1.00 |
| TTMYPGIADR     | MQKEITALAPSTMK          | N-ter +28.03 Da, K +28.03 Da              | 41.7       | 45.1              | 3      | 1631.97                      | 1.157                                        | 0.099                 | ACTC_MOUSE   | ACTA_MOUSE   | Actin, alpha cardiac muscle 1;                            | Alpha-cardiac actin;                                                                                                                                                  | 0.75 - 0.85 |
|                | MQQVEASLQPETLR          | N-ter +28.03 Da                           | 22.2       | 46.7              | 3      | 1656.93                      | 1.104                                        | 0.128                 | SPA3G_MOUSE  | SPA3C_MOUSE  | Serine protease inhibitor A3G;                            | Serine protease inhibitor 2A;                                                                                                                                         | 0.00 - 0.15 |
| PGLGNGFASQ     | MSYGYDEKASGVSPGPMGSPGR  | N-ter +34.06 Da, K +34.06 Da              | 68.5       | 50.9              | 3      | 2493.36                      | -2.837                                       | 1.621                 | CO1A1_MOUSE  | F8WGB7_MOUSE | Collagen alpha-1(I) chain;                                | Alpha-1 type I collagen;                                                                                                                                              | 0.00 - 0.15 |
| SPNKGVLSDF     | MTDVPVDPGVVHR           | N-ter +28.03 Da                           | 32.4       | 49.6              | 3      | 1448.82                      | 0.566                                        | 0.084                 | TPD54_MOUSE  | Q3TUJ_MOUSE  | Tumor protein D54;                                        | Tumor protein D52-like 2;                                                                                                                                             | 0.25 - 0.75 |
| QSRFRILAQ      | MTGTEYMQDPDEEALRR       | N-ter +34.06 Da                           | 28.6       | 47.9              | 3      | 2075.05                      | -1.837                                       | 0.394                 | LDB3_MOUSE   | E9PY9_MOUSE  | LIM domain-binding protein 3;                             | Protein cypher; Protein oracle; Z-band alternatively spliced PDZ-motif protein;                                                                                       | 0.00 - 0.15 |
| ISKEWGFTKF     | NADEFDMVAEKR            | N-ter +34.06 Da, K +34.06 Da              | 25.0       | 65.7              | 3      | 1620.92                      | -1.786                                       | 0.493                 | RLI1_MOUSE   |              | 60S ribosomal protein L10;                                | Protein QM homolog;                                                                                                                                                   | 0.00 - 0.15 |
| TIKKRLETTY     | NATEPVSIFYDKR           | N-ter +34.06 Da, K +34.06 Da              | 28.3       | 58.6              | 3      | 1606.99                      | -0.837                                       | 0.075                 | KAD1_MOUSE   |              | Adenylyl kinase isoenzyme 1;                              | ATP-AMP transphosphorylase 1; Myokinase;                                                                                                                              | 0.25 - 0.75 |
| TGGRTTWART     | NATLSVEPEGR             | N-ter +28.03 Da                           | 46.3       | 36.7              | 2      | 1199.66                      | 0.356                                        | 0.031                 | ACOT2_MOUSE  |              | Acyl-coenzyme A thioesterase 2, mitochondrial;            | Acyl coenzyme A thioesterase; MTE-1; Very-long-chain acyl-CoA thioesterase;                                                                                           | 0.25 - 0.75 |
| ELYKCVKYAC     | NFGPTGIGFGLTQQVEK       | N-ter +34.06 Da, K +34.06 Da              | 34.7       | 48.1              | 3      | 2208.37                      | -1.515                                       | 0.13                  | CSR3_MOUSE   |              | Cysteine and glycine-rich protein 3;                      | cardiac; Muscle LIM protein;                                                                                                                                          | 0.15 - 0.25 |
| NTLVANTSNS     | NLGKADQAEPEKLR          | N-ter +28.03 Da, K +28.03 Da              | 23.9       | 69.2              | 3      | 1652.04                      | 1.623                                        | 0.248                 | ZNT1_MOUSE   |              | Zinc transporter 1;                                       | Solute carrier family 30 member 1;                                                                                                                                    | 0.75 - 0.85 |
| ILLWLYGADG     | NIVMTQSPKSMMSVGER       | N-ter +34.06 Da, K +34.06 Da              | 32.2       | 50.8              | 3      | 2049.17                      | -1.12                                        | 0.17                  | KV5A2_MOUSE  |              | Ig kappa chain V-V region MOPC 21;                        |                                                                                                                                                                       | 0.15 - 0.25 |
| FLPMMAISIN     | NKDGQGYEDFVEGLR         | N-ter +28.03 Da, K +28.03 Da              | 42.3       | 76.3              | 3      | 1782.00                      | -2.252                                       | 0.858                 | MVY1_MOUSE   | E9PWG4_MOUSE | Myosin light chain 1/3, skeletal muscle isoform;          | Myosin light chain alkali 1/2;                                                                                                                                        | 0.00 - 0.15 |
| CIGPLKCAPN     | NKEEYNGYTAFR            | N-ter +28.03 Da, K +28.03 Da              | 29.7       | 62.7              | 3      | 1603.86                      | 0.227                                        | 0.025                 | TRFE_MOUSE   | E9Q035_MOUSE | Serotransferrin;                                          | Beta-1 metal-binding globulin; Siderophilin;                                                                                                                          | 0.25 - 0.75 |
| SSVERYPDRS     | NKWYVAALTPR             | N-ter +28.03 Da, K +28.03 Da              | 26.7       | 60.6              | 3      | 1589.95                      | 2.147                                        | 0.233                 | KLHL8_MOUSE  | A2AH60_MOUSE | Kelch-like protein 8;                                     |                                                                                                                                                                       | 0.85 - 1.00 |
| NYQFFIGENM     | NPDGMAVLLDYL            | N-ter +28.03 Da                           | 28.4       | 75.2              | 3      | 1390.80                      | 3.681                                        | 0.468                 | TCTP_MOUSE   | D3YU75_MOUSE | Translationaly-controlled tumor protein;                  | 21 kDa polypeptide; p21; p23;                                                                                                                                         | 0.85 - 1.00 |
| LAACGSVTVMS    | NPGESSFDLADR            | N-ter +28.03 Da                           | 46.3       | 40.5              | 2      | 1334.66                      | -4.322                                       | 0.864                 | SODE_MOUSE   |              | Extracellular superoxide dismutase [Cu-Zn];               |                                                                                                                                                                       | 0.00 - 0.15 |
| KLTGMFAFRVP    | NPNVSDVLTCLR            | N-ter +28.03 Da, C +57.02 Da              | 22.2       | 97.5              | 3      | 1414.86                      | 2.501                                        | 0.941                 | D320Z9_MOUSE |              | Glyceraldehyde-3-phosphate dehydrogenase;                 |                                                                                                                                                                       | 0.85 - 1.00 |
| GALGCAICHG     | NPVDDICIAKPR            | N-ter +28.03 Da, K +28.03 Da, C +57.02 Da | 25.8       | 61.6              | 3      | 1452.87                      | 0.057                                        | 0.003                 | ANT3_MOUSE   |              | Antithrombin-III;                                         | Serpin C1;                                                                                                                                                            | 0.25 - 0.75 |
| SMQHDITGYE     | NQSSYEESVPRR            | N-ter +34.06 Da                           | 20.9       | 88.6              | 3      | 1484.87                      | -1.737                                       | 0.232                 | B1AW18_MOUSE |              |                                                           |                                                                                                                                                                       | 0.00 - 0.15 |
| IPRHEVTEIS     | NTDVTQPGKTVIR           | N-ter +28.03 Da, K +28.03 Da              | 26.7       | 55.6              | 3      | 1612.97                      | -0.377                                       | 0.093                 | E9Q616_MOUSE |              |                                                           |                                                                                                                                                                       | 0.25 - 0.75 |
| GVPLKATMRF     | NTEITAENLTNLKESVTTDAGR  | N-ter +34.06 Da, K +34.06 Da              | 20.7       | 42.5              | 4      | 2557.50                      | -5.644                                       | 0.001                 | TITIN_MOUSE  | E9Q8M7_MOUSE | Titin;                                                    | Connectin;                                                                                                                                                            | 0.00 - 0.15 |
| DKIREYKSKR     | QASGGPVGIPPEVQQDLDR     | N-ter +34.06 Da                           | 33.8       | 12.0              | 3      | 2078.04                      | -2.396                                       | 0.504                 | ATP5J_MOUSE  | E9QAD6_MOUSE | ATP synthase-coupling factor 6, mitochondrial;            |                                                                                                                                                                       | 0.00 - 0.15 |
| GRKTEVCTF      | QDGALVHQHQWDGKESTITR    | N-ter +28.03 Da, K +28.03 Da              | 26.5       | 76.9              | 4      | 2352.36                      | 0.506                                        | 0.075                 | FABP5_MOUSE  |              | Fatty acid-binding protein, epidermal;                    | Epidermal-type fatty acid-binding protein; Fatty acid-binding protein 5; Keratinocyte lipid-binding protein; Psoriasis-associated fatty acid-binding protein homolog; | 0.25 - 0.75 |
| LAQMTGTEYM     | QDPDEEALRR              | N-ter +34.06 Da                           | 26.3       | 66.2              | 3      | 1261.73                      | -1.434                                       | 0.31                  | LDB3_MOUSE   | E9PY9_MOUSE  | LIM domain-binding protein 3;                             | Protein cypher; Protein oracle; Z-band alternatively spliced PDZ-motif protein;                                                                                       | 0.15 - 0.25 |
| VFSMFQDTQI     | QEFKFAFTVDQNR           | N-ter +28.03 Da, K +28.03 Da              | 41.8       | 63.7              | 3      | 1780.03                      | -3.644                                       | 0.911                 | MLR5_MOUSE   | F6ULR7_MOUSE | Myosin regulatory light chain 2, skeletal muscle isoform; | Fast skeletal myosin light chain 2; MLC2F;                                                                                                                            | 0.00 - 0.15 |
| RLSLESEGAN     | QELDLAALNSKLSGCPVQKPGGR | N-ter +28.03 Da, K +28.03 Da, C +57.02 Da | 25.2       | 69.3              | 4      | 2521.54                      | 3.05                                         | 0.497                 | F6S185_MOUSE |              |                                                           |                                                                                                                                                                       | 0.85 - 1.00 |
| STFQMMWLK      | QEYDEAGPVSVHR           | N-ter +34.06 Da                           | 44.0       | 71.9              | 3      | 1533.87                      | -0.269                                       | 0.019                 | ACTC_MOUSE   | ACTA_MOUSE   | Actin, alpha cardiac muscle 1;                            | Alpha-cardiac actin;                                                                                                                                                  | 0.25 - 0.75 |
| RQFYRYITD      | QEYYSIHTR               | N-ter +28.03 Da                           | 35.0       | 68.6              | 3      | 1336.77                      | -0.234                                       | 0.008                 | MA2B2_MOUSE  | F6TMZ3_MOUSE | Epididymis-specific alpha-mannosidase;                    | Mannosidase alpha class 2B member 2;                                                                                                                                  | 0.25 - 0.75 |
| RQHLKSLVML     | QJAATELEKEESR           | N-ter +28.03 Da, K +28.03 Da              | 30.7       | 55.3              | 3      | 1558.91                      | -0.34                                        | 0.043                 | TNNI2_MOUSE  | A2A6K0_MOUSE | Troponin I, fast skeletal muscle;                         | Troponin I, fast-twitch isoform;                                                                                                                                      | 0.25 - 0.75 |
| FQNAILVRVT     | QKAPQVSTPLVEAAR         | N-ter +28.03 Da, K +28.03 Da              | 50.7       | 48.2              | 3      | 1751.08                      | 0.669                                        | 0.063                 | ALBU_MOUSE   |              | Serum albumin;                                            |                                                                                                                                                                       | 0.25 - 0.75 |



Table S11, Tholen et al.

| Non Prime Site | Prime Site                | Modifications                             | Hyperscore | Mass error in ppm | Charge | Precursor neutral mass in Da | Fold change (log <sub>2</sub> ) of ASAPRatio | FC-error of ASAPRatio | Uniprot ID 1 | Uniprot ID 2 | Protein Name 1                                                                                                                                                   | Protein Name 2                                                                               | Quantile    |
|----------------|---------------------------|-------------------------------------------|------------|-------------------|--------|------------------------------|----------------------------------------------|-----------------------|--------------|--------------|------------------------------------------------------------------------------------------------------------------------------------------------------------------|----------------------------------------------------------------------------------------------|-------------|
| LYKPVTDLFL     | QLVDSGKVDKDEAR            | N-ter +28.03 Da, K +28.03 Da              | 26.2       | 69.2              | 3      | 1371.83                      | -1.218                                       | 0.113                 | LPPRC_MOUSE  |              | Leucine-rich PPR motif-containing protein, mitochondrial;                                                                                                        | 130 kDa leucine-rich protein;                                                                | 0.15 - 0.25 |
| FDSLFPVIVT     | QMMNPGLPFESVLDINECLR      | N-ter +28.03 Da, C +57.02 Da              | 18.9       | 94.5              | 4      | 2243.29                      | -4.644                                       | 1.161                 | GPC3_MOUSE   | B1ATRS_MOUSE | Glypican-3;                                                                                                                                                      |                                                                                              | 0.00 - 0.15 |
| QSLPSSHGSPS    | QPGLPAVLSSPSPPLSPR        | N-ter +28.03 Da                           | 23.4       | 69.8              | 4      | 1827.15                      | 4.326                                        | 0.574                 | CB071_MOUSE  |              | Uncharacterized protein C2orf71 homolog;                                                                                                                         |                                                                                              | 0.85 - 1.00 |
| LQPQNLQPPS     | QPHLSVSSAANGHLGR          | N-ter +34.06 Da                           | 23.6       | 64.5              | 3      | 1664.00                      | -3.837                                       | 1.644                 | NOTC1_MOUSE  | Q7TQ50_MOUSE | Neurogenic locus notch homolog protein 1;                                                                                                                        | Notch A;mt14;p300;                                                                           | 0.00 - 0.15 |
| FTFLRPLSVQ     | QPSALALEPEALR             | N-ter +34.06 Da                           | 23.5       | 64.6              | 3      | 1427.91                      | -2.556                                       | 0.301                 | Q8K4A2_MOUSE | Q91XW9_MOUSE |                                                                                                                                                                  |                                                                                              | 0.00 - 0.15 |
| LLHPTLILAQ     | QSNVDELGCSHLGQSYESR       | N-ter +34.06 Da, C +57.02 Da              | 63.5       | 64.3              | 3      | 2199.15                      | -3.644                                       | 0.911                 | CO3A1_MOUSE  | Q5DTG2_MOUSE | Collagen alpha-1(III) chain;                                                                                                                                     |                                                                                              | 0.00 - 0.15 |
| LGRFAVRDMR     | QTVAVGVKAVDKK             | N-ter +28.03 Da, K +28.03 Da              | 33.6       | 61.4              | 4      | 1567.10                      | 1.757                                        | 0.239                 | EF1A1_MOUSE  |              | Elongation factor 1-alpha 1;                                                                                                                                     | Elongation factor Tu;Eukaryotic elongation factor 1 A-1;                                     | 0.75 - 0.85 |
| LGRFAVRDMR     | QTVAVGVKAVDK              | N-ter +34.06 Da, K +34.06 Da              | 27.0       | 48.4              | 3      | 1429.05                      | 1.915                                        | 0.488                 | EF1A1_MOUSE  |              | Elongation factor 1-alpha 1;                                                                                                                                     | Elongation factor Tu;Eukaryotic elongation factor 1 A-1;                                     | 0.85 - 1.00 |
| PPGLTGNFAA     | QYSDKGVSSGPGMGLMGRP       | N-ter +34.06 Da, K +34.06 Da              | 31.1       | 57.5              | 3      | 2088.20                      | -2.252                                       | 0.214                 | CO1A2_MOUSE  | E0CXI2_MOUSE | Collagen alpha-2(I) chain;                                                                                                                                       | Alpha-2 type I collagen;                                                                     | 0.00 - 0.15 |
| EKIVPNMEF      | RAADEEAFEDNSEEYR          | N-ter +28.03 Da                           | 51.8       | 67.7              | 3      | 2071.05                      | 4.011                                        | 1.117                 | XPO2_MOUSE   | E9QAX7_MOUSE | Exportin-2;                                                                                                                                                      |                                                                                              | 0.85 - 1.00 |
| RRGQSSANR      | RAGSSSGVQGSAGLAADASR      | N-ter +28.03 Da                           | 82.7       | 63.2              | 3      | 2104.16                      | -0.234                                       | 0.074                 | FILA_MOUSE   | F7BVV1_MOUSE | Filaggrin;                                                                                                                                                       | Chromosome segregation 1-like protein;Importin-alpha re-exporter;                            | 0.25 - 0.75 |
| MRAAPR         | RAPAAQPAAAAPSVAAGSAPAAAPR | N-ter +28.03 Da                           | 58.2       | 68.4              | 4      | 2180.33                      | 2.077                                        | 0.443                 | CHCH2_MOUSE  | B2RPV8_MOUSE | Coiled-coil-helix-coiled-coil-helix domain-containing protein 2, mitochondrial;                                                                                  |                                                                                              | 0.85 - 1.00 |
| EPQVLNYLSL     | RATEQEKDVMDSAR            | N-ter +28.03 Da, K +28.03 Da              | 32.5       | 79.5              | 4      | 1690.97                      | -1.322                                       | 0.264                 | ECM29_MOUSE  | A2ALV7_MOUSE | Proteasome-associated protein ECM29 homolog;                                                                                                                     |                                                                                              | 0.15 - 0.25 |
| RRASHALAQL     | RCILDSLEGIR               | N-ter +28.03 Da, C +57.02 Da              | 39.3       | 88.9              | 3      | 1487.91                      | 0.595                                        | 0.039                 | KBL_MOUSE    | E9PWY6_MOUSE | 2-amino-3-ketobutyrate coenzyme A ligase, mitochondrial;                                                                                                         | Aminoacetone synthase;Glycine acetyltransferase;                                             | 0.25 - 0.75 |
| AKAVLSAEKL     | RDEEVHTGLGELLR            | N-ter +34.06 Da                           | 24.5       | 43.4              | 3      | 1656.97                      | -0.515                                       | 0.044                 | SERPH_MOUSE  |              | Serpin H1;                                                                                                                                                       | 47 kDa heat shock protein;Collagen-binding protein;Serine protease inhibitor J6;             | 0.25 - 0.75 |
| LSLMEPESEF     | RDIDNPSAEAR               | N-ter +28.03 Da                           | 35.3       | 64.7              | 3      | 1399.76                      | 0.379                                        | 0.108                 | PLIN1_MOUSE  |              | Perilipin-1;                                                                                                                                                     | Lipid droplet-associated protein;Perilipin A;                                                | 0.25 - 0.75 |
| DIKSKTQYVM     | RDYEQAGSAAPSVFSR          | N-ter +34.06 Da                           | 54.8       | 68.4              | 3      | 1774.01                      | -2.059                                       | 0.343                 | MSTN1_MOUSE  |              | Musculoskeletal embryonic nuclear protein 1;                                                                                                                     |                                                                                              | 0.00 - 0.15 |
| SHIRNVKGPV     | REGDVLTLLESEK             | N-ter +34.06 Da                           | 37.4       | 69.3              | 3      | 1549.96                      | -0.943                                       | 0.109                 | RS28_MOUSE   |              | 40S ribosomal protein S28;                                                                                                                                       |                                                                                              | 0.15 - 0.25 |
| QAQPNANEDY     | REGPCAVNLVLR              | N-ter +28.03 Da, C +57.02 Da              | 42.6       | 63.0              | 3      | 1410.87                      | -1.218                                       | 0.085                 | STK39_MOUSE  |              | STE20/SPS1-related proline-alanine-rich protein kinase;                                                                                                          | Serine/threonine-protein kinase 39;                                                          | 0.15 - 0.25 |
| KQIQKLEXR      | RELEGEVEENEQKR            | N-ter +34.06 Da, K +34.06 Da              | 33.5       | 80.6              | 4      | 1683.06                      | -1.69                                        | 0.327                 | MYH1_MOUSE   | MYH8_MOUSE   | Myosin-1;                                                                                                                                                        | Myosin heavy chain 1;Myosin heavy chain 2x;Myosin heavy chain, skeletal muscle, adult 1;     | 0.00 - 0.15 |
|                | RELENEVEENEQKR            | N-ter +34.06 Da, K +34.06 Da              | 32.9       | 79.2              | 4      | 1740.08                      | -5.059                                       | 1.686                 | MYH4_MOUSE   |              | Myosin-4;                                                                                                                                                        | Myosin heavy chain 2b;Myosin heavy chain 4;                                                  | 0.00 - 0.15 |
| TFYSNKEIFL     | RELISNASDALDKIR           | N-ter +28.03 Da, K +28.03 Da              | 40.8       | 70.4              | 4      | 1756.11                      | 3.433                                        | 0.569                 | HS90B_MOUSE  | ENPL_MOUSE   | Heat shock protein HSP 90-beta;                                                                                                                                  | Heat shock 84 kDa;Tumor-specific transplantation 84 kDa antigen;                             | 0.85 - 1.00 |
|                |                           |                                           |            |                   |        |                              |                                              |                       |              |              | Coactivator of activating protein 1 and estrogen receptors;RNA-binding motif protein 39;RNA-binding region-containing protein 2;Transcription coactivator CAPER; |                                                                                              | 0.25 - 0.75 |
| SPFRKDKSPV     | REPIDNLTPEER              | N-ter +28.03 Da                           | 31.7       | 64.8              | 3      | 1495.86                      | -0.667                                       | 0.042                 | RBM39_MOUSE  | Q3U313_MOUSE | RNA-binding protein 39;                                                                                                                                          |                                                                                              | 0.25 - 0.75 |
| PLPTFSSLNL     | RETNLESPLVDTHSKR          | N-ter +28.03 Da, K +28.03 Da              | 26.4       | 65.9              | 4      | 2050.25                      | 1.632                                        | 0.158                 | VIME_MOUSE   | E9PZV5_MOUSE | Vimentin;                                                                                                                                                        |                                                                                              | 0.75 - 0.85 |
| GKAFRLQLPF     | RGDDGIFDDNFIEER           | N-ter +34.06 Da                           | 46.9       | 71.9              | 3      | 1830.99                      | -0.943                                       | 0.199                 | SNX3_MOUSE   | Q78ZM0_MOUSE | Sorting nexin-3;                                                                                                                                                 | SDP3 protein;                                                                                | 0.15 - 0.25 |
| GKALKRQLPF     | RGDEGIFEEFIEER            | N-ter +34.06 Da                           | 51.1       | 69.8              | 3      | 1846.02                      | -0.494                                       | 0.097                 | SNX12_MOUSE  | Q6ZWQ5_MOUSE | Sorting nexin-12;                                                                                                                                                | SDP8 protein;                                                                                | 0.25 - 0.75 |
| PVGPAGKNGD     | RGETGPAAGPAGIPAGAR        | N-ter +34.06 Da                           | 68.8       | 66.1              | 3      | 1722.05                      | -2.252                                       | 0.322                 | CO1A1_MOUSE  | F8WGB7_MOUSE | Collagen alpha-1(I) chain;                                                                                                                                       | Alpha-1 type I collagen;                                                                     | 0.00 - 0.15 |
| GGGSGGGGRG     | RGGKNVGGPGLSKSR           | N-ter +28.03 Da, K +28.03 Da              | 26.7       | 48.8              | 3      | 1552.99                      | 2.599                                        | 0.416                 | PURG_MOUSE   |              | Purine-rich element-binding protein gamma;                                                                                                                       |                                                                                              | 0.85 - 1.00 |
| M              | RGQVGLSPQQQEALAR          | N-ter +34.06 Da                           | 49.1       | 55.2              | 3      | 2017.17                      | 2.406                                        | 0.522                 | S14L4_MOUSE  |              | SEC14-like protein 4;                                                                                                                                            |                                                                                              | 0.85 - 1.00 |
| EEGSFKERLA     | RIRPQFIGDIHGR             | N-ter +28.03 Da                           | 22.1       | 46.2              | 4      | 1591.98                      | 1.163                                        | 0.192                 | TCAL1_MOUSE  |              | Transcription elongation factor A protein-like 1;                                                                                                                | Transcription elongation factor S-II protein-like 1;                                         | 0.75 - 0.85 |
| TFKNIYKRNW     | RIVDEPNKICEADR            | N-ter +28.03 Da, K +28.03 Da, C +57.02 Da | 23.8       | 78.4              | 4      | 1899.10                      | 1.281                                        | 0.2                   | XPO2_MOUSE   | E9QAX7_MOUSE | Exportin-2;                                                                                                                                                      | Chromosome segregation 1-like protein;Importin-alpha re-exporter;                            | 0.75 - 0.85 |
|                |                           |                                           |            |                   |        |                              |                                              |                       |              |              | GAIP C-terminus-interacting protein;RGS-GAIP-interacting protein;RGS19-interacting protein 1;SemaF cytoplasmic domain-associated protein 1;Synectin;             |                                                                                              | 0.85 - 1.00 |
| MPLGLGR        | RKKAPPLVENEAEPSR          | N-ter +28.03 Da, K +28.03 Da              | 37.6       | 61.9              | 4      | 2033.25                      | 1.903                                        | 0.351                 | GIPC1_MOUSE  |              | PDZ domain-containing protein GIPC1;                                                                                                                             |                                                                                              | 0.85 - 1.00 |
| LKQSLPSHDL     | RKVMAAIKQR                | N-ter +34.06 Da, K +34.06 Da              | 11.1       | 35.9              | 3      | 1301.96                      | -2                                           | 0.16                  | F179A_MOUSE  | F6YU21_MOUSE | Protein FAM179A;                                                                                                                                                 |                                                                                              | 0.00 - 0.15 |
| LAYVTPTPR      | RLASTSDIEKENR             | N-ter +28.03 Da, K +28.03 Da              | 25.8       | 69.7              | 4      | 1703.00                      | 0.084                                        | 0.009                 | MYPT1_MOUSE  |              | Protein phosphatase 1 regulatory subunit 12A;                                                                                                                    | Myosin phosphatase-targeting subunit 1;                                                      | 0.25 - 0.75 |
| LLALAGLLQA     | RLLLPQAQGFGECDR           | N-ter +28.03 Da, C +57.02 Da              | 42.8       | 60.9              | 3      | 1787.02                      | -2.059                                       | 0.343                 | ENDD1_MOUSE  | Q69ZY2_MOUSE | Endonuclease domain-containing 1 protein;                                                                                                                        |                                                                                              | 0.00 - 0.15 |
| VETQPKQTVI     | RLPSGSGPASPTTGSADVIR      | N-ter +34.06 Da                           | 61.7       | 64.6              | 3      | 1959.19                      | -1.69                                        | 0.382                 | E9Q616_MOUSE |              |                                                                                                                                                                  |                                                                                              | 0.00 - 0.15 |
| DRRKEEPPSL     | RPAPPPISGGGYR             | N-ter +28.03 Da                           | 22.5       | 71.2              | 3      | 1351.83                      | -0.322                                       | 0.016                 | FIBB_MOUSE   |              | Fibrinogen beta chain;                                                                                                                                           |                                                                                              | 0.25 - 0.75 |
| MN             | RPAPVEISYENMR             | N-ter +28.03 Da                           | 34.0       | 76.7              | 3      | 1588.92                      | 0.057                                        | 0.003                 | TP4A2_MOUSE  |              | Protein tyrosine phosphatase type IVA 2;                                                                                                                         | Protein-tyrosine phosphatase 4a2;Protein-tyrosine phosphatase of regenerating liver 2;       | 0.25 - 0.75 |
| KAHDVCLLGP     | RPLPPSPVPR                | N-ter +28.03 Da                           | 24.0       | 64.4              | 3      | 1142.77                      | 2.483                                        | 0.089                 | GILT_MOUSE   | F6YSI1_MOUSE | Gamma-interferon-inducible lysosomal thiol reductase;                                                                                                            | Gamma-interferon-inducible protein IP-30;Lysosomal thiol reductase IP30;                     | 0.85 - 1.00 |
| PNSRNSRVL      | RPPGGGSNFSLGFDEPAEQPVR    | N-ter +28.03 Da                           | 51.0       | 83.4              | 4      | 2341.34                      | 1.642                                        | 0.342                 | HNI1_MOUSE   |              | Hematological and neurological expressed 1 protein;                                                                                                              |                                                                                              | 0.75 - 0.85 |
| LINEHRILNG     | RPPLGFLNPR                | N-ter +28.03 Da                           | 48.2       | 57.2              | 3      | 1193.77                      | 0.642                                        | 0.025                 | TPP1_MOUSE   |              | Tripeptidyl-peptidase 1;                                                                                                                                         | Lysosomal pepstatin-insensitive protease;Tripeptidyl aminopeptidase;Tripeptidyl-peptidase I; | 0.25 - 0.75 |
| LIWDNGMVLG     | RPPSPPPPPR                | N-ter +28.03 Da                           | 36.7       | 62.1              | 3      | 1221.77                      | 1.176                                        | 0.026                 | E9Q217_MOUSE |              |                                                                                                                                                                  |                                                                                              | 0.75 - 0.85 |
| QDIAKMLPLL     | RQEELESVEAGVQGFAGETR      | N-ter +28.03 Da                           | 64.0       | 62.9              | 3      | 2276.25                      | 3.394                                        | 0.962                 | EHD2_MOUSE   | Q8R2X0_MOUSE | EH domain-containing protein 2;                                                                                                                                  |                                                                                              | 0.85 - 1.00 |

Table S11, Tholen et al.

| Non Prime Site | Prime Site               | Modifications                             | Hyperscore | Mass error in ppm | Charge | Precursor neutral mass in Da | Fold change (log <sub>2</sub> ) of ASAPRatio | FC-error of ASAPRatio | Uniprot ID 1 | Uniprot ID 2                       | Protein Name 1                                                            | Protein Name 2                                                                                                                                                     | Quantile    |
|----------------|--------------------------|-------------------------------------------|------------|-------------------|--------|------------------------------|----------------------------------------------|-----------------------|--------------|------------------------------------|---------------------------------------------------------------------------|--------------------------------------------------------------------------------------------------------------------------------------------------------------------|-------------|
| LQAQRAFTR      | RQISEDVDGPDNR            | N-ter +34.06 Da                           | 41.9       | 70.8              | 3      | 1533.87                      | -0.152                                       | 0.019                 | NEDD4_MOUSE  | E3 ubiquitin-protein ligase NEDD4; | Neural precursor cell expressed developmentally down-regulated protein 4; |                                                                                                                                                                    | 0.25 - 0.75 |
| AAPAFSRALN     | RQLSSGVSEIR              | N-ter +28.03 Da                           | 26.7       | 68.9              | 3      | 1258.79                      | 0.163                                        | 0.013                 | HSPB1_MOUSE  | D3Y206_MOUSE                       | Heat shock protein beta-1;                                                | Growth-related 25 kDa protein;Heat shock 25 kDa protein;Heat shock 27 kDa protein;p25;                                                                             | 0.25 - 0.75 |
| GRSSNRDRP      | RQPSQSQSDSVQHSVQVQVEGR   | N-ter +28.03 Da                           | 48.4       | 77.4              | 4      | 2379.34                      | 2.639                                        | 0.479                 | E9Q019_MOUSE | F7BVV1_MOUSE                       |                                                                           |                                                                                                                                                                    | 0.85 - 1.00 |
| SQSGSGRSP      | RSPVHPESSEGEHSHVVPQR     | N-ter +34.06 Da                           | 35.2       | 71.1              | 4      | 2276.30                      | 0.401                                        | 0.058                 | FILA2_MOUSE  | FILA2_MOUSE                        | Filaggrin-2;                                                              | Intermediate filament-associated protein;                                                                                                                          | 0.25 - 0.75 |
| MKLFQ          | RSTPAITLENPDKIKYPLR      | N-ter +28.03 Da, K +28.03 Da              | 41.1       | 56.0              | 4      | 2139.32                      | -0.837                                       | 0.06                  | NBSR3_MOUSE  | F2Z3V0_MOUSE                       | NADH-cytochrome b5 reductase 3;                                           | Diaphorase-1;                                                                                                                                                      | 0.25 - 0.75 |
| GHKTEPVPR      | RTEITIVKQESVLR           | N-ter +28.03 Da, K +28.03 Da              | 24.6       | 53.6              | 4      | 1824.18                      | 2.147                                        | 0.334                 | SEPT9_MOUSE  | A2A6U3_MOUSE                       | Septin-9;                                                                 | SL3-3 integration site 1 protein;                                                                                                                                  | 0.85 - 1.00 |
| PAQSAATLPA     | RTLETAAQMEGLFNR          | N-ter +28.03 Da                           | 63.2       | 73.5              | 3      | 1861.09                      | -1                                           | 0.22                  | SPTB2_MOUSE  |                                    | Spectrin beta chain, brain 1;                                             | Beta-II spectrin;Embryonic liver fodrin;Fodrin beta chain;Spectrin, non-erythroid beta chain 1;                                                                    | 0.15 - 0.25 |
| IWHHSFYNEL     | RVAPPEHPTLLTEAPLNPKANR   | N-ter +28.03 Da, K +28.03 Da              | 56.4       | 66.3              | 4      | 2508.55                      | 3.065                                        | 0.154                 | ACT5_MOUSE   | ACTA_MOUSE                         | Actin, alpha skeletal muscle;                                             | Alpha-actin-1;                                                                                                                                                     | 0.85 - 1.00 |
| IWHHTFYNEL     | RVAPPEHPVLLTEAPLNPKANR   | N-ter +28.03 Da, K +28.03 Da              | 60.3       | 62.5              | 4      | 2506.56                      | 5.235                                        | 0.627                 | ACTB_MOUSE   | ACTG_MOUSE                         | Actin, cytoplasmic 1;                                                     | Beta-actin;                                                                                                                                                        | 0.85 - 1.00 |
| VVKISGFPVG     | RVIGSGCNDLSAR            | N-ter +34.06 Da, C +57.02 Da              | 37.3       | 68.2              | 3      | 1437.85                      | -0.971                                       | 0.114                 | LDHA_MOUSE   | LDHB_MOUSE                         | L-lactate dehydrogenase A chain;                                          | LDH muscle subunit;                                                                                                                                                | 0.15 - 0.25 |
| NVVGARSSWG     | RVISSIQKTER              | N-ter +34.06 Da, K +34.06 Da              | 27.3       | 39.9              | 4      | 1512.99                      | 0.604                                        | 0.095                 | 1433B_MOUSE  | A2A5N1_MOUSE                       | 14-3-3 protein beta/alpha;                                                | Protein kinase C inhibitor protein 1;                                                                                                                              | 0.25 - 0.75 |
| LNGLKTGMFAF    | RVPTPNVSVDLTCR           | N-ter +34.06 Da, C +57.02 Da              | 45.3       | 69.6              | 3      | 1746.09                      | 0.31                                         | 0.013                 | G3P_MOUSE    | G3PT_MOUSE                         | Glyceraldehyde-3-phosphate dehydrogenase;                                 | Peptidyl-cysteine S-nitrosylase GAPDH;                                                                                                                             | 0.25 - 0.75 |
| KEALLGRVAV     | SADPNVPNVIVTR            | N-ter +34.06 Da                           | 31.2       | 45.6              | 3      | 1414.86                      | -1.12                                        | 0.073                 | GDIR1_MOUSE  |                                    | Rho GDP-dissociation inhibitor 1;                                         | GDI-1;Rho-GDI alpha;                                                                                                                                               | 0.15 - 0.25 |
| LKAKLRSRNR     | SAEEGVEVTEKSSQKSSVQR     | N-ter +28.03 Da, K +28.03 Da              | 32.6       | 81.6              | 4      | 2365.35                      | 0.39                                         | 0.161                 | TB182_MOUSE  |                                    | 182 kDa tankyrase-1-binding protein;                                      |                                                                                                                                                                    | 0.25 - 0.75 |
| QDEGAEPMGY     | SAELSSGILLDRNEEKR        | N-ter +28.03 Da, K +28.03 Da              | 43.7       | 67.6              | 4      | 2103.19                      | -0.322                                       | 0.022                 | EZRI_MOUSE   |                                    | Ezrin;                                                                    | Cytovillin;Villin-2;p81;                                                                                                                                           | 0.25 - 0.75 |
| QDEGAEPMGY     | SAELSSGILLDR             | N-ter +28.03 Da                           | 56.3       | 43.1              | 2      | 1418.75                      | -0.494                                       | 0.104                 | EZRI_MOUSE   |                                    | Ezrin;                                                                    | Cytovillin;Villin-2;p81;                                                                                                                                           | 0.25 - 0.75 |
| ESQDAKKAKA     | SAGPQVQPSTSASSANLDAAR    | N-ter +34.06 Da                           | 44.7       | 35.7              | 3      | 2048.11                      | -1.737                                       | 0.579                 | ZN830_MOUSE  |                                    | Zinc finger protein 830;                                                  |                                                                                                                                                                    | 0.00 - 0.15 |
| MATRSCVSRG     | SAGSAAAGPVEAIR           | N-ter +28.03 Da                           | 60.4       | 26.4              | 2      | 1354.76                      | -0.014                                       | 0.001                 | BOLA1_MOUSE  |                                    | Bola-like protein 1;                                                      |                                                                                                                                                                    | 0.25 - 0.75 |
| SQMSYGYDEK     | SAGVSVPGMPGSGPR          | N-ter +34.06 Da                           | 37.4       | 38.9              | 3      | 1485.84                      | -3.322                                       | 0.332                 | CO1A1_MOUSE  | F8WGB7_MOUSE                       | Collagen alpha-1(I) chain;                                                | Alpha-1 type I collagen;                                                                                                                                           | 0.00 - 0.15 |
| PSPTLDRKAK     | SALPAQSAATLPAR           | N-ter +28.03 Da                           | 29.9       | 37.4              | 3      | 1380.82                      | 1.949                                        | 0.49                  | SPTB2_MOUSE  |                                    | Spectrin beta chain, brain 1;                                             | Beta-II spectrin;Embryonic liver fodrin;Fodrin beta chain;Spectrin, non-erythroid beta chain 1;                                                                    | 0.85 - 1.00 |
| VLHIGSAHNR     | SAMPFTASAPSTR            | N-ter +28.03 Da                           | 48.7       | 27.9              | 2      | 1447.75                      | 1.895                                        | 0.214                 | PDL1_MOUSE   |                                    | PDZ and LIM domain protein 1;                                             | C-terminal LIM domain protein 1;Elfin;LIM domain protein CLP-36;                                                                                                   | 0.85 - 1.00 |
| QEPKRRSARL     | SAMPVPTPELKPKR           | N-ter +28.03 Da, K +28.03 Da              | 20.5       | 62.1              | 4      | 1781.14                      | -0.014                                       | 0.001                 | HMGNS_MOUSE  |                                    | High mobility group nucleosome-binding domain-containing protein 5;       | Nucleosome-binding protein 1;Nucleosome-binding protein 45;Protein GARP45;                                                                                         | 0.25 - 0.75 |
| VTLINFWVPD     | SAPASSQLSHDDTHSR         | N-ter +28.03 Da                           | 48.2       | 86.2              | 4      | 1820.00                      | -0.837                                       | 0.359                 | DMD_MOUSE    | A2A922_MOUSE                       | Dystrophin;                                                               |                                                                                                                                                                    | 0.25 - 0.75 |
| KSMWKEGSVF     | SAPSASGTPNKETAGLKVGVSSR  | N-ter +34.06 Da, K +34.06 Da              | 33.7       | 74.4              | 4      | 2302.51                      | 0.189                                        | 0.045                 | Q8VCQ8_MOUSE | E9Q0M9_MOUSE                       |                                                                           |                                                                                                                                                                    | 0.25 - 0.75 |
| MRLMAAMEIF     | SAQQQEDIKDFEDER          | N-ter +28.03 Da, K +28.03 Da              | 23.8       | 59.9              | 3      | 1745.91                      | 3.979                                        | 1.378                 | FAF1_MOUSE   |                                    | FAS-associated factor 1;                                                  |                                                                                                                                                                    | 0.85 - 1.00 |
| TKKRPAPRAP     | SASPLAIHASR              | N-ter +28.03 Da                           | 45.3       | 61.4              | 3      | 1136.70                      | -3.644                                       | 0.456                 | MILK1_MOUSE  |                                    | MICAL-like protein 1;                                                     | Molecule interacting with Rab13;                                                                                                                                   | 0.00 - 0.15 |
| SCLVLAARHA     | SASSTNLKDVLSNLPKEQAR     | N-ter +28.03 Da, K +28.03 Da              | 27.0       | 81.5              | 4      | 2354.51                      | -0.415                                       | 0.116                 | CISY_MOUSE   |                                    | Citrate synthase, mitochondrial;                                          |                                                                                                                                                                    | 0.25 - 0.75 |
| IKHDPSLQPW     | SASYDPGSAKTLNNGKTCR      | N-ter +28.03 Da, K +28.03 Da, C +57.02 Da | 20.3       | 73.6              | 4      | 2223.30                      | -0.621                                       | 0.067                 | CAH3_MOUSE   |                                    | Carbonic anhydrase 3;                                                     | Carbonate dehydratase III;Carbonic anhydrase III;                                                                                                                  | 0.25 - 0.75 |
| M              | SATHHKTSLPQGV            | N-ter +34.06 Da, K +34.06 Da              | 33.0       | 18.9              | 3      | 1585.96                      | -2.396                                       | 0.126                 | LEG7_MOUSE   |                                    | Galectin-7;                                                               |                                                                                                                                                                    | 0.00 - 0.15 |
| SLPAVVVETF     | SATVNGAVEGSAGTGR         | N-ter +34.06 Da                           | 56.9       | 45.7              | 3      | 1466.82                      | -1.322                                       | 0.099                 | BIN1_MOUSE   | Q6P189_MOUSE                       | Myc box-dependent-interacting protein 1;                                  | Amphiphysin II;Amphiphysin-like protein;Bridging integrator 1;SH3 domain-containing protein 9;                                                                     | 0.15 - 0.25 |
| RYEDMAAFMK     | SAVEKGEELSCCEER          | N-ter +28.03 Da, K +28.03 Da, C +57.02 Da | 29.9       | 75.2              | 3      | 1677.91                      | 1.021                                        | 0.131                 | 1433S_MOUSE  |                                    | 14-3-3 protein sigma;                                                     | Stratifin;                                                                                                                                                         | 0.25 - 0.75 |
| GEADRDTYRR     | SAVPPGADKAAEAGAGSATEFQFR | N-ter +28.03 Da, K +28.03 Da              | 31.9       | 76.7              | 4      | 2475.47                      | 0.516                                        | 0.043                 | RS10_MOUSE   |                                    | 40S ribosomal protein S10;                                                |                                                                                                                                                                    | 0.25 - 0.75 |
| EADPSNFANR     | SAYPSIEDMIEWAKR          | N-ter +28.03 Da, K +28.03 Da              | 28.2       | 66.8              | 3      | 1867.01                      | 0.299                                        | 0.044                 | EPS15_MOUSE  |                                    | Epidermal growth factor receptor substrate 15;                            | Protein AF-1p;                                                                                                                                                     | 0.25 - 0.75 |
| GTRKPVKDF      | SCHLAQAPNHVVVSR          | N-ter +28.03 Da, C +57.02 Da              | 36.9       | 76.1              | 4      | 1702.00                      | -0.322                                       | 0.048                 | TRFE_MOUSE   | E9Q035_MOUSE                       | Serotransferrin;                                                          | Beta-1 metal-binding globulin;Siderophilin;                                                                                                                        | 0.25 - 0.75 |
| TQCCAEADKE     | SCLTPKLDGVKEKALVSSVR     | N-ter +28.03 Da, K +28.03 Da, C +57.02 Da | 20.0       | 57.2              | 4      | 2298.47                      | -0.434                                       | 0.023                 | ALBU_MOUSE   |                                    | Serum albumin;                                                            |                                                                                                                                                                    | 0.25 - 0.75 |
| TESTVKTTVF     | SCNLGKFDDETTADGR         | N-ter +28.03 Da, K +28.03 Da, C +57.02 Da | 41.7       | 61.3              | 3      | 1854.96                      | 2.824                                        | 0.351                 | FABP5_MOUSE  | E9Q964_MOUSE                       | Fatty acid-binding protein, epidermal;                                    | Epidermal-type fatty acid-binding protein;Fatty acid-binding protein 5;Keratinocyte lipid-binding protein;Psoriasis-associated fatty acid-binding protein homolog; | 0.85 - 1.00 |
| LWALLTPAEA     | SCQGIQCAPGQR             | N-ter +28.03 Da, C +57.02 Da              | 24.6       | 49.7              | 3      | 1388.70                      | 0.585                                        | 0.058                 | E9PVG8_MOUSE |                                    |                                                                           |                                                                                                                                                                    | 0.25 - 0.75 |
| GTVTLHCRQY     | SDAPPLTLGDIKDR           | N-ter +28.03 Da, K +28.03 Da              | 57.8       | 43.8              | 3      | 1552.91                      | 0.496                                        | 0.032                 | ACPM_MOUSE   | F8WJ64_MOUSE                       | Acyl carrier protein, mitochondrial;                                      | Ci-SDAP;NADH-ubiquinone oxidoreductase 9.6 kDa subunit;                                                                                                            | 0.25 - 0.75 |
| QIGAKFWEVI     | SDEHGIDPTGYHGDSDLQLDR    | N-ter +28.03 Da                           | 33.1       | 86.6              | 4      | 2455.30                      | 3.432                                        | 1.008                 | TBBS_MOUSE   |                                    | Tubulin beta-5 chain;                                                     |                                                                                                                                                                    | 0.85 - 1.00 |
| ESQASDSEGH     | SDFSEGAQVGAHR            | N-ter +28.03 Da                           | 42.6       | 70.0              | 3      | 1387.74                      | -0.201                                       | 0.016                 | FILA_MOUSE   | F7BVV1_MOUSE                       | Filaggrin;                                                                |                                                                                                                                                                    | 0.25 - 0.75 |
| DSPGPPVAPL     | SDISEDQPQPPR             | N-ter +28.03 Da                           | 30.8       | 45.0              | 3      | 1524.77                      | -0.218                                       | 0.03                  | PKHO2_MOUSE  |                                    | Plectstrin homology domain-containing family O member 2;                  | Plectstrin homology domain-containing family O member 1;                                                                                                           | 0.25 - 0.75 |
| GLTGNFAAQY     | SDKGVSGSPGMLMGPR         | N-ter +28.03 Da, K +28.03 Da              | 70.2       | 56.8              | 3      | 1784.99                      | -2.322                                       | 0.232                 | CO1A2_MOUSE  | E0CXI2_MOUSE                       | Collagen alpha-2(I) chain;                                                | Alpha-2 type I collagen;                                                                                                                                           | 0.00 - 0.15 |
| QKEEAQKKK      | SDLEIELLKR               | N-ter +28.03 Da, K +28.03 Da              | 26.0       | 58.7              | 3      | 1270.82                      | 1.195                                        | 0.391                 | F107B_MOUSE  |                                    | Protein FAM107B;                                                          |                                                                                                                                                                    | 0.75 - 0.85 |
| AVALHSVSA      | SDLELHPPSPVWSHR          | N-ter +28.03 Da                           | 30.1       | 70.8              | 4      | 1848.03                      | -0.152                                       | 0.007                 | CY1_MOUSE    |                                    | Cytochrome c1, heme protein, mitochondrial;                               | Complex III subunit 4;Complex III subunit IV;Cytochrome b-c1 complex subunit 4;Ubiquinol-cytochrome-c reductase complex cytochrome c1 subunit;                     | 0.25 - 0.75 |
| KKSKENPRNF     | SDNQLQEGKNVIGLQMGNTNR    | N-ter +34.06 Da, K +34.06 Da              | 38.6       | 56.8              | 4      | 2269.34                      | 0.227                                        | 0.031                 | TAGL2_MOUSE  |                                    | Transgelin-2;                                                             | SM22-beta;                                                                                                                                                         | 0.25 - 0.75 |
| TKQTQFTTY      | SDNQPGVLIQVYEGER         | N-ter +28.03 Da                           | 36.9       | 46.9              | 3      | 1831.00                      | -0.152                                       | 0.01                  | H571A_MOUSE  | HS71B_MOUSE                        | Heat shock 70 kDa protein 1A;                                             | Heat shock 70 kDa protein 3;Hsp68;                                                                                                                                 | 0.25 - 0.75 |

Table S11, Tholen et al.

| Non Prime Site | Prime Site                | Modifications                             | Hyperscore | Mass error in ppm | Charge | Precursor neutral mass in Da | Fold change (log <sub>2</sub> ) of ASAPRatio | FC-error of ASAPRatio | Uniprot ID 1 | Uniprot ID 2 | Protein Name 1                                                                     | Protein Name 2                                                                                                                                                                                                                                                                  | Quantile    |
|----------------|---------------------------|-------------------------------------------|------------|-------------------|--------|------------------------------|----------------------------------------------|-----------------------|--------------|--------------|------------------------------------------------------------------------------------|---------------------------------------------------------------------------------------------------------------------------------------------------------------------------------------------------------------------------------------------------------------------------------|-------------|
| PSQPPTVEVA     | SDPQPPAPEASASASAPPLR      | N-ter +34.06 Da                           | 36.6       | 44.3              | 3      | 2076.16                      | 5.652                                        | 1.251                 | VAT1_MOUSE   |              | Synaptic vesicle membrane protein VAT-1 homolog;                                   |                                                                                                                                                                                                                                                                                 | 0.85 - 1.00 |
| SGGGLLVDF      | SDSASAVAPLAPGSEDNFAR      | N-ter +34.06 Da                           | 63.6       | 41.2              | 3      | 1995.06                      | -0.415                                       | 0.083                 | AP2A2_MOUSE  |              | AP-2 complex subunit alpha-2;                                                      | 100 kDa coated vesicle protein C;Adapter-related protein complex 2 alpha-2 subunit;Adaptor protein complex AP-2 subunit alpha-2;Alpha-adaptin C;Alpha2-adaptin;Clathrin assembly protein complex 2 alpha-C large chain;Plasma membrane adaptor HAZ/AP2 adaptin alpha C subunit; | 0.25 - 0.75 |
| GPGPRTEEKI     | SDSEGFKANLSLLR            | N-ter +34.06 Da, K +34.06 Da              | 21.3       | 52.3              | 3      | 1604.00                      | -0.515                                       | 0.118                 | SFPQ_MOUSE   |              | Splicing factor, proline- and glutamine-rich;                                      |                                                                                                                                                                                                                                                                                 | 0.25 - 0.75 |
| LQTRGFVSDS     | SDSMDTGAGSIR              | N-ter +28.03 Da                           | 33.7       | 40.0              | 2      | 1223.59                      | -0.761                                       | 0.064                 | ATIF1_MOUSE  | Q9D879_MOUSE | ATPase inhibitor, mitochondrial;                                                   |                                                                                                                                                                                                                                                                                 | 0.25 - 0.75 |
| RPRQPSPSQS     | SDSQVHSGVQVEAQR           | N-ter +28.03 Da                           | 51.9       | 66.6              | 3      | 1653.92                      | -1                                           | 0.24                  | FILA_MOUSE   | F6TLQ2_MOUSE | Filaggrin;                                                                         |                                                                                                                                                                                                                                                                                 | 0.15 - 0.25 |
| RPRQPSPSQS     | SDSQVHSGVQVEGR            | N-ter +28.03 Da                           | 54.4       | 68.7              | 3      | 1511.84                      | 1.536                                        | 0.477                 | FILA_MOUSE   | F7BVV1_MOUSE | Filaggrin;                                                                         |                                                                                                                                                                                                                                                                                 | 0.75 - 0.85 |
| MKVLQTRGFV     | SDSDSMDTGAGSIR            | N-ter +28.03 Da                           | 38.5       | 62.2              | 3      | 1512.73                      | -1.286                                       | 0.125                 | ATIF1_MOUSE  | Q9D879_MOUSE | ATPase inhibitor, mitochondrial;                                                   | Inhibitor of F(1)F(o)-ATPase;                                                                                                                                                                                                                                                   | 0.15 - 0.25 |
| QLQFEDIRGQ     | SDTAITKMFEEALR            | N-ter +28.03 Da, K +28.03 Da              | 9.2        | 67.6              | 3      | 1782.01                      | 10.766                                       | 1.627                 | MCM4_MOUSE   | F6Z957_MOUSE | DNA replication licensing factor MCM4;                                             |                                                                                                                                                                                                                                                                                 | 0.85 - 1.00 |
| A              | SDVLELTDFENFESR           | N-ter +28.03 Da                           | 58.0       | 50.0              | 2      | 1680.87                      | 1.952                                        | 0.318                 | PDIA3_MOUSE  | F6Q404_MOUSE | Protein disulfide-isomerase A3;                                                    | 58 kDa glucose-regulated protein;58 kDa microsomal protein;Disulfide isomerase ER-60;Endoplasmic reticulum resident protein 57;Endoplasmic reticulum resident protein 60;                                                                                                       | 0.85 - 1.00 |
| RILGGVISAI     | SEAAAQYNPEPPPPR           | N-ter +28.03 Da                           | 36.6       | 65.4              | 3      | 1650.91                      | 0.856                                        | 0.08                  | CPNS1_MOUSE  | D3YW48_MOUSE | Calpain small subunit 1;                                                           |                                                                                                                                                                                                                                                                                 | 0.25 - 0.75 |
| FCPEEYVSPN     | SEDFVGVGPKGDPGPOGPR       | N-ter +34.06 Da, K +34.06 Da              | 26.8       | 58.4              | 3      | 1945.13                      | -1.515                                       | 0.476                 | CO1A1_MOUSE  | F8WGB7_MOUSE | Collagen alpha-1(I) chain;                                                         |                                                                                                                                                                                                                                                                                 | 0.15 - 0.25 |
| LLWENGLLR      | SEETKQNEAFSLTAKGGR        | N-ter +34.06 Da, K +34.06 Da              | 25.9       | 66.5              | 4      | 2216.46                      | 0.496                                        | 0.088                 | CO3_MOUSE    |              | Complement C3;                                                                     | HSE-MSF;                                                                                                                                                                                                                                                                        | 0.25 - 0.75 |
| RPANPNWGVF     | SEFGDSSSPATR              | N-ter +28.03 Da                           | 52.4       | 38.4              | 2      | 1267.62                      | -1.358                                       | 0.139                 | Q99K47_MOUSE | E9PV24_MOUSE |                                                                                    |                                                                                                                                                                                                                                                                                 | 0.15 - 0.25 |
| RGVSEQASD      | SEGHDFSEGGQAVGAHR         | N-ter +28.03 Da                           | 38.7       | 80.4              | 4      | 1797.95                      | 1.937                                        | 0.445                 | E9Q019_MOUSE | FILA_MOUSE   |                                                                                    |                                                                                                                                                                                                                                                                                 | 0.85 - 1.00 |
| VCLLHEKTPV     | SEHVTKCCSGSLVER           | N-ter +34.06 Da, K +34.06 Da, C +57.02 Da | 29.2       | 64.8              | 4      | 1816.04                      | -0.556                                       | 0.098                 | ALBU_MOUSE   |              | Serum albumin;                                                                     |                                                                                                                                                                                                                                                                                 | 0.25 - 0.75 |
| YGEAKRQFL      | SELAQLEENVHLAR            | N-ter +34.06 Da                           | 50.5       | 75.8              | 3      | 1642.01                      | -2.12                                        | 0.277                 | Q148I5_MOUSE |              |                                                                                    |                                                                                                                                                                                                                                                                                 | 0.00 - 0.15 |
| RDHVLGLAR      | SELEEDIPEEDIISR           | N-ter +34.06 Da                           | 44.2       | 51.7              | 3      | 1920.08                      | 1.74                                         | 0.422                 | CO3_MOUSE    |              | Complement C3;                                                                     | HSE-MSF;                                                                                                                                                                                                                                                                        | 0.75 - 0.85 |
| AFVGTWKLVS     | SENFDDYMKVEVGVGFATR       | N-ter +28.03 Da, K +28.03 Da              | 34.0       | 65.4              | 3      | 2120.13                      | -0.667                                       | 0.307                 | FABP4_MOUSE  |              | Fatty acid-binding protein, adipocyte;                                             |                                                                                                                                                                                                                                                                                 | 0.25 - 0.75 |
| NVLA           | SEPEIPKGR                 | N-ter +34.06 Da, K +34.06 Da              | 19.8       | 54.7              | 3      | 1192.81                      | 2.227                                        | 0.062                 | KAD2_MOUSE   | F7BP55_MOUSE | Adenylate kinase 2, mitochondrial;                                                 |                                                                                                                                                                                                                                                                                 | 0.85 - 1.00 |
| KQYAPRCVVC     | SEPIIMPEPGRDETIVR         | N-ter +28.03 Da                           | 34.5       | 52.7              | 3      | 1739.94                      | 0.714                                        | 0.078                 | ZYX_MOUSE    | Q7TQE2_MOUSE | Zyxin;                                                                             |                                                                                                                                                                                                                                                                                 | 0.25 - 0.75 |
| KRHPYKMNLA     | SEPQEVLIHGSANHR           | N-ter +28.03 Da                           | 23.0       | 99.1              | 4      | 1701.03                      | -0.377                                       | 0.029                 | PDL1_MOUSE   |              | PDZ and LIM domain protein 1;                                                      |                                                                                                                                                                                                                                                                                 | 0.25 - 0.75 |
| DSPERELIS      | SEPSPAVTPVPTTLIAPR        | N-ter +28.03 Da                           | 51.4       | 45.5              | 3      | 1661.17                      | 0.614                                        | 0.108                 | SNX2_MOUSE   |              | Sorting nexin-2;                                                                   |                                                                                                                                                                                                                                                                                 | 0.25 - 0.75 |
| SSQPNLSTSY     | SEQEYKAGGSPASVYHGSTSPR    | N-ter +28.03 Da, K +28.03 Da              | 47.1       | 76.7              | 4      | 2308.25                      | -0.377                                       | 0.098                 | EPN2_MOUSE   | Q5NCM6_MOUSE | Epsin-2;                                                                           |                                                                                                                                                                                                                                                                                 | 0.25 - 0.75 |
| PRQPTVTSVC     | SESAQELAEQQR              | N-ter +28.03 Da                           | 33.7       | 50.5              | 3      | 1331.70                      | 0.029                                        | 0.003                 | PDL1_MOUSE   | E9Q8P5_MOUSE | PDZ and LIM domain protein 5;                                                      |                                                                                                                                                                                                                                                                                 | 0.25 - 0.75 |
| SPLRSPLLG      | SESPYEDFLSADSKVLGR        | N-ter +28.03 Da, K +28.03 Da              | 34.1       | 67.1              | 3      | 2055.15                      | -1.152                                       | 0.179                 | MAP1B_MOUSE  |              | Microtubule-associated protein 1B;                                                 |                                                                                                                                                                                                                                                                                 | 0.15 - 0.25 |
| SADROGRRGV     | SESQASDSEGHDFSEGGQAVGAHR  | N-ter +28.03 Da                           | 50.2       | 80.4              | 4      | 2502.27                      | 1.618                                        | 0.49                  | E9Q019_MOUSE | F7BVV1_MOUSE |                                                                                    |                                                                                                                                                                                                                                                                                 | 0.75 - 0.85 |
| MTTLFCINVL     | SEVCGQDITTKHMLPTVLR       | N-ter +28.03 Da, K +28.03 Da, C +57.02 Da | 48.1       | 97.3              | 4      | 2240.38                      | 1.637                                        | 0.174                 | 2AAA_MOUSE   |              | Serine/threonine-protein phosphatase 2A 65 kDa regulatory subunit A alpha isoform; | PP2A subunit A isoform PR65-alpha;PP2A subunit A isoform R1-alpha;                                                                                                                                                                                                              | 0.75 - 0.85 |
| WTHEVFSRS      | SEVVLSDGDEYDQR            | N-ter +28.03 Da                           | 43.8       | 66.6              | 3      | 1638.85                      | -0.434                                       | 0.053                 | E9Q616_MOUSE |              |                                                                                    |                                                                                                                                                                                                                                                                                 | 0.25 - 0.75 |
| VEIPATVTF      | SEFEDDSAPLSPLKFMAR        | N-ter +34.06 Da, K +34.06 Da              | 33.5       | 63.5              | 3      | 2106.24                      | -5.644                                       | 0.001                 | ADDG_MOUSE   |              | Gamma-adducin;                                                                     | Adducin-like protein 70;                                                                                                                                                                                                                                                        | 0.00 - 0.15 |
| ERDRITALKR     | SFEVEIEPPNTPPR            | N-ter +28.03 Da                           | 43.7       | 62.2              | 3      | 1855.02                      | 1.214                                        | 0.089                 | SEPT9_MOUSE  | A2A6U3_MOUSE | Septin-9;                                                                          | SL3-3 integration site 1 protein;                                                                                                                                                                                                                                               | 0.75 - 0.85 |
| DEQALEDHFS     | SFGPISVVVVKDR             | N-ter +28.03 Da, K +28.03 Da              | 39.0       | 61.1              | 3      | 1587.00                      | -0.218                                       | 0.028                 | RBM3_MOUSE   | Q8BG13_MOUSE | Putative RNA-binding protein 3;                                                    | RNA-binding motif protein 3;                                                                                                                                                                                                                                                    | 0.25 - 0.75 |
| ANEVEAVKVH     | SFPTLKFPPASADR            | N-ter +28.03 Da, K +28.03 Da              | 26.5       | 72.9              | 3      | 1639.00                      | -0.12                                        | 0.005                 | PDIA1_MOUSE  | E9Q8G8_MOUSE | Protein disulfide-isomerase;                                                       | Cellular thyroid hormone-binding protein;Endoplasmic reticulum resident protein 59;Prolyl 4-hydroxylase subunit beta;p55;                                                                                                                                                       | 0.25 - 0.75 |
| ETPSQRATR      | SGAQSASTPLSPTR            | N-ter +28.03 Da                           | 52.4       | 35.1              | 2      | 1386.76                      | 0.766                                        | 0.149                 | LMNA_MOUSE   | D3YUF7_MOUSE | Prelamin-A/C;                                                                      |                                                                                                                                                                                                                                                                                 | 0.25 - 0.75 |
| GPEANVPGY      | SGDSAPLQEAMAVLQHHDAVSGTAR | N-ter +34.06 Da                           | 57.7       | 70.7              | 4      | 2581.46                      | -0.474                                       | 0.118                 | MA2B1_MOUSE  |              | Lysosomal alpha-mannosidase;                                                       |                                                                                                                                                                                                                                                                                 | 0.25 - 0.75 |
| NIDIRSAFKR     | SEGEQEDAGELDFSGLLKR       | N-ter +34.06 Da, K +34.06 Da              | 54.8       | 65.2              | 3      | 2075.22                      | -2.474                                       | 0.412                 | D3YU50_MOUSE | Q6P6L5_MOUSE |                                                                                    | member 1;Mannosidase alpha-B;                                                                                                                                                                                                                                                   | 0.00 - 0.15 |
| ESTECRTRV      | SEGHMDLTTCPAAGGQOEKLR     | N-ter +28.03 Da, K +28.03 Da, C +57.02 Da | 54.5       | 63.3              | 4      | 2454.36                      | 2.529                                        | 0.184                 | Q9D1B1_MOUSE |              |                                                                                    |                                                                                                                                                                                                                                                                                 | 0.85 - 1.00 |
| IEMGGNPLEN     | SGFEPGAFDGLKLNLYR         | N-ter +28.03 Da, K +28.03 Da              | 30.2       | 67.9              | 3      | 1938.15                      | -2.184                                       | 0.298                 | PGS1_MOUSE   |              | Biglycan;                                                                          | Bone/cartilage proteoglycan I;PG-S1;                                                                                                                                                                                                                                            | 0.00 - 0.15 |
| VTLHIVERPY     | SGFFDASSEGPEPTQGEAR       | N-ter +34.06 Da                           | 40.1       | 34.5              | 3      | 1951.96                      | -0.644                                       | 0.111                 | PTRF_MOUSE   | Q3U4N4_MOUSE | Polymerase I and transcript release factor;                                        | Cav-p60;Cavin-1;                                                                                                                                                                                                                                                                | 0.25 - 0.75 |

| Non Prime Site | Prime Site                 | Modifications                             | Hyperscore | Mass error in ppm | Charge | Precursor neutral mass in Da | Fold change (log <sub>2</sub> ) of ASAPRatio | FC-error of ASAPRatio | Uniprot ID 1 | Uniprot ID 2 | Protein Name 1                                         | Protein Name 2                                                                                                                                                             | Quantile    |
|----------------|----------------------------|-------------------------------------------|------------|-------------------|--------|------------------------------|----------------------------------------------|-----------------------|--------------|--------------|--------------------------------------------------------|----------------------------------------------------------------------------------------------------------------------------------------------------------------------------|-------------|
| GRTTVMVTPR     | SGGSKDNLSPLGQCLTER         | N-ter +34.06 Da, K +34.06 Da, C +57.02 Da | 27.6       | 47.4              | 3      | 2083.20                      | 0.872                                        | 0.11                  | THRB_MOUSE   |              | Prothrombin;                                           | Coagulation factor II;                                                                                                                                                     | 0.25 - 0.75 |
| RKDLVANTVL     | SGGTTMPYGIADR              | N-ter +34.06 Da                           | 48.5       | 34.7              | 2      | 1358.72                      | -0.556                                       | 0.025                 | ACTA_MOUSE   | ACTB_MOUSE   | Actin, aortic smooth muscle;                           | Alpha-actin-2;                                                                                                                                                             | 0.25 - 0.75 |
| AIMARIAQFL     | SGIPETVPLSTVNR             | N-ter +28.03 Da                           | 30.9       | 43.3              | 3      | 1496.88                      | 0.949                                        | 0.098                 | THIKA_MOUSE  | THIKB_MOUSE  | 3-ketoacyl-CoA thiolase A, peroxisomal;                | Acetyl-CoA acyltransferase A;Beta-ketothiolase A;Peroxisomal 3-oxoacyl-CoA thiolase A;                                                                                     | 0.25 - 0.75 |
| GLSDPNLTL      | SGKDGQCLPLVEQVR            | N-ter +28.03 Da, K +28.03 Da, C +57.02 Da | 36.2       | 81.9              | 3      | 1727.05                      | 0.345                                        | 0.071                 | LRC47_MOUSE  | F6YT33_MOUSE | Leucine-rich repeat-containing protein 47;             |                                                                                                                                                                            | 0.25 - 0.75 |
| VSVERALADE     | SGLDLYSLGGGGVPLVLR         | N-ter +28.03 Da                           | 54.1       | 42.0              | 3      | 1861.07                      | -0.184                                       | 0.038                 | A2BFA6_MOUSE |              |                                                        |                                                                                                                                                                            | 0.25 - 0.75 |
| ETTALVCDNG     | SGLVKAGFAGDDAPR            | N-ter +34.06 Da, K +34.06 Da              | 30.2       | 56.0              | 3      | 1527.95                      | -0.889                                       | 0.099                 | ACTC_MOUSE   | ACTS_MOUSE   | Actin, alpha cardiac muscle 1;                         | Alpha-cardiac actin;                                                                                                                                                       | 0.25 - 0.75 |
| ELLPNGPVL      | SGNPPALPGVGPPIR            | N-ter +28.03 Da, K +28.03 Da              | 34.3       | 15.7              | 3      | 1822.11                      | -0.434                                       | 0.029                 | MBNL3_MOUSE  | Q8BYC7_MOUSE | Muscleblind-like protein 3;                            | Cys3His CCG1-required protein;Muscleblind-like X-linked protein;Protein MCHCR;                                                                                             | 0.25 - 0.75 |
| MLSVAAR        | SGPFAPVLSATS               | N-ter +34.06 Da                           | 48.3       | 23.9              | 2      | 1322.77                      | -1.644                                       | 0.103                 | UCRI_MOUSE   |              | Cytochrome b-c1 complex subunit Rieske, mitochondrial; | Complex III subunit 5;Cytochrome b-c1 complex subunit 5;Cytochrome b-c1 complex subunit 5;Rieske iron-sulfur protein;Ubiquinol-cytochrome c reductase iron-sulfur subunit; | 0.00 - 0.15 |
| AAQYSDKGV      | SGPGMGLMGPR                | N-ter +34.06 Da                           | 34.9       | 40.0              | 2      | 1189.66                      | -1.837                                       | 0.197                 | CO1A2_MOUSE  | E0CXI2_MOUSE | Collagen alpha-2(I) chain;                             | Alpha-2 type I collagen;                                                                                                                                                   | 0.00 - 0.15 |
| PSGVPKDGDR     | SGQPGVGPAGVR               | N-ter +34.06 Da                           | 43.4       | 37.7              | 2      | 1211.73                      | -2.396                                       | 0.378                 | CO1A2_MOUSE  | E9QG69_MOUSE | Collagen alpha-2(I) chain;                             | Alpha-2 type I collagen;                                                                                                                                                   | 0.00 - 0.15 |
| SDYSQQGHVS     | SGSEVTCQCCDLCNER           | N-ter +28.03 Da, C +57.02 Da              | 33.4       | 50.4              | 3      | 2070.95                      | 1.632                                        | 0.284                 | LY6D_MOUSE   |              | Lymphocyte antigen 6D;                                 | Thymocyte B-cell antigen;                                                                                                                                                  | 0.75 - 0.85 |
| ASSREGSPAR     | SGTPVHCPSPIR               | N-ter +28.03 Da, C +57.02 Da              | 36.2       | 63.6              | 3      | 1334.76                      | 0.585                                        | 0.031                 | BAG3_MOUSE   |              | BAG family molecular chaperone regulator 3;            | Bcl-2-associated athanogene 3;Bcl-2-binding protein Bis;                                                                                                                   | 0.25 - 0.75 |
| ERHVAHGPKL     | SGVGPSQPTTVGTECGFVSR       | N-ter +28.03 Da, C +57.02 Da              | 20.0       | 47.8              | 3      | 2050.08                      | -1.286                                       | 0.22                  | F7CK47_MOUSE |              | Microtubule-associated protein;                        |                                                                                                                                                                            | 0.15 - 0.25 |
| GLNVASVRF      | SHTDVKVPDFDYR              | N-ter +34.06 Da, K +34.06 Da              | 27.8       | 75.7              | 4      | 1733.04                      | -0.761                                       | 0.052                 | UCRI_MOUSE   |              | Cytochrome b-c1 complex subunit Rieske, mitochondrial; | Complex III subunit 5;Cytochrome b-c1 complex subunit 5;Rieske iron-sulfur protein;Ubiquinol-cytochrome c reductase iron-sulfur subunit;                                   | 0.25 - 0.75 |
| KITKFENAF      | SHVISQHQSLGNIR             | N-ter +28.03 Da                           | 20.8       | 68.3              | 4      | 1716.06                      | 1.989                                        | 0.23                  | ATPA_MOUSE   | D3ZGF5_MOUSE | ATP synthase subunit alpha, mitochondrial;             |                                                                                                                                                                            | 0.85 - 1.00 |
| RSTCHNQNSM     | SICEEFSQADDKGCFR           | N-ter +28.03 Da, K +28.03 Da, C +57.02 Da | 60.0       | 56.6              | 3      | 2132.05                      | 1.459                                        | 0.446                 | A2M_MOUSE    | D3YW52_MOUSE | Alpha-2-macroglobulin;                                 | Pregnancy zone protein;                                                                                                                                                    | 0.75 - 0.85 |
| NQQEGVCEP      | SIDNSPVKWCALSHLER          | N-ter +34.06 Da, K +34.06 Da, C +57.02 Da | 27.5       | 67.5              | 4      | 2079.26                      | -0.269                                       | 0.029                 | TRFE_MOUSE   | E9Q035_MOUSE | Serotransferrin;                                       | Beta-1 metal-binding globulin;Siderophilin;                                                                                                                                | 0.25 - 0.75 |
| ASTSQSRAA      | SIFGAKPVDTAAR              | N-ter +34.06 Da, K +34.06 Da              | 30.8       | 59.8              | 3      | 1456.95                      | -0.811                                       | 0.128                 | IF4B_MOUSE   | Q3TDD8_MOUSE | Eukaryotic translation initiation factor 4B;           |                                                                                                                                                                            | 0.25 - 0.75 |
| GLILPGILAK     | SIGTLDSPCKDPTDR            | N-ter +28.03 Da, K +28.03 Da, C +57.02 Da | 23.5       | 55.4              | 3      | 1601.90                      | 1.996                                        | 0.61                  | CDSN_MOUSE   |              | Corneodesmosin;                                        |                                                                                                                                                                            | 0.85 - 1.00 |
| QLPNQVLESI     | SIDTPGILGAKQR              | N-ter +28.03 Da, K +28.03 Da              | 48.8       | 58.7              | 3      | 1611.03                      | 0.651                                        | 0.062                 | EHD2_MOUSE   | Q8R2X0_MOUSE | EH domain-containing protein 2;                        |                                                                                                                                                                            | 0.25 - 0.75 |
| SAGIHETTYN     | SIMKCDIDIR                 | N-ter +28.03 Da, K +28.03 Da, C +57.02 Da | 30.4       | 71.4              | 3      | 1305.77                      | 0.098                                        | 0.016                 | ACTA_MOUSE   | ACTC_MOUSE   | Actin, aortic smooth muscle;                           | Alpha-actin-2;                                                                                                                                                             | 0.25 - 0.75 |
| LSEKISSVQ      | SIVPALEIANAHR              | N-ter +28.03 Da                           | 43.2       | 70.4              | 3      | 1417.90                      | 1                                            | 0.065                 | CH60_MOUSE   |              | 60 kDa heat shock protein, mitochondrial;              | 60 kDa chaperonin;Chaperonin 60;HSP-65;Heat shock protein 60;Mitochondrial matrix protein P1;                                                                              | 0.25 - 0.75 |
| RTSPVPRQKR     | SIVVSPILPENQR              | N-ter +28.03 Da                           | 36.8       | 56.9              | 3      | 1592.02                      | 1                                            | 0.16                  | CAD13_MOUSE  |              | Cadherin-13;                                           | Heart cadherin;Truncated cadherin;                                                                                                                                         | 0.25 - 0.75 |
| IHQVQYQEMD     | SKADDLLKSSGVQIR            | N-ter +28.03 Da, K +28.03 Da              | 33.2       | 70.7              | 4      | 1928.23                      | -1                                           | 0.06                  | C163A_MOUSE  |              | Scavenger receptor cysteine-rich type 1 protein M130;  |                                                                                                                                                                            | 0.15 - 0.25 |
| AAVSTAQPIL     | SKLEPQIATASEYADR           | N-ter +28.03 Da, K +28.03 Da              | 40.3       | 69.9              | 4      | 1856.11                      | -0.943                                       | 0.073                 | PLIN3_MOUSE  |              | Perilipin-3;                                           | Cargo selection protein TIP47;Mannose-6-phosphate receptor-binding protein 1;                                                                                              | 0.15 - 0.25 |
| GKKGVKRPNR     | SKLQDMLANLR                | N-ter +28.03 Da, K +28.03 Da              | 36.7       | 79.4              | 3      | 1343.87                      | 0.678                                        | 0.136                 | STRN_MOUSE   | F8WH41_MOUSE | Striatin;                                              |                                                                                                                                                                            | 0.25 - 0.75 |
| LWSLVATLLG     | SKWPEPVFGR                 | N-ter +28.03 Da, K +28.03 Da              | 31.2       | 75.1              | 3      | 1257.78                      | 0.782                                        | 0.068                 | MASP2_MOUSE  |              | Mannan-binding lectin serine protease 2;               | MBL-associated serine protease 2;Mannose-binding protein-associated serine protease 2;                                                                                     | 0.25 - 0.75 |
| VRLQDSVDF      | SLADAINTEFKNTR             | N-ter +28.03 Da, K +28.03 Da              | 39.8       | 70.5              | 3      | 1634.98                      | -0.184                                       | 0.04                  | VIME_MOUSE   | A2AKI2_MOUSE | Vimentin;                                              |                                                                                                                                                                            | 0.25 - 0.75 |
| ISRRLVSDG      | SLAEVPEAKPVGILGSGDFAR      | N-ter +34.06 Da, K +34.06 Da              | 26.5       | 79.1              | 4      | 2342.59                      | 0.322                                        | 0.07                  | STEA3_MOUSE  | E9QN92_MOUSE | Metalloendopeptidase STEAP3;                           | Dudulin-2;Protein nm1054;Six-transmembrane epithelial antigen of prostate 3;Tumor suppressor-activated pathway protein 6;                                                  | 0.25 - 0.75 |
| STVHEILCKL     | SLEGDHSTPPSAYSGVKPYTNFDAER | N-ter +34.06 Da, K +34.06 Da              | 37.7       | 74.7              | 4      | 2892.64                      | 2.646                                        | 0.693                 | ANXA2_MOUSE  | BOV2N7_MOUSE | Annexin A2;                                            | Annexin I;Annexin-2;Calpactin I heavy chain;Calpactin-1 heavy chain;Chromobindin-8;Lipocortin II;Placental anticoagulant protein IV;Protein I;p36;                         | 0.85 - 1.00 |
| NEMATAASSS     | SLEKSYELPDGQVITIGNER       | N-ter +34.06 Da, K +34.06 Da              | 38.4       | 60.2              | 4      | 2315.40                      | 0.163                                        | 0.017                 | ACTC_MOUSE   | ACTA_MOUSE   | Actin, alpha cardiac muscle 1;                         | Alpha-cardiac actin;                                                                                                                                                       | 0.25 - 0.75 |
| LRPPGGGSNF     | SLGFDEPAEQPVR              | N-ter +28.03 Da                           | 43.3       | 44.9              | 3      | 1471.80                      | 0.202                                        | 0.032                 | HN1_MOUSE    |              | Hematological and neurological expressed 1 protein;    |                                                                                                                                                                            | 0.25 - 0.75 |
| DCLQGFQLTH     | SLGGGTGSGMGTLISKIR         | N-ter +28.03 Da, K +28.03 Da              | 27.9       | 49.0              | 3      | 1860.14                      | -0.474                                       | 0.053                 | TBB5_MOUSE   | TBB2A_MOUSE  | Tubulin beta-5 chain;                                  |                                                                                                                                                                            | 0.25 - 0.75 |
| LVVASSLGLV     | SLGGKATTASQAKVALSAEKL      | N-ter +28.03 Da, K +28.03 Da              | 26.4       | 65.9              | 4      | 2298.52                      | 0.401                                        | 0.064                 | SERPH_MOUSE  |              | Serpin H1;                                             | 47 kDa heat shock protein;Collagen-binding protein;Serine protease inhibitor J6;                                                                                           | 0.25 - 0.75 |
| RPEPQQVGTV     | SLHLGVTSPVLR               | N-ter +28.03 Da                           | 32.5       | 63.8              | 3      | 1305.86                      | 1.74                                         | 0.266                 | TPP1_MOUSE   |              | Tripeptidyl-peptidase 1;                               | Lysosomal pepstatin-insensitive protease;Tripeptidyl aminopeptidase;Tripeptidyl-peptidase I;                                                                               | 0.75 - 0.85 |

| Non Prime Site | Prime Site                  | Modifications                             | Hyperscore | Mass error in ppm | Charge | Precursor neutral mass in Da | Fold change (log <sub>2</sub> ) of ASAPRatio | FC-error of ASAPRatio | Uniprot ID 1 | Uniprot ID 2 | Protein Name 1                                                                                           | Protein Name 2                                                                                                                                                     | Quantile    |
|----------------|-----------------------------|-------------------------------------------|------------|-------------------|--------|------------------------------|----------------------------------------------|-----------------------|--------------|--------------|----------------------------------------------------------------------------------------------------------|--------------------------------------------------------------------------------------------------------------------------------------------------------------------|-------------|
| SCRNDPCALC     | SLHSIGKIGGAQNR              | N-ter +28.03 Da, K +28.03 Da              | 23.5       | 75.8              | 4      | 1492.96                      | -0.916                                       | 0.086                 | MIF_MOUSE    |              | Macrophage migration inhibitory factor;                                                                  | Delayed early response protein 6;Glycosylation-inhibiting factor;L-dopachrome isomerase;L-dopachrome tautomerase;Phenylpyruvate tautomerase;                       | 0.25 - 0.75 |
| ADESAANCDK     | SLHTLFGDKLCAIPNLR           | N-ter +28.03 Da, K +28.03 Da, C +57.02 Da | 38.9       | 87.3              | 4      | 2010.28                      | 0.345                                        | 0.024                 | ALBU_MOUSE   |              | Serum albumin;                                                                                           |                                                                                                                                                                    | 0.25 - 0.75 |
| SIRSAPPKLA     | SLKGVVPEDAVETLAGSLGTR       | N-ter +28.03 Da, K +28.03 Da              | 56.2       | 62.2              | 3      | 2154.32                      | 0.84                                         | 0.258                 | ICAL_MOUSE   | Q921U7_MOUSE | Calpastatin;                                                                                             | Calpain inhibitor;                                                                                                                                                 | 0.25 - 0.75 |
| AMKANTMSNY     | SLLPASLLDHR                 | N-ter +28.03 Da                           | 47.1       | 70.2              | 3      | 1248.81                      | 2.727                                        | 0.692                 | STZB1_MOUSE  | E9QKC1_MOUSE | Sulfotransferase family cytosolic 2B member 1;                                                           | Alcohol sulfotransferase;Hydroxysteroid sulfotransferase 2;                                                                                                        | 0.85 - 1.00 |
| RSPLQLLQGR     | SLPEGVVDGIEVYSTKISKCVTSR    | N-ter +34.06 Da, K +34.06 Da, C +57.02 Da | 25.9       | 62.7              | 4      | 2725.71                      | -3.059                                       | 0.51                  | ITIH3_MOUSE  | E9PVS1_MOUSE | Inter-alpha-trypsin inhibitor heavy chain H3;                                                            |                                                                                                                                                                    | 0.00 - 0.15 |
| SGSLVVEEFM     | SLPELQQNPLVQR               | N-ter +28.03 Da                           | 41.8       | 43.3              | 3      | 1548.93                      | 1.384                                        | 0.048                 | CANB1_MOUSE  |              | Calcineurin subunit B type 1;                                                                            | Protein phosphatase 2B regulatory subunit 1;Protein phosphatase 3 regulatory subunit B alpha isoform 1;                                                            | 0.75 - 0.85 |
| RSLLSGETTG     | SLPGNYLVPIYSGR              | N-ter +34.06 Da                           | 51.0       | 26.6              | 2      | 1568.92                      | -2.12                                        | 0.369                 | MYOM1_MOUSE  |              | Myomesin-1;                                                                                              | Myomesin family member 1;Skelemin;                                                                                                                                 | 0.00 - 0.15 |
| LLGSPRRSY      | SLPPHQKVPPLSPPTMOAGTIAR     | N-ter +34.06 Da, K +34.06 Da              | 48.8       | 44.5              | 4      | 2593.62                      | -0.201                                       | 0.005                 | ODP2_MOUSE   |              | Dihydropolyllysine-residue acetyltransferase component of pyruvate dehydrogenase complex, mitochondrial; | Dihydropolamide acetyltransferase component of pyruvate dehydrogenase complex;Pyruvate dehydrogenase complex component E2;                                         | 0.25 - 0.75 |
| TVTSAAGLQR     | SLPSSSTAAKTPPGSSSAGTQSSTSNR | N-ter +28.03 Da, K +28.03 Da              | 23.3       | 67.1              | 4      | 2707.51                      | 2.982                                        | 0.491                 | MYPT1_MOUSE  |              | Protein phosphatase 1 regulatory subunit 12A;                                                            | Myosin phosphatase-targeting subunit 1;                                                                                                                            | 0.85 - 1.00 |
| DPAKVEAFQA     | SLSKLGDVVVNDAFGTAHR         | N-ter +28.03 Da, K +28.03 Da              | 37.1       | 87.6              | 4      | 2105.28                      | -1.059                                       | 0.088                 | PGK1_MOUSE   | PGK2_MOUSE   | Phosphoglycerate kinase 1;                                                                               |                                                                                                                                                                    | 0.15 - 0.25 |
| ACFATIKDGK     | SLTKDLGGNAKCSDFTEEICR       | N-ter +28.03 Da, K +28.03 Da, C +57.02 Da | 41.5       | 68.6              | 4      | 2484.37                      | 1.58                                         | 0.28                  | IDH3A_MOUSE  |              | Isocitrate dehydrogenase [NAD] subunit alpha, mitochondrial;                                             | Isocitric dehydrogenase subunit alpha;NAD(+)-specific ICDH subunit alpha;                                                                                          | 0.75 - 0.85 |
| ASGPENFCVQ     | SMPPAQQTSGQMHR              | N-ter +28.03 Da                           | 51.8       | 66.7              | 3      | 1824.00                      | 1.475                                        | 0.207                 | TLN1_MOUSE   | F8WGT0_MOUSE | Talin-1;                                                                                                 |                                                                                                                                                                    | 0.75 - 0.85 |
| STAASRATTL     | SNAYVSLASTGLSLTKVDER        | N-ter +28.03 Da, K +28.03 Da              | 57.1       | 56.6              | 3      | 2090.24                      | -0.234                                       | 0.033                 | PICA_MOUSE   |              | Phosphatidylinositol-binding clathrin assembly protein;                                                  | Clathrin assembly lymphoid myeloid leukemia; Aldolase 1;Muscle-type aldolase;                                                                                      | 0.25 - 0.75 |
| TPGHACTQKF     | SNEEIAMATVTALR              | N-ter +28.03 Da                           | 41.6       | 50.9              | 3      | 1532.86                      | -1.69                                        | 0.109                 | ALDOA_MOUSE  | Q9CPQ9_MOUSE | Fructose-bisphosphate aldolase A;                                                                        | Beta-tubulin cofactor D;Tubulin-folding cofactor D;                                                                                                                | 0.00 - 0.15 |
| MVL            | SNEPAASAAEEVEDDALVR         | N-ter +28.03 Da                           | 69.4       | 54.1              | 3      | 2129.09                      | 2.556                                        | 0.556                 | TBCD_MOUSE   |              | Tubulin-specific chaperone D;                                                                            |                                                                                                                                                                    | 0.85 - 1.00 |
| PEPPRRSHY      | SNIEANESEVVR                | N-ter +28.03 Da                           | 49.0       | 38.0              | 2      | 1403.71                      | 0.422                                        | 0.063                 | CPNS1_MOUSE  | D3YW48_MOUSE | Calpain small subunit 1;                                                                                 | Calcium-activated neutral proteinase small subunit;Calcium-dependent protease small subunit;Calcium-dependent protease small subunit 1;Calpain regulatory subunit; | 0.25 - 0.75 |
| DRDKPAQIRF     | SNISAAKAVADAIR              | N-ter +28.03 Da, K +28.03 Da              | 44.0       | 59.6              | 3      | 1441.91                      | 1.31                                         | 0.111                 | TCPD_MOUSE   |              | T-complex protein 1 subunit delta;                                                                       | A45;CCT-delta;                                                                                                                                                     | 0.75 - 0.85 |
| DNAROSAERN     | SNLVGAAHEELQQR              | N-ter +34.06 Da                           | 53.3       | 54.7              | 3      | 1671.97                      | 0.39                                         | 0.036                 | LMNA_MOUSE   |              | Prelamin-A/C;                                                                                            |                                                                                                                                                                    | 0.25 - 0.75 |
| EQFLPMMQAI     | SNNKDQGGYEDFVGLR            | N-ter +34.06 Da, K +34.06 Da              | 53.1       | 66.2              | 3      | 1995.13                      | -2.396                                       | 0.631                 | MYL1_MOUSE   | E9PWG4_MOUSE | Myosin light chain 1/3, skeletal muscle isoform;                                                         | Myosin light chain alkali 1/2;                                                                                                                                     | 0.00 - 0.15 |
| LLAACGSVTM     | SNPGESSFADLRDLDPVEKIDR      | N-ter +34.06 Da, K +34.06 Da              | 38.3       | 80.3              | 4      | 2527.52                      | -0.014                                       | 0.002                 | SODE_MOUSE   |              | Extracellular superoxide dismutase [Cu-Zn];                                                              |                                                                                                                                                                    | 0.25 - 0.75 |
| LLAACGSVTM     | SNPGESSFADLR                | N-ter +28.03 Da                           | 63.5       | 36.8              | 2      | 1421.70                      | 0.475                                        | 0.079                 | SODE_MOUSE   |              | Extracellular superoxide dismutase [Cu-Zn];                                                              |                                                                                                                                                                    | 0.25 - 0.75 |
| SLAQRLEALK     | SNPTLNEYHTR                 | N-ter +28.03 Da                           | 42.0       | 62.2              | 3      | 1358.74                      | -0.34                                        | 0.06                  | APOA1_MOUSE  | Q8BPD5_MOUSE | Apolipoprotein A-I;                                                                                      | Apolipoprotein A1;                                                                                                                                                 | 0.25 - 0.75 |
| GGEVPRKRYL     | SNQERPYEHSVVVGR             | N-ter +34.06 Da                           | 24.7       | 85.2              | 4      | 1918.15                      | 3.228                                        | 0.699                 | S14L4_MOUSE  |              | SEC14-like protein 4;                                                                                    |                                                                                                                                                                    | 0.85 - 1.00 |
| TSGDSLTVAS     | SNTDFAFSLYR                 | N-ter +28.03 Da                           | 41.6       | 37.3              | 2      | 1347.70                      | 2.856                                        | 0.335                 | SPA3G_MOUSE  | D3Z450_MOUSE | Serine protease inhibitor A3G;                                                                           | Serine protease inhibitor 2A;                                                                                                                                      | 0.85 - 1.00 |
| KIPRHEVTEI     | SNTDVEIQPGKTVIR             | N-ter +34.06 Da, K +34.06 Da              | 44.5       | 52.5              | 3      | 1712.06                      | -1                                           | 0.26                  | E9Q616_MOUSE |              |                                                                                                          |                                                                                                                                                                    | 0.15 - 0.25 |
| LHPTLLAQQ      | SNVDELGCSHLGQSYESR          | N-ter +34.06 Da, C +57.02 Da              | 53.8       | 68.1              | 3      | 2071.09                      | -2.474                                       | 0.55                  | CO3A1_MOUSE  | Q5DTG2_MOUSE | Collagen alpha-1(III) chain;                                                                             |                                                                                                                                                                    | 0.00 - 0.15 |
| QETDTSQKDC     | SPASHEIATNLGDFALR           | N-ter +28.03 Da                           | 55.6       | 68.1              | 3      | 1826.06                      | 0.454                                        | 0.07                  | A1AT4_MOUSE  |              | Alpha-1-antitrypsin 1-4;                                                                                 | Alpha-1 protease inhibitor 4;Serine protease inhibitor 1-4;Serine protease inhibitor A1d;                                                                          | 0.25 - 0.75 |
| NSTHPMHSRC     | SPDPGLTALLSDHR              | N-ter +28.03 Da                           | 54.3       | 56.2              | 3      | 1505.87                      | 0.993                                        | 0.06                  | HEMO_MOUSE   |              | Hemopexin;                                                                                               |                                                                                                                                                                    | 0.25 - 0.75 |
| VESASGETLH     | SPKVGQPGAAGPVSPMCPGR        | N-ter +28.03 Da, K +28.03 Da, C +57.02 Da | 71.5       | 58.2              | 3      | 2005.14                      | 0.911                                        | 0.174                 | FETUA_MOUSE  |              | Alpha-2-HS-glycoprotein;                                                                                 | Countertryptin;Fetuin-A;                                                                                                                                           | 0.25 - 0.75 |
| SNRRDRPQRP     | SPSQSSDSQVHSGVQVEGR         | N-ter +28.03 Da                           | 26.9       | 60.9              | 3      | 1998.06                      | 0.832                                        | 0.234                 | FILA_MOUSE   | F7BVV1_MOUSE | Filaggrin;                                                                                               |                                                                                                                                                                    | 0.25 - 0.75 |
| QSGSGRSPRR     | SPVHPESSEGEHSVVPQR          | N-ter +28.03 Da                           | 36.8       | 80.2              | 4      | 2114.17                      | -0.304                                       | 0.049                 | FILA2_MOUSE  | FILA2_MOUSE  | Filaggrin-2;                                                                                             | Intermediate filament-associated protein;                                                                                                                          | 0.25 - 0.75 |
| DDGHLNLSLG     | SPVQADVFFPR                 | N-ter +28.03 Da                           | 33.5       | 50.6              | 3      | 1305.74                      | 0.043                                        | 0.004                 | LEGLA_MOUSE  | E9QAC6_MOUSE | Galectin-related protein A;                                                                              | Lectin galactoside-binding-like protein A;                                                                                                                         | 0.25 - 0.75 |
| PVRNRKVVYD     | SQFQESDDADEDYGR             | N-ter +28.03 Da                           | 54.7       | 53.4              | 3      | 1788.80                      | 0.367                                        | 0.083                 | NUCKS_MOUSE  |              | Nuclear ubiquituous casein and cyclin-dependent kinases substrate;                                       | JC7;                                                                                                                                                               | 0.25 - 0.75 |
| TALLDWLKNP     | SQLGIQTVKR                  | N-ter +28.03 Da, K +28.03 Da              | 23.1       | 65.2              | 3      | 1184.80                      | 0.379                                        | 0.067                 | CFAL_MOUSE   |              | Complement factor I;                                                                                     | C3B/C4B inactivator;                                                                                                                                               | 0.25 - 0.75 |
| QAVRINKEQV     | SQLLPEKFAEQILR              | N-ter +34.06 Da, K +34.06 Da              | 30.0       | 54.3              | 3      | 1739.16                      | -1                                           | 0.06                  | SAMH1_MOUSE  | Q6ZQM3_MOUSE | SAM domain and HD domain-containing protein 1;                                                           | Interferon-gamma-inducible protein Mg11;                                                                                                                           | 0.15 - 0.25 |
| TFLPRKIISL     | SQLLQEDSLNVADLSSLR          | N-ter +28.03 Da                           | 57.0       | 47.4              | 3      | 2015.15                      | 1.07                                         | 0.321                 | PSME2_MOUSE  | E0CZ90_MOUSE | Proteasome activator complex subunit 2;                                                                  | 11S regulator complex subunit beta;Activator of multicatalytic protease subunit 2;Proteasome activator 2B subunit beta;                                            | 0.25 - 0.75 |
| WKLVPRGRGL     | SQNAAAKASATAPEVR            | N-ter +28.03 Da, K +28.03 Da              | 51.5       | 39.2              | 3      | 1626.93                      | 1.17                                         | 0.229                 | RT30_MOUSE   |              | 28S ribosomal protein S30, mitochondrial;                                                                |                                                                                                                                                                    | 0.75 - 0.85 |
| AVVRVAGRRL     | SQQSASGAPVLLR               | N-ter +28.03 Da                           | 33.8       | 44.1              | 3      | 1340.80                      | 0.782                                        | 0.032                 | ETHE1_MOUSE  |              | Protein ETHE1, mitochondrial;                                                                            | Ethylmalonic encephalopathy protein 1 homolog;Hepatoma subtracted clone one protein;                                                                               | 0.25 - 0.75 |
| RRDRPQPSPP     | SQSSDSQVHSGVQVEGR           | N-ter +34.06 Da                           | 58.2       | 62.3              | 3      | 1820.00                      | 2.128                                        | 0.726                 | FILA_MOUSE   | F7BVV1_MOUSE | Filaggrin;                                                                                               |                                                                                                                                                                    | 0.85 - 1.00 |
| ISKVRVHIQG     | SRGESQEVALPSR               | N-ter +34.06 Da                           | 35.4       | 56.4              | 3      | 1448.86                      | -0.494                                       | 0.035                 | Q3UR26_MOUSE | F7DBB3_MOUSE |                                                                                                          |                                                                                                                                                                    | 0.25 - 0.75 |
| RASGPWGRSH     | SSAAAEASAALKVRPER           | N-ter +34.06 Da, K +34.06 Da              | 17.9       | 52.8              | 4      | 1781.14                      | -0.667                                       | 0.032                 | ALAT2_MOUSE  | D6RFQ8_MOUSE | Alanine aminotransferase 2;                                                                              | Glutamate pyruvate transaminase 2;Glutamic--alanine transaminase 2;Glutamic--pyruvic transaminase 2;                                                               | 0.25 - 0.75 |
| GLRLLGVRRS     | SSAPVASPNVR                 | N-ter +28.03 Da                           | 54.2       | 31.2              | 2      | 1111.63                      | 0.546                                        | 0.056                 | PYC_MOUSE    | E9QPD7_MOUSE | Pyruvate carboxylase, mitochondrial;                                                                     | Pyruvic carboxylase;                                                                                                                                               | 0.25 - 0.75 |

Table S11, Tholen et al.

| Non Prime Site | Prime Site                  | Modifications                             | Hyperscore | Mass error in ppm | Charge | Precursor neutral mass in Da | Fold change (log <sub>2</sub> ) of ASAPRatio | FC-error of ASAPRatio | Uniprot ID 1 | Uniprot ID 2 | Protein Name 1                                                                                                                                        | Protein Name 2                                                                                                                                      | Quantile    |
|----------------|-----------------------------|-------------------------------------------|------------|-------------------|--------|------------------------------|----------------------------------------------|-----------------------|--------------|--------------|-------------------------------------------------------------------------------------------------------------------------------------------------------|-----------------------------------------------------------------------------------------------------------------------------------------------------|-------------|
| ETRSQTAHEY     | SSCPDDAIFQSLAR              | N-ter +28.03 Da, C +57.02 Da              | 32.0       | 66.4              | 3      | 1593.85                      | -1.69                                        | 0.218                 | CBPE_MOUSE   |              | Carboxypeptidase E;                                                                                                                                   | Carboxypeptidase H;Enkephalin convertase;Prohormone-processing carboxypeptidase;                                                                    | 0.00 - 0.15 |
| QFLVLLVAGR     | SSDAVAGPASSLQKR             | N-ter +28.03 Da, K +28.03 Da              | 33.9       | 52.8              | 3      | 1528.90                      | 1.163                                        | 0.062                 | E9PWQ3_MOUSE | D3YWD1_MOUSE |                                                                                                                                                       |                                                                                                                                                     | 0.75 - 0.85 |
| VLQTRGFVSD     | SSDSMDTGAGSIR               | N-ter +34.06 Da                           | 47.7       | 40.6              | 2      | 1316.66                      | -0.415                                       | 0.044                 | ATIF1_MOUSE  | Q9D879_MOUSE | ATPase inhibitor, mitochondrial;                                                                                                                      | Inhibitor of F(1)F(o)-ATPase;                                                                                                                       | 0.25 - 0.75 |
| DRPRQPSFSQ     | SSDSQVHSGVQVEGR             | N-ter +28.03 Da                           | 55.5       | 63.2              | 3      | 1598.87                      | 0.941                                        | 0.279                 | FILA_MOUSE   | F78VV1_MOUSE | Filaggrin;                                                                                                                                            |                                                                                                                                                     | 0.25 - 0.75 |
| GALAPTGPSA     | SSEAPPLVNEVKR               | N-ter +28.03 Da, K +28.03 Da              | 48.8       | 60.0              | 3      | 1595.95                      | -0.494                                       | 0.077                 | RPN1_MOUSE   |              | Dolichyl-diphosphooligosaccharide--protein glycosyltransferase 67 kDa subunit;                                                                        | Ribophorin I;Ribophorin-1;                                                                                                                          | 0.25 - 0.75 |
| SPRRSPVHPE     | SSGEEHVVVPQR                | N-ter +28.03 Da                           | 56.6       | 59.7              | 3      | 1467.78                      | 0.824                                        | 0.084                 | E9QPZ3_MOUSE | FILA2_MOUSE  |                                                                                                                                                       |                                                                                                                                                     | 0.25 - 0.75 |
| TDEQALEDHF     | SSFGPISEVVVKDR              | N-ter +34.06 Da, K +34.06 Da              | 53.3       | 55.5              | 3      | 1686.09                      | -0.889                                       | 0.082                 | RBM3_MOUSE   | Q8BG13_MOUSE | Putative RNA-binding protein 3;                                                                                                                       | RNA-binding motif protein 3;                                                                                                                        | 0.25 - 0.75 |
| SDVQTAVKTN     | SSFIQGFVDHVKEDCDR           | N-ter +28.03 Da, K +28.03 Da, C +57.02 Da | 31.4       | 88.0              | 4      | 2094.17                      | 1.993                                        | 0.451                 | SAP_MOUSE    | Q8BFQ1_MOUSE | Sulfated glycoprotein 1;                                                                                                                              | Prosaposin;                                                                                                                                         | 0.85 - 1.00 |
| IIRKVVVRQVD    | SSGAIDTQHQEEVELR            | N-ter +34.06 Da                           | 53.3       | 56.3              | 3      | 1832.02                      | -2.12                                        | 0.369                 | ANK1_MOUSE   | D3YTV8_MOUSE | Ankyrin-1;                                                                                                                                            | Erythrocyte ankyrin;                                                                                                                                | 0.00 - 0.15 |
| VVLLFETALL     | SSGFSLEDPQTHSNR             | N-ter +28.03 Da                           | 62.2       | 54.8              | 3      | 1688.87                      | 4.776                                        | 0.382                 | H590B_MOUSE  | Q71X8_MOUSE  | Heat shock protein HSP 90-beta;                                                                                                                       | Heat shock 84 kDa;Tumor-specific transplantation 84 kDa antigen;                                                                                    | 0.85 - 1.00 |
| CGLSDPNLTL     | SSGKDGQCLVVEQVR             | N-ter +28.03 Da, K +28.03 Da, C +57.02 Da | 45.7       | 68.6              | 3      | 1814.06                      | -0.074                                       | 0.008                 | LRC47_MOUSE  | F6YT33_MOUSE | Leucine-rich repeat-containing protein 47;                                                                                                            |                                                                                                                                                     | 0.25 - 0.75 |
| EGVPQFLVLI     | SSGKSDDEVDSAVELKQFGVAPLTIAR | N-ter +28.03 Da, K +28.03 Da              | 91.1       | 83.4              | 4      | 3017.81                      | 1.491                                        | 0.488                 | E9PWQ3_MOUSE | D3YWD1_MOUSE |                                                                                                                                                       |                                                                                                                                                     | 0.75 - 0.85 |
| IEDLEKVEQL     | SSGLEHDNLEAHSPEQPPR         | N-ter +34.06 Da                           | 20.6       | 77.5              | 4      | 2133.20                      | -0.786                                       | 0.068                 | PDXD1_MOUSE  | E9Q8P7_MOUSE | Pyridoxal-dependent decarboxylase domain-containing protein 1;                                                                                        |                                                                                                                                                     | 0.25 - 0.75 |
| DDGLADLLFV     | SSGPTNASAFTEK               | N-ter +28.03 Da                           | 53.0       | 36.9              | 2      | 1351.69                      | 5.863                                        | 1.07                  | MAP4_MOUSE   | E9QPW8_MOUSE | Microtubule-associated protein 4;                                                                                                                     |                                                                                                                                                     | 0.85 - 1.00 |
| STGRISNNAR     | SSGTGASVGGPPSQDQTLVQR       | N-ter +28.03 Da                           | 56.0       | 46.7              | 3      | 2211.18                      | 2.965                                        | 0.797                 | PDLI5_MOUSE  |              | PDZ and LIM domain protein 5;                                                                                                                         | Enigma homolog;Enigma-like PDZ and LIM domains protein;                                                                                             | 0.85 - 1.00 |
| DLKTGESVTL     | SSIPLPSDDFKSTGIKIVYEDR      | N-ter +28.03 Da, K +28.03 Da              | 43.9       | 84.1              | 4      | 2437.48                      | 2.539                                        | 0.424                 | PALMD_MOUSE  | Q3UV77_MOUSE | Palmdelphin;                                                                                                                                          |                                                                                                                                                     | 0.85 - 1.00 |
| SSVATQQTLL     | SSIPSPSTAGKIFR              | N-ter +34.06 Da, K +34.06 Da              | 21.7       | 66.4              | 4      | 1652.08                      | -0.515                                       | 0.081                 | A2AQ82_MOUSE | A2AQ89_MOUSE |                                                                                                                                                       |                                                                                                                                                     | 0.25 - 0.75 |
| KYDMEVKVQK     | SSKELEDMNQKLFDR             | N-ter +28.03 Da, K +28.03 Da              | 26.9       | 80.7              | 4      | 2036.23                      | -1.515                                       | 0.26                  | TNNI2_MOUSE  | A2AGK0_MOUSE | Troponin I, fast skeletal muscle;                                                                                                                     | Troponin I, fast-twitch isoform;                                                                                                                    | 0.15 - 0.25 |
| SRATLNSNAV     | SSLASTGLSLTKVDER            | N-ter +34.06 Da, K +34.06 Da              | 33.1       | 55.4              | 3      | 1731.10                      | -3.322                                       | 0.332                 | PICA_MOUSE   |              |                                                                                                                                                       | Clastrin assembly lymphoid myeloid leukemia;                                                                                                        | 0.00 - 0.15 |
| ENEMATAASV     | SSLEKSYELPDGQVITIGNER       | N-ter +28.03 Da, K +28.03 Da              | 39.3       | 53.1              | 3      | 2390.36                      | 0.934                                        | 0.073                 | ADXC_MOUSE   | ACTA_MOUSE   | Actin, alpha cardiac muscle 1;                                                                                                                        | Alpha-cardiac actin;                                                                                                                                | 0.25 - 0.75 |
| WAVTPSWKST     | SSLSLETTSSVLVGR             | N-ter +28.03 Da                           | 17.0       | 59.5              | 4      | 1634.97                      | -0.644                                       | 0.081                 | A2APQ4_MOUSE |              |                                                                                                                                                       |                                                                                                                                                     | 0.25 - 0.75 |
| SPQVEAEAFI     | SSLETIEGADAEADGHSPEQQRK     | N-ter +34.06 Da, K +34.06 Da              | 56.6       | 70.0              | 4      | 2609.47                      | -5.644                                       | 0.001                 | CFAB_MOUSE   | B8JMS_MOUSE  | Complement factor B;                                                                                                                                  | C3/C5 convertase;                                                                                                                                   | 0.00 - 0.15 |
| ITSGDSDLTVA    | SSNTDFAFSLYR                | N-ter +28.03 Da                           | 48.1       | 42.2              | 2      | 1434.74                      | 2.609                                        | 0.441                 | SPA3G_MOUSE  | D3Z450_MOUSE | Serine protease inhibitor A3G;                                                                                                                        | Serine protease inhibitor 2A;                                                                                                                       | 0.85 - 1.00 |
| PNHQKASSGK     | SSPFKVSPLSFRG               | N-ter +28.03 Da, K +28.03 Da              | 24.2       | 64.6              | 3      | 1463.91                      | 0.299                                        | 0.012                 | SDPR_MOUSE   |              | Serum deprivation-response protein;                                                                                                                   | Cavin-2;Phosphatidylserine-binding protein;                                                                                                         | 0.25 - 0.75 |
| SQSGRSRSPR     | SSPVHPESSGEEHVVPPQR         | N-ter +28.03 Da                           | 40.2       | 82.1              | 4      | 2201.22                      | 0.475                                        | 0.065                 | FILA2_MOUSE  | E9QPZ3_MOUSE | Filaggrin-2;                                                                                                                                          | Intermediate filament-associated protein;                                                                                                           | 0.25 - 0.75 |
| AAHVAPRSI      | SSQQTIPPSAKYGGK             | N-ter +28.03 Da, K +28.03 Da              | 27.8       | 48.3              | 3      | 1631.94                      | -0.943                                       | 0.018                 | IDHG1_MOUSE  |              | Isocitrate dehydrogenase [NAD] subunit gamma 1, mitochondrial;                                                                                        | Isocitrate dehydrogenase subunit gamma;NAD(+)-specific IDH subunit gamma;                                                                           | 0.15 - 0.25 |
| GGRLRLGVR      | SSAPVAPSNVR                 | N-ter +34.06 Da                           | 52.0       | 27.0              | 2      | 1204.70                      | -0.34                                        | 0.065                 | PYC_MOUSE    | E9QPD7_MOUSE | Pyruvate carboxylase, mitochondrial;                                                                                                                  | Pyruvic carboxylase;                                                                                                                                | 0.25 - 0.75 |
| RPLSVYARAR     | SSSEDKITVHFKNR              | N-ter +28.03 Da, K +28.03 Da              | 13.8       | 77.8              | 4      | 1731.07                      | -0.252                                       | 0.027                 | ADX_MOUSE    | E9Q8L1_MOUSE | Adrenodoxin, mitochondrial;                                                                                                                           | Adrenal ferredoxin;Ferredoxin-1;                                                                                                                    | 0.25 - 0.75 |
| RSRGRGQFV      | SSSLPDIQYR                  | N-ter +34.06 Da, C +57.02 Da              | 27.1       | 46.0              | 2      | 1230.67                      | 1.922                                        | 0.254                 | CNBP_MOUSE   | D3YFF6_MOUSE | Cellular nucleic acid-binding protein;                                                                                                                | Zinc finger protein 9;                                                                                                                              | 0.85 - 1.00 |
| EVREAKPAL      | SSVETQPAEEVR                | N-ter +28.03 Da                           | 57.3       | 31.2              | 2      | 1358.71                      | 0.333                                        | 0.056                 | E41L_MOUSE   | Q811B2_MOUSE | Band 4.1-like protein 2;                                                                                                                              | Generally expressed protein 4.1;                                                                                                                    | 0.25 - 0.75 |
| YQCLVRSALK     | SSVEYEPKEKTFDKILIANR        | N-ter +28.03 Da, K +28.03 Da              | 22.7       | 64.6              | 4      | 2478.53                      | 0.604                                        | 0.083                 | PCCA_MOUSE   | D3Y2C0_MOUSE | Propionyl-CoA carboxylase alpha chain, mitochondrial;                                                                                                 | Propanoyl-CoA:carbon dioxide ligase subunit alpha;                                                                                                  | 0.25 - 0.75 |
| SPSGSKSQRY     | SSVYGASVSDDELKR             | N-ter +34.06 Da, K +34.06 Da              | 53.3       | 62.6              | 3      | 1680.01                      | -1.737                                       | 0.174                 | CHCH3_MOUSE  | Q9D9P1_MOUSE | Coiled-coil-helix-coiled-coil-helix domain-containing protein 3, mitochondrial;                                                                       |                                                                                                                                                     | 0.00 - 0.15 |
| KLLRFQSSH      | STDITSLDQYVER               | N-ter +28.03 Da                           | 29.7       | 48.0              | 3      | 1553.83                      | -0.218                                       | 0.015                 | ENPL_MOUSE   | F7C312_MOUSE | Endoplasmic reticulum resident protein 99;Heat shock protein 90 kDa beta member 1;Polymorphic tumor rejection antigen 1;Tumor rejection antigen gp96; |                                                                                                                                                     | 0.25 - 0.75 |
| QELDKWLVTN     | STEALISHTLER                | N-ter +28.03 Da                           | 28.9       | 68.9              | 3      | 1383.83                      | -0.396                                       | 0.036                 | SAPL1_MOUSE  |              | Proactivator polypeptide-like 1;                                                                                                                      |                                                                                                                                                     | 0.25 - 0.75 |
| LDKVKSATLS     | STESTASGMQDEVR              | N-ter +34.06 Da                           | 33.9       | 50.2              | 3      | 1530.78                      | -0.322                                       | 0.048                 | AKA12_MOUSE  | F8W121_MOUSE | A-kinase anchor protein 12;                                                                                                                           | Germ cell lineage protein gercelin;Src-suppressed C kinase substrate;                                                                               | 0.25 - 0.75 |
| IHRAAAVAAM     | STGTFFVVSQPLNYR             | N-ter +28.03 Da                           | 39.2       | 46.4              | 3      | 1726.95                      | -1.396                                       | 0.11                  | AL9A1_MOUSE  | Q3U367_MOUSE | 4-trimethylaminobutyraldehyde dehydrogenase;                                                                                                          | Aldehyde dehydrogenase family 9 member A1;                                                                                                          | 0.15 - 0.25 |
| NKSVQKSGVR     | STHQAAVVKIDSR               | N-ter +28.03 Da, K +28.03 Da              | 31.9       | 77.0              | 4      | 1553.97                      | 1.257                                        | 0.221                 | Q8VCQ8_MOUSE | E9Q0M9_MOUSE |                                                                                                                                                       |                                                                                                                                                     | 0.75 - 0.85 |
| LLLLAALTEA     | STIIHYEILEER                | N-ter +28.03 Da                           | 40.4       | 64.6              | 3      | 1529.91                      | 0.454                                        | 0.056                 | Q91XX1_MOUSE |              |                                                                                                                                                       | Protein kinase C-like 1;Protein kinase C-like PKN;Protein-kinase C-related kinase 1;Serine-threonine protein kinase N;                              | 0.25 - 0.75 |
| LPGPPPATHY     | STLSKPAPLTGTLEVR            | N-ter +28.03 Da, K +28.03 Da              | 50.1       | 54.0              | 3      | 1725.10                      | -1.943                                       | 0.224                 | PKN1_MOUSE   | D6RH37_MOUSE | Serine/threonine-protein kinase N1;                                                                                                                   |                                                                                                                                                     | 0.00 - 0.15 |
| LCKLSLEGDH     | STPPSAYGSVKPYTNFDAER        | N-ter +28.03 Da, K +28.03 Da              | 29.6       | 55.7              | 3      | 2242.22                      | 0.454                                        | 0.07                  | ANXA2_MOUSE  | B0V2N7_MOUSE | Annexin A2;                                                                                                                                           | Annexin II;Annexin-2;Calpactin I heavy chain;Calpactin-1 heavy chain;Chromobindin-8;Lipocortin II;Placental anticoagulant protein IV;Protein I;p36; | 0.25 - 0.75 |
| QTSVAIGRSF     | STPOSQFQESSPVWKLGR          | N-ter +28.03 Da, K +28.03 Da              | 39.7       | 62.7              | 3      | 2117.22                      | 0.084                                        | 0.016                 | MCEE_MOUSE   |              | Methylmalonyl-CoA epimerase, mitochondrial;                                                                                                           | DL-methylmalonyl-CoA racemase;                                                                                                                      | 0.25 - 0.75 |
| ASGISAGQLY     | STQAAEDKEEESLHSIISNTEAVR    | N-ter +28.03 Da, K +28.03 Da              | 37.3       | 80.3              | 4      | 2699.54                      | 0.623                                        | 0.142                 | TRAP1_MOUSE  | F6YP65_MOUSE | Heat shock protein 75 kDa, mitochondrial;                                                                                                             | TNFR-associated protein 1;Tumor necrosis factor type 1 receptor-associated protein;                                                                 | 0.25 - 0.75 |
| ASYNPIGLY      | STSNIQDALHGQLR              | N-ter +34.06 Da                           | 38.8       | 61.6              | 3      | 1572.94                      | 0.356                                        | 0.103                 | PDLI3_MOUSE  |              | PDZ and LIM domain protein 3;                                                                                                                         | Actinin-associated LIM protein;Alpha-actinin-2-associated LIM protein;                                                                              | 0.25 - 0.75 |

Table S11, Tholen et al.

| Non Prime Site | Prime Site                 | Modifications                             | Hyperscore | Mass error in ppm | Charge | Precursor neutral mass in Da | Fold change (log <sub>2</sub> ) of ASAPRatio | FC-error of ASAPRatio | Uniprot ID 1 | Uniprot ID 2 | Protein Name 1                                                                                        | Protein Name 2                                                                                                                                             | Quantile    |
|----------------|----------------------------|-------------------------------------------|------------|-------------------|--------|------------------------------|----------------------------------------------|-----------------------|--------------|--------------|-------------------------------------------------------------------------------------------------------|------------------------------------------------------------------------------------------------------------------------------------------------------------|-------------|
| LVGLTSLRAV     | STSSMGTLPKQKQKIVEVGR       | N-ter +28.03 Da, K +28.03 Da              | 26.7       | 74.6              | 4      | 2197.42                      | 0.714                                        | 0.091                 | HMGCL_MOUSE  |              | Hydroxymethylglutaryl-CoA lyase, mitochondrial; Microtubule-associated protein RP/EB family member 1; | 3-hydroxy-3-methylglutarate-CoA lyase;                                                                                                                     | 0.25 - 0.75 |
| MAVNVY         | STSVTSDNLSR                | N-ter +34.06 Da                           | 29.7       | 33.9              | 2      | 1199.66                      | 0.911                                        | 0.145                 | MARE1_MOUSE  |              | APC-binding protein EB1;End-binding protein 1;                                                        | 0.25 - 0.75                                                                                                                                                |             |
| GVHTSVASAT     | SVATKKTEQGPSSSEYIFER       | N-ter +28.03 Da, K +28.03 Da              | 46.9       | 66.7              | 4      | 2337.38                      | 0.333                                        | 0.024                 | OAT_MOUSE    |              | Ornithine aminotransferase, mitochondrial;                                                            | Ornithine-oxo-acid aminotransferase;                                                                                                                       | 0.25 - 0.75 |
| GESGNKGEFG     | SVGAQGGPPGPSGEEGKR         | N-ter +34.06 Da, K +34.06 Da              | 33.6       | 54.8              | 3      | 1677.00                      | -1.837                                       | 0.328                 | CO1A2_MOUSE  | E9Q6U9_MOUSE | Collagen alpha-2(I) chain;                                                                            | Alpha-2 type I collagen;                                                                                                                                   | 0.00 - 0.15 |
| LAKGRRAEAG     | SVIDYELIDQDAR              | N-ter +34.06 Da                           | 38.9       | 56.1              | 3      | 1569.90                      | 0.098                                        | 0.01                  | ANXA2_MOUSE  | BOV2N7_MOUSE | Annexin A2;                                                                                           | Annexin II;Annexin-2;Calpactin I heavy chain;Calpactin-1 heavy chain;Chromobindin-8;Lipocortin II;Placental anticoagulant protein IV;Protein I;p36;        | 0.25 - 0.75 |
| LESKSNKIVQ     | SVIQAVTDQFAR               | N-ter +34.06 Da                           | 43.5       | 23.1              | 2      | 1367.79                      | -2.252                                       | 0.214                 | AKA12_MOUSE  |              | A-kinase anchor protein 12;                                                                           | Germ cell lineage protein gercelin;Src-suppressed C kinase substrate;                                                                                      | 0.00 - 0.15 |
| FRVLRALKAI     | SVISGLKVIIVGALLR           | N-ter +34.06 Da, K +34.06 Da              | 17.2       | 63.6              | 4      | 1592.20                      | -2.556                                       | 0.15                  | SCNBA_MOUSE  |              | Sodium channel protein type 11 subunit alpha;                                                         | NaN;Sensory neuron sodium channel 2;Sodium channel protein type XI subunit alpha;Voltage-gated sodium channel subunit alpha Nav1.9;                        | 0.00 - 0.15 |
| AITARRRQHLK    | SVMLQIAATELEKEESR          | N-ter +34.06 Da, K +34.06 Da              | 60.0       | 63.4              | 3      | 2001.24                      | 0.014                                        | 0.001                 | TNNI2_MOUSE  | A2A6K0_MOUSE | Troponin I, fast skeletal muscle;                                                                     | Troponin I, fast-twitch isoform;                                                                                                                           | 0.25 - 0.75 |
| LQETKRLFER     | SVPAASGGDKAEAVAR           | N-ter +34.06 Da, K +34.06 Da              | 33.2       | 55.7              | 3      | 1481.93                      | -1.218                                       | 0.227                 | NEB2_MOUSE   |              | Neurabin-2;                                                                                           | Neurabin-II;Protein phosphatase 1 regulatory subunit 9B;Spinophilin;                                                                                       | 0.15 - 0.25 |
| TKIFTASNVS     | SVPLPAENVTTTAGQR           | N-ter +28.03 Da                           | 51.8       | 48.5              | 3      | 1680.00                      | -3.322                                       | 0.664                 | UBP2L_MOUSE  | E9Q9Q3_MOUSE | Ubiquitin-associated protein 2-like;                                                                  |                                                                                                                                                            | 0.00 - 0.15 |
| VEPDTYCRYD     | SVSVFNGAVSDDSKR            | N-ter +28.03 Da, K +28.03 Da              | 46.3       | 69.2              | 3      | 1622.94                      | -4.059                                       | 0.001                 | PCOC1_MOUSE  | D3YZE3_MOUSE | Procollagen C-endopeptidase enhancer 1;                                                               | P14;Procollagen COOH-terminal proteinase enhancer 1;Type 1 procollagen C-proteinase enhancer protein;Type I procollagen COOH-terminal proteinase enhancer; | 0.00 - 0.15 |
| RYDDMAACMK     | SVTEQGAELSNEER             | N-ter +28.03 Da                           | 42.1       | 58.6              | 3      | 1575.83                      | 0.07                                         | 0.007                 | 1433Z_MOUSE  | D3YXF4_MOUSE | 14-3-3 protein zeta/delta;                                                                            | Protein kinase C inhibitor protein 1;SEZ2;                                                                                                                 | 0.25 - 0.75 |
| FQHVGTSVFL     | SVTGEQGNPIR                | N-ter +28.03 Da                           | 26.4       | 64.4              | 3      | 1347.77                      | -1.059                                       | 0.088                 | SDF2L_MOUSE  |              | Stromal cell-derived factor 2-like protein 1;                                                         |                                                                                                                                                            | 0.15 - 0.25 |
| SQEHLNHSK      | SVTPASTLTKSGPGR            | N-ter +28.03 Da, K +28.03 Da              | 33.9       | 51.6              | 3      | 1513.92                      | 1.799                                        | 0.289                 | AFAD_MOUSE   | E9PYX7_MOUSE | Afadin;                                                                                               | Protein Af-6;                                                                                                                                              | 0.85 - 1.00 |
| VYSPLAHRY      | SVVAGGPEVTLTPER            | N-ter +34.06 Da                           | 45.6       | 46.1              | 3      | 1544.93                      | 0.422                                        | 0.063                 | D2HDH_MOUSE  | E9QN44_MOUSE | D-2-hydroxyglutarate dehydrogenase, mitochondrial;                                                    |                                                                                                                                                            | 0.25 - 0.75 |
| ALNDNFVKLI     | SVWYDNEYGSNR               | N-ter +28.03 Da                           | 30.0       | 50.9              | 3      | 1580.73                      | 4.652                                        | 0.879                 | G3P_MOUSE    | F8WJL5_MOUSE | Glycerinaldehyde-3-phosphate dehydrogenase;                                                           | Peptidyl-cysteine S-nitrosylase GAPDH; Carbonate dehydratase III;Carbonic anhydrase III;                                                                   | 0.85 - 1.00 |
| HDPQLPWSA      | SYDPSAKTILNNGKTCR          | N-ter +28.03 Da, K +28.03 Da, C +57.02 Da | 15.5       | 69.7              | 4      | 2065.21                      | -0.943                                       | 0.127                 | CAH3_MOUSE   |              | Carbonic anhydrase 3;                                                                                 |                                                                                                                                                            | 0.15 - 0.25 |
| TAASSSLEK      | SVELPDGQVITIGNER           | N-ter +28.03 Da                           | 49.7       | 66.6              | 3      | 1818.04                      | 0.189                                        | 0.017                 | ACTS_MOUSE   | ACTA_MOUSE   | Actin, alpha skeletal muscle;                                                                         | Alpha-actin-1;                                                                                                                                             | 0.25 - 0.75 |
| QOPQQQMTS      | SYGGYKEPAAPVSIQR           | N-ter +28.03 Da, K +28.03 Da              | 48.9       | 60.5              | 3      | 1778.04                      | -0.889                                       | 0.132                 | LASP1_MOUSE  | A2AGH0_MOUSE | LIM and SH3 domain protein 1;                                                                         | Metastatic lymph node gene 50 protein;                                                                                                                     | 0.25 - 0.75 |
| GLGNGFASQM     | SYGVDEKSAVSVPGMPGSPGR      | N-ter +34.06 Da, K +34.06 Da              | 53.2       | 47.2              | 3      | 2362.30                      | -2.252                                       | 0.429                 | CO1A1_MOUSE  | F8WGB7_MOUSE | Collagen alpha-1(I) chain;                                                                            | Alpha-1 type I collagen;                                                                                                                                   | 0.00 - 0.15 |
| KKSPGPKGA      | TAAASHKGEVPPNIR            | N-ter +28.03 Da, K +28.03 Da              | 24.9       | 87.8              | 3      | 1604.97                      | 1.58                                         | 0.122                 | B1AVP0_MOUSE |              |                                                                                                       |                                                                                                                                                            | 0.75 - 0.85 |
| KLHDDLCEKR     | TAATIATHDLOAVR             | N-ter +28.03 Da                           | 30.0       | 71.6              | 3      | 1494.92                      | 1.163                                        | 0.109                 | LR47_MOUSE   | E9PV22_MOUSE | Leucine-rich repeat-containing protein 47;                                                            |                                                                                                                                                            | 0.75 - 0.85 |
| LQKRGTGGVD     | TAAVGAVFDSNADR             | N-ter +28.03 Da                           | 47.0       | 51.9              | 3      | 1533.86                      | -1.322                                       | 0.033                 | KCRM_MOUSE   |              | Creatine kinase M-type;                                                                               | Creatine kinase M chain;M-CK;                                                                                                                              | 0.15 - 0.25 |
| VISIMCYGIY     | TADTDGGYIEER               | N-ter +28.03 Da                           | 63.7       | 35.4              | 2      | 1353.65                      | 1.084                                        | 0.138                 | TMX3_MOUSE   |              | Protein disulfide-isomerase TMX3;                                                                     | Thioredoxin domain-containing protein 10;Thioredoxin-related transmembrane protein 3;                                                                      | 0.75 - 0.85 |
| GSWEFFASGK     | TAESGELHGLTTDEKFEVGVYR     | N-ter +28.03 Da, K +28.03 Da              | 32.9       | 75.9              | 4      | 2493.43                      | -0.862                                       | 0.282                 | THY_MOUSE    |              | Transthyretin;                                                                                        | Prealbumin;                                                                                                                                                | 0.25 - 0.75 |
| EQLAELAEY      | TAKIALLEEAR                | N-ter +34.06 Da, K +34.06 Da              | 23.1       | 47.9              | 3      | 1281.89                      | -1.556                                       | 0.046                 | EZRIN_MOUSE  |              | Ezrin;                                                                                                | Cytovillin;Villin-2;p81;                                                                                                                                   | 0.15 - 0.25 |
| GAQRMFPMNR     | TAKPFLGSMNQPAAPFSPTR       | N-ter +28.03 Da, K +28.03 Da              | 39.4       | 63.9              | 4      | 2173.27                      | 0.138                                        | 0.014                 | SYNP2_MOUSE  | D3YVV9_MOUSE | Synaptopodin-2;                                                                                       | Myopodin;                                                                                                                                                  | 0.25 - 0.75 |
| GPLVEQGRQR     | TANLGAGAAQPLR              | N-ter +28.03 Da                           | 51.0       | 38.7              | 3      | 1266.75                      | -1.358                                       | 0.07                  | APOE_MOUSE   |              | Apolipoprotein E;                                                                                     |                                                                                                                                                            | 0.15 - 0.25 |
| QDDWAGWQKF     | TASAGIQVGGDDLTVPKRR        | N-ter +28.03 Da, K +28.03 Da              | 57.3       | 52.5              | 4      | 2097.25                      | 0.176                                        | 0.025                 | ENOA_MOUSE   | Q6PHC1_MOUSE | Alpha-enolase;                                                                                        | 2-phospho-D-glycerate hydro-lyase;Enolase 1;Non-neural enolase;                                                                                            | 0.25 - 0.75 |
| ATPQISNLTK     | TASESINLSEAGSVKKGRR        | N-ter +28.03 Da, K +28.03 Da              | 36.2       | 73.0              | 4      | 2133.28                      | 0.098                                        | 0.008                 | CLIP1_MOUSE  | Q8C0S5_MOUSE | CAP-Gly domain-containing linker protein 1;                                                           | Restin;                                                                                                                                                    | 0.25 - 0.75 |
| EPVWAIKTKG     | TATPQQAQEVHEKLR            | N-ter +34.06 Da, K +34.06 Da              | 27.5       | 65.8              | 4      | 1803.15                      | 0.356                                        | 0.067                 | TPIS_MOUSE   | E0CXH5_MOUSE | Triosephosphate isomerase;                                                                            | Triose-phosphate isomerase;                                                                                                                                | 0.25 - 0.75 |
| AAAMNLSAPR     | TAVAPSAVNLADPR             | N-ter +28.03 Da                           | 36.6       | 40.9              | 3      | 1408.83                      | -1.12                                        | 0.073                 | SRRM2_MOUSE  | E9QMJ6_MOUSE | Serine/arginine repetitive matrix protein 2;                                                          |                                                                                                                                                            | 0.15 - 0.25 |
| SQEALHTQML     | TAVQEISHLIEPLASAR          | N-ter +28.03 Da                           | 48.1       | 55.3              | 3      | 1933.17                      | 1.66                                         | 0.121                 | TLN1_MOUSE   | F8WGT0_MOUSE | Talin-1;                                                                                              |                                                                                                                                                            | 0.75 - 0.85 |
| VMDDFQAQFLD    | TCKKAADKDTFCSTEGPNLVTR     | N-ter +34.06 Da, K +34.06 Da, C +57.02 Da | 50.3       | 63.3              | 4      | 2632.48                      | 0.189                                        | 0.036                 | ALBU_MOUSE   |              | Serum albumin;                                                                                        |                                                                                                                                                            | 0.25 - 0.75 |
| DTCKAADKDK     | TCFSTEGPNLVTR              | N-ter +28.03 Da, C +57.02 Da              | 44.9       | 40.9              | 3      | 1508.79                      | 0.227                                        | 0.031                 | ALBU_MOUSE   |              | Serum albumin;                                                                                        |                                                                                                                                                            | 0.25 - 0.75 |
| RVSGEHMDLT     | TCPLAAGGQKEKLR             | N-ter +28.03 Da, K +28.03 Da, C +57.02 Da | 33.8       | 57.6              | 3      | 1583.94                      | 1.345                                        | 0.159                 | Q9D1B1_MOUSE |              |                                                                                                       |                                                                                                                                                            | 0.75 - 0.85 |
| MVHL           | TDAEKSAVSLWAKVNPDEVGGEALGR | N-ter +34.06 Da, K +34.06 Da, C +57.02 Da | 53.2       | 73.1              | 4      | 2960.79                      | -2.184                                       | 1.092                 | HBB2_MOUSE   |              | Hemoglobin subunit beta-2;                                                                            | Beta-2-globin;Hemoglobin beta-2 chain;Hemoglobin beta-minor chain;                                                                                         | 0.00 - 0.15 |
| TYGTAALKAY     | TDDLGAAGVACLEDEASALR       | N-ter +34.06 Da, C +57.02 Da              | 36.0       | 110.5             | 3      | 2053.21                      | -0.786                                       | 0.285                 | WIPI2_MOUSE  | D3YWK1_MOUSE | WD repeat domain phosphoinositide-interacting protein 2;                                              |                                                                                                                                                            | 0.25 - 0.75 |
| RELPSFLGER     | TDEAAFQKVMNSLDSNR          | N-ter +28.03 Da, K +28.03 Da              | 19.8       | 59.6              | 3      | 1981.08                      | 1.714                                        | 0.319                 | S10A4_MOUSE  | D3YUT9_MOUSE | Protein S100-A4;                                                                                      | Metastasin;Metastatic cell protein;PEL98;Placental calcium-binding protein;Protein 18A2;Protein Mts1;S100 calcium-binding protein A4;                      | 0.75 - 0.85 |
| ALRKAMKGGI     | TDEATIDIVTHR               | N-ter +28.03 Da                           | 34.4       | 51.1              | 3      | 1510.88                      | 1                                            | 0.14                  | ANXA6_MOUSE  | F8WITZ_MOUSE | Annexin A6;                                                                                           | Annexin-6;Calphobindin-II;Chromobindin-20;Lipocortin VI;Protein III;p68;p70;                                                                               | 0.25 - 0.75 |

Table S11, Tholen et al.

| Non Prime Site | Prime Site             | Modifications                             | Hyperscore | Mass error in ppm | Charge | Precursor neutral mass in Da | Fold change (log <sub>2</sub> ) of ASAPRatio | FC-error of ASAPRatio | Uniprot ID 1 | Uniprot ID 2 | Protein Name 1                                                 | Protein Name 2                                                                                                                                                                                                                                             | Quantile    |
|----------------|------------------------|-------------------------------------------|------------|-------------------|--------|------------------------------|----------------------------------------------|-----------------------|--------------|--------------|----------------------------------------------------------------|------------------------------------------------------------------------------------------------------------------------------------------------------------------------------------------------------------------------------------------------------------|-------------|
| VLKAMKGLG      | TDEDSLNLTLTSR          | N-ter +28.03 Da                           | 41.9       | 58.1              | 3      | 1503.87                      | 0.151                                        | 0.041                 | ANXA5_MOUSE  |              | Annexin A5;                                                    | Anchoring CII;Annexin V;Annexin-5;Calphobindin I;Endonexin II;Lipocortin V;Placental anticoagulant protein 4;Placental anticoagulant protein I;Thromboplastin inhibitor;Vascular anticoagulant-alpha;                                                      | 0.25 - 0.75 |
| KISNAVQGLG     | TDEDSLIEICSR           | N-ter +34.06 Da, C +57.02 Da              | 36.2       | 51.7              | 3      | 1583.87                      | 0.444                                        | 0.091                 | ANXA2_MOUSE  | B0VZN7_MOUSE | Annexin A2;                                                    | Annexin II;Annexin-2;Calpactin I heavy chain;Calpactin-1 heavy chain;Chromobindin-8;Lipocortin II;Placental anticoagulant protein IV;Protein I;p36;                                                                                                        | 0.25 - 0.75 |
| LFQAGELKWG     | TDEEFKIFITGTR          | N-ter +28.03 Da, K +28.03 Da              | 34.3       | 78.6              | 3      | 1611.98                      | 0.202                                        | 0.026                 | ANXA5_MOUSE  |              | Annexin A5;                                                    | Anchoring CII;Annexin V;Annexin-5;Calphobindin I;Endonexin II;Lipocortin V;Placental anticoagulant protein 4;Placental anticoagulant protein I;Thromboplastin inhibitor;Vascular anticoagulant-alpha;                                                      | 0.25 - 0.75 |
| ERRGFCFITY     | TDEEPVKKLLESR          | N-ter +34.06 Da, K +34.06 Da              | 18.3       | 57.8              | 4      | 1645.11                      | -2.252                                       | 0.214                 | HNRDL_MOUSE  | F6VQH5_MOUSE | Heterogeneous nuclear ribonucleoprotein D-like;                | JKT41-binding protein; 67 kDa calelectrin;Annexin VI;Annexin-6;Calphobindin-II;Chromobindin-20;Lipocortin VI;Protein III;p68;p70;                                                                                                                          | 0.00 - 0.15 |
| EIKDAISGVG     | TDEKCLIEILASR          | N-ter +28.03 Da, K +28.03 Da, C +57.02 Da | 34.0       | 67.4              | 3      | 1602.97                      | 0.475                                        | 0.068                 | ANXA6_MOUSE  | F8WIT2_MOUSE | Annexin A6;                                                    | 67 kDa calelectrin;Annexin VI;Annexin-6;Calphobindin-II;Chromobindin-20;Lipocortin VI;Protein III;p68;p70;                                                                                                                                                 | 0.25 - 0.75 |
| AESGELHGLT     | TDEKFEVGVYR            | N-ter +28.03 Da, K +28.03 Da              | 26.5       | 73.2              | 3      | 1397.82                      | -0.201                                       | 0.016                 | THY_MOUSE    |              | Transthyretin;                                                 | Prealbumin;                                                                                                                                                                                                                                                | 0.25 - 0.75 |
| QLKAMEGAG      | TDEKTLIEILATR          | N-ter +28.03 Da, K +28.03 Da              | 41.9       | 69.9              | 3      | 1558.01                      | 0.516                                        | 0.051                 | ANXA6_MOUSE  | F8WIT2_MOUSE | Annexin A6;                                                    | 67 kDa calelectrin;Annexin VI;Annexin-6;Calphobindin-II;Chromobindin-20;Lipocortin VI;Protein III;p68;p70;                                                                                                                                                 | 0.25 - 0.75 |
| ELKHALKGAG     | TDEKVLTEIASR           | N-ter +28.03 Da, K +28.03 Da              | 50.6       | 54.1              | 3      | 1529.95                      | -0.578                                       | 0.104                 | ANXA5_MOUSE  |              | Annexin A5;                                                    | Anchoring CII;Annexin V;Annexin-5;Calphobindin I;Endonexin II;Lipocortin V;Placental anticoagulant protein 4;Placental anticoagulant protein I;Thromboplastin inhibitor;Vascular anticoagulant-alpha;                                                      | 0.25 - 0.75 |
| PGEQVTEEQF     | TDEQGNIVTKIIR          | N-ter +34.06 Da, K +34.06 Da              | 15.3       | 63.1              | 4      | 1716.21                      | -2.474                                       | 0.137                 | ANK1_MOUSE   | Q0VGY9_MOUSE | Ankyrin-1;                                                     | Erythrocyte ankyrin;                                                                                                                                                                                                                                       | 0.00 - 0.15 |
| EWKRSIGYDD     | TDESHCVIEHSR           | N-ter +28.03 Da, C +57.02 Da              | 20.6       | 80.2              | 4      | 1625.84                      | 1.245                                        | 0.404                 | PLIN2_MOUSE  |              | Perilipin-2;                                                   | Adipophilin;Adipose differentiation-related protein;                                                                                                                                                                                                       | 0.75 - 0.85 |
| SVSMASRKP      | TDGASSNCVTDISHLVR      | N-ter +28.03 Da, C +57.02 Da              | 51.9       | 58.0              | 3      | 1946.03                      | 1.683                                        | 0.315                 | NASP_MOUSE   | B1AU75_MOUSE | Nuclear autoantigenic sperm protein;                           |                                                                                                                                                                                                                                                            | 0.75 - 0.85 |
| ERSTSIHML      | TODGANTGESRPEKIENVR    | N-ter +28.03 Da, K +28.03 Da              | 20.9       | 77.3              | 4      | 2271.28                      | 2.93                                         | 0.335                 | ITH3_MOUSE   | E9PVS1_MOUSE | Inter-alpha-trypsin inhibitor heavy chain H3;                  |                                                                                                                                                                                                                                                            | 0.85 - 1.00 |
| KTAHSFEQVL     | TDITDAIKLDGSGVVKR      | N-ter +28.03 Da, K +28.03 Da              | 27.4       | 71.4              | 4      | 1814.18                      | -1.644                                       | 0.257                 | DCLK1_MOUSE  | Q8BRN4_MOUSE | Serine/threonine-protein kinase DCLK1;                         | Doublecortin-like and CAM kinase-like 1;Doublecortin-like kinase 1; 94 kDa glucose-regulated protein;Endoplasmic reticulum resident protein 99;Heat shock protein 90 kDa beta member 1;Polymorphic tumor rejection antigen 1;Tumor rejection antigen gp96; | 0.00 - 0.15 |
| LLRFQSSHHS     | TDITSLDQYVER           | N-ter +28.03 Da                           | 32.7       | 57.1              | 3      | 1466.81                      | -0.837                                       | 0.06                  | ENPL_MOUSE   | F7C312_MOUSE | Endoplasmic;                                                   |                                                                                                                                                                                                                                                            | 0.25 - 0.75 |
| INRVYKEMYK     | TDLEKDIISDTSGDFR       | N-ter +28.03 Da, K +28.03 Da              | 42.9       | 65.9              | 3      | 1867.04                      | -0.578                                       | 0.086                 | ANXA2_MOUSE  | B0VZN7_MOUSE | Annexin A2;                                                    | Annexin II;Annexin-2;Calpactin I heavy chain;Calpactin-1 heavy chain;Chromobindin-8;Lipocortin II;Placental anticoagulant protein IV;Protein I;p36;                                                                                                        | 0.25 - 0.75 |
| GGYKPTDKHK     | TDLNHNENLKGDDLPNVLSSR  | N-ter +28.03 Da, K +28.03 Da              | 40.0       | 59.1              | 4      | 2627.44                      | -0.535                                       | 0.101                 | KCRM_MOUSE   |              | Creatine kinase M-type;                                        | Creatine kinase M chain;M-CK;                                                                                                                                                                                                                              | 0.25 - 0.75 |
| TRRSTQGVTL     | TDLQEAETFSR            | N-ter +34.06 Da, K +34.06 Da              | 24.0       | 55.3              | 3      | 1491.90                      | -1.556                                       | 0.092                 | MYPT2_MOUSE  | A6H644_MOUSE | Protein phosphatase 1 regulatory subunit 12B;                  | Myosin phosphatase-targeting subunit 2;                                                                                                                                                                                                                    | 0.15 - 0.25 |
| ADFAEITKLA     | TDLTQVKNKCCGDLLLECAADR | N-ter +28.03 Da, K +28.03 Da, C +57.02 Da | 44.7       | 57.6              | 4      | 2732.41                      | 0.595                                        | 0.15                  | ALBU_MOUSE   |              | Serum albumin;                                                 |                                                                                                                                                                                                                                                            | 0.25 - 0.75 |
| AHVDHGKSTL     | TDLSLVCKAGIISAR        | N-ter +34.06 Da, K +34.06 Da, C +57.02 Da | 21.6       | 46.9              | 3      | 1629.03                      | 0.098                                        | 0.013                 | EF2_MOUSE    |              | Elongation factor 2;                                           |                                                                                                                                                                                                                                                            | 0.25 - 0.75 |
| ILSVASTVWT     | TDTEDKGFLSEGGVVR       | N-ter +28.03 Da, K +28.03 Da              | 36.5       | 57.8              | 3      | 1851.99                      | -1.12                                        | 0.292                 | Q99K47_MOUSE | E9PV24_MOUSE |                                                                |                                                                                                                                                                                                                                                            | 0.15 - 0.25 |
| NASAEAIIG      | TDVLQDHNALDFEHR        | N-ter +28.03 Da                           | 47.3       | 66.1              | 4      | 1936.07                      | 1.367                                        | 0.201                 | APRV1_MOUSE  |              | Retroviral-like aspartic protease 1;                           | Skin-specific retroviral-like aspartic protease;TPA-inducible aspartic protease-like protein;                                                                                                                                                              | 0.75 - 0.85 |
| KAVLDVAETG     | TEAAAATGVIGGIR         | N-ter +34.06 Da                           | 60.4       | 27.6              | 2      | 1319.80                      | -0.089                                       | 0.016                 | SPA3K_MOUSE  |              | Serine protease inhibitor A3K;                                 | Contrapsin;SP1-2;                                                                                                                                                                                                                                          | 0.25 - 0.75 |
| AGSYIYKPKQ     | TEAPQVTGPIEVVVR        | N-ter +28.03 Da                           | 40.8       | 56.4              | 3      | 1719.05                      | 0.926                                        | 0.195                 | CRIP2_MOUSE  |              | Cysteine-rich protein 2;                                       | Heart LIM protein;                                                                                                                                                                                                                                         | 0.25 - 0.75 |
| RRGAISAQVY     | TEEDAASYVR             | N-ter +34.06 Da                           | 28.6       | 41.2              | 2      | 1173.62                      | -0.044                                       | 0.004                 | KAP0_MOUSE   | A2AI69_MOUSE | cAMP-dependent protein kinase type I-alpha regulatory subunit; |                                                                                                                                                                                                                                                            | 0.25 - 0.75 |
| LFVRNLANTV     | TEEILEKSFQFGKLER       | N-ter +34.06 Da, K +34.06 Da              | 23.1       | 83.6              | 4      | 2142.42                      | -3.474                                       | 0.386                 | HNRPQ_MOUSE  |              | Heterogeneous nuclear ribonucleoprotein Q;                     | Glycine- and tyrosine-rich RNA-binding protein;NS1-associated protein 1;Synaptotagmin-binding, cytoplasmic RNA-interacting protein;pp68;                                                                                                                   | 0.00 - 0.15 |
| VIRFQPGETL     | TEILETPATNEQEAHQSR     | N-ter +28.03 Da                           | 48.4       | 44.3              | 3      | 2123.11                      | -0.761                                       | 0.129                 | IQGA1_MOUSE  | F6ZIB0_MOUSE | Ras GTPase-activating-like protein IQGAP1;                     |                                                                                                                                                                                                                                                            | 0.25 - 0.75 |
| NVNLQIQRFT     | TEMDSHEEKVFR           | N-ter +34.06 Da, K +34.06 Da              | 19.2       | 76.1              | 4      | 1574.92                      | -0.943                                       | 0.181                 | COPD_MOUSE   |              | Coatomer subunit delta;                                        | Archain;Delta-coat protein;                                                                                                                                                                                                                                | 0.15 - 0.25 |
| REGEVEVLKA     | TEMVEVGPEDVEGAER       | N-ter +28.03 Da                           | 55.4       | 43.9              | 3      | 1888.92                      | -0.889                                       | 0.263                 | PTFR_MOUSE   |              | Polymerase I and transcript release factor;                    | Cav-p60;Cavin-1;                                                                                                                                                                                                                                           | 0.25 - 0.75 |
| KKRELETYYNA    | TEPVISFYDKR            | N-ter +34.06 Da, K +34.06 Da              | 27.2       | 65.1              | 3      | 1421.91                      | -0.943                                       | 0.073                 | KAD1_MOUSE   |              | Adenylate kinase isoenzyme 1;                                  | ATP-AMP transphosphorylase 1;Myokinase;                                                                                                                                                                                                                    | 0.15 - 0.25 |
| QLEKEKLLA      | TEQEDAIVAKSKLR         | N-ter +28.03 Da, K +28.03 Da              | 23.5       | 71.7              | 4      | 1629.03                      | -1.029                                       | 0.168                 | RRB1_MOUSE   | A2AVJ7_MOUSE | Ribosome-binding protein 1;                                    | Ribosome receptor protein;                                                                                                                                                                                                                                 | 0.15 - 0.25 |



Table S11, Tholen et al.

| Non Prime Site | Prime Site            | Modifications                             | Hyperscore | Mass error in ppm | Charge | Precursor neutral mass in Da | Fold change (log <sub>2</sub> ) of ASAPRatio | FC-error of ASAPRatio | Uniprot ID 1 | Uniprot ID 2 | Protein Name 1                                            | Protein Name 2                                                                                                                                                     | Quantile    |
|----------------|-----------------------|-------------------------------------------|------------|-------------------|--------|------------------------------|----------------------------------------------|-----------------------|--------------|--------------|-----------------------------------------------------------|--------------------------------------------------------------------------------------------------------------------------------------------------------------------|-------------|
| AAPCIWVLP      | TESIVQKEAEQAE         | N-ter +28.03 Da, K +28.03 Da              | 32.1       | 63.1              | 3      | 1801.04                      | -0.943                                       | 0.272                 | ACINU_MOUSE  | B8J93_MOUSE  | Apoptotic chromatin condensation inducer in the nucleus;  |                                                                                                                                                                    | 0.15 - 0.25 |
| ESVRSRSGSS     | TEVLVTPAGVASKR        | N-ter +34.06 Da, K +34.06 Da              | 45.5       | 36.2              | 3      | 1494.99                      | 2.281                                        | 0.282                 | LAD1_MOUSE   |              | Ladinin-1;                                                | Linear IgA disease antigen homolog;                                                                                                                                | 0.85 - 1.00 |
| TLNAAVNPAG     | TEVVCAPPTAYDFAR       | N-ter +34.06 Da, C +57.02 Da              | 36.2       | 49.3              | 3      | 1843.03                      | -0.667                                       | 0.085                 | TPIS_MOUSE   |              | Triosephosphate isomerase;                                | Triose-phosphate isomerase;                                                                                                                                        | 0.25 - 0.75 |
| SFRILAQMTG     | TEYMQDPDEEALRR        | N-ter +34.06 Da                           | 32.6       | 79.3              | 3      | 1785.98                      | -0.599                                       | 0.1                   | LDB3_MOUSE   | E9PY9_MOUSE  | LIM domain-binding protein 3;                             | Protein cypher;Protein oracle;Z-band alternatively spliced PDZ-motif protein;                                                                                      | 0.25 - 0.75 |
| SFRILAQMTG     | TEYMQDPDEEALR         | N-ter +34.06 Da                           | 41.7       | 68.2              | 3      | 1629.85                      | -1.12                                        | 0.243                 | E9PY9_MOUSE  | LDB3_MOUSE   |                                                           |                                                                                                                                                                    | 0.15 - 0.25 |
| GLKNDLNLKG     | TFASLSELHCDKLHVDPENFR | N-ter +28.03 Da, K +28.03 Da, C +57.02 Da | 30.2       | 75.3              | 4      | 2570.45                      | -0.515                                       | 0.059                 | HBB1_MOUSE   | HBB2_MOUSE   | Hemoglobin subunit beta-1;                                | Beta-1-globin;Hemoglobin beta-1 chain;Hemoglobin beta-major chain;                                                                                                 | 0.25 - 0.75 |
| AFGQGRDMAE     | TFDQGAHHAFGQGGGR      | N-ter +28.03 Da                           | 25.6       | 100.5             | 4      | 1612.91                      | 0.766                                        | 0.194                 | SBSN_MOUSE   | E9QPB2_MOUSE | Suprabasin;                                               |                                                                                                                                                                    | 0.25 - 0.75 |
| LLKAKSQELV     | TFEDVAVYFIWR          | N-ter +28.03 Da                           | 12.2       | 90.2              | 3      | 1572.94                      | 0.993                                        | 0.125                 | Q8C689_MOUSE | E9Q7V7_MOUSE |                                                           |                                                                                                                                                                    | 0.25 - 0.75 |
| KWKISFPDQD     | TFESEFYLDEKR          | N-ter +28.03 Da, K +28.03 Da              | 47.6       | 62.5              | 3      | 1618.89                      | -1.358                                       | 0.279                 | SPA3K_MOUSE  | SPA3M_MOUSE  | Serine protease inhibitor A3K;                            | Contrapsin;SPI-2;                                                                                                                                                  | 0.15 - 0.25 |
| IAPSNQVIML     | TFGKFDVEPDTYCR        | N-ter +28.03 Da, K +28.03 Da, C +57.02 Da | 36.2       | 65.6              | 3      | 1789.95                      | 1.501                                        | 0.387                 | PCOC1_MOUSE  | D3YZE3_MOUSE | Procollagen C-endopeptidase enhancer 1;                   | P14;Procollagen COOH-terminal proteinase enhancer 1;Type 1 procollagen C-proteinase enhancer protein;Type I procollagen COOH-terminal proteinase enhancer;         | 0.75 - 0.85 |
| MANSER         | TFIAIKPDGVQR          | N-ter +28.03 Da, K +28.03 Da              | 30.8       | 50.5              | 3      | 1399.89                      | 0.014                                        | 0.002                 | NDKA_MOUSE   | NDKB_MOUSE   | Nucleoside diphosphate kinase A;                          | Metastasis inhibition factor NM23;NDPK-A;Tumor metastatic process-associated protein;nm23-M1;                                                                      | 0.25 - 0.75 |
| ADGRKTETVC     | TFQDGLVQHQQWDGKESTITR | N-ter +28.03 Da, K +28.03 Da              | 39.4       | 63.0              | 4      | 2600.46                      | 3.252                                        | 0.399                 | FABP5_MOUSE  |              | Fatty acid-binding protein, epidermal;                    | Epidermal-type fatty acid-binding protein;Fatty acid-binding protein 5;Keratinocyte lipid-binding protein;Psoriasis-associated fatty acid-binding protein homolog; | 0.85 - 1.00 |
| VTTLDIVRAN     | TFVAELKGLDPAR         | N-ter +34.06 Da, K +34.06 Da              | 28.8       | 61.8              | 3      | 1484.00                      | 0                                            | 0.001                 | MDHM_MOUSE   |              | Malate dehydrogenase, mitochondrial;                      |                                                                                                                                                                    | 0.25 - 0.75 |
| LIKEGDVVRK     | TGAIVDVPVGEELGR       | N-ter +28.03 Da                           | 36.2       | 38.7              | 3      | 1651.98                      | 0.422                                        | 0.06                  | ATPA_MOUSE   | D3Z6F5_MOUSE | ATP synthase subunit alpha, mitochondrial;                |                                                                                                                                                                    | 0.25 - 0.75 |
| RRVAGPQPAQ     | TGAPQGSLEGYLFR        | N-ter +34.06 Da                           | 28.4       | 76.0              | 3      | 1657.98                      | -0.713                                       | 0.094                 | FRIL1_MOUSE  | Q9CPX4_MOUSE | Ferritin light chain 1;                                   | Ferritin L subunit 1;                                                                                                                                              | 0.25 - 0.75 |
| ETRIEKRIVI     | TGDAALDHDQALAAQAIR    | N-ter +28.03 Da                           | 50.3       | 53.9              | 3      | 1793.00                      | 0.151                                        | 0.01                  | E41L2_MOUSE  | Q811B2_MOUSE | Band 4.1-like protein 2;                                  | Generally expressed protein 4.1;                                                                                                                                   | 0.25 - 0.75 |
| FKEAFLFDR      | TGCEKITLSVQGDVLR      | N-ter +28.03 Da, K +28.03 Da, C +57.02 Da | 49.8       | 46.5              | 3      | 1831.07                      | -0.535                                       | 0.078                 | MY1_MOUSE    | E9PWG4_MOUSE | Myosin light chain 1/3, skeletal muscle isoform;          | Myosin light chain alkali 1/2;                                                                                                                                     | 0.25 - 0.75 |
| KETQKSIYI      | TGESKEQVANSAFVER      | N-ter +28.03 Da, K +28.03 Da              | 42.0       | 53.6              | 3      | 1807.01                      | -4.059                                       | 0.677                 | H590B_MOUSE  | Q71LX8_MOUSE | Heat shock protein HSP 90-beta;                           | Heat shock 84 kDa;Tumor-specific transplantation 84 kDa antigen;                                                                                                   | 0.00 - 0.15 |
| SFSQFTGSDG     | TGGDAAAPGAAGTQAEPLHR  | N-ter +28.03 Da                           | 60.1       | 56.3              | 3      | 1875.03                      | -0.434                                       | 0.059                 | LMAN1_MOUSE  |              | Protein ERGIC-53;                                         | Protein;Lectin mannose-binding 1,p58;                                                                                                                              | 0.25 - 0.75 |
| LTRLRLQKRG     | TGGVDTAAVGAVDISNADR   | N-ter +28.03 Da                           | 54.3       | 54.3              | 3      | 1963.07                      | 0.978                                        | 0.179                 | KCRM_MOUSE   |              | Creatine kinase M-type;                                   | Creatine kinase M chain;M-CK;                                                                                                                                      | 0.25 - 0.75 |
| KVCYAKNFGP     | TGIGFGLTQQVEKK        | N-ter +28.03 Da, K +28.03 Da              | 30.3       | 50.3              | 3      | 1775.07                      | -1.184                                       | 0.161                 | CSR3_MOUSE   |              | Cysteine and glycine-rich protein 3;                      | Cysteine-rich protein 3;LIM domain protein, cardiac;Muscle LIM protein;                                                                                            | 0.15 - 0.25 |
| PRISVREPMQ     | TGIIKAVDSLVPIGR       | N-ter +28.03 Da, K +28.03 Da              | 30.7       | 51.0              | 3      | 1480.97                      | 0.696                                        | 0.086                 | ATPA_MOUSE   | D3Z6F5_MOUSE | ATP synthase subunit alpha, mitochondrial;                |                                                                                                                                                                    | 0.25 - 0.75 |
| FRAAVPSGAS     | TGIYEALER             | N-ter +28.03 Da                           | 39.4       | 42.6              | 2      | 1191.70                      | -0.12                                        | 0.007                 | ENOA_MOUSE   | ENO8_MOUSE   | Alpha-enolase;                                            | 2-phospho-D-glycerate hydro-lyase;Enolase 1;Non-neural enolase;                                                                                                    | 0.25 - 0.75 |
| LAYEPVWAIG     | TGKTATPQQAQEVHEKLR    | N-ter +28.03 Da, K +28.03 Da              | 37.0       | 71.1              | 4      | 2105.31                      | 0.516                                        | 0.061                 | TPIS_MOUSE   | E0CXH5_MOUSE | Triosephosphate isomerase;                                | Triose-phosphate isomerase;                                                                                                                                        | 0.25 - 0.75 |
| HTVEKGGKHK     | TGPNLHGLFGR           | N-ter +28.03 Da                           | 23.5       | 66.5              | 3      | 1195.73                      | 0.251                                        | 0.017                 | CYC_MOUSE    |              | Cytochrome c, somatic;                                    |                                                                                                                                                                    | 0.25 - 0.75 |
| RGTGGVDTAA     | TGSVFDISLDR           | N-ter +28.03 Da                           | 43.4       | 35.6              | 2      | 1350.73                      | 2.091                                        | 0.201                 | KCRU_MOUSE   |              | Creatine kinase U-type, mitochondrial;                    | Acidic-type mitochondrial creatine kinase;Ubiquitous mitochondrial creatine kinase;                                                                                | 0.85 - 1.00 |
| VHKAVLDVAE     | TGTEAAAATGVIGGIR      | N-ter +34.06 Da                           | 37.1       | 36.7              | 3      | 1477.89                      | -3.474                                       | 0.386                 | SPA3K_MOUSE  |              | Serine protease inhibitor A3K;                            | Contrapsin;SPI-2;                                                                                                                                                  | 0.00 - 0.15 |
| QSQAKAYFEK     | THEQLTPLVR            | N-ter +28.03 Da                           | 30.0       | 56.1              | 3      | 1220.76                      | -0.434                                       | 0.023                 | APOA2_MOUSE  | Q3UKX6_MOUSE | Apolipoprotein A-II;                                      | Apolipoprotein A2;                                                                                                                                                 | 0.25 - 0.75 |
| IKTKGKEAFP     | THFDPSCLFPACR         | N-ter +28.03 Da, C +57.02 Da              | 36.5       | 71.5              | 3      | 1634.85                      | -0.074                                       | 0.005                 | CAH3_MOUSE   |              | Carbonic anhydrase 3;                                     | Carbonate dehydratase III;Carbonic anhydrase III;                                                                                                                  | 0.25 - 0.75 |
| IFEVKSTAGD     | THLGGEDFDNR           | N-ter +28.03 Da                           | 36.3       | 66.7              | 3      | 1287.67                      | -0.535                                       | 0.062                 | HS71A_MOUSE  | HS71B_MOUSE  | Heat shock 70 kDa protein 1A;                             | Heat shock 70 kDa protein 3;Hsp68;                                                                                                                                 | 0.25 - 0.75 |
| SFRHPGYSTK     | THVNDIMLVR            | N-ter +28.03 Da                           | 24.7       | 60.8              | 3      | 1224.74                      | 1.138                                        | 0.078                 | KLK7_MOUSE   |              | Kallikrein-7;                                             | Serine protease 6;Stratum corneum chymotryptic enzyme;Thymosin;                                                                                                    | 0.75 - 0.85 |
| NIPISDPKR      | TIADQYGLVKADEGISFR    | N-ter +28.03 Da, K +28.03 Da              | 41.3       | 58.0              | 3      | 2038.19                      | -0.34                                        | 0.065                 | PRDX1_MOUSE  | B1AXW6_MOUSE | Peroxiredoxin-1;                                          | Macrophage 23 kDa stress protein;Osteoblast-specific factor 3;Thioredoxin peroxidase 2;Thioredoxin-dependent peroxide reductase 2;                                 | 0.25 - 0.75 |
| GGDVAFVKHTM    | TIFEVLPEKADR          | N-ter +34.06 Da, K +34.06 Da              | 40.2       | 58.2              | 3      | 1484.97                      | 0.39                                         | 0.051                 | TRFE_MOUSE   | D3YXR8_MOUSE | Serotransferrin;                                          | Beta-1 metal-binding globulin;Siderophilin;                                                                                                                        | 0.25 - 0.75 |
|                | TIGSMENVEFTSEGKGR     | N-ter +34.06 Da, K +34.06 Da              | 56.1       | 44.9              | 3      | 2008.15                      | -1.252                                       | 0.149                 | SMVD1_MOUSE  |              | SET and MYND domain-containing protein 1;                 | CD8b-opposite;Zinc finger protein BOP;                                                                                                                             | 0.15 - 0.25 |
|                |                       | N-ter +28.03 Da, K +28.03 Da, C +57.02 Da | 26.9       | 84.3              | 4      | 2206.39                      | -0.811                                       | 0.028                 | MLRS_MOUSE   |              | Myosin regulatory light chain 2, skeletal muscle isoform; |                                                                                                                                                                    | 0.25 - 0.75 |
|                |                       | N-ter +34.06 Da, K +34.06 Da              | 24.3       | 59.7              | 3      | 1312.88                      | 1.949                                        | 0.343                 | Q99K47_MOUSE | E9PV24_MOUSE |                                                           | Fast skeletal myosin light chain 2;MLC2F;                                                                                                                          | 0.85 - 1.00 |
|                |                       | N-ter +28.03 Da, K +28.03 Da, C +57.02 Da | 36.1       | 71.3              | 4      | 2059.13                      | 0.251                                        | 0.025                 | LEG1_MOUSE   |              | Galectin-1;                                               | 14 kDa lectin;Beta-galactoside-binding lectin L-14-I;Galactin;Lactose-binding lectin 1;Lectin galactoside-binding soluble 1;S-Lac lectin 1;                        | 0.25 - 0.75 |
| PRFNAHGDMAN    | TIVCNTKEDGTWGTEHR     | N-ter +28.03 Da, K +28.03 Da              | 45.9       | 57.0              | 3      | 1715.04                      | 5.053                                        | 1.008                 | K1C17_MOUSE  | D3YXP7_MOUSE | Keratin, type I cytoskeletal 17;                          | Cytokeratin-17;Keratin-17;                                                                                                                                         | 0.85 - 1.00 |
| RDAYVTRQVR     | TIVEVQDGKVISSR        | N-ter +28.03 Da, K +28.03 Da              | 27.4       | 47.2              | 3      | 1496.01                      | -1                                           | 0.16                  | HSP7C_MOUSE  | Q504P4_MOUSE | Heat shock cognate 71 kDa protein;                        | Heat shock 70 kDa protein 8;                                                                                                                                       | 0.15 - 0.25 |
| EIAEAYLGKA     | TKDAGTIAGLNVLR        | N-ter +34.06 Da, K +34.06 Da              | 46.9       | 69.9              | 4      | 1797.10                      | -0.044                                       | 0.004                 | ACTS_MOUSE   |              | Actin, alpha skeletal muscle;                             | Alpha-actin-1;                                                                                                                                                     | 0.25 - 0.75 |
| SLSTFQQMWI     | TKQYDEAGPSIVHR        | N-ter +34.06 Da, K +34.06 Da              | 46.9       | 69.9              | 4      | 1797.10                      | -0.044                                       | 0.004                 | ACTS_MOUSE   |              | Actin, alpha skeletal muscle;                             | Alpha-actin-1;                                                                                                                                                     | 0.25 - 0.75 |
| VFEWEAFARG     | TKSLMDEVVKATSR        | N-ter +28.03 Da, K +28.03 Da              | 26.4       | 68.2              | 4      | 1648.04                      | -0.34                                        | 0.022                 | PGK1_MOUSE   |              | Phosphoglycerate kinase 1;                                |                                                                                                                                                                    | 0.25 - 0.75 |
| AEITKLATDL     | TKVNKECCHGDLLECAADR   | N-ter +34.06 Da, K +34.06 Da, C +57.02 Da | 37.0       | 73.0              | 4      | 2421.37                      | -0.396                                       | 0.094                 | ALBU_MOUSE   |              | Serum albumin;                                            |                                                                                                                                                                    | 0.25 - 0.75 |



| Non Prime Site                                                                                | Prime Site                                                                                                                                        | Modifications                                                                                                                                                                         | Hyperscore                                           | Mass error in ppm                                     | Charge                          | Precursor neutral mass in Da                                              | Fold change (log <sub>2</sub> ) of ASAPRatio                    | FC-error of ASAPRatio                                       | Uniprot ID 1                                                                                       | Uniprot ID 2                                 | Protein Name 1                                                                                                                                                                               | Protein Name 2                                                                                                                                                                                                                                        | Quantile                                                                                              |
|-----------------------------------------------------------------------------------------------|---------------------------------------------------------------------------------------------------------------------------------------------------|---------------------------------------------------------------------------------------------------------------------------------------------------------------------------------------|------------------------------------------------------|-------------------------------------------------------|---------------------------------|---------------------------------------------------------------------------|-----------------------------------------------------------------|-------------------------------------------------------------|----------------------------------------------------------------------------------------------------|----------------------------------------------|----------------------------------------------------------------------------------------------------------------------------------------------------------------------------------------------|-------------------------------------------------------------------------------------------------------------------------------------------------------------------------------------------------------------------------------------------------------|-------------------------------------------------------------------------------------------------------|
| GGGDVAFVKH<br>LYANTVLSGG                                                                      | TTIFEVLPEKADR<br>TTMYPGIADR                                                                                                                       | N-ter +34.06 Da, K +34.06 Da<br>N-ter +34.06 Da                                                                                                                                       | 48.8<br>29.1                                         | 57.0<br>39.1                                          | 3<br>2                          | 1586.03<br>1157.64                                                        | 1.531<br>0.322                                                  | 0.222<br>0.049                                              | TRFE_MOUSE<br>ACTA_MOUSE                                                                           | D3YR8_MOUSE<br>ACTB_MOUSE                    | Serotransferrin;<br>Actin, aortic smooth muscle;                                                                                                                                             | Beta-1 metal-binding globulin;Siderophilin;<br>Alpha-actin-2;                                                                                                                                                                                         | 0.75 - 0.85<br>0.25 - 0.75                                                                            |
| TKCFVKLPEG<br>VPLAGTNGET                                                                      | TTEPKYLGAEMQSVGNMR<br>TTQGLDGLSER                                                                                                                 | N-ter +28.03 Da, K +28.03 Da<br>N-ter +34.06 Da                                                                                                                                       | 31.9<br>29.6                                         | 54.3<br>30.5                                          | 3<br>2                          | 2230.20<br>1209.68                                                        | 0.872<br>-1.089                                                 | 0.1<br>0.093                                                | TRFE_MOUSE<br>ALDOA_MOUSE                                                                          | E9Q035_MOUSE<br>Q9CPQ9_MOUSE                 | Serotransferrin;<br>Fructose-bisphosphate aldolase A;                                                                                                                                        | Beta-1 metal-binding globulin;Siderophilin;<br>Aldolase 1;Muscle-type aldolase;<br>XP-C repair-complementing complex 58 kDa protein;                                                                                                                  | 0.25 - 0.75<br>0.15 - 0.25                                                                            |
| AAATTTATT                                                                                     | TTSGGHPLEFLR                                                                                                                                      | N-ter +28.03 Da                                                                                                                                                                       | 27.3                                                 | 76.9                                                  | 3                               | 1341.81                                                                   | 0.227                                                           | 0.008                                                       | RD23B_MOUSE                                                                                        | Q3TJ52_MOUSE                                 | UV excision repair protein RAD23 homolog B;                                                                                                                                                  | XP-C repair-complementing complex 58 kDa protein;                                                                                                                                                                                                     | 0.25 - 0.75                                                                                           |
| AAAATTTATT<br>ISAVEQTAQR                                                                      | TTTSGGHPLEFLR<br>TTTTAVHIQPAQEQR                                                                                                                  | N-ter +28.03 Da<br>N-ter +34.06 Da                                                                                                                                                    | 40.9<br>45.8                                         | 65.4<br>60.5                                          | 3<br>3                          | 1442.85<br>1785.07                                                        | 0.275<br>0.575                                                  | 0.03<br>0.151                                               | RD23B_MOUSE<br>TITIN_MOUSE                                                                         | Q3TJ52_MOUSE<br>Q8BU16_MOUSE                 | UV excision repair protein RAD23 homolog B;<br>Titin;                                                                                                                                        | Connectin;                                                                                                                                                                                                                                            | 0.25 - 0.75<br>0.25 - 0.75                                                                            |
| ITVKTESTVK                                                                                    | TTVFSCNLGEKDETTADGR                                                                                                                               | N-ter +28.03 Da, K +28.03 Da, C +57.02 Da                                                                                                                                             | 46.0                                                 | 51.0                                                  | 3                               | 2303.19                                                                   | 2.414                                                           | 0.53                                                        | FABP5_MOUSE                                                                                        | E9Q964_MOUSE                                 | Fatty acid-binding protein, epidermal;                                                                                                                                                       | Epidermal-type fatty acid-binding protein;Fatty acid-binding protein 5;Keratinocyte lipid-binding protein;Psoriasis-associated fatty acid-binding protein homolog;                                                                                    | 0.85 - 1.00                                                                                           |
| QRPRQLQKPR                                                                                    | TVATPLNQVANPNFAIFGGARPR                                                                                                                           | N-ter +28.03 Da                                                                                                                                                                       | 50.8                                                 | 65.1                                                  | 4                               | 2378.44                                                                   | 1.971                                                           | 0.297                                                       | IF4H_MOUSE                                                                                         | Q80U88_MOUSE                                 | Eukaryotic translation initiation factor 4H;                                                                                                                                                 | Williams-Beuren syndrome chromosomal region 1 protein homolog;                                                                                                                                                                                        | 0.85 - 1.00                                                                                           |
| QRPRQLQKPR<br>EKAKREVCSW<br>GCVAGDEESY<br>M                                                   | TVATPLNQVANPNFAIFGGAR<br>TVEGDVNTDPWAGYR<br>TVFKDLFDPIQDR<br>TVHNLFLFDR                                                                           | N-ter +28.03 Da<br>N-ter +28.03 Da<br>N-ter +34.06 Da, K +34.06 Da<br>N-ter +34.06 Da                                                                                                 | 57.0<br>38.5<br>44.0<br>27.8                         | 44.7<br>49.9<br>66.0<br>69.3                          | 3<br>3<br>3<br>3                | 2125.22<br>1706.88<br>1774.15<br>1310.81                                  | 2.671<br>-0.786<br>-2.059<br>-0.044                             | 0.625<br>0.068<br>0.944<br>0.006                            | IF4H_MOUSE<br>AMP1_MOUSE<br>KCRM_MOUSE<br>TPPC1_MOUSE                                              | Q80U88_MOUSE                                 | Eukaryotic translation initiation factor 4H;<br>Methionine aminopeptidase 1;<br>Creatine kinase M-type;<br>Trafficking protein particle complex subunit 1;                                   | Williams-Beuren syndrome chromosomal region 1 protein homolog;<br>Peptidase M 1;<br>Creatine kinase M chain;M-CK;                                                                                                                                     | 0.85 - 1.00<br>0.25 - 0.75<br>0.00 - 0.15<br>0.25 - 0.75                                              |
| KDVVDYIFG                                                                                     | TVIQEVKTSNVAR                                                                                                                                     | N-ter +28.03 Da, K +28.03 Da                                                                                                                                                          | 35.4                                                 | 60.1                                                  | 3                               | 1499.96                                                                   | 0.963                                                           | 0.207                                                       | ECHB_MOUSE                                                                                         | D3YXU1_MOUSE                                 | Trifunctional enzyme subunit beta, mitochondrial;                                                                                                                                            | TP-beta;                                                                                                                                                                                                                                              | 0.25 - 0.75                                                                                           |
| GNNITVKTES<br>VETELRGVCD<br>NMKGNDISG<br>VDIRKDLAN<br>VVQVPSAYQK<br>VMDSDGQVTH                | TVKTTVFSCNLGEKDETTADGR<br>TVLGLDLSHLIKAGDAESR<br>TVLSDYVSGSPPSGTGLHR<br>TVLSGGTTMYPGIADR<br>TVPIEAVTSKTSNIR<br>TVPIYEGYALPHALR                    | N-ter +28.03 Da, K +28.03 Da, C +57.02 Da<br>N-ter +28.03 Da, K +28.03 Da<br>N-ter +28.03 Da<br>N-ter +28.03 Da<br>N-ter +34.06 Da, K +34.06 Da<br>N-ter +28.03 Da                    | 51.0<br>28.5<br>43.6<br>47.8<br>30.2<br>27.9         | 80.8<br>73.5<br>54.6<br>42.5<br>44.0<br>56.1          | 4<br>3<br>3<br>3<br>3<br>3      | 2659.53<br>2107.32<br>1927.09<br>1665.91<br>1683.09<br>1840.13            | 2.759<br>2.886<br>0.411<br>0.84<br>1.007<br>2.687               | 0.66<br>0.215<br>0.04<br>0.206<br>0.06<br>0.117             | FABP5_MOUSE<br>1433S_MOUSE<br>PEBP1_MOUSE<br>ACTB_MOUSE<br>SRC8_MOUSE<br>ACTB_MOUSE                | E9Q964_MOUSE                                 | Fatty acid-binding protein, epidermal;<br>14-3-3 protein sigma;<br>Phosphatidylethanolamine-binding protein 1;<br>Actin, cytoplasmic 1;<br>Src substrate cortactin;<br>Actin, cytoplasmic 1; | Epidermal-type fatty acid-binding protein;Fatty acid-binding protein 5;Keratinocyte lipid-binding protein;Psoriasis-associated fatty acid-binding protein homolog;<br>Stratifin;<br>HCNPPP;<br>Beta-actin;                                            | 0.85 - 1.00<br>0.85 - 1.00<br>0.25 - 0.75<br>0.25 - 0.75<br>0.25 - 0.75<br>0.85 - 1.00                |
| MATRG<br>SPGMKDLGA<br>SDEHGIDPTG<br>TSTVKKQVTK<br>VSGRQQVEL<br>SQVVKAVLD<br>TFTVITMVLG        | TVTDFPGFDR<br>TWVVLGHSER<br>TYHGDSDLQDR<br>TYKMADEAGSEHR<br>VAEQADLEQAFSPSPDPCVDR<br>VAETGTEAAATGVIGIR<br>VAEVFEIFRR                              | N-ter +28.03 Da<br>N-ter +28.03 Da<br>N-ter +28.03 Da<br>N-ter +34.06 Da, K +34.06 Da<br>N-ter +28.03 Da, C +57.02 Da<br>N-ter +28.03 Da<br>N-ter +34.06 Da                           | 41.9<br>36.3<br>25.4<br>27.4<br>52.1<br>61.4<br>17.2 | 36.4<br>71.6<br>104.4<br>79.3<br>44.1<br>45.9<br>69.8 | 2<br>3<br>3<br>4<br>3<br>3<br>3 | 1238.64<br>1210.73<br>1446.83<br>1632.95<br>2376.16<br>1771.03<br>1411.94 | 0.138<br>-0.667<br>2.359<br>-1.184<br>5.737<br>-0.415<br>-3.184 | 0.013<br>0.053<br>0.704<br>0.215<br>2.147<br>0.05<br>0.289  | ANXA5_MOUSE<br>TPIS_MOUSE<br>TBB5_MOUSE<br>O99K47_MOUSE<br>APIS_MOUSE<br>SPA3K_MOUSE<br>CXE1_MOUSE | E0CXH5_MOUSE<br>E9PV24_MOUSE                 | Annexin A5;<br>Triosephosphate isomerase;<br>Tubulin beta-5 chain;<br>Apoptosis inhibitor 5;<br>Serine protease inhibitor A3K;<br>Gap junction epsilon-1 protein;                            | Annexin CII;Annexin V;Annexin-5;Calphobindin I;Endonexin II;Lipocortin V;Placental anticoagulant protein 4;Placental anticoagulant protein I;Thromboplastin inhibitor;Vascular anticoagulant-alpha;<br>Triose-phosphate isomerase;                    | 0.25 - 0.75<br>0.25 - 0.75<br>0.85 - 1.00<br>0.15 - 0.25<br>0.85 - 1.00<br>0.25 - 0.75<br>0.00 - 0.15 |
| LIGTFNIVRL<br>VNOAQKEAEK<br>KNCGRHRFVL<br>PLPVPHQVK<br>WHHSFYNELR<br>WHHTFYNELR<br>EERSVNCGTM | VAGEMGQNEPDQGGOR<br>VAHGVTQGVNQAGKETQR<br>VANQDFVENLVR<br>VANSPANADYQER<br>VAPEEHPTLLTEAPLNKANR<br>VAPEEHPTLLTEAPLNKANR<br>VAQPKNLEGVYGFANLPNQVYR | N-ter +28.03 Da<br>N-ter +28.03 Da, K +28.03 Da<br>N-ter +28.03 Da<br>N-ter +28.03 Da<br>N-ter +28.03 Da, K +28.03 Da<br>N-ter +28.03 Da, K +28.03 Da<br>N-ter +34.06 Da, K +34.06 Da | 40.7<br>47.3<br>47.9<br>44.4<br>46.8<br>40.8<br>52.0 | 43.6<br>77.6<br>54.9<br>48.1<br>71.5<br>70.0<br>72.0  | 3<br>4<br>3<br>3<br>3<br>3<br>4 | 1699.83<br>1935.18<br>1529.90<br>1461.76<br>2352.45<br>2350.47<br>2544.60 | 2.263<br>1.803<br>1.214<br>-1.358<br>3.886<br>4.128<br>0.138    | 0.627<br>0.408<br>0.068<br>0.244<br>0.523<br>0.647<br>0.015 | HCD2_MOUSE<br>S8S1_MOUSE<br>TOM1_MOUSE<br>E9PYJ9_MOUSE<br>ACTA_MOUSE<br>ACTB_MOUSE<br>E9Q9F5_MOUSE | Q99N15_MOUSE<br>E9QP82_MOUSE<br>Q3UDC3_MOUSE | 3-hydroxyacyl-CoA dehydrogenase type-2;<br>Suprabasin;<br>Target of Myb protein 1;<br>Actin, aortic smooth muscle;<br>Actin, cytoplasmic 1;                                                  | 17-beta-hydroxysteroid dehydrogenase 10;3-hydroxy-2-methylbutyryl-CoA dehydrogenase;3-hydroxyacyl-CoA dehydrogenase type II;Endoplasmic reticulum-associated amyloid beta-peptide-binding protein;Mitochondrial ribonuclease P protein 2;Type II HDH; | 0.85 - 1.00<br>0.85 - 1.00<br>0.75 - 0.85<br>0.15 - 0.25<br>0.85 - 1.00<br>0.85 - 1.00<br>0.25 - 0.75 |
| AHQLFGRGFSF<br>VHTSVASATS<br>PTLILAQGSN                                                       | VATGLMEDDGKPR<br>VATKTEQGPSPSEYIFER<br>VDELGCSHLGQSYER                                                                                            | N-ter +28.03 Da, K +28.03 Da<br>N-ter +34.06 Da, K +34.06 Da<br>N-ter +34.06 Da, C +57.02 Da                                                                                          | 29.0<br>32.1<br>44.8                                 | 62.3<br>72.2<br>71.1                                  | 3<br>3<br>3                     | 1443.83<br>2268.45<br>1870.01                                             | -0.044<br>-1.252<br>-0.811                                      | 0.002<br>0.119<br>0.142                                     | K6A1_MOUSE<br>OAT_MOUSE<br>CO3A1_MOUSE                                                             | Q505N6_MOUSE                                 | Ribosomal protein S6 kinase alpha-1;<br>Ornithine aminotransferase, mitochondrial;<br>Collagen alpha-1(III) chain;                                                                           | Ribosomal protein S6 kinase 1;MAP kinase-activated protein kinase 1a;Ribosomal S6 kinase 1;<br>Ornithine--oxo-acid aminotransferase;                                                                                                                  | 0.25 - 0.75<br>0.15 - 0.25<br>0.25 - 0.75                                                             |
| REALLGVQED<br>EVNKRDIVFL                                                                      | VDEYVVLGHEEQQR<br>VDGSSSLGPSNFNAIR                                                                                                                | N-ter +28.03 Da, K +28.03 Da<br>N-ter +28.03 Da                                                                                                                                       | 20.5<br>39.0                                         | 32.4<br>47.1                                          | 3<br>3                          | 1784.96<br>1647.90                                                        | 5.382<br>-0.599                                                 | 1.218<br>0.036                                              | RCN2_MOUSE<br>E9PWQ3_MOUSE                                                                         | D3YWD1_MOUSE                                 | Reticulocalbin-2;                                                                                                                                                                            | Taipoxin-associated calcium-binding protein 49;                                                                                                                                                                                                       | 0.85 - 1.00<br>0.25 - 0.75                                                                            |
| AGKHVPRAVF<br>AGKHVPRAVF                                                                      | VDLEPTVIDEIR<br>VDLEPTVIDEVR                                                                                                                      | N-ter +28.03 Da<br>N-ter +34.06 Da                                                                                                                                                    | 39.2<br>32.5                                         | 38.6<br>49.8                                          | 2<br>3                          | 1425.83<br>1417.86                                                        | 1.731<br>4.364                                                  | 0.48<br>1.026                                               | TBA4A_MOUSE<br>TBA1A_MOUSE                                                                         | TBA1B_MOUSE                                  | Tubulin alpha-4A chain;<br>Tubulin alpha-1A chain;                                                                                                                                           | Alpha-tubulin 4;Alpha-tubulin isotype M-alpha-4;Tubulin alpha-4 chain;<br>Alpha-tubulin 1;Alpha-tubulin isotype M-alpha-1;Tubulin alpha-1 chain;                                                                                                      | 0.75 - 0.85<br>0.85 - 1.00                                                                            |





Table S11, Tholen et al.

| Non Prime Site | Prime Site           | Modifications                             | Hyperscore | Mass error in ppm | Charge | Precursor neutral mass in Da | Fold change (log <sub>2</sub> ) of ASAPRatio | FC-error of ASAPRatio | Uniprot ID 1 | Uniprot ID 2 | Protein Name 1                                                                     | Protein Name 2                                                                            | Quantile    |
|----------------|----------------------|-------------------------------------------|------------|-------------------|--------|------------------------------|----------------------------------------------|-----------------------|--------------|--------------|------------------------------------------------------------------------------------|-------------------------------------------------------------------------------------------|-------------|
| AGLPTSLTL      | YLDNNKISNIPDEVFKR    | N-ter +34.06 Da, K +34.06 Da              | 28.3       | 72.8              | 4      | 2230.41                      | -3.644                                       | 0.456                 | LUM_MOUSE    |              | Lumican;                                                                           | Keratan sulfate proteoglycan lumican;                                                     | 0.00 - 0.15 |
| LGLKPLSFL      | YMEKNQLEEVPSALPR     | N-ter +34.06 Da, K +34.06 Da              | 50.4       | 49.7              | 3      | 1971.17                      | 1.996                                        | 0.235                 | PRELP_MOUSE  |              | Prolargin;                                                                         | Proline-arginine-rich end leucine-rich repeat protein;                                    | 0.85 - 1.00 |
| ETIKRLETY      | YNATEPVIISFYDKR      | N-ter +34.06 Da, K +34.06 Da              | 43.5       | 54.1              | 3      | 1770.06                      | -1                                           | 0.14                  | KAD1_MOUSE   |              | Adenylate kinase isoenzyme 1;                                                      | ATP-AMP transphosphorylase 1;Myokinase;                                                   | 0.15 - 0.25 |
| DEQLTSLKVL     | YNDLGAQVTEGKQDLER    | N-ter +28.03 Da, K +28.03 Da              | 22.3       | 59.3              | 3      | 1991.11                      | 0.299                                        | 0.027                 | E9Q6R7_MOUSE |              |                                                                                    |                                                                                           | 0.25 - 0.75 |
| DLQLERINVV     | YNEATGGKYVPR         | N-ter +28.03 Da, K +28.03 Da              | 19.6       | 68.7              | 3      | 1409.83                      | 0.202                                        | 0.032                 | TBB2C_MOUSE  | TBB5_MOUSE   | Tubulin beta-4B chain;<br>WD repeat domain phosphoinositide-interacting protein 2; | Tubulin beta-2C chain;                                                                    | 0.25 - 0.75 |
| VGASDGLYLM     | YNLDPQEGGECALMR      | N-ter +28.03 Da, C +57.02 Da              | 45.6       | 68.1              | 3      | 1779.91                      | 0.651                                        | 0.124                 | WIPI2_MOUSE  | D3YWK1_MOUSE |                                                                                    |                                                                                           | 0.25 - 0.75 |
| STSSPVFHPK     | YQACSGPILPHR         | N-ter +28.03 Da, C +57.02 Da              | 30.3       | 63.5              | 3      | 1425.81                      | -0.737                                       | 0.061                 | Q99M20_MOUSE |              |                                                                                    |                                                                                           | 0.25 - 0.75 |
| DKAKELWDTL     | YQLETDKFEFGKLR       | N-ter +34.06 Da, K +34.06 Da              | 22.6       | 54.0              | 4      | 2166.42                      | -1.434                                       | 0.116                 | TNNT3_MOUSE  | A2A6J0_MOUSE | Troponin T, fast skeletal muscle;                                                  | Fast skeletal muscle troponin T;                                                          | 0.15 - 0.25 |
| RLMEIQEKL      | YRPPVLDALGR          | N-ter +28.03 Da                           | 40.1       | 71.5              | 3      | 1380.89                      | 1.736                                        | 0.172                 | E9Q005_MOUSE | E9PVA8_MOUSE |                                                                                    |                                                                                           | 0.75 - 0.85 |
| PGLTGNFAAQ     | YSDKGVSSGPGMGLMGPR   | N-ter +28.03 Da, K +28.03 Da              | 74.9       | 67.8              | 3      | 1948.09                      | -4.322                                       | 0.864                 | CO1A2_MOUSE  | E0CXI2_MOUSE | Collagen alpha-2(I) chain;                                                         | Alpha-2 type I collagen;                                                                  | 0.00 - 0.15 |
| VQVEEYIDL      | YSEEPGEEPAWVQTER     | N-ter +28.03 Da                           | 45.3       | 48.1              | 3      | 2063.01                      | 2.356                                        | 0.262                 | RCN3_MOUSE   | D3ZTT1_MOUSE | Reticulocalbin-3;                                                                  |                                                                                           | 0.85 - 1.00 |
| SPRRSQVHPE     | YSEGEAHSEVSQR        | N-ter +28.03 Da                           | 39.2       | 82.5              | 3      | 1505.80                      | -0.494                                       | 0.278                 | E9QPZ3_MOUSE | FILA2_MOUSE  |                                                                                    |                                                                                           | 0.25 - 0.75 |
| MLQTRFPLDY     | YSIPFPTPTLTLGR       | N-ter +28.03 Da                           | 25.3       | 47.3              | 3      | 1674.98                      | -0.252                                       | 0.024                 | UBP2L_MOUSE  | E9PZA1_MOUSE | Ubiquitin-associated protein 2-like;                                               |                                                                                           | 0.25 - 0.75 |
| AAMKANTMSN     | YSLPASLLDHR          | N-ter +28.03 Da                           | 40.0       | 84.6              | 3      | 1411.90                      | 1.585                                        | 0.227                 | ST2B1_MOUSE  | E9QK1_MOUSE  | Sulfotransferase family cytosolic 2B member 1;                                     | Alcohol sulfotransferase;Hydroxysteroid sulfotransferase 2;                               | 0.75 - 0.85 |
| FIHHELLAYL     | YSSADQSSLMEEAEQQR    | N-ter +28.03 Da                           | 57.8       | 50.4              | 3      | 2144.04                      | 2.646                                        | 0.537                 | DYN2_MOUSE   | Q91Z39_MOUSE | Dynamain-2;                                                                        | Dynamain UDNM;                                                                            | 0.85 - 1.00 |
| CTFFLAVSGL     | YSSDDVIELTPSNFNR     | N-ter +34.06 Da                           | 48.0       | 47.5              | 3      | 1977.05                      | 0.614                                        | 0.084                 | PDIA6_MOUSE  | Q3TML0_MOUSE | Protein disulfide-isomerase A6;                                                    | Thioredoxin domain-containing protein 7;                                                  | 0.25 - 0.75 |
| SYMKIDELSL     | YSVPEGQSKYVEEPR      | N-ter +28.03 Da, K +28.03 Da              | 22.2       | 58.9              | 3      | 1823.02                      | -0.474                                       | 0.118                 | APOO_MOUSE   | B1ASQ2_MOUSE | Apolipoprotein O;                                                                  | Protein FAM121B;                                                                          | 0.25 - 0.75 |
| PLAKLKDSGT     | YTCTASNEAGSSSSAAVAVR | N-ter +34.06 Da, C +57.02 Da              | 20.4       | 41.6              | 4      | 2109.07                      | -4.644                                       | 1.161                 | TITIN_MOUSE  | E9Q8K5_MOUSE | Titin;                                                                             | Connectin;                                                                                | 0.00 - 0.15 |
| RSESIYEML      | YTPPEPNGMASEEVTEKER  | N-ter +28.03 Da, K +28.03 Da              | 31.3       | 61.8              | 3      | 2122.12                      | 2.118                                        | 0.678                 | E9Q3A1_MOUSE | E9Q6H8_MOUSE |                                                                                    |                                                                                           | 0.85 - 1.00 |
| YGFQNAILVR     | YTQKAPQVSTPTLVEAAR   | N-ter +28.03 Da, K +28.03 Da              | 58.5       | 50.2              | 3      | 2015.21                      | 1.799                                        | 0.274                 | ALBU_MOUSE   |              | Serum albumin;                                                                     |                                                                                           | 0.85 - 1.00 |
| QKIGQPTLLL     | YVDAGAETMTQR         | N-ter +34.06 Da                           | 35.4       | 68.4              | 3      | 1374.76                      | 1.362                                        | 0.207                 | KAD1_MOUSE   |              | Adenylate kinase isoenzyme 1;                                                      | ATP-AMP transphosphorylase 1;Myokinase;                                                   | 0.75 - 0.85 |
| MYAKRAFVHW     | YVGEEMEEGFSEAR       | N-ter +28.03 Da                           | 48.0       | 64.7              | 3      | 1716.84                      | 4.994                                        | 0.694                 | TBA1A_MOUSE  | TBA1B_MOUSE  | Tubulin alpha-1A chain;                                                            | Alpha-tubulin 1;Alpha-tubulin isotype M-alpha-1;Tubulin alpha-1 chain;                    | 0.85 - 1.00 |
| LCALLVPGGA     | YVLDDSDGLGR          | N-ter +28.03 Da                           | 23.5       | 47.1              | 2      | 1236.66                      | 0.816                                        | 0.046                 | GALC_MOUSE   |              | Galactocerebrosidase;                                                              | Galactocerebrosidase;Galactosylceramidase;Galactosylceramide beta-galactosidase;          | 0.25 - 0.75 |
| LGGALDSGAA     | YVLEQASSHIGNSTQAAVR  | N-ter +28.03 Da                           | 51.8       | 53.4              | 3      | 2058.16                      | 1.664                                        | 0.278                 | ATLA3_MOUSE  | E9PYT3_MOUSE | Atlastin-3;                                                                        |                                                                                           | 0.75 - 0.85 |
| HPFMWNEHLG     | YVLTCPNSLGTGLR       | N-ter +28.03 Da, C +57.02 Da              | 30.5       | 39.4              | 3      | 1577.89                      | -2.737                                       | 0.365                 | KCRM_MOUSE   |              | Creatine kinase M-type;                                                            | Creatine kinase M chain;M-CK;                                                             | 0.00 - 0.15 |
| AFRPMEVANF     | YYEPDCLAYGAKAAR      | N-ter +28.03 Da, K +28.03 Da, C +57.02 Da | 29.1       | 63.1              | 3      | 1802.98                      | -0.943                                       | 0.145                 | CEBPB_MOUSE  |              | CCAAT/enhancer-binding protein beta;                                               | AGP/EBP;Interleukin-6-dependent-binding protein;Liver-enriched transcriptional activator; | 0.15 - 0.25 |
| LQKRPKPDEK     | YSSSIWGPCTCDGLDR     | N-ter +34.06 Da, C +57.02 Da              | 18.0       | 97.2              | 4      | 1910.06                      | -6.644                                       | 0.001                 | DCOR_MOUSE   | Q8CIC5_MOUSE | Ornithine decarboxylase;                                                           |                                                                                           | 0.00 - 0.15 |
