# Supplementary material
Source: PubMed Central journal article supplement (PMC3591655)
Supplement: supp_M112.017962_mcp.M112.017962-14.pdf [file supp_M112.017962_mcp.M112.017962-14.pdf]

**Table S12:** Dimethylated (naturally unmodified) N-termini identified in both replicates of the TAILS experiment comparing wild-type and *Cts1<sup>-/-</sup>* skin.

| Non Prime Site | Prime Site                  | Fold change (log <sub>2</sub> )<br>of ASAPRatio<br>(replicate 1) | Fold change (log <sub>2</sub> ) of<br>ASAPRatio<br>(replicate 2) | Uniprot ID  | Protein Name                                             |
|----------------|-----------------------------|------------------------------------------------------------------|------------------------------------------------------------------|-------------|----------------------------------------------------------|
| M              | VQAWYMEDESTADPR             | 0.25                                                             | -0.38                                                            | MTND_MOUSE  | 1,2-dihydroxy-3-keto-5-methylthiopentene dioxygenase;    |
| NVVGARRSSW     | RVISSIEQKTER                | 1.87                                                             | 0.60                                                             | 1433B_MOUSE | 14-3-3 protein beta/alpha;                               |
| RYEDMAAFMK     | SAVEKGEELSCEER              | 0.26                                                             | 1.02                                                             | 1433S_MOUSE | 14-3-3 protein sigma;                                    |
| VETELRGVCD     | TVLGLLDSHLIKAGDAESR         | 1.29                                                             | 2.89                                                             | 1433S_MOUSE | 14-3-3 protein sigma;                                    |
| RYDDMAACMK     | SVTEQGAELSNEER              | 0.12                                                             | 0.07                                                             | 1433Z_MOUSE | 14-3-3 protein zeta/delta;                               |
| M              | VLESTMVCVDNSEYMR            | 1.58                                                             | 0.58                                                             | PSMD4_MOUSE | 26S proteasome non-ATPase regulatory subunit 4;          |
| NPNRVAQTTK     | KVTQLDLDGPKELSR             | -0.74                                                            | -0.17                                                            | HAP28_MOUSE | 28 kDa heat- and acid-stable phosphoprotein;             |
| PNRVAQTTKK     | VTQLDLDGPKELSR              | 1.06                                                             | 0.19                                                             | HAP28_MOUSE | 28 kDa heat- and acid-stable phosphoprotein;             |
| RRAHSALAQL     | RCILDSELEGIR                | 0.60                                                             | 0.60                                                             | KBL_MOUSE   | 2-amino-3-ketobutyrate coenzyme A ligase, mitochondrial; |
| VILQHLRMSM     | HTEAAEVLLER                 | -0.79                                                            | -0.71                                                            | HIBCH_MOUSE | 3-hydroxyisobutyryl-CoA hydrolase, mitochondrial;        |
| AIMARIAQFL     | SGIPETVPLSTVNR              | 0.45                                                             | 0.95                                                             | THIKA_MOUSE | 3-ketoacyl-CoA thiolase A, peroxisomal;                  |
| GEADRDTYRR     | SAVPPGADKKAEGAGSATEFQFR     | 1.16                                                             | 0.52                                                             | RS10_MOUSE  | 40S ribosomal protein S10;                               |
| HIFASFNDTF     | VHVTDLSGKETICR              | 0.06                                                             | -0.81                                                            | RS14_MOUSE  | 40S ribosomal protein S14;                               |
| MAF            | KDTGKTPVEPEVAIHR            | 1.81                                                             | -0.22                                                            | RS20_MOUSE  | 40S ribosomal protein S20;                               |
| SASNRIIAAK     | DHASIQMNVAEVDR              | -0.38                                                            | 0.45                                                             | RS21_MOUSE  | 40S ribosomal protein S21;                               |
| FVPNDGCLNF     | IEENDEVLVAGFGR              | 0.87                                                             | -0.38                                                            | RS23_MOUSE  | 40S ribosomal protein S23;                               |
| SIIRNVKGPV     | REGDVLTLLESER               | -0.67                                                            | -0.94                                                            | RS28_MOUSE  | 40S ribosomal protein S28;                               |
| RSIIRNVKGP     | VREGDVLTLLESER              | 3.10                                                             | 0.99                                                             | RS28_MOUSE  | 40S ribosomal protein S28;                               |
| TLTAVHDAIL     | EDLVFPSEIVGKR               | 1.25                                                             | -0.54                                                            | RS7_MOUSE   | 40S ribosomal protein S7;                                |
| IHRAAAVAAM     | STGTFVVSQPLNYR              | -0.58                                                            | -1.40                                                            | AL9A1_MOUSE | 4-trimethylaminobutyraldehyde dehydrogenase;             |
| LLPWPAASA      | WELTILHTNDVHSR              | -0.42                                                            | 0.19                                                             | 5NTD_MOUSE  | 5'-nucleotidase;                                         |
| SPSAKDIKKI     | LDSVGIEADDDR                | -1.03                                                            | -1.18                                                            | RLA2_MOUSE  | 60S acidic ribosomal protein P2;                         |
| ISKEWGF TKF    | NADEFEDMVAEKR               | -0.22                                                            | -1.79                                                            | RL10_MOUSE  | 60S ribosomal protein L10;                               |
| SLARELSGTI     | KEILGTAQSVGCNVDGR           | -0.67                                                            | -1.09                                                            | RL12_MOUSE  | 60S ribosomal protein L12;                               |
| MPCKI          | EEIKDFLLTAR                 | -5.64                                                            | -1.84                                                            | RL38_MOUSE  | 60S ribosomal protein L38;                               |
| QEVRCLETSY     | ASKPTLNEVVIVSAIR            | -0.43                                                            | 1.35                                                             | THIL_MOUSE  | Acetyl-CoA acetyltransferase, mitochondrial;             |
| YVALDFENEM     | ATAASSSSLEKSYELPDGQVITIGNER | 3.02                                                             | 1.50                                                             | ACTC_MOUSE  | Actin, alpha cardiac muscle 1;                           |
| QGVVMVGMGQK    | DSYVGDQAQSKR                | 2.20                                                             | 3.34                                                             | ACTC_MOUSE  | Actin, alpha cardiac muscle 1;                           |
| DDEETTALVC     | DNGSGLVKAGFAGDDAPR          | -1.25                                                            | -1.56                                                            | ACTC_MOUSE  | Actin, alpha cardiac muscle 1;                           |
| YPGIADRMQK     | EITALAPSTMKIKIIPPER         | 4.85                                                             | 4.04                                                             | ACTC_MOUSE  | Actin, alpha cardiac muscle 1;                           |
| EETTALVCDN     | GSGLVKAGFAGDDAPR            | -0.12                                                            | -1.12                                                            | ACTC_MOUSE  | Actin, alpha cardiac muscle 1;                           |
| TTMPGIADR      | MQKEITALAPSTMKIK            | 3.79                                                             | 2.90                                                             | ACTC_MOUSE  | Actin, alpha cardiac muscle 1;                           |
| TTMPGIADR      | MQKEITALAPSTMK              | 0.75                                                             | 1.16                                                             | ACTC_MOUSE  | Actin, alpha cardiac muscle 1;                           |
| STFQQMWISK     | QEYDEAGPSIVHR               | -0.89                                                            | -0.27                                                            | ACTC_MOUSE  | Actin, alpha cardiac muscle 1;                           |

Table S12, Tholen et al.

| Non Prime Site | Prime Site              | Fold change (log <sub>2</sub> )<br>of ASAPRatio<br>(replicate 1) | Fold change (log <sub>2</sub> ) of<br>ASAPRatio<br>(replicate 2) | Uniprot ID  | Protein Name                                   |
|----------------|-------------------------|------------------------------------------------------------------|------------------------------------------------------------------|-------------|------------------------------------------------|
| ETTALVCDNG     | SGLVKAGFAGDDAPR         | 0.49                                                             | -0.89                                                            | ACTC_MOUSE  | Actin, alpha cardiac muscle 1;                 |
| SAGIHETTYN     | SIMKCDIDIR              | 0.25                                                             | 0.10                                                             | ACTC_MOUSE  | Actin, alpha cardiac muscle 1;                 |
| NEMATAASSS     | SLEKSYELPDGQVITIGNER    | 1.29                                                             | 0.16                                                             | ACTC_MOUSE  | Actin, alpha cardiac muscle 1;                 |
| ELRVAPEEHP     | TLLTEAPLNPKANR          | 0.15                                                             | 0.30                                                             | ACTC_MOUSE  | Actin, alpha cardiac muscle 1;                 |
| WHHSFYNELR     | VAPEEHPTLLTEAPLNPKANR   | 4.38                                                             | 3.89                                                             | ACTC_MOUSE  | Actin, alpha cardiac muscle 1;                 |
| CDIDIRKDLY     | ANNVMSGGTTMYPGIADR      | -2.64                                                            | -4.32                                                            | ACTS_MOUSE  | Actin, alpha skeletal muscle;                  |
| IMKCDIDIRK     | DLYANNVMSGGTTMYPGIADR   | 3.92                                                             | 4.72                                                             | ACTS_MOUSE  | Actin, alpha skeletal muscle;                  |
| PETLFQPSFI     | GMESAGIHETTYNSIMKCDIDIR | 4.60                                                             | 4.47                                                             | ACTS_MOUSE  | Actin, alpha skeletal muscle;                  |
| GRPRHQGVMV     | GMGQKDSYVGDEAQSQR       | 1.01                                                             | 0.23                                                             | ACTS_MOUSE  | Actin, alpha skeletal muscle;                  |
| PSIVGRPRHQ     | GVMVGMGQKDSYVGDEAQSQR   | 0.52                                                             | 0.11                                                             | ACTS_MOUSE  | Actin, alpha skeletal muscle;                  |
| LSTFQQMWIS     | KQEYDEAGPSIVHR          | -0.52                                                            | -0.74                                                            | ACTS_MOUSE  | Actin, alpha skeletal muscle;                  |
| RPRHQGVMVG     | MGQKDSYVGDEAQSQR        | 1.08                                                             | 0.07                                                             | ACTS_MOUSE  | Actin, alpha skeletal muscle;                  |
| TTMYPGIADR     | MQKEITALAPSTMKIKIIPPER  | 2.31                                                             | -0.84                                                            | ACTS_MOUSE  | Actin, alpha skeletal muscle;                  |
| SLSTFQQMWI     | TKQEYDEAGPSIVHR         | -0.47                                                            | -0.04                                                            | ACTS_MOUSE  | Actin, alpha skeletal muscle;                  |
| VCDNGSGLCK     | AGFAGDDAPR              | -0.12                                                            | 0.11                                                             | ACTA_MOUSE  | Actin, aortic smooth muscle;                   |
| VFPSIVGRPR     | HQGVMVGMGQKDSYVGDEAQSQR | 3.54                                                             | 3.66                                                             | ACTA_MOUSE  | Actin, aortic smooth muscle;                   |
| IWHHSFYNEL     | RVAPEEHPTLLTEAPLNPKANR  | 3.30                                                             | 3.07                                                             | ACTA_MOUSE  | Actin, aortic smooth muscle;                   |
| LYANTVLSGG     | TTMYPGIADR              | -4.64                                                            | 0.32                                                             | ACTA_MOUSE  | Actin, aortic smooth muscle;                   |
| HHTFYNELRV     | APEEHPVLLTEAPLNPKANR    | 1.35                                                             | 1.71                                                             | ACTB_MOUSE  | Actin, cytoplasmic 1;                          |
| ASSSSLEKSY     | ELPDGQVITIGNER          | 0.91                                                             | 0.41                                                             | ACTB_MOUSE  | Actin, cytoplasmic 1;                          |
| IWHHTFYNEL     | RVAPEEHPVLLTEAPLNPKANR  | 4.28                                                             | 5.24                                                             | ACTB_MOUSE  | Actin, cytoplasmic 1;                          |
| RKDLYANTVL     | SGGTTMYPGIADR           | -0.42                                                            | -0.56                                                            | ACTB_MOUSE  | Actin, cytoplasmic 1;                          |
| TAASSSSLEK     | SYELPDGQVITIGNER        | 0.19                                                             | 0.19                                                             | ACTB_MOUSE  | Actin, cytoplasmic 1;                          |
| VDIRKDLYAN     | TVLSGGTTMYPGIADR        | 0.06                                                             | 0.84                                                             | ACTB_MOUSE  | Actin, cytoplasmic 1;                          |
| WHHTFYNELR     | VAPEEHPVLLTEAPLNPKANR   | 3.47                                                             | 4.13                                                             | ACTB_MOUSE  | Actin, cytoplasmic 1;                          |
| LASLSTFQQM     | WISKQEYDESGPSIVHR       | 0.20                                                             | 1.27                                                             | ACTB_MOUSE  | Actin, cytoplasmic 1;                          |
| FQQMWISKQE     | YDESGPSIVHR             | 0.28                                                             | 0.87                                                             | ACTB_MOUSE  | Actin, cytoplasmic 1;                          |
| AASSSSLEKS     | YELPDGQVITIGNER         | 0.51                                                             | 1.39                                                             | ACTB_MOUSE  | Actin, cytoplasmic 1;                          |
| GTVTHLCRQY     | SDAPPLTLDGIKDR          | 0.88                                                             | 0.50                                                             | ACPM_MOUSE  | Acyl carrier protein, mitochondrial;           |
| TGGRTTWARD     | NATLSVEPEGR             | -0.47                                                            | 0.36                                                             | ACOT2_MOUSE | Acyl-coenzyme A thioesterase 2, mitochondrial; |
| PGPYAQPSVN     | TPLPNLQNGPIYAR          | -0.60                                                            | 0.00                                                             | CRK_MOUSE   | Adapter molecule crk;                          |
| M              | APNVLASEPEIPKGR         | 1.42                                                             | 2.01                                                             | KAD2_MOUSE  | Adenylate kinase 2, mitochondrial;             |
| TQCEKIVQKY     | GYTHLSTGDLLR            | -0.79                                                            | -1.09                                                            | KAD1_MOUSE  | Adenylate kinase isoenzyme 1;                  |
| GSGKGTQCEK     | IVQKYGYTHLSTGDLLR       | -0.42                                                            | 0.62                                                             | KAD1_MOUSE  | Adenylate kinase isoenzyme 1;                  |
| TIKKRLETTY     | NATEPVISFYDKR           | -0.38                                                            | -0.84                                                            | KAD1_MOUSE  | Adenylate kinase isoenzyme 1;                  |
| GTQCEKIVQK     | YGYTHLSTGDLLR           | 1.64                                                             | 1.80                                                             | KAD1_MOUSE  | Adenylate kinase isoenzyme 1;                  |
| ETIKKRLETY     | YNATEPVISFYDKR          | -0.86                                                            | -1.00                                                            | KAD1_MOUSE  | Adenylate kinase isoenzyme 1;                  |

Table S12, Tholen et al.

| Non Prime Site | Prime Site                 | Fold change (log <sub>2</sub> ) of ASAPRatio (replicate 1) | Fold change (log <sub>2</sub> ) of ASAPRatio (replicate 2) | Uniprot ID  | Protein Name                                       |
|----------------|----------------------------|------------------------------------------------------------|------------------------------------------------------------|-------------|----------------------------------------------------|
| QKIGQPTELL     | YVDAGAETMTQR               | 1.56                                                       | 1.36                                                       | KAD1_MOUSE  | Adenylate kinase isoenzyme 1;                      |
| LARAPLCERI     | AQNFGQLQLSSGHLLR           | 0.66                                                       | 1.12                                                       | KAD4_MOUSE  | Adenylate kinase isoenzyme 4, mitochondrial;       |
| RTFGTTGERR     | AGEEAADSPPELPR             | -0.43                                                      | -0.18                                                      | ADXL_MOUSE  | Adrenodoxin-like protein, mitochondrial;           |
| LESKSNKIVQ     | SVIQTAVDQFAR               | -1.18                                                      | -2.25                                                      | AKA12_MOUSE | A-kinase anchor protein 12;                        |
| HLAQGSETVQ     | ATPESLEVPEVTEDVDR          | -0.81                                                      | -2.74                                                      | AKA12_MOUSE | A-kinase anchor protein 12;                        |
| LDKVKSATLS     | STESTASGMQDEVR             | -0.76                                                      | -0.32                                                      | AKA12_MOUSE | A-kinase anchor protein 12;                        |
| WWNPPQEKI      | EEQLDEEHLESHR              | 0.12                                                       | 0.14                                                       | AKAP2_MOUSE | A-kinase anchor protein 2;                         |
| RASGPWGRSH     | SSAAAESAALKVRPER           | -1.52                                                      | -0.67                                                      | ALAT2_MOUSE | Alanine aminotransferase 2;                        |
| SPASHEIATN     | LGDFAIISLYR                | 0.66                                                       | 0.71                                                       | A1AT1_MOUSE | Alpha-1-antitrypsin 1-1;                           |
| DQSPASHEIA     | TNLGDFAIISLYR              | -1.03                                                      | -0.47                                                      | A1AT2_MOUSE | Alpha-1-antitrypsin 1-2;                           |
| DVQETDTSQK     | DQSPASHEIATNLGDFALR        | -2.40                                                      | 0.65                                                       | A1AT4_MOUSE | Alpha-1-antitrypsin 1-4;                           |
| QETDTSQKQDQ    | SPASHEIATNLGDFALR          | -3.06                                                      | 0.45                                                       | A1AT4_MOUSE | Alpha-1-antitrypsin 1-4;                           |
| NAVGPVPTAN     | AALPADPPASVVVGPVVVPR       | -0.22                                                      | -0.76                                                      | FETUA_MOUSE | Alpha-2-HS-glycoprotein;                           |
| VPTANAALPA     | DPPASVVVGPVVVPR            | -0.32                                                      | -0.60                                                      | FETUA_MOUSE | Alpha-2-HS-glycoprotein;                           |
| SDHRTYHDLR     | HAFSPVASVESASGETLHSPK      | -0.45                                                      | -0.38                                                      | FETUA_MOUSE | Alpha-2-HS-glycoprotein;                           |
| RKDAQMVHSN     | ALNEDTQDELGDPR             | -0.89                                                      | -0.40                                                      | AMRP_MOUSE  | Alpha-2-macroglobulin receptor-associated protein; |
| LTSESSRPTR     | DLSSSDLSTASKIVK            | 1.31                                                       | 0.59                                                       | A2M_MOUSE   | Alpha-2-macroglobulin;                             |
| LTSESSRPTR     | DLSSSDLSTASK               | -0.54                                                      | 0.21                                                       | A2M_MOUSE   | Alpha-2-macroglobulin;                             |
| RSTCHNQNSM     | SICEEFSQQADDKGCFR          | 0.55                                                       | 1.46                                                       | A2M_MOUSE   | Alpha-2-macroglobulin;                             |
| RTSTSAVPLN     | FVPLNTNPKEVQEMR            | 0.04                                                       | -0.71                                                      | ADDA_MOUSE  | Alpha-adducin;                                     |
| QDDWGAWQKF     | TASAGIQVVGDDLTVTNPKR       | 0.63                                                       | 0.18                                                       | ENOA_MOUSE  | Alpha-enolase;                                     |
| NRVYREELKR     | DLAKDITSDTSGDFR            | 0.11                                                       | -0.45                                                      | ANXA1_MOUSE | Annexin A1;                                        |
| AALHKAIMVK     | GVDEATIIDILTKR             | 0.90                                                       | 0.91                                                       | ANXA1_MOUSE | Annexin A1;                                        |
| HLEEVVLAML     | KTPAQFDAELR                | 0.77                                                       | 0.77                                                       | ANXA1_MOUSE | Annexin A1;                                        |
| GDHSTPPSAY     | GSVKPYTNFDAER              | -0.09                                                      | -0.60                                                      | ANXA2_MOUSE | Annexin A2;                                        |
| STVHEILCKL     | SLEGDHSTPPSAYGSVKPYTNFDAER | 1.02                                                       | 2.65                                                       | ANXA2_MOUSE | Annexin A2;                                        |
| LCKLSLEGDH     | STPPSAYGSVKPYTNFDAER       | 0.61                                                       | 0.45                                                       | ANXA2_MOUSE | Annexin A2;                                        |
| INRVYKEMYK     | TDLEKDIISDTSGDFR           | 0.49                                                       | -0.58                                                      | ANXA2_MOUSE | Annexin A2;                                        |
| QEINRVYKEM     | YKTLEKDIISDTSGDFR          | 0.43                                                       | 1.03                                                       | ANXA2_MOUSE | Annexin A2;                                        |
| ELKHALKGAG     | TDEKVLTEIISR               | -0.30                                                      | -0.58                                                      | ANXA5_MOUSE | Annexin A5;                                        |
| MA             | TRGTVTDFPGFDGR             | -0.74                                                      | -1.43                                                      | ANXA5_MOUSE | Annexin A5;                                        |
| QLKKAMEGAG     | TDEKTLIEILATR              | -1.74                                                      | 0.52                                                       | ANXA6_MOUSE | Annexin A6;                                        |
| QLQDMGLIDL     | FSPEKSQLPGIVAGGR           | 0.63                                                       | 1.67                                                       | ANT3_MOUSE  | Antithrombin-III;                                  |
| GALGCAICHG     | NPVDDICIAKPR               | -0.36                                                      | 0.06                                                       | ANT3_MOUSE  | Antithrombin-III;                                  |
| PSPGEALHIL     | LDLPCTPPPPAPIPSVR          | 1.66                                                       | 1.90                                                       | AP1G2_MOUSE | AP-1 complex subunit gamma-like 2;                 |
| SGGGLLDVDF     | SDSASAVAPLAPGSEDNFAR       | -0.25                                                      | -0.42                                                      | AP2A2_MOUSE | AP-2 complex subunit alpha-2;                      |
| QSQWVKVDF      | ANVYVDAVKDSGR              | 1.32                                                       | 0.77                                                       | APOA1_MOUSE | Apolipoprotein A-I;                                |

Table S12, Tholen et al.

| Non Prime Site | Prime Site              | Fold change (log <sub>2</sub> ) of ASAPRatio (replicate 1) | Fold change (log <sub>2</sub> ) of ASAPRatio (replicate 2) | Uniprot ID  | Protein Name                                                          |
|----------------|-------------------------|------------------------------------------------------------|------------------------------------------------------------|-------------|-----------------------------------------------------------------------|
| LGQQNLNLL      | ENWDTLGSTVSQLQER        | 2.09                                                       | 3.57                                                       | APOA1_MOUSE | Apolipoprotein A-I;                                                   |
| GPLVEQGRQR     | TANLGAGAAQPLR           | -1.09                                                      | -1.36                                                      | APOE_MOUSE  | Apolipoprotein E;                                                     |
| SYMKIDELSL     | YSVPEGQSKYVEEPR         | -0.01                                                      | -0.47                                                      | APOO_MOUSE  | Apolipoprotein O;                                                     |
| VSGRQQLVEL     | VAEQADLEQAFSPDPDCVDR    | 2.44                                                       | 5.74                                                       | API5_MOUSE  | Apoptosis inhibitor 5;                                                |
| AAPCIYWLPL     | TESQIVQKEAEQAER         | 0.72                                                       | -0.94                                                      | ACINU_MOUSE | Apoptotic chromatin condensation inducer in the nucleus;              |
| ELLSQEFLLL     | TLEQKNAIVENEVR          | 1.95                                                       | 1.32                                                       | ASHWN_MOUSE | Ashwin;                                                               |
| LGGAIDSGAA     | YVLEQASSHIGNSTQAAVR     | 1.36                                                       | 1.66                                                       | ATLA3_MOUSE | Atlantin-3;                                                           |
| QYREVAFAAQ     | FGSDLDAATQQLSR          | 0.72                                                       | -0.34                                                      | ATPA_MOUSE  | ATP synthase subunit alpha, mitochondrial;                            |
| YREVAFAQF      | GSDLDAATQQLSR           | -0.58                                                      | -0.54                                                      | ATPA_MOUSE  | ATP synthase subunit alpha, mitochondrial;                            |
| NLHASNTRLQ     | KTGTAEMSSILEER          | -0.40                                                      | -0.76                                                      | ATPA_MOUSE  | ATP synthase subunit alpha, mitochondrial;                            |
| LIKEGDVVKR     | TGAIVDVPVGEELLGR        | 2.60                                                       | 0.42                                                       | ATPA_MOUSE  | ATP synthase subunit alpha, mitochondrial;                            |
| LIIGDRQTGK     | TSIAIDIINQKR            | -0.34                                                      | 0.49                                                       | ATPA_MOUSE  | ATP synthase subunit alpha, mitochondrial;                            |
| TKFENAFSLH     | VISQHQSLGNIR            | 0.81                                                       | 0.98                                                       | ATPA_MOUSE  | ATP synthase subunit alpha, mitochondrial;                            |
| VQGRDSRLVL     | EVAQHLGESTVR            | 0.54                                                       | 1.75                                                       | ATPB_MOUSE  | ATP synthase subunit beta, mitochondrial;                             |
| TVLSRAIAEL     | GIYPAVDPLDSTSR          | 0.97                                                       | 3.33                                                       | ATPB_MOUSE  | ATP synthase subunit beta, mitochondrial;                             |
| DKIREYKSKR     | QASGGPVDIGPEYQQDLDR     | -1.74                                                      | -2.40                                                      | ATP5J_MOUSE | ATP synthase-coupling factor 6, mitochondrial;                        |
| MKVLQTRGFV     | SDSSDSMDTGAGSIR         | -1.74                                                      | -1.29                                                      | ATIF1_MOUSE | ATPase inhibitor, mitochondrial;                                      |
| LQTRGFVSDS     | SDSMDTGAGSIR            | -0.32                                                      | -0.76                                                      | ATIF1_MOUSE | ATPase inhibitor, mitochondrial;                                      |
| VLQTRGFVSD     | SSDSMDTGAGSIR           | 0.06                                                       | -0.42                                                      | ATIF1_MOUSE | ATPase inhibitor, mitochondrial;                                      |
| ASSREGSPAR     | SGTPVHCPSPIR            | 0.69                                                       | 0.59                                                       | BAG3_MOUSE  | BAG family molecular chaperone regulator 3;                           |
| GRRDSKSPTK     | ATPLPAEGKKNTLR          | -0.20                                                      | -0.92                                                      | E41L2_MOUSE | Band 4.1-like protein 2;                                              |
| EVREAKPALK     | SSVETQPAEEVR            | 0.93                                                       | 0.33                                                       | E41L2_MOUSE | Band 4.1-like protein 2;                                              |
| QVLVQGSSSN     | LPDTSIPGGSTPTVQVTPQLETR | -2.12                                                      | 1.77                                                       | PGBM_MOUSE  | Basement membrane-specific heparan sulfate proteoglycan core protein; |
| RPRHQGVMVG     | MGQKDCYVGDEAQSKR        | 0.99                                                       | 0.51                                                       | ACTBL_MOUSE | Beta-actin-like protein 2;                                            |
| RLAKYNQLMR     | IEEALGDKAVFAGR          | -0.25                                                      | -1.25                                                      | ENOB_MOUSE  | Beta-enolase;                                                         |
| HRSGETEDTF     | IADLVVGLCTGQIKTGAPCR    | -1.40                                                      | -2.40                                                      | ENOB_MOUSE  | Beta-enolase;                                                         |
| LAKYNQLMRI     | EEALGDKAVFAGR           | -5.06                                                      | -2.84                                                      | ENOB_MOUSE  | Beta-enolase;                                                         |
| ENLATAFTIL     | HHPEFTPDQPTER           | 0.89                                                       | -0.52                                                      | TXLNB_MOUSE | Beta-taxilin;                                                         |
| MATRSCVSRG     | SAGSAAAAGPVEAAIR        | -0.12                                                      | -0.01                                                      | BOLA1_MOUSE | Bola-like protein 1;                                                  |
| QPRNWLLFAC     | HVTNEVAQLIQGGR          | -0.27                                                      | 0.71                                                       | BR44L_MOUSE | Brain protein 44-like protein;                                        |
| TIDCDVITLM     | GTPSGTAEPYDGTKAR        | 0.23                                                       | 2.01                                                       | BSDC1_MOUSE | BSD domain-containing protein 1;                                      |
| TGTGTLVLL      | LDVNDNAPIPEPR           | 2.84                                                       | 3.58                                                       | CADH1_MOUSE | Cadherin-1;                                                           |
| YRIWRDTANW     | LEINPETGAIFTR           | -2.00                                                      | -2.56                                                      | CADH1_MOUSE | Cadherin-1;                                                           |
| RTSPVPRQKR     | SIVVSPILIPENQR          | 0.38                                                       | 1.00                                                       | CAD13_MOUSE | Cadherin-13;                                                          |
| SGSLVVEEFM     | SLPELQQNPLVQR           | -0.79                                                      | 1.38                                                       | CANB1_MOUSE | Calcineurin subunit B type 1;                                         |

Table S12, Tholen et al.

| Non Prime Site | Prime Site                | Fold change (log <sub>2</sub> ) of ASAPRatio (replicate 1) | Fold change (log <sub>2</sub> ) of ASAPRatio (replicate 2) | Uniprot ID  | Protein Name                                                                    |
|----------------|---------------------------|------------------------------------------------------------|------------------------------------------------------------|-------------|---------------------------------------------------------------------------------|
| GGGGTAMRIL     | GGVISAISEAAAQYNPEPPPPR    | 1.51                                                       | 2.40                                                       | CPNS1_MOUSE | Calpain small subunit 1;                                                        |
| RILGGVISAI     | SEAAAQYNPEPPPPR           | 0.01                                                       | 0.86                                                       | CPNS1_MOUSE | Calpain small subunit 1;                                                        |
| VVLDPMYSTY     | LEALGIKEGTIPPEYR          | -0.45                                                      | -0.56                                                      | ICAL_MOUSE  | Calpastatin;                                                                    |
| SIRSAPPKLA     | SLKGVVPEDAVETLAGSLGTR     | 0.93                                                       | 0.84                                                       | ICAL_MOUSE  | Calpastatin;                                                                    |
| TISLQMGTNK     | GASQAGMLAPGTR             | 0.95                                                       | 0.10                                                       | CNN3_MOUSE  | Calponin-3;                                                                     |
| LGTPRLGVQG     | EDGLDFPEYDGVDR            | -0.32                                                      | -0.94                                                      | CASQ1_MOUSE | Calsequestrin-1;                                                                |
| ATPQISNLTK     | TASESISNLSEAGSVKKGGER     | 0.25                                                       | 0.10                                                       | CLIP1_MOUSE | CAP-Gly domain-containing linker protein 1;                                     |
| HDPQLPWSA      | SYDPGSAKTILNNGKTCR        | -0.71                                                      | -0.94                                                      | CAH3_MOUSE  | Carbonic anhydrase 3;                                                           |
| IKTKGKEAPF     | THFDPSCLPACR              | -0.32                                                      | -0.07                                                      | CAH3_MOUSE  | Carbonic anhydrase 3;                                                           |
| KLPGRVAFGE     | DIDLPEYDFAR               | 3.16                                                       | 2.59                                                       | CATB_MOUSE  | Cathepsin B;                                                                    |
| PKLPGRVAFG     | EDIDLPEYDFAR              | 2.11                                                       | 2.66                                                       | CATB_MOUSE  | Cathepsin B;                                                                    |
| GGPKLPGRVA     | FGEDIDLPEYDFAR            | 1.29                                                       | 1.37                                                       | CATB_MOUSE  | Cathepsin B;                                                                    |
| GPKLPGRVAF     | GEDIDLPEYDFAR             | 0.32                                                       | 2.33                                                       | CATB_MOUSE  | Cathepsin B;                                                                    |
| AFRPMEVANF     | YYEPDCLAYGAKAAR           | -0.64                                                      | -0.94                                                      | CEBPB_MOUSE | CCAAT/enhancer-binding protein beta;                                            |
| LSIFVGSFCFS    | ESPTKVQLVGGGHR            | 0.16                                                       | -0.94                                                      | CD5L_MOUSE  | CD5 antigen-like;                                                               |
| DFRHTMHVGR     | AGDAFGDTSFLTSLKAR         | 0.49                                                       | 1.01                                                       | BORG4_MOUSE | Cdc42 effector protein 4;                                                       |
| M              | VGGEASAAVEKLVSGVR         | -0.03                                                      | 0.73                                                       | C2AIL_MOUSE | CDKN2AIP N-terminal-like protein;                                               |
| KDCKEPKRER     | EQCCYNCGKPGHLAR           | -0.36                                                      | 0.84                                                       | CNBP_MOUSE  | Cellular nucleic acid-binding protein;                                          |
| RSRGRGFQFV     | SSSLPDICYR                | 2.00                                                       | 1.92                                                       | CNBP_MOUSE  | Cellular nucleic acid-binding protein;                                          |
| MSVFGKLF       | GAGGGKAGKGGPTPQEAIQR      | 2.33                                                       | 0.85                                                       | CHM4B_MOUSE | Charged multivesicular body protein 4b;                                         |
| SCLVLAARHA     | SASSTNLKDVLSNLIPEQAR      | 0.14                                                       | -0.42                                                      | CISY_MOUSE  | Citrate synthase, mitochondrial;                                                |
| LIWDNGMVLG     | EQEVSDNELQELSTQGSR        | 2.10                                                       | 1.12                                                       | CLUS_MOUSE  | Clusterin;                                                                      |
| DNGMVLGEQE     | VSDNELQELSTQGSR           | -0.62                                                      | 1.31                                                       | CLUS_MOUSE  | Clusterin;                                                                      |
| GCLVLPGYEA     | LKGPKEISGFEGDTVSLR        | -0.45                                                      | -0.67                                                      | CLM9_MOUSE  | CMRF35-like molecule 9;                                                         |
| APPWKDSKKF     | KDAPDGPVTVLTVDGR          | -6.64                                                      | -6.64                                                      | FA12_MOUSE  | Coagulation factor XII;                                                         |
| NVNLAQIRTF     | TEMDSHEEKVFR              | -1.18                                                      | -0.94                                                      | COPD_MOUSE  | Coatomer subunit delta;                                                         |
| MRAAPRRAPA     | AQPPAAAAPSAVGSPPAAAPR     | -1.43                                                      | -1.84                                                      | CHCH2_MOUSE | Coiled-coil-helix-coiled-coil-helix domain-containing protein 2, mitochondrial; |
| MRAAPR         | RAPAAQPPAAAAPSAVGSPPAAAPR | 1.96                                                       | 2.08                                                       | CHCH2_MOUSE | Coiled-coil-helix-coiled-coil-helix domain-containing protein 2, mitochondrial; |
| GTASTRRVTF     | EADENENITVVKGIR           | 0.53                                                       | -0.52                                                      | CHCH3_MOUSE | Coiled-coil-helix-coiled-coil-helix domain-containing protein 3, mitochondrial; |
| SPSGSKSQRY     | SSVYGASVDEDLKR            | -0.17                                                      | -1.74                                                      | CHCH3_MOUSE | Coiled-coil-helix-coiled-coil-helix domain-containing protein 3, mitochondrial; |
| PEEYVSPNSE     | DVGVEGPKGDPGPQGPR         | -0.49                                                      | 0.33                                                       | CO1A1_MOUSE | Collagen alpha-1(I) chain;                                                      |
| GATALLTHGQ     | EDIPEVSCIHNGLR            | -0.94                                                      | -1.84                                                      | CO1A1_MOUSE | Collagen alpha-1(I) chain;                                                      |
| GPAGKNGDRG     | ETGPAGPAGPIGPAGAR         | 0.26                                                       | -0.15                                                      | CO1A1_MOUSE | Collagen alpha-1(I) chain;                                                      |

Table S12, Tholen et al.

| Non Prime Site | Prime Site                 | Fold change (log <sub>2</sub> )<br>of ASAPRatio<br>(replicate 1) | Fold change (log <sub>2</sub> ) of<br>ASAPRatio<br>(replicate 2) | Uniprot ID  | Protein Name                        |
|----------------|----------------------------|------------------------------------------------------------------|------------------------------------------------------------------|-------------|-------------------------------------|
| VGPAGKNGDR     | GETGPAGPAGPIGPAGAR         | 1.76                                                             | 0.12                                                             | CO1A1_MOUSE | Collagen alpha-1(I) chain;          |
| LGGNFASQMS     | YGYDEKSAGVSVPGPMGPGSGPR    | -3.32                                                            | -5.64                                                            | CO1A1_MOUSE | Collagen alpha-1(I) chain;          |
| GPVGPAGKNG     | DRGETGPAGPAGPIGPAGAR       | -2.64                                                            | -2.00                                                            | CO1A1_MOUSE | Collagen alpha-1(I) chain;          |
| PGLGGNFASQ     | MSYGYDEKSAGVSVPGPMGPGSGPR  | -3.18                                                            | -2.84                                                            | CO1A1_MOUSE | Collagen alpha-1(I) chain;          |
| SQMSYGYDEK     | SAGVSVPGPMGPGSGPR          | -2.74                                                            | -3.32                                                            | CO1A1_MOUSE | Collagen alpha-1(I) chain;          |
| PGPVGPAGKN     | GDRGETGPAGPAGPIGPAGAR      | -2.00                                                            | -2.84                                                            | CO1A1_MOUSE | Collagen alpha-1(I) chain;          |
| GGNFASQMSY     | GYDEKSAGVSVPGPMGPGSGPR     | -1.89                                                            | -2.64                                                            | CO1A1_MOUSE | Collagen alpha-1(I) chain;          |
| PVGPAGKNGD     | RGETGPAGPAGPIGPAGAR        | -2.64                                                            | -2.25                                                            | CO1A1_MOUSE | Collagen alpha-1(I) chain;          |
| NFASQMSYGY     | DEKSAGVSVPGPMGPGSGPR       | -3.06                                                            | -3.06                                                            | CO1A1_MOUSE | Collagen alpha-1(I) chain;          |
| GLGGNFASQM     | SYGYDEKSAGVSVPGPMGPGSGPR   | -0.74                                                            | -2.25                                                            | CO1A1_MOUSE | Collagen alpha-1(I) chain;          |
| LLHPTLILAQ     | QSNVDELGCShLGQSYESR        | -1.74                                                            | -3.64                                                            | CO3A1_MOUSE | Collagen alpha-1(III) chain;        |
| GDKGDQGLAG     | FPGSPGEKGEKGSAGTPGMPGSPGPR | 0.86                                                             | 1.75                                                             | CO4A1_MOUSE | Collagen alpha-1(IV) chain;         |
| GLPGSMGPPG     | TPSVDHGFLVTR               | 0.24                                                             | 0.85                                                             | CO4A1_MOUSE | Collagen alpha-1(IV) chain;         |
| SPSEIGPGMP     | ANQDTIFEGIGGPR             | -3.47                                                            | -2.56                                                            | CO5A1_MOUSE | Collagen alpha-1(V) chain;          |
| PPLNPILSAN     | YERPVLHLVALNTPVAGDIR       | 1.93                                                             | 1.41                                                             | COFA1_MOUSE | Collagen alpha-1(XV) chain;         |
| CPPETSKSRR     | DTQSNELIEINPQTEGKVYTR      | 0.66                                                             | -0.22                                                            | COGA1_MOUSE | Collagen alpha-1(XVI) chain;        |
| AAQYSDKGV      | SGPGPMGLMGPR               | -2.74                                                            | -1.84                                                            | CO1A2_MOUSE | Collagen alpha-2(I) chain;          |
| EGPVGLPGID     | GRPGPIGPAGPR               | -2.47                                                            | -2.47                                                            | CO1A2_MOUSE | Collagen alpha-2(I) chain;          |
| GNFAAQYSDK     | GVSSGPGPMGLMGPR            | -1.74                                                            | -2.32                                                            | CO1A2_MOUSE | Collagen alpha-2(I) chain;          |
| GLTGNFAAQY     | SDKGVSSGPGPMGLMGPR         | -1.52                                                            | -2.32                                                            | CO1A2_MOUSE | Collagen alpha-2(I) chain;          |
| YSQLQGLPGL     | AGLHGDQGAPGPVGPAGPR        | -2.40                                                            | -2.25                                                            | CO1A2_MOUSE | Collagen alpha-2(I) chain;          |
| PGLTGNFAAQ     | YSDKGVSSGPGPMGLMGPR        | -2.40                                                            | -4.32                                                            | CO1A2_MOUSE | Collagen alpha-2(I) chain;          |
| PSGPVKGKDR     | SGQPGVPAGVR                | -0.17                                                            | -2.40                                                            | CO1A2_MOUSE | Collagen alpha-2(I) chain;          |
| RRDHVLGLAR     | SELEEDIPEEDIISR            | -0.89                                                            | 1.74                                                             | CO3_MOUSE   | Complement C3;                      |
| EKLQGGVQK      | VDVPAADLSQVPTDSETR         | 0.81                                                             | 1.05                                                             | CO3_MOUSE   | Complement C3;                      |
| FEGRRSRRRR     | EAPKVVEEQESR               | -0.52                                                            | -0.23                                                            | CO4B_MOUSE  | Complement C4-B;                    |
| NLDPLNNLGR     | TLEIPGSSDPNIVPDGDFSSLVR    | 0.52                                                             | -0.67                                                            | CO4B_MOUSE  | Complement C4-B;                    |
| AAVCAQPRGR     | ILGGQEAAAHAR               | -1.00                                                            | 0.33                                                             | CFAD_MOUSE  | Complement factor D;                |
| GLILPGILAK     | SIGTLDPCCKDPTTR            | 1.76                                                             | 2.00                                                             | CDSN_MOUSE  | Corneodesmosin;                     |
| EKSKLDWESF     | KEEEGIGEELAIHNR            | -0.18                                                            | -0.36                                                            | CFDP1_MOUSE | Craniofacial development protein 1; |
| PDSLKHNNHM     | AKVLTPLDLYNKLR             | 0.53                                                             | 0.04                                                             | KCRM_MOUSE  | Creatine kinase M-type;             |
| PTDKHKTDLN     | HENLKGDDLDPNYVLSR          | -1.25                                                            | -1.74                                                            | KCRM_MOUSE  | Creatine kinase M-type;             |
| HPFMWNEHLG     | YVLTCPNLGTGLR              | -2.56                                                            | -2.74                                                            | KCRM_MOUSE  | Creatine kinase M-type;             |
| KKAGHPFMWN     | EHLGYVLTCPNLGTGLR          | -0.97                                                            | -2.47                                                            | KCRM_MOUSE  | Creatine kinase M-type;             |
| AGDEESYTVF     | KDLFDPIIQR                 | 0.31                                                             | -3.18                                                            | KCRM_MOUSE  | Creatine kinase M-type;             |
| WPDARGIWHN     | DNKSLVWVNEEDHLR            | -1.32                                                            | -3.84                                                            | KCRM_MOUSE  | Creatine kinase M-type;             |
| LQKRGTTGGVD    | TAAVGAVFDISNADR            | -0.09                                                            | -1.32                                                            | KCRM_MOUSE  | Creatine kinase M-type;             |

Table S12, Tholen et al.

| Non Prime Site | Prime Site                | Fold change (log <sub>2</sub> )<br>of ASAPRatio<br>(replicate 1) | Fold change (log <sub>2</sub> ) of<br>ASAPRatio<br>(replicate 2) | Uniprot ID  | Protein Name                                                                                                 |
|----------------|---------------------------|------------------------------------------------------------------|------------------------------------------------------------------|-------------|--------------------------------------------------------------------------------------------------------------|
| GGYKPTDKHK     | TDLNHENLKGDDLDPNYVLSR     | -0.52                                                            | -0.54                                                            | KCRM_MOUSE  | Creatine kinase M-type;                                                                                      |
| LTRLRLQKRG     | TGGVDTAAVGAVFDISNADR      | 0.20                                                             | 0.98                                                             | KCRM_MOUSE  | Creatine kinase M-type;                                                                                      |
| GCVAGDEESY     | TVFKDLFDPIIQDR            | 0.04                                                             | -2.06                                                            | KCRM_MOUSE  | Creatine kinase M-type;                                                                                      |
| KHKTDLNHEN     | LKGGDDLDPNYVLSR           | -1.12                                                            | -1.94                                                            | KCRM_MOUSE  | Creatine kinase M-type;                                                                                      |
| GIWHNDNKSF     | LVVWNEEDHLR               | -1.56                                                            | -1.89                                                            | KCRM_MOUSE  | Creatine kinase M-type;                                                                                      |
| AGDEESYEVF     | ADLFDPVIKLR               | -2.56                                                            | -3.84                                                            | KCRS_MOUSE  | Creatine kinase S-type, mitochondrial;                                                                       |
| KRGTGGVDTA     | ATGSVFDISNDR              | 0.71                                                             | 3.43                                                             | KCRU_MOUSE  | Creatine kinase U-type, mitochondrial;                                                                       |
| QQLIDHFLF      | DKPVSPLLTAAGMAR           | 0.21                                                             | 0.16                                                             | KCRU_MOUSE  | Creatine kinase U-type, mitochondrial;                                                                       |
| GVKVLAFLSL     | AEVGQVAGPGPQR             | 2.08                                                             | 1.01                                                             | CAND2_MOUSE | Cullin-associated NEDD8-dissociated protein 2;                                                               |
| GVNIGGAGSY     | IYEKPQTEAPQVTGPIEVPVVR    | -1.94                                                            | -0.43                                                            | CRIP2_MOUSE | Cysteine-rich protein 2;                                                                                     |
| AGSYIYEKPQ     | TEAPQVTGPIEVPVVR          | 0.04                                                             | 0.93                                                             | CRIP2_MOUSE | Cysteine-rich protein 2;                                                                                     |
| VNIGGAGSYI     | YEKPQTEAPQVTGPIEVPVVR     | 1.44                                                             | 2.35                                                             | CRIP2_MOUSE | Cysteine-rich protein 2;                                                                                     |
| EDERKMLTGS     | GDPKEEEEEELVDPLTTVR       | -0.20                                                            | -0.27                                                            | QCR6_MOUSE  | Cytochrome b-c1 complex subunit 6, mitochondrial;                                                            |
| GLNVPASVRF     | SHTDVKVPDFSDYR            | -1.36                                                            | -0.76                                                            | UCRI_MOUSE  | Cytochrome b-c1 complex subunit Rieske, mitochondrial;                                                       |
| RAISTSVCLR     | AHGSVVKSEDYAFPTYADRR      | -0.81                                                            | -0.76                                                            | COX41_MOUSE | Cytochrome c oxidase subunit 4 isoform 1, mitochondrial;                                                     |
| RAISTSVCLR     | AHGSVVKSEDYAFPTYADR       | -1.09                                                            | 0.03                                                             | COX41_MOUSE | Cytochrome c oxidase subunit 4 isoform 1, mitochondrial;                                                     |
| EEFDARWVTY     | FNKPIDAWELR               | -0.97                                                            | -1.22                                                            | COX5A_MOUSE | Cytochrome c oxidase subunit 5A, mitochondrial;                                                              |
| ARGAAVTRSM     | ASGGGVPTDEEQATGLER        | -0.22                                                            | 0.70                                                             | COX5B_MOUSE | Cytochrome c oxidase subunit 5B, mitochondrial;                                                              |
| HTVEKGGKHK     | TGPNLHGLFGR               | -0.42                                                            | 0.25                                                             | CYC_MOUSE   | Cytochrome c, somatic;                                                                                       |
| AVALHSAVSA     | SDLELHPPSPWWSHR           | -0.67                                                            | -0.15                                                            | CY1_MOUSE   | Cytochrome c1, heme protein, mitochondrial;                                                                  |
| GILHENFQTL     | KVEDNFEDIITKPPVR          | 1.36                                                             | -0.03                                                            | DC1L1_MOUSE | Cytoplasmic dynein 1 light intermediate chain 1;                                                             |
| YSPLAHRAYS     | VVAGGPEVTLTPER            | -1.94                                                            | 0.04                                                             | D2HHD_MOUSE | D-2-hydroxyglutarate dehydrogenase, mitochondrial;                                                           |
| LLGSPRRSY      | SLPPHQKVLPLSLPTMQAGTIAR   | 1.12                                                             | -0.20                                                            | ODP2_MOUSE  | Dihydrolypoyllysine-residue acetyltransferase component<br>of pyruvate dehydrogenase complex, mitochondrial; |
| LPLLARLSAG     | DCPCSEAAALCQPIR           | -0.81                                                            | 0.50                                                             | DIAC_MOUSE  | Di-N-acetylchitobiase;                                                                                       |
| APMTDEIQQQ     | ILNLPESWDWR               | 1.61                                                             | 1.05                                                             | CATC_MOUSE  | Dipeptidyl peptidase 1;                                                                                      |
| SLPSTAVTSE     | TLPGSLPPVEKYR             | -0.62                                                            | 0.62                                                             | DLG1_MOUSE  | Disks large homolog 1;                                                                                       |
| SVGDGETVEF     | DVVEGEKGAAANVTGPDGVPVEGSR | -3.06                                                            | -1.79                                                            | DBPA_MOUSE  | DNA-binding protein A;                                                                                       |
| GRYTDATSKY     | ESVMKTEPSVAEYTVR          | -0.43                                                            | -0.71                                                            | DNJC3_MOUSE | DnaJ homolog subfamily C member 3;                                                                           |
| GALAPTPGSA     | SSEAPPLVNEDVKR            | -1.36                                                            | -0.49                                                            | RPN1_MOUSE  | Dolichyl-diphosphooligosaccharide--protein<br>glycosyltransferase subunit 1;                                 |
| PREIFKQKER     | AMSTTSVTSSQPGLR           | 1.70                                                             | 2.45                                                             | DBNL_MOUSE  | Drebrin-like protein;                                                                                        |
| FISNPNSIIL     | AVTAANTDMATSEALKISR       | 0.30                                                             | 1.24                                                             | DNM1L_MOUSE | Dynamin-1-like protein;                                                                                      |
| FIHHELLAYL     | YSSADQSSLMEESAQAQR        | 1.38                                                             | 2.65                                                             | DYN2_MOUSE  | Dynamin-2;                                                                                                   |
| VTLINFWPVD     | SAPASSPQLSHDDTHSR         | 0.00                                                             | -0.84                                                            | DMD_MOUSE   | Dystrophin;                                                                                                  |
| LQAQRAFTR      | RQJSEVDVGPDR              | -0.84                                                            | -0.15                                                            | NEDD4_MOUSE | E3 ubiquitin-protein ligase NEDD4;                                                                           |
| FQLRSICYLL     | GQPEPLAPGTTLPAPDR         | 0.52                                                             | 0.00                                                             | RN123_MOUSE | E3 ubiquitin-protein ligase RNF123;                                                                          |

Table S12, Tholen et al.

| Non Prime Site | Prime Site               | Fold change (log <sub>2</sub> ) | Fold change (log <sub>2</sub> ) of | Uniprot ID  | Protein Name                                   |
|----------------|--------------------------|---------------------------------|------------------------------------|-------------|------------------------------------------------|
|                |                          | of ASAPRatio<br>(replicate 1)   | ASAPRatio<br>(replicate 2)         |             |                                                |
| VLMDIFQVKA     | EVLDMAENAFDDEYLKCKSR     | -0.43                           | -2.56                              | NAR3_MOUSE  | Ecto-ADP-ribosyltransferase 3;                 |
| TEGVKGAKNF     | FEAKVQAINVSSR            | 0.21                            | 0.49                               | EFHD2_MOUSE | EF-hand domain-containing protein D2;          |
| GPEPTDCFV      | AVMHGETEGTVPGNALVVDPEKPF | 3.41                            | 2.14                               | EHD2_MOUSE  | EH domain-containing protein 2;                |
| IILLFDAHKL     | EISDEFSEAIGALR           | -1.09                           | 0.04                               | EHD2_MOUSE  | EH domain-containing protein 2;                |
| QDIAKLMPLL     | RQEELESVEAGVQGGAFEGTR    | 4.63                            | 3.39                               | EHD2_MOUSE  | EH domain-containing protein 2;                |
| QLPNQVLESI     | SIIDTPGILSGAKQR          | -0.17                           | 0.65                               | EHD2_MOUSE  | EH domain-containing protein 2;                |
| QADCAVLIVA     | AGVGEFEAGISKNGQTR        | -1.89                           | -1.22                              | EF1A1_MOUSE | Elongation factor 1-alpha 1;                   |
| DGSASGTLL      | EALDCILPPTTRPTDKPLR      | -1.79                           | -1.56                              | EF1A1_MOUSE | Elongation factor 1-alpha 1;                   |
| LWKFETSKYY     | VTIIDAPGHR               | -5.06                           | -4.32                              | EF1A1_MOUSE | Elongation factor 1-alpha 1;                   |
| ADCAVLIVAA     | GVGEFEAGISKNGQTR         | -1.25                           | -1.40                              | EF1A1_MOUSE | Elongation factor 1-alpha 1;                   |
| LGRFAVRDMR     | QTVAVGVKAVDKK            | 1.11                            | 1.76                               | EF1A1_MOUSE | Elongation factor 1-alpha 1;                   |
| ASGTTLEAL      | DCILPPTTRPTDKPLR         | -2.25                           | -2.12                              | EF1A1_MOUSE | Elongation factor 1-alpha 1;                   |
| KDGSASGTLL     | LEALDCILPPTTRPTDKPLR     | -2.74                           | -2.64                              | EF1A1_MOUSE | Elongation factor 1-alpha 1;                   |
| EGNASGVSL      | EALDTILPPTTRPTDKPLR      | -4.32                           | -3.64                              | EF1A2_MOUSE | Elongation factor 1-alpha 2;                   |
| KEGNASGVSL     | LEALDTILPPTTRPTDKPLR     | -3.84                           | -2.56                              | EF1A2_MOUSE | Elongation factor 1-alpha 2;                   |
| AGELHLEICL     | KDLEEDHACIPIKSDPVVSYR    | -0.01                           | 0.32                               | EF2_MOUSE   | Elongation factor 2;                           |
| AHVDHGKSTL     | TDSLVCAGIISAR            | -1.00                           | 0.10                               | EF2_MOUSE   | Elongation factor 2;                           |
| LGVKSVQKLL     | DAVDYIPVPTTR             | 3.76                            | 1.83                               | EFTU_MOUSE  | Elongation factor Tu, mitochondrial;           |
| LLALAGLLQA     | RLLLPQQAGFGECDR          | -2.64                           | -2.06                              | ENDD1_MOUSE | Endonuclease domain-containing 1 protein;      |
| VLLTFGFVRA     | DDEVDVDGTVEEDLGKSR       | 2.25                            | 1.85                               | ENPL_MOUSE  | Endoplasmic reticulum chaperone 78 kDa;        |
| HPTSPRPPG      | GSIIIVYPKEIR             | 0.86                            | 0.54                               | MA2B2_MOUSE | Epididymis-specific alpha-mannosidase;         |
| RQYFYRITD      | QEYIYSIHTR               | -1.15                           | -0.23                              | MA2B2_MOUSE | Epididymis-specific alpha-mannosidase;         |
| SSQPNLSTSY     | SEQEYKAGGSPASYHGSTSPR    | -0.29                           | -0.38                              | EPN2_MOUSE  | Epsin-2;                                       |
| RYLSPKYIKM     | FVLDEADEMLSR             | 0.61                            | -0.25                              | IF4A1_MOUSE | Eukaryotic translation initiation factor 4A-1; |
| IQNLHSFDPF     | ADASKGDDLLPAGTEDIHIR     | 0.67                            | 0.86                               | EIF1_MOUSE  | Eukaryotic translation initiation factor 1;    |
| ASASTSQSSR     | AASIFGGAKPVDTAAR         | 1.37                            | 3.01                               | IF4B_MOUSE  | Eukaryotic translation initiation factor 4B;   |
| EEGPRKDG       | KVDVVGATQGGAGSCSR        | 1.52                            | 0.77                               | IF4B_MOUSE  | Eukaryotic translation initiation factor 4B;   |
| ASTSQSSRAA     | SIFGGAKPVDTAAR           | -1.18                           | -0.81                              | IF4B_MOUSE  | Eukaryotic translation initiation factor 4B;   |
| QRRLQLKPR      | TVATPLNQVANPNSAIFGGARPR  | 1.77                            | 1.97                               | IF4H_MOUSE  | Eukaryotic translation initiation factor 4H;   |
| QRRLQLKPR      | TVATPLNQVANPNSAIFGGAR    | 1.18                            | 2.67                               | IF4H_MOUSE  | Eukaryotic translation initiation factor 4H;   |
| NIKRNDFQLI     | GIQDGYLSLLQDSGEVR        | -0.18                           | -1.64                              | IF5A1_MOUSE | Eukaryotic translation initiation factor 5A-1; |
| FQLIGIQDGY     | LSLLQDSGEVR              | -2.84                           | -2.25                              | IF5A1_MOUSE | Eukaryotic translation initiation factor 5A-1; |
| GTDIFTGKYY     | EDICPSTHMDVNPNIKR        | -1.47                           | -2.06                              | IF5A1_MOUSE | Eukaryotic translation initiation factor 5A-1; |
| SCLDHVISYY     | HVASDTEKIIR              | 0.77                            | -0.14                              | EXOC7_MOUSE | Exocyst complex component 7;                   |
| EKVIVPNMEF     | RAADEEAFEDNSEEYIR        | 4.27                            | 4.01                               | XPO2_MOUSE  | Exportin-2;                                    |
| TFKNYIKRNW     | RIVEDEPNKICEADR          | 1.58                            | 1.28                               | XPO2_MOUSE  | Exportin-2;                                    |
| ACGSVTMSNP     | GESSFDLADR               | -0.71                           | 0.37                               | SODE_MOUSE  | Extracellular superoxide dismutase [Cu-Zn];    |



Table S12, Tholen et al.

| Non Prime Site | Prime Site              | Fold change (log <sub>2</sub> ) of ASAPRatio (replicate 1) | Fold change (log <sub>2</sub> ) of ASAPRatio (replicate 2) | Uniprot ID  | Protein Name                                |
|----------------|-------------------------|------------------------------------------------------------|------------------------------------------------------------|-------------|---------------------------------------------|
| LLAACGSVTM     | SNPGESSFDLADRLDPVEKIDR  | 0.94                                                       | -0.01                                                      | SODE_MOUSE  | Extracellular superoxide dismutase [Cu-Zn]; |
| QDEGAEPMGY     | SAELSSEGILDDRNEEKR      | 0.64                                                       | -0.32                                                      | EZRI_MOUSE  | Ezrin;                                      |
| QDEGAEPMGY     | SAELSSEGILDDR           | 0.03                                                       | -0.49                                                      | EZRI_MOUSE  | Ezrin;                                      |
| EQLAAELAAY     | TAKIALLEEAR             | -0.94                                                      | -1.56                                                      | EZRI_MOUSE  | Ezrin;                                      |
| GKSTTIKRKR     | DGDKLVVECVMKGVSTR       | 3.05                                                       | 0.00                                                       | FABP4_MOUSE | Fatty acid-binding protein, adipocyte;      |
| TVKTTVFSCN     | LGEKFDETTADGR           | -6.64                                                      | -6.64                                                      | FABP5_MOUSE | Fatty acid-binding protein, epidermal;      |
| GRKTETVCTF     | QDGALVQHQQWDGKESTITR    | 1.54                                                       | 0.51                                                       | FABP5_MOUSE | Fatty acid-binding protein, epidermal;      |
| TESTVKTTFV     | SCNLGKFEDETTADGR        | 1.56                                                       | 2.82                                                       | FABP5_MOUSE | Fatty acid-binding protein, epidermal;      |
| ADGRKTETVC     | TFQDGALVQHQQWDGKESTITR  | 1.93                                                       | 3.25                                                       | FABP5_MOUSE | Fatty acid-binding protein, epidermal;      |
| ITVKTESTVK     | TTVFSCNLGKFEDETTADGR    | 2.59                                                       | 2.41                                                       | FABP5_MOUSE | Fatty acid-binding protein, epidermal;      |
| NWYKMGLQVL     | ATIEKIPFESAFR           | 0.91                                                       | 2.81                                                       | FACR2_MOUSE | Fatty acyl-CoA reductase 2;                 |
| KMGLQVLATI     | EKIPFESAFR              | 0.98                                                       | 2.07                                                       | FACR2_MOUSE | Fatty acyl-CoA reductase 2;                 |
| VAGPQPAQTG     | APQGSGLGEYLFER          | 1.01                                                       | 1.53                                                       | FRIL1_MOUSE | Ferritin light chain 1;                     |
| RVAGPQPAQT     | GAPQGSGLGEYLFER         | 2.25                                                       | 1.95                                                       | FRIL1_MOUSE | Ferritin light chain 1;                     |
| RGQSSANRR      | AGSSSGSGVQASAGGLAADASR  | 0.48                                                       | 0.65                                                       | FILA_MOUSE  | Filaggrin;                                  |
| PRQPSPSQSS     | DSQVHSGVQVEGR           | 0.12                                                       | 0.87                                                       | FILA_MOUSE  | Filaggrin;                                  |
| QASDSEGHSD     | FSEGQAVGAHR             | 3.51                                                       | 3.45                                                       | FILA_MOUSE  | Filaggrin;                                  |
| SQASDSEGHS     | DFSEGQAVGAHR            | -1.94                                                      | -2.25                                                      | FILA_MOUSE  | Filaggrin;                                  |
| RRGQSSANR      | RAGSSSGSGVQASAGGLAADASR | -1.03                                                      | -0.23                                                      | FILA_MOUSE  | Filaggrin;                                  |
| ESQASDSEGH     | SDFSEGQAVGAHR           | -0.30                                                      | -0.20                                                      | FILA_MOUSE  | Filaggrin;                                  |
| RPRQPSPSQS     | SDSQVHSGVQVEGR          | -0.03                                                      | 1.54                                                       | FILA_MOUSE  | Filaggrin;                                  |
| RRDRPRQPSP     | SQSSDSQVHSGVQVEGR       | 2.19                                                       | 2.13                                                       | FILA_MOUSE  | Filaggrin;                                  |
| DRPRQPSPSQ     | SSDSQVHSGVQVEGR         | 0.60                                                       | 0.94                                                       | FILA_MOUSE  | Filaggrin;                                  |
| SQSGSRSRSP     | RSPVHPESSEGEHSVVPQR     | -1.56                                                      | 0.40                                                       | FILA2_MOUSE | Filaggrin-2;                                |
| QSGSRSRSPR     | SPVHPESSEGEHSVVPQR      | -1.74                                                      | -0.30                                                      | FILA2_MOUSE | Filaggrin-2;                                |
| SPRRSPVHPE     | SSEGEHSVVPQR            | 0.06                                                       | 0.82                                                       | FILA2_MOUSE | Filaggrin-2;                                |
| GSGRSRSPRSP    | VHPESSEGEHSVVPQR        | -0.64                                                      | 0.68                                                       | FILA2_MOUSE | Filaggrin-2;                                |
| SPRRSQVHPE     | YSEGEAHSEVSQR           | -0.14                                                      | -0.49                                                      | FILA2_MOUSE | Filaggrin-2;                                |
| SVCVVHLRNL     | GTLDNPSLDETAYER         | -0.14                                                      | 0.14                                                       | FRDA_MOUSE  | Frataxin, mitochondrial;                    |
| KGVVPLAGTN     | GETTTQGLDGLSER          | -0.97                                                      | -0.92                                                      | ALDOA_MOUSE | Fructose-bisphosphate aldolase A;           |
| IAHRIVAPGK     | GILAADESTGSIKR          | -0.17                                                      | -0.38                                                      | ALDOA_MOUSE | Fructose-bisphosphate aldolase A;           |
| KKELSDIAHR     | IVAPGKGILAADESTGSIKR    | 0.72                                                       | 1.26                                                       | ALDOA_MOUSE | Fructose-bisphosphate aldolase A;           |
| DESTGSIKR      | LQSIGTENTEENRR          | 2.72                                                       | 1.77                                                       | ALDOA_MOUSE | Fructose-bisphosphate aldolase A;           |
| TPGHACTQKF     | SNEEIAMATVTALR          | -1.32                                                      | -1.69                                                      | ALDOA_MOUSE | Fructose-bisphosphate aldolase A;           |
| VDKGVVPLAG     | TNGETTTQGLDGLSER        | -1.25                                                      | 0.60                                                       | ALDOA_MOUSE | Fructose-bisphosphate aldolase A;           |
| WRCVLKIGEH     | TPSALAIMENANVLAR        | 0.12                                                       | 0.08                                                       | ALDOA_MOUSE | Fructose-bisphosphate aldolase A;           |
| PNMVTDPGHAC    | TQKFSNEEIAMATVTALR      | 0.80                                                       | 0.18                                                       | ALDOA_MOUSE | Fructose-bisphosphate aldolase A;           |

Table S12, Tholen et al.

| Non Prime Site | Prime Site             | Fold change (log <sub>2</sub> )<br>of ASAPRatio<br>(replicate 1) | Fold change (log <sub>2</sub> ) of<br>ASAPRatio<br>(replicate 2) | Uniprot ID  | Protein Name                                                                            |
|----------------|------------------------|------------------------------------------------------------------|------------------------------------------------------------------|-------------|-----------------------------------------------------------------------------------------|
| PRFNAHGDN      | TIVCNTKEDGTWGTEHR      | -0.20                                                            | 0.25                                                             | LEG1_MOUSE  | Galectin-1;                                                                             |
| AGRFHVNLCC     | GEEQGADAALHFNPR        | 0.26                                                             | 1.71                                                             | LEG7_MOUSE  | Galectin-7;                                                                             |
| PDQAGRFBVN     | LLCGEEQGADAALHFNPR     | 0.85                                                             | 0.52                                                             | LEG7_MOUSE  | Galectin-7;                                                                             |
| DDGHLNNSLG     | SPVQADVYFPR            | 0.00                                                             | 0.04                                                             | LEGLA_MOUSE | Galectin-related protein A;                                                             |
| M              | VVEHPEFLKAGKEPGLQIWR   | 0.26                                                             | 0.70                                                             | GELS_MOUSE  | Gelsolin;                                                                               |
| M              | GLLSQGSPLSWEETQR       | -0.03                                                            | -0.04                                                            | GSH1_MOUSE  | Glutamate--cysteine ligase catalytic subunit;                                           |
| LLWAAACAQS     | EQDFYDFKAVNIR          | -0.62                                                            | -0.40                                                            | GPX7_MOUSE  | Glutathione peroxidase 7;<br>Glyceraldehyde-3-phosphate dehydrogenase, testis-specific; |
| NGKLTGMAFR     | VPTPNVSVVDLTCR         | 2.71                                                             | 0.86                                                             | G3PT_MOUSE  | Glyceraldehyde-3-phosphate dehydrogenase;                                               |
| IVEGLMTTVH     | AITATQKTVDGSPGKLWR     | -0.25                                                            | -0.40                                                            | G3P_MOUSE   | Glyceraldehyde-3-phosphate dehydrogenase;                                               |
| IIPASTGAAK     | AVGKVIPELNGKLTGMAFR    | -1.52                                                            | 1.63                                                             | G3P_MOUSE   | Glyceraldehyde-3-phosphate dehydrogenase;                                               |
| IALNDFVKL      | ISWYDNEYGYSNR          | 2.31                                                             | 2.83                                                             | G3P_MOUSE   | Glyceraldehyde-3-phosphate dehydrogenase;                                               |
| LNGKLTGMAF     | RVPTPNVSVVDLTCR        | 0.48                                                             | 0.31                                                             | G3P_MOUSE   | Glyceraldehyde-3-phosphate dehydrogenase;                                               |
| ALNDFVKLI      | SWYDNEYGYSNR           | 4.76                                                             | 4.65                                                             | G3P_MOUSE   | Glyceraldehyde-3-phosphate dehydrogenase;                                               |
| STGAAKAVGK     | VIPELNGKLTGMAFR        | 0.01                                                             | 2.73                                                             | G3P_MOUSE   | Glyceraldehyde-3-phosphate dehydrogenase;                                               |
|                | MKVFTGPLPAEGR          | -0.74                                                            | -0.15                                                            | GRHPR_MOUSE | Glyoxylate reductase/hydroxypyruvate reductase;                                         |
| GEATWSGSEF     | EISFPDSPAQAQADHLPR     | 0.59                                                             | 1.37                                                             | GORS1_MOUSE | Golgi reassembly-stacking protein 1;                                                    |
| M              | GSSQSVEIPGGGTEGYHVLR   | 0.12                                                             | 0.76                                                             | GORS2_MOUSE | Golgi reassembly-stacking protein 2;                                                    |
| LTKLPGYPVK     | EVKCDMEVSCPEGYTCCR     | 0.99                                                             | 1.12                                                             | GRN_MOUSE   | Granulins;                                                                              |
| LLTKLPGYPV     | KEVKCDMEVSCPEGYTCCR    | 2.30                                                             | 2.66                                                             | GRN_MOUSE   | Granulins;                                                                              |
| PKHPVDQVQR     | IIGGSMDAKGSFPWQAK      | 0.37                                                             | 0.06                                                             | HPT_MOUSE   | Haptoglobin;                                                                            |
| TKQTQFTTY      | SDNQPGVLIQVYEGER       | 0.23                                                             | -0.15                                                            | HS71A_MOUSE | Heat shock 70 kDa protein 1A;                                                           |
| IFEVKSTAGD     | THLGGEDFDNR            | 1.07                                                             | -0.54                                                            | HS71A_MOUSE | Heat shock 70 kDa protein 1A;                                                           |
| MGYMMMAKKHL    | EINPDHPIVETLR          | -0.52                                                            | 0.54                                                             | HS90B_MOUSE | Heat shock protein HSP 90-beta;                                                         |
| FYSNKEIFLR     | ELISNASDALDKIR         | 0.79                                                             | 0.42                                                             | HS90B_MOUSE | Heat shock protein HSP 90-beta;                                                         |
| SNKEIFLREL     | ISNASDALDKIR           | 3.48                                                             | 2.19                                                             | HS90B_MOUSE | Heat shock protein HSP 90-beta;                                                         |
| NTFYSNKEIF     | LRELISNASDALDKIR       | 0.32                                                             | 0.47                                                             | HS90B_MOUSE | Heat shock protein HSP 90-beta;                                                         |
| TFYSNKEIFL     | RELISNASDALDKIR        | -0.09                                                            | 3.43                                                             | HS90B_MOUSE | Heat shock protein HSP 90-beta;                                                         |
| VVLLFETALL     | SSGFSLEDPPQTHSNR       | 3.89                                                             | 4.78                                                             | HS90B_MOUSE | Heat shock protein HSP 90-beta;                                                         |
| VLRPPGGGSN     | FSLGFDEPAEQPVR         | 0.03                                                             | 0.50                                                             | HN1_MOUSE   | Hematological and neurological expressed 1 protein;                                     |
| RKNKMASNIF     | GTPEENPPSWAKSAGSKSSGGR | 0.07                                                             | -0.18                                                            | HN1_MOUSE   | Hematological and neurological expressed 1 protein;                                     |
| LRPPGGGSNF     | SLGFDEPAEQPVR          | 0.35                                                             | 0.20                                                             | HN1_MOUSE   | Hematological and neurological expressed 1 protein;                                     |
| SNIKAAWGKI     | GGHGAEYGAEALER         | -1.74                                                            | -0.69                                                            | HBA_MOUSE   | Hemoglobin subunit alpha;                                                               |
| KSNIKAAWGK     | IGGHGAEYGAEALER        | -2.06                                                            | 1.51                                                             | HBA_MOUSE   | Hemoglobin subunit alpha;                                                               |
| DAEKAASVCL     | WGKVNSEVGGGALGR        | 1.38                                                             | -0.54                                                            | HBB1_MOUSE  | Hemoglobin subunit beta-1;                                                              |
| DAEKASVCL      | WAKVNPDEVGGGALGR       | -2.32                                                            | 0.70                                                             | HBB2_MOUSE  | Hemoglobin subunit beta-2;                                                              |
| GNSTHPMHSR     | CSPDPGLTALLSDHR        | 2.64                                                             | 1.43                                                             | HEMO_MOUSE  | Hemopexin;                                                                              |

Table S12, Tholen et al.

| Non Prime Site | Prime Site                 | Fold change (log <sub>2</sub> ) of ASAPRatio (replicate 1) | Fold change (log <sub>2</sub> ) of ASAPRatio (replicate 2) | Uniprot ID  | Protein Name                                                        |
|----------------|----------------------------|------------------------------------------------------------|------------------------------------------------------------|-------------|---------------------------------------------------------------------|
| NSTHPMHSRC     | SPDPGLTALLSDHR             | 0.00                                                       | 0.99                                                       | HEMO_MOUSE  | Hemopexin;                                                          |
| KDLKDYFTKF     | GEVVDCTIKMDPNTGR           | -1.94                                                      | -6.64                                                      | ROAA_MOUSE  | Heterogeneous nuclear ribonucleoprotein A/B;                        |
| DTEEYNLRDY     | FEKYGKIETIEVMEDR           | -0.86                                                      | -1.84                                                      | ROA3_MOUSE  | Heterogeneous nuclear ribonucleoprotein A3;                         |
| YNLRDYFEKY     | GKIETIEVMEDR               | -1.36                                                      | -1.89                                                      | ROA3_MOUSE  | Heterogeneous nuclear ribonucleoprotein A3;                         |
| KDLKDYFSKF     | GEVVDCTLKLDPITGR           | -1.64                                                      | -2.06                                                      | HNRPD_MOUSE | Heterogeneous nuclear ribonucleoprotein D0;                         |
| KDLTEYLSRF     | GEVVDCTIKTDPVTGR           | -2.32                                                      | -3.32                                                      | HNRDL_MOUSE | Heterogeneous nuclear ribonucleoprotein D-like;                     |
| ERRGFCFITY     | TDEEPVKLLLESR              | -2.18                                                      | -2.25                                                      | HNRDL_MOUSE | Heterogeneous nuclear ribonucleoprotein D-like;                     |
| AAGGGGGENY     | DDPHKTPASPVVHIR            | -0.01                                                      | -1.22                                                      | HNRPL_MOUSE | Heterogeneous nuclear ribonucleoprotein L;                          |
| LFVRNLANTV     | TEEILEKSFSQFGKLER          | -2.18                                                      | -3.47                                                      | HNRPO_MOUSE | Heterogeneous nuclear ribonucleoprotein Q;                          |
| GGRPAMEPGN     | GSLDLGGDAAGR               | 2.65                                                       | 2.76                                                       | HNRPU_MOUSE | Heterogeneous nuclear ribonucleoprotein U;                          |
| TEEHHLRDYF     | EEYGKIDTIEIITDR            | -1.06                                                      | -0.71                                                      | ROA2_MOUSE  | Heterogeneous nuclear ribonucleoproteins A2/B1;                     |
| GGNFGFGDSR     | GGGGNFGPGPSNFR             | -0.79                                                      | 0.44                                                       | ROA2_MOUSE  | Heterogeneous nuclear ribonucleoproteins A2/B1;                     |
| MIASHMIACL     | FTELNQNVQKVDQYLYHMR        | 1.38                                                       | -0.06                                                      | HXK2_MOUSE  | Hexokinase-2;                                                       |
| EPKRRSARLS     | AMPVPFTELKPKR              | -0.25                                                      | -0.84                                                      | HMG5_MOUSE  | High mobility group nucleosome-binding domain-containing protein 5; |
| QEPKRRSARL     | SAMPVPFTELKPKR             | 0.82                                                       | -0.01                                                      | HMG5_MOUSE  | High mobility group nucleosome-binding domain-containing protein 5; |
| GARGAQVRGN     | AGVSDGSEVAKAQAAPGGASPTIFSR | 0.52                                                       | 0.33                                                       | HINT2_MOUSE | Histidine triad nucleotide-binding protein 2, mitochondrial;        |
| ARGAQVRGNA     | GVSDGSEVAKAQAAPGGASPTIFSR  | 0.43                                                       | -0.52                                                      | HINT2_MOUSE | Histidine triad nucleotide-binding protein 2, mitochondrial;        |
| SELLHSITLL     | AHLTGDTIIQGSATSLR          | 0.66                                                       | 0.73                                                       | HIP1_MOUSE  | Huntingtin-interacting protein 1;                                   |
| LVGLTSLRAV     | STSSMGTLPKQVKIVEVGPR       | 1.09                                                       | 0.71                                                       | HMGCL_MOUSE | Hydroxymethylglutaryl-CoA lyase, mitochondrial;                     |
| VGLTSLRAVS     | TSSMGTLPKQVKIVEVGPR        | 0.40                                                       | -0.20                                                      | HMGCL_MOUSE | Hydroxymethylglutaryl-CoA lyase, mitochondrial;                     |
| LMAVVIGINS     | EVQLQQSGAELVR              | -0.74                                                      | -0.60                                                      | HVM02_MOUSE | Ig heavy chain V region 93G7;                                       |
| LVLILKGVQC     | DVQLVESGGGLVQPGGSR         | -3.18                                                      | -2.25                                                      | HVM16_MOUSE | Ig heavy chain V region MOPC 21;                                    |
| E              | VKLVESGGGLVQPGGSLR         | -0.54                                                      | -3.06                                                      | HVM17_MOUSE | Ig heavy chain V region MOPC 47A;                                   |
| MLLWLSGVEG     | DIVMTQSHKFMSTSVGDR         | -1.52                                                      | -0.54                                                      | KV5A1_MOUSE | Ig kappa chain V19-17;                                              |
| LLWVPGSTGD     | IVLTQSPASLAVSLGQR          | -1.64                                                      | -2.25                                                      | KV3A1_MOUSE | Ig kappa chain V-III region PC 2880/PC 1229;                        |
| LLFWIPASRG     | DILLTQSPAILSVPGER          | -3.18                                                      | -0.56                                                      | KV5A9_MOUSE | Ig kappa chain V-V region L7;                                       |
| D              | IQMTQTSSLSASLGDR           | -1.79                                                      | -2.12                                                      | KV5AA_MOUSE | Ig kappa chain V-V region MOPC 173;                                 |
| ILLWLYGADG     | NIVMTQSPKSMMSVGER          | -1.32                                                      | -1.12                                                      | KV5A2_MOUSE | Ig kappa chain V-V region MOPC 21;                                  |
| LLLWFPGARC     | DIQMTQSPSSLSASLGER         | -3.18                                                      | -0.86                                                      | KV5A7_MOUSE | Ig kappa chain V-V region MOPC 41;                                  |
| LLLWFPGIKC     | DIKMTQSPSSMYASLGER         | -1.09                                                      | -0.25                                                      | KV5A5_MOUSE | Ig kappa chain V-V region T1;                                       |
| LLPLLAGAQA     | AIVFIKEPSSQDALQGR          | 1.05                                                       | 2.50                                                       | PTK7_MOUSE  | Inactive tyrosine-protein kinase 7;                                 |
| IFGDYIERLW     | AYLTIEQLLEKR               | 2.79                                                       | 1.32                                                       | ITIH3_MOUSE | Inter-alpha-trypsin inhibitor heavy chain H3;                       |
| GDYIERLWAY     | LTIEQLLEKR                 | 3.50                                                       | 2.32                                                       | ITIH3_MOUSE | Inter-alpha-trypsin inhibitor heavy chain H3;                       |

Table S12, Tholen et al.

| Non Prime Site | Prime Site               | Fold change (log <sub>2</sub> ) of ASAPRatio (replicate 1) | Fold change (log <sub>2</sub> ) of ASAPRatio (replicate 2) | Uniprot ID  | Protein Name                                                                                                |
|----------------|--------------------------|------------------------------------------------------------|------------------------------------------------------------|-------------|-------------------------------------------------------------------------------------------------------------|
| RSPLQLLGKR     | SLPEGVVDGIEVYSTKISKVTSR  | 0.81                                                       | -3.06                                                      | ITIH3_MOUSE | Inter-alpha-trypsin inhibitor heavy chain H3;                                                               |
| RRSGRLLTRW     | ETSSIPEAGEGQIR           | 0.43                                                       | 0.39                                                       | ISCA2_MOUSE | Iron-sulfur cluster assembly 2 homolog, mitochondrial;                                                      |
| ACFATIKDGGK    | SLTKDLGGNAKCSDFTEEICR    | 4.19                                                       | 1.58                                                       | IDH3A_MOUSE | Isocitrate dehydrogenase [NAD] subunit alpha, mitochondrial;                                                |
| FRHACVPVDF     | EEVHVSSNADEEDIR          | -0.12                                                      | -0.30                                                      | IDHG1_MOUSE | Isocitrate dehydrogenase [NAD] subunit gamma 1, mitochondrial;                                              |
| PSPLAVPRRA     | HSILPVDDDDINGLNEEQKQLR   | 0.63                                                       | -0.15                                                      | IVD_MOUSE   | Isovaleryl-CoA dehydrogenase, mitochondrial;                                                                |
| DAVTTRQVRT     | IVEEVQDGKVISSR           | 4.48                                                       | 4.72                                                       | K1C17_MOUSE | Keratin, type I cytoskeletal 17;                                                                            |
| RDAVTTRQVR     | TIVEEVQDGKVISSR          | 4.82                                                       | 5.05                                                       | K1C17_MOUSE | Keratin, type I cytoskeletal 17;                                                                            |
| TAGKHGDSLRL    | DTKNEIAELTR              | -0.54                                                      | 0.04                                                       | K2C79_MOUSE | Keratin, type II cytoskeletal 79;                                                                           |
| GLDNVHKQRV     | AEVLNDPESMEKR            | -0.92                                                      | -1.22                                                      | KLC1_MOUSE  | Kinesin light chain 1;                                                                                      |
| ESVRSFGSSR     | TEVLVTPAGVASKR           | 1.08                                                       | 2.28                                                       | LAD1_MOUSE  | Ladinin-1;                                                                                                  |
| LYKPVTDLFL     | QLVDSGKVDPEAR            | -0.60                                                      | -1.22                                                      | LPPRC_MOUSE | Leucine-rich PPR motif-containing protein, mitochondrial;                                                   |
| CGLSDPNLTL     | SSGKDGQCPLVVEQVR         | 0.80                                                       | -0.07                                                      | LRC47_MOUSE | Leucine-rich repeat-containing protein 47;                                                                  |
| PQQQQMTSSY     | GGYKEPAAPVSIQR           | 0.81                                                       | -0.25                                                      | LASP1_MOUSE | LIM and SH3 domain protein 1;                                                                               |
| QQQQMTSSYG     | GYKEPAAPVSIQR            | 2.06                                                       | 1.18                                                       | LASP1_MOUSE | LIM and SH3 domain protein 1;                                                                               |
| QQMTSSYGGY     | KEPAAPVSIQR              | -0.06                                                      | -0.17                                                      | LASP1_MOUSE | LIM and SH3 domain protein 1;                                                                               |
| QQPQQQMTSS     | SYGGYKEPAAPVSIQR         | -1.00                                                      | -0.89                                                      | LASP1_MOUSE | LIM and SH3 domain protein 1;                                                                               |
| QPQQQMTSS      | YGGYKEPAAPVSIQR          | 0.58                                                       | -0.62                                                      | LASP1_MOUSE | LIM and SH3 domain protein 1;                                                                               |
| NLQSRFRIL      | AQMTGTTEYMQDPDEEALR      | 1.25                                                       | 0.79                                                       | LDB3_MOUSE  | LIM domain-binding protein 3;                                                                               |
| ILAQMTGTEY     | MQDPDEEALRR              | 0.33                                                       | -2.25                                                      | LDB3_MOUSE  | LIM domain-binding protein 3;                                                                               |
| SFRILAQMTG     | TEYMQDPDEEALRR           | 0.59                                                       | -0.60                                                      | LDB3_MOUSE  | LIM domain-binding protein 3;                                                                               |
| HSLRTAAVLQ     | GQVVQFKLSDIGEGIR         | 0.91                                                       | 0.20                                                       | ODB2_MOUSE  | Lipoamide acyltransferase component of branched-chain alpha-keto acid dehydrogenase complex, mitochondrial; |
| LSVPCILGQN     | GISDVVKVTLTPPEEAR        | -0.84                                                      | -1.64                                                      | LDHA_MOUSE  | L-lactate dehydrogenase A chain;                                                                            |
| DLSKVLFICT     | ANVIDTIPEPLR             | 0.86                                                       | 0.43                                                       | LONM_MOUSE  | Lon protease homolog, mitochondrial;                                                                        |
| GESLQAFLIA     | VVVPDVESLPSWAQKR         | 2.24                                                       | 2.34                                                       | ACSL1_MOUSE | Long-chain-fatty-acid--CoA ligase 1;                                                                        |
| LPTSLLLYL      | DNNKISNIPDEYFKR          | -1.09                                                      | -1.22                                                      | LUM_MOUSE   | Lumican;                                                                                                    |
| AGLPTSLTL      | YLDNNKISNIPDEYFKR        | -2.40                                                      | -3.64                                                      | LUM_MOUSE   | Lumican;                                                                                                    |
| PLLLCEGAQA     | LECYSVCQKADDGCSPHR       | 2.97                                                       | 2.23                                                       | LYPD3_MOUSE | Ly6/PLAUR domain-containing protein 3;                                                                      |
| IWTRHPVQGG     | ADLVQDLSISTCR            | -0.81                                                      | 0.01                                                       | LYVE1_MOUSE | Lymphatic vessel endothelial hyaluronic acid receptor 1;                                                    |
| DYSQQGHVSS     | GSEVTQCCQTDLCNER         | 2.36                                                       | 5.35                                                       | LY6D_MOUSE  | Lymphocyte antigen 6D;                                                                                      |
| PPRSTEDRLT     | TQWREDEEEAAR             | 1.98                                                       | 0.59                                                       | LSP1_MOUSE  | Lymphocyte-specific protein 1;                                                                              |
| GPEANVGPYG     | SGDSAPLQEAMAVLQHHDVSGTAR | -1.47                                                      | -0.47                                                      | MA2B1_MOUSE | Lysosomal alpha-mannosidase;                                                                                |
| LLSWASRNEA     | APDQDEIDCLPGLAKQPSFR     | 0.96                                                       | 1.74                                                       | PPGB_MOUSE  | Lysosomal protective protein;                                                                               |
| SWASRNEAAP     | DQDEIDCLPGLAKQPSFR       | 1.32                                                       | 2.39                                                       | PPGB_MOUSE  | Lysosomal protective protein;                                                                               |
| LLATVWHGQG     | APVIEPSGPELVVEPGETVTLR   | -0.14                                                      | 0.11                                                       | CSF1R_MOUSE | Macrophage colony-stimulating factor 1 receptor;                                                            |

Table S12, Tholen et al.

| Non Prime Site | Prime Site             | Fold change (log <sub>2</sub> ) of ASAPRatio (replicate 1) | Fold change (log <sub>2</sub> ) of ASAPRatio (replicate 2) | Uniprot ID  | Protein Name                                                          |
|----------------|------------------------|------------------------------------------------------------|------------------------------------------------------------|-------------|-----------------------------------------------------------------------|
| VLHFGIAVLY     | EACCVLLLLWLALFLSIQPR   | 3.19                                                       | 2.43                                                       | MFS6L_MOUSE | Major facilitator superfamily domain-containing protein 6-like;       |
| VTTLDIVRAN     | TFVAELKGLDPA           | 0.07                                                       | 0.00                                                       | MDHM_MOUSE  | Malate dehydrogenase, mitochondrial;                                  |
| SRLTYDIAH      | TPGVAADLSHIETR         | 0.24                                                       | -0.22                                                      | MDHM_MOUSE  | Malate dehydrogenase, mitochondrial;                                  |
| KTIIPISQC      | TPKVDFPQDQLATLTGR      | -0.25                                                      | -0.34                                                      | MDHM_MOUSE  | Malate dehydrogenase, mitochondrial;                                  |
| LWVSLVATLLG    | SKWPEPVFGR             | -0.07                                                      | 0.78                                                       | MASP2_MOUSE | Mannan-binding lectin serine protease 2;                              |
| ALSVLPDSRA     | LRPGDCEVCISYLGR        | 0.74                                                       | 0.01                                                       | MANF_MOUSE  | Mesencephalic astrocyte-derived neurotrophic factor;                  |
| ISRRLVSDSG     | SLAEVPKEAPKVGILGSGDFAR | -0.60                                                      | 0.32                                                       | STEA3_MOUSE | Metalloreductase STEAP3;                                              |
| EKAKREVCSW     | TVEGDVNTDPWAGYR        | -0.40                                                      | -0.79                                                      | AMPM1_MOUSE | Methionine aminopeptidase 1;                                          |
| SPLRSPPLG      | SESPYEDFLSADSKVLGR     | 0.06                                                       | -1.15                                                      | MAP1B_MOUSE | Microtubule-associated protein 1B;                                    |
| DDGLADLLFV     | SSGPTNASAFTR           | 2.07                                                       | 5.86                                                       | MAP4_MOUSE  | Microtubule-associated protein 4;                                     |
| APQRPIATQR     | TTAAPKAGPGMVR          | 0.66                                                       | 1.20                                                       | MARE1_MOUSE | Microtubule-associated protein RP/EB family member 1;                 |
| DIKSKTYQVM     | RDYEQAGSAAPSVFSR       | -1.64                                                      | -2.06                                                      | MSTN1_MOUSE | Musculoskeletal embryonic nuclear protein 1;                          |
| EFEQFLPMMQ     | AISNNKDQGGYEDFVEGLR    | 0.37                                                       | 0.50                                                       | MYL1_MOUSE  | Myosin light chain 1/3, skeletal muscle isoform;                      |
| EQFLPMMQAI     | SNNKDQGGYEDFVEGLR      | -2.32                                                      | -2.40                                                      | MYL1_MOUSE  | Myosin light chain 1/3, skeletal muscle isoform;                      |
| FKEAFLFDR      | TGECKITLSQVGDVLR       | -4.64                                                      | -0.54                                                      | MYL1_MOUSE  | Myosin light chain 1/3, skeletal muscle isoform;                      |
| DVIRNAFACF     | DEEATGTIQEDYLR         | 3.93                                                       | 1.48                                                       | ML12B_MOUSE | Myosin regulatory light chain 12B;                                    |
| EGSSNVFSMF     | DQTQIQEFKEAFTVIDQNR    | -0.71                                                      | -1.69                                                      | MLRS_MOUSE  | Myosin regulatory light chain 2, skeletal muscle isoform;             |
| FSMFDQTQIQ     | EFKEAFTVIDQNR          | -0.49                                                      | -1.43                                                      | MLRS_MOUSE  | Myosin regulatory light chain 2, skeletal muscle isoform;             |
| SMFDQTQIQE     | FKEAFTVIDQNR           | -0.29                                                      | -1.22                                                      | MLRS_MOUSE  | Myosin regulatory light chain 2, skeletal muscle isoform;             |
| PEGKGTIKKQ     | FLEELLTQCDR            | -0.97                                                      | -0.76                                                      | MLRS_MOUSE  | Myosin regulatory light chain 2, skeletal muscle isoform;             |
| LDPEGKGTIK     | KQFLEELLTQCDR          | 0.66                                                       | -1.03                                                      | MLRS_MOUSE  | Myosin regulatory light chain 2, skeletal muscle isoform;             |
| EGKGTIKKQF     | LEELLTQCDR             | -1.56                                                      | -3.06                                                      | MLRS_MOUSE  | Myosin regulatory light chain 2, skeletal muscle isoform;             |
| VFSMFDQTQI     | QEFKEAFTVIDQNR         | -2.94                                                      | -3.64                                                      | MLRS_MOUSE  | Myosin regulatory light chain 2, skeletal muscle isoform;             |
| MFDQTQIQEF     | KEAFTVIDQNR            | -1.43                                                      | -2.32                                                      | MLRS_MOUSE  | Myosin regulatory light chain 2, skeletal muscle isoform;             |
| FKVLDPGKGG     | TIKKQFLEELLTQCDR       | 0.55                                                       | -0.81                                                      | MLRS_MOUSE  | Myosin regulatory light chain 2, skeletal muscle isoform;             |
| KQIQKLEXRV     | RELEGEVENEQKR          | -3.06                                                      | -1.69                                                      | MYH1_MOUSE  | Myosin-1;                                                             |
| KKQIQKLEAR     | VRELENEVENEQKR         | -1.36                                                      | -1.56                                                      | MYH4_MOUSE  | Myosin-4;                                                             |
| MDIQGDPKYR     | AVSEQGVCTLEIR          | -0.36                                                      | -0.71                                                      | MYBPH_MOUSE | Myosin-binding protein H;                                             |
| HHDYNTYTF      | DLNLDSLKFR             | 0.59                                                       | -2.25                                                      | NDUV3_MOUSE | NADH dehydrogenase [ubiquinone] flavoprotein 3, mitochondrial;        |
| QTRDTQLITV     | DEKLDITLTGVPEEHIKTR    | -2.06                                                      | -0.58                                                      | NDUS4_MOUSE | NADH dehydrogenase [ubiquinone] iron-sulfur protein 4, mitochondrial; |
| LQPQNLQPPS     | QPHLSVSSAANGHLGR       | -3.84                                                      | -3.84                                                      | NOTC1_MOUSE | Neurogenic locus notch homolog protein 1;                             |
| KPTDGASSSN     | CVTDISHLVR             | 0.86                                                       | 1.40                                                       | NASP_MOUSE  | Nuclear autoantigenic sperm protein;                                  |
| SVSMIASRKP     | TDGASSSNCVTDISHLVR     | 0.93                                                       | 1.68                                                       | NASP_MOUSE  | Nuclear autoantigenic sperm protein;                                  |

Table S12, Tholen et al.

| Non Prime Site | Prime Site                | Fold change (log <sub>2</sub> ) of ASAPRatio (replicate 1) | Fold change (log <sub>2</sub> ) of ASAPRatio (replicate 2) | Uniprot ID  | Protein Name                                                      |
|----------------|---------------------------|------------------------------------------------------------|------------------------------------------------------------|-------------|-------------------------------------------------------------------|
| PVRNRKVVVDY    | SQFQESDDADEDYGR           | 0.99                                                       | 0.37                                                       | NUCKS_MOUSE | Nuclear ubiquitous casein and cyclin-dependent kinases substrate; |
| MNHHLKQF       | EHLNHQNPNTFESR            | 1.46                                                       | 1.64                                                       | NUCB2_MOUSE | Nucleobindin-2;                                                   |
| NVVKTRVML      | GETNPADSKPGTIR            | 0.37                                                       | 1.93                                                       | NDKA_MOUSE  | Nucleoside diphosphate kinase A;                                  |
| MANSER         | TFIAIKPDGVQR              | 1.23                                                       | 0.01                                                       | NDKA_MOUSE  | Nucleoside diphosphate kinase A;                                  |
| SVTREDSGQY     | AAVISNAVGAAAYSSAR         | -4.64                                                      | -3.84                                                      | OBSCN_MOUSE | Obscurin;                                                         |
| GRRGQFGARG     | VSEGSAAAMAAGESMAQR        | -0.71                                                      | -0.30                                                      | ORN_MOUSE   | Oligoribonuclease, mitochondrial;                                 |
| GVHTSVASAT     | SVATKKTEQGPPSSEYIFER      | -2.00                                                      | 0.33                                                       | OAT_MOUSE   | Ornithine aminotransferase, mitochondrial;                        |
| RGVHTSVASA     | TSVATKKTEQGPPSSEYIFER     | -0.84                                                      | 0.18                                                       | OAT_MOUSE   | Ornithine aminotransferase, mitochondrial;                        |
| LQKRPKPDEK     | YYSSSIWGPCTDGLDR          | -6.64                                                      | -6.64                                                      | DCOR_MOUSE  | Ornithine decarboxylase;                                          |
| NPEESIEDIY     | ANIPDLPSSYIPSR            | -0.27                                                      | -1.12                                                      | PALMD_MOUSE | Palmdelphin;                                                      |
| DLKTGESVVL     | SSIPLSDDFKSTGIKVYEDR      | 3.18                                                       | 2.54                                                       | PALMD_MOUSE | Palmdelphin;                                                      |
| GKRHPYKMNL     | ASEPQEVHLHIGSAHNR         | 2.92                                                       | 2.38                                                       | PDLI1_MOUSE | PDZ and LIM domain protein 1;                                     |
| VLHIGSAHNR     | SAMPFTASPAPSTR            | 0.84                                                       | 1.90                                                       | PDLI1_MOUSE | PDZ and LIM domain protein 1;                                     |
| KRHPYKMNLA     | SEPQEVHLHIGSAHNR          | -0.09                                                      | -0.38                                                      | PDLI1_MOUSE | PDZ and LIM domain protein 1;                                     |
| EPPKQSTSFL     | VLQEILESDGKGDPNKPSGFR     | 1.25                                                       | 1.16                                                       | PDLI1_MOUSE | PDZ and LIM domain protein 1;                                     |
| LNLKQKGYFF     | VEGELYCETHAR              | -1.74                                                      | -2.84                                                      | PDLI3_MOUSE | PDZ and LIM domain protein 3;                                     |
| PRQPTVTSVC     | SESAQELAEGQR              | -0.07                                                      | 0.03                                                       | PDLI5_MOUSE | PDZ and LIM domain protein 5;                                     |
| MPLGLGR        | RKKAPPLVENEAEPSR          | 2.47                                                       | 1.90                                                       | GIPC1_MOUSE | PDZ domain-containing protein GIPC1;                              |
| LLIATGPTTA     | LTEDEKQTMVDLHNQYR         | 0.42                                                       | 0.95                                                       | PI16_MOUSE  | Peptidase inhibitor 16;                                           |
| MVNPTVF        | FDITADDEPLGR              | 2.04                                                       | 1.25                                                       | PPIA_MOUSE  | Peptidyl-prolyl cis-trans isomerase A;                            |
| YKNSKFHRVI     | KDFMIQGGDFTR              | -3.47                                                      | -4.64                                                      | PPIB_MOUSE  | Peptidyl-prolyl cis-trans isomerase B;                            |
| M              | GVQVETISPGDGR             | -0.25                                                      | 1.53                                                       | FKB1A_MOUSE | Peptidyl-prolyl cis-trans isomerase FKBP1A;                       |
| QPRGSLRSVR     | GLSAPSCPLDDKTEASAR        | 3.29                                                       | 2.12                                                       | PLIN1_MOUSE | Perilipin-1;                                                      |
| MSMN           | KGPTLLDGDLPQENVLQR        | 0.21                                                       | 0.99                                                       | PLIN1_MOUSE | Perilipin-1;                                                      |
| LSLMEPESEF     | RDIDNPSAEER               | 0.63                                                       | 0.38                                                       | PLIN1_MOUSE | Perilipin-1;                                                      |
| AAVSTAQPIL     | SKLEPQIATASEYHR           | -0.34                                                      | -0.94                                                      | PLIN3_MOUSE | Perilipin-3;                                                      |
| PWINTPKKQG     | GLGPMNIPLISDPKR           | -0.30                                                      | 1.06                                                       | PRDX1_MOUSE | Peroxisomal protein 1;                                            |
| NIPLISDPKR     | TIAQDYGVKKADEGISFR        | 0.56                                                       | -0.34                                                      | PRDX1_MOUSE | Peroxisomal protein 1;                                            |
| STAASRATTL     | SNAVSSLASTGLSLTKVDER      | 0.07                                                       | -0.23                                                      | PICA_MOUSE  | Phosphatidylinositol-binding clathrin assembly protein;           |
| VFEWEAFARG     | TKSLMDEVVKATSR            | -1.36                                                      | -0.34                                                      | PGK1_MOUSE  | Phosphoglycerate kinase 1;                                        |
| LREDPAYLHY     | YDPAGGEDPLGAVHLR          | 0.52                                                       | -0.69                                                      | PLEK_MOUSE  | Pleckstrin;                                                       |
| IREGEVEVLK     | ATEMVEVGPEDDEVAER         | 1.02                                                       | 0.24                                                       | PTRF_MOUSE  | Polymerase I and transcript release factor;                       |
| MEDVTL         | HIVERPYSGFDPASSEGEPTQGEAR | 7.76                                                       | 4.36                                                       | PTRF_MOUSE  | Polymerase I and transcript release factor;                       |
| KIREGEVEVL     | KATEMVEVGPEDDEVAER        | -0.29                                                      | -1.18                                                      | PTRF_MOUSE  | Polymerase I and transcript release factor;                       |
| REGEVEVLKA     | TEMVEVGPEDDEVAER          | 1.14                                                       | -0.89                                                      | PTRF_MOUSE  | Polymerase I and transcript release factor;                       |
| EVEVLKATEM     | VEVGPEDDEVAER             | 0.57                                                       | 0.16                                                       | PTRF_MOUSE  | Polymerase I and transcript release factor;                       |

Table S12, Tholen et al.

| Non Prime Site | Prime Site             | Fold change (log <sub>2</sub> ) of ASAPRatio (replicate 1) | Fold change (log <sub>2</sub> ) of ASAPRatio (replicate 2) | Uniprot ID  | Protein Name                                          |
|----------------|------------------------|------------------------------------------------------------|------------------------------------------------------------|-------------|-------------------------------------------------------|
| MD             | GIVPDIIVGTRK           | 1.35                                                       | 0.40                                                       | PTBP1_MOUSE | Polypyrimidine tract-binding protein 1;               |
| GKSGGSGAGK     | GAVSAEQVIAGFNR         | 0.33                                                       | -0.12                                                      | PFD2_MOUSE  | Prefoldin subunit 2;                                  |
| ETPSQRRATR     | SGAQASSTPLSPTR         | 2.00                                                       | 0.77                                                       | LMNA_MOUSE  | Prelamin-A/C;                                         |
| LADQNIKDRY     | YGINDPVADKLLKR         | -0.14                                                      | -1.43                                                      | RBM22_MOUSE | Pre-mRNA-splicing factor RBM22;                       |
| RVLLPEGGIT     | AIVEFLEPLEAR           | 1.14                                                       | 3.38                                                       | RBM19_MOUSE | Probable RNA-binding protein 19;                      |
| DVEPDTYCRY     | DSVSVFNGAVSDDSKR       | -0.30                                                      | -1.22                                                      | PCOC1_MOUSE | Procollagen C-endopeptidase enhancer 1;               |
| VEPDTYCRYD     | SVSVFNGAVSDDSKR        | -1.74                                                      | -4.06                                                      | PCOC1_MOUSE | Procollagen C-endopeptidase enhancer 1;               |
| DMTSKFLTAL     | AQDGVINEEALSVELDR      | 2.22                                                       | 3.88                                                       | PDC6I_MOUSE | Programmed cell death 6-interacting protein;          |
| KLPSLAFLYM     | EKNQLEEVPSALPR         | -1.32                                                      | 0.19                                                       | PRELP_MOUSE | Prolargin;                                            |
| TQICPNNLVA     | FHDFSSDLENVPHLR        | 3.13                                                       | 2.51                                                       | PRELP_MOUSE | Prolargin;                                            |
| VLGKLPFLAF     | LYMEKNQLEEVPSALPR      | 0.19                                                       | -2.32                                                      | PRELP_MOUSE | Prolargin;                                            |
| GKLPFLAFLY     | MEKNQLEEVPSALPR        | -0.01                                                      | -0.18                                                      | PRELP_MOUSE | Prolargin;                                            |
| LGKLPFLAFL     | YMEKNQLEEVPSALPR       | 2.07                                                       | 2.00                                                       | PRELP_MOUSE | Prolargin;                                            |
| LLVILPATGS     | DPVLCFTQYEESGR         | 0.26                                                       | -0.52                                                      | PROP_MOUSE  | Properdin;                                            |
| YQCLVVSRL      | SSVEYEPKEKTFDKILIANR   | 0.21                                                       | 0.60                                                       | PCCA_MOUSE  | Propionyl-CoA carboxylase alpha chain, mitochondrial; |
| PRKIISLSQL     | LQEDSLNVADLSSLR        | 0.40                                                       | 1.44                                                       | PSME2_MOUSE | Proteasome activator complex subunit 2;               |
| TFLPRKIISL     | SQLQEDSLNVADLSSLR      | 0.06                                                       | 1.07                                                       | PSME2_MOUSE | Proteasome activator complex subunit 2;               |
| LRVPHARKTG     | TTIAGLVFR              | 2.10                                                       | 0.89                                                       | PSB10_MOUSE | Proteasome subunit beta type-10;                      |
| FKLPKARKTG     | TTIAGVVYKDGIVLGADTR    | 1.66                                                       | 0.78                                                       | PSB7_MOUSE  | Proteasome subunit beta type-7;                       |
| LEEVTMKQIC     | KEYYENYPAYDLTER        | -1.52                                                      | -3.06                                                      | DEK_MOUSE   | Protein DEK;                                          |
| SRDGKALEQF     | LQEYFDGNLKR            | -1.60                                                      | -1.12                                                      | PDIA3_MOUSE | Protein disulfide-isomerase A3;                       |
| A              | SDVLELTDENFESR         | 2.31                                                       | 1.95                                                       | PDIA3_MOUSE | Protein disulfide-isomerase A3;                       |
| SCTFFLAVSG     | LYSSDDVIELTPSNFNR      | 0.37                                                       | 0.59                                                       | PDIA6_MOUSE | Protein disulfide-isomerase A6;                       |
| CTFFLAVSGL     | YSSDDVIELTPSNFNR       | 1.43                                                       | 0.61                                                       | PDIA6_MOUSE | Protein disulfide-isomerase A6;                       |
| ANEVEAVKVH     | SFPTLKFFPASADR         | -1.29                                                      | -0.12                                                      | PDIA1_MOUSE | Protein disulfide-isomerase;                          |
| SFSQFTGSDG     | TGGDAAAPGAAGTQAELEPHR  | -0.60                                                      | -0.43                                                      | LMAN1_MOUSE | Protein ERGIC-53;                                     |
| AVVRVAGRRL     | SQQSASGAPVLLR          | 0.37                                                       | 0.78                                                       | ETHE1_MOUSE | Protein ETHE1, mitochondrial;                         |
| DALKRGLREH     | LCEQQAELDYLCGR         | -3.32                                                      | -5.06                                                      | FA65C_MOUSE | Protein FAM65C;                                       |
| VREKEAQPLE     | AEAPGVLDLILPEGR        | 0.15                                                       | 0.11                                                       | NIBAN_MOUSE | Protein Niban;                                        |
| ITQQASMTSL     | AQGPGETSAITFPPEEQEDPR  | -0.64                                                      | -0.38                                                      | PRRC1_MOUSE | Protein PRRC1;                                        |
| KGSVAGGAVY     | LVYDQELLGSPDKSEALR     | -1.84                                                      | -1.40                                                      | QIL1_MOUSE  | Protein QIL1;                                         |
| GSVAGGAVYL     | VYDQELLGSPDKSEALR      | 1.16                                                       | 0.80                                                       | QIL1_MOUSE  | Protein QIL1;                                         |
| QLSKTEFLSF     | MNTELAaftknqkdpGVLDLDR | 2.11                                                       | 1.09                                                       | S10AB_MOUSE | Protein S100-A11;                                     |
| LSCIAMMCNE     | FFEGCPDKEPR            | 0.51                                                       | 0.30                                                       | S10A4_MOUSE | Protein S100-A4;                                      |
| RELPSFLGER     | TDEAAFQKVMSNLDSNR      | 2.02                                                       | 1.71                                                       | S10A4_MOUSE | Protein S100-A4;                                      |
| EQALEDHFSS     | FGPISEVVVKDR           | 0.07                                                       | -1.47                                                      | RBM3_MOUSE  | Putative RNA-binding protein 3;                       |
| DEQALEDHFS     | SFGPISEVVVKDR          | -0.30                                                      | -0.22                                                      | RBM3_MOUSE  | Putative RNA-binding protein 3;                       |

Table S12, Tholen et al.

| Non Prime Site | Prime Site                    | Fold change (log <sub>2</sub> ) of ASAPRatio (replicate 1) | Fold change (log <sub>2</sub> ) of ASAPRatio (replicate 2) | Uniprot ID  | Protein Name                                                                       |
|----------------|-------------------------------|------------------------------------------------------------|------------------------------------------------------------|-------------|------------------------------------------------------------------------------------|
| TDEQALEDFH     | SSFGPISEVVVKDR                | -1.36                                                      | -0.89                                                      | RBM3_MOUSE  | Putative RNA-binding protein 3;                                                    |
| GGLRLLGVRR     | SSSAPVASPNVR                  | 0.53                                                       | -0.34                                                      | PYC_MOUSE   | Pyruvate carboxylase, mitochondrial;                                               |
| ASRVLVASRN     | FANDATFEIKKCDLHR              | 1.65                                                       | 0.35                                                       | ODPA_MOUSE  | Pyruvate dehydrogenase E1 component subunit alpha, somatic form, mitochondrial;    |
| KPHSEAGTAF     | IQTQQLHAAMADTFLEHMCR          | 0.06                                                       | -1.36                                                      | KPYM_MOUSE  | Pyruvate kinase isozymes M1/M2;                                                    |
| VIRFQPGETL     | TEILETPATNEQEAEHQ             | -0.43                                                      | -0.76                                                      | IQGA1_MOUSE | Ras GTPase-activating-like protein IQGAP1;                                         |
| VQVEEYIADL     | YSEEPGEEPAWVQTER              | 0.32                                                       | 2.36                                                       | RCN3_MOUSE  | Reticulocalbin-3;                                                                  |
| LERKPAAGLS     | AAPVPPAAAPLLDFSSDSVPPAPR      | -0.22                                                      | 0.21                                                       | RTN4_MOUSE  | Reticulon-4;                                                                       |
| NASAEAIIG      | TDVLQDHNVAVDFEHR              | 0.86                                                       | 1.37                                                       | APRV1_MOUSE | Retroviral-like aspartic protease 1;                                               |
| LTKYKKTLLG     | DVPVVADPTVPNVTVTR             | 0.40                                                       | 1.09                                                       | GDIR2_MOUSE | Rho GDP-dissociation inhibitor 2;                                                  |
| SLTKYKKTLL     | GDVPVVADPTVPNVTVTR            | -0.49                                                      | 0.37                                                       | GDIR2_MOUSE | Rho GDP-dissociation inhibitor 2;                                                  |
| AHQLFRGFSF     | VATGLMEDDGKPR                 | -0.52                                                      | -0.04                                                      | KS6A1_MOUSE | Ribosomal protein S6 kinase alpha-1;                                               |
| QLEEKEKLLA     | TEQEDAAVAKSKLR                | -1.36                                                      | -1.03                                                      | RRBP1_MOUSE | Ribosome-binding protein 1;                                                        |
| KSPQVILVNM     | ASFPECTAAAIKAI                | -0.30                                                      | 0.24                                                       | RRFM_MOUSE  | Ribosome-recycling factor, mitochondrial;                                          |
| SPFRKDKSPV     | REPIDNLTPEER                  | -0.18                                                      | -0.67                                                      | RBM39_MOUSE | RNA-binding protein 39;                                                            |
| DEKLLKRKER     | FGIVTSSAGTGTTEDEAKKR          | -0.84                                                      | -0.64                                                      | SARNP_MOUSE | SAP domain-containing ribonucleoprotein;                                           |
| EKLKRKERF      | GIVTSSAGTGTTEDEAKKR           | -1.00                                                      | -0.86                                                      | SARNP_MOUSE | SAP domain-containing ribonucleoprotein;                                           |
| ERGNPVIAQW     | EEVEDASEEAPLR                 | 3.66                                                       | 0.12                                                       | SRCA_MOUSE  | Sarcalumenin;                                                                      |
| LASLLSGQA      | EVEDASEEAPLR                  | 0.71                                                       | -0.43                                                      | SRCA_MOUSE  | Sarcalumenin;                                                                      |
| IHQVQYQEMD     | SKADDLLKSSGVIQR               | -0.76                                                      | -1.00                                                      | C163A_MOUSE | Scavenger receptor cysteine-rich type 1 protein M130;                              |
| M              | RGQVGDLSPPQQEALAR             | 1.69                                                       | 2.41                                                       | S14L4_MOUSE | SEC14-like protein 4;                                                              |
| MRGQ           | VGDLSPPQQEALAR                | 0.91                                                       | 7.56                                                       | S14L4_MOUSE | SEC14-like protein 4;                                                              |
| MEPYS          | CDTFVALPPATVGNR               | -0.97                                                      | -1.12                                                      | SCRN3_MOUSE | Secernin-3;                                                                        |
| VIQHRPSQQY     | ATLDVYNPFENR                  | 0.03                                                       | 0.20                                                       | SCAM3_MOUSE | Secretory carrier-associated membrane protein 3;                                   |
| ERDRITALKR     | SFEVEIEPPNSTPPR               | 0.40                                                       | 1.21                                                       | SEPT9_MOUSE | Septin-9;                                                                          |
| TSGDSLTVAS     | SNTDFAFSLYR                   | 2.52                                                       | 2.86                                                       | SPA3G_MOUSE | Serine protease inhibitor A3G;                                                     |
| KWKISFDPQD     | TFESEFYLDEKR                  | -1.89                                                      | -1.36                                                      | SPA3K_MOUSE | Serine protease inhibitor A3K;                                                     |
| VHKAVLDVAE     | TGTEAAAATGVIGGIR              | -3.64                                                      | -3.47                                                      | SPA3K_MOUSE | Serine protease inhibitor A3K;                                                     |
| KAVLDVAETG     | TEAAAATGVIGGIR                | -1.15                                                      | -0.09                                                      | SPA3K_MOUSE | Serine protease inhibitor A3K;                                                     |
| KHKKEKAVTI     | ATPATAAPAAVSAATTTSAQEPEAAPEPR | -1.69                                                      | -0.54                                                      | SRRM1_MOUSE | Serine/arginine repetitive matrix protein 1;                                       |
| LPGPFPTHY      | STLSKPAPLTGTLEVR              | -2.56                                                      | -1.94                                                      | PKN1_MOUSE  | Serine/threonine-protein kinase N1;                                                |
| MSDN           | GELEDKPPAPPVR                 | 0.74                                                       | 1.96                                                       | PAK2_MOUSE  | Serine/threonine-protein kinase PAK 2;                                             |
| TIEHLLPLFL     | AQLKDECEVPR                   | -3.47                                                      | -1.84                                                      | 2AAA_MOUSE  | Serine/threonine-protein phosphatase 2A 65 kDa regulatory subunit A alpha isoform; |
| MTTLFCINVL     | SEVCGQDITTKHMLPTVLR           | 0.11                                                       | 1.64                                                       | 2AAA_MOUSE  | Serine/threonine-protein phosphatase 2A 65 kDa regulatory subunit A alpha isoform; |
| FEVLPEKADR     | DQYELLCLDNTR                  | 1.53                                                       | 0.47                                                       | TRFE_MOUSE  | Serotransferrin;                                                                   |



Table S12, Tholen et al.

| Non Prime Site | Prime Site             | Fold change (log <sub>2</sub> ) of ASAPRatio (replicate 1) | Fold change (log <sub>2</sub> ) of ASAPRatio (replicate 2) | Uniprot ID  | Protein Name                                                                        |
|----------------|------------------------|------------------------------------------------------------|------------------------------------------------------------|-------------|-------------------------------------------------------------------------------------|
| GTRKPVKDF      | SCHLAQAPNHVVSR         | -0.52                                                      | -0.32                                                      | TRFE_MOUSE  | Serotransferrin;                                                                    |
| NQQEGVCEG      | SIDNSPVKWCALSHLR       | -0.15                                                      | -0.27                                                      | TRFE_MOUSE  | Serotransferrin;                                                                    |
| GGDVAFVKHT     | TIFEVLPEKADR           | 0.32                                                       | 0.39                                                       | TRFE_MOUSE  | Serotransferrin;                                                                    |
| DQYELLCLDN     | TRKPVQYEDCYLAR         | -0.58                                                      | 0.24                                                       | TRFE_MOUSE  | Serotransferrin;                                                                    |
| GGGDVAFVKH     | TTIFEVLPEKADR          | 0.37                                                       | 1.53                                                       | TRFE_MOUSE  | Serotransferrin;                                                                    |
| KAVLSAEKLR     |                        |                                                            |                                                            |             |                                                                                     |
|                | DEEVHTGLGELLR          | 1.73                                                       | 1.55                                                       | SERPH_MOUSE | Serpin H1;                                                                          |
| AKAVLSAEKL     | RDEEVHTGLGELLR         | 1.34                                                       | -0.52                                                      | SERPH_MOUSE | Serpin H1;                                                                          |
| FYADHPFIFL     | VRDNQSGSLLFIGR         | -0.92                                                      | 0.33                                                       | SERPH_MOUSE | Serpin H1;                                                                          |
| NAILVRYTQK     | APQVSTPTLVEAAR         | -2.12                                                      | 0.31                                                       | ALBU_MOUSE  | Serum albumin;                                                                      |
| ARNLGRVGTK     | CCTLPEDQR              | 1.09                                                       | 0.77                                                       | ALBU_MOUSE  | Serum albumin;                                                                      |
| DDFAQFLDTC     | CKAADKDTCFSTEGPNLVTR   | 0.59                                                       | -0.12                                                      | ALBU_MOUSE  | Serum albumin;                                                                      |
| SAANCDKSLH     | TLFGDKLCAIPNLR         | -3.18                                                      | -3.64                                                      | ALBU_MOUSE  | Serum albumin;                                                                      |
| DKLCAIPNLR     | ENYGELADCCTKQEPER      | 3.44                                                       | 1.99                                                       | ALBU_MOUSE  | Serum albumin;                                                                      |
| QNAILVRYTQ     | KAPQVSTPTLVEAAR        | 0.11                                                       | 0.25                                                       | ALBU_MOUSE  | Serum albumin;                                                                      |
| FLDTCCKAAD     | KDTCFSTEGPNLVTR        | 0.32                                                       | 0.97                                                       | ALBU_MOUSE  | Serum albumin;                                                                      |
| KLATDLTKVN     | KECCHGDLLECADDR        | 0.07                                                       | -0.18                                                      | ALBU_MOUSE  | Serum albumin;                                                                      |
| AANCDKSLHT     | LFGDKLCAIPNLR          | -0.32                                                      | -0.27                                                      | ALBU_MOUSE  | Serum albumin;                                                                      |
| FGDKLCAIPN     | LRENYGELADCCTKQEPER    | 0.43                                                       | -0.11                                                      | ALBU_MOUSE  | Serum albumin;                                                                      |
| CDLYEKLGEY     | GFQNAILVR              | -2.00                                                      | -1.18                                                      | ALBU_MOUSE  | Serum albumin;                                                                      |
| TQCCAEADKE     | SCLTPKLDGVKEKALVSSVR   | -0.29                                                      | -0.43                                                      | ALBU_MOUSE  | Serum albumin;                                                                      |
| ADESAANCDK     | SLHTLFGDKLCAIPNLR      | 1.07                                                       | 0.35                                                       | ALBU_MOUSE  | Serum albumin;                                                                      |
| VMDDFAQFLD     | TCCKAADKDTCFSTEGPNLVTR | 0.93                                                       | 0.19                                                       | ALBU_MOUSE  | Serum albumin;                                                                      |
| DTCKKAADKD     | TCFSTEGPNLVTR          | 0.86                                                       | 0.23                                                       | ALBU_MOUSE  | Serum albumin;                                                                      |
| ADFAEITKLA     | TDLTKVNKECCHGDLLECADDR | 1.55                                                       | 0.60                                                       | ALBU_MOUSE  | Serum albumin;                                                                      |
| AEITKLATDL     | TKVNKECCHGDLLECADDR    | 0.82                                                       | -0.40                                                      | ALBU_MOUSE  | Serum albumin;                                                                      |
| LNRVCLLHEK     | TPVSEHVTKCCSGSLVER     | 1.27                                                       | 0.69                                                       | ALBU_MOUSE  | Serum albumin;                                                                      |
| GFQNAILVRY     | TQKAPQVSTPTLVEAAR      | -0.71                                                      | -0.34                                                      | ALBU_MOUSE  | Serum albumin;                                                                      |
| AMCTSFKENP     | TTFMGHYLHEVAR          | 0.86                                                       | -1.15                                                      | ALBU_MOUSE  | Serum albumin;                                                                      |
| YGFQNAILVR     | YTQKAPQVSTPTLVEAAR     | 3.52                                                       | 1.80                                                       | ALBU_MOUSE  | Serum albumin;                                                                      |
| PNHQKASSGK     | SSPFKVSPLSFGR          | 1.69                                                       | 0.30                                                       | SDPR_MOUSE  | Serum deprivation-response protein;<br>Short-chain specific acyl-CoA dehydrogenase, |
| RALGVRDWRR     | LHTVYQSVELPETHQMLR     | 0.71                                                       | 0.28                                                       | ACADS_MOUSE | mitochondrial;                                                                      |
| LQVFRQFVRH     | ESEVASSLVLER           | 3.98                                                       | 5.27                                                       | SSBP_MOUSE  | Single-stranded DNA-binding protein, mitochondrial;                                 |
| QPISNVRAIQ     | ANINIPMGAFRPGAGQPPR    | 0.21                                                       | 0.32                                                       | SMPX_MOUSE  | Small muscular protein;                                                             |
| GKALKRQLPF     | RGDEGIFEEFIEER         | -0.06                                                      | -0.49                                                      | SNX12_MOUSE | Sorting nexin-12;                                                                   |
| DSPERELILS     | SEPSPAVTPVPTTLIAPR     | 0.71                                                       | 0.61                                                       | SNX2_MOUSE  | Sorting nexin-2;                                                                    |
| NDAYGPPSNF     | LEIDVSNPQTVGVGR        | -1.12                                                      | -2.00                                                      | SNX3_MOUSE  | Sorting nexin-3;                                                                    |

Table S12, Tholen et al.

| Non Prime Site | Prime Site               | Fold change (log <sub>2</sub> ) of ASAPRatio (replicate 1) | Fold change (log <sub>2</sub> ) of ASAPRatio (replicate 2) | Uniprot ID  | Protein Name                                            |
|----------------|--------------------------|------------------------------------------------------------|------------------------------------------------------------|-------------|---------------------------------------------------------|
| GKAFLRQLPF     | RGDDGIFDDNFIEER          | -0.01                                                      | -0.94                                                      | SNX3_MOUSE  | Sorting nexin-3;                                        |
| MYIFPVHWQF     | GQLDQHPIDGYLSHTEPLR      | 0.75                                                       | -1.09                                                      | SPRC_MOUSE  | SPARC;                                                  |
| DWLKNVLT       | YERDEGNLLTEKQKLR         | -0.52                                                      | 0.57                                                       | SPRC_MOUSE  | SPARC;                                                  |
| PRTLASPXXX     | DLSLEEIQKKLEAAEER        | 2.23                                                       | 0.42                                                       | STMN1_MOUSE | Stathmin;                                               |
| QAQPNANEDY     | REGPCAVNLVLR             | -0.06                                                      | -1.22                                                      | STK39_MOUSE | STE20/SPS1-related proline-alanine-rich protein kinase; |
| EPAGTPRRSY     | ASGPGGLHADLLR            | 0.01                                                       | 0.33                                                       | SSDH_MOUSE  | Succinate-semialdehyde dehydrogenase, mitochondrial;    |
| SDVQTAVKTN     | SSFIQGFVDHVKEDCDR        | 0.08                                                       | 1.99                                                       | SAP_MOUSE   | Sulfated glycoprotein 1;                                |
| AMKANTMSNY     | SLLPASLLDHR              | 3.02                                                       | 2.73                                                       | ST2B1_MOUSE | Sulfotransferase family cytosolic 2B member 1;          |
| AAMKANTMSN     | YLLPASLLDHR              | 2.80                                                       | 1.59                                                       | ST2B1_MOUSE | Sulfotransferase family cytosolic 2B member 1;          |
| M              | VEKEEAGGGGGGISEEEAAQYDR  | 3.31                                                       | 1.48                                                       | SAE1_MOUSE  | SUMO-activating enzyme subunit 1;                       |
| HHAFGQGRDM     | AETFDQGAHHAFGQGGR        | -0.45                                                      | -0.84                                                      | SBSN_MOUSE  | Suprabasin;                                             |
| DKVIRPGVSQ     | AGEEMEQQFGQGR            | -0.20                                                      | 1.57                                                       | SBSN_MOUSE  | Suprabasin;                                             |
| VLLGTLPARA     | AHEDPVEKVIIEGFSR         | 0.23                                                       | 0.92                                                       | SBSN_MOUSE  | Suprabasin;                                             |
| GAHHAFGQGR     | DMAETFDQGAHHAFGQGGR      | 0.06                                                       | 0.50                                                       | SBSN_MOUSE  | Suprabasin;                                             |
| LGTLPARAAH     | EDPVEKVIIEGFSR           | 0.33                                                       | 0.69                                                       | SBSN_MOUSE  | Suprabasin;                                             |
| HAFGQGRDMA     | ETFDQGAHHAFGQGGR         | 0.33                                                       | 1.19                                                       | SBSN_MOUSE  | Suprabasin;                                             |
| LLGTLPARAA     | HEDPVEKVIIEGFSR          | 0.53                                                       | 0.21                                                       | SBSN_MOUSE  | Suprabasin;                                             |
| FSRGLSNAER     | EVGKALEGINNGITQAGR       | -1.18                                                      | -1.22                                                      | SBSN_MOUSE  | Suprabasin;                                             |
| AFGQGRDMAE     | TFDQGAHHAFGQGGR          | 1.13                                                       | 0.77                                                       | SBSN_MOUSE  | Suprabasin;                                             |
| MFGGLSSWL      | GLKPPEGAAEAGEEPPSR       | 1.46                                                       | 3.11                                                       | SYAP1_MOUSE | Synapse-associated protein 1;                           |
| ARRQSRMEKY     | VISSGHAEAR               | -3.06                                                      | -4.06                                                      | SYNPO_MOUSE | Synaptopodin;                                           |
| GAQRMFPMNR     | TAKPFLGSMNQPAAPFSPTR     | 1.06                                                       | 0.14                                                       | SYNP2_MOUSE | Synaptopodin-2;                                         |
| VSKQPSRITN     | GQPQQTGAASGGYIKR         | 0.16                                                       | 0.16                                                       | SNP23_MOUSE | Synaptosomal-associated protein 23;                     |
| ISLEVSRSR      | AEVSTIHLQSPGR            | 0.68                                                       | -0.18                                                      | SYNEM_MOUSE | Synemin;                                                |
| LDHGRTLREQ     | GVEEHETLLLR              | -0.74                                                      | -0.81                                                      | TLN1_MOUSE  | Talin-1;                                                |
| STSQLVACTK     | VVAPTISSPVCQEQLVEAGR     | 2.38                                                       | 3.44                                                       | TLN1_MOUSE  | Talin-1;                                                |
| KNCGHRFHVL     | VANQDFVENLVR             | 0.59                                                       | 1.21                                                       | TOM1_MOUSE  | Target of Myb protein 1;                                |
| SLLSPMSVN      | AVMKVIDPATATSVDLR        | -0.27                                                      | 2.14                                                       | TCPD_MOUSE  | T-complex protein 1 subunit delta;                      |
| LSPMSVNAV      | KVIDPATATSVDLR           | -0.03                                                      | 2.04                                                       | TCPD_MOUSE  | T-complex protein 1 subunit delta;                      |
| SKMFEELKNR     | MDVLAQEVALLEK            | -1.64                                                      | -0.03                                                      | TETN_MOUSE  | Tetranectin;                                            |
| M              | KPPAACAGDVVDAASPASTVNHLR | 0.99                                                       | 0.81                                                       | THOP1_MOUSE | Thimet oligopeptidase;                                  |
| SPCLLPRVHL     | ASAFGSSTESLVAR           | -0.12                                                      | 0.28                                                       | THEM5_MOUSE | Thioesterase superfamily member 5;                      |
| RTVHTTRVCL     | TTFNVQDGPDFQDR           | 0.85                                                       | 0.91                                                       | THIOM_MOUSE | Thioredoxin, mitochondrial;                             |
| M              | VGKVPVSDPDFQPELSGAGSR    | 3.07                                                       | 1.64                                                       | TXNL1_MOUSE | Thioredoxin-like protein 1;                             |
| ISAVEQTAQR     | TTTTAVHIQPAEQAR          | 0.29                                                       | 0.58                                                       | TITIN_MOUSE | Titin;                                                  |
| LEAWYRHGRT     | TSSYSALSEPSR             | -0.01                                                      | 0.44                                                       | MECR_MOUSE  | Trans-2-enoyl-CoA reductase, mitochondrial;             |
| DTPKKQALYL     | MFDTPQESPVKSPVVR         | 0.21                                                       | 0.52                                                       | TACC2_MOUSE | Transforming acidic coiled-coil-containing protein 2;   |

Table S12, Tholen et al.

| Non Prime Site | Prime Site             | Fold change (log <sub>2</sub> ) | Fold change (log <sub>2</sub> ) of | Uniprot ID  | Protein Name                                      |
|----------------|------------------------|---------------------------------|------------------------------------|-------------|---------------------------------------------------|
|                |                        | of ASAPRatio<br>(replicate 1)   | ASAPRatio<br>(replicate 2)         |             |                                                   |
| KKSKENPRNF     | SDNQLQEGKNVIGLQMGNTNR  | 0.21                            | 0.23                               | TAGL2_MOUSE | Transgelin-2;                                     |
| AEKNAPAIIF     | IDELDAIAPKR            | 0.85                            | 0.16                               | TERA_MOUSE  | Transitional endoplasmic reticulum ATPase;        |
| VVYLETETLV     | TREAVTEILGIEPDR        | -0.52                           | -1.40                              | TSN_MOUSE   | Translin;                                         |
| LLLGPSVVLG     | ISFHLPVNSR             | -0.94                           | -0.18                              | TMEDA_MOUSE | Transmembrane emp24 domain-containing protein 10; |
| VSEAGPAGAG     | ESKCLPMVKVLDVAVR       | 0.65                            | 0.67                               | TTHY_MOUSE  | Transthyretin;                                    |
| LAGLVFVSEA     | GPAGAGESKCLPMVKVLDVAVR | 0.38                            | 0.16                               | TTHY_MOUSE  | Transthyretin;                                    |
| GSWEFASGK      | TAESGELHGLTTDEKFEVGVYR | 0.65                            | -0.86                              | TTHY_MOUSE  | Transthyretin;                                    |
| KDVVDYIIFG     | TVIQEVKTSNVAR          | 0.90                            | 0.96                               | ECHB_MOUSE  | Trifunctional enzyme subunit beta, mitochondrial; |
| EPVWAIGTGK     | TATPQQAQEVHEKLR        | 0.32                            | 0.36                               | TPIS_MOUSE  | Triosephosphate isomerase;                        |
| TLNAANVPAG     | TEVVCAPPTAYIDFAR       | -1.25                           | -0.67                              | TPIS_MOUSE  | Triosephosphate isomerase;                        |
| SPGMIKDLGA     | TWVVLGHSER             | -0.32                           | -0.67                              | TPIS_MOUSE  | Triosephosphate isomerase;                        |
| PEPQQVGTVS     | LHLGVTPSVLR            | -0.18                           | 0.99                               | TPP1_MOUSE  | Tripeptidyl-peptidase 1;                          |
| RPEPQQVGTV     | SLHLGVTPSVLR           | 0.77                            | 1.74                               | TPP1_MOUSE  | Tripeptidyl-peptidase 1;                          |
| ARRQHLKSVM     | LQIAATELEKEESR         | 0.62                            | 0.84                               | TNNI2_MOUSE | Troponin I, fast skeletal muscle;                 |
| RRQHLKSVML     | QIAATELEKEESR          | -0.67                           | -0.34                              | TNNI2_MOUSE | Troponin I, fast skeletal muscle;                 |
| DMEVKVQKSS     | KELEDMNQKLFDLR         | -1.22                           | -1.56                              | TNNI2_MOUSE | Troponin I, fast skeletal muscle;                 |
| KYDMEVKVQK     | SSKELEDMNQKLFDLR       | 0.29                            | -1.52                              | TNNI2_MOUSE | Troponin I, fast skeletal muscle;                 |
| AITARRQHLK     | SVMLQIAATELEKEESR      | 0.99                            | 0.01                               | TNNI2_MOUSE | Troponin I, fast skeletal muscle;                 |
| RQNKDLMELQ     | ALIDSHFEAR             | -0.81                           | -1.22                              | TNNT3_MOUSE | Troponin T, fast skeletal muscle;                 |
| DKAKELWDTL     | YQLETDKFEFGEKLR        | -2.94                           | -1.43                              | TNNT3_MOUSE | Troponin T, fast skeletal muscle;                 |
| KKILAERRKP     | LNIDHLSDDKLR           | -1.64                           | -3.18                              | TNNT3_MOUSE | Troponin T, fast skeletal muscle;                 |
| RAFVHWYVGE     | GMEEGEFSEAR            | 0.42                            | 0.19                               | TBA1A_MOUSE | Tubulin alpha-1A chain;                           |
| AGKHVPRAVF     | VDLEPTVIDEVR           | 2.35                            | 4.36                               | TBA1A_MOUSE | Tubulin alpha-1A chain;                           |
| MYAKRAVHW      | YVGEGMEEGEFSEAR        | 5.27                            | 4.99                               | TBA1A_MOUSE | Tubulin alpha-1A chain;                           |
| EAAGNKYVPR     | AILVDLEPGTMDSVR        | -1.22                           | 2.12                               | TBB2A_MOUSE | Tubulin beta-2A chain;                            |
| QIGAKFWEVI     | SDEHGIDPTGTYHGDSDLQLDR | 2.09                            | 3.43                               | TBB5_MOUSE  | Tubulin beta-5 chain;                             |
| RLSESEGAN      | EGATAAPELSALEEFRR      | 0.57                            | -0.62                              | TPPP_MOUSE  | Tubulin polymerization-promoting protein;         |
| KGKSCRTITF     | EQFQEALEELAKKR         | -0.30                           | -1.69                              | TPPP_MOUSE  | Tubulin polymerization-promoting protein;         |
| M              | VLSNEPAASAAEEVEDDALVR  | -0.97                           | 0.04                               | TBCD_MOUSE  | Tubulin-specific chaperone D;                     |
| GPSAGDVEAI     | KNAIANASTLAEVER        | 0.15                            | -1.29                              | RU2A_MOUSE  | U2 small nuclear ribonucleoprotein A';            |
| SGNRLDGKKK     | GVEPSPSPIKPGDIKR       | 0.03                            | -0.29                              | UFD1_MOUSE  | Ubiquitin fusion degradation protein 1 homolog;   |
| TKIFTASNV      | SVPLPAENVITITAGQR      | -4.32                           | -3.32                              | UBP2L_MOUSE | Ubiquitin-associated protein 2-like;              |
| KTDQVIQFFI     | ALVNDPQPEHPLR          | 4.25                            | 2.20                               | UB2L3_MOUSE | Ubiquitin-conjugating enzyme E2 L3;               |
| NTLHLDYVMA     | AANLFAQTYGLTGSQDR      | -0.07                           | -0.74                              | UBA1_MOUSE  | Ubiquitin-like modifier-activating enzyme 1;      |
| SPVSSGVNLF     | ANDGSFLELFKR           | 0.84                            | -0.89                              | CS043_MOUSE | Uncharacterized protein C19orf43 homolog;         |
| QSLPSSHGPS     | QPGLPAVLSSPPLSPR       | 4.13                            | 4.33                               | CB071_MOUSE | Uncharacterized protein C2orf71 homolog;          |
| PLPTFSSLNL     | RETNLESPLVDTHSKR       | 2.62                            | 1.63                               | VIME_MOUSE  | Vimentin;                                         |

Table S12, Tholen et al.

| Non Prime Site | Prime Site             | Fold change (log <sub>2</sub> ) of ASAPRatio (replicate 1) | Fold change (log <sub>2</sub> ) of ASAPRatio (replicate 2) | Uniprot ID   | Protein Name                                             |
|----------------|------------------------|------------------------------------------------------------|------------------------------------------------------------|--------------|----------------------------------------------------------|
| LRAMRGIVNG     | AAPELPVPTGGPMAGAR      | -0.29                                                      | 0.12                                                       | VATB2_MOUSE  | V-type proton ATPase subunit B, brain isoform;           |
| LNKNRHPNFL     | VVEKDTTINEIEDTFR       | 1.51                                                       | 1.72                                                       | VATF_MOUSE   | V-type proton ATPase subunit F;                          |
| M              | ASQTQGIQQLLQAEKR       | 2.48                                                       | 5.73                                                       | VATG2_MOUSE  | V-type proton ATPase subunit G 2;                        |
| VGASDGLYM      | YNLDPQEGGECALMR        | -0.03                                                      | 0.65                                                       | WIPI2_MOUSE  | WD repeat domain phosphoinositide-interacting protein 2; |
| ICAKLSRQVV     | VEKGAEAGSQAEGSPLHPR    | 0.18                                                       | 1.02                                                       | CASZ1_MOUSE  | Zinc finger protein castor homolog 1;                    |
| KQYAPRCVC      | SEPIMPEPGRDETVR        | 0.93                                                       | 0.71                                                       | ZYX_MOUSE    | Zyxin;                                                   |
| LTARDEARGR     | AAVQQLQAEGLSPR         | 0.31                                                       | 0.56                                                       | Q8K354_MOUSE |                                                          |
| LWLLPSLALA     | AAVTEPADLEYTEVPR       | 2.69                                                       | 1.86                                                       | Q8BVL6_MOUSE |                                                          |
| SLQLVSWTLA     | AEPVDVLEAWGVHR         | 0.77                                                       | -0.27                                                      | Q9JLI2_MOUSE |                                                          |
| ARSKPSPQLS     | AETPVAALPEFPR          | -0.36                                                      | -0.47                                                      | E9Q0S6_MOUSE |                                                          |
| PKHLSRRTL      | AFPQKVMPPQAR           | 0.33                                                       | 0.99                                                       | Q3U422_MOUSE |                                                          |
| LALAFGLAHA     | AMEGPWKTVAIAADR        | 2.48                                                       | 2.41                                                       | A2AEN9_MOUSE |                                                          |
| ENAFSRSGGR     | ASGDKEAEGAPQVEAGKR     | 2.09                                                       | 1.49                                                       | Q8VCQ8_MOUSE |                                                          |
| QKIGQPTLL      | AVEEQSCEYSGR           | -1.52                                                      | -1.15                                                      | E9PX16_MOUSE |                                                          |
| VLTGFGMTLC     | AVPIAQKSEPOQSLNEALMR   | 0.80                                                       | 1.04                                                       | Q542V8_MOUSE |                                                          |
| LSLEVQELQA     | AVRPLQLLGTCAELCR       | -0.30                                                      | -0.14                                                      | Q8BTE6_MOUSE |                                                          |
| LQSELMSTL      | AVSKEKEEETSPTDSIPR     | 1.34                                                       | -0.79                                                      | E9Q7D5_MOUSE |                                                          |
| QAGRFHVNLL     | CGEEQGADAALHFNPR       | 1.99                                                       | 2.49                                                       | Q9CRB1_MOUSE |                                                          |
| ESAAKDEAVF     | DDEVAPDAAAENCLAER      | 0.81                                                       | -0.18                                                      | E9PVP1_MOUSE |                                                          |
| DVIRNAFACF     | DEEAIGTIQEDYLR         | 1.25                                                       | 1.71                                                       | Q6ZWQ9_MOUSE |                                                          |
| FVREPPIMVT     | KQLEDMNAYCGER          | -4.06                                                      | -5.06                                                      | D3YU50_MOUSE |                                                          |
| DFHLLNEVN      | KTDPGIILKTENR          | -1.29                                                      | -1.43                                                      | Q3UWK8_MOUSE |                                                          |
| GVSESQASDS     | EGHSDFSEGQAVGAHR       | 1.36                                                       | 0.67                                                       | F7BVV1_MOUSE |                                                          |
| LLAVLPTTTA     | EKNGIDIYSLTVDSR        | 0.57                                                       | -0.07                                                      | Q9DBK8_MOUSE |                                                          |
| GAGFRPKVKR     | EVKVDCSEYLALSKR        | -0.71                                                      | -1.60                                                      | Q148R4_MOUSE |                                                          |
| EAASGALSMF     | FQGEETENEENLSSEKAGLDKR | 2.27                                                       | 1.85                                                       | A2AIX1_MOUSE |                                                          |
| LLRGPPVARA     | GAGAVGAGPVVR           | -1.36                                                      | -0.43                                                      | Q6PE62_MOUSE |                                                          |
| DYKSAHKGFK     | GAYDAQGTLSKIFKLGG      | -2.12                                                      | -0.52                                                      | F7A0B0_MOUSE |                                                          |
| DLNLKGSKVK     | GDVDISGPKLEGDIKVP      | -0.67                                                      | -0.81                                                      | E9Q616_MOUSE |                                                          |
| DLNFKGPKLK     | GEIDASVPEMEADLR        | -0.42                                                      | 0.23                                                       | E9Q616_MOUSE |                                                          |
| VETQPGKTVI     | RLPSGSGPASPTTGSVDIR    | -1.79                                                      | -1.69                                                      | E9Q616_MOUSE |                                                          |
| AVPVFDLIL      | GVGPDGHTCSLFPDHPLLQER  | 3.11                                                       | 2.16                                                       | 6PGL_MOUSE   |                                                          |
| GMVPDQAGRF     | HVNLLCGEEQGADAALHFNPR  | 1.96                                                       | 2.31                                                       | Q9CRB1_MOUSE |                                                          |
| QGVRVGTVMR     | IRGMVPDQAGR            | -0.01                                                      | -0.27                                                      | Q9CRB1_MOUSE |                                                          |
| RKRKEGENQR     | ITSGESSGGNPKAKDECAQYR  | -0.06                                                      | 1.20                                                       | Q148R4_MOUSE |                                                          |
| LPMMQAISNN     | KDQGGYEDFVEGLR         | 0.03                                                       | -2.06                                                      | E9PWG4_MOUSE |                                                          |

Table S12, Tholen et al.

| Non Prime Site | Prime Site               | Fold change (log <sub>2</sub> ) | Fold change (log <sub>2</sub> ) of | Uniprot ID   | Protein Name |
|----------------|--------------------------|---------------------------------|------------------------------------|--------------|--------------|
|                |                          | of ASAPRatio<br>(replicate 1)   | ASAPRatio<br>(replicate 2)         |              |              |
| R              | IFQTTTERPFIQKLF          | -2.12                           | -1.52                              | F7D9Q0_MOUSE |              |
| DQAGRFHVN      | LCGEEQGADAALHFNPR        | -0.54                           | 1.21                               | Q9CRB1_MOUSE |              |
| SPLPVIHQK      | VVANSANADYQER            | -1.89                           | -1.64                              | E9PYJ9_MOUSE |              |
| MEVNRDIVF      | LVDGSSSLGPSNFNAIR        | -0.52                           | 0.11                               | E9PWQ3_MOUSE |              |
| GRSSNRDRP      | RQPSPQSSDSQVHSGVQVEGR    | 0.87                            | 2.64                               | E9Q019_MOUSE |              |
| KSMWEKGSVF     | SAPSASGTPNKETAGLKVGVSSR  | 0.08                            | 0.19                               | Q8VCQ8_MOUSE |              |
| LWALLPAEA      | SCQGIQCAPGQR             | 0.77                            | 0.59                               | E9PVG8_MOUSE |              |
| RPANPNWGVF     | SEFGDSSSPATR             | 0.01                            | -1.36                              | Q99K47_MOUSE |              |
| RGVSESQASD     | SEGHSDFSEGQAVGAHR        | 2.75                            | 1.94                               | E9Q019_MOUSE |              |
| SADRQRRGV      | SESQASDSEGHSDFSEGQAVGAHR | 0.90                            | 1.62                               | E9Q019_MOUSE |              |
| WTHEVFSSRS     | SEVVLSGDDEDYQR           | -0.03                           | -0.43                              | E9Q616_MOUSE |              |
| NIDIRSAFKR     | SGEGQEDAGELDFSGLLKR      | -0.79                           | -2.47                              | D3YU50_MOUSE |              |
| ESTECKTRV      | SGEHMDLTTCPLAAGGQKEKLR   | 3.28                            | 2.53                               | Q9D1B1_MOUSE |              |
| KIPRHEVTEI     | SNTDVETQPGKTIVR          | -1.40                           | -1.00                              | E9Q616_MOUSE |              |
| QFLVLLVAGR     | SSDAVAGPASSLKQR          | 0.99                            | 1.16                               | E9PWQ3_MOUSE |              |
| SSVATQQTTL     | SSIPSHPSTAGKIFR          | 0.60                            | -0.52                              | A2AQB2_MOUSE |              |
| NKSVQKSGVR     | STHQAAVVKIDSR            | 1.13                            | 1.26                               | Q8VCQ8_MOUSE |              |
| RVSGEHMDLT     | TCPLAAGGQKEKLR           | 2.68                            | 1.35                               | Q9D1B1_MOUSE |              |
| ILSVASTVWT     | TDTEKGEFLSEGGGVR         | 0.77                            | -1.12                              | Q99K47_MOUSE |              |
| DEESKPASSN     | TQVEGDEEAALLER           | 1.92                            | 1.42                               | Q8VCQ8_MOUSE |              |
| TRVSGEHMDL     | TTCPLAAGGQKEKLR          | 1.77                            | 1.78                               | Q9D1B1_MOUSE |              |
| EERSVNCGTM     | VAQPKNLEGYVGFANLPNQVYR   | 1.21                            | 0.14                               | E9Q9F5_MOUSE |              |
| EVNKRDIVFL     | VDGSSSLGPSNFNAIR         | 0.53                            | -0.60                              | E9PWQ3_MOUSE |              |
| IAEGVPQLLI     | VLTAEPSGDVDR             | 2.50                            | 2.91                               | E9PWQ3_MOUSE |              |
| IPESLKNMLL     | VMDTAEIFHSADAR           | 1.37                            | 1.01                               | Q6DFZ1_MOUSE |              |
| IESTECKTR      | VSGEHMDLTTCPLAAGGQKEKLR  | 2.68                            | 3.03                               | Q9D1B1_MOUSE |              |
| FLPMMQAISN     | NKDQGGYEDFVEGLR          | -1.12                           | -2.25                              | E9PWG4_MOUSE |              |
| STSSPVFHPK     | YQACSGPILPHR             | 0.48                            | -0.74                              | Q99M20_MOUSE |              |
| RLMEIYQEKL     | YRPPVLDALGR              | 1.03                            | 1.74                               | E9Q005_MOUSE |              |
