# Supplementary material
Source: PubMed Central journal article supplement (PMC3591655)
Supplement: supp_M112.017962_mcp.M112.017962-15.pdf [file supp_M112.017962_mcp.M112.017962-15.pdf]

**Table S13:** Ranking of dimethylated (naturally unmodified) N-termini reduced in the TAILS experiment comparing wild-type and *Ctsb*<sup>-/-</sup> skin.

| Non Prime Site | Prime Site                  | Fold change<br>(log <sub>2</sub> ) of<br>ASAPRatio<br>(replicate 1) | Fold change<br>(log <sub>2</sub> ) of<br>ASAPRatio<br>(replicate 2) | Ranking (max. 6<br>points / min. -6<br>points) | Uniprot ID   | Protein Name                                                 |
|----------------|-----------------------------|---------------------------------------------------------------------|---------------------------------------------------------------------|------------------------------------------------|--------------|--------------------------------------------------------------|
| YGGGGGGYG      | GGSGYGGGGGGYGGGEGYSISPNSYR  | -5.64                                                               | -6.64                                                               | 4                                              | E9QNN1_MOUSE | ATP-dependent RNA helicase A                                 |
| FEHRLGEAAR     | SLGNAGNEIGR                 | -4.06                                                               | -1.06                                                               | 4                                              | DMKN_MOUSE   | Dermokine;                                                   |
| IIRKVVQRVD     | SSGAIDTQQHEEVELR            | -1.84                                                               | -1.32                                                               | 4                                              | ANK1_MOUSE   | Ankyrin-1;                                                   |
| DFHRCEKAMT     | AKGGDVSCEWYR                | -1.29                                                               | -2.25                                                               | 3                                              | CX6B1_MOUSE  | Cytochrome c oxidase subunit 6B1;                            |
| HSKINFRDKR     | SALQSIWASQTTDGKLEVTKDVER    | -2.40                                                               | -3.18                                                               | 2                                              | SERPH_MOUSE  | Serpin H1;                                                   |
| SCLVLAARHA     | SASSTNLKDVLSNLPKEQAR        | -2.56                                                               | -1.40                                                               | 2                                              | CISY_MOUSE   | Citrate synthase, mitochondrial;                             |
| NIDIRSAFKR     | SGEGQEDAGELDFSGLLKR         | -6.64                                                               | -2.32                                                               | 2                                              | D3YU50_MOUSE | RIKEN cDNA 8030451F13, isoform CRA_c                         |
| AITARRQHKL     | SVMLQIAATELEKEESR           | -1.32                                                               | -1.40                                                               | 2                                              | TNNI2_MOUSE  | Troponin I, fast skeletal muscle;                            |
| KIREGEVEVL     | KATEMVEVGPEDVEGAER          | -0.84                                                               | -1.64                                                               | 2                                              | PTRF_MOUSE   | Polymerase I and transcript release factor;                  |
| ASGPENFQVG     | SMPPAQQTSGQMHR              | -0.84                                                               | -4.32                                                               | 2                                              | TLN1_MOUSE   | Talin-1;                                                     |
| SVTREDSGQY     | AAYISNAVGAAYSSAR            | -6.64                                                               | -4.64                                                               | 1                                              | OBSCN_MOUSE  | Obscurin;                                                    |
| KNVREATESF     | ASDPILYRPVAVALDTKGPEIR      | -1.18                                                               | -1.09                                                               | 1                                              | KPYM_MOUSE   | Pyruvate kinase isozymes M1/M2;                              |
| WTGYFGKVLV     | ASTSYLPSQVTEMFNQGR          | -2.94                                                               | -3.84                                                               | 1                                              | WIPI2_MOUSE  | WD repeat domain phosphoinositide-interacting protein 2;     |
| LASLLSGQA      | EVEDASEEAPLR                | -0.76                                                               | -1.64                                                               | 1                                              | SRCA_MOUSE   | Sarcalumenin;                                                |
| LSKDITANTW     | AVTVDPCCSTNAKR              | -6.64                                                               | -2.74                                                               | 1                                              | PPR3A_MOUSE  | Protein phosphatase 1 regulatory subunit 3A;                 |
| AIPNLRENYG     | ELADCCTKQEPER               | -3.84                                                               | -2.74                                                               | 1                                              | ALBU_MOUSE   | Serum albumin;                                               |
| PSNQVIMLTF     | GKFDVDPDYCR                 | -1.47                                                               | -6.64                                                               | 1                                              | PCOC1_MOUSE  | Procollagen C-endopeptidase enhancer 1;                      |
| TQCEKIVQKY     | GYTHLSTGDLR                 | -1.84                                                               | -1.15                                                               | 1                                              | KAD1_MOUSE   | Adenylate kinase isoenzyme 1;                                |
| ILLWLYGADG     | NIVMTQSPKSMMSVGER           | -1.06                                                               | -1.56                                                               | 1                                              | KV5A2_MOUSE  | Ig kappa chain V-V region MOPC 21;                           |
| M              | SATHHKTSLPQGV               | -6.64                                                               | -3.32                                                               | 1                                              | LEG7_MOUSE   | Galectin-7;                                                  |
| GMLPEKDCRY     | ALYDASFETKESR               | -1.25                                                               | -0.92                                                               | 0                                              | DEST_MOUSE   | Dextrin;                                                     |
| PREIFKQKER     | AMSTTSVTSSQPGKLR            | -1.18                                                               | -2.12                                                               | 0                                              | DBNL_MOUSE   | Drebrin-like protein;                                        |
| CDIDIRKDL      | ANNVMMSGTTMYPGIADR          | -2.84                                                               | -3.84                                                               | 0                                              | ACTS_MOUSE   | Actin, alpha skeletal muscle;                                |
| PKLPGRVAFG     | EDIDLPEFDAR                 | -5.64                                                               | -5.64                                                               | 0                                              | CATB_MOUSE   | Cathepsin B;                                                 |
| D              | IQMTQTSSLSASLGDR            | -3.84                                                               | -1.29                                                               | 0                                              | KV5AF_MOUSE  | Ig kappa chain V-V region HP 91A3;                           |
| MYTPIQ         | SGSPFPASVQDPLHIWR           | -2.64                                                               | -1.52                                                               | 0                                              | CAPG_MOUSE   | Macrophage-capping protein;                                  |
| AMKANTMSNY     | SLLPASLLDHR                 | -1.22                                                               | -1.64                                                               | 0                                              | ST2B1_MOUSE  | Sulfotransferase family cytosolic 2B member 1;               |
| IFVKAVLVGT     | DDEATILADNKCMCTR            | -0.84                                                               | -2.94                                                               | -1                                             | IGJ_MOUSE    | Immunoglobulin J chain;                                      |
| PTKETGWASF     | SEFTSSLTKESLR               | -0.86                                                               | -3.18                                                               | -1                                             | PP6R3_MOUSE  | Serine/threonine-protein phosphatase 6 regulatory subunit 3; |
| WTHEVFSSRS     | SEVVLSDGDEDEYQR             | -0.81                                                               | -1.52                                                               | -1                                             | E9Q616_MOUSE | Ahnak                                                        |
| SGLLLTQG       | EEAQEIDCNDEAVFQAVDASLKKLNAR | -1.84                                                               | -3.18                                                               | -1                                             | Q6S9I3_MOUSE | HMW kininogen-II                                             |
| APPWKDSKFF     | KDAPDGPTVVLTVDGR            | -6.64                                                               | -6.64                                                               | -1                                             | FA12_MOUSE   | Coagulation factor XII;                                      |
| EDVQETDSQ      | KDQSPASHEIATNLGDFAIPLYR     | -5.64                                                               | -1.79                                                               | -1                                             | A1AT2_MOUSE  | Alpha-1-antitrypsin 1-2;                                     |
| MVHL           | TDAEKSAVSCLVAKVNPDEVGGEALGR | -6.64                                                               | -5.06                                                               | -1                                             | HBB2_MOUSE   | Hemoglobin subunit beta-2;                                   |
| SLLGSVQGY      | MEQASKTVQDALSSVQESDIAVVAR   | -1.00                                                               | -2.84                                                               | -2                                             | APOC3_MOUSE  | Apolipoprotein C-III;                                        |
| IENHEGVRFF     | DEILEASDGIMVAR              | -1.18                                                               | -1.03                                                               | -2                                             | KPYM_MOUSE   | Pyruvate kinase isozymes M1/M2;                              |
| PSSGAATTV      | SEKPGKAAEVGDDFLGDFVVGER     | -2.74                                                               | -2.06                                                               | -2                                             | CLIP2_MOUSE  | CAP-Gly domain-containing linker protein 2;                  |
