# Supplementary material
Source: PubMed Central journal article supplement (PMC3591655)
Supplement: supp_M112.017962_mcp.M112.017962-16.pdf [file supp_M112.017962_mcp.M112.017962-16.pdf]

**Table S14:** Ranking of dimethylated (naturally unmodified) N-termini reduced in the TAILS experiment comparing wild-type and *Ctsl*<sup>-/-</sup> skin.

| Non Prime Site | Prime Site            | Fold change<br>(log <sub>2</sub> ) of<br>ASAPRatio<br>(replicate 1) | Fold change<br>(log <sub>2</sub> ) of<br>ASAPRatio<br>(replicate 2) | Ranking (max. 5<br>points / min. -6<br>points) | Uniprot ID   | Protein Name                                                                       |
|----------------|-----------------------|---------------------------------------------------------------------|---------------------------------------------------------------------|------------------------------------------------|--------------|------------------------------------------------------------------------------------|
| QADCAVLIVA     | AGVGEFEAGISKNGQTR     | -1.89                                                               | -1.22                                                               | 5                                              | EF1A1_MOUSE  | Elongation factor 1-alpha 1;                                                       |
| AAQYSDKGV      | SGPGPMGLMGPR          | -2.74                                                               | -1.84                                                               | 5                                              | CO1A2_MOUSE  | Collagen alpha-2(I) chain;                                                         |
| HLAQGSETVQ     | ATPESLEVPEVTEDVDR     | -0.81                                                               | -2.74                                                               | 5                                              | AKA12_MOUSE  | A-kinase anchor protein 12;                                                        |
| TKIFTASNVS     | SVPLPAENVITAGQR       | -4.32                                                               | -3.32                                                               | 4                                              | UBP2L_MOUSE  | Ubiquitin-associated protein 2-like;                                               |
| LESKSNKIVQ     | SVIQTAVDQFAR          | -1.18                                                               | -2.25                                                               | 4                                              | AKA12_MOUSE  | A-kinase anchor protein 12;                                                        |
| SAANCDKSLH     | TLFGDKLCAIPNLR        | -3.18                                                               | -3.64                                                               | 3                                              | ALBU_MOUSE   | Serum albumin;                                                                     |
| TIEHLLPLFL     | AQLKDECEPVR           | -3.47                                                               | -1.84                                                               | 3                                              | 2AAA_MOUSE   | Serine/threonine-protein phosphatase 2A 65 kDa regulatory subunit A alpha isoform; |
| VEPDTYCRYD     | SVSVFNGAVSDDSKR       | -1.74                                                               | -4.06                                                               | 3                                              | PCOC1_MOUSE  | Procollagen C-endopeptidase enhancer 1;                                            |
| EGNASGVLL      | EALDTLPPTRPTDKPLR     | -4.32                                                               | -3.64                                                               | 3                                              | EF1A2_MOUSE  | Elongation factor 1-alpha 2;                                                       |
| DGSASGTTLL     | EALDCILPPTPTDKPLR     | -1.79                                                               | -1.56                                                               | 3                                              | EF1A1_MOUSE  | Elongation factor 1-alpha 1;                                                       |
| LWKFETSKYY     | VTIIDAPGHR            | -5.06                                                               | -4.32                                                               | 3                                              | EF1A1_MOUSE  | Elongation factor 1-alpha 1;                                                       |
| AGDEESYEVF     | ADLFDPIVILR           | -2.56                                                               | -3.84                                                               | 3                                              | KCRS_MOUSE   | Creatine kinase S-type, mitochondrial;                                             |
| PTDKHKTDLN     | HENLKGDDLDPNVYVSSR    | -1.25                                                               | -1.74                                                               | 3                                              | KCRM_MOUSE   | Creatine kinase M-type;                                                            |
| HPFMWNEHLG     | YVLTCPNLGTGLR         | -2.56                                                               | -2.74                                                               | 3                                              | KCRM_MOUSE   | Creatine kinase M-type;                                                            |
| EGPVGLPGID     | GRPGPIGPAGPR          | -2.47                                                               | -2.47                                                               | 3                                              | CO1A2_MOUSE  | Collagen alpha-2(I) chain;                                                         |
| MKVLQTRGFV     | SDSSDSMDTGAGSIR       | -1.74                                                               | -1.29                                                               | 3                                              | ATIF1_MOUSE  | ATPase inhibitor, mitochondrial;                                                   |
| CDIDIRKDL      | ANNVMSGTTMYPGIADR     | -2.64                                                               | -4.32                                                               | 3                                              | ACTS_MOUSE   | Actin, alpha skeletal muscle;                                                      |
| QKIGQPTLL      | AVEEQYSCYVSGSR        | -1.52                                                               | -1.15                                                               | 3                                              | E9PX16_MOUSE |                                                                                    |
| FVREPPIMVT     | KQLEDMNAYCGER         | -4.06                                                               | -5.06                                                               | 3                                              | D3YU50_MOUSE |                                                                                    |
| LPGFPATHY      | STLSKPAPLTGTLEVR      | -2.56                                                               | -1.94                                                               | 2                                              | PKN1_MOUSE   | Serine/threonine-protein kinase N1;                                                |
| KGSVAGGAVY     | LVYDQELLGSPDKSEALR    | -1.84                                                               | -1.40                                                               | 2                                              | QIL1_MOUSE   | Protein QIL1;                                                                      |
| LEEVTMKQIC     | KEVYENYPAYDLTER       | -1.52                                                               | -3.06                                                               | 2                                              | DEK_MOUSE    | Protein DEK;                                                                       |
| YKNSKFHRVI     | KDFMIQGGDFTR          | -3.47                                                               | -4.64                                                               | 2                                              | PPIB_MOUSE   | Peptidyl-prolyl cis-trans isomerase B;                                             |
| LNLKQKGYFF     | VEGELYCETHAR          | -1.74                                                               | -2.84                                                               | 2                                              | PDLI3_MOUSE  | PDZ and LIM domain protein 3;                                                      |
| SVTREDSGQY     | AAAYISNAVGAAYSSAR     | -4.64                                                               | -3.84                                                               | 2                                              | OBSCN_MOUSE  | Obscurin;                                                                          |
| LQPQNLQPPS     | QPHLSVSSAANGHLGR      | -3.84                                                               | -3.84                                                               | 2                                              | NOTC1_MOUSE  | Neurogenic locus notch homolog protein 1;                                          |
| DIKSKTYQVM     | RDYEQAGSAAVSVFSR      | -1.64                                                               | -2.06                                                               | 2                                              | MSTN1_MOUSE  | Musculoskeletal embryonic nuclear protein 1;                                       |
| KKAGHPFMWN     | EHLGYVLTCPNLGTGLR     | -0.97                                                               | -2.47                                                               | 2                                              | KCRM_MOUSE   | Creatine kinase M-type;                                                            |
| LGGNFASQMS     | YGYDEKSAGVSVPGPMGSPGR | -3.32                                                               | -5.64                                                               | 2                                              | CO1A1_MOUSE  | Collagen alpha-1(I) chain;                                                         |
| MRAAPRRAPA     | AQPPAAAAPSAVGPAAAPR   | -1.43                                                               | -1.84                                                               | 2                                              | CHCH2_MOUSE  | Coiled-coil-helix-coiled-coil-helix domain-containing protein 2, mitochondrial;    |
| VETQPGKTVI     | RLPSGSGPASPTTGSVDIR   | -1.79                                                               | -1.69                                                               | 2                                              | E9Q616_MOUSE |                                                                                    |
| KWKISFDPQD     | TFESEFYLDEKR          | -1.89                                                               | -1.36                                                               | 1                                              | SPA3K_MOUSE  | Serine protease inhibitor A3K;                                                     |
| LSVPCILGQN     | GISDVVKVTLTPEEAR      | -0.84                                                               | -1.64                                                               | 1                                              | LDHA_MOUSE   | L-lactate dehydrogenase A chain;                                                   |
| SQASDSEGHS     | DFSEGQAVGAHR          | -1.94                                                               | -2.25                                                               | 1                                              | FILA_MOUSE   | Filaggrin;                                                                         |
| TVKTTVFSCN     | LGEKFDETTADGR         | -6.64                                                               | -6.64                                                               | 1                                              | FABP5_MOUSE  | Fatty acid-binding protein, epidermal;                                             |
| LLALAGLLQA     | RLLLPQAGFGGECDR       | -2.64                                                               | -2.06                                                               | 1                                              | ENDD1_MOUSE  | Endonuclease domain-containing 1 protein;                                          |
| GNFAAQYSDK     | GVSSGPGPMGLMGPR       | -1.74                                                               | -2.32                                                               | 1                                              | CO1A2_MOUSE  | Collagen alpha-2(I) chain;                                                         |
| GLTGNFAAQY     | SDKGVSSGPGPMGLMGPR    | -1.52                                                               | -2.32                                                               | 1                                              | CO1A2_MOUSE  | Collagen alpha-2(I) chain;                                                         |
| GPVGPAGKNG     | DRGETGPAGPAGIPAGAR    | -2.64                                                               | -2.00                                                               | 1                                              | CO1A1_MOUSE  | Collagen alpha-1(I) chain;                                                         |
| NDAYGPPSNF     | LEIDVSNPQTVGVGR       | -1.12                                                               | -2.00                                                               | 0                                              | SNX3_MOUSE   | Sorting nexin-3;                                                                   |
| VHKAVLDVAE     | TGTEAAAATGVIGGIR      | -3.64                                                               | -3.47                                                               | 0                                              | SPA3K_MOUSE  | Serine protease inhibitor A3K;                                                     |
| SRDGKALEQF     | LQEYFDGNLKR           | -1.60                                                               | -1.12                                                               | 0                                              | PDIA3_MOUSE  | Protein disulfide-isomerase A3;                                                    |

Table S14, Tholen et al.

| Non Prime Site | Prime Site                | Fold change<br>(log <sub>2</sub> ) of<br>ASAPRatio<br>(replicate 1) | Fold change<br>(log <sub>2</sub> ) of<br>ASAPRatio<br>(replicate 2) | Ranking (max. 5<br>points / min. -6<br>points) | Uniprot ID   | Protein Name                                              |
|----------------|---------------------------|---------------------------------------------------------------------|---------------------------------------------------------------------|------------------------------------------------|--------------|-----------------------------------------------------------|
| EGKGTIKKQF     | LEELLTQCDR                | -1.56                                                               | -3.06                                                               | 0                                              | MLRS_MOUSE   | Myosin regulatory light chain 2, skeletal muscle isoform; |
| VFSMFDQTI      | QEFKEAFTVIDQNR            | -2.94                                                               | -3.64                                                               | 0                                              | MLRS_MOUSE   | Myosin regulatory light chain 2, skeletal muscle isoform; |
| D              | IQMTQTSSLSASLGDR          | -1.79                                                               | -2.12                                                               | 0                                              | KV5AA_MOUSE  | Ig kappa chain V-V region MOPC 173;                       |
| LVLILKGVQC     | DVQLVESGGGLVQPGGSR        | -3.18                                                               | -2.25                                                               | 0                                              | HVM16_MOUSE  | Ig heavy chain V region MOPC 21;                          |
| DTEEYNLRDY     | FEKYGIETIEVMEDR           | -0.86                                                               | -1.84                                                               | 0                                              | ROA3_MOUSE   | Heterogeneous nuclear ribonucleoprotein A3;               |
| WPDARGIWHN     | DNKSFLVWVNEEDHLR          | -1.32                                                               | -3.84                                                               | 0                                              | KCRM_MOUSE   | Creatine kinase M-type;                                   |
| YSGLQGLPGL     | AGLHGDQAGPVPVGPAGPR       | -2.40                                                               | -2.25                                                               | 0                                              | CO1A2_MOUSE  | Collagen alpha-2(I) chain;                                |
| PGLTGNFAAQ     | YSDKGVSSGPGMGLMGPR        | -2.40                                                               | -4.32                                                               | 0                                              | CO1A2_MOUSE  | Collagen alpha-2(I) chain;                                |
| LLHPTLILAQ     | QSNVDLGCSSLGQSYESR        | -1.74                                                               | -3.64                                                               | 0                                              | CO3A1_MOUSE  | Collagen alpha-1(III) chain;                              |
| PGLGGNFASQ     | MSYGYDEKSAGVSPGPMGSPGPR   | -3.18                                                               | -2.84                                                               | 0                                              | CO1A1_MOUSE  | Collagen alpha-1(I) chain;                                |
| SQMSYGYDEK     | SAGVSPGPMGSPGPR           | -2.74                                                               | -3.32                                                               | 0                                              | CO1A1_MOUSE  | Collagen alpha-1(I) chain;                                |
| YRIWRDTANW     | LEINPETGAIFTR             | -2.00                                                               | -2.56                                                               | 0                                              | CADH1_MOUSE  | Cadherin-1;                                               |
| R              | IFQTTTTRPFQKLF            | -2.12                                                               | -1.52                                                               | 0                                              | F7D9Q0_MOUSE |                                                           |
| SPLPVIPHQK     | VVANSAPANADYQER           | -1.89                                                               | -1.64                                                               | 0                                              | E9PYJ9_MOUSE |                                                           |
| CDLYEKLGEY     | GFQNAILVR                 | -2.00                                                               | -1.18                                                               | -1                                             | ALBU_MOUSE   | Serum albumin;                                            |
| EQFLPMMQAI     | SNNKQGGYEDFVEGLR          | -2.32                                                               | -2.40                                                               | -1                                             | MYL1_MOUSE   | Myosin light chain 1/3, skeletal muscle isoform;          |
| LFVRNLANTV     | TEEILEKFSQFGKLER          | -2.18                                                               | -3.47                                                               | -1                                             | HNRPO_MOUSE  | Heterogeneous nuclear ribonucleoprotein Q;                |
| KDLKDYFSKF     | GEVVDCTLKLDPITGR          | -1.64                                                               | -2.06                                                               | -1                                             | HNRPD_MOUSE  | Heterogeneous nuclear ribonucleoprotein D0;               |
| KDLTEYLSRF     | GEVVDCTIKTDPVTGR          | -2.32                                                               | -3.32                                                               | -1                                             | HNRDL_MOUSE  | Heterogeneous nuclear ribonucleoprotein D-like;           |
| ERRGFCFITY     | TDEEPVKLLLES              | -2.18                                                               | -2.25                                                               | -1                                             | HNRDL_MOUSE  | Heterogeneous nuclear ribonucleoprotein D-like;           |
| YNLRDYFEKY     | GKIETIEVMEDR              | -1.36                                                               | -1.89                                                               | -1                                             | ROA3_MOUSE   | Heterogeneous nuclear ribonucleoprotein A3;               |
| KDLKDYFTKF     | GEVVDCTIKMDPNTGR          | -1.94                                                               | -6.64                                                               | -1                                             | ROAA_MOUSE   | Heterogeneous nuclear ribonucleoprotein A/B;              |
| TPGHACTQKF     | SNEEIAMATVTALR            | -1.32                                                               | -1.69                                                               | -1                                             | ALDOA_MOUSE  | Fructose-bisphosphate aldolase A;                         |
| FQLIGIQDGY     | LSLLQDSGEVR               | -2.84                                                               | -2.25                                                               | -1                                             | IF5A1_MOUSE  | Eukaryotic translation initiation factor 5A-1;            |
| SPSEIGPGMP     | ANQDTTFEGIGGPR            | -3.47                                                               | -2.56                                                               | -1                                             | CO5A1_MOUSE  | Collagen alpha-1(V) chain;                                |
| GATALLTHGQ     | EDIPEVSCIHNGLR            | -0.94                                                               | -1.84                                                               | -1                                             | CO1A1_MOUSE  | Collagen alpha-1(I) chain;                                |
| PGPVGPAGKN     | GDRGETGPAGPAGPIGPAGAR     | -2.00                                                               | -2.84                                                               | -1                                             | CO1A1_MOUSE  | Collagen alpha-1(I) chain;                                |
| GGNFASQMSY     | GYDEKSAGVSPGPMGSPGPR      | -1.89                                                               | -2.64                                                               | -1                                             | CO1A1_MOUSE  | Collagen alpha-1(I) chain;                                |
| PVGPAGKNGD     | RGETGPAGPAGPIGPAGAR       | -2.64                                                               | -2.25                                                               | -1                                             | CO1A1_MOUSE  | Collagen alpha-1(I) chain;                                |
| HRSGETEDTF     | IADLVVGLCTGQIKTGAPCR      | -1.40                                                               | -2.40                                                               | -1                                             | ENOB_MOUSE   | Beta-enolase;                                             |
| DKIREYKSKR     | QASGGPVDIGPEYQQDLDR       | -1.74                                                               | -2.40                                                               | -1                                             | ATP5J_MOUSE  | ATP synthase-coupling factor 6, mitochondrial;            |
| DKAKELWDTL     | YQLETKDFEFGEKLR           | -2.94                                                               | -1.43                                                               | -2                                             | TNNT3_MOUSE  | Troponin T, fast skeletal muscle;                         |
| ARRQSRMEKY     | VISSGHAELAR               | -3.06                                                               | -4.06                                                               | -2                                             | SYNPO_MOUSE  | Synaptopodin;                                             |
| DALKRGLREH     | LCEQQAELDYLCGR            | -3.32                                                               | -5.06                                                               | -2                                             | FA65C_MOUSE  | Protein FAM65C;                                           |
| LQKRPKPDEK     | YYSSSIWGPCTCDGLDR         | -6.64                                                               | -6.64                                                               | -2                                             | DCOR_MOUSE   | Ornithine decarboxylase;                                  |
| KQIQKLEXRV     | RELEGEVENEQKR             | -3.06                                                               | -1.69                                                               | -2                                             | MYH1_MOUSE   | Myosin-1;                                                 |
| MFDQTIQIEF     | KEAFTVIDQNR               | -1.43                                                               | -2.32                                                               | -2                                             | MLRS_MOUSE   | Myosin regulatory light chain 2, skeletal muscle isoform; |
| AGLPTSLTL      | YLDNNKISNIPDEYFKR         | -2.40                                                               | -3.64                                                               | -2                                             | LUM_MOUSE    | Lumican;                                                  |
| LLWVPGSTGD     | IVLTQSPASLAVSLGQR         | -1.64                                                               | -2.25                                                               | -2                                             | KV3A1_MOUSE  | Ig kappa chain V-III region PC 2880/PC 1229;              |
| GTDIFTGKKY     | EDICPSTHNMDVPNIKR         | -1.47                                                               | -2.06                                                               | -2                                             | IF5A1_MOUSE  | Eukaryotic translation initiation factor 5A-1;            |
| KEGNASGVSL     | LEALDTLPPTRPDKPLR         | -3.84                                                               | -2.56                                                               | -2                                             | EF1A2_MOUSE  | Elongation factor 1-alpha 2;                              |
| ASGTTLLEAL     | DCILPPTRPDKPLR            | -2.25                                                               | -2.12                                                               | -2                                             | EF1A1_MOUSE  | Elongation factor 1-alpha 1;                              |
| KDGASGTTL      | LEALDCILPPTRPDKPLR        | -2.74                                                               | -2.64                                                               | -2                                             | EF1A1_MOUSE  | Elongation factor 1-alpha 1;                              |
| SVGDGETVEF     | DVVEGEKGAEANVTGPDGVPVEGSR | -3.06                                                               | -1.79                                                               | -2                                             | DBPA_MOUSE   | DNA-binding protein A;                                    |
| KHKTDLNHEN     | LKGGDDLDPNYVLSR           | -1.12                                                               | -1.94                                                               | -2                                             | KCRM_MOUSE   | Creatine kinase M-type;                                   |
| GIWHNDNKSF     | LVWVNEEDHLR               | -1.56                                                               | -1.89                                                               | -2                                             | KCRM_MOUSE   | Creatine kinase M-type;                                   |
| NFASQMSYGY     | DEKSAGVSPGPMGSPGPR        | -3.06                                                               | -3.06                                                               | -2                                             | CO1A1_MOUSE  | Collagen alpha-1(I) chain;                                |
| APPWKDSKKF     | KDAPDGPTVVLTVDGR          | -6.64                                                               | -6.64                                                               | -2                                             | FA12_MOUSE   | Coagulation factor XII;                                   |

Table S14, Tholen et al.

| Non Prime Site | Prime Site      | Fold change<br>(log <sub>2</sub> ) of<br>ASAPRatio<br>(replicate 1) | Fold change<br>(log <sub>2</sub> ) of<br>ASAPRatio<br>(replicate 2) | Ranking (max. 5<br>points / min. -6<br>points) | Uniprot ID   | Protein Name                      |
|----------------|-----------------|---------------------------------------------------------------------|---------------------------------------------------------------------|------------------------------------------------|--------------|-----------------------------------|
| LAKYNQLMRI     | EEALGDKAVFAGR   | -5.06                                                               | -2.84                                                               | -2                                             | ENOB_MOUSE   | Beta-enolase;                     |
| MPCKI          | EEIKDFLLTAR     | -5.64                                                               | -1.84                                                               | -2                                             | RL38_MOUSE   | 60S ribosomal protein L38;        |
| FLPMMQAISN     | NKDQGGYEDFVEGLR | -1.12                                                               | -2.25                                                               | -2                                             | E9PWG4_MOUSE |                                   |
| KKILAERRKP     | LNIDHLSDDKLR    | -1.64                                                               | -3.18                                                               | -4                                             | TNNT3_MOUSE  | Troponin T, fast skeletal muscle; |
