# Supplementary material
Source: PubMed Central journal article supplement (PMC3591655)
Supplement: supp_M112.017962_mcp.M112.017962-17.pdf [file supp_M112.017962_mcp.M112.017962-17.pdf]

Table S15: Acetylated N-termini identified in the TAILS experiment comparing wild-type and *Ctsb*<sup>-/-</sup> skin (replicate 1). Up to two potential protein IDs per peptide are stated.

| Non Prime Site | Prime Site                  | Modifications                              | Hyperscore | Mass error in ppm | Charge | Precursor neutral mass in Da | Fold change (log <sub>2</sub> ) of ASAPRatio | FC-error of ASAPRatio | Uniprot ID 1 | Uniprot ID 2 | Protein Name 1                                                                                        | Protein Name 2                                                                                                                                                                                                      |
|----------------|-----------------------------|--------------------------------------------|------------|-------------------|--------|------------------------------|----------------------------------------------|-----------------------|--------------|--------------|-------------------------------------------------------------------------------------------------------|---------------------------------------------------------------------------------------------------------------------------------------------------------------------------------------------------------------------|
| MAA            | AAAAAAGAAAGRSGPGRR          | N-ter + 42.01 Da                           | 44.8       | 48.8              | 3      | 1764.99                      | n.d.                                         | n.d.                  | PABP2_MOUSE  |              | Nuclear poly(A)-binding protein 1;Poly(A)-binding protein II;Polyadenylate-binding nuclear protein 1; |                                                                                                                                                                                                                     |
| AAAAAVAAA      | AAAAAAEYPASGTTKR            | N-ter + 42.01 Da, K +34.06 Da              | 37.8       | 29.7              | 3      | 1778.99                      | -2.74                                        | 0.37                  | ALKB5_MOUSE  |              | Alkylated DNA repair protein alkB homolog 5;                                                          |                                                                                                                                                                                                                     |
| M              | AAAAAASHLNLDALR             | N-ter + 42.01 Da                           | 46.4       | 51.6              | 3      | 1505.87                      | n.d.                                         | n.d.                  | TRI32_MOUSE  | A2AGS1_MOUSE | E3 ubiquitin-protein ligase TRIM32;                                                                   | Tripartite motif-containing protein 32;                                                                                                                                                                             |
| M              | AAAAGAVVASAASGPAEGKKITELR   | N-ter + 42.01 Da, K +34.06 Da              | 65.2       | 37.3              | 3      | 2405.48                      | 0.32                                         | 0.01                  | SLTM_MOUSE   |              | SAFB-like transcription modulator;                                                                    | Modulator of estrogen-induced transcription;SAF-like transcription modulator;                                                                                                                                       |
| M              | AAAKDGCGLTAAGNGR            | N-ter + 42.01 Da, K +28.03 Da, C +57.02 Da | 54.0       | 57.4              | 3      | 1687.89                      | -0.27                                        | 0.02                  | FPD3_MOUSE   | Q3TIR6_MOUSE | Prefoldin subunit 3;                                                                                  | Von Hippel-Lindau-binding protein 1;                                                                                                                                                                                |
| M              | AAAMDVDTPSGTNSGAGKRR        | N-ter + 42.01 Da, K +28.03 Da              | 42.4       | 66.0              | 3      | 2031.14                      | -0.03                                        | 0.01                  | RBX1_MOUSE   |              | E3 ubiquitin-protein ligase RBX1;                                                                     | RING finger protein 75;RING-box protein 1;                                                                                                                                                                          |
| M              | AAAPATLALDPQPEKQKDASESSELSR | N-ter + 42.01 Da, K +28.03 Da              | 31.7       | 74.5              | 4      | 3035.77                      | -0.43                                        | 0.06                  | RABE2_MOUSE  |              | Rab GTPase-binding effector protein 2;                                                                | Rabaptin-5beta;                                                                                                                                                                                                     |
| M              | AADDKVAITDDEEEQKR           | N-ter + 42.01 Da, K +28.03 Da              | 26.3       | 64.6              | 3      | 2143.20                      | 0.52                                         | 0.05                  | MFS6_MOUSE   | D3Z183_MOUSE | Major facilitator superfamily domain-containing protein 6;                                            | Macrophage MHC class I receptor 2;                                                                                                                                                                                  |
| M              | AADISQWAGLPLCLQEVDEPPQHALR  | N-ter + 42.01 Da, C +57.02 Da              | 54.6       | 55.7              | 3      | 2842.53                      | n.d.                                         | n.d.                  | PEBP1_MOUSE  | D3Z1V4_MOUSE | Phosphatidylethanolamine-binding protein 1;                                                           | HCNPPP;                                                                                                                                                                                                             |
| M              | AAGFKTVEPLEYR               | N-ter + 42.01 Da, K +28.03 Da              | 42.2       | 53.1              | 3      | 1712.97                      | -0.74                                        | 0.04                  | EXOS8_MOUSE  | D3YYN3_MOUSE | Exosome complex component RRP43;                                                                      | Exosome component 8;Ribosomal RNA-processing protein 43;                                                                                                                                                            |
| M              | CQKEEAGPGP                  | AAGPQTQPLGYSYR                             | 31.3       | 80.1              | 3      | 1591.93                      | n.d.                                         | n.d.                  | TRM2A_MOUSE  | Q3UYU2_MOUSE | tRNA (uracil-5)-methyltransferase homolog A;                                                          | Hpal1 tiny fragments locus 9c protein;                                                                                                                                                                              |
| M              | AAIPSSGSLVATHDYR            | N-ter + 42.01 Da                           | 27.3       | 55.3              | 3      | 1849.00                      | n.d.                                         | n.d.                  | PPDPF_MOUSE  |              | Pancreatic progenitor cell differentiation and proliferation factor;                                  | Exocrine differentiation and proliferation factor;                                                                                                                                                                  |
| M              | AAKPKLYFNDR                 | N-ter + 42.01 Da, K +28.03 Da              | 32.8       | 52.0              | 3      | 1524.93                      | -0.52                                        | 0.04                  | GSTA4_MOUSE  |              | Glutathione S-transferase A4;                                                                         | GST A4-4;GST class-alpha member 4;Glutathione S-transferase 5.7;                                                                                                                                                    |
| M              | AANATTNPQLLPLELVDKICISR     | N-ter + 42.01 Da, K +28.03 Da, C +57.02 Da | 57.8       | 42.8              | 3      | 2643.53                      | -0.07                                        | 0.03                  | LSM5_MOUSE   |              | U6 snRNA-associated Sm-like protein LSM5;                                                             |                                                                                                                                                                                                                     |
| M              | ADTSKQESNM                  | AAPAKGENLSLVVHGPGDIR                       | 56.7       | 62.2              | 3      | 2070.25                      | -0.04                                        | 0.01                  | DHSO_MOUSE   |              | Sorbitol dehydrogenase;                                                                               | L-iditol 2-dehydrogenase;                                                                                                                                                                                           |
| M              | AAPSVPPLYGHVGR              | N-ter + 42.01 Da                           | 40.8       | 34.4              | 3      | 1562.87                      | n.d.                                         | n.d.                  | D3Z6J0_MOUSE | Q6PRU9_MOUSE |                                                                                                       | BRG1-associated factor 250;BRG1-associated factor 250a;Osa homolog 1;SWI-like protein;SWI/SNF complex protein p270;SWI/SNF-related, matrix-associated, actin-dependent regulator of chromatin subfamily F member 1; |
| M              | AAQVAPAAASLGNPPPPSELKAEQQQR | N-ter + 42.01 Da, K +28.03 Da              | 40.4       | 72.6              | 4      | 3135.90                      | 0.14                                         | 0.01                  | ARI1A_MOUSE  | E9QAQ7_MOUSE | AT-rich interactive domain-containing protein 1A;                                                     | SRA stem-loop-interacting RNA-binding protein, mitochondrial;                                                                                                                                                       |
| M              | AASAIGLSALR                 | N-ter + 42.01 Da, K +34.06 Da              | 60.5       | 21.1              | 2      | 1232.79                      | 0.72                                         | 0.04                  | SLRP_MOUSE   |              |                                                                                                       | Cell death regulatory protein GRIM-19;Complex I-B16.6;Gene associated with retinoic and interferon-induced mortality 19 protein;NADH-ubiquinone oxidoreductase B16.6 subunit;                                       |
| M              | AASKVKQDMPGGYGPIDYKR        | N-ter + 42.01 Da, K +34.06 Da              | 51.3       | 55.7              | 4      | 2518.55                      | 0.10                                         | 0.00                  | NDUAD_MOUSE  |              | NADH dehydrogenase [ubiquinone] 1 alpha subcomplex subunit 13;                                        | ADP-ribosylation factor GTPase-activating protein 2;                                                                                                                                                                |
| M              | AASPSKTEIQTIFR              | N-ter + 42.01 Da, K +28.03 Da              | 29.8       | 66.4              | 3      | 1774.12                      | 0.39                                         | 0.04                  | ARFG2_MOUSE  |              |                                                                                                       |                                                                                                                                                                                                                     |
| M              | AASSSQVSEMKGVEDSSKTQTEGPR   | N-ter + 42.01 Da, K +34.06 Da              | 39.7       | 69.5              | 4      | 2705.53                      | 0.31                                         | 0.04                  | E9PUL5_MOUSE |              |                                                                                                       |                                                                                                                                                                                                                     |
| M              | AATFFGEVVKAPCR              | N-ter + 42.01 Da, K +28.03 Da, C +57.02 Da | 30.8       | 59.6              | 3      | 1621.93                      | 0.37                                         | 0.07                  | PSMG1_MOUSE  | D3Z795_MOUSE | Proteasome assembly chaperone 1;                                                                      | Down syndrome critical region protein 2 homolog;                                                                                                                                                                    |
| M              | AATTGSGVKVPR                | N-ter + 42.01 Da, K +28.03 Da              | 68.2       | 35.5              | 2      | 1212.73                      | 0.75                                         | 0.07                  | UB2V1_MOUSE  | D3Z1I3_MOUSE | Ubiquitin-conjugating enzyme E2 variant 1;                                                            | CROC-1;                                                                                                                                                                                                             |
| M              | AAYKLVLR                    | N-ter + 42.01 Da, K +34.06 Da              | 44.3       | 58.1              | 2      | 1121.80                      | 0.42                                         | 0.04                  | PGAM1_MOUSE  |              | Phosphoglycerate mutase 1;                                                                            | BPG-dependent PGAM 1;Phosphoglycerate mutase isozyme B;                                                                                                                                                             |
| M              | ACGLVASLNLNKPGCECLKVR       | N-ter + 42.01 Da, K +28.03 Da, C +57.02 Da | 52.2       | 79.2              | 4      | 2296.42                      | -0.12                                        | 0.01                  | LEG1_MOUSE   |              | Galectin-1;                                                                                           | 14 kDa lectin;Beta-galactoside-binding lectin L-14-I;Galactin;Lactose-binding lectin 1;Lectin galactoside-binding soluble 1;S-Lac lectin 1;                                                                         |
| M              | ADAAAAPVVKR                 | N-ter + 42.01 Da, K +34.06 Da              | 56.8       | 39.5              | 2      | 1117.67                      | 0.39                                         | 0.04                  | KDM3B_MOUSE  | B9EKS2_MOUSE | Lysine-specific demethylase 3B;                                                                       | JmjC domain-containing histone demethylation protein 2B;Jumonji domain-containing protein 1B;                                                                                                                       |
| M              | IQNLHSDFPF                  | ADAAKSGDDLPAGETEYIHR                       | 39.5       | 96.5              | 4      | 2326.37                      | 2.33                                         | 0.13                  | EIF1_MOUSE   |              | Eukaryotic translation initiation factor 1;                                                           | Protein translation factor SUI1 homolog;                                                                                                                                                                            |
| M              | ADEDEGEGHPSAPHR             | N-ter + 42.01 Da                           | 43.5       | 76.5              | 3      | 1628.84                      | n.d.                                         | n.d.                  | SNX27_MOUSE  | D6RES4_MOUSE | Sorting nexin-27;                                                                                     |                                                                                                                                                                                                                     |
| M              | ADEEKLPPGWKVR               | N-ter + 42.01 Da, K +34.06 Da              | 53.7       | 69.2              | 3      | 1664.04                      | -0.18                                        | 0.01                  | PINI_MOUSE   |              | Peptidyl-prolyl cis-trans isomerase NIMA-interacting 1;                                               | Peptidyl-prolyl cis-trans isomerase Pin1;                                                                                                                                                                           |
| M              | ADEIKAQVAQPGGDTIFGKIIR      | N-ter + 42.01 Da, K +34.06 Da              | 59.0       | 87.0              | 4      | 2507.66                      | -0.20                                        | 0.05                  | HINT1_MOUSE  | 80R1E3_MOUSE | Histidine triad nucleotide-binding protein 1;                                                         | Adenosine 5'-monophosphoramidase;Protein kinase C inhibitor 1;Protein kinase C-interacting protein 1;                                                                                                               |
| M              | NIYKPNKAM                   | ADEVTEKQVYDAHTKEIDLVR                      | 40.1       | 44.0              | 4      | 2682.53                      | -0.18                                        | 0.03                  | CAV1_MOUSE   | D3Z148_MOUSE | Caveolin-1;                                                                                           |                                                                                                                                                                                                                     |
| M              | ADKEAFAFDDAVEER             | N-ter + 42.01 Da, K +28.03 Da              | 51.5       | 49.8              | 3      | 1634.82                      | 0.06                                         | 0.01                  | RBBP4_MOUSE  | E9PYH8_MOUSE | Histone-binding protein RBBP4;                                                                        | Chromatin assembly factor 1 subunit C;Chromatin assembly factor I p48 subunit;Nucleosome-remodeling factor subunit RBAP48;Retinoblastoma-binding protein 4;Retinoblastoma-binding protein p48;                      |
| M              | ADKMDMSLDDIIKLNLR           | N-ter + 42.01 Da, K +28.03 Da              | 67.5       | 61.9              | 3      | 1975.13                      | 1.01                                         | 0.17                  | REFP2_MOUSE  | THOC4_MOUSE  | RNA and export factor-binding protein 2;                                                              |                                                                                                                                                                                                                     |
| M              | ADLEEQLSDSEKVR              | N-ter + 42.01 Da, K +34.06 Da              | 54.6       | 40.7              | 3      | 1735.94                      | -0.20                                        | 0.05                  | CAZA2_MOUSE  | D6RCW7_MOUSE | F-actin-capping protein subunit alpha-2;                                                              | CapZ alpha-2;                                                                                                                                                                                                       |
| M              | ADLSLVDALTEPPEIEGEIKR       | N-ter + 42.01 Da, K +34.06 Da              | 37.6       | 60.9              | 3      | 2467.48                      | -0.09                                        | 0.03                  | MAP4_MOUSE   | Q78TF3_MOUSE | Microtubule-associated protein 4;                                                                     |                                                                                                                                                                                                                     |
| M              | ADTAPQLKR                   | N-ter + 42.01 Da, K +28.03 Da              | 39.0       | 41.6              | 2      | 1068.64                      | 0.41                                         | 0.04                  | DCPS_MOUSE   | Q3TBW9_MOUSE | Scavenger mRNA-decapping enzyme Dcps;                                                                 | DCS-1;Hint-related 7meGMP-directed hydrolase;Histidine triad protein member 5;                                                                                                                                      |
| M              | IQTQQLHAAM                  | ADTFLEHMCR                                 | 49.6       | 43.2              | 2      | 1320.62                      | n.d.                                         | n.d.                  | KPYM_MOUSE   |              | Pyruvate kinase isozymes M1/M2;                                                                       | Pyruvate kinase muscle isozyme;                                                                                                                                                                                     |
| M              | SVPAPPTLPM                  | ADTYAVVQKR                                 | 45.3       | 38.8              | 2      | 1225.74                      | 0.32                                         | 0.03                  | PTN18_MOUSE  | Q3V441_MOUSE | Tyrosine-protein phosphatase non-receptor type 18;                                                    | Fetal liver phosphatase 1;PTP-K1;                                                                                                                                                                                   |

| Non Prime Site | Prime Site                    | Modifications                               | Hyperscore | Mass error in ppm | Charge | Precursor neutral mass in Da | Fold change (log <sub>2</sub> ) of ASAPRatio | FC-error of ASAPRatio | Uniprot ID 1 | Uniprot ID 2 | Protein Name 1                                                                          | Protein Name 2                                                                                                                                      |
|----------------|-------------------------------|---------------------------------------------|------------|-------------------|--------|------------------------------|----------------------------------------------|-----------------------|--------------|--------------|-----------------------------------------------------------------------------------------|-----------------------------------------------------------------------------------------------------------------------------------------------------|
| M              | ADSVSDQSKLPGVKEVCR            | N-ter + 42.01 Da, K + 34.06 Da, C +57.02 Da | 38.5       | 55.8              | 3      | 2096.27                      | 1.49                                         | 0.15                  | CCD50_MOUSE  |              | Coiled-coil domain-containing protein 50;                                               | Protein Ymer;                                                                                                                                       |
| M              | AEEAAQLKEEGNR                 | N-ter + 42.01 Da, K + 28.03 Da              | 33.6       | 54.9              | 3      | 1584.86                      | 0.08                                         | 0.01                  | UN45B_MOUSE  |              | Protein unc-45 homolog B;                                                               |                                                                                                                                                     |
| M              | AEEQPQVELFKVKGSDGAKIGNCFFSQR  | N-ter + 42.01 Da, K + 34.06 Da, C +57.02 Da | 20.5       | 73.9              | 4      | 3171.86                      | -0.01                                        | 0.00                  | CLIC1_MOUSE  |              | Chloride intracellular channel protein 1;                                               | Nuclear chloride ion channel 27;                                                                                                                    |
| M              | AFFPSKVSTR                    | N-ter + 42.01 Da, K + 34.06 Da              | 25.2       | 20.1              | 2      | 1196.69                      | 0.16                                         | 0.01                  | PLLP_MOUSE   |              | Plasmolipin;                                                                            | Plasma membrane proteolipid;                                                                                                                        |
| M              | AEKTQKSVKIAPGAVCVSEIR         | N-ter + 42.01 Da, K + 34.06 Da, C +57.02 Da | 40.7       | 64.9              | 4      | 2642.72                      | -0.11                                        | 0.02                  | DCTN6_MOUSE  | D3Z6A1_MOUSE | Dynactin subunit 6;                                                                     | Dynactin subunit p27;Protein WS-3;                                                                                                                  |
| M              | AELDIGHQCVQVHCR               | N-ter + 42.01 Da, C +57.02 Da               | 37.7       | 53.4              | 3      | 1891.94                      | n.d.                                         | n.d.                  | ZFAN1_MOUSE  | D3Z7G5_MOUSE | AN1-type zinc finger protein 1;                                                         |                                                                                                                                                     |
| GTDPSRSKRM     | AELLEVTLDGKPLQALR             | N-ter + 42.01 Da, K + 34.06 Da              | 51.9       | 53.6              | 3      | 1957.20                      | 0.39                                         | 0.10                  | ACINU_MOUSE  | E9Q9R4_MOUSE | Apoptotic chromatin condensation inducer in the nucleus;                                |                                                                                                                                                     |
| M              | AELQEVQTTEKPLLPQTPETAKEAELAAR | N-ter + 42.01 Da, K + 28.03 Da              | 45.8       | 67.5              | 4      | 3487.08                      | -0.22                                        | 0.05                  | NDRG2_MOUSE  |              | Protein NDRG2;                                                                          | Protein Ndr2;                                                                                                                                       |
| M              | AELQMLLEEEIIPSGKR             | N-ter + 42.01 Da, K + 28.03 Da              | 56.9       | 57.6              | 3      | 1912.11                      | -0.06                                        | 0.01                  | ABI1_MOUSE   | B7ZCU5_MOUSE | Abl interactor 1;                                                                       | Abelson interactor 1;Abjphilin-1;Eps8 SH3 domain-binding protein;Spectrin SH3 domain-binding protein 1;e3B1;                                        |
| M              | AELVQQQSAPVGMKAEGFVDALHR      | N-ter + 42.01 Da, K + 34.06 Da              | 37.1       | 79.3              | 4      | 2585.55                      | -0.38                                        | 0.06                  | A2AJ72_MOUSE | Q3TIX6_MOUSE |                                                                                         |                                                                                                                                                     |
| CPAGGAEVEM     | AELYVPGNKER                   | N-ter + 42.01 Da, K + 34.06 Da              | 27.9       | 49.1              | 3      | 1512.97                      | 0.71                                         | 0.10                  | SRA1_MOUSE   |              | Steroid receptor RNA activator 1;                                                       | Steroid receptor RNA activator protein;                                                                                                             |
| M              | AENGESSGPPRPSR                | N-ter + 42.01 Da                            | 28.8       | 78.7              | 3      | 1481.80                      | n.d.                                         | n.d.                  | UBQL2_MOUSE  |              | Ubiquitin-2;                                                                            | Chap1;DSK2 homolog;Protein linking IAP with cytoskeleton 2;Ubiquitin-like product Chap1/Dsk2;                                                       |
| M              | AENLLDGPNNPKR                 | N-ter + 42.01 Da, K + 28.03 Da              | 29.2       | 36.4              | 3      | 1489.84                      | -0.15                                        | 0.01                  | CBP_MOUSE    | F8VPR5_MOUSE | CREB-binding protein;                                                                   |                                                                                                                                                     |
| M              | AENNAQNKAKLISETR              | N-ter + 42.01 Da, K + 34.06 Da              | 42.9       | 58.4              | 3      | 1896.18                      | 0.35                                         | 0.07                  | MSPD2_MOUSE  | B1AU74_MOUSE | Motile sperm domain-containing protein 2;                                               |                                                                                                                                                     |
| M              | AENPLENHR                     | N-ter + 42.01 Da                            | 48.1       | 44.8              | 2      | 1177.60                      | n.d.                                         | n.d.                  | IMA3_MOUSE   | E9Q1R3_MOUSE | Importin subunit alpha-3;                                                               | Importin alpha Q2;Karyopherin subunit alpha-3; DNA polymerase II subunit 3;DNA polymerase epsilon subunit p17;NF-YB-like protein;YB-like protein 1; |
| M              | AERPDLNLPNAVITR               | N-ter + 42.01 Da                            | 39.2       | 39.7              | 3      | 1849.04                      | n.d.                                         | n.d.                  | DPOE3_MOUSE  | D6RDT4_MOUSE | DNA polymerase epsilon subunit 3;                                                       |                                                                                                                                                     |
| M              | AETLSGLGDASAAGAAVSSAASETGTRR  | N-ter + 42.01 Da                            | 47.2       | 51.5              | 3      | 2676.43                      | n.d.                                         | n.d.                  | D3YXK2_MOUSE | E9PZM6_MOUSE |                                                                                         |                                                                                                                                                     |
| MAFFPPLWE      | AEEVETLKR                     | N-ter + 42.01 Da, K + 28.03 Da              | 52.1       | 34.2              | 2      | 1143.65                      | 1.26                                         | 0.14                  | DLR1_MOUSE   | A2AVR9_MOUSE | Dynein light chain roadblock-type 1;                                                    | Dynein light chain 2A, cytoplasmic;                                                                                                                 |
| M              | AEVGSKVLVCLGNICR              | N-ter + 42.01 Da, K + 28.03 Da, C +57.02 Da | 52.5       | 55.2              | 3      | 2078.18                      | -1.18                                        | 0.27                  | PPAC_MOUSE   | Q561M1_MOUSE | Low molecular weight phosphotyrosine protein phosphatase;                               | Low molecular weight cytosolic acid phosphatase;                                                                                                    |
| M              | AFASEDNVSHSNAVYR              | N-ter + 42.01 Da                            | 56.7       | 51.9              | 3      | 1970.98                      | n.d.                                         | n.d.                  | S29A3_MOUSE  | D6RI95_MOUSE | Equilibrative nucleoside transporter 3;                                                 | Solute carrier family 29 member 3;                                                                                                                  |
| M              | AFCAPPAYLTHQKVLRL             | N-ter + 42.01 Da, K + 34.06 Da, C +57.02 Da | 30.7       | 63.5              | 3      | 2075.25                      | -1.36                                        | 0.14                  | NDUB9_MOUSE  |              | NADH dehydrogenase [ubiquinone] 1 beta subcomplex subunit 9;                            | Complex I-B22;NADH-ubiquinone oxidoreductase B22 subunit;                                                                                           |
| M              | AFKDTGKTPEPEVAIHR             | N-ter + 42.01 Da, K + 34.06 Da              | 38.6       | 66.7              | 4      | 2104.34                      | 1.32                                         | 0.15                  | RS20_MOUSE   |              | 40S ribosomal protein S20;                                                              |                                                                                                                                                     |
| DPVIYQLRAD     | AFNKLTASSTPPALDR              | N-ter + 42.01 Da, K + 34.06 Da              | 30.2       | 62.7              | 3      | 1764.07                      | -2.84                                        | 0.20                  | XPO4_MOUSE   |              | Exportin-4;                                                                             |                                                                                                                                                     |
| M              | AGGEAGVTLGQPHLSR              | N-ter + 42.01 Da                            | 53.9       | 54.6              | 3      | 1590.90                      | n.d.                                         | n.d.                  | IF2H_MOUSE   |              | Eukaryotic translation initiation factor 2 subunit 3, Y-linked;                         | Eukaryotic translation initiation factor 2 subunit gamma, Y-linked;                                                                                 |
| M              | AGGEGGVTLGQPHLSR              | N-ter + 42.01 Da                            | 68.4       | 31.5              | 2      | 1576.85                      | n.d.                                         | n.d.                  | IF2G_MOUSE   | A2AAW9_MOUSE | Eukaryotic translation initiation factor 2 subunit 3, X-linked;                         | Eukaryotic translation initiation factor 2 subunit gamma, X-linked;                                                                                 |
| M              | AGGPPKALPSTGPQSLR             | N-ter + 42.01 Da, K + 34.06 Da              | 44.6       | 60.5              | 3      | 1709.07                      | 0.14                                         | 0.02                  | SNX30_MOUSE  |              | Sorting nexin-30;                                                                       |                                                                                                                                                     |
| M              | AGKPVLYHFDGR                  | N-ter + 42.01 Da, K + 28.03 Da              | 42.2       | 47.7              | 3      | 1428.82                      | -0.15                                        | 0.02                  | GSTA3_MOUSE  |              | Glutathione S-transferase A3;                                                           | GST class-alpha member 3;Glutathione S-transferase Ya3;Glutathione S-transferase Yc;                                                                |
| M              | AGKPVLYHFNAR                  | N-ter + 42.01 Da, K + 28.03 Da              | 31.4       | 48.7              | 3      | 1441.85                      | -0.52                                        | 0.04                  | GSTA1_MOUSE  | GSTA2_MOUSE  | Glutathione S-transferase A1;                                                           | GST class-alpha member 1;Glutathione S-transferase Ya;Glutathione S-transferase Ya1;                                                                |
| M              | AGLGHSPAFGR                   | N-ter + 42.01 Da                            | 50.3       | 58.7              | 2      | 1110.62                      | n.d.                                         | n.d.                  | DDAH1_MOUSE  |              | N(G),N(G)-dimethylarginine dimethylaminohydrolase 1;                                    | DDAH1;Dimethylargininase-1;                                                                                                                         |
| M              | AGLLKTTGLVLGAVCDTPHER         | N-ter + 42.01 Da, K + 34.06 Da, C +57.02 Da | 49.5       | 93.7              | 4      | 2433.57                      | -3.18                                        | 0.29                  | NDUAS_MOUSE  |              | Complex I subunit B13;Complex I-13kD-B;NADH-ubiquinone oxidoreductase 13 kDa-B subunit; | Complex I subunit B13;Complex I-13kD-B;NADH-ubiquinone oxidoreductase 13 kDa-B subunit;                                                             |
| M              | AGLNSLEAVKR                   | N-ter + 42.01 Da, K + 34.06 Da              | 58.5       | 26.4              | 2      | 1232.76                      | -0.06                                        | 0.01                  | TPM4_MOUSE   |              | Tropomyosin alpha-4 chain;                                                              | Tropomyosin-4;                                                                                                                                      |
| M              | AGSAWVSKVSR                   | N-ter + 42.01 Da, K + 28.03 Da              | 48.2       | 29.8              | 2      | 1216.69                      | -1.03                                        | 0.11                  | IDH3A_MOUSE  |              | Isocitrate dehydrogenase [NAD] subunit alpha, mitochondrial;                            | Isocitric dehydrogenase subunit alpha;NAD(+)-specific ICDH subunit alpha;                                                                           |
| M              | AGTTTIEAVKR                   | N-ter + 42.01 Da, K + 28.03 Da              | 53.7       | 30.2              | 2      | 1215.72                      | -0.42                                        | 0.04                  | Q8C7C3_MOUSE | D3Z6I8_MOUSE |                                                                                         |                                                                                                                                                     |
| M              | AGVDQHEGHTIQVQQNLFFR          | N-ter + 42.01 Da                            | 47.4       | 52.9              | 3      | 2285.24                      | n.d.                                         | n.d.                  | ABHEB_MOUSE  |              | Abhydrolase domain-containing protein 14B;                                              | CCG1-interacting factor B;                                                                                                                          |
| M              | AGVPRPDNVAEIVVAGAR            | N-ter + 42.01 Da                            | 52.3       | 34.3              | 3      | 1621.91                      | n.d.                                         | n.d.                  | KBTBB_MOUSE  |              | Kelch repeat and BTB domain-containing protein 11;                                      |                                                                                                                                                     |
| M              | AHATPPSALEQGGPIR              | N-ter + 42.01 Da                            | 41.9       | 50.9              | 3      | 1642.93                      | n.d.                                         | n.d.                  | GTL3B_MOUSE  |              | Protein GTLF3B;                                                                         | Gene trap locus protein F3-2;Gene trap locus protein F3b;                                                                                           |
| M              | AKDILGEAGLHFDLNLKLR           | N-ter + 42.01 Da, K + 34.06 Da              | 54.4       | 92.1              | 4      | 2248.49                      | -0.34                                        | 0.02                  | IFT20_MOUSE  |              | Intraflagellar transport protein 20 homolog;                                            |                                                                                                                                                     |
| M              | AKIAKTHEDIAQIR                | N-ter + 42.01 Da, K + 34.06 Da              | 26.5       | 64.0              | 4      | 1832.20                      | 0.08                                         | 0.01                  | SF3B1_MOUSE  |              | Splicing factor 3B subunit 1;                                                           | Pre-mRNA-splicing factor SF3b 155 kDa subunit;Spliceosome-associated protein 155;                                                                   |
| M              | AKIAQGAMYR                    | N-ter + 42.01 Da, K + 28.03 Da              | 44.6       | 39.2              | 2      | 1177.67                      | 1.38                                         | 0.05                  | ANXA6_MOUSE  | F8WIT2_MOUSE | Annexin A6;                                                                             | 67 kDa calelectrin;Annexin VI;Annexin-6;Calphobindin-II;Chromobindin-20;Lipocortin VI;Protein III;p68;p70;                                          |
| EVSSVPTNGM     | AKNGSEADIDESLYSR              | N-ter + 42.01 Da, K + 34.06 Da              | 56.5       | 52.6              | 3      | 1829.98                      | 0.28                                         | 0.03                  | UBA1_MOUSE   |              | Ubiquitin-like modifier-activating enzyme 1;                                            | Ubiquitin-activating enzyme E1;Ubiquitin-activating enzyme 1 X;                                                                                     |
| M              | AKTEEMVQTEEMETPR              | N-ter + 42.01 Da, K + 28.03 Da              | 44.9       | 48.2              | 3      | 1978.00                      | -0.43                                        | 0.02                  | BAG1_MOUSE   | F6TCF9_MOUSE | BAG family molecular chaperone regulator 1;                                             | Bcl-2-associated athanogene 1;                                                                                                                      |
| M              | AKVEQVLSLEPQHELFKR            | N-ter + 42.01 Da, K + 34.06 Da              | 35.2       | 44.7              | 3      | 2260.42                      | -1.09                                        | 0.12                  | VAPB_MOUSE   | Q88H80_MOUSE | Vesicle-associated membrane protein-associated protein B;                               | VAMP-associated protein 33b;                                                                                                                        |
| M              | ALDGPEQMELEEGKAGSLR           | N-ter + 42.01 Da, K + 34.06 Da              | 65.3       | 29.6              | 3      | 2162.14                      | -0.17                                        | 0.03                  | PRS8_MOUSE   |              | 26S proteasome AAA-ATPase subunit RPT6;Proteasome 26S subunit ATPase                    | 26S proteasome AAA-ATPase subunit RPT6;Proteasome 26S subunit ATPase                                                                                |
| M              | ALDPAEQHLR                    | N-ter + 42.01 Da                            | 37.0       | 42.0              | 2      | 1190.65                      | n.d.                                         | n.d.                  | COXAM_MOUSE  |              | COX assembly mitochondrial protein homolog;                                             | 5;Proteasome subunit p45;p45/SUG;                                                                                                                   |

Table S15, Tholen et al.

| Non Prime Site | Prime Site                  | Modifications                              | Hyperscore | Mass error in ppm | Charge | Precursor neutral mass in Da | Fold change (log <sub>2</sub> ) of ASAPRatio | FC-error of ASAPRatio | Uniprot ID 1 | Uniprot ID 2 | Protein Name 1                                                          | Protein Name 2                                                                                                                                                                                                                                    |
|----------------|-----------------------------|--------------------------------------------|------------|-------------------|--------|------------------------------|----------------------------------------------|-----------------------|--------------|--------------|-------------------------------------------------------------------------|---------------------------------------------------------------------------------------------------------------------------------------------------------------------------------------------------------------------------------------------------|
| M              | ALETVPKDLR                  | N-ter + 42.01 Da, K +34.06 Da              | 43.1       | 28.6              | 2      | 1216.76                      | -0.54                                        | 0.03                  | SPT41_MOUSE  | SPT42_MOUSE  | Transcription elongation factor SPT4 1;                                 | DRB sensitivity-inducing factor small subunit 1;                                                                                                                                                                                                  |
| GRVYLEENNG     | ALHISNVR                    | N-ter + 42.01 Da                           | 9.3        | 25.5              | 2      | 950.55                       | n.d.                                         | n.d.                  | CD48_MOUSE   | F8WHM0_MOUSE | CD48 antigen;                                                           | BCM1 surface antigen;BLAST-1;HM48-1;MRC OX-45 surface antigen;sgp-60;                                                                                                                                                                             |
| KMS            | ALKAVFYQIDENQDR             | N-ter + 42.01 Da, K +28.03 Da              | 29.6       | 85.4              | 3      | 1879.11                      | -0.22                                        | 0.04                  | CNDP2_MOUSE  | F6XEL6_MOUSE | Cytosolic non-specific dipeptidase;                                     | CNDP dipeptidase 2;Glutamate carboxypeptidase-like protein 1;                                                                                                                                                                                     |
| M              | ALKQISSNR                   | N-ter + 42.01 Da, K +28.03 Da              | 32.9       | 28.4              | 2      | 1085.65                      | 0.64                                         | 0.05                  | ESTD_MOUSE   |              | S-formylglutathione hydrolase;                                          | Esterase 10;Esterase D;Sid 478;                                                                                                                                                                                                                   |
| M              | ALLAEHLKPLPADR              | N-ter + 42.01 Da, K +28.03 Da              | 39.5       | 78.5              | 3      | 1726.15                      | 0.19                                         | 0.06                  | GLTP_MOUSE   | D3Z1H9_MOUSE | Glycolipid transfer protein;                                            |                                                                                                                                                                                                                                                   |
| EESPSGAQPN     | ALPEAHR                     | N-ter + 42.01 Da                           | 24.2       | 81.1              | 2      | 834.50                       | n.d.                                         | n.d.                  | K0649_MOUSE  |              | Protein phosphatase 1 regulatory subunit 26;                            |                                                                                                                                                                                                                                                   |
| M              | ALQALHSSGVGLR               | N-ter + 42.01 Da                           | 57.7       | 24.6              | 2      | 1349.77                      | n.d.                                         | n.d.                  | MMP37_MOUSE  | D6RGT1_MOUSE | Mitochondrial translocator assembly and maintenance protein 41 homolog; | MMP37-like protein, mitochondrial;                                                                                                                                                                                                                |
| M              | AMNYSAKDEVGGPAGPPGAAKTR     | N-ter + 42.01 Da, K +28.03 Da              | 44.7       | 81.2              | 4      | 2514.42                      | 0.38                                         | 0.05                  | CC50A_MOUSE  | D3YVV1_MOUSE | Cell cycle control protein 50A;                                         | Transmembrane protein 30A;                                                                                                                                                                                                                        |
| M              | AMQKIFAR                    | N-ter + 42.01 Da, K +28.03 Da              | 41.4       | 35.1              | 2      | 1033.61                      | 0.81                                         | 0.01                  | ENOB_MOUSE   | Q5SX59_MOUSE | Beta-enolase;                                                           | 2-phospho-D-glycerate hydro-lyase;Enolase 3;Muscle-specific enolase;Skeletal muscle enolase;                                                                                                                                                      |
| M              | AMVSEFLKQAR                 | N-ter + 42.01 Da, K +28.03 Da              | 57.7       | 35.7              | 2      | 1348.77                      | -0.30                                        | 0.02                  | ANXA1_MOUSE  | E9QA30_MOUSE | Annexin A1;                                                             | Annexin I;Annexin-1;Calpactin II;Calpactin-2;Chromobindin-9;Lipocortin I;Phospholipase A2 inhibitory protein;p35;                                                                                                                                 |
| M              | ANEVQLVPSPLKGR              | N-ter + 42.01 Da, K +28.03 Da              | 32.6       | 34.5              | 3      | 1576.95                      | 0.36                                         | 0.04                  | DAPL1_MOUSE  |              | Death-associated protein-like 1;                                        | Early epithelial differentiation-associated protein;                                                                                                                                                                                              |
| M              | ANHAPFETDISTLTR             | N-ter + 42.01 Da                           | 47.9       | 51.5              | 3      | 1713.92                      | n.d.                                         | n.d.                  | F16P1_MOUSE  | E9Q0T7_MOUSE | Fructose-1,6-bisphosphatase 1;                                          | D-fructose-1,6-bisphosphate 1-phosphohydrolase 1;                                                                                                                                                                                                 |
| M              | ANKGPSYGMRSR                | N-ter + 42.01 Da, K +34.06 Da              | 58.9       | 43.5              | 2      | 1242.68                      | -0.23                                        | 0.04                  | TAGL_MOUSE   |              | Transgelin;                                                             | Actin-associated protein p27;Smooth muscle protein 22-alpha;                                                                                                                                                                                      |
| M              | ANRGPSYGLSR                 | N-ter + 42.01 Da                           | 47.1       | 38.2              | 2      | 1218.66                      | n.d.                                         | n.d.                  | TAGL2_MOUSE  | TAGL3_MOUSE  | Transgelin-2;                                                           | SM22-beta;                                                                                                                                                                                                                                        |
| M              | ANVADTKLYDILGVPPGASENELKAYR | N-ter + 42.01 Da, K +34.06 Da              | 26.0       | 76.1              | 4      | 3176.04                      | -0.22                                        | 0.01                  | DNJA2_MOUSE  |              | DnaJ homolog subfamily A member 2;                                      | mDJ3;                                                                                                                                                                                                                                             |
| M              | APKVSQVQLR                  | N-ter + 42.01 Da, K +34.06 Da              | 24.6       | 73.7              | 3      | 1403.89                      | 0.26                                         | 0.03                  | TOM34_MOUSE  |              | Mitochondrial import receptor subunit TOM34;                            | Translocase of outer membrane 34 kDa subunit;                                                                                                                                                                                                     |
| SASKNEKGQM     | AQAFEGAYHRPLTSR             | N-ter + 42.01 Da                           | 29.0       | 64.2              | 3      | 1668.94                      | n.d.                                         | n.d.                  | USE1_MOUSE   | D3Z6D3_MOUSE | Vesicle transport protein USE1;                                         | Protein D12;USE1-like protein;                                                                                                                                                                                                                    |
| M              | AQAPAKPCSPYSGDGMGKLR        | N-ter + 42.01 Da, K +34.06 Da, C +57.02 Da | 32.8       | 80.0              | 4      | 2386.40                      | 0.23                                         | 0.04                  | GMDS_MOUSE   |              | GDP-mannose 4,6 dehydratase;                                            | GDP-D-mannose dehydratase;                                                                                                                                                                                                                        |
| M              | AQDGVLEKSVR                 | N-ter + 42.01 Da, K +28.03 Da              | 49.2       | 31.9              | 2      | 1399.78                      | -1.00                                        | 0.08                  | CS066_MOUSE  |              | UPF0515 protein C19orf66 homolog;                                       |                                                                                                                                                                                                                                                   |
| M              | AQDLSEKELLR                 | N-ter + 42.01 Da, K +34.06 Da              | 50.6       | 19.4              | 2      | 1376.80                      | 0.59                                         | 0.03                  | GBGT2_MOUSE  |              | Guanine nucleotide-binding protein G(I)/G(S)/G(O) subunit gamma-T2;     | G gamma-C;G-gamma-8;                                                                                                                                                                                                                              |
| M              | AQDQGEKENPMR                | N-ter + 42.01 Da, K +28.03 Da              | 28.0       | 56.5              | 3      | 1471.76                      | 0.20                                         | 0.03                  | RL11_MOUSE   | D3Z3K1_MOUSE | 60S ribosomal protein L11;                                              |                                                                                                                                                                                                                                                   |
| M              | AQELQHPFAR                  | N-ter + 42.01 Da                           | 41.9       | 47.3              | 3      | 1366.73                      | n.d.                                         | n.d.                  | ADSV_MOUSE   | E9QM03_MOUSE | Adseverin;                                                              | Gelsolin-like protein;Scinderin;                                                                                                                                                                                                                  |
| M              | AQERPSCAVEPEHVQR            | N-ter + 42.01 Da, C +57.02 Da              | 54.8       | 63.2              | 3      | 1934.03                      | n.d.                                         | n.d.                  | CDD_MOUSE    |              | Cytidine deaminase;                                                     | Cytidine aminohydrolase;                                                                                                                                                                                                                          |
| M              | AQGSHQIDFVLHDLR             | N-ter + 42.01 Da                           | 51.8       | 68.8              | 3      | 1905.08                      | n.d.                                         | n.d.                  | TAB2_MOUSE   | D3Z216_MOUSE | TGF-beta-activated kinase 1 and MAP3K7-binding protein 2;               | Mitogen-activated protein kinase kinase kinase 7-interacting protein 2;TAK1-binding protein 2;TGF-beta-activated kinase 1-binding protein 2;                                                                                                      |
| SALARETRAM     | AQKPDGGAGLR                 | N-ter + 42.01 Da, K +34.06 Da              | 43.1       | 40.1              | 2      | 1144.69                      | 0.15                                         | 0.03                  | MAGD1_MOUSE  | F6YTL0_MOUSE | Melanoma-associated antigen D1;                                         | Dixin-1;MAGE-D1 antigen;Neurotrophin receptor-interacting MAGE homolog;                                                                                                                                                                           |
| M              | AQNLKDLAGR                  | N-ter + 42.01 Da, K +28.03 Da              | 43.5       | 27.4              | 2      | 1154.67                      | 0.25                                         | 0.03                  | PHB2_MOUSE   | E9Q313_MOUSE | Prohibitin-2;                                                           | B-cell receptor-associated protein BAP37;Repressor of estrogen receptor activity;                                                                                                                                                                 |
| EERSVNCGTM     | AQPKNLEGVGFANLNPQVYR        | N-ter + 42.01 Da, K +34.06 Da              | 69.6       | 51.9              | 3      | 2453.42                      | -0.29                                        | 0.07                  | SEPT7_MOUSE  | E9Q9F5_MOUSE | Septin-7;                                                               | CDC10 protein homolog;                                                                                                                                                                                                                            |
| M              | ASASYHISNLEKMTSSDKDFR       | N-ter + 42.01 Da, K +34.06 Da              | 32.9       | 98.6              | 4      | 2609.60                      | -0.54                                        | 0.09                  | CAND1_MOUSE  |              | Cullin-associated NEDD8-dissociated protein 1;                          | Cullin-associated and neddylation-dissociated protein 1;p120 CAND1;                                                                                                                                                                               |
| M              | ASCASIDEDATQHRLR            | N-ter + 42.01 Da, C +57.02 Da              | 48.6       | 65.3              | 3      | 1827.96                      | n.d.                                         | n.d.                  | EDC4_MOUSE   | D6RE33_MOUSE | Enhancer of mRNA-decapping protein 4;                                   |                                                                                                                                                                                                                                                   |
| M              | ASCDEIKEHPR                 | N-ter + 42.01 Da, K +28.03 Da, C +57.02 Da | 27.2       | 76.5              | 3      | 1410.76                      | -0.17                                        | 0.02                  | SEPI0_MOUSE  |              | Septin-10;                                                              | Eukaryotic translation initiation factor 2-alpha kinase 2;interferon-inducible RNA-dependent protein kinase;P1/eIF-2A protein kinase;Protein kinase RNA-activated;Serine/threonine-protein kinase TIK;Tyrosine-protein kinase EIF2AK2;p68 kinase; |
| M              | ASDTPGFYMDKLNKYR            | N-ter + 42.01 Da, K +34.06 Da              | 31.9       | 75.5              | 3      | 2015.20                      | 0.53                                         | 0.08                  | E2AK2_MOUSE  |              | Interferon-induced, double-stranded RNA-activated protein kinase;       | Argininosuccinate lyase;                                                                                                                                                                                                                          |
| M              | ASESGKLWGGR                 | N-ter + 42.01 Da, K +28.03 Da              | 48.7       | 25.5              | 2      | 1216.65                      | 0.81                                         | 0.06                  | ARLY_MOUSE   | E0CY49_MOUSE |                                                                         | Argininosuccinase;                                                                                                                                                                                                                                |
| M              | ASGADSKGDDLSTAILKQKNRPNR    | N-ter + 42.01 Da, K +28.03 Da              | 44.0       | 76.4              | 4      | 2667.63                      | -0.38                                        | 0.06                  | TERA_MOUSE   |              | Transitional endoplasmic reticulum ATPase;                              | 15S Mg(2+)-ATPase p97 subunit;Valosin-containing protein;                                                                                                                                                                                         |
| M              | ASGCKIGPSINSDLANLGAELR      | N-ter + 42.01 Da, K +28.03 Da, C +57.02 Da | 62.3       | 49.4              | 3      | 2585.42                      | 0.11                                         | 0.03                  | RPE_MOUSE    | B2KGF0_MOUSE | Ribulose-phosphate 3-epimerase;                                         | Ribulose-5-phosphate-epimerase;                                                                                                                                                                                                                   |
| AMLATGTARM     | ASGRPEELWEAVVGAER           | N-ter + 42.01 Da                           | 54.7       | 45.6              | 3      | 1968.06                      | n.d.                                         | n.d.                  | AKTS1_MOUSE  | D3YWZ1_MOUSE | Proline-rich AKT1 substrate 1;                                          |                                                                                                                                                                                                                                                   |
| M              | ASGVAVSDGVKVFNDMKVR         | N-ter + 42.01 Da, K +28.03 Da              | 48.0       | 77.7              | 3      | 2189.36                      | 0.11                                         | 0.04                  | COF1_MOUSE   | E9Q1T2_MOUSE | Cofilin-1;                                                              | Cofilin, non-muscle isoform;                                                                                                                                                                                                                      |
| M              | ASGVTNDEVKVFNDMKVR          | N-ter + 42.01 Da, K +28.03 Da              | 54.9       | 66.1              | 3      | 2318.38                      | -0.12                                        | 0.04                  | COF2_MOUSE   |              | Cofilin-2;                                                              | Cofilin, muscle isoform;                                                                                                                                                                                                                          |
| M              | ASKEMFEDTVEER               | N-ter + 42.01 Da, K +28.03 Da              | 55.7       | 33.1              | 2      | 1639.79                      | 0.49                                         | 0.06                  | RBBP7_MOUSE  | A2AFI9_MOUSE | Histone-binding protein RBBP7;                                          | Histone acetyltransferase type B subunit 2;Nucleosome-remodeling factor subunit RBAP46;Retinoblastoma-binding protein 7;Retinoblastoma-binding protein p46;                                                                                       |
| M              | ASLKDLQKWR                  | N-ter + 42.01 Da, K +28.03 Da              | 54.1       | 37.0              | 2      | 1399.83                      | 0.84                                         | 0.06                  | FABP5_MOUSE  | E9Q964_MOUSE | Fatty acid-binding protein, epidermal;                                  | Epidermal-type fatty acid-binding protein;Fatty acid-binding protein 5;Keratinocyte lipid-binding protein;Psoriasis-associated fatty acid-binding protein homolog;                                                                                |
| M              | ASLPPHAGPATPLSPTR           | N-ter + 42.01 Da                           | 35.9       | 41.2              | 3      | 1710.98                      | n.d.                                         | n.d.                  | LMNB2_MOUSE  |              | Lamin-B2;                                                               |                                                                                                                                                                                                                                                   |
| M              | ASLSIAPVNIKFGADEER          | N-ter + 42.01 Da, K +34.06 Da              | 52.1       | 45.8              | 3      | 2063.21                      | 0.58                                         | 0.17                  | TCPB_MOUSE   |              | T-complex protein 1 subunit beta;                                       | CCT-beta;                                                                                                                                                                                                                                         |

Table S15, Tholen et al.

| Non Prime Site | Prime Site                   | Modifications                              | Hyperscore | Mass error in ppm | Charge | Precursor neutral mass in Da | Fold change (log <sub>2</sub> ) of ASAPRatio | FC-error of ASAPRatio | Uniprot ID 1 | Uniprot ID 2 | Protein Name 1                                                         | Protein Name 2                                                                                                                                |
|----------------|------------------------------|--------------------------------------------|------------|-------------------|--------|------------------------------|----------------------------------------------|-----------------------|--------------|--------------|------------------------------------------------------------------------|-----------------------------------------------------------------------------------------------------------------------------------------------|
| M              | ASNFKTTMASSAQR               | N-ter + 42.01 Da, K +28.03 Da              | 38.0       | 66.2              | 3      | 1725.00                      | 0.06                                         | 0.01                  | CETN2_MOUSE  |              | Centrin-2;                                                             | Caltractin isoform 1;                                                                                                                         |
| M              | ASNPDRGEILTELLQDGR           | N-ter + 42.01 Da                           | 36.9       | 43.7              | 3      | 2112.14                      | n.d.                                         | n.d.                  | PKN2_MOUSE   | E9QAV1_MOUSE | Serine/threonine-protein kinase N2;                                    | PKN gamma;Protein kinase C-like 2;Protein-kinase C-related kinase 2;                                                                          |
| M              | ASQNRDPAAASVAAVR             | N-ter + 42.01 Da                           | 39.6       | 64.6              | 3      | 1624.93                      | n.d.                                         | n.d.                  | UBE2C_MOUSE  | A2A421_MOUSE | Ubiquitin-conjugating enzyme E2 C;                                     | UbcH10;Ubiquitin carrier protein C;Ubiquitin-protein ligase C;                                                                                |
| M              | ASQSQGIQQLLQAEKR             | N-ter + 42.01 Da, K +28.03 Da              | 49.4       | 32.3              | 3      | 1854.06                      | -0.42                                        | 0.06                  | VATG1_MOUSE  |              | V-type proton ATPase subunit G 1;                                      | V-ATPase 13 kDa subunit 1;Vacuolar proton pump subunit G 1;                                                                                   |
| DDFFRAKPRS     | ASRPAAEPPGAR                 | N-ter + 42.01 Da                           | 28.3       | 106.5             | 3      | 1220.76                      | n.d.                                         | n.d.                  | F1712_MOUSE  |              | Protein FAM171A2;                                                      | Leukemia-associated gene protein;Leukemia-associated phosphoprotein                                                                           |
| M              | ASSDIQVKELEKR                | N-ter + 42.01 Da, K +28.03 Da              | 40.9       | 62.9              | 3      | 1599.98                      | 1.16                                         | 0.12                  | STMN1_MOUSE  | D3Z128_MOUSE | Stathmin;                                                              | p18;Metablastin;Oncoprotein 18;Phosphoprotein p19;Prosolin;Protein Pr22;pp17;                                                                 |
| M              | ASSHTVLMR                    | N-ter + 42.01 Da                           | 48.2       | 41.0              | 2      | 1042.57                      | n.d.                                         | n.d.                  | BPNT1_MOUSE  | D3Z5X0_MOUSE | 3'(2'),5'-bisphosphate nucleotidase 1;                                 | Bisphosphate 3'-nucleotidase 1;PAP-inositol-1,4-phosphatase;                                                                                  |
| M              | ASSKVKTLVLSLR                | N-ter + 42.01 Da, K +34.06 Da              | 23.3       | 52.7              | 3      | 1485.04                      | -0.27                                        | 0.03                  | PIR_MOUSE    | A2AIH8_MOUSE | Pirin;                                                                 | Probable quercetin 2,3-dioxygenase PIR;                                                                                                       |
| M              | ASYFDEHDCPLNPER              | N-ter + 42.01 Da, C +57.02 Da              | 34.9       | 76.1              | 3      | 2019.98                      | n.d.                                         | n.d.                  | RN181_MOUSE  | D3YUJ1_MOUSE | E3 ubiquitin-protein ligase RNF181;                                    | RING finger protein 181;                                                                                                                      |
| SPWFSDLRPM     | ATCPVLQKETLFR                | N-ter + 42.01 Da, K +34.06 Da, C +57.02 Da | 19.9       | 49.3              | 3      | 1637.98                      | -0.18                                        | 0.02                  | NEUR2_MOUSE  | E9Q2Z0_MOUSE | Sialidase-2;                                                           | Cytosolic sialidase;Mouse skeletal muscle sialidase;Murine thymic sialidase;N-acetyl-alpha-neuraminidase 2;                                   |
| M              | ATDDKSPTLDSANDLPR            | N-ter + 42.01 Da, K +28.03 Da              | 37.8       | 62.3              | 3      | 1972.06                      | 0.04                                         | 0.00                  | FYV1_MOUSE   | D3Z5N5_MOUSE | 1-phosphatidylinositol-3-phosphate 5-kinase;                           | FYVE finger-containing phosphoinositide kinase;PIKfyve;Phosphatidylinositol-3-phosphate 5-kinase type III;p235;                               |
| M              | ATDELASKLSR                  | N-ter + 42.01 Da, K +28.03 Da              | 63.7       | 30.4              | 2      | 1259.71                      | -0.36                                        | 0.05                  | EFHD2_MOUSE  | Q8C845_MOUSE | EF-hand domain-containing protein D2;                                  | Swi-prosin-1;                                                                                                                                 |
| M              | ATDISESSGADCKGDKNSAKLDADYPLR | N-ter + 42.01 Da, K +28.03 Da              | 39.8       | 59.0              | 4      | 3228.82                      | -0.03                                        | 0.00                  | DENR_MOUSE   | E9Q0G1_MOUSE | Density-regulated protein;                                             | Huntingtin yeast partner K;                                                                                                                   |
| MRRRGEIEM      | ATEGDVLELETETSGPERPPEKPR     | N-ter + 42.01 Da, K +28.03 Da              | 51.0       | 51.4              | 3      | 2835.52                      | -0.07                                        | 0.01                  | HYPK_MOUSE   |              | Huntingtin-interacting protein K;                                      |                                                                                                                                               |
| M              | ATEGMILTNHDDQIR              | N-ter + 42.01 Da                           | 43.4       | 57.4              | 3      | 1776.96                      | n.d.                                         | n.d.                  | GEPH_MOUSE   | A0JNY3_MOUSE | Gephyrin;                                                              |                                                                                                                                               |
| M              | ATESSLTHVLDASGLPAQGLCLR      | N-ter + 42.01 Da, C +57.02 Da              | 43.4       | 50.4              | 3      | 2736.51                      | n.d.                                         | n.d.                  | HUHU_MOUSE   |              | 5-hydroxyisourate hydrolase;                                           | Transthyretin-related protein;                                                                                                                |
| M              | ATGANATLDFPSSKRR             | N-ter + 42.01 Da, K +34.06 Da              | 40.8       | 56.9              | 3      | 1783.13                      | 0.77                                         | 0.06                  | SF01_MOUSE   | Q3UI45_MOUSE | Splicing factor 1;                                                     | CW17;Mammalian branch point-binding protein;Transcription factor ZFM1;Zinc finger gene in MEN1 locus;Zinc finger protein 162;                 |
| M              | ATIGPSGLHPGER                | N-ter + 42.01 Da                           | 60.0       | 23.2              | 2      | 1332.71                      | n.d.                                         | n.d.                  | HXK3_MOUSE   | D6RCV7_MOUSE | Hexokinase-3;                                                          | Hexokinase type II;                                                                                                                           |
| M              | ATKCTKCGPGYSTPLEAMKGR        | N-ter + 42.01 Da, K +28.03 Da, C +57.02 Da | 64.0       | 75.3              | 4      | 2535.46                      | 0.84                                         | 0.07                  | SBP1_MOUSE   | D6RHN2_MOUSE | Selenium-binding protein 1;                                            | 56 kDa selenium-binding protein;                                                                                                              |
| M              | ATKIDKEACR                   | N-ter + 42.01 Da, K +28.03 Da, C +57.02 Da | 27.0       | 73.3              | 3      | 1288.78                      | 0.07                                         | 0.02                  | COTL1_MOUSE  |              | Coactosin-like protein;                                                |                                                                                                                                               |
| MFLCRFWGKM     | ATNDVAVLR                    | N-ter + 42.01 Da, K +28.03 Da              | 39.3       | 38.6              | 2      | 1056.63                      | 0.00                                         | 0.00                  | AIMP1_MOUSE  | Q3UZG4_MOUSE | Aminoacyl tRNA synthase complex-interacting multifunctional protein 1; | Multisynthase complex auxiliary component p43;                                                                                                |
| M              | ATPDSLALFTGLGLENKAR          | N-ter + 42.01 Da, K +28.03 Da              | 68.4       | 40.7              | 3      | 2130.22                      | -0.20                                        | 0.06                  | Q8BML9_MOUSE | D3Z158_MOUSE |                                                                        | Cytochrome b5 outer mitochondrial membrane isoform;                                                                                           |
| M              | ATPEASGSGEKVEGSEPSVTYYR      | N-ter + 42.01 Da, K +34.06 Da              | 47.6       | 48.5              | 3      | 2476.30                      | 0.21                                         | 0.03                  | CYB5B_MOUSE  |              | Cytochrome b5 type B;                                                  |                                                                                                                                               |
| MS             | ATQHKTSLPQGVGR               | N-ter + 42.01 Da, K +34.06 Da              | 29.8       | 52.0              | 3      | 1497.93                      | -0.45                                        | 0.05                  | Q9CRB1_MOUSE | D3Z141_MOUSE |                                                                        |                                                                                                                                               |
| M              | ATTAQQSQPQVAGKR              | N-ter + 42.01 Da, K +34.06 Da              | 38.5       | 62.3              | 3      | 1614.99                      | 1.08                                         | 0.30                  | THUM1_MOUSE  |              | THUMP domain-containing protein 1;                                     |                                                                                                                                               |
| M              | ATVAATTKVPEIR                | N-ter + 42.01 Da, K +28.03 Da              | 60.5       | 28.8              | 2      | 1425.86                      | -3.06                                        | 0.26                  | RUVB2_MOUSE  | D3YXQ8_MOUSE | RuvB-like 2;                                                           | p47 protein;                                                                                                                                  |
| M              | ATVDLEKLR                    | N-ter + 42.01 Da, K +28.03 Da              | 47.9       | 15.8              | 2      | 1113.66                      | 0.52                                         | 0.08                  | K6PL_MOUSE   |              | 6-phosphofructokinase, liver type;                                     | Phosphofructo-1-kinase isozyme                                                                                                                |
| M              | AVAVGRPSNEELR                | N-ter + 42.01 Da                           | 40.1       | 29.2              | 2      | 1438.79                      | n.d.                                         | n.d.                  | SEPI1_MOUSE  |              | Septin-11;                                                             | B;Phosphofructokinase 1;Phosphohexokinase;                                                                                                    |
| M              | AVPPTYADLGKSAR               | N-ter + 42.01 Da, K +34.06 Da              | 43.4       | 15.0              | 2      | 1520.86                      | -0.79                                        | 0.01                  | VDAC1_MOUSE  | F2Z471_MOUSE | Voltage-dependent anion-selective channel protein 1;                   | Outer mitochondrial membrane protein porin 1;Plasmalemmal porin;Voltage-dependent anion-selective channel protein 5;                          |
| M              | AVSTGVKVPFR                  | N-ter + 42.01 Da, K +28.03 Da              | 51.4       | 30.4              | 2      | 1082.68                      | 0.67                                         | 0.05                  | UBZV2_MOUSE  |              | Ubiquitin-conjugating enzyme E2 variant 2;                             | Ubc-like protein MMS2;                                                                                                                        |
| M              | AWKSGGASHSELIHLNR            | N-ter + 42.01 Da, K +34.06 Da              | 48.4       | 49.3              | 4      | 1938.12                      | 0.14                                         | 0.02                  | PIMT_MOUSE   | E9PWE0_MOUSE | Protein-L-isoaspartate(D-aspartate) O-methyltransferase;               | L-isoaspartyl protein carboxyl methyltransferase;Protein L-isoaspartyl/D-aspartyl methyltransferase;Protein-beta-aspartate methyltransferase; |
| M              | AYHSFLVPEISCHAWNKDR          | N-ter + 42.01 Da, K +34.06 Da, C +57.02 Da | 44.3       | 89.9              | 4      | 2405.40                      | 0.30                                         | 0.02                  | ARC1B_MOUSE  | D3Z650_MOUSE | Actin-related protein 2/3 complex subunit 1B;                          | Arp2/3 complex 41 kDa subunit;p41-ARC;                                                                                                        |
| MA             | AYKLVLR                      | N-ter + 42.01 Da, K +34.06 Da              | 41.3       | 43.4              | 2      | 1050.75                      | -0.11                                        | 0.01                  | PGAM1_MOUSE  |              | Phosphoglycerate mutase 1;                                             | BPG-dependent PGAM 1;Phosphoglycerate mutase isozyme B;                                                                                       |
| M              | DADKDNKQACDER                | N-ter + 42.01 Da, K +28.03 Da, C +57.02 Da | 37.5       | 71.8              | 3      | 1905.99                      | -0.29                                        | 0.08                  | NMI_MOUSE    | B7ZD13_MOUSE | N-myc-interactor;                                                      | N-myc and STAT interactor;                                                                                                                    |
| M              | DDDIAALVDNDSGMCKAGFAGDDAPR   | N-ter + 42.01 Da, K +28.03 Da, C +57.02 Da | 70.7       | 47.0              | 3      | 2806.39                      | -0.18                                        | 0.05                  | ACTB_MOUSE   | E9Q1F2_MOUSE | Actin, cytoplasmic 1;                                                  | Beta-actin;                                                                                                                                   |
| M              | DDREDLVYQAKLAEQAEK           | N-ter + 42.01 Da, K +34.06 Da              | 57.2       | 63.7              | 3      | 2355.31                      | 1.14                                         | 0.19                  | 1433E_MOUSE  | D6REF3_MOUSE | 14-3-3 protein epsilon;                                                |                                                                                                                                               |
| M              | DDREDLVYQAK                  | N-ter + 42.01 Da, K +28.03 Da              | 31.4       | 62.5              | 3      | 1551.82                      | 0.38                                         | 0.04                  | 1433E_MOUSE  | D6REF3_MOUSE | 14-3-3 protein epsilon;                                                |                                                                                                                                               |
| MC             | DEDETTALVCDNDSGLVKAGFAGDDAPR | N-ter + 42.01 Da, K +28.03 Da, C +57.02 Da | 67.8       | 43.3              | 3      | 2949.46                      | -0.29                                        | 0.04                  | ACTS_MOUSE   |              | Actin, alpha skeletal muscle;                                          | Alpha-actin-1;                                                                                                                                |
| M              | DFSKLPKIR                    | N-ter + 42.01 Da, K +34.06 Da              | 21.0       | 75.4              | 3      | 1343.93                      | 0.43                                         | 0.06                  | VATA_MOUSE   | D3YWH3_MOUSE | V-type proton ATPase catalytic subunit A;                              | V-ATPase 69 kDa subunit;Vacuolar proton pump subunit alpha;                                                                                   |

Table S15, Tholen et al.

| Non Prime Site | Prime Site                     | Modifications                              | Hyperscore | Mass error in ppm | Charge | Precursor neutral mass in Da | Fold change (log <sub>2</sub> ) of ASAPRatio | FC-error of ASAPRatio | Uniprot ID 1 | Uniprot ID 2 | Protein Name 1                                                               | Protein Name 2                                                                                                                              |
|----------------|--------------------------------|--------------------------------------------|------------|-------------------|--------|------------------------------|----------------------------------------------|-----------------------|--------------|--------------|------------------------------------------------------------------------------|---------------------------------------------------------------------------------------------------------------------------------------------|
| M              | DFSKLPK                        | N-ter + 42.01 Da, K +34.06 Da              | 42.6       | 11.6              | 2      | 1074.65                      | -0.54                                        | 0.03                  | VATA_MOUSE   | D3YWH3_MOUSE | V-type proton ATPase catalytic subunit A;                                    | V-ATPase 69 kDa subunit;Vacuolar proton pump subunit alpha;                                                                                 |
| M              | DGEDDSNLVIKRR                  | N-ter + 42.01 Da, K +34.06 Da              | 25.0       | 61.3              | 3      | 1729.04                      | 0.06                                         | 0.01                  | F192A_MOUSE  |              | Protein FAM192A;                                                             | NEFA-interacting nuclear protein NIP30;                                                                                                     |
| M              | DGIVPDIIVGTKR                  | N-ter + 42.01 Da, K +34.06 Da              | 45.7       | 17.9              | 2      | 1546.89                      | 1.33                                         | 0.20                  | PTBP1_MOUSE  | Q92217_MOUSE | Polypyrimidine tract-binding protein 1;                                      | Heterogeneous nuclear ribonucleoprotein I;                                                                                                  |
| IGEFVKYSIR     | DGKEINFLR                      | N-ter + 42.01 Da, K +28.03 Da              | 9.2        | 46.8              | 2      | 1160.67                      | 2.62                                         | 0.23                  | ALPK2_MOUSE  | F6Z2L0_MOUSE | Alpha-protein kinase 2;                                                      | Heart alpha-protein kinase;                                                                                                                 |
| M              | DIAIHPWIR                      | N-ter + 42.01 Da                           | 29.9       | 66.6              | 3      | 1429.82                      | n.d.                                         | n.d.                  | CRYAB_MOUSE  |              | Alpha-crystallin B chain;                                                    | Alpha(B)-crystallin;P23;                                                                                                                    |
| M              | DKNELVQKAKLAEQAER              | N-ter + 42.01 Da, K +34.06 Da              | 50.1       | 45.1              | 3      | 2244.40                      | 0.21                                         | 0.02                  | 1433Z_MOUSE  | D3YXF4_MOUSE | 14-3-3 protein zeta/delta;                                                   | Protein kinase C inhibitor protein 1;SEZ-2;                                                                                                 |
| M              | DKNELVQKAK                     | N-ter + 42.01 Da, K +28.03 Da              | 27.7       | 73.6              | 3      | 1428.91                      | 0.19                                         | 0.03                  | 1433Z_MOUSE  | D3YXF4_MOUSE | 14-3-3 protein zeta/delta;                                                   | Protein kinase C inhibitor protein 1;SEZ-2;                                                                                                 |
| M              | DKNELVQK                       | N-ter + 42.01 Da, K +34.06 Da              | 42.8       | 37.6              | 2      | 1213.75                      | 0.28                                         | 0.04                  | 1433Z_MOUSE  | D3YXF4_MOUSE | 14-3-3 protein zeta/delta;                                                   | Protein kinase C inhibitor protein 1;SEZ-2;                                                                                                 |
| M              | DLAIAEPGAGSQHPEVR              | N-ter + 42.01 Da                           | 50.7       | 59.8              | 3      | 1948.03                      | n.d.                                         | n.d.                  | MCM6_MOUSE   | Q3ULG5_MOUSE | DNA replication licensing factor MCM6;                                       | Mis5 homolog;                                                                                                                               |
| M              | DLEAVCKR                       | N-ter + 42.01 Da, K +28.03 Da, C +57.02 Da | 48.6       | 40.2              | 2      | 1190.63                      | 0.79                                         | 0.11                  | AGM1_MOUSE   | Q88WW3_MOUSE | Phosphoacetylglucosamine mutase;                                             | Acetylglucosamine phosphomutase;N-acetylglucosamine-phosphate mutase;Phosphoglucosmutase-3;                                                 |
| M              | DMGNQHPHSIR                    | N-ter + 42.01 Da                           | 39.2       | 44.4              | 2      | 1413.68                      | n.d.                                         | n.d.                  | BAG5_MOUSE   | E0CX76_MOUSE | BAG family molecular chaperone regulator 5;                                  | Bcl-2-associated athanogene 5;                                                                                                              |
| M              | DNLSDTLKKLKITTAADR             | N-ter + 42.01 Da, K +28.03 Da              | 27.1       | 98.0              | 4      | 2158.41                      | -0.52                                        | 0.13                  | E9Q912_MOUSE | E9Q6Q4_MOUSE |                                                                              |                                                                                                                                             |
| M              | DNSGKQAEAMALLAEER              | N-ter + 42.01 Da, K +34.06 Da              | 60.6       | 57.3              | 3      | 2110.15                      | -0.29                                        | 0.02                  | SNAA_MOUSE   |              | Alpha-soluble NSF attachment protein;                                        | N-ethylmaleimide-sensitive factor attachment protein alpha;                                                                                 |
| M              | DPNCSCASDGSCSAGACKCK           | N-ter + 42.01 Da, K +28.03 Da, C +57.02 Da | 55.9       | 47.7              | 3      | 2580.05                      | 2.11                                         | 0.63                  | MT2_MOUSE    |              | Metallothionein-2;                                                           | Metallothionein-II;                                                                                                                         |
| M              | DPSGVKVLTAEDIQER               | N-ter + 42.01 Da, K +34.06 Da              | 47.1       | 57.4              | 3      | 2092.18                      | -0.11                                        | 0.01                  | SPTA2_MOUSE  | A3KGU7_MOUSE | Spectrin alpha chain, brain;                                                 | Alpha-II spectrin;Fodrin alpha chain;Spectrin, non-erythroid alpha chain;                                                                   |
| M              | DPSWATQSEEAIAEKVLR             | N-ter + 42.01 Da, K +28.03 Da              | 55.3       | 60.0              | 3      | 2216.21                      | -0.30                                        | 0.09                  | STAR5_MOUSE  | D3YU00_MOUSE | STAR-related lipid transfer protein 5;                                       | START domain-containing protein 5;                                                                                                          |
| M              | DSEAFQHAR                      | N-ter + 42.01 Da                           | 55.1       | 48.7              | 2      | 1232.58                      | n.d.                                         | n.d.                  | IASPP_MOUSE  | D3YXE7_MOUSE | RelA-associated inhibitor;                                                   | Inhibitor of ASPP protein;NFkB-interacting protein 1;PPP1R13B-like protein;                                                                 |
| M              | DSFEDKLQGLR                    | N-ter + 42.01 Da, K +34.06 Da              | 23.7       | 66.1              | 3      | 1584.91                      | 0.83                                         | 0.06                  | AL3B1_MOUSE  |              | Aldehyde dehydrogenase family 3 member B1;                                   | Aldehyde dehydrogenase 7;                                                                                                                   |
| M              | DSKESLAPPGRDEVSSLLGR           | N-ter + 42.01 Da, K +28.03 Da              | 42.1       | 64.2              | 3      | 2410.37                      | -0.58                                        | 0.06                  | GCR_MOUSE    | E9PUR6_MOUSE | Glucocorticoid receptor;                                                     | Nuclear receptor subfamily 3 group C member 1;                                                                                              |
| M              | DSKESLAPPGR                    | N-ter + 42.01 Da, K +34.06 Da              | 40.4       | 47.7              | 3      | 1362.77                      | -0.15                                        | 0.01                  | GCR_MOUSE    | E9PUR6_MOUSE | Glucocorticoid receptor;                                                     | Nuclear receptor subfamily 3 group C member 1;                                                                                              |
| M              | DSSAVITQSKKEAR                 | N-ter + 42.01 Da, K +34.06 Da              | 39.3       | 44.8              | 3      | 1840.03                      | 1.68                                         | 0.14                  | CTDS1_MOUSE  |              | Carboxy-terminal domain RNA polymerase II polypeptide A small phosphatase 1; | Golli-interacting protein;Nuclear LIM interactor-interacting factor 3;Small C-terminal domain phosphatase 1;                                |
| M              | DVQLVESGGGLVQPQGSRR            | N-ter + 42.01 Da                           | 61.3       | 63.1              | 3      | 1796.02                      | n.d.                                         | n.d.                  | HVM16_MOUSE  |              | Ig heavy chain V region MOPC 21;                                             |                                                                                                                                             |
| M              | EAAHSKSTEECLSYFVGSSETGLTPDQVKR | N-ter + 42.01 Da, K +28.03 Da, C +57.02 Da | 82.3       | 60.9              | 4      | 3555.90                      | 0.08                                         | 0.01                  | AT2A1_MOUSE  |              | Sarcoplasmic/endoplasmic reticulum calcium ATPase 1;                         | Calcium pump 1;Calcium-transporting ATPase sarcoplasmic reticulum type, fast twitch skeletal muscle isoform;Endoplasmic reticulum class 1/2 |
| M              | EAKGGTVKAAASGFNATEDAQLTR       | N-ter + 42.01 Da, K +28.03 Da              | 56.3       | 74.5              | 4      | 2550.47                      | -0.18                                        | 0.04                  | ANXA4_MOUSE  | E9Q073_MOUSE | Annexin A4;                                                                  | Ca(2+) ATPase; Annexin IV;Annexin-4;                                                                                                        |
| M              | EDEMPKTLVYVGNLSR               | N-ter + 42.01 Da, K +34.06 Da              | 49.2       | 51.7              | 3      | 1958.07                      | 0.16                                         | 0.01                  | TIA1_MOUSE   | Q80ZW7_MOUSE | Nucleolysin TIA-1;                                                           | RNA-binding protein TIA-1;T-cell-restricted intracellular antigen-1;                                                                        |
| M              | EDIMQLPKAR                     | N-ter + 42.01 Da, K +28.03 Da              | 54.0       | 35.2              | 2      | 1400.77                      | -0.84                                        | 0.06                  | RFA3_MOUSE   |              | Replication protein A 14 kDa subunit;                                        | Replication factor A protein 3;                                                                                                             |
| M              | EDKPLVSVK                      | N-ter + 42.01 Da, K +34.06 Da              | 39.2       | 6.9               | 2      | 1254.76                      | 0.45                                         | 0.02                  | PSMG3_MOUSE  |              | Proteasome assembly chaperone 3;                                             |                                                                                                                                             |
| M              | EDVTLHIVR                      | N-ter + 42.01 Da                           | 49.1       | 40.0              | 2      | 1382.74                      | n.d.                                         | n.d.                  | PTRF_MOUSE   | Q3U4N4_MOUSE | Polymerase I and transcript release factor;                                  | Cav-p60;Cavin-1;                                                                                                                            |
| M              | EEAELVKGR                      | N-ter + 42.01 Da, K +34.06 Da              | 55.3       | 33.7              | 2      | 1236.70                      | -0.06                                        | 0.01                  | PALMD_MOUSE  | Q3UVT7_MOUSE | Palmdelphin;                                                                 |                                                                                                                                             |
| M              | EEAPHGCPGADSAQAGR              | N-ter + 42.01 Da, C +57.02 Da              | 70.3       | 54.9              | 3      | 1881.88                      | n.d.                                         | n.d.                  | NUBP1_MOUSE  |              | Cytosolic Fe-S cluster assembly factor NUBP1;                                | Nucleotide-binding protein 1;                                                                                                               |
| M              | EEESIKEGSEKPR                  | N-ter + 42.01 Da, K +28.03 Da              | 37.5       | 85.3              | 3      | 1746.00                      | -0.60                                        | 0.07                  | PKHO2_MOUSE  |              | Pleckstrin homology domain-containing family O member 2;                     | Pleckstrin homology domain-containing family Q member 1;                                                                                    |
| M              | EELIYAKFVSKISKTR               | N-ter + 42.01 Da, K +28.03 Da              | 25.3       | 106.0             | 4      | 2183.43                      | -0.27                                        | 0.01                  | NUP43_MOUSE  |              | Nucleoporin Nup43;                                                           | Nup107-160 subcomplex subunit Nup43;                                                                                                        |
| M              | EERPSETNSNVSSAQPSVAQLAGR       | N-ter + 42.01 Da                           | 24.0       | 58.6              | 4      | 2801.45                      | n.d.                                         | n.d.                  | CP2IP_MOUSE  |              | CapZ-interacting protein;                                                    | Protein kinase substrate CapZIP;                                                                                                            |
| M              | EESEYVSLCVKPEVHVYR             | N-ter + 42.01 Da, K +28.03 Da, C +57.02 Da | 54.0       | 53.8              | 3      | 2552.33                      | -0.25                                        | 0.05                  | NECP2_MOUSE  | D6RFU1_MOUSE | Adaptin ear-binding coat-associated protein 2;                               | NECAP endocytosis-associated protein 2;                                                                                                     |
| M              | EFDPDLGAHCSEPCQR               | N-ter + 42.01 Da, C +57.02 Da              | 45.0       | 53.8              | 3      | 2061.95                      | n.d.                                         | n.d.                  | ZFN2B_MOUSE  | E0CY18_MOUSE | AN1-type zinc finger protein 2B;                                             | Arsenite-inducible RNA-associated protein-like protein;                                                                                     |
| M              | EGHYKPDQKQLKALKDTANR           | N-ter + 42.01 Da, K +28.03 Da              | 40.8       | 79.3              | 4      | 2596.55                      | 0.59                                         | 0.09                  | TKT_MOUSE    | E0CY51_MOUSE | Transketolase;                                                               | P68;                                                                                                                                        |
| M              | EIPPTHYAASR                    | N-ter + 42.01 Da                           | 29.4       | 36.2              | 2      | 1413.72                      | n.d.                                         | n.d.                  | LXN_MOUSE    |              | Latexin;                                                                     | Endogenous carboxypeptidase inhibitor;Tissue carboxypeptidase inhibitor;                                                                    |
| M              | FAPEQSPAKM                     | N-ter + 42.01 Da, K +28.03 Da              | 39.9       | 43.3              | 2      | 1221.61                      | -0.40                                        | 0.06                  | Q8R2L7_MOUSE | E9Q616_MOUSE |                                                                              |                                                                                                                                             |
| M              | EKPAASTEPOGSRPALGR             | N-ter + 42.01 Da, K +34.06 Da              | 27.9       | 69.7              | 3      | 2058.22                      | 0.16                                         | 0.03                  | PCTL_MOUSE   | Q66IR2_MOUSE | PCTP-like protein;                                                           | START domain-containing protein 10;Serologically defined colon cancer antigen 28 homolog;STAR-related lipid transfer protein 10;            |
| M              | EKPAASTEPOGSR                  | N-ter + 42.01 Da, K +34.06 Da              | 35.1       | 52.1              | 3      | 1563.86                      | 0.21                                         | 0.04                  | PCTL_MOUSE   |              | PCTP-like protein;                                                           | START domain-containing protein 10;Serologically defined colon cancer antigen 28 homolog;STAR-related lipid transfer protein 10;            |
| M              | EKTELQKAKLAEQAER               | N-ter + 42.01 Da, K +34.06 Da              | 39.5       | 51.0              | 4      | 2259.45                      | 1.23                                         | 0.11                  | 1433T_MOUSE  | F6VW30_MOUSE | 14-3-3 protein theta;                                                        | 14-3-3 protein tau;                                                                                                                         |
| M              | EKTLTIQK                       | N-ter + 42.01 Da, K +34.06 Da              | 29.9       | 13.5              | 2      | 1228.75                      | -3.06                                        | 0.26                  | 1433T_MOUSE  |              | 14-3-3 protein theta;                                                        | 14-3-3 protein tau;                                                                                                                         |
| M              | EKTLETVPLER                    | N-ter + 42.01 Da, K +28.03 Da              | 52.2       | 15.7              | 2      | 1514.83                      | 1.14                                         | 0.14                  | ROA2_MOUSE   |              | Heterogeneous nuclear ribonucleoproteins A2/B1;                              |                                                                                                                                             |
| M              | EKPVGDMIEIRR                   | N-ter + 42.01 Da, K +34.06 Da              | 33.0       | 75.1              | 3      | 1664.97                      | -0.47                                        | 0.02                  | CYGB_MOUSE   |              | Cytoglobin;                                                                  | Histoglobin;                                                                                                                                |
| M              | EKPVGDMIEIR                    | N-ter + 42.01 Da, K +34.06 Da              | 43.6       | 36.3              | 2      | 1508.80                      | -0.29                                        | 0.02                  | CYGB_MOUSE   |              | Cytoglobin;                                                                  | Histoglobin;                                                                                                                                |
| M              | ELGELYNKSEYTIASGNKYSR          | N-ter + 42.01 Da, K +28.03 Da              | 29.4       | 75.0              | 4      | 2828.64                      | -0.79                                        | 0.16                  | DCTN5_MOUSE  |              | Dynactin subunit 5;                                                          | Dynactin subunit p25;                                                                                                                       |
| M              | ELVEVLKR                       | N-ter + 42.01 Da, K +34.06 Da              | 57.1       | 29.2              | 2      | 1191.75                      | -0.64                                        | 0.17                  | NDUAC_MOUSE  |              | NADH dehydrogenase [ubiquinone] 1 alpha subcomplex subunit 12;               | Complex I-B17.2;NADH-ubiquinone oxidoreductase subunit B17.2;                                                                               |
| M              | EMTSTSLKR                      | N-ter + 42.01 Da, K +34.06 Da              | 47.7       | 31.6              | 2      | 1258.69                      | 0.24                                         | 0.03                  | B7ZNL8_MOUSE | Q3ULP8_MOUSE |                                                                              |                                                                                                                                             |

Table S15, Tholen et al.

| Non Prime Site | Prime Site                 | Modifications                                           | Hyperscore | Mass error in ppm | Charge | Precursor neutral mass in Da | Fold change (log <sub>2</sub> ) of ASAPRatio | FC-error of ASAPRatio | Uniprot ID 1 | Uniprot ID 2 | Protein Name 1                                                                                                                                                           | Protein Name 2                                                                                                                                                           |
|----------------|----------------------------|---------------------------------------------------------|------------|-------------------|--------|------------------------------|----------------------------------------------|-----------------------|--------------|--------------|--------------------------------------------------------------------------------------------------------------------------------------------------------------------------|--------------------------------------------------------------------------------------------------------------------------------------------------------------------------|
| M              | ENEYKR                     | N-ter + 42.01 Da, K +28.03 Da                           | 40.2       | 47.9              | 2      | 1038.53                      | -0.25                                        | 0.02                  | IFISA_MOUSE  |              | Interferon-activable protein 205-A;                                                                                                                                      | Interferon-inducible protein p205-A;Protein D3'                                                                                                                          |
| M              | ENLQTSVVEER                | N-ter + 42.01 Da, K +28.03 Da                           | 49.1       | 24.8              | 2      | 1532.79                      | 0.43                                         | 0.06                  | OCTC_MOUSE   |              | Peroxisomal carnitine O-octanoyltransferase;                                                                                                                             |                                                                                                                                                                          |
| M              | EPGPAAPSSGAPRRPAR          | N-ter + 42.01 Da                                        | 29.2       | 42.1              | 3      | 1689.90                      | n.d.                                         | n.d.                  | E9QM38_MOUSE |              | Zinc finger CCHC-type and RNA-binding motif-containing protein 1;                                                                                                        | MADP-1;U11/U12 small nuclear ribonucleoprotein 31 kDa protein;                                                                                                           |
| ACPKNMLGER     | EPPKKEKKKKR                | N-ter + 42.01 Da, K +34.06 Da, K +28.03 Da              | 11.9       | 104.4             | 3      | 1947.69                      | n.d.                                         | n.d.                  | ZCRB1_MOUSE  |              | Smoothelin-like protein 2;                                                                                                                                               |                                                                                                                                                                          |
| M              | ESPDAEEAHTVR               | N-ter + 42.01 Da                                        | 36.8       | 65.5              | 3      | 1609.81                      | n.d.                                         | n.d.                  | SMTL2_MOUSE  |              | Partner of Y14 and mago;                                                                                                                                                 | Protein wibg homolog;                                                                                                                                                    |
| M              | ETASTPEATGTGKYIASTQRPDGTWR | N-ter + 42.01 Da, K +34.06 Da                           | 26.5       | 68.8              | 4      | 2987.66                      | 0.29                                         | 0.06                  | WIBG_MOUSE   |              | Ketosamine-3-kinase;                                                                                                                                                     | Fructosamine-3-kinase-related protein;                                                                                                                                   |
| PPDSQRTVY      | ETLLKR                     | N-ter + 42.01 Da, K +34.06 Da                           | 33.7       | 36.8              | 2      | 965.61                       | 0.08                                         | 0.00                  | KT3K_MOUSE   |              | Interferon regulatory factor 3;                                                                                                                                          |                                                                                                                                                                          |
| M              | ETPKPR                     | N-ter + 42.01 Da, K +28.03 Da                           | 35.2       | 42.9              | 2      | 927.52                       | -1.43                                        | 0.16                  | IRF3_MOUSE   |              | Long-chain-fatty-acid-CoA ligase 1;                                                                                                                                      | Long-chain acyl-CoA synthetase 1;                                                                                                                                        |
| M              | EVHELFR                    | N-ter + 42.01 Da                                        | 45.7       | 34.1              | 2      | 1101.57                      | n.d.                                         | n.d.                  | ACSL1_MOUSE  | D3Z041_MOUSE | Heterogeneous nuclear ribonucleoprotein A3;                                                                                                                              |                                                                                                                                                                          |
| M              | EVKPPPPGRPPQDSGR           | N-ter + 42.01 Da, K +28.03 Da                           | 24.9       | 75.5              | 3      | 1817.06                      | 0.88                                         | 0.05                  | ROA3_MOUSE   | A2AL12_MOUSE | Peroxisomal acyl-coenzyme A oxidase 1;                                                                                                                                   | Palmitoyl-CoA oxidase;                                                                                                                                                   |
| AHCHYVTVKV     | FAKDKPKIQDR                | N-ter + 42.01 Da, K +28.03 Da                           | 28.0       | 54.1              | 3      | 1427.89                      | 8.49                                         | 0.31                  | ACOX1_MOUSE  |              | Eukaryotic translation initiation factor 2D;                                                                                                                             | Ligatin;                                                                                                                                                                 |
| M              | FAKAFR                     | N-ter + 42.01 Da, K +28.03 Da                           | 20.7       | 22.9              | 2      | 939.52                       | 0.59                                         | 0.03                  | EIF2D_MOUSE  |              | Cytoglobin;                                                                                                                                                              | Histoglobin;                                                                                                                                                             |
| EDVGVAIVLR     | FFVNFPSAK                  | N-ter + 42.01 Da, K +34.06 Da                           | 19.3       | 81.5              | 3      | 1131.71                      | -5.06                                        | 0.00                  | CYGB_MOUSE   |              | Hematological and neurological expressed 1-like protein;                                                                                                                 |                                                                                                                                                                          |
| PMYFFLQNF5     | FLEIFTSVSPR                | N-ter + 42.01 Da                                        | 28.2       | 21.0              | 3      | 1562.90                      | n.d.                                         | n.d.                  | Q7TRIS_MOUSE | Q7TRIS_MOUSE | NF-kappa-B inhibitor alpha;                                                                                                                                              | I-kappa-B-alpha;                                                                                                                                                         |
| M              | FQGADSQAGKSGSR             | N-ter + 42.01 Da, K +28.03 Da                           | 58.0       | 37.5              | 2      | 1595.80                      | 0.71                                         | 0.09                  | HN1L_MOUSE   |              | EH domain-containing protein 1;                                                                                                                                          | PAST homolog 1;                                                                                                                                                          |
| M              | FQPAGHGQDWAMEGPR           | N-ter + 42.01 Da                                        | 39.0       | 49.9              | 3      | 1955.94                      | n.d.                                         | n.d.                  | IKBA_MOUSE   |              | Ubiquitin-associated domain-containing protein 1;                                                                                                                        | E3 ubiquitin-protein ligase subunit KPC2;Kip1 ubiquitination-promoting complex protein 2; Huntingtin yeast partner C;Huntingtin-interacting protein C;                   |
| VAASPVSGIM     | FSWVSKDAR                  | N-ter + 42.01 Da, K +28.03 Da                           | 42.9       | 46.2              | 2      | 1295.69                      | -0.34                                        | 0.03                  | EHD1_MOUSE   | F6Y7R7_MOUSE | Pre-mRNA-processing factor 40 homolog B; NADH dehydrogenase [ubiquinone] flavoprotein 2, mitochondrial;                                                                  | NADH-ubiquinone oxidoreductase 24 kDa subunit; Tyrosyl-tRNA synthetase;                                                                                                  |
| M              | FVQEEKIFAGKVLRL            | N-ter + 42.01 Da, K +34.06 Da                           | 39.7       | 55.0              | 3      | 1904.23                      | -0.69                                        | 0.13                  | UBAC1_MOUSE  |              | Protection of telomeres protein 1;                                                                                                                                       | POT1-like telomere end-binding protein; Peptide-methionine (S)-S-oxide reductase;Protein-methionine-S-oxide reductase;                                                   |
| PGSTPLDLFK     | FYVEELKAR                  | N-ter + 42.01 Da, K +34.06 Da                           | 23.7       | 63.3              | 3      | 1229.76                      | 2.36                                         | 0.24                  | PR40B_MOUSE  | D3Z4N6_MOUSE | Mitochondrial peptide methionine sulfoxide reductase;                                                                                                                    | Collagen alpha-1(I) chain;                                                                                                                                               |
| RNLHKTAVHN     | GAGGALFVHR                 | N-ter + 42.01 Da                                        | 49.8       | 34.4              | 2      | 1025.58                      | n.d.                                         | n.d.                  | NDUV2_MOUSE  |              | Hemoglobin subunit epsilon-Y2;                                                                                                                                           | Beta-1-globin;Hemoglobin beta-1 chain;Hemoglobin beta-major chain; Epsilon-Y2-globin;Hemoglobin epsilon-Y2 chain;                                                        |
| SAGNRDSGAM     | GDAPSPPEKHLILTR            | N-ter + 42.01 Da, K +28.03 Da                           | 24.5       | 68.1              | 3      | 1732.03                      | -0.32                                        | 0.03                  | SYCC_MOUSE   | A2A757_MOUSE | EF-hand domain-containing family member A1;                                                                                                                              | HD domain-containing protein 3;Metazoan Spot homolog 1;Penta-phosphate guanosine-3'-pyrophosphohydrolase;                                                                |
| RVSTQDLTFE     | GDLSHIER                   | N-ter + 42.01 Da                                        | 40.1       | 24.7              | 2      | 967.50                       | n.d.                                         | n.d.                  | POTE1_MOUSE  | Q3UXR7_MOUSE | Creatine kinase M-type;                                                                                                                                                  | Creatine kinase M chain;M-CK; 3-hydroxy-3-methylglutarate-CoA lyase; 12 kDa FK506-binding protein;FK506-binding protein 1A;Immunophilin FKBP12;Rotamase;                 |
| LSSANPVRRM     | GDSASKVIAEAEALPGR          | N-ter + 42.01 Da, K +28.03 Da                           | 36.7       | 46.7              | 3      | 1755.98                      | -1.03                                        | 0.08                  | MSRA_MOUSE   |              | Hydroxymethylglutaryl-CoA lyase, mitochondrial;                                                                                                                          |                                                                                                                                                                          |
| VGPAGKNGDR     | GETGPAGPAGIPAGAR           | N-ter + 42.01 Da                                        | 53.5       | 63.2              | 3      | 1573.88                      | n.d.                                         | n.d.                  | CO1A1_MOUSE  | F8WGB7_MOUSE | Peptidyl-prolyl cis-trans isomerase FKBP1A;                                                                                                                              | Protein YIF1B;                                                                                                                                                           |
| AEKAAVSLCW     | GKVNSEVGEALGR              | N-ter + 42.01 Da, K +34.06 Da                           | 30.9       | 35.4              | 3      | 1562.87                      | 0.38                                         | 0.04                  | HBB1_MOUSE   |              | Alpha-1 antitrypsin 1-1;                                                                                                                                                 | Serine protease inhibitor A1a;                                                                                                                                           |
| FTAEEKTLIN     | GLWSKVNVEEVGEALGR          | N-ter + 42.01 Da, K +34.06 Da                           | 28.8       | 33.5              | 3      | 1975.13                      | -0.71                                        | 0.07                  | HBE_MOUSE    | Q9CR49_MOUSE | Probable carboxypeptidase X1;                                                                                                                                            | Regulatory protein TSC-22;TGF-beta-stimulated clone 22 homolog;TSC22-related inducible leucine zipper 1b;Transforming growth factor beta-1-induced transcript 4 protein; |
| SKTVTAPSDP     | GQPSQVPEEAPLR              | N-ter + 42.01 Da                                        | 30.7       | 49.7              | 3      | 1448.80                      | n.d.                                         | n.d.                  | A2ADM8_MOUSE |              | TSC22 domain family protein 1;                                                                                                                                           |                                                                                                                                                                          |
| LAGAGAAWHH     | GRVKAAREGSR                | N-ter + 42.01 Da, K +28.03 Da                           | 27.8       | 51.9              | 3      | 1326.82                      | 2.40                                         | 0.41                  | EFHA1_MOUSE  |              | Cell differentiation protein RCD1 homolog;                                                                                                                               | Cell differentiation protein RCD1 homolog;                                                                                                                               |
| M              | GSEAAQLLEAFAAHKHR          | N-ter + 42.01 Da, K +34.06 Da                           | 33.9       | 92.6              | 4      | 2097.28                      | -0.62                                        | 0.05                  | MESH1_MOUSE  |              | Ig kappa chain V-V region HP 123E6;                                                                                                                                      | Ig kappa chain V-V region MOPC 173;                                                                                                                                      |
| ILTRLRLQKR     | GTGGVDTAAVGAVFDISNADR      | N-ter + 42.01 Da                                        | 55.6       | 71.4              | 3      | 2034.11                      | n.d.                                         | n.d.                  | KCRM_MOUSE   |              | Creatine kinase M-type;                                                                                                                                                  | Creatine kinase M chain;M-CK;                                                                                                                                            |
| SLRAVSTSSM     | GTLPKQVKIVEVGPR            | N-ter + 42.01 Da, K +34.06 Da                           | 36.1       | 57.1              | 3      | 1730.21                      | -0.92                                        | 0.10                  | HMGCL_MOUSE  |              | Myosin regulatory light chain 2, skeletal muscle isoform;                                                                                                                | Fast skeletal myosin light chain 2;MLC2F;                                                                                                                                |
| M              | GVQVETISPGDGR              | N-ter + 42.01 Da                                        | 46.1       | 63.3              | 2      | 1355.75                      | n.d.                                         | n.d.                  | FKB1A_MOUSE  | Q1JUQ8_MOUSE | Peptide-methionine (S)-S-oxide reductase;                                                                                                                                |                                                                                                                                                                          |
| M              | HATGLAAPAGTPR              | N-ter + 42.01 Da                                        | 28.3       | 48.5              | 3      | 1391.77                      | n.d.                                         | n.d.                  | YIF1B_MOUSE  | D3Z5F9_MOUSE | Alpha-1 antitrypsin 1-1;                                                                                                                                                 | Alpha-1 antitrypsin 1-1;Serine protease inhibitor A1a;                                                                                                                   |
| TSQKDQSPAS     | HEIATNLGDFAIILYR           | N-ter + 42.01 Da                                        | 40.2       | 38.6              | 2      | 1861.01                      | n.d.                                         | n.d.                  | A1AT1_MOUSE  | A1AT2_MOUSE  | Metallocarboxypeptidase CPX-1;                                                                                                                                           |                                                                                                                                                                          |
| EPEVRYVAGM     | HGNEALGR                   | N-ter + 42.01 Da                                        | 32.3       | 93.6              | 2      | 894.51                       | n.d.                                         | n.d.                  | CPXM1_MOUSE  |              | Regulatory protein TSC-22;TGF-beta-stimulated clone 22 homolog;TSC22-related inducible leucine zipper 1b;Transforming growth factor beta-1-induced transcript 4 protein; | CCR4-NOT transcription complex subunit 9;EPO-induced protein FL10;                                                                                                       |
| M              | HQPPESTAAAAAADISAR         | N-ter + 42.01 Da                                        | 54.2       | 36.5              | 3      | 2007.02                      | n.d.                                         | n.d.                  | T22D1_MOUSE  | D3Z0V7_MOUSE | Cell differentiation protein RCD1 homolog;                                                                                                                               | Cell differentiation protein RCD1 homolog;                                                                                                                               |
| M              | HSLATAAPVPTALAQVDR         | N-ter + 42.01 Da                                        | 46.0       | 45.2              | 3      | 1990.12                      | n.d.                                         | n.d.                  | RCD1_MOUSE   |              | Ig kappa chain V-V region HP 123E6;                                                                                                                                      | Ig kappa chain V-V region MOPC 173;                                                                                                                                      |
| D              | IQMTQTSSLSASLGDR           | N-ter + 42.01 Da                                        | 43.4       | 74.5              | 3      | 1938.04                      | n.d.                                         | n.d.                  | KVSAD_MOUSE  |              | Creatine kinase M-type;                                                                                                                                                  | Creatine kinase M chain;M-CK;                                                                                                                                            |
| D              | IQMTQTSSLSASLGDR           | N-ter + 42.01 Da                                        | 33.3       | 38.7              | 3      | 1951.99                      | n.d.                                         | n.d.                  | KVSAA_MOUSE  | KV5AB_MOUSE  | Myosin regulatory light chain 2, skeletal muscle isoform;                                                                                                                | Fast skeletal myosin light chain 2;MLC2F;                                                                                                                                |
| AGDEESYTVF     | KDLFDPIQDR                 | N-ter + 42.01 Da, K +34.06 Da                           | 33.4       | 65.1              | 3      | 1434.89                      | -3.32                                        | 0.33                  | KCRM_MOUSE   |              | Ubiquitinating enzyme 33;Ubiquitin thiolesterase 33;Ubiquitin-specific-processing protease 33;VHL-interacting deubiquitinating enzyme 1;                                 |                                                                                                                                                                          |
| MFDQTQIQEF     | KEAFTVIDONR                | N-ter + 42.01 Da, K +34.06 Da                           | 25.9       | 71.7              | 3      | 1395.86                      | -2.56                                        | 0.30                  | MLRS_MOUSE   | F6ULR7_MOUSE | Ubiquitin carboxyl-terminal hydrolase 33;                                                                                                                                |                                                                                                                                                                          |
| PHLDSVGEIT     | KEDLIQKSLGACQDCKVR         | N-ter + 42.01 Da, K +34.06 Da, K +28.03 Da, C +57.02 Da | 30.4       | 41.4              | 4      | 2285.35                      | n.d.                                         | n.d.                  | UBP33_MOUSE  | D6RES0_MOUSE | Ubiquitin carboxyl-terminal hydrolase 33;                                                                                                                                |                                                                                                                                                                          |
| VTPICLELL      | KESVSADCNHSFCR             | N-ter + 42.01 Da, K +34.06 Da, C +57.02 Da              | 23.9       | 38.4              | 3      | 1771.85                      | -0.54                                        | 0.05                  | E9PWLO_MOUSE |              | Ubiquitinating enzyme 33;Ubiquitin thiolesterase 33;Ubiquitin-specific-processing protease 33;VHL-interacting deubiquitinating enzyme 1;                                 |                                                                                                                                                                          |
| M              | KLNFSGLR                   | N-ter + 42.01 Da, K +28.03 Da                           | 39.6       | 42.2              | 2      | 1134.67                      | -0.07                                        | 0.01                  | CBR2_MOUSE   |              | Carbonyl reductase [NADPH] 2;                                                                                                                                            | Adipocyte protein P27;Lung carbonyl reductase;NADPH-dependent carbonyl reductase 2;                                                                                      |
| VPPGPTNEMS     | KNKEMDIDESLYSR             | N-ter + 42.01 Da, K +28.03 Da                           | 43.7       | 27.5              | 3      | 1824.94                      | 0.91                                         | 0.06                  | UBA1Y_MOUSE  |              | Ubiquitin-activating enzyme E1;Ubiquitin-activating enzyme E1 Y;                                                                                                         |                                                                                                                                                                          |
| YELLCLDNTR     | KPVDQYEDCYLAR              | N-ter + 42.01 Da, K +34.06 Da, C +57.02 Da              | 38.3       | 76.0              | 3      | 1731.97                      | 0.72                                         | 0.09                  | TRFE_MOUSE   | E9Q035_MOUSE | Serotransferrin;                                                                                                                                                         | Beta-1 metal-binding globulin;Siderophilin;                                                                                                                              |
| M              | KQPKNLEGVGFANLPNQVYR       | N-ter + 42.01 Da, K +28.03 Da                           | 55.5       | 70.9              | 4      | 2532.53                      | -0.30                                        | 0.05                  | E9Q1G8_MOUSE |              |                                                                                                                                                                          |                                                                                                                                                                          |



Table S15, Tholen et al.

| Non Prime Site | Prime Site                   | Modifications                              | Hyperscore                                 | Mass error in ppm | Charge | Precursor neutral mass in Da | Fold change (log <sub>2</sub> ) of ASARatio | FC-error of ASARatio | Uniprot ID 1 | Uniprot ID 2 | Protein Name 1                                                      | Protein Name 2                                                                                                            |                                                                                                                              |
|----------------|------------------------------|--------------------------------------------|--------------------------------------------|-------------------|--------|------------------------------|---------------------------------------------|----------------------|--------------|--------------|---------------------------------------------------------------------|---------------------------------------------------------------------------------------------------------------------------|------------------------------------------------------------------------------------------------------------------------------|
| M              | SDDKPFLLTAPGCGQR             | N-ter + 42.01 Da, K +28.03 Da, C +57.02 Da | 37.0                                       | 51.7              | 3      | 1877.94                      | -0.01                                       | 0.00                 | ATF2_MOUSE   | A2AQE9_MOUSE | Cyclic AMP-dependent transcription factor ATF-2;                    | Activating transcription factor 2;MXBP protein;cAMP response element-binding protein CRE-BP1;                             |                                                                                                                              |
| M              | SDKLPYKVDIGLAAWGR            | N-ter + 42.01 Da, K +34.06 Da              | 48.9                                       | 58.1              | 3      | 2069.32                      | 0.50                                        | 0.14                 | SAHH_MOUSE   | A2ALT5_MOUSE | Adenosylhomocysteinase;                                             | CUBP;Liver copper-binding protein;S-adenosyl-L-homocysteine hydrolase;                                                    |                                                                                                                              |
| M              | SDNGELEDKPPAPPVPR            | N-ter + 42.01 Da, K +34.06 Da              | 44.0                                       | 49.7              | 3      | 1796.01                      | 0.88                                        | 0.13                 | PAK2_MOUSE   |              | Serine/threonine-protein kinase PAK 2;                              | Gamma-PAK;p21-activated kinase 2;                                                                                         |                                                                                                                              |
| M              | KSKSKENPRNF                  | SDNQLQEGKNVIGLQMGTRN                       | N-ter + 42.01 Da, K +28.03 Da              | 34.5              | 38.8   | 3                            | 2271.22                                     | 0.44                 | 0.06         | TAGL2_MOUSE  |                                                                     | Transgelin-2;                                                                                                             | SM22-beta;                                                                                                                   |
| M              | SDSEKLNLDLSIGR               | N-ter + 42.01 Da, K +34.06 Da              | 57.3                                       | 34.1              | 2      | 1621.93                      | 0.61                                        | 0.09                 | PP1A_MOUSE   |              | Serine/threonine-protein phosphatase PP1-alpha catalytic subunit;   |                                                                                                                           |                                                                                                                              |
| M              | SDSFDRAPEQTKPQR              | N-ter + 42.01 Da, K +28.03 Da              | 35.4                                       | 73.0              | 3      | 1831.02                      | 0.24                                        | 0.04                 | PAIP1_MOUSE  |              | Polyadenylate-binding protein-interacting protein 1;                |                                                                                                                           |                                                                                                                              |
| M              | SDSLDNEEKPPAPPLR             | N-ter + 42.01 Da, K +34.06 Da              | 40.4                                       | 43.8              | 3      | 1840.02                      | 0.53                                        | 0.03                 | PAK3_MOUSE   | A3KGC2_MOUSE | Serine/threonine-protein kinase PAK 3;                              | Beta-PAK;CDC42/RAC effector kinase PAK-B;p21-activated kinase 3;                                                          |                                                                                                                              |
| M              | NKLHHHHHHQ                   | SDSLVCEVDPELKETLR                          | N-ter + 42.01 Da, K +34.06 Da, C +57.02 Da | 32.8              | 52.3   | 3                            | 2164.23                                     | -0.42                | 0.06         | GMFG_MOUSE   |                                                                     | Glia maturation factor gamma;                                                                                             |                                                                                                                              |
| M              | SEAFDCAKCNESLYGR             | N-ter + 42.01 Da, K +28.03 Da, C +57.02 Da | 42.2                                       | 49.5              | 3      | 1975.94                      | -1.00                                       | 0.14                 | FHL3_MOUSE   | A6H6N4_MOUSE | Four and a half LIM domains protein 3;                              | Skeletal muscle LIM-protein 2;                                                                                            |                                                                                                                              |
| M              | SEDEEKVKLR                   | N-ter + 42.01 Da, K +28.03 Da              | 23.3                                       | 71.4              | 3      | 1329.81                      | 0.21                                        | 0.02                 | STX17_MOUSE  | B1AVI2_MOUSE | Syntaxin-17;                                                        |                                                                                                                           |                                                                                                                              |
| M              | SEGDSVGD5VHGKPSVVYR          | N-ter + 42.01 Da, K +34.06 Da              | 53.5                                       | 66.8              | 3      | 2050.15                      | -0.17                                       | 0.03                 | RER1_MOUSE   |              | Protein RER1;                                                       |                                                                                                                           |                                                                                                                              |
| M              | GPSSYKVGTM                   | SEKFDCHYCR                                 | N-ter + 42.01 Da, K +34.06 Da, C +57.02 Da | 25.5              | 70.8   | 3                            | 1476.74                                     | 0.04                 | 0.01         | FHL1_MOUSE   | A2AEX8_MOUSE                                                        | Four and a half LIM domains protein 1;                                                                                    | Kyot;RBP-associated molecule 14-1;Skeletal muscle LIM-protein 1;                                                             |
| M              | LPASPGPGTM                   | SEKSVAAEALSADLKEKKDVEEKAGR                 | N-ter + 42.01 Da, K +28.03 Da              | 35.6              | 67.6   | 4                            | 3411.15                                     | 0.28                 | 0.02         | PTMS_MOUSE   |                                                                     | Parathyroid hormone-related protein 2;                                                                                    |                                                                                                                              |
| M              | SELEQRQEAQLR                 | N-ter + 42.01 Da                           | 39.6                                       | 70.7              | 3      | 1770.02                      | n.d.                                        | n.d.                 | GBB2_MOUSE   | GBB4_MOUSE   | Guanine nucleotide-binding protein G(i1)/G(s)/G(t) subunit beta-2;  | G protein subunit beta-2;Transducin beta chain 2;                                                                         |                                                                                                                              |
| M              | SEPELKVLR                    | N-ter + 42.01 Da, K +28.03 Da              | 36.8                                       | 35.1              | 2      | 1210.73                      | 0.93                                        | 0.09                 | APT_MOUSE    | Q6PK77_MOUSE | Adenine phosphoribosyltransferase;                                  |                                                                                                                           |                                                                                                                              |
| M              | SESLVCDVAEDLVEKLR            | N-ter + 42.01 Da, K +34.06 Da, C +57.02 Da | 55.3                                       | 64.9              | 3      | 2136.26                      | -0.58                                       | 0.19                 | GMFB_MOUSE   |              | Glia maturation factor beta;                                        |                                                                                                                           |                                                                                                                              |
| M              | MOSELVPVSM                   | SETAPAAPAAPAAEKTVPVKKKAR                   | N-ter + 42.01 Da, K +34.06 Da              | 26.7              | 96.0   | 4                            | 2564.84                                     | -1.64                | 0.15         | H14_MOUSE    |                                                                     | Histone H1.4;                                                                                                             | H1 VAR.2;H1e;                                                                                                                |
| M              | MOSELVPVSM                   | SETEHIASISSDATTEKTSCLR                     | N-ter + 42.01 Da, K +34.06 Da              | 55.3              | 59.9   | 3                            | 2467.36                                     | -0.40                | 0.09         | CJ118_MOUSE  |                                                                     | Uncharacterized protein C10orf118 homolog;                                                                                | Oocyte-testis gene 1 protein;                                                                                                |
| M              | MLSPAM                       | SFLKSFPPGASDGLR                            | N-ter + 42.01 Da, K +34.06 Da              | 28.3              | 25.1   | 3                            | 1750.99                                     | -1.69                | 0.00         | ICLN_MOUSE   | Q923F1_MOUSE                                                        | Methylosome subunit pICln;                                                                                                | Chloride channel, nucleotide sensitive 1A;Chloride conductance regulatory protein IClN;Chloride ion current inducer protein; |
| M              | SGEDEQQEQTIAEDLVVTKYMGGDIANR | N-ter + 42.01 Da, K +34.06 Da              | 39.5                                       | 80.0              | 4      | 3333.93                      | 0.58                                        | 0.15                 | PA2G4_MOUSE  | D3YVH7_MOUSE | Proliferation-associated protein 2G4;                               | IRE5-specific cellular trans-acting factor 45 kDa;Mpp1;Proliferation-associated protein 1;Protein p38-2G4;                |                                                                                                                              |
| M              | SGEGENPASKPTPVQDVQGDGR       | N-ter + 42.01 Da, K +34.06 Da              | 66.8                                       | 55.6              | 3      | 2300.24                      | 0.16                                        | 0.03                 | PA1B3_MOUSE  | Q8CA83_MOUSE | Platelet-activating factor acetylhydrolase IB subunit gamma;        | PAF acetylhydrolase 29 kDa subunit;PAF-AH subunit gamma;                                                                  |                                                                                                                              |
| M              | SGEMDKPLISR                  | N-ter + 42.01 Da, K +28.03 Da              | 33.0                                       | 37.7              | 2      | 1301.71                      | 0.20                                        | 0.01                 | STEA3_MOUSE  | E9QN92_MOUSE | Metalloendopeptidase STEAP3;                                        | Dudulin-2;Protein nm1054;Six-transmembrane epithelial antigen of prostate 3;Tumor suppressor-activated pathway protein 6; |                                                                                                                              |
| M              | SGGKYVDSHGHLVTVPIR           | N-ter + 42.01 Da, K +28.03 Da              | 57.1                                       | 62.4              | 3      | 2047.17                      | 0.75                                        | 0.09                 | CAV1_MOUSE   |              | Caveolin-1;                                                         |                                                                                                                           |                                                                                                                              |
| M              | SGGLLKALR                    | N-ter + 42.01 Da, K +34.06 Da              | 36.8                                       | 22.8              | 2      | 989.67                       | 0.11                                        | 0.00                 | NCBP2_MOUSE  | D3Z3D2_MOUSE | Nuclear cap-binding protein subunit 2;                              | 20 kDa nuclear cap-binding protein;NCBP 20 kDa subunit;                                                                   |                                                                                                                              |
| M              | RKDLFANTVL                   | SGGSTMYPGIADR                              | N-ter + 42.01 Da                           | 37.8              | 69.4   | 2                            | 1352.70                                     | n.d.                 | n.d.         | ACTBL_MOUSE  |                                                                     | Beta-actin-like protein 2;                                                                                                | Kappa-actin;                                                                                                                 |
| M              | SGGTPYIGSKISLISKAIEIR        | N-ter + 42.01 Da, K +28.03 Da              | 23.2                                       | 60.5              | 3      | 2174.36                      | 0.18                                        | 0.01                 | LS14A_MOUSE  |              | Protein LSM14 homolog A;                                            | Protein FAM61A;RNA-associated protein 55A;                                                                                |                                                                                                                              |
| M              | ESPRASTGVP                   | SGKRRLPTSEERSPAKR                          | N-ter + 42.01 Da, K +34.06 Da, K +28.03 Da | 29.7              | 102.2  | 4                            | 2187.48                                     | n.d.                 | n.d.         | TP53B_MOUSE  | A2AU91_MOUSE                                                        | Tumor suppressor p53-binding protein 1;                                                                                   |                                                                                                                              |
| M              | SGSSVAAMKVVQQLR              | N-ter + 42.01 Da, K +34.06 Da              | 48.1                                       | 59.9              | 3      | 1885.22                      | -0.29                                       | 0.04                 | GBG5_MOUSE   |              | Guanine nucleotide-binding protein G(i1)/G(s)/G(o) subunit gamma-5; |                                                                                                                           |                                                                                                                              |
| M              | MA                           | SGVAVSDGVIKVFNDMKVR                        | N-ter + 42.01 Da, K +34.06 Da              | 37.1              | 60.0   | 3                            | 2130.34                                     | -0.64                | 0.17         | COF1_MOUSE   | E9Q1T2_MOUSE                                                        | Cofilin-1;                                                                                                                | Cofilin, non-muscle isoform;                                                                                                 |
| M              | SGYTPDEKLR                   | N-ter + 42.01 Da, K +34.06 Da              | 42.2                                       | 29.7              | 2      | 1240.69                      | -0.07                                       | 0.01                 | NDUB6_MOUSE  | A2AP32_MOUSE | NADH dehydrogenase [ubiquinone] 1 beta subcomplex subunit 6;        | Complex I-B17;NADH-ubiquinone oxidoreductase B17 subunit;                                                                 |                                                                                                                              |
| M              | SHGFTKEEVAEFQAFNR            | N-ter + 42.01 Da, K +34.06 Da              | 43.2                                       | 95.9              | 4      | 2143.26                      | -0.43                                       | 0.02                 | CALM4_MOUSE  |              | Calmodulin-4;                                                       | Calcium-binding protein Dd112;                                                                                            |                                                                                                                              |
| M              | SHPSWLPPKSTGEPLGHVPAR        | N-ter + 42.01 Da, K +28.03 Da              | 40.5                                       | 71.7              | 4      | 2319.38                      | 0.01                                        | 0.00                 | LPP_MOUSE    |              | Lipoma-preferred partner homolog;                                   |                                                                                                                           |                                                                                                                              |
| M              | SHQTGIQASDVKEIFAR            | N-ter + 42.01 Da, K +28.03 Da              | 54.7                                       | 77.2              | 3      | 2085.21                      | -0.30                                       | 0.05                 | TWF1_MOUSE   |              | Twinfilin-1;                                                        | Protein A6;                                                                                                               |                                                                                                                              |
| M              | SHTILLVQPTKRPEGR             | N-ter + 42.01 Da, K +28.03 Da              | 34.7                                       | 61.4              | 4      | 1901.20                      | -0.36                                       | 0.02                 | ERH_MOUSE    |              | Enhancer of rudimentary homolog;                                    |                                                                                                                           |                                                                                                                              |
| M              | SIGVPIKVLHEAEGHIVTCTNTGEVYR  | N-ter + 42.01 Da, K +28.03 Da, C +57.02 Da | 32.5                                       | 90.4              | 4      | 3177.90                      | 0.04                                        | 0.01                 | SMD3_MOUSE   |              | Small nuclear ribonucleoprotein Sm D3;                              | snRNP core protein D3;                                                                                                    |                                                                                                                              |
| M              | SILVSPHPDAPFSLR              | N-ter + 42.01 Da                           | 49.9                                       | 56.0              | 3      | 1840.06                      | n.d.                                        | n.d.                 | SVVC_MOUSE   |              | Valine-tRNA ligase;                                                 | Protein G7a;Valyl-tRNA synthetase;                                                                                        |                                                                                                                              |
| M              | SISESSPAATSLPNGDCGRPR        | N-ter + 42.01 Da, C +57.02 Da              | 36.4                                       | 58.2              | 3      | 2200.15                      | n.d.                                        | n.d.                 | PURA2_MOUSE  |              | Adenylosuccinate synthetase 2;                                      | Adenylosuccinate synthetase, acidic isozyme;Adenylosuccinate synthetase, liver isozyme;IMP-aspartate ligase 2;            |                                                                                                                              |
| M              | SISLSGISGKGR                 | N-ter + 42.01 Da, K +34.06 Da              | 62.4                                       | 29.9              | 2      | 1236.76                      | 1.37                                        | 0.13                 | B1AXE7_MOUSE | A2BI37_MOUSE |                                                                     |                                                                                                                           |                                                                                                                              |
| M              | SKQQTQFINPETPGYVFANLPQVHR    | N-ter + 42.01 Da, K +34.06 Da              | 45.0                                       | 84.5              | 4      | 3242.94                      | -0.15                                       | 0.03                 | SEPT2_MOUSE  | D3Z3C0_MOUSE | Septin-2;                                                           | Neural precursor cell expressed developmentally down-regulated protein 5;                                                 |                                                                                                                              |
| M              | SKSESPKEPEQLR                | N-ter + 42.01 Da, K +34.06 Da              | 30.1                                       | 63.8              | 3      | 1624.01                      | 0.06                                        | 0.01                 | ROA1_MOUSE   | Q5EBP8_MOUSE | Heterogeneous nuclear ribonucleoprotein A1;                         | HDP-1;Helix-stabilizing protein;Single-strand-binding protein;Topoisomerase-inhibitor suppressed;hnRNP core protein A1;   |                                                                                                                              |
| M              | SKSFQSSLSGR                  | N-ter + 42.01 Da, K +34.06 Da              | 38.5                                       | 40.2              | 2      | 1299.75                      | 0.25                                        | 0.03                 | MATR3_MOUSE  | Q6ZQ61_MOUSE | Matrin-3;                                                           |                                                                                                                           |                                                                                                                              |
| M              | SLHQFLLEPITCHAWNRR           | N-ter + 42.01 Da, C +57.02 Da              | 56.5                                       | 62.5              | 3      | 2163.20                      | n.d.                                        | n.d.                 | ARCA1_MOUSE  | D3YVI5_MOUSE | Actin-related protein 2/3 complex subunit 1A;                       | SOP2-like protein;Sid 329;                                                                                                |                                                                                                                              |



Table S15, Tholen et al.

| Non Prime Site | Prime Site                 | Modifications                              | Hyperscore                    | Mass error in ppm | Charge | Precursor neutral mass in Da | Fold change (log <sub>2</sub> ) of ASAPRatio | FC-error of ASAPRatio | Uniprot ID 1 | Uniprot ID 2 | Protein Name 1                                                                                        | Protein Name 2                                                                                                                                                |  |
|----------------|----------------------------|--------------------------------------------|-------------------------------|-------------------|--------|------------------------------|----------------------------------------------|-----------------------|--------------|--------------|-------------------------------------------------------------------------------------------------------|---------------------------------------------------------------------------------------------------------------------------------------------------------------|--|
| M              | SLICSJNVEPHPCVSPVSNHVVYER  | N-ter + 42.01 Da, C +57.02 Da              | 37.8                          | 76.0              | 4      | 3050.65                      | n.d.                                         | n.d.                  | PRP19_MOUSE  |              | Pre-mRNA-processing factor 19;                                                                        | Nuclear matrix protein 200;PRP19/PSO4                                                                                                                         |  |
| CEPVYGLTLM     | SLKPQPQPAPATGR             | N-ter + 42.01 Da, K +28.03 Da              | 38.1                          | 44.8              | 3      | 1613.96                      | 0.14                                         | 0.01                  | ATX2_MOUSE   | E9QQ60_MOUSE | Ataxin-2;                                                                                             | homolog;Senescence evasion factor;                                                                                                                            |  |
| M              | SLSNKLTLDLKVGGKR           | N-ter + 42.01 Da, K +28.03 Da              | 28.0                          | 42.0              | 3      | 2068.35                      | -0.11                                        | 0.01                  | PGK1_MOUSE   |              | Phosphoglycerate kinase 1;                                                                            | Spinocerebellar ataxia type 2 protein homolog;                                                                                                                |  |
| M              | SLVAVPFYQKR                | N-ter + 42.01 Da, K +28.03 Da              | 38.5                          | 33.9              | 2      | 1376.83                      | -0.58                                        | 0.07                  | Q14B15_MOUSE |              |                                                                                                       |                                                                                                                                                               |  |
| M              | SLVDLGGKLEAAR              | N-ter + 42.01 Da, K +34.06 Da              | 55.3                          | 80.7              | 3      | 1622.17                      | -0.69                                        | 0.33                  | GABP1_MOUSE  | A2AQ71_MOUSE | GA-binding protein subunit beta-1;                                                                    | GABP subunit beta-2;                                                                                                                                          |  |
| EVVLALDAIH     | SMGLIHR                    | N-ter + 42.01 Da                           | 34.5                          | 41.3              | 2      | 854.48                       | n.d.                                         | n.d.                  | ROCK2_MOUSE  | F8VPK5_MOUSE | Rho-associated protein kinase 2;                                                                      | Rho-associated, coiled-coil-containing protein kinase 2;                                                                                                      |  |
| ASVILQHLRM     | SMHTEAAEVLLER              | N-ter + 42.01 Da                           | 35.9                          | 46.9              | 3      | 1526.81                      | n.d.                                         | n.d.                  | HIBCH_MOUSE  | E0CX19_MOUSE | 3-hydroxyisobutyryl-CoA hydrolase, mitochondrial;                                                     | coiled-coil-containing protein kinase II;p164 ROCK-2;                                                                                                         |  |
| M              | SMNKGPTLLDGLDPEQENVLQR     | N-ter + 42.01 Da, K +34.06 Da              | 55.9                          | 47.4              | 3      | 2529.42                      | -0.71                                        | 0.08                  | PLIN1_MOUSE  |              | Perilipin-1;                                                                                          | Lipid droplet-associated protein;Perilipin A;                                                                                                                 |  |
| M              | SNYGEDHMAEDCRDDIGR         | N-ter + 42.01 Da, C +57.02 Da              | 39.6                          | 63.6              | 3      | 2180.99                      | n.d.                                         | n.d.                  | ELAV1_MOUSE  |              | ELAV-like protein 1;                                                                                  | Elav-like generic protein;Hu-antigen R;MeIG;                                                                                                                  |  |
| GLQQPPGSPG     | SPGEGQPSGASGAPGPR          | N-ter + 42.01 Da                           | 29.5                          | 83.3              | 3      | 1549.84                      | n.d.                                         | n.d.                  | CO1A1_MOUSE  | F8WGB7_MOUSE | Collagen alpha-1(I) chain;                                                                            | Alpha-1 type I collagen;                                                                                                                                      |  |
| M              | SQAEFDKAAEEVKR             | N-ter + 42.01 Da, K +28.03 Da              | 62.4                          | 33.0              | 2      | 1704.93                      | -0.25                                        | 0.01                  | ACBP_MOUSE   |              | Acyl-CoA-binding protein;                                                                             | Diazepam-binding inhibitor;Endozepine;                                                                                                                        |  |
| M              | SGQDSNPAAIHPAAEIDIQDGR     | N-ter + 42.01 Da                           | 60.9                          | 41.1              | 3      | 2305.12                      | n.d.                                         | n.d.                  | PA1B2_MOUSE  | F8WIW7_MOUSE | Platelet-activating factor acetylhydrolase IB subunit beta;                                           | PAF acetylhydrolase 30 kDa subunit;PAF-AH subunit beta;                                                                                                       |  |
| EDIRERVETL     | SQVEVLQQAADIAR             | N-ter + 42.01 Da                           | 32.8                          | 47.0              | 3      | 1769.02                      | n.d.                                         | n.d.                  | LAMB1_MOUSE  | E9QN70_MOUSE | Laminin subunit beta-1;                                                                               | Laminin B1 chain;Laminin-1 subunit beta;Laminin-10 subunit beta;Laminin-12 subunit beta;Laminin-2 subunit beta;Laminin-6 subunit beta;Laminin-8 subunit beta; |  |
| CQGLPKDRP      | SRGKDAIAPKR                | N-ter + 42.01 Da, K +34.06 Da              | 20.2                          | 43.7              | 3      | 1307.89                      | -1.15                                        | 0.13                  | FHDC1_MOUSE  |              | FH2 domain-containing protein 1;                                                                      |                                                                                                                                                               |  |
| M              | SSEPPPPPLQPPTHTQTSVGLLDTPR | N-ter + 42.01 Da                           | 33.4                          | 57.9              | 4      | 2689.53                      | n.d.                                         | n.d.                  | CHSP1_MOUSE  |              | Calcium-regulated heat stable protein 1;                                                              | Calcium-regulated heat-stable protein of 24 kDa;                                                                                                              |  |
| M              | SSLPFTPPVVKR               | N-ter + 42.01 Da, K +34.06 Da              | 30.9                          | 25.9              | 2      | 1515.96                      | 0.71                                         | 0.07                  | SMAD2_MOUSE  | E9Q3M0_MOUSE | Mothers against decapentaplegic homolog 2;                                                            | Mad-related protein 2;SMAD family member 2;                                                                                                                   |  |
| M              | SSKSMVLGVWDIR              | N-ter + 42.01 Da, K +28.03 Da              | 40.1                          | 66.5              | 3      | 1610.92                      | -0.74                                        | 0.10                  | GSTM5_MOUSE  | E9PVM7_MOUSE | Glutathione S-transferase Mu 5;                                                                       | Fibrous sheath component 2;GST class-mu 5;                                                                                                                    |  |
| M              | SKTASTNSIAQAR              | N-ter + 42.01 Da, K +34.06 Da              | 34.8                          | 57.4              | 3      | 1496.89                      | -0.49                                        | 0.12                  | GBG12_MOUSE  |              | Guanine nucleotide-binding protein G(I)/G(S)/G(O) subunit gamma-12;                                   |                                                                                                                                                               |  |
| GSSSPLPKYA     | SSPKPNNSYMFKR              | N-ter + 42.01 Da, K +34.06 Da, K +28.03 Da | 22.4                          | 7.6               | 3      | 1658.88                      | n.d.                                         | n.d.                  | GLC1_MOUSE   | E9QKK4_MOUSE | Glucocorticoid-induced transcript 1 protein;                                                          | Glucocorticoid-induced gene 18 protein;Testhymine;Thymocyte/spermatocyte selection protein 1;                                                                 |  |
| M              | SSPPEGKLETKAGHPPAVKAGGMR   | N-ter + 42.01 Da, K +28.03 Da              | 22.8                          | 77.5              | 4      | 2527.55                      | 0.18                                         | 0.01                  | DAP1_MOUSE   |              | Death-associated protein 1;                                                                           |                                                                                                                                                               |  |
| M              | SMNRLWRKNK                 | SSQPFGICGVDLNR                             | N-ter + 42.01 Da, C +57.02 Da | 27.5              | 5.6    | 3                            | 1703.84                                      | n.d.                  | n.d.         | CBPA5_MOUSE  | E9PYY7_MOUSE                                                                                          | Carboxypeptidase A5;                                                                                                                                          |  |
| TCVSNPFFIM     | SSSASAANGDSKFKGDNR         | N-ter + 42.01 Da, K +34.06 Da              | 31.8                          | 103.8             | 4      | 2184.39                      | -0.36                                        | 0.10                  | PTBP1_MOUSE  | EQ2217_MOUSE | Polypyrimidine tract-binding protein 1;                                                               | Heterogeneous nuclear ribonucleoprotein I;                                                                                                                    |  |
| M              | SSLLAGGHMVLSTPCEESR        | N-ter + 42.01 Da, C +57.02 Da              | 45.4                          | 64.0              | 3      | 2159.14                      | n.d.                                         | n.d.                  | TENS4_MOUSE  |              | Tensin-4;                                                                                             |                                                                                                                                                               |  |
| M              | SSSRPVALVTGANKGIGFAITR     | N-ter + 42.01 Da, K +28.03 Da              | 58.9                          | 56.8              | 3      | 2271.40                      | 0.25                                         | 0.06                  | CBR1_MOUSE   |              | Carbonyl reductase [NADPH] 1;                                                                         | 15-hydroxyprostaglandin dehydrogenase [NADP+];NADPH-dependent carbonyl reductase 1;Prostaglandin 9-ketoreductase;Prostaglandin-E(2) 9-reductase;              |  |
| M              | SSTQFNKGPSYGLSAEVKNR       | N-ter + 42.01 Da, K +34.06 Da              | 66.0                          | 60.3              | 3      | 2279.36                      | 0.06                                         | 0.01                  | CNN2_MOUSE   | D327R6_MOUSE | Calponin-2;                                                                                           | Calponin H2, smooth muscle;Neutral calponin;                                                                                                                  |  |
| M              | SSVAVLTQESFAEHR            | N-ter + 42.01 Da                           | 59.6                          | 74.2              | 3      | 1701.96                      | n.d.                                         | n.d.                  | VIGLN_MOUSE  |              | Vigilin;                                                                                              | High density lipoprotein-binding protein;                                                                                                                     |  |
| CKAADKTCF      | STEGPNLVTR                 | N-ter + 42.01 Da                           | 29.1                          | 87.8              | 2      | 1114.66                      | n.d.                                         | n.d.                  | ALBU_MOUSE   |              | Serum albumin;                                                                                        |                                                                                                                                                               |  |
| LFANTVLSGG     | STMPYGIADR                 | N-ter + 42.01 Da                           | 23.6                          | 75.9              | 2      | 1151.62                      | n.d.                                         | n.d.                  | ACTBL_MOUSE  |              | Beta-actin-like protein 2;                                                                            | Kappa-actin;                                                                                                                                                  |  |
| M              | STNTDLSLSDYDEGQSKFIR       | N-ter + 42.01 Da, K +28.03 Da              | 58.5                          | 40.0              | 3      | 2374.22                      | 0.03                                         | 0.00                  | HIG1A_MOUSE  |              | HIG1 domain family member 1A;                                                                         | Hypoxia-inducible gene 1 protein;                                                                                                                             |  |
| M              | STTTGPEAAPKPSAKSIYEQR      | N-ter + 42.01 Da, K +28.03 Da              | 27.4                          | 65.8              | 3      | 2316.35                      | -0.38                                        | 0.09                  | ES8L1_MOUSE  | E9Q4X5_MOUSE | Epidermal growth factor receptor kinase substrate 8-like protein 1;                                   | Epidermal growth factor receptor pathway substrate 8-related protein 1;                                                                                       |  |
| M              | SVFGKLFAGAGGKAGKGGPTPQEIQR | N-ter + 42.01 Da, K +28.03 Da              | 29.5                          | 73.0              | 4      | 2740.70                      | -0.69                                        | 0.02                  | CHM4B_MOUSE  |              | Charged multivesicular body protein 4b;                                                               | Chromatin-modifying protein 4b;                                                                                                                               |  |
| M              | TAFFKTLR                   | N-ter + 42.01 Da, K +34.06 Da              | 34.5                          | 32.1              | 2      | 1058.67                      | 0.74                                         | 0.04                  | AGK_MOUSE    |              | Acylglycerol kinase, mitochondrial;                                                                   | Multiple substrate lipid kinase;                                                                                                                              |  |
| M              | TAIHKIVSR                  | N-ter + 42.01 Da, K +28.03 Da              | 59.0                          | 36.5              | 2      | 1198.77                      | -0.45                                        | 0.10                  | PTEIN_MOUSE  |              | Phosphatidylinositol-3,4,5-trisphosphate 3-phosphatase and dual-specificity protein phosphatase PTEN; | Mutated in multiple advanced cancers                                                                                                                          |  |
| M              | TATLRPYSAVR                | N-ter + 42.01 Da                           | 38.0                          | 23.5              | 2      | 1388.81                      | n.d.                                         | n.d.                  | ARPC4_MOUSE  |              | Actin-related protein 2/3 complex subunit 4;                                                          | 1;Phosphatase and tensin homolog;                                                                                                                             |  |
| M              | TETDGFYKSR                 | N-ter + 42.01 Da, K +28.03 Da              | 51.7                          | 34.4              | 2      | 1272.64                      | 0.24                                         | 0.02                  | CASP6_MOUSE  |              | Caspase-6;                                                                                            | Arp2/3 complex 20 kDa subunit; Apoptotic protease Mch-2;                                                                                                      |  |
| M              | TFAEDKTYKIR                | N-ter + 42.01 Da, K +28.03 Da              | 27.7                          | 69.1              | 3      | 1631.97                      | -0.74                                        | 0.03                  | MAVS_MOUSE   |              | Mitochondrial antiviral-signaling protein;                                                            | CARD adapter inducing interferon beta;Interferon beta promoter stimulator protein 1;Virus-induced-signaling adapter;                                          |  |
| M              | THSSQDAGSHGIEEGR           | N-ter + 42.01 Da                           | 55.2                          | 92.3              | 3      | 1836.97                      | n.d.                                         | n.d.                  | CG053_MOUSE  |              | C7orf53 homolog;                                                                                      |                                                                                                                                                               |  |
| M              | TMDKSELVQKAKLAEQAEAR       | N-ter + 42.01 Da, K +28.03 Da              | 43.8                          | 58.9              | 4      | 2300.38                      | 0.10                                         | 0.01                  | 1433B_MOUSE  | A2A5N1_MOUSE | 14-3-3 protein beta/alpha;                                                                            | Protein kinase C inhibitor protein 1;                                                                                                                         |  |
| MPAIM          | TMLADHAAR                  | N-ter + 42.01 Da                           | 37.0                          | 48.4              | 2      | 1026.54                      | n.d.                                         | n.d.                  | XPO1_MOUSE   | A2AKT6_MOUSE | Exportin-1;                                                                                           | Chromosome region maintenance 1 protein homolog;                                                                                                              |  |
| M              | TNEEPLPKKVR                | N-ter + 42.01 Da, K +34.06 Da              | 19.6                          | 45.6              | 3      | 1419.94                      | -0.23                                        | 0.03                  | FL2D_MOUSE   | E0CYH0_MOUSE | Pre-mRNA-splicing regulator WTAP;                                                                     | Female-lethal(2)D homolog;WT1-associated protein;Wilms tumor 1-associating protein;                                                                           |  |
| M              | TQEEAGRLPQVLAR             | N-ter + 42.01 Da                           | 25.0                          | 37.2              | 3      | 1608.92                      | n.d.                                         | n.d.                  | Q8BGM4_MOUSE | Q8BV07_MOUSE |                                                                                                       | Transcription factor CP2-like 2;Transcription factor LBP-32;                                                                                                  |  |
| M              | TQEYDNKRPLVLLQNEALYPQR     | N-ter + 42.01 Da, K +28.03 Da              | 44.1                          | 71.4              | 4      | 2743.63                      | -0.42                                        | 0.04                  | GRHL1_MOUSE  |              | Grainyhead-like protein 1 homolog;                                                                    |                                                                                                                                                               |  |
| M              | LFKAKKVAMM                 | TQPPSTPALPR                                | N-ter + 42.01 Da              | 22.4              | 29.6   | 3                            | 1205.68                                      | n.d.                  | n.d.         | E9PZQ0_MOUSE |                                                                                                       |                                                                                                                                                               |  |
| M              | TSPEGAQNKEIDCLSPAEQR       | N-ter + 42.01 Da, K +34.06 Da, C +57.02 Da | 36.9                          | 49.9              | 3      | 2305.22                      | -0.04                                        | 0.01                  | LRRF1_MOUSE  | E9Q9T1_MOUSE | Leucine-rich repeat flightless-interacting protein 1;                                                 | FLI-LRR-associated protein 1;H186 FLAP;                                                                                                                       |  |
| M              | TSSYGHVLER                 | N-ter + 42.01 Da                           | 60.0                          | 39.4              | 2      | 1189.62                      | n.d.                                         | n.d.                  | PRRX1_MOUSE  |              | Paired mesoderm homeobox protein 1;                                                                   | Homeobox protein K-2;Homeobox protein mHox;Paired-related homeobox protein 1;                                                                                 |  |
| M              | TTKDPSEHPSVTLFR            | N-ter + 42.01 Da, K +34.06 Da              | 42.3                          | 63.0              | 3      | 1919.11                      | 0.38                                         | 0.04                  | ACY1_MOUSE   |              | Aminoacylase-1;                                                                                       | N-acyl-L-amino-acid amidohydrolase;                                                                                                                           |  |

Table S15, Tholen et al.

| Non Prime Site | Prime Site             | Modifications                 | Hyperscore | Mass error in ppm | Charge | Precursor neutral mass in Da | Fold change (log <sub>2</sub> ) of ASAPRatio | FC-error of ASAPRatio | Uniprot ID 1 | Uniprot ID 2 | Protein Name 1                                          | Protein Name 2                                                                           |
|----------------|------------------------|-------------------------------|------------|-------------------|--------|------------------------------|----------------------------------------------|-----------------------|--------------|--------------|---------------------------------------------------------|------------------------------------------------------------------------------------------|
| M              | TTNTVPLHPYWPR          | N-ter + 42.01 Da              | 29.1       | 56.3              | 3      | 1622.91                      | n.d.                                         | n.d.                  | EBP_MOUSE    | A2AC29_MOUSE | 3-beta-hydroxysteroid-Delta(8),Delta(7)-isomerase;      | Cholestenol Delta-isomerase;Delta(8)-Delta(7) sterol isomerase;Emopamil-binding protein; |
| M              | TTTTTFKGVDPNSR         | N-ter + 42.01 Da, K +34.06 Da | 27.3       | 49.3              | 3      | 1599.91                      | 0.37                                         | 0.05                  | HN1_MOUSE    |              | Hematological and neurological expressed 1 protein;     |                                                                                          |
| VDIRKDLFAN     | TVLSGGSTMYPGIADR       | N-ter + 42.01 Da              | 28.2       | 60.0              | 3      | 1665.90                      | n.d.                                         | n.d.                  | ACTBL_MOUSE  |              | Beta-actin-like protein 2;                              | Kappa-actin;                                                                             |
| M              | VEKEEAGGGGGGSEEEAAQYDR | N-ter + 42.01 Da, K +34.06 Da | 90.7       | 56.6              | 3      | 2470.27                      | -0.06                                        | 0.01                  | SAE1_MOUSE   |              | SUMO-activating enzyme subunit 1;                       | Ubiquitin-like 1-activating enzyme E1A;                                                  |
| GVANVSIDDR     | VISLSGEHSIIIGR         | N-ter + 42.01 Da              | 33.6       | 59.3              | 3      | 1408.85                      | n.d.                                         | n.d.                  | SODC_MOUSE   |              | Superoxide dismutase [Cu-Zn];                           |                                                                                          |
| PVKM           | VKVGVNGFGR             | N-ter + 42.01 Da, K +28.03 Da | 43.5       | 31.2              | 2      | 1101.66                      | -0.32                                        | 0.02                  | G3P_MOUSE    | E9PX99_MOUSE | Glyceraldehyde-3-phosphate dehydrogenase;               | Peptidyl-cysteine S-nitrosylase GAPDH;                                                   |
| CDEIHDRVKD     | VLKSHQAHAHAR           | N-ter + 42.01 Da, K +34.06 Da | 22.7       | 14.6              | 3      | 1221.73                      | -2.12                                        | 0.37                  | SPAT6_MOUSE  |              | Spermatogenesis-associated protein 6;                   | Kinesin-related protein;                                                                 |
| KAASGLWGK      | VNADEVGGEALGR          | N-ter + 42.01 Da              | 20.6       | 27.8              | 2      | 1327.67                      | n.d.                                         | n.d.                  | A8DUK4_MOUSE | E9Q223_MOUSE |                                                         |                                                                                          |
| M              | VSMNTVDTSHEDIHQMDYYGTR | N-ter + 42.01 Da              | 30.5       | 74.7              | 4      | 3056.52                      | n.d.                                         | n.d.                  | SEC13_MOUSE  |              | Protein SEC13 homolog;                                  | SEC13-like protein 1;SEC13-related protein;                                              |
| PGSTPFKFWA     | WDPEEERR               | N-ter + 42.01 Da              | 15.7       | 33.1              | 3      | 1157.55                      | n.d.                                         | n.d.                  | LIMC1_MOUSE  | E9PXS0_MOUSE | LIM and calponin homology domains-containing protein 1; |                                                                                          |
| LASLTFQQM      | WISKQYDEAGPSIVHR       | N-ter + 42.01 Da, K +28.03 Da | 33.8       | 70.9              | 4      | 2084.18                      | 1.14                                         | 0.07                  | ACTA_MOUSE   | ACTC_MOUSE   | Actin, aortic smooth muscle;                            | Alpha-actin-2;                                                                           |
| LASLTFQQM      | WITKQYDEAGPSIVHR       | N-ter + 42.01 Da, K +28.03 Da | 33.1       | 105.2             | 4      | 2098.27                      | 1.64                                         | 0.20                  | ACTS_MOUSE   |              | Actin, alpha skeletal muscle;                           | Alpha-actin-1;                                                                           |
| DDFVPPRHAT     | YFLAGLGPESGR           | N-ter + 42.01 Da              | 24.3       | 39.4              | 2      | 1307.70                      | n.d.                                         | n.d.                  | CRNS1_MOUSE  | E9PX09_MOUSE | Carnosine synthase 1;                                   | ATP-grasp domain-containing protein 1;                                                   |
| PGLTGNFAAQ     | YSDKGVSSGGPMGLMGPR     | N-ter + 42.01 Da, K +28.03 Da | 41.2       | 93.1              | 3      | 1962.12                      | -1.06                                        | 0.11                  | CO1A2_MOUSE  | E0CXI2_MOUSE | Collagen alpha-2(I) chain;                              | Alpha-2 type I collagen;                                                                 |
| YGFQNALIVR     | YTQKAPQVSTPTLVEAAR     | N-ter + 42.01 Da, K +34.06 Da | 46.4       | 68.4              | 3      | 2035.26                      | -0.25                                        | 0.03                  | ALBU_MOUSE   |              | Serum albumin;                                          |                                                                                          |
