# Supplementary material
Source: PubMed Central journal article supplement (PMC3591655)
Supplement: supp_M112.017962_mcp.M112.017962-18.pdf [file supp_M112.017962_mcp.M112.017962-18.pdf]

Table S16: Acetylated N-termini identified in the TAILS experiment comparing wild-type and *Ctsb*<sup>-/-</sup> skin (replicate 2). Up to two potential protein IDs per peptide are stated.

| Non Prime Site | Prime Site                       | Modifications                              | Hyperscore | Mass error in ppm | Charge | Precursor neutral mass in Da | Fold change (log <sub>2</sub> ) of ASAPRatio | FC-error of ASAPRatio | Uniprot ID 1 | Uniprot ID 2 | Protein Name 1                                           | Protein Name 2                                                                                                                                                                                                                            |
|----------------|----------------------------------|--------------------------------------------|------------|-------------------|--------|------------------------------|----------------------------------------------|-----------------------|--------------|--------------|----------------------------------------------------------|-------------------------------------------------------------------------------------------------------------------------------------------------------------------------------------------------------------------------------------------|
| M              | AAAAAAAAAAGAAGGR                 | N-ter + 42.01 Da                           | 64.5       | 73.6              | 2      | 1239.72                      | n.d.                                         | n.d.                  | PABP2_MOUSE  |              | Polyadenylate-binding protein 2;                         | Nuclear poly(A)-binding protein 1;Poly(A)-binding protein II;Polyadenylate-binding nuclear protein 1;                                                                                                                                     |
| MA             | AAAAAAAAAAGAAGGR                 | N-ter + 42.01 Da                           | 51.5       | 79.1              | 2      | 1168.69                      | n.d.                                         | n.d.                  | PABP2_MOUSE  |              | Polyadenylate-binding protein 2;                         | Nuclear poly(A)-binding protein 1;Poly(A)-binding protein II;Polyadenylate-binding nuclear protein 1;                                                                                                                                     |
| MAA            | AAAAAAAAAAGRGSGPGRR              | N-ter + 42.01 Da                           | 48.5       | 31.4              | 3      | 1764.96                      | n.d.                                         | n.d.                  | PABP2_MOUSE  |              | Polyadenylate-binding protein 2;                         | Nuclear poly(A)-binding protein 1;Poly(A)-binding protein II;Polyadenylate-binding nuclear protein 1;                                                                                                                                     |
| AAAAAVAAA      | AAAAAAEPPASGTTKR                 | N-ter + 42.01 Da, K +34.06 Da              | 41.3       | 28.1              | 3      | 1778.99                      | -2.56                                        | 0.30                  | ALKB5_MOUSE  |              | Probable alpha-ketoglutarate-dependent dioxygenase ABH5; | Alkylated DNA repair protein alkB homolog 5; ERT2;Extracellular signal-regulated kinase 1;Insulin-stimulated MAP2 kinase;MAP kinase isoform p44;MNK1;Microtubule-associated protein 2 kinase;Mitogen-activated protein kinase 1;p44-ERK1; |
| M              | AAAAAPGGGGGEPR                   | N-ter + 42.01 Da                           | 37.4       | 75.4              | 2      | 1250.70                      | n.d.                                         | n.d.                  | MK03_MOUSE   | D323G6_MOUSE | Mitogen-activated protein kinase 3;                      |                                                                                                                                                                                                                                           |
| M              | AAAAAVAGAGR                      | N-ter + 42.01 Da                           | 48.2       | 74.7              | 2      | 997.61                       | n.d.                                         | n.d.                  | E9QN6_MOUSE  |              |                                                          |                                                                                                                                                                                                                                           |
| M              | AAAAAGPASSQR                     | N-ter + 42.01 Da                           | 40.9       | 94.8              | 2      | 1098.65                      | n.d.                                         | n.d.                  | SUGT1_MOUSE  |              | Suppressor of G2 allele of SKP1 homolog;                 |                                                                                                                                                                                                                                           |
| MA             | AAAAAGPEMVR                      | N-ter + 42.01 Da                           | 33.6       | 58.8              | 2      | 1084.60                      | n.d.                                         | n.d.                  | MK01_MOUSE   | E9QAI2_MOUSE | Mitogen-activated protein kinase 1;                      |                                                                                                                                                                                                                                           |
| M              | AAAAASGAGVAVAGAGGAPAGR           | N-ter + 42.01 Da                           | 41.0       | 96.4              | 3      | 1836.10                      | n.d.                                         | n.d.                  | E9PU87_MOUSE |              |                                                          |                                                                                                                                                                                                                                           |
| M              | AAAAATAATKNGGGSGR                | N-ter + 42.01 Da, K +34.06 Da              | 39.3       | 61.6              | 3      | 1563.91                      | -0.60                                        | 0.05                  | HACD2_MOUSE  |              | 3-hydroxyacyl-CoA dehydratase 2;                         | Protein-tyrosine phosphatase-like member B; Modulator of estrogen-induced transcription;SAF-like transcription modulator;                                                                                                                 |
| M              | AAAAGAVVASAASGPAEGKKTCLR         | N-ter + 42.01 Da, K +34.06 Da              | 42.0       | 93.6              | 4      | 2405.62                      | 1.24                                         | 0.13                  | SLTM_MOUSE   |              | SAFB-like transcription modulator;                       | 26S proteasome regulatory subunit RPN6;26S proteasome regulatory subunit S9;26S proteasome regulatory subunit p44.5;                                                                                                                      |
| M              | AAAAVVEFQR                       | N-ter + 42.01 Da                           | 36.8       | 54.1              | 2      | 1102.64                      | n.d.                                         | n.d.                  | PSD11_MOUSE  |              | 26S proteasome non-ATPase regulatory subunit 11;         |                                                                                                                                                                                                                                           |
| M              | AAAECCGVGVEDDR                   | N-ter + 42.01 Da, C +57.02 Da              | 30.7       | 77.1              | 2      | 1575.77                      | n.d.                                         | n.d.                  | PEX19_MOUSE  |              | Peroxisomal biogenesis factor 19;                        | Peroxin-19;Peroxisomal farnesylated protein;                                                                                                                                                                                              |
| M              | AAAGGGAAAAAGR                    | N-ter + 42.01 Da                           | 64.0       | 87.5              | 2      | 1012.59                      | n.d.                                         | n.d.                  | RAB21_MOUSE  | Q6A0C7_MOUSE | Ras-related protein Rab-21;                              | Rab-12; Synaptosomal-associated protein 25-binding protein;                                                                                                                                                                               |
| M              | AAAGSAVSGAGTPVAGPTGR             | N-ter + 42.01 Da                           | 36.5       | 108.9             | 3      | 1767.08                      | n.d.                                         | n.d.                  | SNAPN_MOUSE  |              | SNARE-associated protein Snapin;                         |                                                                                                                                                                                                                                           |
| M              | AAAKDGCGLTAAGNGR                 | N-ter + 42.01 Da, K +28.03 Da, C +57.02 Da | 61.8       | 75.8              | 3      | 1687.92                      | 0.89                                         | 0.09                  | PF3_MOUSE    | Q3TIR6_MOUSE | Prefoldin subunit 3;                                     | Von Hippel-Lindau-binding protein 1;                                                                                                                                                                                                      |
| M              | AAAMDVDTPSGTNSGAGKRR             | N-ter + 42.01 Da, K +34.06 Da              | 37.2       | 37.7              | 3      | 2043.15                      | 0.71                                         | 0.07                  | RBX1_MOUSE   |              | E3 ubiquitin-protein ligase RBX1;                        | RING finger protein 75;RING-box protein 1; AC40;DNA-directed RNA polymerases I and III 40 kDa polypeptide;RPC40;                                                                                                                          |
| M              | AAAQAVEEMR                       | N-ter + 42.01 Da                           | 35.1       | 84.9              | 2      | 1116.62                      | n.d.                                         | n.d.                  | RPAC1_MOUSE  | F6ZXK9_MOUSE | DNA-directed RNA polymerases I and III subunit RPAC1;    | Probable alpha-ketoglutarate-dependent dioxygenase ABH5;                                                                                                                                                                                  |
| M              | AAASGYDLR                        | N-ter + 42.01 Da                           | 39.0       | 73.6              | 2      | 1065.59                      | n.d.                                         | n.d.                  | ALKB5_MOUSE  |              |                                                          | Alkylated DNA repair protein alkB homolog 5; Component of oligomeric Golgi complex 1;Low density lipoprotein receptor defect B-complementing protein;                                                                                     |
| M              | AAATASSALKR                      | N-ter + 42.01 Da, K +28.03 Da              | 43.2       | 30.1              | 2      | 1115.66                      | -1.03                                        | 0.06                  | COG1_MOUSE   | Q81057_MOUSE | Conserved oligomeric Golgi complex subunit 1;            | Imidazole receptor 1;Imidazole receptor I-1-like protein;Imidazole-1 receptor;                                                                                                                                                            |
| M              | AAATLSFGPER                      | N-ter + 42.01 Da                           | 37.6       | 76.3              | 2      | 1160.67                      | n.d.                                         | n.d.                  | NISCH_MOUSE  | E9PWZ1_MOUSE | Nischarin;                                               |                                                                                                                                                                                                                                           |
| M              | AAATPTETPAPEGSLGMDAR             | N-ter + 42.01 Da                           | 31.9       | 109.6             | 3      | 2041.17                      | n.d.                                         | n.d.                  | PGM2_MOUSE   |              | Phosphoglucosyltransferase 2;                            | Glucose phosphomutase 2;Phosphodeoxyribomutase;Phosphopentomutase;                                                                                                                                                                        |
| M              | AAAVAVAAASR                      | N-ter + 42.01 Da                           | 47.6       | 74.0              | 2      | 998.62                       | n.d.                                         | n.d.                  | E9Q1P8_MOUSE |              |                                                          | 25 kDa FK506-binding protein;FK506-binding protein 3;Immunophilin FKBP25;Rapamycin-selective 25 kDa immunophilin;Rotamase;                                                                                                                |
| M              | AAAVPQR                          | N-ter + 42.01 Da                           | 27.3       | 84.1              | 2      | 753.48                       | n.d.                                         | n.d.                  | FKBP3_MOUSE  |              | Peptidyl-prolyl cis-trans isomerase FKBP3;               |                                                                                                                                                                                                                                           |
| M              | AAAVVEEAAAGDVQR                  | N-ter + 42.01 Da                           | 55.1       | 66.7              | 2      | 1497.84                      | n.d.                                         | n.d.                  | NLE1_MOUSE   |              | Notchless protein homolog 1;                             |                                                                                                                                                                                                                                           |
| M              | AADIEQVFR                        | N-ter + 42.01 Da                           | 34.8       | 89.9              | 2      | 1089.64                      | n.d.                                         | n.d.                  | SON_MOUSE    |              | Protein SON;                                             | Negative regulatory element-binding protein;                                                                                                                                                                                              |
| M              | AADISQWAGPLCLQEVDEPPQHALR        | N-ter + 42.01 Da, C +57.02 Da              | 58.9       | 61.1              | 3      | 2842.54                      | n.d.                                         | n.d.                  | PEBP1_MOUSE  | D321V4_MOUSE | Phosphatidylethanolamine-binding protein 1;              | HCNPPp;                                                                                                                                                                                                                                   |
| M              | AAEEATLTVR                       | N-ter + 42.01 Da                           | 43.4       | 80.4              | 2      | 1101.66                      | n.d.                                         | n.d.                  | CB076_MOUSE  |              | UPF0538 protein C2orf76 homolog;                         |                                                                                                                                                                                                                                           |
| ARSVRTRRLA     | AAEENLEVAR                       | N-ter + 42.01 Da                           | 30.0       | 67.4              | 2      | 1142.63                      | n.d.                                         | n.d.                  | ASH11_MOUSE  |              | Histone-lysine N-methyltransferase ASH11;                | ASH1-like protein;Absent small and homeotic disks protein 1 homolog;                                                                                                                                                                      |
| M              | AAGAAAALAFLNQESR                 | N-ter + 42.01 Da                           | 33.9       | 70.8              | 2      | 1601.93                      | n.d.                                         | n.d.                  | NPM3_MOUSE   |              | Nucleoplasm-3;                                           |                                                                                                                                                                                                                                           |
| M              | AAGDGDVKLSTLGGSGEGDGGSPGGAGATAAR | N-ter + 42.01 Da, K +34.06 Da              | 78.1       | 72.9              | 3      | 2878.59                      | -1.89                                        | 0.49                  | PGRC2_MOUSE  |              | Membrane-associated progesterone receptor component 2;   |                                                                                                                                                                                                                                           |
| RGVSEGSAAAM    | AAGESMAQR                        | N-ter + 42.01 Da                           | 41.8       | 100.6             | 2      | 961.53                       | n.d.                                         | n.d.                  | ORN_MOUSE    |              | Oligoribonuclease, mitochondrial;                        | RNA exonuclease 2 homolog;Small fragment nuclease;                                                                                                                                                                                        |
| M              | AAGFKTVEPLEYR                    | N-ter + 42.01 Da, K +28.03 Da              | 38.6       | 65.2              | 3      | 1712.99                      | -0.97                                        | 0.08                  | EXOS8_MOUSE  | D3YYN3_MOUSE | Exosome complex component RRP43;                         | Exosome component 8;Ribosomal RNA-processing protein 43;                                                                                                                                                                                  |
| M              | AAGGAVAVAPECR                    | N-ter + 42.01 Da, C +57.02 Da              | 40.7       | 74.0              | 2      | 1269.71                      | n.d.                                         | n.d.                  | MKLN1_MOUSE  |              | Muskelin;                                                |                                                                                                                                                                                                                                           |
| M              | AAGTLYTYPENWR                    | N-ter + 42.01 Da                           | 32.8       | 73.6              | 2      | 1582.86                      | n.d.                                         | n.d.                  | EF1G_MOUSE   |              | Elongation factor 1-gamma;                               | eEF-1B gamma;                                                                                                                                                                                                                             |
| M              | AAGTSNYWEDLR                     | N-ter + 42.01 Da                           | 27.9       | 75.9              | 2      | 1423.74                      | n.d.                                         | n.d.                  | GOSR1_MOUSE  | Q91VU9_MOUSE | Golgi SNAP receptor complex member 1;                    | 28 kDa Golgi SNARE protein;28 kDa cis-Golgi SNARE p28;                                                                                                                                                                                    |
| M              | AAKPKLYFNGR                      | N-ter + 42.01 Da, K +28.03 Da              | 25.5       | 56.4              | 3      | 1524.93                      | -1.15                                        | 0.10                  | GSTA4_MOUSE  |              | Glutathione S-transferase A4;                            | GST A4-4;GST class-alpha member 4;Glutathione S-transferase 5.7;                                                                                                                                                                          |

Table S16, Tholen et al.

| Non Prime Site | Prime Site                     | Modifications                                           | Hyperscore | Mass error in ppm | Charge | Precursor neutral mass in Da | Fold change (log <sub>2</sub> ) of ASAPRatio | FC-error of ASAPRatio | Uniprot ID 1 | Uniprot ID 2 | Protein Name 1                                                 | Protein Name 2                                                                                                                                                                                                       |
|----------------|--------------------------------|---------------------------------------------------------|------------|-------------------|--------|------------------------------|----------------------------------------------|-----------------------|--------------|--------------|----------------------------------------------------------------|----------------------------------------------------------------------------------------------------------------------------------------------------------------------------------------------------------------------|
| M              | AALGEPVR                       | N-ter + 42.01 Da                                        | 27.0       | 74.9              | 2      | 853.53                       | n.d.                                         | n.d.                  | LIN7C_MOUSE  |              | Protein lin-7 homolog C;                                       | Mammalian lin-seven protein 3;Vertebrate lin-7 homolog 3;                                                                                                                                                            |
| M              | AALGSSSQNVTEYVVR               | N-ter + 42.01 Da                                        | 31.5       | 110.8             | 3      | 1722.05                      | n.d.                                         | n.d.                  | TZFA_MOUSE   | E9Q7N7_MOUSE | General transcription factor IIF subunit 1;                    | Transcription initiation factor IIF subunit alpha;                                                                                                                                                                   |
| M              | AALTAEHFVALQSLKASSKDVVR        | N-ter + 42.01 Da, K +34.06 Da                           | 23.7       | 108.2             | 4      | 2663.85                      | 0.16                                         | 0.01                  | COMD9_MOUSE  |              | COMM domain-containing protein 9;                              |                                                                                                                                                                                                                      |
| M              | AALVSETAEPGSR                  | N-ter + 42.01 Da                                        | 33.6       | 75.7              | 2      | 1427.83                      | n.d.                                         | n.d.                  | DPH1_MOUSE   |              | Diphthamide biosynthesis protein 1;                            | DPH1 homolog;Diphthamide biosynthesis protein 2 homolog-like 1;Ovarian cancer-associated gene 1 protein homolog;                                                                                                     |
| M              | AALYGGVEGGGTR                  | N-ter + 42.01 Da                                        | 33.9       | 78.1              | 2      | 1248.71                      | n.d.                                         | n.d.                  | NAGK_MOUSE   | D3YXG2_MOUSE | N-acetyl-D-glucosamine kinase;                                 | GlcNAc kinase;                                                                                                                                                                                                       |
| M              | AAMAVGGAGGSR                   | N-ter + 42.01 Da                                        | 47.6       | 70.2              | 2      | 1045.57                      | n.d.                                         | n.d.                  | ANM5_MOUSE   |              | Protein arginine N-methyltransferase 5;                        | Histone-arginine N-methyltransferase PRMT5;Jak-binding protein 1;Shk1 kinase-binding protein 1 homolog;                                                                                                              |
| M              | AANATMATSGSAR                  | N-ter + 42.01 Da                                        | 41.5       | 82.5              | 2      | 1249.68                      | n.d.                                         | n.d.                  | IF4A3_MOUSE  | A2AFK7_MOUSE | Eukaryotic initiation factor 4A-III;                           | ATP-dependent RNA helicase DDX48;ATP-dependent RNA helicase eIF4A-3;DEAD box protein 48;Eukaryotic translation initiation factor 4A isoform 3;                                                                       |
| M              | AANATTNPQLLELVKICGSR           | N-ter + 42.01 Da, K +28.03 Da, C +57.02 Da              | 45.6       | 64.5              | 3      | 2637.55                      | 0.66                                         | 0.20                  | LSM5_MOUSE   |              | U6 snRNA-associated Sm-like protein LSM5;                      |                                                                                                                                                                                                                      |
| M              | AAPAAPAAAGETGPDAR              | N-ter + 42.01 Da                                        | 40.8       | 56.8              | 2      | 1463.78                      | n.d.                                         | n.d.                  | GLGB_MOUSE   |              | 1,4-alpha-glucan-branching enzyme;                             | Brancher enzyme;Glycogen-branching enzyme;                                                                                                                                                                           |
| M              | AAPAGGGSAVSLAPNGR              | N-ter + 42.01 Da                                        | 36.5       | 118.1             | 3      | 1650.04                      | n.d.                                         | n.d.                  | ASPC1_MOUSE  |              | Tether containing UBX domain for GLUT4;                        | Alveolar soft part sarcoma chromosomal region candidate gene 1 protein homolog;                                                                                                                                      |
| ADTSKQESNM     | AAPAKGENLSLVVHGPDJR            | N-ter + 42.01 Da, K +28.03 Da                           | 58.2       | 52.2              | 3      | 2070.23                      | 0.30                                         | 0.05                  | DHSO_MOUSE   |              | Sorbitol dehydrogenase;                                        | L-iditol 2-dehydrogenase;                                                                                                                                                                                            |
| M              | AAPEDVAALQAEITR                | N-ter + 42.01 Da                                        | 47.7       | 71.1              | 2      | 1595.93                      | n.d.                                         | n.d.                  | MOC53_MOUSE  |              | Adenylyltransferase and sulfurtransferase MOC53;               | Molybdenum cofactor synthesis protein 3;                                                                                                                                                                             |
| M              | AAPPGYFVSGVQVSCR               | N-ter + 42.01 Da, C +57.02 Da                           | 29.3       | 98.4              | 3      | 1853.02                      | n.d.                                         | n.d.                  | LSM12_MOUSE  |              | Protein LSM12 homolog;                                         |                                                                                                                                                                                                                      |
| M              | AAPQDVHVR                      | N-ter + 42.01 Da                                        | 30.8       | 63.9              | 2      | 1033.60                      | n.d.                                         | n.d.                  | SEC20_MOUSE  | B8JJI4_MOUSE | Vesicle transport protein SEC20;                               |                                                                                                                                                                                                                      |
| M              | AAPQLFR                        | N-ter + 42.01 Da                                        | 20.9       | 86.6              | 2      | 843.53                       | n.d.                                         | n.d.                  | THTM_MOUSE   | Q3UW66_MOUSE | 3-mercaptopyruvate sulfurtransferase;                          |                                                                                                                                                                                                                      |
| M              | AAPSEPAGFPR                    | N-ter + 42.01 Da                                        | 28.0       | 73.1              | 2      | 1140.64                      | n.d.                                         | n.d.                  | ALR_MOUSE    |              | FAD-linked sulphydryl oxidase ALR;                             | Augmenter of liver regeneration;                                                                                                                                                                                     |
| M              | AAQALAAQAVASR                  | N-ter + 42.01 Da                                        | 41.0       | 73.8              | 2      | 1268.78                      | n.d.                                         | n.d.                  | SYTC2_MOUSE  |              | Probable threonine-tRNA ligase 2, cytoplasmic;                 | Threonyl-tRNA synthetase;Threonyl-tRNA synthetase-like protein 2;                                                                                                                                                    |
| M              | AAQAVSLLR                      | N-ter + 42.01 Da                                        | 45.3       | 81.6              | 2      | 969.64                       | n.d.                                         | n.d.                  | PSMD5_MOUSE  |              | 26S proteasome non-ATPase regulatory subunit 5;                | 26S protease subunit 55 basic;26S proteasome subunit 55B;                                                                                                                                                            |
| M              | AAQVAPAAASSLGNPPPPSELKKAEEQQQR | N-ter + 42.01 Da, K +28.03 Da                           | 26.5       | 88.9              | 4      | 3135.95                      | 1.42                                         | 0.06                  | ARI1A_MOUSE  | E9QAQ7_MOUSE | AT-rich interactive domain-containing protein 1A;              | BRG1-associated factor 250a;BRG1-associated factor 250a;Osa homolog 1;SWI-like protein;SWI/SNF complex protein p270;SWI/SNF-related, matrix-associated, actin-dependent regulator of chromatin subfamily F member 1; |
| SSGFLSFHKM     | AASEDELLPR                     | N-ter + 42.01 Da                                        | 37.1       | 64.6              | 2      | 1254.73                      | n.d.                                         | n.d.                  | IGBP1_MOUSE  | E9Q2M7_MOUSE | Immunoglobulin-binding protein 1;                              | Alpha4 phosphoprotein;CD79a-binding protein 1;Lymphocyte signal transduction molecule alpha 4;p52;                                                                                                                   |
| M              | AASGDPGSAESYR                  | N-ter + 42.01 Da                                        | 34.6       | 85.5              | 2      | 1308.67                      | n.d.                                         | n.d.                  | PUR8_MOUSE   | E9Q0A0_MOUSE | Adenylosuccinate lyase;                                        | Adenylosuccinase;                                                                                                                                                                                                    |
| M              | AASKVKQDMPPPGYGPIDYKR          | N-ter + 42.01 Da, K +34.06 Da                           | 52.5       | 80.5              | 4      | 2518.61                      | -2.25                                        | 0.11                  | NDUAD_MOUSE  |              | NADH dehydrogenase [ubiquinone] 1 alpha subcomplex subunit 13; | Cell death regulatory protein GRIM-19;Complex I-B16.6;Gene associated with retinoic and interferon-induced mortality 19 protein;NADH-ubiquinone oxidoreductase B16.6 subunit;                                        |
| M              | AASPSKTEIQTIFKR                | N-ter + 42.01 Da, K +34.06 Da                           | 39.5       | 60.5              | 3      | 1786.17                      | -0.71                                        | 0.13                  | ARFG2_MOUSE  |              | ADP-ribosylation factor GTPase-activating protein 2;           | GTPase-activating protein ZNF289;Zinc finger protein 289;                                                                                                                                                            |
| M              | AASTDIAGLEESFR                 | N-ter + 42.01 Da                                        | 40.5       | 73.0              | 2      | 1507.83                      | n.d.                                         | n.d.                  | TPPP3_MOUSE  |              | Tubulin polymerization-promoting protein family member 3;      |                                                                                                                                                                                                                      |
| M              | AATAAEVAASGSGEAR               | N-ter + 42.01 Da                                        | 51.6       | 72.7              | 2      | 1459.80                      | n.d.                                         | n.d.                  | HIF1N_MOUSE  |              | Hypoxia-inducible factor 1-alpha inhibitor;                    | Hypoxia-inducible factor asparagine hydroxylase;                                                                                                                                                                     |
| M              | AATAAVPGAAAAGR                 | N-ter + 42.01 Da                                        | 22.7       | 67.9              | 2      | 1124.67                      | n.d.                                         | n.d.                  | EI2BE_MOUSE  |              | Translation initiation factor eIF-2B subunit epsilon;          | eIF-2B GDP-GTP exchange factor subunit epsilon;                                                                                                                                                                      |
| M              | AATFFGEVVKAPCR                 | N-ter + 42.01 Da, K +28.03 Da, C +57.02 Da              | 26.6       | 63.3              | 3      | 1621.93                      | 0.35                                         | 0.05                  | PSMG1_MOUSE  | D3Z795_MOUSE | Proteasome assembly chaperone 1;                               | Down syndrome critical region protein 2 homolog;                                                                                                                                                                     |
| M              | AATTGSQVIVPR                   | N-ter + 42.01 Da, K +34.06 Da                           | 61.9       | 49.0              | 2      | 1218.77                      | 1.18                                         | 0.14                  | UB2V1_MOUSE  |              | Ubiquitin-conjugating enzyme E2 variant 1;                     | CROC-1;                                                                                                                                                                                                              |
| M              | AAVGSPPGLESAPR                 | N-ter + 42.01 Da                                        | 34.1       | 79.8              | 2      | 1339.78                      | n.d.                                         | n.d.                  | TGT_MOUSE    |              | Queuine tRNA-ribosyltransferase;                               | Guanine insertion enzyme;tRNA-guanine transglycosylase;                                                                                                                                                              |
| M              | AAVKTLNPKAEVAR                 | N-ter + 42.01 Da, K +34.06 Da                           | 39.2       | 82.5              | 3      | 1577.12                      | 0.16                                         | 0.03                  | TCPZ_MOUSE   | E9QPA6_MOUSE | T-complex protein 1 subunit zeta;                              | CCT-zeta-1;                                                                                                                                                                                                          |
| M              | AAVPSAVHLPR                    | N-ter + 42.01 Da                                        | 41.4       | 18.9              | 2      | 1158.67                      | n.d.                                         | n.d.                  | LYPL1_MOUSE  | E9QLB2_MOUSE | Lysophospholipase-like protein 1;                              |                                                                                                                                                                                                                      |
| M              | AAVTEVVPAADGAEARPLAAEELAAQKR   | N-ter + 42.01 Da, K +34.06 Da                           | 31.5       | 95.2              | 4      | 2907.86                      | 0.99                                         | 0.14                  | SYF2_MOUSE   |              | Pre-mRNA-splicing factor SYF2;                                 | CCNDBP1-interactor;mp29;p29;                                                                                                                                                                                         |
| M              | AAVTVNSAKR                     | N-ter + 42.01 Da, K +28.03 Da                           | 44.6       | 51.3              | 2      | 1085.68                      | -0.14                                        | 0.02                  | MTHF5_MOUSE  | B2KF83_MOUSE | 5-formyltetrahydrofolate cyclo-ligase;                         | 5,10-methenyl-tetrahydrofolate synthetase;                                                                                                                                                                           |
| M              | AAYKLVLR                       | N-ter + 42.01 Da, K +28.03 Da                           | 44.7       | 53.9              | 2      | 1115.77                      | -0.47                                        | 0.05                  | PGAM1_MOUSE  |              | Phosphoglycerate mutase 1;                                     | BPG-dependent PGAM 1;Phosphoglycerate mutase isozyme B;                                                                                                                                                              |
| MTLESIM        | ACCLSEAKEAR                    | N-ter + 42.01 Da, K +34.06 Da, C +57.02 Da              | 54.4       | 54.8              | 2      | 1498.78                      | -2.40                                        | 0.38                  | GNAQ_MOUSE   |              | Guanine nucleotide-binding protein G(q) subunit alpha;         | Guanine nucleotide-binding protein alpha-q;                                                                                                                                                                          |
| M              | ACGLVASNLNLPKGECLKVR           | N-ter + 42.01 Da, K +34.06 Da, C +57.02 Da              | 43.0       | 31.6              | 2      | 2308.38                      | 0.12                                         | 0.00                  | LEG1_MOUSE   |              | Galectin-1;                                                    | 14 kDa lectin;Beta-galactoside-binding lectin L-14-I;Galactin;Lactose-binding lectin 1;Lectin galactoside-binding soluble 1;S-Lac lectin 1;                                                                          |
| NNQGLTPLHL     | ACKMGKQEMVR                    | N-ter + 42.01 Da, K +34.06 Da, C +28.03 Da, C +57.02 Da | 25.1       | 5.6               | 2      | 1440.75                      | n.d.                                         | n.d.                  | PA2G6_MOUSE  |              | 85 kDa calcium-independent phospholipase A2;                   | Group VI phospholipase A2;                                                                                                                                                                                           |
| M              | ADAAAAPVQKR                    | N-ter + 42.01 Da, K +28.03 Da                           | 50.8       | 40.2              | 2      | 1111.64                      | 0.44                                         | 0.05                  | KDM3B_MOUSE  | B9EK52_MOUSE | Lysine-specific demethylase 3B;                                | JmjC domain-containing histone demethylation protein 2B;Jumonji domain-containing protein 1B;                                                                                                                        |
| M              | ADDVQQQTNTTVEEPLDIR            | N-ter + 42.01 Da                                        | 31.1       | 100.8             | 3      | 2441.40                      | n.d.                                         | n.d.                  | LSM3_MOUSE   |              | U6 snRNA-associated Sm-like protein LSM3;                      |                                                                                                                                                                                                                      |

Table S16, Tholen et al.

| Non Prime Site | Prime Site                     | Modifications                              | Hyperscore | Mass error in ppm | Charge | Precursor neutral mass in Da | Fold change (log <sub>2</sub> ) of ASAPRatio | FC-error of ASAPRatio | Uniprot ID 1 | Uniprot ID 2 | Protein Name 1                                                                  | Protein Name 2                                                                                                                                                                                                            |
|----------------|--------------------------------|--------------------------------------------|------------|-------------------|--------|------------------------------|----------------------------------------------|-----------------------|--------------|--------------|---------------------------------------------------------------------------------|---------------------------------------------------------------------------------------------------------------------------------------------------------------------------------------------------------------------------|
| M              | ADEALAGLDEGALR                 | N-ter + 42.01 Da                           | 40.4       | 73.1              | 2      | 1441.81                      | n.d.                                         | n.d.                  | SMTN_MOUSE   | D3VZ10_MOUSE | Smoothelin;                                                                     |                                                                                                                                                                                                                           |
| M              | ADEDEGEGIHPSAPHR               | N-ter + 42.01 Da                           | 34.8       | 92.9              | 3      | 1628.87                      | n.d.                                         | n.d.                  | SNX27_MOUSE  | D6RE54_MOUSE | Sorting nexin-27;                                                               |                                                                                                                                                                                                                           |
| M              | ADEEKLPPGWKEKR                 | N-ter + 42.01 Da, K +28.03 Da              | 50.9       | 92.0              | 3      | 1652.01                      | 0.59                                         | 0.02                  | PINI_MOUSE   |              | Peptidyl-prolyl cis-trans isomerase NIMA-interacting 1;                         | Peptidyl-prolyl cis-trans isomerase Pin1;                                                                                                                                                                                 |
| M              | ADEIAKAQVAQGGDTIFGKIIR         | N-ter + 42.01 Da, K +28.03 Da              | 54.4       | 98.0              | 4      | 2495.62                      | -0.42                                        | 0.02                  | HINT1_MOUSE  | B0R1E3_MOUSE | Histidine triad nucleotide-binding protein 1;                                   | Adenosine 5'-monophosphoramidase;Protein kinase C inhibitor 1;Protein kinase C-interacting protein 1;                                                                                                                     |
| NIYKPNKKAM     | ADEVTEKQVYDAHTKEIDLVR          | N-ter + 42.01 Da, K +28.03 Da              | 46.2       | 73.1              | 4      | 2670.55                      | -1.64                                        | 0.26                  | CAV1_MOUSE   | D3Z148_MOUSE | Caveolin-1;                                                                     | Williams-Beuren syndrome chromosomal region 1 protein homolog;                                                                                                                                                            |
| M              | ADFDTYDDR                      | N-ter + 42.01 Da                           | 30.2       | 101.2             | 2      | 1158.56                      | n.d.                                         | n.d.                  | IF4H_MOUSE   | Q80U88_MOUSE | Eukaryotic translation initiation factor 4H;                                    |                                                                                                                                                                                                                           |
| M              | ADFLKGLPVYKNSFSR               | N-ter + 42.01 Da, K +28.03 Da              | 52.1       | 69.3              | 3      | 2053.24                      | -0.67                                        | 0.13                  | DDA1_MOUSE   | D3YXY5_MOUSE | DET1- and DDB1-associated protein 1;                                            |                                                                                                                                                                                                                           |
| M              | ADGELNVDSLITR                  | N-ter + 42.01 Da                           | 37.0       | 101.4             | 2      | 1443.87                      | n.d.                                         | n.d.                  | PP1B_MOUSE   |              | Serine/threonine-protein phosphatase PP1-beta catalytic subunit;                |                                                                                                                                                                                                                           |
| M              | ADGGAASQDESSAAAAAADS           | N-ter + 42.01 Da                           | 57.4       | 111.2             | 3      | 1991.07                      | n.d.                                         | n.d.                  | E9Q6Z8_MOUSE |              |                                                                                 | SH3 domain-containing protein SH3P3;SH3-containing adapter molecule 1;Sorbin and SH3 domain-containing protein 3;                                                                                                         |
| SSRPLSPHRM     | ADGGGSPFLGR                    | N-ter + 42.01 Da                           | 35.7       | 96.3              | 2      | 1074.61                      | n.d.                                         | n.d.                  | VINEX_MOUSE  |              | Vinexin;                                                                        |                                                                                                                                                                                                                           |
| M              | ADIDKLNDSIIQR                  | N-ter + 42.01 Da, K +34.06 Da              | 53.0       | 65.8              | 3      | 1689.06                      | -0.67                                        | 0.19                  | PP1G_MOUSE   |              | Serine/threonine-protein phosphatase PP1-gamma catalytic subunit;               | Protein phosphatase 1C catalytic subunit; HCNPpp;                                                                                                                                                                         |
| MA             | ADISQWAGLCLQEVDEPQHALR         | N-ter + 42.01 Da, K +57.02 Da              | 38.0       | 50.7              | 3      | 2771.47                      | n.d.                                         | n.d.                  | PEBP1_MOUSE  | D3Z1V4_MOUSE | Phosphatidylethanolamine-binding protein 1;                                     | Chromatin assembly factor I subunit C;Chromatin assembly factor I p48 subunit;Nucleosome-remodeling factor subunit RBAP48;Retinoblastoma-binding protein 4;Retinoblastoma-binding protein p48;                            |
| M              | ADKEAAFDDAVEER                 | N-ter + 42.01 Da, K +28.03 Da              | 67.9       | 31.0              | 2      | 1634.79                      | 0.21                                         | 0.02                  | RBBP4_MOUSE  | E9PYH8_MOUSE | Histone-binding protein RBBP4;                                                  |                                                                                                                                                                                                                           |
| M              | ADKMDMSLDDIKNLR                | N-ter + 42.01 Da, K +28.03 Da              | 60.2       | 33.6              | 3      | 1975.08                      | 0.77                                         | 0.19                  | REFP2_MOUSE  | THOC4_MOUSE  | RNA and export factor-binding protein 2;                                        |                                                                                                                                                                                                                           |
| M              | ADLEEQLSDEEKVR                 | N-ter + 42.01 Da, K +34.06 Da              | 54.2       | 34.1              | 3      | 1735.93                      | -0.84                                        | 0.15                  | CAZA2_MOUSE  | D6RCW7_MOUSE | F-actin-capping protein subunit alpha-2;                                        | Cap2 alpha-2;                                                                                                                                                                                                             |
| NKCVYHILR      | ADLPPPEEEK                     | N-ter + 42.01 Da, K +34.06 Da              | 23.6       | 38.8              | 2      | 1199.66                      | -3.06                                        | 0.51                  | ECSIT_MOUSE  |              | Evolutionarily conserved signaling intermediate in Toll pathway, mitochondrial; | Protein SITPEC;                                                                                                                                                                                                           |
| M              | ADLSLVLDALTEPPEIEGEIKR         | N-ter + 42.01 Da, K +28.03 Da              | 45.0       | 58.0              | 3      | 2461.44                      | 0.52                                         | 0.14                  | MAP4_MOUSE   | Q78TF3_MOUSE | Microtubule-associated protein 4;                                               |                                                                                                                                                                                                                           |
| M              | ADMQNQLVER                     | N-ter + 42.01 Da                           | 42.7       | 94.5              | 2      | 1116.63                      | n.d.                                         | n.d.                  | CAP1_MOUSE   | B1AR50_MOUSE | Adenylyl cyclase-associated protein 1;                                          |                                                                                                                                                                                                                           |
| MPVAVM         | ADNAFSFR                       | N-ter + 42.01 Da                           | 28.8       | 67.1              | 2      | 968.50                       | n.d.                                         | n.d.                  | CSN8_MOUSE   |              | COP9 signalosome complex subunit 8;                                             | COP9 homolog;JAB1-containing signalosome subunit 8;                                                                                                                                                                       |
| M              | ADNPVLELLR                     | N-ter + 42.01 Da                           | 31.6       | 67.1              | 2      | 1293.82                      | n.d.                                         | n.d.                  | SYFA_MOUSE   | Q88JG2_MOUSE | Phenylalanine-tRNA ligase alpha chain;                                          | Phenylalanyl-tRNA synthetase alpha chain;                                                                                                                                                                                 |
| M              | ADPESPWSQIGR                   | N-ter + 42.01 Da                           | 30.9       | 56.4              | 2      | 1383.72                      | n.d.                                         | n.d.                  | STAR4_MOUSE  | Q80SX0_MOUSE | StAR-related lipid transfer protein 4;                                          | START domain-containing protein 4;                                                                                                                                                                                        |
| PVAAEPAAL      | ADQGAAMAAADIAR                 | N-ter + 42.01 Da                           | 48.6       | 82.7              | 2      | 1301.71                      | n.d.                                         | n.d.                  | A2A3W1_MOUSE |              |                                                                                 |                                                                                                                                                                                                                           |
| M              | ADSGPAGGAAALAPAPGGSGTGPR       | N-ter + 42.01 Da                           | 27.1       | 96.7              | 3      | 2188.26                      | n.d.                                         | n.d.                  | PP14B_MOUSE  |              | Protein phosphatase 1 regulatory subunit 14B;                                   | Phosphatase holoenzyme inhibitor 1;Phospholipase C-beta-3 neighbouring gene protein;                                                                                                                                      |
| M              | ADTAPQLKR                      | N-ter + 42.01 Da, K +34.06 Da              | 40.9       | 58.0              | 2      | 1074.69                      | -0.27                                        | 0.03                  | DCPS_MOUSE   | Q3TBW9_MOUSE | Scavenger mRNA-decapping enzyme Dcp5;                                           | DCS-1;Hint-related 7meGMP-directed hydrolase;Histidine triad protein member 5;                                                                                                                                            |
| IQTQQLHAAM     | ADTFLEHMCR                     | N-ter + 42.01 Da, C +57.02 Da              | 49.6       | 78.1              | 2      | 1320.66                      | n.d.                                         | n.d.                  | KPYM_MOUSE   |              | Pyruvate kinase isozymes M1/M2;                                                 | Pyruvate kinase muscle isozyme;                                                                                                                                                                                           |
| M              | ADTPSVYETR                     | N-ter + 42.01 Da                           | 37.8       | 86.3              | 2      | 1179.64                      | n.d.                                         | n.d.                  | ACBD5_MOUSE  | E9QNH7_MOUSE | Acyl-CoA-binding domain-containing protein 5;                                   |                                                                                                                                                                                                                           |
| M              | ADTQYILPNDIGVSSLDRCR           | N-ter + 42.01 Da, C +57.02 Da              | 39.3       | 110.6             | 3      | 2178.27                      | n.d.                                         | n.d.                  | DPP3_MOUSE   |              | Dipeptidyl peptidase 3;                                                         | Dipeptidyl aminopeptidase III;Dipeptidyl arylamidase III;Dipeptidyl peptidase III;                                                                                                                                        |
| M              | ADTYAVVQKR                     | N-ter + 42.01 Da, K +28.03 Da              | 48.6       | 46.4              | 2      | 1219.71                      | 0.28                                         | 0.04                  | PTN18_MOUSE  | Q3V441_MOUSE | Tyrosine-protein phosphatase non-receptor type 18;                              | Fetal liver phosphatase 1;PTP-K1;                                                                                                                                                                                         |
| M              | ADYSTVPPSSGSAGGGGVVNDAFKDALQR  | N-ter + 42.01 Da, K +28.03 Da              | 41.3       | 86.3              | 4      | 3103.75                      | 1.12                                         | 0.03                  | FUBP1_MOUSE  | Q3TUE1_MOUSE | Far upstream element-binding protein 1;                                         |                                                                                                                                                                                                                           |
| M              | AEAIDPR                        | N-ter + 42.01 Da                           | 24.6       | 90.0              | 2      | 883.52                       | n.d.                                         | n.d.                  | LSP1_MOUSE   | A2A6J7_MOUSE | Lymphocyte-specific protein 1;                                                  | 52 kDa phosphoprotein;Lymphocyte-specific antigen WP34;S37 protein;                                                                                                                                                       |
| M              | AEAEAALKEEGNR                  | N-ter + 42.01 Da, K +34.06 Da              | 30.2       | 63.9              | 3      | 1590.91                      | -2.06                                        | 0.17                  | UN45B_MOUSE  |              | Protein unc-45 homolog B;                                                       |                                                                                                                                                                                                                           |
| M              | AEAPQVETDPDFEPLPR              | N-ter + 42.01 Da                           | 34.5       | 110.4             | 3      | 2051.21                      | n.d.                                         | n.d.                  | FOXO1_MOUSE  |              | Forkhead box protein O1A;                                                       | Forkhead in rhabdomyosarcoma;                                                                                                                                                                                             |
| M              | AEFPSKVSTR                     | N-ter + 42.01 Da, K +28.03 Da              | 45.9       | 43.1              | 2      | 1190.68                      | -1.94                                        | 0.08                  | PLL_MOUSE    |              | Plasmolipin;                                                                    | Plasma membrane proteolipid;                                                                                                                                                                                              |
| M              | AEGEDVGVVWR                    | N-ter + 42.01 Da                           | 36.0       | 81.8              | 2      | 1245.64                      | n.d.                                         | n.d.                  | BSDC1_MOUSE  | D6RDC8_MOUSE | BSD domain-containing protein 1;                                                |                                                                                                                                                                                                                           |
| M              | AEGGAADLTQR                    | N-ter + 42.01 Da                           | 46.1       | 85.4              | 2      | 1244.67                      | n.d.                                         | n.d.                  | UBP15_MOUSE  | Q3UZHO_MOUSE | Ubiquitin carboxyl-terminal hydrolase 15;                                       | Deubiquitinating enzyme 15;Ubiquitin thiolesterase 15;Ubiquitin-specific-processing protease 15;                                                                                                                          |
| M              | AEGGQAQQPPQLGPGAAAR            | N-ter + 42.01 Da                           | 28.2       | 110.5             | 3      | 1973.19                      | n.d.                                         | n.d.                  | RF0X2_MOUSE  |              | RNA binding protein fox-1 homolog 2;                                            | Fox-1 homolog B;Fox-1 homolog Fxh;Hexaribonucleotide-binding protein 2;RNA-binding motif protein 9;RNA-binding protein 9; Class II mMOB1;Mob1 homolog 3;Mps one binder kinase activator-like 3;Preimplantation protein 3; |
| MVM            | AEGTAVLR                       | N-ter + 42.01 Da                           | 36.9       | 82.3              | 2      | 857.53                       | n.d.                                         | n.d.                  | MOBL3_MOUSE  | E0CX17_MOUSE | MOB-like protein phocein;                                                       |                                                                                                                                                                                                                           |
| M              | AEKTQKSVKIAPGAVVCESEIR         | N-ter + 42.01 Da, K +34.06 Da, C +57.02 Da | 37.0       | 73.3              | 4      | 2642.75                      | 0.10                                         | 0.01                  | DCTN6_MOUSE  | D3Z6A1_MOUSE | Dynactin subunit 6;                                                             | Dynactin subunit p27;Protein WS-3;                                                                                                                                                                                        |
| GTDPTSRKM      | AELLEVTLDGKPLQALR              | N-ter + 42.01 Da, K +34.06 Da              | 48.1       | 55.7              | 3      | 1957.20                      | 1.60                                         | 0.49                  | ACINU_MOUSE  | E9Q9R4_MOUSE | Apoptotic chromatin condensation inducer in the nucleus;                        |                                                                                                                                                                                                                           |
| M              | AELQEVQITEEKPLPGQTPETAKEAELAAR | N-ter + 42.01 Da, K +34.06 Da              | 39.9       | 82.2              | 4      | 3499.20                      | -1.56                                        | 0.23                  | NDRG2_MOUSE  |              | Protein NDRG2;                                                                  | Protein Ndr2;                                                                                                                                                                                                             |
| M              | AELVQGQSAPVGMKAEGFVDALHR       | N-ter + 42.01 Da, K +28.03 Da              | 45.9       | 93.9              | 4      | 2579.56                      | 0.71                                         | 0.14                  | A2AJ72_MOUSE | Q3TIX6_MOUSE |                                                                                 |                                                                                                                                                                                                                           |
| M              | AENGESSPPRPSR                  | N-ter + 42.01 Da                           | 28.6       | 79.9              | 3      | 1481.80                      | n.d.                                         | n.d.                  | UBQL2_MOUSE  |              | Ubiquilin-2;                                                                    | Chap1;DSK2 homolog;Protein linking IAP with cytoskeleton 2;Ubiquitin-like product Chap1/Dsk2;                                                                                                                             |
| M              | AENHCELLPPASGLGAGLGGGLCR       | N-ter + 42.01 Da, C +57.02 Da              | 52.6       | 77.5              | 3      | 2544.42                      | n.d.                                         | n.d.                  | KCTD5_MOUSE  |              | BTB/POZ domain-containing protein KCTD5;                                        |                                                                                                                                                                                                                           |

Table S16, Tholen et al.

| Non Prime Site | Prime Site                       | Modifications                              | Hyperscore | Mass error in ppm | Charge | Precursor neutral mass in Da | Fold change (log <sub>2</sub> ) of ASAPRatio | FC-error of ASAPRatio | Uniprot ID 1 | Uniprot ID 2 | Protein Name 1                                                    | Protein Name 2                                                                                                                                                                         |
|----------------|----------------------------------|--------------------------------------------|------------|-------------------|--------|------------------------------|----------------------------------------------|-----------------------|--------------|--------------|-------------------------------------------------------------------|----------------------------------------------------------------------------------------------------------------------------------------------------------------------------------------|
| M              | AENLDGPPNPKR                     | N-ter + 42.01 Da, K +28.03 Da              | 27.7       | 22.5              | 2      | 1489.82                      | 1.01                                         | 0.04                  | CBP_MOUSE    | F8VPR5_MOUSE | CREB-binding protein;                                             |                                                                                                                                                                                        |
| M              | AENNAQNKAKLISETR                 | N-ter + 42.01 Da, K +28.03 Da              | 32.3       | 84.0              | 3      | 1884.17                      | -0.36                                        | 0.08                  | MSPD2_MOUSE  | B1AU74_MOUSE | Motile sperm domain-containing protein 2;                         |                                                                                                                                                                                        |
| M              | AENPGLENHR                       | N-ter + 42.01 Da                           | 35.5       | 62.6              | 2      | 1177.62                      | n.d.                                         | n.d.                  | IMA3_MOUSE   | E9Q1R3_MOUSE | Importin subunit alpha-3;                                         | Importin alpha Q2;Karyopherin subunit alpha-3;                                                                                                                                         |
| M              | AEPGTGSDPAFGPGASESGTR            | N-ter + 42.01 Da                           | 38.0       | 106.2             | 3      | 2046.11                      | n.d.                                         | n.d.                  | SAFB2_MOUSE  | D6RJ78_MOUSE | Scaffold attachment factor B2;                                    |                                                                                                                                                                                        |
| M              | AEPWGNELASAAAR                   | N-ter + 42.01 Da                           | 47.4       | 79.2              | 2      | 1483.82                      | n.d.                                         | n.d.                  | CDN2C_MOUSE  |              | Cyclin-dependent kinase 4 inhibitor C;                            | Cyclin-dependent kinase 6 inhibitor;p18-INK4c;p18-INK6;                                                                                                                                |
| M              | AEQVALSR                         | N-ter + 42.01 Da                           | 26.4       | 96.9              | 2      | 914.57                       | n.d.                                         | n.d.                  | G6PD1_MOUSE  | A3KG36_MOUSE | Glucose-6-phosphate 1-dehydrogenase X;                            |                                                                                                                                                                                        |
| M              | AERPEDLNLPNAVITR                 | N-ter + 42.01 Da                           | 40.5       | 48.2              | 3      | 1849.06                      | n.d.                                         | n.d.                  | DPOE3_MOUSE  | D6RDT4_MOUSE | DNA polymerase epsilon subunit 3;                                 | DNA polymerase II subunit 3;DNA polymerase epsilon subunit p17;NF-YB-like protein;YB-like protein 1;                                                                                   |
| M              | AESDWDVTVTLR                     | N-ter + 42.01 Da                           | 36.9       | 76.9              | 2      | 1432.79                      | n.d.                                         | n.d.                  | EDF1_MOUSE   |              | Endothelial differentiation-related factor 1;                     | Multiprotein-bridging factor 1;                                                                                                                                                        |
| M              | AESNEEVAVLVQR                    | N-ter + 42.01 Da                           | 30.7       | 69.5              | 2      | 1484.85                      | n.d.                                         | n.d.                  | E9QA66_MOUSE |              |                                                                   |                                                                                                                                                                                        |
| M              | AESPFLSAKDEGSFAYLTIKDR           | N-ter + 42.01 Da, K +28.03 Da              | 33.6       | 55.7              | 3      | 2613.48                      | -0.52                                        | 0.03                  | CF211_MOUSE  | D6RG65_MOUSE | UPF0364 protein C6orf211 homolog;                                 |                                                                                                                                                                                        |
| M              | AESPAPGAAAESGEEQER               | N-ter + 42.01 Da, C +57.02 Da              | 37.0       | 106.2             | 3      | 1987.03                      | n.d.                                         | n.d.                  | E9QL96_MOUSE |              |                                                                   |                                                                                                                                                                                        |
| M              | AESSELSASSPAR                    | N-ter + 42.01 Da                           | 50.0       | 83.3              | 2      | 1419.77                      | n.d.                                         | n.d.                  | MCM2_MOUSE   |              | DNA replication licensing factor MCM2;                            | Minichromosome maintenance protein 2 homolog;Nuclear protein BM28;                                                                                                                     |
| M              | AETAASGGGGSDGSGVACER             | N-ter + 42.01 Da, C +57.02 Da              | 43.9       | 108.6             | 3      | 1878.97                      | n.d.                                         | n.d.                  | DUS3L_MOUSE  |              | tRNA-dihydrouridine(47) synthase [NAD(P)(+)]-like;                | tRNA-dihydrouridine synthase 3-like;                                                                                                                                                   |
| M              | AETLSGLGDASAAGAAVSSAASSETGTR     | N-ter + 42.01 Da                           | 39.1       | 98.2              | 3      | 2520.44                      | n.d.                                         | n.d.                  | D3YXK2_MOUSE | E9PZM6_MOUSE |                                                                   |                                                                                                                                                                                        |
| MAFPPLWE       | AEVEETLKR                        | N-ter + 42.01 Da, K +28.03 Da              | 51.5       | 42.9              | 2      | 1143.66                      | 1.16                                         | 0.11                  | DLR81_MOUSE  | A2AVR9_MOUSE | Dynein light chain roadblock-type 1;                              | Dynein light chain 2A, cytoplasmic; 60 kDa Tat-interactive protein;Histone acetyltransferase HTATIP;Lysine acetyltransferase 5;                                                        |
| M              | AEVGEIEGCR                       | N-ter + 42.01 Da, C +57.02 Da              | 31.2       | 75.7              | 2      | 1273.69                      | n.d.                                         | n.d.                  | KAT5_MOUSE   | E9PXP9_MOUSE | Histone acetyltransferase KAT5;                                   |                                                                                                                                                                                        |
| M              | AFASDENVVHSSNAVYR                | N-ter + 42.01 Da                           | 40.2       | 32.9              | 3      | 1970.94                      | n.d.                                         | n.d.                  | S29A3_MOUSE  | D6R195_MOUSE | Equilibrative nucleoside transporter 3;                           | Solute carrier family 29 member 3;                                                                                                                                                     |
| M              | AFCAAPPAYLTHQKVLRL               | N-ter + 42.01 Da, K +28.03 Da, C +57.02 Da | 28.2       | 64.2              | 3      | 2069.22                      | 0.23                                         | 0.03                  | NDUB9_MOUSE  |              | NADH dehydrogenase [ubiquinone] 1 beta subcomplex subunit 9;      | Complex I-B22;NADH-ubiquinone oxidoreductase B22 subunit;                                                                                                                              |
| M              | AFKDTGKTPVEVAIHR                 | N-ter + 42.01 Da, K +34.06 Da              | 41.8       | 74.3              | 4      | 2104.35                      | 0.72                                         | 0.05                  | RS20_MOUSE   |              | 40S ribosomal protein S20;                                        |                                                                                                                                                                                        |
| M              | AFSQVQLCLDDHNNWNWR               | N-ter + 42.01 Da, C +57.02 Da              | 40.7       | 77.3              | 3      | 2030.06                      | n.d.                                         | n.d.                  | FA83G_MOUSE  |              | Protein FAM83G;                                                   |                                                                                                                                                                                        |
| M              | AGAACCFSDEQFR                    | N-ter + 42.01 Da, C +57.02 Da              | 31.8       | 115.5             | 3      | 1559.79                      | n.d.                                         | n.d.                  | PPCT_MOUSE   | Q5SV41_MOUSE | Phosphatidylcholine transfer protein;                             | START domain-containing protein 2;STAR-related lipid transfer protein 2;                                                                                                               |
| M              | AGARPGVHALQLEPPTVETLR            | N-ter + 42.01 Da                           | 46.1       | 78.2              | 3      | 2352.48                      | n.d.                                         | n.d.                  | PLCB3_MOUSE  |              | 1-phosphatidylinositol-4,5-bisphosphate phosphodiesterase beta-3; | Phosphoinositide phospholipase C-beta-3;Phospholipase C-beta-3; Protein kinase C-like 1;Protein kinase C-like PKN;Protein-kinase C-related kinase 1;Serine-threonine protein kinase N; |
| M              | AGDAVQSEPR                       | N-ter + 42.01 Da                           | 30.9       | 52.2              | 2      | 1070.56                      | n.d.                                         | n.d.                  | PKN1_MOUSE   |              | Serine/threonine-protein kinase N1;                               |                                                                                                                                                                                        |
| M              | AGEGLGQGSASATAAPETR              | N-ter + 42.01 Da                           | 37.3       | 119.6             | 3      | 1813.08                      | n.d.                                         | n.d.                  | RAB32_MOUSE  |              | Ras-related protein Rab-32;                                       |                                                                                                                                                                                        |
| M              | AGGEAGVTLGQPILSR                 | N-ter + 42.01 Da                           | 45.8       | 55.7              | 3      | 1590.90                      | n.d.                                         | n.d.                  | IF2H_MOUSE   |              | Eukaryotic translation initiation factor 2 subunit 3, Y-linked;   | Eukaryotic translation initiation factor 2 subunit gamma, Y-linked;                                                                                                                    |
| M              | AGGEGVTLGQPILSR                  | N-ter + 42.01 Da                           | 53.5       | 50.1              | 3      | 1576.87                      | n.d.                                         | n.d.                  | IF2G_MOUSE   | A2AAW9_MOUSE | Eukaryotic translation initiation factor 2 subunit 3, X-linked;   | Eukaryotic translation initiation factor 2 subunit gamma, X-linked;                                                                                                                    |
| M              | AGKKVCIVGSGNWGSAIAKIVGNSNAGR     | N-ter + 42.01 Da, K +34.06 Da, C +57.02 Da | 49.0       | 105.8             | 4      | 2800.92                      | -0.92                                        | 0.05                  | GPDA_MOUSE   | E0CXN5_MOUSE | Glycerol-3-phosphate dehydrogenase [NAD+], cytoplasmic;           |                                                                                                                                                                                        |
| M              | AGKPVLYHFDGR                     | N-ter + 42.01 Da, K +28.03 Da              | 44.7       | 49.2              | 3      | 1428.82                      | -0.81                                        | 0.09                  | GSTA3_MOUSE  |              | Glutathione S-transferase A3;                                     | GST class-alpha member 3;Glutathione S-transferase Ya3;Glutathione S-transferase Yc; GST class-alpha member 1;Glutathione S-transferase Ya;Glutathione S-transferase Ya1;              |
| M              | AGKPVLYHFNAR                     | N-ter + 42.01 Da, K +34.06 Da              | 23.3       | 46.7              | 3      | 1447.88                      | 0.47                                         | 0.05                  | GSTA1_MOUSE  | GSTA2_MOUSE  | Glutathione S-transferase A1;                                     |                                                                                                                                                                                        |
| M              | AGLGHPSAFGR                      | N-ter + 42.01 Da                           | 49.7       | 71.6              | 2      | 1110.64                      | n.d.                                         | n.d.                  | DDAH1_MOUSE  |              | N-(G),N(G)-dimethylarginine dimethylaminohydrolyase 1;            | DDAH1;Dimethylargininase-1;                                                                                                                                                            |
| M              | AGLDQHEGTVQVQGNLFFR              | N-ter + 42.01 Da, K +28.03 Da, C +57.02 Da | 46.6       | 93.9              | 4      | 2433.57                      | -2.25                                        | 0.11                  | NDUA5_MOUSE  |              | NADH dehydrogenase [ubiquinone] 1 alpha subcomplex subunit 5;     | Complex I subunit B13;Complex I-13kD-B;NADH-ubiquinone oxidoreductase 13 kDa-B subunit;                                                                                                |
| M              | AGLNSLEAVKR                      | N-ter + 42.01 Da, K +28.03 Da              | 51.4       | 45.9              | 2      | 1226.76                      | -0.17                                        | 0.01                  | TPM4_MOUSE   |              | Tropomyosin alpha-4 chain;                                        | Tropomyosin-4;                                                                                                                                                                         |
| M              | AGNKVPALASHQPDR                  | N-ter + 42.01 Da, K +34.06 Da              | 30.3       | 69.8              | 3      | 1733.06                      | 1.19                                         | 0.13                  | TRUA_MOUSE   | D3Z092_MOUSE | tRNA pseudouridine synthase A, mitochondrial;                     | tRNA pseudouridylate synthase I;tRNA-uridine isomerase I;                                                                                                                              |
| M              | AGPGPGAALLESPR                   | N-ter + 42.01 Da                           | 48.5       | 81.7              | 2      | 1220.71                      | n.d.                                         | n.d.                  | HECD3_MOUSE  |              | E3 ubiquitin-protein ligase HECTD3;                               | HECT domain-containing protein 3;                                                                                                                                                      |
| M              | AGSSAEQAADYR                     | N-ter + 42.01 Da                           | 40.8       | 86.1              | 2      | 1266.66                      | n.d.                                         | n.d.                  | SYCC_MOUSE   |              | Cysteine-tRNA ligase, cytoplasmic;                                | CysteinyI-tRNA synthetase;                                                                                                                                                             |
| M              | AGSVADSDAVKLLDDGHLNLSGSPQADVYFPR | N-ter + 42.01 Da, K +28.03 Da              | 49.2       | 87.0              | 4      | 3583.07                      | 0.28                                         | 0.08                  | LEGLA_MOUSE  |              | Galectin-related protein A;                                       | Lectin galactoside-binding-like protein A;                                                                                                                                             |
| M              | AGTTTIEAVKR                      | N-ter + 42.01 Da, K +34.06 Da              | 50.4       | 38.4              | 2      | 1221.76                      | 1.40                                         | 0.18                  | Q8C7C3_MOUSE | D3Z618_MOUSE |                                                                   |                                                                                                                                                                                        |
| M              | AGVDQHEGTVQVQGNLFFR              | N-ter + 42.01 Da                           | 47.5       | 56.4              | 3      | 2285.25                      | n.d.                                         | n.d.                  | ABHEB_MOUSE  |              | Abhydrolase domain-containing protein 14B;                        | CCG1-interacting factor B;                                                                                                                                                             |
| LLADAYSGRM     | AGVRPDNPVAEVVAGAR                | N-ter + 42.01 Da                           | 48.6       | 35.4              | 3      | 1621.91                      | n.d.                                         | n.d.                  | KBTBB_MOUSE  |              | Kelch repeat and BTB domain-containing protein 11;                |                                                                                                                                                                                        |
| M              | AHIFVYGTLLKR                     | N-ter + 42.01 Da, K +28.03 Da              | 29.6       | 55.9              | 3      | 1373.86                      | -0.64                                        | 0.07                  | A2LD1_MOUSE  | E0CZ04_MOUSE | Gamma-glutamylaminocyclotransferase;                              |                                                                                                                                                                                        |
| M              | AKIAQGAMYR                       | N-ter + 42.01 Da, K +34.06 Da              | 51.6       | 50.2              | 2      | 1183.72                      | 0.59                                         | 0.03                  | ANXA6_MOUSE  | F8WIT2_MOUSE | Annexin A6;                                                       |                                                                                                                                                                                        |
| EVSSVPTNGM     | AKNGSEADIDESLYSR                 | N-ter + 42.01 Da, K +28.03 Da              | 54.1       | 61.4              | 3      | 1823.97                      | -0.09                                        | 0.01                  | UBA1_MOUSE   |              | Ubiquitin-like modifier-activating enzyme 1;                      | AIG2-like domain-containing protein 1; 67 kDa calelectrin;Annexin VI;Annexin-6;Calphobindin-II;Chromobindin-20;Lipocortin VI;Protein III;p68;p70;                                      |
| M              | AKTEEMVQTEEMETPR                 | N-ter + 42.01 Da, K +28.03 Da              | 42.8       | 60.7              | 3      | 1978.02                      | 0.16                                         | 0.02                  | BAG1_MOUSE   | F6TFC9_MOUSE | BAG family molecular chaperone regulator 1;                       | Bcl-2-associated athanogene 1;                                                                                                                                                         |
| M              | AKVAKDLNPGVQKMSLGGQQQSAR         | N-ter + 42.01 Da, K +34.06 Da              | 37.6       | 71.9              | 4      | 2597.70                      | -0.71                                        | 0.09                  | LMCD1_MOUSE  | E9Q306_MOUSE | LIM and cysteine-rich domains protein 1;                          |                                                                                                                                                                                        |
| M              | AKVEQVLSLEPQHELKFR               | N-ter + 42.01 Da, K +28.03 Da              | 48.5       | 70.0              | 4      | 2248.42                      | -0.12                                        | 0.01                  | VAPB_MOUSE   | Q88H80_MOUSE | Vesicle-associated membrane protein-associated protein B;         | VAMP-associated protein 33b;                                                                                                                                                           |

Table S16, Tholen et al.

| Non Prime Site | Prime Site                       | Modifications                              | Hyperscore | Mass error in ppm | Charge | Precursor neutral mass in Da | Fold change (log <sub>2</sub> ) of ASAPRatio | FC-error of ASAPRatio | Uniprot ID 1 | Uniprot ID 2 | Protein Name 1                                                          | Protein Name 2                                                                                                                                                                                                                                    |
|----------------|----------------------------------|--------------------------------------------|------------|-------------------|--------|------------------------------|----------------------------------------------|-----------------------|--------------|--------------|-------------------------------------------------------------------------|---------------------------------------------------------------------------------------------------------------------------------------------------------------------------------------------------------------------------------------------------|
| M              | ALDGPEQMELEEGKAGSGLR             | N-ter + 42.01 Da, K +34.06 Da              | 54.5       | 42.8              | 3      | 2162.17                      | 0.44                                         | 0.05                  | PRSS_MOUSE   |              | 26S proteasome AAA-ATPase subunit RPT6;Proteasome 26S subunit ATPase    | 26S proteasome AAA-ATPase subunit RPT6;Proteasome 26S subunit ATPase                                                                                                                                                                              |
| M              | ALKQISSNR                        | N-ter + 42.01 Da, K +28.03 Da              | 46.8       | 84.1              | 2      | 1085.71                      | -1.06                                        | 0.09                  | ESTD_MOUSE   |              | 5-Formylglutathione hydrolase;                                          | 5-Formylglutathione hydrolase;                                                                                                                                                                                                                    |
| M              | ALLAEHLKPLPADR                   | N-ter + 42.01 Da, K +34.06 Da              | 36.9       | 24.0              | 3      | 1732.09                      | -0.89                                        | 0.26                  | GLTP_MOUSE   | D3Z1H9_MOUSE | Glycolipid transfer protein;                                            | Esterase 10;Esterase D;Sid 478;                                                                                                                                                                                                                   |
| M              | ALQALHSSGVGLR                    | N-ter + 42.01 Da                           | 57.1       | 23.9              | 2      | 1349.77                      | n.d.                                         | n.d.                  | MMP37_MOUSE  | D6RGT1_MOUSE | Mitochondrial translocator assembly and maintenance protein 41 homolog; | MMP37-like protein, mitochondrial;                                                                                                                                                                                                                |
| HKLVDNWARD     | AMNLSGRR                         | N-ter + 42.01 Da                           | 11.2       | 61.5              | 2      | 945.54                       | n.d.                                         | n.d.                  | WNK1_MOUSE   | F6TAR7_MOUSE | Serine/threonine-protein kinase WNK1;                                   | Protein kinase lysine-deficient 1;Protein kinase with no lysine 1;                                                                                                                                                                                |
| M              | AMQKIFAR                         | N-ter + 42.01 Da, K +34.06 Da              | 42.6       | 41.7              | 2      | 1039.65                      | -0.58                                        | 0.01                  | ENOB_MOUSE   | Q5SX59_MOUSE | Beta-enolase;                                                           | 2-phospho-D-glycerate hydro-lyase;Enolase                                                                                                                                                                                                         |
| M              | AMVSEFLKQAR                      | N-ter + 42.01 Da, K +28.03 Da              | 56.1       | 76.1              | 2      | 1348.82                      | 0.71                                         | 0.09                  | ANXA1_MOUSE  | E9QA30_MOUSE | Annexin A1;                                                             | 3;Muscle-specific enolase;Skeletal muscle enolase;                                                                                                                                                                                                |
| M              | ANEVQLVPLPKGR                    | N-ter + 42.01 Da, K +28.03 Da              | 39.7       | 32.3              | 3      | 1576.94                      | 0.31                                         | 0.04                  | DAPL1_MOUSE  |              | Death-associated protein-like 1;                                        | Annexin I;Annexin-1;Calpactin II;Calpactin-2;Chromobindin-9;Lipocortin I;Phospholipase A2 inhibitory protein;p35;                                                                                                                                 |
| M              | ANHAPFETDISTLTR                  | N-ter + 42.01 Da                           | 40.8       | 56.4              | 3      | 1713.93                      | n.d.                                         | n.d.                  | F16P1_MOUSE  | E9Q0T7_MOUSE | Fructose-1,6-bisphosphatase 1;                                          | Early epithelial differentiation-associated protein;                                                                                                                                                                                              |
| M              | ANKAPSQMER                       | N-ter + 42.01 Da, K +34.06 Da              | 27.2       | 47.7              | 2      | 1206.68                      | -0.64                                        | 0.09                  | S10A9_MOUSE  |              | Protein S100-A9;                                                        | D-fructose-1,6-bisphosphate 1-phosphohydrolase 1;                                                                                                                                                                                                 |
| M              | ANKGPSYGMRSR                     | N-ter + 42.01 Da, K +34.06 Da              | 47.9       | 54.8              | 2      | 1242.69                      | -0.38                                        | 0.03                  | TAGL_MOUSE   |              | Transgelin;                                                             | Calgranulin-B;Leukocyte L1 complex heavy chain;Migration inhibitory factor-related protein                                                                                                                                                        |
| M              | ANSANTNTVPKLYR                   | N-ter + 42.01 Da, K +28.03 Da              | 35.2       | 65.7              | 3      | 1617.95                      | 0.77                                         | 0.04                  | TF2AA_MOUSE  |              | Transcription initiation factor IIA subunit 1;                          | 14;S100 calcium-binding protein A9;                                                                                                                                                                                                               |
| M              | ANVADTKLYDILGVPPGASENELKKAYR     | N-ter + 42.01 Da, K +28.03 Da              | 34.5       | 82.2              | 4      | 3157.96                      | 0.61                                         | 0.02                  | DNIA2_MOUSE  |              | Dnaj homolog subfamily A member 2;                                      | Actin-associated protein p27;Smooth muscle protein 22-alpha;                                                                                                                                                                                      |
| M              | APKVSDSVQRLR                     | N-ter + 42.01 Da, K +28.03 Da              | 32.3       | 86.0              | 3      | 1397.87                      | 0.44                                         | 0.05                  | TOM34_MOUSE  |              | Mitochondrial import receptor subunit TOM34;                            | General transcription factor IIA subunit 1;                                                                                                                                                                                                       |
| M              | AQALSEEEFQR                      | N-ter + 42.01 Da                           | 34.0       | 88.3              | 2      | 1348.74                      | n.d.                                         | n.d.                  | GRAP1_MOUSE  | AZAEW6_MOUSE | GRIP1-associated protein 1;                                             | mDj3;                                                                                                                                                                                                                                             |
| M              | AQAPAKCPSYPGSGDGMGKLR            | N-ter + 42.01 Da, K +34.06 Da, C +57.02 Da | 56.2       | 73.0              | 3      | 2386.38                      | -0.74                                        | 0.12                  | GMDS_MOUSE   |              | GDP-mannose 4,6 dehydratase;                                            | GDP-D-mannose dehydratase;                                                                                                                                                                                                                        |
| M              | AQAPTIVITQPGFVR                  | N-ter + 42.01 Da                           | 31.9       | 102.6             | 3      | 1625.06                      | n.d.                                         | n.d.                  | PLAC8_MOUSE  |              | Placenta-specific gene 8 protein;                                       | Onzin;Protein C15;                                                                                                                                                                                                                                |
| M              | AQDGVLEKSVR                      | N-ter + 42.01 Da, K +28.03 Da              | 47.8       | 44.9              | 2      | 1399.79                      | 0.30                                         | 0.03                  | CS066_MOUSE  |              | UPF0515 protein C19orf66 homolog;                                       |                                                                                                                                                                                                                                                   |
| M              | AQDLSEKELLR                      | N-ter + 42.01 Da, K +28.03 Da              | 35.9       | 3.0               | 2      | 1370.74                      | -0.30                                        | 0.02                  | GBGT2_MOUSE  |              | Guanine nucleotide-binding protein G(I)/G(S)/G(O) subunit gamma-T2;     | G gamma-C;G-gamma-8;                                                                                                                                                                                                                              |
| M              | AQDQGEKENPMR                     | N-ter + 42.01 Da, K +34.06 Da              | 51.0       | 41.4              | 2      | 1477.77                      | 0.47                                         | 0.06                  | RL11_MOUSE   | D3Z3K1_MOUSE | 60S ribosomal protein L11;                                              |                                                                                                                                                                                                                                                   |
| M              | AQELQHPFAR                       | N-ter + 42.01 Da                           | 51.3       | 42.7              | 2      | 1366.72                      | n.d.                                         | n.d.                  | ADSV_MOUSE   | E9QM03_MOUSE | Adseverin;                                                              | Gelsolin-like protein;Scinderin;                                                                                                                                                                                                                  |
| M              | AQERPSCAVEPEHVQR                 | N-ter + 42.01 Da, C +57.02 Da              | 45.7       | 91.1              | 3      | 1934.08                      | n.d.                                         | n.d.                  | CDD_MOUSE    |              | Cytidine deaminase;                                                     | Cytidine aminohydrolase;                                                                                                                                                                                                                          |
| M              | AQEVSEYLSQNPR                    | N-ter + 42.01 Da                           | 36.9       | 71.8              | 2      | 1561.85                      | n.d.                                         | n.d.                  | CARF_MOUSE   |              | CDKN2A-interacting protein;                                             | Collaborator of ARF;                                                                                                                                                                                                                              |
| M              | AQGSHQIDFVLHDLR                  | N-ter + 42.01 Da                           | 57.7       | 53.3              | 3      | 1905.05                      | n.d.                                         | n.d.                  | TAB2_MOUSE   | D3Z216_MOUSE | TGF-beta-activated kinase 1 and MAP3K7-binding protein 2;               | Mitogen-activated protein kinase kinase kinase 7-interacting protein 2;TAK1-binding protein 2;TGF-beta-activated kinase 1-binding protein 2;                                                                                                      |
| SALARETRAM     | AQKPDGGAGLR                      | N-ter + 42.01 Da, K +28.03 Da              | 35.0       | 47.2              | 2      | 1138.66                      | 0.79                                         | 0.09                  | MAGD1_MOUSE  | F6YTL0_MOUSE | Melanoma-associated antigen D1;                                         | Dlxin-1;MAGE-D1 antigen;Neurotrophin receptor-interacting MAGE homolog;                                                                                                                                                                           |
| M              | AQNLKDLAGR                       | N-ter + 42.01 Da, K +34.06 Da              | 44.0       | 33.3              | 2      | 1160.71                      | -1.60                                        | 0.19                  | PHB2_MOUSE   | E9Q313_MOUSE | Prohibitin-2;                                                           | B-cell receptor-associated protein BAP37;Repressor of estrogen receptor activity;                                                                                                                                                                 |
| M              | AQPGPAPQPDVSLQQR                 | N-ter + 42.01 Da                           | 31.9       | 116.0             | 3      | 1730.08                      | n.d.                                         | n.d.                  | RABE1_MOUSE  | Q5QNU4_MOUSE | Rab GTPase-binding effector protein 1;                                  | Rabaptin-5;Rabaptin-5alpha;                                                                                                                                                                                                                       |
| EERSVNCGTM     | AQPKNLEGVVGFANLPNQVYR            | N-ter + 42.01 Da, K +34.06 Da              | 65.8       | 70.1              | 3      | 2453.46                      | -0.27                                        | 0.05                  | SEPT7_MOUSE  | E9Q9F5_MOUSE | Septin-7;                                                               | CDC10 protein homolog;                                                                                                                                                                                                                            |
| M              | AQWNQLQLDTR                      | N-ter + 42.01 Da                           | 32.3       | 64.8              | 2      | 1541.86                      | n.d.                                         | n.d.                  | STAT3_MOUSE  | B7ZC18_MOUSE | Signal transducer and activator of transcription 3;                     | Acute-phase response factor;                                                                                                                                                                                                                      |
| M              | ASALEQFVNSVR                     | N-ter + 42.01 Da                           | 36.4       | 86.4              | 2      | 1361.81                      | n.d.                                         | n.d.                  | CSN3_MOUSE   | Q8BX58_MOUSE | COP9 signalosome complex subunit 3;                                     | JAB1-containing signalosome subunit 3;                                                                                                                                                                                                            |
| M              | ASAMAGAGPAPGLPVAGGPVPGVIGIPGKSGE | N-ter + 42.01 Da, K +34.06 Da              | 33.2       | 84.4              | 4      | 3239.99                      | 0.85                                         | 0.11                  | D3YYW8_MOUSE |              |                                                                         |                                                                                                                                                                                                                                                   |
| M              | ER                               | N-ter + 42.01 Da                           | 26.7       | 78.9              | 2      | 1110.62                      | n.d.                                         | n.d.                  | RAB3D_MOUSE  | D3YVW3_MOUSE | Ras-related protein Rab-3D;                                             |                                                                                                                                                                                                                                                   |
| M              | ASASYHISNLEKMTSSDKDFR            | N-ter + 42.01 Da, K +34.06 Da              | 26.8       | 107.1             | 4      | 2609.62                      | -0.64                                        | 0.13                  | CAND1_MOUSE  |              | Cullin-associated NEDD8-dissociated protein 1;                          | Cullin-associated and neddylation-dissociated protein 1;p120 CAND1;                                                                                                                                                                               |
| M              | ASAVSPANLPAVLLQPR                | N-ter + 42.01 Da                           | 33.2       | 119.7             | 3      | 1745.19                      | n.d.                                         | n.d.                  | HCF1_MOUSE   | B1AUX2_MOUSE | Host cell factor 1;                                                     | C1 factor;                                                                                                                                                                                                                                        |
| M              | ASCASIDIEDATQHLLR                | N-ter + 42.01 Da, C +57.02 Da              | 51.5       | 71.8              | 3      | 1827.97                      | n.d.                                         | n.d.                  | EDC4_MOUSE   | D6RE33_MOUSE | Enhancer of mRNA-decapping protein 4;                                   |                                                                                                                                                                                                                                                   |
| M              | ASCDEIKEHPR                      | N-ter + 42.01 Da, K +34.06 Da, C +57.02 Da | 21.1       | 86.1              | 3      | 1416.81                      | 0.12                                         | 0.01                  | SEP10_MOUSE  |              | Septin-10;                                                              |                                                                                                                                                                                                                                                   |
| M              | ASDTPGFYMDKLNKYR                 | N-ter + 42.01 Da, K +34.06 Da              | 30.0       | 82.9              | 3      | 2015.21                      | -0.22                                        | 0.03                  | E2AK2_MOUSE  |              | Interferon-induced, double-stranded RNA-activated protein kinase;       | Eukaryotic translation initiation factor 2-alpha kinase 2;Interferon-inducible RNA-dependent protein kinase;P1/eIF-2A protein kinase;Protein kinase RNA-activated;Serine/threonine-protein kinase TIK;Tyrosine-protein kinase EIF2AK2;p68 kinase; |
| M              | ASEAGGIGGGGGKIR                  | N-ter + 42.01 Da, K +28.03 Da              | 30.4       | 66.7              | 3      | 1469.86                      | 0.39                                         | 0.02                  | E9Q3G8_MOUSE |              |                                                                         |                                                                                                                                                                                                                                                   |
| M              | ASESGKLWGGR                      | N-ter + 42.01 Da, K +34.06 Da              | 56.2       | 54.6              | 2      | 1222.72                      | -0.76                                        | 0.05                  | ARLY_MOUSE   | E0CY49_MOUSE | Argininosuccinate lyase;                                                | Argininosuccinase;                                                                                                                                                                                                                                |
| M              | ASESSPLLAR                       | N-ter + 42.01 Da                           | 31.5       | 67.0              | 2      | 1234.70                      | n.d.                                         | n.d.                  | S12A9_MOUSE  | D3Z362_MOUSE | Solute carrier family 12 member 9;                                      | Cation-chloride cotransporter-interacting protein 1;Potassium-chloride transporter 9;                                                                                                                                                             |
| M              | ASGCKIGPSILNSDLNLAEGAECLR        | N-ter + 42.01 Da, K +28.03 Da, C +57.02 Da | 55.0       | 50.4              | 3      | 2585.42                      | 0.60                                         | 0.18                  | RPE_MOUSE    | B2KGF0_MOUSE | Ribulose-phosphate 3-epimerase;                                         | Ribulose-5-phosphate-epimerase;                                                                                                                                                                                                                   |

Table S16, Tholen et al.

| Non Prime Site  | Prime Site                                           | Modifications                                        | Hyperscore   | Mass error in ppm | Charge | Precursor neutral mass in Da | Fold change (log <sub>2</sub> ) of ASAPRatio | FC-error of ASAPRatio | Uniprot ID 1               | Uniprot ID 2                 | Protein Name 1                                                                                                        | Protein Name 2                                                                                                                                                     |
|-----------------|------------------------------------------------------|------------------------------------------------------|--------------|-------------------|--------|------------------------------|----------------------------------------------|-----------------------|----------------------------|------------------------------|-----------------------------------------------------------------------------------------------------------------------|--------------------------------------------------------------------------------------------------------------------------------------------------------------------|
| M<br>AMLATGTARM | ASGNAIQKSPDFTATAVVDGAFKEIKLSDYR<br>ASGRPEELWEAVVGAER | N-ter + 42.01 Da, K +28.03 Da<br>N-ter + 42.01 Da    | 37.9<br>63.5 | 47.3<br>69.1      | 4<br>3 | 3553.01<br>1968.11           | -1.03<br>n.d.                                | 0.19<br>n.d.          | PRDX2_MOUSE<br>AKT51_MOUSE | D3Z4A4_MOUSE<br>D3YWZ1_MOUSE | Peroxioredoxin-2;<br>Proline-rich AKT1 substrate 1;<br>cAMP-dependent protein kinase type I-alpha regulatory subunit; | Thiol-specific antioxidant protein;Thioredoxin peroxidase 1;Thioredoxin-dependent peroxidase reductase 1;                                                          |
| M               | ASGSMATSEER<br>ASGSPPSQPPASGSGYVPGVSAAFVTCNPKVAK     | N-ter + 42.01 Da<br>N-ter + 42.01 Da, K +28.03 Da, C | 38.4         | 96.5              | 2      | 1295.65                      | n.d.                                         | n.d.                  | KAPO_MOUSE                 | A2A169_MOUSE                 |                                                                                                                       | Brain acetylcholinesterase putative membrane anchor;                                                                                                               |
| LLLPRALLSM      | ASGVAVSDGVKIKVFNMDMKVR                               | N-ter + 42.01 Da, K +28.03 Da                        | 29.9         | 79.5              | 4      | 4052.35                      | -0.42                                        | 0.03                  | CUTA_MOUSE                 | D5MCW4_MOUSE                 | Protein CutA;                                                                                                         |                                                                                                                                                                    |
| M               | ASGVQVADEVCR                                         | N-ter + 42.01 Da, C +57.02 Da                        | 39.5         | 67.3              | 3      | 2189.34                      | 0.71                                         | 0.14                  | COF1_MOUSE                 | E9Q1T2_MOUSE                 | Cofilin-1;                                                                                                            | Brain acetylcholinesterase putative membrane anchor;                                                                                                               |
| M               | ASGVTVNDEVIKVFNDMKVR                                 | N-ter + 42.01 Da, K +34.06 Da                        | 40.6         | 77.3              | 2      | 1331.72                      | n.d.                                         | n.d.                  | DEST_MOUSE                 |                              | Destrin;                                                                                                              | Cofilin, non-muscle isoform;                                                                                                                                       |
| M               |                                                      |                                                      | 40.9         | 81.0              | 3      | 2330.48                      | -0.43                                        | 0.11                  | COF2_MOUSE                 |                              | Cofilin-2;                                                                                                            | Cofilin, muscle isoform;                                                                                                                                           |
| M               | ASKEMFEDTVEER                                        | N-ter + 42.01 Da, K +34.06 Da                        | 51.4         | 16.3              | 2      | 1645.80                      | 0.83                                         | 0.11                  | RBBP7_MOUSE                | A2AF19_MOUSE                 | Histone-binding protein RBBP7;                                                                                        | Histone acetyltransferase type B subunit 2;Nucleosome-remodeling factor subunit RBAP46;Retinoblastoma-binding protein 7;Retinoblastoma-binding protein p46;        |
| M               | ASLKDLGKWR                                           | N-ter + 42.01 Da, K +28.03 Da                        | 54.7         | 43.7              | 2      | 1399.84                      | 3.26                                         | 0.08                  | FABP5_MOUSE                | E9Q964_MOUSE                 | Fatty acid-binding protein, epidermal;                                                                                | Epidermal-type fatty acid-binding protein;Fatty acid-binding protein 5;Keratinocyte lipid-binding protein;Psoriasis-associated fatty acid-binding protein homolog; |
| M               | ASLSLAPVNIKAGADEER                                   | N-ter + 42.01 Da, K +28.03 Da                        | 39.3         | 48.1              | 3      | 2057.18                      | 0.63                                         | 0.18                  | TCPB_MOUSE                 |                              | T-complex protein 1 subunit beta;                                                                                     | CCT-beta;                                                                                                                                                          |
| M               | ASNFKTTMASSAQR                                       | N-ter + 42.01 Da, K +28.03 Da                        | 30.3         | 95.2              | 3      | 1725.05                      | 0.62                                         | 0.17                  | CETN2_MOUSE                |                              | Centrin-2;                                                                                                            | Caltractin isoform 1;                                                                                                                                              |
| M               | ASNNTASIAQAR                                         | N-ter + 42.01 Da                                     | 32.7         | 52.0              | 2      | 1244.68                      | n.d.                                         | n.d.                  | GBG2_MOUSE                 |                              | Guanine nucleotide-binding protein G(i1)/G(s)/G(o) subunit gamma-2;                                                   | G gamma-1;                                                                                                                                                         |
| M               | ASNPRDGEILLTELQGDSR                                  | N-ter + 42.01 Da                                     | 36.6         | 57.4              | 3      | 2112.17                      | n.d.                                         | n.d.                  | PKN2_MOUSE                 | E9QAV1_MOUSE                 | Serine/threonine-protein kinase N2;                                                                                   | PKN gamma;Protein kinase C-like 2;Protein-kinase C-related kinase 2;                                                                                               |
| M               | ASPAAGGVVIVGSLIGR                                    | N-ter + 42.01 Da                                     | 56.2         | 77.5              | 2      | 1622.04                      | n.d.                                         | n.d.                  | CRYL1_MOUSE                | Q9D221_MOUSE                 | Lambda-crystallin homolog;                                                                                            | L-gulonate 3-dehydrogenase;                                                                                                                                        |
| M               | ASQSQGIQLLQAEKR                                      | N-ter + 42.01 Da, K +28.03 Da                        | 46.1         | 34.0              | 3      | 1854.06                      | 0.39                                         | 0.05                  | VATG1_MOUSE                |                              | V-type proton ATPase subunit G 1;                                                                                     | V-ATPase 13 kDa subunit 1;Vacuolar proton pump subunit G 1;                                                                                                        |
| M               | ASSAQSSGSGGPAVPTVQR                                  | N-ter + 42.01 Da                                     | 28.7         | 113.8             | 3      | 1872.11                      | n.d.                                         | n.d.                  | SND1_MOUSE                 | Q3TJ56_MOUSE                 | Staphylococcal nuclease domain-containing protein 1;                                                                  | 100 kDa coactivator;p100 co-activator;                                                                                                                             |
| M               | ASSDIQVKELEKR                                        | N-ter + 42.01 Da, K +28.03 Da                        | 34.4         | 58.1              | 3      | 1599.98                      | 2.68                                         | 0.11                  | STMN1_MOUSE                | D3Z1Z8_MOUSE                 | Stathmin;                                                                                                             | Leukemia-associated gene protein;Leukemia-associated phosphoprotein p18;Metablastin;Oncoprotein 18;Phosphoprotein p19;Protein Pr22;pp17;                           |
| M               | ASSHTVLMR                                            | N-ter + 42.01 Da                                     | 42.3         | 49.2              | 2      | 1042.57                      | n.d.                                         | n.d.                  | BPNT1_MOUSE                | D3Z5X0_MOUSE                 | 3'(2'),5'-bisphosphate nucleotidase 1;                                                                                | Bisphosphate 3'-nucleotidase 1;PAP-inositol-1,4-phosphatase;                                                                                                       |
| M               | ASSKVTLSVLSR                                         | N-ter + 42.01 Da, K +28.03 Da                        | 34.6         | 71.5              | 3      | 1473.00                      | -0.25                                        | 0.05                  | PIR_MOUSE                  | A2AIH8_MOUSE                 | Pirin;                                                                                                                | Probable quercetin 2,3-dioxygenase PIR;                                                                                                                            |
| QAQHSSPGEM      | ASSPQGLDNPALLR                                       | N-ter + 42.01 Da                                     | 35.5         | 111.5             | 3      | 1479.93                      | n.d.                                         | n.d.                  | DDI2_MOUSE                 |                              | Protein DDI1 homolog 2;                                                                                               |                                                                                                                                                                    |
| M               | ASSSGNDDLTIPR                                        | N-ter + 42.01 Da                                     | 34.6         | 71.9              | 2      | 1488.78                      | n.d.                                         | n.d.                  | NC2B_MOUSE                 |                              | Protein Dr1;                                                                                                          | Down-regulator of transcription 1;Negative cofactor 2-beta;TATA-binding protein-associated phosphoprotein                                                          |
| M               | ASYEILDVPR                                           | N-ter + 42.01 Da                                     | 33.4         | 79.6              | 2      | 1366.79                      | n.d.                                         | n.d.                  | DNJB2_MOUSE                | Q3TB24_MOUSE                 | DnaJ homolog subfamily B member 2;                                                                                    | DnaJ homolog subfamily B member 10;mDj8;                                                                                                                           |
| M               | ATATPVQQQR                                           | N-ter + 42.01 Da                                     | 31.1         | 9.0               | 2      | 1140.60                      | n.d.                                         | n.d.                  | LMNB1_MOUSE                |                              | Lamin-B1;                                                                                                             |                                                                                                                                                                    |
| M               | ATDDKSSPTLDSANDLPR                                   | N-ter + 42.01 Da, K +28.03 Da                        | 34.3         | 86.3              | 3      | 1972.11                      | 0.73                                         | 0.04                  | FYV1_MOUSE                 | D3Z5N5_MOUSE                 | 1-phosphatidylinositol-3-phosphate 5-kinase;                                                                          | FYVE finger-containing phosphoinositide kinase;PIKfyve;Phosphatidylinositol-3-phosphate 5-kinase type III;p235;                                                    |
| M               | ATDELASKLSR                                          | N-ter + 42.01 Da, K +28.03 Da                        | 61.0         | 34.6              | 2      | 1259.72                      | 1.01                                         | 0.15                  | EFHD2_MOUSE                | Q8C845_MOUSE                 | EF-hand domain-containing protein D2;                                                                                 | Swi5prosin-1;                                                                                                                                                      |
| M               | ATDISSESGADCKGDKNSAKLDADYPLR                         | +57.02 Da                                            | 32.4         | 65.5              | 4      | 3228.84                      | 0.49                                         | 0.05                  | DENR_MOUSE                 | E9Q0G1_MOUSE                 | Density-regulated protein;                                                                                            |                                                                                                                                                                    |
| M               | ATEGDVLELETETSGPERPPEKPR                             | N-ter + 42.01 Da, K +34.06 Da                        | 42.4         | 61.1              | 3      | 2841.58                      | 1.08                                         | 0.15                  | HYPK_MOUSE                 |                              | Huntingtin-interacting protein K;                                                                                     | Huntingtin yeast partner K;                                                                                                                                        |
| M               | ATEGMILTNHHDQIR                                      | N-ter + 42.01 Da                                     | 38.0         | 66.7              | 3      | 1776.98                      | n.d.                                         | n.d.                  | GEPH_MOUSE                 | A0JNY3_MOUSE                 | Gephyrin;                                                                                                             |                                                                                                                                                                    |
| M               | ATESGSDSQR                                           | N-ter + 42.01 Da                                     | 29.2         | 78.2              | 2      | 1191.63                      | n.d.                                         | n.d.                  | PPWD1_MOUSE                | E9Q873_MOUSE                 | Peptidylprolyl isomerase domain and WD repeat-containing protein 1;                                                   |                                                                                                                                                                    |
| M               | ATESSPLTHVLDTASGLPAQGLCLR                            | N-ter + 42.01 Da, C +57.02 Da                        | 32.9         | 51.4              | 3      | 2736.52                      | n.d.                                         | n.d.                  | HIUH_MOUSE                 |                              | 5-hydroxyisourate hydrolase;                                                                                          |                                                                                                                                                                    |
| M               | ATGANATPLDFPSKRR                                     | N-ter + 42.01 Da, K +34.06 Da                        | 39.8         | 80.2              | 3      | 1783.17                      | 1.14                                         | 0.04                  | SF01_MOUSE                 | Q3UI45_MOUSE                 | Splicing factor 1;                                                                                                    | Transthyretin-related protein;                                                                                                                                     |
| M               | ATGQKLMR                                             | N-ter + 42.01 Da, K +34.06 Da                        | 30.0         | 50.9              | 2      | 979.62                       | -0.45                                        | 0.02                  | QOR_MOUSE                  | D3Z2X0_MOUSE                 | Quinone oxidoreductase;                                                                                               | CW17;Mammalian branch point-binding protein;Transcription factor ZFM1;Zinc finger gene in MEN1 locus;Zinc finger protein 162;                                      |
| M               | ATIATMPVPETR                                         | N-ter + 42.01 Da                                     | 26.5         | 78.6              | 2      | 1327.79                      | n.d.                                         | n.d.                  | SNRPA_MOUSE                | E9Q4T6_MOUSE                 | U1 small nuclear ribonucleoprotein A;                                                                                 | NADPH:quinone reductase;Zeta-crystallin;                                                                                                                           |
| M               | ATIGPSGLHPGER                                        | N-ter + 42.01 Da                                     | 51.6         | 36.8              | 2      | 1332.73                      | n.d.                                         | n.d.                  | HXX3_MOUSE                 | D6RCV7_MOUSE                 | Hexokinase-3;                                                                                                         | Hexokinase type III;                                                                                                                                               |
| M               | ATKCTKCGPYSTPLEAMKGR                                 | +57.02 Da                                            | 55.3         | 83.3              | 4      | 2535.48                      | 0.48                                         | 0.02                  | SBP1_MOUSE                 | D6RHN2_MOUSE                 | Selenium-binding protein 1;                                                                                           | 56 kDa selenium-binding protein;                                                                                                                                   |
| M               | ATLCLFDMDGTLTAPR                                     | N-ter + 42.01 Da, C +57.02 Da                        | 42.6         | 114.3             | 3      | 1823.07                      | n.d.                                         | n.d.                  | PMM2_MOUSE                 |                              | Phosphomannosidase 2;                                                                                                 |                                                                                                                                                                    |
| MFLCRFWGKM      | ATNDAVLKR                                            | N-ter + 42.01 Da, K +34.06 Da                        | 50.8         | 64.6              | 2      | 1062.67                      | 0.77                                         | 0.09                  | AIMP1_MOUSE                | Q3UZG4_MOUSE                 | Aminoacyl tRNA synthase complex-interacting multifunctional protein 1;                                                | Multisynthase complex auxiliary component p43;                                                                                                                     |
| M               | ATPDSLALFTGLGLSENKAR                                 | N-ter + 42.01 Da, K +34.06 Da                        | 49.1         | 45.4              | 3      | 2136.30                      | -0.25                                        | 0.07                  | Q8BML9_MOUSE               | D3Z1S8_MOUSE                 |                                                                                                                       |                                                                                                                                                                    |
| M               | ATPEASGSGEKVEGSEPSVTYYR                              | N-ter + 42.01 Da, K +28.03 Da                        | 36.0         | 79.2              | 3      | 2470.35                      | -1.74                                        | 0.35                  | CYB5B_MOUSE                |                              | Cytochrome b5 type B;                                                                                                 | Cytochrome b5 outer mitochondrial membrane isoform;                                                                                                                |
| M               | ATQVEPLLAPAGAPLLQAEHGLAR                             | N-ter + 42.01 Da                                     | 55.0         | 45.0              | 3      | 2522.46                      | n.d.                                         | n.d.                  | LARP1_MOUSE                |                              | La-related protein 1;                                                                                                 | La ribonucleoprotein domain family member 1;                                                                                                                       |
| M               | ATLSGSNTYNR                                          | N-ter + 42.01 Da                                     | 30.9         | 63.5              | 2      | 1224.65                      | n.d.                                         | n.d.                  | RBM22_MOUSE                |                              | Pre-mRNA-splicing factor RBM22;                                                                                       | RNA-binding motif protein 22;                                                                                                                                      |

Table S16, Tholen et al.

| Non Prime Site | Prime Site                  | Modifications                                           | Hyperscore | Mass error in ppm | Charge | Precursor neutral mass in Da | Fold change (log <sub>2</sub> ) of ASAPRatio | FC-error of ASAPRatio | Uniprot ID 1 | Uniprot ID 2 | Protein Name 1                                                        | Protein Name 2                                                                                                                                   |
|----------------|-----------------------------|---------------------------------------------------------|------------|-------------------|--------|------------------------------|----------------------------------------------|-----------------------|--------------|--------------|-----------------------------------------------------------------------|--------------------------------------------------------------------------------------------------------------------------------------------------|
| M              | ATTSSEEVLLIVKVR             | N-ter + 42.01 Da, K +28.03 Da                           | 41.2       | 77.2              | 3      | 1769.20                      | 0.30                                         | 0.02                  | TF2H1_MOUSE  | D6RJL7_MOUSE | General transcription factor IIH subunit 1;                           | Basic transcription factor 2 62 kDa subunit;General transcription factor IIH polypeptide 1;TFIIH basal transcription factor complex p62 subunit; |
| M              | ATTAQSQPQPVAGKR             | N-ter + 42.01 Da, K +28.03 Da                           | 45.6       | 0.2               | 3      | 1608.86                      | 0.63                                         | 0.16                  | THUM1_MOUSE  |              | THUMP domain-containing protein 1;                                    |                                                                                                                                                  |
| M              | ATTFQLTSSTFGGSSSTR          | N-ter + 42.01 Da                                        | 27.2       | 101.7             | 3      | 1790.03                      | n.d.                                         | n.d.                  | K1C15_MOUSE  | B1AQ77_MOUSE | Keratin, type I cytoskeletal 15;                                      | Cytokeratin-15;Keratin-15;                                                                                                                       |
| M              | ATVAATTKVPEIR               | N-ter + 42.01 Da, K +28.03 Da                           | 55.3       | 29.7              | 2      | 1425.86                      | -1.60                                        | 0.15                  | RUVB2_MOUSE  | D3YXQ8_MOUSE | RuvB-like 2;                                                          | p47 protein;                                                                                                                                     |
| M              | ATVDLEKLR                   | N-ter + 42.01 Da, K +34.06 Da                           | 45.7       | 23.4              | 2      | 1119.70                      | -1.29                                        | 0.06                  | K6PL_MOUSE   |              | 6-phosphofructokinase, liver type;                                    | Phosphofructo-1-kinase isozyme B;Phosphofructokinase 1;Phosphohexokinase;                                                                        |
| M              | AVAAAAATAMSAAGGGASAAR       | N-ter + 42.01 Da                                        | 55.2       | 110.2             | 3      | 1873.12                      | n.d.                                         | n.d.                  | ARHL2_MOUSE  |              | Poly(ADP-ribose) glycohydrolase ARH3;                                 | ADP-ribosylhydrolase 3;Protein ADP-ribosylarginine] hydrolase-like protein 2;                                                                    |
| M              | AVAAAAVAAPAGGGGAR           | N-ter + 42.01 Da                                        | 37.2       | 61.6              | 2      | 1378.82                      | n.d.                                         | n.d.                  | SNTB1_MOUSE  |              | Beta-1-syntrophin;                                                    | 59 kDa dystrophin-associated protein A1 basic component 1;Syntrophin-2;                                                                          |
| MADGEEPM       | AVDGGCGDTGDWEGR             | N-ter + 42.01 Da, C +57.02 Da                           | 37.5       | 80.1              | 2      | 1592.74                      | n.d.                                         | n.d.                  | UBA3_MOUSE   | Q3TL72_MOUSE | NEDD8-activating enzyme E1 catalytic subunit;                         | NEDD8-activating enzyme E1C;Ubiquitin-activating enzyme 3;                                                                                       |
| M              | AVEELQSIKR                  | N-ter + 42.01 Da, K +34.06 Da                           | 52.6       | 12.4              | 2      | 1360.83                      | 4.83                                         | 0.48                  | GLMN_MOUSE   | Q3T9A5_MOUSE | Glomulin;                                                             | FK506-binding protein-associated protein;FKBP-associated protein;                                                                                |
| M              | AVFPWHSR                    | N-ter + 42.01 Da                                        | 33.1       | 52.3              | 2      | 1040.57                      | n.d.                                         | n.d.                  | CP062_MOUSE  | D3YW19_MOUSE | UPF0505 protein C16orf62 homolog;                                     |                                                                                                                                                  |
| M              | AVNVYSTVSDNLSR              | N-ter + 42.01 Da                                        | 35.0       | 76.7              | 2      | 1753.98                      | n.d.                                         | n.d.                  | MARE1_MOUSE  |              | Microtubule-associated protein RP/EB family member 1;                 | APC-binding protein EB1;End-binding protein 1;                                                                                                   |
| M              | AVPPTYADLGKRSAR             | N-ter + 42.01 Da, K +34.06 Da                           | 40.5       | 24.4              | 2      | 1520.88                      | -2.40                                        | 0.00                  | VDAC1_MOUSE  | F2Z471_MOUSE | Voltage-dependent anion-selective channel protein 1;                  | Outer mitochondrial membrane protein porin 1;Plasmalemmal porin;Voltage-dependent anion-selective channel protein 5;                             |
| M              | AVSTGVKVR                   | N-ter + 42.01 Da, K +28.03 Da                           | 47.2       | 36.3              | 2      | 1082.68                      | -0.07                                        | 0.02                  | UB2V2_MOUSE  |              | Ubiquitin-conjugating enzyme E2 variant 2;                            | Ubc-like protein MMS2;                                                                                                                           |
| MA             | AYKLVLR                     | N-ter + 42.01 Da, K +34.06 Da                           | 24.8       | 4.3               | 2      | 1050.71                      | -0.20                                        | 0.01                  | PGAM1_MOUSE  |              | Phosphoglycerate mutase 1;                                            | BPG-dependent PGAM 1;Phosphoglycerate mutase isozyme B;                                                                                          |
| EKPFPCFPFG     | CGKIFAR                     | N-ter + 42.01 Da, K +34.06 Da, C +57.02 Da              | 23.8       | 98.1              | 2      | 926.61                       | -1.00                                        | 0.04                  | ZIC3_MOUSE   | A2AWK3_MOUSE | Zinc finger protein ZIC 3;                                            | Zinc finger protein of the cerebellum 3;                                                                                                         |
| KQVQYAEKLR     | CGSHSPLR                    | N-ter + 42.01 Da, C +57.02 Da                           | 22.8       | 104.5             | 2      | 954.53                       | n.d.                                         | n.d.                  | MCTP2_MOUSE  |              | Multiple C2 and transmembrane domain-containing protein 2;            |                                                                                                                                                  |
| LGVLEYWMRL     | CLPLKSLQACNKR               | N-ter + 42.01 Da, K +34.06 Da, K +28.03 Da, C +57.02 Da | 30.3       | 57.5              | 3      | 1788.10                      | n.d.                                         | n.d.                  | RPGR1_MOUSE  | E9QQ97_MOUSE | X-linked retinitis pigmentosa GTPase regulator-interacting protein 1; |                                                                                                                                                  |
| M              | DAATLYDTLR                  | N-ter + 42.01 Da                                        | 37.4       | 57.7              | 2      | 1411.75                      | n.d.                                         | n.d.                  | ATG4B_MOUSE  |              | Cysteine protease ATG4B;                                              | AUT-like 1 cysteine endopeptidase;Autophagin-1;Autophagy-related cysteine endopeptidase                                                          |
| NTKEVDKIVF     | DAGFFR                      | N-ter + 42.01 Da                                        | 26.7       | 90.6              | 2      | 884.47                       | n.d.                                         | n.d.                  | SRRM1_MOUSE  | A2A8V8_MOUSE | Serine/arginine repetitive matrix protein 1;                          | 1;Autophagy-related protein 4 homolog B;                                                                                                         |
| M              | DAQSSAKVNSR                 | N-ter + 42.01 Da, K +28.03 Da                           | 68.3       | 44.5              | 2      | 1362.72                      | -0.34                                        | 0.06                  | PCY1A_MOUSE  | D3Z3T5_MOUSE | Choline-phosphate cytidylyltransferase A;                             | Plenty-of-prolines 101;                                                                                                                          |
| M              | DDIAALVDNGSGMCKAGFAGDDAPR   | N-ter + 42.01 Da, K +28.03 Da, C +57.02 Da              | 66.8       | 48.7              | 3      | 2806.39                      | 0.77                                         | 0.14                  | ACTB_MOUSE   | E9Q1F2_MOUSE | Actin, cytoplasmic 1;                                                 | Beta-actin;                                                                                                                                      |
| M              | DDIFTQCR                    | N-ter + 42.01 Da, C +57.02 Da                           | 30.6       | 89.8              | 2      | 1226.62                      | n.d.                                         | n.d.                  | ILK_MOUSE    | D3YZA5_MOUSE | Integrin-linked protein kinase;                                       |                                                                                                                                                  |
| M              | DDREDLVYQAKLAEQAER          | N-ter + 42.01 Da, K +34.06 Da                           | 51.9       | 73.5              | 3      | 2355.33                      | 0.44                                         | 0.06                  | D6REF3_MOUSE |              | 14-3-3 protein epsilon;                                               |                                                                                                                                                  |
| MC             | DEDETTALVCDNGSLVKAGFAGDDAPR | N-ter + 42.01 Da, K +34.06 Da, C +57.02 Da              | 67.5       | 67.5              | 3      | 2955.56                      | 0.15                                         | 0.01                  | ACTS_MOUSE   |              | Actin, alpha skeletal muscle;                                         |                                                                                                                                                  |
| PLREEAAGAE     | DEKYYTDR                    | N-ter + 42.01 Da, K +34.06 Da                           | 20.5       | 59.7              | 2      | 1100.62                      | -3.18                                        | 0.29                  | CAMP2_MOUSE  | E9Q4Q5_MOUSE | Calmodulin-regulated spectrin-associated protein 2;                   | Alpha-actin-1;                                                                                                                                   |
| M              | DETSPLVSPER                 | N-ter + 42.01 Da                                        | 29.7       | 84.1              | 2      | 1401.76                      | n.d.                                         | n.d.                  | P4K2A_MOUSE  |              | Phosphatidylinositol 4-kinase type 2-alpha;                           | Calmodulin-regulated spectrin-associated protein 1-like protein 1;                                                                               |
| M              | DFSKLPKIR                   | N-ter + 42.01 Da, K +28.03 Da                           | 25.0       | 72.5              | 3      | 1331.86                      | -1.29                                        | 0.19                  | VATA_MOUSE   | D3YWH3_MOUSE | V-type proton ATPase catalytic subunit A;                             | Phosphatidylinositol 4-kinase type II-alpha;                                                                                                     |
| M              | DFSKLPK                     | N-ter + 42.01 Da, K +34.06 Da                           | 39.9       | 23.2              | 2      | 1074.67                      | -0.94                                        | 0.11                  | VATA_MOUSE   | D3YWH3_MOUSE | V-type proton ATPase catalytic subunit A;                             | V-ATPase 69 kDa subunit;Vacuolar proton pump subunit alpha;                                                                                      |
| M              | DGAAGPGEPAHETLQTLRSR        | N-ter + 42.01 Da                                        | 42.3       | 17.0              | 3      | 2264.09                      | n.d.                                         | n.d.                  | EMAL3_MOUSE  |              | Echinoderm microtubule-associated protein-like 3;                     | V-ATPase 69 kDa subunit;Vacuolar proton pump subunit alpha;                                                                                      |
| M              | DGEDDSNLVIKRR               | N-ter + 42.01 Da, K +28.03 Da                           | 28.7       | 78.6              | 3      | 1717.01                      | -0.67                                        | 0.10                  | F192A_MOUSE  |              | Protein FAM192A;                                                      |                                                                                                                                                  |
| M              | DGIVPDIAGVTKR               | N-ter + 42.01 Da, K +34.06 Da                           | 46.1       | 22.6              | 2      | 1546.89                      | 1.33                                         | 0.10                  | PTBP1_MOUSE  | Q922I7_MOUSE | Polypyrimidine tract-binding protein 1;                               | NEFA-interacting nuclear protein NIP30;                                                                                                          |
| M              | DGLVAQCSAR                  | N-ter + 42.01 Da, C +57.02 Da                           | 41.0       | 84.6              | 2      | 1248.66                      | n.d.                                         | n.d.                  | SYRC_MOUSE   |              | Arginine-tRNA ligase, cytoplasmic;                                    | Heterogeneous nuclear ribonucleoprotein 1;                                                                                                       |
| M              | DGSEDDPTFSAR                | N-ter + 42.01 Da                                        | 30.0       | 70.3              | 2      | 1581.77                      | n.d.                                         | n.d.                  | ATHL1_MOUSE  | E9QA85_MOUSE | Acid trehalase-like protein 1;                                        | Arginyl-tRNA synthetase;                                                                                                                         |
| M              | DIAIHPWIR                   | N-ter + 42.01 Da                                        | 28.9       | 74.3              | 3      | 1429.84                      | n.d.                                         | n.d.                  | CRYAB_MOUSE  |              | Alpha-crystallin B chain;                                             | Alpha(B)-crystallin;P23;                                                                                                                         |
| M              | DILKSEILR                   | N-ter + 42.01 Da, K +28.03 Da                           | 32.2       | 26.6              | 2      | 1286.76                      | 0.36                                         | 0.04                  | PRP18_MOUSE  |              | Pre-mRNA-splicing factor 18;                                          | Alpha-crystallin B chain;                                                                                                                        |
| M              | DKNELVQAKLAEQAER            | N-ter + 42.01 Da, K +34.06 Da                           | 40.6       | 46.0              | 3      | 2244.40                      | -0.15                                        | 0.01                  | 1433Z_MOUSE  | D3YXF4_MOUSE | 14-3-3 protein zeta/delta;                                            | Protein kinase C inhibitor protein 1;SEZ-2;                                                                                                      |
| M              | DKVCAVFGGSR                 | N-ter + 42.01 Da, K +34.06 Da, C +57.02 Da              | 33.3       | 37.3              | 2      | 1401.75                      | 0.03                                         | 0.00                  | CBR4_MOUSE   | D3Z6C4_MOUSE | Carbonyl reductase family member 4;                                   | 3-oxoacyl-[acyl-carrier-protein] reductase;Quinone reductase CBR4;                                                                               |
| M              | DLEAVCKR                    | N-ter + 42.01 Da, K +28.03 Da, C +57.02 Da              | 50.5       | 66.4              | 2      | 1190.66                      | -0.25                                        | 0.02                  | AGM1_MOUSE   | Q8BWW3_MOUSE | Phosphoacetylglucosamine mutase;                                      | Acetylglucosamine phosphomutase;N-acetylglucosamine-phosphate mutase;Phosphoglucomutase-3;                                                       |
| M              | DLGTAESTR                   | N-ter + 42.01 Da                                        | 40.7       | 75.4              | 2      | 1121.59                      | n.d.                                         | n.d.                  | CASZ1_MOUSE  | B1AS47_MOUSE | Zinc finger protein castor homolog 1;                                 | Castor-related protein;                                                                                                                          |
| M              | DLLFGR                      | N-ter + 42.01 Da                                        | 23.9       | 86.4              | 2      | 892.52                       | n.d.                                         | n.d.                  | CHM2A_MOUSE  |              | Charged multivesicular body protein 2a;                               | Chromatin-modifying protein 2a;Vacuolar protein sorting-associated protein 2;                                                                    |
| YATAVTPGVH     | DMDDDEMPNYAR                | N-ter + 42.01 Da                                        | 9.3        | 59.4              | 4      | 1627.67                      | n.d.                                         | n.d.                  | PAR3L_MOUSE  | Q5SV55_MOUSE | Partitioning defective 3 homolog B;                                   | Amyotrophic lateral sclerosis 2 chromosomal region candidate gene 19 protein homolog;PAR3-                                                       |
| M              | DMGNQHPSISR                 | N-ter + 42.01 Da                                        | 46.0       | 48.8              | 2      | 1413.68                      | n.d.                                         | n.d.                  | BAG5_MOUSE   | E0CX76_MOUSE | BAG family molecular chaperone regulator 5;                           | beta;Partitioning defective 3-like protein;                                                                                                      |





Table S16, Tholen et al.

| Non Prime Site                                                            | Prime Site                                                                                                                                                                                | Modifications                                                                                                                                                                                                                                                                                                                                 | Hyperscore                                                                                           | Mass error in ppm                                                                                     | Charge                                                        | Precursor neutral mass in Da                                                                                                             | Fold change (log <sub>2</sub> ) of ASAPRatio                                                                   | FC-error of ASAPRatio                                                                                | Uniprot ID 1                                                                                                                                                                                | Uniprot ID 2                                                 | Protein Name 1                                                                                                                                                                                                                                                                                                                                                                                                                                 | Protein Name 2                                                                                                                                                                                                                                                         |
|---------------------------------------------------------------------------|-------------------------------------------------------------------------------------------------------------------------------------------------------------------------------------------|-----------------------------------------------------------------------------------------------------------------------------------------------------------------------------------------------------------------------------------------------------------------------------------------------------------------------------------------------|------------------------------------------------------------------------------------------------------|-------------------------------------------------------------------------------------------------------|---------------------------------------------------------------|------------------------------------------------------------------------------------------------------------------------------------------|----------------------------------------------------------------------------------------------------------------|------------------------------------------------------------------------------------------------------|---------------------------------------------------------------------------------------------------------------------------------------------------------------------------------------------|--------------------------------------------------------------|------------------------------------------------------------------------------------------------------------------------------------------------------------------------------------------------------------------------------------------------------------------------------------------------------------------------------------------------------------------------------------------------------------------------------------------------|------------------------------------------------------------------------------------------------------------------------------------------------------------------------------------------------------------------------------------------------------------------------|
| SMEAKRKAE<br>FAPEQSPAKM                                                   | EKDSLRS<br>EKEEETR                                                                                                                                                                        | N-ter + 42.01 Da, K +34.06 Da<br>N-ter + 42.01 Da, K +28.03 Da                                                                                                                                                                                                                                                                                | 32.5<br>32.3                                                                                         | 55.7<br>57.2                                                                                          | 2<br>2                                                        | 1040.60<br>1221.62                                                                                                                       | 0.18<br>0.04                                                                                                   | 0.01<br>0.01                                                                                         | CDK6_MOUSE<br>Q8R2L7_MOUSE                                                                                                                                                                  | E9Q616_MOUSE                                                 | Cyclin-dependent kinase 6;<br>6;Serine/threonine-protein kinase PLSTIRE;                                                                                                                                                                                                                                                                                                                                                                       | CR2 protein kinase;Cell division protein kinase 6;Serine/threonine-protein kinase PLSTIRE;                                                                                                                                                                             |
| M                                                                         | EKPAASTEPOQSRPALGR                                                                                                                                                                        | N-ter + 42.01 Da, K +34.06 Da                                                                                                                                                                                                                                                                                                                 | 29.0                                                                                                 | 83.4                                                                                                  | 3                                                             | 2058.25                                                                                                                                  | 0.31                                                                                                           | 0.06                                                                                                 | PCTL_MOUSE                                                                                                                                                                                  | Q66R2_MOUSE                                                  | PCTP-like protein;                                                                                                                                                                                                                                                                                                                                                                                                                             | START domain-containing protein 10;Serologically defined colon cancer antigen 28 homolog;STAR-related lipid transfer protein 10;<br>START domain-containing protein 10;Serologically defined colon cancer antigen 28 homolog;STAR-related lipid transfer protein 10;   |
| M<br>PARRSPSLAM<br>PARRSPSLAM<br>PARRSPSLAM<br>M<br>M<br>M<br>M<br>M<br>M | EKPAASTEPOQSR<br>EKTELIQKAKLAEQAER<br>EKTELIQKAK<br>EKTELIQK<br>EKLTETVPLER<br>EKVPGDMEIERR<br>EKVPGDMEIER<br>ELGELLYNKSEYIETASGNKVSR<br>ELSADYLR<br>ELSESVQR<br>ELSGEVYVGDGEPQQR         | N-ter + 42.01 Da, K +34.06 Da<br>N-ter + 42.01 Da, K +28.03 Da<br>N-ter + 42.01 Da, K +34.06 Da<br>N-ter + 42.01 Da, K +28.03 Da<br>N-ter + 42.01 Da, K +34.06 Da<br>N-ter + 42.01 Da<br>N-ter + 42.01 Da<br>N-ter + 42.01 Da, C +57.02 Da | 36.3<br>30.2<br>35.8<br>24.8<br>50.8<br>30.5<br>32.5<br>52.2<br>34.2<br>34.5<br>39.6                 | 52.0<br>53.5<br>78.5<br>28.8<br>23.6<br>78.8<br>28.0<br>66.5<br>88.7<br>79.5<br>110.8                 | 3<br>4<br>3<br>2<br>2<br>3<br>2<br>3<br>2<br>2<br>3           | 1563.86<br>2241.36<br>1462.05<br>1228.77<br>1520.87<br>1664.98<br>1502.75<br>2840.68<br>1138.63<br>1119.61<br>1867.98                    | -0.34<br>1.04<br>0.36<br>2.00<br>1.17<br>-1.00<br>-0.86<br>0.79<br>n.d.<br>n.d.<br>n.d.                        | 0.03<br>0.08<br>0.08<br>0.18<br>0.16<br>0.06<br>0.05<br>0.22<br>n.d.<br>n.d.<br>n.d.                 | PCTL_MOUSE<br>1433T_MOUSE<br>1433T_MOUSE<br>1433T_MOUSE<br>ROA2_MOUSE<br>CYGB_MOUSE<br>CYGB_MOUSE<br>DCTN5_MOUSE<br>BOLA2_MOUSE<br>COMD3_MOUSE<br>CN142_MOUSE                               | F6VW30_MOUSE                                                 | PCTP-like protein;<br>14-3-3 protein theta;<br>14-3-3 protein theta;<br>14-3-3 protein tau;<br>14-3-3 protein theta;<br>Heterogeneous nuclear ribonucleoproteins A2/B1;<br>Cytoglobin;<br>Cytoglobin;<br>Dynactin subunit 5;<br>Bola-like protein 2;<br>COMM domain-containing protein 3;<br>Uncharacterized protein C14orf142 homolog;<br>NADH dehydrogenase [ubiquinone] 1 alpha subcomplex subunit 12;                                      | Histoglobin;<br>Histoglobin;<br>Dynactin subunit p25;<br>Bmi-1 upstream gene protein;<br>Complex I-B17.2;NADH-ubiquinone oxidoreductase subunit B17.2;<br>Nicotinate phosphoribosyltransferase domain-containing protein 1;                                            |
| M<br>M<br>M<br>M                                                          | ELVEVLKR<br>EMELDSEGR<br>EMTSTSLKR<br>ENEYKR<br>ENQLTKSVEER                                                                                                                               | N-ter + 42.01 Da, K +34.06 Da<br>N-ter + 42.01 Da<br>N-ter + 42.01 Da, K +28.03 Da<br>N-ter + 42.01 Da, K +34.06 Da<br>N-ter + 42.01 Da, K +34.06 Da                                                                                                                                                                                          | 57.1<br>27.6<br>42.1<br>37.8<br>56.1                                                                 | 39.2<br>86.2<br>53.6<br>67.6<br>20.9                                                                  | 2<br>2<br>2<br>2<br>2                                         | 1191.76<br>1237.60<br>1252.68<br>1044.58<br>1538.81                                                                                      | -1.36<br>n.d.<br>0.39<br>-0.20<br>0.37                                                                         | 0.38<br>n.d.<br>0.05<br>0.03<br>0.03                                                                 | NDUAC_MOUSE<br>PNCB_MOUSE<br>B7ZNL8_MOUSE<br>IFISA_MOUSE<br>OCTC_MOUSE                                                                                                                      | Q3ULP8_MOUSE                                                 | Nicotinate phosphoribosyltransferase;<br>Nicotinate phosphoribosyltransferase domain-containing protein 1;<br>Interferon-activable protein 205-A;<br>Peroxisomal carnitine O-octanoyltransferase;                                                                                                                                                                                                                                              | Complex I-B17.2;NADH-ubiquinone oxidoreductase subunit B17.2;<br>Nicotinate phosphoribosyltransferase domain-containing protein 1;<br>Interferon-inducible protein p205-A;Protein D3';<br>Peroxisomal carnitine O-octanoyltransferase;                                 |
| M<br>M<br>M<br>M<br>M                                                     | EPAMEPETLEAR<br>EPDIIIR<br>EPGPAAPSSGAPRPAR<br>EPGPAAPSSGAPR<br>EPGPDGPAAPGPAAIR                                                                                                          | N-ter + 42.01 Da<br>N-ter + 42.01 Da<br>N-ter + 42.01 Da<br>N-ter + 42.01 Da<br>N-ter + 42.01 Da, K +28.03 Da, C +57.02 Da                                                                                                                                                                                                                    | 37.2<br>33.9<br>20.8<br>27.9<br>28.7                                                                 | 90.7<br>75.9<br>74.7<br>71.1<br>108.4                                                                 | 2<br>2<br>3<br>2<br>3                                         | 1544.83<br>914.52<br>1689.95<br>1365.73<br>1644.97                                                                                       | n.d.<br>n.d.<br>n.d.<br>n.d.<br>n.d.                                                                           | n.d.<br>n.d.<br>n.d.<br>n.d.<br>n.d.                                                                 | GGA1_MOUSE<br>AFTIN_MOUSE<br>E9QM38_MOUSE<br>E9QM38_MOUSE<br>SPEE_MOUSE                                                                                                                     |                                                              | ADP-ribosylation factor-binding protein GGA1;<br>Aftiphilin;<br>Spermidine synthase;                                                                                                                                                                                                                                                                                                                                                           | Gamma-adaptin-related protein 1;Golgi-localized, gamma ear-containing, ARF-binding protein 1;<br>Putrescine aminopropyltransferase;                                                                                                                                    |
| M<br>M<br>M<br>M                                                          | EPKAPCPAAVPSSEER<br>EPLYQQNTKQVIEIQSHMGR<br>EPSSGGGLGPR<br>EPSPDAAEAHTVR                                                                                                                  | N-ter + 42.01 Da<br>N-ter + 42.01 Da, K +34.06 Da<br>N-ter + 42.01 Da<br>N-ter + 42.01 Da                                                                                                                                                                                                                                                     | 41.9<br>26.0<br>32.9<br>59.4                                                                         | 74.2<br>110.0<br>81.1<br>34.7                                                                         | 3<br>4<br>2<br>2                                              | 1838.01<br>2620.58<br>1155.63<br>1609.76                                                                                                 | -0.32<br>-1.15<br>n.d.<br>n.d.                                                                                 | 0.05<br>0.15<br>n.d.<br>n.d.                                                                         | COAC_MOUSE<br>GOSR2_MOUSE<br>DIAP1_MOUSE<br>SMTL2_MOUSE                                                                                                                                     | A2A910_MOUSE<br>E9PV41_MOUSE                                 | Phosphopantothenoylcysteine decarboxylase;<br>Golgi SNAP receptor complex member 2;<br>Protein diaphanous homolog 1;<br>Smoothelin-like protein 2;<br>Sterol-4-alpha-carboxylate 3-dehydrogenase, decarboxylating;                                                                                                                                                                                                                             | CoaC;<br>27 kDa Golgi SNARE protein;Membrin;<br>Diaphanous-related formin-1;p140MDIA;                                                                                                                                                                                  |
| M<br>M<br>M<br>M<br>M                                                     | EQAVHGESKR<br>EQTETLTR<br>ESEMSDPQLQEEER<br>ESEQMLEGQTQVAENPHSEYGLTDSVER<br>ESFTNDR                                                                                                       | N-ter + 42.01 Da, K +34.06 Da<br>N-ter + 42.01 Da<br>N-ter + 42.01 Da<br>N-ter + 42.01 Da<br>N-ter + 42.01 Da                                                                                                                                                                                                                                 | 29.0<br>28.6<br>32.7<br>40.4<br>31.8                                                                 | 80.8<br>81.2<br>108.7<br>78.4<br>108.3                                                                | 3<br>2<br>3<br>4<br>2                                         | 1346.79<br>1149.63<br>1846.97<br>3335.72<br>1040.54                                                                                      | -0.79<br>n.d.<br>n.d.<br>n.d.<br>n.d.                                                                          | 0.12<br>n.d.<br>n.d.<br>n.d.<br>n.d.                                                                 | NSDHL_MOUSE<br>Q8QZV8_MOUSE<br>CASPE_MOUSE<br>DPY30_MOUSE<br>LCAP_MOUSE                                                                                                                     | Q1HDU4_MOUSE                                                 | Caspase-14;<br>Protein dpy-30 homolog;<br>Leucyl-cystinyl aminopeptidase;<br>Mitochondrial import inner membrane translocase subunit Tim8 A;                                                                                                                                                                                                                                                                                                   | Mini-ICE;<br>Dpy-30-like protein;<br>Oxytocinase;                                                                                                                                                                                                                      |
| M                                                                         | ESSTSSGSLGAVDPLQLQHFIEVETQKQR                                                                                                                                                             | N-ter + 42.01 Da, K +28.03 Da                                                                                                                                                                                                                                                                                                                 | 30.4                                                                                                 | 79.6                                                                                                  | 4                                                             | 3416.92                                                                                                                                  | 0.93                                                                                                           | 0.28                                                                                                 | TIM8A_MOUSE                                                                                                                                                                                 |                                                              | Deafness dystonia protein 1 homolog;<br>DPH2 homolog;Diphthamide biosynthesis protein 2 homolog-like 2;MmDph2;                                                                                                                                                                                                                                                                                                                                 | Deafness dystonia protein 1 homolog;<br>DPH2 homolog;Diphthamide biosynthesis protein 2 homolog-like 2;MmDph2;                                                                                                                                                         |
| M<br>M<br>M<br>M<br>M<br>M<br>M<br>M<br>M<br>M<br>M<br>M                  | ESTFSSPAEALQR<br>ETGPAPLVAAPR<br>ETILEQQR<br>ETLLKR<br>ETPKPR<br>ETPLDVLSR<br>EVHELFR<br>EVKPPGPRPQDPSGR<br>EVKVVESGGGLVQPGGSLR<br>EVLATDTSQQER<br>EVSQAASGTDGVR<br>FAHCHVYTVKV<br>FAKAFR | N-ter + 42.01 Da<br>N-ter + 42.01 Da<br>N-ter + 42.01 Da<br>N-ter + 42.01 Da, K +34.06 Da<br>N-ter + 42.01 Da, K +28.03 Da<br>N-ter + 42.01 Da<br>N-ter + 42.01 Da<br>N-ter + 42.01 Da, K +34.06 Da<br>N-ter + 42.01 Da, K +28.03 Da<br>N-ter + 42.01 Da<br>N-ter + 42.01 Da, K +28.03 Da<br>N-ter + 42.01 Da, K +34.06 Da                    | 40.3<br>44.9<br>37.6<br>38.3<br>37.5<br>40.7<br>46.2<br>26.9<br>27.8<br>30.5<br>41.2<br>28.3<br>26.0 | 115.5<br>76.2<br>85.3<br>53.2<br>59.2<br>85.2<br>59.7<br>91.4<br>81.3<br>67.1<br>78.0<br>93.0<br>64.3 | 3<br>2<br>2<br>2<br>2<br>2<br>2<br>3<br>2<br>2<br>2<br>3<br>2 | 1665.96<br>1376.82<br>1188.68<br>965.63<br>927.54<br>1201.70<br>1101.59<br>1823.12<br>1937.22<br>1619.85<br>1448.77<br>1427.95<br>945.59 | n.d.<br>n.d.<br>n.d.<br>-0.86<br>-0.03<br>n.d.<br>n.d.<br>0.84<br>1.66<br>n.d.<br>n.d.<br>n.d.<br>4.39<br>0.08 | n.d.<br>n.d.<br>n.d.<br>0.05<br>0.00<br>n.d.<br>n.d.<br>0.04<br>0.19<br>n.d.<br>n.d.<br>0.14<br>0.01 | DPH2_MOUSE<br>TB10B_MOUSE<br>SF3A3_MOUSE<br>KT3K_MOUSE<br>IRF3_MOUSE<br>Q3TQ19_MOUSE<br>ACSL1_MOUSE<br>ROA3_MOUSE<br>HVM26_MOUSE<br>PALM_MOUSE<br>CD003_MOUSE<br>ACOX1_MOUSE<br>EIF2D_MOUSE | D3Z130_MOUSE<br>D3Z041_MOUSE<br>A2AL12_MOUSE                 | Diphthamide biosynthesis protein 2;<br>TBC1 domain family member 10B;<br>Splicing factor 3A subunit 3;<br>Ketosamine-3-kinase;<br>Interferon regulatory factor 3;<br>Long-chain-fatty-acid-CoA ligase 1;<br>Heterogeneous nuclear ribonucleoprotein A3;<br>Ig heavy chain V region M167;<br>Paralemmin-1;<br>Uncharacterized protein C4orf3 homolog;<br>Peroxisomal acyl-coenzyme A oxidase 1;<br>Eukaryotic translation initiation factor 2D; | Protein w23-85;<br>SF3a60;Spliceosome-associated protein 61;<br>Fructosamine-3-kinase-related protein;                                                                                                                                                                 |
| M<br>M<br>M<br>M<br>M<br>M<br>M<br>M<br>M<br>M<br>M                       | FAKKGSAVPSDQGAR<br>FNVSVER<br>FQGADSQAGKSGSR<br>FSEQAAQR<br>FSWVSKDAR<br>FVQEEKIFAGKVLRL<br>GAGGALFVHR                                                                                    | N-ter + 42.01 Da, K +34.06 Da<br>N-ter + 42.01 Da<br>N-ter + 42.01 Da, K +28.03 Da<br>N-ter + 42.01 Da<br>N-ter + 42.01 Da, K +34.06 Da<br>N-ter + 42.01 Da, K +28.03 Da<br>N-ter + 42.01 Da                                                                                                                                                  | 33.2<br>35.8<br>55.3<br>29.9<br>36.1<br>42.9<br>53.2                                                 | 79.8<br>86.3<br>41.1<br>33.9<br>32.6<br>57.5<br>57.8                                                  | 3<br>2<br>2<br>2<br>2<br>3<br>2                               | 1816.14<br>1151.63<br>1595.80<br>1108.53<br>1301.71<br>1892.17<br>1025.60                                                                | -0.34<br>n.d.<br>1.73<br>n.d.<br>-1.18<br>-0.36<br>n.d.                                                        | 0.03<br>n.d.<br>0.27<br>n.d.<br>0.16<br>0.07<br>n.d.                                                 | SSBP3_MOUSE<br>HOOK3_MOUSE<br>HN1L_MOUSE<br>DPOD2_MOUSE<br>EHD1_MOUSE<br>UBAC1_MOUSE<br>NDUV2_MOUSE                                                                                         | B1AS34_MOUSE<br>E9Q272_MOUSE<br>A8Y5G7_MOUSE<br>F6Y7R7_MOUSE | Single-stranded DNA-binding protein 3;<br>Protein Hook homolog 3;<br>Hematological and neurological expressed 1-like protein;<br>DNA polymerase delta subunit 2;<br>EH domain-containing protein 1;                                                                                                                                                                                                                                            | Lck-associated signal transducer;Sequence-specific single-stranded-DNA-binding protein;<br>DNA polymerase delta subunit p50;<br>E3 ubiquitin-protein ligase subunit KPC2;Kip1 ubiquitin-promoting complex protein 2;<br>NADH-ubiquinone oxidoreductase 24 kDa subunit; |

Table S16, Tholen et al.

| Non Prime Site | Prime Site             | Modifications                              | Hyperscore | Mass error in ppm | Charge | Precursor neutral mass in Da | Fold change (log <sub>2</sub> ) of ASAPRatio | FC-error of ASAPRatio | Uniprot ID 1 | Uniprot ID 2 | Protein Name 1                                                | Protein Name 2                                                                                                                                                       |
|----------------|------------------------|--------------------------------------------|------------|-------------------|--------|------------------------------|----------------------------------------------|-----------------------|--------------|--------------|---------------------------------------------------------------|----------------------------------------------------------------------------------------------------------------------------------------------------------------------|
| M              | GAVTDDEVIR             | N-ter + 42.01 Da                           | 37.5       | 80.3              | 2      | 1115.64                      | n.d.                                         | n.d.                  | THOC7_MOUSE  |              | THO complex subunit 7 homolog;                                | Ngg1-interacting factor 3-like protein 1-binding protein 1;                                                                                                          |
| M              | GDPLNINIQEPR           | N-ter + 42.01 Da                           | 40.6       | 79.8              | 2      | 1519.92                      | n.d.                                         | n.d.                  | SFXN3_MOUSE  | Q3U4F0_MOUSE | Sideroflexin-3;                                               |                                                                                                                                                                      |
| R              | RVSTQDLTFE             | N-ter + 42.01 Da                           | 41.6       | 70.9              | 2      | 967.54                       | n.d.                                         | n.d.                  | POTE1_MOUSE  | Q3UXR7_MOUSE | Protection of telomeres protein 1;                            | POT1-like telomere end-binding protein;                                                                                                                              |
| M              | GEQPIFTR               | N-ter + 42.01 Da                           | 33.4       | 68.8              | 2      | 1089.62                      | n.d.                                         | n.d.                  | HOME2_MOUSE  |              | Homer protein homolog 2;                                      | Cupidin;VASP/Ena-related gene up-regulated during seizure and LTP 2;                                                                                                 |
| M              | GEVAGGAAPGPPR          | N-ter + 42.01 Da                           | 44.2       | 85.3              | 2      | 1176.69                      | n.d.                                         | n.d.                  | ARHG1_MOUSE  | E9PUF7_MOUSE | Rho guanine nucleotide exchange factor 1;                     | Lbc's second cousin;Lymphoid blast crisis-like 2;                                                                                                                    |
| M              | FRILEVGC GA            | N-ter + 42.01 Da                           | 28.0       | 24.8              | 3      | 1499.85                      | n.d.                                         | n.d.                  | Q8CA70_MOUSE |              |                                                               |                                                                                                                                                                      |
| M              | LAGAGAAWHH             | N-ter + 42.01 Da, K +28.03 Da              | 32.3       | 63.2              | 3      | 1326.83                      | 2.60                                         | 0.29                  | EFHA1_MOUSE  |              | EF-hand domain-containing family member A1;                   |                                                                                                                                                                      |
| M              | GTALVYHEDMTATR         | N-ter + 42.01 Da                           | 33.1       | 35.8              | 2      | 1605.80                      | n.d.                                         | n.d.                  | HDA10_MOUSE  | D3Z7T4_MOUSE | Histone deacetylase 10;                                       |                                                                                                                                                                      |
| M              | ILTRLRLQKR             | N-ter + 42.01 Da                           | 53.4       | 85.2              | 3      | 2034.14                      | n.d.                                         | n.d.                  | KCRM_MOUSE   |              | Creatine kinase M-type;                                       | Creatine kinase M chain;M-CK;                                                                                                                                        |
| M              | SLRAVSTSSM             | N-ter + 42.01 Da, K +34.06 Da              | 32.8       | 56.1              | 3      | 1730.21                      | -1.06                                        | 0.07                  | HMGCL_MOUSE  |              | Hydroxymethylglutaryl-CoA lyase, mitochondrial;               | 3-hydroxy-3-methylglutarate-CoA lyase;                                                                                                                               |
| M              | HSLATAAPVPALAQVDR      | N-ter + 42.01 Da                           | 28.1       | 47.5              | 3      | 1990.13                      | n.d.                                         | n.d.                  | RCD1_MOUSE   |              | Cell differentiation protein RCD1 homolog;                    | CCR4-NOT transcription complex subunit 9;EPO-induced protein FL10;                                                                                                   |
| M              | HVTSSVGVYKFKAPPTGASQKK | N-ter + 42.01 Da, K +34.06 Da, K +28.03 Da | 24.8       | 43.5              | 4      | 2573.59                      | n.d.                                         | n.d.                  | ACTT2_MOUSE  |              | Actin-related protein T2;                                     | Actin-related protein M2;                                                                                                                                            |
| D              | IQMTQSTSLASLGDR        | N-ter + 42.01 Da                           | 43.1       | 84.1              | 3      | 1938.06                      | n.d.                                         | n.d.                  | KVSAD_MOUSE  |              | Ig kappa chain V-V region HP 123E6;                           |                                                                                                                                                                      |
| M              | KAGLAGTR               | N-ter + 42.01 Da, K +34.06 Da              | 34.9       | 41.9              | 2      | 848.56                       | -0.34                                        | 0.01                  | ARPM1_MOUSE  |              | Actin-related protein M1 homolog;                             |                                                                                                                                                                      |
| M              | KDFDPIIQDR             | N-ter + 42.01 Da, K +34.06 Da, K +28.03 Da | 26.9       | 39.8              | 3      | 1434.85                      | -0.76                                        | 0.04                  | KCRM_MOUSE   |              | Creatine kinase M-type;                                       | Creatine kinase M chain;M-CK;                                                                                                                                        |
| M              | KGELELAELKTR           | N-ter + 42.01 Da, K +34.06 Da, K +28.03 Da | 30.4       | 7.6               | 3      | 1489.90                      | n.d.                                         | n.d.                  | EXO5_MOUSE   |              | Probable exonuclease V;                                       | Defects in morphology protein 1 homolog;                                                                                                                             |
| M              | KKVAVVR                | N-ter + 42.01 Da, K +34.06 Da, K +28.03 Da | 15.7       | 119.5             | 2      | 902.76                       | n.d.                                         | n.d.                  | TAU_MOUSE    | B1AQW2_MOUSE | Microtubule-associated protein tau;                           | Neurofibrillary tangle protein;Paired helical filament- $\tau$ ;                                                                                                     |
| M              | KLNF5GLR               | N-ter + 42.01 Da, K +28.03 Da              | 33.6       | 31.8              | 2      | 1134.66                      | -0.97                                        | 0.13                  | CBR2_MOUSE   |              | Carbonyl reductase [NADPH] 2;                                 | Adipocyte protein P27;Lung carbonyl reductase;NADPH-dependent carbonyl reductase 2;                                                                                  |
| M              | KNKEMDIDESLYSR         | N-ter + 42.01 Da, K +28.03 Da              | 42.9       | 61.0              | 3      | 1825.00                      | 1.14                                         | 0.11                  | UBA1Y_MOUSE  |              | Ubiquitin-like modifier-activating enzyme 1 Y;                | Ubiquitin-activating enzyme E1;Ubiquitin-activating enzyme E1 Y;                                                                                                     |
| M              | KPPASIFAR              | N-ter + 42.01 Da, K +28.03 Da              | 20.1       | 65.1              | 2      | 1055.68                      | 9.81                                         | 0.60                  | CNTN4_MOUSE  |              | Contactin-4;                                                  | Brain-derived immunoglobulin superfamily protein 2;                                                                                                                  |
| M              | KQPKNLEGYVGFANLPNQVYR  | N-ter + 42.01 Da, K +34.06 Da              | 49.4       | 59.5              | 3      | 2544.56                      | -0.36                                        | 0.03                  | E9Q1G8_MOUSE |              |                                                               | HIB homolog 1;PDX-1 C-terminal-interacting factor 1;                                                                                                                 |
| M              | LADELGLGWENSR          | N-ter + 42.01 Da                           | 26.3       | 85.2              | 3      | 1500.85                      | n.d.                                         | n.d.                  | SPOP_MOUSE   | E9Q6N9_MOUSE | Speckle-type POZ protein;                                     |                                                                                                                                                                      |
| M              | LGGLGKLAEEGLAHR        | N-ter + 42.01 Da, K +34.06 Da              | 61.1       | 53.3              | 3      | 1669.04                      | -0.15                                        | 0.04                  | FAM25_MOUSE  |              | Protein FAM25;                                                |                                                                                                                                                                      |
| M              | LGSGFKAER              | N-ter + 42.01 Da, K +34.06 Da              | 39.7       | 29.8              | 2      | 1170.66                      | 0.23                                         | 0.02                  | IST1_MOUSE   | Q88HC2_MOUSE | IST1 homolog;                                                 |                                                                                                                                                                      |
| M              | LKPQPPQQTSPQPPTQQA VAR | N-ter + 42.01 Da, K +28.03 Da              | 28.3       | 86.2              | 4      | 2850.73                      | 0.39                                         | 0.02                  | ATX2L_MOUSE  |              | Ataxin-2-like protein;                                        |                                                                                                                                                                      |
| M              | LNMWVKVR               | N-ter + 42.01 Da, K +34.06 Da              | 45.8       | 30.7              | 2      | 1152.67                      | 0.35                                         | 0.02                  | Q5SUH6_MOUSE | Q5SUH7_MOUSE |                                                               |                                                                                                                                                                      |
| M              | LSEAEPR                | N-ter + 42.01 Da                           | 33.1       | 96.8              | 2      | 1102.60                      | n.d.                                         | n.d.                  | TFIP8_MOUSE  | D3Z3Z5_MOUSE | Tumor necrosis factor alpha-induced protein 8;                |                                                                                                                                                                      |
| M              | LSFYPDVYR              | N-ter + 42.01 Da                           | 40.9       | 83.9              | 2      | 1459.80                      | n.d.                                         | n.d.                  | PPCE_MOUSE   | E9Q0H7_MOUSE | Prolyl endopeptidase;                                         | Post-proline cleaving enzyme;                                                                                                                                        |
| M              | LYLGHNYVTAIR           | N-ter + 42.01 Da                           | 35.3       | 89.3              | 3      | 1460.91                      | n.d.                                         | n.d.                  | TRFE_MOUSE   | E9Q035_MOUSE | Serotransferrin;                                              | Beta-1 metal-binding globulin;Siderophilin;                                                                                                                          |
| M              | MDAVLSDVYR             | N-ter + 42.01 Da                           | 37.7       | 83.5              | 2      | 1193.67                      | n.d.                                         | n.d.                  | OTU7A_MOUSE  | B2RUR8_MOUSE | OTU domain-containing protein 7A;                             | Zinc finger protein Gezanne 2;                                                                                                                                       |
| M              | MDFNVKKLAADAGTFLSR     | N-ter + 42.01 Da, K +34.06 Da              | 47.4       | 94.7              | 3      | 2093.36                      | 0.68                                         | 0.15                  | SHLB1_MOUSE  | Q3TYR7_MOUSE | Endophilin-B1;                                                | SH3 domain-containing GRB2-like protein B1;                                                                                                                          |
| M              | MDGEPKPVDAEEKR         | N-ter + 42.01 Da, K +34.06 Da              | 50.9       | 96.5              | 3      | 1700.04                      | -0.74                                        | 0.15                  | SYT1_MOUSE   |              | Threonine--tRNA ligase, cytoplasmic;                          | Threonyl-tRNA synthetase;                                                                                                                                            |
| M              | MDLVKSHLMYAVR          | N-ter + 42.01 Da, K +34.06 Da              | 39.9       | 98.1              | 3      | 1638.05                      | 0.50                                         | 0.07                  | T22D1_MOUSE  | D3Z0V7_MOUSE | TSC22 domain family protein 1;                                | Regulatory protein TSC-22;TGFB-stimulated clone 22 homolog;TSC22-related inducible leucine zipper 1b;Transforming growth factor beta-1-induced transcript 4 protein; |
| M              | MDSAEELLAPLR           | N-ter + 42.01 Da                           | 36.5       | 85.8              | 2      | 1385.80                      | n.d.                                         | n.d.                  | SYG_MOUSE    |              | Glycine--tRNA ligase;                                         | Diadenosine tetraphosphate synthetase;Glycyl-tRNA synthetase;                                                                                                        |
| M              | MDTGAGSIR              | N-ter + 42.01 Da                           | 32.8       | 95.2              | 2      | 948.52                       | n.d.                                         | n.d.                  | ATIF1_MOUSE  | Q9D879_MOUSE | ATPase inhibitor, mitochondrial;                              | Inhibitor of F(1)F(o)-ATPase;                                                                                                                                        |
| M              | MEAADVFHR              | N-ter + 42.01 Da                           | 43.2       | 40.9              | 2      | 1116.55                      | n.d.                                         | n.d.                  | CPPED_MOUSE  | D3Z7F7_MOUSE | Calcineurin-like phosphoesterase domain-containing protein 1; |                                                                                                                                                                      |
| M              | MEEGSVKMFLR            | N-ter + 42.01 Da, K +34.06 Da              | 41.5       | 38.3              | 2      | 1401.77                      | -0.25                                        | 0.02                  | EMAL2_MOUSE  | D6RGM3_MOUSE | Echinoderm microtubule-associated protein-like 2;             |                                                                                                                                                                      |
| M              | MEGTMEGPEAVQR          | N-ter + 42.01 Da                           | 36.5       | 77.9              | 2      | 1475.75                      | n.d.                                         | n.d.                  | ANKR2_MOUSE  |              | Ankyrin repeat domain-containing protein 2;                   | Skeletal muscle ankyrin repeat protein;                                                                                                                              |
| M              | MEGYSEASLLR            | N-ter + 42.01 Da                           | 49.9       | 82.1              | 2      | 1425.76                      | n.d.                                         | n.d.                  | SYNPO_MOUSE  | E9Q3E2_MOUSE | Synaptopodin;                                                 |                                                                                                                                                                      |
| M              | MEKPSLLVGR             | N-ter + 42.01 Da, K +28.03 Da              | 27.0       | 6.2               | 2      | 1295.74                      | -0.01                                        | 0.00                  | G3BP1_MOUSE  | G3BP2_MOUSE  | Ras GTPase-activating protein-binding protein 1;              | ATP-dependent DNA helicase VIII;GAP SH3 domain-binding protein 1;HDH-VIII;                                                                                           |
| M              | MEMLPDITGKGMALMFAKR    | N-ter + 42.01 Da, K +28.03 Da              | 28.4       | 89.0              | 3      | 2094.25                      | -0.03                                        | 0.00                  | SYNP2_MOUSE  |              | Synaptopodin-2;                                               | Myopodin;                                                                                                                                                            |
| M              | MENCLGDSR              | N-ter + 42.01 Da, C +57.02 Da              | 37.8       | 102.6             | 2      | 1122.56                      | n.d.                                         | n.d.                  | LIMA1_MOUSE  | Q8CD09_MOUSE | LIM domain and actin-binding protein 1;                       | Epithelial protein lost in neoplasm;                                                                                                                                 |
| M              | MENLFLQVR              | N-ter + 42.01 Da                           | 44.5       | 72.4              | 2      | 1190.70                      | n.d.                                         | n.d.                  | CARKD_MOUSE  |              | Carbohydrate kinase domain-containing protein;                |                                                                                                                                                                      |
| M              | MENVEVFTSEKGR          | N-ter + 42.01 Da, K +34.06 Da              | 63.1       | 20.8              | 2      | 1657.85                      | -2.00                                        | 0.56                  | SMYD1_MOUSE  |              | SET and MYND domain-containing protein 1;                     | CD8b-opposite;Zinc finger protein BOP;                                                                                                                               |
| M              | MEPETLEAR              | N-ter + 42.01 Da                           | 33.6       | 90.6              | 2      | 1116.61                      | n.d.                                         | n.d.                  | GGA1_MOUSE   |              | ADP-ribosylation factor-binding protein GGA1;                 | Gamma-adaptin-related protein 1;Golgi-localized, gamma ear-containing, ARF-binding protein 1;                                                                        |
| M              | MEYTEGISQR             | N-ter + 42.01 Da                           | 26.0       | 106.9             | 2      | 1254.69                      | n.d.                                         | n.d.                  | MFF_MOUSE    | E0CY13_MOUSE | Mitochondrial fission factor;                                 |                                                                                                                                                                      |
| M              | MKVFTVTPPQAEGR         | N-ter + 42.01 Da, K +28.03 Da              | 36.4       | 63.0              | 3      | 1570.95                      | -0.06                                        | 0.01                  | GRHPR_MOUSE  | D6REG4_MOUSE | Glyoxylate reductase/hydroxypruvate reductase;                |                                                                                                                                                                      |
| M              | MLGAEAGGEGVYKVR        | N-ter + 42.01 Da, K +28.03 Da              | 63.0       | 30.1              | 2      | 1617.90                      | 0.63                                         | 0.10                  | HNRH1_MOUSE  | Q8C2Q7_MOUSE | Heterogeneous nuclear ribonucleoprotein H;                    |                                                                                                                                                                      |
| M              | MLGPEGEGEVVVKLR        | N-ter + 42.01 Da, K +28.03 Da              | 40.3       | 54.0              | 3      | 1673.97                      | 0.99                                         | 0.10                  | HNRPF_MOUSE  |              | Heterogeneous nuclear ribonucleoprotein F;                    |                                                                                                                                                                      |
| M              | MLSTEGR                | N-ter + 42.01 Da                           | 25.3       | 82.7              | 2      | 965.51                       | n.d.                                         | n.d.                  | HNRH2_MOUSE  |              | Heterogeneous nuclear ribonucleoprotein H2;                   | Heterogeneous nuclear ribonucleoprotein H';                                                                                                                          |
| M              | MMAAAAAR               | N-ter + 42.01 Da                           | 24.9       | 107.6             | 2      | 1022.54                      | n.d.                                         | n.d.                  | CP013_MOUSE  | D3Y2M4_MOUSE | UPF0585 protein C16orf13 homolog;                             |                                                                                                                                                                      |
| M              | MNTEQSQNTVSR           | N-ter + 42.01 Da                           | 24.8       | 109.8             | 3      | 1548.89                      | n.d.                                         | n.d.                  | SH319_MOUSE  | F8WI17_MOUSE | SH3 domain-containing protein 19;                             | Kryn;                                                                                                                                                                |

Table S16, Tholen et al.

| Non Prime Site | Prime Site                | Modifications                                           | Hyperscore | Mass error in ppm | Charge | Precursor neutral mass in Da | Fold change (log <sub>2</sub> ) of ASAPRatio | FC-error of ASAPRatio | Uniprot ID 1 | Uniprot ID 2 | Protein Name 1                                                               | Protein Name 2                                                                                                                                                                                                                                                              |
|----------------|---------------------------|---------------------------------------------------------|------------|-------------------|--------|------------------------------|----------------------------------------------|-----------------------|--------------|--------------|------------------------------------------------------------------------------|-----------------------------------------------------------------------------------------------------------------------------------------------------------------------------------------------------------------------------------------------------------------------------|
| MA             | MQKIFAR                   | N-ter + 42.01 Da, K +28.03 Da                           | 34.6       | 24.3              | 2      | 962.56                       | -1.60                                        | 0.44                  | ENOB_MOUSE   | Q5SX59_MOUSE | Beta-enolase;                                                                | 2-phospho-D-glycerate hydro-lyase;Enolase                                                                                                                                                                                                                                   |
| PGLGGNFASQ     | MSYGYDEKSAGVSVPGPMGSPGR   | N-ter + 42.01 Da, K +28.03 Da                           | 22.3       | 71.8              | 3      | 2495.33                      | -0.20                                        | 0.02                  | CO1A1_MOUSE  | F8WGB7_MOUSE | Collagen alpha-1(I) chain;                                                   | 3;Muscle-specific enolase;Skeletal muscle enolase; Alpha-1 type I collagen;                                                                                                                                                                                                 |
| M              | MTEEHTDLEAR               | N-ter + 42.01 Da                                        | 36.1       | 36.1              | 2      | 1503.69                      | n.d.                                         | n.d.                  | CAV3_MOUSE   |              | Caveolin-3;                                                                  | M-caveolin;                                                                                                                                                                                                                                                                 |
| M              | NAGSDPVVIVSAAR            | N-ter + 42.01 Da                                        | 38.5       | 61.0              | 2      | 1527.87                      | n.d.                                         | n.d.                  | THIC_MOUSE   |              | Acetyl-CoA acetyltransferase, cytosolic;                                     | Cytosolic acetoacetyl-CoA thiolase;                                                                                                                                                                                                                                         |
| PEPSIRPQIM     | NGPLHPR                   | N-ter + 42.01 Da                                        | 29.7       | 72.9              | 2      | 962.55                       | n.d.                                         | n.d.                  | Q91YZ2_MOUSE |              |                                                                              |                                                                                                                                                                                                                                                                             |
| M              | NHDFQALALESR              | N-ter + 42.01 Da                                        | 21.2       | 74.3              | 3      | 1572.85                      | n.d.                                         | n.d.                  | PUM2_MOUSE   | Q3UR91_MOUSE | Pumilio homolog 2;                                                           |                                                                                                                                                                                                                                                                             |
| M              | NHTSQAFITASGGQPPNYER      | N-ter + 42.01 Da                                        | 41.7       | 28.2              | 3      | 2418.17                      | n.d.                                         | n.d.                  | IFM3_MOUSE   |              | Interferon-induced transmembrane protein 3;                                  | Fragilis protein;Interferon-inducible protein 15;Mouse iftm-like protein 1;                                                                                                                                                                                                 |
| M              | NILAPVRR                  | N-ter + 42.01 Da                                        | 36.0       | 47.2              | 2      | 1110.69                      | n.d.                                         | n.d.                  | RAB34_MOUSE  | 81AQD3_MOUSE | Ras-related protein Rab-34;                                                  | Ras-related homolog;Ras-related protein Rab-39;Ras-related protein Rah;                                                                                                                                                                                                     |
| M              | NKAPQPTGPPPAR             | N-ter + 42.01 Da, K +34.06 Da                           | 40.9       | 56.9              | 3      | 1536.92                      | 0.93                                         | 0.05                  | IF4G1_MOUSE  | D3YWC6_MOUSE | Eukaryotic translation initiation factor 4 gamma 1;                          |                                                                                                                                                                                                                                                                             |
| LSPTAHLALE     | NKGFIVTR                  | N-ter + 42.01 Da, K +28.03 Da                           | 25.2       | 38.7              | 2      | 1132.67                      | 0.82                                         | 0.07                  | Q88XH3_MOUSE | E9Q6H0_MOUSE |                                                                              |                                                                                                                                                                                                                                                                             |
| M              | NNQKQKPTLSGQR             | N-ter + 42.01 Da, K +34.06 Da                           | 32.0       | 74.5              | 3      | 1867.18                      | -0.18                                        | 0.03                  | BZW1_MOUSE   |              | Basic leucine zipper and W2 domain-containing protein 1;                     |                                                                                                                                                                                                                                                                             |
| EQQQMKETIM     | NQEKLAKLQAQVR             | N-ter + 42.01 Da, K +28.03 Da                           | 36.6       | 85.9              | 3      | 1754.14                      | 1.58                                         | 0.23                  | BT3L4_MOUSE  | BTf3_MOUSE   | Transcription factor BTf3 homolog 4;                                         | Basic transcription factor 3-like 4; Protein-tyrosine phosphatase 4a2;Protein-tyrosine phosphatase of regenerating liver 2; Protein 15E1.1;WF-1;p53-inducible cell-survival factor;                                                                                         |
| M              | NRPAPVEISYENMR            | N-ter + 42.01 Da                                        | 38.3       | 49.4              | 3      | 1847.96                      | n.d.                                         | n.d.                  | TP4A2_MOUSE  |              | Protein tyrosine phosphatase type IVA 2;                                     |                                                                                                                                                                                                                                                                             |
| M              | NSVGEACTDMKR              | N-ter + 42.01 Da, K +28.03 Da, C +57.02 Da              | 60.6       | 41.1              | 2      | 1567.74                      | 0.51                                         | 0.09                  | TRIA1_MOUSE  |              | TP53-regulated inhibitor of apoptosis 1;                                     |                                                                                                                                                                                                                                                                             |
| M              | NVEHEVNLVVEIHR            | N-ter + 42.01 Da                                        | 68.3       | 93.3              | 3      | 2002.18                      | n.d.                                         | n.d.                  | CF115_MOUSE  | E9QM2_MOUSE  | Costars family protein C6orf115 homolog;                                     |                                                                                                                                                                                                                                                                             |
| M              | NVNDLKQR                  | N-ter + 42.01 Da, K +28.03 Da                           | 57.9       | 57.9              | 2      | 1186.68                      | -0.86                                        | 0.08                  | UAP1_MOUSE   | Q3UH27_MOUSE | UDP-N-acetylhexosamine pyrophosphorylase;                                    |                                                                                                                                                                                                                                                                             |
| SFETTEESLR     | NYEQWVGK                  | N-ter + 42.01 Da, K +28.03 Da                           | 24.0       | 25.9              | 2      | 1156.55                      | 3.25                                         | 0.20                  | ROA2_MOUSE   | F6U106_MOUSE | Heterogeneous nuclear ribonucleoproteins A2/B1;                              |                                                                                                                                                                                                                                                                             |
| M              | QDAENVAVPEAAEER           | N-ter + 42.01 Da                                        | 33.0       | 68.1              | 2      | 1799.92                      | n.d.                                         | n.d.                  | E1F3B_MOUSE  | E9PX78_MOUSE | Eukaryotic translation initiation factor 3 subunit B;                        | Eukaryotic translation initiation factor 3 subunit 9;eIF-3-eta;eIF3 p116;                                                                                                                                                                                                   |
| HGYAAAGQIW     | QEGDKVHPGVSOQAGEMEQFGQGVK | N-ter + 42.01 Da, K +34.06 Da                           | 26.3       | 69.4              | 4      | 2887.60                      | -3.84                                        | 0.55                  | SBSN_MOUSE   |              | Suprabasin;                                                                  |                                                                                                                                                                                                                                                                             |
| NTEENRRFYR     | QLLLTADDR                 | N-ter + 42.01 Da                                        | 30.3       | 60.8              | 2      | 1085.64                      | n.d.                                         | n.d.                  | ALDOA_MOUSE  | Q9CPQ9_MOUSE | Fructose-bisphosphate aldolase A;                                            | Aldolase 1;Muscle-type aldolase;                                                                                                                                                                                                                                            |
| MAALGSSS       | QNDAGEFVLDVYVPR           | N-ter + 42.01 Da                                        | 33.4       | 117.5             | 3      | 1795.04                      | n.d.                                         | n.d.                  | RS21_MOUSE   |              | 40S ribosomal protein S21;                                                   |                                                                                                                                                                                                                                                                             |
|                | QNVTEYVVR                 | N-ter + 42.01 Da                                        | 24.6       | 95.4              | 2      | 1148.69                      | n.d.                                         | n.d.                  | T2FA_MOUSE   | E9Q7N7_MOUSE | General transcription factor IIF subunit 1;                                  | Transcription initiation factor IIF subunit alpha; Cytosolic prostaglandin E2 synthase;Hsp90 co-chaperone;Progesterone receptor complex p23;Sid 3177;Telomerase-binding protein p23; Interferon-gamma-inducible protein Mg11; HS1-binding protein 3; ITBA2 protein homolog; |
| M              | QPASAKWYDR                | N-ter + 42.01 Da, K +34.06 Da                           | 37.4       | 31.6              | 2      | 1427.75                      | 1.10                                         | 0.09                  | TEBP_MOUSE   | D3Z7C6_MOUSE | Prostaglandin E synthase 3;                                                  |                                                                                                                                                                                                                                                                             |
| SQPRVSEVAM     | QSPALEQPAKRRP             | N-ter + 42.01 Da, K +28.03 Da                           | 24.0       | 62.8              | 3      | 1678.00                      | -0.47                                        | 0.09                  | SAMH1_MOUSE  | E9Q0K6_MOUSE | SAM domain and HD domain-containing protein 1;                               |                                                                                                                                                                                                                                                                             |
| M              | QSPAVLR                   | N-ter + 42.01 Da                                        | 31.7       | 56.2              | 2      | 942.55                       | n.d.                                         | n.d.                  | H1BP3_MOUSE  |              | HCL1-binding protein 3;                                                      |                                                                                                                                                                                                                                                                             |
| M              | QTAHTGLSHTADGADGQTSR      | N-ter + 42.01 Da                                        | 42.2       | 85.4              | 3      | 2183.15                      | n.d.                                         | n.d.                  | LAGE3_MOUSE  |              | L antigen family member 3;                                                   |                                                                                                                                                                                                                                                                             |
| M              | SAAEVDGLGVVRPHTYGSVLDNER  | N-ter + 42.01 Da                                        | 36.5       | 41.3              | 3      | 2610.38                      | n.d.                                         | n.d.                  | IQGA1_MOUSE  | F6Z1B0_MOUSE | Ras GTPase-activating-like protein IQGAP1;                                   |                                                                                                                                                                                                                                                                             |
| M              | SAAETGSEPSQGAGSEATLHSR    | N-ter + 42.01 Da                                        | 63.9       | 57.5              | 3      | 2381.25                      | n.d.                                         | n.d.                  | E9Q3E1_MOUSE |              | Aldehyde dehydrogenase;                                                      |                                                                                                                                                                                                                                                                             |
| M              | SADAAAGEPLPR              | N-ter + 42.01 Da                                        | 34.0       | 82.8              | 2      | 1195.68                      | n.d.                                         | n.d.                  | NHRF1_MOUSE  |              | Na(+)/H(+) exchange regulatory cofactor NHE-RF1;                             | Ezrin-radixin-moesin-binding phosphoprotein 50;Regulatory cofactor of Na(+)/H(+) exchanger;Sodium-hydrogen exchanger regulatory factor 1;Solute carrier family 9 isoform A3 regulatory carrier 1;                                                                           |
| M              | SANFNLHLVTKSQPVAPR        | N-ter + 42.01 Da, K +28.03 Da                           | 48.1       | 50.9              | 3      | 2047.26                      | 0.39                                         | 0.11                  | MSRB3_MOUSE  | D3YUC9_MOUSE | Methionine-R-sulfoxide reductase B3, mitochondrial;                          |                                                                                                                                                                                                                                                                             |
| M              | SAGDFGNPLR                | N-ter + 42.01 Da                                        | 38.3       | 82.3              | 2      | 1131.62                      | n.d.                                         | n.d.                  | RAB6A_MOUSE  | RAB6B_MOUSE  | Ras-related protein Rab-6A;                                                  |                                                                                                                                                                                                                                                                             |
| M              | SAHLQWVVRR                | N-ter + 42.01 Da                                        | 45.3       | 29.5              | 2      | 1267.69                      | n.d.                                         | n.d.                  | RL28_MOUSE   |              | 60S ribosomal protein L28;                                                   |                                                                                                                                                                                                                                                                             |
| M              | SAKAISEQTKELLYKICTTSAIQNR | N-ter + 42.01 Da, K +34.06 Da, C +57.02 Da              | 31.5       | 86.2              | 4      | 3217.07                      | -0.79                                        | 0.14                  | ACLY_MOUSE   | Q3TS02_MOUSE | ATP-citrate synthase;                                                        | ATP-citrate (pro-S-)-lyase;Citrate cleavage enzyme;                                                                                                                                                                                                                         |
| M              | SAKSAISKEIFALPDR          | N-ter + 42.01 Da, K +28.03 Da                           | 38.6       | 69.9              | 3      | 1959.20                      | 1.01                                         | 0.09                  | STXB6_MOUSE  | Q3TYA4_MOUSE | Syntaxin-binding protein 6;                                                  |                                                                                                                                                                                                                                                                             |
| KM             | SALKAVFQYIDENQDR          | N-ter + 42.01 Da, K +34.06 Da                           | 49.3       | 48.3              | 3      | 1972.11                      | -0.45                                        | 0.13                  | CNDP2_MOUSE  | F6XEL6_MOUSE | Cytosolic non-specific dipeptidase;                                          | CNDP dipeptidase 2;Glutamate carboxypeptidase-like protein 1;                                                                                                                                                                                                               |
| M              | SALLEQEIQDEN              | N-ter + 42.01 Da, K +34.06 Da                           | 30.8       | 60.3              | 3      | 1533.91                      | 0.10                                         | 0.01                  | ANR40_MOUSE  |              | Ankyrin repeat domain-containing protein 40;                                 |                                                                                                                                                                                                                                                                             |
| M              | SAMEAADVFHR               | N-ter + 42.01 Da                                        | 54.2       | 32.9              | 2      | 1274.61                      | n.d.                                         | n.d.                  | CPPED_MOUSE  | D3Z7F7_MOUSE | Calcineurin-like phosphoesterase domain-containing protein 1;                |                                                                                                                                                                                                                                                                             |
| M              | SAPAGSPHPAAGAR            | N-ter + 42.01 Da                                        | 47.4       | 57.3              | 2      | 1287.71                      | n.d.                                         | n.d.                  | Q80ZXO_MOUSE |              |                                                                              |                                                                                                                                                                                                                                                                             |
| MCGNNM         | SAPMPAVVPAAR              | N-ter + 42.01 Da                                        | 39.5       | 75.1              | 2      | 1207.73                      | n.d.                                         | n.d.                  | LYP1A1_MOUSE | D3Z269_MOUSE | Acyl-protein thioesterase 1;                                                 | Lysophospholipase 1;Lysophospholipase I;                                                                                                                                                                                                                                    |
| M              | SASVVSVIR                 | N-ter + 42.01 Da                                        | 29.5       | 81.4              | 2      | 1045.66                      | n.d.                                         | n.d.                  | DAD1_MOUSE   |              | Dolichyl-diphosphooligosaccharide--protein glycosyltransferase subunit DAD1; | Defender against cell death 1;                                                                                                                                                                                                                                              |
| M              | SATQHKTSLPQGVK            | N-ter + 42.01 Da, K +34.06 Da                           | 61.9       | 60.0              | 3      | 1584.97                      | 1.14                                         | 0.04                  | Q9CRB1_MOUSE | D3Z141_MOUSE |                                                                              |                                                                                                                                                                                                                                                                             |
| M              | SGTKEGKEKR                | N-ter + 42.01 Da, K +34.06 Da, C +28.03 Da, C +57.02 Da | 9.2        | 24.3              | 3      | 1969.12                      | n.d.                                         | n.d.                  | A3KFM6_MOUSE | A3KFM7_MOUSE |                                                                              |                                                                                                                                                                                                                                                                             |
| M              | SDKLPYKVADIGLAAWGR        | N-ter + 42.01 Da, K +34.06 Da                           | 47.8       | 57.3              | 3      | 2069.31                      | -0.47                                        | 0.16                  | SAHH_MOUSE   | A2ALT5_MOUSE | Adenosylhomocysteinase;                                                      | CUBP;Liver copper-binding protein;S-adenosyl-L-homocysteine hydrolase;                                                                                                                                                                                                      |
| M              | SDNGELEDKPPAPPVVR         | N-ter + 42.01 Da, K +34.06 Da                           | 43.6       | 63.3              | 3      | 1796.03                      | 1.83                                         | 0.21                  | PAK2_MOUSE   |              | Serine/threonine-protein kinase PAK 2;                                       | Gamma-PAK;p21-activated kinase 2;                                                                                                                                                                                                                                           |
| M              | SDSEKLNLSIIGR             | N-ter + 42.01 Da, K +34.06 Da                           | 51.2       | 31.6              | 2      | 1621.93                      | -0.27                                        | 0.03                  | PP1A_MOUSE   |              | Serine/threonine-protein phosphatase PP1-alpha catalytic subunit;            |                                                                                                                                                                                                                                                                             |
| M              | SDSLDNEEKPPAPPLR          | N-ter + 42.01 Da, K +34.06 Da                           | 35.7       | 75.1              | 3      | 1840.08                      | -1.22                                        | 0.06                  | PAK3_MOUSE   | A3KGC2_MOUSE | Serine/threonine-protein kinase PAK 3;                                       | Beta-PAK;CDC42/RAC effector kinase PAK-B;p21-activated kinase 3;                                                                                                                                                                                                            |
| NKLHHHHHQ      | SDSLVCEVDPPELKETLR        | N-ter + 42.01 Da, K +28.03 Da, C +57.02 Da              | 41.8       | 79.2              | 3      | 2158.25                      | -0.07                                        | 0.01                  | GMFG_MOUSE   |              | Glia maturation factor gamma;                                                |                                                                                                                                                                                                                                                                             |
| LQTRGFVSDS     | SDSMDTGAGSIR              | N-ter + 42.01 Da                                        | 38.5       | 87.2              | 2      | 1237.63                      | n.d.                                         | n.d.                  | ATIF1_MOUSE  | Q9D879_MOUSE | ATPase inhibitor, mitochondrial;                                             | Inhibitor of F(1)F(o)-ATPase;                                                                                                                                                                                                                                               |

Table S16, Tholen et al.

| Non Prime Site | Prime Site                          | Modifications                              | Hyperscore | Mass error in ppm | Charge | Precursor neutral mass in Da | Fold change (log <sub>2</sub> ) of ASAPRatio | FC-error of ASAPRatio | Uniprot ID 1 | Uniprot ID 2 | Protein Name 1                                                     | Protein Name 2                                                                                                               |
|----------------|-------------------------------------|--------------------------------------------|------------|-------------------|--------|------------------------------|----------------------------------------------|-----------------------|--------------|--------------|--------------------------------------------------------------------|------------------------------------------------------------------------------------------------------------------------------|
| M              | SDSMESKTQQVVIPEDEECLMSGTR           | N-ter + 42.01 Da, K +34.06 Da, C +57.02 Da | 54.4       | 61.1              | 3      | 2931.52                      | -1.15                                        | 0.28                  | C209D_MOUSE  | CD209_MOUSE  | CD209 antigen-like protein D;                                      | DC-SIGN-related protein 3;                                                                                                   |
| M              | MKVLQTRGFV                          | SDSSDSMDTGAGSIR                            | 38.3       | 72.5              | 2      | 1526.73                      | n.d.                                         | n.d.                  | ATIF1_MOUSE  | Q9D879_MOUSE | ATPase inhibitor, mitochondrial;                                   | Inhibitor of F(1)F(o)-ATPase;                                                                                                |
| M              | SDTPASTFGGR                         | N-ter + 42.01 Da                           | 39.2       | 89.3              | 2      | 1136.61                      | n.d.                                         | n.d.                  | F13A_MOUSE   | Q3TQH1_MOUSE | Coagulation factor XIII A chain;                                   | Protein-glutamine gamma-glutamyltransferase A chain;Transglutaminase A chain;                                                |
| M              | SEAFDCAKCNESLYGR                    | N-ter + 42.01 Da                           | 40.7       | 40.7              | 3      | 1981.95                      | -0.64                                        | 0.07                  | FHL3_MOUSE   | A6H6N4_MOUSE | Four and a half LIM domains protein 3;                             | Skeletal muscle LIM-protein 2;                                                                                               |
| M              | SEDSALPWSINR                        | N-ter + 42.01 Da                           | 32.1       | 73.2              | 2      | 1502.81                      | n.d.                                         | n.d.                  | OXSRI_MOUSE  | D6RFV0_MOUSE | Serine/threonine-protein kinase OSR1;                              | Oxidative stress-responsive 1 protein;                                                                                       |
| M              | SEGDVSGSVHGKPSVYR                   | N-ter + 42.01 Da, K +28.03 Da              | 35.2       | 88.7              | 3      | 2044.17                      | -2.12                                        | 0.37                  | RER1_MOUSE   |              | Protein RER1;                                                      |                                                                                                                              |
| M              | GPSSYKVGTM                          | N-ter + 42.01 Da, K +28.03 Da, C +57.02 Da | 30.6       | 83.2              | 3      | 1470.72                      | -0.43                                        | 0.07                  | FHL1_MOUSE   | A2AEX8_MOUSE | Four and a half LIM domains protein 1;                             | Kyot;RBP-associated molecule 14-1;Skeletal muscle LIM-protein 1;                                                             |
| M              | SELDQLRQEAELKNQIR                   | N-ter + 42.01 Da, K +28.03 Da              | 34.1       | 70.8              | 3      | 2267.35                      | -1.43                                        | 0.31                  | GBB1_MOUSE   |              | Guanine nucleotide-binding protein G(I)/G(S)/G(T) subunit beta-1;  | Transducin beta chain 1;                                                                                                     |
| M              | SELEQLRQEAELQR                      | N-ter + 42.01 Da                           | 33.7       | 74.3              | 3      | 1770.02                      | n.d.                                         | n.d.                  | GBB2_MOUSE   | GBB4_MOUSE   | Guanine nucleotide-binding protein G(I)/G(S)/G(T) subunit beta-2;  | G protein subunit beta-2;Transducin beta chain 2;                                                                            |
| M              | SEPELKLVAR                          | N-ter + 42.01 Da, K +28.03 Da              | 35.2       | 21.4              | 2      | 1210.72                      | 0.93                                         | 0.11                  | APT_MOUSE    | Q6PK77_MOUSE | Adenine phosphoribosyltransferase;                                 |                                                                                                                              |
| M              | SEPGGGEDGSAGLEVSAVQNVADVAVLQKHLR    | N-ter + 42.01 Da, K +34.06 Da              | 48.0       | 84.9              | 4      | 3264.96                      | -1.00                                        | 0.20                  | DYHC1_MOUSE  |              | Cytoplasmic dynein 1 heavy chain 1;                                | Cytoplasmic dynein heavy chain 1;Dynein heavy chain, cytosolic;                                                              |
| M              | SESLVCDVAEDLVEKLR                   | N-ter + 42.01 Da, K +28.03 Da, C +57.02 Da | 64.7       | 80.9              | 3      | 2130.26                      | -0.27                                        | 0.07                  | GMFB_MOUSE   |              | Glia maturation factor beta;                                       |                                                                                                                              |
| M              | SETVICSSR                           | N-ter + 42.01 Da, C +57.02 Da              | 26.5       | 98.0              | 2      | 1079.60                      | n.d.                                         | n.d.                  | VASP_MOUSE   |              | Vasodilator-stimulated phosphoprotein;                             |                                                                                                                              |
| M              | SFLKSFPPPGSADGLR                    | N-ter + 42.01 Da, K +28.03 Da              | 42.2       | 49.7              | 3      | 1745.00                      | 0.25                                         | 0.00                  | ICLN_MOUSE   | Q923F1_MOUSE | Methylosome subunit pICln;                                         | Chloride channel, nucleotide sensitive 1A;Chloride conductance regulatory protein IClN;Chloride ion current inducer protein; |
| M              | SGAPPSYFVALPPR                      | N-ter + 42.01 Da                           | 51.9       | 68.8              | 2      | 1586.92                      | n.d.                                         | n.d.                  | SCRN1_MOUSE  | D3YXW0_MOUSE | Secernin-1;                                                        |                                                                                                                              |
| M              | SGEDEQQEQTIAEDLVVTKYKMGDIANR        | N-ter + 42.01 Da, K +34.06 Da              | 28.1       | 92.9              | 4      | 3333.98                      | 0.28                                         | 0.07                  | PAZG4_MOUSE  | D3YVH7_MOUSE | Proliferation-associated protein 2G4;                              | IRES-specific cellular trans-acting factor 45 kDa;Mpp1;Proliferation-associated protein 1;Protein p38-2G4;                   |
| M              | SGEDGPAAGGAAAAAAR                   | N-ter + 42.01 Da                           | 44.1       | 115.3             | 3      | 1679.98                      | n.d.                                         | n.d.                  | PP12C_MOUSE  |              | Protein phosphatase 1 regulatory subunit 12C;                      | Protein phosphatase 1 myosin-binding subunit of 85 kDa;                                                                      |
| M              | SGEGENPASKPTPVQDVGQDGR              | N-ter + 42.01 Da, K +34.06 Da              | 62.9       | 70.3              | 3      | 2300.27                      | -0.27                                        | 0.08                  | PA1B3_MOUSE  | Q8CA83_MOUSE | Platelet-activating factor acetylhydrolase IB subunit gamma;       | PAF acetylhydrolase 29 kDa subunit;PAF-AH subunit gamma;                                                                     |
| M              | SGGEVVCSGWLR                        | N-ter + 42.01 Da, C +57.02 Da              | 33.8       | 73.9              | 2      | 1347.72                      | n.d.                                         | n.d.                  | GAB1_MOUSE   |              | GRB2-associated-binding protein 1;                                 | GRB2-associated binder 1;Growth factor receptor bound protein 2-associated protein 1;                                        |
| M              | SGGKYVDSGHLTVPIR                    | N-ter + 42.01 Da, K +28.03 Da              | 51.2       | 63.3              | 3      | 2047.17                      | -0.09                                        | 0.01                  | CAV1_MOUSE   |              | Caveolin-1;                                                        |                                                                                                                              |
| M              | SGLLKALR                            | N-ter + 42.01 Da, K +28.03 Da              | 30.6       | 12.1              | 2      | 983.62                       | 0.20                                         | 0.00                  | NCBP2_MOUSE  | D3Z3D2_MOUSE | Nuclear cap-binding protein subunit 2;                             | 20 kDa nuclear cap-binding protein;NCBP 20 kDa subunit;                                                                      |
| M              | RKDLFANTVL                          | SGGSTMYPGIADR                              | 33.9       | 79.3              | 2      | 1352.71                      | n.d.                                         | n.d.                  | ACTBL_MOUSE  |              | Beta-actin-like protein 2;                                         | Kappa-actin;                                                                                                                 |
| M              | TGLTPLMEAA                          | SGGYAEVGR                                  | 31.1       | 81.3              | 2      | 936.51                       | n.d.                                         | n.d.                  | ANR17_MOUSE  | E9Q1M6_MOUSE | Ankyrin repeat domain-containing protein 17;                       | Ankyrin repeat domain-containing protein FOE;Gene trap ankyrin repeat protein                                                |
| M              | SGSKYKPAPLATLPSTLDPAEYDVPETR        | N-ter + 42.01 Da, K +34.06 Da              | 47.9       | 89.4              | 4      | 3199.98                      | -2.06                                        | 0.26                  | NDUB4_MOUSE  |              | NADH dehydrogenase [ubiquinone] 1 beta subcomplex subunit 4;       | Complex I-B15;NADH-ubiquinone oxidoreductase B15 subunit;                                                                    |
| M              | SGSSVAAMKVKVQQLR                    | N-ter + 42.01 Da, K +34.06 Da              | 31.4       | 60.4              | 3      | 1885.22                      | -0.43                                        | 0.05                  | GBG5_MOUSE   |              | Guanine nucleotide-binding protein G(I)/G(S)/G(O) subunit gamma-5; |                                                                                                                              |
| M              | SGYTPDEKLR                          | N-ter + 42.01 Da, K +34.06 Da              | 38.0       | 53.2              | 2      | 1240.72                      | -1.74                                        | 0.12                  | NDUB6_MOUSE  | A2AP32_MOUSE | NADH dehydrogenase [ubiquinone] 1 beta subcomplex subunit 6;       | Complex I-B17;NADH-ubiquinone oxidoreductase B17 subunit;                                                                    |
| M              | SHGFTKEEVAEFAAFNR                   | N-ter + 42.01 Da, K +28.03 Da              | 27.9       | 90.0              | 4      | 2137.22                      | -0.94                                        | 0.09                  | CALM4_MOUSE  |              | Calmodulin-4;                                                      | Calcium-binding protein Dd112;                                                                                               |
| M              | SHPSWLPKSTGEPLGHVPPAR               | N-ter + 42.01 Da, K +28.03 Da              | 35.6       | 87.1              | 4      | 2319.42                      | 0.57                                         | 0.01                  | LPP_MOUSE    |              | Lipoma-preferred partner homolog;                                  |                                                                                                                              |
| M              | SHQTGIQASEDVEKIEFAR                 | N-ter + 42.01 Da, K +34.06 Da              | 41.1       | 84.9              | 3      | 2091.26                      | 0.06                                         | 0.01                  | TWF1_MOUSE   |              | Twinfilin-1;                                                       | Protein A6;                                                                                                                  |
| M              | SHVAVENALGLDQQFAGLDLNSSDNQSGSTASKGR | N-ter + 42.01 Da, K +28.03 Da              | 52.2       | 86.2              | 4      | 3700.09                      | 1.22                                         | 0.32                  | DDX3X_MOUSE  |              | ATP-dependent RNA helicase DDX3X;                                  | D1Pas1-related sequence 2;DEAD box RNA helicase DEAD3;DEAD box protein 3, X-chromosomal;Embryonic RNA helicase;              |
| M              | SIEKIWAR                            | N-ter + 42.01 Da, K +34.06 Da              | 45.4       | 22.0              | 2      | 1077.66                      | -0.86                                        | 0.09                  | ENOG_MOUSE   | D3Z6E4_MOUSE | Gamma-enolase;                                                     | 2-phospho-D-glycerate hydro-lyase;Enolase 2;Neural enolase;Neuron-specific enolase;                                          |
| M              | SIFPTNQIR                           | N-ter + 42.01 Da                           | 35.2       | 65.9              | 2      | 1217.72                      | n.d.                                         | n.d.                  | SBDS_MOUSE   | D6REV5_MOUSE | Ribosome maturation protein SBDS;                                  | Protein 22A3;Shwachman-Bodian-Diamond syndrome protein homolog;                                                              |
| M              | SIGVPIKVLHEAEGHVTCETNTGEVYR         | N-ter + 42.01 Da, K +34.06 Da, C +57.02 Da | 42.4       | 81.4              | 4      | 3183.90                      | 0.87                                         | 0.12                  | SMD3_MOUSE   |              | Small nuclear ribonucleoprotein Sm D3;                             | snRNP core protein D3;                                                                                                       |
| M              | SILVSPHPDAFPLSR                     | N-ter + 42.01 Da                           | 45.4       | 55.1              | 3      | 1840.05                      | n.d.                                         | n.d.                  | SYVC_MOUSE   |              | Valine-tRNA ligase;                                                | Protein G7a;Valyl-tRNA synthetase;                                                                                           |
| M              | SISSESPAATSLPNGDCGRPR               | N-ter + 42.01 Da, C +57.02 Da              | 43.7       | 55.4              | 3      | 2200.14                      | n.d.                                         | n.d.                  | PUR2_MOUSE   |              | Adenylosuccinate synthetase isozyme 2;                             | Adenylosuccinate synthetase, acidic isozyme;Adenylosuccinate synthetase, liver isozyme;IMP-aspartate ligase 2;               |
| M              | SISLSGIGKGR                         | N-ter + 42.01 Da, K +34.06 Da              | 49.8       | 23.2              | 2      | 1236.75                      | 1.23                                         | 0.13                  | B1AXE7_MOUSE | A2BI37_MOUSE |                                                                    |                                                                                                                              |
| M              | SKQPTQFINPETPGYVFANLNQVHR           | N-ter + 42.01 Da, K +28.03 Da              | 47.9       | 72.3              | 4      | 3236.87                      | -0.47                                        | 0.06                  | SEPT2_MOUSE  | D3Z3C0_MOUSE | Septin-2;                                                          | Neural precursor cell expressed developmentally down-regulated protein 5;                                                    |
| M              | SKSEKIDAVDLGAIGGNIQQVVGVGPTQER      | N-ter + 42.01 Da, K +28.03 Da              | 60.1       | 92.5              | 4      | 3162.98                      | 1.62                                         | 0.30                  | TCHL1_MOUSE  | F8VQ46_MOUSE | Trichohyalin-like protein 1;                                       |                                                                                                                              |
| M              | SKSESPKEPEQLR                       | N-ter + 42.01 Da, K +34.06 Da              | 40.9       | 85.2              | 3      | 1624.05                      | 0.58                                         | 0.12                  | ROA1_MOUSE   | Q5EBP8_MOUSE | Heterogeneous nuclear ribonucleoprotein A1;                        | HDP-1;Helix-destabilizing protein;Single-strand-binding protein;Topoisomerase-inhibitor suppressed;hnRNP core protein A1;    |
| M              | SKSFQSSLGR                          | N-ter + 42.01 Da, K +34.06 Da              | 43.7       | 53.8              | 2      | 1299.77                      | 0.68                                         | 0.06                  | MATR3_MOUSE  | Q6ZQ61_MOUSE | Matrin-3;                                                          |                                                                                                                              |

Table S16, Tholen et al.

| Non Prime Site | Prime Site                 | Modifications                              | Hyperscore | Mass error in ppm | Charge | Precursor neutral mass in Da | Fold change (log <sub>2</sub> ) of ASAPRatio | FC-error of ASAPRatio | Uniprot ID 1 | Uniprot ID 2 | Protein Name 1                                                      | Protein Name 2                                                                                                                                   |
|----------------|----------------------------|--------------------------------------------|------------|-------------------|--------|------------------------------|----------------------------------------------|-----------------------|--------------|--------------|---------------------------------------------------------------------|--------------------------------------------------------------------------------------------------------------------------------------------------|
| LKIDGITVQ      | SLAIMELEYETRIPIPR          | N-ter + 42.01 Da                           | 27.5       | 79.6              | 3      | 1959.17                      | n.d.                                         | n.d.                  | MAA1_MOUSE   |              | Maleylacetacetate isomerase;                                        | GSTZ1-1;Glutathione S-transferase zeta 1;                                                                                                        |
| TRRLHCAPT      | SLDIQCEQLSDAR              | N-ter + 42.01 Da, C +57.02 Da              | 36.0       | 72.5              | 2      | 1575.83                      | n.d.                                         | n.d.                  | RINI_MOUSE   |              | Ribonuclease inhibitor;                                             | Ribonuclease/angiogenin inhibitor 1;                                                                                                             |
| M              | SLGGVSEASR                 | N-ter + 42.01 Da                           | 34.7       | 82.6              | 2      | 1003.58                      | n.d.                                         | n.d.                  | CYT1_MOUSE   | Q497J0_MOUSE | Stefin-1;                                                           |                                                                                                                                                  |
| M              | SLHQLLEPITCHAWNR           | N-ter + 42.01 Da, C +57.02 Da              | 53.3       | 76.7              | 3      | 2163.23                      | n.d.                                         | n.d.                  | ARCI1_MOUSE  | D3YV15_MOUSE | Actin-related protein 2/3 complex subunit 1A;                       | SOP2-like protein;Sid 329;                                                                                                                       |
| M              | SLICSISNEVPEHCVPSPNVHYER   | N-ter + 42.01 Da, C +57.02 Da              | 40.2       | 99.6              | 4      | 3050.73                      | n.d.                                         | n.d.                  | PRP19_MOUSE  |              | Pre-mRNA-processing factor 19;                                      | Nuclear matrix protein 200;PRP19/PSO4                                                                                                            |
| CEPVYGPLTM     | SLKQPQPAPATGR              | N-ter + 42.01 Da, K +28.03 Da              | 22.7       | 63.1              | 3      | 1613.99                      | 0.49                                         | 0.02                  | ATX2_MOUSE   | E9QQ60_MOUSE | Ataxin-2;                                                           | homolog;Senescence evasion factor;                                                                                                               |
| M              | SLVAVFPYQKR                | N-ter + 42.01 Da, K +34.06 Da              | 44.2       | 28.2              | 2      | 1382.85                      | -1.12                                        | 0.12                  | Q14B15_MOUSE |              |                                                                     | Spinocerebellar ataxia type 2 protein homolog;                                                                                                   |
| M              | SLVDLGLKLEEAR              | N-ter + 42.01 Da, K +34.06 Da              | 31.3       | 98.5              | 3      | 1622.20                      | 0.26                                         | 0.07                  | GABP1_MOUSE  | A2AQ71_MOUSE | GA-binding protein subunit beta-1;                                  | GABP subunit beta-2;                                                                                                                             |
| M              | SLVDLGR                    | N-ter + 42.01 Da, K +34.06 Da              | 31.3       | 15.1              | 2      | 962.61                       | -0.54                                        | 0.04                  | GABP2_MOUSE  | Q8C2T8_MOUSE | GA-binding protein subunit beta-2;                                  | GA-binding protein beta-2-1;                                                                                                                     |
| EVVALDAIH      | SMGLIHR                    | N-ter + 42.01 Da                           | 35.0       | 64.6              | 2      | 854.50                       | n.d.                                         | n.d.                  | ROCK2_MOUSE  | F8VPK5_MOUSE | Rho-associated protein kinase 2;                                    | Rho-associated, coiled-coil-containing protein kinase 2;Rho-associated, coiled-coil-containing protein kinase II;p164 ROCK-2;                    |
| ASVILQHLRM     | SMHTEAAEVLLER              | N-ter + 42.01 Da                           | 37.7       | 11.3              | 2      | 1526.76                      | n.d.                                         | n.d.                  | HIBCH_MOUSE  | E0CX19_MOUSE | 3-hydroxyisobutyryl-CoA hydrolase, mitochondrial;                   | 3-hydroxyisobutyryl-coenzyme A hydrolase;                                                                                                        |
| M              | SMNKGPTLDDGLPEQENVLQR      | N-ter + 42.01 Da, K +34.06 Da              | 47.6       | 55.6              | 3      | 2529.44                      | 0.42                                         | 0.06                  | PLIN1_MOUSE  |              | Perilipin-1;                                                        | Lipid droplet-associated protein;Perilipin A;                                                                                                    |
| PATGTSLLLS     | SMTVDIVCEKLR               | N-ter + 42.01 Da, C +57.02 Da              | 34.5       | 22.7              | 2      | 1519.81                      | 1.68                                         | 0.24                  | E9PXC4_MOUSE | E9Q9B7_MOUSE |                                                                     |                                                                                                                                                  |
| M              | SNEPAPPYGGPTAPLLEKSGAPLTGR | N-ter + 42.01 Da, K +34.06 Da              | 36.3       | 91.0              | 4      | 3001.83                      | -1.52                                        | 0.13                  | LITFL_MOUSE  |              | LITAF-like protein;                                                 |                                                                                                                                                  |
| M              | SNGYEDHMAEDCRDDIGR         | N-ter + 42.01 Da, C +57.02 Da              | 41.8       | 56.0              | 3      | 2180.97                      | n.d.                                         | n.d.                  | ELAV1_MOUSE  |              | ElAV-like protein 1;                                                | Elav-like generic protein;Hu-antigen R;MeIG;                                                                                                     |
| M              | SNGYEDHMAEDCR              | N-ter + 42.01 Da, C +57.02 Da              | 56.1       | 51.8              | 2      | 1624.67                      | n.d.                                         | n.d.                  | ELAV1_MOUSE  |              | ElAV-like protein 1;                                                | Elav-like generic protein;Hu-antigen R;MeIG;                                                                                                     |
| M              | SQAEFDKAAEEVKR             | N-ter + 42.01 Da, K +28.03 Da              | 58.4       | 65.1              | 2      | 1704.98                      | 1.42                                         | 0.05                  | ACBP_MOUSE   |              | Acyl-CoA-binding protein;                                           | Diazepam-binding inhibitor;Endozepine;                                                                                                           |
| M              | SQERPTFYR                  | N-ter + 42.01 Da                           | 24.7       | 57.5              | 2      | 1224.66                      | n.d.                                         | n.d.                  | MK14_MOUSE   | B2KF35_MOUSE | Mitogen-activated protein kinase 14;                                | CRK1;Mitogen-activated protein kinase p38 alpha;                                                                                                 |
| M              | SOGDSNPAIPIAHAEDIQDGR      | N-ter + 42.01 Da                           | 53.5       | 56.8              | 3      | 2305.15                      | n.d.                                         | n.d.                  | PA1B2_MOUSE  | F8W1W7_MOUSE | Platelet-activating factor acetylhydrolase IB subunit beta;         | beta;                                                                                                                                            |
| KTTWKEVSKA     | SOKTEGHR                   | N-ter + 42.01 Da, K +34.06 Da              | 27.2       | 57.2              | 2      | 1017.60                      | -0.94                                        | 0.04                  | F6VUL6_MOUSE |              |                                                                     |                                                                                                                                                  |
| PSRWPRSDPE     | SQPLGGGAGGSGAGATAPPPR      | N-ter + 42.01 Da                           | 26.6       | 4.8               | 3      | 2054.06                      | n.d.                                         | n.d.                  | NMDE4_MOUSE  | E9PYG0_MOUSE | Glutamate [NMDA] receptor subunit epsilon-4;                        | N-methyl D-aspartate receptor subtype 2D;                                                                                                        |
| CGGLPKDRP      | SRGKDAIAPKR                | N-ter + 42.01 Da, K +34.06 Da              | 27.0       | 27.9              | 3      | 1307.87                      | -0.14                                        | 0.00                  | FHD01_MOUSE  |              | FH2 domain-containing protein 1;                                    |                                                                                                                                                  |
| M              | SSDAEMAVFGAAAPYL           | N-ter + 42.01 Da                           | 43.8       | 73.9              | 2      | 1854.98                      | n.d.                                         | n.d.                  | MYH1_MOUSE   | MYH4_MOUSE   | Myosin-1;                                                           | Myosin heavy chain 1;Myosin heavy chain 2x;Myosin heavy chain, skeletal muscle, adult 1;                                                         |
| RSPGASRAAM     | SSDAQWLTAEER               | N-ter + 42.01 Da                           | 32.1       | 77.9              | 2      | 1433.75                      | n.d.                                         | n.d.                  | PHS2_MOUSE   |              | Pterin-4-alpha-carbinolamine dehydratase 2;                         | alpha dimerization cofactor;                                                                                                                     |
| M              | SSDTSAPAVTTTPPPSPMPHKER    | N-ter + 42.01 Da, K +34.06 Da              | 39.2       | 80.2              | 3      | 2393.40                      | -1.00                                        | 0.08                  | ADDG_MOUSE   |              | Gamma-adducin;                                                      | Adducin-like protein 70;                                                                                                                         |
| M              | SSEPPPPQLPPTQTSVGLLDTPR    | N-ter + 42.01 Da                           | 42.9       | 82.1              | 4      | 2689.59                      | n.d.                                         | n.d.                  | CHSP1_MOUSE  |              | Calcium-regulated heat stable protein 1;                            | Calcium-regulated heat-stable protein of 24 kDa;                                                                                                 |
| M              | SSGALLPKPQMR               | N-ter + 42.01 Da, K +34.06 Da              | 30.4       | 7.0               | 2      | 1359.79                      | -1.74                                        | 0.12                  | COX6C_MOUSE  | D3Z6E1_MOUSE | Cytochrome c oxidase subunit 6C;                                    | Cytochrome c oxidase polypeptide VIc;                                                                                                            |
| M              | SSGASVSALQR                | N-ter + 42.01 Da                           | 39.2       | 73.4              | 2      | 1103.64                      | n.d.                                         | n.d.                  | GBG10_MOUSE  |              | Guanine nucleotide-binding protein G(I)/G(S)/G(O) subunit gamma-10; |                                                                                                                                                  |
| M              | SSIIGTGYDLASTFSPDGR        | N-ter + 42.01 Da                           | 33.6       | 106.6             | 3      | 1959.09                      | n.d.                                         | n.d.                  | PSA3_MOUSE   | E0CZ34_MOUSE | Proteasome subunit alpha type-3;                                    | Macropain subunit C8;Multicatalytic endopeptidase complex subunit C8;Proteasome component C8;Proteasome subunit K;                               |
| M              | SSIIPFTPPVVKR              | N-ter + 42.01 Da, K +28.03 Da              | 30.8       | 35.6              | 2      | 1509.95                      | 0.33                                         | 0.02                  | SMAD2_MOUSE  | E9Q3M0_MOUSE | Mothers against decapentaplegic homolog 2;                          | Mad-related protein 2;SMAD family member 2;                                                                                                      |
| M              | SSKSMVLGVWDIR              | N-ter + 42.01 Da, K +28.03 Da              | 39.5       | 90.1              | 3      | 1610.96                      | -1.18                                        | 0.16                  | GSTM5_MOUSE  | E9PVM7_MOUSE | Glutathione S-transferase Mu 5;                                     | Fibrous sheath component 2;GST class-mu 5;                                                                                                       |
| M              | SSKTASTNSIAQAR             | N-ter + 42.01 Da, K +34.06 Da              | 40.1       | 71.1              | 3      | 1496.91                      | -1.22                                        | 0.28                  | GBG12_MOUSE  |              | Guanine nucleotide-binding protein G(I)/G(S)/G(O) subunit gamma-12; |                                                                                                                                                  |
| M              | SSLEISNCFSPETR             | N-ter + 42.01 Da, C +57.02 Da              | 33.8       | 65.5              | 2      | 1754.89                      | n.d.                                         | n.d.                  | MOC2B_MOUSE  |              | Molybdopterin synthase catalytic subunit;                           | Molybdenum cofactor synthesis protein 2 large subunit;Molybdenum cofactor synthesis protein 2B;                                                  |
| M              | SSMTQQLR                   | N-ter + 42.01 Da                           | 35.1       | 74.2              | 2      | 977.53                       | n.d.                                         | n.d.                  | ACO13_MOUSE  |              | Acyl-coenzyme A thioesterase 13;                                    | Thioesterase superfamily member 2;                                                                                                               |
| M              | SSNECFKGR                  | N-ter + 42.01 Da, K +34.06 Da, C +57.02 Da | 35.5       | 59.6              | 2      | 1319.66                      | -0.43                                        | 0.08                  | CNBP_MOUSE   | D3YF6_MOUSE  | Cellular nucleic acid-binding protein;                              | Zinc finger protein 9;                                                                                                                           |
| SMNRLWRNKR     | SSQPGFCIGVDLNR             | N-ter + 42.01 Da, C +57.02 Da              | 27.5       | 5.4               | 3      | 1703.84                      | n.d.                                         | n.d.                  | CBPA5_MOUSE  | E9PYY7_MOUSE | Carboxypeptidase A5;                                                |                                                                                                                                                  |
| M              | SSSAASPLFAPGEDCGPAWR       | N-ter + 42.01 Da, C +57.02 Da              | 36.1       | 96.1              | 3      | 2104.13                      | n.d.                                         | n.d.                  | GAMT_MOUSE   |              | Guanidinoacetate N-methyltransferase;                               |                                                                                                                                                  |
| M              | SSSLAGGHMVSLLTPEESR        | N-ter + 42.01 Da, C +57.02 Da              | 38.0       | 76.5              | 3      | 2159.16                      | n.d.                                         | n.d.                  | TENS4_MOUSE  |              | Tensin-4;                                                           |                                                                                                                                                  |
| M              | SSSRPVALVTGANKGIGFAITR     | N-ter + 42.01 Da, K +28.03 Da              | 51.0       | 82.3              | 3      | 2271.46                      | -0.40                                        | 0.08                  | CBR1_MOUSE   |              | Carbonyl reductase [NADPH] 1;                                       | 15-hydroxyprostaglandin dehydrogenase [NADP+];NADPH-dependent carbonyl reductase 1;Prostaglandin 9-ketoreductase;Prostaglandin-E(2) 9-reductase; |
| M              | SSSQFNKGPSVGLSAEYKNR       | N-ter + 42.01 Da, K +28.03 Da              | 52.4       | 85.1              | 3      | 2267.35                      | 1.59                                         | 0.33                  | CNN2_MOUSE   | D3Z7R6_MOUSE | Calponin-2;                                                         | Calponin H2, smooth muscle;Neutral calponin;                                                                                                     |
| M              | SSVAVLTIQESFAEHR           | N-ter + 42.01 Da                           | 40.4       | 63.1              | 3      | 1701.94                      | n.d.                                         | n.d.                  | VIGLN_MOUSE  |              | Vigilin;                                                            | High density lipoprotein-binding protein;                                                                                                        |
| M              | STPLQRIGISM                | SSVTVTKEVADESPPPLTR                        | 42.8       | 76.0              | 3      | 1941.15                      | 0.01                                         | 0.00                  | SSFA2_MOUSE  | Q3TEM8_MOUSE | Sperm-specific antigen 2 homolog;                                   | Ki-ras-induced actin-interacting protein;                                                                                                        |
| M              | STAGVAAQDIR                | N-ter + 42.01 Da                           | 41.4       | 85.8              | 2      | 1129.67                      | n.d.                                         | n.d.                  | ERRF1_MOUSE  |              | ERBB receptor feedback inhibitor 1;                                 | Mitogen-inducible gene 6 protein homolog;                                                                                                        |
| M              | STEASARPLR                 | N-ter + 42.01 Da                           | 29.9       | 50.0              | 2      | 1128.65                      | n.d.                                         | n.d.                  | DCTN1_MOUSE  | D3YYG9_MOUSE | Dynactin subunit 1;                                                 | 150 kDa dynein-associated polypeptide;DAP-150;p150-glu2;                                                                                         |
| IHRAAAVAAM     | STGTFVVSQQLNYR             | N-ter + 42.01 Da                           | 36.2       | 75.2              | 2      | 1609.93                      | n.d.                                         | n.d.                  | AL9A1_MOUSE  | Q3U367_MOUSE | 4-trimethylaminobutyraldehyde dehydrogenase;                        | Aldehyde dehydrogenase family 9 member A1;                                                                                                       |
| M              | STLIIHPQYAWLQDLGLR         | N-ter + 42.01 Da                           | 45.6       | 60.3              | 3      | 2302.36                      | n.d.                                         | n.d.                  | AL7A1_MOUSE  | E9Q1G1_MOUSE | Alpha-aminoacidipic semialdehyde dehydrogenase;                     | Aldehyde dehydrogenase family 7 member A1;Antiquitin-1;Betaine aldehyde dehydrogenase;Delta1-piperidine-6-carboxylate dehydrogenase;             |
| M              | STNTDLSLSDYEGQSGKFIK       | N-ter + 42.01 Da, K +34.06 Da              | 49.1       | 54.1              | 3      | 2380.29                      | -2.47                                        | 0.55                  | HIG1A_MOUSE  |              | HIG1 domain family member 1A;                                       | Hypoxia-inducible gene 1 protein;                                                                                                                |

Table S16, Tholen et al.

| Non Prime Site | Prime Site               | Modifications                              | Hyperscore | Mass error in ppm | Charge | Precursor neutral mass in Da | Fold change (log <sub>2</sub> ) of ASARatio | FC-error of ASARatio | Uniprot ID 1 | Uniprot ID 2 | Protein Name 1                                                                                                                     | Protein Name 2                                                                                                                             |
|----------------|--------------------------|--------------------------------------------|------------|-------------------|--------|------------------------------|---------------------------------------------|----------------------|--------------|--------------|------------------------------------------------------------------------------------------------------------------------------------|--------------------------------------------------------------------------------------------------------------------------------------------|
| M              | STPGKENFR                | N-ter + 42.01 Da, K +34.06 Da              | 33.2       | 57.7              | 2      | 1110.65                      | 0.61                                        | 0.04                 | IMA1_MOUSE   |              | Importin subunit alpha-1; Importin alpha-S1;Karyopherin subunit alpha-1;Nucleoprotein interactor 1;RAG cohort protein 2;SRP1-beta; | Importin subunit alpha-1; Epidermal growth factor receptor kinase substrate 8-like protein 1;                                              |
| M              | STTTGPEAAPKPSAKSIYEQR    | N-ter + 42.01 Da, K +28.03 Da              | 27.0       | 81.8              | 3      | 2316.39                      | -0.64                                       | 0.14                 | ES8L1_MOUSE  | E9Q4X5_MOUSE | Epidermal growth factor receptor pathway substrate 8-related protein 1; Protein SYT;Synovial sarcoma-associated Ss18-alpha;        |                                                                                                                                            |
| M              | SVAFAPR                  | N-ter + 42.01 Da                           | 27.5       | 76.6              | 2      | 859.52                       | n.d.                                        | n.d.                 | SSXT_MOUSE   | Q88K1_MOUSE  | Protein SSXT;                                                                                                                      |                                                                                                                                            |
| M              | SVAVAPVAVHPDMSLSEAEPR    | N-ter + 42.01 Da                           | 36.6       | 69.2              | 3      | 2332.30                      | n.d.                                        | n.d.                 | D32325_MOUSE | D3Z205_MOUSE |                                                                                                                                    |                                                                                                                                            |
| M              | SVNTDELRL                | N-ter + 42.01 Da                           | 34.2       | 96.3              | 2      | 974.56                       | n.d.                                        | n.d.                 | F100B_MOUSE  | D3YZA3_MOUSE | Protein FAM100B;                                                                                                                   |                                                                                                                                            |
| M              | SVPAFIDISEEQAAELR        | N-ter + 42.01 Da                           | 34.1       | 86.5              | 3      | 2031.16                      | n.d.                                        | n.d.                 | E1F3M_MOUSE  |              | Eukaryotic translation initiation factor 3 subunit M;                                                                              |                                                                                                                                            |
| MCGNTM         | SVPLTDAATVSGAER          | N-ter + 42.01 Da                           | 48.2       | 73.9              | 2      | 1627.96                      | n.d.                                        | n.d.                 | LYPEA_MOUSE  |              | Acyl-protein thioesterase 2;                                                                                                       | PCI domain-containing protein 1; Lysophospholipase 2;Lysophospholipase II; Cadherin-associated Src substrate;p120 catenin;p120(cas);       |
| YTEEDPEGAM     | SVSVVETDDGTTR            | N-ter + 42.01 Da                           | 31.2       | 73.8              | 2      | 1507.81                      | n.d.                                        | n.d.                 | CTND1_MOUSE  | E9Q8Z9_MOUSE | Catenin delta-1;                                                                                                                   | Kinase-enhanced PP1 inhibitor;PKC-potentiated PP1 inhibitory protein;                                                                      |
| M              | SVVTGGGEEAAGGGGGGAR      | N-ter + 42.01 Da                           | 57.6       | 71.0              | 2      | 1514.82                      | n.d.                                        | n.d.                 | PP14C_MOUSE  |              | Protein phosphatase 1 regulatory subunit 14C;                                                                                      |                                                                                                                                            |
| M              | SWFADLAGR                | N-ter + 42.01 Da                           | 28.3       | 78.9              | 2      | 1063.59                      | n.d.                                        | n.d.                 | GOGA5_MOUSE  |              | Golgin subfamily A member 5;                                                                                                       | Golgin-84; Protein Ret-II;Protein Sumiko;                                                                                                  |
| M              | SYGPLDMYR                | N-ter + 42.01 Da                           | 34.6       | 83.1              | 2      | 1142.60                      | n.d.                                        | n.d.                 | STX12_MOUSE  |              | Syntaxin-12;                                                                                                                       |                                                                                                                                            |
| LGSRRRFAAM     | SYGRPPDPVEGMSLTKVDNLTYS  | N-ter + 42.01 Da, K +28.03 Da              | 57.1       | 77.3              | 3      | 2664.53                      | -0.03                                       | 0.00                 | SRSF2_MOUSE  | E9Q975_MOUSE | Serine/arginine-rich splicing factor 2;                                                                                            | Protein PR264;Putative myelin regulatory factor 1;Splicing component, 35 kDa;Splicing factor SC35;Splicing factor, arginine/serine-rich 2; |
| M              | SYTPGGGDSQAQALQR         | N-ter + 42.01 Da                           | 31.3       | 113.4             | 3      | 1661.99                      | n.d.                                        | n.d.                 | STX7_MOUSE   | Q88H40_MOUSE | Syntaxin-7;                                                                                                                        |                                                                                                                                            |
| M              | SYTPGQPVTAVVQR           | N-ter + 42.01 Da                           | 41.3       | 71.2              | 2      | 1543.91                      | n.d.                                        | n.d.                 | TX1B3_MOUSE  | B1AUD9_MOUSE | Tax1-binding protein 3;                                                                                                            | Tax interaction protein 1;                                                                                                                 |
| M              | TAFFKTLR                 | N-ter + 42.01 Da, K +34.06 Da              | 35.5       | 27.1              | 2      | 1058.66                      | -0.45                                       | 0.01                 | AGK_MOUSE    |              | Acylglycerol kinase, mitochondrial;                                                                                                | Multiple substrate lipid kinase;                                                                                                           |
| M              | TAIHKIVSR                | N-ter + 42.01 Da, K +28.03 Da              | 53.7       | 44.6              | 2      | 1198.78                      | -0.14                                       | 0.03                 | PTEH_MOUSE   |              | Phosphatidylinositol-3,4,5-trisphosphate 3-phosphatase and dual-specificity protein phosphatase PTEN;                              | Mutated in multiple advanced cancers 1;Phosphatase and tensin homolog;                                                                     |
| M              | TATLRPYLSAVR             | N-ter + 42.01 Da                           | 37.0       | 26.1              | 2      | 1388.81                      | n.d.                                        | n.d.                 | ARPC4_MOUSE  |              | Actin-related protein 2/3 complex subunit 4;                                                                                       | Arp2/3 complex 20 kDa subunit;                                                                                                             |
| M              | TDMAGLMER                | N-ter + 42.01 Da                           | 31.1       | 101.2             | 2      | 1064.57                      | n.d.                                        | n.d.                 | CAP2_MOUSE   | D3YTR7_MOUSE | Adenylyl cyclase-associated protein 2;                                                                                             |                                                                                                                                            |
| LQSQRSLDM      | TDNTNSQLVVR              | N-ter + 42.01 Da                           | 32.0       | 67.9              | 2      | 1287.73                      | n.d.                                        | n.d.                 | ARHG7_MOUSE  | D3Z0V2_MOUSE | Rho guanine nucleotide exchange factor 7;                                                                                          | Beta-Pix;PAK-interacting exchange factor beta;p85SPR;                                                                                      |
| SVMRTDSSEM     | TDVESVITSFASSAR          | N-ter + 42.01 Da                           | 42.8       | 75.6              | 2      | 1610.90                      | n.d.                                        | n.d.                 | IPKB_MOUSE   | Q3TZU5_MOUSE | cAMP-dependent protein kinase inhibitor beta;                                                                                      | PKI-beta;cAMP-dependent protein kinase inhibitor, testis isoform;                                                                          |
| M              | TDVETTYADFIASGR          | N-ter + 42.01 Da                           | 37.6       | 72.5              | 2      | 1686.90                      | n.d.                                        | n.d.                 | IPKA_MOUSE   |              | cAMP-dependent protein kinase inhibitor alpha;                                                                                     | muscle/brain isoform;                                                                                                                      |
| MM             | TEETHDLEAR               | N-ter + 42.01 Da                           | 48.4       | 58.1              | 2      | 1241.63                      | n.d.                                        | n.d.                 | CAV3_MOUSE   |              | Caveolin-3;                                                                                                                        | M-caveolin;                                                                                                                                |
| M              | TEELITPVYCTGVSQAQVKR     | N-ter + 42.01 Da, K +28.03 Da, C +57.02 Da | 29.1       | 62.7              | 3      | 2504.49                      | -0.89                                       | 0.20                 | CAN1_MOUSE   |              | Calpain-1 catalytic subunit;                                                                                                       | Calcium-activated neutral proteinase 1;Calpain mu-type;Calpain-1 large subunit;Micromolar-calpain;                                         |
| M              | TEKEVVESSPPPPGGETPQSGLQR | N-ter + 42.01 Da, K +34.06 Da              | 45.2       | 84.3              | 4      | 2712.61                      | -0.17                                       | 0.02                 | STAC3_MOUSE  |              | SH3 and cysteine-rich domain-containing protein 3;                                                                                 |                                                                                                                                            |
| M              | TETDGFYKSR               | N-ter + 42.01 Da, K +34.06 Da              | 40.9       | 58.4              | 2      | 1278.71                      | -0.27                                       | 0.02                 | CASP6_MOUSE  |              | Caspase-6;                                                                                                                         | Apoptotic protease Mch-2;                                                                                                                  |
| M              | THSSQDAGSHGIEEGR         | N-ter + 42.01 Da                           | 53.2       | 106.0             | 3      | 1836.99                      | n.d.                                        | n.d.                 | CG053_MOUSE  |              | Coiled-coil domain-containing transmembrane protein C7orf53 homolog;                                                               |                                                                                                                                            |
| M              | VTEKQVYDAH               | N-ter + 42.01 Da, K +34.06 Da              | 30.2       | 0.8               | 2      | 1162.68                      | -1.36                                       | 0.10                 | CAV1_MOUSE   | D3Z148_MOUSE | Caveolin-1;                                                                                                                        |                                                                                                                                            |
| M              | TLKSSEGGGNMSMR           | N-ter + 42.01 Da, K +28.03 Da              | 43.1       | 74.1              | 3      | 1521.82                      | 0.29                                        | 0.02                 | EM55_MOUSE   | B7ZCM1_MOUSE | 55 kDa erythrocyte membrane protein;                                                                                               | Membrane protein, palmitoylated 1;                                                                                                         |
| M              | TMDKSELVQKAKLAEQAEER     | N-ter + 42.01 Da, K +28.03 Da              | 41.7       | 72.0              | 4      | 2300.41                      | 0.07                                        | 0.00                 | 1433B_MOUSE  | A2A5N1_MOUSE | 14-3-3 protein beta/alpha;                                                                                                         | Protein kinase C inhibitor protein 1; Chromosome region maintenance 1 protein homolog;                                                     |
| M              | TMLADHAAR                | N-ter + 42.01 Da                           | 40.5       | 75.0              | 2      | 1026.57                      | n.d.                                        | n.d.                 | XPO1_MOUSE   | A2AKT6_MOUSE | Exportin-1;                                                                                                                        |                                                                                                                                            |
| M              | TQEEAGRPLQVVLAR          | N-ter + 42.01 Da                           | 41.9       | 11.2              | 3      | 1608.88                      | n.d.                                        | n.d.                 | Q8BGM4_MOUSE | Q8BY07_MOUSE |                                                                                                                                    |                                                                                                                                            |
| M              | TQEYDNKRPLVLQNEALYR      | N-ter + 42.01 Da, K +28.03 Da              | 27.6       | 96.8              | 4      | 2743.70                      | 0.55                                        | 0.07                 | GRHL1_MOUSE  |              | Grainyhead-like protein 1 homolog;                                                                                                 | Transcription factor CP2-like 2;Transcription factor LBP-32;                                                                               |
| M              | TSALEYINR                | N-ter + 42.01 Da                           | 30.4       | 91.9              | 2      | 1221.71                      | n.d.                                        | n.d.                 | NAA38_MOUSE  |              | N-alpha-acetyltransferase 38, NatC auxiliary subunit;                                                                              | U6 snRNA-associated 5m-like protein L5m8;                                                                                                  |
| M              | TSPEGAQNKEIDCLPEAQR      | N-ter + 42.01 Da, K +28.03 Da, C +57.02 Da | 38.2       | 81.7              | 3      | 2299.26                      | 0.72                                        | 0.13                 | LRRF1_MOUSE  | E9Q9T1_MOUSE | Leucine-rich repeat flightless-interacting protein 1;                                                                              | FLI-LRR-associated protein 1;H186 FLAP;                                                                                                    |
| M              | TTYSHVHLR                | N-ter + 42.01 Da                           | 55.3       | 50.3              | 2      | 1189.63                      | n.d.                                        | n.d.                 | PRRX1_MOUSE  |              | Paired mesoderm homeobox protein 1;                                                                                                | Homeobox protein K-2;Homeobox protein mHox;Paired-related homeobox protein 1;                                                              |
| M              | TTKDPSEHPVTLFR           | N-ter + 42.01 Da, K +28.03 Da              | 32.8       | 69.2              | 3      | 1913.09                      | 0.08                                        | 0.01                 | ACY1_MOUSE   |              | Aminoacylase-1;                                                                                                                    | N-acyl-L-amino-acid amidohydrolase;                                                                                                        |
| M              | TTNTVPLHPYWR             | N-ter + 42.01 Da                           | 32.0       | 66.5              | 3      | 1622.93                      | n.d.                                        | n.d.                 | EBP_MOUSE    | A2AC29_MOUSE | 3-beta-hydroxysteroid-Delta(8),Delta(7)-isomerase;                                                                                 | Cholesterol Delta-isomerase;Delta(8)-Delta(7) sterol isomerase;Emopamil-binding protein;                                                   |
| M              | TTQQIVLQGGPWGFR          | N-ter + 42.01 Da                           | 42.3       | 114.5             | 3      | 1826.16                      | n.d.                                        | n.d.                 | PDLI1_MOUSE  |              | PDZ and LIM domain protein 1;                                                                                                      | C-terminal LIM domain protein 1;E1fn;LIM domain protein CLP-36;                                                                            |
| M              | TTSGALFPSLVPGR           | N-ter + 42.01 Da                           | 30.3       | 69.0              | 2      | 1530.91                      | n.d.                                        | n.d.                 | ADRM1_MOUSE  | D3YUD8_MOUSE | Proteasomal ubiquitin receptor ADRM1;                                                                                              | 110 kDa cell membrane glycoprotein;Adhesion-regulating molecule 1;Rpn13 homolog;                                                           |
| M              | TTSLQDGGQAAGR            | N-ter + 42.01 Da                           | 46.5       | 75.1              | 2      | 1332.73                      | n.d.                                        | n.d.                 | GRB14_MOUSE  |              | Growth factor receptor-bound protein 14;                                                                                           | GRB14 adapter protein;                                                                                                                     |
| M              | TTTTTFKGVDPNSR           | N-ter + 42.01 Da, K +28.03 Da              | 27.6       | 71.6              | 3      | 1593.91                      | 1.38                                        | 0.16                 | HN1_MOUSE    |              | Hematological and neurological expressed 1 protein;                                                                                |                                                                                                                                            |
| M              | TTVLEFIQQNEER            | N-ter + 42.01 Da                           | 37.6       | 84.7              | 2      | 1711.95                      | n.d.                                        | n.d.                 | SC23A_MOUSE  | E9Q153_MOUSE | Protein transport protein Sec23A;                                                                                                  | SEC23-related protein A;                                                                                                                   |
| VDIRKDLFAN     | TVLSGGSTMYPGIADR         | N-ter + 42.01 Da                           | 28.2       | 73.2              | 3      | 1665.92                      | n.d.                                        | n.d.                 | ACTBL_MOUSE  |              | Beta-actin-like protein 2;                                                                                                         | Kappa-actin;                                                                                                                               |
| M              | VEAAPGSGLR               | N-ter + 42.01 Da                           | 39.7       | 85.2              | 2      | 1165.71                      | n.d.                                        | n.d.                 | CAMP3_MOUSE  | E9Q580_MOUSE | Calmodulin-regulated spectrin-associated protein 3;                                                                                | Protein Nezh2a;                                                                                                                            |
| M              | VEKEEAGGGGGGSEEEAAQYDR   | N-ter + 42.01 Da, K +34.06 Da              | 82.2       | 77.8              | 3      | 2470.32                      | -0.43                                       | 0.13                 | SAE1_MOUSE   |              | SUMO-activating enzyme subunit 1;                                                                                                  | Ubiquitin-like 1-activating enzyme E1A;                                                                                                    |
| GDMMLDTPDPY    | VELFISITPDSRRK           | N-ter + 42.01 Da, K +28.03 Da              | 11.2       | 82.3              | 3      | 1718.08                      | 1.76                                        | 0.19                 | PA24A_MOUSE  | Q9DBX5_MOUSE | Cytosolic phospholipase A2;                                                                                                        | Phospholipase A2 group IVA;                                                                                                                |
| HQTKAEILNL     | VKMKLKTGKALNLGYALDYALR   | N-ter + 42.01 Da, K +34.06 Da, C +28.03 Da | 24.2       | 116.4             | 3      | 2800.14                      | n.d.                                        | n.d.                 | E9PWQ3_MOUSE | D3YWD1_MOUSE |                                                                                                                                    |                                                                                                                                            |
| PVDKML         | VKVGNGVFR                | N-ter + 42.01 Da, K +34.06 Da              | 50.8       | 42.5              | 2      | 1107.71                      | -0.92                                       | 0.12                 | G3P_MOUSE    | E9PX99_MOUSE | Glyceraldehyde-3-phosphate dehydrogenase;                                                                                          | Peptidyl-cysteine S-nitrosylase GAPDH;                                                                                                     |

Table S16, Tholen et al.

| Non Prime Site | Prime Site               | Modifications                                           | Hyperscore | Mass error in ppm | Charge | Precursor neutral mass in Da | Fold change (log <sub>2</sub> ) of ASAPRatio | FC-error of ASAPRatio | Uniprot ID 1 | Uniprot ID 2 | Protein Name 1                                              | Protein Name 2                                                                                                                                                                                                                                                                                                                                                    |
|----------------|--------------------------|---------------------------------------------------------|------------|-------------------|--------|------------------------------|----------------------------------------------|-----------------------|--------------|--------------|-------------------------------------------------------------|-------------------------------------------------------------------------------------------------------------------------------------------------------------------------------------------------------------------------------------------------------------------------------------------------------------------------------------------------------------------|
| VDIRSPAISW     | VNNLEVDSR                | N-ter + 42.01 Da                                        | 25.1       | 109.4             | 2      | 1086.65                      | n.d.                                         | n.d.                  | UGGG1_MOUSE  |              | UDP-glucose:glycoprotein glucosyltransferase 1;             | UDP-Glc:glycoprotein glucosyltransferase;UDP-glucose ceramide glucosyltransferase-like 1; Cyclophilin A;Cyclosporin A-binding protein;Rotamase A;SP18;                                                                                                                                                                                                            |
| M              | VNPTVFFDITADDEPLGR       | N-ter + 42.01 Da                                        | 37.1       | 114.0             | 3      | 2047.22                      | n.d.                                         | n.d.                  | PPIA_MOUSE   | E9Q1E3_MOUSE | Peptidyl-prolyl cis-trans isomerase A;                      | Spermatogenic cell-specific glyceraldehyde 3-phosphate dehydrogenase 2;Spermatogenic glyceraldehyde-3-phosphate dehydrogenase; SEC13-like protein 1;SEC13-related protein; Spermatogenic cell-specific glyceraldehyde 3-phosphate dehydrogenase 2;Spermatogenic glyceraldehyde-3-phosphate dehydrogenase; Carbonic anhydrase 3; Ig kappa chain V-II region 26-10; |
| NGKLTGMAFR     | VPTPNVSVVDLTCR           | N-ter + 42.01 Da, C +57.02 Da                           | 29.3       | 73.9              | 3      | 1597.93                      | n.d.                                         | n.d.                  | G3PT_MOUSE   | G3P_MOUSE    | Glyceraldehyde-3-phosphate dehydrogenase, testis-specific;  |                                                                                                                                                                                                                                                                                                                                                                   |
| M              | VSMNTVDTSHEDIHQMDYYGTR   | N-ter + 42.01 Da                                        | 32.5       | 99.6              | 4      | 3056.60                      | n.d.                                         | n.d.                  | SEC13_MOUSE  |              | Protein SEC13 homolog;                                      |                                                                                                                                                                                                                                                                                                                                                                   |
| GMAFRVPTPN     | VSVVDLTCR                | N-ter + 42.01 Da, C +57.02 Da                           | 30.4       | 74.6              | 2      | 1089.63                      | n.d.                                         | n.d.                  | G3PT_MOUSE   | G3P_MOUSE    | Glyceraldehyde-3-phosphate dehydrogenase, testis-specific;  |                                                                                                                                                                                                                                                                                                                                                                   |
| TILNNGKTCR     | VVFDDTYDR                | N-ter + 42.01 Da                                        | 30.5       | 74.1              | 2      | 1170.61                      | n.d.                                         | n.d.                  | CAH3_MOUSE   |              | Carbonic anhydrase 3;                                       |                                                                                                                                                                                                                                                                                                                                                                   |
| MFWIPASSSD     | VVMTQTPLSLPVSLGDDQASISCR | N-ter + 42.01 Da, C +57.02 Da                           | 53.9       | 76.1              | 3      | 2615.49                      | n.d.                                         | n.d.                  | KV2A7_MOUSE  |              | Ig kappa chain V-II region 26-10;                           |                                                                                                                                                                                                                                                                                                                                                                   |
| EKLNEVMQEA     | WKYNRECKLLR              | N-ter + 42.01 Da, K +34.06 Da, K +28.03 Da, C +57.02 Da | 9.4        | 6.8               | 3      | 1668.95                      | n.d.                                         | n.d.                  | MAPK5_MOUSE  | D3Z2B0_MOUSE | MAP kinase-activated protein kinase 5;                      |                                                                                                                                                                                                                                                                                                                                                                   |
| M              | WPPDAEPEPDPEAHGPR        | N-ter + 42.01 Da                                        | 44.2       | 31.4              | 3      | 2155.99                      | n.d.                                         | n.d.                  | CKLF3_MOUSE  |              | CKLF-like MARVEL transmembrane domain-containing protein 3; | Chemokine-like factor superfamily member 3;                                                                                                                                                                                                                                                                                                                       |
| M              | YAPGGAGLPGGR             | N-ter + 42.01 Da                                        | 26.5       | 95.9              | 2      | 1244.72                      | n.d.                                         | n.d.                  | TM127_MOUSE  |              | Transmembrane protein 127;                                  |                                                                                                                                                                                                                                                                                                                                                                   |
| ASKQIMADKQ     | YKGIIDCVVR               | N-ter + 42.01 Da, K +28.03 Da, C +57.02 Da              | 27.7       | 83.6              | 3      | 1291.80                      | -0.74                                        | 0.03                  | ADT1_MOUSE   | ADT2_MOUSE   | ADP/ATP translocase 1;                                      | ADP,ATP carrier protein 1;ADP,ATP carrier protein, heart/skeletal muscle isoform T1;Adenine nucleotide translocator 1;Solute carrier family 25 member 4;mANC1;                                                                                                                                                                                                    |
| M              | YTIPIQSGSPFPASVQDPLHIWR  | N-ter + 42.01 Da                                        | 32.8       | 56.9              | 3      | 2822.55                      | n.d.                                         | n.d.                  | CAPG_MOUSE   | Q99LB4_MOUSE | Macrophage-capping protein;                                 | Actin regulatory protein CAP-G;Actin-capping protein GCAP39;Myc basic motif homolog 1;                                                                                                                                                                                                                                                                            |
