# Supplementary material
Source: PubMed Central journal article supplement (PMC3591655)
Supplement: supp_M112.017962_mcp.M112.017962-19.pdf [file supp_M112.017962_mcp.M112.017962-19.pdf]

Table S17: Acetylated N-termini identified in the TAILS experiment comparing wild-type and Ctsl<sup>-/-</sup> skin (replicate 1). Up to two potential protein IDs per peptide are stated.

| Non Prime Site | Prime Site                  | Modifications                                                     | Hyperscore | Mass error in ppm | Charge | Precursor neutral mass in Da | Fold change (log <sub>2</sub> ) of ASAPRatio | FC-error of ASAPRatio | Uniprot ID 1 | Uniprot ID 2 | Protein Name 1                                                  | Protein Name 2                                                                                                                                               |
|----------------|-----------------------------|-------------------------------------------------------------------|------------|-------------------|--------|------------------------------|----------------------------------------------|-----------------------|--------------|--------------|-----------------------------------------------------------------|--------------------------------------------------------------------------------------------------------------------------------------------------------------|
| MAA            | AAAAAAAAGAGRSGPGRR          | N-ter + 42.01 Da                                                  | 44.8       | 45.8              | 3      | 1764.99                      | n.d.                                         | n.d.                  | PABP2_MOUSE  |              | Polyadenylate-binding protein 2;                                | Nuclear poly(A)-binding protein I;Poly(A)-binding protein II;Polyadenylate-binding nuclear protein 1;                                                        |
| AAAAAVAAA      | AAAAAAEPPASGTTKR            | N-ter + 42.01 Da, K +34.06 Da                                     | 37.3       | 28.3              | 3      | 1778.99                      | -1.43                                        | 0.23                  | ALKB5_MOUSE  |              | Probable alpha-ketoglutarate-dependent dioxygenase ABH5;        | Alkylated DNA repair protein alkB homolog 5;                                                                                                                 |
| M              | AAAAGAVVASAASGPAEGKITELR    | N-ter + 42.01 Da, K +28.03 Da<br>N-ter + 42.01 Da, K +28.03 Da, C | 70.0       | 46.7              | 3      | 2393.44                      | 1.14                                         | 0.41                  | SLTM_MOUSE   |              | SAFB-like transcription modulator;                              | Modulator of estrogen-induced transcription;SAF-like transcription modulator;                                                                                |
| M              | AAAKDGCLETAAGNGR            | +57.02 Da                                                         | 53.1       | 42.3              | 3      | 1687.87                      | 0.16                                         | 0.02                  | FPD3_MOUSE   | Q3TIR6_MOUSE | Prefoldin subunit 3;                                            | Von Hippel-Lindau-binding protein 1;                                                                                                                         |
| M              | AAAKAVLGPLVGAVDQTSSTR       | N-ter + 42.01 Da, K +28.03 Da                                     | 40.1       | 56.6              | 4      | 2294.43                      | 0.30                                         | 0.03                  | GLPK_MOUSE   | B1ASZ3_MOUSE | Glycerol kinase;                                                | ATP:glycerol 3-phosphotransferase;                                                                                                                           |
| M              | AAAMDVTPSGTNSGAGKKR         | N-ter + 42.01 Da, K +28.03 Da                                     | 49.6       | 47.0              | 3      | 2031.10                      | -0.01                                        | 0.01                  | RBX1_MOUSE   |              | E3 ubiquitin-protein ligase RBX1;                               | RING finger protein 75;RING-box protein 1;                                                                                                                   |
| M              | AAAPATLADPQPQEKQKDASESSELSR | N-ter + 42.01 Da, K +28.03 Da                                     | 34.0       | 48.8              | 4      | 3035.69                      | 1.44                                         | 0.62                  | RABE2_MOUSE  |              | Rab GTPase-binding effector protein 2;                          | Rabaptin-5beta;                                                                                                                                              |
| M              | AAATASSALKR                 | N-ter + 42.01 Da, K +28.03 Da                                     | 38.0       | 25.8              | 2      | 1115.66                      | -0.92                                        | 0.07                  | COG1_MOUSE   | Q81057_MOUSE | Conserved oligomeric Golgi complex subunit 1;                   | Component of oligomeric Golgi complex 1;Low density lipoprotein receptor defect B-complementing protein;                                                     |
| M              | AAADISQWAGPLCLQEVDEPPQHALR  | N-ter + 42.01 Da, C +57.02 Da<br>N-ter + 42.01 Da, K +28.03 Da, C | 45.4       | 43.8              | 3      | 2842.50                      | n.d.                                         | n.d.                  | PEBP1_MOUSE  | D3Z1V4_MOUSE | Phosphatidylethanolamine-binding protein 1;                     | HCNPPP;                                                                                                                                                      |
| M              | AAETVELHKLKLAELKQECLAR      | +57.02 Da                                                         | 40.5       | 61.8              | 4      | 2675.67                      | -1.43                                        | 0.31                  | SARNP_MOUSE  |              | SAP domain-containing ribonucleoprotein;                        | Nuclear protein Hcc-1;                                                                                                                                       |
| M              | AAGFKTVEPLEYR               | N-ter + 42.01 Da, K +28.03 Da                                     | 42.5       | 46.3              | 3      | 1712.96                      | -1.40                                        | 0.33                  | EXOS8_MOUSE  | D3YYN3_MOUSE | Exosome complex component RRP43;                                | Exosome component 8;Ribosomal RNA-processing protein 43;                                                                                                     |
| M              | AAKPKLYFNNGR                | N-ter + 42.01 Da, K +28.03 Da<br>N-ter + 42.01 Da, K +28.03 Da, C | 23.3       | 48.8              | 3      | 1524.92                      | 0.00                                         | 0.00                  | GSTA4_MOUSE  |              | Glutathione S-transferase A4;                                   | GST A4-4;GST class-alpha member 4;Glutathione S-transferase 5.7;                                                                                             |
| M              | AAANATTNPSQLLPLELVDKIGISR   | +57.02 Da                                                         | 49.8       | 43.8              | 3      | 2637.50                      | 1.36                                         | 1.48                  | LSM5_MOUSE   |              | U6 snRNA-associated Sm-like protein LSM5;                       |                                                                                                                                                              |
| ADTSKQESNM     | AAAPAKGENLSLVVHGGDIR        | N-ter + 42.01 Da, K +34.06 Da                                     | 68.1       | 43.8              | 3      | 2076.24                      | -2.00                                        | 0.64                  | DHSO_MOUSE   |              | Sorbitol dehydrogenase;                                         | L-iditol 2-dehydrogenase;                                                                                                                                    |
| M              | AAPODVHVR                   | N-ter + 42.01 Da                                                  | 39.6       | 39.6              | 2      | 1033.57                      | n.d.                                         | n.d.                  | SEC20_MOUSE  | B8JH4_MOUSE  | Vesicle transport protein SEC20;                                |                                                                                                                                                              |
| M              | AASAAASSEHFEKLHEIFR         | N-ter + 42.01 Da, K +28.03 Da                                     | 44.6       | 66.4              | 4      | 2099.18                      | -1.40                                        | 0.26                  | VTI1B_MOUSE  | Q91XH6_MOUSE | Vesicle transport through interaction with t-SNAREs homolog 1B; | Vesicle transport v-SNARE protein Vti1-like 1;Vti1-rp1;                                                                                                      |
| M              | AASPSKTEIQITFKR             | N-ter + 42.01 Da, K +28.03 Da<br>N-ter + 42.01 Da, K +28.03 Da, C | 38.7       | 36.2              | 3      | 1774.06                      | -0.62                                        | 0.15                  | ARFG2_MOUSE  |              | ADP-ribosylation factor GTPase-activating protein 2;            | GTPase-activating protein ZNF289;Zinc finger protein 289;                                                                                                    |
| M              | AATFFGVEVKAPCR              | +57.02 Da                                                         | 32.4       | 44.2              | 3      | 1621.90                      | -0.06                                        | 0.02                  | PSMG1_MOUSE  | D3Z795_MOUSE | Proteasome assembly chaperone 1;                                | Down syndrome critical region protein 2 homolog;                                                                                                             |
| M              | AATFGSGVIVPR                | N-ter + 42.01 Da, K +34.06 Da                                     | 60.0       | 28.4              | 2      | 1218.75                      | 2.12                                         | 0.56                  | UB2V1_MOUSE  | D3Z1I3_MOUSE | Ubiquitin-conjugating enzyme E2 variant 1;                      | CROC-1;                                                                                                                                                      |
| M              | AAVKTLNPKAEVAR              | N-ter + 42.01 Da, K +28.03 Da                                     | 38.0       | 36.0              | 3      | 1564.99                      | 0.06                                         | 0.01                  | TCPZ_MOUSE   | E9QPA6_MOUSE | T-complex protein 1 subunit zeta;                               | CCT-zeta-1;                                                                                                                                                  |
| M              | AAVPSAVHLPR                 | N-ter + 42.01 Da                                                  | 35.1       | 29.2              | 2      | 1158.68                      | n.d.                                         | n.d.                  | LYPL1_MOUSE  | E9QLB2_MOUSE | Lysophospholipase-like protein 1;                               |                                                                                                                                                              |
| DLYTAKGLFR     | AAVPSGASTGIYEALRLR          | N-ter + 42.01 Da                                                  | 33.9       | 68.7              | 3      | 1846.07                      | n.d.                                         | n.d.                  | ENOA_MOUSE   | ENOB_MOUSE   | Alpha-enolase;                                                  | 2-phospho-D-glycerate hydro-lyase;Enolase 1;Non-neural enolase;                                                                                              |
| M              | AAYKLVILR                   | N-ter + 42.01 Da, K +34.06 Da                                     | 49.0       | 40.0              | 2      | 1121.78                      | 0.65                                         | 0.14                  | PGAM1_MOUSE  |              | Phosphoglycerate mutase 1;                                      | BPG-dependent PGAM 1;Phosphoglycerate mutase isozyme B;                                                                                                      |
| M              | ACGLVASNLNLKPGCECLKVR       | N-ter + 42.01 Da, K +28.03 Da, C<br>+57.02 Da                     | 52.1       | 53.3              | 4      | 2296.36                      | -0.36                                        | 0.05                  | LEG1_MOUSE   |              | Galectin-1;                                                     | 14 kDa lectin;Beta-galactoside-binding lectin L-14-I;Galaptin;Lactose-binding lectin 1;Lectin galactoside-binding soluble 1;S-Lac lectin 1;                  |
| M              | ADEDEGEGHPSAPHR             | N-ter + 42.01 Da                                                  | 49.3       | 51.1              | 3      | 1628.80                      | n.d.                                         | n.d.                  | SNX27_MOUSE  | D6RES4_MOUSE | Sorting nexin-27;                                               |                                                                                                                                                              |
| M              | ADEEKLPPGWEKR               | N-ter + 42.01 Da, K +28.03 Da                                     | 49.5       | 49.7              | 3      | 1651.94                      | -0.22                                        | 0.02                  | PINI_MOUSE   |              | Peptidyl-prolyl cis-trans isomerase NIMA-interacting 1;         | Peptidyl-prolyl cis-trans isomerase Pin1;                                                                                                                    |
| M              | ADEIAKAQVAQPGGDTFGKIIR      | N-ter + 42.01 Da, K +28.03 Da                                     | 68.1       | 53.2              | 4      | 2495.51                      | -0.38                                        | 0.30                  | HINT1_MOUSE  | 80R1E3_MOUSE | Histidine triad nucleotide-binding protein 1;                   | Adenosine 5'-monophosphoramidase;Protein kinase C inhibitor 1;Protein kinase C-interacting protein 1;                                                        |
| NIYKPNKAM      | ADEVTEKQVYDAHTKEIDLVNR      | N-ter + 42.01 Da, K +34.06 Da                                     | 45.6       | 59.6              | 4      | 2682.57                      | -1.25                                        | 0.54                  | CAV1_MOUSE   | D3Z148_MOUSE | Caveolin-1;                                                     |                                                                                                                                                              |
| M              | ADIDKLNDSIIQR               | N-ter + 42.01 Da, K +34.06 Da                                     | 59.3       | 47.2              | 3      | 1689.03                      | -1.25                                        | 0.66                  | PP1G_MOUSE   |              | Protein phosphatase 1C catalytic subunit;                       | Protein phosphatase 1C catalytic subunit;                                                                                                                    |
| M              | ADKEAAFDDAVEER              | N-ter + 42.01 Da, K +34.06 Da                                     | 51.9       | 44.3              | 3      | 1640.85                      | 0.30                                         | 0.09                  | RBBP4_MOUSE  | E9PYH8_MOUSE | Histone-binding protein RBBP4;                                  | Chromatin assembly factor 1 subunit C;Chromatin assembly factor I p48 subunit;Nucleosome-remodeling factor subunit RBAP48;Retinoblastoma-binding protein 48; |
| M              | ADLEQLSDDEEKVR              | N-ter + 42.01 Da, K +28.03 Da                                     | 47.4       | 41.9              | 3      | 1729.91                      | -0.84                                        | 0.14                  | CAZA2_MOUSE  | D6RCW7_MOUSE | F-actin-capping protein subunit alpha-2;                        | CapZ alpha-2;                                                                                                                                                |
| IQTQQLHAAM     | ADTFLEHMCR                  | N-ter + 42.01 Da, C +57.02 Da                                     | 54.5       | 37.8              | 2      | 1320.61                      | n.d.                                         | n.d.                  | KPYM_MOUSE   |              | Pyruvate kinase isozymes M1/M2;                                 | Pyruvate kinase muscle isozyme;                                                                                                                              |
| SVPAPPTLPM     | ADTYAVVQKR                  | N-ter + 42.01 Da, K +28.03 Da                                     | 29.7       | 22.3              | 2      | 1219.68                      | -1.09                                        | 0.19                  | PTN18_MOUSE  | Q3V441_MOUSE | Tyrosine-protein phosphatase non-receptor type 18;              | Fetal liver phosphatase 1;PTP-K1;                                                                                                                            |
| M              | AEAEAALKEEGNR               | N-ter + 42.01 Da, K +28.03 Da                                     | 34.4       | 54.3              | 3      | 1584.86                      | -2.94                                        | 0.68                  | UN45B_MOUSE  |              | Protein unc-45 homolog B;                                       |                                                                                                                                                              |
| GTDPTSRKMM     | AELEEVLDGKPLQALR            | N-ter + 42.01 Da, K +34.06 Da                                     | 51.9       | 45.1              | 3      | 1957.18                      | 1.42                                         | 0.84                  | ACINU_MOUSE  | E9Q9R4_MOUSE | Apoptotic chromatin condensation inducer in the nucleus;        |                                                                                                                                                              |
| M              | AENLLDGPPNPKR               | N-ter + 42.01 Da, K +28.03 Da                                     | 31.3       | 43.3              | 3      | 1489.85                      | -0.52                                        | 0.06                  | CBP_MOUSE    | F8VPR5_MOUSE | CREB-binding protein;                                           |                                                                                                                                                              |
| M              | AENNAQNKAKLISETR            | N-ter + 42.01 Da, K +28.03 Da                                     | 48.1       | 41.1              | 3      | 1884.08                      | 0.21                                         | 0.05                  | MSPD2_MOUSE  | B1AU74_MOUSE | Motile sperm domain-containing protein 2;                       |                                                                                                                                                              |
| M              | AENPGLNHR                   | N-ter + 42.01 Da                                                  | 36.3       | 40.6              | 2      | 1177.60                      | n.d.                                         | n.d.                  | IMA3_MOUSE   | E9Q1R3_MOUSE | Importin subunit alpha-3;                                       | Importin alpha Q2;Karyopherin subunit alpha-3;                                                                                                               |
| M              | AERPEDLNLPAVITR             | N-ter + 42.01 Da                                                  | 46.3       | 43.3              | 3      | 1849.05                      | n.d.                                         | n.d.                  | DPOE3_MOUSE  | D6RDT4_MOUSE | DNA polymerase epsilon subunit 3;                               | DNA polymerase II subunit 3;DNA polymerase epsilon subunit p17;NF-YB-like protein;YB-like protein 1;                                                         |
| MAFPPLWE       | AEVETLKR                    | N-ter + 42.01 Da, K +28.03 Da                                     | 47.6       | 34.4              | 2      | 1143.65                      | -0.34                                        | 0.08                  | DLRB1_MOUSE  | A2AVR9_MOUSE | Dynein light chain roadblock-type 1;                            | Dynein light chain 2A, cytoplasmic;                                                                                                                          |
| M              | AFKDTGKTPEVEVAIHR           | N-ter + 42.01 Da, K +34.06 Da                                     | 49.0       | 50.8              | 4      | 2104.30                      | 0.82                                         | 0.32                  | RS20_MOUSE   |              | 40S ribosomal protein S20;                                      |                                                                                                                                                              |

Table S17, Tholen et al.

| Non Prime Site | Prime Site                | Modifications                              | Hyperscore | Mass error in ppm | Charge | Precursor neutral mass in Da | Fold change (log <sub>2</sub> ) of ASAPRatio | FC-error of ASAPRatio | Uniprot ID 1 | Uniprot ID 2 | Protein Name 1                                                | Protein Name 2                                                                                                                                                     |
|----------------|---------------------------|--------------------------------------------|------------|-------------------|--------|------------------------------|----------------------------------------------|-----------------------|--------------|--------------|---------------------------------------------------------------|--------------------------------------------------------------------------------------------------------------------------------------------------------------------|
| M              | AGKPVLYHFDGR              | N-ter + 42.01 Da, K +28.03 Da              | 33.6       | 57.3              | 3      | 1428.83                      | -0.36                                        | 0.12                  | GSTA3_MOUSE  |              | Glutathione S-transferase A3;                                 | GST class-alpha member 3;Glutathione S-transferase Ya3;Glutathione S-transferase Yc;                                                                               |
| M              | AGLGHPSAFGR               | N-ter + 42.01 Da                           | 57.4       | 38.4              | 2      | 1110.60                      | n.d.                                         | n.d.                  | DDAH1_MOUSE  |              | N(G),N(G)-dimethylarginine dimethylaminohydrolyase 1;         | DDAH1;Dimethylargininase-1;                                                                                                                                        |
| M              | AGLLKKTTLVGLVCDTPHER      | N-ter + 42.01 Da, K +28.03 Da, C +57.02 Da | 62.7       | 58.5              | 4      | 2433.48                      | -4.64                                        | 2.32                  | NDUA5_MOUSE  |              | NADH dehydrogenase [ubiquinone] 1 alpha subcomplex subunit 5; | Complex I subunit B13;Complex I-13kD-B;NADH-ubiquinone oxidoreductase 13 kDa-B subunit;                                                                            |
| M              | AGLNSLEAVKR               | N-ter + 42.01 Da, K +28.03 Da              | 55.3       | 32.0              | 2      | 1226.74                      | 1.61                                         | 0.42                  | TPM4_MOUSE   |              | Tropomyosin alpha-4 chain;                                    | Tropomyosin-4;                                                                                                                                                     |
| M              | AGTTTIEAVKR               | N-ter + 42.01 Da, K +28.03 Da              | 50.8       | 31.3              | 2      | 1215.72                      | 2.42                                         | 0.72                  | Q8C7C3_MOUSE | D3Z6i8_MOUSE |                                                               |                                                                                                                                                                    |
| M              | AGVDQHEGTIQVQQQLFFR       | N-ter + 42.01 Da                           | 48.9       | 43.2              | 3      | 2285.22                      | n.d.                                         | n.d.                  | ABHEB_MOUSE  |              | Abhydrolase domain-containing protein 14B;                    | CCG1-interacting factor B;                                                                                                                                         |
| M              | AGVPRPDNVAEIVAGAR         | N-ter + 42.01 Da                           | 42.6       | 41.6              | 3      | 1621.92                      | n.d.                                         | n.d.                  | KBTBB_MOUSE  |              | Kelch repeat and BTB domain-containing protein 11;            |                                                                                                                                                                    |
| M              | AIVHTLPVPLEPAR            | N-ter + 42.01 Da                           | 36.0       | 43.4              | 3      | 1553.96                      | n.d.                                         | n.d.                  | LZTS2_MOUSE  |              | Leucine zipper putative tumor suppressor 2;                   |                                                                                                                                                                    |
| M              | AKIAKTHEDIAQIR            | N-ter + 42.01 Da, K +34.06 Da              | 30.7       | 52.3              | 4      | 1832.18                      | 0.84                                         | 0.28                  | SF3B1_MOUSE  |              | Splicing factor 3B subunit 1;                                 | Protein LAPSER1;                                                                                                                                                   |
| M              | AKIAQAGMYR                | N-ter + 42.01 Da, K +34.06 Da              | 45.8       | 27.7              | 2      | 1183.69                      | -0.45                                        | 0.13                  | ANXA6_MOUSE  | F8WIT2_MOUSE | Annexin A6;                                                   | Pre-mRNA-splicing factor SF3b 155 kDa subunit;Spliceosome-associated protein 155;                                                                                  |
| M              | AKTEEMVQTEEMETPR          | N-ter + 42.01 Da, K +28.03 Da              | 40.1       | 53.4              | 3      | 1978.01                      | -0.03                                        | 0.01                  | BAG1_MOUSE   | F6TFC9_MOUSE | BAG family molecular chaperone regulator 1;                   | 67 kDa calelectrin;Annexin VI;Annexin-6;Calphobindin-II;Chromobindin-20;Lipocortin VI;Protein III;p68;p70;                                                         |
| M              | AKVEQVLSLEPQHELFKR        | N-ter + 42.01 Da, K +28.03 Da              | 50.6       | 64.1              | 4      | 2248.40                      | -0.62                                        | 0.20                  | VAPB_MOUSE   | Q88H80_MOUSE | Vesicle-associated membrane protein-associated protein B;     | Ubiquitin-activating enzyme E1;Ubiquitin-activating enzyme E1 X;Ubiquitin-like modifier-activating enzyme 1 X;                                                     |
| M              | ALDGPQEMLLEEGKAGSGLR      | N-ter + 42.01 Da, K +28.03 Da              | 55.8       | 46.7              | 3      | 2156.14                      | 3.46                                         | 1.02                  | PR58_MOUSE   |              | 26S protease regulatory subunit 8;                            | Bcl-2-associated athanogene 1;                                                                                                                                     |
| M              | ALDPAEQHLR                | N-ter + 42.01 Da                           | 41.6       | 38.5              | 2      | 1190.65                      | n.d.                                         | n.d.                  | COXAM_MOUSE  |              | COX assembly mitochondrial protein homolog;                   |                                                                                                                                                                    |
| M              | ALKQISSNR                 | N-ter + 42.01 Da, K +34.06 Da              | 42.1       | 36.7              | 2      | 1091.69                      | -1.29                                        | 0.41                  | ESTD_MOUSE   |              | 5-formylglutathione hydrolase;                                | Esterase 10;Esterase D;Sid 478;                                                                                                                                    |
| M              | ALLAEHLKPLPADR            | N-ter + 42.01 Da, K +28.03 Da              | 47.6       | 46.2              | 3      | 1726.09                      | 0.68                                         | 0.55                  | GLTP_MOUSE   | D3Z1H9_MOUSE | Glycolipid transfer protein;                                  |                                                                                                                                                                    |
| M              | AMQKIFAR                  | N-ter + 42.01 Da, K +34.06 Da              | 42.5       | 36.0              | 2      | 1039.64                      | -1.47                                        | 0.86                  | ENOB_MOUSE   | Q5SX59_MOUSE | Beta-enolase;                                                 | 2-phospho-D-glycerate hydro-lyase;Enolase 3;Muscle-specific enolase;Skeletal muscle enolase;                                                                       |
| M              | AMVSEFLKQAR               | N-ter + 42.01 Da, K +28.03 Da              | 56.9       | 37.8              | 2      | 1348.77                      | 3.42                                         | 2.63                  | ANXA1_MOUSE  | E9QA30_MOUSE | Annexin A1;                                                   | Annexin I;Annexin-1;Calpactin II;Calpactin-2;Chromobindin-9;Lipocortin I;Phospholipase A2 inhibitory protein;p35;                                                  |
| M              | ANHAPFETDISTLTR           | N-ter + 42.01 Da                           | 42.6       | 49.3              | 3      | 1713.92                      | n.d.                                         | n.d.                  | F16P1_MOUSE  | E9Q0T7_MOUSE | Fructose-1,6-bisphosphatase 1;                                | D-fructose-1,6-bisphosphate 1-phosphohydrolase 1;                                                                                                                  |
| M              | ANKGSPSYGMSR              | N-ter + 42.01 Da, K +28.03 Da              | 46.9       | 37.0              | 2      | 1236.64                      | -0.22                                        | 0.04                  | TAGL_MOUSE   |              | Transgelin;                                                   | Actin-associated protein p27;Smooth muscle protein 22-alpha;                                                                                                       |
| M              | AQDQGEKENPMR              | N-ter + 42.01 Da, K +28.03 Da              | 29.2       | 48.6              | 3      | 1471.74                      | -0.18                                        | 0.03                  | RL11_MOUSE   | D3Z3K1_MOUSE | 60S ribosomal protein L11;                                    |                                                                                                                                                                    |
| M              | AQELQHPFAR                | N-ter + 42.01 Da                           | 31.9       | 46.1              | 3      | 1366.73                      | n.d.                                         | n.d.                  | ADSV_MOUSE   | E9QM03_MOUSE | Adseverin;                                                    | Gelsolin-like protein;Scinderin;                                                                                                                                   |
| M              | AQGSHQIDFQVLHDLR          | N-ter + 42.01 Da                           | 63.6       | 42.7              | 3      | 1905.03                      | n.d.                                         | n.d.                  | TAB2_MOUSE   | D3Z216_MOUSE | TGF-beta-activated kinase 1 and MAP3K7-binding protein 2;     | Mitogen-activated protein kinase kinase 7-interacting protein 2;TAK1-binding protein 2;TGF-beta-activated kinase 1-binding protein 2;                              |
| M              | AQNLKDLAGR                | N-ter + 42.01 Da, K +34.06 Da              | 43.7       | 30.7              | 2      | 1160.71                      | -1.12                                        | 0.12                  | PHB2_MOUSE   | E9Q313_MOUSE | Prohibitin-2;                                                 | B-cell receptor-associated protein BAP37;Repressor of estrogen receptor activity;                                                                                  |
| M              | AQPKNLEGYVGFANLPNQVYR     | N-ter + 42.01 Da, K +28.03 Da              | 67.8       | 41.4              | 3      | 2447.36                      | 0.82                                         | 0.54                  | SEPT7_MOUSE  | E9Q9F5_MOUSE | Septin-7;                                                     | CDC10 protein homolog;                                                                                                                                             |
| M              | ASASYHISNLEKMTSSDKDFR     | N-ter + 42.01 Da, K +28.03 Da              | 34.3       | 59.7              | 4      | 2597.43                      | -1.18                                        | 0.57                  | CAND1_MOUSE  |              | Cullin-associated NEDD8-dissociated protein 1;                | Cullin-associated and neddylation-dissociated protein 1;p120 CAND1;                                                                                                |
| M              | ASCASIDIEDATAQHRLR        | N-ter + 42.01 Da, C +57.02 Da              | 48.3       | 53.1              | 3      | 1827.94                      | n.d.                                         | n.d.                  | EDC4_MOUSE   | D6RE33_MOUSE | Enhancer of mRNA-decapping protein 4;                         |                                                                                                                                                                    |
| M              | ASESGKLWGGRR              | N-ter + 42.01 Da, K +28.03 Da              | 48.4       | 33.9              | 2      | 1216.66                      | -2.32                                        | 0.46                  | ARLY_MOUSE   | E0CY49_MOUSE | Argininosuccinate lyase;                                      | Argininosuccinase;                                                                                                                                                 |
| M              | ASGADSKGDDLSTAILKQKRNPNR  | N-ter + 42.01 Da, K +28.03 Da              | 40.8       | 65.4              | 4      | 2667.61                      | 2.64                                         | 1.04                  | TERA_MOUSE   |              | Transitional endoplasmic reticulum ATPase;                    | 155 Mg(2+)-ATPase p97 subunit;Valosin-containing protein;                                                                                                          |
| M              | ASGCKIGPSILNSDLANLGAELCLR | N-ter + 42.01 Da, K +34.06 Da, C +57.02 Da | 65.1       | 46.2              | 3      | 2591.45                      | 0.37                                         | 0.26                  | RPE_MOUSE    | B2KGF0_MOUSE | Ribulose-phosphate 3-epimerase;                               | Ribulose-5-phosphate-epimerase;                                                                                                                                    |
| M              | ASGVAVSDGVKVFNDMKVYR      | N-ter + 42.01 Da, K +34.06 Da              | 44.8       | 45.2              | 3      | 2201.35                      | 1.41                                         | 1.37                  | COF1_MOUSE   | E9Q1T2_MOUSE | Cofilin-1;                                                    | Cofilin, non-muscle isoform;                                                                                                                                       |
| M              | ASGVQVADEVCR              | N-ter + 42.01 Da, C +57.02 Da              | 29.8       | 45.9              | 2      | 1331.67                      | n.d.                                         | n.d.                  | DEST_MOUSE   |              | Destrin;                                                      | Actin-depolymerizing factor;Sid 23;                                                                                                                                |
| M              | ASGVTNVNDEVKVFNDMKVYR     | N-ter + 42.01 Da, K +34.06 Da              | 45.8       | 48.0              | 3      | 2330.41                      | -1.18                                        | 1.27                  | COF2_MOUSE   |              | Cofilin-2;                                                    | Cofilin, muscle isoform;                                                                                                                                           |
| M              | ASKEMFEDTVEER             | N-ter + 42.01 Da, K +28.03 Da              | 44.0       | 53.6              | 3      | 1639.83                      | -0.03                                        | 0.01                  | RBBP7_MOUSE  | A2AFI9_MOUSE | Histone-binding protein RBBP7;                                | Histone acetyltransferase type B subunit 2;Nucleosome-remodeling factor subunit RBAP46;Retinoblastoma-binding protein 7;Retinoblastoma-binding protein p46;        |
| M              | ASLKDLGKWR                | N-ter + 42.01 Da, K +28.03 Da              | 46.7       | 34.5              | 2      | 1399.83                      | 2.59                                         | 0.27                  | FABP5_MOUSE  | E9Q964_MOUSE | Fatty acid-binding protein, epidermal;                        | Epidermal-type fatty acid-binding protein;Fatty acid-binding protein 5;Keratinocyte lipid-binding protein;Psoriasis-associated fatty acid-binding protein homolog; |
| M              | ASLQPPGGIR                | N-ter + 42.01 Da                           | 17.7       | 6.5               | 2      | 1067.58                      | n.d.                                         | n.d.                  | PRKDC_MOUSE  |              | DNA-dependent protein kinase catalytic subunit;               | p460;                                                                                                                                                              |
| M              | ASLSLAPVNIKAGADEER        | N-ter + 42.01 Da, K +34.06 Da              | 55.2       | 42.2              | 3      | 2063.20                      | 3.02                                         | 2.23                  | TCPB_MOUSE   |              | T-complex protein 1 subunit beta;                             | CCT-beta;                                                                                                                                                          |
| M              | ASNFKKTMASSAQR            | N-ter + 42.01 Da, K +28.03 Da              | 36.4       | 52.6              | 3      | 1724.98                      | -0.79                                        | 0.49                  | CETN2_MOUSE  |              | Centrin-2;                                                    | Caltractin isoform 1;                                                                                                                                              |
| M              | ASQSQGIQQLLQAEKR          | N-ter + 42.01 Da, K +28.03 Da              | 41.1       | 48.8              | 3      | 1854.09                      | 1.63                                         | 0.46                  | VATG1_MOUSE  |              | V-type proton ATPase subunit G 1;                             | V-ATPase 13 kDa subunit 1;Vacuolar proton pump subunit G 1;                                                                                                        |

Table S17, Tholen et al.

| Non Prime Site | Prime Site                    | Modifications                                           | Hyperscore | Mass error in ppm | Charge | Precursor neutral mass in Da | Fold change (log <sub>2</sub> ) of ASAPRatio | FC-error of ASAPRatio | Uniprot ID 1 | Uniprot ID 2 | Protein Name 1                                            | Protein Name 2                                                                                                                                                                                                                                   |
|----------------|-------------------------------|---------------------------------------------------------|------------|-------------------|--------|------------------------------|----------------------------------------------|-----------------------|--------------|--------------|-----------------------------------------------------------|--------------------------------------------------------------------------------------------------------------------------------------------------------------------------------------------------------------------------------------------------|
| M              | ASSDIQVKELEKR                 | N-ter + 42.01 Da, K +28.03 Da                           | 40.1       | 46.4              | 3      | 1599.96                      | 2.58                                         | 0.93                  | STMN1_MOUSE  | D321Z8_MOUSE | Stathmin;                                                 | Leukemia-associated gene protein;Leukemia-associated phosphoprotein p18;Metablastin;Oncoprotein 18;Phosphoprotein p19;Prosolin;Protein Pr22;pp17; Bisphosphate 3'-nucleotidase 1;PAP-inositol-1,4-phosphatase;                                   |
| M              | ASSHTVLMR                     | N-ter + 42.01 Da                                        | 47.5       | 35.5              | 2      | 1042.56                      | n.d.                                         | n.d.                  | BPNT1_MOUSE  | D325X0_MOUSE | 3'(2'),5'-bisphosphate nucleotidase 1;                    |                                                                                                                                                                                                                                                  |
| M              | ASSKKVTLVLSR                  | N-ter + 42.01 Da, K +34.06 Da                           | 32.7       | 43.0              | 3      | 1485.02                      | 0.00                                         | 0.00                  | PIR_MOUSE    | A2AIH8_MOUSE | Pirin;                                                    | Probable quercetin 2,3-dioxygenase PIR;                                                                                                                                                                                                          |
| DVAHPKEAPP     | ASTVSGIRPAR                   | N-ter + 42.01 Da                                        | 15.4       | 44.4              | 2      | 1155.69                      | n.d.                                         | n.d.                  | OKR1_MOUSE   | F8WGG8_MOUSE | Oxidation resistance protein 1;                           | Protein C7; FYVE finger-containing phosphoinositide kinase;PIKfyve;Phosphatidylinositol-3-phosphate 5-kinase type III;p235; Swiprosin-1;                                                                                                         |
| M              | ATDDKSSPTLDSANDLPR            | N-ter + 42.01 Da, K +28.03 Da                           | 44.4       | 48.5              | 3      | 1972.03                      | -1.94                                        | 0.52                  | FYV1_MOUSE   | D325N5_MOUSE | 1-phosphatidylinositol-3-phosphate 5-kinase;              |                                                                                                                                                                                                                                                  |
| M              | ATDELASKLSR                   | N-ter + 42.01 Da, K +28.03 Da                           | 68.6       | 37.0              | 2      | 1259.72                      | 2.50                                         | 0.94                  | EFHD2_MOUSE  | Q8C845_MOUSE | EF-hand domain-containing protein D2;                     |                                                                                                                                                                                                                                                  |
| M              | ATDISESSGADCKGDTKNSAKLDADYPLR | N-ter + 42.01 Da, K +28.03 Da, C +57.02 Da              | 39.4       | 64.1              | 4      | 3210.74                      | 0.08                                         | 0.04                  | DENR_MOUSE   | E9Q0G1_MOUSE | Density-regulated protein;                                |                                                                                                                                                                                                                                                  |
| M              | ATEGMILTNHHDQIR               | N-ter + 42.01 Da                                        | 49.6       | 57.5              | 3      | 1776.96                      | n.d.                                         | n.d.                  | GEPH_MOUSE   | A0JNY3_MOUSE | Gephyrin;                                                 |                                                                                                                                                                                                                                                  |
| M              | ATESSLPTHVLDTASGLPAQGLCLR     | N-ter + 42.01 Da, C +57.02 Da                           | 30.3       | 44.8              | 3      | 2736.50                      | n.d.                                         | n.d.                  | HIUH_MOUSE   |              | 5-hydroxyisourate hydrolase;                              | Transthyretin-related protein; CW17;Mammalian branch point-binding protein;Transcription factor ZFM1;Zinc finger gene in MEN1 locus;Zinc finger protein 162;                                                                                     |
| M              | ATGANATPLDFPSKRR              | N-ter + 42.01 Da, K +28.03 Da                           | 45.1       | 51.6              | 3      | 1771.05                      | 1.30                                         | 0.18                  | SF01_MOUSE   | Q3UI45_MOUSE | Splicing factor 1;                                        | Hexokinase type III;                                                                                                                                                                                                                             |
| M              | ATIGPSGLHPGER                 | N-ter + 42.01 Da                                        | 49.4       | 30.8              | 2      | 1332.72                      | n.d.                                         | n.d.                  | HXX3_MOUSE   | D6RCV7_MOUSE | Hexokinase-3;                                             | Hexokinase type III;                                                                                                                                                                                                                             |
| M              | ATKCTKCGPGYSTPLEAMKGR         | N-ter + 42.01 Da, K +28.03 Da, C +57.02 Da              | 63.6       | 52.4              | 4      | 2553.49                      | -1.69                                        | 0.60                  | SBP1_MOUSE   | D6RHN2_MOUSE | Selenium-binding protein 1;                               | 56 kDa selenium-binding protein;                                                                                                                                                                                                                 |
| M              | ATKIDKEACR                    | N-ter + 42.01 Da, K +28.03 Da, C +57.02 Da              | 25.9       | 57.4              | 3      | 1288.75                      | 0.77                                         | 0.33                  | COTL1_MOUSE  |              | Coactosin-like protein;                                   |                                                                                                                                                                                                                                                  |
| M              | ATPEASGSGEKVEGSEPSVTYYR       | N-ter + 42.01 Da, K +34.06 Da                           | 41.1       | 37.6              | 3      | 2476.27                      | 0.12                                         | 0.05                  | CYB5B_MOUSE  |              | Cytochrome b5 type B;                                     | Cytochrome b5 outer mitochondrial membrane isoform;                                                                                                                                                                                              |
| M              | ATQVEPLLPAGAPLLQAEHGLAR       | N-ter + 42.01 Da                                        | 39.2       | 44.7              | 3      | 2522.46                      | n.d.                                         | n.d.                  | LARP1_MOUSE  |              | La-related protein 1;                                     | La ribonucleoprotein domain family member 1; Anchorin C1;Annexin V;Annexin-5;Calphobindin I;Endonexin II;Lipocortin V;Placental anticoagulant protein 4;Placental anticoagulant protein I;Thromboplastin inhibitor;Vascular anticoagulant-alpha; |
| M              | ATRGTVTFDFGFDGR               | N-ter + 42.01 Da                                        | 42.7       | 52.3              | 3      | 1637.87                      | n.d.                                         | n.d.                  | ANXA5_MOUSE  |              | Annexin A5;                                               |                                                                                                                                                                                                                                                  |
| M              | ATTAQSQPQVAGKR                | N-ter + 42.01 Da, K +28.03 Da                           | 41.0       | 44.6              | 3      | 1608.93                      | 2.18                                         | 0.83                  | THUM1_MOUSE  |              | THUMP domain-containing protein 1;                        |                                                                                                                                                                                                                                                  |
| EATGGKYVPR     | AVLVDELPMTMDSVR               | N-ter + 42.01 Da                                        | 32.7       | 71.5              | 3      | 1642.94                      | n.d.                                         | n.d.                  | TBB2C_MOUSE  | TBB4_MOUSE   | Tubulin beta-4B chain;                                    | Tubulin beta-2C chain;                                                                                                                                                                                                                           |
| M              | AVSTGVKVPR                    | N-ter + 42.01 Da, K +34.06 Da                           | 42.8       | 15.7              | 2      | 1088.69                      | 0.12                                         | 0.05                  | UB2V2_MOUSE  |              | Ubiquitin-conjugating enzyme E2 variant 2;                | Ubc-like protein MMS2; L-isoaspartyl protein carboxyl methyltransferase;Protein L-isoaspartyl/D-aspartyl methyltransferase;Protein-beta-aspartate methyltransferase;                                                                             |
| M              | AWKSGGASHSELIHNR              | N-ter + 42.01 Da, K +28.03 Da                           | 44.7       | 52.0              | 4      | 1932.10                      | 0.67                                         | 0.20                  | P1MT_MOUSE   | E9PWEO_MOUSE | Protein-L-isoaspartate(D-aspartate) O-methyltransferase;  |                                                                                                                                                                                                                                                  |
| M              | AYHSFLVEPISCHAWNKDR           | N-ter + 42.01 Da, K +28.03 Da, C +57.02 Da              | 37.9       | 63.8              | 4      | 2399.30                      | 0.60                                         | 0.12                  | ARC1B_MOUSE  | D32650_MOUSE | Actin-related protein 2/3 complex subunit 1B;             | Arp2/3 complex 41 kDa subunit;p41-ARC; BPG-dependent PGAM 1;Phosphoglycerate mutase isozyme B;                                                                                                                                                   |
| MA             | AYKLVLR                       | N-ter + 42.01 Da, K +34.06 Da                           | 41.7       | 36.8              | 2      | 1050.74                      | 0.07                                         | 0.01                  | PGAM1_MOUSE  |              | Phosphoglycerate mutase 1;                                |                                                                                                                                                                                                                                                  |
| VYTYIQEFYR     | CLVQKGLVKTK                   | N-ter + 42.01 Da, K +34.06 Da, K +28.03 Da, C +57.02 Da | 11.2       | 38.0              | 2      | 1410.98                      | n.d.                                         | n.d.                  | Q9D7A0_MOUSE | D3YV51_MOUSE |                                                           |                                                                                                                                                                                                                                                  |
| GNSTHPMHSR     | CSPDPGLTALLSDHR               | N-ter + 42.01 Da, C +57.02 Da                           | 48.1       | 73.0              | 3      | 1679.92                      | n.d.                                         | n.d.                  | HEMO_MOUSE   |              | Hemopexin;                                                |                                                                                                                                                                                                                                                  |
| M              | DADKDNKQACDER                 | N-ter + 42.01 Da, K +28.03 Da, C +57.02 Da              | 37.3       | 66.0              | 3      | 1905.98                      | 0.03                                         | 0.01                  | NMI_MOUSE    | 87ZD13_MOUSE | N-myc-interactor;                                         | N-myc and STAT interactor;                                                                                                                                                                                                                       |
| M              | DDDIAALVDNDSGCMKAGFAGDDAPR    | N-ter + 42.01 Da, K +34.06 Da, C +57.02 Da              | 66.1       | 33.1              | 3      | 2812.38                      | 1.12                                         | 0.69                  | ACTB_MOUSE   | E9Q1F2_MOUSE | Actin, cytoplasmic 1;                                     | Beta-actin;                                                                                                                                                                                                                                      |
| M              | DDREDLVYQAKLAQAER             | N-ter + 42.01 Da, K +28.03 Da                           | 65.8       | 48.0              | 3      | 2349.24                      | 2.37                                         | 1.04                  | 1433E_MOUSE  | D6REF3_MOUSE | 14-3-3 protein epsilon;                                   |                                                                                                                                                                                                                                                  |
| MC             | DEDETTALVCDNDSGLVKAGFAGDDAPR  | N-ter + 42.01 Da, K +28.03 Da, C +57.02 Da              | 61.3       | 39.8              | 3      | 2949.45                      | -0.34                                        | 0.17                  | ACTS_MOUSE   |              | Actin, alpha skeletal muscle;                             | Alpha-actin-1;                                                                                                                                                                                                                                   |
| M              | DGAAGPGEPAHETLQTLRSQR         | N-ter + 42.01 Da                                        | 59.5       | 45.3              | 3      | 2264.15                      | n.d.                                         | n.d.                  | EMAL3_MOUSE  |              | Echinoderm microtubule-associated protein-like 3;         | 3T3-L1 lipid-binding protein;Adipocyte lipid-binding protein;Adipocyte-type fatty acid-binding protein;Fatty acid-binding protein 4;Myelin P2 protein homolog;p15;p2 adipocyte protein;Protein 422;                                              |
| GKSTTIKRR      | DGDKLVVECVKMGVTSTR            | N-ter + 42.01 Da, K +28.03 Da, C +57.02 Da              | 38.0       | 79.0              | 4      | 2091.24                      | -2.32                                        | 0.58                  | FABP4_MOUSE  |              | Fatty acid-binding protein, adipocyte;                    |                                                                                                                                                                                                                                                  |
| M              | DGEDDSNLVIKRR                 | N-ter + 42.01 Da, K +28.03 Da                           | 29.8       | 51.2              | 3      | 1716.96                      | -0.76                                        | 0.14                  | F192A_MOUSE  |              | Protein FAM192A;                                          | NEFA-interacting nuclear protein NIP30;                                                                                                                                                                                                          |
| QAFTVIDQNR     | DGIIDKEDLR                    | N-ter + 42.01 Da, K +34.06 Da                           | 33.4       | 69.3              | 3      | 1248.76                      | -1.47                                        | 0.41                  | MLR5_MOUSE   | F6ULR7_MOUSE | Myosin regulatory light chain 2, skeletal muscle isoform; | Fast skeletal myosin light chain 2;MLC2F;                                                                                                                                                                                                        |
| M              | DGIVPDIAGVTKR                 | N-ter + 42.01 Da, K +34.06 Da                           | 33.1       | 42.1              | 2      | 1546.92                      | 2.49                                         | 0.95                  | PTBP1_MOUSE  | Q92217_MOUSE | Polypyrimidine tract-binding protein 1;                   | Heterogeneous nuclear ribonucleoprotein I;                                                                                                                                                                                                       |
| PLPLLSALD      | DGKATLTSSTNPLGR               | N-ter + 42.01 Da, K +28.03 Da                           | 41.7       | 106.7             | 3      | 1587.00                      | 2.72                                         | 0.89                  | PAX8_MOUSE   | A2AIU6_MOUSE | Paired box protein Pax-8;                                 |                                                                                                                                                                                                                                                  |
| LLQDGLKMDL     | DHGKFLDCVVR                   | N-ter + 42.01 Da, K +34.06 Da, C +57.02 Da              | 36.6       | 79.6              | 3      | 1420.85                      | -2.00                                        | 0.96                  | KBTB5_MOUSE  |              | Kelch repeat and BTB domain-containing protein 5;         |                                                                                                                                                                                                                                                  |
| M              | DIAIHPWIR                     | N-ter + 42.01 Da                                        | 35.3       | 56.9              | 3      | 1429.81                      | n.d.                                         | n.d.                  | CRYAB_MOUSE  |              | Alpha-crystallin B chain;                                 | Alpha(B)-crystallin;p23;                                                                                                                                                                                                                         |
| LTMKAKSTVR     | DIDPQNDLFLR                   | N-ter + 42.01 Da                                        | 29.0       | 79.3              | 3      | 1487.84                      | n.d.                                         | n.d.                  | DLRB2_MOUSE  |              | Dynein light chain roadblock-type 2;                      | Dynein light chain 2B, cytoplasmic;                                                                                                                                                                                                              |
| M              | DKNELVQKAKLAEQAER             | N-ter + 42.01 Da, K +34.06 Da                           | 39.5       | 46.8              | 4      | 2244.41                      | 1.21                                         | 0.38                  | 1433Z_MOUSE  | D3YXF4_MOUSE | 14-3-3 protein zeta/delta;                                | Protein kinase C inhibitor protein 1;SEZ-2;                                                                                                                                                                                                      |
| M              | DKNELVQKAK                    | N-ter + 42.01 Da, K +34.06 Da                           | 37.6       | 40.4              | 3      | 1446.96                      | 1.71                                         | 0.72                  | 1433Z_MOUSE  | D3YXF4_MOUSE | 14-3-3 protein zeta/delta;                                | Protein kinase C inhibitor protein 1;SEZ-2;                                                                                                                                                                                                      |
| M              | DLA AAAEPGAGSQHPEVR           | N-ter + 42.01 Da                                        | 58.2       | 63.9              | 3      | 1948.04                      | n.d.                                         | n.d.                  | MCM6_MOUSE   | Q3ULG5_MOUSE | DNA replication licensing factor MCM6;                    | Mi5 homolog;                                                                                                                                                                                                                                     |

Table S17, Tholen et al.

| Non Prime Site | Prime Site                   | Modifications                              | Hyperscore | Mass error in ppm | Charge  | Precursor neutral mass in Da | Fold change (log <sub>2</sub> ) of ASAPRatio | FC-error of ASAPRatio | Uniprot ID 1 | Uniprot ID 2                                    | Protein Name 1                                                  | Protein Name 2                                                                                            |
|----------------|------------------------------|--------------------------------------------|------------|-------------------|---------|------------------------------|----------------------------------------------|-----------------------|--------------|-------------------------------------------------|-----------------------------------------------------------------|-----------------------------------------------------------------------------------------------------------|
| M              | DLEAVCKR                     | N-ter + 42.01 Da, K +34.06 Da, C +57.02 Da | 49.8       | 37.0              | 2       | 1196.66                      | -0.15                                        | 0.04                  | AGM1_MOUSE   | Q88WW3_MOUSE                                    | Phosphoacetylglucosamine mutase;                                | Acetylglucosamine phosphomutase;N-acetylglucosamine-phosphate mutase;Phosphoglucomutase-3;                |
| LTSSESRPTR     | DLSSSDLTASKIVK               | N-ter + 42.01 Da, K +28.03 Da              | 31.8       | 58.4              | 3       | 1647.99                      | 0.50                                         | 0.12                  | A2M_MOUSE    | D3YW52_MOUSE                                    | Alpha-2-macroglobulin;                                          | Pregnancy zone protein;                                                                                   |
| M              | DNLSDTLKKLKITAADR            | N-ter + 42.01 Da, K +28.03 Da              | 25.9       | 57.9              | 4       | 2158.33                      | 1.60                                         | 1.15                  | E9Q912_MOUSE | E9Q6Q4_MOUSE                                    |                                                                 |                                                                                                           |
| M              | DPSGVKVLETAEDIQER            | N-ter + 42.01 Da, K +28.03 Da              | 40.7       | 47.3              | 3       | 2086.12                      | 0.85                                         | 0.36                  | SPTA2_MOUSE  | A3KGU7_MOUSE                                    | Spectrin alpha chain, brain;                                    | Alpha-II spectrin;Fodrin alpha chain;Spectrin, non-erythroid alpha chain;                                 |
| M              | DSEAFQHAR                    | N-ter + 42.01 Da                           | 62.9       | 46.9              | 2       | 1232.58                      | n.d.                                         | n.d.                  | IASPP_MOUSE  | D3YXE7_MOUSE                                    | RelA-associated inhibitor;                                      | Inhibitor of ASPP protein;NFkB-interacting protein 1;PPP1R13B-like protein;                               |
| M              | EAATHQVGMAGPR                | N-ter + 42.01 Da                           | 53.1       | 58.4              | 3       | 1496.77                      | n.d.                                         | n.d.                  | E9Q7K1_MOUSE |                                                 |                                                                 |                                                                                                           |
| M              | EAKGGTVKAASGFNATEDAQTLR      | N-ter + 42.01 Da, K +28.03 Da              | 56.4       | 55.0              | 4       | 2550.42                      | -0.38                                        | 0.17                  | ANKA4_MOUSE  | E9Q073_MOUSE                                    | Annexin A4;                                                     | Annexin IV;Annexin-4;                                                                                     |
| M              | EDPGETSIIHR                  | N-ter + 42.01 Da                           | 47.3       | 32.0              | 2       | 1427.64                      | n.d.                                         | n.d.                  | Q80X98_MOUSE |                                                 |                                                                 |                                                                                                           |
| M              | EEAELVKGR                    | N-ter + 42.01 Da, K +28.03 Da              | 55.9       | 39.5              | 2       | 1230.68                      | 2.12                                         | 0.63                  | PALMD_MOUSE  | Q3UVT7_MOUSE                                    | Palmdelphin;                                                    |                                                                                                           |
| M              | EEAPHGCPGADSAQAGR            | N-ter + 42.01 Da, C +57.02 Da              | 67.4       | 49.7              | 3       | 1881.87                      | n.d.                                         | n.d.                  | NUBP1_MOUSE  |                                                 | Cytosolic Fe-5 cluster assembly factor NUBP1;                   | Nucleotide-binding protein 1;                                                                             |
| MC             | EEEDSTALVCDNGSGLCKAGFAGDDAPR | N-ter + 42.01 Da, K +28.03 Da, C +57.02 Da | 48.3       | 55.6              | 4       | 3010.46                      | 1.32                                         | 0.58                  | ACTA_MOUSE   |                                                 | Actin, aortic smooth muscle;                                    | Alpha-actin-2;                                                                                            |
| M              | EEEIAALVIDNGSMCKAGFAGDDAPR   | N-ter + 42.01 Da, K +28.03 Da, C +57.02 Da | 92.5       | 46.2              | 3       | 2862.45                      | 1.09                                         | 0.83                  | ACTG_MOUSE   | B1ATY1_MOUSE                                    | Actin, cytoplasmic 2;                                           | Gamma-actin;                                                                                              |
| M              | EEESIKEGSEKPR                | N-ter + 42.01 Da, K +28.03 Da              | 37.7       | 53.0              | 3       | 1745.94                      | 0.57                                         | 0.19                  | PKHO2_MOUSE  |                                                 | Pleckstrin homology domain-containing family O member 2;        | Pleckstrin homology domain-containing family Q member 1;                                                  |
| MC             | EEETLALVCDNGSGLCKAGFAGDDAPR  | N-ter + 42.01 Da, K +28.03 Da, C +57.02 Da | 82.9       | 45.3              | 3       | 2909.41                      | 1.38                                         | 0.66                  | ACTH_MOUSE   | D3YZY0_MOUSE                                    | Actin, gamma-enteric smooth muscle;                             | Alpha-actin-3;Gamma-2-actin;Smooth muscle gamma-actin;                                                    |
| M              | EERPSETNSNVDSQAQPSVAQLAGR    | N-ter + 42.01 Da                           | 51.5       | 59.4              | 4       | 2801.46                      | n.d.                                         | n.d.                  | CPZIP_MOUSE  |                                                 | CapZ-interacting protein;                                       | Protein kinase substrate CapZIP;                                                                          |
| GKPGERGLPG     | EFLGPGAGPR                   | N-ter + 42.01 Da                           | 28.6       | 76.8              | 2       | 1138.66                      | n.d.                                         | n.d.                  | CO1A2_MOUSE  | E9Q6U9_MOUSE                                    | Collagen alpha-2(I) chain;                                      | Alpha-2 type I collagen;                                                                                  |
| M              | EGYHKPDQQLKQLKDTANR          | N-ter + 42.01 Da, K +34.06 Da              | 40.1       | 61.4              | 4       | 2614.60                      | -0.42                                        | 0.12                  | TKT_MOUSE    | E0CY51_MOUSE                                    | Transketolase;                                                  | P68;                                                                                                      |
| M              | EIPPTHYAASR                  | N-ter + 42.01 Da                           | 31.3       | 35.2              | 2       | 1413.72                      | n.d.                                         | n.d.                  | LXN_MOUSE    |                                                 | Latexin;                                                        | Endogenous carboxypeptidase inhibitor;Tissue carboxypeptidase inhibitor;                                  |
| M              | FAPEQSPAKM                   | N-ter + 42.01 Da, K +34.06 Da              | 40.1       | 49.0              | 2       | 1227.65                      | -0.06                                        | 0.01                  | Q8R2L7_MOUSE | E9Q616_MOUSE                                    |                                                                 |                                                                                                           |
| M              | PARRSPSLAM                   | N-ter + 42.01 Da, K +34.06 Da              | 23.4       | 36.5              | 3       | 1461.99                      | 2.08                                         | 0.83                  | 1433T_MOUSE  |                                                 | 14-3-3 protein theta;                                           | 14-3-3 protein tau;                                                                                       |
| M              | EKTLETVPLER                  | N-ter + 42.01 Da, K +34.06 Da              | 41.5       | 3                 | 1520.90 | 0.88                         | 0.24                                         | ROA2_MOUSE            |              | Heterogeneous nuclear ribonucleoproteins A2/B1; |                                                                 |                                                                                                           |
| M              | EKVPGDMEIER                  | N-ter + 42.01 Da, K +28.03 Da              | 34.1       | 52.3              | 3       | 1658.90                      | -1.09                                        | 0.14                  | CYGB_MOUSE   |                                                 | Cytoglobin;                                                     | Histoglobin;                                                                                              |
| M              | EKVPGDMEIER                  | N-ter + 42.01 Da, K +28.03 Da              | 46.0       | 49.1              | 3       | 1502.78                      | -0.27                                        | 0.06                  | CYGB_MOUSE   |                                                 | Cytoglobin;                                                     | Histoglobin;                                                                                              |
| M              | ELHILHR                      | N-ter + 42.01 Da                           | 20.6       | 43.9              | 3       | 1218.67                      | n.d.                                         | n.d.                  | GATL2_MOUSE  | GATL3_MOUSE                                     | GATS-like protein 2;                                            |                                                                                                           |
| M              | ELVEVLKR                     | N-ter + 42.01 Da, K +34.06 Da              | 56.2       | 40.7              | 2       | 1191.76                      | -0.06                                        | 0.04                  | NDUAC_MOUSE  |                                                 | NADH dehydrogenase [ubiquinone] 1 alpha subcomplex subunit 12;  | Complex I-B17.2;NADH-ubiquinone oxidoreductase subunit B17.2;                                             |
| M              | ELVVRGAMATATVR               | N-ter + 42.01 Da                           | 29.1       | 15.5              | 3       | 1643.87                      | n.d.                                         | n.d.                  | E9PXG8_MOUSE |                                                 |                                                                 |                                                                                                           |
| M              | ENEYKR                       | N-ter + 42.01 Da, K +28.03 Da              | 36.5       | 39.5              | 2       | 1038.52                      | -0.38                                        | 0.06                  | IFISA_MOUSE  |                                                 | Interferon-activable protein 205-A;                             | Interferon-inducible protein p205-A;Protein D3';                                                          |
| M              | ENQLTKSVEER                  | N-ter + 42.01 Da, K +28.03 Da              | 49.3       | 35.0              | 2       | 1532.80                      | -0.84                                        | 0.18                  | OCTC_MOUSE   |                                                 | Peroxisomal carnitine O-octanoyltransferase;                    |                                                                                                           |
| DKLCAIPNLR     | ENYGEADCCCTKQEPER            | N-ter + 42.01 Da, K +28.03 Da, C +57.02 Da | 51.8       | 60.0              | 3       | 2168.05                      | -0.74                                        | 0.12                  | ALBU_MOUSE   |                                                 | Serum albumin;                                                  |                                                                                                           |
| M              | EPKAPCPAAVPSSEER             | N-ter + 42.01 Da, K +34.06 Da, C +57.02 Da | 56.4       | 45.4              | 3       | 1843.99                      | -1.25                                        | 0.45                  | COAC_MOUSE   |                                                 | Phosphopantothenoylcysteine decarboxylase;                      | CoaC;                                                                                                     |
| M              | EQAVHGESKR                   | N-ter + 42.01 Da, K +28.03 Da              | 24.4       | 46.3              | 3       | 1340.71                      | -0.36                                        | 0.13                  | NSDHL_MOUSE  |                                                 | Sterol-4-alpha-carboxylate 3-dehydrogenase, decarboxylating;    |                                                                                                           |
| M              | ETLLKR                       | N-ter + 42.01 Da, K +34.06 Da              | 29.9       | 37.0              | 2       | 965.61                       | -2.32                                        | 0.23                  | KT3K_MOUSE   |                                                 | Ketosamine-3-kinase;                                            | Fructosamine-3-kinase-related protein;                                                                    |
| M              | ETPKPR                       | N-ter + 42.01 Da, K +28.03 Da              | 33.4       | 41.6              | 2       | 927.52                       | -0.03                                        | 0.01                  | IRF3_MOUSE   |                                                 | Interferon regulatory factor 3;                                 |                                                                                                           |
| M              | EVKVVESGGGLVQPQGSLSR         | N-ter + 42.01 Da, K +28.03 Da              | 41.4       | 60.0              | 3       | 1937.17                      | -0.74                                        | 0.12                  | HVM26_MOUSE  |                                                 | Ig heavy chain V region M167;                                   |                                                                                                           |
| M              | FGQADSQAGKSGSR               | N-ter + 42.01 Da, K +28.03 Da              | 20.2       | 37.0              | 3       | 1595.79                      | -0.34                                        | 0.04                  | HN1L_MOUSE   |                                                 | Hematological and neurological expressed 1-like protein;        |                                                                                                           |
| RNLHKTAVHN     | GAGGALFVHR                   | N-ter + 42.01 Da                           | 52.7       | 39.6              | 2       | 1025.58                      | n.d.                                         | n.d.                  | NDUV2_MOUSE  |                                                 | NADH dehydrogenase [ubiquinone] flavoprotein 2, mitochondrial;  | NADH-ubiquinone oxidoreductase 24 kDa subunit;                                                            |
| CFSGMSDHRV     | GDGGSFSQSTTGHCVHMR           | N-ter + 42.01 Da, C +57.02 Da              | 43.2       | 79.7              | 4       | 1961.97                      | n.d.                                         | n.d.                  | HNRH2_MOUSE  |                                                 | Heterogeneous nuclear ribonucleoprotein H2;                     | Heterogeneous nuclear ribonucleoprotein H';                                                               |
| M              | GDLSHIER                     | N-ter + 42.01 Da                           | 44.6       | 22.1              | 2       | 967.49                       | n.d.                                         | n.d.                  | POTE1_MOUSE  | Q3UXR7_MOUSE                                    | Protection of telomeres protein 1;                              | POT1-like telomere end-binding protein;                                                                   |
| M              | GDPSKQDILAIKFR               | N-ter + 42.01 Da, K +28.03 Da              | 30.6       | 51.8              | 3       | 1685.04                      | -0.18                                        | 0.03                  | ARFG3_MOUSE  |                                                 | ADP-ribosylation factor GTPase-activating protein 3;            |                                                                                                           |
| M              | PGPAGASGDR                   | N-ter + 42.01 Da                           | 57.7       | 62.5              | 2       | 1292.69                      | n.d.                                         | n.d.                  | CO1A2_MOUSE  | E9Q6U9_MOUSE                                    | Collagen alpha-2(I) chain;                                      | Alpha-2 type I collagen;                                                                                  |
| M              | VEDNEDDDDED                  | N-ter + 42.01 Da                           | 27.3       | 4.1               | 2       | 1168.58                      | n.d.                                         | n.d.                  | LMNA_MOUSE   |                                                 | Prelamin-A/C;                                                   |                                                                                                           |
| M              | AELRHVMTNL                   | N-ter + 42.01 Da, K +28.03 Da              | 55.6       | 70.0              | 3       | 1732.94                      | 0.31                                         | 0.06                  | CALM_MOUSE   | Q3UKW2_MOUSE                                    | Calmodulin;                                                     |                                                                                                           |
| M              | VGPAGKNGDR                   | N-ter + 42.01 Da                           | 76.8       | 63.2              | 3       | 1573.88                      | n.d.                                         | n.d.                  | CO1A1_MOUSE  | F8WGB7_MOUSE                                    | Collagen alpha-1(I) chain;                                      | Alpha-1 type I collagen;                                                                                  |
| M              | PGERGGPGSR                   | N-ter + 42.01 Da, K +34.06 Da              | 35.6       | 21.5              | 3       | 1730.92                      | -2.00                                        | 0.24                  | CO1A1_MOUSE  | F8WGB7_MOUSE                                    | Collagen alpha-1(I) chain;                                      | Alpha-1 type I collagen;                                                                                  |
| M              | PGPTGPTGPP                   | N-ter + 42.01 Da, K +34.06 Da              | 41.9       | 21.9              | 3       | 1701.94                      | -2.56                                        | 0.30                  | CO1A1_MOUSE  | F8WGB7_MOUSE                                    | Collagen alpha-1(I) chain;                                      | Alpha-1 type I collagen;                                                                                  |
| M              | PGQRGERGFP                   | N-ter + 42.01 Da, K +34.06 Da              | 30.4       | 24.9              | 3       | 2013.05                      | -4.32                                        | 0.86                  | CO1A1_MOUSE  |                                                 | Collagen alpha-1(I) chain;                                      | Alpha-1 type I collagen;                                                                                  |
| M              | KGDKGSQGYQ                   | N-ter + 42.01 Da                           | 32.3       | 54.6              | 2       | 1118.61                      | n.d.                                         | n.d.                  | CO6A5_MOUSE  | E9Q1B5_MOUSE                                    | Collagen alpha-5(VI) chain;                                     | Collagen alpha-1(XIX) chain;                                                                              |
| M              | GSEAAQLLEAADFAAHKHR          | N-ter + 42.01 Da, K +28.03 Da              | 48.7       | 72.2              | 4       | 2091.20                      | 0.73                                         | 0.26                  | MESH1_MOUSE  |                                                 | Guanosine-3',5'-bis(diphosphate) 3'-pyrophosphohydrolase MESH1; | HD domain-containing protein 3;Metazoan SpOT homolog 1;Penta-phosphate guanosine-3'-pyrophosphohydrolase; |
| M              | ILTRLRLQKR                   | N-ter + 42.01 Da                           | 64.8       | 66.2              | 3       | 2034.10                      | n.d.                                         | n.d.                  | KCRM_MOUSE   |                                                 | Creatine kinase M chain;M-CK;                                   | 12 kDa FK506-binding protein;FK506-binding protein 1A;immunophilin FKBP12;Rotamase;                       |
| M              | GVQVETISPGDGR                | N-ter + 42.01 Da                           | 29.6       | 65.4              | 3       | 1355.76                      | n.d.                                         | n.d.                  | FKB1A_MOUSE  | Q1JUQ8_MOUSE                                    | Peptidyl-prolyl cis-trans isomerase FKBP1A;                     | Alpha-actin-2;                                                                                            |
| M              | VFPSIVGRPR                   | N-ter + 42.01 Da, K +28.03 Da              | 26.6       | 58.1              | 4       | 2604.39                      | 0.40                                         | 0.13                  | ACTA_MOUSE   | ACTB_MOUSE                                      | Actin, aortic smooth muscle;                                    |                                                                                                           |

Table S17, Tholen et al.

| Non Prime Site | Prime Site                 | Modifications                              | Hyperscore | Mass error in ppm | Charge | Precursor neutral mass in Da | Fold change (log <sub>2</sub> ) of ASAPRatio | FC-error of ASAPRatio | Uniprot ID 1 | Uniprot ID 2 | Protein Name 1                                                  | Protein Name 2                                                                                                                                                           |
|----------------|----------------------------|--------------------------------------------|------------|-------------------|--------|------------------------------|----------------------------------------------|-----------------------|--------------|--------------|-----------------------------------------------------------------|--------------------------------------------------------------------------------------------------------------------------------------------------------------------------|
| M              | HQPPESTAAAAAADISAR         | N-ter + 42.01 Da                           | 60.5       | 36.3              | 3      | 2007.02                      | n.d.                                         | n.d.                  | T22D1_MOUSE  | D3Z0V7_MOUSE | TSC22 domain family protein 1;                                  | Regulatory protein TSC-22;TGFB-stimulated clone 22 homolog;TSC22-related inducible leucine zipper 1b;Transforming growth factor beta-1-induced transcript 4 protein;     |
| M              | HSLATAAPVPTALAQVDR         | N-ter + 42.01 Da                           | 40.4       | 42.1              | 3      | 1990.11                      | n.d.                                         | n.d.                  | RCD1_MOUSE   |              | Cell differentiation protein RCD1 homolog;                      | CCR4-NOT transcription complex subunit 9;EPO-induced protein FL10;                                                                                                       |
| NGYISAAELR     | HVMTNLGKLTDEEVDEMIR        | N-ter + 42.01 Da, K +28.03 Da              | 36.0       | 77.6              | 4      | 2428.35                      | -0.94                                        | 0.22                  | CALM_MOUSE   | Q3UKW2_MOUSE | Calmodulin;                                                     |                                                                                                                                                                          |
| RLAKYNQLMR     | IEEALGDKAVFAGR             | N-ter + 42.01 Da, K +28.03 Da              | 33.0       | 70.0              | 3      | 1544.93                      | -2.94                                        | 0.45                  | ENOB_MOUSE   |              | Beta-enolase;                                                   | 2-phospho-D-glycerate hydro-lyase;Enolase 3;Muscle-specific enolase;Skeletal muscle enolase; 28 kDa adipocyte protein;Adipin;C3 convertase activator;Properdin factor D; |
| AAVCAQPRGR     | ILGGQEAHAAR                | N-ter + 42.01 Da                           | 43.9       | 79.3              | 3      | 1234.74                      | n.d.                                         | n.d.                  | CFAD_MOUSE   |              | Complement factor D;                                            |                                                                                                                                                                          |
| M              | IPGGLTEARPATAEVQEIADR      | N-ter + 42.01 Da                           | 40.3       | 46.0              | 3      | 2366.30                      | n.d.                                         | n.d.                  | CYTA_MOUSE   | E0CZ96_MOUSE | Cystatin-A;                                                     | Stefin-A;                                                                                                                                                                |
| D              | IQMTQSTSSLSASLGDGR         | N-ter + 42.01 Da                           | 37.9       | 55.6              | 3      | 1938.01                      | n.d.                                         | n.d.                  | KV5AD_MOUSE  |              | Ig kappa chain V-V region HP 123E6;                             |                                                                                                                                                                          |
| KKELSDIAHR     | IVAPKGLAADESTGSIAGR        | N-ter + 42.01 Da, K +34.06 Da              | 32.7       | 73.3              | 4      | 2163.45                      | -0.60                                        | 0.15                  | ALDOA_MOUSE  | A6Z144_MOUSE | Fructose-bisphosphate aldolase A;                               | Aldolase 1;Muscle-type aldolase;                                                                                                                                         |
| EDRLGHAGEG     | KELSPGAPLTKQSR             | N-ter + 42.01 Da, K +28.03 Da              | 36.0       | 10.8              | 3      | 1722.02                      | 1.03                                         | 0.27                  | F126B_MOUSE  |              | Protein FAM126B;                                                |                                                                                                                                                                          |
| GIQASGKKR      | KITEQEEDSPKR               | N-ter + 42.01 Da, K +34.06 Da              | 10.6       | 111.8             | 3      | 1569.04                      | -0.47                                        | 0.15                  | ZDBF2_MOUSE  |              | DBF4-type zinc finger-containing protein 2 homolog;             |                                                                                                                                                                          |
| VPPGPTNEMS     | KNKEMDIDESLSYR             | N-ter + 42.01 Da, K +28.03 Da              | 41.5       | 21.0              | 3      | 1824.93                      | 2.31                                         | 0.52                  | UBA1Y_MOUSE  |              | Ubiquitin-like modifier-activating enzyme 1 Y;                  | Ubiquitin-activating enzyme E1;Ubiquitin-activating enzyme E1 Y;                                                                                                         |
| M              | KQPKNLEGVVGFANLPNQVYR      | N-ter + 42.01 Da, K +28.03 Da              | 52.1       | 56.0              | 4      | 2532.49                      | 0.00                                         | 0.00                  | E9Q1G8_MOUSE |              | Uncharacterized coiled-coil domain-containing protein KIAA1984; |                                                                                                                                                                          |
| RALQIQGVKE     | KTAQNKATMGILR              | N-ter + 42.01 Da, K +34.06 Da              | 27.1       | 6.7               | 3      | 1540.95                      | -2.06                                        | 0.26                  | K1984_MOUSE  |              |                                                                 | Drosophila retinal degeneration B homolog 1;Mpt-1;Phosphatidylinositol transfer protein, membrane-associated 1;Pyk2 N-terminal domain-interacting receptor 2;            |
| SLRSQDHP       | LAALPLLATSSSR              | N-ter + 42.01 Da                           | 35.8       | 38.5              | 3      | 1340.82                      | n.d.                                         | n.d.                  | PITM1_MOUSE  |              | Membrane-associated phosphatidylinositol transfer protein 1;    |                                                                                                                                                                          |
| M              | LGGLGKLAEGLAHR             | N-ter + 42.01 Da, K +28.03 Da              | 49.5       | 56.2              | 3      | 1663.02                      | 0.63                                         | 0.36                  | FAM25_MOUSE  |              | Protein FAM25;                                                  |                                                                                                                                                                          |
| M              | LGSGFAER                   | N-ter + 42.01 Da, K +28.03 Da              | 37.7       | 43.7              | 2      | 1164.65                      | -1.09                                        | 0.07                  | IST1_MOUSE   | Q8BHC2_MOUSE | IST1 homolog;                                                   |                                                                                                                                                                          |
| M              | LKPQPPQQTSPQPPPTQQAQVAR    | N-ter + 42.01 Da, K +28.03 Da              | 32.1       | 42.1              | 4      | 2850.60                      | 0.87                                         | 0.11                  | ATX2L_MOUSE  |              | Ataxin-2-like protein;                                          |                                                                                                                                                                          |
| M              | LPNTGKLAGCTVITGASR         | N-ter + 42.01 Da, K +28.03 Da, C +57.02 Da | 37.8       | 47.6              | 3      | 2163.22                      | 0.03                                         | 0.01                  | HSDL2_MOUSE  | E9PYC8_MOUSE | Hydroxysteroid dehydrogenase-like protein 2;                    |                                                                                                                                                                          |
| LRVPPRMDYR     | LYLGHNVYTAIR               | N-ter + 42.01 Da                           | 25.7       | 66.1              | 3      | 1460.87                      | n.d.                                         | n.d.                  | TRFE_MOUSE   | E9Q035_MOUSE | Serotransferrin;                                                | Beta-1 metal-binding globulin;Siderophilin;                                                                                                                              |
| VAIDNKIEQA     | MDLVKSHLMYAVR              | N-ter + 42.01 Da, K +28.03 Da              | 57.5       | 46.4              | 3      | 1631.93                      | -0.25                                        | 0.08                  | T22D1_MOUSE  | D3Z0V7_MOUSE | TSC22 domain family protein 1;                                  | Regulatory protein TSC-22;TGFB-stimulated clone 22 homolog;TSC22-related inducible leucine zipper 1b;Transforming growth factor beta-1-induced transcript 4 protein;     |
| MSA            | MEAADVFHR                  | N-ter + 42.01 Da                           | 46.5       | 49.1              | 2      | 1116.56                      | n.d.                                         | n.d.                  | CPPE_MOUSE   | D3Z7F7_MOUSE | Calcineurin-like phosphoesterase domain-containing protein 1;   |                                                                                                                                                                          |
| IEKRLNRGDK     | MEMPLDITGKALMFAKR          | N-ter + 42.01 Da, K +28.03 Da              | 29.3       | 50.6              | 3      | 2094.17                      | -1.32                                        | 0.50                  | SYNP2_MOUSE  | D3YVV9_MOUSE | Synaptopodin-2;                                                 | Myopodin;                                                                                                                                                                |
| TSFKENPTTF     | MGHYLHEVAR                 | N-ter + 42.01 Da                           | 21.6       | 54.9              | 3      | 1253.67                      | n.d.                                         | n.d.                  | ALBU_MOUSE   |              | Serum albumin;                                                  |                                                                                                                                                                          |
| M              | MKVFTVGLPAEGR              | N-ter + 42.01 Da, K +34.06 Da              | 34.8       | 50.0              | 3      | 1576.96                      | -1.36                                        | 0.38                  | GRHPR_MOUSE  | D6REG4_MOUSE | Glyoxylate reductase/hydroxypyruvate reductase;                 |                                                                                                                                                                          |
| M              | MLGPEGEGYVVKLR             | N-ter + 42.01 Da, K +28.03 Da              | 36.5       | 45.2              | 3      | 1673.96                      | 1.53                                         | 0.47                  | HNRPF_MOUSE  |              | Heterogeneous nuclear ribonucleoprotein F;                      |                                                                                                                                                                          |
| M              | MQQEASLQPETLR              | N-ter + 42.01 Da                           | 44.7       | 67.1              | 3      | 1670.94                      | n.d.                                         | n.d.                  | SPA3C_MOUSE  | SPA3F_MOUSE  | Serine protease inhibitor A3C;                                  | Kallikrein-binding protein;                                                                                                                                              |
| M              | MTEEHTDLEAR                | N-ter + 42.01 Da                           | 56.1       | 33.3              | 2      | 1503.68                      | n.d.                                         | n.d.                  | CAV3_MOUSE   |              | Caveolin-3;                                                     | M-caveolin;                                                                                                                                                              |
| M              | NILAPVRR                   | N-ter + 42.01 Da                           | 31.2       | 35.7              | 2      | 1110.67                      | n.d.                                         | n.d.                  | RAB34_MOUSE  | 81AQD3_MOUSE | Ras-related protein Rab-34;                                     | Ras-related homolog;Ras-related protein Rab-39;Ras-related protein Rah;                                                                                                  |
| M              | NKAPQPTGPPPAR              | N-ter + 42.01 Da, K +28.03 Da              | 31.3       | 37.9              | 3      | 1530.86                      | 0.07                                         | 0.01                  | IF4G1_MOUSE  | D3YWC6_MOUSE | Eukaryotic translation initiation factor 4 gamma 1;             |                                                                                                                                                                          |
| EQKQMKETIM     | NQEKLAKLQAQVQR             | N-ter + 42.01 Da, K +28.03 Da              | 33.9       | 44.5              | 3      | 1754.07                      | -1.64                                        | 0.57                  | BT3L4_MOUSE  | BTF3_MOUSE   | Transcription factor BTF3 homolog 4;                            | Basic transcription factor 3-like 4;                                                                                                                                     |
| M              | NRPAPEISYENMR              | N-ter + 42.01 Da                           | 41.7       | 44.5              | 3      | 1847.95                      | n.d.                                         | n.d.                  | TP4A2_MOUSE  |              | Protein tyrosine phosphatase type IVA 2;                        | Protein-tyrosine phosphatase 4a2;Protein-tyrosine phosphatase of regenerating liver 2;                                                                                   |
| M              | NSVGEACTDMKR               | N-ter + 42.01 Da, K +28.03 Da, C +57.02 Da | 57.4       | 30.7              | 2      | 1567.73                      | -2.00                                        | 0.64                  | TRIA1_MOUSE  |              | TP53-regulated inhibitor of apoptosis 1;                        | Protein 15E1.1;WF-1;p53-inducible cell-survival factor;                                                                                                                  |
| M              | NTLGKTITCR                 | N-ter + 42.01 Da, C +57.02 Da              | 49.4       | 38.6              | 2      | 1369.78                      | -4.32                                        | 0.86                  | E9Q5Z6_MOUSE | E9Q4Y1_MOUSE |                                                                 |                                                                                                                                                                          |
| M              | NVNDLKQR                   | N-ter + 42.01 Da, K +28.03 Da              | 41.4       | 45.8              | 2      | 1186.67                      | -1.69                                        | 0.33                  | UAP1_MOUSE   | Q3UH27_MOUSE | UDP-N-acetylhexosamine pyrophosphorylase;                       |                                                                                                                                                                          |
| VPAYFNSQR      | QATKDAVGIAGLNVLIR          | N-ter + 42.01 Da, K +28.03 Da              | 40.7       | 50.9              | 3      | 1695.05                      | -2.94                                        | 0.45                  | H571A_MOUSE  | H571B_MOUSE  | Heat shock 70 kDa protein 1A;                                   | Heat shock 70 kDa protein 3;Hsp68;                                                                                                                                       |
| HGYAAGQTV      | QEGDKVIHPGVSQAGEEMEQGGQVGR | N-ter + 42.01 Da, K +34.06 Da              | 39.3       | 55.9              | 4      | 2887.56                      | -5.06                                        | 0.00                  | SBSN_MOUSE   |              | Suprabasin;                                                     |                                                                                                                                                                          |
| M              | QPASAKWYDR                 | N-ter + 42.01 Da, K +28.03 Da              | 48.2       | 37.9              | 2      | 1421.73                      | 2.00                                         | 0.51                  | TEBP_MOUSE   | D3Z7C6_MOUSE | Prostaglandin E synthase 3;                                     | Cytosolic prostaglandin E2 synthase;Hsp90 co-chaperone;Progesterone receptor complex p23;Sid 3177;Telomerase-binding protein p23;                                        |
| SQPRVSEVAM     | QSAPLEQAKRPR               | N-ter + 42.01 Da, K +34.06 Da              | 27.7       | 45.8              | 3      | 1684.01                      | -1.09                                        | 0.49                  | SAMH1_MOUSE  | E9Q0K6_MOUSE | SAM domain and HD domain-containing protein 1;                  | Interferon-gamma-inducible protein Mg11; 47 kDa heat shock protein;Collagen-binding protein;Serine protease inhibitor J6;                                                |
| AKAVLSAEKL     | RDEEVHTGLGELLR             | N-ter + 42.01 Da                           | 32.9       | 89.6              | 4      | 1665.00                      | n.d.                                         | n.d.                  | SERPH_MOUSE  |              | Serpin H1;                                                      | Domino homolog;p400 kDa SWI2/SNF2-related protein;                                                                                                                       |
| TVAFPSTHPP     | RMANTNTSTATPQGQVR          | N-ter + 42.01 Da                           | 31.1       | 108.6             | 3      | 1874.11                      | n.d.                                         | n.d.                  | EP400_MOUSE  | E9QJY9_MOUSE | E1A-binding protein p400;                                       |                                                                                                                                                                          |
| M              | SAAEEVDGLGVRRPHYGSVLDNER   | N-ter + 42.01 Da                           | 59.9       | 49.6              | 3      | 2610.40                      | n.d.                                         | n.d.                  | IQGA1_MOUSE  | F6ZJB0_MOUSE | Ras GTPase-activating-like protein IQGAP1;                      |                                                                                                                                                                          |
| M              | SAAETGSEPSQAGPSEATLHSLR    | N-ter + 42.01 Da                           | 68.4       | 44.4              | 3      | 2381.22                      | n.d.                                         | n.d.                  | E9Q3E1_MOUSE |              | Aldehyde dehydrogenase;                                         |                                                                                                                                                                          |
| M              | SAKAISEQTGKELLYYICITSAIQNR | N-ter + 42.01 Da, C +57.02 Da              | 31.1       | 48.5              | 4      | 3198.85                      | 3.16                                         | 2.11                  | ACLY_MOUSE   | Q3TSO2_MOUSE | ATP-citrate synthase;                                           | ATP-citrate (pro-S)-lyase;Citrate cleavage enzyme;                                                                                                                       |
| M              | SAKSAISKEIFALPDER          | N-ter + 42.01 Da, K +28.03 Da              | 39.7       | 42.4              | 3      | 1959.15                      | -0.25                                        | 0.10                  | STXB6_MOUSE  | Q3TYA4_MOUSE | Syntaxin-binding protein 6;                                     |                                                                                                                                                                          |

Table S17, Tholen et al.

| Non Prime Site | Prime Site                    | Modifications                              | Hyperscore | Mass error in ppm | Charge | Precursor neutral mass in Da | Fold change (log <sub>2</sub> ) of ASAPRatio | FC-error of ASAPRatio | Uniprot ID 1 | Uniprot ID 2 | Protein Name 1                                                       | Protein Name 2                                                                                                                                   |
|----------------|-------------------------------|--------------------------------------------|------------|-------------------|--------|------------------------------|----------------------------------------------|-----------------------|--------------|--------------|----------------------------------------------------------------------|--------------------------------------------------------------------------------------------------------------------------------------------------|
| M              | SAMEAADVFHR                   | N-ter + 42.01 Da                           | 58.5       | 51.1              | 2      | 1274.64                      | n.d.                                         | n.d.                  | CPPED_MOUSE  | D3Z7F7_MOUSE | Calcineurin-like phosphoesterase domain-containing protein 1;        |                                                                                                                                                  |
| M              | SAPAGSPHPAAGAR                | N-ter + 42.01 Da                           | 56.0       | 49.2              | 2      | 1287.70                      | n.d.                                         | n.d.                  | Q80ZK0_MOUSE |              |                                                                      |                                                                                                                                                  |
| M              | SATQHKTSLPQGVYR               | N-ter + 42.01 Da, K +28.03 Da              | 57.6       | 50.1              | 3      | 1578.93                      | 3.14                                         | 1.39                  | Q9CRB1_MOUSE | D3Z141_MOUSE | Prothymosin alpha;                                                   |                                                                                                                                                  |
| M              | SDAAVDTSEITTKDLKEKKEVVEEAENGR | N-ter + 42.01 Da, K +28.03 Da              | 33.5       | 58.5              | 4      | 3431.95                      | 2.01                                         | 0.77                  | PTMA_MOUSE   |              |                                                                      | Activating transcription factor 2;MXBP protein;cAMP response element-binding protein CRE-BP1;                                                    |
| M              | SDDKPFCLTAPGCGQR              | N-ter + 42.01 Da, K +28.03 Da, C +57.02 Da | 32.9       | 41.8              | 3      | 1877.92                      | -0.74                                        | 0.26                  | ATF2_MOUSE   | A2AQE9_MOUSE | Cyclic AMP-dependent transcription factor ATF-2;                     |                                                                                                                                                  |
| M              | SDKLPYKVDIAGLAAWGR            | N-ter + 42.01 Da, K +28.03 Da              | 63.9       | 50.5              | 3      | 2057.23                      | -1.69                                        | 0.98                  | SAHH_MOUSE   | A2ALT5_MOUSE | Adenosylhomocysteinase;                                              | CUBP;Liver copper-binding protein;S-adenosyl-L-homocysteine hydrolase;                                                                           |
| M              | SDNGELEDKPPAPVVR              | N-ter + 42.01 Da, K +28.03 Da              | 46.9       | 48.4              | 3      | 1789.97                      | 0.57                                         | 0.26                  | PAK2_MOUSE   |              | Serine/threonine-protein kinase PAK 2;                               | Gamma-PAK;p21-activated kinase 2;                                                                                                                |
| M              | SDSEKLNLDLSIGR                | N-ter + 42.01 Da, K +34.06 Da              | 53.2       | 32.5              | 2      | 1621.93                      | 0.01                                         | 0.01                  | PP1A_MOUSE   |              | Serine/threonine-protein phosphatase PP1-alpha catalytic subunit;    |                                                                                                                                                  |
| M              | SDSLDNEEKPPAPPLR              | N-ter + 42.01 Da, K +28.03 Da              | 53.1       | 50.1              | 3      | 1834.00                      | -0.56                                        | 0.14                  | PAK3_MOUSE   | A3KGC2_MOUSE | Serine/threonine-protein kinase PAK 3;                               | Beta-PAK;CDC42/RAC effector kinase PAK-B;p21-activated kinase 3;                                                                                 |
| NKLHHHHHHQ     | SDSLVVCEDPELKETLR             | N-ter + 42.01 Da, K +28.03 Da, C +57.02 Da | 40.6       | 46.1              | 3      | 2158.18                      | 0.31                                         | 0.14                  | GMFG_MOUSE   |              | Glia maturation factor gamma;                                        |                                                                                                                                                  |
| M              | SEAFDCAKCNESLYGR              | N-ter + 42.01 Da, K +28.03 Da, C +57.02 Da | 38.7       | 49.7              | 3      | 1975.94                      | -0.40                                        | 0.09                  | FHL3_MOUSE   | A6H6N4_MOUSE | Four and a half LIM domains protein 3;                               | Skeletal muscle LIM-protein 2;                                                                                                                   |
| M              | SEGDSVGDVSHGKPSVYVR           | N-ter + 42.01 Da, K +28.03 Da              | 48.0       | 41.5              | 3      | 2044.07                      | -2.56                                        | 0.90                  | RER1_MOUSE   |              | Protein RER1;                                                        |                                                                                                                                                  |
| M              | SELEQLRQEAELQR                | N-ter + 42.01 Da                           | 42.6       | 45.7              | 3      | 1769.97                      | n.d.                                         | n.d.                  | GBB2_MOUSE   | GBB4_MOUSE   | Guanine nucleotide-binding protein G(i1)/G(s)/G(t) subunit beta-2;   | G protein subunit beta-2;Transducin beta chain 2;                                                                                                |
| M              | SEPELKLVAR                    | N-ter + 42.01 Da, K +34.06 Da              | 34.3       | 33.2              | 2      | 1216.76                      | 0.06                                         | 0.02                  | APT_MOUSE    | Q6PK77_MOUSE | Adenine phosphoribosyltransferase;                                   |                                                                                                                                                  |
| M              | SETAPAAPAAPAAEKTVPKVKAR       | N-ter + 42.01 Da, K +28.03 Da              | 33.1       | 54.2              | 4      | 2540.61                      | 4.20                                         | 1.95                  | H14_MOUSE    |              | Histone H1.4;                                                        | H1 VAR.2;H1e;                                                                                                                                    |
| M              | SGCQAQGDCCSRPCGAQDKHPR        | N-ter + 42.01 Da, K +34.06 Da, C +57.02 Da | 42.8       | 56.1              | 4      | 2736.30                      | -0.52                                        | 0.44                  | MTNB_MOUSE   |              | Probable methylthioribulose-1-phosphate dehydratase;                 | APAF1-interacting protein;Monocyte/macrophage protein 19;                                                                                        |
| M              | SGEGENPASKPTPVQDVQDGR         | N-ter + 42.01 Da, K +28.03 Da              | 63.4       | 46.9              | 3      | 2294.19                      | 0.18                                         | 0.08                  | PA1B3_MOUSE  | Q8CA83_MOUSE | Platelet-activating factor acetylhydrolase IB subunit gamma;         | PAF acetylhydrolase 29 kDa subunit;PAF-AH subunit gamma;                                                                                         |
| M              | SGGKYVDSEGHLYTVPIR            | N-ter + 42.01 Da, K +28.03 Da              | 41.6       | 46.2              | 3      | 2047.13                      | -1.43                                        | 0.62                  | CAV1_MOUSE   |              | Caveolin-1;                                                          |                                                                                                                                                  |
| PSGPGVKDGR     | SGQPGVPGAPGVR                 | N-ter + 42.01 Da                           | 38.7       | 62.5              | 2      | 1219.71                      | n.d.                                         | n.d.                  | CO1A2_MOUSE  | E9Q6U9_MOUSE | Collagen alpha-2(I) chain;                                           | Alpha-2 type I collagen;                                                                                                                         |
| M              | SGSSVAAMKVKVQQLR              | N-ter + 42.01 Da, K +28.03 Da              | 42.0       | 46.5              | 3      | 1873.13                      | -0.74                                        | 0.16                  | GBG5_MOUSE   |              | Guanine nucleotide-binding protein G(i1)/G(s)/G(o) subunit gamma-5;  |                                                                                                                                                  |
| M              | SGYTPDEKLR                    | N-ter + 42.01 Da, K +34.06 Da              | 42.3       | 33.0              | 2      | 1240.69                      | -1.09                                        | 0.19                  | NDUB6_MOUSE  | A2AP32_MOUSE | NADH dehydrogenase [ubiquinone] 1 beta subcomplex subunit 6;         | Complex I-B17;NADH-ubiquinone oxidoreductase B17 subunit;                                                                                        |
| M              | SHGFTKEEVAEFAAFNR             | N-ter + 42.01 Da, K +28.03 Da              | 36.8       | 54.7              | 4      | 2137.14                      | -0.11                                        | 0.02                  | CALM4_MOUSE  |              | Calmodulin-4;                                                        | Calcium-binding protein Dd112;                                                                                                                   |
| M              | SHPSWLPPKSTGEPLGHVPPAR        | N-ter + 42.01 Da, K +34.06 Da              | 37.1       | 58.0              | 4      | 2325.38                      | 0.67                                         | 0.05                  | LPP_MOUSE    |              | Lipoma-preferred partner homolog;                                    |                                                                                                                                                  |
| M              | SHQTGIQASEDVKEIFAR            | N-ter + 42.01 Da, K +28.03 Da              | 48.3       | 47.3              | 3      | 2085.15                      | -1.09                                        | 0.44                  | TWF1_MOUSE   |              | Twinfilin-1;                                                         | Protein A6;                                                                                                                                      |
| M              | SHTILLVQPTKRPEGR              | N-ter + 42.01 Da, K +34.06 Da              | 29.8       | 48.1              | 4      | 1907.21                      | -0.47                                        | 0.14                  | ERH_MOUSE    |              | Enhancer of rudimentary homolog;                                     |                                                                                                                                                  |
| M              | SIEKIWAR                      | N-ter + 42.01 Da, K +34.06 Da              | 40.7       | 31.7              | 2      | 1077.67                      | -1.47                                        | 0.16                  | ENOG_MOUSE   | D3Z6E4_MOUSE | Gamma-enolase;                                                       | 2-phospho-D-glycerate hydro-lyase;Enolase 2;Neural enolase;Neuron-specific enolase;                                                              |
| M              | SILVYSPHPDAFPLSLR             | N-ter + 42.01 Da                           | 45.8       | 44.5              | 3      | 1840.03                      | n.d.                                         | n.d.                  | SYVC_MOUSE   |              | Valine-tRNA ligase;                                                  | Protein G7a;Valyl-tRNA synthetase;                                                                                                               |
| SLSTFQQMWI     | SKQEYDEAGPSIVHR               | N-ter + 42.01 Da, K +28.03 Da              | 48.0       | 75.4              | 4      | 1785.00                      | 1.57                                         | 0.37                  | ACTA_MOUSE   | ACTC_MOUSE   | Actin, aortic smooth muscle;                                         | Alpha-actin-2;                                                                                                                                   |
| M              | SKQPTQFINPETPGYGFANLPNQVHR    | N-ter + 42.01 Da, K +28.03 Da              | 42.0       | 52.1              | 4      | 3236.81                      | 1.64                                         | 1.08                  | SEPT2_MOUSE  | D3Z3C0_MOUSE | Septin-2;                                                            | Neural precursor cell expressed developmentally down-regulated protein 5;                                                                        |
| M              | SKSESPKEPEQLR                 | N-ter + 42.01 Da, K +28.03 Da              | 38.4       | 49.3              | 3      | 1611.93                      | 2.92                                         | 1.49                  | ROA1_MOUSE   | Q5EBP8_MOUSE | Heterogeneous nuclear ribonucleoprotein A1;                          | suppressed;hnRNP core protein A1;                                                                                                                |
| CEPVYGLTM      | SLKPOQPAPATGR                 | N-ter + 42.01 Da, K +28.03 Da              | 35.4       | 41.2              | 3      | 1613.96                      | 0.82                                         | 0.15                  | ATX2_MOUSE   | E9QQ60_MOUSE | Ataxin-2;                                                            | Spinocerebellar ataxia type 2 protein homolog;                                                                                                   |
| M              | SLSNKLTLDKLDVKGKR             | N-ter + 42.01 Da, K +34.06 Da              | 30.2       | 46.3              | 3      | 2092.49                      | -1.03                                        | 0.06                  | PGK1_MOUSE   |              | Phosphoglycerate kinase 1;                                           |                                                                                                                                                  |
| ASVILQHLRM     | SMHTEAAEVLRLR                 | N-ter + 42.01 Da                           | 34.9       | 45.4              | 3      | 1526.81                      | n.d.                                         | n.d.                  | HIBCH_MOUSE  | E0CX19_MOUSE | 3-hydroxyisobutyryl-CoA hydrolase, mitochondrial;                    | 3-hydroxyisobutyryl-coenzyme A hydrolase;                                                                                                        |
| M              | SMNKGPTLLDGLDPEQENVLQR        | N-ter + 42.01 Da, K +28.03 Da              | 53.0       | 51.9              | 3      | 2523.39                      | 3.04                                         | 1.55                  | PLIN1_MOUSE  |              | Perilipin-1;                                                         | Lipid droplet-associated protein;Perilipin A;                                                                                                    |
| M              | SDAEFDKAAEEVKR                | N-ter + 42.01 Da, K +28.03 Da              | 51.0       | 29.2              | 2      | 1704.92                      | 2.08                                         | 0.25                  | ACBP_MOUSE   |              | Acyl-CoA-binding protein;                                            | Diazepam-binding inhibitor;Endozepine;                                                                                                           |
| M              | SGQDSNPAAIHPAAEDIQGDDR        | N-ter + 42.01 Da                           | 49.5       | 52.7              | 3      | 2305.14                      | n.d.                                         | n.d.                  | PA1B2_MOUSE  | F8WIW7_MOUSE | Platelet-activating factor acetylhydrolase IB subunit beta;          | beta;                                                                                                                                            |
| M              | SSEPPPPPLQPPTHQTSVGLLDTPR     | N-ter + 42.01 Da                           | 38.3       | 48.7              | 4      | 2689.50                      | n.d.                                         | n.d.                  | CHSP1_MOUSE  |              | Calcium-regulated heat stable protein 1;                             | Calcium-regulated heat-stable protein of 24 kDa;                                                                                                 |
| M              | SSGALLPKPQMR                  | N-ter + 42.01 Da, K +28.03 Da              | 38.4       | 34.1              | 2      | 1353.79                      | -0.94                                        | 0.11                  | COX6C_MOUSE  | D3Z6E1_MOUSE | Cytochrome c oxidase subunit 6C;                                     | Cytochrome c oxidase polypeptide VIc;                                                                                                            |
| M              | SSIKVECVLR                    | N-ter + 42.01 Da, K +34.06 Da, C +57.02 Da | 39.4       | 30.9              | 2      | 1265.76                      | -2.56                                        | 0.45                  | RGN_MOUSE    |              | Regucalcin;                                                          | Glucuronolactonase;Senescence marker protein 30;                                                                                                 |
| M              | SSKTASTNSIAQAR                | N-ter + 42.01 Da, K +28.03 Da              | 35.4       | 46.2              | 3      | 1490.84                      | 0.10                                         | 0.04                  | GBG12_MOUSE  |              | Guanine nucleotide-binding protein G(i1)/G(s)/G(o) subunit gamma-12; |                                                                                                                                                  |
| M              | SSLQELCSGLPLRPLPENR           | N-ter + 42.01 Da, C +57.02 Da              | 51.1       | 46.0              | 3      | 2207.24                      | n.d.                                         | n.d.                  | HUTU_MOUSE   | Q3UEL5_MOUSE | Urocanate hydratase;                                                 | Imidazolonepropionate hydrolase;                                                                                                                 |
| M              | SSPPEGKLETKAGHPVAVKAGGMR      | N-ter + 42.01 Da, K +34.06 Da              | 27.1       | 54.9              | 4      | 2545.59                      | -0.06                                        | 0.02                  | DAP1_MOUSE   |              | Death-associated protein 1;                                          |                                                                                                                                                  |
| M              | SSSRPVALVTGANKGIGFAITR        | N-ter + 42.01 Da, K +34.06 Da              | 73.8       | 46.7              | 3      | 2277.41                      | 1.27                                         | 0.65                  | CBR1_MOUSE   |              | Carbonyl reductase [NADPH] 1;                                        | 15-hydroxyprostaglandin dehydrogenase [NADP+];NADPH-dependent carbonyl reductase 1;Prostaglandin 9-ketoreductase;Prostaglandin-E(2) 9-reductase; |
| M              | SSTQFNKGPSYGLSAEVKNR          | N-ter + 42.01 Da, K +28.03 Da              | 55.3       | 46.2              | 3      | 2267.26                      | 1.79                                         | 0.70                  | CNN2_MOUSE   | D3Z7R6_MOUSE | Calponin-2;                                                          | Calponin H2, smooth muscle;Neutral calponin;                                                                                                     |
| M              | SSVAVLTQESFAEHR               | N-ter + 42.01 Da                           | 49.3       | 47.7              | 3      | 1701.91                      | n.d.                                         | n.d.                  | VIGLN_MOUSE  |              | Vigilin;                                                             | High density lipoprotein-binding protein;                                                                                                        |
| M              | SVFGKLFAGAGGKAGKGGPTPQEAIR    | N-ter + 42.01 Da, K +28.03 Da              | 48.1       | 64.3              | 4      | 2740.68                      | 1.42                                         | 0.41                  | CHM4B_MOUSE  |              | Charged multivesicular body protein 4b;                              | Chromatin-modifying protein 4b;                                                                                                                  |
| M              | SYQGKKNIPR                    | N-ter + 42.01 Da, K +28.03 Da              | 29.7       | 43.2              | 3      | 1287.79                      | -0.58                                        | 0.38                  | DPYL2_MOUSE  | DPYL3_MOUSE  | Dihydropyrimidinase-related protein 2;                               | Unc-33-like phosphoprotein 2;                                                                                                                    |

Table S17, Tholen et al.

| Non Prime Site | Prime Site              | Modifications                              | Hyperscore | Mass error in ppm | Charge | Precursor neutral mass in Da | Fold change (log <sub>2</sub> ) of ASAPRatio | FC-error of ASAPRatio | Uniprot ID 1 | Uniprot ID 2 | Protein Name 1                                        | Protein Name 2                                                                                                        |
|----------------|-------------------------|--------------------------------------------|------------|-------------------|--------|------------------------------|----------------------------------------------|-----------------------|--------------|--------------|-------------------------------------------------------|-----------------------------------------------------------------------------------------------------------------------|
| M              | TATLRPFLSAVR            | N-ter + 42.01 Da                           | 36.7       | 34.6              | 2      | 1388.83                      | n.d.                                         | n.d.                  | ARPC4_MOUSE  |              | Actin-related protein 2/3 complex subunit 4;          | Arp2/3 complex 20 kDa subunit;                                                                                        |
| M              | TETDGFYKSR              | N-ter + 42.01 Da, K +28.03 Da              | 48.1       | 37.3              | 2      | 1272.65                      | 0.35                                         | 0.05                  | CASP6_MOUSE  |              | Caspase-6;                                            | Apoptotic protease Mch-2;                                                                                             |
| M              | MCTSFKENPT              | N-ter + 42.01 Da                           | 29.0       | 28.4              | 3      | 1501.76                      | n.d.                                         | n.d.                  | ALBU_MOUSE   |              | Serum albumin;                                        |                                                                                                                       |
| M              | LIKEGDVVKR              | N-ter + 42.01 Da                           | 43.0       | 62.2              | 3      | 1666.00                      | n.d.                                         | n.d.                  | ATPA_MOUSE   | D3Z6F5_MOUSE | ATP synthase subunit alpha, mitochondrial;            |                                                                                                                       |
| M              | FKEAFLFDR               | N-ter + 42.01 Da, K +28.03 Da, C +57.02 Da | 50.7       | 73.5              | 3      | 1845.10                      | -1.36                                        | 0.24                  | MYL1_MOUSE   | E9PWG4_MOUSE | Myosin light chain 1/3, skeletal muscle isoform;      | Myosin light chain alkali 1/2;                                                                                        |
| M              | TMDKSELVQKAKLAEQAER     | N-ter + 42.01 Da, K +28.03 Da              | 40.5       | 59.5              | 4      | 2300.38                      | 2.26                                         | 0.87                  | 1433B_MOUSE  | A2A5N1_MOUSE | 14-3-3 protein beta/alpha;                            | Protein kinase C inhibitor protein 1;                                                                                 |
| M              | TQEEAGRLPQVLAR          | N-ter + 42.01 Da                           | 36.5       | 40.3              | 3      | 1608.92                      | n.d.                                         | n.d.                  | Q8BGM4_MOUSE | Q88Y07_MOUSE |                                                       |                                                                                                                       |
| M              | GFQNAILVRY              | N-ter + 42.01 Da, K +34.06 Da              | 35.0       | 1.4               | 3      | 1872.06                      | -2.64                                        | 0.50                  | ALBU_MOUSE   |              | Serum albumin;                                        |                                                                                                                       |
| M              | TSDDAKVVAEPPQQR         | N-ter + 42.01 Da, K +28.03 Da              | 46.9       | 49.2              | 3      | 1811.99                      | 2.41                                         | 1.68                  | LAR4B_MOUSE  |              | La-related protein 4B;                                | La ribonucleoprotein domain family member 4B;La ribonucleoprotein domain family member 5;La-related protein 5;        |
| M              | FERPEAEAMC              | N-ter + 42.01 Da, K +34.06 Da              | 26.6       | 52.5              | 4      | 2440.33                      | -0.54                                        | 0.11                  | ALBU_MOUSE   |              | Serum albumin;                                        |                                                                                                                       |
| M              | TSPEGAQNKEIDCLSPAQR     | N-ter + 42.01 Da, K +34.06 Da, C +57.02 Da | 48.6       | 46.1              | 3      | 2305.21                      | 0.73                                         | 0.37                  | LRRF1_MOUSE  | E9Q9T1_MOUSE | Leucine-rich repeat flightless-interacting protein 1; | FLI-LRR-associated protein 1;H186 FLAP; Homeobox protein K-2;Homeobox protein mHox;Paired-related homeobox protein 1; |
| M              | TSSYGHVLER              | N-ter + 42.01 Da                           | 55.1       | 41.7              | 2      | 1189.62                      | n.d.                                         | n.d.                  | PRRX1_MOUSE  |              | Paired mesoderm homeobox protein 1;                   |                                                                                                                       |
| M              | AMCTSFKENP              | N-ter + 42.01 Da                           | 25.9       | 30.1              | 3      | 1602.81                      | n.d.                                         | n.d.                  | ALBU_MOUSE   |              | Serum albumin;                                        |                                                                                                                       |
| M              | TTKDPSEHPSVTLFR         | N-ter + 42.01 Da, K +28.03 Da              | 42.2       | 45.9              | 3      | 1913.04                      | -1.47                                        | 0.53                  | ACY1_MOUSE   |              | Aminoacylase-1;                                       | N-acyl-L-amino-acid amidohydrolase;                                                                                   |
| M              | VEKEEAGGGGGGISEEEAAQYDR | N-ter + 42.01 Da, K +28.03 Da              | 79.7       | 54.6              | 3      | 2464.23                      | 0.07                                         | 0.02                  | SAE1_MOUSE   |              | SUMO-activating enzyme subunit 1;                     | Ubiquitin-like 1-activating enzyme E1A;                                                                               |
| M              | LDSETLCRRA              | N-ter + 42.01 Da, K +34.06 Da, K +28.03 Da | 10.0       | 109.5             | 3      | 1459.36                      | n.d.                                         | n.d.                  | STK11_MOUSE  | F8WJM6_MOUSE | Serine/threonine-protein kinase STK11;                | Liver kinase B1 homolog;                                                                                              |
| M              | PVDKM                   | N-ter + 42.01 Da, K +34.06 Da              | 39.5       | 30.9              | 2      | 1107.70                      | -1.79                                        | 0.25                  | G3P_MOUSE    | E9PX99_MOUSE | Glyceraldehyde-3-phosphate dehydrogenase;             | Peptidyl-cysteine S-nitrosylase GAPDH;                                                                                |
| M              | MITCQFS                 | N-ter + 42.01 Da, K +34.06 Da              | 32.6       | 28.1              | 2      | 1336.77                      | -2.00                                        | 0.32                  | TITIN_MOUSE  | A2AT70_MOUSE | Titin;                                                | Connectin;                                                                                                            |
| M              | TILNNGKTCR              | N-ter + 42.01 Da                           | 24.2       | 67.4              | 2      | 1170.60                      | n.d.                                         | n.d.                  | CAH3_MOUSE   |              | Carbonic anhydrase 3;                                 | Carbonate dehydratase III;Carbonic anhydrase III;                                                                     |
| M              | LASLSTFQQM              | N-ter + 42.01 Da, K +28.03 Da              | 32.5       | 76.0              | 4      | 2084.19                      | 1.12                                         | 0.21                  | ACTA_MOUSE   | ACTC_MOUSE   | Actin, aortic smooth muscle;                          | Alpha-actin-2;                                                                                                        |
| M              | YGFQNAILVR              | N-ter + 42.01 Da, K +28.03 Da              | 55.7       | 54.2              | 3      | 2029.19                      | -0.42                                        | 0.09                  | ALBU_MOUSE   |              | Serum albumin;                                        |                                                                                                                       |
