# Supplementary material
Source: PubMed Central journal article supplement (PMC3591655)
Supplement: supp_M112.017962_mcp.M112.017962-20.pdf [file supp_M112.017962_mcp.M112.017962-20.pdf]

Table S18: Acetylated N-termini identified in the TAILS experiment comparing wild-type and Ctsl<sup>-/-</sup> skin (replicate 2). Up to two potential protein IDs per peptide are stated.

| Non Prime Site | Prime Site                    | Modifications                              | Hyperscore | Mass error in ppm | Charge | Precursor neutral mass in Da | Fold change (log <sub>2</sub> ) of ASAPRatio | FC-error of ASAPRatio | Uniprot ID 1 | Uniprot ID 2 | Protein Name 1                                                 | Protein Name 2                                                                                                                                                                               |
|----------------|-------------------------------|--------------------------------------------|------------|-------------------|--------|------------------------------|----------------------------------------------|-----------------------|--------------|--------------|----------------------------------------------------------------|----------------------------------------------------------------------------------------------------------------------------------------------------------------------------------------------|
| M              | AAAAAAAAAAGAAGGR              | N-ter + 42.01 Da                           | 69.2       | 49.8              | 2      | 1239.69                      | n.d.                                         | n.d.                  | PABP2_MOUSE  |              | Polyadenylate-binding protein 2;                               | Nuclear poly(A)-binding protein 1;Poly(A)-binding protein II;Polyadenylate-binding nuclear protein 1;                                                                                        |
| MA             | AAAAAAAAAAGAAGGR              | N-ter + 42.01 Da                           | 61.1       | 42.0              | 2      | 1168.64                      | n.d.                                         | n.d.                  | PABP2_MOUSE  |              | Polyadenylate-binding protein 2;                               | Nuclear poly(A)-binding protein 1;Poly(A)-binding protein II;Polyadenylate-binding nuclear protein 1;                                                                                        |
| MAA            | AAAAAAAAAAGGRSGPGRR           | N-ter + 42.01 Da                           | 46.3       | 41.7              | 3      | 1764.98                      | n.d.                                         | n.d.                  | PABP2_MOUSE  |              | Polyadenylate-binding protein 2;                               | Nuclear poly(A)-binding protein 1;Poly(A)-binding protein II;Polyadenylate-binding nuclear protein 1;                                                                                        |
| M              | AAAAAAGPEMVR                  | N-ter + 42.01 Da                           | 40.3       | 57.5              | 2      | 1155.64                      | n.d.                                         | n.d.                  | MK01_MOUSE   | E9QAI2_MOUSE | Mitogen-activated protein kinase 1;                            | ERT2;Extracellular signal-regulated kinase 1;Insulin-stimulated MAP2 kinase;MAP kinase isoform p44;MNK1;Microtubule-associated protein 2 kinase;Mitogen-activated protein kinase 1;p44-ERK1; |
| M              | AAAAAPGGGGPEPR                | N-ter + 42.01 Da                           | 40.7       | 62.0              | 2      | 1250.68                      | n.d.                                         | n.d.                  | MK03_MOUSE   | D3Z3G6_MOUSE | Mitogen-activated protein kinase 3;                            |                                                                                                                                                                                              |
| M              | AAAAAVAGAGR                   | N-ter + 42.01 Da                           | 44.6       | 16.3              | 2      | 997.55                       | n.d.                                         | n.d.                  | E9QNR6_MOUSE |              |                                                                |                                                                                                                                                                                              |
| M              | AAAAAGPASSQR                  | N-ter + 42.01 Da                           | 30.9       | 65.1              | 2      | 1098.61                      | n.d.                                         | n.d.                  | SUGT1_MOUSE  |              | Suppressor of G2 allele of SKP1 homolog;                       |                                                                                                                                                                                              |
| M              | AAAAAMAEQEGAR                 | N-ter + 42.01 Da                           | 52.7       | 57.5              | 2      | 1287.66                      | n.d.                                         | n.d.                  | GET4_MOUSE   | D3Z4J5_MOUSE | Golgi to ER traffic protein 4 homolog;                         |                                                                                                                                                                                              |
| M              | AAAAASGAGVAVAGAGGAPAGR        | N-ter + 42.01 Da                           | 64.8       | 70.5              | 3      | 1836.05                      | n.d.                                         | n.d.                  | E9PU87_MOUSE |              |                                                                |                                                                                                                                                                                              |
| M              | AAAAATAAAAAAPSGGGGGEER        | N-ter + 42.01 Da                           | 44.6       | 81.7              | 3      | 2012.08                      | n.d.                                         | n.d.                  | D3Z7U4_MOUSE |              | Biogenesis of lysosome-related organelles complex 1 subunit 2; |                                                                                                                                                                                              |
| M              | AAAAEGVPATR                   | N-ter + 42.01 Da                           | 37.3       | 50.8              | 2      | 1054.59                      | n.d.                                         | n.d.                  | BL1S2_MOUSE  |              |                                                                | Modulator of estrogen-induced transcription;SAF-like transcription modulator;                                                                                                                |
| M              | AAAAGAVVASAASGPAEGKKITELR     | N-ter + 42.01 Da, K +28.03 Da              | 38.6       | 52.1              | 4      | 2393.45                      | -0.67                                        | 0.03                  | SLTM_MOUSE   |              | SAFB-like transcription modulator;                             | 26S proteasome regulatory subunit RPN6;26S proteasome regulatory subunit S9;26S proteasome regulatory subunit p44.5;                                                                         |
| M              | AAAAVVEFQR                    | N-ter + 42.01 Da                           | 37.5       | 55.2              | 2      | 1102.64                      | n.d.                                         | n.d.                  | PSD11_MOUSE  |              | 26S proteasome non-ATPase regulatory subunit 11;               |                                                                                                                                                                                              |
| M              | AAEEGCGVGEDDR                 | N-ter + 42.01 Da, C +57.02 Da              | 40.8       | 62.4              | 2      | 1575.75                      | n.d.                                         | n.d.                  | PEX19_MOUSE  |              | Peroxisomal biogenesis factor 19;                              | Peroxin-19;Peroxisomal farnesylated protein;                                                                                                                                                 |
| M              | AAAGAGPGPGVAVAGGPGAAASATTAEDR | N-ter + 42.01 Da                           | 70.8       | 69.9              | 3      | 2433.32                      | n.d.                                         | n.d.                  | ASH2L_MOUSE  | D6RI55_MOUSE | ASH2;                                                          | ASH2-like protein;                                                                                                                                                                           |
| M              | AAAGGGAAAAAGR                 | N-ter + 42.01 Da                           | 55.7       | 62.4              | 2      | 1012.57                      | n.d.                                         | n.d.                  | RAB21_MOUSE  | Q6A0C7_MOUSE | Ras-related protein Rab-21;                                    | Rab-12;                                                                                                                                                                                      |
| M              | AAAGSAVSGAGTPVAGPTGR          | N-ter + 42.01 Da                           | 49.7       | 77.4              | 3      | 1767.03                      | n.d.                                         | n.d.                  | SNAPN_MOUSE  |              | SNARE-associated protein Snapin;                               | Synaptosomal-associated protein 25-binding protein;                                                                                                                                          |
| M              | AAAKDGCLETAAGNGR              | N-ter + 42.01 Da, K +28.03 Da, C +57.02 Da | 46.7       | 48.8              | 3      | 1687.88                      | 0.54                                         | 0.13                  | PF3_MOUSE    | Q3TIR6_MOUSE | Prefoldin subunit 3;                                           | Von Hippel-Lindau-binding protein 1;                                                                                                                                                         |
| M              | AAAMDVDTPSGTNSGAGKKR          | N-ter + 42.01 Da, K +34.06 Da              | 44.9       | 58.5              | 3      | 2043.19                      | -0.67                                        | 0.19                  | RBX1_MOUSE   |              | E3 ubiquitin-protein ligase RBX1;                              | RING finger protein 75;RING-box protein 1;                                                                                                                                                   |
| M              | AAAQAVEEMR                    | N-ter + 42.01 Da                           | 45.9       | 62.9              | 2      | 1116.59                      | n.d.                                         | n.d.                  | RPAC1_MOUSE  | F6ZKX9_MOUSE | DNA-directed RNA polymerases I and III subunit RPAC1;          | AC40;DNA-directed RNA polymerases I and III 40 kDa polypeptide;RPC40;                                                                                                                        |
| M              | AAASGYDLR                     | N-ter + 42.01 Da                           | 36.8       | 63.7              | 2      | 1065.58                      | n.d.                                         | n.d.                  | ALKB5_MOUSE  |              | Alkylated DNA repair protein alkB homolog 5;                   | Alkylated DNA repair protein alkB homolog 5;                                                                                                                                                 |
| M              | AAATLSFGPER                   | N-ter + 42.01 Da                           | 35.3       | 41.1              | 2      | 1160.63                      | n.d.                                         | n.d.                  | NISCH_MOUSE  | E9PWZ1_MOUSE | Nischarin;                                                     | Imidazole receptor 1;imidazole receptor I-1-like protein;imidazole-1 receptor;                                                                                                               |
| M              | AAATPTETPAPEGSLGMDAR          | N-ter + 42.01 Da                           | 40.4       | 74.4              | 3      | 2041.09                      | n.d.                                         | n.d.                  | PGM2_MOUSE   |              | Phosphoglucomutase-2;                                          | Glucose phosphomutase                                                                                                                                                                        |
| M              | AAAVVAASR                     | N-ter + 42.01 Da                           | 40.2       | 52.2              | 2      | 998.60                       | n.d.                                         | n.d.                  | E9Q1P8_MOUSE |              |                                                                | 2;Phosphodeoxyribomutase;Phosphopentomutase;                                                                                                                                                 |
| M              | AAAVVDPOQSVVMR                | N-ter + 42.01 Da                           | 28.2       | 82.0              | 3      | 1511.90                      | n.d.                                         | n.d.                  | PLIN2_MOUSE  | B1AXR5_MOUSE | Perilipin-2;                                                   | Adipophilin;Adipose differentiation-related protein;                                                                                                                                         |
| M              | AADIEQVFR                     | N-ter + 42.01 Da                           | 45.2       | 59.7              | 2      | 1089.61                      | n.d.                                         | n.d.                  | SON_MOUSE    |              | Protein SON;                                                   | Negative regulatory element-binding protein;                                                                                                                                                 |
| M              | AADISQWAGPLCLQEVEPPQHALR      | N-ter + 42.01 Da, C +57.02 Da              | 49.5       | 51.6              | 4      | 2842.52                      | n.d.                                         | n.d.                  | PEBP1_MOUSE  | D3Z1V4_MOUSE | Phosphatidylethanolamine-binding protein 1;                    | HCPNpp;                                                                                                                                                                                      |
| M              | AAEEATLTVR                    | N-ter + 42.01 Da                           | 41.9       | 54.3              | 2      | 1101.63                      | n.d.                                         | n.d.                  | CB076_MOUSE  |              | UPF0538 protein C2orf76 homolog;                               |                                                                                                                                                                                              |
| M              | AAEIQQPLTR                    | N-ter + 42.01 Da                           | 35.2       | 44.6              | 2      | 1264.73                      | n.d.                                         | n.d.                  | WDFY2_MOUSE  |              | WD repeat and FYVE domain-containing protein 2;                | WD40- and FYVE domain-containing protein 2;                                                                                                                                                  |
| M              | AAETVELHKLKLAELKQELAR         | N-ter + 42.01 Da, K +28.03 Da, C +57.02 Da | 28.2       | 73.0              | 4      | 2675.70                      | -0.67                                        | 0.11                  | SARNP_MOUSE  |              | SAP domain-containing ribonucleoprotein;                       | Nuclear protein Hcc-1;                                                                                                                                                                       |
| M              | AAGCEGIAPPTLGER               | N-ter + 42.01 Da, C +57.02 Da              | 30.0       | 71.9              | 3      | 1539.85                      | n.d.                                         | n.d.                  | HBAP1_MOUSE  |              | HSPB1-associated protein 1;                                    | 27 kDa heat shock protein-associated protein 1;Protein associated with small stress protein 1;                                                                                               |
| M              | AAGGAVVAPEFCR                 | N-ter + 42.01 Da, C +57.02 Da              | 48.3       | 60.0              | 2      | 1269.69                      | n.d.                                         | n.d.                  | MKLN1_MOUSE  |              | Muskelin;                                                      |                                                                                                                                                                                              |
| M              | AAGTLYTPENWR                  | N-ter + 42.01 Da                           | 37.2       | 52.6              | 2      | 1582.83                      | n.d.                                         | n.d.                  | EF1G_MOUSE   |              | Elongation factor 1-gamma;                                     | eEF-1B gamma;                                                                                                                                                                                |
| M              | AAGTSNYWEDLR                  | N-ter + 42.01 Da                           | 38.5       | 54.6              | 2      | 1423.71                      | n.d.                                         | n.d.                  | GOSR1_MOUSE  | Q91VU9_MOUSE | Golgi SNAP receptor complex member 1;                          | 28 kDa Golgi SNARE protein;28 kDa cis-Golgi SNARE p28;                                                                                                                                       |
| M              | AAKPKLYFNGR                   | N-ter + 42.01 Da, K +28.03 Da              | 33.4       | 61.6              | 3      | 1524.94                      | -0.22                                        | 0.04                  | GSTA4_MOUSE  |              | Glutathione S-transferase A4;                                  | GST A4-4;GST class-alpha member 4;Glutathione S-transferase 5.7;                                                                                                                             |
| AQPVPRLSIP     | AALALGSAALGAATFATLLGKR        | N-ter + 42.01 Da, K +28.03 Da              | 29.2       | 22.5              | 4      | 2182.33                      | 1.09                                         | 0.24                  | CMTD1_MOUSE  |              | Catechol O-methyltransferase domain-containing protein 1;      |                                                                                                                                                                                              |
| M              | AALGSSQNVTVEVVR               | N-ter + 42.01 Da                           | 36.8       | 68.6              | 3      | 1721.98                      | n.d.                                         | n.d.                  | T2FA_MOUSE   | E9Q7N7_MOUSE | General transcription factor IIF subunit 1;                    | Transcription initiation factor IIF subunit alpha;                                                                                                                                           |
| M              | AALVSETAEPGSR                 | N-ter + 42.01 Da                           | 33.8       | 59.7              | 2      | 1427.81                      | n.d.                                         | n.d.                  | DPH1_MOUSE   |              | Diphthamide biosynthesis protein 1;                            | DPH1 homolog;Diphthamide biosynthesis protein 2 homolog-like 1;Ovarian cancer-associated gene 1 protein homolog;                                                                             |
| M              | AALYGGVEGGTR                  | N-ter + 42.01 Da                           | 42.2       | 45.2              | 2      | 1248.67                      | n.d.                                         | n.d.                  | NAGK_MOUSE   | D3YXG2_MOUSE | N-acetyl-D-glucosamine kinase;                                 | GlcNAc kinase;                                                                                                                                                                               |

Table S5, Tholen et al.

| Non Prime Site | Prime Site              | Modifications                              | Hyperscore | Mass error in ppm | Charge | Precursor neutral mass in Da | Fold change (log <sub>2</sub> ) of ASAPRatio | FC-error of ASAPRatio | Uniprot ID 1 | Uniprot ID 2 | Protein Name 1                                                                                                 | Protein Name 2                                                                                                                                                                                                                                                                                                                               |
|----------------|-------------------------|--------------------------------------------|------------|-------------------|--------|------------------------------|----------------------------------------------|-----------------------|--------------|--------------|----------------------------------------------------------------------------------------------------------------|----------------------------------------------------------------------------------------------------------------------------------------------------------------------------------------------------------------------------------------------------------------------------------------------------------------------------------------------|
| M              | AANATTNPQLLPLELVDKICISR | N-ter + 42.01 Da, K +28.03 Da, C +57.02 Da | 53.1       | 38.6              | 3      | 2637.48                      | 0.33                                         | 0.32                  | LSM5_MOUSE   |              | U6 snRNA-associated Sm-like protein LSm5;                                                                      |                                                                                                                                                                                                                                                                                                                                              |
| M              | AAPAAPAAGETGPDAR        | N-ter + 42.01 Da                           | 40.9       | 56.4              | 2      | 1463.78                      | n.d.                                         | n.d.                  | GLGB_MOUSE   |              | 1,4-alpha-glucan-branching enzyme;                                                                             | Brancher enzyme;Glycogen-branching enzyme;                                                                                                                                                                                                                                                                                                   |
| M              | AAPAGGGGSAVSVLAPNGR     | N-ter + 42.01 Da                           | 26.6       | 70.8              | 3      | 1649.97                      | n.d.                                         | n.d.                  | ASPC1_MOUSE  |              | Tether containing UBX domain for GLUT4;                                                                        |                                                                                                                                                                                                                                                                                                                                              |
| ADTSKQESNM     | AAPAKGENLSLVVHGPDIR     | N-ter + 42.01 Da, K +28.03 Da              | 47.9       | 49.3              | 3      | 2070.22                      | -0.40                                        | 0.13                  | DHSO_MOUSE   |              | Sorbitol dehydrogenase;                                                                                        | Alveolar soft part sarcoma chromosomal region candidate gene 1 protein homolog;                                                                                                                                                                                                                                                              |
| M              | AAPPGYFYSVGSQVSCR       | N-ter + 42.01 Da, C +57.02 Da              | 36.1       | 76.7              | 3      | 1852.98                      | n.d.                                         | n.d.                  | LSM12_MOUSE  |              | Protein LSM12 homolog;                                                                                         | L-iditol 2-dehydrogenase;                                                                                                                                                                                                                                                                                                                    |
| M              | AAPQDVHVR               | N-ter + 42.01 Da                           | 32.6       | 30.7              | 2      | 1033.56                      | n.d.                                         | n.d.                  | SEC20_MOUSE  | B8JJI4_MOUSE | Vesicle transport protein SEC20;                                                                               |                                                                                                                                                                                                                                                                                                                                              |
| M              | AAPSEPAGFPR             | N-ter + 42.01 Da                           | 35.0       | 43.4              | 2      | 1140.61                      | n.d.                                         | n.d.                  | ALR_MOUSE    |              | FAD-linked sulfhydryl oxidase ALR;                                                                             | Augmenter of liver regeneration;                                                                                                                                                                                                                                                                                                             |
| M              | AAPSVPTPLGVHGR          | N-ter + 42.01 Da                           | 53.7       | 54.1              | 3      | 1562.91                      | n.d.                                         | n.d.                  | D326J0_MOUSE | Q6PRU9_MOUSE |                                                                                                                |                                                                                                                                                                                                                                                                                                                                              |
| M              | AAQALAAQAVASR           | N-ter + 42.01 Da                           | 49.0       | 48.4              | 2      | 1268.75                      | n.d.                                         | n.d.                  | SYTC2_MOUSE  |              | Probable threonine-tRNA ligase 2, cytoplasmic;                                                                 | Threonyl-tRNA synthetase;Threonyl-tRNA synthetase-like protein 2;                                                                                                                                                                                                                                                                            |
| M              | AAQAVLLR                | N-ter + 42.01 Da                           | 36.2       | 54.9              | 2      | 969.61                       | n.d.                                         | n.d.                  | PSMD5_MOUSE  |              | 26S proteasome non-ATPase regulatory subunit 5;                                                                | 26S protease subunit S5 basic;26S proteasome subunit S5B;                                                                                                                                                                                                                                                                                    |
| M              | AASAAASSEHFEKLHEIFR     | N-ter + 42.01 Da, K +28.03 Da              | 27.5       | 96.8              | 4      | 2099.25                      | -1.03                                        | 0.15                  | VTI1B_MOUSE  | Q91XH6_MOUSE | Vesicle transport through interaction with t-SNAREs homolog 1B;                                                | Vesicle transport v-SNARE protein Vti1-like 1;Vti1-rp1;                                                                                                                                                                                                                                                                                      |
| M              | AASAIKGLSALR            | N-ter + 42.01 Da, K +28.03 Da              | 58.8       | 30.4              | 2      | 1226.77                      | -0.36                                        | 0.10                  | SLIRP_MOUSE  |              | SRA stem-loop-interacting RNA-binding protein, mitochondrial;                                                  |                                                                                                                                                                                                                                                                                                                                              |
| SSGFLSFHKM     | AASEDELLPR              | N-ter + 42.01 Da                           | 44.0       | 53.6              | 2      | 1254.71                      | n.d.                                         | n.d.                  | IGBP1_MOUSE  | E9Q2M7_MOUSE | Immunoglobulin-binding protein 1;                                                                              | Alpha4 phosphoprotein;CD79a-binding protein 1;Lymphocyte signal transduction molecule alpha 4;p52;                                                                                                                                                                                                                                           |
| M              | AASGDPGSAESYR           | N-ter + 42.01 Da                           | 34.4       | 62.6              | 2      | 1308.64                      | n.d.                                         | n.d.                  | PUR8_MOUSE   | E9Q0A0_MOUSE | Adenylosuccinate lyase;                                                                                        | Adenylosuccinase;                                                                                                                                                                                                                                                                                                                            |
| M              | AASPSKTEIQTFKR          | N-ter + 42.01 Da, K +28.03 Da              | 39.1       | 46.9              | 3      | 1774.08                      | 0.43                                         | 0.11                  | ARFG2_MOUSE  |              | ADP-ribosylation factor GTPase-activating protein 2; Tubulin polymerization-promoting protein family member 3; | GTPase-activating protein ZNF289;Zinc finger protein 289;                                                                                                                                                                                                                                                                                    |
| M              | AASTDIAGLEESFR          | N-ter + 42.01 Da                           | 44.8       | 51.6              | 2      | 1507.79                      | n.d.                                         | n.d.                  | TPPP3_MOUSE  |              | Hypoxia-inducible factor 1-alpha inhibitor;                                                                    | Hypoxia-inducible factor asparagine hydroxylase;                                                                                                                                                                                                                                                                                             |
| M              | AATAAAEVAASGSGEAR       | N-ter + 42.01 Da                           | 65.1       | 54.7              | 2      | 1459.77                      | n.d.                                         | n.d.                  | HIF1N_MOUSE  |              | Translation initiation factor eIF-2B subunit epsilon;                                                          | eIF-2B GDP-GTP exchange factor subunit epsilon;                                                                                                                                                                                                                                                                                              |
| M              | AATAAVPGAAAGR           | N-ter + 42.01 Da                           | 35.8       | 41.3              | 2      | 1124.64                      | n.d.                                         | n.d.                  | EI2B_MOUSE   |              |                                                                                                                | PTE-2b;Peroxisomal acyl coenzyme A thioester hydrolase lb;Peroxisomal long-chain acyl-CoA thioesterase lb;                                                                                                                                                                                                                                   |
| M              | AATLSVEPTGR             | N-ter + 42.01 Da                           | 30.3       | 54.0              | 2      | 1142.65                      | n.d.                                         | n.d.                  | ACOT4_MOUSE  |              | Acyl-coenzyme A thioesterase 4;                                                                                |                                                                                                                                                                                                                                                                                                                                              |
| M              | AATTAAVVAEEDTELK        | N-ter + 42.01 Da                           | 55.9       | 57.6              | 2      | 1687.92                      | n.d.                                         | n.d.                  | FR1OP_MOUSE  | TGAP1_MOUSE  | FGFR1 oncogene partner;                                                                                        |                                                                                                                                                                                                                                                                                                                                              |
| M              | AATTGSGVKVPR            | N-ter + 42.01 Da, K +34.06 Da              | 57.4       | 26.0              | 2      | 1218.75                      | 1.89                                         | 0.36                  | UB2V1_MOUSE  | D321I3_MOUSE | Ubiquitin-conjugating enzyme E2 variant 1;                                                                     | CROC-1;                                                                                                                                                                                                                                                                                                                                      |
| M              | AAVGSPPGLESAPR          | N-ter + 42.01 Da                           | 42.0       | 59.1              | 2      | 1339.75                      | n.d.                                         | n.d.                  | TGT_MOUSE    |              | Queuine tRNA-ribosyltransferase;                                                                               | Guanine insertion enzyme;tRNA-guanine transglycosylase;                                                                                                                                                                                                                                                                                      |
| M              | AAVKTLNPKAEVAR          | N-ter + 42.01 Da, K +28.03 Da              | 41.3       | 51.7              | 3      | 1565.01                      | 0.42                                         | 0.12                  | TCPCZ_MOUSE  | E9QPA6_MOUSE | T-complex protein 1 subunit zeta;                                                                              | CCT-zeta-1;                                                                                                                                                                                                                                                                                                                                  |
| M              | AAVPSAVHLPR             | N-ter + 42.01 Da                           | 33.4       | 26.3              | 2      | 1158.68                      | n.d.                                         | n.d.                  | LYPL1_MOUSE  | E9QLB2_MOUSE | Lysophospholipase-like protein 1;                                                                              |                                                                                                                                                                                                                                                                                                                                              |
| MA             | AAVVDPPQSVVMR           | N-ter + 42.01 Da                           | 43.5       | 48.7              | 2      | 1440.81                      | n.d.                                         | n.d.                  | PLIN2_MOUSE  | B1AXR5_MOUSE | Perilipin-2;                                                                                                   | Adipophilin;Adipose differentiation-related protein;                                                                                                                                                                                                                                                                                         |
| M              | AAVVLGGDTMGPER          | N-ter + 42.01 Da                           | 43.7       | 56.8              | 2      | 1413.77                      | n.d.                                         | n.d.                  | MEA1_MOUSE   |              | Male-enhanced antigen 1;                                                                                       |                                                                                                                                                                                                                                                                                                                                              |
| M              | AAYKLVLR                | N-ter + 42.01 Da, K +28.03 Da              | 48.8       | 42.0              | 2      | 1115.75                      | 0.85                                         | 0.19                  | PGAM1_MOUSE  |              | Phosphoglycerate mutase 1;                                                                                     | BPG-dependent PGAM 1;Phosphoglycerate mutase isozyme B;                                                                                                                                                                                                                                                                                      |
| M              | ACGLVASNLNLKPGCECLKVR   | N-ter + 42.01 Da, K +34.06 Da, C +57.02 Da | 43.6       | 57.0              | 3      | 2308.43                      | 0.20                                         | 0.02                  | LEG1_MOUSE   |              | Galectin-1;                                                                                                    | 14 kDa lectin;Beta-galactoside-binding lectin L-14-l;Galaptin;Lactose-binding lectin 1;Lectin galactoside-binding soluble 1;S-Lac lectin 1; Ezrin-radixin-moesin-binding phosphoprotein 50;Regulatory cofactor of Na(+)/H(+) exchanger;Sodium-hydrogen exchanger regulatory factor 1;Solute carrier family 9 isoform A3 regulatory factor 1; |
| MS             | ADAAAGEPLPR             | N-ter + 42.01 Da                           | 30.1       | 59.8              | 2      | 1108.62                      | n.d.                                         | n.d.                  | NHRF1_MOUSE  |              | Na(+)/H(+) exchange regulatory cofactor NHE-RF1;                                                               | Cardiomyopathy-associated protein 1;                                                                                                                                                                                                                                                                                                         |
| M              | ADAGMQVAPTPTIQMR        | N-ter + 42.01 Da                           | 35.0       | 79.4              | 3      | 1799.01                      | n.d.                                         | n.d.                  | XIRP1_MOUSE  | E9QQ93_MOUSE | Xin actin-binding repeat-containing protein 1;                                                                 |                                                                                                                                                                                                                                                                                                                                              |
| M              | ADDVDQQQTNTTVEEPLDLIR   | N-ter + 42.01 Da                           | 38.4       | 72.9              | 3      | 2441.33                      | n.d.                                         | n.d.                  | LSM3_MOUSE   |              | U6 snRNA-associated Sm-like protein LSm3;                                                                      |                                                                                                                                                                                                                                                                                                                                              |
| M              | ADEALAGLDEGALR          | N-ter + 42.01 Da                           | 48.5       | 54.0              | 2      | 1441.78                      | n.d.                                         | n.d.                  | SMTN_MOUSE   | D3YZ10_MOUSE | Smoothelin;                                                                                                    |                                                                                                                                                                                                                                                                                                                                              |
| M              | ADEDEGEGHPSAPHR         | N-ter + 42.01 Da                           | 36.9       | 87.9              | 3      | 1628.86                      | n.d.                                         | n.d.                  | SNX27_MOUSE  | D6RES4_MOUSE | Sorting nexin-27;                                                                                              |                                                                                                                                                                                                                                                                                                                                              |
| M              | ADEEKLPPGWKVR           | N-ter + 42.01 Da, K +28.03 Da              | 50.5       | 55.5              | 3      | 1651.95                      | -0.23                                        | 0.01                  | PIN1_MOUSE   |              | Peptidyl-prolyl cis-trans isomerase NIMA-interacting 1;                                                        | Peptidyl-prolyl cis-trans isomerase Pin1;                                                                                                                                                                                                                                                                                                    |
| M              | ADEEELALR               | N-ter + 42.01 Da                           | 28.5       | 62.6              | 2      | 1086.59                      | n.d.                                         | n.d.                  | PDCD5_MOUSE  |              | Programmed cell death protein 5;                                                                               | TF-1 cell apoptosis-related protein 19;                                                                                                                                                                                                                                                                                                      |
| M              | ADEIAKAQVAOPGGDTIFGKIIR | N-ter + 42.01 Da, K +28.03 Da              | 65.0       | 76.0              | 4      | 2495.56                      | -0.76                                        | 0.36                  | HINT1_MOUSE  | 80R1E3_MOUSE | Histidine triad nucleotide-binding protein 1;                                                                  | Adenosine 5'-monophosphoramidase;Protein kinase C inhibitor 1;Protein kinase C-interacting protein 1;                                                                                                                                                                                                                                        |
| NIYKPNNKAM     | ADEVTEKQVYDAHTKEIDLNVNR | N-ter + 42.01 Da, K +28.03 Da              | 44.6       | 80.2              | 4      | 2670.56                      | -0.71                                        | 0.27                  | CAV1_MOUSE   | D32148_MOUSE | Caveolin-1;                                                                                                    |                                                                                                                                                                                                                                                                                                                                              |
| M              | ADFDTYDDR               | N-ter + 42.01 Da                           | 36.3       | 75.1              | 2      | 1158.53                      | n.d.                                         | n.d.                  | IF4H_MOUSE   | Q80U88_MOUSE | Eukaryotic translation initiation factor 4H;                                                                   | Williams-Beuren syndrome chromosomal region 1 protein homolog;                                                                                                                                                                                                                                                                               |
| M              | ADGELNVDSLITR           | N-ter + 42.01 Da                           | 41.9       | 51.5              | 2      | 1443.80                      | n.d.                                         | n.d.                  | PP1B_MOUSE   |              | Serine/threonine-protein phosphatase PP1-beta catalytic subunit;                                               |                                                                                                                                                                                                                                                                                                                                              |
| M              | ADGGAAASQDESSAAAAAADS   | N-ter + 42.01 Da                           | 52.9       | 79.5              | 3      | 1991.01                      | n.d.                                         | n.d.                  | E9Q6Z8_MOUSE |              |                                                                                                                |                                                                                                                                                                                                                                                                                                                                              |
| M              | ADIDKLNIDSIQR           | N-ter + 42.01 Da, K +34.06 Da              | 58.1       | 43.3              | 3      | 1689.03                      | -0.81                                        | 0.58                  | PP1G_MOUSE   |              | Serine/threonine-protein phosphatase PP1-gamma catalytic subunit;                                              | Protein phosphatase 1C catalytic subunit;                                                                                                                                                                                                                                                                                                    |

Table S5, Tholen et al.

| Non Prime Site | Prime Site                   | Modifications                              | Hyperscore | Mass error in ppm | Charge | Precursor neutral mass in Da | Fold change (log <sub>2</sub> ) of ASAPRatio | FC-error of ASAPRatio | Uniprot ID 1 | Uniprot ID 2 | Protein Name 1                                                  | Protein Name 2                                                                                                                                                                                 |
|----------------|------------------------------|--------------------------------------------|------------|-------------------|--------|------------------------------|----------------------------------------------|-----------------------|--------------|--------------|-----------------------------------------------------------------|------------------------------------------------------------------------------------------------------------------------------------------------------------------------------------------------|
| M              | ADKEAFAFDVAEER               | N-ter + 42.01 Da, K +34.06 Da              | 53.4       | 37.0              | 3      | 1640.83                      | -0.04                                        | 0.01                  | RBBP4_MOUSE  | E9PYH8_MOUSE | Histone-binding protein RBBP4;                                  | Chromatin assembly factor 1 subunit C;Chromatin assembly factor 1 p48 subunit;Nucleosome-remodeling factor subunit RBAP48;Retinoblastoma-binding protein 4;Retinoblastoma-binding protein p48; |
| M              | ADLEEQLSDEEKVR               | N-ter + 42.01 Da, K +34.06 Da              | 62.1       | 48.6              | 3      | 1735.95                      | -0.25                                        | 0.07                  | CAZ2_MOUSE   | D6RCW7_MOUSE | F-actin-capping protein subunit alpha-2;                        | Cap2 alpha-2;                                                                                                                                                                                  |
| M              | ADMQLNLEVER                  | N-ter + 42.01 Da                           | 46.4       | 60.7              | 2      | 1116.59                      | n.d.                                         | n.d.                  | CAP1_MOUSE   | B1ARS0_MOUSE | Adenylyl cyclase-associated protein 1;                          |                                                                                                                                                                                                |
| M              | ADPAAAGPPPEGEESTVR           | N-ter + 42.01 Da                           | 50.9       | 67.6              | 3      | 1807.95                      | n.d.                                         | n.d.                  | KPCB_MOUSE   |              | Protein kinase C beta type;                                     |                                                                                                                                                                                                |
| M              | ADPESPWSQIGR                 | N-ter + 42.01 Da                           | 48.3       | 60.0              | 2      | 1383.72                      | n.d.                                         | n.d.                  | STAR4_MOUSE  | Q80SX0_MOUSE | STAR-related lipid transfer protein 4;                          | START domain-containing protein 4;                                                                                                                                                             |
| M              | ADPKYADLPGIAR                | N-ter + 42.01 Da, K +28.03 Da              | 26.6       | 53.5              | 3      | 1455.85                      | 0.58                                         | 0.29                  | DCTN2_MOUSE  |              | Dynactin subunit 2;                                             | 50 kDa dynein-associated polypeptide;Dynactin complex 50 kDa subunit;Growth cone membrane protein 23-48k;p50 dynamitin;                                                                        |
| M              | PVAEAPAEAL                   | ADQGAMAAADIAR                              | 42.9       | 62.7              | 2      | 1301.69                      | n.d.                                         | n.d.                  | A2A3W1_MOUSE |              |                                                                 |                                                                                                                                                                                                |
| M              | ADSGPAGGAALAAPAPGGSGSTGPR    | N-ter + 42.01 Da                           | 47.6       | 61.2              | 3      | 2188.18                      | n.d.                                         | n.d.                  | PP14B_MOUSE  |              | Protein phosphatase 1 regulatory subunit 14B;                   | Phosphatase holoenzyme inhibitor 1;Phospholipase C-beta-3 neighbouring gene protein;                                                                                                           |
| M              | ADTAPQLKR                    | N-ter + 42.01 Da, K +28.03 Da              | 37.4       | 33.8              | 2      | 1068.63                      | -0.14                                        | 0.04                  | DGPS_MOUSE   | Q3TBW9_MOUSE | Scavenger mRNA-decapping enzyme Dcp5;                           | DCS-1;Hint-related 7meGMP-directed hydrolase;Histidine triad protein member 5;                                                                                                                 |
| M              | IQTQQLHAAM                   | ADTFLEHMCR                                 | 57.6       | 49.8              | 2      | 1320.62                      | n.d.                                         | n.d.                  | KPYM_MOUSE   |              | Pyruvate kinase isozymes M1/M2;                                 | Pyruvate kinase muscle isozyme;                                                                                                                                                                |
| M              | ADTPSVYETR                   | N-ter + 42.01 Da                           | 37.3       | 63.1              | 2      | 1179.62                      | n.d.                                         | n.d.                  | ACBD5_MOUSE  | E9QN7_MOUSE  | Acyl-CoA-binding domain-containing protein 5;                   |                                                                                                                                                                                                |
| M              | ADTQYILPNDIGVSSLDLDR         | N-ter + 42.01 Da, C +57.02 Da              | 46.6       | 72.0              | 3      | 2178.18                      | n.d.                                         | n.d.                  | DPP3_MOUSE   |              | Dipeptidyl peptidase 3;                                         | Dipeptidyl aminopeptidase III;Dipeptidyl arylamidase III;Dipeptidyl peptidase III;                                                                                                             |
| M              | ADVSVDQSKLPGVKEVCR           | N-ter + 42.01 Da, K +34.06 Da, C +57.02 Da | 42.6       | 50.7              | 3      | 2096.26                      | 0.33                                         | 0.06                  | CCD50_MOUSE  |              | Coiled-coil domain-containing protein 50;                       | Protein Ymer;                                                                                                                                                                                  |
| M              | ADVVPANDSTASQDVANR           | N-ter + 42.01 Da                           | 47.4       | 74.3              | 3      | 1935.00                      | n.d.                                         | n.d.                  | KPCA_MOUSE   | Q4VA93_MOUSE | Protein kinase C alpha type;                                    |                                                                                                                                                                                                |
| M              | AEAAIDPR                     | N-ter + 42.01 Da                           | 33.9       | 53.0              | 2      | 883.49                       | n.d.                                         | n.d.                  | LSP1_MOUSE   | A2A6J7_MOUSE | Lymphocyte-specific protein 1;                                  | 52 kDa phosphoprotein;Lymphocyte-specific antigen WP34;S37 protein;                                                                                                                            |
| M              | AEAAALLPPEAAER               | N-ter + 42.01 Da                           | 30.1       | 36.7              | 2      | 1562.89                      | n.d.                                         | n.d.                  | E9QL65_MOUSE |              |                                                                 |                                                                                                                                                                                                |
| M              | AEAEAAQLKEEGNR               | N-ter + 42.01 Da, K +28.03 Da              | 40.9       | 60.1              | 3      | 1584.87                      | -2.32                                        | 0.35                  | UN45B_MOUSE  |              | Protein unc-45 homolog B;                                       |                                                                                                                                                                                                |
| M              | MSNGYEDHM                    | AEDCRDDIGR                                 | 35.8       | 41.9              | 2      | 1247.57                      | n.d.                                         | n.d.                  | ELAV1_MOUSE  |              | ELAV-like protein 1;                                            | Elav-like generic protein;Hu-antigen R;MeIG;                                                                                                                                                   |
| M              | AEGGAADLDTQR                 | N-ter + 42.01 Da                           | 50.7       | 57.7              | 2      | 1244.64                      | n.d.                                         | n.d.                  | UBP15_MOUSE  | Q3UZH0_MOUSE | Ubiquitin carboxyl-terminal hydrolase 15;                       | Deubiquitinating enzyme 15;Ubiquitin thiolesterase 15;Ubiquitin-specific-processing protease 15;                                                                                               |
| M              | AEGGQAQQPPQLPGGAAAR          | N-ter + 42.01 Da                           | 35.0       | 76.3              | 3      | 1973.12                      | n.d.                                         | n.d.                  | RFOX2_MOUSE  |              | RNA binding protein fox-1 homolog 2;                            | Fox-1 homolog B;Fox-1 homolog Fxh;Hexaribonucleotide-binding protein 2;RNA-binding motif protein 9;RNA-binding protein 9;                                                                      |
| M              | AEGQVLVLDGR                  | N-ter + 42.01 Da                           | 29.8       | 46.3              | 2      | 1197.69                      | n.d.                                         | n.d.                  | RL13A_MOUSE  | Q3TDS9_MOUSE | 60S ribosomal protein L13a;                                     | Transplantation antigen P198;Tum-P198 antigen;                                                                                                                                                 |
| M              | AELGEADEAELQR                | N-ter + 42.01 Da                           | 44.3       | 55.4              | 2      | 1471.76                      | n.d.                                         | n.d.                  | TIM8B_MOUSE  |              | Mitochondrial import inner membrane translocase subunit Tim8 B; | Deafness dystonia protein 2 homolog;                                                                                                                                                           |
| M              | AELVQGSQAPVGMKAEGFVDALHR     | N-ter + 42.01 Da, K +28.03 Da              | 37.9       | 72.0              | 4      | 2579.50                      | 0.20                                         | 0.07                  | A2AJ72_MOUSE | Q3TIX6_MOUSE |                                                                 | Chap1;Dsk2 homolog;Protein linking IAP with cytoskeleton 2;Ubiquitin-like product Chap1/Dsk2;                                                                                                  |
| M              | AENGESGPPRPSR                | N-ter + 42.01 Da                           | 33.2       | 56.3              | 3      | 1481.77                      | n.d.                                         | n.d.                  | UBQL2_MOUSE  |              | Ubiquilin-2;                                                    |                                                                                                                                                                                                |
| M              | AENNAQNKAKLISETR             | N-ter + 42.01 Da, K +28.03 Da              | 45.4       | 55.0              | 3      | 1884.11                      | 0.23                                         | 0.11                  | MSPD2_MOUSE  | B1AU74_MOUSE | Motile sperm domain-containing protein 2;                       |                                                                                                                                                                                                |
| M              | AENPGLNHR                    | N-ter + 42.01 Da                           | 55.0       | 37.0              | 2      | 1177.59                      | n.d.                                         | n.d.                  | IMA3_MOUSE   | E9Q1R3_MOUSE | Importin subunit alpha-3;                                       | Importin alpha Q2;Karyopherin subunit alpha-3;                                                                                                                                                 |
| M              | AEPGTSGDPAFGPGESESGTR        | N-ter + 42.01 Da                           | 49.5       | 77.5              | 3      | 2046.05                      | n.d.                                         | n.d.                  | SAFB2_MOUSE  | D6RJ78_MOUSE | Scaffold attachment factor B2;                                  |                                                                                                                                                                                                |
| M              | AEPWGNELASAAAR               | N-ter + 42.01 Da                           | 52.9       | 48.8              | 2      | 1483.78                      | n.d.                                         | n.d.                  | CDN2C_MOUSE  |              | Cyclin-dependent kinase 4 inhibitor C;                          | Cyclin-dependent kinase 6 inhibitor;p18-INK4c;p18-INK6;                                                                                                                                        |
| M              | AERPDLNLPNAVITR              | N-ter + 42.01 Da                           | 46.5       | 9.2               | 3      | 1848.99                      | n.d.                                         | n.d.                  | DPOE3_MOUSE  | D6RDT4_MOUSE | DNA polymerase epsilon subunit 3;                               | DNA polymerase II subunit 3;DNA polymerase epsilon subunit p17;NF-YB-like protein;YB-like protein 1;                                                                                           |
| M              | AESDWDTVTVLR                 | N-ter + 42.01 Da                           | 43.2       | 47.5              | 2      | 1432.75                      | n.d.                                         | n.d.                  | EDF1_MOUSE   |              | Endothelial differentiation-related factor 1;                   | Multiprotein-bridging factor 1;                                                                                                                                                                |
| M              | AESNEEVAVLVQR                | N-ter + 42.01 Da                           | 30.3       | 86.0              | 3      | 1484.87                      | n.d.                                         | n.d.                  | E9QAB6_MOUSE |              |                                                                 |                                                                                                                                                                                                |
| M              | AESPAPGAAAEESCGEEQER         | N-ter + 42.01 Da, C +57.02 Da              | 50.5       | 75.3              | 3      | 1986.97                      | n.d.                                         | n.d.                  | E9QL96_MOUSE |              |                                                                 |                                                                                                                                                                                                |
| M              | AESSELSASSPAR                | N-ter + 42.01 Da                           | 54.3       | 47.0              | 2      | 1419.71                      | n.d.                                         | n.d.                  | MCM2_MOUSE   |              | DNA replication licensing factor MCM2;                          | Minichromosome maintenance protein 2 homolog;Nuclear protein BM28;                                                                                                                             |
| M              | AETAAGSGGGDSGVGACER          | N-ter + 42.01 Da, C +57.02 Da              | 46.5       | 87.9              | 3      | 1878.93                      | n.d.                                         | n.d.                  | DUS3L_MOUSE  |              | tRNA-dihydrouridine(47) synthase [NAD(P)(+)]-like;              | tRNA-dihydrouridine synthase 3-like;                                                                                                                                                           |
| M              | AETLSGLGDASAAAGAAVSSAASETGTR | N-ter + 42.01 Da                           | 66.7       | 67.1              | 3      | 2520.36                      | n.d.                                         | n.d.                  | D3YXK2_MOUSE | E9PZM6_MOUSE |                                                                 |                                                                                                                                                                                                |
| M              | MAFPPLLWE                    | AEVETLKR                                   | 54.6       | 33.9              | 2      | 1143.65                      | 0.68                                         | 0.20                  | DLR1_MOUSE   | A2AVR9_MOUSE | Dynein light chain roadblock-type 1;                            | Dynein light chain 2A, cytoplasmic; 60 kDa Tat-interactive protein;Histone acetyltransferase HTATIP;Lysine acetyltransferase 5;                                                                |
| M              | AEVGEIIEGCR                  | N-ter + 42.01 Da, C +57.02 Da              | 41.8       | 62.3              | 2      | 1273.68                      | n.d.                                         | n.d.                  | KAT5_MOUSE   | E9PXP9_MOUSE | Histone acetyltransferase KAT5;                                 | Exosome component 3;Ribosomal RNA-processing protein 40;                                                                                                                                       |
| M              | AEVLSAGPESVAGCR              | N-ter + 42.01 Da, C +57.02 Da              | 35.1       | 71.9              | 2      | 1543.84                      | n.d.                                         | n.d.                  | EXOS3_MOUSE  |              | Exosome complex component RRP40;                                | Eukaryotic translation initiation factor 3 subunit 6;MMTV integration site 6;Mammary tumor-associated protein INT-6;Viral integration site protein INT-6;eIF-3 p48;                            |
| M              | AEYDLTTR                     | N-ter + 42.01 Da                           | 32.5       | 56.3              | 2      | 1009.53                      | n.d.                                         | n.d.                  | EIF3E_MOUSE  |              | Eukaryotic translation initiation factor 3 subunit E;           | Complex I-B22;NADH-ubiquinone oxidoreductase B22 subunit;                                                                                                                                      |
| M              | AFCAPPAYLTHQKVLRL            | N-ter + 42.01 Da, K +28.03 Da, C +57.02 Da | 30.1       | 50.9              | 3      | 2069.19                      | -1.69                                        | 0.44                  | NDU89_MOUSE  |              | NADH dehydrogenase [ubiquinone] 1 beta subcomplex subunit 9;    |                                                                                                                                                                                                |
| M              | AFKDTGKTPVEVAIHR             | N-ter + 42.01 Da, K +34.06 Da              | 42.1       | 69.3              | 4      | 2104.34                      | -0.52                                        | 0.10                  | RS20_MOUSE   |              | 40S ribosomal protein S20;                                      |                                                                                                                                                                                                |

Table S5, Tholen et al.

| Non Prime Site | Prime Site            | Modifications                              | Hyperscore | Mass error in ppm | Charge | Precursor neutral mass in Da | Fold change (log <sub>2</sub> ) of ASAPRatio | FC-error of ASAPRatio | Uniprot ID 1 | Uniprot ID 2 | Protein Name 1                                                          | Protein Name 2                                                                                                                                                                                  |
|----------------|-----------------------|--------------------------------------------|------------|-------------------|--------|------------------------------|----------------------------------------------|-----------------------|--------------|--------------|-------------------------------------------------------------------------|-------------------------------------------------------------------------------------------------------------------------------------------------------------------------------------------------|
| M              | AGAACCFSDQFR          | N-ter + 42.01 Da, C +57.02 Da              | 36.2       | 77.9              | 3      | 1559.74                      | n.d.                                         | n.d.                  | PPCT_MOUSE   | Q5SV41_MOUSE | Phosphatidylcholine transfer protein;                                   | START domain-containing protein 2;STAR-related lipid transfer protein 2; Protein kinase C-like 1;Protein kinase C-like PKN;Protein-kinase C-related kinase 1;Serine-threonine protein kinase N; |
| M              | AGDAVQSEPR            | N-ter + 42.01 Da                           | 32.0       | 53.9              | 2      | 1070.56                      | n.d.                                         | n.d.                  | PKN1_MOUSE   |              | Serine/threonine-protein kinase N1;                                     |                                                                                                                                                                                                 |
| M              | AGEGLGQGSASATAAPETR   | N-ter + 42.01 Da                           | 32.7       | 83.4              | 3      | 1813.01                      | n.d.                                         | n.d.                  | RAB32_MOUSE  |              | Ras-related protein Rab-32;                                             |                                                                                                                                                                                                 |
| M              | AGGEAGVTLGQPHLR       | N-ter + 42.01 Da                           | 49.0       | 51.2              | 3      | 1590.89                      | n.d.                                         | n.d.                  | IF2H_MOUSE   |              | Eukaryotic translation initiation factor 2 subunit 3, Y-linked;         | Eukaryotic translation initiation factor 2 subunit gamma, Y-linked;                                                                                                                             |
| M              | AGGEGGVTLGQPHLR       | N-ter + 42.01 Da                           | 56.2       | 52.3              | 3      | 1576.88                      | n.d.                                         | n.d.                  | IF2G_MOUSE   | A2AAW9_MOUSE | Eukaryotic translation initiation factor 2 subunit 3, X-linked;         | Eukaryotic translation initiation factor 2 subunit gamma, X-linked;                                                                                                                             |
| M              | AGGPPKALPSTGPQSLR     | N-ter + 42.01 Da, K +28.03 Da              | 56.4       | 49.0              | 3      | 1703.02                      | -0.76                                        | 0.17                  | SNX30_MOUSE  |              | Sorting nexin-30;                                                       |                                                                                                                                                                                                 |
| M              | AGKPVLYHFDGR          | N-ter + 42.01 Da, K +34.06 Da              | 35.6       | 21.7              | 3      | 1434.81                      | -1.00                                        | 0.30                  | GSTA3_MOUSE  |              | Glutathione S-transferase A3;                                           | GST class-alpha member 3;Glutathione S-transferase Ya3;Glutathione S-transferase Yc;                                                                                                            |
| M              | AGKPVLYHFNAR          | N-ter + 42.01 Da, K +28.03 Da              | 30.8       | 66.0              | 3      | 1441.88                      | -1.43                                        | 0.27                  | GSTA1_MOUSE  | GSTA2_MOUSE  | Glutathione S-transferase A1;                                           | GST class-alpha member 1;Glutathione S-transferase Ya;Glutathione S-transferase Ya1;                                                                                                            |
| M              | AGLELLSDQGYR          | N-ter + 42.01 Da                           | 36.9       | 53.7              | 2      | 1362.75                      | n.d.                                         | n.d.                  | EXOS4_MOUSE  |              | Exosome complex component RRP41;                                        | Exosome component 4;Ribosomal RNA-processing protein 41;                                                                                                                                        |
| M              | AGLGHSPAFGR           | N-ter + 42.01 Da                           | 38.4       | 36.9              | 2      | 1110.60                      | n.d.                                         | n.d.                  | DDAH1_MOUSE  |              | N(G),N(G)-dimethylarginine dimethylaminohydrolase 1;                    | DDAH1;Dimethylargininase-1;                                                                                                                                                                     |
| M              | AGLNSLEAVKR           | N-ter + 42.01 Da, K +28.03 Da              | 53.6       | 29.8              | 2      | 1226.74                      | 1.42                                         | 0.31                  | TPM4_MOUSE   |              | Tropomyosin-4;                                                          | Tropomyosin-4;                                                                                                                                                                                  |
| M              | AGNKVPPALASHQPDR      | N-ter + 42.01 Da, K +28.03 Da              | 60.4       | 45.8              | 3      | 1726.99                      | -1.56                                        | 0.18                  | TRUA_MOUSE   | D3Z092_MOUSE | tRNA pseudouridine synthase A, mitochondrial;                           | tRNA pseudouridine synthase I;RNA-uridine isomerase I;                                                                                                                                          |
| M              | AGPGGGALESPPR         | N-ter + 42.01 Da                           | 26.5       | 27.6              | 2      | 1220.65                      | n.d.                                         | n.d.                  | HECD3_MOUSE  |              | E3 ubiquitin-protein ligase HECTD3;                                     | HECT domain-containing protein 3;                                                                                                                                                               |
| M              | AGQEDPVQR             | N-ter + 42.01 Da                           | 30.7       | 71.9              | 2      | 1040.56                      | n.d.                                         | n.d.                  | BRK1_MOUSE   |              | Protein BRICK1;                                                         |                                                                                                                                                                                                 |
| M              | AGSSAEQAADYR          | N-ter + 42.01 Da                           | 49.2       | 73.0              | 2      | 1266.64                      | n.d.                                         | n.d.                  | SYCC_MOUSE   |              | Cysteine-tRNA ligase, cytoplasmic;                                      | CysteinyI-tRNA synthetase;                                                                                                                                                                      |
| M              | AGTSSAEAEALAAAR       | N-ter + 42.01 Da                           | 41.3       | 89.6              | 3      | 1545.87                      | n.d.                                         | n.d.                  | PRPK_MOUSE   | Q5U452_MOUSE | TP53-regulating kinase;                                                 | Nori-2;p53-related protein kinase;                                                                                                                                                              |
| M              | AGTTTIEAVKR           | N-ter + 42.01 Da, K +28.03 Da              | 56.3       | 31.6              | 2      | 1215.72                      | 1.95                                         | 0.44                  | Q8C7C3_MOUSE | D3Z618_MOUSE |                                                                         |                                                                                                                                                                                                 |
| M              | AGTVVLDVELR           | N-ter + 42.01 Da                           | 35.1       | 51.7              | 2      | 1327.77                      | n.d.                                         | n.d.                  | MCM3_MOUSE   |              | DNA replication licensing factor MCM3;                                  | DNA polymerase alpha holoenzyme-associated protein P1;p1-MCM3;                                                                                                                                  |
| M              | AGVDQHEGTIVQVQQLFFR   | N-ter + 42.01 Da                           | 50.3       | 54.1              | 3      | 2285.24                      | n.d.                                         | n.d.                  | ABHEB_MOUSE  |              | Abhydrolase domain-containing protein 14B;                              | CCG1-interacting factor B;                                                                                                                                                                      |
| LLADAYSGRM     | AGVRPNDVAEVVAGAR      | N-ter + 42.01 Da                           | 53.9       | 53.6              | 3      | 1621.94                      | n.d.                                         | n.d.                  | KBTBB_MOUSE  |              | Kelch repeat and BTB domain-containing protein 11;                      |                                                                                                                                                                                                 |
| M              | AHATPPSALEGGPIR       | N-ter + 42.01 Da                           | 51.3       | 47.7              | 3      | 1642.92                      | n.d.                                         | n.d.                  | GTL3B_MOUSE  |              | Protein GTLF3B;                                                         | Gene trap locus protein F3-2;Gene trap locus protein F3b;                                                                                                                                       |
| M              | AKCLTSSLSVR           | N-ter + 42.01 Da, K +28.03 Da, C +57.02 Da | 56.8       | 25.9              | 2      | 1403.82                      | 0.64                                         | 0.12                  | ECHD1_MOUSE  | E0CX53_MOUSE | Enoyl-CoA hydratase domain-containing protein 1;                        |                                                                                                                                                                                                 |
| M              | AKIAKTHEIEAQIR        | N-ter + 42.01 Da, K +34.06 Da              | 32.5       | 69.1              | 4      | 1832.21                      | 0.06                                         | 0.02                  | SF3B1_MOUSE  |              | Splicing factor 3B subunit 1;                                           | Pre-mRNA-splicing factor SF3b 155 kDa subunit;Spliceosome-associated protein 155;                                                                                                               |
| M              | AKIAQGAMYSR           | N-ter + 42.01 Da, K +34.06 Da              | 43.8       | 31.1              | 2      | 1183.70                      | 0.35                                         | 0.03                  | ANXA6_MOUSE  | F8WIT2_MOUSE | Annexin A6;                                                             | 67 kDa calelectrin;Annexin VI;Annexin-6;Calphobindin-II;Chromobindin-20;Lipocortin VI;Protein III;p68;p70;                                                                                      |
| EVSSVPTNGM     | AKNGSEADIDESLYSR      | N-ter + 42.01 Da, K +28.03 Da              | 63.3       | 46.3              | 3      | 1823.94                      | -0.22                                        | 0.05                  | UBA1_MOUSE   |              | Ubiquitin-like modifier-activating enzyme 1;                            | Ubiquitin-activating enzyme E1;Ubiquitin-activating enzyme 1 X;                                                                                                                                 |
| M              | AKTEEMVQTEEMETPR      | N-ter + 42.01 Da, K +34.06 Da              | 43.6       | 53.6              | 3      | 1984.04                      | -0.25                                        | 0.11                  | BAG1_MOUSE   | F6TCF9_MOUSE | BAG family molecular chaperone regulator 1;                             | Bcl-2-associated athanogene 1;                                                                                                                                                                  |
| M              | AKVEQVLSLEPQHELFKR    | N-ter + 42.01 Da, K +28.03 Da              | 49.6       | 84.6              | 4      | 2248.45                      | 0.03                                         | 0.01                  | VAPB_MOUSE   | Q8BH80_MOUSE | Vesicle-associated membrane protein-associated protein B;               |                                                                                                                                                                                                 |
| M              | ALDQPEQMELEEGKAGSGLR  | N-ter + 42.01 Da, K +28.03 Da              | 59.6       | 42.9              | 3      | 2156.13                      | 1.37                                         | 0.50                  | PR58_MOUSE   |              | 26S protease regulatory subunit 8;                                      | VAMP-associated protein 33b;                                                                                                                                                                    |
| M              | ALKQISSNR             | N-ter + 42.01 Da, K +28.03 Da              | 35.4       | 37.8              | 2      | 1085.66                      | 0.01                                         | 0.00                  | ESTD_MOUSE   |              | 5-formylglutathione hydrolase;                                          | 26S proteasome AAA-ATPase subunit RPT6;Proteasome 26S subunit ATPase 5;Proteasome subunit p45;p45/SUG;                                                                                          |
| M              | ALLAEHLKPLPADR        | N-ter + 42.01 Da, K +34.06 Da              | 32.1       | 60.0              | 3      | 1732.15                      | 0.29                                         | 0.17                  | GLTP_MOUSE   | D3Z1H9_MOUSE | Glycolipid transfer protein;                                            | Esterase 10;Esterase D;Sid 478;                                                                                                                                                                 |
| M              | ALPGPAVFGPGR          | N-ter + 42.01 Da                           | 39.8       | 48.5              | 2      | 1266.73                      | n.d.                                         | n.d.                  | F116A_MOUSE  |              | Protein FAM116A;                                                        |                                                                                                                                                                                                 |
| M              | ALQALHSSGVGLR         | N-ter + 42.01 Da                           | 69.9       | 34.3              | 2      | 1349.79                      | n.d.                                         | n.d.                  | MMP37_MOUSE  | D6RGT1_MOUSE | Mitochondrial translocator assembly and maintenance protein 41 homolog; | MMP37-like protein, mitochondrial;                                                                                                                                                              |
| QDGLGQSQV      | ALSSEALEAEER          | N-ter + 42.01 Da                           | 22.7       | 30.1              | 3      | 1482.74                      | n.d.                                         | n.d.                  | CEP72_MOUSE  |              | Centrosomal protein of 72 kDa;                                          |                                                                                                                                                                                                 |
| M              | AMQKIFAR              | N-ter + 42.01 Da, K +28.03 Da              | 40.9       | 12.7              | 2      | 1033.59                      | -1.47                                        | 0.04                  | ENOB_MOUSE   | Q5SX59_MOUSE | Beta-enolase;                                                           | 2-phospho-D-glycerate hydro-lyase;Enolase 3;Muscle-specific enolase;Skeletal muscle enolase;                                                                                                    |
| YTLRNKEMKV     | AMRRLFAR              | N-ter + 42.01 Da                           | 37.4       | 44.8              | 2      | 1061.64                      | n.d.                                         | n.d.                  | Q8VF84_MOUSE |              |                                                                         |                                                                                                                                                                                                 |
| M              | AMVSEFLKQAR           | N-ter + 42.01 Da, K +28.03 Da              | 53.3       | 34.9              | 2      | 1348.76                      | 0.50                                         | 0.08                  | ANXA1_MOUSE  | E9QA30_MOUSE | Annexin A1;                                                             | Annexin I;Annexin-1;Calpactin II;Calpactin-2;Chromobindin-9;Lipocortin I;Phospholipase A2 inhibitory protein;p35;                                                                               |
| M              | ANKGPGSYGMSR          | N-ter + 42.01 Da, K +28.03 Da              | 46.8       | 43.3              | 2      | 1236.65                      | -0.38                                        | 0.08                  | TAGL_MOUSE   |              | Transgelin;                                                             | Actin-associated protein p27;Smooth muscle protein 22-alpha;                                                                                                                                    |
| M              | ANSANTNTVPKLYR        | N-ter + 42.01 Da, K +28.03 Da              | 28.2       | 37.8              | 3      | 1617.91                      | 0.08                                         | 0.01                  | TF2AA_MOUSE  |              | Transcription initiation factor IIA subunit 1;                          | General transcription factor IIA subunit 1;                                                                                                                                                     |
| M              | AQALSEEERFQR          | N-ter + 42.01 Da                           | 34.9       | 63.3              | 2      | 1348.71                      | n.d.                                         | n.d.                  | GRAP1_MOUSE  | A2AEW6_MOUSE | GRIP1-associated protein 1;                                             | HCMV-interacting protein;                                                                                                                                                                       |
| M              | AQAPAKCPSYPGSDGEMGKLR | N-ter + 42.01 Da, K +28.03 Da, C +57.02 Da | 34.6       | 63.0              | 4      | 2374.29                      | -1.79                                        | 0.43                  | GMDS_MOUSE   |              | GDP-mannose 4,6 dehydratase;                                            | GDP-D-mannose dehydratase;                                                                                                                                                                      |
| M              | AQAPTIVITQPGFVR       | N-ter + 42.01 Da                           | 38.9       | 76.1              | 3      | 1625.02                      | n.d.                                         | n.d.                  | PLAC8_MOUSE  |              | Placenta-specific gene 8 protein;                                       | Onzin;Protein C15;                                                                                                                                                                              |
| M              | AQDGVLEKSVR           | N-ter + 42.01 Da, K +28.03 Da              | 49.3       | 36.5              | 2      | 1399.78                      | 0.04                                         | 0.01                  | CS066_MOUSE  |              | UPF0515 protein C19orf66 homolog;                                       |                                                                                                                                                                                                 |

Table S5, Tholen et al.

| Non Prime Site | Prime Site               | Modifications                              | Hyperscore | Mass error in ppm | Charge | Precursor neutral mass in Da | Fold change (log <sub>2</sub> ) of ASAPRatio | FC-error of ASAPRatio | Uniprot ID 1 | Uniprot ID 2 | Protein Name 1                                                      | Protein Name 2                                                                                                                                                                                                                                    |
|----------------|--------------------------|--------------------------------------------|------------|-------------------|--------|------------------------------|----------------------------------------------|-----------------------|--------------|--------------|---------------------------------------------------------------------|---------------------------------------------------------------------------------------------------------------------------------------------------------------------------------------------------------------------------------------------------|
| M              | AQDSEKELLR               | N-ter + 42.01 Da, K +34.06 Da              | 62.6       | 28.0              | 2      | 1376.81                      | -0.17                                        | 0.04                  | GBGT2_MOUSE  |              | Guanine nucleotide-binding protein G(i)/G(s)/G(o) subunit gamma-T2; | G gamma-C;G-gamma-8;                                                                                                                                                                                                                              |
| M              | AQDQGEKENPMR             | N-ter + 42.01 Da, K +28.03 Da              | 31.1       | 47.3              | 3      | 1471.74                      | -0.92                                        | 0.24                  | RL11_MOUSE   | D323K1_MOUSE | 60S ribosomal protein L11;                                          |                                                                                                                                                                                                                                                   |
| M              | AQELQHPFAR               | N-ter + 42.01 Da                           | 43.8       | 49.3              | 3      | 1366.73                      | n.d.                                         | n.d.                  | ADSV_MOUSE   | E9QM03_MOUSE | Adseverin;                                                          | Gelsolin-like protein;Scinderin;                                                                                                                                                                                                                  |
| M              | AQERPSCAVEPEHVQR         | N-ter + 42.01 Da, C +57.02 Da              | 55.1       | 53.4              | 3      | 1934.01                      | n.d.                                         | n.d.                  | CDD_MOUSE    |              | Cytidine deaminase;                                                 | Cytidine aminohydrolase;                                                                                                                                                                                                                          |
| M              | AQEVSEYLSQNPR            | N-ter + 42.01 Da                           | 37.1       | 80.5              | 3      | 1561.86                      | n.d.                                         | n.d.                  | CARF_MOUSE   |              | CDKN2A-interacting protein;                                         | Collaborator of ARF;                                                                                                                                                                                                                              |
| M              | AQGLIEVER                | N-ter + 42.01 Da                           | 35.2       | 56.0              | 2      | 1055.62                      | n.d.                                         | n.d.                  | THTPA_MOUSE  |              | Thiamine-triphosphatase;                                            |                                                                                                                                                                                                                                                   |
| M              | AQGSHQIDFQVLHDLR         | N-ter + 42.01 Da                           | 58.7       | 66.5              | 3      | 1905.08                      | n.d.                                         | n.d.                  | TAB2_MOUSE   | D32216_MOUSE | TGF-beta-activated kinase 1 and MAP3K7-binding protein 2;           | Mitogen-activated protein kinase kinase kinase 7-interacting protein 2;TAK1-binding protein 2;TGF-beta-activated kinase 1-binding protein 2;                                                                                                      |
| SALARETRAM     | AQKPDGGAGLR              | N-ter + 42.01 Da, K +34.06 Da              | 35.9       | 41.3              | 2      | 1144.69                      | 0.12                                         | 0.03                  | MAGD1_MOUSE  | F6YTL0_MOUSE | Melanoma-associated antigen D1;                                     | Dixin-1;MAGE-D1 antigen;Neurotrophin receptor-interacting MAGE homolog;                                                                                                                                                                           |
| M              | AQNLKDLAGR               | N-ter + 42.01 Da, K +34.06 Da              | 44.8       | 27.3              | 2      | 1160.70                      | 0.40                                         | 0.09                  | PHB2_MOUSE   | E9Q313_MOUSE | Prohibitin-2;                                                       | B-cell receptor-associated protein BAP37;Repressor of estrogen receptor activity;                                                                                                                                                                 |
| M              | AQNPSPNMEPLR             | N-ter + 42.01 Da                           | 37.7       | 61.3              | 2      | 1297.69                      | n.d.                                         | n.d.                  | O91W19_MOUSE |              |                                                                     |                                                                                                                                                                                                                                                   |
| M              | AQPGPAPQPDVSLQQR         | N-ter + 42.01 Da                           | 35.1       | 74.8              | 3      | 1730.00                      | n.d.                                         | n.d.                  | RABE1_MOUSE  | Q5QNU4_MOUSE | Rab GTPase-binding effector protein 1;                              | Rabaptin-5;Rabaptin-5alpha;                                                                                                                                                                                                                       |
| VVYAAPAPTS     | AQTASPPQPAR              | N-ter + 42.01 Da                           | 30.6       | 1.4               | 2      | 1067.54                      | n.d.                                         | n.d.                  | AKNA_MOUSE   |              | AT-hook-containing transcription factor;                            |                                                                                                                                                                                                                                                   |
| M              | ASALEQFVNSVR             | N-ter + 42.01 Da                           | 36.8       | 62.0              | 2      | 1361.78                      | n.d.                                         | n.d.                  | CSN3_MOUSE   | Q88X58_MOUSE | COP9 signalosome complex subunit 3;                                 | JAB1-containing signalosome subunit 3;                                                                                                                                                                                                            |
| M              | ASASEPPASPR              | N-ter + 42.01 Da                           | 33.2       | 58.1              | 2      | 1110.60                      | n.d.                                         | n.d.                  | RAB3D_MOUSE  | D3YW33_MOUSE | Ras-related protein Rab-3D;                                         |                                                                                                                                                                                                                                                   |
| M              | ASAVSPANLPAVLLQPR        | N-ter + 42.01 Da                           | 40.4       | 72.0              | 3      | 1745.11                      | n.d.                                         | n.d.                  | HCF1_MOUSE   | B1AUX2_MOUSE | Host cell factor 1;                                                 | C1 factor;                                                                                                                                                                                                                                        |
| M              | ASCASIEDATQHLR           | N-ter + 42.01 Da, K +57.02 Da              | 48.9       | 54.2              | 3      | 1827.94                      | n.d.                                         | n.d.                  | EDC4_MOUSE   | D6RE33_MOUSE | Enhancer of mRNA-decapping protein 4;                               |                                                                                                                                                                                                                                                   |
| M              | ASCDEIHEHPR              | N-ter + 42.01 Da, K +34.06 Da, C +57.02 Da | 23.9       | 68.0              | 3      | 1416.78                      | -0.47                                        | 0.16                  | SEP10_MOUSE  |              | Septin-10;                                                          |                                                                                                                                                                                                                                                   |
| M              | ASDSGGPVLASER            | N-ter + 42.01 Da                           | 44.4       | 65.6              | 2      | 1430.76                      | n.d.                                         | n.d.                  | EGLN1_MOUSE  |              | Egl nine homolog 1;                                                 | Hypoxia-inducible factor prolyl hydroxylase 2;Prolyl hydroxylase domain-containing protein 2;SM-20;                                                                                                                                               |
| M              | ASDTPGFYMDKLNKYR         | N-ter + 42.01 Da, K +28.03 Da              | 30.5       | 55.0              | 3      | 2003.09                      | -0.67                                        | 0.11                  | E2AK2_MOUSE  |              | Interferon-induced, double-stranded RNA-activated protein kinase;   | Eukaryotic translation initiation factor 2-alpha kinase 2;Interferon-inducible RNA-dependent protein kinase;P1/eIF-2A protein kinase;Protein kinase RNA-activated;Serine/threonine-protein kinase TIK;Tyrosine-protein kinase EIF2AK2;p68 kinase; |
| M              | ASESGKLWGGRR             | N-ter + 42.01 Da, K +28.03 Da              | 40.8       | 27.7              | 2      | 1216.65                      | -0.06                                        | 0.01                  | ARLY_MOUSE   | E0CY49_MOUSE | Argininosuccinate lyase;                                            | Argininosuccinase;                                                                                                                                                                                                                                |
| M              | ASESSPLLAYR              | N-ter + 42.01 Da                           | 40.7       | 56.6              | 2      | 1234.69                      | n.d.                                         | n.d.                  | S12A9_MOUSE  | D3Z362_MOUSE | Solute carrier family 12 member 9;                                  | Cation-chloride cotransporter-interacting protein 1;Potassium-chloride transporter 9;                                                                                                                                                             |
| M              | ASEVEEQIPVRR             | N-ter + 42.01 Da                           | 33.9       | 47.6              | 2      | 1297.71                      | n.d.                                         | n.d.                  | CB043_MOUSE  |              | UPF0554 protein C2orf43 homolog;                                    | 15S Mg(2+)-ATPase p97 subunit;Valosin-containing protein;                                                                                                                                                                                         |
| M              | ASGADSKGDDLSTAILKQKNRPNR | N-ter + 42.01 Da, K +28.03 Da              | 40.5       | 56.6              | 4      | 2667.58                      | 1.01                                         | 0.30                  | TERA_MOUSE   |              | Transitional endoplasmic reticulum ATPase;                          |                                                                                                                                                                                                                                                   |
| M              | ASGCKIGPSILNSDLANLGAELR  | N-ter + 42.01 Da, K +28.03 Da, C +57.02 Da | 48.2       | 40.5              | 3      | 2585.40                      | 0.24                                         | 0.20                  | RPE_MOUSE    | B2KGF0_MOUSE | Ribulose-phosphate 3-epimerase;                                     | Ribulose-5-phosphate-epimerase;                                                                                                                                                                                                                   |
| M              | ASGSMATSEER              | N-ter + 42.01 Da                           | 38.0       | 55.3              | 2      | 1295.60                      | n.d.                                         | n.d.                  | KAPO_MOUSE   | A2AI69_MOUSE | cAMP-dependent protein kinase type I-alpha regulatory subunit;      |                                                                                                                                                                                                                                                   |
| M              | ASGSSDAEPAAGPAGR         | N-ter + 42.01 Da                           | 41.4       | 61.6              | 2      | 1528.77                      | n.d.                                         | n.d.                  | TYDP2_MOUSE  |              | Tyrosyl-DNA phosphodiesterase 2;                                    | 5'-tyrosyl-DNA phosphodiesterase;TRAF and TNF receptor-associated protein;                                                                                                                                                                        |
| M              | ASGVAVSDGVKVFNDMKVR      | N-ter + 42.01 Da, K +34.06 Da              | 45.0       | 59.7              | 3      | 2201.38                      | 0.51                                         | 0.32                  | COF1_MOUSE   | E9Q1T2_MOUSE | Cofilin-1;                                                          | Cofilin, non-muscle isoform;                                                                                                                                                                                                                      |
| M              | ASGVQADVECR              | N-ter + 42.01 Da, C +57.02 Da              | 45.8       | 57.9              | 2      | 1331.69                      | n.d.                                         | n.d.                  | DEST_MOUSE   |              | Destrin;                                                            | Actin-depolymerizing factor;Sid 23;                                                                                                                                                                                                               |
| M              | ASGVTVNDEVIKVFNDMKVR     | N-ter + 42.01 Da, K +28.03 Da              | 45.1       | 63.8              | 3      | 2318.38                      | -0.23                                        | 0.20                  | COF2_MOUSE   |              | Cofilin, muscle isoform;                                            | Cofilin, muscle isoform;                                                                                                                                                                                                                          |
| M              | ASKEMFEDTVEER            | N-ter + 42.01 Da, K +28.03 Da              | 48.7       | 54.4              | 3      | 1639.83                      | 0.16                                         | 0.05                  | RBBP7_MOUSE  | A2AF19_MOUSE | Histone-binding protein RBBP7;                                      | Histone acetyltransferase type B subunit 2;Nucleosome-remodeling factor subunit RBAP46;Retinoblastoma-binding protein 7;Retinoblastoma-binding protein p46;                                                                                       |
| M              | ASLKDLQKWR               | N-ter + 42.01 Da, K +34.06 Da              | 46.2       | 39.3              | 2      | 1411.90                      | 3.24                                         | 0.25                  | FABP5_MOUSE  | E9Q964_MOUSE | Fatty acid-binding protein, epidermal;                              | Epidermal-type fatty acid-binding protein;Fatty acid-binding protein homolog;                                                                                                                                                                     |
| M              | ASGLAPVNFKAGADDEER       | N-ter + 42.01 Da, K +34.06 Da              | 55.5       | 38.3              | 3      | 2063.19                      | 1.81                                         | 1.78                  | TCPB_MOUSE   |              | T-complex protein 1 subunit beta;                                   | Protein homolog;                                                                                                                                                                                                                                  |
| M              | ASNFKTTMASSAQR           | N-ter + 42.01 Da, K +28.03 Da              | 36.0       | 62.5              | 3      | 1725.00                      | -0.58                                        | 0.23                  | CETN2_MOUSE  |              | Centrin-2;                                                          | CCT-beta;                                                                                                                                                                                                                                         |
| M              | ASNNTASIAQAR             | N-ter + 42.01 Da                           | 34.3       | 43.2              | 2      | 1244.66                      | n.d.                                         | n.d.                  | GBG2_MOUSE   |              | Guanine nucleotide-binding protein G(i)/G(s)/G(o) subunit gamma-2;  | G gamma-1;                                                                                                                                                                                                                                        |
| M              | ASPAAGGVVIVGSLIGR        | N-ter + 42.01 Da                           | 60.5       | 49.3              | 2      | 1621.99                      | n.d.                                         | n.d.                  | CRYL1_MOUSE  | Q9D221_MOUSE | Lambda-crystallin homolog;                                          | L-gulonate 3-dehydrogenase;                                                                                                                                                                                                                       |
| M              | ASQSQQIQLLQAEKR          | N-ter + 42.01 Da, K +28.03 Da              | 49.4       | 54.7              | 3      | 1854.10                      | 1.37                                         | 0.28                  | VATG1_MOUSE  |              | V-type proton ATPase subunit G 1;                                   | V-ATPase 13 kDa subunit 1;Vacuolar proton pump subunit G 1;                                                                                                                                                                                       |
| M              | ASSAQSSGGPAPVTVQR        | N-ter + 42.01 Da                           | 31.6       | 79.3              | 3      | 1872.05                      | n.d.                                         | n.d.                  | SND1_MOUSE   | Q3TJ56_MOUSE | Staphylococcal nuclease domain-containing protein 1;                | 100 kDa coactivator;p100 co-activator;                                                                                                                                                                                                            |
| M              | ASSDIQVKELEKR            | N-ter + 42.01 Da, K +28.03 Da              | 36.3       | 58.5              | 3      | 1599.98                      | 0.75                                         | 0.21                  | STMN1_MOUSE  | D3Z1Z8_MOUSE | Stathmin;                                                           | Leukemia-associated gene protein;Leukemia-associated phosphoprotein                                                                                                                                                                               |
| M              | ASSGYNPYVEIEQPR          | N-ter + 42.01 Da                           | 24.7       | 68.9              | 3      | 1864.03                      | n.d.                                         | n.d.                  | REL_MOUSE    | A4QPD3_MOUSE | Proto-oncogene c-Rel;                                               | p18;Metablastin;Oncoprotein 18;Phosphoprotein p19;Proslin;Protein Pr22;pp17;                                                                                                                                                                      |
| M              | ASSHTVLMR                | N-ter + 42.01 Da                           | 45.0       | 37.6              | 2      | 1042.56                      | n.d.                                         | n.d.                  | BPNT1_MOUSE  | D3Z5X0_MOUSE | 3'(2'),5'-bisphosphate nucleotidase 1;                              | Bisphosphate 3'-nucleotidase 1;PAP-inositol-1,4-phosphatase;                                                                                                                                                                                      |

Table S5, Tholen et al.

| Non Prime Site | Prime Site                 | Modifications                              | Hyperscore | Mass error in ppm | Charge | Precursor neutral mass in Da | Fold change (log <sub>2</sub> ) of ASAPRatio | FC-error of ASAPRatio | Uniprot ID 1 | Uniprot ID 2 | Protein Name 1                                                         | Protein Name 2                                                                                                                                                                                       |
|----------------|----------------------------|--------------------------------------------|------------|-------------------|--------|------------------------------|----------------------------------------------|-----------------------|--------------|--------------|------------------------------------------------------------------------|------------------------------------------------------------------------------------------------------------------------------------------------------------------------------------------------------|
| M              | ASSKIVTLSEVLSR             | N-ter + 42.01 Da, K +34.06 Da              | 41.6       | 45.0              | 3      | 1485.02                      | 0.10                                         | 0.03                  | PIR_MOUSE    | A2AIH8_MOUSE | Pirin;                                                                 | Probable quercetin 2,3-dioxygenase PIR;                                                                                                                                                              |
| QAQHSPPGEM     | ASSPQGLDNPALLR             | N-ter + 42.01 Da                           | 34.6       | 71.7              | 3      | 1479.87                      | n.d.                                         | n.d.                  | DDI2_MOUSE   |              | Protein DDI1 homolog 2;                                                | Down-regulator of transcription 1;Negative cofactor 2-beta;TATA-binding protein-associated phosphoprotein;                                                                                           |
| M              | ASSSGNDDLTIPR              | N-ter + 42.01 Da                           | 31.3       | 47.4              | 2      | 1488.74                      | n.d.                                         | n.d.                  | NC2B_MOUSE   |              | Protein Dr1;                                                           |                                                                                                                                                                                                      |
| MA             | ASTDIAGLEESFR              | N-ter + 42.01 Da                           | 48.0       | 53.0              | 2      | 1436.76                      | n.d.                                         | n.d.                  | TPPP3_MOUSE  |              | Tubulin polymerization-promoting protein family member 3;              |                                                                                                                                                                                                      |
| M              | ASWAEPEPAALR               | N-ter + 42.01 Da                           | 31.4       | 51.1              | 2      | 1425.76                      | n.d.                                         | n.d.                  | FKBP8_MOUSE  | D3Z597_MOUSE | Peptidyl-prolyl cis-trans isomerase FKBP8;                             | 38 kDa FK506-binding protein;FK506-binding protein 8;FKBP38;Rotamase;                                                                                                                                |
| M              | ASYFDEHDCPLNPER            | N-ter + 42.01 Da, C +57.02 Da              | 50.9       | 57.4              | 3      | 2019.94                      | n.d.                                         | n.d.                  | RN181_MOUSE  | D3YUJ1_MOUSE | E3 ubiquitin-protein ligase RNF181;                                    | RING finger protein 181;                                                                                                                                                                             |
| M              | ASYEILDVPR                 | N-ter + 42.01 Da                           | 41.1       | 59.9              | 2      | 1366.76                      | n.d.                                         | n.d.                  | DNJB2_MOUSE  | Q3TB24_MOUSE | DnaI homolog subfamily B member 2;                                     | DnaI homolog subfamily B member 10;MDJ8; Cytosolic sialidase;Mouse skeletal muscle sialidase;Murine thymic sialidase;N-acetyl-alpha-neuraminidase 2;                                                 |
| SPWFSDLRPM     | ATCPVLQKELFR               | N-ter + 42.01 Da, K +28.03 Da, C +57.02 Da | 23.5       | 46.0              | 3      | 1631.95                      | -1.43                                        | 0.62                  | NEUR2_MOUSE  | E9Q2Z0_MOUSE | Sialidase-2;                                                           | FYVE finger-containing phosphoinositide kinase;PIKfyve;Phosphatidylinositol-3-phosphate 5-kinase type III;p235;                                                                                      |
| M              | ATDDKSSPTLDSANDLPR         | N-ter + 42.01 Da, K +28.03 Da              | 39.9       | 50.0              | 3      | 1972.04                      | -0.43                                        | 0.11                  | FYV1_MOUSE   | D3Z5N5_MOUSE | 1-phosphatidylinositol-3-phosphate 5-kinase;                           | Swiprosin-1;                                                                                                                                                                                         |
| M              | ATDELASKLSR                | N-ter + 42.01 Da, K +34.06 Da              | 57.7       | 31.2              | 2      | 1265.74                      | 1.55                                         | 0.56                  | EFHD2_MOUSE  | Q8C845_MOUSE | EF-hand domain-containing protein D2;                                  |                                                                                                                                                                                                      |
| M              | ATEGMILTNHHDQIR            | N-ter + 42.01 Da                           | 52.7       | 68.5              | 3      | 1776.98                      | n.d.                                         | n.d.                  | GEPH_MOUSE   | A0JNY3_MOUSE | Gephyrin;                                                              |                                                                                                                                                                                                      |
| M              | ATESSLTHLVDLTASGLPAQGLCLR  | N-ter + 42.01 Da, C +57.02 Da              | 43.6       | 40.5              | 3      | 2736.49                      | n.d.                                         | n.d.                  | HIUH_MOUSE   |              | 5-hydroxyisourate hydrolase;                                           | Transthyretin-related protein; CW17;Mammalian branch point-binding protein;Transcription factor ZFM1;Zinc finger gene in MEN1 locus;Zinc finger protein 162;                                         |
| M              | ATGANATPLDFPSKRR           | N-ter + 42.01 Da, K +34.06 Da              | 46.4       | 50.4              | 3      | 1783.12                      | 0.90                                         | 0.15                  | SF01_MOUSE   | Q3UI45_MOUSE | Splicing factor 1;                                                     |                                                                                                                                                                                                      |
| M              | ATIATMPVPETR               | N-ter + 42.01 Da                           | 30.3       | 53.0              | 2      | 1327.75                      | n.d.                                         | n.d.                  | SNRPA_MOUSE  | E9Q4T6_MOUSE | U1 small nuclear ribonucleoprotein A;                                  |                                                                                                                                                                                                      |
| M              | ATIGPSGLHPGER              | N-ter + 42.01 Da                           | 50.8       | 28.5              | 2      | 1332.72                      | n.d.                                         | n.d.                  | HXX3_MOUSE   | D6RCV7_MOUSE | Hexokinase-3;                                                          | Hexokinase type III;                                                                                                                                                                                 |
| M              | ATKCTKCGPYSTPLEAMKGR       | N-ter + 42.01 Da, K +34.06 Da, C +57.02 Da | 71.5       | 78.7              | 4      | 2553.56                      | -1.18                                        | 0.24                  | SBP1_MOUSE   | D6RHN2_MOUSE | Selenium-binding protein 1;                                            | 56 kDa selenium-binding protein;                                                                                                                                                                     |
| M              | ATKIDKEACR                 | N-ter + 42.01 Da, K +34.06 Da, C +57.02 Da | 27.7       | 65.0              | 3      | 1300.83                      | 0.90                                         | 0.52                  | COTL1_MOUSE  |              | Coactosin-like protein;                                                |                                                                                                                                                                                                      |
| MFLCRFWGKM     | ATNDAVLKR                  | N-ter + 42.01 Da, K +34.06 Da              | 37.0       | 29.7              | 2      | 1062.66                      | 1.61                                         | 0.27                  | AIMP1_MOUSE  | Q3UZG4_MOUSE | Aminoacyl tRNA synthase complex-interacting multifunctional protein 1; | Multisynthase complex auxiliary component p43;                                                                                                                                                       |
| M              | ATPAAPASGVR                | N-ter + 42.01 Da                           | 31.5       | 67.3              | 2      | 1038.62                      | n.d.                                         | n.d.                  | YIPF3_MOUSE  | D3YXM6_MOUSE | Protein YIPF3;                                                         | Killer lineage protein 1;YIP1 family member 3; Cytochrome b5 outer mitochondrial membrane isoform;                                                                                                   |
| M              | ATPEASGSGEKVEGSEPSVTYYR    | N-ter + 42.01 Da, K +34.06 Da              | 46.9       | 43.4              | 3      | 2476.29                      | 0.53                                         | 0.30                  | CYB5B_MOUSE  |              | Cytochrome b5 type B;                                                  |                                                                                                                                                                                                      |
| MS             | ATQHKTSLPQGVRR             | N-ter + 42.01 Da, K +28.03 Da              | 35.1       | 96.2              | 3      | 1491.96                      | -6.64                                        | 0.00                  | Q9CRB1_MOUSE | D3Z141_MOUSE |                                                                        | Anchorin CII;Annexin V;Annexin-5;Calphobindin I;Endonexin II;Lipocortin V;Placental anticoagulant protein 4;Placental anticoagulant protein I;Thromboplastin inhibitor;Vascular anticoagulant-alpha; |
| M              | ATRGTVDFFPFDGR             | N-ter + 42.01 Da                           | 37.9       | 55.2              | 3      | 1637.87                      | n.d.                                         | n.d.                  | ANXA5_MOUSE  |              | Annexin A5;                                                            |                                                                                                                                                                                                      |
| M              | ATELSQCQVEENQER            | N-ter + 42.01 Da, C +57.02 Da              | 37.4       | 84.6              | 3      | 1907.98                      | n.d.                                         | n.d.                  | TELT_MOUSE   |              | Telethonin;                                                            | Titin cap protein;                                                                                                                                                                                   |
| M              | ATTAQQSPQPVAGKR            | N-ter + 42.01 Da, K +28.03 Da              | 42.0       | 40.1              | 3      | 1608.92                      | 0.90                                         | 0.40                  | THUM1_MOUSE  |              | THUMP domain-containing protein 1;                                     |                                                                                                                                                                                                      |
| M              | ATVAATTKVPEIR              | N-ter + 42.01 Da, K +28.03 Da              | 64.3       | 27.6              | 2      | 1425.86                      | 0.44                                         | 0.16                  | RUVB2_MOUSE  | D3YXQ8_MOUSE | RuvB-like 2;                                                           | p47 protein; Phosphofructo-1-kinase isozyme B;Phosphofructokinase 1;Phosphohexokinase; SEC23-related protein B;                                                                                      |
| M              | ATVDLEKLR                  | N-ter + 42.01 Da, K +28.03 Da              | 34.7       | 27.2              | 2      | 1113.67                      | -0.47                                        | 0.09                  | K6PL_MOUSE   |              | 6-phosphofructokinase, liver type;                                     |                                                                                                                                                                                                      |
| M              | ATYLEFIQQNEER              | N-ter + 42.01 Da                           | 45.6       | 40.7              | 2      | 1681.86                      | n.d.                                         | n.d.                  | SC23B_MOUSE  | A2AN98_MOUSE | Protein transport protein Sec23B;                                      |                                                                                                                                                                                                      |
| M              | AVAAAAAATAASAAGGGGASAAR    | N-ter + 42.01 Da                           | 66.4       | 84.4              | 3      | 1873.07                      | n.d.                                         | n.d.                  | ARHL2_MOUSE  |              | Poly(ADP-ribose) glycohydrolase ARH3;                                  |                                                                                                                                                                                                      |
| M              | AVAAAAVAAPAGGGGAR          | N-ter + 42.01 Da                           | 48.4       | 33.9              | 2      | 1378.78                      | n.d.                                         | n.d.                  | SNTB1_MOUSE  |              | Beta-1-syntrophin;                                                     | 59 kDa dystrophin-associated protein A1 basic component 1;Syntrophin-2;                                                                                                                              |
| M              | AVAVGRPSNEELR              | N-ter + 42.01 Da                           | 35.7       | 31.0              | 2      | 1438.80                      | n.d.                                         | n.d.                  | SEP11_MOUSE  |              | Septin-11;                                                             |                                                                                                                                                                                                      |
| MADGEEPM       | AVDGGCGDTGDWEGR            | N-ter + 42.01 Da, C +57.02 Da              | 46.8       | 59.4              | 2      | 1592.71                      | n.d.                                         | n.d.                  | UBA3_MOUSE   | Q3TL72_MOUSE | NEDD8-activating enzyme E1 catalytic subunit;                          | NEDD8-activating enzyme E1C;Ubiquitin-activating enzyme 3;                                                                                                                                           |
| EATGGKYVPR     | AVLVDLEPMTDMSVR            | N-ter + 42.01 Da                           | 32.9       | 76.6              | 3      | 1642.95                      | n.d.                                         | n.d.                  | TBB2C_MOUSE  | TBB4_MOUSE   | Tubulin beta-4B chain;                                                 | Tubulin beta-2C chain;                                                                                                                                                                               |
| M              | AVNVYSTVSDNLSR             | N-ter + 42.01 Da                           | 32.6       | 72.3              | 3      | 1753.98                      | n.d.                                         | n.d.                  | MARE1_MOUSE  |              | Microtubule-associated protein RP/EB family member 1;                  | APC-binding protein EB1;End-binding protein 1;                                                                                                                                                       |
| M              | AVSTGVKVP                  | N-ter + 42.01 Da, K +28.03 Da              | 51.1       | 27.8              | 2      | 1082.67                      | 1.14                                         | 0.21                  | UB2V2_MOUSE  |              | Ubiquitin-conjugating enzyme E2 variant 2;                             | Ubc-like protein MMS2; L-isospartyl protein carboxyl methyltransferase;Protein L-isospartyl/D-aspartyl methyltransferase;Protein-beta-aspartate methyltransferase;                                   |
| M              | AWKSGGASHSELIHNL           | N-ter + 42.01 Da, K +28.03 Da              | 36.7       | 31.9              | 4      | 1932.06                      | 0.42                                         | 0.11                  | PIMT_MOUSE   | E9PWE0_MOUSE | Protein-L-isospartate(D-aspartate) O-methyltransferase;                |                                                                                                                                                                                                      |
| M              | AYHSFLVEPISCHAWNKDR        | N-ter + 42.01 Da, K +34.06 Da, C +57.02 Da | 38.5       | 82.1              | 4      | 2405.38                      | -0.29                                        | 0.05                  | ARC1B_MOUSE  | D3Z6S0_MOUSE | Actin-related protein 2/3 complex subunit 1B;                          | Arp2/3 complex 41 kDa subunit;p41-ARC; BPG-dependent PGAM 1;Phosphoglycerate mutase isozyme B;                                                                                                       |
| MA             | AYKLVLR                    | N-ter + 42.01 Da, K +28.03 Da              | 40.9       | 35.3              | 2      | 1044.71                      | 0.18                                         | 0.03                  | PGAM1_MOUSE  |              | Phosphoglycerate mutase 1;                                             |                                                                                                                                                                                                      |
| M              | DAATLTYDTLR                | N-ter + 42.01 Da                           | 45.2       | 53.4              | 2      | 1411.74                      | n.d.                                         | n.d.                  | ATG4B_MOUSE  |              | Cysteine protease ATG4B;                                               | AUT-like 1 cysteine endopeptidase;Autophagin-1;Autophagy-related cysteine endopeptidase 1;Autophagy-related protein 4 homolog B;                                                                     |
| M              | DDIIAALVDNDSGMCKAGFAGDDAPR | N-ter + 42.01 Da, K +28.03 Da, C +57.02 Da | 71.0       | 40.4              | 3      | 2806.37                      | 1.06                                         | 0.73                  | ACTB_MOUSE   | E9Q1F2_MOUSE | Actin, cytoplasmic 1;                                                  | Beta-actin;                                                                                                                                                                                          |

Table S5, Tholen et al.

| Non Prime Site | Prime Site                  | Modifications                              | Hyperscore | Mass error in ppm | Charge | Precursor neutral mass in Da | Fold change (log <sub>2</sub> ) of ASAPRatio | FC-error of ASAPRatio | Uniprot ID 1 | Uniprot ID 2 | Protein Name 1                                              | Protein Name 2                                                                                                                                                                                      |
|----------------|-----------------------------|--------------------------------------------|------------|-------------------|--------|------------------------------|----------------------------------------------|-----------------------|--------------|--------------|-------------------------------------------------------------|-----------------------------------------------------------------------------------------------------------------------------------------------------------------------------------------------------|
| M              | DDEEETYSR                   | N-ter + 42.01 Da                           | 40.9       | 80.3              | 2      | 1228.55                      | n.d.                                         | n.d.                  | RPAB1_MOUSE  |              | DNA-directed RNA polymerases I, II, and III subunit RPABC1; | DNA-directed RNA polymerase II subunit E;RPB5 homolog;                                                                                                                                              |
| M              | DDIIFTQCR                   | N-ter + 42.01 Da, C +57.02 Da              | 34.0       | 60.0              | 2      | 1226.58                      | n.d.                                         | n.d.                  | ILK_MOUSE    | D3YZA5_MOUSE | Integrin-linked protein kinase;                             |                                                                                                                                                                                                     |
| M              | DDREDLVYQAKLAEQAER          | N-ter + 42.01 Da, K +34.06 Da              | 56.0       | 56.7              | 3      | 2355.29                      | 0.42                                         | 0.16                  | 1433E_MOUSE  | D6REF3_MOUSE | 14-3-3 protein epsilon;                                     |                                                                                                                                                                                                     |
| MC             | DEDETTALVCDNGSLVKAGFAGDDAPR | N-ter + 42.01 Da, K +34.06 Da, C +57.02 Da | 63.9       | 38.5              | 3      | 2955.48                      | -0.60                                        | 0.39                  | ACTS_MOUSE   |              | Actin, alpha skeletal muscle;                               | Alpha-actin-1;                                                                                                                                                                                      |
| M              | DETSPLVSPER                 | N-ter + 42.01 Da                           | 33.9       | 51.4              | 2      | 1401.72                      | n.d.                                         | n.d.                  | P4K2A_MOUSE  |              | Phosphatidylinositol 4-kinase type 2-alpha;                 | Phosphatidylinositol 4-kinase type II-alpha;                                                                                                                                                        |
| M              | DFSCLKPIR                   | N-ter + 42.01 Da, K +34.06 Da              | 24.2       | 69.3              | 3      | 1343.92                      | 0.25                                         | 0.08                  | VATA_MOUSE   | D3YWH3_MOUSE | V-type proton ATPase catalytic subunit A;                   | V-ATPase 69 kDa subunit;Vacuolar proton pump subunit alpha;                                                                                                                                         |
| M              | DFSCLKPK                    | N-ter + 42.01 Da, K +28.03 Da              | 39.6       | 40.7              | 2      | 1062.62                      | 0.52                                         | 0.11                  | VATA_MOUSE   | D3YWH3_MOUSE | V-type proton ATPase catalytic subunit A;                   | V-ATPase 69 kDa subunit;Vacuolar proton pump subunit alpha;                                                                                                                                         |
| GKSTTKRRK      | DGDKLVECEVMKGVTSR           | N-ter + 42.01 Da, K +28.03 Da, C +57.02 Da | 36.7       | 94.4              | 4      | 2091.27                      | -3.47                                        | 0.39                  | FABP4_MOUSE  |              | Fatty acid-binding protein, adipocyte;                      | 3T3-L1 lipid-binding protein;Adipocyte lipid-binding protein;Adipocyte-type fatty acid-binding protein;Fatty acid-binding protein 4;Myelin P2 protein homolog;P15;P2 adipocyte protein;Protein 422; |
| M              | DGEDDNLVIKKR                | N-ter + 42.01 Da, K +28.03 Da              | 29.7       | 69.6              | 3      | 1716.99                      | -4.64                                        | 1.16                  | F192A_MOUSE  |              | Protein FAM192A;                                            | NEFA-interacting nuclear protein NIP30;                                                                                                                                                             |
| M              | DGIVPDIAGVTKR               | N-ter + 42.01 Da, K +28.03 Da              | 40.3       | 35.3              | 2      | 1540.88                      | 2.00                                         | 0.76                  | PTBP1_MOUSE  | Q922I7_MOUSE | Polypyrimidine tract-binding protein 1;                     | Heterogeneous nuclear ribonucleoprotein I;                                                                                                                                                          |
| M              | DGLVAQCSAR                  | N-ter + 42.01 Da, C +57.02 Da              | 45.3       | 55.8              | 2      | 1248.63                      | n.d.                                         | n.d.                  | SYRC_MOUSE   |              | Arginine-tRNA ligase, cytoplasmic;                          | Arginyl-tRNA synthetase;                                                                                                                                                                            |
| M              | DGSEDDPTFSAR                | N-ter + 42.01 Da                           | 33.8       | 56.3              | 2      | 1581.75                      | n.d.                                         | n.d.                  | ATHL1_MOUSE  | E9QA85_MOUSE | Acid trehalase-like protein 1;                              |                                                                                                                                                                                                     |
| LLQDGLKMDL     | DHGKFLDCVVR                 | N-ter + 42.01 Da, K +34.06 Da, C +57.02 Da | 31.7       | 89.1              | 3      | 1420.86                      | -2.18                                        | 1.19                  | KBTB5_MOUSE  |              | Kelch repeat and BTB domain-containing protein 5;           | Alpha(B)-crystallin;P23;                                                                                                                                                                            |
| M              | DIAIHPWIR                   | N-ter + 42.01 Da                           | 36.1       | 75.6              | 3      | 1429.84                      | n.d.                                         | n.d.                  | CRYAB_MOUSE  |              | Alpha-crystallin B chain;                                   | Alpha(B)-crystallin;P23;                                                                                                                                                                            |
| KLPGRVAFGE     | DIDLPEFDAR                  | N-ter + 42.01 Da                           | 40.1       | 72.8              | 2      | 1332.72                      | n.d.                                         | n.d.                  | CATB_MOUSE   |              | Cathepsin B;                                                | Cathepsin B1;                                                                                                                                                                                       |
| DDSESRRRL      | DKDSGFAYSWHR                | N-ter + 42.01 Da, K +34.06 Da              | 27.0       | 53.4              | 2      | 1543.81                      | -6.64                                        | 0.00                  | SNRK_MOUSE   |              | SNF-related serine/threonine-protein kinase;                | SNF1-related kinase;                                                                                                                                                                                |
| M              | DKNELVQKAKLAEQAER           | N-ter + 42.01 Da, K +34.06 Da              | 37.4       | 45.1              | 3      | 2244.40                      | 0.57                                         | 0.07                  | 1433Z_MOUSE  | D3YXF4_MOUSE | 14-3-3 protein zeta/delta;                                  | Protein kinase C inhibitor protein 1;SEZ-2;                                                                                                                                                         |
| M              | DKNELVQKAK                  | N-ter + 42.01 Da, K +34.06 Da              | 35.0       | 52.2              | 3      | 1446.97                      | 0.78                                         | 0.26                  | 1433Z_MOUSE  | D3YXF4_MOUSE | 14-3-3 protein zeta/delta;                                  | Protein kinase C inhibitor protein 1;SEZ-2;                                                                                                                                                         |
| M              | DLAAAEPGAGSQHPEVR           | N-ter + 42.01 Da                           | 54.9       | 57.7              | 3      | 1948.02                      | n.d.                                         | n.d.                  | MCM6_MOUSE   | Q3ULG5_MOUSE | DNA replication licensing factor MCM6;                      | Mis5 homolog;                                                                                                                                                                                       |
| M              | DLEAVCKR                    | N-ter + 42.01 Da, K +28.03 Da, C +57.02 Da | 53.2       | 39.7              | 2      | 1190.63                      | -0.76                                        | 0.16                  | AGM1_MOUSE   | Q8BWW3_MOUSE | Phosphoacetylglucosamine mutase;                            | Acetylglucosamine phosphomutase;N-acetylglucosamine-phosphate mutase;Phosphoglucosmutase-3;                                                                                                         |
| M              | DLDLAGR                     | N-ter + 42.01 Da                           | 25.7       | 62.1              | 2      | 873.49                       | n.d.                                         | n.d.                  | DCXR_MOUSE   | A2AC16_MOUSE | L-xylulose reductase;                                       | Dicarbonyl/L-xylulose reductase;                                                                                                                                                                    |
| M              | DLLFGR                      | N-ter + 42.01 Da                           | 26.7       | 54.7              | 2      | 892.50                       | n.d.                                         | n.d.                  | CHM2A_MOUSE  |              | Charged multivesicular body protein 2a;                     | Chromatin-modifying protein 2a;Vacuolar protein sorting-associated protein 2;                                                                                                                       |
| TIVGCRRGSM     | DLSELER                     | N-ter + 42.01 Da                           | 30.5       | 70.6              | 2      | 1033.55                      | n.d.                                         | n.d.                  | RNH2A_MOUSE  | Q05C51_MOUSE | Ribonuclease H2 subunit A;                                  | Ribonuclease HI large subunit;Ribonuclease HI subunit A;                                                                                                                                            |
| LTSESSRPTR     | DLSSSDLTASKIVK              | N-ter + 42.01 Da, K +28.03 Da              | 41.1       | 79.2              | 3      | 1648.02                      | -0.56                                        | 0.10                  | A2M_MOUSE    | D3YW52_MOUSE | Alpha-2-macroglobulin;                                      | Pregnancy zone protein;                                                                                                                                                                             |
| M              | DMIGNQHPISIR                | N-ter + 42.01 Da                           | 46.7       | 42.9              | 2      | 1413.67                      | n.d.                                         | n.d.                  | BAG5_MOUSE   | E0CX76_MOUSE | BAG family molecular chaperone regulator 5;                 | Bcl-2-associated athanogene 5;                                                                                                                                                                      |
| M              | DNLSPEEVQLR                 | N-ter + 42.01 Da                           | 36.7       | 60.7              | 2      | 1471.79                      | n.d.                                         | n.d.                  | SNP23_MOUSE  | Q9D3L3_MOUSE | Synaptosomal-associated protein 23;                         | Syndet;Vesicle-membrane fusion protein SNAP-23;                                                                                                                                                     |
| M              | DNSGKQAEAMALLAEAR           | N-ter + 42.01 Da, K +34.06 Da              | 71.1       | 42.4              | 3      | 2110.11                      | -0.34                                        | 0.19                  | SNAA_MOUSE   |              | Alpha-soluble NSF attachment protein;                       | Alpha-II spectrin;Fodrin alpha chain;Spectrin, non-erythroid alpha chain;                                                                                                                           |
| M              | DPNTIIEALR                  | N-ter + 42.01 Da                           | 34.1       | 56.8              | 2      | 1313.74                      | n.d.                                         | n.d.                  | IPO7_MOUSE   |              | Importin-7;                                                 | Ran-binding protein 7;                                                                                                                                                                              |
| RPEREPYACM     | DPSAALHR                    | N-ter + 42.01 Da                           | 34.8       | 72.4              | 2      | 1038.57                      | n.d.                                         | n.d.                  | RAB12_MOUSE  | A2CG35_MOUSE | Ras-related protein Rab-12;                                 | Rab-13;                                                                                                                                                                                             |
| M              | DPSGVKLVETAEDIQER           | N-ter + 42.01 Da, K +34.06 Da              | 49.7       | 41.2              | 3      | 2092.14                      | -0.64                                        | 0.27                  | SPTA2_MOUSE  | A3KGU7_MOUSE | Spectrin alpha chain, brain;                                | Alpha-II spectrin;Fodrin alpha chain;Spectrin, non-erythroid alpha chain;                                                                                                                           |
| TLRHPNTNM      | DQVMQFVPSR                  | N-ter + 42.01 Da                           | 40.5       | 63.4              | 2      | 1507.78                      | n.d.                                         | n.d.                  | SC61G_MOUSE  |              | Protein transport protein Sec61 subunit gamma;              |                                                                                                                                                                                                     |
| M              | DSEAFQHR                    | N-ter + 42.01 Da                           | 54.8       | 59.8              | 2      | 1232.60                      | n.d.                                         | n.d.                  | IASPP_MOUSE  | D3YXE7_MOUSE | RelA-associated inhibitor;                                  | Inhibitor of ASPP protein;NFkB-interacting protein 1;PPP1R13B-like protein;                                                                                                                         |
| M              | DSFEDKLQQLR                 | N-ter + 42.01 Da, K +34.06 Da              | 30.1       | 58.2              | 3      | 1584.90                      | -1.40                                        | 0.22                  | AL3B1_MOUSE  |              | Aldehyde dehydrogenase family 3 member B1;                  | Aldehyde dehydrogenase 7;                                                                                                                                                                           |
| IPDWFLNRQK     | DVKDGKYR                    | N-ter + 42.01 Da, K +34.06 Da, K +28.03 Da | 9.4        | 36.3              | 2      | 1083.65                      | n.d.                                         | n.d.                  | D3YVW7_MOUSE |              |                                                             |                                                                                                                                                                                                     |
| M              | DVNLAPLR                    | N-ter + 42.01 Da                           | 33.6       | 65.1              | 2      | 1069.63                      | n.d.                                         | n.d.                  | PRAF3_MOUSE  |              |                                                             | ADP-ribosylation factor-like protein 6-interacting protein 5;Addicins;GTRAP3-18;Glutamate transporter EAAC1-interacting protein;Prenylated Rab acceptor protein 2;Protein JWA;                      |
| M              | DVSGQETDWR                  | N-ter + 42.01 Da                           | 34.3       | 70.8              | 2      | 1364.66                      | n.d.                                         | n.d.                  | Q3TE00_MOUSE | E9Q7C1_MOUSE |                                                             |                                                                                                                                                                                                     |
| M              | DWLMGKSK                    | N-ter + 42.01 Da, K +28.03 Da              | 37.1       | 38.4              | 2      | 1192.64                      | -1.03                                        | 0.19                  | MOB2_MOUSE   |              | MOB kinase activator 2;                                     | Mob2 homolog;Mps one binder kinase activator-like 2;Ovary-specific MOB-like protein;                                                                                                                |
| M              | EAALADGEPDR                 | N-ter + 42.01 Da                           | 40.3       | 60.3              | 2      | 1315.65                      | n.d.                                         | n.d.                  | B9EJ86_MOUSE |              | Oxysterol-binding protein;                                  |                                                                                                                                                                                                     |
| M              | EAALAVTR                    | N-ter + 42.01 Da                           | 32.4       | 69.8              | 2      | 1002.59                      | n.d.                                         | n.d.                  | PRCM_MOUSE   |              | Probable proline racemase;                                  |                                                                                                                                                                                                     |
| M              | EAATHQVMAGPR                | N-ter + 42.01 Da                           | 38.2       | 50.1              | 3      | 1496.76                      | n.d.                                         | n.d.                  | E9Q7K1_MOUSE |              |                                                             |                                                                                                                                                                                                     |
| M              | EAEAADAPPPR                 | N-ter + 42.01 Da                           | 48.0       | 60.0              | 2      | 1255.63                      | n.d.                                         | n.d.                  | WIP1_MOUSE   | B1AT64_MOUSE | WD repeat domain phosphoinositide-interacting protein 1;    | WD40 repeat protein interacting with phosphoinositides of 49 kDa;                                                                                                                                   |
| M              | EAGGLGCAVCVLTGASR           | N-ter + 42.01 Da, C +57.02 Da              | 54.1       | 73.3              | 3      | 1849.98                      | n.d.                                         | n.d.                  | Q91XH5_MOUSE |              |                                                             |                                                                                                                                                                                                     |
| M              | EAKGGTVKAASGFNATEDAQLR      | N-ter + 42.01 Da, K +34.06 Da              | 57.0       | 69.1              | 4      | 2562.52                      | 0.69                                         | 0.21                  | ANXA4_MOUSE  | E9Q073_MOUSE | Annexin A4;                                                 | Annexin IV;Annexin-4;                                                                                                                                                                               |
| M              | EAPELGPGLVLR                | N-ter + 42.01 Da                           | 41.6       | 52.6              | 2      | 1438.79                      | n.d.                                         | n.d.                  | A2RT81_MOUSE |              |                                                             |                                                                                                                                                                                                     |
| M              | EATGLVPFVR                  | N-ter + 42.01 Da                           | 34.2       | 44.4              | 2      | 1260.71                      | n.d.                                         | n.d.                  | FLII_MOUSE   |              | Protein flightless-1 homolog;                               |                                                                                                                                                                                                     |
| M              | EATLNLEPSGR                 | N-ter + 42.01 Da                           | 40.9       | 59.1              | 2      | 1227.68                      | n.d.                                         | n.d.                  | ACOT1_MOUSE  |              | Acyl-coenzyme A thioesterase 1;                             | CTE-1;Inducible cytosolic acyl-coenzyme A thioesterase 1;                                                                                                                                           |
| M              | EAVAAAEEVTER                | N-ter + 42.01 Da                           | 46.0       | 52.5              | 2      | 1317.69                      | n.d.                                         | n.d.                  | CCD97_MOUSE  |              | Coiled-coil domain-containing protein 97;                   | hydrolase;Long chain acyl-CoA thioester hydrolase;                                                                                                                                                  |





Table S5, Tholen et al.

| Non Prime Site | Prime Site            | Modifications                              | Hyperscore | Mass error in ppm | Charge | Precursor neutral mass in Da | Fold change (log <sub>2</sub> ) of ASAPRatio | FC-error of ASAPRatio | Uniprot ID 1 | Uniprot ID 2                | Protein Name 1                                                  | Protein Name 2                                                                                                                                              |
|----------------|-----------------------|--------------------------------------------|------------|-------------------|--------|------------------------------|----------------------------------------------|-----------------------|--------------|-----------------------------|-----------------------------------------------------------------|-------------------------------------------------------------------------------------------------------------------------------------------------------------|
| M              | EQAVHGESKR            | N-ter + 42.01 Da, K +34.06 Da              | 28.2       | 53.3              | 3      | 1346.75                      | 0.07                                         | 0.02                  | NSDHL_MOUSE  |                             | Sterol-4-alpha-carboxylate 3-dehydrogenase, decarboxylating;    |                                                                                                                                                             |
| M              | EQTETLTR              | N-ter + 42.01 Da                           | 32.0       | 54.8              | 2      | 1149.60                      | n.d.                                         | n.d.                  | Q8QZW8_MOUSE | Q1H DU4_MOUSE               |                                                                 |                                                                                                                                                             |
| M              | ESDFYLR               | N-ter + 42.01 Da                           | 31.7       | 64.2              | 2      | 1101.55                      | n.d.                                         | n.d.                  | MG_N_MOUSE   |                             | Protein mago nashi homolog;                                     |                                                                                                                                                             |
| M              | ESMSDPQLQEER          | N-ter + 42.01 Da                           | 32.4       | 79.3              | 3      | 1846.92                      | n.d.                                         | n.d.                  | CASPE_MOUSE  |                             | Caspase-14;                                                     | Mini-ICE;                                                                                                                                                   |
| M              | ESGFTSKDTYLSHFNFR     | N-ter + 42.01 Da, K +28.03 Da              | 65.0       | 49.6              | 3      | 2186.12                      | -0.69                                        | 0.10                  | NNMT_MOUSE   | D3YX59_MOUSE                | Nicotinamide N-methyltransferase;                               |                                                                                                                                                             |
| M              | ESTFSSPAEALQR         | N-ter + 42.01 Da                           | 38.2       | 82.6              | 3      | 1665.90                      | n.d.                                         | n.d.                  | DPH2_MOUSE   |                             | Diphthamide biosynthesis protein 2;                             | DPH2 homolog;Diphthamide biosynthesis protein 2                                                                                                             |
| M              | ETELSSQDR             | N-ter + 42.01 Da                           | 35.0       | 81.6              | 2      | 1236.63                      | n.d.                                         | n.d.                  | ATG13_MOUSE  |                             | Autophagy-related protein 13;                                   |                                                                                                                                                             |
| M              | ETGPAPLVAPPR          | N-ter + 42.01 Da                           | 46.4       | 45.3              | 2      | 1376.77                      | n.d.                                         | n.d.                  | TB10B_MOUSE  |                             | TBC1 domain family member 10B;                                  | Protein w23-85;                                                                                                                                             |
| M              | ETGSDSQQLER           | N-ter + 42.01 Da                           | 42.4       | 76.1              | 2      | 1408.68                      | n.d.                                         | n.d.                  | ECM29_MOUSE  | A2ALW1_MOUSE                | Proteasome-associated protein ECM29 homolog;                    |                                                                                                                                                             |
| M              | ETILEQQR              | N-ter + 42.01 Da                           | 38.1       | 61.2              | 2      | 1188.65                      | n.d.                                         | n.d.                  | SF3A3_MOUSE  |                             | Splicing factor 3A subunit 3;                                   | SF3a60;Spliceosome-associated protein 61;                                                                                                                   |
| M              | ETPKPR                | N-ter + 42.01 Da, K +28.03 Da              | 35.3       | 32.3              | 2      | 927.51                       | -0.49                                        | 0.07                  | IRF3_MOUSE   |                             | Interferon regulatory factor 3;                                 |                                                                                                                                                             |
| M              | ETPLDVLNR             | N-ter + 42.01 Da                           | 44.3       | 56.5              | 2      | 1201.67                      | n.d.                                         | n.d.                  | Q3TQI9_MOUSE | D3Z130_MOUSE                |                                                                 |                                                                                                                                                             |
| M              | EVKPPGPRPQPSGGR       | N-ter + 42.01 Da, K +28.03 Da              | 26.3       | 61.4              | 3      | 1817.04                      | -0.25                                        | 0.03                  | ROA3_MOUSE   | A2AL12_MOUSE                | Heterogeneous nuclear ribonucleoprotein A3;                     |                                                                                                                                                             |
| M              | EVLATDTASQQER         | N-ter + 42.01 Da                           | 47.9       | 68.4              | 3      | 1619.86                      | n.d.                                         | n.d.                  | PALM_MOUSE   |                             | Paralemmin-1;                                                   | Paralemmin;                                                                                                                                                 |
| M              | EVQCGGAGFIPESR        | N-ter + 42.01 Da, C +57.02 Da              | 31.9       | 79.3              | 3      | 1765.92                      | n.d.                                         | n.d.                  | GIMA4_MOUSE  | D3Z7Q4_MOUSE                | GTPase IMAP family member 4;                                    | Immunity-associated nucleotide 1 protein;immunity-associated protein 4;                                                                                     |
| M              | EVSQAASTGTVGR         | N-ter + 42.01 Da                           | 61.1       | 55.5              | 2      | 1448.74                      | n.d.                                         | n.d.                  | CD003_MOUSE  |                             | Uncharacterized protein C4orf3 homolog;                         |                                                                                                                                                             |
| M              | FAKKGKSAVPSDGGAR      | N-ter + 42.01 Da, K +28.03 Da              | 38.9       | 53.5              | 3      | 1804.03                      | -2.12                                        | 0.37                  | SSBP3_MOUSE  | B1A534_MOUSE                | Single-stranded DNA-binding protein 3;                          | Lck-associated signal transducer;Sequence-specific single-stranded-DNA-binding protein;                                                                     |
| MSVFDLFRG      | FFGFPGPR              | N-ter + 42.01 Da                           | 13.4       | 7.2               | 2      | 965.48                       | n.d.                                         | n.d.                  | HAX1_MOUSE   |                             | HCL1-associated protein X-1;                                    | HS1-associating protein X-1;HS1-binding protein 1; Empty spiracles homolog 1;Empty spiracles-like protein 1;                                                |
| SAAETAFVSG     | FPAAAAAGAGR           | N-ter + 42.01 Da                           | 31.9       | 11.9              | 2      | 1000.52                      | n.d.                                         | n.d.                  | EMX1_MOUSE   |                             | Homeobox protein EMX1;                                          |                                                                                                                                                             |
| VAASPVSGIM     | FOGADSOAGKSGSR        | N-ter + 42.01 Da, K +28.03 Da              | 20.1       | 49.8              | 3      | 1595.82                      | -0.58                                        | 0.07                  | HN11_MOUSE   |                             | Hematological and neurological expressed 1-like protein;        |                                                                                                                                                             |
| M              | FSWVSKDAR             | N-ter + 42.01 Da, K +28.03 Da              | 45.5       | 37.8              | 2      | 1295.68                      | -0.97                                        | 0.13                  | EHD1_MOUSE   | F6Y7R7_MOUSE                | EH domain-containing protein 1;                                 | PAST homolog 1;                                                                                                                                             |
| M              | GDMDAMIPER            | N-ter + 42.01 Da                           | 29.8       | 66.6              | 2      | 1304.62                      | n.d.                                         | n.d.                  | NU214_MOUSE  |                             | Nuclear pore complex protein Nup214;                            | 214 kDa nucleoporin;Nucleoporin Nup214;                                                                                                                     |
| M              | RVSTQDLTFE            | GDLSHIER                                   | 44.5       | 18.5              | 2      | 967.49                       | n.d.                                         | n.d.                  | POTE1_MOUSE  | Q3UXR7_MOUSE                | Protection of telomeres protein 1;                              | POT1-like telomere end-binding protein;                                                                                                                     |
| M              | GDREQLLQR             | N-ter + 42.01 Da                           | 33.6       | 31.3              | 2      | 1155.64                      | n.d.                                         | n.d.                  | 1433F_MOUSE  | E9Q4V8_MOUSE                | 14-3-3 protein eta;                                             |                                                                                                                                                             |
| M              | PGLIGLPGTK            | GEKGRPGEPGLDGFPGPR                         | 34.7       | 12.6              | 3      | 1891.98                      | 5.55                                         | 1.05                  | CONA1_MOUSE  |                             | Collagen alpha-1(XIII) chain;                                   |                                                                                                                                                             |
| M              | GEQPIFSTR             | N-ter + 42.01 Da                           | 27.9       | 56.4              | 2      | 1075.59                      | n.d.                                         | n.d.                  | HOME1_MOUSE  | Q3UVL6_MOUSE                | Homer protein homolog 1;                                        | VASP/Ena-related gene up-regulated during seizure and LTP 1;                                                                                                |
| M              | VGPAKNGDR             | GETGPAGPAGIPAGAR                           | 64.2       | 68.2              | 3      | 1573.89                      | n.d.                                         | n.d.                  | CO1A1_MOUSE  | F8WGB7_MOUSE                | Collagen alpha-1(I) chain;                                      | Alpha-1 type I collagen;                                                                                                                                    |
| M              | GEVAGGAAPGPR          | N-ter + 42.01 Da                           | 40.7       | 55.8              | 2      | 1176.65                      | n.d.                                         | n.d.                  | ARHG1_MOUSE  | E9PUF7_MOUSE                | Rho guanine nucleotide exchange factor 1;                       | Lbc's second cousin;Lymphoid blast crisis-like 2; HD domain-containing protein 3;Metazoan Spot homolog 1;Penta-phosphate guanosine-3'-pyrophosphohydrolase; |
| M              | GSEAAQLLEAADAFAHKHR   | N-ter + 42.01 Da, K +34.06 Da              | 34.9       | 86.9              | 4      | 2097.26                      | 0.06                                         | 0.01                  | MESH1_MOUSE  |                             | Guanosine-3',5'-bis(diphosphate) 3'-pyrophosphohydrolase MESH1; |                                                                                                                                                             |
| M              | GTALVYHEDMTATR        | N-ter + 42.01 Da                           | 29.9       | 88.1              | 3      | 1605.89                      | n.d.                                         | n.d.                  | HDA10_MOUSE  | D3Z7T4_MOUSE                | Histone deacetylase 10;                                         |                                                                                                                                                             |
| VEAARNLGRV     | GTKCCTLPEDQR          | N-ter + 42.01 Da, K +34.06 Da, C +57.02 Da | 31.4       | 78.5              | 3      | 1539.84                      | -1.47                                        | 0.25                  | ALBU_MOUSE   |                             | Serum albumin;                                                  | 12 kDa FK506-binding protein;FK506-binding protein 1A;immunophilin FKBP12;Rotamase;                                                                         |
| M              | GTSEAAPPFFAR          | N-ter + 42.01 Da                           | 32.7       | 46.2              | 2      | 1241.66                      | n.d.                                         | n.d.                  | DUS28_MOUSE  |                             | Dual specificity phosphatase 28;                                |                                                                                                                                                             |
| M              | GVQVETISPGDGR         | N-ter + 42.01 Da                           | 41.9       | 57.7              | 2      | 1355.75                      | n.d.                                         | n.d.                  | FKB1A_MOUSE  | Q1JUQ8_MOUSE                | Peptidyl-prolyl cis-trans isomerase FKBP1A;                     |                                                                                                                                                             |
| M              | HFSIPETESR            | N-ter + 42.01 Da                           | 39.5       | 40.8              | 2      | 1374.68                      | n.d.                                         | n.d.                  | SNX17_MOUSE  | D3Z3J1_MOUSE                | Sorting nexin-17;                                               |                                                                                                                                                             |
| M              | MVSKSIATTL            | IDTSSSEVLDELVR                             | 25.2       | 92.5              | 3      | 1695.94                      | n.d.                                         | n.d.                  | TFIP8_MOUSE  | D3YWJ5_MOUSE                | Tumor necrosis factor alpha-induced protein 8;                  |                                                                                                                                                             |
| AAVCAQPRGR     | ILGGQEAHAAR           | N-ter + 42.01 Da                           | 46.3       | 90.1              | 3      | 1234.75                      | n.d.                                         | n.d.                  | CFAD_MOUSE   |                             | Complement factor D;                                            | 28 kDa adipocyte protein;Adipsin;C3 convertase activator;Properdin factor D;                                                                                |
| D              | IQMTQSTSSLSASLGDR     | N-ter + 42.01 Da                           | 39.4       | 63.8              | 3      | 1938.02                      | n.d.                                         | n.d.                  | KV5AD_MOUSE  |                             | Ig kappa chain V-V region HP 123E6;                             |                                                                                                                                                             |
| D              | IQMTQTTSSLSASLGDR     | N-ter + 42.01 Da                           | 32.7       | 34.0              | 3      | 1951.98                      | n.d.                                         | n.d.                  | KV5AA_MOUSE  |                             | Ig kappa chain V-V region MOPC 173;                             |                                                                                                                                                             |
| M              | IALNDFVKL             | ISWYDNEYGYSNR                              | 26.2       | 86.2              | 3      | 1707.86                      | n.d.                                         | n.d.                  | G3P_MOUSE    | KV5AB_MOUSE<br>F8WJL5_MOUSE | Glyceraldehyde-3-phosphate dehydrogenase;                       | Peptidyl-cysteine S-nitrosylase GAPDH;                                                                                                                      |
| M              | IYENLQNSR             | N-ter + 42.01 Da                           | 39.0       | 57.1              | 2      | 1308.69                      | n.d.                                         | n.d.                  | MMGL_MOUSE   | B1AU01_MOUSE                | Macrophage asialoglycoprotein-binding protein 1;                | MMGL;Macrophage galactose/N-acetylgalactosamine-specific lectin;                                                                                            |
| M              | KIDAREISIR            | KAEIILK                                    | 8.0        | 101.8             | 2      | 1079.91                      | n.d.                                         | n.d.                  | FCS2_MOUSE   |                             | FCH and double SH3 domains protein 2;                           | SH3 multiple domains protein 3;                                                                                                                             |
| M              | KLNFSGLR              | N-ter + 42.01 Da, K +28.03 Da              | 36.6       | 36.9              | 2      | 1134.66                      | -0.69                                        | 0.30                  | CBR2_MOUSE   |                             | Carbonyl reductase [NADPH] 2;                                   | Adipocyte protein P27;Lung carbonyl reductase;NADPH-dependent carbonyl reductase 2;                                                                         |
| M              | VPPGPTNEMS            | KNKEMIDESLYSR                              | 46.4       | 14.4              | 3      | 1824.92                      | 2.59                                         | 0.87                  | UBA1Y_MOUSE  |                             | Ubiquitin-like modifier-activating enzyme 1 Y;                  | Ubiquitin-activating enzyme E1;Ubiquitin-activating enzyme E1 Y;                                                                                            |
| M              | KQPKNLEGVGFANLNQVYR   | N-ter + 42.01 Da, K +34.06 Da              | 52.0       | 72.0              | 4      | 2544.60                      | -0.56                                        | 0.09                  | E9Q1G8_MOUSE |                             |                                                                 |                                                                                                                                                             |
| M              | TSQEEHRPFE            | KVVNKESLVISGLR                             | 9.4        | 28.1              | 4      | 1645.08                      | n.d.                                         | n.d.                  | INSR_MOUSE   | F8VPU4_MOUSE                | Insulin receptor;                                               |                                                                                                                                                             |
| M              | LQRDIAPGVK            | LFVLEEDLSR                                 | 22.7       | 59.9              | 3      | 1261.73                      | n.d.                                         | n.d.                  | PAR14_MOUSE  |                             | Poly [ADP-ribose] polymerase 14;                                | Collaborator of STAT6;                                                                                                                                      |
| M              | LGAADESVR             | N-ter + 42.01 Da                           | 42.7       | 56.2              | 2      | 1176.61                      | n.d.                                         | n.d.                  | KI21A_MOUSE  | E9Q100_MOUSE                | Kinesin-like protein KIF21A;                                    |                                                                                                                                                             |
| M              | LGGLGKLAEGLAHR        | N-ter + 42.01 Da, K +28.03 Da              | 60.3       | 72.9              | 3      | 1663.05                      | 0.65                                         | 0.10                  | FAM25_MOUSE  |                             | Protein FAM25;                                                  |                                                                                                                                                             |
| M              | LGSFKAER              | N-ter + 42.01 Da, K +34.06 Da              | 46.0       | 31.6              | 2      | 1170.66                      | 1.21                                         | 0.25                  | IST1_MOUSE   | Q8BHC2_MOUSE                | IST1 homolog;                                                   |                                                                                                                                                             |
| M              | NLLVSEVYVQ            | LKFPVKPADLKR                               | 11.4       | 71.0              | 3      | 1699.25                      | n.d.                                         | n.d.                  | CUL4B_MOUSE  | E9PYX1_MOUSE                | Cullin-4B;                                                      |                                                                                                                                                             |
| M              | LKPQPPQTSQPQPPPTQAVAR | N-ter + 42.01 Da, K +28.03 Da              | 36.5       | 58.3              | 4      | 2850.65                      | 0.14                                         | 0.02                  | ATX2L_MOUSE  |                             | Ataxin-2-like protein;                                          |                                                                                                                                                             |

Table S5, Tholen et al.

| Non Prime Site | Prime Site              | Modifications                              | Hyperscore | Mass error in ppm | Charge | Precursor neutral mass in Da | Fold change (log <sub>2</sub> ) of ASAPRatio | FC-error of ASAPRatio | Uniprot ID 1 | Uniprot ID 2 | Protein Name 1                                                                                                                                                        | Protein Name 2                                                                                  |
|----------------|-------------------------|--------------------------------------------|------------|-------------------|--------|------------------------------|----------------------------------------------|-----------------------|--------------|--------------|-----------------------------------------------------------------------------------------------------------------------------------------------------------------------|-------------------------------------------------------------------------------------------------|
| RELMLGEDAR     | LPKRLVKKGKK             | N-ter + 42.01 Da, K +34.06 Da, K +28.03 Da | 13.2       | 66.0              | 3      | 1500.29                      | n.d.                                         | n.d.                  | A2A8L1_MOUSE | E9PYU4_MOUSE | Tumor necrosis factor alpha-induced protein 8;                                                                                                                        |                                                                                                 |
| APVAVHPDMS     | LSEAEPR                 | N-ter + 42.01 Da                           | 32.7       | 61.0              | 2      | 1102.56                      | n.d.                                         | n.d.                  | TFIP8_MOUSE  | D3Z325_MOUSE |                                                                                                                                                                       | Post-proline cleaving enzyme;                                                                   |
| M              | LSFYQPDVYR              | N-ter + 42.01 Da                           | 49.3       | 52.3              | 2      | 1459.76                      | n.d.                                         | n.d.                  | PPCE_MOUSE   | E9Q0H7_MOUSE | Prolyl endopeptidase;                                                                                                                                                 |                                                                                                 |
| MTLD           | MDAVLSDVFR              | N-ter + 42.01 Da                           | 37.8       | 53.3              | 2      | 1193.64                      | n.d.                                         | n.d.                  | OTU7A_MOUSE  | B2RUR8_MOUSE | OTU domain-containing protein 7A;                                                                                                                                     | Zinc finger protein Cezanne 2;                                                                  |
|                | MDKSELVQKAKLAEQAER      | N-ter + 42.01 Da, K +28.03 Da              | 29.8       | 64.7              | 4      | 2199.34                      | 0.38                                         | 0.11                  | 1433B_MOUSE  | A2A5N1_MOUSE | 14-3-3 protein beta/alpha;                                                                                                                                            | Protein kinase C inhibitor protein 1;                                                           |
| MAE            | MDLVAELPRPAGAAR         | N-ter + 42.01 Da                           | 33.2       | 53.1              | 3      | 1607.93                      | n.d.                                         | n.d.                  | PPCS_MOUSE   |              | Phosphopantothene--cysteine ligase;                                                                                                                                   | Phosphopantothenoylecysteine synthetase;                                                        |
|                |                         |                                            |            |                   |        |                              |                                              |                       |              |              | Regulatory protein TSC2;TGF-beta-stimulated clone 22 homolog;TSC2-related inducible leucine zipper 1b;Transforming growth factor beta-1-induced transcript 4 protein; |                                                                                                 |
| VAIDNKIEQA     | MDLVKSHLMYAVR           | N-ter + 42.01 Da, K +28.03 Da              | 54.0       | 61.3              | 3      | 1631.95                      | -1.29                                        | 0.25                  | T22D1_MOUSE  | D3Z0V7_MOUSE | TSC2 domain family protein 1;                                                                                                                                         |                                                                                                 |
| PVETLGPPEPR    | MDPESEGASQALR           | N-ter + 42.01 Da                           | 45.2       | 48.8              | 2      | 1431.70                      | n.d.                                         | n.d.                  | PBIP1_MOUSE  | D3Z2F0_MOUSE | Pre-B-cell leukemia transcription factor-interacting protein 1;                                                                                                       | Hematopoietic PBX-interacting protein;                                                          |
| PAQPAARSS      | MDSAELLAPLR             | N-ter + 42.01 Da                           | 51.8       | 51.5              | 2      | 1385.76                      | n.d.                                         | n.d.                  | SYG_MOUSE    |              | Glycine--tRNA ligase;                                                                                                                                                 | Diadenosine tetraphosphate synthetase;Glycyl-tRNA synthetase;                                   |
| MSA            | MEAADVFHR               | N-ter + 42.01 Da                           | 41.9       | 49.7              | 2      | 1116.56                      | n.d.                                         | n.d.                  | CPPED_MOUSE  | D3Z7F7_MOUSE | Calcineurin-like phosphoesterase domain-containing protein 1;                                                                                                         |                                                                                                 |
| PHALWLAETV     | MEGTMEGPEAVQR           | N-ter + 42.01 Da                           | 40.6       | 55.8              | 2      | 1475.72                      | n.d.                                         | n.d.                  | ANKR2_MOUSE  |              | Ankyrin repeat domain-containing protein 2;                                                                                                                           | Skeletal muscle ankyrin repeat protein;                                                         |
|                | MEGYSEASLLR             | N-ter + 42.01 Da                           | 41.1       | 54.8              | 2      | 1425.72                      | n.d.                                         | n.d.                  | SYNPO_MOUSE  | E9Q3E2_MOUSE | Synaptopodin;                                                                                                                                                         |                                                                                                 |
| MV             | MEKPSLLVGR              | N-ter + 42.01 Da, K +28.03 Da              | 54.9       | 23.3              | 2      | 1295.76                      | 0.65                                         | 0.10                  | G3BP1_MOUSE  | G3BP2_MOUSE  | Ras GTPase-activating protein-binding protein 1;                                                                                                                      | ATP-dependent DNA helicase VIII;GAP SH3 domain-binding protein 1;HDH-VIII;                      |
| IEKRLNRGDK     | MEMLPDITGKALMFAKR       | N-ter + 42.01 Da, K +34.06 Da              | 27.8       | 69.9              | 3      | 2106.28                      | -1.84                                        | 0.39                  | SYNP2_MOUSE  | D3YVW9_MOUSE | Synaptopodin-2;                                                                                                                                                       | Myopodin;                                                                                       |
|                | MENCLGDSR               | N-ter + 42.01 Da, C +57.02 Da              | 46.7       | 84.5              | 2      | 1122.54                      | n.d.                                         | n.d.                  | LIMA1_MOUSE  | Q8CD09_MOUSE | LIM domain and actin-binding protein 1;                                                                                                                               | Epithelial protein lost in neoplasm;                                                            |
| SLHTAHATKD     | MENFLQLVR               | N-ter + 42.01 Da                           | 35.2       | 57.7              | 2      | 1190.68                      | n.d.                                         | n.d.                  | CARKD_MOUSE  |              | Carbohydrate kinase domain-containing protein;                                                                                                                        |                                                                                                 |
| MEPA           | MEPETLEAR               | N-ter + 42.01 Da                           | 32.8       | 63.5              | 2      | 1116.58                      | n.d.                                         | n.d.                  | GGA1_MOUSE   |              | ADP-ribosylation factor-binding protein GGA1;                                                                                                                         | Gamma-adaptin-related protein 1;Golgi-localized, gamma ear-containing, ARF-binding protein 1;   |
| VGAERSEGRR     | MENPEELEEESPPGGR        | N-ter + 42.01 Da                           | 27.8       | 88.4              | 3      | 1858.92                      | n.d.                                         | n.d.                  | E9QNR6_MOUSE | CK068_MOUSE  |                                                                                                                                                                       |                                                                                                 |
| M              | MLGPEGEGEVVVKLR         | N-ter + 42.01 Da, K +28.03 Da              | 40.2       | 49.1              | 3      | 1673.96                      | 0.28                                         | 0.06                  | HNRPF_MOUSE  |              | Heterogeneous nuclear ribonucleoprotein F;                                                                                                                            | Protein tyrosine phosphatase receptor type f polypeptide-interacting protein-binding protein 1; |
| EKLNATEE       | MLQQLLSR                | N-ter + 42.01 Da                           | 42.9       | 41.4              | 2      | 1158.65                      | n.d.                                         | n.d.                  | LIPB1_MOUSE  | LIPB2_MOUSE  | Liprin-beta-1;                                                                                                                                                        | Heterogeneous nuclear ribonucleoprotein H2;                                                     |
| M              | MLSTEGR                 | N-ter + 42.01 Da                           | 30.1       | 57.5              | 2      | 965.49                       | n.d.                                         | n.d.                  | HNRH2_MOUSE  |              |                                                                                                                                                                       | Heterogeneous nuclear ribonucleoprotein H1;                                                     |
| M              | MMAAAAER                | N-ter + 42.01 Da                           | 36.9       | 69.4              | 2      | 1022.51                      | n.d.                                         | n.d.                  | CP013_MOUSE  | D3YZM4_MOUSE | UPF0585 protein C16orf13 homolog;                                                                                                                                     |                                                                                                 |
|                | MNTEQSQNTIVSR           | N-ter + 42.01 Da                           | 21.5       | 73.8              | 3      | 1548.83                      | n.d.                                         | n.d.                  | SH319_MOUSE  | F8W117_MOUSE | SH3 domain-containing protein 19;                                                                                                                                     | Kryn;                                                                                           |
| MA             | MQKIFAR                 | N-ter + 42.01 Da, K +28.03 Da              | 28.0       | 30.4              | 2      | 962.57                       | -2.64                                        | 0.83                  | ENOB_MOUSE   | Q5SX59_MOUSE | Beta-enolase;                                                                                                                                                         | 2-phospho-D-glycerate hydro-lyase;Enolase 3;Muscle-specific enolase;Skeletal muscle enolase;    |
|                | MQQVEASLQPETLR          | N-ter + 42.01 Da                           | 46.1       | 61.5              | 3      | 1670.93                      | n.d.                                         | n.d.                  | SPA3C_MOUSE  |              | Serine protease inhibitor A3C;                                                                                                                                        | Kallikrein-binding protein;                                                                     |
| M              | MTEEHTDLAR              | N-ter + 42.01 Da                           | 69.7       | 36.6              | 2      | 1503.69                      | n.d.                                         | n.d.                  | CAV3_MOUSE   |              | Caveolin-3;                                                                                                                                                           | M-caveolin;                                                                                     |
| M              | NAGSDPVVIVSAAR          | N-ter + 42.01 Da                           | 58.0       | 59.9              | 2      | 1527.86                      | n.d.                                         | n.d.                  | THIC_MOUSE   |              | Acetyl-CoA acetyltransferase, cytosolic;                                                                                                                              | Cytosolic acetoacetyl-CoA thiolase;                                                             |
| PEPSIRPQIM     | NGPLHPR                 | N-ter + 42.01 Da                           | 29.2       | 41.2              | 2      | 962.52                       | n.d.                                         | n.d.                  | Q91YZ2_MOUSE |              |                                                                                                                                                                       |                                                                                                 |
| M              | NHTSQAFITAASGGPPNYER    | N-ter + 42.01 Da                           | 53.1       | 41.5              | 3      | 2418.20                      | n.d.                                         | n.d.                  | IFM3_MOUSE   |              | Interferon-induced transmembrane protein 3;                                                                                                                           | Fragilis protein;Interferon-inducible protein 15;Mouse iftm-like protein 1;                     |
| M              | NKAPQPTGPPPAR           | N-ter + 42.01 Da, K +28.03 Da              | 45.2       | 44.1              | 3      | 1530.87                      | 1.05                                         | 0.27                  | IF4G1_MOUSE  | D3YWC6_MOUSE | Eukaryotic translation initiation factor 4 gamma 1;                                                                                                                   |                                                                                                 |
| GGPWWEWNQNG    | NNASEGPRPPR             | N-ter + 42.01 Da                           | 14.0       | 0.7               | 3      | 1292.62                      | n.d.                                         | n.d.                  | SEM6C_MOUSE  | E9Q4N1_MOUSE | Semaphorin-6C;                                                                                                                                                        | Semaphorin-Y;                                                                                   |
| EQQMKMETIM     | NQEKLAKLQAQVR           | N-ter + 42.01 Da, K +34.06 Da              | 23.4       | 51.0              | 3      | 1766.14                      | -0.20                                        | 0.07                  | BT3L4_MOUSE  | 8TF3_MOUSE   | Transcription factor BTF3 homolog 4;                                                                                                                                  | Basic transcription factor 3-like 4;                                                            |
| M              | NRPAVVEISYENMR          | N-ter + 42.01 Da                           | 46.8       | 50.2              | 3      | 1847.96                      | n.d.                                         | n.d.                  | TP4A2_MOUSE  |              | Protein tyrosine phosphatase type IVA 2;                                                                                                                              | Protein-tyrosine phosphatase 4a2;Protein-tyrosine phosphatase of regenerating liver 2;          |
| M              | NSVGEACTDMKR            | N-ter + 42.01 Da, K +34.06 Da, C +57.02 Da | 64.0       | 36.7              | 2      | 1573.77                      | 0.01                                         | 0.01                  | TRIA1_MOUSE  |              | TP53-regulated inhibitor of apoptosis 1;                                                                                                                              | Protein 15E1.1;WF-1;p53-inducible cell-survival factor;                                         |
| M              | NVEHEVNLLVEEHR          | N-ter + 42.01 Da                           | 54.4       | 74.3              | 3      | 2002.14                      | n.d.                                         | n.d.                  | CF115_MOUSE  | E9QMV2_MOUSE | Costars family protein C6orf115 homolog;                                                                                                                              |                                                                                                 |
| M              | NVNDLKQR                | N-ter + 42.01 Da, K +34.06 Da              | 39.4       | 31.7              | 2      | 1192.68                      | -2.06                                        | 0.34                  | UAP1_MOUSE   | Q3UHZ7_MOUSE | UDP-N-acetylhexosamine pyrophosphorylase;                                                                                                                             |                                                                                                 |
| M              | NVVDLGR                 | N-ter + 42.01 Da                           | 23.0       | 56.6              | 2      | 944.53                       | n.d.                                         | n.d.                  | PGF5_MOUSE   |              | Prostamide/prostaglandin F synthase;                                                                                                                                  |                                                                                                 |
|                |                         |                                            |            |                   |        |                              |                                              |                       |              |              | Coiled-coil-helix-coiled-coil-helix domain-containing protein 5;                                                                                                      |                                                                                                 |
| M              | QAALVETAR               | N-ter + 42.01 Da                           | 42.2       | 64.1              | 2      | 1130.65                      | n.d.                                         | n.d.                  | CHCH5_MOUSE  |              |                                                                                                                                                                       | Eukaryotic translation initiation factor 3 subunit 9;eIF-3-eta;eIF3 p116;                       |
| M              | QDAENVAPPEAAER          | N-ter + 42.01 Da                           | 45.2       | 79.2              | 3      | 1799.94                      | n.d.                                         | n.d.                  | E1F3B_MOUSE  | E9PX78_MOUSE | Eukaryotic translation initiation factor 3 subunit B;                                                                                                                 | Fast skeletal myosin light chain 2;MLC2F;                                                       |
| VFSMFDQTOI     | QEFKEAFVTDQNR           | N-ter + 42.01 Da, K +28.03 Da              | 35.5       | 87.4              | 3      | 1794.05                      | 3.80                                         | 0.82                  | MLR5_MOUSE   | F6ULR7_MOUSE | Myosin regulatory light chain 2, skeletal muscle isoform;                                                                                                             | 26S proteasome AAA-ATPase subunit RPT5;Proteasome 26S subunit ATPase 3;Tat-binding protein 1;   |
| M              | QEMNLLPTSPVTR           | N-ter + 42.01 Da                           | 39.3       | 70.5              | 3      | 1884.04                      | n.d.                                         | n.d.                  | PR56A_MOUSE  | 87ZCF1_MOUSE | 26S protease regulatory subunit 6A;                                                                                                                                   |                                                                                                 |
| NTEENRRFYR     | QLLLTADDR               | N-ter + 42.01 Da                           | 31.0       | 63.3              | 2      | 1085.64                      | n.d.                                         | n.d.                  | ALDOA_MOUSE  | Q9CPQ9_MOUSE | Fructose-bisphosphate aldolase A;                                                                                                                                     | Aldolase 1;Muscle-type aldolase;                                                                |
| M              | QNDAGEFVDLYVPR          | N-ter + 42.01 Da                           | 39.7       | 73.8              | 3      | 1794.96                      | n.d.                                         | n.d.                  | RS21_MOUSE   |              | 40S ribosomal protein S21;                                                                                                                                            |                                                                                                 |
| EQEDGVEDLQ     | QNGKTLININIDMEPGAIVDQLR | N-ter + 42.01 Da, K +28.03 Da              | 26.6       | 29.2              | 4      | 2622.43                      | 1.61                                         | 0.50                  | E9Q777_MOUSE | E9Q774_MOUSE |                                                                                                                                                                       |                                                                                                 |
| M              | QNVINTYKGG              | N-ter + 42.01 Da, K +28.03 Da              | 46.0       | 5.9               | 2      | 1328.76                      | -0.49                                        | 0.04                  | ATG3_MOUSE   |              | Ubiquitin-like-conjugating enzyme ATG3;                                                                                                                               | Autophagy-related protein 3;                                                                    |
|                |                         |                                            |            |                   |        |                              |                                              |                       |              |              | Cytosolic prostaglandin E2 synthase;Hsp90 co-chaperone;Progesterone receptor complex p23;Sid 3177;Telomerase-binding protein p23;                                     |                                                                                                 |
| M              | QPASAKWYDR              | N-ter + 42.01 Da, K +28.03 Da              | 60.3       | 32.7              | 2      | 1421.72                      | 0.90                                         | 0.18                  | TEBP_MOUSE   | D3Z7C6_MOUSE | Prostaglandin E synthase 3;                                                                                                                                           |                                                                                                 |
| SQPRVSEVAM     | QSAPLEQPAKRPR           | N-ter + 42.01 Da, K +28.03 Da              | 27.7       | 57.5              | 3      | 1678.00                      | -0.45                                        | 0.16                  | SAMH1_MOUSE  | E9Q0K6_MOUSE | SAM domain and HD domain-containing protein 1;                                                                                                                        | Interferon-gamma-inducible protein Mg11;                                                        |
|                |                         |                                            |            |                   |        |                              |                                              |                       |              |              | ATPase class I type 8B member 2-like protein;ATPase class I type 8B member 5;Flippase expressed in testis A;                                                          |                                                                                                 |
| HFCLKHPIPT     | QVQTKIKHPSLRR           | N-ter + 42.01 Da, K +34.06 Da              | 10.2       | 18.1              | 3      | 1700.12                      | -4.64                                        | 1.16                  | AT8B5_MOUSE  |              | Probable phospholipid-transporting ATPase FetA;                                                                                                                       |                                                                                                 |

Table S5, Tholen et al.

| Non Prime Site | Prime Site                            | Modifications                              | Hyperscore | Mass error in ppm | Charge | Precursor neutral mass in Da | Fold change (log <sub>2</sub> ) of ASAPRatio | FC-error of ASAPRatio | Uniprot ID 1 | Uniprot ID 2 | Protein Name 1                                                               | Protein Name 2                                                                                                                                                                                   |
|----------------|---------------------------------------|--------------------------------------------|------------|-------------------|--------|------------------------------|----------------------------------------------|-----------------------|--------------|--------------|------------------------------------------------------------------------------|--------------------------------------------------------------------------------------------------------------------------------------------------------------------------------------------------|
| LPAEGKKNTL     | RVDGDNIYVR                            | N-ter + 42.01 Da                           | 9.3        | 25.2              | 2      | 1247.66                      | n.d.                                         | n.d.                  | E41L2_MOUSE  |              | Band 4.1-like protein 2;                                                     | Generally expressed protein 4.1;                                                                                                                                                                 |
| M              | SAAEEVDGLGVVRRPHYGSVLDNER             | N-ter + 42.01 Da                           | 48.8       | 54.4              | 3      | 2610.41                      | n.d.                                         | n.d.                  | IQGA1_MOUSE  | F6ZJBO_MOUSE | Ras GTPase-activating-like protein IQGAP1;                                   |                                                                                                                                                                                                  |
| M              | SAAETGSEPSQAGPSEATLHSLR               | N-ter + 42.01 Da                           | 57.1       | 40.4              | 3      | 2381.21                      | n.d.                                         | n.d.                  | E9Q3E1_MOUSE |              | Aldehyde dehydrogenase;                                                      |                                                                                                                                                                                                  |
| M              | SADAAAGEPLPR                          | N-ter + 42.01 Da                           | 40.9       | 58.1              | 2      | 1195.65                      | n.d.                                         | n.d.                  | NHRF1_MOUSE  |              | Na(+)/H(+) exchange regulatory cofactor NHE-RF1;                             | Ezrin-radixin-moesin-binding phosphoprotein 50;Regulatory cofactor of Na(+)/H(+) exchanger;Sodium-hydrogen exchanger regulatory factor 1;Solute carrier family 9 isoform A3 regulatory factor 1; |
| M              | SAFNLLHLVTKSQPVAPR                    | N-ter + 42.01 Da, K +28.03 Da              | 58.4       | 62.6              | 3      | 2047.29                      | -2.00                                        | 0.80                  | MSRB3_MOUSE  | D3YUC9_MOUSE | Methionine-R-sulfoxide reductase B3, mitochondrial;                          |                                                                                                                                                                                                  |
| M              | SAGGAVPPPNPAVSPAPR                    | N-ter + 42.01 Da                           | 41.7       | 68.2              | 3      | 1927.13                      | n.d.                                         | n.d.                  | MAL2_MOUSE   |              | Protein MAL2;                                                                |                                                                                                                                                                                                  |
| M              | SAHLQWVMVVR                           | N-ter + 42.01 Da                           | 41.4       | 32.4              | 2      | 1267.69                      | n.d.                                         | n.d.                  | RL28_MOUSE   |              | 60S ribosomal protein L28;                                                   |                                                                                                                                                                                                  |
| M              | SAKAISEQTGKELLYKICTSAIQNR             | N-ter + 42.01 Da, K +28.03 Da, C +57.02 Da | 31.4       | 85.5              | 4      | 3198.97                      | 1.95                                         | 1.38                  | ACLY_MOUSE   | Q3TS02_MOUSE | ATP-citrate synthase;                                                        | ATP-citrate (pro-S)-lyase;Citrate cleavage enzyme;                                                                                                                                               |
| M              | SALEKSMHLGR                           | N-ter + 42.01 Da, K +34.06 Da              | 32.0       | 63.2              | 3      | 1303.80                      | 1.28                                         | 0.27                  | PPME1_MOUSE  |              | Protein phosphatase methylesterase 1;                                        |                                                                                                                                                                                                  |
| KM             | SALKAVFQYIDENQDR                      | N-ter + 42.01 Da, K +28.03 Da              | 40.9       | 58.3              | 3      | 1966.09                      | 0.21                                         | 0.15                  | CNDP2_MOUSE  | F6XEL6_MOUSE | Cytosolic non-specific dipeptidase;                                          | CNDP dipeptidase 2;Glutamate carboxypeptidase-like protein 1;                                                                                                                                    |
| M              | SAMEAADVFHR                           | N-ter + 42.01 Da                           | 51.8       | 50.4              | 2      | 1274.64                      | n.d.                                         | n.d.                  | CPPED_MOUSE  | D3Z7F7_MOUSE | Protein bicaudal D homolog 2;                                                |                                                                                                                                                                                                  |
| M              | SAPAGSPHPAAGAR                        | N-ter + 42.01 Da                           | 57.2       | 38.8              | 2      | 1287.68                      | n.d.                                         | n.d.                  | Q80ZX0_MOUSE |              |                                                                              |                                                                                                                                                                                                  |
| MCGNNM         | SAPMPAVVPAAR                          | N-ter + 42.01 Da                           | 55.3       | 51.7              | 2      | 1207.70                      | n.d.                                         | n.d.                  | LYPE1_MOUSE  | D3Z269_MOUSE | Acyl-protein thioesterase 1;                                                 | Lysophospholipase 1;Lysophospholipase I;                                                                                                                                                         |
| M              | SAPSEEEYAR                            | N-ter + 42.01 Da                           | 40.3       | 59.7              | 2      | 1308.62                      | n.d.                                         | n.d.                  | BICD2_MOUSE  |              | Dolichyl-diphosphooligosaccharide--protein glycosyltransferase subunit DAD1; |                                                                                                                                                                                                  |
| M              | SASVVSVISR                            | N-ter + 42.01 Da                           | 36.5       | 61.4              | 2      | 1045.64                      | n.d.                                         | n.d.                  | DAD1_MOUSE   |              |                                                                              | Defender against cell death 1;                                                                                                                                                                   |
| M              | SATQHKTSLPOGVR                        | N-ter + 42.01 Da, K +34.06 Da              | 61.4       | 56.9              | 3      | 1584.97                      | 1.35                                         | 0.14                  | Q9CRB1_MOUSE | D3Z141_MOUSE |                                                                              |                                                                                                                                                                                                  |
| M              | SDEKNLGVSKLVSPSR                      | N-ter + 42.01 Da, K +28.03 Da              | 29.0       | 51.5              | 3      | 1941.15                      | 0.19                                         | 0.02                  | OSBL3_MOUSE  | F8WH20_MOUSE | Oxysterol-binding protein-related protein 3;                                 |                                                                                                                                                                                                  |
| M              | SDNGELEDKPPAPPVVR                     | N-ter + 42.01 Da, K +34.06 Da              | 47.1       | 43.7              | 3      | 1796.00                      | 1.15                                         | 0.60                  | PAK2_MOUSE   |              | Serine/threonine-protein kinase PAK 2;                                       | Gamma-PAK;p21-activated kinase 2;                                                                                                                                                                |
| MESEM          | SDPQLQEER                             | N-ter + 42.01 Da                           | 44.1       | 60.8              | 2      | 1239.65                      | n.d.                                         | n.d.                  | CASPE_MOUSE  |              | Caspase-14;                                                                  | Mini-ICE;                                                                                                                                                                                        |
| M              | SDQQLDCALDLMR                         | N-ter + 42.01 Da, C +57.02 Da              | 37.5       | 57.0              | 2      | 1605.80                      | n.d.                                         | n.d.                  | CAPZB_MOUSE  | A2AMV7_MOUSE | F-actin-capping protein subunit beta;                                        | CapZ beta;                                                                                                                                                                                       |
| M              | SDSEKLNLDIIGR                         | N-ter + 42.01 Da, K +34.06 Da              | 49.7       | 50.7              | 3      | 1621.96                      | -0.43                                        | 0.15                  | PP1A_MOUSE   |              | Serine/threonine-protein phosphatase PP1-alpha catalytic subunit;            |                                                                                                                                                                                                  |
| M              | SDSLDNEEKPPAPPLR                      | N-ter + 42.01 Da, K +34.06 Da              | 47.6       | 52.2              | 3      | 1840.04                      | -0.03                                        | 0.01                  | PAK3_MOUSE   | A3KGC2_MOUSE | Serine/threonine-protein kinase PAK 3;                                       | Beta-PAK;CDC42/RAC effector kinase PAK-B;p21-activated kinase 3;                                                                                                                                 |
| NKLHHHHHHQ     | SDSLVVCEDPELKETLR                     | N-ter + 42.01 Da, K +34.06 Da, C +57.02 Da | 42.1       | 38.1              | 3      | 2164.20                      | 0.10                                         | 0.06                  | GMFG_MOUSE   |              | Glia maturation factor gamma;                                                |                                                                                                                                                                                                  |
| LQTRGFVSDS     | SDSMDTGAGSIR                          | N-ter + 42.01 Da                           | 39.8       | 69.3              | 2      | 1237.61                      | n.d.                                         | n.d.                  | ATIF1_MOUSE  | Q9D879_MOUSE | ATPase inhibitor, mitochondrial;                                             | Inhibitor of F(1)F(o)-ATPase;                                                                                                                                                                    |
| MKVLQTRGFV     | SDSSDSMDTGAGSIR                       | N-ter + 42.01 Da                           | 45.2       | 66.1              | 2      | 1526.72                      | n.d.                                         | n.d.                  | ATIF1_MOUSE  | Q9D879_MOUSE | ATPase inhibitor, mitochondrial;                                             | Inhibitor of F(1)F(o)-ATPase;                                                                                                                                                                    |
| M              | SDTAVADTR                             | N-ter + 42.01 Da                           | 30.3       | 62.1              | 2      | 976.51                       | n.d.                                         | n.d.                  | SNX12_MOUSE  | Q6ZWQ5_MOUSE | Sorting nexin-12;                                                            | SDP8 protein;                                                                                                                                                                                    |
| M              | SDTPASTFGGR                           | N-ter + 42.01 Da                           | 35.1       | 69.7              | 2      | 1136.59                      | n.d.                                         | n.d.                  | F13A_MOUSE   | Q3TQH1_MOUSE | Coagulation factor XIII A chain;                                             | Protein-glutamine gamma-glutamyltransferase A chain;Transglutaminase A chain;                                                                                                                    |
| A              | SDVLELTDENFESR                        | N-ter + 42.01 Da                           | 39.2       | 79.3              | 3      | 1694.90                      | n.d.                                         | n.d.                  | PDIA3_MOUSE  | F6Q404_MOUSE | Protein disulfide-isomerase A3;                                              | 58 kDa glucose-regulated protein;58 kDa microsomal protein;Disulfide isomerase ER-60;Endoplasmic reticulum resident protein 57;Endoplasmic reticulum resident protein 60;                        |
| M              | SDYNTGGPPPPPPAGGGGAAGAGGGPPPPGPPGAGDR | N-ter + 42.01 Da                           | 50.4       | 81.5              | 4      | 3286.77                      | n.d.                                         | n.d.                  | FUBP2_MOUSE  |              | Far upstream element-binding protein 2;                                      | KH type-splicing regulatory protein;                                                                                                                                                             |
| M              | SEAFDCAKCNESLYGR                      | N-ter + 42.01 Da, K +28.03 Da, C +57.02 Da | 51.3       | 49.1              | 3      | 1975.94                      | -0.54                                        | 0.17                  | FHL3_MOUSE   | A6H6N4_MOUSE | Four and a half LIM domains protein 3;                                       | Skeletal muscle LIM-protein 2;                                                                                                                                                                   |
| M              | SESSALPWSINR                          | N-ter + 42.01 Da                           | 36.0       | 50.3              | 2      | 1502.78                      | n.d.                                         | n.d.                  | OXSRI_MOUSE  | D6RFV0_MOUSE | Serine/threonine-protein kinase OSR1;                                        | Oxidative stress-responsive 1 protein;                                                                                                                                                           |
| M              | SEGDSVGVSVHGKPSVVYR                   | N-ter + 42.01 Da, K +28.03 Da              | 52.1       | 54.4              | 3      | 2044.10                      | -0.43                                        | 0.14                  | RER1_MOUSE   |              | Protein RER1;                                                                |                                                                                                                                                                                                  |
| GPSSYKVGTM     | SEKFDCHYCR                            | N-ter + 42.01 Da, K +28.03 Da, C +57.02 Da | 27.7       | 64.5              | 3      | 1470.70                      | -2.40                                        | 0.76                  | FHL1_MOUSE   | A2AEX8_MOUSE | Four and a half LIM domains protein 1;                                       | KyOT;RBP-associated molecule 14-1;Skeletal muscle LIM-protein 1;                                                                                                                                 |
| M              | SELEQLRQEAELQR                        | N-ter + 42.01 Da                           | 37.1       | 59.2              | 3      | 1770.00                      | n.d.                                         | n.d.                  | GBB2_MOUSE   | GBB4_MOUSE   | Guanine nucleotide-binding protein G(i)/G(s)/G(t) subunit beta-2;            | G protein subunit beta-2;Transducin beta chain 2;                                                                                                                                                |
| M              | SETAPAAPAAPAPAEKTPVKKKAR              | N-ter + 42.01 Da, K +28.03 Da              | 36.8       | 73.5              | 4      | 2540.66                      | -0.03                                        | 0.01                  | H14_MOUSE    |              | Histone H1.4;                                                                | H1 VAR.2;H1e;                                                                                                                                                                                    |
| M              | SETVICSRR                             | N-ter + 42.01 Da, C +57.02 Da              | 27.9       | 61.6              | 2      | 1079.56                      | n.d.                                         | n.d.                  | VASP_MOUSE   |              | Vasodilator-stimulated phosphoprotein;                                       |                                                                                                                                                                                                  |
| M              | SGAPPSYFVALPPR                        | N-ter + 42.01 Da                           | 56.5       | 48.5              | 2      | 1586.89                      | n.d.                                         | n.d.                  | SCRNI1_MOUSE | D3YXW0_MOUSE | Secernin-1;                                                                  |                                                                                                                                                                                                  |
| M              | SGCQAQGDCCSRPCAQDKHEPR                | N-ter + 42.01 Da, K +28.03 Da, C +57.02 Da | 37.4       | 78.6              | 4      | 2730.33                      | -0.43                                        | 0.26                  | MTN8_MOUSE   |              | Probable methylthioribulose-1-phosphate dehydratase;                         | APAF1-interacting protein;Monocyte/macrophage protein 19;                                                                                                                                        |
| M              | SGEDGPAAGPGAAAAAAAR                   | N-ter + 42.01 Da                           | 43.2       | 78.9              | 3      | 1679.92                      | n.d.                                         | n.d.                  | PP12C_MOUSE  |              | Protein phosphatase 1 regulatory subunit 12C;                                | Protein phosphatase 1 myosin-binding subunit of 85 kDa;                                                                                                                                          |
| M              | SGEGENPASKPTPVQDVQGDGR                | N-ter + 42.01 Da, K +34.06 Da              | 62.9       | 42.4              | 3      | 2300.21                      | 0.06                                         | 0.03                  | PA1B3_MOUSE  | Q8CA83_MOUSE | Platelet-activating factor acetylhydrolase IB subunit gamma;                 | PAF acetylhydrolase 29 kDa subunit;PAF-AH subunit gamma;                                                                                                                                         |
| M              | SGGKYVDSEGHLYTPIR                     | N-ter + 42.01 Da, K +28.03 Da              | 51.6       | 53.6              | 3      | 2047.15                      | -1.18                                        | 0.38                  | CAV1_MOUSE   |              | Caveolin-1;                                                                  |                                                                                                                                                                                                  |
| M              | RKDLFANTVL                            | N-ter + 42.01 Da                           | 30.5       | 64.9              | 2      | 1352.69                      | n.d.                                         | n.d.                  | ACTBL_MOUSE  |              | Beta-actin-like protein 2;                                                   | Kappa-actin;                                                                                                                                                                                     |
| M              | PSGPVKGDKGR                           | N-ter + 42.01 Da                           | 34.9       | 55.7              | 2      | 1219.70                      | n.d.                                         | n.d.                  | CO1A2_MOUSE  | E9Q6U9_MOUSE | Collagen alpha-2(I) chain;                                                   | Alpha-2 type I collagen;                                                                                                                                                                         |
| M              | SGSSSVAAMKVVQQLR                      | N-ter + 42.01 Da, K +28.03 Da              | 32.6       | 58.0              | 3      | 1873.15                      | 0.16                                         | 0.04                  | GBG5_MOUSE   |              | Guanine nucleotide-binding protein G(i)/G(s)/G(o) subunit gamma-5;           |                                                                                                                                                                                                  |
| MA             | SGVQVADEVCR                           | N-ter + 42.01 Da, C +57.02 Da              | 37.4       | 61.7              | 2      | 1260.65                      | n.d.                                         | n.d.                  | DEST_MOUSE   |              | Destrin;                                                                     | Actin-depolymerizing factor;Sid 23;                                                                                                                                                              |
| M              | SGYTPDEKLR                            | N-ter + 42.01 Da, K +28.03 Da              | 38.3       | 30.6              | 2      | 1234.66                      | -0.20                                        | 0.05                  | NDUB6_MOUSE  | A2AP32_MOUSE | NADH dehydrogenase [ubiquinone] 1 beta subcomplex subunit 6;                 | Complex I-B17;NADH-ubiquinone oxidoreductase B17 subunit;                                                                                                                                        |

Table S5, Tholen et al.

| Non Prime Site | Prime Site                | Modifications                              | Hyperscore | Mass error in ppm | Charge | Precursor neutral mass in Da | Fold change (log <sub>2</sub> ) of ASAPRatio | FC-error of ASAPRatio | Uniprot ID 1 | Uniprot ID 2 | Protein Name 1                                                                     | Protein Name 2                                                                                                                                                                                                                                                                                                   |
|----------------|---------------------------|--------------------------------------------|------------|-------------------|--------|------------------------------|----------------------------------------------|-----------------------|--------------|--------------|------------------------------------------------------------------------------------|------------------------------------------------------------------------------------------------------------------------------------------------------------------------------------------------------------------------------------------------------------------------------------------------------------------|
| M              | SHGFTKEEVAEFOAAFNR        | N-ter + 42.01 Da, K +28.03 Da              | 41.6       | 80.8              | 4      | 2137.20                      | 1.40                                         | 0.19                  | CALM4_MOUSE  |              | Calmodulin-4;                                                                      | Calcium-binding protein Dd112;                                                                                                                                                                                                                                                                                   |
| M              | SHPSWLPKSTGEPGLHVPAR      | N-ter + 42.01 Da, K +34.06 Da              | 38.6       | 75.4              | 4      | 2325.42                      | 0.86                                         | 0.05                  | LPP_MOUSE    |              | Lipoma-preferred partner homolog;                                                  |                                                                                                                                                                                                                                                                                                                  |
| M              | SHQTGIQASEDVKEIFAR        | N-ter + 42.01 Da, K +28.03 Da              | 51.1       | 67.1              | 3      | 2085.19                      | -0.36                                        | 0.12                  | TWF1_MOUSE   |              | Twinfilin-1;                                                                       | Protein A6;                                                                                                                                                                                                                                                                                                      |
| M              | SHTILLQPTKRPKEGR          | N-ter + 42.01 Da, K +34.06 Da              | 29.7       | 56.9              | 4      | 1907.23                      | 0.20                                         | 0.04                  | ERH_MOUSE    |              | Enhancer of rudimentary homolog;                                                   |                                                                                                                                                                                                                                                                                                                  |
| M              | SILVYSPHPDAPFSLR          | N-ter + 42.01 Da                           | 35.2       | 48.1              | 3      | 1840.04                      | n.d.                                         | n.d.                  | SYVC_MOUSE   |              | Valine-tRNA ligase;                                                                | Protein G7a;Valyl-tRNA synthetase;                                                                                                                                                                                                                                                                               |
| M              | SISESSPAATSLPNGDCGRPR     | N-ter + 42.01 Da, C +57.02 Da              | 42.4       | 52.2              | 3      | 2200.13                      | n.d.                                         | n.d.                  | PUR2_MOUSE   |              | Adenylosuccinate synthetase isozyme 2;                                             | Adenylosuccinate synthetase, acidic isozyme;Adenylosuccinate synthetase, liver isozyme;IMP-aspartate ligase 2;                                                                                                                                                                                                   |
| RTSPVPRQKR     | SIVVSPILPENQR             | N-ter + 42.01 Da                           | 39.6       | 72.3              | 3      | 1606.03                      | n.d.                                         | n.d.                  | CAD13_MOUSE  |              | Cadherin-13;                                                                       | Heart cadherin;Truncated cadherin;                                                                                                                                                                                                                                                                               |
| LSHCERPHRF     | SKGLNGTPR                 | N-ter + 42.01 Da, K +34.06 Da              | 25.0       | 99.7              | 2      | 1004.68                      | -0.23                                        | 0.03                  | KDM2B_MOUSE  | E9QL25_MOUSE | Lysine-specific demethylase 2B;                                                    | F-box and leucine-rich repeat protein 10;F-box protein FBL10;F-box/LRR-repeat protein 10;ImJc domain-containing histone demethylation protein 1B;[Histone-H3]-lysine-36 demethylase 1B;HDP-1;Helix-destabilizing protein;Single-strand-binding protein;Topoisomerase-inhibitor suppressed;hnrPC core protein A1; |
| M              | SKSESPKEPEQLR             | N-ter + 42.01 Da, K +34.06 Da              | 46.8       | 54.6              | 3      | 1624.00                      | 0.88                                         | 0.49                  | ROA1_MOUSE   | Q5EBP8_MOUSE | Heterogeneous nuclear ribonucleoprotein A1;                                        | Ribonuclease inhibitor;                                                                                                                                                                                                                                                                                          |
| TRRLHCAPTAM    | SLDIQCEQLSDAR             | N-ter + 42.01 Da, C +57.02 Da              | 47.1       | 49.6              | 2      | 1575.80                      | n.d.                                         | n.d.                  | RINI_MOUSE   |              |                                                                                    | Ribonuclease/angiogenin inhibitor 1;                                                                                                                                                                                                                                                                             |
| M              | SLGCVSEASR                | N-ter + 42.01 Da                           | 40.5       | 55.2              | 2      | 1003.55                      | n.d.                                         | n.d.                  | CYT1_MOUSE   | Q497J0_MOUSE | Stefin-1;                                                                          |                                                                                                                                                                                                                                                                                                                  |
| CEPVYGLTAM     | SLKPPQPPAPATGR            | N-ter + 42.01 Da, K +28.03 Da              | 32.9       | 51.0              | 3      | 1613.97                      | 0.44                                         | 0.07                  | ATX2_MOUSE   | E9QQG6_MOUSE | Ataxin-2;                                                                          | Spinocerebellar ataxia type 2 protein homolog;                                                                                                                                                                                                                                                                   |
| M              | SLSNKLTLKLDVKKGR          | N-ter + 42.01 Da, K +28.03 Da              | 40.3       | 51.2              | 3      | 2068.37                      | -0.89                                        | 0.05                  | PGK1_MOUSE   |              | Phosphoglycerate kinase 1;                                                         |                                                                                                                                                                                                                                                                                                                  |
| ASVILQHLRM     | SMHTEAAEVLLER             | N-ter + 42.01 Da                           | 30.2       | 41.1              | 3      | 1526.80                      | n.d.                                         | n.d.                  | HIBCH_MOUSE  | E0CX19_MOUSE | 3-hydroxyisobutyryl-CoA hydrolase, mitochondrial;                                  | 3-hydroxyisobutyryl-coenzyme A hydrolase;                                                                                                                                                                                                                                                                        |
| M              | SMNKGPTLLDGLPEQENVLQR     | N-ter + 42.01 Da, K +28.03 Da              | 51.4       | 52.9              | 3      | 2523.40                      | 0.04                                         | 0.02                  | PLIN1_MOUSE  |              | Perilipin-1;                                                                       | Lipid droplet-associated protein;Perilipin A;                                                                                                                                                                                                                                                                    |
| M              | SNGYEDHMAEDCR             | N-ter + 42.01 Da, C +57.02 Da              | 43.7       | 48.8              | 3      | 1624.67                      | n.d.                                         | n.d.                  | ELAV1_MOUSE  |              | ELAV-like protein 1;                                                               | Elav-like generic protein;Hu-antigen R;MeIG;                                                                                                                                                                                                                                                                     |
| M              | SNNGVDIQDKPPAPPMR         | N-ter + 42.01 Da, K +28.03 Da              | 24.3       | 45.2              | 3      | 1905.03                      | -0.32                                        | 0.06                  | PAK1_MOUSE   |              | Serine/threonine-protein kinase PAK 1;                                             | Alpha-PAK;CDC42/RAC effector kinase PAK-A;p21-activated kinase 1;p65-PAK;                                                                                                                                                                                                                                        |
| M              | SPEIALNR                  | N-ter + 42.01 Da                           | 37.9       | 58.0              | 2      | 1071.60                      | n.d.                                         | n.d.                  | BRE_MOUSE    | E9Q8Q1_MOUSE | BRCA1-A complex subunit BRE;                                                       | BRCA1/BRCA2-containing complex subunit 45;Brain and reproductive organ-expressed protein;                                                                                                                                                                                                                        |
| M              | SQAEFDKAAEEVKR            | N-ter + 42.01 Da, K +28.03 Da              | 58.3       | 33.3              | 2      | 1704.93                      | 0.21                                         | 0.02                  | ACBP_MOUSE   |              | Acyl-CoA-binding protein;                                                          | Diazepam-binding inhibitor;Endozepine;                                                                                                                                                                                                                                                                           |
| M              | SQEKASSPSGKMDGKPVDAESEKR  | N-ter + 42.01 Da, K +28.03 Da              | 46.0       | 69.7              | 4      | 2830.60                      | -0.11                                        | 0.05                  | SYTC_MOUSE   |              | Threonine-tRNA ligase, cytoplasmic;                                                | Threonyl-tRNA synthetase;                                                                                                                                                                                                                                                                                        |
| M              | SQERPTFYR                 | N-ter + 42.01 Da                           | 25.2       | 38.0              | 2      | 1224.64                      | n.d.                                         | n.d.                  | MK14_MOUSE   | B2KF35_MOUSE | Mitogen-activated protein kinase 14;                                               | CRK1;Mitogen-activated protein kinase p38 alpha;PAF acetylhydrolase 30 kDa subunit;PAF-AH subunit beta;                                                                                                                                                                                                          |
| M              | SQGDSNPAAIPIHAEIDQGGDR    | N-ter + 42.01 Da                           | 50.3       | 41.2              | 3      | 2305.12                      | n.d.                                         | n.d.                  | PA1B2_MOUSE  | F8WIW7_MOUSE | Platelet-activating factor acetylhydrolase IB subunit beta;                        |                                                                                                                                                                                                                                                                                                                  |
| KTTWKEVSKA     | SQKTEGHR                  | N-ter + 42.01 Da, K +34.06 Da              | 29.6       | 40.5              | 2      | 1017.58                      | -1.06                                        | 0.09                  | F6VUL6_MOUSE |              |                                                                                    | PP2A B subunit isoform B'-epsilon;PP2A B subunit isoform B56-epsilon;PP2A B subunit isoform PR61-epsilon;PP2A B subunit isoform R5-epsilon;                                                                                                                                                                      |
| M              | SSAPTPPSVDKVDGFSR         | N-ter + 42.01 Da, K +28.03 Da              | 31.2       | 39.9              | 3      | 1917.02                      | 0.12                                         | 0.04                  | 2A5E_MOUSE   | Q3UZJ4_MOUSE | Serine/threonine-protein phosphatase 2A 56 kDa regulatory subunit epsilon isoform; | Myosin heavy chain 1;Myosin heavy chain 2x;Myosin heavy chain, skeletal muscle, adult 1;                                                                                                                                                                                                                         |
| M              | SSDAEMAVFGAAPPYLR         | N-ter + 42.01 Da                           | 52.1       | 47.9              | 2      | 1854.93                      | n.d.                                         | n.d.                  | MYH1_MOUSE   | MYH4_MOUSE   | Myosin-1;                                                                          | 4-alpha-hydroxy-tetrahydropterin dehydratase 2;DcoH-like protein DCoH;Dimerization cofactor of hepatocyte nuclear factor 1 from muscle;HNF-1-alpha dimerization cofactor;                                                                                                                                        |
| RSPGASRAAM     | SSDAQWLTAEER              | N-ter + 42.01 Da                           | 30.6       | 56.2              | 2      | 1433.72                      | n.d.                                         | n.d.                  | PHS2_MOUSE   |              | Pterin-4-alpha-carbinolamine dehydratase 2;                                        | Calcium-regulated heat stable protein of 24 kDa;                                                                                                                                                                                                                                                                 |
| M              | SSEPPPPPLQPPHTQTSVGLLDTPR | N-ter + 42.01 Da                           | 32.3       | 52.5              | 4      | 2689.51                      | n.d.                                         | n.d.                  | CHSP1_MOUSE  |              | Calcium-regulated heat stable protein 1;                                           | Cytochrome c oxidase polypeptide VIc;                                                                                                                                                                                                                                                                            |
| M              | SSGALLPKPQMR              | N-ter + 42.01 Da, K +28.03 Da              | 41.4       | 32.9              | 2      | 1353.79                      | -0.14                                        | 0.02                  | COX6C_MOUSE  | D3Z6E1_MOUSE | Cytochrome c oxidase subunit 6C;                                                   | Macropain subunit C8;Multicatalytic endopeptidase complex subunit C8;Proteasome component C8;Proteasome subunit K;                                                                                                                                                                                               |
| M              | SSIGTGYDLSASTFSPDGR       | N-ter + 42.01 Da                           | 38.1       | 77.8              | 3      | 1959.04                      | n.d.                                         | n.d.                  | PSA3_MOUSE   | E0CZ34_MOUSE | Proteasome subunit alpha type-3;                                                   |                                                                                                                                                                                                                                                                                                                  |
| M              | SSIKVECVLR                | N-ter + 42.01 Da, K +34.06 Da, C +57.02 Da | 33.5       | 26.2              | 2      | 1265.76                      | 2.32                                         | 0.34                  | RGN_MOUSE    |              | Regucalcin;                                                                        | Glucuronolactonase;Senescence marker protein 30;                                                                                                                                                                                                                                                                 |
| M              | SSKTASTNSIAQAR            | N-ter + 42.01 Da, K +34.06 Da              | 34.5       | 50.0              | 3      | 1496.88                      | 0.59                                         | 0.29                  | GBG12_MOUSE  |              | Guanine nucleotide-binding protein G(I)/G(S)/G(O) subunit gamma-12;                |                                                                                                                                                                                                                                                                                                                  |
| M              | SSLEISNCFSPETR            | N-ter + 42.01 Da, C +57.02 Da              | 45.2       | 50.4              | 2      | 1754.87                      | n.d.                                         | n.d.                  | MOC2B_MOUSE  |              | Molybdopterin synthase catalytic subunit;                                          | Molybdenum cofactor synthesis protein 2 large subunit;Molybdenum cofactor synthesis protein 2B;                                                                                                                                                                                                                  |
| M              | SSSAASPLFAPGEDCGPAWR      | N-ter + 42.01 Da, C +57.02 Da              | 43.7       | 77.3              | 3      | 2104.09                      | n.d.                                         | n.d.                  | GAMT_MOUSE   |              | Guanidinoacetate N-methyltransferase;                                              |                                                                                                                                                                                                                                                                                                                  |
| TCVSNPGPFIM    | SSSASAANGNSDKFKFGDNR      | N-ter + 42.01 Da, K +28.03 Da              | 38.0       | 78.4              | 4      | 2166.24                      | 2.42                                         | 2.51                  | PTBP1_MOUSE  | Q922I7_MOUSE | Polypyrimidine tract-binding protein 1;                                            | Heterogeneous nuclear ribonucleoprotein I;                                                                                                                                                                                                                                                                       |
| M              | SSSRPVALVTGANKGIGFAITR    | N-ter + 42.01 Da, K +28.03 Da              | 54.3       | 52.2              | 3      | 2271.39                      | 0.84                                         | 0.21                  | CBR1_MOUSE   |              | Carbonyl reductase [NADPH] 1;                                                      | 15-hydroxyprostaglandin dehydrogenase                                                                                                                                                                                                                                                                            |
| M              | SSQTQFNKPSYGLSAEYKNNR     | N-ter + 42.01 Da, K +28.03 Da              | 67.2       | 52.2              | 3      | 2267.27                      | 1.83                                         | 0.70                  | CNN2_MOUSE   | D3Z7R6_MOUSE | Calponin-2;                                                                        | Calponin H2, smooth muscle;Neutral calponin;                                                                                                                                                                                                                                                                     |
| M              | SSVAVLQESFAEHR            | N-ter + 42.01 Da                           | 43.1       | 63.4              | 3      | 1701.94                      | n.d.                                         | n.d.                  | VIGLN_MOUSE  |              | Vigilin;                                                                           | High density lipoprotein-binding protein;                                                                                                                                                                                                                                                                        |
| IHRAAVAAM      | STGTFFVSNPLNYR            | N-ter + 42.01 Da                           | 48.8       | 37.8              | 2      | 1609.87                      | n.d.                                         | n.d.                  | AL9A1_MOUSE  | Q3U367_MOUSE | 4-trimethylaminobutylaldehyde dehydrogenase;                                       | Aldehyde dehydrogenase family 9 member A1;                                                                                                                                                                                                                                                                       |
| M              | STGVPSGSSAATGSNR          | N-ter + 42.01 Da                           | 32.2       | 45.0              | 2      | 1476.75                      | n.d.                                         | n.d.                  | VAMP3_MOUSE  |              | Vesicle-associated membrane protein 3;                                             | Cellubrevin;Synaptobrevin-3;                                                                                                                                                                                                                                                                                     |
| LFANTVLSGG     | STMYPGIADR                | N-ter + 42.01 Da                           | 23.6       | 70.2              | 2      | 1151.61                      | n.d.                                         | n.d.                  | ACTBL_MOUSE  |              | Beta-actin-like protein 2;                                                         | Kappa-actin;                                                                                                                                                                                                                                                                                                     |
| M              | STTTGPEAAPKPSAKSIYEQR     | N-ter + 42.01 Da, K +28.03 Da              | 32.5       | 54.9              | 3      | 2316.32                      | 1.31                                         | 0.53                  | ES8L1_MOUSE  | E9Q4X5_MOUSE | Epidermal growth factor receptor kinase substrate 8-like protein 1;                | Epidermal growth factor receptor pathway substrate 8-related protein 1;                                                                                                                                                                                                                                          |
| M              | SVFGKLFAGGGKAGKGGPTPQEAQR | N-ter + 42.01 Da, K +28.03 Da              | 48.2       | 80.8              | 4      | 2740.72                      | 0.36                                         | 0.11                  | CHM4B_MOUSE  |              | Charged multivesicular body protein 4b;                                            | Chromatin-modifying protein 4b;                                                                                                                                                                                                                                                                                  |
| MCGNTM         | SVPLLTDAATVSGAER          | N-ter + 42.01 Da                           | 50.4       | 50.6              | 2      | 1627.92                      | n.d.                                         | n.d.                  | LYPE2_MOUSE  |              | Acyl-protein thioesterase 2;                                                       | Lysophospholipase 2;Lysophospholipase II;                                                                                                                                                                                                                                                                        |

Table S5, Tholen et al.

| Non Prime Site | Prime Site               | Modifications                              | Hyperscore | Mass error in ppm | Charge | Precursor neutral mass in Da | Fold change (log <sub>2</sub> ) of ASAPRatio | FC-error of ASAPRatio | Uniprot ID 1 | Uniprot ID 2 | Protein Name 1                                                                                        | Protein Name 2                                                                                                                                 |
|----------------|--------------------------|--------------------------------------------|------------|-------------------|--------|------------------------------|----------------------------------------------|-----------------------|--------------|--------------|-------------------------------------------------------------------------------------------------------|------------------------------------------------------------------------------------------------------------------------------------------------|
| M              | SVQVAAPGSTGLGPER         | N-ter + 42.01 Da                           | 26.6       | 21.5              | 2      | 1566.83                      | n.d.                                         | n.d.                  | KLC3_MOUSE   | D32710_MOUSE | Kinesin light chain 3;                                                                                |                                                                                                                                                |
| M              | SVVTGGGEAAGGGGGGAR       | N-ter + 42.01 Da                           | 60.1       | 46.7              | 2      | 1514.78                      | n.d.                                         | n.d.                  | PP14C_MOUSE  |              | Protein phosphatase 1 regulatory subunit 14C;                                                         | Kinase-enhanced PP1 inhibitor;PKC-potiated PP1 inhibitory protein;                                                                             |
| M              | SYGPDIMYR                | N-ter + 42.01 Da                           | 44.8       | 58.1              | 2      | 1142.57                      | n.d.                                         | n.d.                  | STX12_MOUSE  |              | Syntaxin-12;                                                                                          |                                                                                                                                                |
| SDEHGIDPTG     | SYHGSDQLQER              | N-ter + 42.01 Da                           | 37.5       | 104.7             | 3      | 1460.81                      | n.d.                                         | n.d.                  | TBB2A_MOUSE  | TBB2B_MOUSE  | Tubulin beta-2A chain;                                                                                |                                                                                                                                                |
| M              | SYQGKKNIPR               | N-ter + 42.01 Da, K +34.06 Da              | 27.4       | 56.5              | 3      | 1299.87                      | -0.52                                        | 0.40                  | DPYL2_MOUSE  | DPYL3_MOUSE  | Dihydropyrimidinase-related protein 2;                                                                | Unc-33-like phosphoprotein 2; 160 kDa neurofilament protein;Neurofilament 3;Neurofilament triplet M protein;                                   |
| M              | SYTLDSLGNPSAYR           | N-ter + 42.01 Da                           | 36.0       | 43.6              | 2      | 1584.81                      | n.d.                                         | n.d.                  | NFM_MOUSE    | D3Y235_MOUSE | Neurofilament medium polypeptide;                                                                     |                                                                                                                                                |
| M              | SYTPGIGGDSQAQLAQR        | N-ter + 42.01 Da                           | 47.1       | 78.7              | 3      | 1661.93                      | n.d.                                         | n.d.                  | STX7_MOUSE   | Q88H40_MOUSE | Syntaxin-7;                                                                                           |                                                                                                                                                |
| M              | SYTPGQPVTAVVQR           | N-ter + 42.01 Da                           | 32.4       | 78.4              | 3      | 1543.92                      | n.d.                                         | n.d.                  | TX1B3_MOUSE  | B1AUD9_MOUSE | Tax1-binding protein 3;                                                                               | Tax interaction protein 1; Mutated in multiple advanced cancers                                                                                |
| M              | TAIKEIVSR                | N-ter + 42.01 Da, K +28.03 Da              | 50.2       | 38.5              | 2      | 1198.77                      | 0.12                                         | 0.05                  | PTEN_MOUSE   |              | Phosphatidylinositol-3,4,5-trisphosphate 3-phosphatase and dual-specificity protein phosphatase PTEN; | Mutated in multiple advanced cancers                                                                                                           |
| M              | TDMAGLMER                | N-ter + 42.01 Da                           | 33.7       | 66.1              | 2      | 1064.53                      | n.d.                                         | n.d.                  | CAP2_MOUSE   | D3YTR7_MOUSE | Adenylyl cyclase-associated protein 2;                                                                | 3;Phosphatase and tensin homolog;                                                                                                              |
| LQSQYRSLDM     | TDNTNSQLVVR              | N-ter + 42.01 Da                           | 30.3       | 62.5              | 2      | 1287.72                      | n.d.                                         | n.d.                  | ARHG7_MOUSE  | D320V2_MOUSE | Rho guanine nucleotide exchange factor 7;                                                             | Beta-Pix;PAK-interacting exchange factor beta;p85SPR;                                                                                          |
| SVMRTDSSEM     | TDVESVITSFASSAR          | N-ter + 42.01 Da                           | 44.9       | 46.6              | 2      | 1610.85                      | n.d.                                         | n.d.                  | IPKB_MOUSE   | Q3TZU5_MOUSE | cAMP-dependent protein kinase inhibitor beta;                                                         | PKI-beta;cAMP-dependent protein kinase inhibitor, testis isoform;                                                                              |
| M              | TDVETTYADFIASGR          | N-ter + 42.01 Da                           | 42.2       | 58.6              | 2      | 1686.87                      | n.d.                                         | n.d.                  | IPKA_MOUSE   |              | cAMP-dependent protein kinase inhibitor alpha;                                                        | cAMP-dependent protein kinase inhibitor, muscle/brain isoform;                                                                                 |
| MM             | TEEHTDLEAR               | N-ter + 42.01 Da                           | 52.8       | 37.6              | 2      | 1241.60                      | n.d.                                         | n.d.                  | CAV3_MOUSE   |              | Caveolin-3;                                                                                           | M-caveolin;                                                                                                                                    |
| M              | TEELITPVYCTGVSAQVQKQR    | N-ter + 42.01 Da, K +28.03 Da, C +57.02 Da | 27.2       | 52.6              | 3      | 2504.46                      | 0.40                                         | 0.14                  | CAN1_MOUSE   |              | Calpain-1 catalytic subunit;                                                                          | Calcium-activated neutral proteinase 1;Calpain mu-type;Calpain-1 large subunit;Micromolar-calpain;                                             |
| AALIRNTSSM     | TEGLQPASVVVLP            | N-ter + 42.01 Da                           | 25.1       | 47.6              | 2      | 1506.91                      | n.d.                                         | n.d.                  | CN159_MOUSE  | E9QMK9_MOUSE | UPF0317 protein C14orf159 homolog, mitochondrial;                                                     |                                                                                                                                                |
| M              | TELQSAALLR               | N-ter + 42.01 Da                           | 40.0       | 60.2              | 2      | 1184.75                      | n.d.                                         | n.d.                  | UB2G1_MOUSE  | D6RES1_MOUSE | Ubiquitin-conjugating enzyme E2 G1;                                                                   | E217K;UBC7;Ubiquitin carrier protein G1;Ubiquitin-protein ligase G1;                                                                           |
| M              | TETDGFYKSR               | N-ter + 42.01 Da, K +28.03 Da              | 47.1       | 35.4              | 2      | 1272.64                      | -0.17                                        | 0.02                  | CASP6_MOUSE  |              | Caspase-6;                                                                                            | Apoptotic protease Mch-2; CARD adapter inducing interferon beta;Interferon beta promoter stimulator protein 1;Virus-induced-signaling adapter; |
| M              | TFAEDKTYKIR              | N-ter + 42.01 Da, K +28.03 Da              | 23.4       | 73.3              | 3      | 1631.98                      | -1.84                                        | 0.33                  | MAVS_MOUSE   |              | Mitochondrial antiviral-signaling protein;                                                            |                                                                                                                                                |
| M              | THSSQDAGSHGIEEGR         | N-ter + 42.01 Da                           | 52.5       | 84.7              | 3      | 1836.95                      | n.d.                                         | n.d.                  | CG053_MOUSE  |              | Coiled-coil domain-containing transmembrane protein C7orf53 homolog;                                  |                                                                                                                                                |
| M              | TKLKEAQEEQR              | N-ter + 42.01 Da                           | 53.6       | 51.5              | 2      | 1314.71                      | n.d.                                         | n.d.                  | KBTB5_MOUSE  |              | Kelch repeat and BTB domain-containing protein 5;                                                     |                                                                                                                                                |
| M              | TMDKLELVQKAKLAEQAER      | N-ter + 42.01 Da, K +28.03 Da              | 53.4       | 63.6              | 4      | 2300.39                      | 0.45                                         | 0.12                  | 1433B_MOUSE  | A2A5N1_MOUSE | 14-3-3 protein beta/alpha;                                                                            | Protein kinase C inhibitor protein 1; TR4 orphan receptor-associated 16 kDa protein;                                                           |
| M              | TQSLVCPDVTISR            | N-ter + 42.01 Da, C +57.02 Da              | 33.8       | 50.5              | 2      | 1403.74                      | n.d.                                         | n.d.                  | NR2CA_MOUSE  |              | Nuclear receptor 2C2-associated protein;                                                              | U6 snRNA-associated Sm-like protein LSM8;                                                                                                      |
| M              | TSALENYINR               | N-ter + 42.01 Da                           | 42.6       | 55.3              | 2      | 1221.67                      | n.d.                                         | n.d.                  | NAA38_MOUSE  |              | N-alpha-acetyltransferase 38, NatC auxiliary subunit;                                                 | La ribonucleoprotein domain family member 4B;La ribonucleoprotein domain family member 5;La-related protein 5;                                 |
| M              | TSDQDAKVAEPQAQR          | N-ter + 42.01 Da, K +28.03 Da              | 34.7       | 43.8              | 3      | 1811.98                      | 2.48                                         | 1.36                  | LAR4B_MOUSE  |              | La-related protein 4B;                                                                                |                                                                                                                                                |
| M              | TSPEGAQNKEIDCLSPQAQR     | N-ter + 42.01 Da, K +34.06 Da, C +57.02 Da | 48.8       | 47.6              | 3      | 2305.22                      | 0.20                                         | 0.10                  | LRRF1_MOUSE  | E9Q9T1_MOUSE | Leucine-rich repeat flightless-interacting protein 1;                                                 | FLI-LRR-associated protein 1;H186 FLAP;                                                                                                        |
| M              | TSSYGHVLR                | N-ter + 42.01 Da                           | 61.6       | 44.0              | 2      | 1189.63                      | n.d.                                         | n.d.                  | PRRX1_MOUSE  |              | Paired mesoderm homeobox protein 1;                                                                   | Homeobox protein K-2;Homeobox protein mHox;Paired-related homeobox protein 1;                                                                  |
| M              | TTKDPSEHPSVTLFR          | N-ter + 42.01 Da, K +28.03 Da              | 38.5       | 46.3              | 3      | 1913.04                      | 0.19                                         | 0.05                  | ACY1_MOUSE   |              | Aminoacylase-1;                                                                                       | N-acyl-L-amino-acid amidohydrolase; C-terminal LIM domain protein 1;Elfin;LIM domain protein CLP-36;                                           |
| M              | TTQQIVLQGPWPWGR          | N-ter + 42.01 Da                           | 44.3       | 75.1              | 3      | 1826.09                      | n.d.                                         | n.d.                  | PDLI1_MOUSE  |              | PDZ and LIM domain protein 1;                                                                         | 110 kDa cell membrane glycoprotein;Adhesion-regulating molecule 1;Rpn13 homolog; SEC23-related protein A;                                      |
| M              | TTSYGALFPLVPSGR          | N-ter + 42.01 Da                           | 33.9       | 59.0              | 2      | 1530.89                      | n.d.                                         | n.d.                  | ADRM1_MOUSE  | D3YUD8_MOUSE | Proteasomal ubiquitin receptor ADRM1;                                                                 | DEAD box RNA helicase DEAD1;DEAD box protein 5;RNA helicase p68;                                                                               |
| M              | TTYLEFIQNEER             | N-ter + 42.01 Da                           | 42.9       | 53.6              | 2      | 1711.90                      | n.d.                                         | n.d.                  | SC23A_MOUSE  | E9Q153_MOUSE | Protein transport protein Sec23A;                                                                     | Biiliverdin reductase B;Biiliverdin-IX beta-reductase;NADPH-dependent diaphorase;NADPH-flavin reductase;                                       |
| LECGKTLNRR     | TTYLVLEADR               | N-ter + 42.01 Da                           | 34.3       | 34.5              | 2      | 1336.70                      | n.d.                                         | n.d.                  | DDX5_MOUSE   | Q8BT50_MOUSE | Probable ATP-dependent RNA helicase DDX5;                                                             | Kappa-actin; Protein Nezha; Ubiquitin-like 1-activating enzyme E1A;                                                                            |
| M              | TVKKIAIFGATGR            | N-ter + 42.01 Da, K +28.03 Da              | 27.8       | 41.9              | 3      | 1458.95                      | -0.09                                        | 0.02                  | BLVRB_MOUSE  | E9P2C3_MOUSE | Flavin reductase (NADPH);                                                                             | Peptidyl-cysteine S-nitrosylase GAPDH;                                                                                                         |
| M              | TVLSGGSTMYPGIADR         | N-ter + 42.01 Da                           | 31.8       | 68.5              | 3      | 1665.92                      | n.d.                                         | n.d.                  | ACTBL_MOUSE  |              | Beta-actin-like protein 2;                                                                            | Aromatic amino acid transporter 1;Solute carrier family 16 member 10;T-type amino acid transporter 1;                                          |
| M              | VEAAPAGSGPLR             | N-ter + 42.01 Da                           | 35.8       | 54.0              | 2      | 1165.67                      | n.d.                                         | n.d.                  | CAMP3_MOUSE  | E9Q580_MOUSE | Calmodulin-regulated spectrin-associated protein 3;                                                   | SEC13-like protein 1;SEC13-related protein; Carbonate dehydratase III;Carbonic anhydrase III;                                                  |
| M              | VEKEEAGGGGGGISEEEAAQYDR  | N-ter + 42.01 Da, K +28.03 Da              | 80.2       | 49.7              | 3      | 2464.22                      | 0.15                                         | 0.11                  | SAE1_MOUSE   |              | SUMO-activating enzyme subunit 1;                                                                     | Beta-1-globin;Hemoglobin beta-1 chain;Hemoglobin beta-major chain;                                                                             |
| M              | VEQDAAPLL                | N-ter + 42.01 Da                           | 41.3       | 59.6              | 2      | 1209.71                      | n.d.                                         | n.d.                  | LCHN_MOUSE   |              | Protein LCHN;                                                                                         | Alpha-actin-1;                                                                                                                                 |
| PVDKM          | VKGVGVNGFR               | N-ter + 42.01 Da, K +34.06 Da              | 31.0       | 36.2              | 2      | 1107.70                      | -1.18                                        | 0.19                  | G3P_MOUSE    | E9PX99_MOUSE | Glyceraldehyde-3-phosphate dehydrogenase;                                                             | Apollipoprotein E receptor 2;                                                                                                                  |
| M              | VPSQEEPAER               | N-ter + 42.01 Da                           | 44.7       | 63.0              | 2      | 1384.72                      | n.d.                                         | n.d.                  | MOT10_MOUSE  |              | Monocarboxylate transporter 10;                                                                       |                                                                                                                                                |
| M              | VVMVNTVDTSHEDMIHQMDYVYGR | N-ter + 42.01 Da                           | 37.1       | 73.1              | 4      | 3056.52                      | n.d.                                         | n.d.                  | SEC13_MOUSE  |              | Protein SEC13 homolog;                                                                                |                                                                                                                                                |
| TILNNGKTCR     | VVFDTDYDR                | N-ter + 42.01 Da                           | 29.1       | 58.2              | 2      | 1170.59                      | n.d.                                         | n.d.                  | CAH3_MOUSE   |              | Carbonic anhydrase 3;                                                                                 |                                                                                                                                                |
| DAEKAASCL      | WGKVNDSVEGGEALGR         | N-ter + 42.01 Da, K +28.03 Da              | 44.1       | 90.3              | 3      | 1743.02                      | 0.28                                         | 0.06                  | HBB1_MOUSE   |              | Hemoglobin subunit beta-1;                                                                            |                                                                                                                                                |
| LASLSTFQQM     | WTLKQEQYDEAGPSIVHR       | N-ter + 42.01 Da, K +28.03 Da              | 33.3       | 95.6              | 4      | 2098.25                      | -0.52                                        | 0.09                  | ACTS_MOUSE   |              | Actin, alpha skeletal muscle;                                                                         |                                                                                                                                                |
| RQTLVSDNIE     | WPNGITLDLSQR             | N-ter + 42.01 Da                           | 25.3       | 71.9              | 3      | 1553.93                      | n.d.                                         | n.d.                  | LRP8_MOUSE   | B1AXJ4_MOUSE | Low-density lipoprotein receptor-related protein 8;                                                   |                                                                                                                                                |
| YGFQNAILVR     | YTQKAPQVSTPTLVEAAR       | N-ter + 42.01 Da, K +28.03 Da              | 61.0       | 65.3              | 3      | 2029.22                      | -0.36                                        | 0.12                  | ALBU_MOUSE   |              | Serum albumin;                                                                                        |                                                                                                                                                |
