# Supplementary material
Source: PubMed Central journal article supplement (PMC3591655)
Supplement: supp_M112.017962_mcp.M112.017962-22.pdf [file supp_M112.017962_mcp.M112.017962-22.pdf]

X-range:

0 - 0

MassTol: Y-zoom:

0. 1.

MassType:

☐ AVG ☒ MONO

Axis:

☒ 1 ☐ 2

Label:

☒ I ☐ M ☐ -

Ions:

a ☐ + ☐ 2+ ☐ 3+

b ☒ + ☐ 2+ ☐ 3+

c ☐ + ☐ 2+ ☐ 3+

x ☐ + ☐ 2+ ☐ 3+

y ☒ + ☒ 2+ ☐ 3+

z ☐ + ☐ 2+ ☐ 3+

hide H<sub>2</sub>O/NH<sub>3</sub> ☐

zoom 112-122 ☐

GO

AAGGAGAQVGGSSISSGSSASSVTVTR, MH+ 2250.1326, m/z 750.7157  
L OS G12 P120811 220811-s1.02983.02983.3.dta

scan 2983; 1.4e+000

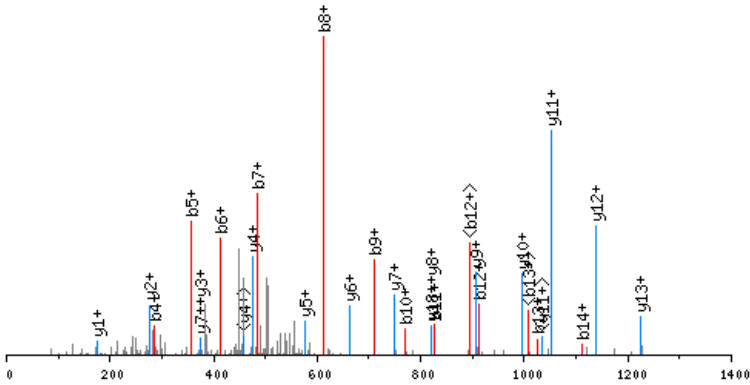

click image to zoom in; click top corners to zoom out [precursor±]

scan 2982; 750.7 m/z; 5.7e+000

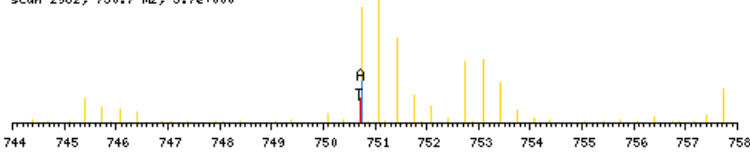

zoomed in precursor plot; T=theoretical m/z, A=acquired m/z

| b <sup>+</sup> | #  | AA | #  | y <sup>+</sup> | y <sup>2+</sup> |
|----------------|----|----|----|----------------|-----------------|
| 100.0762       | 1  | A  | 26 |                |                 |
| 171.1133       | 2  | A  | 25 | 2151.0642      | 1076.0360       |
| 228.1348       | 3  | G  | 24 | 2080.0271      | 1040.5174       |
| 285.1563       | 4  | G  | 23 | 2023.0056      | 1012.0067       |
| 356.1934       | 5  | A  | 22 | 1965.9841      | 983.4960        |
| 413.2148       | 6  | G  | 21 | 1894.9470      | 947.9774        |
| 484.2519       | 7  | A  | 20 | 1837.9256      | 919.4667        |
| 612.3105       | 8  | Q  | 19 | 1766.8884      | 883.9481        |
| 711.3789       | 9  | V  | 18 | 1638.8299      | 819.9188        |
| 768.4004       | 10 | G  | 17 | 1539.7615      | 770.3846        |
| 825.4219       | 11 | G  | 16 | 1482.7400      | 741.8739        |
| 912.4539       | 12 | S  | 15 | 1425.7185      | 713.3632        |
| 1025.5380      | 13 | I  | 14 | 1338.6865      | 669.8472        |
| 1112.5700      | 14 | S  | 13 | 1225.6024      | 613.3051        |
| 1199.6020      | 15 | S  | 12 | 1138.5704      | 569.7891        |
| 1256.6235      | 16 | G  | 11 | 1051.5384      | 526.2731        |
| 1343.6555      | 17 | S  | 10 | 994.5169       | 497.7624        |
| 1430.6875      | 18 | S  | 9  | 907.4849       | 454.2464        |
| 1501.7246      | 19 | A  | 8  | 820.4529       | 410.7303        |
| 1588.7567      | 20 | S  | 7  | 749.4157       | 375.2118        |
| 1675.7887      | 21 | S  | 6  | 662.3837       | 331.6958        |
| 1774.8571      | 22 | V  | 5  | 575.3517       | 288.1798        |
| 1875.9048      | 23 | T  | 4  | 476.2833       | 238.6455        |
| 1974.9732      | 24 | V  | 3  | 375.2356       | 188.1217        |
| 2076.0209      | 25 | T  | 2  | 276.1672       | 138.5875        |
|                | 26 | R  | 1  | 175.1195       | 88.0637         |

N-term:+29.04

X-range:

0 - 0

MassTol: Y-zoom:

0. 1.

MassType:

☐AVG ☒MONO

Axis:

☒1 ☐2

Label:

☒I ☐M ☐-

Ions:

a ☐+ ☐2+ ☐3+

b ☒+ ☐2+ ☐3+

c ☐+ ☐2+ ☐3+

x ☐+ ☐2+ ☐3+

y ☒+ ☒2+ ☐3+

z ☐+ ☐2+ ☐3+

hide H<sub>2</sub>O/NH<sub>3</sub> ☐

zoom 112-122 ☐

GO

AALGYDYKGETEKHESQR, MH+ 2166.0832, m/z 542.2762  
L OS G18 P120811 220811-s1.02638.02638.4.dta

scan 2638; 6.3e+000

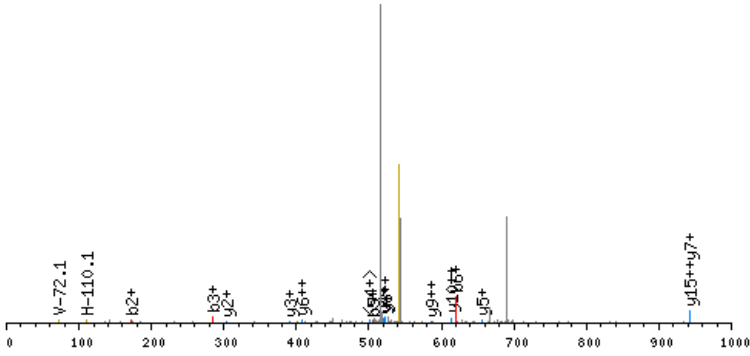

click image to zoom in; click top corners to zoom out [\[precursor±\]](#)

scan 2636; 542.3 m/z; 5.1e+000

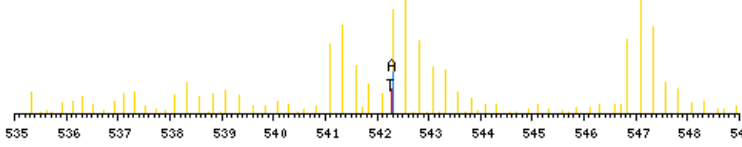

zoomed in precursor plot; T=theoretical m/z, A=acquired m/z

| b <sup>+</sup> | #  | AA | #  | y <sup>+</sup> | y <sup>2+</sup> |
|----------------|----|----|----|----------------|-----------------|
| 100.0762       | 1  | A  | 18 |                |                 |
| 171.1133       | 2  | A  | 17 | 2067.0148      | 1034.0113       |
| 284.1974       | 3  | L  | 16 | 1995.9777      | 998.4927        |
| 341.2189       | 4  | G  | 15 | 1882.8936      | 941.9507        |
| 504.2822       | 5  | Y  | 14 | 1825.8721      | 913.4400        |
| 619.3091       | 6  | D  | 13 | 1662.8088      | 831.9083        |
| 782.3725       | 7  | Y  | 12 | 1547.7819      | 774.3948        |
| 938.4988       | 8  | K  | 11 | 1384.7185      | 692.8632        |
| 995.5202       | 9  | G  | 10 | 1228.5922      | 614.8000        |
| 1124.5628      | 10 | E  | 9  | 1171.5708      | 586.2893        |
| 1225.6105      | 11 | T  | 8  | 1042.5282      | 521.7680        |
| 1354.6531      | 12 | E  | 7  | 941.4805       | 471.2442        |
| 1510.7794      | 13 | K  | 6  | 812.4379       | 406.7229        |
| 1647.8383      | 14 | H  | 5  | 656.3116       | 328.6597        |
| 1776.8809      | 15 | E  | 4  | 519.2527       | 260.1303        |
| 1863.9129      | 16 | S  | 3  | 390.2101       | 195.6090        |
| 1991.9715      | 17 | Q  | 2  | 303.1781       | 152.0930        |
|                | 18 | R  | 1  | 175.1195       | 88.0637         |

N-term: +29.04 K(8): +156.13  
K(13): +156.13

X-range:

0 - 0

MassTol: Y-zoom:

0. 1.

MassType:

☐ AVG ☒ MONO

Axis:

☒ 1 ☐ 2

Label:

☒ I ☐ M ☐ -

Ions:

a ☐ + ☐ 2+ ☐ 3+

b ☒ + ☐ 2+ ☐ 3+

c ☐ + ☐ 2+ ☐ 3+

x ☐ + ☐ 2+ ☐ 3+

y ☒ + ☒ 2+ ☐ 3+

z ☐ + ☐ 2+ ☐ 3+

hide H<sub>2</sub>O/NH<sub>3</sub> ☐

zoom 112-122 ☐

GO

AALPADPPASVVVGPVVVPR, MH+ 1939.1380, m/z 647.0509  
L OS G12 P120811 220811-s1.05004.05004.3.dta

scan 5004; 2.0e+000

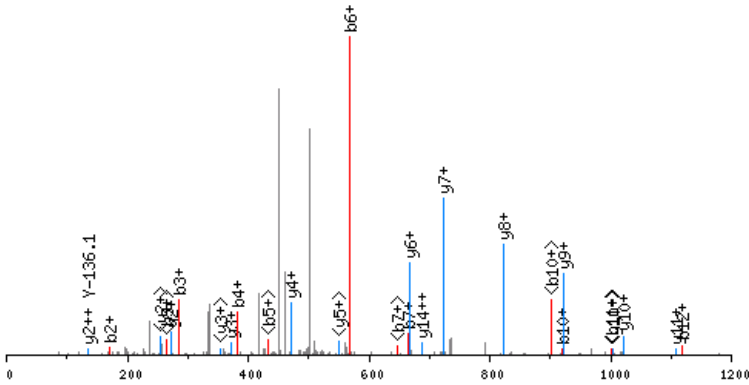

click image to zoom in; click top corners to zoom out [\[precursor±\]](#)

scan 5002; 647.1 m/z; 3.3e+000

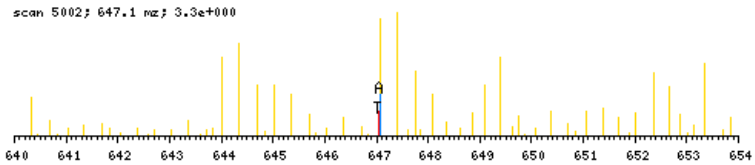

zoomed in precursor plot; T=theoretical m/z, A=acquired m/z

| b <sup>+</sup> | #  | AA | #  | y <sup>+</sup> | y <sup>2+</sup> |
|----------------|----|----|----|----------------|-----------------|
| 100.0762       | 1  | A  | 20 |                |                 |
| 171.1133       | 2  | A  | 19 | 1840.0696      | 920.5387        |
| 284.1974       | 3  | L  | 18 | 1769.0325      | 885.0202        |
| 381.2502       | 4  | P  | 17 | 1655.9485      | 828.4781        |
| 452.2873       | 5  | A  | 16 | 1558.8957      | 779.9518        |
| 567.3142       | 6  | D  | 15 | 1487.8586      | 744.4332        |
| 664.3670       | 7  | P  | 14 | 1372.8316      | 686.9197        |
| 761.4197       | 8  | P  | 13 | 1275.7789      | 638.3934        |
| 832.4569       | 9  | A  | 12 | 1178.7261      | 589.8670        |
| 919.4889       | 10 | S  | 11 | 1107.6890      | 554.3484        |
| 1018.5573      | 11 | V  | 10 | 1020.6570      | 510.8324        |
| 1117.6257      | 12 | V  | 9  | 921.5886       | 461.2982        |
| 1216.6941      | 13 | V  | 8  | 822.5201       | 411.7640        |
| 1273.7156      | 14 | G  | 7  | 723.4517       | 362.2298        |
| 1370.7684      | 15 | P  | 6  | 666.4303       | 333.7190        |
| 1469.8368      | 16 | V  | 5  | 569.3775       | 285.1927        |
| 1568.9052      | 17 | V  | 4  | 470.3091       | 235.6585        |
| 1667.9736      | 18 | V  | 3  | 371.2407       | 186.1243        |
| 1765.0264      | 19 | P  | 2  | 272.1723       | 136.5900        |
|                | 20 | R  | 1  | 175.1195       | 88.0637         |

N-term:+29.04

X-range:

0 - 0

MassTol: Y-zoom:

0. 1.

MassType:

☐AVG ☒MONO

Axis:

☒1 ☐2

Label:

☒I ☐M ☐-

Ions:

a ☐+ ☐2+ ☐3+

b ☒+ ☐2+ ☐3+

c ☐+ ☐2+ ☐3+

x ☐+ ☐2+ ☐3+

y ☒+ ☒2+ ☐3+

z ☐+ ☐2+ ☐3+

hide H<sub>2</sub>O/NH<sub>3</sub> ☐

zoom 112-122 ☐

GO

AANLFAQTYGLTGSQDR, MH+ 1840.9193, m/z 614.3113  
L OS G13 P120811 220811-s1.05883.05883.3.dta

scan 5883; 1.3e+000

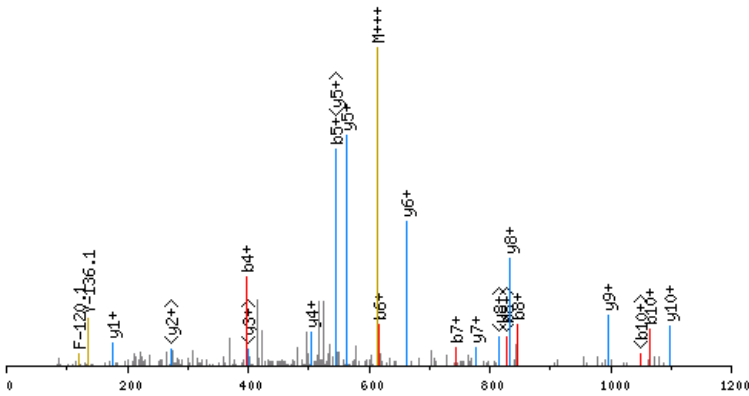

click image to zoom in; click top corners to zoom out

[precursor±]

scan 5879; 614.3 m/z; 3.8e+000

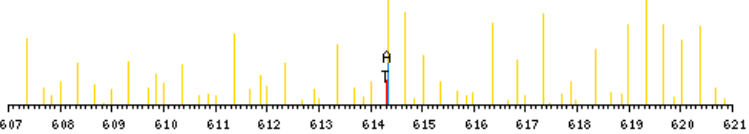

zoomed in precursor plot; T=theoretical m/z, A=acquired m/z

| b <sup>+</sup> | #  | AA | #  | y <sup>+</sup> | y <sup>2+</sup> |
|----------------|----|----|----|----------------|-----------------|
| 100.0762       | 1  | A  | 17 |                |                 |
| 171.1133       | 2  | A  | 16 | 1741.8509      | 871.4294        |
| 285.1563       | 3  | N  | 15 | 1670.8138      | 835.9108        |
| 398.2403       | 4  | L  | 14 | 1556.7709      | 778.8894        |
| 545.3087       | 5  | F  | 13 | 1443.6868      | 722.3473        |
| 616.3458       | 6  | A  | 12 | 1296.6184      | 648.8131        |
| 744.4044       | 7  | Q  | 11 | 1225.5813      | 613.2946        |
| 845.4521       | 8  | T  | 10 | 1097.5227      | 549.2653        |
| 1008.5154      | 9  | Y  | 9  | 996.4750       | 498.7414        |
| 1065.5369      | 10 | G  | 8  | 833.4117       | 417.2098        |
| 1178.6210      | 11 | L  | 7  | 776.3903       | 388.6990        |
| 1279.6686      | 12 | T  | 6  | 663.3062       | 332.1570        |
| 1336.6901      | 13 | G  | 5  | 562.2585       | 281.6332        |
| 1423.7221      | 14 | S  | 4  | 505.2370       | 253.1224        |
| 1551.7807      | 15 | Q  | 3  | 418.2050       | 209.6064        |
| 1666.8077      | 16 | D  | 2  | 290.1464       | 145.5771        |
|                | 17 | R  | 1  | 175.1195       | 88.0637         |

N-term:+29.04

X-range:

0 - 0

MassTol: Y-zoom:

0. 1.

MassType:

☐ AVG ☒ MONO

Axis:

☒ 1 ☐ 2

Label:

☒ I ☐ M ☐ -

Ions:

a ☐ + ☐ 2+ ☐ 3+

b ☒ + ☐ 2+ ☐ 3+

c ☐ + ☐ 2+ ☐ 3+

x ☐ + ☐ 2+ ☐ 3+

y ☒ + ☒ 2+ ☐ 3+

z ☐ + ☐ 2+ ☐ 3+

hide H<sub>2</sub>O/NH<sub>3</sub> ☐

zoom 112-122 ☐

GO

AANVPAGTEVVCAPPTAYIDFAR, MH+ 2418.2127, m/z 806.7424  
L OS G12 P120811 220811-s1.05221.05221.3.dta

scan 5221; 1.4e+000

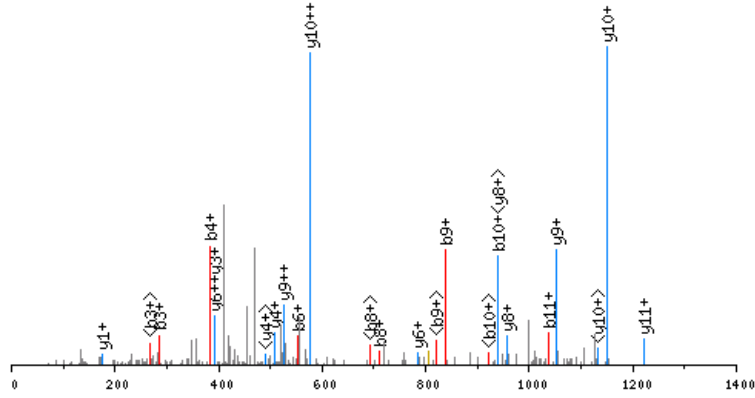

click image to zoom in; click top corners to zoom out [\[precursor±\]](#)

scan 5217; 806.7 m/z; 3.0e+000

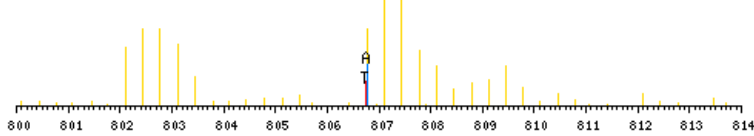

zoomed in precursor plot; T=theoretical m/z, A=acquired m/z

| b <sup>+</sup> | #  | AA | #  | y <sup>+</sup> | y <sup>2+</sup> |
|----------------|----|----|----|----------------|-----------------|
| 100.0762       | 1  | A  | 23 |                |                 |
| 171.1133       | 2  | A  | 22 | 2319.1443      | 1160.0761       |
| 285.1563       | 3  | N  | 21 | 2248.1072      | 1124.5575       |
| 384.2247       | 4  | V  | 20 | 2134.0643      | 1067.5360       |
| 481.2774       | 5  | P  | 19 | 2034.9958      | 1018.0018       |
| 552.3145       | 6  | A  | 18 | 1937.9431      | 969.4755        |
| 609.3360       | 7  | G  | 17 | 1866.9060      | 933.9569        |
| 710.3837       | 8  | T  | 16 | 1809.8845      | 905.4462        |
| 839.4263       | 9  | E  | 15 | 1708.8368      | 854.9223        |
| 938.4947       | 10 | V  | 14 | 1579.7942      | 790.4010        |
| 1037.5631      | 11 | V  | 13 | 1480.7258      | 740.8668        |
| 1197.5937      | 12 | C  | 12 | 1381.6574      | 691.3326        |
| 1268.6308      | 13 | A  | 11 | 1221.6268      | 611.3173        |
| 1365.6836      | 14 | P  | 10 | 1150.5897      | 575.7988        |
| 1462.7364      | 15 | P  | 9  | 1053.5369      | 527.2724        |
| 1563.7840      | 16 | T  | 8  | 956.4842       | 478.7460        |
| 1634.8211      | 17 | A  | 7  | 855.4365       | 428.2222        |
| 1797.8845      | 18 | Y  | 6  | 784.3994       | 392.7036        |
| 1910.9685      | 19 | I  | 5  | 621.3360       | 311.1719        |
| 2025.9955      | 20 | D  | 4  | 508.2520       | 254.6299        |
| 2173.0639      | 21 | F  | 3  | 393.2250       | 197.1164        |
| 2244.1010      | 22 | A  | 2  | 246.1566       | 123.5822        |
|                | 23 | R  | 1  | 175.1195       | 88.0637         |

N-term:+29.04 C(12):+160.03

N-term: +29.04

X-range:

0 - 0

MassTol: Y-zoom:

0. 1.

MassType:

☐ AVG ☒ MONO

Axis:

☒ 1 ☐ 2

Label:

☒ I ☐ M ☐ -

Ions:

a ☐ + ☐ 2+ ☐ 3+

b ☒ + ☐ 2+ ☐ 3+

c ☐ + ☐ 2+ ☐ 3+

x ☐ + ☐ 2+ ☐ 3+

y ☒ + ☒ 2+ ☐ 3+

z ☐ + ☐ 2+ ☐ 3+

hide H<sub>2</sub>O/NH<sub>3</sub> ☐

zoom 112-122 ☐

GO

AAPGDKNLLHYPDGR, MH+ 1805.0346, m/z 452.0141  
H OS G17 P120811 220811-s1.04340.04340.4.dta

scan 4340; 1.2e+001

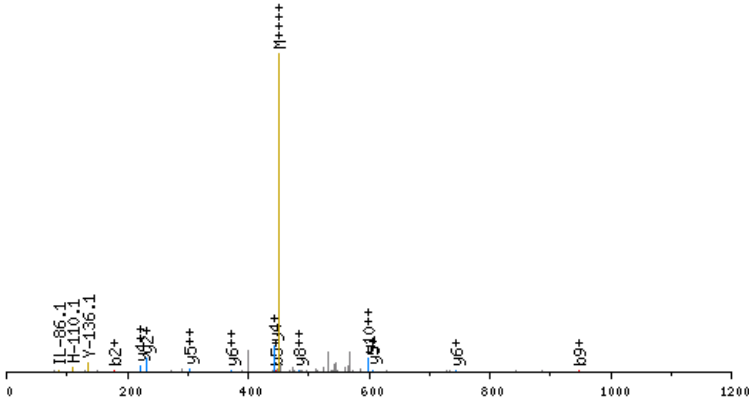

click image to zoom in; click top corners to zoom out

[precursor±]

scan 4338; 452.0 m/z; 9.9e+000

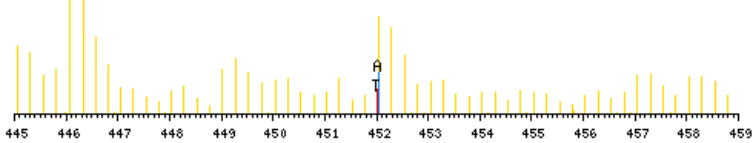

zoomed in precursor plot; T=theoretical m/z, A=acquired m/z

| b <sup>+</sup> | #  | AA | #  | y <sup>+</sup> | y <sup>2+</sup> |
|----------------|----|----|----|----------------|-----------------|
| 106.1080       | 1  | A  | 16 |                |                 |
| 177.1451       | 2  | A  | 15 | 1699.9344      | 850.4711        |
| 274.1979       | 3  | P  | 14 | 1628.8973      | 814.9526        |
| 331.2194       | 4  | G  | 13 | 1531.8445      | 766.4262        |
| 446.2463       | 5  | D  | 12 | 1474.8231      | 737.9154        |
| 608.4044       | 6  | K  | 11 | 1359.7961      | 680.4020        |
| 722.4473       | 7  | N  | 10 | 1197.6380      | 599.3229        |
| 835.5314       | 8  | L  | 9  | 1083.5951      | 542.3015        |
| 948.6155       | 9  | L  | 8  | 970.5110       | 485.7594        |
| 1061.6995      | 10 | L  | 7  | 857.4270       | 429.2174        |
| 1198.7584      | 11 | H  | 6  | 744.3429       | 372.6754        |
| 1361.8218      | 12 | Y  | 5  | 607.2840       | 304.1459        |
| 1458.8745      | 13 | P  | 4  | 444.2207       | 222.6142        |
| 1573.9015      | 14 | D  | 3  | 347.1679       | 174.0879        |
| 1630.9229      | 15 | G  | 2  | 232.1410       | 116.5744        |
|                | 16 | R  | 1  | 175.1195       | 88.0637         |

N-term:+35.07 K(6):+162.16

X-range:

0 - 0

MassTol: Y-zoom:

0. 1.

MassType:

☐ AVG ☒ MONO

Axis:

☒ 1 ☐ 2

Label:

☒ I ☐ M ☐ -

Ions:

a ☐ + ☐ 2+ ☐ 3+

b ☒ + ☐ 2+ ☐ 3+

c ☐ + ☐ 2+ ☐ 3+

x ☐ + ☐ 2+ ☐ 3+

y ☒ + ☒ 2+ ☐ 3+

z ☐ + ☐ 2+ ☐ 3+

hide H<sub>2</sub>O/NH<sub>3</sub> ☐

zoom 112-122 ☐

GO

AAPVPPAAAPLLDFSSDSVPPAPR, MH+ 2371.2661, m/z 593.5720  
L OS G12 P120811 220811-s1.05423.05423.4.dta

scan 5423; 1.2e+001

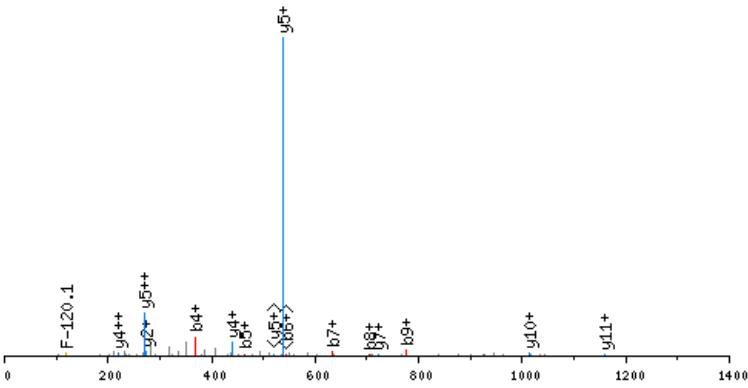

click image to zoom in; click top corners to zoom out [\[precursor±\]](#)

scan 5422; 593.6 m/z; 9.1e+000

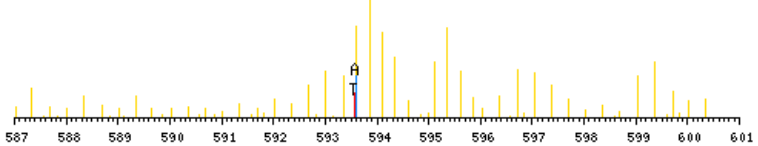

zoomed in precursor plot; T=theoretical m/z, A=acquired m/z

| b <sup>+</sup> | #  | AA | #  | y <sup>+</sup> | y <sup>2+</sup> |
|----------------|----|----|----|----------------|-----------------|
| 100.0762       | 1  | A  | 24 |                |                 |
| 171.1133       | 2  | A  | 23 | 2272.1978      | 1136.6028       |
| 268.1661       | 3  | P  | 22 | 2201.1606      | 1101.0842       |
| 367.2345       | 4  | V  | 21 | 2104.1079      | 1052.5579       |
| 464.2873       | 5  | P  | 20 | 2005.0395      | 1003.0236       |
| 561.3400       | 6  | P  | 19 | 1907.9867      | 954.4973        |
| 632.3771       | 7  | A  | 18 | 1810.9339      | 905.9709        |
| 703.4143       | 8  | A  | 17 | 1739.8968      | 870.4523        |
| 774.4514       | 9  | A  | 16 | 1668.8597      | 834.9338        |
| 871.5041       | 10 | P  | 15 | 1597.8226      | 799.4152        |
| 984.5882       | 11 | L  | 14 | 1500.7698      | 750.8888        |
| 1097.6723      | 12 | L  | 13 | 1387.6858      | 694.3468        |
| 1212.6992      | 13 | D  | 12 | 1274.6017      | 637.8048        |
| 1359.7676      | 14 | F  | 11 | 1159.5748      | 580.2913        |
| 1446.7997      | 15 | S  | 10 | 1012.5063      | 506.7571        |
| 1533.8317      | 16 | S  | 9  | 925.4743       | 463.2411        |
| 1648.8586      | 17 | D  | 8  | 838.4423       | 419.7251        |
| 1735.8907      | 18 | S  | 7  | 723.4153       | 362.2116        |
| 1834.9591      | 19 | V  | 6  | 636.3833       | 318.6956        |
| 1932.0118      | 20 | P  | 5  | 537.3149       | 269.1614        |
| 2029.0646      | 21 | P  | 4  | 440.2621       | 220.6350        |
| 2100.1017      | 22 | A  | 3  | 343.2094       | 172.1086        |
| 2197.1545      | 23 | P  | 2  | 272.1723       | 136.5900        |
|                | 24 | R  | 1  | 175.1195       | 88.0637         |

N-term:+29.04

X-range:

0 - 0

MassTol: Y-zoom:

0. 1.

MassType:

☐AVG ☒MONO

Axis:

☒1 ☐2

Label:

☒I ☐M ☐-

Ions:

a ☐+ ☐2+ ☐3+

b ☒+ ☐2+ ☐3+

c ☐+ ☐2+ ☐3+

x ☐+ ☐2+ ☐3+

y ☒+ ☒2+ ☐3+

z ☐+ ☐2+ ☐3+

hide H<sub>2</sub>O/NH<sub>3</sub> ☐

zoom 112-122 ☐

GO

AAQASSSTPVVITR, MH+ 1415.7858, m/z 472.6001  
L OS G13 P120811 220811-s1.02886.02886.3.dta

scan 2886; 2.6e+000

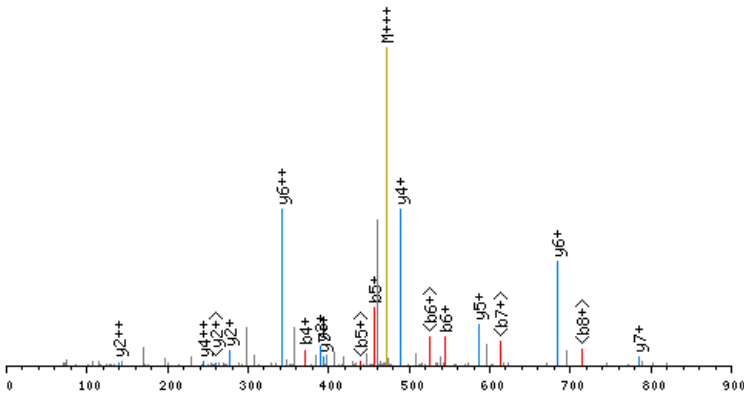

click image to zoom in; click top corners to zoom out [precursor±]

scan 2884; 472.6 m/z; 7.1e+000

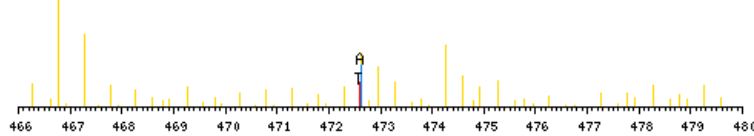

zoomed in precursor plot; T=theoretical m/z, A=acquired m/z

| b <sup>+</sup> | #  | AA | #  | y <sup>+</sup> | y <sup>2+</sup> |
|----------------|----|----|----|----------------|-----------------|
| 100.0762       | 1  | A  | 14 |                |                 |
| 171.1133       | 2  | A  | 13 | 1316.7174      | 658.8626        |
| 299.1719       | 3  | Q  | 12 | 1245.6803      | 623.3441        |
| 370.2090       | 4  | A  | 11 | 1117.6217      | 559.3148        |
| 457.2410       | 5  | S  | 10 | 1046.5846      | 523.7962        |
| 544.2731       | 6  | S  | 9  | 959.5526       | 480.2802        |
| 631.3051       | 7  | S  | 8  | 872.5205       | 436.7642        |
| 732.3528       | 8  | T  | 7  | 785.4885       | 393.2482        |
| 829.4055       | 9  | P  | 6  | 684.4408       | 342.7243        |
| 928.4740       | 10 | V  | 5  | 587.3881       | 294.1979        |
| 1027.5424      | 11 | V  | 4  | 488.3197       | 244.6637        |
| 1140.6264      | 12 | I  | 3  | 389.2512       | 195.1295        |
| 1241.6741      | 13 | T  | 2  | 276.1672       | 138.5875        |
|                | 14 | R  | 1  | 175.1195       | 88.0637         |

N-term:+29.04

X-range:

0 - 0

MassTol: Y-zoom:

0. 1.

MassType:

☐AVG ☒MONO

Axis:

☒1 ☐2

Label:

☒I ☐M ☐-

Ions:

a ☐+ ☐2+ ☐3+

b ☒+ ☐2+ ☐3+

c ☐+ ☐2+ ☐3+

x ☐+ ☐2+ ☐3+

y ☒+ ☒2+ ☐3+

z ☐+ ☐2+ ☐3+

hide H<sub>2</sub>O/NH<sub>3</sub> ☐

zoom 112-122 ☐

GO

AASAAAVDAGMAMAGQSPVLR, MH+ 1972.9948, m/z 658.3365  
L OS G12 P120811 220811-s1.04668.04668.3.dta

scan 4668; 1.8e+000

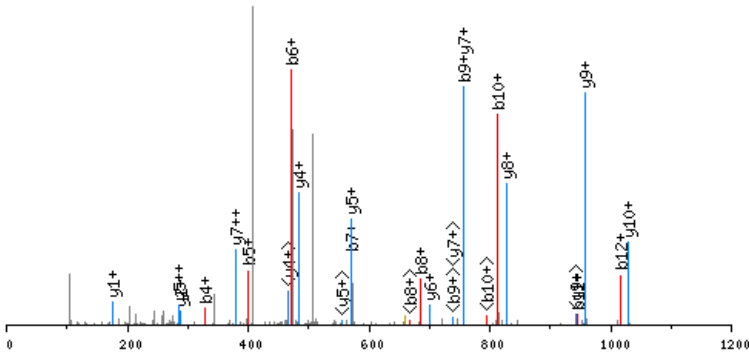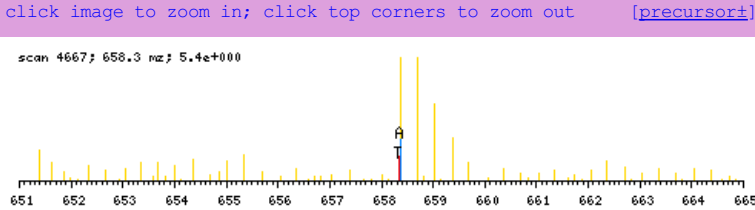

zoomed in precursor plot; T=theoretical m/z, A=acquired m/z

| b <sup>+</sup> | #  | AA | #  | y <sup>+</sup> | y <sup>2+</sup> |
|----------------|----|----|----|----------------|-----------------|
| 100.0762       | 1  | A  | 21 |                |                 |
| 171.1133       | 2  | A  | 20 | 1873.9264      | 937.4671        |
| 258.1454       | 3  | S  | 19 | 1802.8893      | 901.9486        |
| 329.1825       | 4  | A  | 18 | 1715.8573      | 858.4326        |
| 400.2196       | 5  | A  | 17 | 1644.8202      | 822.9140        |
| 471.2567       | 6  | A  | 16 | 1573.7831      | 787.3954        |
| 570.3251       | 7  | V  | 15 | 1502.7459      | 751.8769        |
| 685.3521       | 8  | D  | 14 | 1403.6775      | 702.3427        |
| 756.3892       | 9  | A  | 13 | 1288.6506      | 644.8292        |
| 813.4106       | 10 | G  | 12 | 1217.6135      | 609.3106        |
| 944.4511       | 11 | M  | 11 | 1160.5920      | 580.7999        |
| 1015.4882      | 12 | A  | 10 | 1029.5515      | 515.2797        |
| 1146.5287      | 13 | M  | 9  | 958.5144       | 479.7611        |
| 1217.5658      | 14 | A  | 8  | 827.4739       | 414.2409        |
| 1274.5873      | 15 | G  | 7  | 756.4368       | 378.7223        |
| 1402.6459      | 16 | Q  | 6  | 699.4153       | 350.2116        |
| 1489.6779      | 17 | S  | 5  | 571.3568       | 286.1823        |
| 1586.7307      | 18 | P  | 4  | 484.3247       | 242.6663        |
| 1685.7991      | 19 | V  | 3  | 387.2720       | 194.1399        |
| 1798.8831      | 20 | L  | 2  | 288.2036       | 144.6057        |
|                | 21 | R  | 1  | 175.1195       | 88.0637         |

N-term:+29.04

X-range:

0 - 0

MassTol: Y-zoom:

0. 1.

MassType:

☐ AVG ☒ MONO

Axis:

☒ 1 ☐ 2

Label:

☒ I ☐ M ☐ -

Ions:

a ☐ + ☐ 2+ ☐ 3+

b ☒ + ☐ 2+ ☐ 3+

c ☐ + ☐ 2+ ☐ 3+

x ☐ + ☐ 2+ ☐ 3+

y ☒ + ☒ 2+ ☐ 3+

z ☐ + ☐ 2+ ☐ 3+

hide H<sub>2</sub>O/NH<sub>3</sub> ☐

zoom 112-122 ☐

GO

AASIFGGAKPVDTAAR, MH+ 1599.9495, m/z 533.9880  
H OS G15 P120811 220811-s1.03382.03382.3.dta

scan 3382; 4.6e+001

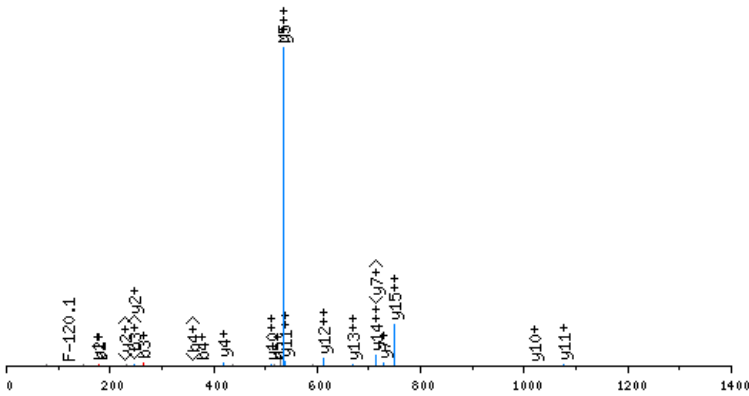

click image to zoom in; click top corners to zoom out

[precursor±]

scan 3381; 534.0 m/z; 5.8e+001

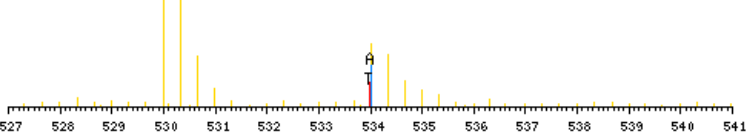

zoomed in precursor plot; T=theoretical m/z, A=acquired m/z

| b <sup>+</sup> | #  | AA | #  | y <sup>+</sup> | y <sup>2+</sup> |
|----------------|----|----|----|----------------|-----------------|
| 106.1080       | 1  | A  | 16 |                |                 |
| 177.1451       | 2  | A  | 15 | 1494.8493      | 747.9286        |
| 264.1772       | 3  | S  | 14 | 1423.8122      | 712.4100        |
| 377.2612       | 4  | I  | 13 | 1336.7801      | 668.8940        |
| 524.3296       | 5  | F  | 12 | 1223.6961      | 612.3520        |
| 581.3511       | 6  | G  | 11 | 1076.6277      | 538.8177        |
| 638.3726       | 7  | G  | 10 | 1019.6062      | 510.3070        |
| 709.4097       | 8  | A  | 9  | 962.5847       | 481.7963        |
| 871.5678       | 9  | K  | 8  | 891.5476       | 446.2777        |
| 968.6205       | 10 | P  | 7  | 729.3895       | 365.1987        |
| 1067.6890      | 11 | V  | 6  | 632.3368       | 316.6723        |
| 1182.7159      | 12 | D  | 5  | 533.2683       | 267.1381        |
| 1283.7636      | 13 | T  | 4  | 418.2414       | 209.6246        |
| 1354.8007      | 14 | A  | 3  | 317.1937       | 159.1008        |
| 1425.8378      | 15 | A  | 2  | 246.1566       | 123.5822        |
|                | 16 | R  | 1  | 175.1195       | 88.0637         |

N-term:+35.07 K(9):+162.16

X-range:

0 - 0

MassTol: Y-zoom:

0. 1.

MassType:

☐AVG ☒MONO

Axis:

☒1 ☐2

Label:

☒I ☐M ☐-

Ions:

a ☐+ ☐2+ ☐3+

b ☒+ ☐2+ ☐3+

c ☐+ ☐2+ ☐3+

x ☐+ ☐2+ ☐3+

y ☒+ ☒2+ ☐3+

z ☐+ ☐2+ ☐3+

hide H<sub>2</sub>O/NH<sub>3</sub> ☐

zoom 112-122 ☐

GO

AATGSVFDISNLR, MH+ 1493.7600, m/z 498.5915  
L OS G13 P120811 220811-s1.06052.06052.3.dta

scan 6052; 1.8e+000

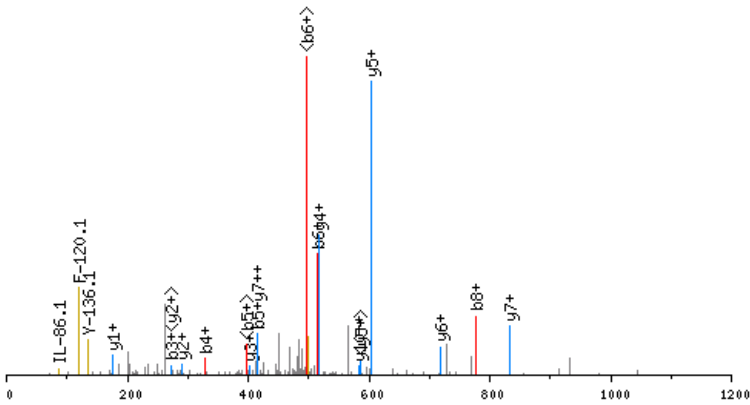

click image to zoom in; click top corners to zoom out

[precursor±]

scan 6049; 498.6 m/z; 6.2e+000

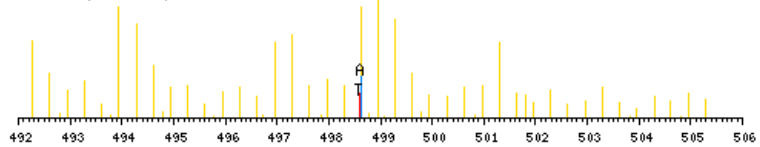

zoomed in precursor plot; T=theoretical m/z, A=acquired m/z

| b <sup>+</sup> | #  | AA | #  | y <sup>+</sup> | y <sup>2+</sup> |
|----------------|----|----|----|----------------|-----------------|
| 100.0762       | 1  | A  | 14 |                |                 |
| 171.1133       | 2  | A  | 13 | 1394.6916      | 697.8497        |
| 272.1610       | 3  | T  | 12 | 1323.6545      | 662.3311        |
| 329.1825       | 4  | G  | 11 | 1222.6068      | 611.8073        |
| 416.2145       | 5  | S  | 10 | 1165.5853      | 583.2966        |
| 515.2829       | 6  | V  | 9  | 1078.5533      | 539.7806        |
| 662.3513       | 7  | F  | 8  | 979.4849       | 490.2464        |
| 777.3783       | 8  | D  | 7  | 832.4165       | 416.7121        |
| 890.4623       | 9  | I  | 6  | 717.3895       | 359.1987        |
| 977.4944       | 10 | S  | 5  | 604.3055       | 302.6566        |
| 1091.5373      | 11 | N  | 4  | 517.2734       | 259.1406        |
| 1204.6214      | 12 | L  | 3  | 403.2305       | 202.1192        |
| 1319.6483      | 13 | D  | 2  | 290.1464       | 145.5771        |
|                | 14 | R  | 1  | 175.1195       | 88.0637         |

N-term:+29.04

X-range:

0 - 0

MassTol: Y-zoom:

0. 1.

MassType:

☐AVG ☒MONO

Axis:

☒1 ☐2

Label:

☒I ☐M ☐-

Ions:

a ☐+ ☐2+ ☐3+

b ☒+ ☐2+ ☐3+

c ☐+ ☐2+ ☐3+

x ☐+ ☐2+ ☐3+

y ☒+ ☒2+ ☐3+

z ☐+ ☐2+ ☐3+

hide H<sub>2</sub>O/NH<sub>3</sub> ☐

zoom 112-122 ☐

GO

AAVPSGASTGIYEALRL, MH+ 1839.0076, m/z 613.6740  
H OS G12 P120811 220811-s1.05148.05148.3.dta

scan 5148; 2.2e+000

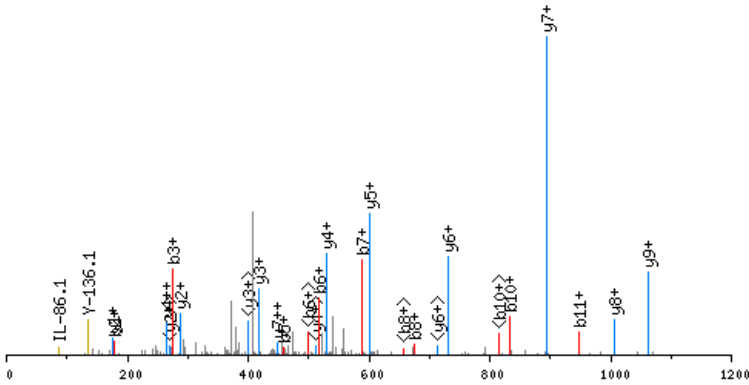

click image to zoom in; click top corners to zoom out [precursor±]

scan 5147; 613.7 m/z; 5.4e+000

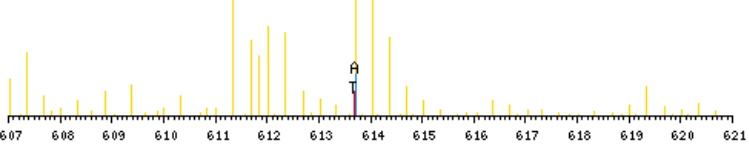

zoomed in precursor plot; T=theoretical m/z, A=acquired m/z

| b <sup>+</sup> | #  | AA | #  | y <sup>+</sup> | y <sup>2+</sup> |
|----------------|----|----|----|----------------|-----------------|
| 106.1080       | 1  | A  | 18 |                |                 |
| 177.1451       | 2  | A  | 17 | 1733.9074      | 867.4576        |
| 276.2135       | 3  | V  | 16 | 1662.8703      | 831.9391        |
| 373.2663       | 4  | P  | 15 | 1563.8019      | 782.4048        |
| 460.2983       | 5  | S  | 14 | 1466.7491      | 733.8785        |
| 517.3198       | 6  | G  | 13 | 1379.7171      | 690.3624        |
| 588.3569       | 7  | A  | 12 | 1322.6956      | 661.8517        |
| 675.3889       | 8  | S  | 11 | 1251.6585      | 626.3332        |
| 776.4366       | 9  | T  | 10 | 1164.6265      | 582.8171        |
| 833.4581       | 10 | G  | 9  | 1063.5788      | 532.2933        |
| 946.5421       | 11 | I  | 8  | 1006.5573      | 503.7826        |
| 1109.6055      | 12 | Y  | 7  | 893.4733       | 447.2405        |
| 1238.6481      | 13 | E  | 6  | 730.4099       | 365.7089        |
| 1309.6852      | 14 | A  | 5  | 601.3673       | 301.1876        |
| 1422.7692      | 15 | L  | 4  | 530.3302       | 265.6690        |
| 1551.8118      | 16 | E  | 3  | 417.2462       | 209.1270        |
| 1664.8959      | 17 | L  | 2  | 288.2036       | 144.6057        |
|                | 18 | R  | 1  | 175.1195       | 88.0637         |

N-term:+35.07

X-range:

0 - 0

MassTol: Y-zoom:

0. 1.

MassType:

☐AVG ☒MONO

Axis:

☒1 ☐2

Label:

☒I ☐M ☐-

Ions:

a ☐+ ☐2+ ☐3+

b ☒+ ☐2+ ☐3+

c ☐+ ☐2+ ☐3+

x ☐+ ☐2+ ☐3+

y ☒+ ☒2+ ☐3+

z ☐+ ☐2+ ☐3+

hide H<sub>2</sub>O/NH<sub>3</sub> ☐

zoom 112-122 ☐

GO

AAVQQLQAEGLSPR, MH+ 1495.8232, m/z 499.2793  
L OS G13 P120811 220811-s1.03968.03968.3.dta

scan 3968; 3.2e+000

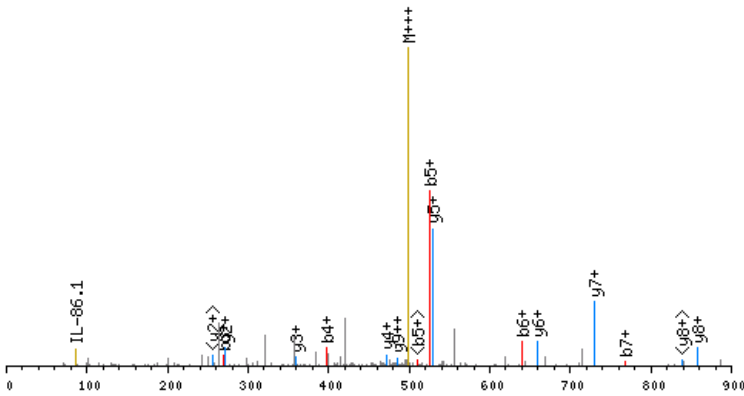

click image to zoom in; click top corners to zoom out

[precursor±]

scan 3964; 499.3 m/z; 2.1e+001

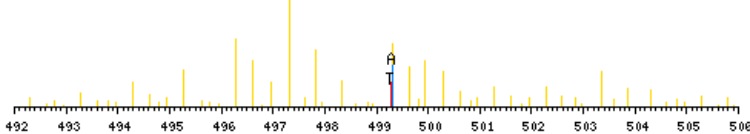

zoomed in precursor plot; T=theoretical m/z, A=acquired m/z

| b <sup>+</sup> | #  | AA | #  | y <sup>+</sup> | y <sup>2+</sup> |
|----------------|----|----|----|----------------|-----------------|
| 100.0762       | 1  | A  | 14 |                |                 |
| 171.1133       | 2  | A  | 13 | 1396.7549      | 698.8813        |
| 270.1817       | 3  | V  | 12 | 1325.7177      | 663.3628        |
| 398.2403       | 4  | Q  | 11 | 1226.6493      | 613.8286        |
| 526.2989       | 5  | Q  | 10 | 1098.5907      | 549.7993        |
| 639.3830       | 6  | L  | 9  | 970.5322       | 485.7700        |
| 767.4415       | 7  | Q  | 8  | 857.4481       | 429.2280        |
| 838.4787       | 8  | A  | 7  | 729.3895       | 365.1987        |
| 967.5212       | 9  | E  | 6  | 658.3524       | 329.6801        |
| 1024.5427      | 10 | G  | 5  | 529.3098       | 265.1588        |
| 1137.6268      | 11 | L  | 4  | 472.2884       | 236.6481        |
| 1224.6588      | 12 | S  | 3  | 359.2043       | 180.1061        |
| 1321.7116      | 13 | P  | 2  | 272.1723       | 136.5900        |
|                | 14 | R  | 1  | 175.1195       | 88.0637         |

N-term:+29.04

N-term: +29.04

X-range:

0 - 0

MassTol: Y-zoom:

0. 1.

MassType:

☐ AVG ☒ MONO

Axis:

☒ 1 ☐ 2

Label:

☒ I ☐ M ☐ -

Ions:

a ☐ + ☐ 2+ ☐ 3+

b ☒ + ☐ 2+ ☐ 3+

c ☐ + ☐ 2+ ☐ 3+

x ☐ + ☐ 2+ ☐ 3+

y ☒ + ☒ 2+ ☐ 3+

z ☐ + ☐ 2+ ☐ 3+

hide H<sub>2</sub>O/NH<sub>3</sub> ☐

zoom 112-122 ☐

GO

AAWGKIGGHGAEYGAEALER, MH+ 2111.1310, m/z 528.5382  
H OS G17 P120811 220811-s1.04579.04579.4.dta

scan 4579; 1.3e+000

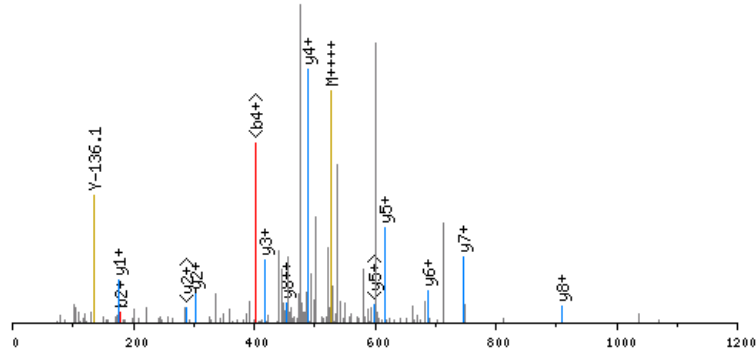

click image to zoom in; click top corners to zoom out [\[precursor±\]](#)

scan 4578; 528.5 m/z; 2.8e+001

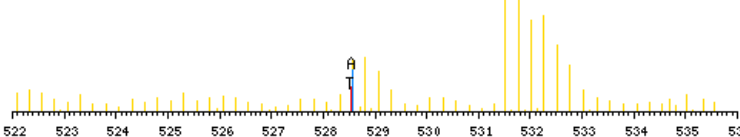

zoomed in precursor plot; T=theoretical m/z, A=acquired m/z

| b <sup>+</sup> | #  | AA | #  | y <sup>+</sup> | y <sup>2+</sup> |
|----------------|----|----|----|----------------|-----------------|
| 106.1080       | 1  | A  | 20 |                |                 |
| 177.1451       | 2  | A  | 19 | 2006.0308      | 1003.5193       |
| 363.2244       | 3  | W  | 18 | 1934.9937      | 968.0008        |
| 420.2459       | 4  | G  | 17 | 1748.9144      | 874.9611        |
| 582.4040       | 5  | K  | 16 | 1691.8929      | 846.4504        |
| 695.4881       | 6  | I  | 15 | 1529.7348      | 765.3713        |
| 752.5095       | 7  | G  | 14 | 1416.6508      | 708.8293        |
| 809.5310       | 8  | G  | 13 | 1359.6293      | 680.3186        |
| 946.5899       | 9  | H  | 12 | 1302.6079      | 651.8078        |
| 1003.6114      | 10 | G  | 11 | 1165.5489      | 583.2784        |
| 1074.6485      | 11 | A  | 10 | 1108.5275      | 554.7677        |
| 1203.6911      | 12 | E  | 9  | 1037.4904      | 519.2491        |
| 1366.7544      | 13 | Y  | 8  | 908.4478       | 454.7278        |
| 1423.7759      | 14 | G  | 7  | 745.3844       | 373.1961        |
| 1494.8130      | 15 | A  | 6  | 688.3630       | 344.6854        |
| 1623.8556      | 16 | E  | 5  | 617.3259       | 309.1668        |
| 1694.8927      | 17 | A  | 4  | 488.2833       | 244.6455        |
| 1807.9768      | 18 | L  | 3  | 417.2462       | 209.1270        |
| 1937.0193      | 19 | E  | 2  | 304.1621       | 152.5850        |
|                | 20 | R  | 1  | 175.1195       | 88.0637         |

N-term:+35.07 K(5):+162.16

X-range:

0 - 0

MassTol: Y-zoom:

0. 1.

MassType:

☐AVG ☒MONO

Axis:

☒1 ☐2

Label:

☒I ☐M ☐-

Ions:

a ☐+ ☐2+ ☐3+

b ☒+ ☐2+ ☐3+

c ☐+ ☐2+ ☐3+

x ☐+ ☐2+ ☐3+

y ☒+ ☒2+ ☐3+

z ☐+ ☐2+ ☐3+

hide H<sub>2</sub>O/NH<sub>3</sub> ☐

zoom 112-122 ☐

GO

AAYISNAVGAAYSSAR, MH+ 1605.8449, m/z 535.9531  
H OS G15 P120811 220811-s1.06082.06082.3.dta

scan 6082; 2.9e+000

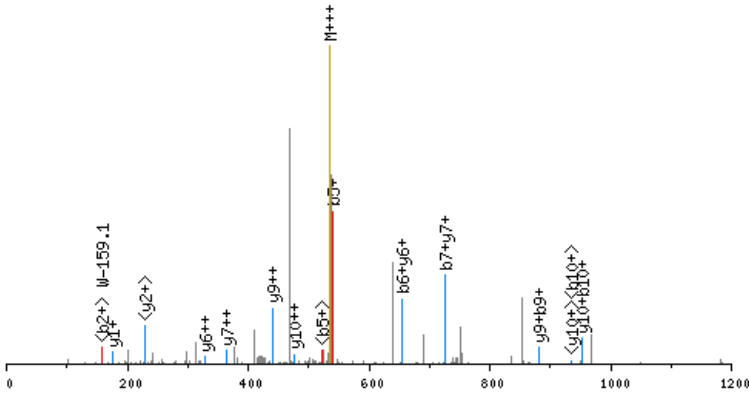

click image to zoom in; click top corners to zoom out [\[precursor±\]](#)

scan 6081; 536.0 m/z; 6.2e+000

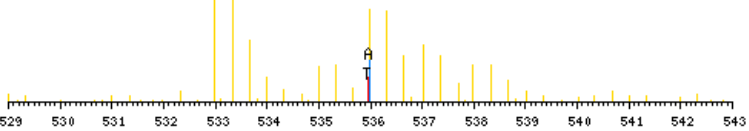

zoomed in precursor plot; T=theoretical m/z, A=acquired m/z

| b <sup>+</sup> | #  | AA | #  | y <sup>+</sup> | y <sup>2+</sup> |
|----------------|----|----|----|----------------|-----------------|
| 106.1080       | 1  | A  | 16 |                |                 |
| 177.1451       | 2  | A  | 15 | 1500.7447      | 750.8763        |
| 340.2085       | 3  | Y  | 14 | 1429.7076      | 715.3577        |
| 453.2925       | 4  | I  | 13 | 1266.6442      | 633.8260        |
| 540.3245       | 5  | S  | 12 | 1153.5602      | 577.2840        |
| 654.3675       | 6  | N  | 11 | 1066.5281      | 533.7680        |
| 725.4046       | 7  | A  | 10 | 952.4852       | 476.7465        |
| 824.4730       | 8  | V  | 9  | 881.4481       | 441.2280        |
| 881.4945       | 9  | G  | 8  | 782.3797       | 391.6938        |
| 952.5316       | 10 | A  | 7  | 725.3582       | 363.1830        |
| 1023.5687      | 11 | A  | 6  | 654.3211       | 327.6645        |
| 1186.6320      | 12 | Y  | 5  | 583.2840       | 292.1459        |
| 1273.6641      | 13 | S  | 4  | 420.2207       | 210.6142        |
| 1360.6961      | 14 | S  | 3  | 333.1886       | 167.0982        |
| 1431.7332      | 15 | A  | 2  | 246.1566       | 123.5822        |
|                | 16 | R  | 1  | 175.1195       | 88.0637         |

N-term:+35.07

X-range:

0 - 0

MassTol: Y-zoom:

0. 1.

MassType:

☐ AVG ☒ MONO

Axis:

☒ 1 ☐ 2

Label:

☒ I ☐ M ☐ -

Ions:

a ☐ + ☐ 2+ ☐ 3+

b ☒ + ☐ 2+ ☐ 3+

c ☐ + ☐ 2+ ☐ 3+

x ☐ + ☐ 2+ ☐ 3+

y ☒ + ☒ 2+ ☐ 3+

z ☐ + ☐ 2+ ☐ 3+

hide H<sub>2</sub>O/NH<sub>3</sub> ☐

zoom 112-122 ☐

GO

ACGLNFADLMGR, MH+ 1352.6454, m/z 676.8264  
L OS G13 P120811 220811-s1.06552.06552.2.dta

scan 6552; 4.7e+000

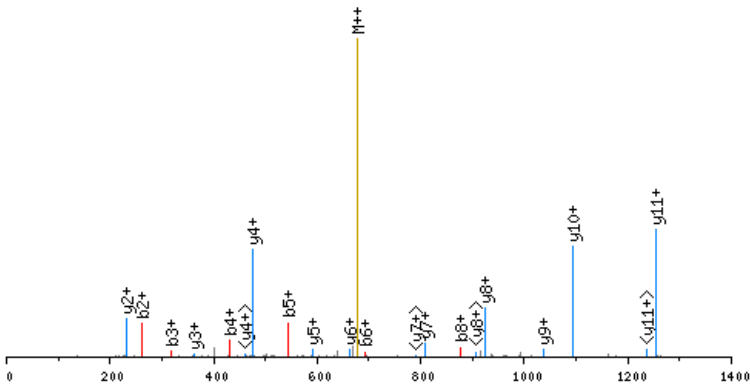

click image to zoom in; click top corners to zoom out

[precursor±]

scan 6549; 676.8 m/z; 5.1e+000

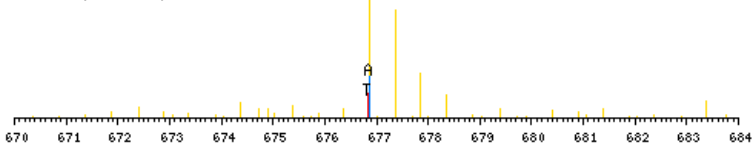

zoomed in precursor plot; T=theoretical m/z, A=acquired m/z

| b <sup>+</sup> | #  | AA | #  | y <sup>+</sup> | y <sup>2+</sup> |
|----------------|----|----|----|----------------|-----------------|
| 100.0762       | 1  | A  | 12 |                |                 |
| 260.1068       | 2  | C  | 11 | 1253.5770      | 627.2924        |
| 317.1283       | 3  | G  | 10 | 1093.5464      | 547.2771        |
| 430.2123       | 4  | L  | 9  | 1036.5250      | 518.7664        |
| 544.2553       | 5  | N  | 8  | 923.4409       | 462.2244        |
| 691.3237       | 6  | F  | 7  | 809.3980       | 405.2029        |
| 762.3608       | 7  | A  | 6  | 662.3296       | 331.6687        |
| 877.3877       | 8  | D  | 5  | 591.2925       | 296.1501        |
| 990.4718       | 9  | L  | 4  | 476.2655       | 238.6367        |
| 1121.5123      | 10 | M  | 3  | 363.1814       | 182.0946        |
| 1178.5338      | 11 | G  | 2  | 232.1410       | 116.5744        |
|                | 12 | R  | 1  | 175.1195       | 88.0637         |

N-term:+29.04 C(2):+160.03

X-range:

0 - 0

MassTol: Y-zoom:

0. 1.

MassType:

☐ AVG ☒ MONO

Axis:

☒ 1 ☐ 2

Label:

☒ I ☐ M ☐ -

Ions:

a ☐ + ☐ 2+ ☐ 3+

b ☒ + ☐ 2+ ☐ 3+

c ☐ + ☐ 2+ ☐ 3+

x ☐ + ☐ 2+ ☐ 3+

y ☒ + ☒ 2+ ☐ 3+

z ☐ + ☐ 2+ ☐ 3+

hide H<sub>2</sub>O/NH<sub>3</sub> ☐

zoom 112-122 ☐

GO

ADASKGDDLPLAGTEDYIHIR, MH+ 2313.1727, m/z 579.0486  
L OS G16 P120811 220811-s1.05606.05606.4.dta

scan 5606; 1.8e+000

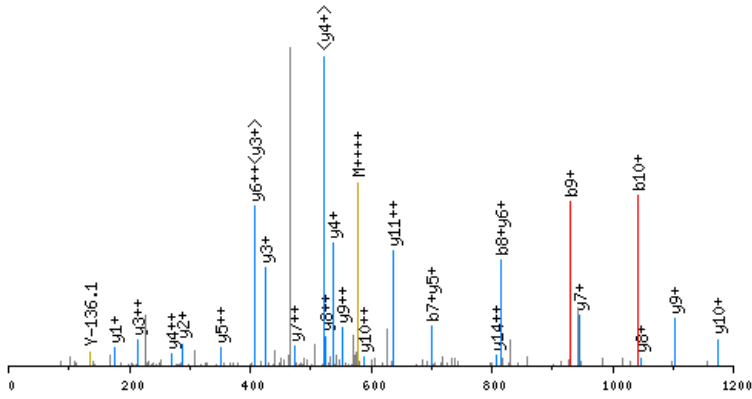

click image to zoom in; click top corners to zoom out [\[precursor±\]](#)

scan 5603; 579.0 m/z; 6.3e+000

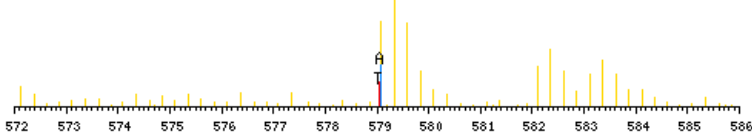

zoomed in precursor plot; T=theoretical m/z, A=acquired m/z

| b <sup>+</sup> | #  | AA | #  | y <sup>+</sup> | y <sup>2+</sup> |
|----------------|----|----|----|----------------|-----------------|
| 100.0762       | 1  | A  | 21 |                |                 |
| 215.1032       | 2  | D  | 20 | 2214.1043      | 1107.5561       |
| 286.1403       | 3  | A  | 19 | 2099.0773      | 1050.0426       |
| 373.1723       | 4  | S  | 18 | 2028.0402      | 1014.5240       |
| 529.2986       | 5  | K  | 17 | 1941.0082      | 971.0080        |
| 586.3201       | 6  | G  | 16 | 1784.8819      | 892.9449        |
| 701.3470       | 7  | D  | 15 | 1727.8604      | 864.4341        |
| 816.3739       | 8  | D  | 14 | 1612.8335      | 806.9207        |
| 929.4580       | 9  | L  | 13 | 1497.8066      | 749.4072        |
| 1042.5421      | 10 | L  | 12 | 1384.7225      | 692.8652        |
| 1139.5948      | 11 | P  | 11 | 1271.6384      | 636.3231        |
| 1210.6320      | 12 | A  | 10 | 1174.5857      | 587.7967        |
| 1267.6534      | 13 | G  | 9  | 1103.5485      | 552.2782        |
| 1368.7011      | 14 | T  | 8  | 1046.5271      | 523.7675        |
| 1497.7437      | 15 | E  | 7  | 945.4794       | 473.2436        |
| 1612.7706      | 16 | D  | 6  | 816.4368       | 408.7223        |
| 1775.8340      | 17 | Y  | 5  | 701.4099       | 351.2088        |
| 1888.9180      | 18 | I  | 4  | 538.3465       | 269.6772        |
| 2025.9769      | 19 | H  | 3  | 425.2625       | 213.1352        |
| 2139.0610      | 20 | I  | 2  | 288.2036       | 144.6057        |
|                | 21 | R  | 1  | 175.1195       | 88.0637         |

N-term:+29.04 K(5):+156.13

N-term: +35.07 K(4): +162.16

X-range:

0 - 0

MassTol: Y-zoom:

0. 1.

MassType:

☐AVG ☒MONO

Axis:

☒1 ☐2

Label:

☒I ☐M ☐-

Ions:

a ☐+ ☐2+ ☐3+

b ☒+ ☐2+ ☐3+

c ☐+ ☐2+ ☐3+

x ☐+ ☐2+ ☐3+

y ☒+ ☒2+ ☐3+

z ☐+ ☐2+ ☐3+

hide H<sub>2</sub>O/NH<sub>3</sub> ☐

zoom 112-122 ☐

GO

ADIALAPMEAAKVR, MH+ 1511.8620, m/z 504.6255  
L OS G15 P120811 220811-s1.04459.04459.3.dta

scan 4459; 9.5e+000

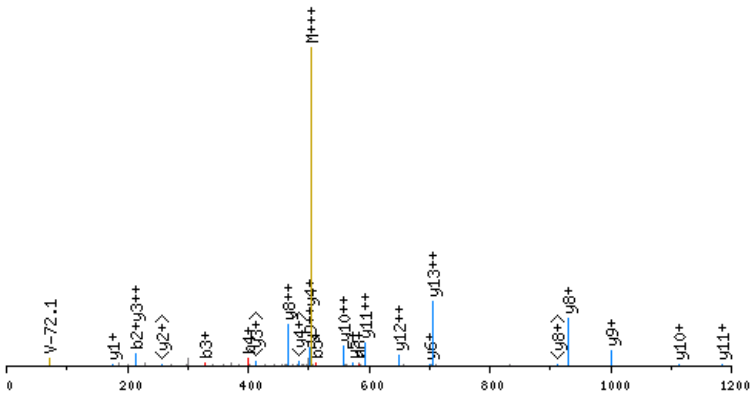

click image to zoom in; click top corners to zoom out [precursor±]

scan 4456; 504.6 m/z; 4.9e+000

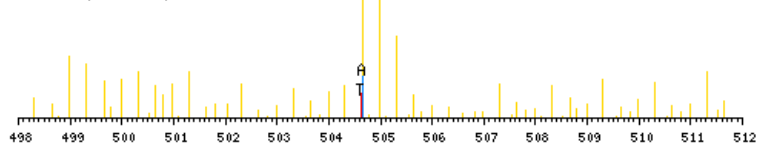

zoomed in precursor plot; T=theoretical m/z, A=acquired m/z

| b <sup>+</sup> | #  | AA | #  | y <sup>+</sup> | y <sup>2+</sup> |
|----------------|----|----|----|----------------|-----------------|
| 100.0762       | 1  | A  | 14 |                |                 |
| 215.1032       | 2  | D  | 13 | 1412.7936      | 706.9007        |
| 328.1872       | 3  | I  | 12 | 1297.7666      | 649.3872        |
| 399.2243       | 4  | A  | 11 | 1184.6826      | 592.8452        |
| 512.3084       | 5  | L  | 10 | 1113.6455      | 557.3266        |
| 583.3455       | 6  | A  | 9  | 1000.5614      | 500.7846        |
| 680.3983       | 7  | P  | 8  | 929.5243       | 465.2661        |
| 811.4388       | 8  | M  | 7  | 832.4715       | 416.7397        |
| 940.4814       | 9  | E  | 6  | 701.4310       | 351.2194        |
| 1011.5185      | 10 | A  | 5  | 572.3884       | 286.6981        |
| 1082.5556      | 11 | A  | 4  | 501.3513       | 251.1796        |
| 1238.6819      | 12 | K  | 3  | 430.3142       | 215.6610        |
| 1337.7503      | 13 | V  | 2  | 274.1879       | 137.5979        |
|                | 14 | R  | 1  | 175.1195       | 88.0637         |

N-term:+29.04 K(12):+156.13

X-range:

0 - 0

MassTol: Y-zoom:

0. 1.

MassType:

☐AVG ☒MONO

Axis:

☒1 ☐2

Label:

☒I ☐M ☐-

Ions:

a ☐+ ☐2+ ☐3+

b ☒+ ☐2+ ☐3+

c ☐+ ☐2+ ☐3+

x ☐+ ☐2+ ☐3+

y ☒+ ☒2+ ☐3+

z ☐+ ☐2+ ☐3+

hide H<sub>2</sub>O/NH<sub>3</sub> ☐

zoom 112-122 ☐

GO

ADIVENQVMDTR, MH+ 1418.6949, m/z 473.5698  
L OS G13 P120811 220811-s1.03907.03907.3.dta

scan 3907; 2.2e+000

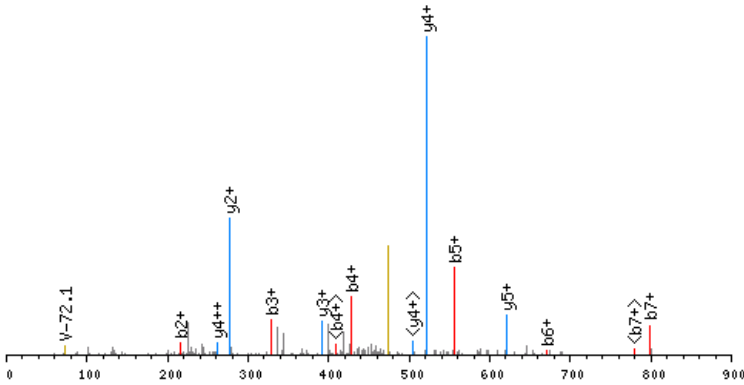

click image to zoom in; click top corners to zoom out [precursor±]

scan 3904; 473.6 m/z; 4.9e+000

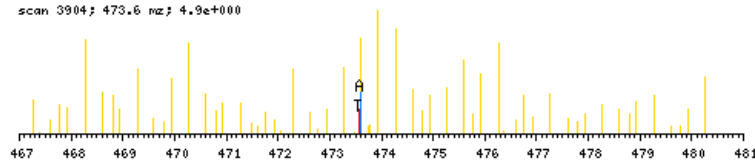

zoomed in precursor plot; T=theoretical m/z, A=acquired m/z

| b <sup>+</sup> | #  | AA | #  | y <sup>+</sup> | y <sup>2+</sup> |
|----------------|----|----|----|----------------|-----------------|
| 100.0762       | 1  | A  | 12 |                |                 |
| 215.1032       | 2  | D  | 11 | 1319.6265      | 660.3172        |
| 328.1872       | 3  | I  | 10 | 1204.5996      | 602.8037        |
| 427.2556       | 4  | V  | 9  | 1091.5155      | 546.2617        |
| 556.2982       | 5  | E  | 8  | 992.4471       | 496.7275        |
| 670.3412       | 6  | N  | 7  | 863.4045       | 432.2062        |
| 798.3997       | 7  | Q  | 6  | 749.3616       | 375.1847        |
| 897.4681       | 8  | V  | 5  | 621.3030       | 311.1554        |
| 1028.5086      | 9  | M  | 4  | 522.2346       | 261.6212        |
| 1143.5356      | 10 | D  | 3  | 391.1941       | 196.1010        |
| 1244.5833      | 11 | T  | 2  | 276.1672       | 138.5875        |
|                | 12 | R  | 1  | 175.1195       | 88.0637         |

N-term:+29.04

X-range:

0 - 0

MassTol: Y-zoom:

0. 1.

MassType:

☐AVG ☒MONO

Axis:

☒1 ☐2

Label:

☒I ☐M ☐-

Ions:

a ☐+ ☐2+ ☐3+

b ☒+ ☐2+ ☐3+

c ☐+ ☐2+ ☐3+

x ☐+ ☐2+ ☐3+

y ☒+ ☒2+ ☐3+

z ☐+ ☐2+ ☐3+

hide H<sub>2</sub>O/NH<sub>3</sub> ☐

zoom 112-122 ☐

GO

ADLFDPVIKLR, MH+ 1342.8099, m/z 448.2748  
L OS G15 P120811 220811-s1.05895.05895.3.dta

scan 5895; 1.6e+001

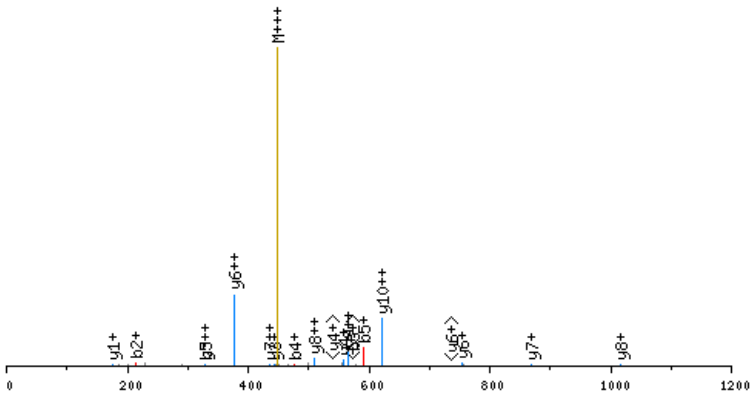

click image to zoom in; click top corners to zoom out

[precursor±]

scan 5891; 448.3 m/z; 1.2e+001

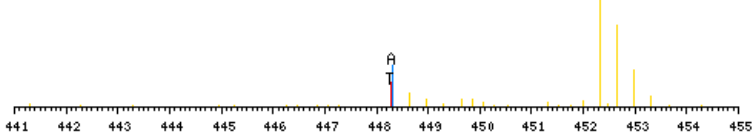

zoomed in precursor plot; T=theoretical m/z, A=acquired m/z

| b <sup>+</sup> | #  | AA | #  | y <sup>+</sup> | y <sup>2+</sup> |
|----------------|----|----|----|----------------|-----------------|
| 100.0762       | 1  | A  | 11 |                |                 |
| 215.1032       | 2  | D  | 10 | 1243.7415      | 622.3746        |
| 328.1872       | 3  | L  | 9  | 1128.7145      | 564.8612        |
| 475.2556       | 4  | F  | 8  | 1015.6305      | 508.3191        |
| 590.2826       | 5  | D  | 7  | 868.5620       | 434.7849        |
| 687.3353       | 6  | P  | 6  | 753.5351       | 377.2715        |
| 786.4038       | 7  | V  | 5  | 656.4823       | 328.7451        |
| 899.4878       | 8  | I  | 4  | 557.4139       | 279.2109        |
| 1055.6141      | 9  | K  | 3  | 444.3299       | 222.6688        |
| 1168.6982      | 10 | L  | 2  | 288.2036       | 144.6057        |
|                | 11 | R  | 1  | 175.1195       | 88.0637         |

N-term:+29.04 K(9):+156.13

X-range:

0 - 0

MassTol: Y-zoom:

0. 1.

MassType:

☐AVG ☒MONO

Axis:

☒1 ☐2

Label:

☒I ☐M ☐-

Ions:

a ☐+ ☐2+ ☐3+

b ☒+ ☐2+ ☐3+

c ☐+ ☐2+ ☐3+

x ☐+ ☐2+ ☐3+

y ☒+ ☒2+ ☐3+

z ☐+ ☐2+ ☐3+

hide H<sub>2</sub>O/NH<sub>3</sub> ☐

zoom 112-122 ☐

GO

ADLVQDLISICTR, MH+ 1511.7951, m/z 504.6032  
H OS G13 P120811 220811-s1.05800.05800.3.dta

scan 5800; 3.2e+000

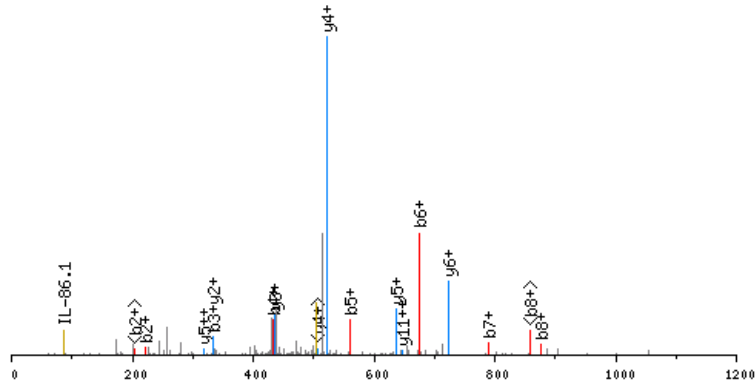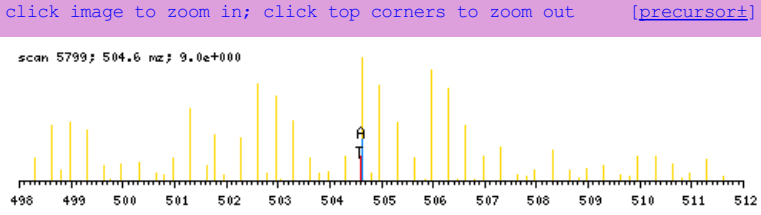

zoomed in precursor plot; T=theoretical m/z, A=acquired m/z

| b <sup>+</sup> | #  | AA | #  | y <sup>+</sup> | y <sup>2+</sup> |
|----------------|----|----|----|----------------|-----------------|
| 106.1080       | 1  | A  | 13 |                |                 |
| 221.1350       | 2  | D  | 12 | 1406.6949      | 703.8514        |
| 334.2190       | 3  | L  | 11 | 1291.6680      | 646.3379        |
| 433.2874       | 4  | V  | 10 | 1178.5839      | 589.7959        |
| 561.3460       | 5  | Q  | 9  | 1079.5155      | 540.2617        |
| 676.3730       | 6  | D  | 8  | 951.4569       | 476.2324        |
| 789.4570       | 7  | L  | 7  | 836.4300       | 418.7189        |
| 876.4890       | 8  | S  | 6  | 723.3459       | 362.1769        |
| 989.5731       | 9  | I  | 5  | 636.3139       | 318.6608        |
| 1076.6051      | 10 | S  | 4  | 523.2298       | 262.1188        |
| 1177.6528      | 11 | T  | 3  | 436.1978       | 218.6028        |
| 1337.6834      | 12 | C  | 2  | 335.1501       | 168.0790        |
|                | 13 | R  | 1  | 175.1195       | 88.0637         |

N-term:+35.07 C(12):+160.03

X-range:

0 - 0

MassTol: Y-zoom:

0. 1.

MassType:

☐AVG ☒MONO

Axis:

☒1 ☐2

Label:

☒I ☐M ☐-

Ions:

a ☐+ ☐2+ ☐3+

b ☒+ ☐2+ ☐3+

c ☐+ ☐2+ ☐3+

x ☐+ ☐2+ ☐3+

y ☒+ ☒2+ ☐3+

z ☐+ ☐2+ ☐3+

hide H<sub>2</sub>O/NH<sub>3</sub> ☐

zoom 112-122 ☐

GO

ADVLTNPLPECFYAVSR, MH+ 1878.9423, m/z 626.9856  
L OS G12 P120811 220811-s1.05365.05365.3.dta

scan 5365; 2.7e+000

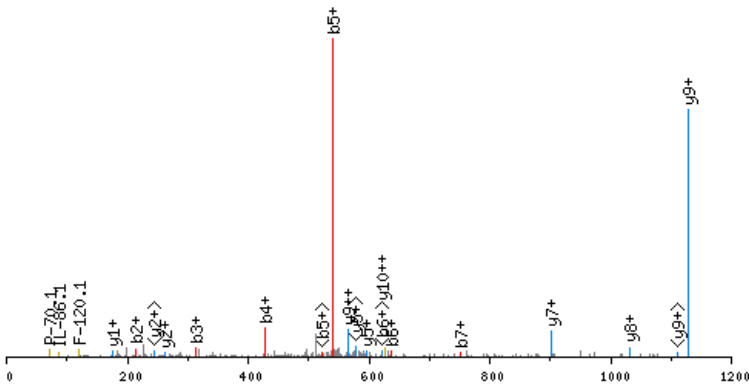

click image to zoom in; click top corners to zoom out

[precursor±]

scan 5362; 627.0 m/z; 3.4e+000

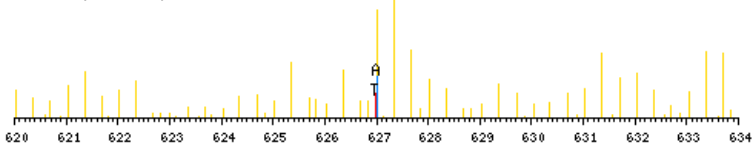

zoomed in precursor plot; T=theoretical m/z, A=acquired m/z

| b <sup>+</sup> | #  | AA | #  | y <sup>+</sup> | y <sup>2+</sup> |
|----------------|----|----|----|----------------|-----------------|
| 100.0762       | 1  | A  | 16 |                |                 |
| 215.1032       | 2  | D  | 15 | 1779.8739      | 890.4409        |
| 314.1716       | 3  | V  | 14 | 1664.8470      | 832.9274        |
| 427.2556       | 4  | L  | 13 | 1565.7786      | 783.3932        |
| 541.2986       | 5  | N  | 12 | 1452.6945      | 726.8512        |
| 638.3513       | 6  | P  | 11 | 1338.6516      | 669.8297        |
| 751.4354       | 7  | L  | 10 | 1241.5988      | 621.3033        |
| 848.4882       | 8  | P  | 9  | 1128.5148      | 564.7613        |
| 977.5307       | 9  | E  | 8  | 1031.4620      | 516.2349        |
| 1137.5613      | 10 | C  | 7  | 902.4194       | 451.7136        |
| 1284.6298      | 11 | F  | 6  | 742.3888       | 371.6983        |
| 1447.6931      | 12 | Y  | 5  | 595.3204       | 298.1641        |
| 1518.7302      | 13 | A  | 4  | 432.2571       | 216.6324        |
| 1617.7986      | 14 | V  | 3  | 361.2199       | 181.1139        |
| 1704.8306      | 15 | S  | 2  | 262.1515       | 131.5797        |
|                | 16 | R  | 1  | 175.1195       | 88.0637         |

N-term:+29.04 C(10):+160.03

X-range:

0 - 0

MassTol: Y-zoom:

0. 1.

MassType:

☐AVG ☒MONO

Axis:

☒1 ☐2

Label:

☒I ☐M ☐-

Ions:

a ☐+ ☐2+ ☐3+

b ☒+ ☐2+ ☐3+

c ☐+ ☐2+ ☐3+

x ☐+ ☐2+ ☐3+

y ☒+ ☒2+ ☐3+

z ☐+ ☐2+ ☐3+

hide H<sub>2</sub>O/NH<sub>3</sub> ☐

zoom 112-122 ☐

GO

AEAPGVDLGILPEGR, MH+ 1521.8277, m/z 507.9474  
L OS G13 P120811 220811-s1.05955.05955.3.dta

scan 5955; 3.2e+000

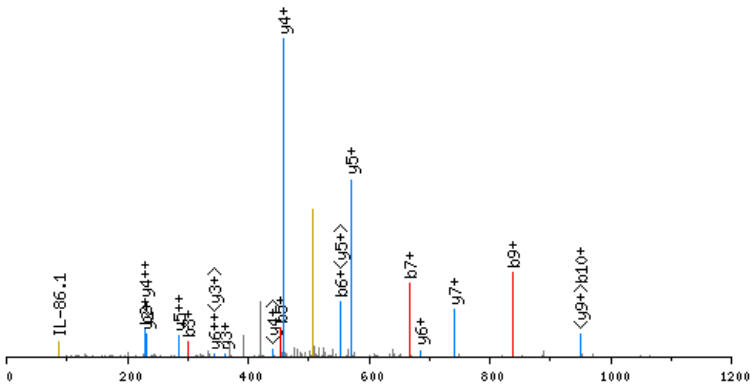

click image to zoom in; click top corners to zoom out

[precursor±]

scan 5954; 507.9 m/z; 5.8e+000

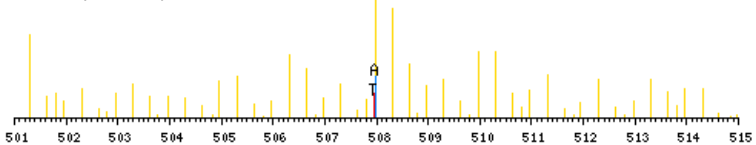

zoomed in precursor plot; T=theoretical m/z, A=acquired m/z

| b <sup>+</sup> | #  | AA | #  | y <sup>+</sup> | y <sup>2+</sup> |
|----------------|----|----|----|----------------|-----------------|
| 100.0762       | 1  | A  | 15 |                |                 |
| 229.1188       | 2  | E  | 14 | 1422.7593      | 711.8835        |
| 300.1559       | 3  | A  | 13 | 1293.7167      | 647.3623        |
| 397.2087       | 4  | P  | 12 | 1222.6796      | 611.8437        |
| 454.2301       | 5  | G  | 11 | 1125.6268      | 563.3173        |
| 553.2986       | 6  | V  | 10 | 1068.6053      | 534.8066        |
| 668.3255       | 7  | D  | 9  | 969.5369       | 485.2724        |
| 781.4096       | 8  | L  | 8  | 854.5100       | 427.7589        |
| 838.4310       | 9  | G  | 7  | 741.4259       | 371.2169        |
| 951.5151       | 10 | I  | 6  | 684.4044       | 342.7061        |
| 1064.5992      | 11 | L  | 5  | 571.3204       | 286.1641        |
| 1161.6519      | 12 | P  | 4  | 458.2363       | 229.6221        |
| 1290.6945      | 13 | E  | 3  | 361.1836       | 181.0957        |
| 1347.7160      | 14 | G  | 2  | 232.1410       | 116.5744        |
|                | 15 | R  | 1  | 175.1195       | 88.0637         |

N-term:+29.04

X-range:

0 - 0

MassTol: Y-zoom:

0. 1.

MassType:

☐AVG ☒MONO

Axis:

☒1 ☐2

Label:

☒I ☐M ☐-

Ions:

a ☐+ ☐2+ ☐3+

b ☒+ ☐2+ ☐3+

c ☐+ ☐2+ ☐3+

x ☐+ ☐2+ ☐3+

y ☒+ ☒2+ ☐3+

z ☐+ ☐2+ ☐3+

hide H<sub>2</sub>O/NH<sub>3</sub> ☐

zoom 112-122 ☐

GO

AECLDEYEDDEAGQKER, MH+ 2112.9031, m/z 704.9726  
L OS G15 P120811 220811-s1.02737.02737.3.dta

scan 2737: 6.7e+000

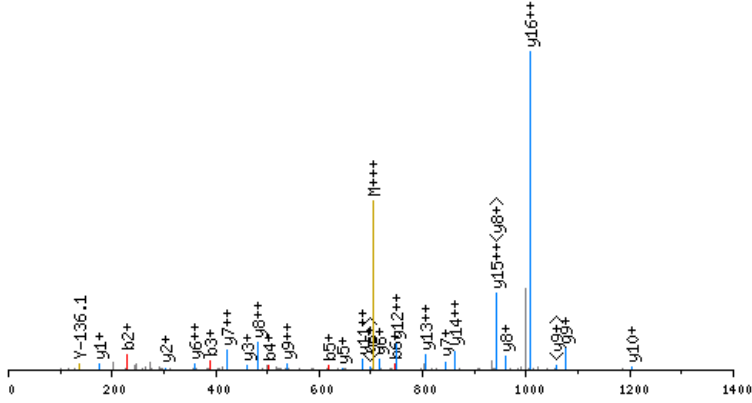

click image to zoom in; click top corners to zoom out [\[precursor±\]](#)

scan 2736: 705.0 m/z; 7.7e+000

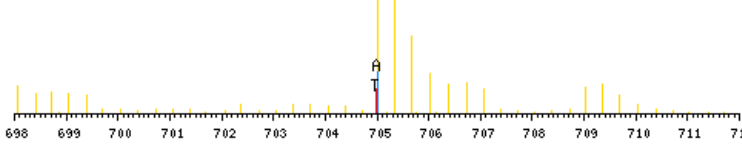

zoomed in precursor plot; T=theoretical m/z, A=acquired m/z

| b <sup>+</sup> | #  | AA | #  | y <sup>+</sup> | y <sup>2+</sup> |
|----------------|----|----|----|----------------|-----------------|
| 100.0762       | 1  | A  | 17 |                |                 |
| 229.1188       | 2  | E  | 16 | 2013.8347      | 1007.4213       |
| 389.1494       | 3  | C  | 15 | 1884.7922      | 942.9000        |
| 502.2335       | 4  | L  | 14 | 1724.7616      | 862.8847        |
| 617.2604       | 5  | D  | 13 | 1611.6775      | 806.3427        |
| 746.3030       | 6  | E  | 12 | 1496.6505      | 748.8292        |
| 909.3663       | 7  | Y  | 11 | 1367.6079      | 684.3079        |
| 1038.4089      | 8  | E  | 10 | 1204.5446      | 602.7762        |
| 1153.4359      | 9  | D  | 9  | 1075.5020      | 538.2549        |
| 1268.4628      | 10 | D  | 8  | 960.4751       | 480.7415        |
| 1397.5054      | 11 | E  | 7  | 845.4481       | 423.2280        |
| 1468.5425      | 12 | A  | 6  | 716.4055       | 358.7067        |
| 1525.5640      | 13 | G  | 5  | 645.3684       | 323.1881        |
| 1653.6226      | 14 | Q  | 4  | 588.3470       | 294.6774        |
| 1809.7489      | 15 | K  | 3  | 460.2884       | 230.6481        |
| 1938.7915      | 16 | E  | 2  | 304.1621       | 152.5850        |
|                | 17 | R  | 1  | 175.1195       | 88.0637         |

N-term:+29.04 C(3):+160.03  
K(15):+156.13

X-range:

0 - 0

MassTol: Y-zoom:

0. 1.

MassType:

☐AVG ☒MONO

Axis:

☒1 ☐2

Label:

☒I ☐M ☐-

Ions:

a ☐+ ☐2+ ☐3+

b ☒+ ☐2+ ☐3+

c ☐+ ☐2+ ☐3+

x ☐+ ☐2+ ☐3+

y ☒+ ☒2+ ☐3+

z ☐+ ☐2+ ☐3+

hide H<sub>2</sub>O/NH<sub>3</sub> ☐

zoom 112-122 ☐

GO

AEPVDVLEAWGVHR, MH+ 1605.8389, m/z 535.9511  
L OS G15 P120811 220811-s1.06082.06082.3.dta

scan 6082; 2.9e+000

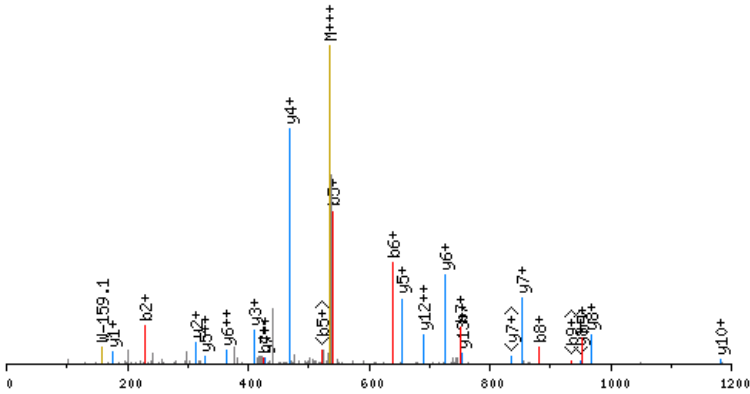

click image to zoom in; click top corners to zoom out

[precursor±]

scan 6081; 536.0 m/z; 6.2e+000

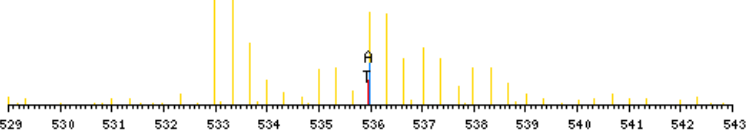

zoomed in precursor plot; T=theoretical m/z, A=acquired m/z

| b <sup>+</sup> | #  | AA | #  | y <sup>+</sup> | y <sup>2+</sup> |
|----------------|----|----|----|----------------|-----------------|
| 100.0762       | 1  | A  | 14 |                |                 |
| 229.1188       | 2  | E  | 13 | 1506.7705      | 753.8892        |
| 326.1716       | 3  | P  | 12 | 1377.7279      | 689.3679        |
| 425.2400       | 4  | V  | 11 | 1280.6751      | 640.8415        |
| 540.2669       | 5  | D  | 10 | 1181.6067      | 591.3073        |
| 639.3353       | 6  | V  | 9  | 1066.5798      | 533.7938        |
| 752.4194       | 7  | L  | 8  | 967.5114       | 484.2596        |
| 881.4620       | 8  | E  | 7  | 854.4273       | 427.7176        |
| 952.4991       | 9  | A  | 6  | 725.3847       | 363.1963        |
| 1138.5784      | 10 | W  | 5  | 654.3476       | 327.6777        |
| 1195.5999      | 11 | G  | 4  | 468.2683       | 234.6381        |
| 1294.6683      | 12 | V  | 3  | 411.2468       | 206.1273        |
| 1431.7272      | 13 | H  | 2  | 312.1784       | 156.5931        |
|                | 14 | R  | 1  | 175.1195       | 88.0637         |

N-term:+29.04

X-range:

0 - 0

MassTol: Y-zoom:

0. 1.

MassType:

☐AVG ☒MONO

Axis:

☒1 ☐2

Label:

☒I ☐M ☐-

Ions:

a ☐+ ☐2+ ☐3+

b ☒+ ☐2+ ☐3+

c ☐+ ☐2+ ☐3+

x ☐+ ☐2+ ☐3+

y ☒+ ☒2+ ☐3+

z ☐+ ☐2+ ☐3+

hide H<sub>2</sub>O/NH<sub>3</sub> ☐

zoom 112-122 ☐

GO

AERARGRPLGAVDKYRLR, MH+ 2152.3216, m/z 538.8358  
H OS G19 P120811 220811-s1.02222.02222.4.dta

scan 2222; 1.3e+001

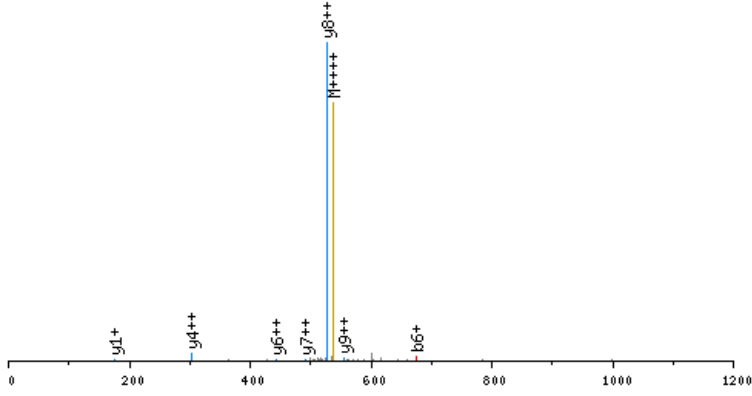

click image to zoom in; click top corners to zoom out [\[precursor±\]](#)

scan 2220; 538.8 m/z; 2.2e+000

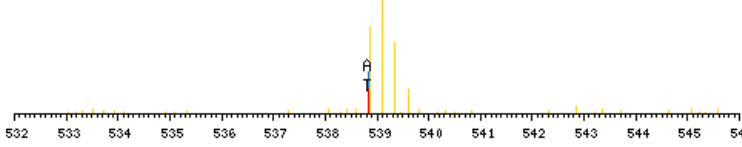

zoomed in precursor plot; T=theoretical m/z, A=acquired m/z

| b <sup>+</sup> | #  | AA | #  | y <sup>+</sup> | y <sup>2+</sup> |
|----------------|----|----|----|----------------|-----------------|
| 106.1080       | 1  | A  | 18 |                |                 |
| 235.1506       | 2  | E  | 17 | 2047.2214      | 1024.1146       |
| 391.2517       | 3  | R  | 16 | 1918.1788      | 959.5933        |
| 462.2888       | 4  | A  | 15 | 1762.0777      | 881.5427        |
| 618.3899       | 5  | R  | 14 | 1691.0406      | 846.0242        |
| 675.4114       | 6  | G  | 13 | 1534.9394      | 767.9736        |
| 831.5125       | 7  | R  | 12 | 1477.9180      | 739.4629        |
| 928.5653       | 8  | P  | 11 | 1321.8169      | 661.4123        |
| 1041.6493      | 9  | L  | 10 | 1224.7641      | 612.8860        |
| 1098.6708      | 10 | G  | 9  | 1111.6800      | 556.3439        |
| 1169.7079      | 11 | A  | 8  | 1054.6586      | 527.8332        |
| 1268.7763      | 12 | V  | 7  | 983.6215       | 492.3146        |
| 1383.8033      | 13 | D  | 6  | 884.5530       | 442.7804        |
| 1545.9614      | 14 | K  | 5  | 769.5261       | 385.2670        |
| 1709.0247      | 15 | Y  | 4  | 607.3680       | 304.1879        |
| 1865.1258      | 16 | R  | 3  | 444.3047       | 222.6563        |
| 1978.2099      | 17 | L  | 2  | 288.2036       | 144.6057        |
|                | 18 | R  | 1  | 175.1195       | 88.0637         |

N-term:+35.07 K(14):+162.16

X-range:

0 - 0

MassTol: Y-zoom:

0. 1.

MassType:

☐AVG ☒MONO

Axis:

☒1 ☐2

Label:

☒I ☐M ☐-

Ions:

a ☐+ ☐2+ ☐3+

b ☒+ ☐2+ ☐3+

c ☐+ ☐2+ ☐3+

x ☐+ ☐2+ ☐3+

y ☒+ ☒2+ ☐3+

z ☐+ ☐2+ ☐3+

hide H<sub>2</sub>O/NH<sub>3</sub> ☐

zoom 112-122 ☐

GO

AESEDSQESVDSVTDSQKR, MH+ 2165.0482, m/z 722.3543  
H OS G15 P120811 220811-s1.02309.02309.3.dta

scan 2309; 4.3e+000

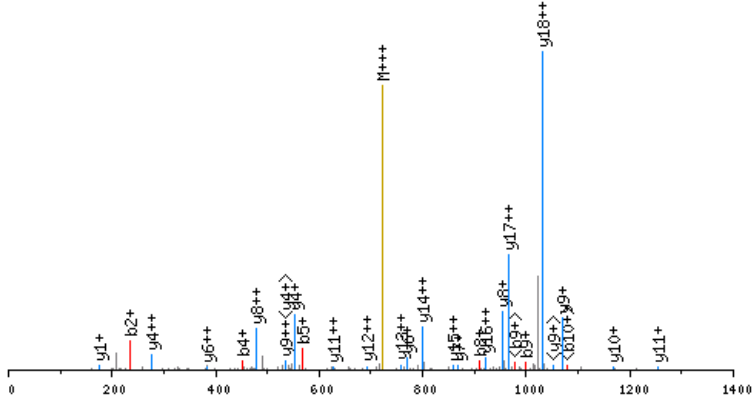

click image to zoom in; click top corners to zoom out [\[precursor±\]](#)

scan 2306; 722.4 m/z; 2.9e+000

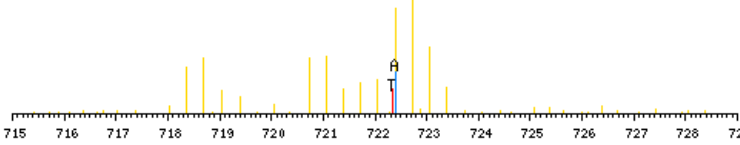

zoomed in precursor plot; T=theoretical m/z, A=acquired m/z

| b <sup>+</sup> | #  | AA | #  | y <sup>+</sup> | y <sup>2+</sup> |
|----------------|----|----|----|----------------|-----------------|
| 106.1080       | 1  | A  | 19 |                |                 |
| 235.1506       | 2  | E  | 18 | 2059.9480      | 1030.4779       |
| 322.1826       | 3  | S  | 17 | 1930.9054      | 965.9566        |
| 451.2252       | 4  | E  | 16 | 1843.8734      | 922.4406        |
| 566.2522       | 5  | D  | 15 | 1714.8308      | 857.9193        |
| 653.2842       | 6  | S  | 14 | 1599.8039      | 800.4058        |
| 781.3428       | 7  | Q  | 13 | 1512.7718      | 756.8898        |
| 910.3854       | 8  | E  | 12 | 1384.7132      | 692.8605        |
| 997.4174       | 9  | S  | 11 | 1255.6707      | 628.3392        |
| 1096.4858      | 10 | V  | 10 | 1168.6386      | 584.8232        |
| 1211.5128      | 11 | D  | 9  | 1069.5702      | 535.2890        |
| 1298.5448      | 12 | S  | 8  | 954.5433       | 477.7755        |
| 1397.6132      | 13 | V  | 7  | 867.5112       | 434.2595        |
| 1498.6609      | 14 | T  | 6  | 768.4428       | 384.7253        |
| 1613.6878      | 15 | D  | 5  | 667.3951       | 334.2015        |
| 1700.7198      | 16 | S  | 4  | 552.3682       | 276.6880        |
| 1828.7784      | 17 | Q  | 3  | 465.3362       | 233.1720        |
| 1990.9365      | 18 | K  | 2  | 337.2776       | 169.1427        |
|                | 19 | R  | 1  | 175.1195       | 88.0637         |

N-term:+35.07 K(18):+162.16

X-range:

0 - 0

MassTol: Y-zoom:

0. 1.

MassType:

☐AVG ☒MONO

Axis:

☒1 ☐2

Label:

☒I ☐M ☐-

Ions:

a ☐+ ☐2+ ☐3+

b ☒+ ☐2+ ☐3+

c ☐+ ☐2+ ☐3+

x ☐+ ☐2+ ☐3+

y ☒+ ☒2+ ☐3+

z ☐+ ☐2+ ☐3+

hide H<sub>2</sub>O/NH<sub>3</sub> ☐

zoom 112-122 ☐

GO

AETFDQGAHHAFGGGGR, MH+ 1813.8370, m/z 454.2147  
L OS G18 P120811 220811-s1.02772.02772.4.dta

scan 2772; 4.0e+000

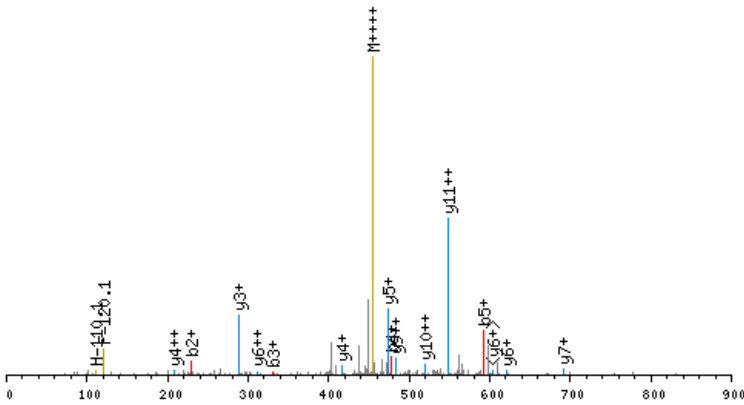

click image to zoom in; click top corners to zoom out

[precursor±]

scan 2771; 454.2 m/z; 1.7e+001

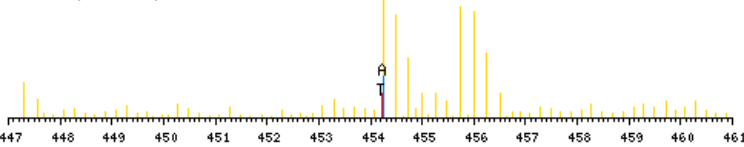

zoomed in precursor plot; T=theoretical m/z, A=acquired m/z

| b <sup>+</sup> | #  | AA | #  | y <sup>+</sup> | y <sup>2+</sup> |
|----------------|----|----|----|----------------|-----------------|
| 100.0762       | 1  | A  | 17 |                |                 |
| 229.1188       | 2  | E  | 16 | 1714.7686      | 857.8882        |
| 330.1665       | 3  | T  | 15 | 1585.7260      | 793.3669        |
| 477.2349       | 4  | F  | 14 | 1484.6783      | 742.8431        |
| 592.2618       | 5  | D  | 13 | 1337.6099      | 669.3089        |
| 720.3204       | 6  | Q  | 12 | 1222.5830      | 611.7954        |
| 777.3419       | 7  | G  | 11 | 1094.5244      | 547.7661        |
| 848.3790       | 8  | A  | 10 | 1037.5029      | 519.2554        |
| 985.4379       | 9  | H  | 9  | 966.4658       | 483.7368        |
| 1122.4968      | 10 | H  | 8  | 829.4069       | 415.2074        |
| 1193.5339      | 11 | A  | 7  | 692.3480       | 346.6779        |
| 1340.6023      | 12 | F  | 6  | 621.3109       | 311.1594        |
| 1397.6238      | 13 | G  | 5  | 474.2425       | 237.6251        |
| 1525.6824      | 14 | Q  | 4  | 417.2210       | 209.1144        |
| 1582.7039      | 15 | G  | 3  | 289.1624       | 145.0851        |
| 1639.7253      | 16 | G  | 2  | 232.1410       | 116.5744        |
|                | 17 | R  | 1  | 175.1195       | 88.0637         |

N-term:+29.04

X-range:

0 - 0

MassTol: Y-zoom:

0. 1.

MassType:

☐AVG ☒MONO

Axis:

☒1 ☐2

Label:

☒I ☐M ☐-

Ions:

a ☐+ ☐2+ ☐3+

b ☒+ ☐2+ ☐3+

c ☐+ ☐2+ ☐3+

x ☐+ ☐2+ ☐3+

y ☒+ ☒2+ ☐3+

z ☐+ ☐2+ ☐3+

hide H<sub>2</sub>O/NH<sub>3</sub> ☐

zoom 112-122 ☐

GO

AETIKASSNESLVANR, MH+ 1745.9398, m/z 582.6514  
L OS G15 P120811 220811-s1.02537.02537.3.dta

scan 2537; 7.1e+000

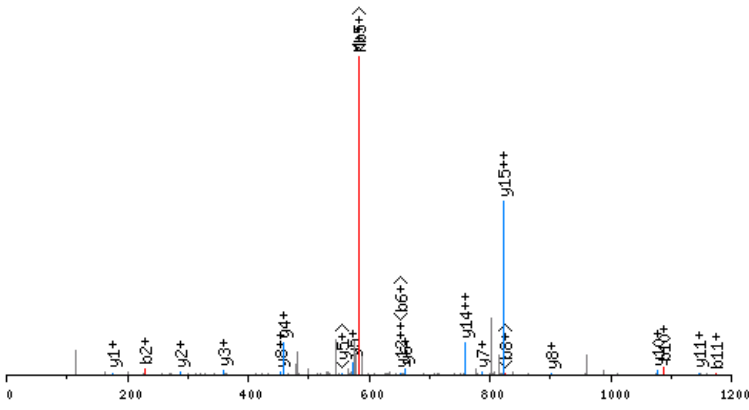

click image to zoom in; click top corners to zoom out

[precursor±]

scan 2536; 582.7 m/z; 8.9e+000

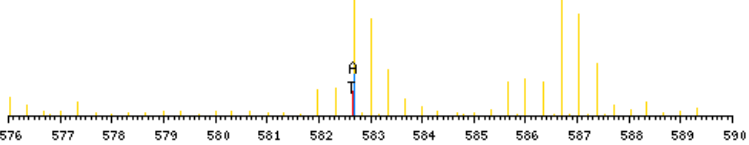

zoomed in precursor plot; T=theoretical m/z, A=acquired m/z

| b <sup>+</sup> | #  | AA | #  | y <sup>+</sup> | y <sup>2+</sup> |
|----------------|----|----|----|----------------|-----------------|
| 100.0762       | 1  | A  | 16 |                |                 |
| 229.1188       | 2  | E  | 15 | 1646.8714      | 823.9396        |
| 330.1665       | 3  | T  | 14 | 1517.8288      | 759.4183        |
| 443.2505       | 4  | I  | 13 | 1416.7811      | 708.8945        |
| 599.3768       | 5  | K  | 12 | 1303.6970      | 652.3524        |
| 670.4140       | 6  | A  | 11 | 1147.5707      | 574.2893        |
| 757.4460       | 7  | S  | 10 | 1076.5336      | 538.7707        |
| 844.4780       | 8  | S  | 9  | 989.5016       | 495.2547        |
| 958.5209       | 9  | N  | 8  | 902.4696       | 451.7387        |
| 1087.5635      | 10 | E  | 7  | 788.4266       | 394.7172        |
| 1174.5956      | 11 | S  | 6  | 659.3840       | 330.1959        |
| 1287.6796      | 12 | L  | 5  | 572.3520       | 286.6799        |
| 1386.7480      | 13 | V  | 4  | 459.2680       | 230.1379        |
| 1457.7852      | 14 | A  | 3  | 360.1995       | 180.6037        |
| 1571.8281      | 15 | N  | 2  | 289.1624       | 145.0851        |
|                | 16 | R  | 1  | 175.1195       | 88.0637         |

N-term:+29.04 K(5):+156.13

X-range:

0 - 0

MassTol: Y-zoom:

0. 1.

MassType:

☐ AVG ☒ MONO

Axis:

☒ 1 ☐ 2

Label:

☒ I ☐ M ☐ -

Ions:

a ☐ + ☐ 2+ ☐ 3+

b ☒ + ☐ 2+ ☐ 3+

c ☐ + ☐ 2+ ☐ 3+

x ☐ + ☐ 2+ ☐ 3+

y ☒ + ☒ 2+ ☐ 3+

z ☐ + ☐ 2+ ☐ 3+

hide H<sub>2</sub>O/NH<sub>3</sub> ☐

zoom 112-122 ☐

GO

AETPVAAALPEFPR, MH+ 1425.7742, m/z 475.9296  
L OS G13 P120811 220811-s1.05903.05903.3.dta

scan 5903; 2.4e+000

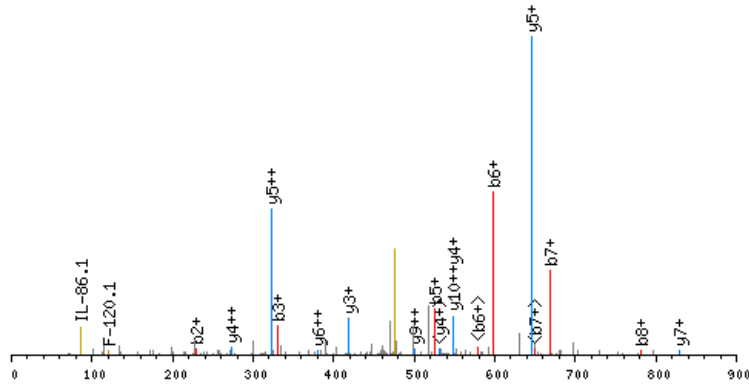

click image to zoom in; click top corners to zoom out [\[precursor±\]](#)

scan 5899; 475.9 m/z; 5.6e+000

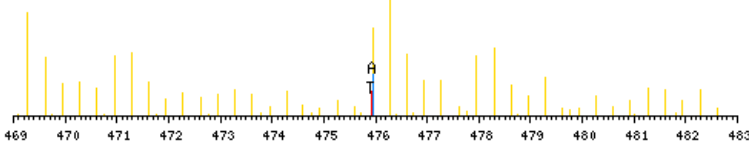

zoomed in precursor plot; T=theoretical m/z, A=acquired m/z

| b <sup>+</sup> | #  | AA | #  | y <sup>+</sup> | y <sup>2+</sup> |
|----------------|----|----|----|----------------|-----------------|
| 100.0762       | 1  | A  | 13 |                |                 |
| 229.1188       | 2  | E  | 12 | 1326.7058      | 663.8568        |
| 330.1665       | 3  | T  | 11 | 1197.6632      | 599.3355        |
| 427.2192       | 4  | P  | 10 | 1096.6155      | 548.8117        |
| 526.2877       | 5  | V  | 9  | 999.5627       | 500.2853        |
| 597.3248       | 6  | A  | 8  | 900.4943       | 450.7511        |
| 668.3619       | 7  | A  | 7  | 829.4572       | 415.2325        |
| 781.4460       | 8  | L  | 6  | 758.4201       | 379.7140        |
| 878.4987       | 9  | P  | 5  | 645.3360       | 323.1719        |
| 1007.5413      | 10 | E  | 4  | 548.2833       | 274.6455        |
| 1154.6097      | 11 | F  | 3  | 419.2407       | 210.1243        |
| 1251.6625      | 12 | P  | 2  | 272.1723       | 136.5900        |
|                | 13 | R  | 1  | 175.1195       | 88.0637         |

N-term:+29.04

X-range:

0 - 0

MassTol: Y-zoom:

0. 1.

MassType:

☐ AVG ☒ MONO

Axis:

☒ 1 ☐ 2

Label:

☒ I ☐ M ☐ -

Ions:

a ☐ + ☐ 2+ ☐ 3+

b ☒ + ☐ 2+ ☐ 3+

c ☐ + ☐ 2+ ☐ 3+

x ☐ + ☐ 2+ ☐ 3+

y ☒ + ☒ 2+ ☐ 3+

z ☐ + ☐ 2+ ☐ 3+

hide H<sub>2</sub>O/NH<sub>3</sub> ☐

zoom 112-122 ☐

GO

AEVGQVAGPGPQR, MH+ 1293.6915, m/z 431.9020  
L OS G13 P120811 220811-s1.02367.02367.3.dta

scan 2367; 1.8e+000

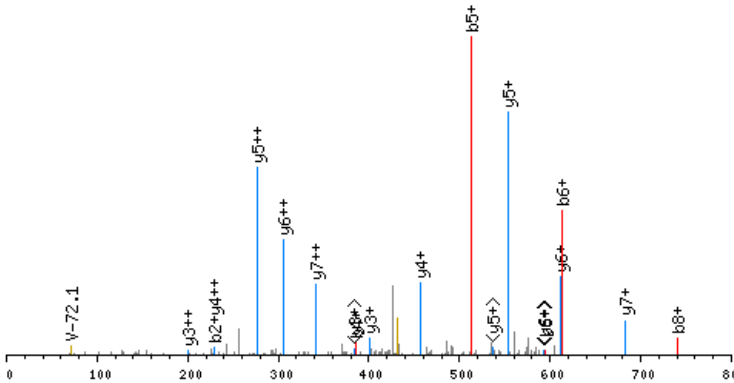

click image to zoom in; click top corners to zoom out

[precursor±]

scan 2364; 431.9 m/z; 2.3e+000

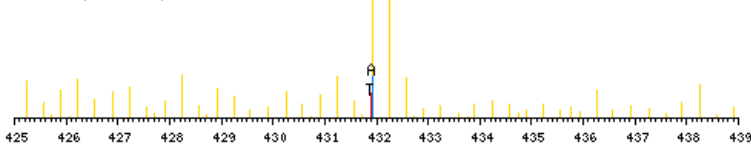

zoomed in precursor plot; T=theoretical m/z, A=acquired m/z

| b <sup>+</sup> | #  | AA | #  | y <sup>+</sup> | y <sup>2+</sup> |
|----------------|----|----|----|----------------|-----------------|
| 100.0762       | 1  | A  | 13 |                |                 |
| 229.1188       | 2  | E  | 12 | 1194.6231      | 597.8155        |
| 328.1872       | 3  | V  | 11 | 1065.5805      | 533.2942        |
| 385.2087       | 4  | G  | 10 | 966.5121       | 483.7600        |
| 513.2673       | 5  | Q  | 9  | 909.4906       | 455.2492        |
| 612.3357       | 6  | V  | 8  | 781.4321       | 391.2199        |
| 683.3728       | 7  | A  | 7  | 682.3636       | 341.6857        |
| 740.3943       | 8  | G  | 6  | 611.3265       | 306.1672        |
| 837.4470       | 9  | P  | 5  | 554.3051       | 277.6564        |
| 894.4685       | 10 | G  | 4  | 457.2523       | 229.1301        |
| 991.5212       | 11 | P  | 3  | 400.2308       | 200.6193        |
| 1119.5798      | 12 | Q  | 2  | 303.1781       | 152.0930        |
|                | 13 | R  | 1  | 175.1195       | 88.0637         |

N-term:+29.04

X-range:

0 - 0

MassTol: Y-zoom:

0. 1.

MassType:

☐AVG ☒MONO

Axis:

☒1 ☐2

Label:

☒I ☐M ☐-

Ions:

a ☐+ ☐2+ ☐3+

b ☒+ ☐2+ ☐3+

c ☐+ ☐2+ ☐3+

x ☐+ ☐2+ ☐3+

y ☒+ ☒2+ ☐3+

z ☐+ ☐2+ ☐3+

hide H<sub>2</sub>O/NH<sub>3</sub> ☐

zoom 112-122 ☐

GO

AEVLNDPESMEKR, MH+ 1573.7896, m/z 525.2680  
L OS G15 P120811 220811-s1.02869.02869.3.dta

scan 2869; 4.0e+000

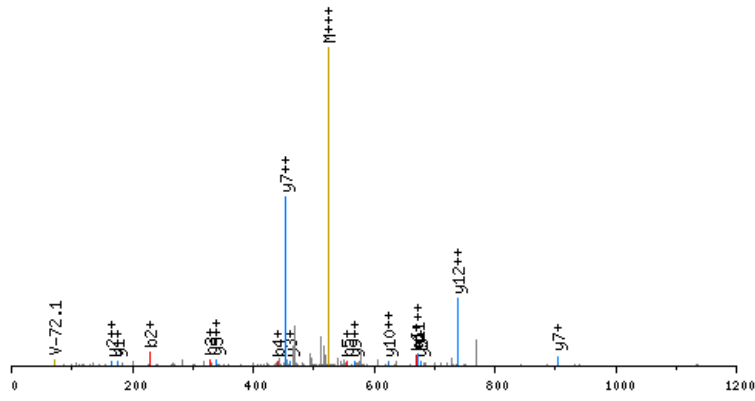

click image to zoom in; click top corners to zoom out [\[precursor±\]](#)

scan 2866; 525.3 m/z; 5.8e+000

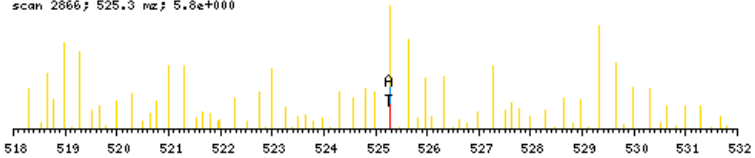

zoomed in precursor plot; T=theoretical m/z, A=acquired m/z

| b <sup>+</sup> | #  | AA | #  | y <sup>+</sup> | y <sup>2+</sup> |
|----------------|----|----|----|----------------|-----------------|
| 100.0762       | 1  | A  | 13 |                |                 |
| 229.1188       | 2  | E  | 12 | 1474.7212      | 737.8645        |
| 328.1872       | 3  | V  | 11 | 1345.6786      | 673.3432        |
| 441.2713       | 4  | L  | 10 | 1246.6102      | 623.8090        |
| 555.3142       | 5  | N  | 9  | 1133.5261      | 567.2670        |
| 670.3412       | 6  | D  | 8  | 1019.4832      | 510.2455        |
| 767.3939       | 7  | P  | 7  | 904.4563       | 452.7320        |
| 896.4365       | 8  | E  | 6  | 807.4035       | 404.2057        |
| 983.4685       | 9  | S  | 5  | 678.3609       | 339.6844        |
| 1114.5090      | 10 | M  | 4  | 591.3289       | 296.1684        |
| 1243.5516      | 11 | E  | 3  | 460.2884       | 230.6481        |
| 1399.6779      | 12 | K  | 2  | 331.2458       | 166.1268        |
|                | 13 | R  | 1  | 175.1195       | 88.0637         |

N-term:+29.04 K(12):+156.13

X-range:

0 - 0

MassTol: Y-zoom:

0. 1.

MassType:

☐AVG ☒MONO

Axis:

☒1 ☐2

Label:

☒I ☐M ☐-

Ions:

a ☐+ ☐2+ ☐3+

b ☒+ ☐2+ ☐3+

c ☐+ ☐2+ ☐3+

x ☐+ ☐2+ ☐3+

y ☒+ ☒2+ ☐3+

z ☐+ ☐2+ ☐3+

hide H<sub>2</sub>O/NH<sub>3</sub> ☐

zoom 112-122 ☐

GO

AEVSTIHLQSPGR, MH+ 1428.8023, m/z 476.9389  
H OS G16 P120811 220811-s1.03360.03360.3.dta

scan 3360; 1.0e+001

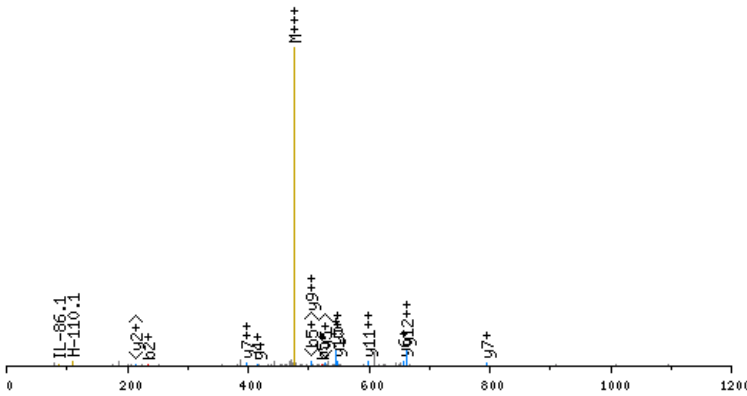

click image to zoom in; click top corners to zoom out

[precursor±]

scan 3358; 476.9 m/z; 2.6e+001

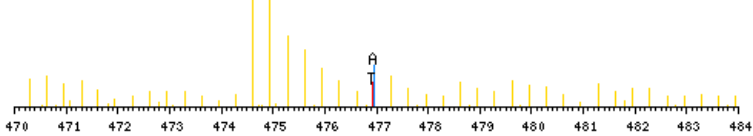

zoomed in precursor plot; T=theoretical m/z, A=acquired m/z

| b <sup>+</sup> | #  | AA | #  | y <sup>+</sup> | y <sup>2+</sup> |
|----------------|----|----|----|----------------|-----------------|
| 106.1080       | 1  | A  | 13 |                |                 |
| 235.1506       | 2  | E  | 12 | 1323.7021      | 662.3550        |
| 334.2190       | 3  | V  | 11 | 1194.6595      | 597.8337        |
| 421.2510       | 4  | S  | 10 | 1095.5911      | 548.2995        |
| 522.2987       | 5  | T  | 9  | 1008.5591      | 504.7834        |
| 635.3828       | 6  | I  | 8  | 907.5114       | 454.2596        |
| 772.4417       | 7  | H  | 7  | 794.4273       | 397.7176        |
| 885.5258       | 8  | L  | 6  | 657.3684       | 329.1881        |
| 1013.5843      | 9  | Q  | 5  | 544.2843       | 272.6461        |
| 1100.6164      | 10 | S  | 4  | 416.2258       | 208.6168        |
| 1197.6691      | 11 | P  | 3  | 329.1937       | 165.1008        |
| 1254.6906      | 12 | G  | 2  | 232.1410       | 116.5744        |
|                | 13 | R  | 1  | 175.1195       | 88.0637         |

N-term:+35.07

X-range:

0 - 0

MassTol: Y-zoom:

0. 1.

MassType:

☐ AVG ☒ MONO

Axis:

☒ 1 ☐ 2

Label:

☒ I ☐ M ☐ -

Ions:

a ☐ + ☐ 2+ ☐ 3+

b ☒ + ☐ 2+ ☐ 3+

c ☐ + ☐ 2+ ☐ 3+

x ☐ + ☐ 2+ ☐ 3+

y ☒ + ☒ 2+ ☐ 3+

z ☐ + ☐ 2+ ☐ 3+

hide H<sub>2</sub>O/NH<sub>3</sub> ☐

zoom 112-122 ☐

GO

AEYGEIKNIHLNLDR, MH+ 1853.0557, m/z 464.0194  
H OS G17 P120811 220811-s1.05167.05167.4.dta

scan 5167; 1.2e+001

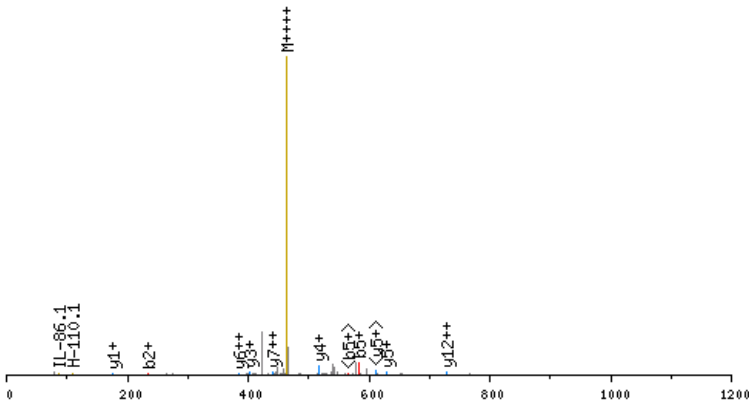

click image to zoom in; click top corners to zoom out

[precursor±]

scan 5163; 464.0 m/z; 7.8e+000

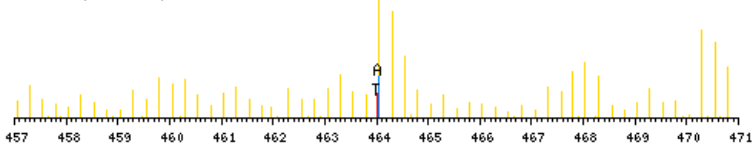

zoomed in precursor plot; T=theoretical m/z, A=acquired m/z

| b <sup>+</sup> | #  | AA | #  | y <sup>+</sup> | y <sup>2+</sup> |
|----------------|----|----|----|----------------|-----------------|
| 106.1080       | 1  | A  | 15 |                |                 |
| 235.1506       | 2  | E  | 14 | 1747.9555      | 874.4817        |
| 398.2139       | 3  | Y  | 13 | 1618.9130      | 809.9604        |
| 455.2354       | 4  | G  | 12 | 1455.8496      | 728.4287        |
| 584.2780       | 5  | E  | 11 | 1398.8282      | 699.9180        |
| 697.3621       | 6  | I  | 10 | 1269.7856      | 635.3967        |
| 859.5202       | 7  | K  | 9  | 1156.7015      | 578.8547        |
| 973.5631       | 8  | N  | 8  | 994.5434       | 497.7756        |
| 1086.6471      | 9  | I  | 7  | 880.5005       | 440.7542        |
| 1223.7061      | 10 | H  | 6  | 767.4164       | 384.2121        |
| 1336.7901      | 11 | L  | 5  | 630.3575       | 315.6827        |
| 1450.8331      | 12 | N  | 4  | 517.2734       | 259.1406        |
| 1563.9171      | 13 | L  | 3  | 403.2305       | 202.1192        |
| 1678.9441      | 14 | D  | 2  | 290.1464       | 145.5771        |
|                | 15 | R  | 1  | 175.1195       | 88.0637         |

N-term:+35.07 K(7):+162.16

X-range:

0 - 0

MassTol: Y-zoom:

0. 1.

MassType:

☐AVG ☒MONO

Axis:

☒1 ☐2

Label:

☒I ☐M ☐-

Ions:

a ☐+ ☐2+ ☐3+

b ☒+ ☐2+ ☐3+

c ☐+ ☐2+ ☐3+

x ☐+ ☐2+ ☐3+

y ☒+ ☒2+ ☐3+

z ☐+ ☐2+ ☐3+

hide H<sub>2</sub>O/NH<sub>3</sub> ☐

zoom 112-122 ☐

GO

AFPPQKVMPPPPQAR, MH+ 1522.8568, m/z 508.2905  
L OS G15 P120811 220811-s1.03059.03059.3.dta

scan 3059; 9.1e+000

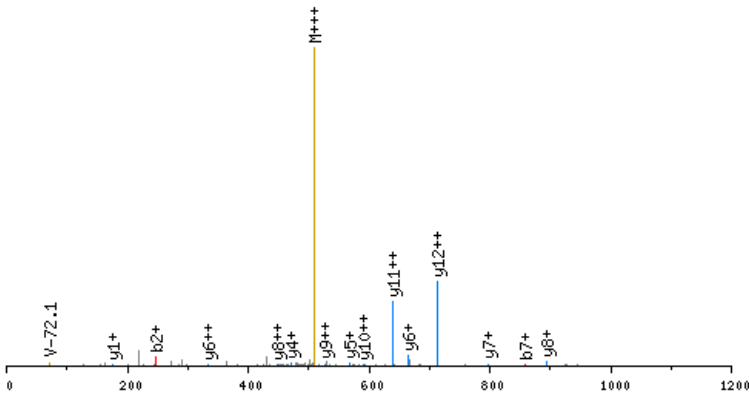

click image to zoom in; click top corners to zoom out

[precursor±]

scan 3056; 508.3 m/z; 7.7e+000

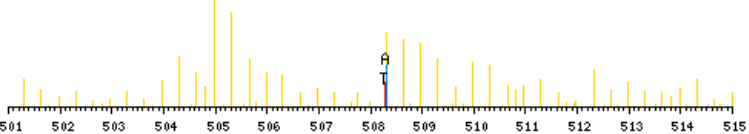

zoomed in precursor plot; T=theoretical m/z, A=acquired m/z

| b <sup>+</sup> | #  | AA | #  | y <sup>+</sup> | y <sup>2+</sup> |
|----------------|----|----|----|----------------|-----------------|
| 100.0762       | 1  | A  | 13 |                |                 |
| 247.1446       | 2  | F  | 12 | 1423.7884      | 712.3981        |
| 344.1974       | 3  | P  | 11 | 1276.7200      | 638.8639        |
| 472.2560       | 4  | Q  | 10 | 1179.6673      | 590.3375        |
| 628.3823       | 5  | K  | 9  | 1051.6087      | 526.3083        |
| 727.4507       | 6  | V  | 8  | 895.4824       | 448.2451        |
| 858.4912       | 7  | M  | 7  | 796.4140       | 398.7109        |
| 955.5439       | 8  | P  | 6  | 665.3735       | 333.1907        |
| 1052.5967      | 9  | P  | 5  | 568.3207       | 284.6643        |
| 1149.6495      | 10 | P  | 4  | 471.2680       | 236.1379        |
| 1277.7080      | 11 | Q  | 3  | 374.2152       | 187.6115        |
| 1348.7452      | 12 | A  | 2  | 246.1566       | 123.5822        |
|                | 13 | R  | 1  | 175.1195       | 88.0637         |

N-term:+29.04 K(5):+156.13

X-range:

0 - 0

MassTol: Y-zoom:

0. 1.

MassType:

☐ AVG ☒ MONO

Axis:

☒ 1 ☐ 2

Label:

☒ I ☐ M ☐ -

Ions:

a ☐ + ☐ 2+ ☐ 3+

b ☒ + ☐ 2+ ☐ 3+

c ☐ + ☐ 2+ ☐ 3+

x ☐ + ☐ 2+ ☐ 3+

y ☒ + ☒ 2+ ☐ 3+

z ☐ + ☐ 2+ ☐ 3+

hide H<sub>2</sub>O/NH<sub>3</sub> ☐

zoom 112-122 ☐

GO

AFTVIDQNR, MH+ 1097.6167, m/z 549.3120  
H OS G14 P120811 220811-s1.03765.03765.2.dta

scan 3765; 7.5e+000

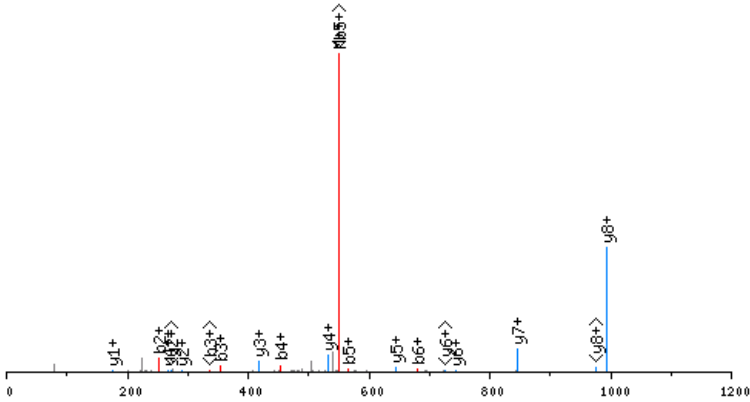

click image to zoom in; click top corners to zoom out

[precursor±]

scan 3761; 549.3 m/z; 8.5e+000

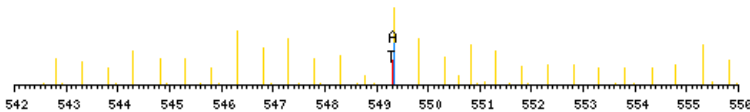

zoomed in precursor plot; T=theoretical m/z, A=acquired m/z

| b <sup>+</sup> | # | AA | # | y <sup>+</sup> | y <sup>2+</sup> |
|----------------|---|----|---|----------------|-----------------|
| 106.1080       | 1 | A  | 9 |                |                 |
| 253.1764       | 2 | F  | 8 | 992.5165       | 496.7622        |
| 354.2241       | 3 | T  | 7 | 845.4481       | 423.2280        |
| 453.2925       | 4 | V  | 6 | 744.4004       | 372.7041        |
| 566.3766       | 5 | I  | 5 | 645.3320       | 323.1699        |
| 681.4035       | 6 | D  | 4 | 532.2479       | 266.6279        |
| 809.4621       | 7 | Q  | 3 | 417.2210       | 209.1144        |
| 923.5050       | 8 | N  | 2 | 289.1624       | 145.0851        |
|                | 9 | R  | 1 | 175.1195       | 88.0637         |

N-term:+35.07

X-range:

0 - 0

MassTol: Y-zoom:

0. 1.

MassType:

☐ AVG ☒ MONO

Axis:

☒ 1 ☐ 2

Label:

☒ I ☐ M ☐ -

Ions:

a ☐ + ☐ 2+ ☐ 3+

b ☒ + ☐ 2+ ☐ 3+

c ☐ + ☐ 2+ ☐ 3+

x ☐ + ☐ 2+ ☐ 3+

y ☒ + ☒ 2+ ☐ 3+

z ☐ + ☐ 2+ ☐ 3+

hide H<sub>2</sub>O/NH<sub>3</sub> ☐

zoom 112-122 ☐

GO

AGDAFGDTSFLTTSKAR, MH+ 1699.8655, m/z 567.2934  
L OS G15 P120811 220811-s1.04642.04642.3.dta

scan 4642; 8.7e+000

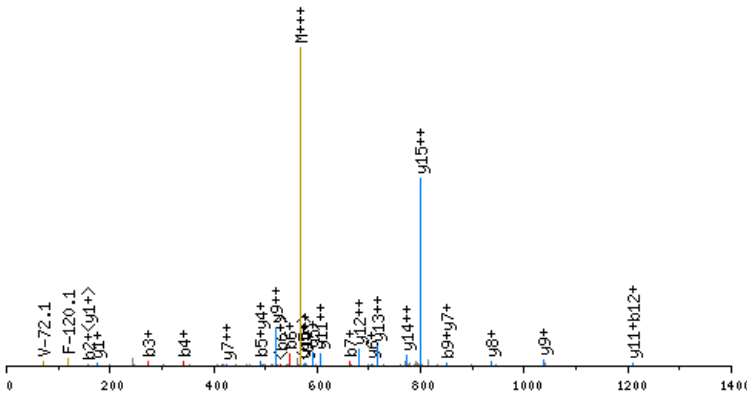

X-range:

0 - 0

MassTol: Y-zoom:

0. 1.

MassType:

☐ AVG ☒ MONO

Axis:

☒ 1 ☐ 2

Label:

☒ I ☐ M ☐ -

Ions:

a ☐ + ☐ 2+ ☐ 3+

b ☒ + ☐ 2+ ☐ 3+

c ☐ + ☐ 2+ ☐ 3+

x ☐ + ☐ 2+ ☐ 3+

y ☒ + ☒ 2+ ☐ 3+

z ☐ + ☐ 2+ ☐ 3+

hide H<sub>2</sub>O/NH<sub>3</sub> ☐

zoom 112-122 ☐

GO

AGEEAADSPQLPR, MH+ 1375.6917, m/z 459.2354  
H OS G13 P120811 220811-s1.02945.02945.3.dta

scan 2945; 4.2e+000

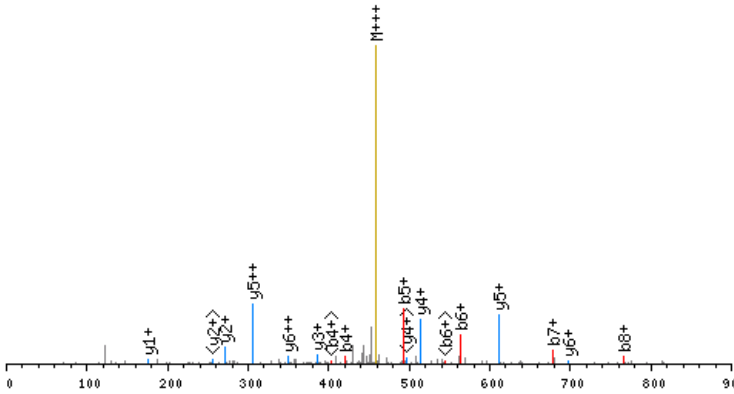

click image to zoom in; click top corners to zoom out

[precursor±]

scan 2944; 459.2 m/z; 1.2e+001

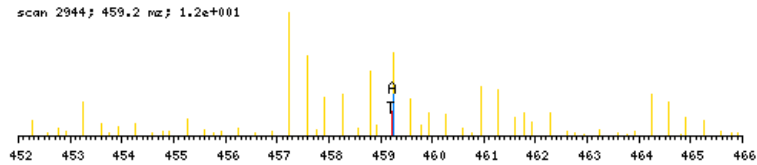

zoomed in precursor plot; T=theoretical m/z, A=acquired m/z

| b <sup>+</sup> | #  | AA | #  | y <sup>+</sup> | y <sup>2+</sup> |
|----------------|----|----|----|----------------|-----------------|
| 106.1080       | 1  | A  | 13 |                |                 |
| 163.1295       | 2  | G  | 12 | 1270.5915      | 635.7997        |
| 292.1721       | 3  | E  | 11 | 1213.5701      | 607.2889        |
| 421.2147       | 4  | E  | 10 | 1084.5275      | 542.7677        |
| 492.2518       | 5  | A  | 9  | 955.4849       | 478.2464        |
| 563.2889       | 6  | A  | 8  | 884.4478       | 442.7278        |
| 678.3158       | 7  | D  | 7  | 813.4107       | 407.2092        |
| 765.3479       | 8  | S  | 6  | 698.3837       | 349.6958        |
| 862.4006       | 9  | P  | 5  | 611.3517       | 306.1798        |
| 991.4432       | 10 | E  | 4  | 514.2989       | 257.6534        |
| 1104.5273      | 11 | L  | 3  | 385.2563       | 193.1321        |
| 1201.5800      | 12 | P  | 2  | 272.1723       | 136.5900        |
|                | 13 | R  | 1  | 175.1195       | 88.0637         |

N-term:+35.07

X-range:

0 - 0

MassTol: Y-zoom:

0. 1.

MassType:

☐AVG ☒MONO

Axis:

☒1 ☐2

Label:

☒I ☐M ☐-

Ions:

a ☐+ ☐2+ ☐3+

b ☒+ ☐2+ ☐3+

c ☐+ ☐2+ ☐3+

x ☐+ ☐2+ ☐3+

y ☒+ ☒2+ ☐3+

z ☐+ ☐2+ ☐3+

hide H<sub>2</sub>O/NH<sub>3</sub> ☐

zoom 112-122 ☐

GO

AGEEMEQFGQGV, MH+ 1465.6745, m/z 489.2297  
L OS G13 P120811 220811-s1.03773.03773.3.dta

scan 3773; 4.3e+000

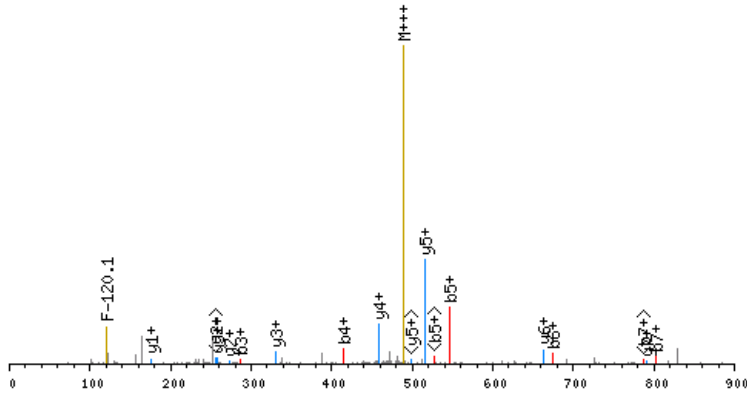

click image to zoom in; click top corners to zoom out

[precursor±]

scan 3769; 489.2 m/z; 3.2e+001

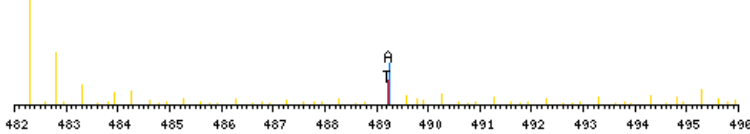

zoomed in precursor plot; T=theoretical m/z, A=acquired m/z

| b <sup>+</sup> | #  | AA | #  | y <sup>+</sup> | y <sup>2+</sup> |
|----------------|----|----|----|----------------|-----------------|
| 100.0762       | 1  | A  | 13 |                |                 |
| 157.0977       | 2  | G  | 12 | 1366.6061      | 683.8070        |
| 286.1403       | 3  | E  | 11 | 1309.5847      | 655.2963        |
| 415.1829       | 4  | E  | 10 | 1180.5421      | 590.7750        |
| 546.2233       | 5  | M  | 9  | 1051.4995      | 526.2537        |
| 675.2659       | 6  | E  | 8  | 920.4590       | 460.7334        |
| 803.3245       | 7  | Q  | 7  | 791.4164       | 396.2121        |
| 950.3929       | 8  | F  | 6  | 663.3578       | 332.1828        |
| 1007.4144      | 9  | G  | 5  | 516.2894       | 258.6486        |
| 1135.4730      | 10 | Q  | 4  | 459.2680       | 230.1379        |
| 1192.4944      | 11 | G  | 3  | 331.2094       | 166.1086        |
| 1291.5629      | 12 | V  | 2  | 274.1879       | 137.5979        |
|                | 13 | R  | 1  | 175.1195       | 88.0637         |

N-term:+29.04

X-range:

0 - 0

MassTol: Y-zoom:

0. 1.

MassType:

☐AVG ☒MONO

Axis:

☒1 ☐2

Label:

☒I ☐M ☐-

Ions:

a ☐+ ☐2+ ☐3+

b ☒+ ☐2+ ☐3+

c ☐+ ☐2+ ☐3+

x ☐+ ☐2+ ☐3+

y ☒+ ☒2+ ☐3+

z ☐+ ☐2+ ☐3+

hide H<sub>2</sub>O/NH<sub>3</sub> ☐

zoom 112-122 ☐

GO

AGFAGDDAPR, MH+ 1010.5119, m/z 505.7596  
H OS G14 P120811 220811-s1.02307.02307.2.dta

scan 2307; 1.3e+001

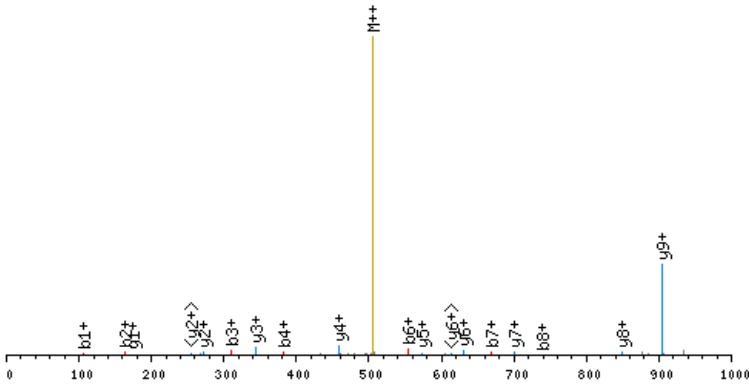

click image to zoom in; click top corners to zoom out

[precursor±]

scan 2306; 505.8 m/z; 1.3e+001

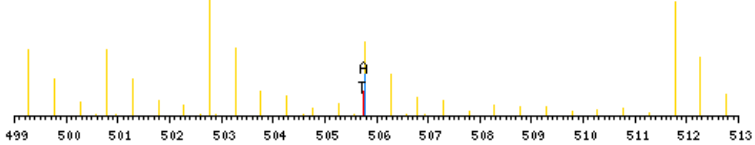

zoomed in precursor plot; T=theoretical m/z, A=acquired m/z

| b <sup>+</sup> | #  | AA | #  | y <sup>+</sup> | y <sup>2+</sup> |
|----------------|----|----|----|----------------|-----------------|
| 106.1080       | 1  | A  | 10 |                |                 |
| 163.1295       | 2  | G  | 9  | 905.4117       | 453.2098        |
| 310.1979       | 3  | F  | 8  | 848.3903       | 424.6990        |
| 381.2350       | 4  | A  | 7  | 701.3218       | 351.1648        |
| 438.2565       | 5  | G  | 6  | 630.2847       | 315.6463        |
| 553.2834       | 6  | D  | 5  | 573.2633       | 287.1355        |
| 668.3104       | 7  | D  | 4  | 458.2363       | 229.6221        |
| 739.3475       | 8  | A  | 3  | 343.2094       | 172.1086        |
| 836.4002       | 9  | P  | 2  | 272.1723       | 136.5900        |
|                | 10 | R  | 1  | 175.1195       | 88.0637         |

N-term:+35.07

X-range:

0 - 0

MassTol: Y-zoom:

0. 1.

MassType:

☐AVG ☒MONO

Axis:

☒1 ☐2

Label:

☒I ☐M ☐-

Ions:

a ☐+ ☐2+ ☐3+

b ☒+ ☐2+ ☐3+

c ☐+ ☐2+ ☐3+

x ☐+ ☐2+ ☐3+

y ☒+ ☒2+ ☐3+

z ☐+ ☐2+ ☐3+

hide H<sub>2</sub>O/NH<sub>3</sub> ☐

zoom 112-122 ☐

GO

AGGEGGVTLGQPHLSR, MH+ 1563.8243, m/z 521.9463  
L OS G16 P120811 220811-s1.03354.03354.3.dta

scan 3354; 3.1e+000

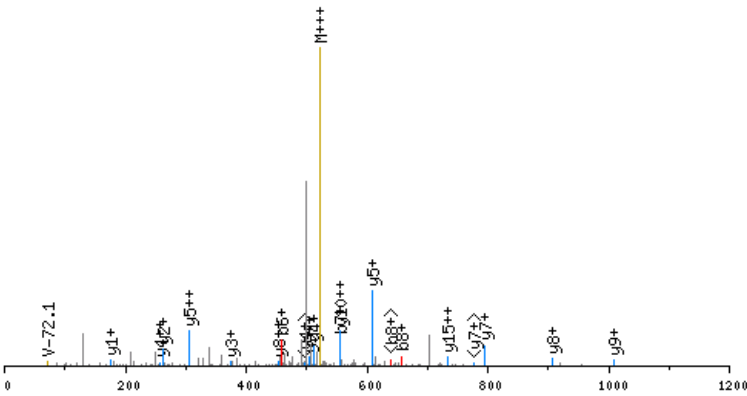

click image to zoom in; click top corners to zoom out [\[precursor±\]](#)

scan 3353; 521.9 m/z; 1.1e+001

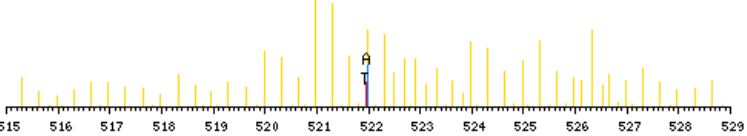

zoomed in precursor plot; T=theoretical m/z, A=acquired m/z

| b <sup>+</sup> | #  | AA | #  | y <sup>+</sup> | y <sup>2+</sup> |
|----------------|----|----|----|----------------|-----------------|
| 100.0762       | 1  | A  | 16 |                |                 |
| 157.0977       | 2  | G  | 15 | 1464.7559      | 732.8819        |
| 214.1191       | 3  | G  | 14 | 1407.7345      | 704.3711        |
| 343.1617       | 4  | E  | 13 | 1350.7130      | 675.8604        |
| 400.1832       | 5  | G  | 12 | 1221.6704      | 611.3391        |
| 457.2047       | 6  | G  | 11 | 1164.6489      | 582.8284        |
| 556.2731       | 7  | V  | 10 | 1107.6275      | 554.3176        |
| 657.3208       | 8  | T  | 9  | 1008.5591      | 504.7834        |
| 770.4048       | 9  | L  | 8  | 907.5114       | 454.2596        |
| 827.4263       | 10 | G  | 7  | 794.4273       | 397.7176        |
| 955.4849       | 11 | Q  | 6  | 737.4058       | 369.2068        |
| 1052.5376      | 12 | P  | 5  | 609.3473       | 305.1775        |
| 1189.5965      | 13 | H  | 4  | 512.2945       | 256.6512        |
| 1302.6806      | 14 | L  | 3  | 375.2356       | 188.1217        |
| 1389.7126      | 15 | S  | 2  | 262.1515       | 131.5797        |
|                | 16 | R  | 1  | 175.1195       | 88.0637         |

N-term:+29.04

X-range:

0 - 0

MassTol: Y-zoom:

0. 1.

MassType:

☐AVG ☒MONO

Axis:

☒1 ☐2

Label:

☒I ☐M ☐-

Ions:

a ☐+ ☐2+ ☐3+

b ☒+ ☐2+ ☐3+

c ☐+ ☐2+ ☐3+

x ☐+ ☐2+ ☐3+

y ☒+ ☒2+ ☐3+

z ☐+ ☐2+ ☐3+

hide H<sub>2</sub>O/NH<sub>3</sub> ☐

zoom 112-122 ☐

GO

AGLHGDQGAPGVPVGPAGPR, MH+ 1744.9307, m/z 582.3151  
H OS G16 P120811 220811-s1.02782.02782.3.dta

scan 2782; 3.8e+000

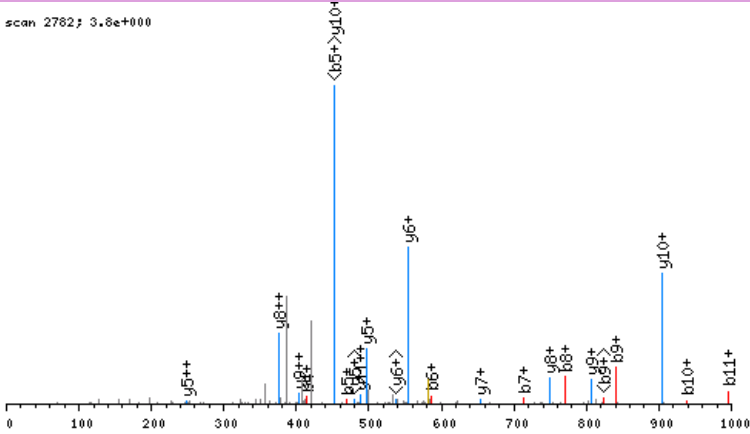

click image to zoom in; click top corners to zoom out

[precursor±]

scan 2778; 582.3 m/z; 4.8e+000

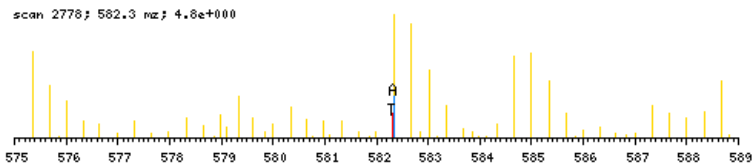

zoomed in precursor plot; T=theoretical m/z, A=acquired m/z

| b <sup>+</sup> | #  | AA | #  | y <sup>+</sup> | y <sup>2+</sup> |
|----------------|----|----|----|----------------|-----------------|
| 106.1080       | 1  | A  | 19 |                |                 |
| 163.1295       | 2  | G  | 18 | 1639.8305      | 820.4192        |
| 276.2135       | 3  | L  | 17 | 1582.8090      | 791.9084        |
| 413.2725       | 4  | H  | 16 | 1469.7249      | 735.3664        |
| 470.2939       | 5  | G  | 15 | 1332.6660      | 666.8369        |
| 585.3209       | 6  | D  | 14 | 1275.6446      | 638.3262        |
| 713.3794       | 7  | Q  | 13 | 1160.6176      | 580.8127        |
| 770.4009       | 8  | G  | 12 | 1032.5591      | 516.7834        |
| 841.4380       | 9  | A  | 11 | 975.5376       | 488.2727        |
| 938.4908       | 10 | P  | 10 | 904.5005       | 452.7542        |
| 995.5122       | 11 | G  | 9  | 807.4477       | 404.2278        |
| 1092.5650      | 12 | P  | 8  | 750.4262       | 375.7170        |
| 1191.6334      | 13 | V  | 7  | 653.3735       | 327.1907        |
| 1248.6549      | 14 | G  | 6  | 554.3051       | 277.6564        |
| 1345.7076      | 15 | P  | 5  | 497.2836       | 249.1457        |
| 1416.7448      | 16 | A  | 4  | 400.2308       | 200.6193        |
| 1473.7662      | 17 | G  | 3  | 329.1937       | 165.1008        |
| 1570.8190      | 18 | P  | 2  | 272.1723       | 136.5900        |
|                | 19 | R  | 1  | 175.1195       | 88.0637         |

N-term:+35.07

AGSFGGAGGHAPGVAR, MH+ 1396.7085, m/z 466.2410  
L OS G16 P120811 220811-s1.02441.02441.3.dta

scan 2441; 7.7e+000

click image to zoom in; click top corners to zoom out      [precursor±]

scan 2438; 466.2 m/z; 2.7e+001

zoomed in precursor plot; T=theoretical m/z, A=acquired m/z

X-range:  
 -

MassTol: Y-zoom:

MassType:  
☐ AVG ☒ MONO

Axis:  
☒ 1 ☐ 2

Label:  
☒ I ☐ M ☐ -

Ions:  
a ☐ + ☐ 2+ ☐ 3+  
b ☒ + ☐ 2+ ☐ 3+  
c ☐ + ☐ 2+ ☐ 3+  
x ☐ + ☐ 2+ ☐ 3+  
y ☒ + ☒ 2+ ☐ 3+  
z ☐ + ☐ 2+ ☐ 3+

hide H<sub>2</sub>O/NH<sub>3</sub> ☐

zoom 112-122 ☐

GO

| b <sup>+</sup> | #  | AA | #  | y <sup>+</sup> | y <sup>2+</sup> |
|----------------|----|----|----|----------------|-----------------|
| 100.0762       | 1  | A  | 16 |                |                 |
| 157.0977       | 2  | G  | 15 | 1297.6402      | 649.3240        |
| 244.1297       | 3  | S  | 14 | 1240.6187      | 620.8133        |
| 391.1981       | 4  | F  | 13 | 1153.5867      | 577.2972        |
| 448.2196       | 5  | G  | 12 | 1006.5183      | 503.7630        |
| 505.2410       | 6  | G  | 11 | 949.4968       | 475.2523        |
| 576.2782       | 7  | A  | 10 | 892.4753       | 446.7416        |
| 633.2996       | 8  | G  | 9  | 821.4382       | 411.2230        |
| 690.3211       | 9  | G  | 8  | 764.4167       | 382.7123        |
| 827.3800       | 10 | H  | 7  | 707.3953       | 354.2016        |
| 898.4171       | 11 | A  | 6  | 570.3364       | 285.6721        |
| 995.4699       | 12 | P  | 5  | 499.2993       | 250.1535        |
| 1052.4913      | 13 | G  | 4  | 402.2465       | 201.6272        |
| 1151.5598      | 14 | V  | 3  | 345.2250       | 173.1164        |
| 1222.5969      | 15 | A  | 2  | 246.1566       | 123.5822        |
|                | 16 | R  | 1  | 175.1195       | 88.0637         |

N-term:+29.04

X-range:

0 - 0

MassTol: Y-zoom:

0. 1.

MassType:

☐ AVG ☒ MONO

Axis:

☒ 1 ☐ 2

Label:

☒ I ☐ M ☐ -

Ions:

a ☐ + ☐ 2+ ☐ 3+

b ☒ + ☐ 2+ ☐ 3+

c ☐ + ☐ 2+ ☐ 3+

x ☐ + ☐ 2+ ☐ 3+

y ☒ + ☒ 2+ ☐ 3+

z ☐ + ☐ 2+ ☐ 3+

hide H<sub>2</sub>O/NH<sub>3</sub> ☐

zoom 112-122 ☐

GO

AGSSSGSGVQGASAGGLAADASR, MH+ 1954.9642, m/z 652.3263  
H OS G13 P120811 220811-s1.02930.02930.3.dta

scan 2930; 1.6e+000

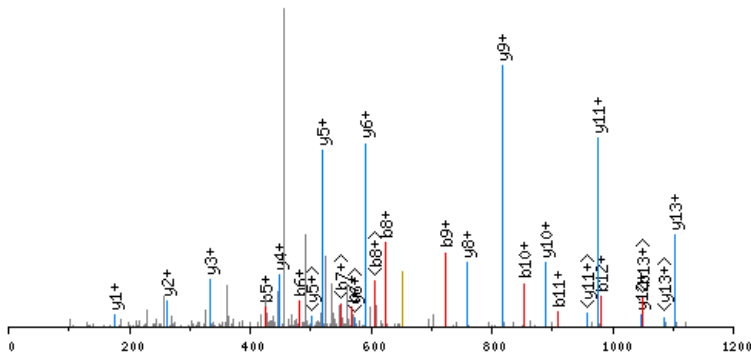

click image to zoom in; click top corners to zoom out [\[precursor±\]](#)

scan 2929; 652.3 m/z; 2.0e+001

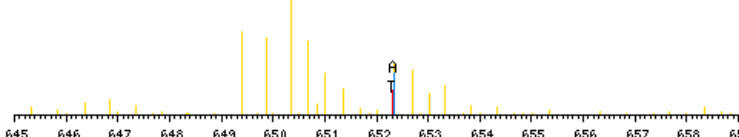

zoomed in precursor plot; T=theoretical m/z, A=acquired m/z

| b <sup>+</sup> | #  | AA | #  | y <sup>+</sup> | y <sup>2+</sup> |
|----------------|----|----|----|----------------|-----------------|
| 106.1080       | 1  | A  | 23 |                |                 |
| 163.1295       | 2  | G  | 22 | 1849.8640      | 925.4359        |
| 250.1615       | 3  | S  | 21 | 1792.8426      | 896.9252        |
| 337.1935       | 4  | S  | 20 | 1705.8105      | 853.4092        |
| 424.2256       | 5  | S  | 19 | 1618.7785      | 809.8932        |
| 481.2470       | 6  | G  | 18 | 1531.7465      | 766.3771        |
| 568.2791       | 7  | S  | 17 | 1474.7250      | 737.8664        |
| 625.3005       | 8  | G  | 16 | 1387.6930      | 694.3504        |
| 724.3689       | 9  | V  | 15 | 1330.6715      | 665.8397        |
| 852.4275       | 10 | Q  | 14 | 1231.6031      | 616.3055        |
| 909.4490       | 11 | G  | 13 | 1103.5445      | 552.2762        |
| 980.4861       | 12 | A  | 12 | 1046.5231      | 523.7654        |
| 1067.5181      | 13 | S  | 11 | 975.4859       | 488.2469        |
| 1138.5552      | 14 | A  | 10 | 888.4539       | 444.7309        |
| 1195.5767      | 15 | G  | 9  | 817.4168       | 409.2123        |
| 1252.5982      | 16 | G  | 8  | 760.3953       | 380.7016        |
| 1365.6822      | 17 | L  | 7  | 703.3739       | 352.1909        |
| 1436.7193      | 18 | A  | 6  | 590.2898       | 295.6488        |
| 1507.7564      | 19 | A  | 5  | 519.2527       | 260.1303        |
| 1622.7834      | 20 | D  | 4  | 448.2156       | 224.6117        |
| 1693.8205      | 21 | A  | 3  | 333.1886       | 167.0982        |
| 1780.8525      | 22 | S  | 2  | 262.1515       | 131.5797        |
|                | 23 | R  | 1  | 175.1195       | 88.0637         |

N-term:+35.07

X-range:

0 - 0

MassTol: Y-zoom:

0. 1.

MassType:

☐ AVG ☒ MONO

Axis:

☒ 1 ☐ 2

Label:

☒ I ☐ M ☐ -

Ions:

a ☐ + ☐ 2+ ☐ 3+

b ☒ + ☐ 2+ ☐ 3+

c ☐ + ☐ 2+ ☐ 3+

x ☐ + ☐ 2+ ☐ 3+

y ☒ + ☒ 2+ ☐ 3+

z ☐ + ☐ 2+ ☐ 3+

hide H<sub>2</sub>O/NH<sub>3</sub> ☐

zoom 112-122 ☐

GO

AGTNGETTQGLDGLSER, MH+ 1840.9100, m/z 614.3082  
H OS G13 P120811 220811-s1.03497.03497.3.dta

scan 3497; 1.1e+000

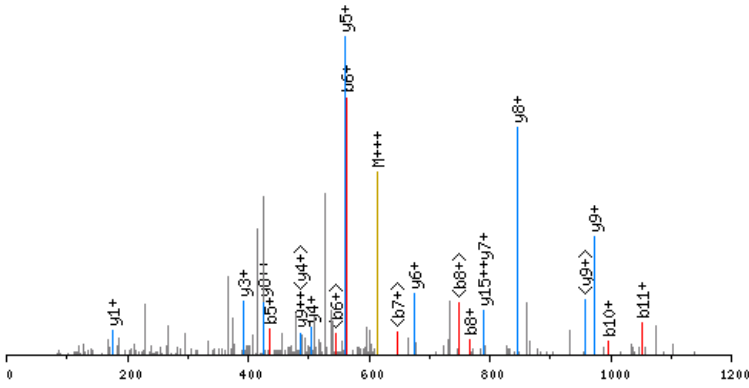

click image to zoom in; click top corners to zoom out

[precursor±]

scan 3494; 614.3 m/z; 6.3e+000

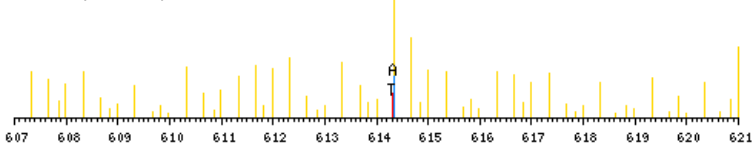

N-term: +29.04 K(12) : +156.13

X-range:

0 - 0

MassTol: Y-zoom:

0. 1.

MassType:

☐AVG ☒MONO

Axis:

☒1 ☐2

Label:

☒I ☐M ☐-

Ions:

a ☐+ ☐2+ ☐3+

b ☒+ ☐2+ ☐3+

c ☐+ ☐2+ ☐3+

x ☐+ ☐2+ ☐3+

y ☒+ ☒2+ ☐3+

z ☐+ ☐2+ ☐3+

hide H<sub>2</sub>O/NH<sub>3</sub> ☐

zoom 112-122 ☐

GO

AGVSDGSEVAKAQKAAPGGASPTIFSR, MH+ 2643.4107, m/z 661.6081  
L OS G16 P120811 220811-s1.04300.04300.4.dta

scan 4300; 8.4e+000

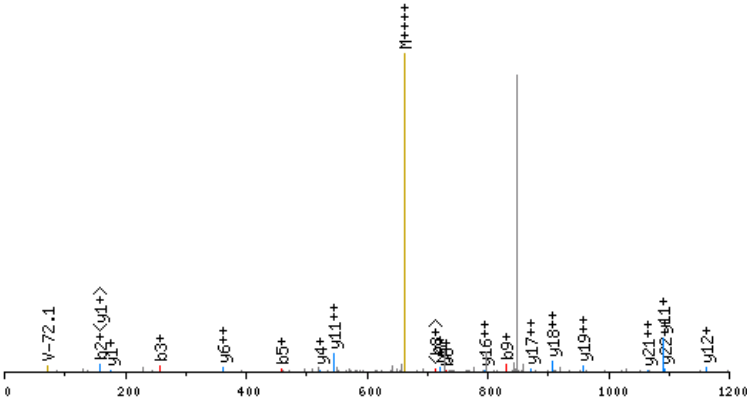

click image to zoom in; click top corners to zoom out

[precursor±]

scan 4298; 661.6 m/z; 1.5e+001

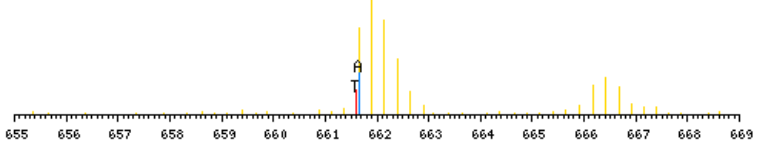

zoomed in precursor plot; T=theoretical m/z, A=acquired m/z

| b <sup>+</sup> | #  | AA | #  | y <sup>+</sup> | y <sup>2+</sup> |
|----------------|----|----|----|----------------|-----------------|
| 100.0762       | 1  | A  | 27 |                |                 |
| 157.0977       | 2  | G  | 26 | 2544.3423      | 1272.6750       |
| 256.1661       | 3  | V  | 25 | 2487.3208      | 1244.1643       |
| 343.1981       | 4  | S  | 24 | 2388.2524      | 1194.6301       |
| 458.2251       | 5  | D  | 23 | 2301.2204      | 1151.1141       |
| 515.2465       | 6  | G  | 22 | 2186.1934      | 1093.6006       |
| 602.2786       | 7  | S  | 21 | 2129.1720      | 1065.0899       |
| 731.3211       | 8  | E  | 20 | 2042.1399      | 1021.5739       |
| 830.3896       | 9  | V  | 19 | 1913.0973      | 957.0526        |
| 901.4267       | 10 | A  | 18 | 1814.0289      | 907.5184        |
| 1057.5530      | 11 | K  | 17 | 1742.9918      | 871.9998        |
| 1128.5901      | 12 | A  | 16 | 1586.8655      | 793.9367        |
| 1256.6487      | 13 | Q  | 15 | 1515.8284      | 758.4181        |
| 1412.7750      | 14 | K  | 14 | 1387.7698      | 694.3888        |
| 1483.8121      | 15 | A  | 13 | 1231.6435      | 616.3257        |
| 1554.8492      | 16 | A  | 12 | 1160.6064      | 580.8071        |
| 1651.9020      | 17 | P  | 11 | 1089.5693      | 545.2886        |
| 1708.9234      | 18 | G  | 10 | 992.5165       | 496.7622        |
| 1765.9449      | 19 | G  | 9  | 935.4951       | 468.2514        |
| 1836.9820      | 20 | A  | 8  | 878.4736       | 439.7407        |
| 1924.0140      | 21 | S  | 7  | 807.4365       | 404.2222        |
| 2021.0668      | 22 | P  | 6  | 720.4044       | 360.7061        |
| 2122.1145      | 23 | T  | 5  | 623.3517       | 312.1798        |
| 2235.1985      | 24 | I  | 4  | 522.3040       | 261.6559        |
| 2382.2669      | 25 | F  | 3  | 409.2199       | 205.1139        |
| 2469.2990      | 26 | S  | 2  | 262.1515       | 131.5797        |
|                | 27 | R  | 1  | 175.1195       | 88.0637         |

N-term: +29.04 K(11): +156.13  
K(14): +156.13

X-range:

0 - 0

MassTol: Y-zoom:

0. 1.

MassType:

☐ AVG ☒ MONO

Axis:

☒ 1 ☐ 2

Label:

☒ I ☐ M ☐ -

Ions:

a ☐ + ☐ 2+ ☐ 3+

b ☒ + ☐ 2+ ☐ 3+

c ☐ + ☐ 2+ ☐ 3+

x ☐ + ☐ 2+ ☐ 3+

y ☒ + ☒ 2+ ☐ 3+

z ☐ + ☐ 2+ ☐ 3+

hide H<sub>2</sub>O/NH<sub>3</sub> ☐

zoom 112-122 ☐

GO

AGVSVPGPMGPGSGPR, MH+ 1399.7580, m/z 467.2575  
H OS G13 P120811 220811-s1.03992.03992.3.dta

scan 3992; 1.3e+000

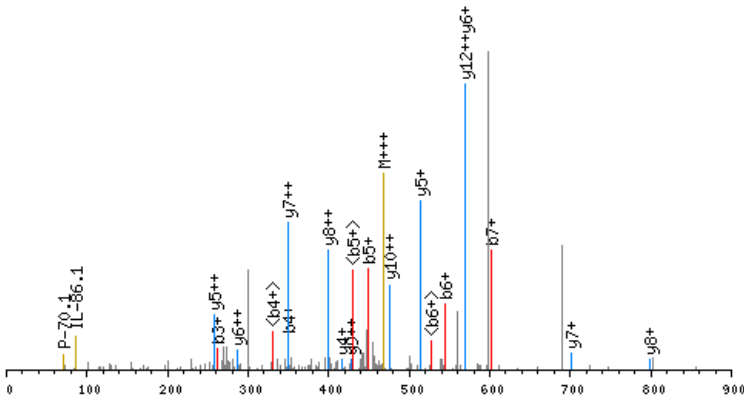

click image to zoom in; click top corners to zoom out [precursor±]

scan 3989; 467.3 m/z; 3.4e+001

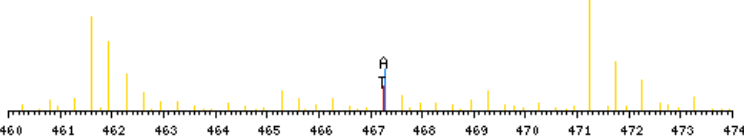

zoomed in precursor plot; T=theoretical m/z, A=acquired m/z

| b <sup>+</sup> | #  | AA | #  | y <sup>+</sup> | y <sup>2+</sup> |
|----------------|----|----|----|----------------|-----------------|
| 106.1080       | 1  | A  | 15 |                |                 |
| 163.1295       | 2  | G  | 14 | 1294.6578      | 647.8328        |
| 262.1979       | 3  | V  | 13 | 1237.6363      | 619.3221        |
| 349.2299       | 4  | S  | 12 | 1138.5679      | 569.7879        |
| 448.2983       | 5  | V  | 11 | 1051.5359      | 526.2718        |
| 545.3511       | 6  | P  | 10 | 952.4675       | 476.7376        |
| 602.3726       | 7  | G  | 9  | 855.4147       | 428.2113        |
| 699.4253       | 8  | P  | 8  | 798.3932       | 399.7005        |
| 830.4658       | 9  | M  | 7  | 701.3405       | 351.1741        |
| 887.4873       | 10 | G  | 6  | 570.3000       | 285.6539        |
| 984.5400       | 11 | P  | 5  | 513.2785       | 257.1432        |
| 1071.5721      | 12 | S  | 4  | 416.2258       | 208.6168        |
| 1128.5935      | 13 | G  | 3  | 329.1937       | 165.1008        |
| 1225.6463      | 14 | P  | 2  | 272.1723       | 136.5900        |
|                | 15 | R  | 1  | 175.1195       | 88.0637         |

N-term:+35.07

X-range:

0 - 0

MassTol: Y-zoom:

0. 1.

MassType:

☐AVG ☒MONO

Axis:

☒1 ☐2

Label:

☒I ☐M ☐-

Ions:

a ☐+ ☐2+ ☐3+

b ☒+ ☐2+ ☐3+

c ☐+ ☐2+ ☐3+

x ☐+ ☐2+ ☐3+

y ☒+ ☒2+ ☐3+

z ☐+ ☐2+ ☐3+

hide H<sub>2</sub>O/NH<sub>3</sub> ☐

zoom 112-122 ☐

GO

AHEDPVEKVIEGFSR, MH+ 1768.9234, m/z 442.9863  
L OS G17 P120811 220811-s1.06149.06149.4.dta

scan 6149; 3.0e+000

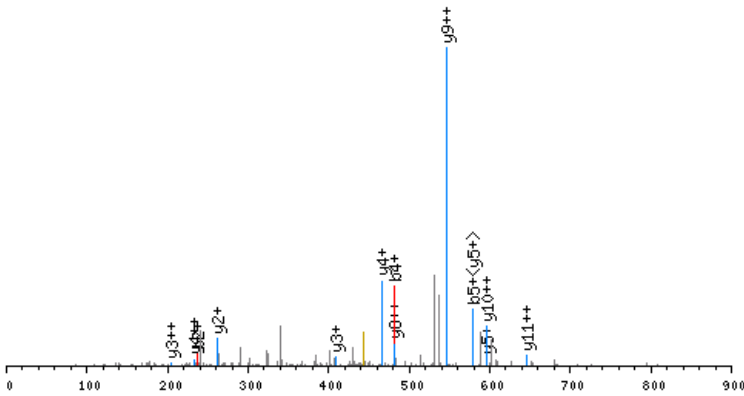

click image to zoom in; click top corners to zoom out

[precursor±]

scan 6148; 443.0 m/z; 8.1e+000

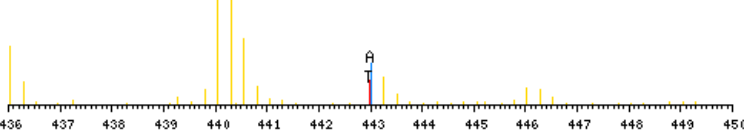

zoomed in precursor plot; T=theoretical m/z, A=acquired m/z

| b <sup>+</sup> | #  | AA | #  | y <sup>+</sup> | y <sup>2+</sup> |
|----------------|----|----|----|----------------|-----------------|
| 100.0762       | 1  | A  | 15 |                |                 |
| 237.1351       | 2  | H  | 14 | 1669.8550      | 835.4314        |
| 366.1777       | 3  | E  | 13 | 1532.7961      | 766.9020        |
| 481.2047       | 4  | D  | 12 | 1403.7535      | 702.3807        |
| 578.2574       | 5  | P  | 11 | 1288.7265      | 644.8672        |
| 677.3258       | 6  | V  | 10 | 1191.6738      | 596.3408        |
| 806.3684       | 7  | E  | 9  | 1092.6054      | 546.8066        |
| 962.4947       | 8  | K  | 8  | 963.5628       | 482.2853        |
| 1061.5631      | 9  | V  | 7  | 807.4365       | 404.2222        |
| 1174.6472      | 10 | I  | 6  | 708.3681       | 354.6879        |
| 1303.6898      | 11 | E  | 5  | 595.2840       | 298.1459        |
| 1360.7113      | 12 | G  | 4  | 466.2414       | 233.6246        |
| 1507.7797      | 13 | F  | 3  | 409.2199       | 205.1139        |
| 1594.8117      | 14 | S  | 2  | 262.1515       | 131.5797        |
|                | 15 | R  | 1  | 175.1195       | 88.0637         |

N-term:+29.04 K(8):+156.13

X-range:

0 - 0

MassTol: Y-zoom:

0. 1.

MassType:

☐ AVG ☒ MONO

Axis:

☒ 1 ☐ 2

Label:

☒ I ☐ M ☐ -

Ions:

a ☐ + ☐ 2+ ☐ 3+

b ☒ + ☐ 2+ ☐ 3+

c ☐ + ☐ 2+ ☐ 3+

x ☐ + ☐ 2+ ☐ 3+

y ☒ + ☒ 2+ ☐ 3+

z ☐ + ☐ 2+ ☐ 3+

hide H<sub>2</sub>O/NH<sub>3</sub> ☐

zoom 112-122 ☐

GO

AHGGYSVFAGVGER, MH+ 1434.7130, m/z 478.9092  
L OS G16 P120811 220811-s1.04027.04027.3.dta

scan 4027; 5.1e+000

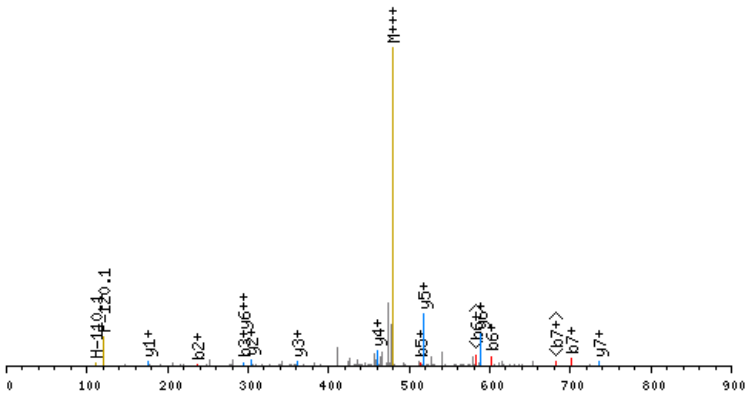

click image to zoom in; click top corners to zoom out [\[precursor±\]](#)

scan 4023; 478.9 m/z; 3.6e+001

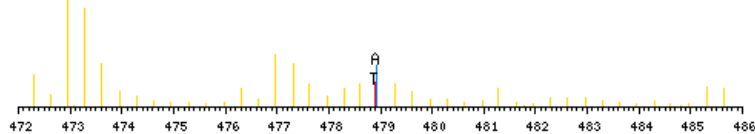

zoomed in precursor plot; T=theoretical m/z, A=acquired m/z

| b <sup>+</sup> | #  | AA | #  | y <sup>+</sup> | y <sup>2+</sup> |
|----------------|----|----|----|----------------|-----------------|
| 100.0762       | 1  | A  | 14 |                |                 |
| 237.1351       | 2  | H  | 13 | 1335.6446      | 668.3262        |
| 294.1566       | 3  | G  | 12 | 1198.5857      | 599.7967        |
| 351.1781       | 4  | G  | 11 | 1141.5642      | 571.2860        |
| 514.2414       | 5  | Y  | 10 | 1084.5427      | 542.7753        |
| 601.2734       | 6  | S  | 9  | 921.4794       | 461.2436        |
| 700.3418       | 7  | V  | 8  | 834.4474       | 417.7276        |
| 847.4102       | 8  | F  | 7  | 735.3790       | 368.1934        |
| 918.4474       | 9  | A  | 6  | 588.3105       | 294.6592        |
| 975.4688       | 10 | G  | 5  | 517.2734       | 259.1406        |
| 1074.5372      | 11 | V  | 4  | 460.2520       | 230.6299        |
| 1131.5587      | 12 | G  | 3  | 361.1836       | 181.0957        |
| 1260.6013      | 13 | E  | 2  | 304.1621       | 152.5850        |
|                | 14 | R  | 1  | 175.1195       | 88.0637         |

N-term:+29.04

X-range:

0 - 0

MassTol: Y-zoom:

0. 1.

MassType:

☐ AVG ☒ MONO

Axis:

☒ 1 ☐ 2

Label:

☒ I ☐ M ☐ -

Ions:

a ☐ + ☐ 2+ ☐ 3+

b ☒ + ☐ 2+ ☐ 3+

c ☐ + ☐ 2+ ☐ 3+

x ☐ + ☐ 2+ ☐ 3+

y ☒ + ☒ 2+ ☐ 3+

z ☐ + ☐ 2+ ☐ 3+

hide H<sub>2</sub>O/NH<sub>3</sub> ☐

zoom 112-122 ☐

GO

AHGSVVKSEDYAFPTYADR, MH+ 2181.1253, m/z 546.0368  
H OS G17 P120811 220811-s1.04150.04150.4.dta

scan 4150; 2.3e+000

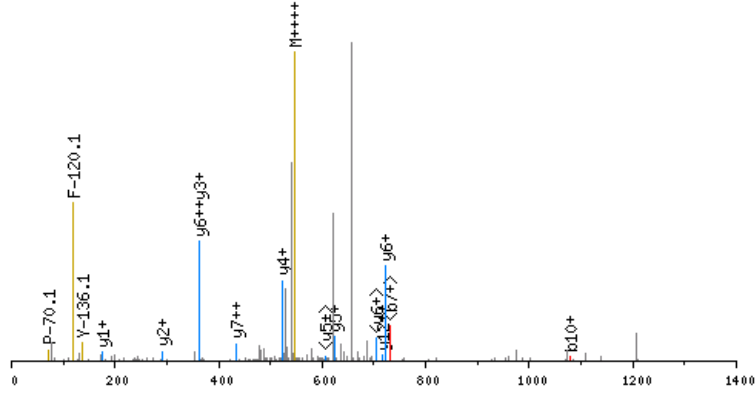

click image to zoom in; click top corners to zoom out [\[precursor±\]](#)

scan 4148; 546.0 m/z; 1.1e+001

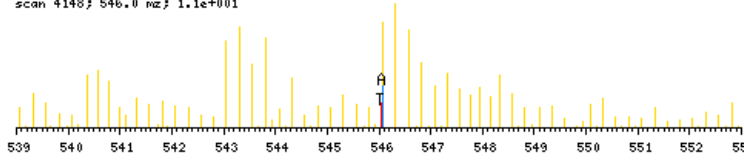

zoomed in precursor plot; T=theoretical m/z, A=acquired m/z

| b <sup>+</sup> | #  | AA | #  | y <sup>+</sup> | y <sup>2+</sup> |
|----------------|----|----|----|----------------|-----------------|
| 106.1080       | 1  | A  | 19 |                |                 |
| 243.1669       | 2  | H  | 18 | 2076.0251      | 1038.5165       |
| 300.1884       | 3  | G  | 17 | 1938.9662      | 969.9870        |
| 387.2204       | 4  | S  | 16 | 1881.9447      | 941.4763        |
| 486.2888       | 5  | V  | 15 | 1794.9127      | 897.9603        |
| 585.3572       | 6  | V  | 14 | 1695.8443      | 848.4260        |
| 747.5153       | 7  | K  | 13 | 1596.7758      | 798.8918        |
| 834.5474       | 8  | S  | 12 | 1434.6177      | 717.8128        |
| 963.5900       | 9  | E  | 11 | 1347.5857      | 674.2968        |
| 1078.6169      | 10 | D  | 10 | 1218.5431      | 609.7755        |
| 1241.6802      | 11 | Y  | 9  | 1103.5162      | 552.2620        |
| 1312.7174      | 12 | A  | 8  | 940.4529       | 470.7303        |
| 1459.7858      | 13 | F  | 7  | 869.4157       | 435.2118        |
| 1556.8385      | 14 | P  | 6  | 722.3473       | 361.6776        |
| 1657.8862      | 15 | T  | 5  | 625.2946       | 313.1512        |
| 1820.9495      | 16 | Y  | 4  | 524.2469       | 262.6274        |
| 1891.9867      | 17 | A  | 3  | 361.1836       | 181.0957        |
| 2007.0136      | 18 | D  | 2  | 290.1464       | 145.5771        |
|                | 19 | R  | 1  | 175.1195       | 88.0637         |

N-term:+35.07 K(7):+162.16

X-range:

0 - 0

MassTol: Y-zoom:

0. 1.

MassType:

☐AVG ☒MONO

Axis:

☒1 ☐2

Label:

☒I ☐M ☐-

Ions:

a ☐+ ☐2+ ☐3+

b ☒+ ☐2+ ☐3+

c ☐+ ☐2+ ☐3+

x ☐+ ☐2+ ☐3+

y ☒+ ☒2+ ☐3+

z ☐+ ☐2+ ☐3+

hide H<sub>2</sub>O/NH<sub>3</sub> ☐

zoom 112-122 ☐

GO

AHGSVVKSEDIYAFPTYADRR, MH+ 2337.2264, m/z 585.0621  
H OS G18 P120811 220811-s1.03853.03853.4.dta

scan 3853; 4.0e+000

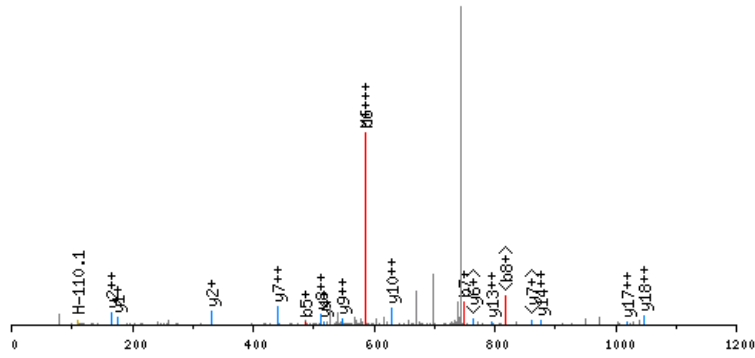

click image to zoom in; click top corners to zoom out [\[precursor±\]](#)

scan 3851; 585.1 m/z; 9.2e+000

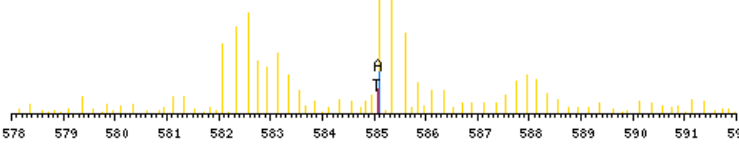

zoomed in precursor plot; T=theoretical m/z, A=acquired m/z

| b <sup>+</sup> | #  | AA | #  | y <sup>+</sup> | y <sup>2+</sup> |
|----------------|----|----|----|----------------|-----------------|
| 106.1080       | 1  | A  | 20 |                |                 |
| 243.1669       | 2  | H  | 19 | 2232.1262      | 1116.5670       |
| 300.1884       | 3  | G  | 18 | 2095.0673      | 1048.0376       |
| 387.2204       | 4  | S  | 17 | 2038.0458      | 1019.5268       |
| 486.2888       | 5  | V  | 16 | 1951.0138      | 976.0108        |
| 585.3572       | 6  | V  | 15 | 1851.9454      | 926.4766        |
| 747.5153       | 7  | K  | 14 | 1752.8770      | 876.9424        |
| 834.5474       | 8  | S  | 13 | 1590.7189      | 795.8633        |
| 963.5900       | 9  | E  | 12 | 1503.6868      | 752.3473        |
| 1078.6169      | 10 | D  | 11 | 1374.6442      | 687.8260        |
| 1241.6802      | 11 | Y  | 10 | 1259.6173      | 630.3126        |
| 1312.7174      | 12 | A  | 9  | 1096.5540      | 548.7809        |
| 1459.7858      | 13 | F  | 8  | 1025.5169      | 513.2623        |
| 1556.8385      | 14 | P  | 7  | 878.4484       | 439.7281        |
| 1657.8862      | 15 | T  | 6  | 781.3957       | 391.2018        |
| 1820.9495      | 16 | Y  | 5  | 680.3480       | 340.6779        |
| 1891.9867      | 17 | A  | 4  | 517.2847       | 259.1462        |
| 2007.0136      | 18 | D  | 3  | 446.2476       | 223.6277        |
| 2163.1147      | 19 | R  | 2  | 331.2206       | 166.1142        |
|                | 20 | R  | 1  | 175.1195       | 88.0637         |

N-term:+35.07 K(7):+162.16

X-range:

0 - 0

MassTol: Y-zoom:

0. 1.

MassType:

☐AVG ☒MONO

Axis:

☒1 ☐2

Label:

☒I ☐M ☐-

Ions:

a ☐+ ☐2+ ☐3+

b ☒+ ☐2+ ☐3+

c ☐+ ☐2+ ☐3+

x ☐+ ☐2+ ☐3+

y ☒+ ☒2+ ☐3+

z ☐+ ☐2+ ☐3+

hide H<sub>2</sub>O/NH<sub>3</sub> ☐

zoom 112-122 ☐

GO

AHLTGDTIIQGSATSLR, MH+ 1768.9557, m/z 590.3234  
L OS G16 P120811 220811-s1.04432.04432.3.dta

scan 4432; 1.1e+000

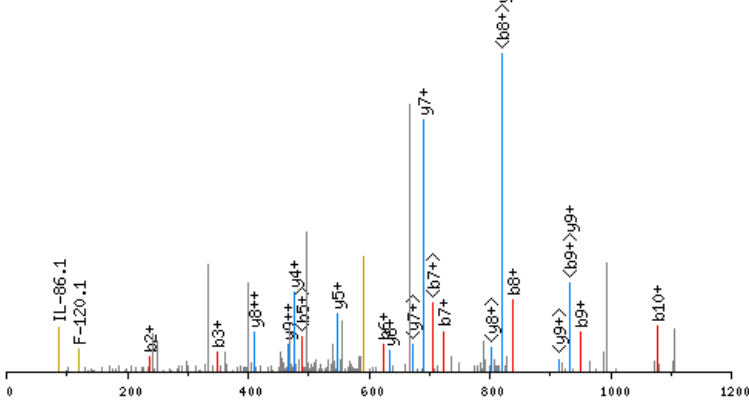

click image to zoom in; click top corners to zoom out

[precursor±]

scan 4428; 590.3 m/z; 2.1e+001

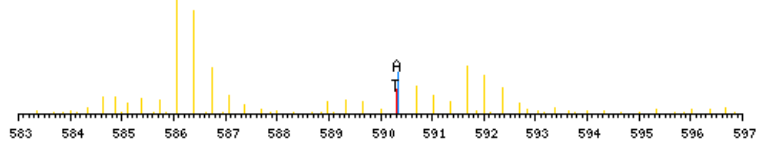

zoomed in precursor plot; T=theoretical m/z, A=acquired m/z

| b <sup>+</sup> | #  | AA | #  | y <sup>+</sup> | y <sup>2+</sup> |
|----------------|----|----|----|----------------|-----------------|
| 100.0762       | 1  | A  | 17 |                |                 |
| 237.1351       | 2  | H  | 16 | 1669.8873      | 835.4476        |
| 350.2192       | 3  | L  | 15 | 1532.8284      | 766.9181        |
| 451.2669       | 4  | T  | 14 | 1419.7443      | 710.3761        |
| 508.2883       | 5  | G  | 13 | 1318.6967      | 659.8522        |
| 623.3153       | 6  | D  | 12 | 1261.6752      | 631.3415        |
| 724.3630       | 7  | T  | 11 | 1146.6483      | 573.8280        |
| 837.4470       | 8  | I  | 10 | 1045.6006      | 523.3042        |
| 950.5311       | 9  | I  | 9  | 932.5165       | 466.7622        |
| 1078.5897      | 10 | Q  | 8  | 819.4325       | 410.2201        |
| 1135.6111      | 11 | G  | 7  | 691.3739       | 346.1909        |
| 1222.6432      | 12 | S  | 6  | 634.3524       | 317.6801        |
| 1293.6803      | 13 | A  | 5  | 547.3204       | 274.1641        |
| 1394.7279      | 14 | T  | 4  | 476.2833       | 238.6455        |
| 1481.7600      | 15 | S  | 3  | 375.2356       | 188.1217        |
| 1594.8440      | 16 | L  | 2  | 288.2036       | 144.6057        |
|                | 17 | R  | 1  | 175.1195       | 88.0637         |

N-term:+29.04

X-range:

0 - 0

MassTol: Y-zoom:

0. 1.

MassType:

☐AVG ☒MONO

Axis:

☒1 ☐2

Label:

☒I ☐M ☐-

Ions:

a ☐+ ☐2+ ☐3+

b ☒+ ☐2+ ☐3+

c ☐+ ☐2+ ☐3+

x ☐+ ☐2+ ☐3+

y ☒+ ☒2+ ☐3+

z ☐+ ☐2+ ☐3+

hide H<sub>2</sub>O/NH<sub>3</sub> ☐

zoom 112-122 ☐

GO

AHTEFTPTETDTYACR, MH+ 1927.8495, m/z 643.2880  
L OS G16 P120811 220811-s1.03332.03332.3.dta

scan 3332; 6.9e-001

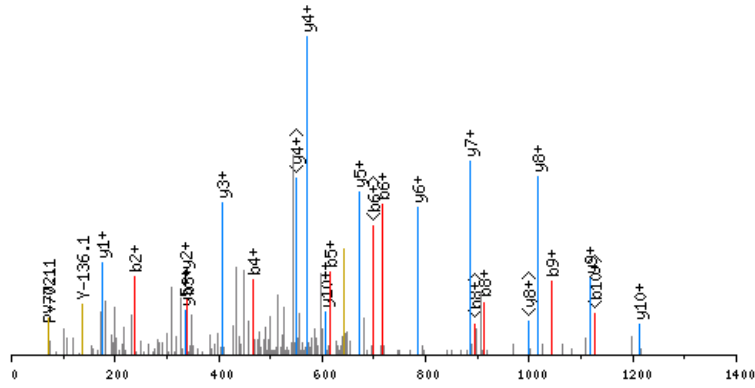

click image to zoom in; click top corners to zoom out

[precursor±]

scan 3328; 643.3 m/z; 7.0e+000

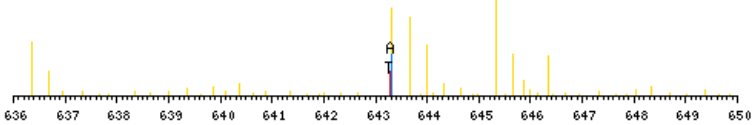

zoomed in precursor plot; T=theoretical m/z, A=acquired m/z

| b <sup>+</sup> | #  | AA | #  | y <sup>+</sup> | y <sup>2+</sup> |
|----------------|----|----|----|----------------|-----------------|
| 100.0762       | 1  | A  | 16 |                |                 |
| 237.1351       | 2  | H  | 15 | 1828.7812      | 914.8945        |
| 338.1828       | 3  | T  | 14 | 1691.7222      | 846.3650        |
| 467.2254       | 4  | E  | 13 | 1590.6746      | 795.8412        |
| 614.2938       | 5  | F  | 12 | 1461.6320      | 731.3199        |
| 715.3415       | 6  | T  | 11 | 1314.5636      | 657.7857        |
| 812.3943       | 7  | P  | 10 | 1213.5159      | 607.2619        |
| 913.4419       | 8  | T  | 9  | 1116.4631      | 558.7355        |
| 1042.4845      | 9  | E  | 8  | 1015.4154      | 508.2116        |
| 1143.5322      | 10 | T  | 7  | 886.3728       | 443.6903        |
| 1258.5591      | 11 | D  | 6  | 785.3252       | 393.1665        |
| 1359.6068      | 12 | T  | 5  | 670.2982       | 335.6530        |
| 1522.6702      | 13 | Y  | 4  | 569.2505       | 285.1292        |
| 1593.7073      | 14 | A  | 3  | 406.1872       | 203.5975        |
| 1753.7379      | 15 | C  | 2  | 335.1501       | 168.0790        |
|                | 16 | R  | 1  | 175.1195       | 88.0637         |

N-term:+29.04 C(15):+160.03

X-range:

0 - 0

MassTol: Y-zoom:

0. 1.

MassType:

☐AVG ☒MONO

Axis:

☒1 ☐2

Label:

☒I ☐M ☐-

Ions:

a ☐+ ☐2+ ☐3+

b ☒+ ☐2+ ☐3+

c ☐+ ☐2+ ☐3+

x ☐+ ☐2+ ☐3+

y ☒+ ☒2+ ☐3+

z ☐+ ☐2+ ☐3+

hide H<sub>2</sub>O/NH<sub>3</sub> ☐

zoom 112-122 ☐

GO

AIDLIAQQPVNEVEHR, MH+ 1859.9979, m/z 620.6708  
L OS G15 P120811 220811-s1.04599.04599.3.dta

scan 4599; 1.7e+000

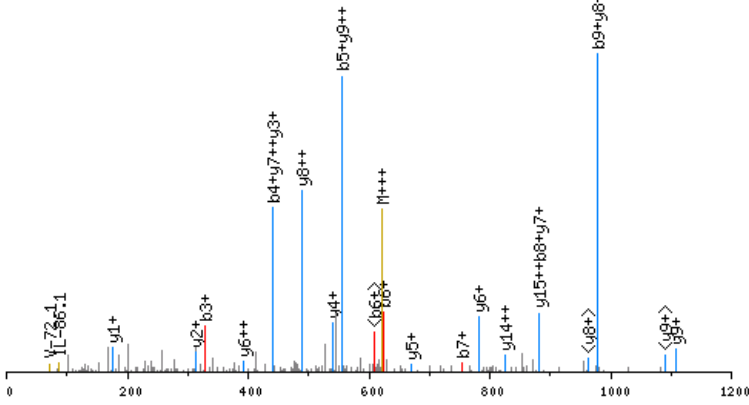

click image to zoom in; click top corners to zoom out

[precursor±]

scan 4596; 620.7 m/z; 1.9e+002

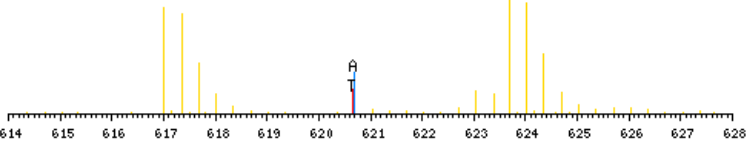

zoomed in precursor plot; T=theoretical m/z, A=acquired m/z

| b <sup>+</sup> | #  | AA | #  | y <sup>+</sup> | y <sup>2+</sup> |
|----------------|----|----|----|----------------|-----------------|
| 100.0762       | 1  | A  | 16 |                |                 |
| 213.1603       | 2  | I  | 15 | 1760.9295      | 880.9687        |
| 328.1872       | 3  | D  | 14 | 1647.8455      | 824.4266        |
| 441.2713       | 4  | L  | 13 | 1532.8185      | 766.9132        |
| 554.3553       | 5  | I  | 12 | 1419.7345      | 710.3711        |
| 625.3925       | 6  | A  | 11 | 1306.6504      | 653.8291        |
| 753.4510       | 7  | Q  | 10 | 1235.6133      | 618.3105        |
| 881.5096       | 8  | Q  | 9  | 1107.5547      | 554.2813        |
| 978.5624       | 9  | P  | 8  | 979.4961       | 490.2520        |
| 1077.6308      | 10 | V  | 7  | 882.4434       | 441.7256        |
| 1191.6737      | 11 | N  | 6  | 783.3749       | 392.1914        |
| 1320.7163      | 12 | E  | 5  | 669.3320       | 335.1699        |
| 1419.7847      | 13 | V  | 4  | 540.2894       | 270.6486        |
| 1548.8273      | 14 | E  | 3  | 441.2210       | 221.1144        |
| 1685.8862      | 15 | H  | 2  | 312.1784       | 156.5931        |
|                | 16 | R  | 1  | 175.1195       | 88.0637         |

N-term:+29.04

X-range:

0 - 0

MassTol: Y-zoom:

0. 1.

MassType:

☐AVG ☒MONO

Axis:

☒1 ☐2

Label:

☒I ☐M ☐-

Ions:

a ☐+ ☐2+ ☐3+

b ☒+ ☐2+ ☐3+

c ☐+ ☐2+ ☐3+

x ☐+ ☐2+ ☐3+

y ☒+ ☒2+ ☐3+

z ☐+ ☐2+ ☐3+

hide H<sub>2</sub>O/NH<sub>3</sub> ☐

zoom 112-122 ☐

GO

AIGEDFVLLKER, MH+ 1445.8368, m/z 482.6171  
L OS G15 P120811 220811-s1.05235.05235.3.dta

scan 5235; 1.4e+001

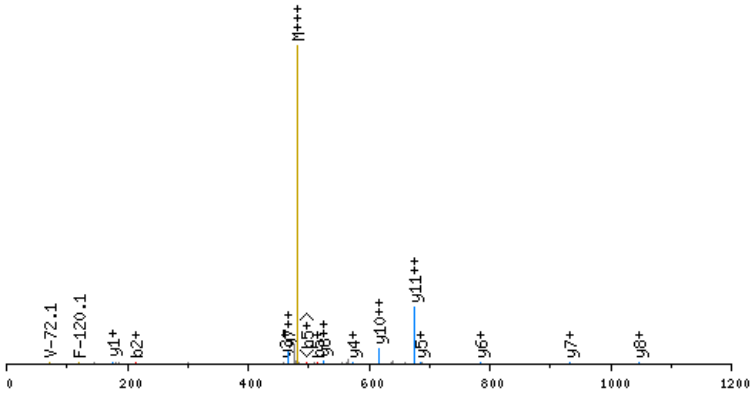

click image to zoom in; click top corners to zoom out

[precursor±]

scan 5231; 482.6 m/z; 4.1e+000

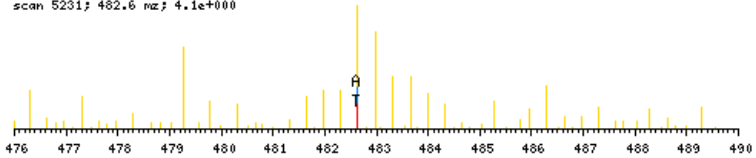

zoomed in precursor plot; T=theoretical m/z, A=acquired m/z

| b <sup>+</sup> | #  | AA | #  | y <sup>+</sup> | y <sup>2+</sup> |
|----------------|----|----|----|----------------|-----------------|
| 100.0762       | 1  | A  | 12 |                |                 |
| 213.1603       | 2  | I  | 11 | 1346.7684      | 673.8881        |
| 270.1817       | 3  | G  | 10 | 1233.6843      | 617.3461        |
| 399.2243       | 4  | E  | 9  | 1176.6629      | 588.8354        |
| 514.2513       | 5  | D  | 8  | 1047.6203      | 524.3141        |
| 661.3197       | 6  | F  | 7  | 932.5933       | 466.8006        |
| 760.3881       | 7  | V  | 6  | 785.5249       | 393.2664        |
| 873.4722       | 8  | L  | 5  | 686.4565       | 343.7322        |
| 986.5562       | 9  | L  | 4  | 573.3725       | 287.1901        |
| 1142.6825      | 10 | K  | 3  | 460.2884       | 230.6481        |
| 1271.7251      | 11 | E  | 2  | 304.1621       | 152.5850        |
|                | 12 | R  | 1  | 175.1195       | 88.0637         |

N-term:+29.04 K(10):+156.13

X-range:

0 - 0

MassTol: Y-zoom:

0. 1.

MassType:

☐AVG ☒MONO

Axis:

☒1 ☐2

Label:

☒I ☐M ☐-

Ions:

a ☐+ ☐2+ ☐3+

b ☒+ ☐2+ ☐3+

c ☐+ ☐2+ ☐3+

x ☐+ ☐2+ ☐3+

y ☒+ ☒2+ ☐3+

z ☐+ ☐2+ ☐3+

hide H<sub>2</sub>O/NH<sub>3</sub> ☐

zoom 112-122 ☐

GO

AILVDLEPGTMSVR, MH+ 1643.8678, m/z 548.6275  
L OS G13 P120811 220811-s1.06371.06371.3.dta

scan 6371; 3.6e+000

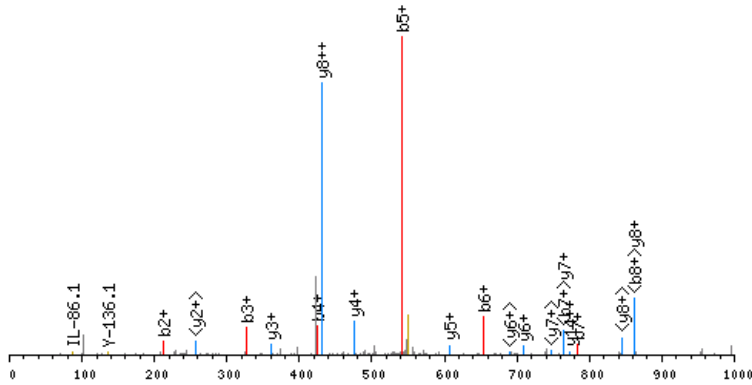

click image to zoom in; click top corners to zoom out [\[precursor±\]](#)

scan 6369; 548.6 m/z; 2.3e+001

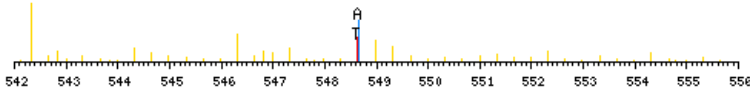

zoomed in precursor plot; T=theoretical m/z, A=acquired m/z

| b <sup>+</sup> | #  | AA | #  | y <sup>+</sup> | y <sup>2+</sup> |
|----------------|----|----|----|----------------|-----------------|
| 100.0762       | 1  | A  | 15 |                |                 |
| 213.1603       | 2  | I  | 14 | 1544.7994      | 772.9036        |
| 326.2443       | 3  | L  | 13 | 1431.7154      | 716.3616        |
| 425.3128       | 4  | V  | 12 | 1318.6313      | 659.8196        |
| 540.3397       | 5  | D  | 11 | 1219.5629      | 610.2854        |
| 653.4238       | 6  | L  | 10 | 1104.5359      | 552.7719        |
| 782.4664       | 7  | E  | 9  | 991.4519       | 496.2298        |
| 879.5191       | 8  | P  | 8  | 862.4093       | 431.7086        |
| 936.5406       | 9  | G  | 7  | 765.3565       | 383.1822        |
| 1037.5883      | 10 | T  | 6  | 708.3350       | 354.6714        |
| 1168.6287      | 11 | M  | 5  | 607.2874       | 304.1476        |
| 1283.6557      | 12 | D  | 4  | 476.2469       | 238.6274        |
| 1370.6877      | 13 | S  | 3  | 361.2199       | 181.1139        |
| 1469.7561      | 14 | V  | 2  | 274.1879       | 137.5979        |
|                | 15 | R  | 1  | 175.1195       | 88.0637         |

N-term:+29.04

X-range:

0 - 0

MassTol: Y-zoom:

0. 1.

MassType:

☐AVG ☒MONO

Axis:

☒1 ☐2

Label:

☒I ☐M ☐-

Ions:

a ☐+ ☐2+ ☐3+

b ☒+ ☐2+ ☐3+

c ☐+ ☐2+ ☐3+

x ☐+ ☐2+ ☐3+

y ☒+ ☒2+ ☐3+

z ☐+ ☐2+ ☐3+

hide H<sub>2</sub>O/NH<sub>3</sub> ☐

zoom 112-122 ☐

GO

AISNNKDQGGYEDFVEGLR, MH+ 2180.1260, m/z 727.3802  
H OS G15 P120811 220811-s1.04989.04989.3.dta

scan 4989; 1.0e+001

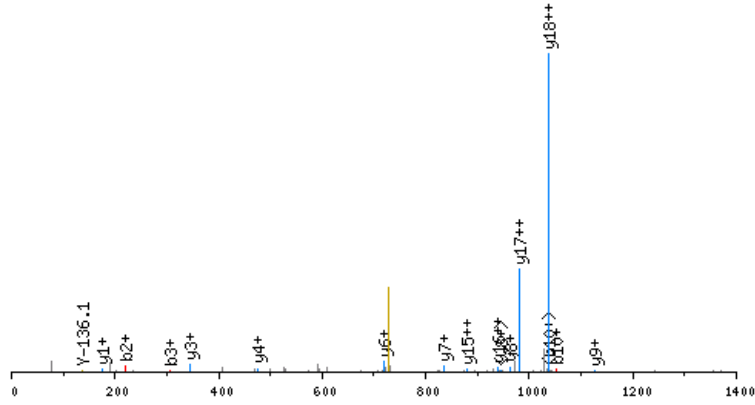

click image to zoom in; click top corners to zoom out [\[precursor±\]](#)

scan 4986; 727.4 m/z; 1.3e+001

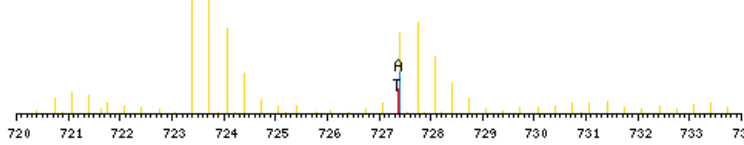

zoomed in precursor plot; T=theoretical m/z, A=acquired m/z

| b <sup>+</sup> | #  | AA | #  | y <sup>+</sup> | y <sup>2+</sup> |
|----------------|----|----|----|----------------|-----------------|
| 106.1080       | 1  | A  | 19 |                |                 |
| 219.1921       | 2  | I  | 18 | 2075.0258      | 1038.0168       |
| 306.2241       | 3  | S  | 17 | 1961.9417      | 981.4748        |
| 420.2670       | 4  | N  | 16 | 1874.9097      | 937.9588        |
| 534.3100       | 5  | N  | 15 | 1760.8668      | 880.9373        |
| 696.4681       | 6  | K  | 14 | 1646.8239      | 823.9158        |
| 811.4950       | 7  | D  | 13 | 1484.6658      | 742.8368        |
| 939.5536       | 8  | Q  | 12 | 1369.6388      | 685.3233        |
| 996.5750       | 9  | G  | 11 | 1241.5802      | 621.2940        |
| 1053.5965      | 10 | G  | 10 | 1184.5588      | 592.7833        |
| 1216.6598      | 11 | Y  | 9  | 1127.5373      | 564.2726        |
| 1345.7024      | 12 | E  | 8  | 964.4740       | 482.7409        |
| 1460.7294      | 13 | D  | 7  | 835.4314       | 418.2196        |
| 1607.7978      | 14 | F  | 6  | 720.4044       | 360.7061        |
| 1706.8662      | 15 | V  | 5  | 573.3360       | 287.1719        |
| 1835.9088      | 16 | E  | 4  | 474.2676       | 237.6377        |
| 1892.9303      | 17 | G  | 3  | 345.2250       | 173.1164        |
| 2006.0143      | 18 | L  | 2  | 288.2036       | 144.6057        |
|                | 19 | R  | 1  | 175.1195       | 88.0637         |

N-term:+35.07 K(6):+162.16

X-range:

 $0 - 0$ 

0. 1.

AVG MONO

1 2

☒ I ☐ M ☐ -

$$a \quad \boxed{\phantom{00}} + \boxed{\phantom{00}}^2 + \boxed{\phantom{00}}^3 +$$
b. ☒ 1 + ☐ 2 + ☐ 3 +

c.  $\square + \square^2 + \square^3 +$

$$= \square + \square^2 + \square^3 + \dots$$

|                                     |                                     |                                     |
|-------------------------------------|-------------------------------------|-------------------------------------|
| <input type="checkbox"/>            | <input type="checkbox"/>            | <input type="checkbox"/>            |
| <input checked="" type="checkbox"/> | <input checked="" type="checkbox"/> | <input checked="" type="checkbox"/> |

Y ☒ ☒ ☐

$$z = \begin{bmatrix} 1 \\ 2 \\ 3 \end{bmatrix} + \begin{bmatrix} 1 \\ 2 \\ 3 \end{bmatrix} z + \begin{bmatrix} 1 \\ 2 \\ 3 \end{bmatrix} z^2 + \begin{bmatrix} 1 \\ 2 \\ 3 \end{bmatrix} z^3 + \dots$$

zoom 112-122

GO

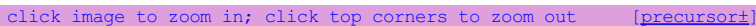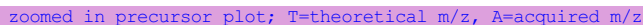

N-term:+29.04 C(5):+160.03

zoomed in precursor plot; T=theoretical m/z, A=acquired m/z

X-range:

0 - 0

MassTol: Y-zoom:

0. 1.

MassType:

☐AVG ☒MONO

Axis:

☒1 ☐2

Label:

☒I ☐M ☐-

Ions:

a ☐+ ☐2+ ☐3+

b ☒+ ☐2+ ☐3+

c ☐+ ☐2+ ☐3+

x ☐+ ☐2+ ☐3+

y ☒+ ☒2+ ☐3+

z ☐+ ☐2+ ☐3+

hide H<sub>2</sub>O/NH<sub>3</sub> ☐

zoom 112-122 ☐

GO

AITATQKTVDGPSGLWR, MH+ 2031.2451, m/z 508.5667  
H OS G17 P120811 220811-s1.03880.03880.4.dta

scan 3880; 1.3e+001

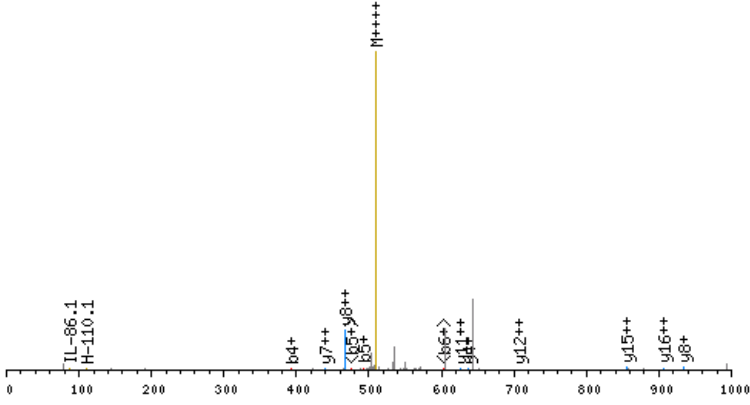

click image to zoom in; click top corners to zoom out [\[precursor±\]](#)

scan 3878; 508.6 m/z; 1.7e+001

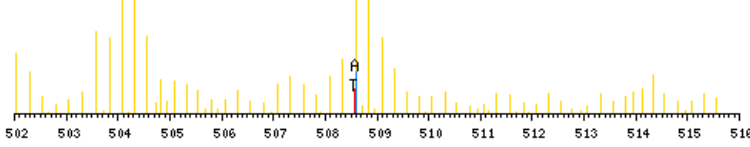

zoomed in precursor plot; T=theoretical m/z, A=acquired m/z

| b <sup>+</sup> | #  | AA | #  | y <sup>+</sup> | y <sup>2+</sup> |
|----------------|----|----|----|----------------|-----------------|
| 106.1080       | 1  | A  | 18 |                |                 |
| 219.1921       | 2  | I  | 17 | 1926.1449      | 963.5764        |
| 320.2398       | 3  | T  | 16 | 1813.0609      | 907.0344        |
| 391.2769       | 4  | A  | 15 | 1712.0132      | 856.5105        |
| 492.3245       | 5  | T  | 14 | 1640.9761      | 820.9920        |
| 620.3831       | 6  | Q  | 13 | 1539.9284      | 770.4681        |
| 782.5412       | 7  | K  | 12 | 1411.8698      | 706.4388        |
| 883.5889       | 8  | T  | 11 | 1249.7117      | 625.3598        |
| 982.6573       | 9  | V  | 10 | 1148.6641      | 574.8359        |
| 1097.6843      | 10 | D  | 9  | 1049.5956      | 525.3017        |
| 1154.7057      | 11 | G  | 8  | 934.5687       | 467.7883        |
| 1251.7585      | 12 | P  | 7  | 877.5472       | 439.2775        |
| 1338.7905      | 13 | S  | 6  | 780.4945       | 390.7511        |
| 1395.8120      | 14 | G  | 5  | 693.4624       | 347.2351        |
| 1557.9701      | 15 | K  | 4  | 636.4410       | 318.7244        |
| 1671.0541      | 16 | L  | 3  | 474.2829       | 237.6454        |
| 1857.1335      | 17 | W  | 2  | 361.1988       | 181.1033        |
|                | 18 | R  | 1  | 175.1195       | 88.0637         |

N-term:+35.07 K(7):+162.16  
K(15):+162.16

X-range:

0 - 0

MassTol: Y-zoom:

0. 1.

MassType:

☐AVG ☒MONO

Axis:

☒1 ☐2

Label:

☒I ☐M ☐-

Ions:

a ☐+ ☐2+ ☐3+

b ☒+ ☐2+ ☐3+

c ☐+ ☐2+ ☐3+

x ☐+ ☐2+ ☐3+

y ☒+ ☒2+ ☐3+

z ☐+ ☐2+ ☐3+

hide H<sub>2</sub>O/NH<sub>3</sub> ☐

zoom 112-122 ☐

GO

AIVEFLEPLEAR, MH+ 1414.7946, m/z 472.2697  
L OS G16 P120811 220811-s1.06116.06116.3.dta

scan 6116; 4.9e+000

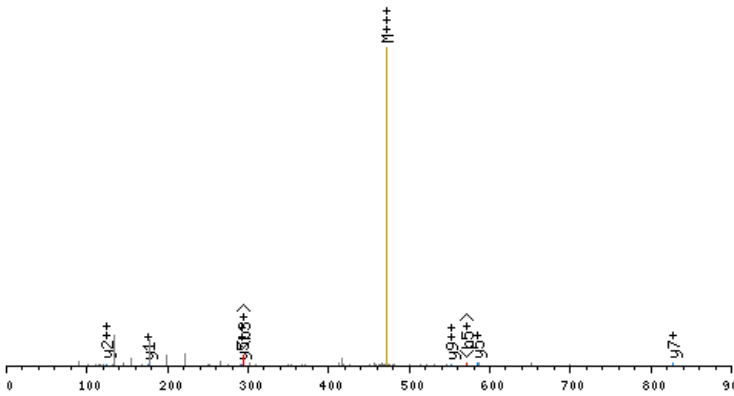

click image to zoom in; click top corners to zoom out

[precursor±]

scan 6113; 472.3 m/z; 4.2e+002

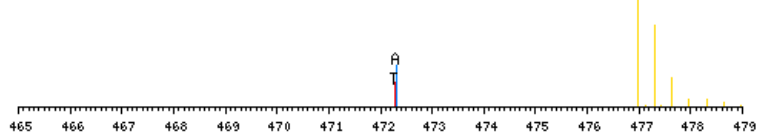

zoomed in precursor plot; T=theoretical m/z, A=acquired m/z

| b <sup>+</sup> | #  | AA | #  | y <sup>+</sup> | y <sup>2+</sup> |
|----------------|----|----|----|----------------|-----------------|
| 100.0762       | 1  | A  | 12 |                |                 |
| 213.1603       | 2  | I  | 11 | 1315.7262      | 658.3670        |
| 312.2287       | 3  | V  | 10 | 1202.6421      | 601.8250        |
| 441.2713       | 4  | E  | 9  | 1103.5737      | 552.2908        |
| 588.3397       | 5  | F  | 8  | 974.5311       | 487.7695        |
| 701.4238       | 6  | L  | 7  | 827.4627       | 414.2353        |
| 830.4664       | 7  | E  | 6  | 714.3786       | 357.6932        |
| 927.5191       | 8  | P  | 5  | 585.3360       | 293.1719        |
| 1040.6032      | 9  | L  | 4  | 488.2833       | 244.6455        |
| 1169.6458      | 10 | E  | 3  | 375.1992       | 188.1035        |
| 1240.6829      | 11 | A  | 2  | 246.1566       | 123.5822        |
|                | 12 | R  | 1  | 175.1195       | 88.0637         |

N-term:+29.04

X-range:

0 - 0

MassTol: Y-zoom:

0. 1.

MassType:

☐AVG ☒MONO

Axis:

☒1 ☐2

Label:

☒I ☐M ☐-

Ions:

a ☐+ ☐2+ ☐3+

b ☒+ ☐2+ ☐3+

c ☐+ ☐2+ ☐3+

x ☐+ ☐2+ ☐3+

y ☒+ ☒2+ ☐3+

z ☐+ ☐2+ ☐3+

hide H<sub>2</sub>O/NH<sub>3</sub> ☐

zoom 112-122 ☐

GO

AIVFIKEPSSQDALQGR, MH+ 1927.1289, m/z 643.0478  
H OS G15 P120811 220811-s1.04637.04637.3.dta

scan 4637; 4.4e+000

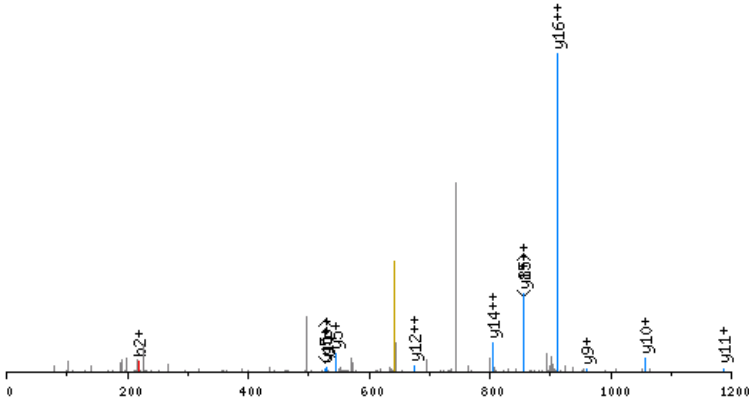

click image to zoom in; click top corners to zoom out

[precursor±]

scan 4636; 643.0 m/z; 4.6e+001

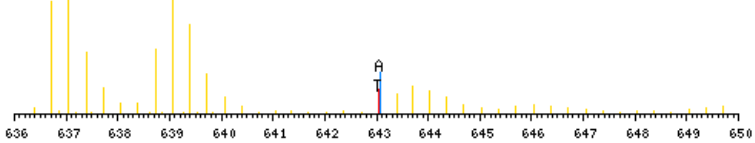

zoomed in precursor plot; T=theoretical m/z, A=acquired m/z

| b <sup>+</sup> | #  | AA | #  | y <sup>+</sup> | y <sup>2+</sup> |
|----------------|----|----|----|----------------|-----------------|
| 106.1080       | 1  | A  | 17 |                |                 |
| 219.1921       | 2  | I  | 16 | 1822.0287      | 911.5183        |
| 318.2605       | 3  | V  | 15 | 1708.9446      | 854.9762        |
| 465.3289       | 4  | F  | 14 | 1609.8762      | 805.4420        |
| 578.4130       | 5  | I  | 13 | 1462.8078      | 731.9078        |
| 740.5711       | 6  | K  | 12 | 1349.7238      | 675.3658        |
| 869.6137       | 7  | E  | 11 | 1187.5657      | 594.2867        |
| 966.6664       | 8  | P  | 10 | 1058.5231      | 529.7654        |
| 1053.6985      | 9  | S  | 9  | 961.4703       | 481.2391        |
| 1140.7305      | 10 | S  | 8  | 874.4383       | 437.7230        |
| 1268.7891      | 11 | Q  | 7  | 787.4062       | 394.2070        |
| 1383.8160      | 12 | D  | 6  | 659.3477       | 330.1777        |
| 1454.8531      | 13 | A  | 5  | 544.3207       | 272.6643        |
| 1567.9372      | 14 | L  | 4  | 473.2836       | 237.1457        |
| 1695.9958      | 15 | Q  | 3  | 360.1995       | 180.6037        |
| 1753.0172      | 16 | G  | 2  | 232.1410       | 116.5744        |
|                | 17 | R  | 1  | 175.1195       | 88.0637         |

N-term:+35.07 K(6):+162.16

X-range:

0 - 0

MassTol: Y-zoom:

0. 1.

MassType:

☐ AVG ☒ MONO

Axis:

☒ 1 ☐ 2

Label:

☒ I ☐ M ☐ -

Ions:

a ☐ + ☐ 2+ ☐ 3+

b ☒ + ☐ 2+ ☐ 3+

c ☐ + ☐ 2+ ☐ 3+

x ☐ + ☐ 2+ ☐ 3+

y ☒ + ☒ 2+ ☐ 3+

z ☐ + ☐ 2+ ☐ 3+

hide H<sub>2</sub>O/NH<sub>3</sub> ☐

zoom 112-122 ☐

GO

AKFEELNMDLFR, MH+ 1568.8147, m/z 523.6097  
L OS G16 P120811 220811-s1.06041.06041.3.dta

scan 6041; 2.6e+000

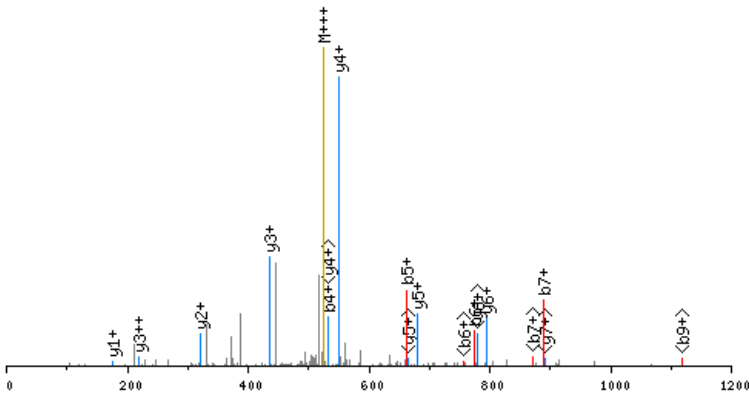

click image to zoom in; click top corners to zoom out

[precursor±]

scan 6038; 523.6 m/z; 3.1e+000

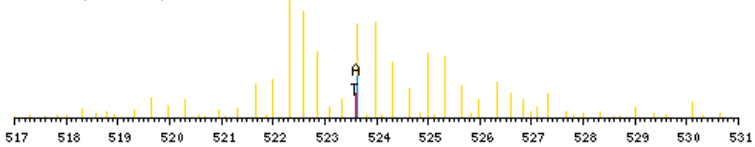

zoomed in precursor plot; T=theoretical m/z, A=acquired m/z

| b <sup>+</sup> | #  | AA | #  | y <sup>+</sup> | y <sup>2+</sup> |
|----------------|----|----|----|----------------|-----------------|
| 100.0762       | 1  | A  | 12 |                |                 |
| 256.2025       | 2  | K  | 11 | 1469.7463      | 735.3771        |
| 403.2709       | 3  | F  | 10 | 1313.6200      | 657.3139        |
| 532.3135       | 4  | E  | 9  | 1166.5516      | 583.7797        |
| 661.3561       | 5  | E  | 8  | 1037.5090      | 519.2584        |
| 774.4402       | 6  | L  | 7  | 908.4664       | 454.7371        |
| 888.4831       | 7  | N  | 6  | 795.3823       | 398.1951        |
| 1019.5236      | 8  | M  | 5  | 681.3394       | 341.1736        |
| 1134.5505      | 9  | D  | 4  | 550.2989       | 275.6534        |
| 1247.6346      | 10 | L  | 3  | 435.2720       | 218.1399        |
| 1394.7030      | 11 | F  | 2  | 322.1879       | 161.5979        |
|                | 12 | R  | 1  | 175.1195       | 88.0637         |

N-term:+29.04 K(2):+156.13

X-range:

0 - 0

MassTol: Y-zoom:

0. 1.

MassType:

☐AVG ☒MONO

Axis:

☒1 ☐2

Label:

☒I ☐M ☐-

Ions:

a ☐+ ☐2+ ☐3+

b ☒+ ☐2+ ☐3+

c ☐+ ☐2+ ☐3+

x ☐+ ☐2+ ☐3+

y ☒+ ☒2+ ☐3+

z ☐+ ☐2+ ☐3+

hide H<sub>2</sub>O/NH<sub>3</sub> ☐

zoom 112-122 ☐

GO

AKVLTPDLYNKLR, MH+ 1633.0901, m/z 409.0280  
H OS G17 P120811 220811-s1.04551.04551.4.dta

scan 4551; 1.5e+001

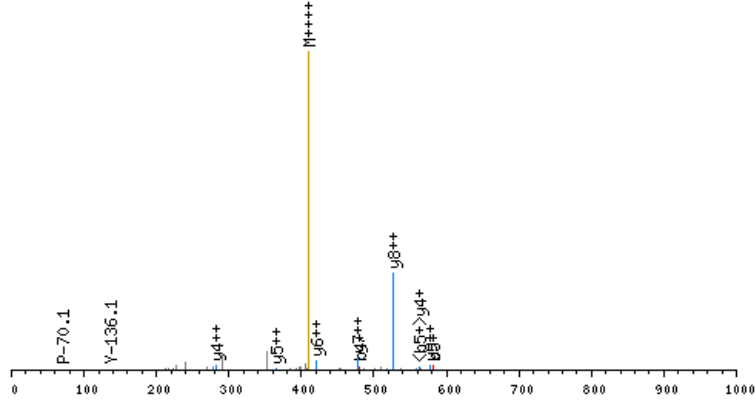

click image to zoom in; click top corners to zoom out [\[precursor±\]](#)

scan 4548; 409.0 m/z; 1.2e+001

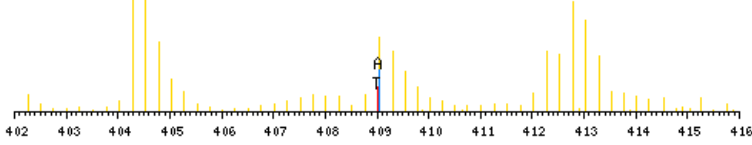

zoomed in precursor plot; T=theoretical m/z, A=acquired m/z

| b <sup>+</sup> | #  | AA | #  | y <sup>+</sup> | y <sup>2+</sup> |
|----------------|----|----|----|----------------|-----------------|
| 106.1080       | 1  | A  | 13 |                |                 |
| 268.2661       | 2  | K  | 12 | 1527.9899      | 764.4989        |
| 367.3345       | 3  | V  | 11 | 1365.8318      | 683.4198        |
| 480.4186       | 4  | L  | 10 | 1266.7634      | 633.8856        |
| 581.4663       | 5  | T  | 9  | 1153.6794      | 577.3436        |
| 678.5190       | 6  | P  | 8  | 1052.6317      | 526.8198        |
| 793.5460       | 7  | D  | 7  | 955.5789       | 478.2934        |
| 906.6300       | 8  | L  | 6  | 840.5520       | 420.7799        |
| 1069.6934      | 9  | Y  | 5  | 727.4679       | 364.2379        |
| 1183.7363      | 10 | N  | 4  | 564.4046       | 282.7062        |
| 1345.8944      | 11 | K  | 3  | 450.3617       | 225.6847        |
| 1458.9785      | 12 | L  | 2  | 288.2036       | 144.6057        |
|                | 13 | R  | 1  | 175.1195       | 88.0637         |

N-term:+35.07 K(2):+162.16  
K(11):+162.16

X-range:

0 - 0

MassTol: Y-zoom:

0. 1.

MassType:

☐ AVG ☒ MONO

Axis:

☒ 1 ☐ 2

Label:

☒ I ☐ M ☐ -

Ions:

a ☐ + ☐ 2+ ☐ 3+

b ☒ + ☐ 2+ ☐ 3+

c ☐ + ☐ 2+ ☐ 3+

x ☐ + ☐ 2+ ☐ 3+

y ☒ + ☒ 2+ ☐ 3+

z ☐ + ☐ 2+ ☐ 3+

hide H<sub>2</sub>O/NH<sub>3</sub> ☐

zoom 112-122 ☐

GO

ALDLDPSTNVSGGAIALGHPLGGSGSR, MH+ 2703.4430, m/z 676.6162  
L\_OS\_G16\_P120811\_220811-s1.05582.05582.4.dta

scan 5582; 2.5e+000

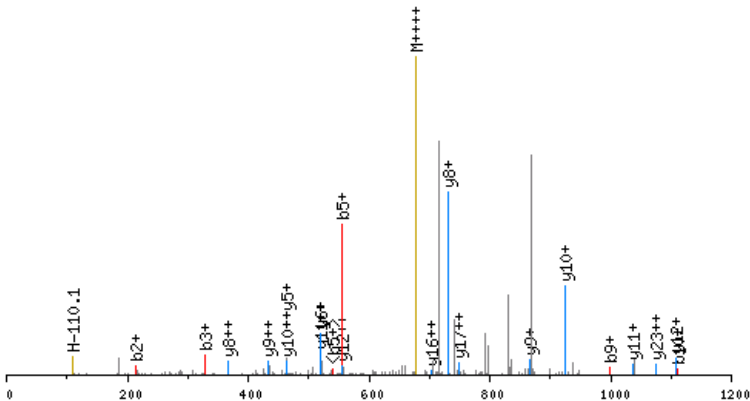

click image to zoom in; click top corners to zoom out

[precursor±]

scan 5578; 676.6 m/z; 3.7e+000

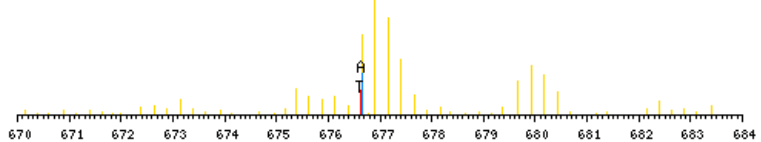

X-range:

0 - 0

MassTol: Y-zoom:

0. 1.

MassType:

☐AVG ☒MONO

Axis:

☒1 ☐2

Label:

☒I ☐M ☐-

Ions:

a ☐+ ☐2+ ☐3+

b ☒+ ☐2+ ☐3+

c ☐+ ☐2+ ☐3+

x ☐+ ☐2+ ☐3+

y ☒+ ☒2+ ☐3+

z ☐+ ☐2+ ☐3+

hide H<sub>2</sub>O/NH<sub>3</sub> ☐

zoom 112-122 ☐

GO

ALIDSHFEAR, MH+ 1192.6538, m/z 398.2228  
H OS G16 P120811 220811-s1.03782.03782.3.dta

scan 3782; 8.8e+000

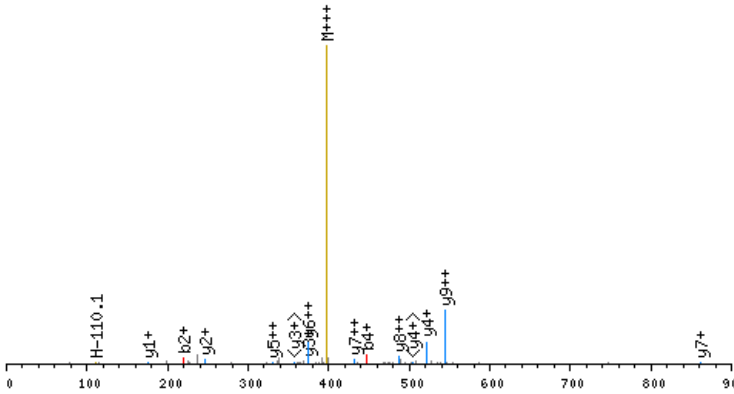

click image to zoom in; click top corners to zoom out

[precursor±]

scan 3778; 398.2 m/z; 1.3e+001

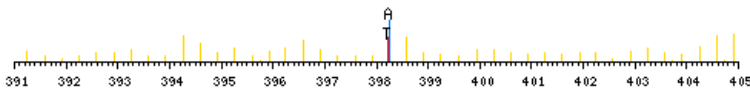

zoomed in precursor plot; T=theoretical m/z, A=acquired m/z

| b <sup>+</sup> | #  | AA | #  | y <sup>+</sup> | y <sup>2+</sup> |
|----------------|----|----|----|----------------|-----------------|
| 106.1080       | 1  | A  | 10 |                |                 |
| 219.1921       | 2  | L  | 9  | 1087.5536      | 544.2807        |
| 332.2761       | 3  | I  | 8  | 974.4696       | 487.7387        |
| 447.3031       | 4  | D  | 7  | 861.3855       | 431.1967        |
| 534.3351       | 5  | S  | 6  | 746.3586       | 373.6832        |
| 671.3940       | 6  | H  | 5  | 659.3265       | 330.1672        |
| 818.4624       | 7  | F  | 4  | 522.2676       | 261.6377        |
| 947.5050       | 8  | E  | 3  | 375.1992       | 188.1035        |
| 1018.5421      | 9  | A  | 2  | 246.1566       | 123.5822        |
|                | 10 | R  | 1  | 175.1195       | 88.0637         |

N-term:+35.07

N-term: +29.04

X-range:

0 - 0

MassTol: Y-zoom:

0. 1.

MassType:

☐ AVG ☒ MONO

Axis:

☒ 1 ☐ 2

Label:

☒ I ☐ M ☐ -

Ions:

a ☐ + ☐ 2+ ☐ 3+

b ☒ + ☐ 2+ ☐ 3+

c ☐ + ☐ 2+ ☐ 3+

x ☐ + ☐ 2+ ☐ 3+

y ☒ + ☒ 2+ ☐ 3+

z ☐ + ☐ 2+ ☐ 3+

hide H<sub>2</sub>O/NH<sub>3</sub> ☐

zoom 112-122 ☐

GO

ALSAMSNQQLEDLINQGR, MH+ 2022.0502, m/z 506.2680  
H OS G16 P120811 220811-s1.04584.04584.4.dta

scan 4584; 2.0e+001

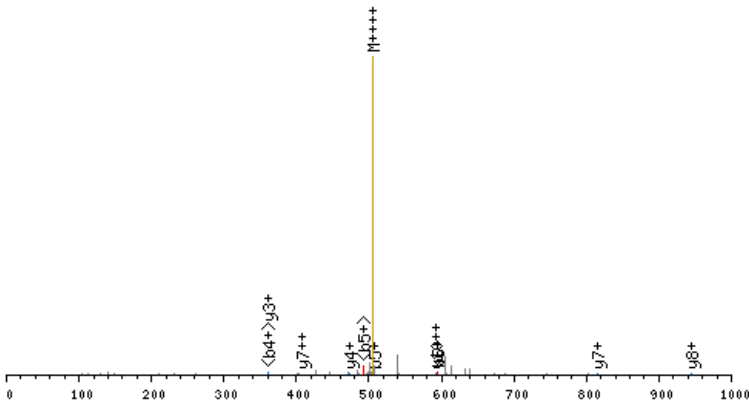

click image to zoom in; click top corners to zoom out

[precursor±]

scan 4583; 506.3 m/z; 1.1e+001

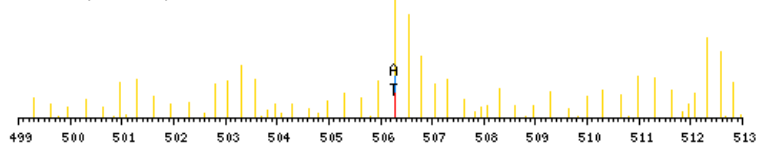

zoomed in precursor plot; T=theoretical m/z, A=acquired m/z

| b <sup>+</sup> | #  | AA | #  | y <sup>+</sup> | y <sup>2+</sup> |
|----------------|----|----|----|----------------|-----------------|
| 106.1080       | 1  | A  | 18 |                |                 |
| 219.1921       | 2  | L  | 17 | 1916.9500      | 958.9789        |
| 306.2241       | 3  | S  | 16 | 1803.8659      | 902.4369        |
| 377.2612       | 4  | A  | 15 | 1716.8339      | 858.9209        |
| 508.3017       | 5  | M  | 14 | 1645.7968      | 823.4023        |
| 595.3337       | 6  | S  | 13 | 1514.7563      | 757.8821        |
| 709.3767       | 7  | N  | 12 | 1427.7243      | 714.3661        |
| 837.4352       | 8  | Q  | 11 | 1313.6814      | 657.3446        |
| 965.4938       | 9  | Q  | 10 | 1185.6228      | 593.3153        |
| 1078.5779      | 10 | L  | 9  | 1057.5642      | 529.2860        |
| 1207.6205      | 11 | E  | 8  | 944.4801       | 472.7440        |
| 1322.6474      | 12 | D  | 7  | 815.4375       | 408.2227        |
| 1435.7315      | 13 | L  | 6  | 700.4106       | 350.7092        |
| 1548.8155      | 14 | I  | 5  | 587.3265       | 294.1672        |
| 1662.8585      | 15 | N  | 4  | 474.2425       | 237.6251        |
| 1790.9170      | 16 | Q  | 3  | 360.1995       | 180.6037        |
| 1847.9385      | 17 | G  | 2  | 232.1410       | 116.5744        |
|                | 18 | R  | 1  | 175.1195       | 88.0637         |

N-term:+35.07



X-range:

0 - 0

MassTol: Y-zoom:

0. 1.

MassType:

☐AVG ☒MONO

Axis:

☒1 ☐2

Label:

☒I ☐M ☐-

Ions:

a ☐+ ☐2+ ☐3+

b ☒+ ☐2+ ☐3+

c ☐+ ☐2+ ☐3+

x ☐+ ☐2+ ☐3+

y ☒+ ☒2+ ☐3+

z ☐+ ☐2+ ☐3+

hide H<sub>2</sub>O/NH<sub>3</sub> ☐

zoom 112-122 ☐

GO

AMDDDIAALVVDNGSGMCKAGFAGDDAPR, MH+ 2995.3599, m/z 749.5954  
L OS G12 P120811 220811-s1.05068.05068.4.dta

scan 5068; 2.4e+000

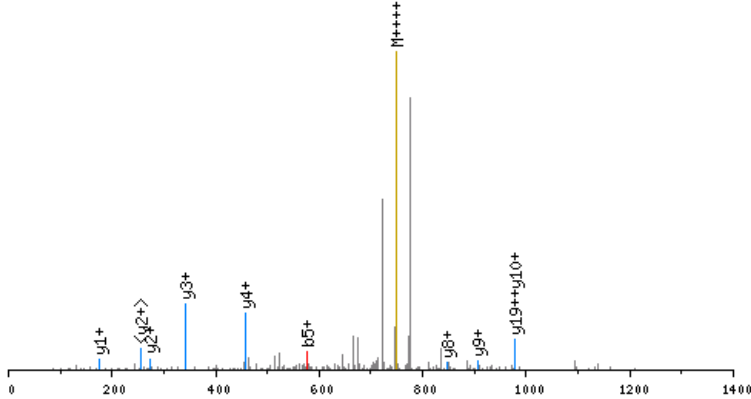

click image to zoom in; click top corners to zoom out

[precursor±]

scan 5067; 749.6 m/z; 5.6e+000

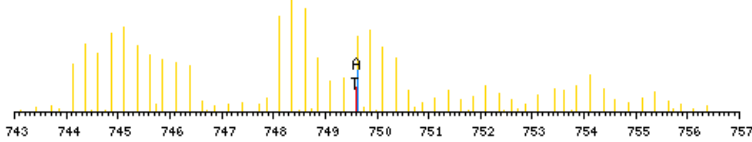

zoomed in precursor plot; T=theoretical m/z, A=acquired m/z

| b <sup>+</sup> | #  | AA | #  | y <sup>+</sup> | y <sup>2+</sup> |
|----------------|----|----|----|----------------|-----------------|
| 100.0762       | 1  | A  | 29 |                |                 |
| 231.1167       | 2  | M  | 28 | 2896.2915      | 1448.6497       |
| 346.1436       | 3  | D  | 27 | 2765.2511      | 1383.1294       |
| 461.1706       | 4  | D  | 26 | 2650.2241      | 1325.6160       |
| 576.1975       | 5  | D  | 25 | 2535.1972      | 1268.1025       |
| 689.2816       | 6  | I  | 24 | 2420.1702      | 1210.5890       |
| 760.3187       | 7  | A  | 23 | 2307.0862      | 1154.0470       |
| 831.3558       | 8  | A  | 22 | 2236.0491      | 1118.5284       |
| 944.4399       | 9  | L  | 21 | 2165.0119      | 1083.0099       |
| 1043.5083      | 10 | V  | 20 | 2051.9279      | 1026.4678       |
| 1142.5767      | 11 | V  | 19 | 1952.8595      | 976.9336        |
| 1257.6037      | 12 | D  | 18 | 1853.7910      | 927.3994        |
| 1371.6466      | 13 | N  | 17 | 1738.7641      | 869.8860        |
| 1428.6680      | 14 | G  | 16 | 1624.7212      | 812.8645        |
| 1515.7001      | 15 | S  | 15 | 1567.6997      | 784.3538        |
| 1572.7215      | 16 | G  | 14 | 1480.6677      | 740.8378        |
| 1703.7620      | 17 | M  | 13 | 1423.6462      | 712.3270        |
| 1863.7926      | 18 | C  | 12 | 1292.6057      | 646.8068        |
| 2019.9189      | 19 | K  | 11 | 1132.5751      | 566.7915        |
| 2090.9560      | 20 | A  | 10 | 976.4488       | 488.7283        |
| 2147.9775      | 21 | G  | 9  | 905.4117       | 453.2098        |
| 2295.0459      | 22 | F  | 8  | 848.3903       | 424.6990        |
| 2366.0830      | 23 | A  | 7  | 701.3218       | 351.1648        |
| 2423.1045      | 24 | G  | 6  | 630.2847       | 315.6463        |
| 2538.1314      | 25 | D  | 5  | 573.2633       | 287.1355        |
| 2653.1584      | 26 | D  | 4  | 458.2363       | 229.6221        |
| 2724.1955      | 27 | A  | 3  | 343.2094       | 172.1086        |
| 2821.2483      | 28 | P  | 2  | 272.1723       | 136.5900        |
|                | 29 | R  | 1  | 175.1195       | 88.0637         |

N-term: +29.04 C(18): +160.03  
K(19): +156.13

X-range:

0 - 0

MassTol: Y-zoom:

0. 1.

MassType:

☐AVG ☒MONO

Axis:

☒1 ☐2

Label:

☒I ☐M ☐-

Ions:

a ☐+ ☐2+ ☐3+

b ☒+ ☐2+ ☐3+

c ☐+ ☐2+ ☐3+

x ☐+ ☐2+ ☐3+

y ☒+ ☒2+ ☐3+

z ☐+ ☐2+ ☐3+

hide H<sub>2</sub>O/NH<sub>3</sub> ☐

zoom 112-122 ☐

GO

AMEGPWKTVAIAADR, MH+ 1683.9528, m/z 561.9891  
H OS G15 P120811 220811-s1.04814.04814.3.dta

scan 4814; 1.1e+001

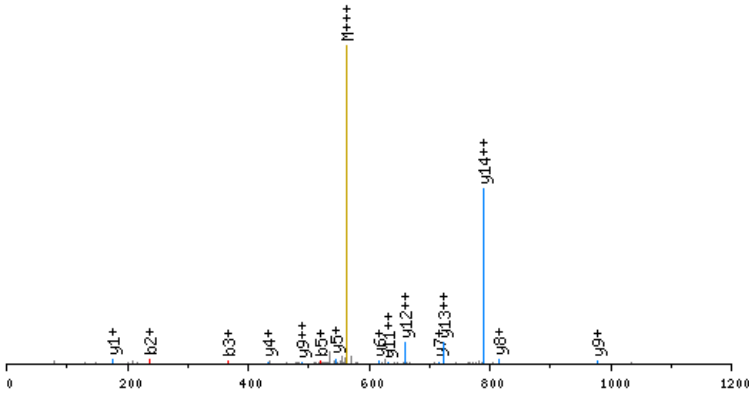

click image to zoom in; click top corners to zoom out

[precursor±]

scan 4811; 562.0 m/z; 3.0e+001

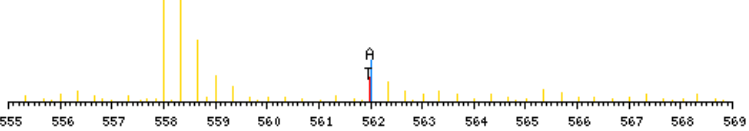

zoomed in precursor plot; T=theoretical m/z, A=acquired m/z

| b <sup>+</sup> | #  | AA | #  | y <sup>+</sup> | y <sup>2+</sup> |
|----------------|----|----|----|----------------|-----------------|
| 106.1080       | 1  | A  | 15 |                |                 |
| 237.1485       | 2  | M  | 14 | 1578.8527      | 789.9302        |
| 366.1911       | 3  | E  | 13 | 1447.8122      | 724.4100        |
| 423.2126       | 4  | G  | 12 | 1318.7696      | 659.8887        |
| 520.2653       | 5  | P  | 11 | 1261.7481      | 631.3780        |
| 706.3446       | 6  | W  | 10 | 1164.6954      | 582.8516        |
| 868.5027       | 7  | K  | 9  | 978.6160       | 489.8119        |
| 969.5504       | 8  | T  | 8  | 816.4579       | 408.7329        |
| 1068.6188      | 9  | V  | 7  | 715.4103       | 358.2090        |
| 1139.6559      | 10 | A  | 6  | 616.3418       | 308.6748        |
| 1252.7400      | 11 | I  | 5  | 545.3047       | 273.1563        |
| 1323.7771      | 12 | A  | 4  | 432.2207       | 216.6142        |
| 1394.8142      | 13 | A  | 3  | 361.1836       | 181.0957        |
| 1509.8412      | 14 | D  | 2  | 290.1464       | 145.5771        |
|                | 15 | R  | 1  | 175.1195       | 88.0637         |

N-term:+35.07 K(7):+162.16

N-term: +29.04 K(12): +156.13

zoomed in precursor plot; T=theoretical m/z, A=acquired m/z

X-range:

0 - 0

MassTol: Y-zoom:

0. 1.

MassType:

☐AVG ☒MONO

Axis:

☒1 ☐2

Label:

☒I ☐M ☐-

Ions:

a ☐+ ☐2+ ☐3+

b ☒+ ☐2+ ☐3+

c ☐+ ☐2+ ☐3+

x ☐+ ☐2+ ☐3+

y ☒+ ☒2+ ☐3+

z ☐+ ☐2+ ☐3+

hide H<sub>2</sub>O/NH<sub>3</sub> ☐

zoom 112-122 ☐

GO

AMPLDLDALSPEER, MH+ 1584.7943, m/z 528.9363  
L OS G13 P120811 220811-s1.06532.06532.3.dta

scan 6532; 2.2e+000

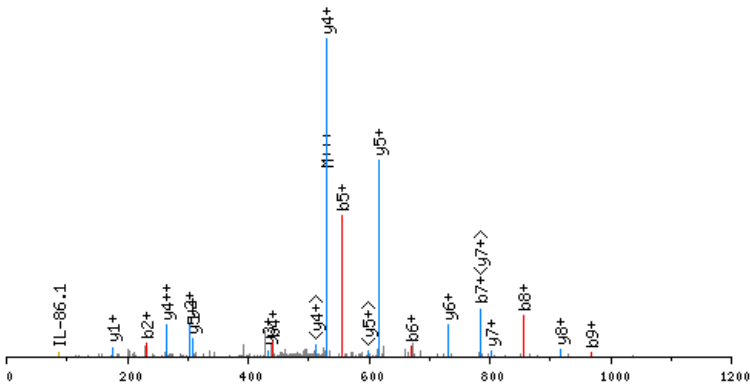

click image to zoom in; click top corners to zoom out [\[precursor±\]](#)

scan 6529; 528.9 m/z; 3.6e+000

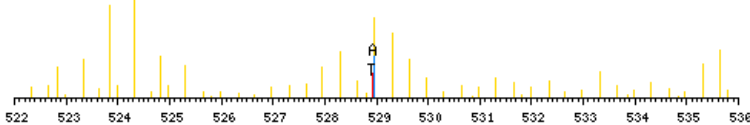

zoomed in precursor plot; T=theoretical m/z, A=acquired m/z

| b <sup>+</sup> | #  | AA | #  | y <sup>+</sup> | y <sup>2+</sup> |
|----------------|----|----|----|----------------|-----------------|
| 100.0762       | 1  | A  | 14 |                |                 |
| 231.1167       | 2  | M  | 13 | 1485.7259      | 743.3669        |
| 328.1695       | 3  | P  | 12 | 1354.6854      | 677.8466        |
| 441.2535       | 4  | L  | 11 | 1257.6327      | 629.3202        |
| 556.2805       | 5  | D  | 10 | 1144.5486      | 572.7782        |
| 669.3645       | 6  | L  | 9  | 1029.5217      | 515.2647        |
| 784.3915       | 7  | D  | 8  | 916.4376       | 458.7227        |
| 855.4286       | 8  | A  | 7  | 801.4107       | 401.2092        |
| 968.5127       | 9  | L  | 6  | 730.3735       | 365.6907        |
| 1055.5447      | 10 | S  | 5  | 617.2895       | 309.1487        |
| 1152.5974      | 11 | P  | 4  | 530.2575       | 265.6326        |
| 1281.6400      | 12 | E  | 3  | 433.2047       | 217.1063        |
| 1410.6826      | 13 | E  | 2  | 304.1621       | 152.5850        |
|                | 14 | R  | 1  | 175.1195       | 88.0637         |

N-term:+29.04

X-range:

0 - 0

MassTol: Y-zoom:

0. 1.

MassType:

☐ AVG ☒ MONO

Axis:

☒ 1 ☐ 2

Label:

☒ I ☐ M ☐ -

Ions:

a ☐ + ☐ 2+ ☐ 3+

b ☒ + ☐ 2+ ☐ 3+

c ☐ + ☐ 2+ ☐ 3+

x ☐ + ☐ 2+ ☐ 3+

y ☒ + ☒ 2+ ☐ 3+

z ☐ + ☐ 2+ ☐ 3+

hide H<sub>2</sub>O/NH<sub>3</sub> ☐

zoom 112-122 ☐

GO

AMPVPFTPELKPKR, MH+ 1695.0032, m/z 424.5063  
L OS G17 P120811 220811-s1.05057.05057.4.dta

scan 5057; 5.4e+000

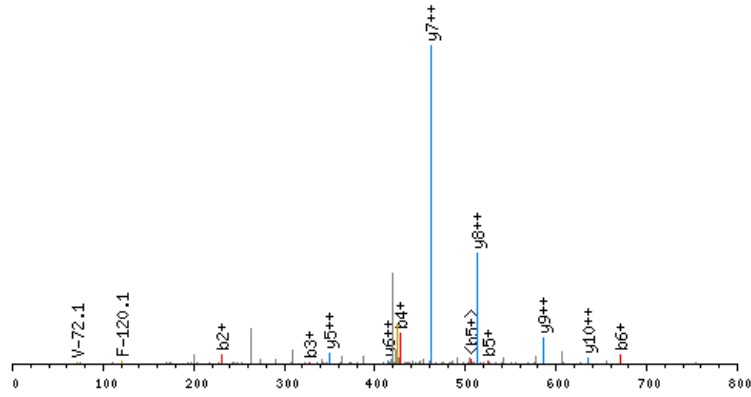

click image to zoom in; click top corners to zoom out [\[precursor±\]](#)

scan 5053; 424.5 m/z; 7.8e+000

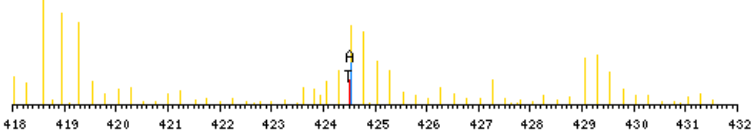

zoomed in precursor plot; T=theoretical m/z, A=acquired m/z

| b <sup>+</sup> | #  | AA | #  | y <sup>+</sup> | y <sup>2+</sup> |
|----------------|----|----|----|----------------|-----------------|
| 100.0762       | 1  | A  | 14 |                |                 |
| 231.1167       | 2  | M  | 13 | 1595.9348      | 798.4713        |
| 328.1695       | 3  | P  | 12 | 1464.8943      | 732.9511        |
| 427.2379       | 4  | V  | 11 | 1367.8416      | 684.4247        |
| 524.2906       | 5  | P  | 10 | 1268.7731      | 634.8905        |
| 671.3591       | 6  | F  | 9  | 1171.7204      | 586.3641        |
| 772.4067       | 7  | T  | 8  | 1024.6520      | 512.8299        |
| 869.4595       | 8  | P  | 7  | 923.6043       | 462.3061        |
| 998.5021       | 9  | E  | 6  | 826.5515       | 413.7797        |
| 1111.5862      | 10 | L  | 5  | 697.5089       | 349.2584        |
| 1267.7125      | 11 | K  | 4  | 584.4249       | 292.7163        |
| 1364.7652      | 12 | P  | 3  | 428.2986       | 214.6532        |
| 1520.8915      | 13 | K  | 2  | 331.2458       | 166.1268        |
|                | 14 | R  | 1  | 175.1195       | 88.0637         |

N-term:+29.04 K(11):+156.13  
K(13):+156.13

X-range:

0 - 0

MassTol: Y-zoom:

0. 1.

**MassType:**

AVG MONO

Axis:

1 2

Label:

© I M -

Ions:

a  +  2 +  3 +

b ☒ 1+ ☐ 2+ ☐ 3+

a  + 2 + 3 +

$$= \square + \square^2 + \square^3 + \dots$$
 $\square_1 + \square_2 + \square_3$ [illegible]

2 | | |

hide  $\text{H}_2\text{O}/\text{NH}_3$ 

zoom 112-123

GO

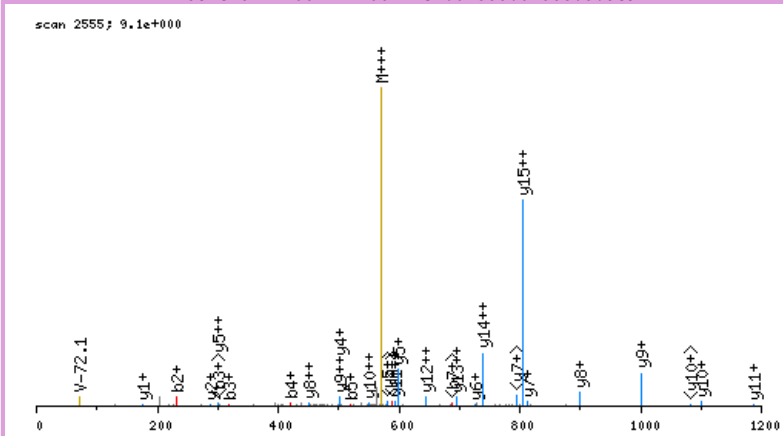

click image to zoom in; click top corners to zoom out

```
[precursor±]
```

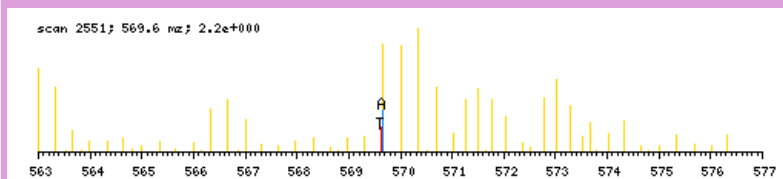

zoomed in precursor plot; T=theoretical m/z, A=acquired m/z

| $b^+$     | #  | AA | #  | $y^+$     | $y^{2+}$ |
|-----------|----|----|----|-----------|----------|
| 100.0762  | 1  | A  | 16 |           |          |
| 231.1167  | 2  | M  | 15 | 1607.8427 | 804.4253 |
| 318.1487  | 3  | S  | 14 | 1476.8022 | 738.9050 |
| 419.1964  | 4  | T  | 13 | 1389.7702 | 695.3890 |
| 520.2441  | 5  | T  | 12 | 1288.7225 | 644.8652 |
| 607.2761  | 6  | S  | 11 | 1187.6748 | 594.3413 |
| 706.3445  | 7  | V  | 10 | 1100.6428 | 550.8253 |
| 807.3922  | 8  | T  | 9  | 1001.5744 | 501.2911 |
| 894.4242  | 9  | S  | 8  | 900.5267  | 450.7673 |
| 981.4563  | 10 | S  | 7  | 813.4947  | 407.2513 |
| 1109.5148 | 11 | Q  | 6  | 726.4627  | 363.7352 |
| 1206.5676 | 12 | P  | 5  | 598.4041  | 299.7060 |
| 1263.5891 | 13 | G  | 4  | 501.3513  | 251.1796 |
| 1419.7154 | 14 | K  | 3  | 444.3299  | 222.6688 |
| 1532.7994 | 15 | L  | 2  | 288.2036  | 144.6057 |
|           | 16 | R  | 1  | 175.1195  | 88.0637  |

N-term:+29.04 K(14):+156.13

N-term:+29.04 K(11):+156.13

X-range:

0 - 0

MassTol: Y-zoom:

0. 1.

MassType:

☐AVG ☒MONO

Axis:

☒1 ☐2

Label:

☒I ☐M ☐-

Ions:

a ☐+ ☐2+ ☐3+

b ☒+ ☐2+ ☐3+

c ☐+ ☐2+ ☐3+

x ☐+ ☐2+ ☐3+

y ☒+ ☒2+ ☐3+

z ☐+ ☐2+ ☐3+

hide H<sub>2</sub>O/NH<sub>3</sub> ☐

zoom 112-122 ☐

GO

ANINIPMGAFRPGAGQPPR, MH+ 1992.0601, m/z 664.6916  
L OS G15 P120811 220811-s1.04997.04997.3.dta

scan 4997; 9.3e+000

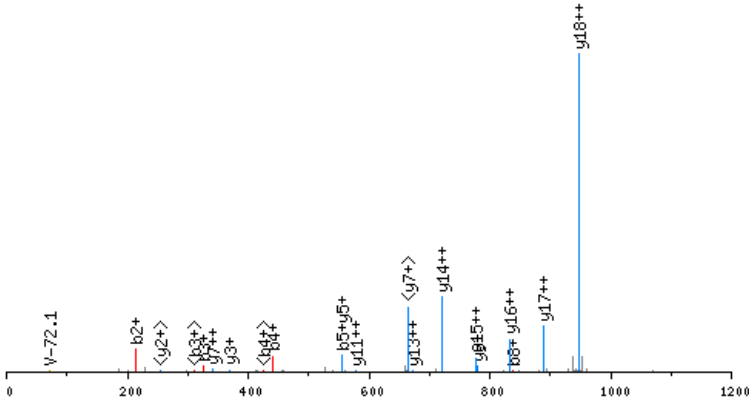

click image to zoom in; click top corners to zoom out

[precursor±]

scan 4996; 664.7 m/z; 8.2e+000

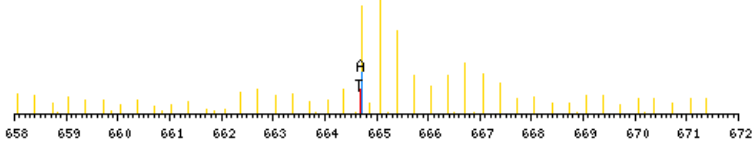

zoomed in precursor plot; T=theoretical m/z, A=acquired m/z

| b <sup>+</sup> | #  | AA | #  | y <sup>+</sup> | y <sup>2+</sup> |
|----------------|----|----|----|----------------|-----------------|
| 100.0762       | 1  | A  | 19 |                |                 |
| 214.1191       | 2  | N  | 18 | 1892.9917      | 946.9998        |
| 327.2032       | 3  | I  | 17 | 1778.9488      | 889.9783        |
| 441.2461       | 4  | N  | 16 | 1665.8648      | 833.4363        |
| 554.3302       | 5  | I  | 15 | 1551.8218      | 776.4148        |
| 651.3830       | 6  | P  | 14 | 1438.7378      | 719.8728        |
| 782.4234       | 7  | M  | 13 | 1341.6850      | 671.3464        |
| 839.4449       | 8  | G  | 12 | 1210.6445      | 605.8262        |
| 910.4820       | 9  | A  | 11 | 1153.6231      | 577.3154        |
| 1057.5504      | 10 | F  | 10 | 1082.5859      | 541.7969        |
| 1213.6515      | 11 | R  | 9  | 935.5175       | 468.2627        |
| 1310.7043      | 12 | P  | 8  | 779.4164       | 390.2121        |
| 1367.7258      | 13 | G  | 7  | 682.3636       | 341.6857        |
| 1438.7629      | 14 | A  | 6  | 625.3422       | 313.1750        |
| 1495.7844      | 15 | G  | 5  | 554.3051       | 277.6564        |
| 1623.8429      | 16 | Q  | 4  | 497.2836       | 249.1457        |
| 1720.8957      | 17 | P  | 3  | 369.2250       | 185.1164        |
| 1817.9485      | 18 | P  | 2  | 272.1723       | 136.5900        |
|                | 19 | R  | 1  | 175.1195       | 88.0637         |

N-term:+29.04

X-range:

0 - 0

MassTol: Y-zoom:

0. 1.

MassType:

☐AVG ☒MONO

Axis:

☒1 ☐2

Label:

☒I ☐M ☐-

Ions:

a ☐+ ☐2+ ☐3+

b ☒+ ☐2+ ☐3+

c ☐+ ☐2+ ☐3+

x ☐+ ☐2+ ☐3+

y ☒+ ☒2+ ☐3+

z ☐+ ☐2+ ☐3+

hide H<sub>2</sub>O/NH<sub>3</sub> ☐

zoom 112-122 ☐

GO

ANIPDLPPSSYIPSR, MH+ 1557.8277, m/z 519.9474  
L OS G13 P120811 220811-s1.05860.05860.3.dta

scan 5860; 1.9e+000

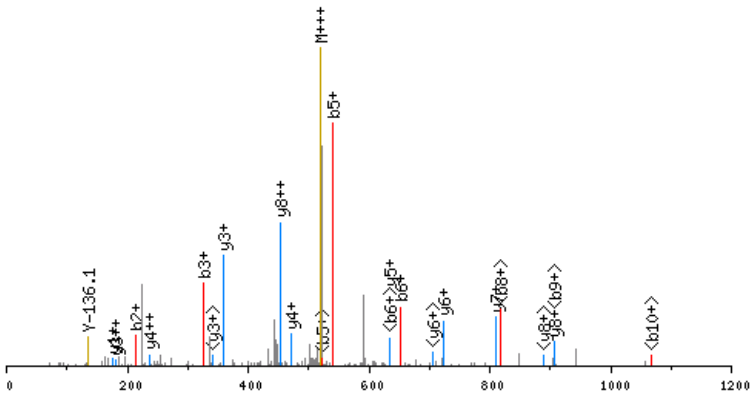

click image to zoom in; click top corners to zoom out

[precursor±]

scan 5859; 519.9 m/z; 2.4e+001

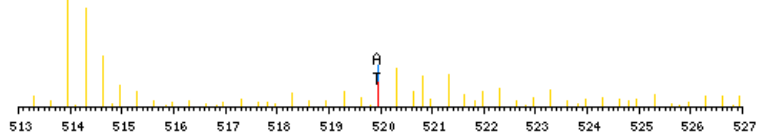

zoomed in precursor plot; T=theoretical m/z, A=acquired m/z

| b <sup>+</sup> | #  | AA | #  | y <sup>+</sup> | y <sup>2+</sup> |
|----------------|----|----|----|----------------|-----------------|
| 100.0762       | 1  | A  | 14 |                |                 |
| 214.1191       | 2  | N  | 13 | 1458.7593      | 729.8835        |
| 327.2032       | 3  | I  | 12 | 1344.7163      | 672.8621        |
| 424.2560       | 4  | P  | 11 | 1231.6323      | 616.3201        |
| 539.2829       | 5  | D  | 10 | 1134.5795      | 567.7937        |
| 652.3670       | 6  | L  | 9  | 1019.5526      | 510.2802        |
| 749.4197       | 7  | P  | 8  | 906.4685       | 453.7382        |
| 836.4518       | 8  | S  | 7  | 809.4157       | 405.2118        |
| 923.4838       | 9  | S  | 6  | 722.3837       | 361.6958        |
| 1086.5471      | 10 | Y  | 5  | 635.3517       | 318.1798        |
| 1199.6312      | 11 | I  | 4  | 472.2884       | 236.6481        |
| 1296.6840      | 12 | P  | 3  | 359.2043       | 180.1061        |
| 1383.7160      | 13 | S  | 2  | 262.1515       | 131.5797        |
|                | 14 | R  | 1  | 175.1195       | 88.0637         |

N-term:+29.04

X-range:

0 - 0

MassTol: Y-zoom:

0. 1.

MassType:

☐AVG ☒MONO

Axis:

☒1 ☐2

Label:

☒I ☐M ☐-

Ions:

a ☐+ ☐2+ ☐3+

b ☒+ ☐2+ ☐3+

c ☐+ ☐2+ ☐3+

x ☐+ ☐2+ ☐3+

y ☒+ ☒2+ ☐3+

z ☐+ ☐2+ ☐3+

hide H<sub>2</sub>O/NH<sub>3</sub> ☐

zoom 112-122 ☐

GO

ANNVMSGTTMYPGIADR, MH+ 1882.8791, m/z 628.2979  
L OS G13 P120811 220811-s1.04811.04811.3.dta

scan 4811; 2.3e+000

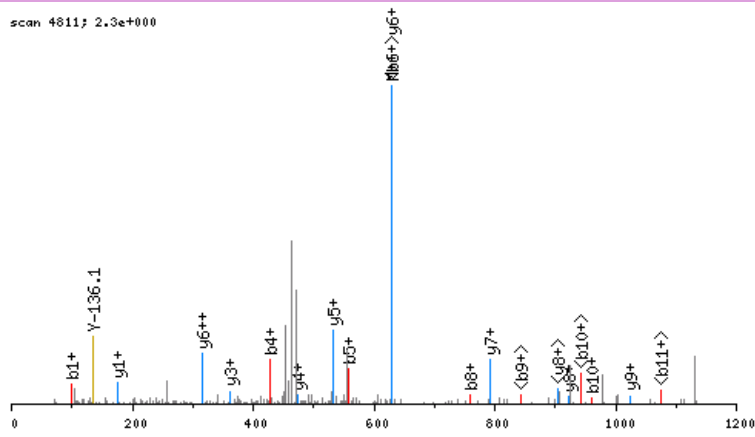

click image to zoom in; click top corners to zoom out

[precursor±]

scan 4809; 628.3 m/z; 2.4e+001

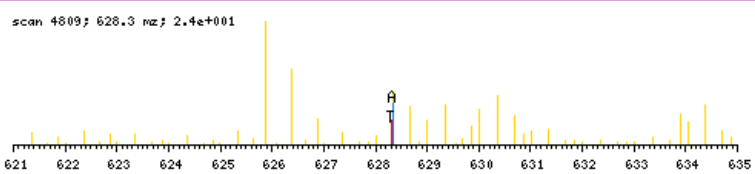

zoomed in precursor plot; T=theoretical m/z, A=acquired m/z

| b <sup>+</sup> | #  | AA | #  | y <sup>+</sup> | y <sup>2+</sup> |
|----------------|----|----|----|----------------|-----------------|
| 100.0762       | 1  | A  | 18 |                |                 |
| 214.1191       | 2  | N  | 17 | 1783.8107      | 892.4093        |
| 328.1621       | 3  | N  | 16 | 1669.7678      | 835.3878        |
| 427.2305       | 4  | V  | 15 | 1555.7249      | 778.3663        |
| 558.2710       | 5  | M  | 14 | 1456.6565      | 728.8321        |
| 645.3030       | 6  | S  | 13 | 1325.6160      | 663.3119        |
| 702.3245       | 7  | G  | 12 | 1238.5839      | 619.7959        |
| 759.3459       | 8  | G  | 11 | 1181.5625      | 591.2852        |
| 860.3936       | 9  | T  | 10 | 1124.5410      | 562.7744        |
| 961.4413       | 10 | T  | 9  | 1023.4933      | 512.2506        |
| 1092.4818      | 11 | M  | 8  | 922.4457       | 461.7267        |
| 1255.5451      | 12 | Y  | 7  | 791.4052       | 396.2065        |
| 1352.5979      | 13 | P  | 6  | 628.3418       | 314.6748        |
| 1409.6193      | 14 | G  | 5  | 531.2891       | 266.1485        |
| 1522.7034      | 15 | I  | 4  | 474.2676       | 237.6377        |
| 1593.7405      | 16 | A  | 3  | 361.1836       | 181.0957        |
| 1708.7674      | 17 | D  | 2  | 290.1464       | 145.5771        |
|                | 18 | R  | 1  | 175.1195       | 88.0637         |

N-term:+29.04

X-range:

0 - 0

MassTol: Y-zoom:

0. 1.

MassType:

☐ AVG ☒ MONO

Axis:

☒ 1 ☐ 2

Label:

☒ I ☐ M ☐ -

Ions:

a ☐ + ☐ 2+ ☐ 3+

b ☒ + ☐ 2+ ☐ 3+

c ☐ + ☐ 2+ ☐ 3+

x ☐ + ☐ 2+ ☐ 3+

y ☒ + ☒ 2+ ☐ 3+

z ☐ + ☐ 2+ ☐ 3+

hide H<sub>2</sub>O/NH<sub>3</sub> ☐

zoom 112-122 ☐

GO

ANQDTIFEGIGGPR, MH+ 1508.7921, m/z 503.6022  
H OS G13 P120811 220811-s1.05315.05315.3.dta

scan 5315; 3.5e+000

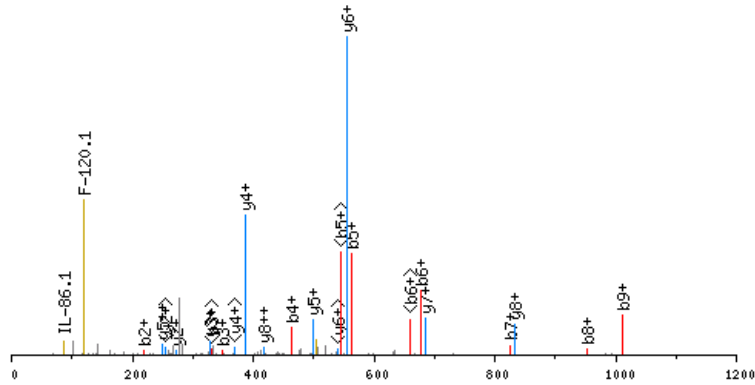

click image to zoom in; click top corners to zoom out

[precursor±]

scan 5314; 503.6 m/z; 1.4e+001

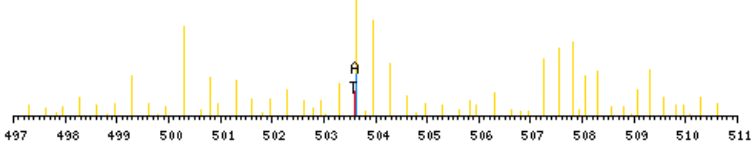

zoomed in precursor plot; T=theoretical m/z, A=acquired m/z

| b <sup>+</sup> | #  | AA | #  | y <sup>+</sup> | y <sup>2+</sup> |
|----------------|----|----|----|----------------|-----------------|
| 106.1080       | 1  | A  | 14 |                |                 |
| 220.1509       | 2  | N  | 13 | 1403.6919      | 702.3499        |
| 348.2095       | 3  | Q  | 12 | 1289.6490      | 645.3284        |
| 463.2365       | 4  | D  | 11 | 1161.5904      | 581.2991        |
| 564.2841       | 5  | T  | 10 | 1046.5635      | 523.7856        |
| 677.3682       | 6  | I  | 9  | 945.5158       | 473.2618        |
| 824.4366       | 7  | F  | 8  | 832.4317       | 416.7198        |
| 953.4792       | 8  | E  | 7  | 685.3633       | 343.1856        |
| 1010.5007      | 9  | G  | 6  | 556.3207       | 278.6643        |
| 1123.5847      | 10 | I  | 5  | 499.2993       | 250.1535        |
| 1180.6062      | 11 | G  | 4  | 386.2152       | 193.6115        |
| 1237.6277      | 12 | G  | 3  | 329.1937       | 165.1008        |
| 1334.6804      | 13 | P  | 2  | 272.1723       | 136.5900        |
|                | 14 | R  | 1  | 175.1195       | 88.0637         |

N-term:+35.07

X-range:

0 - 0

MassTol: Y-zoom:

0. 1.

MassType:

☐ AVG ☒ MONO

Axis:

☒ 1 ☐ 2

Label:

☒ I ☐ M ☐ -

Ions:

a ☐ + ☐ 2+ ☐ 3+

b ☒ + ☐ 2+ ☐ 3+

c ☐ + ☐ 2+ ☐ 3+

x ☐ + ☐ 2+ ☐ 3+

y ☒ + ☒ 2+ ☐ 3+

z ☐ + ☐ 2+ ☐ 3+

hide H<sub>2</sub>O/NH<sub>3</sub> ☐

zoom 112-122 ☐

GO

ANTFVAELKGLDPAK, MH+ 1657.9277, m/z 553.3141  
L OS G15 P120811 220811-s1.05573.05573.3.dta

scan 5573; 5.5e+000

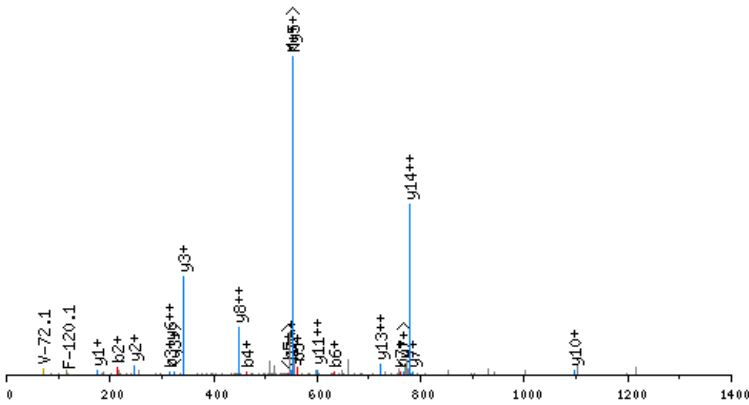

click image to zoom in; click top corners to zoom out [\[precursor±\]](#)

scan 5571; 553.3 m/z; 1.2e+001

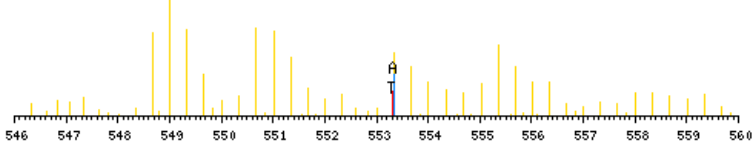

zoomed in precursor plot; T=theoretical m/z, A=acquired m/z

| b <sup>+</sup> | #  | AA | #  | y <sup>+</sup> | y <sup>2+</sup> |
|----------------|----|----|----|----------------|-----------------|
| 100.0762       | 1  | A  | 15 |                |                 |
| 214.1191       | 2  | N  | 14 | 1558.8594      | 779.9336        |
| 315.1668       | 3  | T  | 13 | 1444.8164      | 722.9121        |
| 462.2352       | 4  | F  | 12 | 1343.7687      | 672.3883        |
| 561.3036       | 5  | V  | 11 | 1196.7003      | 598.8541        |
| 632.3408       | 6  | A  | 10 | 1097.6319      | 549.3199        |
| 761.3834       | 7  | E  | 9  | 1026.5948      | 513.8013        |
| 874.4674       | 8  | L  | 8  | 897.5522       | 449.2800        |
| 1030.5937      | 9  | K  | 7  | 784.4681       | 392.7380        |
| 1087.6152      | 10 | G  | 6  | 628.3418       | 314.6748        |
| 1200.6992      | 11 | L  | 5  | 571.3204       | 286.1641        |
| 1315.7262      | 12 | D  | 4  | 458.2363       | 229.6221        |
| 1412.7790      | 13 | P  | 3  | 343.2094       | 172.1086        |
| 1483.8161      | 14 | A  | 2  | 246.1566       | 123.5822        |
|                | 15 | R  | 1  | 175.1195       | 88.0637         |

N-term:+29.04 K(9):+156.13

X-range:

0 - 0

MassTol: Y-zoom:

0. 1.

MassType:

☐AVG ☒MONO

Axis:

☒1 ☐2

Label:

☒I ☐M ☐-

Ions:

a ☐+ ☐2+ ☐3+

b ☒+ ☐2+ ☐3+

c ☐+ ☐2+ ☐3+

x ☐+ ☐2+ ☐3+

y ☒+ ☒2+ ☐3+

z ☐+ ☐2+ ☐3+

hide H<sub>2</sub>O/NH<sub>3</sub> ☐

zoom 112-122 ☐

GO

ANTVLSGGTTMYPGIADR, MH+ 1851.9274, m/z 617.9807  
L OS G13 P120811 220811-s1.05277.05277.3.dta

scan 5277; 1.2e+000

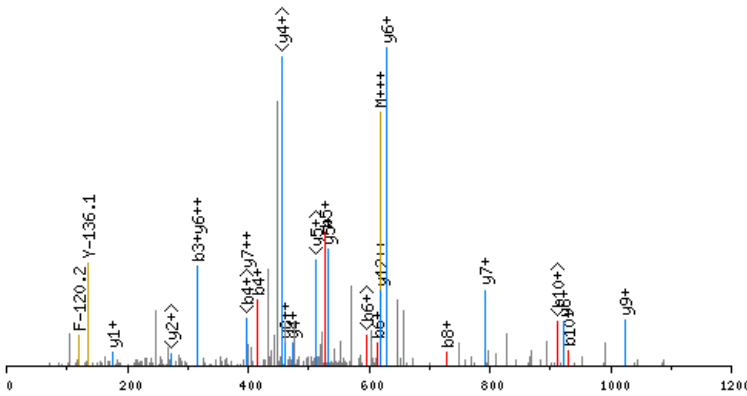

click image to zoom in; click top corners to zoom out

[precursor±]

scan 5274; 618.0 m/z; 6.2e+000

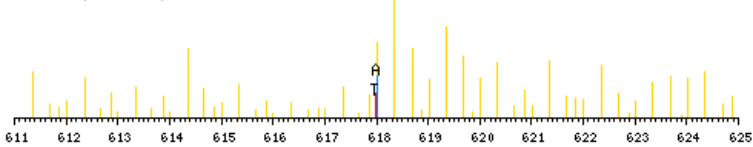

zoomed in precursor plot; T=theoretical m/z, A=acquired m/z

| b <sup>+</sup> | #  | AA | #  | y <sup>+</sup> | y <sup>2+</sup> |
|----------------|----|----|----|----------------|-----------------|
| 100.0762       | 1  | A  | 18 |                |                 |
| 214.1191       | 2  | N  | 17 | 1752.8591      | 876.9334        |
| 315.1668       | 3  | T  | 16 | 1638.8161      | 819.9120        |
| 414.2352       | 4  | V  | 15 | 1537.7685      | 769.3881        |
| 527.3193       | 5  | L  | 14 | 1438.7000      | 719.8539        |
| 614.3513       | 6  | S  | 13 | 1325.6160      | 663.3119        |
| 671.3728       | 7  | G  | 12 | 1238.5839      | 619.7959        |
| 728.3943       | 8  | G  | 11 | 1181.5625      | 591.2852        |
| 829.4419       | 9  | T  | 10 | 1124.5410      | 562.7744        |
| 930.4896       | 10 | T  | 9  | 1023.4933      | 512.2506        |
| 1061.5301      | 11 | M  | 8  | 922.4457       | 461.7267        |
| 1224.5934      | 12 | Y  | 7  | 791.4052       | 396.2065        |
| 1321.6462      | 13 | P  | 6  | 628.3418       | 314.6748        |
| 1378.6677      | 14 | G  | 5  | 531.2891       | 266.1485        |
| 1491.7517      | 15 | I  | 4  | 474.2676       | 237.6377        |
| 1562.7888      | 16 | A  | 3  | 361.1836       | 181.0957        |
| 1677.8158      | 17 | D  | 2  | 290.1464       | 145.5771        |
|                | 18 | R  | 1  | 175.1195       | 88.0637         |

N-term:+29.04

X-range:

0 - 0

MassTol: Y-zoom:

0. 1.

MassType:

☐AVG ☒MONO

Axis:

☒1 ☐2

Label:

☒I ☐M ☐-

Ions:

a ☐+ ☐2+ ☐3+

b ☒+ ☐2+ ☐3+

c ☐+ ☐2+ ☐3+

x ☐+ ☐2+ ☐3+

y ☒+ ☒2+ ☐3+

z ☐+ ☐2+ ☐3+

hide H<sub>2</sub>O/NH<sub>3</sub> ☐

zoom 112-122 ☐

GO

ANVIDTIPEPLR, MH+ 1365.7742, m/z 683.3907  
L OS G13 P120811 220811-s1.05983.05983.2.dta

scan 5983; 2.5e+000

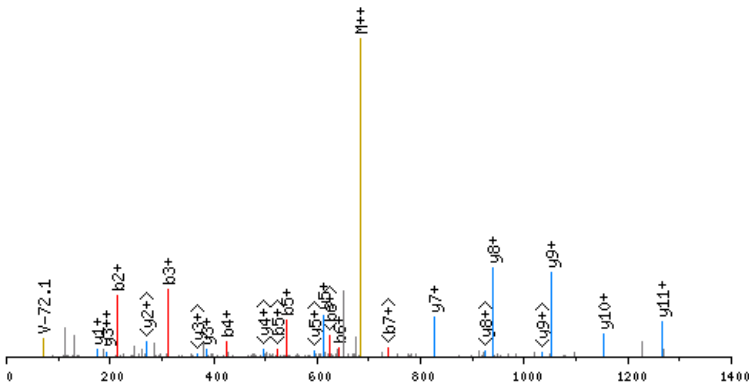

click image to zoom in; click top corners to zoom out

[precursor±]

scan 5979; 683.4 m/z; 5.9e+000

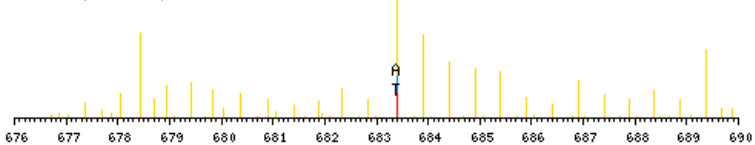

zoomed in precursor plot; T=theoretical m/z, A=acquired m/z

| b <sup>+</sup> | #  | AA | #  | y <sup>+</sup> | y <sup>2+</sup> |
|----------------|----|----|----|----------------|-----------------|
| 100.0762       | 1  | A  | 12 |                |                 |
| 214.1191       | 2  | N  | 11 | 1266.7058      | 633.8568        |
| 313.1876       | 3  | V  | 10 | 1152.6628      | 576.8353        |
| 426.2716       | 4  | I  | 9  | 1053.5944      | 527.3011        |
| 541.2986       | 5  | D  | 8  | 940.5104       | 470.7591        |
| 642.3462       | 6  | T  | 7  | 825.4834       | 413.2456        |
| 755.4303       | 7  | I  | 6  | 724.4357       | 362.7218        |
| 852.4831       | 8  | P  | 5  | 611.3517       | 306.1798        |
| 981.5257       | 9  | E  | 4  | 514.2989       | 257.6534        |
| 1078.5784      | 10 | P  | 3  | 385.2563       | 193.1321        |
| 1191.6625      | 11 | L  | 2  | 288.2036       | 144.6057        |
|                | 12 | R  | 1  | 175.1195       | 88.0637         |

N-term:+29.04

X-range:

0 - 0

MassTol: Y-zoom:

0. 1.

MassType:

☐AVG ☒MONO

Axis:

☒1 ☐2

Label:

☒I ☐M ☐-

Ions:

a ☐+ ☐2+ ☐3+

b ☒+ ☐2+ ☐3+

c ☐+ ☐2+ ☐3+

x ☐+ ☐2+ ☐3+

y ☒+ ☒2+ ☐3+

z ☐+ ☐2+ ☐3+

hide H<sub>2</sub>O/NH<sub>3</sub> ☐

zoom 112-122 ☐

GO

ANVYVDAVKDSGR, MH+ 1449.7702, m/z 483.9282  
L OS G16 P120811 220811-s1.03270.03270.3.dta

scan 3270; 2.9e+001

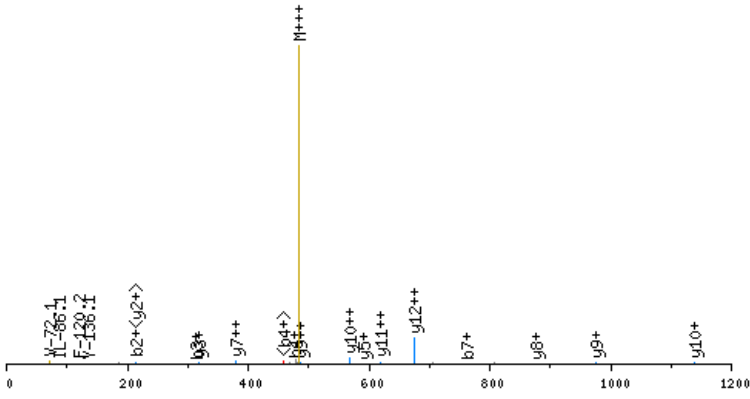

click image to zoom in; click top corners to zoom out

[precursor±]

scan 3268; 483.9 m/z; 2.1e+001

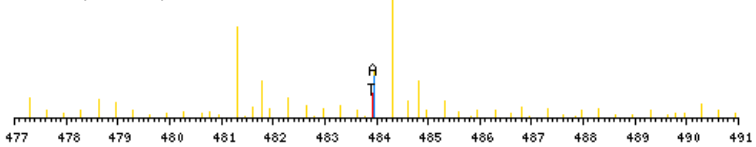

zoomed in precursor plot; T=theoretical m/z, A=acquired m/z

| b <sup>+</sup> | #  | AA | #  | y <sup>+</sup> | y <sup>2+</sup> |
|----------------|----|----|----|----------------|-----------------|
| 100.0762       | 1  | A  | 13 |                |                 |
| 214.1191       | 2  | N  | 12 | 1350.7018      | 675.8548        |
| 313.1876       | 3  | V  | 11 | 1236.6589      | 618.8333        |
| 476.2509       | 4  | Y  | 10 | 1137.5904      | 569.2991        |
| 575.3193       | 5  | V  | 9  | 974.5271       | 487.7675        |
| 690.3462       | 6  | D  | 8  | 875.4587       | 438.2333        |
| 761.3834       | 7  | A  | 7  | 760.4318       | 380.7198        |
| 860.4518       | 8  | V  | 6  | 689.3946       | 345.2012        |
| 1016.5781      | 9  | K  | 5  | 590.3262       | 295.6670        |
| 1131.6050      | 10 | D  | 4  | 434.1999       | 217.6039        |
| 1218.6370      | 11 | S  | 3  | 319.1730       | 160.0904        |
| 1275.6585      | 12 | G  | 2  | 232.1410       | 116.5744        |
|                | 13 | R  | 1  | 175.1195       | 88.0637         |

N-term:+29.04 K(9):+156.13



X-range:

0 - 0

MassTol: Y-zoom:

0. 1.

MassType:

☐AVG ☒MONO

Axis:

☒1 ☐2

Label:

☒I ☐M ☐-

Ions:

a ☐+ ☐2+ ☐3+

b ☒+ ☐2+ ☐3+

c ☐+ ☐2+ ☐3+

x ☐+ ☐2+ ☐3+

y ☒+ ☒2+ ☐3+

z ☐+ ☐2+ ☐3+

hide H<sub>2</sub>O/NH<sub>3</sub> ☐

zoom 112-122 ☐

GO

APEEHPVLLTEAPLNPKANR, MH+ 2252.2403, m/z 563.8155  
L OS G16 P120811 220811-s1.04527.04527.4.dta

scan 4527; 6.5e+000

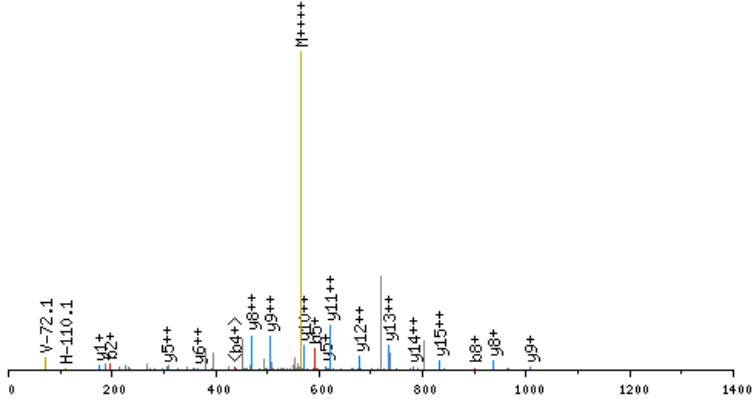

click image to zoom in; click top corners to zoom out [\[precursor±\]](#)

scan 4523; 563.8 m/z; 1.1e+001

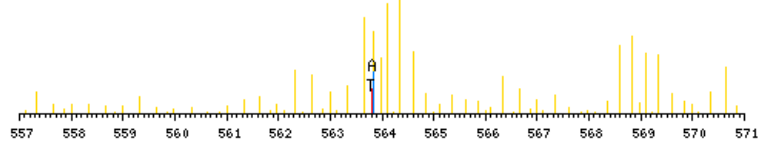

zoomed in precursor plot; T=theoretical m/z, A=acquired m/z

| b <sup>+</sup> | #  | AA | #  | y <sup>+</sup> | y <sup>2+</sup> |
|----------------|----|----|----|----------------|-----------------|
| 100.0762       | 1  | A  | 20 |                |                 |
| 197.1290       | 2  | P  | 19 | 2153.1719      | 1077.0899       |
| 326.1716       | 3  | E  | 18 | 2056.1192      | 1028.5635       |
| 455.2142       | 4  | E  | 17 | 1927.0766      | 964.0422        |
| 592.2731       | 5  | H  | 16 | 1798.0340      | 899.5209        |
| 689.3258       | 6  | P  | 15 | 1660.9751      | 830.9914        |
| 788.3943       | 7  | V  | 14 | 1563.9223      | 782.4651        |
| 901.4783       | 8  | L  | 13 | 1464.8539      | 732.9308        |
| 1014.5624      | 9  | L  | 12 | 1351.7698      | 676.3888        |
| 1115.6101      | 10 | T  | 11 | 1238.6857      | 619.8468        |
| 1244.6527      | 11 | E  | 10 | 1137.6381      | 569.3229        |
| 1315.6898      | 12 | A  | 9  | 1008.5955      | 504.8017        |
| 1412.7425      | 13 | P  | 8  | 937.5584       | 469.2831        |
| 1525.8266      | 14 | L  | 7  | 840.5056       | 420.7567        |
| 1639.8695      | 15 | N  | 6  | 727.4215       | 364.2147        |
| 1736.9223      | 16 | P  | 5  | 613.3786       | 307.1932        |
| 1893.0486      | 17 | K  | 4  | 516.3258       | 258.6668        |
| 1964.0857      | 18 | A  | 3  | 360.1995       | 180.6037        |
| 2078.1286      | 19 | N  | 2  | 289.1624       | 145.0851        |
|                | 20 | R  | 1  | 175.1195       | 88.0637         |

N-term:+29.04 K(17):+156.13

X-range:

0 - 0

MassTol: Y-zoom:

0. 1.

MassType:

☐AVG ☒MONO

Axis:

☒1 ☐2

Label:

☒I ☐M ☐-

Ions:

a ☐+ ☐2+ ☐3+

b ☒+ ☐2+ ☐3+

c ☐+ ☐2+ ☐3+

x ☐+ ☐2+ ☐3+

y ☒+ ☒2+ ☐3+

z ☐+ ☐2+ ☐3+

hide H<sub>2</sub>O/NH<sub>3</sub> ☐

zoom 112-122 ☐

GO

APEGSVANKEFYVHNDIFR, MH+ 2120.0929, m/z 530.7787  
L OS G17 P120811 220811-s1.05429.05429.4.dta

scan 5429; 3.8e+000

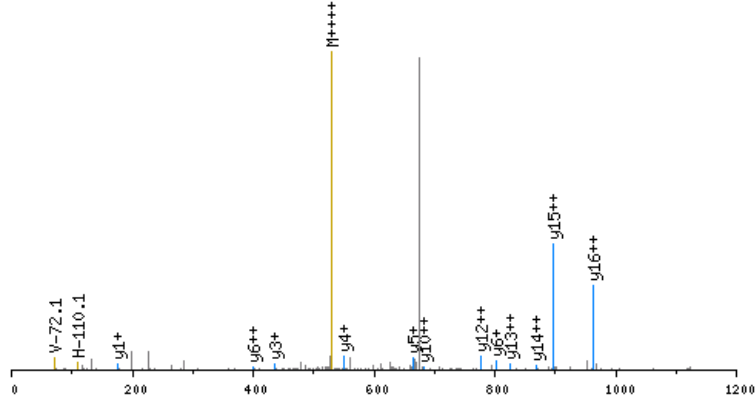

click image to zoom in; click top corners to zoom out [\[precursor±\]](#)

scan 5428; 530.8 m/z; 8.8e+000

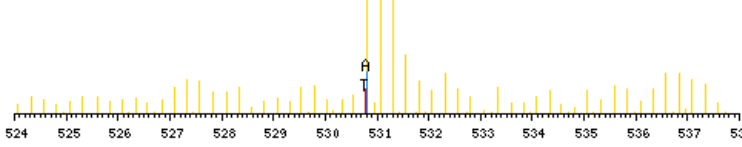

zoomed in precursor plot; T=theoretical m/z, A=acquired m/z

| b <sup>+</sup> | #  | AA | #  | y <sup>+</sup> | y <sup>2+</sup> |
|----------------|----|----|----|----------------|-----------------|
| 100.0762       | 1  | A  | 18 |                |                 |
| 197.1290       | 2  | P  | 17 | 2021.0245      | 1011.0162       |
| 326.1716       | 3  | E  | 16 | 1923.9718      | 962.4898        |
| 383.1930       | 4  | G  | 15 | 1794.9292      | 897.9685        |
| 470.2251       | 5  | S  | 14 | 1737.9077      | 869.4578        |
| 569.2935       | 6  | V  | 13 | 1650.8757      | 825.9417        |
| 640.3306       | 7  | A  | 12 | 1551.8073      | 776.4075        |
| 754.3735       | 8  | N  | 11 | 1480.7701      | 740.8890        |
| 910.4998       | 9  | K  | 10 | 1366.7272      | 683.8675        |
| 1057.5682      | 10 | F  | 9  | 1210.6009      | 605.8044        |
| 1220.6316      | 11 | Y  | 8  | 1063.5325      | 532.2702        |
| 1319.7000      | 12 | V  | 7  | 900.4692       | 450.7385        |
| 1456.7589      | 13 | H  | 6  | 801.4008       | 401.2043        |
| 1570.8018      | 14 | N  | 5  | 664.3418       | 332.6748        |
| 1685.8288      | 15 | D  | 4  | 550.2989       | 275.6534        |
| 1798.9128      | 16 | I  | 3  | 435.2720       | 218.1399        |
| 1945.9812      | 17 | F  | 2  | 322.1879       | 161.5979        |
|                | 18 | R  | 1  | 175.1195       | 88.0637         |

N-term:+29.04 K(9):+156.13

X-range:

0 - 0

MassTol: Y-zoom:

0. 1.

MassType:

☐AVG ☒MONO

Axis:

☒1 ☐2

Label:

☒I ☐M ☐-

Ions:

a ☐+ ☐2+ ☐3+

b ☒+ ☐2+ ☐3+

c ☐+ ☐2+ ☐3+

x ☐+ ☐2+ ☐3+

y ☒+ ☒2+ ☐3+

z ☐+ ☐2+ ☐3+

hide H<sub>2</sub>O/NH<sub>3</sub> ☐

zoom 112-122 ☐

GO

APLPDSDPDPQALLAR, MH+ 1816.9809, m/z 606.3318  
L OS G12 P120811 220811-s1.05011.05011.3.dta

scan 5011; 5.1e-001

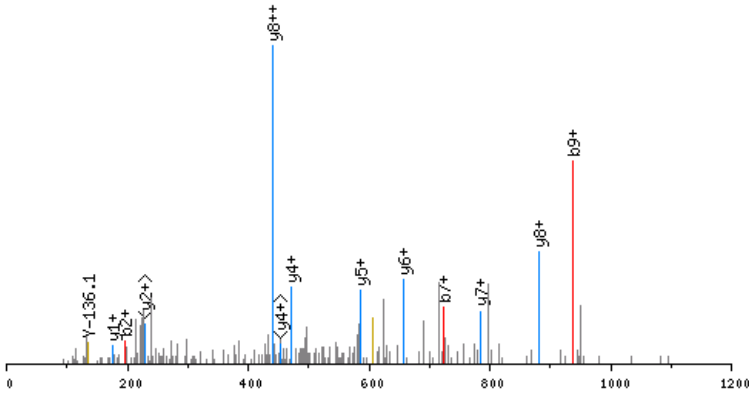

click image to zoom in; click top corners to zoom out

[precursor±]

scan 5007; 606.3 m/z; 2.8e+000

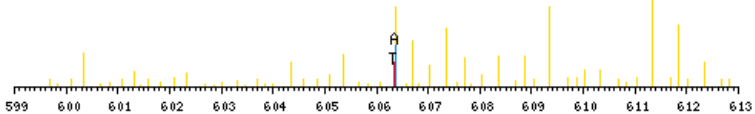

zoomed in precursor plot; T=theoretical m/z, A=acquired m/z

| b <sup>+</sup> | #  | AA | #  | y <sup>+</sup> | y <sup>2+</sup> |
|----------------|----|----|----|----------------|-----------------|
| 100.0762       | 1  | A  | 17 |                |                 |
| 197.1290       | 2  | P  | 16 | 1717.9125      | 859.4602        |
| 310.2130       | 3  | L  | 15 | 1620.8597      | 810.9338        |
| 407.2658       | 4  | P  | 14 | 1507.7756      | 754.3917        |
| 522.2927       | 5  | D  | 13 | 1410.7229      | 705.8654        |
| 609.3248       | 6  | S  | 12 | 1295.6959      | 648.3519        |
| 724.3517       | 7  | D  | 11 | 1208.6639      | 604.8359        |
| 821.4045       | 8  | P  | 10 | 1093.6370      | 547.3224        |
| 936.4314       | 9  | D  | 9  | 996.5842       | 498.7960        |
| 1033.4842      | 10 | P  | 8  | 881.5573       | 441.2825        |
| 1161.5428      | 11 | Q  | 7  | 784.5045       | 392.7562        |
| 1232.5799      | 12 | A  | 6  | 656.4459       | 328.7269        |
| 1345.6639      | 13 | L  | 5  | 585.4088       | 293.2083        |
| 1458.7480      | 14 | L  | 4  | 472.3247       | 236.6663        |
| 1571.8321      | 15 | L  | 3  | 359.2407       | 180.1243        |
| 1642.8692      | 16 | A  | 2  | 246.1566       | 123.5822        |
|                | 17 | R  | 1  | 175.1195       | 88.0637         |

N-term:+29.04

X-range:

$$\boxed{0} - \boxed{0}$$

0. 1.

☐ AVG ☒ MONO

1 2

I M -

$$a \square + \square^2 + \square^3 +$$

b. ☒ 1+ ☐ 2+ ☐ 3+

$$= \square + \square^2 + \square^3 + \dots$$

**c**

| x  | 1+     | 2+     | 3+     |
|----|--------|--------|--------|
| 1  | 0.0000 | 0.0000 | 0.0000 |
| 2  | 0.0000 | 0.0000 | 0.0000 |
| 3  | 0.0000 | 0.0000 | 0.0000 |
| 4  | 0.0000 | 0.0000 | 0.0000 |
| 5  | 0.0000 | 0.0000 | 0.0000 |
| 6  | 0.0000 | 0.0000 | 0.0000 |
| 7  | 0.0000 | 0.0000 | 0.0000 |
| 8  | 0.0000 | 0.0000 | 0.0000 |
| 9  | 0.0000 | 0.0000 | 0.0000 |
| 10 | 0.0000 | 0.0000 | 0.0000 |
| 11 | 0.0000 | 0.0000 | 0.0000 |
| 12 | 0.0000 | 0.0000 | 0.0000 |
| 13 | 0.0000 | 0.0000 | 0.0000 |
| 14 | 0.0000 | 0.0000 | 0.0000 |
| 15 | 0.0000 | 0.0000 | 0.0000 |
| 16 | 0.0000 | 0.0000 | 0.0000 |
| 17 | 0.0000 | 0.0000 | 0.0000 |
| 18 | 0.0000 | 0.0000 | 0.0000 |
| 19 | 0.0000 | 0.0000 | 0.0000 |
| 20 | 0.0000 | 0.0000 | 0.0000 |
| 21 | 0.0000 | 0.0000 | 0.0000 |
| 22 | 0.0000 | 0.0000 | 0.0000 |
| 23 | 0.0000 | 0.0000 | 0.0000 |
| 24 | 0.0000 | 0.0000 | 0.0000 |
| 25 | 0.0000 | 0.0000 | 0.0000 |
| 26 | 0.0000 | 0.0000 | 0.0000 |
| 27 | 0.0000 | 0.0000 | 0.0000 |
| 28 | 0.0000 | 0.0000 | 0.0000 |
| 29 | 0.0000 | 0.0000 | 0.0000 |
| 30 | 0.0000 | 0.0000 | 0.0000 |
| 31 | 0.0000 | 0.0000 | 0.0000 |
| 32 | 0.0000 | 0.0000 | 0.0000 |
| 33 | 0.0000 | 0.0000 | 0.0000 |
| 34 | 0.0000 | 0.0000 | 0.0000 |
| 35 | 0.0000 | 0.0000 | 0.0000 |
| 36 | 0.0000 | 0.0000 | 0.0000 |
| 37 | 0.0000 | 0.0000 | 0.0000 |
| 38 | 0.0000 | 0.0000 | 0.0000 |
| 39 | 0.0000 | 0.0000 | 0.0000 |
| 40 | 0.0000 | 0.0000 | 0.0000 |
| 41 | 0.0000 | 0.0000 | 0.0000 |
| 42 | 0.0000 | 0.0000 | 0.0000 |
| 43 | 0.0000 | 0.0000 | 0.0000 |
| 44 | 0.0000 | 0.0000 | 0.0000 |
| 45 | 0.0000 | 0.0000 | 0.0000 |
| 46 | 0.0000 | 0.0000 | 0.0000 |
| 47 | 0.0000 | 0.0000 | 0.0000 |
| 48 | 0.0000 | 0.0000 | 0.0000 |
| 49 | 0.0000 | 0.0000 | 0.0000 |
| 50 | 0.0000 | 0.0000 | 0.0000 |
| 51 | 0.0000 | 0.0000 | 0.0000 |
| 52 | 0.0000 | 0.0000 | 0.0000 |
| 53 | 0.0000 | 0.0000 | 0.0000 |
| 54 | 0.0000 | 0.0000 | 0.0000 |
| 55 | 0.0000 | 0.0000 | 0.0000 |
| 56 | 0.0000 | 0.0000 | 0.0000 |
| 57 | 0.0000 | 0.0000 | 0.0000 |
| 58 | 0.0000 | 0.0000 | 0.0000 |
| 59 | 0.0000 | 0.0000 | 0.0000 |
| 60 | 0.0000 | 0.0000 | 0.0000 |
| 61 | 0.0000 | 0.0000 | 0.0000 |
| 62 | 0.0000 | 0.0000 | 0.0000 |
| 63 | 0.0000 | 0.0000 | 0.0000 |
| 64 | 0.0000 | 0.0000 | 0.0000 |
| 65 | 0.0000 | 0.0000 | 0.0000 |
| 66 | 0.0000 | 0.0000 | 0.0000 |
| 67 | 0.0000 | 0.0000 | 0.0000 |
| 68 | 0.0000 | 0.0000 | 0.0000 |
| 69 | 0.0000 | 0.0000 | 0.0000 |
| 70 | 0.0000 | 0.0000 | 0.0000 |
| 71 | 0.0000 | 0.0000 | 0.0000 |
| 72 | 0.0000 | 0.0000 | 0.0000 |
| 73 | 0.0000 | 0.0000 | 0.0000 |
| 74 | 0.0000 | 0.0000 | 0.0000 |
| 75 | 0.0000 | 0.0000 | 0.0000 |
| 76 | 0.0000 | 0.0000 | 0.0000 |
| 77 | 0.0000 | 0.0000 | 0.0000 |
| 78 | 0.0000 | 0.0000 | 0.0000 |
| 79 | 0.0000 | 0.0000 | 0.0000 |
| 80 | 0.0000 | 0      |        |

y ☒ <sup>+</sup> ☒ <sup>2+</sup> ☐ <sup>3+</sup>

$$z \square + \square^2 + \square^3 +$$

```
hide H2O/NH.
```

FORM 113-13

GO

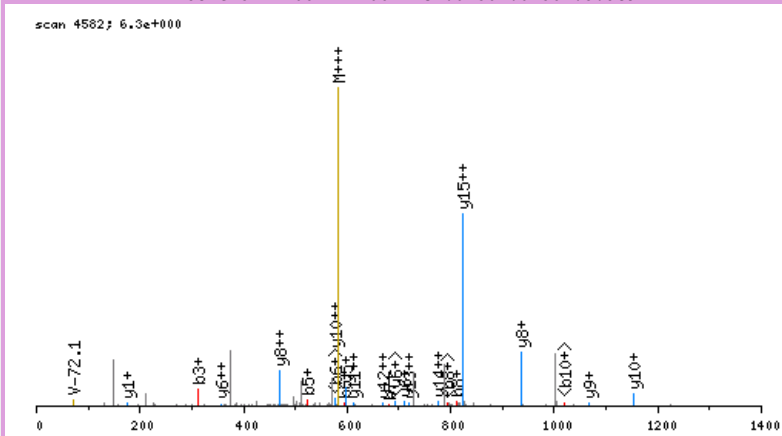

click image to zoom in; click top corners to zoom out

```
[precursor±]
```

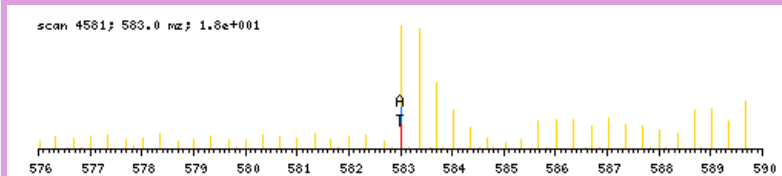

zoomed in precursor plot; T=theoretical m/z, A=acquired m/z

| $b^+$     | #  | AA | #  | $y^+$     | $y^{2+}$ |
|-----------|----|----|----|-----------|----------|
| 100.0762  | 1  | A  | 16 |           |          |
| 197.1290  | 2  | P  | 15 | 1647.9434 | 824.4756 |
| 311.1719  | 3  | N  | 14 | 1550.8907 | 775.9492 |
| 410.2403  | 4  | V  | 13 | 1436.8477 | 718.9278 |
| 523.3244  | 5  | L  | 12 | 1337.7793 | 669.3936 |
| 594.3615  | 6  | A  | 11 | 1224.6952 | 612.8515 |
| 681.3935  | 7  | S  | 10 | 1153.6581 | 577.3330 |
| 810.4361  | 8  | E  | 9  | 1066.6261 | 533.8170 |
| 907.4889  | 9  | P  | 8  | 937.5835  | 469.2957 |
| 1036.5315 | 10 | E  | 7  | 840.5307  | 420.7693 |
| 1149.6155 | 11 | I  | 6  | 711.4882  | 356.2480 |
| 1246.6683 | 12 | P  | 5  | 598.4041  | 299.7060 |
| 1402.7946 | 13 | K  | 4  | 501.3513  | 251.1796 |
| 1459.8161 | 14 | G  | 3  | 345.2250  | 173.1164 |
| 1572.9001 | 15 | I  | 2  | 288.2036  | 144.6057 |
|           | 16 | R  | 1  | 175.1195  | 88.0637  |

N-term: +29.04 K(13): +156.13

X-range:

0 - 0

MassTol: Y-zoom:

0. 1.

MassType:

☐AVG ☒MONO

Axis:

☒1 ☐2

Label:

☒I ☐M ☐-

Ions:

a ☐+ ☐2+ ☐3+

b ☒+ ☐2+ ☐3+

c ☐+ ☐2+ ☐3+

x ☐+ ☐2+ ☐3+

y ☒+ ☒2+ ☐3+

z ☐+ ☐2+ ☐3+

hide H<sub>2</sub>O/NH<sub>3</sub> ☐

zoom 112-122 ☐

GO

APPSGPPISGFSVGTTYDITR, MH+ 2148.0977, m/z 716.7041  
L OS G12 P120811 220811-s1.04941.04941.3.dta

scan 4941: 1.9e+000

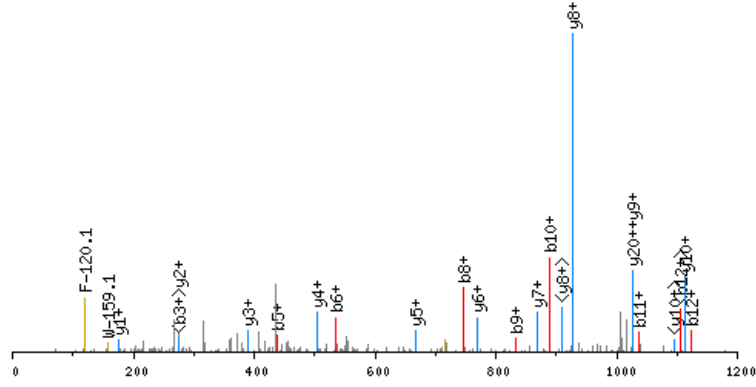

click image to zoom in; click top corners to zoom out [\[precursor±\]](#)

scan 4937: 716.7 m/z; 3.1e+000

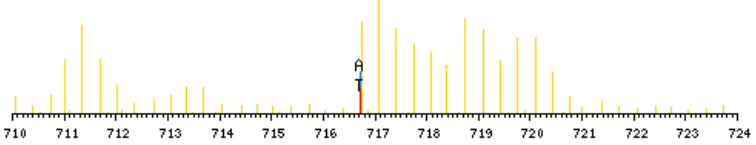

zoomed in precursor plot; T=theoretical m/z, A=acquired m/z

| b <sup>+</sup> | #  | AA | #  | y <sup>+</sup> | y <sup>2+</sup> |
|----------------|----|----|----|----------------|-----------------|
| 100.0762       | 1  | A  | 21 |                |                 |
| 197.1290       | 2  | P  | 20 | 2049.0293      | 1025.0186       |
| 294.1817       | 3  | P  | 19 | 1951.9765      | 976.4922        |
| 381.2138       | 4  | S  | 18 | 1854.9238      | 927.9658        |
| 438.2352       | 5  | G  | 17 | 1767.8917      | 884.4498        |
| 535.2880       | 6  | P  | 16 | 1710.8703      | 855.9391        |
| 632.3408       | 7  | P  | 15 | 1613.8175      | 807.4127        |
| 745.4248       | 8  | I  | 14 | 1516.7647      | 758.8863        |
| 832.4569       | 9  | S  | 13 | 1403.6807      | 702.3443        |
| 889.4783       | 10 | G  | 12 | 1316.6487      | 658.8282        |
| 1036.5467      | 11 | F  | 11 | 1259.6272      | 630.3175        |
| 1123.5788      | 12 | S  | 10 | 1112.5588      | 556.7833        |
| 1222.6472      | 13 | V  | 9  | 1025.5267      | 513.2673        |
| 1279.6686      | 14 | G  | 8  | 926.4583       | 463.7331        |
| 1380.7163      | 15 | T  | 7  | 869.4369       | 435.2223        |
| 1481.7640      | 16 | T  | 6  | 768.3892       | 384.6985        |
| 1644.8273      | 17 | Y  | 5  | 667.3415       | 334.1747        |
| 1759.8543      | 18 | D  | 4  | 504.2782       | 252.6430        |
| 1872.9383      | 19 | I  | 3  | 389.2512       | 195.1295        |
| 1973.9860      | 20 | T  | 2  | 276.1672       | 138.5875        |
|                | 21 | R  | 1  | 175.1195       | 88.0637         |

N-term:+29.04

N-term:+29.04

X-range:

0 - 0

MassTol: Y-zoom:

0. 1.

MassType:

☐AVG ☒MONO

Axis:

☒1 ☐2

Label:

☒I ☐M ☐-

Ions:

a ☐+ ☐2+ ☐3+

b ☒+ ☐2+ ☐3+

c ☐+ ☐2+ ☐3+

x ☐+ ☐2+ ☐3+

y ☒+ ☒2+ ☐3+

z ☐+ ☐2+ ☐3+

hide H<sub>2</sub>O/NH<sub>3</sub> ☐

zoom 112-122 ☐

GO

APQVSTPTLVEAAR, MH+ 1467.8171, m/z 489.9439  
L OS G13 P120811 220811-s1.04262.04262.3.dta

scan 4262; 2.2e+000

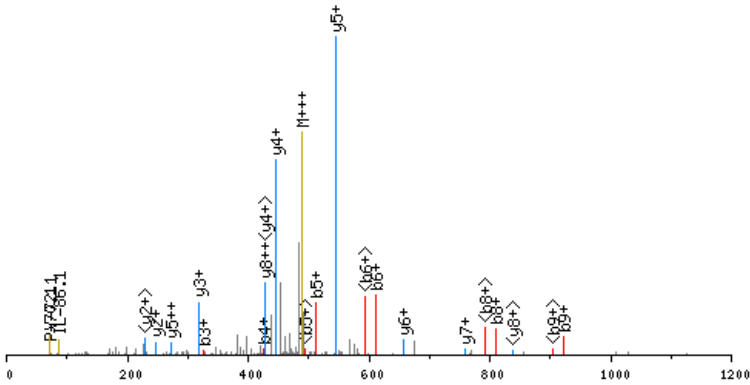

click image to zoom in; click top corners to zoom out [precursor±]

scan 4259; 489.9 m/z; 9.7e+000

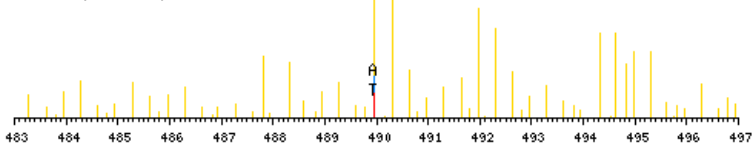

zoomed in precursor plot; T=theoretical m/z, A=acquired m/z

| b <sup>+</sup> | #  | AA | #  | y <sup>+</sup> | y <sup>2+</sup> |
|----------------|----|----|----|----------------|-----------------|
| 100.0762       | 1  | A  | 14 |                |                 |
| 197.1290       | 2  | P  | 13 | 1368.7487      | 684.8783        |
| 325.1876       | 3  | Q  | 12 | 1271.6959      | 636.3519        |
| 424.2560       | 4  | V  | 11 | 1143.6374      | 572.3226        |
| 511.2880       | 5  | S  | 10 | 1044.5689      | 522.7884        |
| 612.3357       | 6  | T  | 9  | 957.5369       | 479.2724        |
| 709.3884       | 7  | P  | 8  | 856.4892       | 428.7485        |
| 810.4361       | 8  | T  | 7  | 759.4365       | 380.2222        |
| 923.5202       | 9  | L  | 6  | 658.3888       | 329.6983        |
| 1022.5886      | 10 | V  | 5  | 545.3047       | 273.1563        |
| 1151.6312      | 11 | E  | 4  | 446.2363       | 223.6221        |
| 1222.6683      | 12 | A  | 3  | 317.1937       | 159.1008        |
| 1293.7054      | 13 | A  | 2  | 246.1566       | 123.5822        |
|                | 14 | R  | 1  | 175.1195       | 88.0637         |

N-term:+29.04

X-range:

0 - 0

MassTol: Y-zoom:

0. 1.

MassType:

☐ AVG ☒ MONO

Axis:

☒ 1 ☐ 2

Label:

☒ I ☐ M ☐ -

Ions:

a ☐ + ☐ 2+ ☐ 3+

b ☒ + ☐ 2+ ☐ 3+

c ☐ + ☐ 2+ ☐ 3+

x ☐ + ☐ 2+ ☐ 3+

y ☒ + ☒ 2+ ☐ 3+

z ☐ + ☐ 2+ ☐ 3+

hide H<sub>2</sub>O/NH<sub>3</sub> ☐

zoom 112-122 ☐

GO

APVIEPSGPPELVVEPGETVTILR, MH+ 2323.2973, m/z 775.1039  
H OS G12 P120811 220811-s1.05140.05140.3.dta

scan 5140; 2.5e+000

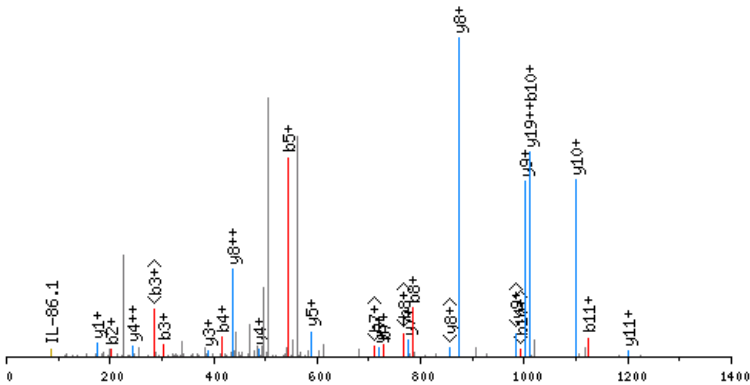

click image to zoom in; click top corners to zoom out [precursor±]

scan 5137; 775.1 m/z; 1.9e+001

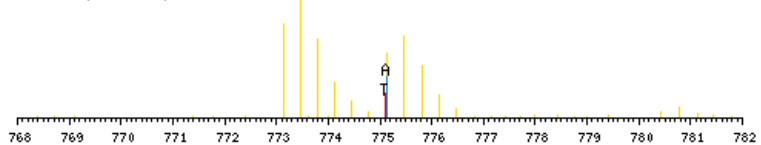

zoomed in precursor plot; T=theoretical m/z, A=acquired m/z

| b <sup>+</sup> | #  | AA | #  | y <sup>+</sup> | y <sup>2+</sup> |
|----------------|----|----|----|----------------|-----------------|
| 106.1080       | 1  | A  | 22 |                |                 |
| 203.1608       | 2  | P  | 21 | 2218.1971      | 1109.6025       |
| 302.2292       | 3  | V  | 20 | 2121.1443      | 1061.0761       |
| 415.3133       | 4  | I  | 19 | 2022.0759      | 1011.5419       |
| 544.3558       | 5  | E  | 18 | 1908.9918      | 954.9998        |
| 641.4086       | 6  | P  | 17 | 1779.9493      | 890.4785        |
| 728.4406       | 7  | S  | 16 | 1682.8965      | 841.9522        |
| 785.4621       | 8  | G  | 15 | 1595.8645      | 798.4361        |
| 882.5149       | 9  | P  | 14 | 1538.8430      | 769.9254        |
| 1011.5575      | 10 | E  | 13 | 1441.7902      | 721.3990        |
| 1124.6415      | 11 | L  | 12 | 1312.7476      | 656.8777        |
| 1223.7099      | 12 | V  | 11 | 1199.6636      | 600.3357        |
| 1322.7784      | 13 | V  | 10 | 1100.5952      | 550.8015        |
| 1451.8209      | 14 | E  | 9  | 1001.5267      | 501.2673        |
| 1548.8737      | 15 | P  | 8  | 872.4842       | 436.7460        |
| 1605.8952      | 16 | G  | 7  | 775.4314       | 388.2196        |
| 1734.9378      | 17 | E  | 6  | 718.4099       | 359.7089        |
| 1835.9854      | 18 | T  | 5  | 589.3673       | 295.1876        |
| 1935.0539      | 19 | V  | 4  | 488.3197       | 244.6637        |
| 2036.1015      | 20 | T  | 3  | 389.2512       | 195.1295        |
| 2149.1856      | 21 | L  | 2  | 288.2036       | 144.6057        |
|                | 22 | R  | 1  | 175.1195       | 88.0637         |

N-term:+35.07

X-range:

0 - 0

MassTol: Y-zoom:

0. 1.

MassType:

☐AVG ☒MONO

Axis:

☒1 ☐2

Label:

☒I ☐M ☐-

Ions:

a ☐+ ☐2+ ☐3+

b ☒+ ☐2+ ☐3+

c ☐+ ☐2+ ☐3+

x ☐+ ☐2+ ☐3+

y ☒+ ☒2+ ☐3+

z ☐+ ☐2+ ☐3+

hide H<sub>2</sub>O/NH<sub>3</sub> ☐

zoom 112-122 ☐

GO

AQDGVINEEALSVTELDLDR, MH+ 1986.9984, m/z 663.0043  
L OS G12 P120811 220811-s1.04806.04806.3.dta

scan 4806; 2.2e+000

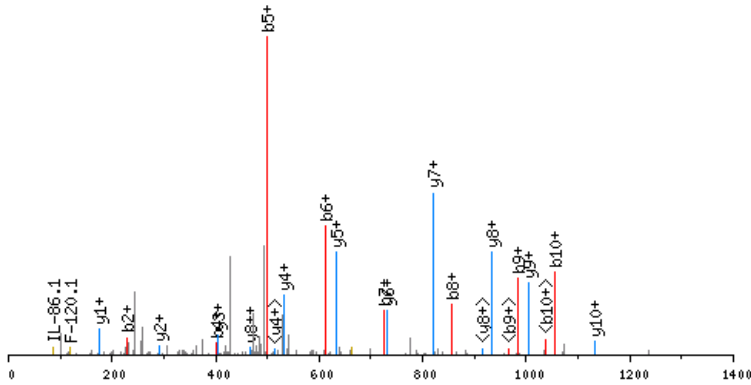

click image to zoom in; click top corners to zoom out

[precursor±]

scan 4802; 663.0 m/z; 4.6e+000

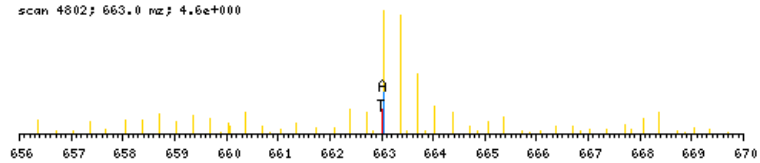

zoomed in precursor plot; T=theoretical m/z, A=acquired m/z

| b <sup>+</sup> | #  | AA | #  | y <sup>+</sup> | y <sup>2+</sup> |
|----------------|----|----|----|----------------|-----------------|
| 100.0762       | 1  | A  | 18 |                |                 |
| 228.1348       | 2  | Q  | 17 | 1887.9300      | 944.4689        |
| 343.1617       | 3  | D  | 16 | 1759.8714      | 880.4396        |
| 400.1832       | 4  | G  | 15 | 1644.8445      | 822.9261        |
| 499.2516       | 5  | V  | 14 | 1587.8230      | 794.4154        |
| 612.3357       | 6  | I  | 13 | 1488.7546      | 744.8812        |
| 726.3786       | 7  | N  | 12 | 1375.6705      | 688.3392        |
| 855.4212       | 8  | E  | 11 | 1261.6276      | 631.3177        |
| 984.4638       | 9  | E  | 10 | 1132.5850      | 566.7964        |
| 1055.5009      | 10 | A  | 9  | 1003.5424      | 502.2751        |
| 1168.5850      | 11 | L  | 8  | 932.5053       | 466.7566        |
| 1255.6170      | 12 | S  | 7  | 819.4212       | 410.2145        |
| 1354.6854      | 13 | V  | 6  | 732.3892       | 366.6985        |
| 1455.7331      | 14 | T  | 5  | 633.3208       | 317.1643        |
| 1584.7757      | 15 | E  | 4  | 532.2731       | 266.6405        |
| 1697.8597      | 16 | L  | 3  | 403.2305       | 202.1192        |
| 1812.8867      | 17 | D  | 2  | 290.1464       | 145.5771        |
|                | 18 | R  | 1  | 175.1195       | 88.0637         |

N-term:+29.04

X-range:

0 - 0

MassTol: Y-zoom:

0. 1.

MassType:

☐AVG ☒MONO

Axis:

☒1 ☐2

Label:

☒I ☐M ☐-

Ions:

a ☐+ ☐2+ ☐3+

b ☒+ ☐2+ ☐3+

c ☐+ ☐2+ ☐3+

x ☐+ ☐2+ ☐3+

y ☒+ ☒2+ ☐3+

z ☐+ ☐2+ ☐3+

hide H<sub>2</sub>O/NH<sub>3</sub> ☐

zoom 112-122 ☐

GO

AQGGTTSAITFPPEEQEDPR, MH+ 2165.0574, m/z 722.3573  
H OS G12 P120811 220811-s1.03765.03765.3.dta

scan 3765; 3.1e+000

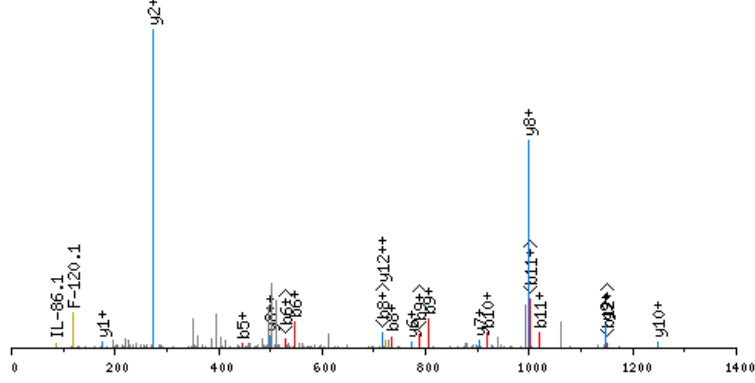

click image to zoom in; click top corners to zoom out [\[precursor±\]](#)

scan 3762; 722.4 m/z; 7.2e+000

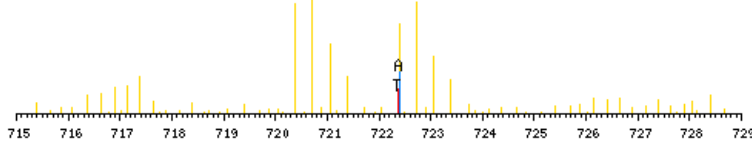

zoomed in precursor plot; T=theoretical m/z, A=acquired m/z

| b <sup>+</sup> | #  | AA | #  | y <sup>+</sup> | y <sup>2+</sup> |
|----------------|----|----|----|----------------|-----------------|
| 106.1080       | 1  | A  | 20 |                |                 |
| 234.1666       | 2  | Q  | 19 | 2059.9573      | 1030.4825       |
| 291.1881       | 3  | G  | 18 | 1931.8987      | 966.4533        |
| 388.2408       | 4  | P  | 17 | 1874.8772      | 937.9425        |
| 445.2623       | 5  | G  | 16 | 1777.8244      | 889.4161        |
| 546.3100       | 6  | T  | 15 | 1720.8030      | 860.9054        |
| 647.3576       | 7  | T  | 14 | 1619.7553      | 810.3816        |
| 734.3897       | 8  | S  | 13 | 1518.7076      | 759.8577        |
| 805.4268       | 9  | A  | 12 | 1431.6756      | 716.3417        |
| 918.5108       | 10 | I  | 11 | 1360.6385      | 680.8232        |
| 1019.5585      | 11 | T  | 10 | 1247.5544      | 624.2811        |
| 1166.6269      | 12 | F  | 9  | 1146.5067      | 573.7573        |
| 1263.6797      | 13 | P  | 8  | 999.4383       | 500.2231        |
| 1392.7223      | 14 | E  | 7  | 902.3856       | 451.6967        |
| 1521.7649      | 15 | E  | 6  | 773.3430       | 387.1754        |
| 1649.8235      | 16 | Q  | 5  | 644.3004       | 322.6541        |
| 1778.8661      | 17 | E  | 4  | 516.2418       | 258.6248        |
| 1893.8930      | 18 | D  | 3  | 387.1992       | 194.1035        |
| 1990.9458      | 19 | P  | 2  | 272.1723       | 136.5900        |
|                | 20 | R  | 1  | 175.1195       | 88.0637         |

N-term:+35.07

X-range:

0 - 0

MassTol: Y-zoom:

0. 1.

MassType:

☐ AVG ☒ MONO

Axis:

☒ 1 ☐ 2

Label:

☒ I ☐ M ☐ -

Ions:

a ☐ + ☐ 2+ ☐ 3+

b ☒ + ☐ 2+ ☐ 3+

c ☐ + ☐ 2+ ☐ 3+

x ☐ + ☐ 2+ ☐ 3+

y ☒ + ☒ 2+ ☐ 3+

z ☐ + ☐ 2+ ☐ 3+

hide H<sub>2</sub>O/NH<sub>3</sub> ☐

zoom 112-122 ☐

GO

AQLKDECPEVR, MH+ 1400.7207, m/z 467.5784  
L OS G16 P120811 220811-s1.02417.02417.3.dta

scan 2417; 1.2e+001

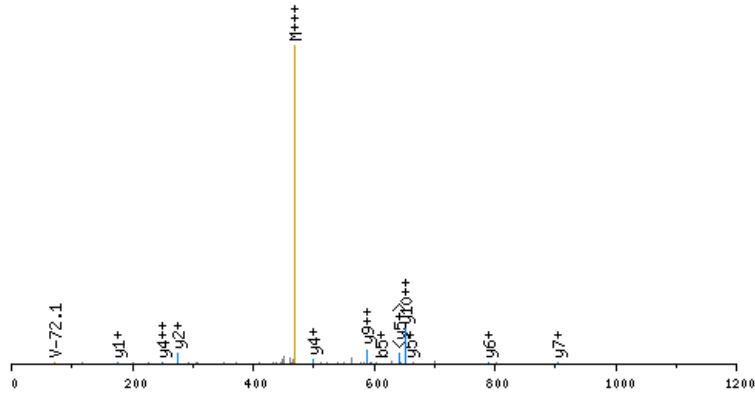

click image to zoom in; click top corners to zoom out [\[precursor±\]](#)

scan 2413; 467.6 m/z; 2.3e+002

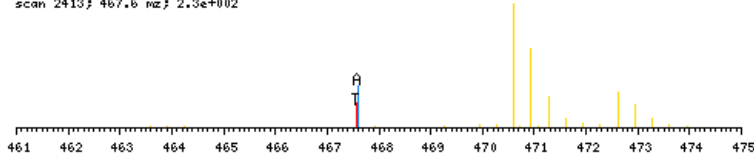

zoomed in precursor plot; T=theoretical m/z, A=acquired m/z

| b <sup>+</sup> | #  | AA | #  | y <sup>+</sup> | y <sup>2+</sup> |
|----------------|----|----|----|----------------|-----------------|
| 100.0762       | 1  | A  | 11 |                |                 |
| 228.1348       | 2  | Q  | 10 | 1301.6523      | 651.3301        |
| 341.2189       | 3  | L  | 9  | 1173.5938      | 587.3008        |
| 497.3452       | 4  | K  | 8  | 1060.5097      | 530.7588        |
| 612.3721       | 5  | D  | 7  | 904.3834       | 452.6956        |
| 741.4147       | 6  | E  | 6  | 789.3565       | 395.1821        |
| 901.4453       | 7  | C  | 5  | 660.3139       | 330.6608        |
| 998.4981       | 8  | P  | 4  | 500.2833       | 250.6455        |
| 1127.5406      | 9  | E  | 3  | 403.2305       | 202.1192        |
| 1226.6091      | 10 | V  | 2  | 274.1879       | 137.5979        |
|                | 11 | R  | 1  | 175.1195       | 88.0637         |

N-term:+29.04 K(4):+156.13  
C(7):+160.03

X-range:

0 - 0

MassTol: Y-zoom:

0. 1.

MassType:

☐AVG ☒MONO

Axis:

☒1 ☐2

Label:

☒I ☐M ☐-

Ions:

a ☐+ ☐2+ ☐3+

b ☒+ ☐2+ ☐3+

c ☐+ ☐2+ ☐3+

x ☐+ ☐2+ ☐3+

y ☒+ ☒2+ ☐3+

z ☐+ ☐2+ ☐3+

hide H<sub>2</sub>O/NH<sub>3</sub> ☐

zoom 112-122 ☐

GO

AQMTGTEYMQDPDEEALR, MH+ 2112.9218, m/z 704.9788  
L OS G12 P120811 220811-s1.03778.03778.3.dta

scan 3778; 2.2e+000

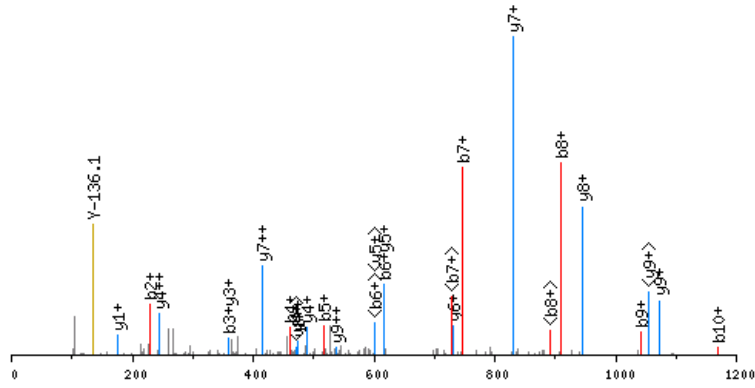

click image to zoom in; click top corners to zoom out [\[precursor±\]](#)

scan 3777; 705.0 m/z; 1.1e+001

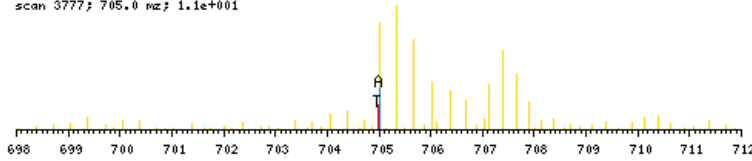

zoomed in precursor plot; T=theoretical m/z, A=acquired m/z

| b <sup>+</sup> | #  | AA | #  | y <sup>+</sup> | y <sup>2+</sup> |
|----------------|----|----|----|----------------|-----------------|
| 100.0762       | 1  | A  | 18 |                |                 |
| 228.1348       | 2  | Q  | 17 | 2013.8534      | 1007.4306       |
| 359.1753       | 3  | M  | 16 | 1885.7948      | 943.4013        |
| 460.2230       | 4  | T  | 15 | 1754.7543      | 877.8811        |
| 517.2444       | 5  | G  | 14 | 1653.7066      | 827.3572        |
| 618.2921       | 6  | T  | 13 | 1596.6852      | 798.8465        |
| 747.3347       | 7  | E  | 12 | 1495.6375      | 748.3227        |
| 910.3980       | 8  | Y  | 11 | 1366.5949      | 683.8014        |
| 1041.4385      | 9  | M  | 10 | 1203.5316      | 602.2697        |
| 1169.4971      | 10 | Q  | 9  | 1072.4911      | 536.7495        |
| 1284.5240      | 11 | D  | 8  | 944.4325       | 472.7202        |
| 1381.5768      | 12 | P  | 7  | 829.4056       | 415.2067        |
| 1496.6037      | 13 | D  | 6  | 732.3528       | 366.6803        |
| 1625.6463      | 14 | E  | 5  | 617.3259       | 309.1668        |
| 1754.6889      | 15 | E  | 4  | 488.2833       | 244.6455        |
| 1825.7260      | 16 | A  | 3  | 359.2407       | 180.1243        |
| 1938.8101      | 17 | L  | 2  | 288.2036       | 144.6057        |
|                | 18 | R  | 1  | 175.1195       | 88.0637         |

N-term:+29.04

X-range:

0 - 0

MassTol: Y-zoom:

0. 1.

MassType:

☐ AVG ☒ MONO

Axis:

☒ 1 ☐ 2

Label:

☒ I ☐ M ☐ -

Ions:

a ☐ + ☐ 2+ ☐ 3+

b ☒ + ☐ 2+ ☐ 3+

c ☐ + ☐ 2+ ☐ 3+

x ☐ + ☐ 2+ ☐ 3+

y ☒ + ☒ 2+ ☐ 3+

z ☐ + ☐ 2+ ☐ 3+

hide H<sub>2</sub>O/NH<sub>3</sub> ☐

zoom 112-122 ☐

GO

AQNFGQLQHLSSGHLLR, MH+ 1805.9775, m/z 452.2498  
L OS G17 P120811 220811-s1.05015.05015.4.dta

scan 5015; 2.1e+001

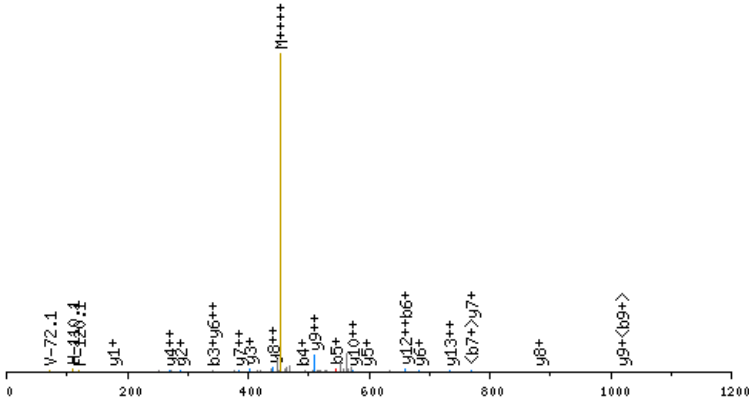

click image to zoom in; click top corners to zoom out

[precursor±]

scan 5013; 452.3 m/z; 1.0e+001

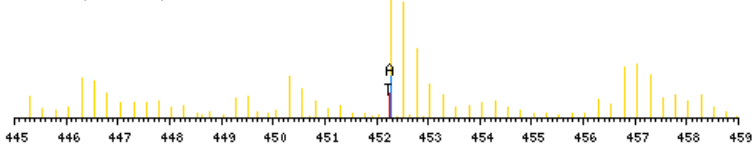

zoomed in precursor plot; T=theoretical m/z, A=acquired m/z

| b <sup>+</sup> | #  | AA | #  | y <sup>+</sup> | y <sup>2+</sup> |
|----------------|----|----|----|----------------|-----------------|
| 100.0762       | 1  | A  | 16 |                |                 |
| 228.1348       | 2  | Q  | 15 | 1706.9091      | 853.9584        |
| 342.1777       | 3  | N  | 14 | 1578.8505      | 789.9292        |
| 489.2461       | 4  | F  | 13 | 1464.8076      | 732.9077        |
| 546.2676       | 5  | G  | 12 | 1317.7391      | 659.3735        |
| 659.3517       | 6  | L  | 11 | 1260.7177      | 630.8628        |
| 787.4102       | 7  | Q  | 10 | 1147.6336      | 574.3207        |
| 924.4691       | 8  | H  | 9  | 1019.5750      | 510.2914        |
| 1037.5532      | 9  | I  | 8  | 882.5161       | 441.7620        |
| 1124.5852      | 10 | S  | 7  | 769.4321       | 385.2199        |
| 1211.6173      | 11 | S  | 6  | 682.4000       | 341.7039        |
| 1268.6387      | 12 | G  | 5  | 595.3680       | 298.1879        |
| 1405.6976      | 13 | H  | 4  | 538.3465       | 269.6772        |
| 1518.7817      | 14 | L  | 3  | 401.2876       | 201.1477        |
| 1631.8658      | 15 | L  | 2  | 288.2036       | 144.6057        |
|                | 16 | R  | 1  | 175.1195       | 88.0637         |

N-term:+29.04

X-range:

0 - 0

MassTol: Y-zoom:

0. 1.

MassType:

☐AVG ☒MONO

Axis:

☒1 ☐2

Label:

☒I ☐M ☐-

Ions:

a ☐+ ☐2+ ☐3+

b ☒+ ☐2+ ☐3+

c ☐+ ☐2+ ☐3+

x ☐+ ☐2+ ☐3+

y ☒+ ☒2+ ☐3+

z ☐+ ☐2+ ☐3+

hide H<sub>2</sub>O/NH<sub>3</sub> ☐

zoom 112-122 ☐

GO

AQPPAAAPSAVGSPAAAPR, MH+ 1791.9929, m/z 598.0025  
H OS G12 P120811 220811-s1.02811.02811.3.dta

scan 2811; 1.3e+000

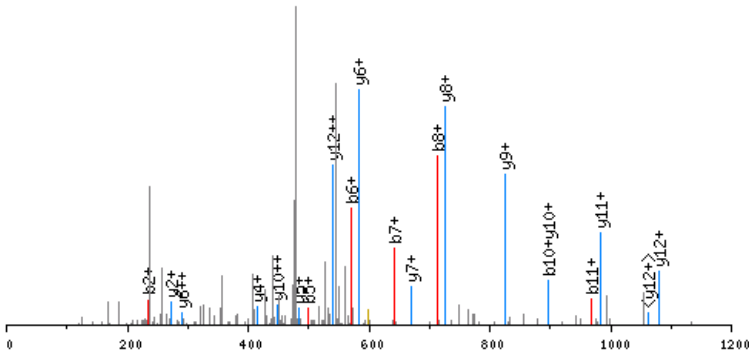

click image to zoom in; click top corners to zoom out

[precursor±]

scan 2807; 598.0 m/z; 2.4e+000

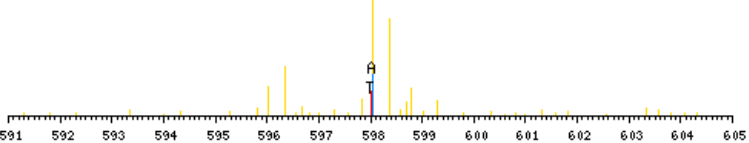

zoomed in precursor plot; T=theoretical m/z, A=acquired m/z

| b <sup>+</sup> | #  | AA | #  | y <sup>+</sup> | y <sup>2+</sup> |
|----------------|----|----|----|----------------|-----------------|
| 106.1080       | 1  | A  | 20 |                |                 |
| 234.1666       | 2  | Q  | 19 | 1686.8927      | 843.9503        |
| 331.2194       | 3  | P  | 18 | 1558.8342      | 779.9210        |
| 428.2721       | 4  | P  | 17 | 1461.7814      | 731.3946        |
| 499.3092       | 5  | A  | 16 | 1364.7286      | 682.8682        |
| 570.3463       | 6  | A  | 15 | 1293.6915      | 647.3497        |
| 641.3835       | 7  | A  | 14 | 1222.6544      | 611.8311        |
| 712.4206       | 8  | A  | 13 | 1151.6173      | 576.3126        |
| 809.4733       | 9  | P  | 12 | 1080.5802      | 540.7940        |
| 896.5054       | 10 | S  | 11 | 983.5274       | 492.2676        |
| 967.5425       | 11 | A  | 10 | 896.4954       | 448.7516        |
| 1066.6109      | 12 | V  | 9  | 825.4583       | 413.2331        |
| 1123.6324      | 13 | G  | 8  | 726.3899       | 363.6988        |
| 1210.6644      | 14 | S  | 7  | 669.3684       | 335.1881        |
| 1307.7172      | 15 | P  | 6  | 582.3364       | 291.6721        |
| 1378.7543      | 16 | A  | 5  | 485.2836       | 243.1457        |
| 1449.7914      | 17 | A  | 4  | 414.2465       | 207.6272        |
| 1520.8285      | 18 | A  | 3  | 343.2094       | 172.1086        |
| 1617.8813      | 19 | P  | 2  | 272.1723       | 136.5900        |
|                | 20 | R  | 1  | 175.1195       | 88.0637         |

N-term:+35.07

X-range:

0 - 0

MassTol: Y-zoom:

0. 1.

MassType:

☐AVG ☒MONO

Axis:

☒1 ☐2

Label:

☒I ☐M ☐-

Ions:

a ☐+ ☐2+ ☐3+

b ☒+ ☐2+ ☐3+

c ☐+ ☐2+ ☐3+

x ☐+ ☐2+ ☐3+

y ☒+ ☒2+ ☐3+

z ☐+ ☐2+ ☐3+

hide H<sub>2</sub>O/NH<sub>3</sub> ☐

zoom 112-122 ☐

GO

ARFEELNADLFR, MH+ 1508.7861, m/z 503.6002  
L OS G16 P120811 220811-s1.05625.05625.3.dta

scan 5625; 1.0e+000

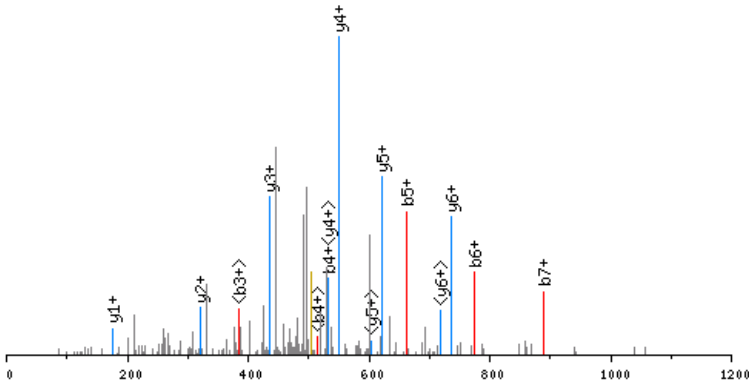

click image to zoom in; click top corners to zoom out

[precursor±]

scan 5623; 503.6 m/z; 4.8e+000

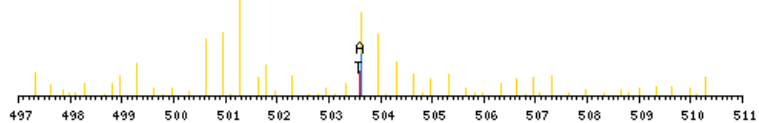

zoomed in precursor plot; T=theoretical m/z, A=acquired m/z

| b <sup>+</sup> | #  | AA | #  | y <sup>+</sup> | y <sup>2+</sup> |
|----------------|----|----|----|----------------|-----------------|
| 100.0762       | 1  | A  | 12 |                |                 |
| 256.1773       | 2  | R  | 11 | 1409.7177      | 705.3628        |
| 403.2457       | 3  | F  | 10 | 1253.6166      | 627.3122        |
| 532.2883       | 4  | E  | 9  | 1106.5482      | 553.7780        |
| 661.3309       | 5  | E  | 8  | 977.5056       | 489.2567        |
| 774.4150       | 6  | L  | 7  | 848.4630       | 424.7354        |
| 888.4579       | 7  | N  | 6  | 735.3790       | 368.1934        |
| 959.4950       | 8  | A  | 5  | 621.3360       | 311.1719        |
| 1074.5220      | 9  | D  | 4  | 550.2989       | 275.6534        |
| 1187.6060      | 10 | L  | 3  | 435.2720       | 218.1399        |
| 1334.6745      | 11 | F  | 2  | 322.1879       | 161.5979        |
|                | 12 | R  | 1  | 175.1195       | 88.0637         |

N-term:+29.04

N-term: +35.07

X-range:

0 - 0

MassTol: Y-zoom:

0. 1.

MassType:

☐AVG ☒MONO

Axis:

☒1 ☐2

Label:

☒I ☐M ☐-

Ions:

a ☐+ ☐2+ ☐3+

b ☒+ ☐2+ ☐3+

c ☐+ ☐2+ ☐3+

x ☐+ ☐2+ ☐3+

y ☒+ ☒2+ ☐3+

z ☐+ ☐2+ ☐3+

hide H<sub>2</sub>O/NH<sub>3</sub> ☐

zoom 112-122 ☐

GO

ASDSEGHSDSFSEGQAVGAHR, MH+ 2071.9069, m/z 518.7322  
L OS G17 P120811 220811-s1.02292.02292.4.dta

scan 2292; 1.8e+000

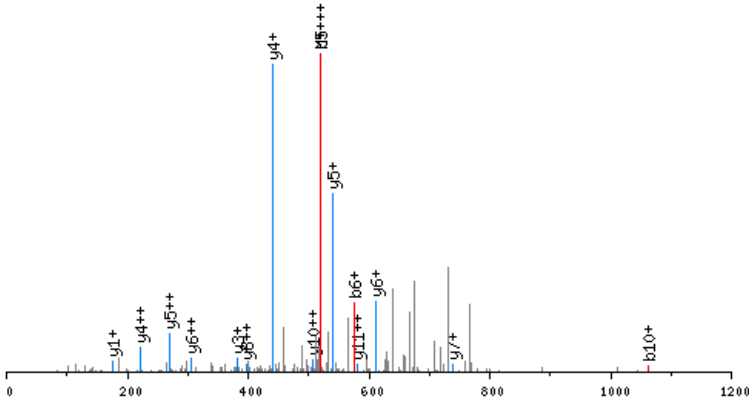

click image to zoom in; click top corners to zoom out

[precursor±]

scan 2288; 518.7 m/z; 2.7e+000

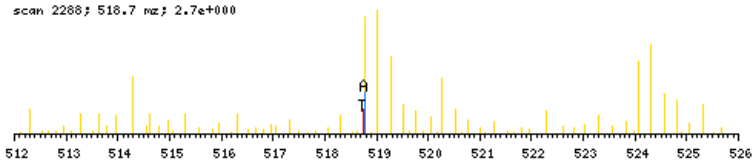

zoomed in precursor plot; T=theoretical m/z, A=acquired m/z

| b <sup>+</sup> | #  | AA | #  | y <sup>+</sup> | y <sup>2+</sup> |
|----------------|----|----|----|----------------|-----------------|
| 100.0762       | 1  | A  | 20 |                |                 |
| 187.1082       | 2  | S  | 19 | 1972.8385      | 986.9232        |
| 302.1352       | 3  | D  | 18 | 1885.8065      | 943.4072        |
| 389.1672       | 4  | S  | 17 | 1770.7796      | 885.8937        |
| 518.2098       | 5  | E  | 16 | 1683.7475      | 842.3777        |
| 575.2313       | 6  | G  | 15 | 1554.7049      | 777.8564        |
| 712.2902       | 7  | H  | 14 | 1497.6835      | 749.3457        |
| 799.3222       | 8  | S  | 13 | 1360.6246      | 680.8162        |
| 914.3492       | 9  | D  | 12 | 1273.5925      | 637.3002        |
| 1061.4176      | 10 | F  | 11 | 1158.5656      | 579.7867        |
| 1148.4496      | 11 | S  | 10 | 1011.4972      | 506.2525        |
| 1277.4922      | 12 | E  | 9  | 924.4652       | 462.7365        |
| 1334.5137      | 13 | G  | 8  | 795.4226       | 398.2152        |
| 1462.5722      | 14 | Q  | 7  | 738.4011       | 369.7045        |
| 1533.6093      | 15 | A  | 6  | 610.3425       | 305.6752        |
| 1632.6778      | 16 | V  | 5  | 539.3054       | 270.1566        |
| 1689.6992      | 17 | G  | 4  | 440.2370       | 220.6224        |
| 1760.7363      | 18 | A  | 3  | 383.2155       | 192.1117        |
| 1897.7952      | 19 | H  | 2  | 312.1784       | 156.5931        |
|                | 20 | R  | 1  | 175.1195       | 88.0637         |

N-term:+29.04

X-range:

$$\boxed{0} - \boxed{0}$$

0. 1.

☐ AVG ☒ MONO

1 2

I M -

$$a \square + \square^2 + \square^3 +$$
b ☒ 1+ ☐ 2+ ☐ 3+
$$= \square + \square^2 + \square^3 + \dots$$

**c**

| <b>x</b> | <b>1</b> | <b>2</b> | <b>3</b> |
|----------|----------|----------|----------|
| 1        | 1        | 2        | 3        |
| 2        | 2        | 4        | 6        |
| 3        | 3        | 6        | 9        |
| 4        | 4        | 8        | 12       |
| 5        | 5        | 10       | 15       |
| 6        | 6        | 12       | 18       |
| 7        | 7        | 14       | 21       |
| 8        | 8        | 16       | 24       |
| 9        | 9        | 18       | 27       |
| 10       | 10       | 20       | 30       |

y ☒ <sup>+</sup> ☒ <sup>2+</sup> ☐ <sup>3+</sup>

$$z \square + \square^2 + \square^3 +$$


7

GO

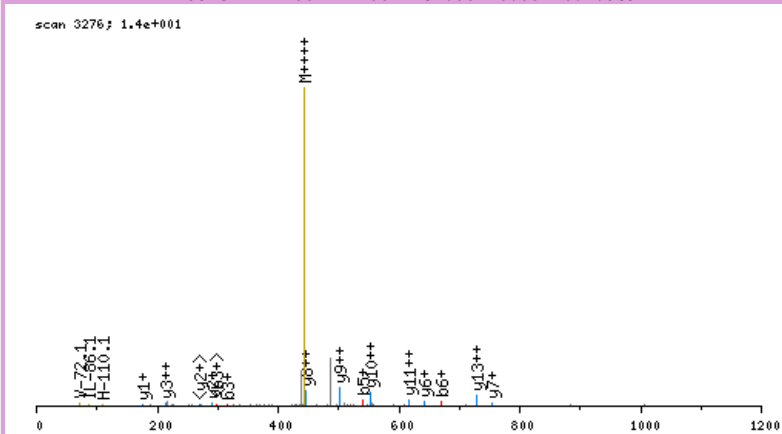

click image to zoom in; click top corners to zoom out

```
[precursor±]
```

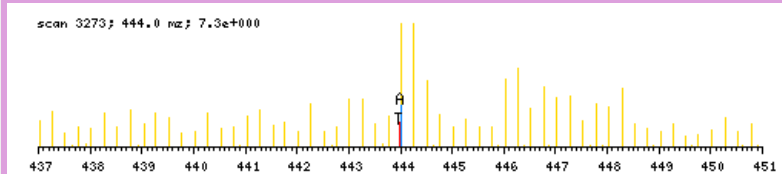

zoomed in precursor plot; T=theoretical m/z, A=acquired m/z

| $b^+$     | #  | AA | #  | $y^+$     | $y^{2+}$ |
|-----------|----|----|----|-----------|----------|
| 100.0762  | 1  | A  | 16 |           |          |
| 187.1082  | 2  | S  | 15 | 1673.8360 | 837.4219 |
| 316.1508  | 3  | E  | 14 | 1586.8039 | 793.9059 |
| 413.2036  | 4  | P  | 13 | 1457.7613 | 729.3846 |
| 541.2622  | 5  | Q  | 12 | 1360.7086 | 680.8582 |
| 670.3048  | 6  | E  | 11 | 1232.6500 | 616.8289 |
| 769.3732  | 7  | V  | 10 | 1103.6074 | 552.3076 |
| 882.4572  | 8  | L  | 9  | 1004.5390 | 502.7734 |
| 1019.5162 | 9  | H  | 8  | 891.4549  | 446.2314 |
| 1132.6002 | 10 | I  | 7  | 754.3960  | 377.7019 |
| 1189.6217 | 11 | G  | 6  | 641.3119  | 321.1599 |
| 1276.6537 | 12 | S  | 5  | 584.2905  | 292.6492 |
| 1347.6908 | 13 | A  | 4  | 497.2585  | 249.1331 |
| 1484.7497 | 14 | H  | 3  | 426.2213  | 213.6146 |
| 1598.7927 | 15 | N  | 2  | 289.1624  | 145.0851 |
|           | 16 | R  | 1  | 175.1195  | 88.0637  |

N-term: +29.04



X-range:

0 - 0

MassTol: Y-zoom:

0. 1.

MassType:

☐ AVG ☒ MONO

Axis:

☒ 1 ☐ 2

Label:

☒ I ☐ M ☐ -

Ions:

a ☐ + ☐ 2+ ☐ 3+

b ☒ + ☐ 2+ ☐ 3+

c ☐ + ☐ 2+ ☐ 3+

x ☐ + ☐ 2+ ☐ 3+

y ☒ + ☒ 2+ ☐ 3+

z ☐ + ☐ 2+ ☐ 3+

hide H<sub>2</sub>O/NH<sub>3</sub> ☐

zoom 112-122 ☐

GO

ASFPECTAAAIKAIK, MH+ 1661.9049, m/z 554.6398  
L OS G15 P120811 220811-s1.04898.04898.3.dta

scan 4898; 7.6e+000

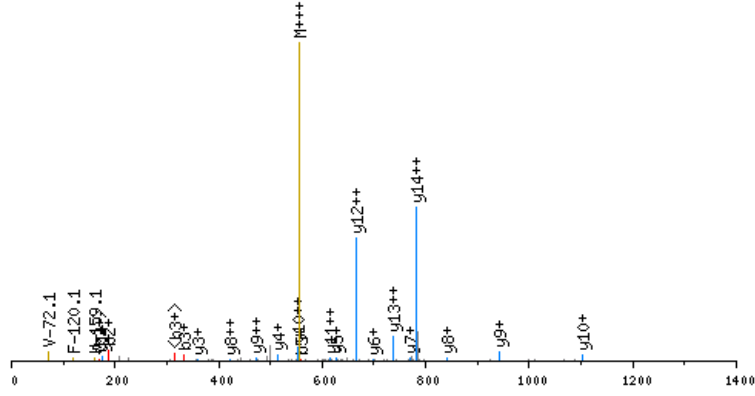

click image to zoom in; click top corners to zoom out [\[precursor±\]](#)

scan 4896; 554.6 m/z; 1.7e+001

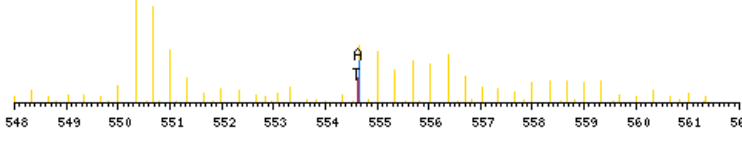

zoomed in precursor plot; T=theoretical m/z, A=acquired m/z

| b <sup>+</sup> | #  | AA | #  | y <sup>+</sup> | y <sup>2+</sup> |
|----------------|----|----|----|----------------|-----------------|
| 100.0762       | 1  | A  | 15 |                |                 |
| 187.1082       | 2  | S  | 14 | 1562.8365      | 781.9221        |
| 334.1767       | 3  | F  | 13 | 1475.8044      | 738.4061        |
| 431.2294       | 4  | P  | 12 | 1328.7360      | 664.8719        |
| 560.2720       | 5  | E  | 11 | 1231.6833      | 616.3455        |
| 720.3026       | 6  | C  | 10 | 1102.6407      | 551.8242        |
| 821.3503       | 7  | T  | 9  | 942.6101       | 471.8089        |
| 892.3874       | 8  | A  | 8  | 841.5624       | 421.2851        |
| 963.4245       | 9  | A  | 7  | 770.5253       | 385.7665        |
| 1034.4616      | 10 | A  | 6  | 699.4882       | 350.2480        |
| 1147.5457      | 11 | I  | 5  | 628.4510       | 314.7294        |
| 1303.6720      | 12 | K  | 4  | 515.3670       | 258.1874        |
| 1374.7091      | 13 | A  | 3  | 359.2407       | 180.1243        |
| 1487.7932      | 14 | I  | 2  | 288.2036       | 144.6057        |
|                | 15 | R  | 1  | 175.1195       | 88.0637         |

N-term:+29.04 C(6):+160.03  
K(12):+156.13

N-term: +29.04 K(5): +156.13  
K(17): +156.13

X-range:

0 - 0

MassTol: Y-zoom:

0. 1.

MassType:

☐AVG ☒MONO

Axis:

☒1 ☐2

Label:

☒I ☐M ☐-

Ions:

a ☐+ ☐2+ ☐3+

b ☒+ ☐2+ ☐3+

c ☐+ ☐2+ ☐3+

x ☐+ ☐2+ ☐3+

y ☒+ ☒2+ ☐3+

z ☐+ ☐2+ ☐3+

hide H<sub>2</sub>O/NH<sub>3</sub> ☐

zoom 112-122 ☐

GO

ASGGGVPTDEEQATGLER, MH+ 1801.8568, m/z 601.2904  
L OS G13 P120811 220811-s1.03281.03281.3.dta

scan 3281; 2.2e+000

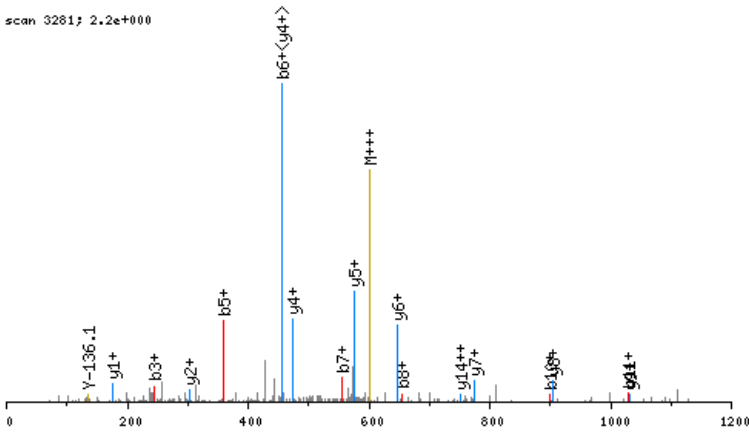

click image to zoom in; click top corners to zoom out

[precursor±]

scan 3279; 601.3 m/z; 1.8e+001

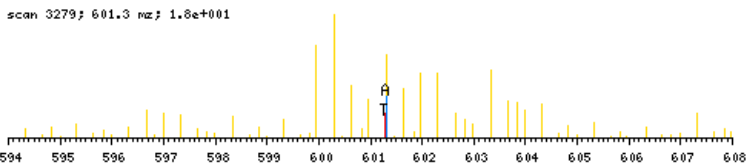

zoomed in precursor plot; T=theoretical m/z, A=acquired m/z

| b <sup>+</sup> | #  | AA | #  | y <sup>+</sup> | y <sup>2+</sup> |
|----------------|----|----|----|----------------|-----------------|
| 100.0762       | 1  | A  | 18 |                |                 |
| 187.1082       | 2  | S  | 17 | 1702.7884      | 851.8981        |
| 244.1297       | 3  | G  | 16 | 1615.7564      | 808.3821        |
| 301.1512       | 4  | G  | 15 | 1558.7349      | 779.8714        |
| 358.1726       | 5  | G  | 14 | 1501.7134      | 751.3606        |
| 457.2410       | 6  | V  | 13 | 1444.6920      | 722.8499        |
| 554.2938       | 7  | P  | 12 | 1345.6236      | 673.3157        |
| 655.3415       | 8  | T  | 11 | 1248.5708      | 624.7893        |
| 770.3684       | 9  | D  | 10 | 1147.5231      | 574.2655        |
| 899.4110       | 10 | E  | 9  | 1032.4962      | 516.7520        |
| 1028.4536      | 11 | E  | 8  | 903.4536       | 452.2307        |
| 1156.5122      | 12 | Q  | 7  | 774.4110       | 387.7094        |
| 1227.5493      | 13 | A  | 6  | 646.3524       | 323.6801        |
| 1328.5970      | 14 | T  | 5  | 575.3153       | 288.1616        |
| 1385.6185      | 15 | G  | 4  | 474.2676       | 237.6377        |
| 1498.7025      | 16 | L  | 3  | 417.2462       | 209.1270        |
| 1627.7451      | 17 | E  | 2  | 304.1621       | 152.5850        |
|                | 18 | R  | 1  | 175.1195       | 88.0637         |

N-term:+29.04

X-range:

0 - 0

MassTol: Y-zoom:

0. 1.

MassType:

☐AVG ☒MONO

Axis:

☒1 ☐2

Label:

☒I ☐M ☐-

Ions:

a ☐+ ☐2+ ☐3+

b ☒+ ☐2+ ☐3+

c ☐+ ☐2+ ☐3+

x ☐+ ☐2+ ☐3+

y ☒+ ☒2+ ☐3+

z ☐+ ☐2+ ☐3+

hide H<sub>2</sub>O/NH<sub>3</sub> ☐

zoom 112-122 ☐

GO

ASGPGGLHADLLR, MH+ 1291.7122, m/z 431.2423  
L OS G16 P120811 220811-s1.04010.04010.3.dta

scan 4010; 1.4e+001

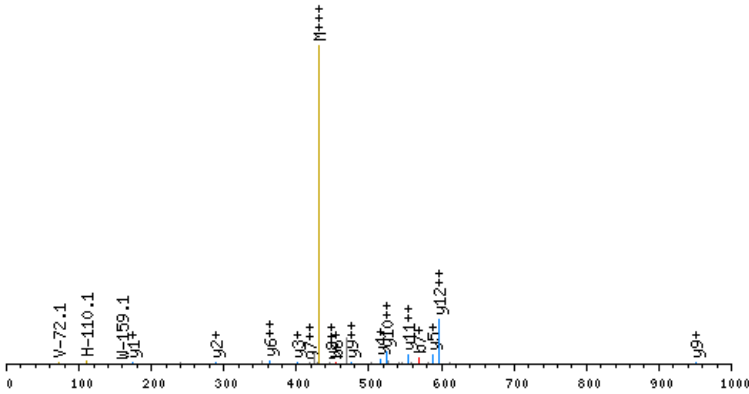

click image to zoom in; click top corners to zoom out [\[precursor±\]](#)

scan 4008; 431.2 m/z; 8.4e+000

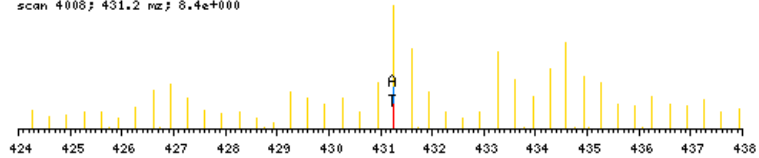

zoomed in precursor plot; T=theoretical m/z, A=acquired m/z

| b <sup>+</sup> | #  | AA | #  | y <sup>+</sup> | y <sup>2+</sup> |
|----------------|----|----|----|----------------|-----------------|
| 100.0762       | 1  | A  | 13 |                |                 |
| 187.1082       | 2  | S  | 12 | 1192.6438      | 596.8258        |
| 244.1297       | 3  | G  | 11 | 1105.6118      | 553.3098        |
| 341.1825       | 4  | P  | 10 | 1048.5904      | 524.7991        |
| 398.2039       | 5  | G  | 9  | 951.5376       | 476.2727        |
| 455.2254       | 6  | G  | 8  | 894.5161       | 447.7620        |
| 568.3095       | 7  | L  | 7  | 837.4947       | 419.2512        |
| 705.3684       | 8  | H  | 6  | 724.4106       | 362.7092        |
| 776.4055       | 9  | A  | 5  | 587.3517       | 294.1798        |
| 891.4324       | 10 | D  | 4  | 516.3146       | 258.6612        |
| 1004.5165      | 11 | L  | 3  | 401.2876       | 201.1477        |
| 1117.6006      | 12 | L  | 2  | 288.2036       | 144.6057        |
|                | 13 | R  | 1  | 175.1195       | 88.0637         |

N-term:+29.04



X-range:

0 - 0

MassTol: Y-zoom:

0. 1.

MassType:

☐ AVG ☒ MONO

Axis:

☒ 1 ☐ 2

Label:

☒ I ☐ M ☐ -

Ions:

a ☐ + ☐ 2+ ☐ 3+

b ☒ + ☐ 2+ ☐ 3+

c ☐ + ☐ 2+ ☐ 3+

x ☐ + ☐ 2+ ☐ 3+

y ☒ + ☒ 2+ ☐ 3+

z ☐ + ☐ 2+ ☐ 3+

hide H<sub>2</sub>O/NH<sub>3</sub> ☐

zoom 112-122 ☐

GO

ASKPTLNEVVIVSAIR, MH+ 1765.1224, m/z 589.0456  
H OS G15 P120811 220811-s1.05167.05167.3.dta

scan 5167; 3.0e+000

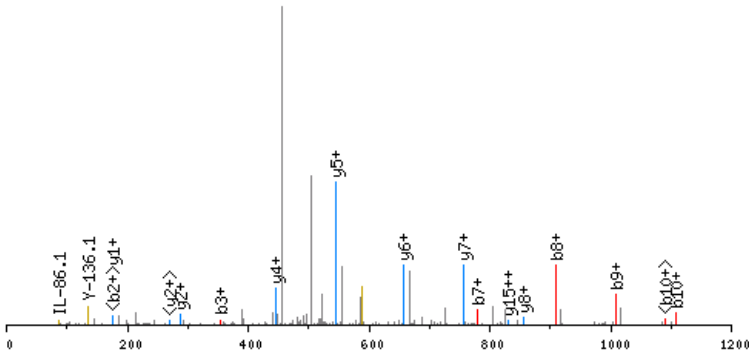

click image to zoom in; click top corners to zoom out

[precursor±]

scan 5166; 589.0 m/z; 1.2e+001

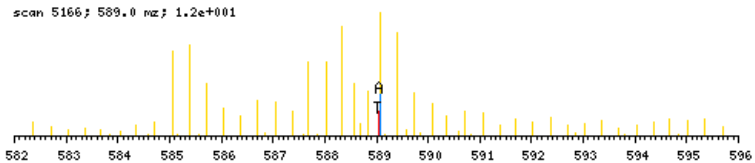

zoomed in precursor plot; T=theoretical m/z, A=acquired m/z

| b <sup>+</sup> | #  | AA | #  | y <sup>+</sup> | y <sup>2+</sup> |
|----------------|----|----|----|----------------|-----------------|
| 106.1080       | 1  | A  | 16 |                |                 |
| 193.1400       | 2  | S  | 15 | 1660.0222      | 830.5150        |
| 355.2981       | 3  | K  | 14 | 1572.9901      | 786.9990        |
| 452.3509       | 4  | P  | 13 | 1410.8320      | 705.9199        |
| 553.3986       | 5  | T  | 12 | 1313.7793      | 657.3936        |
| 666.4826       | 6  | L  | 11 | 1212.7316      | 606.8697        |
| 780.5256       | 7  | N  | 10 | 1099.6475      | 550.3277        |
| 909.5682       | 8  | E  | 9  | 985.6046       | 493.3062        |
| 1008.6366      | 9  | V  | 8  | 856.5620       | 428.7849        |
| 1107.7050      | 10 | V  | 7  | 757.4936       | 379.2507        |
| 1220.7891      | 11 | I  | 6  | 658.4252       | 329.7165        |
| 1319.8575      | 12 | V  | 5  | 545.3411       | 273.1745        |
| 1406.8895      | 13 | S  | 4  | 446.2727       | 223.6403        |
| 1477.9266      | 14 | A  | 3  | 359.2407       | 180.1243        |
| 1591.0107      | 15 | I  | 2  | 288.2036       | 144.6057        |
|                | 16 | R  | 1  | 175.1195       | 88.0637         |

N-term:+35.07 K(3):+162.16

N-term: +29.04 K(5): +156.13

X-range:

0 - 0

MassTol: Y-zoom:

0. 1.

MassType:

☐AVG ☒MONO

Axis:

☒1 ☐2

Label:

☒I ☐M ☐-

Ions:

a ☐+ ☐2+ ☐3+

b ☒+ ☐2+ ☐3+

c ☐+ ☐2+ ☐3+

x ☐+ ☐2+ ☐3+

y ☒+ ☒2+ ☐3+

z ☐+ ☐2+ ☐3+

hide H<sub>2</sub>O/NH<sub>3</sub> ☐

zoom 112-122 ☐

GO

ASNQPEQFDWAINDR, MH+ 1818.8411, m/z 606.9519  
L OS G13 P120811 220811-s1.05448.05448.3.dta

scan 5448; 1.4e+000

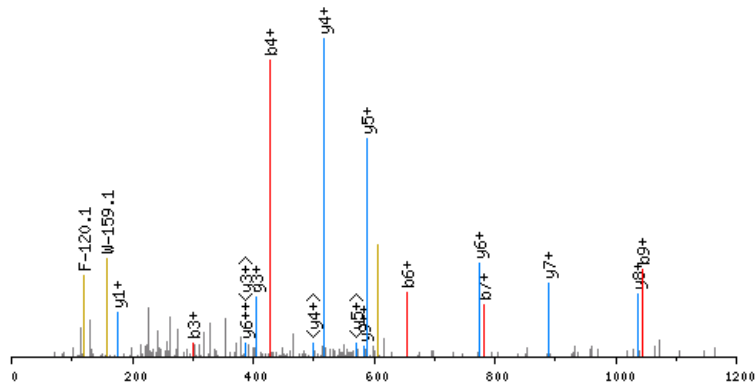

click image to zoom in; click top corners to zoom out

[precursor±]

scan 5444; 607.0 m/z; 7.6e+000

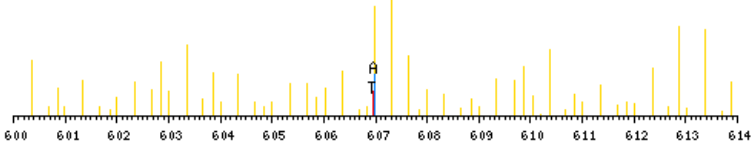

zoomed in precursor plot; T=theoretical m/z, A=acquired m/z

| b <sup>+</sup> | #  | AA | #  | y <sup>+</sup> | y <sup>2+</sup> |
|----------------|----|----|----|----------------|-----------------|
| 100.0762       | 1  | A  | 15 |                |                 |
| 187.1082       | 2  | S  | 14 | 1719.7727      | 860.3903        |
| 301.1512       | 3  | N  | 13 | 1632.7407      | 816.8742        |
| 429.2097       | 4  | Q  | 12 | 1518.6977      | 759.8528        |
| 526.2625       | 5  | P  | 11 | 1390.6392      | 695.8235        |
| 655.3051       | 6  | E  | 10 | 1293.5864      | 647.2971        |
| 783.3637       | 7  | Q  | 9  | 1164.5438      | 582.7758        |
| 930.4321       | 8  | F  | 8  | 1036.4852      | 518.7465        |
| 1045.4590      | 9  | D  | 7  | 889.4168       | 445.2123        |
| 1231.5384      | 10 | W  | 6  | 774.3899       | 387.6988        |
| 1302.5755      | 11 | A  | 5  | 588.3105       | 294.6592        |
| 1415.6595      | 12 | I  | 4  | 517.2734       | 259.1406        |
| 1529.7025      | 13 | N  | 3  | 404.1894       | 202.5986        |
| 1644.7294      | 14 | D  | 2  | 290.1464       | 145.5771        |
|                | 15 | R  | 1  | 175.1195       | 88.0637         |

N-term:+29.04

X-range:

0

-

0

MassTol: Y-zoom:

0.

1.

MassType:

AVG

MONO

Axis:

1

2

Label:

I

M

-

Ions:

a

+

2+

3+

b

+

2+

3+

c

+

2+

3+

x

+

2+

3+

y

+

2+

3+

z

+

2+

3+

hide H<sub>2</sub>O/NH<sub>3</sub>

zoom 112-122

GO

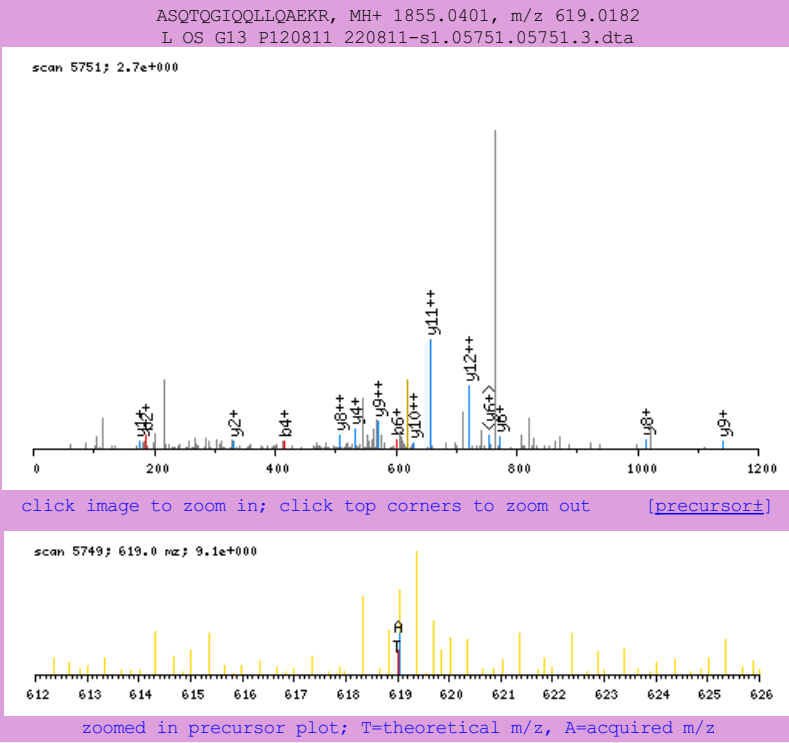

| b <sup>+</sup> | #  | AA | #  | y <sup>+</sup> | y <sup>2+</sup> |
|----------------|----|----|----|----------------|-----------------|
| 100.0762       | 1  | A  | 16 |                |                 |
| 187.1082       | 2  | S  | 15 | 1755.9718      | 878.4898        |
| 315.1668       | 3  | Q  | 14 | 1668.9397      | 834.9738        |
| 416.2145       | 4  | T  | 13 | 1540.8812      | 770.9445        |
| 544.2731       | 5  | Q  | 12 | 1439.8335      | 720.4206        |
| 601.2945       | 6  | G  | 11 | 1311.7749      | 656.3914        |
| 714.3786       | 7  | I  | 10 | 1254.7534      | 627.8806        |
| 842.4372       | 8  | Q  | 9  | 1141.6694      | 571.3386        |
| 970.4958       | 9  | Q  | 8  | 1013.6108      | 507.3093        |
| 1083.5798      | 10 | L  | 7  | 885.5522       | 443.2800        |
| 1196.6639      | 11 | L  | 6  | 772.4681       | 386.7380        |
| 1324.7225      | 12 | Q  | 5  | 659.3841       | 330.1960        |
| 1395.7596      | 13 | A  | 4  | 531.3255       | 266.1667        |
| 1524.8022      | 14 | E  | 3  | 460.2884       | 230.6481        |
| 1680.9285      | 15 | K  | 2  | 331.2458       | 166.1268        |
|                | 16 | R  | 1  | 175.1195       | 88.0637         |

N-term:+29.04 K(15):+156.13

X-range:

0 - 0

MassTol: Y-zoom:

0. 1.

MassType:

☐ AVG ☒ MONO

Axis:

☒ 1 ☐ 2

Label:

☒ I ☐ M ☐ -

Ions:

a ☐ + ☐ 2+ ☐ 3+

b ☒ + ☐ 2+ ☐ 3+

c ☐ + ☐ 2+ ☐ 3+

x ☐ + ☐ 2+ ☐ 3+

y ☒ + ☒ 2+ ☐ 3+

z ☐ + ☐ 2+ ☐ 3+

hide H<sub>2</sub>O/NH<sub>3</sub> ☐

zoom 112-122 ☐

GO

ASQTTDGLPEVTKDVER, MH+ 2076.2037, m/z 519.8064  
H OS G16 P120811 220811-s1.03254.03254.4.dta

scan 3254; 8.1e+000

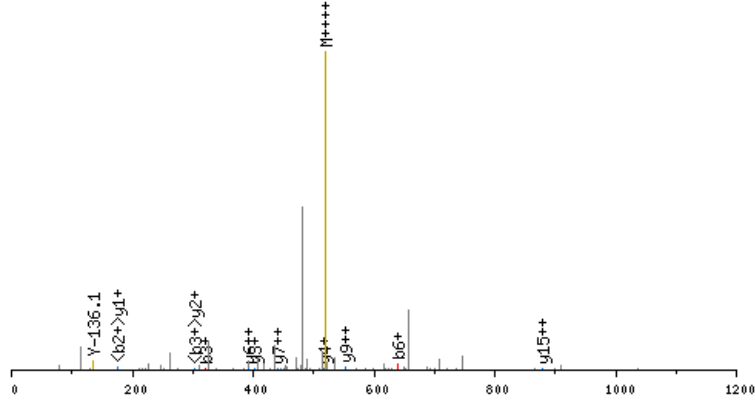

click image to zoom in; click top corners to zoom out [\[precursor±\]](#)

scan 3253; 519.8 m/z; 1.2e+001

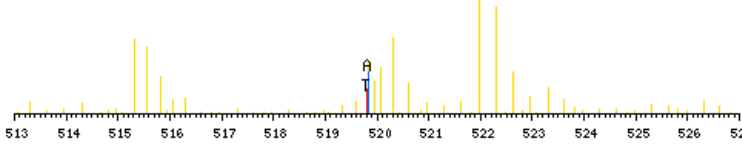

zoomed in precursor plot; T=theoretical m/z, A=acquired m/z

| b <sup>+</sup> | #  | AA | #  | y <sup>+</sup> | y <sup>2+</sup> |
|----------------|----|----|----|----------------|-----------------|
| 106.1080       | 1  | A  | 18 |                |                 |
| 193.1400       | 2  | S  | 17 | 1971.1035      | 986.0557        |
| 321.1986       | 3  | Q  | 16 | 1884.0715      | 942.5397        |
| 422.2463       | 4  | T  | 15 | 1756.0129      | 878.5104        |
| 523.2940       | 5  | T  | 14 | 1654.9652      | 827.9865        |
| 638.3209       | 6  | D  | 13 | 1553.9176      | 777.4627        |
| 695.3424       | 7  | G  | 12 | 1438.8906      | 719.9492        |
| 857.5005       | 8  | K  | 11 | 1381.8692      | 691.4385        |
| 970.5845       | 9  | L  | 10 | 1219.7111      | 610.3594        |
| 1067.6373      | 10 | P  | 9  | 1106.6270      | 553.8174        |
| 1196.6799      | 11 | E  | 8  | 1009.5742      | 505.2910        |
| 1295.7483      | 12 | V  | 7  | 880.5316       | 440.7697        |
| 1396.7960      | 13 | T  | 6  | 781.4632       | 391.2355        |
| 1558.9541      | 14 | K  | 5  | 680.4156       | 340.7117        |
| 1673.9810      | 15 | D  | 4  | 518.2575       | 259.6326        |
| 1773.0495      | 16 | V  | 3  | 403.2305       | 202.1192        |
| 1902.0920      | 17 | E  | 2  | 304.1621       | 152.5850        |
|                | 18 | R  | 1  | 175.1195       | 88.0637         |

N-term: +35.07 K(8): +162.16  
K(14): +162.16

X-range:

0 - 0

MassTol: Y-zoom:

0. 1.

MassType:

☐AVG ☒MONO

Axis:

☒1 ☐2

Label:

☒I ☐M ☐-

Ions:

a ☐+ ☐2+ ☐3+

b ☒+ ☐2+ ☐3+

c ☐+ ☐2+ ☐3+

x ☐+ ☐2+ ☐3+

y ☒+ ☒2+ ☐3+

z ☐+ ☐2+ ☐3+

hide H<sub>2</sub>O/NH<sub>3</sub> ☐

zoom 112-122 ☐

GO

ASQVTLEGDKVKVER, MH+ 1743.0017, m/z 436.5059  
L OS G17 P120811 220811-s1.03050.03050.4.dta

scan 3050; 2.3e+001

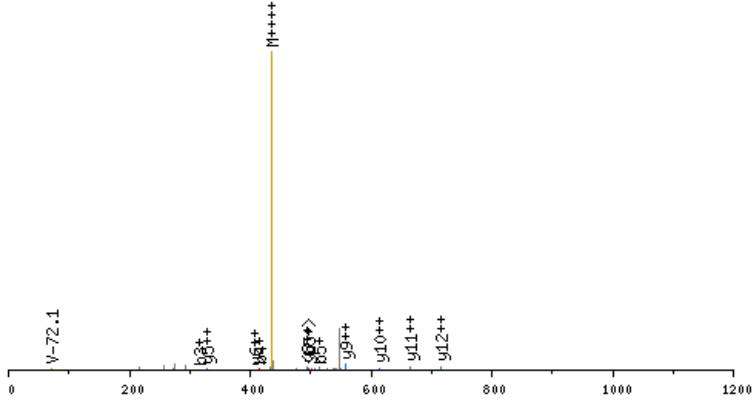

click image to zoom in; click top corners to zoom out [\[precursor±\]](#)

scan 3048; 436.5 m/z; 7.3e+000

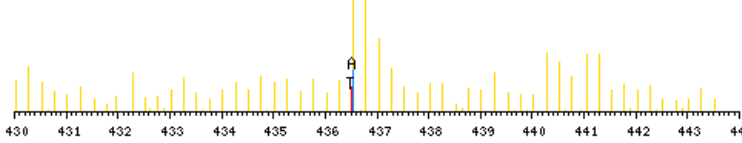

zoomed in precursor plot; T=theoretical m/z, A=acquired m/z

| b <sup>+</sup> | #  | AA | #  | y <sup>+</sup> | y <sup>2+</sup> |
|----------------|----|----|----|----------------|-----------------|
| 100.0762       | 1  | A  | 15 |                |                 |
| 187.1082       | 2  | S  | 14 | 1643.9333      | 822.4706        |
| 315.1668       | 3  | Q  | 13 | 1556.9013      | 778.9545        |
| 414.2352       | 4  | V  | 12 | 1428.8427      | 714.9253        |
| 515.2829       | 5  | T  | 11 | 1329.7743      | 665.3910        |
| 628.3670       | 6  | L  | 10 | 1228.7266      | 614.8672        |
| 757.4096       | 7  | E  | 9  | 1115.6425      | 558.3252        |
| 814.4310       | 8  | G  | 8  | 986.5999       | 493.8039        |
| 929.4580       | 9  | D  | 7  | 929.5785       | 465.2931        |
| 1085.5843      | 10 | K  | 6  | 814.5515       | 407.7797        |
| 1184.6527      | 11 | V  | 5  | 658.4252       | 329.7165        |
| 1340.7790      | 12 | K  | 4  | 559.3568       | 280.1823        |
| 1439.8474      | 13 | V  | 3  | 403.2305       | 202.1192        |
| 1568.8900      | 14 | E  | 2  | 304.1621       | 152.5850        |
|                | 15 | R  | 1  | 175.1195       | 88.0637         |

N-term:+29.04 K(10):+156.13  
K(12):+156.13

X-range:

0 - 0

MassTol: Y-zoom:

0. 1.

MassType:

☐AVG ☒MONO

Axis:

☒1 ☐2

Label:

☒I ☐M ☐-

Ions:

a ☐+ ☐2+ ☐3+

b ☒+ ☐2+ ☐3+

c ☐+ ☐2+ ☐3+

x ☐+ ☐2+ ☐3+

y ☒+ ☒2+ ☐3+

z ☐+ ☐2+ ☐3+

hide H<sub>2</sub>O/NH<sub>3</sub> ☐

zoom 112-122 ☐

GO

ASTGLSLTKVDER, MH+ 1432.8011, m/z 478.2719  
L OS G15 P120811 220811-s1.03024.03024.3.dta

scan 3024; 1.6e+001

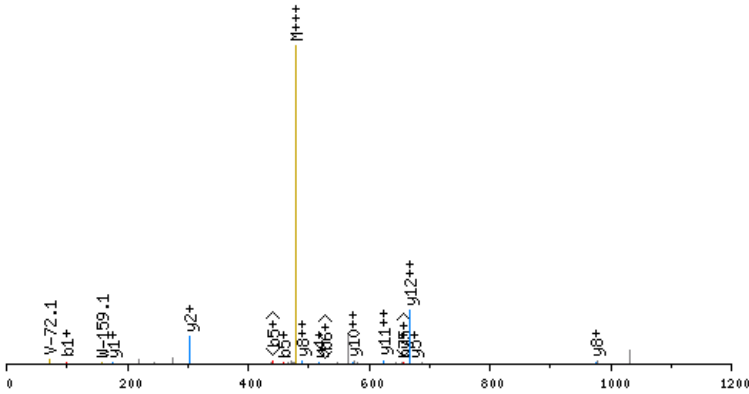

click image to zoom in; click top corners to zoom out

[precursor±]

scan 3021; 478.3 m/z; 7.1e+000

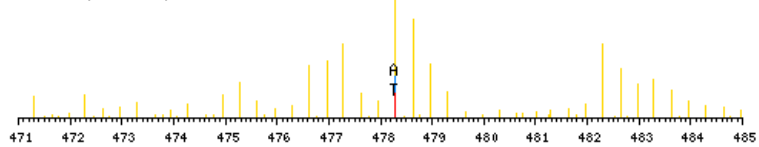

zoomed in precursor plot; T=theoretical m/z, A=acquired m/z

| b <sup>+</sup> | #  | AA | #  | y <sup>+</sup> | y <sup>2+</sup> |
|----------------|----|----|----|----------------|-----------------|
| 100.0762       | 1  | A  | 13 |                |                 |
| 187.1082       | 2  | S  | 12 | 1333.7328      | 667.3703        |
| 288.1559       | 3  | T  | 11 | 1246.7007      | 623.8543        |
| 345.1774       | 4  | G  | 10 | 1145.6530      | 573.3304        |
| 458.2614       | 5  | L  | 9  | 1088.6316      | 544.8197        |
| 545.2935       | 6  | S  | 8  | 975.5475       | 488.2777        |
| 658.3775       | 7  | L  | 7  | 888.5155       | 444.7617        |
| 759.4252       | 8  | T  | 6  | 775.4314       | 388.2196        |
| 915.5515       | 9  | K  | 5  | 674.3838       | 337.6958        |
| 1014.6199      | 10 | V  | 4  | 518.2575       | 259.6326        |
| 1129.6469      | 11 | D  | 3  | 419.1890       | 210.0984        |
| 1258.6895      | 12 | E  | 2  | 304.1621       | 152.5850        |
|                | 13 | R  | 1  | 175.1195       | 88.0637         |

N-term:+29.04 K(9):+156.13

X-range:

0 - 0

MassTol: Y-zoom:

0. 1.

MassType:

☐ AVG ☒ MONO

Axis:

☒ 1 ☐ 2

Label:

☒ I ☐ M ☐ -

Ions:

a ☐ + ☐ 2+ ☐ 3+

b ☒ + ☐ 2+ ☐ 3+

c ☐ + ☐ 2+ ☐ 3+

x ☐ + ☐ 2+ ☐ 3+

y ☒ + ☒ 2+ ☐ 3+

z ☐ + ☐ 2+ ☐ 3+

hide H<sub>2</sub>O/NH<sub>3</sub> ☐

zoom 112-122 ☐

GO

ASTPGPEETLTAAATVPPPPR, MH+ 2017.0606, m/z 673.0250  
L OS G12 P120811 220811-s1.03906.03906.3.dta

scan 3906; 4.1e+000

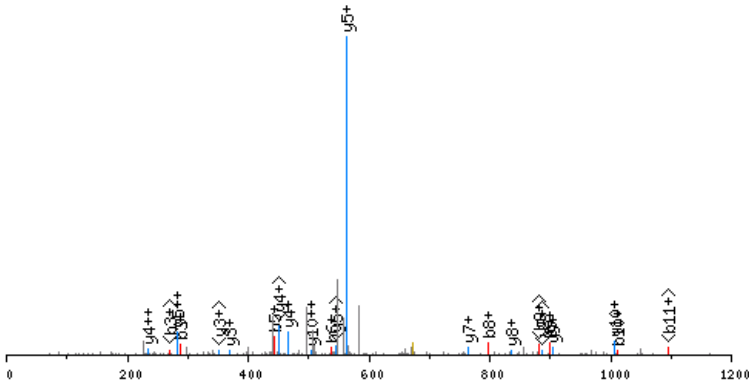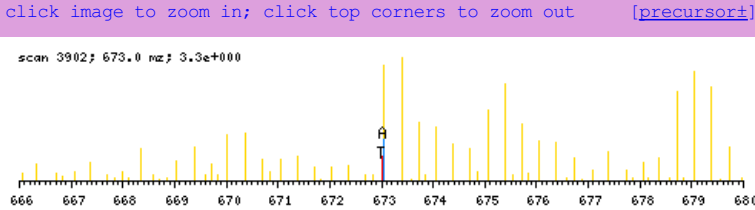

zoomed in precursor plot; T=theoretical m/z, A=acquired m/z

| b <sup>+</sup> | #  | AA | #  | y <sup>+</sup> | y <sup>2+</sup> |
|----------------|----|----|----|----------------|-----------------|
| 100.0762       | 1  | A  | 20 |                |                 |
| 187.1082       | 2  | S  | 19 | 1917.9922      | 959.5000        |
| 288.1559       | 3  | T  | 18 | 1830.9602      | 915.9840        |
| 385.2087       | 4  | P  | 17 | 1729.9125      | 865.4602        |
| 442.2301       | 5  | G  | 16 | 1632.8597      | 816.9338        |
| 539.2829       | 6  | P  | 15 | 1575.8382      | 788.4230        |
| 668.3255       | 7  | E  | 14 | 1478.7855      | 739.8967        |
| 797.3681       | 8  | E  | 13 | 1349.7429      | 675.3754        |
| 898.4158       | 9  | T  | 12 | 1220.7003      | 610.8541        |
| 1011.4998      | 10 | L  | 11 | 1119.6526      | 560.3302        |
| 1112.5475      | 11 | T  | 10 | 1006.5686      | 503.7882        |
| 1183.5846      | 12 | A  | 9  | 905.5209       | 453.2644        |
| 1254.6217      | 13 | A  | 8  | 834.4838       | 417.7458        |
| 1355.6694      | 14 | T  | 7  | 763.4466       | 382.2272        |
| 1454.7378      | 15 | V  | 6  | 662.3990       | 331.7034        |
| 1551.7906      | 16 | P  | 5  | 563.3306       | 282.1692        |
| 1648.8434      | 17 | P  | 4  | 466.2778       | 233.6428        |
| 1745.8961      | 18 | P  | 3  | 369.2250       | 185.1164        |
| 1842.9489      | 19 | P  | 2  | 272.1723       | 136.5900        |
|                | 20 | R  | 1  | 175.1195       | 88.0637         |

N-term:+29.04

X-range:

0 - 0

MassTol: Y-zoom:

0. 1.

MassType:

☐ AVG ☒ MONO

Axis:

☒ 1 ☐ 2

Label:

☒ I ☐ M ☐ -

Ions:

a ☐ + ☐ 2+ ☐ 3+

b ☒ + ☐ 2+ ☐ 3+

c ☐ + ☐ 2+ ☐ 3+

x ☐ + ☐ 2+ ☐ 3+

y ☒ + ☒ 2+ ☐ 3+

z ☐ + ☐ 2+ ☐ 3+

hide H<sub>2</sub>O/NH<sub>3</sub> ☐

zoom 112-122 ☐

GO

ATAASSSSLEKSYELPDGQVITIGNER, MH+ 2879.4638, m/z 720.6214  
L OS G14 P120811 220811-s1.05677.05677.4.dta

scan 5677; 2.7e+000

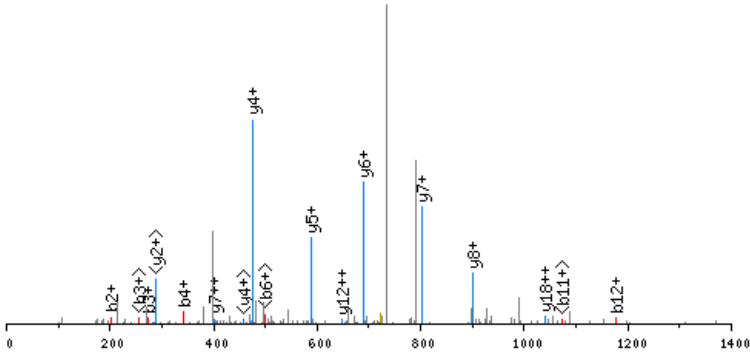

click image to zoom in; click top corners to zoom out [\[precursor±\]](#)

scan 5676; 720.6 m/z; 8.0e+000

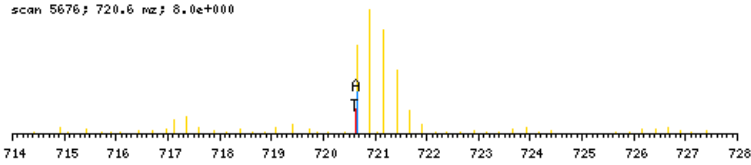

zoomed in precursor plot; T=theoretical m/z, A=acquired m/z

| b <sup>+</sup> | #  | AA | #  | y <sup>+</sup> | y <sup>2+</sup> |
|----------------|----|----|----|----------------|-----------------|
| 100.0762       | 1  | A  | 27 |                |                 |
| 201.1239       | 2  | T  | 26 | 2780.3954      | 1390.7016       |
| 272.1610       | 3  | A  | 25 | 2679.3478      | 1340.1778       |
| 343.1981       | 4  | A  | 24 | 2608.3107      | 1304.6592       |
| 430.2301       | 5  | S  | 23 | 2537.2735      | 1269.1407       |
| 517.2622       | 6  | S  | 22 | 2450.2415      | 1225.6247       |
| 604.2942       | 7  | S  | 21 | 2363.2095      | 1182.1087       |
| 691.3262       | 8  | S  | 20 | 2276.1775      | 1138.5926       |
| 804.4103       | 9  | L  | 19 | 2189.1454      | 1095.0766       |
| 933.4529       | 10 | E  | 18 | 2076.0614      | 1038.5346       |
| 1089.5792      | 11 | K  | 17 | 1947.0188      | 974.0133        |
| 1176.6112      | 12 | S  | 16 | 1790.8925      | 895.9501        |
| 1339.6745      | 13 | Y  | 15 | 1703.8604      | 852.4341        |
| 1468.7171      | 14 | E  | 14 | 1540.7971      | 770.9025        |
| 1581.8012      | 15 | L  | 13 | 1411.7545      | 706.3812        |
| 1678.8540      | 16 | P  | 12 | 1298.6705      | 649.8391        |
| 1793.8809      | 17 | D  | 11 | 1201.6177      | 601.3128        |
| 1850.9024      | 18 | G  | 10 | 1086.5907      | 543.7993        |
| 1978.9610      | 19 | Q  | 9  | 1029.5693      | 515.2886        |
| 2078.0294      | 20 | V  | 8  | 901.5107       | 451.2593        |
| 2191.1134      | 21 | I  | 7  | 802.4423       | 401.7251        |
| 2292.1611      | 22 | T  | 6  | 689.3582       | 345.1830        |
| 2405.2452      | 23 | I  | 5  | 588.3105       | 294.6592        |
| 2462.2666      | 24 | G  | 4  | 475.2265       | 238.1172        |
| 2576.3096      | 25 | N  | 3  | 418.2050       | 209.6064        |
| 2705.3522      | 26 | E  | 2  | 304.1621       | 152.5850        |
|                | 27 | R  | 1  | 175.1195       | 88.0637         |

N-term:+29.04 K(11):+156.13

X-range:

0 - 0

MassTol: Y-zoom:

0. 1.

MassType:

☐ AVG ☒ MONO

Axis:

☒ 1 ☐ 2

Label:

☒ I ☐ M ☐ -

Ions:

a ☐ + ☐ 2+ ☐ 3+

b ☒ + ☐ 2+ ☐ 3+

c ☐ + ☐ 2+ ☐ 3+

x ☐ + ☐ 2+ ☐ 3+

y ☒ + ☒ 2+ ☐ 3+

z ☐ + ☐ 2+ ☐ 3+

hide H<sub>2</sub>O/NH<sub>3</sub> ☐

zoom 112-122 ☐

GO

ATALPDDIITQR, MH+ 1341.7378, m/z 447.9174  
L OS G13 P120811 220811-s1.04902.04902.3.dta

scan 4902; 3.2e+000

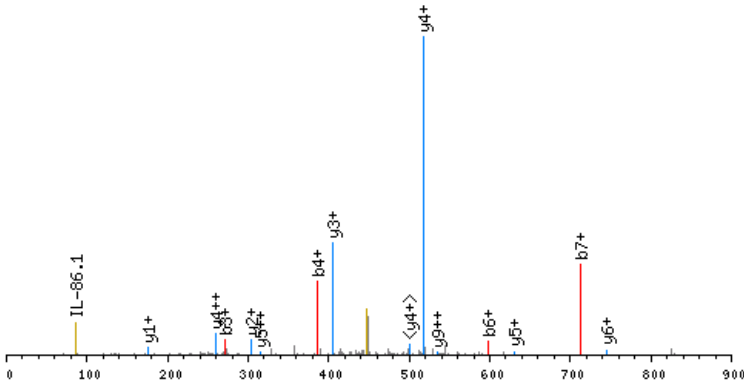

click image to zoom in; click top corners to zoom out

[precursor±]

scan 4899; 447.9 m/z; 5.2e+000

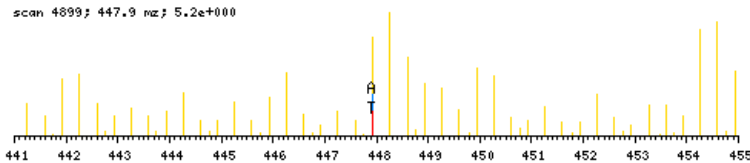

zoomed in precursor plot; T=theoretical m/z, A=acquired m/z

| b <sup>+</sup> | #  | AA | #  | y <sup>+</sup> | y <sup>2+</sup> |
|----------------|----|----|----|----------------|-----------------|
| 100.0762       | 1  | A  | 12 |                |                 |
| 201.1239       | 2  | T  | 11 | 1242.6694      | 621.8386        |
| 272.1610       | 3  | A  | 10 | 1141.6217      | 571.3148        |
| 385.2451       | 4  | L  | 9  | 1070.5846      | 535.7962        |
| 482.2978       | 5  | P  | 8  | 957.5005       | 479.2542        |
| 597.3248       | 6  | D  | 7  | 860.4478       | 430.7278        |
| 712.3517       | 7  | D  | 6  | 745.4208       | 373.2143        |
| 825.4358       | 8  | I  | 5  | 630.3939       | 315.7009        |
| 938.5198       | 9  | I  | 4  | 517.3098       | 259.1588        |
| 1039.5675      | 10 | T  | 3  | 404.2258       | 202.6168        |
| 1167.6261      | 11 | Q  | 2  | 303.1781       | 152.0930        |
|                | 12 | R  | 1  | 175.1195       | 88.0637         |

N-term:+29.04

X-range:

0 - 0

MassTol: Y-zoom:

0. 1.

MassType:

☐AVG ☒MONO

Axis:

☒1 ☐2

Label:

☒I ☐M ☐-

Ions:

a ☐+ ☐2+ ☐3+

b ☒+ ☐2+ ☐3+

c ☐+ ☐2+ ☐3+

x ☐+ ☐2+ ☐3+

y ☒+ ☒2+ ☐3+

z ☐+ ☐2+ ☐3+

hide H<sub>2</sub>O/NH<sub>3</sub> ☐

zoom 112-122 ☐

GO

ATEMVEVGPEDDEVGAER, MH+ 1960.8810, m/z 654.2985  
L OS G12 P120811 220811-s1.03478.03478.3.dta

scan 3478; 1.5e+000

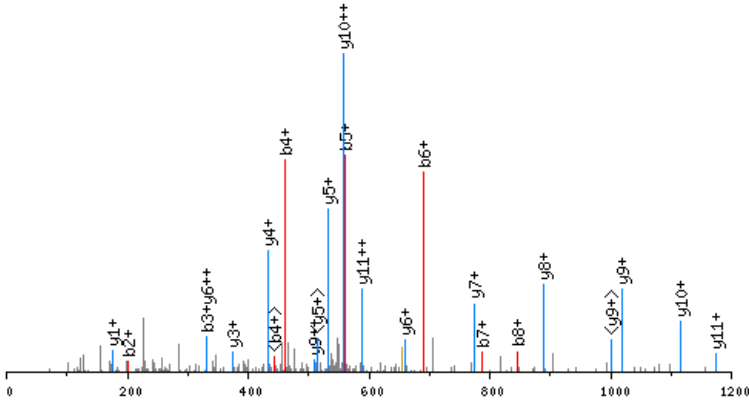

click image to zoom in; click top corners to zoom out

[precursor±]

scan 3477; 654.3 m/z; 6.5e+000

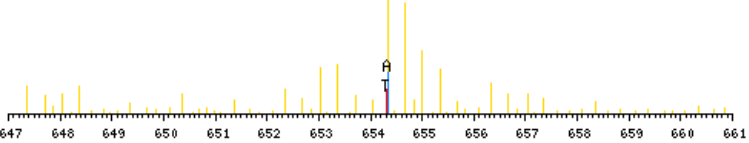

zoomed in precursor plot; T=theoretical m/z, A=acquired m/z

| b <sup>+</sup> | #  | AA | #  | y <sup>+</sup> | y <sup>2+</sup> |
|----------------|----|----|----|----------------|-----------------|
| 100.0762       | 1  | A  | 18 |                |                 |
| 201.1239       | 2  | T  | 17 | 1861.8126      | 931.4102        |
| 330.1665       | 3  | E  | 16 | 1760.7649      | 880.8864        |
| 461.2070       | 4  | M  | 15 | 1631.7223      | 816.3651        |
| 560.2754       | 5  | V  | 14 | 1500.6818      | 750.8448        |
| 689.3180       | 6  | E  | 13 | 1401.6134      | 701.3106        |
| 788.3864       | 7  | V  | 12 | 1272.5708      | 636.7893        |
| 845.4079       | 8  | G  | 11 | 1173.5024      | 587.2551        |
| 942.4606       | 9  | P  | 10 | 1116.4809      | 558.7444        |
| 1071.5032      | 10 | E  | 9  | 1019.4282      | 510.2180        |
| 1186.5302      | 11 | D  | 8  | 890.3856       | 445.6967        |
| 1301.5571      | 12 | D  | 7  | 775.3586       | 388.1832        |
| 1430.5997      | 13 | E  | 6  | 660.3317       | 330.6698        |
| 1529.6681      | 14 | V  | 5  | 531.2891       | 266.1485        |
| 1586.6896      | 15 | G  | 4  | 432.2207       | 216.6142        |
| 1657.7267      | 16 | A  | 3  | 375.1992       | 188.1035        |
| 1786.7693      | 17 | E  | 2  | 304.1621       | 152.5850        |
|                | 18 | R  | 1  | 175.1195       | 88.0637         |

N-term:+29.04

N-term:+29.04

N-term: +29.04 K(5): +156.13

X-range:

0 - 0

MassTol: Y-zoom:

0. 1.

MassType:

☐ AVG ☒ MONO

Axis:

☒ 1 ☐ 2

Label:

☒ I ☐ M ☐ -

Ions:

a ☐ + ☐ 2+ ☐ 3+

b ☒ + ☐ 2+ ☐ 3+

c ☐ + ☐ 2+ ☐ 3+

x ☐ + ☐ 2+ ☐ 3+

y ☒ + ☒ 2+ ☐ 3+

z ☐ + ☐ 2+ ☐ 3+

hide H<sub>2</sub>O/NH<sub>3</sub> ☐

zoom 112-122 ☐

GO

ATLDVYNPFENR, MH+ 1466.7279, m/z 489.5808  
L OS G13 P120811 220811-s1.06280.06280.3.dta

scan 6280; 4.0e+000

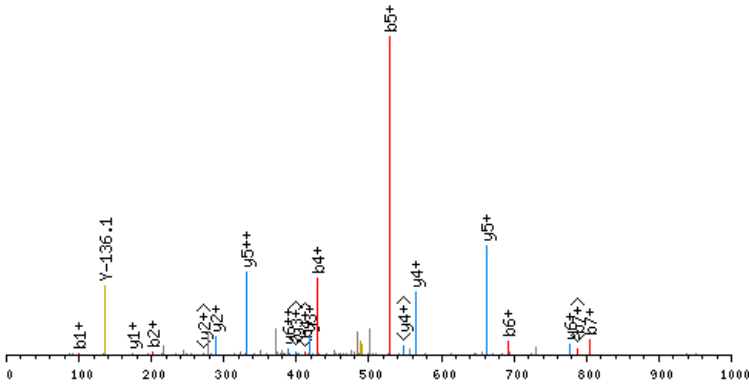

click image to zoom in; click top corners to zoom out

[precursor±]

scan 6279; 489.6 m/z; 5.1e+000

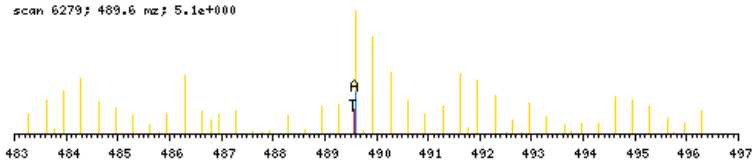

zoomed in precursor plot; T=theoretical m/z, A=acquired m/z

| b <sup>+</sup> | #  | AA | #  | y <sup>+</sup> | y <sup>2+</sup> |
|----------------|----|----|----|----------------|-----------------|
| 100.0762       | 1  | A  | 12 |                |                 |
| 201.1239       | 2  | T  | 11 | 1367.6596      | 684.3337        |
| 314.2080       | 3  | L  | 10 | 1266.6119      | 633.8099        |
| 429.2349       | 4  | D  | 9  | 1153.5278      | 577.2678        |
| 528.3033       | 5  | V  | 8  | 1038.5009      | 519.7543        |
| 691.3666       | 6  | Y  | 7  | 939.4325       | 470.2201        |
| 805.4096       | 7  | N  | 6  | 776.3691       | 388.6885        |
| 902.4623       | 8  | P  | 5  | 662.3262       | 331.6670        |
| 1049.5307      | 9  | F  | 4  | 565.2734       | 283.1406        |
| 1178.5733      | 10 | E  | 3  | 418.2050       | 209.6064        |
| 1292.6163      | 11 | N  | 2  | 289.1624       | 145.0851        |
|                | 12 | R  | 1  | 175.1195       | 88.0637         |

N-term:+29.04

X-range:

0 - 0

MassTol: Y-zoom:

0. 1.

MassType:

☐AVG ☒MONO

Axis:

☒1 ☐2

Label:

☒I ☐M ☐-

Ions:

a ☐+ ☐2+ ☐3+

b ☒+ ☐2+ ☐3+

c ☐+ ☐2+ ☐3+

x ☐+ ☐2+ ☐3+

y ☒+ ☒2+ ☐3+

z ☐+ ☐2+ ☐3+

hide H<sub>2</sub>O/NH<sub>3</sub> ☐

zoom 112-122 ☐

GO

ATLGVEVHPLVFHTNR, MH+ 1818.0026, m/z 455.2561  
L OS G17 P120811 220811-s1.05386.05386.4.dta

scan 5386; 7.3e+000

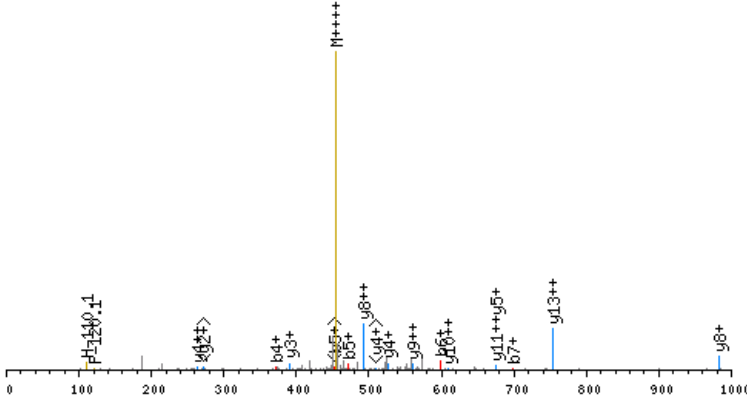

click image to zoom in; click top corners to zoom out

[precursor±]

scan 5383; 455.3 m/z; 3.5e+000

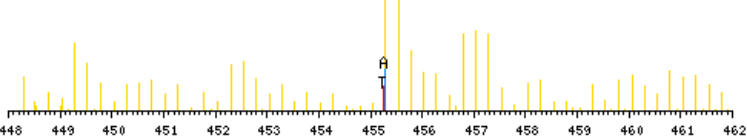

zoomed in precursor plot; T=theoretical m/z, A=acquired m/z

| b <sup>+</sup> | #  | AA | #  | y <sup>+</sup> | y <sup>2+</sup> |
|----------------|----|----|----|----------------|-----------------|
| 100.0762       | 1  | A  | 16 |                |                 |
| 201.1239       | 2  | T  | 15 | 1718.9342      | 859.9710        |
| 314.2080       | 3  | L  | 14 | 1617.8865      | 809.4472        |
| 371.2294       | 4  | G  | 13 | 1504.8025      | 752.9051        |
| 470.2978       | 5  | V  | 12 | 1447.7810      | 724.3944        |
| 599.3404       | 6  | E  | 11 | 1348.7126      | 674.8602        |
| 698.4088       | 7  | V  | 10 | 1219.6700      | 610.3389        |
| 835.4678       | 8  | H  | 9  | 1120.6016      | 560.8047        |
| 932.5205       | 9  | P  | 8  | 983.5427       | 492.2752        |
| 1045.6046      | 10 | L  | 7  | 886.4899       | 443.7489        |
| 1144.6730      | 11 | V  | 6  | 773.4058       | 387.2068        |
| 1291.7414      | 12 | F  | 5  | 674.3374       | 337.6726        |
| 1428.8003      | 13 | H  | 4  | 527.2690       | 264.1384        |
| 1529.8480      | 14 | T  | 3  | 390.2101       | 195.6090        |
| 1643.8909      | 15 | N  | 2  | 289.1624       | 145.0851        |
|                | 16 | R  | 1  | 175.1195       | 88.0637         |

N-term:+29.04

X-range:

0 - 0

MassTol: Y-zoom:

0. 1.

MassType:

☐AVG ☒MONO

Axis:

☒1 ☐2

Label:

☒I ☐M ☐-

Ions:

a ☐+ ☐2+ ☐3+

b ☒+ ☐2+ ☐3+

c ☐+ ☐2+ ☐3+

x ☐+ ☐2+ ☐3+

y ☒+ ☒2+ ☐3+

z ☐+ ☐2+ ☐3+

hide H<sub>2</sub>O/NH<sub>3</sub> ☐

zoom 112-122 ☐

GO

ATNRPDTLDPALLRPGR, MH+ 1891.0513, m/z 473.5183  
L OS G17 P120811 220811-s1.04389.04389.4.dta

scan 4389; 1.1e+001

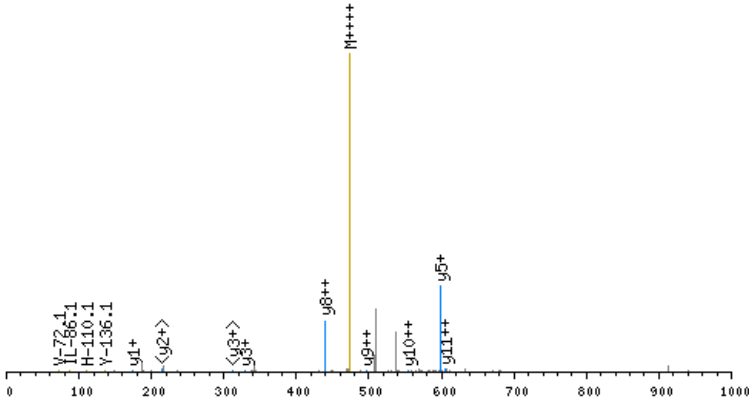

click image to zoom in; click top corners to zoom out

[precursor±]

scan 4388; 473.5 m/z; 2.0e+001

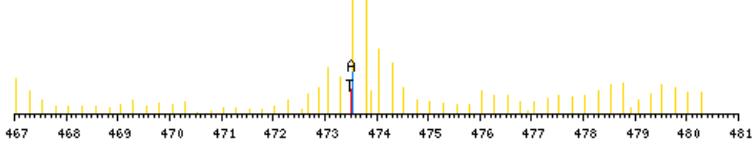

zoomed in precursor plot; T=theoretical m/z, A=acquired m/z

| b <sup>+</sup> | #  | AA | #  | y <sup>+</sup> | y <sup>2+</sup> |
|----------------|----|----|----|----------------|-----------------|
| 100.0762       | 1  | A  | 17 |                |                 |
| 201.1239       | 2  | T  | 16 | 1791.9830      | 896.4954        |
| 315.1668       | 3  | N  | 15 | 1690.9353      | 845.9716        |
| 471.2679       | 4  | R  | 14 | 1576.8923      | 788.9501        |
| 568.3207       | 5  | P  | 13 | 1420.7912      | 710.8995        |
| 683.3476       | 6  | D  | 12 | 1323.7385      | 662.3731        |
| 784.3953       | 7  | T  | 11 | 1208.7115      | 604.8597        |
| 897.4794       | 8  | L  | 10 | 1107.6639      | 554.3358        |
| 1012.5063      | 9  | D  | 9  | 994.5798       | 497.7938        |
| 1109.5591      | 10 | P  | 8  | 879.5528       | 440.2803        |
| 1180.5962      | 11 | A  | 7  | 782.5001       | 391.7540        |
| 1293.6803      | 12 | L  | 6  | 711.4630       | 356.2354        |
| 1406.7643      | 13 | L  | 5  | 598.3789       | 299.6934        |
| 1562.8654      | 14 | R  | 4  | 485.2948       | 243.1513        |
| 1659.9182      | 15 | P  | 3  | 329.1937       | 165.1008        |
| 1716.9397      | 16 | G  | 2  | 232.1410       | 116.5744        |
|                | 17 | R  | 1  | 175.1195       | 88.0637         |

N-term:+29.04

**X-range:**

0 - 0

0. 1.

☒ AVG ☐ MONO

1 2

☒ I ☐ M ☐ -

$$a \begin{bmatrix} 1 \\ 2 \\ 3 \end{bmatrix} + \begin{bmatrix} 1 \\ 2 \\ 3 \end{bmatrix}^2 + \begin{bmatrix} 1 \\ 2 \\ 3 \end{bmatrix}^3 + \dots$$
$$= \square + \square^2 + \square^3 + \dots$$

| x | 1 | 2 | 3 |
|---|---|---|---|
| y | 1 | 2 | 3 |

**z** 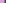 + 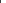 2 + 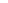 3 +

room 112 12

zoom 112=12.

GO

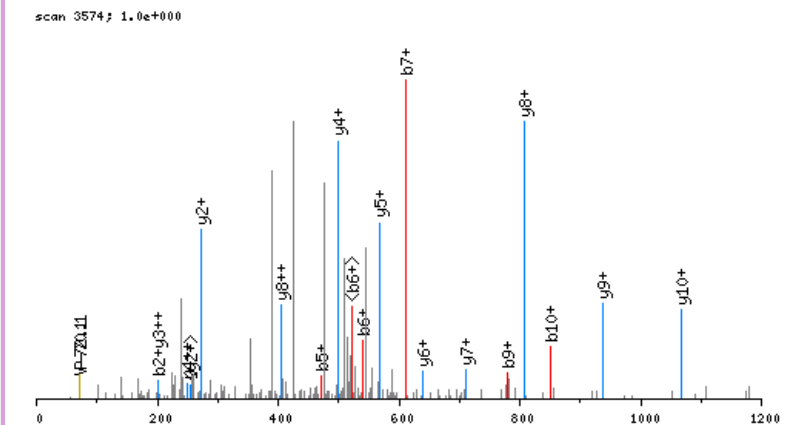

click image to zoom in; click top corners to zoom out

[precursor±]

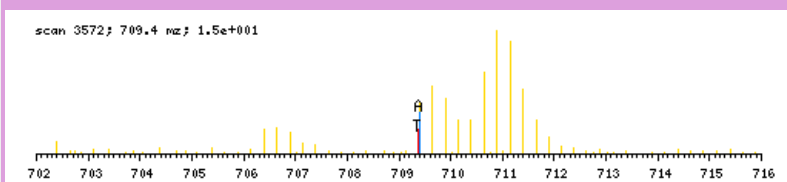

zoomed in precursor plot; T=theoretical m/z, A=acquired m/z

| $b^+$     | #  | AA | #  | $y^+$     | $y^{2+}$  |
|-----------|----|----|----|-----------|-----------|
| 100.0762  | 1  | A  | 30 |           |           |
| 201.1239  | 2  | T  | 29 | 2735.3488 | 1368.1783 |
| 298.1767  | 3  | P  | 28 | 2634.3011 | 1317.6545 |
| 369.2138  | 4  | A  | 27 | 2537.2483 | 1269.1281 |
| 470.2614  | 5  | T  | 26 | 2466.2112 | 1233.6095 |
| 541.2986  | 6  | A  | 25 | 2365.1636 | 1183.0857 |
| 612.3357  | 7  | A  | 24 | 2294.1264 | 1147.5671 |
| 709.3884  | 8  | P  | 23 | 2223.0893 | 1112.0486 |
| 780.4256  | 9  | A  | 22 | 2126.0366 | 1063.5222 |
| 851.4627  | 10 | A  | 21 | 2054.9995 | 1028.0036 |
| 950.5311  | 11 | V  | 20 | 1983.9623 | 992.4851  |
| 1037.5631 | 12 | S  | 19 | 1884.8939 | 942.9509  |
| 1108.6002 | 13 | A  | 18 | 1797.8619 | 899.4349  |
| 1179.6373 | 14 | A  | 17 | 1726.8248 | 863.9163  |
| 1280.6850 | 15 | T  | 16 | 1655.7877 | 828.3977  |
| 1381.7327 | 16 | T  | 15 | 1554.7400 | 777.8739  |
| 1482.7804 | 17 | T  | 14 | 1453.6923 | 727.3501  |
| 1569.8124 | 18 | S  | 13 | 1352.6446 | 676.8262  |
| 1640.8495 | 19 | A  | 12 | 1265.6126 | 633.3102  |
| 1768.9081 | 20 | Q  | 11 | 1194.5755 | 597.7917  |
| 1897.9507 | 21 | E  | 10 | 1066.5169 | 533.7624  |
| 2026.9933 | 22 | E  | 9  | 937.4743  | 469.2411  |
| 2124.0460 | 23 | P  | 8  | 808.4317  | 404.7198  |
| 2195.0832 | 24 | A  | 7  | 711.3790  | 356.1934  |
| 2266.1203 | 25 | A  | 6  | 640.3418  | 320.6748  |
| 2337.1574 | 26 | A  | 5  | 569.3047  | 285.1563  |
| 2434.2101 | 27 | P  | 4  | 498.2676  | 249.6377  |
| 2563.2527 | 28 | E  | 3  | 401.2149  | 201.1113  |
| 2660.3055 | 29 | P  | 2  | 272.1723  | 136.5900  |
|           | 30 | R  | 1  | 175.1195  | 88.0637   |

N-term: +29.04

X-range:

0 - 0

MassTol: Y-zoom:

0. 1.

MassType:

☐AVG ☒MONO

Axis:

☒1 ☐2

Label:

☒I ☐M ☐-

Ions:

a ☐+ ☐2+ ☐3+

b ☒+ ☐2+ ☐3+

c ☐+ ☐2+ ☐3+

x ☐+ ☐2+ ☐3+

y ☒+ ☒2+ ☐3+

z ☐+ ☐2+ ☐3+

hide H<sub>2</sub>O/NH<sub>3</sub> ☐

zoom 112-122 ☐

GO

ATPESLEVPEVTEDVDR, MH+ 1919.9662, m/z 640.6602  
H OS G12 P120811 220811-s1.04345.04345.3.dta

scan 4345; 3.1e+000

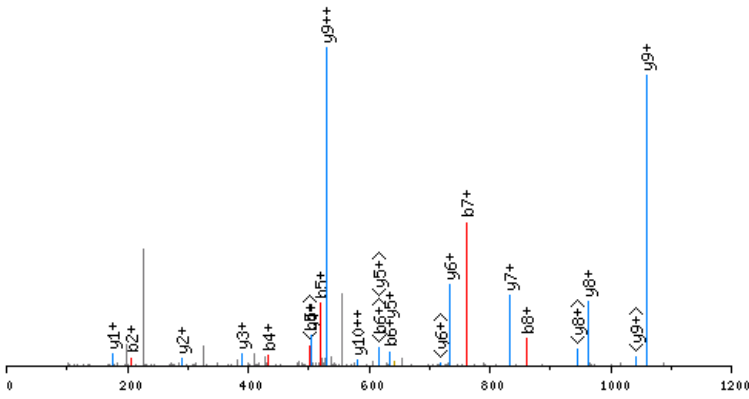

click image to zoom in; click top corners to zoom out [precursor±]

scan 4342; 640.7 m/z; 3.5e+000

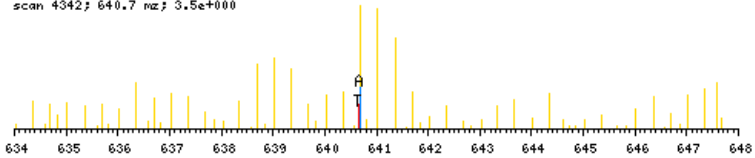

zoomed in precursor plot; T=theoretical m/z, A=acquired m/z

| b <sup>+</sup> | #  | AA | #  | y <sup>+</sup> | y <sup>2+</sup> |
|----------------|----|----|----|----------------|-----------------|
| 106.1080       | 1  | A  | 17 |                |                 |
| 207.1557       | 2  | T  | 16 | 1814.8660      | 907.9369        |
| 304.2085       | 3  | P  | 15 | 1713.8183      | 857.4131        |
| 433.2510       | 4  | E  | 14 | 1616.7655      | 808.8867        |
| 520.2831       | 5  | S  | 13 | 1487.7229      | 744.3654        |
| 633.3671       | 6  | L  | 12 | 1400.6909      | 700.8494        |
| 762.4097       | 7  | E  | 11 | 1287.6069      | 644.3073        |
| 861.4781       | 8  | V  | 10 | 1158.5643      | 579.7860        |
| 958.5309       | 9  | P  | 9  | 1059.4958      | 530.2518        |
| 1087.5735      | 10 | E  | 8  | 962.4431       | 481.7255        |
| 1186.6419      | 11 | V  | 7  | 833.4005       | 417.2042        |
| 1287.6896      | 12 | T  | 6  | 734.3321       | 367.6699        |
| 1416.7322      | 13 | E  | 5  | 633.2844       | 317.1461        |
| 1531.7591      | 14 | D  | 4  | 504.2418       | 252.6248        |
| 1630.8275      | 15 | V  | 3  | 389.2149       | 195.1113        |
| 1745.8545      | 16 | D  | 2  | 290.1464       | 145.5771        |
|                | 17 | R  | 1  | 175.1195       | 88.0637         |

N-term:+35.07

X-range:

0 - 0

MassTol: Y-zoom:

0. 1.

MassType:

☐ AVG ☒ MONO

Axis:

☒ 1 ☐ 2

Label:

☒ I ☐ M ☐ -

Ions:

a ☐ + ☐ 2+ ☐ 3+

b ☒ + ☐ 2+ ☐ 3+

c ☐ + ☐ 2+ ☐ 3+

x ☐ + ☐ 2+ ☐ 3+

y ☒ + ☒ 2+ ☐ 3+

z ☐ + ☐ 2+ ☐ 3+

hide H<sub>2</sub>O/NH<sub>3</sub> ☐

zoom 112-122 ☐

GO

ATPLPAEGKKNTLR, MH+ 1579.9536, m/z 395.7439  
L OS G17 P120811 220811-s1.02222.02222.4.dta

scan 2222; 2.1e+001

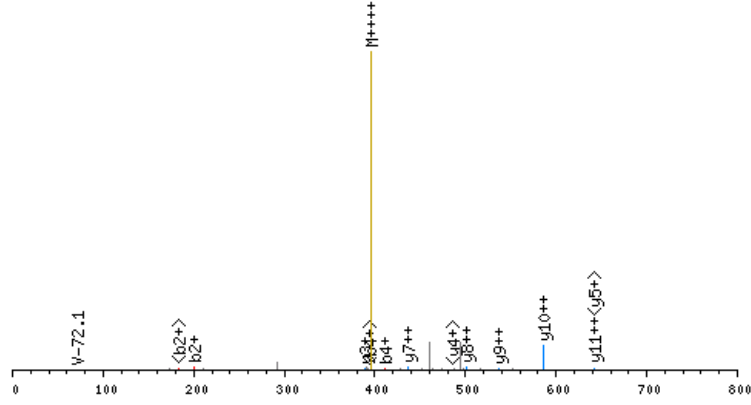

click image to zoom in; click top corners to zoom out [\[precursor±\]](#)

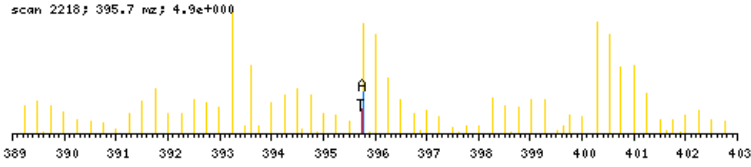

zoomed in precursor plot; T=theoretical m/z, A=acquired m/z

| b <sup>+</sup> | #  | AA | #  | y <sup>+</sup> | y <sup>2+</sup> |
|----------------|----|----|----|----------------|-----------------|
| 100.0762       | 1  | A  | 14 |                |                 |
| 201.1239       | 2  | T  | 13 | 1480.8852      | 740.9465        |
| 298.1767       | 3  | P  | 12 | 1379.8375      | 690.4227        |
| 411.2607       | 4  | L  | 11 | 1282.7848      | 641.8963        |
| 508.3135       | 5  | P  | 10 | 1169.7007      | 585.3543        |
| 579.3506       | 6  | A  | 9  | 1072.6479      | 536.8279        |
| 708.3932       | 7  | E  | 8  | 1001.6108      | 501.3093        |
| 765.4147       | 8  | G  | 7  | 872.5682       | 436.7880        |
| 921.5410       | 9  | K  | 6  | 815.5468       | 408.2773        |
| 1077.6673      | 10 | K  | 5  | 659.4205       | 330.2141        |
| 1191.7102      | 11 | N  | 4  | 503.2942       | 252.1510        |
| 1292.7579      | 12 | T  | 3  | 389.2512       | 195.1295        |
| 1405.8419      | 13 | L  | 2  | 288.2036       | 144.6057        |
|                | 14 | R  | 1  | 175.1195       | 88.0637         |

N-term:+29.04 K(9):+156.13  
K(10):+156.13

X-range:

0 - 0

MassTol: Y-zoom:

0. 1.

MassType:

☐AVG ☒MONO

Axis:

☒1 ☐2

Label:

☒I ☐M ☐-

Ions:

a ☐+ ☐2+ ☐3+

b ☒+ ☐2+ ☐3+

c ☐+ ☐2+ ☐3+

x ☐+ ☐2+ ☐3+

y ☒+ ☒2+ ☐3+

z ☐+ ☐2+ ☐3+

hide H<sub>2</sub>O/NH<sub>3</sub> ☐

zoom 112-122 ☐

GO

ATTTTSGGHPLEFLR, MH+ 1722.9238, m/z 574.9795  
H OS G15 P120811 220811-s1.03960.03960.3.dta

scan 3960; 3.7e+000

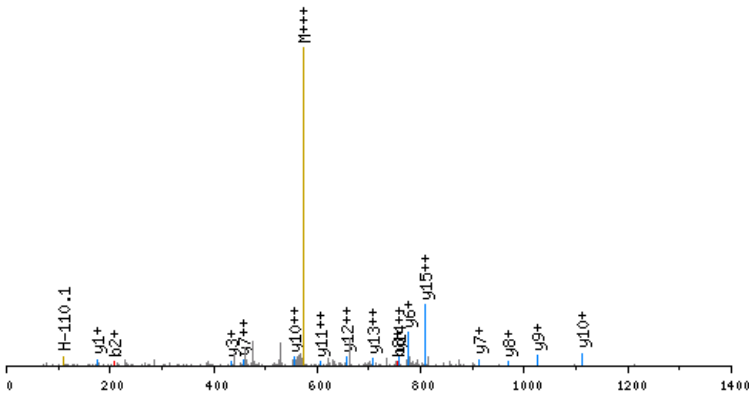

click image to zoom in; click top corners to zoom out

[precursor±]

scan 3956; 575.0 m/z; 2.5e+001

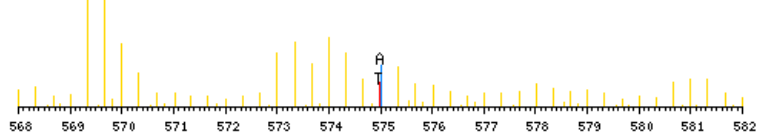

zoomed in precursor plot; T=theoretical m/z, A=acquired m/z

| b <sup>+</sup> | #  | AA | #  | y <sup>+</sup> | y <sup>2+</sup> |
|----------------|----|----|----|----------------|-----------------|
| 106.1080       | 1  | A  | 16 |                |                 |
| 207.1557       | 2  | T  | 15 | 1617.8237      | 809.4157        |
| 308.2034       | 3  | T  | 14 | 1516.7760      | 758.8919        |
| 409.2510       | 4  | T  | 13 | 1415.7283      | 708.3681        |
| 510.2987       | 5  | T  | 12 | 1314.6806      | 657.8442        |
| 611.3464       | 6  | T  | 11 | 1213.6329      | 607.3204        |
| 698.3784       | 7  | S  | 10 | 1112.5853      | 556.7965        |
| 755.3999       | 8  | G  | 9  | 1025.5532      | 513.2805        |
| 812.4214       | 9  | G  | 8  | 968.5318       | 484.7698        |
| 949.4803       | 10 | H  | 7  | 911.5103       | 456.2591        |
| 1046.5330      | 11 | P  | 6  | 774.4514       | 387.7296        |
| 1159.6171      | 12 | L  | 5  | 677.3986       | 339.2032        |
| 1288.6597      | 13 | E  | 4  | 564.3146       | 282.6612        |
| 1435.7281      | 14 | F  | 3  | 435.2720       | 218.1399        |
| 1548.8122      | 15 | L  | 2  | 288.2036       | 144.6057        |
|                | 16 | R  | 1  | 175.1195       | 88.0637         |

N-term:+35.07

X-range:

0 - 0

MassTol: Y-zoom:

0. 1.

MassType:

☐ AVG ☒ MONO

Axis:

☒ 1 ☐ 2

Label:

☒ I ☐ M ☐ -

Ions:

a ☐ + ☐ 2+ ☐ 3+

b ☒ + ☐ 2+ ☐ 3+

c ☐ + ☐ 2+ ☐ 3+

x ☐ + ☐ 2+ ☐ 3+

y ☒ + ☒ 2+ ☐ 3+

z ☐ + ☐ 2+ ☐ 3+

hide H<sub>2</sub>O/NH<sub>3</sub> ☐

zoom 112-122 ☐

GO

AVADKVKEDSQVPATQTLQR, MH+ 2286.3518, m/z 572.3434  
H OS G16 P120811 220811-s1.03320.03320.4.dta

scan 3320; 1.6e+000

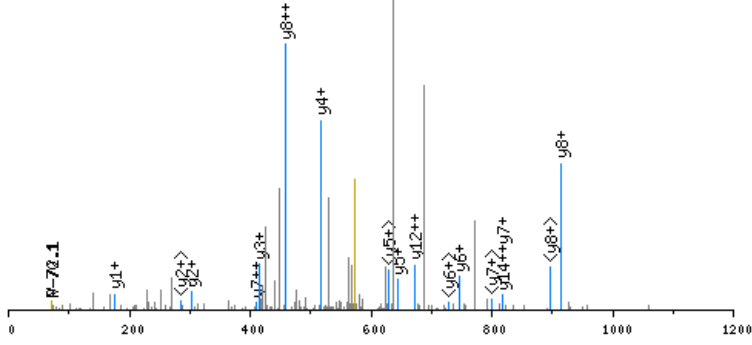

click image to zoom in; click top corners to zoom out [\[precursor±\]](#)

scan 3318; 572.3 m/z; 4.3e+000

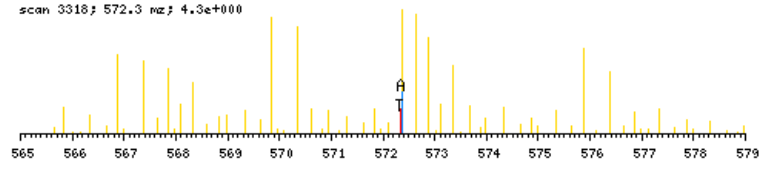

zoomed in precursor plot; T=theoretical m/z, A=acquired m/z

| b <sup>+</sup> | #  | AA | #  | y <sup>+</sup> | y <sup>2+</sup> |
|----------------|----|----|----|----------------|-----------------|
| 106.1080       | 1  | A  | 20 |                |                 |
| 205.1764       | 2  | V  | 19 | 2181.2516      | 1091.1297       |
| 276.2135       | 3  | A  | 18 | 2082.1832      | 1041.5955       |
| 391.2405       | 4  | D  | 17 | 2011.1461      | 1006.0769       |
| 553.3986       | 5  | K  | 16 | 1896.1191      | 948.5635        |
| 652.4670       | 6  | V  | 15 | 1733.9610      | 867.4844        |
| 814.6251       | 7  | K  | 14 | 1634.8926      | 817.9502        |
| 943.6677       | 8  | E  | 13 | 1472.7345      | 736.8712        |
| 1058.6946      | 9  | D  | 12 | 1343.6919      | 672.3499        |
| 1145.7267      | 10 | S  | 11 | 1228.6650      | 614.8364        |
| 1273.7852      | 11 | Q  | 10 | 1141.6329      | 571.3204        |
| 1372.8537      | 12 | V  | 9  | 1013.5744      | 507.2911        |
| 1469.9064      | 13 | P  | 8  | 914.5060       | 457.7569        |
| 1540.9435      | 14 | A  | 7  | 817.4532       | 409.2305        |
| 1641.9912      | 15 | T  | 6  | 746.4161       | 373.7120        |
| 1770.0498      | 16 | Q  | 5  | 645.3684       | 323.1881        |
| 1871.0975      | 17 | T  | 4  | 517.3098       | 259.1588        |
| 1984.1815      | 18 | L  | 3  | 416.2621       | 208.6350        |
| 2112.2401      | 19 | Q  | 2  | 303.1781       | 152.0930        |
|                | 20 | R  | 1  | 175.1195       | 88.0637         |

N-term:+35.07 K(5):+162.16  
K(7):+162.16

N-term: +29.04 K(12): +156.13

N-term:+29.04

N-term: +35.07 C(8): +160.03

X-range:

$$\boxed{0} - \boxed{0}$$

MassTol: Y-zoom:

0. 1.

MassType:

☐ AVG ☒ MONO

**Axis:**

1 2

Label:

☒ I ☐ M ☐ -

Ions:

$$a \square + \square^2 + \square^3 +$$

b ☒ <sup>+</sup> ☐ <sup>2+</sup> ☐ <sup>3+</sup>

$\square + \square^2 + \square^3 +$

$$= \square + \square^2 + \square^3 + \dots$$
[illegible]

☒ y ☒ z ☐ 3  
☐ ☐ ☐ ☐

hide H<sub>2</sub>O/NH<sub>3</sub> ☐

zoom 112-122

GO

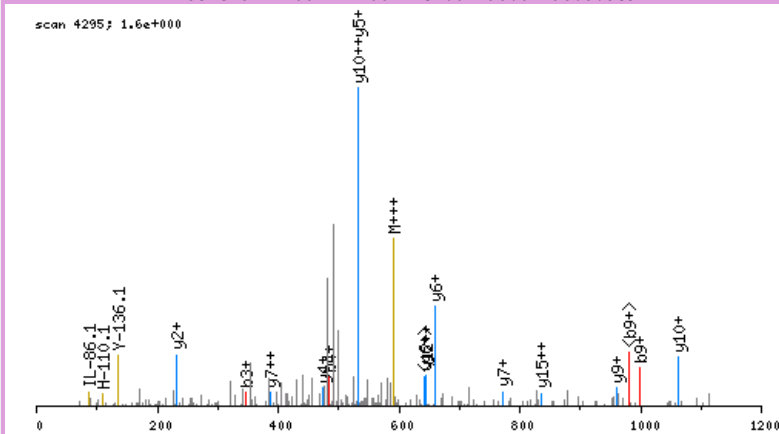

click image to zoom in; click top corners to zoom out [precursor±]

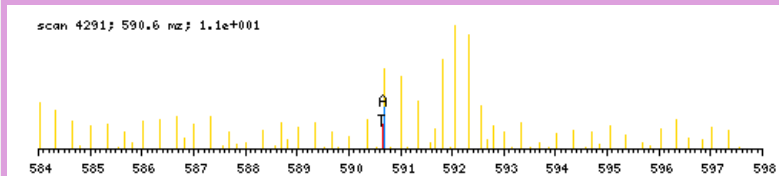

zoomed in precursor plot; T=theoretical m/z, A=acquired m/z

| $b^+$     | #  | AA | #  | $y^+$     | $y^{2+}$ |
|-----------|----|----|----|-----------|----------|
| 100.0762  | 1  | A  | 16 |           |          |
| 199.1446  | 2  | V  | 15 | 1670.8502 | 835.9290 |
| 346.2130  | 3  | F  | 14 | 1571.7818 | 786.3948 |
| 483.2720  | 4  | H  | 13 | 1424.7134 | 712.8606 |
| 580.3247  | 5  | P  | 12 | 1287.6545 | 644.3311 |
| 709.3673  | 6  | E  | 11 | 1190.6017 | 595.8048 |
| 810.4150  | 7  | T  | 10 | 1061.5591 | 531.2835 |
| 897.4470  | 8  | S  | 9  | 960.5114  | 480.7596 |
| 998.4947  | 9  | T  | 8  | 873.4794  | 437.2436 |
| 1111.5788 | 10 | I  | 7  | 772.4317  | 386.7198 |
| 1239.6373 | 11 | Q  | 6  | 659.3477  | 330.1777 |
| 1296.6588 | 12 | G  | 5  | 531.2891  | 266.1485 |
| 1409.7429 | 13 | L  | 4  | 474.2676  | 237.6377 |
| 1538.7855 | 14 | E  | 3  | 361.1836  | 181.0957 |
| 1595.8069 | 15 | G  | 2  | 232.1410  | 116.5744 |
|           | 16 | R  | 1  | 175.1195  | 88.0637  |

N-term: +29.04

X-range:

0 - 0

MassTol: Y-zoom:

0. 1.

MassType:

☐AVG ☒MONO

Axis:

☒1 ☐2

Label:

☒I ☐M ☐-

Ions:

a ☐+ ☐2+ ☐3+

b ☒+ ☐2+ ☐3+

c ☐+ ☐2+ ☐3+

x ☐+ ☐2+ ☐3+

y ☒+ ☒2+ ☐3+

z ☐+ ☐2+ ☐3+

hide H<sub>2</sub>O/NH<sub>3</sub> ☐

zoom 112-122 ☐

GO

AVGAVFDISNADR, MH+ 1368.7335, m/z 456.9160  
H OS G13 P120811 220811-s1.05215.05215.3.dta

scan 5215; 2.7e+000

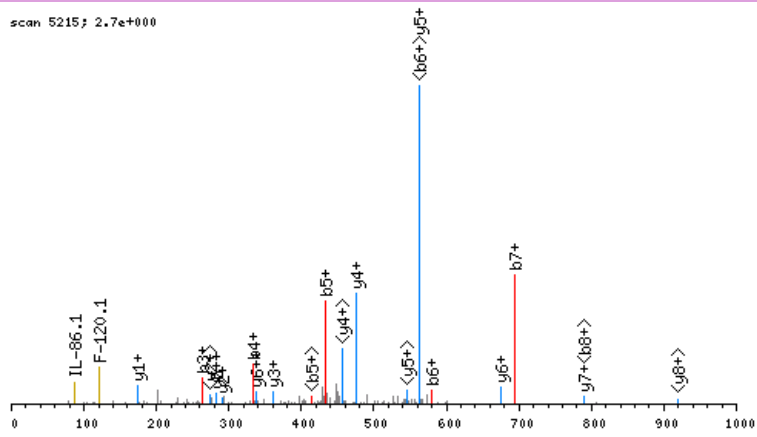

click image to zoom in; click top corners to zoom out

[precursor±]

scan 5214; 456.9 m/z; 8.6e+000

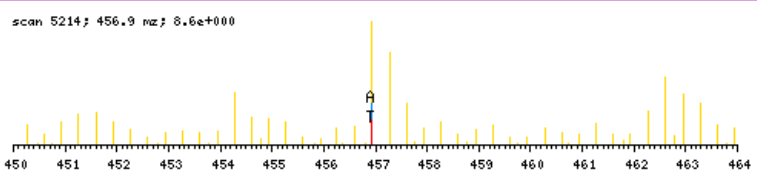

zoomed in precursor plot; T=theoretical m/z, A=acquired m/z

| b <sup>+</sup> | #  | AA | #  | y <sup>+</sup> | y <sup>2+</sup> |
|----------------|----|----|----|----------------|-----------------|
| 106.1080       | 1  | A  | 13 |                |                 |
| 205.1764       | 2  | V  | 12 | 1263.6333      | 632.3206        |
| 262.1979       | 3  | G  | 11 | 1164.5649      | 582.7864        |
| 333.2350       | 4  | A  | 10 | 1107.5435      | 554.2756        |
| 432.3034       | 5  | V  | 9  | 1036.5063      | 518.7571        |
| 579.3718       | 6  | F  | 8  | 937.4379       | 469.2229        |
| 694.3988       | 7  | D  | 7  | 790.3695       | 395.6887        |
| 807.4828       | 8  | I  | 6  | 675.3426       | 338.1752        |
| 894.5149       | 9  | S  | 5  | 562.2585       | 281.6332        |
| 1008.5578      | 10 | N  | 4  | 475.2265       | 238.1172        |
| 1079.5949      | 11 | A  | 3  | 361.1836       | 181.0957        |
| 1194.6219      | 12 | D  | 2  | 290.1464       | 145.5771        |
|                | 13 | R  | 1  | 175.1195       | 88.0637         |

N-term:+35.07

X-range:

$$\boxed{0} - \boxed{0}$$

0. 1.

☐ AVG ☒ MONO

1 2

I M -

$$a \quad \boxed{\phantom{00}} + \boxed{\phantom{00}}^2 + \boxed{\phantom{00}}^3 +$$
b ☒ 1+ ☐ 2+ ☐ 3+

Page 2 of 2

c 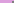

**x** | + | 2+ | 3+

**y** ☒+ ☒2+ ☐3+

$$z^1 + z^2 + z^3 + \dots$$

```
hide H2O/NH.
```

110 10

20011 112-12

GO

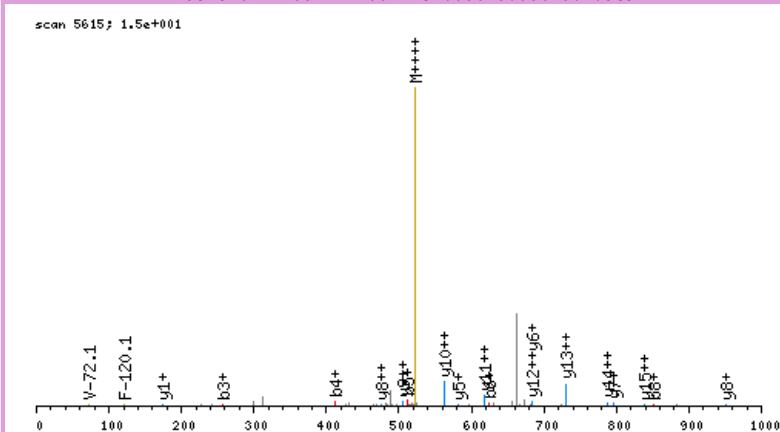

click image to zoom in; click top corners to zoom out      [precursor±]

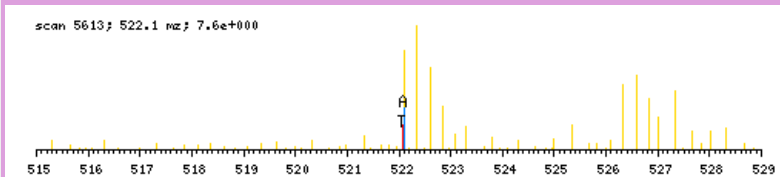

zoomed in precursor plot: T=theoretical m/z, A=acquired m/z

| $b^+$     | #  | AA | #  | $y^+$     | $y^{2+}$ |
|-----------|----|----|----|-----------|----------|
| 100.0762  | 1  | A  | 19 |           |          |
| 199.1446  | 2  | V  | 18 | 1986.1575 | 993.5827 |
| 256.1661  | 3  | G  | 17 | 1887.0891 | 944.0484 |
| 412.2924  | 4  | K  | 16 | 1830.0676 | 915.5377 |
| 511.3608  | 5  | V  | 15 | 1673.9413 | 837.4746 |
| 624.4449  | 6  | I  | 14 | 1574.8729 | 787.9404 |
| 721.4976  | 7  | P  | 13 | 1461.7888 | 731.3983 |
| 850.5402  | 8  | E  | 12 | 1364.7361 | 682.8719 |
| 963.6243  | 9  | L  | 11 | 1235.6935 | 618.3506 |
| 1077.6672 | 10 | N  | 10 | 1122.6094 | 561.8086 |
| 1134.6887 | 11 | G  | 9  | 1008.5665 | 504.7872 |
| 1290.8150 | 12 | K  | 8  | 951.5450  | 476.2764 |
| 1403.8990 | 13 | L  | 7  | 795.4187  | 398.2133 |
| 1504.9467 | 14 | T  | 6  | 682.3347  | 341.6712 |
| 1561.9682 | 15 | G  | 5  | 581.2870  | 291.1474 |
| 1693.0087 | 16 | M  | 4  | 524.2655  | 262.6367 |
| 1764.0458 | 17 | A  | 3  | 393.2250  | 197.1164 |
| 1911.1142 | 18 | F  | 2  | 322.1879  | 161.5979 |
|           | 19 | R  | 1  | 175.1195  | 88.0637  |

N-term: +29.04 K(4): +156.13  
K(12): +156.13



X-range:

0 - 0

MassTol: Y-zoom:

0. 1.

MassType:

☐ AVG ☒ MONO

Axis:

☒ 1 ☐ 2

Label:

☒ I ☐ M ☐ -

Ions:

a ☐ + ☐ 2+ ☐ 3+

b ☒ + ☐ 2+ ☐ 3+

c ☐ + ☐ 2+ ☐ 3+

x ☐ + ☐ 2+ ☐ 3+

y ☒ + ☒ 2+ ☐ 3+

z ☐ + ☐ 2+ ☐ 3+

hide H<sub>2</sub>O/NH<sub>3</sub> ☐

zoom 112-122 ☐

GO

AVLVLDLEPGTMDSVR, MH+ 1629.8522, m/z 543.9556  
L OS G13 P120811 220811-s1.06103.06103.3.dta

scan 6103; 2.2e+000

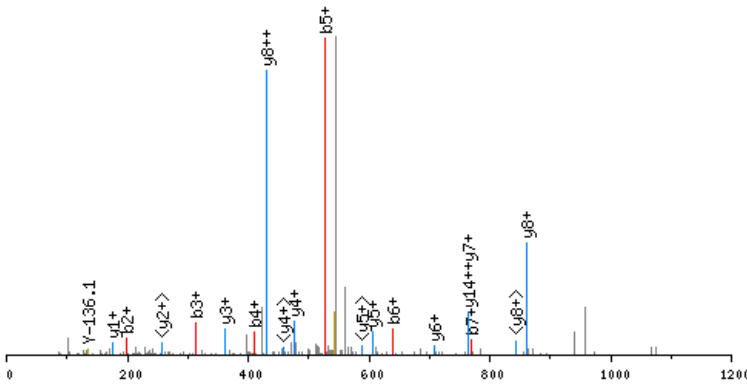

click image to zoom in; click top corners to zoom out [\[precursor±\]](#)

scan 6099; 544.0 m/z; 1.1e+001

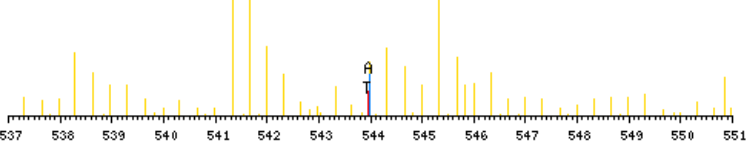

zoomed in precursor plot; T=theoretical m/z, A=acquired m/z

| b <sup>+</sup> | #  | AA | #  | y <sup>+</sup> | y <sup>2+</sup> |
|----------------|----|----|----|----------------|-----------------|
| 100.0762       | 1  | A  | 15 |                |                 |
| 199.1446       | 2  | V  | 14 | 1530.7838      | 765.8958        |
| 312.2287       | 3  | L  | 13 | 1431.7154      | 716.3616        |
| 411.2971       | 4  | V  | 12 | 1318.6313      | 659.8196        |
| 526.3240       | 5  | D  | 11 | 1219.5629      | 610.2854        |
| 639.4081       | 6  | L  | 10 | 1104.5359      | 552.7719        |
| 768.4507       | 7  | E  | 9  | 991.4519       | 496.2298        |
| 865.5035       | 8  | P  | 8  | 862.4093       | 431.7086        |
| 922.5249       | 9  | G  | 7  | 765.3565       | 383.1822        |
| 1023.5726      | 10 | T  | 6  | 708.3350       | 354.6714        |
| 1154.6131      | 11 | M  | 5  | 607.2874       | 304.1476        |
| 1269.6400      | 12 | D  | 4  | 476.2469       | 238.6274        |
| 1356.6721      | 13 | S  | 3  | 361.2199       | 181.1139        |
| 1455.7405      | 14 | V  | 2  | 274.1879       | 137.5979        |
|                | 15 | R  | 1  | 175.1195       | 88.0637         |

N-term:+29.04

N-term: +29.04 K(22) : +156.13

X-range:

0 - 0

MassTol: Y-zoom:

0. 1.

MassType:

☐AVG ☒MONO

Axis:

☒1 ☐2

Label:

☒I ☐M ☐-

Ions:

a ☐+ ☐2+ ☐3+

b ☒+ ☐2+ ☐3+

c ☐+ ☐2+ ☐3+

x ☐+ ☐2+ ☐3+

y ☒+ ☒2+ ☐3+

z ☐+ ☐2+ ☐3+

hide H<sub>2</sub>O/NH<sub>3</sub> ☐

zoom 112-122 ☐

GO

AVMKVIDPATATSVDLR, MH+ 1843.0363, m/z 615.0170  
L OS G15 P120811 220811-s1.04950.04950.3.dta

scan 4950; 1.1e+000

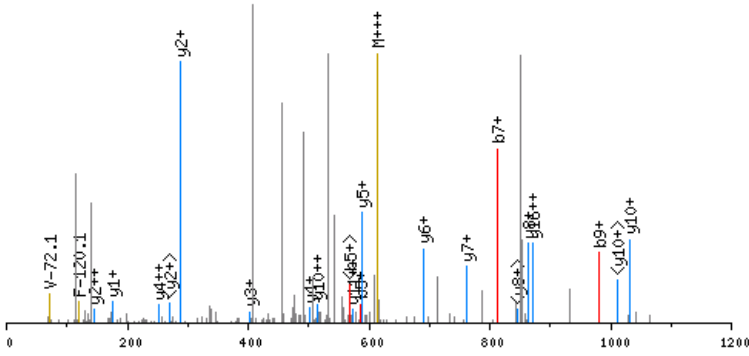

click image to zoom in; click top corners to zoom out

[precursor±]

scan 4946; 615.0 m/z; 2.0e+001

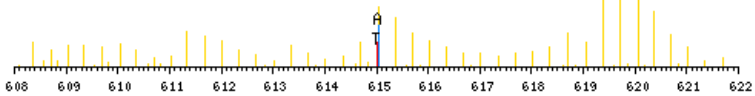

zoomed in precursor plot; T=theoretical m/z, A=acquired m/z

| b <sup>+</sup> | #  | AA | #  | y <sup>+</sup> | y <sup>2+</sup> |
|----------------|----|----|----|----------------|-----------------|
| 100.0762       | 1  | A  | 17 |                |                 |
| 199.1446       | 2  | V  | 16 | 1743.9679      | 872.4879        |
| 330.1851       | 3  | M  | 15 | 1644.8995      | 822.9537        |
| 486.3114       | 4  | K  | 14 | 1513.8590      | 757.4334        |
| 585.3798       | 5  | V  | 13 | 1357.7327      | 679.3703        |
| 698.4639       | 6  | I  | 12 | 1258.6643      | 629.8361        |
| 813.4908       | 7  | D  | 11 | 1145.5802      | 573.2940        |
| 910.5436       | 8  | P  | 10 | 1030.5533      | 515.7806        |
| 981.5807       | 9  | A  | 9  | 933.5005       | 467.2542        |
| 1082.6284      | 10 | T  | 8  | 862.4634       | 431.7356        |
| 1153.6655      | 11 | A  | 7  | 761.4157       | 381.2118        |
| 1254.7132      | 12 | T  | 6  | 690.3786       | 345.6932        |
| 1341.7452      | 13 | S  | 5  | 589.3310       | 295.1694        |
| 1440.8136      | 14 | V  | 4  | 502.2989       | 251.6534        |
| 1555.8406      | 15 | D  | 3  | 403.2305       | 202.1192        |
| 1668.9246      | 16 | L  | 2  | 288.2036       | 144.6057        |
|                | 17 | R  | 1  | 175.1195       | 88.0637         |

N-term:+29.04 K(4):+156.13

X-range:

0 - 0

MassTol: Y-zoom:

0. 1.

MassType:

☐AVG ☒MONO

Axis:

☒1 ☐2

Label:

☒I ☐M ☐-

Ions:

a ☐+ ☐2+ ☐3+

b ☒+ ☐2+ ☐3+

c ☐+ ☐2+ ☐3+

x ☐+ ☐2+ ☐3+

y ☒+ ☒2+ ☐3+

z ☐+ ☐2+ ☐3+

hide H<sub>2</sub>O/NH<sub>3</sub> ☐

zoom 112-122 ☐

GO

AVNAAQDSTDLVAKLR, MH+ 1727.9656, m/z 576.6600  
L OS G15 P120811 220811-s1.04544.04544.3.dta

scan 4544; 4.1e+000

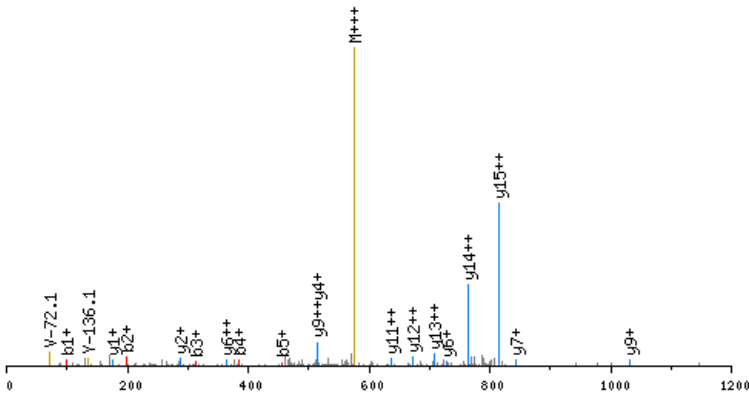

click image to zoom in; click top corners to zoom out

[precursor±]

scan 4541; 576.7 m/z; 7.8e+000

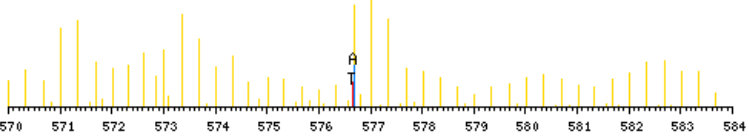

zoomed in precursor plot; T=theoretical m/z, A=acquired m/z

| b <sup>+</sup> | #  | AA | #  | y <sup>+</sup> | y <sup>2+</sup> |
|----------------|----|----|----|----------------|-----------------|
| 100.0762       | 1  | A  | 16 |                |                 |
| 199.1446       | 2  | V  | 15 | 1628.8972      | 814.9525        |
| 313.1876       | 3  | N  | 14 | 1529.8288      | 765.4183        |
| 384.2247       | 4  | A  | 13 | 1415.7859      | 708.3968        |
| 455.2618       | 5  | A  | 12 | 1344.7487      | 672.8783        |
| 583.3204       | 6  | Q  | 11 | 1273.7116      | 637.3597        |
| 698.3473       | 7  | D  | 10 | 1145.6530      | 573.3304        |
| 785.3793       | 8  | S  | 9  | 1030.6261      | 515.8170        |
| 886.4270       | 9  | T  | 8  | 943.5941       | 472.3010        |
| 1001.4540      | 10 | D  | 7  | 842.5464       | 421.7771        |
| 1114.5380      | 11 | L  | 6  | 727.5195       | 364.2636        |
| 1213.6064      | 12 | V  | 5  | 614.4354       | 307.7216        |
| 1284.6435      | 13 | A  | 4  | 515.3670       | 258.1874        |
| 1440.7698      | 14 | K  | 3  | 444.3299       | 222.6688        |
| 1553.8539      | 15 | L  | 2  | 288.2036       | 144.6057        |
|                | 16 | R  | 1  | 175.1195       | 88.0637         |

N-term:+29.04 K(14):+156.13

X-range:

0 - 0

MassTol: Y-zoom:

0. 1.

MassType:

☐ AVG ☒ MONO

Axis:

☒ 1 ☐ 2

Label:

☒ I ☐ M ☐ -

Ions:

a ☐ + ☐ 2+ ☐ 3+

b ☒ + ☐ 2+ ☐ 3+

c ☐ + ☐ 2+ ☐ 3+

x ☐ + ☐ 2+ ☐ 3+

y ☒ + ☒ 2+ ☐ 3+

z ☐ + ☐ 2+ ☐ 3+

hide H<sub>2</sub>O/NH<sub>3</sub> ☐

zoom 112-122 ☐

GO

AVPIAQKSEPPQSLNEALMR, MH+ 2225.1964, m/z 557.0546  
L OS G14 P120811 220811-s1.04614.04614.4.dta

scan 4614; 2.2e+000

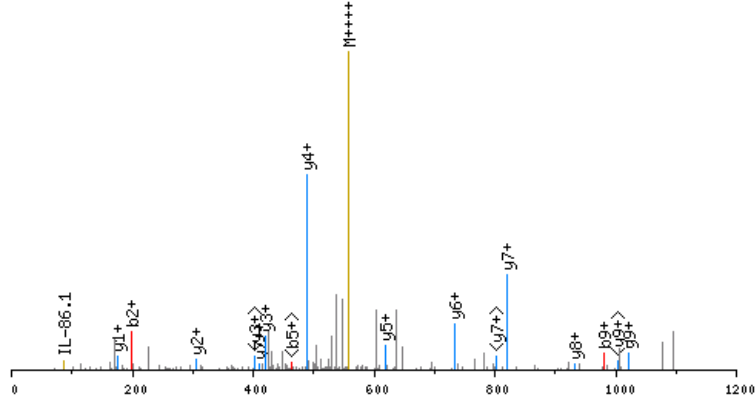

click image to zoom in; click top corners to zoom out [\[precursor±\]](#)

scan 4611; 557.1 m/z; 5.2e+000

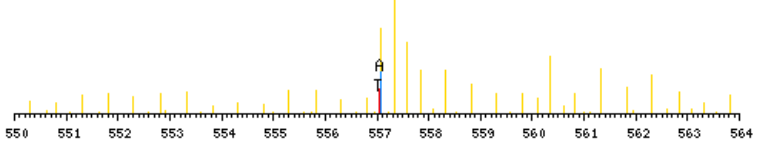

zoomed in precursor plot; T=theoretical m/z, A=acquired m/z

| b <sup>+</sup> | #  | AA | #  | y <sup>+</sup> | y <sup>2+</sup> |
|----------------|----|----|----|----------------|-----------------|
| 100.0762       | 1  | A  | 20 |                |                 |
| 199.1446       | 2  | V  | 19 | 2126.1280      | 1063.5679       |
| 296.1974       | 3  | P  | 18 | 2027.0596      | 1014.0337       |
| 409.2815       | 4  | I  | 17 | 1930.0068      | 965.5073        |
| 480.3186       | 5  | A  | 16 | 1816.9228      | 908.9653        |
| 608.3771       | 6  | Q  | 15 | 1745.8856      | 873.4467        |
| 764.5034       | 7  | K  | 14 | 1617.8271      | 809.4174        |
| 851.5355       | 8  | S  | 13 | 1461.7008      | 731.3543        |
| 980.5781       | 9  | E  | 12 | 1374.6687      | 687.8383        |
| 1077.6308      | 10 | P  | 11 | 1245.6261      | 623.3170        |
| 1205.6894      | 11 | Q  | 10 | 1148.5734      | 574.7906        |
| 1292.7214      | 12 | S  | 9  | 1020.5148      | 510.7613        |
| 1405.8055      | 13 | L  | 8  | 933.4828       | 467.2453        |
| 1492.8375      | 14 | S  | 7  | 820.3987       | 410.7033        |
| 1606.8805      | 15 | N  | 6  | 733.3667       | 367.1873        |
| 1735.9231      | 16 | E  | 5  | 619.3238       | 310.1658        |
| 1806.9602      | 17 | A  | 4  | 490.2812       | 245.6445        |
| 1920.0442      | 18 | L  | 3  | 419.2440       | 210.1259        |
| 2051.0847      | 19 | M  | 2  | 306.1600       | 153.5839        |
|                | 20 | R  | 1  | 175.1195       | 88.0637         |

N-term:+29.04 K(7):+156.13

X-range:

0 - 0

MassTol: Y-zoom:

0. 1.

MassType:

☐AVG ☒MONO

Axis:

☒1 ☐2

Label:

☒I ☐M ☐-

Ions:

a ☐+ ☐2+ ☐3+

b ☒+ ☐2+ ☐3+

c ☐+ ☐2+ ☐3+

x ☐+ ☐2+ ☐3+

y ☒+ ☒2+ ☐3+

z ☐+ ☐2+ ☐3+

hide H<sub>2</sub>O/NH<sub>3</sub> ☐

zoom 112-122 ☐

GO

AVRPLQLLGTCALCR, MH+ 1885.0151, m/z 629.0099  
L OS G15 P120811 220811-s1.05388.05388.3.dta

scan 5388; 1.8e+000

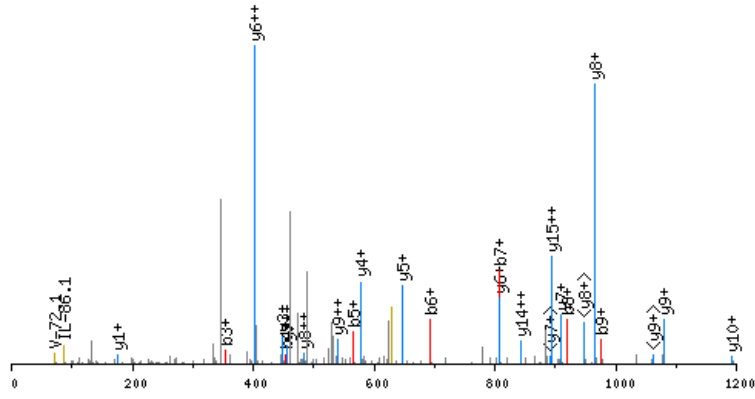

click image to zoom in; click top corners to zoom out

[precursor±]

scan 5386; 629.0 m/z; 8.6e+000

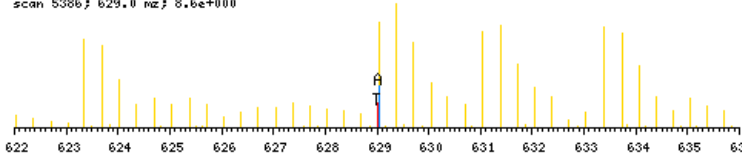

zoomed in precursor plot; T=theoretical m/z, A=acquired m/z

| b <sup>+</sup> | #  | AA | #  | y <sup>+</sup> | y <sup>2+</sup> |
|----------------|----|----|----|----------------|-----------------|
| 100.0762       | 1  | A  | 16 |                |                 |
| 199.1446       | 2  | V  | 15 | 1785.9467      | 893.4772        |
| 355.2457       | 3  | R  | 14 | 1686.8783      | 843.9430        |
| 452.2985       | 4  | P  | 13 | 1530.7771      | 765.8925        |
| 565.3826       | 5  | L  | 12 | 1433.7244      | 717.3661        |
| 693.4411       | 6  | Q  | 11 | 1320.6403      | 660.8241        |
| 806.5252       | 7  | L  | 10 | 1192.5817      | 596.7948        |
| 919.6093       | 8  | L  | 9  | 1079.4977      | 540.2528        |
| 976.6307       | 9  | G  | 8  | 966.4136       | 483.7107        |
| 1077.6784      | 10 | T  | 7  | 909.3922       | 455.2000        |
| 1237.7090      | 11 | C  | 6  | 808.3445       | 404.6761        |
| 1308.7461      | 12 | A  | 5  | 648.3139       | 324.6608        |
| 1437.7887      | 13 | E  | 4  | 577.2768       | 289.1423        |
| 1550.8728      | 14 | L  | 3  | 448.2342       | 224.6210        |
| 1710.9034      | 15 | C  | 2  | 335.1501       | 168.0790        |
|                | 16 | R  | 1  | 175.1195       | 88.0637         |

N-term:+29.04 C(11):+160.03  
C(15):+160.03

X-range:

0 - 0

MassTol: Y-zoom:

0. 1.

MassType:

☐AVG ☒MONO

Axis:

☒1 ☐2

Label:

☒I ☐M ☐-

Ions:

a ☐+ ☐2+ ☐3+

b ☒+ ☐2+ ☐3+

c ☐+ ☐2+ ☐3+

x ☐+ ☐2+ ☐3+

y ☒+ ☒2+ ☐3+

z ☐+ ☐2+ ☐3+

hide H<sub>2</sub>O/NH<sub>3</sub> ☐

zoom 112-122 ☐

GO

AVSEHENTKCISFR, MH+ 1733.8644, m/z 434.2216  
L OS G17 P120811 220811-s1.02744.02744.4.dta

scan 2744; 1.5e+001

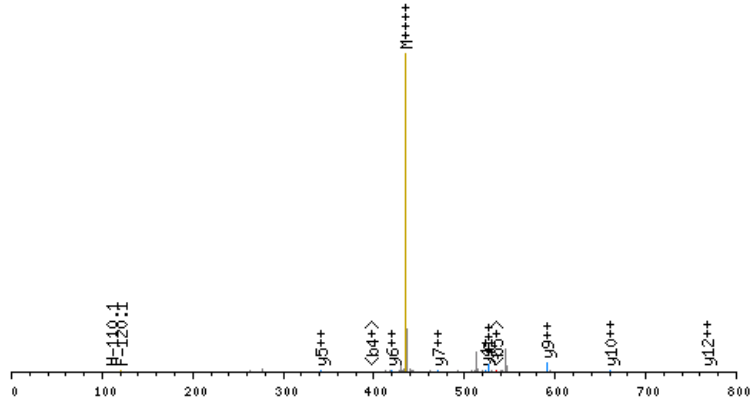

click image to zoom in; click top corners to zoom out [\[precursor±\]](#)

scan 2743; 434.2 m/z; 2.8e+000

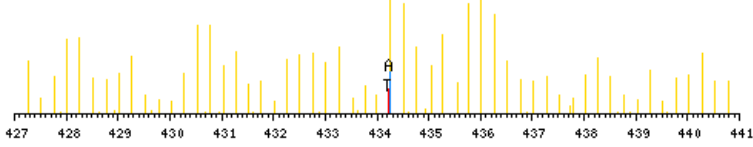

zoomed in precursor plot; T=theoretical m/z, A=acquired m/z

| b <sup>+</sup> | #  | AA | #  | y <sup>+</sup> | y <sup>2+</sup> |
|----------------|----|----|----|----------------|-----------------|
| 100.0762       | 1  | A  | 14 |                |                 |
| 199.1446       | 2  | V  | 13 | 1634.7961      | 817.9019        |
| 286.1767       | 3  | S  | 12 | 1535.7276      | 768.3677        |
| 415.2192       | 4  | E  | 11 | 1448.6956      | 724.8517        |
| 552.2782       | 5  | H  | 10 | 1319.6530      | 660.3304        |
| 681.3208       | 6  | E  | 9  | 1182.5941      | 591.8010        |
| 795.3637       | 7  | N  | 8  | 1053.5515      | 527.2797        |
| 896.4114       | 8  | T  | 7  | 939.5086       | 470.2582        |
| 1052.5377      | 9  | K  | 6  | 838.4609       | 419.7344        |
| 1212.5683      | 10 | C  | 5  | 682.3346       | 341.6712        |
| 1325.6523      | 11 | I  | 4  | 522.3040       | 261.6559        |
| 1412.6844      | 12 | S  | 3  | 409.2199       | 205.1139        |
| 1559.7528      | 13 | F  | 2  | 322.1879       | 161.5979        |
|                | 14 | R  | 1  | 175.1195       | 88.0637         |

N-term:+29.04 K(9):+156.13  
C(10):+160.03

X-range:

0 - 0

MassTol: Y-zoom:

0. 1.

MassType:

☐ AVG ☒ MONO

Axis:

☒ 1 ☐ 2

Label:

☒ I ☐ M ☐ -

Ions:

a ☐ + ☐ 2+ ☐ 3+

b ☒ + ☐ 2+ ☐ 3+

c ☐ + ☐ 2+ ☐ 3+

x ☐ + ☐ 2+ ☐ 3+

y ☒ + ☒ 2+ ☐ 3+

z ☐ + ☐ 2+ ☐ 3+

hide H<sub>2</sub>O/NH<sub>3</sub> ☐

zoom 112-122 ☐

GO

AVSEQGVCTLEIR, MH+ 1489.7684, m/z 497.2610  
L OS G13 P120811 220811-s1.04362.04362.3.dta

scan 4362; 2.9e+000

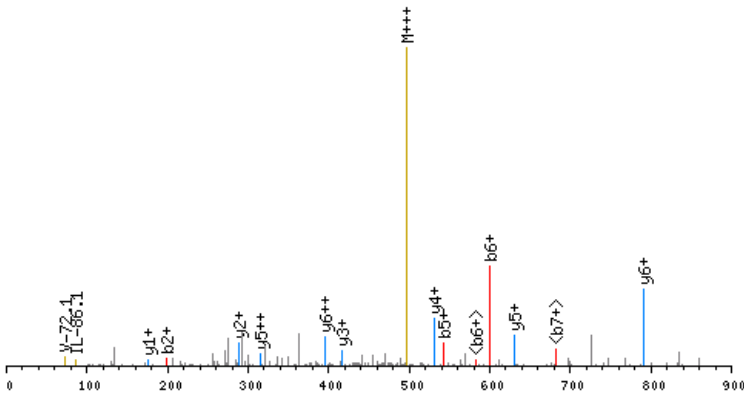

click image to zoom in; click top corners to zoom out

[precursor±]

scan 4359; 497.3 m/z; 2.6e+001

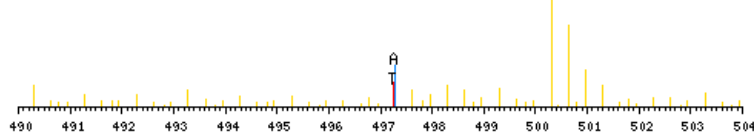

zoomed in precursor plot; T=theoretical m/z, A=acquired m/z

| b <sup>+</sup> | #  | AA | #  | y <sup>+</sup> | y <sup>2+</sup> |
|----------------|----|----|----|----------------|-----------------|
| 100.0762       | 1  | A  | 13 |                |                 |
| 199.1446       | 2  | V  | 12 | 1390.7000      | 695.8539        |
| 286.1767       | 3  | S  | 11 | 1291.6316      | 646.3197        |
| 415.2192       | 4  | E  | 10 | 1204.5995      | 602.8037        |
| 543.2778       | 5  | Q  | 9  | 1075.5570      | 538.2824        |
| 600.2993       | 6  | G  | 8  | 947.4984       | 474.2531        |
| 699.3677       | 7  | V  | 7  | 890.4769       | 445.7424        |
| 859.3983       | 8  | C  | 6  | 791.4085       | 396.2082        |
| 960.4460       | 9  | T  | 5  | 631.3779       | 316.1929        |
| 1073.5300      | 10 | L  | 4  | 530.3302       | 265.6690        |
| 1202.5726      | 11 | E  | 3  | 417.2462       | 209.1270        |
| 1315.6567      | 12 | I  | 2  | 288.2036       | 144.6057        |
|                | 13 | R  | 1  | 175.1195       | 88.0637         |

N-term:+29.04 C(8):+160.03

X-range:

0 - 0

MassTol: Y-zoom:

0. 1.

MassType:

☐ AVG ☒ MONO

Axis:

☒ 1 ☐ 2

Label:

☒ I ☐ M ☐ -

Ions:

a ☐ + ☐ 2+ ☐ 3+

b ☒ + ☐ 2+ ☐ 3+

c ☐ + ☐ 2+ ☐ 3+

x ☐ + ☐ 2+ ☐ 3+

y ☒ + ☒ 2+ ☐ 3+

z ☐ + ☐ 2+ ☐ 3+

hide H<sub>2</sub>O/NH<sub>3</sub> ☐

zoom 112-122 ☐

GO

AVSKEKEEEETSPDTSIPR, MH+ 2216.1298, m/z 554.7879  
L OS G17 P120811 220811-s1.02532.02532.4.dta

scan 2532: 1.4e+000

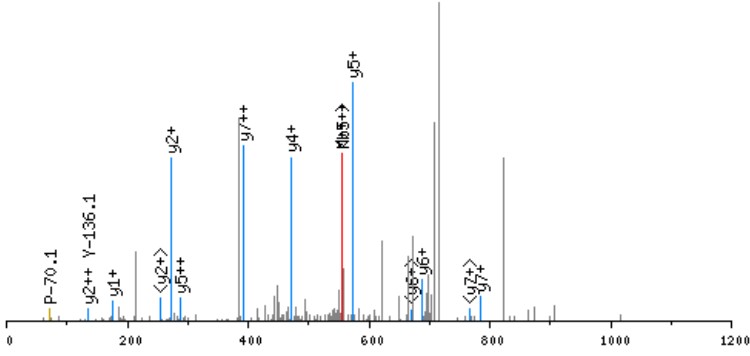

click image to zoom in; click top corners to zoom out [\[precursor±\]](#)

scan 2528: 554.8 m/z; 7.6e+000

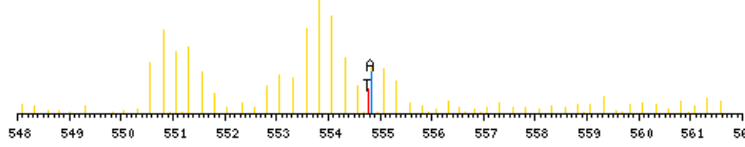

zoomed in precursor plot; T=theoretical m/z, A=acquired m/z

| b <sup>+</sup> | #  | AA | #  | y <sup>+</sup> | y <sup>2+</sup> |
|----------------|----|----|----|----------------|-----------------|
| 100.0762       | 1  | A  | 19 |                |                 |
| 199.1446       | 2  | V  | 18 | 2117.0615      | 1059.0346       |
| 286.1767       | 3  | S  | 17 | 2017.9930      | 1009.5004       |
| 442.3030       | 4  | K  | 16 | 1930.9610      | 965.9844        |
| 571.3455       | 5  | E  | 15 | 1774.8347      | 887.9213        |
| 727.4718       | 6  | K  | 14 | 1645.7921      | 823.4000        |
| 856.5144       | 7  | E  | 13 | 1489.6658      | 745.3368        |
| 985.5570       | 8  | E  | 12 | 1360.6232      | 680.8155        |
| 1114.5996      | 9  | E  | 11 | 1231.5806      | 616.2942        |
| 1243.6422      | 10 | E  | 10 | 1102.5380      | 551.7729        |
| 1344.6899      | 11 | T  | 9  | 973.4954       | 487.2516        |
| 1431.7219      | 12 | S  | 8  | 872.4478       | 436.7278        |
| 1528.7747      | 13 | P  | 7  | 785.4157       | 393.2118        |
| 1643.8016      | 14 | D  | 6  | 688.3630       | 344.6854        |
| 1744.8493      | 15 | T  | 5  | 573.3360       | 287.1719        |
| 1831.8813      | 16 | S  | 4  | 472.2884       | 236.6481        |
| 1944.9654      | 17 | I  | 3  | 385.2563       | 193.1321        |
| 2042.0182      | 18 | P  | 2  | 272.1723       | 136.5900        |
|                | 19 | R  | 1  | 175.1195       | 88.0637         |

N-term:+29.04 K(4):+156.13  
K(6):+156.13

X-range:

0 - 0

MassTol: Y-zoom:

0. 1.

MassType:

☐AVG ☒MONO

Axis:

☒1 ☐2

Label:

☒I ☐M ☐-

Ions:

a ☐+ ☐2+ ☐3+

b ☒+ ☐2+ ☐3+

c ☐+ ☐2+ ☐3+

x ☐+ ☐2+ ☐3+

y ☒+ ☒2+ ☐3+

z ☐+ ☐2+ ☐3+

hide H<sub>2</sub>O/NH<sub>3</sub> ☐

zoom 112-122 ☐

GO

AVSSELQIQQSFVPDECPR, MH+ 2218.0813, m/z 740.0320  
L OS G12 P120811 220811-s1.04611.04611.3.dta

scan 4611: 1.0e+000

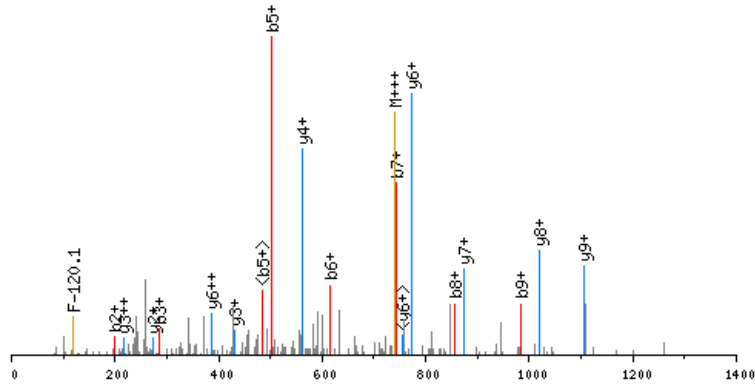

click image to zoom in; click top corners to zoom out [\[precursor±\]](#)

scan 4607: 740.0 m/z; 3.4e+000

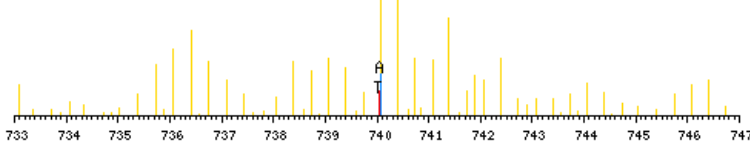

zoomed in precursor plot; T=theoretical m/z, A=acquired m/z

| b <sup>+</sup> | #  | AA | #  | y <sup>+</sup> | y <sup>2+</sup> |
|----------------|----|----|----|----------------|-----------------|
| 100.0762       | 1  | A  | 19 |                |                 |
| 199.1446       | 2  | V  | 18 | 2119.0129      | 1060.0104       |
| 286.1767       | 3  | S  | 17 | 2019.9445      | 1010.4762       |
| 373.2087       | 4  | S  | 16 | 1932.9125      | 966.9602        |
| 502.2513       | 5  | E  | 15 | 1845.8805      | 923.4441        |
| 615.3353       | 6  | L  | 14 | 1716.8379      | 858.9229        |
| 743.3939       | 7  | Q  | 13 | 1603.7538      | 802.3808        |
| 856.4780       | 8  | I  | 12 | 1475.6952      | 738.3515        |
| 984.5366       | 9  | Q  | 11 | 1362.6112      | 681.8095        |
| 1112.5951      | 10 | Q  | 10 | 1234.5526      | 617.7802        |
| 1199.6272      | 11 | S  | 9  | 1106.4940      | 553.7509        |
| 1346.6956      | 12 | F  | 8  | 1019.4620      | 510.2349        |
| 1445.7640      | 13 | V  | 7  | 872.3936       | 436.7007        |
| 1542.8168      | 14 | P  | 6  | 773.3252       | 387.1665        |
| 1657.8437      | 15 | D  | 5  | 676.2724       | 338.6401        |
| 1786.8863      | 16 | E  | 4  | 561.2455       | 281.1266        |
| 1946.9169      | 17 | C  | 3  | 432.2029       | 216.6053        |
| 2043.9697      | 18 | P  | 2  | 272.1723       | 136.5900        |
|                | 19 | R  | 1  | 175.1195       | 88.0637         |

N-term:+29.04 C(17):+160.03

X-range:

0 - 0

MassTol: Y-zoom:

0. 1.

MassType:

☐ AVG ☒ MONO

Axis:

☒ 1 ☐ 2

Label:

☒ I ☐ M ☐ -

Ions:

a ☐ + ☐ 2+ ☐ 3+

b ☒ + ☐ 2+ ☐ 3+

c ☐ + ☐ 2+ ☐ 3+

x ☐ + ☐ 2+ ☐ 3+

y ☒ + ☒ 2+ ☐ 3+

z ☐ + ☐ 2+ ☐ 3+

hide H<sub>2</sub>O/NH<sub>3</sub> ☐

zoom 112-122 ☐

GO

AVSVSFGDPEGSALHEKSLR, MH+ 2142.1195, m/z 536.2853  
L OS G17 P120811 220811-s1.03061.03061.4.dta

scan 3061; 6.6e-001

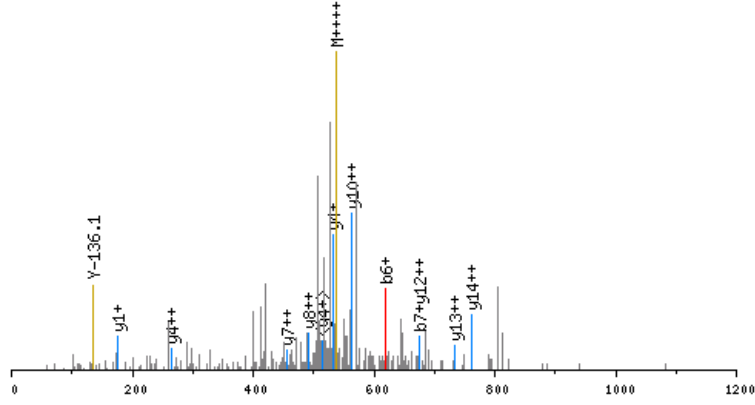

click image to zoom in; click top corners to zoom out [\[precursor±\]](#)

scan 3058; 536.3 m/z; 3.6e+001

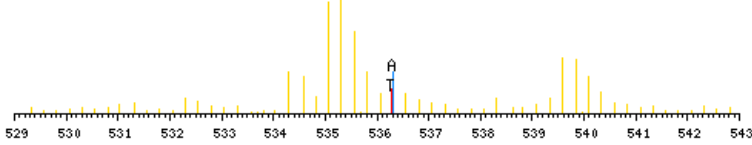

zoomed in precursor plot; T=theoretical m/z, A=acquired m/z

| b <sup>+</sup> | #  | AA | #  | y <sup>+</sup> | y <sup>2+</sup> |
|----------------|----|----|----|----------------|-----------------|
| 100.0762       | 1  | A  | 20 |                |                 |
| 199.1446       | 2  | V  | 19 | 2043.0511      | 1022.0295       |
| 286.1767       | 3  | S  | 18 | 1943.9827      | 972.4953        |
| 385.2451       | 4  | V  | 17 | 1856.9507      | 928.9793        |
| 472.2771       | 5  | S  | 16 | 1757.8823      | 879.4450        |
| 619.3455       | 6  | F  | 15 | 1670.8502      | 835.9290        |
| 676.3670       | 7  | G  | 14 | 1523.7818      | 762.3948        |
| 791.3939       | 8  | D  | 13 | 1466.7604      | 733.8841        |
| 888.4467       | 9  | P  | 12 | 1351.7334      | 676.3706        |
| 1017.4893      | 10 | E  | 11 | 1254.6807      | 627.8442        |
| 1074.5107      | 11 | G  | 10 | 1125.6381      | 563.3229        |
| 1161.5428      | 12 | S  | 9  | 1068.6166      | 534.8122        |
| 1232.5799      | 13 | A  | 8  | 981.5846       | 491.2962        |
| 1345.6639      | 14 | L  | 7  | 910.5475       | 455.7776        |
| 1482.7229      | 15 | H  | 6  | 797.4634       | 399.2356        |
| 1611.7655      | 16 | E  | 5  | 660.4045       | 330.7062        |
| 1767.8918      | 17 | K  | 4  | 531.3619       | 266.1849        |
| 1854.9238      | 18 | S  | 3  | 375.2356       | 188.1217        |
| 1968.0078      | 19 | L  | 2  | 288.2036       | 144.6057        |
|                | 20 | R  | 1  | 175.1195       | 88.0637         |

N-term:+29.04 K(17):+156.13

| b <sup>+</sup> | #  | AA | #  | y <sup>+</sup> | y <sup>2+</sup> |
|----------------|----|----|----|----------------|-----------------|
| 100.0762       | 1  | A  | 19 |                |                 |
| 199.1446       | 2  | V  | 18 | 1906.9908      | 953.9993        |
| 300.1923       | 3  | T  | 17 | 1807.9224      | 904.4651        |
| 371.2294       | 4  | A  | 16 | 1706.8747      | 853.9413        |
| 442.2665       | 5  | A  | 15 | 1635.8376      | 818.4227        |
| 556.3095       | 6  | N  | 14 | 1564.8005      | 782.9042        |
| 657.3571       | 7  | T  | 13 | 1450.7576      | 725.8827        |
| 772.3841       | 8  | D  | 12 | 1349.7099      | 675.3589        |
| 903.4246       | 9  | M  | 11 | 1234.6830      | 617.8454        |
| 974.4617       | 10 | A  | 10 | 1103.6425      | 552.3252        |
| 1075.5094      | 11 | T  | 9  | 1032.6054      | 516.8066        |
| 1162.5414      | 12 | S  | 8  | 931.5577       | 466.2828        |
| 1291.5840      | 13 | E  | 7  | 844.5257       | 422.7667        |
| 1362.6211      | 14 | A  | 6  | 715.4831       | 358.2454        |
| 1475.7052      | 15 | L  | 5  | 644.4460       | 322.7269        |
| 1631.8315      | 16 | K  | 4  | 531.3619       | 266.1849        |
| 1744.9155      | 17 | I  | 3  | 375.2356       | 188.1217        |
| 1831.9476      | 18 | S  | 2  | 262.1515       | 131.5797        |
|                | 19 | R  | 1  | 175.1195       | 88.0637         |

X-range:

0 - 0

MassTol: Y-zoom:

0. 1.

MassType:

☐AVG ☒MONO

Axis:

☒1 ☐2

Label:

☒I ☐M ☐-

Ions:

a ☐+ ☐2+ ☐3+

b ☒+ ☐2+ ☐3+

c ☐+ ☐2+ ☐3+

x ☐+ ☐2+ ☐3+

y ☒+ ☒2+ ☐3+

z ☐+ ☐2+ ☐3+

hide H<sub>2</sub>O/NH<sub>3</sub> ☐

zoom 112-122 ☐

GO

AVVGDDEYLHFHHR, MH+ 1728.8670, m/z 432.9722  
H OS G19 P120811 220811-s1.03268.03268.4.dta

scan 3268; 2.3e+000

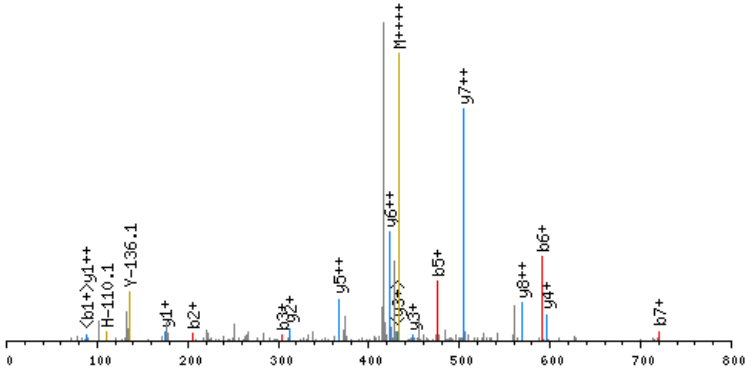

click image to zoom in; click top corners to zoom out [\[precursor±\]](#)

scan 3266; 433.0 m/z; 7.9e+001

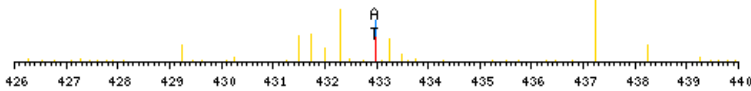

zoomed in precursor plot; T=theoretical m/z, A=acquired m/z

| b <sup>+</sup> | #  | AA | #  | y <sup>+</sup> | y <sup>2+</sup> |
|----------------|----|----|----|----------------|-----------------|
| 106.1080       | 1  | A  | 14 |                |                 |
| 205.1764       | 2  | V  | 13 | 1623.7668      | 812.3873        |
| 304.2448       | 3  | V  | 12 | 1524.6984      | 762.8531        |
| 361.2663       | 4  | G  | 11 | 1425.6300      | 713.3189        |
| 476.2932       | 5  | D  | 10 | 1368.6085      | 684.8082        |
| 591.3202       | 6  | D  | 9  | 1253.5816      | 627.2947        |
| 720.3628       | 7  | E  | 8  | 1138.5546      | 569.7812        |
| 883.4261       | 8  | Y  | 7  | 1009.5120      | 505.2599        |
| 996.5102       | 9  | L  | 6  | 846.4487       | 423.7283        |
| 1133.5691      | 10 | H  | 5  | 733.3647       | 367.1862        |
| 1280.6375      | 11 | F  | 4  | 596.3057       | 298.6568        |
| 1417.6964      | 12 | H  | 3  | 449.2373       | 225.1226        |
| 1554.7553      | 13 | H  | 2  | 312.1784       | 156.5931        |
|                | 14 | R  | 1  | 175.1195       | 88.0637         |

N-term:+35.07

X-range:

0 - 0

MassTol: Y-zoom:

0. 1.

MassType:

☐ AVG ☒ MONO

Axis:

☒ 1 ☐ 2

Label:

☒ I ☐ M ☐ -

Ions:

a ☐ + ☐ 2+ ☐ 3+

b ☒ + ☐ 2+ ☐ 3+

c ☐ + ☐ 2+ ☐ 3+

x ☐ + ☐ 2+ ☐ 3+

y ☒ + ☒ 2+ ☐ 3+

z ☐ + ☐ 2+ ☐ 3+

hide H<sub>2</sub>O/NH<sub>3</sub> ☐

zoom 112-122 ☐

GO

AWESSAGGSFTVR, MH+ 1382.6704, m/z 691.8389  
L OS G14 P120811 220811-s1.04354.04354.2.dta

scan 4354; 1.7e+000

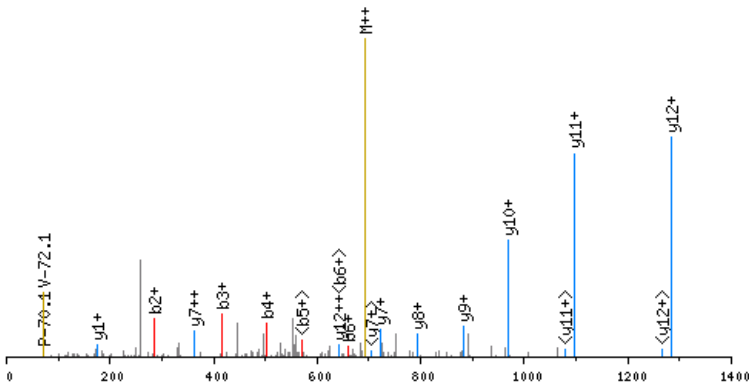

click image to zoom in; click top corners to zoom out

[precursor±]

scan 4351; 691.8 m/z; 4.1e+001

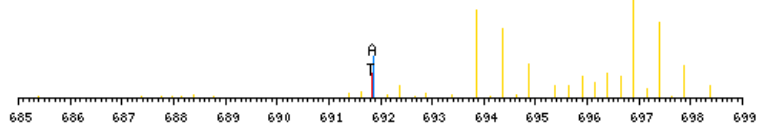

zoomed in precursor plot; T=theoretical m/z, A=acquired m/z

| b <sup>+</sup> | #  | AA | #  | y <sup>+</sup> | y <sup>2+</sup> |
|----------------|----|----|----|----------------|-----------------|
| 100.0762       | 1  | A  | 13 |                |                 |
| 286.1555       | 2  | W  | 12 | 1283.6020      | 642.3049        |
| 415.1981       | 3  | E  | 11 | 1097.5227      | 549.2653        |
| 502.2301       | 4  | S  | 10 | 968.4801       | 484.7440        |
| 589.2622       | 5  | S  | 9  | 881.4481       | 441.2280        |
| 660.2993       | 6  | A  | 8  | 794.4161       | 397.7120        |
| 717.3208       | 7  | G  | 7  | 723.3790       | 362.1934        |
| 774.3422       | 8  | G  | 6  | 666.3575       | 333.6827        |
| 861.3742       | 9  | S  | 5  | 609.3360       | 305.1719        |
| 1008.4427      | 10 | F  | 4  | 522.3040       | 261.6559        |
| 1109.4903      | 11 | T  | 3  | 375.2356       | 188.1217        |
| 1208.5588      | 12 | V  | 2  | 274.1879       | 137.5979        |
|                | 13 | R  | 1  | 175.1195       | 88.0637         |

N-term:+29.04

X-range:

0 - 0

MassTol: Y-zoom:

0. 1.

MassType:

☐AVG ☒MONO

Axis:

☒1 ☐2

Label:

☒I ☐M ☐-

Ions:

a ☐+ ☐2+ ☐3+

b ☒+ ☐2+ ☐3+

c ☐+ ☐2+ ☐3+

x ☐+ ☐2+ ☐3+

y ☒+ ☒2+ ☐3+

z ☐+ ☐2+ ☐3+

hide H<sub>2</sub>O/NH<sub>3</sub> ☐

zoom 112-122 ☐

GO

AWGKIGGHGAEYGAEALER, MH+ 2040.0939, m/z 510.7789  
H OS G17 P120811 220811-s1.04376.04376.4.dta

scan 4376; 2.8e+000

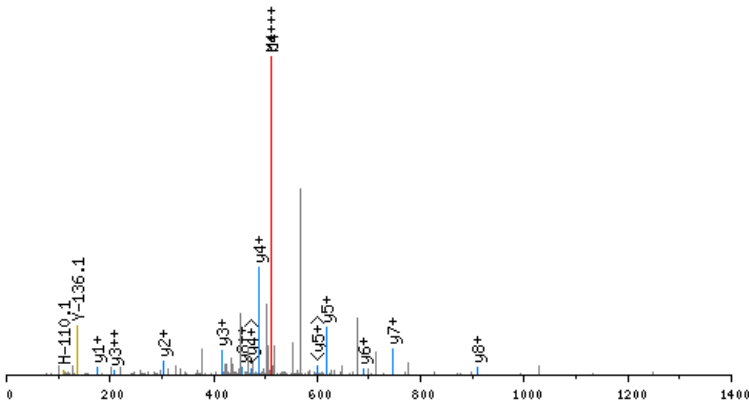

click image to zoom in; click top corners to zoom out

[precursor±]

scan 4373; 510.8 m/z; 9.7e+000

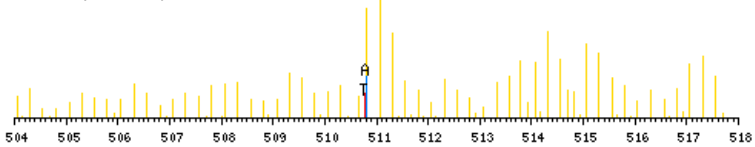

zoomed in precursor plot; T=theoretical m/z, A=acquired m/z

| b <sup>+</sup> | #  | AA | #  | y <sup>+</sup> | y <sup>2+</sup> |
|----------------|----|----|----|----------------|-----------------|
| 106.1080       | 1  | A  | 19 |                |                 |
| 292.1873       | 2  | W  | 18 | 1934.9937      | 968.0008        |
| 349.2088       | 3  | G  | 17 | 1748.9144      | 874.9611        |
| 511.3669       | 4  | K  | 16 | 1691.8929      | 846.4504        |
| 624.4510       | 5  | I  | 15 | 1529.7348      | 765.3713        |
| 681.4724       | 6  | G  | 14 | 1416.6508      | 708.8293        |
| 738.4939       | 7  | G  | 13 | 1359.6293      | 680.3186        |
| 875.5528       | 8  | H  | 12 | 1302.6079      | 651.8078        |
| 932.5743       | 9  | G  | 11 | 1165.5489      | 583.2784        |
| 1003.6114      | 10 | A  | 10 | 1108.5275      | 554.7677        |
| 1132.6540      | 11 | E  | 9  | 1037.4904      | 519.2491        |
| 1295.7173      | 12 | Y  | 8  | 908.4478       | 454.7278        |
| 1352.7388      | 13 | G  | 7  | 745.3844       | 373.1961        |
| 1423.7759      | 14 | A  | 6  | 688.3630       | 344.6854        |
| 1552.8185      | 15 | E  | 5  | 617.3259       | 309.1668        |
| 1623.8556      | 16 | A  | 4  | 488.2833       | 244.6455        |
| 1736.9396      | 17 | L  | 3  | 417.2462       | 209.1270        |
| 1865.9822      | 18 | E  | 2  | 304.1621       | 152.5850        |
|                | 19 | R  | 1  | 175.1195       | 88.0637         |

N-term:+35.07 K(4):+162.16

X-range:

0 - 0

MassTol: Y-zoom:

0. 1.

MassType:

☐AVG ☒MONO

Axis:

☒1 ☐2

Label:

☒I ☐M ☐-

Ions:

a ☐+ ☐2+ ☐3+

b ☒+ ☐2+ ☐3+

c ☐+ ☐2+ ☐3+

x ☐+ ☐2+ ☐3+

y ☒+ ☒2+ ☐3+

z ☐+ ☐2+ ☐3+

hide H<sub>2</sub>O/NH<sub>3</sub> ☐

zoom 112-122 ☐

GO

AYEQAESDIMKR, MH+ 1496.7419, m/z 499.5855  
L OS G16 P120811 220811-s1.03162.03162.3.dta

scan 3162; 1.1e+001

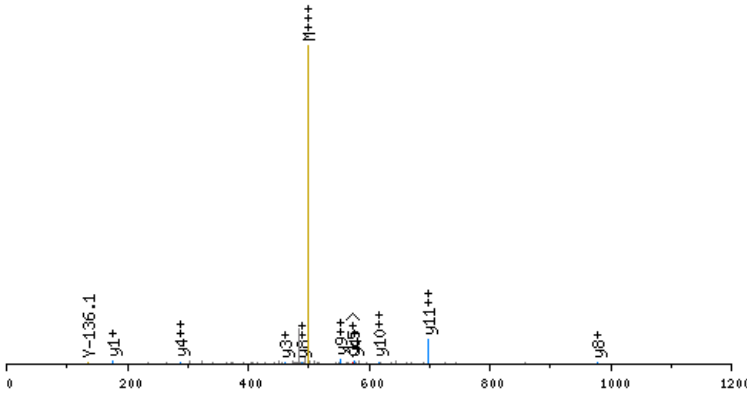

click image to zoom in; click top corners to zoom out [\[precursor±\]](#)

scan 3158; 499.6 m/z; 9.3e+000

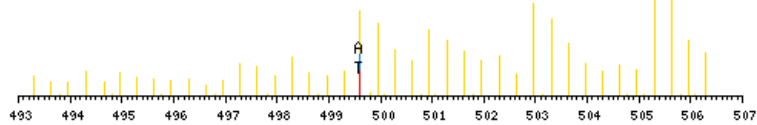

zoomed in precursor plot; T=theoretical m/z, A=acquired m/z

| b <sup>+</sup> | #  | AA | #  | y <sup>+</sup> | y <sup>2+</sup> |
|----------------|----|----|----|----------------|-----------------|
| 100.0762       | 1  | A  | 12 |                |                 |
| 263.1395       | 2  | Y  | 11 | 1397.6735      | 699.3407        |
| 392.1821       | 3  | E  | 10 | 1234.6102      | 617.8090        |
| 520.2407       | 4  | Q  | 9  | 1105.5676      | 553.2877        |
| 591.2778       | 5  | A  | 8  | 977.5090       | 489.2584        |
| 720.3204       | 6  | E  | 7  | 906.4719       | 453.7399        |
| 807.3524       | 7  | S  | 6  | 777.4293       | 389.2186        |
| 922.3794       | 8  | D  | 5  | 690.3973       | 345.7026        |
| 1035.4635      | 9  | I  | 4  | 575.3703       | 288.1891        |
| 1166.5039      | 10 | M  | 3  | 462.2863       | 231.6471        |
| 1322.6302      | 11 | K  | 2  | 331.2458       | 166.1268        |
|                | 12 | R  | 1  | 175.1195       | 88.0637         |

N-term:+29.04 K(11):+156.13

X-range:

0 - 0

MassTol: Y-zoom:

0. 1.

MassType:

☐AVG ☒MONO

Axis:

☒1 ☐2

Label:

☒I ☐M ☐-

Ions:

a ☐+ ☐2+ ☐3+

b ☒+ ☐2+ ☐3+

c ☐+ ☐2+ ☐3+

x ☐+ ☐2+ ☐3+

y ☒+ ☒2+ ☐3+

z ☐+ ☐2+ ☐3+

hide H<sub>2</sub>O/NH<sub>3</sub> ☐

zoom 112-122 ☐

GO

AYLTIEQLLEKR, MH+ 1532.9052, m/z 511.6399  
L OS G15 P120811 220811-s1.06137.06137.3.dta

scan 6137; 1.4e+001

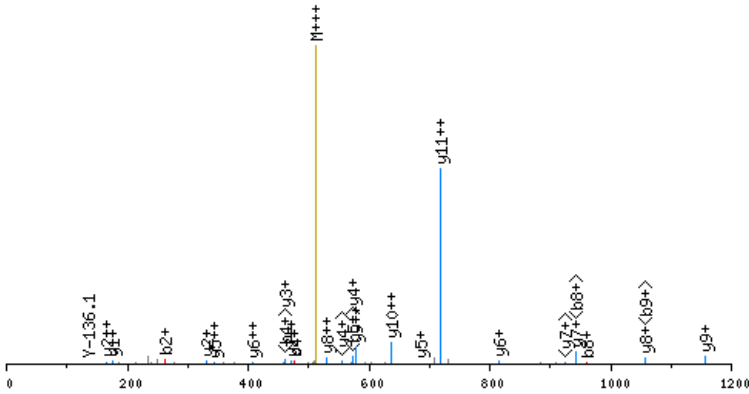

click image to zoom in; click top corners to zoom out

[precursor±]

scan 6136; 511.6 m/z; 5.5e+000

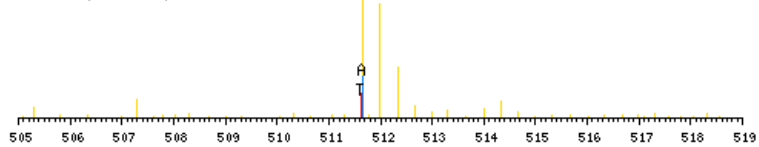

zoomed in precursor plot; T=theoretical m/z, A=acquired m/z

| b <sup>+</sup> | #  | AA | #  | y <sup>+</sup> | y <sup>2+</sup> |
|----------------|----|----|----|----------------|-----------------|
| 100.0762       | 1  | A  | 12 |                |                 |
| 263.1395       | 2  | Y  | 11 | 1433.8368      | 717.4223        |
| 376.2236       | 3  | L  | 10 | 1270.7735      | 635.8907        |
| 477.2713       | 4  | T  | 9  | 1157.6894      | 579.3486        |
| 590.3553       | 5  | I  | 8  | 1056.6418      | 528.8248        |
| 719.3979       | 6  | E  | 7  | 943.5577       | 472.2828        |
| 847.4565       | 7  | Q  | 6  | 814.5151       | 407.7615        |
| 960.5406       | 8  | L  | 5  | 686.4565       | 343.7322        |
| 1073.6246      | 9  | L  | 4  | 573.3725       | 287.1901        |
| 1202.6672      | 10 | E  | 3  | 460.2884       | 230.6481        |
| 1358.7935      | 11 | K  | 2  | 331.2458       | 166.1268        |
|                | 12 | R  | 1  | 175.1195       | 88.0637         |

N-term:+29.04 K(11):+156.13

X-range:

0 - 0

MassTol: Y-zoom:

0. 1.

MassType:

☐AVG ☒MONO

Axis:

☒1 ☐2

Label:

☒I ☐M ☐-

Ions:

a ☐+ ☐2+ ☐3+

b ☒+ ☐2+ ☐3+

c ☐+ ☐2+ ☐3+

x ☐+ ☐2+ ☐3+

y ☒+ ☒2+ ☐3+

z ☐+ ☐2+ ☐3+

hide H<sub>2</sub>O/NH<sub>3</sub> ☐

zoom 112-122 ☐

GO

CAPYNTSDTTTETSNNYR, MH+ 2027.8828, m/z 676.6325  
H OS G15 P120811 220811-s1.03905.03905.3.dta

scan 3905; 1.5e+000

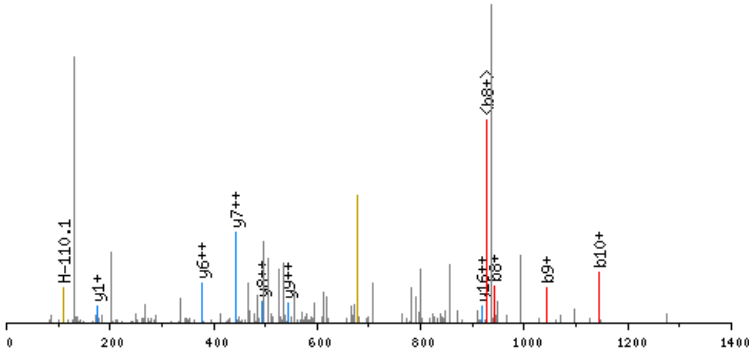

click image to zoom in; click top corners to zoom out

[precursor±]

scan 3901; 676.6 m/z; 5.6e+000

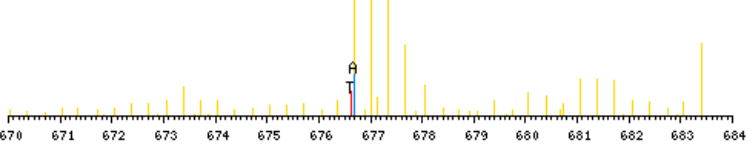

zoomed in precursor plot; T=theoretical m/z, A=acquired m/z

| b <sup>+</sup> | #  | AA | #  | y <sup>+</sup> | y <sup>2+</sup> |
|----------------|----|----|----|----------------|-----------------|
| 195.1015       | 1  | C  | 17 |                |                 |
| 266.1386       | 2  | A  | 16 | 1833.7891      | 917.3985        |
| 363.1914       | 3  | P  | 15 | 1762.7520      | 881.8799        |
| 526.2547       | 4  | Y  | 14 | 1665.6992      | 833.3535        |
| 640.2976       | 5  | N  | 13 | 1502.6359      | 751.8219        |
| 741.3453       | 6  | T  | 12 | 1388.5930      | 694.8004        |
| 828.3773       | 7  | S  | 11 | 1287.5453      | 644.2766        |
| 943.4043       | 8  | D  | 10 | 1200.5133      | 600.7606        |
| 1044.4520      | 9  | T  | 9  | 1085.4863      | 543.2471        |
| 1145.4996      | 10 | T  | 8  | 984.4387       | 492.7232        |
| 1274.5422      | 11 | E  | 7  | 883.3910       | 442.1994        |
| 1375.5899      | 12 | T  | 6  | 754.3484       | 377.6781        |
| 1462.6219      | 13 | S  | 5  | 653.3007       | 327.1543        |
| 1576.6649      | 14 | N  | 4  | 566.2687       | 283.6383        |
| 1690.7078      | 15 | N  | 3  | 452.2258       | 226.6168        |
| 1853.7711      | 16 | Y  | 2  | 338.1828       | 169.5953        |
|                | 17 | R  | 1  | 175.1195       | 88.0637         |

N-term:+35.07 C(1):+160.03

X-range:

0 - 0

MassTol: Y-zoom:

0. 1.

MassType:

☐ AVG ☒ MONO

Axis:

☒ 1 ☐ 2

Label:

☒ I ☐ M ☐ -

Ions:

a ☐ + ☐ 2+ ☐ 3+

b ☒ + ☐ 2+ ☐ 3+

c ☐ + ☐ 2+ ☐ 3+

x ☐ + ☐ 2+ ☐ 3+

y ☒ + ☒ 2+ ☐ 3+

z ☐ + ☐ 2+ ☐ 3+

hide H<sub>2</sub>O/NH<sub>3</sub> ☐

zoom 112-122 ☐

GO

CCTLPEDQR, MH+ 1206.5246, m/z 603.7659  
L OS G14 P120811 220811-s1.02208.02208.2.dta

scan 2208; 3.8e+000

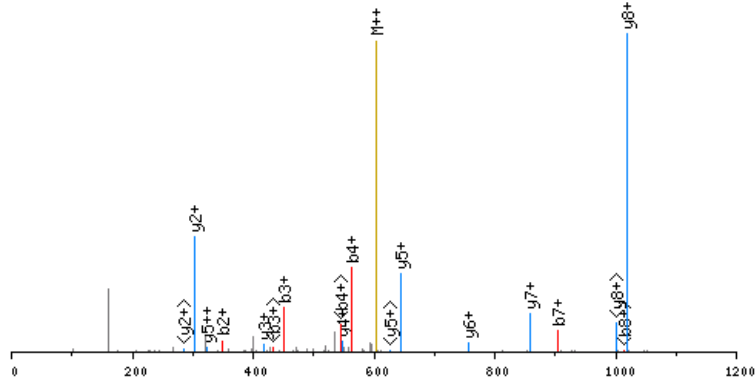

click image to zoom in; click top corners to zoom out

[precursor±]

scan 2206; 603.8 m/z; 4.8e+000

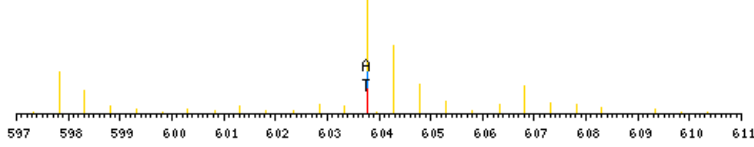

zoomed in precursor plot; T=theoretical m/z, A=acquired m/z

| b <sup>+</sup> | # | AA | # | y <sup>+</sup> | y <sup>2+</sup> |
|----------------|---|----|---|----------------|-----------------|
| 189.0697       | 1 | C  | 9 |                |                 |
| 349.1003       | 2 | C  | 8 | 1018.4627      | 509.7353        |
| 450.1480       | 3 | T  | 7 | 858.4321       | 429.7200        |
| 563.2320       | 4 | L  | 6 | 757.3844       | 379.1961        |
| 660.2848       | 5 | P  | 5 | 644.3004       | 322.6541        |
| 789.3274       | 6 | E  | 4 | 547.2476       | 274.1277        |
| 904.3543       | 7 | D  | 3 | 418.2050       | 209.6064        |
| 1032.4129      | 8 | Q  | 2 | 303.1781       | 152.0930        |
|                | 9 | R  | 1 | 175.1195       | 88.0637         |

N-term:+29.04 C(1):+160.03  
C(2):+160.03



N-term:+29.04 C(1):+160.03

X-range:

0 - 0

MassTol: Y-zoom:

0. 1.

MassType:

☐ AVG ☒ MONO

Axis:

☒ 1 ☐ 2

Label:

☒ I ☐ M ☐ -

Ions:

a ☐ + ☐ 2+ ☐ 3+

b ☒ + ☐ 2+ ☐ 3+

c ☐ + ☐ 2+ ☐ 3+

x ☐ + ☐ 2+ ☐ 3+

y ☒ + ☒ 2+ ☐ 3+

z ☐ + ☐ 2+ ☐ 3+

hide H<sub>2</sub>O/NH<sub>3</sub> ☐

zoom 112-122 ☐

GO

CDTFVALPPATVGNR, MH+ 1651.8689, m/z 551.2945  
H OS G13 P120811 220811-s1.05500.05500.3.dta

scan 5500; 3.1e+000

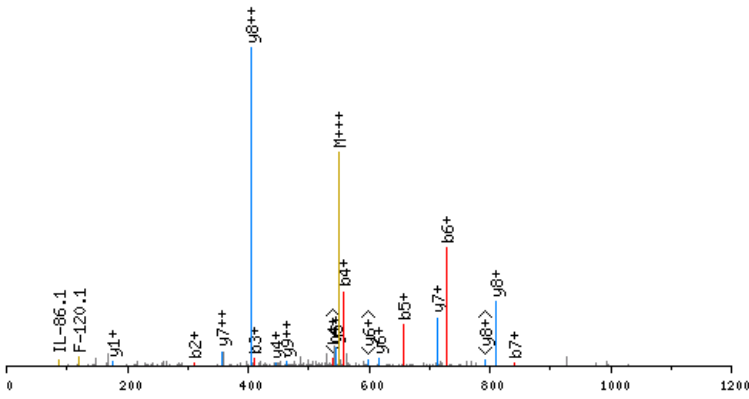

click image to zoom in; click top corners to zoom out [precursor±]

scan 5499; 551.3 m/z; 5.1e+001

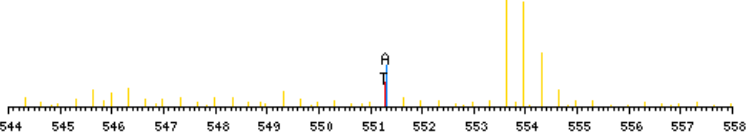

zoomed in precursor plot; T=theoretical m/z, A=acquired m/z

| b <sup>+</sup> | #  | AA | #  | y <sup>+</sup> | y <sup>2+</sup> |
|----------------|----|----|----|----------------|-----------------|
| 195.1015       | 1  | C  | 15 |                |                 |
| 310.1284       | 2  | D  | 14 | 1457.7753      | 729.3915        |
| 411.1761       | 3  | T  | 13 | 1342.7483      | 671.8781        |
| 558.2445       | 4  | F  | 12 | 1241.7006      | 621.3542        |
| 657.3129       | 5  | V  | 11 | 1094.6322      | 547.8200        |
| 728.3501       | 6  | A  | 10 | 995.5638       | 498.2858        |
| 841.4341       | 7  | L  | 9  | 924.5267       | 462.7673        |
| 938.4869       | 8  | P  | 8  | 811.4426       | 406.2252        |
| 1035.5397      | 9  | P  | 7  | 714.3899       | 357.6988        |
| 1106.5768      | 10 | A  | 6  | 617.3371       | 309.1725        |
| 1207.6244      | 11 | T  | 5  | 546.3000       | 273.6539        |
| 1306.6929      | 12 | V  | 4  | 445.2523       | 223.1301        |
| 1363.7143      | 13 | G  | 3  | 346.1839       | 173.5959        |
| 1477.7573      | 14 | N  | 2  | 289.1624       | 145.0851        |
|                | 15 | R  | 1  | 175.1195       | 88.0637         |

N-term:+35.07 C(1):+160.03

X-range:

0 - 0

MassTol: Y-zoom:

0. 1.

MassType:

☐AVG ☒MONO

Axis:

☒1 ☐2

Label:

☒I ☐M ☐-

Ions:

a ☐+ ☐2+ ☐3+

b ☒+ ☐2+ ☐3+

c ☐+ ☐2+ ☐3+

x ☐+ ☐2+ ☐3+

y ☒+ ☒2+ ☐3+

z ☐+ ☐2+ ☐3+

hide H<sub>2</sub>O/NH<sub>3</sub> ☐

zoom 112-122 ☐

GO

CEIGYELDR, MH+ 1182.5464, m/z 591.7769  
L OS G14 P120811 220811-s1.04004.04004.2.dta

scan 4004; 7.7e+000

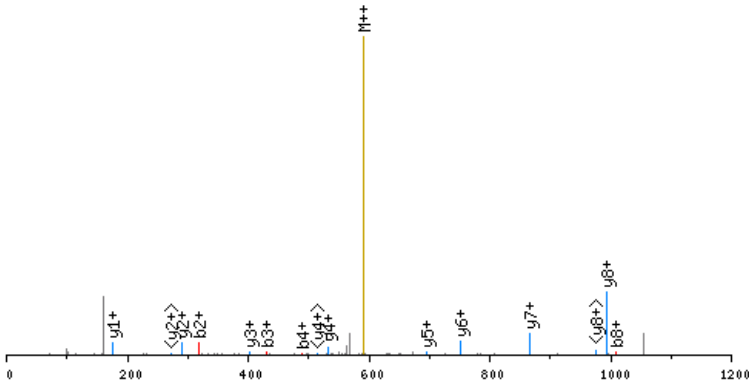

click image to zoom in; click top corners to zoom out

[precursor±]

scan 4001; 591.8 m/z; 7.0e+000

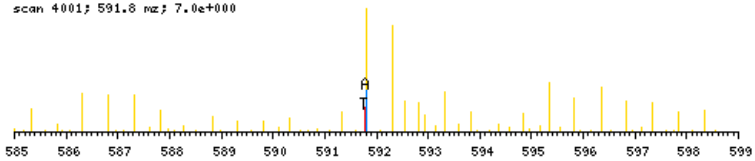

zoomed in precursor plot; T=theoretical m/z, A=acquired m/z

| b <sup>+</sup> | # | AA | # | y <sup>+</sup> | y <sup>2+</sup> |
|----------------|---|----|---|----------------|-----------------|
| 189.0697       | 1 | C  | 9 |                |                 |
| 318.1123       | 2 | E  | 8 | 994.4846       | 497.7462        |
| 431.1964       | 3 | I  | 7 | 865.4420       | 433.2249        |
| 488.2178       | 4 | G  | 6 | 752.3579       | 376.6829        |
| 651.2811       | 5 | Y  | 5 | 695.3364       | 348.1721        |
| 780.3237       | 6 | E  | 4 | 532.2731       | 266.6405        |
| 893.4078       | 7 | L  | 3 | 403.2305       | 202.1192        |
| 1008.4347      | 8 | D  | 2 | 290.1464       | 145.5771        |
|                | 9 | R  | 1 | 175.1195       | 88.0637         |

N-term:+29.04 C(1):+160.03

X-range:

0 - 0

MassTol: Y-zoom:

0. 1.

MassType:

☐AVG ☒MONO

Axis:

☒1 ☐2

Label:

☒I ☐M ☐-

Ions:

a ☐+ ☐2+ ☐3+

b ☒+ ☐2+ ☐3+

c ☐+ ☐2+ ☐3+

x ☐+ ☐2+ ☐3+

y ☒+ ☒2+ ☐3+

z ☐+ ☐2+ ☐3+

hide H<sub>2</sub>O/NH<sub>3</sub> ☐

zoom 112-122 ☐

GO

CFLHLPR, MH+ 976.5614, m/z 488.7843  
H OS G14 P120811 220811-s1.05895.05895.2.dta

scan 5895; 5.4e+000

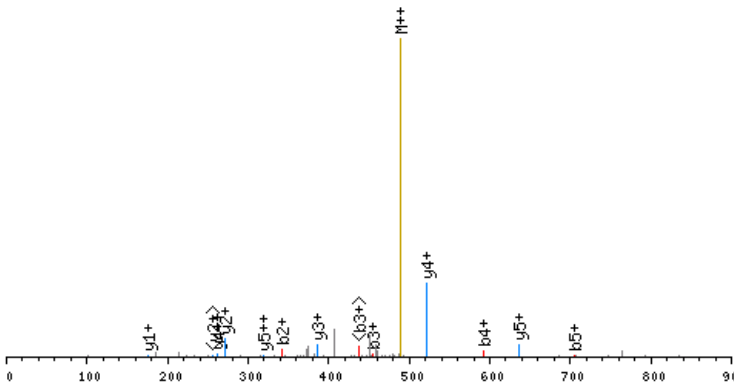

click image to zoom in; click top corners to zoom out [precursor±]

scan 5891; 488.8 m/z; 2.6e+000

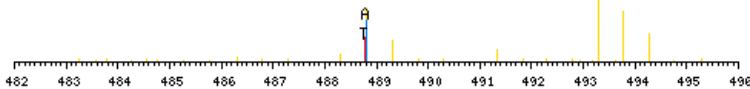

zoomed in precursor plot; T=theoretical m/z, A=acquired m/z

| b <sup>+</sup> | # | AA | # | y <sup>+</sup> | y <sup>2+</sup> |
|----------------|---|----|---|----------------|-----------------|
| 195.1015       | 1 | C  | 7 |                |                 |
| 342.1699       | 2 | F  | 6 | 782.4677       | 391.7378        |
| 455.2540       | 3 | L  | 5 | 635.3993       | 318.2036        |
| 592.3129       | 4 | H  | 4 | 522.3152       | 261.6615        |
| 705.3970       | 5 | L  | 3 | 385.2563       | 193.1321        |
| 802.4497       | 6 | P  | 2 | 272.1723       | 136.5900        |
|                | 7 | R  | 1 | 175.1195       | 88.0637         |

N-term:+35.07 C(1):+160.03

N-term:+29.04 C(1):+160.03

X-range:

0 - 0

MassTol: Y-zoom:

0. 1.

MassType:

☐AVG ☒MONO

Axis:

☒1 ☐2

Label:

☒I ☐M ☐-

Ions:

a ☐+ ☐2+ ☐3+

b ☒+ ☐2+ ☐3+

c ☐+ ☐2+ ☐3+

x ☐+ ☐2+ ☐3+

y ☒+ ☒2+ ☐3+

z ☐+ ☐2+ ☐3+

hide H<sub>2</sub>O/NH<sub>3</sub> ☐

zoom 112-122 ☐

GO

CKAADKDTCTFSTEGPNLVTR, MH+ 2354.1484, m/z 589.2926  
L OS G17 P120811 220811-s1.03739.03739.4.dta

scan 3739; 2.9e+000

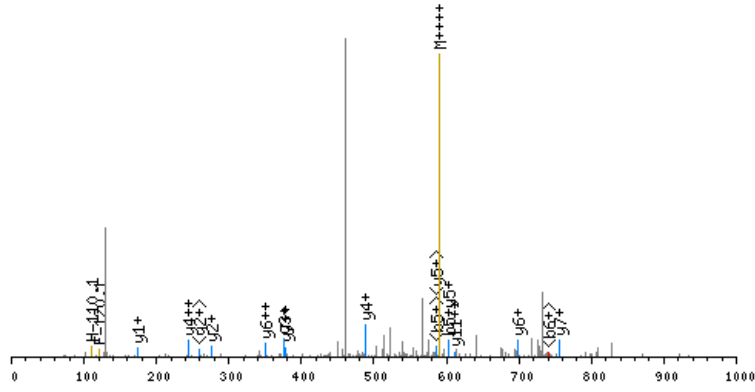

click image to zoom in; click top corners to zoom out [precursor±]

scan 3738; 589.3 m/z; 3.0e+001

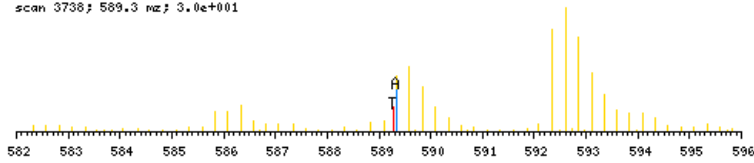

zoomed in precursor plot; T=theoretical m/z, A=acquired m/z

| b <sup>+</sup> | #  | AA | #  | y <sup>+</sup> | y <sup>2+</sup> |
|----------------|----|----|----|----------------|-----------------|
| 189.0697       | 1  | C  | 20 |                |                 |
| 345.1960       | 2  | K  | 19 | 2166.0865      | 1083.5472       |
| 416.2331       | 3  | A  | 18 | 2009.9602      | 1005.4840       |
| 487.2702       | 4  | A  | 17 | 1938.9231      | 969.9655        |
| 602.2972       | 5  | D  | 16 | 1867.8860      | 934.4469        |
| 758.4235       | 6  | K  | 15 | 1752.8590      | 876.9334        |
| 873.4504       | 7  | D  | 14 | 1596.7327      | 798.8703        |
| 974.4981       | 8  | T  | 13 | 1481.7058      | 741.3568        |
| 1134.5287      | 9  | C  | 12 | 1380.6581      | 690.8330        |
| 1281.5971      | 10 | F  | 11 | 1220.6275      | 610.8177        |
| 1368.6291      | 11 | S  | 10 | 1073.5591      | 537.2835        |
| 1469.6768      | 12 | T  | 9  | 986.5271       | 493.7675        |
| 1598.7194      | 13 | E  | 8  | 885.4794       | 443.2436        |
| 1655.7409      | 14 | G  | 7  | 756.4368       | 378.7223        |
| 1752.7936      | 15 | P  | 6  | 699.4153       | 350.2116        |
| 1866.8366      | 16 | N  | 5  | 602.3626       | 301.6852        |
| 1979.9206      | 17 | L  | 4  | 488.3197       | 244.6637        |
| 2078.9890      | 18 | V  | 3  | 375.2356       | 188.1217        |
| 2180.0367      | 19 | T  | 2  | 276.1672       | 138.5875        |
|                | 20 | R  | 1  | 175.1195       | 88.0637         |

N-term:+29.04 C(1):+160.03  
K(2):+156.13 K(6):+156.13 C(9):+160.03

X-range:

0 - 0

MassTol: Y-zoom:

0. 1.

MassType:

☐ AVG ☒ MONO

Axis:

☒ 1 ☐ 2

Label:

☒ I ☐ M ☐ -

Ions:

a ☐ + ☐ 2+ ☐ 3+

b ☒ + ☐ 2+ ☐ 3+

c ☐ + ☐ 2+ ☐ 3+

x ☐ + ☐ 2+ ☐ 3+

y ☒ + ☒ 2+ ☐ 3+

z ☐ + ☐ 2+ ☐ 3+

hide H<sub>2</sub>O/NH<sub>3</sub> ☐

zoom 112-122 ☐

GO

CSPDPGLTALLSDHR, MH+ 1666.8222, m/z 556.2789  
L OS G15 P120811 220811-s1.05179.05179.3.dta

scan 5179; 1.5e+000

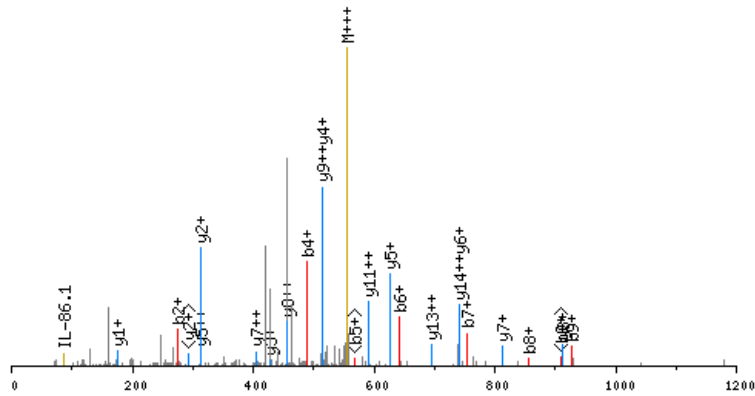

click image to zoom in; click top corners to zoom out [\[precursor±\]](#)

scan 5176; 556.3 m/z; 1.4e+001

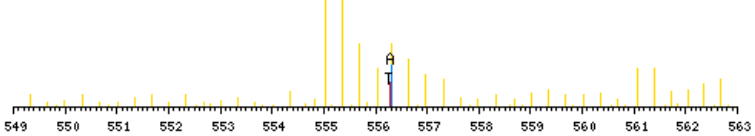

zoomed in precursor plot; T=theoretical m/z, A=acquired m/z

| b <sup>+</sup> | #  | AA | #  | y <sup>+</sup> | y <sup>2+</sup> |
|----------------|----|----|----|----------------|-----------------|
| 189.0697       | 1  | C  | 15 |                |                 |
| 276.1017       | 2  | S  | 14 | 1478.7603      | 739.8841        |
| 373.1545       | 3  | P  | 13 | 1391.7283      | 696.3681        |
| 488.1814       | 4  | D  | 12 | 1294.6755      | 647.8417        |
| 585.2342       | 5  | P  | 11 | 1179.6486      | 590.3282        |
| 642.2557       | 6  | G  | 10 | 1082.5958      | 541.8018        |
| 755.3397       | 7  | L  | 9  | 1025.5744      | 513.2911        |
| 856.3874       | 8  | T  | 8  | 912.4903       | 456.7491        |
| 927.4245       | 9  | A  | 7  | 811.4426       | 406.2252        |
| 1040.5086      | 10 | L  | 6  | 740.4055       | 370.7067        |
| 1153.5926      | 11 | L  | 5  | 627.3214       | 314.1646        |
| 1240.6247      | 12 | S  | 4  | 514.2374       | 257.6226        |
| 1355.6516      | 13 | D  | 3  | 427.2054       | 214.1066        |
| 1492.7105      | 14 | H  | 2  | 312.1784       | 156.5931        |
|                | 15 | R  | 1  | 175.1195       | 88.0637         |

N-term:+29.04 C(1):+160.03

X-range:

0 - 0

MassTol: Y-zoom:

0. 1.

MassType:

☐AVG ☒MONO

Axis:

☒1 ☐2

Label:

☒I ☐M ☐-

Ions:

a ☐+ ☐2+ ☐3+

b ☒+ ☐2+ ☐3+

c ☐+ ☐2+ ☐3+

x ☐+ ☐2+ ☐3+

y ☒+ ☒2+ ☐3+

z ☐+ ☐2+ ☐3+

hide H<sub>2</sub>O/NH<sub>3</sub> ☐

zoom 112-122 ☐

GO

CTSIITEDEKGHLLHGR, MH+ 2022.0442, m/z 506.2665  
L OS G18 P120811 220811-s1.03887.03887.4.dta

scan 3887; 8.8e+000

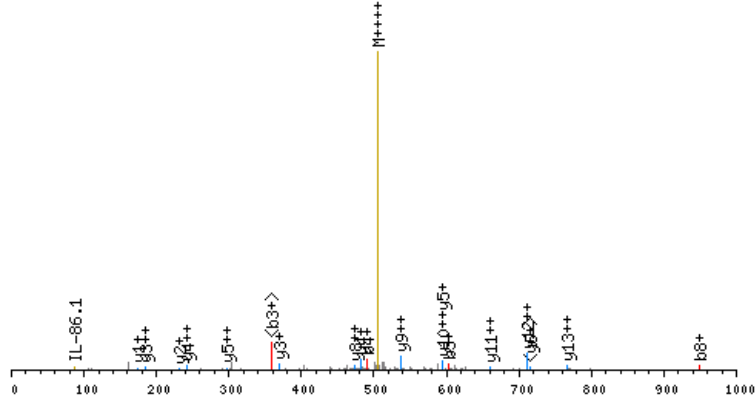

click image to zoom in; click top corners to zoom out [\[precursor±\]](#)

scan 3886; 506.3 m/z; 2.1e+001

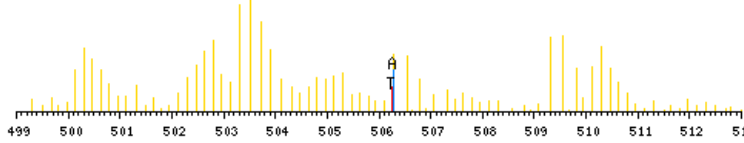

zoomed in precursor plot; T=theoretical m/z, A=acquired m/z

| b <sup>+</sup> | #  | AA | #  | y <sup>+</sup> | y <sup>2+</sup> |
|----------------|----|----|----|----------------|-----------------|
| 189.0697       | 1  | C  | 17 |                |                 |
| 290.1174       | 2  | T  | 16 | 1833.9823      | 917.4951        |
| 377.1494       | 3  | S  | 15 | 1732.9346      | 866.9712        |
| 490.2335       | 4  | I  | 14 | 1645.9026      | 823.4552        |
| 603.3175       | 5  | I  | 13 | 1532.8186      | 766.9132        |
| 704.3652       | 6  | T  | 12 | 1419.7345      | 710.3712        |
| 833.4078       | 7  | E  | 11 | 1318.6868      | 659.8473        |
| 948.4347       | 8  | D  | 10 | 1189.6442      | 595.3260        |
| 1077.4773      | 9  | E  | 9  | 1074.6173      | 537.8125        |
| 1233.6036      | 10 | K  | 8  | 945.5747       | 473.2913        |
| 1290.6251      | 11 | G  | 7  | 789.4484       | 395.2281        |
| 1427.6840      | 12 | H  | 6  | 732.4269       | 366.7174        |
| 1540.7681      | 13 | L  | 5  | 595.3680       | 298.1879        |
| 1653.8521      | 14 | L  | 4  | 482.2839       | 241.6459        |
| 1790.9111      | 15 | H  | 3  | 369.1999       | 185.1039        |
| 1847.9325      | 16 | G  | 2  | 232.1410       | 116.5744        |
|                | 17 | R  | 1  | 175.1195       | 88.0637         |

N-term:+29.04 C(1):+160.03  
K(10):+156.13

X-range:

0 - 0

MassTol: Y-zoom:

0. 1.

MassType:

☐ AVG ☒ MONO

Axis:

☒ 1 ☐ 2

Label:

☒ I ☐ M ☐ -

Ions:

a ☐ + ☐ 2+ ☐ 3+

b ☒ + ☐ 2+ ☐ 3+

c ☐ + ☐ 2+ ☐ 3+

x ☐ + ☐ 2+ ☐ 3+

y ☒ + ☒ 2+ ☐ 3+

z ☐ + ☐ 2+ ☐ 3+

hide H<sub>2</sub>O/NH<sub>3</sub> ☐

zoom 112-122 ☐

GO

CVIGGDGSLTGANIFR, MH+ 1664.8429, m/z 555.6192  
L OS G13 P120811 220811-s1.06228.06228.3.dta

scan 6228; 7.6e-001

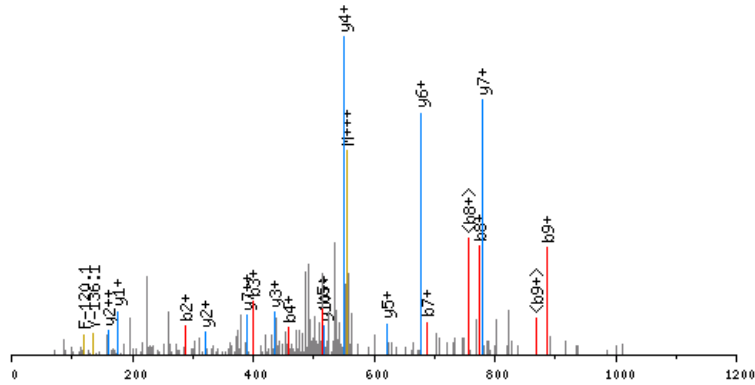

click image to zoom in; click top corners to zoom out

[precursor±]

scan 6224; 555.6 m/z; 2.0e+001

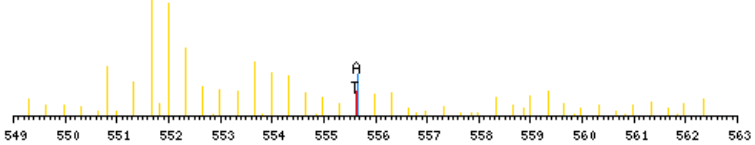

zoomed in precursor plot; T=theoretical m/z, A=acquired m/z

| b <sup>+</sup> | #  | AA | #  | y <sup>+</sup> | y <sup>2+</sup> |
|----------------|----|----|----|----------------|-----------------|
| 189.0697       | 1  | C  | 16 |                |                 |
| 288.1381       | 2  | V  | 15 | 1476.7811      | 738.8944        |
| 401.2222       | 3  | I  | 14 | 1377.7127      | 689.3602        |
| 458.2436       | 4  | G  | 13 | 1264.6286      | 632.8182        |
| 515.2651       | 5  | G  | 12 | 1207.6071      | 604.3075        |
| 630.2920       | 6  | D  | 11 | 1150.5857      | 575.7967        |
| 687.3135       | 7  | G  | 10 | 1035.5587      | 518.2833        |
| 774.3455       | 8  | S  | 9  | 978.5373       | 489.7725        |
| 887.4296       | 9  | L  | 8  | 891.5052       | 446.2565        |
| 988.4773       | 10 | T  | 7  | 778.4212       | 389.7145        |
| 1045.4987      | 11 | G  | 6  | 677.3735       | 339.1907        |
| 1116.5359      | 12 | A  | 5  | 620.3520       | 310.6799        |
| 1230.5788      | 13 | N  | 4  | 549.3149       | 275.1614        |
| 1343.6629      | 14 | I  | 3  | 435.2720       | 218.1399        |
| 1490.7313      | 15 | F  | 2  | 322.1879       | 161.5979        |
|                | 16 | R  | 1  | 175.1195       | 88.0637         |

N-term:+29.04 C(1):+160.03

X-range:

0 - 0

MassTol: Y-zoom:

0. 1.

MassType:

☐AVG ☒MONO

Axis:

☒1 ☐2

Label:

☒I ☐M ☐-

Ions:

a ☐+ ☐2+ ☐3+

b ☒+ ☐2+ ☐3+

c ☐+ ☐2+ ☐3+

x ☐+ ☐2+ ☐3+

y ☒+ ☒2+ ☐3+

z ☐+ ☐2+ ☐3+

hide H<sub>2</sub>O/NH<sub>3</sub> ☐

zoom 112-122 ☐

GO

CVTDISHLVR, MH+ 1227.6519, m/z 409.8888  
L OS G16 P120811 220811-s1.04549.04549.3.dta

scan 4549; 1.5e+001

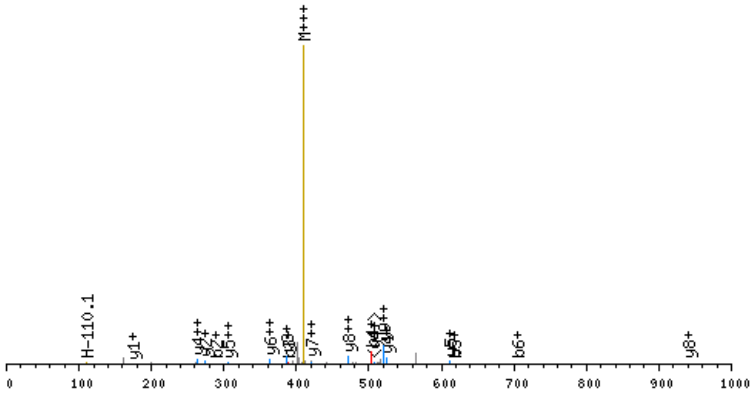

click image to zoom in; click top corners to zoom out

[precursor±]

scan 4548; 409.9 m/z; 7.5e+000

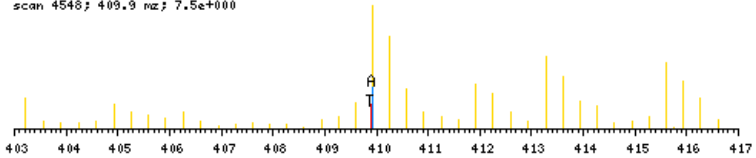

zoomed in precursor plot; T=theoretical m/z, A=acquired m/z

| b <sup>+</sup> | #  | AA | #  | y <sup>+</sup> | y <sup>2+</sup> |
|----------------|----|----|----|----------------|-----------------|
| 189.0697       | 1  | C  | 10 |                |                 |
| 288.1381       | 2  | V  | 9  | 1039.5900      | 520.2989        |
| 389.1858       | 3  | T  | 8  | 940.5216       | 470.7647        |
| 504.2127       | 4  | D  | 7  | 839.4739       | 420.2409        |
| 617.2968       | 5  | I  | 6  | 724.4470       | 362.7274        |
| 704.3288       | 6  | S  | 5  | 611.3629       | 306.1854        |
| 841.3877       | 7  | H  | 4  | 524.3309       | 262.6694        |
| 954.4718       | 8  | L  | 3  | 387.2720       | 194.1399        |
| 1053.5402      | 9  | V  | 2  | 274.1879       | 137.5979        |
|                | 10 | R  | 1  | 175.1195       | 88.0637         |

N-term:+29.04 C(1):+160.03

X-range:

0 - 0

MassTol: Y-zoom:

0. 1.

MassType:

☐ AVG ☒ MONO

Axis:

☒ 1 ☐ 2

Label:

☒ I ☐ M ☐ -

Ions:

a ☐ + ☐ 2+ ☐ 3+

b ☒ + ☐ 2+ ☐ 3+

c ☐ + ☐ 2+ ☐ 3+

x ☐ + ☐ 2+ ☐ 3+

y ☒ + ☒ 2+ ☐ 3+

z ☐ + ☐ 2+ ☐ 3+

hide H<sub>2</sub>O/NH<sub>3</sub> ☐

zoom 112-122 ☐

GO

DAGEFVDLYVPR, MH+ 1408.7112, m/z 470.2419  
L OS G13 P120811 220811-s1.06612.06612.3.dta

scan 6612; 2.5e+000

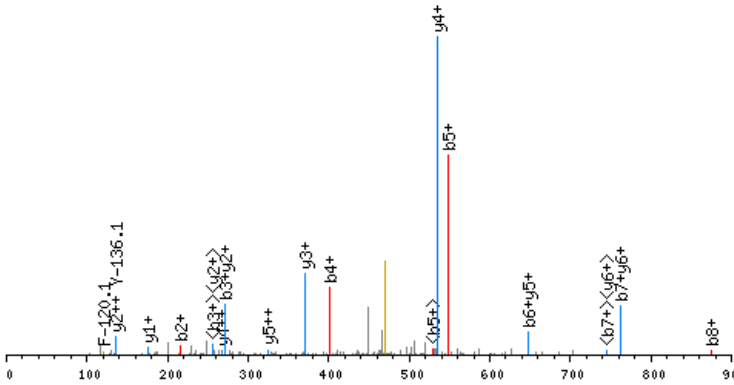

click image to zoom in; click top corners to zoom out

[precursor±]

scan 6609; 470.2 m/z; 1.8e+000

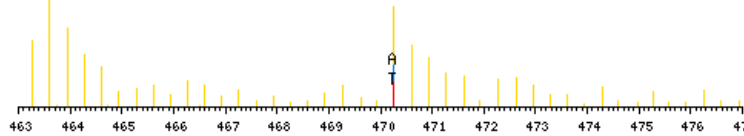

zoomed in precursor plot; T=theoretical m/z, A=acquired m/z

| b <sup>+</sup> | #  | AA | #  | y <sup>+</sup> | y <sup>2+</sup> |
|----------------|----|----|----|----------------|-----------------|
| 144.0660       | 1  | D  | 12 |                |                 |
| 215.1032       | 2  | A  | 11 | 1265.6530      | 633.3304        |
| 272.1246       | 3  | G  | 10 | 1194.6159      | 597.8119        |
| 401.1672       | 4  | E  | 9  | 1137.5944      | 569.3011        |
| 548.2356       | 5  | F  | 8  | 1008.5518      | 504.7798        |
| 647.3040       | 6  | V  | 7  | 861.4834       | 431.2456        |
| 762.3310       | 7  | D  | 6  | 762.4150       | 381.7114        |
| 875.4150       | 8  | L  | 5  | 647.3881       | 324.1979        |
| 1038.4784      | 9  | Y  | 4  | 534.3040       | 267.6559        |
| 1137.5468      | 10 | V  | 3  | 371.2407       | 186.1243        |
| 1234.5996      | 11 | P  | 2  | 272.1723       | 136.5900        |
|                | 12 | R  | 1  | 175.1195       | 88.0637         |

N-term:+29.04

N-term: +29.04

X-range:

0 - 0

MassTol: Y-zoom:

0. 1.

MassType:

☐AVG ☒MONO

Axis:

☒1 ☐2

Label:

☒I ☐M ☐-

Ions:

a ☐+ ☐2+ ☐3+

b ☒+ ☐2+ ☐3+

c ☐+ ☐2+ ☐3+

x ☐+ ☐2+ ☐3+

y ☒+ ☒2+ ☐3+

z ☐+ ☐2+ ☐3+

hide H<sub>2</sub>O/NH<sub>3</sub> ☐

zoom 112-122 ☐

GO

DAVERPRPPPPGPGPPWSPR, MH+ 2196.1890, m/z 549.8027  
H OS G17 P120811 220811-s1.01905.01905.4.dta

scan 1905; 2.0e+000

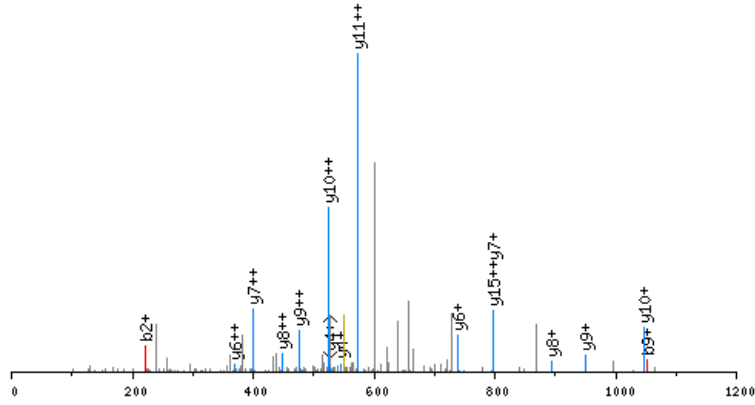

click image to zoom in; click top corners to zoom out [\[precursor±\]](#)

scan 1903; 549.8 m/z; 3.3e+000

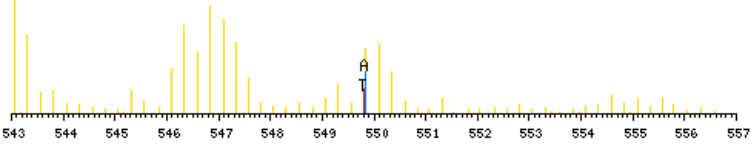

zoomed in precursor plot; T=theoretical m/z, A=acquired m/z

| b <sup>+</sup> | #  | AA | #  | y <sup>+</sup> | y <sup>2+</sup> |
|----------------|----|----|----|----------------|-----------------|
| 150.0978       | 1  | D  | 20 |                |                 |
| 221.1350       | 2  | A  | 19 | 2047.0990      | 1024.0534       |
| 320.2034       | 3  | V  | 18 | 1976.0619      | 988.5348        |
| 449.2460       | 4  | E  | 17 | 1876.9935      | 939.0006        |
| 605.3471       | 5  | R  | 16 | 1747.9509      | 874.4793        |
| 702.3998       | 6  | P  | 15 | 1591.8498      | 796.4288        |
| 858.5009       | 7  | R  | 14 | 1494.7970      | 747.9024        |
| 955.5537       | 8  | P  | 13 | 1338.6959      | 669.8519        |
| 1052.6065      | 9  | P  | 12 | 1241.6431      | 621.3255        |
| 1149.6592      | 10 | P  | 11 | 1144.5904      | 572.7991        |
| 1246.7120      | 11 | P  | 10 | 1047.5376      | 524.2727        |
| 1303.7335      | 12 | G  | 9  | 950.4848       | 475.7463        |
| 1400.7862      | 13 | P  | 8  | 893.4634       | 447.2356        |
| 1457.8077      | 14 | G  | 7  | 796.4106       | 398.7092        |
| 1554.8605      | 15 | P  | 6  | 739.3891       | 370.1985        |
| 1651.9132      | 16 | P  | 5  | 642.3364       | 321.6721        |
| 1837.9925      | 17 | W  | 4  | 545.2836       | 273.1457        |
| 1925.0246      | 18 | S  | 3  | 359.2043       | 180.1061        |
| 2022.0773      | 19 | P  | 2  | 272.1723       | 136.5900        |
|                | 20 | R  | 1  | 175.1195       | 88.0637         |

N-term:+35.07

X-range:

0 - 0

MassTol: Y-zoom:

0. 1.

MassType:

☐ AVG ☒ MONO

Axis:

☒ 1 ☐ 2

Label:

☒ I ☐ M ☐ -

Ions:

a ☐ + ☐ 2+ ☐ 3+

b ☒ + ☐ 2+ ☐ 3+

c ☐ + ☐ 2+ ☐ 3+

x ☐ + ☐ 2+ ☐ 3+

y ☒ + ☒ 2+ ☐ 3+

z ☐ + ☐ 2+ ☐ 3+

hide H<sub>2</sub>O/NH<sub>3</sub> ☐

zoom 112-122 ☐

GO

DCILPPTRPTDKPLR, MH+ 1847.0849, m/z 462.5267  
H OS G17 P120811 220811-s1.03775.03775.4.dta

scan 3775; 1.4e+001

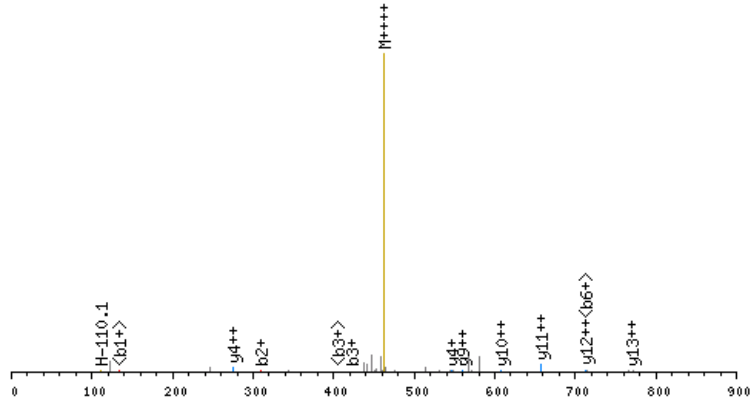

click image to zoom in; click top corners to zoom out [\[precursor±\]](#)

scan 3773; 462.5 m/z; 1.2e+001

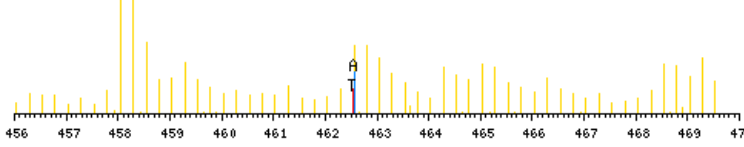

zoomed in precursor plot; T=theoretical m/z, A=acquired m/z

| b <sup>+</sup> | #  | AA | #  | y <sup>+</sup> | y <sup>2+</sup> |
|----------------|----|----|----|----------------|-----------------|
| 150.0978       | 1  | D  | 15 |                |                 |
| 310.1284       | 2  | C  | 14 | 1697.9949      | 849.5013        |
| 423.2125       | 3  | I  | 13 | 1537.9643      | 769.4860        |
| 536.2966       | 4  | L  | 12 | 1424.8802      | 712.9440        |
| 633.3493       | 5  | P  | 11 | 1311.7961      | 656.4020        |
| 730.4021       | 6  | P  | 10 | 1214.7434      | 607.8756        |
| 831.4498       | 7  | T  | 9  | 1117.6906      | 559.3492        |
| 987.5509       | 8  | R  | 8  | 1016.6429      | 508.8254        |
| 1084.6037      | 9  | P  | 7  | 860.5418       | 430.7748        |
| 1185.6513      | 10 | T  | 6  | 763.4891       | 382.2484        |
| 1300.6783      | 11 | D  | 5  | 662.4414       | 331.7246        |
| 1462.8364      | 12 | K  | 4  | 547.4144       | 274.2111        |
| 1559.8891      | 13 | P  | 3  | 385.2563       | 193.1321        |
| 1672.9732      | 14 | L  | 2  | 288.2036       | 144.6057        |
|                | 15 | R  | 1  | 175.1195       | 88.0637         |

N-term:+35.07 C(2):+160.03  
K(12):+162.16

X-range:

0 - 0

MassTol: Y-zoom:

0. 1.

MassType:

☐ AVG ☒ MONO

Axis:

☒ 1 ☐ 2

Label:

☒ I ☐ M ☐ -

Ions:

a ☐ + ☐ 2+ ☐ 3+

b ☒ + ☐ 2+ ☐ 3+

c ☐ + ☐ 2+ ☐ 3+

x ☐ + ☐ 2+ ☐ 3+

y ☒ + ☒ 2+ ☐ 3+

z ☐ + ☐ 2+ ☐ 3+

hide H<sub>2</sub>O/NH<sub>3</sub> ☐

zoom 112-122 ☐

GO

DCPCSEAALCQPIR, MH+ 1710.7824, m/z 570.9323  
H OS G13 P120811 220811-s1.03953.03953.3.dta

scan 3953; 1.2e+000

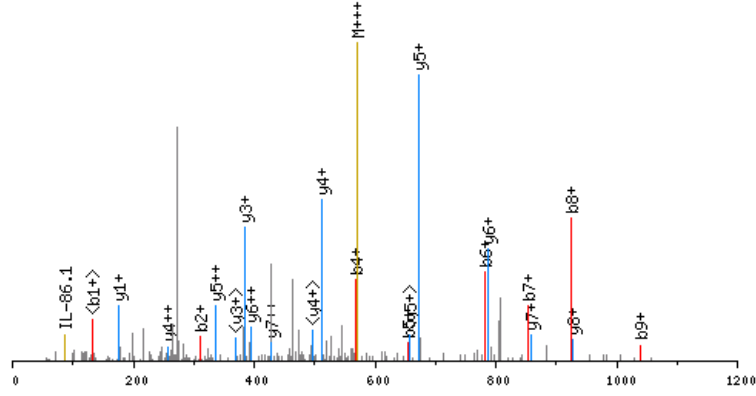

click image to zoom in; click top corners to zoom out [\[precursor±\]](#)

scan 3949; 570.9 m/z; 1.6e+001

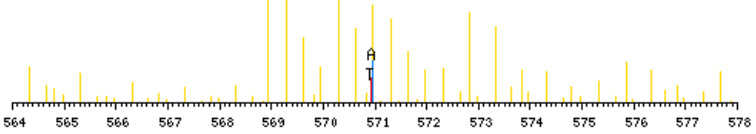

zoomed in precursor plot; T=theoretical m/z, A=acquired m/z

| b <sup>+</sup> | #  | AA | #  | y <sup>+</sup> | y <sup>2+</sup> |
|----------------|----|----|----|----------------|-----------------|
| 150.0978       | 1  | D  | 14 |                |                 |
| 310.1284       | 2  | C  | 13 | 1561.6924      | 781.3501        |
| 407.1812       | 3  | P  | 12 | 1401.6618      | 701.3348        |
| 567.2118       | 4  | C  | 11 | 1304.6090      | 652.8084        |
| 654.2438       | 5  | S  | 10 | 1144.5784      | 572.7931        |
| 783.2864       | 6  | E  | 9  | 1057.5464      | 529.2771        |
| 854.3235       | 7  | A  | 8  | 928.5038       | 464.7558        |
| 925.3607       | 8  | A  | 7  | 857.4667       | 429.2373        |
| 1038.4447      | 9  | L  | 6  | 786.4296       | 393.7187        |
| 1198.4753      | 10 | C  | 5  | 673.3455       | 337.1767        |
| 1326.5339      | 11 | Q  | 4  | 513.3149       | 257.1614        |
| 1423.5867      | 12 | P  | 3  | 385.2563       | 193.1321        |
| 1536.6707      | 13 | I  | 2  | 288.2036       | 144.6057        |
|                | 14 | R  | 1  | 175.1195       | 88.0637         |

N-term:+35.07 C(2):+160.03  
C(4):+160.03 C(10):+160.03

X-range:

0 - 0

MassTol: Y-zoom:

0. 1.

MassType:

☐AVG ☒MONO

Axis:

☒1 ☐2

Label:

☒I ☐M ☐-

Ions:

a ☐+ ☐2+ ☐3+

b ☒+ ☐2+ ☐3+

c ☐+ ☐2+ ☐3+

x ☐+ ☐2+ ☐3+

y ☒+ ☒2+ ☐3+

z ☐+ ☐2+ ☐3+

hide H<sub>2</sub>O/NH<sub>3</sub> ☐

zoom 112-122 ☐

GO

DDEVAPDAAAENCLAER, MH+ 1873.8237, m/z 625.2794  
L OS G12 P120811 220811-s1.03389.03389.3.dta

scan 3389; 2.1e+000

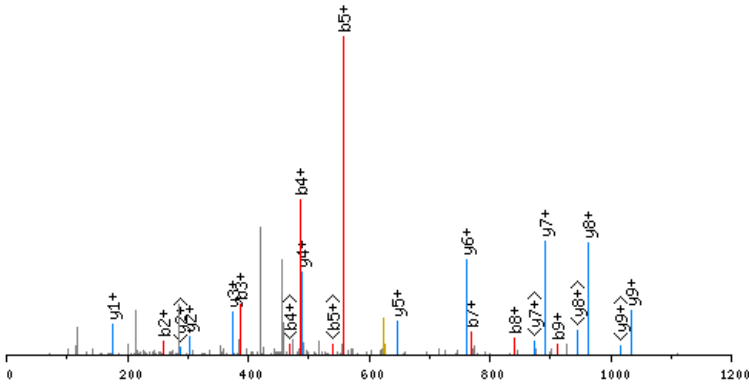

click image to zoom in; click top corners to zoom out

[precursor±]

scan 3387; 625.3 m/z; 3.3e+000

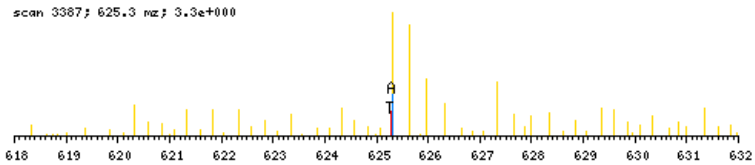

zoomed in precursor plot; T=theoretical m/z, A=acquired m/z

| b <sup>+</sup> | #  | AA | #  | y <sup>+</sup> | y <sup>2+</sup> |
|----------------|----|----|----|----------------|-----------------|
| 144.0660       | 1  | D  | 17 |                |                 |
| 259.0930       | 2  | D  | 16 | 1730.7655      | 865.8867        |
| 388.1356       | 3  | E  | 15 | 1615.7386      | 808.3732        |
| 487.2040       | 4  | V  | 14 | 1486.6960      | 743.8519        |
| 558.2411       | 5  | A  | 13 | 1387.6276      | 694.3177        |
| 655.2939       | 6  | P  | 12 | 1316.5904      | 658.7991        |
| 770.3208       | 7  | D  | 11 | 1219.5377      | 610.2728        |
| 841.3579       | 8  | A  | 10 | 1104.5107      | 552.7593        |
| 912.3950       | 9  | A  | 9  | 1033.4736      | 517.2407        |
| 983.4322       | 10 | A  | 8  | 962.4365       | 481.7222        |
| 1112.4747      | 11 | E  | 7  | 891.3994       | 446.2036        |
| 1226.5177      | 12 | N  | 6  | 762.3568       | 381.6823        |
| 1386.5483      | 13 | C  | 5  | 648.3139       | 324.6608        |
| 1499.6323      | 14 | L  | 4  | 488.2833       | 244.6455        |
| 1570.6695      | 15 | A  | 3  | 375.1992       | 188.1035        |
| 1699.7120      | 16 | E  | 2  | 304.1621       | 152.5850        |
|                | 17 | R  | 1  | 175.1195       | 88.0637         |

N-term:+29.04 C(13):+160.03

N-term: +29.04 K(16) : +156.13

X-range:

0 - 0

MassTol: Y-zoom:

0. 1.

MassType:

☐ AVG ☒ MONO

Axis:

☒ 1 ☐ 2

Label:

☒ I ☐ M ☐ -

Ions:

a ☐ + ☐ 2+ ☐ 3+

b ☒ + ☐ 2+ ☐ 3+

c ☐ + ☐ 2+ ☐ 3+

x ☐ + ☐ 2+ ☐ 3+

y ☒ + ☒ 2+ ☐ 3+

z ☐ + ☐ 2+ ☐ 3+

hide H<sub>2</sub>O/NH<sub>3</sub> ☐

zoom 112-122 ☐

GO

DDMAAAMKAVTEQGHELSNEER, MH+ 2488.1448, m/z 622.7917  
L OS G16 P120811 220811-s1.05710.05710.4.dta

scan 5710; 2.0e+000

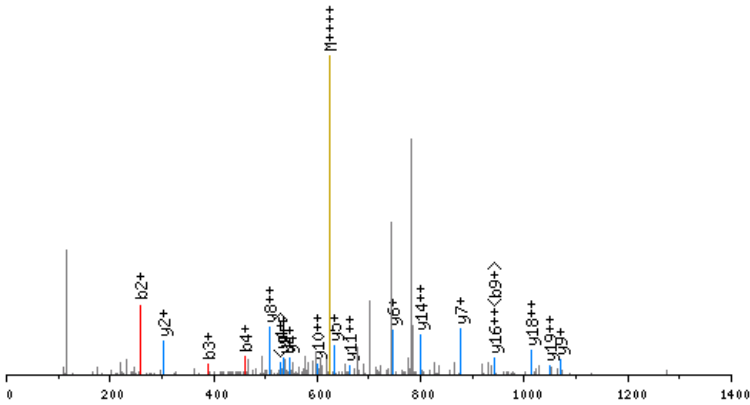

click image to zoom in; click top corners to zoom out [precursor±]

scan 5708; 622.8 m/z; 8.6e+000

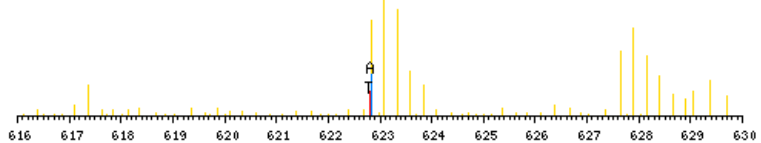

zoomed in precursor plot; T=theoretical m/z, A=acquired m/z

| b <sup>+</sup> | #  | AA | #  | y <sup>+</sup> | y <sup>2+</sup> |
|----------------|----|----|----|----------------|-----------------|
| 144.0660       | 1  | D  | 22 |                |                 |
| 259.0930       | 2  | D  | 21 | 2345.0866      | 1173.0472       |
| 390.1335       | 3  | M  | 20 | 2230.0597      | 1115.5337       |
| 461.1706       | 4  | A  | 19 | 2099.0192      | 1050.0135       |
| 532.2077       | 5  | A  | 18 | 2027.9821      | 1014.4949       |
| 603.2448       | 6  | A  | 17 | 1956.9450      | 978.9764        |
| 734.2853       | 7  | M  | 16 | 1885.9078      | 943.4578        |
| 890.4116       | 8  | K  | 15 | 1754.8674      | 877.9376        |
| 961.4487       | 9  | A  | 14 | 1598.7411      | 799.8744        |
| 1060.5171      | 10 | V  | 13 | 1527.7039      | 764.3559        |
| 1161.5648      | 11 | T  | 12 | 1428.6355      | 714.8217        |
| 1290.6074      | 12 | E  | 11 | 1327.5878      | 664.2978        |
| 1418.6660      | 13 | Q  | 10 | 1198.5453      | 599.7765        |
| 1475.6874      | 14 | G  | 9  | 1070.4867      | 535.7473        |
| 1612.7463      | 15 | H  | 8  | 1013.4652      | 507.2365        |
| 1741.7889      | 16 | E  | 7  | 876.4063       | 438.7071        |
| 1854.8730      | 17 | L  | 6  | 747.3637       | 374.1858        |
| 1941.9050      | 18 | S  | 5  | 634.2796       | 317.6437        |
| 2055.9480      | 19 | N  | 4  | 547.2476       | 274.1277        |
| 2184.9906      | 20 | E  | 3  | 433.2047       | 217.1063        |
| 2314.0331      | 21 | E  | 2  | 304.1621       | 152.5850        |
|                | 22 | R  | 1  | 175.1195       | 88.0637         |

N-term:+29.04 K(8):+156.13

X-range:

0 - 0

MassTol: Y-zoom:

0. 1.

MassType:

☐ AVG ☒ MONO

Axis:

☒ 1 ☐ 2

Label:

☒ I ☐ M ☐ -

Ions:

a ☐ + ☐ 2+ ☐ 3+

b ☒ + ☐ 2+ ☐ 3+

c ☐ + ☐ 2+ ☐ 3+

x ☐ + ☐ 2+ ☐ 3+

y ☒ + ☒ 2+ ☐ 3+

z ☐ + ☐ 2+ ☐ 3+

hide H<sub>2</sub>O/NH<sub>3</sub> ☐

zoom 112-122 ☐

GO

DDMAACMKSVTEQGAELSNEER, MH+ 2527.1114, m/z 632.5333  
L OS G14 P120811 220811-s1.05398.05398.4.dta

scan 5398; 6.3e-001

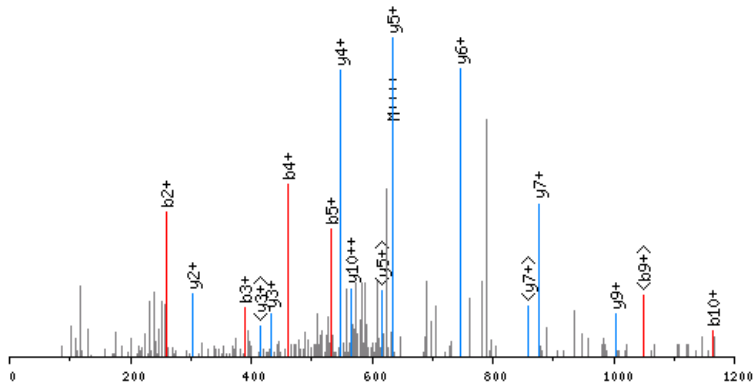

click image to zoom in; click top corners to zoom out

[precursor±]

scan 5396; 632.5 m/z; 3.9e+000

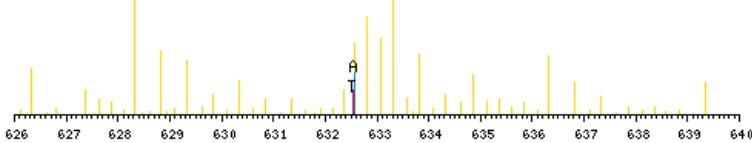

zoomed in precursor plot; T=theoretical m/z, A=acquired m/z

| b <sup>+</sup> | #  | AA | #  | y <sup>+</sup> | y <sup>2+</sup> |
|----------------|----|----|----|----------------|-----------------|
| 144.0660       | 1  | D  | 22 |                |                 |
| 259.0930       | 2  | D  | 21 | 2384.0532      | 1192.5305       |
| 390.1335       | 3  | M  | 20 | 2269.0263      | 1135.0170       |
| 461.1706       | 4  | A  | 19 | 2137.9858      | 1069.4968       |
| 532.2077       | 5  | A  | 18 | 2066.9487      | 1033.9782       |
| 692.2383       | 6  | C  | 17 | 1995.9116      | 998.4597        |
| 823.2788       | 7  | M  | 16 | 1835.8810      | 918.4444        |
| 979.4051       | 8  | K  | 15 | 1704.8405      | 852.9241        |
| 1066.4371      | 9  | S  | 14 | 1548.7142      | 774.8610        |
| 1165.5055      | 10 | V  | 13 | 1461.6821      | 731.3450        |
| 1266.5532      | 11 | T  | 12 | 1362.6137      | 681.8108        |
| 1395.5958      | 12 | E  | 11 | 1261.5660      | 631.2869        |
| 1523.6544      | 13 | Q  | 10 | 1132.5235      | 566.7656        |
| 1580.6758      | 14 | G  | 9  | 1004.4649      | 502.7364        |
| 1651.7130      | 15 | A  | 8  | 947.4434       | 474.2256        |
| 1780.7555      | 16 | E  | 7  | 876.4063       | 438.7071        |
| 1893.8396      | 17 | L  | 6  | 747.3637       | 374.1858        |
| 1980.8716      | 18 | S  | 5  | 634.2796       | 317.6437        |
| 2094.9146      | 19 | N  | 4  | 547.2476       | 274.1277        |
| 2223.9572      | 20 | E  | 3  | 433.2047       | 217.1063        |
| 2352.9998      | 21 | E  | 2  | 304.1621       | 152.5850        |
|                | 22 | R  | 1  | 175.1195       | 88.0637         |

N-term:+29.04 C(6):+160.03  
K(8):+156.13

X-range:

0 - 0

MassTol: Y-zoom:

0. 1.

MassType:

☐AVG ☒MONO

Axis:

☒1 ☐2

Label:

☒I ☐M ☐-

Ions:

a ☐+ ☐2+ ☐3+

b ☒+ ☐2+ ☐3+

c ☐+ ☐2+ ☐3+

x ☐+ ☐2+ ☐3+

y ☒+ ☒2+ ☐3+

z ☐+ ☐2+ ☐3+

hide H<sub>2</sub>O/NH<sub>3</sub> ☐

zoom 112-122 ☐

GO

DDPHKTPASPVVHIR, MH+ 1724.9448, m/z 431.9917  
L OS G18 P120811 220811-s1.02694.02694.4.dta

scan 2694; 4.4e+000

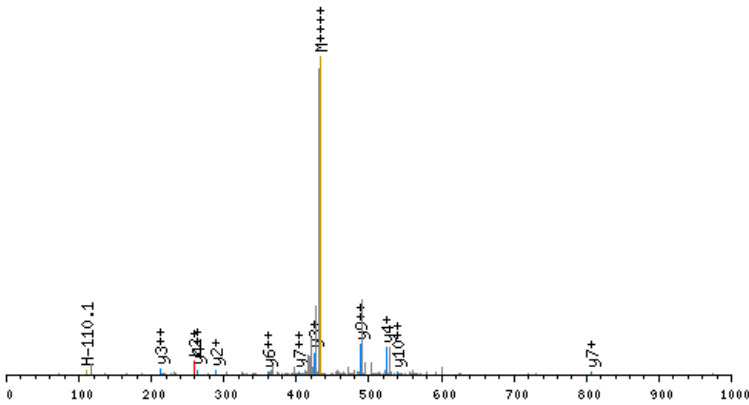

click image to zoom in; click top corners to zoom out

[precursor±]

scan 2691; 432.0 m/z; 8.4e+000

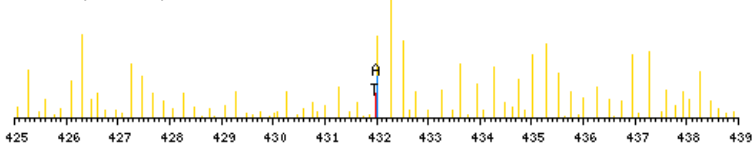

zoomed in precursor plot; T=theoretical m/z, A=acquired m/z

| b <sup>+</sup> | #  | AA | #  | y <sup>+</sup> | y <sup>2+</sup> |
|----------------|----|----|----|----------------|-----------------|
| 144.0660       | 1  | D  | 15 |                |                 |
| 259.0930       | 2  | D  | 14 | 1581.8866      | 791.4472        |
| 356.1458       | 3  | P  | 13 | 1466.8596      | 733.9337        |
| 493.2047       | 4  | H  | 12 | 1369.8069      | 685.4073        |
| 649.3310       | 5  | K  | 11 | 1232.7480      | 616.8779        |
| 750.3786       | 6  | T  | 10 | 1076.6217      | 538.8147        |
| 847.4314       | 7  | P  | 9  | 975.5740       | 488.2909        |
| 918.4685       | 8  | A  | 8  | 878.5212       | 439.7645        |
| 1005.5005      | 9  | S  | 7  | 807.4841       | 404.2460        |
| 1102.5533      | 10 | P  | 6  | 720.4521       | 360.7299        |
| 1201.6217      | 11 | V  | 5  | 623.3993       | 312.2036        |
| 1300.6901      | 12 | V  | 4  | 524.3309       | 262.6694        |
| 1437.7491      | 13 | H  | 3  | 425.2625       | 213.1352        |
| 1550.8331      | 14 | I  | 2  | 288.2036       | 144.6057        |
|                | 15 | R  | 1  | 175.1195       | 88.0637         |

N-term:+29.04 K(5):+156.13



X-range:

0 - 0

MassTol: Y-zoom:

0. 1.

MassType:

☐AVG ☒MONO

Axis:

☒1 ☐2

Label:

☒I ☐M ☐-

Ions:

a ☐+ ☐2+ ☐3+

b ☒+ ☐2+ ☐3+

c ☐+ ☐2+ ☐3+

x ☐+ ☐2+ ☐3+

y ☒+ ☒2+ ☐3+

z ☐+ ☐2+ ☐3+

hide H<sub>2</sub>O/NH<sub>3</sub> ☐

zoom 112-122 ☐

GO

DEAIHCPCSEKLR, MH+ 1967.9318, m/z 492.7384  
L OS G17 P120811 220811-s1.02865.02865.4.dta

scan 2865; 2.9e+000

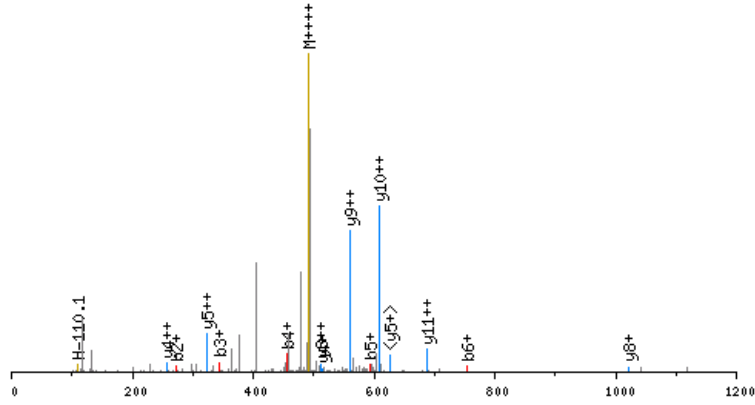

click image to zoom in; click top corners to zoom out

[precursor±]

scan 2863; 492.7 m/z; 1.2e+001

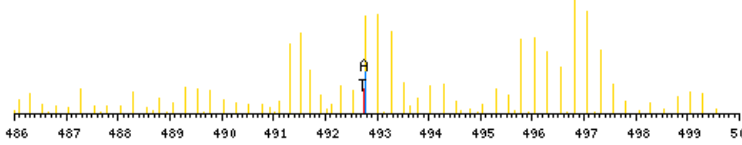

zoomed in precursor plot; T=theoretical m/z, A=acquired m/z

| b <sup>+</sup> | #  | AA | #  | y <sup>+</sup> | y <sup>2+</sup> |
|----------------|----|----|----|----------------|-----------------|
| 144.0660       | 1  | D  | 16 |                |                 |
| 273.1086       | 2  | E  | 15 | 1824.8736      | 912.9407        |
| 344.1458       | 3  | A  | 14 | 1695.8310      | 848.4194        |
| 457.2298       | 4  | I  | 13 | 1624.7939      | 812.9009        |
| 594.2887       | 5  | H  | 12 | 1511.7098      | 756.3588        |
| 754.3193       | 6  | C  | 11 | 1374.6509      | 687.8294        |
| 851.3721       | 7  | P  | 10 | 1214.6203      | 607.8141        |
| 948.4249       | 8  | P  | 9  | 1117.5676      | 559.2877        |
| 1108.4555      | 9  | C  | 8  | 1020.5148      | 510.7613        |
| 1195.4875      | 10 | S  | 7  | 860.4842       | 430.7460        |
| 1324.5301      | 11 | E  | 6  | 773.4522       | 387.2300        |
| 1453.5727      | 12 | E  | 5  | 644.4096       | 322.7087        |
| 1609.6990      | 13 | K  | 4  | 515.3670       | 258.1874        |
| 1722.7830      | 14 | L  | 3  | 359.2407       | 180.1243        |
| 1793.8201      | 15 | A  | 2  | 246.1566       | 123.5822        |
|                | 16 | R  | 1  | 175.1195       | 88.0637         |

N-term:+29.04 C(6):+160.03  
C(9):+160.03 K(13):+156.13

X-range:

0 - 0

MassTol: Y-zoom:

0. 1.

MassType:

☐AVG ☒MONO

Axis:

☒1 ☐2

Label:

☒I ☐M ☐-

Ions:

a ☐+ ☐2+ ☐3+

b ☒+ ☐2+ ☐3+

c ☐+ ☐2+ ☐3+

x ☐+ ☐2+ ☐3+

y ☒+ ☒2+ ☐3+

z ☐+ ☐2+ ☐3+

hide H<sub>2</sub>O/NH<sub>3</sub> ☐

zoom 112-122 ☐

GO

DEEAIGTIQEDYLR, MH+ 1679.8128, m/z 560.6091  
L OS G12 P120811 220811-s1.04673.04673.3.dta

scan 4673; 3.1e+000

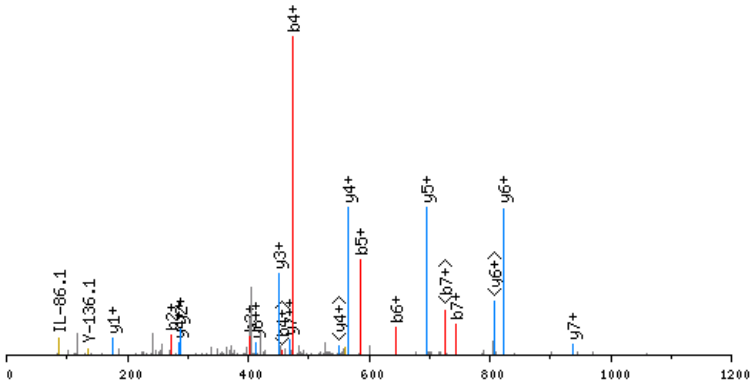

click image to zoom in; click top corners to zoom out

[precursor±]

scan 4672; 560.6 m/z; 1.8e+001

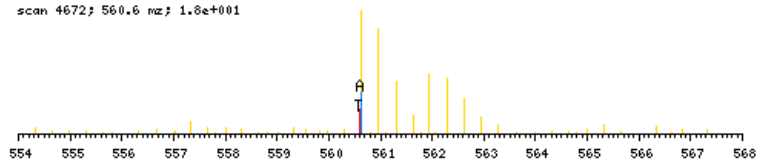

zoomed in precursor plot; T=theoretical m/z, A=acquired m/z

| b <sup>+</sup> | #  | AA | #  | y <sup>+</sup> | y <sup>2+</sup> |
|----------------|----|----|----|----------------|-----------------|
| 144.0660       | 1  | D  | 14 |                |                 |
| 273.1086       | 2  | E  | 13 | 1536.7546      | 768.8812        |
| 402.1512       | 3  | E  | 12 | 1407.7120      | 704.3599        |
| 473.1883       | 4  | A  | 11 | 1278.6694      | 639.8386        |
| 586.2724       | 5  | I  | 10 | 1207.6323      | 604.3201        |
| 643.2939       | 6  | G  | 9  | 1094.5482      | 547.7780        |
| 744.3415       | 7  | T  | 8  | 1037.5267      | 519.2673        |
| 857.4256       | 8  | I  | 7  | 936.4791       | 468.7434        |
| 985.4842       | 9  | Q  | 6  | 823.3950       | 412.2014        |
| 1114.5268      | 10 | E  | 5  | 695.3364       | 348.1721        |
| 1229.5537      | 11 | D  | 4  | 566.2938       | 283.6508        |
| 1392.6171      | 12 | Y  | 3  | 451.2669       | 226.1374        |
| 1505.7011      | 13 | L  | 2  | 288.2036       | 144.6057        |
|                | 14 | R  | 1  | 175.1195       | 88.0637         |

N-term:+29.04

X-range:

0 - 0

MassTol: Y-zoom:

0. 1.

MassType:

☐AVG ☒MONO

Axis:

☒1 ☐2

Label:

☒I ☐M ☐-

Ions:

a ☐+ ☐2+ ☐3+

b ☒+ ☐2+ ☐3+

c ☐+ ☐2+ ☐3+

x ☐+ ☐2+ ☐3+

y ☒+ ☒2+ ☐3+

z ☐+ ☐2+ ☐3+

hide H<sub>2</sub>O/NH<sub>3</sub> ☐

zoom 112-122 ☐

GO

DEEASGFIHEDHLR, MH+ 1682.7774, m/z 421.4498  
L OS G17 P120811 220811-s1.03884.03884.4.dta

scan 3884; 7.8e+000

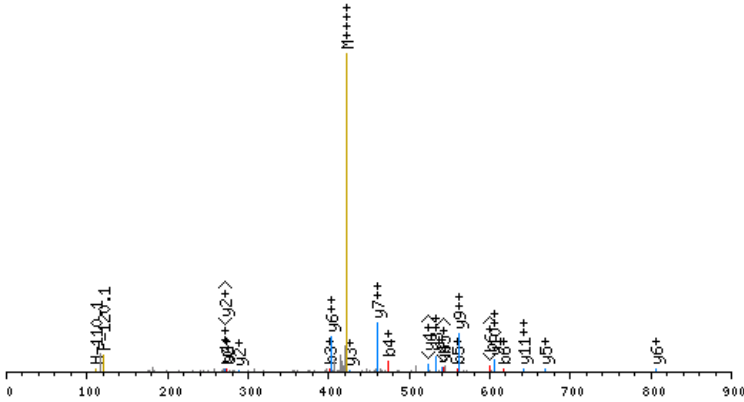

click image to zoom in; click top corners to zoom out

[precursor±]

scan 3883; 421.5 m/z; 8.0e+000

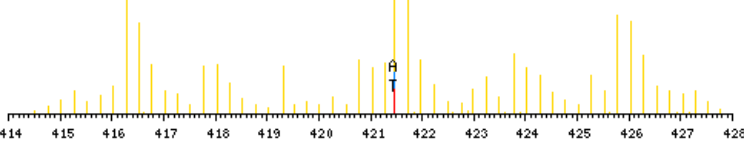

zoomed in precursor plot; T=theoretical m/z, A=acquired m/z

| b <sup>+</sup> | #  | AA | #  | y <sup>+</sup> | y <sup>2+</sup> |
|----------------|----|----|----|----------------|-----------------|
| 144.0660       | 1  | D  | 14 |                |                 |
| 273.1086       | 2  | E  | 13 | 1539.7192      | 770.3635        |
| 402.1512       | 3  | E  | 12 | 1410.6766      | 705.8422        |
| 473.1883       | 4  | A  | 11 | 1281.6340      | 641.3209        |
| 560.2204       | 5  | S  | 10 | 1210.5969      | 605.8024        |
| 617.2418       | 6  | G  | 9  | 1123.5649      | 562.2863        |
| 764.3102       | 7  | F  | 8  | 1066.5434      | 533.7756        |
| 877.3943       | 8  | I  | 7  | 919.4750       | 460.2414        |
| 1014.4532      | 9  | H  | 6  | 806.3909       | 403.6994        |
| 1143.4958      | 10 | E  | 5  | 669.3320       | 335.1699        |
| 1258.5228      | 11 | D  | 4  | 540.2894       | 270.6486        |
| 1395.5817      | 12 | H  | 3  | 425.2625       | 213.1352        |
| 1508.6657      | 13 | L  | 2  | 288.2036       | 144.6057        |
|                | 14 | R  | 1  | 175.1195       | 88.0637         |

N-term:+29.04

X-range:

0 - 0

MassTol: Y-zoom:

0. 1.

MassType:

☐ AVG ☒ MONO

Axis:

☒ 1 ☐ 2

Label:

☒ I ☐ M ☐ -

Ions:

a ☐ + ☐ 2+ ☐ 3+

b ☒ + ☐ 2+ ☐ 3+

c ☐ + ☐ 2+ ☐ 3+

x ☐ + ☐ 2+ ☐ 3+

y ☒ + ☒ 2+ ☐ 3+

z ☐ + ☐ 2+ ☐ 3+

hide H<sub>2</sub>O/NH<sub>3</sub> ☐

zoom 112-122 ☐

GO

DEEATGTIQEDYLR, MH+ 1667.7764, m/z 556.5970  
L OS G12 P120811 220811-s1.03711.03711.3.dta

scan 3711; 1.2e+000

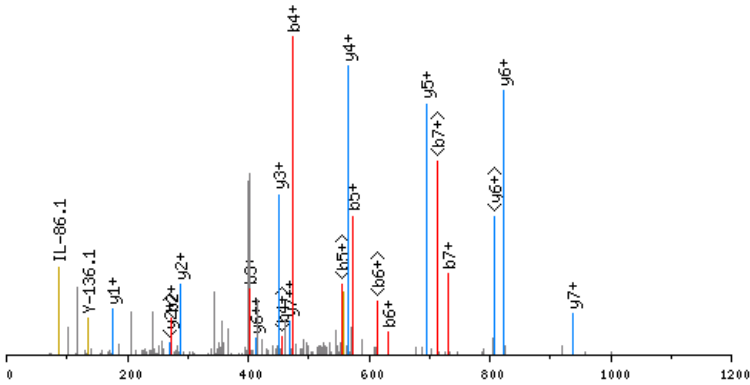

click image to zoom in; click top corners to zoom out [\[precursor±\]](#)

scan 3707; 556.6 m/z; 4.1e+000

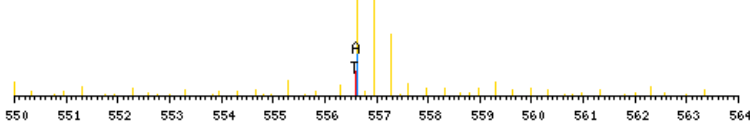

zoomed in precursor plot; T=theoretical m/z, A=acquired m/z

| b <sup>+</sup> | #  | AA | #  | y <sup>+</sup> | y <sup>2+</sup> |
|----------------|----|----|----|----------------|-----------------|
| 144.0660       | 1  | D  | 14 |                |                 |
| 273.1086       | 2  | E  | 13 | 1524.7182      | 762.8630        |
| 402.1512       | 3  | E  | 12 | 1395.6756      | 698.3417        |
| 473.1883       | 4  | A  | 11 | 1266.6330      | 633.8204        |
| 574.2360       | 5  | T  | 10 | 1195.5959      | 598.3019        |
| 631.2575       | 6  | G  | 9  | 1094.5482      | 547.7780        |
| 732.3052       | 7  | T  | 8  | 1037.5267      | 519.2673        |
| 845.3892       | 8  | I  | 7  | 936.4791       | 468.7434        |
| 973.4478       | 9  | Q  | 6  | 823.3950       | 412.2014        |
| 1102.4904      | 10 | E  | 5  | 695.3364       | 348.1721        |
| 1217.5173      | 11 | D  | 4  | 566.2938       | 283.6508        |
| 1380.5807      | 12 | Y  | 3  | 451.2669       | 226.1374        |
| 1493.6647      | 13 | L  | 2  | 288.2036       | 144.6057        |
|                | 14 | R  | 1  | 175.1195       | 88.0637         |

N-term:+29.04

[precursor±]

X-range:

0 - 0

MassTol: Y-zoom:

0. 1.

MassType:

☐ AVG ☒ MONO

Axis:

☒ 1 ☐ 2

Label:

☒ I ☐ M ☐ -

Ions:

a ☐ + ☐ 2+ ☐ 3+

b ☒ + ☐ 2+ ☐ 3+

c ☐ + ☐ 2+ ☐ 3+

x ☐ + ☐ 2+ ☐ 3+

y ☒ + ☒ 2+ ☐ 3+

z ☐ + ☐ 2+ ☐ 3+

hide H<sub>2</sub>O/NH<sub>3</sub> ☐

zoom 112-122 ☐

GO

DEGLPPILNALEVQGR, MH+ 1748.9546, m/z 583.6564  
L OS G12 P120811 220811-s1.05580.05580.3.dta

scan 5580; 5.7e-001

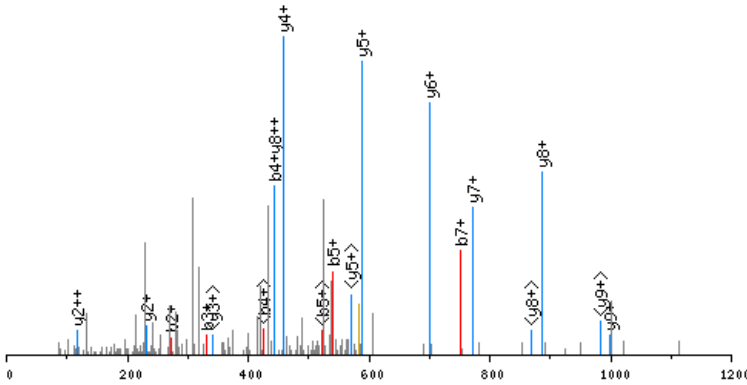

click image to zoom in; click top corners to zoom out [precursor±]

scan 5577; 583.7 m/z; 2.3e+000

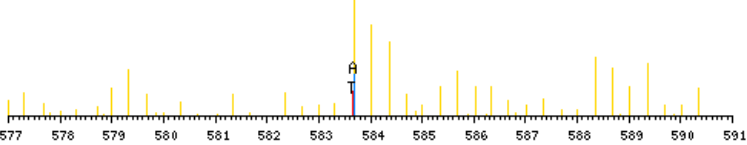

zoomed in precursor plot; T=theoretical m/z, A=acquired m/z

| b <sup>+</sup> | #  | AA | #  | y <sup>+</sup> | y <sup>2+</sup> |
|----------------|----|----|----|----------------|-----------------|
| 144.0660       | 1  | D  | 16 |                |                 |
| 273.1086       | 2  | E  | 15 | 1605.8964      | 803.4521        |
| 330.1301       | 3  | G  | 14 | 1476.8538      | 738.9308        |
| 443.2142       | 4  | L  | 13 | 1419.8324      | 710.4201        |
| 540.2669       | 5  | P  | 12 | 1306.7483      | 653.8781        |
| 637.3197       | 6  | P  | 11 | 1209.6955      | 605.3517        |
| 750.4038       | 7  | I  | 10 | 1112.6428      | 556.8253        |
| 863.4878       | 8  | L  | 9  | 999.5587       | 500.2833        |
| 977.5307       | 9  | N  | 8  | 886.4747       | 443.7412        |
| 1048.5679      | 10 | A  | 7  | 772.4317       | 386.7198        |
| 1161.6519      | 11 | L  | 6  | 701.3946       | 351.2012        |
| 1290.6945      | 12 | E  | 5  | 588.3105       | 294.6592        |
| 1389.7629      | 13 | V  | 4  | 459.2680       | 230.1379        |
| 1517.8215      | 14 | Q  | 3  | 360.1995       | 180.6037        |
| 1574.8430      | 15 | G  | 2  | 232.1410       | 116.5744        |
|                | 16 | R  | 1  | 175.1195       | 88.0637         |

N-term:+29.04

X-range:

0 - 0

MassTol: Y-zoom:

0. 1.

MassType:

☐ AVG ☒ MONO

Axis:

☒ 1 ☐ 2

Label:

☒ I ☐ M ☐ -

Ions:

a ☐ + ☐ 2+ ☐ 3+

b ☒ + ☐ 2+ ☐ 3+

c ☐ + ☐ 2+ ☐ 3+

x ☐ + ☐ 2+ ☐ 3+

y ☒ + ☒ 2+ ☐ 3+

z ☐ + ☐ 2+ ☐ 3+

hide H<sub>2</sub>O/NH<sub>3</sub> ☐

zoom 112-122 ☐

GO

DEKLDITTLTGVPEEHIKTR, MH+ 2397.4090, m/z 600.1077  
H OS G18 P120811 220811-s1.05918.05918.4.dta

scan 5918; 3.2e+000

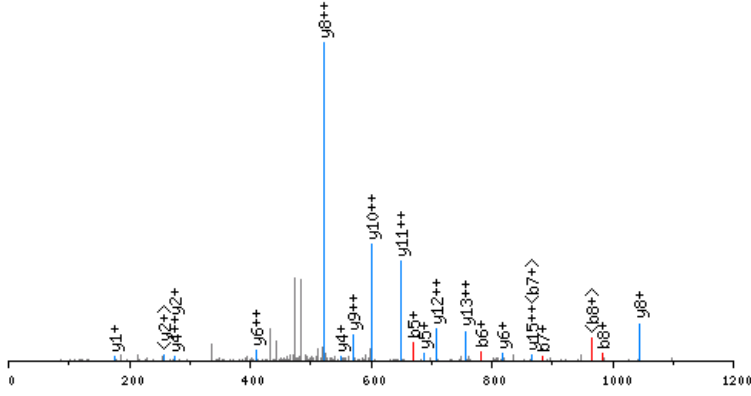

click image to zoom in; click top corners to zoom out [precursor±]

scan 5916; 600.1 m/z; 9.7e+000

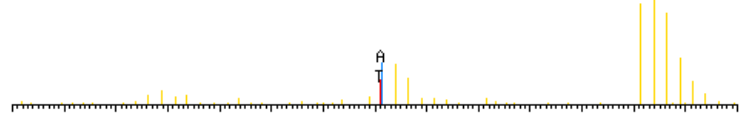

zoomed in precursor plot; T=theoretical m/z, A=acquired m/z

| b <sup>+</sup> | #  | AA | #  | y <sup>+</sup> | y <sup>2+</sup> |
|----------------|----|----|----|----------------|-----------------|
| 150.0978       | 1  | D  | 20 |                |                 |
| 279.1404       | 2  | E  | 19 | 2248.3189      | 1124.6634       |
| 441.2985       | 3  | K  | 18 | 2119.2764      | 1060.1421       |
| 554.3826       | 4  | L  | 17 | 1957.1183      | 979.0630        |
| 669.4095       | 5  | D  | 16 | 1844.0342      | 922.5210        |
| 782.4936       | 6  | I  | 15 | 1729.0072      | 865.0075        |
| 883.5413       | 7  | T  | 14 | 1615.9232      | 808.4655        |
| 984.5890       | 8  | T  | 13 | 1514.8755      | 757.9417        |
| 1097.6730      | 9  | L  | 12 | 1413.8278      | 707.4178        |
| 1198.7207      | 10 | T  | 11 | 1300.7438      | 650.8758        |
| 1255.7422      | 11 | G  | 10 | 1199.6961      | 600.3520        |
| 1354.8106      | 12 | V  | 9  | 1142.6746      | 571.8412        |
| 1451.8633      | 13 | P  | 8  | 1043.6062      | 522.3070        |
| 1580.9059      | 14 | E  | 7  | 946.5534       | 473.7806        |
| 1709.9485      | 15 | E  | 6  | 817.5108       | 409.2593        |
| 1847.0074      | 16 | H  | 5  | 688.4683       | 344.7380        |
| 1960.0915      | 17 | I  | 4  | 551.4093       | 276.2086        |
| 2122.2496      | 18 | K  | 3  | 438.3253       | 219.6666        |
| 2223.2973      | 19 | T  | 2  | 276.1672       | 138.5875        |
|                | 20 | R  | 1  | 175.1195       | 88.0637         |

N-term:+35.07 K(3):+162.16  
K(18):+162.16

N-term: +35.07 K(3) : +162.16

X-range:

0 - 0

MassTol: Y-zoom:

0. 1.

MassType:

☐AVG ☒MONO

Axis:

☒1 ☐2

Label:

☒I ☐M ☐-

Ions:

a ☐+ ☐2+ ☐3+

b ☒+ ☐2+ ☐3+

c ☐+ ☐2+ ☐3+

x ☐+ ☐2+ ☐3+

y ☒+ ☒2+ ☐3+

z ☐+ ☐2+ ☐3+

hide H<sub>2</sub>O/NH<sub>3</sub> ☐

zoom 112-122 ☐

GO

DELGSILKGFSSDAR, MH+ 1662.9339, m/z 554.9828  
H OS G15 P120811 220811-s1.06172.06172.3.dta

scan 6172; 3.1e+000

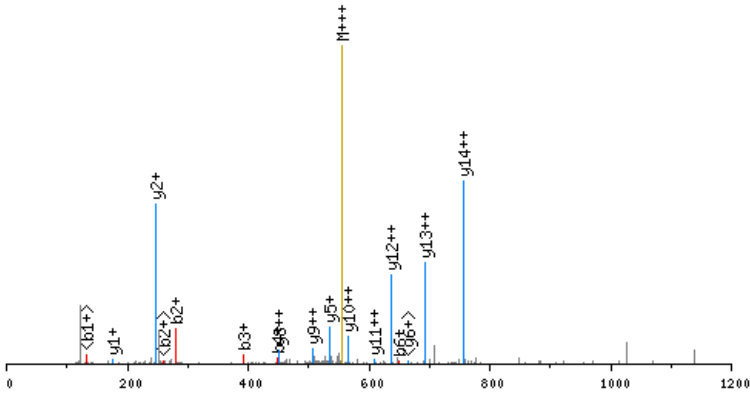

click image to zoom in; click top corners to zoom out [precursor±]

scan 6171; 555.0 m/z; 4.2e+000

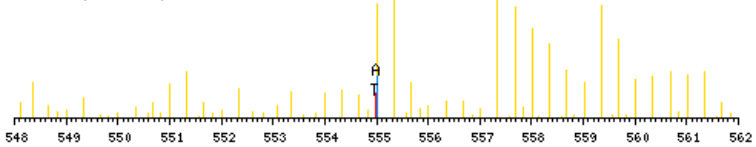

zoomed in precursor plot; T=theoretical m/z, A=acquired m/z

| b <sup>+</sup> | #  | AA | #  | y <sup>+</sup> | y <sup>2+</sup> |
|----------------|----|----|----|----------------|-----------------|
| 150.0978       | 1  | D  | 15 |                |                 |
| 279.1404       | 2  | E  | 14 | 1513.8439      | 757.4258        |
| 392.2245       | 3  | L  | 13 | 1384.8013      | 692.9046        |
| 449.2460       | 4  | G  | 12 | 1271.7172      | 636.3625        |
| 536.2780       | 5  | S  | 11 | 1214.6957      | 607.8518        |
| 649.3621       | 6  | I  | 10 | 1127.6637      | 564.3358        |
| 762.4461       | 7  | L  | 9  | 1014.5797      | 507.7937        |
| 924.6042       | 8  | K  | 8  | 901.4956       | 451.2517        |
| 981.6257       | 9  | G  | 7  | 739.3375       | 370.1727        |
| 1128.6941      | 10 | F  | 6  | 682.3160       | 341.6619        |
| 1215.7261      | 11 | S  | 5  | 535.2476       | 268.1277        |
| 1302.7582      | 12 | S  | 4  | 448.2156       | 224.6117        |
| 1417.7851      | 13 | D  | 3  | 361.1836       | 181.0957        |
| 1488.8222      | 14 | A  | 2  | 246.1566       | 123.5822        |
|                | 15 | R  | 1  | 175.1195       | 88.0637         |

N-term:+35.07 K(8):+162.16

X-range:

0 - 0

MassTol: Y-zoom:

0. 1.

MassType:

☐AVG ☒MONO

Axis:

☒1 ☐2

Label:

☒I ☐M ☐-

Ions:

a ☐+ ☐2+ ☐3+

b ☒+ ☐2+ ☐3+

c ☐+ ☐2+ ☐3+

x ☐+ ☐2+ ☐3+

y ☒+ ☒2+ ☐3+

z ☐+ ☐2+ ☐3+

hide H<sub>2</sub>O/NH<sub>3</sub> ☐

zoom 112-122 ☐

GO

DETDASSAVKVKR, MH+ 1489.8226, m/z 373.2111  
L OS G17 P120811 220811-s1.02006.02006.4.dta

scan 2006; 1.0e+001

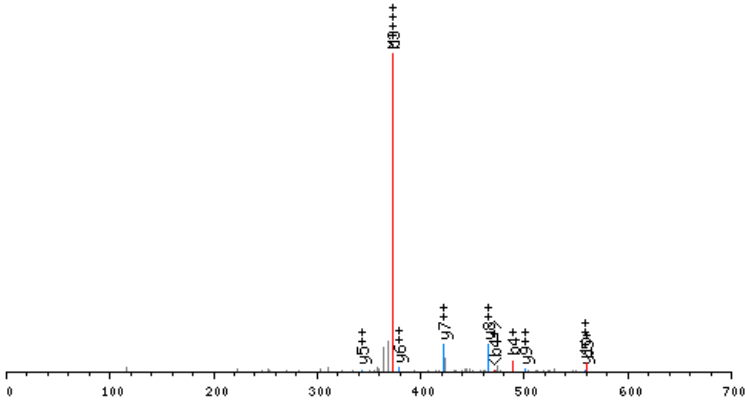

click image to zoom in; click top corners to zoom out [\[precursor±\]](#)

scan 2003; 373.2 m/z; 2.5e+000

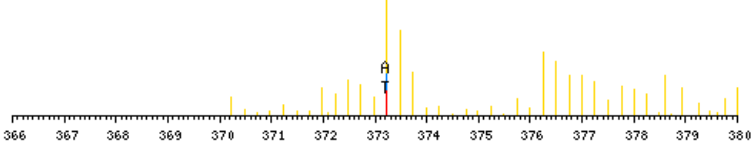

zoomed in precursor plot; T=theoretical m/z, A=acquired m/z

| b <sup>+</sup> | #  | AA | #  | y <sup>+</sup> | y <sup>2+</sup> |
|----------------|----|----|----|----------------|-----------------|
| 144.0660       | 1  | D  | 13 |                |                 |
| 273.1086       | 2  | E  | 12 | 1346.7644      | 673.8861        |
| 374.1563       | 3  | T  | 11 | 1217.7218      | 609.3648        |
| 489.1833       | 4  | D  | 10 | 1116.6742      | 558.8410        |
| 560.2204       | 5  | A  | 9  | 1001.6472      | 501.3275        |
| 647.2524       | 6  | S  | 8  | 930.6101       | 465.8090        |
| 734.2844       | 7  | S  | 7  | 843.5781       | 422.2929        |
| 805.3215       | 8  | A  | 6  | 756.5460       | 378.7769        |
| 904.3900       | 9  | V  | 5  | 685.5089       | 343.2584        |
| 1060.5163      | 10 | K  | 4  | 586.4405       | 293.7242        |
| 1159.5847      | 11 | V  | 3  | 430.3142       | 215.6610        |
| 1315.7110      | 12 | K  | 2  | 331.2458       | 166.1268        |
|                | 13 | R  | 1  | 175.1195       | 88.0637         |

N-term:+29.04 K(10):+156.13  
K(12):+156.13

X-range:

0 - 0

MassTol: Y-zoom:

0. 1.

MassType:

☐AVG ☒MONO

Axis:

☒1 ☐2

Label:

☒I ☐M ☐-

Ions:

a ☐+ ☐2+ ☐3+

b ☒+ ☐2+ ☐3+

c ☐+ ☐2+ ☐3+

x ☐+ ☐2+ ☐3+

y ☒+ ☒2+ ☐3+

z ☐+ ☐2+ ☐3+

hide H<sub>2</sub>O/NH<sub>3</sub> ☐

zoom 112-122 ☐

GO

DFLAGGVAAAISKTA VAPIER, MH+ 2113.2021, m/z 529.0560  
L OS G14 P120811 220811-s1.06056.06056.4.dta

scan 6056; 8.9e-001

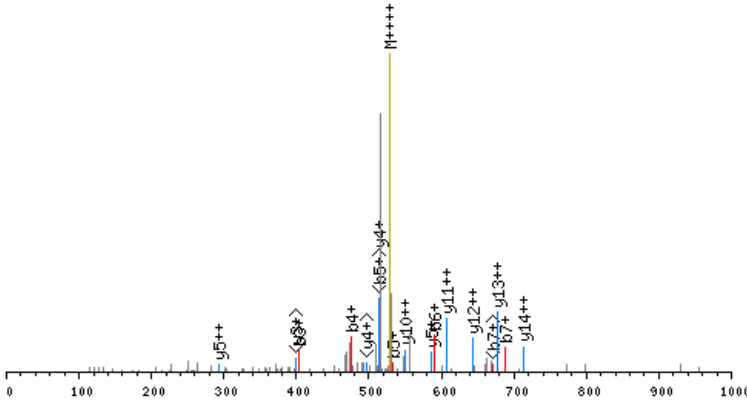

click image to zoom in; click top corners to zoom out

[precursor±]

scan 6052; 529.1 m/z; 4.1e+000

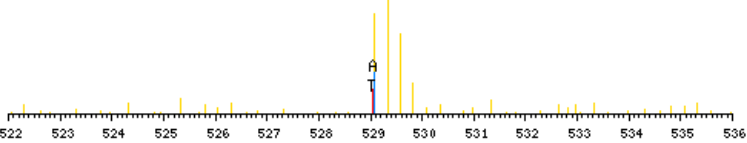

zoomed in precursor plot; T=theoretical m/z, A=acquired m/z

| b <sup>+</sup> | #  | AA | #  | y <sup>+</sup> | y <sup>2+</sup> |
|----------------|----|----|----|----------------|-----------------|
| 144.0660       | 1  | D  | 21 |                |                 |
| 291.1345       | 2  | F  | 20 | 1970.1439      | 985.5759        |
| 404.2185       | 3  | L  | 19 | 1823.0755      | 912.0417        |
| 475.2556       | 4  | A  | 18 | 1709.9914      | 855.4996        |
| 532.2771       | 5  | G  | 17 | 1638.9543      | 819.9811        |
| 589.2986       | 6  | G  | 16 | 1581.9329      | 791.4703        |
| 688.3670       | 7  | V  | 15 | 1524.9114      | 762.9596        |
| 759.4041       | 8  | A  | 14 | 1425.8430      | 713.4254        |
| 830.4412       | 9  | A  | 13 | 1354.8059      | 677.9068        |
| 901.4783       | 10 | A  | 12 | 1283.7687      | 642.3883        |
| 1014.5624      | 11 | I  | 11 | 1212.7316      | 606.8697        |
| 1101.5944      | 12 | S  | 10 | 1099.6476      | 550.3277        |
| 1257.7207      | 13 | K  | 9  | 1012.6155      | 506.8117        |
| 1358.7684      | 14 | T  | 8  | 856.4892       | 428.7485        |
| 1429.8055      | 15 | A  | 7  | 755.4416       | 378.2247        |
| 1528.8739      | 16 | V  | 6  | 684.4044       | 342.7061        |
| 1599.9110      | 17 | A  | 5  | 585.3360       | 293.1719        |
| 1696.9638      | 18 | P  | 4  | 514.2989       | 257.6534        |
| 1810.0479      | 19 | I  | 3  | 417.2462       | 209.1270        |
| 1939.0905      | 20 | E  | 2  | 304.1621       | 152.5850        |
|                | 21 | R  | 1  | 175.1195       | 88.0637         |

N-term:+29.04 K(13):+156.13

X-range:

0 - 0

MassTol: Y-zoom:

0. 1.

MassType:

☐AVG ☒MONO

Axis:

☒1 ☐2

Label:

☒I ☐M ☐-

Ions:

a ☐+ ☐2+ ☐3+

b ☒+ ☐2+ ☐3+

c ☐+ ☐2+ ☐3+

x ☐+ ☐2+ ☐3+

y ☒+ ☒2+ ☐3+

z ☐+ ☐2+ ☐3+

hide H<sub>2</sub>O/NH<sub>3</sub> ☐

zoom 112-122 ☐

GO

DFSEGGQAVGAHR, MH+ 1301.6238, m/z 434.5461  
L OS G16 P120811 220811-s1.02711.02711.3.dta

scan 2711; 5.8e+000

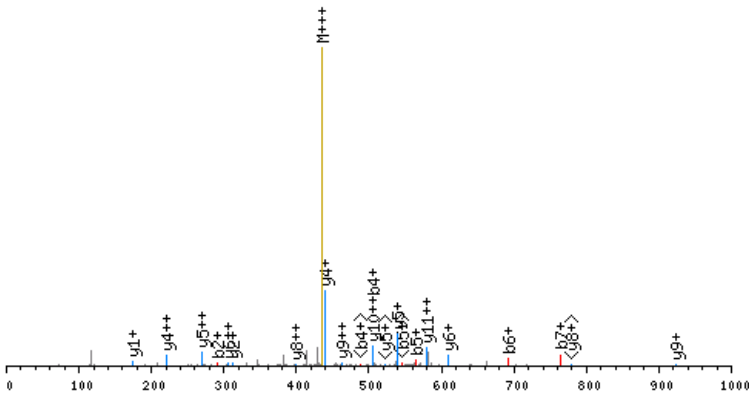

click image to zoom in; click top corners to zoom out

[precursor±]

scan 2708; 434.5 m/z; 6.9e+000

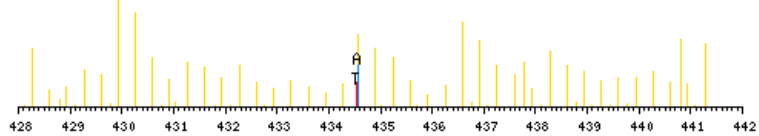

zoomed in precursor plot; T=theoretical m/z, A=acquired m/z

| b <sup>+</sup> | #  | AA | #  | y <sup>+</sup> | y <sup>2+</sup> |
|----------------|----|----|----|----------------|-----------------|
| 144.0660       | 1  | D  | 12 |                |                 |
| 291.1345       | 2  | F  | 11 | 1158.5656      | 579.7867        |
| 378.1665       | 3  | S  | 10 | 1011.4972      | 506.2525        |
| 507.2091       | 4  | E  | 9  | 924.4652       | 462.7365        |
| 564.2305       | 5  | G  | 8  | 795.4226       | 398.2152        |
| 692.2891       | 6  | Q  | 7  | 738.4011       | 369.7045        |
| 763.3262       | 7  | A  | 6  | 610.3425       | 305.6752        |
| 862.3946       | 8  | V  | 5  | 539.3054       | 270.1566        |
| 919.4161       | 9  | G  | 4  | 440.2370       | 220.6224        |
| 990.4532       | 10 | A  | 3  | 383.2155       | 192.1117        |
| 1127.5121      | 11 | H  | 2  | 312.1784       | 156.5931        |
|                | 12 | R  | 1  | 175.1195       | 88.0637         |

N-term:+29.04

X-range:

0 - 0

MassTol: Y-zoom:

0. 1.

MassType:

☐AVG ☒MONO

Axis:

☒1 ☐2

Label:

☒I ☐M ☐-

Ions:

a ☐+ ☐2+ ☐3+

b ☒+ ☐2+ ☐3+

c ☐+ ☐2+ ☐3+

x ☐+ ☐2+ ☐3+

y ☒+ ☒2+ ☐3+

z ☐+ ☐2+ ☐3+

hide H<sub>2</sub>O/NH<sub>3</sub> ☐

zoom 112-122 ☐

GO

DGDKLVVECVMKGVTSSTR, MH+ 2078.0990, m/z 520.2802  
L OS G16 P120811 220811-s1.05700.05700.4.dta

scan 5700; 4.6e+000

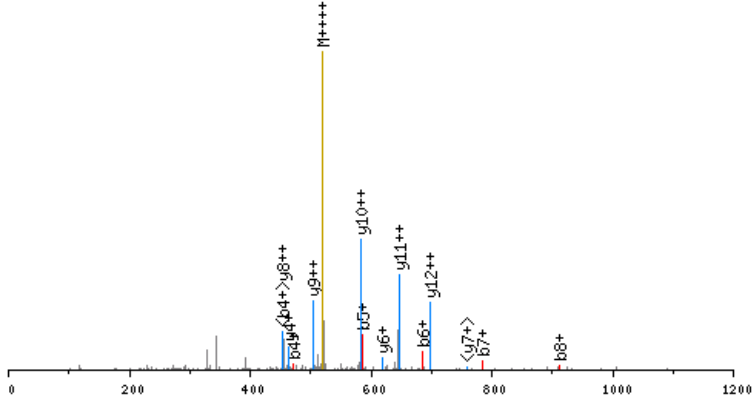

click image to zoom in; click top corners to zoom out [\[precursor±\]](#)

scan 5698; 520.3 m/z; 7.8e+000

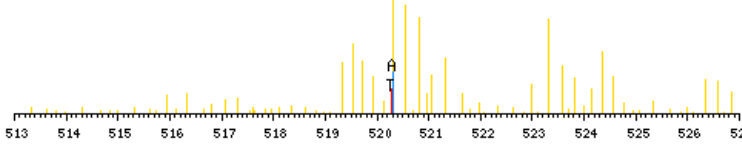

zoomed in precursor plot; T=theoretical m/z, A=acquired m/z

| b <sup>+</sup> | #  | AA | #  | y <sup>+</sup> | y <sup>2+</sup> |
|----------------|----|----|----|----------------|-----------------|
| 144.0660       | 1  | D  | 18 |                |                 |
| 201.0875       | 2  | G  | 17 | 1935.0408      | 968.0243        |
| 316.1144       | 3  | D  | 16 | 1878.0193      | 939.5136        |
| 472.2407       | 4  | K  | 15 | 1762.9923      | 882.0001        |
| 585.3248       | 5  | L  | 14 | 1606.8660      | 803.9369        |
| 684.3932       | 6  | V  | 13 | 1493.7820      | 747.3949        |
| 783.4616       | 7  | V  | 12 | 1394.7136      | 697.8607        |
| 912.5042       | 8  | E  | 11 | 1295.6452      | 648.3265        |
| 1072.5348      | 9  | C  | 10 | 1166.6026      | 583.8052        |
| 1171.6032      | 10 | V  | 9  | 1006.5720      | 503.7899        |
| 1302.6437      | 11 | M  | 8  | 907.5035       | 454.2557        |
| 1458.7700      | 12 | K  | 7  | 776.4631       | 388.7354        |
| 1515.7915      | 13 | G  | 6  | 620.3368       | 310.6723        |
| 1614.8599      | 14 | V  | 5  | 563.3153       | 282.1616        |
| 1715.9076      | 15 | T  | 4  | 464.2469       | 232.6274        |
| 1802.9396      | 16 | S  | 3  | 363.1992       | 182.1035        |
| 1903.9873      | 17 | T  | 2  | 276.1672       | 138.5875        |
|                | 18 | R  | 1  | 175.1195       | 88.0637         |

N-term:+29.04 K(4):+156.13  
C(9):+160.03 K(12):+156.13

X-range:

0 - 0

MassTol: Y-zoom:

0. 1.

MassType:

☐AVG ☒MONO

Axis:

☒1 ☐2

Label:

☒I ☐M ☐-

Ions:

a ☐+ ☐2+ ☐3+

b ☒+ ☐2+ ☐3+

c ☐+ ☐2+ ☐3+

x ☐+ ☐2+ ☐3+

y ☒+ ☒2+ ☐3+

z ☐+ ☐2+ ☐3+

hide H<sub>2</sub>O/NH<sub>3</sub> ☐

zoom 112-122 ☐

GO

DGVIVGNRY, MH+ 1020.5478, m/z 510.7775  
L OS G13 P120811 220811-s1.03057.03057.2.dta

scan 3057; 7.1e+000

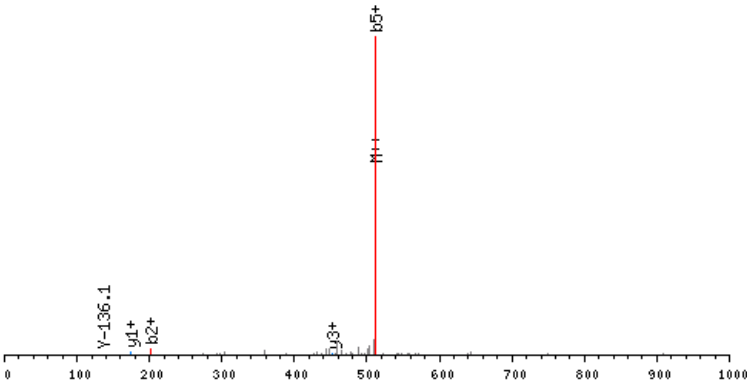

click image to zoom in; click top corners to zoom out [\[precursor±\]](#)

scan 3054; 510.8 m/z; 2.3e+001

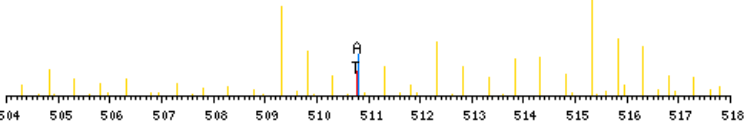

zoomed in precursor plot; T=theoretical m/z, A=acquired m/z

| b <sup>+</sup> | # | AA | # | y <sup>+</sup> | y <sup>2+</sup> |
|----------------|---|----|---|----------------|-----------------|
| 144.0660       | 1 | D  | 9 |                |                 |
| 201.0875       | 2 | G  | 8 | 877.4896       | 439.2487        |
| 300.1559       | 3 | V  | 7 | 820.4681       | 410.7380        |
| 413.2400       | 4 | I  | 6 | 721.3997       | 361.2038        |
| 512.3084       | 5 | V  | 5 | 608.3156       | 304.6617        |
| 569.3299       | 6 | G  | 4 | 509.2472       | 255.1275        |
| 683.3728       | 7 | N  | 3 | 452.2258       | 226.6168        |
| 846.4361       | 8 | Y  | 2 | 338.1828       | 169.5953        |
|                | 9 | R  | 1 | 175.1195       | 88.0637         |

N-term:+29.04

X-range:

0 - 0

MassTol: Y-zoom:

0. 1.

MassType:

☐AVG ☒MONO

Axis:

☒1 ☐2

Label:

☒I ☐M ☐-

Ions:

a ☐+ ☐2+ ☐3+

b ☒+ ☐2+ ☐3+

c ☐+ ☐2+ ☐3+

x ☐+ ☐2+ ☐3+

y ☒+ ☒2+ ☐3+

z ☐+ ☐2+ ☐3+

hide H<sub>2</sub>O/NH<sub>3</sub> ☐

zoom 112-122 ☐

GO

DHASIQMNVAEVDR, MH+ 1618.8071, m/z 540.2739  
H OS G16 P120811 220811-s1.04021.04021.3.dta

scan 4021; 2.7e+000

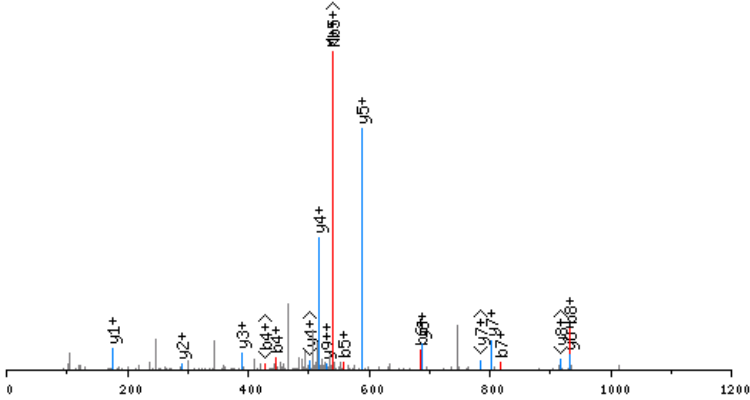

click image to zoom in; click top corners to zoom out [\[precursor±\]](#)

scan 4018; 540.3 m/z; 6.4e+000

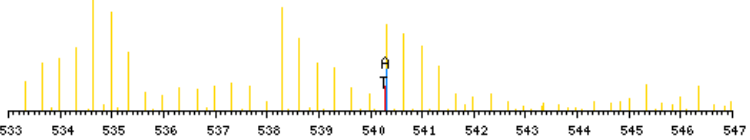

zoomed in precursor plot; T=theoretical m/z, A=acquired m/z

| b <sup>+</sup> | #  | AA | #  | y <sup>+</sup> | y <sup>2+</sup> |
|----------------|----|----|----|----------------|-----------------|
| 150.0978       | 1  | D  | 14 |                |                 |
| 287.1568       | 2  | H  | 13 | 1469.7171      | 735.3625        |
| 358.1939       | 3  | A  | 12 | 1332.6582      | 666.8330        |
| 445.2259       | 4  | S  | 11 | 1261.6211      | 631.3144        |
| 558.3100       | 5  | I  | 10 | 1174.5890      | 587.7984        |
| 686.3685       | 6  | Q  | 9  | 1061.5050      | 531.2564        |
| 817.4090       | 7  | M  | 8  | 933.4464       | 467.2271        |
| 931.4520       | 8  | N  | 7  | 802.4059       | 401.7069        |
| 1030.5204      | 9  | V  | 6  | 688.3630       | 344.6854        |
| 1101.5575      | 10 | A  | 5  | 589.2946       | 295.1512        |
| 1230.6001      | 11 | E  | 4  | 518.2575       | 259.6326        |
| 1329.6685      | 12 | V  | 3  | 389.2149       | 195.1113        |
| 1444.6954      | 13 | D  | 2  | 290.1464       | 145.5771        |
|                | 14 | R  | 1  | 175.1195       | 88.0637         |

N-term:+35.07

X-range:

0 - 0

MassTol: Y-zoom:

0. 1.

MassType:

☐AVG ☒MONO

Axis:

☒1 ☐2

Label:

☒I ☐M ☐-

Ions:

a ☐+ ☐2+ ☐3+

b ☒+ ☐2+ ☐3+

c ☐+ ☐2+ ☐3+

x ☐+ ☐2+ ☐3+

y ☒+ ☒2+ ☐3+

z ☐+ ☐2+ ☐3+

hide H<sub>2</sub>O/NH<sub>3</sub> ☐

zoom 112-122 ☐

GO

DIAALVVDNNGSMCKAGFAGDDAPR, MH+ 2563.2284, m/z 641.5626  
L OS G14 P120811 220811-s1.05805.05805.4.dta

scan 5805; 3.8e-001

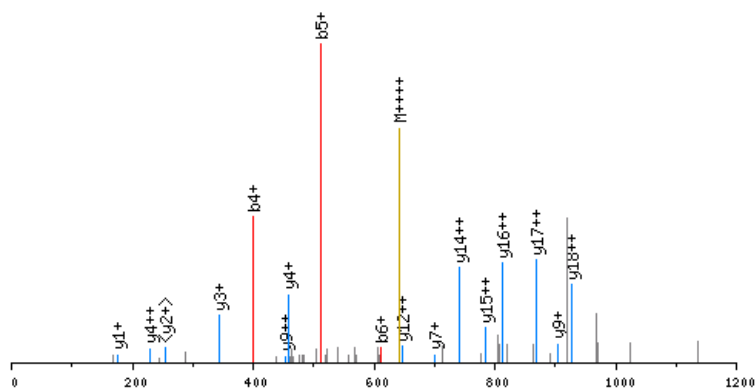

click image to zoom in; click top corners to zoom out

[precursor±]

scan 5801; 641.6 mz; 1.4e+000

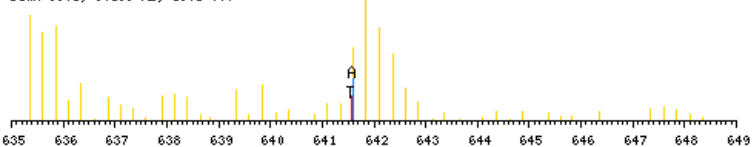

zoomed in precursor plot; T=theoretical m/z, A=acquired m/z

| b <sup>+</sup> | #  | AA | #  | y <sup>+</sup> | y <sup>2+</sup> |
|----------------|----|----|----|----------------|-----------------|
| 144.0660       | 1  | D  | 25 |                |                 |
| 257.1501       | 2  | I  | 24 | 2420.1702      | 1210.5890       |
| 328.1872       | 3  | A  | 23 | 2307.0862      | 1154.0470       |
| 399.2243       | 4  | A  | 22 | 2236.0491      | 1118.5284       |
| 512.3084       | 5  | L  | 21 | 2165.0119      | 1083.0099       |
| 611.3768       | 6  | V  | 20 | 2051.9279      | 1026.4678       |
| 710.4452       | 7  | V  | 19 | 1952.8595      | 976.9336        |
| 825.4722       | 8  | D  | 18 | 1853.7910      | 927.3994        |
| 939.5151       | 9  | N  | 17 | 1738.7641      | 869.8860        |
| 996.5366       | 10 | G  | 16 | 1624.7212      | 812.8645        |
| 1083.5686      | 11 | S  | 15 | 1567.6997      | 784.3538        |
| 1140.5901      | 12 | G  | 14 | 1480.6677      | 740.8378        |
| 1271.6305      | 13 | M  | 13 | 1423.6462      | 712.3270        |
| 1431.6611      | 14 | C  | 12 | 1292.6057      | 646.8068        |
| 1587.7874      | 15 | K  | 11 | 1132.5751      | 566.7915        |
| 1658.8246      | 16 | A  | 10 | 976.4488       | 488.7283        |
| 1715.8460      | 17 | G  | 9  | 905.4117       | 453.2098        |
| 1862.9144      | 18 | F  | 8  | 848.3903       | 424.6990        |
| 1933.9515      | 19 | A  | 7  | 701.3218       | 351.1648        |
| 1990.9730      | 20 | G  | 6  | 630.2847       | 315.6463        |
| 2105.9999      | 21 | D  | 5  | 573.2633       | 287.1355        |
| 2221.0269      | 22 | D  | 4  | 458.2363       | 229.6221        |
| 2292.0640      | 23 | A  | 3  | 343.2094       | 172.1086        |
| 2389.1168      | 24 | P  | 2  | 272.1723       | 136.5900        |
|                | 25 | R  | 1  | 175.1195       | 88.0637         |

N-term:+29.04 C(14):+160.03  
K(15):+156.13

X-range:

0 - 0

MassTol: Y-zoom:

0. 1.

MassType:

☐ AVG ☒ MONO

Axis:

☒ 1 ☐ 2

Label:

☒ I ☐ M ☐ -

Ions:

a ☐ + ☐ 2+ ☐ 3+

b ☒ + ☐ 2+ ☐ 3+

c ☐ + ☐ 2+ ☐ 3+

x ☐ + ☐ 2+ ☐ 3+

y ☒ + ☒ 2+ ☐ 3+

z ☐ + ☐ 2+ ☐ 3+

hide H<sub>2</sub>O/NH<sub>3</sub> ☐

zoom 112-122 ☐

GO

DIDLPEFDAR, MH+ 1319.6483, m/z 660.3278  
L OS G13 P120811 220811-s1.05957.05957.2.dta

scan 5957; 2.7e+000

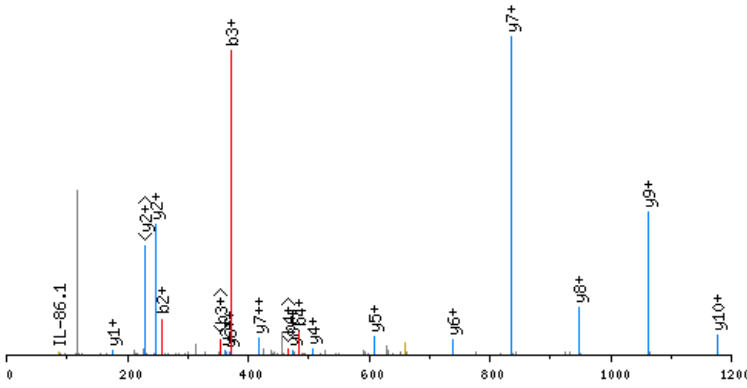

click image to zoom in; click top corners to zoom out

[precursor±]

scan 5954; 660.3 m/z; 5.1e+000

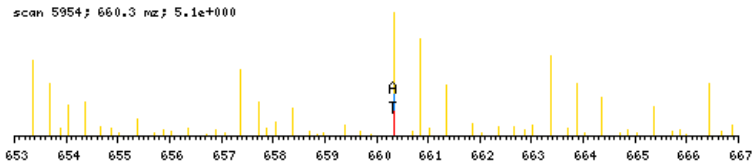

zoomed in precursor plot; T=theoretical m/z, A=acquired m/z

| b <sup>+</sup> | #  | AA | #  | y <sup>+</sup> | y <sup>2+</sup> |
|----------------|----|----|----|----------------|-----------------|
| 144.0660       | 1  | D  | 11 |                |                 |
| 257.1501       | 2  | I  | 10 | 1176.5901      | 588.7990        |
| 372.1771       | 3  | D  | 9  | 1063.5060      | 532.2569        |
| 485.2611       | 4  | L  | 8  | 948.4791       | 474.7434        |
| 582.3139       | 5  | P  | 7  | 835.3950       | 418.2014        |
| 711.3565       | 6  | E  | 6  | 738.3422       | 369.6750        |
| 812.4041       | 7  | T  | 5  | 609.2997       | 305.1537        |
| 959.4726       | 8  | F  | 4  | 508.2520       | 254.6299        |
| 1074.4995      | 9  | D  | 3  | 361.1836       | 181.0957        |
| 1145.5366      | 10 | A  | 2  | 246.1566       | 123.5822        |
|                | 11 | R  | 1  | 175.1195       | 88.0637         |

N-term:+29.04

X-range:

0 - 0

MassTol: Y-zoom:

0. 1.

MassType:

☐ AVG ☒ MONO

Axis:

☒ 1 ☐ 2

Label:

☒ I ☐ M ☐ -

Ions:

a ☐ + ☐ 2+ ☐ 3+

b ☒ + ☐ 2+ ☐ 3+

c ☐ + ☐ 2+ ☐ 3+

x ☐ + ☐ 2+ ☐ 3+

y ☒ + ☒ 2+ ☐ 3+

z ☐ + ☐ 2+ ☐ 3+

hide H<sub>2</sub>O/NH<sub>3</sub> ☐

zoom 112-122 ☐

GO

DIKKILDSVGIEADDDR, MH+ 1986.0760, m/z 662.6968  
L OS G17 P120811 220811-s1.06526.06526.3.dta

scan 6526; 3.1e+000

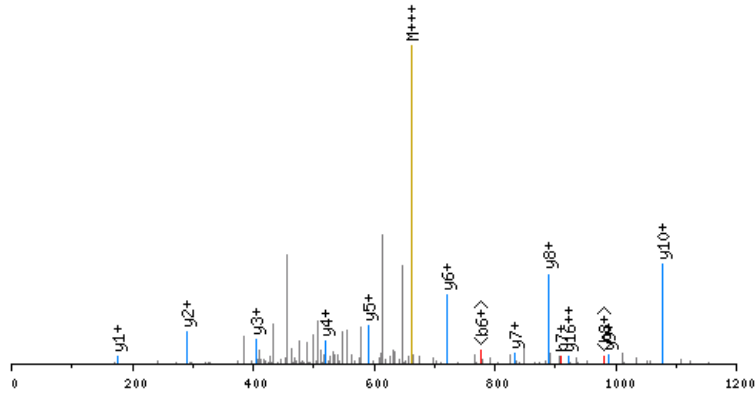

click image to zoom in; click top corners to zoom out [\[precursor±\]](#)

scan 6525; 662.7 m/z; 5.6e+000

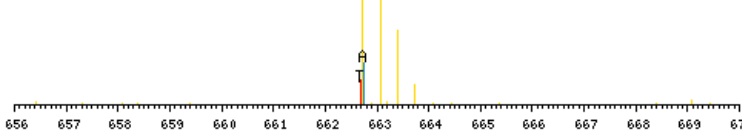

zoomed in precursor plot; T=theoretical m/z, A=acquired m/z

| b <sup>+</sup> | #  | AA | #  | y <sup>+</sup> | y <sup>2+</sup> |
|----------------|----|----|----|----------------|-----------------|
| 144.0660       | 1  | D  | 17 |                |                 |
| 257.1501       | 2  | I  | 16 | 1843.0177      | 922.0128        |
| 413.2764       | 3  | K  | 15 | 1729.9337      | 865.4708        |
| 569.4027       | 4  | K  | 14 | 1573.8074      | 787.4076        |
| 682.4868       | 5  | I  | 13 | 1417.6811      | 709.3445        |
| 795.5708       | 6  | L  | 12 | 1304.5970      | 652.8024        |
| 910.5978       | 7  | D  | 11 | 1191.5130      | 596.2604        |
| 997.6298       | 8  | S  | 10 | 1076.4860      | 538.7469        |
| 1096.6982      | 9  | V  | 9  | 989.4540       | 495.2309        |
| 1153.7197      | 10 | G  | 8  | 890.3856       | 445.6967        |
| 1266.8037      | 11 | I  | 7  | 833.3641       | 417.1860        |
| 1395.8463      | 12 | E  | 6  | 720.2800       | 360.6439        |
| 1466.8835      | 13 | A  | 5  | 591.2374       | 296.1226        |
| 1581.9104      | 14 | D  | 4  | 520.2003       | 260.6041        |
| 1696.9373      | 15 | D  | 3  | 405.1734       | 203.0906        |
| 1811.9643      | 16 | D  | 2  | 290.1464       | 145.5771        |
|                | 17 | R  | 1  | 175.1195       | 88.0637         |

N-term:+29.04 K(3):+156.13  
K(4):+156.13

X-range:

0 - 0

MassTol: Y-zoom:

0. 1.

MassType:

☐AVG ☒MONO

Axis:

☒1 ☐2

Label:

☒I ☐M ☐-

Ions:

a ☐+ ☐2+ ☐3+

b ☒+ ☐2+ ☐3+

c ☐+ ☐2+ ☐3+

x ☐+ ☐2+ ☐3+

y ☒+ ☒2+ ☐3+

z ☐+ ☐2+ ☐3+

hide H<sub>2</sub>O/NH<sub>3</sub> ☐

zoom 112-122 ☐

GO

DIKMTQSPSSMYASLGER, MH+ 2057.0047, m/z 686.3398  
L OS G15 P120811 220811-s1.04962.04962.3.dta

scan 4962; 1.1e+000

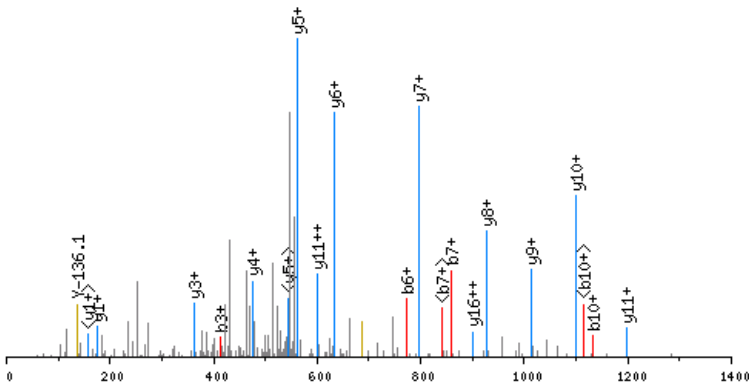

click image to zoom in; click top corners to zoom out

[precursor±]

scan 4961; 686.3 m/z; 1.7e+001

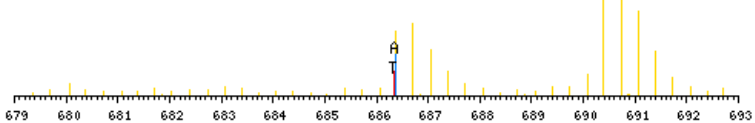

zoomed in precursor plot; T=theoretical m/z, A=acquired m/z

| b <sup>+</sup> | #  | AA | #  | y <sup>+</sup> | y <sup>2+</sup> |
|----------------|----|----|----|----------------|-----------------|
| 144.0660       | 1  | D  | 18 |                |                 |
| 257.1501       | 2  | I  | 17 | 1913.9465      | 957.4772        |
| 413.2764       | 3  | K  | 16 | 1800.8625      | 900.9351        |
| 544.3169       | 4  | M  | 15 | 1644.7362      | 822.8720        |
| 645.3646       | 5  | T  | 14 | 1513.6957      | 757.3518        |
| 773.4231       | 6  | Q  | 13 | 1412.6480      | 706.8279        |
| 860.4552       | 7  | S  | 12 | 1284.5894      | 642.7986        |
| 957.5079       | 8  | P  | 11 | 1197.5574      | 599.2826        |
| 1044.5400      | 9  | S  | 10 | 1100.5046      | 550.7562        |
| 1131.5720      | 10 | S  | 9  | 1013.4726      | 507.2402        |
| 1262.6125      | 11 | M  | 8  | 926.4406       | 463.7242        |
| 1425.6758      | 12 | Y  | 7  | 795.4001       | 398.2040        |
| 1496.7129      | 13 | A  | 6  | 632.3368       | 316.6723        |
| 1583.7450      | 14 | S  | 5  | 561.2997       | 281.1537        |
| 1696.8290      | 15 | L  | 4  | 474.2676       | 237.6377        |
| 1753.8505      | 16 | G  | 3  | 361.1836       | 181.0957        |
| 1882.8931      | 17 | E  | 2  | 304.1621       | 152.5850        |
|                | 18 | R  | 1  | 175.1195       | 88.0637         |

N-term:+29.04 K(3):+156.13

X-range:

0 - 0

MassTol: Y-zoom:

0. 1.

MassType:

☐AVG ☒MONO

Axis:

☒1 ☐2

Label:

☒I ☐M ☐-

Ions:

a ☐+ ☐2+ ☐3+

b ☒+ ☐2+ ☐3+

c ☐+ ☐2+ ☐3+

x ☐+ ☐2+ ☐3+

y ☒+ ☒2+ ☐3+

z ☐+ ☐2+ ☐3+

hide H<sub>2</sub>O/NH<sub>3</sub> ☐

zoom 112-122 ☐

GO

DILLTQSPAILSVSPGER, MH+ 1924.0755, m/z 642.0300  
L OS G12 P120811 220811-s1.05373.05373.3.dta

scan 5373; 3.6e+000

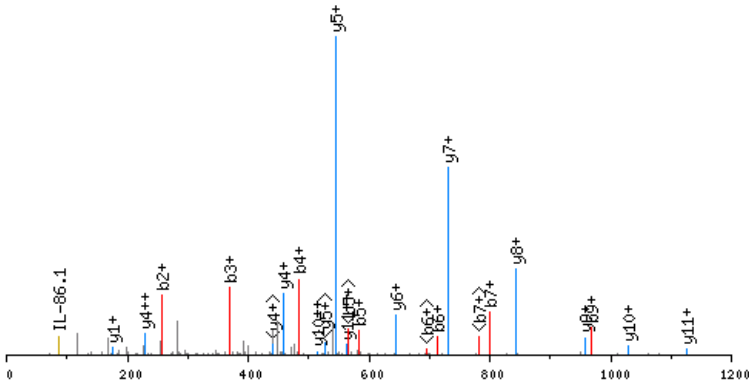

click image to zoom in; click top corners to zoom out [\[precursor±\]](#)

scan 5372; 642.0 m/z; 3.0e+002

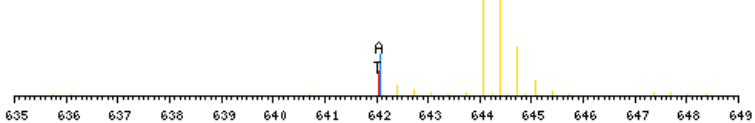

zoomed in precursor plot; T=theoretical m/z, A=acquired m/z

| b <sup>+</sup> | #  | AA | #  | y <sup>+</sup> | y <sup>2+</sup> |
|----------------|----|----|----|----------------|-----------------|
| 144.0660       | 1  | D  | 18 |                |                 |
| 257.1501       | 2  | I  | 17 | 1781.0173      | 891.0125        |
| 370.2342       | 3  | L  | 16 | 1667.9332      | 834.4705        |
| 483.3182       | 4  | L  | 15 | 1554.8491      | 777.9285        |
| 584.3659       | 5  | T  | 14 | 1441.7651      | 721.3865        |
| 712.4245       | 6  | Q  | 13 | 1340.7174      | 670.8626        |
| 799.4565       | 7  | S  | 12 | 1212.6588      | 606.8333        |
| 896.5093       | 8  | P  | 11 | 1125.6268      | 563.3173        |
| 967.5464       | 9  | A  | 10 | 1028.5740      | 514.7909        |
| 1080.6305      | 10 | I  | 9  | 957.5369       | 479.2724        |
| 1193.7145      | 11 | L  | 8  | 844.4529       | 422.7303        |
| 1280.7466      | 12 | S  | 7  | 731.3688       | 366.1883        |
| 1379.8150      | 13 | V  | 6  | 644.3368       | 322.6723        |
| 1466.8470      | 14 | S  | 5  | 545.2683       | 273.1381        |
| 1563.8998      | 15 | P  | 4  | 458.2363       | 229.6221        |
| 1620.9212      | 16 | G  | 3  | 361.1836       | 181.0957        |
| 1749.9638      | 17 | E  | 2  | 304.1621       | 152.5850        |
|                | 18 | R  | 1  | 175.1195       | 88.0637         |

N-term:+29.04

N-term: +29.04

X-range:

0 - 0

MassTol: Y-zoom:

0. 1.

MassType:

☐AVG ☒MONO

Axis:

☒1 ☐2

Label:

☒I ☐M ☐-

Ions:

a ☐+ ☐2+ ☐3+

b ☒+ ☐2+ ☐3+

c ☐+ ☐2+ ☐3+

x ☐+ ☐2+ ☐3+

y ☒+ ☒2+ ☐3+

z ☐+ ☐2+ ☐3+

hide H<sub>2</sub>O/NH<sub>3</sub> ☐

zoom 112-122 ☐

GO

DITADDEPLGR, MH+ 1235.6331, m/z 618.3202  
H OS G13 P120811 220811-s1.03767.03767.2.dta

scan 3767; 1.1e+000

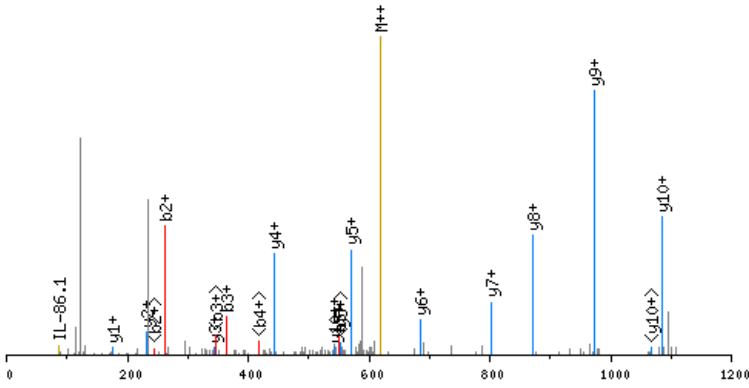

click image to zoom in; click top corners to zoom out

[precursor±]

scan 3764; 618.3 m/z; 1.9e+001

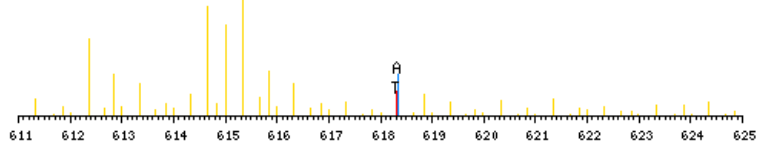

zoomed in precursor plot; T=theoretical m/z, A=acquired m/z

| b <sup>+</sup> | #  | AA | #  | y <sup>+</sup> | y <sup>2+</sup> |
|----------------|----|----|----|----------------|-----------------|
| 150.0978       | 1  | D  | 11 |                |                 |
| 263.1819       | 2  | I  | 10 | 1086.5431      | 543.7755        |
| 364.2296       | 3  | T  | 9  | 973.4591       | 487.2334        |
| 435.2667       | 4  | A  | 8  | 872.4114       | 436.7096        |
| 550.2936       | 5  | D  | 7  | 801.3743       | 401.1910        |
| 665.3206       | 6  | D  | 6  | 686.3473       | 343.6776        |
| 794.3632       | 7  | E  | 5  | 571.3204       | 286.1641        |
| 891.4159       | 8  | P  | 4  | 442.2778       | 221.6428        |
| 1004.5000      | 9  | L  | 3  | 345.2250       | 173.1164        |
| 1061.5215      | 10 | G  | 2  | 232.1410       | 116.5744        |
|                | 11 | R  | 1  | 175.1195       | 88.0637         |

N-term:+35.07

X-range:

0 - 0

MassTol: Y-zoom:

0. 1.

MassType:

☐AVG ☒MONO

Axis:

☒1 ☐2

Label:

☒I ☐M ☐-

Ions:

a ☐+ ☐2+ ☐3+

b ☒+ ☐2+ ☐3+

c ☐+ ☐2+ ☐3+

x ☐+ ☐2+ ☐3+

y ☒+ ☒2+ ☐3+

z ☐+ ☐2+ ☐3+

hide H<sub>2</sub>O/NH<sub>3</sub> ☐

zoom 112-122 ☐

GO

DIVMTQSHKFMSTSVGDR, MH+ 2095.0316, m/z 524.5134  
L OS G17 P120811 220811-s1.04889.04889.4.dta

scan 4889; 3.4e+000

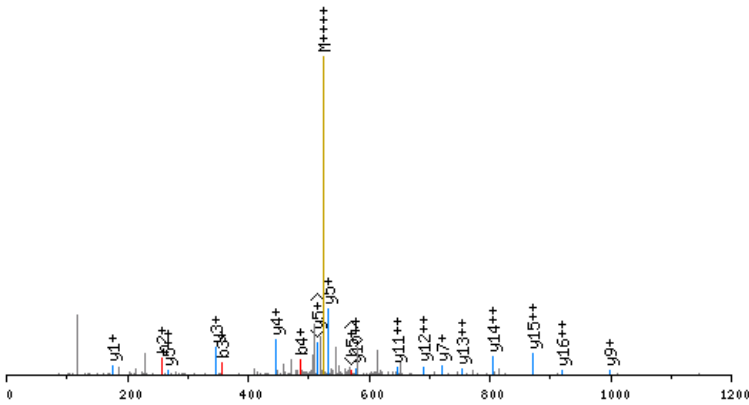

click image to zoom in; click top corners to zoom out

[precursor±]

scan 4888; 524.5 m/z; 4.3e+001

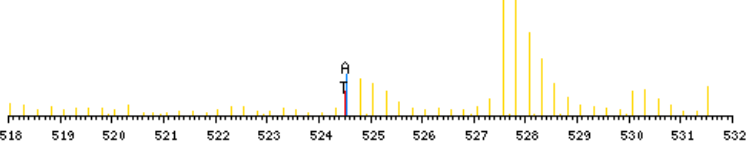

zoomed in precursor plot; T=theoretical m/z, A=acquired m/z

| b <sup>+</sup> | #  | AA | #  | y <sup>+</sup> | y <sup>2+</sup> |
|----------------|----|----|----|----------------|-----------------|
| 144.0660       | 1  | D  | 18 |                |                 |
| 257.1501       | 2  | I  | 17 | 1951.9734      | 976.4906        |
| 356.2185       | 3  | V  | 16 | 1838.8894      | 919.9486        |
| 487.2590       | 4  | M  | 15 | 1739.8209      | 870.4144        |
| 588.3067       | 5  | T  | 14 | 1608.7805      | 804.8941        |
| 716.3653       | 6  | Q  | 13 | 1507.7328      | 754.3703        |
| 803.3973       | 7  | S  | 12 | 1379.6742      | 690.3410        |
| 940.4562       | 8  | H  | 11 | 1292.6422      | 646.8250        |
| 1096.5825      | 9  | K  | 10 | 1155.5833      | 578.2955        |
| 1243.6509      | 10 | F  | 9  | 999.4570       | 500.2324        |
| 1374.6914      | 11 | M  | 8  | 852.3885       | 426.6982        |
| 1461.7234      | 12 | S  | 7  | 721.3481       | 361.1779        |
| 1562.7711      | 13 | T  | 6  | 634.3160       | 317.6619        |
| 1649.8031      | 14 | S  | 5  | 533.2683       | 267.1381        |
| 1748.8715      | 15 | V  | 4  | 446.2363       | 223.6221        |
| 1805.8930      | 16 | G  | 3  | 347.1679       | 174.0879        |
| 1920.9200      | 17 | D  | 2  | 290.1464       | 145.5771        |
|                | 18 | R  | 1  | 175.1195       | 88.0637         |

N-term:+29.04 K(9):+156.13

X-range:

0 - 0

MassTol: Y-zoom:

0. 1.

MassType:

☐ AVG ☒ MONO

Axis:

☒ 1 ☐ 2

Label:

☒ I ☐ M ☐ -

Ions:

a ☐ + ☐ 2+ ☐ 3+

b ☒ + ☐ 2+ ☐ 3+

c ☐ + ☐ 2+ ☐ 3+

x ☐ + ☐ 2+ ☐ 3+

y ☒ + ☒ 2+ ☐ 3+

z ☐ + ☐ 2+ ☐ 3+

hide H<sub>2</sub>O/NH<sub>3</sub> ☐

zoom 112-122 ☐

GO

DKFEFGKLR, MH+ 1533.0114, m/z 384.0083  
H OS G19 P120811 220811-s1.03094.03094.4.dta

scan 3094; 1.5e+001

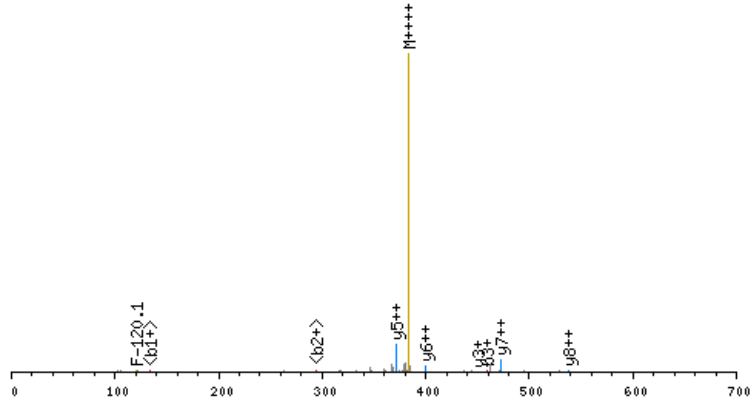

click image to zoom in; click top corners to zoom out [\[precursor±\]](#)

scan 3091; 384.0 m/z; 3.4e+000

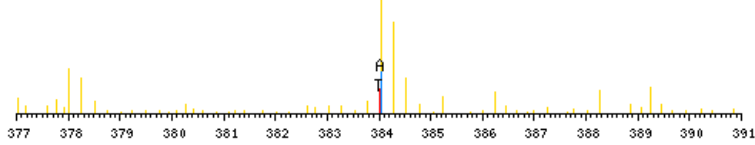

zoomed in precursor plot; T=theoretical m/z, A=acquired m/z

| b <sup>+</sup> | #  | AA | #  | y <sup>+</sup> | y <sup>2+</sup> |
|----------------|----|----|----|----------------|-----------------|
| 150.0978       | 1  | D  | 11 |                |                 |
| 312.2559       | 2  | K  | 10 | 1383.9213      | 692.4646        |
| 459.3244       | 3  | F  | 9  | 1221.7632      | 611.3855        |
| 588.3670       | 4  | E  | 8  | 1074.6948      | 537.8513        |
| 735.4354       | 5  | F  | 7  | 945.6522       | 473.3300        |
| 792.4568       | 6  | G  | 6  | 798.5838       | 399.7958        |
| 921.4994       | 7  | E  | 5  | 741.5624       | 371.2851        |
| 1083.6575      | 8  | K  | 4  | 612.5198       | 306.7638        |
| 1196.7416      | 9  | L  | 3  | 450.3617       | 225.6847        |
| 1358.8997      | 10 | K  | 2  | 337.2776       | 169.1427        |
|                | 11 | R  | 1  | 175.1195       | 88.0637         |

N-term:+35.07 K(2):+162.16  
K(8):+162.16 K(10):+162.16

X-range:

0 - 0

MassTol: Y-zoom:

0. 1.

MassType:

☐AVG ☒MONO

Axis:

☒1 ☐2

Label:

☒I ☐M ☐-

Ions:

a ☐+ ☐2+ ☐3+

b ☒+ ☐2+ ☐3+

c ☐+ ☐2+ ☐3+

x ☐+ ☐2+ ☐3+

y ☒+ ☒2+ ☐3+

z ☐+ ☐2+ ☐3+

hide H<sub>2</sub>O/NH<sub>3</sub> ☐

zoom 112-122 ☐

GO

DKPVSPLLTAAGMAR, MH+ 1582.8991, m/z 528.3045  
L OS G15 P120811 220811-s1.04934.04934.3.dta

scan 4934; 5.6e+000

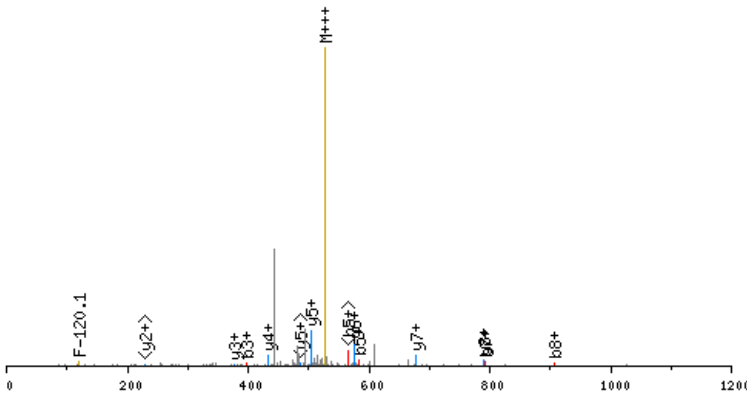

click image to zoom in; click top corners to zoom out

[precursor±]

scan 4931; 528.3 m/z; 9.8e+000

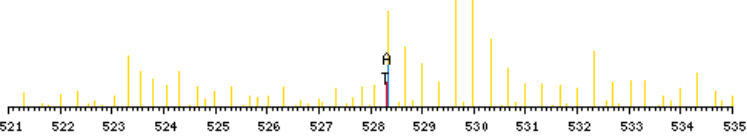

zoomed in precursor plot; T=theoretical m/z, A=acquired m/z

| b <sup>+</sup> | #  | AA | #  | y <sup>+</sup> | y <sup>2+</sup> |
|----------------|----|----|----|----------------|-----------------|
| 144.0660       | 1  | D  | 15 |                |                 |
| 300.1923       | 2  | K  | 14 | 1439.8409      | 720.4243        |
| 397.2451       | 3  | P  | 13 | 1283.7146      | 642.3612        |
| 496.3135       | 4  | V  | 12 | 1186.6618      | 593.8348        |
| 583.3455       | 5  | S  | 11 | 1087.5934      | 544.3006        |
| 680.3983       | 6  | P  | 10 | 1000.5614      | 500.7846        |
| 793.4824       | 7  | L  | 9  | 903.5086       | 452.2582        |
| 906.5664       | 8  | L  | 8  | 790.4245       | 395.7162        |
| 1007.6141      | 9  | T  | 7  | 677.3405       | 339.1741        |
| 1078.6512      | 10 | A  | 6  | 576.2928       | 288.6503        |
| 1149.6883      | 11 | A  | 5  | 505.2557       | 253.1318        |
| 1206.7098      | 12 | G  | 4  | 434.2186       | 217.6132        |
| 1337.7503      | 13 | M  | 3  | 377.1971       | 189.1025        |
| 1408.7874      | 14 | A  | 2  | 246.1566       | 123.5822        |
|                | 15 | R  | 1  | 175.1195       | 88.0637         |

N-term:+29.04 K(2):+156.13

X-range:

0 - 0

MassTol: Y-zoom:

0. 1.

MassType:

☐AVG ☒MONO

Axis:

☒1 ☐2

Label:

☒I ☐M ☐-

Ions:

a ☐+ ☐2+ ☐3+

b ☒+ ☐2+ ☐3+

c ☐+ ☐2+ ☐3+

x ☐+ ☐2+ ☐3+

y ☒+ ☒2+ ☐3+

z ☐+ ☐2+ ☐3+

hide H<sub>2</sub>O/NH<sub>3</sub> ☐

zoom 112-122 ☐

GO

DLAKDITSDTSGDFR, MH+ 1696.8394, m/z 566.2846  
L OS G15 P120811 220811-s1.04858.04858.3.dta

scan 4858; 1.7e+000

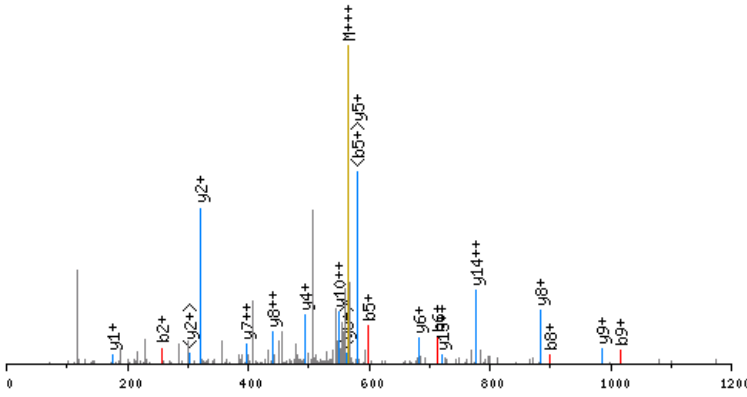

click image to zoom in; click top corners to zoom out [\[precursor±\]](#)

scan 4856; 566.3 m/z; 1.2e+001

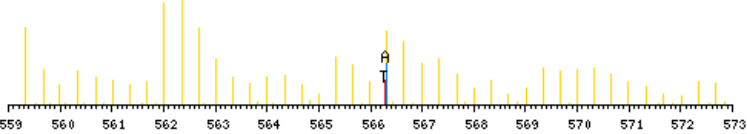

zoomed in precursor plot; T=theoretical m/z, A=acquired m/z

| b <sup>+</sup> | #  | AA | #  | y <sup>+</sup> | y <sup>2+</sup> |
|----------------|----|----|----|----------------|-----------------|
| 144.0660       | 1  | D  | 15 |                |                 |
| 257.1501       | 2  | L  | 14 | 1553.7812      | 777.3945        |
| 328.1872       | 3  | A  | 13 | 1440.6971      | 720.8525        |
| 484.3135       | 4  | K  | 12 | 1369.6600      | 685.3339        |
| 599.3405       | 5  | D  | 11 | 1213.5337      | 607.2708        |
| 712.4245       | 6  | I  | 10 | 1098.5067      | 549.7573        |
| 813.4722       | 7  | T  | 9  | 985.4227       | 493.2153        |
| 900.5042       | 8  | S  | 8  | 884.3750       | 442.6914        |
| 1015.5312      | 9  | D  | 7  | 797.3430       | 399.1754        |
| 1116.5789      | 10 | T  | 6  | 682.3160       | 341.6619        |
| 1203.6109      | 11 | S  | 5  | 581.2683       | 291.1381        |
| 1260.6323      | 12 | G  | 4  | 494.2363       | 247.6221        |
| 1375.6593      | 13 | D  | 3  | 437.2149       | 219.1113        |
| 1522.7277      | 14 | F  | 2  | 322.1879       | 161.5979        |
|                | 15 | R  | 1  | 175.1195       | 88.0637         |

N-term:+29.04 K(4):+156.13

X-range:

0 - 0

MassTol: Y-zoom:

0. 1.

MassType:

☐AVG ☒MONO

Axis:

☒1 ☐2

Label:

☒I ☐M ☐-

Ions:

a ☐+ ☐2+ ☐3+

b ☒+ ☐2+ ☐3+

c ☐+ ☐2+ ☐3+

x ☐+ ☐2+ ☐3+

y ☒+ ☒2+ ☐3+

z ☐+ ☐2+ ☐3+

hide H<sub>2</sub>O/NH<sub>3</sub> ☐

zoom 112-122 ☐

GO

DLFSDGHSEFLKAASNLK, MH+ 2063.0562, m/z 516.5195  
L OS G17 P120811 220811-s1.06436.06436.4.dta

scan 6436; 8.3e-001

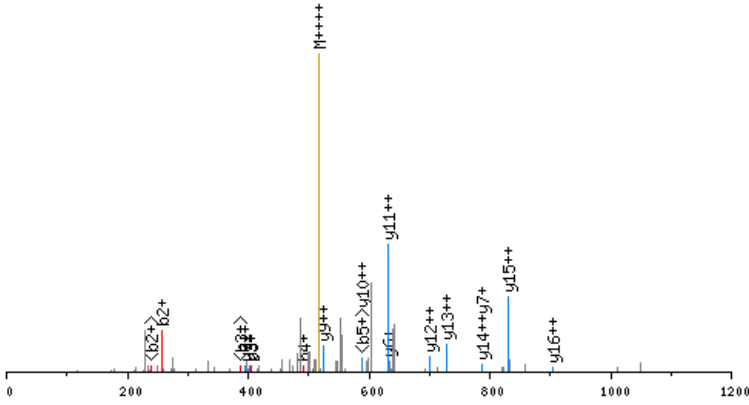

click image to zoom in; click top corners to zoom out

[precursor±]

scan 6435; 516.5 m/z; 1.4e+000

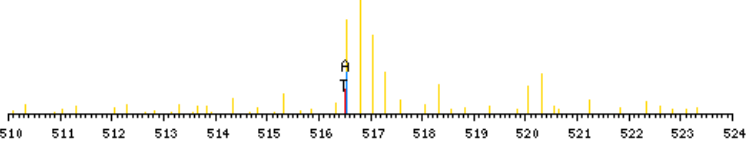

zoomed in precursor plot; T=theoretical m/z, A=acquired m/z

| b <sup>+</sup> | #  | AA | #  | y <sup>+</sup> | y <sup>2+</sup> |
|----------------|----|----|----|----------------|-----------------|
| 144.0660       | 1  | D  | 18 |                |                 |
| 257.1501       | 2  | L  | 17 | 1919.9980      | 960.5029        |
| 404.2185       | 3  | F  | 16 | 1806.9139      | 903.9609        |
| 491.2505       | 4  | S  | 15 | 1659.8455      | 830.4267        |
| 606.2775       | 5  | D  | 14 | 1572.8135      | 786.9106        |
| 663.2990       | 6  | G  | 13 | 1457.7865      | 729.3972        |
| 800.3579       | 7  | H  | 12 | 1400.7651      | 700.8864        |
| 887.3899       | 8  | S  | 11 | 1263.7061      | 632.3570        |
| 1016.4325      | 9  | E  | 10 | 1176.6741      | 588.8410        |
| 1163.5009      | 10 | F  | 9  | 1047.6315      | 524.3197        |
| 1276.5850      | 11 | L  | 8  | 900.5631       | 450.7855        |
| 1432.7113      | 12 | K  | 7  | 787.4790       | 394.2434        |
| 1503.7484      | 13 | A  | 6  | 631.3527       | 316.1803        |
| 1574.7855      | 14 | A  | 5  | 560.3156       | 280.6617        |
| 1661.8175      | 15 | S  | 4  | 489.2785       | 245.1432        |
| 1775.8605      | 16 | N  | 3  | 402.2465       | 201.6272        |
| 1888.9445      | 17 | L  | 2  | 288.2036       | 144.6057        |
|                | 18 | R  | 1  | 175.1195       | 88.0637         |

N-term:+29.04 K(12):+156.13

X-range:

0 - 0

MassTol: Y-zoom:

0. 1.

MassType:

☐AVG ☒MONO

Axis:

☒1 ☐2

Label:

☒I ☐M ☐-

Ions:

a ☐+ ☐2+ ☐3+

b ☒+ ☐2+ ☐3+

c ☐+ ☐2+ ☐3+

x ☐+ ☐2+ ☐3+

y ☒+ ☒2+ ☐3+

z ☐+ ☐2+ ☐3+

hide H<sub>2</sub>O/NH<sub>3</sub> ☐

zoom 112-122 ☐

GO

DLIAQQPVNEVEHR, MH+ 1675.8767, m/z 559.2971  
L OS G15 P120811 220811-s1.03749.03749.3.dta

scan 3749; 1.8e+000

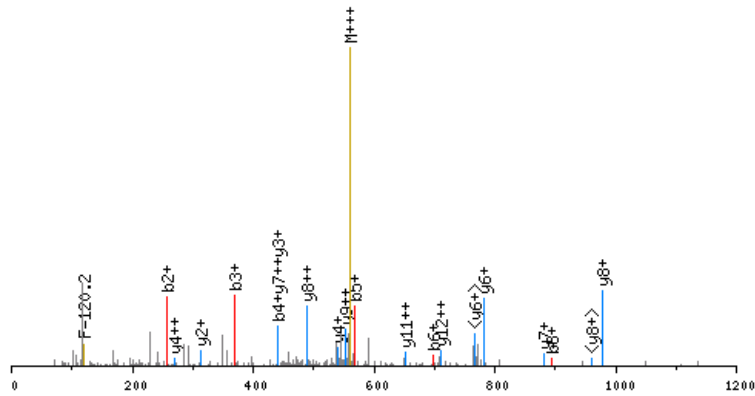

click image to zoom in; click top corners to zoom out

[precursor±]

scan 3746; 559.3 m/z; 7.3e+000

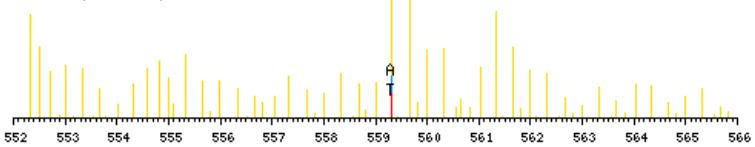

zoomed in precursor plot; T=theoretical m/z, A=acquired m/z

| b <sup>+</sup> | #  | AA | #  | y <sup>+</sup> | y <sup>2+</sup> |
|----------------|----|----|----|----------------|-----------------|
| 144.0660       | 1  | D  | 14 |                |                 |
| 257.1501       | 2  | L  | 13 | 1532.8185      | 766.9132        |
| 370.2342       | 3  | I  | 12 | 1419.7345      | 710.3711        |
| 441.2713       | 4  | A  | 11 | 1306.6504      | 653.8291        |
| 569.3299       | 5  | Q  | 10 | 1235.6133      | 618.3105        |
| 697.3884       | 6  | Q  | 9  | 1107.5547      | 554.2813        |
| 794.4412       | 7  | P  | 8  | 979.4961       | 490.2520        |
| 893.5096       | 8  | V  | 7  | 882.4434       | 441.7256        |
| 1007.5525      | 9  | N  | 6  | 783.3749       | 392.1914        |
| 1136.5951      | 10 | E  | 5  | 669.3320       | 335.1699        |
| 1235.6636      | 11 | V  | 4  | 540.2894       | 270.6486        |
| 1364.7061      | 12 | E  | 3  | 441.2210       | 221.1144        |
| 1501.7651      | 13 | H  | 2  | 312.1784       | 156.5931        |
|                | 14 | R  | 1  | 175.1195       | 88.0637         |

N-term:+29.04

X-range:

0 - 0

MassTol: Y-zoom:

0. 1.

MassType:

☐AVG ☒MONO

Axis:

☒1 ☐2

Label:

☒I ☐M ☐-

Ions:

a ☐+ ☐2+ ☐3+

b ☒+ ☐2+ ☐3+

c ☐+ ☐2+ ☐3+

x ☐+ ☐2+ ☐3+

y ☒+ ☒2+ ☐3+

z ☐+ ☐2+ ☐3+

hide H<sub>2</sub>O/NH<sub>3</sub> ☐

zoom 112-122 ☐

GO

DLLECADDR, MH+ 1134.5100, m/z 567.7587  
L OS G13 P120811 220811-s1.03787.03787.2.dta

scan 3787; 2.7e+000

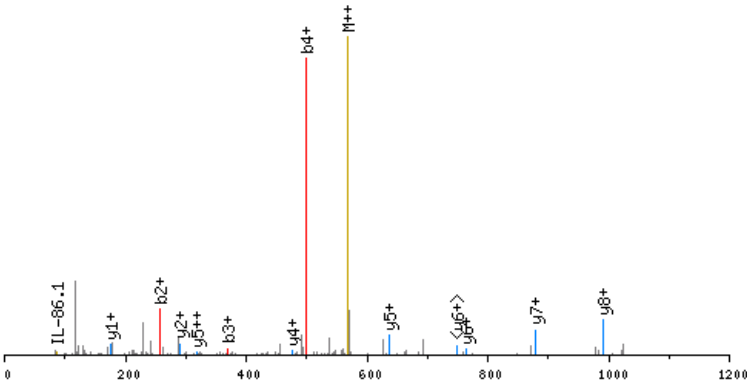

click image to zoom in; click top corners to zoom out

[precursor±]

scan 3784; 567.8 m/z; 1.2e+002

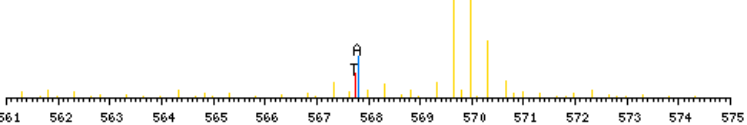

zoomed in precursor plot; T=theoretical m/z, A=acquired m/z

| b <sup>+</sup> | # | AA | # | y <sup>+</sup> | y <sup>2+</sup> |
|----------------|---|----|---|----------------|-----------------|
| 144.0660       | 1 | D  | 9 |                |                 |
| 257.1501       | 2 | L  | 8 | 991.4518       | 496.2298        |
| 370.2342       | 3 | L  | 7 | 878.3678       | 439.6878        |
| 499.2768       | 4 | E  | 6 | 765.2837       | 383.1458        |
| 659.3074       | 5 | C  | 5 | 636.2411       | 318.6245        |
| 730.3445       | 6 | A  | 4 | 476.2105       | 238.6092        |
| 845.3714       | 7 | D  | 3 | 405.1734       | 203.0906        |
| 960.3984       | 8 | D  | 2 | 290.1464       | 145.5771        |
|                | 9 | R  | 1 | 175.1195       | 88.0637         |

N-term:+29.04 C(5):+160.03

X-range:

0 - 0

MassTol: Y-zoom:

0. 1.

MassType:

☐AVG ☒MONO

Axis:

☒1 ☐2

Label:

☒I ☐M ☐-

Ions:

a ☐+ ☐2+ ☐3+

b ☒+ ☐2+ ☐3+

c ☐+ ☐2+ ☐3+

x ☐+ ☐2+ ☐3+

y ☒+ ☒2+ ☐3+

z ☐+ ☐2+ ☐3+

hide H<sub>2</sub>O/NH<sub>3</sub> ☐

zoom 112-122 ☐

GO

DLNLDLSKFR, MH+ 1288.7901, m/z 430.2682  
H OS G16 P120811 220811-s1.05822.05822.3.dta

scan 5822; 9.2e+000

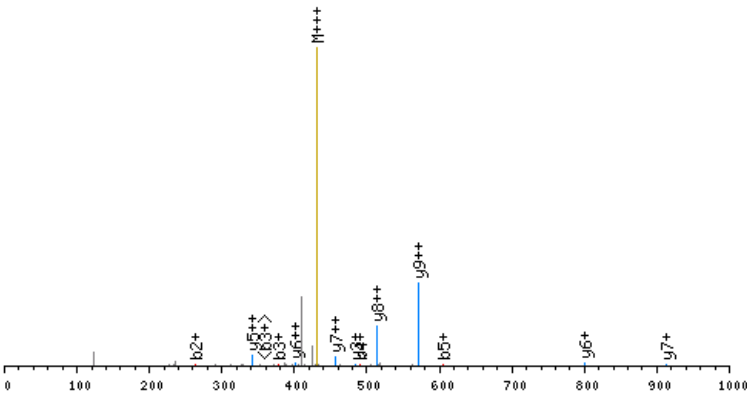

click image to zoom in; click top corners to zoom out

[precursor±]

scan 5818; 430.3 m/z; 4.4e+000

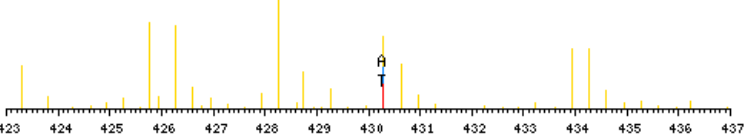

zoomed in precursor plot; T=theoretical m/z, A=acquired m/z

| b <sup>+</sup> | #  | AA | #  | y <sup>+</sup> | y <sup>2+</sup> |
|----------------|----|----|----|----------------|-----------------|
| 150.0978       | 1  | D  | 10 |                |                 |
| 263.1819       | 2  | L  | 9  | 1139.7001      | 570.3540        |
| 377.2248       | 3  | N  | 8  | 1026.6160      | 513.8119        |
| 490.3089       | 4  | L  | 7  | 912.5731       | 456.7905        |
| 605.3358       | 5  | D  | 6  | 799.4891       | 400.2484        |
| 718.4199       | 6  | L  | 5  | 684.4621       | 342.7350        |
| 805.4519       | 7  | S  | 4  | 571.3780       | 286.1929        |
| 967.6100       | 8  | K  | 3  | 484.3460       | 242.6769        |
| 1114.6784      | 9  | F  | 2  | 322.1879       | 161.5979        |
|                | 10 | R  | 1  | 175.1195       | 88.0637         |

N-term:+35.07 K(8):+162.16

X-range:

0 - 0

MassTol: Y-zoom:

0. 1.

MassType:

☐AVG ☒MONO

Axis:

☒1 ☐2

Label:

☒I ☐M ☐-

Ions:

a ☐+ ☐2+ ☐3+

b ☒+ ☐2+ ☐3+

c ☐+ ☐2+ ☐3+

x ☐+ ☐2+ ☐3+

y ☒+ ☒2+ ☐3+

z ☐+ ☐2+ ☐3+

hide H<sub>2</sub>O/NH<sub>3</sub> ☐

zoom 112-122 ☐

GO

DLPAAAAAGPASFAR, MH+ 1510.8018, m/z 504.2721  
L OS G12 P120811 220811-s1.04101.04101.3.dta

scan 4101; 2.6e+000

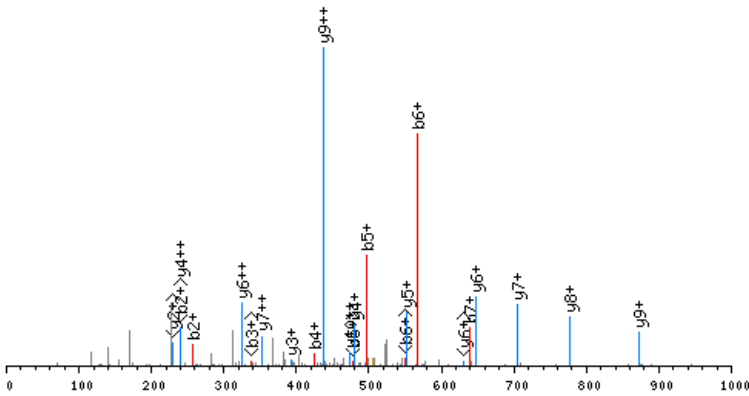

click image to zoom in; click top corners to zoom out

[precursor±]

scan 4097; 504.3 m/z; 2.7e+000

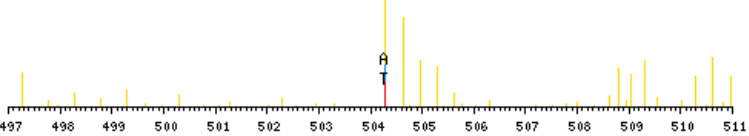

zoomed in precursor plot; T=theoretical m/z, A=acquired m/z

| b <sup>+</sup> | #  | AA | #  | y <sup>+</sup> | y <sup>2+</sup> |
|----------------|----|----|----|----------------|-----------------|
| 144.0660       | 1  | D  | 16 |                |                 |
| 257.1501       | 2  | L  | 15 | 1367.7436      | 684.3757        |
| 354.2029       | 3  | P  | 14 | 1254.6595      | 627.8337        |
| 425.2400       | 4  | A  | 13 | 1157.6067      | 579.3073        |
| 496.2771       | 5  | A  | 12 | 1086.5696      | 543.7887        |
| 567.3142       | 6  | A  | 11 | 1015.5325      | 508.2702        |
| 638.3513       | 7  | A  | 10 | 944.4954       | 472.7516        |
| 735.4041       | 8  | P  | 9  | 873.4583       | 437.2331        |
| 806.4412       | 9  | A  | 8  | 776.4055       | 388.7067        |
| 863.4627       | 10 | G  | 7  | 705.3684       | 353.1881        |
| 960.5154       | 11 | P  | 6  | 648.3469       | 324.6774        |
| 1031.5525      | 12 | A  | 5  | 551.2942       | 276.1510        |
| 1118.5846      | 13 | S  | 4  | 480.2571       | 240.6324        |
| 1265.6530      | 14 | F  | 3  | 393.2250       | 197.1164        |
| 1336.6901      | 15 | A  | 2  | 246.1566       | 123.5822        |
|                | 16 | R  | 1  | 175.1195       | 88.0637         |

N-term:+29.04

X-range:

0 - 0

MassTol: Y-zoom:

0. 1.

MassType:

☐ AVG ☒ MONO

Axis:

☒ 1 ☐ 2

Label:

☒ I ☐ M ☐ -

Ions:

a ☐ + ☐ 2+ ☐ 3+

b ☒ + ☐ 2+ ☐ 3+

c ☐ + ☐ 2+ ☐ 3+

x ☐ + ☐ 2+ ☐ 3+

y ☒ + ☒ 2+ ☐ 3+

z ☐ + ☐ 2+ ☐ 3+

hide H<sub>2</sub>O/NH<sub>3</sub> ☐

zoom 112-122 ☐

GO

DLSLEETQKKLEAAEER, MH+ 2085.1444, m/z 522.0416  
L OS G17 P120811 220811-s1.06474.06474.4.dta

scan 6474; 9.2e+000

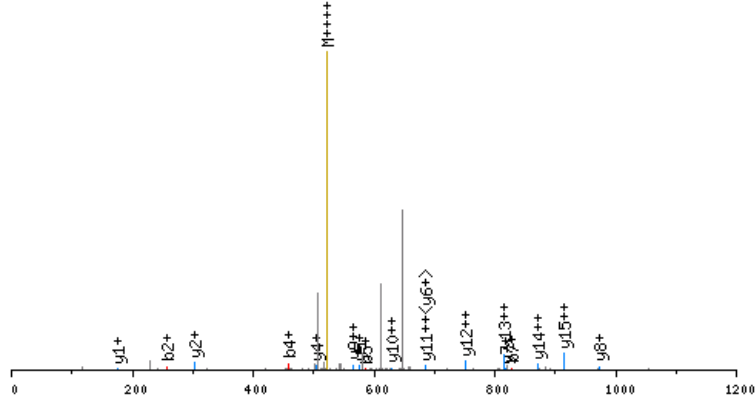

click image to zoom in; click top corners to zoom out [\[precursor±\]](#)

scan 6473; 522.0 m/z; 8.0e+000

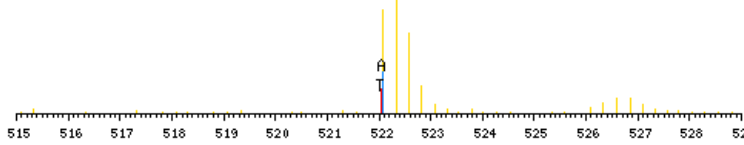

zoomed in precursor plot; T=theoretical m/z, A=acquired m/z

| b <sup>+</sup> | #  | AA | #  | y <sup>+</sup> | y <sup>2+</sup> |
|----------------|----|----|----|----------------|-----------------|
| 144.0660       | 1  | D  | 17 |                |                 |
| 257.1501       | 2  | L  | 16 | 1942.0862      | 971.5470        |
| 344.1821       | 3  | S  | 15 | 1829.0021      | 915.0050        |
| 457.2662       | 4  | L  | 14 | 1741.9701      | 871.4889        |
| 586.3088       | 5  | E  | 13 | 1628.8860      | 814.9469        |
| 715.3514       | 6  | E  | 12 | 1499.8434      | 750.4256        |
| 828.4354       | 7  | I  | 11 | 1370.8008      | 685.9043        |
| 956.4940       | 8  | Q  | 10 | 1257.7167      | 629.3623        |
| 1112.6203      | 9  | K  | 9  | 1129.6582      | 565.3330        |
| 1268.7466      | 10 | K  | 8  | 973.5319       | 487.2698        |
| 1381.8307      | 11 | L  | 7  | 817.4056       | 409.2067        |
| 1510.8733      | 12 | E  | 6  | 704.3215       | 352.6647        |
| 1581.9104      | 13 | A  | 5  | 575.2789       | 288.1434        |
| 1652.9475      | 14 | A  | 4  | 504.2418       | 252.6248        |
| 1781.9901      | 15 | E  | 3  | 433.2047       | 217.1063        |
| 1911.0327      | 16 | E  | 2  | 304.1621       | 152.5850        |
|                | 17 | R  | 1  | 175.1195       | 88.0637         |

N-term:+29.04 K(9):+156.13  
K(10):+156.13

X-range:

0 - 0

MassTol: Y-zoom:

0. 1.

MassType:

☐ AVG ☒ MONO

Axis:

☒ 1 ☐ 2

Label:

☒ I ☐ M ☐ -

Ions:

a ☐ + ☐ 2+ ☐ 3+

b ☒ + ☐ 2+ ☐ 3+

c ☐ + ☐ 2+ ☐ 3+

x ☐ + ☐ 2+ ☐ 3+

y ☒ + ☒ 2+ ☐ 3+

z ☐ + ☐ 2+ ☐ 3+

hide H<sub>2</sub>O/NH<sub>3</sub> ☐

zoom 112-122 ☐

GO

DLSSSDLSTASK, MH+ 1266.6429, m/z 633.8251  
L OS G13 P120811 220811-s1.03076.03076.2.dta

scan 3076; 1.3e+000

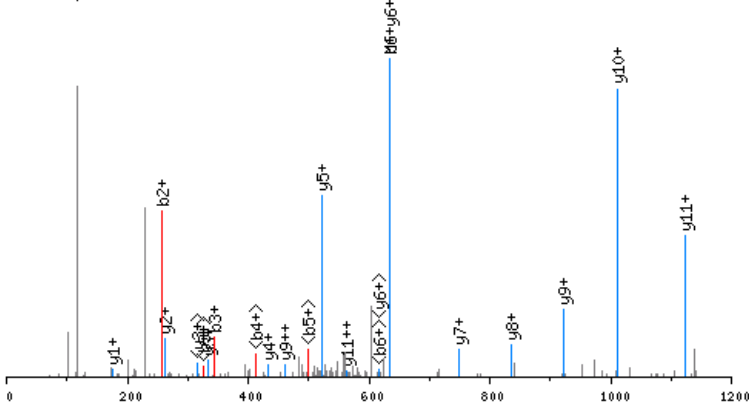

click image to zoom in; click top corners to zoom out

[precursor±]

scan 3074; 633.8 m/z; 2.1e+001

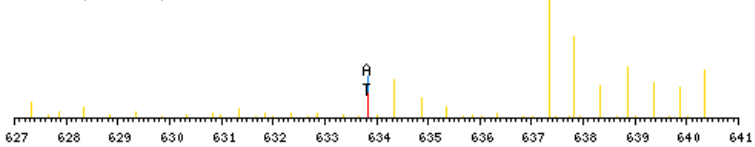

zoomed in precursor plot; T=theoretical m/z, A=acquired m/z

| b <sup>+</sup> | #  | AA | #  | y <sup>+</sup> | y <sup>2+</sup> |
|----------------|----|----|----|----------------|-----------------|
| 144.0660       | 1  | D  | 12 |                |                 |
| 257.1501       | 2  | L  | 11 | 1123.5847      | 562.2963        |
| 344.1821       | 3  | S  | 10 | 1010.5006      | 505.7542        |
| 431.2142       | 4  | S  | 9  | 923.4686       | 462.2382        |
| 518.2462       | 5  | S  | 8  | 836.4366       | 418.7222        |
| 633.2731       | 6  | D  | 7  | 749.4045       | 375.2062        |
| 746.3572       | 7  | L  | 6  | 634.3776       | 317.6927        |
| 833.3892       | 8  | S  | 5  | 521.2935       | 261.1507        |
| 934.4369       | 9  | T  | 4  | 434.2615       | 217.6347        |
| 1005.4740      | 10 | A  | 3  | 333.2138       | 167.1108        |
| 1092.5060      | 11 | S  | 2  | 262.1767       | 131.5923        |
|                | 12 | K  | 1  | 175.1447       | 88.0763         |

N-term:+29.04 K(12):+156.13

X-range:

0 - 0

MassTol: Y-zoom:

0. 1.

MassType:

☐ AVG ☒ MONO

Axis:

☒ 1 ☐ 2

Label:

☒ I ☐ M ☐ -

Ions:

a ☐ + ☐ 2+ ☐ 3+

b ☒ + ☐ 2+ ☐ 3+

c ☐ + ☐ 2+ ☐ 3+

x ☐ + ☐ 2+ ☐ 3+

y ☒ + ☒ 2+ ☐ 3+

z ☐ + ☐ 2+ ☐ 3+

hide H<sub>2</sub>O/NH<sub>3</sub> ☐

zoom 112-122 ☐

GO

DLSSSDLSTASKIVK, MH+ 1634.9217, m/z 545.6454  
L OS G14 P120811 220811-s1.04752.04752.3.dta

scan 4752; 7.5e+000

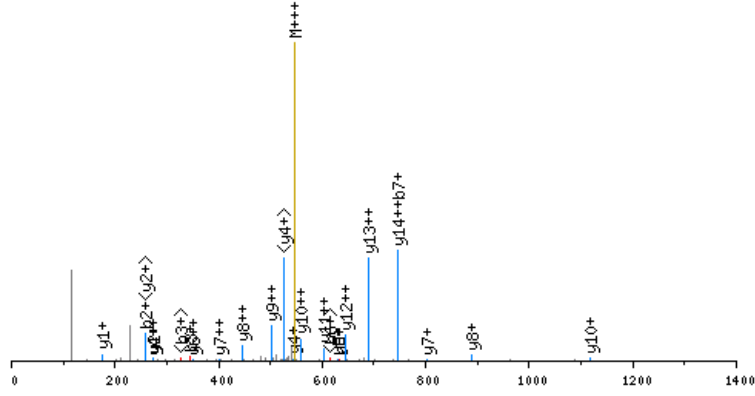

click image to zoom in; click top corners to zoom out [\[precursor±\]](#)

scan 4751; 545.6 m/z; 2.1e+001

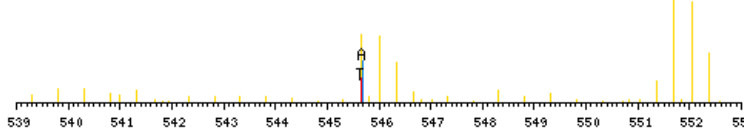

zoomed in precursor plot; T=theoretical m/z, A=acquired m/z

| b <sup>+</sup> | #  | AA | #  | y <sup>+</sup> | y <sup>2+</sup> |
|----------------|----|----|----|----------------|-----------------|
| 144.0660       | 1  | D  | 15 |                |                 |
| 257.1501       | 2  | L  | 14 | 1491.8635      | 746.4356        |
| 344.1821       | 3  | S  | 13 | 1378.7794      | 689.8936        |
| 431.2142       | 4  | S  | 12 | 1291.7474      | 646.3776        |
| 518.2462       | 5  | S  | 11 | 1204.7154      | 602.8616        |
| 633.2731       | 6  | D  | 10 | 1117.6833      | 559.3456        |
| 746.3572       | 7  | L  | 9  | 1002.6564      | 501.8321        |
| 833.3892       | 8  | S  | 8  | 889.5723       | 445.2901        |
| 934.4369       | 9  | T  | 7  | 802.5403       | 401.7741        |
| 1005.4740      | 10 | A  | 6  | 701.4926       | 351.2502        |
| 1092.5060      | 11 | S  | 5  | 630.4555       | 315.7317        |
| 1248.6323      | 12 | K  | 4  | 543.4235       | 272.2156        |
| 1361.7164      | 13 | I  | 3  | 387.2972       | 194.1525        |
| 1460.7848      | 14 | V  | 2  | 274.2131       | 137.6105        |
|                | 15 | K  | 1  | 175.1447       | 88.0763         |

N-term:+29.04 K(12):+156.13  
K(15):+156.13

X-range:

0 - 0

MassTol: Y-zoom:

0. 1.

MassType:

☐AVG ☒MONO

Axis:

☒1 ☐2

Label:

☒I ☐M ☐-

Ions:

a ☐+ ☐2+ ☐3+

b ☒+ ☐2+ ☐3+

c ☐+ ☐2+ ☐3+

x ☐+ ☐2+ ☐3+

y ☒+ ☒2+ ☐3+

z ☐+ ☐2+ ☐3+

hide H<sub>2</sub>O/NH<sub>3</sub> ☐

zoom 112-122 ☐

GO

DLYANNMSGGTTMYPGIADR, MH+ 2274.0535, m/z 758.6893  
L OS G12 P120811 220811-s1.04950.04950.3.dta

scan 4950; 1.2e+000

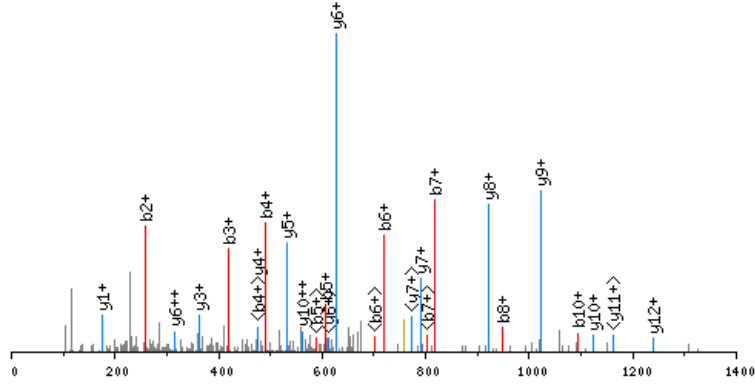

click image to zoom in; click top corners to zoom out [precursor±]

scan 4947; 758.7 m/z; 4.9e+000

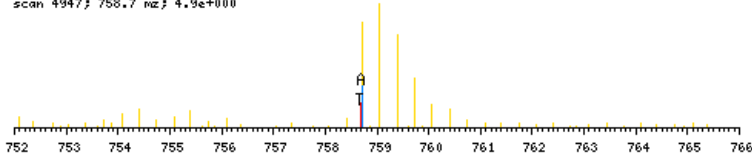

zoomed in precursor plot; T=theoretical m/z, A=acquired m/z

| b <sup>+</sup> | #  | AA | #  | y <sup>+</sup> | y <sup>2+</sup> |
|----------------|----|----|----|----------------|-----------------|
| 144.0660       | 1  | D  | 21 |                |                 |
| 257.1501       | 2  | L  | 20 | 2130.9952      | 1066.0015       |
| 420.2134       | 3  | Y  | 19 | 2017.9112      | 1009.4595       |
| 491.2505       | 4  | A  | 18 | 1854.8478      | 927.9278        |
| 605.2935       | 5  | N  | 17 | 1783.8107      | 892.4093        |
| 719.3364       | 6  | N  | 16 | 1669.7678      | 835.3878        |
| 818.4048       | 7  | V  | 15 | 1555.7249      | 778.3663        |
| 949.4453       | 8  | M  | 14 | 1456.6565      | 728.8321        |
| 1036.4773      | 9  | S  | 13 | 1325.6160      | 663.3119        |
| 1093.4988      | 10 | G  | 12 | 1238.5839      | 619.7959        |
| 1150.5203      | 11 | G  | 11 | 1181.5625      | 591.2852        |
| 1251.5679      | 12 | T  | 10 | 1124.5410      | 562.7744        |
| 1352.6156      | 13 | T  | 9  | 1023.4933      | 512.2506        |
| 1483.6561      | 14 | M  | 8  | 922.4457       | 461.7267        |
| 1646.7194      | 15 | Y  | 7  | 791.4052       | 396.2065        |
| 1743.7722      | 16 | P  | 6  | 628.3418       | 314.6748        |
| 1800.7937      | 17 | G  | 5  | 531.2891       | 266.1485        |
| 1913.8777      | 18 | I  | 4  | 474.2676       | 237.6377        |
| 1984.9148      | 19 | A  | 3  | 361.1836       | 181.0957        |
| 2099.9418      | 20 | D  | 2  | 290.1464       | 145.5771        |
|                | 21 | R  | 1  | 175.1195       | 88.0637         |

N-term:+29.04

X-range:

0 - 0

MassTol: Y-zoom:

0. 1.

MassType:

☐AVG ☒MONO

Axis:

☒1 ☐2

Label:

☒I ☐M ☐-

Ions:

a ☐+ ☐2+ ☐3+

b ☒+ ☐2+ ☐3+

c ☐+ ☐2+ ☐3+

x ☐+ ☐2+ ☐3+

y ☒+ ☒2+ ☐3+

z ☐+ ☐2+ ☐3+

hide H<sub>2</sub>O/NH<sub>3</sub> ☐

zoom 112-122 ☐

GO

DMAETFDQGAHHAFGQGGR, MH+ 2059.9044, m/z 515.7316  
L OS G17 P120811 220811-s1.04870.04870.4.dta

scan 4870; 1.9e+000

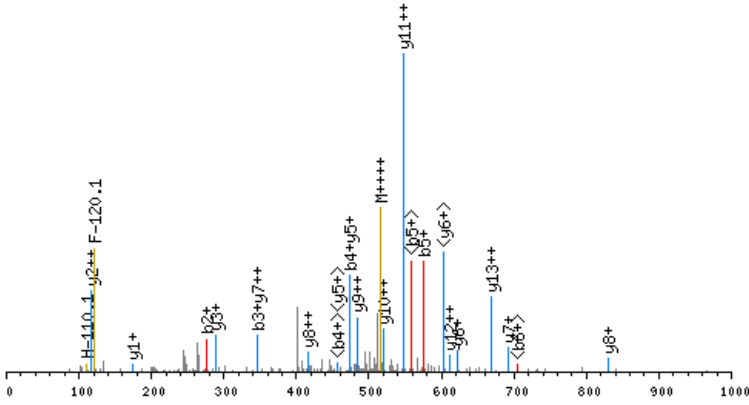

click image to zoom in; click top corners to zoom out

[precursor±]

scan 4868; 515.7 m/z; 1.4e+001

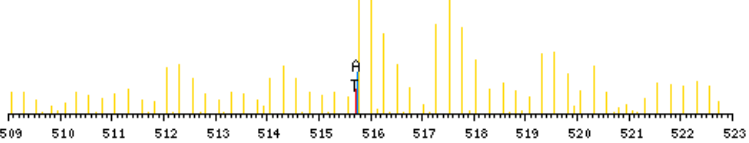

zoomed in precursor plot; T=theoretical m/z, A=acquired m/z

| b <sup>+</sup> | #  | AA | #  | y <sup>+</sup> | y <sup>2+</sup> |
|----------------|----|----|----|----------------|-----------------|
| 144.0660       | 1  | D  | 19 |                |                 |
| 275.1065       | 2  | M  | 18 | 1916.8462      | 958.9270        |
| 346.1436       | 3  | A  | 17 | 1785.8057      | 893.4068        |
| 475.1862       | 4  | E  | 16 | 1714.7686      | 857.8882        |
| 576.2339       | 5  | T  | 15 | 1585.7260      | 793.3669        |
| 723.3023       | 6  | F  | 14 | 1484.6783      | 742.8431        |
| 838.3293       | 7  | D  | 13 | 1337.6099      | 669.3089        |
| 966.3878       | 8  | Q  | 12 | 1222.5830      | 611.7954        |
| 1023.4093      | 9  | G  | 11 | 1094.5244      | 547.7661        |
| 1094.4464      | 10 | A  | 10 | 1037.5029      | 519.2554        |
| 1231.5053      | 11 | H  | 9  | 966.4658       | 483.7368        |
| 1368.5642      | 12 | H  | 8  | 829.4069       | 415.2074        |
| 1439.6014      | 13 | A  | 7  | 692.3480       | 346.6779        |
| 1586.6698      | 14 | F  | 6  | 621.3109       | 311.1594        |
| 1643.6912      | 15 | G  | 5  | 474.2425       | 237.6251        |
| 1771.7498      | 16 | Q  | 4  | 417.2210       | 209.1144        |
| 1828.7713      | 17 | G  | 3  | 289.1624       | 145.0851        |
| 1885.7927      | 18 | G  | 2  | 232.1410       | 116.5744        |
|                | 19 | R  | 1  | 175.1195       | 88.0637         |

N-term:+29.04

N-term: +29.04 K(8) : +156.13

X-range:

0 - 0

MassTol: Y-zoom:

0. 1.

MassType:

☐AVG ☒MONO

Axis:

☒1 ☐2

Label:

☒I ☐M ☐-

Ions:

a ☐+ ☐2+ ☐3+

b ☒+ ☐2+ ☐3+

c ☐+ ☐2+ ☐3+

x ☐+ ☐2+ ☐3+

y ☒+ ☒2+ ☐3+

z ☐+ ☐2+ ☐3+

hide H<sub>2</sub>O/NH<sub>3</sub> ☐

zoom 112-122 ☐

GO

DNKSFVLVWVNEEDHLR, MH+ 2069.1092, m/z 518.0328  
H OS G17 P120811 220811-s1.06367.06367.4.dta

scan 6367; 1.3e+000

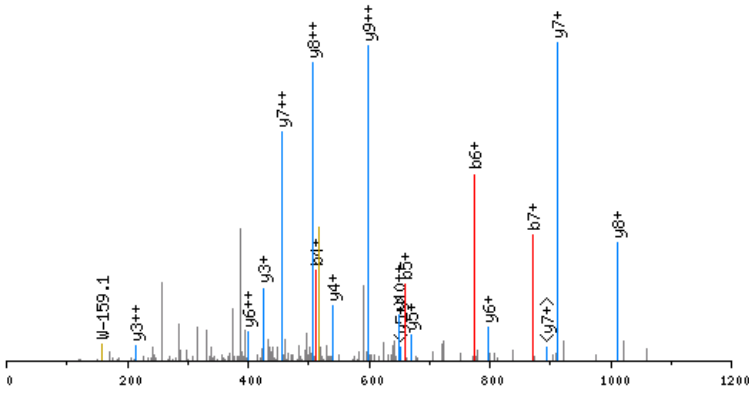

click image to zoom in; click top corners to zoom out

[precursor±]

scan 6365; 518.0 m/z; 3.8e+000

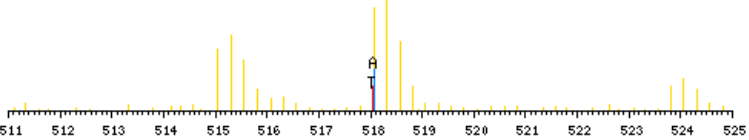

zoomed in precursor plot; T=theoretical m/z, A=acquired m/z

| b <sup>+</sup> | #  | AA | #  | y <sup>+</sup> | y <sup>2+</sup> |
|----------------|----|----|----|----------------|-----------------|
| 150.0978       | 1  | D  | 16 |                |                 |
| 264.1408       | 2  | N  | 15 | 1920.0192      | 960.5135        |
| 426.2989       | 3  | K  | 14 | 1805.9763      | 903.4921        |
| 513.3309       | 4  | S  | 13 | 1643.8182      | 822.4130        |
| 660.3993       | 5  | F  | 12 | 1556.7862      | 778.8970        |
| 773.4834       | 6  | L  | 11 | 1409.7177      | 705.3628        |
| 872.5518       | 7  | V  | 10 | 1296.6337      | 648.8207        |
| 1058.6311      | 8  | W  | 9  | 1197.5653      | 599.2865        |
| 1157.6995      | 9  | V  | 8  | 1011.4859      | 506.2469        |
| 1271.7424      | 10 | N  | 7  | 912.4175       | 456.7127        |
| 1400.7850      | 11 | E  | 6  | 798.3746       | 399.6912        |
| 1529.8276      | 12 | E  | 5  | 669.3320       | 335.1699        |
| 1644.8546      | 13 | D  | 4  | 540.2894       | 270.6486        |
| 1781.9135      | 14 | H  | 3  | 425.2625       | 213.1352        |
| 1894.9976      | 15 | L  | 2  | 288.2036       | 144.6057        |
|                | 16 | R  | 1  | 175.1195       | 88.0637         |

N-term:+35.07 K(3):+162.16

X-range:

0 - 0

MassTol: Y-zoom:

0. 1.

MassType:

☐ AVG ☒ MONO

Axis:

☒ 1 ☐ 2

Label:

☒ I ☐ M ☐ -

Ions:

a ☐ + ☐ 2+ ☐ 3+

b ☒ + ☐ 2+ ☐ 3+

c ☐ + ☐ 2+ ☐ 3+

x ☐ + ☐ 2+ ☐ 3+

y ☒ + ☒ 2+ ☐ 3+

z ☐ + ☐ 2+ ☐ 3+

hide H<sub>2</sub>O/NH<sub>3</sub> ☐

zoom 112-122 ☐

GO

DNNKISNIPDEYFKR, MH+ 1937.0133, m/z 485.0088  
L OS G17 P120811 220811-s1.05056.05056.4.dta

scan 5056; 9.0e+000

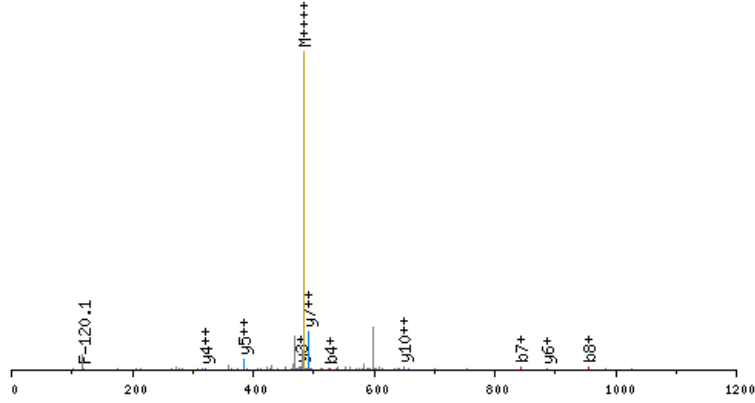

click image to zoom in; click top corners to zoom out [\[precursor±\]](#)

scan 5053; 485.0 m/z; 9.0e+000

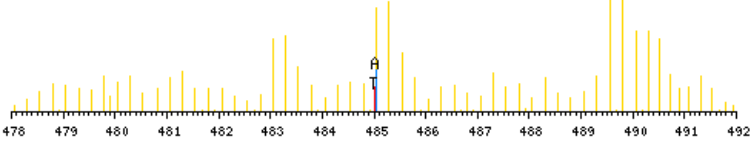

zoomed in precursor plot; T=theoretical m/z, A=acquired m/z

| b <sup>+</sup> | #  | AA | #  | y <sup>+</sup> | y <sup>2+</sup> |
|----------------|----|----|----|----------------|-----------------|
| 144.0660       | 1  | D  | 15 |                |                 |
| 258.1090       | 2  | N  | 14 | 1793.9551      | 897.4815        |
| 372.1519       | 3  | N  | 13 | 1679.9122      | 840.4600        |
| 528.2782       | 4  | K  | 12 | 1565.8692      | 783.4385        |
| 641.3623       | 5  | I  | 11 | 1409.7429      | 705.3754        |
| 728.3943       | 6  | S  | 10 | 1296.6589      | 648.8333        |
| 842.4372       | 7  | N  | 9  | 1209.6268      | 605.3173        |
| 955.5213       | 8  | I  | 8  | 1095.5839      | 548.2959        |
| 1052.5740      | 9  | P  | 7  | 982.4998       | 491.7538        |
| 1167.6010      | 10 | D  | 6  | 885.4471       | 443.2275        |
| 1296.6436      | 11 | E  | 5  | 770.4201       | 385.7140        |
| 1459.7069      | 12 | Y  | 4  | 641.3775       | 321.1927        |
| 1606.7753      | 13 | F  | 3  | 478.3142       | 239.6610        |
| 1762.9016      | 14 | K  | 2  | 331.2458       | 166.1268        |
|                | 15 | R  | 1  | 175.1195       | 88.0637         |

N-term:+29.04 K(4):+156.13  
K(14):+156.13

X-range:

0 - 0

MassTol: Y-zoom:

0. 1.

MassType:

☐ AVG ☒ MONO

Axis:

☒ 1 ☐ 2

Label:

☒ I ☐ M ☐ -

Ions:

a ☐ + ☐ 2+ ☐ 3+

b ☒ + ☐ 2+ ☐ 3+

c ☐ + ☐ 2+ ☐ 3+

x ☐ + ☐ 2+ ☐ 3+

y ☒ + ☒ 2+ ☐ 3+

z ☐ + ☐ 2+ ☐ 3+

hide H<sub>2</sub>O/NH<sub>3</sub> ☐

zoom 112-122 ☐

GO

DPASTLPDIQVQENFSESR, MH+ 2167.0731, m/z 723.0292  
H OS G12 P120811 220811-s1.04724.04724.3.dta

scan 4724; 1.4e+000

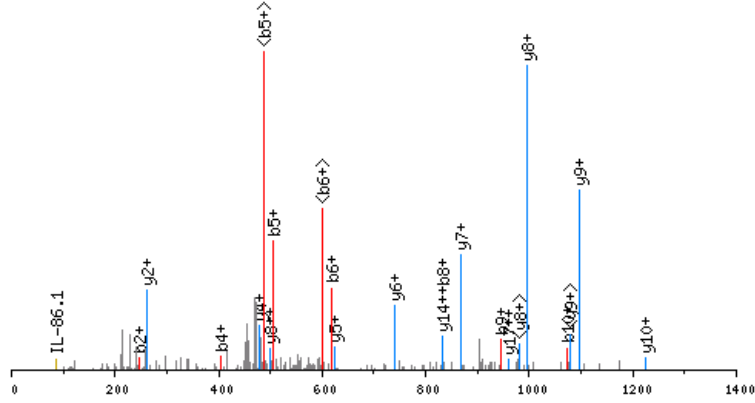

click image to zoom in; click top corners to zoom out [\[precursor±\]](#)

scan 4722; 723.0 m/z; 4.7e+000

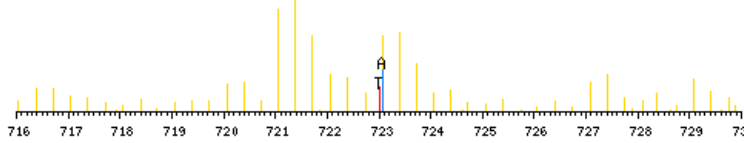

zoomed in precursor plot; T=theoretical m/z, A=acquired m/z

| b <sup>+</sup> | #  | AA | #  | y <sup>+</sup> | y <sup>2+</sup> |
|----------------|----|----|----|----------------|-----------------|
| 150.0978       | 1  | D  | 19 |                |                 |
| 247.1506       | 2  | P  | 18 | 2017.9831      | 1009.4954       |
| 318.1877       | 3  | A  | 17 | 1920.9303      | 960.9691        |
| 405.2197       | 4  | S  | 16 | 1849.8932      | 925.4505        |
| 506.2674       | 5  | T  | 15 | 1762.8612      | 881.9345        |
| 619.3515       | 6  | L  | 14 | 1661.8135      | 831.4107        |
| 716.4043       | 7  | P  | 13 | 1548.7294      | 774.8686        |
| 831.4312       | 8  | D  | 12 | 1451.6767      | 726.3422        |
| 944.5153       | 9  | I  | 11 | 1336.6497      | 668.8288        |
| 1072.5738      | 10 | Q  | 10 | 1223.5657      | 612.2867        |
| 1171.6423      | 11 | V  | 9  | 1095.5071      | 548.2575        |
| 1299.7008      | 12 | Q  | 8  | 996.4387       | 498.7232        |
| 1428.7434      | 13 | E  | 7  | 868.3801       | 434.6940        |
| 1542.7864      | 14 | N  | 6  | 739.3375       | 370.1727        |
| 1689.8548      | 15 | F  | 5  | 625.2946       | 313.1512        |
| 1776.8868      | 16 | S  | 4  | 478.2262       | 239.6170        |
| 1905.9294      | 17 | E  | 3  | 391.1941       | 196.1010        |
| 1992.9614      | 18 | S  | 2  | 262.1515       | 131.5797        |
|                | 19 | R  | 1  | 175.1195       | 88.0637         |

N-term:+35.07

X-range:

0 - 0

MassTol: Y-zoom:

0. 1.

MassType:

☐ AVG ☒ MONO

Axis:

☒ 1 ☐ 2

Label:

☒ I ☐ M ☐ -

Ions:

a ☐ + ☐ 2+ ☐ 3+

b ☒ + ☐ 2+ ☐ 3+

c ☐ + ☐ 2+ ☐ 3+

x ☐ + ☐ 2+ ☐ 3+

y ☒ + ☒ 2+ ☐ 3+

z ☐ + ☐ 2+ ☐ 3+

hide H<sub>2</sub>O/NH<sub>3</sub> ☐

zoom 112-122 ☐

GO

DPPASVVVGPPVVVPR, MH+ 1521.9217, m/z 507.9787  
H OS G12 P120811 220811-s1.04631.04631.3.dta

scan 4631; 2.1e+000

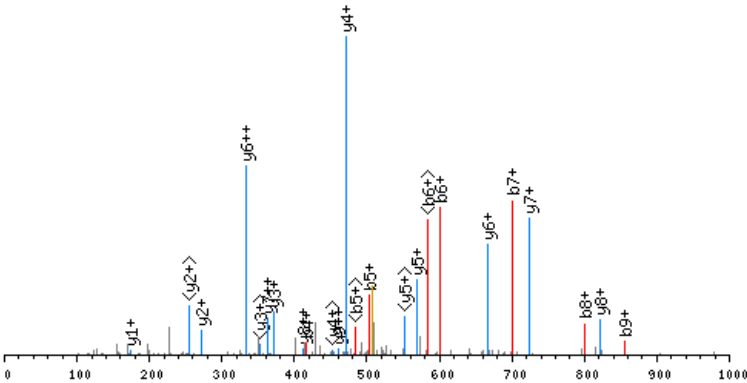

click image to zoom in; click top corners to zoom out [\[precursor±\]](#)

scan 4627; 508.0 m/z; 4.0e+000

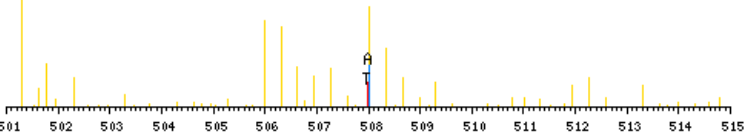

zoomed in precursor plot; T=theoretical m/z, A=acquired m/z

| b <sup>+</sup> | #  | AA | #  | y <sup>+</sup> | y <sup>2+</sup> |
|----------------|----|----|----|----------------|-----------------|
| 150.0978       | 1  | D  | 15 |                |                 |
| 247.1506       | 2  | P  | 14 | 1372.8316      | 686.9197        |
| 344.2034       | 3  | P  | 13 | 1275.7789      | 638.3934        |
| 415.2405       | 4  | A  | 12 | 1178.7261      | 589.8670        |
| 502.2725       | 5  | S  | 11 | 1107.6890      | 554.3484        |
| 601.3409       | 6  | V  | 10 | 1020.6570      | 510.8324        |
| 700.4093       | 7  | V  | 9  | 921.5886       | 461.2982        |
| 799.4778       | 8  | V  | 8  | 822.5201       | 411.7640        |
| 856.4992       | 9  | G  | 7  | 723.4517       | 362.2298        |
| 953.5520       | 10 | P  | 6  | 666.4303       | 333.7190        |
| 1052.6204      | 11 | V  | 5  | 569.3775       | 285.1927        |
| 1151.6888      | 12 | V  | 4  | 470.3091       | 235.6585        |
| 1250.7572      | 13 | V  | 3  | 371.2407       | 186.1243        |
| 1347.8100      | 14 | P  | 2  | 272.1723       | 136.5900        |
|                | 15 | R  | 1  | 175.1195       | 88.0637         |

N-term:+35.07

X-range:

0 - 0

MassTol: Y-zoom:

0. 1.

MassType:

☐ AVG ☒ MONO

Axis:

☒ 1 ☐ 2

Label:

☒ I ☐ M ☐ -

Ions:

a ☐ + ☐ 2+ ☐ 3+

b ☒ + ☐ 2+ ☐ 3+

c ☐ + ☐ 2+ ☐ 3+

x ☐ + ☐ 2+ ☐ 3+

y ☒ + ☒ 2+ ☐ 3+

z ☐ + ☐ 2+ ☐ 3+

hide H<sub>2</sub>O/NH<sub>3</sub> ☐

zoom 112-122 ☐

GO

DPVLCFTQYEESGR, MH+ 1821.8541, m/z 607.9562  
H OS G12 P120811 220811-s1.04779.04779.3.dta

scan 4779; 1.5e+000

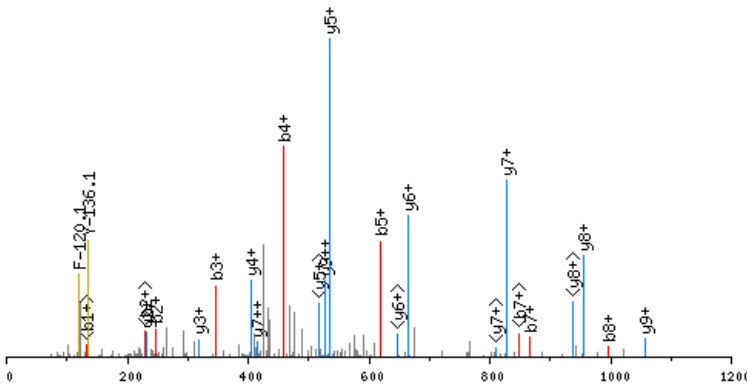

click image to zoom in; click top corners to zoom out

[precursor±]

scan 4777; 608.0 m/z; 6.5e+000

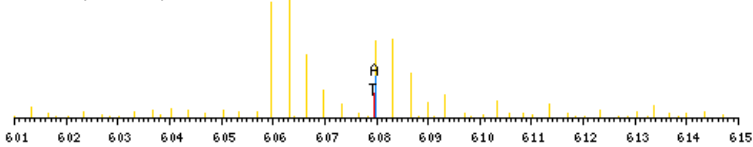

zoomed in precursor plot; T=theoretical m/z, A=acquired m/z

| b <sup>+</sup> | #  | AA | #  | y <sup>+</sup> | y <sup>2+</sup> |
|----------------|----|----|----|----------------|-----------------|
| 150.0978       | 1  | D  | 15 |                |                 |
| 247.1506       | 2  | P  | 14 | 1672.7640      | 836.8859        |
| 346.2190       | 3  | V  | 13 | 1575.7113      | 788.3596        |
| 459.3031       | 4  | L  | 12 | 1476.6429      | 738.8253        |
| 619.3337       | 5  | C  | 11 | 1363.5588      | 682.2833        |
| 766.4021       | 6  | F  | 10 | 1203.5282      | 602.2680        |
| 867.4498       | 7  | T  | 9  | 1056.4598      | 528.7338        |
| 995.5084       | 8  | Q  | 8  | 955.4121       | 478.2100        |
| 1158.5717      | 9  | Y  | 7  | 827.3535       | 414.1807        |
| 1287.6143      | 10 | E  | 6  | 664.2902       | 332.6490        |
| 1416.6569      | 11 | E  | 5  | 535.2476       | 268.1277        |
| 1503.6889      | 12 | S  | 4  | 406.2050       | 203.6064        |
| 1590.7209      | 13 | S  | 3  | 319.1730       | 160.0904        |
| 1647.7424      | 14 | G  | 2  | 232.1410       | 116.5744        |
|                | 15 | R  | 1  | 175.1195       | 88.0637         |

N-term:+35.07 C(5):+160.03

X-range:

0 - 0

MassTol: Y-zoom:

0. 1.

MassType:

☐ AVG ☒ MONO

Axis:

☒ 1 ☐ 2

Label:

☒ I ☐ M ☐ -

Ions:

a ☐ + ☐ 2+ ☐ 3+

b ☒ + ☐ 2+ ☐ 3+

c ☐ + ☐ 2+ ☐ 3+

x ☐ + ☐ 2+ ☐ 3+

y ☒ + ☒ 2+ ☐ 3+

z ☐ + ☐ 2+ ☐ 3+

hide H<sub>2</sub>O/NH<sub>3</sub> ☐

zoom 112-122 ☐

GO

DQDEIDCLPGLAKQPSFR, MH+ 2145.0650, m/z 715.6932  
L OS G14 P120811 220811-s1.05553.05553.3.dta

scan 5553; 1.7e+000

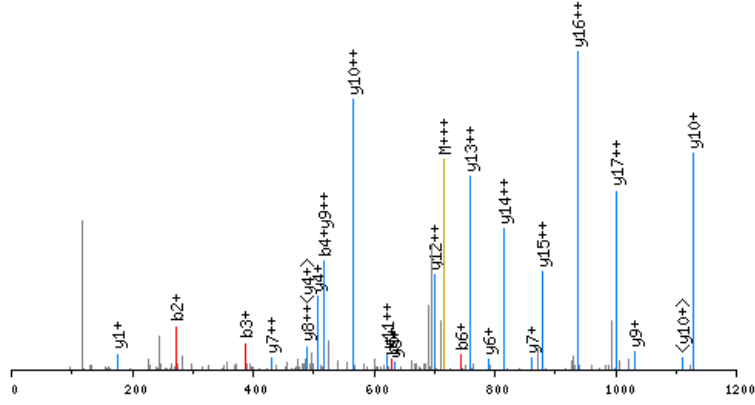

click image to zoom in; click top corners to zoom out

[precursor±]

scan 5551; 715.7 m/z; 2.4e+000

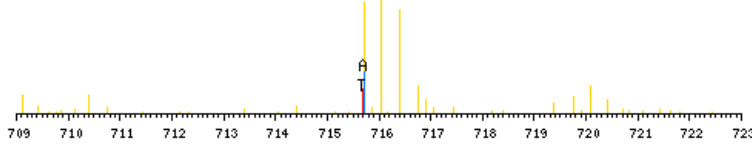

zoomed in precursor plot; T=theoretical m/z, A=acquired m/z

| b <sup>+</sup> | #  | AA | #  | y <sup>+</sup> | y <sup>2+</sup> |
|----------------|----|----|----|----------------|-----------------|
| 144.0660       | 1  | D  | 18 |                |                 |
| 272.1246       | 2  | Q  | 17 | 2002.0068      | 1001.5073       |
| 387.1516       | 3  | D  | 16 | 1873.9482      | 937.4780        |
| 516.1942       | 4  | E  | 15 | 1758.9213      | 879.9645        |
| 629.2782       | 5  | I  | 14 | 1629.8787      | 815.4432        |
| 744.3052       | 6  | D  | 13 | 1516.7946      | 758.9012        |
| 904.3358       | 7  | C  | 12 | 1401.7677      | 701.3877        |
| 1017.4198      | 8  | L  | 11 | 1241.7371      | 621.3724        |
| 1114.4726      | 9  | P  | 10 | 1128.6530      | 564.8304        |
| 1171.4941      | 10 | G  | 9  | 1031.6002      | 516.3040        |
| 1284.5781      | 11 | L  | 8  | 974.5788       | 487.7933        |
| 1355.6152      | 12 | A  | 7  | 861.4947       | 431.2513        |
| 1511.7415      | 13 | K  | 6  | 790.4576       | 395.7327        |
| 1639.8001      | 14 | Q  | 5  | 634.3313       | 317.6696        |
| 1736.8529      | 15 | P  | 4  | 506.2727       | 253.6403        |
| 1823.8849      | 16 | S  | 3  | 409.2199       | 205.1139        |
| 1970.9533      | 17 | F  | 2  | 322.1879       | 161.5979        |
|                | 18 | R  | 1  | 175.1195       | 88.0637         |

N-term: +29.04 C(7): +160.03  
K(13): +156.13

X-range:

0 - 0

MassTol: Y-zoom:

0. 1.

MassType:

☐AVG ☒MONO

Axis:

☒1 ☐2

Label:

☒I ☐M ☐-

Ions:

a ☐+ ☐2+ ☐3+

b ☒+ ☐2+ ☐3+

c ☐+ ☐2+ ☐3+

x ☐+ ☐2+ ☐3+

y ☒+ ☒2+ ☐3+

z ☐+ ☐2+ ☐3+

hide H<sub>2</sub>O/NH<sub>3</sub> ☐

zoom 112-122 ☐

GO

DQPGASGDNDDEPPPLPR, MH+ 2025.9213, m/z 675.9786  
H OS G12 P120811 220811-s1.03075.03075.3.dta

scan 3075; 1.0e+000

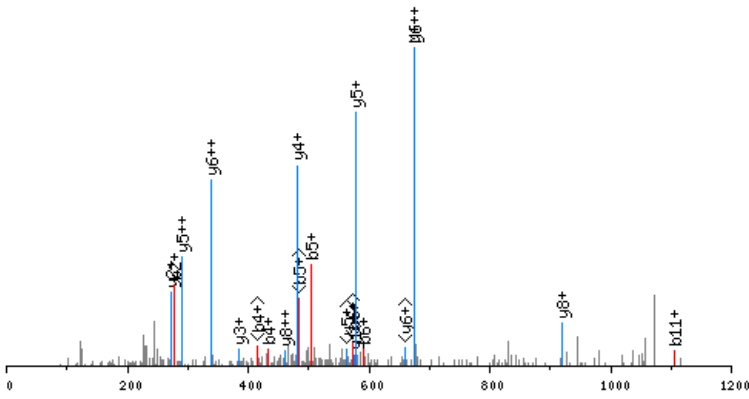

click image to zoom in; click top corners to zoom out

[precursor±]

scan 3072; 676.0 m/z; 2.3e+000

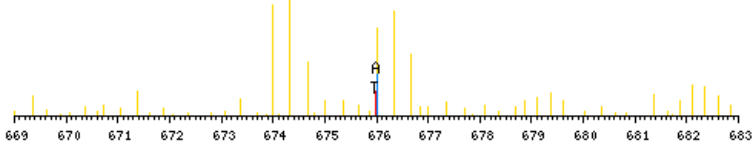

zoomed in precursor plot; T=theoretical m/z, A=acquired m/z

| b <sup>+</sup> | #  | AA | #  | y <sup>+</sup> | y <sup>2+</sup> |
|----------------|----|----|----|----------------|-----------------|
| 150.0978       | 1  | D  | 19 |                |                 |
| 278.1564       | 2  | Q  | 18 | 1876.8313      | 938.9196        |
| 375.2092       | 3  | P  | 17 | 1748.7727      | 874.8903        |
| 432.2306       | 4  | G  | 16 | 1651.7200      | 826.3639        |
| 503.2678       | 5  | A  | 15 | 1594.6985      | 797.8532        |
| 590.2998       | 6  | S  | 14 | 1523.6614      | 762.3346        |
| 647.3213       | 7  | G  | 13 | 1436.6294      | 718.8186        |
| 762.3482       | 8  | D  | 12 | 1379.6079      | 690.3079        |
| 876.3911       | 9  | N  | 11 | 1264.5810      | 632.7944        |
| 991.4181       | 10 | D  | 10 | 1150.5380      | 575.7729        |
| 1106.4450      | 11 | D  | 9  | 1035.5111      | 518.2595        |
| 1221.4720      | 12 | D  | 8  | 920.4842       | 460.7460        |
| 1350.5145      | 13 | E  | 7  | 805.4572       | 403.2325        |
| 1447.5673      | 14 | P  | 6  | 676.4146       | 338.7112        |
| 1544.6201      | 15 | P  | 5  | 579.3619       | 290.1848        |
| 1641.6728      | 16 | P  | 4  | 482.3091       | 241.6585        |
| 1754.7569      | 17 | L  | 3  | 385.2563       | 193.1321        |
| 1851.8097      | 18 | P  | 2  | 272.1723       | 136.5900        |
|                | 19 | R  | 1  | 175.1195       | 88.0637         |

N-term:+35.07

X-range:

0 - 0

MassTol: Y-zoom:

0. 1.

MassType:

☐AVG ☒MONO

Axis:

☒1 ☐2

Label:

☒I ☐M ☐-

Ions:

a ☐+ ☐2+ ☐3+

b ☒+ ☐2+ ☐3+

c ☐+ ☐2+ ☐3+

x ☐+ ☐2+ ☐3+

y ☒+ ☒2+ ☐3+

z ☐+ ☐2+ ☐3+

hide H<sub>2</sub>O/NH<sub>3</sub> ☐

zoom 112-122 ☐

GO

DQSPASHEIATNLGDFALR, MH+ 2070.0256, m/z 690.6800  
L OS G15 P120811 220811-s1.05650.05650.3.dta

scan 5650; 1.4e+000

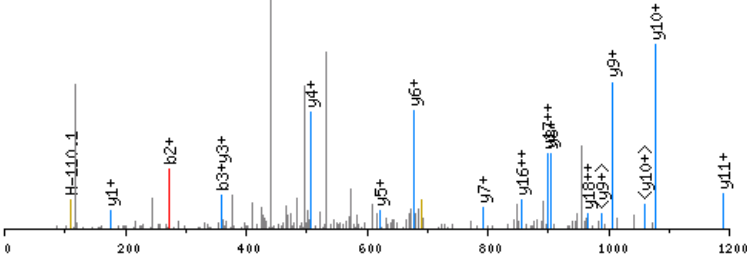

click image to zoom in; click top corners to zoom out

[precursor±]

scan 5646; 690.7 m/z; 2.4e+001

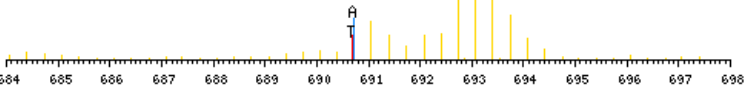

zoomed in precursor plot; T=theoretical m/z, A=acquired m/z

| b <sup>+</sup> | #  | AA | #  | y <sup>+</sup> | y <sup>2+</sup> |
|----------------|----|----|----|----------------|-----------------|
| 144.0660       | 1  | D  | 19 |                |                 |
| 272.1246       | 2  | Q  | 18 | 1926.9674      | 963.9876        |
| 359.1566       | 3  | S  | 17 | 1798.9088      | 899.9583        |
| 456.2094       | 4  | P  | 16 | 1711.8768      | 856.4423        |
| 527.2465       | 5  | A  | 15 | 1614.8240      | 807.9159        |
| 614.2786       | 6  | S  | 14 | 1543.7869      | 772.3974        |
| 751.3375       | 7  | H  | 13 | 1456.7549      | 728.8813        |
| 880.3801       | 8  | E  | 12 | 1319.6959      | 660.3519        |
| 993.4641       | 9  | I  | 11 | 1190.6533      | 595.8306        |
| 1064.5012      | 10 | A  | 10 | 1077.5693      | 539.2886        |
| 1165.5489      | 11 | T  | 9  | 1006.5322      | 503.7700        |
| 1279.5918      | 12 | N  | 8  | 905.4845       | 453.2462        |
| 1392.6759      | 13 | L  | 7  | 791.4416       | 396.2247        |
| 1449.6974      | 14 | G  | 6  | 678.3575       | 339.6827        |
| 1564.7243      | 15 | D  | 5  | 621.3360       | 311.1719        |
| 1711.7927      | 16 | F  | 4  | 506.3091       | 253.6585        |
| 1782.8298      | 17 | A  | 3  | 359.2407       | 180.1243        |
| 1895.9139      | 18 | L  | 2  | 288.2036       | 144.6057        |
|                | 19 | R  | 1  | 175.1195       | 88.0637         |

N-term:+29.04

X-range:

$$\boxed{0} - \boxed{0}$$

0. 1.

☐ AVG ☒ MONO

1 2

I M -

 $a \square + \square^2 + \square^3 +$ b. ☒ 1+ ☐ 2+ ☐ 3+

□<sub>1</sub> □<sub>2</sub> □<sub>3</sub>

c

**x** | + | 2+ | 3+

**y** ☒+ ☒2+ ☐3+

$$z \begin{bmatrix} 1 \\ 2 \\ 3 \end{bmatrix} + \begin{bmatrix} 1 \\ 2 \\ 3 \end{bmatrix}^2 + \begin{bmatrix} 1 \\ 2 \\ 3 \end{bmatrix}^3 + \dots$$
hide  $\text{H}_2\text{O}/\text{NH}_3$  ☐

zoom 112-122

GO

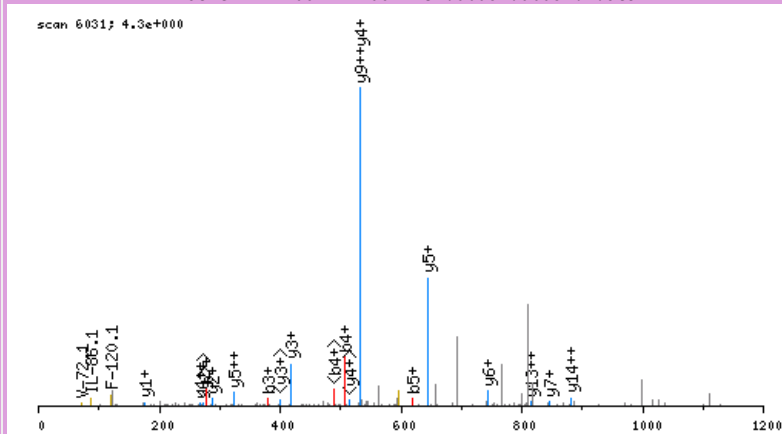

click image to zoom in; click top corners to zoom out      [precursor±]

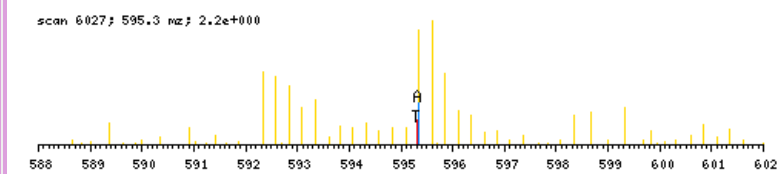

zoomed in precursor plot; T=theoretical m/z, A=acquired m/z

| $b^+$     | #  | AA | #  | $y^+$     | $y^{2+}$  |
|-----------|----|----|----|-----------|-----------|
| 150.0978  | 1  | D  | 19 |           |           |
| 278.1564  | 2  | Q  | 18 | 2229.1728 | 1115.0903 |
| 379.2041  | 3  | T  | 17 | 2101.1142 | 1051.0610 |
| 507.2627  | 4  | Q  | 16 | 2000.0666 | 1000.5372 |
| 620.3467  | 5  | I  | 15 | 1872.0080 | 936.5079  |
| 748.4053  | 6  | Q  | 14 | 1758.9239 | 879.9659  |
| 877.4479  | 7  | E  | 13 | 1630.8653 | 815.9366  |
| 1024.5163 | 8  | F  | 12 | 1501.8227 | 751.4153  |
| 1186.6744 | 9  | K  | 11 | 1354.7543 | 677.8811  |
| 1315.7170 | 10 | E  | 10 | 1192.5962 | 596.8020  |
| 1386.7541 | 11 | A  | 9  | 1063.5536 | 532.2807  |
| 1533.8225 | 12 | F  | 8  | 992.5165  | 496.7622  |
| 1634.8702 | 13 | T  | 7  | 845.4481  | 423.2280  |
| 1733.9386 | 14 | V  | 6  | 744.4004  | 372.7041  |
| 1847.0227 | 15 | I  | 5  | 645.3320  | 323.1699  |
| 1962.0496 | 16 | D  | 4  | 532.2479  | 266.6279  |
| 2090.1082 | 17 | Q  | 3  | 417.2210  | 209.1144  |
| 2204.1512 | 18 | N  | 2  | 289.1624  | 145.0851  |
|           | 19 | R  | 1  | 175.1195  | 88.0637   |

N-term: +35.07 K(9): +162.16

X-range:

0 - 0

MassTol: Y-zoom:

0. 1.

MassType:

☐AVG ☒MONO

Axis:

☒1 ☐2

Label:

☒I ☐M ☐-

Ions:

a ☐+ ☐2+ ☐3+

b ☒+ ☐2+ ☐3+

c ☐+ ☐2+ ☐3+

x ☐+ ☐2+ ☐3+

y ☒+ ☒2+ ☐3+

z ☐+ ☐2+ ☐3+

hide H<sub>2</sub>O/NH<sub>3</sub> ☐

zoom 112-122 ☐

GO

DQYELLCLDNTR, MH+ 1567.7426, m/z 523.2524  
L OS G13 P120811 220811-s1.05888.05888.3.dta

scan 5888; 3.1e+000

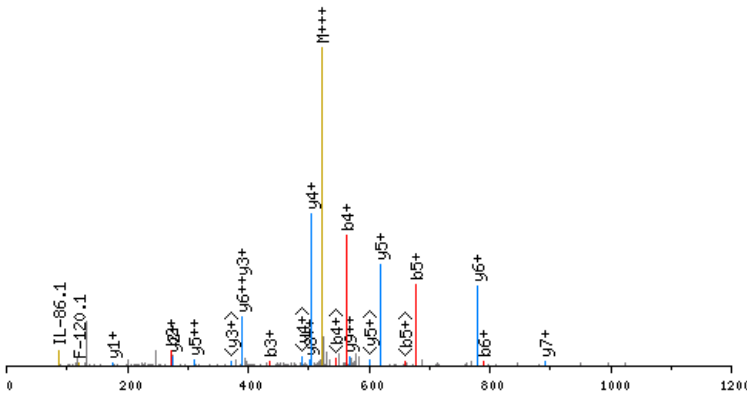

click image to zoom in; click top corners to zoom out [\[precursor±\]](#)

scan 5884; 523.3 m/z; 5.2e+000

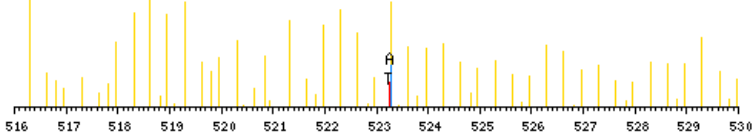

zoomed in precursor plot; T=theoretical m/z, A=acquired m/z

| b <sup>+</sup> | #  | AA | #  | y <sup>+</sup> | y <sup>2+</sup> |
|----------------|----|----|----|----------------|-----------------|
| 144.0660       | 1  | D  | 12 |                |                 |
| 272.1246       | 2  | Q  | 11 | 1424.6843      | 712.8461        |
| 435.1879       | 3  | Y  | 10 | 1296.6258      | 648.8168        |
| 564.2305       | 4  | E  | 9  | 1133.5624      | 567.2851        |
| 677.3146       | 5  | L  | 8  | 1004.5198      | 502.7638        |
| 790.3987       | 6  | L  | 7  | 891.4358       | 446.2218        |
| 950.4293       | 7  | C  | 6  | 778.3517       | 389.6798        |
| 1063.5133      | 8  | L  | 5  | 618.3211       | 309.6645        |
| 1178.5403      | 9  | D  | 4  | 505.2370       | 253.1224        |
| 1292.5832      | 10 | N  | 3  | 390.2101       | 195.6090        |
| 1393.6309      | 11 | T  | 2  | 276.1672       | 138.5875        |
|                | 12 | R  | 1  | 175.1195       | 88.0637         |

N-term:+29.04 C(7):+160.03

X-range:

0 - 0

MassTol: Y-zoom:

0. 1.

MassType:

☐AVG ☒MONO

Axis:

☒1 ☐2

Label:

☒I ☐M ☐-

Ions:

a ☐+ ☐2+ ☐3+

b ☒+ ☐2+ ☐3+

c ☐+ ☐2+ ☐3+

x ☐+ ☐2+ ☐3+

y ☒+ ☒2+ ☐3+

z ☐+ ☐2+ ☐3+

hide H<sub>2</sub>O/NH<sub>3</sub> ☐

zoom 112-122 ☐

GO

DRGETGPAGPAGPIGPAGAR, MH+ 1837.9733, m/z 613.3293  
H OS G15 P120811 220811-s1.02732.02732.3.dta

scan 2732; 1.1e+000

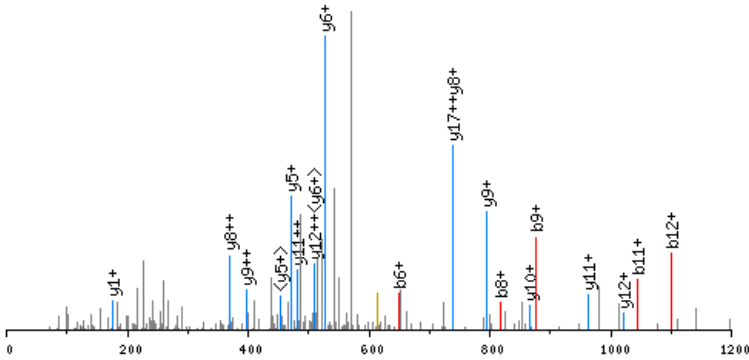

click image to zoom in; click top corners to zoom out

[precursor±]

scan 2731; 613.3 m/z; 2.2e+001

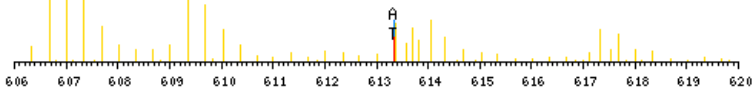

zoomed in precursor plot; T=theoretical m/z, A=acquired m/z

| b <sup>+</sup> | #  | AA | #  | y <sup>+</sup> | y <sup>2+</sup> |
|----------------|----|----|----|----------------|-----------------|
| 150.0978       | 1  | D  | 20 |                |                 |
| 306.1990       | 2  | R  | 19 | 1688.8832      | 844.9455        |
| 363.2204       | 3  | G  | 18 | 1532.7821      | 766.8950        |
| 492.2630       | 4  | E  | 17 | 1475.7607      | 738.3842        |
| 593.3107       | 5  | T  | 16 | 1346.7181      | 673.8629        |
| 650.3322       | 6  | G  | 15 | 1245.6704      | 623.3391        |
| 747.3849       | 7  | P  | 14 | 1188.6489      | 594.8284        |
| 818.4220       | 8  | A  | 13 | 1091.5962      | 546.3020        |
| 875.4435       | 9  | G  | 12 | 1020.5591      | 510.7834        |
| 972.4963       | 10 | P  | 11 | 963.5376       | 482.2727        |
| 1043.5334      | 11 | A  | 10 | 866.4848       | 433.7463        |
| 1100.5548      | 12 | G  | 9  | 795.4477       | 398.2278        |
| 1197.6076      | 13 | P  | 8  | 738.4262       | 369.7170        |
| 1310.6917      | 14 | I  | 7  | 641.3735       | 321.1907        |
| 1367.7131      | 15 | G  | 6  | 528.2894       | 264.6486        |
| 1464.7659      | 16 | P  | 5  | 471.2680       | 236.1379        |
| 1535.8030      | 17 | A  | 4  | 374.2152       | 187.6115        |
| 1592.8245      | 18 | G  | 3  | 303.1781       | 152.0930        |
| 1663.8616      | 19 | A  | 2  | 246.1566       | 123.5822        |
|                | 20 | R  | 1  | 175.1195       | 88.0637         |

N-term:+35.07

X-range:

0 - 0

MassTol: Y-zoom:

0. 1.

MassType:

☐ AVG ☒ MONO

Axis:

☒ 1 ☐ 2

Label:

☒ I ☐ M ☐ -

Ions:

a ☐ + ☐ 2+ ☐ 3+

b ☒ + ☐ 2+ ☐ 3+

c ☐ + ☐ 2+ ☐ 3+

x ☐ + ☐ 2+ ☐ 3+

y ☒ + ☒ 2+ ☐ 3+

z ☐ + ☐ 2+ ☐ 3+

hide H<sub>2</sub>O/NH<sub>3</sub> ☐

zoom 112-122 ☐

GO

DSGDGVTHNVPIYEGYALPHAIMR, MH+ 2640.2880, m/z 660.8275  
L OS G16 P120811 220811-s1.05916.05916.4.dta

scan 5916; 1.8e+000

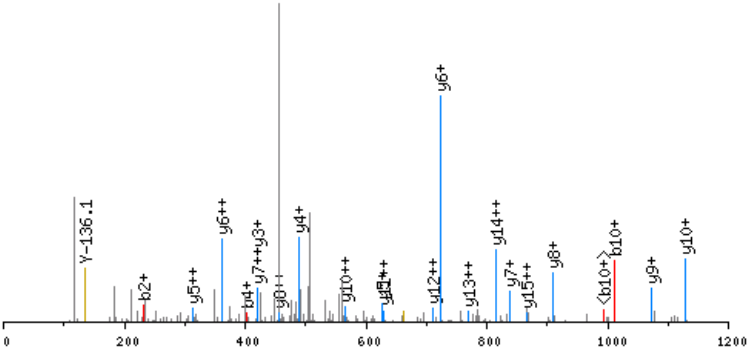

click image to zoom in; click top corners to zoom out [\[precursor±\]](#)

scan 5913; 660.8 m/z; 3.6e+000

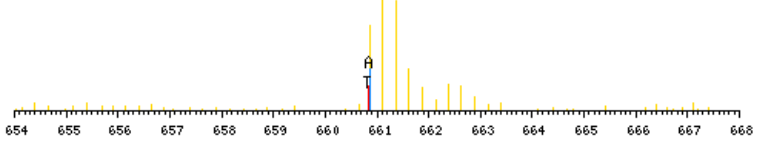

zoomed in precursor plot; T=theoretical m/z, A=acquired m/z

| b <sup>+</sup> | #  | AA | #  | y <sup>+</sup> | y <sup>2+</sup> |
|----------------|----|----|----|----------------|-----------------|
| 144.0660       | 1  | D  | 24 |                |                 |
| 231.0981       | 2  | S  | 23 | 2497.2298      | 1249.1188       |
| 288.1195       | 3  | G  | 22 | 2410.1978      | 1205.6028       |
| 403.1465       | 4  | D  | 21 | 2353.1763      | 1177.0921       |
| 460.1679       | 5  | G  | 20 | 2238.1494      | 1119.5786       |
| 559.2364       | 6  | V  | 19 | 2181.1279      | 1091.0679       |
| 660.2840       | 7  | T  | 18 | 2082.0595      | 1041.5337       |
| 797.3429       | 8  | H  | 17 | 1981.0118      | 991.0098        |
| 911.3859       | 9  | N  | 16 | 1843.9529      | 922.4804        |
| 1010.4543      | 10 | V  | 15 | 1729.9100      | 865.4589        |
| 1107.5071      | 11 | P  | 14 | 1630.8416      | 815.9247        |
| 1220.5911      | 12 | I  | 13 | 1533.7888      | 767.3983        |
| 1383.6544      | 13 | Y  | 12 | 1420.7047      | 710.8563        |
| 1512.6970      | 14 | E  | 11 | 1257.6414      | 629.3246        |
| 1569.7185      | 15 | G  | 10 | 1128.5988      | 564.8033        |
| 1732.7818      | 16 | Y  | 9  | 1071.5773      | 536.2926        |
| 1803.8189      | 17 | A  | 8  | 908.5140       | 454.7609        |
| 1916.9030      | 18 | L  | 7  | 837.4769       | 419.2424        |
| 2013.9558      | 19 | P  | 6  | 724.3928       | 362.7003        |
| 2151.0147      | 20 | H  | 5  | 627.3401       | 314.1740        |
| 2222.0518      | 21 | A  | 4  | 490.2812       | 245.6445        |
| 2335.1359      | 22 | I  | 3  | 419.2440       | 210.1259        |
| 2466.1763      | 23 | M  | 2  | 306.1600       | 153.5839        |
|                | 24 | R  | 1  | 175.1195       | 88.0637         |

N-term:+29.04

X-range:

0 - 0

MassTol: Y-zoom:

0. 1.

MassType:

☐AVG ☒MONO

Axis:

☒1 ☐2

Label:

☒I ☐M ☐-

Ions:

a ☐+ ☐2+ ☐3+

b ☒+ ☐2+ ☐3+

c ☐+ ☐2+ ☐3+

x ☐+ ☐2+ ☐3+

y ☒+ ☒2+ ☐3+

z ☐+ ☐2+ ☐3+

hide H<sub>2</sub>O/NH<sub>3</sub> ☐

zoom 112-122 ☐

GO

DSQVHSGVQVEGR, MH+ 1425.7086, m/z 475.9077  
L OS G16 P120811 220811-s1.02112.02112.3.dta

scan 2112; 4.4e+000

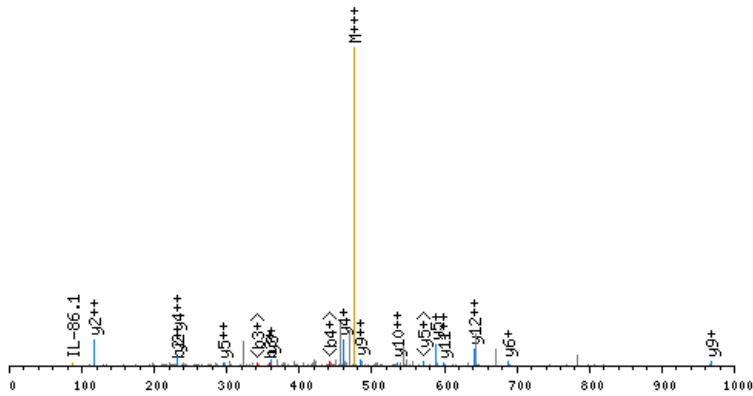

click image to zoom in; click top corners to zoom out

[precursor±]

scan 2108; 475.9 m/z; 4.4e+000

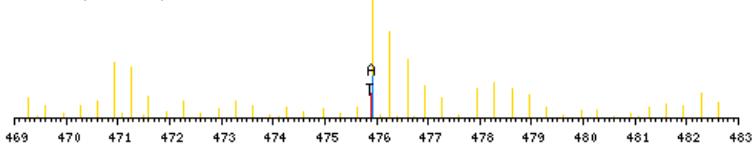

zoomed in precursor plot; T=theoretical m/z, A=acquired m/z

| b <sup>+</sup> | #  | AA | #  | y <sup>+</sup> | y <sup>2+</sup> |
|----------------|----|----|----|----------------|-----------------|
| 144.0660       | 1  | D  | 13 |                |                 |
| 231.0981       | 2  | S  | 12 | 1282.6504      | 641.8291        |
| 359.1566       | 3  | Q  | 11 | 1195.6184      | 598.3131        |
| 458.2251       | 4  | V  | 10 | 1067.5598      | 534.2838        |
| 595.2840       | 5  | H  | 9  | 968.4914       | 484.7496        |
| 682.3160       | 6  | S  | 8  | 831.4325       | 416.2201        |
| 739.3375       | 7  | G  | 7  | 744.4004       | 372.7041        |
| 838.4059       | 8  | V  | 6  | 687.3790       | 344.1934        |
| 966.4645       | 9  | Q  | 5  | 588.3105       | 294.6592        |
| 1065.5329      | 10 | V  | 4  | 460.2520       | 230.6299        |
| 1194.5755      | 11 | E  | 3  | 361.1836       | 181.0957        |
| 1251.5969      | 12 | G  | 2  | 232.1410       | 116.5744        |
|                | 13 | R  | 1  | 175.1195       | 88.0637         |

N-term:+29.04

X-range:

0 - 0

MassTol: Y-zoom:

0. 1.

MassType:

☐ AVG ☒ MONO

Axis:

☒ 1 ☐ 2

Label:

☒ I ☐ M ☐ -

Ions:

a ☐ + ☐ 2+ ☐ 3+

b ☒ + ☐ 2+ ☐ 3+

c ☐ + ☐ 2+ ☐ 3+

x ☐ + ☐ 2+ ☐ 3+

y ☒ + ☒ 2+ ☐ 3+

z ☐ + ☐ 2+ ☐ 3+

hide H<sub>2</sub>O/NH<sub>3</sub> ☐

zoom 112-122 ☐

GO

DSVSVFNGAVSDDSKR, MH+ 1750.9248, m/z 584.3131  
H OS G15 P120811 220811-s1.03633.03633.3.dta

scan 3633; 1.9e+000

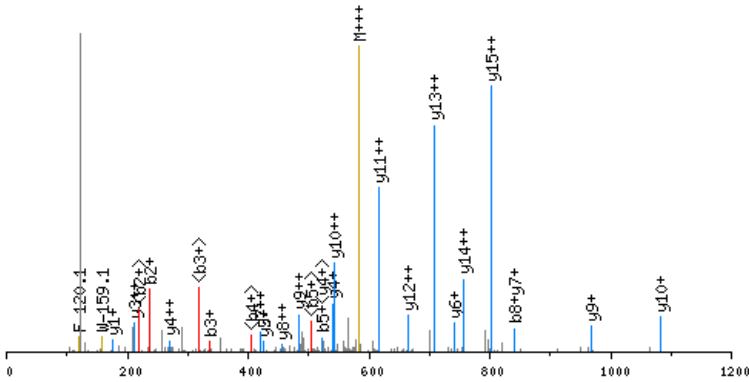

click image to zoom in; click top corners to zoom out

[precursor±]

scan 3631; 584.3 m/z; 1.1e+001

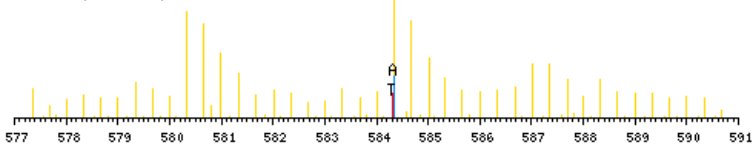

zoomed in precursor plot; T=theoretical m/z, A=acquired m/z

| b <sup>+</sup> | #  | AA | #  | y <sup>+</sup> | y <sup>2+</sup> |
|----------------|----|----|----|----------------|-----------------|
| 150.0978       | 1  | D  | 16 |                |                 |
| 237.1299       | 2  | S  | 15 | 1601.8348      | 801.4213        |
| 336.1983       | 3  | V  | 14 | 1514.8027      | 757.9053        |
| 423.2303       | 4  | S  | 13 | 1415.7343      | 708.3711        |
| 522.2987       | 5  | V  | 12 | 1328.7023      | 664.8551        |
| 669.3671       | 6  | F  | 11 | 1229.6339      | 615.3209        |
| 783.4101       | 7  | N  | 10 | 1082.5655      | 541.7866        |
| 840.4315       | 8  | G  | 9  | 968.5225       | 484.7652        |
| 911.4686       | 9  | A  | 8  | 911.5011       | 456.2544        |
| 1010.5371      | 10 | V  | 7  | 840.4640       | 420.7359        |
| 1097.5691      | 11 | S  | 6  | 741.3955       | 371.2017        |
| 1212.5960      | 12 | D  | 5  | 654.3635       | 327.6857        |
| 1327.6230      | 13 | D  | 4  | 539.3366       | 270.1722        |
| 1414.6550      | 14 | S  | 3  | 424.3096       | 212.6587        |
| 1576.8131      | 15 | K  | 2  | 337.2776       | 169.1427        |
|                | 16 | R  | 1  | 175.1195       | 88.0637         |

N-term:+35.07 K(15):+162.16

X-range:

0 - 0

MassTol: Y-zoom:

0. 1.

MassType:

☐AVG ☒MONO

Axis:

☒1 ☐2

Label:

☒I ☐M ☐-

Ions:

a ☐+ ☐2+ ☐3+

b ☒+ ☐2+ ☐3+

c ☐+ ☐2+ ☐3+

x ☐+ ☐2+ ☐3+

y ☒+ ☒2+ ☐3+

z ☐+ ☐2+ ☐3+

hide H<sub>2</sub>O/NH<sub>3</sub> ☐

zoom 112-122 ☐

GO

DSYVGVDEAQSQR, MH+ 1410.6865, m/z 470.9004  
L OS G14 P120811 220811-s1.02170.02170.3.dta

scan 2170; 6.3e+000

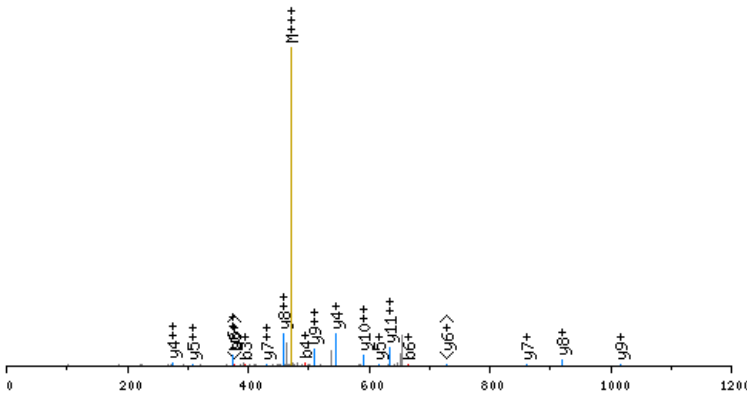

click image to zoom in; click top corners to zoom out

[precursor±]

scan 2169; 470.9 m/z; 3.0e+000

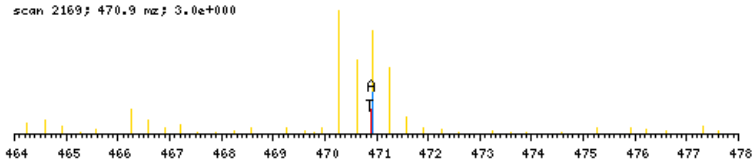

zoomed in precursor plot; T=theoretical m/z, A=acquired m/z

| b <sup>+</sup> | #  | AA | #  | y <sup>+</sup> | y <sup>2+</sup> |
|----------------|----|----|----|----------------|-----------------|
| 144.0660       | 1  | D  | 12 |                |                 |
| 231.0981       | 2  | S  | 11 | 1267.6283      | 634.3181        |
| 394.1614       | 3  | Y  | 10 | 1180.5963      | 590.8020        |
| 493.2298       | 4  | V  | 9  | 1017.5329      | 509.2704        |
| 550.2513       | 5  | G  | 8  | 918.4645       | 459.7362        |
| 665.2782       | 6  | D  | 7  | 861.4431       | 431.2254        |
| 794.3208       | 7  | E  | 6  | 746.4161       | 373.7120        |
| 865.3579       | 8  | A  | 5  | 617.3735       | 309.1907        |
| 993.4165       | 9  | Q  | 4  | 546.3364       | 273.6721        |
| 1080.4485      | 10 | S  | 3  | 418.2778       | 209.6428        |
| 1236.5748      | 11 | K  | 2  | 331.2458       | 166.1268        |
|                | 12 | R  | 1  | 175.1195       | 88.0637         |

N-term:+29.04 K(11):+156.13

X-range:

0 - 0

MassTol: Y-zoom:

0. 1.

MassType:

☐AVG ☒MONO

Axis:

☒1 ☐2

Label:

☒I ☐M ☐-

Ions:

a ☐+ ☐2+ ☐3+

b ☒+ ☐2+ ☐3+

c ☐+ ☐2+ ☐3+

x ☐+ ☐2+ ☐3+

y ☒+ ☒2+ ☐3+

z ☐+ ☐2+ ☐3+

hide H<sub>2</sub>O/NH<sub>3</sub> ☐

zoom 112-122 ☐

GO

DTDLEDELEPDPR, MH+ 1571.7077, m/z 524.5741  
L OS G12 P120811 220811-s1.04016.04016.3.dta

scan 4016; 4.4e+000

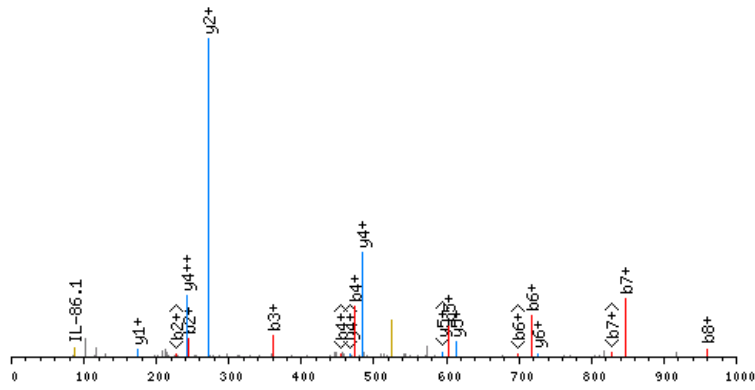

click image to zoom in; click top corners to zoom out

[precursor±]

scan 4012; 524.6 m/z; 3.2e+000

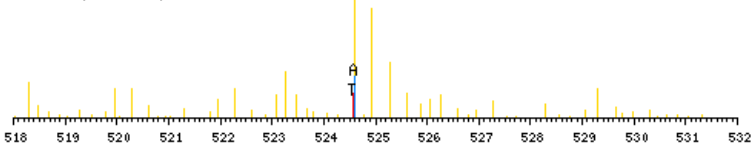

zoomed in precursor plot; T=theoretical m/z, A=acquired m/z

| b <sup>+</sup> | #  | AA | #  | y <sup>+</sup> | y <sup>2+</sup> |
|----------------|----|----|----|----------------|-----------------|
| 144.0660       | 1  | D  | 13 |                |                 |
| 245.1137       | 2  | T  | 12 | 1428.6494      | 714.8286        |
| 360.1407       | 3  | D  | 11 | 1327.6018      | 664.3048        |
| 473.2247       | 4  | L  | 10 | 1212.5748      | 606.7913        |
| 602.2673       | 5  | E  | 9  | 1099.4908      | 550.2493        |
| 717.2943       | 6  | D  | 8  | 970.4482       | 485.7280        |
| 846.3369       | 7  | E  | 7  | 855.4212       | 428.2145        |
| 959.4209       | 8  | L  | 6  | 726.3786       | 363.6932        |
| 1088.4635      | 9  | E  | 5  | 613.2946       | 307.1512        |
| 1185.5163      | 10 | P  | 4  | 484.2520       | 242.6299        |
| 1300.5432      | 11 | D  | 3  | 387.1992       | 194.1035        |
| 1397.5960      | 12 | P  | 2  | 272.1723       | 136.5900        |
|                | 13 | R  | 1  | 175.1195       | 88.0637         |

N-term:+29.04

X-range:

0 - 0

MassTol: Y-zoom:

0. 1.

MassType:

☐AVG ☒MONO

Axis:

☒1 ☐2

Label:

☒I ☐M ☐-

Ions:

a ☐+ ☐2+ ☐3+

b ☒+ ☐2+ ☐3+

c ☐+ ☐2+ ☐3+

x ☐+ ☐2+ ☐3+

y ☒+ ☒2+ ☐3+

z ☐+ ☐2+ ☐3+

hide H<sub>2</sub>O/NH<sub>3</sub> ☐

zoom 112-122 ☐

GO

DTGVISVLTSGGLDR, MH+ 1460.7960, m/z 487.6035  
L OS G12 P120811 220811-s1.05525.05525.3.dta

scan 5525; 1.6e+000

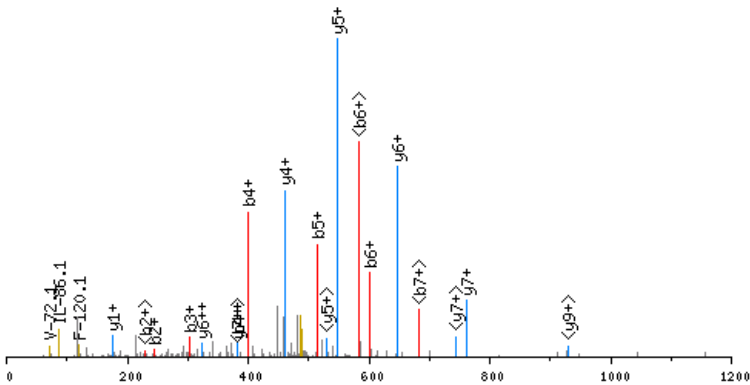

click image to zoom in; click top corners to zoom out

[precursor±]

scan 5522; 487.6 m/z; 4.5e+000

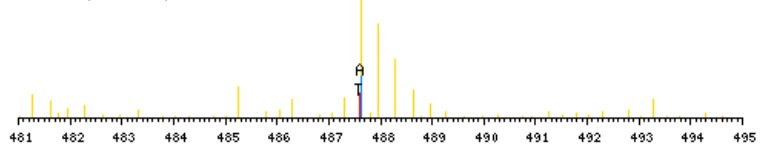

zoomed in precursor plot; T=theoretical m/z, A=acquired m/z

| b <sup>+</sup> | #  | AA | #  | y <sup>+</sup> | y <sup>2+</sup> |
|----------------|----|----|----|----------------|-----------------|
| 144.0660       | 1  | D  | 14 |                |                 |
| 245.1137       | 2  | T  | 13 | 1317.7378      | 659.3728        |
| 302.1352       | 3  | G  | 12 | 1216.6901      | 608.8490        |
| 401.2036       | 4  | V  | 11 | 1159.6687      | 580.3382        |
| 514.2877       | 5  | I  | 10 | 1060.6002      | 530.8040        |
| 601.3197       | 6  | S  | 9  | 947.5162       | 474.2620        |
| 700.3881       | 7  | V  | 8  | 860.4842       | 430.7460        |
| 813.4722       | 8  | L  | 7  | 761.4157       | 381.2118        |
| 914.5198       | 9  | T  | 6  | 648.3317       | 324.6698        |
| 1001.5519      | 10 | S  | 5  | 547.2840       | 274.1459        |
| 1058.5733      | 11 | G  | 4  | 460.2520       | 230.6299        |
| 1171.6574      | 12 | L  | 3  | 403.2305       | 202.1192        |
| 1286.6843      | 13 | D  | 2  | 290.1464       | 145.5771        |
|                | 14 | R  | 1  | 175.1195       | 88.0637         |

N-term:+29.04

X-range:

0 - 0

MassTol: Y-zoom:

0. 1.

MassType:

☐AVG ☒MONO

Axis:

☒1 ☐2

Label:

☒I ☐M ☐-

Ions:

a ☐+ ☐2+ ☐3+

b ☒+ ☐2+ ☐3+

c ☐+ ☐2+ ☐3+

x ☐+ ☐2+ ☐3+

y ☒+ ☒2+ ☐3+

z ☐+ ☐2+ ☐3+

hide H<sub>2</sub>O/NH<sub>3</sub> ☐

zoom 112-122 ☐

GO

DTILPPTRPTDKPLR, MH+ 1788.1020, m/z 447.7809  
H OS G17 P120811 220811-s1.03861.03861.4.dta

scan 3861; 1.4e+001

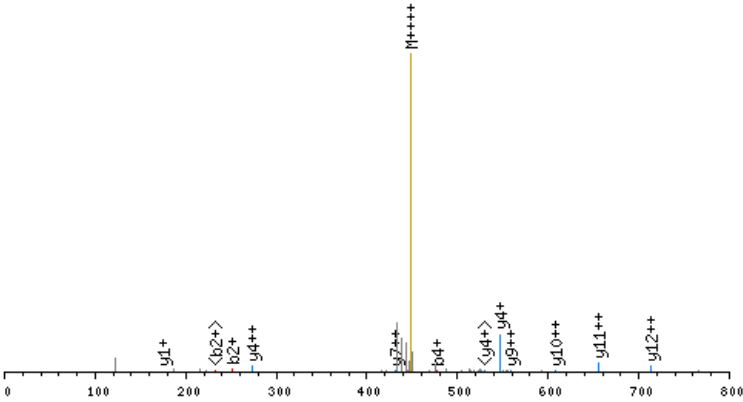

click image to zoom in; click top corners to zoom out [precursor±]

scan 3858; 447.8 m/z; 1.2e+001

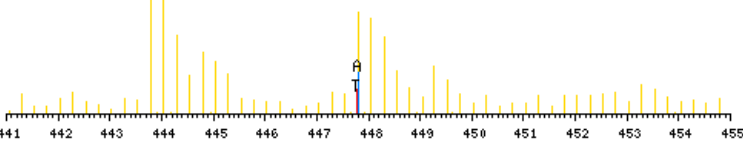

zoomed in precursor plot; T=theoretical m/z, A=acquired m/z

| b <sup>+</sup> | #  | AA | #  | y <sup>+</sup> | y <sup>2+</sup> |
|----------------|----|----|----|----------------|-----------------|
| 150.0978       | 1  | D  | 15 |                |                 |
| 251.1455       | 2  | T  | 14 | 1639.0119      | 820.0099        |
| 364.2296       | 3  | I  | 13 | 1537.9643      | 769.4860        |
| 477.3136       | 4  | L  | 12 | 1424.8802      | 712.9440        |
| 574.3664       | 5  | P  | 11 | 1311.7961      | 656.4020        |
| 671.4192       | 6  | P  | 10 | 1214.7434      | 607.8756        |
| 772.4669       | 7  | T  | 9  | 1117.6906      | 559.3492        |
| 928.5680       | 8  | R  | 8  | 1016.6429      | 508.8254        |
| 1025.6207      | 9  | P  | 7  | 860.5418       | 430.7748        |
| 1126.6684      | 10 | T  | 6  | 763.4891       | 382.2484        |
| 1241.6954      | 11 | D  | 5  | 662.4414       | 331.7246        |
| 1403.8535      | 12 | K  | 4  | 547.4144       | 274.2111        |
| 1500.9062      | 13 | P  | 3  | 385.2563       | 193.1321        |
| 1613.9903      | 14 | L  | 2  | 288.2036       | 144.6057        |
|                | 15 | R  | 1  | 175.1195       | 88.0637         |

N-term:+35.07 K(12):+162.16

N-term: +29.04 C(5): +160.03

X-range:

0 - 0

MassTol: Y-zoom:

0. 1.

MassType:

☐ AVG ☒ MONO

Axis:

☒ 1 ☐ 2

Label:

☒ I ☐ M ☐ -

Ions:

a ☐ + ☐ 2+ ☐ 3+

b ☒ + ☐ 2+ ☐ 3+

c ☐ + ☐ 2+ ☐ 3+

x ☐ + ☐ 2+ ☐ 3+

y ☒ + ☒ 2+ ☐ 3+

z ☐ + ☐ 2+ ☐ 3+

hide H<sub>2</sub>O/NH<sub>3</sub> ☐

zoom 112-122 ☐

GO

DTKNEIAELTR, MH+ 1345.7327, m/z 449.2491  
L OS G15 P120811 220811-s1.03558.03558.3.dta

scan 3558; 6.6e+000

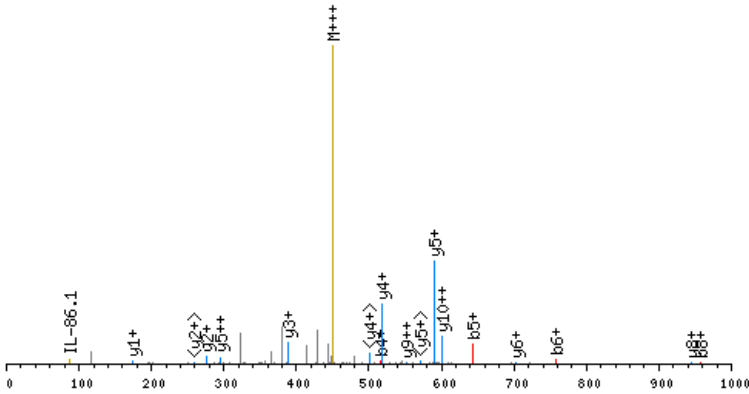

click image to zoom in; click top corners to zoom out

[precursor±]

scan 3556; 449.2 m/z; 5.4e+000

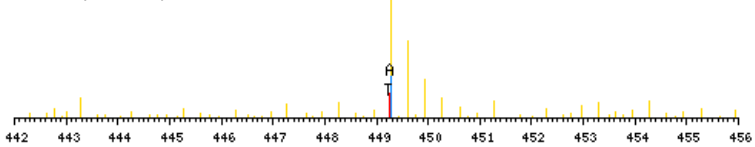

zoomed in precursor plot; T=theoretical m/z, A=acquired m/z

| b <sup>+</sup> | #  | AA | #  | y <sup>+</sup> | y <sup>2+</sup> |
|----------------|----|----|----|----------------|-----------------|
| 144.0660       | 1  | D  | 11 |                |                 |
| 245.1137       | 2  | T  | 10 | 1202.6745      | 601.8412        |
| 401.2400       | 3  | K  | 9  | 1101.6268      | 551.3173        |
| 515.2829       | 4  | N  | 8  | 945.5005       | 473.2542        |
| 644.3255       | 5  | E  | 7  | 831.4576       | 416.2327        |
| 757.4096       | 6  | I  | 6  | 702.4150       | 351.7114        |
| 828.4467       | 7  | A  | 5  | 589.3310       | 295.1694        |
| 957.4893       | 8  | E  | 4  | 518.2938       | 259.6508        |
| 1070.5734      | 9  | L  | 3  | 389.2512       | 195.1295        |
| 1171.6211      | 10 | T  | 2  | 276.1672       | 138.5875        |
|                | 11 | R  | 1  | 175.1195       | 88.0637         |

N-term:+29.04 K(3):+156.13

N-term: +29.04 K(17) : +156.13

X-range:

0 - 0

MassTol: Y-zoom:

0. 1.

MassType:

☐AVG ☒MONO

Axis:

☒1 ☐2

Label:

☒I ☐M ☐-

Ions:

a ☐+ ☐2+ ☐3+

b ☒+ ☐2+ ☐3+

c ☐+ ☐2+ ☐3+

x ☐+ ☐2+ ☐3+

y ☒+ ☒2+ ☐3+

z ☐+ ☐2+ ☐3+

hide H<sub>2</sub>O/NH<sub>3</sub> ☐

zoom 112-122 ☐

GO

DVGVEGPKGDGPQGPR, MH+ 1717.8873, m/z 573.3006  
L OS G15 P120811 220811-s1.02534.02534.3.dta

scan 2534; 3.5e+000

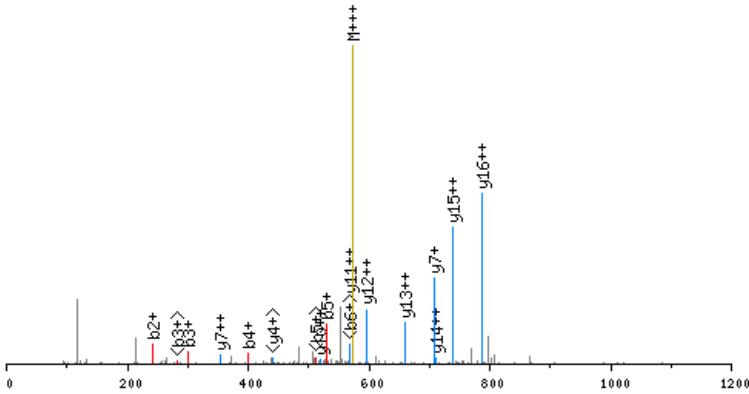

click image to zoom in; click top corners to zoom out

[precursor±]

scan 2531; 573.3 m/z; 3.6e+000

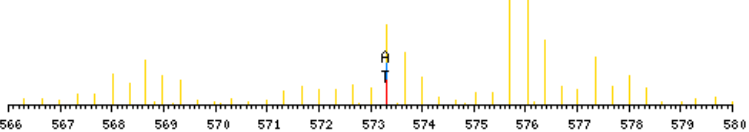

zoomed in precursor plot; T=theoretical m/z, A=acquired m/z

| b <sup>+</sup> | #  | AA | #  | y <sup>+</sup> | y <sup>2+</sup> |
|----------------|----|----|----|----------------|-----------------|
| 144.0660       | 1  | D  | 17 |                |                 |
| 243.1345       | 2  | V  | 16 | 1574.8291      | 787.9185        |
| 300.1559       | 3  | G  | 15 | 1475.7607      | 738.3843        |
| 399.2243       | 4  | V  | 14 | 1418.7392      | 709.8735        |
| 528.2669       | 5  | E  | 13 | 1319.6708      | 660.3393        |
| 585.2884       | 6  | G  | 12 | 1190.6282      | 595.8180        |
| 682.3412       | 7  | P  | 11 | 1133.6068      | 567.3073        |
| 838.4675       | 8  | K  | 10 | 1036.5540      | 518.7809        |
| 895.4889       | 9  | G  | 9  | 880.4277       | 440.7178        |
| 1010.5159      | 10 | D  | 8  | 823.4062       | 412.2070        |
| 1107.5686      | 11 | P  | 7  | 708.3793       | 354.6936        |
| 1164.5901      | 12 | G  | 6  | 611.3265       | 306.1672        |
| 1261.6429      | 13 | P  | 5  | 554.3051       | 277.6564        |
| 1389.7014      | 14 | Q  | 4  | 457.2523       | 229.1301        |
| 1446.7229      | 15 | G  | 3  | 329.1937       | 165.1008        |
| 1543.7757      | 16 | P  | 2  | 272.1723       | 136.5900        |
|                | 17 | R  | 1  | 175.1195       | 88.0637         |

N-term:+29.04 K(8):+156.13

X-range:

0 - 0

MassTol: Y-zoom:

0. 1.

MassType:

☐ AVG ☒ MONO

Axis:

☒ 1 ☐ 2

Label:

☒ I ☐ M ☐ -

Ions:

a ☐ + ☐ 2+ ☐ 3+

b ☒ + ☐ 2+ ☐ 3+

c ☐ + ☐ 2+ ☐ 3+

x ☐ + ☐ 2+ ☐ 3+

y ☒ + ☒ 2+ ☐ 3+

z ☐ + ☐ 2+ ☐ 3+

hide H<sub>2</sub>O/NH<sub>3</sub> ☐

zoom 112-122 ☐

GO

DVLELTDENFESR, MH+ 1594.7600, m/z 532.2582  
L OS G13 P120811 220811-s1.06163.06163.3.dta

scan 6163; 1.2e+000

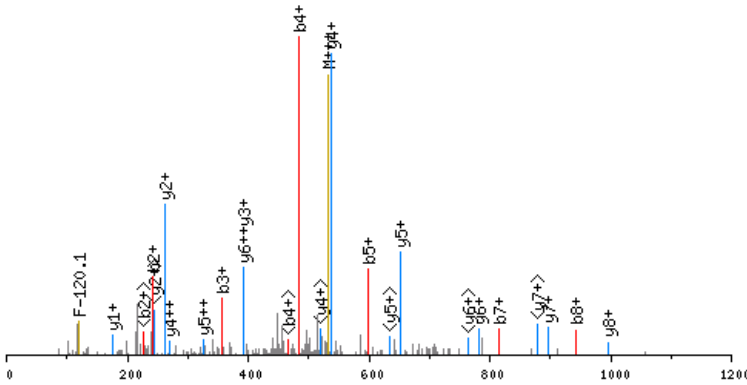

click image to zoom in; click top corners to zoom out

[precursor±]

scan 6159; 532.3 m/z; 3.4e+000

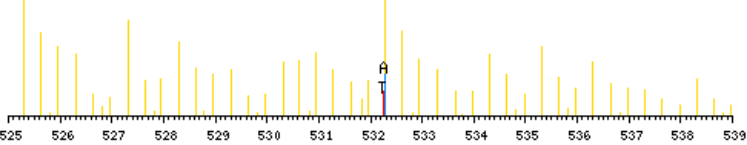

zoomed in precursor plot; T=theoretical m/z, A=acquired m/z

| b <sup>+</sup> | #  | AA | #  | y <sup>+</sup> | y <sup>2+</sup> |
|----------------|----|----|----|----------------|-----------------|
| 144.0660       | 1  | D  | 13 |                |                 |
| 243.1345       | 2  | V  | 12 | 1451.7018      | 726.3548        |
| 356.2185       | 3  | L  | 11 | 1352.6334      | 676.8206        |
| 485.2611       | 4  | E  | 10 | 1239.5493      | 620.2786        |
| 598.3452       | 5  | L  | 9  | 1110.5067      | 555.7573        |
| 699.3929       | 6  | T  | 8  | 997.4227       | 499.2153        |
| 814.4198       | 7  | D  | 7  | 896.3750       | 448.6914        |
| 943.4624       | 8  | E  | 6  | 781.3481       | 391.1779        |
| 1057.5053      | 9  | N  | 5  | 652.3055       | 326.6566        |
| 1204.5737      | 10 | F  | 4  | 538.2625       | 269.6352        |
| 1333.6163      | 11 | E  | 3  | 391.1941       | 196.1010        |
| 1420.6484      | 12 | S  | 2  | 262.1515       | 131.5797        |
|                | 13 | R  | 1  | 175.1195       | 88.0637         |

N-term:+29.04

X-range:

0 - 0

MassTol: Y-zoom:

0. 1.

MassType:

☐AVG ☒MONO

Axis:

☒1 ☐2

Label:

☒I ☐M ☐-

Ions:

a ☐+ ☐2+ ☐3+

b ☒+ ☐2+ ☐3+

c ☐+ ☐2+ ☐3+

x ☐+ ☐2+ ☐3+

y ☒+ ☒2+ ☐3+

z ☐+ ☐2+ ☐3+

hide H<sub>2</sub>O/NH<sub>3</sub> ☐

zoom 112-122 ☐

GO

DVPVVADPTVPNVTVTR, MH+ 1806.9965, m/z 603.0037  
L OS G12 P120811 220811-s1.04545.04545.3.dta

scan 4545; 3.1e+000

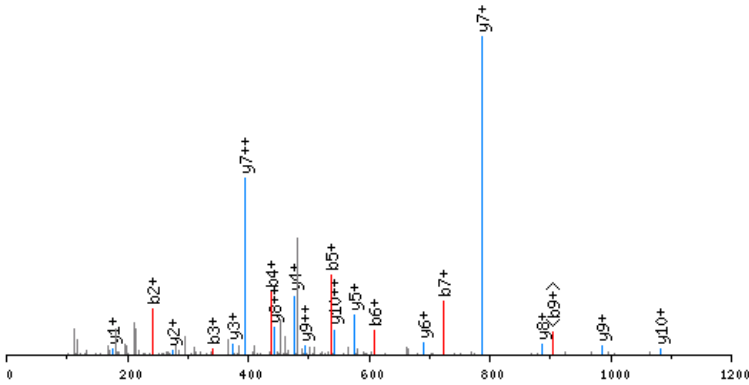

click image to zoom in; click top corners to zoom out [\[precursor±\]](#)

scan 4542; 603.0 m/z; 4.1e+000

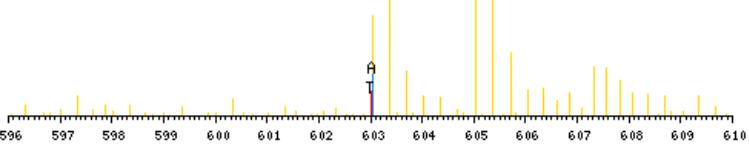

zoomed in precursor plot; T=theoretical m/z, A=acquired m/z

| b <sup>+</sup> | #  | AA | #  | y <sup>+</sup> | y <sup>2+</sup> |
|----------------|----|----|----|----------------|-----------------|
| 144.0660       | 1  | D  | 17 |                |                 |
| 243.1345       | 2  | V  | 16 | 1663.9383      | 832.4731        |
| 340.1872       | 3  | P  | 15 | 1564.8699      | 782.9389        |
| 439.2556       | 4  | V  | 14 | 1467.8171      | 734.4125        |
| 538.3240       | 5  | V  | 13 | 1368.7487      | 684.8783        |
| 609.3612       | 6  | A  | 12 | 1269.6803      | 635.3441        |
| 724.3881       | 7  | D  | 11 | 1198.6432      | 599.8255        |
| 821.4409       | 8  | P  | 10 | 1083.6162      | 542.3120        |
| 922.4885       | 9  | T  | 9  | 986.5635       | 493.7856        |
| 1021.5570      | 10 | V  | 8  | 885.5158       | 443.2618        |
| 1118.6097      | 11 | P  | 7  | 786.4474       | 393.7276        |
| 1232.6527      | 12 | N  | 6  | 689.3946       | 345.2012        |
| 1331.7211      | 13 | V  | 5  | 575.3517       | 288.1798        |
| 1432.7687      | 14 | T  | 4  | 476.2833       | 238.6455        |
| 1531.8372      | 15 | V  | 3  | 375.2356       | 188.1217        |
| 1632.8848      | 16 | T  | 2  | 276.1672       | 138.5875        |
|                | 17 | R  | 1  | 175.1195       | 88.0637         |

N-term:+29.04

X-range:

0 - 0

MassTol: Y-zoom:

0. 1.

MassType:

☐AVG ☒MONO

Axis:

☒1 ☐2

Label:

☒I ☐M ☐-

Ions:

a ☐+ ☐2+ ☐3+

b ☒+ ☐2+ ☐3+

c ☐+ ☐2+ ☐3+

x ☐+ ☐2+ ☐3+

y ☒+ ☒2+ ☐3+

z ☐+ ☐2+ ☐3+

hide H<sub>2</sub>O/NH<sub>3</sub> ☐

zoom 112-122 ☐

GO

DVQLVESGGGLVQPGGSR, MH+ 1782.9350, m/z 594.9832  
L OS G12 P120811 220811-s1.04198.04198.3.dta

scan 4198; 4.2e+000

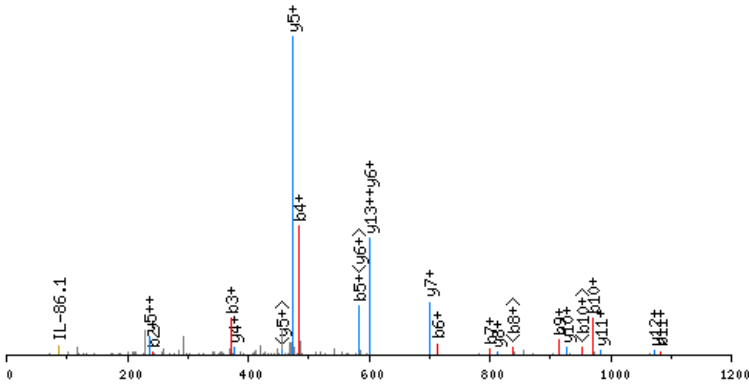

click image to zoom in; click top corners to zoom out

[precursor±]

scan 4197; 595.0 m/z; 1.9e+002

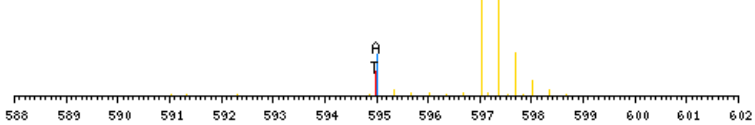

zoomed in precursor plot; T=theoretical m/z, A=acquired m/z

| b <sup>+</sup> | #  | AA | #  | y <sup>+</sup> | y <sup>2+</sup> |
|----------------|----|----|----|----------------|-----------------|
| 144.0660       | 1  | D  | 18 |                |                 |
| 243.1345       | 2  | V  | 17 | 1639.8768      | 820.4423        |
| 371.1930       | 3  | Q  | 16 | 1540.8083      | 770.9081        |
| 484.2771       | 4  | L  | 15 | 1412.7498      | 706.8788        |
| 583.3455       | 5  | V  | 14 | 1299.6657      | 650.3368        |
| 712.3881       | 6  | E  | 13 | 1200.5973      | 600.8026        |
| 799.4201       | 7  | S  | 12 | 1071.5547      | 536.2813        |
| 856.4416       | 8  | G  | 11 | 984.5227       | 492.7652        |
| 913.4631       | 9  | G  | 10 | 927.5012       | 464.2545        |
| 970.4845       | 10 | G  | 9  | 870.4797       | 435.7438        |
| 1083.5686      | 11 | L  | 8  | 813.4583       | 407.2331        |
| 1182.6370      | 12 | V  | 7  | 700.3742       | 350.6910        |
| 1310.6956      | 13 | Q  | 6  | 601.3058       | 301.1568        |
| 1407.7483      | 14 | P  | 5  | 473.2472       | 237.1275        |
| 1464.7698      | 15 | G  | 4  | 376.1945       | 188.6011        |
| 1521.7913      | 16 | G  | 3  | 319.1730       | 160.0904        |
| 1608.8233      | 17 | S  | 2  | 262.1515       | 131.5797        |
|                | 18 | R  | 1  | 175.1195       | 88.0637         |

N-term:+29.04

X-range:

-

MassTol: Y-zoom:

MassType:

☐ AVG ☒ MONO

Axis:

☒ 1 ☐ 2

Label:

☒ I ☐ M ☐ -

Ions:

a ☐ + ☐ 2+ ☐ 3+

b ☒ + ☐ 2+ ☐ 3+

c ☐ + ☐ 2+ ☐ 3+

x ☐ + ☐ 2+ ☐ 3+

y ☒ + ☒ 2+ ☐ 3+

z ☐ + ☐ 2+ ☐ 3+

hide H<sub>2</sub>O/NH<sub>3</sub> ☐

zoom 112-122 ☐

GO

DVVEGEKGAEAAANVTGPDGVPVEGSR, MH+ 2607.3538, m/z 652.5939  
H OS G14 P120811 220811-s1.04292.04292.4.dta

scan 4292; 2.9e+000

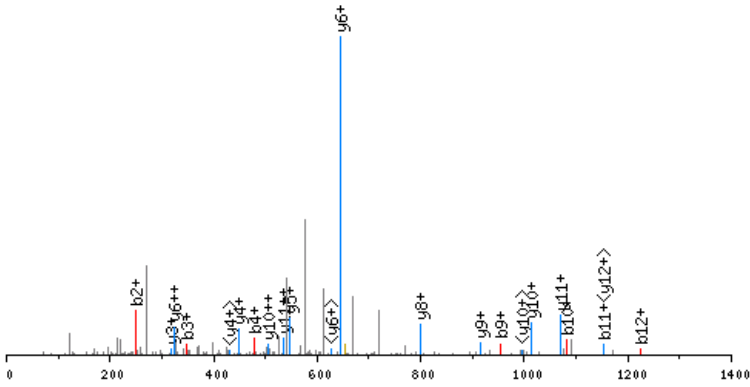

click image to zoom in; click top corners to zoom out

[precursor±]

scan 4291; 652.6 m/z; 1.2e+001

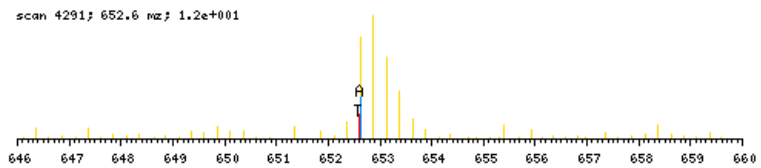

zoomed in precursor plot; T=theoretical m/z, A=acquired m/z

| b <sup>+</sup> | #  | AA | #  | y <sup>+</sup> | y <sup>2+</sup> |
|----------------|----|----|----|----------------|-----------------|
| 150.0978       | 1  | D  | 26 |                |                 |
| 249.1663       | 2  | V  | 25 | 2458.2638      | 1229.6358       |
| 348.2347       | 3  | V  | 24 | 2359.1954      | 1180.1016       |
| 477.2773       | 4  | E  | 23 | 2260.1270      | 1130.5674       |
| 534.2987       | 5  | G  | 22 | 2131.0844      | 1066.0461       |
| 663.3413       | 6  | E  | 21 | 2074.0629      | 1037.5354       |
| 825.4994       | 7  | K  | 20 | 1945.0203      | 973.0141        |
| 882.5209       | 8  | G  | 19 | 1782.8622      | 891.9350        |
| 953.5580       | 9  | A  | 18 | 1725.8408      | 863.4243        |
| 1082.6006      | 10 | E  | 17 | 1654.8037      | 827.9057        |
| 1153.6377      | 11 | A  | 16 | 1525.7611      | 763.3844        |
| 1224.6748      | 12 | A  | 15 | 1454.7239      | 727.8659        |
| 1338.7177      | 13 | N  | 14 | 1383.6868      | 692.3473        |
| 1437.7862      | 14 | V  | 13 | 1269.6439      | 635.3259        |
| 1538.8338      | 15 | T  | 12 | 1170.5755      | 585.7917        |
| 1595.8553      | 16 | G  | 11 | 1069.5278      | 535.2678        |
| 1692.9081      | 17 | P  | 10 | 1012.5063      | 506.7571        |
| 1807.9350      | 18 | D  | 9  | 915.4536       | 458.2307        |
| 1864.9565      | 19 | G  | 8  | 800.4266       | 400.7172        |
| 1964.0249      | 20 | V  | 7  | 743.4052       | 372.2065        |
| 2061.0777      | 21 | P  | 6  | 644.3368       | 322.6723        |
| 2160.1461      | 22 | V  | 5  | 547.2840       | 274.1459        |
| 2289.1887      | 23 | E  | 4  | 448.2156       | 224.6117        |
| 2346.2101      | 24 | G  | 3  | 319.1730       | 160.0904        |
| 2433.2422      | 25 | S  | 2  | 262.1515       | 131.5797        |
|                | 26 | R  | 1  | 175.1195       | 88.0637         |

N-term:+35.07 K(7):+162.16

X-range:

0 - 0

MassTol: Y-zoom:

0. 1.

MassType:

☐AVG ☒MONO

Axis:

☒1 ☐2

Label:

☒I ☐M ☐-

Ions:

a ☐+ ☐2+ ☐3+

b ☒+ ☐2+ ☐3+

c ☐+ ☐2+ ☐3+

x ☐+ ☐2+ ☐3+

y ☒+ ☒2+ ☐3+

z ☐+ ☐2+ ☐3+

hide H<sub>2</sub>O/NH<sub>3</sub> ☐

zoom 112-122 ☐

GO

DYEEKYGR, MH+ 1115.5373, m/z 558.2723  
L OS G14 P120811 220811-s1.03069.03069.2.dta

scan 3069; 4.0e+001

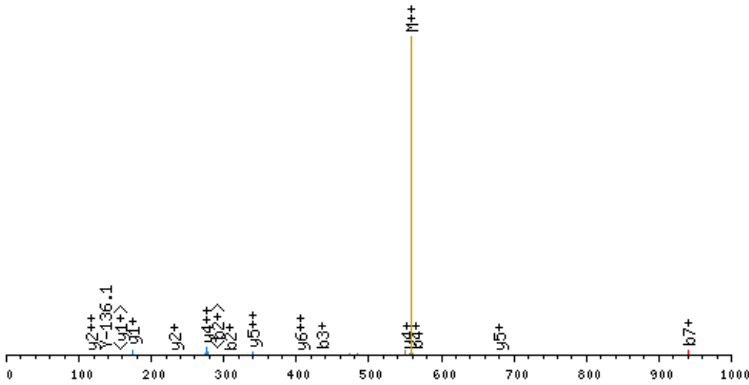

click image to zoom in; click top corners to zoom out

[precursor±]

scan 3066; 558.3 m/z; 9.2e+001

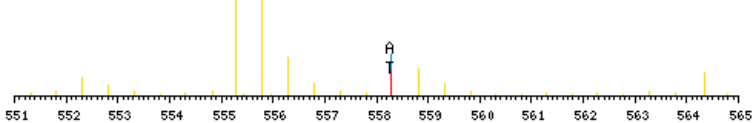

zoomed in precursor plot; T=theoretical m/z, A=acquired m/z

| b <sup>+</sup> | # | AA | # | y <sup>+</sup> | y <sup>2+</sup> |
|----------------|---|----|---|----------------|-----------------|
| 144.0660       | 1 | D  | 8 |                |                 |
| 307.1294       | 2 | Y  | 7 | 972.4791       | 486.7435        |
| 436.1720       | 3 | E  | 6 | 809.4158       | 405.2118        |
| 565.2146       | 4 | E  | 5 | 680.3732       | 340.6905        |
| 721.3409       | 5 | K  | 4 | 551.3306       | 276.1692        |
| 884.4042       | 6 | Y  | 3 | 395.2043       | 198.1061        |
| 941.4257       | 7 | G  | 2 | 232.1410       | 116.5744        |
|                | 8 | R  | 1 | 175.1195       | 88.0637         |

N-term:+29.04 K(5):+156.13

X-range:

0 - 0

MassTol: Y-zoom:

0. 1.

MassType:

☐AVG ☒MONO

Axis:

☒1 ☐2

Label:

☒I ☐M ☐-

Ions:

a ☐+ ☐2+ ☐3+

b ☒+ ☐2+ ☐3+

c ☐+ ☐2+ ☐3+

x ☐+ ☐2+ ☐3+

y ☒+ ☒2+ ☐3+

z ☐+ ☐2+ ☐3+

hide H<sub>2</sub>O/NH<sub>3</sub> ☐

zoom 112-122 ☐

GO

EAAALGSHGSCSSEVEKETR, MH+ 2161.0195, m/z 541.0103  
L OS G17 P120811 220811-s1.02251.02251.4.dta

scan 2251: 1.1e+001

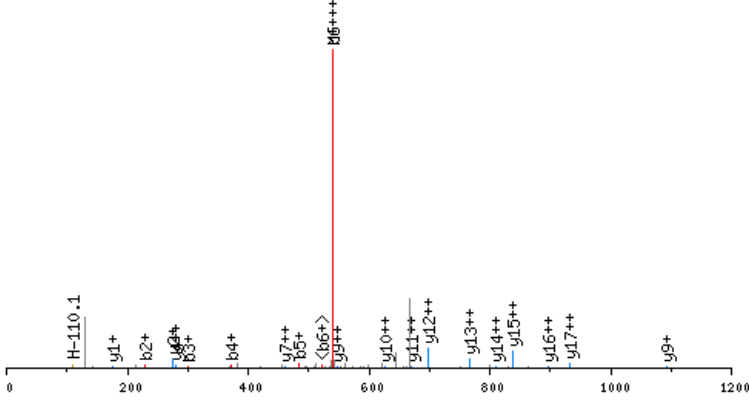

click image to zoom in; click top corners to zoom out [\[precursor±\]](#)

scan 2248: 541.0 m/z; 7.2e+000

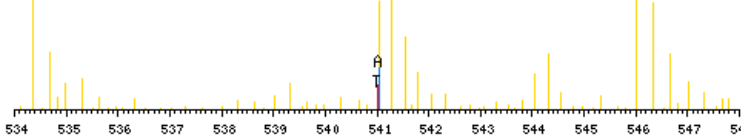

zoomed in precursor plot; T=theoretical m/z, A=acquired m/z

| b <sup>+</sup> | #  | AA | #  | y <sup>+</sup> | y <sup>2+</sup> |
|----------------|----|----|----|----------------|-----------------|
| 158.0817       | 1  | E  | 20 |                |                 |
| 229.1188       | 2  | A  | 19 | 2003.9456      | 1002.4767       |
| 300.1559       | 3  | A  | 18 | 1932.9085      | 966.9582        |
| 371.1930       | 4  | A  | 17 | 1861.8714      | 931.4396        |
| 484.2771       | 5  | L  | 16 | 1790.8343      | 895.9211        |
| 541.2986       | 6  | G  | 15 | 1677.7502      | 839.3790        |
| 628.3306       | 7  | S  | 14 | 1620.7288      | 810.8683        |
| 765.3895       | 8  | H  | 13 | 1533.6967      | 767.3523        |
| 822.4110       | 9  | G  | 12 | 1396.6378      | 698.8228        |
| 909.4430       | 10 | S  | 11 | 1339.6164      | 670.3121        |
| 1069.4736      | 11 | C  | 10 | 1252.5843      | 626.7961        |
| 1156.5056      | 12 | S  | 9  | 1092.5537      | 546.7808        |
| 1243.5377      | 13 | S  | 8  | 1005.5217      | 503.2648        |
| 1372.5802      | 14 | E  | 7  | 918.4897       | 459.7487        |
| 1471.6487      | 15 | V  | 6  | 789.4471       | 395.2275        |
| 1600.6913      | 16 | E  | 5  | 690.3787       | 345.6932        |
| 1756.8176      | 17 | K  | 4  | 561.3361       | 281.1719        |
| 1885.8601      | 18 | E  | 3  | 405.2098       | 203.1088        |
| 1986.9078      | 19 | T  | 2  | 276.1672       | 138.5875        |
|                | 20 | R  | 1  | 175.1195       | 88.0637         |

N-term: +29.04 C(11): +160.03  
K(17): +156.13

X-range:

0 - 0

MassTol: Y-zoom:

0. 1.

MassType:

☐ AVG ☒ MONO

Axis:

☒ 1 ☐ 2

Label:

☒ I ☐ M ☐ -

Ions:

a ☐ + ☐ 2+ ☐ 3+

b ☒ + ☐ 2+ ☐ 3+

c ☐ + ☐ 2+ ☐ 3+

x ☐ + ☐ 2+ ☐ 3+

y ☒ + ☒ 2+ ☐ 3+

z ☐ + ☐ 2+ ☐ 3+

hide H<sub>2</sub>O/NH<sub>3</sub> ☐

zoom 112-122 ☐

GO

EACCVVLLWLALFLSIQPR, MH+ 2429.3452, m/z 608.0917  
L OS G17 P120811 220811-s1.06130.06130.4.dta

scan 6130; 3.3e+000

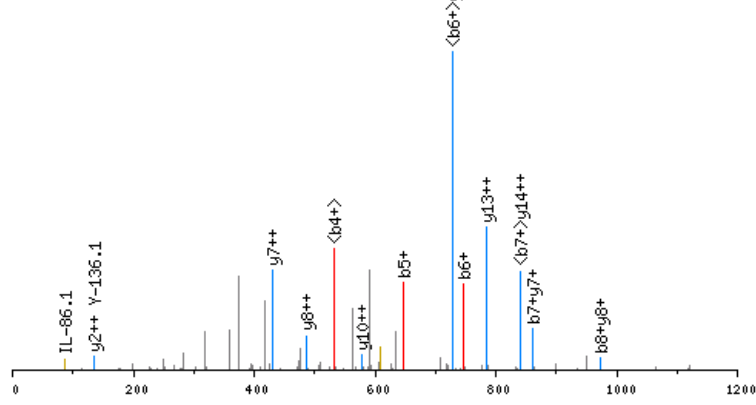

click image to zoom in; click top corners to zoom out [\[precursor±\]](#)

scan 6128; 608.1 m/z; 1.4e+001

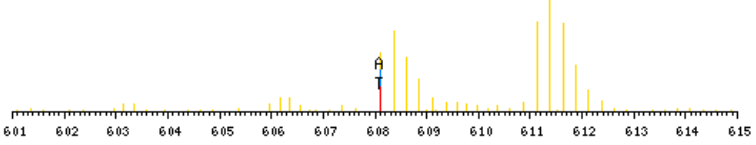

zoomed in precursor plot; T=theoretical m/z, A=acquired m/z

| b <sup>+</sup> | #  | AA | #  | y <sup>+</sup> | y <sup>2+</sup> |
|----------------|----|----|----|----------------|-----------------|
| 158.0817       | 1  | E  | 20 |                |                 |
| 229.1188       | 2  | A  | 19 | 2272.2713      | 1136.6396       |
| 389.1494       | 3  | C  | 18 | 2201.2342      | 1101.1210       |
| 549.1800       | 4  | C  | 17 | 2041.2036      | 1021.1057       |
| 648.2484       | 5  | V  | 16 | 1881.1730      | 941.0904        |
| 747.3168       | 6  | V  | 15 | 1782.1046      | 891.5562        |
| 860.4009       | 7  | L  | 14 | 1683.0362      | 842.0220        |
| 973.4850       | 8  | L  | 13 | 1569.9521      | 785.4800        |
| 1086.5690      | 9  | L  | 12 | 1456.8680      | 728.9379        |
| 1272.6483      | 10 | W  | 11 | 1343.7840      | 672.3959        |
| 1385.7324      | 11 | L  | 10 | 1157.7047      | 579.3562        |
| 1456.7695      | 12 | A  | 9  | 1044.6206      | 522.8142        |
| 1569.8536      | 13 | L  | 8  | 973.5835       | 487.2957        |
| 1716.9220      | 14 | F  | 7  | 860.4994       | 430.7536        |
| 1830.0061      | 15 | L  | 6  | 713.4310       | 357.2194        |
| 1917.0381      | 16 | S  | 5  | 600.3469       | 300.6774        |
| 2030.1222      | 17 | I  | 4  | 513.3149       | 257.1614        |
| 2158.1807      | 18 | Q  | 3  | 400.2308       | 200.6193        |
| 2255.2335      | 19 | P  | 2  | 272.1723       | 136.5900        |
|                | 20 | R  | 1  | 175.1195       | 88.0637         |

N-term:+29.04 C(3):+160.03  
C(4):+160.03

X-range:

0 - 0

MassTol: Y-zoom:

0. 1.

MassType:

☐AVG ☒MONO

Axis:

☒1 ☐2

Label:

☒I ☐M ☐-

Ions:

a ☐+ ☐2+ ☐3+

b ☒+ ☐2+ ☐3+

c ☐+ ☐2+ ☐3+

x ☐+ ☐2+ ☐3+

y ☒+ ☒2+ ☐3+

z ☐+ ☐2+ ☐3+

hide H<sub>2</sub>O/NH<sub>3</sub> ☐

zoom 112-122 ☐

GO

EADENENITVVKGIR, MH+ 1742.9289, m/z 581.6478  
L OS G15 P120811 220811-s1.03385.03385.3.dta

scan 3385; 9.4e+000

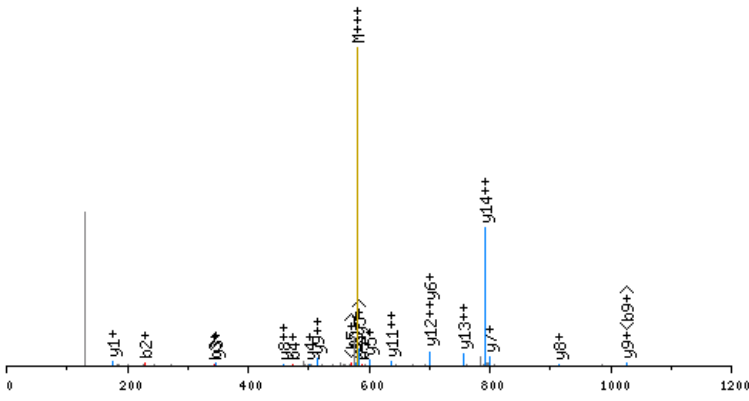

click image to zoom in; click top corners to zoom out

[precursor±]

scan 3381; 581.6 m/z; 1.1e+001

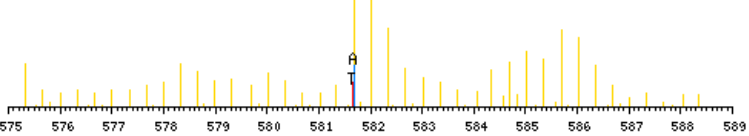

zoomed in precursor plot; T=theoretical m/z, A=acquired m/z

| b <sup>+</sup> | #  | AA | #  | y <sup>+</sup> | y <sup>2+</sup> |
|----------------|----|----|----|----------------|-----------------|
| 158.0817       | 1  | E  | 15 |                |                 |
| 229.1188       | 2  | A  | 14 | 1585.8550      | 793.4314        |
| 344.1458       | 3  | D  | 13 | 1514.8179      | 757.9129        |
| 473.1883       | 4  | E  | 12 | 1399.7909      | 700.3994        |
| 587.2313       | 5  | N  | 11 | 1270.7483      | 635.8781        |
| 716.2739       | 6  | E  | 10 | 1156.7054      | 578.8566        |
| 830.3168       | 7  | N  | 9  | 1027.6628      | 514.3353        |
| 943.4009       | 8  | I  | 8  | 913.6199       | 457.3139        |
| 1044.4485      | 9  | T  | 7  | 800.5358       | 400.7718        |
| 1143.5169      | 10 | V  | 6  | 699.4882       | 350.2480        |
| 1242.5854      | 11 | V  | 5  | 600.4197       | 300.7138        |
| 1398.7117      | 12 | K  | 4  | 501.3513       | 251.1796        |
| 1455.7331      | 13 | G  | 3  | 345.2250       | 173.1164        |
| 1568.8172      | 14 | I  | 2  | 288.2036       | 144.6057        |
|                | 15 | R  | 1  | 175.1195       | 88.0637         |

N-term:+29.04 K(12):+156.13

X-range:

0 - 0

MassTol: Y-zoom:

0. 1.

MassType:

☐AVG ☒MONO

Axis:

☒1 ☐2

Label:

☒I ☐M ☐-

Ions:

a ☐+ ☐2+ ☐3+

b ☒+ ☐2+ ☐3+

c ☐+ ☐2+ ☐3+

x ☐+ ☐2+ ☐3+

y ☒+ ☒2+ ☐3+

z ☐+ ☐2+ ☐3+

hide H<sub>2</sub>O/NH<sub>3</sub> ☐

zoom 112-122 ☐

GO

EAFPTVIDQNR, MH+ 1226.6593, m/z 613.8333  
H OS G13 P120811 220811-s1.03911.03911.2.dta

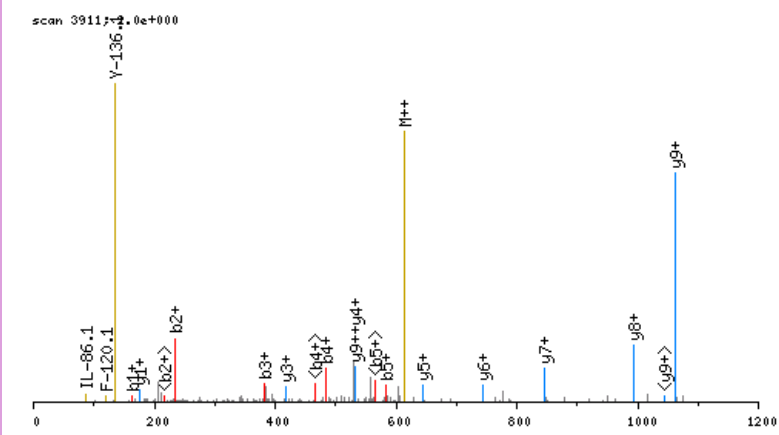

click image to zoom in; click top corners to zoom out

[precursor±]

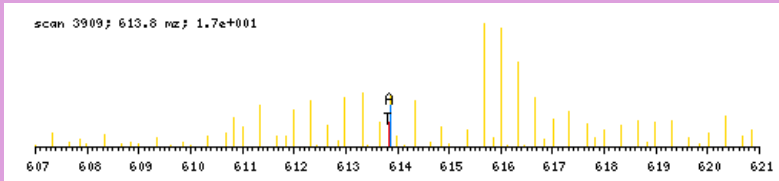

zoomed in precursor plot; T=theoretical m/z, A=acquired m/z

| b <sup>+</sup> | #  | AA | #  | y <sup>+</sup> | y <sup>2+</sup> |
|----------------|----|----|----|----------------|-----------------|
| 164.1135       | 1  | E  | 10 |                |                 |
| 235.1506       | 2  | A  | 9  | 1063.5536      | 532.2807        |
| 382.2190       | 3  | F  | 8  | 992.5165       | 496.7622        |
| 483.2667       | 4  | T  | 7  | 845.4481       | 423.2280        |
| 582.3351       | 5  | V  | 6  | 744.4004       | 372.7041        |
| 695.4192       | 6  | I  | 5  | 645.3320       | 323.1699        |
| 810.4461       | 7  | D  | 4  | 532.2479       | 266.6279        |
| 938.5047       | 8  | Q  | 3  | 417.2210       | 209.1144        |
| 1052.5476      | 9  | N  | 2  | 289.1624       | 145.0851        |
|                | 10 | R  | 1  | 175.1195       | 88.0637         |

N-term:+35.07

X-range:

0 - 0

MassTol: Y-zoom:

0. 1.

MassType:

☐AVG ☒MONO

Axis:

☒1 ☐2

Label:

☒I ☐M ☐-

Ions:

a ☐+ ☐2+ ☐3+

b ☒+ ☐2+ ☐3+

c ☐+ ☐2+ ☐3+

x ☐+ ☐2+ ☐3+

y ☒+ ☒2+ ☐3+

z ☐+ ☐2+ ☐3+

hide H<sub>2</sub>O/NH<sub>3</sub> ☐

zoom 112-122 ☐

GO

EALDCILPPTRPTDKPLR, MH+ 2160.2486, m/z 540.8176  
H OS G16 P120811 220811-s1.04999.04999.4.dta

scan 4999; 5.1e+000

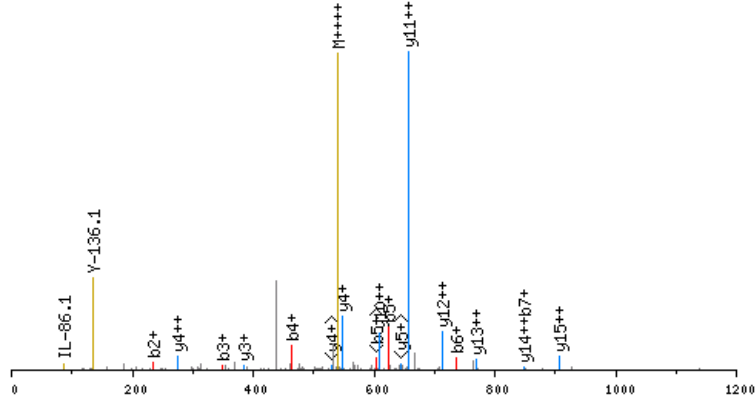

click image to zoom in; click top corners to zoom out [\[precursor±\]](#)

scan 4998; 540.8 m/z; 2.1e+001

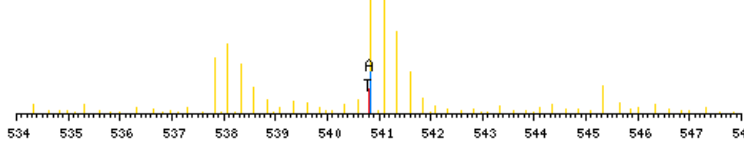

zoomed in precursor plot; T=theoretical m/z, A=acquired m/z

| b <sup>+</sup> | #  | AA | #  | y <sup>+</sup> | y <sup>2+</sup> |
|----------------|----|----|----|----------------|-----------------|
| 164.1135       | 1  | E  | 18 |                |                 |
| 235.1506       | 2  | A  | 17 | 1997.1430      | 999.0754        |
| 348.2347       | 3  | L  | 16 | 1926.1059      | 963.5568        |
| 463.2616       | 4  | D  | 15 | 1813.0218      | 907.0148        |
| 623.2922       | 5  | C  | 14 | 1697.9949      | 849.5013        |
| 736.3763       | 6  | I  | 13 | 1537.9643      | 769.4860        |
| 849.4603       | 7  | L  | 12 | 1424.8802      | 712.9440        |
| 946.5131       | 8  | P  | 11 | 1311.7961      | 656.4020        |
| 1043.5659      | 9  | P  | 10 | 1214.7434      | 607.8756        |
| 1144.6135      | 10 | T  | 9  | 1117.6906      | 559.3492        |
| 1300.7147      | 11 | R  | 8  | 1016.6429      | 508.8254        |
| 1397.7674      | 12 | P  | 7  | 860.5418       | 430.7748        |
| 1498.8151      | 13 | T  | 6  | 763.4891       | 382.2484        |
| 1613.8420      | 14 | D  | 5  | 662.4414       | 331.7246        |
| 1776.0001      | 15 | K  | 4  | 547.4144       | 274.2111        |
| 1873.0529      | 16 | P  | 3  | 385.2563       | 193.1321        |
| 1986.1370      | 17 | L  | 2  | 288.2036       | 144.6057        |
|                | 18 | R  | 1  | 175.1195       | 88.0637         |

N-term:+35.07 C(5):+160.03  
K(15):+162.16

N-term: +35.07 K(15): +162.16

X-range:

0 - 0

MassTol: Y-zoom:

0. 1.

MassType:

☐AVG ☒MONO

Axis:

☒1 ☐2

Label:

☒I ☐M ☐-

Ions:

a ☐+ ☐2+ ☐3+

b ☒+ ☐2+ ☐3+

c ☐+ ☐2+ ☐3+

x ☐+ ☐2+ ☐3+

y ☒+ ☒2+ ☐3+

z ☐+ ☐2+ ☐3+

hide H<sub>2</sub>O/NH<sub>3</sub> ☐

zoom 112-122 ☐

GO

EANKIDFKELDIAGDEDN, MH+ 2276.1411, m/z 569.7907  
L OS G17 P120811 220811-s1.05591.05591.4.dta

scan 5591: 1.5e+000

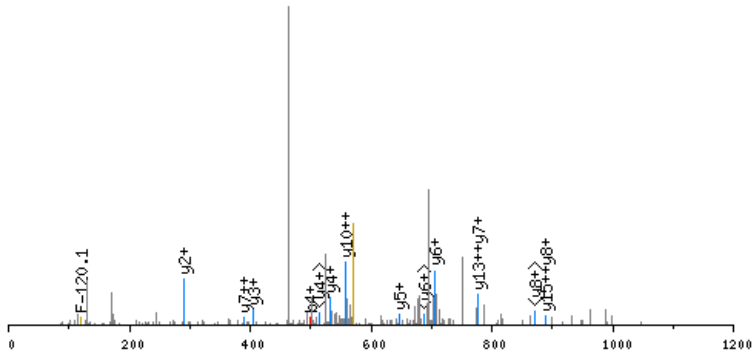

click image to zoom in; click top corners to zoom out [\[precursor±\]](#)

scan 5588: 569.8 m/z; 5.9e+000

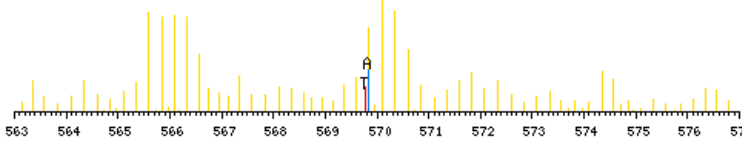

zoomed in precursor plot; T=theoretical m/z, A=acquired m/z

| b <sup>+</sup> | #  | AA | #  | y <sup>+</sup> | y <sup>2+</sup> |
|----------------|----|----|----|----------------|-----------------|
| 158.0817       | 1  | E  | 19 |                |                 |
| 229.1188       | 2  | A  | 18 | 2119.0672      | 1060.0375       |
| 343.1617       | 3  | N  | 17 | 2048.0301      | 1024.5190       |
| 499.2880       | 4  | K  | 16 | 1933.9872      | 967.4975        |
| 612.3721       | 5  | I  | 15 | 1777.8609      | 889.4343        |
| 727.3990       | 6  | D  | 14 | 1664.7768      | 832.8923        |
| 874.4675       | 7  | F  | 13 | 1549.7499      | 775.3788        |
| 1030.5938      | 8  | K  | 12 | 1402.6814      | 701.8446        |
| 1159.6363      | 9  | E  | 11 | 1246.5551      | 623.7815        |
| 1272.7204      | 10 | L  | 10 | 1117.5126      | 559.2602        |
| 1387.7474      | 11 | D  | 9  | 1004.4285      | 502.7182        |
| 1500.8314      | 12 | I  | 8  | 889.4015       | 445.2047        |
| 1571.8685      | 13 | A  | 7  | 776.3175       | 388.6627        |
| 1628.8900      | 14 | G  | 6  | 705.2804       | 353.1441        |
| 1743.9169      | 15 | D  | 5  | 648.2589       | 324.6334        |
| 1872.9595      | 16 | E  | 4  | 533.2320       | 267.1199        |
| 1987.9865      | 17 | D  | 3  | 404.1894       | 202.5986        |
| 2102.0294      | 18 | N  | 2  | 289.1624       | 145.0851        |
|                | 19 | R  | 1  | 175.1195       | 88.0637         |

N-term:+29.04 K(4):+156.13  
K(8):+156.13

X-range:

0 - 0

MassTol: Y-zoom:

0. 1.

MassType:

☐AVG ☒MONO

Axis:

☒1 ☐2

Label:

☒I ☐M ☐-

Ions:

a ☐+ ☐2+ ☐3+

b ☒+ ☐2+ ☐3+

c ☐+ ☐2+ ☐3+

x ☐+ ☐2+ ☐3+

y ☒+ ☒2+ ☐3+

z ☐+ ☐2+ ☐3+

hide H<sub>2</sub>O/NH<sub>3</sub> ☐

zoom 112-122 ☐

GO

EAPKVVVEEQESR, MH+ 1468.8284, m/z 490.2810  
H OS G16 P120811 220811-s1.02262.02262.3.dta

scan 2262; 2.4e+001

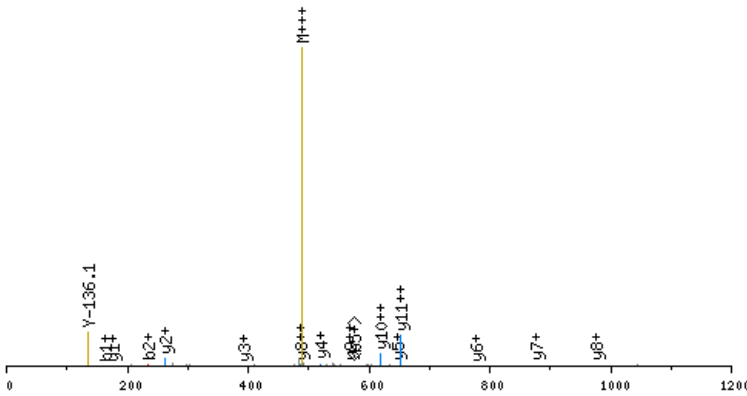

click image to zoom in; click top corners to zoom out [\[precursor±\]](#)

scan 2258; 490.3 m/z; 1.8e+001

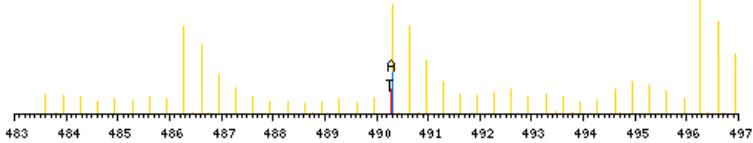

zoomed in precursor plot; T=theoretical m/z, A=acquired m/z

| b <sup>+</sup> | #  | AA | #  | y <sup>+</sup> | y <sup>2+</sup> |
|----------------|----|----|----|----------------|-----------------|
| 164.1135       | 1  | E  | 12 |                |                 |
| 235.1506       | 2  | A  | 11 | 1305.7227      | 653.3653        |
| 332.2034       | 3  | P  | 10 | 1234.6856      | 617.8467        |
| 494.3615       | 4  | K  | 9  | 1137.6328      | 569.3203        |
| 593.4299       | 5  | V  | 8  | 975.4747       | 488.2413        |
| 692.4983       | 6  | V  | 7  | 876.4063       | 438.7071        |
| 821.5409       | 7  | E  | 6  | 777.3379       | 389.1729        |
| 950.5835       | 8  | E  | 5  | 648.2953       | 324.6516        |
| 1078.6421      | 9  | Q  | 4  | 519.2527       | 260.1303        |
| 1207.6847      | 10 | E  | 3  | 391.1941       | 196.1010        |
| 1294.7167      | 11 | S  | 2  | 262.1515       | 131.5797        |
|                | 12 | R  | 1  | 175.1195       | 88.0637         |

N-term:+35.07 K(4):+162.16

X-range:

0 - 0

MassTol: Y-zoom:

0. 1.

MassType:

☐AVG ☒MONO

Axis:

☒1 ☐2

Label:

☒I ☐M ☐-

Ions:

a ☐+ ☐2+ ☐3+

b ☒+ ☐2+ ☐3+

c ☐+ ☐2+ ☐3+

x ☐+ ☐2+ ☐3+

y ☒+ ☒2+ ☐3+

z ☐+ ☐2+ ☐3+

hide H<sub>2</sub>O/NH<sub>3</sub> ☐

zoom 112-122 ☐

GO

EAVPMSMPILR, MH+ 1368.7383, m/z 456.9176  
L OS G13 P120811 220811-s1.06357.06357.3.dta

scan 6357; 2.5e+000

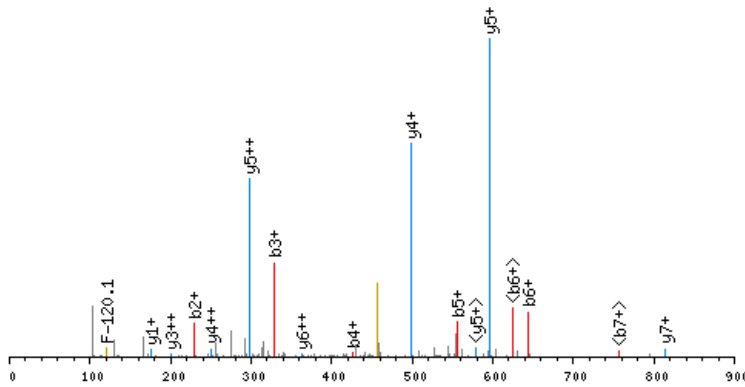

click image to zoom in; click top corners to zoom out

[precursor±]

scan 6354; 456.9 m/z; 3.4e+000

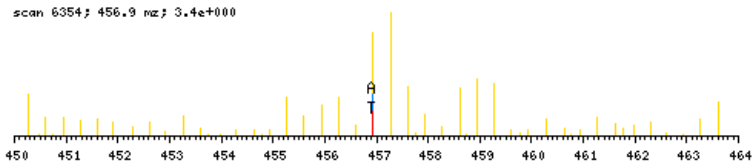

zoomed in precursor plot; T=theoretical m/z, A=acquired m/z

| b <sup>+</sup> | #  | AA | #  | y <sup>+</sup> | y <sup>2+</sup> |
|----------------|----|----|----|----------------|-----------------|
| 158.0817       | 1  | E  | 12 |                |                 |
| 229.1188       | 2  | A  | 11 | 1211.6644      | 606.3361        |
| 328.1872       | 3  | V  | 10 | 1140.6273      | 570.8176        |
| 425.2400       | 4  | P  | 9  | 1041.5589      | 521.2834        |
| 556.2805       | 5  | M  | 8  | 944.5062       | 472.7570        |
| 643.3125       | 6  | S  | 7  | 813.4657       | 407.2367        |
| 774.3530       | 7  | M  | 6  | 726.4336       | 363.7207        |
| 871.4057       | 8  | P  | 5  | 595.3932       | 298.2005        |
| 968.4585       | 9  | P  | 4  | 498.3404       | 249.6741        |
| 1081.5426      | 10 | I  | 3  | 401.2876       | 201.1477        |
| 1194.6266      | 11 | L  | 2  | 288.2036       | 144.6057        |
|                | 12 | R  | 1  | 175.1195       | 88.0637         |

N-term:+29.04

X-range:

0 - 0

MassTol: Y-zoom:

0. 1.

MassType:

☐ AVG ☒ MONO

Axis:

☒ 1 ☐ 2

Label:

☒ I ☐ M ☐ -

Ions:

a ☐ + ☐ 2+ ☐ 3+

b ☒ + ☐ 2+ ☐ 3+

c ☐ + ☐ 2+ ☐ 3+

x ☐ + ☐ 2+ ☐ 3+

y ☒ + ☒ 2+ ☐ 3+

z ☐ + ☐ 2+ ☐ 3+

hide H<sub>2</sub>O/NH<sub>3</sub> ☐

zoom 112-122 ☐

GO

EDDEDGEELLHHHR, MH+ 1873.7952, m/z 469.2043  
L OS G19 P120811 220811-s1.02596.02596.4.dta

scan 2596; 2.1e+000

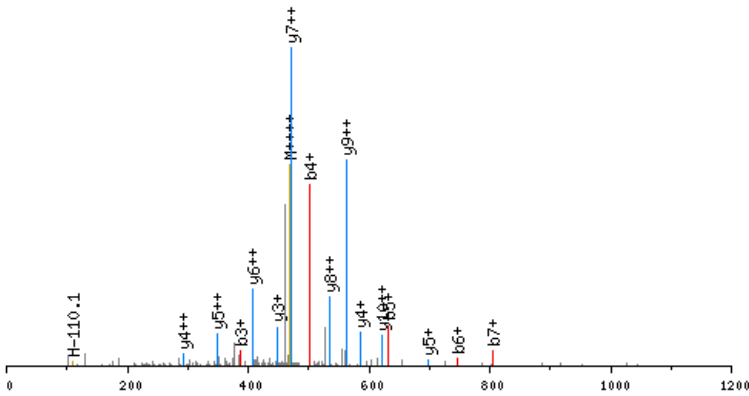

click image to zoom in; click top corners to zoom out [\[precursor±\]](#)

scan 2593; 469.2 m/z; 4.9e+000

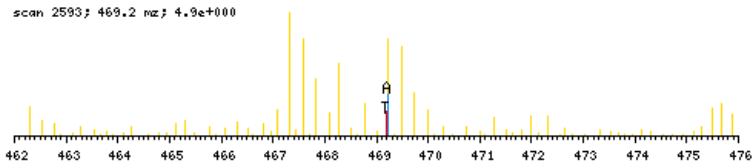

zoomed in precursor plot; T=theoretical m/z, A=acquired m/z

| b <sup>+</sup> | #  | AA | #  | y <sup>+</sup> | y <sup>2+</sup> |
|----------------|----|----|----|----------------|-----------------|
| 158.0817       | 1  | E  | 15 |                |                 |
| 273.1086       | 2  | D  | 14 | 1716.7214      | 858.8646        |
| 388.1356       | 3  | D  | 13 | 1601.6944      | 801.3511        |
| 503.1625       | 4  | D  | 12 | 1486.6675      | 743.8377        |
| 632.2051       | 5  | E  | 11 | 1371.6406      | 686.3242        |
| 747.2321       | 6  | D  | 10 | 1242.5980      | 621.8029        |
| 804.2535       | 7  | G  | 9  | 1127.5710      | 564.2894        |
| 933.2961       | 8  | E  | 8  | 1070.5496      | 535.7787        |
| 1062.3387      | 9  | E  | 7  | 941.5070       | 471.2574        |
| 1175.4228      | 10 | L  | 6  | 812.4644       | 406.7361        |
| 1288.5068      | 11 | L  | 5  | 699.3803       | 350.1941        |
| 1425.5657      | 12 | H  | 4  | 586.2962       | 293.6520        |
| 1562.6247      | 13 | H  | 3  | 449.2373       | 225.1226        |
| 1699.6836      | 14 | H  | 2  | 312.1784       | 156.5931        |
|                | 15 | R  | 1  | 175.1195       | 88.0637         |

N-term:+29.04

X-range:

0 - 0

MassTol: Y-zoom:

0. 1.

MassType:

☐ AVG ☒ MONO

Axis:

☒ 1 ☐ 2

Label:

☒ I ☐ M ☐ -

Ions:

a ☐ + ☐ 2+ ☐ 3+

b ☒ + ☐ 2+ ☐ 3+

c ☐ + ☐ 2+ ☐ 3+

x ☐ + ☐ 2+ ☐ 3+

y ☒ + ☒ 2+ ☐ 3+

z ☐ + ☐ 2+ ☐ 3+

hide H<sub>2</sub>O/NH<sub>3</sub> ☐

zoom 112-122 ☐

GO

EDGLDFPEYDGVDR, MH+ 1660.7554, m/z 554.2567  
H OS G13 P120811 220811-s1.05711.05711.3.dta

scan 5711; 3.2e+000

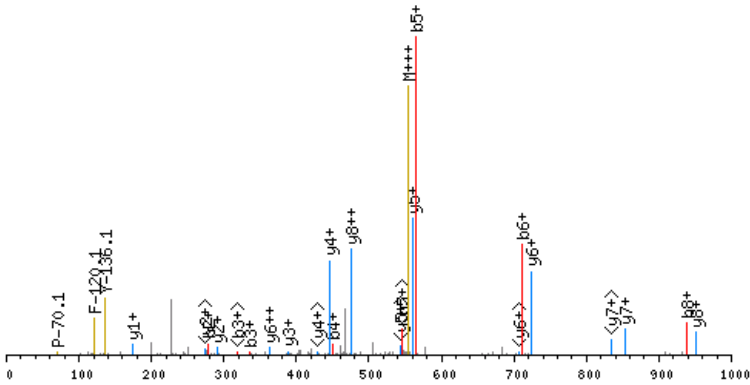

click image to zoom in; click top corners to zoom out

[precursor±]

scan 5709; 554.3 m/z; 1.6e+001

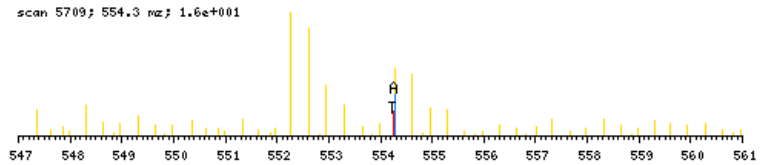

zoomed in precursor plot; T=theoretical m/z, A=acquired m/z

| b <sup>+</sup> | #  | AA | #  | y <sup>+</sup> | y <sup>2+</sup> |
|----------------|----|----|----|----------------|-----------------|
| 164.1135       | 1  | E  | 14 |                |                 |
| 279.1404       | 2  | D  | 13 | 1497.6498      | 749.3288        |
| 336.1619       | 3  | G  | 12 | 1382.6228      | 691.8153        |
| 449.2460       | 4  | L  | 11 | 1325.6014      | 663.3046        |
| 564.2729       | 5  | D  | 10 | 1212.5173      | 606.7626        |
| 711.3413       | 6  | F  | 9  | 1097.4904      | 549.2491        |
| 808.3941       | 7  | P  | 8  | 950.4220       | 475.7149        |
| 937.4367       | 8  | E  | 7  | 853.3692       | 427.1885        |
| 1100.5000      | 9  | Y  | 6  | 724.3266       | 362.6672        |
| 1215.5269      | 10 | D  | 5  | 561.2633       | 281.1355        |
| 1272.5484      | 11 | G  | 4  | 446.2363       | 223.6221        |
| 1371.6168      | 12 | V  | 3  | 389.2149       | 195.1113        |
| 1486.6438      | 13 | D  | 2  | 290.1464       | 145.5771        |
|                | 14 | R  | 1  | 175.1195       | 88.0637         |

N-term:+35.07

X-range:

0 - 0

MassTol: Y-zoom:

0. 1.

MassType:

☐ AVG ☒ MONO

Axis:

☒ 1 ☐ 2

Label:

☒ I ☐ M ☐ -

Ions:

a ☐ + ☐ 2+ ☐ 3+

b ☒ + ☐ 2+ ☐ 3+

c ☐ + ☐ 2+ ☐ 3+

x ☐ + ☐ 2+ ☐ 3+

y ☒ + ☒ 2+ ☐ 3+

z ☐ + ☐ 2+ ☐ 3+

hide H<sub>2</sub>O/NH<sub>3</sub> ☐

zoom 112-122 ☐

GO

EDICPSTHNMDVPNIKR, MH+ 2082.0112, m/z 521.2583  
L OS G17 P120811 220811-s1.04049.04049.4.dta

scan 4049; 7.9e+000

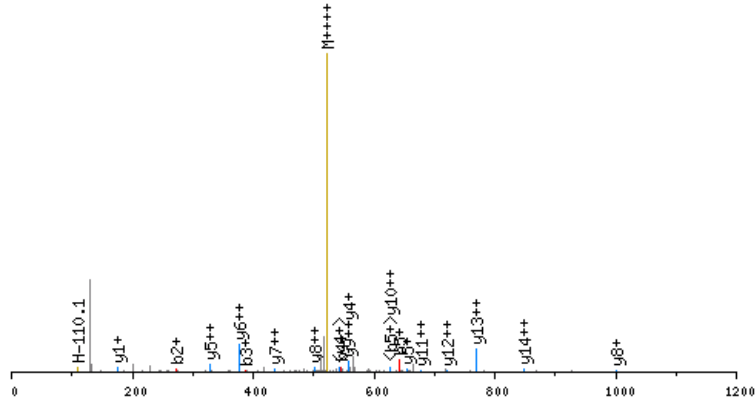

click image to zoom in; click top corners to zoom out

[precursor±]

scan 4048; 521.3 m/z; 6.4e+001

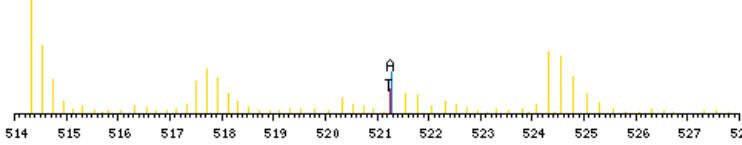

zoomed in precursor plot; T=theoretical m/z, A=acquired m/z

| b <sup>+</sup> | #  | AA | #  | y <sup>+</sup> | y <sup>2+</sup> |
|----------------|----|----|----|----------------|-----------------|
| 158.0817       | 1  | E  | 17 |                |                 |
| 273.1086       | 2  | D  | 16 | 1924.9373      | 962.9726        |
| 386.1927       | 3  | I  | 15 | 1809.9104      | 905.4591        |
| 546.2233       | 4  | C  | 14 | 1696.8263      | 848.9171        |
| 643.2761       | 5  | P  | 13 | 1536.7957      | 768.9018        |
| 730.3081       | 6  | S  | 12 | 1439.7429      | 720.3754        |
| 831.3558       | 7  | T  | 11 | 1352.7109      | 676.8594        |
| 968.4147       | 8  | H  | 10 | 1251.6632      | 626.3355        |
| 1082.4576      | 9  | N  | 9  | 1114.6043      | 557.8061        |
| 1213.4981      | 10 | M  | 8  | 1000.5614      | 500.7846        |
| 1328.5250      | 11 | D  | 7  | 869.5209       | 435.2644        |
| 1427.5935      | 12 | V  | 6  | 754.4940       | 377.7509        |
| 1524.6462      | 13 | P  | 5  | 655.4256       | 328.2167        |
| 1638.6891      | 14 | N  | 4  | 558.3728       | 279.6903        |
| 1751.7732      | 15 | I  | 3  | 444.3299       | 222.6688        |
| 1907.8995      | 16 | K  | 2  | 331.2458       | 166.1268        |
|                | 17 | R  | 1  | 175.1195       | 88.0637         |

N-term:+29.04 C(4):+160.03  
K(16):+156.13

X-range:

0 - 0

MassTol: Y-zoom:

0. 1.

MassType:

☐ AVG ☒ MONO

Axis:

☒ 1 ☐ 2

Label:

☒ I ☐ M ☐ -

Ions:

a ☐ + ☐ 2+ ☐ 3+

b ☒ + ☐ 2+ ☐ 3+

c ☐ + ☐ 2+ ☐ 3+

x ☐ + ☐ 2+ ☐ 3+

y ☒ + ☒ 2+ ☐ 3+

z ☐ + ☐ 2+ ☐ 3+

hide H<sub>2</sub>O/NH<sub>3</sub> ☐

zoom 112-122 ☐

GO

EDIDLPETFDAR, MH+ 1448.6909, m/z 483.5685  
L OS G13 P120811 220811-s1.05725.05725.3.dta

scan 5725; 2.7e+000

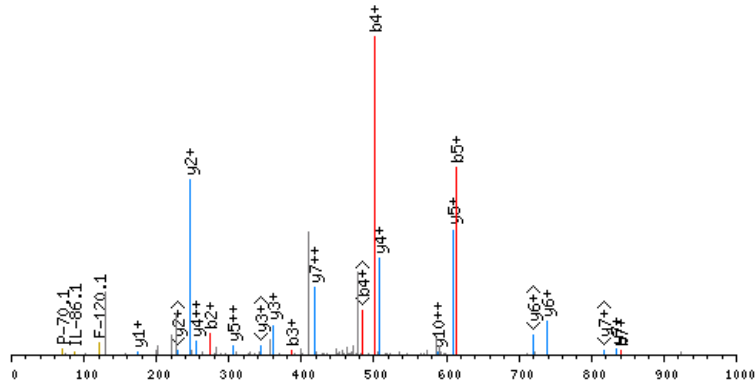

click image to zoom in; click top corners to zoom out

[precursor±]

scan 5724; 483.6 m/z; 1.1e+001

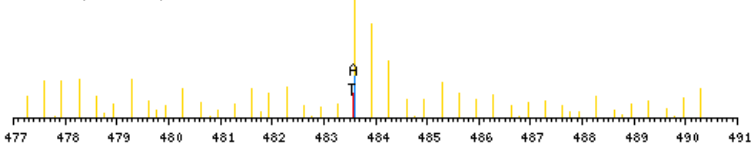

zoomed in precursor plot; T=theoretical m/z, A=acquired m/z

| b <sup>+</sup> | #  | AA | #  | y <sup>+</sup> | y <sup>2+</sup> |
|----------------|----|----|----|----------------|-----------------|
| 158.0817       | 1  | E  | 12 |                |                 |
| 273.1086       | 2  | D  | 11 | 1291.6170      | 646.3124        |
| 386.1927       | 3  | I  | 10 | 1176.5901      | 588.7990        |
| 501.2196       | 4  | D  | 9  | 1063.5060      | 532.2569        |
| 614.3037       | 5  | L  | 8  | 948.4791       | 474.7434        |
| 711.3565       | 6  | P  | 7  | 835.3950       | 418.2014        |
| 840.3991       | 7  | E  | 6  | 738.3422       | 369.6750        |
| 941.4467       | 8  | T  | 5  | 609.2997       | 305.1537        |
| 1088.5152      | 9  | F  | 4  | 508.2520       | 254.6299        |
| 1203.5421      | 10 | D  | 3  | 361.1836       | 181.0957        |
| 1274.5792      | 11 | A  | 2  | 246.1566       | 123.5822        |
|                | 12 | R  | 1  | 175.1195       | 88.0637         |

N-term:+29.04

X-range:

0 - 0

MassTol: Y-zoom:

0. 1.

MassType:

☐ AVG ☒ MONO

Axis:

☒ 1 ☐ 2

Label:

☒ I ☐ M ☐ -

Ions:

a ☐ + ☐ 2+ ☐ 3+

b ☒ + ☐ 2+ ☐ 3+

c ☐ + ☐ 2+ ☐ 3+

x ☐ + ☐ 2+ ☐ 3+

y ☒ + ☒ 2+ ☐ 3+

z ☐ + ☐ 2+ ☐ 3+

hide H<sub>2</sub>O/NH<sub>3</sub> ☐

zoom 112-122 ☐

GO

EDIPEVSCIHNGLR, MH+ 1672.8540, m/z 558.2895  
H OS G15 P120811 220811-s1.04219.04219.3.dta

scan 4219; 5.5e+000

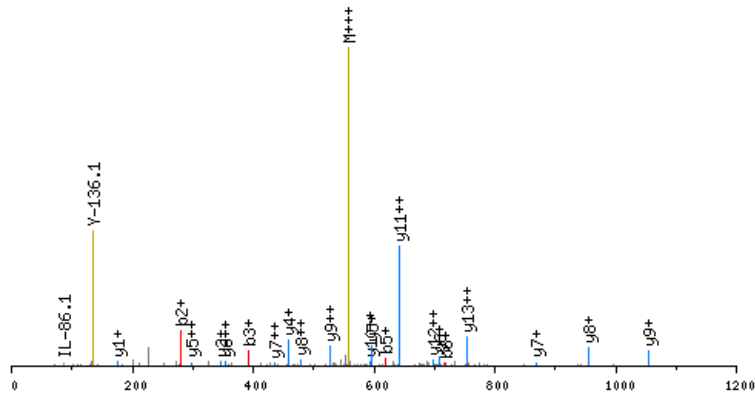

click image to zoom in; click top corners to zoom out [\[precursor±\]](#)

scan 4216; 558.3 m/z; 8.2e+001

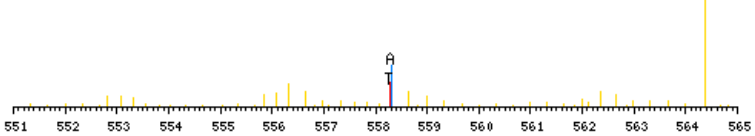

zoomed in precursor plot; T=theoretical m/z, A=acquired m/z

| b <sup>+</sup> | #  | AA | #  | y <sup>+</sup> | y <sup>2+</sup> |
|----------------|----|----|----|----------------|-----------------|
| 164.1135       | 1  | E  | 14 |                |                 |
| 279.1404       | 2  | D  | 13 | 1509.7483      | 755.3781        |
| 392.2245       | 3  | I  | 12 | 1394.7214      | 697.8646        |
| 489.2773       | 4  | P  | 11 | 1281.6373      | 641.3226        |
| 618.3199       | 5  | E  | 10 | 1184.5846      | 592.7962        |
| 717.3883       | 6  | V  | 9  | 1055.5420      | 528.2749        |
| 804.4203       | 7  | S  | 8  | 956.4736       | 478.7407        |
| 964.4509       | 8  | C  | 7  | 869.4415       | 435.2247        |
| 1077.5350      | 9  | I  | 6  | 709.4109       | 355.2094        |
| 1214.5399      | 10 | H  | 5  | 596.3269       | 298.6673        |
| 1328.6368      | 11 | N  | 4  | 459.2680       | 230.1379        |
| 1385.6583      | 12 | G  | 3  | 345.2250       | 173.1164        |
| 1498.7423      | 13 | L  | 2  | 288.2036       | 144.6057        |
|                | 14 | R  | 1  | 175.1195       | 88.0637         |

N-term:+35.07 C(8):+160.03

X-range:

0 - 0

MassTol: Y-zoom:

0. 1.

MassType:

☐AVG ☒MONO

Axis:

☒1 ☐2

Label:

☒I ☐M ☐-

Ions:

a ☐+ ☐2+ ☐3+

b ☒+ ☐2+ ☐3+

c ☐+ ☐2+ ☐3+

x ☐+ ☐2+ ☐3+

y ☒+ ☒2+ ☐3+

z ☐+ ☐2+ ☐3+

hide H<sub>2</sub>O/NH<sub>3</sub> ☐

zoom 112-122 ☐

GO

EDLVFPSEIVGKR, MH+ 1544.8688, m/z 515.6278  
L OS G15 P120811 220811-s1.05288.05288.3.dta

scan 5286; 1.0e+001

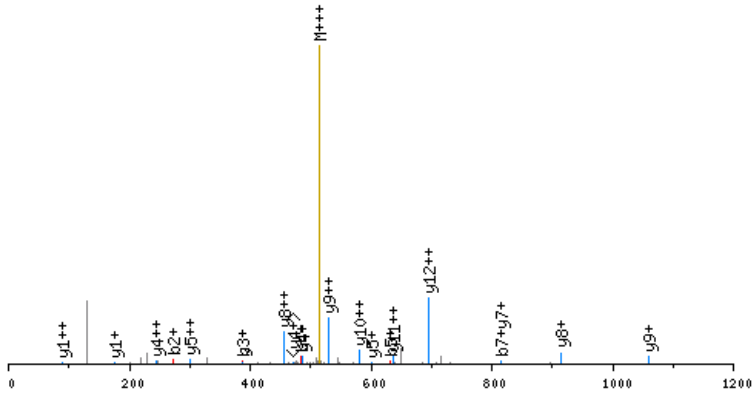

click image to zoom in; click top corners to zoom out [\[precursor±\]](#)

scan 5286; 515.6 m/z; 1.0e+001

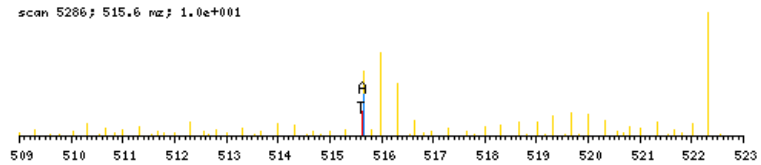

zoomed in precursor plot; T=theoretical m/z, A=acquired m/z

| b <sup>+</sup> | #  | AA | #  | y <sup>+</sup> | y <sup>2+</sup> |
|----------------|----|----|----|----------------|-----------------|
| 158.0817       | 1  | E  | 13 |                |                 |
| 273.1086       | 2  | D  | 12 | 1387.7950      | 694.4014        |
| 386.1927       | 3  | L  | 11 | 1272.7680      | 636.8879        |
| 485.2611       | 4  | V  | 10 | 1159.6840      | 580.3459        |
| 632.3295       | 5  | F  | 9  | 1060.6155      | 530.8117        |
| 729.3823       | 6  | P  | 8  | 913.5471       | 457.2775        |
| 816.4143       | 7  | S  | 7  | 816.4944       | 408.7511        |
| 945.4569       | 8  | E  | 6  | 729.4623       | 365.2351        |
| 1058.5410      | 9  | I  | 5  | 600.4197       | 300.7138        |
| 1157.6094      | 10 | V  | 4  | 487.3357       | 244.1718        |
| 1214.6309      | 11 | G  | 3  | 388.2673       | 194.6375        |
| 1370.7572      | 12 | K  | 2  | 331.2458       | 166.1268        |
|                | 13 | R  | 1  | 175.1195       | 88.0637         |

N-term:+29.04 K(12):+156.13

X-range:

0 - 0

MassTol: Y-zoom:

0. 1.

MassType:

☐ AVG ☒ MONO

Axis:

☒ 1 ☐ 2

Label:

☒ I ☐ M ☐ -

Ions:

a ☐ + ☐ 2+ ☐ 3+

b ☒ + ☐ 2+ ☐ 3+

c ☐ + ☐ 2+ ☐ 3+

x ☐ + ☐ 2+ ☐ 3+

y ☒ + ☒ 2+ ☐ 3+

z ☐ + ☐ 2+ ☐ 3+

hide H<sub>2</sub>O/NH<sub>3</sub> ☐

zoom 112-122 ☐

GO

EDNEDDEDGEELLHHR, MH+ 2237.9395, m/z 560.2403  
H OS G19 P120811 220811-s1.02683.02683.4.dta

scan 2683; 2.0e+000

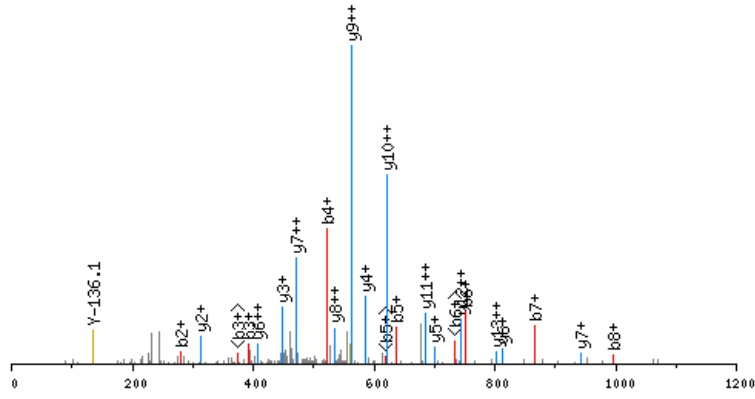

click image to zoom in; click top corners to zoom out [\[precursor±\]](#)

scan 2681; 560.2 m/z; 2.4e+000

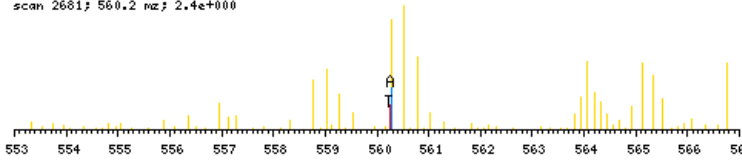

zoomed in precursor plot; T=theoretical m/z, A=acquired m/z

| b <sup>+</sup> | #  | AA | #  | y <sup>+</sup> | y <sup>2+</sup> |
|----------------|----|----|----|----------------|-----------------|
| 164.1135       | 1  | E  | 18 |                |                 |
| 279.1404       | 2  | D  | 17 | 2074.8338      | 1037.9208       |
| 393.1834       | 3  | N  | 16 | 1959.8069      | 980.4074        |
| 522.2260       | 4  | E  | 15 | 1845.7640      | 923.3859        |
| 637.2529       | 5  | D  | 14 | 1716.7214      | 858.8646        |
| 752.2798       | 6  | D  | 13 | 1601.6944      | 801.3511        |
| 867.3068       | 7  | D  | 12 | 1486.6675      | 743.8377        |
| 996.3494       | 8  | E  | 11 | 1371.6406      | 686.3242        |
| 1111.3763      | 9  | D  | 10 | 1242.5980      | 621.8029        |
| 1168.3978      | 10 | G  | 9  | 1127.5710      | 564.2894        |
| 1297.4404      | 11 | E  | 8  | 1070.5496      | 535.7787        |
| 1426.4830      | 12 | E  | 7  | 941.5070       | 471.2574        |
| 1539.5670      | 13 | L  | 6  | 812.4644       | 406.7361        |
| 1652.6511      | 14 | L  | 5  | 699.3803       | 350.1941        |
| 1789.7100      | 15 | H  | 4  | 586.2962       | 293.6520        |
| 1926.7689      | 16 | H  | 3  | 449.2373       | 225.1226        |
| 2063.8278      | 17 | H  | 2  | 312.1784       | 156.5931        |
|                | 18 | R  | 1  | 175.1195       | 88.0637         |

N-term:+35.07

X-range:

0 - 0

MassTol: Y-zoom:

0. 1.

MassType:

☐AVG ☒MONO

Axis:

☒1 ☐2

Label:

☒I ☐M ☐-

Ions:

a ☐+ ☐2+ ☐3+

b ☒+ ☐2+ ☐3+

c ☐+ ☐2+ ☐3+

x ☐+ ☐2+ ☐3+

y ☒+ ☒2+ ☐3+

z ☐+ ☐2+ ☐3+

hide H<sub>2</sub>O/NH<sub>3</sub> ☐

zoom 112-122 ☐

GO

EDPVKVIKIEGFSR, MH+ 1560.8274, m/z 520.9473  
L OS G15 P120811 220811-s1.06093.06093.3.dta

scan 6093; 1.3e+001

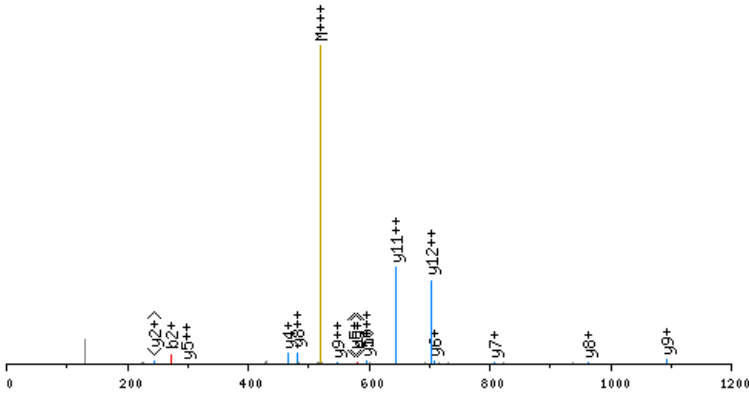

click image to zoom in; click top corners to zoom out

[precursor±]

scan 6091; 520.9 m/z; 4.2e+000

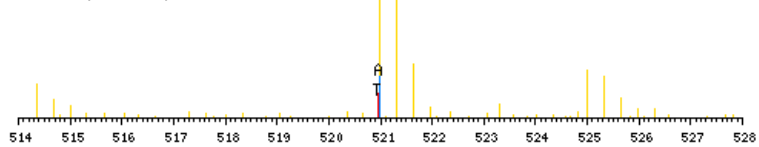

zoomed in precursor plot; T=theoretical m/z, A=acquired m/z

| b <sup>+</sup> | #  | AA | #  | y <sup>+</sup> | y <sup>2+</sup> |
|----------------|----|----|----|----------------|-----------------|
| 158.0817       | 1  | E  | 13 |                |                 |
| 273.1086       | 2  | D  | 12 | 1403.7535      | 702.3807        |
| 370.1614       | 3  | P  | 11 | 1288.7265      | 644.8672        |
| 469.2298       | 4  | V  | 10 | 1191.6738      | 596.3408        |
| 598.2724       | 5  | E  | 9  | 1092.6054      | 546.8066        |
| 754.3987       | 6  | K  | 8  | 963.5628       | 482.2853        |
| 853.4671       | 7  | V  | 7  | 807.4365       | 404.2222        |
| 966.5512       | 8  | I  | 6  | 708.3681       | 354.6879        |
| 1095.5938      | 9  | E  | 5  | 595.2840       | 298.1459        |
| 1152.6152      | 10 | G  | 4  | 466.2414       | 233.6246        |
| 1299.6837      | 11 | F  | 3  | 409.2199       | 205.1139        |
| 1386.7157      | 12 | S  | 2  | 262.1515       | 131.5797        |
|                | 13 | R  | 1  | 175.1195       | 88.0637         |

N-term:+29.04 K(6):+156.13

X-range:

0 - 0

MassTol: Y-zoom:

0. 1.

MassType:

☐AVG ☒MONO

Axis:

☒1 ☐2

Label:

☒I ☐M ☐-

Ions:

a ☐+ ☐2+ ☐3+

b ☒+ ☐2+ ☐3+

c ☐+ ☐2+ ☐3+

x ☐+ ☐2+ ☐3+

y ☒+ ☒2+ ☐3+

z ☐+ ☐2+ ☐3+

hide H<sub>2</sub>O/NH<sub>3</sub> ☐

zoom 112-122 ☐

GO

EDVQETDTSQKQSPASHEIATNLGDFAILYR, MH+ 3733.8469, m/z 934.2172  
H OS G16 P120811 220811-s1.06273.06273.4.dta

scan 6273; 1.6e+000

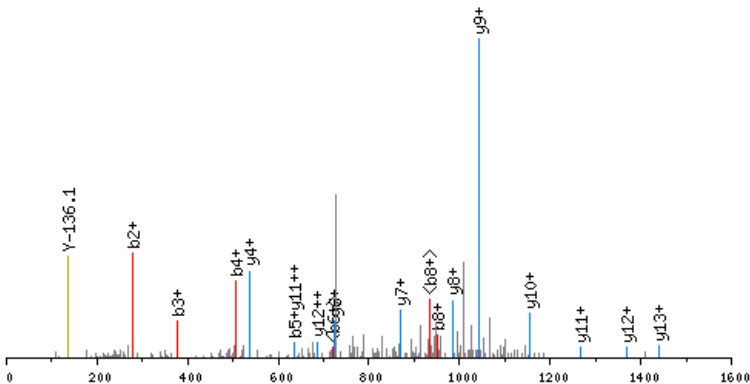

click image to zoom in; click top corners to zoom out

[precursor±]

scan 6272; 934.2 m/z; 9.3e+000

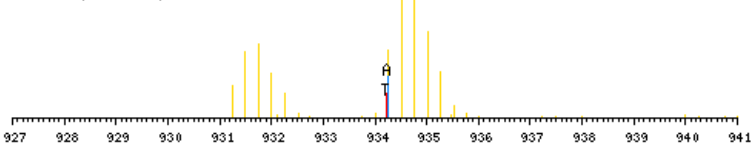

zoomed in precursor plot; T=theoretical m/z, A=acquired m/z

| b <sup>+</sup> | #  | AA | #  | y <sup>+</sup> | y <sup>2+</sup> |
|----------------|----|----|----|----------------|-----------------|
| 164.1135       | 1  | E  | 33 |                |                 |
| 279.1404       | 2  | D  | 32 | 3570.7413      | 1785.8745       |
| 378.2089       | 3  | V  | 31 | 3455.7143      | 1728.3611       |
| 506.2674       | 4  | Q  | 30 | 3356.6459      | 1678.8269       |
| 635.3100       | 5  | E  | 29 | 3228.5873      | 1614.7976       |
| 736.3577       | 6  | T  | 28 | 3099.5447      | 1550.2763       |
| 851.3846       | 7  | D  | 27 | 2998.4971      | 1499.7524       |
| 952.4323       | 8  | T  | 26 | 2883.4701      | 1442.2390       |
| 1039.4643      | 9  | S  | 25 | 2782.4224      | 1391.7151       |
| 1167.5229      | 10 | Q  | 24 | 2695.3904      | 1348.1991       |
| 1329.6810      | 11 | K  | 23 | 2567.3318      | 1284.1698       |
| 1444.7080      | 12 | D  | 22 | 2405.1737      | 1203.0908       |
| 1572.7665      | 13 | Q  | 21 | 2290.1468      | 1145.5773       |
| 1659.7986      | 14 | S  | 20 | 2162.0882      | 1081.5480       |
| 1756.8513      | 15 | P  | 19 | 2075.0562      | 1038.0320       |
| 1827.8885      | 16 | A  | 18 | 1978.0034      | 989.5056        |
| 1914.9205      | 17 | S  | 17 | 1906.9663      | 953.9871        |
| 2051.9794      | 18 | H  | 16 | 1819.9343      | 910.4710        |
| 2181.0220      | 19 | E  | 15 | 1682.8754      | 841.9416        |
| 2294.1061      | 20 | I  | 14 | 1553.8328      | 777.4203        |
| 2365.1432      | 21 | A  | 13 | 1440.7487      | 720.8783        |
| 2466.1908      | 22 | T  | 12 | 1369.7116      | 685.3597        |
| 2580.2338      | 23 | N  | 11 | 1268.6639      | 634.8359        |
| 2693.3178      | 24 | L  | 10 | 1154.6210      | 577.8144        |
| 2750.3393      | 25 | G  | 9  | 1041.5369      | 521.2724        |
| 2865.3662      | 26 | D  | 8  | 984.5155       | 492.7616        |
| 3012.4347      | 27 | F  | 7  | 869.4885       | 435.2482        |
| 3083.4718      | 28 | A  | 6  | 722.4201       | 361.7140        |
| 3196.5558      | 29 | I  | 5  | 651.3830       | 326.1954        |
| 3283.5879      | 30 | S  | 4  | 538.2989       | 269.6534        |
| 3396.6719      | 31 | L  | 3  | 451.2669       | 226.1374        |
| 3559.7353      | 32 | Y  | 2  | 338.1828       | 169.5953        |
|                | 33 | R  | 1  | 175.1195       | 88.0637         |

N-term:+35.07 K(11):+162.16

X-range:

0 - 0

MassTol: Y-zoom:

0. 1.

MassType:

☐ AVG ☒ MONO

Axis:

☒ 1 ☐ 2

Label:

☒ I ☐ M ☐ -

Ions:

a ☐ + ☐ 2+ ☐ 3+

b ☒ + ☐ 2+ ☐ 3+

c ☐ + ☐ 2+ ☐ 3+

x ☐ + ☐ 2+ ☐ 3+

y ☒ + ☒ 2+ ☐ 3+

z ☐ + ☐ 2+ ☐ 3+

hide H<sub>2</sub>O/NH<sub>3</sub> ☐

zoom 112-122 ☐

GO

EDVQETDTSQKDQSPASHEIATNLGDFALR, MH+ 3370.6675, m/z 843.4223  
H OS G16 P120811 220811-s1.05614.05614.4.dta

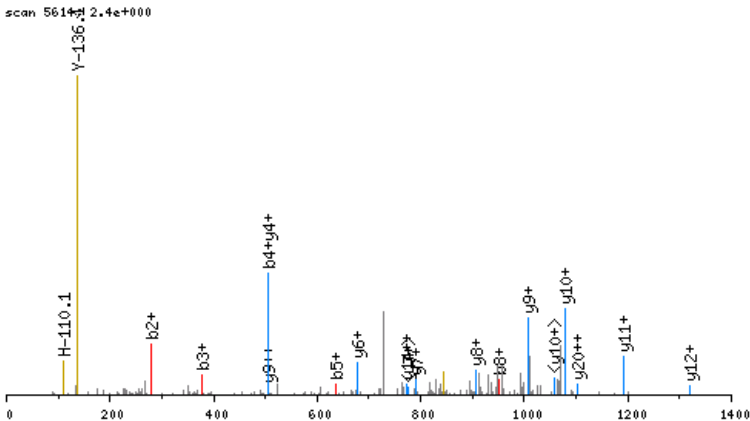

click image to zoom in; click top corners to zoom out

[precursor±]

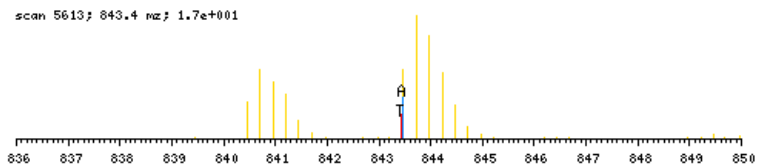

zoomed in precursor plot; T=theoretical m/z, A=acquired m/z

| b <sup>+</sup> | #  | AA | #  | y <sup>+</sup> | y <sup>2+</sup> |
|----------------|----|----|----|----------------|-----------------|
| 164.1135       | 1  | E  | 30 |                |                 |
| 279.1404       | 2  | D  | 29 | 3207.5618      | 1604.2848       |
| 378.2089       | 3  | V  | 28 | 3092.5349      | 1546.7714       |
| 506.2674       | 4  | Q  | 27 | 2993.4665      | 1497.2372       |
| 635.3100       | 5  | E  | 26 | 2865.4079      | 1433.2079       |
| 736.3577       | 6  | T  | 25 | 2736.3653      | 1368.6866       |
| 851.3846       | 7  | D  | 24 | 2635.3176      | 1318.1627       |
| 952.4323       | 8  | T  | 23 | 2520.2907      | 1260.6493       |
| 1039.4643      | 9  | S  | 22 | 2419.2430      | 1210.1254       |
| 1167.5229      | 10 | Q  | 21 | 2332.2110      | 1166.6094       |
| 1329.6810      | 11 | K  | 20 | 2204.1524      | 1102.5801       |
| 1444.7080      | 12 | D  | 19 | 2041.9943      | 1021.5011       |
| 1572.7665      | 13 | Q  | 18 | 1926.9674      | 963.9876        |
| 1659.7986      | 14 | S  | 17 | 1798.9088      | 899.9583        |
| 1756.8513      | 15 | P  | 16 | 1711.8768      | 856.4423        |
| 1827.8885      | 16 | A  | 15 | 1614.8240      | 807.9159        |
| 1914.9205      | 17 | S  | 14 | 1543.7869      | 772.3974        |
| 2051.9794      | 18 | H  | 13 | 1456.7549      | 728.8813        |
| 2181.0220      | 19 | E  | 12 | 1319.6959      | 660.3519        |
| 2294.1061      | 20 | I  | 11 | 1190.6533      | 595.8306        |
| 2365.1432      | 21 | A  | 10 | 1077.5693      | 539.2886        |
| 2466.1908      | 22 | T  | 9  | 1006.5322      | 503.7700        |
| 2580.2338      | 23 | N  | 8  | 905.4845       | 453.2462        |
| 2693.3178      | 24 | L  | 7  | 791.4416       | 396.2247        |
| 2750.3393      | 25 | G  | 6  | 678.3575       | 339.6827        |
| 2865.3662      | 26 | D  | 5  | 621.3360       | 311.1719        |
| 3012.4347      | 27 | F  | 4  | 506.3091       | 253.6585        |
| 3083.4718      | 28 | A  | 3  | 359.2407       | 180.1243        |
| 3196.5558      | 29 | L  | 2  | 288.2036       | 144.6057        |
|                | 30 | R  | 1  | 175.1195       | 88.0637         |

N-term:+35.07 K(11):+162.16

X-range:

0 - 0

MassTol: Y-zoom:

0. 1.

MassType:

☐ AVG ☒ MONO

Axis:

☒ 1 ☐ 2

Label:

☒ I ☐ M ☐ -

Ions:

a ☐ + ☐ 2+ ☐ 3+

b ☒ + ☐ 2+ ☐ 3+

c ☐ + ☐ 2+ ☐ 3+

x ☐ + ☐ 2+ ☐ 3+

y ☒ + ☒ 2+ ☐ 3+

z ☐ + ☐ 2+ ☐ 3+

hide H<sub>2</sub>O/NH<sub>3</sub> ☐

zoom 112-122 ☐

GO

EEALGDKAVFAGR, MH+ 1430.8280, m/z 477.6142  
H OS G15 P120811 220811-s1.03270.03270.3.dta

scan 3270; 2.4e+001

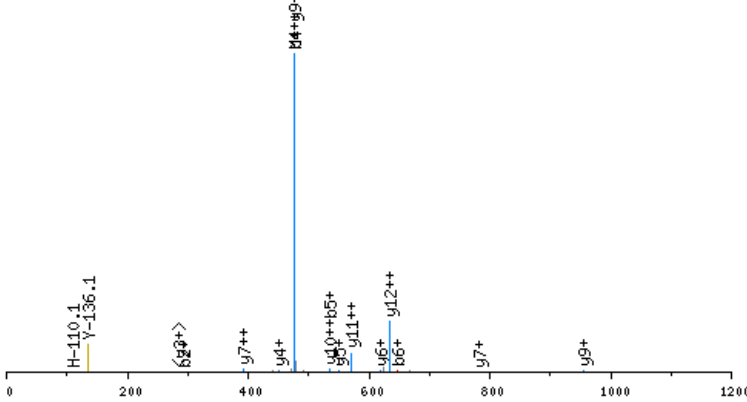

click image to zoom in; click top corners to zoom out [\[precursor±\]](#)

scan 3266; 477.6 m/z; 8.5e+000

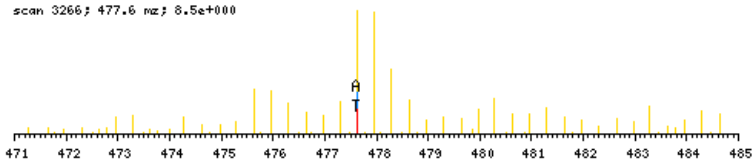

zoomed in precursor plot; T=theoretical m/z, A=acquired m/z

| b <sup>+</sup> | #  | AA | #  | y <sup>+</sup> | y <sup>2+</sup> |
|----------------|----|----|----|----------------|-----------------|
| 164.1135       | 1  | E  | 13 |                |                 |
| 293.1561       | 2  | E  | 12 | 1267.7223      | 634.3651        |
| 364.1932       | 3  | A  | 11 | 1138.6797      | 569.8438        |
| 477.2773       | 4  | L  | 10 | 1067.6426      | 534.3252        |
| 534.2987       | 5  | G  | 9  | 954.5585       | 477.7832        |
| 649.3257       | 6  | D  | 8  | 897.5371       | 449.2724        |
| 811.4838       | 7  | K  | 7  | 782.5101       | 391.7590        |
| 882.5209       | 8  | A  | 6  | 620.3520       | 310.6799        |
| 981.5893       | 9  | V  | 5  | 549.3149       | 275.1614        |
| 1128.6577      | 10 | F  | 4  | 450.2465       | 225.6272        |
| 1199.6948      | 11 | A  | 3  | 303.1781       | 152.0930        |
| 1256.7163      | 12 | G  | 2  | 232.1410       | 116.5744        |
|                | 13 | R  | 1  | 175.1195       | 88.0637         |

N-term:+35.07 K(7):+162.16

X-range:

0 - 0

MassTol: Y-zoom:

0. 1.

MassType:

☐AVG ☒MONO

Axis:

☒1 ☐2

Label:

☒I ☐M ☐-

Ions:

a ☐+ ☐2+ ☐3+

b ☒+ ☐2+ ☐3+

c ☐+ ☐2+ ☐3+

x ☐+ ☐2+ ☐3+

y ☒+ ☒2+ ☐3+

z ☐+ ☐2+ ☐3+

hide H<sub>2</sub>O/NH<sub>3</sub> ☐

zoom 112-122 ☐

GO

EEEEELIALKER, MH+ 1414.7793, m/z 472.2646  
L OS G15 P120811 220811-s1.03648.03648.3.dta

scan 3648; 2.1e+001

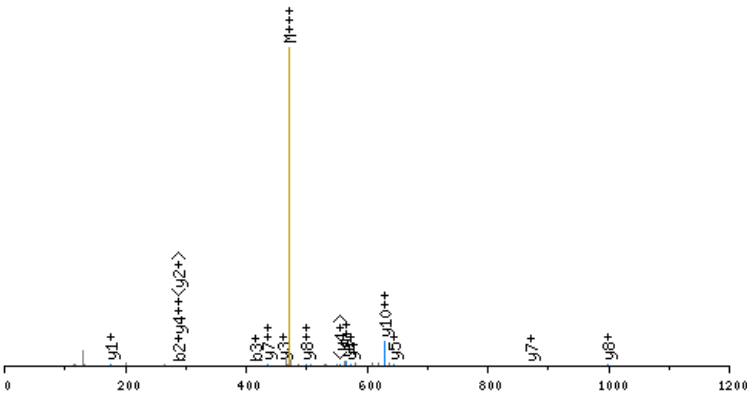

click image to zoom in; click top corners to zoom out

[precursor±]

scan 3646; 472.3 m/z; 1.4e+001

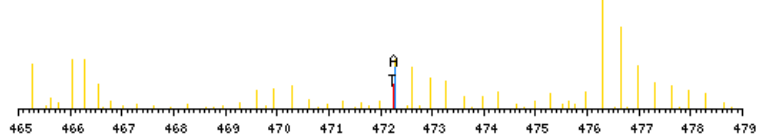

zoomed in precursor plot; T=theoretical m/z, A=acquired m/z

| b <sup>+</sup> | #  | AA | #  | y <sup>+</sup> | y <sup>2+</sup> |
|----------------|----|----|----|----------------|-----------------|
| 158.0817       | 1  | E  | 11 |                |                 |
| 287.1243       | 2  | E  | 10 | 1257.7055      | 629.3567        |
| 416.1669       | 3  | E  | 9  | 1128.6629      | 564.8354        |
| 545.2095       | 4  | E  | 8  | 999.6203       | 500.3141        |
| 658.2935       | 5  | L  | 7  | 870.5777       | 435.7928        |
| 771.3776       | 6  | I  | 6  | 757.4936       | 379.2507        |
| 842.4147       | 7  | A  | 5  | 644.4096       | 322.7087        |
| 955.4988       | 8  | L  | 4  | 573.3725       | 287.1901        |
| 1111.6251      | 9  | K  | 3  | 460.2884       | 230.6481        |
| 1240.6677      | 10 | E  | 2  | 304.1621       | 152.5850        |
|                | 11 | R  | 1  | 175.1195       | 88.0637         |

N-term:+29.04 K(9):+156.13

N-term: +29.04 K(15) : +156.13

X-range:

0 - 0

MassTol: Y-zoom:

0. 1.

MassType:

☐AVG ☒MONO

Axis:

☒1 ☐2

Label:

☒I ☐M ☐-

Ions:

a ☐+ ☐2+ ☐3+

b ☒+ ☐2+ ☐3+

c ☐+ ☐2+ ☐3+

x ☐+ ☐2+ ☐3+

y ☒+ ☒2+ ☐3+

z ☐+ ☐2+ ☐3+

hide H<sub>2</sub>O/NH<sub>3</sub> ☐

zoom 112-122 ☐

GO

EEHPVLLTEAPLNPKANR, MH+ 2084.1504, m/z 521.7931  
L OS G17 P120811 220811-s1.04665.04665.4.dta

scan 4665; 1.9e+000

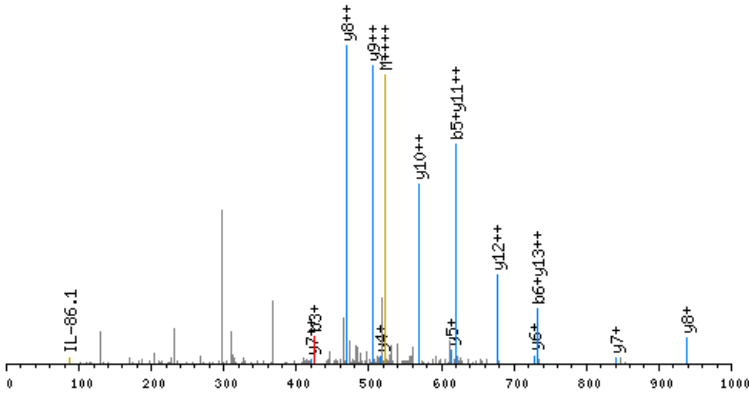

click image to zoom in; click top corners to zoom out

[precursor±]

scan 4663; 521.8 m/z; 9.2e+000

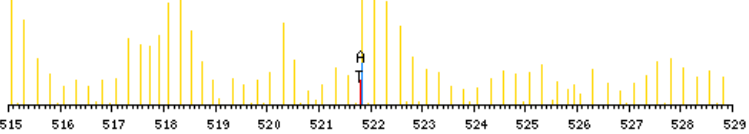

zoomed in precursor plot; T=theoretical m/z, A=acquired m/z

| b <sup>+</sup> | #  | AA | #  | y <sup>+</sup> | y <sup>2+</sup> |
|----------------|----|----|----|----------------|-----------------|
| 158.0817       | 1  | E  | 18 |                |                 |
| 287.1243       | 2  | E  | 17 | 1927.0766      | 964.0422        |
| 424.1832       | 3  | H  | 16 | 1798.0340      | 899.5209        |
| 521.2360       | 4  | P  | 15 | 1660.9751      | 830.9914        |
| 620.3044       | 5  | V  | 14 | 1563.9223      | 782.4651        |
| 733.3884       | 6  | L  | 13 | 1464.8539      | 732.9308        |
| 846.4725       | 7  | L  | 12 | 1351.7698      | 676.3888        |
| 947.5202       | 8  | T  | 11 | 1238.6857      | 619.8468        |
| 1076.5628      | 9  | E  | 10 | 1137.6381      | 569.3229        |
| 1147.5999      | 10 | A  | 9  | 1008.5955      | 504.8017        |
| 1244.6527      | 11 | P  | 8  | 937.5584       | 469.2831        |
| 1357.7367      | 12 | L  | 7  | 840.5056       | 420.7567        |
| 1471.7796      | 13 | N  | 6  | 727.4215       | 364.2147        |
| 1568.8324      | 14 | P  | 5  | 613.3786       | 307.1932        |
| 1724.9587      | 15 | K  | 4  | 516.3258       | 258.6668        |
| 1795.9958      | 16 | A  | 3  | 360.1995       | 180.6037        |
| 1910.0387      | 17 | N  | 2  | 289.1624       | 145.0851        |
|                | 18 | R  | 1  | 175.1195       | 88.0637         |

N-term:+29.04 K(15):+156.13

X-range:

0 - 0

MassTol: Y-zoom:

0. 1.

MassType:

☐AVG ☒MONO

Axis:

☒1 ☐2

Label:

☒I ☐M ☐-

Ions:

a ☐+ ☐2+ ☐3+

b ☒+ ☐2+ ☐3+

c ☐+ ☐2+ ☐3+

x ☐+ ☐2+ ☐3+

y ☒+ ☒2+ ☐3+

z ☐+ ☐2+ ☐3+

hide H<sub>2</sub>O/NH<sub>3</sub> ☐

zoom 112-122 ☐

GO

EEIKDFLLTAR, MH+ 1390.7946, m/z 464.2697  
L OS G16 P120811 220811-s1.05712.05712.3.dta

scan 5712; 1.2e+001

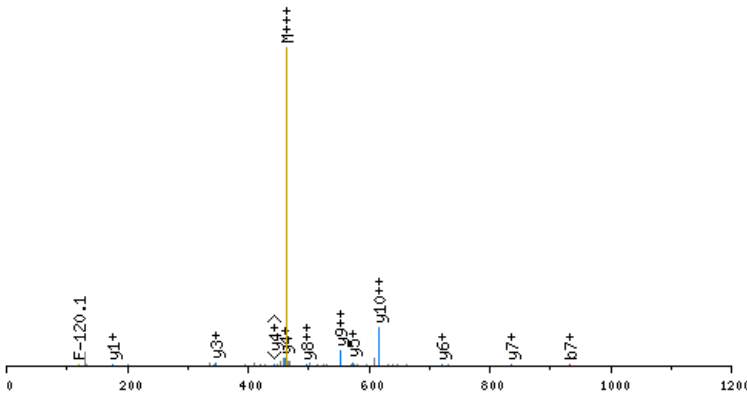

click image to zoom in; click top corners to zoom out

[precursor±]

scan 5708; 464.3 m/z; 2.2e+001

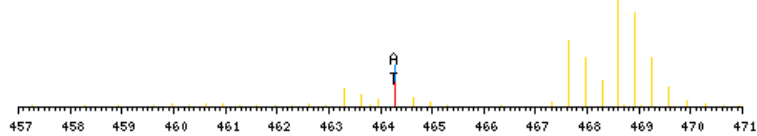

zoomed in precursor plot; T=theoretical m/z, A=acquired m/z

| b <sup>+</sup> | #  | AA | #  | y <sup>+</sup> | y <sup>2+</sup> |
|----------------|----|----|----|----------------|-----------------|
| 158.0817       | 1  | E  | 11 |                |                 |
| 287.1243       | 2  | E  | 10 | 1233.7207      | 617.3643        |
| 400.2084       | 3  | I  | 9  | 1104.6781      | 552.8430        |
| 556.3347       | 4  | K  | 8  | 991.5941       | 496.3010        |
| 671.3616       | 5  | D  | 7  | 835.4678       | 418.2378        |
| 818.4300       | 6  | F  | 6  | 720.4408       | 360.7243        |
| 931.5141       | 7  | L  | 5  | 573.3724       | 287.1901        |
| 1044.5981      | 8  | L  | 4  | 460.2884       | 230.6481        |
| 1145.6458      | 9  | T  | 3  | 347.2043       | 174.1061        |
| 1216.6829      | 10 | A  | 2  | 246.1566       | 123.5822        |
|                | 11 | R  | 1  | 175.1195       | 88.0637         |

N-term:+29.04 K(4):+156.13

N-term: +29.04 C (7) : +160.03

X-range:

0 - 0

MassTol: Y-zoom:

0. 1.

MassType:

☐AVG ☒MONO

Axis:

☒1 ☐2

Label:

☒I ☐M ☐-

Ions:

a ☐+ ☐2+ ☐3+

b ☒+ ☐2+ ☐3+

c ☐+ ☐2+ ☐3+

x ☐+ ☐2+ ☐3+

y ☒+ ☒2+ ☐3+

z ☐+ ☐2+ ☐3+

hide H<sub>2</sub>O/NH<sub>3</sub> ☐

zoom 112-122 ☐

GO

EEQLDEEHLESHR, MH+ 1678.7672, m/z 420.4473  
L OS G17 P120811 220811-s1.02490.02490.4.dta

scan 2490; 7.3e+000

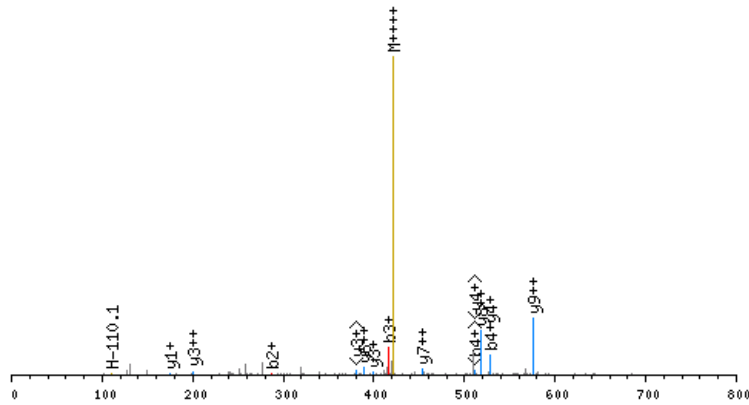

click image to zoom in; click top corners to zoom out [\[precursor±\]](#)

scan 2488; 420.4 m/z; 8.1e+000

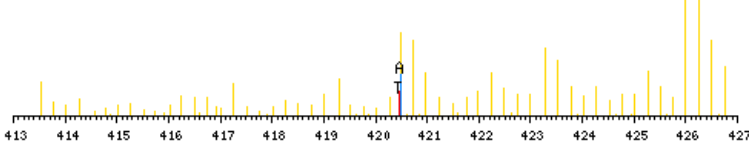

zoomed in precursor plot; T=theoretical m/z, A=acquired m/z

| b <sup>+</sup> | #  | AA | #  | y <sup>+</sup> | y <sup>2+</sup> |
|----------------|----|----|----|----------------|-----------------|
| 158.0817       | 1  | E  | 13 |                |                 |
| 287.1243       | 2  | E  | 12 | 1521.6934      | 761.3506        |
| 415.1829       | 3  | Q  | 11 | 1392.6508      | 696.8293        |
| 528.2669       | 4  | L  | 10 | 1264.5922      | 632.8000        |
| 643.2939       | 5  | D  | 9  | 1151.5081      | 576.2580        |
| 772.3365       | 6  | E  | 8  | 1036.4812      | 518.7445        |
| 901.3791       | 7  | E  | 7  | 907.4386       | 454.2232        |
| 1038.4380      | 8  | H  | 6  | 778.3960       | 389.7019        |
| 1151.5220      | 9  | L  | 5  | 641.3371       | 321.1725        |
| 1280.5646      | 10 | E  | 4  | 528.2530       | 264.6304        |
| 1367.5967      | 11 | S  | 3  | 399.2104       | 200.1091        |
| 1504.6556      | 12 | H  | 2  | 312.1784       | 156.5931        |
|                | 13 | R  | 1  | 175.1195       | 88.0637         |

N-term:+29.04

X-range:

0 - 0

MassTol: Y-zoom:

0. 1.

MassType:

☐ AVG ☒ MONO

Axis:

☒ 1 ☐ 2

Label:

☒ I ☐ M ☐ -

Ions:

a ☐ + ☐ 2+ ☐ 3+

b ☒ + ☐ 2+ ☐ 3+

c ☐ + ☐ 2+ ☐ 3+

x ☐ + ☐ 2+ ☐ 3+

y ☒ + ☒ 2+ ☐ 3+

z ☐ + ☐ 2+ ☐ 3+

hide H<sub>2</sub>O/NH<sub>3</sub> ☐

zoom 112-122 ☐

GO

EETQPPVALKKEGIR, MH+ 1779.0381, m/z 445.5150  
L OS G17 P120811 220811-s1.02995.02995.4.dta

scan 2995: 1.5e+001

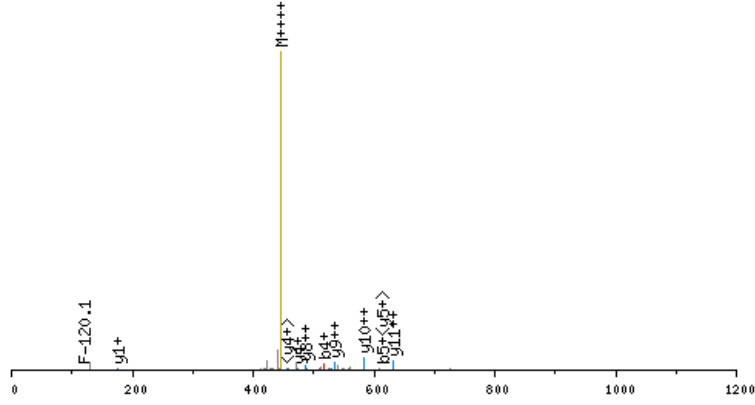

click image to zoom in; click top corners to zoom out [\[precursor±\]](#)

scan 2993: 445.5 m/z; 4.7e+000

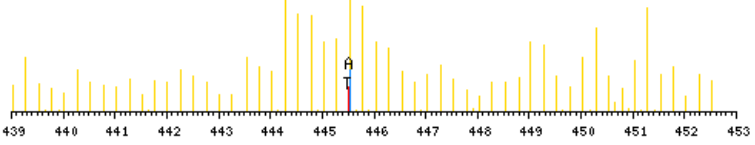

zoomed in precursor plot; T=theoretical m/z, A=acquired m/z

| b <sup>+</sup> | #  | AA | #  | y <sup>+</sup> | y <sup>2+</sup> |
|----------------|----|----|----|----------------|-----------------|
| 158.0817       | 1  | E  | 15 |                |                 |
| 287.1243       | 2  | E  | 14 | 1621.9642      | 811.4860        |
| 388.1720       | 3  | T  | 13 | 1492.9216      | 746.9647        |
| 516.2305       | 4  | Q  | 12 | 1391.8739      | 696.4409        |
| 613.2833       | 5  | P  | 11 | 1263.8153      | 632.4116        |
| 710.3361       | 6  | P  | 10 | 1166.7626      | 583.8852        |
| 809.4045       | 7  | V  | 9  | 1069.7098      | 535.3588        |
| 880.4416       | 8  | A  | 8  | 970.6414       | 485.8246        |
| 993.5257       | 9  | L  | 7  | 899.6043       | 450.3061        |
| 1149.6520      | 10 | K  | 6  | 786.5202       | 393.7640        |
| 1305.7783      | 11 | K  | 5  | 630.3939       | 315.7009        |
| 1434.8209      | 12 | E  | 4  | 474.2676       | 237.6377        |
| 1491.8423      | 13 | G  | 3  | 345.2250       | 173.1164        |
| 1604.9264      | 14 | I  | 2  | 288.2036       | 144.6057        |
|                | 15 | R  | 1  | 175.1195       | 88.0637         |

N-term:+29.04 K(10):+156.13  
K(11):+156.13

X-range:

0 - 0

MassTol: Y-zoom:

0. 1.

MassType:

☐AVG ☒MONO

Axis:

☒1 ☐2

Label:

☒I ☐M ☐-

Ions:

a ☐+ ☐2+ ☐3+

b ☒+ ☐2+ ☐3+

c ☐+ ☐2+ ☐3+

x ☐+ ☐2+ ☐3+

y ☒+ ☒2+ ☐3+

z ☐+ ☐2+ ☐3+

hide H<sub>2</sub>O/NH<sub>3</sub> ☐

zoom 112-122 ☐

GO

EEVEDASEEAPLR, MH+ 1507.7340, m/z 503.2495  
H OS G13 P120811 220811-s1.03211.03211.3.dta

scan 3211; 3.9e+000

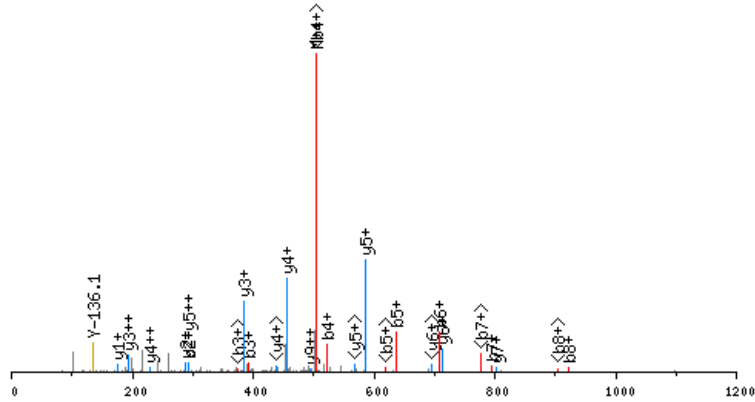

click image to zoom in; click top corners to zoom out

[precursor±]

scan 3209; 503.2 m/z; 6.7e+001

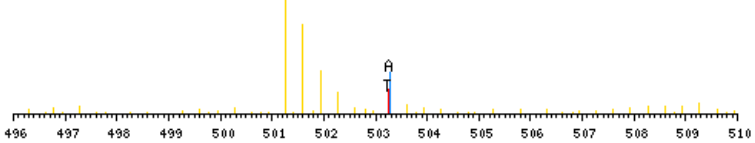

zoomed in precursor plot; T=theoretical m/z, A=acquired m/z

| b <sup>+</sup> | #  | AA | #  | y <sup>+</sup> | y <sup>2+</sup> |
|----------------|----|----|----|----------------|-----------------|
| 164.1135       | 1  | E  | 13 |                |                 |
| 293.1561       | 2  | E  | 12 | 1344.6283      | 672.8181        |
| 392.2245       | 3  | V  | 11 | 1215.5857      | 608.2968        |
| 521.2671       | 4  | E  | 10 | 1116.5173      | 558.7626        |
| 636.2940       | 5  | D  | 9  | 987.4747       | 494.2413        |
| 707.3312       | 6  | A  | 8  | 872.4478       | 436.7278        |
| 794.3632       | 7  | S  | 7  | 801.4107       | 401.2092        |
| 923.4058       | 8  | E  | 6  | 714.3786       | 357.6932        |
| 1052.4484      | 9  | E  | 5  | 585.3360       | 293.1719        |
| 1123.4855      | 10 | A  | 4  | 456.2934       | 228.6506        |
| 1220.5382      | 11 | P  | 3  | 385.2563       | 193.1321        |
| 1333.6223      | 12 | L  | 2  | 288.2036       | 144.6057        |
|                | 13 | R  | 1  | 175.1195       | 88.0637         |

N-term:+35.07

X-range:

0 - 0

MassTol: Y-zoom:

0. 1.

MassType:

☐AVG ☒MONO

Axis:

☒1 ☐2

Label:

☒I ☐M ☐-

Ions:

a ☐+ ☐2+ ☐3+

b ☒+ ☐2+ ☐3+

c ☐+ ☐2+ ☐3+

x ☐+ ☐2+ ☐3+

y ☒+ ☒2+ ☐3+

z ☐+ ☐2+ ☐3+

hide H<sub>2</sub>O/NH<sub>3</sub> ☐

zoom 112-122 ☐

GO

EEVHVSSNADEEDIR, MH+ 1756.7989, m/z 586.2712  
L OS G16 P120811 220811-s1.02826.02826.3.dta

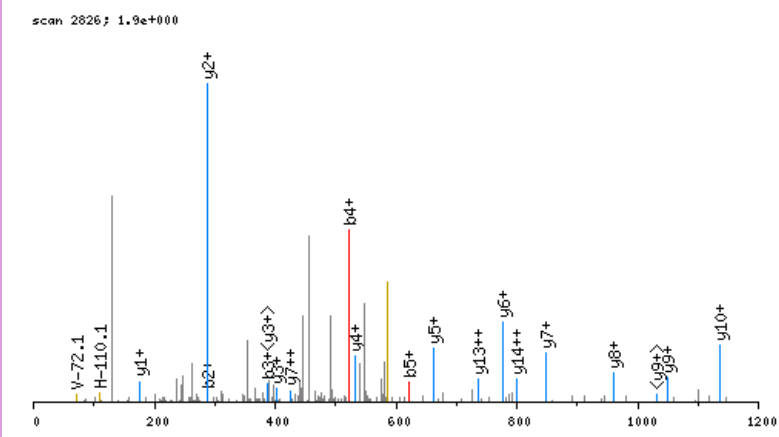

click image to zoom in; click top corners to zoom out [\[precursor±\]](#)

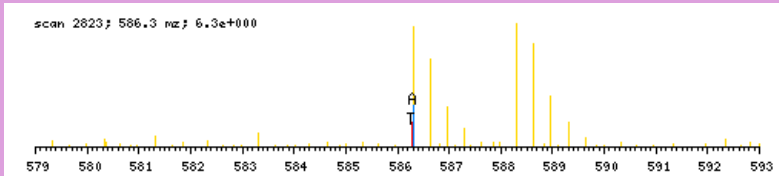

zoomed in precursor plot; T=theoretical m/z, A=acquired m/z

| b <sup>+</sup> | #  | AA | #  | y <sup>+</sup> | y <sup>2+</sup> |
|----------------|----|----|----|----------------|-----------------|
| 158.0817       | 1  | E  | 15 |                |                 |
| 287.1243       | 2  | E  | 14 | 1599.7251      | 800.3664        |
| 386.1927       | 3  | V  | 13 | 1470.6825      | 735.8452        |
| 523.2516       | 4  | H  | 12 | 1371.6141      | 686.3109        |
| 622.3200       | 5  | V  | 11 | 1234.5551      | 617.7815        |
| 709.3521       | 6  | S  | 10 | 1135.4867      | 568.2473        |
| 796.3841       | 7  | S  | 9  | 1048.4547      | 524.7313        |
| 910.4270       | 8  | N  | 8  | 961.4227       | 481.2153        |
| 981.4641       | 9  | A  | 7  | 847.3798       | 424.1938        |
| 1096.4911      | 10 | D  | 6  | 776.3426       | 388.6752        |
| 1225.5337      | 11 | E  | 5  | 661.3157       | 331.1618        |
| 1354.5763      | 12 | E  | 4  | 532.2731       | 266.6405        |
| 1469.6032      | 13 | D  | 3  | 403.2305       | 202.1192        |
| 1582.6873      | 14 | I  | 2  | 288.2036       | 144.6057        |
|                | 15 | R  | 1  | 175.1195       | 88.0637         |

N-term:+29.04

X-range:

0 - 0

MassTol: Y-zoom:

0. 1.

MassType:

☐AVG ☒MONO

Axis:

☒1 ☐2

Label:

☒I ☐M ☐-

Ions:

a ☐+ ☐2+ ☐3+

b ☒+ ☐2+ ☐3+

c ☐+ ☐2+ ☐3+

x ☐+ ☐2+ ☐3+

y ☒+ ☒2+ ☐3+

z ☐+ ☐2+ ☐3+

hide H<sub>2</sub>O/NH<sub>3</sub> ☐

zoom 112-122 ☐

GO

EEYGKIDTIEIITDR, MH+ 1850.9751, m/z 617.6632  
L OS G15 P120811 220811-s1.05269.05269.3.dta

scan 5269; 3.6e+000

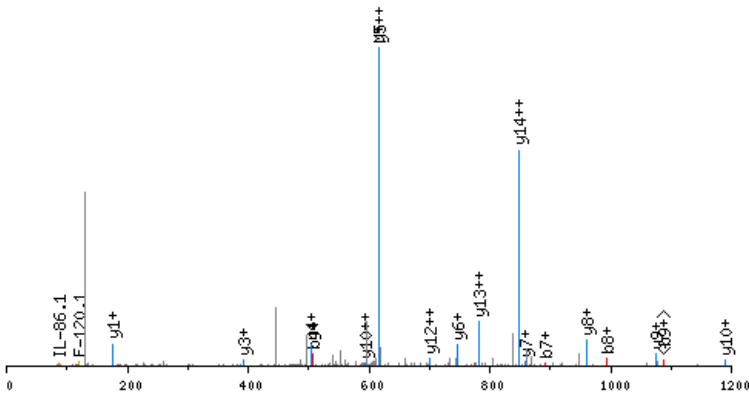

click image to zoom in; click top corners to zoom out

[precursor±]

scan 5266; 617.7 m/z; 1.6e+001

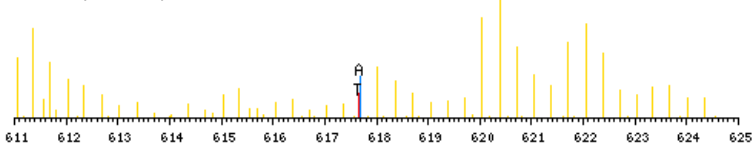

zoomed in precursor plot; T=theoretical m/z, A=acquired m/z

| b <sup>+</sup> | #  | AA | #  | y <sup>+</sup> | y <sup>2+</sup> |
|----------------|----|----|----|----------------|-----------------|
| 158.0817       | 1  | E  | 15 |                |                 |
| 287.1243       | 2  | E  | 14 | 1693.9013      | 847.4546        |
| 450.1876       | 3  | Y  | 13 | 1564.8587      | 782.9333        |
| 507.2091       | 4  | G  | 12 | 1401.7954      | 701.4016        |
| 663.3354       | 5  | K  | 11 | 1344.7739      | 672.8909        |
| 776.4194       | 6  | I  | 10 | 1188.6476      | 594.8277        |
| 891.4464       | 7  | D  | 9  | 1075.5635      | 538.2857        |
| 992.4941       | 8  | T  | 8  | 960.5366       | 480.7722        |
| 1105.5781      | 9  | I  | 7  | 859.4889       | 430.2484        |
| 1234.6207      | 10 | E  | 6  | 746.4048       | 373.7063        |
| 1347.7048      | 11 | I  | 5  | 617.3623       | 309.1850        |
| 1460.7888      | 12 | I  | 4  | 504.2782       | 252.6430        |
| 1561.8365      | 13 | T  | 3  | 391.1941       | 196.1010        |
| 1676.8635      | 14 | D  | 2  | 290.1464       | 145.5771        |
|                | 15 | R  | 1  | 175.1195       | 88.0637         |

N-term:+29.04 K(5):+156.13

X-range:

0 - 0

MassTol: Y-zoom:

0. 1.

MassType:

☐AVG ☒MONO

Axis:

☒1 ☐2

Label:

☒I ☐M ☐-

Ions:

a ☐+ ☐2+ ☐3+

b ☒+ ☐2+ ☐3+

c ☐+ ☐2+ ☐3+

x ☐+ ☐2+ ☐3+

y ☒+ ☒2+ ☐3+

z ☐+ ☐2+ ☐3+

hide H<sub>2</sub>O/NH<sub>3</sub> ☐

zoom 112-122 ☐

GO

EFDDLPLAEQR, MH+ 1360.6748, m/z 454.2298  
L OS G13 P120811 220811-s1.05368.05368.3.dta

scan 5368; 1.1e+000

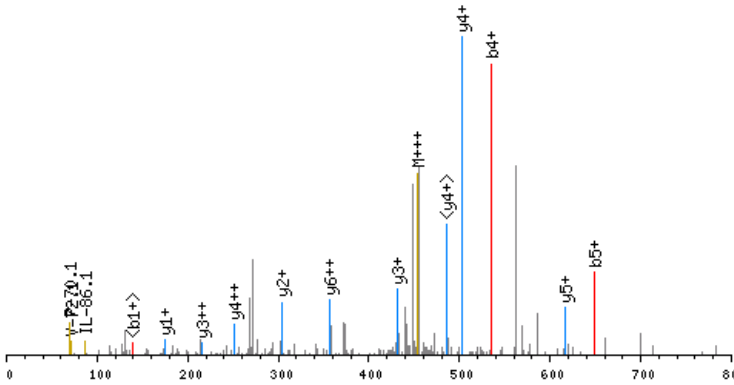

click image to zoom in; click top corners to zoom out

[precursor±]

scan 5364; 454.2 m/z; 1.2e+001

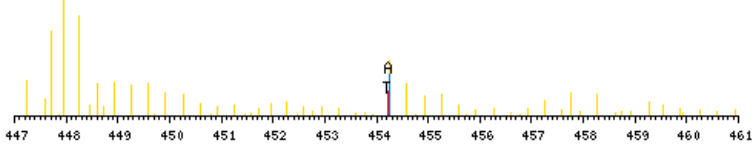

zoomed in precursor plot; T=theoretical m/z, A=acquired m/z

| b <sup>+</sup> | #  | AA | #  | y <sup>+</sup> | y <sup>2+</sup> |
|----------------|----|----|----|----------------|-----------------|
| 158.0817       | 1  | E  | 11 |                |                 |
| 305.1501       | 2  | F  | 10 | 1203.6010      | 602.3044        |
| 420.1771       | 3  | D  | 9  | 1056.5326      | 528.7702        |
| 535.2040       | 4  | D  | 8  | 941.5056       | 471.2567        |
| 648.2881       | 5  | L  | 7  | 826.4787       | 413.7433        |
| 745.3408       | 6  | P  | 6  | 713.3946       | 357.2012        |
| 858.4249       | 7  | L  | 5  | 616.3418       | 308.6748        |
| 929.4620       | 8  | A  | 4  | 503.2578       | 252.1328        |
| 1058.5046      | 9  | E  | 3  | 432.2207       | 216.6142        |
| 1186.5632      | 10 | Q  | 2  | 303.1781       | 152.0930        |
|                | 11 | R  | 1  | 175.1195       | 88.0637         |

N-term:+29.04

X-range:

0 - 0

MassTol: Y-zoom:

0. 1.

MassType:

☐AVG ☒MONO

Axis:

☒1 ☐2

Label:

☒I ☐M ☐-

Ions:

a ☐+ ☐2+ ☐3+

b ☒+ ☐2+ ☐3+

c ☐+ ☐2+ ☐3+

x ☐+ ☐2+ ☐3+

y ☒+ ☒2+ ☐3+

z ☐+ ☐2+ ☐3+

hide H<sub>2</sub>O/NH<sub>3</sub> ☐

zoom 112-122 ☐

GO

EFKEAFTVIDQNR, MH+ 1664.9284, m/z 555.6477  
H OS G16 P120811 220811-s1.05109.05109.3.dta

scan 5109; 3.7e+000

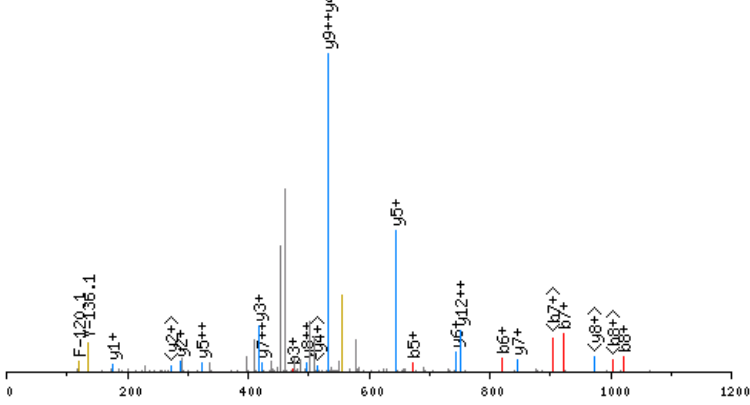

click image to zoom in; click top corners to zoom out

[precursor±]

scan 5108; 555.6 m/z; 1.8e+001

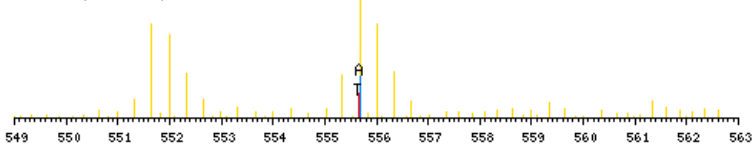

zoomed in precursor plot; T=theoretical m/z, A=acquired m/z

| b <sup>+</sup> | #  | AA | #  | y <sup>+</sup> | y <sup>2+</sup> |
|----------------|----|----|----|----------------|-----------------|
| 164.1135       | 1  | E  | 13 |                |                 |
| 311.1819       | 2  | F  | 12 | 1501.8227      | 751.4153        |
| 473.3400       | 3  | K  | 11 | 1354.7543      | 677.8811        |
| 602.3826       | 4  | E  | 10 | 1192.5962      | 596.8020        |
| 673.4197       | 5  | A  | 9  | 1063.5536      | 532.2807        |
| 820.4881       | 6  | F  | 8  | 992.5165       | 496.7622        |
| 921.5358       | 7  | T  | 7  | 845.4481       | 423.2280        |
| 1020.6042      | 8  | V  | 6  | 744.4004       | 372.7041        |
| 1133.6883      | 9  | I  | 5  | 645.3320       | 323.1699        |
| 1248.7152      | 10 | D  | 4  | 532.2479       | 266.6279        |
| 1376.7738      | 11 | Q  | 3  | 417.2210       | 209.1144        |
| 1490.8167      | 12 | N  | 2  | 289.1624       | 145.0851        |
|                | 13 | R  | 1  | 175.1195       | 88.0637         |

N-term:+35.07 K(3):+162.16

N-term: +29.04

X-range:

0 - 0

MassTol: Y-zoom:

0. 1.

MassType:

☐ AVG ☒ MONO

Axis:

☒ 1 ☐ 2

Label:

☒ I ☐ M ☐ -

Ions:

a ☐ + ☐ 2+ ☐ 3+

b ☒ + ☐ 2+ ☐ 3+

c ☐ + ☐ 2+ ☐ 3+

x ☐ + ☐ 2+ ☐ 3+

y ☒ + ☒ 2+ ☐ 3+

z ☐ + ☐ 2+ ☐ 3+

hide H<sub>2</sub>O/NH<sub>3</sub> ☐

zoom 112-122 ☐

GO

EGATAAPELSALEEAFRR, MH+ 1945.9983, m/z 649.3376  
L OS G15 P120811 220811-s1.06177.06177.3.dta

scan 6177; 1.1e+001

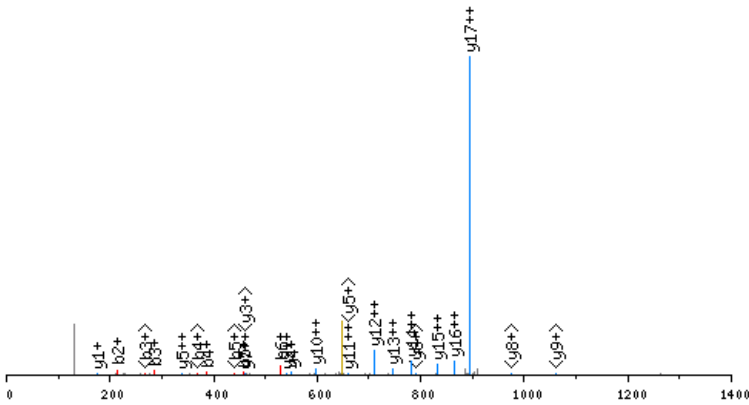

click image to zoom in; click top corners to zoom out [\[precursor±\]](#)

scan 6176; 649.3 m/z; 1.0e+001

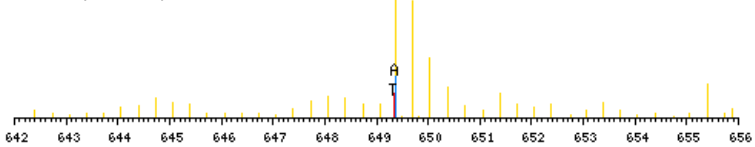

zoomed in precursor plot; T=theoretical m/z, A=acquired m/z

| b <sup>+</sup> | #  | AA | #  | y <sup>+</sup> | y <sup>2+</sup> |
|----------------|----|----|----|----------------|-----------------|
| 158.0817       | 1  | E  | 18 |                |                 |
| 215.1032       | 2  | G  | 17 | 1788.9244      | 894.9661        |
| 286.1403       | 3  | A  | 16 | 1731.9030      | 866.4554        |
| 387.1879       | 4  | T  | 15 | 1660.8659      | 830.9368        |
| 458.2251       | 5  | A  | 14 | 1559.8182      | 780.4130        |
| 529.2622       | 6  | A  | 13 | 1488.7811      | 744.8944        |
| 626.3149       | 7  | P  | 12 | 1417.7440      | 709.3759        |
| 755.3575       | 8  | E  | 11 | 1320.6912      | 660.8495        |
| 868.4416       | 9  | L  | 10 | 1191.6486      | 596.3282        |
| 955.4736       | 10 | S  | 9  | 1078.5645      | 539.7862        |
| 1026.5107      | 11 | A  | 8  | 991.5325       | 496.2702        |
| 1139.5948      | 12 | L  | 7  | 920.4954       | 460.7516        |
| 1268.6374      | 13 | E  | 6  | 807.4113       | 404.2096        |
| 1397.6800      | 14 | E  | 5  | 678.3687       | 339.6883        |
| 1468.7171      | 15 | A  | 4  | 549.3261       | 275.1670        |
| 1615.7855      | 16 | F  | 3  | 478.2890       | 239.6484        |
| 1771.8866      | 17 | R  | 2  | 331.2206       | 166.1142        |
|                | 18 | R  | 1  | 175.1195       | 88.0637         |

N-term:+29.04

X-range:

0 - 0

MassTol: Y-zoom:

0. 1.

MassType:

☐AVG ☒MONO

Axis:

☒1 ☐2

Label:

☒I ☐M ☐-

Ions:

a ☐+ ☐2+ ☐3+

b ☒+ ☐2+ ☐3+

c ☐+ ☐2+ ☐3+

x ☐+ ☐2+ ☐3+

y ☒+ ☒2+ ☐3+

z ☐+ ☐2+ ☐3+

hide H<sub>2</sub>O/NH<sub>3</sub> ☐

zoom 112-122 ☐

GO

EGDVLTLLESER, MH+ 1388.7273, m/z 694.8673  
L OS G13 P120811 220811-s1.06611.06611.2.dta

scan 6611; 2.0e+000

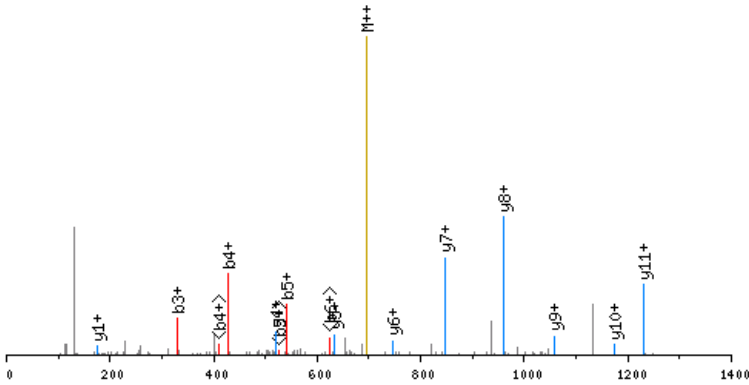

click image to zoom in; click top corners to zoom out [precursor±]

scan 6609; 694.9 m/z; 2.4e+000

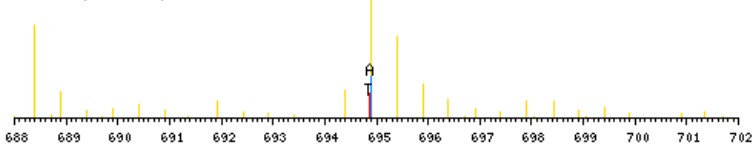

zoomed in precursor plot; T=theoretical m/z, A=acquired m/z

| b <sup>+</sup> | #  | AA | #  | y <sup>+</sup> | y <sup>2+</sup> |
|----------------|----|----|----|----------------|-----------------|
| 158.0817       | 1  | E  | 12 |                |                 |
| 215.1032       | 2  | G  | 11 | 1231.6534      | 616.3306        |
| 330.1301       | 3  | D  | 10 | 1174.6319      | 587.8199        |
| 429.1985       | 4  | V  | 9  | 1059.6050      | 530.3064        |
| 542.2826       | 5  | L  | 8  | 960.5366       | 480.7722        |
| 643.3303       | 6  | T  | 7  | 847.4525       | 424.2302        |
| 756.4143       | 7  | L  | 6  | 746.4048       | 373.7063        |
| 869.4984       | 8  | L  | 5  | 633.3208       | 317.1643        |
| 998.5410       | 9  | E  | 4  | 520.2367       | 260.6223        |
| 1085.5730      | 10 | S  | 3  | 391.1941       | 196.1010        |
| 1214.6156      | 11 | E  | 2  | 304.1621       | 152.5850        |
|                | 12 | R  | 1  | 175.1195       | 88.0637         |

N-term:+29.04

X-range:

0 - 0

MassTol: Y-zoom:

0. 1.

MassType:

☐AVG ☒MONO

Axis:

☒1 ☐2

Label:

☒I ☐M ☐-

Ions:

a ☐+ ☐2+ ☐3+

b ☒+ ☐2+ ☐3+

c ☐+ ☐2+ ☐3+

x ☐+ ☐2+ ☐3+

y ☒+ ☒2+ ☐3+

z ☐+ ☐2+ ☐3+

hide H<sub>2</sub>O/NH<sub>3</sub> ☐

zoom 112-122 ☐

GO

EGGVESAFHKTTSGATPAAIR, MH+ 2143.1148, m/z 536.5341  
L OS G17 P120811 220811-s1.03981.03981.4.dta

scan 3981; 2.9e+000

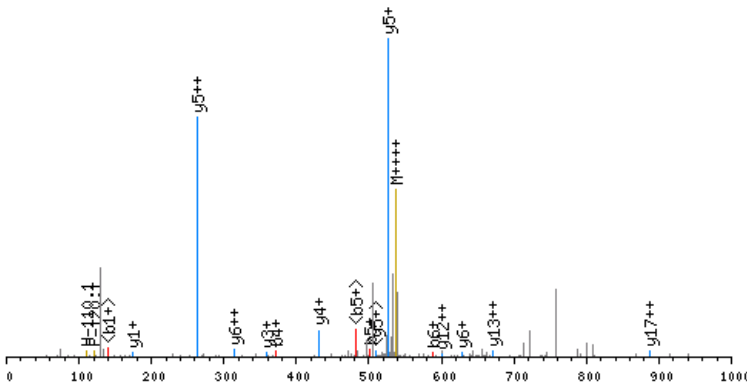

click image to zoom in; click top corners to zoom out

[precursor±]

scan 3978; 536.5 m/z; 4.0e+001

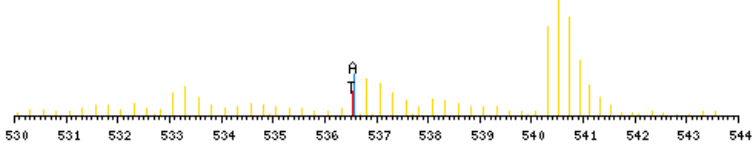

zoomed in precursor plot; T=theoretical m/z, A=acquired m/z

| b <sup>+</sup> | #  | AA | #  | y <sup>+</sup> | y <sup>2+</sup> |
|----------------|----|----|----|----------------|-----------------|
| 158.0817       | 1  | E  | 21 |                |                 |
| 215.1032       | 2  | G  | 20 | 1986.0409      | 993.5244        |
| 272.1246       | 3  | G  | 19 | 1929.0194      | 965.0136        |
| 371.1930       | 4  | V  | 18 | 1871.9980      | 936.5029        |
| 500.2356       | 5  | E  | 17 | 1772.9296      | 886.9687        |
| 587.2677       | 6  | S  | 16 | 1643.8870      | 822.4474        |
| 658.3048       | 7  | A  | 15 | 1556.8549      | 778.9314        |
| 805.3732       | 8  | F  | 14 | 1485.8178      | 743.4128        |
| 942.4321       | 9  | H  | 13 | 1338.7494      | 669.8786        |
| 1098.5584      | 10 | K  | 12 | 1201.6905      | 601.3492        |
| 1199.6061      | 11 | T  | 11 | 1045.5642      | 523.2860        |
| 1300.6538      | 12 | T  | 10 | 944.5165       | 472.7622        |
| 1387.6858      | 13 | S  | 9  | 843.4688       | 422.2383        |
| 1444.7072      | 14 | G  | 8  | 756.4368       | 378.7223        |
| 1515.7444      | 15 | A  | 7  | 699.4153       | 350.2116        |
| 1616.7920      | 16 | T  | 6  | 628.3782       | 314.6930        |
| 1713.8448      | 17 | P  | 5  | 527.3306       | 264.1692        |
| 1784.8819      | 18 | A  | 4  | 430.2778       | 215.6428        |
| 1855.9190      | 19 | A  | 3  | 359.2407       | 180.1243        |
| 1969.0031      | 20 | I  | 2  | 288.2036       | 144.6057        |
|                | 21 | R  | 1  | 175.1195       | 88.0637         |

N-term:+29.04 K(10):+156.13

N-term: +29.04

X-range:

0 - 0

MassTol: Y-zoom:

0. 1.

MassType:

☐AVG ☒MONO

Axis:

☒1 ☐2

Label:

☒I ☐M ☐-

Ions:

a ☐+ ☐2+ ☐3+

b ☒+ ☐2+ ☐3+

c ☐+ ☐2+ ☐3+

x ☐+ ☐2+ ☐3+

y ☒+ ☒2+ ☐3+

z ☐+ ☐2+ ☐3+

hide H<sub>2</sub>O/NH<sub>3</sub> ☐

zoom 112-122 ☐

GO

EGKEVWDYVTVR, MH+ 1536.8062, m/z 512.9403  
L OS G16 P120811 220811-s1.05372.05372.3.dta

scan 5372; 4.3e+000

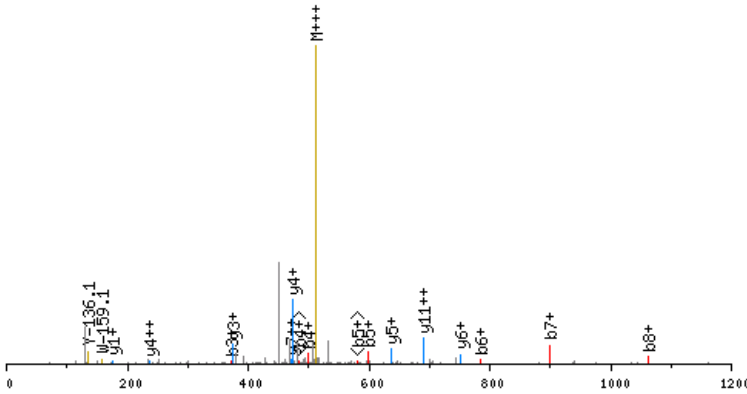

X-range:

0 - 0

MassTol: Y-zoom:

0. 1.

MassType:

☐AVG ☒MONO

Axis:

☒1 ☐2

Label:

☒I ☐M ☐-

Ions:

a ☐+ ☐2+ ☐3+

b ☒+ ☐2+ ☐3+

c ☐+ ☐2+ ☐3+

x ☐+ ☐2+ ☐3+

y ☒+ ☒2+ ☐3+

z ☐+ ☐2+ ☐3+

hide H<sub>2</sub>O/NH<sub>3</sub> ☐

zoom 112-122 ☐

GO

EGSVANKFYVHNDIFR, MH+ 1952.0030, m/z 488.7562  
L OS G17 P120811 220811-s1.05312.05312.4.dta

scan 5312; 9.0e+000

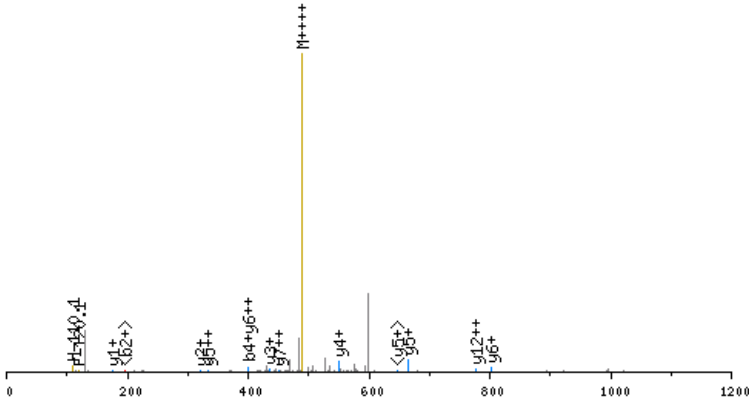

click image to zoom in; click top corners to zoom out

[precursor±]

scan 5308; 488.8 m/z; 7.1e+000

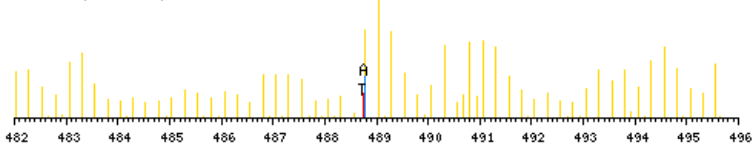

zoomed in precursor plot; T=theoretical m/z, A=acquired m/z

| b <sup>+</sup> | #  | AA | #  | y <sup>+</sup> | y <sup>2+</sup> |
|----------------|----|----|----|----------------|-----------------|
| 158.0817       | 1  | E  | 16 |                |                 |
| 215.1032       | 2  | G  | 15 | 1794.9292      | 897.9685        |
| 302.1352       | 3  | S  | 14 | 1737.9077      | 869.4578        |
| 401.2036       | 4  | V  | 13 | 1650.8757      | 825.9417        |
| 472.2407       | 5  | A  | 12 | 1551.8073      | 776.4075        |
| 586.2836       | 6  | N  | 11 | 1480.7701      | 740.8890        |
| 742.4099       | 7  | K  | 10 | 1366.7272      | 683.8675        |
| 889.4784       | 8  | F  | 9  | 1210.6009      | 605.8044        |
| 1052.5417      | 9  | Y  | 8  | 1063.5325      | 532.2702        |
| 1151.6101      | 10 | V  | 7  | 900.4692       | 450.7385        |
| 1288.6690      | 11 | H  | 6  | 801.4008       | 401.2043        |
| 1402.7119      | 12 | N  | 5  | 664.3418       | 332.6748        |
| 1517.7389      | 13 | D  | 4  | 550.2989       | 275.6534        |
| 1630.8229      | 14 | I  | 3  | 435.2720       | 218.1399        |
| 1777.8914      | 15 | F  | 2  | 322.1879       | 161.5979        |
|                | 16 | R  | 1  | 175.1195       | 88.0637         |

N-term:+29.04 K(7):+156.13

X-range:

0 - 0

MassTol: Y-zoom:

0. 1.

MassType:

☐AVG ☒MONO

Axis:

☒1 ☐2

Label:

☒I ☐M ☐-

Ions:

a ☐+ ☐2+ ☐3+

b ☒+ ☐2+ ☐3+

c ☐+ ☐2+ ☐3+

x ☐+ ☐2+ ☐3+

y ☒+ ☒2+ ☐3+

z ☐+ ☐2+ ☐3+

hide H<sub>2</sub>O/NH<sub>3</sub> ☐

zoom 112-122 ☐

GO

EHLGYVLTCPSNLGTGLR, MH+ 2015.0383, m/z 672.3510  
L OS G15 P120811 220811-s1.05152.05152.3.dta

scan 5152; 1.9e+000

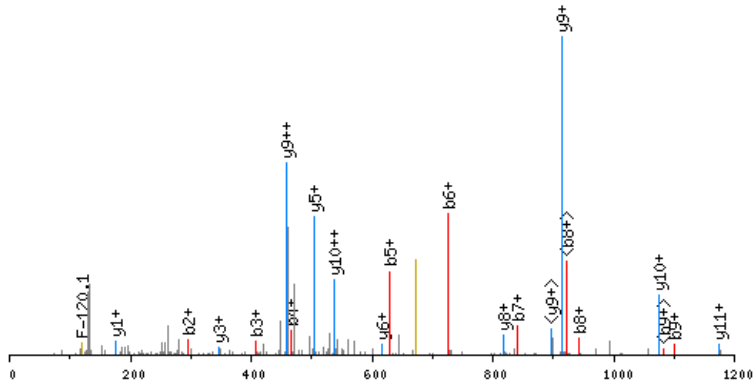

click image to zoom in; click top corners to zoom out [\[precursor±\]](#)

scan 5151; 672.4 m/z; 1.3e+001

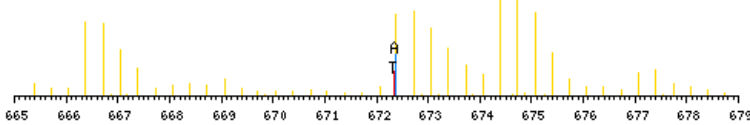

zoomed in precursor plot; T=theoretical m/z, A=acquired m/z

| b <sup>+</sup> | #  | AA | #  | y <sup>+</sup> | y <sup>2+</sup> |
|----------------|----|----|----|----------------|-----------------|
| 158.0817       | 1  | E  | 18 |                |                 |
| 295.1406       | 2  | H  | 17 | 1857.9645      | 929.4862        |
| 408.2247       | 3  | L  | 16 | 1720.9056      | 860.9567        |
| 465.2461       | 4  | G  | 15 | 1607.8215      | 804.4147        |
| 628.3095       | 5  | Y  | 14 | 1550.8000      | 775.9039        |
| 727.3779       | 6  | V  | 13 | 1387.7367      | 694.3723        |
| 840.4619       | 7  | L  | 12 | 1288.6683      | 644.8381        |
| 941.5096       | 8  | T  | 11 | 1175.5842      | 588.2960        |
| 1101.5402      | 9  | C  | 10 | 1074.5366      | 537.7722        |
| 1198.5930      | 10 | P  | 9  | 914.5060       | 457.7569        |
| 1285.6250      | 11 | S  | 8  | 817.4532       | 409.2305        |
| 1399.6679      | 12 | N  | 7  | 730.4212       | 365.7145        |
| 1512.7520      | 13 | L  | 6  | 616.3782       | 308.6930        |
| 1569.7735      | 14 | G  | 5  | 503.2942       | 252.1510        |
| 1670.8211      | 15 | T  | 4  | 446.2727       | 223.6403        |
| 1727.8426      | 16 | G  | 3  | 345.2250       | 173.1164        |
| 1840.9267      | 17 | L  | 2  | 288.2036       | 144.6057        |
|                | 18 | R  | 1  | 175.1195       | 88.0637         |

N-term:+29.04 C(9):+160.03

X-range:

0 - 0

MassTol: Y-zoom:

0. 1.

MassType:

☐AVG ☒MONO

Axis:

☒1 ☐2

Label:

☒I ☐M ☐-

Ions:

a ☐+ ☐2+ ☐3+

b ☒+ ☐2+ ☐3+

c ☐+ ☐2+ ☐3+

x ☐+ ☐2+ ☐3+

y ☒+ ☒2+ ☐3+

z ☐+ ☐2+ ☐3+

hide H<sub>2</sub>O/NH<sub>3</sub> ☐

zoom 112-122 ☐

GO

EHLNHQNPNTFESR, MH+ 1750.8261, m/z 438.4620  
L OS G18 P120811 220811-s1.02043.02043.4.dta

scan 2043; 2.1e+000

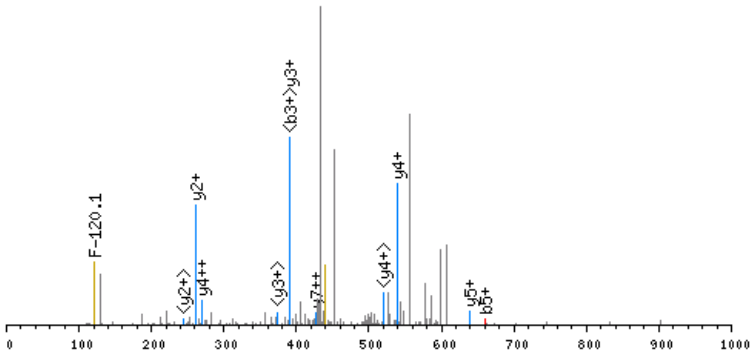

click image to zoom in; click top corners to zoom out

[precursor±]

scan 2041; 438.5 m/z; 5.7e+000

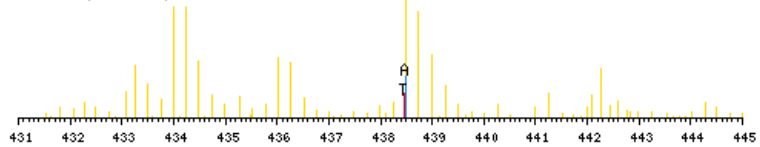

zoomed in precursor plot; T=theoretical m/z, A=acquired m/z

| b <sup>+</sup> | #  | AA | #  | y <sup>+</sup> | y <sup>2+</sup> |
|----------------|----|----|----|----------------|-----------------|
| 158.0817       | 1  | E  | 14 |                |                 |
| 295.1406       | 2  | H  | 13 | 1593.7522      | 797.3800        |
| 408.2247       | 3  | L  | 12 | 1456.6933      | 728.8506        |
| 522.2676       | 4  | N  | 11 | 1343.6093      | 672.3085        |
| 659.3265       | 5  | H  | 10 | 1229.5663      | 615.2871        |
| 787.3851       | 6  | Q  | 9  | 1092.5074      | 546.7576        |
| 901.4280       | 7  | N  | 8  | 964.4488       | 482.7283        |
| 998.4808       | 8  | P  | 7  | 850.4059       | 425.7069        |
| 1112.5237      | 9  | N  | 6  | 753.3531       | 377.1805        |
| 1213.5714      | 10 | T  | 5  | 639.3102       | 320.1590        |
| 1360.6398      | 11 | F  | 4  | 538.2625       | 269.6352        |
| 1489.6824      | 12 | E  | 3  | 391.1941       | 196.1010        |
| 1576.7144      | 13 | S  | 2  | 262.1515       | 131.5797        |
|                | 14 | R  | 1  | 175.1195       | 88.0637         |

N-term:+29.04

X-range:

0 - 0

MassTol: Y-zoom:

0. 1.

MassType:

☐AVG ☒MONO

Axis:

☒1 ☐2

Label:

☒I ☐M ☐-

Ions:

a ☐+ ☐2+ ☐3+

b ☒+ ☐2+ ☐3+

c ☐+ ☐2+ ☐3+

x ☐+ ☐2+ ☐3+

y ☒+ ☒2+ ☐3+

z ☐+ ☐2+ ☐3+

hide H<sub>2</sub>O/NH<sub>3</sub> ☐

zoom 112-122 ☐

GO

EHPDLLTEAPLNPKANR, MH+ 1957.0871, m/z 490.0272  
L OS G17 P120811 220811-s1.04285.04285.4.dta

scan 4285; 2.6e+000

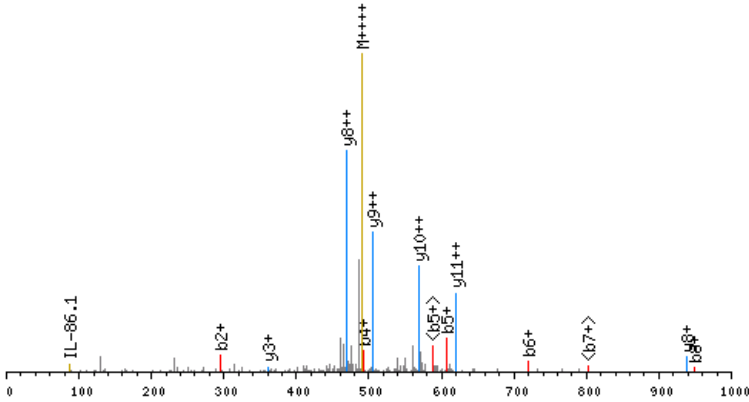

click image to zoom in; click top corners to zoom out

[precursor±]

scan 4283; 490.0 m/z; 3.2e+001

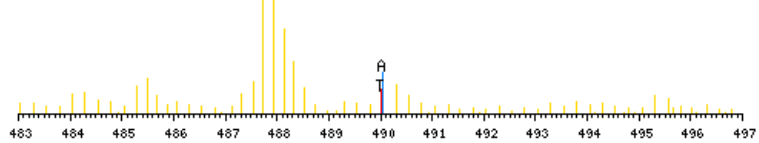

zoomed in precursor plot; T=theoretical m/z, A=acquired m/z

| b <sup>+</sup> | #  | AA | #  | y <sup>+</sup> | y <sup>2+</sup> |
|----------------|----|----|----|----------------|-----------------|
| 158.0817       | 1  | E  | 17 |                |                 |
| 295.1406       | 2  | H  | 16 | 1800.0132      | 900.5105        |
| 392.1934       | 3  | P  | 15 | 1662.9543      | 831.9811        |
| 493.2410       | 4  | T  | 14 | 1565.9016      | 783.4547        |
| 606.3251       | 5  | L  | 13 | 1464.8539      | 732.9308        |
| 719.4092       | 6  | L  | 12 | 1351.7698      | 676.3888        |
| 820.4569       | 7  | T  | 11 | 1238.6857      | 619.8468        |
| 949.4994       | 8  | E  | 10 | 1137.6381      | 569.3229        |
| 1020.5366      | 9  | A  | 9  | 1008.5955      | 504.8017        |
| 1117.5893      | 10 | P  | 8  | 937.5584       | 469.2831        |
| 1230.6734      | 11 | L  | 7  | 840.5056       | 420.7567        |
| 1344.7163      | 12 | N  | 6  | 727.4215       | 364.2147        |
| 1441.7691      | 13 | P  | 5  | 613.3786       | 307.1932        |
| 1597.8954      | 14 | K  | 4  | 516.3258       | 258.6668        |
| 1668.9325      | 15 | A  | 3  | 360.1995       | 180.6037        |
| 1782.9754      | 16 | N  | 2  | 289.1624       | 145.0851        |
|                | 17 | R  | 1  | 175.1195       | 88.0637         |

N-term:+29.04 K(14):+156.13

X-range:

0 - 0

MassTol: Y-zoom:

0. 1.

MassType:

☐AVG ☒MONO

Axis:

☒1 ☐2

Label:

☒I ☐M ☐-

Ions:

a ☐+ ☐2+ ☐3+

b ☒+ ☐2+ ☐3+

c ☐+ ☐2+ ☐3+

x ☐+ ☐2+ ☐3+

y ☒+ ☒2+ ☐3+

z ☐+ ☐2+ ☐3+

hide H<sub>2</sub>O/NH<sub>3</sub> ☐

zoom 112-122 ☐

GO

EHVTKCCSGSLVER, MH+ 1717.8365, m/z 573.2837  
L OS G16 P120811 220811-s1.02656.02656.3.dta

scan 2656; 1.9e+001

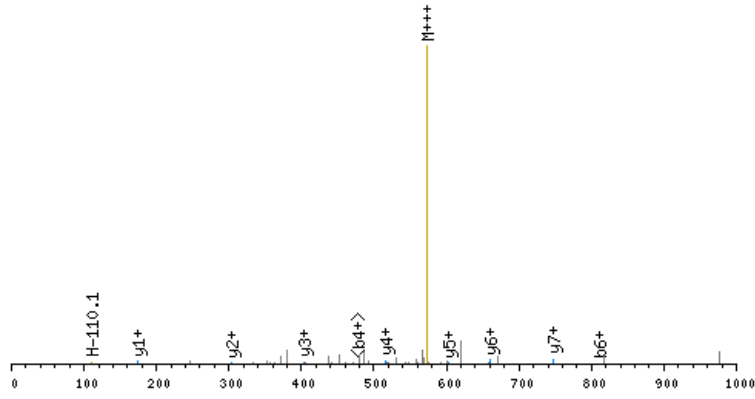

click image to zoom in; click top corners to zoom out [\[precursor±\]](#)

scan 2653; 573.3 m/z; 1.9e+001

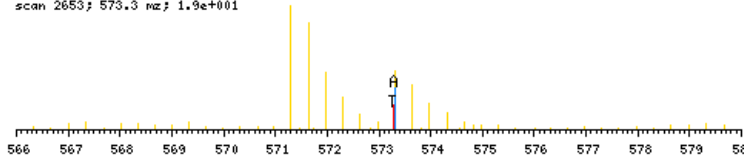

zoomed in precursor plot; T=theoretical m/z, A=acquired m/z

| b <sup>+</sup> | #  | AA | #  | y <sup>+</sup> | y <sup>2+</sup> |
|----------------|----|----|----|----------------|-----------------|
| 158.0817       | 1  | E  | 14 |                |                 |
| 295.1406       | 2  | H  | 13 | 1560.7626      | 780.8852        |
| 394.2090       | 3  | V  | 12 | 1423.7037      | 712.3558        |
| 495.2567       | 4  | T  | 11 | 1324.6353      | 662.8215        |
| 651.3830       | 5  | K  | 10 | 1223.5876      | 612.2977        |
| 811.4136       | 6  | C  | 9  | 1067.4613      | 534.2346        |
| 971.4442       | 7  | C  | 8  | 907.4307       | 454.2193        |
| 1058.4762      | 8  | S  | 7  | 747.4001       | 374.2040        |
| 1115.4977      | 9  | G  | 6  | 660.3681       | 330.6879        |
| 1202.5297      | 10 | S  | 5  | 603.3466       | 302.1772        |
| 1315.6138      | 11 | L  | 4  | 516.3146       | 258.6612        |
| 1414.6822      | 12 | V  | 3  | 403.2305       | 202.1192        |
| 1543.7248      | 13 | E  | 2  | 304.1621       | 152.5850        |
|                | 14 | R  | 1  | 175.1195       | 88.0637         |

N-term:+29.04 K(5):+156.13  
C(6):+160.03 C(7):+160.03

X-range:

0 - 0

MassTol: Y-zoom:

0. 1.

MassType:

☐ AVG ☒ MONO

Axis:

☒ 1 ☐ 2

Label:

☒ I ☐ M ☐ -

Ions:

a ☐ + ☐ 2+ ☐ 3+

b ☒ + ☐ 2+ ☐ 3+

c ☐ + ☐ 2+ ☐ 3+

x ☐ + ☐ 2+ ☐ 3+

y ☒ + ☒ 2+ ☐ 3+

z ☐ + ☐ 2+ ☐ 3+

hide H<sub>2</sub>O/NH<sub>3</sub> ☐

zoom 112-122 ☐

GO

EIAQDFKTDLR, MH+ 1391.7535, m/z 464.5893  
L OS G16 P120811 220811-s1.04110.04110.3.dta

scan 4110; 3.7e+000

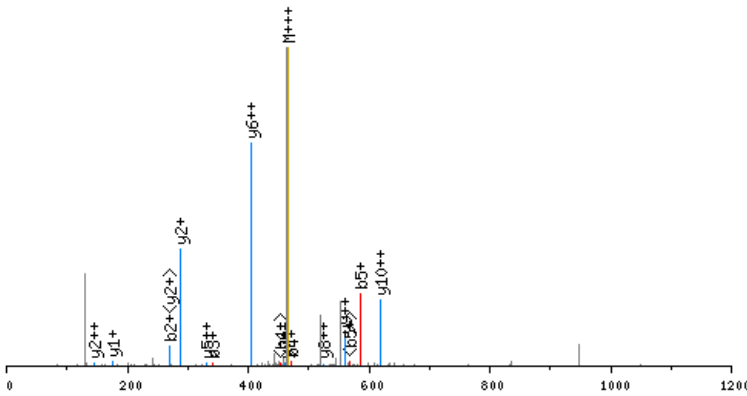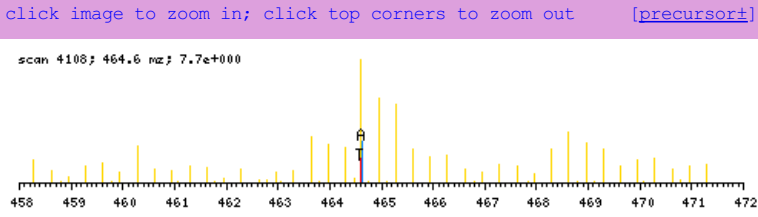

zoomed in precursor plot; T=theoretical m/z, A=acquired m/z

| b <sup>+</sup> | #  | AA | #  | y <sup>+</sup> | y <sup>2+</sup> |
|----------------|----|----|----|----------------|-----------------|
| 158.0817       | 1  | E  | 11 |                |                 |
| 271.1658       | 2  | I  | 10 | 1234.6796      | 617.8437        |
| 342.2029       | 3  | A  | 9  | 1121.5955      | 561.3017        |
| 470.2614       | 4  | Q  | 8  | 1050.5584      | 525.7831        |
| 585.2884       | 5  | D  | 7  | 922.4998       | 461.7538        |
| 732.3568       | 6  | F  | 6  | 807.4729       | 404.2404        |
| 888.4831       | 7  | K  | 5  | 660.4045       | 330.7062        |
| 989.5308       | 8  | T  | 4  | 504.2782       | 252.6430        |
| 1104.5577      | 9  | D  | 3  | 403.2305       | 202.1192        |
| 1217.6418      | 10 | L  | 2  | 288.2036       | 144.6057        |
|                | 11 | R  | 1  | 175.1195       | 88.0637         |

N-term:+29.04 K(7):+156.13

X-range:

0 - 0

MassTol: Y-zoom:

0. 1.

MassType:

☐ AVG ☒ MONO

Axis:

☒ 1 ☐ 2

Label:

☒ I ☐ M ☐ -

Ions:

a ☐ + ☐ 2+ ☐ 3+

b ☒ + ☐ 2+ ☐ 3+

c ☐ + ☐ 2+ ☐ 3+

x ☐ + ☐ 2+ ☐ 3+

y ☒ + ☒ 2+ ☐ 3+

z ☐ + ☐ 2+ ☐ 3+

hide H<sub>2</sub>O/NH<sub>3</sub> ☐

zoom 112-122 ☐

GO

EIDPQNDLTFLR, MH+ 1488.7698, m/z 496.9281  
L OS G13 P120811 220811-s1.06301.06301.3.dta

scan 6301; 1.6e+000

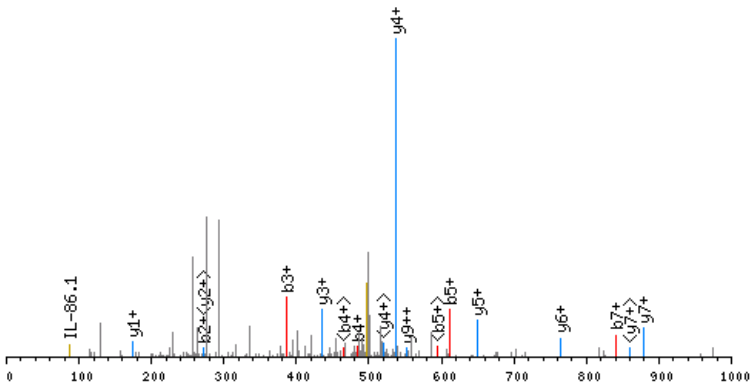

click image to zoom in; click top corners to zoom out

[precursor±]

scan 6299; 496.9 m/z; 4.0e+000

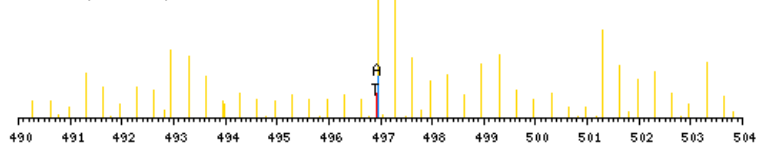

zoomed in precursor plot; T=theoretical m/z, A=acquired m/z

| b <sup>+</sup> | #  | AA | #  | y <sup>+</sup> | y <sup>2+</sup> |
|----------------|----|----|----|----------------|-----------------|
| 158.0817       | 1  | E  | 12 |                |                 |
| 271.1658       | 2  | I  | 11 | 1331.6959      | 666.3519        |
| 386.1927       | 3  | D  | 10 | 1218.6119      | 609.8099        |
| 483.2455       | 4  | P  | 9  | 1103.5849      | 552.2964        |
| 611.3040       | 5  | Q  | 8  | 1006.5322      | 503.7700        |
| 725.3470       | 6  | N  | 7  | 878.4736       | 439.7407        |
| 840.3739       | 7  | D  | 6  | 764.4307       | 382.7192        |
| 953.4580       | 8  | L  | 5  | 649.4037       | 325.2058        |
| 1054.5057      | 9  | T  | 4  | 536.3197       | 268.6637        |
| 1201.5741      | 10 | F  | 3  | 435.2720       | 218.1399        |
| 1314.6581      | 11 | L  | 2  | 288.2036       | 144.6057        |
|                | 12 | R  | 1  | 175.1195       | 88.0637         |

N-term:+29.04

X-range:

0 - 0

MassTol: Y-zoom:

0. 1.

MassType:

☐ AVG ☒ MONO

Axis:

☒ 1 ☐ 2

Label:

☒ I ☐ M ☐ -

Ions:

a ☐ + ☐ 2+ ☐ 3+

b ☒ + ☐ 2+ ☐ 3+

c ☐ + ☐ 2+ ☐ 3+

x ☐ + ☐ 2+ ☐ 3+

y ☒ + ☒ 2+ ☐ 3+

z ☐ + ☐ 2+ ☐ 3+

hide H<sub>2</sub>O/NH<sub>3</sub> ☐

zoom 112-122 ☐

GO

EINPDHPIVETLR, MH+ 1560.8386, m/z 520.9510  
L OS G15 P120811 220811-s1.03970.03970.3.dta

scan 3970; 4.2e+000

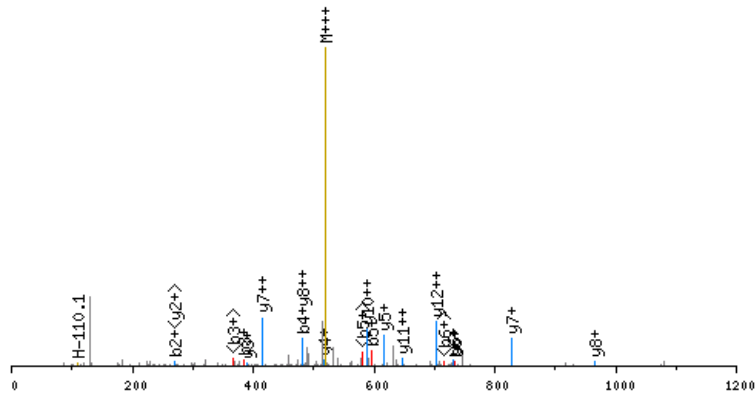

click image to zoom in; click top corners to zoom out

[precursor±]

scan 3966; 521.0 m/z; 6.6e+000

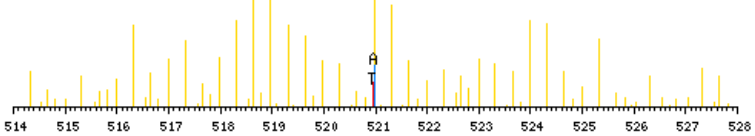

zoomed in precursor plot; T=theoretical m/z, A=acquired m/z

| b <sup>+</sup> | #  | AA | #  | y <sup>+</sup> | y <sup>2+</sup> |
|----------------|----|----|----|----------------|-----------------|
| 158.0817       | 1  | E  | 13 |                |                 |
| 271.1658       | 2  | I  | 12 | 1403.7647      | 702.3863        |
| 385.2087       | 3  | N  | 11 | 1290.6806      | 645.8442        |
| 482.2614       | 4  | P  | 10 | 1176.6377      | 588.8228        |
| 597.2884       | 5  | D  | 9  | 1079.5849      | 540.2964        |
| 734.3473       | 6  | H  | 8  | 964.5580       | 482.7829        |
| 831.4001       | 7  | P  | 7  | 827.4991       | 414.2535        |
| 944.4841       | 8  | I  | 6  | 730.4463       | 365.7271        |
| 1043.5525      | 9  | V  | 5  | 617.3623       | 309.1850        |
| 1172.5951      | 10 | E  | 4  | 518.2938       | 259.6508        |
| 1273.6428      | 11 | T  | 3  | 389.2512       | 195.1295        |
| 1386.7269      | 12 | L  | 2  | 288.2036       | 144.6057        |
|                | 13 | R  | 1  | 175.1195       | 88.0637         |

N-term:+29.04

X-range:

0 - 0

MassTol: Y-zoom:

0. 1.

MassType:

☐AVG ☒MONO

Axis:

☒1 ☐2

Label:

☒I ☐M ☐-

Ions:

a ☐+ ☐2+ ☐3+

b ☒+ ☐2+ ☐3+

c ☐+ ☐2+ ☐3+

x ☐+ ☐2+ ☐3+

y ☒+ ☒2+ ☐3+

z ☐+ ☐2+ ☐3+

hide H<sub>2</sub>O/NH<sub>3</sub> ☐

zoom 112-122 ☐

GO

EISDEFSEAIGALR, MH+ 1564.7859, m/z 522.2668  
L OS G13 P120811 220811-s1.06683.06683.3.dta

scan 6683; 9.1e-001

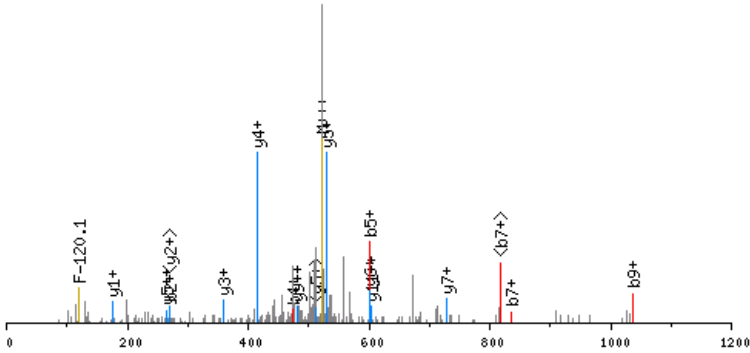

click image to zoom in; click top corners to zoom out [\[precursor±\]](#)

scan 6679; 522.3 m/z; 7.0e+000

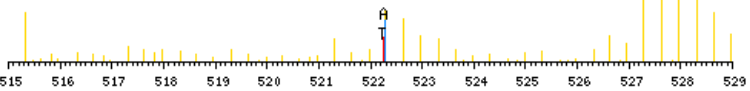

zoomed in precursor plot; T=theoretical m/z, A=acquired m/z

| b <sup>+</sup> | #  | AA | #  | y <sup>+</sup> | y <sup>2+</sup> |
|----------------|----|----|----|----------------|-----------------|
| 158.0817       | 1  | E  | 14 |                |                 |
| 271.1658       | 2  | I  | 13 | 1407.7120      | 704.3599        |
| 358.1978       | 3  | S  | 12 | 1294.6279      | 647.8179        |
| 473.2247       | 4  | D  | 11 | 1207.5959      | 604.3019        |
| 602.2673       | 5  | E  | 10 | 1092.5689      | 546.7884        |
| 749.3357       | 6  | F  | 9  | 963.5264       | 482.2671        |
| 836.3678       | 7  | S  | 8  | 816.4579       | 408.7329        |
| 965.4104       | 8  | E  | 7  | 729.4259       | 365.2169        |
| 1036.4475      | 9  | A  | 6  | 600.3833       | 300.6956        |
| 1149.5315      | 10 | I  | 5  | 529.3462       | 265.1770        |
| 1206.5530      | 11 | G  | 4  | 416.2621       | 208.6350        |
| 1277.5901      | 12 | A  | 3  | 359.2407       | 180.1243        |
| 1390.6742      | 13 | L  | 2  | 288.2036       | 144.6057        |
|                | 14 | R  | 1  | 175.1195       | 88.0637         |

N-term:+29.04

N-term: +29.04



X-range:

0 - 0

MassTol: Y-zoom:

0. 1.

MassType:

☐ AVG ☒ MONO

Axis:

☒ 1 ☐ 2

Label:

☒ I ☐ M ☐ -

Ions:

a ☐ + ☐ 2+ ☐ 3+

b ☒ + ☐ 2+ ☐ 3+

c ☐ + ☐ 2+ ☐ 3+

x ☐ + ☐ 2+ ☐ 3+

y ☒ + ☒ 2+ ☐ 3+

z ☐ + ☐ 2+ ☐ 3+

hide H<sub>2</sub>O/NH<sub>3</sub> ☐

zoom 112-122 ☐

GO

EKIPFESA FR, MH+ 1279.7051, m/z 427.2399  
L OS G16 P120811 220811-s1.04946.04946.3.dta

scan 4946; 6.7e+000

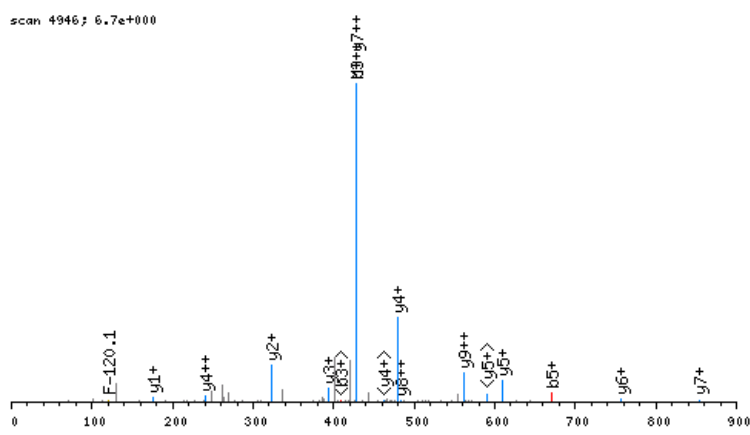

click image to zoom in; click top corners to zoom out

[precursor±]

scan 4943; 427.2 m/z; 3.3e+001

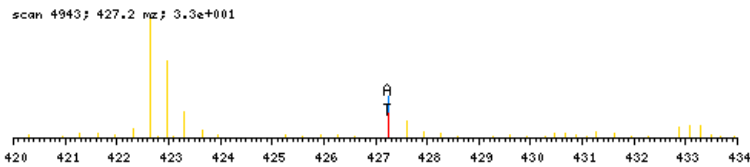

zoomed in precursor plot; T=theoretical m/z, A=acquired m/z

| b <sup>+</sup> | #  | AA | #  | y <sup>+</sup> | y <sup>2+</sup> |
|----------------|----|----|----|----------------|-----------------|
| 158.0817       | 1  | E  | 10 |                |                 |
| 314.2080       | 2  | K  | 9  | 1122.6312      | 561.8195        |
| 427.2921       | 3  | I  | 8  | 966.5049       | 483.7564        |
| 524.3448       | 4  | P  | 7  | 853.4208       | 427.2143        |
| 671.4132       | 5  | F  | 6  | 756.3681       | 378.6879        |
| 800.4558       | 6  | E  | 5  | 609.2997       | 305.1537        |
| 887.4879       | 7  | S  | 4  | 480.2571       | 240.6324        |
| 958.5250       | 8  | A  | 3  | 393.2250       | 197.1164        |
| 1105.5934      | 9  | F  | 2  | 322.1879       | 161.5979        |
|                | 10 | R  | 1  | 175.1195       | 88.0637         |

N-term:+29.04 K(2):+156.13

X-range:

0 - 0

MassTol: Y-zoom:

0. 1.

MassType:

☐ AVG ☒ MONO

Axis:

☒ 1 ☐ 2

Label:

☒ I ☐ M ☐ -

Ions:

a ☐ + ☐ 2+ ☐ 3+

b ☒ + ☐ 2+ ☐ 3+

c ☐ + ☐ 2+ ☐ 3+

x ☐ + ☐ 2+ ☐ 3+

y ☒ + ☒ 2+ ☐ 3+

z ☐ + ☐ 2+ ☐ 3+

hide H<sub>2</sub>O/NH<sub>3</sub> ☐

zoom 112-122 ☐

GO

EKLGEYGFQNAILVR, MH+ 1792.9962, m/z 598.3369  
L OS G15 P120811 220811-s1.05267.05267.3.dta

scan 5267; 1.2e+000

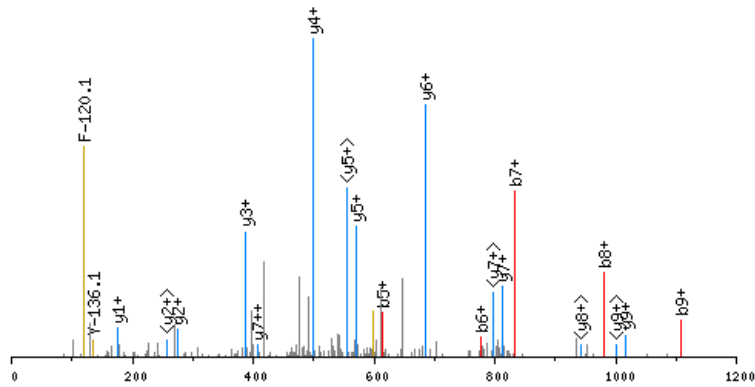

click image to zoom in; click top corners to zoom out

[precursor±]

scan 5266; 598.3 m/z; 4.5e+001

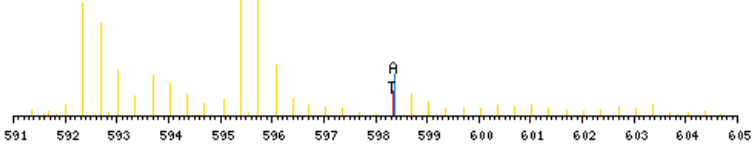

zoomed in precursor plot; T=theoretical m/z, A=acquired m/z

| b <sup>+</sup> | #  | AA | #  | y <sup>+</sup> | y <sup>2+</sup> |
|----------------|----|----|----|----------------|-----------------|
| 158.0817       | 1  | E  | 15 |                |                 |
| 314.2080       | 2  | K  | 14 | 1635.9223      | 818.4651        |
| 427.2921       | 3  | L  | 13 | 1479.7960      | 740.4019        |
| 484.3135       | 4  | G  | 12 | 1366.7119      | 683.8599        |
| 613.3561       | 5  | E  | 11 | 1309.6905      | 655.3491        |
| 776.4194       | 6  | Y  | 10 | 1180.6479      | 590.8278        |
| 833.4409       | 7  | G  | 9  | 1017.5845      | 509.2962        |
| 980.5093       | 8  | F  | 8  | 960.5631       | 480.7855        |
| 1108.5679      | 9  | Q  | 7  | 813.4947       | 407.2512        |
| 1222.6108      | 10 | N  | 6  | 685.4361       | 343.2220        |
| 1293.6479      | 11 | A  | 5  | 571.3932       | 286.2005        |
| 1406.7320      | 12 | I  | 4  | 500.3560       | 250.6819        |
| 1519.8161      | 13 | L  | 3  | 387.2720       | 194.1399        |
| 1618.8845      | 14 | V  | 2  | 274.1879       | 137.5979        |
|                | 15 | R  | 1  | 175.1195       | 88.0637         |

N-term:+29.04 K(2):+156.13

X-range:

0 - 0

MassTol: Y-zoom:

0. 1.

MassType:

☐ AVG ☒ MONO

Axis:

☒ 1 ☐ 2

Label:

☒ I ☐ M ☐ -

Ions:

a ☐ + ☐ 2+ ☐ 3+

b ☒ + ☐ 2+ ☐ 3+

c ☐ + ☐ 2+ ☐ 3+

x ☐ + ☐ 2+ ☐ 3+

y ☒ + ☒ 2+ ☐ 3+

z ☐ + ☐ 2+ ☐ 3+

hide H<sub>2</sub>O/NH<sub>3</sub> ☐

zoom 112-122 ☐

GO

EKNGIDIYSLTVDSR, MH+ 1765.9336, m/z 589.3161  
L OS G16 P120811 220811-s1.05371.05371.3.dta

scan 5371; 1.4e+000

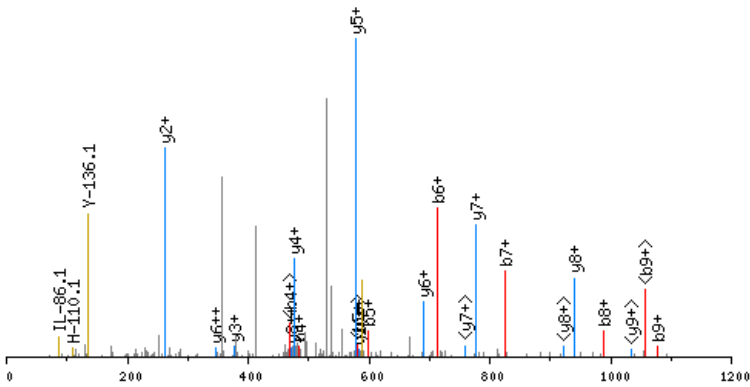

click image to zoom in; click top corners to zoom out

[precursor±]

scan 5368; 589.3 m/z; 3.1e+000

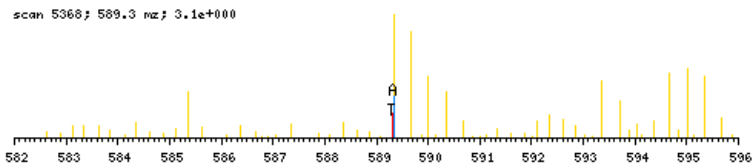

zoomed in precursor plot; T=theoretical m/z, A=acquired m/z

| b <sup>+</sup> | #  | AA | #  | y <sup>+</sup> | y <sup>2+</sup> |
|----------------|----|----|----|----------------|-----------------|
| 158.0817       | 1  | E  | 15 |                |                 |
| 314.2080       | 2  | K  | 14 | 1608.8597      | 804.9338        |
| 428.2509       | 3  | N  | 13 | 1452.7334      | 726.8706        |
| 485.2724       | 4  | G  | 12 | 1338.6905      | 669.8492        |
| 598.3564       | 5  | I  | 11 | 1281.6691      | 641.3384        |
| 713.3834       | 6  | D  | 10 | 1168.5850      | 584.7964        |
| 826.4675       | 7  | I  | 9  | 1053.5580      | 527.2829        |
| 989.5308       | 8  | Y  | 8  | 940.4740       | 470.7409        |
| 1076.5628      | 9  | S  | 7  | 777.4107       | 389.2092        |
| 1189.6469      | 10 | L  | 6  | 690.3786       | 345.6932        |
| 1290.6946      | 11 | T  | 5  | 577.2946       | 289.1512        |
| 1389.7630      | 12 | V  | 4  | 476.2469       | 238.6274        |
| 1504.7899      | 13 | D  | 3  | 377.1785       | 189.0931        |
| 1591.8219      | 14 | S  | 2  | 262.1515       | 131.5797        |
|                | 15 | R  | 1  | 175.1195       | 88.0637         |

N-term:+29.04 K(2):+156.13

X-range:

0 - 0

MassTol: Y-zoom:

0. 1.

MassType:

☐ AVG ☒ MONO

Axis:

☒ 1 ☐ 2

Label:

☒ I ☐ M ☐ -

Ions:

a ☐ + ☐ 2+ ☐ 3+

b ☒ + ☐ 2+ ☐ 3+

c ☐ + ☐ 2+ ☐ 3+

x ☐ + ☐ 2+ ☐ 3+

y ☒ + ☒ 2+ ☐ 3+

z ☐ + ☐ 2+ ☐ 3+

hide H<sub>2</sub>O/NH<sub>3</sub> ☐

zoom 112-122 ☐

GO

EKNQLEEVPSALPR, MH+ 1665.9176, m/z 555.9774  
L OS G15 P120811 220811-s1.03815.03815.3.dta

scan 3815; 4.8e+000

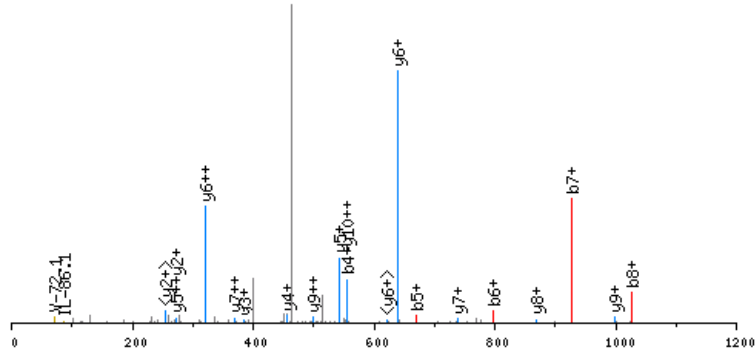

click image to zoom in; click top corners to zoom out

[precursor±]

scan 3811; 556.0 m/z; 7.9e+000

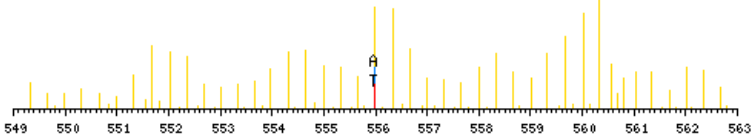

zoomed in precursor plot; T=theoretical m/z, A=acquired m/z

| b <sup>+</sup> | #  | AA | #  | y <sup>+</sup> | y <sup>2+</sup> |
|----------------|----|----|----|----------------|-----------------|
| 158.0817       | 1  | E  | 14 |                |                 |
| 314.2080       | 2  | K  | 13 | 1508.8437      | 754.9258        |
| 428.2509       | 3  | N  | 12 | 1352.7174      | 676.8626        |
| 556.3095       | 4  | Q  | 11 | 1238.6745      | 619.8412        |
| 669.3936       | 5  | L  | 10 | 1110.6159      | 555.8119        |
| 798.4362       | 6  | E  | 9  | 997.5318       | 499.2698        |
| 927.4787       | 7  | E  | 8  | 868.4892       | 434.7485        |
| 1026.5472      | 8  | V  | 7  | 739.4466       | 370.2272        |
| 1123.5999      | 9  | P  | 6  | 640.3782       | 320.6930        |
| 1210.6320      | 10 | S  | 5  | 543.3255       | 272.1666        |
| 1281.6691      | 11 | A  | 4  | 456.2934       | 228.6506        |
| 1394.7531      | 12 | L  | 3  | 385.2563       | 193.1321        |
| 1491.8059      | 13 | P  | 2  | 272.1723       | 136.5900        |
|                | 14 | R  | 1  | 175.1195       | 88.0637         |

N-term:+29.04 K(2):+156.13

X-range:

0 - 0

MassTol: Y-zoom:

0. 1.

MassType:

☐ AVG ☒ MONO

Axis:

☒ 1 ☐ 2

Label:

☒ I ☐ M ☐ -

Ions:

a ☐ + ☐ 2+ ☐ 3+

b ☒ + ☐ 2+ ☐ 3+

c ☐ + ☐ 2+ ☐ 3+

x ☐ + ☐ 2+ ☐ 3+

y ☒ + ☒ 2+ ☐ 3+

z ☐ + ☐ 2+ ☐ 3+

hide H<sub>2</sub>O/NH<sub>3</sub> ☐

zoom 112-122 ☐

GO

ELEDMNQKLFDLR, MH+ 1706.8787, m/z 569.6311  
L OS G15 P120811 220811-s1.05533.05533.3.dta

scan 5533; 4.0e+000

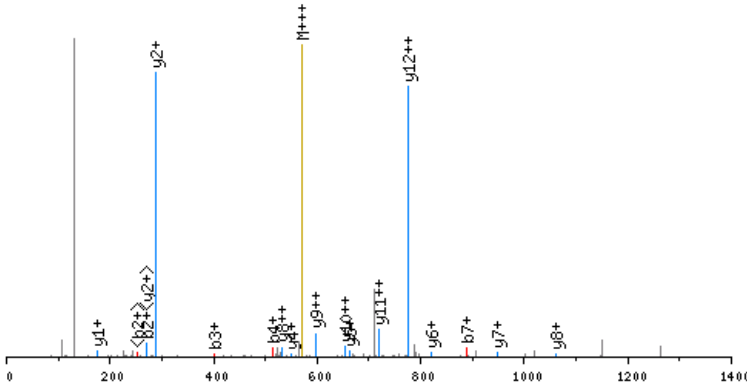

click image to zoom in; click top corners to zoom out

[precursor±]

scan 5531; 569.6 m/z; 3.3e+002

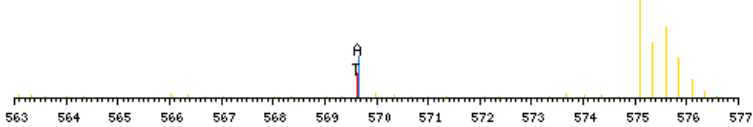

zoomed in precursor plot; T=theoretical m/z, A=acquired m/z

| b <sup>+</sup> | #  | AA | #  | y <sup>+</sup> | y <sup>2+</sup> |
|----------------|----|----|----|----------------|-----------------|
| 158.0817       | 1  | E  | 13 |                |                 |
| 271.1658       | 2  | L  | 12 | 1549.8049      | 775.4064        |
| 400.2084       | 3  | E  | 11 | 1436.7208      | 718.8643        |
| 515.2353       | 4  | D  | 10 | 1307.6782      | 654.3430        |
| 646.2758       | 5  | M  | 9  | 1192.6513      | 596.8296        |
| 760.3187       | 6  | N  | 8  | 1061.6108      | 531.3093        |
| 888.3773       | 7  | Q  | 7  | 947.5679       | 474.2878        |
| 1044.5036      | 8  | K  | 6  | 819.5093       | 410.2586        |
| 1157.5876      | 9  | L  | 5  | 663.3830       | 332.1954        |
| 1304.6561      | 10 | F  | 4  | 550.2989       | 275.6534        |
| 1419.6830      | 11 | D  | 3  | 403.2305       | 202.1192        |
| 1532.7671      | 12 | L  | 2  | 288.2036       | 144.6057        |
|                | 13 | R  | 1  | 175.1195       | 88.0637         |

N-term:+29.04 K(8):+156.13

X-range:

0 - 0

MassTol: Y-zoom:

0. 1.

MassType:

☐AVG ☒MONO

Axis:

☒1 ☐2

Label:

☒I ☐M ☐-

Ions:

a ☐+ ☐2+ ☐3+

b ☒+ ☐2+ ☐3+

c ☐+ ☐2+ ☐3+

x ☐+ ☐2+ ☐3+

y ☒+ ☒2+ ☐3+

z ☐+ ☐2+ ☐3+

hide H<sub>2</sub>O/NH<sub>3</sub> ☐

zoom 112-122 ☐

GO

ELGSILKGFSSDAR, MH+ 1535.8433, m/z 512.6193  
L OS G15 P120811 220811-s1.05374.05374.3.dta

scan 5374; 6.9e+000

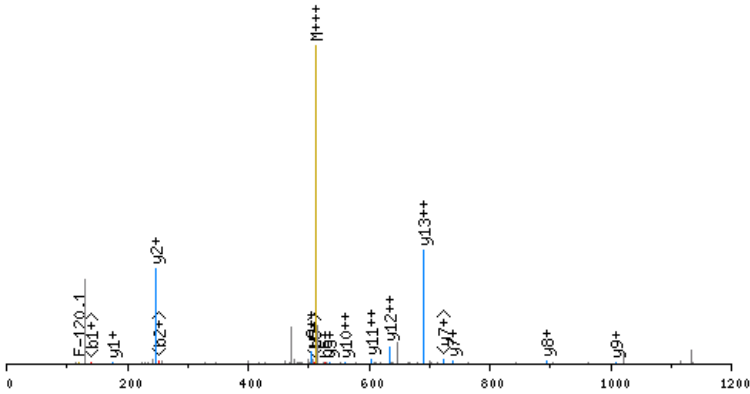

click image to zoom in; click top corners to zoom out

[precursor±]

scan 5371; 512.6 m/z; 1.5e+001

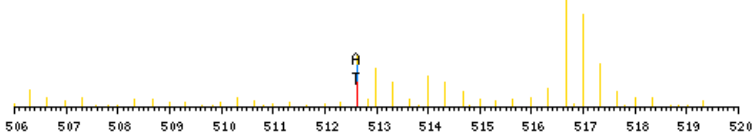

zoomed in precursor plot; T=theoretical m/z, A=acquired m/z

| b <sup>+</sup> | #  | AA | #  | y <sup>+</sup> | y <sup>2+</sup> |
|----------------|----|----|----|----------------|-----------------|
| 158.0817       | 1  | E  | 14 |                |                 |
| 271.1658       | 2  | L  | 13 | 1378.7695      | 689.8887        |
| 328.1872       | 3  | G  | 12 | 1265.6854      | 633.3466        |
| 415.2192       | 4  | S  | 11 | 1208.6639      | 604.8359        |
| 528.3033       | 5  | I  | 10 | 1121.6319      | 561.3199        |
| 641.3874       | 6  | L  | 9  | 1008.5479      | 504.7778        |
| 797.5137       | 7  | K  | 8  | 895.4638       | 448.2358        |
| 854.5351       | 8  | G  | 7  | 739.3375       | 370.1727        |
| 1001.6036      | 9  | F  | 6  | 682.3160       | 341.6619        |
| 1088.6356      | 10 | S  | 5  | 535.2476       | 268.1277        |
| 1175.6676      | 11 | S  | 4  | 448.2156       | 224.6117        |
| 1290.6946      | 12 | D  | 3  | 361.1836       | 181.0957        |
| 1361.7317      | 13 | A  | 2  | 246.1566       | 123.5822        |
|                | 14 | R  | 1  | 175.1195       | 88.0637         |

N-term:+29.04 K(7):+156.13

X-range:

0 - 0

MassTol: Y-zoom:

0. 1.

MassType:

☐ AVG ☒ MONO

Axis:

☒ 1 ☐ 2

Label:

☒ I ☐ M ☐ -

Ions:

a ☐ + ☐ 2+ ☐ 3+

b ☒ + ☐ 2+ ☐ 3+

c ☐ + ☐ 2+ ☐ 3+

x ☐ + ☐ 2+ ☐ 3+

y ☒ + ☒ 2+ ☐ 3+

z ☐ + ☐ 2+ ☐ 3+

hide H<sub>2</sub>O/NH<sub>3</sub> ☐

zoom 112-122 ☐

GO

ELISNASDALDKIR, MH+ 1600.8910, m/z 534.3019  
L OS G15 P120811 220811-s1.04867.04867.3.dta

scan 4867; 1.4e+001

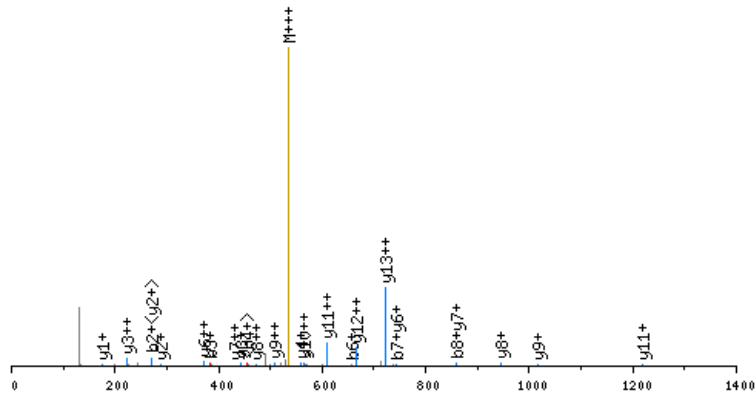

click image to zoom in; click top corners to zoom out

[precursor±]

scan 4866; 534.3 m/z; 1.1e+001

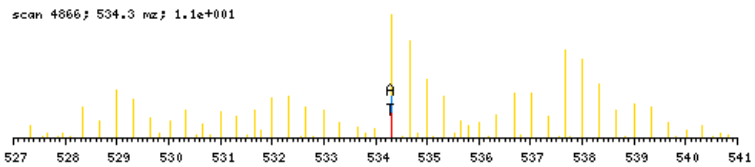

zoomed in precursor plot; T=theoretical m/z, A=acquired m/z

| b <sup>+</sup> | #  | AA | #  | y <sup>+</sup> | y <sup>2+</sup> |
|----------------|----|----|----|----------------|-----------------|
| 158.0817       | 1  | E  | 14 |                |                 |
| 271.1658       | 2  | L  | 13 | 1443.8172      | 722.4125        |
| 384.2498       | 3  | I  | 12 | 1330.7331      | 665.8705        |
| 471.2818       | 4  | S  | 11 | 1217.6490      | 609.3284        |
| 585.3248       | 5  | N  | 10 | 1130.6170      | 565.8124        |
| 656.3619       | 6  | A  | 9  | 1016.5741      | 508.7909        |
| 743.3939       | 7  | S  | 8  | 945.5370       | 473.2724        |
| 858.4209       | 8  | D  | 7  | 858.5049       | 429.7564        |
| 929.4580       | 9  | A  | 6  | 743.4780       | 372.2429        |
| 1042.5420      | 10 | L  | 5  | 672.4409       | 336.7243        |
| 1157.5690      | 11 | D  | 4  | 559.3568       | 280.1823        |
| 1313.6953      | 12 | K  | 3  | 444.3299       | 222.6688        |
| 1426.7793      | 13 | I  | 2  | 288.2036       | 144.6057        |
|                | 14 | R  | 1  | 175.1195       | 88.0637         |

N-term:+29.04 K(12):+156.13

X-range:

0 - 0

MassTol: Y-zoom:

0. 1.

MassType:

☐AVG ☒MONO

Axis:

☒1 ☐2

Label:

☒I ☐M ☐-

Ions:

a ☐+ ☐2+ ☐3+

b ☒+ ☐2+ ☐3+

c ☐+ ☐2+ ☐3+

x ☐+ ☐2+ ☐3+

y ☒+ ☒2+ ☐3+

z ☐+ ☐2+ ☐3+

hide H<sub>2</sub>O/NH<sub>3</sub> ☐

zoom 112-122 ☐

GO

ELNDFISYLQR, MH+ 1425.7378, m/z 475.9174  
L OS G13 P120811 220811-s1.06700.06700.3.dta

scan 6700; 2.2e+000

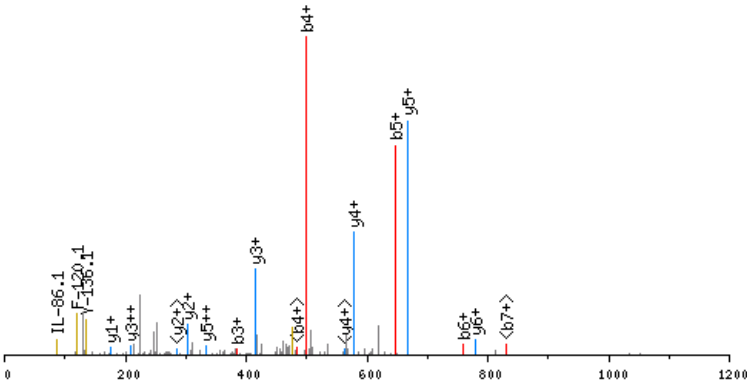

click image to zoom in; click top corners to zoom out

[precursor±]

scan 6699; 475.9 m/z; 6.1e+000

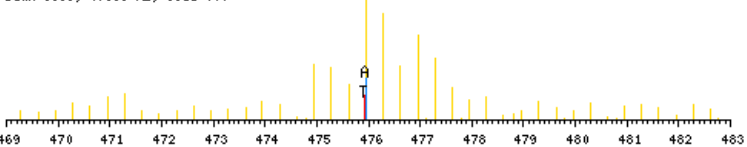

zoomed in precursor plot; T=theoretical m/z, A=acquired m/z

| b <sup>+</sup> | #  | AA | #  | y <sup>+</sup> | y <sup>2+</sup> |
|----------------|----|----|----|----------------|-----------------|
| 158.0817       | 1  | E  | 11 |                |                 |
| 271.1658       | 2  | L  | 10 | 1268.6639      | 634.8359        |
| 385.2087       | 3  | N  | 9  | 1155.5798      | 578.2938        |
| 500.2356       | 4  | D  | 8  | 1041.5369      | 521.2724        |
| 647.3040       | 5  | F  | 7  | 926.5100       | 463.7589        |
| 760.3881       | 6  | I  | 6  | 779.4416       | 390.2247        |
| 847.4201       | 7  | S  | 5  | 666.3575       | 333.6827        |
| 1010.4835      | 8  | Y  | 4  | 579.3255       | 290.1666        |
| 1123.5675      | 9  | L  | 3  | 416.2621       | 208.6350        |
| 1251.6261      | 10 | Q  | 2  | 303.1781       | 152.0930        |
|                | 11 | R  | 1  | 175.1195       | 88.0637         |

N-term:+29.04

X-range:

0 - 0

MassTol: Y-zoom:

0. 1.

MassType:

☐AVG ☒MONO

Axis:

☒1 ☐2

Label:

☒I ☐M ☐-

Ions:

a ☐+ ☐2+ ☐3+

b ☒+ ☐2+ ☐3+

c ☐+ ☐2+ ☐3+

x ☐+ ☐2+ ☐3+

y ☒+ ☒2+ ☐3+

z ☐+ ☐2+ ☐3+

hide H<sub>2</sub>O/NH<sub>3</sub> ☐

zoom 112-122 ☐

GO

ELPDGQVITIGNER, MH+ 1568.8284, m/z 523.6143  
L OS G13 P120811 220811-s1.05240.05240.3.dta

scan 5240; 2.0e+000

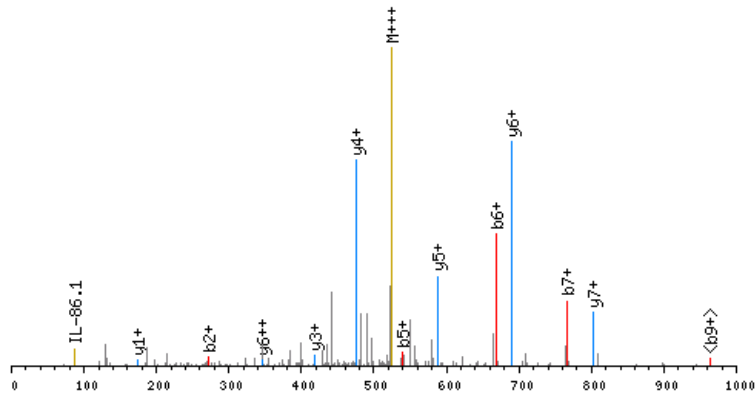

click image to zoom in; click top corners to zoom out

[precursor±]

scan 5239; 523.6 m/z; 1.4e+001

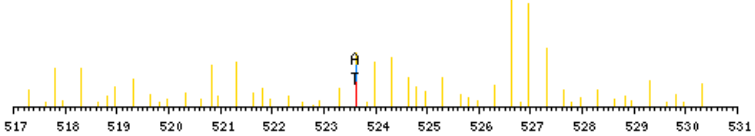

zoomed in precursor plot; T=theoretical m/z, A=acquired m/z

| b <sup>+</sup> | #  | AA | #  | y <sup>+</sup> | y <sup>2+</sup> |
|----------------|----|----|----|----------------|-----------------|
| 158.0817       | 1  | E  | 14 |                |                 |
| 271.1658       | 2  | L  | 13 | 1411.7545      | 706.3812        |
| 368.2185       | 3  | P  | 12 | 1298.6705      | 649.8391        |
| 483.2455       | 4  | D  | 11 | 1201.6177      | 601.3128        |
| 540.2669       | 5  | G  | 10 | 1086.5907      | 543.7993        |
| 668.3255       | 6  | Q  | 9  | 1029.5693      | 515.2886        |
| 767.3939       | 7  | V  | 8  | 901.5107       | 451.2593        |
| 880.4780       | 8  | I  | 7  | 802.4423       | 401.7251        |
| 981.5257       | 9  | T  | 6  | 689.3582       | 345.1830        |
| 1094.6097      | 10 | I  | 5  | 588.3105       | 294.6592        |
| 1151.6312      | 11 | G  | 4  | 475.2265       | 238.1172        |
| 1265.6741      | 12 | N  | 3  | 418.2050       | 209.6064        |
| 1394.7167      | 13 | E  | 2  | 304.1621       | 152.5850        |
|                | 14 | R  | 1  | 175.1195       | 88.0637         |

N-term:+29.04

X-range:

0 - 0

MassTol: Y-zoom:

0. 1.

MassType:

☐AVG ☒MONO

Axis:

☒1 ☐2

Label:

☒I ☐M ☐-

Ions:

a ☐+ ☐2+ ☐3+

b ☒+ ☐2+ ☐3+

c ☐+ ☐2+ ☐3+

x ☐+ ☐2+ ☐3+

y ☒+ ☒2+ ☐3+

z ☐+ ☐2+ ☐3+

hide H<sub>2</sub>O/NH<sub>3</sub> ☐

zoom 112-122 ☐

GO

ELSSEGILDDRNEEKR, MH+ 1945.9831, m/z 487.2512  
L OS G17 P120811 220811-s1.03542.03542.4.dta

scan 3542; 6.5e+000

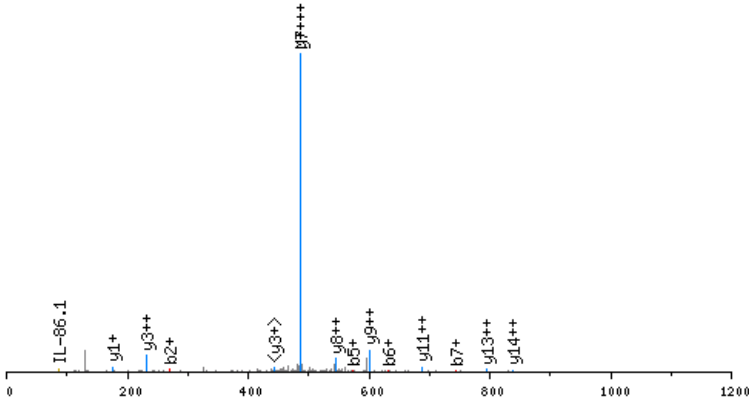

click image to zoom in; click top corners to zoom out [\[precursor±\]](#)

scan 3538; 487.3 m/z; 5.7e+000

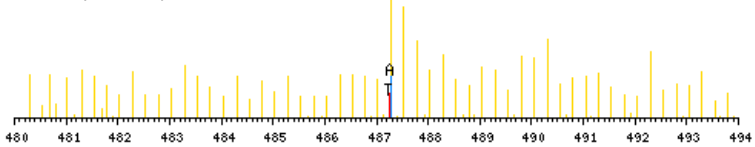

zoomed in precursor plot; T=theoretical m/z, A=acquired m/z

| b <sup>+</sup> | #  | AA | #  | y <sup>+</sup> | y <sup>2+</sup> |
|----------------|----|----|----|----------------|-----------------|
| 158.0817       | 1  | E  | 16 |                |                 |
| 271.1658       | 2  | L  | 15 | 1788.9092      | 894.9585        |
| 358.1978       | 3  | S  | 14 | 1675.8252      | 838.4165        |
| 445.2298       | 4  | S  | 13 | 1588.7931      | 794.9005        |
| 574.2724       | 5  | E  | 12 | 1501.7611      | 751.3845        |
| 631.2939       | 6  | G  | 11 | 1372.7185      | 686.8632        |
| 744.3779       | 7  | I  | 10 | 1315.6970      | 658.3524        |
| 857.4620       | 8  | L  | 9  | 1202.6130      | 601.8104        |
| 972.4889       | 9  | D  | 8  | 1089.5289      | 545.2684        |
| 1087.5159      | 10 | D  | 7  | 974.5020       | 487.7549        |
| 1243.6170      | 11 | R  | 6  | 859.4750       | 430.2414        |
| 1357.6599      | 12 | N  | 5  | 703.3739       | 352.1909        |
| 1486.7025      | 13 | E  | 4  | 589.3310       | 295.1694        |
| 1615.7451      | 14 | E  | 3  | 460.2884       | 230.6481        |
| 1771.8714      | 15 | K  | 2  | 331.2458       | 166.1268        |
|                | 16 | R  | 1  | 175.1195       | 88.0637         |

N-term:+29.04 K(15):+156.13

X-range:

0 - 0

MassTol: Y-zoom:

0. 1.

MassType:

☐AVG ☒MONO

Axis:

☒1 ☐2

Label:

☒I ☐M ☐-

Ions:

a ☐+ ☐2+ ☐3+

b ☒+ ☐2+ ☐3+

c ☐+ ☐2+ ☐3+

x ☐+ ☐2+ ☐3+

y ☒+ ☒2+ ☐3+

z ☐+ ☐2+ ☐3+

hide H<sub>2</sub>O/NH<sub>3</sub> ☐

zoom 112-122 ☐

GO

ELVNNLGEIYQKIER, MH+ 1874.0387, m/z 625.3511  
L OS G15 P120811 220811-s1.05800.05800.3.dta

scan 5800; 2.9e+000

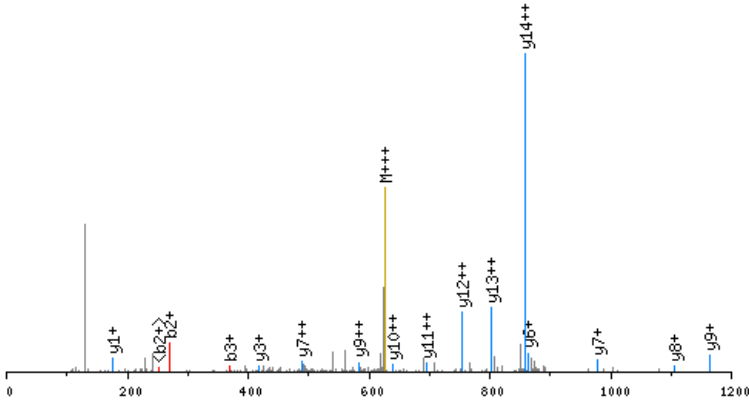

click image to zoom in; click top corners to zoom out [precursor±]

scan 5796; 625.4 m/z; 4.3e+000

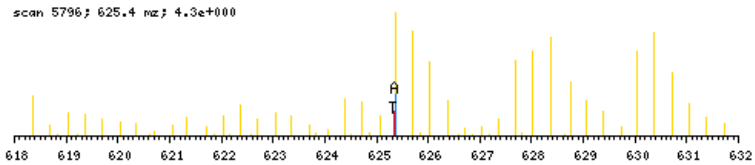

zoomed in precursor plot; T=theoretical m/z, A=acquired m/z

| b <sup>+</sup> | #  | AA | #  | y <sup>+</sup> | y <sup>2+</sup> |
|----------------|----|----|----|----------------|-----------------|
| 158.0817       | 1  | E  | 15 |                |                 |
| 271.1658       | 2  | L  | 14 | 1716.9649      | 858.9864        |
| 370.2342       | 3  | V  | 13 | 1603.8808      | 802.4443        |
| 484.2771       | 4  | N  | 12 | 1504.8124      | 752.9101        |
| 598.3200       | 5  | N  | 11 | 1390.7695      | 695.8887        |
| 711.4041       | 6  | L  | 10 | 1276.7265      | 638.8672        |
| 768.4256       | 7  | G  | 9  | 1163.6425      | 582.3252        |
| 897.4681       | 8  | E  | 8  | 1106.6210      | 553.8144        |
| 1010.5522      | 9  | I  | 7  | 977.5784       | 489.2931        |
| 1173.6155      | 10 | Y  | 6  | 864.4944       | 432.7511        |
| 1301.6741      | 11 | Q  | 5  | 701.4310       | 351.2194        |
| 1457.8004      | 12 | K  | 4  | 573.3725       | 287.1901        |
| 1570.8845      | 13 | I  | 3  | 417.2462       | 209.1270        |
| 1699.9271      | 14 | E  | 2  | 304.1621       | 152.5850        |
|                | 15 | R  | 1  | 175.1195       | 88.0637         |

N-term:+29.04 K(12):+156.13

X-range:

0 - 0

MassTol: Y-zoom:

0. 1.

MassType:

☐AVG ☒MONO

Axis:

☒1 ☐2

Label:

☒I ☐M ☐-

Ions:

a ☐+ ☐2+ ☐3+

b ☒+ ☐2+ ☐3+

c ☐+ ☐2+ ☐3+

x ☐+ ☐2+ ☐3+

y ☒+ ☒2+ ☐3+

z ☐+ ☐2+ ☐3+

hide H<sub>2</sub>O/NH<sub>3</sub> ☐

zoom 112-122 ☐

GO

ENWDTLGSTVSQLQER, MH+ 1890.9197, m/z 630.9781  
L OS G13 P120811 220811-s1.06172.06172.3.dta

scan 6172; 2.5e+000

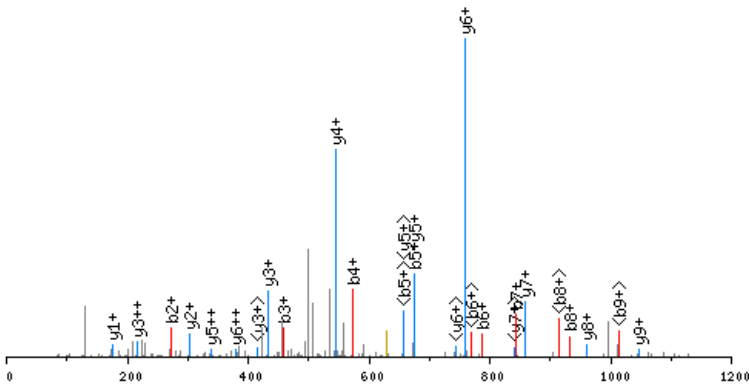

click image to zoom in; click top corners to zoom out

[precursor±]

scan 6169; 631.0 m/z; 1.1e+001

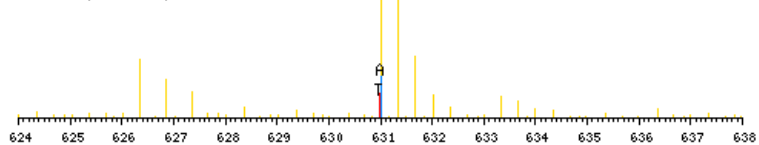

zoomed in precursor plot; T=theoretical m/z, A=acquired m/z

| b <sup>+</sup> | #  | AA | #  | y <sup>+</sup> | y <sup>2+</sup> |
|----------------|----|----|----|----------------|-----------------|
| 158.0817       | 1  | E  | 16 |                |                 |
| 272.1246       | 2  | N  | 15 | 1733.8459      | 867.4268        |
| 458.2039       | 3  | W  | 14 | 1619.8029      | 810.4054        |
| 573.2309       | 4  | D  | 13 | 1433.7236      | 717.3657        |
| 674.2786       | 5  | T  | 12 | 1318.6967      | 659.8522        |
| 787.3626       | 6  | L  | 11 | 1217.6490      | 609.3284        |
| 844.3841       | 7  | G  | 10 | 1104.5649      | 552.7864        |
| 931.4161       | 8  | S  | 9  | 1047.5435      | 524.2756        |
| 1032.4638      | 9  | T  | 8  | 960.5114       | 480.7596        |
| 1131.5322      | 10 | V  | 7  | 859.4638       | 430.2358        |
| 1218.5642      | 11 | S  | 6  | 760.3953       | 380.7016        |
| 1346.6228      | 12 | Q  | 5  | 673.3633       | 337.1856        |
| 1459.7069      | 13 | L  | 4  | 545.3047       | 273.1563        |
| 1587.7655      | 14 | Q  | 3  | 432.2207       | 216.6142        |
| 1716.8080      | 15 | E  | 2  | 304.1621       | 152.5850        |
|                | 16 | R  | 1  | 175.1195       | 88.0637         |

N-term:+29.04

X-range:

0 - 0

MassTol: Y-zoom:

0. 1.

MassType:

☐ AVG ☒ MONO

Axis:

☒ 1 ☐ 2

Label:

☒ I ☐ M ☐ -

Ions:

a ☐ + ☐ 2+ ☐ 3+

b ☒ + ☐ 2+ ☐ 3+

c ☐ + ☐ 2+ ☐ 3+

x ☐ + ☐ 2+ ☐ 3+

y ☒ + ☒ 2+ ☐ 3+

z ☐ + ☐ 2+ ☐ 3+

hide H<sub>2</sub>O/NH<sub>3</sub> ☐

zoom 112-122 ☐

GO

ENYGELADCCTKQEPER, MH+ 2154.9435, m/z 718.9860  
L OS G15 P120811 220811-s1.02789.02789.3.dta

scan 2789; 1.9e+000

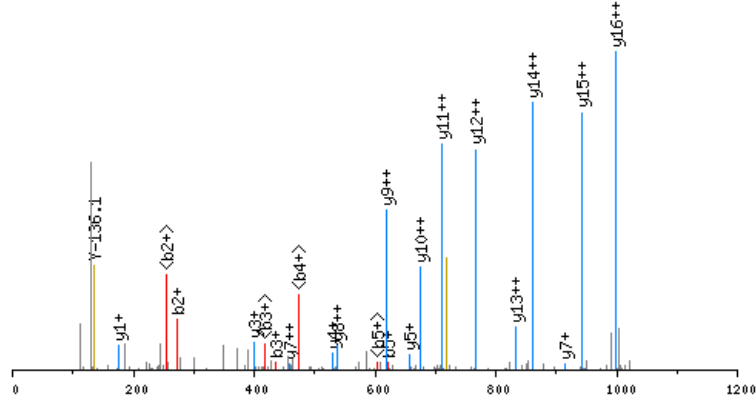

click image to zoom in; click top corners to zoom out [\[precursor±\]](#)

scan 2786; 718.0 m/z; 9.1e+001

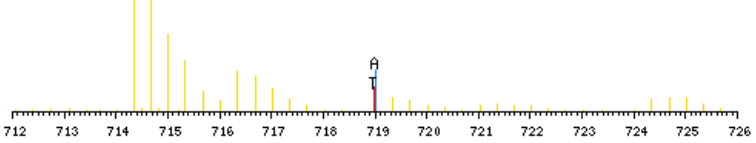

zoomed in precursor plot; T=theoretical m/z, A=acquired m/z

| b <sup>+</sup> | #  | AA | #  | y <sup>+</sup> | y <sup>2+</sup> |
|----------------|----|----|----|----------------|-----------------|
| 158.0817       | 1  | E  | 17 |                |                 |
| 272.1246       | 2  | N  | 16 | 1997.8696      | 999.4387        |
| 435.1879       | 3  | Y  | 15 | 1883.8267      | 942.4173        |
| 492.2094       | 4  | G  | 14 | 1720.7634      | 860.8856        |
| 621.2520       | 5  | E  | 13 | 1663.7419      | 832.3749        |
| 734.3361       | 6  | L  | 12 | 1534.6993      | 767.8536        |
| 805.3732       | 7  | A  | 11 | 1421.6153      | 711.3115        |
| 920.4001       | 8  | D  | 10 | 1350.5782      | 675.7930        |
| 1080.4307      | 9  | C  | 9  | 1235.5512      | 618.2795        |
| 1240.4613      | 10 | C  | 8  | 1075.5206      | 538.2642        |
| 1341.5090      | 11 | T  | 7  | 915.4900       | 458.2489        |
| 1497.6353      | 12 | K  | 6  | 814.4423       | 407.7251        |
| 1625.6939      | 13 | Q  | 5  | 658.3160       | 329.6619        |
| 1754.7365      | 14 | E  | 4  | 530.2575       | 265.6326        |
| 1851.7892      | 15 | P  | 3  | 401.2149       | 201.1113        |
| 1980.8318      | 16 | E  | 2  | 304.1621       | 152.5850        |
|                | 17 | R  | 1  | 175.1195       | 88.0637         |

N-term:+29.04 C(9):+160.03  
C(10):+160.03 K(12):+156.13

X-range:

0 - 0

MassTol: Y-zoom:

0. 1.

MassType:

☐ AVG ☒ MONO

Axis:

☒ 1 ☐ 2

Label:

☒ I ☐ M ☐ -

Ions:

a ☐ + ☐ 2+ ☐ 3+

b ☒ + ☐ 2+ ☐ 3+

c ☐ + ☐ 2+ ☐ 3+

x ☐ + ☐ 2+ ☐ 3+

y ☒ + ☒ 2+ ☐ 3+

z ☐ + ☐ 2+ ☐ 3+

hide H<sub>2</sub>O/NH<sub>3</sub> ☐

zoom 112-122 ☐

GO

EPEGKEVWDYVTVR, MH+ 1762.9016, m/z 588.3054  
L OS G16 P120811 220811-s1.05590.05590.3.dta

scan 5590; 8.7e+000

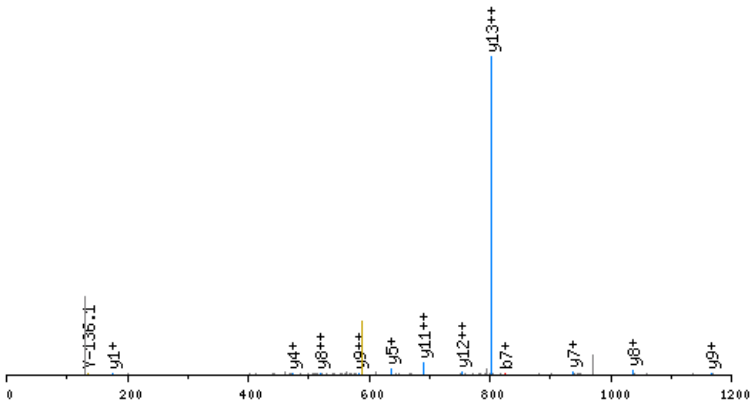

click image to zoom in; click top corners to zoom out

[precursor±]

scan 5588; 588.3 m/z; 3.8e+000

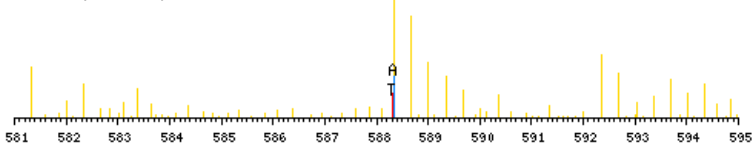

zoomed in precursor plot; T=theoretical m/z, A=acquired m/z

| b <sup>+</sup> | #  | AA | #  | y <sup>+</sup> | y <sup>2+</sup> |
|----------------|----|----|----|----------------|-----------------|
| 158.0817       | 1  | E  | 14 |                |                 |
| 255.1345       | 2  | P  | 13 | 1605.8277      | 803.4178        |
| 384.1771       | 3  | E  | 12 | 1508.7750      | 754.8914        |
| 441.1985       | 4  | G  | 11 | 1379.7324      | 690.3701        |
| 597.3248       | 5  | K  | 10 | 1322.7109      | 661.8594        |
| 726.3674       | 6  | E  | 9  | 1166.5846      | 583.7962        |
| 825.4358       | 7  | V  | 8  | 1037.5420      | 519.2749        |
| 1011.5151      | 8  | W  | 7  | 938.4736       | 469.7407        |
| 1126.5421      | 9  | D  | 6  | 752.3943       | 376.7011        |
| 1289.6054      | 10 | Y  | 5  | 637.3673       | 319.1876        |
| 1388.6738      | 11 | V  | 4  | 474.3040       | 237.6559        |
| 1489.7215      | 12 | T  | 3  | 375.2356       | 188.1217        |
| 1588.7899      | 13 | V  | 2  | 274.1879       | 137.5979        |
|                | 14 | R  | 1  | 175.1195       | 88.0637         |

N-term:+29.04 K(5):+156.13

X-range:

0 - 0

MassTol: Y-zoom:

0. 1.

MassType:

☐AVG ☒MONO

Axis:

☒1 ☐2

Label:

☒I ☐M ☐-

Ions:

a ☐+ ☐2+ ☐3+

b ☒+ ☐2+ ☐3+

c ☐+ ☐2+ ☐3+

x ☐+ ☐2+ ☐3+

y ☒+ ☒2+ ☐3+

z ☐+ ☐2+ ☐3+

hide H<sub>2</sub>O/NH<sub>3</sub> ☐

zoom 112-122 ☐

GO

EQCCYNCGKPGHLAR, MH+ 1905.8521, m/z 477.2185  
L OS G18 P120811 220811-s1.01994.01994.4.dta

scan 1994; 2.0e+000

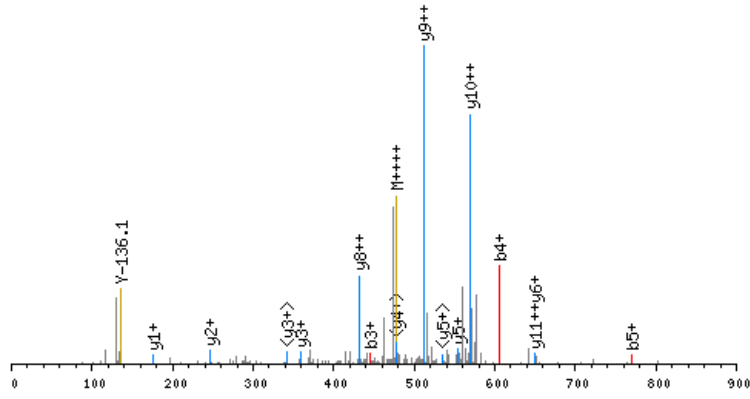

click image to zoom in; click top corners to zoom out [\[precursor±\]](#)

scan 1991; 477.2 m/z; 3.0e+000

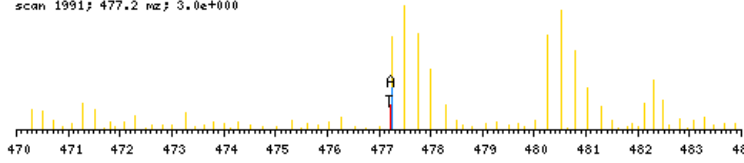

zoomed in precursor plot; T=theoretical m/z, A=acquired m/z

| b <sup>+</sup> | #  | AA | #  | y <sup>+</sup> | y <sup>2+</sup> |
|----------------|----|----|----|----------------|-----------------|
| 158.0817       | 1  | E  | 15 |                |                 |
| 286.1403       | 2  | Q  | 14 | 1748.7782      | 874.8930        |
| 446.1709       | 3  | C  | 13 | 1620.7196      | 810.8637        |
| 606.2015       | 4  | C  | 12 | 1460.6890      | 730.8484        |
| 769.2648       | 5  | Y  | 11 | 1300.6584      | 650.8331        |
| 883.3077       | 6  | N  | 10 | 1137.5951      | 569.3015        |
| 1043.3383      | 7  | C  | 9  | 1023.5522      | 512.2800        |
| 1100.3598      | 8  | G  | 8  | 863.5216       | 432.2647        |
| 1256.4861      | 9  | K  | 7  | 806.5001       | 403.7540        |
| 1353.5389      | 10 | P  | 6  | 650.3738       | 325.6908        |
| 1410.5603      | 11 | G  | 5  | 553.3211       | 277.1644        |
| 1547.6192      | 12 | H  | 4  | 496.2996       | 248.6537        |
| 1660.7033      | 13 | L  | 3  | 359.2407       | 180.1243        |
| 1731.7404      | 14 | A  | 2  | 246.1566       | 123.5822        |
|                | 15 | R  | 1  | 175.1195       | 88.0637         |

N-term:+29.04 C(3):+160.03  
C(4):+160.03 C(7):+160.03 K(9):+156.13

X-range:

0 - 0

MassTol: Y-zoom:

0. 1.

MassType:

☐AVG ☒MONO

Axis:

☒1 ☐2

Label:

☒I ☐M ☐-

Ions:

a ☐+ ☐2+ ☐3+

b ☒+ ☐2+ ☐3+

c ☐+ ☐2+ ☐3+

x ☐+ ☐2+ ☐3+

y ☒+ ☒2+ ☐3+

z ☐+ ☐2+ ☐3+

hide H<sub>2</sub>O/NH<sub>3</sub> ☐

zoom 112-122 ☐

GO

EQDFYDFKAVNIR, MH+ 1700.8648, m/z 567.6265  
L OS G15 P120811 220811-s1.05137.05137.3.dta

scan 5137; 6.4e+000

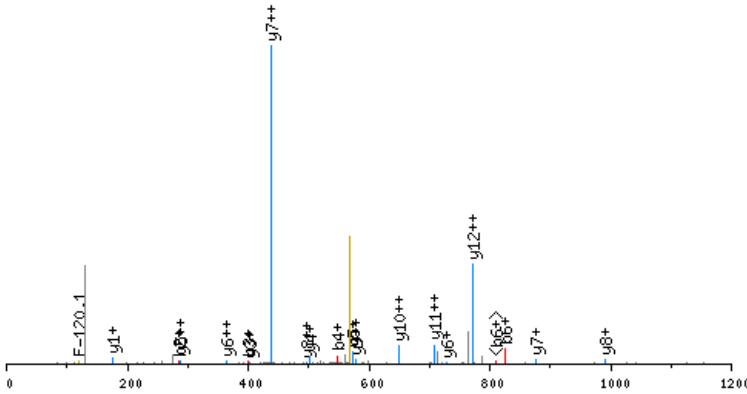

click image to zoom in; click top corners to zoom out [\[precursor±\]](#)

scan 5136; 567.6 m/z; 3.7e+001

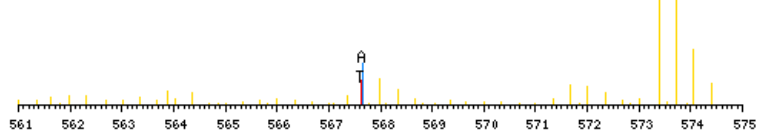

zoomed in precursor plot; T=theoretical m/z, A=acquired m/z

| b <sup>+</sup> | #  | AA | #  | y <sup>+</sup> | y <sup>2+</sup> |
|----------------|----|----|----|----------------|-----------------|
| 158.0817       | 1  | E  | 13 |                |                 |
| 286.1403       | 2  | Q  | 12 | 1543.7909      | 772.3994        |
| 401.1672       | 3  | D  | 11 | 1415.7324      | 708.3701        |
| 548.2356       | 4  | F  | 10 | 1300.7054      | 650.8566        |
| 711.2990       | 5  | Y  | 9  | 1153.6370      | 577.3224        |
| 826.3259       | 6  | D  | 8  | 990.5737       | 495.7908        |
| 973.3943       | 7  | F  | 7  | 875.5467       | 438.2773        |
| 1129.5206      | 8  | K  | 6  | 728.4783       | 364.7431        |
| 1200.5577      | 9  | A  | 5  | 572.3520       | 286.6799        |
| 1299.6261      | 10 | V  | 4  | 501.3149       | 251.1614        |
| 1413.6691      | 11 | N  | 3  | 402.2465       | 201.6272        |
| 1526.7531      | 12 | I  | 2  | 288.2036       | 144.6057        |
|                | 13 | R  | 1  | 175.1195       | 88.0637         |

N-term:+29.04 K(8):+156.13

X-range:

0 - 0

MassTol: Y-zoom:

0. 1.

MassType:

☐AVG ☒MONO

Axis:

☒1 ☐2

Label:

☒I ☐M ☐-

Ions:

a ☐+ ☐2+ ☐3+

b ☒+ ☐2+ ☐3+

c ☐+ ☐2+ ☐3+

x ☐+ ☐2+ ☐3+

y ☒+ ☒2+ ☐3+

z ☐+ ☐2+ ☐3+

hide H<sub>2</sub>O/NH<sub>3</sub> ☐

zoom 112-122 ☐

GO

EQEVSDNELQELSTQGSR, MH+ 2083.0003, m/z 695.0050  
H OS G13 P120811 220811-s1.04597.04597.3.dta

scan 4597; 1.8e+000

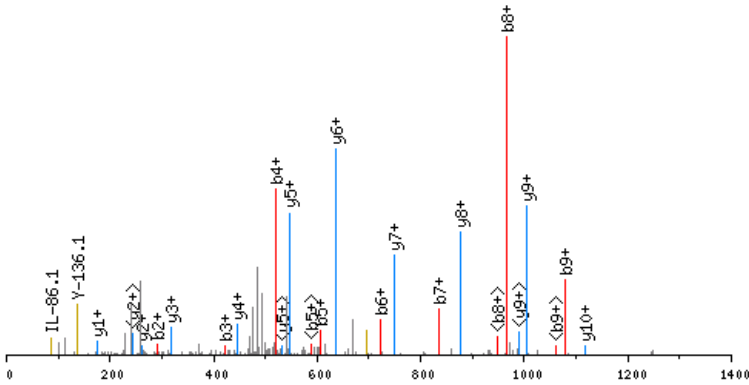

click image to zoom in; click top corners to zoom out [\[precursor±\]](#)

scan 4594; 695.0 m/z; 6.4e+001

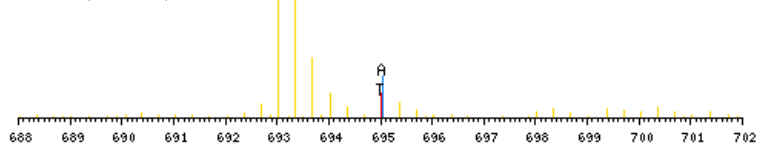

zoomed in precursor plot; T=theoretical m/z, A=acquired m/z

| b <sup>+</sup> | #  | AA | #  | y <sup>+</sup> | y <sup>2+</sup> |
|----------------|----|----|----|----------------|-----------------|
| 164.1135       | 1  | E  | 18 |                |                 |
| 292.1721       | 2  | Q  | 17 | 1919.8947      | 960.4512        |
| 421.2147       | 3  | E  | 16 | 1791.8361      | 896.4220        |
| 520.2831       | 4  | V  | 15 | 1662.7935      | 831.9007        |
| 607.3151       | 5  | S  | 14 | 1563.7251      | 782.3664        |
| 722.3420       | 6  | D  | 13 | 1476.6930      | 738.8504        |
| 836.3850       | 7  | N  | 12 | 1361.6661      | 681.3370        |
| 965.4276       | 8  | E  | 11 | 1247.6232      | 624.3155        |
| 1078.5116      | 9  | L  | 10 | 1118.5806      | 559.7942        |
| 1206.5702      | 10 | Q  | 9  | 1005.4965      | 503.2522        |
| 1335.6128      | 11 | E  | 8  | 877.4379       | 439.2229        |
| 1448.6969      | 12 | L  | 7  | 748.3953       | 374.7016        |
| 1535.7289      | 13 | S  | 6  | 635.3113       | 318.1596        |
| 1636.7766      | 14 | T  | 5  | 548.2792       | 274.6435        |
| 1764.8352      | 15 | Q  | 4  | 447.2316       | 224.1197        |
| 1821.8566      | 16 | G  | 3  | 319.1730       | 160.0904        |
| 1908.8886      | 17 | S  | 2  | 262.1515       | 131.5797        |
|                | 18 | R  | 1  | 175.1195       | 88.0637         |

N-term:+35.07

X-range:

0 - 0

MassTol: Y-zoom:

0. 1.

MassType:

☐ AVG ☒ MONO

Axis:

☒ 1 ☐ 2

Label:

☒ I ☐ M ☐ -

Ions:

a ☐ + ☐ 2+ ☐ 3+

b ☒ + ☐ 2+ ☐ 3+

c ☐ + ☐ 2+ ☐ 3+

x ☐ + ☐ 2+ ☐ 3+

y ☒ + ☒ 2+ ☐ 3+

z ☐ + ☐ 2+ ☐ 3+

hide H<sub>2</sub>O/NH<sub>3</sub> ☐

zoom 112-122 ☐

GO

EQFQEALAEELAKKR, MH+ 1803.0017, m/z 451.5059  
L OS G17 P120811 220811-s1.06049.06049.4.dta

scan 6049; 5.5e+000

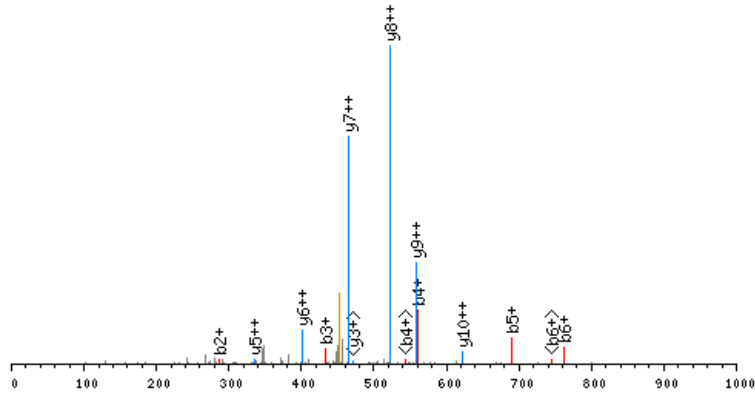

click image to zoom in; click top corners to zoom out

[precursor±]

scan 6048; 451.5 m/z; 6.0e+000

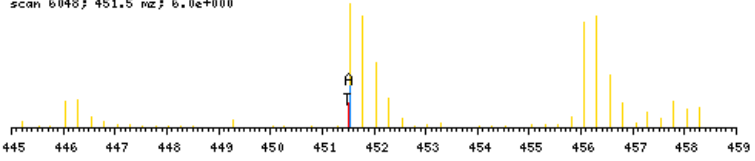

zoomed in precursor plot; T=theoretical m/z, A=acquired m/z

| b <sup>+</sup> | #  | AA | #  | y <sup>+</sup> | y <sup>2+</sup> |
|----------------|----|----|----|----------------|-----------------|
| 158.0817       | 1  | E  | 14 |                |                 |
| 286.1403       | 2  | Q  | 13 | 1645.9278      | 823.4678        |
| 433.2087       | 3  | F  | 12 | 1517.8692      | 759.4385        |
| 561.2673       | 4  | Q  | 11 | 1370.8008      | 685.9043        |
| 690.3099       | 5  | E  | 10 | 1242.7422      | 621.8750        |
| 761.3470       | 6  | A  | 9  | 1113.6996      | 557.3537        |
| 874.4310       | 7  | L  | 8  | 1042.6625      | 521.8352        |
| 1003.4736      | 8  | E  | 7  | 929.5785       | 465.2931        |
| 1132.5162      | 9  | E  | 6  | 800.5359       | 400.7718        |
| 1245.6003      | 10 | L  | 5  | 671.4933       | 336.2506        |
| 1316.6374      | 11 | A  | 4  | 558.4092       | 279.7085        |
| 1472.7637      | 12 | K  | 3  | 487.3721       | 244.1900        |
| 1628.8900      | 13 | K  | 2  | 331.2458       | 166.1268        |
|                | 14 | R  | 1  | 175.1195       | 88.0637         |

N-term:+29.04 K(12):+156.13  
K(13):+156.13

X-range:

0 - 0

MassTol: Y-zoom:

0. 1.

MassType:

☐AVG ☒MONO

Axis:

☒1 ☐2

Label:

☒I ☐M ☐-

Ions:

a ☐+ ☐2+ ☐3+

b ☒+ ☐2+ ☐3+

c ☐+ ☐2+ ☐3+

x ☐+ ☐2+ ☐3+

y ☒+ ☒2+ ☐3+

z ☐+ ☐2+ ☐3+

hide H<sub>2</sub>O/NH<sub>3</sub> ☐

zoom 112-122 ☐

GO

ESAGIHETTYNSIMKCDIDIR, MH+ 2509.2066, m/z 628.0571  
L OS G16 P120811 220811-s1.05090.05090.4.dta

scan 5090; 1.8e+000

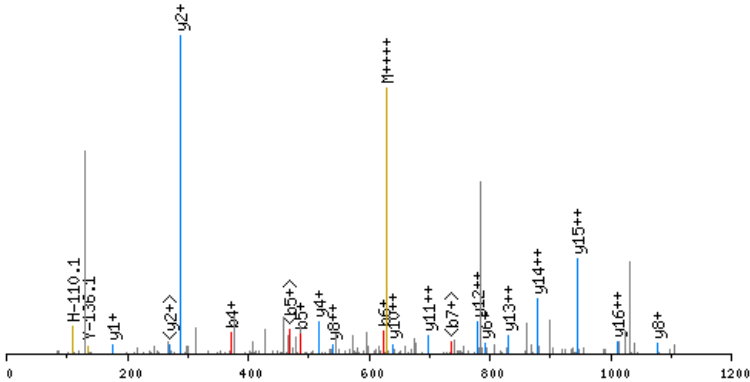

click image to zoom in; click top corners to zoom out

[precursor±]

scan 5088; 628.1 m/z; 8.8e+000

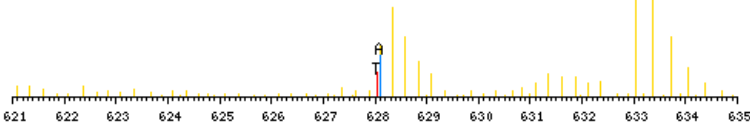

zoomed in precursor plot; T=theoretical m/z, A=acquired m/z

| b <sup>+</sup> | #  | AA | #  | y <sup>+</sup> | y <sup>2+</sup> |
|----------------|----|----|----|----------------|-----------------|
| 158.0817       | 1  | E  | 21 |                |                 |
| 245.1137       | 2  | S  | 20 | 2352.1328      | 1176.5703       |
| 316.1508       | 3  | A  | 19 | 2265.1008      | 1133.0543       |
| 373.1723       | 4  | G  | 18 | 2194.0636      | 1097.5357       |
| 486.2564       | 5  | I  | 17 | 2137.0422      | 1069.0250       |
| 623.3153       | 6  | H  | 16 | 2023.9581      | 1012.4830       |
| 752.3579       | 7  | E  | 15 | 1886.8992      | 943.9535        |
| 853.4055       | 8  | T  | 14 | 1757.8566      | 879.4322        |
| 954.4532       | 9  | T  | 13 | 1656.8089      | 828.9084        |
| 1117.5166      | 10 | Y  | 12 | 1555.7612      | 778.3845        |
| 1231.5595      | 11 | N  | 11 | 1392.6979      | 696.8529        |
| 1318.5915      | 12 | S  | 10 | 1278.6550      | 639.8314        |
| 1431.6756      | 13 | I  | 9  | 1191.6230      | 596.3154        |
| 1562.7161      | 14 | M  | 8  | 1078.5389      | 539.7734        |
| 1718.8424      | 15 | K  | 7  | 947.4984       | 474.2531        |
| 1878.8730      | 16 | C  | 6  | 791.3721       | 396.1900        |
| 1993.8999      | 17 | D  | 5  | 631.3415       | 316.1747        |
| 2106.9840      | 18 | I  | 4  | 516.3146       | 258.6612        |
| 2222.0109      | 19 | D  | 3  | 403.2305       | 202.1192        |
| 2335.0950      | 20 | I  | 2  | 288.2036       | 144.6057        |
|                | 21 | R  | 1  | 175.1195       | 88.0637         |

N-term: +29.04 K(15): +156.13  
C(16): +160.03

X-range:

0 - 0

MassTol: Y-zoom:

0. 1.

MassType:

☐ AVG ☒ MONO

Axis:

☒ 1 ☐ 2

Label:

☒ I ☐ M ☐ -

Ions:

a ☐ + ☐ 2+ ☐ 3+

b ☒ + ☐ 2+ ☐ 3+

c ☐ + ☐ 2+ ☐ 3+

x ☐ + ☐ 2+ ☐ 3+

y ☒ + ☒ 2+ ☐ 3+

z ☐ + ☐ 2+ ☐ 3+

hide H<sub>2</sub>O/NH<sub>3</sub> ☐

zoom 112-122 ☐

GO

ESEVASSLVLER, MH+ 1346.7167, m/z 673.8620  
L OS G13 P120811 220811-s1.04472.04472.2.dta

scan 4472; 1.2e+001

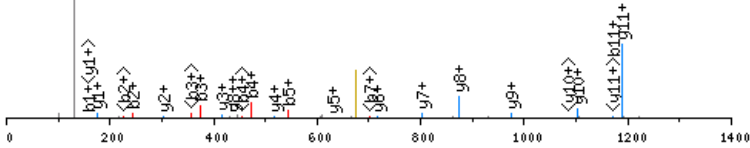

click image to zoom in; click top corners to zoom out

[precursor±]

scan 4469; 673.9 m/z; 1.2e+001

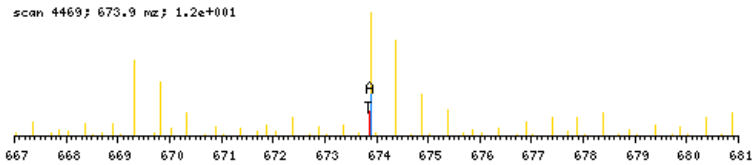

zoomed in precursor plot; T=theoretical m/z, A=acquired m/z

| b <sup>+</sup> | #  | AA | #  | y <sup>+</sup> | y <sup>2+</sup> |
|----------------|----|----|----|----------------|-----------------|
| 158.0817       | 1  | E  | 12 |                |                 |
| 245.1137       | 2  | S  | 11 | 1189.6428      | 595.3253        |
| 374.1563       | 3  | E  | 10 | 1102.6108      | 551.8093        |
| 473.2247       | 4  | V  | 9  | 973.5682       | 487.2880        |
| 544.2618       | 5  | A  | 8  | 874.4998       | 437.7538        |
| 631.2939       | 6  | S  | 7  | 803.4627       | 402.2353        |
| 718.3259       | 7  | S  | 6  | 716.4307       | 358.7192        |
| 831.4100       | 8  | L  | 5  | 629.3986       | 315.2032        |
| 930.4784       | 9  | V  | 4  | 516.3146       | 258.6612        |
| 1043.5624      | 10 | L  | 3  | 417.2462       | 209.1270        |
| 1172.6050      | 11 | E  | 2  | 304.1621       | 152.5850        |
|                | 12 | R  | 1  | 175.1195       | 88.0637         |

N-term:+29.04

X-range:

0 - 0

MassTol: Y-zoom:

0. 1.

MassType:

☐ AVG ☒ MONO

Axis:

☒ 1 ☐ 2

Label:

☒ I ☐ M ☐ -

Ions:

a ☐ + ☐ 2+ ☐ 3+

b ☒ + ☐ 2+ ☐ 3+

c ☐ + ☐ 2+ ☐ 3+

x ☐ + ☐ 2+ ☐ 3+

y ☒ + ☒ 2+ ☐ 3+

z ☐ + ☐ 2+ ☐ 3+

hide H<sub>2</sub>O/NH<sub>3</sub> ☐

zoom 112-122 ☐

GO

ESKCPLMVKVLDAVR, MH+ 1847.1347, m/z 462.5391  
H OS G17 P120811 220811-s1.06211.06211.4.dta

scan 6211; 8.2e+000

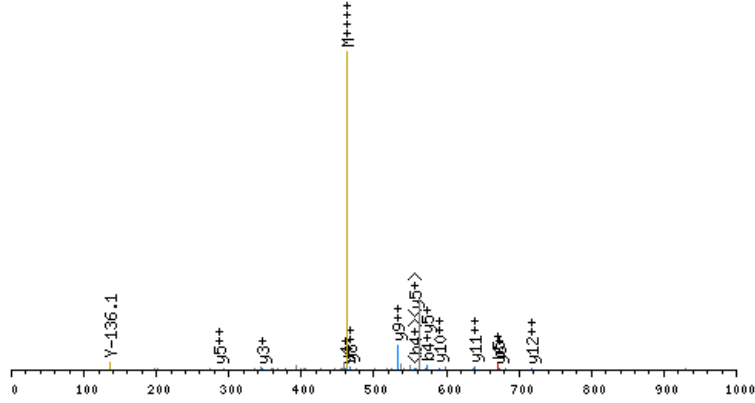

click image to zoom in; click top corners to zoom out [\[precursor±\]](#)

scan 6208; 462.5 m/z; 3.5e+000

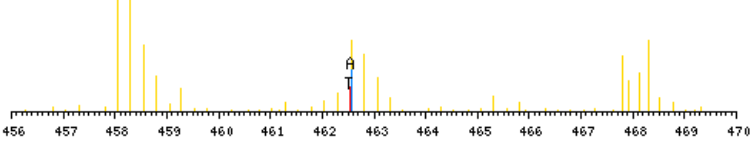

zoomed in precursor plot; T=theoretical m/z, A=acquired m/z

| b <sup>+</sup> | #  | AA | #  | y <sup>+</sup> | y <sup>2+</sup> |
|----------------|----|----|----|----------------|-----------------|
| 164.1135       | 1  | E  | 15 |                |                 |
| 251.1455       | 2  | S  | 14 | 1684.0290      | 842.5184        |
| 413.3036       | 3  | K  | 13 | 1596.9970      | 799.0024        |
| 573.3342       | 4  | C  | 12 | 1434.8389      | 717.9234        |
| 670.3870       | 5  | P  | 11 | 1274.8083      | 637.9081        |
| 783.4710       | 6  | L  | 10 | 1177.7555      | 589.3817        |
| 914.5115       | 7  | M  | 9  | 1064.6714      | 532.8396        |
| 1013.5799      | 8  | V  | 8  | 933.6310       | 467.3194        |
| 1175.7380      | 9  | K  | 7  | 834.5625       | 417.7852        |
| 1274.8065      | 10 | V  | 6  | 672.4044       | 336.7061        |
| 1387.8905      | 11 | L  | 5  | 573.3360       | 287.1719        |
| 1502.9175      | 12 | D  | 4  | 460.2520       | 230.6299        |
| 1573.9546      | 13 | A  | 3  | 345.2250       | 173.1164        |
| 1673.0230      | 14 | V  | 2  | 274.1879       | 137.5979        |
|                | 15 | R  | 1  | 175.1195       | 88.0637         |

N-term:+35.07 K(3):+162.16  
C(4):+160.03 K(9):+162.16

X-range:

0 - 0

MassTol: Y-zoom:

0. 1.

MassType:

☐AVG ☒MONO

Axis:

☒1 ☐2

Label:

☒I ☐M ☐-

Ions:

a ☐+ ☐2+ ☐3+

b ☒+ ☐2+ ☐3+

c ☐+ ☐2+ ☐3+

x ☐+ ☐2+ ☐3+

y ☒+ ☒2+ ☐3+

z ☐+ ☐2+ ☐3+

hide H<sub>2</sub>O/NH<sub>3</sub> ☐

zoom 112-122 ☐

GO

ESPTKVQLVGGAHR, MH+ 1534.8706, m/z 384.4731  
L OS G17 P120811 220811-s1.02429.02429.4.dta

scan 2429; 2.5e+001

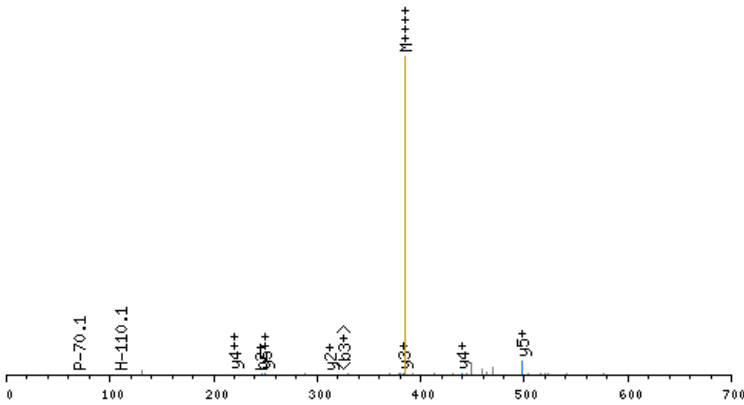

click image to zoom in; click top corners to zoom out

[precursor±]

scan 2428; 384.5 m/z; 4.3e+000

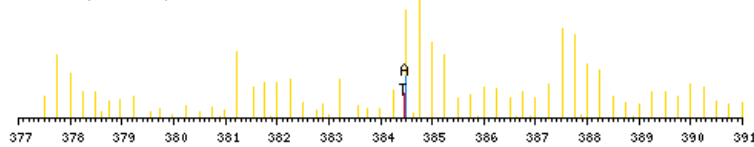

zoomed in precursor plot; T=theoretical m/z, A=acquired m/z

| b <sup>+</sup> | #  | AA | #  | y <sup>+</sup> | y <sup>2+</sup> |
|----------------|----|----|----|----------------|-----------------|
| 158.0817       | 1  | E  | 14 |                |                 |
| 245.1137       | 2  | S  | 13 | 1377.7967      | 689.4023        |
| 342.1665       | 3  | P  | 12 | 1290.7647      | 645.8862        |
| 443.2142       | 4  | T  | 11 | 1193.7119      | 597.3599        |
| 599.3405       | 5  | K  | 10 | 1092.6642      | 546.8360        |
| 698.4089       | 6  | V  | 9  | 936.5379       | 468.7729        |
| 826.4675       | 7  | Q  | 8  | 837.4695       | 419.2387        |
| 939.5515       | 8  | L  | 7  | 709.4109       | 355.2094        |
| 1038.6199      | 9  | V  | 6  | 596.3269       | 298.6673        |
| 1095.6414      | 10 | G  | 5  | 497.2585       | 249.1331        |
| 1152.6629      | 11 | G  | 4  | 440.2370       | 220.6224        |
| 1223.7000      | 12 | A  | 3  | 383.2155       | 192.1117        |
| 1360.7589      | 13 | H  | 2  | 312.1784       | 156.5931        |
|                | 14 | R  | 1  | 175.1195       | 88.0637         |

N-term:+29.04 K(5):+156.13

X-range:

0 - 0

MassTol: Y-zoom:

0. 1.

MassType:

☐ AVG ☒ MONO

Axis:

☒ 1 ☐ 2

Label:

☒ I ☐ M ☐ -

Ions:

a ☐ + ☐ 2+ ☐ 3+

b ☒ + ☐ 2+ ☐ 3+

c ☐ + ☐ 2+ ☐ 3+

x ☐ + ☐ 2+ ☐ 3+

y ☒ + ☒ 2+ ☐ 3+

z ☐ + ☐ 2+ ☐ 3+

hide H<sub>2</sub>O/NH<sub>3</sub> ☐

zoom 112-122 ☐

GO

ESQASDSEGHSDSFSEGQAVGAHR, MH+ 2416.0401, m/z 604.7655  
L OS G17 P120811 220811-s1.02406.02406.4.dta

scan 2406; 1.4e+000

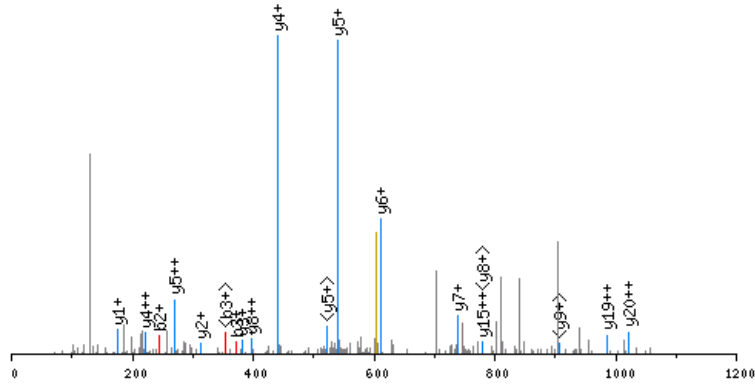

click image to zoom in; click top corners to zoom out [\[precursor±\]](#)

scan 2403; 604.8 m/z; 3.8e+000

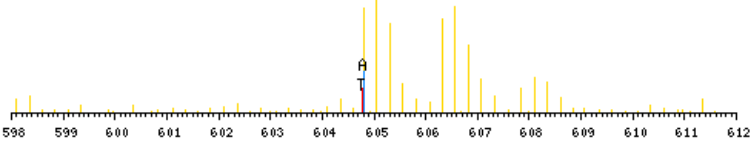

zoomed in precursor plot; T=theoretical m/z, A=acquired m/z

| b <sup>+</sup> | #  | AA | #  | y <sup>+</sup> | y <sup>2+</sup> |
|----------------|----|----|----|----------------|-----------------|
| 158.0817       | 1  | E  | 23 |                |                 |
| 245.1137       | 2  | S  | 22 | 2258.9663      | 1129.9870       |
| 373.1723       | 3  | Q  | 21 | 2171.9342      | 1086.4710       |
| 444.2094       | 4  | A  | 20 | 2043.8756      | 1022.4417       |
| 531.2414       | 5  | S  | 19 | 1972.8385      | 986.9232        |
| 646.2684       | 6  | D  | 18 | 1885.8065      | 943.4072        |
| 733.3004       | 7  | S  | 17 | 1770.7796      | 885.8937        |
| 862.3430       | 8  | E  | 16 | 1683.7475      | 842.3777        |
| 919.3645       | 9  | G  | 15 | 1554.7049      | 777.8564        |
| 1056.4234      | 10 | H  | 14 | 1497.6835      | 749.3457        |
| 1143.4554      | 11 | S  | 13 | 1360.6246      | 680.8162        |
| 1258.4824      | 12 | D  | 12 | 1273.5925      | 637.3002        |
| 1405.5508      | 13 | F  | 11 | 1158.5656      | 579.7867        |
| 1492.5828      | 14 | S  | 10 | 1011.4972      | 506.2525        |
| 1621.6254      | 15 | E  | 9  | 924.4652       | 462.7365        |
| 1678.6469      | 16 | G  | 8  | 795.4226       | 398.2152        |
| 1806.7054      | 17 | Q  | 7  | 738.4011       | 369.7045        |
| 1877.7425      | 18 | A  | 6  | 610.3425       | 305.6752        |
| 1976.8110      | 19 | V  | 5  | 539.3054       | 270.1566        |
| 2033.8324      | 20 | G  | 4  | 440.2370       | 220.6224        |
| 2104.8695      | 21 | A  | 3  | 383.2155       | 192.1117        |
| 2241.9284      | 22 | H  | 2  | 312.1784       | 156.5931        |
|                | 23 | R  | 1  | 175.1195       | 88.0637         |

N-term:+29.04

X-range:

0 - 0

MassTol: Y-zoom:

0. 1.

MassType:

☐ AVG ☒ MONO

Axis:

☒ 1 ☐ 2

Label:

☒ I ☐ M ☐ -

Ions:

a ☐ + ☐ 2+ ☐ 3+

b ☒ + ☐ 2+ ☐ 3+

c ☐ + ☐ 2+ ☐ 3+

x ☐ + ☐ 2+ ☐ 3+

y ☒ + ☒ 2+ ☐ 3+

z ☐ + ☐ 2+ ☐ 3+

hide H<sub>2</sub>O/NH<sub>3</sub> ☐

zoom 112-122 ☐

GO

ESVMKTEPSVAEYTVR, MH+ 1881.9632, m/z 627.9926  
L OS G15 P120811 220811-s1.03729.03729.3.dta

scan 3729; 5.1e+000

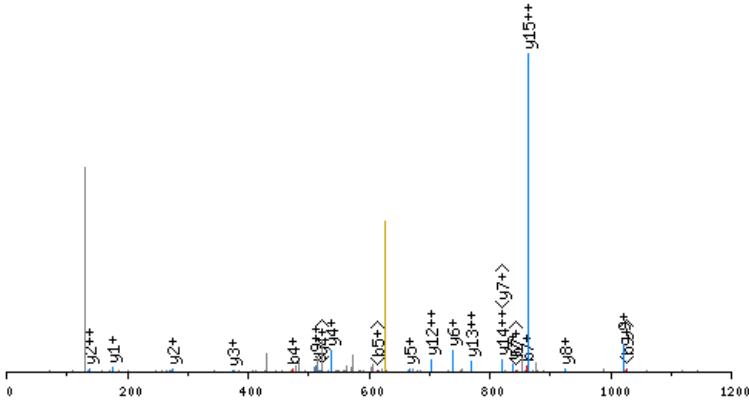

click image to zoom in; click top corners to zoom out

[precursor±]

scan 3726; 628.0 m/z; 1.2e+001

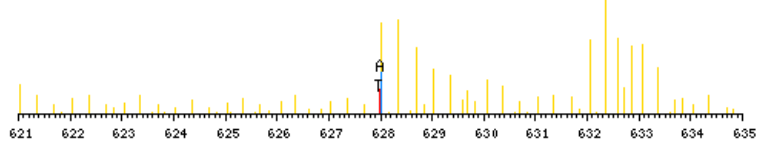

zoomed in precursor plot; T=theoretical m/z, A=acquired m/z

| b <sup>+</sup> | #  | AA | #  | y <sup>+</sup> | y <sup>2+</sup> |
|----------------|----|----|----|----------------|-----------------|
| 158.0817       | 1  | E  | 16 |                |                 |
| 245.1137       | 2  | S  | 15 | 1724.8893      | 862.9486        |
| 344.1821       | 3  | V  | 14 | 1637.8573      | 819.4326        |
| 475.2226       | 4  | M  | 13 | 1538.7889      | 769.8984        |
| 631.3489       | 5  | K  | 12 | 1407.7484      | 704.3781        |
| 732.3966       | 6  | T  | 11 | 1251.6221      | 626.3150        |
| 861.4392       | 7  | E  | 10 | 1150.5744      | 575.7911        |
| 958.4920       | 8  | P  | 9  | 1021.5318      | 511.2698        |
| 1045.5240      | 9  | S  | 8  | 924.4791       | 462.7434        |
| 1144.5924      | 10 | V  | 7  | 837.4470       | 419.2274        |
| 1215.6295      | 11 | A  | 6  | 738.3786       | 369.6932        |
| 1344.6721      | 12 | E  | 5  | 667.3415       | 334.1747        |
| 1507.7354      | 13 | Y  | 4  | 538.2989       | 269.6534        |
| 1608.7831      | 14 | T  | 3  | 375.2356       | 188.1217        |
| 1707.8515      | 15 | V  | 2  | 274.1879       | 137.5979        |
|                | 16 | R  | 1  | 175.1195       | 88.0637         |

N-term:+29.04 K(5):+156.13

X-range:

0 - 0

MassTol: Y-zoom:

0. 1.

MassType:

☐AVG ☒MONO

Axis:

☒1 ☐2

Label:

☒I ☐M ☐-

Ions:

a ☐+ ☐2+ ☐3+

b ☒+ ☐2+ ☐3+

c ☐+ ☐2+ ☐3+

x ☐+ ☐2+ ☐3+

y ☒+ ☒2+ ☐3+

z ☐+ ☐2+ ☐3+

hide H<sub>2</sub>O/NH<sub>3</sub> ☐

zoom 112-122 ☐

GO

ETFDQGAHHAFGQGGR, MH+ 1742.7999, m/z 436.4554  
L OS G18 P120811 220811-s1.02807.02807.4.dta

scan 2807; 3.8e+000

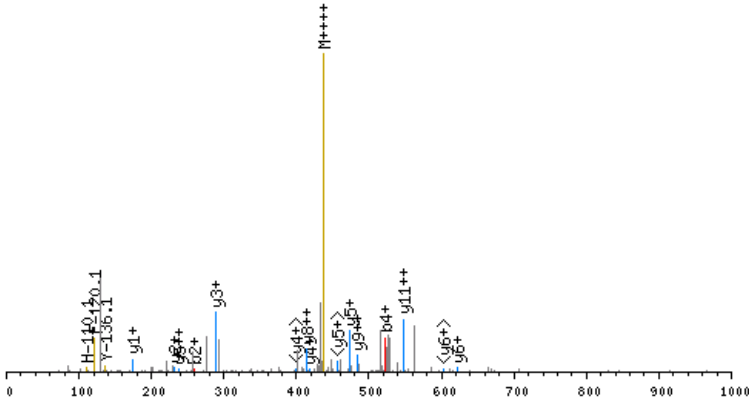

click image to zoom in; click top corners to zoom out

[precursor±]

scan 2806; 436.5 m/z; 2.2e+001

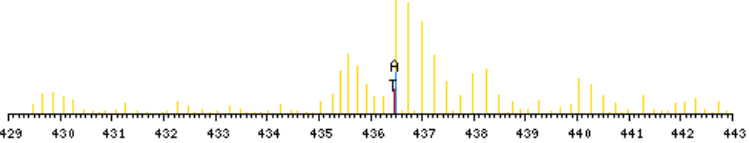

zoomed in precursor plot; T=theoretical m/z, A=acquired m/z

| b <sup>+</sup> | #  | AA | #  | y <sup>+</sup> | y <sup>2+</sup> |
|----------------|----|----|----|----------------|-----------------|
| 158.0817       | 1  | E  | 16 |                |                 |
| 259.1294       | 2  | T  | 15 | 1585.7260      | 793.3669        |
| 406.1978       | 3  | F  | 14 | 1484.6783      | 742.8431        |
| 521.2247       | 4  | D  | 13 | 1337.6099      | 669.3089        |
| 649.2833       | 5  | Q  | 12 | 1222.5830      | 611.7954        |
| 706.3048       | 6  | G  | 11 | 1094.5244      | 547.7661        |
| 777.3419       | 7  | A  | 10 | 1037.5029      | 519.2554        |
| 914.4008       | 8  | H  | 9  | 966.4658       | 483.7368        |
| 1051.4597      | 9  | H  | 8  | 829.4069       | 415.2074        |
| 1122.4968      | 10 | A  | 7  | 692.3480       | 346.6779        |
| 1269.5652      | 11 | F  | 6  | 621.3109       | 311.1594        |
| 1326.5867      | 12 | G  | 5  | 474.2425       | 237.6251        |
| 1454.6453      | 13 | Q  | 4  | 417.2210       | 209.1144        |
| 1511.6667      | 14 | G  | 3  | 289.1624       | 145.0851        |
| 1568.6882      | 15 | G  | 2  | 232.1410       | 116.5744        |
|                | 16 | R  | 1  | 175.1195       | 88.0637         |

N-term:+29.04

X-range:

0 - 0

MassTol: Y-zoom:

0. 1.

MassType:

☐AVG ☒MONO

Axis:

☒1 ☐2

Label:

☒I ☐M ☐-

Ions:

a ☐+ ☐2+ ☐3+

b ☒+ ☐2+ ☐3+

c ☐+ ☐2+ ☐3+

x ☐+ ☐2+ ☐3+

y ☒+ ☒2+ ☐3+

z ☐+ ☐2+ ☐3+

hide H<sub>2</sub>O/NH<sub>3</sub> ☐

zoom 112-122 ☐

GO

ETGPAGPAGPIGPAGAR, MH+ 1509.8237, m/z 503.9461  
H OS G13 P120811 220811-s1.03125.03125.3.dta

scan 3125; 5.2e+000

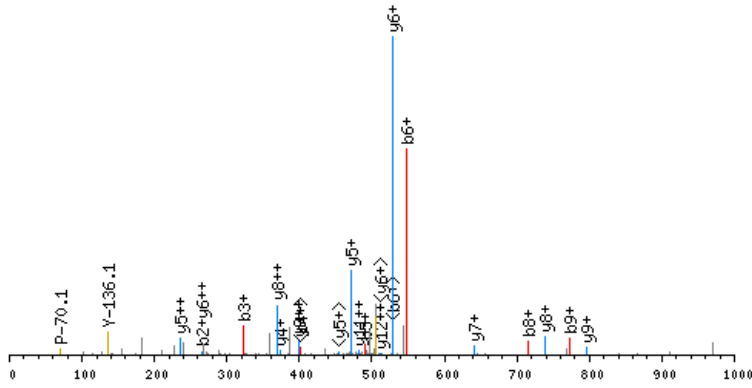

click image to zoom in; click top corners to zoom out

[precursor±]

scan 3124; 503.9 m/z; 2.3e+001

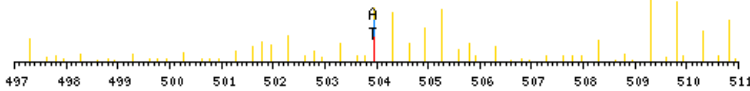

zoomed in precursor plot; T=theoretical m/z, A=acquired m/z

| b <sup>+</sup> | #  | AA | #  | y <sup>+</sup> | y <sup>2+</sup> |
|----------------|----|----|----|----------------|-----------------|
| 164.1135       | 1  | E  | 17 |                |                 |
| 265.1612       | 2  | T  | 16 | 1346.7181      | 673.8629        |
| 322.1826       | 3  | G  | 15 | 1245.6704      | 623.3391        |
| 419.2354       | 4  | P  | 14 | 1188.6489      | 594.8284        |
| 490.2725       | 5  | A  | 13 | 1091.5962      | 546.3020        |
| 547.2940       | 6  | G  | 12 | 1020.5591      | 510.7834        |
| 644.3467       | 7  | P  | 11 | 963.5376       | 482.2727        |
| 715.3839       | 8  | A  | 10 | 866.4848       | 433.7463        |
| 772.4053       | 9  | G  | 9  | 795.4477       | 398.2278        |
| 869.4581       | 10 | P  | 8  | 738.4262       | 369.7170        |
| 982.5421       | 11 | I  | 7  | 641.3735       | 321.1907        |
| 1039.5636      | 12 | G  | 6  | 528.2894       | 264.6486        |
| 1136.6164      | 13 | P  | 5  | 471.2680       | 236.1379        |
| 1207.6535      | 14 | A  | 4  | 374.2152       | 187.6115        |
| 1264.6750      | 15 | G  | 3  | 303.1781       | 152.0930        |
| 1335.7121      | 16 | A  | 2  | 246.1566       | 123.5822        |
|                | 17 | R  | 1  | 175.1195       | 88.0637         |

N-term:+35.07

X-range:

0 - 0

MassTol: Y-zoom:

0. 1.

MassType:

☐AVG ☒MONO

Axis:

☒1 ☐2

Label:

☒I ☐M ☐-

Ions:

a ☐+ ☐2+ ☐3+

b ☒+ ☐2+ ☐3+

c ☐+ ☐2+ ☐3+

x ☐+ ☐2+ ☐3+

y ☒+ ☒2+ ☐3+

z ☐+ ☐2+ ☐3+

hide H<sub>2</sub>O/NH<sub>3</sub> ☐

zoom 112-122 ☐

GO

ETNLESPLVDTHSKR, MH+ 1895.0238, m/z 474.5114  
L OS G17 P120811 220811-s1.04776.04776.4.dta

scan 4776; 8.3e+000

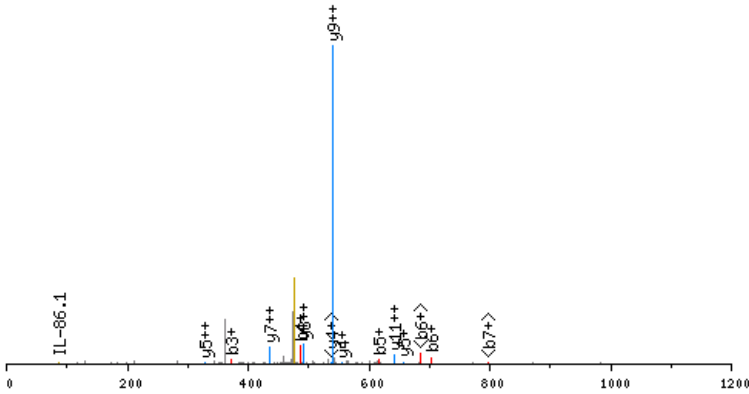

click image to zoom in; click top corners to zoom out

[precursor±]

scan 4773; 474.5 m/z; 4.8e+000

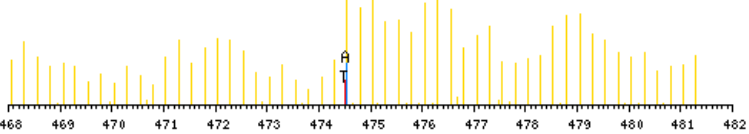

zoomed in precursor plot; T=theoretical m/z, A=acquired m/z

| b <sup>+</sup> | #  | AA | #  | y <sup>+</sup> | y <sup>2+</sup> |
|----------------|----|----|----|----------------|-----------------|
| 158.0817       | 1  | E  | 16 |                |                 |
| 259.1294       | 2  | T  | 15 | 1737.9500      | 869.4789        |
| 373.1723       | 3  | N  | 14 | 1636.9023      | 818.9551        |
| 486.2564       | 4  | L  | 13 | 1522.8594      | 761.9336        |
| 615.2990       | 5  | E  | 12 | 1409.7753      | 705.3916        |
| 702.3310       | 6  | S  | 11 | 1280.7327      | 640.8703        |
| 815.4150       | 7  | L  | 10 | 1193.7007      | 597.3542        |
| 912.4678       | 8  | P  | 9  | 1080.6166      | 540.8122        |
| 1025.5519      | 9  | L  | 8  | 983.5638       | 492.2858        |
| 1124.6203      | 10 | V  | 7  | 870.4798       | 435.7438        |
| 1239.6472      | 11 | D  | 6  | 771.4114       | 386.2096        |
| 1340.6949      | 12 | T  | 5  | 656.3844       | 328.6961        |
| 1477.7538      | 13 | H  | 4  | 555.3367       | 278.1723        |
| 1564.7859      | 14 | S  | 3  | 418.2778       | 209.6428        |
| 1720.9122      | 15 | K  | 2  | 331.2458       | 166.1268        |
|                | 16 | R  | 1  | 175.1195       | 88.0637         |

N-term:+29.04 K(15):+156.13

X-range:

0 - 0

MassTol: Y-zoom:

0. 1.

MassType:

☐ AVG ☒ MONO

Axis:

☒ 1 ☐ 2

Label:

☒ I ☐ M ☐ -

Ions:

a ☐ + ☐ 2+ ☐ 3+

b ☒ + ☐ 2+ ☐ 3+

c ☐ + ☐ 2+ ☐ 3+

x ☐ + ☐ 2+ ☐ 3+

y ☒ + ☒ 2+ ☐ 3+

z ☐ + ☐ 2+ ☐ 3+

hide H<sub>2</sub>O/NH<sub>3</sub> ☐

zoom 112-122 ☐

GO

ETTSSIPEAGEGQIR, MH+ 1608.8293, m/z 536.9479  
H OS G13 P120811 220811-s1.03252.03252.3.dta

scan 3252; 3.4e+000

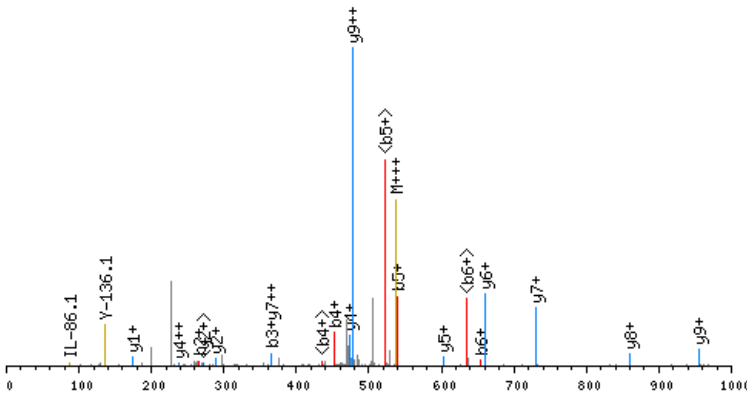

click image to zoom in; click top corners to zoom out [\[precursor±\]](#)

scan 3249; 536.9 m/z; 1.8e+001

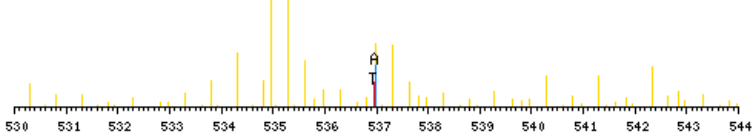

zoomed in precursor plot; T=theoretical m/z, A=acquired m/z

| b <sup>+</sup> | #  | AA | #  | y <sup>+</sup> | y <sup>2+</sup> |
|----------------|----|----|----|----------------|-----------------|
| 164.1135       | 1  | E  | 15 |                |                 |
| 265.1612       | 2  | T  | 14 | 1445.7236      | 723.3657        |
| 366.2089       | 3  | T  | 13 | 1344.6759      | 672.8419        |
| 453.2409       | 4  | S  | 12 | 1243.6283      | 622.3180        |
| 540.2729       | 5  | S  | 11 | 1156.5962      | 578.8020        |
| 653.3570       | 6  | I  | 10 | 1069.5642      | 535.2860        |
| 750.4097       | 7  | P  | 9  | 956.4801       | 478.7440        |
| 879.4523       | 8  | E  | 8  | 859.4274       | 430.2176        |
| 950.4894       | 9  | A  | 7  | 730.3848       | 365.6963        |
| 1007.5109      | 10 | G  | 6  | 659.3477       | 330.1777        |
| 1136.5535      | 11 | E  | 5  | 602.3262       | 301.6670        |
| 1193.5750      | 12 | G  | 4  | 473.2836       | 237.1457        |
| 1321.6335      | 13 | Q  | 3  | 416.2621       | 208.6350        |
| 1434.7176      | 14 | I  | 2  | 288.2036       | 144.6057        |
|                | 15 | R  | 1  | 175.1195       | 88.0637         |

N-term:+35.07

X-range:

0 - 0

MassTol: Y-zoom:

0. 1.

MassType:

☐ AVG ☒ MONO

Axis:

☒ 1 ☐ 2

Label:

☒ I ☐ M ☐ -

Ions:

a ☐ + ☐ 2+ ☐ 3+

b ☒ + ☐ 2+ ☐ 3+

c ☐ + ☐ 2+ ☐ 3+

x ☐ + ☐ 2+ ☐ 3+

y ☒ + ☒ 2+ ☐ 3+

z ☐ + ☐ 2+ ☐ 3+

hide H<sub>2</sub>O/NH<sub>3</sub> ☐

zoom 112-122 ☐

GO

EVAQHLGESTVR, MH+ 1353.7126, m/z 451.9091  
L OS G16 P120811 220811-s1.02364.02364.3.dta

scan 2364; 1.1e+001

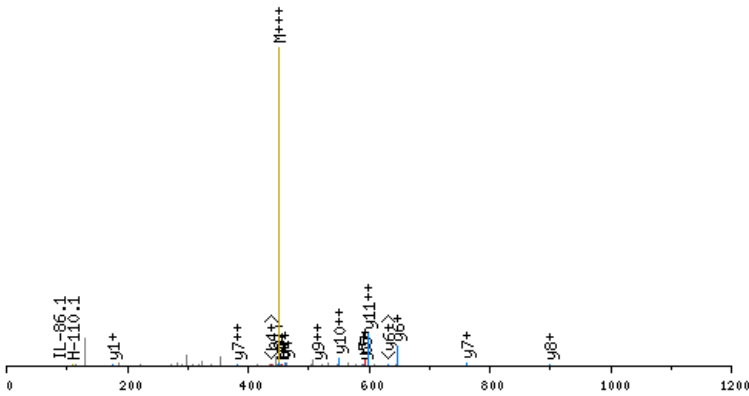

click image to zoom in; click top corners to zoom out

[precursor±]

scan 2363; 451.9 m/z; 5.1e+000

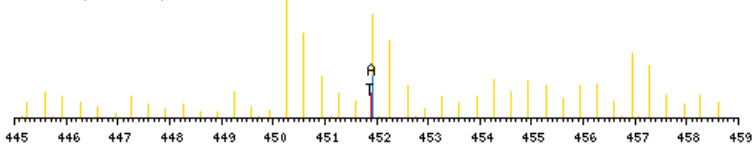

zoomed in precursor plot; T=theoretical m/z, A=acquired m/z

| b <sup>+</sup> | #  | AA | #  | y <sup>+</sup> | y <sup>2+</sup> |
|----------------|----|----|----|----------------|-----------------|
| 158.0817       | 1  | E  | 12 |                |                 |
| 257.1501       | 2  | V  | 11 | 1196.6388      | 598.8233        |
| 328.1872       | 3  | A  | 10 | 1097.5703      | 549.2891        |
| 456.2458       | 4  | Q  | 9  | 1026.5332      | 513.7705        |
| 593.3047       | 5  | H  | 8  | 898.4747       | 449.7412        |
| 706.3888       | 6  | L  | 7  | 761.4157       | 381.2118        |
| 763.4102       | 7  | G  | 6  | 648.3317       | 324.6698        |
| 892.4528       | 8  | E  | 5  | 591.3102       | 296.1590        |
| 979.4849       | 9  | S  | 4  | 462.2676       | 231.6377        |
| 1080.5325      | 10 | T  | 3  | 375.2356       | 188.1217        |
| 1179.6010      | 11 | V  | 2  | 274.1879       | 137.5979        |
|                | 12 | R  | 1  | 175.1195       | 88.0637         |

N-term:+29.04

X-range:

0 - 0

MassTol: Y-zoom:

0. 1.

MassType:

☐AVG ☒MONO

Axis:

☒1 ☐2

Label:

☒I ☐M ☐-

Ions:

a ☐+ ☐2+ ☐3+

b ☒+ ☐2+ ☐3+

c ☐+ ☐2+ ☐3+

x ☐+ ☐2+ ☐3+

y ☒+ ☒2+ ☐3+

z ☐+ ☐2+ ☐3+

hide H<sub>2</sub>O/NH<sub>3</sub> ☐

zoom 112-122 ☐

GO

EVEDASEEAPLR, MH+ 1372.6596, m/z 458.2247  
L OS G13 P120811 220811-s1.02885.02885.3.dta

scan 2885; 7.6e+000

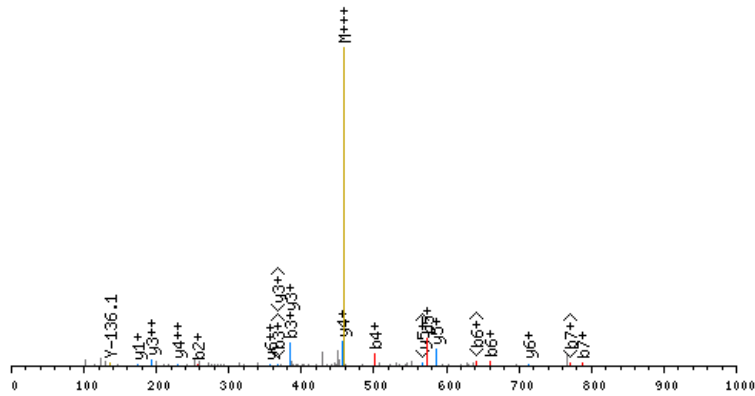

click image to zoom in; click top corners to zoom out

[precursor±]

scan 2884; 458.2 m/z; 8.5e+000

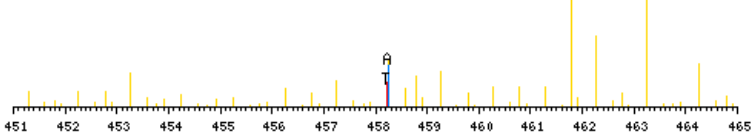

zoomed in precursor plot; T=theoretical m/z, A=acquired m/z

| b <sup>+</sup> | #  | AA | #  | y <sup>+</sup> | y <sup>2+</sup> |
|----------------|----|----|----|----------------|-----------------|
| 158.0817       | 1  | E  | 12 |                |                 |
| 257.1501       | 2  | V  | 11 | 1215.5857      | 608.2968        |
| 386.1927       | 3  | E  | 10 | 1116.5173      | 558.7626        |
| 501.2196       | 4  | D  | 9  | 987.4747       | 494.2413        |
| 572.2568       | 5  | A  | 8  | 872.4478       | 436.7278        |
| 659.2888       | 6  | S  | 7  | 801.4107       | 401.2092        |
| 788.3314       | 7  | E  | 6  | 714.3786       | 357.6932        |
| 917.3740       | 8  | E  | 5  | 585.3360       | 293.1719        |
| 988.4111       | 9  | A  | 4  | 456.2934       | 228.6506        |
| 1085.4638      | 10 | P  | 3  | 385.2563       | 193.1321        |
| 1198.5479      | 11 | L  | 2  | 288.2036       | 144.6057        |
|                | 12 | R  | 1  | 175.1195       | 88.0637         |

N-term:+29.04

N-term: +29.04 K(4): +156.13

X-range:

0 - 0

MassTol: Y-zoom:

0. 1.

MassType:

☐AVG ☒MONO

Axis:

☒1 ☐2

Label:

☒I ☐M ☐-

Ions:

a ☐+ ☐2+ ☐3+

b ☒+ ☐2+ ☐3+

c ☐+ ☐2+ ☐3+

x ☐+ ☐2+ ☐3+

y ☒+ ☒2+ ☐3+

z ☐+ ☐2+ ☐3+

hide H<sub>2</sub>O/NH<sub>3</sub> ☐

zoom 112-122 ☐

GO

EVIDDLNHWHDATKLR, MH+ 2018.0460, m/z 505.2669  
L OS G18 P120811 220811-s1.05343.05343.4.dta

scan 5343; 6.6e+000

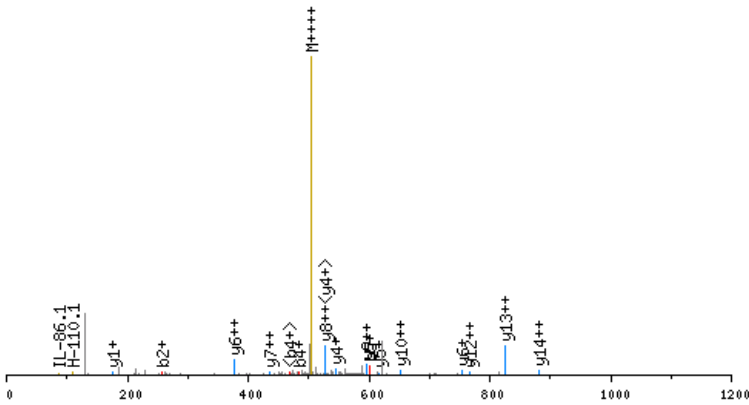

click image to zoom in; click top corners to zoom out [\[precursor±\]](#)

scan 5341; 505.3 m/z; 7.8e+000

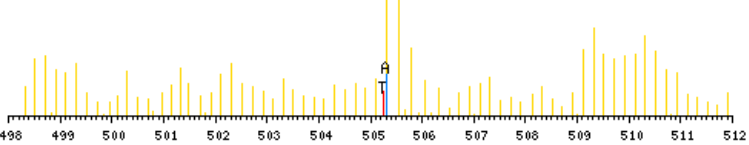

zoomed in precursor plot; T=theoretical m/z, A=acquired m/z

| b <sup>+</sup> | #  | AA | #  | y <sup>+</sup> | y <sup>2+</sup> |
|----------------|----|----|----|----------------|-----------------|
| 158.0817       | 1  | E  | 16 |                |                 |
| 257.1501       | 2  | V  | 15 | 1860.9721      | 930.9900        |
| 370.2342       | 3  | I  | 14 | 1761.9037      | 881.4558        |
| 485.2611       | 4  | D  | 13 | 1648.8196      | 824.9137        |
| 600.2881       | 5  | D  | 12 | 1533.7927      | 767.4002        |
| 713.3721       | 6  | L  | 11 | 1418.7657      | 709.8868        |
| 827.4150       | 7  | N  | 10 | 1305.6817      | 653.3447        |
| 964.4740       | 8  | H  | 9  | 1191.6387      | 596.3233        |
| 1150.5533      | 9  | W  | 8  | 1054.5798      | 527.7938        |
| 1265.5802      | 10 | D  | 7  | 868.5005       | 434.7542        |
| 1402.6391      | 11 | H  | 6  | 753.4736       | 377.2407        |
| 1473.6762      | 12 | A  | 5  | 616.4147       | 308.7112        |
| 1574.7239      | 13 | T  | 4  | 545.3775       | 273.1927        |
| 1730.8502      | 14 | K  | 3  | 444.3299       | 222.6688        |
| 1843.9343      | 15 | L  | 2  | 288.2036       | 144.6057        |
|                | 16 | R  | 1  | 175.1195       | 88.0637         |

N-term:+29.04 K(14):+156.13

X-range:

0 - 0

MassTol: Y-zoom:

0. 1.

MassType:

☐ AVG ☒ MONO

Axis:

☒ 1 ☐ 2

Label:

☒ I ☐ M ☐ -

Ions:

a ☐ + ☐ 2+ ☐ 3+

b ☒ + ☐ 2+ ☐ 3+

c ☐ + ☐ 2+ ☐ 3+

x ☐ + ☐ 2+ ☐ 3+

y ☒ + ☒ 2+ ☐ 3+

z ☐ + ☐ 2+ ☐ 3+

hide H<sub>2</sub>O/NH<sub>3</sub> ☐

zoom 112-122 ☐

GO

EVKCDMEVSCPEGYTCCR, MH+ 2348.0124, m/z 783.3423  
H OS G15 P120811 220811-s1.03324.03324.3.dta

scan 3324; 2.6e+000

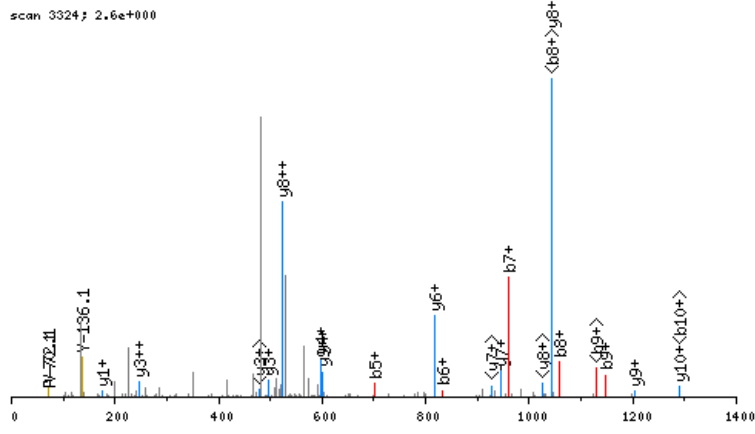

X-range:

0 - 0

MassTol: Y-zoom:

0. 1.

MassType:

☐ AVG ☒ MONO

Axis:

☒ 1 ☐ 2

Label:

☒ I ☐ M ☐ -

Ions:

a ☐ + ☐ 2+ ☐ 3+

b ☒ + ☐ 2+ ☐ 3+

c ☐ + ☐ 2+ ☐ 3+

x ☐ + ☐ 2+ ☐ 3+

y ☒ + ☒ 2+ ☐ 3+

z ☐ + ☐ 2+ ☐ 3+

hide H<sub>2</sub>O/NH<sub>3</sub> ☐

zoom 112-122 ☐

GO

EVKVCSEYLALSK, MH+ 1724.9144, m/z 575.6430  
L OS G15 P120811 220811-s1.04440.04440.3.dta

scan 4440: 4.2e+000

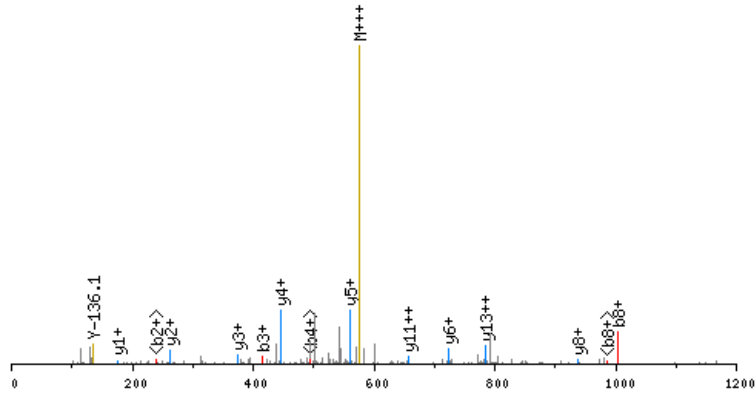

click image to zoom in; click top corners to zoom out [\[precursor±\]](#)

scan 4436: 575.6 m/z; 7.9e+000

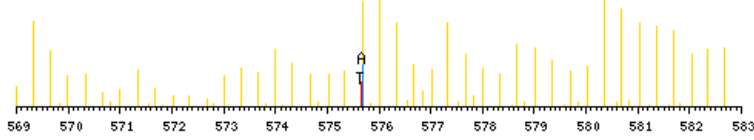

zoomed in precursor plot; T=theoretical m/z, A=acquired m/z

| b <sup>+</sup> | #  | AA | #  | y <sup>+</sup> | y <sup>2+</sup> |
|----------------|----|----|----|----------------|-----------------|
| 158.0817       | 1  | E  | 14 |                |                 |
| 257.1501       | 2  | V  | 13 | 1567.8406      | 784.4242        |
| 413.2764       | 3  | K  | 12 | 1468.7722      | 734.8900        |
| 512.3448       | 4  | V  | 11 | 1312.6459      | 656.8268        |
| 627.3718       | 5  | D  | 10 | 1213.5775      | 607.2926        |
| 787.4024       | 6  | C  | 9  | 1098.5505      | 549.7792        |
| 874.4344       | 7  | S  | 8  | 938.5199       | 469.7639        |
| 1003.4770      | 8  | E  | 7  | 851.4879       | 426.2479        |
| 1166.5403      | 9  | Y  | 6  | 722.4453       | 361.7266        |
| 1279.6244      | 10 | L  | 5  | 559.3820       | 280.1949        |
| 1350.6615      | 11 | A  | 4  | 446.2979       | 223.6529        |
| 1463.7456      | 12 | L  | 3  | 375.2608       | 188.1343        |
| 1550.7776      | 13 | S  | 2  | 262.1767       | 131.5923        |
|                | 14 | K  | 1  | 175.1447       | 88.0763         |

N-term:+29.04 K(3):+156.13  
C(6):+160.03 K(14):+156.13

X-range:

0 - 0

MassTol: Y-zoom:

0. 1.

MassType:

☐ AVG ☒ MONO

Axis:

☒ 1 ☐ 2

Label:

☒ I ☐ M ☐ -

Ions:

a ☐ + ☐ 2+ ☐ 3+

b ☒ + ☐ 2+ ☐ 3+

c ☐ + ☐ 2+ ☐ 3+

x ☐ + ☐ 2+ ☐ 3+

y ☒ + ☒ 2+ ☐ 3+

z ☐ + ☐ 2+ ☐ 3+

hide H<sub>2</sub>O/NH<sub>3</sub> ☐

zoom 112-122 ☐

GO

EVKVCSEYLALSKR, MH+ 1881.0156, m/z 471.0093  
L OS G17 P120811 220811-s1.04670.04670.4.dta

scan 4670; 1.9e+001

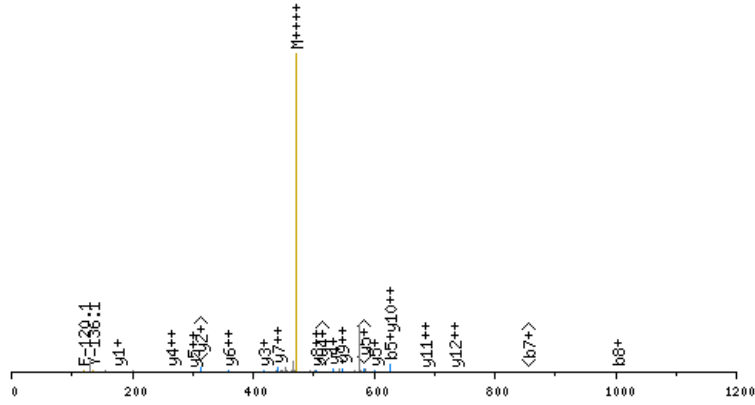

click image to zoom in; click top corners to zoom out [\[precursor±\]](#)

scan 4668; 471.0 m/z; 1.3e+001

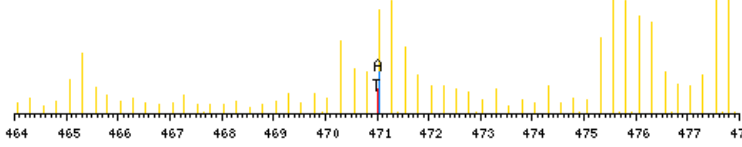

zoomed in precursor plot; T=theoretical m/z, A=acquired m/z

| b <sup>+</sup> | #  | AA | #  | y <sup>+</sup> | y <sup>2+</sup> |
|----------------|----|----|----|----------------|-----------------|
| 158.0817       | 1  | E  | 15 |                |                 |
| 257.1501       | 2  | V  | 14 | 1723.9417      | 862.4748        |
| 413.2764       | 3  | K  | 13 | 1624.8733      | 812.9406        |
| 512.3448       | 4  | V  | 12 | 1468.7470      | 734.8774        |
| 627.3718       | 5  | D  | 11 | 1369.6786      | 685.3432        |
| 787.4024       | 6  | C  | 10 | 1254.6516      | 627.8297        |
| 874.4344       | 7  | S  | 9  | 1094.6210      | 547.8144        |
| 1003.4770      | 8  | E  | 8  | 1007.5890      | 504.2984        |
| 1166.5403      | 9  | Y  | 7  | 878.5464       | 439.7771        |
| 1279.6244      | 10 | L  | 6  | 715.4831       | 358.2454        |
| 1350.6615      | 11 | A  | 5  | 602.3990       | 301.7034        |
| 1463.7456      | 12 | L  | 4  | 531.3619       | 266.1849        |
| 1550.7776      | 13 | S  | 3  | 418.2778       | 209.6428        |
| 1706.9039      | 14 | K  | 2  | 331.2458       | 166.1268        |
|                | 15 | R  | 1  | 175.1195       | 88.0637         |

N-term:+29.04 K(3):+156.13  
C(6):+160.03 K(14):+156.13

X-range:

0 - 0

MassTol: Y-zoom:

0. 1.

MassType:

☐AVG ☒MONO

Axis:

☒1 ☐2

Label:

☒I ☐M ☐-

Ions:

a ☐+ ☐2+ ☐3+

b ☒+ ☐2+ ☐3+

c ☐+ ☐2+ ☐3+

x ☐+ ☐2+ ☐3+

y ☒+ ☒2+ ☐3+

z ☐+ ☐2+ ☐3+

hide H<sub>2</sub>O/NH<sub>3</sub> ☐

zoom 112-122 ☐

GO

EVLDMAENAFDDEYLKCKSR, MH+ 2517.2005, m/z 630.0556  
L OS G16 P120811 220811-s1.05917.05917.4.dta

scan 5917; 1.6e+000

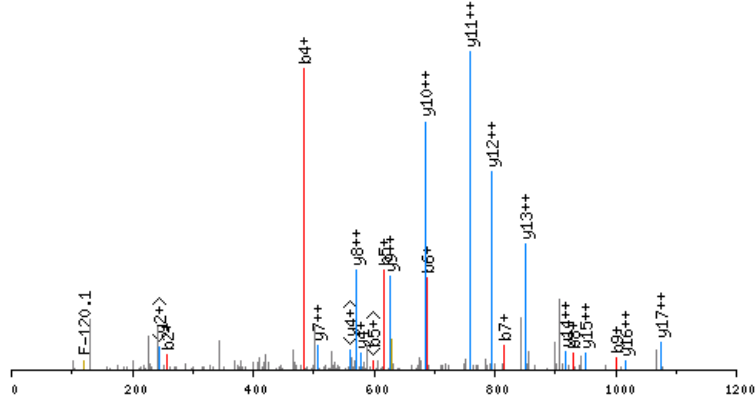

click image to zoom in; click top corners to zoom out [\[precursor±\]](#)

scan 5913; 630.1 m/z; 3.9e+000

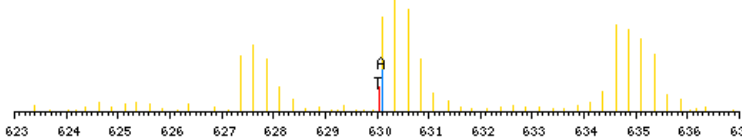

zoomed in precursor plot; T=theoretical m/z, A=acquired m/z

| b <sup>+</sup> | #  | AA | #  | y <sup>+</sup> | y <sup>2+</sup> |
|----------------|----|----|----|----------------|-----------------|
| 158.0817       | 1  | E  | 20 |                |                 |
| 257.1501       | 2  | V  | 19 | 2360.1267      | 1180.5672       |
| 370.2342       | 3  | L  | 18 | 2261.0583      | 1131.0330       |
| 485.2611       | 4  | D  | 17 | 2147.9742      | 1074.4910       |
| 616.3016       | 5  | M  | 16 | 2032.9472      | 1016.9775       |
| 687.3387       | 6  | A  | 15 | 1901.9068      | 951.4573        |
| 816.3813       | 7  | E  | 14 | 1830.8696      | 915.9387        |
| 930.4242       | 8  | N  | 13 | 1701.8271      | 851.4174        |
| 1001.4613      | 9  | A  | 12 | 1587.7841      | 794.3960        |
| 1148.5298      | 10 | F  | 11 | 1516.7470      | 758.8774        |
| 1263.5567      | 11 | D  | 10 | 1369.6786      | 685.3432        |
| 1378.5836      | 12 | D  | 9  | 1254.6517      | 627.8297        |
| 1507.6262      | 13 | E  | 8  | 1139.6247      | 570.3163        |
| 1670.6896      | 14 | Y  | 7  | 1010.5821      | 505.7950        |
| 1783.7736      | 15 | L  | 6  | 847.5188       | 424.2633        |
| 1939.8999      | 16 | K  | 5  | 734.4347       | 367.7213        |
| 2099.9305      | 17 | C  | 4  | 578.3084       | 289.6581        |
| 2256.0568      | 18 | K  | 3  | 418.2778       | 209.6428        |
| 2343.0889      | 19 | S  | 2  | 262.1515       | 131.5797        |
|                | 20 | R  | 1  | 175.1195       | 88.0637         |

N-term: +29.04 K(16): +156.13  
C(17): +160.03 K(18): +156.13

X-range:

0 - 0

MassTol: Y-zoom:

0. 1.

MassType:

☐AVG ☒MONO

Axis:

☒1 ☐2

Label:

☒I ☐M ☐-

Ions:

a ☐+ ☐2+ ☐3+

b ☒+ ☐2+ ☐3+

c ☐+ ☐2+ ☐3+

x ☐+ ☐2+ ☐3+

y ☒+ ☒2+ ☐3+

z ☐+ ☐2+ ☐3+

hide H<sub>2</sub>O/NH<sub>3</sub> ☐

zoom 112-122 ☐

GO

EVQALVAGKPNMTR, MH+ 1569.8787, m/z 523.9644  
L OS G15 P120811 220811-s1.02363.02363.3.dta

scan 2363; 1.4e+001

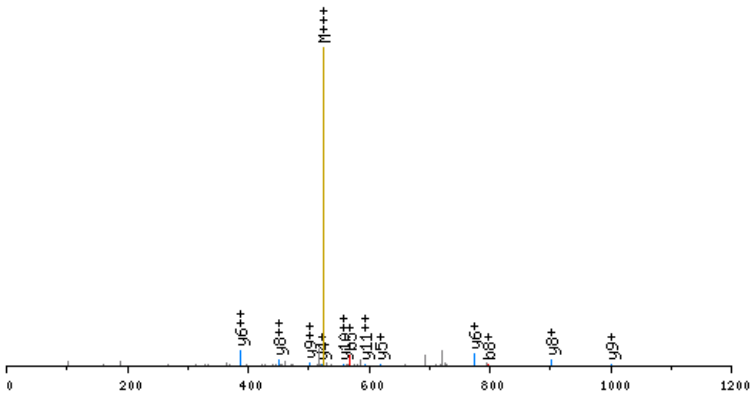

click image to zoom in; click top corners to zoom out

[precursor±]

scan 2361; 524.0 m/z; 7.3e+000

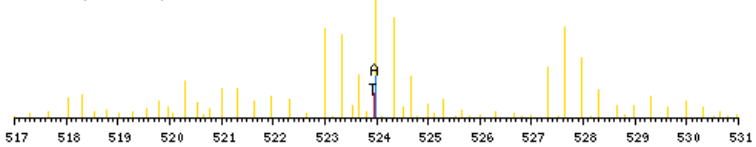

zoomed in precursor plot; T=theoretical m/z, A=acquired m/z

| b <sup>+</sup> | #  | AA | #  | y <sup>+</sup> | y <sup>2+</sup> |
|----------------|----|----|----|----------------|-----------------|
| 158.0817       | 1  | E  | 14 |                |                 |
| 257.1501       | 2  | V  | 13 | 1412.8048      | 706.9063        |
| 385.2087       | 3  | Q  | 12 | 1313.7364      | 657.3721        |
| 456.2458       | 4  | A  | 11 | 1185.6778      | 593.3428        |
| 569.3299       | 5  | L  | 10 | 1114.6407      | 557.8243        |
| 668.3983       | 6  | V  | 9  | 1001.5566      | 501.2822        |
| 739.4354       | 7  | A  | 8  | 902.4882       | 451.7480        |
| 796.4569       | 8  | G  | 7  | 831.4511       | 416.2295        |
| 952.5832       | 9  | K  | 6  | 774.4297       | 387.7187        |
| 1049.6359      | 10 | P  | 5  | 618.3034       | 309.6556        |
| 1163.6788      | 11 | N  | 4  | 521.2506       | 261.1292        |
| 1294.7193      | 12 | M  | 3  | 407.2077       | 204.1077        |
| 1395.7670      | 13 | T  | 2  | 276.1672       | 138.5875        |
|                | 14 | R  | 1  | 175.1195       | 88.0637         |

N-term:+29.04 K(9):+156.13

X-range:

0 - 0

MassTol: Y-zoom:

0. 1.

MassType:

☐AVG ☒MONO

Axis:

☒1 ☐2

Label:

☒I ☐M ☐-

Ions:

a ☐+ ☐2+ ☐3+

b ☒+ ☐2+ ☐3+

c ☐+ ☐2+ ☐3+

x ☐+ ☐2+ ☐3+

y ☒+ ☒2+ ☐3+

z ☐+ ☐2+ ☐3+

hide H<sub>2</sub>O/NH<sub>3</sub> ☐

zoom 112-122 ☐

GO

EVQLQQSGAELVR, MH+ 1490.8391, m/z 497.6179  
H OS G13 P120811 220811-s1.04178.04178.3.dta

scan 4178; 1.6e+000

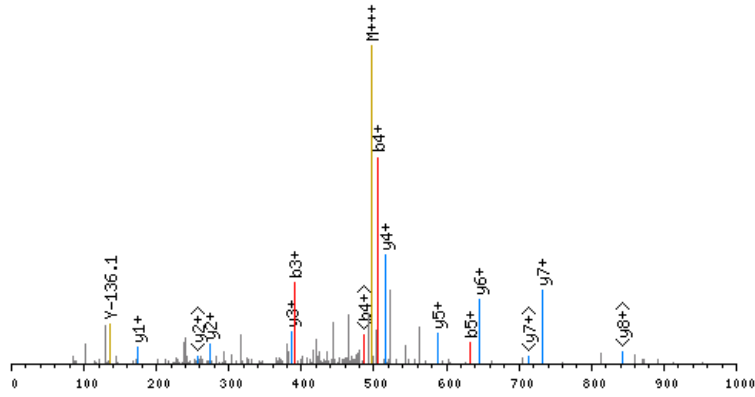

click image to zoom in; click top corners to zoom out

[precursor±]

scan 4174; 497.6 m/z; 1.6e+001

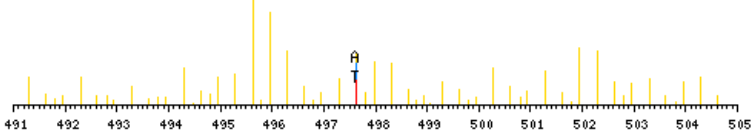

zoomed in precursor plot; T=theoretical m/z, A=acquired m/z

| b <sup>+</sup> | #  | AA | #  | y <sup>+</sup> | y <sup>2+</sup> |
|----------------|----|----|----|----------------|-----------------|
| 164.1135       | 1  | E  | 13 |                |                 |
| 263.1819       | 2  | V  | 12 | 1327.7334      | 664.3706        |
| 391.2405       | 3  | Q  | 11 | 1228.6650      | 614.8364        |
| 504.3245       | 4  | L  | 10 | 1100.6064      | 550.8071        |
| 632.3831       | 5  | Q  | 9  | 987.5223       | 494.2651        |
| 760.4417       | 6  | Q  | 8  | 859.4638       | 430.2358        |
| 847.4737       | 7  | S  | 7  | 731.4052       | 366.2065        |
| 904.4952       | 8  | G  | 6  | 644.3731       | 322.6905        |
| 975.5323       | 9  | A  | 5  | 587.3517       | 294.1798        |
| 1104.5749      | 10 | E  | 4  | 516.3146       | 258.6612        |
| 1217.6590      | 11 | L  | 3  | 387.2720       | 194.1399        |
| 1316.7274      | 12 | V  | 2  | 274.1879       | 137.5979        |
|                | 13 | R  | 1  | 175.1195       | 88.0637         |

N-term:+35.07

X-range:

0 - 0

MassTol: Y-zoom:

0. 1.

MassType:

☐ AVG ☒ MONO

Axis:

☒ 1 ☐ 2

Label:

☒ I ☐ M ☐ -

Ions:

a ☐ + ☐ 2+ ☐ 3+

b ☒ + ☐ 2+ ☐ 3+

c ☐ + ☐ 2+ ☐ 3+

x ☐ + ☐ 2+ ☐ 3+

y ☒ + ☒ 2+ ☐ 3+

z ☐ + ☐ 2+ ☐ 3+

hide H<sub>2</sub>O/NH<sub>3</sub> ☐

zoom 112-122 ☐

GO

EVYAAAAEVLGLILQYITER, MH+ 2256.2703, m/z 564.8230  
H OS G17 P120811 220811-s1.05465.05465.4.dta

scan 5465: 6.1e+000

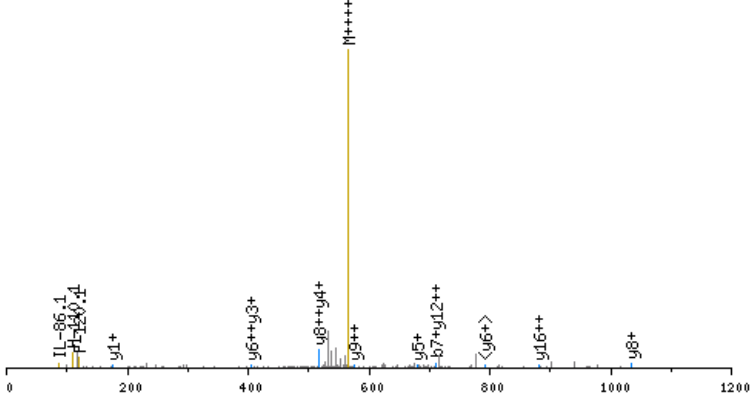

click image to zoom in; click top corners to zoom out [\[precursor±\]](#)

scan 5463: 564.8 m/z; 1.6e+001

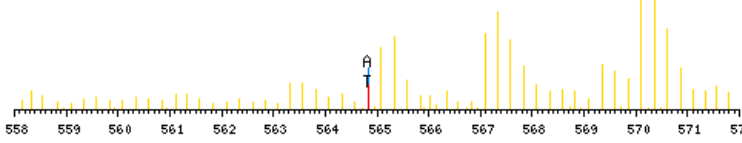

zoomed in precursor plot; T=theoretical m/z, A=acquired m/z

| b <sup>+</sup> | #  | AA | #  | y <sup>+</sup> | y <sup>2+</sup> |
|----------------|----|----|----|----------------|-----------------|
| 164.1135       | 1  | E  | 20 |                |                 |
| 263.1819       | 2  | V  | 19 | 2093.1647      | 1047.0862       |
| 426.2452       | 3  | Y  | 18 | 1994.0963      | 997.5520        |
| 497.2823       | 4  | A  | 17 | 1831.0329      | 916.0204        |
| 568.3195       | 5  | A  | 16 | 1759.9958      | 880.5018        |
| 639.3566       | 6  | A  | 15 | 1688.9587      | 844.9833        |
| 710.3937       | 7  | A  | 14 | 1617.9216      | 809.4647        |
| 839.4363       | 8  | E  | 13 | 1546.8845      | 773.9461        |
| 938.5047       | 9  | V  | 12 | 1417.8419      | 709.4249        |
| 1051.5888      | 10 | L  | 11 | 1318.7735      | 659.8906        |
| 1108.6102      | 11 | G  | 10 | 1205.6894      | 603.3486        |
| 1221.6943      | 12 | L  | 9  | 1148.6679      | 574.8379        |
| 1334.7784      | 13 | I  | 8  | 1035.5839      | 518.2958        |
| 1447.8624      | 14 | L  | 7  | 922.4998       | 461.7538        |
| 1575.9210      | 15 | Q  | 6  | 809.4157       | 405.2118        |
| 1738.9843      | 16 | Y  | 5  | 681.3572       | 341.1825        |
| 1852.0684      | 17 | I  | 4  | 518.2938       | 259.6508        |
| 1953.1161      | 18 | T  | 3  | 405.2098       | 203.1088        |
| 2082.1587      | 19 | E  | 2  | 304.1621       | 152.5850        |
|                | 20 | R  | 1  | 175.1195       | 88.0637         |

N-term:+35.07

X-range:

0 - 0

MassTol: Y-zoom:

0. 1.

MassType:

☐ AVG ☒ MONO

Axis:

☒ 1 ☐ 2

Label:

☒ I ☐ M ☐ -

Ions:

a ☐ + ☐ 2+ ☐ 3+

b ☒ + ☐ 2+ ☐ 3+

c ☐ + ☐ 2+ ☐ 3+

x ☐ + ☐ 2+ ☐ 3+

y ☒ + ☒ 2+ ☐ 3+

z ☐ + ☐ 2+ ☐ 3+

hide H<sub>2</sub>O/NH<sub>3</sub> ☐

zoom 112-122 ☐

GO

EYDEAGPSIVHR, MH+ 1400.6810, m/z 467.5652  
L OS G16 P120811 220811-s1.03076.03076.3.dta

scan 3076; 6.9e+000

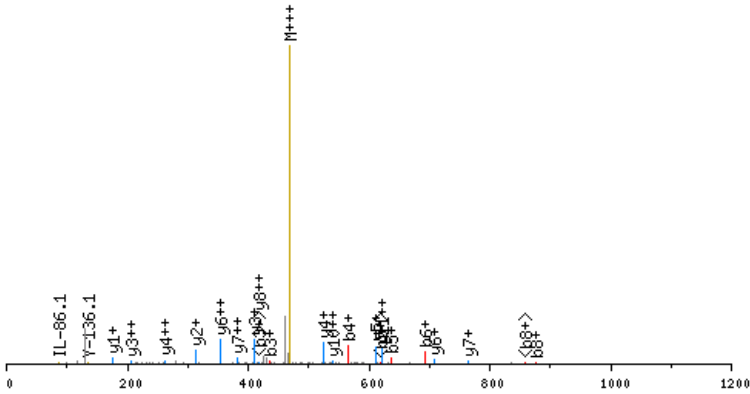

click image to zoom in; click top corners to zoom out [precursor±]

scan 3073; 467.6 m/z; 5.2e+000

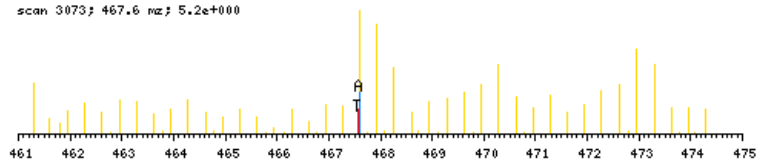

zoomed in precursor plot; T=theoretical m/z, A=acquired m/z

| b <sup>+</sup> | #  | AA | #  | y <sup>+</sup> | y <sup>2+</sup> |
|----------------|----|----|----|----------------|-----------------|
| 158.0817       | 1  | E  | 12 |                |                 |
| 321.1450       | 2  | Y  | 11 | 1243.6071      | 622.3075        |
| 436.1720       | 3  | D  | 10 | 1080.5438      | 540.7758        |
| 565.2146       | 4  | E  | 9  | 965.5169       | 483.2623        |
| 636.2517       | 5  | A  | 8  | 836.4743       | 418.7410        |
| 693.2731       | 6  | G  | 7  | 765.4371       | 383.2225        |
| 790.3259       | 7  | P  | 6  | 708.4157       | 354.7118        |
| 877.3579       | 8  | S  | 5  | 611.3629       | 306.1854        |
| 990.4420       | 9  | I  | 4  | 524.3309       | 262.6694        |
| 1089.5104      | 10 | V  | 3  | 411.2468       | 206.1273        |
| 1226.5693      | 11 | H  | 2  | 312.1784       | 156.5931        |
|                | 12 | R  | 1  | 175.1195       | 88.0637         |

N-term:+29.04

X-range:

0 - 0

MassTol: Y-zoom:

0. 1.

MassType:

☐AVG ☒MONO

Axis:

☒1 ☐2

Label:

☒I ☐M ☐-

Ions:

a ☐+ ☐2+ ☐3+

b ☒+ ☐2+ ☐3+

c ☐+ ☐2+ ☐3+

x ☐+ ☐2+ ☐3+

y ☒+ ☒2+ ☐3+

z ☐+ ☐2+ ☐3+

hide H<sub>2</sub>O/NH<sub>3</sub> ☐

zoom 112-122 ☐

GO

FANDATFEIKKCDLHR, MH+ 2067.1546, m/z 517.5441  
H OS G18 P120811 220811-s1.04132.04132.4.dta

scan 4132; 3.1e+001

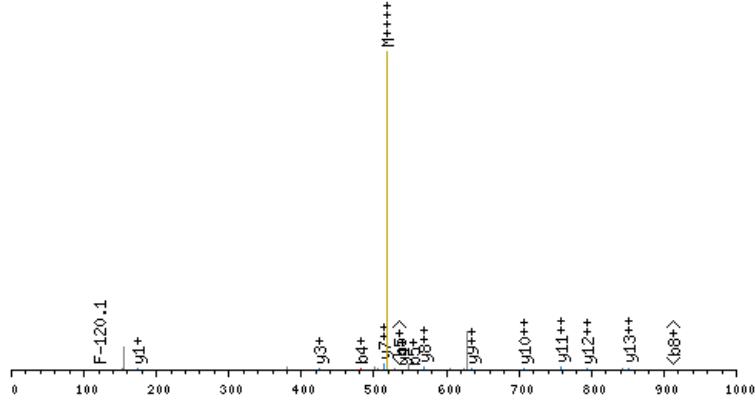

click image to zoom in; click top corners to zoom out

[precursor±]

scan 4131; 517.5 m/z; 5.5e+001

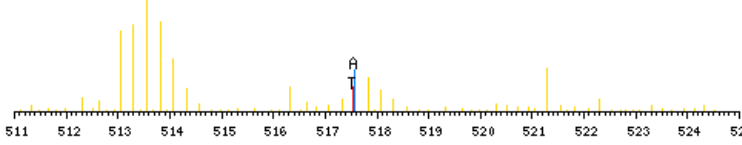

zoomed in precursor plot; T=theoretical m/z, A=acquired m/z

| b <sup>+</sup> | #  | AA | #  | y <sup>+</sup> | y <sup>2+</sup> |
|----------------|----|----|----|----------------|-----------------|
| 182.1393       | 1  | F  | 16 |                |                 |
| 253.1764       | 2  | A  | 15 | 1886.0231      | 943.5154        |
| 367.2194       | 3  | N  | 14 | 1814.9860      | 907.9969        |
| 482.2463       | 4  | D  | 13 | 1700.9430      | 850.9754        |
| 553.2834       | 5  | A  | 12 | 1585.9161      | 793.4620        |
| 654.3311       | 6  | T  | 11 | 1514.8790      | 757.9434        |
| 801.3995       | 7  | F  | 10 | 1413.8313      | 707.4196        |
| 930.4421       | 8  | E  | 9  | 1266.7629      | 633.8854        |
| 1043.5262      | 9  | I  | 8  | 1137.7203      | 569.3641        |
| 1205.6843      | 10 | K  | 7  | 1024.6362      | 512.8220        |
| 1367.8424      | 11 | K  | 6  | 862.4781       | 431.7430        |
| 1527.8730      | 12 | C  | 5  | 700.3200       | 350.6639        |
| 1642.8999      | 13 | D  | 4  | 540.2894       | 270.6486        |
| 1755.9840      | 14 | L  | 3  | 425.2625       | 213.1352        |
| 1893.0429      | 15 | H  | 2  | 312.1784       | 156.5931        |
|                | 16 | R  | 1  | 175.1195       | 88.0637         |

N-term:+35.07 K(10):+162.16

K(11):+162.16 C(12):+160.03

X-range:

0 - 0

MassTol: Y-zoom:

0. 1.

MassType:

☐AVG ☒MONO

Axis:

☒1 ☐2

Label:

☒I ☐M ☐-

Ions:

a ☐+ ☐2+ ☐3+

b ☒+ ☐2+ ☐3+

c ☐+ ☐2+ ☐3+

x ☐+ ☐2+ ☐3+

y ☒+ ☒2+ ☐3+

z ☐+ ☐2+ ☐3+

hide H<sub>2</sub>O/NH<sub>3</sub> ☐

zoom 112-122 ☐

GO

FAPTNDAFKGMTSEER, MH+ 1856.8853, m/z 619.6333  
L OS G15 P120811 220811-s1.04113.04113.3.dta

scan 4113; 4.6e+000

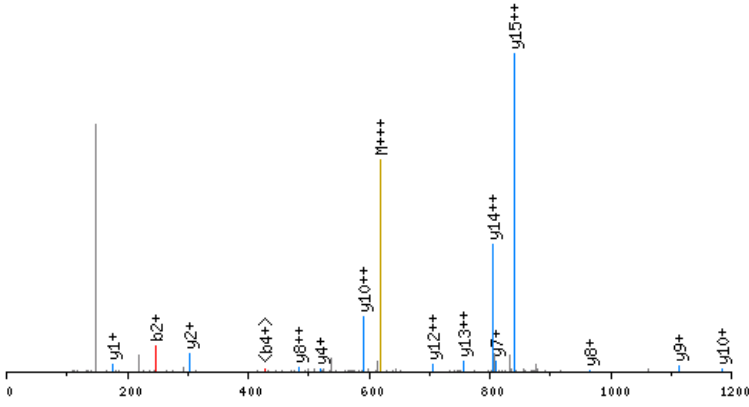

click image to zoom in; click top corners to zoom out

[precursor±]

scan 4111; 619.6 m/z; 1.9e+001

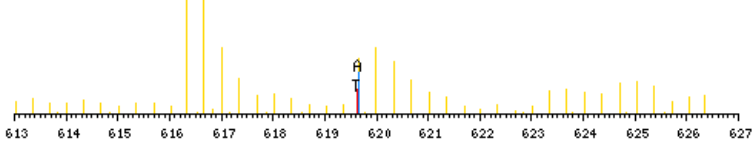

zoomed in precursor plot; T=theoretical m/z, A=acquired m/z

| b <sup>+</sup> | #  | AA | #  | y <sup>+</sup> | y <sup>2+</sup> |
|----------------|----|----|----|----------------|-----------------|
| 176.1075       | 1  | F  | 16 |                |                 |
| 247.1446       | 2  | A  | 15 | 1681.7856      | 841.3967        |
| 344.1974       | 3  | P  | 14 | 1610.7485      | 805.8782        |
| 445.2451       | 4  | T  | 13 | 1513.6957      | 757.3518        |
| 559.2880       | 5  | N  | 12 | 1412.6480      | 706.8279        |
| 674.3149       | 6  | D  | 11 | 1298.6051      | 649.8065        |
| 745.3521       | 7  | A  | 10 | 1183.5782      | 592.2930        |
| 892.4205       | 8  | F  | 9  | 1112.5411      | 556.7744        |
| 1048.5468      | 9  | K  | 8  | 965.4726       | 483.2402        |
| 1105.5682      | 10 | G  | 7  | 809.3463       | 405.1771        |
| 1236.6087      | 11 | M  | 6  | 752.3249       | 376.6664        |
| 1337.6564      | 12 | T  | 5  | 621.2844       | 311.1461        |
| 1424.6884      | 13 | S  | 4  | 520.2367       | 260.6223        |
| 1553.7310      | 14 | E  | 3  | 433.2047       | 217.1063        |
| 1682.7736      | 15 | E  | 2  | 304.1621       | 152.5850        |
|                | 16 | R  | 1  | 175.1195       | 88.0637         |

N-term:+29.04 K(9):+156.13

X-range:

0 - 0

MassTol: Y-zoom:

0. 1.

MassType:

☐AVG ☒MONO

Axis:

☒1 ☐2

Label:

☒I ☐M ☐-

Ions:

a ☐+ ☐2+ ☐3+

b ☒+ ☐2+ ☐3+

c ☐+ ☐2+ ☐3+

x ☐+ ☐2+ ☐3+

y ☒+ ☒2+ ☐3+

z ☐+ ☐2+ ☐3+

hide H<sub>2</sub>O/NH<sub>3</sub> ☐

zoom 112-122 ☐

GO

FAPTNFAFEKLPR, MH+ 1575.8535, m/z 525.9560  
L OS G15 P120811 220811-s1.04495.04495.3.dta

scan 4495; 6.0e+000

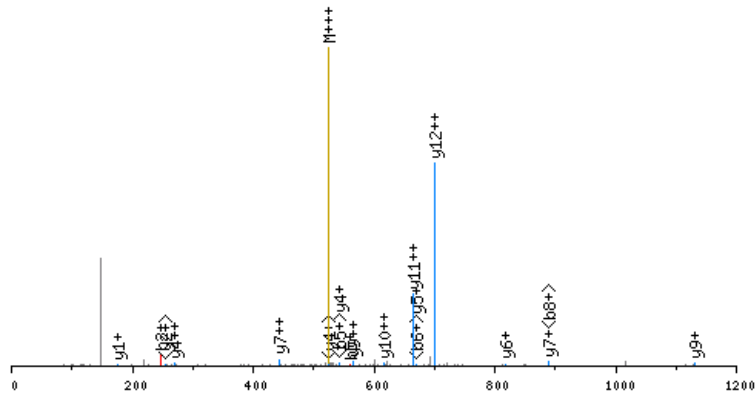

click image to zoom in; click top corners to zoom out [precursor±]

scan 4491; 526.0 m/z; 4.5e+000

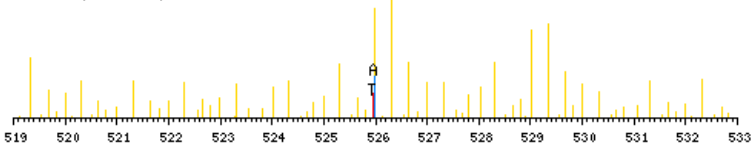

zoomed in precursor plot; T=theoretical m/z, A=acquired m/z

| b <sup>+</sup> | #  | AA | #  | y <sup>+</sup> | y <sup>2+</sup> |
|----------------|----|----|----|----------------|-----------------|
| 176.1075       | 1  | F  | 13 |                |                 |
| 247.1446       | 2  | A  | 12 | 1400.7538      | 700.8808        |
| 344.1974       | 3  | P  | 11 | 1329.7167      | 665.3623        |
| 445.2451       | 4  | T  | 10 | 1232.6639      | 616.8359        |
| 559.2880       | 5  | N  | 9  | 1131.6163      | 566.3120        |
| 688.3306       | 6  | E  | 8  | 1017.5733      | 509.2906        |
| 759.3677       | 7  | A  | 7  | 888.5307       | 444.7693        |
| 906.4361       | 8  | F  | 6  | 817.4936       | 409.2507        |
| 1035.4787      | 9  | E  | 5  | 670.4252       | 335.7165        |
| 1191.6050      | 10 | K  | 4  | 541.3826       | 271.1952        |
| 1304.6891      | 11 | L  | 3  | 385.2563       | 193.1321        |
| 1401.7418      | 12 | P  | 2  | 272.1723       | 136.5900        |
|                | 13 | R  | 1  | 175.1195       | 88.0637         |

N-term:+29.04 K(10):+156.13

X-range:

0 - 0

MassTol: Y-zoom:

0. 1.

MassType:

☐AVG ☒MONO

Axis:

☒1 ☐2

Label:

☒I ☐M ☐-

Ions:

a ☐+ ☐2+ ☐3+

b ☒+ ☐2+ ☐3+

c ☐+ ☐2+ ☐3+

x ☐+ ☐2+ ☐3+

y ☒+ ☒2+ ☐3+

z ☐+ ☐2+ ☐3+

hide H<sub>2</sub>O/NH<sub>3</sub> ☐

zoom 112-122 ☐

GO

FAQTYGLTGSQDR, MH+ 1471.7181, m/z 491.2442  
L OS G13 P120811 220811-s1.03538.03538.3.dta

scan 3538; 2.2e+000

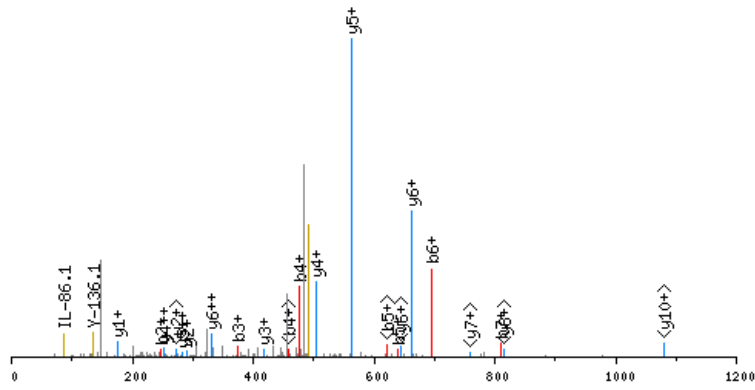

click image to zoom in; click top corners to zoom out [\[precursor±\]](#)

scan 3534; 491.2 m/z; 8.6e+000

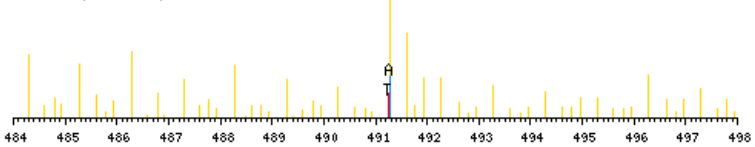

zoomed in precursor plot; T=theoretical m/z, A=acquired m/z

| b <sup>+</sup> | #  | AA | #  | y <sup>+</sup> | y <sup>2+</sup> |
|----------------|----|----|----|----------------|-----------------|
| 176.1075       | 1  | F  | 13 |                |                 |
| 247.1446       | 2  | A  | 12 | 1296.6184      | 648.8131        |
| 375.2032       | 3  | Q  | 11 | 1225.5813      | 613.2946        |
| 476.2509       | 4  | T  | 10 | 1097.5227      | 549.2653        |
| 639.3142       | 5  | Y  | 9  | 996.4750       | 498.7414        |
| 696.3357       | 6  | G  | 8  | 833.4117       | 417.2098        |
| 809.4197       | 7  | L  | 7  | 776.3903       | 388.6990        |
| 910.4674       | 8  | T  | 6  | 663.3062       | 332.1570        |
| 967.4889       | 9  | G  | 5  | 562.2585       | 281.6332        |
| 1054.5209      | 10 | S  | 4  | 505.2370       | 253.1224        |
| 1182.5795      | 11 | Q  | 3  | 418.2050       | 209.6064        |
| 1297.6064      | 12 | D  | 2  | 290.1464       | 145.5771        |
|                | 13 | R  | 1  | 175.1195       | 88.0637         |

N-term:+29.04

X-range:

0 - 0

MassTol: Y-zoom:

0. 1.

MassType:

☐AVG ☒MONO

Axis:

☒1 ☐2

Label:

☒I ☐M ☐-

Ions:

a ☐+ ☐2+ ☐3+

b ☒+ ☐2+ ☐3+

c ☐+ ☐2+ ☐3+

x ☐+ ☐2+ ☐3+

y ☒+ ☒2+ ☐3+

z ☐+ ☐2+ ☐3+

hide H<sub>2</sub>O/NH<sub>3</sub> ☐

zoom 112-122 ☐

GO

FDDYMKEVGVGFATR, MH+ 1790.8787, m/z 597.6311  
L OS G15 P120811 220811-s1.05458.05458.3.dta

scan 5458; 6.1e+000

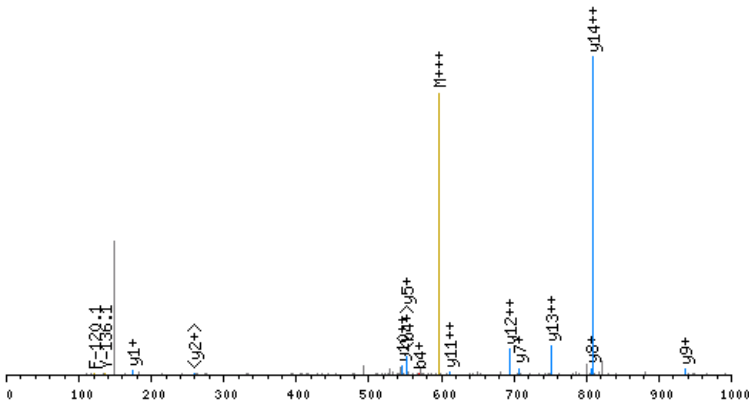

click image to zoom in; click top corners to zoom out

[precursor±]

scan 5456; 597.6 m/z; 6.6e+000

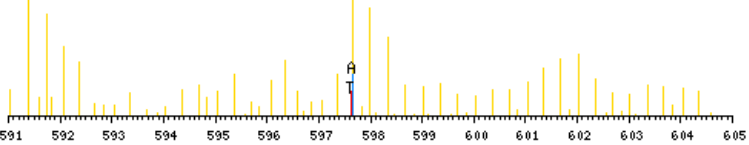

zoomed in precursor plot; T=theoretical m/z, A=acquired m/z

| b <sup>+</sup> | #  | AA | #  | y <sup>+</sup> | y <sup>2+</sup> |
|----------------|----|----|----|----------------|-----------------|
| 176.1075       | 1  | F  | 15 |                |                 |
| 291.1345       | 2  | D  | 14 | 1615.7791      | 808.3934        |
| 406.1614       | 3  | D  | 13 | 1500.7521      | 750.8800        |
| 569.2247       | 4  | Y  | 12 | 1385.7252      | 693.3665        |
| 700.2652       | 5  | M  | 11 | 1222.6618      | 611.8348        |
| 856.3915       | 6  | K  | 10 | 1091.6214      | 546.3146        |
| 985.4341       | 7  | E  | 9  | 935.4951       | 468.2514        |
| 1084.5025      | 8  | V  | 8  | 806.4525       | 403.7301        |
| 1141.5240      | 9  | G  | 7  | 707.3840       | 354.1959        |
| 1240.5924      | 10 | V  | 6  | 650.3626       | 325.6852        |
| 1297.6139      | 11 | G  | 5  | 551.2942       | 276.1510        |
| 1444.6823      | 12 | F  | 4  | 494.2727       | 247.6403        |
| 1515.7194      | 13 | A  | 3  | 347.2043       | 174.1061        |
| 1616.7671      | 14 | T  | 2  | 276.1672       | 138.5875        |
|                | 15 | R  | 1  | 175.1195       | 88.0637         |

N-term:+29.04 K(6):+156.13

X-range:

0 - 0

MassTol: Y-zoom:

0. 1.

MassType:

☐AVG ☒MONO

Axis:

☒1 ☐2

Label:

☒I ☐M ☐-

Ions:

a ☐+ ☐2+ ☐3+

b ☒+ ☐2+ ☐3+

c ☐+ ☐2+ ☐3+

x ☐+ ☐2+ ☐3+

y ☒+ ☒2+ ☐3+

z ☐+ ☐2+ ☐3+

hide H<sub>2</sub>O/NH<sub>3</sub> ☐

zoom 112-122 ☐

GO

FDELDSIAKAR, MH+ 1320.7164, m/z 440.9103  
L OS G16 P120811 220811-s1.04451.04451.3.dta

scan 4451; 2.2e+001

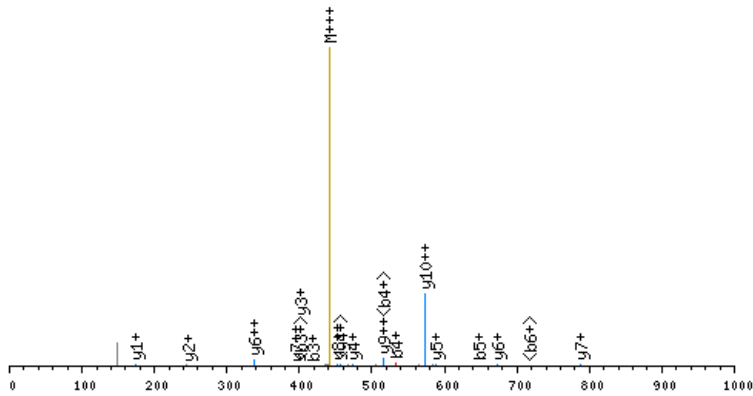

click image to zoom in; click top corners to zoom out

[precursor±]

scan 4448; 440.9 m/z; 1.1e+001

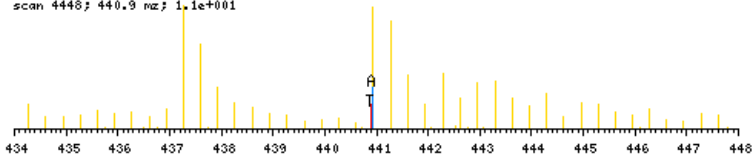

zoomed in precursor plot; T=theoretical m/z, A=acquired m/z

| b <sup>+</sup> | #  | AA | #  | y <sup>+</sup> | y <sup>2+</sup> |
|----------------|----|----|----|----------------|-----------------|
| 176.1075       | 1  | F  | 11 |                |                 |
| 291.1345       | 2  | D  | 10 | 1145.6167      | 573.3122        |
| 420.1771       | 3  | E  | 9  | 1030.5897      | 515.7988        |
| 533.2611       | 4  | L  | 8  | 901.5471       | 451.2775        |
| 648.2881       | 5  | D  | 7  | 788.4631       | 394.7354        |
| 735.3201       | 6  | S  | 6  | 673.4361       | 337.2220        |
| 848.4041       | 7  | I  | 5  | 586.4041       | 293.7060        |
| 919.4413       | 8  | A  | 4  | 473.3200       | 237.1639        |
| 1075.5676      | 9  | K  | 3  | 402.2829       | 201.6454        |
| 1146.6047      | 10 | A  | 2  | 246.1566       | 123.5822        |
|                | 11 | R  | 1  | 175.1195       | 88.0637         |

N-term:+29.04 K(9):+156.13

X-range:

0 - 0

MassTol: Y-zoom:

0. 1.

MassType:

☐AVG ☒MONO

Axis:

☒1 ☐2

Label:

☒I ☐M ☐-

Ions:

a ☐+ ☐2+ ☐3+

b ☒+ ☐2+ ☐3+

c ☐+ ☐2+ ☐3+

x ☐+ ☐2+ ☐3+

y ☒+ ☒2+ ☐3+

z ☐+ ☐2+ ☐3+

hide H<sub>2</sub>O/NH<sub>3</sub> ☐

zoom 112-122 ☐

GO

FDFAGEEVR, MH+ 1103.5585, m/z 552.2829  
H OS G14 P120811 220811-s1.04805.04805.2.dta

scan 4805; 5.8e+000

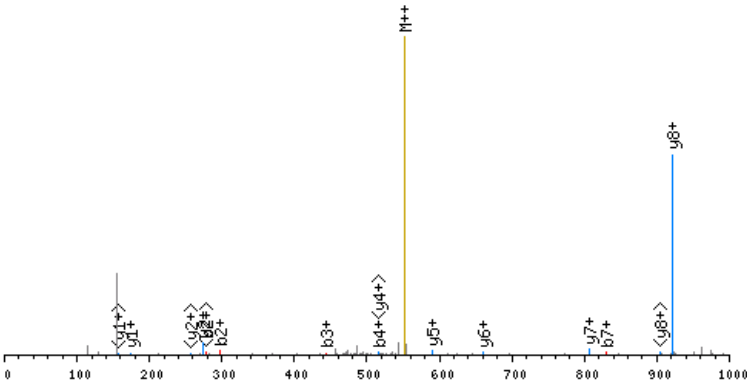

click image to zoom in; click top corners to zoom out

[precursor±]

scan 4801; 552.3 m/z; 4.2e+000

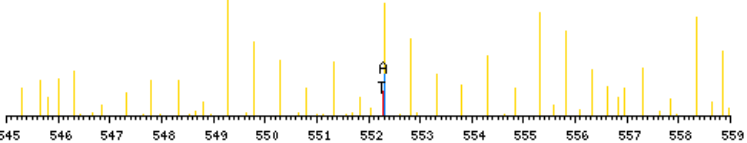

zoomed in precursor plot; T=theoretical m/z, A=acquired m/z

| b <sup>+</sup> | # | AA | # | y <sup>+</sup> | y <sup>2+</sup> |
|----------------|---|----|---|----------------|-----------------|
| 182.1393       | 1 | F  | 9 |                |                 |
| 297.1663       | 2 | D  | 8 | 922.4270       | 461.7174        |
| 444.2347       | 3 | F  | 7 | 807.4001       | 404.2040        |
| 515.2718       | 4 | A  | 6 | 660.3317       | 330.6698        |
| 572.2932       | 5 | G  | 5 | 589.2946       | 295.1512        |
| 701.3358       | 6 | E  | 4 | 532.2731       | 266.6405        |
| 830.3784       | 7 | E  | 3 | 403.2305       | 202.1192        |
| 929.4468       | 8 | V  | 2 | 274.1879       | 137.5979        |
|                | 9 | R  | 1 | 175.1195       | 88.0637         |

N-term:+35.07

X-range:

0 - 0

MassTol: Y-zoom:

0. 1.

MassType:

☐AVG ☒MONO

Axis:

☒1 ☐2

Label:

☒I ☐M ☐-

Ions:

a ☐+ ☐2+ ☐3+

b ☒+ ☐2+ ☐3+

c ☐+ ☐2+ ☐3+

x ☐+ ☐2+ ☐3+

y ☒+ ☒2+ ☐3+

z ☐+ ☐2+ ☐3+

hide H<sub>2</sub>O/NH<sub>3</sub> ☐

zoom 112-122 ☐

GO

FDITADDEPLGR, MH+ 1382.7016, m/z 461.5720  
H OS G13 P120811 220811-s1.05420.05420.3.dta

scan 5420; 2.3e+000

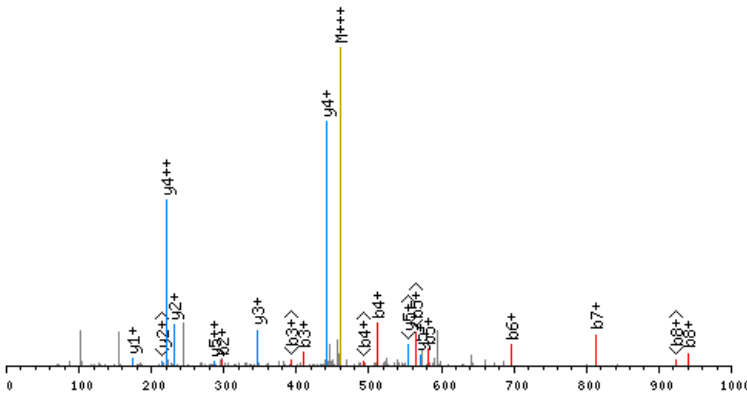

click image to zoom in; click top corners to zoom out [precursor±]

scan 5419; 461.6 m/z; 2.3e+001

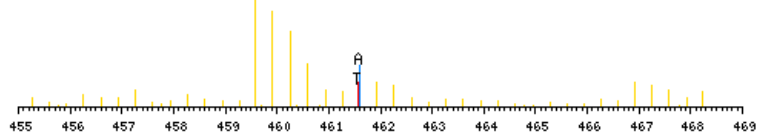

zoomed in precursor plot; T=theoretical m/z, A=acquired m/z

| b <sup>+</sup> | #  | AA | #  | y <sup>+</sup> | y <sup>2+</sup> |
|----------------|----|----|----|----------------|-----------------|
| 182.1393       | 1  | F  | 12 |                |                 |
| 297.1663       | 2  | D  | 11 | 1201.5701      | 601.2889        |
| 410.2503       | 3  | I  | 10 | 1086.5431      | 543.7755        |
| 511.2980       | 4  | T  | 9  | 973.4591       | 487.2334        |
| 582.3351       | 5  | A  | 8  | 872.4114       | 436.7096        |
| 697.3621       | 6  | D  | 7  | 801.3743       | 401.1910        |
| 812.3890       | 7  | D  | 6  | 686.3473       | 343.6776        |
| 941.4316       | 8  | E  | 5  | 571.3204       | 286.1641        |
| 1038.4844      | 9  | P  | 4  | 442.2778       | 221.6428        |
| 1151.5684      | 10 | L  | 3  | 345.2250       | 173.1164        |
| 1208.5899      | 11 | G  | 2  | 232.1410       | 116.5744        |
|                | 12 | R  | 1  | 175.1195       | 88.0637         |

N-term:+35.07

zoomed in precursor plot; T=theoretical m/z, A=acquired m/z

X-range:

0 - 0

MassTol: Y-zoom:

0. 1.

MassType:

☐ AVG ☒ MONO

Axis:

☒ 1 ☐ 2

Label:

☒ I ☐ M ☐ -

Ions:

a ☐ + ☐ 2+ ☐ 3+

b ☒ + ☐ 2+ ☐ 3+

c ☐ + ☐ 2+ ☐ 3+

x ☐ + ☐ 2+ ☐ 3+

y ☒ + ☒ 2+ ☐ 3+

z ☐ + ☐ 2+ ☐ 3+

hide H<sub>2</sub>O/NH<sub>3</sub> ☐

zoom 112-122 ☐

GO

FDKPVSPDLLTAAGMAR, MH+ 1729.9675, m/z 577.3274  
L OS G15 P120811 220811-s1.05255.05255.3.dta

scan 5255; 1.5e+000

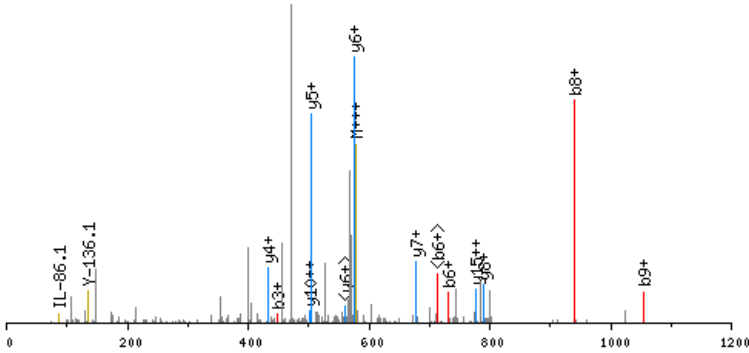

click image to zoom in; click top corners to zoom out

[precursor±]

scan 5251; 577.3 m/z; 1.4e+001

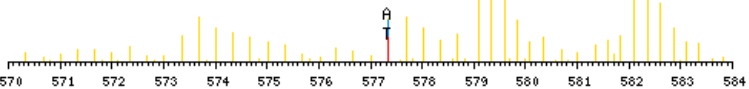

zoomed in precursor plot; T=theoretical m/z, A=acquired m/z

| b <sup>+</sup> | #  | AA | #  | y <sup>+</sup> | y <sup>2+</sup> |
|----------------|----|----|----|----------------|-----------------|
| 176.1075       | 1  | F  | 16 |                |                 |
| 291.1345       | 2  | D  | 15 | 1554.8678      | 777.9378        |
| 447.2608       | 3  | K  | 14 | 1439.8409      | 720.4243        |
| 544.3135       | 4  | P  | 13 | 1283.7146      | 642.3612        |
| 643.3819       | 5  | V  | 12 | 1186.6618      | 593.8348        |
| 730.4140       | 6  | S  | 11 | 1087.5934      | 544.3006        |
| 827.4667       | 7  | P  | 10 | 1000.5614      | 500.7846        |
| 940.5508       | 8  | L  | 9  | 903.5086       | 452.2582        |
| 1053.6349      | 9  | L  | 8  | 790.4245       | 395.7162        |
| 1154.6825      | 10 | T  | 7  | 677.3405       | 339.1741        |
| 1225.7196      | 11 | A  | 6  | 576.2928       | 288.6503        |
| 1296.7568      | 12 | A  | 5  | 505.2557       | 253.1318        |
| 1353.7782      | 13 | G  | 4  | 434.2186       | 217.6132        |
| 1484.8187      | 14 | M  | 3  | 377.1971       | 189.1025        |
| 1555.8558      | 15 | A  | 2  | 246.1566       | 123.5822        |
|                | 16 | R  | 1  | 175.1195       | 88.0637         |

N-term:+29.04 K(3):+156.13

N-term: +29.04

X-range:

0 - 0

MassTol: Y-zoom:

0. 1.

MassType:

☐AVG ☒MONO

Axis:

☒1 ☐2

Label:

☒I ☐M ☐-

Ions:

a ☐+ ☐2+ ☐3+

b ☒+ ☐2+ ☐3+

c ☐+ ☐2+ ☐3+

x ☐+ ☐2+ ☐3+

y ☒+ ☒2+ ☐3+

z ☐+ ☐2+ ☐3+

hide H<sub>2</sub>O/NH<sub>3</sub> ☐

zoom 112-122 ☐

GO

FEAKVQAINVSSR, MH+ 1504.8488, m/z 502.2878  
L OS G16 P120811 220811-s1.03880.03880.3.dta

scan 3880; 2.2e+001

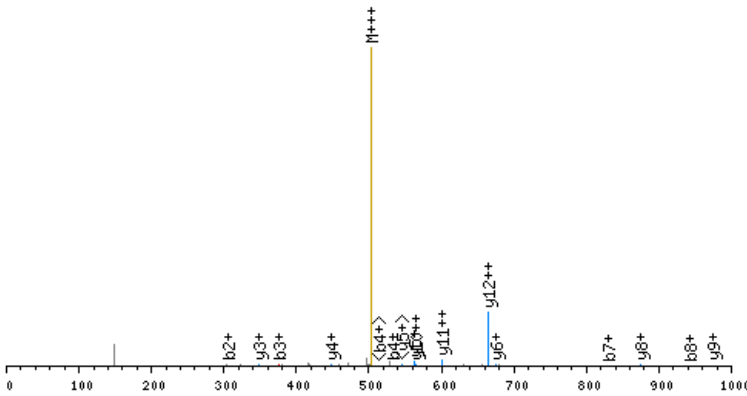

click image to zoom in; click top corners to zoom out [\[precursor±\]](#)

scan 3878; 502.3 m/z; 7.0e+000

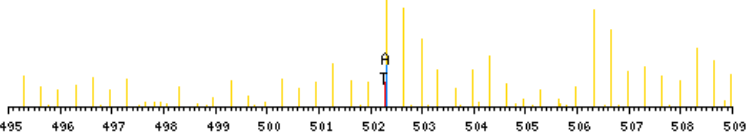

zoomed in precursor plot; T=theoretical m/z, A=acquired m/z

| b <sup>+</sup> | #  | AA | #  | y <sup>+</sup> | y <sup>2+</sup> |
|----------------|----|----|----|----------------|-----------------|
| 176.1075       | 1  | F  | 13 |                |                 |
| 305.1501       | 2  | E  | 12 | 1329.7491      | 665.3785        |
| 376.1872       | 3  | A  | 11 | 1200.7065      | 600.8572        |
| 532.3135       | 4  | K  | 10 | 1129.6694      | 565.3386        |
| 631.3819       | 5  | V  | 9  | 973.5431       | 487.2754        |
| 759.4405       | 6  | Q  | 8  | 874.4747       | 437.7412        |
| 830.4776       | 7  | A  | 7  | 746.4161       | 373.7120        |
| 943.5617       | 8  | I  | 6  | 675.3790       | 338.1934        |
| 1057.6046      | 9  | N  | 5  | 562.2949       | 281.6514        |
| 1156.6730      | 10 | V  | 4  | 448.2520       | 224.6299        |
| 1243.7051      | 11 | S  | 3  | 349.1836       | 175.0957        |
| 1330.7371      | 12 | S  | 2  | 262.1515       | 131.5797        |
|                | 13 | R  | 1  | 175.1195       | 88.0637         |

N-term:+29.04 K(4):+156.13

X-range:

0 - 0

MassTol: Y-zoom:

0. 1.

MassType:

☐ AVG ☒ MONO

Axis:

☒ 1 ☐ 2

Label:

☒ I ☐ M ☐ -

Ions:

a ☐ + ☐ 2+ ☐ 3+

b ☒ + ☐ 2+ ☐ 3+

c ☐ + ☐ 2+ ☐ 3+

x ☐ + ☐ 2+ ☐ 3+

y ☒ + ☒ 2+ ☐ 3+

z ☐ + ☐ 2+ ☐ 3+

hide H<sub>2</sub>O/NH<sub>3</sub> ☐

zoom 112-122 ☐

GO

FEDVAVLFTR, MH+ 1224.6628, m/z 612.8351  
L OS G14 P120811 220811-s1.05210.05210.2.dta

scan 5210; 1.7e+001

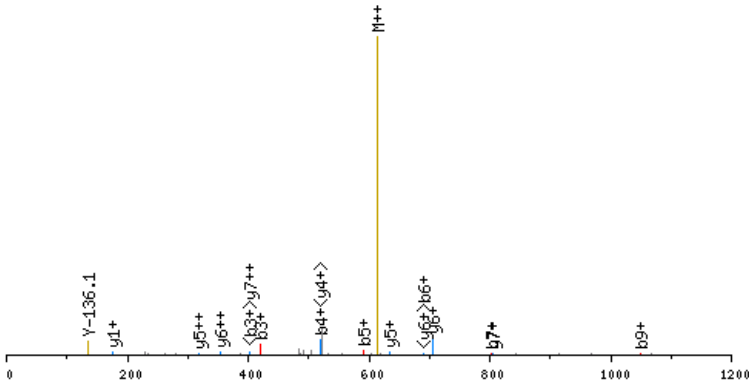

click image to zoom in; click top corners to zoom out

[precursor±]

scan 5206; 612.8 m/z; 7.0e+000

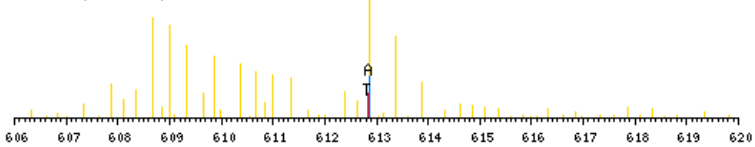

zoomed in precursor plot; T=theoretical m/z, A=acquired m/z

| b <sup>+</sup> | #  | AA | #  | y <sup>+</sup> | y <sup>2+</sup> |
|----------------|----|----|----|----------------|-----------------|
| 176.1075       | 1  | F  | 10 |                |                 |
| 305.1501       | 2  | E  | 9  | 1049.5631      | 525.2855        |
| 420.1771       | 3  | D  | 8  | 920.5205       | 460.7642        |
| 519.2455       | 4  | V  | 7  | 805.4936       | 403.2507        |
| 590.2826       | 5  | A  | 6  | 706.4252       | 353.7165        |
| 689.3510       | 6  | V  | 5  | 635.3881       | 318.1979        |
| 802.4351       | 7  | L  | 4  | 536.3197       | 268.6637        |
| 949.5035       | 8  | F  | 3  | 423.2356       | 212.1217        |
| 1050.5511      | 9  | T  | 2  | 276.1672       | 138.5875        |
|                | 10 | R  | 1  | 175.1195       | 88.0637         |

N-term:+29.04

X-range:

0 - 0

MassTol: Y-zoom:

0. 1.

MassType:

☐ AVG ☒ MONO

Axis:

☒ 1 ☐ 2

Label:

☒ I ☐ M ☐ -

Ions:

a ☐ + ☐ 2+ ☐ 3+

b ☒ + ☐ 2+ ☐ 3+

c ☐ + ☐ 2+ ☐ 3+

x ☐ + ☐ 2+ ☐ 3+

y ☒ + ☒ 2+ ☐ 3+

z ☐ + ☐ 2+ ☐ 3+

hide H<sub>2</sub>O/NH<sub>3</sub> ☐

zoom 112-122 ☐

GO

FEKYGKIETIEVMEDR, MH+ 2089.1740, m/z 523.0490  
H OS G17 P120811 220811-s1.05062.05062.4.dta

scan 5062; 2.2e+000

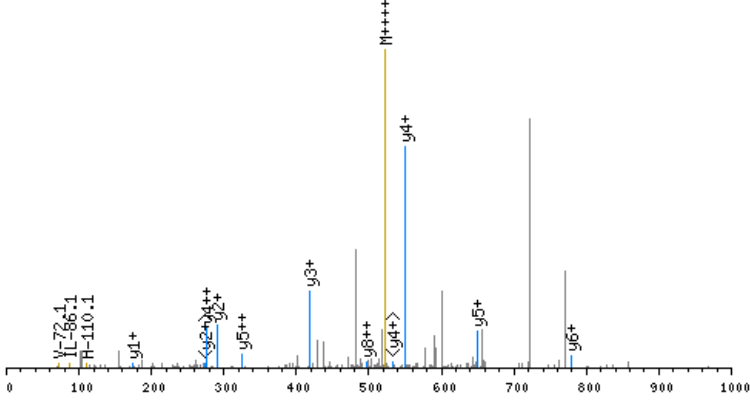

click image to zoom in; click top corners to zoom out

[precursor±]

scan 5058; 523.0 m/z; 1.2e+001

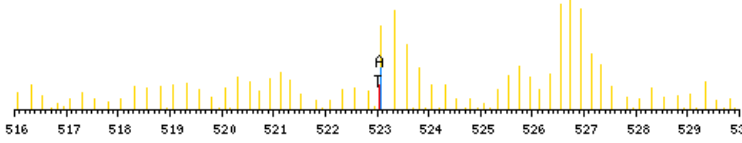

zoomed in precursor plot; T=theoretical m/z, A=acquired m/z

| b <sup>+</sup> | #  | AA | #  | y <sup>+</sup> | y <sup>2+</sup> |
|----------------|----|----|----|----------------|-----------------|
| 182.1393       | 1  | F  | 16 |                |                 |
| 311.1819       | 2  | E  | 15 | 1908.0425      | 954.5252        |
| 473.3400       | 3  | K  | 14 | 1778.9999      | 890.0039        |
| 636.4033       | 4  | Y  | 13 | 1616.8418      | 808.9248        |
| 693.4248       | 5  | G  | 12 | 1453.7785      | 727.3932        |
| 855.5829       | 6  | K  | 11 | 1396.7570      | 698.8824        |
| 968.6670       | 7  | I  | 10 | 1234.5989      | 617.8034        |
| 1097.7096      | 8  | E  | 9  | 1121.5149      | 561.2613        |
| 1198.7572      | 9  | T  | 8  | 992.4723       | 496.7400        |
| 1311.8413      | 10 | I  | 7  | 891.4246       | 446.2162        |
| 1440.8839      | 11 | E  | 6  | 778.3405       | 389.6742        |
| 1539.9523      | 12 | V  | 5  | 649.2979       | 325.1529        |
| 1670.9928      | 13 | M  | 4  | 550.2295       | 275.6187        |
| 1800.0354      | 14 | E  | 3  | 419.1890       | 210.0984        |
| 1915.0623      | 15 | D  | 2  | 290.1464       | 145.5771        |
|                | 16 | R  | 1  | 175.1195       | 88.0637         |

N-term:+35.07 K(3):+162.16  
K(6):+162.16

X-range:

0 - 0

MassTol: Y-zoom:

0. 1.

MassType:

☐ AVG ☒ MONO

Axis:

☒ 1 ☐ 2

Label:

☒ I ☐ M ☐ -

Ions:

a ☐ + ☐ 2+ ☐ 3+

b ☒ + ☐ 2+ ☐ 3+

c ☐ + ☐ 2+ ☐ 3+

x ☐ + ☐ 2+ ☐ 3+

y ☒ + ☒ 2+ ☐ 3+

z ☐ + ☐ 2+ ☐ 3+

hide H<sub>2</sub>O/NH<sub>3</sub> ☐

zoom 112-122 ☐

GO

FELKHLSSGDLLR, MH+ 1570.8957, m/z 393.4794  
L OS G17 P120811 220811-s1.05586.05586.4.dta

scan 5586; 3.2e+000

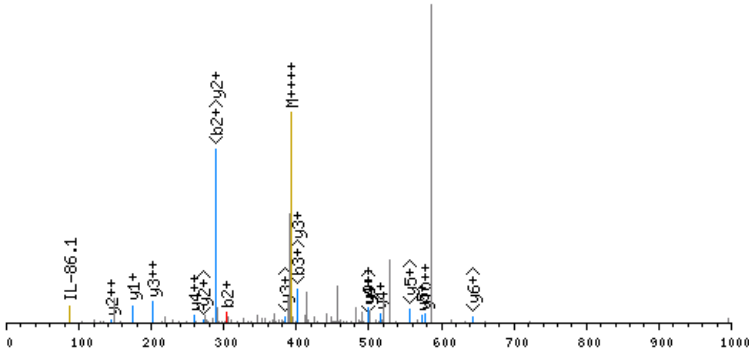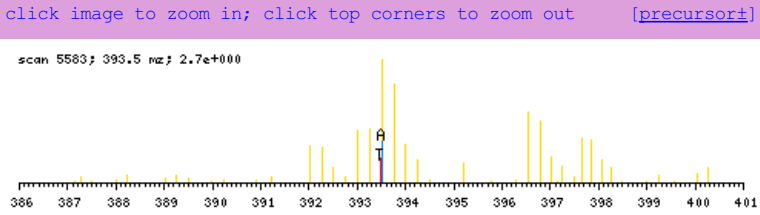

zoomed in precursor plot; T=theoretical m/z, A=acquired m/z

| b <sup>+</sup> | #  | AA | #  | y <sup>+</sup> | y <sup>2+</sup> |
|----------------|----|----|----|----------------|-----------------|
| 176.1075       | 1  | F  | 13 |                |                 |
| 305.1501       | 2  | E  | 12 | 1395.7960      | 698.4019        |
| 418.2342       | 3  | L  | 11 | 1266.7534      | 633.8806        |
| 574.3605       | 4  | K  | 10 | 1153.6694      | 577.3386        |
| 711.4194       | 5  | H  | 9  | 997.5431       | 499.2754        |
| 824.5034       | 6  | L  | 8  | 860.4842       | 430.7460        |
| 911.5355       | 7  | S  | 7  | 747.4001       | 374.2040        |
| 998.5675       | 8  | S  | 6  | 660.3681       | 330.6879        |
| 1055.5890      | 9  | G  | 5  | 573.3360       | 287.1719        |
| 1170.6159      | 10 | D  | 4  | 516.3146       | 258.6612        |
| 1283.7000      | 11 | L  | 3  | 401.2876       | 201.1477        |
| 1396.7840      | 12 | L  | 2  | 288.2036       | 144.6057        |
|                | 13 | R  | 1  | 175.1195       | 88.0637         |

N-term:+29.04 K(4):+156.13

X-range:

0 - 0

MassTol: Y-zoom:

0. 1.

MassType:

☐ AVG ☒ MONO

Axis:

☒ 1 ☐ 2

Label:

☒ I ☐ M ☐ -

Ions:

a ☐ + ☐ 2+ ☐ 3+

b ☒ + ☐ 2+ ☐ 3+

c ☐ + ☐ 2+ ☐ 3+

x ☐ + ☐ 2+ ☐ 3+

y ☒ + ☒ 2+ ☐ 3+

z ☐ + ☐ 2+ ☐ 3+

hide H<sub>2</sub>O/NH<sub>3</sub> ☐

zoom 112-122 ☐

GO

FENVDDAKEAKER, MH+ 1652.9344, m/z 413.9891  
H OS G17 P120811 220811-s1.02055.02055.4.dta

scan 2055; 1.2e+001

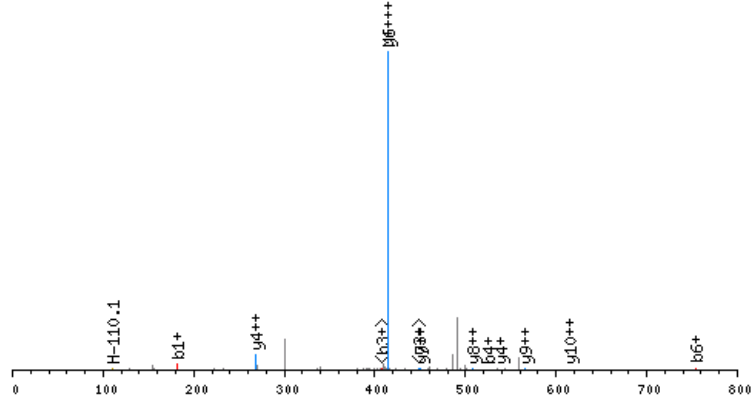

click image to zoom in; click top corners to zoom out [\[precursor±\]](#)

scan 2053; 414.0 m/z; 5.0e+000

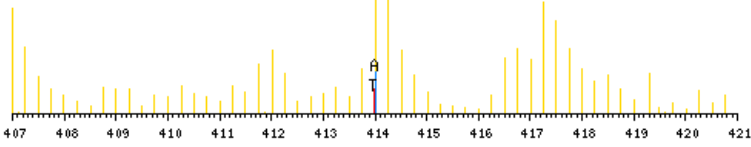

zoomed in precursor plot; T=theoretical m/z, A=acquired m/z

| b <sup>+</sup> | #  | AA | #  | y <sup>+</sup> | y <sup>2+</sup> |
|----------------|----|----|----|----------------|-----------------|
| 182.1393       | 1  | F  | 13 |                |                 |
| 311.1819       | 2  | E  | 12 | 1471.8029      | 736.4054        |
| 425.2248       | 3  | N  | 11 | 1342.7603      | 671.8841        |
| 524.2932       | 4  | V  | 10 | 1228.7174      | 614.8626        |
| 639.3202       | 5  | D  | 9  | 1129.6490      | 565.3284        |
| 754.3471       | 6  | D  | 8  | 1014.6221      | 507.8149        |
| 825.3842       | 7  | A  | 7  | 899.5951       | 450.3015        |
| 987.5423       | 8  | K  | 6  | 828.5580       | 414.7829        |
| 1116.5849      | 9  | E  | 5  | 666.3999       | 333.7039        |
| 1187.6221      | 10 | A  | 4  | 537.3573       | 269.1826        |
| 1349.7802      | 11 | K  | 3  | 466.3202       | 233.6640        |
| 1478.8227      | 12 | E  | 2  | 304.1621       | 152.5850        |
|                | 13 | R  | 1  | 175.1195       | 88.0637         |

N-term:+35.07 K(8):+162.16  
K(11):+162.16

X-range:

0 - 0

MassTol: Y-zoom:

0. 1.

MassType:

☐ AVG ☒ MONO

Axis:

☒ 1 ☐ 2

Label:

☒ I ☐ M ☐ -

Ions:

a ☐ + ☐ 2+ ☐ 3+

b ☒ + ☐ 2+ ☐ 3+

c ☐ + ☐ 2+ ☐ 3+

x ☐ + ☐ 2+ ☐ 3+

y ☒ + ☒ 2+ ☐ 3+

z ☐ + ☐ 2+ ☐ 3+

hide H<sub>2</sub>O/NH<sub>3</sub> ☐

zoom 112-122 ☐

GO

FFEGCPDKEPR, MH+ 1437.6836, m/z 479.8994  
L OS G16 P120811 220811-s1.02677.02677.3.dta

scan 2677; 7.8e+000

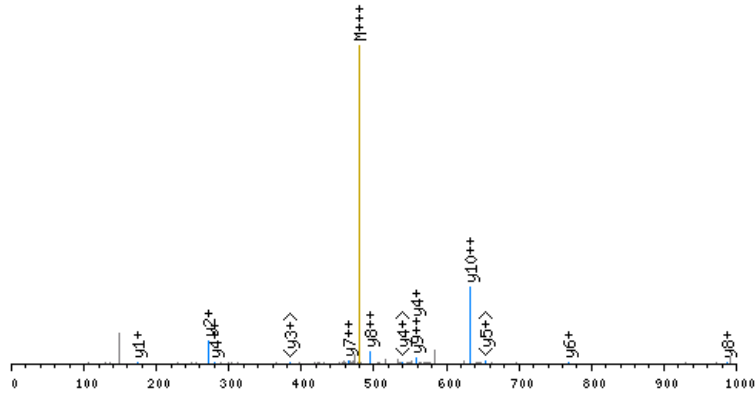

click image to zoom in; click top corners to zoom out [\[precursor±\]](#)

scan 2673; 479.9 m/z; 1.8e+001

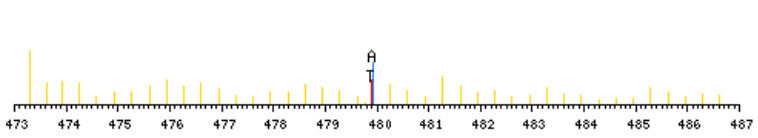

zoomed in precursor plot; T=theoretical m/z, A=acquired m/z

| b <sup>+</sup> | #  | AA | #  | y <sup>+</sup> | y <sup>2+</sup> |
|----------------|----|----|----|----------------|-----------------|
| 176.1075       | 1  | F  | 11 |                |                 |
| 323.1759       | 2  | F  | 10 | 1262.5839      | 631.7959        |
| 452.2185       | 3  | E  | 9  | 1115.5155      | 558.2617        |
| 509.2400       | 4  | G  | 8  | 986.4729       | 493.7404        |
| 669.2706       | 5  | C  | 7  | 929.4515       | 465.2296        |
| 766.3233       | 6  | P  | 6  | 769.4209       | 385.2143        |
| 881.3503       | 7  | D  | 5  | 672.3681       | 336.6880        |
| 1037.4766      | 8  | K  | 4  | 557.3412       | 279.1745        |
| 1166.5192      | 9  | E  | 3  | 401.2149       | 201.1113        |
| 1263.5719      | 10 | P  | 2  | 272.1723       | 136.5900        |
|                | 11 | R  | 1  | 175.1195       | 88.0637         |

N-term: +29.04 C(5): +160.03  
K(8): +156.13

X-range:

0 - 0

MassTol: Y-zoom:

0. 1.

MassType:

☐AVG ☒MONO

Axis:

☒1 ☐2

Label:

☒I ☐M ☐-

Ions:

a ☐+ ☐2+ ☐3+

b ☒+ ☐2+ ☐3+

c ☐+ ☐2+ ☐3+

x ☐+ ☐2+ ☐3+

y ☒+ ☒2+ ☐3+

z ☐+ ☐2+ ☐3+

hide H<sub>2</sub>O/NH<sub>3</sub> ☐

zoom 112-122 ☐

GO

FGDEKEDAGPGQGEAAR, MH+ 1872.9364, m/z 624.9837  
H OS G12 P120811 220811-s1.03719.03719.3.dta

scan 3719; 1.3e+001

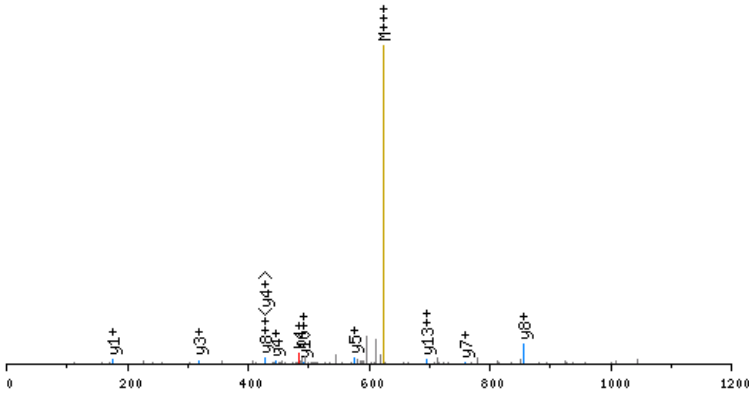

click image to zoom in; click top corners to zoom out

[precursor±]

scan 3717; 625.0 m/z; 2.0e+002

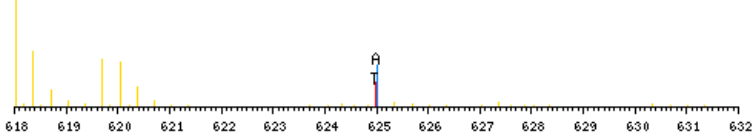

zoomed in precursor plot; T=theoretical m/z, A=acquired m/z

| b <sup>+</sup> | #  | AA | #  | y <sup>+</sup> | y <sup>2+</sup> |
|----------------|----|----|----|----------------|-----------------|
| 182.1393       | 1  | F  | 17 |                |                 |
| 239.1608       | 2  | G  | 16 | 1691.8049      | 846.4064        |
| 354.1877       | 3  | D  | 15 | 1634.7835      | 817.8956        |
| 483.2303       | 4  | E  | 14 | 1519.7565      | 760.3822        |
| 645.3884       | 5  | K  | 13 | 1390.7139      | 695.8609        |
| 774.4310       | 6  | E  | 12 | 1228.5558      | 614.7818        |
| 889.4580       | 7  | D  | 11 | 1099.5132      | 550.2605        |
| 960.4951       | 8  | A  | 10 | 984.4863       | 492.7471        |
| 1017.5165      | 9  | G  | 9  | 913.4492       | 457.2285        |
| 1114.5693      | 10 | P  | 8  | 856.4277       | 428.7178        |
| 1171.5908      | 11 | G  | 7  | 759.3749       | 380.1914        |
| 1299.6493      | 12 | Q  | 6  | 702.3535       | 351.6807        |
| 1427.7079      | 13 | Q  | 5  | 574.2949       | 287.6514        |
| 1556.7505      | 14 | E  | 4  | 446.2363       | 223.6221        |
| 1627.7876      | 15 | A  | 3  | 317.1937       | 159.1008        |
| 1698.8247      | 16 | A  | 2  | 246.1566       | 123.5822        |
|                | 17 | R  | 1  | 175.1195       | 88.0637         |

N-term:+35.07 K(5):+162.16

X-range:

0 - 0

MassTol: Y-zoom:

0. 1.

MassType:

☐ AVG ☒ MONO

Axis:

☒ 1 ☐ 2

Label:

☒ I ☐ M ☐ -

Ions:

a ☐ + ☐ 2+ ☐ 3+

b ☒ + ☐ 2+ ☐ 3+

c ☐ + ☐ 2+ ☐ 3+

x ☐ + ☐ 2+ ☐ 3+

y ☒ + ☒ 2+ ☐ 3+

z ☐ + ☐ 2+ ☐ 3+

hide H<sub>2</sub>O/NH<sub>3</sub> ☐

zoom 112-122 ☐

GO

FGEDIDLPEFDAR, MH+ 1652.7808, m/z 551.5984  
L OS G13 P120811 220811-s1.06440.06440.3.dta

scan 6440; 2.0e+000

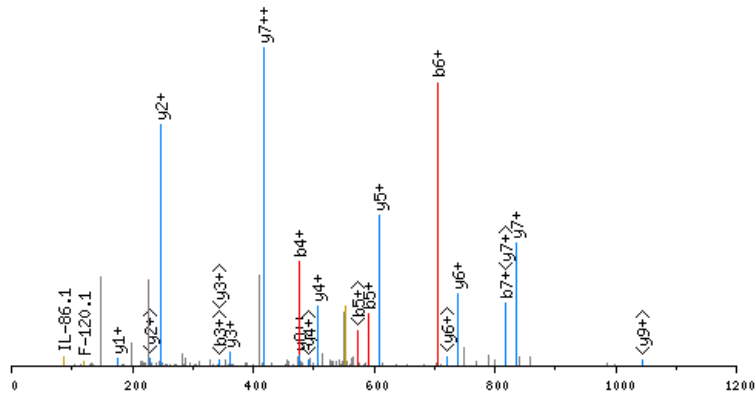

click image to zoom in; click top corners to zoom out

[precursor±]

scan 6439; 551.6 m/z; 2.0e+001

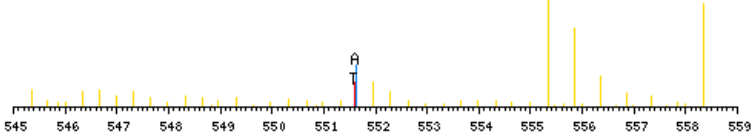

zoomed in precursor plot; T=theoretical m/z, A=acquired m/z

| b <sup>+</sup> | #  | AA | #  | y <sup>+</sup> | y <sup>2+</sup> |
|----------------|----|----|----|----------------|-----------------|
| 176.1075       | 1  | F  | 14 |                |                 |
| 233.1290       | 2  | G  | 13 | 1477.6811      | 739.3445        |
| 362.1716       | 3  | E  | 12 | 1420.6596      | 710.8337        |
| 477.1985       | 4  | D  | 11 | 1291.6170      | 646.3124        |
| 590.2826       | 5  | I  | 10 | 1176.5901      | 588.7990        |
| 705.3095       | 6  | D  | 9  | 1063.5060      | 532.2569        |
| 818.3936       | 7  | L  | 8  | 948.4791       | 474.7434        |
| 915.4463       | 8  | P  | 7  | 835.3950       | 418.2014        |
| 1044.4889      | 9  | E  | 6  | 738.3422       | 369.6750        |
| 1145.5366      | 10 | T  | 5  | 609.2997       | 305.1537        |
| 1292.6050      | 11 | F  | 4  | 508.2520       | 254.6299        |
| 1407.6320      | 12 | D  | 3  | 361.1836       | 181.0957        |
| 1478.6691      | 13 | A  | 2  | 246.1566       | 123.5822        |
|                | 14 | R  | 1  | 175.1195       | 88.0637         |

N-term:+29.04



N-term: +29.04

X-range:

0 - 0

MassTol: Y-zoom:

0. 1.

MassType:

☐AVG ☒MONO

Axis:

☒1 ☐2

Label:

☒I ☐M ☐-

Ions:

a ☐+ ☐2+ ☐3+

b ☒+ ☐2+ ☐3+

c ☐+ ☐2+ ☐3+

x ☐+ ☐2+ ☐3+

y ☒+ ☒2+ ☐3+

z ☐+ ☐2+ ☐3+

hide H<sub>2</sub>O/NH<sub>3</sub> ☐

zoom 112-122 ☐

GO

FGPISEVVVVKDR, MH+ 1500.8790, m/z 500.9645  
L OS G15 P120811 220811-s1.04907.04907.3.dta

scan 4907; 1.5e+001

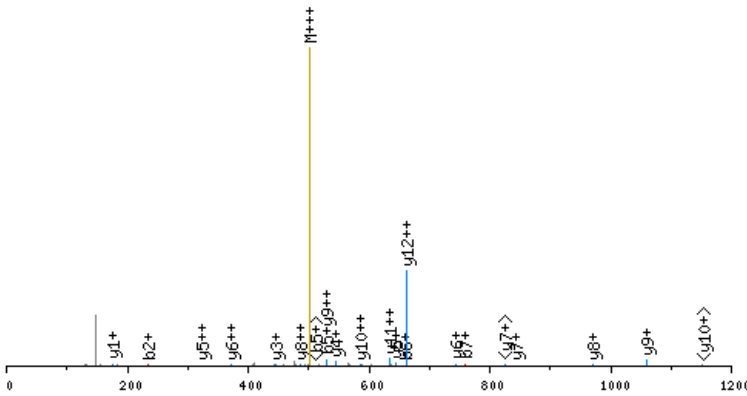

click image to zoom in; click top corners to zoom out

[precursor±]

scan 4906; 501.0 m/z; 9.6e+000

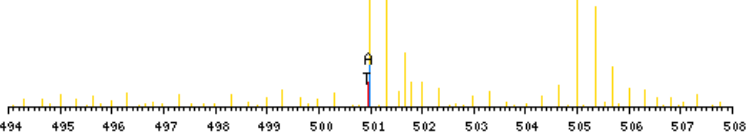

zoomed in precursor plot; T=theoretical m/z, A=acquired m/z

| b <sup>+</sup> | #  | AA | #  | y <sup>+</sup> | y <sup>2+</sup> |
|----------------|----|----|----|----------------|-----------------|
| 176.1075       | 1  | F  | 13 |                |                 |
| 233.1290       | 2  | G  | 12 | 1325.7793      | 663.3936        |
| 330.1817       | 3  | P  | 11 | 1268.7578      | 634.8828        |
| 443.2658       | 4  | I  | 10 | 1171.7051      | 586.3565        |
| 530.2978       | 5  | S  | 9  | 1058.6210      | 529.8144        |
| 659.3404       | 6  | E  | 8  | 971.5890       | 486.2984        |
| 758.4088       | 7  | V  | 7  | 842.5464       | 421.7771        |
| 857.4773       | 8  | V  | 6  | 743.4780       | 372.2429        |
| 956.5457       | 9  | V  | 5  | 644.4096       | 322.7087        |
| 1055.6141      | 10 | V  | 4  | 545.3412       | 273.1745        |
| 1211.7404      | 11 | K  | 3  | 446.2727       | 223.6403        |
| 1326.7673      | 12 | D  | 2  | 290.1464       | 145.5771        |
|                | 13 | R  | 1  | 175.1195       | 88.0637         |

N-term:+29.04 K(11):+156.13

X-range:

0 - 0

MassTol: Y-zoom:

0. 1.

MassType:

☐AVG ☒MONO

Axis:

☒1 ☐2

Label:

☒I ☐M ☐-

Ions:

a ☐+ ☐2+ ☐3+

b ☒+ ☐2+ ☐3+

c ☐+ ☐2+ ☐3+

x ☐+ ☐2+ ☐3+

y ☒+ ☒2+ ☐3+

z ☐+ ☐2+ ☐3+

hide H<sub>2</sub>O/NH<sub>3</sub> ☐

zoom 112-122 ☐

GO

FGSDLDAATQQLSR, MH+ 1649.8498, m/z 550.6215  
L OS G13 P120811 220811-s1.06386.06386.3.dta

scan 6386; 1.4e+000

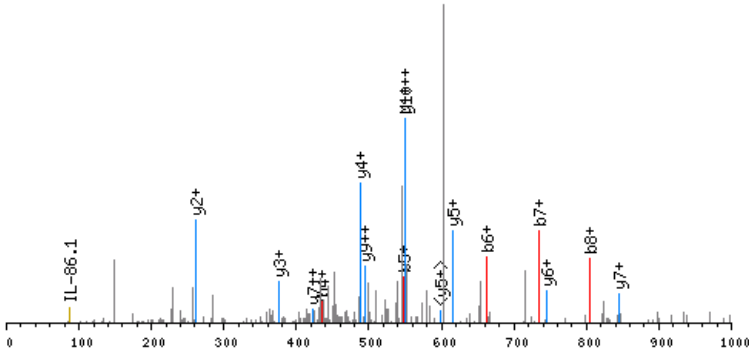

click image to zoom in; click top corners to zoom out [\[precursor±\]](#)

scan 6384; 550.6 m/z; 8.6e+000

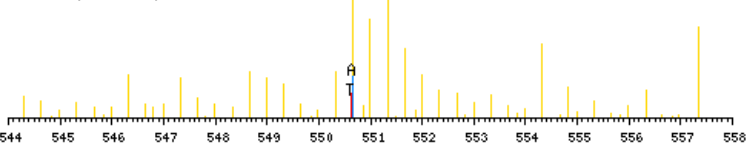

zoomed in precursor plot; T=theoretical m/z, A=acquired m/z

| b <sup>+</sup> | #  | AA | #  | y <sup>+</sup> | y <sup>2+</sup> |
|----------------|----|----|----|----------------|-----------------|
| 176.1075       | 1  | F  | 15 |                |                 |
| 233.1290       | 2  | G  | 14 | 1474.7502      | 737.8790        |
| 320.1610       | 3  | S  | 13 | 1417.7287      | 709.3683        |
| 435.1879       | 4  | D  | 12 | 1330.6967      | 665.8522        |
| 548.2720       | 5  | L  | 11 | 1215.6697      | 608.3388        |
| 663.2990       | 6  | D  | 10 | 1102.5857      | 551.7967        |
| 734.3361       | 7  | A  | 9  | 987.5587       | 494.2833        |
| 805.3732       | 8  | A  | 8  | 916.5216       | 458.7647        |
| 906.4209       | 9  | T  | 7  | 845.4845       | 423.2462        |
| 1034.4794      | 10 | Q  | 6  | 744.4368       | 372.7223        |
| 1162.5380      | 11 | Q  | 5  | 616.3782       | 308.6930        |
| 1275.6221      | 12 | L  | 4  | 488.3197       | 244.6637        |
| 1388.7061      | 13 | L  | 3  | 375.2356       | 188.1217        |
| 1475.7382      | 14 | S  | 2  | 262.1515       | 131.5797        |
|                | 15 | R  | 1  | 175.1195       | 88.0637         |

N-term:+29.04

X-range:

0 - 0

MassTol: Y-zoom:

0. 1.

MassType:

☐ AVG ☒ MONO

Axis:

☒ 1 ☐ 2

Label:

☒ I ☐ M ☐ -

Ions:

a ☐ + ☐ 2+ ☐ 3+

b ☒ + ☐ 2+ ☐ 3+

c ☐ + ☐ 2+ ☐ 3+

x ☐ + ☐ 2+ ☐ 3+

y ☒ + ☒ 2+ ☐ 3+

z ☐ + ☐ 2+ ☐ 3+

hide H<sub>2</sub>O/NH<sub>3</sub> ☐

zoom 112-122 ☐

GO

FHDFSSDLENVPHLR, MH+ 1840.8982, m/z 460.9800  
L OS G18 P120811 220811-s1.05912.05912.4.dta

scan 5912; 3.6e+000

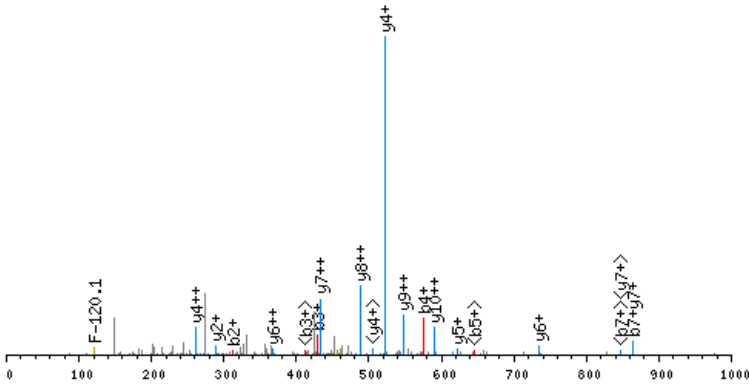

click image to zoom in; click top corners to zoom out

[precursor±]

scan 5911; 461.0 m/z; 8.0e+000

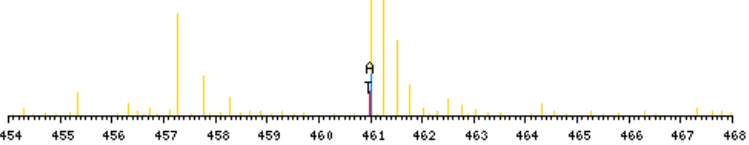

zoomed in precursor plot; T=theoretical m/z, A=acquired m/z

| b <sup>+</sup> | #  | AA | #  | y <sup>+</sup> | y <sup>2+</sup> |
|----------------|----|----|----|----------------|-----------------|
| 176.1075       | 1  | F  | 15 |                |                 |
| 313.1664       | 2  | H  | 14 | 1665.7985      | 833.4032        |
| 428.1934       | 3  | D  | 13 | 1528.7396      | 764.8737        |
| 575.2618       | 4  | F  | 12 | 1413.7127      | 707.3602        |
| 662.2938       | 5  | S  | 11 | 1266.6442      | 633.8260        |
| 749.3258       | 6  | S  | 10 | 1179.6122      | 590.3100        |
| 864.3528       | 7  | D  | 9  | 1092.5802      | 546.7940        |
| 977.4368       | 8  | L  | 8  | 977.5532       | 489.2805        |
| 1106.4794      | 9  | E  | 7  | 864.4692       | 432.7385        |
| 1220.5224      | 10 | N  | 6  | 735.4266       | 368.2172        |
| 1319.5908      | 11 | V  | 5  | 621.3837       | 311.1957        |
| 1416.6435      | 12 | P  | 4  | 522.3152       | 261.6615        |
| 1553.7025      | 13 | H  | 3  | 425.2625       | 213.1352        |
| 1666.7865      | 14 | L  | 2  | 288.2036       | 144.6057        |
|                | 15 | R  | 1  | 175.1195       | 88.0637         |

N-term:+29.04

X-range:

0 - 0

MassTol: Y-zoom:

0. 1.

MassType:

☐AVG ☒MONO

Axis:

☒1 ☐2

Label:

☒I ☐M ☐-

Ions:

a ☐+ ☐2+ ☐3+

b ☒+ ☐2+ ☐3+

c ☐+ ☐2+ ☐3+

x ☐+ ☐2+ ☐3+

y ☒+ ☒2+ ☐3+

z ☐+ ☐2+ ☐3+

hide H<sub>2</sub>O/NH<sub>3</sub> ☐

zoom 112-122 ☐

GO

FIEEIHSVSAKNR, MH+ 1585.8702, m/z 397.2230  
L OS G17 P120811 220811-s1.02871.02871.4.dta

scan 2871; 2.3e+001

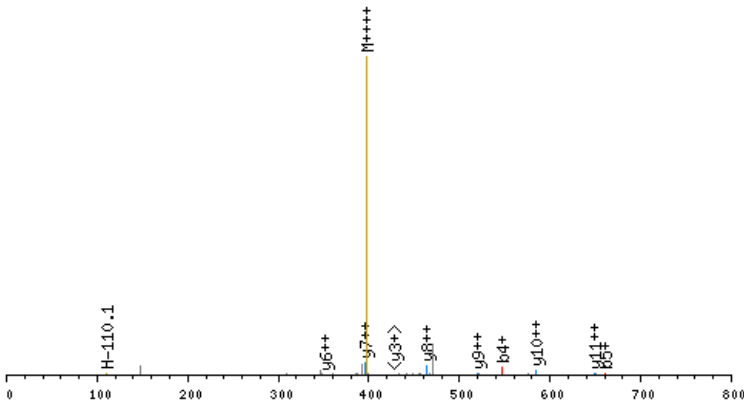

click image to zoom in; click top corners to zoom out

[precursor±]

scan 2868; 397.2 m/z; 1.6e+001

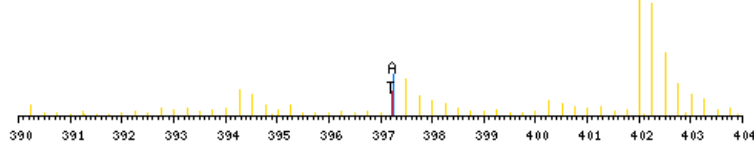

zoomed in precursor plot; T=theoretical m/z, A=acquired m/z

| b <sup>+</sup> | #  | AA | #  | y <sup>+</sup> | y <sup>2+</sup> |
|----------------|----|----|----|----------------|-----------------|
| 176.1075       | 1  | F  | 13 |                |                 |
| 289.1916       | 2  | I  | 12 | 1410.7705      | 705.8892        |
| 418.2342       | 3  | E  | 11 | 1297.6865      | 649.3472        |
| 547.2768       | 4  | E  | 10 | 1168.6439      | 584.8259        |
| 660.3608       | 5  | I  | 9  | 1039.6013      | 520.3046        |
| 797.4197       | 6  | H  | 8  | 926.5172       | 463.7625        |
| 884.4518       | 7  | S  | 7  | 789.4583       | 395.2331        |
| 983.5202       | 8  | V  | 6  | 702.4263       | 351.7171        |
| 1070.5522      | 9  | S  | 5  | 603.3579       | 302.1828        |
| 1141.5893      | 10 | A  | 4  | 516.3258       | 258.6668        |
| 1297.7156      | 11 | K  | 3  | 445.2887       | 223.1483        |
| 1411.7586      | 12 | N  | 2  | 289.1624       | 145.0851        |
|                | 13 | R  | 1  | 175.1195       | 88.0637         |

N-term:+29.04 K(11):+156.13

N-term:+29.04

X-range:

0 - 0

MassTol: Y-zoom:

0. 1.

MassType:

☐ AVG ☒ MONO

Axis:

☒ 1 ☐ 2

Label:

☒ I ☐ M ☐ -

Ions:

a ☐ + ☐ 2+ ☐ 3+

b ☒ + ☐ 2+ ☐ 3+

c ☐ + ☐ 2+ ☐ 3+

x ☐ + ☐ 2+ ☐ 3+

y ☒ + ☒ 2+ ☐ 3+

z ☐ + ☐ 2+ ☐ 3+

hide H<sub>2</sub>O/NH<sub>3</sub> ☐

zoom 112-122 ☐

GO

FIPLSQKDLENLKAEVAR, MH+ 2155.2491, m/z 539.5677  
L OS G17 P120811 220811-s1.06316.06316.4.dta

scan 6316; 5.8e+000

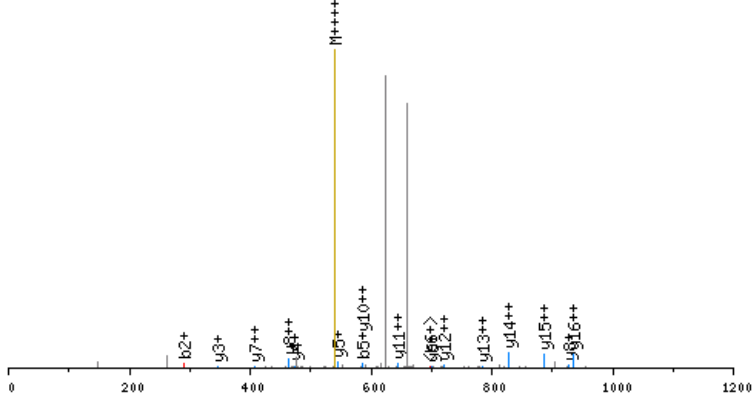

click image to zoom in; click top corners to zoom out [\[precursor±\]](#)

scan 6313; 539.6 m/z; 3.4e+000

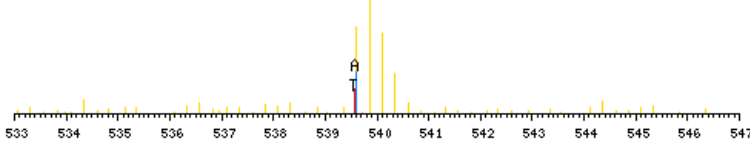

zoomed in precursor plot; T=theoretical m/z, A=acquired m/z

| b <sup>+</sup> | #  | AA | #  | y <sup>+</sup> | y <sup>2+</sup> |
|----------------|----|----|----|----------------|-----------------|
| 176.1075       | 1  | F  | 18 |                |                 |
| 289.1916       | 2  | I  | 17 | 1980.1494      | 990.5786        |
| 386.2443       | 3  | P  | 16 | 1867.0654      | 934.0366        |
| 499.3284       | 4  | L  | 15 | 1770.0126      | 885.5102        |
| 586.3604       | 5  | S  | 14 | 1656.9285      | 828.9682        |
| 714.4190       | 6  | Q  | 13 | 1569.8965      | 785.4522        |
| 870.5453       | 7  | K  | 12 | 1441.8379      | 721.4229        |
| 985.5723       | 8  | D  | 11 | 1285.7116      | 643.3597        |
| 1098.6563      | 9  | L  | 10 | 1170.6847      | 585.8463        |
| 1227.6989      | 10 | E  | 9  | 1057.6006      | 529.3042        |
| 1341.7418      | 11 | N  | 8  | 928.5580       | 464.7829        |
| 1454.8259      | 12 | L  | 7  | 814.5151       | 407.7615        |
| 1610.9522      | 13 | K  | 6  | 701.4310       | 351.2194        |
| 1681.9893      | 14 | A  | 5  | 545.3047       | 273.1563        |
| 1811.0319      | 15 | E  | 4  | 474.2676       | 237.6377        |
| 1910.1003      | 16 | V  | 3  | 345.2250       | 173.1164        |
| 1981.1374      | 17 | A  | 2  | 246.1566       | 123.5822        |
|                | 18 | R  | 1  | 175.1195       | 88.0637         |

N-term:+29.04 K(7):+156.13  
K(13):+156.13

X-range:

0 - 0

MassTol: Y-zoom:

0. 1.

MassType:

☐AVG ☒MONO

Axis:

☒1 ☐2

Label:

☒I ☐M ☐-

Ions:

a ☐+ ☐2+ ☐3+

b ☒+ ☐2+ ☐3+

c ☐+ ☐2+ ☐3+

x ☐+ ☐2+ ☐3+

y ☒+ ☒2+ ☐3+

z ☐+ ☐2+ ☐3+

hide H<sub>2</sub>O/NH<sub>3</sub> ☐

zoom 112-122 ☐

GO

FKEAFTVIDQNR, MH+ 1523.8222, m/z 508.6123  
L OS G16 P120811 220811-s1.04459.04459.3.dta

scan 4459; 3.9e+000

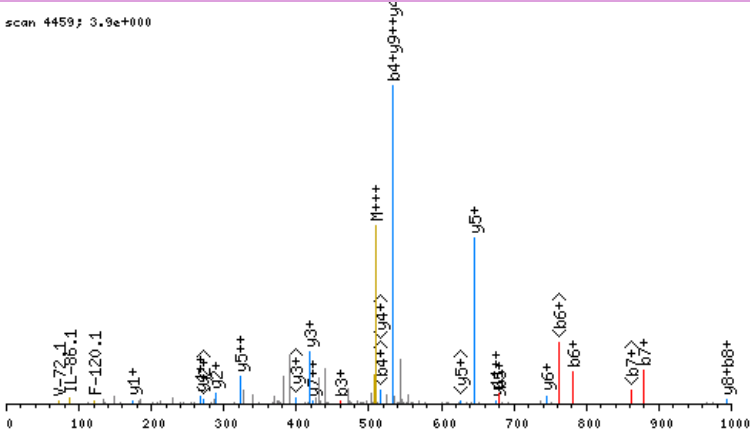

click image to zoom in; click top corners to zoom out

[precursor±]

scan 4458; 508.6 m/z; 2.1e+001

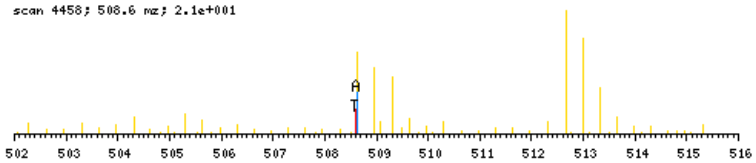

zoomed in precursor plot; T=theoretical m/z, A=acquired m/z

| b <sup>+</sup> | #  | AA | #  | y <sup>+</sup> | y <sup>2+</sup> |
|----------------|----|----|----|----------------|-----------------|
| 176.1075       | 1  | F  | 12 |                |                 |
| 332.2338       | 2  | K  | 11 | 1348.7225      | 674.8652        |
| 461.2764       | 3  | E  | 10 | 1192.5962      | 596.8020        |
| 532.3135       | 4  | A  | 9  | 1063.5536      | 532.2807        |
| 679.3819       | 5  | F  | 8  | 992.5165       | 496.7622        |
| 780.4296       | 6  | T  | 7  | 845.4481       | 423.2280        |
| 879.4980       | 7  | V  | 6  | 744.4004       | 372.7041        |
| 992.5821       | 8  | I  | 5  | 645.3320       | 323.1699        |
| 1107.6090      | 9  | D  | 4  | 532.2479       | 266.6279        |
| 1235.6676      | 10 | Q  | 3  | 417.2210       | 209.1144        |
| 1349.7105      | 11 | N  | 2  | 289.1624       | 145.0851        |
|                | 12 | R  | 1  | 175.1195       | 88.0637         |

N-term:+29.04 K(2):+156.13

X-range:

0 - 0

MassTol: Y-zoom:

0. 1.

MassType:

☐AVG ☒MONO

Axis:

☒1 ☐2

Label:

☒I ☐M ☐-

Ions:

a ☐+ ☐2+ ☐3+

b ☒+ ☐2+ ☐3+

c ☐+ ☐2+ ☐3+

x ☐+ ☐2+ ☐3+

y ☒+ ☒2+ ☐3+

z ☐+ ☐2+ ☐3+

hide H<sub>2</sub>O/NH<sub>3</sub> ☐

zoom 112-122 ☐

GO

FKEETEIPAR, MH+ 1275.6949, m/z 425.9031  
L OS G16 P120811 220811-s1.02704.02704.3.dta

scan 2704; 1.3e+001

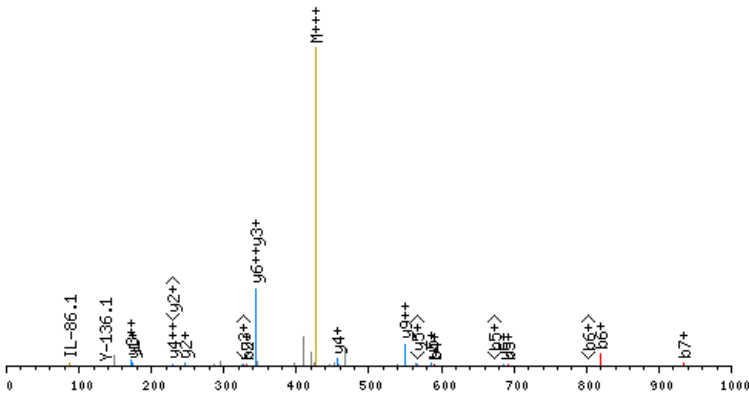

click image to zoom in; click top corners to zoom out [precursor±]

scan 2703; 425.9 m/z; 1.9e+001

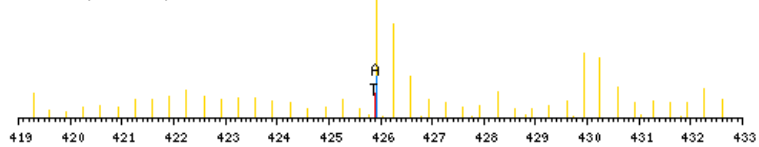

zoomed in precursor plot; T=theoretical m/z, A=acquired m/z

| b <sup>+</sup> | #  | AA | #  | y <sup>+</sup> | y <sup>2+</sup> |
|----------------|----|----|----|----------------|-----------------|
| 176.1075       | 1  | F  | 10 |                |                 |
| 332.2338       | 2  | K  | 9  | 1100.5952      | 550.8015        |
| 461.2764       | 3  | E  | 8  | 944.4689       | 472.7384        |
| 590.3190       | 4  | E  | 7  | 815.4263       | 408.2171        |
| 691.3667       | 5  | T  | 6  | 686.3837       | 343.6958        |
| 820.4093       | 6  | E  | 5  | 585.3360       | 293.1719        |
| 933.4933       | 7  | I  | 4  | 456.2934       | 228.6506        |
| 1030.5461      | 8  | P  | 3  | 343.2094       | 172.1086        |
| 1101.5832      | 9  | A  | 2  | 246.1566       | 123.5822        |
|                | 10 | R  | 1  | 175.1195       | 88.0637         |

N-term:+29.04 K(2):+156.13

X-range:

0 - 0

MassTol: Y-zoom:

0. 1.

MassType:

☐AVG ☒MONO

Axis:

☒1 ☐2

Label:

☒I ☐M ☐-

Ions:

a ☐+ ☐2+ ☐3+

b ☒+ ☐2+ ☐3+

c ☐+ ☐2+ ☐3+

x ☐+ ☐2+ ☐3+

y ☒+ ☒2+ ☐3+

z ☐+ ☐2+ ☐3+

hide H<sub>2</sub>O/NH<sub>3</sub> ☐

zoom 112-122 ☐

GO

FKLDNQDFGDHATLKR, MH+ 1989.0558, m/z 498.0194  
L OS G18 P120811 220811-s1.04433.04433.4.dta

scan 4433; 1.2e+000

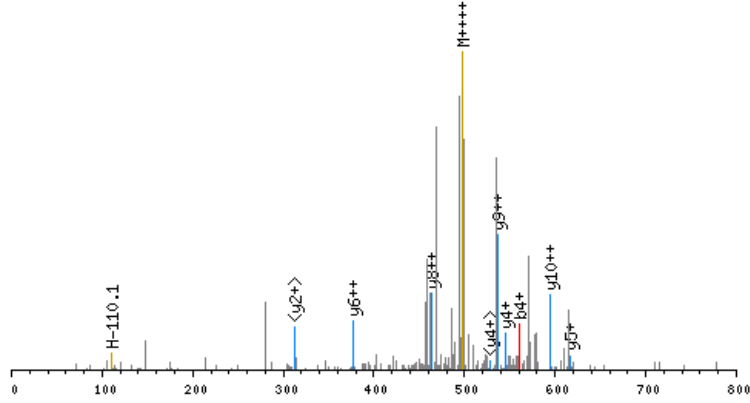

click image to zoom in; click top corners to zoom out [\[precursor±\]](#)

scan 4431; 498.0 m/z; 1.2e+003

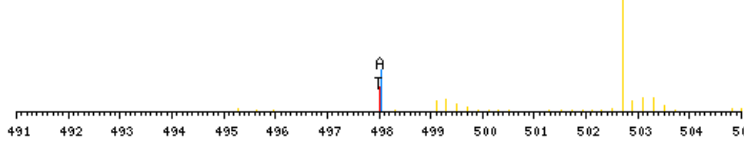

zoomed in precursor plot; T=theoretical m/z, A=acquired m/z

| b <sup>+</sup> | #  | AA | #  | y <sup>+</sup> | y <sup>2+</sup> |
|----------------|----|----|----|----------------|-----------------|
| 176.1075       | 1  | F  | 16 |                |                 |
| 332.2338       | 2  | K  | 15 | 1813.9561      | 907.4820        |
| 445.3179       | 3  | L  | 14 | 1657.8298      | 829.4188        |
| 560.3448       | 4  | D  | 13 | 1544.7458      | 772.8768        |
| 674.3877       | 5  | N  | 12 | 1429.7188      | 715.3633        |
| 802.4463       | 6  | Q  | 11 | 1315.6759      | 658.3419        |
| 917.4733       | 7  | D  | 10 | 1187.6173      | 594.3126        |
| 1064.5417      | 8  | F  | 9  | 1072.5904      | 536.7991        |
| 1121.5631      | 9  | G  | 8  | 925.5220       | 463.2649        |
| 1236.5901      | 10 | D  | 7  | 868.5005       | 434.7542        |
| 1373.6490      | 11 | H  | 6  | 753.4736       | 377.2407        |
| 1444.6861      | 12 | A  | 5  | 616.4147       | 308.7112        |
| 1545.7338      | 13 | T  | 4  | 545.3775       | 273.1927        |
| 1658.8179      | 14 | L  | 3  | 444.3299       | 222.6688        |
| 1814.9442      | 15 | K  | 2  | 331.2458       | 166.1268        |
|                | 16 | R  | 1  | 175.1195       | 88.0637         |

N-term:+29.04 K(2):+156.13  
K(15):+156.13

X-range:

0 - 0

MassTol: Y-zoom:

0. 1.

MassType:

☐AVG ☒MONO

Axis:

☒1 ☐2

Label:

☒I ☐M ☐-

Ions:

a ☐+ ☐2+ ☐3+

b ☒+ ☐2+ ☐3+

c ☐+ ☐2+ ☐3+

x ☐+ ☐2+ ☐3+

y ☒+ ☒2+ ☐3+

z ☐+ ☐2+ ☐3+

hide H<sub>2</sub>O/NH<sub>3</sub> ☐

zoom 112-122 ☐

GO

FLEELLTTQCDR, MH+ 1552.7680, m/z 518.2609  
L OS G13 P120811 220811-s1.05997.05997.3.dta

scan 5997; 6.3e+000

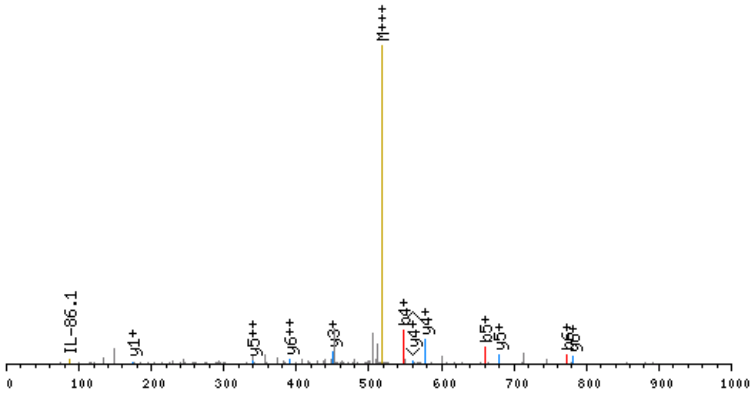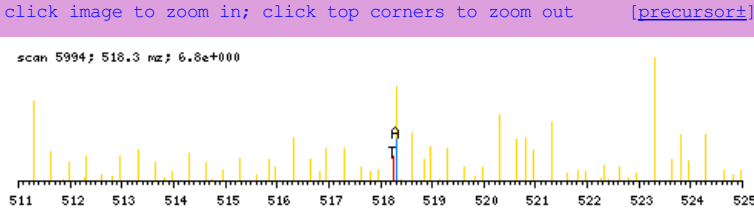

zoomed in precursor plot; T=theoretical m/z, A=acquired m/z

| b <sup>+</sup> | #  | AA | #  | y <sup>+</sup> | y <sup>2+</sup> |
|----------------|----|----|----|----------------|-----------------|
| 176.1075       | 1  | F  | 12 |                |                 |
| 289.1916       | 2  | L  | 11 | 1377.6684      | 689.3381        |
| 418.2342       | 3  | E  | 10 | 1264.5843      | 632.7961        |
| 547.2768       | 4  | E  | 9  | 1135.5417      | 568.2748        |
| 660.3608       | 5  | L  | 8  | 1006.4991      | 503.7535        |
| 773.4449       | 6  | L  | 7  | 893.4150       | 447.2114        |
| 874.4926       | 7  | T  | 6  | 780.3310       | 390.6694        |
| 975.5402       | 8  | T  | 5  | 679.2833       | 340.1456        |
| 1103.5988      | 9  | Q  | 4  | 578.2356       | 289.6217        |
| 1263.6294      | 10 | C  | 3  | 450.1770       | 225.5924        |
| 1378.6564      | 11 | D  | 2  | 290.1464       | 145.5771        |
|                | 12 | R  | 1  | 175.1195       | 88.0637         |

N-term:+29.04 C(10):+160.03



X-range:

0 - 0

MassTol: Y-zoom:

0. 1.

MassType:

☐ AVG ☒ MONO

Axis:

☒ 1 ☐ 2

Label:

☒ I ☐ M ☐ -

Ions:

a ☐ + ☐ 2+ ☐ 3+

b ☒ + ☐ 2+ ☐ 3+

c ☐ + ☐ 2+ ☐ 3+

x ☐ + ☐ 2+ ☐ 3+

y ☒ + ☒ 2+ ☐ 3+

z ☐ + ☐ 2+ ☐ 3+

hide H<sub>2</sub>O/NH<sub>3</sub> ☐

zoom 112-122 ☐

GO

FLEPNPEDPLNKEAAEVLQNNR, MH+ 2593.3262, m/z 649.0870  
L OS G14 P120811 220811-s1.05799.05799.4.dta

scan 5799; 1.6e+000

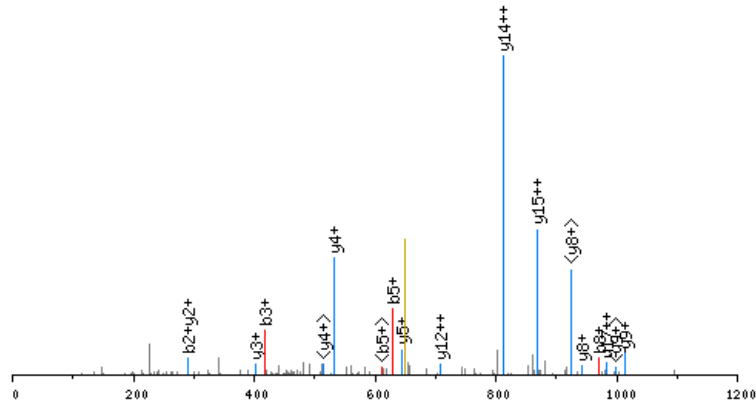

click image to zoom in; click top corners to zoom out [precursor±]

scan 5796; 649.1 m/z; 1.8e+000

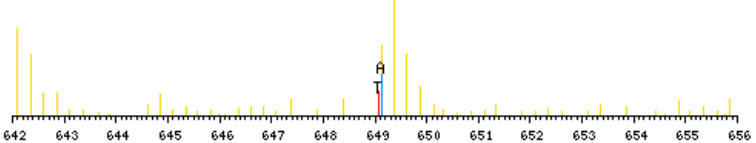

zoomed in precursor plot; T=theoretical m/z, A=acquired m/z

| b <sup>+</sup> | #  | AA | #  | y <sup>+</sup> | y <sup>2+</sup> |
|----------------|----|----|----|----------------|-----------------|
| 176.1075       | 1  | F  | 22 |                |                 |
| 289.1916       | 2  | L  | 21 | 2418.2265      | 1209.6172       |
| 418.2342       | 3  | E  | 20 | 2305.1425      | 1153.0751       |
| 515.2869       | 4  | P  | 19 | 2176.0999      | 1088.5538       |
| 629.3299       | 5  | N  | 18 | 2079.0471      | 1040.0275       |
| 726.3826       | 6  | P  | 17 | 1965.0042      | 983.0060        |
| 855.4252       | 7  | E  | 16 | 1867.9514      | 934.4796        |
| 970.4522       | 8  | D  | 15 | 1738.9088      | 869.9583        |
| 1067.5049      | 9  | P  | 14 | 1623.8819      | 812.4449        |
| 1180.5890      | 10 | L  | 13 | 1526.8291      | 763.9185        |
| 1294.6319      | 11 | N  | 12 | 1413.7451      | 707.3764        |
| 1450.7582      | 12 | K  | 11 | 1299.7021      | 650.3550        |
| 1579.8008      | 13 | E  | 10 | 1143.5758      | 572.2918        |
| 1650.8379      | 14 | A  | 9  | 1014.5332      | 507.7705        |
| 1721.8750      | 15 | A  | 8  | 943.4961       | 472.2520        |
| 1850.9176      | 16 | E  | 7  | 872.4590       | 436.7334        |
| 1949.9860      | 17 | V  | 6  | 743.4164       | 372.2121        |
| 2063.0701      | 18 | L  | 5  | 644.3480       | 322.6779        |
| 2191.1287      | 19 | Q  | 4  | 531.2639       | 266.1359        |
| 2305.1716      | 20 | N  | 3  | 403.2054       | 202.1066        |
| 2419.2145      | 21 | N  | 2  | 289.1624       | 145.0851        |
|                | 22 | R  | 1  | 175.1195       | 88.0637         |

N-term:+29.04 K(12):+156.13

N-term: +29.04

X-range:

0 - 0

MassTol: Y-zoom:

0. 1.

MassType:

☐AVG ☒MONO

Axis:

☒1 ☐2

Label:

☒I ☐M ☐-

Ions:

a ☐+ ☐2+ ☐3+

b ☒+ ☐2+ ☐3+

c ☐+ ☐2+ ☐3+

x ☐+ ☐2+ ☐3+

y ☒+ ☒2+ ☐3+

z ☐+ ☐2+ ☐3+

hide H<sub>2</sub>O/NH<sub>3</sub> ☐

zoom 112-122 ☐

GO

FLQDEIIDKSYTPSKIR, MH+ 2137.1909, m/z 535.0532  
L OS G17 P120811 220811-s1.05251.05251.4.dta

scan 5251; 7.8e+000

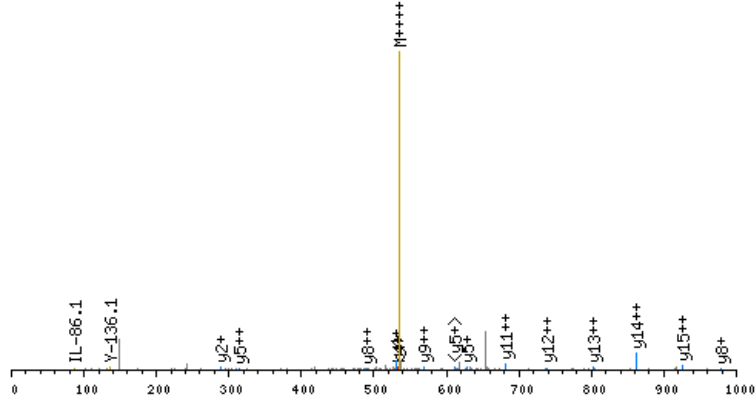

click image to zoom in; click top corners to zoom out [\[precursor±\]](#)

scan 5248; 535.1 m/z; 3.6e+001

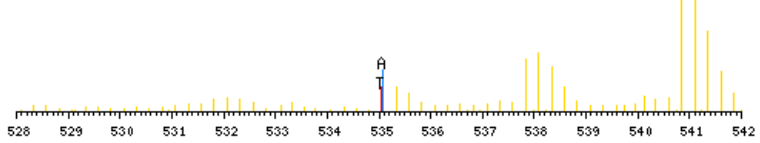

zoomed in precursor plot; T=theoretical m/z, A=acquired m/z

| b <sup>+</sup> | #  | AA | #  | y <sup>+</sup> | y <sup>2+</sup> |
|----------------|----|----|----|----------------|-----------------|
| 176.1075       | 1  | F  | 17 |                |                 |
| 289.1916       | 2  | L  | 16 | 1962.0912      | 981.5495        |
| 417.2502       | 3  | Q  | 15 | 1849.0072      | 925.0075        |
| 532.2771       | 4  | D  | 14 | 1720.9486      | 860.9782        |
| 661.3197       | 5  | E  | 13 | 1605.9217      | 803.4647        |
| 774.4038       | 6  | I  | 12 | 1476.8791      | 738.9434        |
| 887.4878       | 7  | I  | 11 | 1363.7950      | 682.4014        |
| 1002.5148      | 8  | D  | 10 | 1250.7109      | 625.8594        |
| 1158.6411      | 9  | K  | 9  | 1135.6840      | 568.3459        |
| 1245.6731      | 10 | S  | 8  | 979.5577       | 490.2828        |
| 1408.7364      | 11 | Y  | 7  | 892.5257       | 446.7667        |
| 1509.7841      | 12 | T  | 6  | 729.4623       | 365.2351        |
| 1606.8369      | 13 | P  | 5  | 628.4147       | 314.7112        |
| 1693.8689      | 14 | S  | 4  | 531.3619       | 266.1849        |
| 1849.9952      | 15 | K  | 3  | 444.3299       | 222.6688        |
| 1963.0793      | 16 | I  | 2  | 288.2036       | 144.6057        |
|                | 17 | R  | 1  | 175.1195       | 88.0637         |

N-term:+29.04 K(9):+156.13  
K(15):+156.13

X-range:

0 - 0

MassTol: Y-zoom:

0. 1.

MassType:

☐AVG ☒MONO

Axis:

☒1 ☐2

Label:

☒I ☐M ☐-

Ions:

a ☐+ ☐2+ ☐3+

b ☒+ ☐2+ ☐3+

c ☐+ ☐2+ ☐3+

x ☐+ ☐2+ ☐3+

y ☒+ ☒2+ ☐3+

z ☐+ ☐2+ ☐3+

hide H<sub>2</sub>O/NH<sub>3</sub> ☐

zoom 112-122 ☐

GO

FLQLVDSGKVD EAR, MH+ 1632.8961, m/z 544.9702  
L OS G15 P120811 220811-s1.04310.04310.3.dta

scan 4310; 5.9e+000

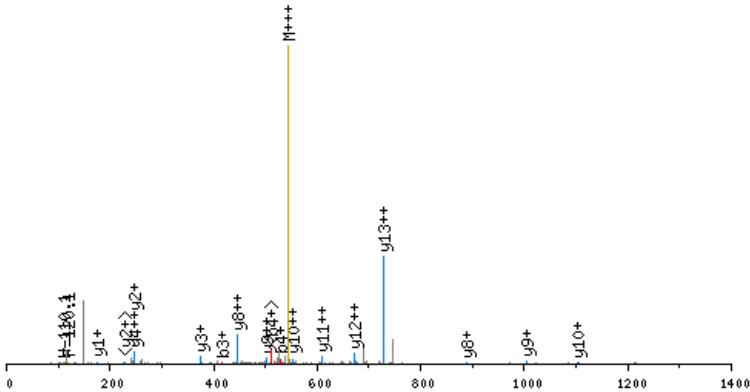

click image to zoom in; click top corners to zoom out

[precursor±]

scan 4306; 545.0 m/z; 5.7e+000

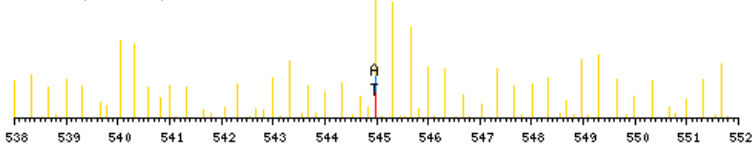

zoomed in precursor plot; T=theoretical m/z, A=acquired m/z

| b <sup>+</sup> | #  | AA | #  | y <sup>+</sup> | y <sup>2+</sup> |
|----------------|----|----|----|----------------|-----------------|
| 176.1075       | 1  | F  | 14 |                |                 |
| 289.1916       | 2  | L  | 13 | 1457.7964      | 729.4021        |
| 417.2502       | 3  | Q  | 12 | 1344.7124      | 672.8601        |
| 530.3342       | 4  | L  | 11 | 1216.6538      | 608.8308        |
| 629.4026       | 5  | V  | 10 | 1103.5697      | 552.2888        |
| 744.4296       | 6  | D  | 9  | 1004.5013      | 502.7546        |
| 831.4616       | 7  | S  | 8  | 889.4744       | 445.2411        |
| 888.4831       | 8  | G  | 7  | 802.4423       | 401.7251        |
| 1044.6094      | 9  | K  | 6  | 745.4209       | 373.2143        |
| 1143.6778      | 10 | V  | 5  | 589.2946       | 295.1512        |
| 1258.7047      | 11 | D  | 4  | 490.2262       | 245.6170        |
| 1387.7473      | 12 | E  | 3  | 375.1992       | 188.1035        |
| 1458.7844      | 13 | A  | 2  | 246.1566       | 123.5822        |
|                | 14 | R  | 1  | 175.1195       | 88.0637         |

N-term:+29.04 K(9):+156.13

X-range:

0 - 0

MassTol: Y-zoom:

0. 1.

MassType:

☐AVG ☒MONO

Axis:

☒1 ☐2

Label:

☒I ☐M ☐-

Ions:

a ☐+ ☐2+ ☐3+

b ☒+ ☐2+ ☐3+

c ☐+ ☐2+ ☐3+

x ☐+ ☐2+ ☐3+

y ☒+ ☒2+ ☐3+

z ☐+ ☐2+ ☐3+

hide H<sub>2</sub>O/NH<sub>3</sub> ☐

zoom 112-122 ☐

GO

FNDTFVHVITDLSGKETICR, MH+ 2295.1443, m/z 574.5415  
L OS G17 P120811 220811-s1.05645.05645.4.dta

scan 5645; 2.6e+000

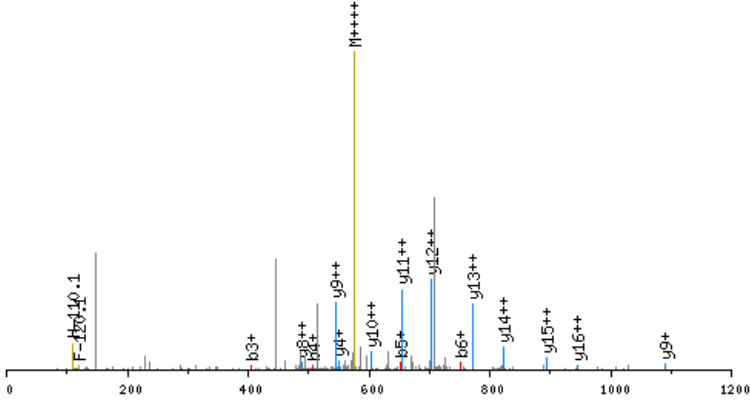

click image to zoom in; click top corners to zoom out [\[precursor±\]](#)

scan 5643; 574.5 m/z; 4.2e+000

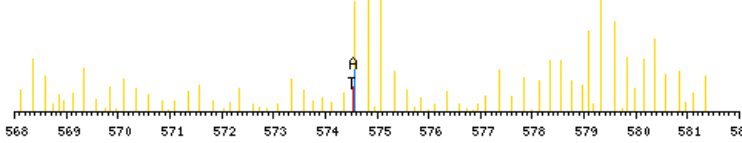

zoomed in precursor plot; T=theoretical m/z, A=acquired m/z

| b <sup>+</sup> | #  | AA | #  | y <sup>+</sup> | y <sup>2+</sup> |
|----------------|----|----|----|----------------|-----------------|
| 176.1075       | 1  | F  | 19 |                |                 |
| 290.1504       | 2  | N  | 18 | 2120.0446      | 1060.5262       |
| 405.1774       | 3  | D  | 17 | 2006.0017      | 1003.5048       |
| 506.2251       | 4  | T  | 16 | 1890.9747      | 945.9913        |
| 653.2935       | 5  | F  | 15 | 1789.9271      | 895.4674        |
| 752.3619       | 6  | V  | 14 | 1642.8587      | 821.9332        |
| 889.4208       | 7  | H  | 13 | 1543.7902      | 772.3990        |
| 988.4892       | 8  | V  | 12 | 1406.7313      | 703.8696        |
| 1089.5369      | 9  | T  | 11 | 1307.6629      | 654.3354        |
| 1204.5638      | 10 | D  | 10 | 1206.6152      | 603.8115        |
| 1317.6479      | 11 | L  | 9  | 1091.5883      | 546.2981        |
| 1404.6799      | 12 | S  | 8  | 978.5042       | 489.7560        |
| 1461.7014      | 13 | G  | 7  | 891.4722       | 446.2400        |
| 1617.8277      | 14 | K  | 6  | 834.4507       | 417.7293        |
| 1746.8703      | 15 | E  | 5  | 678.3244       | 339.6661        |
| 1847.9180      | 16 | T  | 4  | 549.2818       | 275.1448        |
| 1961.0020      | 17 | I  | 3  | 448.2342       | 224.6210        |
| 2121.0326      | 18 | C  | 2  | 335.1501       | 168.0790        |
|                | 19 | R  | 1  | 175.1195       | 88.0637         |

N-term: +29.04 K(14): +156.13  
C(18): +160.03

X-range:

0 - 0

MassTol: Y-zoom:

0. 1.

MassType:

☐AVG ☒MONO

Axis:

☒1 ☐2

Label:

☒I ☐M ☐-

Ions:

a ☐+ ☐2+ ☐3+

b ☒+ ☐2+ ☐3+

c ☐+ ☐2+ ☐3+

x ☐+ ☐2+ ☐3+

y ☒+ ☒2+ ☐3+

z ☐+ ☐2+ ☐3+

hide H<sub>2</sub>O/NH<sub>3</sub> ☐

zoom 112-122 ☐

GO

FNKPDIDAWELR, MH+ 1571.8858, m/z 524.6335  
H OS G16 P120811 220811-s1.05571.05571.3.dta

scan 5571; 5.8e+000

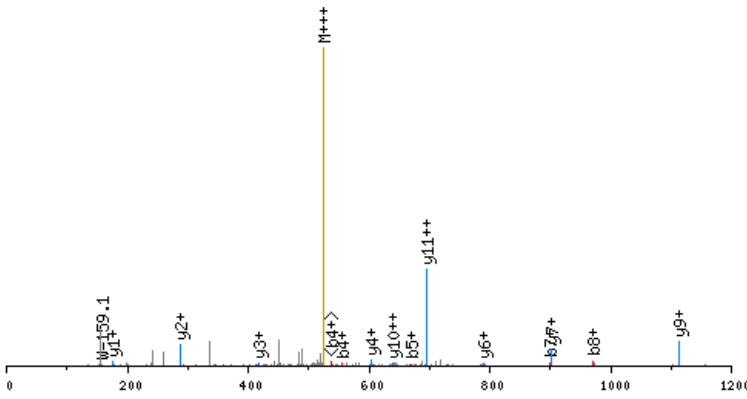

click image to zoom in; click top corners to zoom out

[precursor±]

scan 5568; 524.6 m/z; 7.8e+001

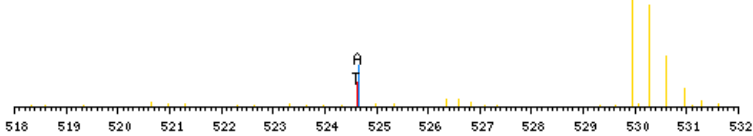

zoomed in precursor plot; T=theoretical m/z, A=acquired m/z

| b <sup>+</sup> | #  | AA | #  | y <sup>+</sup> | y <sup>2+</sup> |
|----------------|----|----|----|----------------|-----------------|
| 182.1393       | 1  | F  | 12 |                |                 |
| 296.1822       | 2  | N  | 11 | 1390.7543      | 695.8811        |
| 458.3403       | 3  | K  | 10 | 1276.7114      | 638.8596        |
| 555.3931       | 4  | P  | 9  | 1114.5533      | 557.7806        |
| 670.4200       | 5  | D  | 8  | 1017.5005      | 509.2542        |
| 783.5041       | 6  | I  | 7  | 902.4736       | 451.7407        |
| 898.5311       | 7  | D  | 6  | 789.3895       | 395.1987        |
| 969.5682       | 8  | A  | 5  | 674.3626       | 337.6852        |
| 1155.6475      | 9  | W  | 4  | 603.3255       | 302.1666        |
| 1284.6901      | 10 | E  | 3  | 417.2462       | 209.1270        |
| 1397.7741      | 11 | L  | 2  | 288.2036       | 144.6057        |
|                | 12 | R  | 1  | 175.1195       | 88.0637         |

N-term:+35.07 K(3):+162.16

X-range:

0 - 0

MassTol: Y-zoom:

0. 1.

MassType:

☐AVG ☒MONO

Axis:

☒1 ☐2

Label:

☒I ☐M ☐-

Ions:

a ☐+ ☐2+ ☐3+

b ☒+ ☐2+ ☐3+

c ☐+ ☐2+ ☐3+

x ☐+ ☐2+ ☐3+

y ☒+ ☒2+ ☐3+

z ☐+ ☐2+ ☐3+

hide H<sub>2</sub>O/NH<sub>3</sub> ☐

zoom 112-122 ☐

GO

FNQEVQKGLQDR, MH+ 1517.8076, m/z 380.2074  
L OS G18 P120811 220811-s1.02398.02398.4.dta

scan 2398; 1.1e+001

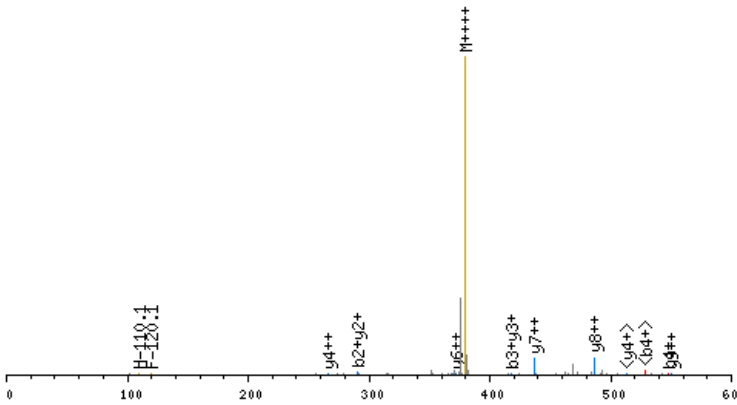

click image to zoom in; click top corners to zoom out

[precursor±]

scan 2396; 380.2 m/z; 1.7e+000

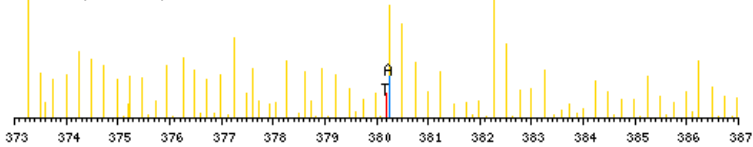

zoomed in precursor plot; T=theoretical m/z, A=acquired m/z

| b <sup>+</sup> | #  | AA | #  | y <sup>+</sup> | y <sup>2+</sup> |
|----------------|----|----|----|----------------|-----------------|
| 176.1075       | 1  | F  | 12 |                |                 |
| 290.1504       | 2  | N  | 11 | 1342.7079      | 671.8579        |
| 418.2090       | 3  | Q  | 10 | 1228.6650      | 614.8364        |
| 547.2516       | 4  | E  | 9  | 1100.6064      | 550.8071        |
| 646.3200       | 5  | V  | 8  | 971.5638       | 486.2858        |
| 774.3786       | 6  | Q  | 7  | 872.4954       | 436.7516        |
| 930.5049       | 7  | K  | 6  | 744.4368       | 372.7223        |
| 987.5264       | 8  | G  | 5  | 588.3105       | 294.6592        |
| 1100.6104      | 9  | L  | 4  | 531.2891       | 266.1485        |
| 1228.6690      | 10 | Q  | 3  | 418.2050       | 209.6064        |
| 1343.6960      | 11 | D  | 2  | 290.1464       | 145.5771        |
|                | 12 | R  | 1  | 175.1195       | 88.0637         |

N-term:+29.04 K(7):+156.13

X-range:

0 - 0

MassTol: Y-zoom:

0. 1.

MassType:

☐ AVG ☒ MONO

Axis:

☒ 1 ☐ 2

Label:

☒ I ☐ M ☐ -

Ions:

a ☐ + ☐ 2+ ☐ 3+

b ☒ + ☐ 2+ ☐ 3+

c ☐ + ☐ 2+ ☐ 3+

x ☐ + ☐ 2+ ☐ 3+

y ☒ + ☒ 2+ ☐ 3+

z ☐ + ☐ 2+ ☐ 3+

hide H<sub>2</sub>O/NH<sub>3</sub> ☐

zoom 112-122 ☐

GO

FPGSPGEKGEKGSAGTPGMPGSPGPR, MH+ 2523.2666, m/z 631.5721  
L\_OS\_G15\_P120811\_220811-s1.04155.04155.4.dta

scan 4155; 1.0e+000

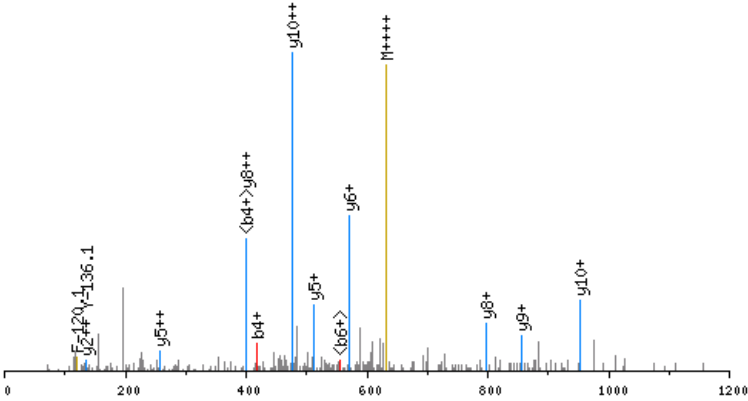

click image to zoom in; click top corners to zoom out [\[precursor±\]](#)

scan 4151; 631.6 m/z; 8.8e+000

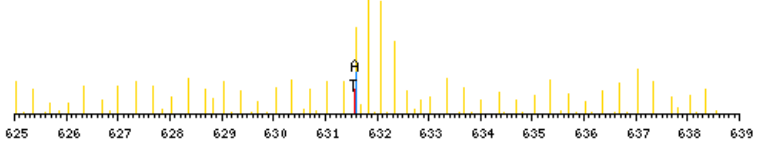

zoomed in precursor plot; T=theoretical m/z, A=acquired m/z

| b <sup>+</sup> | #  | AA | #  | y <sup>+</sup> | y <sup>2+</sup> |
|----------------|----|----|----|----------------|-----------------|
| 176.1075       | 1  | F  | 26 |                |                 |
| 273.1603       | 2  | P  | 25 | 2348.1669      | 1174.5874       |
| 330.1817       | 3  | G  | 24 | 2251.1142      | 1126.0610       |
| 417.2138       | 4  | S  | 23 | 2194.0927      | 1097.5503       |
| 514.2665       | 5  | P  | 22 | 2107.0607      | 1054.0343       |
| 571.2880       | 6  | G  | 21 | 2010.0079      | 1005.5079       |
| 700.3306       | 7  | E  | 20 | 1952.9865      | 976.9971        |
| 856.4569       | 8  | K  | 19 | 1823.9439      | 912.4758        |
| 913.4784       | 9  | G  | 18 | 1667.8176      | 834.4127        |
| 1042.5209      | 10 | E  | 17 | 1610.7961      | 805.9020        |
| 1198.6472      | 11 | K  | 16 | 1481.7535      | 741.3807        |
| 1255.6687      | 12 | G  | 15 | 1325.6272      | 663.3175        |
| 1342.7007      | 13 | S  | 14 | 1268.6057      | 634.8068        |
| 1413.7379      | 14 | A  | 13 | 1181.5737      | 591.2908        |
| 1470.7593      | 15 | G  | 12 | 1110.5366      | 555.7722        |
| 1571.8070      | 16 | T  | 11 | 1053.5151      | 527.2615        |
| 1668.8598      | 17 | P  | 10 | 952.4675       | 476.7376        |
| 1725.8812      | 18 | G  | 9  | 855.4147       | 428.2113        |
| 1856.9217      | 19 | M  | 8  | 798.3932       | 399.7005        |
| 1953.9745      | 20 | P  | 7  | 667.3527       | 334.1803        |
| 2010.9959      | 21 | G  | 6  | 570.3000       | 285.6539        |
| 2098.0280      | 22 | S  | 5  | 513.2785       | 257.1432        |
| 2195.0807      | 23 | P  | 4  | 426.2465       | 213.6272        |
| 2252.1022      | 24 | G  | 3  | 329.1937       | 165.1008        |
| 2349.1550      | 25 | P  | 2  | 272.1723       | 136.5900        |
|                | 26 | R  | 1  | 175.1195       | 88.0637         |

N-term:+29.04 K(8):+156.13  
K(11):+156.13

X-range:

0 - 0

MassTol: Y-zoom:

0. 1.

MassType:

☐ AVG ☒ MONO

Axis:

☒ 1 ☐ 2

Label:

☒ I ☐ M ☐ -

Ions:

a ☐ + ☐ 2+ ☐ 3+

b ☒ + ☐ 2+ ☐ 3+

c ☐ + ☐ 2+ ☐ 3+

x ☐ + ☐ 2+ ☐ 3+

y ☒ + ☒ 2+ ☐ 3+

z ☐ + ☐ 2+ ☐ 3+

hide H<sub>2</sub>O/NH<sub>3</sub> ☐

zoom 112-122 ☐

GO

FQGEETENEENLSSEKAGLDKR, MH+ 2594.2586, m/z 649.3201  
L OS G17 P120811 220811-s1.03439.03439.4.dta

scan 3439; 1.8e+000

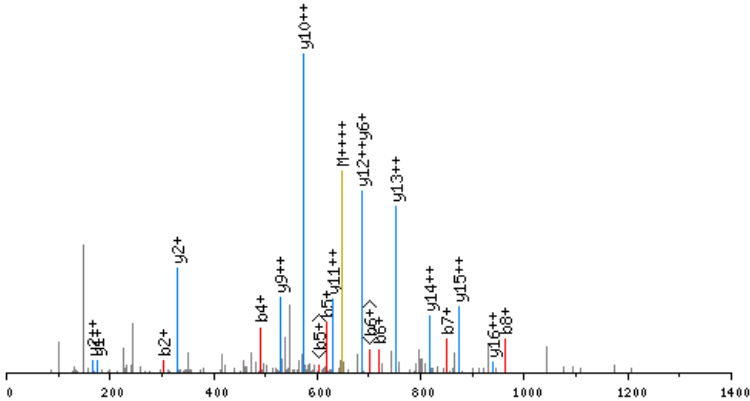

click image to zoom in; click top corners to zoom out

[precursor±]

scan 3438; 649.3 m/z; 9.7e+000

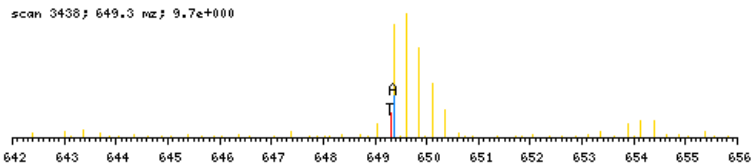

zoomed in precursor plot; T=theoretical m/z, A=acquired m/z

| b <sup>+</sup> | #  | AA | #  | y <sup>+</sup> | y <sup>2+</sup> |
|----------------|----|----|----|----------------|-----------------|
| 176.1075       | 1  | F  | 22 |                |                 |
| 304.1661       | 2  | Q  | 21 | 2419.1589      | 1210.0834       |
| 361.1876       | 3  | G  | 20 | 2291.1004      | 1146.0541       |
| 490.2301       | 4  | E  | 19 | 2234.0789      | 1117.5434       |
| 619.2727       | 5  | E  | 18 | 2105.0363      | 1053.0221       |
| 720.3204       | 6  | T  | 17 | 1975.9937      | 988.5008        |
| 849.3630       | 7  | E  | 16 | 1874.9460      | 937.9769        |
| 963.4059       | 8  | N  | 15 | 1745.9034      | 873.4556        |
| 1092.4485      | 9  | E  | 14 | 1631.8605      | 816.4342        |
| 1221.4911      | 10 | E  | 13 | 1502.8179      | 751.9129        |
| 1335.5341      | 11 | N  | 12 | 1373.7753      | 687.3916        |
| 1448.6181      | 12 | L  | 11 | 1259.7324      | 630.3701        |
| 1535.6501      | 13 | S  | 10 | 1146.6483      | 573.8281        |
| 1622.6822      | 14 | S  | 9  | 1059.6163      | 530.3121        |
| 1751.7248      | 15 | E  | 8  | 972.5843       | 486.7961        |
| 1907.8511      | 16 | K  | 7  | 843.5417       | 422.2748        |
| 1978.8882      | 17 | A  | 6  | 687.4154       | 344.2116        |
| 2035.9096      | 18 | G  | 5  | 616.3783       | 308.6930        |
| 2148.9937      | 19 | L  | 4  | 559.3568       | 280.1823        |
| 2264.0207      | 20 | D  | 3  | 446.2727       | 223.6403        |
| 2420.1470      | 21 | K  | 2  | 331.2458       | 166.1268        |
|                | 22 | R  | 1  | 175.1195       | 88.0637         |

N-term: +29.04 K(16): +156.13  
K(21): +156.13

X-range:

0 - 0

MassTol: Y-zoom:

0. 1.

MassType:

☐AVG ☒MONO

Axis:

☒1 ☐2

Label:

☒I ☐M ☐-

Ions:

a ☐+ ☐2+ ☐3+

b ☒+ ☐2+ ☐3+

c ☐+ ☐2+ ☐3+

x ☐+ ☐2+ ☐3+

y ☒+ ☒2+ ☐3+

z ☐+ ☐2+ ☐3+

hide H<sub>2</sub>O/NH<sub>3</sub> ☐

zoom 112-122 ☐

GO

FQSGQVLSALPR, MH+ 1336.7801, m/z 446.2649  
H OS G13 P120811 220811-s1.05376.05376.3.dta

scan 5376; 4.0e+000

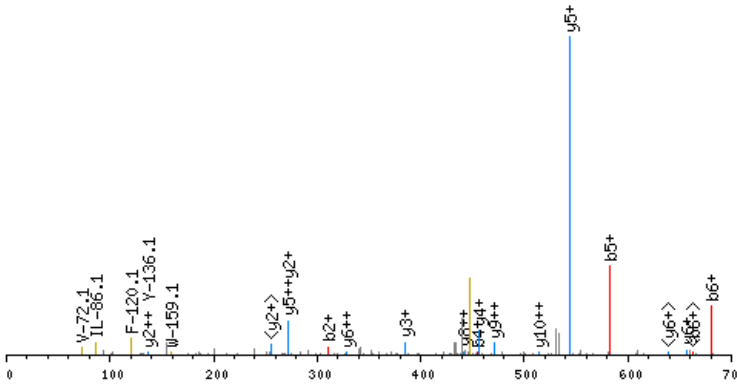

click image to zoom in; click top corners to zoom out

[precursor±]

scan 5374; 446.3 m/z; 7.3e+000

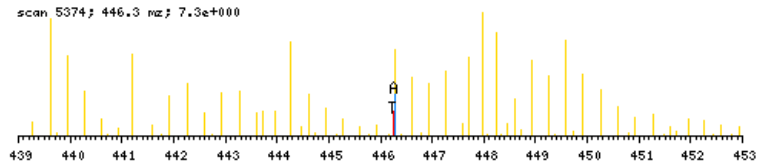

zoomed in precursor plot; T=theoretical m/z, A=acquired m/z

| b <sup>+</sup> | #  | AA | #  | y <sup>+</sup> | y <sup>2+</sup> |
|----------------|----|----|----|----------------|-----------------|
| 182.1393       | 1  | F  | 12 |                |                 |
| 310.1979       | 2  | Q  | 11 | 1155.6486      | 578.3282        |
| 397.2299       | 3  | S  | 10 | 1027.5900      | 514.2989        |
| 454.2514       | 4  | G  | 9  | 940.5580       | 470.7829        |
| 582.3100       | 5  | Q  | 8  | 883.5365       | 442.2722        |
| 681.3784       | 6  | V  | 7  | 755.4779       | 378.2429        |
| 794.4624       | 7  | L  | 6  | 656.4095       | 328.7087        |
| 881.4945       | 8  | S  | 5  | 543.3255       | 272.1666        |
| 952.5316       | 9  | A  | 4  | 456.2934       | 228.6506        |
| 1065.6156      | 10 | L  | 3  | 385.2563       | 193.1321        |
| 1162.6684      | 11 | P  | 2  | 272.1723       | 136.5900        |
|                | 12 | R  | 1  | 175.1195       | 88.0637         |

N-term:+35.07

X-range:

0 - 0

MassTol: Y-zoom:

0. 1.

MassType:

☐AVG ☒MONO

Axis:

☒1 ☐2

Label:

☒I ☐M ☐-

Ions:

a ☐+ ☐2+ ☐3+

b ☒+ ☐2+ ☐3+

c ☐+ ☐2+ ☐3+

x ☐+ ☐2+ ☐3+

y ☒+ ☒2+ ☐3+

z ☐+ ☐2+ ☐3+

hide H<sub>2</sub>O/NH<sub>3</sub> ☐

zoom 112-122 ☐

GO

FRVPTPNVSVDLTCR, MH+ 1888.0114, m/z 630.0087  
L OS G16 P120811 220811-s1.05954.05954.3.dta

scan 5954; 2.3e+000

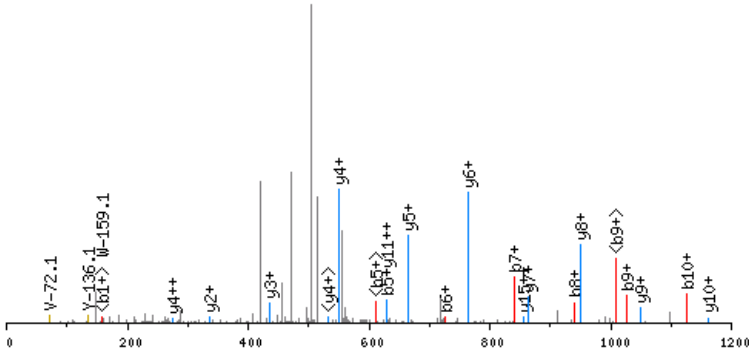

click image to zoom in; click top corners to zoom out

[precursor±]

scan 5953; 630.0 m/z; 6.4e+000

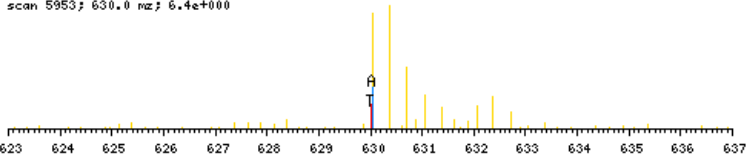

zoomed in precursor plot; T=theoretical m/z, A=acquired m/z

| b <sup>+</sup> | #  | AA | #  | y <sup>+</sup> | y <sup>2+</sup> |
|----------------|----|----|----|----------------|-----------------|
| 176.1075       | 1  | F  | 16 |                |                 |
| 332.2086       | 2  | R  | 15 | 1712.9117      | 856.9598        |
| 431.2770       | 3  | V  | 14 | 1556.8106      | 778.9092        |
| 528.3298       | 4  | P  | 13 | 1457.7422      | 729.3750        |
| 629.3775       | 5  | T  | 12 | 1360.6894      | 680.8486        |
| 726.4302       | 6  | P  | 11 | 1259.6417      | 630.3248        |
| 840.4732       | 7  | N  | 10 | 1162.5890      | 581.7984        |
| 939.5416       | 8  | V  | 9  | 1048.5461      | 524.7769        |
| 1026.5736      | 9  | S  | 8  | 949.4776       | 475.2427        |
| 1125.6420      | 10 | V  | 7  | 862.4456       | 431.7267        |
| 1224.7104      | 11 | V  | 6  | 763.3772       | 382.1925        |
| 1339.7374      | 12 | D  | 5  | 664.3088       | 332.6583        |
| 1452.8215      | 13 | L  | 4  | 549.2818       | 275.1448        |
| 1553.8691      | 14 | T  | 3  | 436.1978       | 218.6028        |
| 1713.8997      | 15 | C  | 2  | 335.1501       | 168.0790        |
|                | 16 | R  | 1  | 175.1195       | 88.0637         |

N-term:+29.04 C(15):+160.03

X-range:

0 - 0

MassTol: Y-zoom:

0. 1.

MassType:

☐AVG ☒MONO

Axis:

☒1 ☐2

Label:

☒I ☐M ☐-

Ions:

a ☐+ ☐2+ ☐3+

b ☒+ ☐2+ ☐3+

c ☐+ ☐2+ ☐3+

x ☐+ ☐2+ ☐3+

y ☒+ ☒2+ ☐3+

z ☐+ ☐2+ ☐3+

hide H<sub>2</sub>O/NH<sub>3</sub> ☐

zoom 112-122 ☐

GO

FSEGGAVGAHR, MH+ 1186.5969, m/z 396.2038  
L OS G16 P120811 220811-s1.02119.02119.3.dta

scan 2119; 6.2e+000

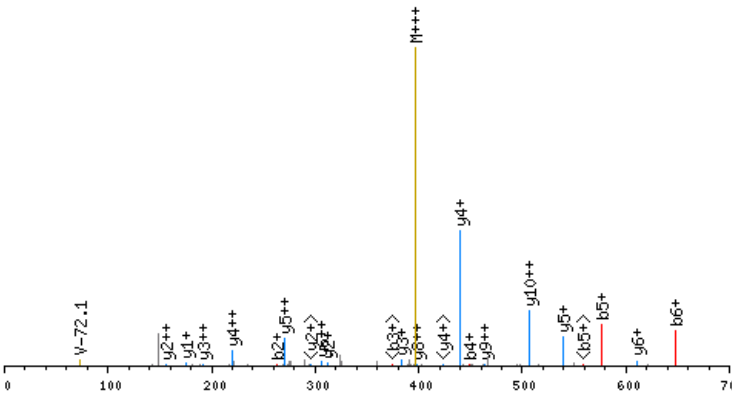

click image to zoom in; click top corners to zoom out

[precursor±]

scan 2118; 396.2 m/z; 9.2e+000

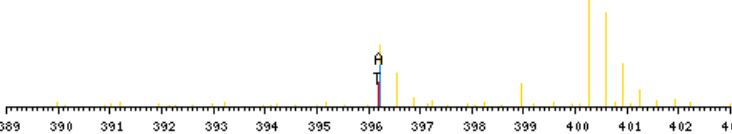

zoomed in precursor plot; T=theoretical m/z, A=acquired m/z

| b <sup>+</sup> | #  | AA | #  | y <sup>+</sup> | y <sup>2+</sup> |
|----------------|----|----|----|----------------|-----------------|
| 176.1075       | 1  | F  | 11 |                |                 |
| 263.1395       | 2  | S  | 10 | 1011.4972      | 506.2525        |
| 392.1821       | 3  | E  | 9  | 924.4652       | 462.7365        |
| 449.2036       | 4  | G  | 8  | 795.4226       | 398.2152        |
| 577.2622       | 5  | Q  | 7  | 738.4011       | 369.7045        |
| 648.2993       | 6  | A  | 6  | 610.3425       | 305.6752        |
| 747.3677       | 7  | V  | 5  | 539.3054       | 270.1566        |
| 804.3892       | 8  | G  | 4  | 440.2370       | 220.6224        |
| 875.4263       | 9  | A  | 3  | 383.2155       | 192.1117        |
| 1012.4852      | 10 | H  | 2  | 312.1784       | 156.5931        |
|                | 11 | R  | 1  | 175.1195       | 88.0637         |

N-term:+29.04

X-range:

0 - 0

MassTol: Y-zoom:

0. 1.

MassType:

☐ AVG ☒ MONO

Axis:

☒ 1 ☐ 2

Label:

☒ I ☐ M ☐ -

Ions:

a ☐ + ☐ 2+ ☐ 3+

b ☒ + ☐ 2+ ☐ 3+

c ☐ + ☐ 2+ ☐ 3+

x ☐ + ☐ 2+ ☐ 3+

y ☒ + ☒ 2+ ☐ 3+

z ☐ + ☐ 2+ ☐ 3+

hide H<sub>2</sub>O/NH<sub>3</sub> ☐

zoom 112-122 ☐

GO

FSLGFDEPAEQPVR, MH+ 1619.8069, m/z 540.6072  
L OS G13 P120811 220811-s1.06035.06035.3.dta

scan 6035; 1.7e+000

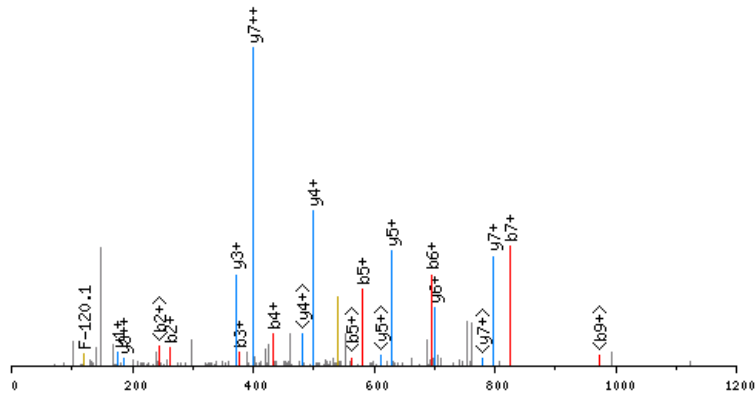

click image to zoom in; click top corners to zoom out

[precursor±]

scan 6034; 540.6 m/z; 6.9e+000

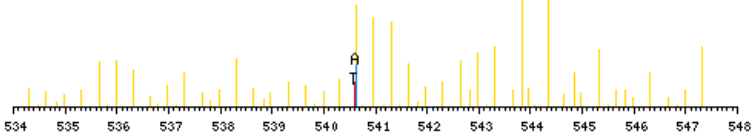

zoomed in precursor plot; T=theoretical m/z, A=acquired m/z

| b <sup>+</sup> | #  | AA | #  | y <sup>+</sup> | y <sup>2+</sup> |
|----------------|----|----|----|----------------|-----------------|
| 176.1075       | 1  | F  | 14 |                |                 |
| 263.1395       | 2  | S  | 13 | 1444.7072      | 722.8575        |
| 376.2236       | 3  | L  | 12 | 1357.6752      | 679.3415        |
| 433.2451       | 4  | G  | 11 | 1244.5911      | 622.7995        |
| 580.3135       | 5  | F  | 10 | 1187.5697      | 594.2888        |
| 695.3404       | 6  | D  | 9  | 1040.5013      | 520.7545        |
| 824.3830       | 7  | E  | 8  | 925.4743       | 463.2411        |
| 921.4358       | 8  | P  | 7  | 796.4317       | 398.7198        |
| 992.4729       | 9  | A  | 6  | 699.3790       | 350.1934        |
| 1121.5155      | 10 | E  | 5  | 628.3418       | 314.6748        |
| 1249.5741      | 11 | Q  | 4  | 499.2993       | 250.1535        |
| 1346.6268      | 12 | P  | 3  | 371.2407       | 186.1243        |
| 1445.6952      | 13 | V  | 2  | 274.1879       | 137.5979        |
|                | 14 | R  | 1  | 175.1195       | 88.0637         |

N-term:+29.04

X-range:

0 - 0

MassTol: Y-zoom:

0. 1.

MassType:

☐AVG ☒MONO

Axis:

☒1 ☐2

Label:

☒I ☐M ☐-

Ions:

a ☐+ ☐2+ ☐3+

b ☒+ ☐2+ ☐3+

c ☐+ ☐2+ ☐3+

x ☐+ ☐2+ ☐3+

y ☒+ ☒2+ ☐3+

z ☐+ ☐2+ ☐3+

hide H<sub>2</sub>O/NH<sub>3</sub> ☐

zoom 112-122 ☐

GO

FSPEKSQLPGIVAGGR, MH+ 1698.9543, m/z 566.9896  
L OS G15 P120811 220811-s1.04242.04242.3.dta

scan 4242; 9.8e+000

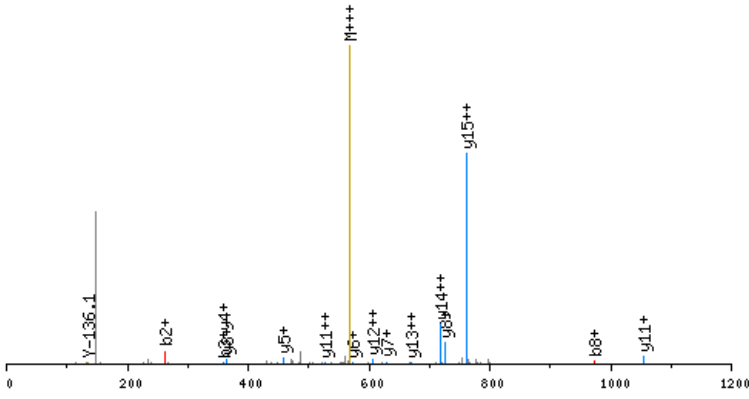

click image to zoom in; click top corners to zoom out

[precursor±]

scan 4241; 567.0 m/z; 2.2e+001

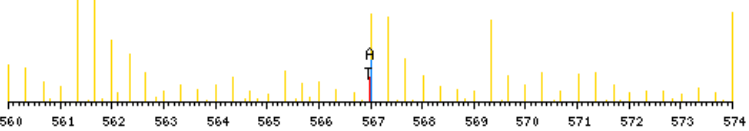

zoomed in precursor plot; T=theoretical m/z, A=acquired m/z

| b <sup>+</sup> | #  | AA | #  | y <sup>+</sup> | y <sup>2+</sup> |
|----------------|----|----|----|----------------|-----------------|
| 176.1075       | 1  | F  | 16 |                |                 |
| 263.1395       | 2  | S  | 15 | 1523.8546      | 762.4312        |
| 360.1923       | 3  | P  | 14 | 1436.8226      | 718.9152        |
| 489.2349       | 4  | E  | 13 | 1339.7698      | 670.3888        |
| 645.3612       | 5  | K  | 12 | 1210.7272      | 605.8675        |
| 732.3932       | 6  | S  | 11 | 1054.6009      | 527.8044        |
| 860.4518       | 7  | Q  | 10 | 967.5689       | 484.2884        |
| 973.5359       | 8  | L  | 9  | 839.5103       | 420.2591        |
| 1070.5886      | 9  | P  | 8  | 726.4262       | 363.7170        |
| 1127.6101      | 10 | G  | 7  | 629.3735       | 315.1907        |
| 1240.6942      | 11 | I  | 6  | 572.3520       | 286.6799        |
| 1339.7626      | 12 | V  | 5  | 459.2680       | 230.1379        |
| 1410.7997      | 13 | A  | 4  | 360.1995       | 180.6037        |
| 1467.8212      | 14 | G  | 3  | 289.1624       | 145.0851        |
| 1524.8426      | 15 | G  | 2  | 232.1410       | 116.5744        |
|                | 16 | R  | 1  | 175.1195       | 88.0637         |

N-term:+29.04 K(5):+156.13

X-range:

0 - 0

MassTol: Y-zoom:

0. 1.

MassType:

☐ AVG ☒ MONO

Axis:

☒ 1 ☐ 2

Label:

☒ I ☐ M ☐ -

Ions:

a ☐ + ☐ 2+ ☐ 3+

b ☒ + ☐ 2+ ☐ 3+

c ☐ + ☐ 2+ ☐ 3+

x ☐ + ☐ 2+ ☐ 3+

y ☒ + ☒ 2+ ☐ 3+

z ☐ + ☐ 2+ ☐ 3+

hide H<sub>2</sub>O/NH<sub>3</sub> ☐

zoom 112-122 ☐

GO

FTELNQNQVQKVDQYLYHMR, MH+ 2610.3139, m/z 653.3339  
L OS G17 P120811 220811-s1.06146.06146.4.dta

scan 6146; 7.4e-001

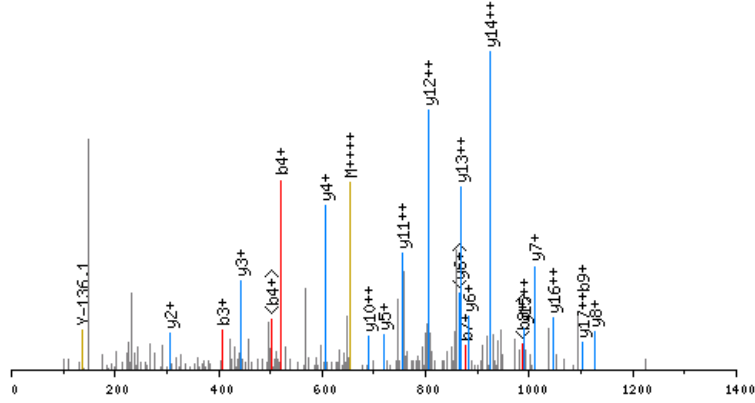

click image to zoom in; click top corners to zoom out [\[precursor±\]](#)

scan 6143; 653.3 m/z; 2.8e+000

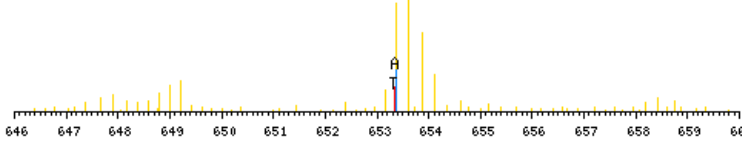

zoomed in precursor plot; T=theoretical m/z, A=acquired m/z

| b <sup>+</sup> | #  | AA | #  | y <sup>+</sup> | y <sup>2+</sup> |
|----------------|----|----|----|----------------|-----------------|
| 176.1075       | 1  | F  | 20 |                |                 |
| 277.1552       | 2  | T  | 19 | 2435.2142      | 1218.1110       |
| 406.1978       | 3  | E  | 18 | 2334.1665      | 1167.5872       |
| 519.2818       | 4  | L  | 17 | 2205.1239      | 1103.0659       |
| 633.3248       | 5  | N  | 16 | 2092.0399      | 1046.5238       |
| 761.3834       | 6  | Q  | 15 | 1977.9969      | 989.5024        |
| 875.4263       | 7  | N  | 14 | 1849.9383      | 925.4731        |
| 1003.4849      | 8  | Q  | 13 | 1735.8954      | 868.4516        |
| 1102.5533      | 9  | V  | 12 | 1607.8368      | 804.4223        |
| 1230.6119      | 10 | Q  | 11 | 1508.7684      | 754.8881        |
| 1386.7382      | 11 | K  | 10 | 1380.7099      | 690.8588        |
| 1485.8066      | 12 | V  | 9  | 1224.5836      | 612.7957        |
| 1600.8335      | 13 | D  | 8  | 1125.5151      | 563.2615        |
| 1728.8921      | 14 | Q  | 7  | 1010.4882      | 505.7480        |
| 1891.9554      | 15 | Y  | 6  | 882.4296       | 441.7187        |
| 2005.0395      | 16 | L  | 5  | 719.3663       | 360.1871        |
| 2168.1028      | 17 | Y  | 4  | 606.2822       | 303.6450        |
| 2305.1617      | 18 | H  | 3  | 443.2189       | 222.1134        |
| 2436.2022      | 19 | M  | 2  | 306.1600       | 153.5839        |
|                | 20 | R  | 1  | 175.1195       | 88.0637         |

N-term:+29.04 K(11):+156.13

X-range:

0 - 0

MassTol: Y-zoom:

0. 1.

MassType:

☐ AVG ☒ MONO

Axis:

☒ 1 ☐ 2

Label:

☒ I ☐ M ☐ -

Ions:

a ☐ + ☐ 2+ ☐ 3+

b ☒ + ☐ 2+ ☐ 3+

c ☐ + ☐ 2+ ☐ 3+

x ☐ + ☐ 2+ ☐ 3+

y ☒ + ☒ 2+ ☐ 3+

z ☐ + ☐ 2+ ☐ 3+

hide H<sub>2</sub>O/NH<sub>3</sub> ☐

zoom 112-122 ☐

GO

FTQAGSEVSALLGR, MH+ 1463.7858, m/z 488.6001  
L OS G13 P120811 220811-s1.05880.05880.3.dta

scan 5880; 1.9e+000

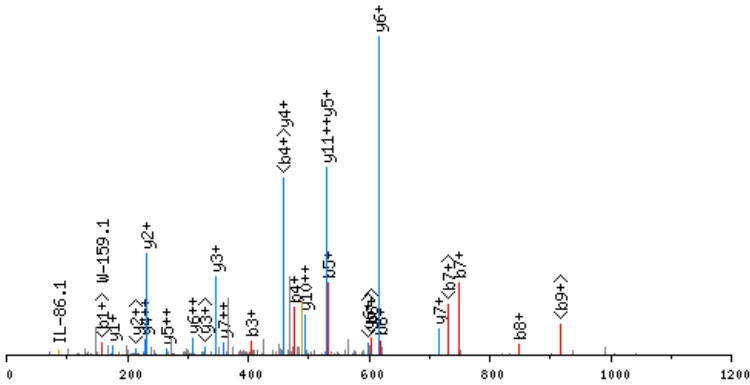

click image to zoom in; click top corners to zoom out

[precursor±]

scan 5879; 488.6 m/z; 4.8e+000

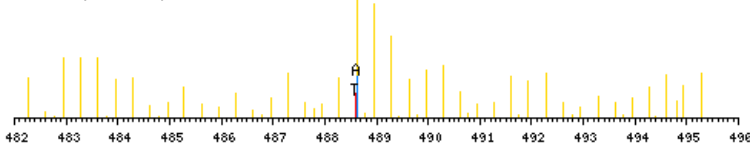

zoomed in precursor plot; T=theoretical m/z, A=acquired m/z

| b <sup>+</sup> | #  | AA | #  | y <sup>+</sup> | y <sup>2+</sup> |
|----------------|----|----|----|----------------|-----------------|
| 176.1075       | 1  | F  | 14 |                |                 |
| 277.1552       | 2  | T  | 13 | 1288.6861      | 644.8470        |
| 405.2138       | 3  | Q  | 12 | 1187.6384      | 594.3231        |
| 476.2509       | 4  | A  | 11 | 1059.5798      | 530.2938        |
| 533.2723       | 5  | G  | 10 | 988.5427       | 494.7753        |
| 620.3044       | 6  | S  | 9  | 931.5213       | 466.2645        |
| 749.3470       | 7  | E  | 8  | 844.4892       | 422.7485        |
| 848.4154       | 8  | V  | 7  | 715.4466       | 358.2272        |
| 935.4474       | 9  | S  | 6  | 616.3782       | 308.6930        |
| 1006.4845      | 10 | A  | 5  | 529.3462       | 265.1770        |
| 1119.5686      | 11 | L  | 4  | 458.3091       | 229.6585        |
| 1232.6527      | 12 | L  | 3  | 345.2250       | 173.1164        |
| 1289.6741      | 13 | G  | 2  | 232.1410       | 116.5744        |
|                | 14 | R  | 1  | 175.1195       | 88.0637         |

N-term:+29.04

X-range:

0 - 0

MassTol: Y-zoom:

0. 1.

MassType:

☐ AVG ☒ MONO

Axis:

☒ 1 ☐ 2

Label:

☒ I ☐ M ☐ -

Ions:

a ☐ + ☐ 2+ ☐ 3+

b ☒ + ☐ 2+ ☐ 3+

c ☐ + ☐ 2+ ☐ 3+

x ☐ + ☐ 2+ ☐ 3+

y ☒ + ☒ 2+ ☐ 3+

z ☐ + ☐ 2+ ☐ 3+

hide H<sub>2</sub>O/NH<sub>3</sub> ☐

zoom 112-122 ☐

GO

FVGGIKEDTEHHLR, MH+ 1835.0088, m/z 459.5077  
H OS G19 P120811 220811-s1.02599.02599.4.dta

scan 2598; 2.0e+001

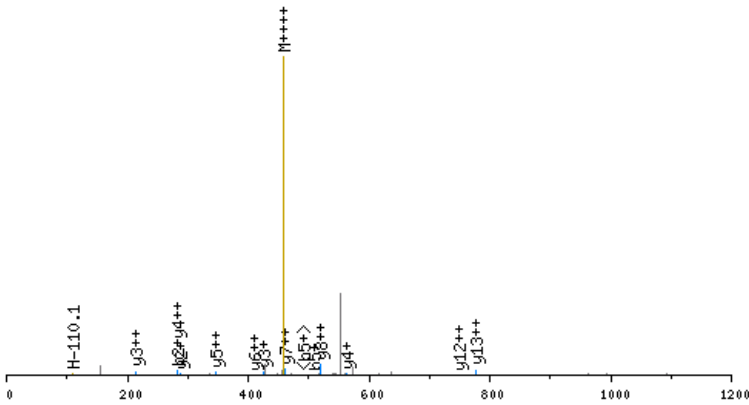

click image to zoom in; click top corners to zoom out

[precursor±]

scan 2598; 459.5 m/z; 7.3e+000

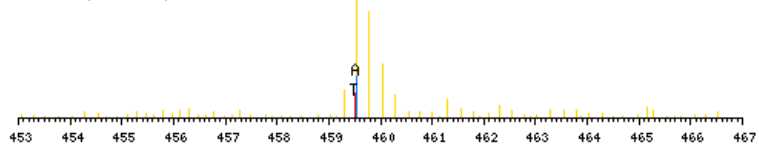

zoomed in precursor plot; T=theoretical m/z, A=acquired m/z

| b <sup>+</sup> | #  | AA | #  | y <sup>+</sup> | y <sup>2+</sup> |
|----------------|----|----|----|----------------|-----------------|
| 182.1393       | 1  | F  | 15 |                |                 |
| 281.2077       | 2  | V  | 14 | 1653.8773      | 827.4426        |
| 338.2292       | 3  | G  | 13 | 1554.8089      | 777.9084        |
| 395.2507       | 4  | G  | 12 | 1497.7874      | 749.3976        |
| 508.3347       | 5  | I  | 11 | 1440.7660      | 720.8869        |
| 670.4928       | 6  | K  | 10 | 1327.6819      | 664.3449        |
| 799.5354       | 7  | E  | 9  | 1165.5238      | 583.2658        |
| 914.5624       | 8  | D  | 8  | 1036.4812      | 518.7445        |
| 1015.6100      | 9  | T  | 7  | 921.4543       | 461.2310        |
| 1144.6526      | 10 | E  | 6  | 820.4066       | 410.7072        |
| 1273.6952      | 11 | E  | 5  | 691.3640       | 346.1859        |
| 1410.7541      | 12 | H  | 4  | 562.3214       | 281.6646        |
| 1547.8130      | 13 | H  | 3  | 425.2625       | 213.1352        |
| 1660.8971      | 14 | L  | 2  | 288.2036       | 144.6057        |
|                | 15 | R  | 1  | 175.1195       | 88.0637         |

N-term:+35.07 K(6):+162.16

X-range:

0 - 0

MassTol: Y-zoom:

0. 1.

MassType:

☐ AVG ☒ MONO

Axis:

☒ 1 ☐ 2

Label:

☒ I ☐ M ☐ -

Ions:

a ☐ + ☐ 2+ ☐ 3+

b ☒ + ☐ 2+ ☐ 3+

c ☐ + ☐ 2+ ☐ 3+

x ☐ + ☐ 2+ ☐ 3+

y ☒ + ☒ 2+ ☐ 3+

z ☐ + ☐ 2+ ☐ 3+

hide H<sub>2</sub>O/NH<sub>3</sub> ☐

zoom 112-122 ☐

GO

FVLDEADEMLSR, MH+ 1452.7044, m/z 484.9063  
L OS G13 P120811 220811-s1.06322.06322.3.dta

scan 6322; 1.5e+000

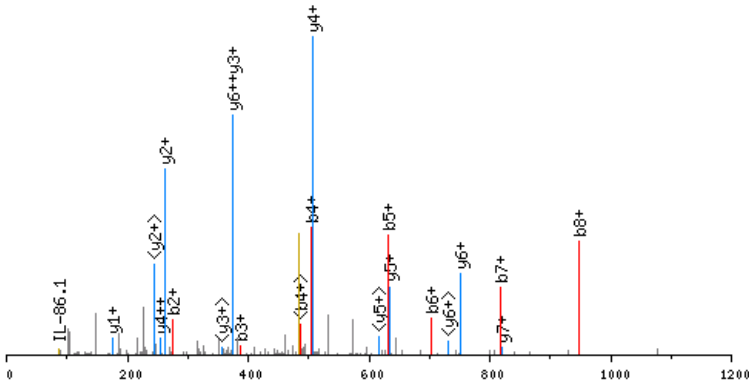

click image to zoom in; click top corners to zoom out

[precursor±]

scan 6319; 484.9 m/z; 3.5e+000

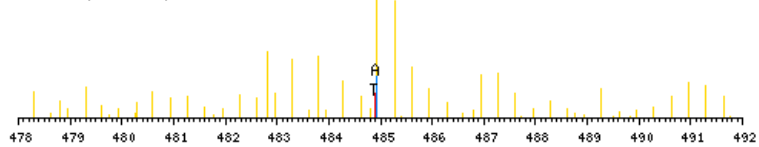

zoomed in precursor plot; T=theoretical m/z, A=acquired m/z

| b <sup>+</sup> | #  | AA | #  | y <sup>+</sup> | y <sup>2+</sup> |
|----------------|----|----|----|----------------|-----------------|
| 176.1075       | 1  | F  | 12 |                |                 |
| 275.1759       | 2  | V  | 11 | 1277.6047      | 639.3063        |
| 388.2600       | 3  | L  | 10 | 1178.5363      | 589.7721        |
| 503.2869       | 4  | D  | 9  | 1065.4523      | 533.2300        |
| 632.3295       | 5  | E  | 8  | 950.4253       | 475.7166        |
| 703.3666       | 6  | A  | 7  | 821.3827       | 411.1953        |
| 818.3936       | 7  | D  | 6  | 750.3456       | 375.6767        |
| 947.4362       | 8  | E  | 5  | 635.3187       | 318.1632        |
| 1078.4767      | 9  | M  | 4  | 506.2761       | 253.6420        |
| 1191.5607      | 10 | L  | 3  | 375.2356       | 188.1217        |
| 1278.5928      | 11 | S  | 2  | 262.1515       | 131.5797        |
|                | 12 | R  | 1  | 175.1195       | 88.0637         |

N-term:+29.04

X-range:

0 - 0

MassTol: Y-zoom:

0. 1.

MassType:

☐ AVG ☒ MONO

Axis:

☒ 1 ☐ 2

Label:

☒ I ☐ M ☐ -

Ions:

a ☐ + ☐ 2+ ☐ 3+

b ☒ + ☐ 2+ ☐ 3+

c ☐ + ☐ 2+ ☐ 3+

x ☐ + ☐ 2+ ☐ 3+

y ☒ + ☒ 2+ ☐ 3+

z ☐ + ☐ 2+ ☐ 3+

hide H<sub>2</sub>O/NH<sub>3</sub> ☐

zoom 112-122 ☐

GO

FVPLNTNPKEVQEMR, MH+ 1857.9897, m/z 620.0014  
L OS G15 P120811 220811-s1.04065.04065.3.dta

scan 4065; 4.5e+000

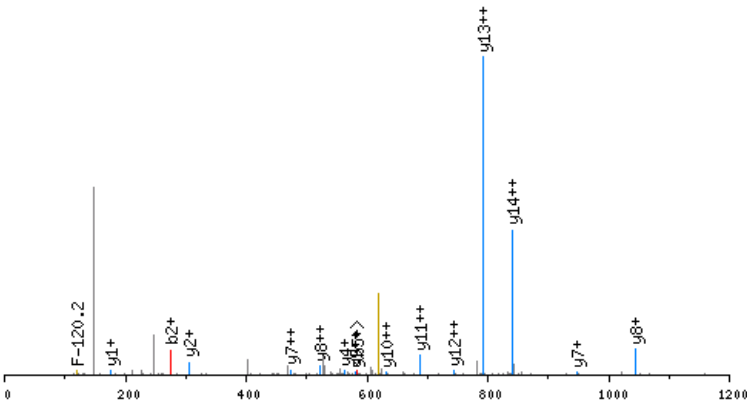

click image to zoom in; click top corners to zoom out

[precursor±]

scan 4061; 620.0 m/z; 7.6e+000

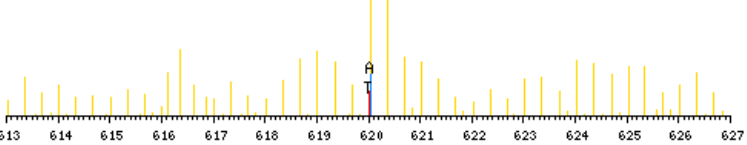

zoomed in precursor plot; T=theoretical m/z, A=acquired m/z

| b <sup>+</sup> | #  | AA | #  | y <sup>+</sup> | y <sup>2+</sup> |
|----------------|----|----|----|----------------|-----------------|
| 176.1075       | 1  | F  | 15 |                |                 |
| 275.1759       | 2  | V  | 14 | 1682.8900      | 841.9489        |
| 372.2287       | 3  | P  | 13 | 1583.8216      | 792.4147        |
| 485.3128       | 4  | L  | 12 | 1486.7688      | 743.8883        |
| 599.3557       | 5  | N  | 11 | 1373.6848      | 687.3463        |
| 700.4034       | 6  | T  | 10 | 1259.6418      | 630.3248        |
| 814.4463       | 7  | N  | 9  | 1158.5942      | 579.8010        |
| 911.4991       | 8  | P  | 8  | 1044.5512      | 522.7795        |
| 1067.6254      | 9  | K  | 7  | 947.4985       | 474.2531        |
| 1196.6679      | 10 | E  | 6  | 791.3722       | 396.1900        |
| 1295.7364      | 11 | V  | 5  | 662.3296       | 331.6687        |
| 1423.7949      | 12 | Q  | 4  | 563.2612       | 282.1345        |
| 1552.8375      | 13 | E  | 3  | 435.2026       | 218.1052        |
| 1683.8780      | 14 | M  | 2  | 306.1600       | 153.5839        |
|                | 15 | R  | 1  | 175.1195       | 88.0637         |

N-term:+29.04 K(9):+156.13



X-range:

0 - 0

MassTol: Y-zoom:

0. 1.

MassType:

☐AVG ☒MONO

Axis:

☒1 ☐2

Label:

☒I ☐M ☐-

Ions:

a ☐+ ☐2+ ☐3+

b ☒+ ☐2+ ☐3+

c ☐+ ☐2+ ☐3+

x ☐+ ☐2+ ☐3+

y ☒+ ☒2+ ☐3+

z ☐+ ☐2+ ☐3+

hide H<sub>2</sub>O/NH<sub>3</sub> ☐

zoom 112-122 ☐

GO

FVSSGPTNASAFTER, MH+ 1598.7814, m/z 533.5987  
L OS G13 P120811 220811-s1.03832.03832.3.dta

scan 3832; 1.2e+000

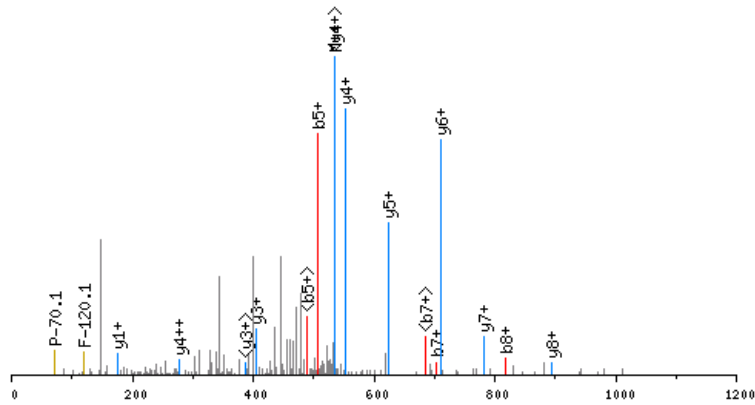

click image to zoom in; click top corners to zoom out

[precursor±]

scan 3829; 533.6 m/z; 2.3e+001

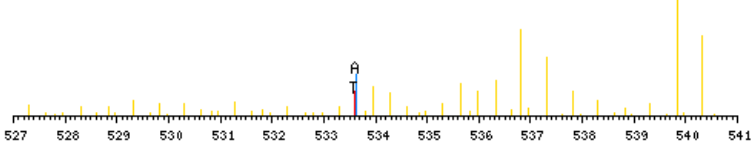

zoomed in precursor plot; T=theoretical m/z, A=acquired m/z

| b <sup>+</sup> | #  | AA | #  | y <sup>+</sup> | y <sup>2+</sup> |
|----------------|----|----|----|----------------|-----------------|
| 176.1075       | 1  | F  | 15 |                |                 |
| 275.1759       | 2  | V  | 14 | 1423.6817      | 712.3448        |
| 362.2080       | 3  | S  | 13 | 1324.6133      | 662.8106        |
| 449.2400       | 4  | S  | 12 | 1237.5813      | 619.2946        |
| 506.2614       | 5  | G  | 11 | 1150.5493      | 575.7786        |
| 603.3142       | 6  | P  | 10 | 1093.5278      | 547.2678        |
| 704.3619       | 7  | T  | 9  | 996.4750       | 498.7414        |
| 818.4048       | 8  | N  | 8  | 895.4274       | 448.2176        |
| 889.4419       | 9  | A  | 7  | 781.3844       | 391.1961        |
| 976.4740       | 10 | S  | 6  | 710.3473       | 355.6776        |
| 1047.5111      | 11 | A  | 5  | 623.3153       | 312.1616        |
| 1194.5795      | 12 | F  | 4  | 552.2782       | 276.6430        |
| 1295.6272      | 13 | T  | 3  | 405.2098       | 203.1088        |
| 1424.6698      | 14 | E  | 2  | 304.1621       | 152.5850        |
|                | 15 | R  | 1  | 175.1195       | 88.0637         |

N-term:+29.04

X-range:

0 - 0

MassTol: Y-zoom:

0. 1.

MassType:

☐AVG ☒MONO

Axis:

☒1 ☐2

Label:

☒I ☐M ☐-

Ions:

a ☐+ ☐2+ ☐3+

b ☒+ ☐2+ ☐3+

c ☐+ ☐2+ ☐3+

x ☐+ ☐2+ ☐3+

y ☒+ ☒2+ ☐3+

z ☐+ ☐2+ ☐3+

hide H<sub>2</sub>O/NH<sub>3</sub> ☐

zoom 112-122 ☐

GO

FVSSSLPDICYR, MH+ 1471.7255, m/z 491.2467  
L OS G13 P120811 220811-s1.05413.05413.3.dta

scan 5413; 1.6e+000

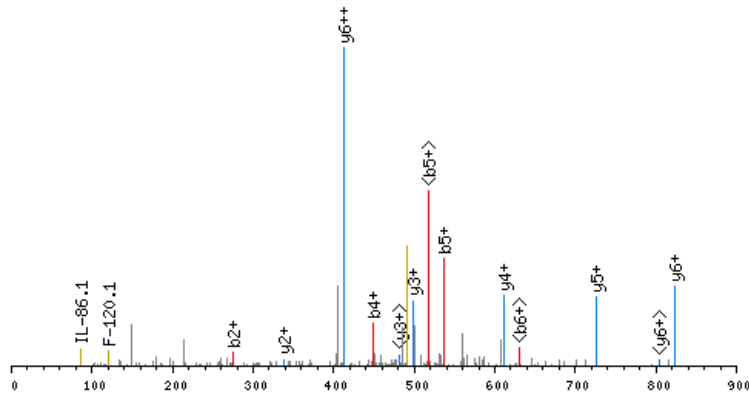

click image to zoom in; click top corners to zoom out [\[precursor±\]](#)

scan 5409; 491.2 m/z; 7.4e+000

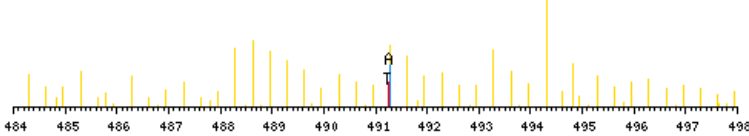

zoomed in precursor plot; T=theoretical m/z, A=acquired m/z

| b <sup>+</sup> | #  | AA | #  | y <sup>+</sup> | y <sup>2+</sup> |
|----------------|----|----|----|----------------|-----------------|
| 176.1075       | 1  | F  | 12 |                |                 |
| 275.1759       | 2  | V  | 11 | 1296.6258      | 648.8168        |
| 362.2080       | 3  | S  | 10 | 1197.5573      | 599.2826        |
| 449.2400       | 4  | S  | 9  | 1110.5253      | 555.7666        |
| 536.2720       | 5  | S  | 8  | 1023.4933      | 512.2506        |
| 649.3561       | 6  | L  | 7  | 936.4613       | 468.7345        |
| 746.4088       | 7  | P  | 6  | 823.3772       | 412.1925        |
| 861.4358       | 8  | D  | 5  | 726.3244       | 363.6661        |
| 974.5198       | 9  | I  | 4  | 611.2975       | 306.1527        |
| 1134.5504      | 10 | C  | 3  | 498.2134       | 249.6106        |
| 1297.6138      | 11 | Y  | 2  | 338.1828       | 169.5953        |
|                | 12 | R  | 1  | 175.1195       | 88.0637         |

N-term:+29.04 C(10):+160.03



X-range:

0 - 0

MassTol: Y-zoom:

0. 1.

MassType:

☐AVG ☒MONO

Axis:

☒1 ☐2

Label:

☒I ☐M ☐-

Ions:

a ☐+ ☐2+ ☐3+

b ☒+ ☐2+ ☐3+

c ☐+ ☐2+ ☐3+

x ☐+ ☐2+ ☐3+

y ☒+ ☒2+ ☐3+

z ☐+ ☐2+ ☐3+

hide H<sub>2</sub>O/NH<sub>3</sub> ☐

zoom 112-122 ☐

GO

GAEIVDSVLDVVR, MH+ 1399.7796, m/z 467.2647  
L OS G13 P120811 220811-s1.06787.06787.3.dta

scan 6787; 3.2e+000

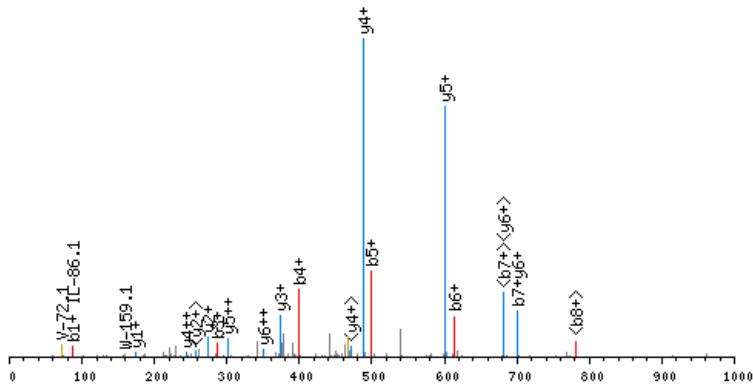

click image to zoom in; click top corners to zoom out

[precursor±]

scan 6784; 467.3 m/z; 6.6e+000

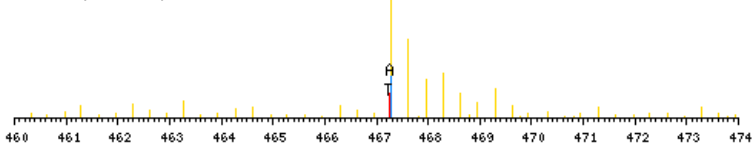

zoomed in precursor plot; T=theoretical m/z, A=acquired m/z

| b <sup>+</sup> | #  | AA | #  | y <sup>+</sup> | y <sup>2+</sup> |
|----------------|----|----|----|----------------|-----------------|
| 86.0606        | 1  | G  | 13 |                |                 |
| 157.0977       | 2  | A  | 12 | 1314.7269      | 657.8674        |
| 286.1403       | 3  | E  | 11 | 1243.6898      | 622.3488        |
| 399.2243       | 4  | L  | 10 | 1114.6472      | 557.8275        |
| 498.2927       | 5  | V  | 9  | 1001.5631      | 501.2855        |
| 613.3197       | 6  | D  | 8  | 902.4947       | 451.7513        |
| 700.3517       | 7  | S  | 7  | 787.4678       | 394.2378        |
| 799.4201       | 8  | V  | 6  | 700.4357       | 350.7218        |
| 912.5042       | 9  | L  | 5  | 601.3673       | 301.1876        |
| 1027.5311      | 10 | D  | 4  | 488.2833       | 244.6455        |
| 1126.5996      | 11 | V  | 3  | 373.2563       | 187.1321        |
| 1225.6680      | 12 | V  | 2  | 274.1879       | 137.5979        |
|                | 13 | R  | 1  | 175.1195       | 88.0637         |

N-term:+29.04

X-range:

0 - 0

MassTol: Y-zoom:

0. 1.

MassType:

☐AVG ☒MONO

Axis:

☒1 ☐2

Label:

☒I ☐M ☐-

Ions:

a ☐+ ☐2+ ☐3+

b ☒+ ☐2+ ☐3+

c ☐+ ☐2+ ☐3+

x ☐+ ☐2+ ☐3+

y ☒+ ☒2+ ☐3+

z ☐+ ☐2+ ☐3+

hide H<sub>2</sub>O/NH<sub>3</sub> ☐

zoom 112-122 ☐

GO

GAFQGLKSLSYIR, MH+ 1495.8637, m/z 499.2927  
L OS G16 P120811 220811-s1.05470.05470.3.dta

scan 5470; 1.2e+001

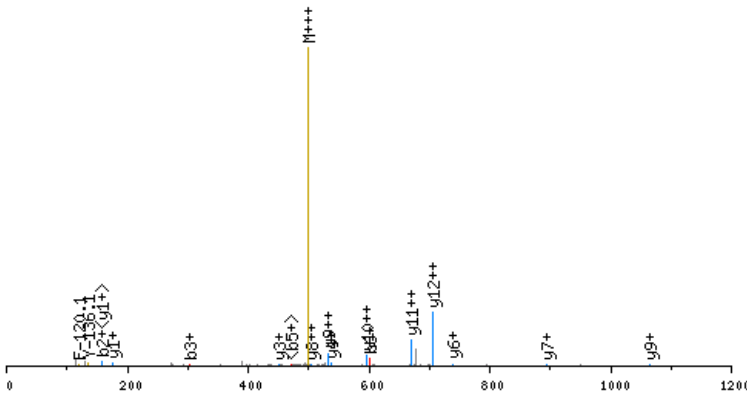

click image to zoom in; click top corners to zoom out

[precursor±]

scan 5468; 499.3 m/z; 4.2e+000

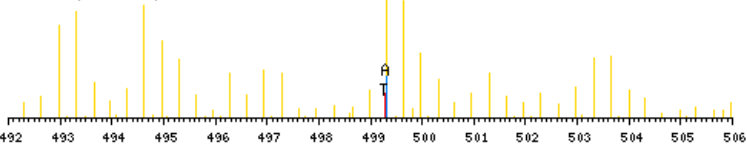

zoomed in precursor plot; T=theoretical m/z, A=acquired m/z

| b <sup>+</sup> | #  | AA | #  | y <sup>+</sup> | y <sup>2+</sup> |
|----------------|----|----|----|----------------|-----------------|
| 86.0606        | 1  | G  | 13 |                |                 |
| 157.0977       | 2  | A  | 12 | 1410.8109      | 705.9094        |
| 304.1661       | 3  | F  | 11 | 1339.7738      | 670.3908        |
| 432.2247       | 4  | Q  | 10 | 1192.7054      | 596.8566        |
| 489.2461       | 5  | G  | 9  | 1064.6468      | 532.8273        |
| 602.3302       | 6  | L  | 8  | 1007.6254      | 504.3166        |
| 758.4565       | 7  | K  | 7  | 894.5413       | 447.7746        |
| 845.4885       | 8  | S  | 6  | 738.4150       | 369.7114        |
| 958.5726       | 9  | L  | 5  | 651.3830       | 326.1954        |
| 1045.6046      | 10 | S  | 4  | 538.2989       | 269.6534        |
| 1208.6679      | 11 | Y  | 3  | 451.2669       | 226.1374        |
| 1321.7520      | 12 | I  | 2  | 288.2036       | 144.6057        |
|                | 13 | R  | 1  | 175.1195       | 88.0637         |

N-term:+29.04 K(7):+156.13

X-range:

0 - 0

MassTol: Y-zoom:

0. 1.

MassType:

☐ AVG ☒ MONO

Axis:

☒ 1 ☐ 2

Label:

☒ I ☐ M ☐ -

Ions:

a ☐ + ☐ 2+ ☐ 3+

b ☒ + ☐ 2+ ☐ 3+

c ☐ + ☐ 2+ ☐ 3+

x ☐ + ☐ 2+ ☐ 3+

y ☒ + ☒ 2+ ☐ 3+

z ☐ + ☐ 2+ ☐ 3+

hide H<sub>2</sub>O/NH<sub>3</sub> ☐

zoom 112-122 ☐

GO

GAGAVGAGPVVR, MH+ 1038.6060, m/z 519.8066  
L OS G13 P120811 220811-s1.02446.02446.2.dta

scan 2446; 9.8e+000

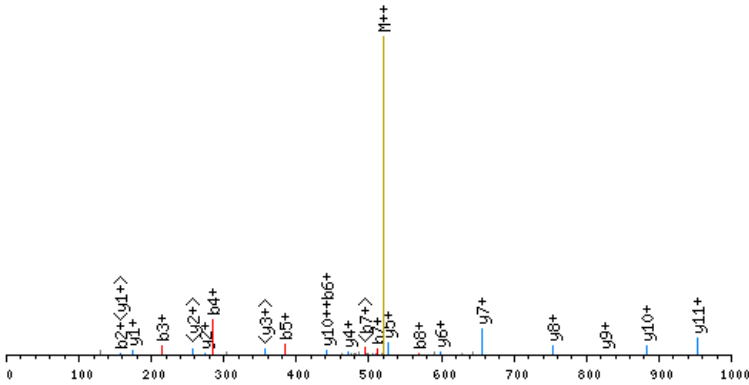

click image to zoom in; click top corners to zoom out

[precursor±]

scan 2444; 519.8 m/z; 1.5e+001

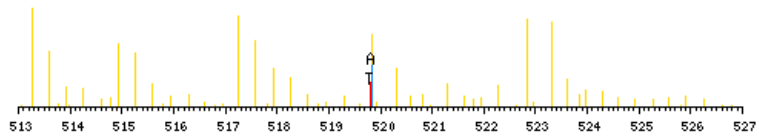

zoomed in precursor plot; T=theoretical m/z, A=acquired m/z

| b <sup>+</sup> | #  | AA | #  | y <sup>+</sup> | y <sup>2+</sup> |
|----------------|----|----|----|----------------|-----------------|
| 86.0606        | 1  | G  | 12 |                |                 |
| 157.0977       | 2  | A  | 11 | 953.5532       | 477.2805        |
| 214.1191       | 3  | G  | 10 | 882.5161       | 441.7620        |
| 285.1563       | 4  | A  | 9  | 825.4947       | 413.2512        |
| 384.2247       | 5  | V  | 8  | 754.4575       | 377.7327        |
| 441.2461       | 6  | G  | 7  | 655.3891       | 328.1985        |
| 512.2832       | 7  | A  | 6  | 598.3677       | 299.6877        |
| 569.3047       | 8  | G  | 5  | 527.3306       | 264.1692        |
| 666.3575       | 9  | P  | 4  | 470.3091       | 235.6585        |
| 765.4259       | 10 | V  | 3  | 373.2563       | 187.1321        |
| 864.4943       | 11 | V  | 2  | 274.1879       | 137.5979        |
|                | 12 | R  | 1  | 175.1195       | 88.0637         |

N-term:+29.04

X-range:

0 - 0

MassTol: Y-zoom:

0. 1.

MassType:

☐ AVG ☒ MONO

Axis:

☒ 1 ☐ 2

Label:

☒ I ☐ M ☐ -

Ions:

a ☐ + ☐ 2+ ☐ 3+

b ☒ + ☐ 2+ ☐ 3+

c ☐ + ☐ 2+ ☐ 3+

x ☐ + ☐ 2+ ☐ 3+

y ☒ + ☒ 2+ ☐ 3+

z ☐ + ☐ 2+ ☐ 3+

hide H<sub>2</sub>O/NH<sub>3</sub> ☐

zoom 112-122 ☐

GO

GAGGGKAGKGGPTPQEAIQR, MH+ 1921.0620, m/z 481.0210  
L OS G17 P120811 220811-s1.01942.01942.4.dta

scan 1942; 3.0e+000

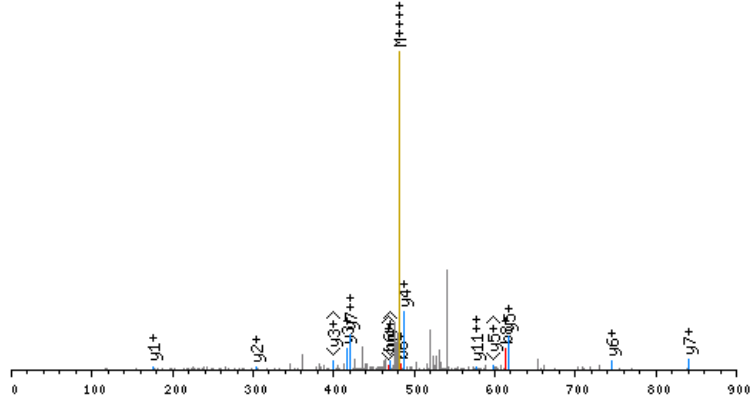

click image to zoom in; click top corners to zoom out [\[precursor±\]](#)

scan 1938; 481.0 m/z; 2.3e+000

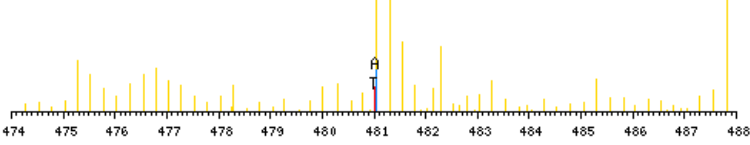

zoomed in precursor plot; T=theoretical m/z, A=acquired m/z

| b <sup>+</sup> | #  | AA | #  | y <sup>+</sup> | y <sup>2+</sup> |
|----------------|----|----|----|----------------|-----------------|
| 86.0606        | 1  | G  | 20 |                |                 |
| 157.0977       | 2  | A  | 19 | 1836.0092      | 918.5085        |
| 214.1191       | 3  | G  | 18 | 1764.9721      | 882.9900        |
| 271.1406       | 4  | G  | 17 | 1707.9507      | 854.4792        |
| 328.1621       | 5  | G  | 16 | 1650.9292      | 825.9685        |
| 484.2884       | 6  | K  | 15 | 1593.9077      | 797.4578        |
| 555.3255       | 7  | A  | 14 | 1437.7814      | 719.3946        |
| 612.3469       | 8  | G  | 13 | 1366.7443      | 683.8761        |
| 768.4732       | 9  | K  | 12 | 1309.7229      | 655.3653        |
| 825.4947       | 10 | G  | 11 | 1153.5966      | 577.3022        |
| 882.5162       | 11 | G  | 10 | 1096.5751      | 548.7915        |
| 979.5689       | 12 | P  | 9  | 1039.5536      | 520.2807        |
| 1080.6166      | 13 | T  | 8  | 942.5009       | 471.7543        |
| 1177.6694      | 14 | P  | 7  | 841.4532       | 421.2305        |
| 1305.7280      | 15 | Q  | 6  | 744.4004       | 372.7041        |
| 1434.7706      | 16 | E  | 5  | 616.3418       | 308.6748        |
| 1505.8077      | 17 | A  | 4  | 487.2993       | 244.1535        |
| 1618.8917      | 18 | I  | 3  | 416.2621       | 208.6350        |
| 1746.9503      | 19 | Q  | 2  | 303.1781       | 152.0930        |
|                | 20 | R  | 1  | 175.1195       | 88.0637         |

N-term:+29.04 K(6):+156.13  
K(9):+156.13

X-range:

0 - 0

MassTol: Y-zoom:

0. 1.

MassType:

☐ AVG ☒ MONO

Axis:

☒ 1 ☐ 2

Label:

☒ I ☐ M ☐ -

Ions:

a ☐ + ☐ 2+ ☐ 3+

b ☒ + ☐ 2+ ☐ 3+

c ☐ + ☐ 2+ ☐ 3+

x ☐ + ☐ 2+ ☐ 3+

y ☒ + ☒ 2+ ☐ 3+

z ☐ + ☐ 2+ ☐ 3+

hide H<sub>2</sub>O/NH<sub>3</sub> ☐

zoom 112-122 ☐

GO

GAGSATEFQFR, MH+ 1198.5856, m/z 599.7965  
L OS G14 P120811 220811-s1.04028.04028.2.dta

scan 4028; 2.7e+000

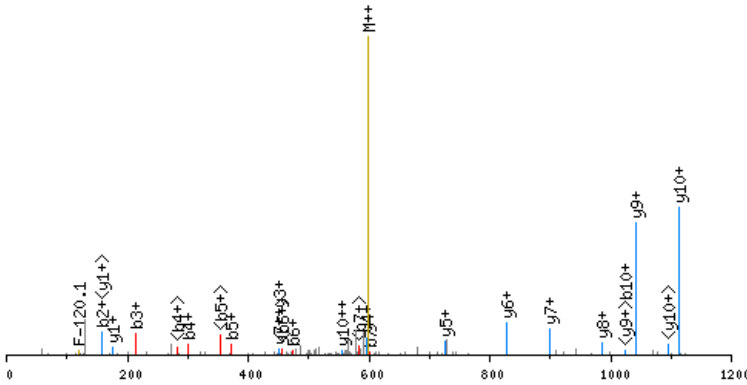

click image to zoom in; click top corners to zoom out

[precursor±]

scan 4026; 599.8 m/z; 1.1e+001

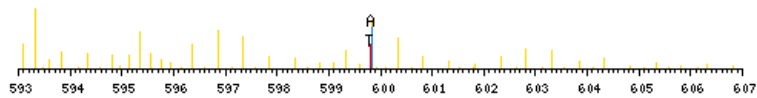

zoomed in precursor plot; T=theoretical m/z, A=acquired m/z

| b <sup>+</sup> | #  | AA | #  | y <sup>+</sup> | y <sup>2+</sup> |
|----------------|----|----|----|----------------|-----------------|
| 86.0606        | 1  | G  | 11 |                |                 |
| 157.0977       | 2  | A  | 10 | 1113.5329      | 557.2704        |
| 214.1191       | 3  | G  | 9  | 1042.4958      | 521.7518        |
| 301.1512       | 4  | S  | 8  | 985.4743       | 493.2411        |
| 372.1883       | 5  | A  | 7  | 898.4423       | 449.7251        |
| 473.2360       | 6  | T  | 6  | 827.4052       | 414.2065        |
| 602.2786       | 7  | E  | 5  | 726.3575       | 363.6827        |
| 749.3470       | 8  | F  | 4  | 597.3149       | 299.1614        |
| 877.4055       | 9  | Q  | 3  | 450.2465       | 225.6272        |
| 1024.4740      | 10 | F  | 2  | 322.1879       | 161.5979        |
|                | 11 | R  | 1  | 175.1195       | 88.0637         |

N-term:+29.04



X-range:

0 - 0

MassTol: Y-zoom:

0. 1.

MassType:

☐AVG ☒MONO

Axis:

☒1 ☐2

Label:

☒I ☐M ☐-

Ions:

a ☐+ ☐2+ ☐3+

b ☒+ ☐2+ ☐3+

c ☐+ ☐2+ ☐3+

x ☐+ ☐2+ ☐3+

y ☒+ ☒2+ ☐3+

z ☐+ ☐2+ ☐3+

hide H<sub>2</sub>O/NH<sub>3</sub> ☐

zoom 112-122 ☐

GO

GAPQGS LG EYLFER, MH+ 1551.7807, m/z 517.9318  
L OS G13 P120811 220811-s1.06160.06160.3.dta

scan 6160; 1.9e+000

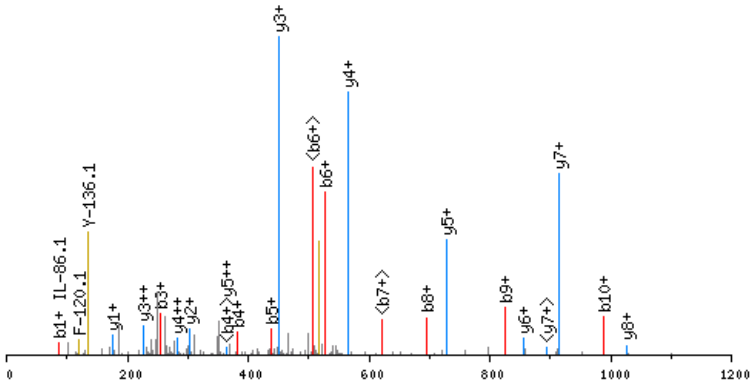

click image to zoom in; click top corners to zoom out

[precursor±]

scan 6159; 517.9 m/z; 2.6e+001

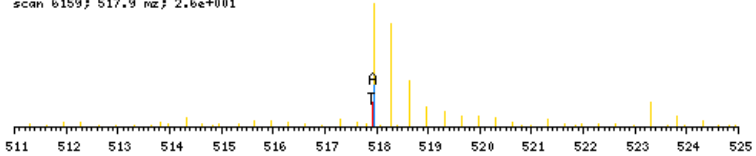

zoomed in precursor plot; T=theoretical m/z, A=acquired m/z

| b <sup>+</sup> | #  | AA | #  | y <sup>+</sup> | y <sup>2+</sup> |
|----------------|----|----|----|----------------|-----------------|
| 86.0606        | 1  | G  | 14 |                |                 |
| 157.0977       | 2  | A  | 13 | 1466.7280      | 733.8679        |
| 254.1504       | 3  | P  | 12 | 1395.6909      | 698.3493        |
| 382.2090       | 4  | Q  | 11 | 1298.6381      | 649.8230        |
| 439.2305       | 5  | G  | 10 | 1170.5795      | 585.7937        |
| 526.2625       | 6  | S  | 9  | 1113.5580      | 557.2829        |
| 639.3466       | 7  | L  | 8  | 1026.5260      | 513.7669        |
| 696.3680       | 8  | G  | 7  | 913.4420       | 457.2249        |
| 825.4106       | 9  | E  | 6  | 856.4205       | 428.7142        |
| 988.4740       | 10 | Y  | 5  | 727.3779       | 364.1929        |
| 1101.5580      | 11 | L  | 4  | 564.3146       | 282.6612        |
| 1248.6264      | 12 | F  | 3  | 451.2305       | 226.1192        |
| 1377.6690      | 13 | E  | 2  | 304.1621       | 152.5850        |
|                | 14 | R  | 1  | 175.1195       | 88.0637         |

N-term:+29.04

X-range:

0 - 0

MassTol: Y-zoom:

0. 1.

MassType:

☐AVG ☒MONO

Axis:

☒1 ☐2

Label:

☒I ☐M ☐-

Ions:

a ☐+ ☐2+ ☐3+

b ☒+ ☐2+ ☐3+

c ☐+ ☐2+ ☐3+

x ☐+ ☐2+ ☐3+

y ☒+ ☒2+ ☐3+

z ☐+ ☐2+ ☐3+

hide H<sub>2</sub>O/NH<sub>3</sub> ☐

zoom 112-122 ☐

GO

GASQAGMLAPGTR, MH+ 1244.6421, m/z 622.8247  
L OS G13 P120811 220811-s1.02673.02673.2.dta

scan 2673; 1.7e+000

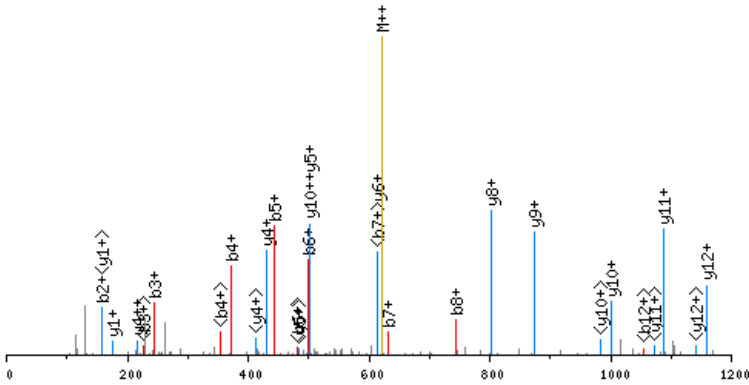

click image to zoom in; click top corners to zoom out

[precursor±]

scan 2669; 622.8 m/z; 6.2e+000

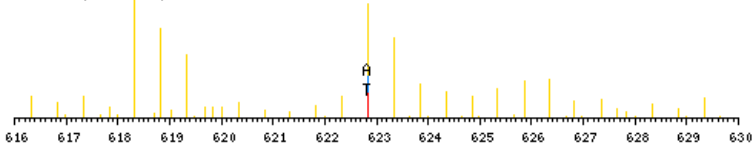

zoomed in precursor plot; T=theoretical m/z, A=acquired m/z

| b <sup>+</sup> | #  | AA | #  | y <sup>+</sup> | y <sup>2+</sup> |
|----------------|----|----|----|----------------|-----------------|
| 86.0606        | 1  | G  | 13 |                |                 |
| 157.0977       | 2  | A  | 12 | 1159.5894      | 580.2986        |
| 244.1297       | 3  | S  | 11 | 1088.5523      | 544.7800        |
| 372.1883       | 4  | Q  | 10 | 1001.5202      | 501.2640        |
| 443.2254       | 5  | A  | 9  | 873.4616       | 437.2347        |
| 500.2469       | 6  | G  | 8  | 802.4245       | 401.7162        |
| 631.2873       | 7  | M  | 7  | 745.4031       | 373.2054        |
| 744.3714       | 8  | L  | 6  | 614.3626       | 307.6852        |
| 815.4085       | 9  | A  | 5  | 501.2785       | 251.1432        |
| 912.4613       | 10 | P  | 4  | 430.2414       | 215.6246        |
| 969.4828       | 11 | G  | 3  | 333.1886       | 167.0982        |
| 1070.5304      | 12 | T  | 2  | 276.1672       | 138.5875        |
|                | 13 | R  | 1  | 175.1195       | 88.0637         |

N-term:+29.04

X-range:

0 - 0

MassTol: Y-zoom:

0. 1.

MassType:

☐AVG ☒MONO

Axis:

☒1 ☐2

Label:

☒I ☐M ☐-

Ions:

a ☐+ ☐2+ ☐3+

b ☒+ ☐2+ ☐3+

c ☐+ ☐2+ ☐3+

x ☐+ ☐2+ ☐3+

y ☒+ ☒2+ ☐3+

z ☐+ ☐2+ ☐3+

hide H<sub>2</sub>O/NH<sub>3</sub> ☐

zoom 112-122 ☐

GO

GAVFDISNADR, MH+ 1198.6280, m/z 599.8176  
H OS G13 P120811 220811-s1.04352.04352.2.dta

scan 4352; 1.8e+000

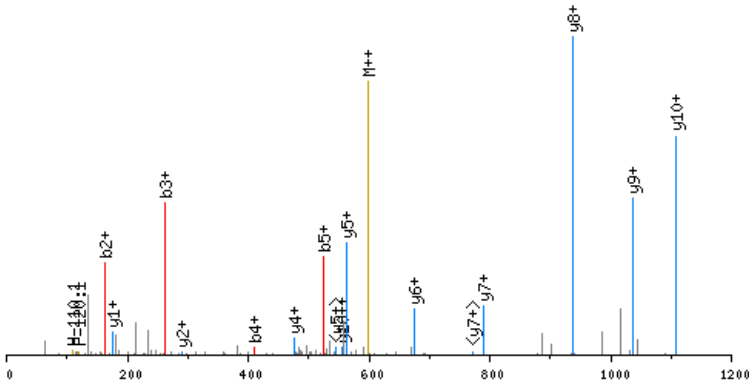

click image to zoom in; click top corners to zoom out

[precursor±]

scan 4349; 599.8 m/z; 8.1e+000

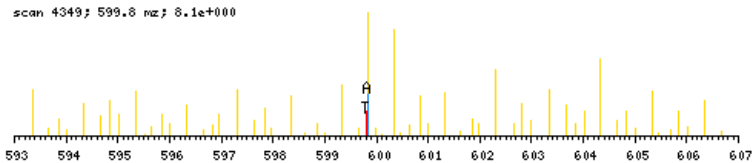

zoomed in precursor plot; T=theoretical m/z, A=acquired m/z

| b <sup>+</sup> | #  | AA | #  | y <sup>+</sup> | y <sup>2+</sup> |
|----------------|----|----|----|----------------|-----------------|
| 92.0924        | 1  | G  | 11 |                |                 |
| 163.1295       | 2  | A  | 10 | 1107.5435      | 554.2756        |
| 262.1979       | 3  | V  | 9  | 1036.5063      | 518.7571        |
| 409.2663       | 4  | F  | 8  | 937.4379       | 469.2229        |
| 524.2932       | 5  | D  | 7  | 790.3695       | 395.6887        |
| 637.3773       | 6  | I  | 6  | 675.3426       | 338.1752        |
| 724.4093       | 7  | S  | 5  | 562.2585       | 281.6332        |
| 838.4523       | 8  | N  | 4  | 475.2265       | 238.1172        |
| 909.4894       | 9  | A  | 3  | 361.1836       | 181.0957        |
| 1024.5163      | 10 | D  | 2  | 290.1464       | 145.5771        |
|                | 11 | R  | 1  | 175.1195       | 88.0637         |

N-term:+35.07

X-range:

0 - 0

MassTol: Y-zoom:

0. 1.

MassType:

☐ AVG ☒ MONO

Axis:

☒ 1 ☐ 2

Label:

☒ I ☐ M ☐ -

Ions:

a ☐ 2+ ☐ 3+

b ☒ 2+ ☐ 3+

c ☐ 2+ ☐ 3+

x ☐ 2+ ☐ 3+

y ☒ 2+ ☐ 3+

z ☐ 2+ ☐ 3+

hide H<sub>2</sub>O/NH<sub>3</sub> ☐

zoom 112-122 ☐

GO

GAVGDPHPMPMR, MH+ 1308.6523, m/z 436.8889  
L OS G16 P120811 220811-s1.03790.03790.3.dta

scan 3790; 3.6e+000

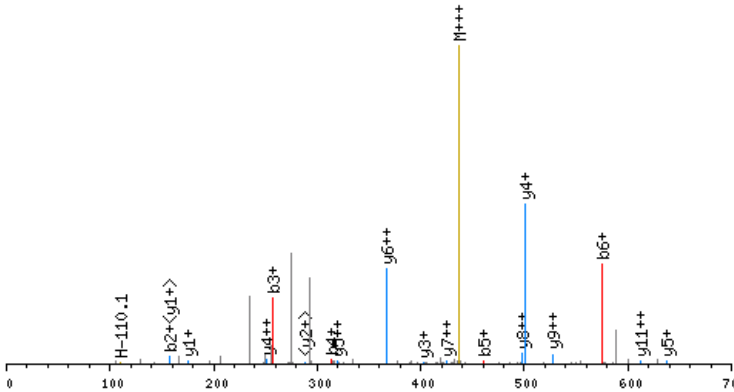

click image to zoom in; click top corners to zoom out

[precursor±]

scan 3788; 436.9 m/z; 7.6e+000

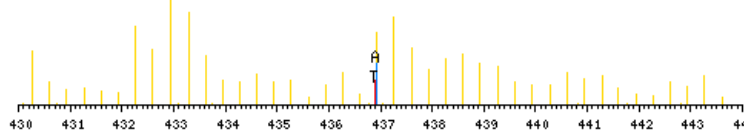

zoomed in precursor plot; T=theoretical m/z, A=acquired m/z

| b <sup>+</sup> | #  | AA | #  | y <sup>+</sup> | y <sup>2+</sup> |
|----------------|----|----|----|----------------|-----------------|
| 86.0606        | 1  | G  | 12 |                |                 |
| 157.0977       | 2  | A  | 11 | 1223.5995      | 612.3037        |
| 256.1661       | 3  | V  | 10 | 1152.5624      | 576.7851        |
| 313.1876       | 4  | G  | 9  | 1053.4940      | 527.2509        |
| 460.2560       | 5  | F  | 8  | 996.4725       | 498.7402        |
| 575.2829       | 6  | D  | 7  | 849.4041       | 425.2060        |
| 672.3357       | 7  | P  | 6  | 734.3772       | 367.6925        |
| 809.3946       | 8  | H  | 5  | 637.3244       | 319.1661        |
| 906.4474       | 9  | P  | 4  | 500.2655       | 250.6367        |
| 1003.5001      | 10 | P  | 3  | 403.2127       | 202.1103        |
| 1134.5406      | 11 | M  | 2  | 306.1600       | 153.5839        |
|                | 12 | R  | 1  | 175.1195       | 88.0637         |

N-term:+29.04

X-range:

0 - 0

MassTol: Y-zoom:

0. 1.

MassType:

☐AVG ☒MONO

Axis:

☒1 ☐2

Label:

☒I ☐M ☐-

Ions:

a ☐+ ☐2+ ☐3+

b ☒+ ☐2+ ☐3+

c ☐+ ☐2+ ☐3+

x ☐+ ☐2+ ☐3+

y ☒+ ☒2+ ☐3+

z ☐+ ☐2+ ☐3+

hide H<sub>2</sub>O/NH<sub>3</sub> ☐

zoom 112-122 ☐

GO

GAVSAEQVIAGFNR, MH+ 1446.7705, m/z 482.9283  
L OS G13 P120811 220811-s1.05840.05840.3.dta

scan 5840; 3.2e+000

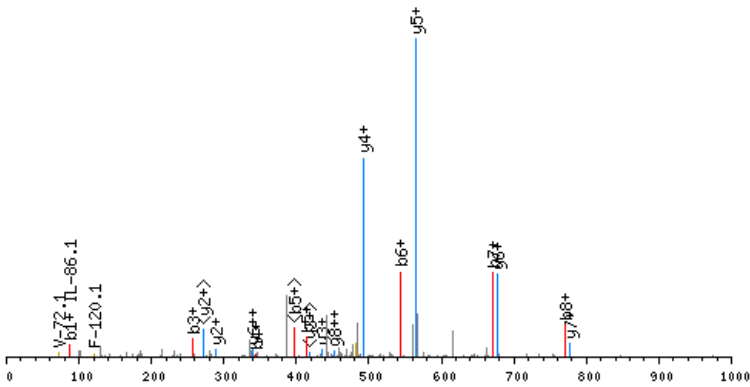

click image to zoom in; click top corners to zoom out [\[precursor±\]](#)

scan 5839; 482.9 m/z; 1.1e+001

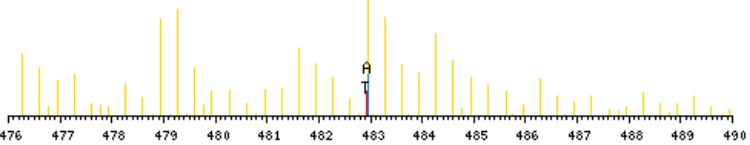

zoomed in precursor plot; T=theoretical m/z, A=acquired m/z

| b <sup>+</sup> | #  | AA | #  | y <sup>+</sup> | y <sup>2+</sup> |
|----------------|----|----|----|----------------|-----------------|
| 86.0606        | 1  | G  | 14 |                |                 |
| 157.0977       | 2  | A  | 13 | 1361.7177      | 681.3628        |
| 256.1661       | 3  | V  | 12 | 1290.6806      | 645.8442        |
| 343.1981       | 4  | S  | 11 | 1191.6122      | 596.3100        |
| 414.2352       | 5  | A  | 10 | 1104.5802      | 552.7940        |
| 543.2778       | 6  | E  | 9  | 1033.5431      | 517.2754        |
| 671.3364       | 7  | Q  | 8  | 904.5005       | 452.7542        |
| 770.4048       | 8  | V  | 7  | 776.4419       | 388.7249        |
| 883.4889       | 9  | I  | 6  | 677.3735       | 339.1907        |
| 954.5260       | 10 | A  | 5  | 564.2894       | 282.6486        |
| 1011.5475      | 11 | G  | 4  | 493.2523       | 247.1301        |
| 1158.6159      | 12 | F  | 3  | 436.2308       | 218.6193        |
| 1272.6588      | 13 | N  | 2  | 289.1624       | 145.0851        |
|                | 14 | R  | 1  | 175.1195       | 88.0637         |

N-term:+29.04

X-range:

0 - 0

MassTol: Y-zoom:

0. 1.

MassType:

☐ AVG ☒ MONO

Axis:

☒ 1 ☐ 2

Label:

☒ I ☐ M ☐ -

Ions:

a ☐ + ☐ 2+ ☐ 3+

b ☒ + ☐ 2+ ☐ 3+

c ☐ + ☐ 2+ ☐ 3+

x ☐ + ☐ 2+ ☐ 3+

y ☒ + ☒ 2+ ☐ 3+

z ☐ + ☐ 2+ ☐ 3+

hide H<sub>2</sub>O/NH<sub>3</sub> ☐

zoom 112-122 ☐

GO

GAYDAQGTLISKIFKLGR, MH+ 1984.2080, m/z 496.8075  
H OS G17 P120811 220811-s1.06393.06393.4.dta

scan 6393; 3.0e+000

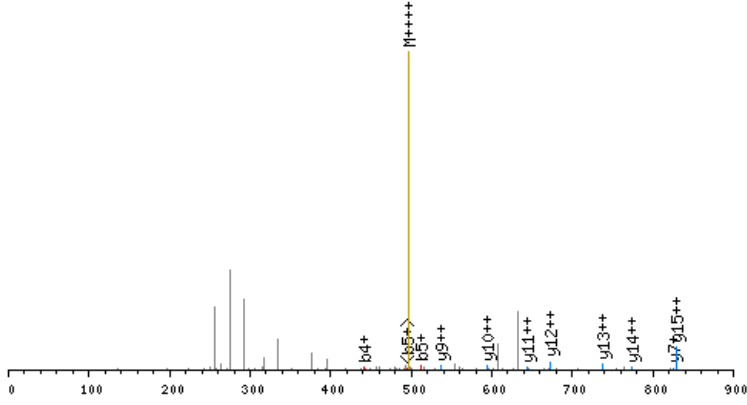

click image to zoom in; click top corners to zoom out (precursor±)

scan 6391; 496.8 m/z; 6.1e+000

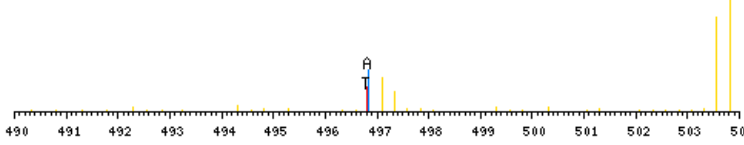

zoomed in precursor plot; T=theoretical m/z, A=acquired m/z

| b <sup>+</sup> | #  | AA | #  | y <sup>+</sup> | y <sup>2+</sup> |
|----------------|----|----|----|----------------|-----------------|
| 92.0924        | 1  | G  | 18 |                |                 |
| 163.1295       | 2  | A  | 17 | 1893.1235      | 947.0657        |
| 326.1928       | 3  | Y  | 16 | 1822.0864      | 911.5471        |
| 441.2197       | 4  | D  | 15 | 1659.0230      | 830.0154        |
| 512.2569       | 5  | A  | 14 | 1543.9961      | 772.5020        |
| 640.3154       | 6  | Q  | 13 | 1472.9590      | 736.9834        |
| 697.3369       | 7  | G  | 12 | 1344.9004      | 672.9541        |
| 798.3846       | 8  | T  | 11 | 1287.8789      | 644.4434        |
| 911.4686       | 9  | L  | 10 | 1186.8313      | 593.9195        |
| 998.5007       | 10 | S  | 9  | 1073.7472      | 537.3775        |
| 1160.6588      | 11 | K  | 8  | 986.7152       | 493.8615        |
| 1273.7428      | 12 | I  | 7  | 824.5571       | 412.7824        |
| 1420.8113      | 13 | F  | 6  | 711.4730       | 356.2404        |
| 1582.9694      | 14 | K  | 5  | 564.4046       | 282.7062        |
| 1696.0534      | 15 | L  | 4  | 402.2465       | 201.6272        |
| 1753.0749      | 16 | G  | 3  | 289.1624       | 145.0851        |
| 1810.0963      | 17 | G  | 2  | 232.1410       | 116.5744        |
|                | 18 | R  | 1  | 175.1195       | 88.0637         |

N-term: +35.07 K(11): +162.16  
K(14): +162.16

X-range:

0 - 0

MassTol: Y-zoom:

0. 1.

MassType:

☐ AVG ☒ MONO

Axis:

☒ 1 ☐ 2

Label:

☒ I ☐ M ☐ -

Ions:

a ☐ + ☐ 2+ ☐ 3+

b ☒ + ☐ 2+ ☐ 3+

c ☐ + ☐ 2+ ☐ 3+

x ☐ + ☐ 2+ ☐ 3+

y ☒ + ☒ 2+ ☐ 3+

z ☐ + ☐ 2+ ☐ 3+

hide H<sub>2</sub>O/NH<sub>3</sub> ☐

zoom 112-122 ☐

GO

GDDSEISKESSGVKKR, MH+ 1833.9923, m/z 459.2535  
L OS G18 P120811 220811-s1.01873.01873.4.dta

scan 1873; 4.6e+001

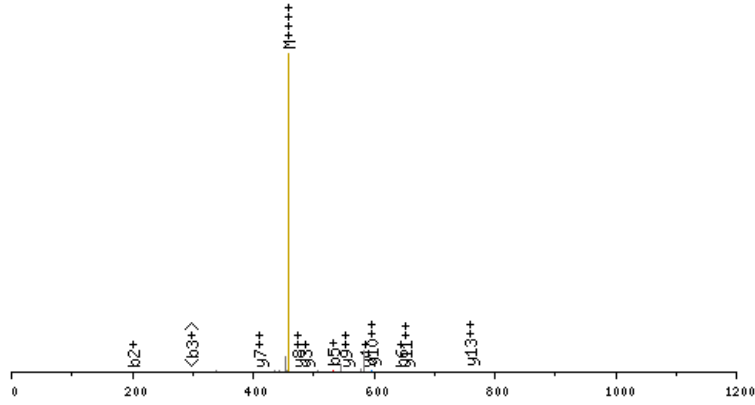

click image to zoom in; click top corners to zoom out [\[precursor±\]](#)

scan 1872; 459.3 m/z; 3.4e+000

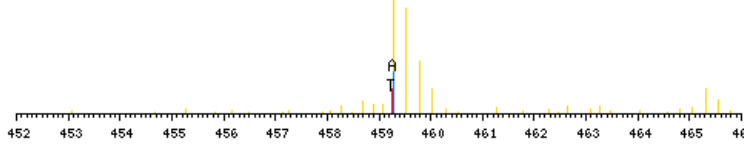

zoomed in precursor plot; T=theoretical m/z, A=acquired m/z

| b <sup>+</sup> | #  | AA | #  | y <sup>+</sup> | y <sup>2+</sup> |
|----------------|----|----|----|----------------|-----------------|
| 86.0606        | 1  | G  | 16 |                |                 |
| 201.0875       | 2  | D  | 15 | 1748.9395      | 874.9737        |
| 316.1144       | 3  | D  | 14 | 1633.9126      | 817.4602        |
| 403.1465       | 4  | S  | 13 | 1518.8856      | 759.9467        |
| 532.1891       | 5  | E  | 12 | 1431.8536      | 716.4307        |
| 645.2731       | 6  | I  | 11 | 1302.8110      | 651.9094        |
| 732.3052       | 7  | S  | 10 | 1189.7270      | 595.3674        |
| 888.4315       | 8  | K  | 9  | 1102.6949      | 551.8514        |
| 1017.4741      | 9  | E  | 8  | 946.5686       | 473.7882        |
| 1104.5061      | 10 | S  | 7  | 817.5260       | 409.2669        |
| 1191.5381      | 11 | S  | 6  | 730.4940       | 365.7509        |
| 1248.5596      | 12 | G  | 5  | 643.4620       | 322.2349        |
| 1347.6280      | 13 | V  | 4  | 586.4405       | 293.7242        |
| 1503.7543      | 14 | K  | 3  | 487.3721       | 244.1900        |
| 1659.8806      | 15 | K  | 2  | 331.2458       | 166.1268        |
|                | 16 | R  | 1  | 175.1195       | 88.0637         |

N-term:+29.04 K(8):+156.13  
K(14):+156.13 K(15):+156.13

N-term: +29.04

X-range:

0 - 0

MassTol: Y-zoom:

0. 1.

MassType:

☐ AVG ☒ MONO

Axis:

☒ 1 ☐ 2

Label:

☒ I ☐ M ☐ -

Ions:

a ☐ + ☐ 2+ ☐ 3+

b ☒ + ☐ 2+ ☐ 3+

c ☐ + ☐ 2+ ☐ 3+

x ☐ + ☐ 2+ ☐ 3+

y ☒ + ☒ 2+ ☐ 3+

z ☐ + ☐ 2+ ☐ 3+

hide H<sub>2</sub>O/NH<sub>3</sub> ☐

zoom 112-122 ☐

GO

GDFNKEVHKSGYLAGDKLLPQR, MH+ 2608.5524, m/z 652.8936  
H OS G19 P120811 220811-s1.03815.03815.4.dta

scan 3815; 2.1e+001

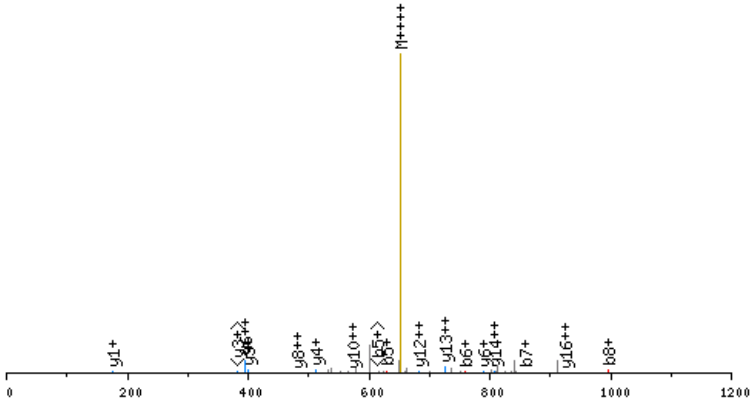

click image to zoom in; click top corners to zoom out [\[precursor±\]](#)

scan 3811; 652.9 m/z; 5.3e+000

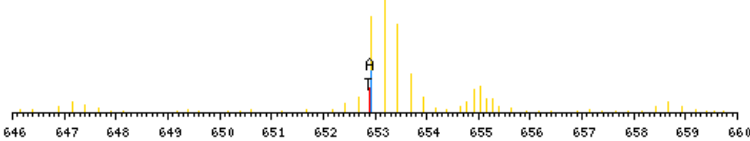

zoomed in precursor plot; T=theoretical m/z, A=acquired m/z

| b <sup>+</sup> | #  | AA | #  | y <sup>+</sup> | y <sup>2+</sup> |
|----------------|----|----|----|----------------|-----------------|
| 92.0924        | 1  | G  | 22 |                |                 |
| 207.1193       | 2  | D  | 21 | 2517.4679      | 1259.2379       |
| 354.1877       | 3  | F  | 20 | 2402.4409      | 1201.7244       |
| 468.2306       | 4  | N  | 19 | 2255.3725      | 1128.1902       |
| 630.3887       | 5  | K  | 18 | 2141.3296      | 1071.1687       |
| 759.4313       | 6  | E  | 17 | 1979.1715      | 990.0897        |
| 858.4998       | 7  | V  | 16 | 1850.1289      | 925.5684        |
| 995.5587       | 8  | H  | 15 | 1751.0605      | 876.0342        |
| 1157.7168      | 9  | K  | 14 | 1614.0016      | 807.5047        |
| 1244.7488      | 10 | S  | 13 | 1451.8435      | 726.4257        |
| 1301.7703      | 11 | G  | 12 | 1364.8114      | 682.9096        |
| 1464.8336      | 12 | Y  | 11 | 1307.7900      | 654.3989        |
| 1577.9177      | 13 | L  | 10 | 1144.7267      | 572.8672        |
| 1648.9548      | 14 | A  | 9  | 1031.6426      | 516.3252        |
| 1705.9762      | 15 | G  | 8  | 960.6055       | 480.8067        |
| 1821.0032      | 16 | D  | 7  | 903.5840       | 452.2959        |
| 1983.1613      | 17 | K  | 6  | 788.5571       | 394.7824        |
| 2096.2453      | 18 | L  | 5  | 626.3990       | 313.7034        |
| 2209.3294      | 19 | L  | 4  | 513.3149       | 257.1614        |
| 2306.3822      | 20 | P  | 3  | 400.2308       | 200.6193        |
| 2434.4407      | 21 | Q  | 2  | 303.1781       | 152.0930        |
|                | 22 | R  | 1  | 175.1195       | 88.0637         |

N-term:+35.07 K(5):+162.16  
K(9):+162.16 K(17):+162.16

X-range:

0 - 0

MassTol: Y-zoom:

0. 1.

MassType:

☐AVG ☒MONO

Axis:

☒1 ☐2

Label:

☒I ☐M ☐-

Ions:

a ☐+ ☐2+ ☐3+

b ☒+ ☐2+ ☐3+

c ☐+ ☐2+ ☐3+

x ☐+ ☐2+ ☐3+

y ☒+ ☒2+ ☐3+

z ☐+ ☐2+ ☐3+

hide H<sub>2</sub>O/NH<sub>3</sub> ☐

zoom 112-122 ☐

GO

GDGGSSFQSTTGHCVHMR, MH+ 1948.8393, m/z 487.9653  
L OS G18 P120811 220811-s1.02540.02540.4.dta

scan 2540; 1.4e+000

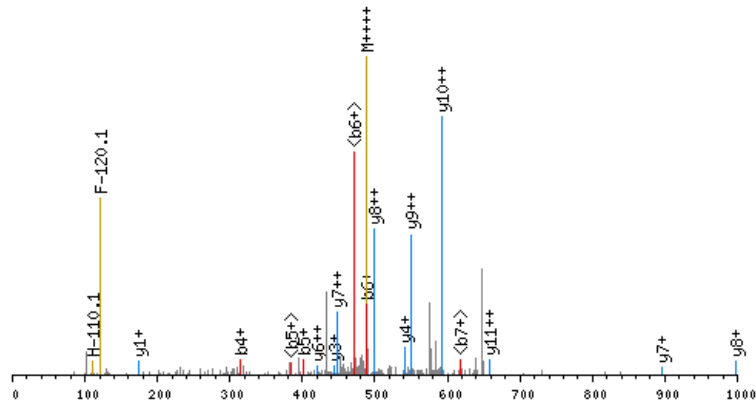

click image to zoom in; click top corners to zoom out [\[precursor±\]](#)

scan 2536; 488.0 m/z; 5.7e+000

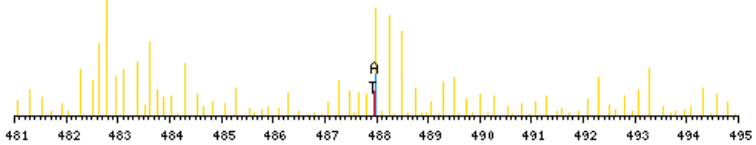

zoomed in precursor plot; T=theoretical m/z, A=acquired m/z

| b <sup>+</sup> | #  | AA | #  | y <sup>+</sup> | y <sup>2+</sup> |
|----------------|----|----|----|----------------|-----------------|
| 86.0606        | 1  | G  | 18 |                |                 |
| 201.0875       | 2  | D  | 17 | 1863.7866      | 932.3972        |
| 258.1090       | 3  | G  | 16 | 1748.7596      | 874.8837        |
| 315.1304       | 4  | G  | 15 | 1691.7382      | 846.3730        |
| 402.1625       | 5  | S  | 14 | 1634.7167      | 817.8623        |
| 489.1945       | 6  | S  | 13 | 1547.6847      | 774.3463        |
| 636.2629       | 7  | F  | 12 | 1460.6527      | 730.8302        |
| 764.3215       | 8  | Q  | 11 | 1313.5842      | 657.2960        |
| 851.3535       | 9  | S  | 10 | 1185.5257      | 593.2667        |
| 952.4012       | 10 | T  | 9  | 1098.4936      | 549.7507        |
| 1053.4489      | 11 | T  | 8  | 997.4460       | 499.2269        |
| 1110.4703      | 12 | G  | 7  | 896.3983       | 448.7031        |
| 1247.5292      | 13 | H  | 6  | 839.3768       | 420.1923        |
| 1407.5598      | 14 | C  | 5  | 702.3179       | 351.6629        |
| 1506.6283      | 15 | V  | 4  | 542.2873       | 271.6476        |
| 1643.6872      | 16 | H  | 3  | 443.2189       | 222.1134        |
| 1774.7277      | 17 | M  | 2  | 306.1600       | 153.5839        |
|                | 18 | R  | 1  | 175.1195       | 88.0637         |

N-term:+29.04 C(14):+160.03

X-range:

0 - 0

MassTol: Y-zoom:

0. 1.

MassType:

☐ AVG ☒ MONO

Axis:

☒ 1 ☐ 2

Label:

☒ I ☐ M ☐ -

Ions:

a ☐ + ☐ 2+ ☐ 3+

b ☒ + ☐ 2+ ☐ 3+

c ☐ + ☐ 2+ ☐ 3+

x ☐ + ☐ 2+ ☐ 3+

y ☒ + ☒ 2+ ☐ 3+

z ☐ + ☐ 2+ ☐ 3+

hide H<sub>2</sub>O/NH<sub>3</sub> ☐

zoom 112-122 ☐

GO

GDGGSTFQSTTGHCVMHR, MH+ 1962.8550, m/z 491.4692  
L OS G18 P120811 220811-s1.02662.02662.4.dta

scan 2662; 1.5e+000

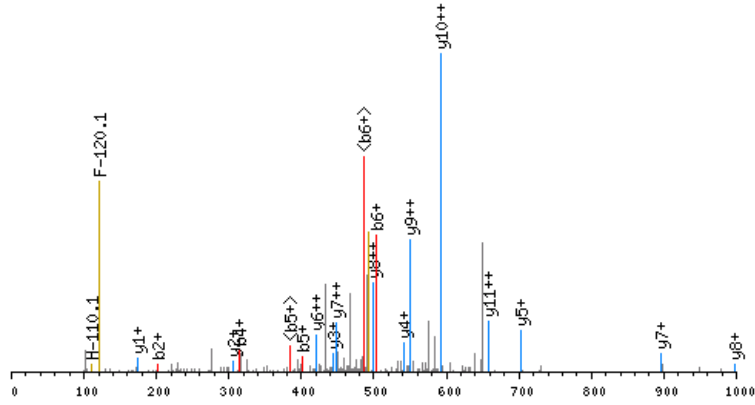

click image to zoom in; click top corners to zoom out

[precursor±]

scan 2661; 491.5 m/z; 4.0e+000

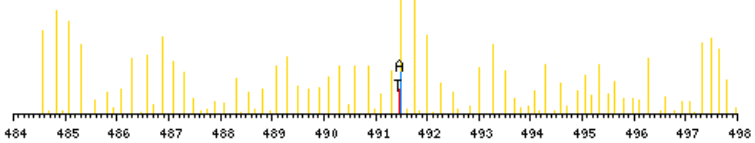

zoomed in precursor plot; T=theoretical m/z, A=acquired m/z

| b <sup>+</sup> | #  | AA | #  | y <sup>+</sup> | y <sup>2+</sup> |
|----------------|----|----|----|----------------|-----------------|
| 86.0606        | 1  | G  | 18 |                |                 |
| 201.0875       | 2  | D  | 17 | 1877.8022      | 939.4050        |
| 258.1090       | 3  | G  | 16 | 1762.7753      | 881.8916        |
| 315.1304       | 4  | G  | 15 | 1705.7538      | 853.3808        |
| 402.1625       | 5  | S  | 14 | 1648.7324      | 824.8701        |
| 503.2101       | 6  | T  | 13 | 1561.7003      | 781.3541        |
| 650.2786       | 7  | F  | 12 | 1460.6527      | 730.8302        |
| 778.3371       | 8  | Q  | 11 | 1313.5842      | 657.2960        |
| 865.3692       | 9  | S  | 10 | 1185.5257      | 593.2667        |
| 966.4168       | 10 | T  | 9  | 1098.4936      | 549.7507        |
| 1067.4645      | 11 | T  | 8  | 997.4460       | 499.2269        |
| 1124.4860      | 12 | G  | 7  | 896.3983       | 448.7031        |
| 1261.5449      | 13 | H  | 6  | 839.3768       | 420.1923        |
| 1421.5755      | 14 | C  | 5  | 702.3179       | 351.6629        |
| 1520.6439      | 15 | V  | 4  | 542.2873       | 271.6476        |
| 1657.7028      | 16 | H  | 3  | 443.2189       | 222.1134        |
| 1788.7433      | 17 | M  | 2  | 306.1600       | 153.5839        |
|                | 18 | R  | 1  | 175.1195       | 88.0637         |

N-term:+29.04 C(14):+160.03

X-range:

0 - 0

MassTol: Y-zoom:

0. 1.

MassType:

☐AVG ☒MONO

Axis:

☒1 ☐2

Label:

☒I ☐M ☐-

Ions:

a ☐+ ☐2+ ☐3+

b ☒+ ☐2+ ☐3+

c ☐+ ☐2+ ☐3+

x ☐+ ☐2+ ☐3+

y ☒+ ☒2+ ☐3+

z ☐+ ☐2+ ☐3+

hide H<sub>2</sub>O/NH<sub>3</sub> ☐

zoom 112-122 ☐

GO

GDKLVVECVMKGVTR, MH+ 1963.0720, m/z 491.5235  
L OS G17 P120811 220811-s1.05461.05461.4.dta

scan 5461: 5.4e+000

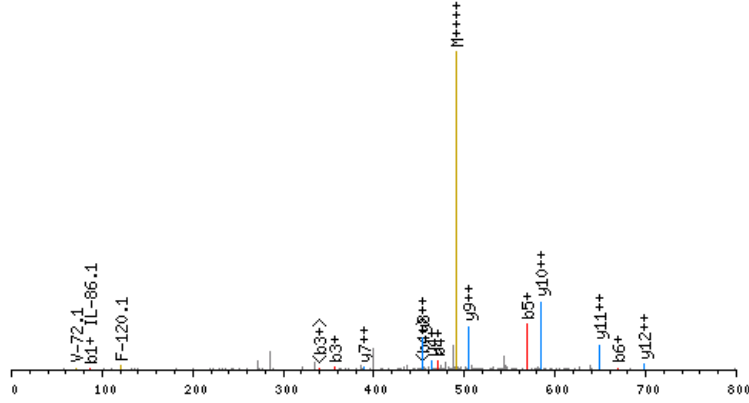

click image to zoom in; click top corners to zoom out [\[precursor±\]](#)

scan 5458: 491.5 m/z; 8.4e+001

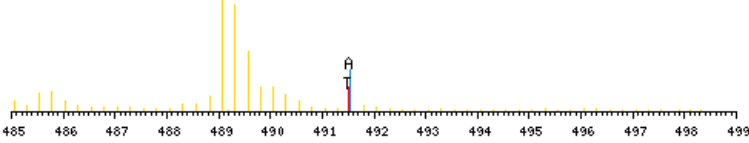

zoomed in precursor plot; T=theoretical m/z, A=acquired m/z

| b <sup>+</sup> | #  | AA | #  | y <sup>+</sup> | y <sup>2+</sup> |
|----------------|----|----|----|----------------|-----------------|
| 86.0606        | 1  | G  | 17 |                |                 |
| 201.0875       | 2  | D  | 16 | 1878.0193      | 939.5136        |
| 357.2138       | 3  | K  | 15 | 1762.9923      | 882.0001        |
| 470.2979       | 4  | L  | 14 | 1606.8660      | 803.9369        |
| 569.3663       | 5  | V  | 13 | 1493.7820      | 747.3949        |
| 668.4347       | 6  | V  | 12 | 1394.7136      | 697.8607        |
| 797.4773       | 7  | E  | 11 | 1295.6452      | 648.3265        |
| 957.5079       | 8  | C  | 10 | 1166.6026      | 583.8052        |
| 1056.5763      | 9  | V  | 9  | 1006.5720      | 503.7899        |
| 1187.6168      | 10 | M  | 8  | 907.5035       | 454.2557        |
| 1343.7431      | 11 | K  | 7  | 776.4631       | 388.7354        |
| 1400.7646      | 12 | G  | 6  | 620.3368       | 310.6723        |
| 1499.8330      | 13 | V  | 5  | 563.3153       | 282.1616        |
| 1600.8806      | 14 | T  | 4  | 464.2469       | 232.6274        |
| 1687.9127      | 15 | S  | 3  | 363.1992       | 182.1035        |
| 1788.9604      | 16 | T  | 2  | 276.1672       | 138.5875        |
|                | 17 | R  | 1  | 175.1195       | 88.0637         |

N-term:+29.04 K(3):+156.13  
C(8):+160.03 K(11):+156.13

X-range:

0 - 0

MassTol: Y-zoom:

0. 1.

MassType:

☐AVG ☒MONO

Axis:

☒1 ☐2

Label:

☒I ☐M ☐-

Ions:

a ☐+ ☐2+ ☐3+

b ☒+ ☐2+ ☐3+

c ☐+ ☐2+ ☐3+

x ☐+ ☐2+ ☐3+

y ☒+ ☒2+ ☐3+

z ☐+ ☐2+ ☐3+

hide H<sub>2</sub>O/NH<sub>3</sub> ☐

zoom 112-122 ☐

GO

GDPKEEEEEELVDPLTTVR, MH+ 2253.1774, m/z 751.7307  
H OS G15 P120811 220811-s1.05398.05398.3.dta

scan 5398; 3.4e+000

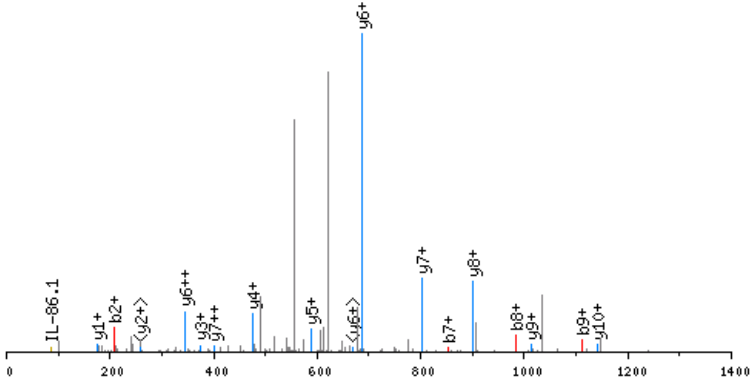

click image to zoom in; click top corners to zoom out [\[precursor±\]](#)

scan 5396; 751.7 m/z; 2.6e+001

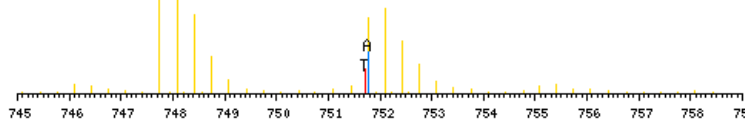

zoomed in precursor plot; T=theoretical m/z, A=acquired m/z

| b <sup>+</sup> | #  | AA | #  | y <sup>+</sup> | y <sup>2+</sup> |
|----------------|----|----|----|----------------|-----------------|
| 92.0924        | 1  | G  | 19 |                |                 |
| 207.1193       | 2  | D  | 18 | 2162.0929      | 1081.5504       |
| 304.1721       | 3  | P  | 17 | 2047.0659      | 1024.0369       |
| 466.3302       | 4  | K  | 16 | 1950.0132      | 975.5105        |
| 595.3728       | 5  | E  | 15 | 1787.8551      | 894.4315        |
| 724.4154       | 6  | E  | 14 | 1658.8125      | 829.9102        |
| 853.4580       | 7  | E  | 13 | 1529.7699      | 765.3889        |
| 982.5005       | 8  | E  | 12 | 1400.7273      | 700.8676        |
| 1111.5431      | 9  | E  | 11 | 1271.6847      | 636.3463        |
| 1240.5857      | 10 | E  | 10 | 1142.6421      | 571.8250        |
| 1353.6698      | 11 | L  | 9  | 1013.5995      | 507.3037        |
| 1452.7382      | 12 | V  | 8  | 900.5155       | 450.7616        |
| 1567.7652      | 13 | D  | 7  | 801.4470       | 401.2274        |
| 1664.8179      | 14 | P  | 6  | 686.4201       | 343.7140        |
| 1777.9020      | 15 | L  | 5  | 589.3673       | 295.1876        |
| 1878.9497      | 16 | T  | 4  | 476.2833       | 238.6455        |
| 1979.9973      | 17 | T  | 3  | 375.2356       | 188.1217        |
| 2079.0657      | 18 | V  | 2  | 274.1879       | 137.5979        |
|                | 19 | R  | 1  | 175.1195       | 88.0637         |

N-term:+35.07 K(4):+162.16

N-term: +29.04

X-range:

0 - 0

MassTol: Y-zoom:

0. 1.

MassType:

☐AVG ☒MONO

Axis:

☒1 ☐2

Label:

☒I ☐M ☐-

Ions:

a ☐+ ☐2+ ☐3+

b ☒+ ☐2+ ☐3+

c ☐+ ☐2+ ☐3+

x ☐+ ☐2+ ☐3+

y ☒+ ☒2+ ☐3+

z ☐+ ☐2+ ☐3+

hide H<sub>2</sub>O/NH<sub>3</sub> ☐

zoom 112-122 ☐

GO

GDSASKVISAEELPGR, MH+ 1742.9289, m/z 581.6478  
L OS G15 P120811 220811-s1.03734.03734.3.dta

scan 3734; 4.4e+000

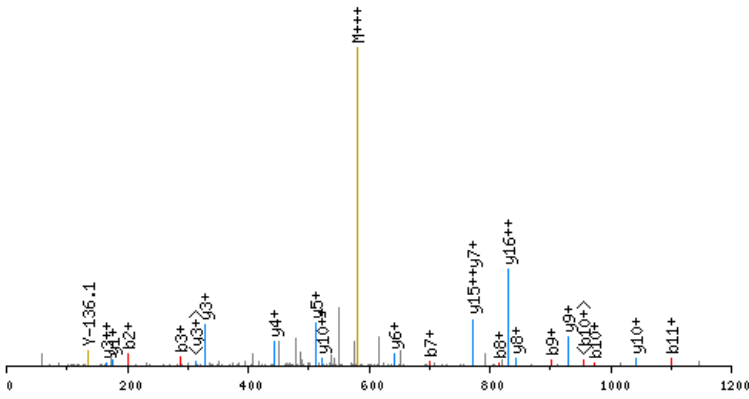

click image to zoom in; click top corners to zoom out

[precursor±]

scan 3731; 581.6 m/z; 4.5e+001

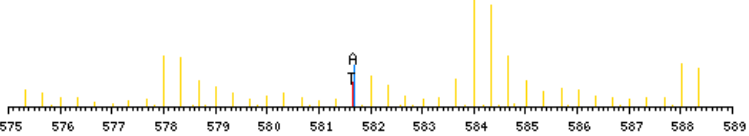

zoomed in precursor plot; T=theoretical m/z, A=acquired m/z

| b <sup>+</sup> | #  | AA | #  | y <sup>+</sup> | y <sup>2+</sup> |
|----------------|----|----|----|----------------|-----------------|
| 86.0606        | 1  | G  | 17 |                |                 |
| 201.0875       | 2  | D  | 16 | 1657.8761      | 829.4420        |
| 288.1195       | 3  | S  | 15 | 1542.8492      | 771.9285        |
| 359.1566       | 4  | A  | 14 | 1455.8172      | 728.4125        |
| 446.1887       | 5  | S  | 13 | 1384.7800      | 692.8939        |
| 602.3150       | 6  | K  | 12 | 1297.7480      | 649.3779        |
| 701.3834       | 7  | V  | 11 | 1141.6217      | 571.3148        |
| 814.4675       | 8  | I  | 10 | 1042.5533      | 521.7806        |
| 901.4995       | 9  | S  | 9  | 929.4692       | 465.2385        |
| 972.5366       | 10 | A  | 8  | 842.4372       | 421.7225        |
| 1101.5792      | 11 | E  | 7  | 771.4001       | 386.2040        |
| 1230.6218      | 12 | E  | 6  | 642.3575       | 321.6827        |
| 1301.6589      | 13 | A  | 5  | 513.3149       | 257.1614        |
| 1414.7430      | 14 | L  | 4  | 442.2778       | 221.6428        |
| 1511.7957      | 15 | P  | 3  | 329.1937       | 165.1008        |
| 1568.8172      | 16 | G  | 2  | 232.1410       | 116.5744        |
|                | 17 | R  | 1  | 175.1195       | 88.0637         |

N-term:+29.04 K(6):+156.13

N-term:+29.04 C(14):+160.03

X-range:

0 - 0

MassTol: Y-zoom:

0. 1.

MassType:

☐ AVG ☒ MONO

Axis:

☒ 1 ☐ 2

Label:

☒ I ☐ M ☐ -

Ions:

a ☐ + ☐ 2+ ☐ 3+

b ☒ + ☐ 2+ ☐ 3+

c ☐ + ☐ 2+ ☐ 3+

x ☐ + ☐ 2+ ☐ 3+

y ☒ + ☒ 2+ ☐ 3+

z ☐ + ☐ 2+ ☐ 3+

hide H<sub>2</sub>O/NH<sub>3</sub> ☐

zoom 112-122 ☐

GO

GDVDSGPKLEGDIKVPR, MH+ 1979.1178, m/z 495.5349  
L OS G16 P120811 220811-s1.04936.04936.4.dta

scan 4936; 6.4e+000

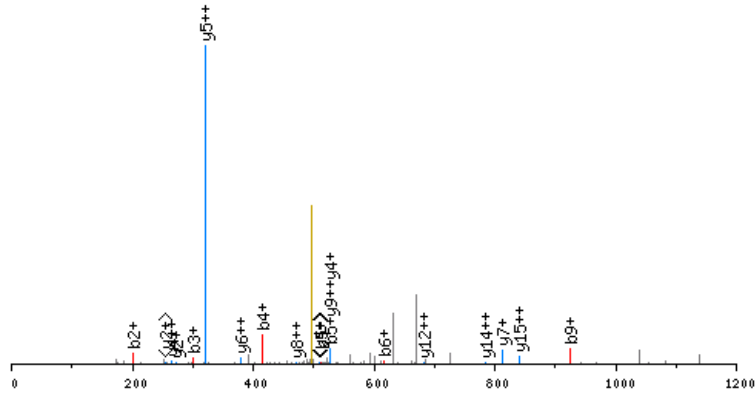

click image to zoom in; click top corners to zoom out [\[precursor±\]](#)

scan 4933; 495.5 m/z; 9.2e+000

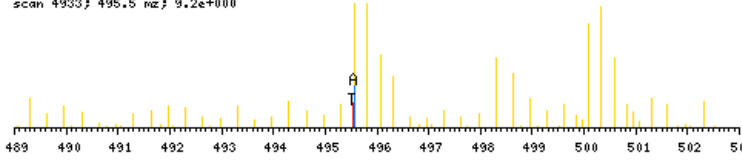

zoomed in precursor plot; T=theoretical m/z, A=acquired m/z

| b <sup>+</sup> | #  | AA | #  | y <sup>+</sup> | y <sup>2+</sup> |
|----------------|----|----|----|----------------|-----------------|
| 86.0606        | 1  | G  | 18 |                |                 |
| 201.0875       | 2  | D  | 17 | 1894.0650      | 947.5364        |
| 300.1559       | 3  | V  | 16 | 1779.0381      | 890.0230        |
| 415.1829       | 4  | D  | 15 | 1679.9697      | 840.4887        |
| 528.2669       | 5  | I  | 14 | 1564.9427      | 782.9753        |
| 615.2990       | 6  | S  | 13 | 1451.8587      | 726.4332        |
| 672.3204       | 7  | G  | 12 | 1364.8266      | 682.9172        |
| 769.3732       | 8  | P  | 11 | 1307.8052      | 654.4065        |
| 925.4995       | 9  | K  | 10 | 1210.7524      | 605.8801        |
| 1038.5835      | 10 | L  | 9  | 1054.6261      | 527.8170        |
| 1167.6261      | 11 | E  | 8  | 941.5420       | 471.2749        |
| 1224.6476      | 12 | G  | 7  | 812.4994       | 406.7536        |
| 1339.6745      | 13 | D  | 6  | 755.4780       | 378.2429        |
| 1452.7586      | 14 | I  | 5  | 640.4510       | 320.7294        |
| 1608.8849      | 15 | K  | 4  | 527.3670       | 264.1874        |
| 1707.9533      | 16 | V  | 3  | 371.2407       | 186.1243        |
| 1805.0061      | 17 | P  | 2  | 272.1723       | 136.5900        |
|                | 18 | R  | 1  | 175.1195       | 88.0637         |

N-term:+29.04 K(9):+156.13  
K(15):+156.13

X-range:

0 - 0

MassTol: Y-zoom:

0. 1.

MassType:

☐ AVG ☒ MONO

Axis:

☒ 1 ☐ 2

Label:

☒ I ☐ M ☐ -

Ions:

a ☐ + ☐ 2+ ☐ 3+

b ☒ + ☐ 2+ ☐ 3+

c ☐ + ☐ 2+ ☐ 3+

x ☐ + ☐ 2+ ☐ 3+

y ☒ + ☒ 2+ ☐ 3+

z ☐ + ☐ 2+ ☐ 3+

hide H<sub>2</sub>O/NH<sub>3</sub> ☐

zoom 112-122 ☐

GO

GDVPVVADPTVPNVTVTR, MH+ 1864.0180, m/z 622.0108  
L OS G12 P120811 220811-s1.04343.04343.3.dta

scan 4343; 3.5e+000

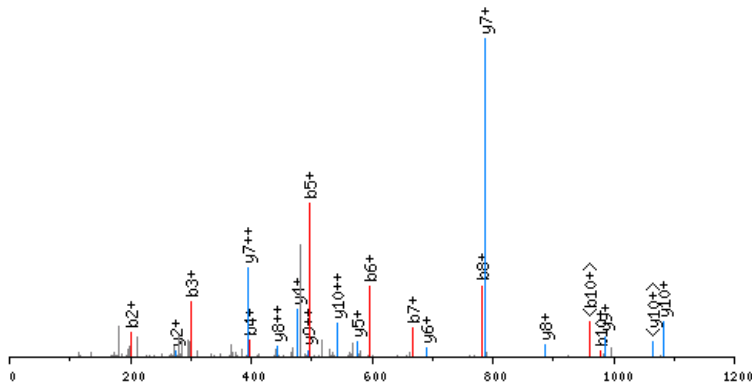

click image to zoom in; click top corners to zoom out

[precursor±]

scan 4342; 622.0 m/z; 9.7e+000

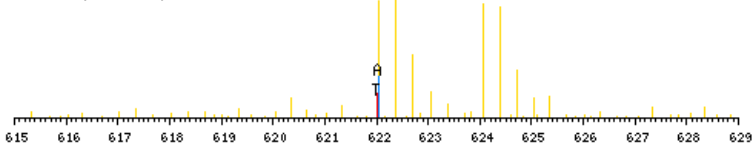

zoomed in precursor plot; T=theoretical m/z, A=acquired m/z

| b <sup>+</sup> | #  | AA | #  | y <sup>+</sup> | y <sup>2+</sup> |
|----------------|----|----|----|----------------|-----------------|
| 86.0606        | 1  | G  | 18 |                |                 |
| 201.0875       | 2  | D  | 17 | 1778.9652      | 889.9865        |
| 300.1559       | 3  | V  | 16 | 1663.9383      | 832.4731        |
| 397.2087       | 4  | P  | 15 | 1564.8699      | 782.9389        |
| 496.2771       | 5  | V  | 14 | 1467.8171      | 734.4125        |
| 595.3455       | 6  | V  | 13 | 1368.7487      | 684.8783        |
| 666.3826       | 7  | A  | 12 | 1269.6803      | 635.3441        |
| 781.4096       | 8  | D  | 11 | 1198.6432      | 599.8255        |
| 878.4623       | 9  | P  | 10 | 1083.6162      | 542.3120        |
| 979.5100       | 10 | T  | 9  | 986.5635       | 493.7856        |
| 1078.5784      | 11 | V  | 8  | 885.5158       | 443.2618        |
| 1175.6312      | 12 | P  | 7  | 786.4474       | 393.7276        |
| 1289.6741      | 13 | N  | 6  | 689.3946       | 345.2012        |
| 1388.7425      | 14 | V  | 5  | 575.3517       | 288.1798        |
| 1489.7902      | 15 | T  | 4  | 476.2833       | 238.6455        |
| 1588.8586      | 16 | V  | 3  | 375.2356       | 188.1217        |
| 1689.9063      | 17 | T  | 2  | 276.1672       | 138.5875        |
|                | 18 | R  | 1  | 175.1195       | 88.0637         |

N-term:+29.04

X-range:

0 - 0

MassTol: Y-zoom:

0. 1.

MassType:

☐ AVG ☒ MONO

Axis:

☒ 1 ☐ 2

Label:

☒ I ☐ M ☐ -

Ions:

a ☐ + ☐ 2+ ☐ 3+

b ☒ + ☐ 2+ ☐ 3+

c ☐ + ☐ 2+ ☐ 3+

x ☐ + ☐ 2+ ☐ 3+

y ☒ + ☒ 2+ ☐ 3+

z ☐ + ☐ 2+ ☐ 3+

hide H<sub>2</sub>O/NH<sub>3</sub> ☐

zoom 112-122 ☐

GO

GEAGAAGPSGPAGPR, MH+ 1279.6395, m/z 427.2180  
L OS G13 P120811 220811-s1.01997.01997.3.dta

scan 1997; 1.9e+000

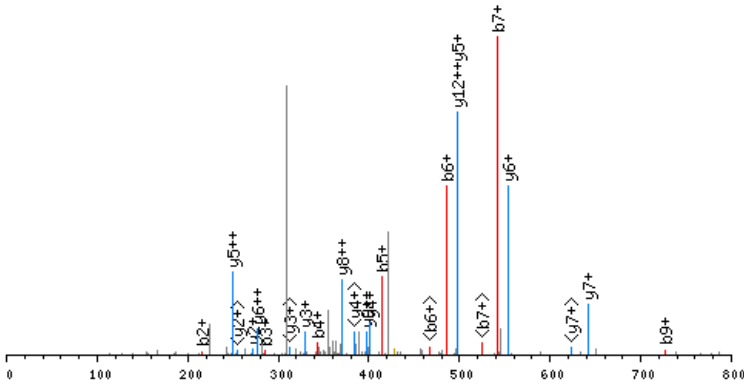

click image to zoom in; click top corners to zoom out

[precursor±]

scan 1994; 427.2 m/z; 7.7e-001

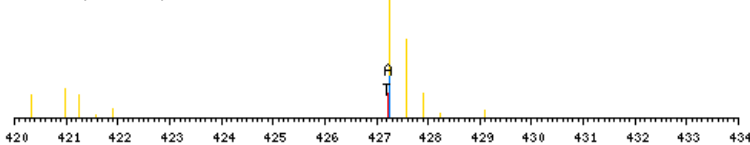

zoomed in precursor plot; T=theoretical m/z, A=acquired m/z

| b <sup>+</sup> | #  | AA | #  | y <sup>+</sup> | y <sup>2+</sup> |
|----------------|----|----|----|----------------|-----------------|
| 86.0606        | 1  | G  | 15 |                |                 |
| 215.1032       | 2  | E  | 14 | 1194.5867      | 597.7973        |
| 286.1403       | 3  | A  | 13 | 1065.5441      | 533.2760        |
| 343.1617       | 4  | G  | 12 | 994.5070       | 497.7574        |
| 414.1988       | 5  | A  | 11 | 937.4856       | 469.2467        |
| 485.2360       | 6  | A  | 10 | 866.4484       | 433.7281        |
| 542.2574       | 7  | G  | 9  | 795.4113       | 398.2096        |
| 639.3102       | 8  | P  | 8  | 738.3899       | 369.6988        |
| 726.3422       | 9  | S  | 7  | 641.3371       | 321.1725        |
| 783.3637       | 10 | G  | 6  | 554.3051       | 277.6564        |
| 880.4164       | 11 | P  | 5  | 497.2836       | 249.1457        |
| 951.4536       | 12 | A  | 4  | 400.2308       | 200.6193        |
| 1008.4750      | 13 | G  | 3  | 329.1937       | 165.1008        |
| 1105.5278      | 14 | P  | 2  | 272.1723       | 136.5900        |
|                | 15 | R  | 1  | 175.1195       | 88.0637         |

N-term:+29.04

X-range:

0 - 0

MassTol: Y-zoom:

0. 1.

MassType:

☐ AVG ☒ MONO

Axis:

☒ 1 ☐ 2

Label:

☒ I ☐ M ☐ -

Ions:

a ☐ + ☐ 2+ ☐ 3+

b ☒ + ☐ 2+ ☐ 3+

c ☐ + ☐ 2+ ☐ 3+

x ☐ + ☐ 2+ ☐ 3+

y ☒ + ☒ 2+ ☐ 3+

z ☐ + ☐ 2+ ☐ 3+

hide H<sub>2</sub>O/NH<sub>3</sub> ☐

zoom 112-122 ☐

GO

GECKITLSQVGDVLR, MH+ 1743.0110, m/z 581.6752  
H OS G15 P120811 220811-s1.05038.05038.3.dta

scan 5038; 2.1e+000

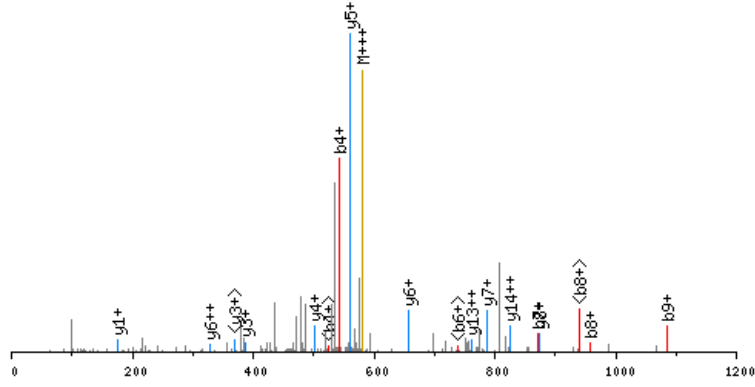

click image to zoom in; click top corners to zoom out [\[precursor±\]](#)

scan 5036; 581.7 m/z; 1.5e+001

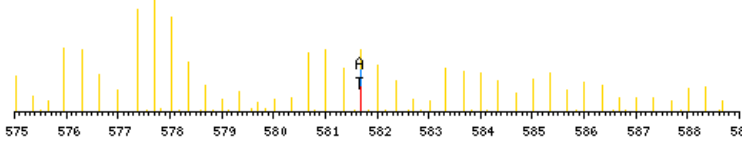

zoomed in precursor plot; T=theoretical m/z, A=acquired m/z

| b <sup>+</sup> | #  | AA | #  | y <sup>+</sup> | y <sup>2+</sup> |
|----------------|----|----|----|----------------|-----------------|
| 92.0924        | 1  | G  | 15 |                |                 |
| 221.1350       | 2  | E  | 14 | 1651.9265      | 826.4672        |
| 381.1656       | 3  | C  | 13 | 1522.8839      | 761.9459        |
| 543.3237       | 4  | K  | 12 | 1362.8533      | 681.9306        |
| 656.4077       | 5  | I  | 11 | 1200.6952      | 600.8515        |
| 757.4554       | 6  | T  | 10 | 1087.6111      | 544.3095        |
| 870.5395       | 7  | L  | 9  | 986.5635       | 493.7856        |
| 957.5715       | 8  | S  | 8  | 873.4794       | 437.2436        |
| 1085.6301      | 9  | Q  | 7  | 786.4474       | 393.7276        |
| 1184.6985      | 10 | V  | 6  | 658.3888       | 329.6983        |
| 1241.7199      | 11 | G  | 5  | 559.3204       | 280.1641        |
| 1356.7469      | 12 | D  | 4  | 502.2989       | 251.6534        |
| 1455.8153      | 13 | V  | 3  | 387.2720       | 194.1399        |
| 1568.8994      | 14 | L  | 2  | 288.2036       | 144.6057        |
|                | 15 | R  | 1  | 175.1195       | 88.0637         |

N-term:+35.07 C(3):+160.03  
K(4):+162.16

X-range:

0 - 0

MassTol: Y-zoom:

0. 1.

MassType:

☐AVG ☒MONO

Axis:

☒1 ☐2

Label:

☒I ☐M ☐-

Ions:

a ☐+ ☐2+ ☐3+

b ☒+ ☐2+ ☐3+

c ☐+ ☐2+ ☐3+

x ☐+ ☐2+ ☐3+

y ☒+ ☒2+ ☐3+

z ☐+ ☐2+ ☐3+

hide H<sub>2</sub>O/NH<sub>3</sub> ☐

zoom 112-122 ☐

GO

GEQSEGVLFQGNR, MH+ 1755.8124, m/z 585.9423  
L OS G13 P120811 220811-s1.05537.05537.3.dta

scan 5537; 1.9e+000

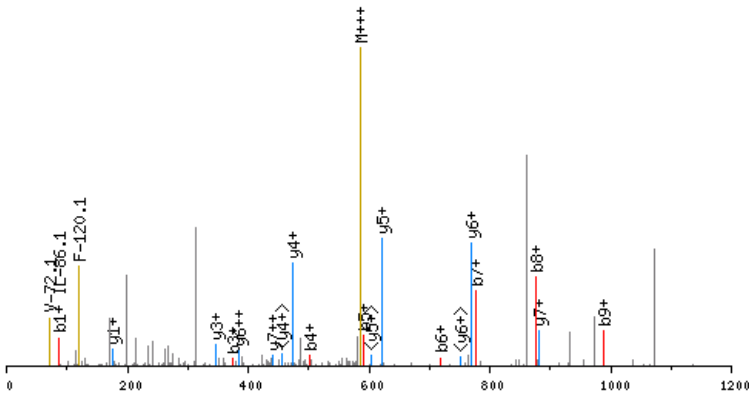

click image to zoom in; click top corners to zoom out

[precursor±]

scan 5534; 585.9 m/z; 1.6e+001

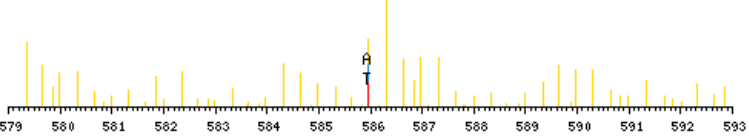

zoomed in precursor plot; T=theoretical m/z, A=acquired m/z

| b <sup>+</sup> | #  | AA | #  | y <sup>+</sup> | y <sup>2+</sup> |
|----------------|----|----|----|----------------|-----------------|
| 86.0606        | 1  | G  | 15 |                |                 |
| 215.1032       | 2  | E  | 14 | 1670.7596      | 835.8837        |
| 375.1338       | 3  | C  | 13 | 1541.7170      | 771.3624        |
| 503.1923       | 4  | Q  | 12 | 1381.6864      | 691.3471        |
| 590.2244       | 5  | S  | 11 | 1253.6279      | 627.3178        |
| 719.2670       | 6  | E  | 10 | 1166.5958      | 583.8018        |
| 776.2884       | 7  | G  | 9  | 1037.5532      | 519.2805        |
| 875.3568       | 8  | V  | 8  | 980.5318       | 490.7698        |
| 988.4409       | 9  | L  | 7  | 881.4634       | 441.2356        |
| 1135.5093      | 10 | F  | 6  | 768.3793       | 384.6936        |
| 1282.5777      | 11 | F  | 5  | 621.3109       | 311.1594        |
| 1410.6363      | 12 | Q  | 4  | 474.2425       | 237.6251        |
| 1467.6578      | 13 | G  | 3  | 346.1839       | 173.5959        |
| 1581.7007      | 14 | N  | 2  | 289.1624       | 145.0851        |
|                | 15 | R  | 1  | 175.1195       | 88.0637         |

N-term:+29.04 C(3):+160.03

X-range:

0 - 0

MassTol: Y-zoom:

0. 1.

MassType:

☐ AVG ☒ MONO

Axis:

☒ 1 ☐ 2

Label:

☒ I ☐ M ☐ -

Ions:

a ☐ + ☐ 2+ ☐ 3+

b ☒ + ☐ 2+ ☐ 3+

c ☐ + ☐ 2+ ☐ 3+

x ☐ + ☐ 2+ ☐ 3+

y ☒ + ☒ 2+ ☐ 3+

z ☐ + ☐ 2+ ☐ 3+

hide H<sub>2</sub>O/NH<sub>3</sub> ☐

zoom 112-122 ☐

GO

GEDIDLPEPFDAR, MH+ 1505.7124, m/z 502.5756  
L OS G13 P120811 220811-s1.05603.05603.3.dta

scan 5603; 4.0e+000

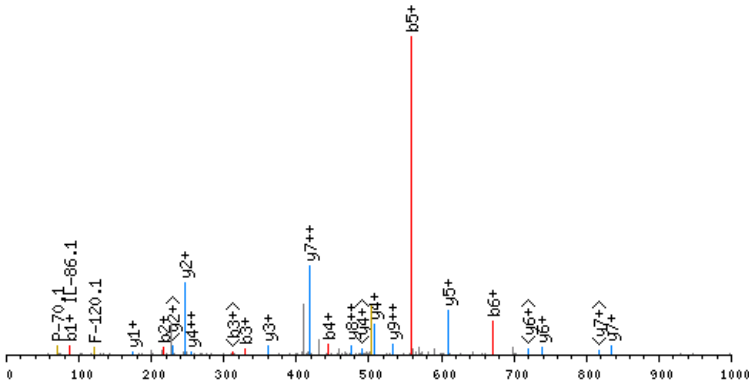

click image to zoom in; click top corners to zoom out

[precursor±]

scan 5599; 502.6 m/z; 1.5e+001

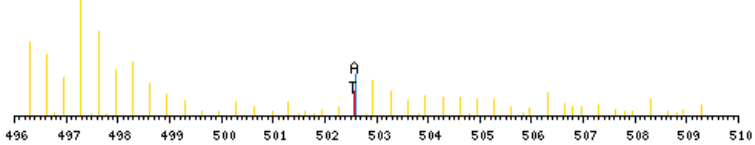

zoomed in precursor plot; T=theoretical m/z, A=acquired m/z

| b <sup>+</sup> | #  | AA | #  | y <sup>+</sup> | y <sup>2+</sup> |
|----------------|----|----|----|----------------|-----------------|
| 86.0606        | 1  | G  | 13 |                |                 |
| 215.1032       | 2  | E  | 12 | 1420.6596      | 710.8337        |
| 330.1301       | 3  | D  | 11 | 1291.6170      | 646.3124        |
| 443.2142       | 4  | I  | 10 | 1176.5901      | 588.7990        |
| 558.2411       | 5  | D  | 9  | 1063.5060      | 532.2569        |
| 671.3252       | 6  | L  | 8  | 948.4791       | 474.7434        |
| 768.3779       | 7  | P  | 7  | 835.3950       | 418.2014        |
| 897.4205       | 8  | E  | 6  | 738.3422       | 369.6750        |
| 998.4682       | 9  | T  | 5  | 609.2997       | 305.1537        |
| 1145.5366      | 10 | F  | 4  | 508.2520       | 254.6299        |
| 1260.5636      | 11 | D  | 3  | 361.1836       | 181.0957        |
| 1331.6007      | 12 | A  | 2  | 246.1566       | 123.5822        |
|                | 13 | R  | 1  | 175.1195       | 88.0637         |

N-term:+29.04

X-range:

0 - 0

MassTol: Y-zoom:

0. 1.

MassType:

☐AVG ☒MONO

Axis:

☒1 ☐2

Label:

☒I ☐M ☐-

Ions:

a ☐+ ☐2+ ☐3+

b ☒+ ☐2+ ☐3+

c ☐+ ☐2+ ☐3+

x ☐+ ☐2+ ☐3+

y ☒+ ☒2+ ☐3+

z ☐+ ☐2+ ☐3+

hide H<sub>2</sub>O/NH<sub>3</sub> ☐

zoom 112-122 ☐

GO

GEEGHDPKEPEQLR, MH+ 1676.8244, m/z 419.9616  
L OS G17 P120811 220811-s1.01970.01970.4.dta

scan 1970; 9.5e+000

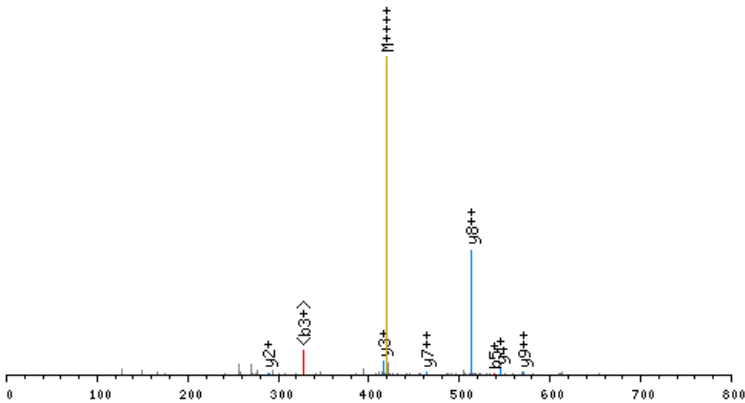

click image to zoom in; click top corners to zoom out

[precursor±]

scan 1968; 420.0 m/z; 4.4e+000

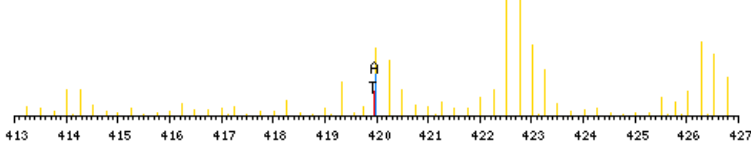

zoomed in precursor plot; T=theoretical m/z, A=acquired m/z

| b <sup>+</sup> | #  | AA | #  | y <sup>+</sup> | y <sup>2+</sup> |
|----------------|----|----|----|----------------|-----------------|
| 86.0606        | 1  | G  | 14 |                |                 |
| 215.1032       | 2  | E  | 13 | 1591.7717      | 796.3897        |
| 344.1458       | 3  | E  | 12 | 1462.7291      | 731.8684        |
| 401.1672       | 4  | G  | 11 | 1333.6865      | 667.3472        |
| 538.2261       | 5  | H  | 10 | 1276.6650      | 638.8364        |
| 653.2531       | 6  | D  | 9  | 1139.6061      | 570.3070        |
| 750.3058       | 7  | P  | 8  | 1024.5792      | 512.7935        |
| 906.4321       | 8  | K  | 7  | 927.5264       | 464.2671        |
| 1035.4747      | 9  | E  | 6  | 771.4001       | 386.2040        |
| 1132.5275      | 10 | P  | 5  | 642.3575       | 321.6827        |
| 1261.5701      | 11 | E  | 4  | 545.3047       | 273.1563        |
| 1389.6287      | 12 | Q  | 3  | 416.2621       | 208.6350        |
| 1502.7127      | 13 | L  | 2  | 288.2036       | 144.6057        |
|                | 14 | R  | 1  | 175.1195       | 88.0637         |

N-term:+29.04 K(8):+156.13

X-range:

0 - 0

MassTol: Y-zoom:

0. 1.

MassType:

☐AVG ☒MONO

Axis:

☒1 ☐2

Label:

☒I ☐M ☐-

Ions:

a ☐+ ☐2+ ☐3+

b ☒+ ☐2+ ☐3+

c ☐+ ☐2+ ☐3+

x ☐+ ☐2+ ☐3+

y ☒+ ☒2+ ☐3+

z ☐+ ☐2+ ☐3+

hide H<sub>2</sub>O/NH<sub>3</sub> ☐

zoom 112-122 ☐

GO

GEEQGADAALHFNPR, MH+ 1645.8146, m/z 549.2764  
H OS G16 P120811 220811-s1.03810.03810.3.dta

scan 3810; 7.5e+000

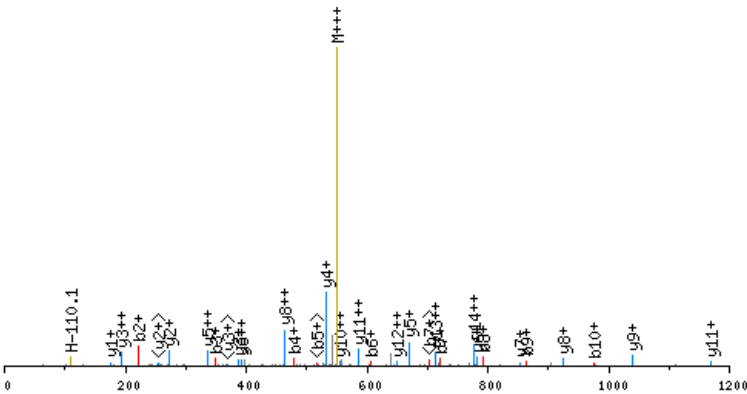

click image to zoom in; click top corners to zoom out

[precursor±]

scan 3808; 549.3 m/z; 1.6e+001

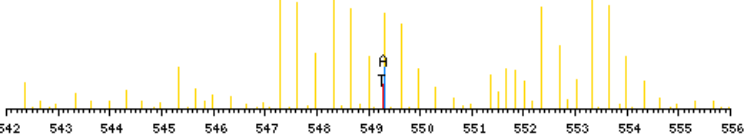

zoomed in precursor plot; T=theoretical m/z, A=acquired m/z

| b <sup>+</sup> | #  | AA | #  | y <sup>+</sup> | y <sup>2+</sup> |
|----------------|----|----|----|----------------|-----------------|
| 92.0924        | 1  | G  | 15 |                |                 |
| 221.1350       | 2  | E  | 14 | 1554.7301      | 777.8690        |
| 350.1776       | 3  | E  | 13 | 1425.6875      | 713.3477        |
| 478.2361       | 4  | Q  | 12 | 1296.6449      | 648.8264        |
| 535.2576       | 5  | G  | 11 | 1168.5863      | 584.7971        |
| 606.2947       | 6  | A  | 10 | 1111.5649      | 556.2863        |
| 721.3216       | 7  | D  | 9  | 1040.5278      | 520.7678        |
| 792.3588       | 8  | A  | 8  | 925.5008       | 463.2543        |
| 863.3959       | 9  | A  | 7  | 854.4637       | 427.7358        |
| 976.4799       | 10 | L  | 6  | 783.4266       | 392.2172        |
| 1113.5389      | 11 | H  | 5  | 670.3425       | 335.6752        |
| 1260.6073      | 12 | F  | 4  | 533.2836       | 267.1457        |
| 1374.6502      | 13 | N  | 3  | 386.2152       | 193.6115        |
| 1471.7030      | 14 | P  | 2  | 272.1723       | 136.5900        |
|                | 15 | R  | 1  | 175.1195       | 88.0637         |

N-term:+35.07

X-range:

0 - 0

MassTol: Y-zoom:

0. 1.

MassType:

☐ AVG ☒ MONO

Axis:

☒ 1 ☐ 2

Label:

☒ I ☐ M ☐ -

Ions:

a ☐ + ☐ 2+ ☐ 3+

b ☒ + ☐ 2+ ☐ 3+

c ☐ + ☐ 2+ ☐ 3+

x ☐ + ☐ 2+ ☐ 3+

y ☒ + ☒ 2+ ☐ 3+

z ☐ + ☐ 2+ ☐ 3+

hide H<sub>2</sub>O/NH<sub>3</sub> ☐

zoom 112-122 ☐

GO

GEHGSSSHPLPSSGQNESSSGQSSR, MH+ 2517.1414, m/z 630.0408  
H OS G17 P120811 220811-s1.01699.01699.4.dta

scan 1699; 6.9e-002

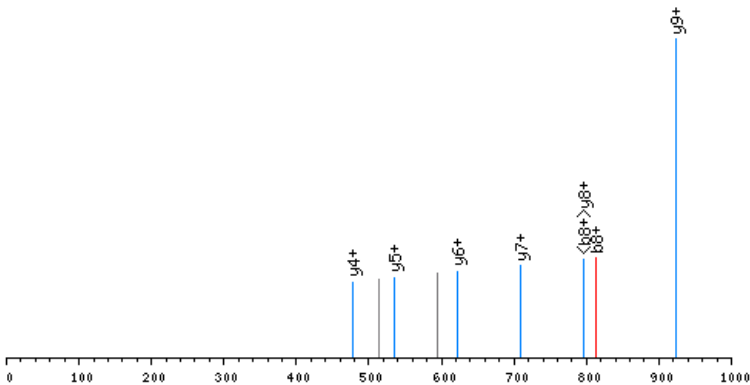

scan 1698; 630.0 m/z; 1.0e+000

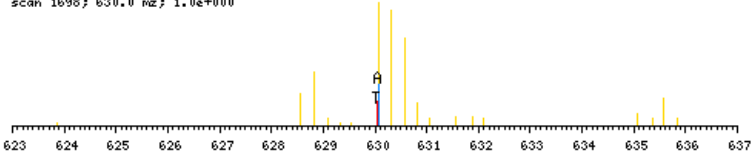

| b <sup>+</sup> | #  | AA | #  | y <sup>+</sup> | y <sup>2+</sup> |
|----------------|----|----|----|----------------|-----------------|
| 92.0924        | 1  | G  | 25 |                |                 |
| 221.1350       | 2  | E  | 24 | 2426.0569      | 1213.5323       |
| 358.1939       | 3  | H  | 23 | 2297.0143      | 1149.0110       |
| 415.2153       | 4  | G  | 22 | 2159.9554      | 1080.4816       |
| 502.2474       | 5  | S  | 21 | 2102.9339      | 1051.9709       |
| 589.2794       | 6  | S  | 20 | 2015.9019      | 1008.4548       |
| 676.3114       | 7  | S  | 19 | 1928.8698      | 964.9388        |
| 813.3703       | 8  | H  | 18 | 1841.8378      | 921.4228        |
| 910.4231       | 9  | P  | 17 | 1704.7789      | 852.8934        |
| 1023.5072      | 10 | L  | 16 | 1607.7261      | 804.3670        |
| 1120.5599      | 11 | P  | 15 | 1494.6421      | 747.8249        |
| 1207.5919      | 12 | S  | 14 | 1397.5893      | 699.2986        |
| 1294.6240      | 13 | S  | 13 | 1310.5573      | 655.7825        |
| 1351.6454      | 14 | G  | 12 | 1223.5252      | 612.2665        |
| 1479.7040      | 15 | Q  | 11 | 1166.5038      | 583.7558        |
| 1593.7469      | 16 | N  | 10 | 1038.4452      | 519.7265        |
| 1722.7895      | 17 | E  | 9  | 924.4023       | 462.7051        |
| 1809.8216      | 18 | S  | 8  | 795.3597       | 398.1838        |
| 1896.8536      | 19 | S  | 7  | 708.3277       | 354.6677        |
| 1983.8856      | 20 | S  | 6  | 621.2956       | 311.1517        |
| 2040.9071      | 21 | G  | 5  | 534.2636       | 267.6357        |
| 2168.9657      | 22 | Q  | 4  | 477.2421       | 239.1250        |
| 2255.9977      | 23 | S  | 3  | 349.1836       | 175.0957        |
| 2343.0297      | 24 | S  | 2  | 262.1515       | 131.5797        |
|                | 25 | R  | 1  | 175.1195       | 88.0637         |

N-term:+35.07

X-range:

0 - 0

MassTol: Y-zoom:

0. 1.

MassType:

☐AVG ☒MONO

Axis:

☒1 ☐2

Label:

☒I ☐M ☐-

Ions:

a ☐+ ☐2+ ☐3+

b ☒+ ☐2+ ☐3+

c ☐+ ☐2+ ☐3+

x ☐+ ☐2+ ☐3+

y ☒+ ☒2+ ☐3+

z ☐+ ☐2+ ☐3+

hide H<sub>2</sub>O/NH<sub>3</sub> ☐

zoom 112-122 ☐

GO

GEHMDLTTCPLAAGGQEEKLR, MH+ 2368.1753, m/z 592.7993  
L OS G17 P120811 220811-s1.04525.04525.4.dta

scan 4525; 7.3e+000

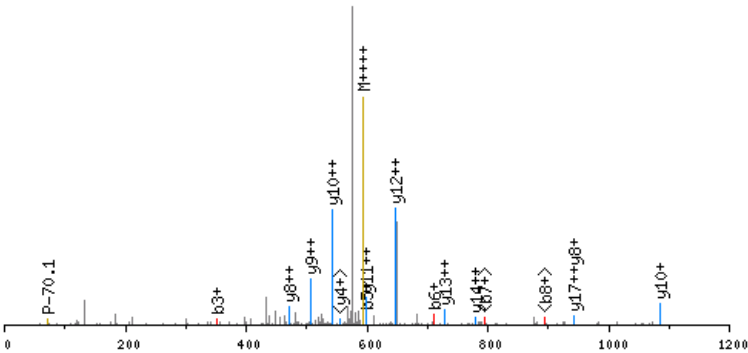

click image to zoom in; click top corners to zoom out

[precursor±]

scan 4523; 592.8 m/z; 3.8e+001

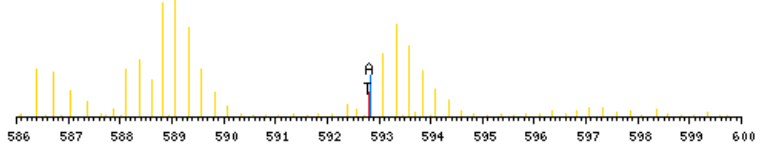

zoomed in precursor plot; T=theoretical m/z, A=acquired m/z

| b <sup>+</sup> | #  | AA | #  | y <sup>+</sup> | y <sup>2+</sup> |
|----------------|----|----|----|----------------|-----------------|
| 86.0606        | 1  | G  | 21 |                |                 |
| 215.1032       | 2  | E  | 20 | 2283.1225      | 1142.0652       |
| 352.1621       | 3  | H  | 19 | 2154.0800      | 1077.5439       |
| 483.2026       | 4  | M  | 18 | 2017.0210      | 1009.0144       |
| 598.2295       | 5  | D  | 17 | 1885.9806      | 943.4942        |
| 711.3136       | 6  | L  | 16 | 1770.9536      | 885.9807        |
| 812.3612       | 7  | T  | 15 | 1657.8696      | 829.4387        |
| 913.4089       | 8  | T  | 14 | 1556.8219      | 778.9148        |
| 1073.4395      | 9  | C  | 13 | 1455.7742      | 728.3910        |
| 1170.4923      | 10 | P  | 12 | 1295.7436      | 648.3757        |
| 1283.5763      | 11 | L  | 11 | 1198.6908      | 599.8493        |
| 1354.6135      | 12 | A  | 10 | 1085.6068      | 543.3073        |
| 1425.6506      | 13 | A  | 9  | 1014.5697      | 507.7887        |
| 1482.6720      | 14 | G  | 8  | 943.5325       | 472.2702        |
| 1539.6935      | 15 | G  | 7  | 886.5111       | 443.7595        |
| 1667.7521      | 16 | Q  | 6  | 829.4896       | 415.2487        |
| 1795.8107      | 17 | Q  | 5  | 701.4310       | 351.2194        |
| 1924.8532      | 18 | E  | 4  | 573.3725       | 287.1901        |
| 2080.9795      | 19 | K  | 3  | 444.3299       | 222.6688        |
| 2194.0636      | 20 | L  | 2  | 288.2036       | 144.6057        |
|                | 21 | R  | 1  | 175.1195       | 88.0637         |

N-term:+29.04 C(9):+160.03  
K(19):+156.13

X-range:

0 - 0

MassTol: Y-zoom:

0. 1.

MassType:

☐AVG ☒MONO

Axis:

☒1 ☐2

Label:

☒I ☐M ☐-

Ions:

a ☐+ ☐2+ ☐3+

b ☒+ ☐2+ ☐3+

c ☐+ ☐2+ ☐3+

x ☐+ ☐2+ ☐3+

y ☒+ ☒2+ ☐3+

z ☐+ ☐2+ ☐3+

hide H<sub>2</sub>O/NH<sub>3</sub> ☐

zoom 112-122 ☐

GO

GEIDASVPEMEADLR, MH+ 1665.8218, m/z 555.9454  
H OS G13 P120811 220811-s1.05781.05781.3.dta

scan 5781; 2.6e+000

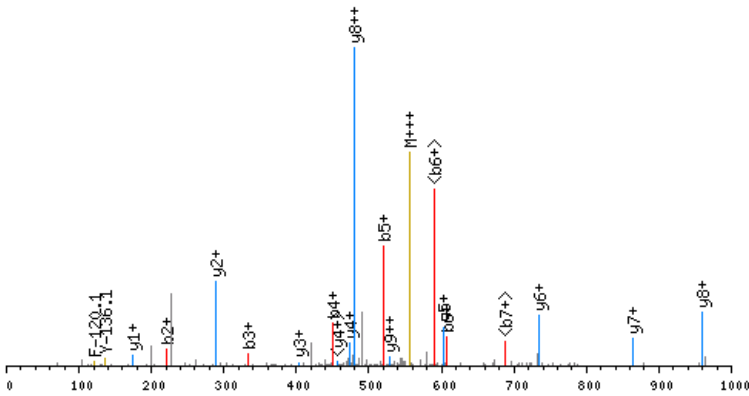

click image to zoom in; click top corners to zoom out

[precursor±]

scan 5779; 555.9 m/z; 9.8e+000

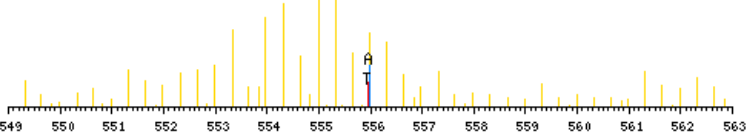

zoomed in precursor plot; T=theoretical m/z, A=acquired m/z

| b <sup>+</sup> | #  | AA | #  | y <sup>+</sup> | y <sup>2+</sup> |
|----------------|----|----|----|----------------|-----------------|
| 92.0924        | 1  | G  | 15 |                |                 |
| 221.1350       | 2  | E  | 14 | 1574.7372      | 787.8725        |
| 334.2190       | 3  | I  | 13 | 1445.6946      | 723.3512        |
| 449.2460       | 4  | D  | 12 | 1332.6106      | 666.8092        |
| 520.2831       | 5  | A  | 11 | 1217.5836      | 609.2957        |
| 607.3151       | 6  | S  | 10 | 1146.5465      | 573.7772        |
| 706.3835       | 7  | V  | 9  | 1059.5145      | 530.2611        |
| 803.4363       | 8  | P  | 8  | 960.4461       | 480.7269        |
| 932.4789       | 9  | E  | 7  | 863.3933       | 432.2006        |
| 1063.5194      | 10 | M  | 6  | 734.3507       | 367.6793        |
| 1192.5620      | 11 | E  | 5  | 603.3102       | 302.1590        |
| 1263.5991      | 12 | A  | 4  | 474.2676       | 237.6377        |
| 1378.6260      | 13 | D  | 3  | 403.2305       | 202.1192        |
| 1491.7101      | 14 | L  | 2  | 288.2036       | 144.6057        |
|                | 15 | R  | 1  | 175.1195       | 88.0637         |

N-term:+35.07

X-range:

0 - 0

MassTol: Y-zoom:

0. 1.

MassType:

☐ AVG ☒ MONO

Axis:

☒ 1 ☐ 2

Label:

☒ I ☐ M ☐ -

Ions:

a ☐ + ☐ 2+ ☐ 3+

b ☒ + ☐ 2+ ☐ 3+

c ☐ + ☐ 2+ ☐ 3+

x ☐ + ☐ 2+ ☐ 3+

y ☒ + ☒ 2+ ☐ 3+

z ☐ + ☐ 2+ ☐ 3+

hide H<sub>2</sub>O/NH<sub>3</sub> ☐

zoom 112-122 ☐

GO

GEIEAIELPIDPKLNKR, MH+ 2037.2809, m/z 510.0757  
H OS G16 P120811 220811-s1.05664.05664.4.dta

scan 5664; 1.8e+000

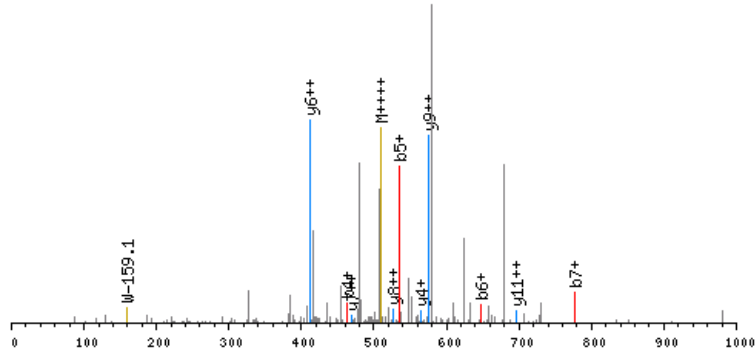

click image to zoom in; click top corners to zoom out [\[precursor±\]](#)

scan 5663; 510.1 m/z; 4.3e+001

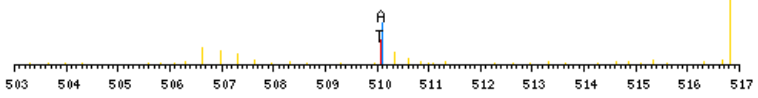

zoomed in precursor plot; T=theoretical m/z, A=acquired m/z

| b <sup>+</sup> | #  | AA | #  | y <sup>+</sup> | y <sup>2+</sup> |
|----------------|----|----|----|----------------|-----------------|
| 92.0924        | 1  | G  | 17 |                |                 |
| 221.1350       | 2  | E  | 16 | 1946.1963      | 973.6021        |
| 334.2190       | 3  | I  | 15 | 1817.1537      | 909.0808        |
| 463.2616       | 4  | E  | 14 | 1704.0697      | 852.5387        |
| 534.2987       | 5  | A  | 13 | 1575.0271      | 788.0174        |
| 647.3828       | 6  | I  | 12 | 1503.9899      | 752.4989        |
| 776.4254       | 7  | E  | 11 | 1390.9059      | 695.9569        |
| 889.5094       | 8  | L  | 10 | 1261.8633      | 631.4356        |
| 986.5622       | 9  | P  | 9  | 1148.7792      | 574.8935        |
| 1099.6463      | 10 | I  | 8  | 1051.7265      | 526.3671        |
| 1214.6732      | 11 | D  | 7  | 938.6424       | 469.8251        |
| 1311.7260      | 12 | P  | 6  | 823.6155       | 412.3116        |
| 1473.8841      | 13 | K  | 5  | 726.5627       | 363.7853        |
| 1586.9681      | 14 | L  | 4  | 564.4046       | 282.7062        |
| 1701.0111      | 15 | N  | 3  | 451.3205       | 226.1642        |
| 1863.1692      | 16 | K  | 2  | 337.2776       | 169.1427        |
|                | 17 | R  | 1  | 175.1195       | 88.0637         |

N-term:+35.07 K(13):+162.16  
K(16):+162.16

X-range:

0 - 0

MassTol: Y-zoom:

0. 1.

MassType:

☐AVG ☒MONO

Axis:

☒1 ☐2

Label:

☒I ☐M ☐-

Ions:

a ☐+ ☐2+ ☐3+

b ☒+ ☐2+ ☐3+

c ☐+ ☐2+ ☐3+

x ☐+ ☐2+ ☐3+

y ☒+ ☒2+ ☐3+

z ☐+ ☐2+ ☐3+

hide H<sub>2</sub>O/NH<sub>3</sub> ☐

zoom 112-122 ☐

GO

GELEDKPPAPPVR, MH+ 1460.8113, m/z 487.6086  
L OS G15 P120811 220811-s1.02747.02747.3.dta

scan 2747; 9.6e+000

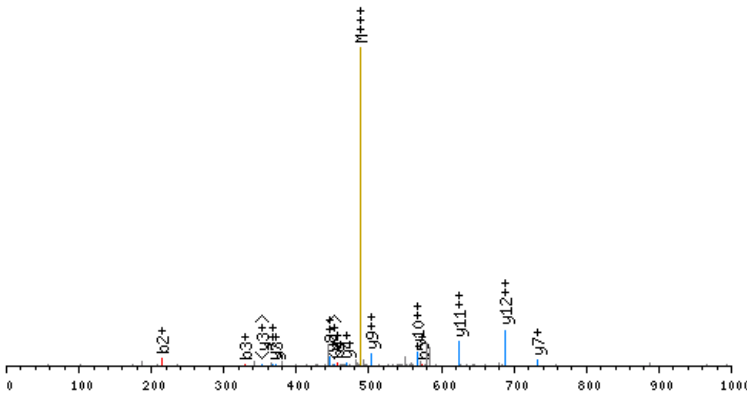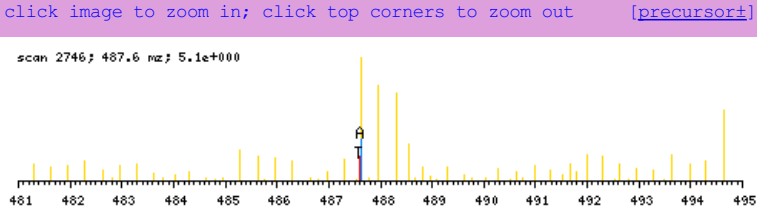

zoomed in precursor plot; T=theoretical m/z, A=acquired m/z

| b <sup>+</sup> | #  | AA | #  | y <sup>+</sup> | y <sup>2+</sup> |
|----------------|----|----|----|----------------|-----------------|
| 86.0606        | 1  | G  | 13 |                |                 |
| 215.1032       | 2  | E  | 12 | 1375.7586      | 688.3832        |
| 328.1872       | 3  | L  | 11 | 1246.7160      | 623.8619        |
| 457.2298       | 4  | E  | 10 | 1133.6319      | 567.3199        |
| 572.2568       | 5  | D  | 9  | 1004.5893      | 502.7986        |
| 728.3831       | 6  | K  | 8  | 889.5624       | 445.2851        |
| 825.4358       | 7  | P  | 7  | 733.4361       | 367.2220        |
| 922.4886       | 8  | P  | 6  | 636.3833       | 318.6956        |
| 993.5257       | 9  | A  | 5  | 539.3306       | 270.1692        |
| 1090.5785      | 10 | P  | 4  | 468.2934       | 234.6506        |
| 1187.6312      | 11 | P  | 3  | 371.2407       | 186.1243        |
| 1286.6996      | 12 | V  | 2  | 274.1879       | 137.5979        |
|                | 13 | R  | 1  | 175.1195       | 88.0637         |

N-term:+29.04 K(6):+156.13

X-range:

0 - 0

MassTol: Y-zoom:

0. 1.

MassType:

☐AVG ☒MONO

Axis:

☒1 ☐2

Label:

☒I ☐M ☐-

Ions:

a ☐+ ☐2+ ☐3+

b ☒+ ☐2+ ☐3+

c ☐+ ☐2+ ☐3+

x ☐+ ☐2+ ☐3+

y ☒+ ☒2+ ☐3+

z ☐+ ☐2+ ☐3+

hide H<sub>2</sub>O/NH<sub>3</sub> ☐

zoom 112-122 ☐

GO

GESSFDLADR, MH+ 1124.5224, m/z 562.7648  
L OS G14 P120811 220811-s1.03720.03720.2.dta

scan 3720; 6.3e+000

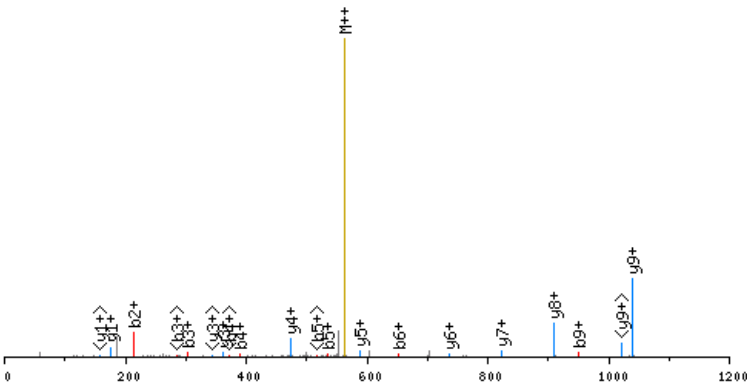

click image to zoom in; click top corners to zoom out

[precursor±]

scan 3716; 562.8 m/z; 1.1e+001

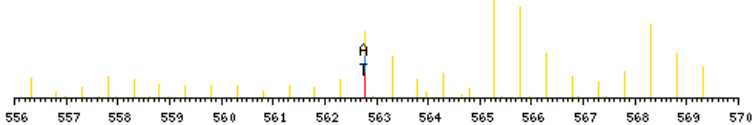

zoomed in precursor plot; T=theoretical m/z, A=acquired m/z

| b <sup>+</sup> | #  | AA | #  | y <sup>+</sup> | y <sup>2+</sup> |
|----------------|----|----|----|----------------|-----------------|
| 86.0606        | 1  | G  | 10 |                |                 |
| 215.1032       | 2  | E  | 9  | 1039.4696      | 520.2387        |
| 302.1352       | 3  | S  | 8  | 910.4270       | 455.7174        |
| 389.1672       | 4  | S  | 7  | 823.3950       | 412.2014        |
| 536.2356       | 5  | F  | 6  | 736.3630       | 368.6854        |
| 651.2626       | 6  | D  | 5  | 589.2946       | 295.1512        |
| 764.3466       | 7  | L  | 4  | 474.2676       | 237.6377        |
| 835.3837       | 8  | A  | 3  | 361.1836       | 181.0957        |
| 950.4107       | 9  | D  | 2  | 290.1464       | 145.5771        |
|                | 10 | R  | 1  | 175.1195       | 88.0637         |

N-term:+29.04

X-range:

0 - 0

MassTol: Y-zoom:

0. 1.

MassType:

☐ AVG ☒ MONO

Axis:

☒ 1 ☐ 2

Label:

☒ I ☐ M ☐ -

Ions:

a ☐ + ☐ 2+ ☐ 3+

b ☒ + ☐ 2+ ☐ 3+

c ☐ + ☐ 2+ ☐ 3+

x ☐ + ☐ 2+ ☐ 3+

y ☒ + ☒ 2+ ☐ 3+

z ☐ + ☐ 2+ ☐ 3+

hide H<sub>2</sub>O/NH<sub>3</sub> ☐

zoom 112-122 ☐

GO

GESSFDLADRLDPVEKIDR, MH+ 2230.1992, m/z 558.3052  
H OS G17 P120811 220811-s1.06065.06065.4.dta

scan 6065; 7.4e+000

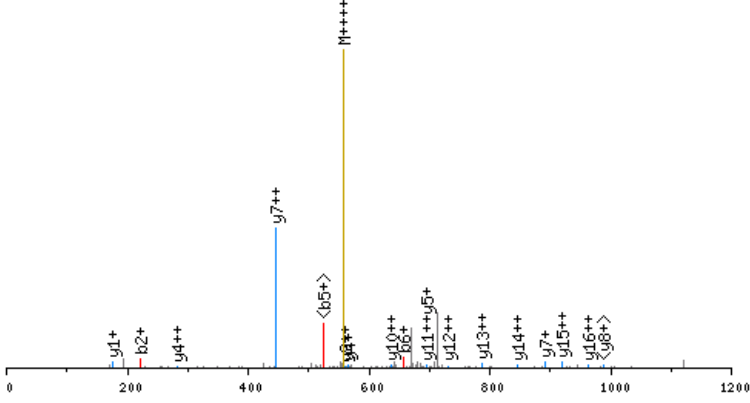

click image to zoom in; click top corners to zoom out [\[precursor±\]](#)

scan 6063; 558.3 m/z; 9.1e+000

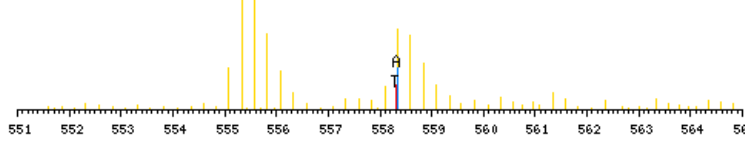

zoomed in precursor plot; T=theoretical m/z, A=acquired m/z

| b <sup>+</sup> | #  | AA | #  | y <sup>+</sup> | y <sup>2+</sup> |
|----------------|----|----|----|----------------|-----------------|
| 92.0924        | 1  | G  | 19 |                |                 |
| 221.1350       | 2  | E  | 18 | 2139.1146      | 1070.0612       |
| 308.1670       | 3  | S  | 17 | 2010.0720      | 1005.5399       |
| 395.1990       | 4  | S  | 16 | 1923.0400      | 962.0239        |
| 542.2674       | 5  | F  | 15 | 1836.0080      | 918.5079        |
| 657.2944       | 6  | D  | 14 | 1688.9396      | 844.9737        |
| 770.3784       | 7  | L  | 13 | 1573.9126      | 787.4602        |
| 841.4155       | 8  | A  | 12 | 1460.8286      | 730.9182        |
| 956.4425       | 9  | D  | 11 | 1389.7914      | 695.3996        |
| 1112.5436      | 10 | R  | 10 | 1274.7645      | 637.8862        |
| 1225.6277      | 11 | L  | 9  | 1118.6634      | 559.8356        |
| 1340.6546      | 12 | D  | 8  | 1005.5793      | 503.2936        |
| 1437.7074      | 13 | P  | 7  | 890.5524       | 445.7801        |
| 1536.7758      | 14 | V  | 6  | 793.4996       | 397.2537        |
| 1665.8184      | 15 | E  | 5  | 694.4312       | 347.7195        |
| 1827.9765      | 16 | K  | 4  | 565.3886       | 283.1982        |
| 1941.0605      | 17 | I  | 3  | 403.2305       | 202.1192        |
| 2056.0875      | 18 | D  | 2  | 290.1464       | 145.5771        |
|                | 19 | R  | 1  | 175.1195       | 88.0637         |

N-term:+35.07 K(16):+162.16

X-range:

0 - 0

MassTol: Y-zoom:

0. 1.

MassType:

☐AVG ☒MONO

Axis:

☒1 ☐2

Label:

☒I ☐M ☐-

Ions:

a ☐+ ☐2+ ☐3+

b ☒+ ☐2+ ☐3+

c ☐+ ☐2+ ☐3+

x ☐+ ☐2+ ☐3+

y ☒+ ☒2+ ☐3+

z ☐+ ☐2+ ☐3+

hide H<sub>2</sub>O/NH<sub>3</sub> ☐

zoom 112-122 ☐

GO

GETGHVAINCKTSEVNCYR, MH+ 2338.0919, m/z 585.2784  
L OS G17 P120811 220811-s1.02731.02731.4.dta

scan 2731; 3.5e+000

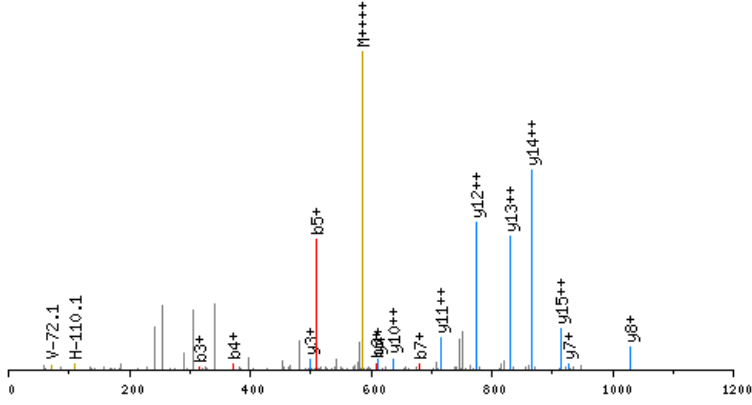

click image to zoom in; click top corners to zoom out [\[precursor±\]](#)

scan 2728; 585.3 m/z; 3.8e+000

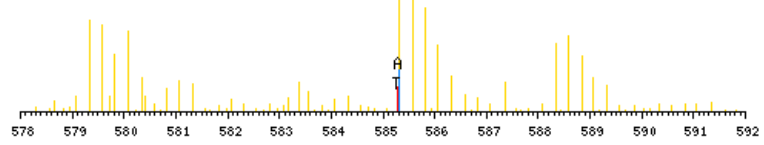

zoomed in precursor plot; T=theoretical m/z, A=acquired m/z

| b <sup>+</sup> | #  | AA | #  | y <sup>+</sup> | y <sup>2+</sup> |
|----------------|----|----|----|----------------|-----------------|
| 86.0606        | 1  | G  | 20 |                |                 |
| 215.1032       | 2  | E  | 19 | 2253.0392      | 1127.0235       |
| 316.1508       | 3  | T  | 18 | 2123.9966      | 1062.5022       |
| 373.1723       | 4  | G  | 17 | 2022.9489      | 1011.9784       |
| 510.2312       | 5  | H  | 16 | 1965.9274      | 983.4676        |
| 609.2996       | 6  | V  | 15 | 1828.8685      | 914.9382        |
| 680.3367       | 7  | A  | 14 | 1729.8001      | 865.4040        |
| 793.4208       | 8  | I  | 13 | 1658.7630      | 829.8854        |
| 907.4637       | 9  | N  | 12 | 1545.6789      | 773.3434        |
| 1067.4943      | 10 | C  | 11 | 1431.6360      | 716.3219        |
| 1154.5264      | 11 | S  | 10 | 1271.6054      | 636.3066        |
| 1310.6527      | 12 | K  | 9  | 1184.5734      | 592.7906        |
| 1411.7003      | 13 | T  | 8  | 1028.4471      | 514.7274        |
| 1498.7324      | 14 | S  | 7  | 927.3994       | 464.2036        |
| 1627.7750      | 15 | E  | 6  | 840.3674       | 420.6876        |
| 1726.8434      | 16 | V  | 5  | 711.3248       | 356.1663        |
| 1840.8863      | 17 | N  | 4  | 612.2564       | 306.6321        |
| 2000.9169      | 18 | C  | 3  | 498.2134       | 249.6106        |
| 2163.9802      | 19 | Y  | 2  | 338.1828       | 169.5953        |
|                | 20 | R  | 1  | 175.1195       | 88.0637         |

N-term:+29.04 C(10):+160.03  
K(12):+156.13 C(18):+160.03

N-term: +29.04

X-range:

0 - 0

MassTol: Y-zoom:

0. 1.

MassType:

☐AVG ☒MONO

Axis:

☒1 ☐2

Label:

☒I ☐M ☐-

Ions:

a ☐+ ☐2+ ☐3+

b ☒+ ☐2+ ☐3+

c ☐+ ☐2+ ☐3+

x ☐+ ☐2+ ☐3+

y ☒+ ☒2+ ☐3+

z ☐+ ☐2+ ☐3+

hide H<sub>2</sub>O/NH<sub>3</sub> ☐

zoom 112-122 ☐

GO

GETNPADSKPGTIR, MH+ 1498.7866, m/z 500.2670  
L OS G15 P120811 220811-s1.02038.02038.3.dta

scan 2038; 9.5e+000

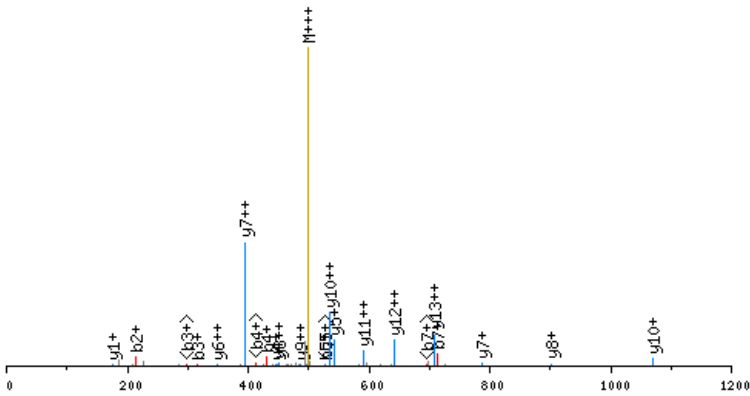

click image to zoom in; click top corners to zoom out

[precursor±]

scan 2036; 500.3 m/z; 3.0e+000

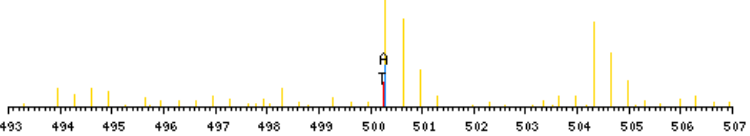

zoomed in precursor plot; T=theoretical m/z, A=acquired m/z

| b <sup>+</sup> | #  | AA | #  | y <sup>+</sup> | y <sup>2+</sup> |
|----------------|----|----|----|----------------|-----------------|
| 86.0606        | 1  | G  | 14 |                |                 |
| 215.1032       | 2  | E  | 13 | 1413.7338      | 707.3708        |
| 316.1508       | 3  | T  | 12 | 1284.6912      | 642.8495        |
| 430.1938       | 4  | N  | 11 | 1183.6435      | 592.3257        |
| 527.2465       | 5  | P  | 10 | 1069.6006      | 535.3042        |
| 598.2836       | 6  | A  | 9  | 972.5479       | 486.7778        |
| 713.3106       | 7  | D  | 8  | 901.5107       | 451.2593        |
| 800.3426       | 8  | S  | 7  | 786.4838       | 393.7458        |
| 956.4689       | 9  | K  | 6  | 699.4518       | 350.2298        |
| 1053.5217      | 10 | P  | 5  | 543.3255       | 272.1666        |
| 1110.5431      | 11 | G  | 4  | 446.2727       | 223.6403        |
| 1211.5908      | 12 | T  | 3  | 389.2512       | 195.1295        |
| 1324.6749      | 13 | I  | 2  | 288.2036       | 144.6057        |
|                | 14 | R  | 1  | 175.1195       | 88.0637         |

N-term:+29.04 K(9):+156.13

X-range:

0 - 0

MassTol: Y-zoom:

0. 1.

MassType:

☐AVG ☒MONO

Axis:

☒1 ☐2

Label:

☒I ☐M ☐-

Ions:

a ☐+ ☐2+ ☐3+

b ☒+ ☐2+ ☐3+

c ☐+ ☐2+ ☐3+

x ☐+ ☐2+ ☐3+

y ☒+ ☒2+ ☐3+

z ☐+ ☐2+ ☐3+

hide H<sub>2</sub>O/NH<sub>3</sub> ☐

zoom 112-122 ☐

GO

GETTTQGLDGLSER, MH+ 1491.7291, m/z 497.9145  
L OS G13 P120811 220811-s1.03391.03391.3.dta

scan 3391; 2.9e+000

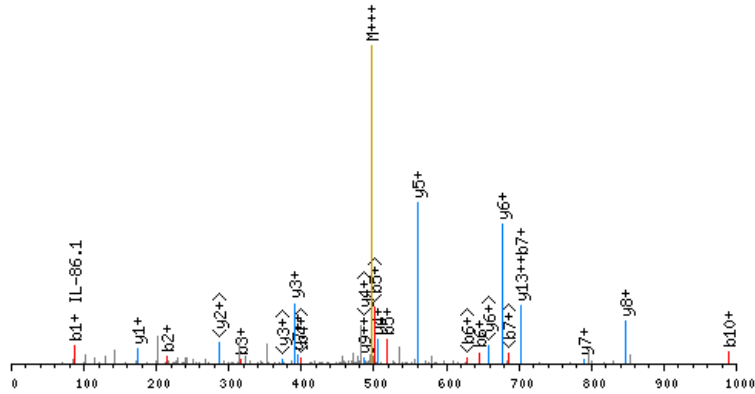

click image to zoom in; click top corners to zoom out [precursor±]

scan 3389; 497.9 m/z; 1.1e+001

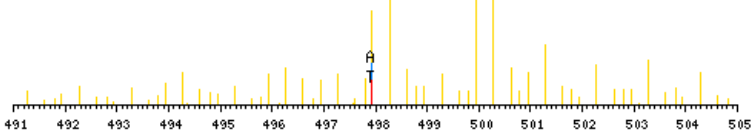

zoomed in precursor plot; T=theoretical m/z, A=acquired m/z

| b <sup>+</sup> | #  | AA | #  | y <sup>+</sup> | y <sup>2+</sup> |
|----------------|----|----|----|----------------|-----------------|
| 86.0606        | 1  | G  | 14 |                |                 |
| 215.1032       | 2  | E  | 13 | 1406.6763      | 703.8421        |
| 316.1508       | 3  | T  | 12 | 1277.6337      | 639.3208        |
| 417.1985       | 4  | T  | 11 | 1176.5861      | 588.7969        |
| 518.2462       | 5  | T  | 10 | 1075.5384      | 538.2731        |
| 646.3048       | 6  | Q  | 9  | 974.4907       | 487.7493        |
| 703.3262       | 7  | G  | 8  | 846.4321       | 423.7200        |
| 816.4103       | 8  | L  | 7  | 789.4107       | 395.2092        |
| 931.4372       | 9  | D  | 6  | 676.3266       | 338.6672        |
| 988.4587       | 10 | G  | 5  | 561.2997       | 281.1537        |
| 1101.5428      | 11 | L  | 4  | 504.2782       | 252.6430        |
| 1188.5748      | 12 | S  | 3  | 391.1941       | 196.1010        |
| 1317.6174      | 13 | E  | 2  | 304.1621       | 152.5850        |
|                | 14 | R  | 1  | 175.1195       | 88.0637         |

N-term:+29.04

X-range:

0 - 0

MassTol: Y-zoom:

0. 1.

MassType:

☐ AVG ☒ MONO

Axis:

☒ 1 ☐ 2

Label:

☒ I ☐ M ☐ -

Ions:

a ☐ + ☐ 2+ ☐ 3+

b ☒ + ☐ 2+ ☐ 3+

c ☐ + ☐ 2+ ☐ 3+

x ☐ + ☐ 2+ ☐ 3+

y ☒ + ☒ 2+ ☐ 3+

z ☐ + ☐ 2+ ☐ 3+

hide H<sub>2</sub>O/NH<sub>3</sub> ☐

zoom 112-122 ☐

GO

GEVVDCTIKMDPNTGR, MH+ 1859.9631, m/z 620.6592  
H OS G15 P120811 220811-s1.03363.03363.3.dta

scan 3363; 3.7e+000

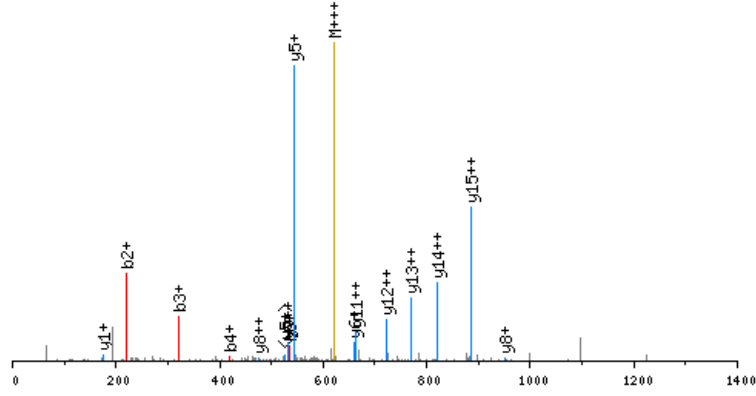

click image to zoom in; click top corners to zoom out

[precursor±]

scan 3361; 620.7 m/z; 2.3e+001

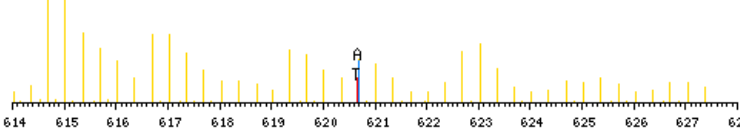

zoomed in precursor plot; T=theoretical m/z, A=acquired m/z

| b <sup>+</sup> | #  | AA | #  | y <sup>+</sup> | y <sup>2+</sup> |
|----------------|----|----|----|----------------|-----------------|
| 92.0924        | 1  | G  | 16 |                |                 |
| 221.1350       | 2  | E  | 15 | 1768.8786      | 884.9432        |
| 320.2034       | 3  | V  | 14 | 1639.8360      | 820.4219        |
| 419.2718       | 4  | V  | 13 | 1540.7676      | 770.8877        |
| 534.2987       | 5  | D  | 12 | 1441.6991      | 721.3535        |
| 694.3293       | 6  | C  | 11 | 1326.6722      | 663.8400        |
| 795.3770       | 7  | T  | 10 | 1166.6416      | 583.8247        |
| 908.4611       | 8  | I  | 9  | 1065.5939      | 533.3009        |
| 1070.6192      | 9  | K  | 8  | 952.5099       | 476.7588        |
| 1201.6597      | 10 | M  | 7  | 790.3518       | 395.6798        |
| 1316.6866      | 11 | D  | 6  | 659.3113       | 330.1596        |
| 1413.7394      | 12 | P  | 5  | 544.2843       | 272.6461        |
| 1527.7823      | 13 | N  | 4  | 447.2316       | 224.1197        |
| 1628.8300      | 14 | T  | 3  | 333.1886       | 167.0982        |
| 1685.8514      | 15 | G  | 2  | 232.1410       | 116.5744        |
|                | 16 | R  | 1  | 175.1195       | 88.0637         |

N-term:+35.07 C(6):+160.03  
K(9):+162.16

X-range:

0 - 0

MassTol: Y-zoom:

0. 1.

MassType:

☐AVG ☒MONO

Axis:

☒1 ☐2

Label:

☒I ☐M ☐-

Ions:

a ☐+ ☐2+ ☐3+

b ☒+ ☐2+ ☐3+

c ☐+ ☐2+ ☐3+

x ☐+ ☐2+ ☐3+

y ☒+ ☒2+ ☐3+

z ☐+ ☐2+ ☐3+

hide H<sub>2</sub>O/NH<sub>3</sub> ☐

zoom 112-122 ☐

GO

GEVVDCTIKTDPVTGR, MH+ 1814.9958, m/z 605.6701  
H OS G15 P120811 220811-s1.03257.03257.3.dta

scan 3257; 1.0e+001

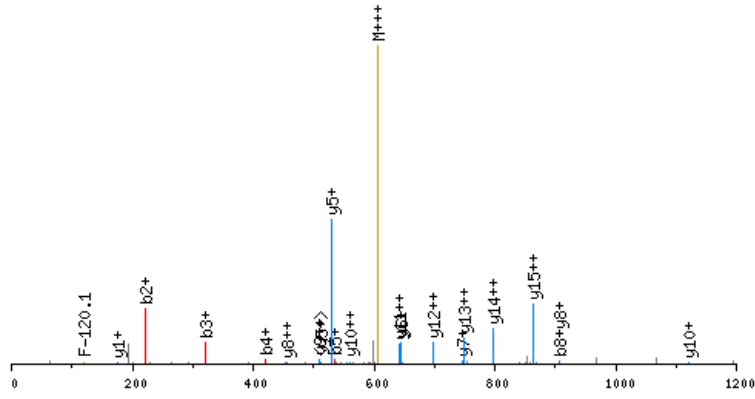

click image to zoom in; click top corners to zoom out [\[precursor±\]](#)

scan 3256; 605.7 m/z; 2.2e+001

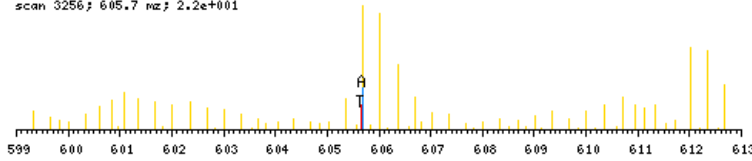

zoomed in precursor plot; T=theoretical m/z, A=acquired m/z

| b <sup>+</sup> | #  | AA | #  | y <sup>+</sup> | y <sup>2+</sup> |
|----------------|----|----|----|----------------|-----------------|
| 92.0924        | 1  | G  | 16 |                |                 |
| 221.1350       | 2  | E  | 15 | 1723.9112      | 862.4595        |
| 320.2034       | 3  | V  | 14 | 1594.8687      | 797.9382        |
| 419.2718       | 4  | V  | 13 | 1495.8002      | 748.4040        |
| 534.2987       | 5  | D  | 12 | 1396.7318      | 698.8698        |
| 694.3293       | 6  | C  | 11 | 1281.7049      | 641.3564        |
| 795.3770       | 7  | T  | 10 | 1121.6743      | 561.3411        |
| 908.4611       | 8  | I  | 9  | 1020.6266      | 510.8172        |
| 1070.6192      | 9  | K  | 8  | 907.5425       | 454.2752        |
| 1171.6668      | 10 | T  | 7  | 745.3844       | 373.1961        |
| 1286.6938      | 11 | D  | 6  | 644.3368       | 322.6723        |
| 1383.7466      | 12 | P  | 5  | 529.3098       | 265.1588        |
| 1482.8150      | 13 | V  | 4  | 432.2571       | 216.6324        |
| 1583.8626      | 14 | T  | 3  | 333.1886       | 167.0982        |
| 1640.8841      | 15 | G  | 2  | 232.1410       | 116.5744        |
|                | 16 | R  | 1  | 175.1195       | 88.0637         |

N-term:+35.07 C(6):+160.03  
K(9):+162.16

X-range:

0 - 0

MassTol: Y-zoom:

0. 1.

MassType:

☐AVG ☒MONO

Axis:

☒1 ☐2

Label:

☒I ☐M ☐-

Ions:

a ☐+ ☐2+ ☐3+

b ☒+ ☐2+ ☐3+

c ☐+ ☐2+ ☐3+

x ☐+ ☐2+ ☐3+

y ☒+ ☒2+ ☐3+

z ☐+ ☐2+ ☐3+

hide H<sub>2</sub>O/NH<sub>3</sub> ☐

zoom 112-122 ☐

GO

GEVVDCTLKLDPTGR, MH+ 1841.0478, m/z 614.3541  
H OS G15 P120811 220811-s1.05015.05015.3.dta

scan 5015; 4.9e+000

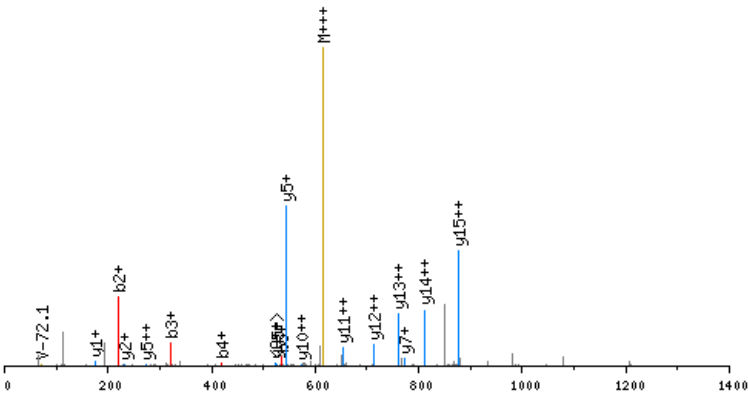

click image to zoom in; click top corners to zoom out [\[precursor±\]](#)

scan 5011; 614.4 m/z; 9.1e+000

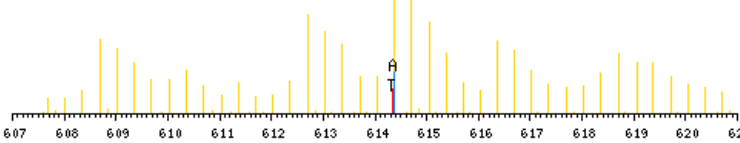

zoomed in precursor plot; T=theoretical m/z, A=acquired m/z

| b <sup>+</sup> | #  | AA | #  | y <sup>+</sup> | y <sup>2+</sup> |
|----------------|----|----|----|----------------|-----------------|
| 92.0924        | 1  | G  | 16 |                |                 |
| 221.1350       | 2  | E  | 15 | 1749.9633      | 875.4856        |
| 320.2034       | 3  | V  | 14 | 1620.9207      | 810.9643        |
| 419.2718       | 4  | V  | 13 | 1521.8523      | 761.4301        |
| 534.2987       | 5  | D  | 12 | 1422.7839      | 711.8958        |
| 694.3293       | 6  | C  | 11 | 1307.7569      | 654.3824        |
| 795.3770       | 7  | T  | 10 | 1147.7263      | 574.3671        |
| 908.4611       | 8  | L  | 9  | 1046.6786      | 523.8432        |
| 1070.6192      | 9  | K  | 8  | 933.5946       | 467.3012        |
| 1183.7032      | 10 | L  | 7  | 771.4365       | 386.2222        |
| 1298.7302      | 11 | D  | 6  | 658.3524       | 329.6801        |
| 1395.7829      | 12 | P  | 5  | 543.3255       | 272.1666        |
| 1508.8670      | 13 | I  | 4  | 446.2727       | 223.6403        |
| 1609.9147      | 14 | T  | 3  | 333.1886       | 167.0982        |
| 1666.9361      | 15 | G  | 2  | 232.1410       | 116.5744        |
|                | 16 | R  | 1  | 175.1195       | 88.0637         |

N-term:+35.07 C(6):+160.03  
K(9):+162.16

X-range:

0 - 0

MassTol: Y-zoom:

0. 1.

MassType:

☐ AVG ☒ MONO

Axis:

☒ 1 ☐ 2

Label:

☒ I ☐ M ☐ -

Ions:

a ☐ + ☐ 2+ ☐ 3+

b ☒ + ☐ 2+ ☐ 3+

c ☐ + ☐ 2+ ☐ 3+

x ☐ + ☐ 2+ ☐ 3+

y ☒ + ☒ 2+ ☐ 3+

z ☐ + ☐ 2+ ☐ 3+

hide H<sub>2</sub>O/NH<sub>3</sub> ☐

zoom 112-122 ☐

GO

GEWVGLCKIDR, MH+ 1388.7360, m/z 463.5835  
L OS G16 P120811 220811-s1.04505.04505.3.dta

scan 4505; 2.5e+001

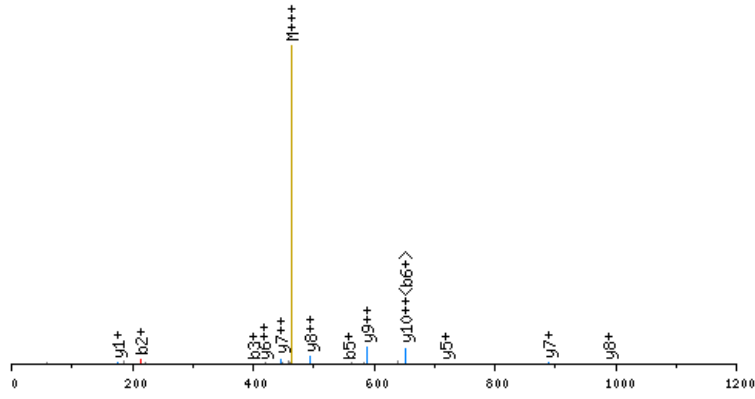

click image to zoom in; click top corners to zoom out

[precursor±]

scan 4503; 463.6 m/z; 8.9e+000

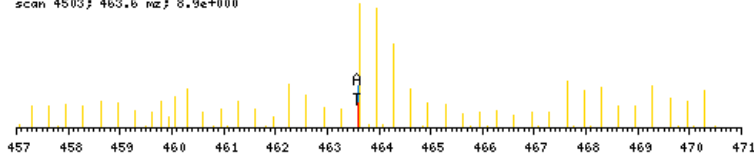

zoomed in precursor plot; T=theoretical m/z, A=acquired m/z

| b <sup>+</sup> | #  | AA | #  | y <sup>+</sup> | y <sup>2+</sup> |
|----------------|----|----|----|----------------|-----------------|
| 86.0606        | 1  | G  | 11 |                |                 |
| 215.1032       | 2  | E  | 10 | 1303.6833      | 652.3455        |
| 401.1825       | 3  | W  | 9  | 1174.6407      | 587.8242        |
| 500.2509       | 4  | V  | 8  | 988.5613       | 494.7846        |
| 557.2723       | 5  | G  | 7  | 889.4929       | 445.2504        |
| 670.3564       | 6  | L  | 6  | 832.4715       | 416.7396        |
| 830.3870       | 7  | C  | 5  | 719.3874       | 360.1976        |
| 986.5133       | 8  | K  | 4  | 559.3568       | 280.1823        |
| 1099.5974      | 9  | I  | 3  | 403.2305       | 202.1192        |
| 1214.6243      | 10 | D  | 2  | 290.1464       | 145.5771        |
|                | 11 | R  | 1  | 175.1195       | 88.0637         |

N-term:+29.04 C(7):+160.03  
K(8):+156.13

X-range:

0 - 0

MassTol: Y-zoom:

0. 1.

MassType:

☐AVG ☒MONO

Axis:

☒1 ☐2

Label:

☒I ☐M ☐-

Ions:

a ☐+ ☐2+ ☐3+

b ☒+ ☐2+ ☐3+

c ☐+ ☐2+ ☐3+

x ☐+ ☐2+ ☐3+

y ☒+ ☒2+ ☐3+

z ☐+ ☐2+ ☐3+

hide H<sub>2</sub>O/NH<sub>3</sub> ☐

zoom 112-122 ☐

GO

GFGGKFGVQMDR, MH+ 1354.6942, m/z 452.2362  
L OS G16 P120811 220811-s1.04227.04227.3.dta

scan 4227; 1.9e+001

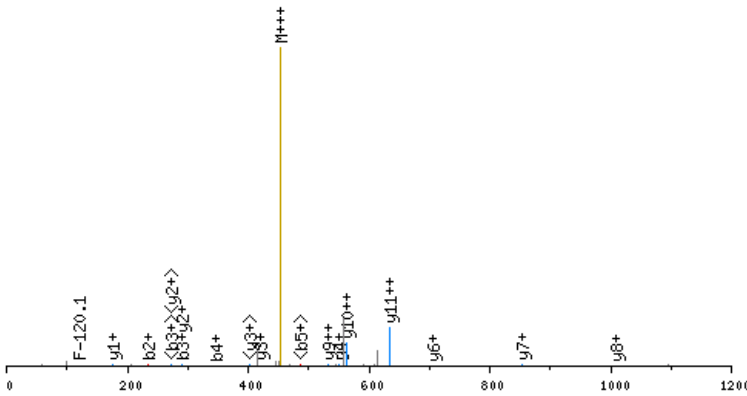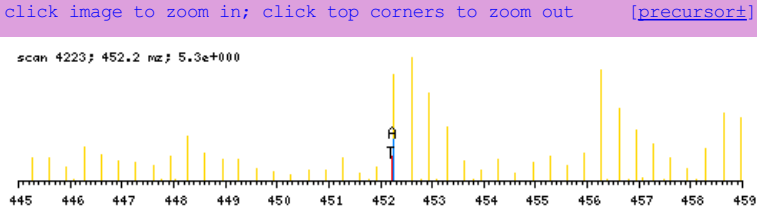

zoomed in precursor plot; T=theoretical m/z, A=acquired m/z

| b <sup>+</sup> | #  | AA | #  | y <sup>+</sup> | y <sup>2+</sup> |
|----------------|----|----|----|----------------|-----------------|
| 86.0606        | 1  | G  | 12 |                |                 |
| 233.1290       | 2  | F  | 11 | 1269.6414      | 635.3246        |
| 290.1504       | 3  | G  | 10 | 1122.5730      | 561.7904        |
| 347.1719       | 4  | G  | 9  | 1065.5516      | 533.2797        |
| 503.2982       | 5  | K  | 8  | 1008.5301      | 504.7690        |
| 650.3666       | 6  | F  | 7  | 852.4038       | 426.7058        |
| 707.3881       | 7  | G  | 6  | 705.3354       | 353.1716        |
| 806.4565       | 8  | V  | 5  | 648.3139       | 324.6609        |
| 934.5151       | 9  | Q  | 4  | 549.2455       | 275.1267        |
| 1065.5556      | 10 | M  | 3  | 421.1869       | 211.0974        |
| 1180.5825      | 11 | D  | 2  | 290.1464       | 145.5771        |
|                | 12 | R  | 1  | 175.1195       | 88.0637         |

N-term:+29.04 K(5):+156.13

X-range:

0 - 0

MassTol: Y-zoom:

0. 1.

MassType:

☐ AVG ☒ MONO

Axis:

☒ 1 ☐ 2

Label:

☒ I ☐ M ☐ -

Ions:

a ☐ + ☐ 2+ ☐ 3+

b ☒ + ☐ 2+ ☐ 3+

c ☐ + ☐ 2+ ☐ 3+

x ☐ + ☐ 2+ ☐ 3+

y ☒ + ☒ 2+ ☐ 3+

z ☐ + ☐ 2+ ☐ 3+

hide H<sub>2</sub>O/NH<sub>3</sub> ☐

zoom 112-122 ☐

GO

GFQNAILVR, MH+ 1045.6158, m/z 523.3115  
L OS G14 P120811 220811-s1.04564.04564.2.dta

scan 4564; 6.4e+000

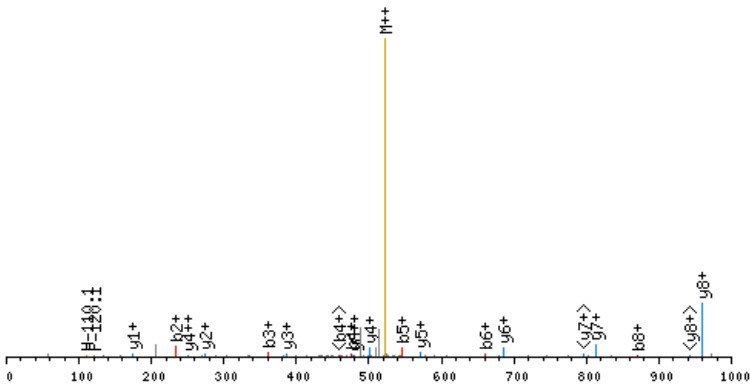

click image to zoom in; click top corners to zoom out

[precursor±]

scan 4561; 523.3 m/z; 3.8e+000

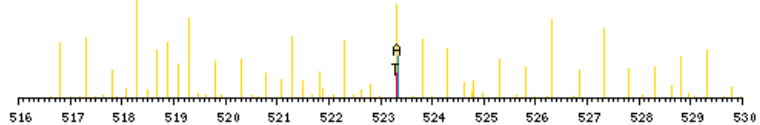

zoomed in precursor plot; T=theoretical m/z, A=acquired m/z

| b <sup>+</sup> | # | AA | # | y <sup>+</sup> | y <sup>2+</sup> |
|----------------|---|----|---|----------------|-----------------|
| 86.0606        | 1 | G  | 9 |                |                 |
| 233.1290       | 2 | F  | 8 | 960.5631       | 480.7855        |
| 361.1876       | 3 | Q  | 7 | 813.4947       | 407.2512        |
| 475.2305       | 4 | N  | 6 | 685.4361       | 343.2220        |
| 546.2676       | 5 | A  | 5 | 571.3932       | 286.2005        |
| 659.3517       | 6 | I  | 4 | 500.3560       | 250.6819        |
| 772.4357       | 7 | L  | 3 | 387.2720       | 194.1399        |
| 871.5041       | 8 | V  | 2 | 274.1879       | 137.5979        |
|                | 9 | R  | 1 | 175.1195       | 88.0637         |

N-term:+29.04

X-range:

0 - 0

MassTol: Y-zoom:

0. 1.

MassType:

☐AVG ☒MONO

Axis:

☒1 ☐2

Label:

☒I ☐M ☐-

Ions:

a ☐+ ☐2+ ☐3+

b ☒+ ☐2+ ☐3+

c ☐+ ☐2+ ☐3+

x ☐+ ☐2+ ☐3+

y ☒+ ☒2+ ☐3+

z ☐+ ☐2+ ☐3+

hide H<sub>2</sub>O/NH<sub>3</sub> ☐

zoom 112-122 ☐

GO

GFSGIPDNVDAAAFALPAHR, MH+ 1989.0406, m/z 498.0156  
H OS G19 P120811 220811-s1.04347.04347.4.dta

scan 4347; 1.2e+001

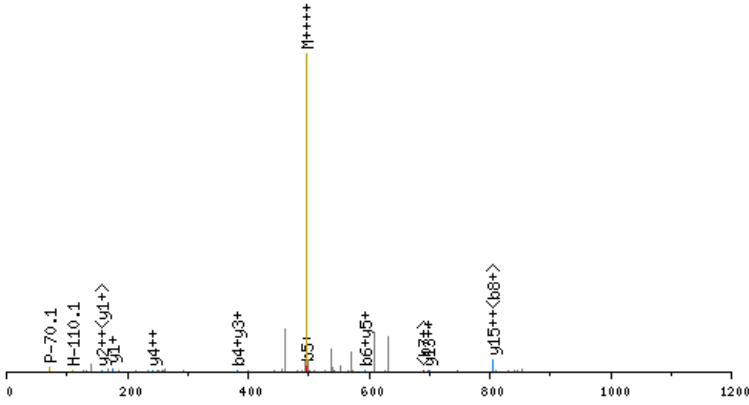

click image to zoom in; click top corners to zoom out

[precursor±]

scan 4346; 498.0 m/z; 1.1e+002

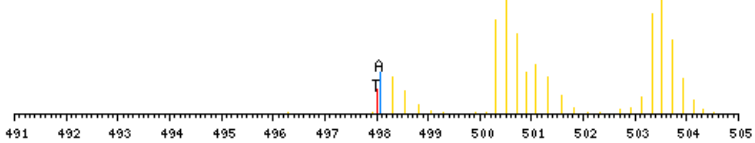

zoomed in precursor plot; T=theoretical m/z, A=acquired m/z

| b <sup>+</sup> | #  | AA | #  | y <sup>+</sup> | y <sup>2+</sup> |
|----------------|----|----|----|----------------|-----------------|
| 92.0924        | 1  | G  | 19 |                |                 |
| 239.1608       | 2  | F  | 18 | 1897.9561      | 949.4819        |
| 326.1928       | 3  | S  | 17 | 1750.8877      | 875.9477        |
| 383.2143       | 4  | G  | 16 | 1663.8556      | 832.4317        |
| 496.2983       | 5  | I  | 15 | 1606.8342      | 803.9210        |
| 593.3511       | 6  | P  | 14 | 1493.7501      | 747.3790        |
| 708.3780       | 7  | D  | 13 | 1396.6973      | 698.8526        |
| 822.4210       | 8  | N  | 12 | 1281.6704      | 641.3391        |
| 921.4894       | 9  | V  | 11 | 1167.6275      | 584.3176        |
| 1036.5163      | 10 | D  | 10 | 1068.5591      | 534.7834        |
| 1107.5534      | 11 | A  | 9  | 953.5321       | 477.2700        |
| 1178.5906      | 12 | A  | 8  | 882.4950       | 441.7514        |
| 1325.6590      | 13 | F  | 7  | 811.4579       | 406.2329        |
| 1396.6961      | 14 | A  | 6  | 664.3895       | 332.6986        |
| 1509.7801      | 15 | L  | 5  | 593.3524       | 297.1801        |
| 1606.8329      | 16 | P  | 4  | 480.2683       | 240.6381        |
| 1677.8700      | 17 | A  | 3  | 383.2155       | 192.1117        |
| 1814.9289      | 18 | H  | 2  | 312.1784       | 156.5931        |
|                | 19 | R  | 1  | 175.1195       | 88.0637         |

N-term:+35.07

X-range:

0 - 0

MassTol: Y-zoom:

0. 1.

MassType:

☐ AVG ☒ MONO

Axis:

☒ 1 ☐ 2

Label:

☒ I ☐ M ☐ -

Ions:

a ☐ + ☐ 2+ ☐ 3+

b ☒ + ☐ 2+ ☐ 3+

c ☐ + ☐ 2+ ☐ 3+

x ☐ + ☐ 2+ ☐ 3+

y ☒ + ☒ 2+ ☐ 3+

z ☐ + ☐ 2+ ☐ 3+

hide H<sub>2</sub>O/NH<sub>3</sub> ☐

zoom 112-122 ☐

GO

GFSVVADTPELQR, MH+ 1446.7592, m/z 482.9246  
L OS G13 P120811 220811-s1.05160.05160.3.dta

scan 5160; 6.5e+000

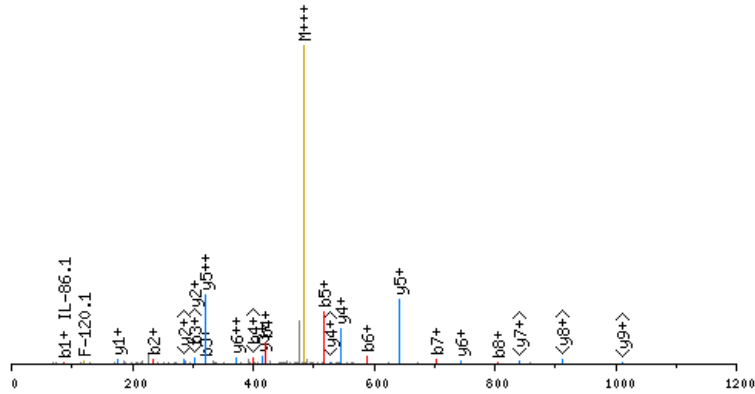

click image to zoom in; click top corners to zoom out

[precursor±]

scan 5159; 482.9 m/z; 8.5e+001

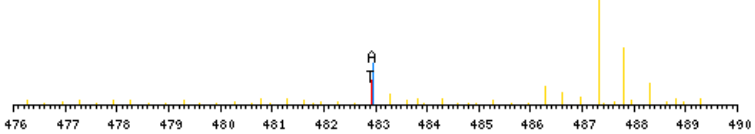

zoomed in precursor plot; T=theoretical m/z, A=acquired m/z

| b <sup>+</sup> | #  | AA | #  | y <sup>+</sup> | y <sup>2+</sup> |
|----------------|----|----|----|----------------|-----------------|
| 86.0606        | 1  | G  | 13 |                |                 |
| 233.1290       | 2  | F  | 12 | 1361.7065      | 681.3572        |
| 320.1610       | 3  | S  | 11 | 1214.6381      | 607.8230        |
| 419.2294       | 4  | V  | 10 | 1127.6061      | 564.3069        |
| 518.2978       | 5  | V  | 9  | 1028.5376      | 514.7727        |
| 589.3349       | 6  | A  | 8  | 929.4692       | 465.2385        |
| 704.3619       | 7  | D  | 7  | 858.4321       | 429.7200        |
| 805.4096       | 8  | T  | 6  | 743.4052       | 372.2065        |
| 902.4623       | 9  | P  | 5  | 642.3575       | 321.6827        |
| 1031.5049      | 10 | E  | 4  | 545.3047       | 273.1563        |
| 1144.5890      | 11 | L  | 3  | 416.2621       | 208.6350        |
| 1272.6476      | 12 | Q  | 2  | 303.1781       | 152.0930        |
|                | 13 | R  | 1  | 175.1195       | 88.0637         |

N-term:+29.04

X-range:

0 - 0

MassTol: Y-zoom:

0. 1.

MassType:

☐AVG ☒MONO

Axis:

☒1 ☐2

Label:

☒I ☐M ☐-

Ions:

a ☐+ ☐2+ ☐3+

b ☒+ ☐2+ ☐3+

c ☐+ ☐2+ ☐3+

x ☐+ ☐2+ ☐3+

y ☒+ ☒2+ ☐3+

z ☐+ ☐2+ ☐3+

hide H<sub>2</sub>O/NH<sub>3</sub> ☐

zoom 112-122 ☐

GO

GGAIGSAHLKEEASGELR, MH+ 1837.9772, m/z 460.2498  
L OS G17 P120811 220811-s1.03195.03195.4.dta

scan 3195; 9.2e+000

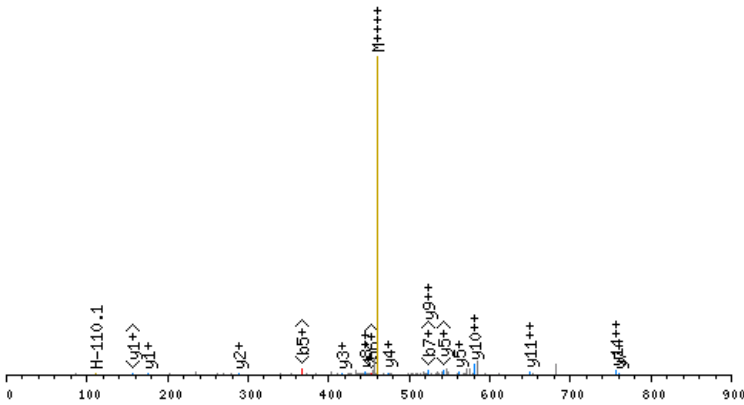

click image to zoom in; click top corners to zoom out

[precursor±]

scan 3193; 460.3 m/z; 1.3e+001

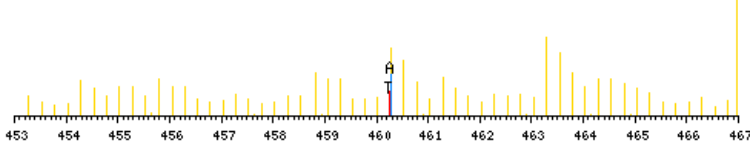

zoomed in precursor plot; T=theoretical m/z, A=acquired m/z

| b <sup>+</sup> | #  | AA | #  | y <sup>+</sup> | y <sup>2+</sup> |
|----------------|----|----|----|----------------|-----------------|
| 86.0606        | 1  | G  | 18 |                |                 |
| 143.0820       | 2  | G  | 17 | 1752.9245      | 876.9661        |
| 214.1191       | 3  | A  | 16 | 1695.9030      | 848.4554        |
| 327.2032       | 4  | I  | 15 | 1624.8659      | 812.9369        |
| 384.2247       | 5  | G  | 14 | 1511.7818      | 756.3948        |
| 471.2567       | 6  | S  | 13 | 1454.7604      | 727.8841        |
| 542.2938       | 7  | A  | 12 | 1367.7283      | 684.3681        |
| 679.3527       | 8  | H  | 11 | 1296.6912      | 648.8495        |
| 792.4368       | 9  | L  | 10 | 1159.6323      | 580.3201        |
| 948.5631       | 10 | K  | 9  | 1046.5483      | 523.7780        |
| 1077.6057      | 11 | E  | 8  | 890.4220       | 445.7149        |
| 1206.6483      | 12 | E  | 7  | 761.3794       | 381.1936        |
| 1277.6854      | 13 | A  | 6  | 632.3368       | 316.6723        |
| 1364.7174      | 14 | S  | 5  | 561.2997       | 281.1537        |
| 1421.7389      | 15 | G  | 4  | 474.2676       | 237.6377        |
| 1550.7815      | 16 | E  | 3  | 417.2462       | 209.1270        |
| 1663.8655      | 17 | L  | 2  | 288.2036       | 144.6057        |
|                | 18 | R  | 1  | 175.1195       | 88.0637         |

N-term:+29.04 K(10):+156.13

X-range:

0 - 0

MassTol: Y-zoom:

0. 1.

MassType:

☐AVG ☒MONO

Axis:

☒1 ☐2

Label:

☒I ☐M ☐-

Ions:

a ☐+ ☐2+ ☐3+

b ☒+ ☐2+ ☐3+

c ☐+ ☐2+ ☐3+

x ☐+ ☐2+ ☐3+

y ☒+ ☒2+ ☐3+

z ☐+ ☐2+ ☐3+

hide H<sub>2</sub>O/NH<sub>3</sub> ☐

zoom 112-122 ☐

GO

GGDDLDPNYVLSSR, MH+ 1541.7660, m/z 514.5935  
H OS G13 P120811 220811-s1.05041.05041.3.dta

scan 5041; 2.8e+000

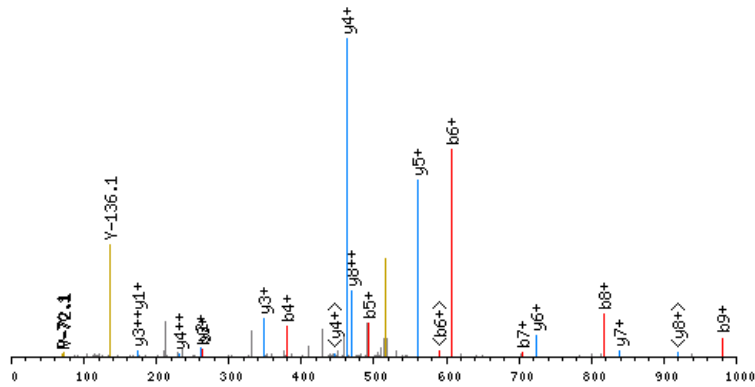

click image to zoom in; click top corners to zoom out

[precursor±]

scan 5039; 514.6 m/z; 1.9e+003

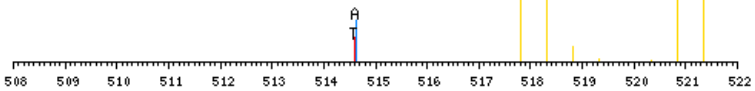

zoomed in precursor plot; T=theoretical m/z, A=acquired m/z

| b <sup>+</sup> | #  | AA | #  | y <sup>+</sup> | y <sup>2+</sup> |
|----------------|----|----|----|----------------|-----------------|
| 92.0924        | 1  | G  | 14 |                |                 |
| 149.1138       | 2  | G  | 13 | 1450.6814      | 725.8446        |
| 264.1408       | 3  | D  | 12 | 1393.6599      | 697.3339        |
| 379.1677       | 4  | D  | 11 | 1278.6330      | 639.8204        |
| 492.2518       | 5  | L  | 10 | 1163.6061      | 582.3069        |
| 607.2787       | 6  | D  | 9  | 1050.5220      | 525.7649        |
| 704.3315       | 7  | P  | 8  | 935.4951       | 468.2514        |
| 818.3744       | 8  | N  | 7  | 838.4423       | 419.7251        |
| 981.4377       | 9  | Y  | 6  | 724.3994       | 362.7036        |
| 1080.5062      | 10 | V  | 5  | 561.3360       | 281.1719        |
| 1193.5902      | 11 | L  | 4  | 462.2676       | 231.6377        |
| 1280.6222      | 12 | S  | 3  | 349.1836       | 175.0957        |
| 1367.6543      | 13 | S  | 2  | 262.1515       | 131.5797        |
|                | 14 | R  | 1  | 175.1195       | 88.0637         |

N-term:+35.07

X-range:

0 - 0

MassTol: Y-zoom:

0. 1.

MassType:

☐ AVG ☒ MONO

Axis:

☒ 1 ☐ 2

Label:

☒ I ☐ M ☐ -

Ions:

a ☐ + ☐ 2+ ☐ 3+

b ☒ + ☐ 2+ ☐ 3+

c ☐ + ☐ 2+ ☐ 3+

x ☐ + ☐ 2+ ☐ 3+

y ☒ + ☒ 2+ ☐ 3+

z ☐ + ☐ 2+ ☐ 3+

hide H<sub>2</sub>O/NH<sub>3</sub> ☐

zoom 112-122 ☐

GO

GGGNGFGPGSGSNFR, MH+ 1405.6613, m/z 469.2253  
L OS G14 P120811 220811-s1.03494.03494.3.dta

scan 3494; 1.0e+001

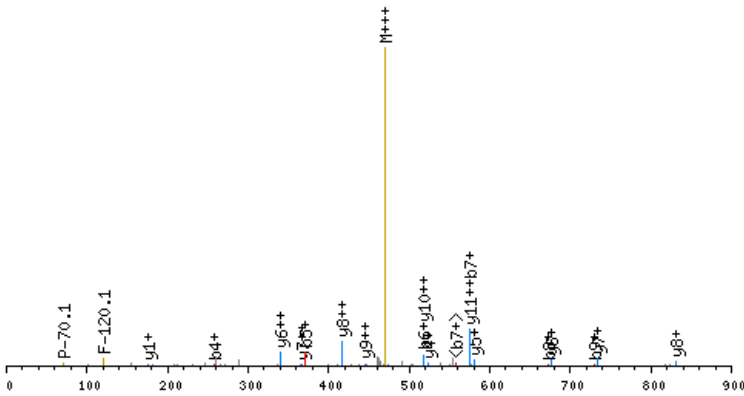

click image to zoom in; click top corners to zoom out [precursor±]

scan 3491; 469.2 m/z; 6.5e+000

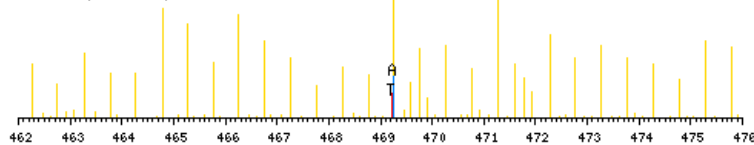

zoomed in precursor plot; T=theoretical m/z, A=acquired m/z

| b <sup>+</sup> | #  | AA | #  | y <sup>+</sup> | y <sup>2+</sup> |
|----------------|----|----|----|----------------|-----------------|
| 86.0606        | 1  | G  | 15 |                |                 |
| 143.0820       | 2  | G  | 14 | 1320.6085      | 660.8082        |
| 200.1035       | 3  | G  | 13 | 1263.5871      | 632.2974        |
| 257.1250       | 4  | G  | 12 | 1206.5656      | 603.7867        |
| 371.1679       | 5  | N  | 11 | 1149.5441      | 575.2760        |
| 518.2363       | 6  | F  | 10 | 1035.5012      | 518.2545        |
| 575.2578       | 7  | G  | 9  | 888.4328       | 444.7203        |
| 672.3105       | 8  | P  | 8  | 831.4113       | 416.2096        |
| 729.3320       | 9  | G  | 7  | 734.3586       | 367.6832        |
| 826.3848       | 10 | P  | 6  | 677.3371       | 339.1725        |
| 883.4062       | 11 | G  | 5  | 580.2843       | 290.6461        |
| 970.4382       | 12 | S  | 4  | 523.2629       | 262.1353        |
| 1084.4812      | 13 | N  | 3  | 436.2308       | 218.6193        |
| 1231.5496      | 14 | F  | 2  | 322.1879       | 161.5979        |
|                | 15 | R  | 1  | 175.1195       | 88.0637         |

N-term:+29.04



GO

X-range:

0 - 0

MassTol: Y-zoom:

0. 1.

MassType:

☐AVG ☒MONO

Axis:

☒1 ☐2

Label:

☒I ☐M ☐-

Ions:

a ☐+ ☐2+ ☐3+

b ☒+ ☐2+ ☐3+

c ☐+ ☐2+ ☐3+

x ☐+ ☐2+ ☐3+

y ☒+ ☒2+ ☐3+

z ☐+ ☐2+ ☐3+

hide H<sub>2</sub>O/NH<sub>3</sub> ☐

zoom 112-122 ☐

GO

GGIKEDTEEHHLR, MH+ 1588.8720, m/z 397.9734  
H OS G19 P120811 220811-s1.01961.01961.4.dta

scan 1961; 7.9e+000

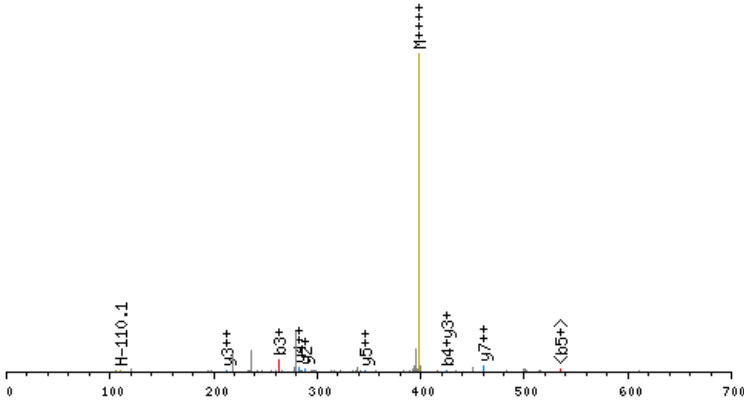

click image to zoom in; click top corners to zoom out

[precursor±]

scan 1959; 398.0 m/z; 1.7e+000

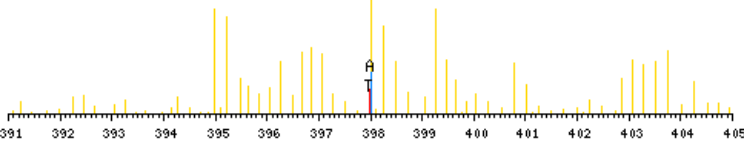

zoomed in precursor plot; T=theoretical m/z, A=acquired m/z

| b <sup>+</sup> | #  | AA | #  | y <sup>+</sup> | y <sup>2+</sup> |
|----------------|----|----|----|----------------|-----------------|
| 92.0924        | 1  | G  | 13 |                |                 |
| 149.1138       | 2  | G  | 12 | 1497.7874      | 749.3976        |
| 262.1979       | 3  | I  | 11 | 1440.7660      | 720.8869        |
| 424.3560       | 4  | K  | 10 | 1327.6819      | 664.3449        |
| 553.3986       | 5  | E  | 9  | 1165.5238      | 583.2658        |
| 668.4255       | 6  | D  | 8  | 1036.4812      | 518.7445        |
| 769.4732       | 7  | T  | 7  | 921.4543       | 461.2310        |
| 898.5158       | 8  | E  | 6  | 820.4066       | 410.7072        |
| 1027.5584      | 9  | E  | 5  | 691.3640       | 346.1859        |
| 1164.6173      | 10 | H  | 4  | 562.3214       | 281.6646        |
| 1301.6762      | 11 | H  | 3  | 425.2625       | 213.1352        |
| 1414.7603      | 12 | L  | 2  | 288.2036       | 144.6057        |
|                | 13 | R  | 1  | 175.1195       | 88.0637         |

N-term:+35.07 K(4):+162.16

X-range:

0 - 0

MassTol: Y-zoom:

0. 1.

MassType:

☐ AVG ☒ MONO

Axis:

☒ 1 ☐ 2

Label:

☒ I ☐ M ☐ -

Ions:

a ☐ + ☐ 2+ ☐ 3+

b ☒ + ☐ 2+ ☐ 3+

c ☐ + ☐ 2+ ☐ 3+

x ☐ + ☐ 2+ ☐ 3+

y ☒ + ☒ 2+ ☐ 3+

z ☐ + ☐ 2+ ☐ 3+

hide H<sub>2</sub>O/NH<sub>3</sub> ☐

zoom 112-122 ☐

GO

GGLDSLIGDSNFGAPSASVAAAPAPAR, MH+ 2497.2687, m/z 833.0944  
L OS G12 P120811 220811-s1.05226.05226.3.dta

scan 5226; 1.2e+000

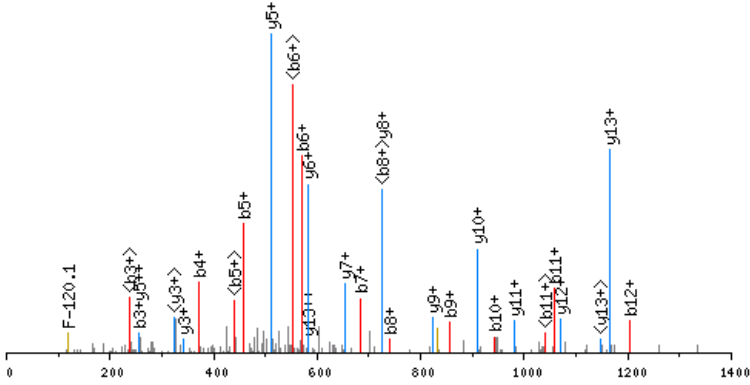

click image to zoom in; click top corners to zoom out

[precursor±]

scan 5222; 833.1 m/z; 2.7e+000

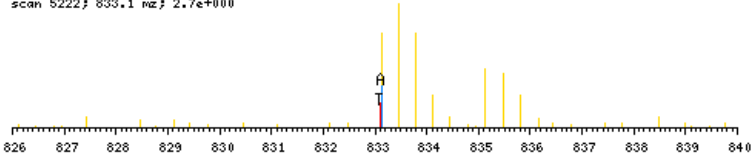

zoomed in precursor plot; T=theoretical m/z, A=acquired m/z

| b <sup>+</sup> | #  | AA | #  | y <sup>+</sup> | y <sup>2+</sup> |
|----------------|----|----|----|----------------|-----------------|
| 86.0606        | 1  | G  | 27 |                |                 |
| 143.0820       | 2  | G  | 26 | 2412.2159      | 1206.6119       |
| 256.1661       | 3  | L  | 25 | 2355.1945      | 1178.1011       |
| 371.1930       | 4  | D  | 24 | 2242.1104      | 1121.5591       |
| 458.2251       | 5  | S  | 23 | 2127.0835      | 1064.0456       |
| 571.3091       | 6  | L  | 22 | 2040.0514      | 1020.5296       |
| 684.3932       | 7  | I  | 21 | 1926.9674      | 963.9876        |
| 741.4147       | 8  | G  | 20 | 1813.8833      | 907.4456        |
| 856.4416       | 9  | D  | 19 | 1756.8618      | 878.9348        |
| 943.4736       | 10 | S  | 18 | 1641.8349      | 821.4214        |
| 1057.5166      | 11 | N  | 17 | 1554.8029      | 777.9053        |
| 1204.5850      | 12 | F  | 16 | 1440.7599      | 720.8839        |
| 1261.6064      | 13 | G  | 15 | 1293.6915      | 647.3497        |
| 1332.6435      | 14 | A  | 14 | 1236.6701      | 618.8389        |
| 1429.6963      | 15 | P  | 13 | 1165.6329      | 583.3204        |
| 1516.7283      | 16 | S  | 12 | 1068.5802      | 534.7940        |
| 1587.7655      | 17 | A  | 11 | 981.5482       | 491.2780        |
| 1674.7975      | 18 | S  | 10 | 910.5110       | 455.7594        |
| 1773.8659      | 19 | V  | 9  | 823.4790       | 412.2434        |
| 1844.9030      | 20 | A  | 8  | 724.4106       | 362.7092        |
| 1915.9401      | 21 | A  | 7  | 653.3735       | 327.1907        |
| 1986.9772      | 22 | A  | 6  | 582.3364       | 291.6721        |
| 2084.0300      | 23 | P  | 5  | 511.2993       | 256.1535        |
| 2155.0671      | 24 | A  | 4  | 414.2465       | 207.6272        |
| 2252.1199      | 25 | P  | 3  | 343.2094       | 172.1086        |
| 2323.1570      | 26 | A  | 2  | 246.1566       | 123.5822        |
|                | 27 | R  | 1  | 175.1195       | 88.0637         |

N-term:+29.04

X-range:

0 - 0

MassTol: Y-zoom:

0. 1.

MassType:

☐ AVG ☒ MONO

Axis:

☒ 1 ☐ 2

Label:

☒ I ☐ M ☐ -

Ions:

a ☐ + ☐ 2+ ☐ 3+

b ☒ + ☐ 2+ ☐ 3+

c ☐ + ☐ 2+ ☐ 3+

x ☐ + ☐ 2+ ☐ 3+

y ☒ + ☒ 2+ ☐ 3+

z ☐ + ☐ 2+ ☐ 3+

hide H<sub>2</sub>O/NH<sub>3</sub> ☐

zoom 112-122 ☐

GO

GGVISAISEAAAQYNPEPPPPR, MH+ 2249.1566, m/z 563.0446  
L OS G12 P120811 220811-s1.05268.05268.4.dta

scan 5268; 4.5e+000

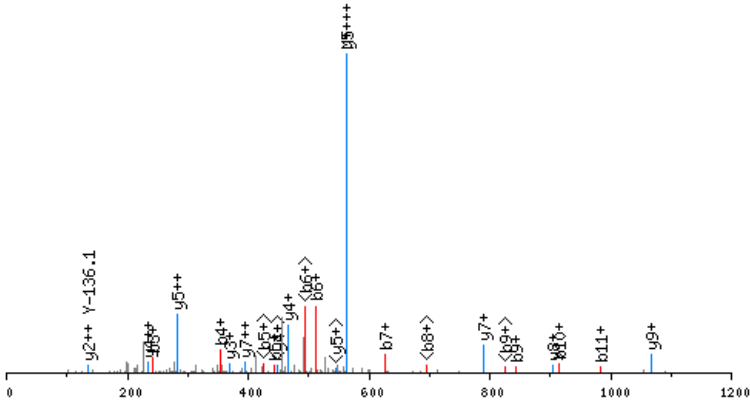

click image to zoom in; click top corners to zoom out [precursor±]

scan 5267; 563.0 m/z; 5.2e+000

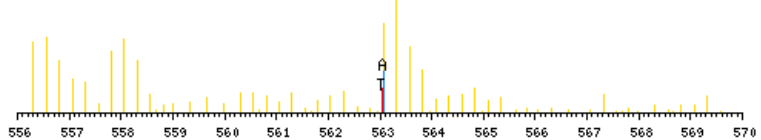

zoomed in precursor plot; T=theoretical m/z, A=acquired m/z

| b <sup>+</sup> | #  | AA | #  | y <sup>+</sup> | y <sup>2+</sup> |
|----------------|----|----|----|----------------|-----------------|
| 86.0606        | 1  | G  | 22 |                |                 |
| 143.0820       | 2  | G  | 21 | 2164.1039      | 1082.5558       |
| 242.1504       | 3  | V  | 20 | 2107.0824      | 1054.0451       |
| 355.2345       | 4  | I  | 19 | 2008.0140      | 1004.5109       |
| 442.2665       | 5  | S  | 18 | 1894.9299      | 947.9689        |
| 513.3036       | 6  | A  | 17 | 1807.8979      | 904.4529        |
| 626.3877       | 7  | I  | 16 | 1736.8608      | 868.9343        |
| 713.4197       | 8  | S  | 15 | 1623.7767      | 812.3923        |
| 842.4623       | 9  | E  | 14 | 1536.7447      | 768.8763        |
| 913.4994       | 10 | A  | 13 | 1407.7021      | 704.3550        |
| 984.5366       | 11 | A  | 12 | 1336.6650      | 668.8364        |
| 1055.5737      | 12 | A  | 11 | 1265.6279      | 633.3178        |
| 1183.6323      | 13 | Q  | 10 | 1194.5907      | 597.7993        |
| 1346.6956      | 14 | Y  | 9  | 1066.5322      | 533.7700        |
| 1460.7385      | 15 | N  | 8  | 903.4688       | 452.2383        |
| 1557.7913      | 16 | P  | 7  | 789.4259       | 395.2169        |
| 1686.8339      | 17 | E  | 6  | 692.3731       | 346.6905        |
| 1783.8866      | 18 | P  | 5  | 563.3306       | 282.1692        |
| 1880.9394      | 19 | P  | 4  | 466.2778       | 233.6428        |
| 1977.9922      | 20 | P  | 3  | 369.2250       | 185.1164        |
| 2075.0449      | 21 | P  | 2  | 272.1723       | 136.5900        |
|                | 22 | R  | 1  | 175.1195       | 88.0637         |

N-term:+29.04

X-range:

0 - 0

MassTol: Y-zoom:

0. 1.

MassType:

☐AVG ☒MONO

Axis:

☒1 ☐2

Label:

☒I ☐M ☐-

Ions:

a ☐+ ☐2+ ☐3+

b ☒+ ☐2+ ☐3+

c ☐+ ☐2+ ☐3+

x ☐+ ☐2+ ☐3+

y ☒+ ☒2+ ☐3+

z ☐+ ☐2+ ☐3+

hide H<sub>2</sub>O/NH<sub>3</sub> ☐

zoom 112-122 ☐

GO

GGYKEPAAPVSIQR, MH+ 1528.8488, m/z 510.2878  
L OS G15 P120811 220811-s1.02867.02867.3.dta

scan 2867; 5.8e+000

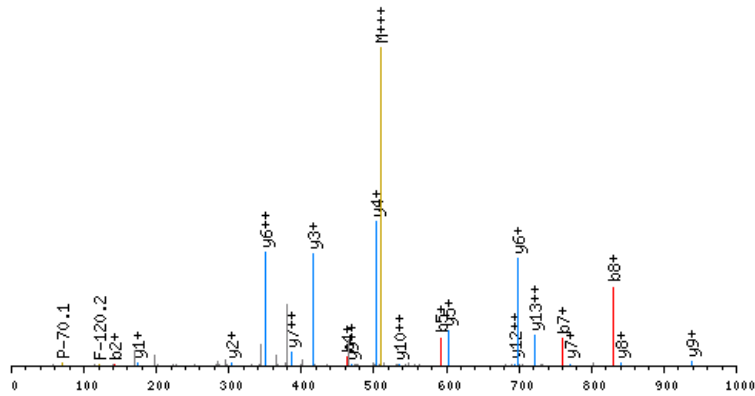

click image to zoom in; click top corners to zoom out

[precursor±]

scan 2866; 510.3 m/z; 2.1e+001

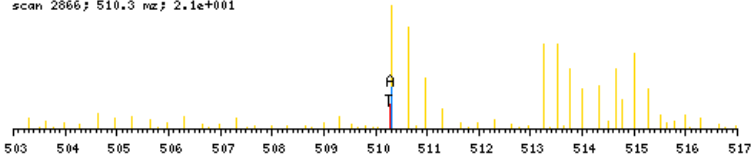

zoomed in precursor plot; T=theoretical m/z, A=acquired m/z

| b <sup>+</sup> | #  | AA | #  | y <sup>+</sup> | y <sup>2+</sup> |
|----------------|----|----|----|----------------|-----------------|
| 86.0606        | 1  | G  | 14 |                |                 |
| 143.0820       | 2  | G  | 13 | 1443.7960      | 722.4019        |
| 306.1454       | 3  | Y  | 12 | 1386.7746      | 693.8912        |
| 462.2717       | 4  | K  | 11 | 1223.7112      | 612.3595        |
| 591.3142       | 5  | E  | 10 | 1067.5849      | 534.2964        |
| 688.3670       | 6  | P  | 9  | 938.5423       | 469.7751        |
| 759.4041       | 7  | A  | 8  | 841.4896       | 421.2487        |
| 830.4412       | 8  | A  | 7  | 770.4525       | 385.7301        |
| 927.4940       | 9  | P  | 6  | 699.4153       | 350.2116        |
| 1026.5624      | 10 | V  | 5  | 602.3626       | 301.6852        |
| 1113.5944      | 11 | S  | 4  | 503.2942       | 252.1510        |
| 1226.6785      | 12 | I  | 3  | 416.2621       | 208.6350        |
| 1354.7371      | 13 | Q  | 2  | 303.1781       | 152.0930        |
|                | 14 | R  | 1  | 175.1195       | 88.0637         |

N-term:+29.04 K(4):+156.13

X-range:

0 - 0

MassTol: Y-zoom:

0. 1.

MassType:

☐AVG ☒MONO

Axis:

☒1 ☐2

Label:

☒I ☐M ☐-

Ions:

a ☐+ ☐2+ ☐3+

b ☒+ ☐2+ ☐3+

c ☐+ ☐2+ ☐3+

x ☐+ ☐2+ ☐3+

y ☒+ ☒2+ ☐3+

z ☐+ ☐2+ ☐3+

hide H<sub>2</sub>O/NH<sub>3</sub> ☐

zoom 112-122 ☐

GO

GHYEVGTSSDEAGKLQSGVSLASKKSR, MH+ 2975.5439, m/z 744.6414  
L OS G19 P120811 220811-s1.03149.03149.4.dta

scan 3149; 4.2e+000

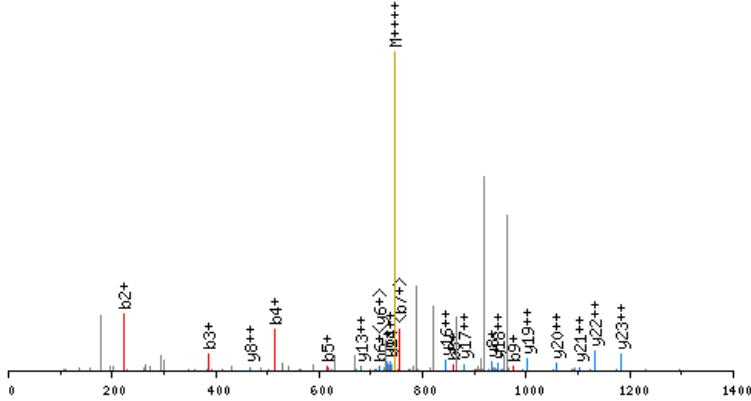

click image to zoom in; click top corners to zoom out

[precursor±]

scan 3146; 744.6 m/z; 8.0e+000

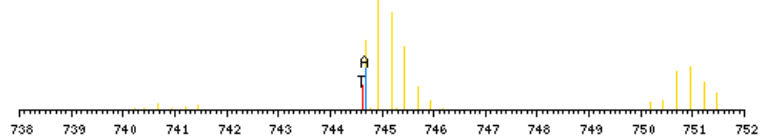

zoomed in precursor plot; T=theoretical m/z, A=acquired m/z

| b <sup>+</sup> | #  | AA | #  | y <sup>+</sup> | y <sup>2+</sup> |
|----------------|----|----|----|----------------|-----------------|
| 86.0606        | 1  | G  | 28 |                |                 |
| 223.1195       | 2  | H  | 27 | 2890.4912      | 1445.7495       |
| 386.1828       | 3  | Y  | 26 | 2753.4322      | 1377.2200       |
| 515.2254       | 4  | E  | 25 | 2590.3689      | 1295.6884       |
| 614.2938       | 5  | V  | 24 | 2461.3263      | 1231.1671       |
| 715.3415       | 6  | T  | 23 | 2362.2579      | 1181.6329       |
| 772.3630       | 7  | G  | 22 | 2261.2102      | 1131.1090       |
| 859.3950       | 8  | S  | 21 | 2204.1888      | 1102.5983       |
| 974.4219       | 9  | D  | 20 | 2117.1567      | 1059.0823       |
| 1089.4489      | 10 | D  | 19 | 2002.1298      | 1001.5688       |
| 1218.4915      | 11 | E  | 18 | 1887.1028      | 944.0553        |
| 1289.5286      | 12 | A  | 17 | 1758.0603      | 879.5340        |
| 1346.5500      | 13 | G  | 16 | 1687.0231      | 844.0155        |
| 1502.6763      | 14 | K  | 15 | 1630.0017      | 815.5048        |
| 1615.7604      | 15 | L  | 14 | 1473.8754      | 737.4416        |
| 1743.8190      | 16 | Q  | 13 | 1360.7913      | 680.8996        |
| 1800.8404      | 17 | G  | 12 | 1232.7327      | 616.8703        |
| 1887.8725      | 18 | S  | 11 | 1175.7113      | 588.3595        |
| 1944.8939      | 19 | G  | 10 | 1088.6792      | 544.8435        |
| 2043.9624      | 20 | V  | 9  | 1031.6578      | 516.3328        |
| 2130.9944      | 21 | S  | 8  | 932.5894       | 466.7986        |
| 2244.0784      | 22 | L  | 7  | 845.5573       | 423.2826        |
| 2315.1156      | 23 | A  | 6  | 732.4733       | 366.7405        |
| 2402.1476      | 24 | S  | 5  | 661.4362       | 331.2220        |
| 2558.2739      | 25 | K  | 4  | 574.4041       | 287.7060        |
| 2714.4002      | 26 | K  | 3  | 418.2778       | 209.6428        |
| 2801.4322      | 27 | S  | 2  | 262.1515       | 131.5797        |
|                | 28 | R  | 1  | 175.1195       | 88.0637         |

N-term:+29.04 K(14):+156.13  
K(25):+156.13 K(26):+156.13

X-range:

0 - 0

MassTol: Y-zoom:

0. 1.

MassType:

☐AVG ☒MONO

Axis:

☒1 ☐2

Label:

☒I ☐M ☐-

Ions:

a ☐+ ☐2+ ☐3+

b ☒+ ☐2+ ☐3+

c ☐+ ☐2+ ☐3+

x ☐+ ☐2+ ☐3+

y ☒+ ☒2+ ☐3+

z ☐+ ☐2+ ☐3+

hide H<sub>2</sub>O/NH<sub>3</sub> ☐

zoom 112-122 ☐

GO

GIDLTQVKGTGPEGR, MH+ 1583.8757, m/z 528.6301  
L OS G15 P120811 220811-s1.03463.03463.3.dta

scan 3463; 2.1e+001

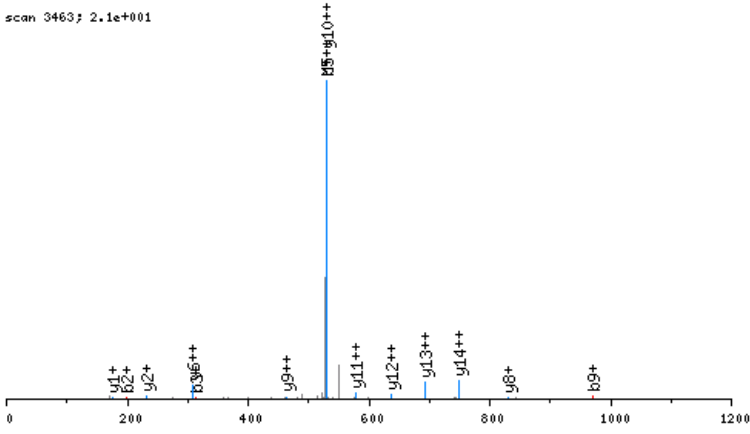

click image to zoom in; click top corners to zoom out

[precursor±]

scan 3461; 528.6 m/z; 1.6e+001

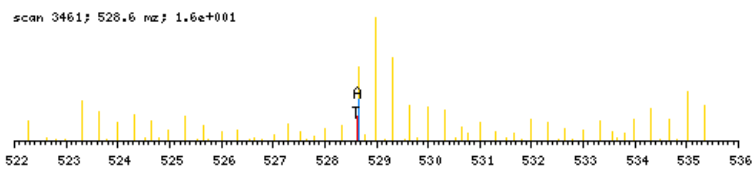

zoomed in precursor plot; T=theoretical m/z, A=acquired m/z

| b <sup>+</sup> | #  | AA | #  | y <sup>+</sup> | y <sup>2+</sup> |
|----------------|----|----|----|----------------|-----------------|
| 86.0606        | 1  | G  | 15 |                |                 |
| 199.1446       | 2  | I  | 14 | 1498.8230      | 749.9154        |
| 314.1716       | 3  | D  | 13 | 1385.7389      | 693.3734        |
| 427.2556       | 4  | L  | 12 | 1270.7120      | 635.8599        |
| 528.3033       | 5  | T  | 11 | 1157.6279      | 579.3179        |
| 656.3619       | 6  | Q  | 10 | 1056.5802      | 528.7940        |
| 755.4303       | 7  | V  | 9  | 928.5216       | 464.7647        |
| 911.5566       | 8  | K  | 8  | 829.4532       | 415.2305        |
| 968.5781       | 9  | G  | 7  | 673.3269       | 337.1674        |
| 1069.6257      | 10 | T  | 6  | 616.3055       | 308.6566        |
| 1126.6472      | 11 | G  | 5  | 515.2578       | 258.1328        |
| 1223.7000      | 12 | P  | 4  | 458.2363       | 229.6221        |
| 1352.7426      | 13 | E  | 3  | 361.1836       | 181.0957        |
| 1409.7640      | 14 | G  | 2  | 232.1410       | 116.5744        |
|                | 15 | R  | 1  | 175.1195       | 88.0637         |

N-term:+29.04 K(8):+156.13

X-range:

0 - 0

MassTol: Y-zoom:

0. 1.

MassType:

☐AVG ☒MONO

Axis:

☒1 ☐2

Label:

☒I ☐M ☐-

Ions:

a ☐+ ☐2+ ☐3+

b ☒+ ☐2+ ☐3+

c ☐+ ☐2+ ☐3+

x ☐+ ☐2+ ☐3+

y ☒+ ☒2+ ☐3+

z ☐+ ☐2+ ☐3+

hide H<sub>2</sub>O/NH<sub>3</sub> ☐

zoom 112-122 ☐

GO

GILAADESTGSIAKR, MH+ 1556.9284, m/z 519.6477  
H OS G15 P120811 220811-s1.03014.03014.3.dta

scan 3014; 8.3e+000

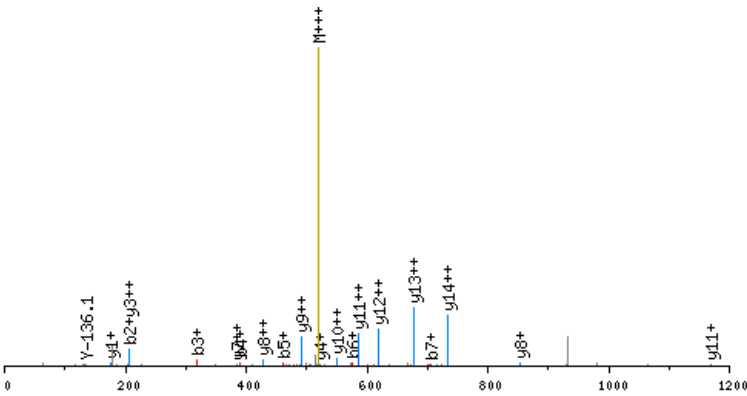

click image to zoom in; click top corners to zoom out [\[precursor±\]](#)

scan 3011; 519.6 m/z; 9.7e+000

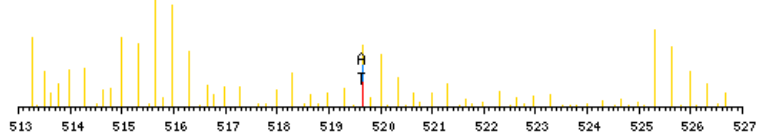

zoomed in precursor plot; T=theoretical m/z, A=acquired m/z

| b <sup>+</sup> | #  | AA | #  | y <sup>+</sup> | y <sup>2+</sup> |
|----------------|----|----|----|----------------|-----------------|
| 92.0924        | 1  | G  | 15 |                |                 |
| 205.1764       | 2  | I  | 14 | 1465.8439      | 733.4258        |
| 318.2605       | 3  | L  | 13 | 1352.7598      | 676.8838        |
| 389.2976       | 4  | A  | 12 | 1239.6757      | 620.3418        |
| 460.3347       | 5  | A  | 11 | 1168.6386      | 584.8232        |
| 575.3617       | 6  | D  | 10 | 1097.6015      | 549.3047        |
| 704.4043       | 7  | E  | 9  | 982.5746       | 491.7912        |
| 791.4363       | 8  | S  | 8  | 853.5320       | 427.2699        |
| 892.4840       | 9  | T  | 7  | 766.4999       | 383.7539        |
| 949.5054       | 10 | G  | 6  | 665.4523       | 333.2300        |
| 1036.5375      | 11 | S  | 5  | 608.4308       | 304.7193        |
| 1149.6215      | 12 | I  | 4  | 521.3988       | 261.2033        |
| 1220.6586      | 13 | A  | 3  | 408.3147       | 204.6613        |
| 1382.8167      | 14 | K  | 2  | 337.2776       | 169.1427        |
|                | 15 | R  | 1  | 175.1195       | 88.0637         |

N-term:+35.07 K(14):+162.16

X-range:

0 - 0

MassTol: Y-zoom:

0. 1.

MassType:

☐ AVG ☒ MONO

Axis:

☒ 1 ☐ 2

Label:

☒ I ☐ M ☐ -

Ions:

a ☐ + ☐ 2+ ☐ 3+

b ☒ + ☐ 2+ ☐ 3+

c ☐ + ☐ 2+ ☐ 3+

x ☐ + ☐ 2+ ☐ 3+

y ☒ + ☒ 2+ ☐ 3+

z ☐ + ☐ 2+ ☐ 3+

hide H<sub>2</sub>O/NH<sub>3</sub> ☐

zoom 112-122 ☐

GO

GIQDGYLSLLQDSGEVR, MH+ 1877.9609, m/z 626.6585  
L OS G13 P120811 220811-s1.06707.06707.3.dta

scan 6707; 2.4e+000

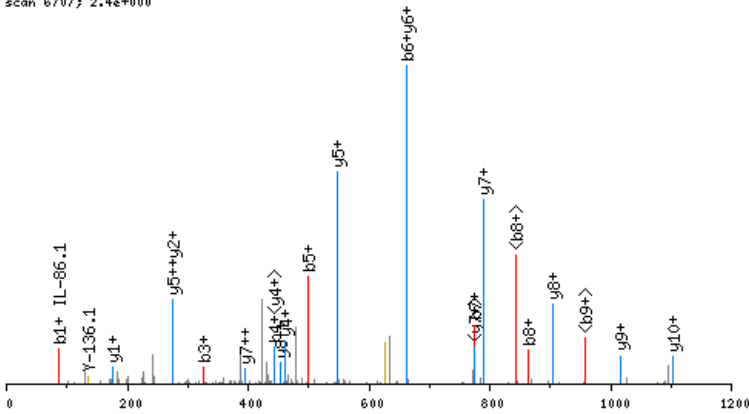

click image to zoom in; click top corners to zoom out [\[precursor±\]](#)

scan 6704; 626.7 m/z; 6.4e+000

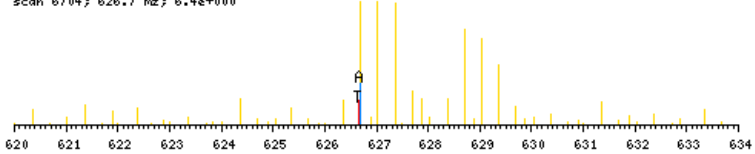

zoomed in precursor plot; T=theoretical m/z, A=acquired m/z

| b <sup>+</sup> | #  | AA | #  | y <sup>+</sup> | y <sup>2+</sup> |
|----------------|----|----|----|----------------|-----------------|
| 86.0606        | 1  | G  | 17 |                |                 |
| 199.1446       | 2  | I  | 16 | 1792.9081      | 896.9580        |
| 327.2032       | 3  | Q  | 15 | 1679.8241      | 840.4159        |
| 442.2301       | 4  | D  | 14 | 1551.7655      | 776.3867        |
| 499.2516       | 5  | G  | 13 | 1436.7385      | 718.8732        |
| 662.3149       | 6  | Y  | 12 | 1379.7171      | 690.3624        |
| 775.3990       | 7  | L  | 11 | 1216.6537      | 608.8308        |
| 862.4310       | 8  | S  | 10 | 1103.5697      | 552.2888        |
| 975.5151       | 9  | L  | 9  | 1016.5376      | 508.7727        |
| 1088.5992      | 10 | L  | 8  | 903.4536       | 452.2307        |
| 1216.6577      | 11 | Q  | 7  | 790.3695       | 395.6887        |
| 1331.6847      | 12 | D  | 6  | 662.3109       | 331.6594        |
| 1418.7167      | 13 | S  | 5  | 547.2840       | 274.1459        |
| 1475.7382      | 14 | G  | 4  | 460.2520       | 230.6299        |
| 1604.7808      | 15 | E  | 3  | 403.2305       | 202.1192        |
| 1703.8492      | 16 | V  | 2  | 274.1879       | 137.5979        |
|                | 17 | R  | 1  | 175.1195       | 88.0637         |

N-term:+29.04

X-range:

0 - 0

MassTol: Y-zoom:

0. 1.

MassType:

☐AVG ☒MONO

Axis:

☒1 ☐2

Label:

☒I ☐M ☐-

Ions:

a ☐+ ☐2+ ☐3+

b ☒+ ☐2+ ☐3+

c ☐+ ☐2+ ☐3+

x ☐+ ☐2+ ☐3+

y ☒+ ☒2+ ☐3+

z ☐+ ☐2+ ☐3+

hide H<sub>2</sub>O/NH<sub>3</sub> ☐

zoom 112-122 ☐

GO

GISDVVKVTLTPPEEAR, MH+ 1911.1075, m/z 637.7073  
H OS G15 P120811 220811-s1.05437.05437.3.dta

scan 5437; 3.4e+000

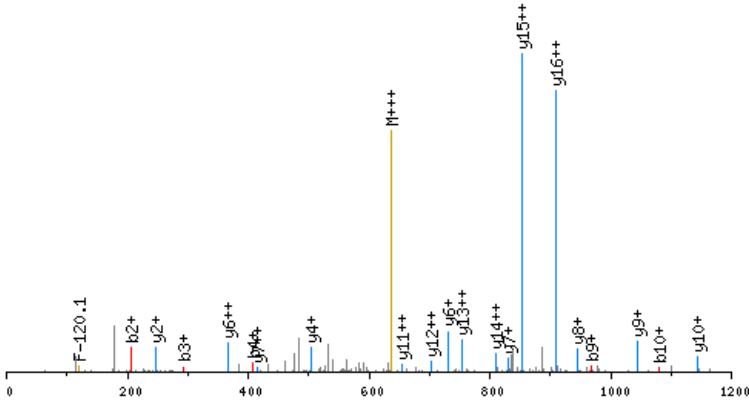

click image to zoom in; click top corners to zoom out

[precursor±]

scan 5436; 637.7 m/z; 7.1e+000

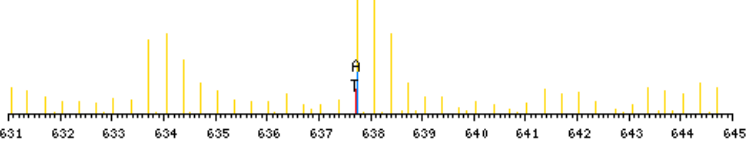

zoomed in precursor plot; T=theoretical m/z, A=acquired m/z

| b <sup>+</sup> | #  | AA | #  | y <sup>+</sup> | y <sup>2+</sup> |
|----------------|----|----|----|----------------|-----------------|
| 92.0924        | 1  | G  | 17 |                |                 |
| 205.1764       | 2  | I  | 16 | 1820.0230      | 910.5154        |
| 292.2085       | 3  | S  | 15 | 1706.9389      | 853.9734        |
| 407.2354       | 4  | D  | 14 | 1619.9069      | 810.4573        |
| 506.3038       | 5  | V  | 13 | 1504.8799      | 752.9439        |
| 605.3722       | 6  | V  | 12 | 1405.8115      | 703.4097        |
| 767.5303       | 7  | K  | 11 | 1306.7431      | 653.8755        |
| 866.5987       | 8  | V  | 10 | 1144.5850      | 572.7964        |
| 967.6464       | 9  | T  | 9  | 1045.5166      | 523.2622        |
| 1080.7305      | 10 | L  | 8  | 944.4689       | 472.7384        |
| 1181.7782      | 11 | T  | 7  | 831.3848       | 416.1963        |
| 1278.8309      | 12 | P  | 6  | 730.3372       | 365.6725        |
| 1407.8735      | 13 | E  | 5  | 633.2844       | 317.1461        |
| 1536.9161      | 14 | E  | 4  | 504.2418       | 252.6248        |
| 1665.9587      | 15 | E  | 3  | 375.1992       | 188.1035        |
| 1736.9958      | 16 | A  | 2  | 246.1566       | 123.5822        |
|                | 17 | R  | 1  | 175.1195       | 88.0637         |

N-term:+35.07 K(7):+162.16

X-range:

0 - 0

MassTol: Y-zoom:

0. 1.

MassType:

☐AVG ☒MONO

Axis:

☒1 ☐2

Label:

☒I ☐M ☐-

Ions:

a ☐+ ☐2+ ☐3+

b ☒+ ☐2+ ☐3+

c ☐+ ☐2+ ☐3+

x ☐+ ☐2+ ☐3+

y ☒+ ☒2+ ☐3+

z ☐+ ☐2+ ☐3+

hide H<sub>2</sub>O/NH<sub>3</sub> ☐

zoom 112-122 ☐

GO

GIVPDIavgTKR, MH+ 1281.7895, m/z 427.9347  
L OS G15 P120811 220811-s1.04018.04018.3.dta

scan 4018; 1.4e+001

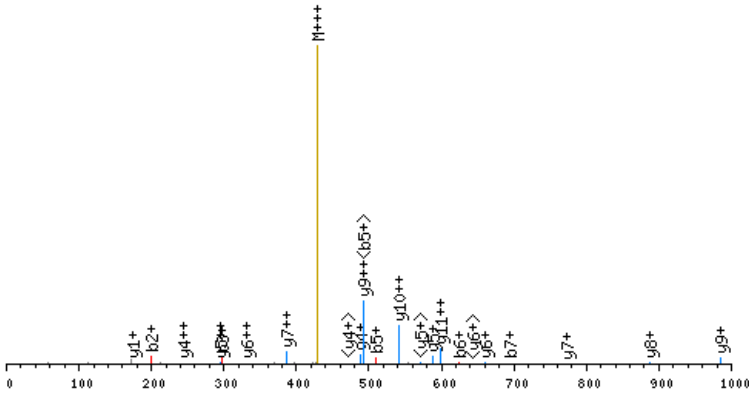

click image to zoom in; click top corners to zoom out

[precursor±]

scan 4016; 427.9 m/z; 4.1e+000

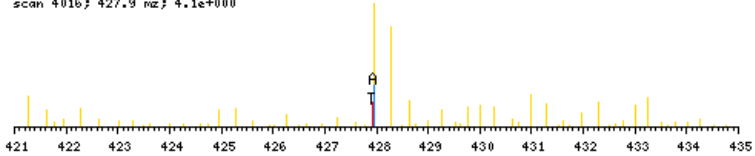

zoomed in precursor plot; T=theoretical m/z, A=acquired m/z

| b <sup>+</sup> | #  | AA | #  | y <sup>+</sup> | y <sup>2+</sup> |
|----------------|----|----|----|----------------|-----------------|
| 86.0606        | 1  | G  | 12 |                |                 |
| 199.1446       | 2  | I  | 11 | 1196.7367      | 598.8723        |
| 298.2130       | 3  | V  | 10 | 1083.6527      | 542.3302        |
| 395.2658       | 4  | P  | 9  | 984.5842       | 492.7960        |
| 510.2927       | 5  | D  | 8  | 887.5315       | 444.2697        |
| 623.3768       | 6  | I  | 7  | 772.5045       | 386.7562        |
| 694.4139       | 7  | A  | 6  | 659.4205       | 330.2141        |
| 793.4823       | 8  | V  | 5  | 588.3834       | 294.6956        |
| 850.5038       | 9  | G  | 4  | 489.3149       | 245.1614        |
| 951.5515       | 10 | T  | 3  | 432.2935       | 216.6507        |
| 1107.6778      | 11 | K  | 2  | 331.2458       | 166.1268        |
|                | 12 | R  | 1  | 175.1195       | 88.0637         |

N-term:+29.04 K(11):+156.13

X-range:

0 - 0

MassTol: Y-zoom:

0. 1.

MassType:

☐ AVG ☒ MONO

Axis:

☒ 1 ☐ 2

Label:

☒ I ☐ M ☐ -

Ions:

a ☐ + ☐ 2+ ☐ 3+

b ☒ + ☐ 2+ ☐ 3+

c ☐ + ☐ 2+ ☐ 3+

x ☐ + ☐ 2+ ☐ 3+

y ☒ + ☒ 2+ ☐ 3+

z ☐ + ☐ 2+ ☐ 3+

hide H<sub>2</sub>O/NH<sub>3</sub> ☐

zoom 112-122 ☐

GO

GIVPIVEPEILPDGDHDLKR, MH+ 2280.3240, m/z 570.8364  
H OS G16 P120811 220811-s1.05900.05900.4.dta

scan 5900; 2.4e+000

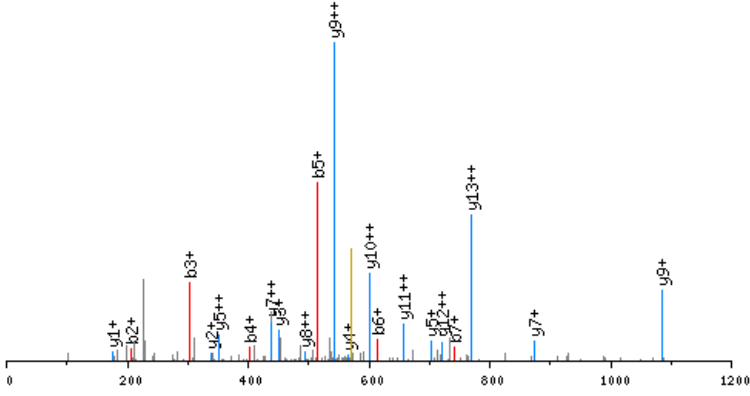

click image to zoom in; click top corners to zoom out [\[precursor±\]](#)

scan 5898; 570.8 m/z; 1.8e+001

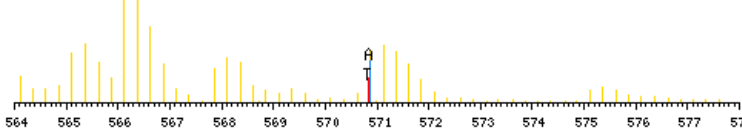

zoomed in precursor plot; T=theoretical m/z, A=acquired m/z

| b <sup>+</sup> | #  | AA | #  | y <sup>+</sup> | y <sup>2+</sup> |
|----------------|----|----|----|----------------|-----------------|
| 92.0924        | 1  | G  | 20 |                |                 |
| 205.1764       | 2  | I  | 19 | 2189.2394      | 1095.1236       |
| 304.2448       | 3  | V  | 18 | 2076.1554      | 1038.5816       |
| 401.2976       | 4  | P  | 17 | 1977.0870      | 989.0474        |
| 514.3817       | 5  | I  | 16 | 1880.0342      | 940.5210        |
| 613.4501       | 6  | V  | 15 | 1766.9501      | 883.9790        |
| 742.4927       | 7  | E  | 14 | 1667.8817      | 834.4448        |
| 839.5454       | 8  | P  | 13 | 1538.8391      | 769.9235        |
| 968.5880       | 9  | E  | 12 | 1441.7864      | 721.3971        |
| 1081.6721      | 10 | I  | 11 | 1312.7438      | 656.8758        |
| 1194.7562      | 11 | L  | 10 | 1199.6597      | 600.3338        |
| 1291.8089      | 12 | P  | 9  | 1086.5756      | 543.7917        |
| 1406.8359      | 13 | D  | 8  | 989.5229       | 495.2653        |
| 1463.8573      | 14 | G  | 7  | 874.4959       | 437.7519        |
| 1578.8843      | 15 | D  | 6  | 817.4745       | 409.2411        |
| 1715.9432      | 16 | H  | 5  | 702.4475       | 351.7277        |
| 1830.9701      | 17 | D  | 4  | 565.3886       | 283.1982        |
| 1944.0542      | 18 | L  | 3  | 450.3617       | 225.6847        |
| 2106.2123      | 19 | K  | 2  | 337.2776       | 169.1427        |
|                | 20 | R  | 1  | 175.1195       | 88.0637         |

N-term:+35.07 K(19):+162.16

X-range:

0 - 0

MassTol: Y-zoom:

0. 1.

MassType:

☐ AVG ☒ MONO

Axis:

☒ 1 ☐ 2

Label:

☒ I ☐ M ☐ -

Ions:

a ☐ + ☐ 2+ ☐ 3+

b ☒ + ☐ 2+ ☐ 3+

c ☐ + ☐ 2+ ☐ 3+

x ☐ + ☐ 2+ ☐ 3+

y ☒ + ☒ 2+ ☐ 3+

z ☐ + ☐ 2+ ☐ 3+

hide H<sub>2</sub>O/NH<sub>3</sub> ☐

zoom 112-122 ☐

GO

GIVTSSAGTGTTEDETEAKKR, MH+ 2093.1091, m/z 524.0327  
L OS G17 P120811 220811-s1.02060.02060.4.dta

scan 2060; 1.4e+000

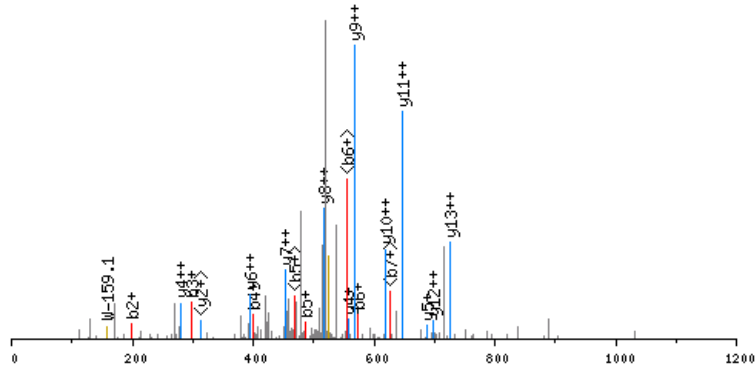

click image to zoom in; click top corners to zoom out [\[precursor±\]](#)

scan 2058; 524.0 m/z; 9.8e+000

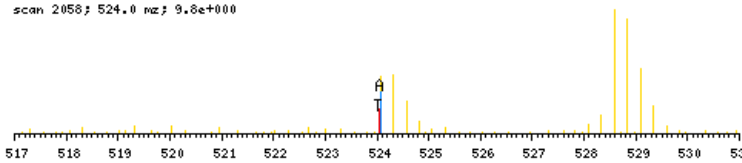

zoomed in precursor plot; T=theoretical m/z, A=acquired m/z

| b <sup>+</sup> | #  | AA | #  | y <sup>+</sup> | y <sup>2+</sup> |
|----------------|----|----|----|----------------|-----------------|
| 86.0606        | 1  | G  | 20 |                |                 |
| 199.1446       | 2  | I  | 19 | 2008.0563      | 1004.5321       |
| 298.2130       | 3  | V  | 18 | 1894.9722      | 947.9900        |
| 399.2607       | 4  | T  | 17 | 1795.9038      | 898.4558        |
| 486.2927       | 5  | S  | 16 | 1694.8562      | 847.9320        |
| 573.3248       | 6  | S  | 15 | 1607.8241      | 804.4160        |
| 644.3619       | 7  | A  | 14 | 1520.7921      | 760.9000        |
| 701.3834       | 8  | G  | 13 | 1449.7550      | 725.3814        |
| 802.4310       | 9  | T  | 12 | 1392.7335      | 696.8707        |
| 859.4525       | 10 | G  | 11 | 1291.6858      | 646.3468        |
| 960.5002       | 11 | T  | 10 | 1234.6644      | 617.8361        |
| 1061.5479      | 12 | T  | 9  | 1133.6167      | 567.3123        |
| 1190.5904      | 13 | E  | 8  | 1032.5690      | 516.7884        |
| 1305.6174      | 14 | D  | 7  | 903.5264       | 452.2671        |
| 1406.6651      | 15 | T  | 6  | 788.4995       | 394.7537        |
| 1535.7077      | 16 | E  | 5  | 687.4518       | 344.2298        |
| 1606.7448      | 17 | A  | 4  | 558.4092       | 279.7085        |
| 1762.8711      | 18 | K  | 3  | 487.3721       | 244.1900        |
| 1918.9974      | 19 | K  | 2  | 331.2458       | 166.1268        |
|                | 20 | R  | 1  | 175.1195       | 88.0637         |

N-term: +29.04 K(18): +156.13  
K(19): +156.13

X-range:

0 - 0

MassTol: Y-zoom:

0. 1.

MassType:

☐ AVG ☒ MONO

Axis:

☒ 1 ☐ 2

Label:

☒ I ☐ M ☐ -

Ions:

a ☐ + ☐ 2+ ☐ 3+

b ☒ + ☐ 2+ ☐ 3+

c ☐ + ☐ 2+ ☐ 3+

x ☐ + ☐ 2+ ☐ 3+

y ☒ + ☒ 2+ ☐ 3+

z ☐ + ☐ 2+ ☐ 3+

hide H<sub>2</sub>O/NH<sub>3</sub> ☐

zoom 112-122 ☐

GO

GIYPAVDPLDSTSR, MH+ 1518.7804, m/z 506.9316  
L OS G13 P120811 220811-s1.05465.05465.3.dta

scan 5465; 2.7e+000

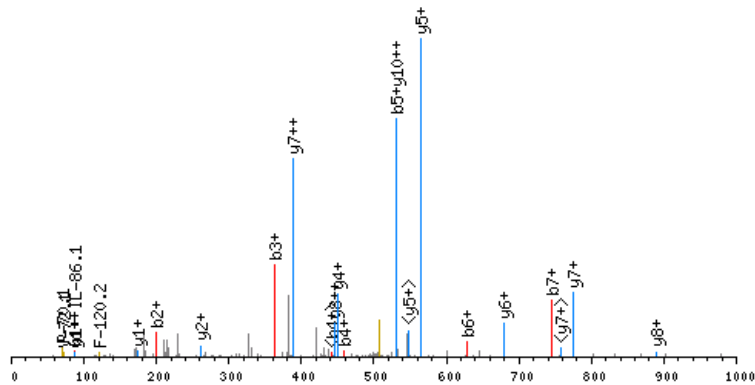

click image to zoom in; click top corners to zoom out

[precursor±]

scan 5464; 506.9 m/z; 1.3e+002

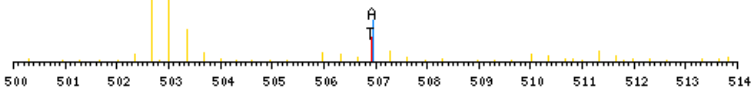

zoomed in precursor plot; T=theoretical m/z, A=acquired m/z

| b <sup>+</sup> | #  | AA | #  | y <sup>+</sup> | y <sup>2+</sup> |
|----------------|----|----|----|----------------|-----------------|
| 86.0606        | 1  | G  | 14 |                |                 |
| 199.1446       | 2  | I  | 13 | 1433.7276      | 717.3677        |
| 362.2080       | 3  | Y  | 12 | 1320.6436      | 660.8257        |
| 459.2607       | 4  | P  | 11 | 1157.5802      | 579.2940        |
| 530.2978       | 5  | A  | 10 | 1060.5275      | 530.7677        |
| 629.3662       | 6  | V  | 9  | 989.4904       | 495.2491        |
| 744.3932       | 7  | D  | 8  | 890.4220       | 445.7149        |
| 841.4460       | 8  | P  | 7  | 775.3950       | 388.2014        |
| 954.5300       | 9  | L  | 6  | 678.3422       | 339.6750        |
| 1069.5570      | 10 | D  | 5  | 565.2582       | 283.1330        |
| 1156.5890      | 11 | S  | 4  | 450.2312       | 225.6195        |
| 1257.6367      | 12 | T  | 3  | 363.1992       | 182.1035        |
| 1344.6687      | 13 | S  | 2  | 262.1515       | 131.5797        |
|                | 14 | R  | 1  | 175.1195       | 88.0637         |

N-term:+29.04

X-range:

0 - 0

MassTol: Y-zoom:

0. 1.

MassType:

☐ AVG ☒ MONO

Axis:

☒ 1 ☐ 2

Label:

☒ I ☐ M ☐ -

Ions:

a ☐ + ☐ 2+ ☐ 3+

b ☒ + ☐ 2+ ☐ 3+

c ☐ + ☐ 2+ ☐ 3+

x ☐ + ☐ 2+ ☐ 3+

y ☒ + ☒ 2+ ☐ 3+

z ☐ + ☐ 2+ ☐ 3+

hide H<sub>2</sub>O/NH<sub>3</sub> ☐

zoom 112-122 ☐

GO

GKEDSKTFDQLSPDESKER, MH+ 2308.1673, m/z 577.7973  
L OS G18 P120811 220811-s1.02835.02835.4.dta

scan 2835; 9.3e+000

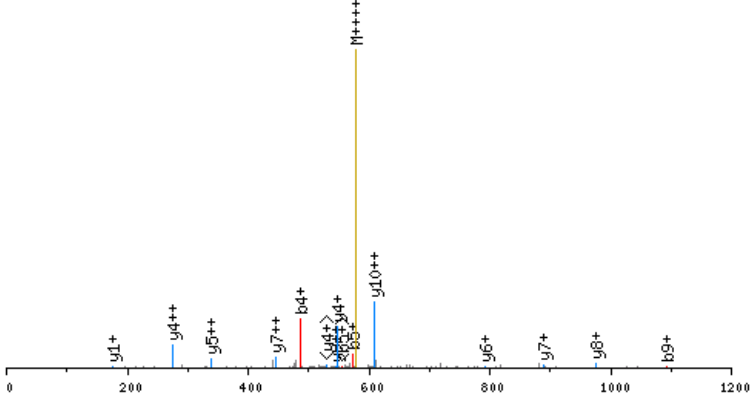

click image to zoom in; click top corners to zoom out [\[precursor±\]](#)

scan 2831; 577.8 m/z; 7.1e+000

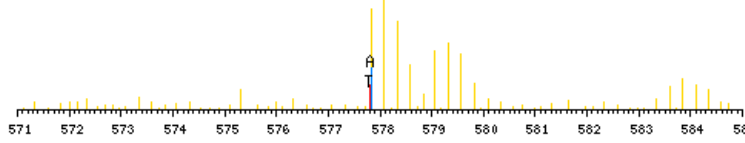

zoomed in precursor plot; T=theoretical m/z, A=acquired m/z

| b <sup>+</sup> | #  | AA | #  | y <sup>+</sup> | y <sup>2+</sup> |
|----------------|----|----|----|----------------|-----------------|
| 86.0606        | 1  | G  | 19 |                |                 |
| 242.1869       | 2  | K  | 18 | 2223.1146      | 1112.0612       |
| 371.2295       | 3  | E  | 17 | 2066.9883      | 1033.9981       |
| 486.2564       | 4  | D  | 16 | 1937.9457      | 969.4768        |
| 573.2884       | 5  | S  | 15 | 1822.9188      | 911.9633        |
| 729.4147       | 6  | K  | 14 | 1735.8867      | 868.4473        |
| 830.4624       | 7  | T  | 13 | 1579.7604      | 790.3841        |
| 977.5308       | 8  | F  | 12 | 1478.7127      | 739.8603        |
| 1092.5578      | 9  | D  | 11 | 1331.6443      | 666.3261        |
| 1220.6163      | 10 | Q  | 10 | 1216.6174      | 608.8126        |
| 1333.7004      | 11 | L  | 9  | 1088.5588      | 544.7833        |
| 1420.7324      | 12 | S  | 8  | 975.4748       | 488.2413        |
| 1517.7852      | 13 | P  | 7  | 888.4427       | 444.7253        |
| 1632.8121      | 14 | D  | 6  | 791.3900       | 396.1989        |
| 1761.8547      | 15 | E  | 5  | 676.3630       | 338.6854        |
| 1848.8868      | 16 | S  | 4  | 547.3204       | 274.1641        |
| 2005.0131      | 17 | K  | 3  | 460.2884       | 230.6481        |
| 2134.0557      | 18 | E  | 2  | 304.1621       | 152.5850        |
|                | 19 | R  | 1  | 175.1195       | 88.0637         |

N-term:+29.04 K(2):+156.13  
K(6):+156.13 K(17):+156.13

X-range:

0 - 0

MassTol: Y-zoom:

0. 1.

MassType:

☐AVG ☒MONO

Axis:

☒1 ☐2

Label:

☒I ☐M ☐-

Ions:

a ☐+ ☐2+ ☐3+

b ☒+ ☐2+ ☐3+

c ☐+ ☐2+ ☐3+

x ☐+ ☐2+ ☐3+

y ☒+ ☒2+ ☐3+

z ☐+ ☐2+ ☐3+

hide H<sub>2</sub>O/NH<sub>3</sub> ☐

zoom 112-122 ☐

GO

GKFEDMAKADKAR, MH+ 1578.8679, m/z 395.4724  
L OS G19 P120811 220811-s1.02260.02260.4.dta

scan 2260; 4.6e+001

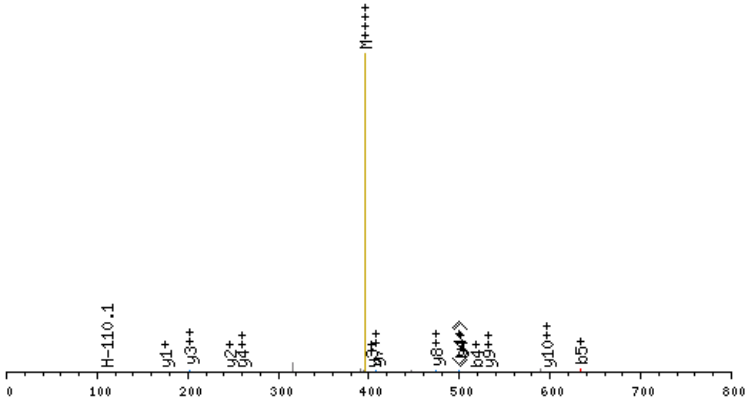

click image to zoom in; click top corners to zoom out

[precursor±]

scan 2259; 395.5 m/z; 2.9e+000

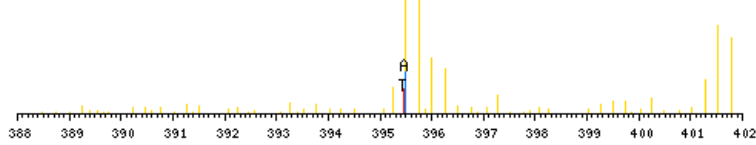

zoomed in precursor plot; T=theoretical m/z, A=acquired m/z

| b <sup>+</sup> | #  | AA | #  | y <sup>+</sup> | y <sup>2+</sup> |
|----------------|----|----|----|----------------|-----------------|
| 86.0606        | 1  | G  | 13 |                |                 |
| 242.1869       | 2  | K  | 12 | 1493.8151      | 747.4115        |
| 389.2553       | 3  | F  | 11 | 1337.6888      | 669.3483        |
| 518.2979       | 4  | E  | 10 | 1190.6204      | 595.8141        |
| 633.3248       | 5  | D  | 9  | 1061.5778      | 531.2928        |
| 764.3653       | 6  | M  | 8  | 946.5509       | 473.7793        |
| 835.4024       | 7  | A  | 7  | 815.5104       | 408.2591        |
| 991.5287       | 8  | K  | 6  | 744.4733       | 372.7405        |
| 1062.5658      | 9  | A  | 5  | 588.3470       | 294.6774        |
| 1177.5928      | 10 | D  | 4  | 517.3099       | 259.1588        |
| 1333.7191      | 11 | K  | 3  | 402.2829       | 201.6454        |
| 1404.7562      | 12 | A  | 2  | 246.1566       | 123.5822        |
|                | 13 | R  | 1  | 175.1195       | 88.0637         |

N-term:+29.04 K(2):+156.13  
K(8):+156.13 K(11):+156.13

zoomed in precursor plot; T=theoretical m/z, A=acquired m/z

X-range:

0 - 0

MassTol: Y-zoom:

0. 1.

MassType:

☐ AVG ☒ MONO

Axis:

☒ 1 ☐ 2

Label:

☒ I ☐ M ☐ -

Ions:

a ☐ + ☐ 2+ ☐ 3+

b ☒ + ☐ 2+ ☐ 3+

c ☐ + ☐ 2+ ☐ 3+

x ☐ + ☐ 2+ ☐ 3+

y ☒ + ☒ 2+ ☐ 3+

z ☐ + ☐ 2+ ☐ 3+

hide H<sub>2</sub>O/NH<sub>3</sub> ☐

zoom 112-122 ☐

GO

GK1ETIEVMEDR, MH+ 1475.7780, m/z 492.5975  
L OS G16 P120811 220811-s1.04130.04130.3.dta

scan 4130; 1.4e+000

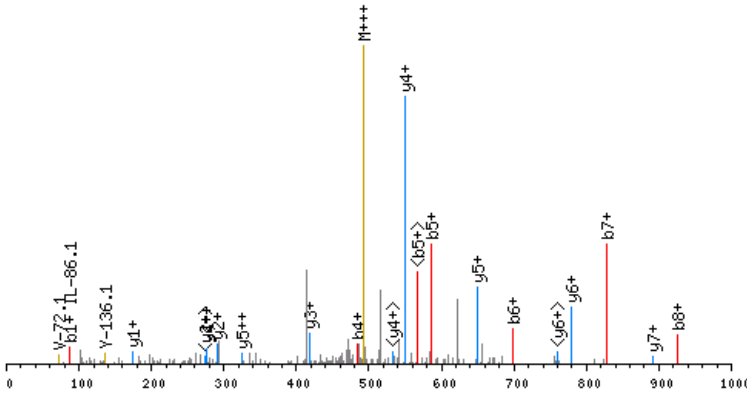

click image to zoom in; click top corners to zoom out

[precursor±]

scan 4128; 492.6 m/z; 7.9e+000

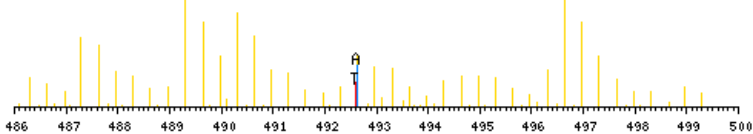

zoomed in precursor plot; T=theoretical m/z, A=acquired m/z

| b <sup>+</sup> | #  | AA | #  | y <sup>+</sup> | y <sup>2+</sup> |
|----------------|----|----|----|----------------|-----------------|
| 86.0606        | 1  | G  | 12 |                |                 |
| 242.1869       | 2  | K  | 11 | 1390.7252      | 695.8665        |
| 355.2709       | 3  | I  | 10 | 1234.5989      | 617.8034        |
| 484.3135       | 4  | E  | 9  | 1121.5149      | 561.2613        |
| 585.3612       | 5  | T  | 8  | 992.4723       | 496.7400        |
| 698.4453       | 6  | I  | 7  | 891.4246       | 446.2162        |
| 827.4879       | 7  | E  | 6  | 778.3405       | 389.6742        |
| 926.5563       | 8  | V  | 5  | 649.2979       | 325.1529        |
| 1057.5968      | 9  | M  | 4  | 550.2295       | 275.6187        |
| 1186.6393      | 10 | E  | 3  | 419.1890       | 210.0984        |
| 1301.6663      | 11 | D  | 2  | 290.1464       | 145.5771        |
|                | 12 | R  | 1  | 175.1195       | 88.0637         |

N-term:+29.04 K(2):+156.13

X-range:

0 - 0

MassTol: Y-zoom:

0. 1.

MassType:

☐AVG ☒MONO

Axis:

☒1 ☐2

Label:

☒I ☐M ☐-

Ions:

a ☐+ ☐2+ ☐3+

b ☒+ ☐2+ ☐3+

c ☐+ ☐2+ ☐3+

x ☐+ ☐2+ ☐3+

y ☒+ ☒2+ ☐3+

z ☐+ ☐2+ ☐3+

hide H<sub>2</sub>O/NH<sub>3</sub> ☐

zoom 112-122 ☐

GO

GKIGGHGAEYGAEALER, MH+ 1782.9775, m/z 446.4998  
H OS G17 P120811 220811-s1.02860.02860.4.dta

scan 2860; 5.2e+000

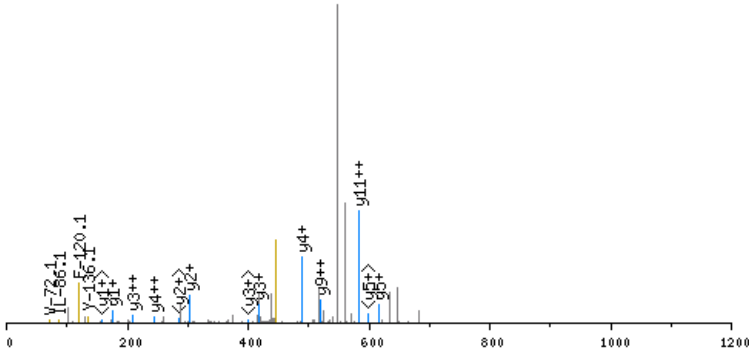

click image to zoom in; click top corners to zoom out [\[precursor±\]](#)

scan 2858; 446.5 m/z; 1.2e+001

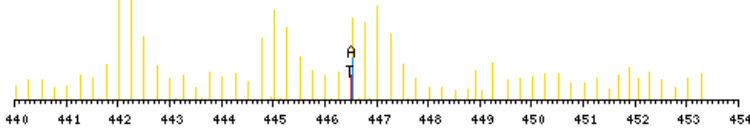

zoomed in precursor plot; T=theoretical m/z, A=acquired m/z

| b <sup>+</sup> | #  | AA | #  | y <sup>+</sup> | y <sup>2+</sup> |
|----------------|----|----|----|----------------|-----------------|
| 92.0924        | 1  | G  | 17 |                |                 |
| 254.2505       | 2  | K  | 16 | 1691.8929      | 846.4504        |
| 367.3345       | 3  | I  | 15 | 1529.7348      | 765.3713        |
| 424.3560       | 4  | G  | 14 | 1416.6508      | 708.8293        |
| 481.3775       | 5  | G  | 13 | 1359.6293      | 680.3186        |
| 618.4364       | 6  | H  | 12 | 1302.6079      | 651.8078        |
| 675.4578       | 7  | G  | 11 | 1165.5489      | 583.2784        |
| 746.4949       | 8  | A  | 10 | 1108.5275      | 554.7677        |
| 875.5375       | 9  | E  | 9  | 1037.4904      | 519.2491        |
| 1038.6009      | 10 | Y  | 8  | 908.4478       | 454.7278        |
| 1095.6223      | 11 | G  | 7  | 745.3844       | 373.1961        |
| 1166.6594      | 12 | A  | 6  | 688.3630       | 344.6854        |
| 1295.7020      | 13 | E  | 5  | 617.3259       | 309.1668        |
| 1366.7392      | 14 | A  | 4  | 488.2833       | 244.6455        |
| 1479.8232      | 15 | L  | 3  | 417.2462       | 209.1270        |
| 1608.8658      | 16 | E  | 2  | 304.1621       | 152.5850        |
|                | 17 | R  | 1  | 175.1195       | 88.0637         |

N-term:+35.07 K(2):+162.16

N-term: +35.07 K(2): +162.16

X-range:

0 - 0

MassTol: Y-zoom:

0. 1.

MassType:

☐AVG ☒MONO

Axis:

☒1 ☐2

Label:

☒I ☐M ☐-

Ions:

a ☐+ ☐2+ ☐3+

b ☒+ ☐2+ ☐3+

c ☐+ ☐2+ ☐3+

x ☐+ ☐2+ ☐3+

y ☒+ ☒2+ ☐3+

z ☐+ ☐2+ ☐3+

hide H<sub>2</sub>O/NH<sub>3</sub> ☐

zoom 112-122 ☐

GO

GKVLEGMDVVR, MH+ 1270.7829, m/z 424.2658  
H OS G16 P120811 220811-s1.03849.03849.3.dta

scan 3849; 3.7e+000

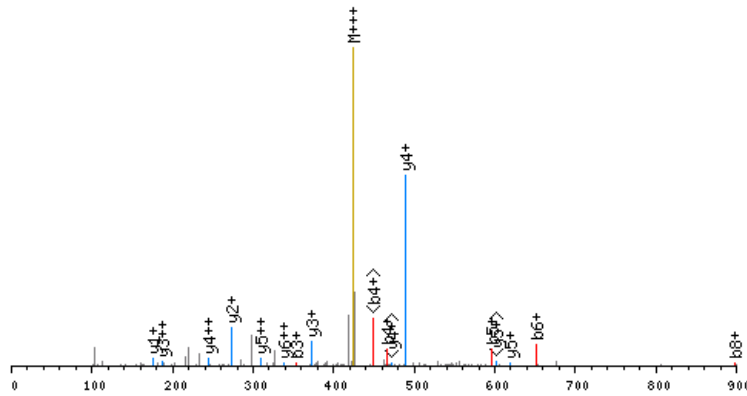

click image to zoom in; click top corners to zoom out [\[precursor±\]](#)

scan 3848; 424.3 m/z; 5.2e+000

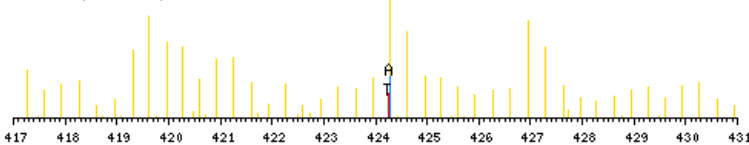

zoomed in precursor plot; T=theoretical m/z, A=acquired m/z

| b <sup>+</sup> | #  | AA | #  | y <sup>+</sup> | y <sup>2+</sup> |
|----------------|----|----|----|----------------|-----------------|
| 92.0924        | 1  | G  | 11 |                |                 |
| 254.2505       | 2  | K  | 10 | 1179.6984      | 590.3531        |
| 353.3189       | 3  | V  | 9  | 1017.5403      | 509.2741        |
| 466.4029       | 4  | L  | 8  | 918.4719       | 459.7399        |
| 595.4455       | 5  | E  | 7  | 805.3878       | 403.1978        |
| 652.4670       | 6  | G  | 6  | 676.3452       | 338.6765        |
| 783.5075       | 7  | M  | 5  | 619.3238       | 310.1658        |
| 898.5344       | 8  | D  | 4  | 488.2833       | 244.6455        |
| 997.6028       | 9  | V  | 3  | 373.2563       | 187.1321        |
| 1096.6713      | 10 | V  | 2  | 274.1879       | 137.5979        |
|                | 11 | R  | 1  | 175.1195       | 88.0637         |

N-term:+35.07 K(2):+162.16

X-range:

0 - 0

MassTol: Y-zoom:

0. 1.

MassType:

☐ AVG ☒ MONO

Axis:

☒ 1 ☐ 2

Label:

☒ I ☐ M ☐ -

Ions:

a ☐ + ☐ 2+ ☐ 3+

b ☒ + ☐ 2+ ☐ 3+

c ☐ + ☐ 2+ ☐ 3+

x ☐ + ☐ 2+ ☐ 3+

y ☒ + ☒ 2+ ☐ 3+

z ☐ + ☐ 2+ ☐ 3+

hide H<sub>2</sub>O/NH<sub>3</sub> ☐

zoom 112-122 ☐

GO

GLAGVENVSELKKNFNR, MH+ 1959.1028, m/z 490.5312  
L OS G17 P120811 220811-s1.05085.05085.4.dta

scan 5085; 1.1e+001

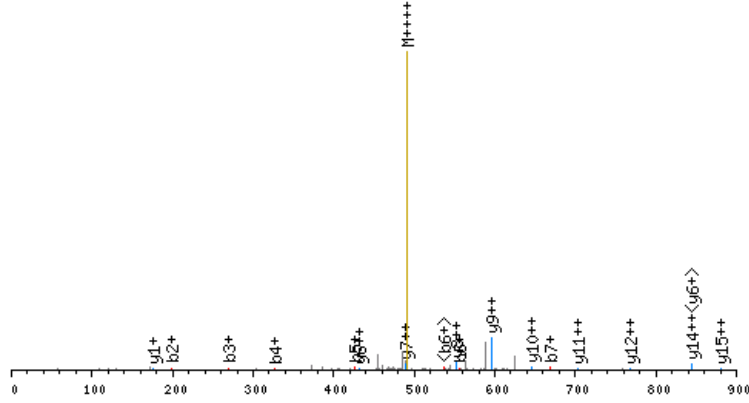

click image to zoom in; click top corners to zoom out [precursor±]

scan 5083; 490.5 m/z; 4.0e+001

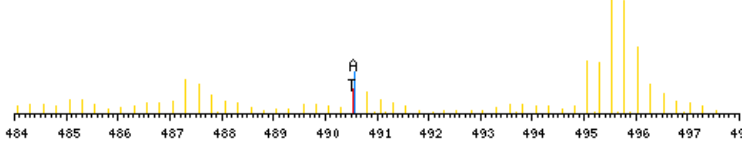

zoomed in precursor plot; T=theoretical m/z, A=acquired m/z

| b <sup>+</sup> | #  | AA | #  | y <sup>+</sup> | y <sup>2+</sup> |
|----------------|----|----|----|----------------|-----------------|
| 86.0606        | 1  | G  | 17 |                |                 |
| 199.1446       | 2  | L  | 16 | 1874.0500      | 937.5289        |
| 270.1817       | 3  | A  | 15 | 1760.9660      | 880.9869        |
| 327.2032       | 4  | G  | 14 | 1689.9289      | 845.4683        |
| 426.2716       | 5  | V  | 13 | 1632.9074      | 816.9576        |
| 555.3142       | 6  | E  | 12 | 1533.8390      | 767.4234        |
| 669.3571       | 7  | N  | 11 | 1404.7964      | 702.9021        |
| 768.4256       | 8  | V  | 10 | 1290.7535      | 645.8806        |
| 855.4576       | 9  | S  | 9  | 1191.6851      | 596.3464        |
| 984.5002       | 10 | E  | 8  | 1104.6530      | 552.8304        |
| 1097.5842      | 11 | L  | 7  | 975.6104       | 488.3091        |
| 1253.7105      | 12 | K  | 6  | 862.5264       | 431.7671        |
| 1409.8368      | 13 | K  | 5  | 706.4001       | 353.7039        |
| 1523.8798      | 14 | N  | 4  | 550.2738       | 275.6408        |
| 1670.9482      | 15 | F  | 3  | 436.2308       | 218.6193        |
| 1784.9911      | 16 | N  | 2  | 289.1624       | 145.0851        |
|                | 17 | R  | 1  | 175.1195       | 88.0637         |

N-term:+29.04 K(12):+156.13  
K(13):+156.13

X-range:

0 - 0

MassTol: Y-zoom:

0. 1.

MassType:

☐ AVG ☒ MONO

Axis:

☒ 1 ☐ 2

Label:

☒ I ☐ M ☐ -

Ions:

a ☐ + ☐ 2+ ☐ 3+

b ☒ + ☐ 2+ ☐ 3+

c ☐ + ☐ 2+ ☐ 3+

x ☐ + ☐ 2+ ☐ 3+

y ☒ + ☒ 2+ ☐ 3+

z ☐ + ☐ 2+ ☐ 3+

hide H<sub>2</sub>O/NH<sub>3</sub> ☐

zoom 112-122 ☐

GO

GLDVKQAFNPEGEFQR, MH+ 1890.9714, m/z 630.9953  
L OS G15 P120811 220811-s1.05054.05054.3.dta

scan 5054; 1.2e+000

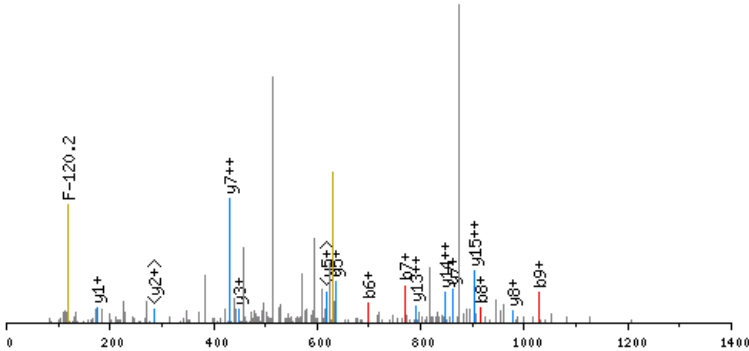

click image to zoom in; click top corners to zoom out

[precursor±]

scan 5051; 631.0 m/z; 4.1e+001

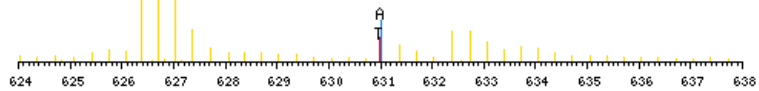

zoomed in precursor plot; T=theoretical m/z, A=acquired m/z

| b <sup>+</sup> | #  | AA | #  | y <sup>+</sup> | y <sup>2+</sup> |
|----------------|----|----|----|----------------|-----------------|
| 86.0606        | 1  | G  | 16 |                |                 |
| 199.1446       | 2  | L  | 15 | 1805.9187      | 903.4632        |
| 314.1716       | 3  | D  | 14 | 1692.8346      | 846.9212        |
| 413.2400       | 4  | V  | 13 | 1577.8077      | 789.4077        |
| 569.3663       | 5  | K  | 12 | 1478.7392      | 739.8735        |
| 697.4249       | 6  | Q  | 11 | 1322.6129      | 661.8104        |
| 768.4620       | 7  | A  | 10 | 1194.5544      | 597.7811        |
| 915.5304       | 8  | F  | 9  | 1123.5172      | 562.2625        |
| 1029.5733      | 9  | N  | 8  | 976.4488       | 488.7283        |
| 1126.6261      | 10 | P  | 7  | 862.4059       | 431.7069        |
| 1255.6687      | 11 | E  | 6  | 765.3531       | 383.1805        |
| 1312.6901      | 12 | G  | 5  | 636.3105       | 318.6592        |
| 1441.7327      | 13 | E  | 4  | 579.2891       | 290.1485        |
| 1588.8011      | 14 | F  | 3  | 450.2465       | 225.6272        |
| 1716.8597      | 15 | Q  | 2  | 303.1781       | 152.0930        |
|                | 16 | R  | 1  | 175.1195       | 88.0637         |

N-term:+29.04 K(5):+156.13

X-range:

0 - 0

MassTol: Y-zoom:

0. 1.

MassType:

☐ AVG ☒ MONO

Axis:

☒ 1 ☐ 2

Label:

☒ I ☐ M ☐ -

Ions:

a ☐ + ☐ 2+ ☐ 3+

b ☒ + ☐ 2+ ☐ 3+

c ☐ + ☐ 2+ ☐ 3+

x ☐ + ☐ 2+ ☐ 3+

y ☒ + ☒ 2+ ☐ 3+

z ☐ + ☐ 2+ ☐ 3+

hide H<sub>2</sub>O/NH<sub>3</sub> ☐

zoom 112-122 ☐

GO

GLESTTGEVPVVAIR, MH+ 1555.8695, m/z 519.2947  
L OS G13 P120811 220811-s1.05322.05322.3.dta

scan 5322; 2.7e+000

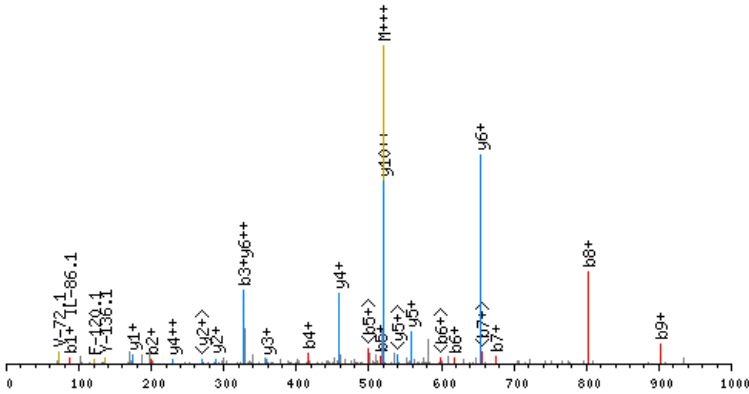

click image to zoom in; click top corners to zoom out

[precursor±]

scan 5319; 519.3 m/z; 7.1e+000

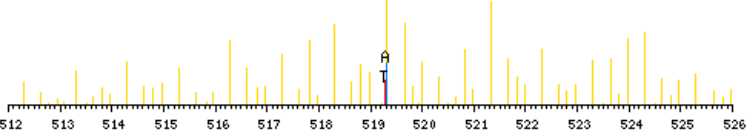

zoomed in precursor plot; T=theoretical m/z, A=acquired m/z

| b <sup>+</sup> | #  | AA | #  | y <sup>+</sup> | y <sup>2+</sup> |
|----------------|----|----|----|----------------|-----------------|
| 86.0606        | 1  | G  | 15 |                |                 |
| 199.1446       | 2  | L  | 14 | 1470.8168      | 735.9123        |
| 328.1872       | 3  | E  | 13 | 1357.7327      | 679.3703        |
| 415.2192       | 4  | S  | 12 | 1228.6901      | 614.8490        |
| 516.2669       | 5  | T  | 11 | 1141.6581      | 571.3330        |
| 617.3146       | 6  | T  | 10 | 1040.6104      | 520.8091        |
| 674.3361       | 7  | G  | 9  | 939.5627       | 470.2853        |
| 803.3787       | 8  | E  | 8  | 882.5413       | 441.7746        |
| 902.4471       | 9  | V  | 7  | 753.4987       | 377.2533        |
| 999.4998       | 10 | P  | 6  | 654.4303       | 327.7190        |
| 1098.5683      | 11 | V  | 5  | 557.3775       | 279.1927        |
| 1197.6367      | 12 | V  | 4  | 458.3091       | 229.6585        |
| 1268.6738      | 13 | A  | 3  | 359.2407       | 180.1243        |
| 1381.7578      | 14 | I  | 2  | 288.2036       | 144.6057        |
|                | 15 | R  | 1  | 175.1195       | 88.0637         |

N-term:+29.04

X-range:

0 - 0

MassTol: Y-zoom:

0. 1.

MassType:

☐AVG ☒MONO

Axis:

☒1 ☐2

Label:

☒I ☐M ☐-

Ions:

a ☐+ ☐2+ ☐3+

b ☒+ ☐2+ ☐3+

c ☐+ ☐2+ ☐3+

x ☐+ ☐2+ ☐3+

y ☒+ ☒2+ ☐3+

z ☐+ ☐2+ ☐3+

hide H<sub>2</sub>O/NH<sub>3</sub> ☐

zoom 112-122 ☐

GO

GLGPMNIPLISDPKR, MH+ 1663.9569, m/z 555.3238  
L OS G15 P120811 220811-s1.05812.05812.3.dta

scan 5812; 2.6e+000

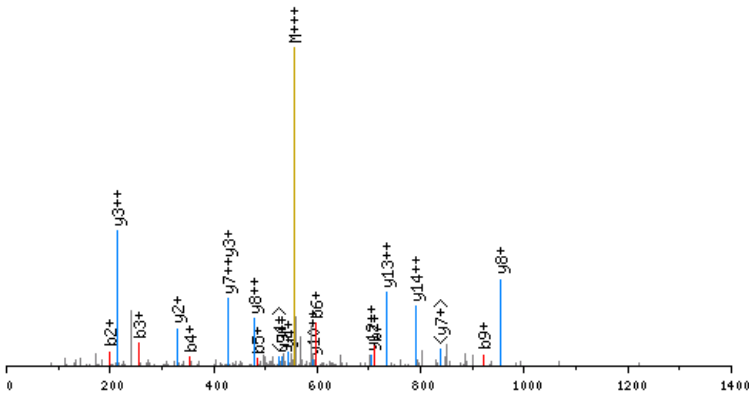

click image to zoom in; click top corners to zoom out

[precursor±]

scan 5811; 555.3 m/z; 9.7e+000

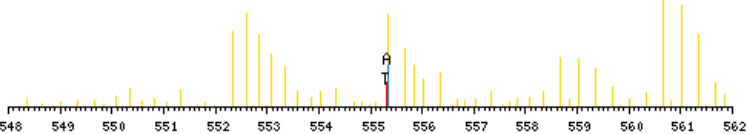

zoomed in precursor plot; T=theoretical m/z, A=acquired m/z

| b <sup>+</sup> | #  | AA | #  | y <sup>+</sup> | y <sup>2+</sup> |
|----------------|----|----|----|----------------|-----------------|
| 86.0606        | 1  | G  | 15 |                |                 |
| 199.1446       | 2  | L  | 14 | 1578.9042      | 789.9560        |
| 256.1661       | 3  | G  | 13 | 1465.8201      | 733.4140        |
| 353.2189       | 4  | P  | 12 | 1408.7987      | 704.9032        |
| 484.2593       | 5  | M  | 11 | 1311.7459      | 656.3769        |
| 598.3023       | 6  | N  | 10 | 1180.7054      | 590.8566        |
| 711.3863       | 7  | I  | 9  | 1066.6625      | 533.8352        |
| 808.4391       | 8  | P  | 8  | 953.5784       | 477.2931        |
| 921.5232       | 9  | L  | 7  | 856.5257       | 428.7667        |
| 1034.6072      | 10 | I  | 6  | 743.4416       | 372.2247        |
| 1121.6393      | 11 | S  | 5  | 630.3575       | 315.6827        |
| 1236.6662      | 12 | D  | 4  | 543.3255       | 272.1667        |
| 1333.7190      | 13 | P  | 3  | 428.2986       | 214.6532        |
| 1489.8453      | 14 | K  | 2  | 331.2458       | 166.1268        |
|                | 15 | R  | 1  | 175.1195       | 88.0637         |

N-term:+29.04 K(14):+156.13

X-range:

0 - 0

MassTol: Y-zoom:

0. 1.

MassType:

☐AVG ☒MONO

Axis:

☒1 ☐2

Label:

☒I ☐M ☐-

Ions:

a ☐+ ☐2+ ☐3+

b ☒+ ☐2+ ☐3+

c ☐+ ☐2+ ☐3+

x ☐+ ☐2+ ☐3+

y ☒+ ☒2+ ☐3+

z ☐+ ☐2+ ☐3+

hide H<sub>2</sub>O/NH<sub>3</sub> ☐

zoom 112-122 ☐

GO

GLKPPEGAAAEAGEEPPSR, MH+ 1847.9503, m/z 616.6550  
L OS G15 P120811 220811-s1.02547.02547.3.dta

scan 2547; 2.6e+000

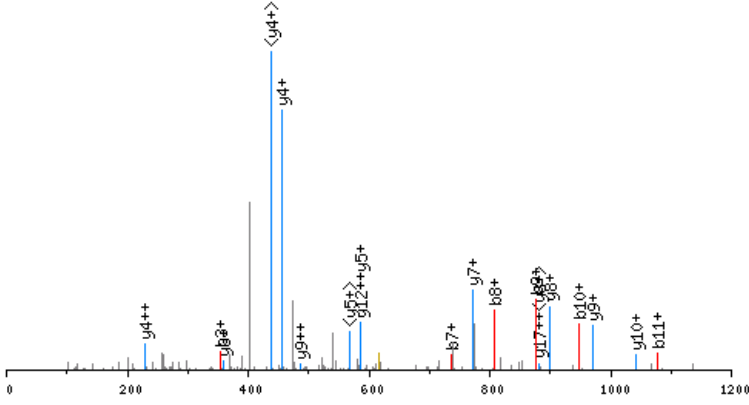

click image to zoom in; click top corners to zoom out

[precursor±]

scan 2546; 616.7 m/z; 3.1e+000

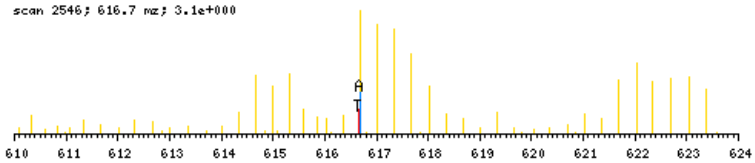

X-range:

0 - 0

MassTol: Y-zoom:

0. 1.

MassType:

☐AVG ☒MONO

Axis:

☒1 ☐2

Label:

☒I ☐M ☐-

Ions:

a ☐+ ☐2+ ☐3+

b ☒+ ☐2+ ☐3+

c ☐+ ☐2+ ☐3+

x ☐+ ☐2+ ☐3+

y ☒+ ☒2+ ☐3+

z ☐+ ☐2+ ☐3+

hide H<sub>2</sub>O/NH<sub>3</sub> ☐

zoom 112-122 ☐

GO

GLKTVFDEAIR, MH+ 1304.7578, m/z 435.5908  
L OS G16 P120811 220811-s1.05127.05127.3.dta

scan 5127; 9.7e+000

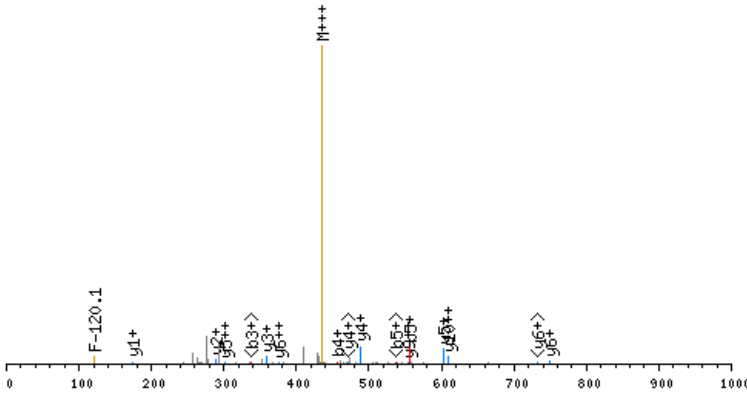

click image to zoom in; click top corners to zoom out

[precursor±]

scan 5123; 435.6 m/z; 4.7e+000

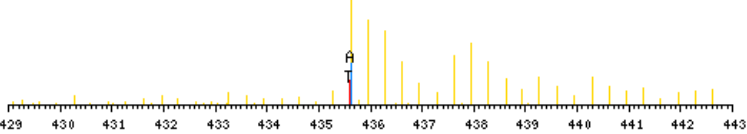

zoomed in precursor plot; T=theoretical m/z, A=acquired m/z

| b <sup>+</sup> | #  | AA | #  | y <sup>+</sup> | y <sup>2+</sup> |
|----------------|----|----|----|----------------|-----------------|
| 86.0606        | 1  | G  | 11 |                |                 |
| 199.1446       | 2  | L  | 10 | 1219.7051      | 610.3565        |
| 355.2709       | 3  | K  | 9  | 1106.6210      | 553.8144        |
| 456.3186       | 4  | T  | 8  | 950.4947       | 475.7513        |
| 555.3870       | 5  | V  | 7  | 849.4470       | 425.2274        |
| 702.4554       | 6  | F  | 6  | 750.3786       | 375.6932        |
| 817.4824       | 7  | D  | 5  | 603.3102       | 302.1590        |
| 946.5250       | 8  | E  | 4  | 488.2833       | 244.6455        |
| 1017.5621      | 9  | A  | 3  | 359.2407       | 180.1243        |
| 1130.6461      | 10 | I  | 2  | 288.2036       | 144.6057        |
|                | 11 | R  | 1  | 175.1195       | 88.0637         |

N-term:+29.04 K(3):+156.13

X-range:

0 - 0

MassTol: Y-zoom:

0. 1.

MassType:

☐AVG ☒MONO

Axis:

☒1 ☐2

Label:

☒I ☐M ☐-

Ions:

a ☐+ ☐2+ ☐3+

b ☒+ ☐2+ ☐3+

c ☐+ ☐2+ ☐3+

x ☐+ ☐2+ ☐3+

y ☒+ ☒2+ ☐3+

z ☐+ ☐2+ ☐3+

hide H<sub>2</sub>O/NH<sub>3</sub> ☐

zoom 112-122 ☐

GO

GLLSQGSPLSWEETQR, MH+ 1815.9241, m/z 605.9795  
L OS G13 P120811 220811-s1.06042.06042.3.dta

scan 6042; 1.9e+000

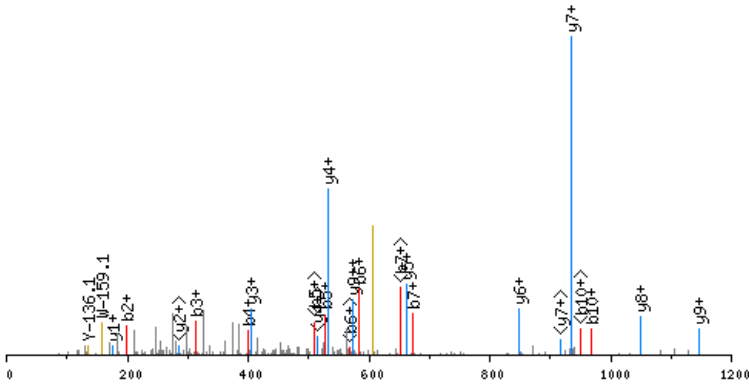

click image to zoom in; click top corners to zoom out

[precursor±]

scan 6039; 606.0 m/z; 5.8e+000

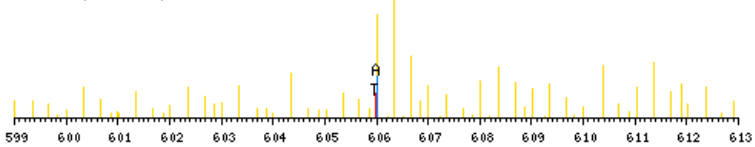

zoomed in precursor plot; T=theoretical m/z, A=acquired m/z

| b <sup>+</sup> | #  | AA | #  | y <sup>+</sup> | y <sup>2+</sup> |
|----------------|----|----|----|----------------|-----------------|
| 86.0606        | 1  | G  | 16 |                |                 |
| 199.1446       | 2  | L  | 15 | 1730.8713      | 865.9396        |
| 312.2287       | 3  | L  | 14 | 1617.7873      | 809.3975        |
| 399.2607       | 4  | S  | 13 | 1504.7032      | 752.8555        |
| 527.3193       | 5  | Q  | 12 | 1417.6712      | 709.3395        |
| 584.3408       | 6  | G  | 11 | 1289.6126      | 645.3102        |
| 671.3728       | 7  | S  | 10 | 1232.5911      | 616.7995        |
| 768.4256       | 8  | P  | 9  | 1145.5591      | 573.2835        |
| 881.5096       | 9  | L  | 8  | 1048.5063      | 524.7571        |
| 968.5416       | 10 | S  | 7  | 935.4223       | 468.2151        |
| 1154.6210      | 11 | W  | 6  | 848.3903       | 424.6990        |
| 1283.6636      | 12 | E  | 5  | 662.3109       | 331.6594        |
| 1412.7061      | 13 | E  | 4  | 533.2683       | 267.1381        |
| 1513.7538      | 14 | T  | 3  | 404.2258       | 202.6168        |
| 1641.8124      | 15 | Q  | 2  | 303.1781       | 152.0930        |
|                | 16 | R  | 1  | 175.1195       | 88.0637         |

N-term:+29.04

X-range:

0 - 0

MassTol: Y-zoom:

0. 1.

MassType:

☐ AVG ☒ MONO

Axis:

☒ 1 ☐ 2

Label:

☒ I ☐ M ☐ -

Ions:

a ☐ + ☐ 2+ ☐ 3+

b ☒ + ☐ 2+ ☐ 3+

c ☐ + ☐ 2+ ☐ 3+

x ☐ + ☐ 2+ ☐ 3+

y ☒ + ☒ 2+ ☐ 3+

z ☐ + ☐ 2+ ☐ 3+

hide H<sub>2</sub>O/NH<sub>3</sub> ☐

zoom 112-122 ☐

GO

GLSAPSCPLDDKTEASAR, MH+ 1987.9758, m/z 663.3301  
L OS G15 P120811 220811-s1.03113.03113.3.dta

scan 3113; 6.5e+000

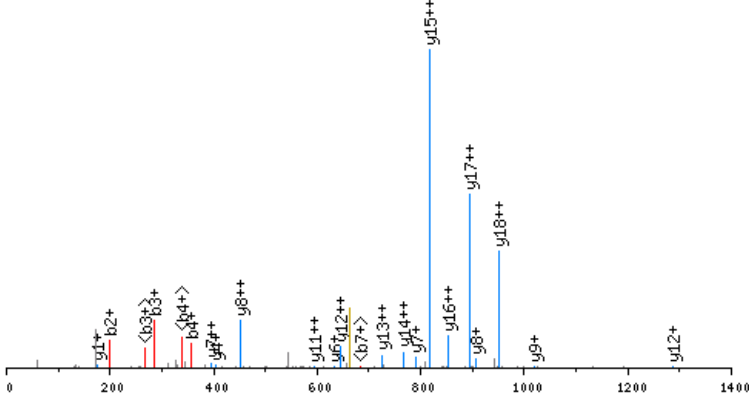

click image to zoom in; click top corners to zoom out [\[precursor±\]](#)

scan 3111; 663.3 m/z; 1.8e+001

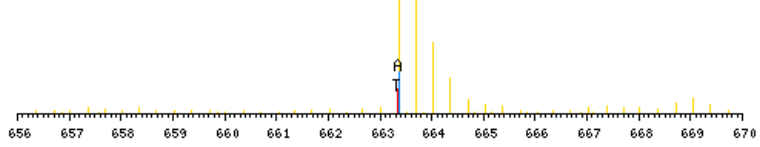

zoomed in precursor plot; T=theoretical m/z, A=acquired m/z

| b <sup>+</sup> | #  | AA | #  | y <sup>+</sup> | y <sup>2+</sup> |
|----------------|----|----|----|----------------|-----------------|
| 86.0606        | 1  | G  | 19 |                |                 |
| 199.1446       | 2  | L  | 18 | 1902.9231      | 951.9655        |
| 286.1767       | 3  | S  | 17 | 1789.8390      | 895.4234        |
| 357.2138       | 4  | A  | 16 | 1702.8070      | 851.9074        |
| 454.2665       | 5  | P  | 15 | 1631.7699      | 816.3889        |
| 541.2986       | 6  | S  | 14 | 1534.7171      | 767.8625        |
| 701.3292       | 7  | C  | 13 | 1447.6851      | 724.3465        |
| 798.3819       | 8  | P  | 12 | 1287.6545      | 644.3312        |
| 855.4034       | 9  | G  | 11 | 1190.6017      | 595.8048        |
| 968.4875       | 10 | L  | 10 | 1133.5803      | 567.2941        |
| 1083.5144      | 11 | D  | 9  | 1020.4962      | 510.7520        |
| 1198.5413      | 12 | D  | 8  | 905.4693       | 453.2385        |
| 1354.6676      | 13 | K  | 7  | 790.4423       | 395.7251        |
| 1455.7153      | 14 | T  | 6  | 634.3160       | 317.6619        |
| 1584.7579      | 15 | E  | 5  | 533.2683       | 267.1381        |
| 1655.7950      | 16 | A  | 4  | 404.2258       | 202.6168        |
| 1742.8271      | 17 | S  | 3  | 333.1886       | 167.0982        |
| 1813.8642      | 18 | A  | 2  | 246.1566       | 123.5822        |
|                | 19 | R  | 1  | 175.1195       | 88.0637         |

N-term:+29.04 C(7):+160.03  
K(13):+156.13





X-range:

0 - 0

MassTol: Y-zoom:

0. 1.

MassType:

☐ AVG ☒ MONO

Axis:

☒ 1 ☐ 2

Label:

☒ I ☐ M ☐ -

Ions:

a ☐ + ☐ 2+ ☐ 3+

b ☒ + ☐ 2+ ☐ 3+

c ☐ + ☐ 2+ ☐ 3+

x ☐ + ☐ 2+ ☐ 3+

y ☒ + ☒ 2+ ☐ 3+

z ☐ + ☐ 2+ ☐ 3+

hide H<sub>2</sub>O/NH<sub>3</sub> ☐

zoom 112-122 ☐

GO

GMEEGEFSEAR, MH+ 1269.5421, m/z 635.2747  
L OS G13 P120811 220811-s1.02983.02983.2.dta

scan 2983; 2.9e+000

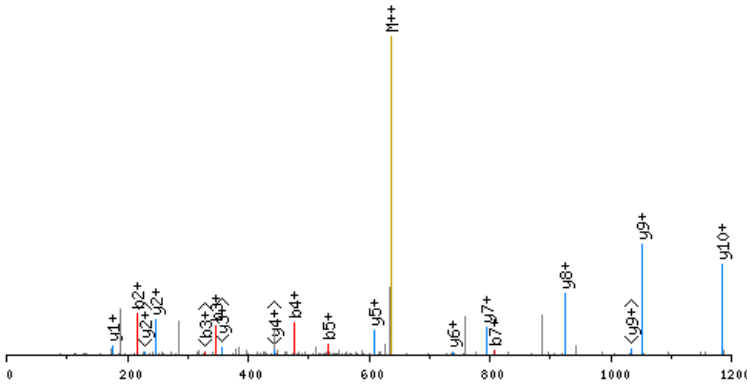

click image to zoom in; click top corners to zoom out

[precursor±]

scan 2979; 635.3 m/z; 5.7e+000

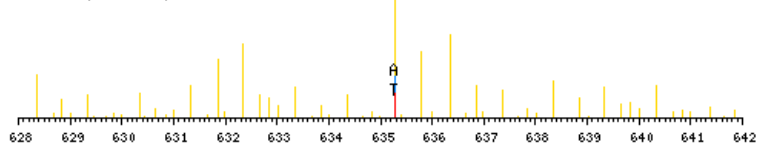

zoomed in precursor plot; T=theoretical m/z, A=acquired m/z

| b <sup>+</sup> | #  | AA | #  | y <sup>+</sup> | y <sup>2+</sup> |
|----------------|----|----|----|----------------|-----------------|
| 86.0606        | 1  | G  | 11 |                |                 |
| 217.1010       | 2  | M  | 10 | 1184.4894      | 592.7486        |
| 346.1436       | 3  | E  | 9  | 1053.4489      | 527.2284        |
| 475.1862       | 4  | E  | 8  | 924.4063       | 462.7071        |
| 532.2077       | 5  | G  | 7  | 795.3637       | 398.1858        |
| 661.2503       | 6  | E  | 6  | 738.3422       | 369.6750        |
| 808.3187       | 7  | F  | 5  | 609.2997       | 305.1537        |
| 895.3507       | 8  | S  | 4  | 462.2312       | 231.6195        |
| 1024.3933      | 9  | E  | 3  | 375.1992       | 188.1035        |
| 1095.4304      | 10 | A  | 2  | 246.1566       | 123.5822        |
|                | 11 | R  | 1  | 175.1195       | 88.0637         |

N-term:+29.04

X-range:

0 - 0

MassTol: Y-zoom:

0. 1.

MassType:

☐ AVG ☒ MONO

Axis:

☒ 1 ☐ 2

Label:

☒ I ☐ M ☐ -

Ions:

a ☐ + ☐ 2+ ☐ 3+

b ☒ + ☐ 2+ ☐ 3+

c ☐ + ☐ 2+ ☐ 3+

x ☐ + ☐ 2+ ☐ 3+

y ☒ + ☒ 2+ ☐ 3+

z ☐ + ☐ 2+ ☐ 3+

hide H<sub>2</sub>O/NH<sub>3</sub> ☐

zoom 112-122 ☐

GO

GMESAGIHETTYNSIMKCDIDIR, MH+ 2697.2686, m/z 675.0726  
L OS G17 P120811 220811-s1.05711.05711.4.dta

scan 5711; 2.0e+000

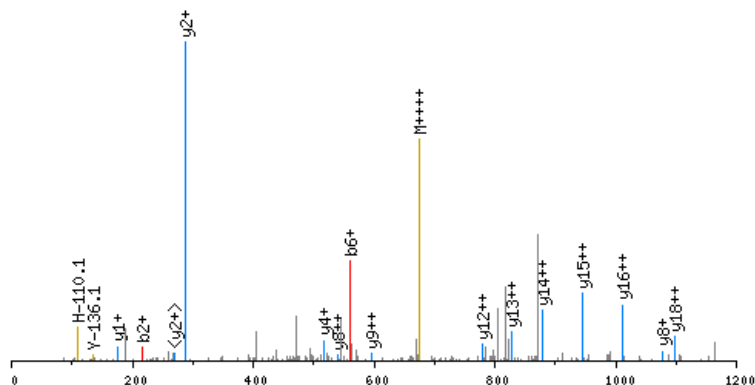

click image to zoom in; click top corners to zoom out

[precursor±]

scan 5708; 675.1 m/z; 7.9e+000

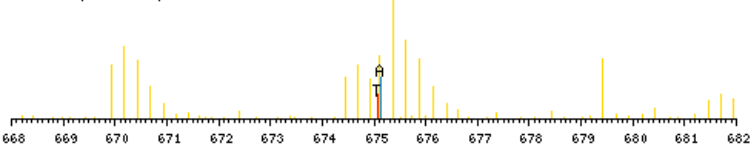

zoomed in precursor plot; T=theoretical m/z, A=acquired m/z

| b <sup>+</sup> | #  | AA | #  | y <sup>+</sup> | y <sup>2+</sup> |
|----------------|----|----|----|----------------|-----------------|
| 86.0606        | 1  | G  | 23 |                |                 |
| 217.1010       | 2  | M  | 22 | 2612.2159      | 1306.6118       |
| 346.1436       | 3  | E  | 21 | 2481.1754      | 1241.0916       |
| 433.1757       | 4  | S  | 20 | 2352.1328      | 1176.5703       |
| 504.2128       | 5  | A  | 19 | 2265.1008      | 1133.0543       |
| 561.2342       | 6  | G  | 18 | 2194.0636      | 1097.5357       |
| 674.3183       | 7  | I  | 17 | 2137.0422      | 1069.0250       |
| 811.3772       | 8  | H  | 16 | 2023.9581      | 1012.4830       |
| 940.4198       | 9  | E  | 15 | 1886.8992      | 943.9535        |
| 1041.4675      | 10 | T  | 14 | 1757.8566      | 879.4322        |
| 1142.5152      | 11 | T  | 13 | 1656.8089      | 828.9084        |
| 1305.5785      | 12 | Y  | 12 | 1555.7612      | 778.3845        |
| 1419.6214      | 13 | N  | 11 | 1392.6979      | 696.8529        |
| 1506.6535      | 14 | S  | 10 | 1278.6550      | 639.8314        |
| 1619.7375      | 15 | I  | 9  | 1191.6230      | 596.3154        |
| 1750.7780      | 16 | M  | 8  | 1078.5389      | 539.7734        |
| 1906.9043      | 17 | K  | 7  | 947.4984       | 474.2531        |
| 2066.9349      | 18 | C  | 6  | 791.3721       | 396.1900        |
| 2181.9618      | 19 | D  | 5  | 631.3415       | 316.1747        |
| 2295.0459      | 20 | I  | 4  | 516.3146       | 258.6612        |
| 2410.0729      | 21 | D  | 3  | 403.2305       | 202.1192        |
| 2523.1569      | 22 | I  | 2  | 288.2036       | 144.6057        |
|                | 23 | R  | 1  | 175.1195       | 88.0637         |

N-term:+29.04 K(17):+156.13

C(18):+160.03

X-range:

0 - 0

MassTol: Y-zoom:

0. 1.

MassType:

☐AVG ☒MONO

Axis:

☒1 ☐2

Label:

☒I ☐M ☐-

Ions:

a ☐+ ☐2+ ☐3+

b ☒+ ☐2+ ☐3+

c ☐+ ☐2+ ☐3+

x ☐+ ☐2+ ☐3+

y ☒+ ☒2+ ☐3+

z ☐+ ☐2+ ☐3+

hide H<sub>2</sub>O/NH<sub>3</sub> ☐

zoom 112-122 ☐

GO

GMGQKDSYVGDEAQSQR, MH+ 1958.0502, m/z 490.2680  
H OS G17 P120811 220811-s1.02070.02070.4.dta

scan 2070; 2.1e+001

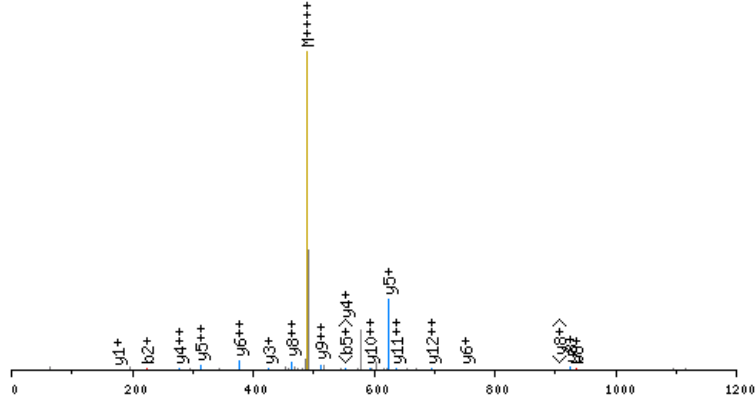

click image to zoom in; click top corners to zoom out [\[precursor±\]](#)

scan 2068; 490.3 m/z; 1.3e+001

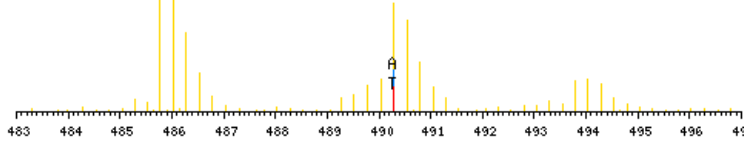

zoomed in precursor plot; T=theoretical m/z, A=acquired m/z

| b <sup>+</sup> | #  | AA | #  | y <sup>+</sup> | y <sup>2+</sup> |
|----------------|----|----|----|----------------|-----------------|
| 92.0924        | 1  | G  | 17 |                |                 |
| 223.1328       | 2  | M  | 16 | 1866.9657      | 933.9867        |
| 280.1543       | 3  | G  | 15 | 1735.9252      | 868.4665        |
| 408.2129       | 4  | Q  | 14 | 1678.9037      | 839.9558        |
| 570.3710       | 5  | K  | 13 | 1550.8451      | 775.9265        |
| 685.3979       | 6  | D  | 12 | 1388.6870      | 694.8474        |
| 772.4300       | 7  | S  | 11 | 1273.6601      | 637.3340        |
| 935.4933       | 8  | Y  | 10 | 1186.6281      | 593.8179        |
| 1034.5617      | 9  | V  | 9  | 1023.5647      | 512.2863        |
| 1091.5832      | 10 | G  | 8  | 924.4963       | 462.7521        |
| 1206.6101      | 11 | D  | 7  | 867.4749       | 434.2413        |
| 1335.6527      | 12 | E  | 6  | 752.4479       | 376.7279        |
| 1406.6898      | 13 | A  | 5  | 623.4053       | 312.2066        |
| 1534.7484      | 14 | Q  | 4  | 552.3682       | 276.6880        |
| 1621.7804      | 15 | S  | 3  | 424.3096       | 212.6587        |
| 1783.9385      | 16 | K  | 2  | 337.2776       | 169.1427        |
|                | 17 | R  | 1  | 175.1195       | 88.0637         |

N-term:+35.07 K(5):+162.16  
K(16):+162.16

X-range:

0 - 0

MassTol: Y-zoom:

0. 1.

MassType:

☐AVG ☒MONO

Axis:

☒1 ☐2

Label:

☒I ☐M ☐-

Ions:

a ☐+ ☐2+ ☐3+

b ☒+ ☐2+ ☐3+

c ☐+ ☐2+ ☐3+

x ☐+ ☐2+ ☐3+

y ☒+ ☒2+ ☐3+

z ☐+ ☐2+ ☐3+

hide H<sub>2</sub>O/NH<sub>3</sub> ☐

zoom 112-122 ☐

GO

GNDVAFHFNP, MH+ 1301.6391, m/z 434.5512  
L OS G16 P120811 220811-s1.04017.04017.3.dta

scan 4017; 1.2e+001

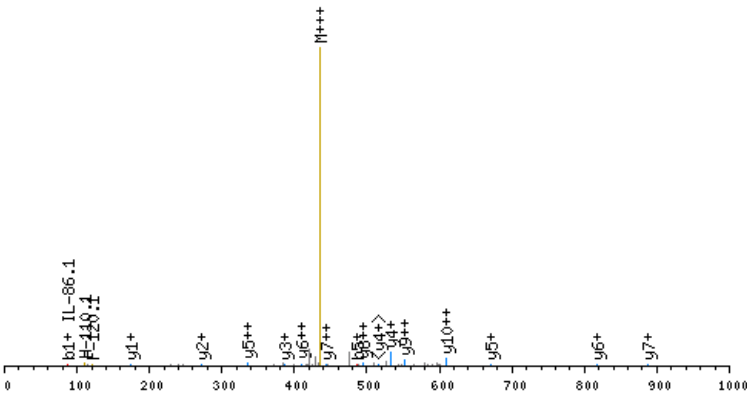

click image to zoom in; click top corners to zoom out [\[precursor±\]](#)

scan 4013; 434.6 m/z; 1.8e+001

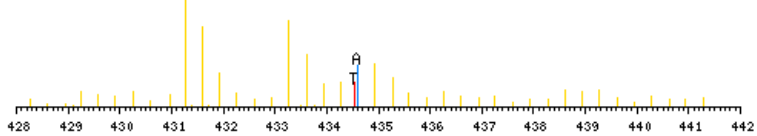

zoomed in precursor plot; T=theoretical m/z, A=acquired m/z

| b <sup>+</sup> | #  | AA | #  | y <sup>+</sup> | y <sup>2+</sup> |
|----------------|----|----|----|----------------|-----------------|
| 86.0606        | 1  | G  | 11 |                |                 |
| 200.1035       | 2  | N  | 10 | 1216.5863      | 608.7971        |
| 315.1304       | 3  | D  | 9  | 1102.5434      | 551.7756        |
| 414.1988       | 4  | V  | 8  | 987.5165       | 494.2621        |
| 485.2360       | 5  | A  | 7  | 888.4480       | 444.7279        |
| 632.3044       | 6  | F  | 6  | 817.4109       | 409.2094        |
| 769.3633       | 7  | H  | 5  | 670.3425       | 335.6752        |
| 916.4317       | 8  | F  | 4  | 533.2836       | 267.1457        |
| 1030.4746      | 9  | N  | 3  | 386.2152       | 193.6115        |
| 1127.5274      | 10 | P  | 2  | 272.1723       | 136.5900        |
|                | 11 | R  | 1  | 175.1195       | 88.0637         |

N-term:+29.04

X-range:

0 - 0

MassTol: Y-zoom:

0. 1.

MassType:

☐AVG ☒MONO

Axis:

☒1 ☐2

Label:

☒I ☐M ☐-

Ions:

a ☐+ ☐2+ ☐3+

b ☒+ ☐2+ ☐3+

c ☐+ ☐2+ ☐3+

x ☐+ ☐2+ ☐3+

y ☒+ ☒2+ ☐3+

z ☐+ ☐2+ ☐3+

hide H<sub>2</sub>O/NH<sub>3</sub> ☐

zoom 112-122 ☐

GO

GNPTVEVDLHTAKGR, MH+ 1649.8975, m/z 413.2298  
L OS G17 P120811 220811-s1.02979.02979.4.dta

scan 2979; 4.9e+000

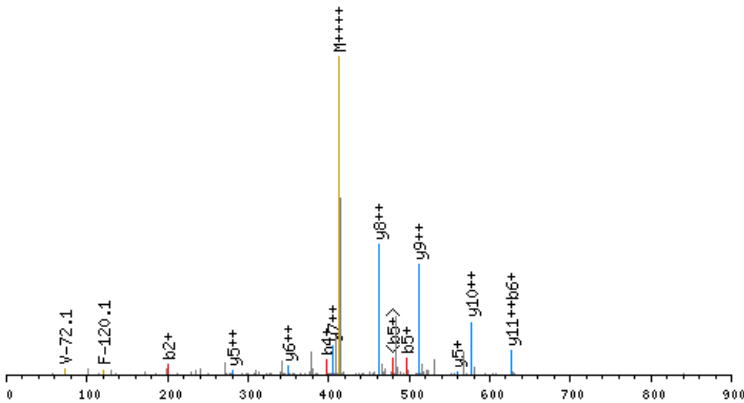

click image to zoom in; click top corners to zoom out

[precursor±]

scan 2978; 413.2 m/z; 2.4e+001

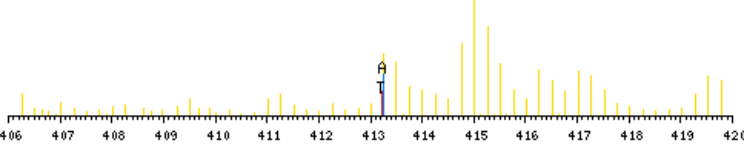

zoomed in precursor plot; T=theoretical m/z, A=acquired m/z

| b <sup>+</sup> | #  | AA | #  | y <sup>+</sup> | y <sup>2+</sup> |
|----------------|----|----|----|----------------|-----------------|
| 86.0606        | 1  | G  | 15 |                |                 |
| 200.1035       | 2  | N  | 14 | 1564.8448      | 782.9263        |
| 297.1563       | 3  | P  | 13 | 1450.8018      | 725.9048        |
| 398.2039       | 4  | T  | 12 | 1353.7491      | 677.3785        |
| 497.2723       | 5  | V  | 11 | 1252.7014      | 626.8546        |
| 626.3149       | 6  | E  | 10 | 1153.6330      | 577.3204        |
| 725.3834       | 7  | V  | 9  | 1024.5904      | 512.7991        |
| 840.4103       | 8  | D  | 8  | 925.5220       | 463.2649        |
| 953.4944       | 9  | L  | 7  | 810.4950       | 405.7514        |
| 1090.5533      | 10 | H  | 6  | 697.4110       | 349.2094        |
| 1191.6010      | 11 | T  | 5  | 560.3521       | 280.6799        |
| 1262.6381      | 12 | A  | 4  | 459.3044       | 230.1561        |
| 1418.7644      | 13 | K  | 3  | 388.2673       | 194.6375        |
| 1475.7858      | 14 | G  | 2  | 232.1410       | 116.5744        |
|                | 15 | R  | 1  | 175.1195       | 88.0637         |

N-term:+29.04 K(13):+156.13

X-range:

0 - 0

MassTol: Y-zoom:

0. 1.

MassType:

☐ AVG ☒ MONO

Axis:

☒ 1 ☐ 2

Label:

☒ I ☐ M ☐ -

Ions:

a ☐ + ☐ 2+ ☐ 3+

b ☒ + ☐ 2+ ☐ 3+

c ☐ + ☐ 2+ ☐ 3+

x ☐ + ☐ 2+ ☐ 3+

y ☒ + ☒ 2+ ☐ 3+

z ☐ + ☐ 2+ ☐ 3+

hide H<sub>2</sub>O/NH<sub>3</sub> ☐

zoom 112-122 ☐

GO

GPAGAGESKCPLMKVLDVAVR, MH+ 2257.3261, m/z 565.0870  
H OS G16 P120811 220811-s1.05964.05964.4.dta

scan 5964; 2.5e+001

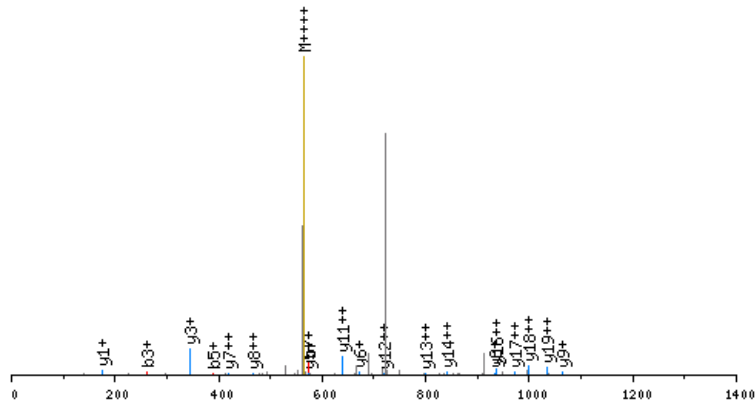

click image to zoom in; click top corners to zoom out

[precursor±]

scan 5963; 565.1 m/z; 7.0e+002

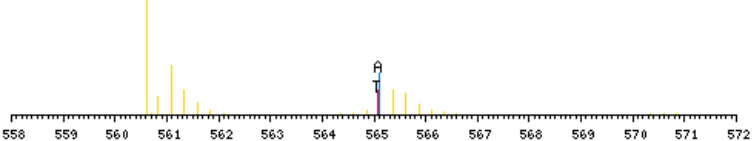

zoomed in precursor plot; T=theoretical m/z, A=acquired m/z

| b <sup>+</sup> | #  | AA | #  | y <sup>+</sup> | y <sup>2+</sup> |
|----------------|----|----|----|----------------|-----------------|
| 92.0924        | 1  | G  | 21 |                |                 |
| 189.1451       | 2  | P  | 20 | 2166.2415      | 1083.6247       |
| 260.1822       | 3  | A  | 19 | 2069.1888      | 1035.0983       |
| 317.2037       | 4  | G  | 18 | 1998.1516      | 999.5797        |
| 388.2408       | 5  | A  | 17 | 1941.1302      | 971.0690        |
| 445.2623       | 6  | G  | 16 | 1870.0931      | 935.5504        |
| 574.3049       | 7  | E  | 15 | 1813.0716      | 907.0397        |
| 661.3369       | 8  | S  | 14 | 1684.0290      | 842.5184        |
| 823.4950       | 9  | K  | 13 | 1596.9970      | 799.0024        |
| 983.5256       | 10 | C  | 12 | 1434.8389      | 717.9234        |
| 1080.5784      | 11 | P  | 11 | 1274.8083      | 637.9081        |
| 1193.6624      | 12 | L  | 10 | 1177.7555      | 589.3817        |
| 1324.7029      | 13 | M  | 9  | 1064.6714      | 532.8396        |
| 1423.7713      | 14 | V  | 8  | 933.6310       | 467.3194        |
| 1585.9294      | 15 | K  | 7  | 834.5625       | 417.7852        |
| 1684.9978      | 16 | V  | 6  | 672.4044       | 336.7061        |
| 1798.0819      | 17 | L  | 5  | 573.3360       | 287.1719        |
| 1913.1089      | 18 | D  | 4  | 460.2520       | 230.6299        |
| 1984.1460      | 19 | A  | 3  | 345.2250       | 173.1164        |
| 2083.2144      | 20 | V  | 2  | 274.1879       | 137.5979        |
|                | 21 | R  | 1  | 175.1195       | 88.0637         |

N-term:+35.07 K(9):+162.16  
C(10):+160.03 K(15):+162.16

X-range:

 - 

MassTol: Y-zoom:

 

MassType:

☐ AVG ☒ MONO

Axis:

☒ 1 ☐ 2

Label:

☒ I ☐ M ☐ -

Ions:

a ☐ + ☐ 2+ ☐ 3+b ☒ + ☐ 2+ ☐ 3+c ☐ + ☐ 2+ ☐ 3+x ☐ + ☐ 2+ ☐ 3+y ☒ + ☒ 2+ ☐ 3+z ☐ + ☐ 2+ ☐ 3+hide H<sub>2</sub>O/NH<sub>3</sub> ☐zoom 112-122 ☐

GO

GPPGPAGEKGLPGEKGPQGPAGR, MH+ 2195.1937, m/z 732.4028  
L OS G13 P120811 220811-s1.04187.04187.3.dta

scan 4187; 2.5e+000

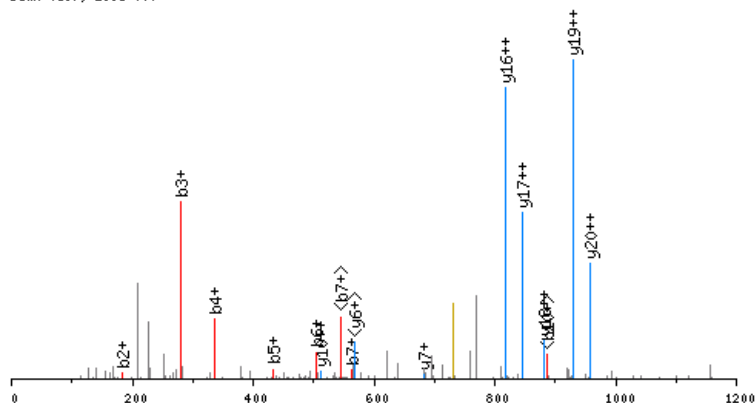

click image to zoom in; click top corners to zoom out

[\[precursor±\]](#)

scan 4184; 732.4 m/z; 2.5e+001

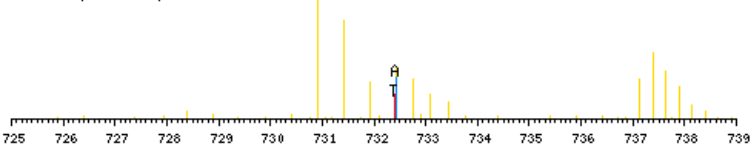

zoomed in precursor plot; T=theoretical m/z, A=acquired m/z

| b <sup>+</sup> | #  | AA | #  | y <sup>+</sup> | y <sup>2+</sup> |
|----------------|----|----|----|----------------|-----------------|
| 86.0606        | 1  | G  | 23 |                |                 |
| 183.1133       | 2  | P  | 22 | 2110.1410      | 1055.5744       |
| 280.1661       | 3  | P  | 21 | 2013.0882      | 1007.0480       |
| 337.1876       | 4  | G  | 20 | 1916.0355      | 958.5216        |
| 434.2403       | 5  | P  | 19 | 1859.0140      | 930.0109        |
| 505.2774       | 6  | A  | 18 | 1761.9612      | 881.4845        |
| 562.2989       | 7  | G  | 17 | 1690.9241      | 845.9660        |
| 691.3415       | 8  | E  | 16 | 1633.9027      | 817.4552        |
| 847.4678       | 9  | K  | 15 | 1504.8601      | 752.9339        |
| 904.4893       | 10 | G  | 14 | 1348.7338      | 674.8708        |
| 1017.5733      | 11 | L  | 13 | 1291.7123      | 646.3601        |
| 1114.6261      | 12 | P  | 12 | 1178.6282      | 589.8180        |
| 1171.6475      | 13 | G  | 11 | 1081.5755      | 541.2916        |
| 1300.6901      | 14 | E  | 10 | 1024.5540      | 512.7809        |
| 1456.8164      | 15 | K  | 9  | 895.5114       | 448.2596        |
| 1513.8379      | 16 | G  | 8  | 739.3851       | 370.1965        |
| 1610.8907      | 17 | P  | 7  | 682.3636       | 341.6857        |
| 1738.9492      | 18 | Q  | 6  | 585.3109       | 293.1594        |
| 1795.9707      | 19 | G  | 5  | 457.2523       | 229.1301        |
| 1893.0235      | 20 | P  | 4  | 400.2308       | 200.6193        |
| 1964.0606      | 21 | A  | 3  | 303.1781       | 152.0930        |
| 2021.0820      | 22 | G  | 2  | 232.1410       | 116.5744        |
|                | 23 | R  | 1  | 175.1195       | 88.0637         |

N-term:+29.04 K(9):+156.13

K(15):+156.13

X-range:

0 - 0

MassTol: Y-zoom:

0. 1.

MassType:

☐AVG ☒MONO

Axis:

☒1 ☐2

Label:

☒I ☐M ☐-

Ions:

a ☐+ ☐2+ ☐3+

b ☒+ ☐2+ ☐3+

c ☐+ ☐2+ ☐3+

x ☐+ ☐2+ ☐3+

y ☒+ ☒2+ ☐3+

z ☐+ ☐2+ ☐3+

hide H<sub>2</sub>O/NH<sub>3</sub> ☐

zoom 112-122 ☐

GO

GPPGPAGPSGESRPGSPGPPGSPGPR, MH+ 2340.1909, m/z 585.8032  
H OS G17 P120811 220811-s1.02511.02511.4.dta

scan 2511; 2.7e+000

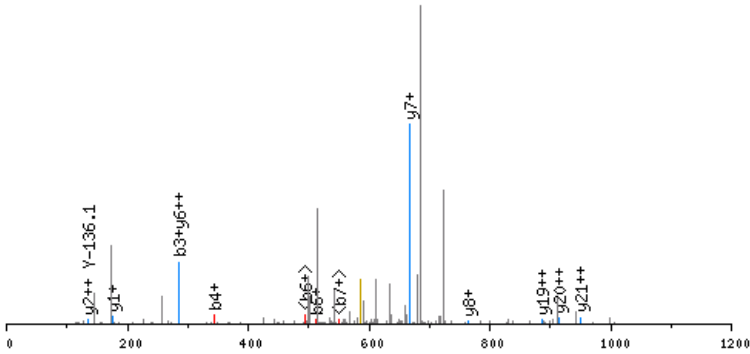

click image to zoom in; click top corners to zoom out [precursor+]

scan 2508; 585.8 m/z; 5.4e+000

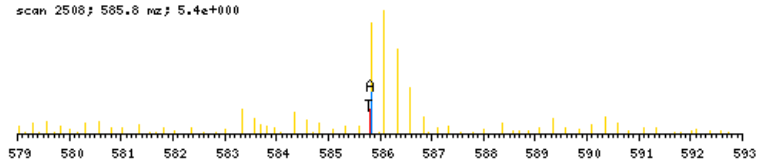

zoomed in precursor plot; T=theoretical m/z, A=acquired m/z

| b <sup>+</sup> | #  | AA | #  | y <sup>+</sup> | y <sup>2+</sup> |
|----------------|----|----|----|----------------|-----------------|
| 92.0924        | 1  | G  | 26 |                |                 |
| 189.1451       | 2  | P  | 25 | 2249.1063      | 1125.0571       |
| 286.1979       | 3  | P  | 24 | 2152.0536      | 1076.5307       |
| 343.2194       | 4  | G  | 23 | 2055.0008      | 1028.0043       |
| 440.2721       | 5  | P  | 22 | 1997.9793      | 999.4936        |
| 511.3092       | 6  | A  | 21 | 1900.9266      | 950.9672        |
| 568.3307       | 7  | G  | 20 | 1829.8894      | 915.4486        |
| 665.3835       | 8  | P  | 19 | 1772.8680      | 886.9379        |
| 752.4155       | 9  | S  | 18 | 1675.8152      | 838.4115        |
| 809.4370       | 10 | G  | 17 | 1588.7832      | 794.8955        |
| 938.4795       | 11 | E  | 16 | 1531.7617      | 766.3848        |
| 1025.5116      | 12 | S  | 15 | 1402.7191      | 701.8635        |
| 1181.6127      | 13 | R  | 14 | 1315.6871      | 658.3475        |
| 1278.6654      | 14 | P  | 13 | 1159.5860      | 580.2969        |
| 1335.6869      | 15 | G  | 12 | 1062.5332      | 531.7705        |
| 1422.7189      | 16 | S  | 11 | 1005.5118      | 503.2598        |
| 1519.7717      | 17 | P  | 10 | 918.4797       | 459.7438        |
| 1576.7932      | 18 | G  | 9  | 821.4270       | 411.2174        |
| 1673.8459      | 19 | P  | 8  | 764.4055       | 382.7067        |
| 1770.8987      | 20 | P  | 7  | 667.3527       | 334.1803        |
| 1827.9202      | 21 | G  | 6  | 570.3000       | 285.6539        |
| 1914.9522      | 22 | S  | 5  | 513.2785       | 257.1432        |
| 2012.0050      | 23 | P  | 4  | 426.2465       | 213.6272        |
| 2069.0264      | 24 | G  | 3  | 329.1937       | 165.1008        |
| 2166.0792      | 25 | P  | 2  | 272.1723       | 136.5900        |
|                | 26 | R  | 1  | 175.1195       | 88.0637         |

N-term:+35.07

X-range:

0 - 0

MassTol: Y-zoom:

0. 1.

MassType:

☐ AVG ☒ MONO

Axis:

☒ 1 ☐ 2

Label:

☒ I ☐ M ☐ -

Ions:

a ☐ + ☐ 2+ ☐ 3+

b ☒ + ☐ 2+ ☐ 3+

c ☐ + ☐ 2+ ☐ 3+

x ☐ + ☐ 2+ ☐ 3+

y ☒ + ☒ 2+ ☐ 3+

z ☐ + ☐ 2+ ☐ 3+

hide H<sub>2</sub>O/NH<sub>3</sub> ☐

zoom 112-122 ☐

GO

GQESGGFSGPGENR, MH+ 1412.6618, m/z 471.5588  
H OS G14 P120811 220811-s1.02219.02219.3.dta

scan 2219; 2.5e+000

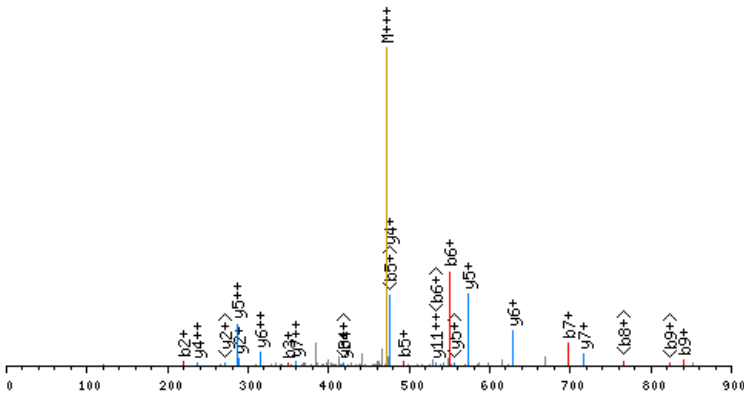

click image to zoom in; click top corners to zoom out

[precursor±]

scan 2216; 471.6 m/z; 1.2e+000

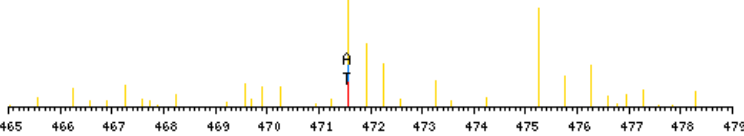

zoomed in precursor plot; T=theoretical m/z, A=acquired m/z

| b <sup>+</sup> | #  | AA | #  | y <sup>+</sup> | y <sup>2+</sup> |
|----------------|----|----|----|----------------|-----------------|
| 92.0924        | 1  | G  | 14 |                |                 |
| 220.1509       | 2  | Q  | 13 | 1321.5773      | 661.2926        |
| 349.1935       | 3  | E  | 12 | 1193.5187      | 597.2633        |
| 436.2256       | 4  | S  | 11 | 1064.4761      | 532.7420        |
| 493.2470       | 5  | G  | 10 | 977.4441       | 489.2260        |
| 550.2685       | 6  | G  | 9  | 920.4226       | 460.7152        |
| 697.3369       | 7  | F  | 8  | 863.4012       | 432.2045        |
| 784.3689       | 8  | S  | 7  | 716.3327       | 358.6703        |
| 841.3904       | 9  | G  | 6  | 629.3007       | 315.1543        |
| 938.4432       | 10 | P  | 5  | 572.2792       | 286.6435        |
| 995.4646       | 11 | G  | 4  | 475.2265       | 238.1172        |
| 1124.5072      | 12 | E  | 3  | 418.2050       | 209.6064        |
| 1238.5501      | 13 | N  | 2  | 289.1624       | 145.0851        |
|                | 14 | R  | 1  | 175.1195       | 88.0637         |

N-term:+35.07

X-range:

0 - 0

MassTol: Y-zoom:

0. 1.

MassType:

☐ AVG ☒ MONO

Axis:

☒ 1 ☐ 2

Label:

☒ I ☐ M ☐ -

Ions:

a ☐ + ☐ 2+ ☐ 3+

b ☒ + ☐ 2+ ☐ 3+

c ☐ + ☐ 2+ ☐ 3+

x ☐ + ☐ 2+ ☐ 3+

y ☒ + ☒ 2+ ☐ 3+

z ☐ + ☐ 2+ ☐ 3+

hide H<sub>2</sub>O/NH<sub>3</sub> ☐

zoom 112-122 ☐

GO

GQFGEIEAIELPIDPKLNKR, MH+ 2369.4293, m/z 593.1128  
H OS G16 P120811 220811-s1.06159.06159.4.dta

scan 6159; 9.0e-001

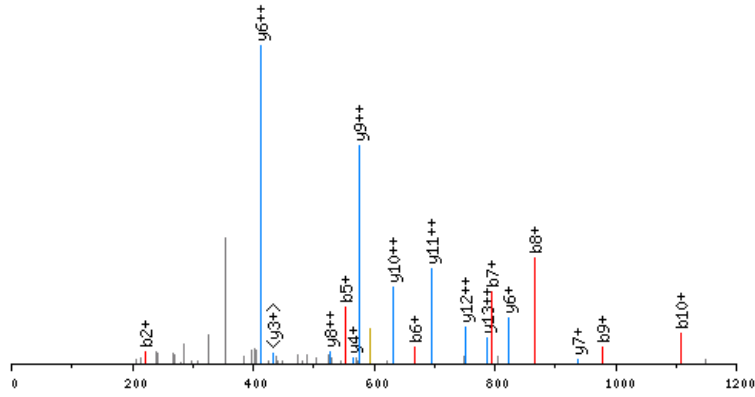

click image to zoom in; click top corners to zoom out [\[precursor±\]](#)

scan 6157; 593.1 m/z; 1.5e+000

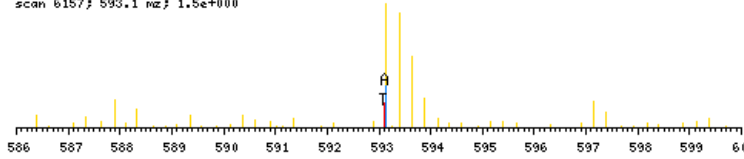

zoomed in precursor plot; T=theoretical m/z, A=acquired m/z

| b <sup>+</sup> | #  | AA | #  | y <sup>+</sup> | y <sup>2+</sup> |
|----------------|----|----|----|----------------|-----------------|
| 92.0924        | 1  | G  | 20 |                |                 |
| 220.1509       | 2  | Q  | 19 | 2278.3448      | 1139.6763       |
| 367.2194       | 3  | F  | 18 | 2150.2862      | 1075.6470       |
| 424.2408       | 4  | G  | 17 | 2003.2178      | 1002.1128       |
| 553.2834       | 5  | E  | 16 | 1946.1963      | 973.6021        |
| 666.3675       | 6  | I  | 15 | 1817.1537      | 909.0808        |
| 795.4101       | 7  | E  | 14 | 1704.0697      | 852.5387        |
| 866.4472       | 8  | A  | 13 | 1575.0271      | 788.0174        |
| 979.5312       | 9  | I  | 12 | 1503.9899      | 752.4989        |
| 1108.5738      | 10 | E  | 11 | 1390.9059      | 695.9569        |
| 1221.6579      | 11 | L  | 10 | 1261.8633      | 631.4356        |
| 1318.7107      | 12 | P  | 9  | 1148.7792      | 574.8935        |
| 1431.7947      | 13 | I  | 8  | 1051.7265      | 526.3671        |
| 1546.8217      | 14 | D  | 7  | 938.6424       | 469.8251        |
| 1643.8744      | 15 | P  | 6  | 823.6155       | 412.3116        |
| 1806.0325      | 16 | K  | 5  | 726.5627       | 363.7853        |
| 1919.1166      | 17 | L  | 4  | 564.4046       | 282.7062        |
| 2033.1595      | 18 | N  | 3  | 451.3205       | 226.1642        |
| 2195.3176      | 19 | K  | 2  | 337.2776       | 169.1427        |
|                | 20 | R  | 1  | 175.1195       | 88.0637         |

N-term: +35.07 K(16): +162.16  
K(19): +162.16

X-range:

0 - 0

MassTol: Y-zoom:

0. 1.

MassType:

☐ AVG ☒ MONO

Axis:

☒ 1 ☐ 2

Label:

☒ I ☐ M ☐ -

Ions:

a ☐ + ☐ 2+ ☐ 3+

b ☒ + ☐ 2+ ☐ 3+

c ☐ + ☐ 2+ ☐ 3+

x ☐ + ☐ 2+ ☐ 3+

y ☒ + ☒ 2+ ☐ 3+

z ☐ + ☐ 2+ ☐ 3+

hide H<sub>2</sub>O/NH<sub>3</sub> ☐

zoom 112-122 ☐

GO

GQKDSYVGDEAQSRR, MH+ 1751.8929, m/z 438.7287  
L OS G17 P120811 220811-s1.01799.01799.4.dta

scan 1799; 5.3e+000

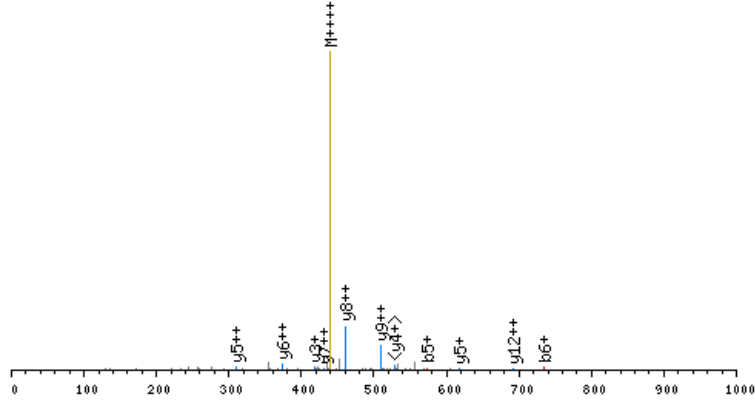

click image to zoom in; click top corners to zoom out

[precursor±]

scan 1796; 438.7 m/z; 2.5e+000

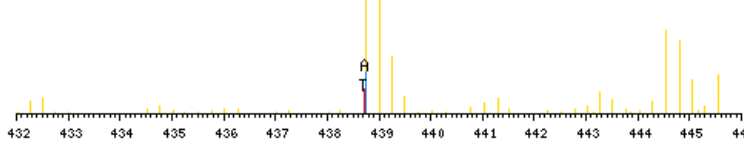

zoomed in precursor plot; T=theoretical m/z, A=acquired m/z

| b <sup>+</sup> | #  | AA | #  | y <sup>+</sup> | y <sup>2+</sup> |
|----------------|----|----|----|----------------|-----------------|
| 86.0606        | 1  | G  | 15 |                |                 |
| 214.1191       | 2  | Q  | 14 | 1666.8401      | 833.9240        |
| 370.2454       | 3  | K  | 13 | 1538.7815      | 769.8947        |
| 485.2724       | 4  | D  | 12 | 1382.6552      | 691.8315        |
| 572.3044       | 5  | S  | 11 | 1267.6283      | 634.3181        |
| 735.3677       | 6  | Y  | 10 | 1180.5963      | 590.8020        |
| 834.4362       | 7  | V  | 9  | 1017.5329      | 509.2704        |
| 891.4576       | 8  | G  | 8  | 918.4645       | 459.7362        |
| 1006.4846      | 9  | D  | 7  | 861.4431       | 431.2254        |
| 1135.5272      | 10 | E  | 6  | 746.4161       | 373.7120        |
| 1206.5643      | 11 | A  | 5  | 617.3735       | 309.1907        |
| 1334.6228      | 12 | Q  | 4  | 546.3364       | 273.6721        |
| 1421.6549      | 13 | S  | 3  | 418.2778       | 209.6428        |
| 1577.7812      | 14 | K  | 2  | 331.2458       | 166.1268        |
|                | 15 | R  | 1  | 175.1195       | 88.0637         |

N-term:+29.04 K(3):+156.13  
K(14):+156.13



X-range:

0 - 0

MassTol: Y-zoom:

0. 1.

MassType:

☐AVG ☒MONO

Axis:

☒1 ☐2

Label:

☒I ☐M ☐-

Ions:

a ☐+ ☐2+ ☐3+

b ☒+ ☐2+ ☐3+

c ☐+ ☐2+ ☐3+

x ☐+ ☐2+ ☐3+

y ☒+ ☒2+ ☐3+

z ☐+ ☐2+ ☐3+

hide H<sub>2</sub>O/NH<sub>3</sub> ☐

zoom 112-122 ☐

GO

QLDQHPIDGYLSHTELAPLR, MH+ 2388.2312, m/z 597.8132  
L OS G16 P120811 220811-s1.05651.05651.4.dta

scan 5651; 1.8e+000

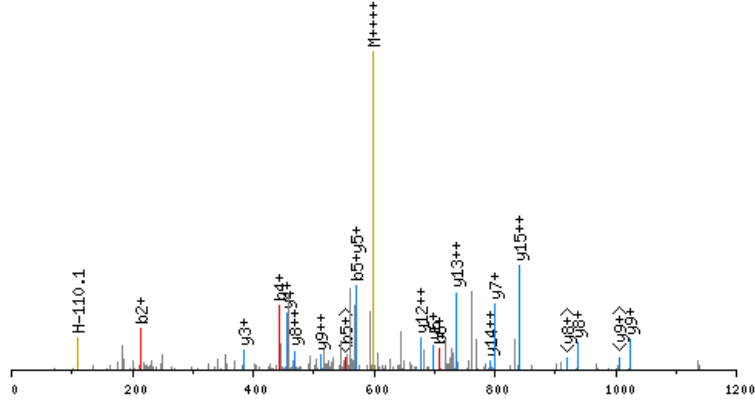

click image to zoom in; click top corners to zoom out [\[precursor±\]](#)

scan 5648; 597.8 m/z; 3.8e+000

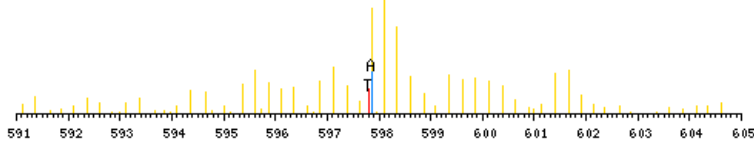

zoomed in precursor plot; T=theoretical m/z, A=acquired m/z

| b <sup>+</sup> | #  | AA | #  | y <sup>+</sup> | y <sup>2+</sup> |
|----------------|----|----|----|----------------|-----------------|
| 86.0606        | 1  | G  | 21 |                |                 |
| 214.1191       | 2  | Q  | 20 | 2303.1784      | 1152.0931       |
| 327.2032       | 3  | L  | 19 | 2175.1198      | 1088.0638       |
| 442.2301       | 4  | D  | 18 | 2062.0358      | 1031.5218       |
| 570.2887       | 5  | Q  | 17 | 1947.0088      | 974.0083        |
| 707.3476       | 6  | H  | 16 | 1818.9503      | 909.9790        |
| 804.4004       | 7  | P  | 15 | 1681.8913      | 841.4496        |
| 917.4845       | 8  | I  | 14 | 1584.8386      | 792.9232        |
| 1032.5114      | 9  | D  | 13 | 1471.7545      | 736.3812        |
| 1089.5329      | 10 | G  | 12 | 1356.7276      | 678.8677        |
| 1252.5962      | 11 | Y  | 11 | 1299.7061      | 650.3570        |
| 1365.6803      | 12 | L  | 10 | 1136.6428      | 568.8253        |
| 1452.7123      | 13 | S  | 9  | 1023.5587      | 512.2833        |
| 1589.7712      | 14 | H  | 8  | 936.5267       | 468.7673        |
| 1690.8189      | 15 | T  | 7  | 799.4678       | 400.2378        |
| 1819.8615      | 16 | E  | 6  | 698.4201       | 349.7140        |
| 1932.9455      | 17 | L  | 5  | 569.3775       | 285.1927        |
| 2003.9827      | 18 | A  | 4  | 456.2934       | 228.6506        |
| 2101.0354      | 19 | P  | 3  | 385.2563       | 193.1321        |
| 2214.1195      | 20 | L  | 2  | 288.2036       | 144.6057        |
|                | 21 | R  | 1  | 175.1195       | 88.0637         |

N-term:+29.04

X-range:

0 - 0

MassTol: Y-zoom:

0. 1.

MassType:

☐AVG ☒MONO

Axis:

☒1 ☐2

Label:

☒I ☐M ☐-

Ions:

a ☐+ ☐2+ ☐3+

b ☒+ ☐2+ ☐3+

c ☐+ ☐2+ ☐3+

x ☐+ ☐2+ ☐3+

y ☒+ ☒2+ ☐3+

z ☐+ ☐2+ ☐3+

hide H<sub>2</sub>O/NH<sub>3</sub> ☐

zoom 112-122 ☐

GO

GQMOKPFEDASFALR, MH+ 1780.9056, m/z 594.3067  
L OS G15 P120811 220811-s1.04840.04840.3.dta

scan 4840; 7.2e+000

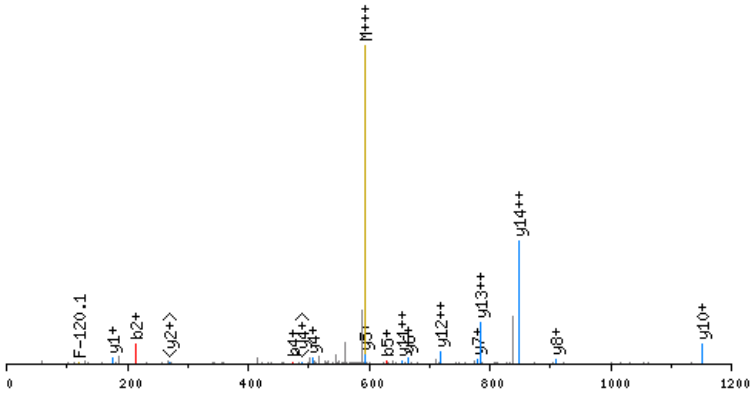

click image to zoom in; click top corners to zoom out [precursor±]

scan 4836; 594.3 m/z; 7.1e+000

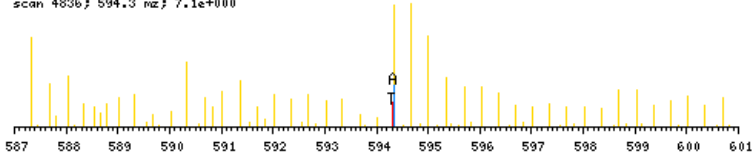

zoomed in precursor plot; T=theoretical m/z, A=acquired m/z

| b <sup>+</sup> | #  | AA | #  | y <sup>+</sup> | y <sup>2+</sup> |
|----------------|----|----|----|----------------|-----------------|
| 86.0606        | 1  | G  | 15 |                |                 |
| 214.1191       | 2  | Q  | 14 | 1695.8529      | 848.4304        |
| 345.1596       | 3  | M  | 13 | 1567.7943      | 784.4011        |
| 473.2182       | 4  | Q  | 12 | 1436.7538      | 718.8808        |
| 629.3445       | 5  | K  | 11 | 1308.6952      | 654.8515        |
| 726.3973       | 6  | P  | 10 | 1152.5689      | 576.7884        |
| 873.4657       | 7  | F  | 9  | 1055.5162      | 528.2620        |
| 1002.5083      | 8  | E  | 8  | 908.4478       | 454.7278        |
| 1117.5352      | 9  | D  | 7  | 779.4052       | 390.2065        |
| 1188.5723      | 10 | A  | 6  | 664.3782       | 332.6930        |
| 1275.6044      | 11 | S  | 5  | 593.3411       | 297.1745        |
| 1422.6728      | 12 | F  | 4  | 506.3091       | 253.6585        |
| 1493.7099      | 13 | A  | 3  | 359.2407       | 180.1243        |
| 1606.7940      | 14 | L  | 2  | 288.2036       | 144.6057        |
|                | 15 | R  | 1  | 175.1195       | 88.0637         |

N-term:+29.04 K(5):+156.13

X-range:

0 - 0

MassTol: Y-zoom:

0. 1.

MassType:

☐AVG ☒MONO

Axis:

☒1 ☐2

Label:

☒I ☐M ☐-

Ions:

a ☐+ ☐2+ ☐3+

b ☒+ ☐2+ ☐3+

c ☐+ ☐2+ ☐3+

x ☐+ ☐2+ ☐3+

y ☒+ ☒2+ ☐3+

z ☐+ ☐2+ ☐3+

hide H<sub>2</sub>O/NH<sub>3</sub> ☐

zoom 112-122 ☐

GO

GQNSSIPVYKGEIQAR, MH+ 1802.9765, m/z 601.6637  
L OS G15 P120811 220811-s1.03165.03165.3.dta

scan 3165; 3.3e+000

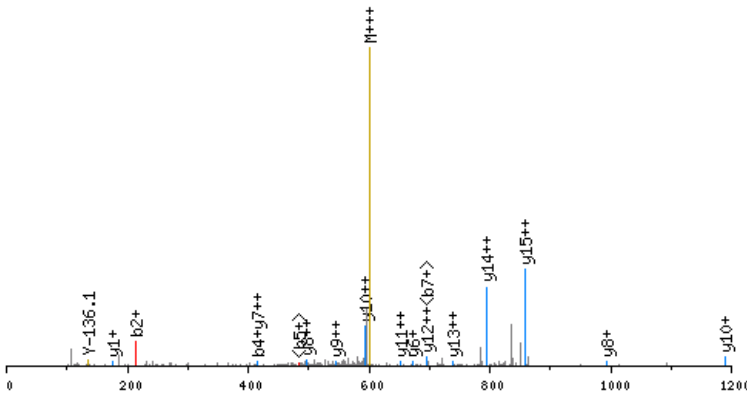

click image to zoom in; click top corners to zoom out

[precursor±]

scan 3161; 601.7 m/z; 3.8e+000

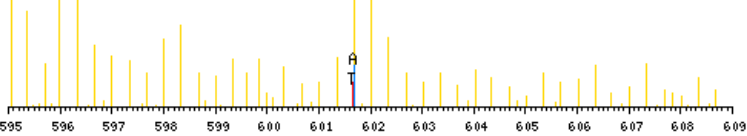

zoomed in precursor plot; T=theoretical m/z, A=acquired m/z

| b <sup>+</sup> | #  | AA | #  | y <sup>+</sup> | y <sup>2+</sup> |
|----------------|----|----|----|----------------|-----------------|
| 86.0606        | 1  | G  | 16 |                |                 |
| 214.1191       | 2  | Q  | 15 | 1717.9237      | 859.4658        |
| 328.1621       | 3  | N  | 14 | 1589.8652      | 795.4365        |
| 415.1941       | 4  | S  | 13 | 1475.8222      | 738.4150        |
| 502.2261       | 5  | S  | 12 | 1388.7902      | 694.8990        |
| 615.3102       | 6  | I  | 11 | 1301.7582      | 651.3830        |
| 712.3630       | 7  | P  | 10 | 1188.6741      | 594.8410        |
| 811.4314       | 8  | V  | 9  | 1091.6214      | 546.3146        |
| 974.4947       | 9  | Y  | 8  | 992.5529       | 496.7804        |
| 1130.6210      | 10 | K  | 7  | 829.4896       | 415.2487        |
| 1187.6425      | 11 | G  | 6  | 673.3633       | 337.1856        |
| 1316.6851      | 12 | E  | 5  | 616.3418       | 308.6748        |
| 1429.7691      | 13 | I  | 4  | 487.2993       | 244.1535        |
| 1557.8277      | 14 | Q  | 3  | 374.2152       | 187.6115        |
| 1628.8648      | 15 | A  | 2  | 246.1566       | 123.5822        |
|                | 16 | R  | 1  | 175.1195       | 88.0637         |

N-term:+29.04 K(10):+156.13

X-range:

0 - 0

MassTol: Y-zoom:

0. 1.

MassType:

☐AVG ☒MONO

Axis:

☒1 ☐2

Label:

☒I ☐M ☐-

Ions:

a ☐+ ☐2+ ☐3+

b ☒+ ☐2+ ☐3+

c ☐+ ☐2+ ☐3+

x ☐+ ☐2+ ☐3+

y ☒+ ☒2+ ☐3+

z ☐+ ☐2+ ☐3+

hide H<sub>2</sub>O/NH<sub>3</sub> ☐

zoom 112-122 ☐

GO

GQPEPLAPGTTLPAPDR, MH+ 1744.9233, m/z 582.3126  
L OS G12 P120811 220811-s1.03605.03605.3.dta

scan 3605; 4.1e+000

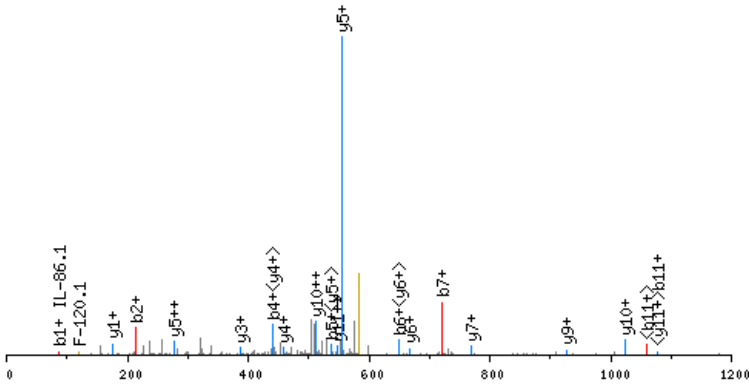

click image to zoom in; click top corners to zoom out

[precursor±]

scan 3602; 582.3 m/z; 2.1e+001

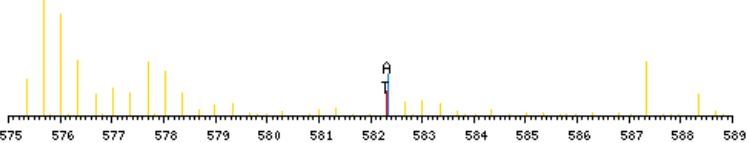

zoomed in precursor plot; T=theoretical m/z, A=acquired m/z

| b <sup>+</sup> | #  | AA | #  | y <sup>+</sup> | y <sup>2+</sup> |
|----------------|----|----|----|----------------|-----------------|
| 86.0606        | 1  | G  | 17 |                |                 |
| 214.1191       | 2  | Q  | 16 | 1659.8706      | 830.4392        |
| 311.1719       | 3  | P  | 15 | 1531.8120      | 766.4099        |
| 440.2145       | 4  | E  | 14 | 1434.7593      | 717.8835        |
| 537.2673       | 5  | P  | 13 | 1305.7167      | 653.3623        |
| 650.3513       | 6  | L  | 12 | 1208.6639      | 604.8359        |
| 721.3884       | 7  | A  | 11 | 1095.5798      | 548.2938        |
| 818.4412       | 8  | P  | 10 | 1024.5427      | 512.7753        |
| 875.4627       | 9  | G  | 9  | 927.4900       | 464.2489        |
| 976.5103       | 10 | T  | 8  | 870.4685       | 435.7382        |
| 1077.5580      | 11 | T  | 7  | 769.4208       | 385.2143        |
| 1190.6421      | 12 | L  | 6  | 668.3731       | 334.6905        |
| 1287.6949      | 13 | P  | 5  | 555.2891       | 278.1485        |
| 1358.7320      | 14 | A  | 4  | 458.2363       | 229.6221        |
| 1455.7847      | 15 | P  | 3  | 387.1992       | 194.1035        |
| 1570.8117      | 16 | D  | 2  | 290.1464       | 145.5771        |
|                | 17 | R  | 1  | 175.1195       | 88.0637         |

N-term:+29.04

N-term: +29.04 K(16): +156.13

X-range:

0 - 0

MassTol: Y-zoom:

0. 1.

MassType:

☐ AVG ☒ MONO

Axis:

☒ 1 ☐ 2

Label:

☒ I ☐ M ☐ -

Ions:

a ☐ + ☐ 2+ ☐ 3+

b ☒ + ☐ 2+ ☐ 3+

c ☐ + ☐ 2+ ☐ 3+

x ☐ + ☐ 2+ ☐ 3+

y ☒ + ☒ 2+ ☐ 3+

z ☐ + ☐ 2+ ☐ 3+

hide H<sub>2</sub>O/NH<sub>3</sub> ☐

zoom 112-122 ☐

GO

GQVVQFKLSDIGEGIR, MH+ 1802.0176, m/z 601.3441  
L OS G15 P120811 220811-s1.05577.05577.3.dta

scan 5577; 5.9e+000

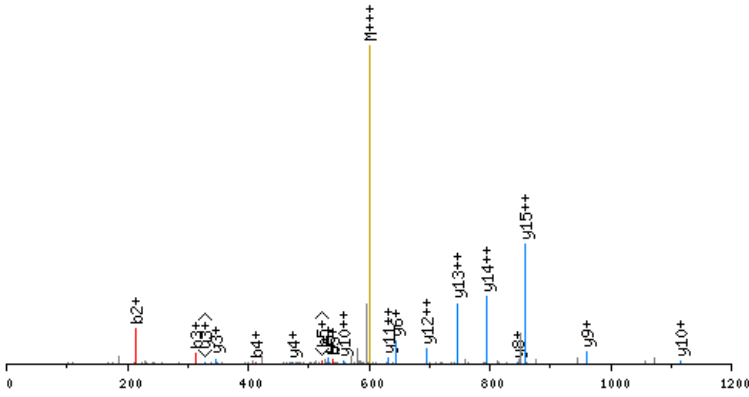

click image to zoom in; click top corners to zoom out

[precursor±]

scan 5576; 601.3 m/z; 6.4e+000

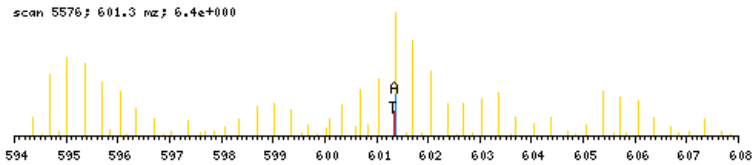

zoomed in precursor plot; T=theoretical m/z, A=acquired m/z

| b <sup>+</sup> | #  | AA | #  | y <sup>+</sup> | y <sup>2+</sup> |
|----------------|----|----|----|----------------|-----------------|
| 86.0606        | 1  | G  | 16 |                |                 |
| 214.1191       | 2  | Q  | 15 | 1716.9649      | 858.9864        |
| 313.1876       | 3  | V  | 14 | 1588.9063      | 794.9571        |
| 412.2560       | 4  | V  | 13 | 1489.8379      | 745.4229        |
| 540.3145       | 5  | Q  | 12 | 1390.7695      | 695.8887        |
| 687.3830       | 6  | F  | 11 | 1262.7109      | 631.8594        |
| 843.5093       | 7  | K  | 10 | 1115.6425      | 558.3252        |
| 956.5933       | 8  | L  | 9  | 959.5162       | 480.2620        |
| 1043.6254      | 9  | S  | 8  | 846.4321       | 423.7200        |
| 1158.6523      | 10 | D  | 7  | 759.4001       | 380.2040        |
| 1271.7364      | 11 | I  | 6  | 644.3731       | 322.6905        |
| 1328.7578      | 12 | G  | 5  | 531.2891       | 266.1485        |
| 1457.8004      | 13 | E  | 4  | 474.2676       | 237.6377        |
| 1514.8219      | 14 | G  | 3  | 345.2250       | 173.1164        |
| 1627.9059      | 15 | I  | 2  | 288.2036       | 144.6057        |
|                | 16 | R  | 1  | 175.1195       | 88.0637         |

N-term:+29.04 K(7):+156.13

X-range:

0 - 0

MassTol: Y-zoom:

0. 1.

MassType:

☐ AVG ☒ MONO

Axis:

☒ 1 ☐ 2

Label:

☒ I ☐ M ☐ -

Ions:

a ☐ + ☐ 2+ ☐ 3+

b ☒ + ☐ 2+ ☐ 3+

c ☐ + ☐ 2+ ☐ 3+

x ☐ + ☐ 2+ ☐ 3+

y ☒ + ☒ 2+ ☐ 3+

z ☐ + ☐ 2+ ☐ 3+

hide H<sub>2</sub>O/NH<sub>3</sub> ☐

zoom 112-122 ☐

GO

GRPGPIGPAGPR, MH+ 1165.7018, m/z 389.2388  
H OS G16 P120811 220811-s1.02169.02169.3.dta

scan 2169; 8.4e+000

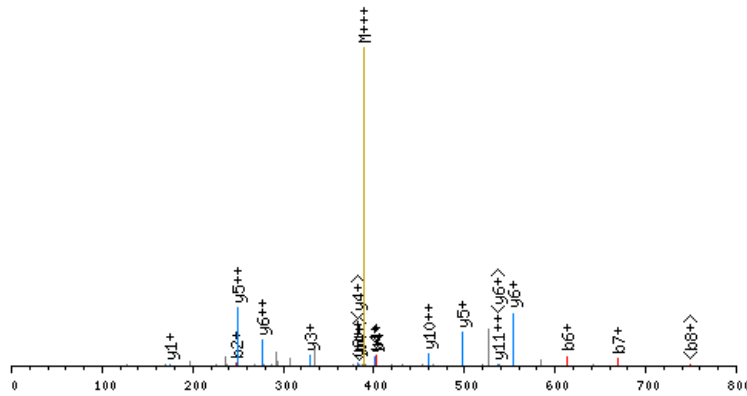

click image to zoom in; click top corners to zoom out

[precursor±]

scan 2168; 389.2 m/z; 4.9e+000

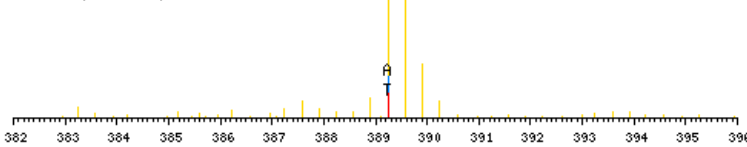

zoomed in precursor plot; T=theoretical m/z, A=acquired m/z

| b <sup>+</sup> | #  | AA | #  | y <sup>+</sup> | y <sup>2+</sup> |
|----------------|----|----|----|----------------|-----------------|
| 92.0924        | 1  | G  | 12 |                |                 |
| 248.1935       | 2  | R  | 11 | 1074.6172      | 537.8125        |
| 345.2462       | 3  | P  | 10 | 918.5161       | 459.7620        |
| 402.2677       | 4  | G  | 9  | 821.4634       | 411.2356        |
| 499.3205       | 5  | P  | 8  | 764.4419       | 382.7249        |
| 612.4045       | 6  | I  | 7  | 667.3891       | 334.1985        |
| 669.4260       | 7  | G  | 6  | 554.3051       | 277.6564        |
| 766.4788       | 8  | P  | 5  | 497.2836       | 249.1457        |
| 837.5159       | 9  | A  | 4  | 400.2308       | 200.6193        |
| 894.5373       | 10 | G  | 3  | 329.1937       | 165.1008        |
| 991.5901       | 11 | P  | 2  | 272.1723       | 136.5900        |
|                | 12 | R  | 1  | 175.1195       | 88.0637         |

N-term:+35.07

X-range:

0 - 0

MassTol: Y-zoom:

0. 1.

MassType:

☐AVG ☒MONO

Axis:

☒1 ☐2

Label:

☒I ☐M ☐-

Ions:

a ☐+ ☐2+ ☐3+

b ☒+ ☐2+ ☐3+

c ☐+ ☐2+ ☐3+

x ☐+ ☐2+ ☐3+

y ☒+ ☒2+ ☐3+

z ☐+ ☐2+ ☐3+

hide H<sub>2</sub>O/NH<sub>3</sub> ☐

zoom 112-122 ☐

GO

GSALSGILDKDLSDR, MH+ 1614.9339, m/z 538.9828  
H OS G15 P120811 220811-s1.05122.05122.3.dta

scan 5122; 5.3e+000

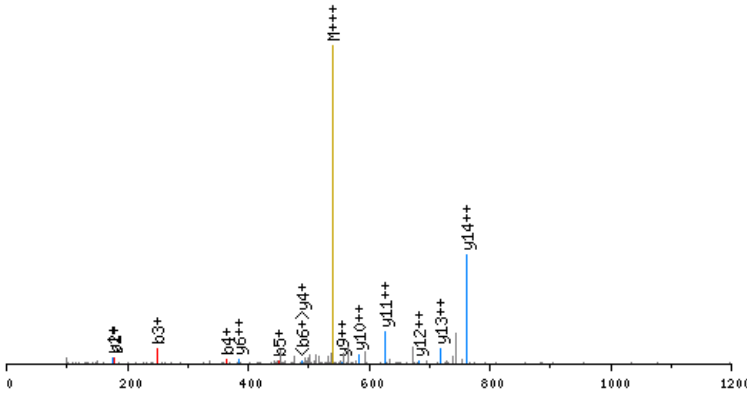

click image to zoom in; click top corners to zoom out [precursor±]

scan 5121; 539.0 m/z; 7.5e+000

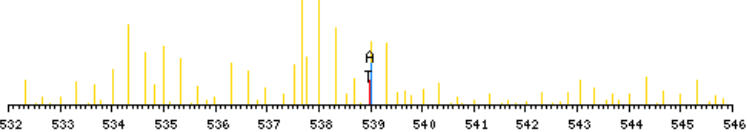

zoomed in precursor plot; T=theoretical m/z, A=acquired m/z

| b <sup>+</sup> | #  | AA | #  | y <sup>+</sup> | y <sup>2+</sup> |
|----------------|----|----|----|----------------|-----------------|
| 92.0924        | 1  | G  | 15 |                |                 |
| 179.1244       | 2  | S  | 14 | 1523.8493      | 762.4286        |
| 250.1615       | 3  | A  | 13 | 1436.8173      | 718.9126        |
| 363.2456       | 4  | L  | 12 | 1365.7802      | 683.3940        |
| 450.2776       | 5  | S  | 11 | 1252.6961      | 626.8520        |
| 507.2991       | 6  | G  | 10 | 1165.6641      | 583.3360        |
| 620.3831       | 7  | I  | 9  | 1108.6427      | 554.8252        |
| 733.4672       | 8  | L  | 8  | 995.5586       | 498.2832        |
| 848.4941       | 9  | D  | 7  | 882.4745       | 441.7412        |
| 1010.6522      | 10 | K  | 6  | 767.4476       | 384.2277        |
| 1125.6792      | 11 | D  | 5  | 605.2895       | 303.1487        |
| 1238.7632      | 12 | L  | 4  | 490.2625       | 245.6352        |
| 1325.7953      | 13 | S  | 3  | 377.1785       | 189.0931        |
| 1440.8222      | 14 | D  | 2  | 290.1464       | 145.5771        |
|                | 15 | R  | 1  | 175.1195       | 88.0637         |

N-term:+35.07 K(10):+162.16

X-range:

0 - 0

MassTol: Y-zoom:

0. 1.

MassType:

☐AVG ☒MONO

Axis:

☒1 ☐2

Label:

☒I ☐M ☐-

Ions:

a ☐+ ☐2+ ☐3+

b ☒+ ☐2+ ☐3+

c ☐+ ☐2+ ☐3+

x ☐+ ☐2+ ☐3+

y ☒+ ☒2+ ☐3+

z ☐+ ☐2+ ☐3+

hide H<sub>2</sub>O/NH<sub>3</sub> ☐

zoom 112-122 ☐

GO

GSDLDAATQQLLSR, MH+ 1502.7814, m/z 501.5987  
L OS G13 P120811 220811-s1.05695.05695.3.dta

scan 5695; 1.3e+000

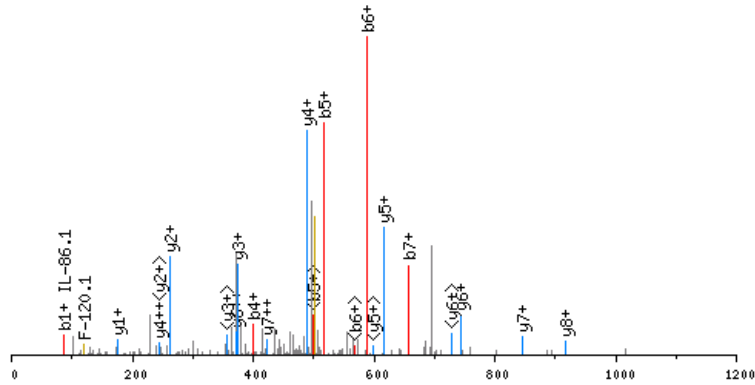

click image to zoom in; click top corners to zoom out

[precursor±]

scan 5694; 501.6 m/z; 2.7e+001

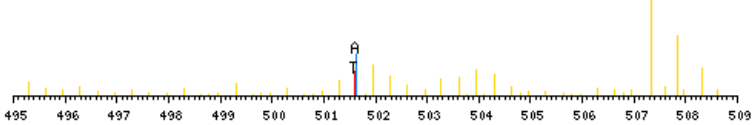

zoomed in precursor plot; T=theoretical m/z, A=acquired m/z

| b <sup>+</sup> | #  | AA | #  | y <sup>+</sup> | y <sup>2+</sup> |
|----------------|----|----|----|----------------|-----------------|
| 86.0606        | 1  | G  | 14 |                |                 |
| 173.0926       | 2  | S  | 13 | 1417.7287      | 709.3683        |
| 288.1195       | 3  | D  | 12 | 1330.6967      | 665.8522        |
| 401.2036       | 4  | L  | 11 | 1215.6697      | 608.3388        |
| 516.2305       | 5  | D  | 10 | 1102.5857      | 551.7967        |
| 587.2677       | 6  | A  | 9  | 987.5587       | 494.2833        |
| 658.3048       | 7  | A  | 8  | 916.5216       | 458.7647        |
| 759.3524       | 8  | T  | 7  | 845.4845       | 423.2462        |
| 887.4110       | 9  | Q  | 6  | 744.4368       | 372.7223        |
| 1015.4696      | 10 | Q  | 5  | 616.3782       | 308.6930        |
| 1128.5537      | 11 | L  | 4  | 488.3197       | 244.6637        |
| 1241.6377      | 12 | L  | 3  | 375.2356       | 188.1217        |
| 1328.6698      | 13 | S  | 2  | 262.1515       | 131.5797        |
|                | 14 | R  | 1  | 175.1195       | 88.0637         |

N-term:+29.04

X-range:

0 - 0

MassTol: Y-zoom:

0. 1.

MassType:

☐AVG ☒MONO

Axis:

☒1 ☐2

Label:

☒I ☐M ☐-

Ions:

a ☐+ ☐2+ ☐3+

b ☒+ ☐2+ ☐3+

c ☐+ ☐2+ ☐3+

x ☐+ ☐2+ ☐3+

y ☒+ ☒2+ ☐3+

z ☐+ ☐2+ ☐3+

hide H<sub>2</sub>O/NH<sub>3</sub> ☐

zoom 112-122 ☐

GO

GSDSLYYFR, MH+ 1135.5424, m/z 568.2748  
L OS G14 P120811 220811-s1.04749.04749.2.dta

scan 4749; 4.6e+000

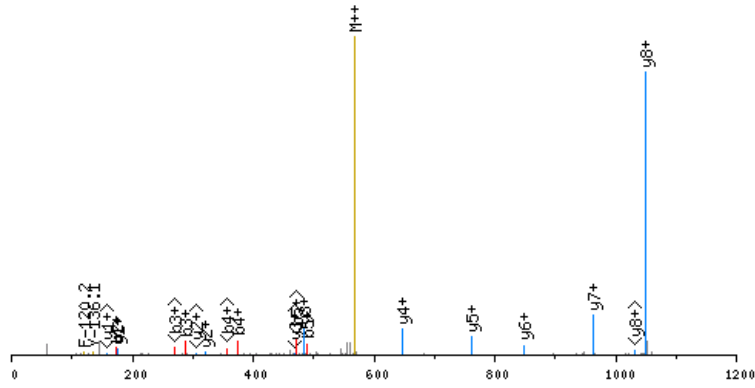

click image to zoom in; click top corners to zoom out

[precursor±]

scan 4746; 568.3 m/z; 2.0e+001

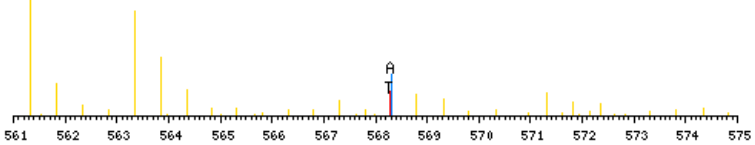

zoomed in precursor plot; T=theoretical m/z, A=acquired m/z

| b <sup>+</sup> | # | AA | # | y <sup>+</sup> | y <sup>2+</sup> |
|----------------|---|----|---|----------------|-----------------|
| 86.0606        | 1 | G  | 9 |                |                 |
| 173.0926       | 2 | S  | 8 | 1050.4896      | 525.7487        |
| 288.1195       | 3 | D  | 7 | 963.4576       | 482.2327        |
| 375.1516       | 4 | S  | 6 | 848.4307       | 424.7192        |
| 488.2356       | 5 | L  | 5 | 761.3986       | 381.2032        |
| 651.2990       | 6 | Y  | 4 | 648.3146       | 324.6612        |
| 814.3623       | 7 | Y  | 3 | 485.2512       | 243.1295        |
| 961.4307       | 8 | F  | 2 | 322.1879       | 161.5979        |
|                | 9 | R  | 1 | 175.1195       | 88.0637         |

N-term:+29.04

X-range:

0 - 0

MassTol: Y-zoom:

0. 1.

MassType:

☐ AVG ☒ MONO

Axis:

☒ 1 ☐ 2

Label:

☒ I ☐ M ☐ -

Ions:

a ☐ + ☐ 2+ ☐ 3+

b ☒ + ☐ 2+ ☐ 3+

c ☐ + ☐ 2+ ☐ 3+

x ☐ + ☐ 2+ ☐ 3+

y ☒ + ☒ 2+ ☐ 3+

z ☐ + ☐ 2+ ☐ 3+

hide H<sub>2</sub>O/NH<sub>3</sub> ☐

zoom 112-122 ☐

GO

GSEVTQCCQTDLNCR, MH+ 1984.8161, m/z 662.2769  
L OS G13 P120811 220811-s1.02687.02687.3.dta

scan 2687; 9.2e-001

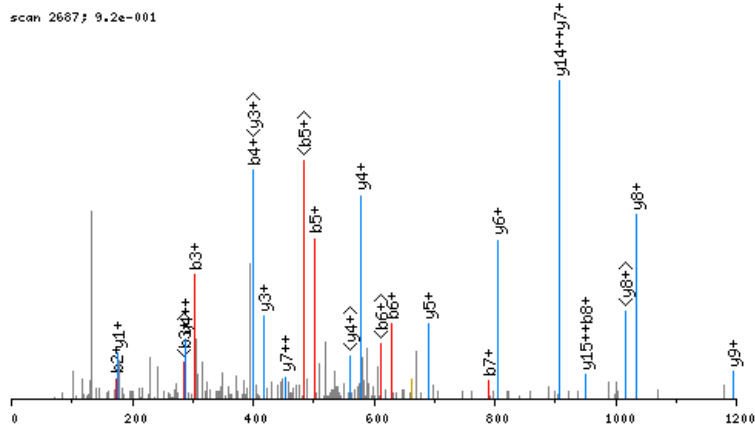

click image to zoom in; click top corners to zoom out

[precursor±]

scan 2684; 662.3 m/z; 3.9e+000

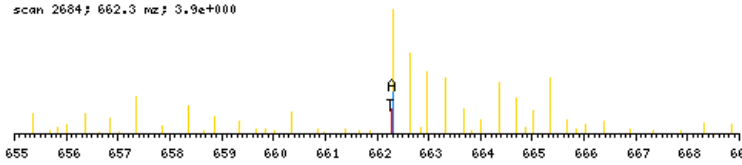

zoomed in precursor plot; T=theoretical m/z, A=acquired m/z

| b <sup>+</sup> | #  | AA | #  | y <sup>+</sup> | y <sup>2+</sup> |
|----------------|----|----|----|----------------|-----------------|
| 86.0606        | 1  | G  | 16 |                |                 |
| 173.0926       | 2  | S  | 15 | 1899.7634      | 950.3856        |
| 302.1352       | 3  | E  | 14 | 1812.7313      | 906.8696        |
| 401.2036       | 4  | V  | 13 | 1683.6888      | 842.3483        |
| 502.2513       | 5  | T  | 12 | 1584.6203      | 792.8141        |
| 630.3099       | 6  | Q  | 11 | 1483.5727      | 742.2902        |
| 790.3405       | 7  | C  | 10 | 1355.5141      | 678.2610        |
| 950.3711       | 8  | C  | 9  | 1195.4835      | 598.2457        |
| 1078.4296      | 9  | Q  | 8  | 1035.4529      | 518.2304        |
| 1179.4773      | 10 | T  | 7  | 907.3943       | 454.2011        |
| 1294.5043      | 11 | D  | 6  | 806.3466       | 403.6772        |
| 1407.5883      | 12 | L  | 5  | 691.3197       | 346.1638        |
| 1567.6189      | 13 | C  | 4  | 578.2356       | 289.6217        |
| 1681.6618      | 14 | N  | 3  | 418.2050       | 209.6064        |
| 1810.7044      | 15 | E  | 2  | 304.1621       | 152.5850        |
|                | 16 | R  | 1  | 175.1195       | 88.0637         |

N-term:+29.04 C(7):+160.03

C(8):+160.03 C(13):+160.03

X-range:

0 - 0

MassTol: Y-zoom:

0. 1.

MassType:

☐AVG ☒MONO

Axis:

☒1 ☐2

Label:

☒I ☐M ☐-

Ions:

a ☐+ ☐2+ ☐3+

b ☒+ ☐2+ ☐3+

c ☐+ ☐2+ ☐3+

x ☐+ ☐2+ ☐3+

y ☒+ ☒2+ ☐3+

z ☐+ ☐2+ ☐3+

hide H<sub>2</sub>O/NH<sub>3</sub> ☐

zoom 112-122 ☐

GO

GSGLVKAGFAGDDAPR, MH+ 1573.8338, m/z 525.2828  
L OS G15 P120811 220811-s1.02988.02988.3.dta

scan 2988; 2.2e+001

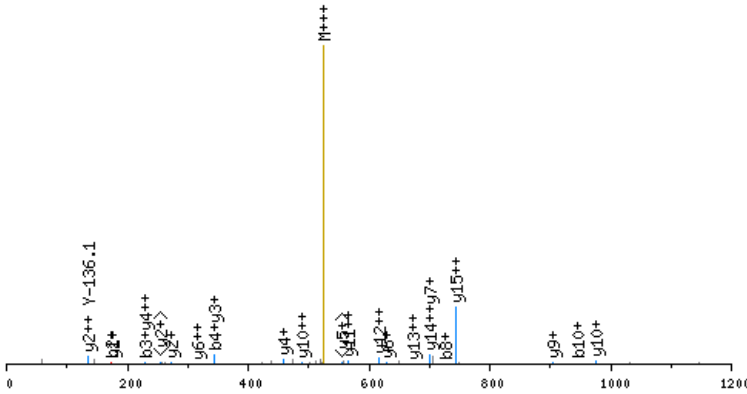

click image to zoom in; click top corners to zoom out

[precursor±]

scan 2986; 525.3 m/z; 3.8e+001

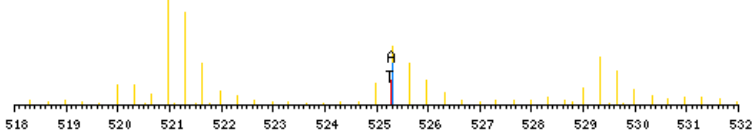

zoomed in precursor plot; T=theoretical m/z, A=acquired m/z

| b <sup>+</sup> | #  | AA | #  | y <sup>+</sup> | y <sup>2+</sup> |
|----------------|----|----|----|----------------|-----------------|
| 86.0606        | 1  | G  | 16 |                |                 |
| 173.0926       | 2  | S  | 15 | 1488.7811      | 744.8945        |
| 230.1141       | 3  | G  | 14 | 1401.7491      | 701.3785        |
| 343.1981       | 4  | L  | 13 | 1344.7276      | 672.8677        |
| 442.2665       | 5  | V  | 12 | 1231.6435      | 616.3257        |
| 598.3928       | 6  | K  | 11 | 1132.5751      | 566.7915        |
| 669.4299       | 7  | A  | 10 | 976.4488       | 488.7283        |
| 726.4514       | 8  | G  | 9  | 905.4117       | 453.2098        |
| 873.5198       | 9  | F  | 8  | 848.3903       | 424.6990        |
| 944.5569       | 10 | A  | 7  | 701.3218       | 351.1648        |
| 1001.5784      | 11 | G  | 6  | 630.2847       | 315.6463        |
| 1116.6053      | 12 | D  | 5  | 573.2633       | 287.1355        |
| 1231.6323      | 13 | D  | 4  | 458.2363       | 229.6221        |
| 1302.6694      | 14 | A  | 3  | 343.2094       | 172.1086        |
| 1399.7222      | 15 | P  | 2  | 272.1723       | 136.5900        |
|                | 16 | R  | 1  | 175.1195       | 88.0637         |

N-term:+29.04 K(6):+156.13

X-range:

0 - 0

MassTol: Y-zoom:

0. 1.

MassType:

☐ AVG ☒ MONO

Axis:

☒ 1 ☐ 2

Label:

☒ I ☐ M ☐ -

Ions:

a ☐ + ☐ 2+ ☐ 3+

b ☒ + ☐ 2+ ☐ 3+

c ☐ + ☐ 2+ ☐ 3+

x ☐ + ☐ 2+ ☐ 3+

y ☒ + ☒ 2+ ☐ 3+

z ☐ + ☐ 2+ ☐ 3+

hide H<sub>2</sub>O/NH<sub>3</sub> ☐

zoom 112-122 ☐

GO

GSIIITVYPKEIR, MH+ 1431.8575, m/z 477.9574  
L OS G15 P120811 220811-s1.04077.04077.3.dta

scan 4077; 1.7e+001

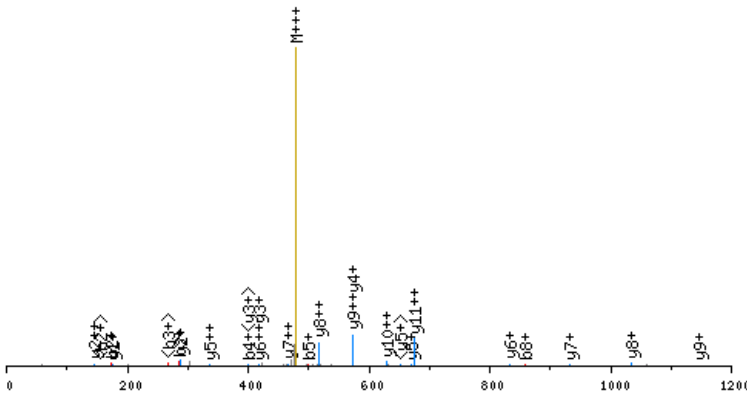

click image to zoom in; click top corners to zoom out

[precursor±]

scan 4076; 478.0 m/z; 8.6e+000

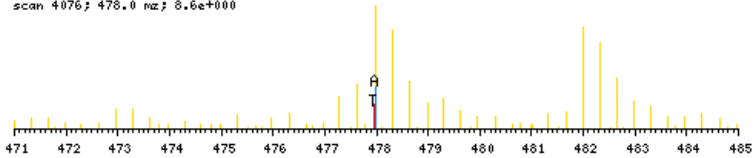

zoomed in precursor plot; T=theoretical m/z, A=acquired m/z

| b <sup>+</sup> | #  | AA | #  | y <sup>+</sup> | y <sup>2+</sup> |
|----------------|----|----|----|----------------|-----------------|
| 86.0606        | 1  | G  | 12 |                |                 |
| 173.0926       | 2  | S  | 11 | 1346.8048      | 673.9063        |
| 286.1767       | 3  | I  | 10 | 1259.7728      | 630.3903        |
| 399.2607       | 4  | I  | 9  | 1146.6887      | 573.8483        |
| 500.3084       | 5  | T  | 8  | 1033.6046      | 517.3062        |
| 599.3768       | 6  | V  | 7  | 932.5570       | 466.7824        |
| 762.4401       | 7  | Y  | 6  | 833.4886       | 417.2482        |
| 859.4929       | 8  | P  | 5  | 670.4252       | 335.7165        |
| 1015.6192      | 9  | K  | 4  | 573.3725       | 287.1901        |
| 1144.6618      | 10 | E  | 3  | 417.2462       | 209.1270        |
| 1257.7459      | 11 | I  | 2  | 288.2036       | 144.6057        |
|                | 12 | R  | 1  | 175.1195       | 88.0637         |

N-term:+29.04 K(9):+156.13

X-range:

0

-

0

MassTol:

Y-zoom:

0.

1.

MassType:

☐AVG

☒MONO

Axis:

☒1

☐2

Label:

☒I

☐M

☐-

Ions:

a

☐

2+

☐

3+

b

☒

2+

☐

3+

c

☐

2+

☐

3+

x

☐

2+

☐

3+

y

☒

2+

☒

3+

z

☐

2+

☐

3+

hide H<sub>2</sub>O/NH<sub>3</sub>

☐

zoom 112-122

☐

GO

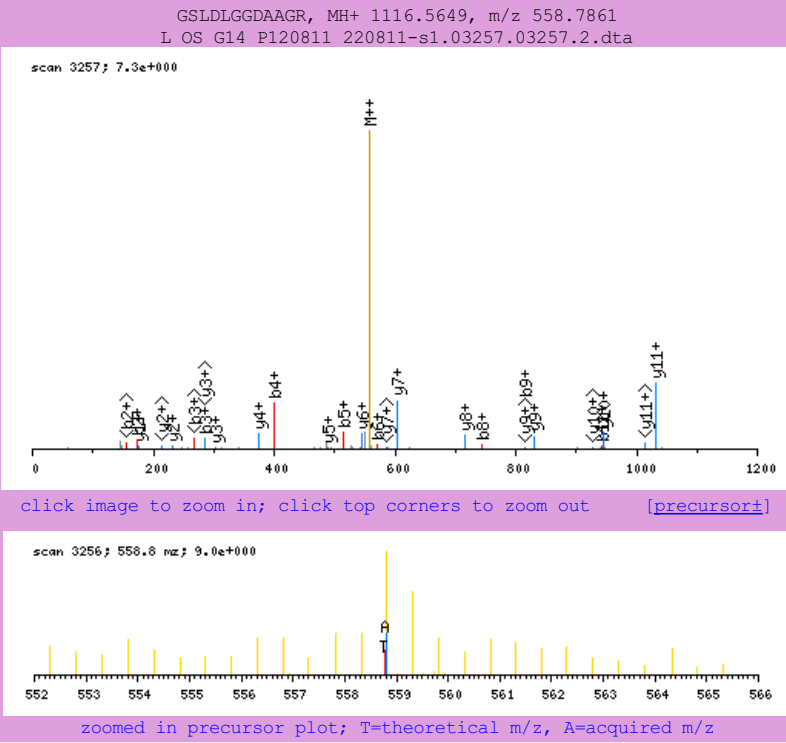

X-range:

0 - 0

MassTol: Y-zoom:

0. 1.

MassType:

☐AVG ☒MONO

Axis:

☒1 ☐2

Label:

☒I ☐M ☐-

Ions:

a ☐+ ☐2+ ☐3+

b ☒+ ☐2+ ☐3+

c ☐+ ☐2+ ☐3+

x ☐+ ☐2+ ☐3+

y ☒+ ☒2+ ☐3+

z ☐+ ☐2+ ☐3+

hide H<sub>2</sub>O/NH<sub>3</sub> ☐

zoom 112-122 ☐

GO

GSPLAEGPQAFFPER, MH+ 1630.8229, m/z 544.2792  
L OS G13 P120811 220811-s1.06333.06333.3.dta

scan 6333; 1.3e+000

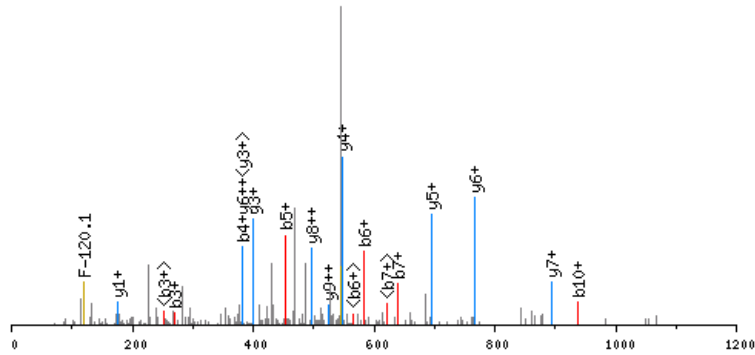

click image to zoom in; click top corners to zoom out [\[precursor±\]](#)

scan 6329; 544.3 m/z; 2.9e+001

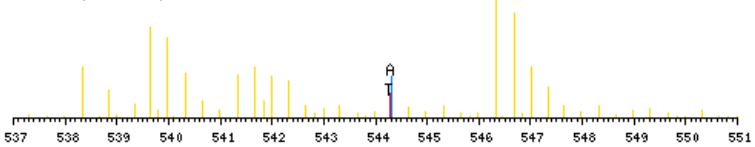

zoomed in precursor plot; T=theoretical m/z, A=acquired m/z

| b <sup>+</sup> | #  | AA | #  | y <sup>+</sup> | y <sup>2+</sup> |
|----------------|----|----|----|----------------|-----------------|
| 86.0606        | 1  | G  | 15 |                |                 |
| 173.0926       | 2  | S  | 14 | 1545.7702      | 773.3890        |
| 270.1454       | 3  | P  | 13 | 1458.7381      | 729.8730        |
| 383.2294       | 4  | L  | 12 | 1361.6854      | 681.3466        |
| 454.2665       | 5  | A  | 11 | 1248.6013      | 624.8046        |
| 583.3091       | 6  | E  | 10 | 1177.5642      | 589.2860        |
| 640.3306       | 7  | G  | 9  | 1048.5216      | 524.7647        |
| 737.3834       | 8  | P  | 8  | 991.5001       | 496.2540        |
| 865.4419       | 9  | Q  | 7  | 894.4474       | 447.7276        |
| 936.4790       | 10 | A  | 6  | 766.3888       | 383.6983        |
| 1083.5475      | 11 | F  | 5  | 695.3517       | 348.1798        |
| 1230.6159      | 12 | F  | 4  | 548.2833       | 274.6455        |
| 1327.6686      | 13 | P  | 3  | 401.2149       | 201.1113        |
| 1456.7112      | 14 | E  | 2  | 304.1621       | 152.5850        |
|                | 15 | R  | 1  | 175.1195       | 88.0637         |

N-term:+29.04

X-range:

0 - 0

MassTol: Y-zoom:

0. 1.

MassType:

☐ AVG ☒ MONO

Axis:

☒ 1 ☐ 2

Label:

☒ I ☐ M ☐ -

Ions:

a ☐ + ☐ 2+ ☐ 3+

b ☒ + ☐ 2+ ☐ 3+

c ☐ + ☐ 2+ ☐ 3+

x ☐ + ☐ 2+ ☐ 3+

y ☒ + ☒ 2+ ☐ 3+

z ☐ + ☐ 2+ ☐ 3+

hide H<sub>2</sub>O/NH<sub>3</sub> ☐

zoom 112-122 ☐

GO

GSSQSVEIPGGGTEGYHVLK, MH+ 2058.0256, m/z 686.6800  
L OS G15 P120811 220811-s1.04160.04160.3.dta

scan 4160; 3.1e+000

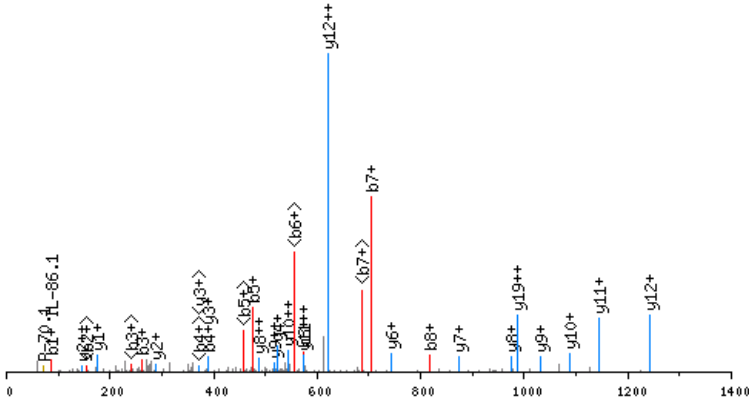

click image to zoom in; click top corners to zoom out

[precursor±]

scan 4156; 686.7 m/z; 8.6e+000

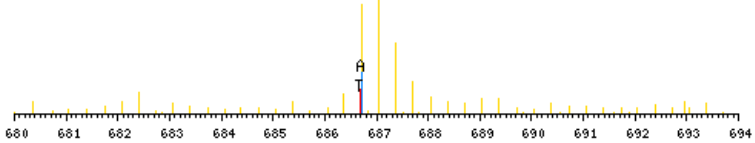

zoomed in precursor plot; T=theoretical m/z, A=acquired m/z

| b <sup>+</sup> | #  | AA | #  | y <sup>+</sup> | y <sup>2+</sup> |
|----------------|----|----|----|----------------|-----------------|
| 86.0606        | 1  | G  | 20 |                |                 |
| 173.0926       | 2  | S  | 19 | 1972.9728      | 986.9903        |
| 260.1246       | 3  | S  | 18 | 1885.9408      | 943.4743        |
| 388.1832       | 4  | Q  | 17 | 1798.9088      | 899.9583        |
| 475.2152       | 5  | S  | 16 | 1670.8502      | 835.9290        |
| 574.2836       | 6  | V  | 15 | 1583.8182      | 792.4130        |
| 703.3262       | 7  | E  | 14 | 1484.7498      | 742.8788        |
| 816.4103       | 8  | I  | 13 | 1355.7072      | 678.3575        |
| 913.4631       | 9  | P  | 12 | 1242.6231      | 621.8155        |
| 970.4845       | 10 | G  | 11 | 1145.5703      | 573.2891        |
| 1027.5060      | 11 | G  | 10 | 1088.5489      | 544.7784        |
| 1084.5275      | 12 | G  | 9  | 1031.5274      | 516.2676        |
| 1185.5751      | 13 | T  | 8  | 974.5060       | 487.7569        |
| 1314.6177      | 14 | E  | 7  | 873.4583       | 437.2331        |
| 1371.6392      | 15 | G  | 6  | 744.4157       | 372.7118        |
| 1534.7025      | 16 | Y  | 5  | 687.3942       | 344.2010        |
| 1671.7614      | 17 | H  | 4  | 524.3309       | 262.6694        |
| 1770.8298      | 18 | V  | 3  | 387.2720       | 194.1399        |
| 1883.9139      | 19 | L  | 2  | 288.2036       | 144.6057        |
|                | 20 | R  | 1  | 175.1195       | 88.0637         |

N-term:+29.04

X-range:

0 - 0

MassTol: Y-zoom:

0. 1.

MassType:

☐ AVG ☒ MONO

Axis:

☒ 1 ☐ 2

Label:

☒ I ☐ M ☐ -

Ions:

a ☐ + ☐ 2+ ☐ 3+

b ☒ + ☐ 2+ ☐ 3+

c ☐ + ☐ 2+ ☐ 3+

x ☐ + ☐ 2+ ☐ 3+

y ☒ + ☒ 2+ ☐ 3+

z ☐ + ☐ 2+ ☐ 3+

hide H<sub>2</sub>O/NH<sub>3</sub> ☐

zoom 112-122 ☐

GO

GSSSGSGVQGASAGGLAADASR, MH+ 1877.8953, m/z 626.6366  
L OS G13 P120811 220811-s1.02902.02902.3.dta

scan 2902; 9.7e-001

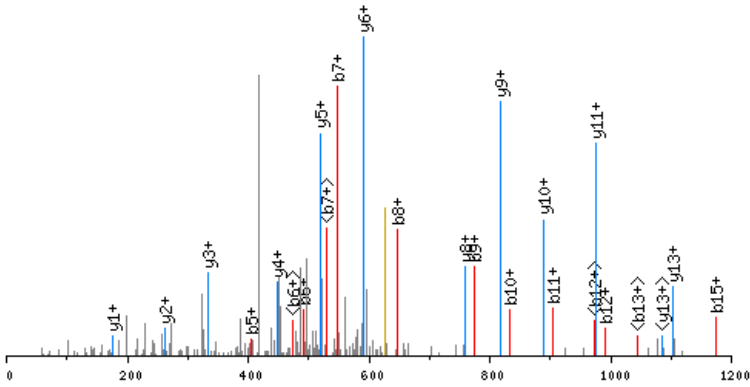

click image to zoom in; click top corners to zoom out [\[precursor±\]](#)

scan 2899; 626.6 m/z; 5.2e+000

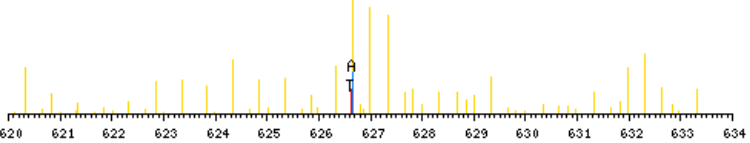

zoomed in precursor plot; T=theoretical m/z, A=acquired m/z

| b <sup>+</sup> | #  | AA | #  | y <sup>+</sup> | y <sup>2+</sup> |
|----------------|----|----|----|----------------|-----------------|
| 86.0606        | 1  | G  | 22 |                |                 |
| 173.0926       | 2  | S  | 21 | 1792.8426      | 896.9252        |
| 260.1246       | 3  | S  | 20 | 1705.8105      | 853.4092        |
| 347.1566       | 4  | S  | 19 | 1618.7785      | 809.8932        |
| 404.1781       | 5  | G  | 18 | 1531.7465      | 766.3771        |
| 491.2101       | 6  | S  | 17 | 1474.7250      | 737.8664        |
| 548.2316       | 7  | G  | 16 | 1387.6930      | 694.3504        |
| 647.3000       | 8  | V  | 15 | 1330.6715      | 665.8397        |
| 775.3586       | 9  | Q  | 14 | 1231.6031      | 616.3055        |
| 832.3801       | 10 | G  | 13 | 1103.5445      | 552.2762        |
| 903.4172       | 11 | A  | 12 | 1046.5231      | 523.7654        |
| 990.4492       | 12 | S  | 11 | 975.4859       | 488.2469        |
| 1061.4863      | 13 | A  | 10 | 888.4539       | 444.7309        |
| 1118.5078      | 14 | G  | 9  | 817.4168       | 409.2123        |
| 1175.5292      | 15 | G  | 8  | 760.3953       | 380.7016        |
| 1288.6133      | 16 | L  | 7  | 703.3739       | 352.1909        |
| 1359.6504      | 17 | A  | 6  | 590.2898       | 295.6488        |
| 1430.6875      | 18 | A  | 5  | 519.2527       | 260.1303        |
| 1545.7145      | 19 | D  | 4  | 448.2156       | 224.6117        |
| 1616.7516      | 20 | A  | 3  | 333.1886       | 167.0982        |
| 1703.7836      | 21 | S  | 2  | 262.1515       | 131.5797        |
|                | 22 | R  | 1  | 175.1195       | 88.0637         |

N-term:+29.04

X-range:

0 - 0

MassTol: Y-zoom:

0. 1.

MassType:

☐AVG ☒MONO

Axis:

☒1 ☐2

Label:

☒I ☐M ☐-

Ions:

a ☐+ ☐2+ ☐3+

b ☒+ ☐2+ ☐3+

c ☐+ ☐2+ ☐3+

x ☐+ ☐2+ ☐3+

y ☒+ ☒2+ ☐3+

z ☐+ ☐2+ ☐3+

hide H<sub>2</sub>O/NH<sub>3</sub> ☐

zoom 112-122 ☐

GO

GSTAPVGGGSFPTITPR, MH+ 1629.8600, m/z 543.9582  
L OS G13 P120811 220811-s1.04871.04871.3.dta

scan 4871; 6.2e+000

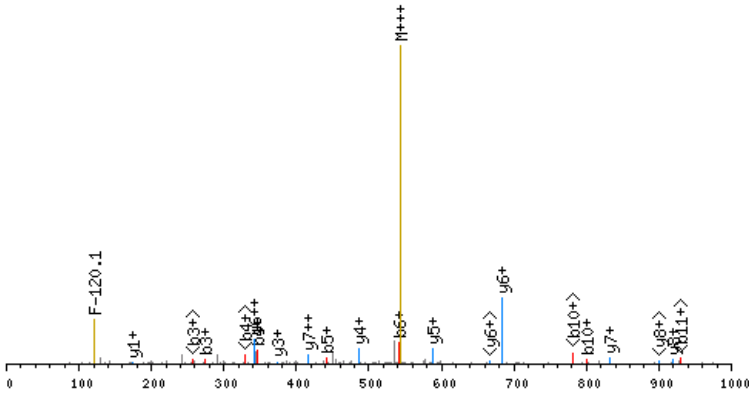

click image to zoom in; click top corners to zoom out

[precursor±]

scan 4869; 544.0 m/z; 8.4e+000

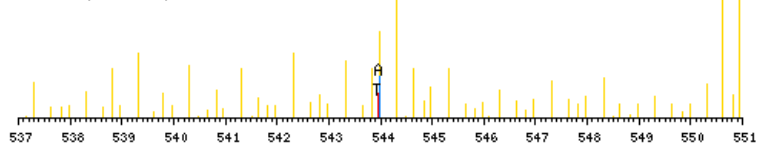

zoomed in precursor plot; T=theoretical m/z, A=acquired m/z

| b <sup>+</sup> | #  | AA | #  | y <sup>+</sup> | y <sup>2+</sup> |
|----------------|----|----|----|----------------|-----------------|
| 86.0606        | 1  | G  | 17 |                |                 |
| 173.0926       | 2  | S  | 16 | 1544.8073      | 772.9076        |
| 274.1403       | 3  | T  | 15 | 1457.7753      | 729.3915        |
| 345.1774       | 4  | A  | 14 | 1356.7276      | 678.8677        |
| 442.2301       | 5  | P  | 13 | 1285.6905      | 643.3491        |
| 541.2986       | 6  | V  | 12 | 1188.6377      | 594.8228        |
| 598.3200       | 7  | G  | 11 | 1089.5693      | 545.2886        |
| 655.3415       | 8  | G  | 10 | 1032.5478      | 516.7778        |
| 712.3630       | 9  | G  | 9  | 975.5264       | 488.2671        |
| 799.3950       | 10 | S  | 8  | 918.5049       | 459.7564        |
| 946.4634       | 11 | F  | 7  | 831.4729       | 416.2403        |
| 1043.5162      | 12 | P  | 6  | 684.4044       | 342.7061        |
| 1144.5638      | 13 | T  | 5  | 587.3517       | 294.1798        |
| 1257.6479      | 14 | I  | 4  | 486.3040       | 243.6559        |
| 1358.6956      | 15 | T  | 3  | 373.2199       | 187.1139        |
| 1455.7483      | 16 | P  | 2  | 272.1723       | 136.5900        |
|                | 17 | R  | 1  | 175.1195       | 88.0637         |

N-term:+29.04

X-range:

0

-

0

MassTol: Y-zoom:

0.

1.

MassType:

☐AVG

☒MONO

Axis:

☒1

☐2

Label:

☒I

☐M

☐-

Ions:

a

☐

2+

☐

3+

b

☒

2+

☐

3+

c

☐

2+

☐

3+

x

☐

2+

☐

3+

y

☒

2+

☒

3+

z

☐

2+

☐

3+

hide H<sub>2</sub>O/NH<sub>3</sub>

☐

zoom 112-122

☐

GO

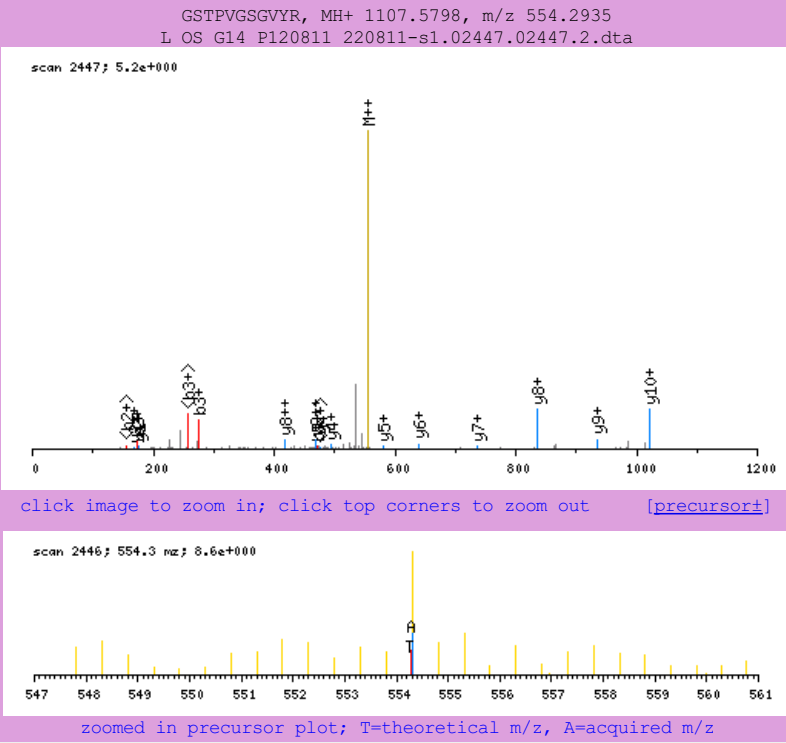

| b <sup>+</sup> | #  | AA | #  | y <sup>+</sup> | y <sup>2+</sup> |
|----------------|----|----|----|----------------|-----------------|
| 86.0606        | 1  | G  | 11 |                |                 |
| 173.0926       | 2  | S  | 10 | 1022.5271      | 511.7675        |
| 274.1403       | 3  | T  | 9  | 935.4951       | 468.2514        |
| 371.1930       | 4  | P  | 8  | 834.4474       | 417.7276        |
| 470.2614       | 5  | V  | 7  | 737.3946       | 369.2012        |
| 527.2829       | 6  | G  | 6  | 638.3262       | 319.6670        |
| 614.3149       | 7  | S  | 5  | 581.3047       | 291.1563        |
| 671.3364       | 8  | G  | 4  | 494.2727       | 247.6403        |
| 770.4048       | 9  | V  | 3  | 437.2512       | 219.1295        |
| 933.4681       | 10 | Y  | 2  | 338.1828       | 169.5953        |
|                | 11 | R  | 1  | 175.1195       | 88.0637         |

N-term:+29.04

X-range:

0 - 0

MassTol: Y-zoom:

0. 1.

MassType:

☐AVG ☒MONO

Axis:

☒1 ☐2

Label:

☒I ☐M ☐-

Ions:

a ☐+ ☐2+ ☐3+

b ☒+ ☐2+ ☐3+

c ☐+ ☐2+ ☐3+

x ☐+ ☐2+ ☐3+

y ☒+ ☒2+ ☐3+

z ☐+ ☐2+ ☐3+

hide H<sub>2</sub>O/NH<sub>3</sub> ☐

zoom 112-122 ☐

GO

GSVFSAPSASGTPNKETAGLKVGVSRR, MH+ 2675.4369, m/z 669.6147  
L OS G16 P120811 220811-s1.04401.04401.4.dta

scan 4401; 3.8e+000

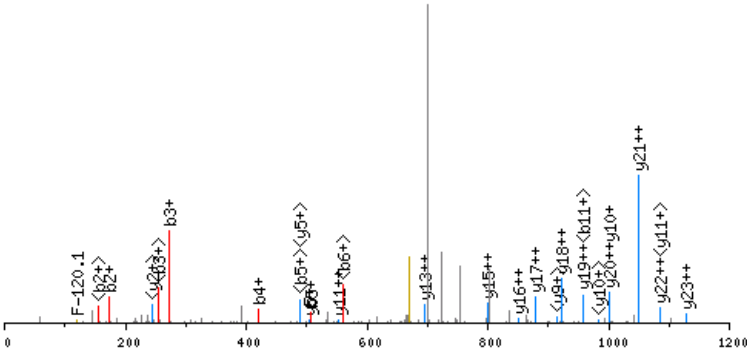

click image to zoom in; click top corners to zoom out

[precursor±]

scan 4398; 669.6 m/z; 7.2e+000

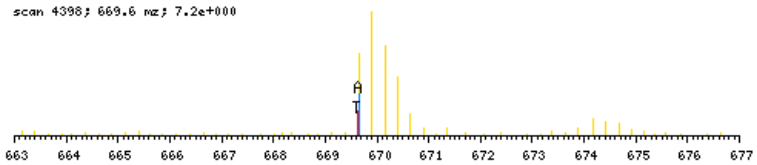

zoomed in precursor plot; T=theoretical m/z, A=acquired m/z

| b <sup>+</sup> | #  | AA | #  | y <sup>+</sup> | y <sup>2+</sup> |
|----------------|----|----|----|----------------|-----------------|
| 86.0606        | 1  | G  | 27 |                |                 |
| 173.0926       | 2  | S  | 26 | 2590.3841      | 1295.6960       |
| 272.1610       | 3  | V  | 25 | 2503.3521      | 1252.1800       |
| 419.2294       | 4  | F  | 24 | 2404.2837      | 1202.6458       |
| 506.2614       | 5  | S  | 23 | 2257.2153      | 1129.1115       |
| 577.2986       | 6  | A  | 22 | 2170.1832      | 1085.5955       |
| 674.3513       | 7  | P  | 21 | 2099.1461      | 1050.0770       |
| 761.3834       | 8  | S  | 20 | 2002.0934      | 1001.5506       |
| 832.4205       | 9  | A  | 19 | 1915.0613      | 958.0346        |
| 919.4525       | 10 | S  | 18 | 1844.0242      | 922.5160        |
| 976.4740       | 11 | G  | 17 | 1756.9922      | 879.0000        |
| 1077.5216      | 12 | T  | 16 | 1699.9707      | 850.4893        |
| 1174.5744      | 13 | P  | 15 | 1598.9231      | 799.9654        |
| 1288.6173      | 14 | N  | 14 | 1501.8703      | 751.4391        |
| 1444.7436      | 15 | K  | 13 | 1387.8274      | 694.4176        |
| 1573.7862      | 16 | E  | 12 | 1231.7011      | 616.3544        |
| 1674.8339      | 17 | T  | 11 | 1102.6585      | 551.8331        |
| 1745.8710      | 18 | A  | 10 | 1001.6108      | 501.3093        |
| 1802.8925      | 19 | G  | 9  | 930.5737       | 465.7908        |
| 1915.9765      | 20 | L  | 8  | 873.5522       | 437.2800        |
| 2072.1028      | 21 | K  | 7  | 760.4681       | 380.7380        |
| 2171.1713      | 22 | V  | 6  | 604.3418       | 302.6748        |
| 2228.1927      | 23 | G  | 5  | 505.2734       | 253.1406        |
| 2327.2611      | 24 | V  | 4  | 448.2520       | 224.6299        |
| 2414.2932      | 25 | S  | 3  | 349.1836       | 175.0957        |
| 2501.3252      | 26 | S  | 2  | 262.1515       | 131.5797        |
|                | 27 | R  | 1  | 175.1195       | 88.0637         |

N-term: +29.04 K(15): +156.13  
K(21): +156.13

X-range:

0 - 0

MassTol: Y-zoom:

0. 1.

MassType:

☐ AVG ☒ MONO

Axis:

☒ 1 ☐ 2

Label:

☒ I ☐ M ☐ -

Ions:

a ☐ + ☐ 2+ ☐ 3+

b ☒ + ☐ 2+ ☐ 3+

c ☐ + ☐ 2+ ☐ 3+

x ☐ + ☐ 2+ ☐ 3+

y ☒ + ☒ 2+ ☐ 3+

z ☐ + ☐ 2+ ☐ 3+

hide H<sub>2</sub>O/NH<sub>3</sub> ☐

zoom 112-122 ☐

GO

GSVKPYTNFDAER, MH+ 1539.7807, m/z 513.9318  
L OS G16 P120811 220811-s1.03110.03110.3.dta

scan 3110; 1.1e+001

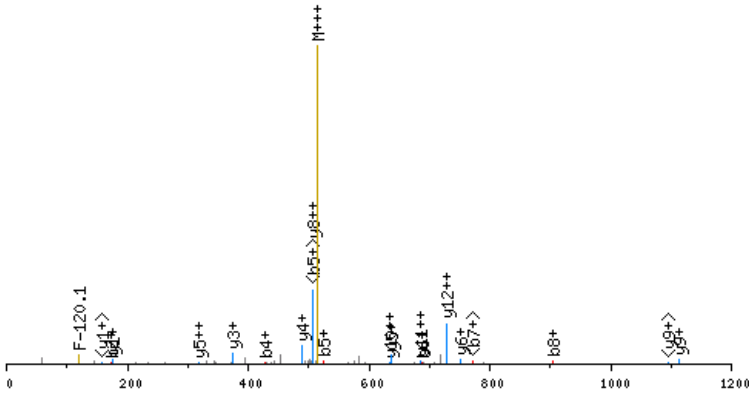

click image to zoom in; click top corners to zoom out

[precursor±]

scan 3108; 513.9 m/z; 3.2e+001

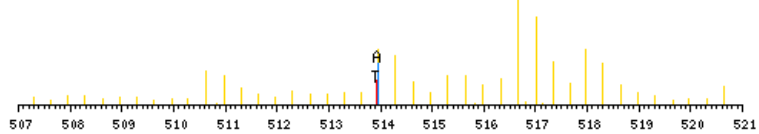

zoomed in precursor plot; T=theoretical m/z, A=acquired m/z

| b <sup>+</sup> | #  | AA | #  | y <sup>+</sup> | y <sup>2+</sup> |
|----------------|----|----|----|----------------|-----------------|
| 86.0606        | 1  | G  | 13 |                |                 |
| 173.0926       | 2  | S  | 12 | 1454.7280      | 727.8679        |
| 272.1610       | 3  | V  | 11 | 1367.6960      | 684.3519        |
| 428.2873       | 4  | K  | 10 | 1268.6276      | 634.8177        |
| 525.3401       | 5  | P  | 9  | 1112.5013      | 556.7545        |
| 688.4034       | 6  | Y  | 8  | 1015.4485      | 508.2282        |
| 789.4511       | 7  | T  | 7  | 852.3852       | 426.6965        |
| 903.4940       | 8  | N  | 6  | 751.3375       | 376.1727        |
| 1050.5624      | 9  | F  | 5  | 637.2946       | 319.1512        |
| 1165.5894      | 10 | D  | 4  | 490.2262       | 245.6170        |
| 1236.6265      | 11 | A  | 3  | 375.1992       | 188.1035        |
| 1365.6691      | 12 | E  | 2  | 304.1621       | 152.5850        |
|                | 13 | R  | 1  | 175.1195       | 88.0637         |

N-term:+29.04 K(4):+156.13

X-range:

0 - 0

MassTol: Y-zoom:

0. 1.

MassType:

☐ AVG ☒ MONO

Axis:

☒ 1 ☐ 2

Label:

☒ I ☐ M ☐ -

Ions:

a ☐ + ☐ 2+ ☐ 3+

b ☒ + ☐ 2+ ☐ 3+

c ☐ + ☐ 2+ ☐ 3+

x ☐ + ☐ 2+ ☐ 3+

y ☒ + ☒ 2+ ☐ 3+

z ☐ + ☐ 2+ ☐ 3+

hide H<sub>2</sub>O/NH<sub>3</sub> ☐

zoom 112-122 ☐

GO

GTGGVDTAAVGAVFDISNADR, MH+ 2020.9939, m/z 674.3362  
L OS G12 P120811 220811-s1.05178.05178.3.dta

scan 5178; 2.0e+000

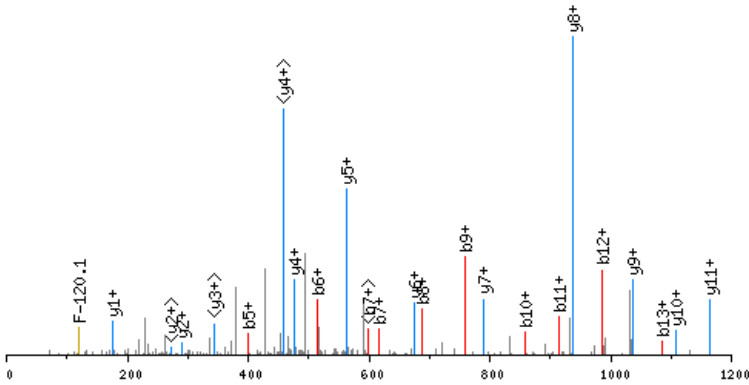

click image to zoom in; click top corners to zoom out

[precursor±]

scan 5177; 674.3 m/z; 9.5e+000

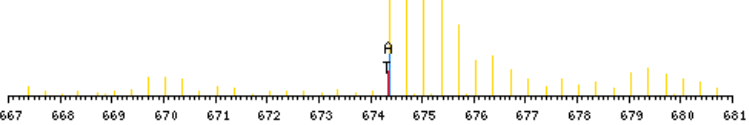

zoomed in precursor plot; T=theoretical m/z, A=acquired m/z

| b <sup>+</sup> | #  | AA | #  | y <sup>+</sup> | y <sup>2+</sup> |
|----------------|----|----|----|----------------|-----------------|
| 86.0606        | 1  | G  | 21 |                |                 |
| 187.1082       | 2  | T  | 20 | 1935.9412      | 968.4745        |
| 244.1297       | 3  | G  | 19 | 1834.8935      | 917.9507        |
| 301.1512       | 4  | G  | 18 | 1777.8721      | 889.4399        |
| 400.2196       | 5  | V  | 17 | 1720.8506      | 860.9292        |
| 515.2465       | 6  | D  | 16 | 1621.7822      | 811.3950        |
| 616.2942       | 7  | T  | 15 | 1506.7552      | 753.8815        |
| 687.3313       | 8  | A  | 14 | 1405.7076      | 703.3577        |
| 758.3684       | 9  | A  | 13 | 1334.6705      | 667.8391        |
| 857.4368       | 10 | V  | 12 | 1263.6333      | 632.3206        |
| 914.4583       | 11 | G  | 11 | 1164.5649      | 582.7864        |
| 985.4954       | 12 | A  | 10 | 1107.5435      | 554.2756        |
| 1084.5638      | 13 | V  | 9  | 1036.5063      | 518.7571        |
| 1231.6323      | 14 | F  | 8  | 937.4379       | 469.2229        |
| 1346.6592      | 15 | D  | 7  | 790.3695       | 395.6887        |
| 1459.7433      | 16 | I  | 6  | 675.3426       | 338.1752        |
| 1546.7753      | 17 | S  | 5  | 562.2585       | 281.6332        |
| 1660.8182      | 18 | N  | 4  | 475.2265       | 238.1172        |
| 1731.8553      | 19 | A  | 3  | 361.1836       | 181.0957        |
| 1846.8823      | 20 | D  | 2  | 290.1464       | 145.5771        |
|                | 21 | R  | 1  | 175.1195       | 88.0637         |

N-term:+29.04

X-range:

0 - 0

MassTol: Y-zoom:

0. 1.

MassType:

☐AVG ☒MONO

Axis:

☒1 ☐2

Label:

☒I ☐M ☐-

Ions:

a ☐+ ☐2+ ☐3+

b ☒+ ☐2+ ☐3+

c ☐+ ☐2+ ☐3+

x ☐+ ☐2+ ☐3+

y ☒+ ☒2+ ☐3+

z ☐+ ☐2+ ☐3+

hide H<sub>2</sub>O/NH<sub>3</sub> ☐

zoom 112-122 ☐

GO

GTKCCTLPEDQR, MH+ 1520.7200, m/z 507.5782  
L OS G16 P120811 220811-s1.02934.02934.3.dta

scan 2934; 6.2e+000

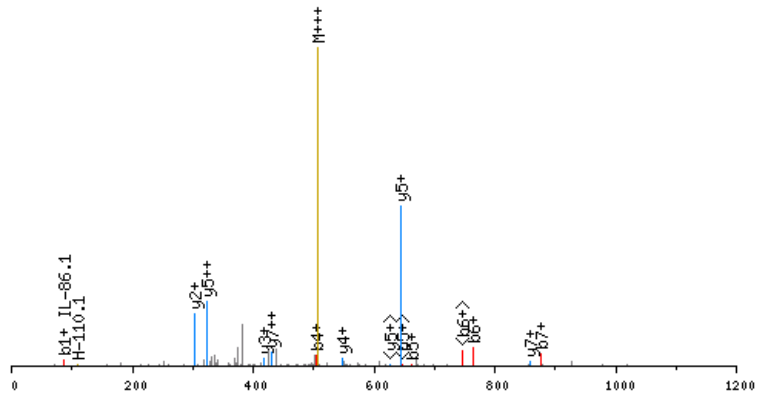

click image to zoom in; click top corners to zoom out [\[precursor±\]](#)

scan 2933; 507.6 m/z; 4.7e+001

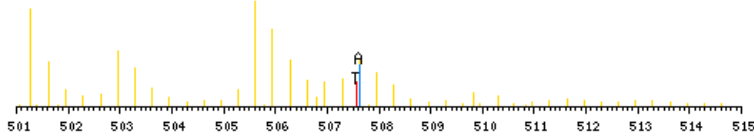

zoomed in precursor plot; T=theoretical m/z, A=acquired m/z

| b <sup>+</sup> | #  | AA | #  | y <sup>+</sup> | y <sup>2+</sup> |
|----------------|----|----|----|----------------|-----------------|
| 86.0606        | 1  | G  | 12 |                |                 |
| 187.1082       | 2  | T  | 11 | 1435.6673      | 718.3376        |
| 343.2345       | 3  | K  | 10 | 1334.6196      | 667.8137        |
| 503.2651       | 4  | C  | 9  | 1178.4933      | 589.7506        |
| 663.2957       | 5  | C  | 8  | 1018.4627      | 509.7353        |
| 764.3434       | 6  | T  | 7  | 858.4321       | 429.7200        |
| 877.4275       | 7  | L  | 6  | 757.3844       | 379.1961        |
| 974.4802       | 8  | P  | 5  | 644.3004       | 322.6541        |
| 1103.5228      | 9  | E  | 4  | 547.2476       | 274.1277        |
| 1218.5498      | 10 | D  | 3  | 418.2050       | 209.6064        |
| 1346.6084      | 11 | Q  | 2  | 303.1781       | 152.0930        |
|                | 12 | R  | 1  | 175.1195       | 88.0637         |

N-term:+29.04 K(3):+156.13  
C(4):+160.03 C(5):+160.03

X-range:

0 - 0

MassTol: Y-zoom:

0. 1.

MassType:

☐AVG ☒MONO

Axis:

☒1 ☐2

Label:

☒I ☐M ☐-

Ions:

a ☐+ ☐2+ ☐3+

b ☒+ ☐2+ ☐3+

c ☐+ ☐2+ ☐3+

x ☐+ ☐2+ ☐3+

y ☒+ ☒2+ ☐3+

z ☐+ ☐2+ ☐3+

hide H<sub>2</sub>O/NH<sub>3</sub> ☐

zoom 112-122 ☐

GO

GTLDNPSSLDETAYER, MH+ 1801.8668, m/z 601.2938  
H OS G13 P120811 220811-s1.04288.04288.3.dta

scan 4288; 2.5e+000

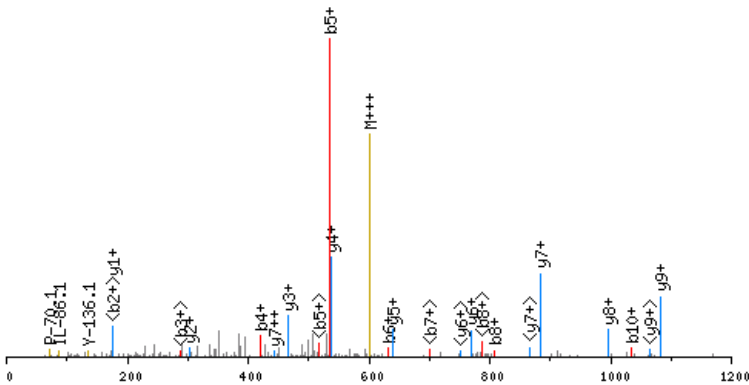

click image to zoom in; click top corners to zoom out

[precursor±]

scan 4284; 601.3 m/z; 9.4e+000

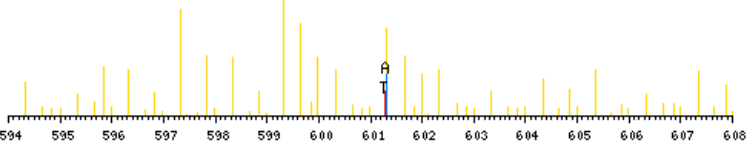

zoomed in precursor plot; T=theoretical m/z, A=acquired m/z

| b <sup>+</sup> | #  | AA | #  | y <sup>+</sup> | y <sup>2+</sup> |
|----------------|----|----|----|----------------|-----------------|
| 92.0924        | 1  | G  | 16 |                |                 |
| 193.1400       | 2  | T  | 15 | 1710.7822      | 855.8950        |
| 306.2241       | 3  | L  | 14 | 1609.7346      | 805.3712        |
| 421.2510       | 4  | D  | 13 | 1496.6505      | 748.8292        |
| 535.2940       | 5  | N  | 12 | 1381.6236      | 691.3157        |
| 632.3467       | 6  | P  | 11 | 1267.5806      | 634.2942        |
| 719.3788       | 7  | S  | 10 | 1170.5279      | 585.7678        |
| 806.4108       | 8  | S  | 9  | 1083.4958      | 542.2518        |
| 919.4949       | 9  | L  | 8  | 996.4638       | 498.7358        |
| 1034.5218      | 10 | D  | 7  | 883.3798       | 442.1938        |
| 1163.5644      | 11 | E  | 6  | 768.3528       | 384.6803        |
| 1264.6121      | 12 | T  | 5  | 639.3102       | 320.1590        |
| 1335.6492      | 13 | A  | 4  | 538.2625       | 269.6352        |
| 1498.7125      | 14 | Y  | 3  | 467.2254       | 234.1166        |
| 1627.7551      | 15 | E  | 2  | 304.1621       | 152.5850        |
|                | 16 | R  | 1  | 175.1195       | 88.0637         |

N-term:+35.07

X-range:

0 - 0

MassTol: Y-zoom:

0. 1.

MassType:

☐ AVG ☒ MONO

Axis:

☒ 1 ☐ 2

Label:

☒ I ☐ M ☐ -

Ions:

a ☐ + ☐ 2+ ☐ 3+

b ☒ + ☐ 2+ ☐ 3+

c ☐ + ☐ 2+ ☐ 3+

x ☐ + ☐ 2+ ☐ 3+

y ☒ + ☒ 2+ ☐ 3+

z ☐ + ☐ 2+ ☐ 3+

hide H<sub>2</sub>O/NH<sub>3</sub> ☐

zoom 112-122 ☐

GO

GTPEENPPSWAKSAGSKSSGGR, MH+ 2289.2324, m/z 573.0636  
H OS G17 P120811 220811-s1.02784.02784.4.dta

scan 2784; 2.5e+000

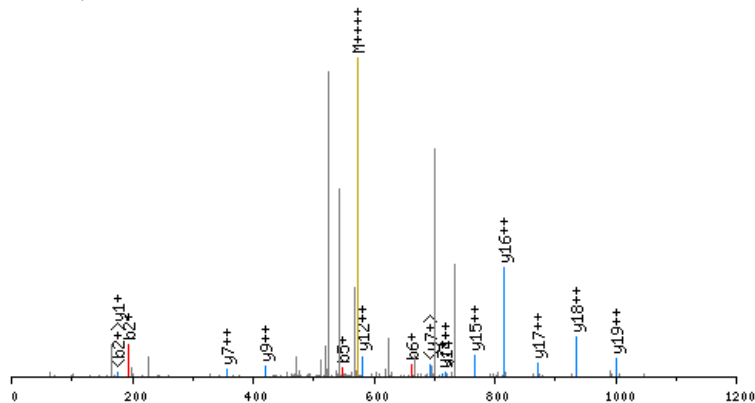

click image to zoom in; click top corners to zoom out [\[precursor±\]](#)

scan 2783; 573.1 m/z; 1.2e+001

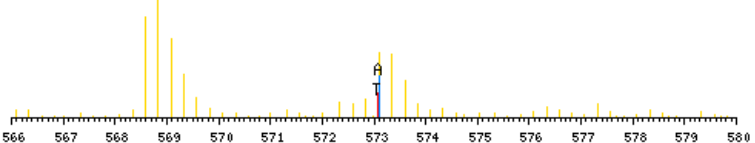

zoomed in precursor plot; T=theoretical m/z, A=acquired m/z

| b <sup>+</sup> | #  | AA | #  | y <sup>+</sup> | y <sup>2+</sup> |
|----------------|----|----|----|----------------|-----------------|
| 92.0924        | 1  | G  | 22 |                |                 |
| 193.1400       | 2  | T  | 21 | 2198.1479      | 1099.5778       |
| 290.1928       | 3  | P  | 20 | 2097.1002      | 1049.0540       |
| 419.2354       | 4  | E  | 19 | 2000.0474      | 1000.5276       |
| 548.2780       | 5  | E  | 18 | 1871.0048      | 936.0063        |
| 662.3209       | 6  | N  | 17 | 1741.9622      | 871.4850        |
| 759.3737       | 7  | P  | 16 | 1627.9193      | 814.4636        |
| 856.4264       | 8  | P  | 15 | 1530.8665      | 765.9372        |
| 943.4585       | 9  | S  | 14 | 1433.8138      | 717.4108        |
| 1129.5378      | 10 | W  | 13 | 1346.7817      | 673.8948        |
| 1200.5749      | 11 | A  | 12 | 1160.7024      | 580.8551        |
| 1362.7330      | 12 | K  | 11 | 1089.6653      | 545.3366        |
| 1449.7650      | 13 | S  | 10 | 927.5072       | 464.2575        |
| 1520.8021      | 14 | A  | 9  | 840.4752       | 420.7415        |
| 1577.8236      | 15 | G  | 8  | 769.4381       | 385.2230        |
| 1664.8556      | 16 | S  | 7  | 712.4166       | 356.7122        |
| 1827.0137      | 17 | K  | 6  | 625.3846       | 313.1962        |
| 1914.0458      | 18 | S  | 5  | 463.2265       | 232.1172        |
| 2001.0778      | 19 | S  | 4  | 376.1945       | 188.6011        |
| 2058.0993      | 20 | G  | 3  | 289.1624       | 145.0851        |
| 2115.1207      | 21 | G  | 2  | 232.1410       | 116.5744        |
|                | 22 | R  | 1  | 175.1195       | 88.0637         |

N-term: +35.07 K(12): +162.16  
K(17): +162.16

X-range:

0 - 0

MassTol: Y-zoom:

0. 1.

MassType:

☐ AVG ☒ MONO

Axis:

☒ 1 ☐ 2

Label:

☒ I ☐ M ☐ -

Ions:

a ☐ + ☐ 2+ ☐ 3+

b ☒ + ☐ 2+ ☐ 3+

c ☐ + ☐ 2+ ☐ 3+

x ☐ + ☐ 2+ ☐ 3+

y ☒ + ☒ 2+ ☐ 3+

z ☐ + ☐ 2+ ☐ 3+

hide H<sub>2</sub>O/NH<sub>3</sub> ☐

zoom 112-122 ☐

GO

GTPSGTAEPYDGTKAR, MH+ 1663.8292, m/z 555.2812  
L OS G15 P120811 220811-s1.02037.02037.3.dta

scan 2037; 3.5e+000

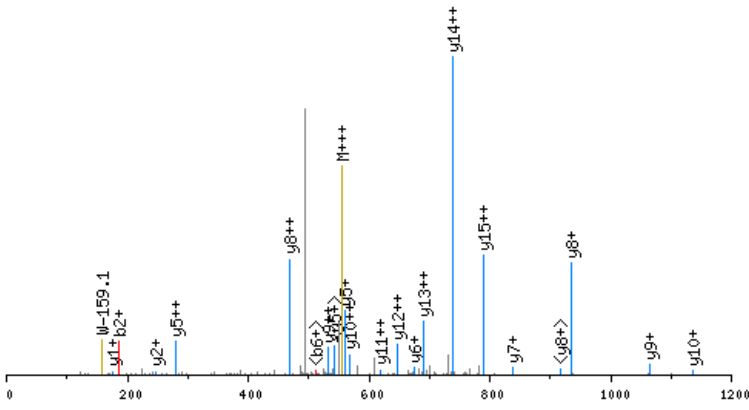

click image to zoom in; click top corners to zoom out

[precursor±]

scan 2036; 555.3 m/z; 6.4e+000

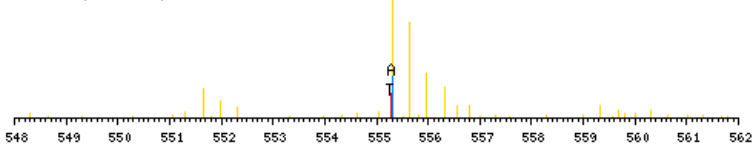

zoomed in precursor plot; T=theoretical m/z, A=acquired m/z

| b <sup>+</sup> | #  | AA | #  | y <sup>+</sup> | y <sup>2+</sup> |
|----------------|----|----|----|----------------|-----------------|
| 86.0606        | 1  | G  | 16 |                |                 |
| 187.1082       | 2  | T  | 15 | 1578.7764      | 789.8921        |
| 284.1610       | 3  | P  | 14 | 1477.7287      | 739.3683        |
| 371.1930       | 4  | S  | 13 | 1380.6760      | 690.8419        |
| 428.2145       | 5  | G  | 12 | 1293.6439      | 647.3259        |
| 529.2622       | 6  | T  | 11 | 1236.6225      | 618.8152        |
| 600.2993       | 7  | A  | 10 | 1135.5748      | 568.2913        |
| 729.3419       | 8  | E  | 9  | 1064.5377      | 532.7728        |
| 826.3946       | 9  | P  | 8  | 935.4951       | 468.2515        |
| 989.4580       | 10 | Y  | 7  | 838.4423       | 419.7251        |
| 1104.4849      | 11 | D  | 6  | 675.3790       | 338.1934        |
| 1161.5064      | 12 | G  | 5  | 560.3521       | 280.6799        |
| 1262.5541      | 13 | T  | 4  | 503.3306       | 252.1692        |
| 1418.6804      | 14 | K  | 3  | 402.2829       | 201.6454        |
| 1489.7175      | 15 | A  | 2  | 246.1566       | 123.5822        |
|                | 16 | R  | 1  | 175.1195       | 88.0637         |

N-term:+29.04 K(14):+156.13

X-range:

0 - 0

MassTol: Y-zoom:

0. 1.

MassType:

☐ AVG ☒ MONO

Axis:

☒ 1 ☐ 2

Label:

☒ I ☐ M ☐ -

Ions:

a ☐ 2+ ☐ 3+

b ☒ 2+ ☐ 3+

c ☐ 2+ ☐ 3+

x ☐ 2+ ☐ 3+

y ☒ 2+ ☐ 3+

z ☐ 2+ ☐ 3+

hide H<sub>2</sub>O/NH<sub>3</sub> ☐

zoom 112-122 ☐

GO

GTSPAAEVTPSPPEPAPALEAPAR, MH+ 2341.2039, m/z 781.0728  
L OS G12 P120811 220811-s1.03931.03931.3.dta

scan 3931; 1.7e+000

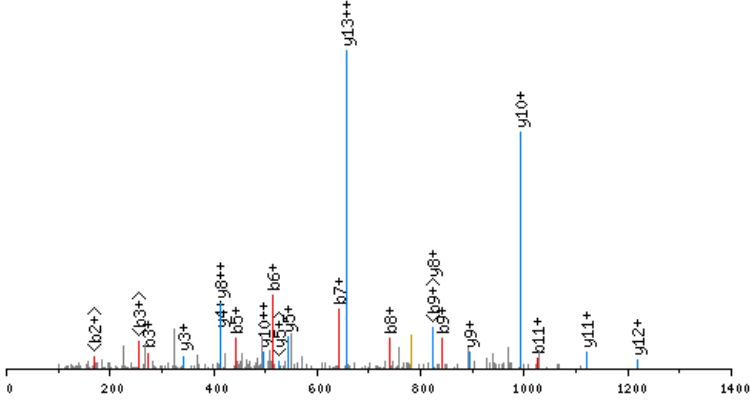

click image to zoom in; click top corners to zoom out [\[precursor±\]](#)

scan 3927; 781.1 m/z; 3.6e+000

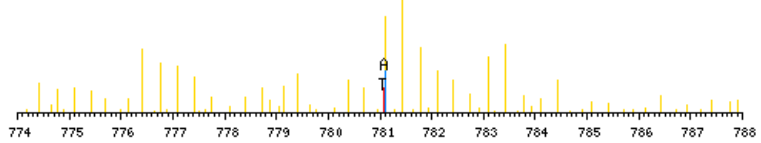

zoomed in precursor plot; T=theoretical m/z, A=acquired m/z

| b <sup>+</sup> | #  | AA | #  | y <sup>+</sup> | y <sup>2+</sup> |
|----------------|----|----|----|----------------|-----------------|
| 86.0606        | 1  | G  | 24 |                |                 |
| 187.1082       | 2  | T  | 23 | 2256.1512      | 1128.5795       |
| 274.1403       | 3  | S  | 22 | 2155.1035      | 1078.0557       |
| 371.1930       | 4  | P  | 21 | 2068.0715      | 1034.5397       |
| 442.2301       | 5  | A  | 20 | 1971.0187      | 986.0133        |
| 513.2673       | 6  | A  | 19 | 1899.9816      | 950.4947        |
| 642.3099       | 7  | E  | 18 | 1828.9445      | 914.9762        |
| 741.3783       | 8  | V  | 17 | 1699.9019      | 850.4549        |
| 842.4259       | 9  | T  | 16 | 1600.8335      | 800.9207        |
| 939.4787       | 10 | P  | 15 | 1499.7858      | 750.3968        |
| 1026.5107      | 11 | S  | 14 | 1402.7331      | 701.8704        |
| 1123.5635      | 12 | P  | 13 | 1315.7010      | 658.3544        |
| 1220.6163      | 13 | P  | 12 | 1218.6483      | 609.8280        |
| 1349.6589      | 14 | E  | 11 | 1121.5955      | 561.3017        |
| 1446.7116      | 15 | P  | 10 | 992.5529       | 496.7804        |
| 1517.7487      | 16 | A  | 9  | 895.5001       | 448.2540        |
| 1614.8015      | 17 | P  | 8  | 824.4630       | 412.7354        |
| 1685.8386      | 18 | A  | 7  | 727.4103       | 364.2090        |
| 1798.9227      | 19 | L  | 6  | 656.3731       | 328.6905        |
| 1927.9653      | 20 | E  | 5  | 543.2891       | 272.1485        |
| 1999.0024      | 21 | A  | 4  | 414.2465       | 207.6272        |
| 2096.0552      | 22 | P  | 3  | 343.2094       | 172.1086        |
| 2167.0923      | 23 | A  | 2  | 246.1566       | 123.5822        |
|                | 24 | R  | 1  | 175.1195       | 88.0637         |

N-term:+29.04

N-term:+29.04 K(13):+156.13

X-range:

0 - 0

MassTol: Y-zoom:

0. 1.

MassType:

☐AVG ☒MONO

Axis:

☒1 ☐2

Label:

☒I ☐M ☐-

Ions:

a ☐+ ☐2+ ☐3+

b ☒+ ☐2+ ☐3+

c ☐+ ☐2+ ☐3+

x ☐+ ☐2+ ☐3+

y ☒+ ☒2+ ☐3+

z ☐+ ☐2+ ☐3+

hide H<sub>2</sub>O/NH<sub>3</sub> ☐

zoom 112-122 ☐

GO

GVEEHETLLLR, MH+ 1329.7590, m/z 443.9245  
H OS G16 P120811 220811-s1.03975.03975.3.dta

scan 3975; 9.0e+000

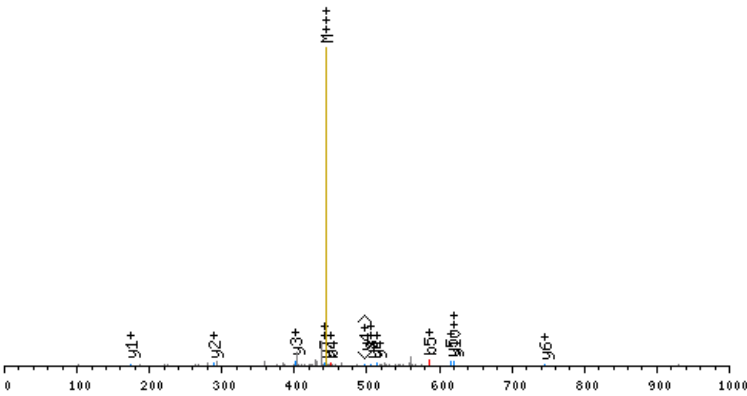

click image to zoom in; click top corners to zoom out [\[precursor±\]](#)

scan 3973; 443.9 m/z; 5.1e+000

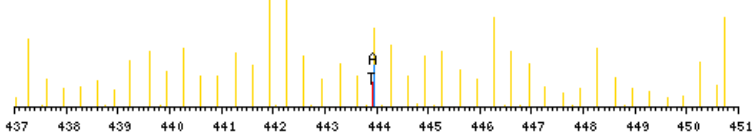

zoomed in precursor plot; T=theoretical m/z, A=acquired m/z

| b <sup>+</sup> | #  | AA | #  | y <sup>+</sup> | y <sup>2+</sup> |
|----------------|----|----|----|----------------|-----------------|
| 92.0924        | 1  | G  | 11 |                |                 |
| 191.1608       | 2  | V  | 10 | 1238.6745      | 619.8412        |
| 320.2034       | 3  | E  | 9  | 1139.6061      | 570.3069        |
| 449.2460       | 4  | E  | 8  | 1010.5635      | 505.7856        |
| 586.3049       | 5  | H  | 7  | 881.5209       | 441.2644        |
| 715.3475       | 6  | E  | 6  | 744.4620       | 372.7349        |
| 816.3951       | 7  | T  | 5  | 615.4194       | 308.2136        |
| 929.4792       | 8  | L  | 4  | 514.3717       | 257.6898        |
| 1042.5633      | 9  | L  | 3  | 401.2876       | 201.1477        |
| 1155.6473      | 10 | L  | 2  | 288.2036       | 144.6057        |
|                | 11 | R  | 1  | 175.1195       | 88.0637         |

N-term:+35.07

X-range:

0 - 0

MassTol: Y-zoom:

0. 1.

MassType:

☐ AVG ☒ MONO

Axis:

☒ 1 ☐ 2

Label:

☒ I ☐ M ☐ -

Ions:

a ☐ + ☐ 2+ ☐ 3+

b ☒ + ☐ 2+ ☐ 3+

c ☐ + ☐ 2+ ☐ 3+

x ☐ + ☐ 2+ ☐ 3+

y ☒ + ☒ 2+ ☐ 3+

z ☐ + ☐ 2+ ☐ 3+

hide H<sub>2</sub>O/NH<sub>3</sub> ☐

zoom 112-122 ☐

GO

GVEPSPSPIKPGDIKR, MH+ 1761.0275, m/z 441.0123  
L OS G17 P120811 220811-s1.03156.03156.4.dta

scan 3156; 9.1e+000

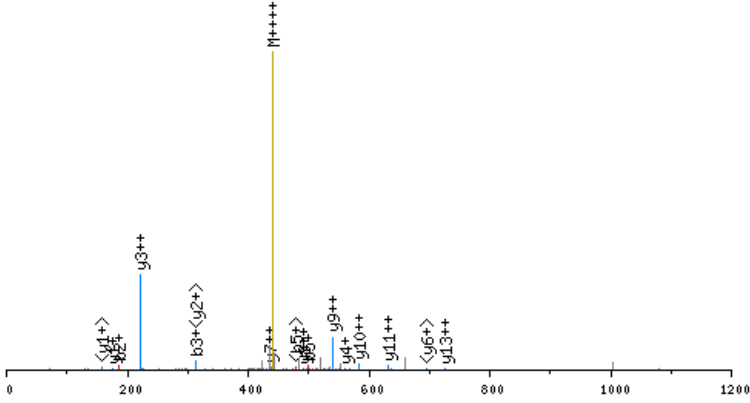

click image to zoom in; click top corners to zoom out [\[precursor±\]](#)

scan 3153; 441.0 m/z; 5.0e+000

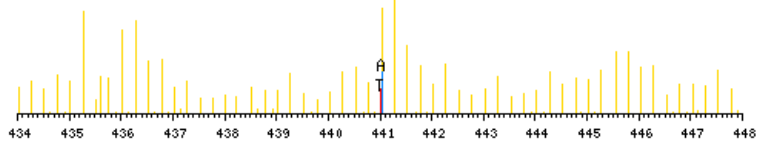

zoomed in precursor plot; T=theoretical m/z, A=acquired m/z

| b <sup>+</sup> | #  | AA | #  | y <sup>+</sup> | y <sup>2+</sup> |
|----------------|----|----|----|----------------|-----------------|
| 86.0606        | 1  | G  | 16 |                |                 |
| 185.1290       | 2  | V  | 15 | 1675.9748      | 838.4913        |
| 314.1716       | 3  | E  | 14 | 1576.9063      | 788.9571        |
| 411.2243       | 4  | P  | 13 | 1447.8637      | 724.4358        |
| 498.2564       | 5  | S  | 12 | 1350.8110      | 675.9094        |
| 595.3091       | 6  | P  | 11 | 1263.7790      | 632.3934        |
| 682.3412       | 7  | S  | 10 | 1166.7262      | 583.8670        |
| 779.3939       | 8  | P  | 9  | 1079.6942      | 540.3510        |
| 892.4780       | 9  | I  | 8  | 982.6414       | 491.8246        |
| 1048.6043      | 10 | K  | 7  | 869.5573       | 435.2826        |
| 1145.6570      | 11 | P  | 6  | 713.4310       | 357.2194        |
| 1202.6785      | 12 | G  | 5  | 616.3783       | 308.6930        |
| 1317.7055      | 13 | D  | 4  | 559.3568       | 280.1823        |
| 1430.7895      | 14 | I  | 3  | 444.3299       | 222.6688        |
| 1586.9158      | 15 | K  | 2  | 331.2458       | 166.1268        |
|                | 16 | R  | 1  | 175.1195       | 88.0637         |

N-term:+29.04 K(10):+156.13  
K(15):+156.13

X-range:

0 - 0

MassTol: Y-zoom:

0. 1.

MassType:

☐AVG ☒MONO

Axis:

☒1 ☐2

Label:

☒I ☐M ☐-

Ions:

a ☐+ ☐2+ ☐3+

b ☒+ ☐2+ ☐3+

c ☐+ ☐2+ ☐3+

x ☐+ ☐2+ ☐3+

y ☒+ ☒2+ ☐3+

z ☐+ ☐2+ ☐3+

hide H<sub>2</sub>O/NH<sub>3</sub> ☐

zoom 112-122 ☐

GO

GVGEFEAGISKNGQTR, MH+ 1717.9509, m/z 573.3218  
H OS G16 P120811 220811-s1.03517.03517.3.dta

scan 3517; 7.3e+000

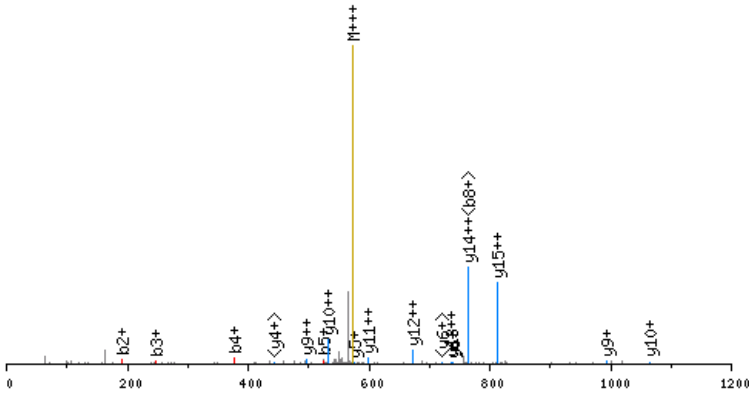

click image to zoom in; click top corners to zoom out

[precursor±]

scan 3513; 573.3 m/z; 5.2e+000

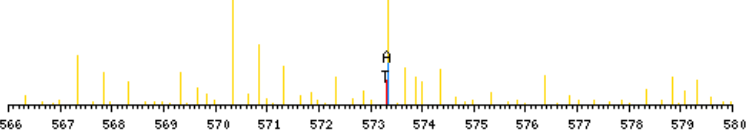

zoomed in precursor plot; T=theoretical m/z, A=acquired m/z

| b <sup>+</sup> | #  | AA | #  | y <sup>+</sup> | y <sup>2+</sup> |
|----------------|----|----|----|----------------|-----------------|
| 92.0924        | 1  | G  | 16 |                |                 |
| 191.1608       | 2  | V  | 15 | 1626.8664      | 813.9371        |
| 248.1822       | 3  | G  | 14 | 1527.7980      | 764.4029        |
| 377.2248       | 4  | E  | 13 | 1470.7765      | 735.8922        |
| 524.2932       | 5  | F  | 12 | 1341.7339      | 671.3709        |
| 653.3358       | 6  | E  | 11 | 1194.6655      | 597.8367        |
| 724.3730       | 7  | A  | 10 | 1065.6229      | 533.3154        |
| 781.3944       | 8  | G  | 9  | 994.5858       | 497.7968        |
| 894.4785       | 9  | I  | 8  | 937.5643       | 469.2861        |
| 981.5105       | 10 | S  | 7  | 824.4803       | 412.7441        |
| 1143.6686      | 11 | K  | 6  | 737.4482       | 369.2280        |
| 1257.7115      | 12 | N  | 5  | 575.2901       | 288.1490        |
| 1314.7330      | 13 | G  | 4  | 461.2472       | 231.1275        |
| 1442.7916      | 14 | Q  | 3  | 404.2258       | 202.6168        |
| 1543.8393      | 15 | T  | 2  | 276.1672       | 138.5875        |
|                | 16 | R  | 1  | 175.1195       | 88.0637         |

N-term:+35.07 K(11):+162.16



X-range:

0 - 0

MassTol: Y-zoom:

0. 1.

MassType:

☐ AVG ☒ MONO

Axis:

☒ 1 ☐ 2

Label:

☒ I ☐ M ☐ -

Ions:

a ☐ + ☐ 2+ ☐ 3+

b ☒ + ☐ 2+ ☐ 3+

c ☐ + ☐ 2+ ☐ 3+

x ☐ + ☐ 2+ ☐ 3+

y ☒ + ☒ 2+ ☐ 3+

z ☐ + ☐ 2+ ☐ 3+

hide H<sub>2</sub>O/NH<sub>3</sub> ☐

zoom 112-122 ☐

GO

GVISAISEAAQYNPEPPPPR, MH+ 2192.1351, m/z 548.7892  
L OS G12 P120811 220811-s1.04951.04951.4.dta

scan 4951; 3.9e+000

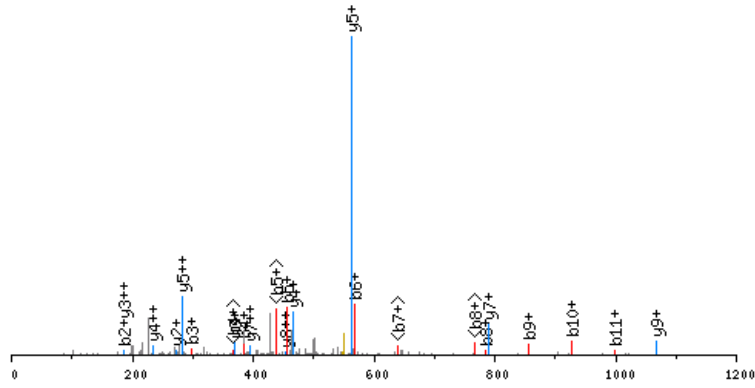

click image to zoom in; click top corners to zoom out [\[precursor±\]](#)

scan 4947; 548.8 m/z; 4.9e+000

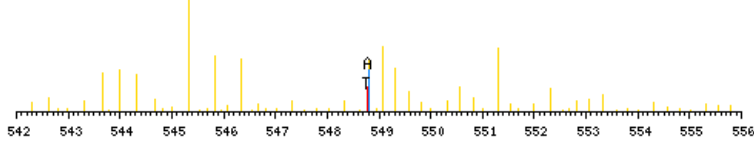

zoomed in precursor plot; T=theoretical m/z, A=acquired m/z

| b <sup>+</sup> | #  | AA | #  | y <sup>+</sup> | y <sup>2+</sup> |
|----------------|----|----|----|----------------|-----------------|
| 86.0606        | 1  | G  | 21 |                |                 |
| 185.1290       | 2  | V  | 20 | 2107.0824      | 1054.0451       |
| 298.2130       | 3  | I  | 19 | 2008.0140      | 1004.5109       |
| 385.2451       | 4  | S  | 18 | 1894.9299      | 947.9689        |
| 456.2822       | 5  | A  | 17 | 1807.8979      | 904.4529        |
| 569.3662       | 6  | I  | 16 | 1736.8608      | 868.9343        |
| 656.3983       | 7  | S  | 15 | 1623.7767      | 812.3923        |
| 785.4409       | 8  | E  | 14 | 1536.7447      | 768.8763        |
| 856.4780       | 9  | A  | 13 | 1407.7021      | 704.3550        |
| 927.5151       | 10 | A  | 12 | 1336.6650      | 668.8364        |
| 998.5522       | 11 | A  | 11 | 1265.6279      | 633.3178        |
| 1126.6108      | 12 | Q  | 10 | 1194.5907      | 597.7993        |
| 1289.6741      | 13 | Y  | 9  | 1066.5322      | 533.7700        |
| 1403.7170      | 14 | N  | 8  | 903.4688       | 452.2383        |
| 1500.7698      | 15 | P  | 7  | 789.4259       | 395.2169        |
| 1629.8124      | 16 | E  | 6  | 692.3731       | 346.6905        |
| 1726.8652      | 17 | P  | 5  | 563.3306       | 282.1692        |
| 1823.9179      | 18 | P  | 4  | 466.2778       | 233.6428        |
| 1920.9707      | 19 | P  | 3  | 369.2250       | 185.1164        |
| 2018.0235      | 20 | P  | 2  | 272.1723       | 136.5900        |
|                | 21 | R  | 1  | 175.1195       | 88.0637         |

N-term:+29.04

X-range:

0 - 0

MassTol: Y-zoom:

0. 1.

MassType:

☐ AVG ☒ MONO

Axis:

☒ 1 ☐ 2

Label:

☒ I ☐ M ☐ -

Ions:

a ☐ + ☐ 2+ ☐ 3+

b ☒ + ☐ 2+ ☐ 3+

c ☐ + ☐ 2+ ☐ 3+

x ☐ + ☐ 2+ ☐ 3+

y ☒ + ☒ 2+ ☐ 3+

z ☐ + ☐ 2+ ☐ 3+

hide H<sub>2</sub>O/NH<sub>3</sub> ☐

zoom 112-122 ☐

GO

GVKEKALVSSVR, MH+ 1356.8579, m/z 452.9575  
L OS G17 P120811 220811-s1.02210.02210.3.dta

scan 2210; 3.1e+001

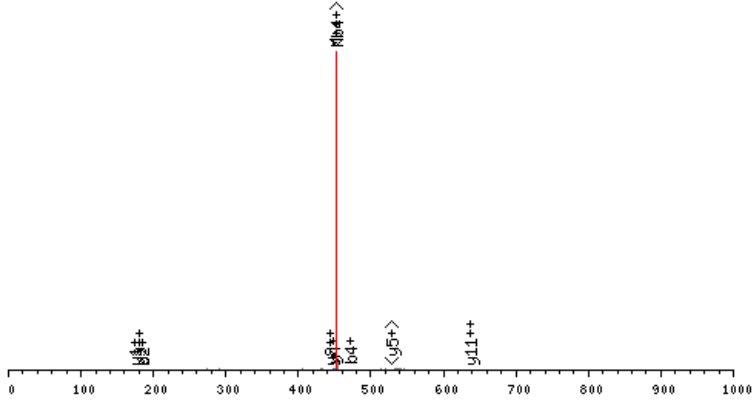

click image to zoom in; click top corners to zoom out [\[precursor±\]](#)

scan 2208; 453.0 mz; 5.9e+000

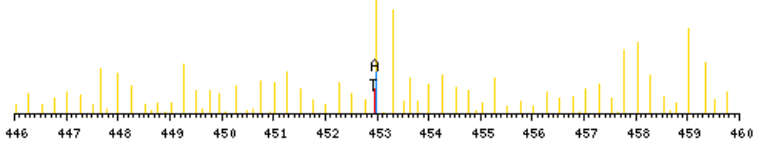

zoomed in precursor plot; T=theoretical m/z, A=acquired m/z

| b <sup>+</sup> | #  | AA | #  | y <sup>+</sup> | y <sup>2+</sup> |
|----------------|----|----|----|----------------|-----------------|
| 86.0606        | 1  | G  | 12 |                |                 |
| 185.1290       | 2  | V  | 11 | 1271.8052      | 636.4065        |
| 341.2553       | 3  | K  | 10 | 1172.7368      | 586.8723        |
| 470.2979       | 4  | E  | 9  | 1016.6105      | 508.8091        |
| 626.4242       | 5  | K  | 8  | 887.5679       | 444.2878        |
| 697.4613       | 6  | A  | 7  | 731.4416       | 366.2247        |
| 810.5453       | 7  | L  | 6  | 660.4044       | 330.7061        |
| 909.6138       | 8  | V  | 5  | 547.3204       | 274.1641        |
| 996.6458       | 9  | S  | 4  | 448.2520       | 224.6299        |
| 1083.6778      | 10 | S  | 3  | 361.2199       | 181.1139        |
| 1182.7462      | 11 | V  | 2  | 274.1879       | 137.5979        |
|                | 12 | R  | 1  | 175.1195       | 88.0637         |

N-term:+29.04 K(3):+156.13  
K(5):+156.13

X-range:

0 - 0

MassTol: Y-zoom:

0. 1.

MassType:

☐AVG ☒MONO

Axis:

☒1 ☐2

Label:

☒I ☐M ☐-

Ions:

a ☐+ ☐2+ ☐3+

b ☒+ ☐2+ ☐3+

c ☐+ ☐2+ ☐3+

x ☐+ ☐2+ ☐3+

y ☒+ ☒2+ ☐3+

z ☐+ ☐2+ ☐3+

hide H<sub>2</sub>O/NH<sub>3</sub> ☐

zoom 112-122 ☐

GO

GVMVGMGQKDSYVGDEAQSRR, MH+ 2326.1536, m/z 582.2939  
L OS G17 P120811 220811-s1.03559.03559.4.dta

scan 3559; 5.3e+000

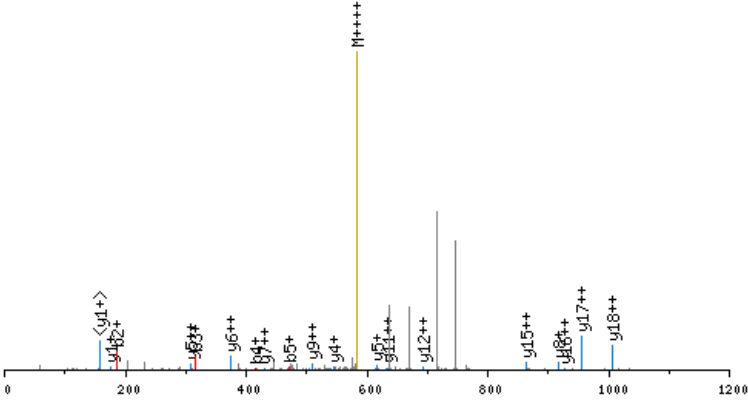

click image to zoom in; click top corners to zoom out

[precursor±]

scan 3558; 582.3 m/z; 2.5e+001

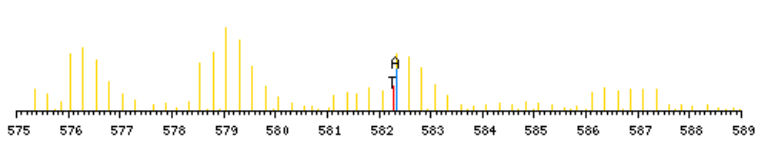

zoomed in precursor plot; T=theoretical m/z, A=acquired m/z

| b <sup>+</sup> | #  | AA | #  | y <sup>+</sup> | y <sup>2+</sup> |
|----------------|----|----|----|----------------|-----------------|
| 86.0606        | 1  | G  | 21 |                |                 |
| 185.1290       | 2  | V  | 20 | 2241.1008      | 1121.0543       |
| 316.1695       | 3  | M  | 19 | 2142.0324      | 1071.5201       |
| 415.2379       | 4  | V  | 18 | 2010.9919      | 1005.9999       |
| 472.2593       | 5  | G  | 17 | 1911.9235      | 956.4657        |
| 603.2998       | 6  | M  | 16 | 1854.9021      | 927.9549        |
| 660.3213       | 7  | G  | 15 | 1723.8616      | 862.4347        |
| 788.3799       | 8  | Q  | 14 | 1666.8401      | 833.9240        |
| 944.5062       | 9  | K  | 13 | 1538.7815      | 769.8947        |
| 1059.5331      | 10 | D  | 12 | 1382.6552      | 691.8315        |
| 1146.5651      | 11 | S  | 11 | 1267.6283      | 634.3181        |
| 1309.6285      | 12 | Y  | 10 | 1180.5963      | 590.8020        |
| 1408.6969      | 13 | V  | 9  | 1017.5329      | 509.2704        |
| 1465.7183      | 14 | G  | 8  | 918.4645       | 459.7362        |
| 1580.7453      | 15 | D  | 7  | 861.4431       | 431.2254        |
| 1709.7879      | 16 | E  | 6  | 746.4161       | 373.7120        |
| 1780.8250      | 17 | A  | 5  | 617.3735       | 309.1907        |
| 1908.8836      | 18 | Q  | 4  | 546.3364       | 273.6721        |
| 1995.9156      | 19 | S  | 3  | 418.2778       | 209.6428        |
| 2152.0419      | 20 | K  | 2  | 331.2458       | 166.1268        |
|                | 21 | R  | 1  | 175.1195       | 88.0637         |

N-term:+29.04 K(9):+156.13  
K(20):+156.13

X-range:

0 - 0

MassTol: Y-zoom:

0. 1.

MassType:

☐ AVG ☒ MONO

Axis:

☒ 1 ☐ 2

Label:

☒ I ☐ M ☐ -

Ions:

a ☐ + ☐ 2+ ☐ 3+

b ☒ + ☐ 2+ ☐ 3+

c ☐ + ☐ 2+ ☐ 3+

x ☐ + ☐ 2+ ☐ 3+

y ☒ + ☒ 2+ ☐ 3+

z ☐ + ☐ 2+ ☐ 3+

hide H<sub>2</sub>O/NH<sub>3</sub> ☐

zoom 112-122 ☐

GO

GVNKMDSLEPPYSQKR, MH+ 1920.9854, m/z 481.0018  
L OS G17 P120811 220811-s1.02299.02299.4.dta

scan 2299; 1.5e+001

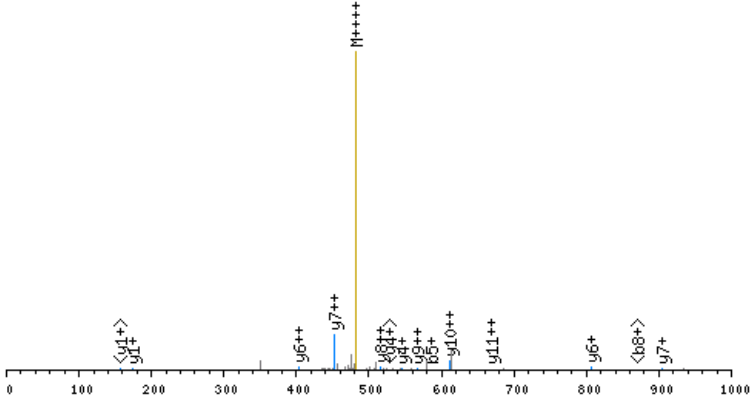

click image to zoom in; click top corners to zoom out [precursor±]

scan 2298; 481.0 m/z; 8.5e+000

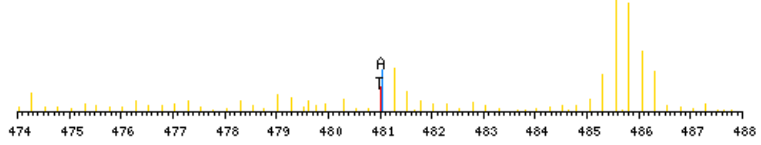

zoomed in precursor plot; T=theoretical m/z, A=acquired m/z

| b <sup>+</sup> | #  | AA | #  | y <sup>+</sup> | y <sup>2+</sup> |
|----------------|----|----|----|----------------|-----------------|
| 86.0606        | 1  | G  | 16 |                |                 |
| 185.1290       | 2  | V  | 15 | 1835.9326      | 918.4702        |
| 299.1719       | 3  | N  | 14 | 1736.8642      | 868.9360        |
| 455.2982       | 4  | K  | 13 | 1622.8213      | 811.9146        |
| 586.3387       | 5  | M  | 12 | 1466.6950      | 733.8514        |
| 701.3656       | 6  | D  | 11 | 1335.6545      | 668.3312        |
| 788.3977       | 7  | S  | 10 | 1220.6276      | 610.8177        |
| 889.4453       | 8  | T  | 9  | 1133.5955      | 567.3017        |
| 1018.4879      | 9  | E  | 8  | 1032.5479      | 516.7778        |
| 1115.5407      | 10 | P  | 7  | 903.5053       | 452.2565        |
| 1212.5935      | 11 | P  | 6  | 806.4525       | 403.7302        |
| 1375.6568      | 12 | Y  | 5  | 709.3997       | 355.2038        |
| 1462.6888      | 13 | S  | 4  | 546.3364       | 273.6721        |
| 1590.7474      | 14 | Q  | 3  | 459.3044       | 230.1561        |
| 1746.8737      | 15 | K  | 2  | 331.2458       | 166.1268        |
|                | 16 | R  | 1  | 175.1195       | 88.0637         |

N-term:+29.04 K(4):+156.13  
K(15):+156.13

N-term: +29.04 K(8): +156.13  
K(14): +156.13

X-range:

0 - 0

MassTol: Y-zoom:

0. 1.

MassType:

☐AVG ☒MONO

Axis:

☒1 ☐2

Label:

☒I ☐M ☐-

Ions:

a ☐+ ☐2+ ☐3+

b ☒+ ☐2+ ☐3+

c ☐+ ☐2+ ☐3+

x ☐+ ☐2+ ☐3+

y ☒+ ☒2+ ☐3+

z ☐+ ☐2+ ☐3+

hide H<sub>2</sub>O/NH<sub>3</sub> ☐

zoom 112-122 ☐

GO

GVQGPPGPAGPR, MH+ 1117.6118, m/z 559.3095  
L OS G13 P120811 220811-s1.02252.02252.2.dta

scan 2252; 3.8e+000

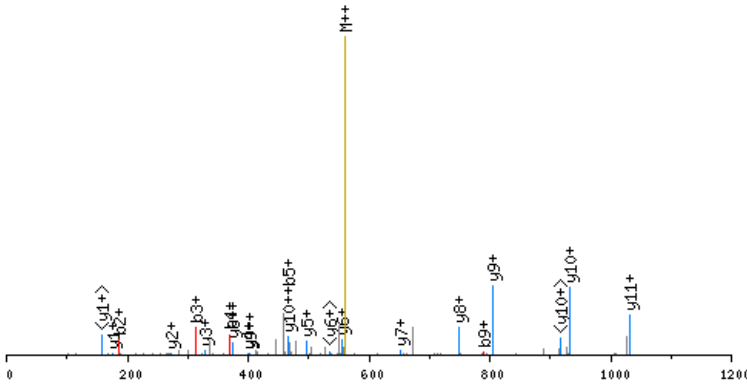

click image to zoom in; click top corners to zoom out

[precursor±]

scan 2249; 559.3 m/z; 8.5e+000

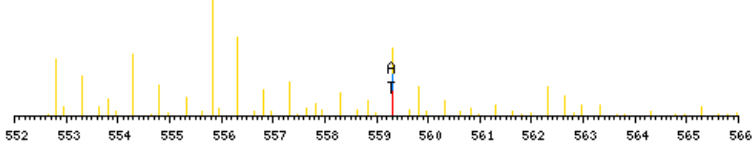

zoomed in precursor plot; T=theoretical m/z, A=acquired m/z

| b <sup>+</sup> | #  | AA | #  | y <sup>+</sup> | y <sup>2+</sup> |
|----------------|----|----|----|----------------|-----------------|
| 86.0606        | 1  | G  | 12 |                |                 |
| 185.1290       | 2  | V  | 11 | 1032.5591      | 516.7834        |
| 313.1876       | 3  | Q  | 10 | 933.4906       | 467.2492        |
| 370.2090       | 4  | G  | 9  | 805.4321       | 403.2199        |
| 467.2618       | 5  | P  | 8  | 748.4106       | 374.7092        |
| 564.3145       | 6  | P  | 7  | 651.3578       | 326.1828        |
| 621.3360       | 7  | G  | 6  | 554.3051       | 277.6564        |
| 718.3888       | 8  | P  | 5  | 497.2836       | 249.1457        |
| 789.4259       | 9  | A  | 4  | 400.2308       | 200.6193        |
| 846.4474       | 10 | G  | 3  | 329.1937       | 165.1008        |
| 943.5001       | 11 | P  | 2  | 272.1723       | 136.5900        |
|                | 12 | R  | 1  | 175.1195       | 88.0637         |

N-term:+29.04

X-range:

0 - 0

MassTol: Y-zoom:

0. 1.

MassType:

☐ AVG ☒ MONO

Axis:

☒ 1 ☐ 2

Label:

☒ I ☐ M ☐ -

Ions:

a ☐ + ☐ 2+ ☐ 3+

b ☒ + ☐ 2+ ☐ 3+

c ☐ + ☐ 2+ ☐ 3+

x ☐ + ☐ 2+ ☐ 3+

y ☒ + ☒ 2+ ☐ 3+

z ☐ + ☐ 2+ ☐ 3+

hide H<sub>2</sub>O/NH<sub>3</sub> ☐

zoom 112-122 ☐

GO

GVQVETISPGDGR, MH+ 1342.6966, m/z 448.2371  
L OS G13 P120811 220811-s1.03305.03305.3.dta

scan 3305; 2.3e+000

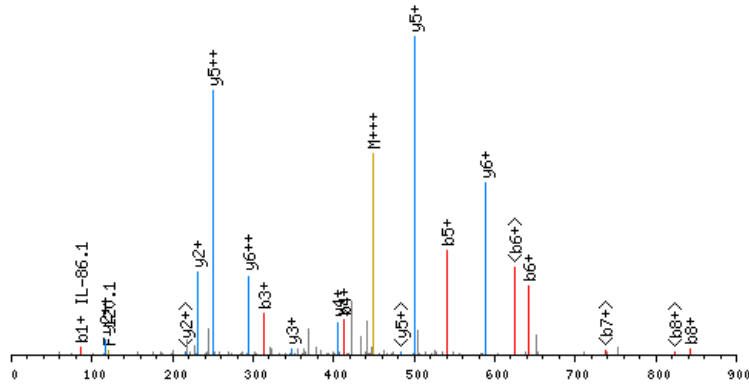

click image to zoom in; click top corners to zoom out [precursor±]

scan 3304; 448.2 m/z; 9.4e+000

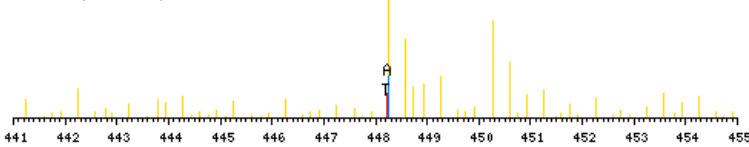

zoomed in precursor plot; T=theoretical m/z, A=acquired m/z

| b <sup>+</sup> | #  | AA | #  | y <sup>+</sup> | y <sup>2+</sup> |
|----------------|----|----|----|----------------|-----------------|
| 86.0606        | 1  | G  | 13 |                |                 |
| 185.1290       | 2  | V  | 12 | 1257.6439      | 629.3259        |
| 313.1876       | 3  | Q  | 11 | 1158.5755      | 579.7917        |
| 412.2560       | 4  | V  | 10 | 1030.5169      | 515.7624        |
| 541.2986       | 5  | E  | 9  | 931.4485       | 466.2282        |
| 642.3462       | 6  | T  | 8  | 802.4059       | 401.7069        |
| 755.4303       | 7  | I  | 7  | 701.3582       | 351.1830        |
| 842.4623       | 8  | S  | 6  | 588.2742       | 294.6410        |
| 939.5151       | 9  | P  | 5  | 501.2421       | 251.1250        |
| 996.5366       | 10 | G  | 4  | 404.1894       | 202.5986        |
| 1111.5635      | 11 | D  | 3  | 347.1679       | 174.0879        |
| 1168.5850      | 12 | G  | 2  | 232.1410       | 116.5744        |
|                | 13 | R  | 1  | 175.1195       | 88.0637         |

N-term:+29.04

X-range:

0 - 0

MassTol: Y-zoom:

0. 1.

MassType:

☐ AVG ☒ MONO

Axis:

☒ 1 ☐ 2

Label:

☒ I ☐ M ☐ -

Ions:

a ☐ + ☐ 2+ ☐ 3+

b ☒ + ☐ 2+ ☐ 3+

c ☐ + ☐ 2+ ☐ 3+

x ☐ + ☐ 2+ ☐ 3+

y ☒ + ☒ 2+ ☐ 3+

z ☐ + ☐ 2+ ☐ 3+

hide H<sub>2</sub>O/NH<sub>3</sub> ☐

zoom 112-122 ☐

GO

GVQVSPSGEKITHGTGQVYDEKDYR, MH+ 2795.5064, m/z 699.6321  
H OS G18 P120811 220811-s1.03565.03565.4.dta

scan 3565; 2.0e+000

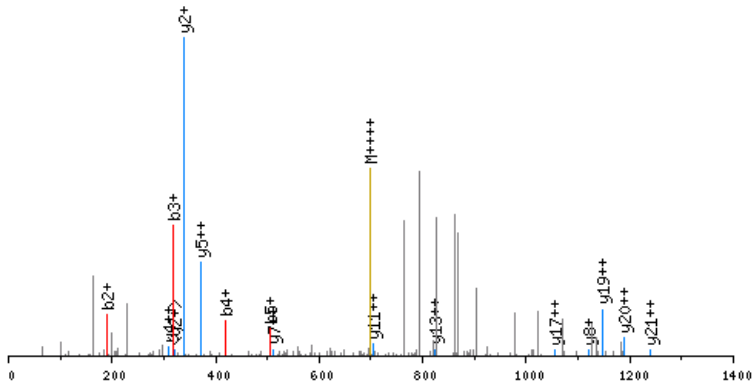

click image to zoom in; click top corners to zoom out

[precursor±]

scan 3561; 699.6 m/z; 7.9e+000

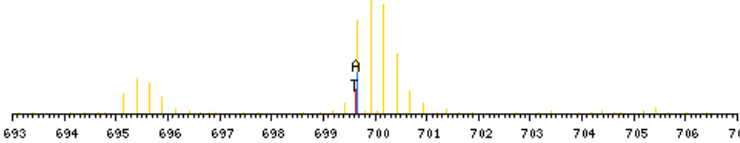

zoomed in precursor plot; T=theoretical m/z, A=acquired m/z

| b <sup>+</sup> | #  | AA | #  | y <sup>+</sup> | y <sup>2+</sup> |
|----------------|----|----|----|----------------|-----------------|
| 92.0924        | 1  | G  | 24 |                |                 |
| 191.1608       | 2  | V  | 23 | 2704.4219      | 1352.7149       |
| 319.2194       | 3  | Q  | 22 | 2605.3535      | 1303.1807       |
| 418.2878       | 4  | V  | 21 | 2477.2949      | 1239.1514       |
| 505.3198       | 5  | S  | 20 | 2378.2265      | 1189.6172       |
| 602.3726       | 6  | P  | 19 | 2291.1945      | 1146.1011       |
| 689.4046       | 7  | S  | 18 | 2194.1417      | 1097.5748       |
| 746.4261       | 8  | G  | 17 | 2107.1097      | 1054.0588       |
| 875.4686       | 9  | E  | 16 | 2050.0882      | 1025.5480       |
| 1037.6267      | 10 | K  | 15 | 1921.0456      | 961.0267        |
| 1150.7108      | 11 | I  | 14 | 1758.8875      | 879.9477        |
| 1251.7585      | 12 | T  | 13 | 1645.8035      | 823.4056        |
| 1388.8174      | 13 | H  | 12 | 1544.7558      | 772.8818        |
| 1489.8651      | 14 | T  | 11 | 1407.6969      | 704.3523        |
| 1546.8865      | 15 | G  | 10 | 1306.6492      | 653.8285        |
| 1674.9451      | 16 | Q  | 9  | 1249.6277      | 625.3178        |
| 1774.0135      | 17 | V  | 8  | 1121.5692      | 561.2885        |
| 1937.0769      | 18 | Y  | 7  | 1022.5007      | 511.7543        |
| 2052.1038      | 19 | D  | 6  | 859.4374       | 430.2226        |
| 2181.1464      | 20 | E  | 5  | 744.4105       | 372.7091        |
| 2343.3045      | 21 | K  | 4  | 615.3679       | 308.1878        |
| 2458.3314      | 22 | D  | 3  | 453.2098       | 227.1088        |
| 2621.3948      | 23 | Y  | 2  | 338.1828       | 169.5953        |
|                | 24 | R  | 1  | 175.1195       | 88.0637         |

N-term:+35.07 K(10):+162.16  
K(21):+162.16

X-range:

0 - 0

MassTol: Y-zoom:

0. 1.

MassType:

☐ AVG ☒ MONO

Axis:

☒ 1 ☐ 2

Label:

☒ I ☐ M ☐ -

Ions:

a ☐ + ☐ 2+ ☐ 3+

b ☒ + ☐ 2+ ☐ 3+

c ☐ + ☐ 2+ ☐ 3+

x ☐ + ☐ 2+ ☐ 3+

y ☒ + ☒ 2+ ☐ 3+

z ☐ + ☐ 2+ ☐ 3+

hide H<sub>2</sub>O/NH<sub>3</sub> ☐

zoom 112-122 ☐

GO

GVSDGSEVAKAQKAAPGGASPTIFSR, MH+ 2572.3735, m/z 643.8488  
L\_OS\_G16\_P120811\_220811-s1.04250.04250.4.dta

scan 4250; 5.8e+000

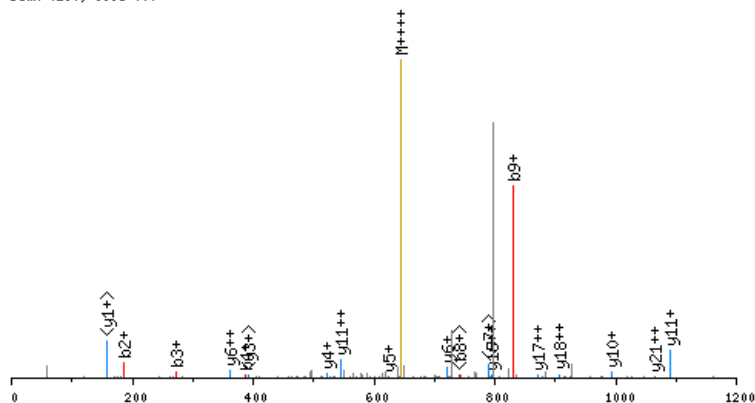

click image to zoom in; click top corners to zoom out

[precursor±]

scan 4248; 643.8 m/z; 1.2e+001

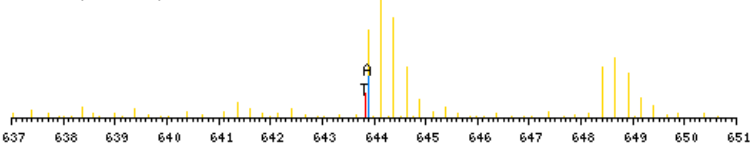

zoomed in precursor plot; T=theoretical m/z, A=acquired m/z

| b <sup>+</sup> | #  | AA | #  | y <sup>+</sup> | y <sup>2+</sup> |
|----------------|----|----|----|----------------|-----------------|
| 86.0606        | 1  | G  | 26 |                |                 |
| 185.1290       | 2  | V  | 25 | 2487.3208      | 1244.1643       |
| 272.1610       | 3  | S  | 24 | 2388.2524      | 1194.6301       |
| 387.1879       | 4  | D  | 23 | 2301.2204      | 1151.1141       |
| 444.2094       | 5  | G  | 22 | 2186.1934      | 1093.6006       |
| 531.2414       | 6  | S  | 21 | 2129.1720      | 1065.0899       |
| 660.2840       | 7  | E  | 20 | 2042.1399      | 1021.5739       |
| 759.3524       | 8  | V  | 19 | 1913.0973      | 957.0526        |
| 830.3896       | 9  | A  | 18 | 1814.0289      | 907.5184        |
| 986.5159       | 10 | K  | 17 | 1742.9918      | 871.9998        |
| 1057.5530      | 11 | A  | 16 | 1586.8655      | 793.9367        |
| 1185.6116      | 12 | Q  | 15 | 1515.8284      | 758.4181        |
| 1341.7379      | 13 | K  | 14 | 1387.7698      | 694.3888        |
| 1412.7750      | 14 | A  | 13 | 1231.6435      | 616.3257        |
| 1483.8121      | 15 | A  | 12 | 1160.6064      | 580.8071        |
| 1580.8648      | 16 | P  | 11 | 1089.5693      | 545.2886        |
| 1637.8863      | 17 | G  | 10 | 992.5165       | 496.7622        |
| 1694.9078      | 18 | G  | 9  | 935.4951       | 468.2514        |
| 1765.9449      | 19 | A  | 8  | 878.4736       | 439.7407        |
| 1852.9769      | 20 | S  | 7  | 807.4365       | 404.2222        |
| 1950.0297      | 21 | P  | 6  | 720.4044       | 360.7061        |
| 2051.0774      | 22 | T  | 5  | 623.3517       | 312.1798        |
| 2164.1614      | 23 | I  | 4  | 522.3040       | 261.6559        |
| 2311.2298      | 24 | F  | 3  | 409.2199       | 205.1139        |
| 2398.2619      | 25 | S  | 2  | 262.1515       | 131.5797        |
|                | 26 | R  | 1  | 175.1195       | 88.0637         |

N-term: +29.04 K(10) : +156.13  
K(13) : +156.13

X-range:

$$0 - 0$$

0. 1.

☐ AVG ☒ MONO

1 2

I M -

$$a \square + \square^2 + \square^3 +$$
 $\square + \square^2 + \square^3 + \dots$ 
$$x \begin{vmatrix} & + \\ & \\ & \end{vmatrix} + \begin{vmatrix} & & \\ & & \\ & & \end{vmatrix} + \begin{vmatrix} & & \\ & & \\ & & \end{vmatrix}$$
$$z \begin{bmatrix} \phantom{0} \end{bmatrix}^1 + \begin{bmatrix} \phantom{0} \end{bmatrix}^2 + \begin{bmatrix} \phantom{0} \end{bmatrix}^3 +$$

zoom 112-122

GO

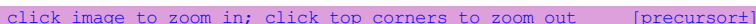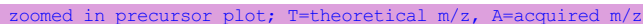

N-term:+29.04

X-range:

0 - 0

MassTol: Y-zoom:

0. 1.

MassType:

☐ AVG ☒ MONO

Axis:

☒ 1 ☐ 2

Label:

☒ I ☐ M ☐ -

Ions:

a ☐ + ☐ 2+ ☐ 3+

b ☒ + ☐ 2+ ☐ 3+

c ☐ + ☐ 2+ ☐ 3+

x ☐ + ☐ 2+ ☐ 3+

y ☒ + ☒ 2+ ☐ 3+

z ☐ + ☐ 2+ ☐ 3+

hide H<sub>2</sub>O/NH<sub>3</sub> ☐

zoom 112-122 ☐

GO

GVSSGPGPMGLMGPR, MH+ 1433.7457, m/z 478.5867  
H OS G13 P120811 220811-s1.04867.04867.3.dta

scan 4867; 1.8e+000

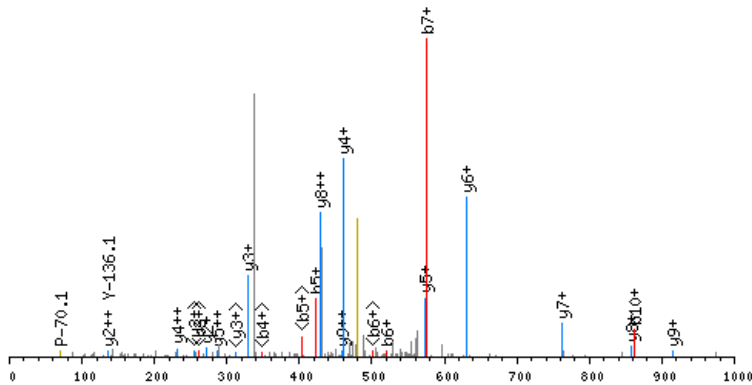

click image to zoom in; click top corners to zoom out

[precursor±]

scan 4864; 478.6 m/z; 5.4e+000

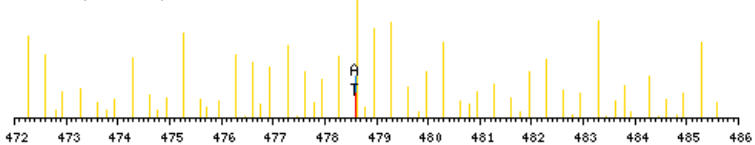

zoomed in precursor plot; T=theoretical m/z, A=acquired m/z

| b <sup>+</sup> | #  | AA | #  | y <sup>+</sup> | y <sup>2+</sup> |
|----------------|----|----|----|----------------|-----------------|
| 92.0924        | 1  | G  | 15 |                |                 |
| 191.1608       | 2  | V  | 14 | 1342.6612      | 671.8345        |
| 278.1928       | 3  | S  | 13 | 1243.5927      | 622.3003        |
| 365.2248       | 4  | S  | 12 | 1156.5607      | 578.7843        |
| 422.2463       | 5  | G  | 11 | 1069.5287      | 535.2683        |
| 519.2991       | 6  | P  | 10 | 1012.5072      | 506.7575        |
| 576.3205       | 7  | G  | 9  | 915.4545       | 458.2311        |
| 673.3733       | 8  | P  | 8  | 858.4330       | 429.7204        |
| 804.4138       | 9  | M  | 7  | 761.3802       | 381.1940        |
| 861.4352       | 10 | G  | 6  | 630.3397       | 315.6738        |
| 974.5193       | 11 | L  | 5  | 573.3183       | 287.1631        |
| 1105.5598      | 12 | M  | 4  | 460.2342       | 230.6210        |
| 1162.5813      | 13 | G  | 3  | 329.1937       | 165.1008        |
| 1259.6340      | 14 | P  | 2  | 272.1723       | 136.5900        |
|                | 15 | R  | 1  | 175.1195       | 88.0637         |

N-term:+35.07

X-range:

0 - 0

MassTol: Y-zoom:

0. 1.

MassType:

☐ AVG ☒ MONO

Axis:

☒ 1 ☐ 2

Label:

☒ I ☐ M ☐ -

Ions:

a ☐ + ☐ 2+ ☐ 3+

b ☒ + ☐ 2+ ☐ 3+

c ☐ + ☐ 2+ ☐ 3+

x ☐ + ☐ 2+ ☐ 3+

y ☒ + ☒ 2+ ☐ 3+

z ☐ + ☐ 2+ ☐ 3+

hide H<sub>2</sub>O/NH<sub>3</sub> ☐

zoom 112-122 ☐

GO

GVTSVSQIFHSPDLAIR, MH+ 1855.0077, m/z 619.0074  
L OS G15 P120811 220811-s1.05814.05814.3.dta

scan 5814; 2.1e+000

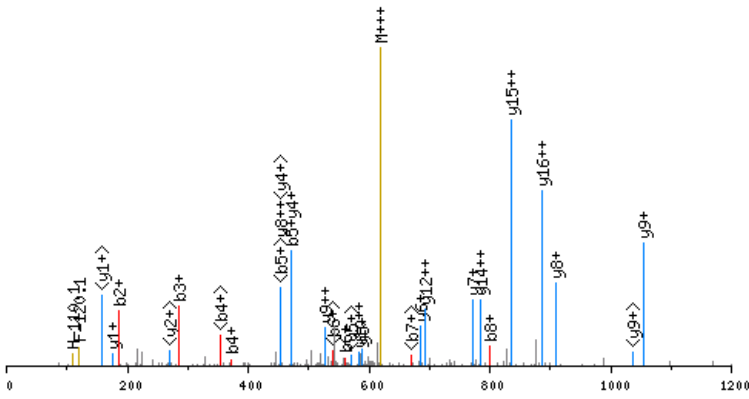

click image to zoom in; click top corners to zoom out

[precursor±]

scan 5811; 619.0 m/z; 4.3e+000

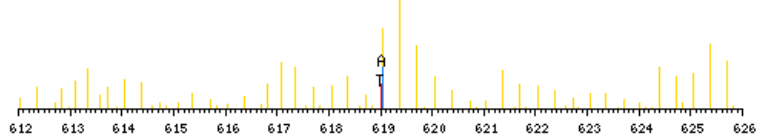

zoomed in precursor plot; T=theoretical m/z, A=acquired m/z

| b <sup>+</sup> | #  | AA | #  | y <sup>+</sup> | y <sup>2+</sup> |
|----------------|----|----|----|----------------|-----------------|
| 86.0606        | 1  | G  | 17 |                |                 |
| 185.1290       | 2  | V  | 16 | 1769.9550      | 885.4814        |
| 286.1767       | 3  | T  | 15 | 1670.8866      | 835.9472        |
| 373.2087       | 4  | S  | 14 | 1569.8389      | 785.4234        |
| 472.2771       | 5  | V  | 13 | 1482.8069      | 741.9074        |
| 559.3091       | 6  | S  | 12 | 1383.7385      | 692.3731        |
| 687.3677       | 7  | Q  | 11 | 1296.7064      | 648.8571        |
| 800.4518       | 8  | I  | 10 | 1168.6479      | 584.8278        |
| 947.5202       | 9  | F  | 9  | 1055.5638      | 528.2858        |
| 1084.5791      | 10 | H  | 8  | 908.4954       | 454.7516        |
| 1171.6111      | 11 | S  | 7  | 771.4365       | 386.2222        |
| 1268.6639      | 12 | P  | 6  | 684.4044       | 342.7061        |
| 1383.6908      | 13 | D  | 5  | 587.3517       | 294.1798        |
| 1496.7749      | 14 | L  | 4  | 472.3247       | 236.6663        |
| 1567.8120      | 15 | A  | 3  | 359.2407       | 180.1243        |
| 1680.8961      | 16 | I  | 2  | 288.2036       | 144.6057        |
|                | 17 | R  | 1  | 175.1195       | 88.0637         |

X-range:

0 - 0

MassTol: Y-zoom:

0. 1.

MassType:

☐AVG ☒MONO

Axis:

☒1 ☐2

Label:

☒I ☐M ☐-

Ions:

a ☐+ ☐2+ ☐3+

b ☒+ ☐2+ ☐3+

c ☐+ ☐2+ ☐3+

x ☐+ ☐2+ ☐3+

y ☒+ ☒2+ ☐3+

z ☐+ ☐2+ ☐3+

hide H<sub>2</sub>O/NH<sub>3</sub> ☐

zoom 112-122 ☐

GO

GVVDSDDLPLNISR, MH+ 1541.8175, m/z 514.6107  
L OS G13 P120811 220811-s1.05753.05753.3.dta

scan 5753; 1.1e+000

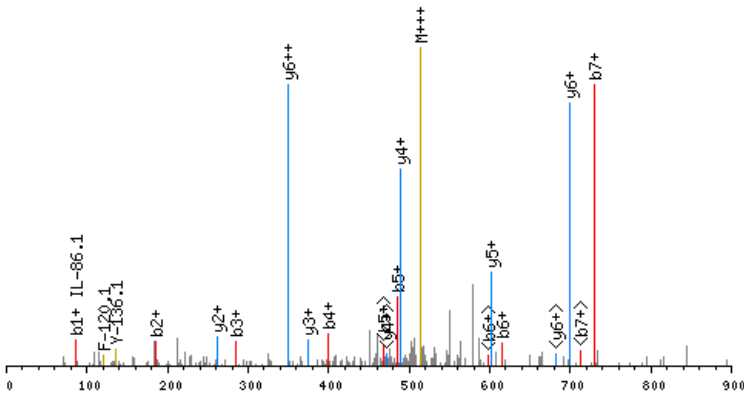

click image to zoom in; click top corners to zoom out

[precursor±]

scan 5749; 514.6 m/z; 6.9e+000

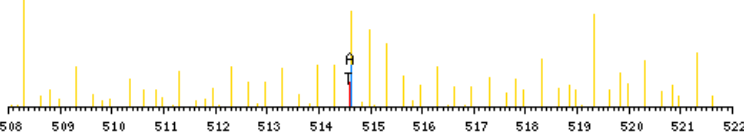

zoomed in precursor plot; T=theoretical m/z, A=acquired m/z

| b <sup>+</sup> | #  | AA | #  | y <sup>+</sup> | y <sup>2+</sup> |
|----------------|----|----|----|----------------|-----------------|
| 86.0606        | 1  | G  | 14 |                |                 |
| 185.1290       | 2  | V  | 13 | 1456.7647      | 728.8863        |
| 284.1974       | 3  | V  | 12 | 1357.6963      | 679.3521        |
| 399.2243       | 4  | D  | 11 | 1258.6279      | 629.8179        |
| 486.2564       | 5  | S  | 10 | 1143.6010      | 572.3044        |
| 615.2990       | 6  | E  | 9  | 1056.5689      | 528.7884        |
| 730.3259       | 7  | D  | 8  | 927.5264       | 464.2671        |
| 843.4100       | 8  | L  | 7  | 812.4994       | 406.7536        |
| 940.4627       | 9  | P  | 6  | 699.4153       | 350.2116        |
| 1053.5468      | 10 | L  | 5  | 602.3626       | 301.6852        |
| 1167.5897      | 11 | N  | 4  | 489.2785       | 245.1432        |
| 1280.6738      | 12 | I  | 3  | 375.2356       | 188.1217        |
| 1367.7058      | 13 | S  | 2  | 262.1515       | 131.5797        |
|                | 14 | R  | 1  | 175.1195       | 88.0637         |

N-term:+29.04

X-range:

0 - 0

MassTol: Y-zoom:

0. 1.

MassType:

☐AVG ☒MONO

Axis:

☒1 ☐2

Label:

☒I ☐M ☐-

Ions:

a ☐+ ☐2+ ☐3+

b ☒+ ☐2+ ☐3+

c ☐+ ☐2+ ☐3+

x ☐+ ☐2+ ☐3+

y ☒+ ☒2+ ☐3+

z ☐+ ☐2+ ☐3+

hide H<sub>2</sub>O/NH<sub>3</sub> ☐

zoom 112-122 ☐

GO

GYDEKSAGVSVPGPMGPSGPR, MH+ 2113.1024, m/z 705.0390  
H OS G15 P120811 220811-s1.03758.03758.3.dta

scan 3758; 7.5e+000

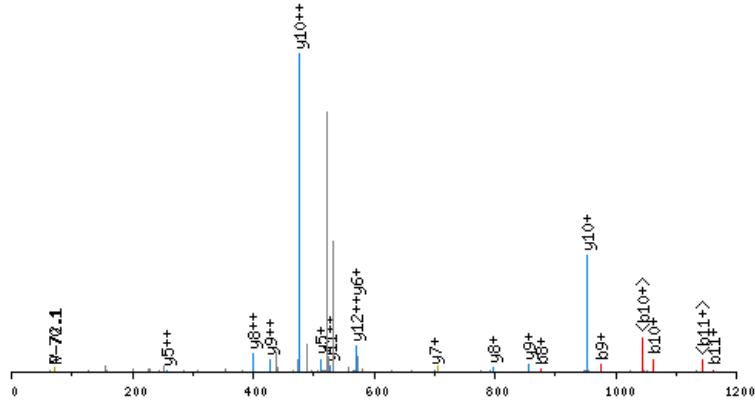

click image to zoom in; click top corners to zoom out [\[precursor±\]](#)

scan 3756; 705.0 m/z; 1.4e+001

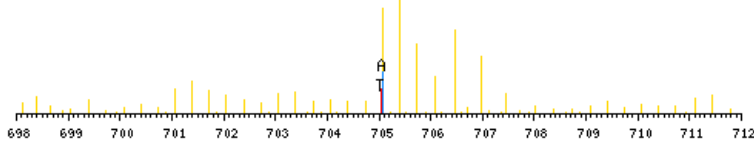

zoomed in precursor plot; T=theoretical m/z, A=acquired m/z

| b <sup>+</sup> | #  | AA | #  | y <sup>+</sup> | y <sup>2+</sup> |
|----------------|----|----|----|----------------|-----------------|
| 92.0924        | 1  | G  | 21 |                |                 |
| 255.1557       | 2  | Y  | 20 | 2022.0179      | 1011.5129       |
| 370.1826       | 3  | D  | 19 | 1858.9546      | 929.9812        |
| 499.2252       | 4  | E  | 18 | 1743.9276      | 872.4677        |
| 661.3833       | 5  | K  | 17 | 1614.8850      | 807.9464        |
| 748.4154       | 6  | S  | 16 | 1452.7269      | 726.8674        |
| 819.4525       | 7  | A  | 15 | 1365.6949      | 683.3514        |
| 876.4739       | 8  | G  | 14 | 1294.6578      | 647.8328        |
| 975.5423       | 9  | V  | 13 | 1237.6363      | 619.3221        |
| 1062.5744      | 10 | S  | 12 | 1138.5679      | 569.7879        |
| 1161.6428      | 11 | V  | 11 | 1051.5359      | 526.2718        |
| 1258.6956      | 12 | P  | 10 | 952.4675       | 476.7376        |
| 1315.7170      | 13 | G  | 9  | 855.4147       | 428.2113        |
| 1412.7698      | 14 | P  | 8  | 798.3932       | 399.7005        |
| 1543.8103      | 15 | M  | 7  | 701.3405       | 351.1741        |
| 1600.8317      | 16 | G  | 6  | 570.3000       | 285.6539        |
| 1697.8845      | 17 | P  | 5  | 513.2785       | 257.1432        |
| 1784.9165      | 18 | S  | 4  | 416.2258       | 208.6168        |
| 1841.9380      | 19 | G  | 3  | 329.1937       | 165.1008        |
| 1938.9908      | 20 | P  | 2  | 272.1723       | 136.5900        |
|                | 21 | R  | 1  | 175.1195       | 88.0637         |

N-term:+35.07 K(5):+162.16

X-range:

0 - 0

MassTol: Y-zoom:

0. 1.

MassType:

☐AVG ☒MONO

Axis:

☒1 ☐2

Label:

☒I ☐M ☐-

Ions:

a ☐+ ☐2+ ☐3+

b ☒+ ☐2+ ☐3+

c ☐+ ☐2+ ☐3+

x ☐+ ☐2+ ☐3+

y ☒+ ☒2+ ☐3+

z ☐+ ☐2+ ☐3+

hide H<sub>2</sub>O/NH<sub>3</sub> ☐

zoom 112-122 ☐

GO

GYKEPAAPVSIQR, MH+ 1483.8909, m/z 495.3018  
H OS G15 P120811 220811-s1.02894.02894.3.dta

scan 2894; 2.6e+000

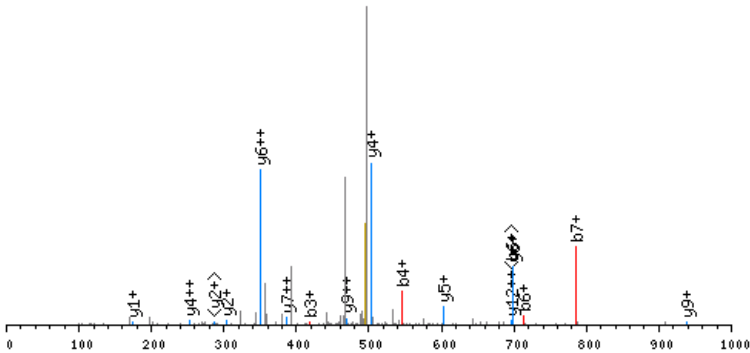

click image to zoom in; click top corners to zoom out

[precursor±]

scan 2891; 495.3 m/z; 3.6e+001

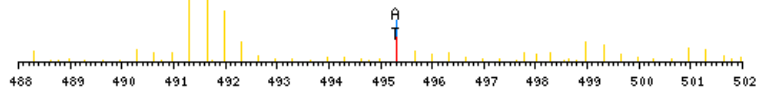

zoomed in precursor plot; T=theoretical m/z, A=acquired m/z

| b <sup>+</sup> | #  | AA | #  | y <sup>+</sup> | y <sup>2+</sup> |
|----------------|----|----|----|----------------|-----------------|
| 92.0924        | 1  | G  | 13 |                |                 |
| 255.1557       | 2  | Y  | 12 | 1392.8064      | 696.9071        |
| 417.3138       | 3  | K  | 11 | 1229.7430      | 615.3754        |
| 546.3564       | 4  | E  | 10 | 1067.5849      | 534.2964        |
| 643.4091       | 5  | P  | 9  | 938.5423       | 469.7751        |
| 714.4463       | 6  | A  | 8  | 841.4896       | 421.2487        |
| 785.4834       | 7  | A  | 7  | 770.4525       | 385.7301        |
| 882.5361       | 8  | P  | 6  | 699.4153       | 350.2116        |
| 981.6046       | 9  | V  | 5  | 602.3626       | 301.6852        |
| 1068.6366      | 10 | S  | 4  | 503.2942       | 252.1510        |
| 1181.7206      | 11 | I  | 3  | 416.2621       | 208.6350        |
| 1309.7792      | 12 | Q  | 2  | 303.1781       | 152.0930        |
|                | 13 | R  | 1  | 175.1195       | 88.0637         |

N-term:+35.07 K(3):+162.16

X-range:

0 - 0

MassTol: Y-zoom:

0. 1.

MassType:

☐ AVG ☒ MONO

Axis:

☒ 1 ☐ 2

Label:

☒ I ☐ M ☐ -

Ions:

a ☐ + ☐ 2+ ☐ 3+

b ☒ + ☐ 2+ ☐ 3+

c ☐ + ☐ 2+ ☐ 3+

x ☐ + ☐ 2+ ☐ 3+

y ☒ + ☒ 2+ ☐ 3+

z ☐ + ☐ 2+ ☐ 3+

hide H<sub>2</sub>O/NH<sub>3</sub> ☐

zoom 112-122 ☐

GO

GYSFTTTAER, MH+ 1160.5588, m/z 580.7830  
L OS G13 P120811 220811-s1.03192.03192.2.dta

scan 3192; 3.7e+000

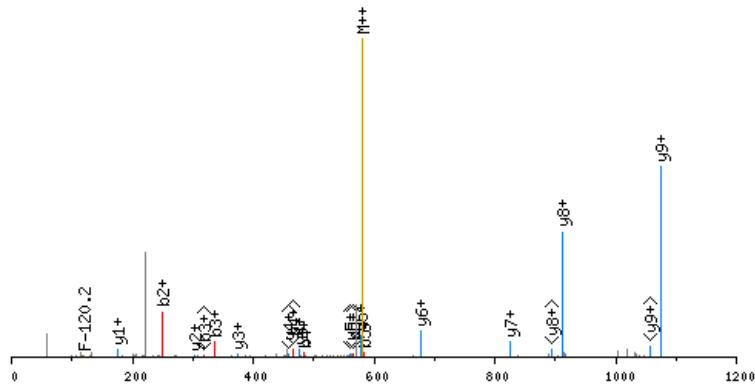

click image to zoom in; click top corners to zoom out [precursor±]

scan 3189; 580.8 m/z; 6.2e+001

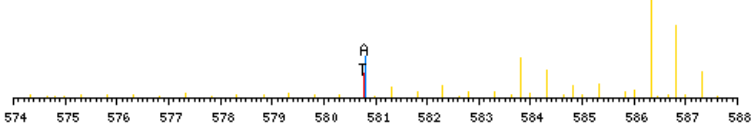

zoomed in precursor plot; T=theoretical m/z, A=acquired m/z

| b <sup>+</sup> | #  | AA | #  | y <sup>+</sup> | y <sup>2+</sup> |
|----------------|----|----|----|----------------|-----------------|
| 86.0606        | 1  | G  | 10 |                |                 |
| 249.1239       | 2  | Y  | 9  | 1075.5060      | 538.2569        |
| 336.1559       | 3  | S  | 8  | 912.4427       | 456.7253        |
| 483.2243       | 4  | F  | 7  | 825.4107       | 413.2092        |
| 584.2720       | 5  | T  | 6  | 678.3422       | 339.6750        |
| 685.3197       | 6  | T  | 5  | 577.2946       | 289.1512        |
| 786.3674       | 7  | T  | 4  | 476.2469       | 238.6274        |
| 857.4045       | 8  | A  | 3  | 375.1992       | 188.1035        |
| 986.4471       | 9  | E  | 2  | 304.1621       | 152.5850        |
|                | 10 | R  | 1  | 175.1195       | 88.0637         |

N-term:+29.04

X-range:

0 - 0

MassTol: Y-zoom:

0. 1.

MassType:

☐AVG ☒MONO

Axis:

☒1 ☐2

Label:

☒I ☐M ☐-

Ions:

a ☐+ ☐2+ ☐3+

b ☒+ ☐2+ ☐3+

c ☐+ ☐2+ ☐3+

x ☐+ ☐2+ ☐3+

y ☒+ ☒2+ ☐3+

z ☐+ ☐2+ ☐3+

hide H<sub>2</sub>O/NH<sub>3</sub> ☐

zoom 112-122 ☐

GO

GYSFVTTAER, MH+ 1158.5795, m/z 579.7934  
L OS G14 P120811 220811-s1.03933.03933.2.dta

scan 3933; 2.3e+000

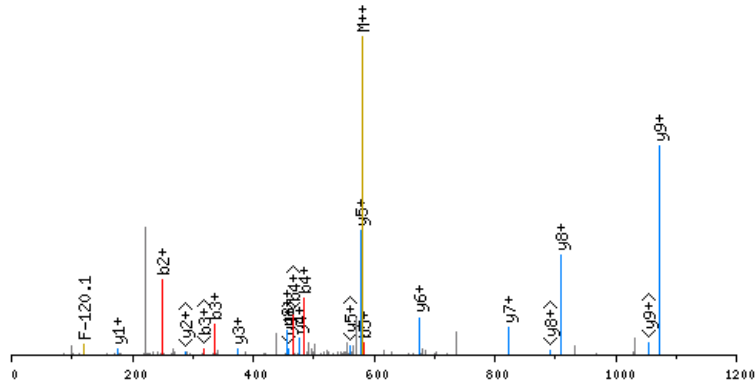

click image to zoom in; click top corners to zoom out

[precursor±]

scan 3931; 579.8 m/z; 9.1e+000

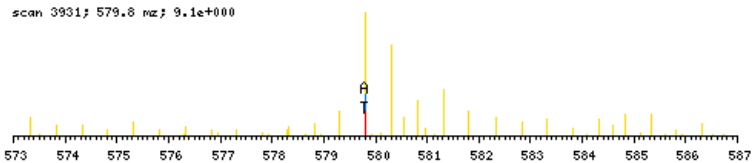

zoomed in precursor plot; T=theoretical m/z, A=acquired m/z

| b <sup>+</sup> | #  | AA | #  | y <sup>+</sup> | y <sup>2+</sup> |
|----------------|----|----|----|----------------|-----------------|
| 86.0606        | 1  | G  | 10 |                |                 |
| 249.1239       | 2  | Y  | 9  | 1073.5267      | 537.2673        |
| 336.1559       | 3  | S  | 8  | 910.4634       | 455.7356        |
| 483.2243       | 4  | F  | 7  | 823.4314       | 412.2196        |
| 582.2927       | 5  | V  | 6  | 676.3630       | 338.6854        |
| 683.3404       | 6  | T  | 5  | 577.2946       | 289.1512        |
| 784.3881       | 7  | T  | 4  | 476.2469       | 238.6274        |
| 855.4252       | 8  | A  | 3  | 375.1992       | 188.1035        |
| 984.4678       | 9  | E  | 2  | 304.1621       | 152.5850        |
|                | 10 | R  | 1  | 175.1195       | 88.0637         |

N-term:+29.04

X-range:

0 - 0

MassTol: Y-zoom:

0. 1.

MassType:

☐AVG ☒MONO

Axis:

☒1 ☐2

Label:

☒I ☐M ☐-

Ions:

a ☐+ ☐2+ ☐3+

b ☒+ ☐2+ ☐3+

c ☐+ ☐2+ ☐3+

x ☐+ ☐2+ ☐3+

y ☒+ ☒2+ ☐3+

z ☐+ ☐2+ ☐3+

hide H<sub>2</sub>O/NH<sub>3</sub> ☐

zoom 112-122 ☐

GO

GYTHLSAGELLR, MH+ 1344.7275, m/z 448.9140  
L OS G16 P120811 220811-s1.04436.04436.3.dta

scan 4436; 1.4e+001

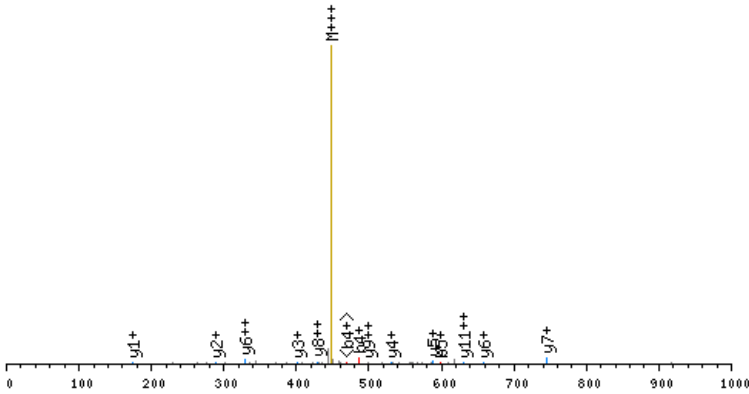

click image to zoom in; click top corners to zoom out [\[precursor±\]](#)

scan 4433; 448.9 m/z; 3.3e+000

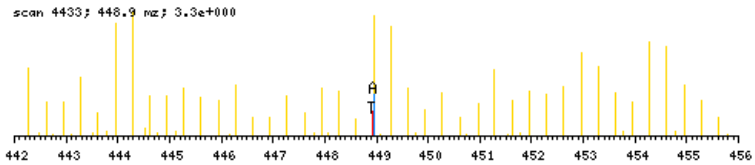

zoomed in precursor plot; T=theoretical m/z, A=acquired m/z

| b <sup>+</sup> | #  | AA | #  | y <sup>+</sup> | y <sup>2+</sup> |
|----------------|----|----|----|----------------|-----------------|
| 86.0606        | 1  | G  | 12 |                |                 |
| 249.1239       | 2  | Y  | 11 | 1259.6748      | 630.3413        |
| 350.1716       | 3  | T  | 10 | 1096.6115      | 548.8097        |
| 487.2305       | 4  | H  | 9  | 995.5638       | 498.2858        |
| 600.3145       | 5  | L  | 8  | 858.5049       | 429.7564        |
| 687.3466       | 6  | S  | 7  | 745.4208       | 373.2143        |
| 758.3837       | 7  | A  | 6  | 658.3888       | 329.6983        |
| 815.4052       | 8  | G  | 5  | 587.3517       | 294.1798        |
| 944.4477       | 9  | E  | 4  | 530.3302       | 265.6690        |
| 1057.5318      | 10 | L  | 3  | 401.2876       | 201.1477        |
| 1170.6159      | 11 | L  | 2  | 288.2036       | 144.6057        |
|                | 12 | R  | 1  | 175.1195       | 88.0637         |

N-term:+29.04

X-range:

0 - 0

MassTol: Y-zoom:

0. 1.

MassType:

☐AVG ☒MONO

Axis:

☒1 ☐2

Label:

☒I ☐M ☐-

Ions:

a ☐+ ☐2+ ☐3+

b ☒+ ☐2+ ☐3+

c ☐+ ☐2+ ☐3+

x ☐+ ☐2+ ☐3+

y ☒+ ☒2+ ☐3+

z ☐+ ☐2+ ☐3+

hide H<sub>2</sub>O/NH<sub>3</sub> ☐

zoom 112-122 ☐

GO

GYTHLSTGDLRL, MH+ 1360.7225, m/z 454.2457  
L OS G16 P120811 220811-s1.04404.04404.3.dta

scan 4404; 9.4e+000

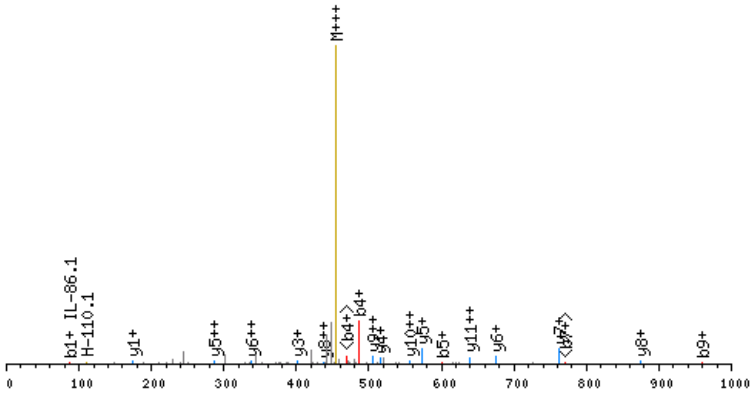

click image to zoom in; click top corners to zoom out

[precursor±]

scan 4403; 454.2 m/z; 1.5e+001

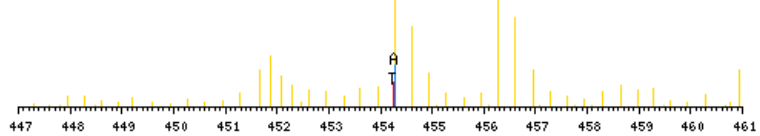

zoomed in precursor plot; T=theoretical m/z, A=acquired m/z

| b <sup>+</sup> | #  | AA | #  | y <sup>+</sup> | y <sup>2+</sup> |
|----------------|----|----|----|----------------|-----------------|
| 86.0606        | 1  | G  | 12 |                |                 |
| 249.1239       | 2  | Y  | 11 | 1275.6697      | 638.3388        |
| 350.1716       | 3  | T  | 10 | 1112.6064      | 556.8071        |
| 487.2305       | 4  | H  | 9  | 1011.5587      | 506.2833        |
| 600.3145       | 5  | L  | 8  | 874.4998       | 437.7538        |
| 687.3466       | 6  | S  | 7  | 761.4157       | 381.2118        |
| 788.3943       | 7  | T  | 6  | 674.3837       | 337.6958        |
| 845.4157       | 8  | G  | 5  | 573.3360       | 287.1719        |
| 960.4427       | 9  | D  | 4  | 516.3146       | 258.6612        |
| 1073.5267      | 10 | L  | 3  | 401.2876       | 201.1477        |
| 1186.6108      | 11 | L  | 2  | 288.2036       | 144.6057        |
|                | 12 | R  | 1  | 175.1195       | 88.0637         |

N-term:+29.04

X-range:  

0-0

MassTol: Y-zoom:  

0.1.

MassType:  

☐AVG☒MONO

Axis:  

☒1☐2

Label:  

☒I☐M☐-

Ions:  

a

☐+☐2+☐3+

b

☒+☐2+☐3+

c

☐+☐2+☐3+

x

☐+☐2+☐3+

y

☒+☒2+☐3+

z

☐+☐2+☐3+

hide H<sub>2</sub>O/NH<sub>3</sub>☐

zoom 112-122☐

GO

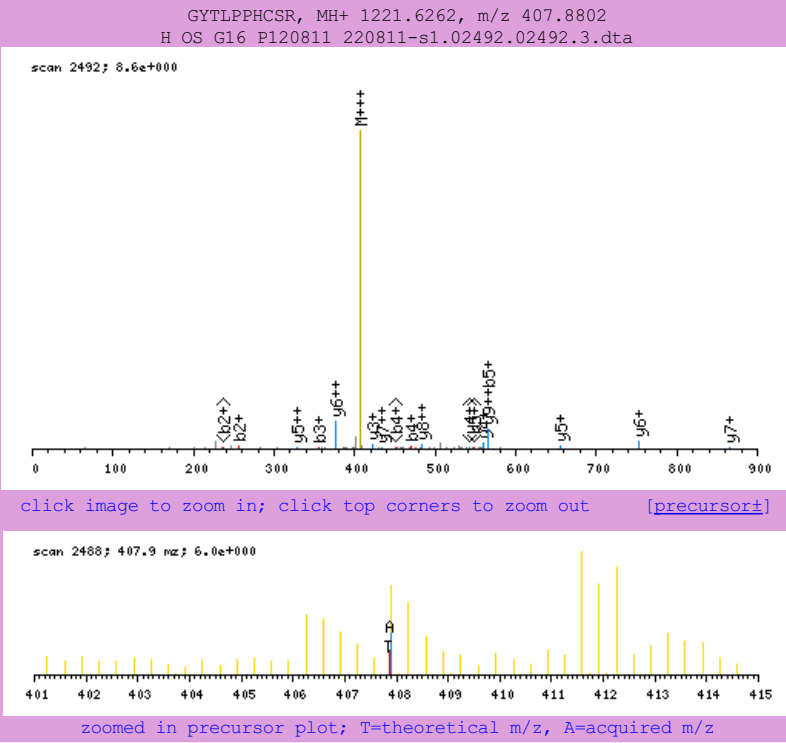

| b <sup>+</sup> | #  | AA | #  | y <sup>+</sup> | y <sup>2+</sup> |
|----------------|----|----|----|----------------|-----------------|
| 92.0924        | 1  | G  | 10 |                |                 |
| 255.1557       | 2  | Y  | 9  | 1130.5416      | 565.7747        |
| 356.2034       | 3  | T  | 8  | 967.4783       | 484.2431        |
| 469.2874       | 4  | L  | 7  | 866.4306       | 433.7192        |
| 566.3402       | 5  | P  | 6  | 753.3466       | 377.1772        |
| 663.3930       | 6  | P  | 5  | 656.2938       | 328.6508        |
| 800.4519       | 7  | H  | 4  | 559.2410       | 280.1244        |
| 960.4825       | 8  | C  | 3  | 422.1821       | 211.5950        |
| 1047.5145      | 9  | S  | 2  | 262.1515       | 131.5797        |
|                | 10 | R  | 1  | 175.1195       | 88.0637         |

N-term:+35.07 C(8):+160.03

X-range:

0 - 0

MassTol: Y-zoom:

0. 1.

MassType:

☐ AVG ☒ MONO

Axis:

☒ 1 ☐ 2

Label:

☒ I ☐ M ☐ -

Ions:

a ☐ + ☐ 2+ ☐ 3+

b ☒ + ☐ 2+ ☐ 3+

c ☐ + ☐ 2+ ☐ 3+

x ☐ + ☐ 2+ ☐ 3+

y ☒ + ☒ 2+ ☐ 3+

z ☐ + ☐ 2+ ☐ 3+

hide H<sub>2</sub>O/NH<sub>3</sub> ☐

zoom 112-122 ☐

GO

HAFSPVASVESASGETLHSPK, MH+ 2194.1144, m/z 549.2841  
L OS G17 P120811 220811-s1.04875.04875.4.dta

scan 4875; 1.0e+000

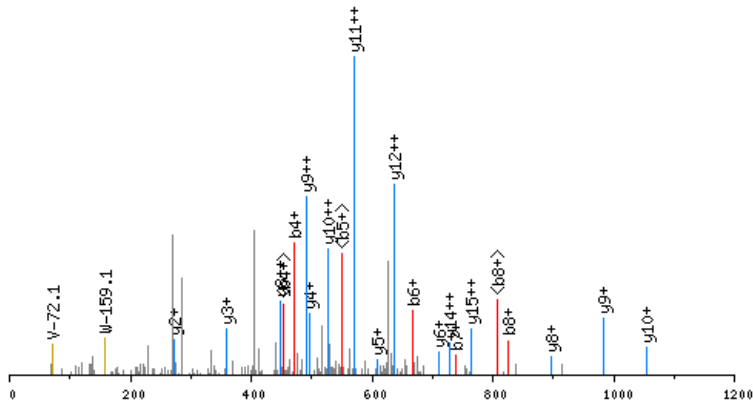

click image to zoom in; click top corners to zoom out [\[precursor±\]](#)

scan 4873; 549.3 m/z; 2.4e+001

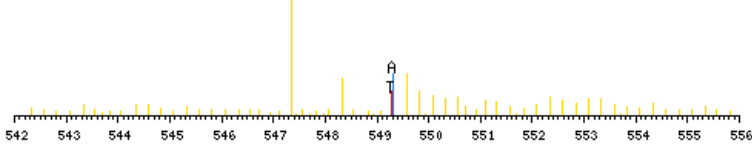

zoomed in precursor plot; T=theoretical m/z, A=acquired m/z

| b <sup>+</sup> | #  | AA | #  | y <sup>+</sup> | y <sup>2+</sup> |
|----------------|----|----|----|----------------|-----------------|
| 166.0980       | 1  | H  | 21 |                |                 |
| 237.1351       | 2  | A  | 20 | 2029.0242      | 1015.0160       |
| 384.2035       | 3  | F  | 19 | 1957.9871      | 979.4975        |
| 471.2356       | 4  | S  | 18 | 1810.9187      | 905.9633        |
| 568.2883       | 5  | P  | 17 | 1723.8867      | 862.4473        |
| 667.3567       | 6  | V  | 16 | 1626.8339      | 813.9209        |
| 738.3939       | 7  | A  | 15 | 1527.7655      | 764.3867        |
| 825.4259       | 8  | S  | 14 | 1456.7284      | 728.8681        |
| 924.4943       | 9  | V  | 13 | 1369.6964      | 685.3521        |
| 1053.5369      | 10 | E  | 12 | 1270.6280      | 635.8179        |
| 1140.5689      | 11 | S  | 11 | 1141.5854      | 571.2966        |
| 1211.6060      | 12 | A  | 10 | 1054.5533      | 527.7806        |
| 1298.6381      | 13 | S  | 9  | 983.5162       | 492.2620        |
| 1355.6595      | 14 | G  | 8  | 896.4842       | 448.7460        |
| 1484.7021      | 15 | E  | 7  | 839.4627       | 420.2353        |
| 1585.7498      | 16 | T  | 6  | 710.4201       | 355.7140        |
| 1698.8339      | 17 | L  | 5  | 609.3725       | 305.1901        |
| 1835.8928      | 18 | H  | 4  | 496.2884       | 248.6481        |
| 1922.9248      | 19 | S  | 3  | 359.2295       | 180.1187        |
| 2019.9776      | 20 | P  | 2  | 272.1975       | 136.6026        |
|                | 21 | K  | 1  | 175.1447       | 88.0763         |

N-term:+29.04 K(21):+156.13

N-term: +29.04 K(8): +156.13

X-range:

0 - 0

MassTol: Y-zoom:

0. 1.

MassType:

☐ AVG ☒ MONO

Axis:

☒ 1 ☐ 2

Label:

☒ I ☐ M ☐ -

Ions:

a ☐ + ☐ 2+ ☐ 3+

b ☒ + ☐ 2+ ☐ 3+

c ☐ + ☐ 2+ ☐ 3+

x ☐ + ☐ 2+ ☐ 3+

y ☒ + ☒ 2+ ☐ 3+

z ☐ + ☐ 2+ ☐ 3+

hide H<sub>2</sub>O/NH<sub>3</sub> ☐

zoom 112-122 ☐

GO

HAITATQKTVDPGSGKLWR, MH+ 2150.2086, m/z 538.3076  
L OS G18 P120811 220811-s1.03470.03470.4.dta

scan 3470; 1.6e+001

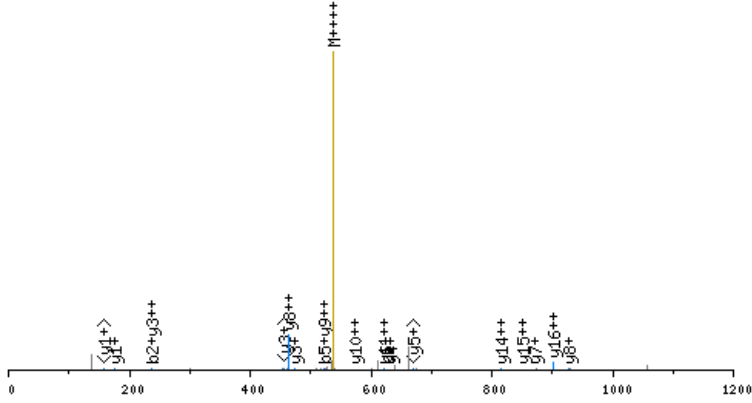

click image to zoom in; click top corners to zoom out [\[precursor±\]](#)

scan 3466; 538.3 m/z; 6.2e+000

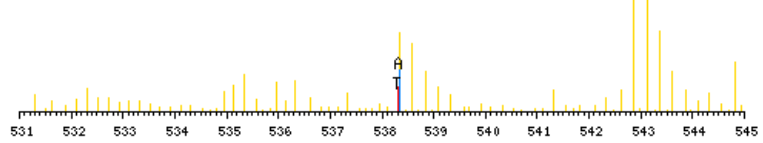

zoomed in precursor plot; T=theoretical m/z, A=acquired m/z

| b <sup>+</sup> | #  | AA | #  | y <sup>+</sup> | y <sup>2+</sup> |
|----------------|----|----|----|----------------|-----------------|
| 166.0980       | 1  | H  | 19 |                |                 |
| 237.1351       | 2  | A  | 18 | 1985.1185      | 993.0631        |
| 350.2192       | 3  | I  | 17 | 1914.0813      | 957.5446        |
| 451.2669       | 4  | T  | 16 | 1800.9973      | 901.0026        |
| 522.3040       | 5  | A  | 15 | 1699.9496      | 850.4787        |
| 623.3517       | 6  | T  | 14 | 1628.9125      | 814.9602        |
| 751.4102       | 7  | Q  | 13 | 1527.8648      | 764.4363        |
| 907.5365       | 8  | K  | 12 | 1399.8062      | 700.4070        |
| 1008.5842      | 9  | T  | 11 | 1243.6799      | 622.3439        |
| 1107.6526      | 10 | V  | 10 | 1142.6323      | 571.8200        |
| 1222.6796      | 11 | D  | 9  | 1043.5638      | 522.2858        |
| 1279.7010      | 12 | G  | 8  | 928.5369       | 464.7724        |
| 1376.7538      | 13 | P  | 7  | 871.5154       | 436.2616        |
| 1463.7858      | 14 | S  | 6  | 774.4627       | 387.7352        |
| 1520.8073      | 15 | G  | 5  | 687.4306       | 344.2192        |
| 1676.9336      | 16 | K  | 4  | 630.4092       | 315.7085        |
| 1790.0177      | 17 | L  | 3  | 474.2829       | 237.6454        |
| 1976.0970      | 18 | W  | 2  | 361.1988       | 181.1033        |
|                | 19 | R  | 1  | 175.1195       | 88.0637         |

N-term: +29.04 K(8): +156.13  
K(16): +156.13

X-range:

0 - 0

MassTol: Y-zoom:

0. 1.

MassType:

☐AVG ☒MONO

Axis:

☒1 ☐2

Label:

☒I ☐M ☐-

Ions:

a ☐+ ☐2+ ☐3+

b ☒+ ☐2+ ☐3+

c ☐+ ☐2+ ☐3+

x ☐+ ☐2+ ☐3+

y ☒+ ☒2+ ☐3+

z ☐+ ☐2+ ☐3+

hide H<sub>2</sub>O/NH<sub>3</sub> ☐

zoom 112-122 ☐

GO

HAQVISSSGIVSLGIGDR, MH+ 1823.9979, m/z 608.6708  
L OS G16 P120811 220811-s1.05302.05302.3.dta

scan 5302; 2.4e+000

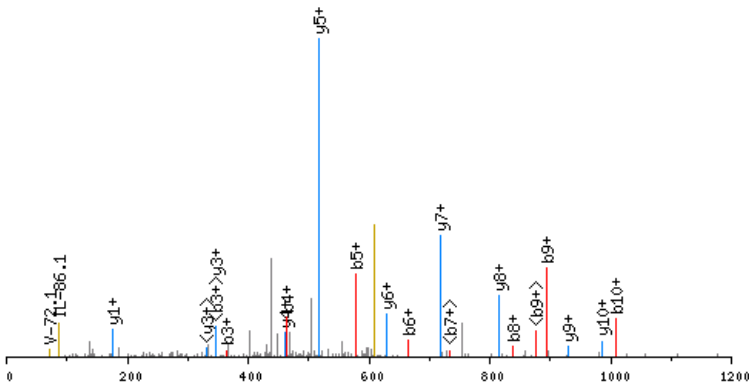

click image to zoom in; click top corners to zoom out

[precursor±]

scan 5298; 608.7 m/z; 4.0e+000

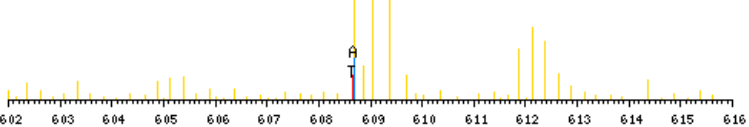

zoomed in precursor plot; T=theoretical m/z, A=acquired m/z

| b <sup>+</sup> | #  | AA | #  | y <sup>+</sup> | y <sup>2+</sup> |
|----------------|----|----|----|----------------|-----------------|
| 166.0980       | 1  | H  | 18 |                |                 |
| 237.1351       | 2  | A  | 17 | 1658.9077      | 829.9578        |
| 365.1937       | 3  | Q  | 16 | 1587.8706      | 794.4392        |
| 464.2621       | 4  | V  | 15 | 1459.8120      | 730.4099        |
| 577.3462       | 5  | I  | 14 | 1360.7436      | 680.8757        |
| 664.3782       | 6  | S  | 13 | 1247.6596      | 624.3337        |
| 751.4102       | 7  | S  | 12 | 1160.6275      | 580.8177        |
| 838.4423       | 8  | S  | 11 | 1073.5955      | 537.3017        |
| 895.4637       | 9  | G  | 10 | 986.5635       | 493.7856        |
| 1008.5478      | 10 | I  | 9  | 929.5420       | 465.2749        |
| 1107.6162      | 11 | V  | 8  | 816.4579       | 408.7329        |
| 1194.6482      | 12 | S  | 7  | 717.3895       | 359.1987        |
| 1307.7323      | 13 | L  | 6  | 630.3575       | 315.6827        |
| 1364.7538      | 14 | G  | 5  | 517.2734       | 259.1406        |
| 1477.8378      | 15 | I  | 4  | 460.2520       | 230.6299        |
| 1534.8593      | 16 | G  | 3  | 347.1679       | 174.0879        |
| 1649.8862      | 17 | D  | 2  | 290.1464       | 145.5771        |
|                | 18 | R  | 1  | 175.1195       | 88.0637         |

N-term:+29.04

X-range:

0 - 0

MassTol: Y-zoom:

0. 1.

MassType:

☐ AVG ☒ MONO

Axis:

☒ 1 ☐ 2

Label:

☒ I ☐ M ☐ -

Ions:

a ☐ + ☐ 2+ ☐ 3+

b ☒ + ☐ 2+ ☐ 3+

c ☐ + ☐ 2+ ☐ 3+

x ☐ + ☐ 2+ ☐ 3+

y ☒ + ☒ 2+ ☐ 3+

z ☐ + ☐ 2+ ☐ 3+

hide H<sub>2</sub>O/NH<sub>3</sub> ☐

zoom 112-122 ☐

GO

HCDKLHVDPENFR, MH+ 1722.8386, m/z 431.4651  
L OS G19 P120811 220811-s1.02917.02917.4.dta

scan 2917; 6.3e+000

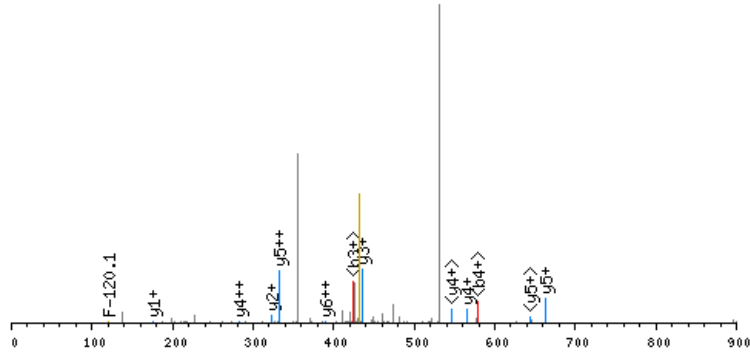

click image to zoom in; click top corners to zoom out [\[precursor±\]](#)

scan 2916; 431.5 m/z; 2.3e+001

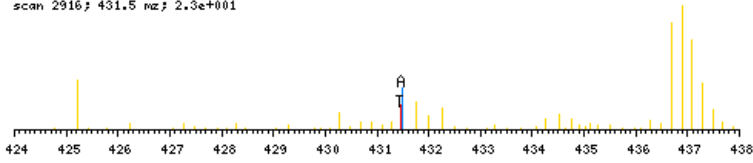

zoomed in precursor plot; T=theoretical m/z, A=acquired m/z

| b <sup>+</sup> | #  | AA | #  | y <sup>+</sup> | y <sup>2+</sup> |
|----------------|----|----|----|----------------|-----------------|
| 166.0980       | 1  | H  | 13 |                |                 |
| 326.1286       | 2  | C  | 12 | 1557.7484      | 779.3781        |
| 441.1556       | 3  | D  | 11 | 1397.7178      | 699.3628        |
| 597.2819       | 4  | K  | 10 | 1282.6908      | 641.8493        |
| 710.3659       | 5  | L  | 9  | 1126.5645      | 563.7862        |
| 847.4248       | 6  | H  | 8  | 1013.4805      | 507.2441        |
| 946.4932       | 7  | V  | 7  | 876.4216       | 438.7147        |
| 1061.5202      | 8  | D  | 6  | 777.3531       | 389.1805        |
| 1158.5730      | 9  | P  | 5  | 662.3262       | 331.6670        |
| 1287.6155      | 10 | E  | 4  | 565.2734       | 283.1406        |
| 1401.6585      | 11 | N  | 3  | 436.2308       | 218.6193        |
| 1548.7269      | 12 | F  | 2  | 322.1879       | 161.5979        |
|                | 13 | R  | 1  | 175.1195       | 88.0637         |

N-term:+29.04 C(2):+160.03  
K(4):+156.13

X-range:

0 - 0

MassTol: Y-zoom:

0. 1.

MassType:

☐AVG ☒MONO

Axis:

☒1 ☐2

Label:

☒I ☐M ☐-

Ions:

a ☐+ ☐2+ ☐3+

b ☒+ ☐2+ ☐3+

c ☐+ ☐2+ ☐3+

x ☐+ ☐2+ ☐3+

y ☒+ ☒2+ ☐3+

z ☐+ ☐2+ ☐3+

hide H<sub>2</sub>O/NH<sub>3</sub> ☐

zoom 112-122 ☐

GO

HDFSSDLENVPHLR, MH+ 1693.8298, m/z 565.2814  
L OS G18 P120811 220811-s1.05619.05619.3.dta

scan 5619; 4.1e+000

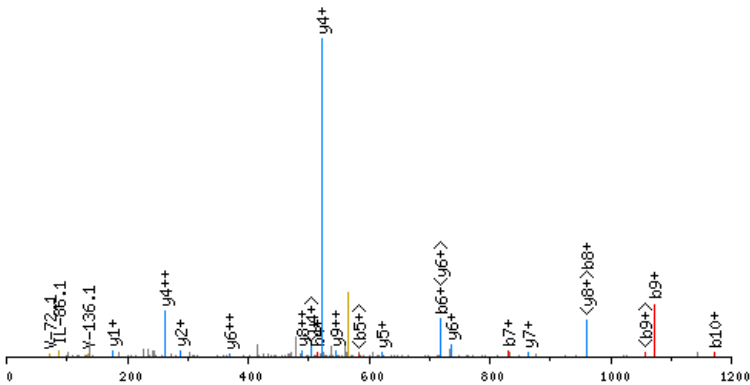

click image to zoom in; click top corners to zoom out

[precursor±]

scan 5616; 565.3 m/z; 5.2e+000

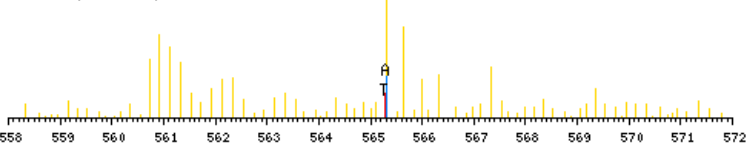

zoomed in precursor plot; T=theoretical m/z, A=acquired m/z

| b <sup>+</sup> | #  | AA | #  | y <sup>+</sup> | y <sup>2+</sup> |
|----------------|----|----|----|----------------|-----------------|
| 166.0980       | 1  | H  | 14 |                |                 |
| 281.1250       | 2  | D  | 13 | 1528.7396      | 764.8737        |
| 428.1934       | 3  | F  | 12 | 1413.7127      | 707.3602        |
| 515.2254       | 4  | S  | 11 | 1266.6442      | 633.8260        |
| 602.2574       | 5  | S  | 10 | 1179.6122      | 590.3100        |
| 717.2844       | 6  | D  | 9  | 1092.5802      | 546.7940        |
| 830.3684       | 7  | L  | 8  | 977.5532       | 489.2805        |
| 959.4110       | 8  | E  | 7  | 864.4692       | 432.7385        |
| 1073.4540      | 9  | N  | 6  | 735.4266       | 368.2172        |
| 1172.5224      | 10 | V  | 5  | 621.3837       | 311.1957        |
| 1269.5751      | 11 | P  | 4  | 522.3152       | 261.6615        |
| 1406.6340      | 12 | H  | 3  | 425.2625       | 213.1352        |
| 1519.7181      | 13 | L  | 2  | 288.2036       | 144.6057        |
|                | 14 | R  | 1  | 175.1195       | 88.0637         |

N-term:+29.04

X-range:

0 - 0

MassTol: Y-zoom:

0. 1.

MassType:

☐AVG ☒MONO

Axis:

☒1 ☐2

Label:

☒I ☐M ☐-

Ions:

a ☐+ ☐2+ ☐3+

b ☒+ ☐2+ ☐3+

c ☐+ ☐2+ ☐3+

x ☐+ ☐2+ ☐3+

y ☒+ ☒2+ ☐3+

z ☐+ ☐2+ ☐3+

hide H<sub>2</sub>O/NH<sub>3</sub> ☐

zoom 112-122 ☐

GO

HDGKVVSTHEQVLR, MH+ 1660.9135, m/z 415.9838  
L OS G19 P120811 220811-s1.02069.02069.4.dta

scan 2069; 2.5e+001

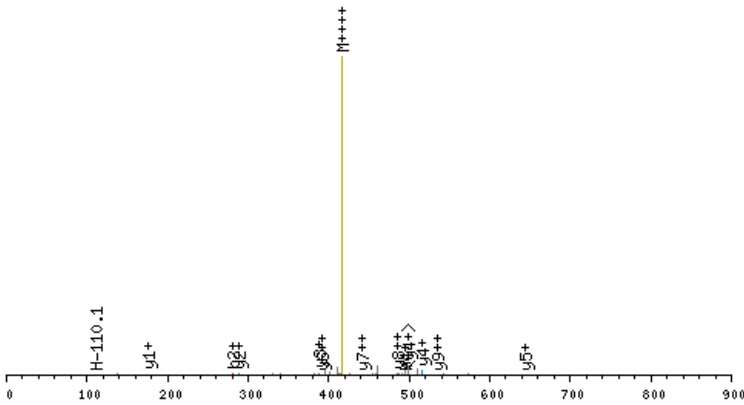

click image to zoom in; click top corners to zoom out

[precursor±]

scan 2068; 416.0 m/z; 6.2e+000

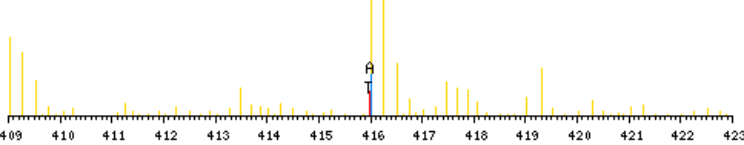

zoomed in precursor plot; T=theoretical m/z, A=acquired m/z

| b <sup>+</sup> | #  | AA | #  | y <sup>+</sup> | y <sup>2+</sup> |
|----------------|----|----|----|----------------|-----------------|
| 166.0980       | 1  | H  | 14 |                |                 |
| 281.1250       | 2  | D  | 13 | 1495.8233      | 748.4156        |
| 338.1464       | 3  | G  | 12 | 1380.7964      | 690.9021        |
| 494.2727       | 4  | K  | 11 | 1323.7749      | 662.3914        |
| 593.3411       | 5  | V  | 10 | 1167.6486      | 584.3282        |
| 692.4095       | 6  | V  | 9  | 1068.5802      | 534.7940        |
| 779.4416       | 7  | S  | 8  | 969.5118       | 485.2598        |
| 880.4893       | 8  | T  | 7  | 882.4797       | 441.7438        |
| 1017.5482      | 9  | H  | 6  | 781.4321       | 391.2199        |
| 1146.5908      | 10 | E  | 5  | 644.3731       | 322.6905        |
| 1274.6493      | 11 | Q  | 4  | 515.3306       | 258.1692        |
| 1373.7178      | 12 | V  | 3  | 387.2720       | 194.1399        |
| 1486.8018      | 13 | L  | 2  | 288.2036       | 144.6057        |
|                | 14 | R  | 1  | 175.1195       | 88.0637         |

N-term:+29.04 K(4):+156.13

X-range:

0 - 0

MassTol: Y-zoom:

0. 1.

MassType:

☐ AVG ☒ MONO

Axis:

☒ 1 ☐ 2

Label:

☒ I ☐ M ☐ -

Ions:

a ☐ + ☐ 2+ ☐ 3+

b ☒ + ☐ 2+ ☐ 3+

c ☐ + ☐ 2+ ☐ 3+

x ☐ + ☐ 2+ ☐ 3+

y ☒ + ☒ 2+ ☐ 3+

z ☐ + ☐ 2+ ☐ 3+

hide H<sub>2</sub>O/NH<sub>3</sub> ☐

zoom 112-122 ☐

GO

HDVEDAETYYKKMLAR, MH+ 1889.9796, m/z 473.2503  
L OS G18 P120811 220811-s1.03977.03977.4.dta

scan 3977; 1.4e+001

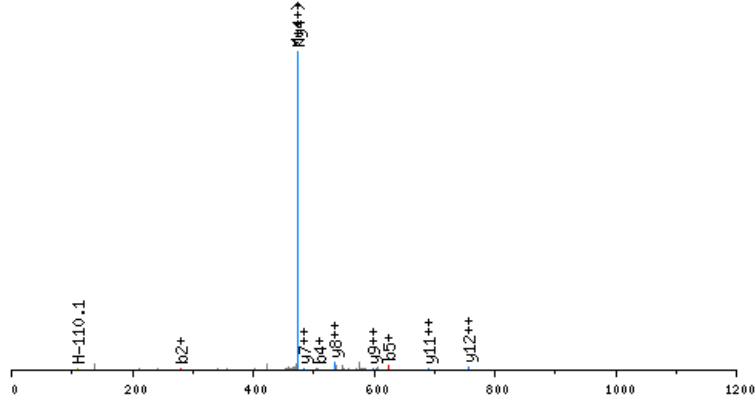

click image to zoom in; click top corners to zoom out [\[precursor±\]](#)

scan 3976; 473.3 m/z; 8.9e+000

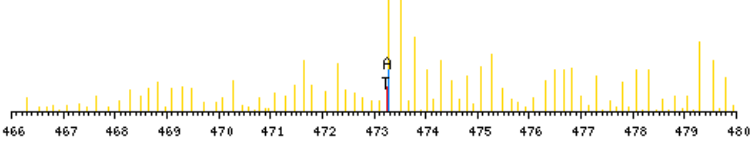

zoomed in precursor plot; T=theoretical m/z, A=acquired m/z

| b <sup>+</sup> | #  | AA | #  | y <sup>+</sup> | y <sup>2+</sup> |
|----------------|----|----|----|----------------|-----------------|
| 166.0980       | 1  | H  | 15 |                |                 |
| 281.1250       | 2  | D  | 14 | 1724.8894      | 862.9486        |
| 380.1934       | 3  | V  | 13 | 1609.8624      | 805.4351        |
| 509.2360       | 4  | E  | 12 | 1510.7940      | 755.9009        |
| 624.2629       | 5  | D  | 11 | 1381.7514      | 691.3796        |
| 695.3000       | 6  | A  | 10 | 1266.7245      | 633.8662        |
| 824.3426       | 7  | E  | 9  | 1195.6874      | 598.3476        |
| 925.3903       | 8  | T  | 8  | 1066.6448      | 533.8263        |
| 1088.4536      | 9  | Y  | 7  | 965.5971       | 483.3025        |
| 1244.5799      | 10 | K  | 6  | 802.5338       | 401.7708        |
| 1400.7062      | 11 | K  | 5  | 646.4075       | 323.7076        |
| 1531.7467      | 12 | M  | 4  | 490.2812       | 245.6445        |
| 1644.8308      | 13 | L  | 3  | 359.2407       | 180.1243        |
| 1715.8679      | 14 | A  | 2  | 246.1566       | 123.5822        |
|                | 15 | R  | 1  | 175.1195       | 88.0637         |

N-term:+29.04 K(10):+156.13  
K(11):+156.13

X-range:

0 - 0

MassTol: Y-zoom:

0. 1.

MassType:

☐AVG ☒MONO

Axis:

☒1 ☐2

Label:

☒I ☐M ☐-

Ions:

a ☐+ ☐2+ ☐3+

b ☒+ ☐2+ ☐3+

c ☐+ ☐2+ ☐3+

x ☐+ ☐2+ ☐3+

y ☒+ ☒2+ ☐3+

z ☐+ ☐2+ ☐3+

hide H<sub>2</sub>O/NH<sub>3</sub> ☐

zoom 112-122 ☐

GO

HEDPVEKVIEGFSR, MH+ 1709.9499, m/z 428.2429  
H OS G17 P120811 220811-s1.06047.06047.4.dta

scan 6047; 2.8e+000

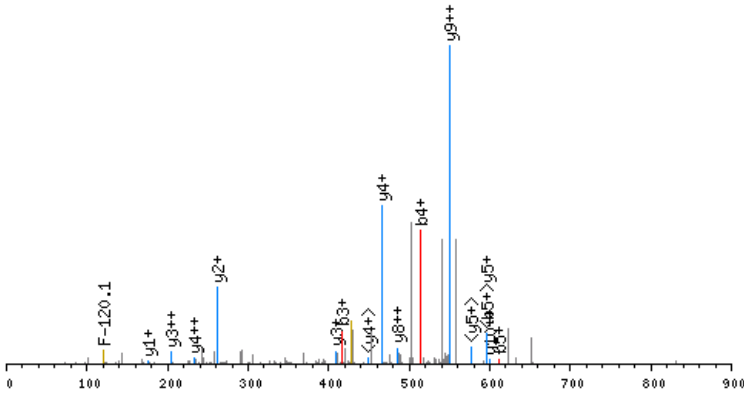

click image to zoom in; click top corners to zoom out [\[precursor±\]](#)

scan 6043; 428.2 m/z; 4.5e+000

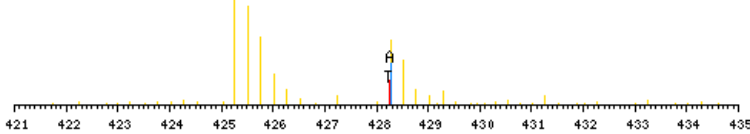

zoomed in precursor plot; T=theoretical m/z, A=acquired m/z

| b <sup>+</sup> | #  | AA | #  | y <sup>+</sup> | y <sup>2+</sup> |
|----------------|----|----|----|----------------|-----------------|
| 172.1298       | 1  | H  | 14 |                |                 |
| 301.1724       | 2  | E  | 13 | 1538.8279      | 769.9179        |
| 416.1993       | 3  | D  | 12 | 1409.7853      | 705.3966        |
| 513.2521       | 4  | P  | 11 | 1294.7583      | 647.8831        |
| 612.3205       | 5  | V  | 10 | 1197.7056      | 599.3567        |
| 741.3631       | 6  | E  | 9  | 1098.6372      | 549.8225        |
| 903.5212       | 7  | K  | 8  | 969.5946       | 485.3012        |
| 1002.5896      | 8  | V  | 7  | 807.4365       | 404.2222        |
| 1115.6737      | 9  | I  | 6  | 708.3681       | 354.6879        |
| 1244.7163      | 10 | E  | 5  | 595.2840       | 298.1459        |
| 1301.7378      | 11 | G  | 4  | 466.2414       | 233.6246        |
| 1448.8062      | 12 | F  | 3  | 409.2199       | 205.1139        |
| 1535.8382      | 13 | S  | 2  | 262.1515       | 131.5797        |
|                | 14 | R  | 1  | 175.1195       | 88.0637         |

N-term:+35.07 K(7):+162.16

X-range:

0 - 0

MassTol: Y-zoom:

0. 1.

MassType:

☐AVG ☒MONO

Axis:

☒1 ☐2

Label:

☒I ☐M ☐-

Ions:

a ☐+ ☐2+ ☐3+

b ☒+ ☐2+ ☐3+

c ☐+ ☐2+ ☐3+

x ☐+ ☐2+ ☐3+

y ☒+ ☒2+ ☐3+

z ☐+ ☐2+ ☐3+

hide H<sub>2</sub>O/NH<sub>3</sub> ☐

zoom 112-122 ☐

GO

HEFADVVFETANDSGHR, MH+ 1829.8571, m/z 458.2197  
L OS G18 P120811 220811-s1.04767.04767.4.dta

scan 4767; 2.1e+000

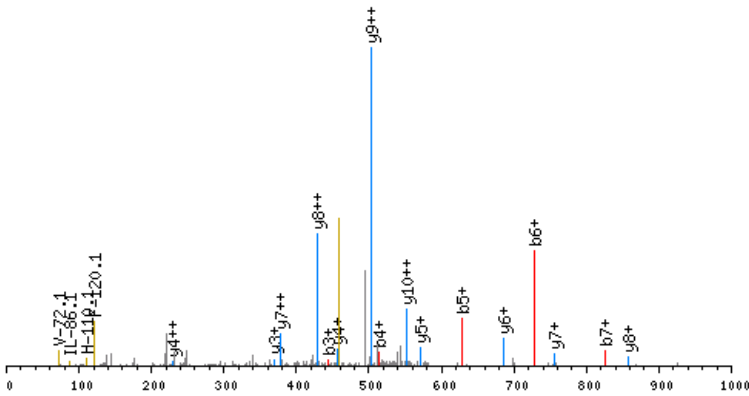

click image to zoom in; click top corners to zoom out [precursor±]

scan 4766; 458.2 m/z; 3.4e+001

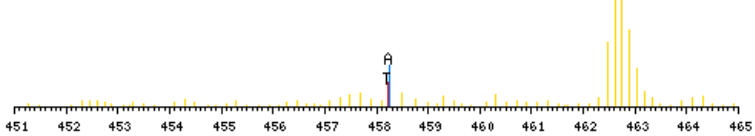

zoomed in precursor plot; T=theoretical m/z, A=acquired m/z

| b <sup>+</sup> | #  | AA | #  | y <sup>+</sup> | y <sup>2+</sup> |
|----------------|----|----|----|----------------|-----------------|
| 166.0980       | 1  | H  | 16 |                |                 |
| 295.1406       | 2  | E  | 15 | 1664.7669      | 832.8873        |
| 442.2090       | 3  | F  | 14 | 1535.7243      | 768.3661        |
| 513.2461       | 4  | A  | 13 | 1388.6559      | 694.8318        |
| 628.2731       | 5  | D  | 12 | 1317.6188      | 659.3133        |
| 727.3415       | 6  | V  | 11 | 1202.5918      | 601.7998        |
| 826.4099       | 7  | V  | 10 | 1103.5234      | 552.2656        |
| 973.4783       | 8  | F  | 9  | 1004.4550      | 502.7314        |
| 1074.5260      | 9  | T  | 8  | 857.3866       | 429.1972        |
| 1145.5631      | 10 | A  | 7  | 756.3389       | 378.6734        |
| 1259.6060      | 11 | N  | 6  | 685.3018       | 343.1548        |
| 1374.6330      | 12 | D  | 5  | 571.2588       | 286.1333        |
| 1461.6650      | 13 | S  | 4  | 456.2319       | 228.6199        |
| 1518.6865      | 14 | G  | 3  | 369.1999       | 185.1039        |
| 1655.7454      | 15 | H  | 2  | 312.1784       | 156.5931        |
|                | 16 | R  | 1  | 175.1195       | 88.0637         |

N-term:+29.04

X-range:

0 - 0

MassTol: Y-zoom:

0. 1.

MassType:

☐AVG ☒MONO

Axis:

☒1 ☐2

Label:

☒I ☐M ☐-

Ions:

a ☐+ ☐2+ ☐3+

b ☒+ ☐2+ ☐3+

c ☐+ ☐2+ ☐3+

x ☐+ ☐2+ ☐3+

y ☒+ ☒2+ ☐3+

z ☐+ ☐2+ ☐3+

hide H<sub>2</sub>O/NH<sub>3</sub> ☐

zoom 112-122 ☐

GO

HENLKGDDLDPNYVLSSR, MH+ 2197.1525, m/z 550.0436  
H OS G17 P120811 220811-s1.04621.04621.4.dta

scan 4621; 2.6e+000

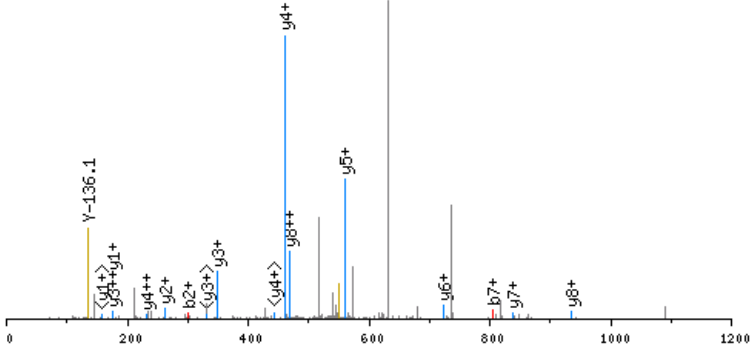

click image to zoom in; click top corners to zoom out [\[precursor±\]](#)

scan 4618; 550.0 m/z; 8.0e+000

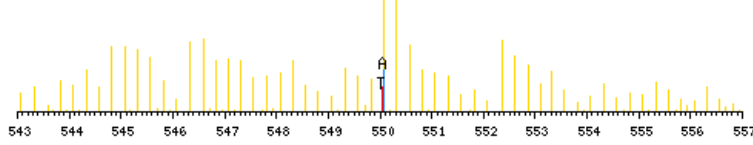

zoomed in precursor plot; T=theoretical m/z, A=acquired m/z

| b <sup>+</sup> | #  | AA | #  | y <sup>+</sup> | y <sup>2+</sup> |
|----------------|----|----|----|----------------|-----------------|
| 172.1298       | 1  | H  | 19 |                |                 |
| 301.1724       | 2  | E  | 18 | 2026.0306      | 1013.5192       |
| 415.2153       | 3  | N  | 17 | 1896.9880      | 948.9979        |
| 528.2994       | 4  | L  | 16 | 1782.9450      | 891.9764        |
| 690.4575       | 5  | K  | 15 | 1669.8610      | 835.4344        |
| 747.4790       | 6  | G  | 14 | 1507.7029      | 754.3554        |
| 804.5004       | 7  | G  | 13 | 1450.6814      | 725.8446        |
| 919.5274       | 8  | D  | 12 | 1393.6599      | 697.3339        |
| 1034.5543      | 9  | D  | 11 | 1278.6330      | 639.8204        |
| 1147.6384      | 10 | L  | 10 | 1163.6061      | 582.3069        |
| 1262.6653      | 11 | D  | 9  | 1050.5220      | 525.7649        |
| 1359.7181      | 12 | P  | 8  | 935.4951       | 468.2514        |
| 1473.7610      | 13 | N  | 7  | 838.4423       | 419.7251        |
| 1636.8243      | 14 | Y  | 6  | 724.3994       | 362.7036        |
| 1735.8928      | 15 | V  | 5  | 561.3360       | 281.1719        |
| 1848.9768      | 16 | L  | 4  | 462.2676       | 231.6377        |
| 1936.0088      | 17 | S  | 3  | 349.1836       | 175.0957        |
| 2023.0409      | 18 | S  | 2  | 262.1515       | 131.5797        |
|                | 19 | R  | 1  | 175.1195       | 88.0637         |

N-term:+35.07 K(5):+162.16

X-range:

0 - 0

MassTol: Y-zoom:

0. 1.

MassType:

☐ AVG ☒ MONO

Axis:

☒ 1 ☐ 2

Label:

☒ I ☐ M ☐ -

Ions:

a ☐ + ☐ 2+ ☐ 3+

b ☒ + ☐ 2+ ☐ 3+

c ☐ + ☐ 2+ ☐ 3+

x ☐ + ☐ 2+ ☐ 3+

y ☒ + ☒ 2+ ☐ 3+

z ☐ + ☐ 2+ ☐ 3+

hide H<sub>2</sub>O/NH<sub>3</sub> ☐

zoom 112-122 ☐

GO

HGIEGAFSGSGAKTVIPR, MH+ 1840.0081, m/z 460.7575  
L OS G17 P120811 220811-s1.04214.04214.4.dta

scan 4214; 1.6e+001

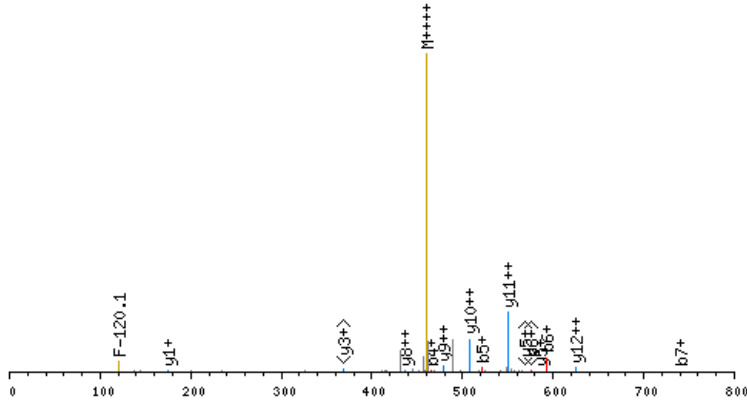

click image to zoom in; click top corners to zoom out

[precursor±]

scan 4213; 460.8 m/z; 2.8e+001

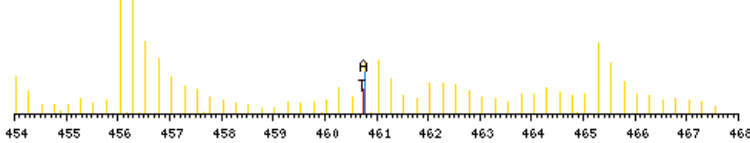

zoomed in precursor plot; T=theoretical m/z, A=acquired m/z

| b <sup>+</sup> | #  | AA | #  | y <sup>+</sup> | y <sup>2+</sup> |
|----------------|----|----|----|----------------|-----------------|
| 166.0980       | 1  | H  | 18 |                |                 |
| 223.1195       | 2  | G  | 17 | 1674.9179      | 837.9629        |
| 336.2035       | 3  | I  | 16 | 1617.8965      | 809.4521        |
| 465.2461       | 4  | E  | 15 | 1504.8124      | 752.9101        |
| 522.2676       | 5  | G  | 14 | 1375.7698      | 688.3888        |
| 593.3047       | 6  | A  | 13 | 1318.7483      | 659.8781        |
| 740.3731       | 7  | F  | 12 | 1247.7112      | 624.3595        |
| 827.4052       | 8  | S  | 11 | 1100.6428      | 550.8253        |
| 884.4266       | 9  | G  | 10 | 1013.6108      | 507.3093        |
| 971.4586       | 10 | S  | 9  | 956.5893       | 478.7986        |
| 1028.4801      | 11 | G  | 8  | 869.5573       | 435.2826        |
| 1099.5172      | 12 | A  | 7  | 812.5358       | 406.7718        |
| 1255.6435      | 13 | K  | 6  | 741.4987       | 371.2533        |
| 1356.6912      | 14 | T  | 5  | 585.3724       | 293.1901        |
| 1455.7596      | 15 | V  | 4  | 484.3247       | 242.6663        |
| 1568.8437      | 16 | I  | 3  | 385.2563       | 193.1321        |
| 1665.8964      | 17 | P  | 2  | 272.1723       | 136.5900        |
|                | 18 | R  | 1  | 175.1195       | 88.0637         |

N-term:+29.04 K(13):+156.13

X-range:

0 - 0

MassTol: Y-zoom:

0. 1.

MassType:

☐AVG ☒MONO

Axis:

☒1 ☐2

Label:

☒I ☐M ☐-

Ions:

a ☐+ ☐2+ ☐3+

b ☒+ ☐2+ ☐3+

c ☐+ ☐2+ ☐3+

x ☐+ ☐2+ ☐3+

y ☒+ ☒2+ ☐3+

z ☐+ ☐2+ ☐3+

hide H<sub>2</sub>O/NH<sub>3</sub> ☐

zoom 112-122 ☐

GO

HGNPVDDICIAPR, MH+ 1647.8640, m/z 412.7215  
L OS G17 P120811 220811-s1.03734.03734.4.dta

scan 3734; 3.1e+001

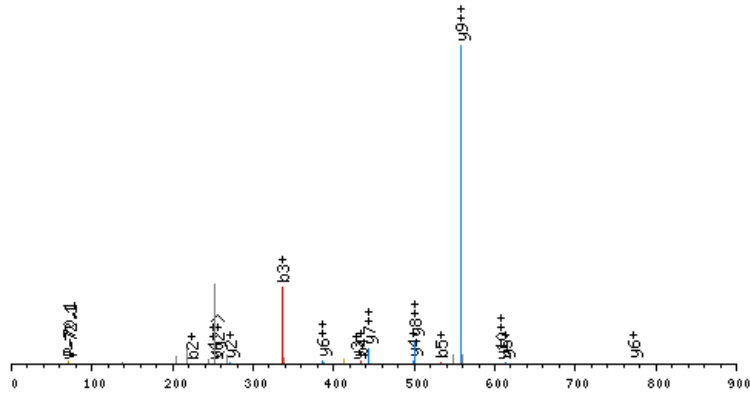

click image to zoom in; click top corners to zoom out

[precursor±]

scan 3733; 412.7 m/z; 1.6e+001

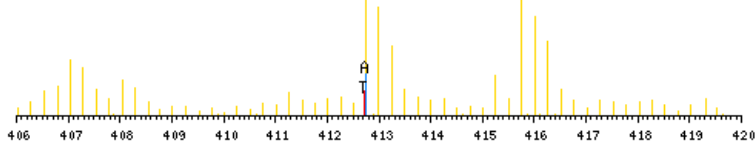

zoomed in precursor plot; T=theoretical m/z, A=acquired m/z

| b <sup>+</sup> | #  | AA | #  | y <sup>+</sup> | y <sup>2+</sup> |
|----------------|----|----|----|----------------|-----------------|
| 166.0980       | 1  | H  | 14 |                |                 |
| 223.1195       | 2  | G  | 13 | 1482.7739      | 741.8908        |
| 337.1624       | 3  | N  | 12 | 1425.7524      | 713.3801        |
| 434.2152       | 4  | P  | 11 | 1311.7095      | 656.3586        |
| 533.2836       | 5  | V  | 10 | 1214.6567      | 607.8323        |
| 648.3105       | 6  | D  | 9  | 1115.5883      | 558.2981        |
| 763.3375       | 7  | D  | 8  | 1000.5613      | 500.7846        |
| 876.4215       | 8  | I  | 7  | 885.5344       | 443.2711        |
| 1036.4521      | 9  | C  | 6  | 772.4503       | 386.7291        |
| 1149.5362      | 10 | I  | 5  | 612.4197       | 306.7138        |
| 1220.5733      | 11 | A  | 4  | 499.3357       | 250.1718        |
| 1376.6996      | 12 | K  | 3  | 428.2986       | 214.6532        |
| 1473.7524      | 13 | P  | 2  | 272.1723       | 136.5900        |
|                | 14 | R  | 1  | 175.1195       | 88.0637         |

N-term:+29.04 C(9):+160.03  
K(12):+156.13

X-range:

0 - 0

MassTol: Y-zoom:

0. 1.

MassType:

☐AVG ☒MONO

Axis:

☒1 ☐2

Label:

☒I ☐M ☐-

Ions:

a ☐+ ☐2+ ☐3+

b ☒+ ☐2+ ☐3+

c ☐+ ☐2+ ☐3+

x ☐+ ☐2+ ☐3+

y ☒+ ☒2+ ☐3+

z ☐+ ☐2+ ☐3+

hide H<sub>2</sub>O/NH<sub>3</sub> ☐

zoom 112-122 ☐

GO

HHPEFTPDQPTER, MH+ 1618.7614, m/z 540.2586  
L OS G18 P120811 220811-s1.02337.02337.3.dta

scan 2337; 2.4e+000

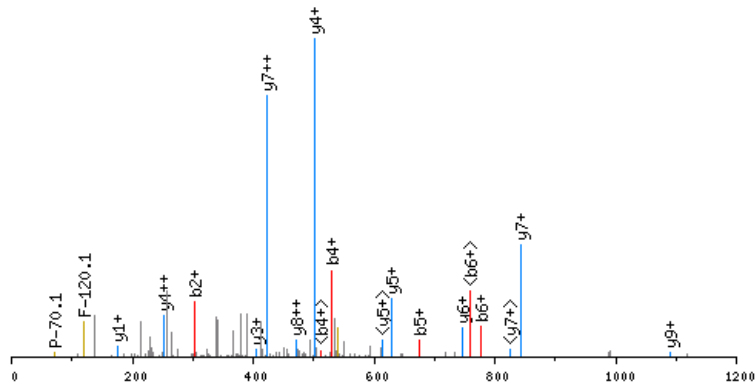

click image to zoom in; click top corners to zoom out

[precursor±]

scan 2336; 540.3 m/z; 6.5e+000

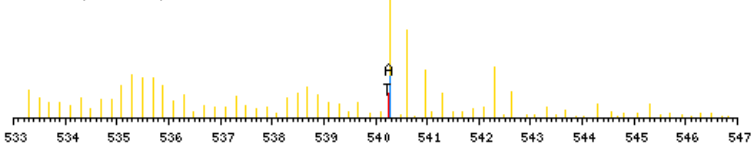

zoomed in precursor plot; T=theoretical m/z, A=acquired m/z

| b <sup>+</sup> | #  | AA | #  | y <sup>+</sup> | y <sup>2+</sup> |
|----------------|----|----|----|----------------|-----------------|
| 166.0980       | 1  | H  | 13 |                |                 |
| 303.1569       | 2  | H  | 12 | 1453.6712      | 727.3395        |
| 400.2097       | 3  | P  | 11 | 1316.6123      | 658.8100        |
| 529.2523       | 4  | E  | 10 | 1219.5595      | 610.2837        |
| 676.3207       | 5  | F  | 9  | 1090.5169      | 545.7624        |
| 777.3684       | 6  | T  | 8  | 943.4485       | 472.2282        |
| 874.4211       | 7  | P  | 7  | 842.4008       | 421.7043        |
| 989.4481       | 8  | D  | 6  | 745.3481       | 373.1779        |
| 1117.5067      | 9  | Q  | 5  | 630.3211       | 315.6645        |
| 1214.5594      | 10 | P  | 4  | 502.2625       | 251.6352        |
| 1315.6071      | 11 | T  | 3  | 405.2098       | 203.1088        |
| 1444.6497      | 12 | E  | 2  | 304.1621       | 152.5850        |
|                | 13 | R  | 1  | 175.1195       | 88.0637         |

N-term:+29.04

X-range:

0 - 0

MassTol: Y-zoom:

0. 1.

MassType:

☐AVG ☒MONO

Axis:

☒1 ☐2

Label:

☒I ☐M ☐-

Ions:

a ☐+ ☐2+ ☐3+

b ☒+ ☐2+ ☐3+

c ☐+ ☐2+ ☐3+

x ☐+ ☐2+ ☐3+

y ☒+ ☒2+ ☐3+

z ☐+ ☐2+ ☐3+

hide H<sub>2</sub>O/NH<sub>3</sub> ☐

zoom 112-122 ☐

GO

HHTFYNELR, MH+ 1244.6176, m/z 415.5441  
L OS G19 P120811 220811-s1.02499.02499.3.dta

scan 2499; 1.3e+000

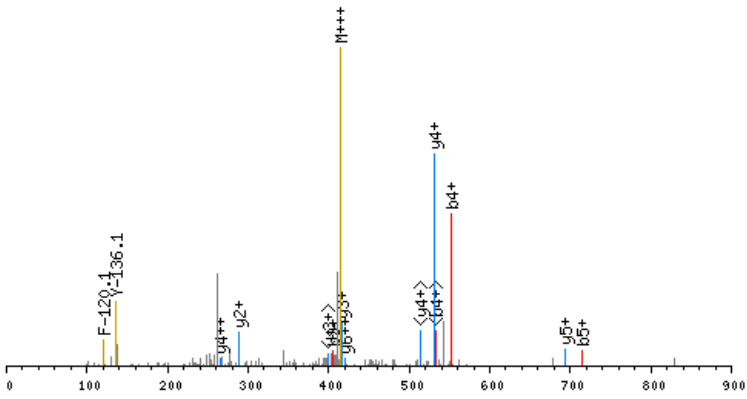

click image to zoom in; click top corners to zoom out [precursor±]

scan 2498; 415.5 m/z; 2.3e+000

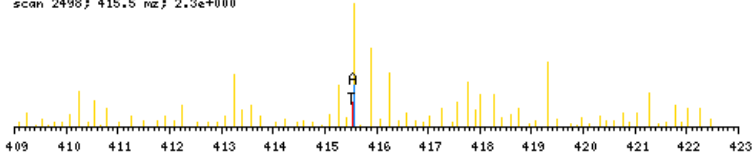

zoomed in precursor plot; T=theoretical m/z, A=acquired m/z

| b <sup>+</sup> | # | AA | # | y <sup>+</sup> | y <sup>2+</sup> |
|----------------|---|----|---|----------------|-----------------|
| 166.0980       | 1 | H  | 9 |                |                 |
| 303.1569       | 2 | H  | 8 | 1079.5274      | 540.2676        |
| 404.2046       | 3 | T  | 7 | 942.4685       | 471.7382        |
| 551.2730       | 4 | F  | 6 | 841.4208       | 421.2143        |
| 714.3363       | 5 | Y  | 5 | 694.3524       | 347.6801        |
| 828.3793       | 6 | N  | 4 | 531.2891       | 266.1485        |
| 957.4219       | 7 | E  | 3 | 417.2462       | 209.1270        |
| 1070.5059      | 8 | L  | 2 | 288.2036       | 144.6057        |
|                | 9 | R  | 1 | 175.1195       | 88.0637         |

N-term: +29.04

X-range:

0 - 0

MassTol: Y-zoom:

0. 1.

MassType:

☐AVG ☒MONO

Axis:

☒1 ☐2

Label:

☒I ☐M ☐-

Ions:

a ☐+ ☐2+ ☐3+

b ☒+ ☐2+ ☐3+

c ☐+ ☐2+ ☐3+

x ☐+ ☐2+ ☐3+

y ☒+ ☒2+ ☐3+

z ☐+ ☐2+ ☐3+

hide H<sub>2</sub>O/NH<sub>3</sub> ☐

zoom 112-122 ☐

GO

HHVLVIENKYMR, MH+ 1594.8892, m/z 399.4778  
L OS G19 P120811 220811-s1.03070.03070.4.dta

scan 3070; 4.6e+000

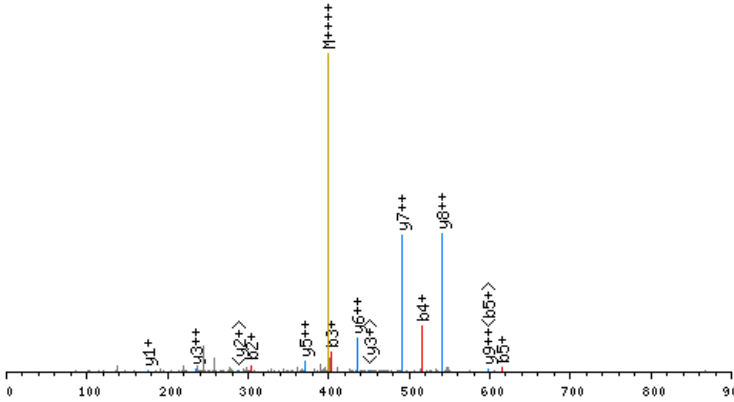

click image to zoom in; click top corners to zoom out

[precursor±]

scan 3066; 399.5 m/z; 1.3e+001

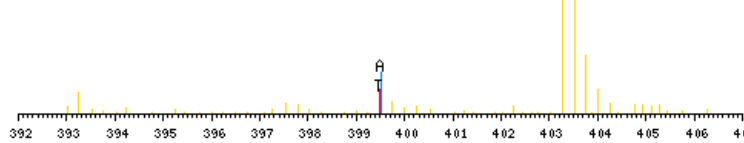

zoomed in precursor plot; T=theoretical m/z, A=acquired m/z

| b <sup>+</sup> | #  | AA | #  | y <sup>+</sup> | y <sup>2+</sup> |
|----------------|----|----|----|----------------|-----------------|
| 166.0980       | 1  | H  | 12 |                |                 |
| 303.1569       | 2  | H  | 11 | 1429.7990      | 715.4034        |
| 402.2253       | 3  | V  | 10 | 1292.7401      | 646.8740        |
| 515.3094       | 4  | L  | 9  | 1193.6717      | 597.3398        |
| 614.3778       | 5  | V  | 8  | 1080.5876      | 540.7977        |
| 727.4619       | 6  | I  | 7  | 981.5192       | 491.2635        |
| 856.5045       | 7  | E  | 6  | 868.4351       | 434.7215        |
| 970.5474       | 8  | N  | 5  | 739.3925       | 370.2002        |
| 1126.6737      | 9  | K  | 4  | 625.3496       | 313.1787        |
| 1289.7370      | 10 | Y  | 3  | 469.2233       | 235.1156        |
| 1420.7775      | 11 | M  | 2  | 306.1600       | 153.5839        |
|                | 12 | R  | 1  | 175.1195       | 88.0637         |

N-term:+29.04 K(9):+156.13

X-range:

$$0 - 0$$

0. 1.

AVG MONO

1 2

☒ I ☐ M ☐ -

 $\square + \square^2 + \square^3 +$  $\square + \square^2 + \square^3 + \dots$ ☐ 1 ☒ 2 ☐ 3
$$1 + 2 + 3 + \dots + n$$


GO

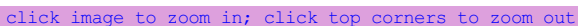

```
[precursor±]
```



N-term:+29.04

X-range:

0 - 0

MassTol: Y-zoom:

0. 1.

MassType:

☐AVG ☒MONO

Axis:

☒1 ☐2

Label:

☒I ☐M ☐-

Ions:

a ☐+ ☐2+ ☐3+

b ☒+ ☐2+ ☐3+

c ☐+ ☐2+ ☐3+

x ☐+ ☐2+ ☐3+

y ☒+ ☒2+ ☐3+

z ☐+ ☐2+ ☐3+

hide H<sub>2</sub>O/NH<sub>3</sub> ☐

zoom 112-122 ☐

GO

HKAEIITVSDGR, MH+ 1381.7804, m/z 461.2650  
L OS G18 P120811 220811-s1.02444.02444.3.dta

scan 2444; 4.6e+000

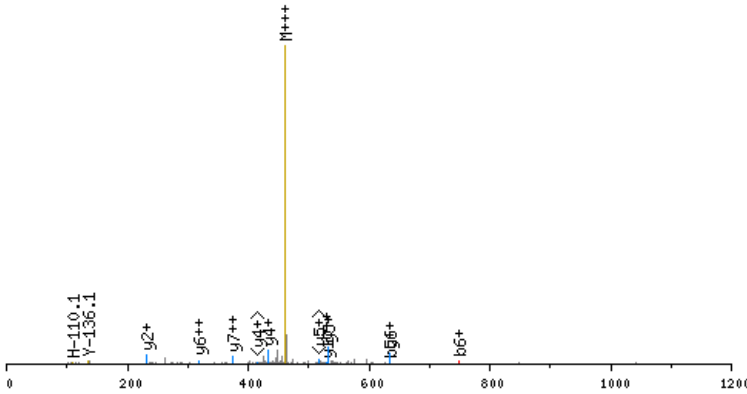

click image to zoom in; click top corners to zoom out

[precursor±]

scan 2441; 461.3 m/z; 7.2e+000

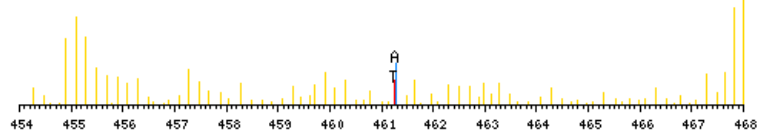

zoomed in precursor plot; T=theoretical m/z, A=acquired m/z

| b <sup>+</sup> | #  | AA | #  | y <sup>+</sup> | y <sup>2+</sup> |
|----------------|----|----|----|----------------|-----------------|
| 166.0980       | 1  | H  | 12 |                |                 |
| 322.2243       | 2  | K  | 11 | 1216.6902      | 608.8490        |
| 393.2614       | 3  | A  | 10 | 1060.5639      | 530.7858        |
| 522.3040       | 4  | E  | 9  | 989.5267       | 495.2673        |
| 635.3881       | 5  | I  | 8  | 860.4842       | 430.7460        |
| 748.4721       | 6  | I  | 7  | 747.4001       | 374.2040        |
| 849.5198       | 7  | T  | 6  | 634.3160       | 317.6619        |
| 948.5882       | 8  | V  | 5  | 533.2683       | 267.1381        |
| 1035.6203      | 9  | S  | 4  | 434.1999       | 217.6039        |
| 1150.6472      | 10 | D  | 3  | 347.1679       | 174.0879        |
| 1207.6687      | 11 | G  | 2  | 232.1410       | 116.5744        |
|                | 12 | R  | 1  | 175.1195       | 88.0637         |

N-term:+29.04 K(2):+156.13



X-range:

0 - 0

MassTol: Y-zoom:

0. 1.

MassType:

☐ AVG ☒ MONO

Axis:

☒ 1 ☐ 2

Label:

☒ I ☐ M ☐ -

Ions:

a ☐ + ☐ 2+ ☐ 3+

b ☒ + ☐ 2+ ☐ 3+

c ☐ + ☐ 2+ ☐ 3+

x ☐ + ☐ 2+ ☐ 3+

y ☒ + ☒ 2+ ☐ 3+

z ☐ + ☐ 2+ ☐ 3+

hide H<sub>2</sub>O/NH<sub>3</sub> ☐

zoom 112-122 ☐

GO

HLKEDQTEYLEER, MH+ 1745.8710, m/z 437.2232  
L OS G18 P120811 220811-s1.03037.03037.4.dta

scan 3037; 5.3e+000

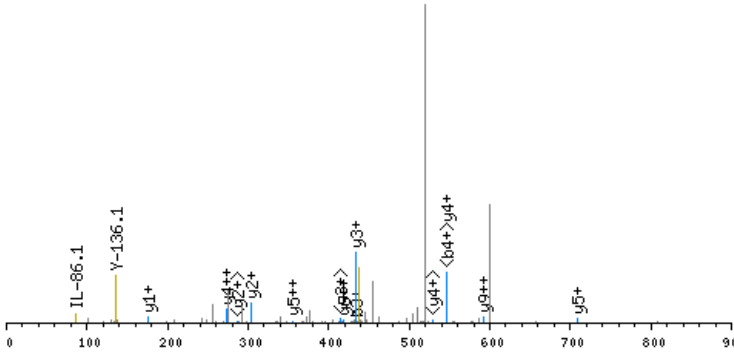

click image to zoom in; click top corners to zoom out

[precursor±]

scan 3036; 437.2 m/z; 6.0e+000

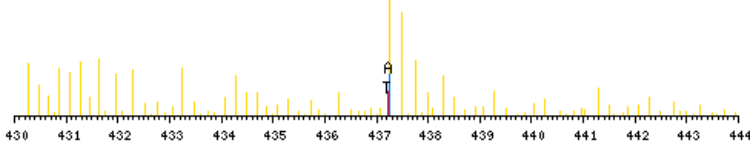

zoomed in precursor plot; T=theoretical m/z, A=acquired m/z

| b <sup>+</sup> | #  | AA | #  | y <sup>+</sup> | y <sup>2+</sup> |
|----------------|----|----|----|----------------|-----------------|
| 166.0980       | 1  | H  | 13 |                |                 |
| 279.1821       | 2  | L  | 12 | 1580.7808      | 790.8943        |
| 435.3084       | 3  | K  | 11 | 1467.6968      | 734.3523        |
| 564.3510       | 4  | E  | 10 | 1311.5705      | 656.2891        |
| 679.3779       | 5  | D  | 9  | 1182.5279      | 591.7678        |
| 807.4365       | 6  | Q  | 8  | 1067.5009      | 534.2544        |
| 908.4842       | 7  | T  | 7  | 939.4424       | 470.2251        |
| 1037.5268      | 8  | E  | 6  | 838.3947       | 419.7012        |
| 1200.5901      | 9  | Y  | 5  | 709.3521       | 355.1800        |
| 1313.6742      | 10 | L  | 4  | 546.2888       | 273.6483        |
| 1442.7167      | 11 | E  | 3  | 433.2047       | 217.1063        |
| 1571.7593      | 12 | E  | 2  | 304.1621       | 152.5850        |
|                | 13 | R  | 1  | 175.1195       | 88.0637         |

N-term:+29.04 K(3):+156.13

X-range:

0 - 0

MassTol: Y-zoom:

0. 1.

MassType:

☐AVG ☒MONO

Axis:

☒1 ☐2

Label:

☒I ☐M ☐-

Ions:

a ☐+ ☐2+ ☐3+

b ☒+ ☐2+ ☐3+

c ☐+ ☐2+ ☐3+

x ☐+ ☐2+ ☐3+

y ☒+ ☒2+ ☐3+

z ☐+ ☐2+ ☐3+

hide H<sub>2</sub>O/NH<sub>3</sub> ☐

zoom 112-122 ☐

GO

HPDYSVSLLLR, MH+ 1327.7374, m/z 443.2506  
L OS G16 P120811 220811-s1.05429.05429.3.dta

scan 5429; 3.0e+000

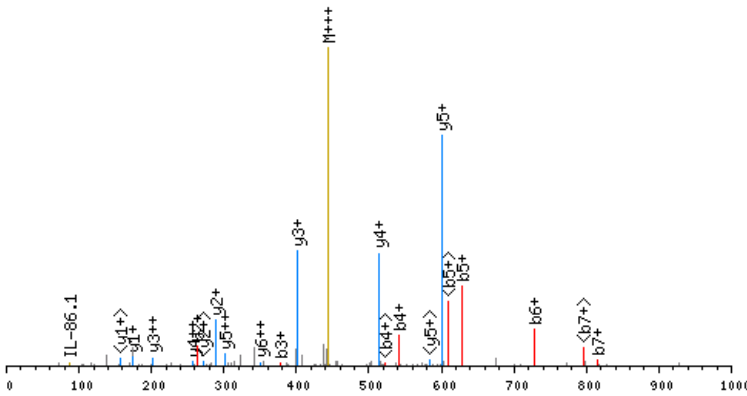

click image to zoom in; click top corners to zoom out

[precursor±]

scan 5428; 443.3 m/z; 7.1e+000

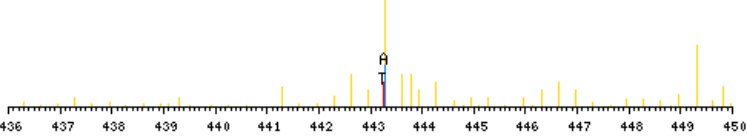

zoomed in precursor plot; T=theoretical m/z, A=acquired m/z

| b <sup>+</sup> | #  | AA | #  | y <sup>+</sup> | y <sup>2+</sup> |
|----------------|----|----|----|----------------|-----------------|
| 166.0980       | 1  | H  | 11 |                |                 |
| 263.1508       | 2  | P  | 10 | 1162.6472      | 581.8275        |
| 378.1777       | 3  | D  | 9  | 1065.5944      | 533.3011        |
| 541.2410       | 4  | Y  | 8  | 950.5675       | 475.7877        |
| 628.2731       | 5  | S  | 7  | 787.5042       | 394.2560        |
| 727.3415       | 6  | V  | 6  | 700.4721       | 350.7400        |
| 814.3735       | 7  | S  | 5  | 601.4037       | 301.2058        |
| 927.4576       | 8  | L  | 4  | 514.3717       | 257.6898        |
| 1040.5416      | 9  | L  | 3  | 401.2876       | 201.1477        |
| 1153.6257      | 10 | L  | 2  | 288.2036       | 144.6057        |
|                | 11 | R  | 1  | 175.1195       | 88.0637         |

N-term:+29.04

X-range:

0 - 0

MassTol: Y-zoom:

0. 1.

MassType:

☐AVG ☒MONO

Axis:

☒1 ☐2

Label:

☒I ☐M ☐-

Ions:

a ☐+ ☐2+ ☐3+

b ☒+ ☐2+ ☐3+

c ☐+ ☐2+ ☐3+

x ☐+ ☐2+ ☐3+

y ☒+ ☒2+ ☐3+

z ☐+ ☐2+ ☐3+

hide H<sub>2</sub>O/NH<sub>3</sub> ☐

zoom 112-122 ☐

GO

HPEYDYSNDLMLLR, MH+ 1799.8850, m/z 600.6332  
H OS G16 P120811 220811-s1.05767.05767.3.dta

scan 5767; 2.4e+000

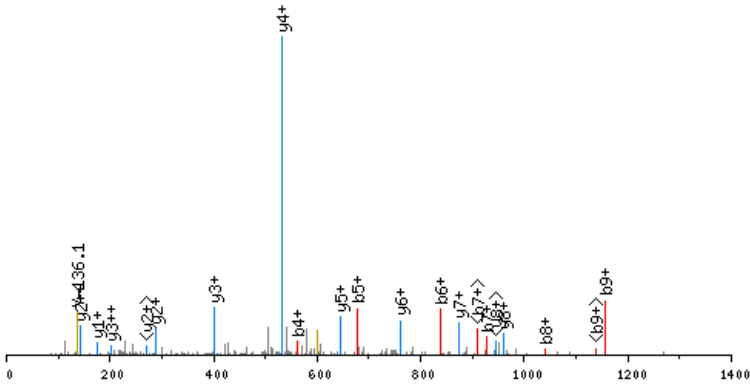

click image to zoom in; click top corners to zoom out

[precursor±]

scan 5763; 600.6 m/z; 8.7e+000

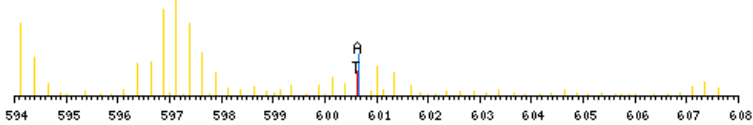

zoomed in precursor plot; T=theoretical m/z, A=acquired m/z

| b <sup>+</sup> | #  | AA | #  | y <sup>+</sup> | y <sup>2+</sup> |
|----------------|----|----|----|----------------|-----------------|
| 172.1298       | 1  | H  | 14 |                |                 |
| 269.1826       | 2  | P  | 13 | 1628.7630      | 814.8854        |
| 398.2252       | 3  | E  | 12 | 1531.7103      | 766.3590        |
| 561.2885       | 4  | Y  | 11 | 1402.6677      | 701.8378        |
| 676.3154       | 5  | D  | 10 | 1239.6043      | 620.3061        |
| 839.3788       | 6  | Y  | 9  | 1124.5774      | 562.7926        |
| 926.4108       | 7  | S  | 8  | 961.5141       | 481.2610        |
| 1040.4537      | 8  | N  | 7  | 874.4820       | 437.7449        |
| 1155.4807      | 9  | D  | 6  | 760.4391       | 380.7235        |
| 1268.5647      | 10 | L  | 5  | 645.4122       | 323.2100        |
| 1399.6052      | 11 | M  | 4  | 532.3281       | 266.6680        |
| 1512.6893      | 12 | L  | 3  | 401.2876       | 201.1477        |
| 1625.7733      | 13 | L  | 2  | 288.2036       | 144.6057        |
|                | 14 | R  | 1  | 175.1195       | 88.0637         |

N-term:+35.07

X-range:

0 - 0

MassTol: Y-zoom:

0. 1.

MassType:

☐AVG ☒MONO

Axis:

☒1 ☐2

Label:

☒I ☐M ☐-

Ions:

a ☐+ ☐2+ ☐3+

b ☒+ ☐2+ ☐3+

c ☐+ ☐2+ ☐3+

x ☐+ ☐2+ ☐3+

y ☒+ ☒2+ ☐3+

z ☐+ ☐2+ ☐3+

hide H<sub>2</sub>O/NH<sub>3</sub> ☐

zoom 112-122 ☐

GO

HPHQIDLVNVTCT, MH+ 1645.8232, m/z 549.2793  
L OS G18 P120811 220811-s1.02890.02890.3.dta

scan 2890; 2.2e+000

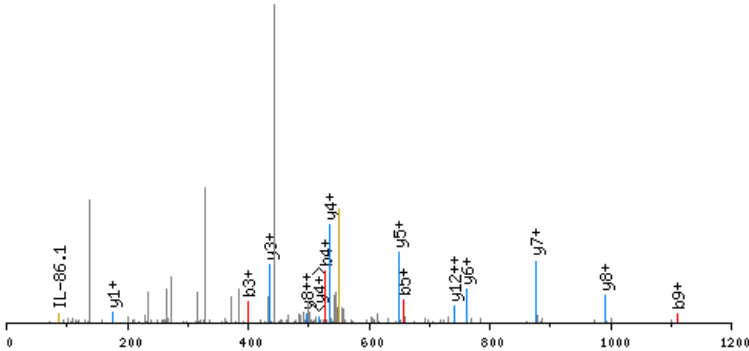

click image to zoom in; click top corners to zoom out [precursor±]

scan 2886; 549.3 m/z; 6.9e+000

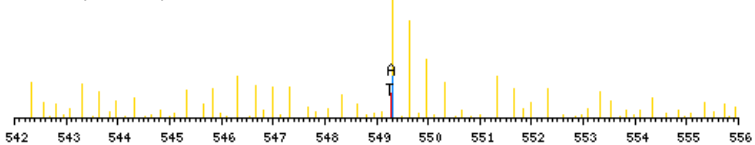

zoomed in precursor plot; T=theoretical m/z, A=acquired m/z

| b <sup>+</sup> | #  | AA | #  | y <sup>+</sup> | y <sup>2+</sup> |
|----------------|----|----|----|----------------|-----------------|
| 166.0980       | 1  | H  | 13 |                |                 |
| 263.1508       | 2  | P  | 12 | 1480.7330      | 740.8704        |
| 400.2097       | 3  | H  | 11 | 1383.6803      | 692.3440        |
| 528.2683       | 4  | Q  | 10 | 1246.6213      | 623.8146        |
| 656.3268       | 5  | Q  | 9  | 1118.5628      | 559.7853        |
| 769.4109       | 6  | I  | 8  | 990.5042       | 495.7560        |
| 884.4378       | 7  | D  | 7  | 877.4201       | 439.2140        |
| 997.5219       | 8  | L  | 6  | 762.3932       | 381.7005        |
| 1111.5648      | 9  | N  | 5  | 649.3091       | 325.1585        |
| 1210.6333      | 10 | V  | 4  | 535.2662       | 268.1370        |
| 1311.6809      | 11 | T  | 3  | 436.1978       | 218.6028        |
| 1471.7115      | 12 | C  | 2  | 335.1501       | 168.0790        |
|                | 13 | R  | 1  | 175.1195       | 88.0637         |

N-term:+29.04 C(12):+160.03

X-range:

0 - 0

MassTol: Y-zoom:

0. 1.

MassType:

☐ AVG ☒ MONO

Axis:

☒ 1 ☐ 2

Label:

☒ I ☐ M ☐ -

Ions:

a ☐ + ☐ 2+ ☐ 3+

b ☒ + ☐ 2+ ☐ 3+

c ☐ + ☐ 2+ ☐ 3+

x ☐ + ☐ 2+ ☐ 3+

y ☒ + ☒ 2+ ☐ 3+

z ☐ + ☐ 2+ ☐ 3+

hide H<sub>2</sub>O/NH<sub>3</sub> ☐

zoom 112-122 ☐

GO

HQDLDKFIKVNPDVLTNNQR, MH+ 2478.3469, m/z 620.3422  
L OS G18 P120811 220811-s1.05788.05788.4.dta

scan 5786; 3.2e+000

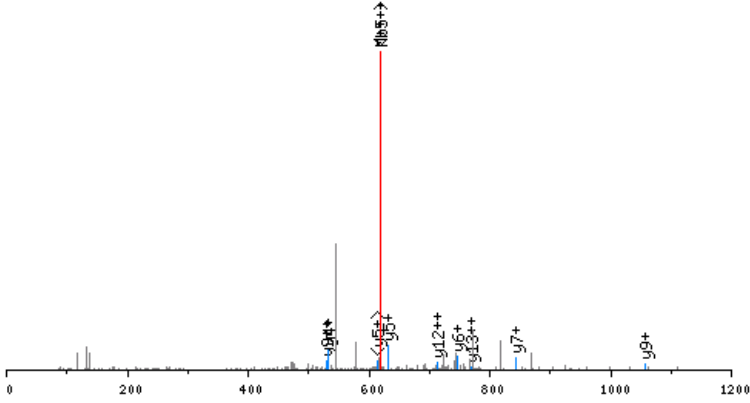

click image to zoom in; click top corners to zoom out [\[precursor±\]](#)

scan 5786; 620.3 m/z; 5.2e+000

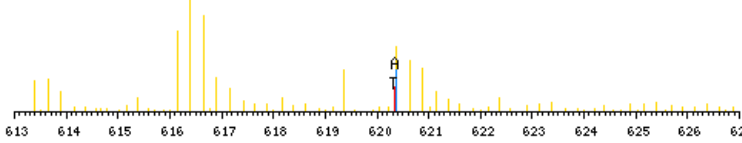

zoomed in precursor plot; T=theoretical m/z, A=acquired m/z

| b <sup>+</sup> | #  | AA | #  | y <sup>+</sup> | y <sup>2+</sup> |
|----------------|----|----|----|----------------|-----------------|
| 166.0980       | 1  | H  | 20 |                |                 |
| 294.1566       | 2  | Q  | 19 | 2313.2567      | 1157.1323       |
| 409.1835       | 3  | D  | 18 | 2185.1982      | 1093.1030       |
| 522.2676       | 4  | L  | 17 | 2070.1712      | 1035.5895       |
| 637.2945       | 5  | D  | 16 | 1957.0872      | 979.0475        |
| 793.4208       | 6  | K  | 15 | 1842.0602      | 921.5340        |
| 940.4893       | 7  | F  | 14 | 1685.9339      | 843.4709        |
| 1053.5733      | 8  | I  | 13 | 1538.8655      | 769.9367        |
| 1209.6996      | 9  | K  | 12 | 1425.7814      | 713.3946        |
| 1308.7680      | 10 | V  | 11 | 1269.6551      | 635.3315        |
| 1422.8110      | 11 | N  | 10 | 1170.5867      | 585.7973        |
| 1519.8637      | 12 | P  | 9  | 1056.5438      | 528.7758        |
| 1634.8907      | 13 | D  | 8  | 959.4910       | 480.2494        |
| 1733.9591      | 14 | V  | 7  | 844.4641       | 422.7360        |
| 1847.0431      | 15 | L  | 6  | 745.3957       | 373.2018        |
| 1948.0908      | 16 | T  | 5  | 632.3116       | 316.6597        |
| 2062.1337      | 17 | N  | 4  | 531.2639       | 266.1359        |
| 2176.1767      | 18 | N  | 3  | 417.2210       | 209.1144        |
| 2304.2353      | 19 | Q  | 2  | 303.1781       | 152.0930        |
|                | 20 | R  | 1  | 175.1195       | 88.0637         |

N-term:+29.04 K(6):+156.13  
K(9):+156.13

X-range:

0 - 0

MassTol: Y-zoom:

0. 1.

MassType:

☐AVG ☒MONO

Axis:

☒1 ☐2

Label:

☒I ☐M ☐-

Ions:

a ☐+ ☐2+ ☐3+

b ☒+ ☐2+ ☐3+

c ☐+ ☐2+ ☐3+

x ☐+ ☐2+ ☐3+

y ☒+ ☒2+ ☐3+

z ☐+ ☐2+ ☐3+

hide H<sub>2</sub>O/NH<sub>3</sub> ☐

zoom 112-122 ☐

GO

HQGVVMGMGQKDSYVGDEAQSQR, MH+ 2591.2711, m/z 648.5732  
L OS G18 P120811 220811-s1.03247.03247.4.dta

scan 3247; 1.7e+001

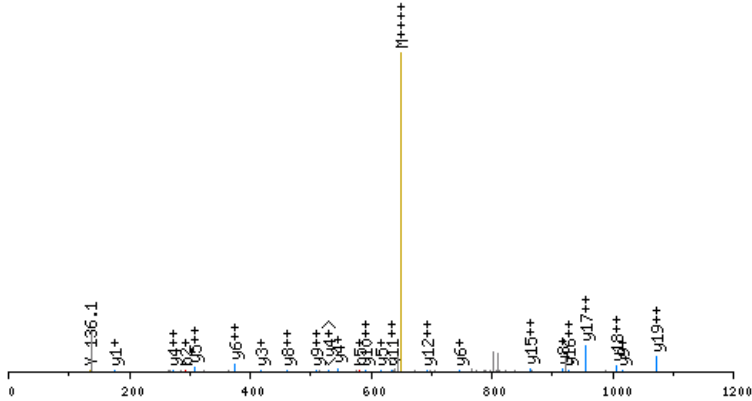

click image to zoom in; click top corners to zoom out

[precursor±]

scan 3246; 648.6 m/z; 1.4e+001

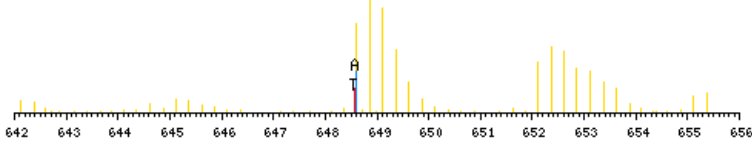

zoomed in precursor plot; T=theoretical m/z, A=acquired m/z

| b <sup>+</sup> | #  | AA | #  | y <sup>+</sup> | y <sup>2+</sup> |
|----------------|----|----|----|----------------|-----------------|
| 166.0980       | 1  | H  | 23 |                |                 |
| 294.1566       | 2  | Q  | 22 | 2426.1809      | 1213.5944       |
| 351.1781       | 3  | G  | 21 | 2298.1223      | 1149.5651       |
| 450.2465       | 4  | V  | 20 | 2241.1008      | 1121.0543       |
| 581.2870       | 5  | M  | 19 | 2142.0324      | 1071.5201       |
| 680.3554       | 6  | V  | 18 | 2010.9919      | 1005.9999       |
| 737.3768       | 7  | G  | 17 | 1911.9235      | 956.4657        |
| 868.4173       | 8  | M  | 16 | 1854.9021      | 927.9549        |
| 925.4388       | 9  | G  | 15 | 1723.8616      | 862.4347        |
| 1053.4974      | 10 | Q  | 14 | 1666.8401      | 833.9240        |
| 1209.6237      | 11 | K  | 13 | 1538.7815      | 769.8947        |
| 1324.6506      | 12 | D  | 12 | 1382.6552      | 691.8315        |
| 1411.6826      | 13 | S  | 11 | 1267.6283      | 634.3181        |
| 1574.7460      | 14 | Y  | 10 | 1180.5963      | 590.8020        |
| 1673.8144      | 15 | V  | 9  | 1017.5329      | 509.2704        |
| 1730.8358      | 16 | G  | 8  | 918.4645       | 459.7362        |
| 1845.8628      | 17 | D  | 7  | 861.4431       | 431.2254        |
| 1974.9054      | 18 | E  | 6  | 746.4161       | 373.7120        |
| 2045.9425      | 19 | A  | 5  | 617.3735       | 309.1907        |
| 2174.0011      | 20 | Q  | 4  | 546.3364       | 273.6721        |
| 2261.0331      | 21 | S  | 3  | 418.2778       | 209.6428        |
| 2417.1594      | 22 | K  | 2  | 331.2458       | 166.1268        |
|                | 23 | R  | 1  | 175.1195       | 88.0637         |

N-term:+29.04 K(11):+156.13

K(22):+156.13

X-range:

0 - 0

MassTol: Y-zoom:

0. 1.

MassType:

☐AVG ☒MONO

Axis:

☒1 ☐2

Label:

☒I ☐M ☐-

Ions:

a ☐+ ☐2+ ☐3+

b ☒+ ☐2+ ☐3+

c ☐+ ☐2+ ☐3+

x ☐+ ☐2+ ☐3+

y ☒+ ☒2+ ☐3+

z ☐+ ☐2+ ☐3+

hide H<sub>2</sub>O/NH<sub>3</sub> ☐

zoom 112-122 ☐

GO

HSDFSEGGAVGAHR, MH+ 1525.7148, m/z 509.2431  
L OS G18 P120811 220811-s1.02069.02069.3.dta

scan 2069; 1.9e+000

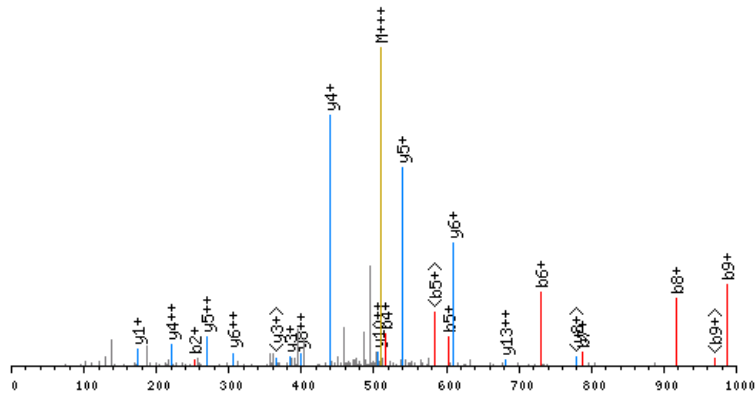

click image to zoom in; click top corners to zoom out

[precursor±]

scan 2066; 509.2 m/z; 2.7e+000

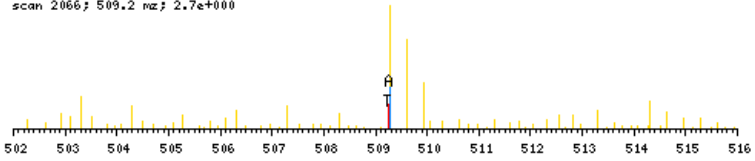

zoomed in precursor plot; T=theoretical m/z, A=acquired m/z

| b <sup>+</sup> | #  | AA | #  | y <sup>+</sup> | y <sup>2+</sup> |
|----------------|----|----|----|----------------|-----------------|
| 166.0980       | 1  | H  | 14 |                |                 |
| 253.1300       | 2  | S  | 13 | 1360.6246      | 680.8162        |
| 368.1570       | 3  | D  | 12 | 1273.5925      | 637.3002        |
| 515.2254       | 4  | F  | 11 | 1158.5656      | 579.7867        |
| 602.2574       | 5  | S  | 10 | 1011.4972      | 506.2525        |
| 731.3000       | 6  | E  | 9  | 924.4652       | 462.7365        |
| 788.3215       | 7  | G  | 8  | 795.4226       | 398.2152        |
| 916.3801       | 8  | Q  | 7  | 738.4011       | 369.7045        |
| 987.4172       | 9  | A  | 6  | 610.3425       | 305.6752        |
| 1086.4856      | 10 | V  | 5  | 539.3054       | 270.1566        |
| 1143.5071      | 11 | G  | 4  | 440.2370       | 220.6224        |
| 1214.5442      | 12 | A  | 3  | 383.2155       | 192.1117        |
| 1351.6031      | 13 | H  | 2  | 312.1784       | 156.5931        |
|                | 14 | R  | 1  | 175.1195       | 88.0637         |

N-term:+29.04

X-range:

0 - 0

MassTol: Y-zoom:

0. 1.

MassType:

☐AVG ☒MONO

Axis:

☒1 ☐2

Label:

☒I ☐M ☐-

Ions:

a ☐+ ☐2+ ☐3+

b ☒+ ☐2+ ☐3+

c ☐+ ☐2+ ☐3+

x ☐+ ☐2+ ☐3+

y ☒+ ☒2+ ☐3+

z ☐+ ☐2+ ☐3+

hide H<sub>2</sub>O/NH<sub>3</sub> ☐

zoom 112-122 ☐

GO

HSILPVDDDDINGLNEEQKQLR, MH+ 2489.3000, m/z 623.0805  
L OS G17 P120811 220811-s1.05730.05730.4.dta

scan 5730; 3.0e+000

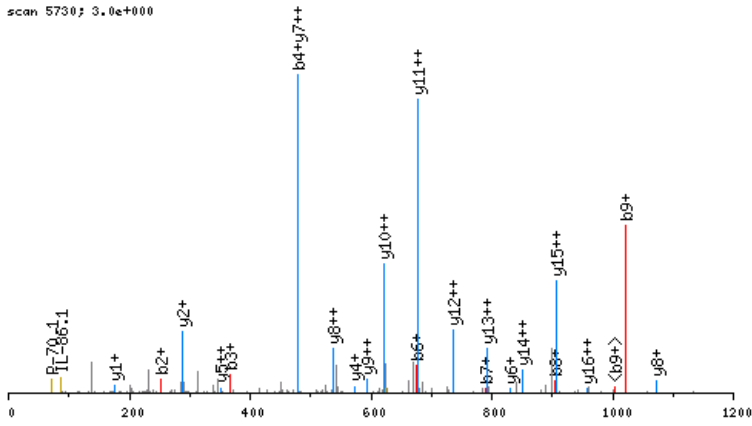

click image to zoom in; click top corners to zoom out [\[precursor±\]](#)

scan 5728; 623.1 m/z; 1.6e+001

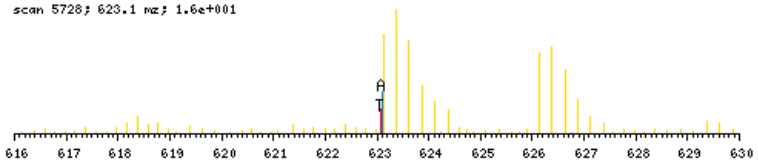

zoomed in precursor plot; T=theoretical m/z, A=acquired m/z

| b <sup>+</sup> | #  | AA | #  | y <sup>+</sup> | y <sup>2+</sup> |
|----------------|----|----|----|----------------|-----------------|
| 166.0980       | 1  | H  | 21 |                |                 |
| 253.1300       | 2  | S  | 20 | 2324.2098      | 1162.6088       |
| 366.2141       | 3  | I  | 19 | 2237.1778      | 1119.0928       |
| 479.2982       | 4  | L  | 18 | 2124.0937      | 1062.5508       |
| 576.3509       | 5  | P  | 17 | 2011.0097      | 1006.0087       |
| 675.4193       | 6  | V  | 16 | 1913.9569      | 957.4824        |
| 790.4463       | 7  | D  | 15 | 1814.8885      | 907.9482        |
| 905.4732       | 8  | D  | 14 | 1699.8615      | 850.4347        |
| 1020.5002      | 9  | D  | 13 | 1584.8346      | 792.9212        |
| 1133.5842      | 10 | I  | 12 | 1469.8077      | 735.4077        |
| 1247.6272      | 11 | N  | 11 | 1356.7236      | 678.8657        |
| 1304.6486      | 12 | G  | 10 | 1242.6807      | 621.8442        |
| 1417.7327      | 13 | L  | 9  | 1185.6592      | 593.3335        |
| 1531.7756      | 14 | N  | 8  | 1072.5751      | 536.7915        |
| 1660.8182      | 15 | E  | 7  | 958.5322       | 479.7700        |
| 1789.8608      | 16 | E  | 6  | 829.4896       | 415.2487        |
| 1917.9194      | 17 | Q  | 5  | 700.4470       | 350.7274        |
| 2074.0457      | 18 | K  | 4  | 572.3884       | 286.6981        |
| 2202.1043      | 19 | Q  | 3  | 416.2621       | 208.6350        |
| 2315.1883      | 20 | L  | 2  | 288.2036       | 144.6057        |
|                | 21 | R  | 1  | 175.1195       | 88.0637         |

N-term:+29.04 K(18):+156.13

X-range:

0 - 0

MassTol: Y-zoom:

0. 1.

MassType:

☐AVG ☒MONO

Axis:

☒1 ☐2

Label:

☒I ☐M ☐-

Ions:

a ☐+ ☐2+ ☐3+

b ☒+ ☐2+ ☐3+

c ☐+ ☐2+ ☐3+

x ☐+ ☐2+ ☐3+

y ☒+ ☒2+ ☐3+

z ☐+ ☐2+ ☐3+

hide H<sub>2</sub>O/NH<sub>3</sub> ☐

zoom 112-122 ☐

GO

HSPAFQFPDVFRLR, MH+ 1703.8545, m/z 568.6230  
L OS G16 P120811 220811-s1.06278.06278.3.dta

scan 6278; 1.7e+000

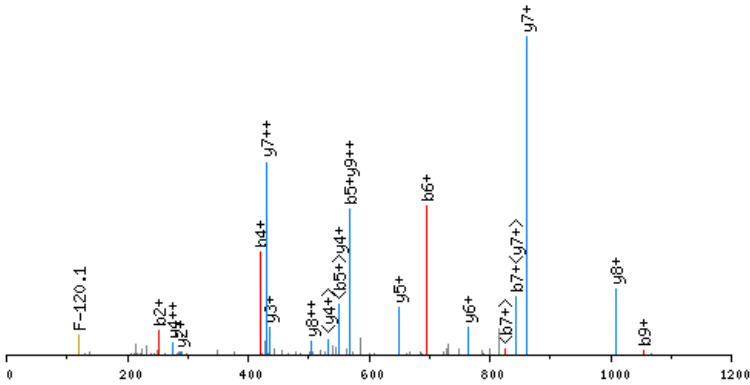

click image to zoom in; click top corners to zoom out

[precursor±]

scan 6277; 568.6 m/z; 2.2e+000

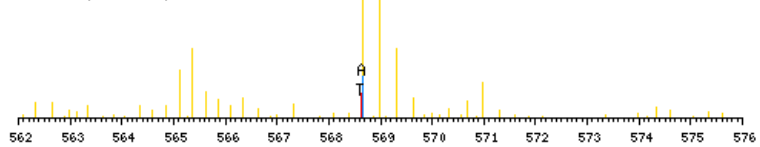

zoomed in precursor plot; T=theoretical m/z, A=acquired m/z

| b <sup>+</sup> | #  | AA | #  | y <sup>+</sup> | y <sup>2+</sup> |
|----------------|----|----|----|----------------|-----------------|
| 166.0980       | 1  | H  | 14 |                |                 |
| 253.1300       | 2  | S  | 13 | 1538.7644      | 769.8861        |
| 350.1828       | 3  | P  | 12 | 1451.7323      | 726.3701        |
| 421.2199       | 4  | A  | 11 | 1354.6796      | 677.8437        |
| 568.2883       | 5  | F  | 10 | 1283.6424      | 642.3251        |
| 696.3469       | 6  | Q  | 9  | 1136.5740      | 568.7909        |
| 843.4153       | 7  | F  | 8  | 1008.5155      | 504.7616        |
| 940.4681       | 8  | P  | 7  | 861.4470       | 431.2274        |
| 1055.4950      | 9  | D  | 6  | 764.3943       | 382.7011        |
| 1154.5634      | 10 | V  | 5  | 649.3673       | 325.1876        |
| 1269.5904      | 11 | D  | 4  | 550.2989       | 275.6534        |
| 1416.6588      | 12 | F  | 3  | 435.2720       | 218.1399        |
| 1529.7429      | 13 | L  | 2  | 288.2036       | 144.6057        |
|                | 14 | R  | 1  | 175.1195       | 88.0637         |

N-term:+29.04

X-range:

0 - 0

MassTol: Y-zoom:

0. 1.

MassType:

☐ AVG ☒ MONO

Axis:

☒ 1 ☐ 2

Label:

☒ I ☐ M ☐ -

Ions:

a ☐ + ☐ 2+ ☐ 3+

b ☒ + ☐ 2+ ☐ 3+

c ☐ + ☐ 2+ ☐ 3+

x ☐ + ☐ 2+ ☐ 3+

y ☒ + ☒ 2+ ☐ 3+

z ☐ + ☐ 2+ ☐ 3+

hide H<sub>2</sub>O/NH<sub>3</sub> ☐

zoom 112-122 ☐

GO

HSYDLGIENR, MH+ 1231.6071, m/z 411.2072  
L OS G17 P120811 220811-s1.03172.03172.3.dta

scan 3172; 1.9e+000

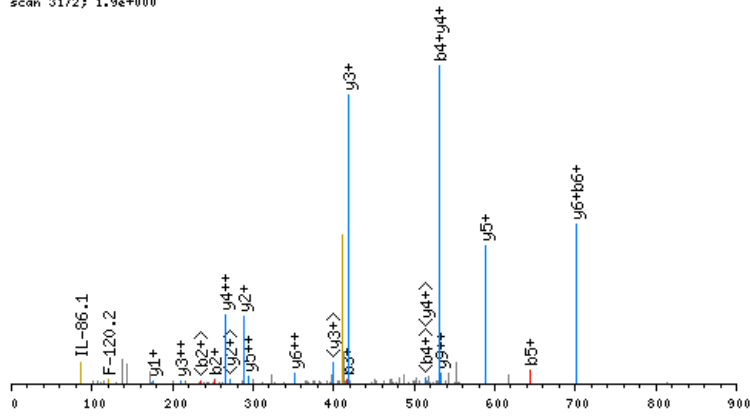

click image to zoom in; click top corners to zoom out [precursor±]

scan 3168; 411.2 m/z; 8.2e+000

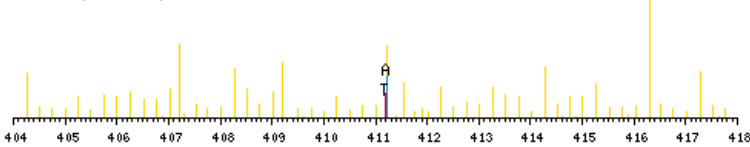

zoomed in precursor plot; T=theoretical m/z, A=acquired m/z

| b <sup>+</sup> | #  | AA | #  | y <sup>+</sup> | y <sup>2+</sup> |
|----------------|----|----|----|----------------|-----------------|
| 166.0980       | 1  | H  | 10 |                |                 |
| 253.1300       | 2  | S  | 9  | 1066.5169      | 533.7624        |
| 416.1934       | 3  | Y  | 8  | 979.4849       | 490.2464        |
| 531.2203       | 4  | D  | 7  | 816.4216       | 408.7147        |
| 644.3044       | 5  | L  | 6  | 701.3946       | 351.2012        |
| 701.3258       | 6  | G  | 5  | 588.3105       | 294.6592        |
| 814.4099       | 7  | I  | 4  | 531.2891       | 266.1485        |
| 943.4525       | 8  | E  | 3  | 418.2050       | 209.6064        |
| 1057.4954      | 9  | N  | 2  | 289.1624       | 145.0851        |
|                | 10 | R  | 1  | 175.1195       | 88.0637         |

N-term:+29.04

X-range:

0 - 0

MassTol: Y-zoom:

0. 1.

MassType:

☐AVG ☒MONO

Axis:

☒1 ☐2

Label:

☒I ☐M ☐-

Ions:

a ☐+ ☐2+ ☐3+

b ☒+ ☐2+ ☐3+

c ☐+ ☐2+ ☐3+

x ☐+ ☐2+ ☐3+

y ☒+ ☒2+ ☐3+

z ☐+ ☐2+ ☐3+

hide H<sub>2</sub>O/NH<sub>3</sub> ☐

zoom 112-122 ☐

GO

HTEAAEVLLER, MH+ 1295.6959, m/z 432.5702  
L OS G16 P120811 220811-s1.03860.03860.3.dta

scan 3860; 2.2e+000

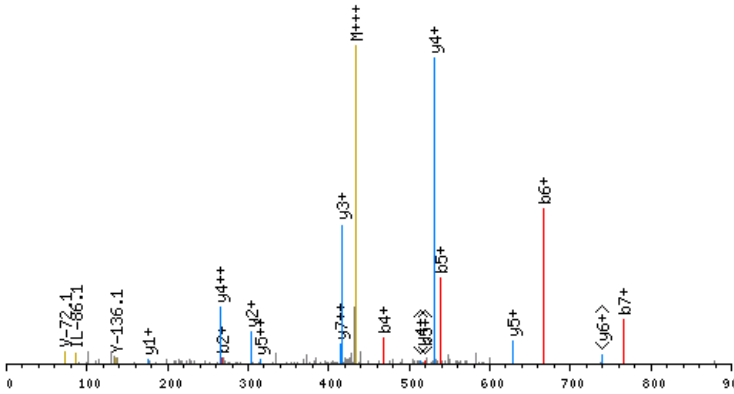

click image to zoom in; click top corners to zoom out [precursor±]

scan 3858; 432.6 m/z; 6.4e+000

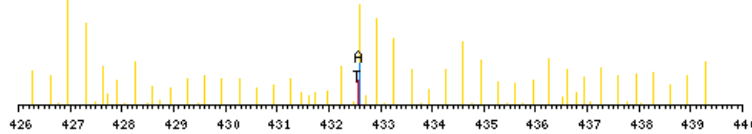

zoomed in precursor plot; T=theoretical m/z, A=acquired m/z

| b <sup>+</sup> | #  | AA | #  | y <sup>+</sup> | y <sup>2+</sup> |
|----------------|----|----|----|----------------|-----------------|
| 166.0980       | 1  | H  | 11 |                |                 |
| 267.1457       | 2  | T  | 10 | 1130.6057      | 565.8068        |
| 396.1883       | 3  | E  | 9  | 1029.5580      | 515.2829        |
| 467.2254       | 4  | A  | 8  | 900.5155       | 450.7616        |
| 538.2625       | 5  | A  | 7  | 829.4783       | 415.2431        |
| 667.3051       | 6  | E  | 6  | 758.4412       | 379.7245        |
| 766.3735       | 7  | V  | 5  | 629.3986       | 315.2032        |
| 879.4576       | 8  | L  | 4  | 530.3302       | 265.6690        |
| 992.5416       | 9  | L  | 3  | 417.2462       | 209.1270        |
| 1121.5842      | 10 | E  | 2  | 304.1621       | 152.5850        |
|                | 11 | R  | 1  | 175.1195       | 88.0637         |

N-term:+29.04

X-range:

0 - 0

MassTol: Y-zoom:

0. 1.

MassType:

☐AVG ☒MONO

Axis:

☒1 ☐2

Label:

☒I ☐M ☐-

Ions:

a ☐+ ☐2+ ☐3+

b ☒+ ☐2+ ☐3+

c ☐+ ☐2+ ☐3+

x ☐+ ☐2+ ☐3+

y ☒+ ☒2+ ☐3+

z ☐+ ☐2+ ☐3+

hide H<sub>2</sub>O/NH<sub>3</sub> ☐

zoom 112-122 ☐

GO

HTEEDFIITTKTGR, MH+ 1703.8968, m/z 426.7297  
L OS G17 P120811 220811-s1.03605.03605.4.dta

scan 3605; 3.6e+000

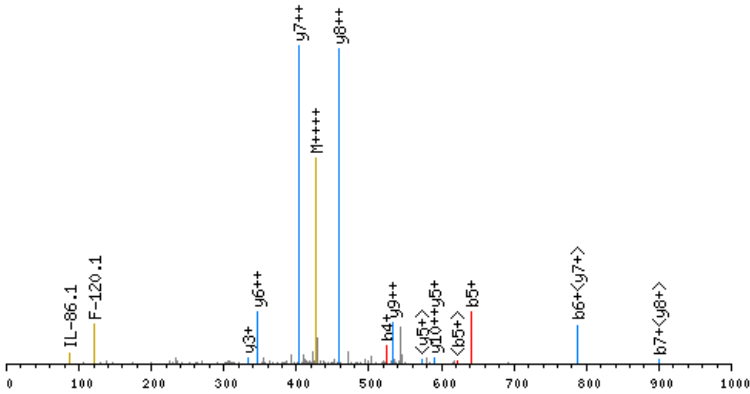

click image to zoom in; click top corners to zoom out

[precursor±]

scan 3603; 426.7 m/z; 6.9e+001

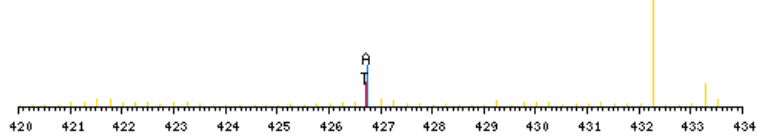

zoomed in precursor plot; T=theoretical m/z, A=acquired m/z

| b <sup>+</sup> | #  | AA | #  | y <sup>+</sup> | y <sup>2+</sup> |
|----------------|----|----|----|----------------|-----------------|
| 166.0980       | 1  | H  | 14 |                |                 |
| 267.1457       | 2  | T  | 13 | 1538.8066      | 769.9072        |
| 396.1883       | 3  | E  | 12 | 1437.7590      | 719.3834        |
| 525.2309       | 4  | E  | 11 | 1308.7164      | 654.8621        |
| 640.2578       | 5  | D  | 10 | 1179.6738      | 590.3408        |
| 787.3262       | 6  | F  | 9  | 1064.6468      | 532.8273        |
| 900.4103       | 7  | I  | 8  | 917.5784       | 459.2931        |
| 1013.4944      | 8  | I  | 7  | 804.4944       | 402.7511        |
| 1114.5420      | 9  | T  | 6  | 691.4103       | 346.2091        |
| 1215.5897      | 10 | T  | 5  | 590.3626       | 295.6852        |
| 1371.7160      | 11 | K  | 4  | 489.3149       | 245.1614        |
| 1472.7637      | 12 | T  | 3  | 333.1886       | 167.0982        |
| 1529.7852      | 13 | G  | 2  | 232.1410       | 116.5744        |
|                | 14 | R  | 1  | 175.1195       | 88.0637         |

N-term:+29.04 K(11):+156.13

X-range:

0 - 0

MassTol: Y-zoom:

0. 1.

MassType:

☐AVG ☒MONO

Axis:

☒1 ☐2

Label:

☒I ☐M ☐-

Ions:

a ☐+ ☐2+ ☐3+

b ☒+ ☐2+ ☐3+

c ☐+ ☐2+ ☐3+

x ☐+ ☐2+ ☐3+

y ☒+ ☒2+ ☐3+

z ☐+ ☐2+ ☐3+

hide H<sub>2</sub>O/NH<sub>3</sub> ☐

zoom 112-122 ☐

GO

HVASDTEKIIR, MH+ 1324.7589, m/z 442.2578  
L OS G18 P120811 220811-s1.02240.02240.3.dta

scan 2240; 1.6e+001

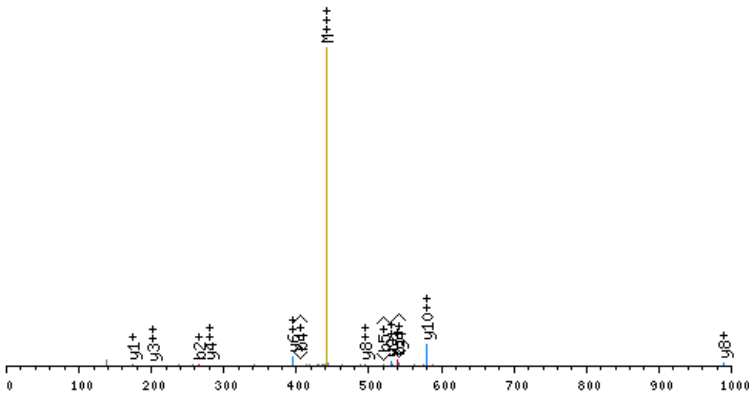

click image to zoom in; click top corners to zoom out [\[precursor±\]](#)

scan 2236; 442.3 m/z; 7.1e+000

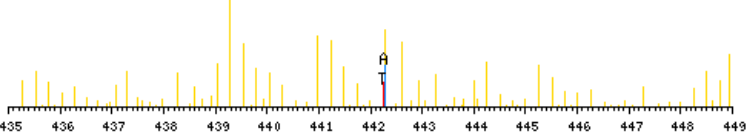

zoomed in precursor plot; T=theoretical m/z, A=acquired m/z

| b <sup>+</sup> | #  | AA | #  | y <sup>+</sup> | y <sup>2+</sup> |
|----------------|----|----|----|----------------|-----------------|
| 166.0980       | 1  | H  | 11 |                |                 |
| 265.1664       | 2  | V  | 10 | 1159.6687      | 580.3383        |
| 336.2035       | 3  | A  | 9  | 1060.6003      | 530.8041        |
| 423.2356       | 4  | S  | 8  | 989.5632       | 495.2855        |
| 538.2625       | 5  | D  | 7  | 902.5311       | 451.7695        |
| 639.3102       | 6  | T  | 6  | 787.5042       | 394.2560        |
| 768.3528       | 7  | E  | 5  | 686.4565       | 343.7322        |
| 924.4791       | 8  | K  | 4  | 557.4139       | 279.2109        |
| 1037.5631      | 9  | I  | 3  | 401.2876       | 201.1477        |
| 1150.6472      | 10 | I  | 2  | 288.2036       | 144.6057        |
|                | 11 | R  | 1  | 175.1195       | 88.0637         |

N-term:+29.04 K(8):+156.13

X-range:

0 - 0

MassTol: Y-zoom:

0. 1.

MassType:

☐ AVG ☒ MONO

Axis:

☒ 1 ☐ 2

Label:

☒ I ☐ M ☐ -

Ions:

a ☐ + ☐ 2+ ☐ 3+

b ☒ + ☐ 2+ ☐ 3+

c ☐ + ☐ 2+ ☐ 3+

x ☐ + ☐ 2+ ☐ 3+

y ☒ + ☒ 2+ ☐ 3+

z ☐ + ☐ 2+ ☐ 3+

hide H<sub>2</sub>O/NH<sub>3</sub> ☐

zoom 112-122 ☐

GO

HVGD LGNV TAGK DGV ANV SIEDR, MH+ 2379.2268, m/z 595.5622  
L OS G17 P120811 220811-s1.04790.04790.4.dta

scan 4790; 1.7e+000

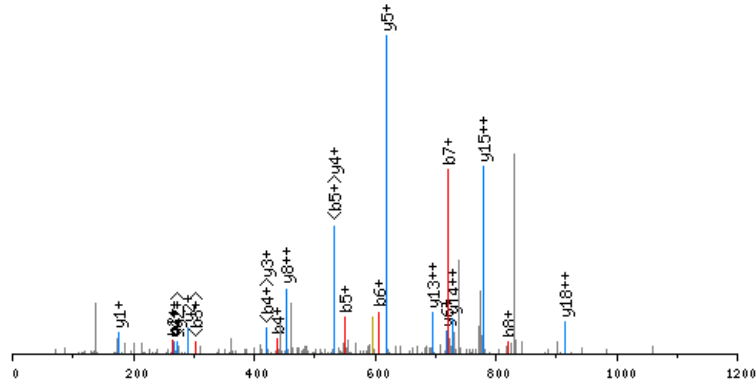

click image to zoom in; click top corners to zoom out [\[precursor±\]](#)

scan 4788; 595.6 m/z; 1.7e+001

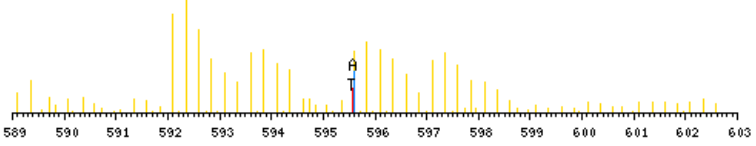

zoomed in precursor plot; T=theoretical m/z, A=acquired m/z

| b <sup>+</sup> | #  | AA | #  | y <sup>+</sup> | y <sup>2+</sup> |
|----------------|----|----|----|----------------|-----------------|
| 166.0980       | 1  | H  | 23 |                |                 |
| 265.1664       | 2  | V  | 22 | 2214.1367      | 1107.5722       |
| 322.1879       | 3  | G  | 21 | 2115.0682      | 1058.0380       |
| 437.2148       | 4  | D  | 20 | 2058.0468      | 1029.5273       |
| 550.2989       | 5  | L  | 19 | 1943.0198      | 972.0138        |
| 607.3204       | 6  | G  | 18 | 1829.9358      | 915.4718        |
| 721.3633       | 7  | N  | 17 | 1772.9143      | 886.9611        |
| 820.4317       | 8  | V  | 16 | 1658.8714      | 829.9396        |
| 921.4794       | 9  | T  | 15 | 1559.8030      | 780.4054        |
| 992.5165       | 10 | A  | 14 | 1458.7553      | 729.8816        |
| 1049.5380      | 11 | G  | 13 | 1387.7182      | 694.3630        |
| 1205.6643      | 12 | K  | 12 | 1330.6967      | 665.8523        |
| 1320.6912      | 13 | D  | 11 | 1174.5704      | 587.7891        |
| 1377.7127      | 14 | G  | 10 | 1059.5435      | 530.2756        |
| 1476.7811      | 15 | V  | 9  | 1002.5220      | 501.7649        |
| 1547.8182      | 16 | A  | 8  | 903.4536       | 452.2307        |
| 1661.8611      | 17 | N  | 7  | 832.4165       | 416.7121        |
| 1760.9295      | 18 | V  | 6  | 718.3735       | 359.6907        |
| 1847.9616      | 19 | S  | 5  | 619.3051       | 310.1565        |
| 1961.0456      | 20 | I  | 4  | 532.2731       | 266.6405        |
| 2090.0882      | 21 | E  | 3  | 419.1890       | 210.0984        |
| 2205.1152      | 22 | D  | 2  | 290.1464       | 145.5771        |
|                | 23 | R  | 1  | 175.1195       | 88.0637         |

N-term:+29.04 K(12):+156.13

N-term: +29.04 C(6): +160.03

| $b^+$     | #  | AA | #  | $y^+$     | $y^{2+}$ |
|-----------|----|----|----|-----------|----------|
| 166.0980  | 1  | H  | 14 |           |          |
| 265.1664  | 2  | V  | 13 | 1384.7549 | 692.8813 |
| 366.2141  | 3  | T  | 12 | 1285.6864 | 643.3471 |
| 480.2570  | 4  | N  | 11 | 1184.6388 | 592.8233 |
| 609.2996  | 5  | E  | 10 | 1070.5958 | 535.8018 |
| 708.3680  | 6  | V  | 9  | 941.5532  | 471.2805 |
| 779.4052  | 7  | A  | 8  | 842.4848  | 421.7463 |
| 907.4637  | 8  | Q  | 7  | 771.4477  | 386.2278 |
| 1020.5478 | 9  | L  | 6  | 643.3891  | 322.1985 |
| 1133.6319 | 10 | I  | 5  | 530.3051  | 265.6564 |
| 1261.6904 | 11 | Q  | 4  | 417.2210  | 209.1144 |
| 1318.7119 | 12 | G  | 3  | 289.1624  | 145.0851 |
| 1375.7334 | 13 | G  | 2  | 232.1410  | 116.5744 |
|           | 14 | R  | 1  | 175.1195  | 88.0637  |

X-range:

0 - 0

MassTol: Y-zoom:

0. 1.

MassType:

☐ AVG ☒ MONO

Axis:

☒ 1 ☐ 2

Label:

☒ I ☐ M ☐ -

Ions:

a ☐ + ☐ 2+ ☐ 3+

b ☒ + ☐ 2+ ☐ 3+

c ☐ + ☐ 2+ ☐ 3+

x ☐ + ☐ 2+ ☐ 3+

y ☒ + ☒ 2+ ☐ 3+

z ☐ + ☐ 2+ ☐ 3+

hide H<sub>2</sub>O/NH<sub>3</sub> ☐

zoom 112-122 ☐

GO

IADLVVGLCTGQIKTGAPCR, MH+ 2197.2472, m/z 550.0673  
H OS G15 P120811 220811-s1.05245.05245.4.dta

scan 5245; 2.0e+000

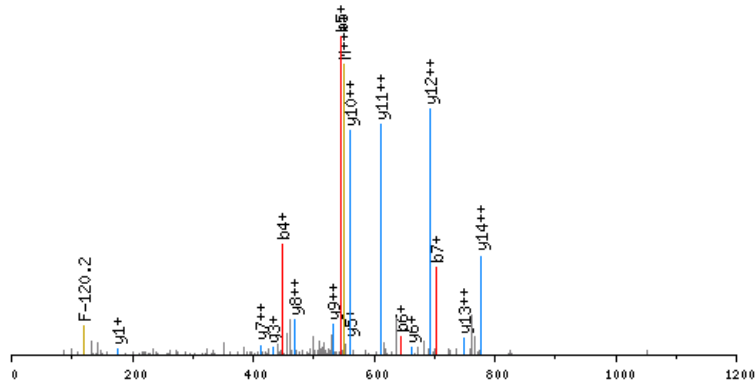

click image to zoom in; click top corners to zoom out [\[precursor±\]](#)

scan 5241; 550.1 m/z; 3.1e+001

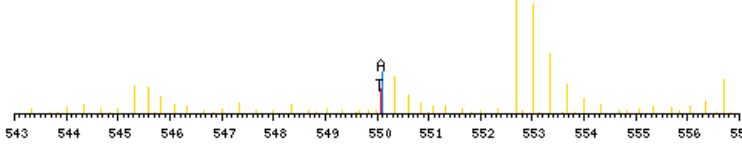

zoomed in precursor plot; T=theoretical m/z, A=acquired m/z

| b <sup>+</sup> | #  | AA | #  | y <sup>+</sup> | y <sup>2+</sup> |
|----------------|----|----|----|----------------|-----------------|
| 148.1550       | 1  | I  | 20 |                |                 |
| 219.1921       | 2  | A  | 19 | 2050.1001      | 1025.5540       |
| 334.2190       | 3  | D  | 18 | 1979.0630      | 990.0354        |
| 447.3031       | 4  | L  | 17 | 1864.0360      | 932.5219        |
| 546.3715       | 5  | V  | 16 | 1750.9520      | 875.9799        |
| 645.4399       | 6  | V  | 15 | 1651.8835      | 826.4457        |
| 702.4614       | 7  | G  | 14 | 1552.8151      | 776.9115        |
| 815.5454       | 8  | L  | 13 | 1495.7937      | 748.4007        |
| 975.5760       | 9  | C  | 12 | 1382.7096      | 691.8587        |
| 1076.6237      | 10 | T  | 11 | 1222.6790      | 611.8434        |
| 1133.6452      | 11 | G  | 10 | 1121.6313      | 561.3196        |
| 1261.7038      | 12 | Q  | 9  | 1064.6099      | 532.8088        |
| 1374.7878      | 13 | I  | 8  | 936.5513       | 468.7796        |
| 1536.9459      | 14 | K  | 7  | 823.4672       | 412.2375        |
| 1637.9936      | 15 | T  | 6  | 661.3091       | 331.1585        |
| 1695.0151      | 16 | G  | 5  | 560.2614       | 280.6346        |
| 1766.0522      | 17 | A  | 4  | 503.2400       | 252.1239        |
| 1863.1049      | 18 | P  | 3  | 432.2029       | 216.6053        |
| 2023.1355      | 19 | C  | 2  | 335.1501       | 168.0790        |
|                | 20 | R  | 1  | 175.1195       | 88.0637         |

N-term:+35.07 C(9):+160.03  
K(14):+162.16 C(19):+160.03

X-range:

0 - 0

MassTol: Y-zoom:

0. 1.

MassType:

☐AVG ☒MONO

Axis:

☒1 ☐2

Label:

☒I ☐M ☐-

Ions:

a ☐+ ☐2+ ☐3+

b ☒+ ☐2+ ☐3+

c ☐+ ☐2+ ☐3+

x ☐+ ☐2+ ☐3+

y ☒+ ☒2+ ☐3+

z ☐+ ☐2+ ☐3+

hide H<sub>2</sub>O/NH<sub>3</sub> ☐

zoom 112-122 ☐

GO

IAELGIYPAVDPLDSTSR, MH+ 1945.0282, m/z 649.0143  
L OS G12 P120811 220811-s1.05345.05345.3.dta

scan 5345; 3.0e+000

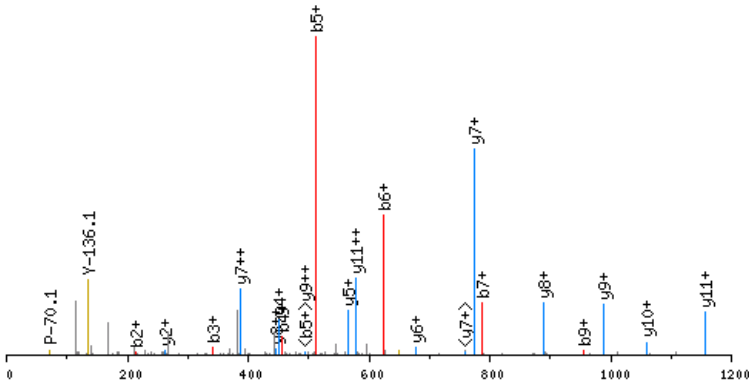

click image to zoom in; click top corners to zoom out [\[precursor±\]](#)

scan 5342; 649.0 m/z; 7.9e+000

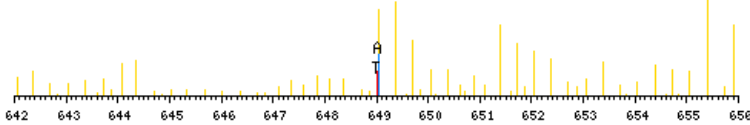

zoomed in precursor plot; T=theoretical m/z, A=acquired m/z

| b <sup>+</sup> | #  | AA | #  | y <sup>+</sup> | y <sup>2+</sup> |
|----------------|----|----|----|----------------|-----------------|
| 142.1232       | 1  | I  | 18 |                |                 |
| 213.1603       | 2  | A  | 17 | 1803.9129      | 902.4603        |
| 342.2029       | 3  | E  | 16 | 1732.8758      | 866.9418        |
| 455.2869       | 4  | L  | 15 | 1603.8332      | 802.4205        |
| 512.3084       | 5  | G  | 14 | 1490.7491      | 745.8785        |
| 625.3925       | 6  | I  | 13 | 1433.7276      | 717.3677        |
| 788.4558       | 7  | Y  | 12 | 1320.6436      | 660.8257        |
| 885.5086       | 8  | P  | 11 | 1157.5802      | 579.2940        |
| 956.5457       | 9  | A  | 10 | 1060.5275      | 530.7677        |
| 1055.6141      | 10 | V  | 9  | 989.4904       | 495.2491        |
| 1170.6410      | 11 | D  | 8  | 890.4220       | 445.7149        |
| 1267.6938      | 12 | P  | 7  | 775.3950       | 388.2014        |
| 1380.7779      | 13 | L  | 6  | 678.3422       | 339.6750        |
| 1495.8048      | 14 | D  | 5  | 565.2582       | 283.1330        |
| 1582.8368      | 15 | S  | 4  | 450.2312       | 225.6195        |
| 1683.8845      | 16 | T  | 3  | 363.1992       | 182.1035        |
| 1770.9165      | 17 | S  | 2  | 262.1515       | 131.5797        |
|                | 18 | R  | 1  | 175.1195       | 88.0637         |

N-term:+29.04

X-range:

0 - 0

MassTol: Y-zoom:

0. 1.

MassType:

☐ AVG ☒ MONO

Axis:

☒ 1 ☐ 2

Label:

☒ I ☐ M ☐ -

Ions:

a ☐ + ☐ 2+ ☐ 3+

b ☒ + ☐ 2+ ☐ 3+

c ☐ + ☐ 2+ ☐ 3+

x ☐ + ☐ 2+ ☐ 3+

y ☒ + ☒ 2+ ☐ 3+

z ☐ + ☐ 2+ ☐ 3+

hide H<sub>2</sub>O/NH<sub>3</sub> ☐

zoom 112-122 ☐

GO

IASDEEIQGTKDAVIQDLER, MH+ 2286.1829, m/z 572.3012  
L OS G15 P120811 220811-s1.05639.05639.4.dta

scan 5639; 1.2e+000

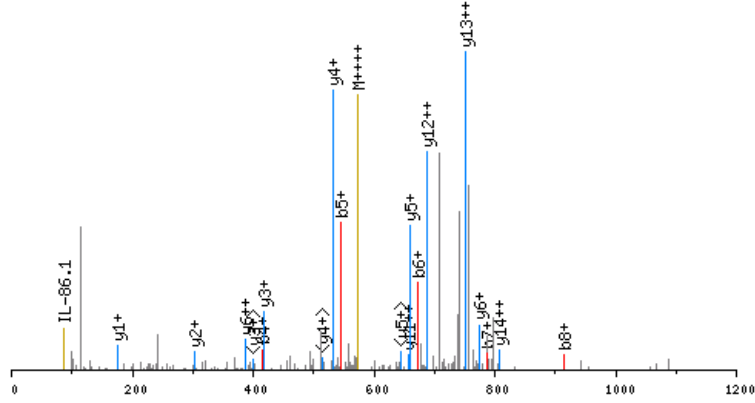

click image to zoom in; click top corners to zoom out [\[precursor±\]](#)

scan 5636; 572.3 m/z; 6.1e+000

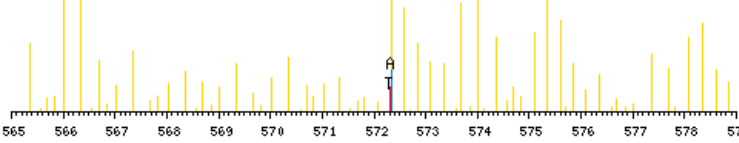

zoomed in precursor plot; T=theoretical m/z, A=acquired m/z

| b <sup>+</sup> | #  | AA | #  | y <sup>+</sup> | y <sup>2+</sup> |
|----------------|----|----|----|----------------|-----------------|
| 142.1232       | 1  | I  | 20 |                |                 |
| 213.1603       | 2  | A  | 19 | 2145.0676      | 1073.0377       |
| 300.1923       | 3  | S  | 18 | 2074.0305      | 1037.5191       |
| 415.2192       | 4  | D  | 17 | 1986.9984      | 994.0031        |
| 544.2618       | 5  | E  | 16 | 1871.9715      | 936.4897        |
| 673.3044       | 6  | E  | 15 | 1742.9289      | 871.9684        |
| 786.3885       | 7  | I  | 14 | 1613.8863      | 807.4471        |
| 914.4471       | 8  | Q  | 13 | 1500.8022      | 750.9050        |
| 971.4685       | 9  | G  | 12 | 1372.7437      | 686.8757        |
| 1072.5162      | 10 | T  | 11 | 1315.7222      | 658.3650        |
| 1228.6425      | 11 | K  | 10 | 1214.6745      | 607.8412        |
| 1343.6695      | 12 | D  | 9  | 1058.5482      | 529.7780        |
| 1414.7066      | 13 | A  | 8  | 943.5213       | 472.2645        |
| 1513.7750      | 14 | V  | 7  | 872.4842       | 436.7460        |
| 1626.8591      | 15 | I  | 6  | 773.4157       | 387.2118        |
| 1754.9176      | 16 | Q  | 5  | 660.3317       | 330.6698        |
| 1869.9446      | 17 | D  | 4  | 532.2731       | 266.6405        |
| 1983.0286      | 18 | L  | 3  | 417.2462       | 209.1270        |
| 2112.0712      | 19 | E  | 2  | 304.1621       | 152.5850        |
|                | 20 | R  | 1  | 175.1195       | 88.0637         |

N-term:+29.04 K(11):+156.13

X-range:

0 - 0

MassTol: Y-zoom:

0. 1.

MassType:

☐AVG ☒MONO

Axis:

☒1 ☐2

Label:

☒I ☐M ☐-

Ions:

a ☐+ ☐2+ ☐3+

b ☒+ ☐2+ ☐3+

c ☐+ ☐2+ ☐3+

x ☐+ ☐2+ ☐3+

y ☒+ ☒2+ ☐3+

z ☐+ ☐2+ ☐3+

hide H<sub>2</sub>O/NH<sub>3</sub> ☐

zoom 112-122 ☐

GO

ICPSTHNMDVPNIKR, MH+ 1837.9416, m/z 460.2409  
L OS G17 P120811 220811-s1.03525.03525.4.dta

scan 3525; 7.4e+000

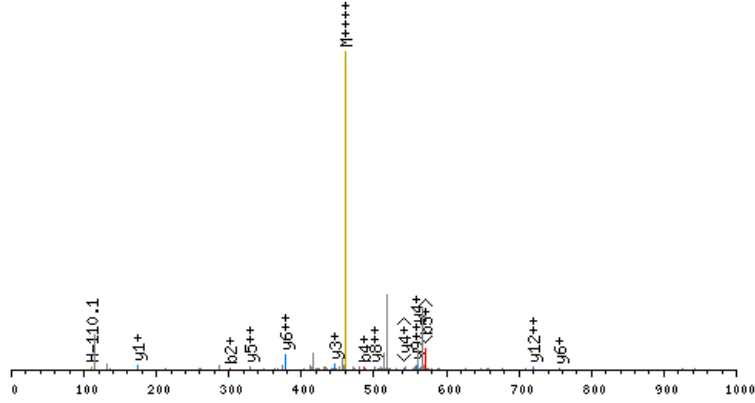

click image to zoom in; click top corners to zoom out [\[precursor±\]](#)

scan 3523; 460.2 m/z; 9.7e+000

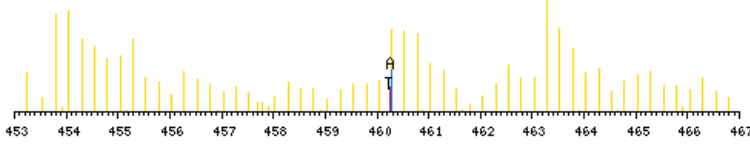

zoomed in precursor plot; T=theoretical m/z, A=acquired m/z

| b <sup>+</sup> | #  | AA | #  | y <sup>+</sup> | y <sup>2+</sup> |
|----------------|----|----|----|----------------|-----------------|
| 142.1232       | 1  | I  | 15 |                |                 |
| 302.1538       | 2  | C  | 14 | 1696.8263      | 848.9171        |
| 399.2065       | 3  | P  | 13 | 1536.7957      | 768.9018        |
| 486.2386       | 4  | S  | 12 | 1439.7429      | 720.3754        |
| 587.2862       | 5  | T  | 11 | 1352.7109      | 676.8594        |
| 724.3451       | 6  | H  | 10 | 1251.6632      | 626.3355        |
| 838.3881       | 7  | N  | 9  | 1114.6043      | 557.8061        |
| 969.4286       | 8  | M  | 8  | 1000.5614      | 500.7846        |
| 1084.4555      | 9  | D  | 7  | 869.5209       | 435.2644        |
| 1183.5239      | 10 | V  | 6  | 754.4940       | 377.7509        |
| 1280.5767      | 11 | P  | 5  | 655.4256       | 328.2167        |
| 1394.6196      | 12 | N  | 4  | 558.3728       | 279.6903        |
| 1507.7037      | 13 | I  | 3  | 444.3299       | 222.6688        |
| 1663.8300      | 14 | K  | 2  | 331.2458       | 166.1268        |
|                | 15 | R  | 1  | 175.1195       | 88.0637         |

N-term:+29.04 C(2):+160.03  
K(14):+156.13

X-range:

0 - 0

MassTol: Y-zoom:

0. 1.

MassType:

☐AVG ☒MONO

Axis:

☒1 ☐2

Label:

☒I ☐M ☐-

Ions:

a ☐+ ☐2+ ☐3+

b ☒+ ☐2+ ☐3+

c ☐+ ☐2+ ☐3+

x ☐+ ☐2+ ☐3+

y ☒+ ☒2+ ☐3+

z ☐+ ☐2+ ☐3+

hide H<sub>2</sub>O/NH<sub>3</sub> ☐

zoom 112-122 ☐

GO

IDELDAIAPKR, MH+ 1296.7527, m/z 432.9224  
L OS G16 P120811 220811-s1.04160.04160.3.dta

scan 4160; 9.3e+000

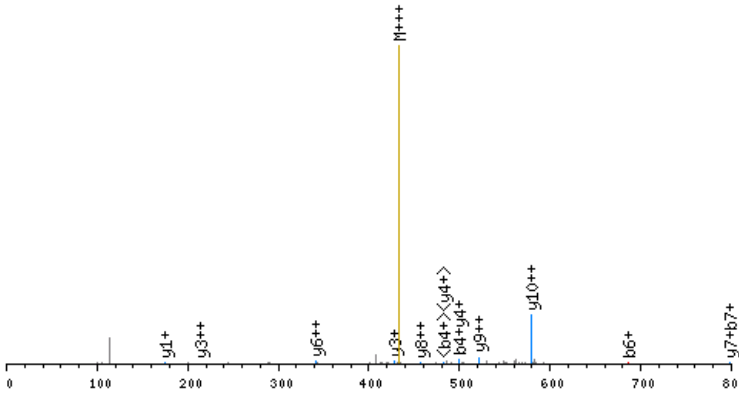

click image to zoom in; click top corners to zoom out [precursor±]

scan 4158; 432.9 m/z; 5.4e+000

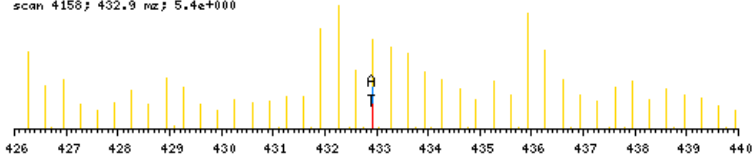

zoomed in precursor plot; T=theoretical m/z, A=acquired m/z

| b <sup>+</sup> | #  | AA | #  | y <sup>+</sup> | y <sup>2+</sup> |
|----------------|----|----|----|----------------|-----------------|
| 142.1232       | 1  | I  | 11 |                |                 |
| 257.1501       | 2  | D  | 10 | 1155.6374      | 578.3226        |
| 386.1927       | 3  | E  | 9  | 1040.6105      | 520.8091        |
| 499.2768       | 4  | L  | 8  | 911.5679       | 456.2878        |
| 614.3037       | 5  | D  | 7  | 798.4838       | 399.7458        |
| 685.3408       | 6  | A  | 6  | 683.4569       | 342.2323        |
| 798.4249       | 7  | I  | 5  | 612.4197       | 306.7138        |
| 869.4620       | 8  | A  | 4  | 499.3357       | 250.1718        |
| 966.5148       | 9  | P  | 3  | 428.2986       | 214.6532        |
| 1122.6411      | 10 | K  | 2  | 331.2458       | 166.1268        |
|                | 11 | R  | 1  | 175.1195       | 88.0637         |

N-term:+29.04 K(10):+156.13

X-range:

0 - 0

MassTol: Y-zoom:

0. 1.

MassType:

☐AVG ☒MONO

Axis:

☒1 ☐2

Label:

☒I ☐M ☐-

Ions:

a ☐+ ☐2+ ☐3+

b ☒+ ☐2+ ☐3+

c ☐+ ☐2+ ☐3+

x ☐+ ☐2+ ☐3+

y ☒+ ☒2+ ☐3+

z ☐+ ☐2+ ☐3+

hide H<sub>2</sub>O/NH<sub>3</sub> ☐

zoom 112-122 ☐

GO

IDSSDAVKPDGIAHIR, MH+ 1749.9499, m/z 438.2429  
L OS G17 P120811 220811-s1.03834.03834.4.dta

scan 3834; 9.3e+000

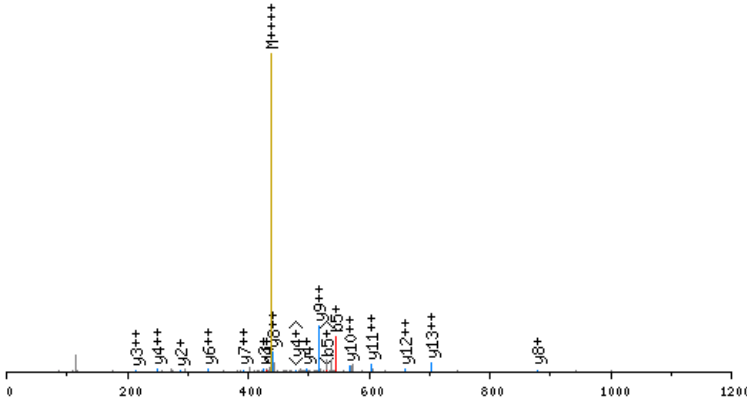

click image to zoom in; click top corners to zoom out

[precursor±]

scan 3833; 438.2 m/z; 1.2e+001

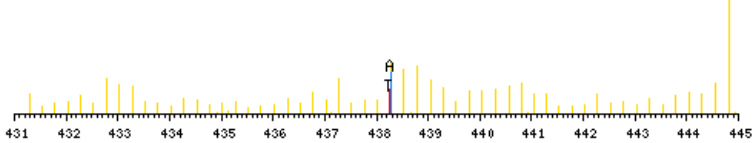

zoomed in precursor plot; T=theoretical m/z, A=acquired m/z

| b <sup>+</sup> | #  | AA | #  | y <sup>+</sup> | y <sup>2+</sup> |
|----------------|----|----|----|----------------|-----------------|
| 142.1232       | 1  | I  | 16 |                |                 |
| 257.1501       | 2  | D  | 15 | 1608.8346      | 804.9212        |
| 344.1821       | 3  | S  | 14 | 1493.8077      | 747.4077        |
| 431.2142       | 4  | S  | 13 | 1406.7756      | 703.8917        |
| 546.2411       | 5  | D  | 12 | 1319.7436      | 660.3757        |
| 617.2782       | 6  | A  | 11 | 1204.7167      | 602.8622        |
| 716.3466       | 7  | V  | 10 | 1133.6795      | 567.3437        |
| 872.4729       | 8  | K  | 9  | 1034.6111      | 517.8095        |
| 969.5257       | 9  | P  | 8  | 878.4848       | 439.7463        |
| 1084.5526      | 10 | D  | 7  | 781.4321       | 391.2199        |
| 1141.5741      | 11 | G  | 6  | 666.4051       | 333.7065        |
| 1254.6582      | 12 | I  | 5  | 609.3837       | 305.1957        |
| 1325.6953      | 13 | A  | 4  | 496.2996       | 248.6537        |
| 1462.7542      | 14 | H  | 3  | 425.2625       | 213.1352        |
| 1575.8383      | 15 | I  | 2  | 288.2036       | 144.6057        |
|                | 16 | R  | 1  | 175.1195       | 88.0637         |

N-term:+29.04 K(8):+156.13

X-range:

0 - 0

MassTol: Y-zoom:

0. 1.

MassType:

☐ AVG ☒ MONO

Axis:

☒ 1 ☐ 2

Label:

☒ I ☐ M ☐ -

Ions:

a ☐ + ☐ 2+ ☐ 3+

b ☒ + ☐ 2+ ☐ 3+

c ☐ + ☐ 2+ ☐ 3+

x ☐ + ☐ 2+ ☐ 3+

y ☒ + ☒ 2+ ☐ 3+

z ☐ + ☐ 2+ ☐ 3+

hide H<sub>2</sub>O/NH<sub>3</sub> ☐

zoom 112-122 ☐

GO

IDVGFDTDDVKKGGPGR, MH+ 1763.0552, m/z 441.5193  
H OS G17 P120811 220811-s1.04176.04176.4.dta

scan 4176; 1.7e+001

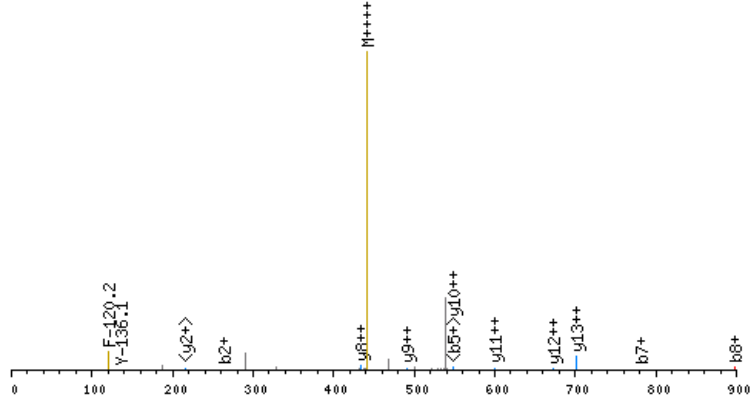

click image to zoom in; click top corners to zoom out [\[precursor±\]](#)

scan 4173; 441.5 m/z; 1.4e+001

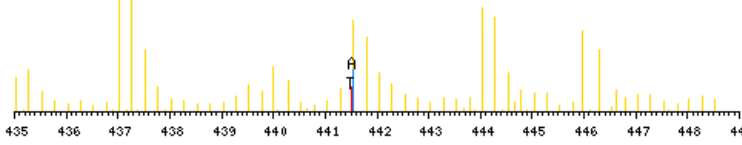

zoomed in precursor plot; T=theoretical m/z, A=acquired m/z

| b <sup>+</sup> | #  | AA | #  | y <sup>+</sup> | y <sup>2+</sup> |
|----------------|----|----|----|----------------|-----------------|
| 148.1550       | 1  | I  | 16 |                |                 |
| 263.1819       | 2  | D  | 15 | 1615.9081      | 808.4579        |
| 362.2503       | 3  | V  | 14 | 1500.8811      | 750.9445        |
| 419.2718       | 4  | G  | 13 | 1401.8127      | 701.4103        |
| 566.3402       | 5  | F  | 12 | 1344.7912      | 672.8995        |
| 667.3879       | 6  | T  | 11 | 1197.7228      | 599.3653        |
| 782.4148       | 7  | D  | 10 | 1096.6752      | 548.8415        |
| 897.4418       | 8  | D  | 9  | 981.6482       | 491.3280        |
| 996.5102       | 9  | V  | 8  | 866.6213       | 433.8145        |
| 1158.6683      | 10 | K  | 7  | 767.5529       | 384.2803        |
| 1320.8264      | 11 | K  | 6  | 605.3948       | 303.2013        |
| 1377.8478      | 12 | G  | 5  | 443.2367       | 222.1222        |
| 1434.8693      | 13 | G  | 4  | 386.2152       | 193.6115        |
| 1531.9221      | 14 | P  | 3  | 329.1937       | 165.1008        |
| 1588.9435      | 15 | G  | 2  | 232.1410       | 116.5744        |
|                | 16 | R  | 1  | 175.1195       | 88.0637         |

N-term:+35.07 K(10):+162.16  
K(11):+162.16

X-range:

0 - 0

MassTol: Y-zoom:

0. 1.

MassType:

☐AVG ☒MONO

Axis:

☒1 ☐2

Label:

☒I ☐M ☐-

Ions:

a ☐+ ☐2+ ☐3+

b ☒+ ☐2+ ☐3+

c ☐+ ☐2+ ☐3+

x ☐+ ☐2+ ☐3+

y ☒+ ☒2+ ☐3+

z ☐+ ☐2+ ☐3+

hide H<sub>2</sub>O/NH<sub>3</sub> ☐

zoom 112-122 ☐

GO

IEEALGDKAVFAGR, MH+ 1531.8484, m/z 511.2877  
L OS G15 P120811 220811-s1.03813.03813.3.dta

scan 3813; 3.1e+001

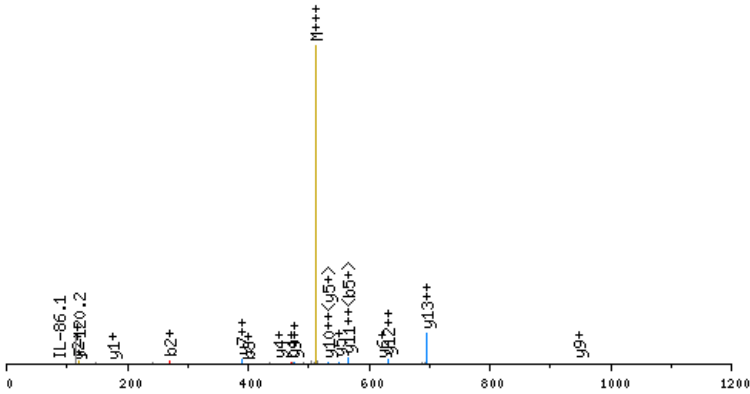

click image to zoom in; click top corners to zoom out

[precursor±]

scan 3811; 511.3 m/z; 9.3e+000

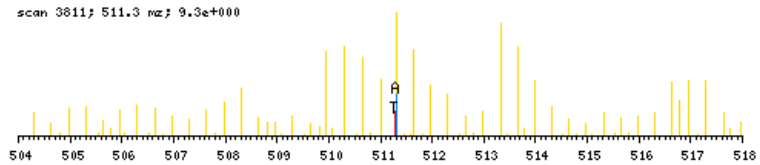

zoomed in precursor plot; T=theoretical m/z, A=acquired m/z

| b <sup>+</sup> | #  | AA | #  | y <sup>+</sup> | y <sup>2+</sup> |
|----------------|----|----|----|----------------|-----------------|
| 142.1232       | 1  | I  | 14 |                |                 |
| 271.1658       | 2  | E  | 13 | 1390.7331      | 695.8705        |
| 400.2084       | 3  | E  | 12 | 1261.6905      | 631.3492        |
| 471.2455       | 4  | A  | 11 | 1132.6479      | 566.8279        |
| 584.3295       | 5  | L  | 10 | 1061.6108      | 531.3093        |
| 641.3510       | 6  | G  | 9  | 948.5267       | 474.7673        |
| 756.3779       | 7  | D  | 8  | 891.5053       | 446.2565        |
| 912.5042       | 8  | K  | 7  | 776.4783       | 388.7431        |
| 983.5413       | 9  | A  | 6  | 620.3520       | 310.6799        |
| 1082.6098      | 10 | V  | 5  | 549.3149       | 275.1614        |
| 1229.6782      | 11 | F  | 4  | 450.2465       | 225.6272        |
| 1300.7153      | 12 | A  | 3  | 303.1781       | 152.0930        |
| 1357.7368      | 13 | G  | 2  | 232.1410       | 116.5744        |
|                | 14 | R  | 1  | 175.1195       | 88.0637         |

N-term:+29.04 K(8):+156.13

N-term: +35.07

X-range:

0 - 0

MassTol: Y-zoom:

0. 1.

MassType:

☐ AVG ☒ MONO

Axis:

☒ 1 ☐ 2

Label:

☒ I ☐ M ☐ -

Ions:

a ☐ + ☐ 2+ ☐ 3+

b ☒ + ☐ 2+ ☐ 3+

c ☐ + ☐ 2+ ☐ 3+

x ☐ + ☐ 2+ ☐ 3+

y ☒ + ☒ 2+ ☐ 3+

z ☐ + ☐ 2+ ☐ 3+

hide H<sub>2</sub>O/NH<sub>3</sub> ☐

zoom 112-122 ☐

GO

IETLSQQLQAKGKELNEFR, MH+ 2334.3882, m/z 584.3525  
H OS G16 P120811 220811-s1.05451.05451.4.dta

scan 5451: 3.5e+000

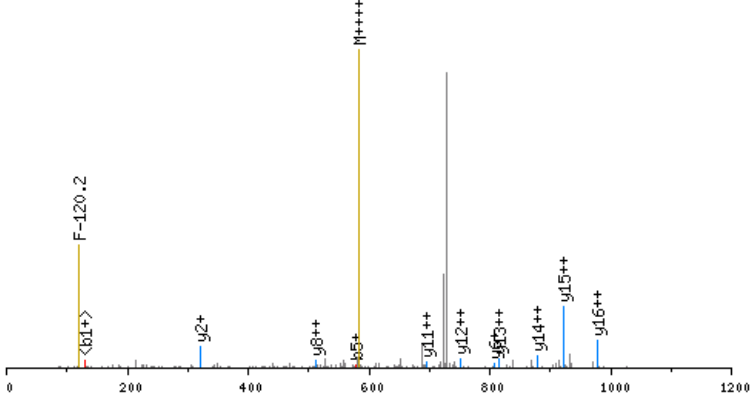

click image to zoom in; click top corners to zoom out [\[precursor±\]](#)

scan 5448: 584.4 m/z; 7.8e+000

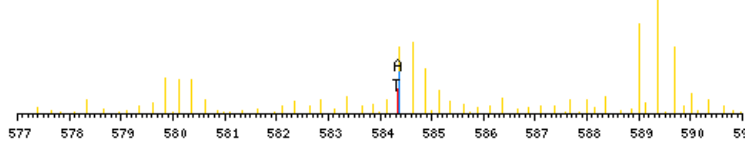

zoomed in precursor plot; T=theoretical m/z, A=acquired m/z

| b <sup>+</sup> | #  | AA | #  | y <sup>+</sup> | y <sup>2+</sup> |
|----------------|----|----|----|----------------|-----------------|
| 148.1550       | 1  | I  | 19 |                |                 |
| 277.1976       | 2  | E  | 18 | 2187.2410      | 1094.1244       |
| 378.2452       | 3  | T  | 17 | 2058.1984      | 1029.6031       |
| 491.3293       | 4  | L  | 16 | 1957.1508      | 979.0793        |
| 578.3613       | 5  | S  | 15 | 1844.0667      | 922.5373        |
| 706.4199       | 6  | Q  | 14 | 1757.0347      | 879.0212        |
| 834.4785       | 7  | Q  | 13 | 1628.9761      | 814.9920        |
| 947.5625       | 8  | L  | 12 | 1500.9175      | 750.9627        |
| 1075.6211      | 9  | Q  | 11 | 1387.8334      | 694.4206        |
| 1146.6582      | 10 | A  | 10 | 1259.7749      | 630.3913        |
| 1308.8163      | 11 | K  | 9  | 1188.7378      | 594.8728        |
| 1365.8378      | 12 | G  | 8  | 1026.5797      | 513.7937        |
| 1527.9959      | 13 | K  | 7  | 969.5582       | 485.2830        |
| 1657.0385      | 14 | E  | 6  | 807.4001       | 404.2040        |
| 1770.1226      | 15 | L  | 5  | 678.3575       | 339.6827        |
| 1884.1655      | 16 | N  | 4  | 565.2734       | 283.1406        |
| 2013.2081      | 17 | E  | 3  | 451.2305       | 226.1192        |
| 2160.2765      | 18 | F  | 2  | 322.1879       | 161.5979        |
|                | 19 | R  | 1  | 175.1195       | 88.0637         |

N-term: +35.07 K(11): +162.16  
K(13): +162.16

X-range:

0 - 0

MassTol: Y-zoom:

0. 1.

MassType:

☐AVG ☒MONO

Axis:

☒1 ☐2

Label:

☒I ☐M ☐-

Ions:

a ☐+ ☐2+ ☐3+

b ☒+ ☐2+ ☐3+

c ☐+ ☐2+ ☐3+

x ☐+ ☐2+ ☐3+

y ☒+ ☒2+ ☐3+

z ☐+ ☐2+ ☐3+

hide H<sub>2</sub>O/NH<sub>3</sub> ☐

zoom 112-122 ☐

GO

IFIDSDHTDNQR, MH+ 1488.7083, m/z 496.9076  
L OS G16 P120811 220811-s1.02785.02785.3.dta

scan 2785; 5.9e+000

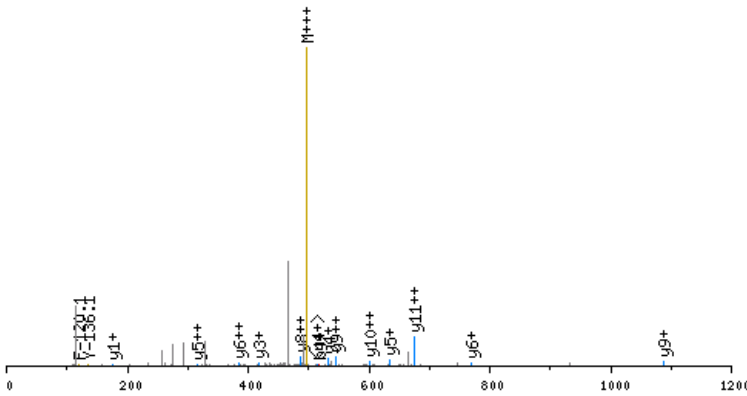

click image to zoom in; click top corners to zoom out

[precursor±]

scan 2783; 496.9 m/z; 6.3e+000

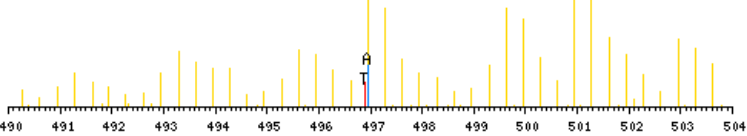

zoomed in precursor plot; T=theoretical m/z, A=acquired m/z

| b <sup>+</sup> | #  | AA | #  | y <sup>+</sup> | y <sup>2+</sup> |
|----------------|----|----|----|----------------|-----------------|
| 142.1232       | 1  | I  | 12 |                |                 |
| 289.1916       | 2  | F  | 11 | 1347.5929      | 674.3004        |
| 402.2756       | 3  | I  | 10 | 1200.5245      | 600.7662        |
| 517.3026       | 4  | D  | 9  | 1087.4405      | 544.2241        |
| 604.3346       | 5  | S  | 8  | 972.4135       | 486.7107        |
| 719.3616       | 6  | D  | 7  | 885.3815       | 443.1947        |
| 856.4205       | 7  | H  | 6  | 770.3545       | 385.6812        |
| 957.4681       | 8  | T  | 5  | 633.2956       | 317.1517        |
| 1072.4951      | 9  | D  | 4  | 532.2479       | 266.6279        |
| 1186.5380      | 10 | N  | 3  | 417.2210       | 209.1144        |
| 1314.5966      | 11 | Q  | 2  | 303.1781       | 152.0930        |
|                | 12 | R  | 1  | 175.1195       | 88.0637         |

N-term:+29.04

X-range:

0 - 0

MassTol: Y-zoom:

0. 1.

MassType:

☐AVG ☒MONO

Axis:

☒1 ☐2

Label:

☒I ☐M ☐-

Ions:

a ☐+ ☐2+ ☐3+

b ☒+ ☐2+ ☐3+

c ☐+ ☐2+ ☐3+

x ☐+ ☐2+ ☐3+

y ☒+ ☒2+ ☐3+

z ☐+ ☐2+ ☐3+

hide H<sub>2</sub>O/NH<sub>3</sub> ☐

zoom 112-122 ☐

GO

IFQTTERPFIQKLF, MH+ 2093.2548, m/z 524.0691  
H OS G16 P120811 220811-s1.05885.05885.4.dta

scan 5885; 3.6e+000

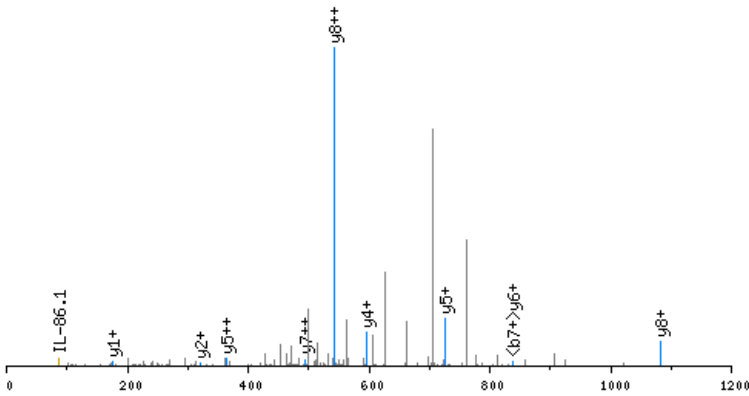

click image to zoom in; click top corners to zoom out

[precursor±]

scan 5883; 524.1 m/z; 8.0e+001

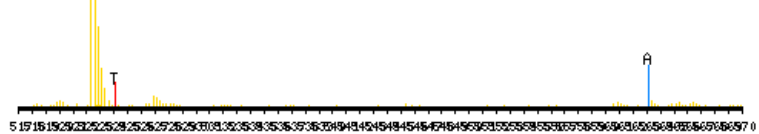

zoomed in precursor plot; T=theoretical m/z, A=acquired m/z

| b <sup>+</sup> | #  | AA | #  | y <sup>+</sup> | y <sup>2+</sup> |
|----------------|----|----|----|----------------|-----------------|
| 148.1550       | 1  | I  | 16 |                |                 |
| 295.2234       | 2  | F  | 15 | 1946.1076      | 973.5577        |
| 423.2820       | 3  | Q  | 14 | 1799.0392      | 900.0235        |
| 524.3296       | 4  | T  | 13 | 1670.9806      | 835.9942        |
| 625.3773       | 5  | T  | 12 | 1569.9330      | 785.4704        |
| 726.4250       | 6  | T  | 11 | 1468.8853      | 734.9466        |
| 855.4676       | 7  | E  | 10 | 1367.8376      | 684.4227        |
| 1011.5687      | 8  | R  | 9  | 1238.7950      | 619.9014        |
| 1108.6215      | 9  | P  | 8  | 1082.6939      | 541.8509        |
| 1255.6899      | 10 | F  | 7  | 985.6411       | 493.3245        |
| 1368.7739      | 11 | I  | 6  | 838.5727       | 419.7903        |
| 1496.8325      | 12 | Q  | 5  | 725.4887       | 363.2482        |
| 1658.9906      | 13 | K  | 4  | 597.4301       | 299.2190        |
| 1772.0747      | 14 | L  | 3  | 435.2720       | 218.1399        |
| 1919.1431      | 15 | F  | 2  | 322.1879       | 161.5979        |
|                | 16 | R  | 1  | 175.1195       | 88.0637         |

N-term:+35.07 K(13):+162.16

X-range:

0 - 0

MassTol: Y-zoom:

0. 1.

MassType:

☐ AVG ☒ MONO

Axis:

☒ 1 ☐ 2

Label:

☒ I ☐ M ☐ -

Ions:

a ☐ + ☐ 2+ ☐ 3+

b ☒ + ☐ 2+ ☐ 3+

c ☐ + ☐ 2+ ☐ 3+

x ☐ + ☐ 2+ ☐ 3+

y ☒ + ☒ 2+ ☐ 3+

z ☐ + ☐ 2+ ☐ 3+

hide H<sub>2</sub>O/NH<sub>3</sub> ☐

zoom 112-122 ☐

GO

IGGHGAEYGAELER, MH+ 1563.7979, m/z 521.9375  
H OS G16 P120811 220811-s1.03234.03234.3.dta

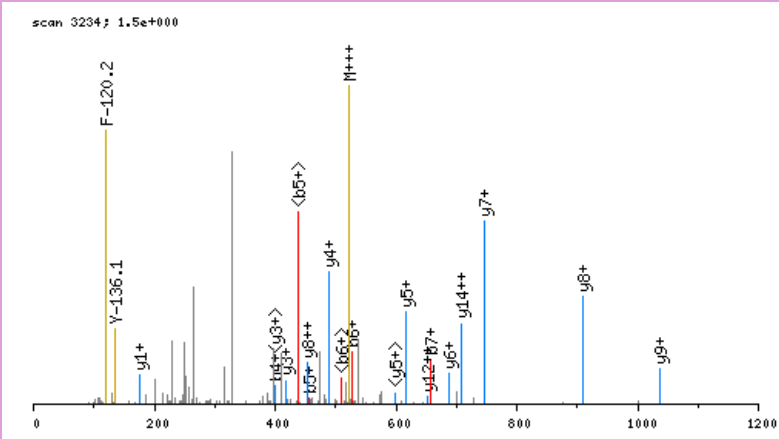

click image to zoom in; click top corners to zoom out [\[precursor±\]](#)

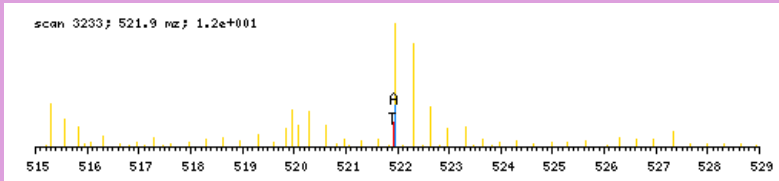

zoomed in precursor plot; T=theoretical m/z, A=acquired m/z

| b <sup>+</sup> | #  | AA | #  | y <sup>+</sup> | y <sup>2+</sup> |
|----------------|----|----|----|----------------|-----------------|
| 148.1550       | 1  | I  | 15 |                |                 |
| 205.1764       | 2  | G  | 14 | 1416.6508      | 708.8293        |
| 262.1979       | 3  | G  | 13 | 1359.6293      | 680.3186        |
| 399.2568       | 4  | H  | 12 | 1302.6079      | 651.8078        |
| 456.2783       | 5  | G  | 11 | 1165.5489      | 583.2784        |
| 527.3154       | 6  | A  | 10 | 1108.5275      | 554.7677        |
| 656.3580       | 7  | E  | 9  | 1037.4904      | 519.2491        |
| 819.4213       | 8  | Y  | 8  | 908.4478       | 454.7278        |
| 876.4428       | 9  | G  | 7  | 745.3844       | 373.1961        |
| 947.4799       | 10 | A  | 6  | 688.3630       | 344.6854        |
| 1076.5225      | 11 | E  | 5  | 617.3259       | 309.1668        |
| 1147.5596      | 12 | A  | 4  | 488.2833       | 244.6455        |
| 1260.6437      | 13 | L  | 3  | 417.2462       | 209.1270        |
| 1389.6862      | 14 | E  | 2  | 304.1621       | 152.5850        |
|                | 15 | R  | 1  | 175.1195       | 88.0637         |

N-term:+35.07



N-term: +29.04 K(9): +156.13  
K(17): +156.13

X-range:

0 - 0

MassTol: Y-zoom:

0. 1.

MassType:

☐AVG ☒MONO

Axis:

☒1 ☐2

Label:

☒I ☐M ☐-

Ions:

a ☐+ ☐2+ ☐3+

b ☒+ ☐2+ ☐3+

c ☐+ ☐2+ ☐3+

x ☐+ ☐2+ ☐3+

y ☒+ ☒2+ ☐3+

z ☐+ ☐2+ ☐3+

hide H<sub>2</sub>O/NH<sub>3</sub> ☐

zoom 112-122 ☐

GO

INEPTAAAIAYGLDKK, MH+ 1872.0847, m/z 624.6997  
L OS G15 P120811 220811-s1.05273.05273.3.dta

scan 5273; 4.0e+000

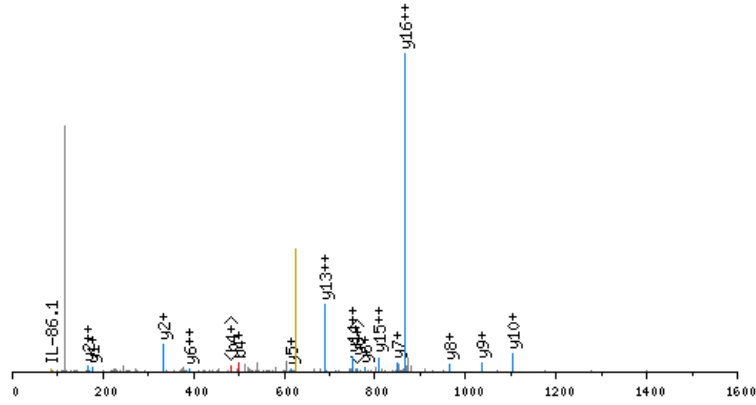

click image to zoom in; click top corners to zoom out [\[precursor±\]](#)

scan 5271; 624.7 m/z; 1.4e+001

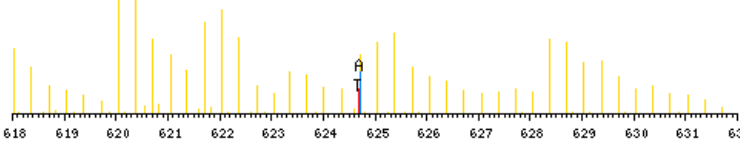

zoomed in precursor plot; T=theoretical m/z, A=acquired m/z

| b <sup>+</sup> | #  | AA | #  | y <sup>+</sup> | y <sup>2+</sup> |
|----------------|----|----|----|----------------|-----------------|
| 142.1232       | 1  | I  | 17 |                |                 |
| 255.2072       | 2  | I  | 16 | 1730.9693      | 865.9886        |
| 369.2502       | 3  | N  | 15 | 1617.8853      | 809.4465        |
| 498.2927       | 4  | E  | 14 | 1503.8423      | 752.4251        |
| 595.3455       | 5  | P  | 13 | 1374.7998      | 687.9038        |
| 696.3932       | 6  | T  | 12 | 1277.7470      | 639.3774        |
| 767.4303       | 7  | A  | 11 | 1176.6993      | 588.8536        |
| 838.4674       | 8  | A  | 10 | 1105.6622      | 553.3350        |
| 909.5045       | 9  | A  | 9  | 1034.6251      | 517.8165        |
| 1022.5886      | 10 | I  | 8  | 963.5880       | 482.2979        |
| 1093.6257      | 11 | A  | 7  | 850.5039       | 425.7559        |
| 1256.6890      | 12 | Y  | 6  | 779.4668       | 390.2373        |
| 1313.7105      | 13 | G  | 5  | 616.4035       | 308.7056        |
| 1426.7946      | 14 | L  | 4  | 559.3820       | 280.1949        |
| 1541.8215      | 15 | D  | 3  | 446.2979       | 223.6529        |
| 1697.9478      | 16 | K  | 2  | 331.2710       | 166.1394        |
|                | 17 | K  | 1  | 175.1447       | 88.0763         |

N-term:+29.04 K(16):+156.13  
K(17):+156.13

X-range:

0 - 0

MassTol: Y-zoom:

0. 1.

MassType:

☐AVG ☒MONO

Axis:

☒1 ☐2

Label:

☒I ☐M ☐-

Ions:

a ☐+ ☐2+ ☐3+

b ☒+ ☐2+ ☐3+

c ☐+ ☐2+ ☐3+

x ☐+ ☐2+ ☐3+

y ☒+ ☒2+ ☐3+

z ☐+ ☐2+ ☐3+

hide H<sub>2</sub>O/NH<sub>3</sub> ☐

zoom 112-122 ☐

GO

ILAHTETPTETDTYACR, MH+ 2160.0495, m/z 720.6880  
H OS G15 P120811 220811-s1.03953.03953.3.dta

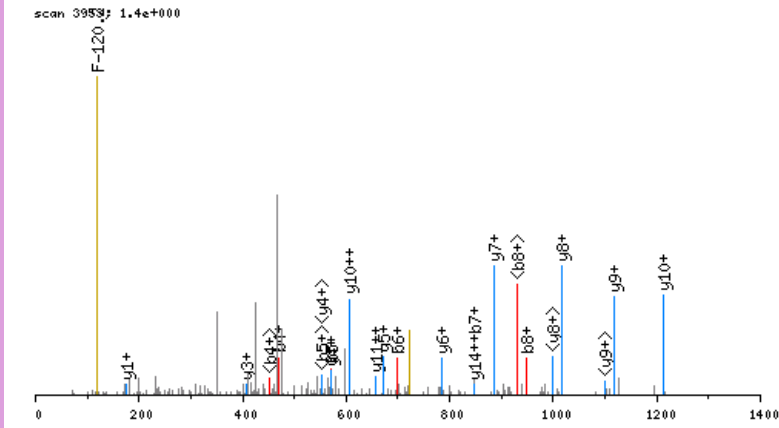

click image to zoom in; click top corners to zoom out [\[precursor±\]](#)

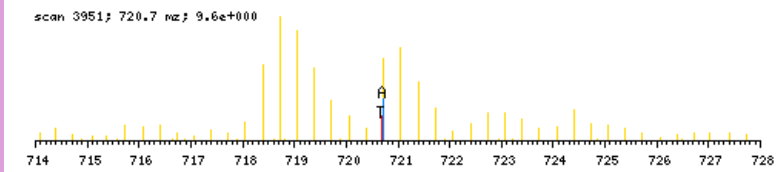

zoomed in precursor plot; T=theoretical m/z, A=acquired m/z

| b <sup>+</sup> | #  | AA | #  | y <sup>+</sup> | y <sup>2+</sup> |
|----------------|----|----|----|----------------|-----------------|
| 148.1550       | 1  | I  | 18 |                |                 |
| 261.2390       | 2  | L  | 17 | 2012.9023      | 1006.9551       |
| 332.2761       | 3  | A  | 16 | 1899.8183      | 950.4130        |
| 469.3351       | 4  | H  | 15 | 1828.7812      | 914.8945        |
| 570.3827       | 5  | T  | 14 | 1691.7222      | 846.3650        |
| 699.4253       | 6  | E  | 13 | 1590.6746      | 795.8412        |
| 846.4937       | 7  | F  | 12 | 1461.6320      | 731.3199        |
| 947.5414       | 8  | T  | 11 | 1314.5636      | 657.7857        |
| 1044.5942      | 9  | P  | 10 | 1213.5159      | 607.2619        |
| 1145.6419      | 10 | T  | 9  | 1116.4631      | 558.7355        |
| 1274.6845      | 11 | E  | 8  | 1015.4154      | 508.2116        |
| 1375.7321      | 12 | T  | 7  | 886.3728       | 443.6903        |
| 1490.7591      | 13 | D  | 6  | 785.3252       | 393.1665        |
| 1591.8068      | 14 | T  | 5  | 670.2982       | 335.6530        |
| 1754.8701      | 15 | Y  | 4  | 569.2505       | 285.1292        |
| 1825.9072      | 16 | A  | 3  | 406.1872       | 203.5975        |
| 1985.9378      | 17 | C  | 2  | 335.1501       | 168.0790        |
|                | 18 | R  | 1  | 175.1195       | 88.0637         |

N-term:+35.07 C(17) :+160.03

X-range:

0 - 0

MassTol: Y-zoom:

0. 1.

MassType:

☐AVG ☒MONO

Axis:

☒1 ☐2

Label:

☒I ☐M ☐-

Ions:

a ☐+ ☐2+ ☐3+

b ☒+ ☐2+ ☐3+

c ☐+ ☐2+ ☐3+

x ☐+ ☐2+ ☐3+

y ☒+ ☒2+ ☐3+

z ☐+ ☐2+ ☐3+

hide H<sub>2</sub>O/NH<sub>3</sub> ☐

zoom 112-122 ☐

GO

ILATPPQEDAPSVDIANIR, MH+ 2048.1028, m/z 683.3724  
L OS G12 P120811 220811-s1.04686.04686.3.dta

scan 4686; 1.1e+000

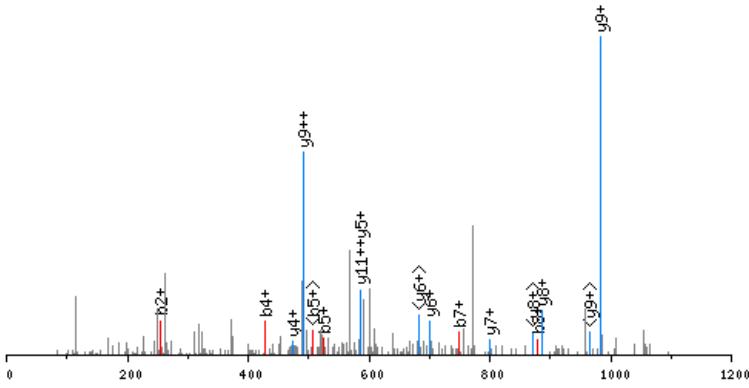

click image to zoom in; click top corners to zoom out [\[precursor±\]](#)

scan 4682; 683.4 m/z; 4.7e+000

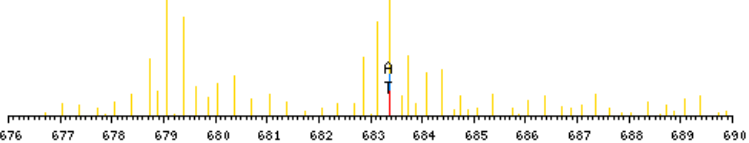

zoomed in precursor plot; T=theoretical m/z, A=acquired m/z

| b <sup>+</sup> | #  | AA | #  | y <sup>+</sup> | y <sup>2+</sup> |
|----------------|----|----|----|----------------|-----------------|
| 142.1232       | 1  | I  | 19 |                |                 |
| 255.2072       | 2  | L  | 18 | 1906.9874      | 953.9976        |
| 326.2443       | 3  | A  | 17 | 1793.9034      | 897.4556        |
| 427.2920       | 4  | T  | 16 | 1722.8663      | 861.9370        |
| 524.3448       | 5  | P  | 15 | 1621.8186      | 811.4132        |
| 621.3975       | 6  | P  | 14 | 1524.7658      | 762.8868        |
| 749.4561       | 7  | Q  | 13 | 1427.7130      | 714.3604        |
| 878.4987       | 8  | E  | 12 | 1299.6545      | 650.3311        |
| 993.5257       | 9  | D  | 11 | 1170.6119      | 585.8099        |
| 1064.5628      | 10 | A  | 10 | 1055.5849      | 528.2964        |
| 1161.6155      | 11 | P  | 9  | 984.5478       | 492.7778        |
| 1248.6476      | 12 | S  | 8  | 887.4951       | 444.2514        |
| 1347.7160      | 13 | V  | 7  | 800.4630       | 400.7354        |
| 1462.7429      | 14 | D  | 6  | 701.3946       | 351.2012        |
| 1575.8270      | 15 | I  | 5  | 586.3677       | 293.6877        |
| 1646.8641      | 16 | A  | 4  | 473.2836       | 237.1457        |
| 1760.9070      | 17 | N  | 3  | 402.2465       | 201.6272        |
| 1873.9911      | 18 | I  | 2  | 288.2036       | 144.6057        |
|                | 19 | R  | 1  | 175.1195       | 88.0637         |

N-term:+29.04

X-range:

0 - 0

MassTol: Y-zoom:

0. 1.

MassType:

☐AVG ☒MONO

Axis:

☒1 ☐2

Label:

☒I ☐M ☐-

Ions:

a ☐+ ☐2+ ☐3+

b ☒+ ☐2+ ☐3+

c ☐+ ☐2+ ☐3+

x ☐+ ☐2+ ☐3+

y ☒+ ☒2+ ☐3+

z ☐+ ☐2+ ☐3+

hide H<sub>2</sub>O/NH<sub>3</sub> ☐

zoom 112-122 ☐

GO

ILDPAYQVDKGGKVR, MH+ 1761.1123, m/z 441.0335  
H OS G17 P120811 220811-s1.03412.03412.4.dta

scan 3412; 1.3e+001

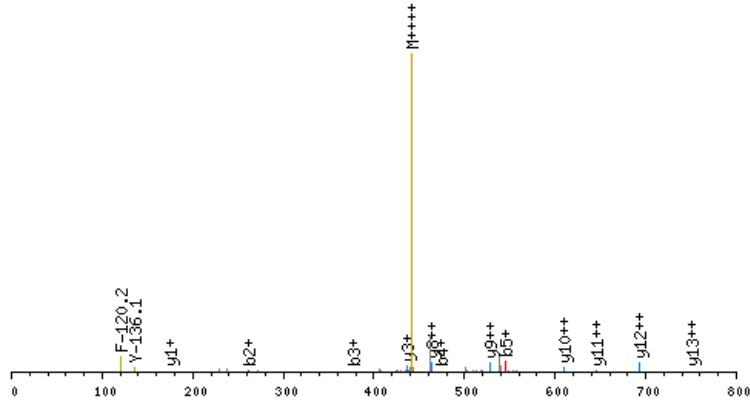

click image to zoom in; click top corners to zoom out [\[precursor±\]](#)

scan 3408; 441.0 m/z; 9.5e+000

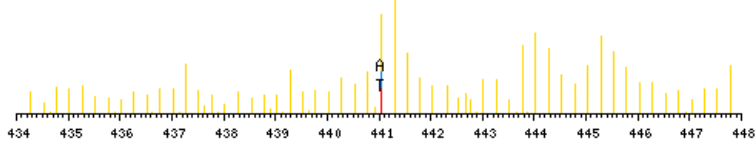

zoomed in precursor plot; T=theoretical m/z, A=acquired m/z

| b <sup>+</sup> | #  | AA | #  | y <sup>+</sup> | y <sup>2+</sup> |
|----------------|----|----|----|----------------|-----------------|
| 148.1550       | 1  | I  | 15 |                |                 |
| 261.2390       | 2  | L  | 14 | 1613.9652      | 807.4865        |
| 376.2660       | 3  | D  | 13 | 1500.8811      | 750.9445        |
| 473.3187       | 4  | P  | 12 | 1385.8542      | 693.4310        |
| 544.3558       | 5  | A  | 11 | 1288.8014      | 644.9046        |
| 707.4192       | 6  | Y  | 10 | 1217.7643      | 609.3861        |
| 835.4778       | 7  | Q  | 9  | 1054.7010      | 527.8544        |
| 934.5462       | 8  | V  | 8  | 926.6424       | 463.8251        |
| 1049.5731      | 9  | D  | 7  | 827.5740       | 414.2909        |
| 1211.7312      | 10 | K  | 6  | 712.5470       | 356.7774        |
| 1268.7527      | 11 | G  | 5  | 550.3889       | 275.6984        |
| 1325.7741      | 12 | G  | 4  | 493.3675       | 247.1877        |
| 1487.9322      | 13 | K  | 3  | 436.3460       | 218.6769        |
| 1587.0007      | 14 | V  | 2  | 274.1879       | 137.5979        |
|                | 15 | R  | 1  | 175.1195       | 88.0637         |

N-term:+35.07 K(10):+162.16  
K(13):+162.16

X-range:

0 - 0

MassTol: Y-zoom:

0. 1.

MassType:

☐AVG ☒MONO

Axis:

☒1 ☐2

Label:

☒I ☐M ☐-

Ions:

a ☐+ ☐2+ ☐3+

b ☒+ ☐2+ ☐3+

c ☐+ ☐2+ ☐3+

x ☐+ ☐2+ ☐3+

y ☒+ ☒2+ ☐3+

z ☐+ ☐2+ ☐3+

hide H<sub>2</sub>O/NH<sub>3</sub> ☐

zoom 112-122 ☐

GO

ILGGQEAAAHAR, MH+ 1227.7022, m/z 409.9056  
H OS G16 P120811 220811-s1.02069.02069.3.dta

scan 2069; 1.0e+001

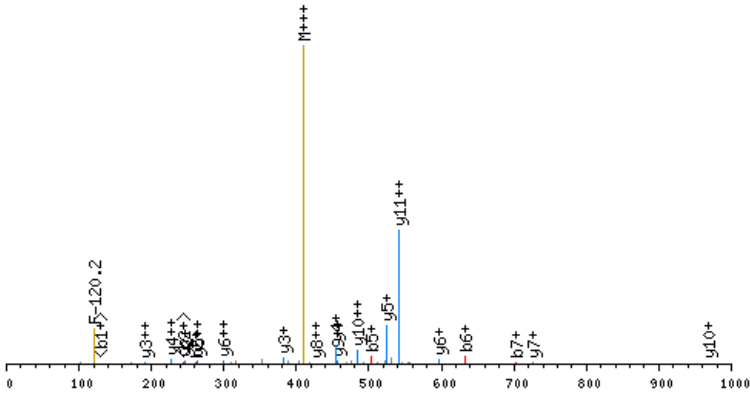

click image to zoom in; click top corners to zoom out

[precursor±]

scan 2068; 409.9 m/z; 5.5e+000

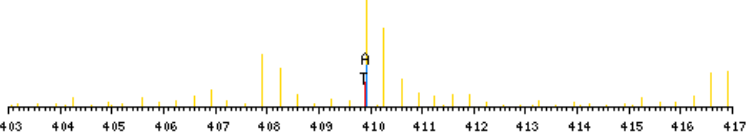

zoomed in precursor plot; T=theoretical m/z, A=acquired m/z

| b <sup>+</sup> | #  | AA | #  | y <sup>+</sup> | y <sup>2+</sup> |
|----------------|----|----|----|----------------|-----------------|
| 148.1550       | 1  | I  | 12 |                |                 |
| 261.2390       | 2  | L  | 11 | 1080.5550      | 540.7814        |
| 318.2605       | 3  | G  | 10 | 967.4710       | 484.2394        |
| 375.2820       | 4  | G  | 9  | 910.4495       | 455.7287        |
| 503.3405       | 5  | Q  | 8  | 853.4280       | 427.2179        |
| 632.3831       | 6  | E  | 7  | 725.3695       | 363.1886        |
| 703.4202       | 7  | A  | 6  | 596.3269       | 298.6673        |
| 774.4574       | 8  | A  | 5  | 525.2898       | 263.1488        |
| 845.4945       | 9  | A  | 4  | 454.2526       | 227.6302        |
| 982.5534       | 10 | H  | 3  | 383.2155       | 192.1117        |
| 1053.5905      | 11 | A  | 2  | 246.1566       | 123.5822        |
|                | 12 | R  | 1  | 175.1195       | 88.0637         |

N-term:+35.07

X-range:

0 - 0

MassTol: Y-zoom:

0. 1.

MassType:

☐ AVG ☒ MONO

Axis:

☒ 1 ☐ 2

Label:

☒ I ☐ M ☐ -

Ions:

a ☐ + ☐ 2+ ☐ 3+

b ☒ + ☐ 2+ ☐ 3+

c ☐ + ☐ 2+ ☐ 3+

x ☐ + ☐ 2+ ☐ 3+

y ☒ + ☒ 2+ ☐ 3+

z ☐ + ☐ 2+ ☐ 3+

hide H<sub>2</sub>O/NH<sub>3</sub> ☐

zoom 112-122 ☐

GO

ILNLPESWDWR, MH+ 1456.7588, m/z 728.8831  
L OS G13 P120811 220811-s1.06755.06755.2.dta

scan 6755; 1.3e+001

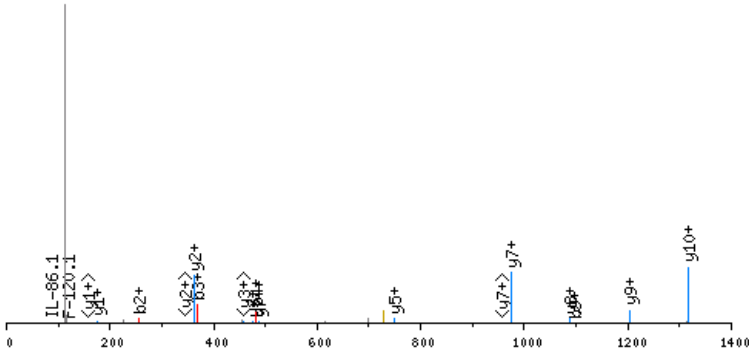

click image to zoom in; click top corners to zoom out [precursor±]

scan 6754; 728.9 m/z; 2.3e+001

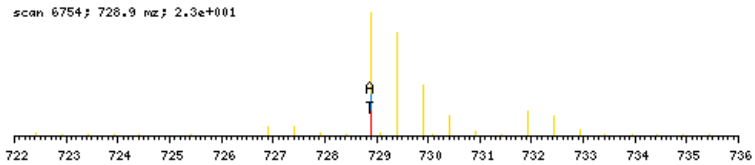

zoomed in precursor plot; T=theoretical m/z, A=acquired m/z

| b <sup>+</sup> | #  | AA | #  | y <sup>+</sup> | y <sup>2+</sup> |
|----------------|----|----|----|----------------|-----------------|
| 142.1232       | 1  | I  | 11 |                |                 |
| 255.2072       | 2  | L  | 10 | 1315.6435      | 658.3257        |
| 369.2502       | 3  | N  | 9  | 1202.5594      | 601.7836        |
| 482.3342       | 4  | L  | 8  | 1088.5165      | 544.7622        |
| 579.3870       | 5  | P  | 7  | 975.4325       | 488.2201        |
| 708.4296       | 6  | E  | 6  | 878.3797       | 439.6938        |
| 795.4616       | 7  | S  | 5  | 749.3371       | 375.1725        |
| 981.5409       | 8  | W  | 4  | 662.3051       | 331.6564        |
| 1096.5679      | 9  | D  | 3  | 476.2258       | 238.6168        |
| 1282.6472      | 10 | W  | 2  | 361.1988       | 181.1033        |
|                | 11 | R  | 1  | 175.1195       | 88.0637         |

N-term:+29.04

X-range:

0 - 0

MassTol: Y-zoom:

0. 1.

MassType:

☐AVG ☒MONO

Axis:

☒1 ☐2

Label:

☒I ☐M ☐-

Ions:

a ☐+ ☐2+ ☐3+

b ☒+ ☐2+ ☐3+

c ☐+ ☐2+ ☐3+

x ☐+ ☐2+ ☐3+

y ☒+ ☒2+ ☐3+

z ☐+ ☐2+ ☐3+

hide H<sub>2</sub>O/NH<sub>3</sub> ☐

zoom 112-122 ☐

GO

IMEDTIGVPLFVGSR, MH+ 1760.9620, m/z 587.6589  
L OS G12 P120811 220811-s1.05515.05515.3.dta

scan 5515; 3.5e+000

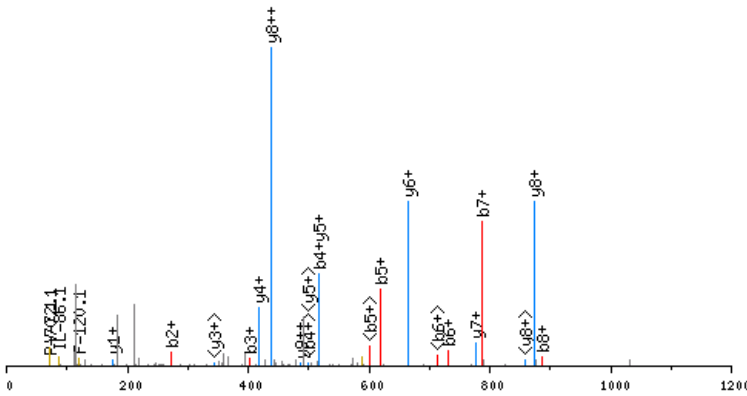

click image to zoom in; click top corners to zoom out [\[precursor±\]](#)

scan 5512; 587.7 m/z; 1.3e+001

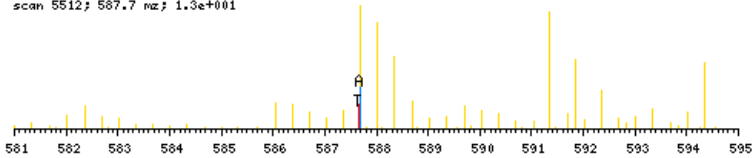

zoomed in precursor plot; T=theoretical m/z, A=acquired m/z

| b <sup>+</sup> | #  | AA | #  | y <sup>+</sup> | y <sup>2+</sup> |
|----------------|----|----|----|----------------|-----------------|
| 142.1232       | 1  | I  | 16 |                |                 |
| 273.1636       | 2  | M  | 15 | 1619.8467      | 810.4273        |
| 402.2062       | 3  | E  | 14 | 1488.8062      | 744.9070        |
| 517.2332       | 4  | D  | 13 | 1359.7636      | 680.3857        |
| 618.2809       | 5  | T  | 12 | 1244.7367      | 622.8723        |
| 731.3649       | 6  | I  | 11 | 1143.6890      | 572.3484        |
| 788.3864       | 7  | G  | 10 | 1030.6049      | 515.8064        |
| 887.4548       | 8  | V  | 9  | 973.5835       | 487.2957        |
| 984.5076       | 9  | P  | 8  | 874.5151       | 437.7614        |
| 1097.5916      | 10 | L  | 7  | 777.4623       | 389.2351        |
| 1244.6600      | 11 | F  | 6  | 664.3782       | 332.6930        |
| 1343.7285      | 12 | V  | 5  | 517.3098       | 259.1588        |
| 1400.7499      | 13 | G  | 4  | 418.2414       | 209.6246        |
| 1487.7820      | 14 | S  | 3  | 361.2199       | 181.1139        |
| 1586.8504      | 15 | V  | 2  | 274.1879       | 137.5979        |
|                | 16 | R  | 1  | 175.1195       | 88.0637         |

N-term:+29.04

N-term: +29.04 K(8): +156.13

N-term: +29.04 K(8): +156.13

X-range:

0 - 0

MassTol: Y-zoom:

0. 1.

MassType:

☐AVG ☒MONO

Axis:

☒1 ☐2

Label:

☒I ☐M ☐-

Ions:

a ☐+ ☐2+ ☐3+

b ☒+ ☐2+ ☐3+

c ☐+ ☐2+ ☐3+

x ☐+ ☐2+ ☐3+

y ☒+ ☒2+ ☐3+

z ☐+ ☐2+ ☐3+

hide H<sub>2</sub>O/NH<sub>3</sub> ☐

zoom 112-122 ☐

GO

IPVPRPPSIEEFTIVK, MH+ 1878.1105, m/z 470.2831  
L OS G19 P120811 220811-s1.02730.02730.4.dta

scan 2730; 1.0e+000

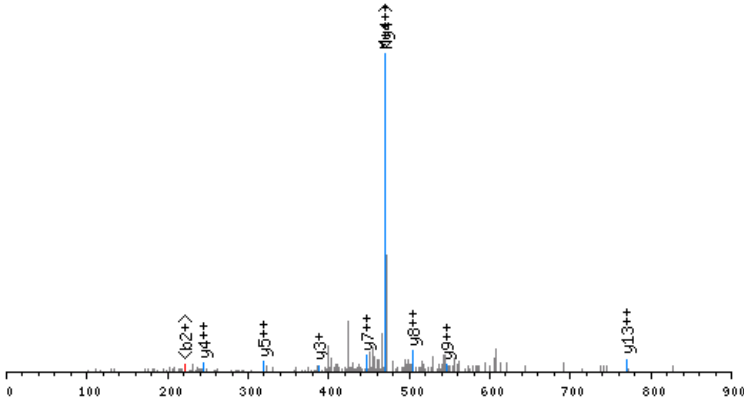

click image to zoom in; click top corners to zoom out

[precursor±]

scan 2726; 470.3 m/z; 7.5e+000

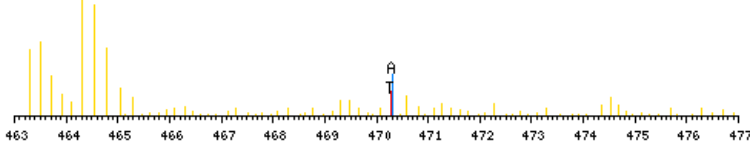

zoomed in precursor plot; T=theoretical m/z, A=acquired m/z

| b <sup>+</sup> | #  | AA | #  | y <sup>+</sup> | y <sup>2+</sup> |
|----------------|----|----|----|----------------|-----------------|
| 142.1232       | 1  | I  | 16 |                |                 |
| 239.1759       | 2  | P  | 15 | 1736.9951      | 869.0015        |
| 338.2443       | 3  | V  | 14 | 1639.9424      | 820.4751        |
| 435.2971       | 4  | P  | 13 | 1540.8739      | 770.9409        |
| 591.3982       | 5  | R  | 12 | 1443.8212      | 722.4145        |
| 688.4510       | 6  | P  | 11 | 1287.7201      | 644.3639        |
| 785.5037       | 7  | P  | 10 | 1190.6673      | 595.8376        |
| 872.5358       | 8  | S  | 9  | 1093.6145      | 547.3112        |
| 985.6198       | 9  | I  | 8  | 1006.5825      | 503.7952        |
| 1114.6624      | 10 | E  | 7  | 893.4984       | 447.2531        |
| 1243.7050      | 11 | E  | 6  | 764.4559       | 382.7318        |
| 1390.7734      | 12 | F  | 5  | 635.4133       | 318.2105        |
| 1491.8211      | 13 | T  | 4  | 488.3448       | 244.6763        |
| 1604.9052      | 14 | I  | 3  | 387.2972       | 194.1525        |
| 1703.9736      | 15 | V  | 2  | 274.2131       | 137.6105        |
|                | 16 | K  | 1  | 175.1447       | 88.0763         |

N-term:+29.04 K(16):+156.13

X-range:

0 - 0

MassTol: Y-zoom:

0. 1.

MassType:

☐ AVG ☒ MONO

Axis:

☒ 1 ☐ 2

Label:

☒ I ☐ M ☐ -

Ions:

a ☐ + ☐ 2+ ☐ 3+

b ☒ + ☐ 2+ ☐ 3+

c ☐ + ☐ 2+ ☐ 3+

x ☐ + ☐ 2+ ☐ 3+

y ☒ + ☒ 2+ ☐ 3+

z ☐ + ☐ 2+ ☐ 3+

hide H<sub>2</sub>O/NH<sub>3</sub> ☐

zoom 112-122 ☐

GO

IQMTQTTSSLSASLGDR, MH+ 1829.9491, m/z 610.6545  
H OS G12 P120811 220811-s1.04453.04453.3.dta

scan 4453; 4.6e+000

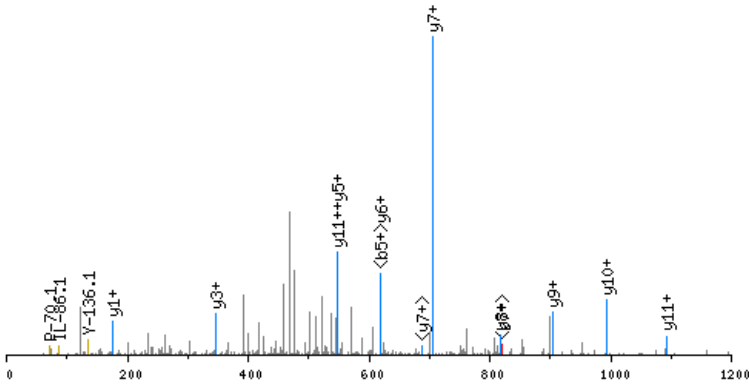

click image to zoom in; click top corners to zoom out [\[precursor±\]](#)

scan 4452; 610.7 m/z; 1.5e+002

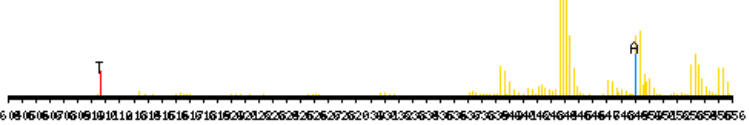

zoomed in precursor plot; T=theoretical m/z, A=acquired m/z

| b <sup>+</sup> | #  | AA | #  | y <sup>+</sup> | y <sup>2+</sup> |
|----------------|----|----|----|----------------|-----------------|
| 148.1550       | 1  | I  | 17 |                |                 |
| 276.2135       | 2  | Q  | 16 | 1682.8019      | 841.9049        |
| 407.2540       | 3  | M  | 15 | 1554.7434      | 777.8756        |
| 508.3017       | 4  | T  | 14 | 1423.7029      | 712.3554        |
| 636.3603       | 5  | Q  | 13 | 1322.6552      | 661.8315        |
| 737.4080       | 6  | T  | 12 | 1194.5966      | 597.8022        |
| 838.4556       | 7  | T  | 11 | 1093.5489      | 547.2784        |
| 925.4877       | 8  | S  | 10 | 992.5013       | 496.7545        |
| 1012.5197      | 9  | S  | 9  | 905.4692       | 453.2385        |
| 1125.6038      | 10 | L  | 8  | 818.4372       | 409.7225        |
| 1212.6358      | 11 | S  | 7  | 705.3531       | 353.1805        |
| 1283.6729      | 12 | A  | 6  | 618.3211       | 309.6645        |
| 1370.7049      | 13 | S  | 5  | 547.2840       | 274.1459        |
| 1483.7890      | 14 | L  | 4  | 460.2520       | 230.6299        |
| 1540.8105      | 15 | G  | 3  | 347.1679       | 174.0879        |
| 1655.8374      | 16 | D  | 2  | 290.1464       | 145.5771        |
|                | 17 | R  | 1  | 175.1195       | 88.0637         |

N-term:+35.07

N-term: +29.04 C (19) : +160.03

X-range:

0 - 0

MassTol: Y-zoom:

0. 1.

MassType:

☐ AVG ☒ MONO

Axis:

☒ 1 ☐ 2

Label:

☒ I ☐ M ☐ -

Ions:

a ☐ + ☐ 2+ ☐ 3+

b ☒ + ☐ 2+ ☐ 3+

c ☐ + ☐ 2+ ☐ 3+

x ☐ + ☐ 2+ ☐ 3+

y ☒ + ☒ 2+ ☐ 3+

z ☐ + ☐ 2+ ☐ 3+

hide H<sub>2</sub>O/NH<sub>3</sub> ☐

zoom 112-122 ☐

GO

IRGMVPDQAGR, MH+ 1227.6632, m/z 409.8926  
L OS G16 P120811 220811-s1.02564.02564.3.dta

scan 2564; 8.0e+000

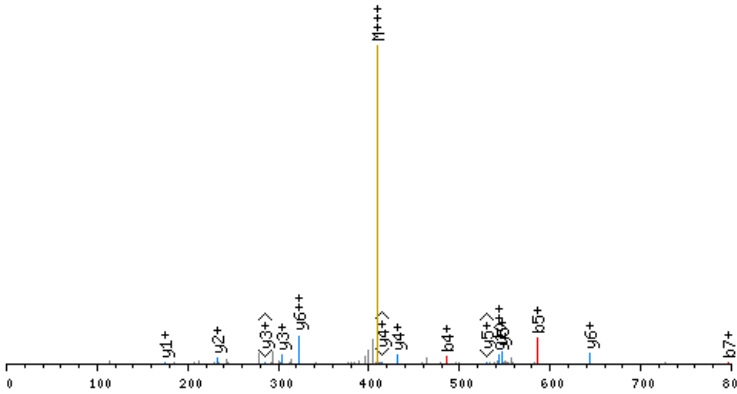

click image to zoom in; click top corners to zoom out

[precursor±]

scan 2563; 409.9 m/z; 6.1e+000

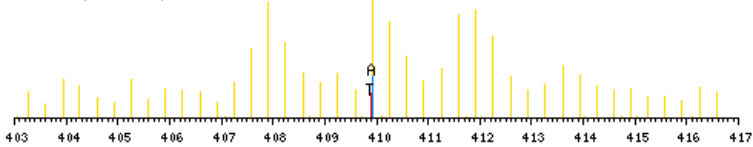

zoomed in precursor plot; T=theoretical m/z, A=acquired m/z

| b <sup>+</sup> | #  | AA | #  | y <sup>+</sup> | y <sup>2+</sup> |
|----------------|----|----|----|----------------|-----------------|
| 142.1232       | 1  | I  | 11 |                |                 |
| 298.2243       | 2  | R  | 10 | 1086.5478      | 543.7778        |
| 355.2457       | 3  | G  | 9  | 930.4467       | 465.7273        |
| 486.2862       | 4  | M  | 8  | 873.4253       | 437.2165        |
| 585.3546       | 5  | V  | 7  | 742.3848       | 371.6963        |
| 682.4074       | 6  | P  | 6  | 643.3164       | 322.1621        |
| 797.4343       | 7  | D  | 5  | 546.2636       | 273.6357        |
| 925.4929       | 8  | Q  | 4  | 431.2367       | 216.1222        |
| 996.5300       | 9  | A  | 3  | 303.1781       | 152.0930        |
| 1053.5515      | 10 | G  | 2  | 232.1410       | 116.5744        |
|                | 11 | R  | 1  | 175.1195       | 88.0637         |

N-term:+29.04

X-range:

0 - 0

MassTol: Y-zoom:

0. 1.

MassType:

☐AVG ☒MONO

Axis:

☒1 ☐2

Label:

☒I ☐M ☐-

Ions:

a ☐+ ☐2+ ☐3+

b ☒+ ☐2+ ☐3+

c ☐+ ☐2+ ☐3+

x ☐+ ☐2+ ☐3+

y ☒+ ☒2+ ☐3+

z ☐+ ☐2+ ☐3+

hide H<sub>2</sub>O/NH<sub>3</sub> ☐

zoom 112-122 ☐

GO

ISFHLPVNSR, MH+ 1197.6744, m/z 399.8963  
L OS G16 P120811 220811-s1.04954.04954.3.dta

scan 4954; 5.2e+000

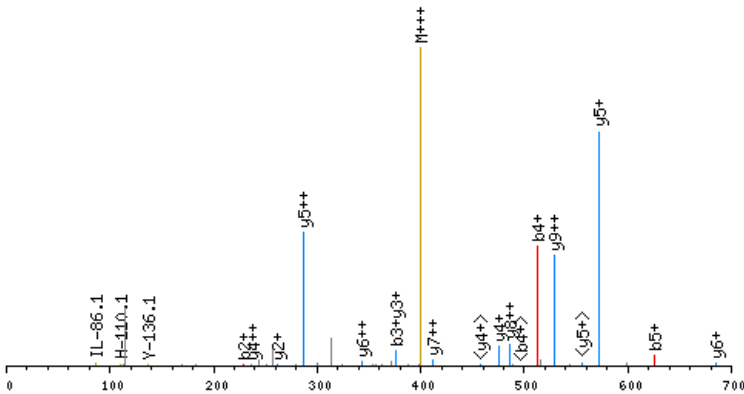

click image to zoom in; click top corners to zoom out

[precursor±]

scan 4953; 399.9 m/z; 1.3e+001

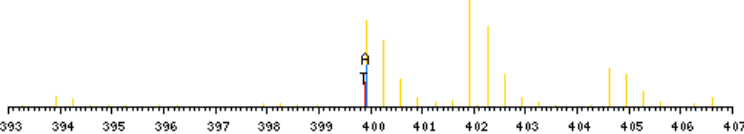

zoomed in precursor plot; T=theoretical m/z, A=acquired m/z

| b <sup>+</sup> | #  | AA | #  | y <sup>+</sup> | y <sup>2+</sup> |
|----------------|----|----|----|----------------|-----------------|
| 142.1232       | 1  | I  | 10 |                |                 |
| 229.1552       | 2  | S  | 9  | 1056.5591      | 528.7834        |
| 376.2236       | 3  | F  | 8  | 969.5270       | 485.2674        |
| 513.2825       | 4  | H  | 7  | 822.4586       | 411.7332        |
| 626.3666       | 5  | L  | 6  | 685.3997       | 343.2038        |
| 723.4193       | 6  | P  | 5  | 572.3156       | 286.6617        |
| 822.4878       | 7  | V  | 4  | 475.2629       | 238.1353        |
| 936.5307       | 8  | N  | 3  | 376.1945       | 188.6011        |
| 1023.5627      | 9  | S  | 2  | 262.1515       | 131.5797        |
|                | 10 | R  | 1  | 175.1195       | 88.0637         |

N-term:+29.04

X-range:

0 - 0

MassTol: Y-zoom:

0. 1.

MassType:

☐AVG ☒MONO

Axis:

☒1 ☐2

Label:

☒I ☐M ☐-

Ions:

a ☐+ ☐2+ ☐3+

b ☒+ ☐2+ ☐3+

c ☐+ ☐2+ ☐3+

x ☐+ ☐2+ ☐3+

y ☒+ ☒2+ ☐3+

z ☐+ ☐2+ ☐3+

hide H<sub>2</sub>O/NH<sub>3</sub> ☐

zoom 112-122 ☐

GO

ISKQYDESGPSIVHR, MH+ 1900.9769, m/z 475.9997  
L OS G17 P120811 220811-s1.02981.02981.4.dta

scan 2981; 5.8e+000

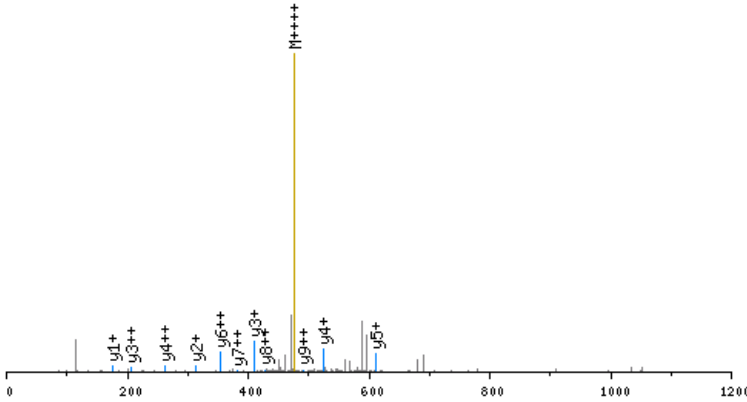

click image to zoom in; click top corners to zoom out

[precursor±]

scan 2978; 476.0 m/z; 1.1e+001

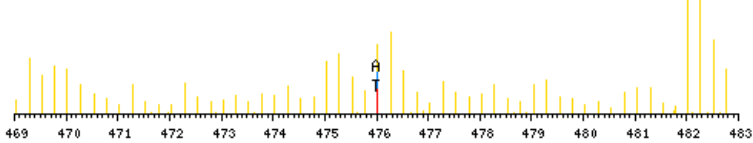

zoomed in precursor plot; T=theoretical m/z, A=acquired m/z

| b <sup>+</sup> | #  | AA | #  | y <sup>+</sup> | y <sup>2+</sup> |
|----------------|----|----|----|----------------|-----------------|
| 142.1232       | 1  | I  | 16 |                |                 |
| 229.1552       | 2  | S  | 15 | 1759.8615      | 880.4347        |
| 385.2815       | 3  | K  | 14 | 1672.8295      | 836.9187        |
| 513.3401       | 4  | Q  | 13 | 1516.7032      | 758.8555        |
| 642.3827       | 5  | E  | 12 | 1388.6446      | 694.8262        |
| 805.4460       | 6  | Y  | 11 | 1259.6020      | 630.3049        |
| 920.4729       | 7  | D  | 10 | 1096.5387      | 548.7733        |
| 1049.5155      | 8  | E  | 9  | 981.5118       | 491.2598        |
| 1136.5476      | 9  | S  | 8  | 852.4692       | 426.7385        |
| 1193.5690      | 10 | G  | 7  | 765.4371       | 383.2225        |
| 1290.6218      | 11 | P  | 6  | 708.4157       | 354.7118        |
| 1377.6538      | 12 | S  | 5  | 611.3629       | 306.1854        |
| 1490.7379      | 13 | I  | 4  | 524.3309       | 262.6694        |
| 1589.8063      | 14 | V  | 3  | 411.2468       | 206.1273        |
| 1726.8652      | 15 | H  | 2  | 312.1784       | 156.5931        |
|                | 16 | R  | 1  | 175.1195       | 88.0637         |

N-term:+29.04 K(3):+156.13

X-range:

0 - 0

MassTol: Y-zoom:

0. 1.

MassType:

☐ AVG ☒ MONO

Axis:

☒ 1 ☐ 2

Label:

☒ I ☐ M ☐ -

Ions:

a ☐ + ☐ 2+ ☐ 3+

b ☒ + ☐ 2+ ☐ 3+

c ☐ + ☐ 2+ ☐ 3+

x ☐ + ☐ 2+ ☐ 3+

y ☒ + ☒ 2+ ☐ 3+

z ☐ + ☐ 2+ ☐ 3+

hide H<sub>2</sub>O/NH<sub>3</sub> ☐

zoom 112-122 ☐

GO

ISNASDALDKIR, MH+ 1358.7644, m/z 453.5930  
L OS G16 P120811 220811-s1.03869.03869.3.dta

scan 3869; 1.7e+001

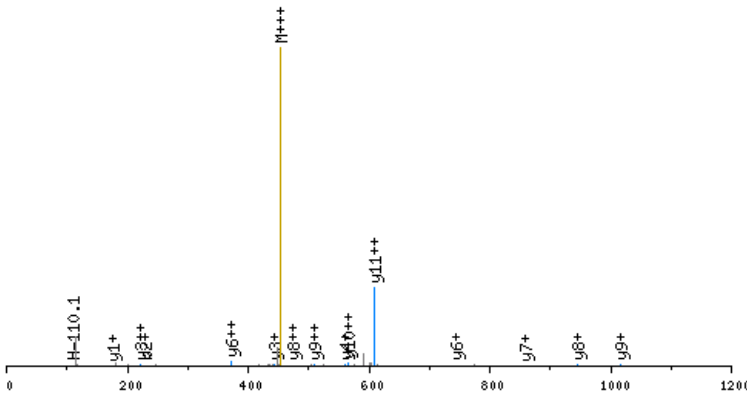

click image to zoom in; click top corners to zoom out

[precursor±]

scan 3868; 453.6 m/z; 7.4e+000

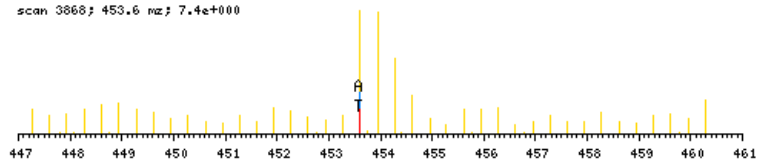

zoomed in precursor plot; T=theoretical m/z, A=acquired m/z

| b <sup>+</sup> | #  | AA | #  | y <sup>+</sup> | y <sup>2+</sup> |
|----------------|----|----|----|----------------|-----------------|
| 142.1232       | 1  | I  | 12 |                |                 |
| 229.1552       | 2  | S  | 11 | 1217.6490      | 609.3284        |
| 343.1981       | 3  | N  | 10 | 1130.6170      | 565.8124        |
| 414.2352       | 4  | A  | 9  | 1016.5741      | 508.7909        |
| 501.2673       | 5  | S  | 8  | 945.5370       | 473.2724        |
| 616.2942       | 6  | D  | 7  | 858.5049       | 429.7564        |
| 687.3313       | 7  | A  | 6  | 743.4780       | 372.2429        |
| 800.4154       | 8  | L  | 5  | 672.4409       | 336.7243        |
| 915.4423       | 9  | D  | 4  | 559.3568       | 280.1823        |
| 1071.5686      | 10 | K  | 3  | 444.3299       | 222.6688        |
| 1184.6527      | 11 | I  | 2  | 288.2036       | 144.6057        |
|                | 12 | R  | 1  | 175.1195       | 88.0637         |

N-term:+29.04 K(10):+156.13

X-range:

0 - 0

MassTol: Y-zoom:

0. 1.

MassType:

☐AVG ☒MONO

Axis:

☒1 ☐2

Label:

☒I ☐M ☐-

Ions:

a ☐+ ☐2+ ☐3+

b ☒+ ☐2+ ☐3+

c ☐+ ☐2+ ☐3+

x ☐+ ☐2+ ☐3+

y ☒+ ☒2+ ☐3+

z ☐+ ☐2+ ☐3+

hide H<sub>2</sub>O/NH<sub>3</sub> ☐

zoom 112-122 ☐

GO

ISWYDNEYGYSNR, MH+ 1694.7451, m/z 565.5865  
L OS G14 P120811 220811-s1.05073.05073.3.dta

scan 5073; 3.1e+000

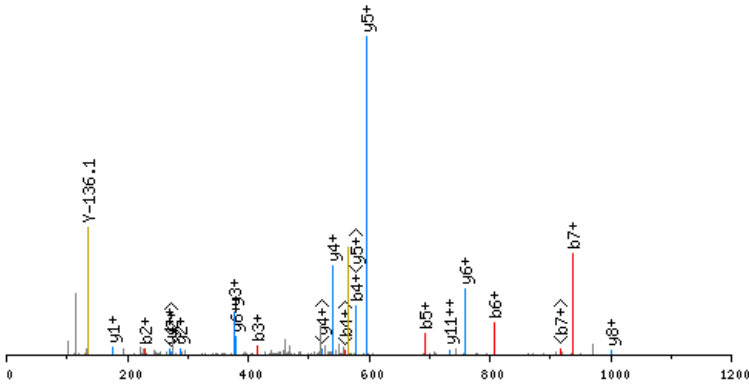

click image to zoom in; click top corners to zoom out

[precursor±]

scan 5071; 565.6 m/z; 5.6e+000

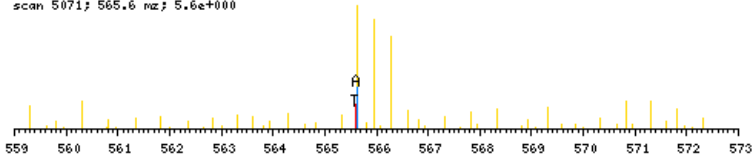

zoomed in precursor plot; T=theoretical m/z, A=acquired m/z

| b <sup>+</sup> | #  | AA | #  | y <sup>+</sup> | y <sup>2+</sup> |
|----------------|----|----|----|----------------|-----------------|
| 142.1232       | 1  | I  | 13 |                |                 |
| 229.1552       | 2  | S  | 12 | 1553.6297      | 777.3188        |
| 415.2345       | 3  | W  | 11 | 1466.5977      | 733.8028        |
| 578.2978       | 4  | Y  | 10 | 1280.5184      | 640.7631        |
| 693.3248       | 5  | D  | 9  | 1117.4550      | 559.2314        |
| 807.3677       | 6  | N  | 8  | 1002.4281      | 501.7180        |
| 936.4103       | 7  | E  | 7  | 888.3852       | 444.6965        |
| 1099.4736      | 8  | Y  | 6  | 759.3426       | 380.1752        |
| 1156.4951      | 9  | G  | 5  | 596.2792       | 298.6435        |
| 1319.5584      | 10 | Y  | 4  | 539.2578       | 270.1328        |
| 1406.5904      | 11 | S  | 3  | 376.1945       | 188.6011        |
| 1520.6334      | 12 | N  | 2  | 289.1624       | 145.0851        |
|                | 13 | R  | 1  | 175.1195       | 88.0637         |

N-term:+29.04

X-range:

0 - 0

MassTol: Y-zoom:

0. 1.

MassType:

☐ AVG ☒ MONO

Axis:

☒ 1 ☐ 2

Label:

☒ I ☐ M ☐ -

Ions:

a ☐ + ☐ 2+ ☐ 3+

b ☒ + ☐ 2+ ☐ 3+

c ☐ + ☐ 2+ ☐ 3+

x ☐ + ☐ 2+ ☐ 3+

y ☒ + ☒ 2+ ☐ 3+

z ☐ + ☐ 2+ ☐ 3+

hide H<sub>2</sub>O/NH<sub>3</sub> ☐

zoom 112-122 ☐

GO

ITSGESSGGNPKAKDECAQYR, MH+ 2426.1622, m/z 607.2960  
L OS G17 P120811 220811-s1.01902.01902.4.dta

scan 1902; 1.5e+000

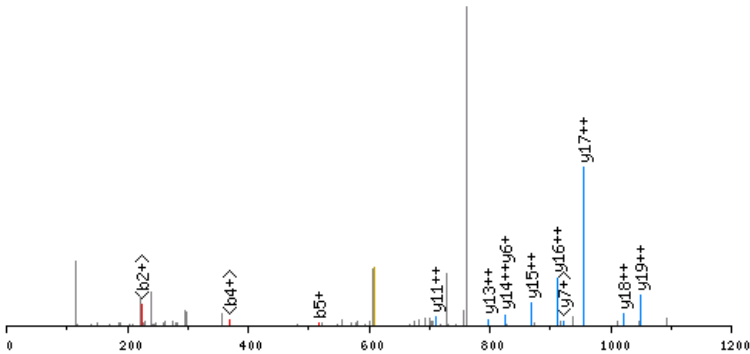

click image to zoom in; click top corners to zoom out [\[precursor±\]](#)

scan 1898; 607.3 m/z; 3.3e+000

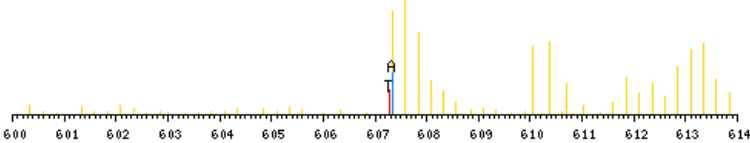

zoomed in precursor plot; T=theoretical m/z, A=acquired m/z

| b <sup>+</sup> | #  | AA | #  | y <sup>+</sup> | y <sup>2+</sup> |
|----------------|----|----|----|----------------|-----------------|
| 142.1232       | 1  | I  | 22 |                |                 |
| 243.1708       | 2  | T  | 21 | 2285.0468      | 1143.0273       |
| 330.2029       | 3  | S  | 20 | 2183.9992      | 1092.5035       |
| 387.2243       | 4  | G  | 19 | 2096.9671      | 1048.9875       |
| 516.2669       | 5  | E  | 18 | 2039.9457      | 1020.4767       |
| 603.2990       | 6  | S  | 17 | 1910.9031      | 955.9554        |
| 690.3310       | 7  | S  | 16 | 1823.8710      | 912.4394        |
| 777.3630       | 8  | S  | 15 | 1736.8390      | 868.9234        |
| 834.3845       | 9  | G  | 14 | 1649.8070      | 825.4074        |
| 891.4059       | 10 | G  | 13 | 1592.7855      | 796.8967        |
| 1005.4489      | 11 | N  | 12 | 1535.7641      | 768.3859        |
| 1102.5016      | 12 | P  | 11 | 1421.7211      | 711.3645        |
| 1258.6279      | 13 | K  | 10 | 1324.6684      | 662.8381        |
| 1329.6650      | 14 | A  | 9  | 1168.5421      | 584.7749        |
| 1485.7913      | 15 | K  | 8  | 1097.5050      | 549.2564        |
| 1600.8183      | 16 | D  | 7  | 941.3787       | 471.1932        |
| 1729.8609      | 17 | E  | 6  | 826.3517       | 413.6798        |
| 1889.8915      | 18 | C  | 5  | 697.3091       | 349.1585        |
| 1960.9286      | 19 | A  | 4  | 537.2785       | 269.1432        |
| 2088.9872      | 20 | Q  | 3  | 466.2414       | 233.6246        |
| 2252.0505      | 21 | Y  | 2  | 338.1828       | 169.5953        |
|                | 22 | R  | 1  | 175.1195       | 88.0637         |

N-term: +29.04 K(13): +156.13  
K(15): +156.13 C(18): +160.03

X-range:

0 - 0

MassTol: Y-zoom:

0. 1.

MassType:

☐ AVG ☒ MONO

Axis:

☒ 1 ☐ 2

Label:

☒ I ☐ M ☐ -

Ions:

a ☐ + ☐ 2+ ☐ 3+

b ☒ + ☐ 2+ ☐ 3+

c ☐ + ☐ 2+ ☐ 3+

x ☐ + ☐ 2+ ☐ 3+

y ☒ + ☒ 2+ ☐ 3+

z ☐ + ☐ 2+ ☐ 3+

hide H<sub>2</sub>O/NH<sub>3</sub> ☐

zoom 112-122 ☐

GO

IVAPGKGILAADESTGSIKR, MH+ 2138.2549, m/z 535.3192  
L OS G15 P120811 220811-s1.03924.03924.4.dta

scan 3924; 7.4e+000

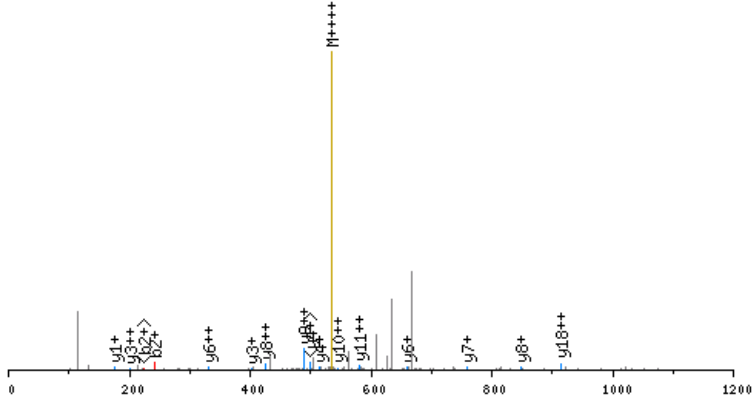

click image to zoom in; click top corners to zoom out

[precursor±]

scan 3921; 535.3 m/z; 7.6e+000

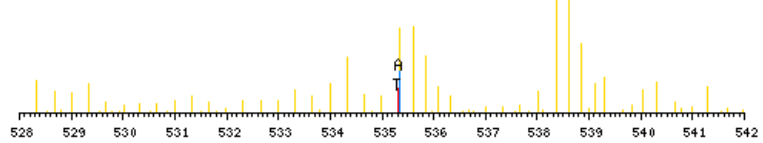

zoomed in precursor plot; T=theoretical m/z, A=acquired m/z

| b <sup>+</sup> | #  | AA | #  | y <sup>+</sup> | y <sup>2+</sup> |
|----------------|----|----|----|----------------|-----------------|
| 142.1232       | 1  | I  | 21 |                |                 |
| 241.1916       | 2  | V  | 20 | 1997.1396      | 999.0737        |
| 312.2287       | 3  | A  | 19 | 1898.0712      | 949.5395        |
| 409.2815       | 4  | P  | 18 | 1827.0341      | 914.0209        |
| 466.3029       | 5  | G  | 17 | 1729.9813      | 865.4946        |
| 622.4292       | 6  | K  | 16 | 1672.9598      | 836.9838        |
| 679.4507       | 7  | G  | 15 | 1516.8335      | 758.9207        |
| 792.5347       | 8  | I  | 14 | 1459.8121      | 730.4099        |
| 905.6188       | 9  | L  | 13 | 1346.7280      | 673.8679        |
| 976.6559       | 10 | A  | 12 | 1233.6439      | 617.3259        |
| 1047.6930      | 11 | A  | 11 | 1162.6068      | 581.8073        |
| 1162.7200      | 12 | D  | 10 | 1091.5697      | 546.2888        |
| 1291.7626      | 13 | E  | 9  | 976.5428       | 488.7753        |
| 1378.7946      | 14 | S  | 8  | 847.5002       | 424.2540        |
| 1479.8423      | 15 | T  | 7  | 760.4681       | 380.7380        |
| 1536.8637      | 16 | G  | 6  | 659.4205       | 330.2141        |
| 1623.8958      | 17 | S  | 5  | 602.3990       | 301.7034        |
| 1736.9798      | 18 | I  | 4  | 515.3670       | 258.1874        |
| 1808.0170      | 19 | A  | 3  | 402.2829       | 201.6454        |
| 1964.1433      | 20 | K  | 2  | 331.2458       | 166.1268        |
|                | 21 | R  | 1  | 175.1195       | 88.0637         |

N-term:+29.04 K(6):+156.13  
K(20):+156.13

X-range:

0 - 0

MassTol: Y-zoom:

0. 1.

MassType:

☐AVG ☒MONO

Axis:

☒1 ☐2

Label:

☒I ☐M ☐-

Ions:

a ☐+ ☐2+ ☐3+

b ☒+ ☐2+ ☐3+

c ☐+ ☐2+ ☐3+

x ☐+ ☐2+ ☐3+

y ☒+ ☒2+ ☐3+

z ☐+ ☐2+ ☐3+

hide H<sub>2</sub>O/NH<sub>3</sub> ☐

zoom 112-122 ☐

GO

IVEEVQDGKVISSR, MH+ 1614.9067, m/z 538.9737  
L OS G15 P120811 220811-s1.02727.02727.3.dta

scan 2727; 1.6e+001

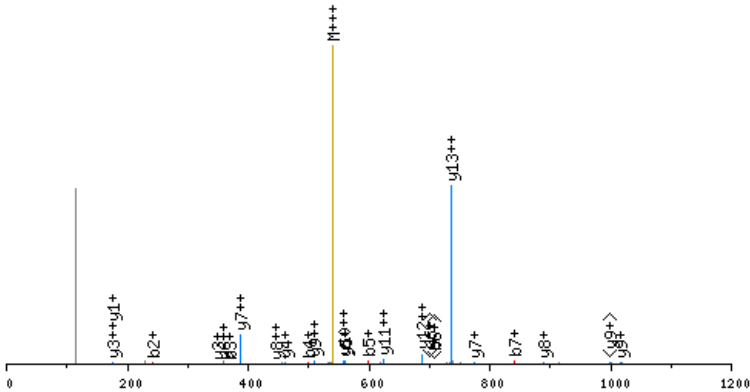

click image to zoom in; click top corners to zoom out

[precursor±]

scan 2726; 539.0 m/z; 2.5e+001

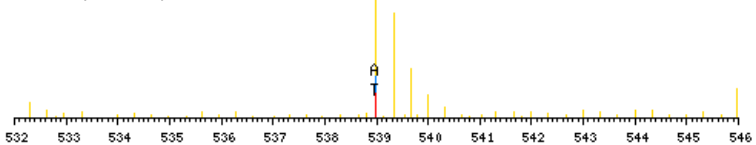

zoomed in precursor plot; T=theoretical m/z, A=acquired m/z

| b <sup>+</sup> | #  | AA | #  | y <sup>+</sup> | y <sup>2+</sup> |
|----------------|----|----|----|----------------|-----------------|
| 142.1232       | 1  | I  | 14 |                |                 |
| 241.1916       | 2  | V  | 13 | 1473.7913      | 737.3996        |
| 370.2342       | 3  | E  | 12 | 1374.7229      | 687.8654        |
| 499.2768       | 4  | E  | 11 | 1245.6803      | 623.3441        |
| 598.3452       | 5  | V  | 10 | 1116.6377      | 558.8228        |
| 726.4038       | 6  | Q  | 9  | 1017.5693      | 509.2886        |
| 841.4307       | 7  | D  | 8  | 889.5107       | 445.2593        |
| 898.4522       | 8  | G  | 7  | 774.4838       | 387.7458        |
| 1054.5785      | 9  | K  | 6  | 717.4623       | 359.2351        |
| 1153.6469      | 10 | V  | 5  | 561.3360       | 281.1719        |
| 1266.7309      | 11 | I  | 4  | 462.2676       | 231.6377        |
| 1353.7630      | 12 | S  | 3  | 349.1836       | 175.0957        |
| 1440.7950      | 13 | S  | 2  | 262.1515       | 131.5797        |
|                | 14 | R  | 1  | 175.1195       | 88.0637         |

N-term:+29.04 K(9):+156.13

X-range:

0 - 0

MassTol: Y-zoom:

0. 1.

MassType:

☐AVG ☒MONO

Axis:

☒1 ☐2

Label:

☒I ☐M ☐-

Ions:

a ☐+ ☐2+ ☐3+

b ☒+ ☐2+ ☐3+

c ☐+ ☐2+ ☐3+

x ☐+ ☐2+ ☐3+

y ☒+ ☒2+ ☐3+

z ☐+ ☐2+ ☐3+

hide H<sub>2</sub>O/NH<sub>3</sub> ☐

zoom 112-122 ☐

GO

IVEPEILPDGDHDLKR, MH+ 1902.0337, m/z 476.2639  
L OS G17 P120811 220811-s1.04791.04791.4.dta

scan 4791; 7.1e+000

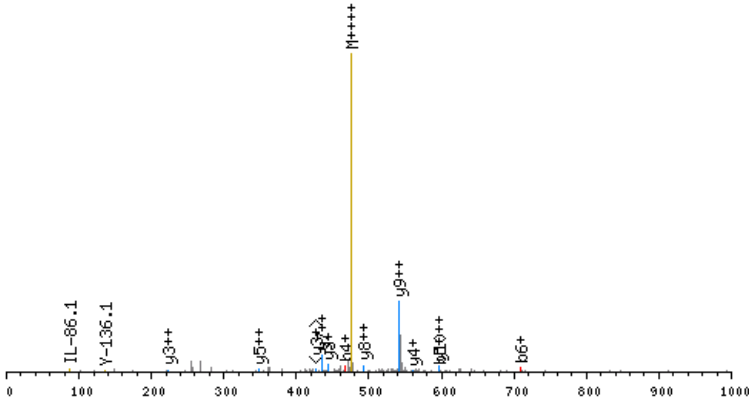

click image to zoom in; click top corners to zoom out [\[precursor±\]](#)

scan 4788; 476.3 m/z; 1.6e+001

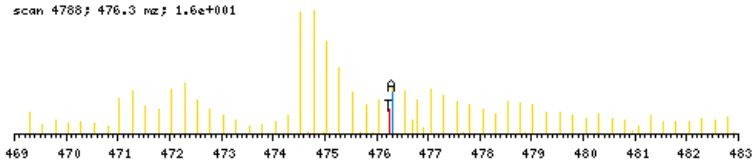

zoomed in precursor plot; T=theoretical m/z, A=acquired m/z

| b <sup>+</sup> | #  | AA | #  | y <sup>+</sup> | y <sup>2+</sup> |
|----------------|----|----|----|----------------|-----------------|
| 142.1232       | 1  | I  | 16 |                |                 |
| 241.1916       | 2  | V  | 15 | 1760.9183      | 880.9631        |
| 370.2342       | 3  | E  | 14 | 1661.8499      | 831.4289        |
| 467.2869       | 4  | P  | 13 | 1532.8073      | 766.9076        |
| 596.3295       | 5  | E  | 12 | 1435.7546      | 718.3812        |
| 709.4136       | 6  | I  | 11 | 1306.7120      | 653.8599        |
| 822.4977       | 7  | L  | 10 | 1193.6279      | 597.3179        |
| 919.5504       | 8  | P  | 9  | 1080.5438      | 540.7758        |
| 1034.5774      | 9  | D  | 8  | 983.4911       | 492.2494        |
| 1091.5988      | 10 | G  | 7  | 868.4641       | 434.7360        |
| 1206.6258      | 11 | D  | 6  | 811.4427       | 406.2252        |
| 1343.6847      | 12 | H  | 5  | 696.4157       | 348.7118        |
| 1458.7116      | 13 | D  | 4  | 559.3568       | 280.1823        |
| 1571.7957      | 14 | L  | 3  | 444.3299       | 222.6688        |
| 1727.9220      | 15 | K  | 2  | 331.2458       | 166.1268        |
|                | 16 | R  | 1  | 175.1195       | 88.0637         |

N-term:+29.04 K(15):+156.13

X-range:

0 - 0

MassTol: Y-zoom:

0. 1.

MassType:

☐AVG ☒MONO

Axis:

☒1 ☐2

Label:

☒I ☐M ☐-

Ions:

a ☐+ ☐2+ ☐3+

b ☒+ ☐2+ ☐3+

c ☐+ ☐2+ ☐3+

x ☐+ ☐2+ ☐3+

y ☒+ ☒2+ ☐3+

z ☐+ ☐2+ ☐3+

hide H<sub>2</sub>O/NH<sub>3</sub> ☐

zoom 112-122 ☐

GO

IVLTQSPASLAVSLGQR, MH+ 1774.0650, m/z 592.0265  
H OS G12 P120811 220811-s1.05384.05384.3.dta

scan 5384; 1.8e+000

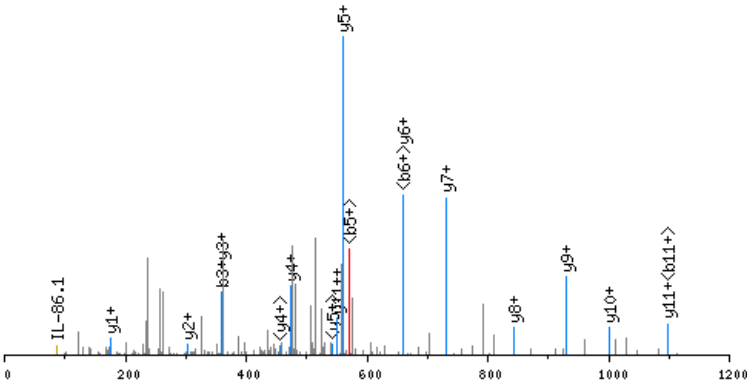

click image to zoom in; click top corners to zoom out

[precursor±]

scan 5382; 592.0 m/z; 1.1e+001

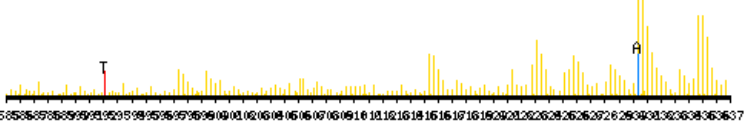

zoomed in precursor plot; T=theoretical m/z, A=acquired m/z

| b <sup>+</sup> | #  | AA | #  | y <sup>+</sup> | y <sup>2+</sup> |
|----------------|----|----|----|----------------|-----------------|
| 148.1550       | 1  | I  | 17 |                |                 |
| 247.2234       | 2  | V  | 16 | 1626.9179      | 813.9629        |
| 360.3074       | 3  | L  | 15 | 1527.8495      | 764.4287        |
| 461.3551       | 4  | T  | 14 | 1414.7654      | 707.8866        |
| 589.4137       | 5  | Q  | 13 | 1313.7177      | 657.3628        |
| 676.4457       | 6  | S  | 12 | 1185.6592      | 593.3335        |
| 773.4985       | 7  | P  | 11 | 1098.6271      | 549.8175        |
| 844.5356       | 8  | A  | 10 | 1001.5744      | 501.2911        |
| 931.5676       | 9  | S  | 9  | 930.5373       | 465.7725        |
| 1044.6517      | 10 | L  | 8  | 843.5052       | 422.2565        |
| 1115.6888      | 11 | A  | 7  | 730.4212       | 365.7145        |
| 1214.7572      | 12 | V  | 6  | 659.3840       | 330.1959        |
| 1301.7893      | 13 | S  | 5  | 560.3156       | 280.6617        |
| 1414.8733      | 14 | L  | 4  | 473.2836       | 237.1457        |
| 1471.8948      | 15 | G  | 3  | 360.1995       | 180.6037        |
| 1599.9534      | 16 | Q  | 2  | 303.1781       | 152.0930        |
|                | 17 | R  | 1  | 175.1195       | 88.0637         |

N-term:+35.07

X-range:

$$\boxed{0} - \boxed{0}$$

MassTol: Y-zoom:

0. 1.

MassType:

AVG MONO

Axis:

1 2

Label:

☒ I ☐ M ☐ -

Ions:

**a**  + 2 + 3 +

b ☒ <sup>+</sup> ☐ <sup>2+</sup> ☐ <sup>3+</sup>

$\square + \square^2 + \square^3 +$

$$= \square + \square^2 + \square^3 + \dots$$

**X** ☐ ☐ ☐

☒ ☒ ☒

y ☒ <sup>+</sup> ☒ <sup>2+</sup> ☐ <sup>3+</sup>

$$z \begin{bmatrix} 1 \\ 1 \\ 1 \end{bmatrix} + \begin{bmatrix} 1 \\ 1 \\ 1 \end{bmatrix}^2 + \begin{bmatrix} 1 \\ 1 \\ 1 \end{bmatrix}^3 + \dots$$
hide  $\text{H}_2\text{O}/\text{NH}_3$  ☐

zoom 112-122

GO

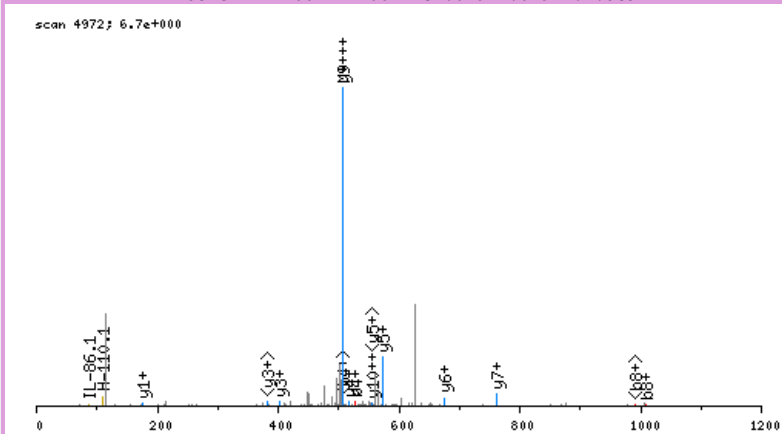

click image to zoom in; click top corners to zoom out

```
[precursor±]
```

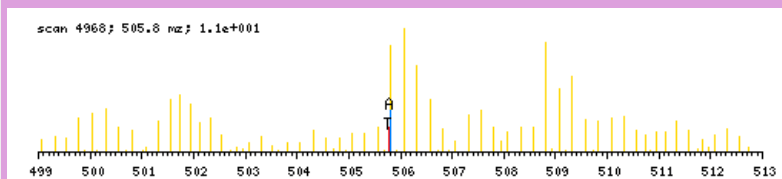

zoomed in precursor plot; T=theoretical m/z, A=acquired m/z

| $b^+$     | #  | AA | #  | $y^+$     | $y^{2+}$ |
|-----------|----|----|----|-----------|----------|
| 142.1232  | 1  | I  | 17 |           |          |
| 241.1916  | 2  | V  | 16 | 1879.0078 | 940.0078 |
| 369.2502  | 3  | Q  | 15 | 1779.9394 | 890.4736 |
| 525.3765  | 4  | K  | 14 | 1651.8808 | 826.4443 |
| 688.4398  | 5  | Y  | 13 | 1495.7545 | 748.3812 |
| 745.4612  | 6  | G  | 12 | 1332.6912 | 666.8495 |
| 908.5246  | 7  | Y  | 11 | 1275.6697 | 638.3388 |
| 1009.5723 | 8  | T  | 10 | 1112.6064 | 556.8071 |
| 1146.6312 | 9  | H  | 9  | 1011.5587 | 506.2833 |
| 1259.7152 | 10 | L  | 8  | 874.4998  | 437.7538 |
| 1346.7473 | 11 | S  | 7  | 761.4157  | 381.2118 |
| 1447.7949 | 12 | T  | 6  | 674.3837  | 337.6958 |
| 1504.8164 | 13 | G  | 5  | 573.3360  | 287.1719 |
| 1619.8433 | 14 | D  | 4  | 516.3146  | 258.6612 |
| 1732.9274 | 15 | L  | 3  | 401.2876  | 201.1477 |
| 1846.0115 | 16 | L  | 2  | 288.2036  | 144.6057 |
|           | 17 | R  | 1  | 175.1195  | 88.0637  |

N-term: +29.04 K(4): +156.13

X-range:

0 - 0

MassTol: Y-zoom:

0. 1.

MassType:

☐AVG ☒MONO

Axis:

☒1 ☐2

Label:

☒I ☐M ☐-

Ions:

a ☐+ ☐2+ ☐3+

b ☒+ ☐2+ ☐3+

c ☐+ ☐2+ ☐3+

x ☐+ ☐2+ ☐3+

y ☒+ ☒2+ ☐3+

z ☐+ ☐2+ ☐3+

hide H<sub>2</sub>O/NH<sub>3</sub> ☐

zoom 112-122 ☐

GO

IVSVDETIKNPR, MH+ 1438.8906, m/z 480.3017  
H OS G15 P120811 220811-s1.02938.02938.3.dta

scan 2938; 1.2e+001

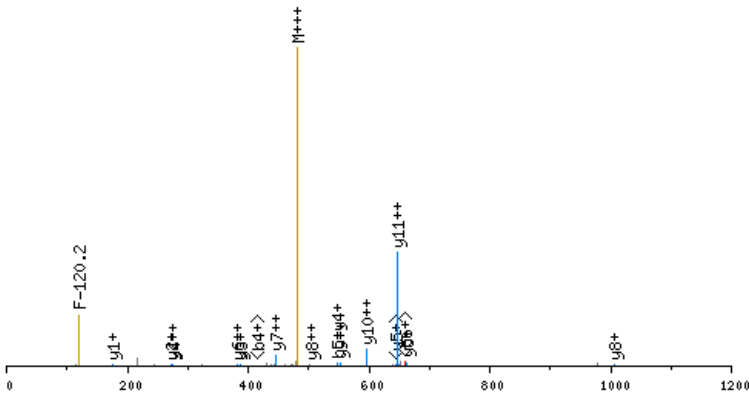

click image to zoom in; click top corners to zoom out

[precursor±]

scan 2936; 480.3 m/z; 6.0e+000

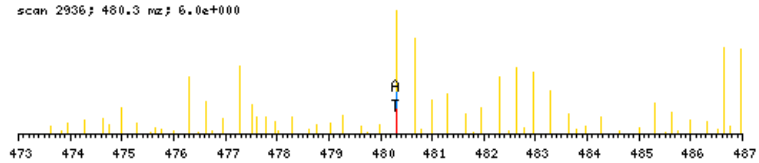

zoomed in precursor plot; T=theoretical m/z, A=acquired m/z

| b <sup>+</sup> | #  | AA | #  | y <sup>+</sup> | y <sup>2+</sup> |
|----------------|----|----|----|----------------|-----------------|
| 148.1550       | 1  | I  | 12 |                |                 |
| 247.2234       | 2  | V  | 11 | 1291.7434      | 646.3756        |
| 334.2554       | 3  | S  | 10 | 1192.6750      | 596.8414        |
| 433.3238       | 4  | V  | 9  | 1105.6430      | 553.3254        |
| 548.3508       | 5  | D  | 8  | 1006.5746      | 503.7912        |
| 677.3934       | 6  | E  | 7  | 891.5476       | 446.2777        |
| 778.4410       | 7  | T  | 6  | 762.5050       | 381.7564        |
| 891.5251       | 8  | I  | 5  | 661.4574       | 331.2326        |
| 1053.6832      | 9  | K  | 4  | 548.3733       | 274.6906        |
| 1167.7261      | 10 | N  | 3  | 386.2152       | 193.6115        |
| 1264.7789      | 11 | P  | 2  | 272.1723       | 136.5900        |
|                | 12 | R  | 1  | 175.1195       | 88.0637         |

N-term:+35.07 K(9):+162.16

X-range:

0 - 0

MassTol: Y-zoom:

0. 1.

MassType:

☐AVG ☒MONO

Axis:

☒1 ☐2

Label:

☒I ☐M ☐-

Ions:

a ☐+ ☐2+ ☐3+

b ☒+ ☐2+ ☐3+

c ☐+ ☐2+ ☐3+

x ☐+ ☐2+ ☐3+

y ☒+ ☒2+ ☐3+

z ☐+ ☐2+ ☐3+

hide H<sub>2</sub>O/NH<sub>3</sub> ☐

zoom 112-122 ☐

GO

IYEKPTQTEAPQVTGPIEVPPVR, MH+ 2518.4557, m/z 630.3694  
H OS G14 P120811 220811-s1.05282.05282.4.dta

scan 5282; 3.4e+000

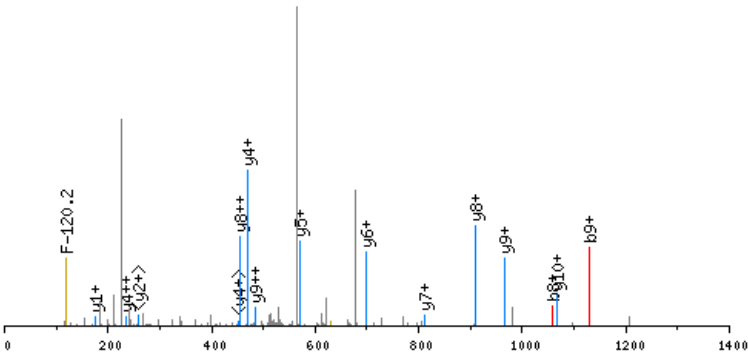

click image to zoom in; click top corners to zoom out [precursor±]

scan 5281; 630.4 m/z; 4.1e+001

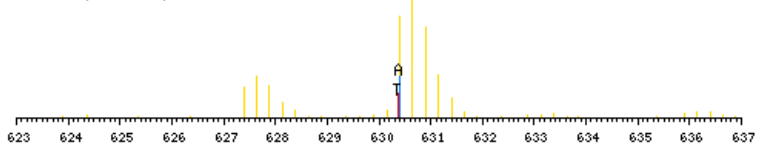

zoomed in precursor plot; T=theoretical m/z, A=acquired m/z

| b <sup>+</sup> | #  | AA | #  | y <sup>+</sup> | y <sup>2+</sup> |
|----------------|----|----|----|----------------|-----------------|
| 148.1550       | 1  | I  | 22 |                |                 |
| 311.2183       | 2  | Y  | 21 | 2371.3086      | 1186.1582       |
| 440.2609       | 3  | E  | 20 | 2208.2452      | 1104.6265       |
| 602.4190       | 4  | K  | 19 | 2079.2027      | 1040.1052       |
| 699.4717       | 5  | P  | 18 | 1917.0446      | 959.0262        |
| 827.5303       | 6  | Q  | 17 | 1819.9918      | 910.4998        |
| 928.5780       | 7  | T  | 16 | 1691.9332      | 846.4705        |
| 1057.6206      | 8  | E  | 15 | 1590.8855      | 795.9467        |
| 1128.6577      | 9  | A  | 14 | 1461.8429      | 731.4254        |
| 1225.7105      | 10 | P  | 13 | 1390.8058      | 695.9068        |
| 1353.7691      | 11 | Q  | 12 | 1293.7531      | 647.3804        |
| 1452.8375      | 12 | V  | 11 | 1165.6945      | 583.3512        |
| 1553.8851      | 13 | T  | 10 | 1066.6261      | 533.8169        |
| 1610.9066      | 14 | G  | 9  | 965.5784       | 483.2931        |
| 1707.9594      | 15 | P  | 8  | 908.5569       | 454.7824        |
| 1821.0434      | 16 | I  | 7  | 811.5042       | 406.2560        |
| 1950.0860      | 17 | E  | 6  | 698.4201       | 349.7140        |
| 2049.1544      | 18 | V  | 5  | 569.3775       | 285.1927        |
| 2146.2072      | 19 | P  | 4  | 470.3091       | 235.6585        |
| 2245.2756      | 20 | V  | 3  | 373.2563       | 187.1321        |
| 2344.3440      | 21 | V  | 2  | 274.1879       | 137.5979        |
|                | 22 | R  | 1  | 175.1195       | 88.0637         |

N-term:+35.07 K(4):+162.16

X-range:

0 - 0

MassTol: Y-zoom:

0. 1.

MassType:

☐AVG ☒MONO

Axis:

☒1 ☐2

Label:

☒I ☐M ☐-

Ions:

a ☐+ ☐2+ ☐3+

b ☒+ ☐2+ ☐3+

c ☐+ ☐2+ ☐3+

x ☐+ ☐2+ ☐3+

y ☒+ ☒2+ ☐3+

z ☐+ ☐2+ ☐3+

hide H<sub>2</sub>O/NH<sub>3</sub> ☐

zoom 112-122 ☐

GO

KAEAVATVVAAVDQAR, MH+ 1654.9492, m/z 552.3213  
L OS G15 P120811 220811-s1.04654.04654.3.dta

scan 4654; 1.8e+000

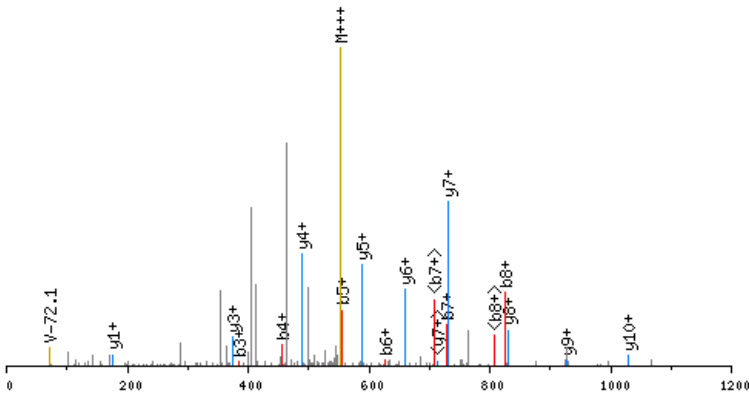

click image to zoom in; click top corners to zoom out

[precursor±]

scan 4651; 552.3 m/z; 5.0e+000

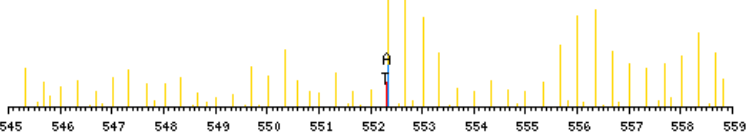

zoomed in precursor plot; T=theoretical m/z, A=acquired m/z

| b <sup>+</sup> | #  | AA | #  | y <sup>+</sup> | y <sup>2+</sup> |
|----------------|----|----|----|----------------|-----------------|
| 185.1654       | 1  | K  | 16 |                |                 |
| 256.2025       | 2  | A  | 15 | 1470.7916      | 735.8997        |
| 385.2451       | 3  | E  | 14 | 1399.7545      | 700.3812        |
| 456.2822       | 4  | A  | 13 | 1270.7119      | 635.8599        |
| 555.3506       | 5  | V  | 12 | 1199.6748      | 600.3413        |
| 626.3877       | 6  | A  | 11 | 1100.6064      | 550.8071        |
| 727.4354       | 7  | T  | 10 | 1029.5693      | 515.2886        |
| 826.5038       | 8  | V  | 9  | 928.5216       | 464.7647        |
| 925.5723       | 9  | V  | 8  | 829.4532       | 415.2305        |
| 996.6094       | 10 | A  | 7  | 730.3848       | 365.6963        |
| 1067.6465      | 11 | A  | 6  | 659.3477       | 330.1777        |
| 1166.7149      | 12 | V  | 5  | 588.3105       | 294.6592        |
| 1281.7418      | 13 | D  | 4  | 489.2421       | 245.1250        |
| 1409.8004      | 14 | Q  | 3  | 374.2152       | 187.6115        |
| 1480.8375      | 15 | A  | 2  | 246.1566       | 123.5822        |
|                | 16 | R  | 1  | 175.1195       | 88.0637         |

N-term:+29.04 K(1):+156.13

X-range:

0 - 0

MassTol: Y-zoom:

0. 1.

MassType:

☐ AVG ☒ MONO

Axis:

☒ 1 ☐ 2

Label:

☒ I ☐ M ☐ -

Ions:

a ☐ + ☐ 2+ ☐ 3+

b ☒ + ☐ 2+ ☐ 3+

c ☐ + ☐ 2+ ☐ 3+

x ☐ + ☐ 2+ ☐ 3+

y ☒ + ☒ 2+ ☐ 3+

z ☐ + ☐ 2+ ☐ 3+

hide H<sub>2</sub>O/NH<sub>3</sub> ☐

zoom 112-122 ☐

GO

KAMKGLGTDEDSILNLLTSR, MH+ 2246.2430, m/z 562.3162  
L OS G17 P120811 220811-s1.06509.06509.4.dta

scan 6509; 1.1e+000

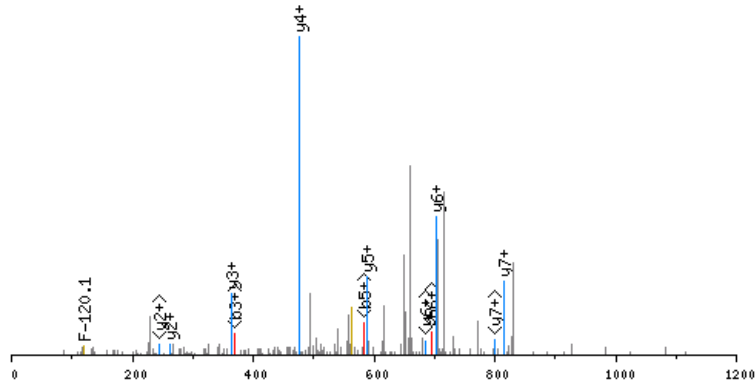

click image to zoom in; click top corners to zoom out [\[precursor±\]](#)

scan 6505; 562.3 m/z; 1.3e+000

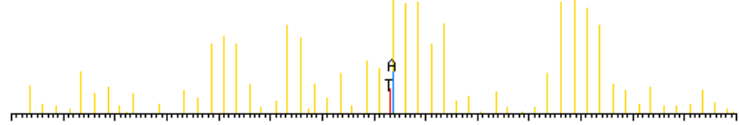

zoomed in precursor plot; T=theoretical m/z, A=acquired m/z

| b <sup>+</sup> | #  | AA | #  | y <sup>+</sup> | y <sup>2+</sup> |
|----------------|----|----|----|----------------|-----------------|
| 185.1654       | 1  | K  | 20 |                |                 |
| 256.2025       | 2  | A  | 19 | 2062.0855      | 1031.5466       |
| 387.2430       | 3  | M  | 18 | 1991.0484      | 996.0281        |
| 543.3693       | 4  | K  | 17 | 1860.0079      | 930.5078        |
| 600.3908       | 5  | G  | 16 | 1703.8816      | 852.4447        |
| 713.4748       | 6  | L  | 15 | 1646.8601      | 823.9340        |
| 770.4963       | 7  | G  | 14 | 1533.7760      | 767.3919        |
| 871.5440       | 8  | T  | 13 | 1476.7546      | 738.8812        |
| 986.5709       | 9  | D  | 12 | 1375.7069      | 688.3574        |
| 1115.6135      | 10 | E  | 11 | 1260.6800      | 630.8439        |
| 1230.6404      | 11 | D  | 10 | 1131.6374      | 566.3226        |
| 1317.6725      | 12 | S  | 9  | 1016.6104      | 508.8091        |
| 1430.7565      | 13 | I  | 8  | 929.5784       | 465.2931        |
| 1543.8406      | 14 | L  | 7  | 816.4943       | 408.7511        |
| 1657.8835      | 15 | N  | 6  | 703.4103       | 352.2090        |
| 1770.9676      | 16 | L  | 5  | 589.3673       | 295.1876        |
| 1884.0517      | 17 | L  | 4  | 476.2833       | 238.6455        |
| 1985.0993      | 18 | T  | 3  | 363.1992       | 182.1035        |
| 2072.1314      | 19 | S  | 2  | 262.1515       | 131.5797        |
|                | 20 | R  | 1  | 175.1195       | 88.0637         |

N-term:+29.04 K(1):+156.13  
K(4):+156.13

X-range:

0 - 0

MassTol: Y-zoom:

0. 1.

MassType:

☐AVG ☒MONO

Axis:

☒1 ☐2

Label:

☒I ☐M ☐-

Ions:

a ☐+ ☐2+ ☐3+

b ☒+ ☐2+ ☐3+

c ☐+ ☐2+ ☐3+

x ☐+ ☐2+ ☐3+

y ☒+ ☒2+ ☐3+

z ☐+ ☐2+ ☐3+

hide H<sub>2</sub>O/NH<sub>3</sub> ☐

zoom 112-122 ☐

GO

KAPQVSTPTLVEAAR, MH+ 1623.9434, m/z 541.9860  
L OS G15 P120811 220811-s1.03400.03400.3.dta

scan 3400; 1.3e+000

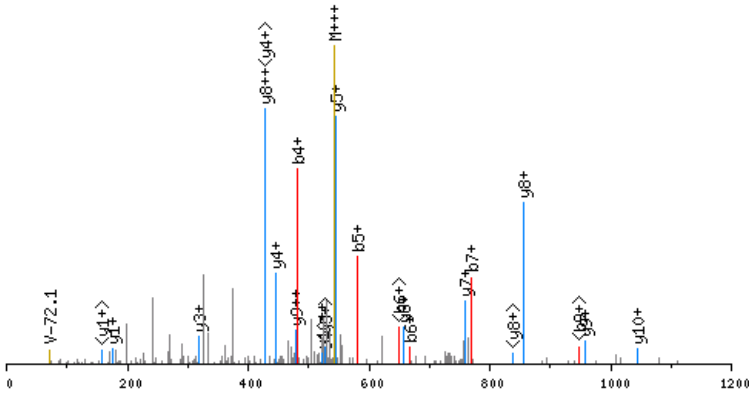

click image to zoom in; click top corners to zoom out

[precursor±]

scan 3396; 542.0 m/z; 1.5e+001

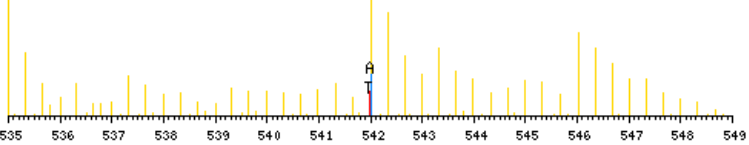

zoomed in precursor plot; T=theoretical m/z, A=acquired m/z

| b <sup>+</sup> | #  | AA | #  | y <sup>+</sup> | y <sup>2+</sup> |
|----------------|----|----|----|----------------|-----------------|
| 185.1654       | 1  | K  | 15 |                |                 |
| 256.2025       | 2  | A  | 14 | 1439.7858      | 720.3968        |
| 353.2553       | 3  | P  | 13 | 1368.7487      | 684.8783        |
| 481.3139       | 4  | Q  | 12 | 1271.6959      | 636.3519        |
| 580.3823       | 5  | V  | 11 | 1143.6374      | 572.3226        |
| 667.4143       | 6  | S  | 10 | 1044.5689      | 522.7884        |
| 768.4620       | 7  | T  | 9  | 957.5369       | 479.2724        |
| 865.5147       | 8  | P  | 8  | 856.4892       | 428.7485        |
| 966.5624       | 9  | T  | 7  | 759.4365       | 380.2222        |
| 1079.6465      | 10 | L  | 6  | 658.3888       | 329.6983        |
| 1178.7149      | 11 | V  | 5  | 545.3047       | 273.1563        |
| 1307.7575      | 12 | E  | 4  | 446.2363       | 223.6221        |
| 1378.7946      | 13 | A  | 3  | 317.1937       | 159.1008        |
| 1449.8317      | 14 | A  | 2  | 246.1566       | 123.5822        |
|                | 15 | R  | 1  | 175.1195       | 88.0637         |

N-term:+29.04 K(1):+156.13

X-range:

0 - 0

MassTol: Y-zoom:

0. 1.

MassType:

☐ AVG ☒ MONO

Axis:

☒ 1 ☐ 2

Label:

☒ I ☐ M ☐ -

Ions:

a ☐ + ☐ 2+ ☐ 3+

b ☒ + ☐ 2+ ☐ 3+

c ☐ + ☐ 2+ ☐ 3+

x ☐ + ☐ 2+ ☐ 3+

y ☒ + ☒ 2+ ☐ 3+

z ☐ + ☐ 2+ ☐ 3+

hide H<sub>2</sub>O/NH<sub>3</sub> ☐

zoom 112-122 ☐

GO

KATEMVEVGPEDDEVGAER, MH+ 2117.0073, m/z 706.3406  
L OS G15 P120811 220811-s1.03394.03394.3.dta

scan 3394; 2.6e+000

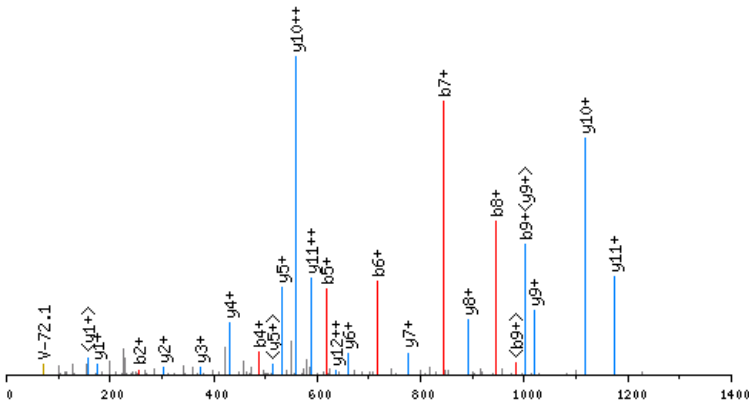

click image to zoom in; click top corners to zoom out

[precursor±]

scan 3391; 706.3 m/z; 1.2e+001

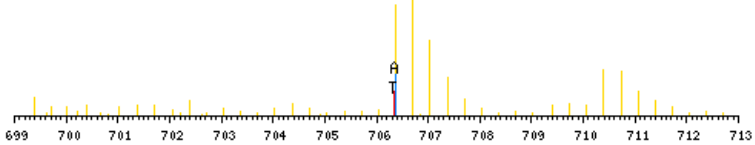

zoomed in precursor plot; T=theoretical m/z, A=acquired m/z

| b <sup>+</sup> | #  | AA | #  | y <sup>+</sup> | y <sup>2+</sup> |
|----------------|----|----|----|----------------|-----------------|
| 185.1654       | 1  | K  | 19 |                |                 |
| 256.2025       | 2  | A  | 18 | 1932.8497      | 966.9288        |
| 357.2502       | 3  | T  | 17 | 1861.8126      | 931.4102        |
| 486.2928       | 4  | E  | 16 | 1760.7649      | 880.8864        |
| 617.3333       | 5  | M  | 15 | 1631.7223      | 816.3651        |
| 716.4017       | 6  | V  | 14 | 1500.6818      | 750.8448        |
| 845.4443       | 7  | E  | 13 | 1401.6134      | 701.3106        |
| 944.5127       | 8  | V  | 12 | 1272.5708      | 636.7893        |
| 1001.5342      | 9  | G  | 11 | 1173.5024      | 587.2551        |
| 1098.5869      | 10 | P  | 10 | 1116.4809      | 558.7444        |
| 1227.6295      | 11 | E  | 9  | 1019.4282      | 510.2180        |
| 1342.6565      | 12 | D  | 8  | 890.3856       | 445.6967        |
| 1457.6834      | 13 | D  | 7  | 775.3586       | 388.1832        |
| 1586.7260      | 14 | E  | 6  | 660.3317       | 330.6698        |
| 1685.7944      | 15 | V  | 5  | 531.2891       | 266.1485        |
| 1742.8159      | 16 | G  | 4  | 432.2207       | 216.6142        |
| 1813.8530      | 17 | A  | 3  | 375.1992       | 188.1035        |
| 1942.8956      | 18 | E  | 2  | 304.1621       | 152.5850        |
|                | 19 | R  | 1  | 175.1195       | 88.0637         |

N-term:+29.04 K(1):+156.13

N-term: +29.04 K(1): +156.13

X-range:

0 - 0

MassTol: Y-zoom:

0. 1.

MassType:

☐AVG ☒MONO

Axis:

☒1 ☐2

Label:

☒I ☐M ☐-

Ions:

a ☐+ ☐2+ ☐3+

b ☒+ ☐2+ ☐3+

c ☐+ ☐2+ ☐3+

x ☐+ ☐2+ ☐3+

y ☒+ ☒2+ ☐3+

z ☐+ ☐2+ ☐3+

hide H<sub>2</sub>O/NH<sub>3</sub> ☐

zoom 112-122 ☐

GO

KDFANVYVDAVKDSGR, MH+ 1867.9918, m/z 467.7534  
L OS G17 P120811 220811-s1.04802.04802.4.dta

scan 4802; 3.9e+000

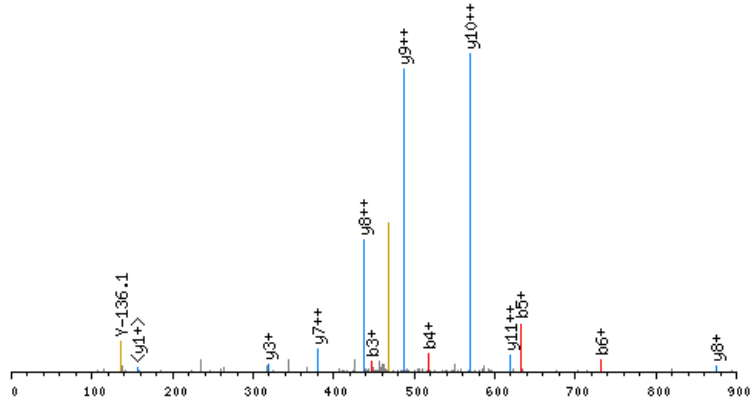

click image to zoom in; click top corners to zoom out [\[precursor±\]](#)

scan 4798; 467.8 m/z; 2.1e+001

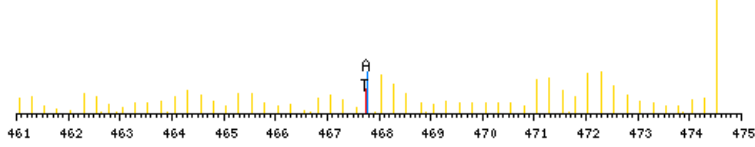

zoomed in precursor plot; T=theoretical m/z, A=acquired m/z

| b <sup>+</sup> | #  | AA | #  | y <sup>+</sup> | y <sup>2+</sup> |
|----------------|----|----|----|----------------|-----------------|
| 185.1654       | 1  | K  | 16 |                |                 |
| 300.1923       | 2  | D  | 15 | 1683.8343      | 842.4210        |
| 447.2608       | 3  | F  | 14 | 1568.8073      | 784.9076        |
| 518.2979       | 4  | A  | 13 | 1421.7389      | 711.3734        |
| 632.3408       | 5  | N  | 12 | 1350.7018      | 675.8548        |
| 731.4092       | 6  | V  | 11 | 1236.6589      | 618.8333        |
| 894.4725       | 7  | Y  | 10 | 1137.5904      | 569.2991        |
| 993.5410       | 8  | V  | 9  | 974.5271       | 487.7675        |
| 1108.5679      | 9  | D  | 8  | 875.4587       | 438.2333        |
| 1179.6050      | 10 | A  | 7  | 760.4318       | 380.7198        |
| 1278.6734      | 11 | V  | 6  | 689.3946       | 345.2012        |
| 1434.7997      | 12 | K  | 5  | 590.3262       | 295.6670        |
| 1549.8267      | 13 | D  | 4  | 434.1999       | 217.6039        |
| 1636.8587      | 14 | S  | 3  | 319.1730       | 160.0904        |
| 1693.8802      | 15 | G  | 2  | 232.1410       | 116.5744        |
|                | 16 | R  | 1  | 175.1195       | 88.0637         |

N-term:+29.04 K(1):+156.13  
K(12):+156.13

X-range:

0 - 0

MassTol: Y-zoom:

0. 1.

MassType:

☐ AVG ☒ MONO

Axis:

☒ 1 ☐ 2

Label:

☒ I ☐ M ☐ -

Ions:

a ☐ + ☐ 2+ ☐ 3+

b ☒ + ☐ 2+ ☐ 3+

c ☐ + ☐ 2+ ☐ 3+

x ☐ + ☐ 2+ ☐ 3+

y ☒ + ☒ 2+ ☐ 3+

z ☐ + ☐ 2+ ☐ 3+

hide H<sub>2</sub>O/NH<sub>3</sub> ☐

zoom 112-122 ☐

GO

KDFMIQGGDFTR, MH+ 1482.8051, m/z 494.9399  
H OS G16 P120811 220811-s1.04594.04594.3.dta

scan 4594; 3.3e+000

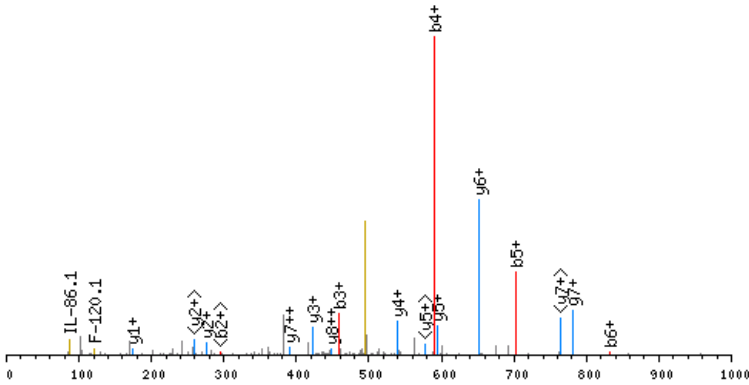

click image to zoom in; click top corners to zoom out [precursor±]

scan 4593; 494.9 m/z; 9.1e+000

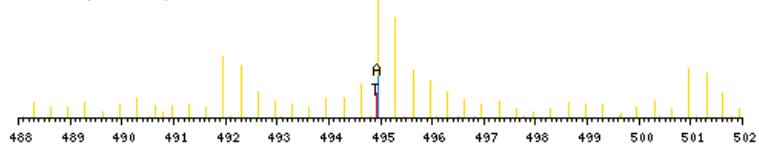

zoomed in precursor plot; T=theoretical m/z, A=acquired m/z

| b <sup>+</sup> | #  | AA | #  | y <sup>+</sup> | y <sup>2+</sup> |
|----------------|----|----|----|----------------|-----------------|
| 197.2290       | 1  | K  | 12 |                |                 |
| 312.2559       | 2  | D  | 11 | 1286.5839      | 643.7959        |
| 459.3244       | 3  | F  | 10 | 1171.5570      | 586.2824        |
| 590.3648       | 4  | M  | 9  | 1024.4886      | 512.7482        |
| 703.4489       | 5  | I  | 8  | 893.4481       | 447.2280        |
| 831.5075       | 6  | Q  | 7  | 780.3640       | 390.6859        |
| 888.5289       | 7  | G  | 6  | 652.3055       | 326.6566        |
| 945.5504       | 8  | G  | 5  | 595.2840       | 298.1459        |
| 1060.5774      | 9  | D  | 4  | 538.2625       | 269.6352        |
| 1207.6458      | 10 | F  | 3  | 423.2356       | 212.1217        |
| 1308.6934      | 11 | T  | 2  | 276.1672       | 138.5875        |
|                | 12 | R  | 1  | 175.1195       | 88.0637         |

N-term:+35.07 K(1):+162.16

X-range:

0 - 0

MassTol: Y-zoom:

0. 1.

MassType:

☐ AVG ☒ MONO

Axis:

☒ 1 ☐ 2

Label:

☒ I ☐ M ☐ -

Ions:

a ☐ + ☐ 2+ ☐ 3+

b ☒ + ☐ 2+ ☐ 3+

c ☐ + ☐ 2+ ☐ 3+

x ☐ + ☐ 2+ ☐ 3+

y ☒ + ☒ 2+ ☐ 3+

z ☐ + ☐ 2+ ☐ 3+

hide H<sub>2</sub>O/NH<sub>3</sub> ☐

zoom 112-122 ☐

GO

KDGFDFICPSDTSSVCGTDGKTYR, MH+ 2650.2128, m/z 663.3087  
L OS G17 P120811 220811-s1.03955.03955.4.dta

scan 3955; 3.3e+000

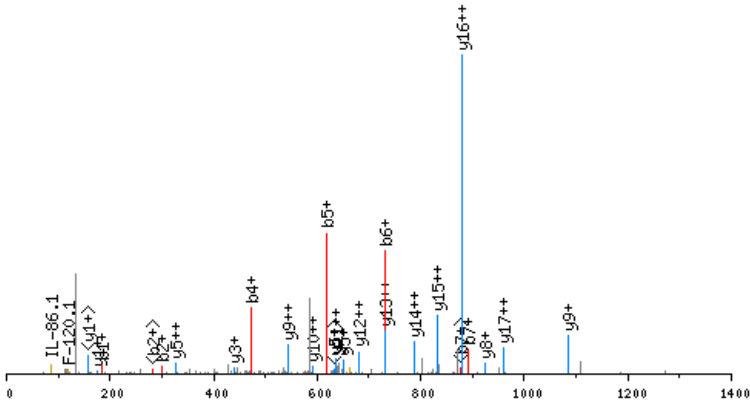

click image to zoom in; click top corners to zoom out [\[precursor±\]](#)

scan 3953; 663.3 m/z; 1.0e+001

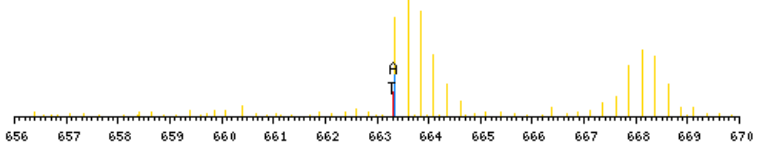

zoomed in precursor plot; T=theoretical m/z, A=acquired m/z

| b <sup>+</sup> | #  | AA | #  | y <sup>+</sup> | y <sup>2+</sup> |
|----------------|----|----|----|----------------|-----------------|
| 185.1654       | 1  | K  | 23 |                |                 |
| 300.1923       | 2  | D  | 22 | 2466.0553      | 1233.5315       |
| 357.2138       | 3  | G  | 21 | 2351.0283      | 1176.0181       |
| 472.2407       | 4  | D  | 20 | 2294.0069      | 1147.5073       |
| 619.3092       | 5  | F  | 19 | 2178.9799      | 1089.9939       |
| 732.3932       | 6  | I  | 18 | 2031.9115      | 1016.4597       |
| 892.4238       | 7  | C  | 17 | 1918.8274      | 959.9176        |
| 989.4766       | 8  | P  | 16 | 1758.7968      | 879.9023        |
| 1076.5086      | 9  | S  | 15 | 1661.7441      | 831.3760        |
| 1191.5356      | 10 | D  | 14 | 1574.7120      | 787.8599        |
| 1292.5832      | 11 | T  | 13 | 1459.6851      | 730.3465        |
| 1379.6153      | 12 | S  | 12 | 1358.6374      | 679.8226        |
| 1466.6473      | 13 | S  | 11 | 1271.6054      | 636.3066        |
| 1565.7157      | 14 | V  | 10 | 1184.5734      | 592.7906        |
| 1725.7463      | 15 | C  | 9  | 1085.5050      | 543.2564        |
| 1782.7678      | 16 | G  | 8  | 925.4744       | 463.2411        |
| 1883.8155      | 17 | T  | 7  | 868.4529       | 434.7304        |
| 1998.8424      | 18 | D  | 6  | 767.4052       | 384.2065        |
| 2055.8639      | 19 | G  | 5  | 652.3783       | 326.6930        |
| 2211.9902      | 20 | K  | 4  | 595.3568       | 298.1823        |
| 2313.0378      | 21 | T  | 3  | 439.2305       | 220.1192        |
| 2476.1012      | 22 | Y  | 2  | 338.1828       | 169.5953        |
|                | 23 | R  | 1  | 175.1195       | 88.0637         |

N-term:+29.04 K(1):+156.13  
C(7):+160.03 C(15):+160.03  
K(20):+156.13

N-term: +35.07 K(1): +162.16

X-range:

0 - 0

MassTol: Y-zoom:

0. 1.

MassType:

☐AVG ☒MONO

Axis:

☒1 ☐2

Label:

☒I ☐M ☐-

Ions:

a ☐+ ☐2+ ☐3+

b ☒+ ☐2+ ☐3+

c ☐+ ☐2+ ☐3+

x ☐+ ☐2+ ☐3+

y ☒+ ☒2+ ☐3+

z ☐+ ☐2+ ☐3+

hide H<sub>2</sub>O/NH<sub>3</sub> ☐

zoom 112-122 ☐

GO

KDLEEDHACIPIKKSDPVVSYSR, MH+ 2735.5715, m/z 684.6483  
H OS G18 P120811 220811-s1.04004.04004.4.dta

scan 4004; 5.7e+000

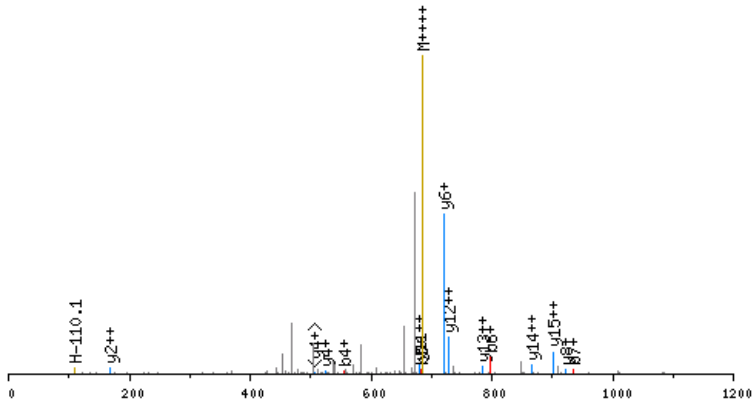

click image to zoom in; click top corners to zoom out

[precursor±]

scan 4001; 684.6 m/z; 1.4e+001

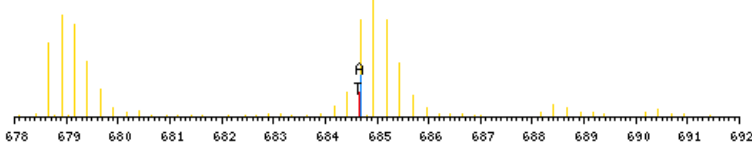

zoomed in precursor plot; T=theoretical m/z, A=acquired m/z

| b <sup>+</sup> | #  | AA | #  | y <sup>+</sup> | y <sup>2+</sup> |
|----------------|----|----|----|----------------|-----------------|
| 197.2290       | 1  | K  | 22 |                |                 |
| 312.2559       | 2  | D  | 21 | 2539.3503      | 1270.1791       |
| 425.3400       | 3  | L  | 20 | 2424.3233      | 1212.6656       |
| 554.3826       | 4  | E  | 19 | 2311.2393      | 1156.1235       |
| 683.4252       | 5  | E  | 18 | 2182.1967      | 1091.6022       |
| 798.4521       | 6  | D  | 17 | 2053.1541      | 1027.0810       |
| 935.5110       | 7  | H  | 16 | 1938.1271      | 969.5675        |
| 1006.5482      | 8  | A  | 15 | 1801.0682      | 901.0380        |
| 1166.5788      | 9  | C  | 14 | 1730.0311      | 865.5195        |
| 1279.6628      | 10 | I  | 13 | 1570.0005      | 785.5042        |
| 1376.7156      | 11 | P  | 12 | 1456.9164      | 728.9621        |
| 1489.7997      | 12 | I  | 11 | 1359.8637      | 680.4358        |
| 1651.9578      | 13 | K  | 10 | 1246.7796      | 623.8937        |
| 1814.1159      | 14 | K  | 9  | 1084.6215      | 542.8147        |
| 1901.1479      | 15 | S  | 8  | 922.4634       | 461.7356        |
| 2016.1748      | 16 | D  | 7  | 835.4314       | 418.2196        |
| 2113.2276      | 17 | P  | 6  | 720.4044       | 360.7061        |
| 2212.2960      | 18 | V  | 5  | 623.3517       | 312.1798        |
| 2311.3644      | 19 | V  | 4  | 524.2833       | 262.6455        |
| 2398.3964      | 20 | S  | 3  | 425.2149       | 213.1113        |
| 2561.4598      | 21 | Y  | 2  | 338.1828       | 169.5953        |
|                | 22 | R  | 1  | 175.1195       | 88.0637         |

N-term:+35.07 K(1):+162.16  
C(9):+160.03 K(13):+162.16  
K(14):+162.16

X-range:

0 - 0

MassTol: Y-zoom:

0. 1.

MassType:

☐ AVG ☒ MONO

Axis:

☒ 1 ☐ 2

Label:

☒ I ☐ M ☐ -

Ions:

a ☐ + ☐ 2+ ☐ 3+

b ☒ + ☐ 2+ ☐ 3+

c ☐ + ☐ 2+ ☐ 3+

x ☐ + ☐ 2+ ☐ 3+

y ☒ + ☒ 2+ ☐ 3+

z ☐ + ☐ 2+ ☐ 3+

hide H<sub>2</sub>O/NH<sub>3</sub> ☐

zoom 112-122 ☐

GO

KDLFDPIIQDR, MH+ 1415.7899, m/z 472.6015  
L OS G16 P120811 220811-s1.05504.05504.3.dta

scan 5504; 2.1e+001

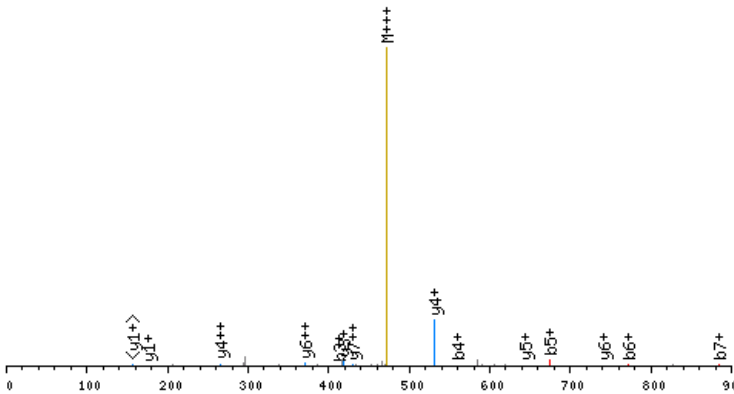

click image to zoom in; click top corners to zoom out

[precursor±]

scan 5503; 472.6 m/z; 3.9e+001

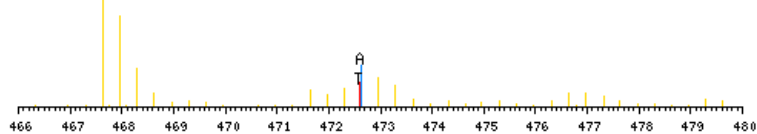

zoomed in precursor plot; T=theoretical m/z, A=acquired m/z

| b <sup>+</sup> | #  | AA | #  | y <sup>+</sup> | y <sup>2+</sup> |
|----------------|----|----|----|----------------|-----------------|
| 185.1654       | 1  | K  | 11 |                |                 |
| 300.1923       | 2  | D  | 10 | 1231.6323      | 616.3201        |
| 413.2764       | 3  | L  | 9  | 1116.6053      | 558.8066        |
| 560.3448       | 4  | F  | 8  | 1003.5213      | 502.2645        |
| 675.3718       | 5  | D  | 7  | 856.4529       | 428.7303        |
| 772.4245       | 6  | P  | 6  | 741.4259       | 371.2169        |
| 885.5086       | 7  | I  | 5  | 644.3731       | 322.6905        |
| 998.5927       | 8  | I  | 4  | 531.2891       | 266.1485        |
| 1126.6512      | 9  | Q  | 3  | 418.2050       | 209.6064        |
| 1241.6782      | 10 | D  | 2  | 290.1464       | 145.5771        |
|                | 11 | R  | 1  | 175.1195       | 88.0637         |

N-term:+29.04 K(1):+156.13

X-range:

0 - 0

MassTol: Y-zoom:

0. 1.

MassType:

☐AVG ☒MONO

Axis:

☒1 ☐2

Label:

☒I ☐M ☐-

Ions:

a ☐+ ☐2+ ☐3+

b ☒+ ☐2+ ☐3+

c ☐+ ☐2+ ☐3+

x ☐+ ☐2+ ☐3+

y ☒+ ☒2+ ☐3+

z ☐+ ☐2+ ☐3+

hide H<sub>2</sub>O/NH<sub>3</sub> ☐

zoom 112-122 ☐

GO

KDPSSNDPLTETIR, MH+ 1628.8496, m/z 543.6214  
L OS G16 P120811 220811-s1.03669.03669.3.dta

scan 3669; 2.2e+000

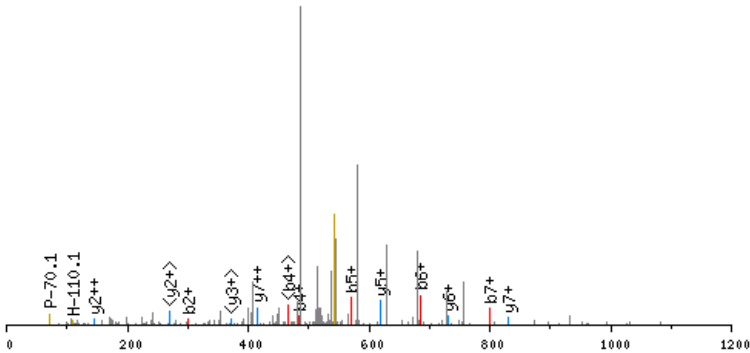

click image to zoom in; click top corners to zoom out [\[precursor±\]](#)

scan 3668; 543.6 m/z; 1.4e+002

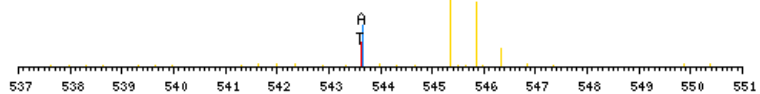

zoomed in precursor plot; T=theoretical m/z, A=acquired m/z

| b <sup>+</sup> | #  | AA | #  | y <sup>+</sup> | y <sup>2+</sup> |
|----------------|----|----|----|----------------|-----------------|
| 185.1654       | 1  | K  | 14 |                |                 |
| 300.1923       | 2  | D  | 13 | 1444.6920      | 722.8499        |
| 397.2451       | 3  | P  | 12 | 1329.6650      | 665.3364        |
| 484.2771       | 4  | S  | 11 | 1232.6123      | 616.8100        |
| 571.3092       | 5  | S  | 10 | 1145.5802      | 573.2940        |
| 685.3521       | 6  | N  | 9  | 1058.5482      | 529.7780        |
| 800.3790       | 7  | D  | 8  | 944.5053       | 472.7566        |
| 897.4318       | 8  | P  | 7  | 829.4783       | 415.2431        |
| 1010.5159      | 9  | L  | 6  | 732.4256       | 366.7167        |
| 1111.5635      | 10 | T  | 5  | 619.3415       | 310.1747        |
| 1240.6061      | 11 | E  | 4  | 518.2938       | 259.6508        |
| 1341.6538      | 12 | T  | 3  | 389.2512       | 195.1295        |
| 1454.7379      | 13 | I  | 2  | 288.2036       | 144.6057        |
|                | 14 | R  | 1  | 175.1195       | 88.0637         |

N-term:+29.04 K(1):+156.13

X-range:

0 - 0

MassTol: Y-zoom:

0. 1.

MassType:

☐ AVG ☒ MONO

Axis:

☒ 1 ☐ 2

Label:

☒ I ☐ M ☐ -

Ions:

a ☐ + ☐ 2+ ☐ 3+

b ☒ + ☐ 2+ ☐ 3+

c ☐ + ☐ 2+ ☐ 3+

x ☐ + ☐ 2+ ☐ 3+

y ☒ + ☒ 2+ ☐ 3+

z ☐ + ☐ 2+ ☐ 3+

hide H<sub>2</sub>O/NH<sub>3</sub> ☐

zoom 112-122 ☐

GO

KDQGGYEDFVEGLR, MH+ 1680.8869, m/z 560.9672  
H OS G16 P120811 220811-s1.05240.05240.3.dta

scan 5240; 5.1e+000

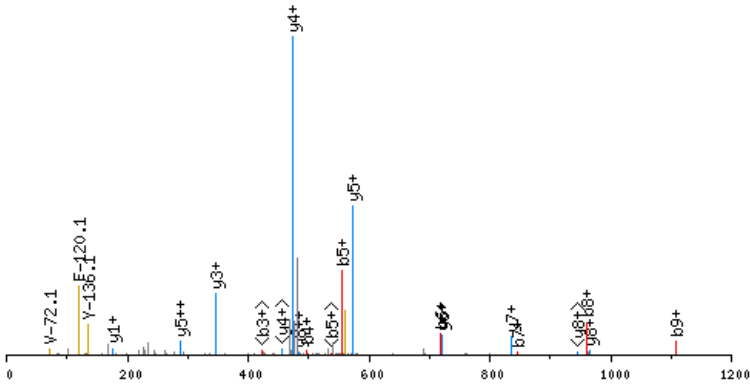

click image to zoom in; click top corners to zoom out [\[precursor±\]](#)

scan 5238; 561.0 m/z; 4.0e+001

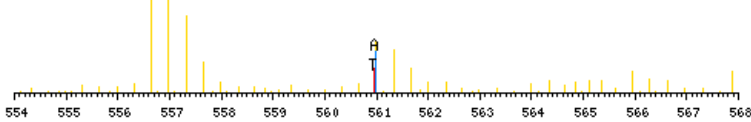

zoomed in precursor plot; T=theoretical m/z, A=acquired m/z

| b <sup>+</sup> | #  | AA | #  | y <sup>+</sup> | y <sup>2+</sup> |
|----------------|----|----|----|----------------|-----------------|
| 197.2290       | 1  | K  | 14 |                |                 |
| 312.2559       | 2  | D  | 13 | 1484.6658      | 742.8368        |
| 440.3145       | 3  | Q  | 12 | 1369.6388      | 685.3233        |
| 497.3360       | 4  | G  | 11 | 1241.5802      | 621.2940        |
| 554.3574       | 5  | G  | 10 | 1184.5588      | 592.7833        |
| 717.4208       | 6  | Y  | 9  | 1127.5373      | 564.2726        |
| 846.4634       | 7  | E  | 8  | 964.4740       | 482.7409        |
| 961.4903       | 8  | D  | 7  | 835.4314       | 418.2196        |
| 1108.5587      | 9  | F  | 6  | 720.4044       | 360.7061        |
| 1207.6271      | 10 | V  | 5  | 573.3360       | 287.1719        |
| 1336.6697      | 11 | E  | 4  | 474.2676       | 237.6377        |
| 1393.6912      | 12 | G  | 3  | 345.2250       | 173.1164        |
| 1506.7753      | 13 | L  | 2  | 288.2036       | 144.6057        |
|                | 14 | R  | 1  | 175.1195       | 88.0637         |

N-term:+35.07 K(1):+162.16



X-range:

0 - 0

MassTol: Y-zoom:

0. 1.

MassType:

☐AVG ☒MONO

Axis:

☒1 ☐2

Label:

☒I ☐M ☐-

Ions:

a ☐+ ☐2+ ☐3+

b ☒+ ☐2+ ☐3+

c ☐+ ☐2+ ☐3+

x ☐+ ☐2+ ☐3+

y ☒+ ☒2+ ☐3+

z ☐+ ☐2+ ☐3+

hide H<sub>2</sub>O/NH<sub>3</sub> ☐

zoom 112-122 ☐

GO

KDTGKTPVEPEVAIHR, MH+ 1861.0548, m/z 466.0191  
L OS G18 P120811 220811-s1.02687.02687.4.dta

scan 2687; 8.0e+000

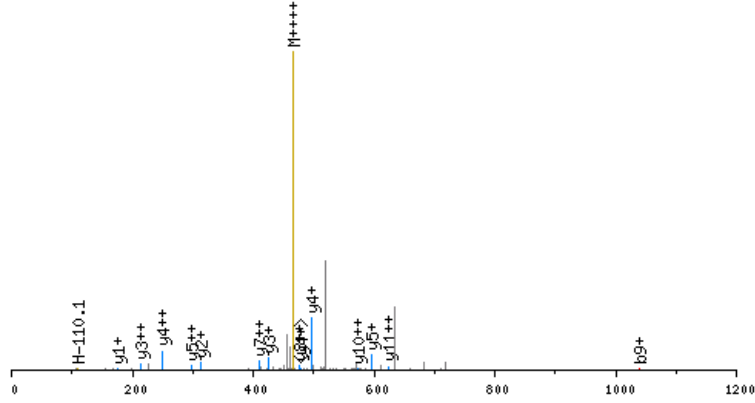

click image to zoom in; click top corners to zoom out [\[precursor±\]](#)

scan 2686; 466.0 m/z; 2.9e+001

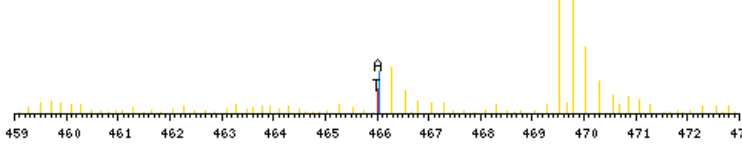

zoomed in precursor plot; T=theoretical m/z, A=acquired m/z

| b <sup>+</sup> | #  | AA | #  | y <sup>+</sup> | y <sup>2+</sup> |
|----------------|----|----|----|----------------|-----------------|
| 185.1654       | 1  | K  | 16 |                |                 |
| 300.1923       | 2  | D  | 15 | 1676.8972      | 838.9525        |
| 401.2400       | 3  | T  | 14 | 1561.8703      | 781.4390        |
| 458.2615       | 4  | G  | 13 | 1460.8226      | 730.9152        |
| 614.3878       | 5  | K  | 12 | 1403.8011      | 702.4045        |
| 715.4355       | 6  | T  | 11 | 1247.6748      | 624.3413        |
| 812.4882       | 7  | P  | 10 | 1146.6271      | 573.8175        |
| 911.5566       | 8  | V  | 9  | 1049.5744      | 525.2911        |
| 1040.5992      | 9  | E  | 8  | 950.5060       | 475.7569        |
| 1137.6520      | 10 | P  | 7  | 821.4634       | 411.2356        |
| 1266.6946      | 11 | E  | 6  | 724.4106       | 362.7092        |
| 1365.7630      | 12 | V  | 5  | 595.3680       | 298.1879        |
| 1436.8001      | 13 | A  | 4  | 496.2996       | 248.6537        |
| 1549.8842      | 14 | I  | 3  | 425.2625       | 213.1352        |
| 1686.9431      | 15 | H  | 2  | 312.1784       | 156.5931        |
|                | 16 | R  | 1  | 175.1195       | 88.0637         |

N-term:+29.04 K(1):+156.13  
K(5):+156.13

X-range:

0 - 0

MassTol: Y-zoom:

0. 1.

MassType:

☐ AVG ☒ MONO

Axis:

☒ 1 ☐ 2

Label:

☒ I ☐ M ☐ -

Ions:

a ☐ + ☐ 2+ ☐ 3+

b ☒ + ☐ 2+ ☐ 3+

c ☐ + ☐ 2+ ☐ 3+

x ☐ + ☐ 2+ ☐ 3+

y ☒ + ☒ 2+ ☐ 3+

z ☐ + ☐ 2+ ☐ 3+

hide H<sub>2</sub>O/NH<sub>3</sub> ☐

zoom 112-122 ☐

GO

KDVNAAIATIKTKR, MH+ 1641.0428, m/z 411.0162  
L OS G18 P120811 220811-s1.02792.02792.4.dta

scan 2792; 2.4e+000

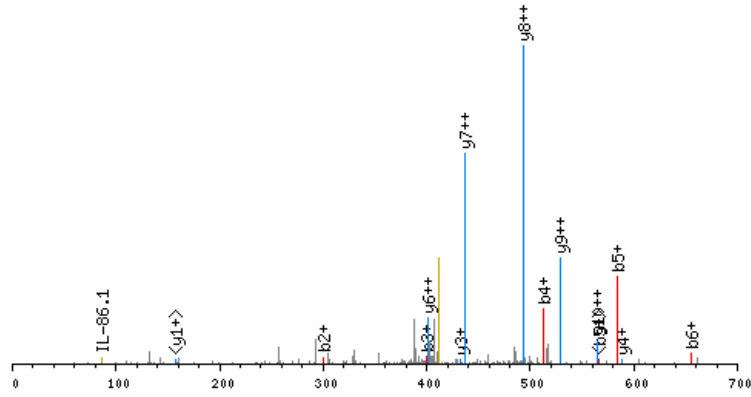

click image to zoom in; click top corners to zoom out [\[precursor±\]](#)

scan 2791; 411.0 m/z; 7.5e+000

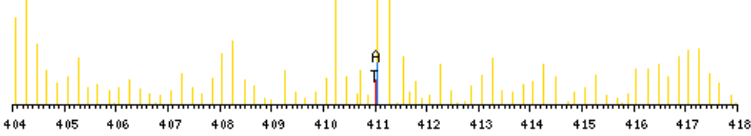

zoomed in precursor plot; T=theoretical m/z, A=acquired m/z

| b <sup>+</sup> | #  | AA | #  | y <sup>+</sup> | y <sup>2+</sup> |
|----------------|----|----|----|----------------|-----------------|
| 185.1654       | 1  | K  | 14 |                |                 |
| 300.1923       | 2  | D  | 13 | 1456.8852      | 728.9465        |
| 399.2608       | 3  | V  | 12 | 1341.8583      | 671.4330        |
| 513.3037       | 4  | N  | 11 | 1242.7899      | 621.8988        |
| 584.3408       | 5  | A  | 10 | 1128.7469      | 564.8774        |
| 655.3779       | 6  | A  | 9  | 1057.7098      | 529.3588        |
| 768.4620       | 7  | I  | 8  | 986.6727       | 493.8403        |
| 839.4991       | 8  | A  | 7  | 873.5886       | 437.2982        |
| 940.5468       | 9  | T  | 6  | 802.5515       | 401.7797        |
| 1053.6308      | 10 | I  | 5  | 701.5038       | 351.2558        |
| 1209.7571      | 11 | K  | 4  | 588.4198       | 294.7138        |
| 1310.8048      | 12 | T  | 3  | 432.2935       | 216.6507        |
| 1466.9311      | 13 | K  | 2  | 331.2458       | 166.1268        |
|                | 14 | R  | 1  | 175.1195       | 88.0637         |

N-term:+29.04 K(1):+156.13  
K(11):+156.13 K(13):+156.13



X-range:

0 - 0

MassTol: Y-zoom:

0. 1.

MassType:

☐ AVG ☒ MONO

Axis:

☒ 1 ☐ 2

Label:

☒ I ☐ M ☐ -

Ions:

a ☐ + ☐ 2+ ☐ 3+

b ☒ + ☐ 2+ ☐ 3+

c ☐ + ☐ 2+ ☐ 3+

x ☐ + ☐ 2+ ☐ 3+

y ☒ + ☒ 2+ ☐ 3+

z ☐ + ☐ 2+ ☐ 3+

hide H<sub>2</sub>O/NH<sub>3</sub> ☐

zoom 112-122 ☐

GO

KEAIGQGTPIDPLPEVKR, MH+ 2032.1807, m/z 508.8006  
L OS G17 P120811 220811-s1.04939.04939.4.dta

scan 4939; 3.5e+000

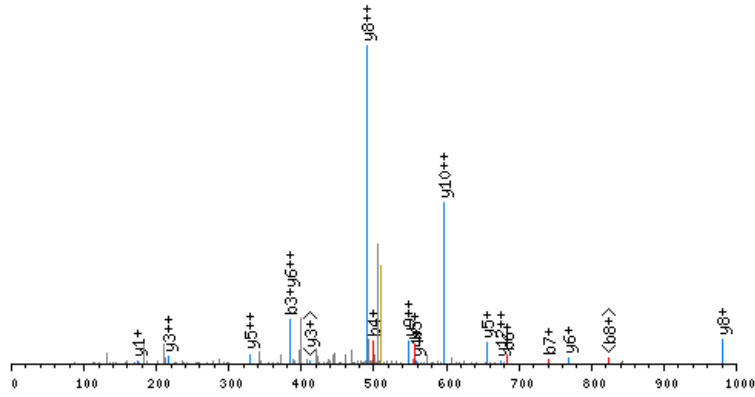

click image to zoom in; click top corners to zoom out [\[precursor±\]](#)

scan 4938; 508.8 m/z; 1.2e+001

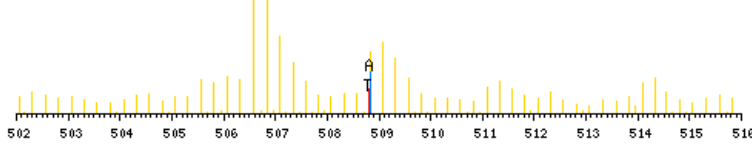

zoomed in precursor plot; T=theoretical m/z, A=acquired m/z

| b <sup>+</sup> | #  | AA | #  | y <sup>+</sup> | y <sup>2+</sup> |
|----------------|----|----|----|----------------|-----------------|
| 185.1654       | 1  | K  | 18 |                |                 |
| 314.2080       | 2  | E  | 17 | 1848.0231      | 924.5155        |
| 385.2451       | 3  | A  | 16 | 1718.9805      | 859.9942        |
| 498.3292       | 4  | I  | 15 | 1647.9434      | 824.4756        |
| 555.3506       | 5  | G  | 14 | 1534.8594      | 767.9336        |
| 683.4092       | 6  | Q  | 13 | 1477.8379      | 739.4229        |
| 740.4307       | 7  | G  | 12 | 1349.7793      | 675.3936        |
| 841.4784       | 8  | T  | 11 | 1292.7578      | 646.8828        |
| 938.5311       | 9  | P  | 10 | 1191.7102      | 596.3590        |
| 1051.6152      | 10 | I  | 9  | 1094.6574      | 547.8326        |
| 1148.6679      | 11 | P  | 8  | 981.5733       | 491.2906        |
| 1263.6949      | 12 | D  | 7  | 884.5206       | 442.7642        |
| 1376.7790      | 13 | L  | 6  | 769.4936       | 385.2507        |
| 1473.8317      | 14 | P  | 5  | 656.4096       | 328.7087        |
| 1602.8743      | 15 | E  | 4  | 559.3568       | 280.1823        |
| 1701.9427      | 16 | V  | 3  | 430.3142       | 215.6610        |
| 1858.0690      | 17 | K  | 2  | 331.2458       | 166.1268        |
|                | 18 | R  | 1  | 175.1195       | 88.0637         |

N-term:+29.04 K(1):+156.13  
K(17):+156.13

X-range:

0 - 0

MassTol: Y-zoom:

0. 1.

MassType:

☐AVG ☒MONO

Axis:

☒1 ☐2

Label:

☒I ☐M ☐-

Ions:

a ☐+ ☐2+ ☐3+

b ☒+ ☐2+ ☐3+

c ☐+ ☐2+ ☐3+

x ☐+ ☐2+ ☐3+

y ☒+ ☒2+ ☐3+

z ☐+ ☐2+ ☐3+

hide H<sub>2</sub>O/NH<sub>3</sub> ☐

zoom 112-122 ☐

GO

KECCHGDLLECADDR, MH+ 1945.8841, m/z 487.2265  
H OS G18 P120811 220811-s1.02829.02829.4.dta

scan 2829; 3.1e+000

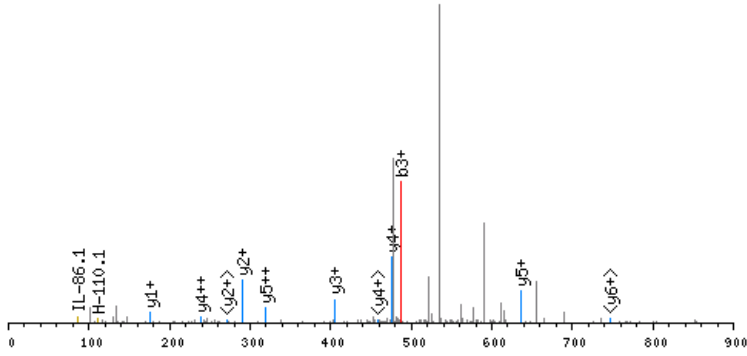

click image to zoom in; click top corners to zoom out [\[precursor±\]](#)

scan 2826; 487.2 m/z; 1.7e+001

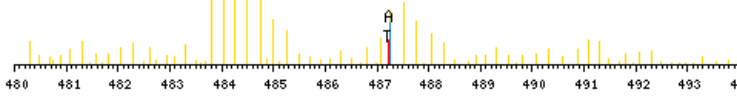

zoomed in precursor plot; T=theoretical m/z, A=acquired m/z

| b <sup>+</sup> | #  | AA | #  | y <sup>+</sup> | y <sup>2+</sup> |
|----------------|----|----|----|----------------|-----------------|
| 197.2290       | 1  | K  | 15 |                |                 |
| 326.2716       | 2  | E  | 14 | 1749.6629      | 875.3354        |
| 486.3022       | 3  | C  | 13 | 1620.6203      | 810.8141        |
| 646.3328       | 4  | C  | 12 | 1460.5897      | 730.7988        |
| 783.3917       | 5  | H  | 11 | 1300.5591      | 650.7835        |
| 840.4132       | 6  | G  | 10 | 1163.5002      | 582.2540        |
| 955.4401       | 7  | D  | 9  | 1106.4788      | 553.7433        |
| 1068.5242      | 8  | L  | 8  | 991.4518       | 496.2298        |
| 1181.6082      | 9  | L  | 7  | 878.3678       | 439.6878        |
| 1310.6508      | 10 | E  | 6  | 765.2837       | 383.1458        |
| 1470.6814      | 11 | C  | 5  | 636.2411       | 318.6245        |
| 1541.7185      | 12 | A  | 4  | 476.2105       | 238.6092        |
| 1656.7455      | 13 | D  | 3  | 405.1734       | 203.0906        |
| 1771.7724      | 14 | D  | 2  | 290.1464       | 145.5771        |
|                | 15 | R  | 1  | 175.1195       | 88.0637         |

N-term:+35.07 K(1):+162.16  
C(3):+160.03 C(4):+160.03  
C(11):+160.03

X-range:

0 - 0

MassTol: Y-zoom:

0. 1.

MassType:

☐ AVG ☒ MONO

Axis:

☒ 1 ☐ 2

Label:

☒ I ☐ M ☐ -

Ions:

a ☐ + ☐ 2+ ☐ 3+

b ☒ + ☐ 2+ ☐ 3+

c ☐ + ☐ 2+ ☐ 3+

x ☐ + ☐ 2+ ☐ 3+

y ☒ + ☒ 2+ ☐ 3+

z ☐ + ☐ 2+ ☐ 3+

hide H<sub>2</sub>O/NH<sub>3</sub> ☐

zoom 112-122 ☐

GO

KEDGQEYQVIKMLGNRR, MH+ 2138.2128, m/z 535.3087  
H OS G17 P120811 220811-s1.05921.05921.4.dta

scan 5921; 1.5e+000

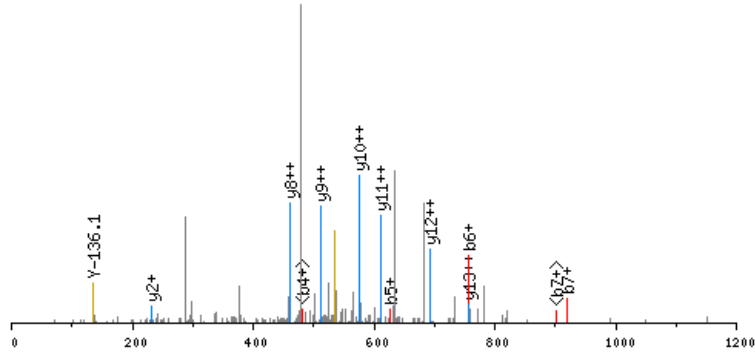

click image to zoom in; click top corners to zoom out [\[precursor±\]](#)

scan 5918; 535.3 m/z; 4.9e+000

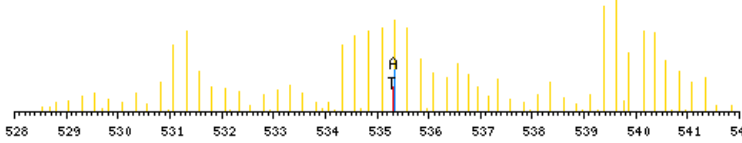

zoomed in precursor plot; T=theoretical m/z, A=acquired m/z

| b <sup>+</sup> | #  | AA | #  | y <sup>+</sup> | y <sup>2+</sup> |
|----------------|----|----|----|----------------|-----------------|
| 197.2290       | 1  | K  | 18 |                |                 |
| 326.2716       | 2  | E  | 17 | 1941.9917      | 971.4997        |
| 441.2985       | 3  | D  | 16 | 1812.9491      | 906.9785        |
| 498.3200       | 4  | G  | 15 | 1697.9221      | 849.4650        |
| 626.3786       | 5  | Q  | 14 | 1640.9007      | 820.9542        |
| 755.4212       | 6  | E  | 13 | 1512.8421      | 756.9250        |
| 918.4845       | 7  | Y  | 12 | 1383.7995      | 692.4037        |
| 989.5216       | 8  | A  | 11 | 1220.7362      | 610.8720        |
| 1117.5802      | 9  | Q  | 10 | 1149.6991      | 575.3534        |
| 1216.6486      | 10 | V  | 9  | 1021.6405      | 511.3242        |
| 1329.7327      | 11 | I  | 8  | 922.5721       | 461.7899        |
| 1491.8908      | 12 | K  | 7  | 809.4880       | 405.2479        |
| 1622.9313      | 13 | M  | 6  | 647.3299       | 324.1689        |
| 1736.0153      | 14 | L  | 5  | 516.2894       | 258.6486        |
| 1793.0368      | 15 | G  | 4  | 403.2054       | 202.1066        |
| 1907.0797      | 16 | N  | 3  | 346.1839       | 173.5959        |
| 1964.1012      | 17 | G  | 2  | 232.1410       | 116.5744        |
|                | 18 | R  | 1  | 175.1195       | 88.0637         |

N-term:+35.07 K(1):+162.16  
K(12):+162.16

X-range:

0 - 0

MassTol: Y-zoom:

0. 1.

MassType:

☐ AVG ☒ MONO

Axis:

☒ 1 ☐ 2

Label:

☒ I ☐ M ☐ -

Ions:

a ☐ + ☐ 2+ ☐ 3+

b ☒ + ☐ 2+ ☐ 3+

c ☐ + ☐ 2+ ☐ 3+

x ☐ + ☐ 2+ ☐ 3+

y ☒ + ☒ 2+ ☐ 3+

z ☐ + ☐ 2+ ☐ 3+

hide H<sub>2</sub>O/NH<sub>3</sub> ☐

zoom 112-122 ☐

GO

KEDVSPGTAIGKTPEMLR, MH+ 2013.1055, m/z 504.0318  
L OS G17 P120811 220811-s1.04287.04287.4.dta

scan 4287; 1.3e+000

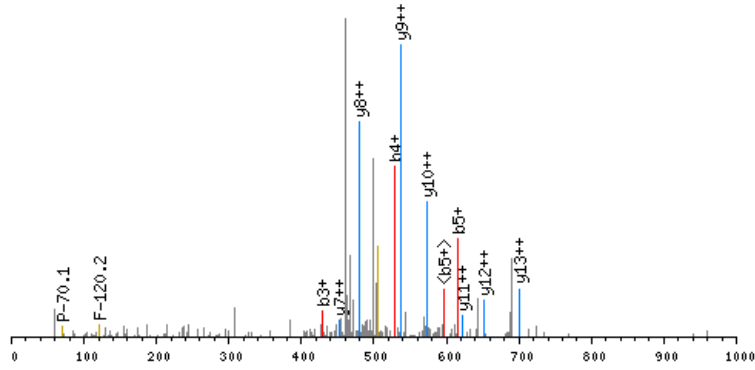

click image to zoom in; click top corners to zoom out [\[precursor±\]](#)

scan 4283; 504.0 m/z; 1.3e+001

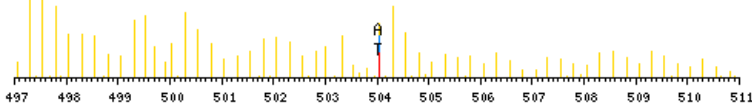

zoomed in precursor plot; T=theoretical m/z, A=acquired m/z

| b <sup>+</sup> | #  | AA | #  | y <sup>+</sup> | y <sup>2+</sup> |
|----------------|----|----|----|----------------|-----------------|
| 185.1654       | 1  | K  | 18 |                |                 |
| 314.2080       | 2  | E  | 17 | 1828.9479      | 914.9779        |
| 429.2349       | 3  | D  | 16 | 1699.9053      | 850.4566        |
| 528.3034       | 4  | V  | 15 | 1584.8784      | 792.9431        |
| 615.3354       | 5  | S  | 14 | 1485.8100      | 743.4089        |
| 712.3881       | 6  | P  | 13 | 1398.7779      | 699.8929        |
| 769.4096       | 7  | G  | 12 | 1301.7252      | 651.3665        |
| 870.4573       | 8  | T  | 11 | 1244.7037      | 622.8558        |
| 941.4944       | 9  | A  | 10 | 1143.6560      | 572.3319        |
| 1054.5785      | 10 | I  | 9  | 1072.6189      | 536.8134        |
| 1111.5999      | 11 | G  | 8  | 959.5348       | 480.2713        |
| 1267.7262      | 12 | K  | 7  | 902.5134       | 451.7606        |
| 1368.7739      | 13 | T  | 6  | 746.3871       | 373.6975        |
| 1465.8267      | 14 | P  | 5  | 645.3394       | 323.1736        |
| 1594.8693      | 15 | E  | 4  | 548.2866       | 274.6472        |
| 1725.9097      | 16 | M  | 3  | 419.2440       | 210.1259        |
| 1838.9938      | 17 | L  | 2  | 288.2036       | 144.6057        |
|                | 18 | R  | 1  | 175.1195       | 88.0637         |

N-term:+29.04 K(1):+156.13  
K(12):+156.13

X-range:

0 - 0

MassTol: Y-zoom:

0. 1.

MassType:

☐AVG ☒MONO

Axis:

☒1 ☐2

Label:

☒I ☐M ☐-

Ions:

a ☐+ ☐2+ ☐3+

b ☒+ ☐2+ ☐3+

c ☐+ ☐2+ ☐3+

x ☐+ ☐2+ ☐3+

y ☒+ ☒2+ ☐3+

z ☐+ ☐2+ ☐3+

hide H<sub>2</sub>O/NH<sub>3</sub> ☐

zoom 112-122 ☐

GO

KEEEGIGEELAIHNR, MH+ 1779.9241, m/z 445.7365  
L OS G17 P120811 220811-s1.03515.03515.4.dta

scan 3515; 9.6e+000

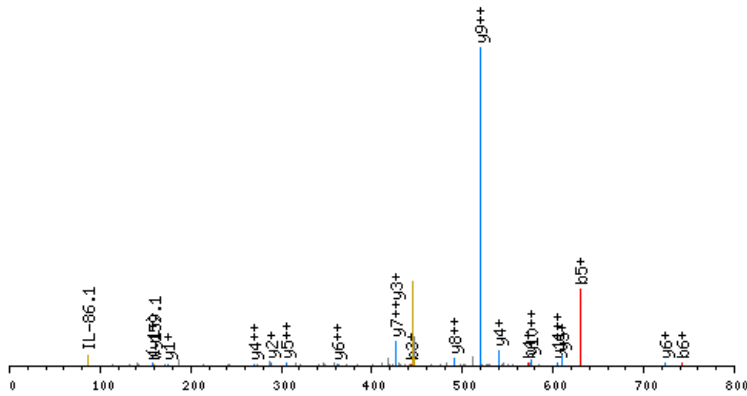

click image to zoom in; click top corners to zoom out

[precursor±]

scan 3513; 445.7 m/z; 1.4e+001

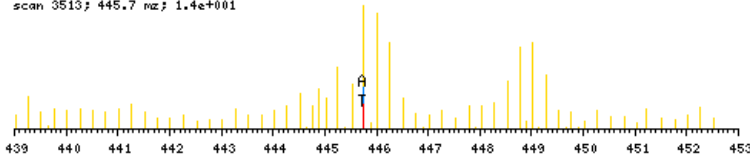

zoomed in precursor plot; T=theoretical m/z, A=acquired m/z

| b <sup>+</sup> | #  | AA | #  | y <sup>+</sup> | y <sup>2+</sup> |
|----------------|----|----|----|----------------|-----------------|
| 185.1654       | 1  | K  | 15 |                |                 |
| 314.2080       | 2  | E  | 14 | 1595.7665      | 798.3872        |
| 443.2506       | 3  | E  | 13 | 1466.7239      | 733.8659        |
| 572.2932       | 4  | E  | 12 | 1337.6814      | 669.3446        |
| 629.3146       | 5  | G  | 11 | 1208.6388      | 604.8233        |
| 742.3987       | 6  | I  | 10 | 1151.6173      | 576.3126        |
| 799.4202       | 7  | G  | 9  | 1038.5332      | 519.7705        |
| 928.4628       | 8  | E  | 8  | 981.5118       | 491.2598        |
| 1057.5054      | 9  | E  | 7  | 852.4692       | 426.7385        |
| 1170.5894      | 10 | L  | 6  | 723.4266       | 362.2172        |
| 1241.6265      | 11 | A  | 5  | 610.3425       | 305.6752        |
| 1354.7106      | 12 | I  | 4  | 539.3054       | 270.1566        |
| 1491.7695      | 13 | H  | 3  | 426.2213       | 213.6146        |
| 1605.8124      | 14 | N  | 2  | 289.1624       | 145.0851        |
|                | 15 | R  | 1  | 175.1195       | 88.0637         |

N-term:+29.04 K(1):+156.13

X-range:

0 - 0

MassTol: Y-zoom:

0. 1.

MassType:

☐AVG ☒MONO

Axis:

☒1 ☐2

Label:

☒I ☐M ☐-

Ions:

a ☐+ ☐2+ ☐3+

b ☒+ ☐2+ ☐3+

c ☐+ ☐2+ ☐3+

x ☐+ ☐2+ ☐3+

y ☒+ ☒2+ ☐3+

z ☐+ ☐2+ ☐3+

hide H<sub>2</sub>O/NH<sub>3</sub> ☐

zoom 112-122 ☐

GO

KEEFKNGKGFSSVADTPELQR, MH+ 2806.6840, m/z 702.4265  
H OS G19 P120811 220811-s1.03520.03520.4.dta

scan 3520; 5.7e+000

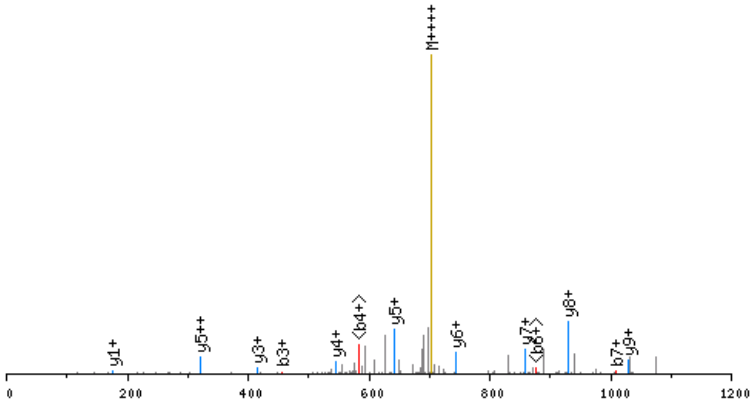

click image to zoom in; click top corners to zoom out [\[precursor±\]](#)

scan 3516; 702.4 m/z; 5.4e+000

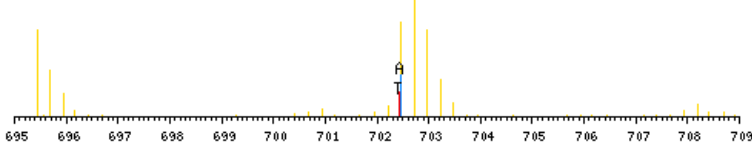

zoomed in precursor plot; T=theoretical m/z, A=acquired m/z

| b <sup>+</sup> | #  | AA | #  | y <sup>+</sup> | y <sup>2+</sup> |
|----------------|----|----|----|----------------|-----------------|
| 197.2290       | 1  | K  | 23 |                |                 |
| 326.2716       | 2  | E  | 22 | 2610.4629      | 1305.7353       |
| 455.3142       | 3  | E  | 21 | 2481.4203      | 1241.2140       |
| 602.3826       | 4  | F  | 20 | 2352.3777      | 1176.6927       |
| 731.4252       | 5  | E  | 19 | 2205.3093      | 1103.1585       |
| 893.5833       | 6  | K  | 18 | 2076.2667      | 1038.6372       |
| 1007.6262      | 7  | N  | 17 | 1914.1086      | 957.5582        |
| 1169.7843      | 8  | K  | 16 | 1800.0656      | 900.5367        |
| 1226.8058      | 9  | G  | 15 | 1637.9075      | 819.4577        |
| 1388.9639      | 10 | K  | 14 | 1580.8861      | 790.9469        |
| 1445.9853      | 11 | G  | 13 | 1418.7280      | 709.8679        |
| 1593.0538      | 12 | F  | 12 | 1361.7065      | 681.3572        |
| 1680.0858      | 13 | S  | 11 | 1214.6381      | 607.8230        |
| 1779.1542      | 14 | V  | 10 | 1127.6061      | 564.3069        |
| 1878.2226      | 15 | V  | 9  | 1028.5376      | 514.7727        |
| 1949.2597      | 16 | A  | 8  | 929.4692       | 465.2385        |
| 2064.2867      | 17 | D  | 7  | 858.4321       | 429.7200        |
| 2165.3344      | 18 | T  | 6  | 743.4052       | 372.2065        |
| 2262.3871      | 19 | P  | 5  | 642.3575       | 321.6827        |
| 2391.4297      | 20 | E  | 4  | 545.3047       | 273.1563        |
| 2504.5138      | 21 | L  | 3  | 416.2621       | 208.6350        |
| 2632.5724      | 22 | Q  | 2  | 303.1781       | 152.0930        |
|                | 23 | R  | 1  | 175.1195       | 88.0637         |

N-term:+35.07 K(1):+162.16  
K(6):+162.16 K(8):+162.16  
K(10):+162.16

X-range:

0 - 0

MassTol: Y-zoom:

0. 1.

MassType:

☐ AVG ☒ MONO

Axis:

☒ 1 ☐ 2

Label:

☒ I ☐ M ☐ -

Ions:

a ☐ + ☐ 2+ ☐ 3+

b ☒ + ☐ 2+ ☐ 3+

c ☐ + ☐ 2+ ☐ 3+

x ☐ + ☐ 2+ ☐ 3+

y ☒ + ☒ 2+ ☐ 3+

z ☐ + ☐ 2+ ☐ 3+

hide H<sub>2</sub>O/NH<sub>3</sub> ☐

zoom 112-122 ☐

GO

KEELAAAMVR, MH+ 1185.7302, m/z 395.9149  
H OS G16 P120811 220811-s1.02550.02550.3.dta

scan 2550; 2.9e+001

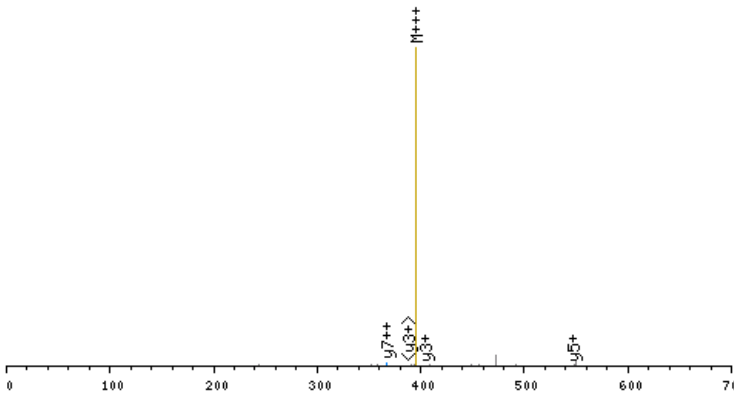

click image to zoom in; click top corners to zoom out

[precursor±]

scan 2548; 395.9 m/z; 5.9e+000

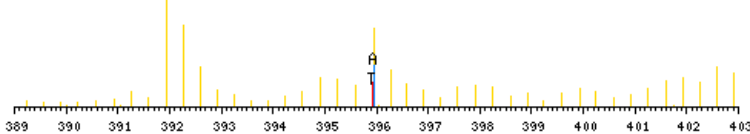

zoomed in precursor plot; T=theoretical m/z, A=acquired m/z

| b <sup>+</sup> | #  | AA | #  | y <sup>+</sup> | y <sup>2+</sup> |
|----------------|----|----|----|----------------|-----------------|
| 197.2290       | 1  | K  | 10 |                |                 |
| 326.2716       | 2  | E  | 9  | 989.5090       | 495.2584        |
| 455.3142       | 3  | E  | 8  | 860.4664       | 430.7371        |
| 568.3983       | 4  | L  | 7  | 731.4238       | 366.2158        |
| 639.4354       | 5  | A  | 6  | 618.3397       | 309.6738        |
| 710.4725       | 6  | A  | 5  | 547.3026       | 274.1552        |
| 781.5096       | 7  | A  | 4  | 476.2655       | 238.6367        |
| 912.5501       | 8  | M  | 3  | 405.2284       | 203.1181        |
| 1011.6185      | 9  | V  | 2  | 274.1879       | 137.5979        |
|                | 10 | R  | 1  | 175.1195       | 88.0637         |

N-term:+35.07 K(1):+162.16

X-range:

0 - 0

MassTol: Y-zoom:

0. 1.

MassType:

☐AVG ☒MONO

Axis:

☒1 ☐2

Label:

☒I ☐M ☐-

Ions:

a ☐+ ☐2+ ☐3+

b ☒+ ☐2+ ☐3+

c ☐+ ☐2+ ☐3+

x ☐+ ☐2+ ☐3+

y ☒+ ☒2+ ☐3+

z ☐+ ☐2+ ☐3+

hide H<sub>2</sub>O/NH<sub>3</sub> ☐

zoom 112-122 ☐

GO

KEGEDSSVIHYDDKAIER, MH+ 2175.0934, m/z 544.5288  
L OS G18 P120811 220811-s1.03279.03279.4.dta

scan 3279; 5.5e+000

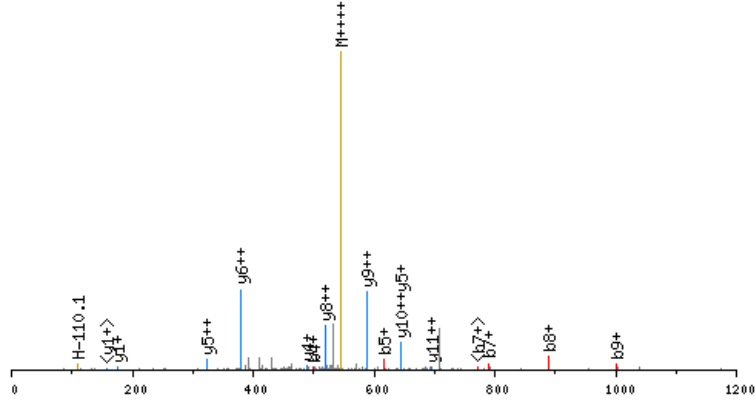

click image to zoom in; click top corners to zoom out [\[precursor±\]](#)

scan 3276; 544.5 m/z; 5.4e+000

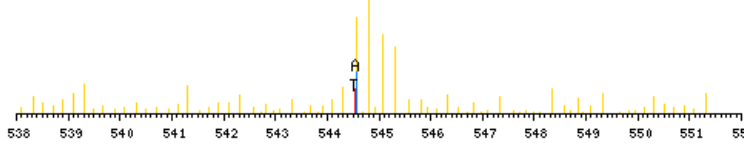

zoomed in precursor plot; T=theoretical m/z, A=acquired m/z

| b <sup>+</sup> | #  | AA | #  | y <sup>+</sup> | y <sup>2+</sup> |
|----------------|----|----|----|----------------|-----------------|
| 185.1654       | 1  | K  | 18 |                |                 |
| 314.2080       | 2  | E  | 17 | 1990.9358      | 995.9718        |
| 371.2295       | 3  | G  | 16 | 1861.8932      | 931.4505        |
| 500.2721       | 4  | E  | 15 | 1804.8718      | 902.9398        |
| 615.2990       | 5  | D  | 14 | 1675.8292      | 838.4185        |
| 702.3310       | 6  | S  | 13 | 1560.8022      | 780.9050        |
| 789.3630       | 7  | S  | 12 | 1473.7702      | 737.3890        |
| 888.4315       | 8  | V  | 11 | 1386.7382      | 693.8730        |
| 1001.5155      | 9  | I  | 10 | 1287.6698      | 644.3388        |
| 1138.5744      | 10 | H  | 9  | 1174.5857      | 587.7968        |
| 1301.6378      | 11 | Y  | 8  | 1037.5268      | 519.2673        |
| 1416.6647      | 12 | D  | 7  | 874.4635       | 437.7356        |
| 1531.6917      | 13 | D  | 6  | 759.4365       | 380.2222        |
| 1687.8180      | 14 | K  | 5  | 644.4096       | 322.7087        |
| 1758.8551      | 15 | A  | 4  | 488.2833       | 244.6455        |
| 1871.9391      | 16 | I  | 3  | 417.2462       | 209.1270        |
| 2000.9817      | 17 | E  | 2  | 304.1621       | 152.5850        |
|                | 18 | R  | 1  | 175.1195       | 88.0637         |

N-term:+29.04 K(1):+156.13  
K(14):+156.13

N-term: +35.07 K(1): +162.16  
C(12): +160.03

X-range:

0 - 0

MassTol: Y-zoom:

0. 1.

MassType:

☐ AVG ☒ MONO

Axis:

☒ 1 ☐ 2

Label:

☒ I ☐ M ☐ -

Ions:

a ☐ + ☐ 2+ ☐ 3+

b ☒ + ☐ 2+ ☐ 3+

c ☐ + ☐ 2+ ☐ 3+

x ☐ + ☐ 2+ ☐ 3+

y ☒ + ☒ 2+ ☐ 3+

z ☐ + ☐ 2+ ☐ 3+

hide H<sub>2</sub>O/NH<sub>3</sub> ☐

zoom 112-122 ☐

GO

KELDPVQKLFVDKIR, MH+ 1964.3221, m/z 491.8360  
H OS G18 P120811 220811-s1.05843.05843.4.dta

scan 5843; 7.6e+000

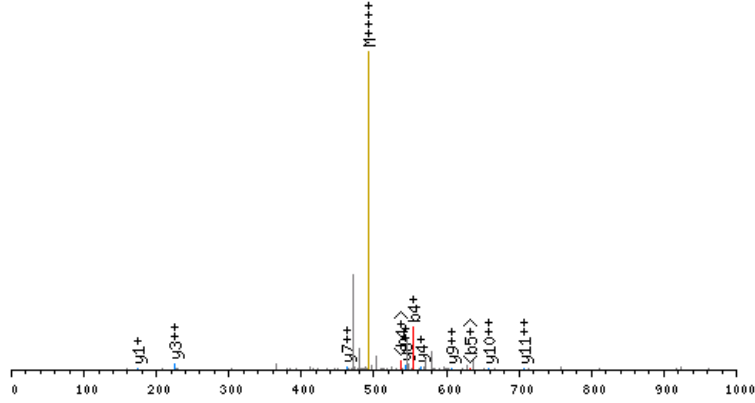

click image to zoom in; click top corners to zoom out [\[precursor±\]](#)

scan 5841; 491.8 mz; 4.9e+000

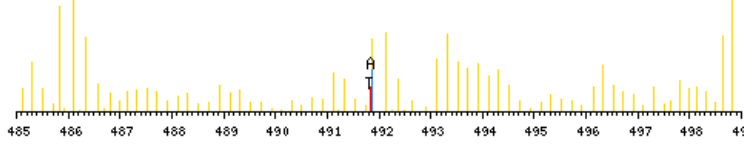

zoomed in precursor plot; T=theoretical m/z, A=acquired m/z

| b <sup>+</sup> | #  | AA | #  | y <sup>+</sup> | y <sup>2+</sup> |
|----------------|----|----|----|----------------|-----------------|
| 197.2290       | 1  | K  | 15 |                |                 |
| 326.2716       | 2  | E  | 14 | 1768.1010      | 884.5544        |
| 439.3557       | 3  | L  | 13 | 1639.0584      | 820.0331        |
| 554.3826       | 4  | D  | 12 | 1525.9743      | 763.4911        |
| 651.4354       | 5  | P  | 11 | 1410.9474      | 705.9776        |
| 750.5038       | 6  | V  | 10 | 1313.8946      | 657.4512        |
| 878.5624       | 7  | Q  | 9  | 1214.8262      | 607.9170        |
| 1040.7205      | 8  | K  | 8  | 1086.7676      | 543.8877        |
| 1153.8045      | 9  | L  | 7  | 924.6095       | 462.8087        |
| 1300.8729      | 10 | F  | 6  | 811.5254       | 406.2666        |
| 1399.9413      | 11 | V  | 5  | 664.4570       | 332.7324        |
| 1514.9683      | 12 | D  | 4  | 565.3886       | 283.1982        |
| 1677.1264      | 13 | K  | 3  | 450.3617       | 225.6847        |
| 1790.2105      | 14 | I  | 2  | 288.2036       | 144.6057        |
|                | 15 | R  | 1  | 175.1195       | 88.0637         |

N-term:+35.07 K(1):+162.16  
K(8):+162.16 K(13):+162.16

X-range:

0 - 0

MassTol: Y-zoom:

0. 1.

MassType:

☐ AVG ☒ MONO

Axis:

☒ 1 ☐ 2

Label:

☒ I ☐ M ☐ -

Ions:

a ☐ + ☐ 2+ ☐ 3+

b ☒ + ☐ 2+ ☐ 3+

c ☐ + ☐ 2+ ☐ 3+

x ☐ + ☐ 2+ ☐ 3+

y ☒ + ☒ 2+ ☐ 3+

z ☐ + ☐ 2+ ☐ 3+

hide H<sub>2</sub>O/NH<sub>3</sub> ☐

zoom 112-122 ☐

GO

KELEDMNQKLFDLR, MH+ 1881.1004, m/z 471.0306  
H OS G17 P120811 220811-s1.05561.05561.4.dta

scan 5561; 2.4e+000

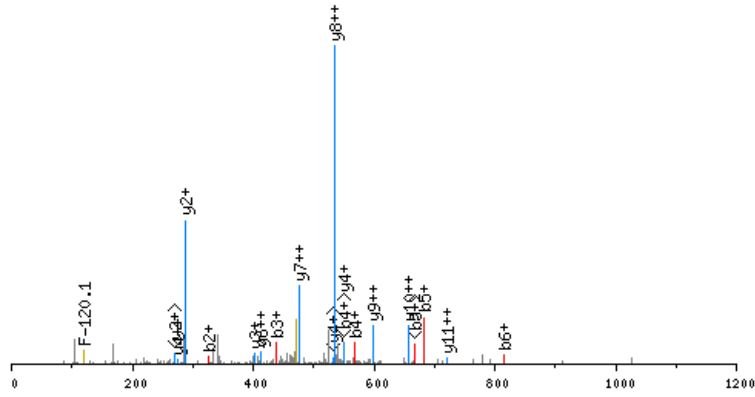

click image to zoom in; click top corners to zoom out [\[precursor±\]](#)

scan 5558; 471.0 m/z; 8.1e+000

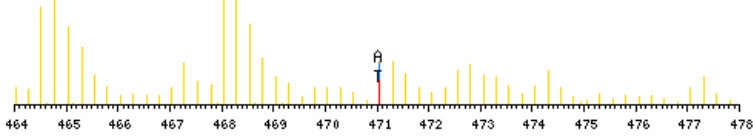

zoomed in precursor plot; T=theoretical m/z, A=acquired m/z

| b <sup>+</sup> | #  | AA | #  | y <sup>+</sup> | y <sup>2+</sup> |
|----------------|----|----|----|----------------|-----------------|
| 197.2290       | 1  | K  | 14 |                |                 |
| 326.2716       | 2  | E  | 13 | 1684.8793      | 842.9435        |
| 439.3557       | 3  | L  | 12 | 1555.8367      | 778.4223        |
| 568.3983       | 4  | E  | 11 | 1442.7526      | 721.8802        |
| 683.4252       | 5  | D  | 10 | 1313.7100      | 657.3589        |
| 814.4657       | 6  | M  | 9  | 1198.6831      | 599.8455        |
| 928.5086       | 7  | N  | 8  | 1067.6426      | 534.3252        |
| 1056.5672      | 8  | Q  | 7  | 953.5997       | 477.3037        |
| 1218.7253      | 9  | K  | 6  | 825.5411       | 413.2745        |
| 1331.8093      | 10 | L  | 5  | 663.3830       | 332.1954        |
| 1478.8778      | 11 | F  | 4  | 550.2989       | 275.6534        |
| 1593.9047      | 12 | D  | 3  | 403.2305       | 202.1192        |
| 1706.9888      | 13 | L  | 2  | 288.2036       | 144.6057        |
|                | 14 | R  | 1  | 175.1195       | 88.0637         |

N-term:+35.07 K(1):+162.16  
K(9):+162.16

X-range:

0 - 0

0. 1.

☐ AVG ☒ MONO

1 2



a  + 2 + 3 +

b ☒ 1+ ☐ 2+ ☐ 3+

Page 23

c

| x | 1 | 2 | 3 |
|---|---|---|---|
|---|---|---|---|

**y** ☒+ ☒2+ ☐3+

$$z^1 + z^2 + z^3 + \dots$$
hide  $\text{H}_2\text{O}/\text{NH}_3$  ☐

zoom 112-122

GO

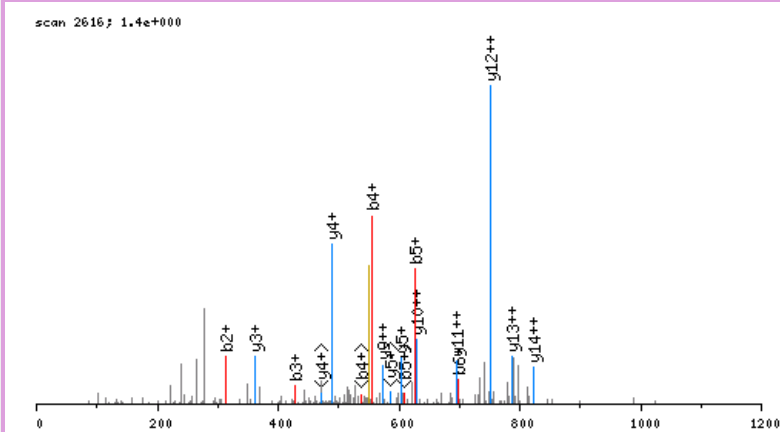

click image to zoom in; click top corners to zoom out      [precursor±]

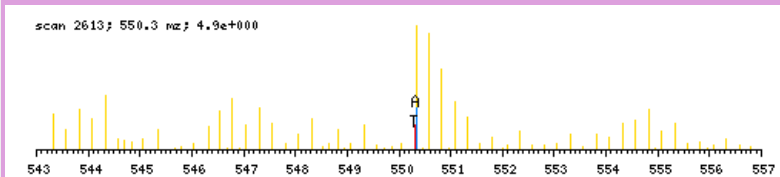

zoomed in precursor plot; T=theoretical m/z, A=acquired m/z

| $b^+$     | #  | AA | #  | $y^+$     | $y^{2+}$  |
|-----------|----|----|----|-----------|-----------|
| 185.1654  | 1  | K  | 18 |           |           |
| 314.2080  | 2  | E  | 17 | 2014.0206 | 1007.5142 |
| 427.2921  | 3  | L  | 16 | 1884.9780 | 942.9929  |
| 555.3506  | 4  | Q  | 15 | 1771.8939 | 886.4509  |
| 626.3877  | 5  | A  | 14 | 1643.8353 | 822.4216  |
| 697.4249  | 6  | A  | 13 | 1572.7982 | 786.9030  |
| 811.4678  | 7  | N  | 12 | 1501.7611 | 751.3845  |
| 940.5104  | 8  | E  | 11 | 1387.7182 | 694.3630  |
| 1054.5533 | 9  | N  | 10 | 1258.6756 | 629.8417  |
| 1210.6796 | 10 | K  | 9  | 1144.6326 | 572.8202  |
| 1338.7382 | 11 | Q  | 8  | 988.5063  | 494.7571  |
| 1466.7968 | 12 | Q  | 7  | 860.4478  | 430.7278  |
| 1595.8394 | 13 | E  | 6  | 732.3892  | 366.6985  |
| 1708.9234 | 14 | L  | 5  | 603.3466  | 302.1772  |
| 1837.9660 | 15 | E  | 4  | 490.2625  | 245.6352  |
| 1924.9980 | 16 | S  | 3  | 361.2199  | 181.1139  |
| 2024.0665 | 17 | V  | 2  | 274.1879  | 137.5979  |
|           | 18 | R  | 1  | 175.1195  | 88.0637   |

N-term:+29.04 K(1):+156.13  
K(10):+156.13

X-range:

0 - 0

MassTol: Y-zoom:

0. 1.

MassType:

☐ AVG ☒ MONO

Axis:

☒ 1 ☐ 2

Label:

☒ I ☐ M ☐ -

Ions:

a ☐ + ☐ 2+ ☐ 3+

b ☒ + ☐ 2+ ☐ 3+

c ☐ + ☐ 2+ ☐ 3+

x ☐ + ☐ 2+ ☐ 3+

y ☒ + ☒ 2+ ☐ 3+

z ☐ + ☐ 2+ ☐ 3+

hide H<sub>2</sub>O/NH<sub>3</sub> ☐

zoom 112-122 ☐

GO

KEPAAPVSIQR, MH+ 1251.7425, m/z 417.9190  
L OS G16 P120811 220811-s1.02619.02619.3.dta

scan 2619; 5.8e+000

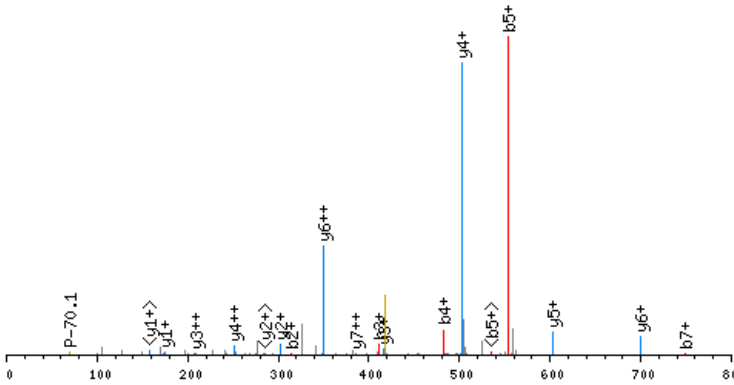

click image to zoom in; click top corners to zoom out [precursor±]

scan 2618; 417.9 m/z; 1.2e+001

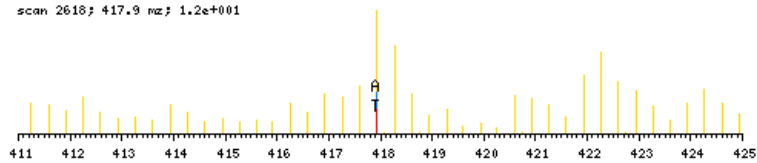

zoomed in precursor plot; T=theoretical m/z, A=acquired m/z

| b <sup>+</sup> | #  | AA | #  | y <sup>+</sup> | y <sup>2+</sup> |
|----------------|----|----|----|----------------|-----------------|
| 185.1654       | 1  | K  | 11 |                |                 |
| 314.2080       | 2  | E  | 10 | 1067.5849      | 534.2964        |
| 411.2608       | 3  | P  | 9  | 938.5423       | 469.7751        |
| 482.2979       | 4  | A  | 8  | 841.4896       | 421.2487        |
| 553.3350       | 5  | A  | 7  | 770.4525       | 385.7301        |
| 650.3877       | 6  | P  | 6  | 699.4153       | 350.2116        |
| 749.4562       | 7  | V  | 5  | 602.3626       | 301.6852        |
| 836.4882       | 8  | S  | 4  | 503.2942       | 252.1510        |
| 949.5723       | 9  | I  | 3  | 416.2621       | 208.6350        |
| 1077.6308      | 10 | Q  | 2  | 303.1781       | 152.0930        |
|                | 11 | R  | 1  | 175.1195       | 88.0637         |

N-term:+29.04 K(1):+156.13

X-range:

0 - 0

MassTol: Y-zoom:

0. 1.

MassType:

☐ AVG ☒ MONO

Axis:

☒ 1 ☐ 2

Label:

☒ I ☐ M ☐ -

Ions:

a ☐ + ☐ 2+ ☐ 3+

b ☒ + ☐ 2+ ☐ 3+

c ☐ + ☐ 2+ ☐ 3+

x ☐ + ☐ 2+ ☐ 3+

y ☒ + ☒ 2+ ☐ 3+

z ☐ + ☐ 2+ ☐ 3+

hide H<sub>2</sub>O/NH<sub>3</sub> ☐

zoom 112-122 ☐

GO

KEQQEDFKAEAFLLFDR, MH+ 2145.2081, m/z 537.0575  
H OS G17 P120811 220811-s1.06452.06452.4.dta

scan 6452; 2.3e+000

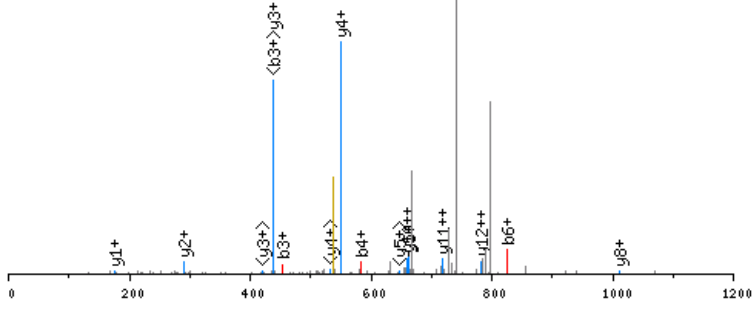

click image to zoom in; click top corners to zoom out [\[precursor±\]](#)

scan 6448; 537.1 m/z; 1.7e+000

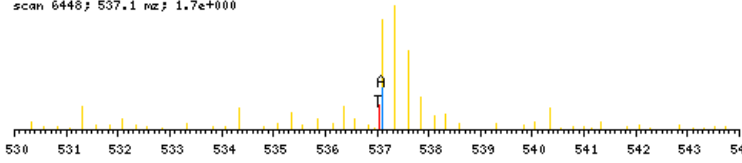

zoomed in precursor plot; T=theoretical m/z, A=acquired m/z

| b <sup>+</sup> | #  | AA | #  | y <sup>+</sup> | y <sup>2+</sup> |
|----------------|----|----|----|----------------|-----------------|
| 197.2290       | 1  | K  | 16 |                |                 |
| 326.2716       | 2  | E  | 15 | 1948.9869      | 974.9974        |
| 454.3302       | 3  | Q  | 14 | 1819.9443      | 910.4761        |
| 582.3887       | 4  | Q  | 13 | 1691.8857      | 846.4468        |
| 711.4313       | 5  | E  | 12 | 1563.8272      | 782.4175        |
| 826.4583       | 6  | D  | 11 | 1434.7846      | 717.8962        |
| 973.5267       | 7  | F  | 10 | 1319.7576      | 660.3827        |
| 1135.6848      | 8  | K  | 9  | 1172.6892      | 586.8485        |
| 1264.7274      | 9  | E  | 8  | 1010.5311      | 505.7695        |
| 1335.7645      | 10 | A  | 7  | 881.4885       | 441.2482        |
| 1482.8329      | 11 | F  | 6  | 810.4514       | 405.7296        |
| 1595.9170      | 12 | L  | 5  | 663.3830       | 332.1954        |
| 1709.0010      | 13 | L  | 4  | 550.2989       | 275.6534        |
| 1856.0695      | 14 | F  | 3  | 437.2149       | 219.1113        |
| 1971.0964      | 15 | D  | 2  | 290.1464       | 145.5771        |
|                | 16 | R  | 1  | 175.1195       | 88.0637         |

N-term:+35.07 K(1):+162.16  
K(8):+162.16

X-range:

0 - 0

MassTol: Y-zoom:

0. 1.

MassType:

☐ AVG ☒ MONO

Axis:

☒ 1 ☐ 2

Label:

☒ I ☐ M ☐ -

Ions:

a ☐ + ☐ 2+ ☐ 3+

b ☒ + ☐ 2+ ☐ 3+

c ☐ + ☐ 2+ ☐ 3+

x ☐ + ☐ 2+ ☐ 3+

y ☒ + ☒ 2+ ☐ 3+

z ☐ + ☐ 2+ ☐ 3+

hide H<sub>2</sub>O/NH<sub>3</sub> ☐

zoom 112-122 ☐

GO

KEVKCDMEVSCPEGYTCCR, MH+ 2492.0751, m/z 623.7742  
L\_OS\_G17\_P120811\_220811-s1.03252.03252.4.dta

scan 3252; 1.4e+000

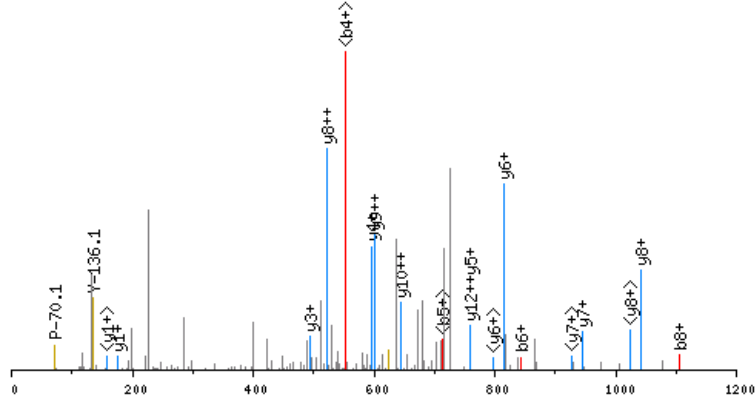

click image to zoom in; click top corners to zoom out

[precursor±]

scan 3248; 623.8 m/z; 8.3e+000

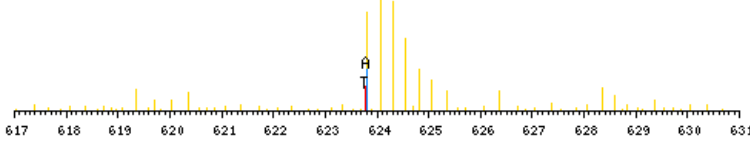

zoomed in precursor plot; T=theoretical m/z, A=acquired m/z

| b <sup>+</sup> | #  | AA | #  | y <sup>+</sup> | y <sup>2+</sup> |
|----------------|----|----|----|----------------|-----------------|
| 185.1654       | 1  | K  | 19 |                |                 |
| 314.2080       | 2  | E  | 18 | 2307.9175      | 1154.4627       |
| 413.2764       | 3  | V  | 17 | 2178.8749      | 1089.9414       |
| 569.4027       | 4  | K  | 16 | 2079.8065      | 1040.4072       |
| 729.4333       | 5  | C  | 15 | 1923.6802      | 962.3440        |
| 844.4603       | 6  | D  | 14 | 1763.6496      | 882.3287        |
| 975.5007       | 7  | M  | 13 | 1648.6226      | 824.8152        |
| 1104.5433      | 8  | E  | 12 | 1517.5822      | 759.2950        |
| 1203.6117      | 9  | V  | 11 | 1388.5396      | 694.7737        |
| 1290.6438      | 10 | S  | 10 | 1289.4712      | 645.2395        |
| 1450.6744      | 11 | C  | 9  | 1202.4391      | 601.7235        |
| 1547.7271      | 12 | P  | 8  | 1042.4085      | 521.7082        |
| 1676.7697      | 13 | E  | 7  | 945.3558       | 473.1818        |
| 1733.7912      | 14 | G  | 6  | 816.3132       | 408.6605        |
| 1896.8545      | 15 | Y  | 5  | 759.2917       | 380.1498        |
| 1997.9022      | 16 | T  | 4  | 596.2284       | 298.6181        |
| 2157.9328      | 17 | C  | 3  | 495.1807       | 248.0943        |
| 2317.9634      | 18 | C  | 2  | 335.1501       | 168.0790        |
|                | 19 | R  | 1  | 175.1195       | 88.0637         |

N-term:+29.04 K(1):+156.13  
K(4):+156.13 C(5):+160.03  
C(11):+160.03 C(17):+160.03  
C(18):+160.03

X-range:

0 - 0

MassTol: Y-zoom:

0. 1.

MassType:

☐ AVG ☒ MONO

Axis:

☒ 1 ☐ 2

Label:

☒ I ☐ M ☐ -

Ions:

a ☐ + ☐ 2+ ☐ 3+

b ☒ + ☐ 2+ ☐ 3+

c ☐ + ☐ 2+ ☐ 3+

x ☐ + ☐ 2+ ☐ 3+

y ☒ + ☒ 2+ ☐ 3+

z ☐ + ☐ 2+ ☐ 3+

hide H<sub>2</sub>O/NH<sub>3</sub> ☐

zoom 112-122 ☐

GO

KEVYENYPAYDLTER, MH+ 1958.0183, m/z 653.3443  
H OS G15 P120811 220811-s1.04139.04139.3.dta

scan 4139; 3.3e+000

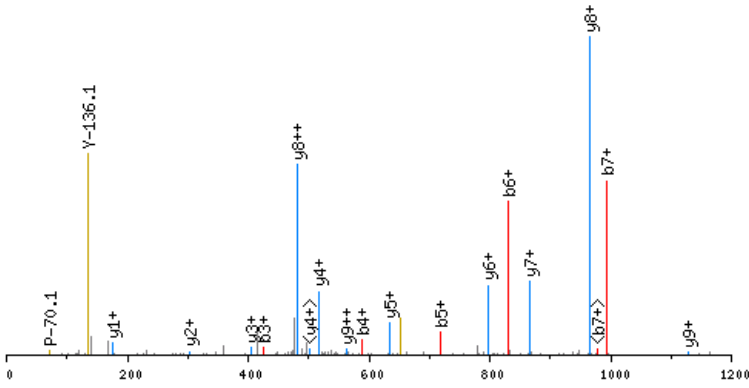

click image to zoom in; click top corners to zoom out

[precursor±]

scan 4136; 653.3 m/z; 1.1e+001

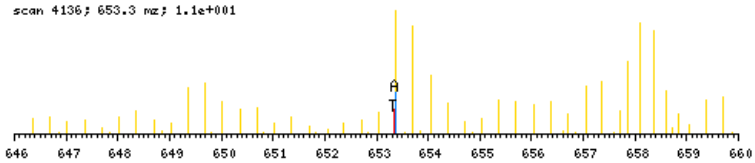

zoomed in precursor plot; T=theoretical m/z, A=acquired m/z

| b <sup>+</sup> | #  | AA | #  | y <sup>+</sup> | y <sup>2+</sup> |
|----------------|----|----|----|----------------|-----------------|
| 197.2290       | 1  | K  | 15 |                |                 |
| 326.2716       | 2  | E  | 14 | 1761.7972      | 881.4025        |
| 425.3400       | 3  | V  | 13 | 1632.7546      | 816.8812        |
| 588.4033       | 4  | Y  | 12 | 1533.6862      | 767.3470        |
| 717.4459       | 5  | E  | 11 | 1370.6228      | 685.8153        |
| 831.4889       | 6  | N  | 10 | 1241.5802      | 621.2940        |
| 994.5522       | 7  | Y  | 9  | 1127.5373      | 564.2726        |
| 1091.6049      | 8  | P  | 8  | 964.4740       | 482.7409        |
| 1162.6421      | 9  | A  | 7  | 867.4212       | 434.2145        |
| 1325.7054      | 10 | Y  | 6  | 796.3841       | 398.6960        |
| 1440.7323      | 11 | D  | 5  | 633.3208       | 317.1643        |
| 1553.8164      | 12 | L  | 4  | 518.2938       | 259.6508        |
| 1654.8641      | 13 | T  | 3  | 405.2098       | 203.1088        |
| 1783.9067      | 14 | E  | 2  | 304.1621       | 152.5850        |
|                | 15 | R  | 1  | 175.1195       | 88.0637         |

N-term:+35.07 K(1):+162.16

X-range:

0 - 0

MassTol: Y-zoom:

0. 1.

MassType:

☐ AVG ☒ MONO

Axis:

☒ 1 ☐ 2

Label:

☒ I ☐ M ☐ -

Ions:

a ☐ + ☐ 2+ ☐ 3+

b ☒ + ☐ 2+ ☐ 3+

c ☐ + ☐ 2+ ☐ 3+

x ☐ + ☐ 2+ ☐ 3+

y ☒ + ☒ 2+ ☐ 3+

z ☐ + ☐ 2+ ☐ 3+

hide H<sub>2</sub>O/NH<sub>3</sub> ☐

zoom 112-122 ☐

GO

KGDDSPVANGAEPAGQR, MH+ 1724.8568, m/z 575.6238  
L OS G13 P120811 220811-s1.03315.03315.3.dta

scan 3315; 2.6e+000

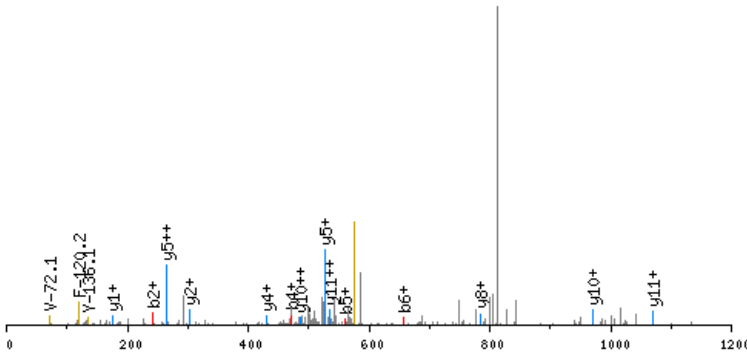

click image to zoom in; click top corners to zoom out [\[precursor±\]](#)

scan 3314; 575.6 m/z; 2.7e+001

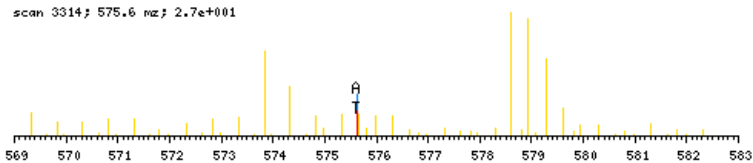

zoomed in precursor plot; T=theoretical m/z, A=acquired m/z

| b <sup>+</sup> | #  | AA | #  | y <sup>+</sup> | y <sup>2+</sup> |
|----------------|----|----|----|----------------|-----------------|
| 185.1654       | 1  | K  | 17 |                |                 |
| 242.1869       | 2  | G  | 16 | 1540.6992      | 770.8535        |
| 357.2138       | 3  | D  | 15 | 1483.6777      | 742.3428        |
| 472.2407       | 4  | D  | 14 | 1368.6508      | 684.8293        |
| 559.2728       | 5  | S  | 13 | 1253.6238      | 627.3158        |
| 656.3255       | 6  | P  | 12 | 1166.5918      | 583.7998        |
| 755.3940       | 7  | V  | 11 | 1069.5390      | 535.2734        |
| 826.4311       | 8  | A  | 10 | 970.4706       | 485.7392        |
| 940.4740       | 9  | N  | 9  | 899.4335       | 450.2207        |
| 997.4955       | 10 | G  | 8  | 785.3906       | 393.1992        |
| 1068.5326      | 11 | A  | 7  | 728.3691       | 364.6885        |
| 1197.5752      | 12 | E  | 6  | 657.3320       | 329.1699        |
| 1294.6279      | 13 | P  | 5  | 528.2894       | 264.6486        |
| 1365.6650      | 14 | A  | 4  | 431.2367       | 216.1222        |
| 1422.6865      | 15 | G  | 3  | 360.1995       | 180.6037        |
| 1550.7451      | 16 | Q  | 2  | 303.1781       | 152.0930        |
|                | 17 | R  | 1  | 175.1195       | 88.0637         |

N-term:+29.04 K(1):+156.13

X-range:

0 - 0

MassTol: Y-zoom:

0. 1.

MassType:

☐ AVG ☒ MONO

Axis:

☒ 1 ☐ 2

Label:

☒ I ☐ M ☐ -

Ions:

a ☐ + ☐ 2+ ☐ 3+

b ☒ + ☐ 2+ ☐ 3+

c ☐ + ☐ 2+ ☐ 3+

x ☐ + ☐ 2+ ☐ 3+

y ☒ + ☒ 2+ ☐ 3+

z ☐ + ☐ 2+ ☐ 3+

hide H<sub>2</sub>O/NH<sub>3</sub> ☐

zoom 112-122 ☐

GO

KGLTEVKIDEFPR, MH+ 1615.9424, m/z 404.7410  
L OS G17 P120811 220811-s1.04679.04679.4.dta

scan 4679; 2.5e+000

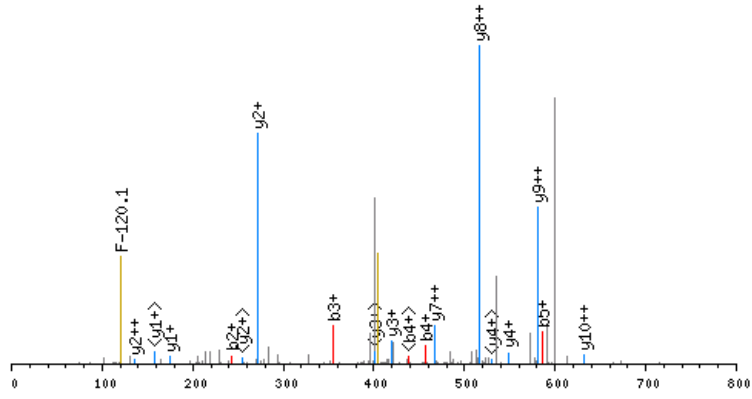

click image to zoom in; click top corners to zoom out [\[precursor±\]](#)

scan 4678; 404.7 m/z; 6.3e+000

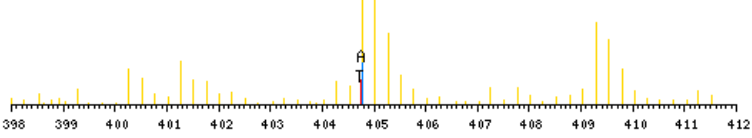

zoomed in precursor plot; T=theoretical m/z, A=acquired m/z

| b <sup>+</sup> | #  | AA | #  | y <sup>+</sup> | y <sup>2+</sup> |
|----------------|----|----|----|----------------|-----------------|
| 185.1654       | 1  | K  | 13 |                |                 |
| 242.1869       | 2  | G  | 12 | 1431.7848      | 716.3963        |
| 355.2709       | 3  | L  | 11 | 1374.7633      | 687.8856        |
| 456.3186       | 4  | T  | 10 | 1261.6793      | 631.3435        |
| 585.3612       | 5  | E  | 9  | 1160.6316      | 580.8197        |
| 684.4296       | 6  | V  | 8  | 1031.5890      | 516.2984        |
| 840.5559       | 7  | K  | 7  | 932.5206       | 466.7642        |
| 953.6400       | 8  | I  | 6  | 776.3943       | 388.7011        |
| 1068.6669      | 9  | D  | 5  | 663.3102       | 332.1590        |
| 1197.7095      | 10 | E  | 4  | 548.2833       | 274.6455        |
| 1344.7779      | 11 | F  | 3  | 419.2407       | 210.1243        |
| 1441.8307      | 12 | P  | 2  | 272.1723       | 136.5900        |
|                | 13 | R  | 1  | 175.1195       | 88.0637         |

N-term:+29.04 K(1):+156.13  
K(7):+156.13

X-range:

0 - 0

MassTol: Y-zoom:

0. 1.

MassType:

☐ AVG ☒ MONO

Axis:

☒ 1 ☐ 2

Label:

☒ I ☐ M ☐ -

Ions:

a ☐ + ☐ 2+ ☐ 3+

b ☒ + ☐ 2+ ☐ 3+

c ☐ + ☐ 2+ ☐ 3+

x ☐ + ☐ 2+ ☐ 3+

y ☒ + ☒ 2+ ☐ 3+

z ☐ + ☐ 2+ ☐ 3+

hide H<sub>2</sub>O/NH<sub>3</sub> ☐

zoom 112-122 ☐

GO

KGPKLKGEIDASVPMEADLR, MH+ 2395.3271, m/z 599.5872  
L OS G18 P120811 220811-s1.05450.05450.4.dta

scan 5450; 1.7e+000

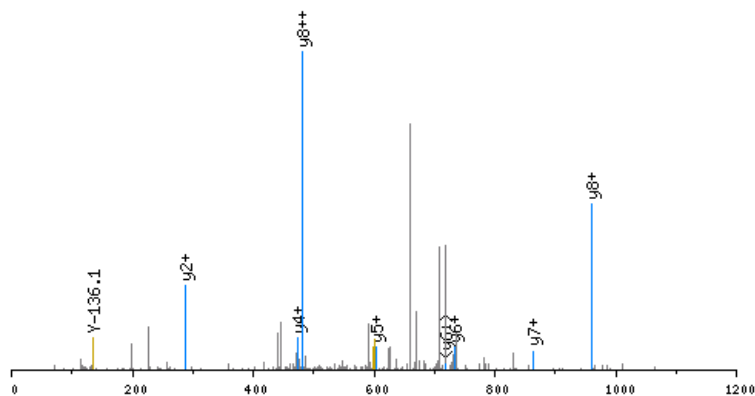

click image to zoom in; click top corners to zoom out

[precursor±]

scan 5446; 599.6 m/z; 3.3e+000

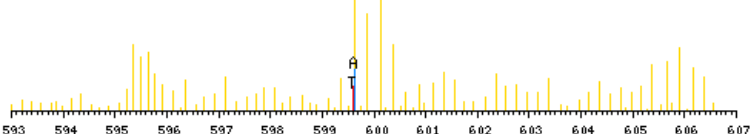

zoomed in precursor plot; T=theoretical m/z, A=acquired m/z

| b <sup>+</sup> | #  | AA | #  | y <sup>+</sup> | y <sup>2+</sup> |
|----------------|----|----|----|----------------|-----------------|
| 185.1654       | 1  | K  | 21 |                |                 |
| 242.1869       | 2  | G  | 20 | 2211.1696      | 1106.0887       |
| 339.2396       | 3  | P  | 19 | 2154.1481      | 1077.5780       |
| 495.3659       | 4  | K  | 18 | 2057.0953      | 1029.0516       |
| 608.4500       | 5  | L  | 17 | 1900.9690      | 950.9884        |
| 764.5763       | 6  | K  | 16 | 1787.8850      | 894.4464        |
| 821.5978       | 7  | G  | 15 | 1631.7587      | 816.3833        |
| 950.6403       | 8  | E  | 14 | 1574.7372      | 787.8725        |
| 1063.7244      | 9  | I  | 13 | 1445.6946      | 723.3512        |
| 1178.7514      | 10 | D  | 12 | 1332.6106      | 666.8092        |
| 1249.7885      | 11 | A  | 11 | 1217.5836      | 609.2957        |
| 1336.8205      | 12 | S  | 10 | 1146.5465      | 573.7772        |
| 1435.8889      | 13 | V  | 9  | 1059.5145      | 530.2611        |
| 1532.9417      | 14 | P  | 8  | 960.4461       | 480.7269        |
| 1661.9843      | 15 | E  | 7  | 863.3933       | 432.2006        |
| 1793.0248      | 16 | M  | 6  | 734.3507       | 367.6793        |
| 1922.0673      | 17 | E  | 5  | 603.3102       | 302.1590        |
| 1993.1045      | 18 | A  | 4  | 474.2676       | 237.6377        |
| 2108.1314      | 19 | D  | 3  | 403.2305       | 202.1192        |
| 2221.2155      | 20 | L  | 2  | 288.2036       | 144.6057        |
|                | 21 | R  | 1  | 175.1195       | 88.0637         |

N-term:+29.04 K(1):+156.13  
K(4):+156.13 K(6):+156.13

X-range:

0 - 0

MassTol: Y-zoom:

0. 1.

MassType:

☐AVG ☒MONO

Axis:

☒1 ☐2

Label:

☒I ☐M ☐-

Ions:

a ☐+ ☐2+ ☐3+

b ☒+ ☐2+ ☐3+

c ☐+ ☐2+ ☐3+

x ☐+ ☐2+ ☐3+

y ☒+ ☒2+ ☐3+

z ☐+ ☐2+ ☐3+

hide H<sub>2</sub>O/NH<sub>3</sub> ☐

zoom 112-122 ☐

GO

KGPTLLDGDLPQENVLQR, MH+ 2178.1770, m/z 545.2997  
L OS G15 P120811 220811-s1.05234.05234.4.dta

scan 5234; 2.8e+000

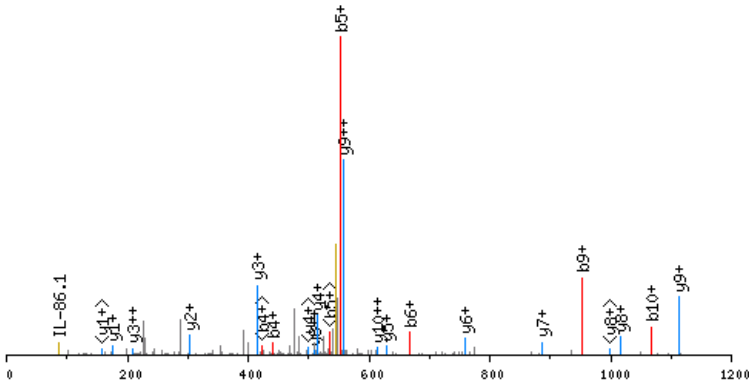

click image to zoom in; click top corners to zoom out

[precursor±]

scan 5231; 545.3 m/z; 5.2e+000

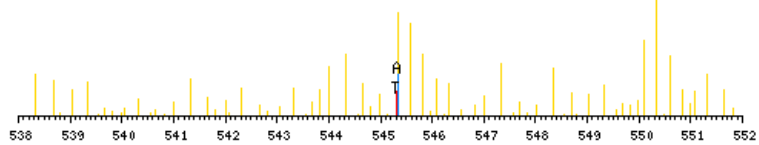

X-range:

0 - 0

MassTol: Y-zoom:

0. 1.

MassType:

☐AVG ☒MONO

Axis:

☒1 ☐2

Label:

☒I ☐M ☐-

Ions:

a ☐+ ☐2+ ☐3+

b ☒+ ☐2+ ☐3+

c ☐+ ☐2+ ☐3+

x ☐+ ☐2+ ☐3+

y ☒+ ☒2+ ☐3+

z ☐+ ☐2+ ☐3+

hide H<sub>2</sub>O/NH<sub>3</sub> ☐

zoom 112-122 ☐

GO

KGVAINMVTEDKR, MH+ 1673.9261, m/z 419.2370  
L OS G17 P120811 220811-s1.03161.03161.4.dta

scan 3161: 1.5e+000

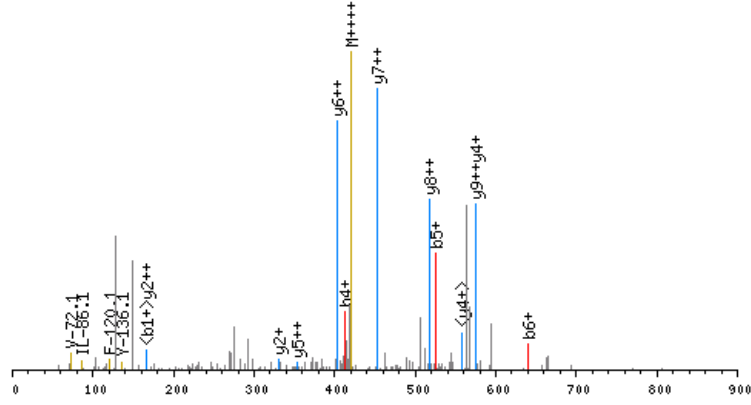

click image to zoom in; click top corners to zoom out [\[precursor±\]](#)

scan 3158: 419.2 m/z; 8.1e+000

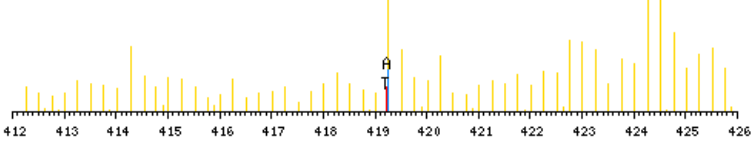

zoomed in precursor plot; T=theoretical m/z, A=acquired m/z

| b <sup>+</sup> | #  | AA | #  | y <sup>+</sup> | y <sup>2+</sup> |
|----------------|----|----|----|----------------|-----------------|
| 185.1654       | 1  | K  | 14 |                |                 |
| 242.1869       | 2  | G  | 13 | 1489.7685      | 745.3882        |
| 341.2553       | 3  | V  | 12 | 1432.7470      | 716.8774        |
| 412.2924       | 4  | A  | 11 | 1333.6786      | 667.3432        |
| 525.3765       | 5  | I  | 10 | 1262.6415      | 631.8247        |
| 639.4194       | 6  | N  | 9  | 1149.5574      | 575.2826        |
| 770.4599       | 7  | M  | 8  | 1035.5145      | 518.2612        |
| 869.5283       | 8  | V  | 7  | 904.4740       | 452.7409        |
| 970.5760       | 9  | T  | 6  | 805.4056       | 403.2067        |
| 1099.6186      | 10 | E  | 5  | 704.3579       | 352.6829        |
| 1228.6611      | 11 | E  | 4  | 575.3153       | 288.1616        |
| 1343.6881      | 12 | D  | 3  | 446.2727       | 223.6403        |
| 1499.8144      | 13 | K  | 2  | 331.2458       | 166.1268        |
|                | 14 | R  | 1  | 175.1195       | 88.0637         |

N-term:+29.04 K(1):+156.13  
K(13):+156.13



X-range:

0 - 0

MassTol: Y-zoom:

0. 1.

MassType:

☐AVG ☒MONO

Axis:

☒1 ☐2

Label:

☒I ☐M ☐-

Ions:

a ☐+ ☐2+ ☐3+

b ☒+ ☐2+ ☐3+

c ☐+ ☐2+ ☐3+

x ☐+ ☐2+ ☐3+

y ☒+ ☒2+ ☐3+

z ☐+ ☐2+ ☐3+

hide H<sub>2</sub>O/NH<sub>3</sub> ☐

zoom 112-122 ☐

GO

KIGGHGAEYGAELER, MH+ 1725.9560, m/z 432.2445  
H OS G18 P120811 220811-s1.02899.02899.4.dta

scan 2899; 5.5e+000

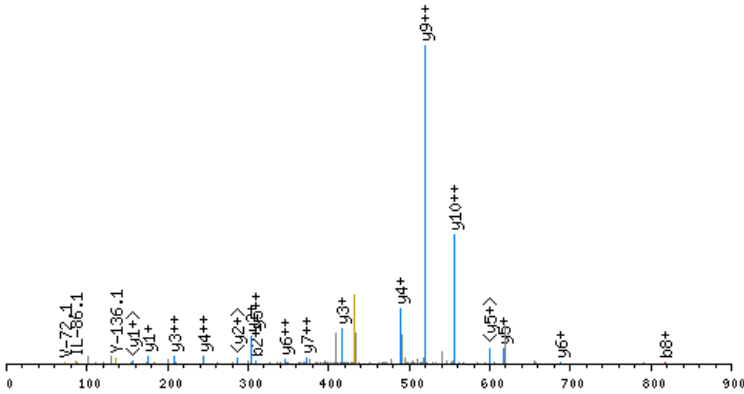

click image to zoom in; click top corners to zoom out

[precursor±]

scan 2896; 432.2 m/z; 1.0e+001

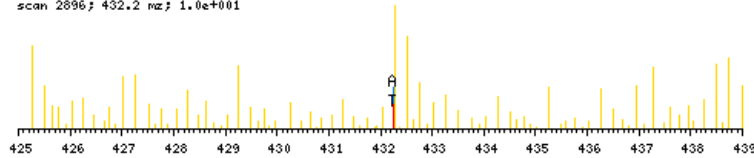

zoomed in precursor plot; T=theoretical m/z, A=acquired m/z

| b <sup>+</sup> | #  | AA | #  | y <sup>+</sup> | y <sup>2+</sup> |
|----------------|----|----|----|----------------|-----------------|
| 197.2290       | 1  | K  | 16 |                |                 |
| 310.3131       | 2  | I  | 15 | 1529.7348      | 765.3713        |
| 367.3345       | 3  | G  | 14 | 1416.6508      | 708.8293        |
| 424.3560       | 4  | G  | 13 | 1359.6293      | 680.3186        |
| 561.4149       | 5  | H  | 12 | 1302.6079      | 651.8078        |
| 618.4364       | 6  | G  | 11 | 1165.5489      | 583.2784        |
| 689.4735       | 7  | A  | 10 | 1108.5275      | 554.7677        |
| 818.5161       | 8  | E  | 9  | 1037.4904      | 519.2491        |
| 981.5794       | 9  | Y  | 8  | 908.4478       | 454.7278        |
| 1038.6009      | 10 | G  | 7  | 745.3844       | 373.1961        |
| 1109.6380      | 11 | A  | 6  | 688.3630       | 344.6854        |
| 1238.6806      | 12 | E  | 5  | 617.3259       | 309.1668        |
| 1309.7177      | 13 | A  | 4  | 488.2833       | 244.6455        |
| 1422.8018      | 14 | L  | 3  | 417.2462       | 209.1270        |
| 1551.8443      | 15 | E  | 2  | 304.1621       | 152.5850        |
|                | 16 | R  | 1  | 175.1195       | 88.0637         |

N-term:+35.07 K(1):+162.16

X-range:

0 - 0

MassTol: Y-zoom:

0. 1.

MassType:

☐ AVG ☒ MONO

Axis:

☒ 1 ☐ 2

Label:

☒ I ☐ M ☐ -

Ions:

a ☐ + ☐ 2+ ☐ 3+

b ☒ + ☐ 2+ ☐ 3+

c ☐ + ☐ 2+ ☐ 3+

x ☐ + ☐ 2+ ☐ 3+

y ☒ + ☒ 2+ ☐ 3+

z ☐ + ☐ 2+ ☐ 3+

hide H<sub>2</sub>O/NH<sub>3</sub> ☐

zoom 112-122 ☐

GO

KILDSVGIEADDDR, MH+ 1601.8387, m/z 534.6177  
L OS G16 P120811 220811-s1.04005.04005.3.dta

scan 4005; 1.8e+000

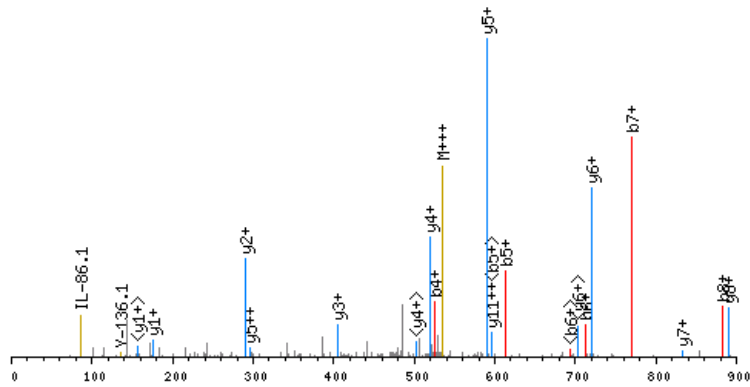

click image to zoom in; click top corners to zoom out

[precursor±]

scan 4003; 534.6 m/z; 8.1e+000

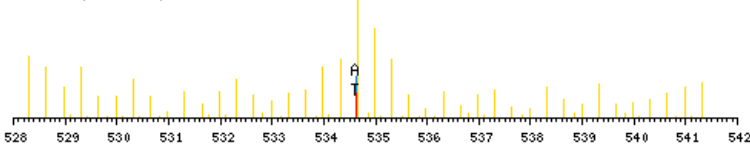

zoomed in precursor plot; T=theoretical m/z, A=acquired m/z

| b <sup>+</sup> | #  | AA | #  | y <sup>+</sup> | y <sup>2+</sup> |
|----------------|----|----|----|----------------|-----------------|
| 185.1654       | 1  | K  | 14 |                |                 |
| 298.2495       | 2  | I  | 13 | 1417.6811      | 709.3445        |
| 411.3335       | 3  | L  | 12 | 1304.5970      | 652.8024        |
| 526.3605       | 4  | D  | 11 | 1191.5130      | 596.2604        |
| 613.3925       | 5  | S  | 10 | 1076.4860      | 538.7469        |
| 712.4609       | 6  | V  | 9  | 989.4540       | 495.2309        |
| 769.4824       | 7  | G  | 8  | 890.3856       | 445.6967        |
| 882.5664       | 8  | I  | 7  | 833.3641       | 417.1860        |
| 1011.6090      | 9  | E  | 6  | 720.2800       | 360.6439        |
| 1082.6461      | 10 | A  | 5  | 591.2374       | 296.1226        |
| 1197.6731      | 11 | D  | 4  | 520.2003       | 260.6041        |
| 1312.7000      | 12 | D  | 3  | 405.1734       | 203.0906        |
| 1427.7270      | 13 | D  | 2  | 290.1464       | 145.5771        |
|                | 14 | R  | 1  | 175.1195       | 88.0637         |

N-term:+29.04 K(1):+156.13

X-range:

0 - 0

MassTol: Y-zoom:

0. 1.

MassType:

☐AVG ☒MONO

Axis:

☒1 ☐2

Label:

☒I ☐M ☐-

Ions:

a ☐+ ☐2+ ☐3+

b ☒+ ☐2+ ☐3+

c ☐+ ☐2+ ☐3+

x ☐+ ☐2+ ☐3+

y ☒+ ☒2+ ☐3+

z ☐+ ☐2+ ☐3+

hide H<sub>2</sub>O/NH<sub>3</sub> ☐

zoom 112-122 ☐

GO

KIQHELEEAER, MH+ 1578.8764, m/z 395.4746  
H OS G18 P120811 220811-s1.02270.02270.4.dta

scan 2270; 2.9e+000

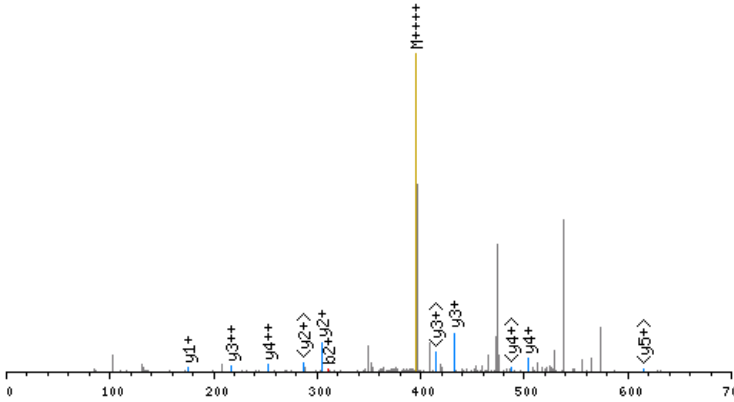

click image to zoom in; click top corners to zoom out

[precursor±]

scan 2266; 395.5 m/z; 5.9e+000

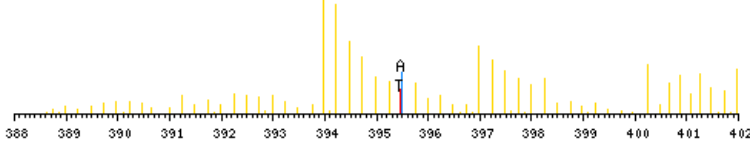

zoomed in precursor plot; T=theoretical m/z, A=acquired m/z

| b <sup>+</sup> | #  | AA | #  | y <sup>+</sup> | y <sup>2+</sup> |
|----------------|----|----|----|----------------|-----------------|
| 197.2290       | 1  | K  | 12 |                |                 |
| 310.3131       | 2  | I  | 11 | 1382.6552      | 691.8315        |
| 438.3716       | 3  | Q  | 10 | 1269.5711      | 635.2895        |
| 575.4306       | 4  | H  | 9  | 1141.5126      | 571.2602        |
| 704.4731       | 5  | E  | 8  | 1004.4536      | 502.7307        |
| 817.5572       | 6  | L  | 7  | 875.4111       | 438.2094        |
| 946.5998       | 7  | E  | 6  | 762.3270       | 381.6674        |
| 1075.6424      | 8  | E  | 5  | 633.2844       | 317.1461        |
| 1146.6795      | 9  | A  | 4  | 504.2418       | 252.6248        |
| 1275.7221      | 10 | E  | 3  | 433.2047       | 217.1063        |
| 1404.7647      | 11 | E  | 2  | 304.1621       | 152.5850        |
|                | 12 | R  | 1  | 175.1195       | 88.0637         |

N-term:+35.07 K(1):+162.16

N-term: +29.04 K(1): +156.13

X-range:

0 - 0

MassTol: Y-zoom:

0. 1.

MassType:

☐ AVG ☒ MONO

Axis:

☒ 1 ☐ 2

Label:

☒ I ☐ M ☐ -

Ions:

a ☐ + ☐ 2+ ☐ 3+

b ☒ + ☐ 2+ ☐ 3+

c ☐ + ☐ 2+ ☐ 3+

x ☐ + ☐ 2+ ☐ 3+

y ☒ + ☒ 2+ ☐ 3+

z ☐ + ☐ 2+ ☐ 3+

hide H<sub>2</sub>O/NH<sub>3</sub> ☐

zoom 112-122 ☐

GO

KKELEEQLGPVAEETR, MH+ 1940.0705, m/z 485.7731  
L OS G17 P120811 220811-s1.03404.03404.4.dta

scan 3404; 3.6e+000

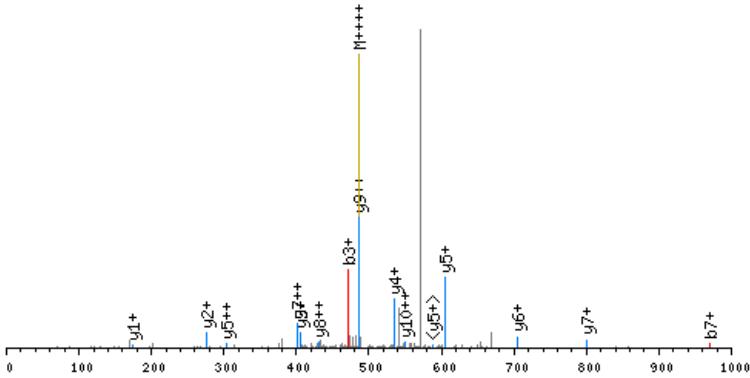

click image to zoom in; click top corners to zoom out [\[precursor±\]](#)

scan 3403; 485.8 m/z; 6.2e+000

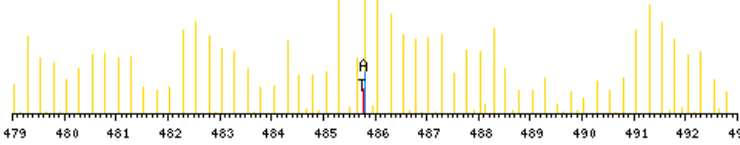

zoomed in precursor plot; T=theoretical m/z, A=acquired m/z

| b <sup>+</sup> | #  | AA | #  | y <sup>+</sup> | y <sup>2+</sup> |
|----------------|----|----|----|----------------|-----------------|
| 185.1654       | 1  | K  | 16 |                |                 |
| 341.2917       | 2  | K  | 15 | 1755.9129      | 878.4604        |
| 470.3343       | 3  | E  | 14 | 1599.7866      | 800.3972        |
| 583.4184       | 4  | L  | 13 | 1470.7440      | 735.8759        |
| 712.4610       | 5  | E  | 12 | 1357.6599      | 679.3339        |
| 841.5035       | 6  | E  | 11 | 1228.6174      | 614.8126        |
| 969.5621       | 7  | Q  | 10 | 1099.5748      | 550.2913        |
| 1082.6462      | 8  | L  | 9  | 971.5162       | 486.2620        |
| 1139.6676      | 9  | G  | 8  | 858.4321       | 429.7200        |
| 1236.7204      | 10 | P  | 7  | 801.4107       | 401.2092        |
| 1335.7888      | 11 | V  | 6  | 704.3579       | 352.6829        |
| 1406.8259      | 12 | A  | 5  | 605.2895       | 303.1487        |
| 1535.8685      | 13 | E  | 4  | 534.2524       | 267.6301        |
| 1664.9111      | 14 | E  | 3  | 405.2098       | 203.1088        |
| 1765.9588      | 15 | T  | 2  | 276.1672       | 138.5875        |
|                | 16 | R  | 1  | 175.1195       | 88.0637         |

N-term:+29.04 K(1):+156.13  
K(2):+156.13

X-range:

0 - 0

MassTol: Y-zoom:

0. 1.

MassType:

☐AVG ☒MONO

Axis:

☒1 ☐2

Label:

☒I ☐M ☐-

Ions:

a ☐+ ☐2+ ☐3+

b ☒+ ☐2+ ☐3+

c ☐+ ☐2+ ☐3+

x ☐+ ☐2+ ☐3+

y ☒+ ☒2+ ☐3+

z ☐+ ☐2+ ☐3+

hide H<sub>2</sub>O/NH<sub>3</sub> ☐

zoom 112-122 ☐

GO

KLGVEFDEITADDR, MH+ 1663.8543, m/z 555.2896  
L OS G16 P120811 220811-s1.05100.05100.3.dta

scan 5100; 1.9e+000

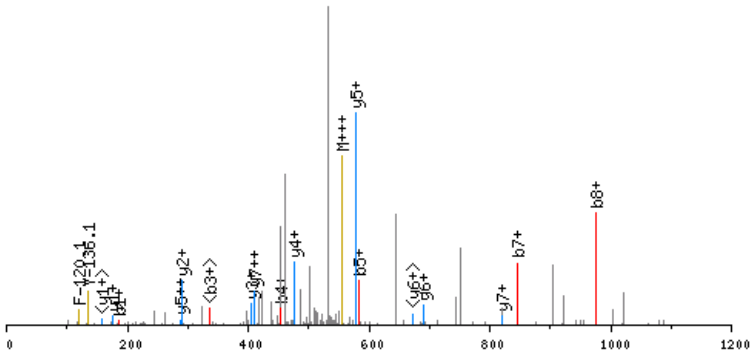

click image to zoom in; click top corners to zoom out

[precursor±]

scan 5098; 555.3 m/z; 7.8e+000

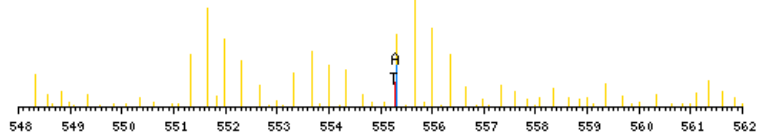

zoomed in precursor plot; T=theoretical m/z, A=acquired m/z

| b <sup>+</sup> | #  | AA | #  | y <sup>+</sup> | y <sup>2+</sup> |
|----------------|----|----|----|----------------|-----------------|
| 185.1654       | 1  | K  | 14 |                |                 |
| 298.2495       | 2  | L  | 13 | 1479.6967      | 740.3523        |
| 355.2709       | 3  | G  | 12 | 1366.6127      | 683.8102        |
| 454.3393       | 4  | V  | 11 | 1309.5912      | 655.2995        |
| 583.3819       | 5  | E  | 10 | 1210.5228      | 605.7653        |
| 730.4503       | 6  | F  | 9  | 1081.4802      | 541.2440        |
| 845.4773       | 7  | D  | 8  | 934.4118       | 467.7098        |
| 974.5199       | 8  | E  | 7  | 819.3848       | 410.1963        |
| 1087.6039      | 9  | I  | 6  | 690.3422       | 345.6750        |
| 1188.6516      | 10 | T  | 5  | 577.2582       | 289.1330        |
| 1259.6887      | 11 | A  | 4  | 476.2105       | 238.6092        |
| 1374.7157      | 12 | D  | 3  | 405.1734       | 203.0906        |
| 1489.7426      | 13 | D  | 2  | 290.1464       | 145.5771        |
|                | 14 | R  | 1  | 175.1195       | 88.0637         |

N-term:+29.04 K(1):+156.13

X-range:

0 - 0

MassTol: Y-zoom:

0. 1.

MassType:

☐AVG ☒MONO

Axis:

☒1 ☐2

Label:

☒I ☐M ☐-

Ions:

a ☐+ ☐2+ ☐3+

b ☒+ ☐2+ ☐3+

c ☐+ ☐2+ ☐3+

x ☐+ ☐2+ ☐3+

y ☒+ ☒2+ ☐3+

z ☐+ ☐2+ ☐3+

hide H<sub>2</sub>O/NH<sub>3</sub> ☐

zoom 112-122 ☐

GO

KLLSYVDDEAFIR, MH+ 1624.8950, m/z 542.3032  
L OS G16 P120811 220811-s1.05641.05641.3.dta

scan 5641; 1.4e+000

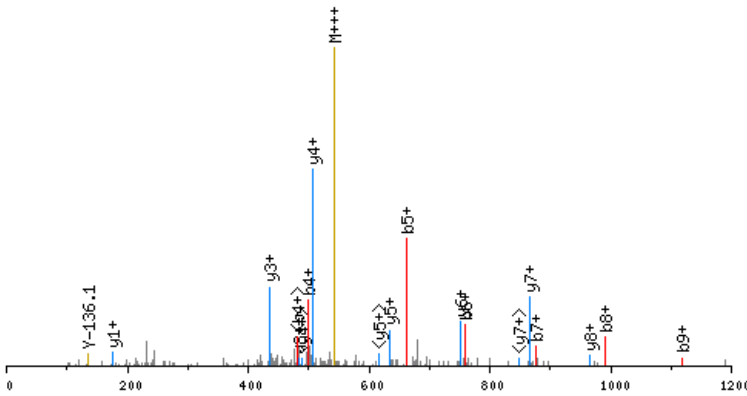

click image to zoom in; click top corners to zoom out

[precursor±]

scan 5638; 542.3 m/z; 2.5e+000

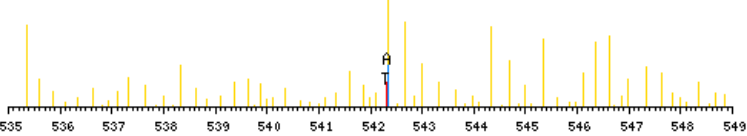

zoomed in precursor plot; T=theoretical m/z, A=acquired m/z

| b <sup>+</sup> | #  | AA | #  | y <sup>+</sup> | y <sup>2+</sup> |
|----------------|----|----|----|----------------|-----------------|
| 185.1654       | 1  | K  | 13 |                |                 |
| 298.2495       | 2  | L  | 12 | 1440.7375      | 720.8726        |
| 411.3335       | 3  | L  | 11 | 1327.6534      | 664.3306        |
| 498.3656       | 4  | S  | 10 | 1214.5693      | 607.7886        |
| 661.4289       | 5  | Y  | 9  | 1127.5373      | 564.2726        |
| 760.4973       | 6  | V  | 8  | 964.4740       | 482.7409        |
| 875.5242       | 7  | D  | 7  | 865.4056       | 433.2067        |
| 990.5512       | 8  | D  | 6  | 750.3786       | 375.6932        |
| 1119.5938      | 9  | E  | 5  | 635.3517       | 318.1798        |
| 1190.6309      | 10 | A  | 4  | 506.3091       | 253.6585        |
| 1337.6993      | 11 | F  | 3  | 435.2720       | 218.1399        |
| 1450.7834      | 12 | I  | 2  | 288.2036       | 144.6057        |
|                | 13 | R  | 1  | 175.1195       | 88.0637         |

N-term:+29.04 K(1):+156.13

X-range:

0 - 0

MassTol: Y-zoom:

0. 1.

MassType:

☐ AVG ☒ MONO

Axis:

☒ 1 ☐ 2

Label:

☒ I ☐ M ☐ -

Ions:

a ☐ + ☐ 2+ ☐ 3+

b ☒ + ☐ 2+ ☐ 3+

c ☐ + ☐ 2+ ☐ 3+

x ☐ + ☐ 2+ ☐ 3+

y ☒ + ☒ 2+ ☐ 3+

z ☐ + ☐ 2+ ☐ 3+

hide H<sub>2</sub>O/NH<sub>3</sub> ☐

zoom 112-122 ☐

GO

KLSSAMSAKAIAADHIR, MH+ 1854.0636, m/z 464.2713  
L OS G18 P120811 220811-s1.05883.05883.4.dta

scan 5883; 1.5e+000

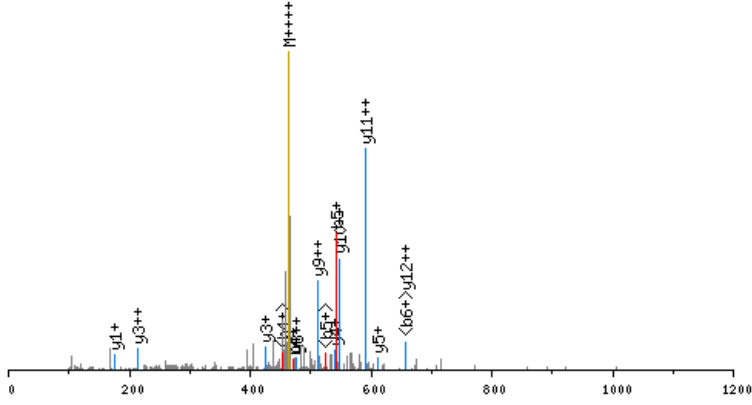

click image to zoom in; click top corners to zoom out [\[precursor±\]](#)

scan 5881; 464.3 m/z; 1.8e+000

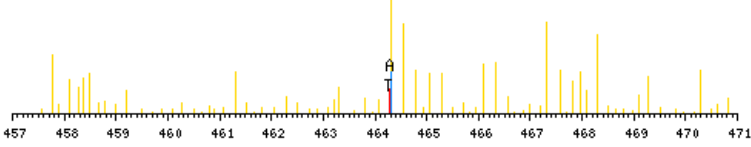

zoomed in precursor plot; T=theoretical m/z, A=acquired m/z

| b <sup>+</sup> | #  | AA | #  | y <sup>+</sup> | y <sup>2+</sup> |
|----------------|----|----|----|----------------|-----------------|
| 185.1654       | 1  | K  | 17 |                |                 |
| 298.2495       | 2  | L  | 16 | 1669.9060      | 835.4569        |
| 385.2815       | 3  | S  | 15 | 1556.8219      | 778.9149        |
| 472.3135       | 4  | S  | 14 | 1469.7899      | 735.3989        |
| 543.3506       | 5  | A  | 13 | 1382.7579      | 691.8828        |
| 674.3911       | 6  | M  | 12 | 1311.7208      | 656.3643        |
| 761.4231       | 7  | S  | 11 | 1180.6803      | 590.8440        |
| 832.4603       | 8  | A  | 10 | 1093.6482      | 547.3280        |
| 903.4974       | 9  | A  | 9  | 1022.6111      | 511.8095        |
| 1059.6237      | 10 | K  | 8  | 951.5740       | 476.2909        |
| 1130.6608      | 11 | A  | 7  | 795.4477       | 398.2278        |
| 1243.7449      | 12 | I  | 6  | 724.4106       | 362.7092        |
| 1314.7820      | 13 | A  | 5  | 611.3265       | 306.1672        |
| 1429.8089      | 14 | D  | 4  | 540.2894       | 270.6486        |
| 1566.8678      | 15 | H  | 3  | 425.2625       | 213.1352        |
| 1679.9519      | 16 | I  | 2  | 288.2036       | 144.6057        |
|                | 17 | R  | 1  | 175.1195       | 88.0637         |

N-term:+29.04 K(1):+156.13  
K(10):+156.13



X-range:

0 - 0

MassTol: Y-zoom:

0. 1.

MassType:

☐AVG ☒MONO

Axis:

☒1 ☐2

Label:

☒I ☐M ☐-

Ions:

a ☐+ ☐2+ ☐3+

b ☒+ ☐2+ ☐3+

c ☐+ ☐2+ ☐3+

x ☐+ ☐2+ ☐3+

y ☒+ ☒2+ ☐3+

z ☐+ ☐2+ ☐3+

hide H<sub>2</sub>O/NH<sub>3</sub> ☐

zoom 112-122 ☐

GO

KNAIANASTLAEVER, MH+ 1654.9764, m/z 552.3303  
H OS G16 P120811 220811-s1.03785.03785.3.dta

scan 3785; 4.8e+000

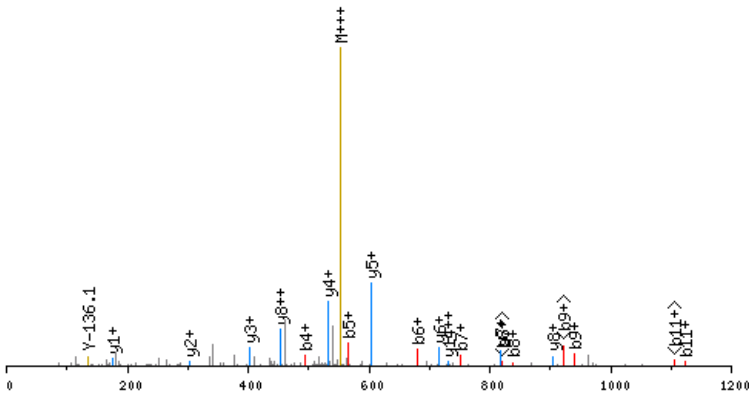

click image to zoom in; click top corners to zoom out

[precursor±]

scan 3783; 552.3 m/z; 7.8e+000

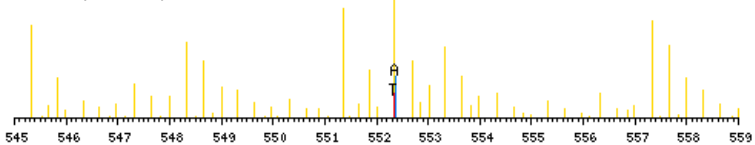

zoomed in precursor plot; T=theoretical m/z, A=acquired m/z

| b <sup>+</sup> | #  | AA | #  | y <sup>+</sup> | y <sup>2+</sup> |
|----------------|----|----|----|----------------|-----------------|
| 197.2290       | 1  | K  | 15 |                |                 |
| 311.2719       | 2  | N  | 14 | 1458.7552      | 729.8815        |
| 382.3090       | 3  | A  | 13 | 1344.7123      | 672.8601        |
| 495.3931       | 4  | I  | 12 | 1273.6752      | 637.3415        |
| 566.4302       | 5  | A  | 11 | 1160.5911      | 580.7995        |
| 680.4731       | 6  | N  | 10 | 1089.5540      | 545.2809        |
| 751.5103       | 7  | A  | 9  | 975.5111       | 488.2595        |
| 838.5423       | 8  | S  | 8  | 904.4740       | 452.7409        |
| 939.5900       | 9  | T  | 7  | 817.4420       | 409.2249        |
| 1052.6740      | 10 | L  | 6  | 716.3943       | 358.7011        |
| 1123.7111      | 11 | A  | 5  | 603.3102       | 302.1590        |
| 1252.7537      | 12 | E  | 4  | 532.2731       | 266.6405        |
| 1351.8222      | 13 | V  | 3  | 403.2305       | 202.1192        |
| 1480.8647      | 14 | E  | 2  | 304.1621       | 152.5850        |
|                | 15 | R  | 1  | 175.1195       | 88.0637         |

N-term:+35.07 K(1):+162.16



X-range:

0 - 0

MassTol: Y-zoom:

0. 1.

MassType:

☐AVG ☒MONO

Axis:

☒1 ☐2

Label:

☒I ☐M ☐-

Ions:

a ☐+ ☐2+ ☐3+

b ☒+ ☐2+ ☐3+

c ☐+ ☐2+ ☐3+

x ☐+ ☐2+ ☐3+

y ☒+ ☒2+ ☐3+

z ☐+ ☐2+ ☐3+

hide H<sub>2</sub>O/NH<sub>3</sub> ☐

zoom 112-122 ☐

GO

KPLNIDHLSDDKLR, MH+ 1766.1025, m/z 442.2811  
H OS G18 P120811 220811-s1.03604.03604.4.dta

scan 3604; 6.4e+000

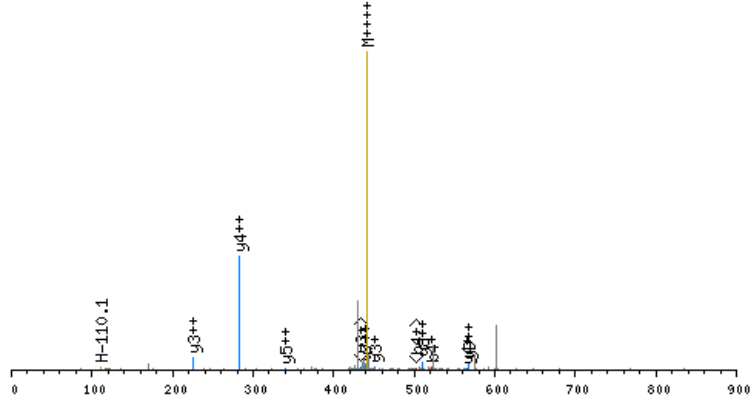

click image to zoom in; click top corners to zoom out [\[precursor±\]](#)

scan 3601; 442.3 m/z; 7.8e+000

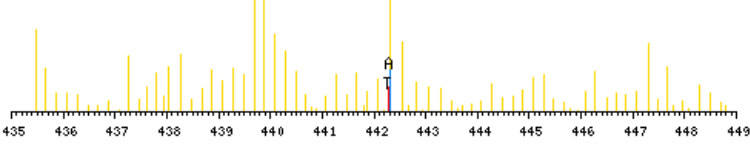

zoomed in precursor plot; T=theoretical m/z, A=acquired m/z

| b <sup>+</sup> | #  | AA | #  | y <sup>+</sup> | y <sup>2+</sup> |
|----------------|----|----|----|----------------|-----------------|
| 197.2290       | 1  | K  | 14 |                |                 |
| 294.2818       | 2  | P  | 13 | 1569.8813      | 785.4446        |
| 407.3658       | 3  | L  | 12 | 1472.8286      | 736.9182        |
| 521.4088       | 4  | N  | 11 | 1359.7445      | 680.3762        |
| 634.4928       | 5  | I  | 10 | 1245.7016      | 623.3547        |
| 749.5198       | 6  | D  | 9  | 1132.6175      | 566.8127        |
| 886.5787       | 7  | H  | 8  | 1017.5906      | 509.2992        |
| 999.6627       | 8  | L  | 7  | 880.5316       | 440.7697        |
| 1086.6948      | 9  | S  | 6  | 767.4476       | 384.2277        |
| 1201.7217      | 10 | D  | 5  | 680.4156       | 340.7117        |
| 1316.7487      | 11 | D  | 4  | 565.3886       | 283.1982        |
| 1478.9068      | 12 | K  | 3  | 450.3617       | 225.6847        |
| 1591.9908      | 13 | L  | 2  | 288.2036       | 144.6057        |
|                | 14 | R  | 1  | 175.1195       | 88.0637         |

N-term:+35.07 K(1):+162.16  
K(12):+162.16

X-range:

$$\boxed{0} - \boxed{0}$$

0. 1.

☐ AVG ☒ MONO

1 2

☒ I ☐ M ☐ -

a.  + 2 + 3 +

b. ☒ 1+ ☐ 2+ ☐ 3+

**B**

**c** <sup>+</sup> <sup>2+</sup> <sup>3+</sup>

$$x \square + \square^2 + \square^3 +$$
☒1+ ☒2+ ☐3+

Y ☒ ☒ ☐

☐ ☐ ☐

$$\mathbf{z} \begin{bmatrix} 1 \\ 1 \\ 1 \end{bmatrix}^T \begin{bmatrix} 1 \\ 1 \\ 1 \end{bmatrix}^T \begin{bmatrix} 1 \\ 1 \\ 1 \end{bmatrix}^T$$

zoom 112-122

GO

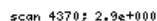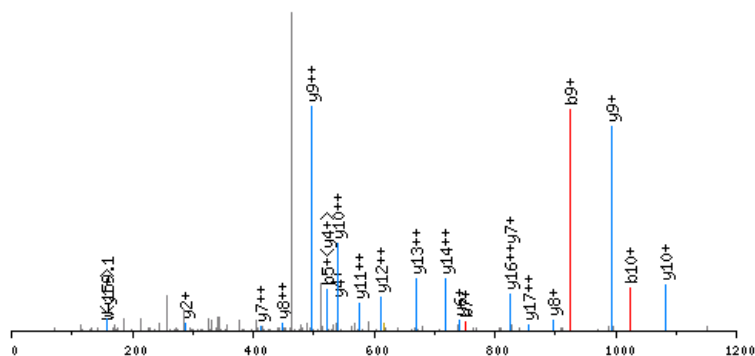

click image to zoom in; click top corners to zoom out

[precursor±]

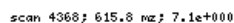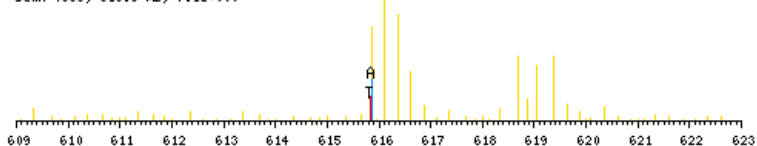

zoomed in precursor plot; T=theoretical m/z, A=acquired m/z

| $b^+$     | #  | AA | #  | $y^+$     | $y^{2+}$  |
|-----------|----|----|----|-----------|-----------|
| 185.1654  | 1  | K  | 24 |           |           |
| 282.2182  | 2  | P  | 23 | 2276.1093 | 1138.5586 |
| 379.2709  | 3  | P  | 22 | 2179.0565 | 1090.0322 |
| 450.3080  | 4  | A  | 21 | 2082.0038 | 1041.5058 |
| 521.3452  | 5  | A  | 20 | 2010.9667 | 1005.9872 |
| 681.3758  | 6  | C  | 19 | 1939.9296 | 970.4687  |
| 752.4129  | 7  | A  | 18 | 1779.8990 | 890.4534  |
| 809.4343  | 8  | G  | 17 | 1708.8618 | 854.9348  |
| 924.4613  | 9  | D  | 16 | 1651.8404 | 826.4241  |
| 1023.5297 | 10 | V  | 15 | 1536.8134 | 768.9106  |
| 1122.5981 | 11 | V  | 14 | 1437.7450 | 719.3764  |
| 1237.6250 | 12 | D  | 13 | 1338.6766 | 669.8422  |
| 1308.6622 | 13 | A  | 12 | 1223.6497 | 612.3287  |
| 1379.6993 | 14 | A  | 11 | 1152.6125 | 576.8102  |
| 1466.7313 | 15 | S  | 10 | 1081.5754 | 541.2916  |
| 1563.7841 | 16 | P  | 9  | 994.5434  | 497.7756  |
| 1634.8212 | 17 | A  | 8  | 897.4906  | 449.2492  |
| 1721.8532 | 18 | S  | 7  | 826.4535  | 413.7307  |
| 1822.9009 | 19 | T  | 6  | 739.4215  | 370.2147  |
| 1921.9693 | 20 | V  | 5  | 638.3738  | 319.6908  |
| 2036.0122 | 21 | N  | 4  | 539.3054  | 270.1566  |
| 2173.0711 | 22 | H  | 3  | 425.2625  | 213.1352  |
| 2286.1552 | 23 | L  | 2  | 288.2036  | 144.6057  |
|           | 24 | R  | 1  | 175.1195  | 88.0637   |

N-term:+29.04 K(1):+156.13  
C(6):+160.03

X-range:

0 - 0

MassTol: Y-zoom:

0. 1.

MassType:

☐ AVG ☒ MONO

Axis:

☒ 1 ☐ 2

Label:

☒ I ☐ M ☐ -

Ions:

a ☐ + ☐ 2+ ☐ 3+

b ☒ + ☐ 2+ ☐ 3+

c ☐ + ☐ 2+ ☐ 3+

x ☐ + ☐ 2+ ☐ 3+

y ☒ + ☒ 2+ ☐ 3+

z ☐ + ☐ 2+ ☐ 3+

hide H<sub>2</sub>O/NH<sub>3</sub> ☐

zoom 112-122 ☐

GO

KQEYDEAGPSIVHR, MH+ 1684.8659, m/z 421.9719  
L OS G17 P120811 220811-s1.02614.02614.4.dta

scan 2614; 1.7e+000

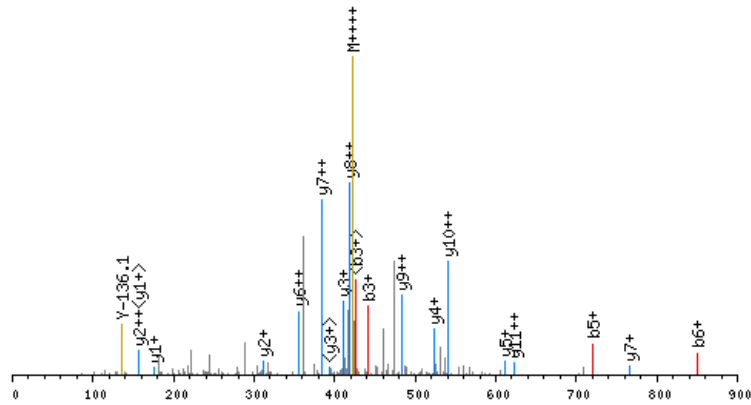

click image to zoom in; click top corners to zoom out

[precursor±]

scan 2613; 422.0 m/z; 5.0e+000

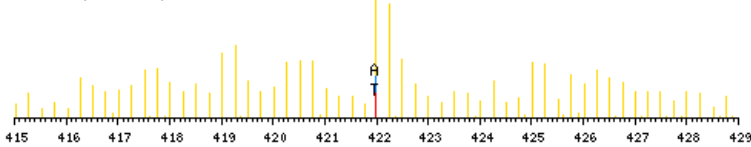

zoomed in precursor plot; T=theoretical m/z, A=acquired m/z

| b <sup>+</sup> | #  | AA | #  | y <sup>+</sup> | y <sup>2+</sup> |
|----------------|----|----|----|----------------|-----------------|
| 185.1654       | 1  | K  | 14 |                |                 |
| 313.2240       | 2  | Q  | 13 | 1500.7083      | 750.8581        |
| 442.2666       | 3  | E  | 12 | 1372.6497      | 686.8288        |
| 605.3299       | 4  | Y  | 11 | 1243.6071      | 622.3075        |
| 720.3568       | 5  | D  | 10 | 1080.5438      | 540.7758        |
| 849.3994       | 6  | E  | 9  | 965.5169       | 483.2623        |
| 920.4365       | 7  | A  | 8  | 836.4743       | 418.7410        |
| 977.4580       | 8  | G  | 7  | 765.4371       | 383.2225        |
| 1074.5108      | 9  | P  | 6  | 708.4157       | 354.7118        |
| 1161.5428      | 10 | S  | 5  | 611.3629       | 306.1854        |
| 1274.6269      | 11 | I  | 4  | 524.3309       | 262.6694        |
| 1373.6953      | 12 | V  | 3  | 411.2468       | 206.1273        |
| 1510.7542      | 13 | H  | 2  | 312.1784       | 156.5931        |
|                | 14 | R  | 1  | 175.1195       | 88.0637         |

N-term:+29.04 K(1):+156.13

X-range:

0 - 0

MassTol: Y-zoom:

0. 1.

MassType:

☐AVG ☒MONO

Axis:

☒1 ☐2

Label:

☒I ☐M ☐-

Ions:

a ☐+ ☐2+ ☐3+

b ☒+ ☐2+ ☐3+

c ☐+ ☐2+ ☐3+

x ☐+ ☐2+ ☐3+

y ☒+ ☒2+ ☐3+

z ☐+ ☐2+ ☐3+

hide H<sub>2</sub>O/NH<sub>3</sub> ☐

zoom 112-122 ☐

GO

KQEYDESGPSIVHR, MH+ 1700.8608, m/z 425.9707  
L OS G17 P120811 220811-s1.02489.02489.4.dta

scan 2489; 2.2e+000

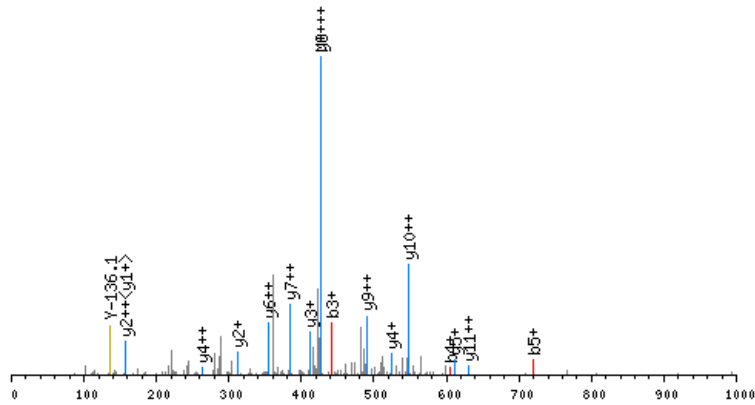

click image to zoom in; click top corners to zoom out

[precursor±]

scan 2488; 426.0 m/z; 1.1e+001

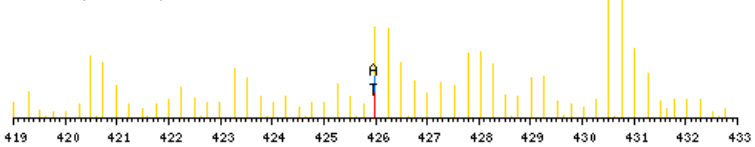

zoomed in precursor plot; T=theoretical m/z, A=acquired m/z

| b <sup>+</sup> | #  | AA | #  | y <sup>+</sup> | y <sup>2+</sup> |
|----------------|----|----|----|----------------|-----------------|
| 185.1654       | 1  | K  | 14 |                |                 |
| 313.2240       | 2  | Q  | 13 | 1516.7032      | 758.8555        |
| 442.2666       | 3  | E  | 12 | 1388.6446      | 694.8262        |
| 605.3299       | 4  | Y  | 11 | 1259.6020      | 630.3049        |
| 720.3568       | 5  | D  | 10 | 1096.5387      | 548.7733        |
| 849.3994       | 6  | E  | 9  | 981.5118       | 491.2598        |
| 936.4315       | 7  | S  | 8  | 852.4692       | 426.7385        |
| 993.4529       | 8  | G  | 7  | 765.4371       | 383.2225        |
| 1090.5057      | 9  | P  | 6  | 708.4157       | 354.7118        |
| 1177.5377      | 10 | S  | 5  | 611.3629       | 306.1854        |
| 1290.6218      | 11 | I  | 4  | 524.3309       | 262.6694        |
| 1389.6902      | 12 | V  | 3  | 411.2468       | 206.1273        |
| 1526.7491      | 13 | H  | 2  | 312.1784       | 156.5931        |
|                | 14 | R  | 1  | 175.1195       | 88.0637         |

N-term:+29.04 K(1):+156.13

X-range:

0 - 0

MassTol: Y-zoom:

0. 1.

MassType:

☐ AVG ☒ MONO

Axis:

☒ 1 ☐ 2

Label:

☒ I ☐ M ☐ -

Ions:

a ☐ + ☐ 2+ ☐ 3+

b ☒ + ☐ 2+ ☐ 3+

c ☐ + ☐ 2+ ☐ 3+

x ☐ + ☐ 2+ ☐ 3+

y ☒ + ☒ 2+ ☐ 3+

z ☐ + ☐ 2+ ☐ 3+

hide H<sub>2</sub>O/NH<sub>3</sub> ☐

zoom 112-122 ☐

GO

KQFEHLNHQNPTFESR, MH+ 2182.0794, m/z 546.2753  
L OS G19 P120811 220811-s1.02403.02403.4.dta

scan 2403; 1.0e+000

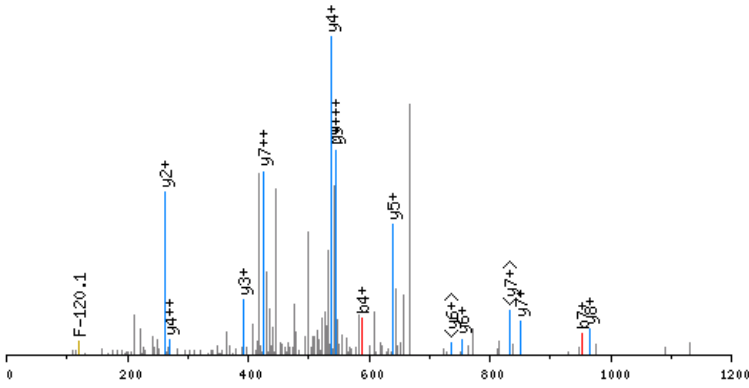

click image to zoom in; click top corners to zoom out

[precursor±]

scan 2402; 546.3 m/z; 7.0e+000

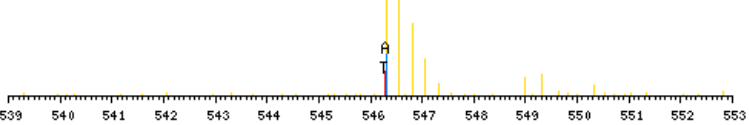

zoomed in precursor plot; T=theoretical m/z, A=acquired m/z

| b <sup>+</sup> | #  | AA | #  | y <sup>+</sup> | y <sup>2+</sup> |
|----------------|----|----|----|----------------|-----------------|
| 185.1654       | 1  | K  | 17 |                |                 |
| 313.2240       | 2  | Q  | 16 | 1997.9218      | 999.4648        |
| 460.2924       | 3  | F  | 15 | 1869.8632      | 935.4355        |
| 589.3350       | 4  | E  | 14 | 1722.7948      | 861.9013        |
| 726.3939       | 5  | H  | 13 | 1593.7522      | 797.3800        |
| 839.4780       | 6  | L  | 12 | 1456.6933      | 728.8506        |
| 953.5209       | 7  | N  | 11 | 1343.6093      | 672.3085        |
| 1090.5798      | 8  | H  | 10 | 1229.5663      | 615.2871        |
| 1218.6384      | 9  | Q  | 9  | 1092.5074      | 546.7576        |
| 1332.6813      | 10 | N  | 8  | 964.4488       | 482.7283        |
| 1429.7341      | 11 | P  | 7  | 850.4059       | 425.7069        |
| 1543.7770      | 12 | N  | 6  | 753.3531       | 377.1805        |
| 1644.8247      | 13 | T  | 5  | 639.3102       | 320.1590        |
| 1791.8931      | 14 | F  | 4  | 538.2625       | 269.6352        |
| 1920.9357      | 15 | E  | 3  | 391.1941       | 196.1010        |
| 2007.9677      | 16 | S  | 2  | 262.1515       | 131.5797        |
|                | 17 | R  | 1  | 175.1195       | 88.0637         |

N-term:+29.04 K(1):+156.13

X-range:

0 - 0

MassTol: Y-zoom:

0. 1.

MassType:

☐ AVG ☒ MONO

Axis:

☒ 1 ☐ 2

Label:

☒ I ☐ M ☐ -

Ions:

a ☐ + ☐ 2+ ☐ 3+

b ☒ + ☐ 2+ ☐ 3+

c ☐ + ☐ 2+ ☐ 3+

x ☐ + ☐ 2+ ☐ 3+

y ☒ + ☒ 2+ ☐ 3+

z ☐ + ☐ 2+ ☐ 3+

hide H<sub>2</sub>O/NH<sub>3</sub> ☐

zoom 112-122 ☐

GO

KQFLEELLTTQCDR, MH+ 1836.9529, m/z 612.9892  
L OS G16 P120811 220811-s1.05817.05817.3.dta

scan 5817; 2.4e+000

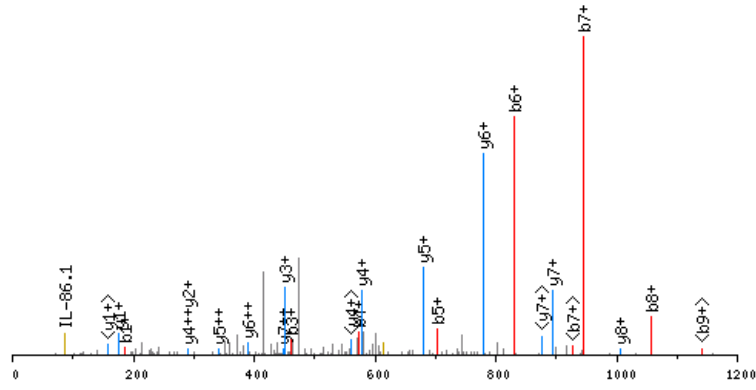

click image to zoom in; click top corners to zoom out [precursor±]

scan 5813; 613.0 m/z; 4.2e+000

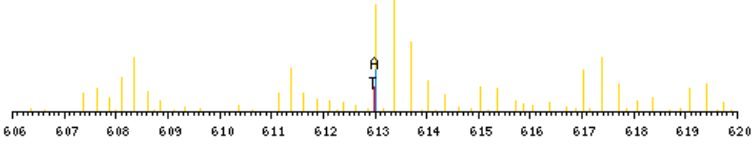

zoomed in precursor plot; T=theoretical m/z, A=acquired m/z

| b <sup>+</sup> | #  | AA | #  | y <sup>+</sup> | y <sup>2+</sup> |
|----------------|----|----|----|----------------|-----------------|
| 185.1654       | 1  | K  | 14 |                |                 |
| 313.2240       | 2  | Q  | 13 | 1652.7953      | 826.9016        |
| 460.2924       | 3  | F  | 12 | 1524.7368      | 762.8723        |
| 573.3765       | 4  | L  | 11 | 1377.6684      | 689.3381        |
| 702.4190       | 5  | E  | 10 | 1264.5843      | 632.7961        |
| 831.4616       | 6  | E  | 9  | 1135.5417      | 568.2748        |
| 944.5457       | 7  | L  | 8  | 1006.4991      | 503.7535        |
| 1057.6298      | 8  | L  | 7  | 893.4150       | 447.2114        |
| 1158.6774      | 9  | T  | 6  | 780.3310       | 390.6694        |
| 1259.7251      | 10 | T  | 5  | 679.2833       | 340.1456        |
| 1387.7837      | 11 | Q  | 4  | 578.2356       | 289.6217        |
| 1547.8143      | 12 | C  | 3  | 450.1770       | 225.5924        |
| 1662.8412      | 13 | D  | 2  | 290.1464       | 145.5771        |
|                | 14 | R  | 1  | 175.1195       | 88.0637         |

N-term:+29.04 K(1):+156.13  
C(12):+160.03

X-range:

0 - 0

MassTol: Y-zoom:

0. 1.

MassType:

☐AVG ☒MONO

Axis:

☒1 ☐2

Label:

☒I ☐M ☐-

Ions:

a ☐+ ☐2+ ☐3+

b ☒+ ☐2+ ☐3+

c ☐+ ☐2+ ☐3+

x ☐+ ☐2+ ☐3+

y ☒+ ☒2+ ☐3+

z ☐+ ☐2+ ☐3+

hide H<sub>2</sub>O/NH<sub>3</sub> ☐

zoom 112-122 ☐

GO

KQIEGSDLSSLQKR, MH+ 1672.9598, m/z 418.9954  
L OS G17 P120811 220811-s1.02844.02844.4.dta

scan 2844; 3.5e+000

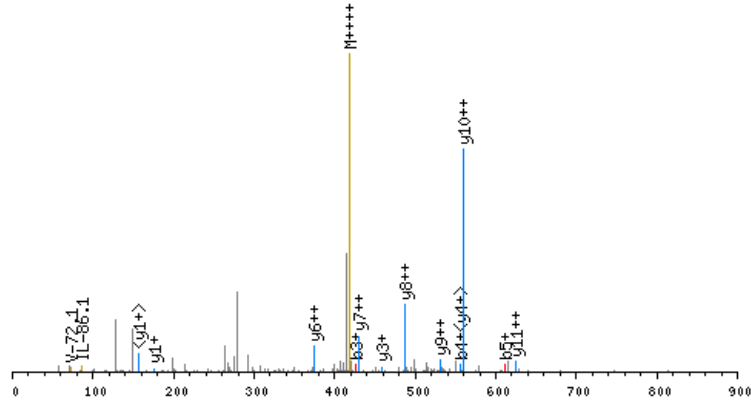

click image to zoom in; click top corners to zoom out [\[precursor±\]](#)

scan 2843; 418.0 m/z; 3.6e+001

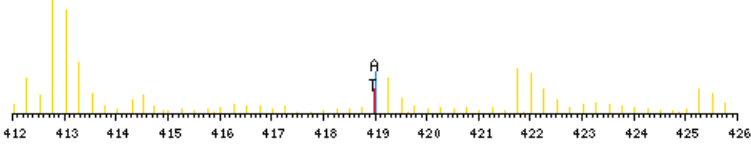

zoomed in precursor plot; T=theoretical m/z, A=acquired m/z

| b <sup>+</sup> | #  | AA | #  | y <sup>+</sup> | y <sup>2+</sup> |
|----------------|----|----|----|----------------|-----------------|
| 185.1654       | 1  | K  | 14 |                |                 |
| 313.2240       | 2  | Q  | 13 | 1488.8022      | 744.9050        |
| 426.3080       | 3  | I  | 12 | 1360.7437      | 680.8757        |
| 555.3506       | 4  | E  | 11 | 1247.6596      | 624.3337        |
| 612.3721       | 5  | G  | 10 | 1118.6170      | 559.8124        |
| 699.4041       | 6  | S  | 9  | 1061.5955      | 531.3017        |
| 814.4311       | 7  | D  | 8  | 974.5635       | 487.7857        |
| 927.5151       | 8  | L  | 7  | 859.5366       | 430.2722        |
| 1014.5472      | 9  | S  | 6  | 746.4525       | 373.7302        |
| 1101.5792      | 10 | S  | 5  | 659.4205       | 330.2141        |
| 1214.6633      | 11 | L  | 4  | 572.3884       | 286.6981        |
| 1342.7218      | 12 | Q  | 3  | 459.3044       | 230.1561        |
| 1498.8481      | 13 | K  | 2  | 331.2458       | 166.1268        |
|                | 14 | R  | 1  | 175.1195       | 88.0637         |

N-term:+29.04 K(1):+156.13  
K(13):+156.13

X-range:

0 - 0

MassTol: Y-zoom:

0. 1.

MassType:

☐AVG ☒MONO

Axis:

☒1 ☐2

Label:

☒I ☐M ☐-

Ions:

a ☐+ ☐2+ ☐3+

b ☒+ ☐2+ ☐3+

c ☐+ ☐2+ ☐3+

x ☐+ ☐2+ ☐3+

y ☒+ ☒2+ ☐3+

z ☐+ ☐2+ ☐3+

hide H<sub>2</sub>O/NH<sub>3</sub> ☐

zoom 112-122 ☐

GO

KQLEDMNAYCGER, MH+ 1681.8314, m/z 561.2820  
H OS G16 P120811 220811-s1.02950.02950.3.dta

scan 2950; 2.5e+000

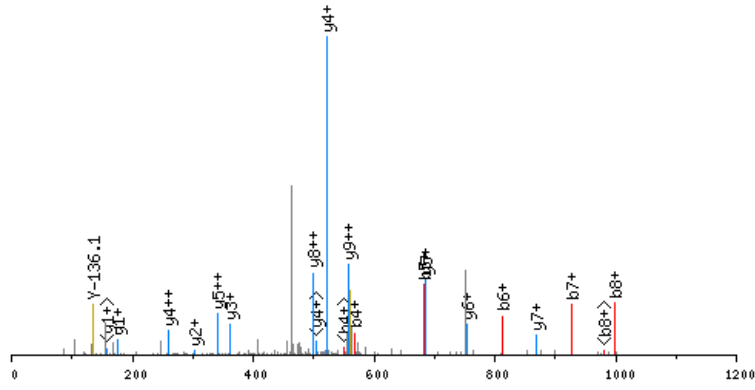

click image to zoom in; click top corners to zoom out [\[precursor±\]](#)

scan 2948; 561.3 m/z; 7.7e+000

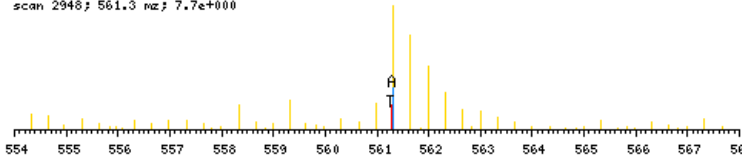

zoomed in precursor plot; T=theoretical m/z, A=acquired m/z

| b <sup>+</sup> | #  | AA | #  | y <sup>+</sup> | y <sup>2+</sup> |
|----------------|----|----|----|----------------|-----------------|
| 197.2290       | 1  | K  | 13 |                |                 |
| 325.2876       | 2  | Q  | 12 | 1485.6102      | 743.3090        |
| 438.3716       | 3  | L  | 11 | 1357.5516      | 679.2797        |
| 567.4142       | 4  | E  | 10 | 1244.4675      | 622.7377        |
| 682.4412       | 5  | D  | 9  | 1115.4250      | 558.2164        |
| 813.4817       | 6  | M  | 8  | 1000.3980      | 500.7029        |
| 927.5246       | 7  | N  | 7  | 869.3575       | 435.1827        |
| 998.5617       | 8  | A  | 6  | 755.3146       | 378.1612        |
| 1161.6250      | 9  | Y  | 5  | 684.2775       | 342.6427        |
| 1321.6556      | 10 | C  | 4  | 521.2142       | 261.1110        |
| 1378.6771      | 11 | G  | 3  | 361.1836       | 181.0957        |
| 1507.7197      | 12 | E  | 2  | 304.1621       | 152.5850        |
|                | 13 | R  | 1  | 175.1195       | 88.0637         |

N-term:+35.07 K(1):+162.16  
C(10):+160.03

X-range:

0 - 0

MassTol: Y-zoom:

0. 1.

MassType:

☐AVG ☒MONO

Axis:

☒1 ☐2

Label:

☒I ☐M ☐-

Ions:

a ☐+ ☐2+ ☐3+

b ☒+ ☐2+ ☐3+

c ☐+ ☐2+ ☐3+

x ☐+ ☐2+ ☐3+

y ☒+ ☒2+ ☐3+

z ☐+ ☐2+ ☐3+

hide H<sub>2</sub>O/NH<sub>3</sub> ☐

zoom 112-122 ☐

GO

KSIGTLSDPCKDPTR, MH+ 1777.0378, m/z 445.0149  
H OS G17 P120811 220811-s1.02562.02562.4.dta

scan 2562; 5.2e+000

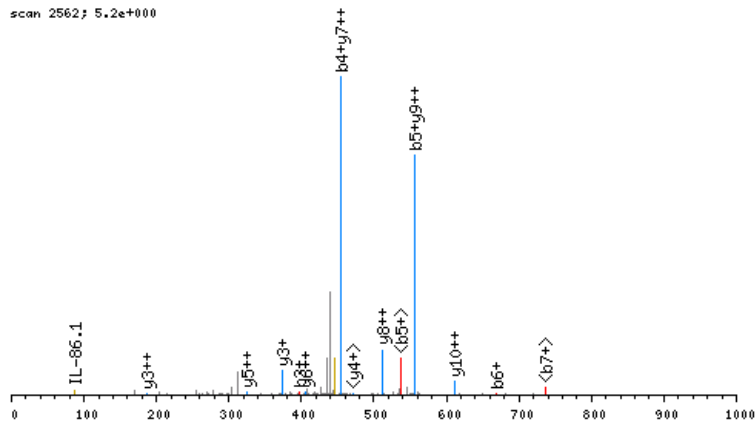

click image to zoom in; click top corners to zoom out [\[precursor±\]](#)

scan 2558; 445.0 m/z; 5.0e+000

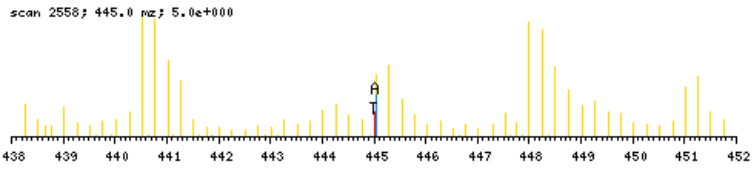

zoomed in precursor plot; T=theoretical m/z, A=acquired m/z

| b <sup>+</sup> | #  | AA | #  | y <sup>+</sup> | y <sup>2+</sup> |
|----------------|----|----|----|----------------|-----------------|
| 197.2290       | 1  | K  | 15 |                |                 |
| 284.2610       | 2  | S  | 14 | 1580.8166      | 790.9122        |
| 397.3451       | 3  | I  | 13 | 1493.7846      | 747.3962        |
| 454.3666       | 4  | G  | 12 | 1380.7005      | 690.8542        |
| 555.4142       | 5  | T  | 11 | 1323.6791      | 662.3434        |
| 668.4983       | 6  | L  | 10 | 1222.6314      | 611.8196        |
| 755.5303       | 7  | S  | 9  | 1109.5473      | 555.2776        |
| 870.5573       | 8  | D  | 8  | 1022.5153      | 511.7616        |
| 967.6100       | 9  | P  | 7  | 907.4884       | 454.2481        |
| 1127.6406      | 10 | C  | 6  | 810.4356       | 405.7217        |
| 1289.7987      | 11 | K  | 5  | 650.4050       | 325.7064        |
| 1404.8257      | 12 | D  | 4  | 488.2469       | 244.6274        |
| 1501.8784      | 13 | P  | 3  | 373.2199       | 187.1139        |
| 1602.9261      | 14 | T  | 2  | 276.1672       | 138.5875        |
|                | 15 | R  | 1  | 175.1195       | 88.0637         |

N-term:+35.07 K(1):+162.16  
C(10):+160.03 K(11):+162.16

X-range:

0

-

0

MassTol: Y-zoom:

0.

1.

MassType:

AVG

MONO

Axis:

1

2

Label:

I

M

-

Ions:

a

b

c

x

y

z

2+

3+

2+

3+

2+

3+

2+

3+

2+

3+

2+

3+

hide H<sub>2</sub>O/NH<sub>3</sub>

zoom 112-122

GO

KSYELPDGQVITIGNER, MH+ 1975.0500, m/z 659.0215  
L OS G16 P120811 220811-s1.05675.05675.3.dta

scan 5675; 1.8e+000

click image to zoom in; click top corners to zoom out

```
[precursor±]
```

scan 5673; 659.0 m/z; 3.7e+000

zoomed in precursor plot; T=theoretical m/z, A=acquired m/z

| b <sup>+</sup> | #  | AA | #  | y <sup>+</sup> | y <sup>2+</sup> |
|----------------|----|----|----|----------------|-----------------|
| 185.1654       | 1  | K  | 17 |                |                 |
| 272.1974       | 2  | S  | 16 | 1790.8925      | 895.9501        |
| 435.2608       | 3  | Y  | 15 | 1703.8604      | 852.4341        |
| 564.3034       | 4  | E  | 14 | 1540.7971      | 770.9025        |
| 677.3874       | 5  | L  | 13 | 1411.7545      | 706.3812        |
| 774.4402       | 6  | P  | 12 | 1298.6705      | 649.8391        |
| 889.4671       | 7  | D  | 11 | 1201.6177      | 601.3128        |
| 946.4886       | 8  | G  | 10 | 1086.5907      | 543.7993        |
| 1074.5472      | 9  | Q  | 9  | 1029.5693      | 515.2886        |
| 1173.6156      | 10 | V  | 8  | 901.5107       | 451.2593        |
| 1286.6996      | 11 | I  | 7  | 802.4423       | 401.7251        |
| 1387.7473      | 12 | T  | 6  | 689.3582       | 345.1830        |
| 1500.8314      | 13 | I  | 5  | 588.3105       | 294.6592        |
| 1557.8528      | 14 | G  | 4  | 475.2265       | 238.1172        |
| 1671.8958      | 15 | N  | 3  | 418.2050       | 209.6064        |
| 1800.9384      | 16 | E  | 2  | 304.1621       | 152.5850        |
|                | 17 | R  | 1  | 175.1195       | 88.0637         |

N-term:+29.04 K(1):+156.13

X-range:

0 - 0

MassTol: Y-zoom:

0. 1.

MassType:

☐ AVG ☒ MONO

Axis:

☒ 1 ☐ 2

Label:

☒ I ☐ M ☐ -

Ions:

a ☐ + ☐ 2+ ☐ 3+

b ☒ + ☐ 2+ ☐ 3+

c ☐ + ☐ 2+ ☐ 3+

x ☐ + ☐ 2+ ☐ 3+

y ☒ + ☒ 2+ ☐ 3+

z ☐ + ☐ 2+ ☐ 3+

hide H<sub>2</sub>O/NH<sub>3</sub> ☐

zoom 112-122 ☐

GO

KTDLEKDIISDTSGDFR, MH+ 2024.0552, m/z 506.7693  
L OS G17 P120811 220811-s1.05490.05490.4.dta

scan 5490: 1.3e+000

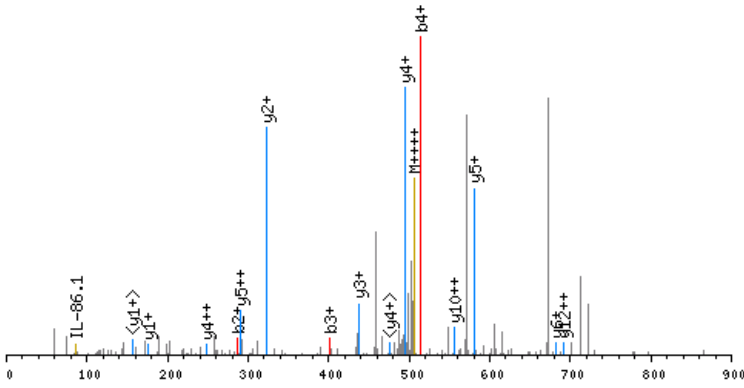

click image to zoom in; click top corners to zoom out [\[precursor±\]](#)

scan 5488: 506.8 m/z; 8.6e+000

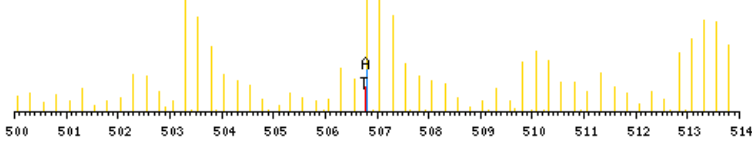

zoomed in precursor plot; T=theoretical m/z, A=acquired m/z

| b <sup>+</sup> | #  | AA | #  | y <sup>+</sup> | y <sup>2+</sup> |
|----------------|----|----|----|----------------|-----------------|
| 185.1654       | 1  | K  | 17 |                |                 |
| 286.2131       | 2  | T  | 16 | 1839.8976      | 920.4527        |
| 401.2400       | 3  | D  | 15 | 1738.8500      | 869.9289        |
| 514.3241       | 4  | L  | 14 | 1623.8230      | 812.4154        |
| 643.3667       | 5  | E  | 13 | 1510.7390      | 755.8734        |
| 799.4930       | 6  | K  | 12 | 1381.6964      | 691.3521        |
| 914.5199       | 7  | D  | 11 | 1225.5701      | 613.2889        |
| 1027.6040      | 8  | I  | 10 | 1110.5431      | 555.7755        |
| 1140.6880      | 9  | I  | 9  | 997.4591       | 499.2334        |
| 1227.7201      | 10 | S  | 8  | 884.3750       | 442.6914        |
| 1342.7470      | 11 | D  | 7  | 797.3430       | 399.1754        |
| 1443.7947      | 12 | T  | 6  | 682.3160       | 341.6619        |
| 1530.8267      | 13 | S  | 5  | 581.2683       | 291.1381        |
| 1587.8482      | 14 | G  | 4  | 494.2363       | 247.6221        |
| 1702.8751      | 15 | D  | 3  | 437.2149       | 219.1113        |
| 1849.9435      | 16 | F  | 2  | 322.1879       | 161.5979        |
|                | 17 | R  | 1  | 175.1195       | 88.0637         |

N-term:+29.04 K(1):+156.13  
K(6):+156.13

X-range:

0 - 0

MassTol: Y-zoom:

0. 1.

MassType:

☐AVG ☒MONO

Axis:

☒1 ☐2

Label:

☒I ☐M ☐-

Ions:

a ☐+ ☐2+ ☐3+

b ☒+ ☐2+ ☐3+

c ☐+ ☐2+ ☐3+

x ☐+ ☐2+ ☐3+

y ☒+ ☒2+ ☐3+

z ☐+ ☐2+ ☐3+

hide H<sub>2</sub>O/NH<sub>3</sub> ☐

zoom 112-122 ☐

GO

KTDPGIILKTENR, MH+ 1568.9376, m/z 392.9899  
L OS G17 P120811 220811-s1.02971.02971.4.dta

scan 2971: 8.8e+000

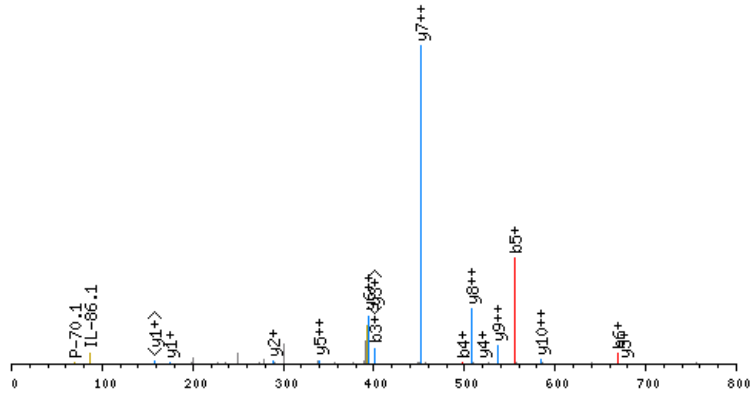

click image to zoom in; click top corners to zoom out [\[precursor±\]](#)

scan 2968: 393.0 m/z; 1.1e+001

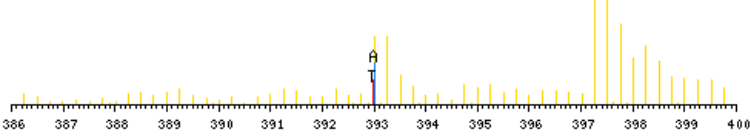

zoomed in precursor plot; T=theoretical m/z, A=acquired m/z

| b <sup>+</sup> | #  | AA | #  | y <sup>+</sup> | y <sup>2+</sup> |
|----------------|----|----|----|----------------|-----------------|
| 185.1654       | 1  | K  | 13 |                |                 |
| 286.2131       | 2  | T  | 12 | 1384.7800      | 692.8939        |
| 401.2400       | 3  | D  | 11 | 1283.7324      | 642.3701        |
| 498.2928       | 4  | P  | 10 | 1168.7054      | 584.8566        |
| 555.3142       | 5  | G  | 9  | 1071.6527      | 536.3302        |
| 668.3983       | 6  | I  | 8  | 1014.6312      | 507.8195        |
| 781.4824       | 7  | I  | 7  | 901.5471       | 451.2775        |
| 894.5664       | 8  | L  | 6  | 788.4631       | 394.7354        |
| 1050.6927      | 9  | K  | 5  | 675.3790       | 338.1934        |
| 1151.7404      | 10 | T  | 4  | 519.2527       | 260.1303        |
| 1280.7830      | 11 | E  | 3  | 418.2050       | 209.6064        |
| 1394.8259      | 12 | N  | 2  | 289.1624       | 145.0851        |
|                | 13 | R  | 1  | 175.1195       | 88.0637         |

N-term:+29.04 K(1):+156.13  
K(9):+156.13

X-range:

0 - 0

MassTol: Y-zoom:

0. 1.

MassType:

☐AVG ☒MONO

Axis:

☒1 ☐2

Label:

☒I ☐M ☐-

Ions:

a ☐+ ☐2+ ☐3+

b ☒+ ☐2+ ☐3+

c ☐+ ☐2+ ☐3+

x ☐+ ☐2+ ☐3+

y ☒+ ☒2+ ☐3+

z ☐+ ☐2+ ☐3+

hide H<sub>2</sub>O/NH<sub>3</sub> ☐

zoom 112-122 ☐

GO

KTGTAEMSSILEER, MH+ 1619.8951, m/z 540.6365  
H OS G16 P120811 220811-s1.04205.04205.3.dta

scan 4205; 5.3e+000

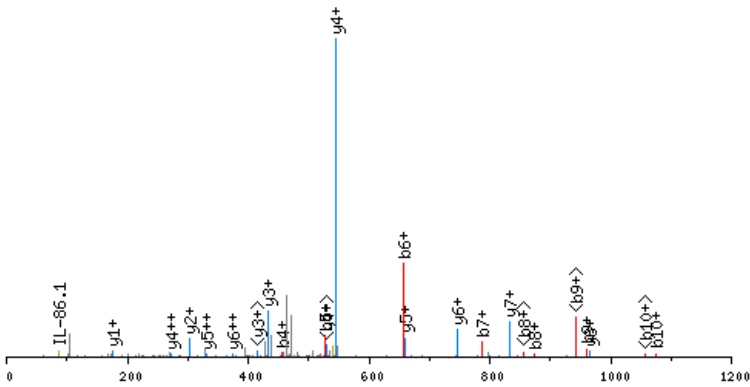

click image to zoom in; click top corners to zoom out

[precursor±]

scan 4203; 540.6 m/z; 9.6e+000

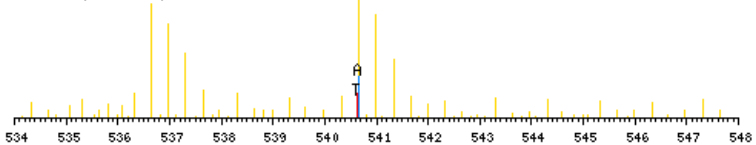

zoomed in precursor plot; T=theoretical m/z, A=acquired m/z

| b <sup>+</sup> | #  | AA | #  | y <sup>+</sup> | y <sup>2+</sup> |
|----------------|----|----|----|----------------|-----------------|
| 197.2290       | 1  | K  | 14 |                |                 |
| 298.2767       | 2  | T  | 13 | 1423.6739      | 712.3409        |
| 355.2981       | 3  | G  | 12 | 1322.6262      | 661.8170        |
| 456.3458       | 4  | T  | 11 | 1265.6047      | 633.3063        |
| 527.3829       | 5  | A  | 10 | 1164.5571      | 582.7824        |
| 656.4255       | 6  | E  | 9  | 1093.5199      | 547.2639        |
| 787.4660       | 7  | M  | 8  | 964.4774       | 482.7426        |
| 874.4980       | 8  | S  | 7  | 833.4369       | 417.2223        |
| 961.5301       | 9  | S  | 6  | 746.4048       | 373.7063        |
| 1074.6141      | 10 | I  | 5  | 659.3728       | 330.1903        |
| 1187.6982      | 11 | L  | 4  | 546.2888       | 273.6483        |
| 1316.7408      | 12 | E  | 3  | 433.2047       | 217.1063        |
| 1445.7834      | 13 | E  | 2  | 304.1621       | 152.5850        |
|                | 14 | R  | 1  | 175.1195       | 88.0637         |

N-term:+35.07 K(1):+162.16

X-range:

0 - 0

MassTol: Y-zoom:

0. 1.

MassType:

☐ AVG ☒ MONO

Axis:

☒ 1 ☐ 2

Label:

☒ I ☐ M ☐ -

Ions:

a ☐ + ☐ 2+ ☐ 3+

b ☒ + ☐ 2+ ☐ 3+

c ☐ + ☐ 2+ ☐ 3+

x ☐ + ☐ 2+ ☐ 3+

y ☒ + ☒ 2+ ☐ 3+

z ☐ + ☐ 2+ ☐ 3+

hide H<sub>2</sub>O/NH<sub>3</sub> ☐

zoom 112-122 ☐

GO

KTPAQFDADLR, MH+ 1446.7593, m/z 482.9246  
L OS G16 P120811 220811-s1.03574.03574.3.dta

scan 3574; 1.6e+000

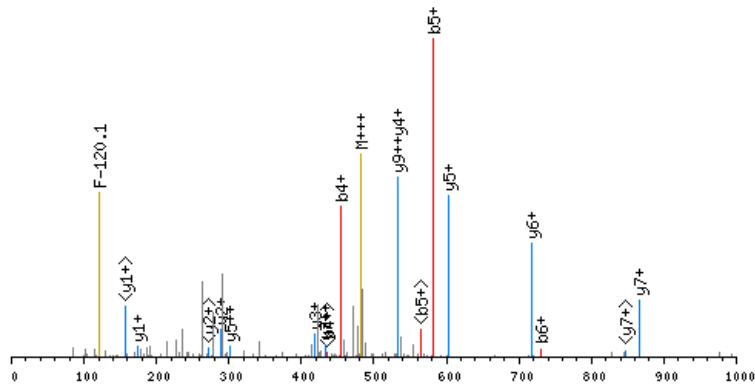

click image to zoom in; click top corners to zoom out

[precursor±]

scan 3573; 482.9 m/z; 7.7e+000

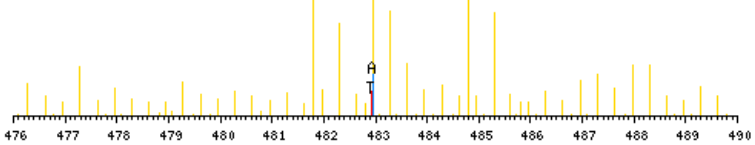

zoomed in precursor plot; T=theoretical m/z, A=acquired m/z

| b <sup>+</sup> | #  | AA | #  | y <sup>+</sup> | y <sup>2+</sup> |
|----------------|----|----|----|----------------|-----------------|
| 185.1654       | 1  | K  | 12 |                |                 |
| 286.2131       | 2  | T  | 11 | 1262.6017      | 631.8048        |
| 383.2658       | 3  | P  | 10 | 1161.5540      | 581.2809        |
| 454.3030       | 4  | A  | 9  | 1064.5013      | 532.7545        |
| 582.3615       | 5  | Q  | 8  | 993.4641       | 497.2360        |
| 729.4299       | 6  | F  | 7  | 865.4056       | 433.2067        |
| 844.4569       | 7  | D  | 6  | 718.3372       | 359.6725        |
| 915.4940       | 8  | A  | 5  | 603.3102       | 302.1590        |
| 1030.5209      | 9  | D  | 4  | 532.2731       | 266.6405        |
| 1159.5635      | 10 | E  | 3  | 417.2462       | 209.1270        |
| 1272.6476      | 11 | L  | 2  | 288.2036       | 144.6057        |
|                | 12 | R  | 1  | 175.1195       | 88.0637         |

N-term:+29.04 K(1):+156.13

X-range:

0 - 0

MassTol: Y-zoom:

0. 1.

MassType:

☐ AVG ☒ MONO

Axis:

☒ 1 ☐ 2

Label:

☒ I ☐ M ☐ -

Ions:

a ☐ + ☐ 2+ ☐ 3+

b ☒ + ☐ 2+ ☐ 3+

c ☐ + ☐ 2+ ☐ 3+

x ☐ + ☐ 2+ ☐ 3+

y ☒ + ☒ 2+ ☐ 3+

z ☐ + ☐ 2+ ☐ 3+

hide H<sub>2</sub>O/NH<sub>3</sub> ☐

zoom 112-122 ☐

GO

KVDVVGATQGQAGSCSR, MH+ 1775.9074, m/z 592.6406  
L OS G16 P120811 220811-s1.02470.02470.3.dta

scan 2470; 2.0e+000

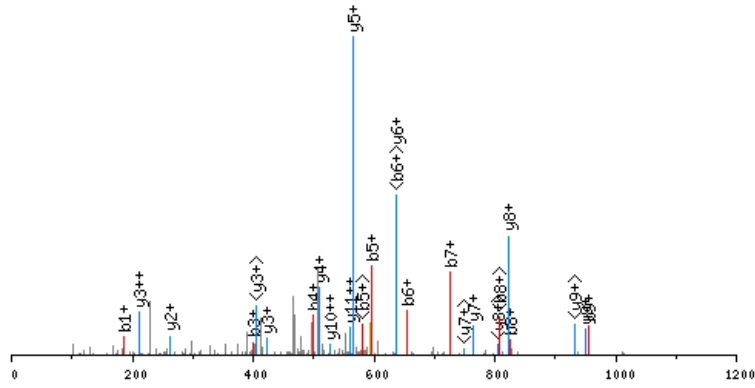

click image to zoom in; click top corners to zoom out [\[precursor±\]](#)

scan 2468; 592.6 m/z; 4.7e+000

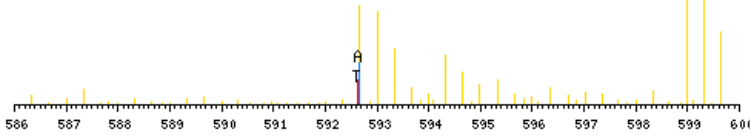

zoomed in precursor plot; T=theoretical m/z, A=acquired m/z

| b <sup>+</sup> | #  | AA | #  | y <sup>+</sup> | y <sup>2+</sup> |
|----------------|----|----|----|----------------|-----------------|
| 185.1654       | 1  | K  | 17 |                |                 |
| 284.2338       | 2  | V  | 16 | 1591.7498      | 796.3788        |
| 399.2608       | 3  | D  | 15 | 1492.6814      | 746.8446        |
| 498.3292       | 4  | V  | 14 | 1377.6544      | 689.3311        |
| 597.3976       | 5  | V  | 13 | 1278.5860      | 639.7969        |
| 654.4190       | 6  | G  | 12 | 1179.5176      | 590.2627        |
| 725.4562       | 7  | A  | 11 | 1122.4961      | 561.7520        |
| 826.5038       | 8  | T  | 10 | 1051.4590      | 526.2334        |
| 954.5624       | 9  | Q  | 9  | 950.4114       | 475.7096        |
| 1011.5839      | 10 | G  | 8  | 822.3528       | 411.6803        |
| 1139.6425      | 11 | Q  | 7  | 765.3313       | 383.1696        |
| 1210.6796      | 12 | A  | 6  | 637.2727       | 319.1403        |
| 1267.7010      | 13 | G  | 5  | 566.2356       | 283.6217        |
| 1354.7331      | 14 | S  | 4  | 509.2142       | 255.1110        |
| 1514.7637      | 15 | C  | 3  | 422.1821       | 211.5950        |
| 1601.7957      | 16 | S  | 2  | 262.1515       | 131.5797        |
|                | 17 | R  | 1  | 175.1195       | 88.0637         |

N-term:+29.04 K(1):+156.13  
C(15):+160.03

X-range:

0 - 0

MassTol: Y-zoom:

0. 1.

MassType:

☐ AVG ☒ MONO

Axis:

☒ 1 ☐ 2

Label:

☒ I ☐ M ☐ -

Ions:

a ☐ + ☐ 2+ ☐ 3+

b ☒ + ☐ 2+ ☐ 3+

c ☐ + ☐ 2+ ☐ 3+

x ☐ + ☐ 2+ ☐ 3+

y ☒ + ☒ 2+ ☐ 3+

z ☐ + ☐ 2+ ☐ 3+

hide H<sub>2</sub>O/NH<sub>3</sub> ☐

zoom 112-122 ☐

GO

KVEDNFEDIITKPPVR, MH+ 1984.1120, m/z 496.7834  
L OS G17 P120811 220811-s1.05552.05552.4.dta

scan 5552; 3.6e+000

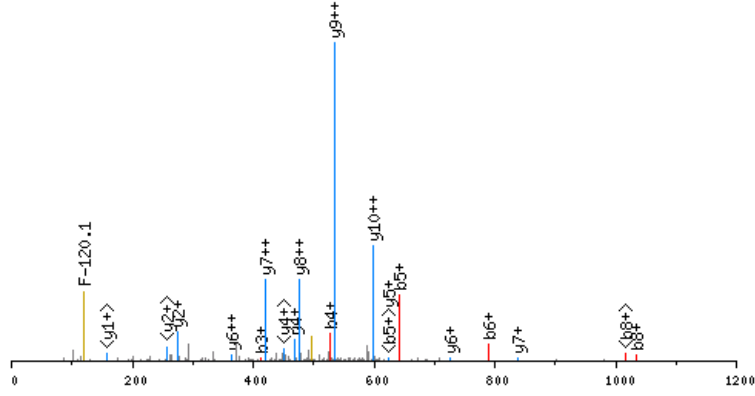

click image to zoom in; click top corners to zoom out [\[precursor±\]](#)

scan 5548; 496.8 m/z; 1.2e+001

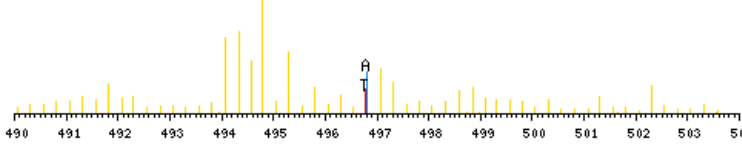

zoomed in precursor plot; T=theoretical m/z, A=acquired m/z

| b <sup>+</sup> | #  | AA | #  | y <sup>+</sup> | y <sup>2+</sup> |
|----------------|----|----|----|----------------|-----------------|
| 185.1654       | 1  | K  | 16 |                |                 |
| 284.2338       | 2  | V  | 15 | 1799.9544      | 900.4811        |
| 413.2764       | 3  | E  | 14 | 1700.8860      | 850.9469        |
| 528.3034       | 4  | D  | 13 | 1571.8434      | 786.4256        |
| 642.3463       | 5  | N  | 12 | 1456.8164      | 728.9121        |
| 789.4147       | 6  | F  | 11 | 1342.7735      | 671.8907        |
| 918.4573       | 7  | E  | 10 | 1195.7051      | 598.3565        |
| 1033.4842      | 8  | D  | 9  | 1066.6625      | 533.8352        |
| 1146.5683      | 9  | I  | 8  | 951.6355       | 476.3217        |
| 1259.6524      | 10 | I  | 7  | 838.5515       | 419.7797        |
| 1360.7000      | 11 | T  | 6  | 725.4674       | 363.2376        |
| 1516.8263      | 12 | K  | 5  | 624.4197       | 312.7138        |
| 1613.8791      | 13 | P  | 4  | 468.2934       | 234.6506        |
| 1710.9319      | 14 | P  | 3  | 371.2407       | 186.1243        |
| 1810.0003      | 15 | V  | 2  | 274.1879       | 137.5979        |
|                | 16 | R  | 1  | 175.1195       | 88.0637         |

N-term:+29.04 K(1):+156.13  
K(12):+156.13

X-range:

0 - 0

MassTol: Y-zoom:

0. 1.

MassType:

☐ AVG ☒ MONO

Axis:

☒ 1 ☐ 2

Label:

☒ I ☐ M ☐ -

Ions:

a ☐ + ☐ 2+ ☐ 3+

b ☒ + ☐ 2+ ☐ 3+

c ☐ + ☐ 2+ ☐ 3+

x ☐ + ☐ 2+ ☐ 3+

y ☒ + ☒ 2+ ☐ 3+

z ☐ + ☐ 2+ ☐ 3+

hide H<sub>2</sub>O/NH<sub>3</sub> ☐

zoom 112-122 ☐

GO

KVGGTSDVEVNEKKDR, MH+ 1873.0396, m/z 469.0153  
L OS G18 P120811 220811-s1.01826.01826.4.dta

scan 1826; 4.0e-001

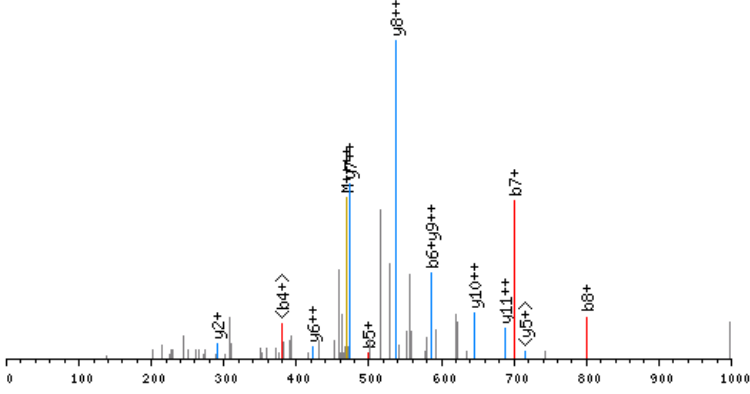

click image to zoom in; click top corners to zoom out [\[precursor±\]](#)

scan 1825; 469.0 m/z; 9.6e-001

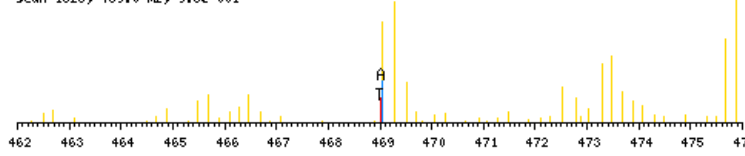

zoomed in precursor plot; T=theoretical m/z, A=acquired m/z

| b <sup>+</sup> | #  | AA | #  | y <sup>+</sup> | y <sup>2+</sup> |
|----------------|----|----|----|----------------|-----------------|
| 185.1654       | 1  | K  | 16 |                |                 |
| 284.2338       | 2  | V  | 15 | 1688.8820      | 844.9449        |
| 341.2553       | 3  | G  | 14 | 1589.8136      | 795.4107        |
| 398.2767       | 4  | G  | 13 | 1532.7921      | 766.9000        |
| 499.3244       | 5  | T  | 12 | 1475.7706      | 738.3892        |
| 586.3564       | 6  | S  | 11 | 1374.7230      | 687.8654        |
| 701.3834       | 7  | D  | 10 | 1287.6909      | 644.3494        |
| 800.4518       | 8  | V  | 9  | 1172.6640      | 586.8359        |
| 929.4944       | 9  | E  | 8  | 1073.5956      | 537.3017        |
| 1028.5628      | 10 | V  | 7  | 944.5530       | 472.7804        |
| 1142.6057      | 11 | N  | 6  | 845.4846       | 423.2462        |
| 1271.6483      | 12 | E  | 5  | 731.4416       | 366.2247        |
| 1427.7746      | 13 | K  | 4  | 602.3990       | 301.7034        |
| 1583.9009      | 14 | K  | 3  | 446.2727       | 223.6403        |
| 1698.9279      | 15 | D  | 2  | 290.1464       | 145.5771        |
|                | 16 | R  | 1  | 175.1195       | 88.0637         |

N-term:+29.04 K(1):+156.13  
K(13):+156.13 K(14):+156.13



X-range:

0 - 0

MassTol: Y-zoom:

0. 1.

MassType:

☐AVG ☒MONO

Axis:

☒1 ☐2

Label:

☒I ☐M ☐-

Ions:

a ☐+ ☐2+ ☐3+

b ☒+ ☐2+ ☐3+

c ☐+ ☐2+ ☐3+

x ☐+ ☐2+ ☐3+

y ☒+ ☒2+ ☐3+

z ☐+ ☐2+ ☐3+

hide H<sub>2</sub>O/NH<sub>3</sub> ☐

zoom 112-122 ☐

GO

KVSHQGYGSTTEFEEPR, MH+ 2007.9776, m/z 502.7499  
L OS G17 P120811 220811-s1.02637.02637.4.dta

scan 2637; 1.3e+000

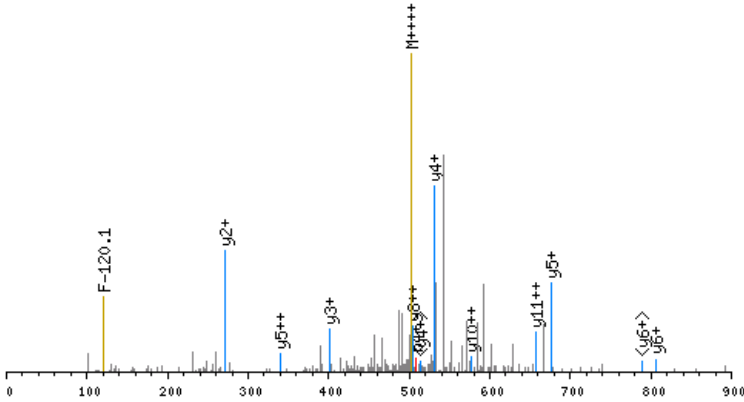

click image to zoom in; click top corners to zoom out

[precursor±]

scan 2633; 502.8 m/z; 7.8e+000

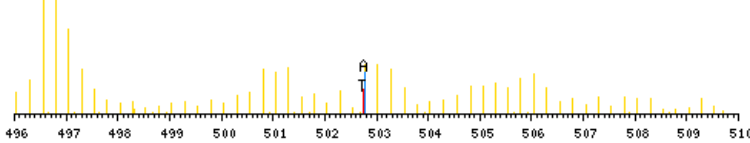

zoomed in precursor plot; T=theoretical m/z, A=acquired m/z

| b <sup>+</sup> | #  | AA | #  | y <sup>+</sup> | y <sup>2+</sup> |
|----------------|----|----|----|----------------|-----------------|
| 185.1654       | 1  | K  | 17 |                |                 |
| 284.2338       | 2  | V  | 16 | 1823.8200      | 912.4139        |
| 371.2658       | 3  | S  | 15 | 1724.7516      | 862.8797        |
| 508.3248       | 4  | H  | 14 | 1637.7196      | 819.3637        |
| 636.3833       | 5  | Q  | 13 | 1500.6607      | 750.8343        |
| 693.4048       | 6  | G  | 12 | 1372.6021      | 686.8050        |
| 856.4681       | 7  | Y  | 11 | 1315.5806      | 658.2942        |
| 913.4896       | 8  | G  | 10 | 1152.5173      | 576.7626        |
| 1000.5216      | 9  | S  | 9  | 1095.4958      | 548.2518        |
| 1101.5693      | 10 | T  | 8  | 1008.4638      | 504.7358        |
| 1202.6170      | 11 | T  | 7  | 907.4161       | 454.2120        |
| 1331.6596      | 12 | E  | 6  | 806.3685       | 403.6881        |
| 1478.7280      | 13 | F  | 5  | 677.3259       | 339.1668        |
| 1607.7706      | 14 | E  | 4  | 530.2575       | 265.6326        |
| 1736.8132      | 15 | E  | 3  | 401.2149       | 201.1113        |
| 1833.8659      | 16 | P  | 2  | 272.1723       | 136.5900        |
|                | 17 | R  | 1  | 175.1195       | 88.0637         |

N-term:+29.04 K(1):+156.13

X-range:

0 - 0

MassTol: Y-zoom:

0. 1.

MassType:

☐ AVG ☒ MONO

Axis:

☒ 1 ☐ 2

Label:

☒ I ☐ M ☐ -

Ions:

a ☐ + ☐ 2+ ☐ 3+

b ☒ + ☐ 2+ ☐ 3+

c ☐ + ☐ 2+ ☐ 3+

x ☐ + ☐ 2+ ☐ 3+

y ☒ + ☒ 2+ ☐ 3+

z ☐ + ☐ 2+ ☐ 3+

hide H<sub>2</sub>O/NH<sub>3</sub> ☐

zoom 112-122 ☐

GO

KVTQLDLGPKELSR, MH+ 1783.0330, m/z 446.5137  
L OS G17 P120811 220811-s1.04064.04064.4.dta

scan 4064; 5.0e+000

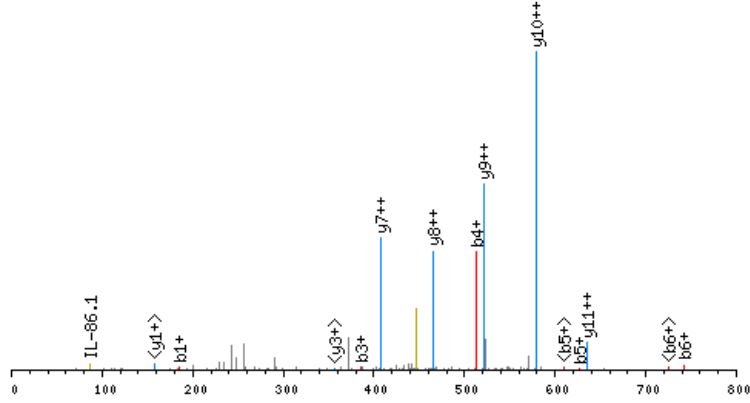

click image to zoom in; click top corners to zoom out [\[precursor±\]](#)

scan 4063; 446.5 m/z; 1.2e+001

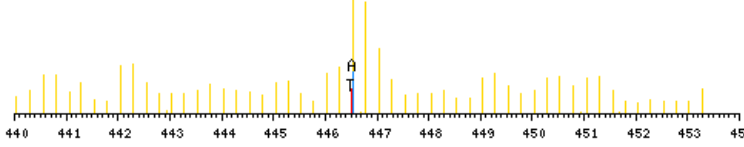

zoomed in precursor plot; T=theoretical m/z, A=acquired m/z

| b <sup>+</sup> | #  | AA | #  | y <sup>+</sup> | y <sup>2+</sup> |
|----------------|----|----|----|----------------|-----------------|
| 185.1654       | 1  | K  | 15 |                |                 |
| 284.2338       | 2  | V  | 14 | 1598.8754      | 799.9416        |
| 385.2815       | 3  | T  | 13 | 1499.8070      | 750.4074        |
| 513.3401       | 4  | Q  | 12 | 1398.7593      | 699.8836        |
| 626.4241       | 5  | L  | 11 | 1270.7007      | 635.8543        |
| 741.4511       | 6  | D  | 10 | 1157.6167      | 579.3122        |
| 854.5351       | 7  | L  | 9  | 1042.5897      | 521.7988        |
| 969.5621       | 8  | D  | 8  | 929.5057       | 465.2567        |
| 1026.5835      | 9  | G  | 7  | 814.4787       | 407.7433        |
| 1123.6363      | 10 | P  | 6  | 757.4573       | 379.2325        |
| 1279.7626      | 11 | K  | 5  | 660.4045       | 330.7062        |
| 1408.8052      | 12 | E  | 4  | 504.2782       | 252.6430        |
| 1521.8893      | 13 | L  | 3  | 375.2356       | 188.1217        |
| 1608.9213      | 14 | S  | 2  | 262.1515       | 131.5797        |
|                | 15 | R  | 1  | 175.1195       | 88.0637         |

N-term:+29.04 K(1):+156.13  
K(11):+156.13

X-range:

0 - 0

MassTol: Y-zoom:

0. 1.

MassType:

☐AVG ☒MONO

Axis:

☒1 ☐2

Label:

☒I ☐M ☐-

Ions:

a ☐+ ☐2+ ☐3+

b ☒+ ☐2+ ☐3+

c ☐+ ☐2+ ☐3+

x ☐+ ☐2+ ☐3+

y ☒+ ☒2+ ☐3+

z ☐+ ☐2+ ☐3+

hide H<sub>2</sub>O/NH<sub>3</sub> ☐

zoom 112-122 ☐

GO

LAEKYEWDVAEAR, MH+ 1647.9019, m/z 549.9721  
H OS G16 P120811 220811-s1.04470.04470.3.dta

scan 4470; 7.7e+000

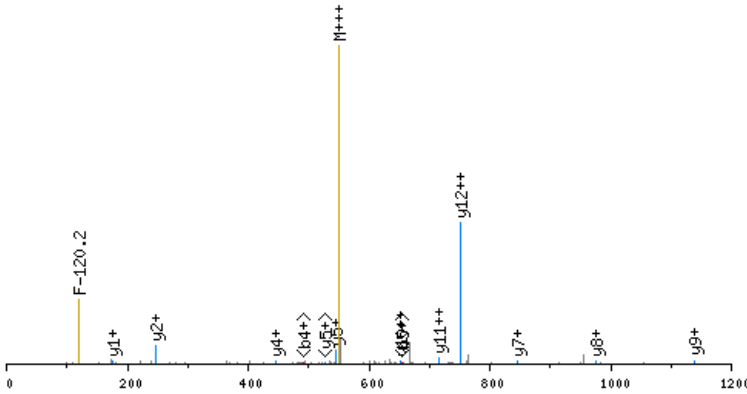

click image to zoom in; click top corners to zoom out [\[precursor±\]](#)

scan 4468; 550.0 m/z; 6.0e+000

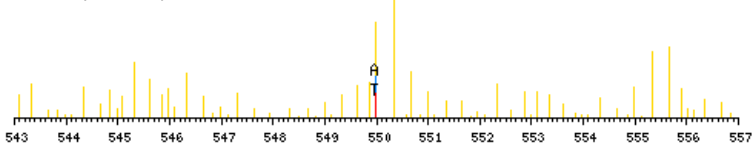

zoomed in precursor plot; T=theoretical m/z, A=acquired m/z

| b <sup>+</sup> | #  | AA | #  | y <sup>+</sup> | y <sup>2+</sup> |
|----------------|----|----|----|----------------|-----------------|
| 148.1550       | 1  | L  | 13 |                |                 |
| 219.1921       | 2  | A  | 12 | 1500.7547      | 750.8813        |
| 348.2347       | 3  | E  | 11 | 1429.7176      | 715.3627        |
| 510.3928       | 4  | K  | 10 | 1300.6750      | 650.8414        |
| 673.4561       | 5  | Y  | 9  | 1138.5169      | 569.7624        |
| 802.4987       | 6  | E  | 8  | 975.4536       | 488.2307        |
| 988.5780       | 7  | W  | 7  | 846.4110       | 423.7094        |
| 1103.6049      | 8  | D  | 6  | 660.3317       | 330.6698        |
| 1202.6734      | 9  | V  | 5  | 545.3047       | 273.1563        |
| 1273.7105      | 10 | A  | 4  | 446.2363       | 223.6221        |
| 1402.7531      | 11 | E  | 3  | 375.1992       | 188.1035        |
| 1473.7902      | 12 | A  | 2  | 246.1566       | 123.5822        |
|                | 13 | R  | 1  | 175.1195       | 88.0637         |

N-term:+35.07 K(4):+162.16

X-range:

0 - 0

MassTol: Y-zoom:

0. 1.

MassType:

☐AVG ☒MONO

Axis:

☒1 ☐2

Label:

☒I ☐M ☐-

Ions:

a ☐+ ☐2+ ☐3+

b ☒+ ☐2+ ☐3+

c ☐+ ☐2+ ☐3+

x ☐+ ☐2+ ☐3+

y ☒+ ☒2+ ☐3+

z ☐+ ☐2+ ☐3+

hide H<sub>2</sub>O/NH<sub>3</sub> ☐

zoom 112-122 ☐

GO

LAEKSNPTLNEYHTR, MH+ 1942.0398, m/z 486.2654  
L OS G17 P120811 220811-s1.03476.03476.4.dta

scan 3476; 1.1e+001

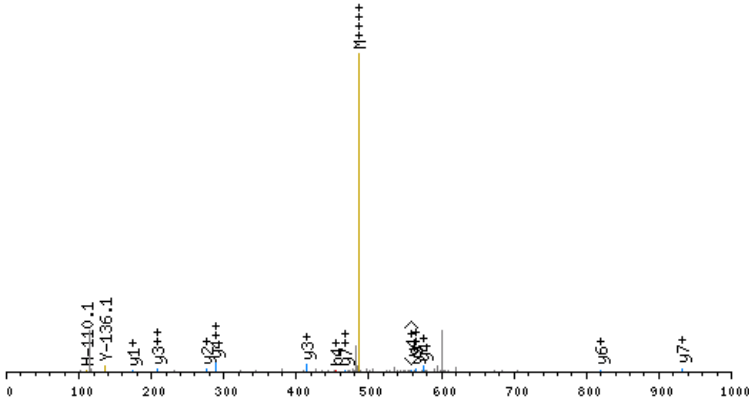

click image to zoom in; click top corners to zoom out

[precursor±]

scan 3473; 486.3 m/z; 1.4e+001

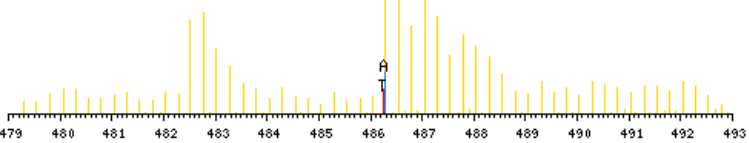

zoomed in precursor plot; T=theoretical m/z, A=acquired m/z

| b <sup>+</sup> | #  | AA | #  | y <sup>+</sup> | y <sup>2+</sup> |
|----------------|----|----|----|----------------|-----------------|
| 142.1232       | 1  | L  | 16 |                |                 |
| 213.1603       | 2  | A  | 15 | 1800.9245      | 900.9661        |
| 342.2029       | 3  | E  | 14 | 1729.8874      | 865.4476        |
| 455.2869       | 4  | L  | 13 | 1600.8448      | 800.9263        |
| 611.4132       | 5  | K  | 12 | 1487.7607      | 744.3843        |
| 698.4453       | 6  | S  | 11 | 1331.6344      | 666.3211        |
| 812.4882       | 7  | N  | 10 | 1244.6024      | 622.8051        |
| 909.5410       | 8  | P  | 9  | 1130.5594      | 565.7836        |
| 1010.5886      | 9  | T  | 8  | 1033.5067      | 517.2573        |
| 1123.6727      | 10 | L  | 7  | 932.4590       | 466.7334        |
| 1237.7156      | 11 | N  | 6  | 819.3749       | 410.1914        |
| 1366.7582      | 12 | E  | 5  | 705.3320       | 353.1699        |
| 1529.8215      | 13 | Y  | 4  | 576.2894       | 288.6486        |
| 1666.8805      | 14 | H  | 3  | 413.2261       | 207.1170        |
| 1767.9281      | 15 | T  | 2  | 276.1672       | 138.5875        |
|                | 16 | R  | 1  | 175.1195       | 88.0637         |

N-term:+29.04 K(5):+156.13

X-range:  

00

MassTol: Y-zoom:  

0.1.

MassType:  

☐AVG☒MONO

Axis:  

☒1☐2

Label:  

☒I☐M☐-

Ions:  

a

☐+☐2+☐3+

b

☒+☐2+☐3+

c

☐+☐2+☐3+

x

☐+☐2+☐3+

y

☒+☒2+☐3+

z

☐+☐2+☐3+

hide H<sub>2</sub>O/NH<sub>3</sub>☐

zoom 112-122☐

GO

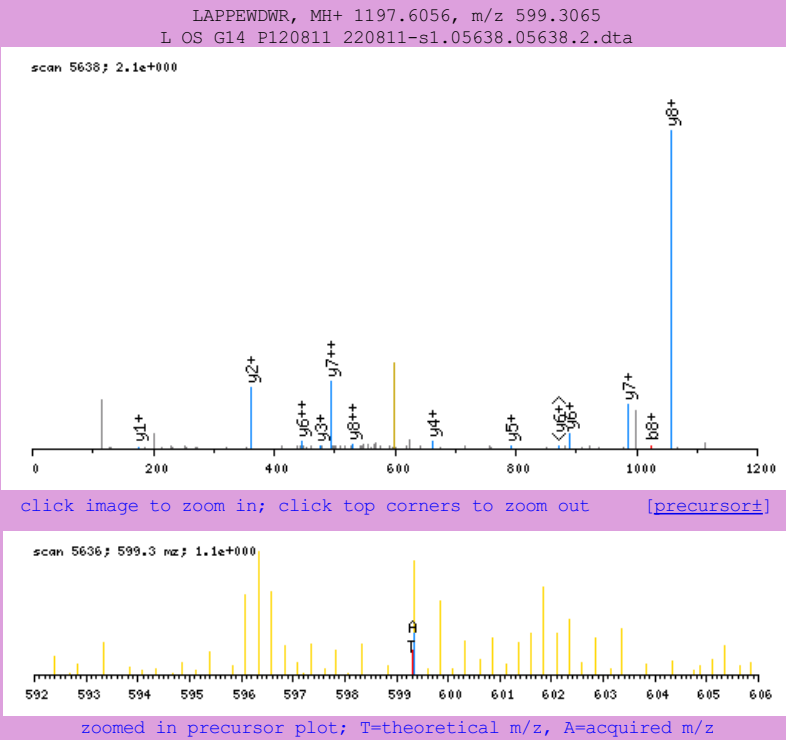

| b <sup>+</sup> | # | AA | # | y <sup>+</sup> | y <sup>2+</sup> |
|----------------|---|----|---|----------------|-----------------|
| 142.1232       | 1 | L  | 9 |                |                 |
| 213.1603       | 2 | A  | 8 | 1056.4903      | 528.7491        |
| 310.2130       | 3 | P  | 7 | 985.4532       | 493.2305        |
| 407.2658       | 4 | P  | 6 | 888.4004       | 444.7041        |
| 536.3084       | 5 | E  | 5 | 791.3477       | 396.1777        |
| 722.3877       | 6 | W  | 4 | 662.3051       | 331.6564        |
| 837.4147       | 7 | D  | 3 | 476.2258       | 238.6168        |
| 1023.4940      | 8 | W  | 2 | 361.1988       | 181.1033        |
|                | 9 | R  | 1 | 175.1195       | 88.0637         |

N-term:+29.04

X-range:

0 - 0

MassTol: Y-zoom:

0. 1.

MassType:

☐AVG ☒MONO

Axis:

☒1 ☐2

Label:

☒I ☐M ☐-

Ions:

a ☐+ ☐2+ ☐3+

b ☒+ ☐2+ ☐3+

c ☐+ ☐2+ ☐3+

x ☐+ ☐2+ ☐3+

y ☒+ ☒2+ ☐3+

z ☐+ ☐2+ ☐3+

hide H<sub>2</sub>O/NH<sub>3</sub> ☐

zoom 112-122 ☐

GO

LAQDGVINEEALSVTELDLR, MH+ 2100.0824, m/z 700.6990  
L OS G12 P120811 220811-s1.05009.05009.3.dta

scan 5009; 1.1e+000

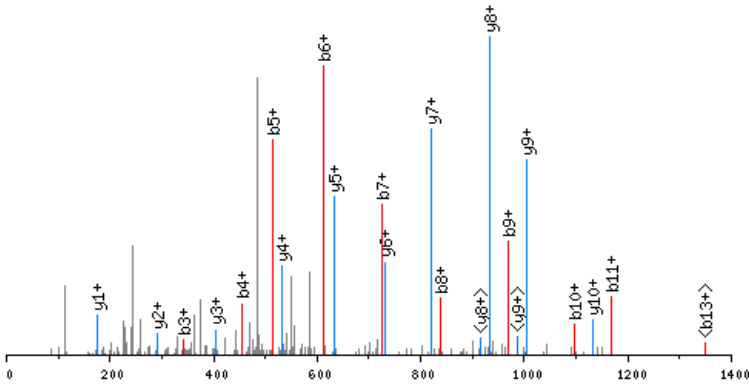

click image to zoom in; click top corners to zoom out

[precursor±]

scan 5007; 700.7 m/z; 1.7e+000

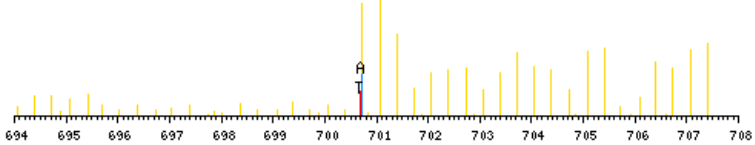

zoomed in precursor plot; T=theoretical m/z, A=acquired m/z

| b <sup>+</sup> | #  | AA | #  | y <sup>+</sup> | y <sup>2+</sup> |
|----------------|----|----|----|----------------|-----------------|
| 142.1232       | 1  | L  | 19 |                |                 |
| 213.1603       | 2  | A  | 18 | 1958.9671      | 979.9875        |
| 341.2189       | 3  | Q  | 17 | 1887.9300      | 944.4689        |
| 456.2458       | 4  | D  | 16 | 1759.8714      | 880.4396        |
| 513.2673       | 5  | G  | 15 | 1644.8445      | 822.9261        |
| 612.3357       | 6  | V  | 14 | 1587.8230      | 794.4154        |
| 725.4197       | 7  | I  | 13 | 1488.7546      | 744.8812        |
| 839.4627       | 8  | N  | 12 | 1375.6705      | 688.3392        |
| 968.5053       | 9  | E  | 11 | 1261.6276      | 631.3177        |
| 1097.5479      | 10 | E  | 10 | 1132.5850      | 566.7964        |
| 1168.5850      | 11 | A  | 9  | 1003.5424      | 502.2751        |
| 1281.6690      | 12 | L  | 8  | 932.5053       | 466.7566        |
| 1368.7011      | 13 | S  | 7  | 819.4212       | 410.2145        |
| 1467.7695      | 14 | V  | 6  | 732.3892       | 366.6985        |
| 1568.8172      | 15 | T  | 5  | 633.3208       | 317.1643        |
| 1697.8597      | 16 | E  | 4  | 532.2731       | 266.6405        |
| 1810.9438      | 17 | L  | 3  | 403.2305       | 202.1192        |
| 1925.9708      | 18 | D  | 2  | 290.1464       | 145.5771        |
|                | 19 | R  | 1  | 175.1195       | 88.0637         |

N-term:+29.04

X-range:

0 - 0

MassTol: Y-zoom:

0. 1.

MassType:

☐AVG ☒MONO

Axis:

☒1 ☐2

Label:

☒I ☐M ☐-

Ions:

a ☐+ ☐2+ ☐3+

b ☒+ ☐2+ ☐3+

c ☐+ ☐2+ ☐3+

x ☐+ ☐2+ ☐3+

y ☒+ ☒2+ ☐3+

z ☐+ ☐2+ ☐3+

hide H<sub>2</sub>O/NH<sub>3</sub> ☐

zoom 112-122 ☐

GO

LCEQQAELDYLCGR, MH+ 1788.8472, m/z 596.9539  
H OS G12 P120811 220811-s1.04006.04006.3.dta

scan 4006; 3.5e+000

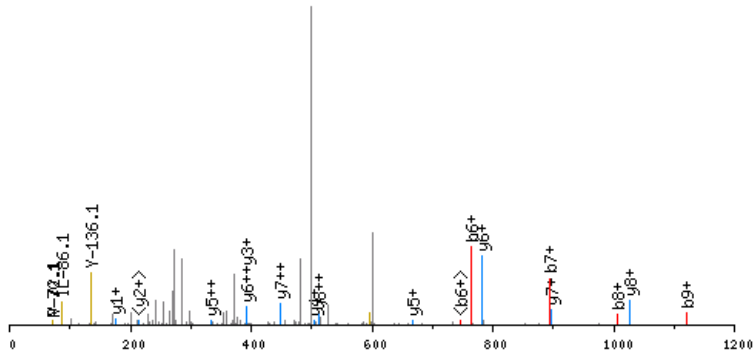

click image to zoom in; click top corners to zoom out [precursor±]

scan 4002; 597.0 m/z; 6.2e+000

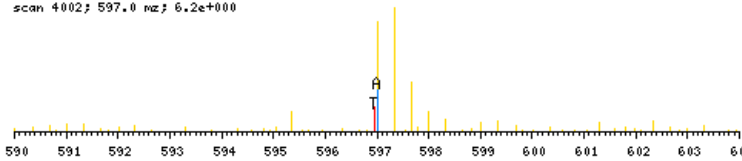

zoomed in precursor plot; T=theoretical m/z, A=acquired m/z

| b <sup>+</sup> | #  | AA | #  | y <sup>+</sup> | y <sup>2+</sup> |
|----------------|----|----|----|----------------|-----------------|
| 148.1550       | 1  | L  | 14 |                |                 |
| 308.1856       | 2  | C  | 13 | 1641.7000      | 821.3539        |
| 437.2282       | 3  | E  | 12 | 1481.6694      | 741.3386        |
| 565.2867       | 4  | Q  | 11 | 1352.6268      | 676.8173        |
| 693.3453       | 5  | Q  | 10 | 1224.5682      | 612.7880        |
| 764.3824       | 6  | A  | 9  | 1096.5097      | 548.7587        |
| 893.4250       | 7  | E  | 8  | 1025.4726      | 513.2402        |
| 1006.5091      | 8  | L  | 7  | 896.4300       | 448.7189        |
| 1121.5360      | 9  | D  | 6  | 783.3459       | 392.1769        |
| 1284.5994      | 10 | Y  | 5  | 668.3190       | 334.6634        |
| 1397.6834      | 11 | L  | 4  | 505.2556       | 253.1317        |
| 1557.7140      | 12 | C  | 3  | 392.1716       | 196.5897        |
| 1614.7355      | 13 | G  | 2  | 232.1410       | 116.5744        |
|                | 14 | R  | 1  | 175.1195       | 88.0637         |

N-term:+35.07 C(2):+160.03  
C(12):+160.03

X-range:

0 - 0

MassTol: Y-zoom:

0. 1.

MassType:

☐AVG ☒MONO

Axis:

☒1 ☐2

Label:

☒I ☐M ☐-

Ions:

a ☐+ ☐2+ ☐3+

b ☒+ ☐2+ ☐3+

c ☐+ ☐2+ ☐3+

x ☐+ ☐2+ ☐3+

y ☒+ ☒2+ ☐3+

z ☐+ ☐2+ ☐3+

hide H<sub>2</sub>O/NH<sub>3</sub> ☐

zoom 112-122 ☐

GO

LCGEEQGADAALHFNPR, MH+ 1912.8975, m/z 638.3040  
L OS G16 P120811 220811-s1.04455.04455.3.dta

scan 4455; 3.1e+000

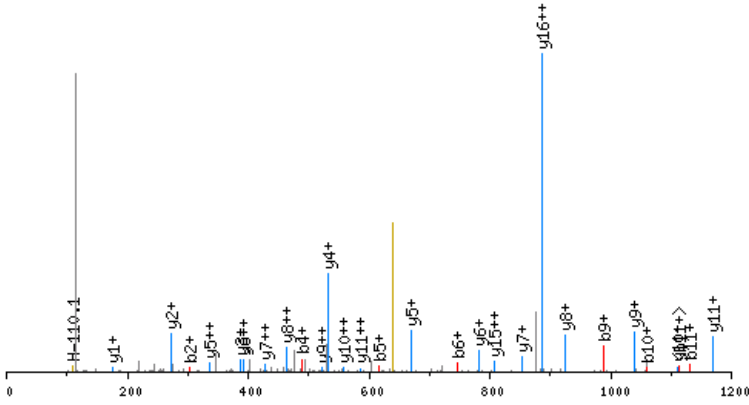

click image to zoom in; click top corners to zoom out

[precursor±]

scan 4453; 638.3 m/z; 1.0e+001

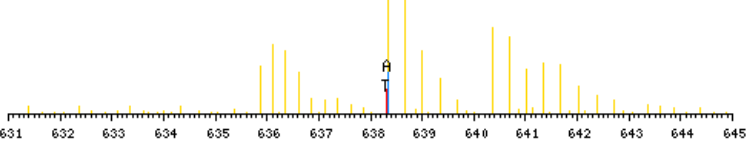

zoomed in precursor plot; T=theoretical m/z, A=acquired m/z

| b <sup>+</sup> | #  | AA | #  | y <sup>+</sup> | y <sup>2+</sup> |
|----------------|----|----|----|----------------|-----------------|
| 142.1232       | 1  | L  | 17 |                |                 |
| 302.1538       | 2  | C  | 16 | 1771.7822      | 886.3950        |
| 359.1752       | 3  | G  | 15 | 1611.7516      | 806.3797        |
| 488.2178       | 4  | E  | 14 | 1554.7301      | 777.8690        |
| 617.2604       | 5  | E  | 13 | 1425.6875      | 713.3477        |
| 745.3190       | 6  | Q  | 12 | 1296.6449      | 648.8264        |
| 802.3405       | 7  | G  | 11 | 1168.5863      | 584.7971        |
| 873.3776       | 8  | A  | 10 | 1111.5649      | 556.2863        |
| 988.4045       | 9  | D  | 9  | 1040.5278      | 520.7678        |
| 1059.4416      | 10 | A  | 8  | 925.5008       | 463.2543        |
| 1130.4787      | 11 | A  | 7  | 854.4637       | 427.7358        |
| 1243.5628      | 12 | L  | 6  | 783.4266       | 392.2172        |
| 1380.6217      | 13 | H  | 5  | 670.3425       | 335.6752        |
| 1527.6901      | 14 | F  | 4  | 533.2836       | 267.1457        |
| 1641.7331      | 15 | N  | 3  | 386.2152       | 193.6115        |
| 1738.7858      | 16 | P  | 2  | 272.1723       | 136.5900        |
|                | 17 | R  | 1  | 175.1195       | 88.0637         |

N-term:+29.04 C(2):+160.03

X-range:

0 - 0

MassTol: Y-zoom:

0. 1.

MassType:

☐AVG ☒MONO

Axis:

☒1 ☐2

Label:

☒I ☐M ☐-

Ions:

a ☐+ ☐2+ ☐3+

b ☒+ ☐2+ ☐3+

c ☐+ ☐2+ ☐3+

x ☐+ ☐2+ ☐3+

y ☒+ ☒2+ ☐3+

z ☐+ ☐2+ ☐3+

hide H<sub>2</sub>O/NH<sub>3</sub> ☐

zoom 112-122 ☐

GO

LDAGHKLNFAVASR, MH+ 1566.9392, m/z 392.4903  
H OS G17 P120811 220811-s1.03990.03990.4.dta

scan 3990; 3.6e+000

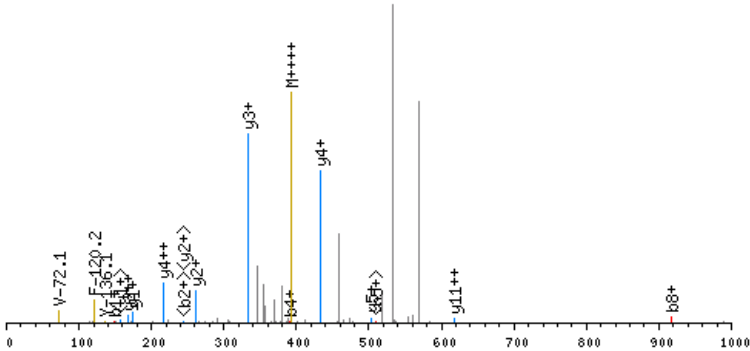

click image to zoom in; click top corners to zoom out

[precursor±]

scan 3988; 392.5 m/z; 7.2e+000

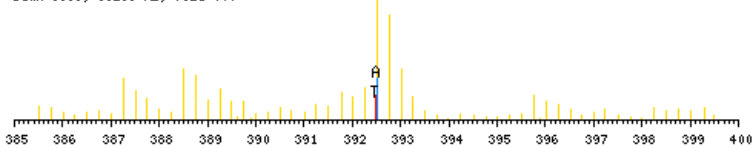

zoomed in precursor plot; T=theoretical m/z, A=acquired m/z

| b <sup>+</sup> | #  | AA | #  | y <sup>+</sup> | y <sup>2+</sup> |
|----------------|----|----|----|----------------|-----------------|
| 148.1550       | 1  | L  | 14 |                |                 |
| 263.1819       | 2  | D  | 13 | 1419.7921      | 710.4000        |
| 334.2190       | 3  | A  | 12 | 1304.7652      | 652.8865        |
| 391.2405       | 4  | G  | 11 | 1233.7281      | 617.3679        |
| 528.2994       | 5  | H  | 10 | 1176.7066      | 588.8572        |
| 690.4575       | 6  | K  | 9  | 1039.6477      | 520.3278        |
| 803.5416       | 7  | L  | 8  | 877.4896       | 439.2487        |
| 917.5845       | 8  | N  | 7  | 764.4055       | 382.7067        |
| 1064.6529      | 9  | F  | 6  | 650.3626       | 325.6852        |
| 1135.6900      | 10 | A  | 5  | 503.2942       | 252.1510        |
| 1234.7584      | 11 | V  | 4  | 432.2571       | 216.6324        |
| 1305.7955      | 12 | A  | 3  | 333.1886       | 167.0982        |
| 1392.8276      | 13 | S  | 2  | 262.1515       | 131.5797        |
|                | 14 | R  | 1  | 175.1195       | 88.0637         |

N-term:+35.07 K(6):+162.16

X-range:

0 - 0

MassTol: Y-zoom:

0. 1.

MassType:

☐AVG ☒MONO

Axis:

☒1 ☐2

Label:

☒I ☐M ☐-

Ions:

a ☐+ ☐2+ ☐3+

b ☒+ ☐2+ ☐3+

c ☐+ ☐2+ ☐3+

x ☐+ ☐2+ ☐3+

y ☒+ ☒2+ ☐3+

z ☐+ ☐2+ ☐3+

hide H<sub>2</sub>O/NH<sub>3</sub> ☐

zoom 112-122 ☐

GO

LDCILPPTTRPTDKPLR, MH+ 1960.1689, m/z 490.7977  
H OS G17 P120811 220811-s1.04504.04504.4.dta

scan 4504; 8.4e+000

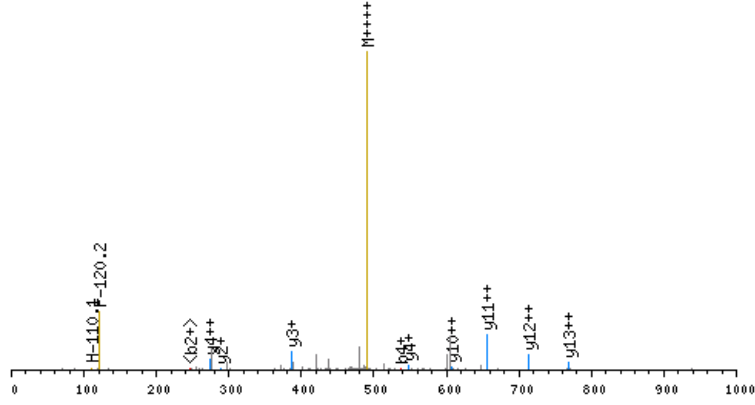

click image to zoom in; click top corners to zoom out

[precursor±]

scan 4503; 490.8 m/z; 8.0e+000

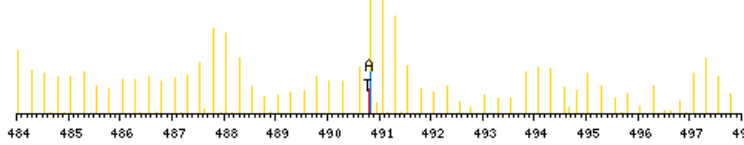

zoomed in precursor plot; T=theoretical m/z, A=acquired m/z

| b <sup>+</sup> | #  | AA | #  | y <sup>+</sup> | y <sup>2+</sup> |
|----------------|----|----|----|----------------|-----------------|
| 148.1550       | 1  | L  | 16 |                |                 |
| 263.1819       | 2  | D  | 15 | 1813.0218      | 907.0148        |
| 423.2125       | 3  | C  | 14 | 1697.9949      | 849.5013        |
| 536.2966       | 4  | I  | 13 | 1537.9643      | 769.4860        |
| 649.3806       | 5  | L  | 12 | 1424.8802      | 712.9440        |
| 746.4334       | 6  | P  | 11 | 1311.7961      | 656.4020        |
| 843.4862       | 7  | P  | 10 | 1214.7434      | 607.8756        |
| 944.5338       | 8  | T  | 9  | 1117.6906      | 559.3492        |
| 1100.6350      | 9  | R  | 8  | 1016.6429      | 508.8254        |
| 1197.6877      | 10 | P  | 7  | 860.5418       | 430.7748        |
| 1298.7354      | 11 | T  | 6  | 763.4891       | 382.2484        |
| 1413.7623      | 12 | D  | 5  | 662.4414       | 331.7246        |
| 1575.9204      | 13 | K  | 4  | 547.4144       | 274.2111        |
| 1672.9732      | 14 | P  | 3  | 385.2563       | 193.1321        |
| 1786.0573      | 15 | L  | 2  | 288.2036       | 144.6057        |
|                | 16 | R  | 1  | 175.1195       | 88.0637         |

N-term:+35.07 C(3):+160.03  
K(13):+162.16

X-range:

0 - 0

MassTol: Y-zoom:

0. 1.

MassType:

☐AVG ☒MONO

Axis:

☒1 ☐2

Label:

☒I ☐M ☐-

Ions:

a ☐+ ☐2+ ☐3+

b ☒+ ☐2+ ☐3+

c ☐+ ☐2+ ☐3+

x ☐+ ☐2+ ☐3+

y ☒+ ☒2+ ☐3+

z ☐+ ☐2+ ☐3+

hide H<sub>2</sub>O/NH<sub>3</sub> ☐

zoom 112-122 ☐

GO

LDGNPLTQSSLPPDMYECLR, MH+ 2334.1109, m/z 778.7085  
L OS G12 P120811 220811-s1.05294.05294.3.dta

scan 5294; 2.3e+000

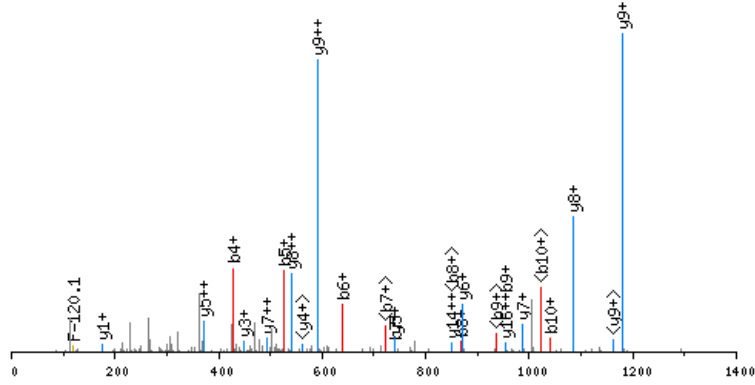

click image to zoom in; click top corners to zoom out [\[precursor±\]](#)

scan 5292; 778.7 m/z; 3.7e+000

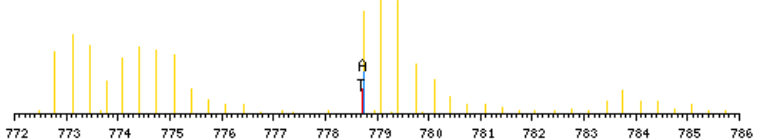

zoomed in precursor plot; T=theoretical m/z, A=acquired m/z

| b <sup>+</sup> | #  | AA | #  | y <sup>+</sup> | y <sup>2+</sup> |
|----------------|----|----|----|----------------|-----------------|
| 142.1232       | 1  | L  | 20 |                |                 |
| 257.1501       | 2  | D  | 19 | 2192.9956      | 1097.0017       |
| 314.1716       | 3  | G  | 18 | 2077.9686      | 1039.4882       |
| 428.2145       | 4  | N  | 17 | 2020.9472      | 1010.9775       |
| 525.2673       | 5  | P  | 16 | 1906.9042      | 953.9560        |
| 638.3513       | 6  | L  | 15 | 1809.8515      | 905.4297        |
| 739.3990       | 7  | T  | 14 | 1696.7674      | 848.8876        |
| 867.4576       | 8  | Q  | 13 | 1595.7197      | 798.3638        |
| 954.4896       | 9  | S  | 12 | 1467.6612      | 734.3345        |
| 1041.5216      | 10 | S  | 11 | 1380.6291      | 690.8185        |
| 1154.6057      | 11 | L  | 10 | 1293.5971      | 647.3025        |
| 1251.6585      | 12 | P  | 9  | 1180.5130      | 590.7604        |
| 1348.7112      | 13 | P  | 8  | 1083.4603      | 542.2341        |
| 1463.7382      | 14 | D  | 7  | 986.4075       | 493.7077        |
| 1594.7787      | 15 | M  | 6  | 871.3806       | 436.1942        |
| 1757.8420      | 16 | Y  | 5  | 740.3401       | 370.6740        |
| 1886.8846      | 17 | E  | 4  | 577.2768       | 289.1423        |
| 2046.9152      | 18 | C  | 3  | 448.2342       | 224.6210        |
| 2159.9992      | 19 | L  | 2  | 288.2036       | 144.6057        |
|                | 20 | R  | 1  | 175.1195       | 88.0637         |

N-term:+29.04 C(18):+160.03

X-range:

0 - 0

MassTol: Y-zoom:

0. 1.

MassType:

☐AVG ☒MONO

Axis:

☒1 ☐2

Label:

☒I ☐M ☐-

Ions:

a ☐+ ☐2+ ☐3+

b ☒+ ☐2+ ☐3+

c ☐+ ☐2+ ☐3+

x ☐+ ☐2+ ☐3+

y ☒+ ☒2+ ☐3+

z ☐+ ☐2+ ☐3+

hide H<sub>2</sub>O/NH<sub>3</sub> ☐

zoom 112-122 ☐

GO

LDIDSAPITAR, MH+ 1199.6636, m/z 600.3354  
L OS G13 P120811 220811-s1.04487.04487.2.dta

scan 4437; 1.9e+000

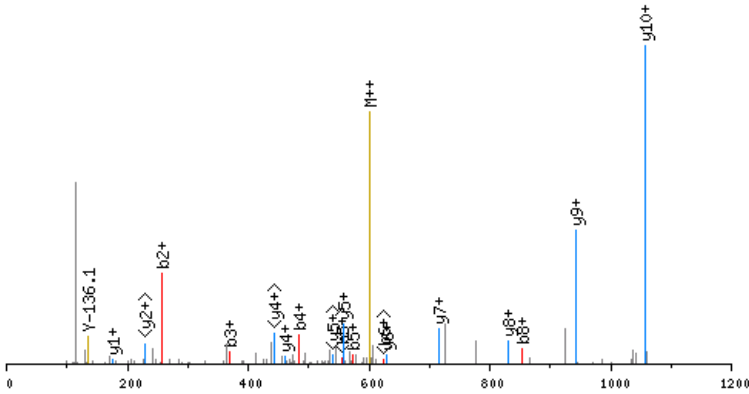

click image to zoom in; click top corners to zoom out

[precursor±]

scan 4484; 600.3 m/z; 1.3e+001

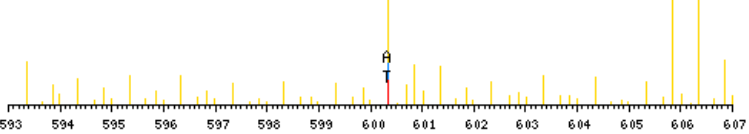

zoomed in precursor plot; T=theoretical m/z, A=acquired m/z

| b <sup>+</sup> | #  | AA | #  | y <sup>+</sup> | y <sup>2+</sup> |
|----------------|----|----|----|----------------|-----------------|
| 142.1232       | 1  | L  | 11 |                |                 |
| 257.1501       | 2  | D  | 10 | 1058.5482      | 529.7780        |
| 370.2342       | 3  | I  | 9  | 943.5213       | 472.2645        |
| 485.2611       | 4  | D  | 8  | 830.4372       | 415.7225        |
| 572.2931       | 5  | S  | 7  | 715.4103       | 358.2090        |
| 643.3303       | 6  | A  | 6  | 628.3782       | 314.6930        |
| 740.3830       | 7  | P  | 5  | 557.3411       | 279.1745        |
| 853.4671       | 8  | I  | 4  | 460.2884       | 230.6481        |
| 954.5148       | 9  | T  | 3  | 347.2043       | 174.1061        |
| 1025.5519      | 10 | A  | 2  | 246.1566       | 123.5822        |
|                | 11 | R  | 1  | 175.1195       | 88.0637         |

N-term:+29.04

X-range:

0 - 0

MassTol: Y-zoom:

0. 1.

MassType:

☐ AVG ☒ MONO

Axis:

☒ 1 ☐ 2

Label:

☒ I ☐ M ☐ -

Ions:

a ☐ + ☐ 2+ ☐ 3+

b ☒ + ☐ 2+ ☐ 3+

c ☐ + ☐ 2+ ☐ 3+

x ☐ + ☐ 2+ ☐ 3+

y ☒ + ☒ 2+ ☐ 3+

z ☐ + ☐ 2+ ☐ 3+

hide H<sub>2</sub>O/NH<sub>3</sub> ☐

zoom 112-122 ☐

GO

LDISELNTVGAGR, MH+ 1372.7436, m/z 458.2527  
L OS G13 P120811 220811-s1.05673.05673.3.dta

scan 5673; 1.1e+000

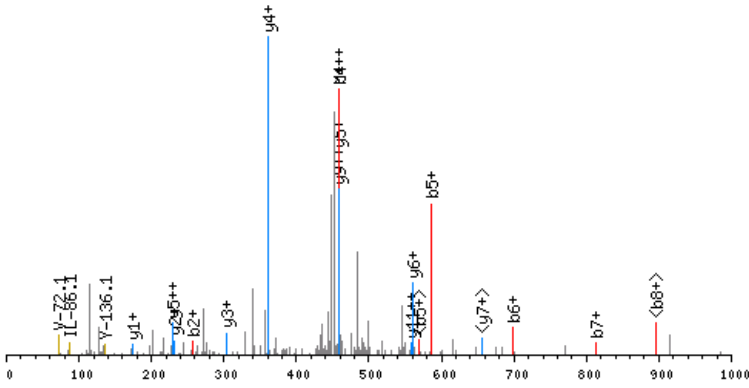

click image to zoom in; click top corners to zoom out

[precursor±]

scan 5669; 458.3 m/z; 3.7e+001

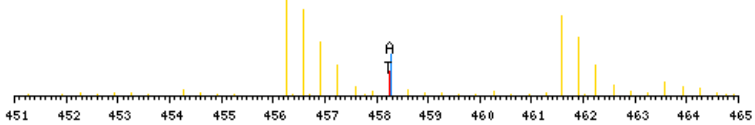

zoomed in precursor plot; T=theoretical m/z, A=acquired m/z

| b <sup>+</sup> | #  | AA | #  | y <sup>+</sup> | y <sup>2+</sup> |
|----------------|----|----|----|----------------|-----------------|
| 142.1232       | 1  | L  | 13 |                |                 |
| 257.1501       | 2  | D  | 12 | 1231.6283      | 616.3180        |
| 370.2342       | 3  | I  | 11 | 1116.6013      | 558.8046        |
| 457.2662       | 4  | S  | 10 | 1003.5172      | 502.2625        |
| 586.3088       | 5  | E  | 9  | 916.4852       | 458.7465        |
| 699.3929       | 6  | L  | 8  | 787.4426       | 394.2252        |
| 813.4358       | 7  | N  | 7  | 674.3586       | 337.6832        |
| 914.4835       | 8  | T  | 6  | 560.3156       | 280.6617        |
| 1013.5519      | 9  | V  | 5  | 459.2680       | 230.1379        |
| 1070.5733      | 10 | G  | 4  | 360.1995       | 180.6037        |
| 1141.6105      | 11 | A  | 3  | 303.1781       | 152.0930        |
| 1198.6319      | 12 | G  | 2  | 232.1410       | 116.5744        |
|                | 13 | R  | 1  | 175.1195       | 88.0637         |

N-term:+29.04

X-range:

0 - 0

MassTol: Y-zoom:

0. 1.

MassType:

☐AVG ☒MONO

Axis:

☒1 ☐2

Label:

☒I ☐M ☐-

Ions:

a ☐+ ☐2+ ☐3+

b ☒+ ☐2+ ☐3+

c ☐+ ☐2+ ☐3+

x ☐+ ☐2+ ☐3+

y ☒+ ☒2+ ☐3+

z ☐+ ☐2+ ☐3+

hide H<sub>2</sub>O/NH<sub>3</sub> ☐

zoom 112-122 ☐

GO

LDKAKTNQGWLDSRR, MH+ 1821.0719, m/z 456.0234  
H OS G17 P120811 220811-s1.02902.02902.4.dta

scan 2902; 2.7e+000

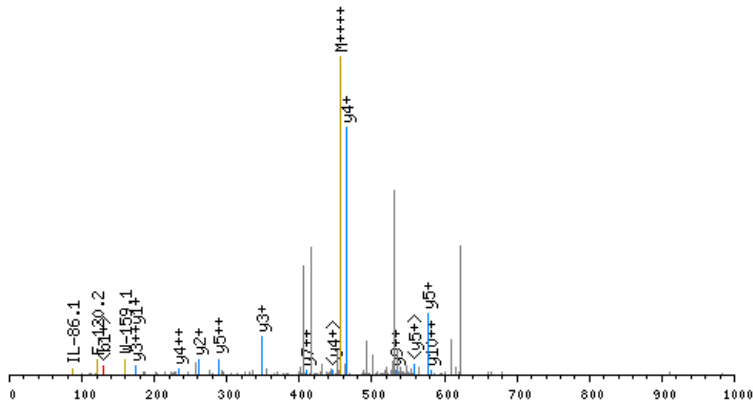

click image to zoom in; click top corners to zoom out

[precursor±]

scan 2898; 456.0 m/z; 5.5e+000

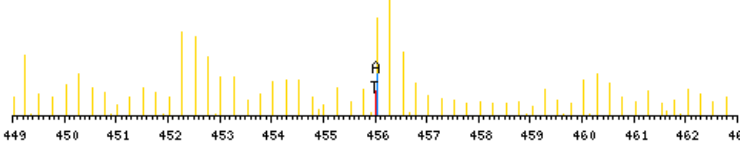

zoomed in precursor plot; T=theoretical m/z, A=acquired m/z

| b <sup>+</sup> | #  | AA | #  | y <sup>+</sup> | y <sup>2+</sup> |
|----------------|----|----|----|----------------|-----------------|
| 148.1550       | 1  | L  | 15 |                |                 |
| 263.1819       | 2  | D  | 14 | 1673.9248      | 837.4663        |
| 425.3400       | 3  | K  | 13 | 1558.8978      | 779.9528        |
| 496.3771       | 4  | A  | 12 | 1396.7397      | 698.8738        |
| 658.5352       | 5  | K  | 11 | 1325.7026      | 663.3552        |
| 759.5829       | 6  | T  | 10 | 1163.5445      | 582.2762        |
| 873.6258       | 7  | N  | 9  | 1062.4968      | 531.7523        |
| 1001.6844      | 8  | Q  | 8  | 948.4539       | 474.7309        |
| 1058.7059      | 9  | G  | 7  | 820.3953       | 410.7016        |
| 1244.7852      | 10 | W  | 6  | 763.3739       | 382.1909        |
| 1357.8692      | 11 | L  | 5  | 577.2946       | 289.1512        |
| 1472.8962      | 12 | D  | 4  | 464.2105       | 232.6092        |
| 1559.9282      | 13 | S  | 3  | 349.1836       | 175.0957        |
| 1646.9602      | 14 | S  | 2  | 262.1515       | 131.5797        |
|                | 15 | R  | 1  | 175.1195       | 88.0637         |

N-term:+35.07 K(3):+162.16  
K(5):+162.16

X-range:

0 - 0

MassTol: Y-zoom:

0. 1.

MassType:

☐ AVG ☒ MONO

Axis:

☒ 1 ☐ 2

Label:

☒ I ☐ M ☐ -

Ions:

a ☐ + ☐ 2+ ☐ 3+

b ☒ + ☐ 2+ ☐ 3+

c ☐ + ☐ 2+ ☐ 3+

x ☐ + ☐ 2+ ☐ 3+

y ☒ + ☒ 2+ ☐ 3+

z ☐ + ☐ 2+ ☐ 3+

hide H<sub>2</sub>O/NH<sub>3</sub> ☐

zoom 112-122 ☐

GO

LDLNLDLSKFR, MH+ 1389.8106, m/z 463.9417  
L OS G16 P120811 220811-s1.06196.06196.3.dta

scan 6196; 2.2e+000

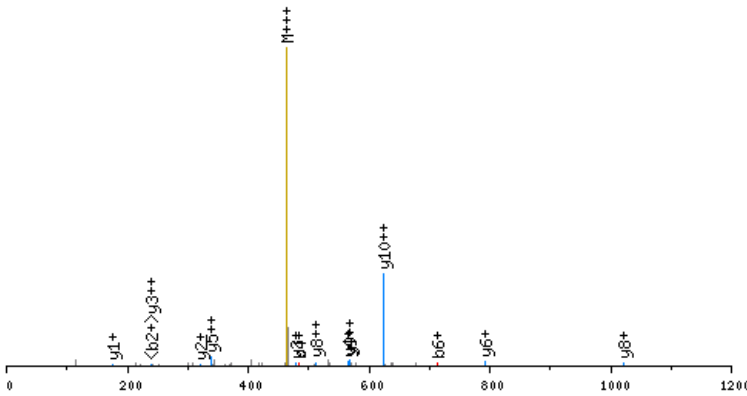

click image to zoom in; click top corners to zoom out [\[precursor±\]](#)

scan 6192; 463.9 m/z; 1.2e+001

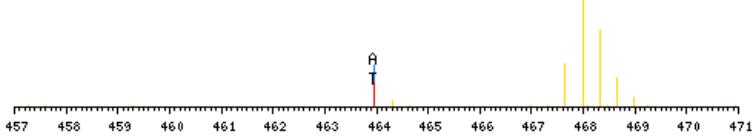

zoomed in precursor plot; T=theoretical m/z, A=acquired m/z

| b <sup>+</sup> | #  | AA | #  | y <sup>+</sup> | y <sup>2+</sup> |
|----------------|----|----|----|----------------|-----------------|
| 142.1232       | 1  | L  | 11 |                |                 |
| 257.1501       | 2  | D  | 10 | 1248.6952      | 624.8515        |
| 370.2342       | 3  | L  | 9  | 1133.6683      | 567.3381        |
| 484.2771       | 4  | N  | 8  | 1020.5842      | 510.7960        |
| 597.3612       | 5  | L  | 7  | 906.5413       | 453.7746        |
| 712.3881       | 6  | D  | 6  | 793.4573       | 397.2325        |
| 825.4722       | 7  | L  | 5  | 678.4303       | 339.7191        |
| 912.5042       | 8  | S  | 4  | 565.3462       | 283.1770        |
| 1068.6305      | 9  | K  | 3  | 478.3142       | 239.6610        |
| 1215.6989      | 10 | F  | 2  | 322.1879       | 161.5979        |
|                | 11 | R  | 1  | 175.1195       | 88.0637         |

N-term:+29.04 K(9):+156.13

X-range:

0 - 0

MassTol: Y-zoom:

0. 1.

MassType:

☐AVG ☒MONO

Axis:

☒1 ☐2

Label:

☒I ☐M ☐-

Ions:

a ☐+ ☐2+ ☐3+

b ☒+ ☐2+ ☐3+

c ☐+ ☐2+ ☐3+

x ☐+ ☐2+ ☐3+

y ☒+ ☒2+ ☐3+

z ☐+ ☐2+ ☐3+

hide H<sub>2</sub>O/NH<sub>3</sub> ☐

zoom 112-122 ☐

GO

LDLPCTPPPPAPIPSVR, MH+ 1855.0151, m/z 619.0099  
L OS G12 P120811 220811-s1.04885.04885.3.dta

scan 4885; 2.3e+000

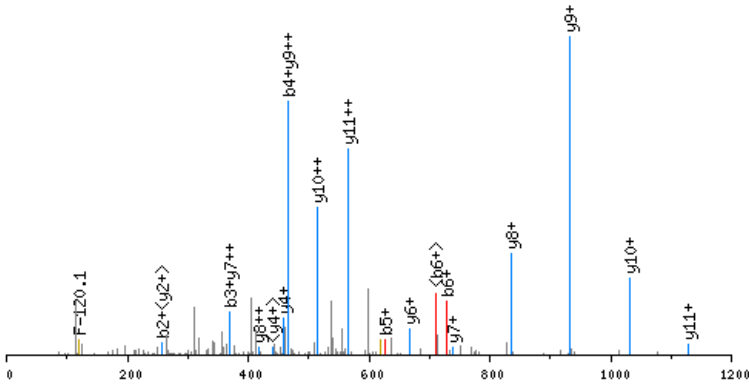

click image to zoom in; click top corners to zoom out

[precursor±]

scan 4882; 619.0 m/z; 5.2e+000

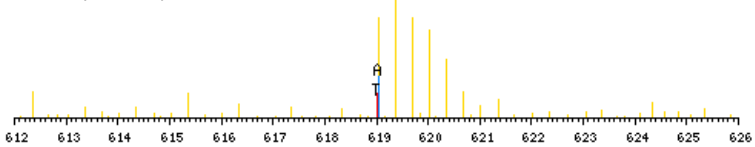

zoomed in precursor plot; T=theoretical m/z, A=acquired m/z

| b <sup>+</sup> | #  | AA | #  | y <sup>+</sup> | y <sup>2+</sup> |
|----------------|----|----|----|----------------|-----------------|
| 142.1232       | 1  | L  | 17 |                |                 |
| 257.1501       | 2  | D  | 16 | 1713.8998      | 857.4538        |
| 370.2342       | 3  | L  | 15 | 1598.8728      | 799.9403        |
| 467.2869       | 4  | P  | 14 | 1485.7887      | 743.3983        |
| 627.3175       | 5  | C  | 13 | 1388.7360      | 694.8719        |
| 728.3652       | 6  | T  | 12 | 1228.7054      | 614.8566        |
| 825.4180       | 7  | P  | 11 | 1127.6577      | 564.3328        |
| 922.4707       | 8  | P  | 10 | 1030.6049      | 515.8064        |
| 1019.5235      | 9  | P  | 9  | 933.5522       | 467.2800        |
| 1116.5763      | 10 | P  | 8  | 836.4994       | 418.7536        |
| 1187.6134      | 11 | A  | 7  | 739.4466       | 370.2272        |
| 1284.6661      | 12 | P  | 6  | 668.4095       | 334.7087        |
| 1397.7502      | 13 | I  | 5  | 571.3568       | 286.1823        |
| 1494.8030      | 14 | P  | 4  | 458.2727       | 229.6403        |
| 1581.8350      | 15 | S  | 3  | 361.2199       | 181.1139        |
| 1680.9034      | 16 | V  | 2  | 274.1879       | 137.5979        |
|                | 17 | R  | 1  | 175.1195       | 88.0637         |

N-term:+29.04 C(5):+160.03

X-range:

$$\boxed{0} - \boxed{0}$$

0. 1.

☐ AVG ☒ MONO

1 2

☒ I ☐ M ☐ -

**a**  + <sup>2</sup> + <sup>3</sup> +

**b** ☒ <sup>1</sup>+ ☐ <sup>2</sup>+ ☐ <sup>3</sup>+

c.  $\square + \square^2 + \square^3 + \dots$

$$x \begin{bmatrix} \phantom{0} \\ \phantom{0} \end{bmatrix} + \begin{bmatrix} \phantom{0} \\ \phantom{0} \end{bmatrix} 2 + \begin{bmatrix} \phantom{0} \\ \phantom{0} \end{bmatrix} 3 +$$

33 ☒ 1+ ☒ 2+ ☐ 3+

$$= \square + \square^2 + \square^3 + \dots$$

2000

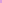

scan 4711; 3.1e-001

Mass spectrum plot showing relative intensity (Y-axis) versus m/z (X-axis). The X-axis ranges from 0 to 1200. The Y-axis represents relative intensity, with the base peak at m/z 570.

Key peaks labeled:

- y1+
- y2+
- y2+>
- b3+
- y7++
- y4+
- y10++
- y5+
- M+++
- y6+b6+
- y7+
- b9+

click image to zoom in; click top corners to zoom out

[precursor±]

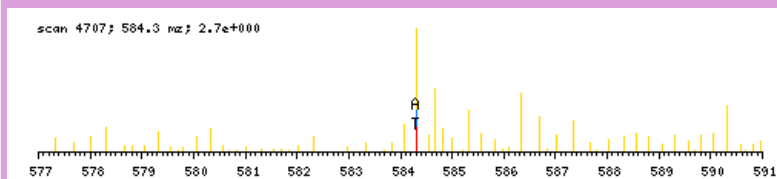

zoomed in precursor plot; T=theoretical m/z, A=acquired m/z

| $b^+$     | #  | AA | #  | $y^+$     | $y^{2+}$ |
|-----------|----|----|----|-----------|----------|
| 142.1232  | 1  | L  | 16 |           |          |
| 257.1501  | 2  | D  | 15 | 1609.7710 | 805.3894 |
| 370.2342  | 3  | L  | 14 | 1494.7440 | 747.8759 |
| 467.2869  | 4  | P  | 13 | 1381.6599 | 691.3339 |
| 596.3295  | 5  | E  | 12 | 1284.6072 | 642.8075 |
| 667.3666  | 6  | A  | 11 | 1155.5646 | 578.2862 |
| 764.4194  | 7  | P  | 10 | 1084.5275 | 542.7677 |
| 879.4463  | 8  | D  | 9  | 987.4747  | 494.2413 |
| 994.4733  | 9  | D  | 8  | 872.4478  | 436.7278 |
| 1091.5261 | 10 | P  | 7  | 757.4208  | 379.2143 |
| 1162.5632 | 11 | A  | 6  | 660.3681  | 330.6879 |
| 1233.6003 | 12 | A  | 5  | 589.3310  | 295.1694 |
| 1346.6843 | 13 | L  | 4  | 518.2938  | 259.6508 |
| 1475.7269 | 14 | E  | 3  | 405.2098  | 203.1088 |
| 1576.7746 | 15 | T  | 2  | 276.1672  | 138.5875 |
|           | 16 | R  | 1  | 175.1195  | 88.0637  |

N-term: +29.04

X-range:

0 - 0

MassTol: Y-zoom:

0. 1.

MassType:

☐AVG ☒MONO

Axis:

☒1 ☐2

Label:

☒I ☐M ☐-

Ions:

a ☐+ ☐2+ ☐3+

b ☒+ ☐2+ ☐3+

c ☐+ ☐2+ ☐3+

x ☐+ ☐2+ ☐3+

y ☒+ ☒2+ ☐3+

z ☐+ ☐2+ ☐3+

hide H<sub>2</sub>O/NH<sub>3</sub> ☐

zoom 112-122 ☐

GO

LDNNKISNIPDEYFKR, MH+ 2050.0974, m/z 513.2798  
L OS G17 P120811 220811-s1.05225.05225.4.dta

scan 5225; 1.0e+001

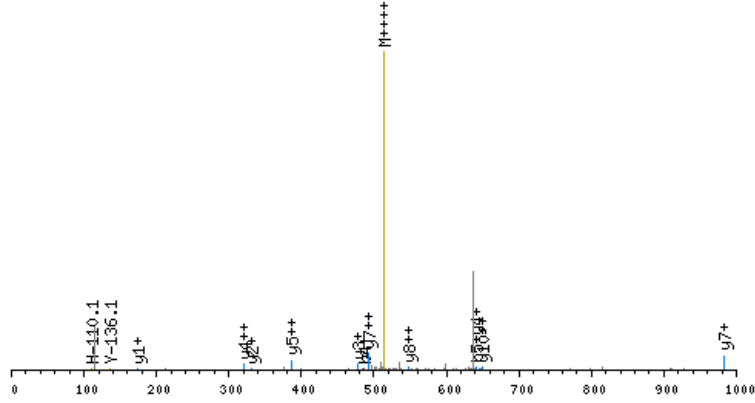

click image to zoom in; click top corners to zoom out [\[precursor±\]](#)

scan 5223; 513.3 m/z; 9.0e+000

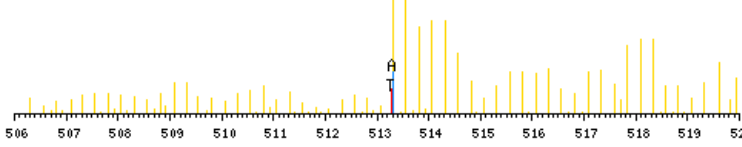

zoomed in precursor plot; T=theoretical m/z, A=acquired m/z

| b <sup>+</sup> | #  | AA | #  | y <sup>+</sup> | y <sup>2+</sup> |
|----------------|----|----|----|----------------|-----------------|
| 142.1232       | 1  | L  | 16 |                |                 |
| 257.1501       | 2  | D  | 15 | 1908.9820      | 954.9949        |
| 371.1930       | 3  | N  | 14 | 1793.9551      | 897.4815        |
| 485.2360       | 4  | N  | 13 | 1679.9122      | 840.4600        |
| 641.3623       | 5  | K  | 12 | 1565.8692      | 783.4385        |
| 754.4463       | 6  | I  | 11 | 1409.7429      | 705.3754        |
| 841.4784       | 7  | S  | 10 | 1296.6589      | 648.8333        |
| 955.5213       | 8  | N  | 9  | 1209.6268      | 605.3173        |
| 1068.6053      | 9  | I  | 8  | 1095.5839      | 548.2959        |
| 1165.6581      | 10 | P  | 7  | 982.4998       | 491.7538        |
| 1280.6851      | 11 | D  | 6  | 885.4471       | 443.2275        |
| 1409.7276      | 12 | E  | 5  | 770.4201       | 385.7140        |
| 1572.7910      | 13 | Y  | 4  | 641.3775       | 321.1927        |
| 1719.8594      | 14 | F  | 3  | 478.3142       | 239.6610        |
| 1875.9857      | 15 | K  | 2  | 331.2458       | 166.1268        |
|                | 16 | R  | 1  | 175.1195       | 88.0637         |

N-term:+29.04 K(5):+156.13  
K(15):+156.13

X-range:

0 - 0

MassTol: Y-zoom:

0. 1.

MassType:

☐AVG ☒MONO

Axis:

☒1 ☐2

Label:

☒I ☐M ☐-

Ions:

a ☐+ ☐2+ ☐3+

b ☒+ ☐2+ ☐3+

c ☐+ ☐2+ ☐3+

x ☐+ ☐2+ ☐3+

y ☒+ ☒2+ ☐3+

z ☐+ ☐2+ ☐3+

hide H<sub>2</sub>O/NH<sub>3</sub> ☐

zoom 112-122 ☐

GO

LDPAYQVDKGGKVR, MH+ 1648.0283, m/z 412.7625  
H OS G17 P120811 220811-s1.02810.02810.4.dta

scan 2810; 2.5e+001

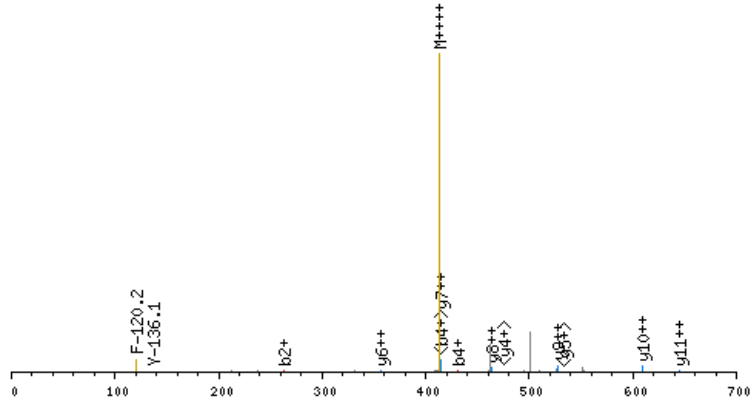

click image to zoom in; click top corners to zoom out [\[precursor±\]](#)

scan 2808; 412.8 m/z; 3.6e+001

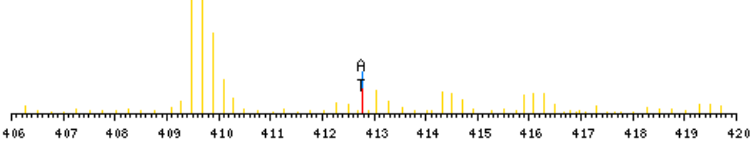

zoomed in precursor plot; T=theoretical m/z, A=acquired m/z

| b <sup>+</sup> | #  | AA | #  | y <sup>+</sup> | y <sup>2+</sup> |
|----------------|----|----|----|----------------|-----------------|
| 148.1550       | 1  | L  | 14 |                |                 |
| 263.1819       | 2  | D  | 13 | 1500.8811      | 750.9445        |
| 360.2347       | 3  | P  | 12 | 1385.8542      | 693.4310        |
| 431.2718       | 4  | A  | 11 | 1288.8014      | 644.9046        |
| 594.3351       | 5  | Y  | 10 | 1217.7643      | 609.3861        |
| 722.3937       | 6  | Q  | 9  | 1054.7010      | 527.8544        |
| 821.4621       | 7  | V  | 8  | 926.6424       | 463.8251        |
| 936.4890       | 8  | D  | 7  | 827.5740       | 414.2909        |
| 1098.6471      | 9  | K  | 6  | 712.5470       | 356.7774        |
| 1155.6686      | 10 | G  | 5  | 550.3889       | 275.6984        |
| 1212.6901      | 11 | G  | 4  | 493.3675       | 247.1877        |
| 1374.8482      | 12 | K  | 3  | 436.3460       | 218.6769        |
| 1473.9166      | 13 | V  | 2  | 274.1879       | 137.5979        |
|                | 14 | R  | 1  | 175.1195       | 88.0637         |

N-term:+35.07 K(9):+162.16  
K(12):+162.16

X-range:

0 - 0

MassTol: Y-zoom:

0. 1.

MassType:

☐AVG ☒MONO

Axis:

☒1 ☐2

Label:

☒I ☐M ☐-

Ions:

a ☐+ ☐2+ ☐3+

b ☒+ ☐2+ ☐3+

c ☐+ ☐2+ ☐3+

x ☐+ ☐2+ ☐3+

y ☒+ ☒2+ ☐3+

z ☐+ ☐2+ ☐3+

hide H<sub>2</sub>O/NH<sub>3</sub> ☐

zoom 112-122 ☐

GO

LDSVGIEADDDR, MH+ 1332.6283, m/z 666.8178  
L OS G13 P120811 220811-s1.03373.03373.2.dta

scan 3373; 2.3e+000

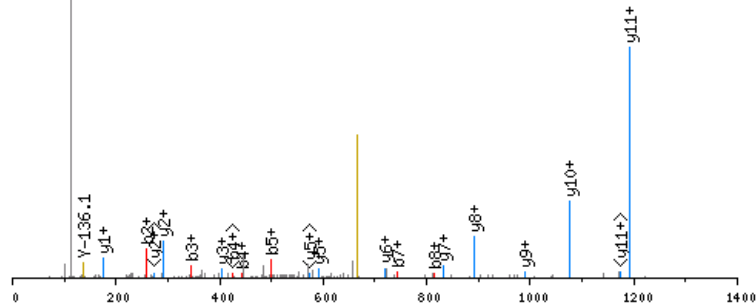

click image to zoom in; click top corners to zoom out

[precursor±]

scan 3369; 666.8 m/z; 5.5e+000

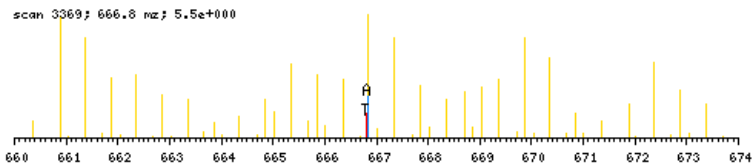

zoomed in precursor plot; T=theoretical m/z, A=acquired m/z

| b <sup>+</sup> | #  | AA | #  | y <sup>+</sup> | y <sup>2+</sup> |
|----------------|----|----|----|----------------|-----------------|
| 142.1232       | 1  | L  | 12 |                |                 |
| 257.1501       | 2  | D  | 11 | 1191.5130      | 596.2604        |
| 344.1821       | 3  | S  | 10 | 1076.4860      | 538.7469        |
| 443.2505       | 4  | V  | 9  | 989.4540       | 495.2309        |
| 500.2720       | 5  | G  | 8  | 890.3856       | 445.6967        |
| 613.3561       | 6  | I  | 7  | 833.3641       | 417.1860        |
| 742.3987       | 7  | E  | 6  | 720.2800       | 360.6439        |
| 813.4358       | 8  | A  | 5  | 591.2374       | 296.1226        |
| 928.4627       | 9  | D  | 4  | 520.2003       | 260.6041        |
| 1043.4897      | 10 | D  | 3  | 405.1734       | 203.0906        |
| 1158.5166      | 11 | D  | 2  | 290.1464       | 145.5771        |
|                | 12 | R  | 1  | 175.1195       | 88.0637         |

N-term:+29.04

X-range:

0 - 0

MassTol: Y-zoom:

0. 1.

MassType:

☐AVG ☒MONO

Axis:

☒1 ☐2

Label:

☒I ☐M ☐-

Ions:

a ☐+ ☐2+ ☐3+

b ☒+ ☐2+ ☐3+

c ☐+ ☐2+ ☐3+

x ☐+ ☐2+ ☐3+

y ☒+ ☒2+ ☐3+

z ☐+ ☐2+ ☐3+

hide H<sub>2</sub>O/NH<sub>3</sub> ☐

zoom 112-122 ☐

GO

LDTCCKAADKDTCTFSTEGPNLVTR, MH+ 2843.3377, m/z 711.5899  
L\_OS\_GI6\_P120811\_220811-s1.04349.04349.4.dta

scan 4349; 4.0e+000

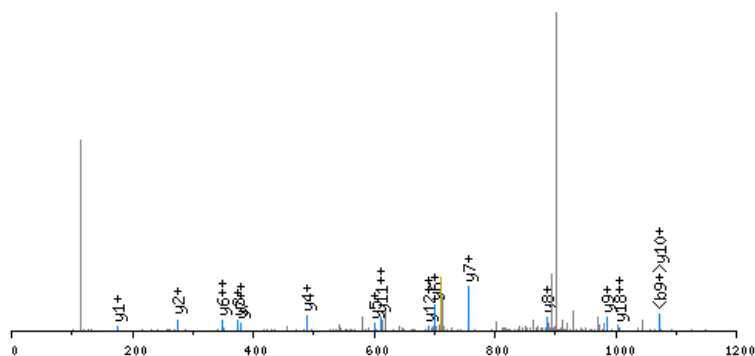

click image to zoom in; click top corners to zoom out

[precursor±]

scan 4348; 711.6 m/z; 9.6e+000

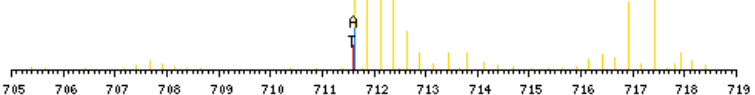

zoomed in precursor plot; T=theoretical m/z, A=acquired m/z

| b <sup>+</sup> | #  | AA | #  | y <sup>+</sup> | y <sup>2+</sup> |
|----------------|----|----|----|----------------|-----------------|
| 142.1232       | 1  | L  | 24 |                |                 |
| 257.1501       | 2  | D  | 23 | 2702.2223      | 1351.6151       |
| 358.1978       | 3  | T  | 22 | 2587.1954      | 1294.1016       |
| 518.2284       | 4  | C  | 21 | 2486.1477      | 1243.5778       |
| 678.2590       | 5  | C  | 20 | 2326.1171      | 1163.5625       |
| 834.3853       | 6  | K  | 19 | 2166.0865      | 1083.5472       |
| 905.4224       | 7  | A  | 18 | 2009.9602      | 1005.4840       |
| 976.4595       | 8  | A  | 17 | 1938.9231      | 969.9655        |
| 1091.4865      | 9  | D  | 16 | 1867.8860      | 934.4469        |
| 1247.6128      | 10 | K  | 15 | 1752.8590      | 876.9334        |
| 1362.6397      | 11 | D  | 14 | 1596.7327      | 798.8703        |
| 1463.6874      | 12 | T  | 13 | 1481.7058      | 741.3568        |
| 1623.7180      | 13 | C  | 12 | 1380.6581      | 690.8330        |
| 1770.7864      | 14 | F  | 11 | 1220.6275      | 610.8177        |
| 1857.8184      | 15 | S  | 10 | 1073.5591      | 537.2835        |
| 1958.8661      | 16 | T  | 9  | 986.5271       | 493.7675        |
| 2087.9087      | 17 | E  | 8  | 885.4794       | 443.2436        |
| 2144.9302      | 18 | G  | 7  | 756.4368       | 378.7223        |
| 2241.9829      | 19 | P  | 6  | 699.4153       | 350.2116        |
| 2356.0258      | 20 | N  | 5  | 602.3626       | 301.6852        |
| 2469.1099      | 21 | L  | 4  | 488.3197       | 244.6637        |
| 2568.1783      | 22 | V  | 3  | 375.2356       | 188.1217        |
| 2669.2260      | 23 | T  | 2  | 276.1672       | 138.5875        |
|                | 24 | R  | 1  | 175.1195       | 88.0637         |

N-term:+29.04 C(4):+160.03  
C(5):+160.03 K(6):+156.13  
K(10):+156.13 C(13):+160.03

X-range:

0 - 0

MassTol: Y-zoom:

0. 1.

MassType:

☐AVG ☒MONO

Axis:

☒1 ☐2

Label:

☒I ☐M ☐-

Ions:

a ☐+ ☐2+ ☐3+

b ☒+ ☐2+ ☐3+

c ☐+ ☐2+ ☐3+

x ☐+ ☐2+ ☐3+

y ☒+ ☒2+ ☐3+

z ☐+ ☐2+ ☐3+

hide H<sub>2</sub>O/NH<sub>3</sub> ☐

zoom 112-122 ☐

GO

LDTILPPTRPTDKPLR, MH+ 1901.1860, m/z 476.0520  
H OS G17 P120811 220811-s1.04565.04565.4.dta

scan 4565; 1.0e+001

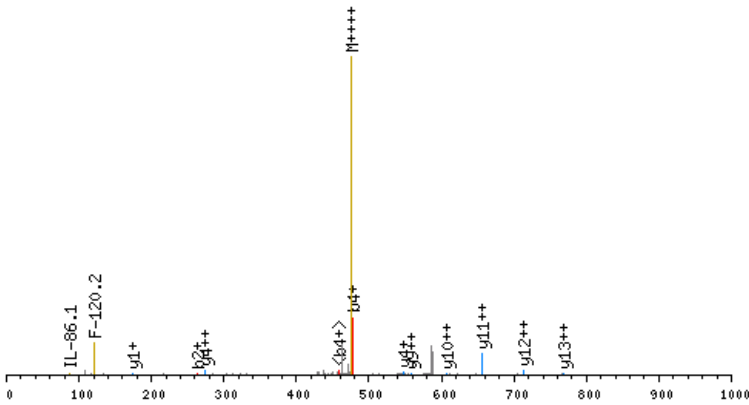

click image to zoom in; click top corners to zoom out

[precursor±]

scan 4563; 476.1 m/z; 7.6e+002

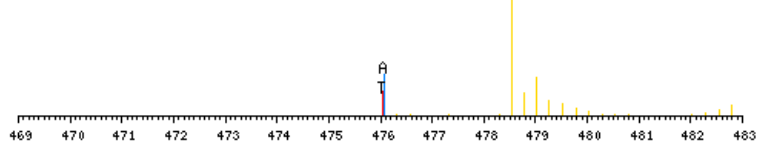

zoomed in precursor plot; T=theoretical m/z, A=acquired m/z

| b <sup>+</sup> | #  | AA | #  | y <sup>+</sup> | y <sup>2+</sup> |
|----------------|----|----|----|----------------|-----------------|
| 148.1550       | 1  | L  | 16 |                |                 |
| 263.1819       | 2  | D  | 15 | 1754.0389      | 877.5234        |
| 364.2296       | 3  | T  | 14 | 1639.0119      | 820.0099        |
| 477.3136       | 4  | I  | 13 | 1537.9643      | 769.4860        |
| 590.3977       | 5  | L  | 12 | 1424.8802      | 712.9440        |
| 687.4505       | 6  | P  | 11 | 1311.7961      | 656.4020        |
| 784.5032       | 7  | P  | 10 | 1214.7434      | 607.8756        |
| 885.5509       | 8  | T  | 9  | 1117.6906      | 559.3492        |
| 1041.6520      | 9  | R  | 8  | 1016.6429      | 508.8254        |
| 1138.7048      | 10 | P  | 7  | 860.5418       | 430.7748        |
| 1239.7525      | 11 | T  | 6  | 763.4891       | 382.2484        |
| 1354.7794      | 12 | D  | 5  | 662.4414       | 331.7246        |
| 1516.9375      | 13 | K  | 4  | 547.4144       | 274.2111        |
| 1613.9903      | 14 | P  | 3  | 385.2563       | 193.1321        |
| 1727.0743      | 15 | L  | 2  | 288.2036       | 144.6057        |
|                | 16 | R  | 1  | 175.1195       | 88.0637         |

N-term:+35.07 K(13):+162.16

X-range:

0 - 0

MassTol: Y-zoom:

0. 1.

MassType:

☐AVG ☒MONO

Axis:

☒1 ☐2

Label:

☒I ☐M ☐-

Ions:

a ☐+ ☐2+ ☐3+

b ☒+ ☐2+ ☐3+

c ☐+ ☐2+ ☐3+

x ☐+ ☐2+ ☐3+

y ☒+ ☒2+ ☐3+

z ☐+ ☐2+ ☐3+

hide H<sub>2</sub>O/NH<sub>3</sub> ☐

zoom 112-122 ☐

GO

LDTINVHLR, MH+ 1108.6478, m/z 370.2208  
L OS G16 P120811 220811-s1.04172.04172.3.dta

scan 4172; 1.3e+001

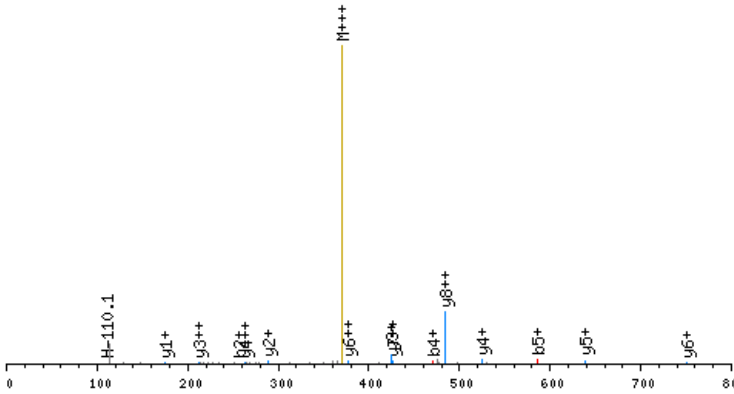

click image to zoom in; click top corners to zoom out

[precursor±]

scan 4168; 370.2 m/z; 4.4e+000

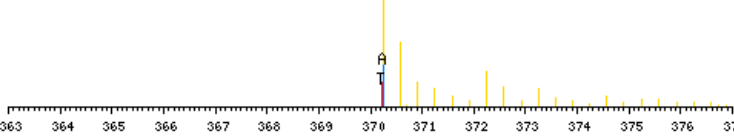

zoomed in precursor plot; T=theoretical m/z, A=acquired m/z

| b <sup>+</sup> | # | AA | # | y <sup>+</sup> | y <sup>2+</sup> |
|----------------|---|----|---|----------------|-----------------|
| 142.1232       | 1 | L  | 9 |                |                 |
| 257.1501       | 2 | D  | 8 | 967.5325       | 484.2702        |
| 358.1978       | 3 | T  | 7 | 852.5056       | 426.7567        |
| 471.2818       | 4 | I  | 6 | 751.4579       | 376.2329        |
| 585.3248       | 5 | N  | 5 | 638.3738       | 319.6908        |
| 684.3932       | 6 | V  | 4 | 524.3309       | 262.6694        |
| 821.4521       | 7 | H  | 3 | 425.2625       | 213.1352        |
| 934.5362       | 8 | L  | 2 | 288.2036       | 144.6057        |
|                | 9 | R  | 1 | 175.1195       | 88.0637         |

N-term:+29.04

X-range:

0 - 0

MassTol: Y-zoom:

0. 1.

MassType:

☐AVG ☒MONO

Axis:

☒1 ☐2

Label:

☒I ☐M ☐-

Ions:

a ☐+ ☐2+ ☐3+

b ☒+ ☐2+ ☐3+

c ☐+ ☐2+ ☐3+

x ☐+ ☐2+ ☐3+

y ☒+ ☒2+ ☐3+

z ☐+ ☐2+ ☐3+

hide H<sub>2</sub>O/NH<sub>3</sub> ☐

zoom 112-122 ☐

GO

LDTYQEATVEKKTLR, MH+ 1897.1495, m/z 475.0428  
H OS G17 P120811 220811-s1.03340.03340.4.dta

scan 3340; 1.1e+001

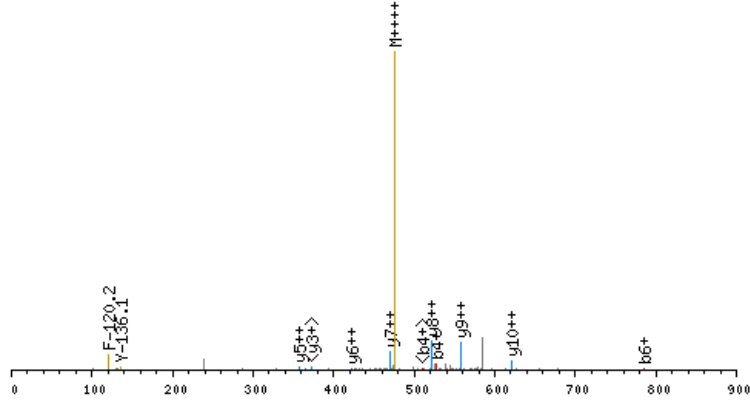

click image to zoom in; click top corners to zoom out [\[precursor±\]](#)

scan 3338; 475.0 m/z; 1.2e+001

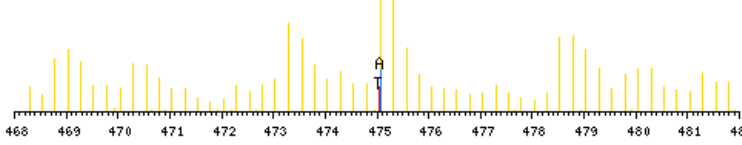

zoomed in precursor plot; T=theoretical m/z, A=acquired m/z

| b <sup>+</sup> | #  | AA | #  | y <sup>+</sup> | y <sup>2+</sup> |
|----------------|----|----|----|----------------|-----------------|
| 148.1550       | 1  | L  | 15 |                |                 |
| 263.1819       | 2  | D  | 14 | 1750.0024      | 875.5051        |
| 364.2296       | 3  | T  | 13 | 1634.9754      | 817.9916        |
| 527.2929       | 4  | Y  | 12 | 1533.9277      | 767.4678        |
| 655.3515       | 5  | Q  | 11 | 1370.8644      | 685.9361        |
| 784.3941       | 6  | E  | 10 | 1242.8058      | 621.9068        |
| 855.4312       | 7  | A  | 9  | 1113.7632      | 557.3855        |
| 956.4789       | 8  | T  | 8  | 1042.7261      | 521.8670        |
| 1055.5473      | 9  | V  | 7  | 941.6785       | 471.3431        |
| 1184.5899      | 10 | E  | 6  | 842.6100       | 421.8089        |
| 1346.7480      | 11 | K  | 5  | 713.5674       | 357.2876        |
| 1508.9061      | 12 | K  | 4  | 551.4093       | 276.2086        |
| 1609.9538      | 13 | T  | 3  | 389.2512       | 195.1295        |
| 1723.0378      | 14 | L  | 2  | 288.2036       | 144.6057        |
|                | 15 | R  | 1  | 175.1195       | 88.0637         |

N-term:+35.07 K(11):+162.16  
K(12):+162.16

X-range:

0 - 0

MassTol: Y-zoom:

0. 1.

MassType:

☐AVG ☒MONO

Axis:

☒1 ☐2

Label:

☒I ☐M ☐-

Ions:

a ☐+ ☐2+ ☐3+

b ☒+ ☐2+ ☐3+

c ☐+ ☐2+ ☐3+

x ☐+ ☐2+ ☐3+

y ☒+ ☒2+ ☐3+

z ☐+ ☐2+ ☐3+

hide H<sub>2</sub>O/NH<sub>3</sub> ☐

zoom 112-122 ☐

GO

LDVNDNAPIPEPR, MH+ 1477.7651, m/z 493.2599  
L OS G13 P120811 220811-s1.04442.04442.3.dta

scan 4442; 3.6e+000

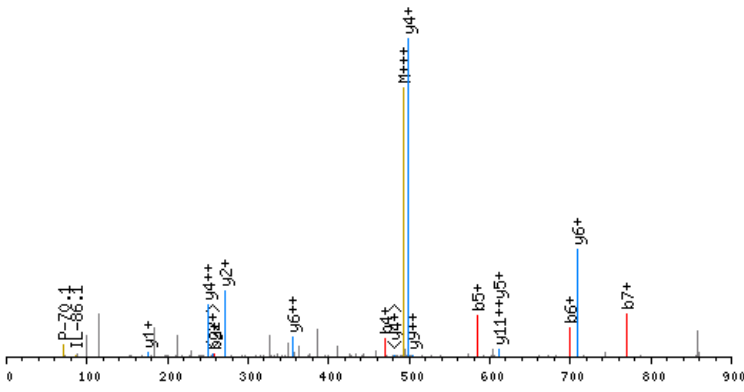

click image to zoom in; click top corners to zoom out

[precursor±]

scan 4439; 493.3 m/z; 3.6e+001

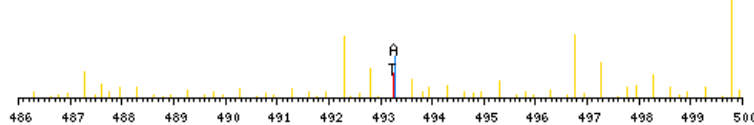

zoomed in precursor plot; T=theoretical m/z, A=acquired m/z

| b <sup>+</sup> | #  | AA | #  | y <sup>+</sup> | y <sup>2+</sup> |
|----------------|----|----|----|----------------|-----------------|
| 142.1232       | 1  | L  | 13 |                |                 |
| 257.1501       | 2  | D  | 12 | 1336.6497      | 668.8288        |
| 356.2185       | 3  | V  | 11 | 1221.6228      | 611.3153        |
| 470.2614       | 4  | N  | 10 | 1122.5544      | 561.7811        |
| 585.2884       | 5  | D  | 9  | 1008.5114      | 504.7596        |
| 699.3313       | 6  | N  | 8  | 893.4845       | 447.2462        |
| 770.3684       | 7  | A  | 7  | 779.4416       | 390.2247        |
| 867.4212       | 8  | P  | 6  | 708.4044       | 354.7061        |
| 980.5053       | 9  | I  | 5  | 611.3517       | 306.1798        |
| 1077.5580      | 10 | P  | 4  | 498.2676       | 249.6377        |
| 1206.6006      | 11 | E  | 3  | 401.2149       | 201.1113        |
| 1303.6534      | 12 | P  | 2  | 272.1723       | 136.5900        |
|                | 13 | R  | 1  | 175.1195       | 88.0637         |

N-term:+29.04

X-range:

0 - 0

MassTol: Y-zoom:

0. 1.

MassType:

☐AVG ☒MONO

Axis:

☒1 ☐2

Label:

☒I ☐M ☐-

Ions:

a ☐+ ☐2+ ☐3+

b ☒+ ☐2+ ☐3+

c ☐+ ☐2+ ☐3+

x ☐+ ☐2+ ☐3+

y ☒+ ☒2+ ☐3+

z ☐+ ☐2+ ☐3+

hide H<sub>2</sub>O/NH<sub>3</sub> ☐

zoom 112-122 ☐

GO

LDYGPCDPPSNSQELKGQYHR, MH+ 2517.1832, m/z 630.0513  
L OS G17 P120811 220811-s1.03670.03670.4.dta

scan 3670; 4.2e+000

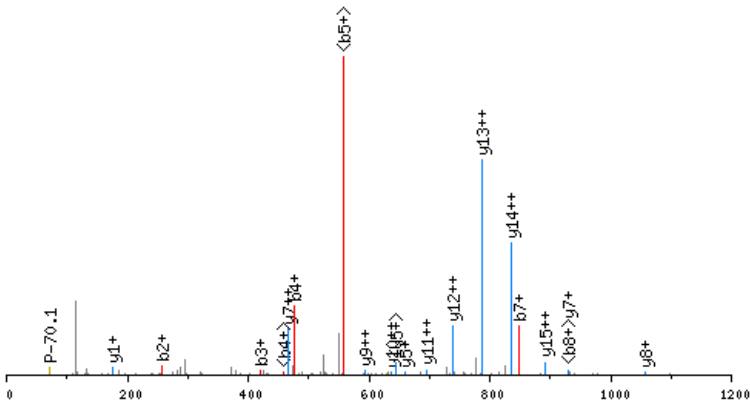

click image to zoom in; click top corners to zoom out

[precursor±]

scan 3668; 630.1 m/z; 1.2e+001

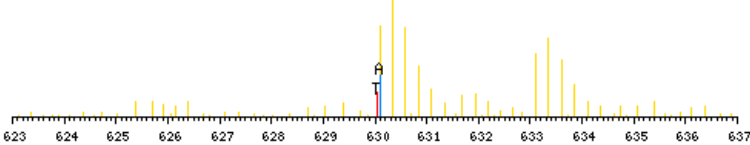

zoomed in precursor plot; T=theoretical m/z, A=acquired m/z

| b <sup>+</sup> | #  | AA | #  | y <sup>+</sup> | y <sup>2+</sup> |
|----------------|----|----|----|----------------|-----------------|
| 142.1232       | 1  | L  | 21 |                |                 |
| 257.1501       | 2  | D  | 20 | 2376.0679      | 1188.5378       |
| 420.2134       | 3  | Y  | 19 | 2261.0409      | 1131.0244       |
| 477.2349       | 4  | G  | 18 | 2097.9776      | 1049.4927       |
| 574.2877       | 5  | P  | 17 | 2040.9561      | 1020.9820       |
| 734.3183       | 6  | C  | 16 | 1943.9034      | 972.4556        |
| 849.3452       | 7  | D  | 15 | 1783.8728      | 892.4403        |
| 946.3980       | 8  | P  | 14 | 1668.8458      | 834.9268        |
| 1043.4507      | 9  | P  | 13 | 1571.7931      | 786.4004        |
| 1130.4828      | 10 | S  | 12 | 1474.7403      | 737.8741        |
| 1244.5257      | 11 | N  | 11 | 1387.7083      | 694.3580        |
| 1331.5577      | 12 | S  | 10 | 1273.6653      | 637.3366        |
| 1459.6163      | 13 | Q  | 9  | 1186.6333      | 593.8206        |
| 1588.6589      | 14 | E  | 8  | 1058.5747      | 529.7913        |
| 1701.7430      | 15 | L  | 7  | 929.5321       | 465.2700        |
| 1857.8693      | 16 | K  | 6  | 816.4481       | 408.7280        |
| 1914.8907      | 17 | G  | 5  | 660.3218       | 330.6648        |
| 2042.9493      | 18 | Q  | 4  | 603.3003       | 302.1541        |
| 2206.0126      | 19 | Y  | 3  | 475.2417       | 238.1248        |
| 2343.0715      | 20 | H  | 2  | 312.1784       | 156.5931        |
|                | 21 | R  | 1  | 175.1195       | 88.0637         |

N-term:+29.04 C(6):+160.03  
K(16):+156.13

X-range:

0 - 0

MassTol: Y-zoom:

0. 1.

MassType:

☐AVG ☒MONO

Axis:

☒1 ☐2

Label:

☒I ☐M ☐-

Ions:

a ☐+ ☐2+ ☐3+

b ☒+ ☐2+ ☐3+

c ☐+ ☐2+ ☐3+

x ☐+ ☐2+ ☐3+

y ☒+ ☒2+ ☐3+

z ☐+ ☐2+ ☐3+

hide H<sub>2</sub>O/NH<sub>3</sub> ☐

zoom 112-122 ☐

GO

LEALDCILPPTRPTDKPLR, MH+ 2261.2691, m/z 566.0727  
L OS G16 P120811 220811-s1.05627.05627.4.dta

scan 5627; 3.4e+000

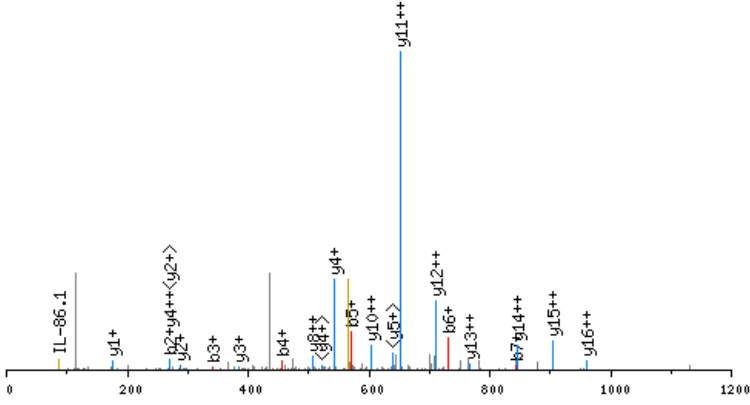

click image to zoom in; click top corners to zoom out [\[precursor±\]](#)

scan 5623; 566.1 m/z; 1.5e+001

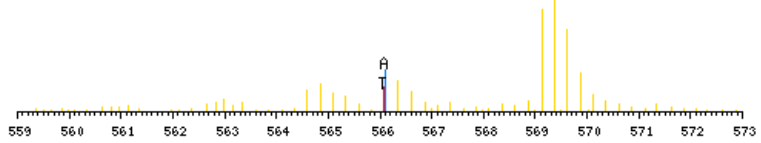

zoomed in precursor plot; T=theoretical m/z, A=acquired m/z

| b <sup>+</sup> | #  | AA | #  | y <sup>+</sup> | y <sup>2+</sup> |
|----------------|----|----|----|----------------|-----------------|
| 142.1232       | 1  | L  | 19 |                |                 |
| 271.1658       | 2  | E  | 18 | 2120.1538      | 1060.5808       |
| 342.2029       | 3  | A  | 17 | 1991.1112      | 996.0595        |
| 455.2869       | 4  | L  | 16 | 1920.0741      | 960.5409        |
| 570.3139       | 5  | D  | 15 | 1806.9900      | 903.9989        |
| 730.3445       | 6  | C  | 14 | 1691.9631      | 846.4854        |
| 843.4285       | 7  | I  | 13 | 1531.9325      | 766.4701        |
| 956.5126       | 8  | L  | 12 | 1418.8484      | 709.9281        |
| 1053.5654      | 9  | P  | 11 | 1305.7643      | 653.3861        |
| 1150.6181      | 10 | P  | 10 | 1208.7116      | 604.8597        |
| 1251.6658      | 11 | T  | 9  | 1111.6588      | 556.3333        |
| 1407.7669      | 12 | R  | 8  | 1010.6111      | 505.8095        |
| 1504.8197      | 13 | P  | 7  | 854.5100       | 427.7589        |
| 1605.8674      | 14 | T  | 6  | 757.4573       | 379.2325        |
| 1720.8943      | 15 | D  | 5  | 656.4096       | 328.7087        |
| 1877.0206      | 16 | K  | 4  | 541.3826       | 271.1952        |
| 1974.0734      | 17 | P  | 3  | 385.2563       | 193.1321        |
| 2087.1574      | 18 | L  | 2  | 288.2036       | 144.6057        |
|                | 19 | R  | 1  | 175.1195       | 88.0637         |

N-term: +29.04 C(6): +160.03  
K(16): +156.13

X-range:

0 - 0

MassTol: Y-zoom:

0. 1.

MassType:

☐ AVG ☒ MONO

Axis:

☒ 1 ☐ 2

Label:

☒ I ☐ M ☐ -

Ions:

a ☐ + ☐ 2+ ☐ 3+

b ☒ + ☐ 2+ ☐ 3+

c ☐ + ☐ 2+ ☐ 3+

x ☐ + ☐ 2+ ☐ 3+

y ☒ + ☒ 2+ ☐ 3+

z ☐ + ☐ 2+ ☐ 3+

hide H<sub>2</sub>O/NH<sub>3</sub> ☐

zoom 112-122 ☐

GO

LEALDTILPPTRPTDKPLR, MH+ 2214.3498, m/z 554.3429  
H OS G16 P120811 220811-s1.05591.05591.4.dta

scan 5591: 3.8e+000

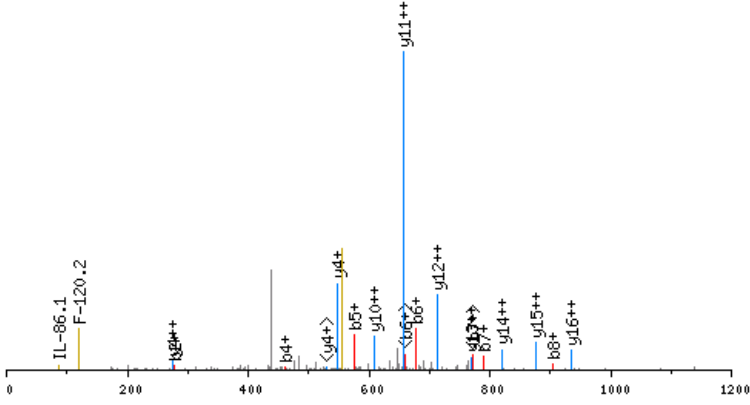

click image to zoom in; click top corners to zoom out [\[precursor±\]](#)

scan 5588: 554.3 m/z; 4.2e+000

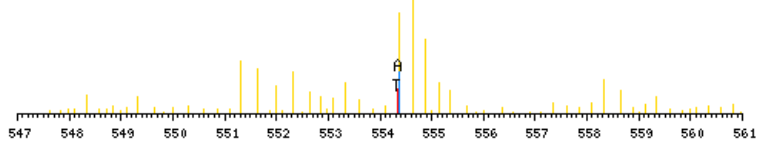

zoomed in precursor plot; T=theoretical m/z, A=acquired m/z

| b <sup>+</sup> | #  | AA | #  | y <sup>+</sup> | y <sup>2+</sup> |
|----------------|----|----|----|----------------|-----------------|
| 148.1550       | 1  | L  | 19 |                |                 |
| 277.1976       | 2  | E  | 18 | 2067.2027      | 1034.1052       |
| 348.2347       | 3  | A  | 17 | 1938.1601      | 969.5839        |
| 461.3187       | 4  | L  | 16 | 1867.1229      | 934.0654        |
| 576.3457       | 5  | D  | 15 | 1754.0389      | 877.5234        |
| 677.3934       | 6  | T  | 14 | 1639.0119      | 820.0099        |
| 790.4774       | 7  | I  | 13 | 1537.9643      | 769.4860        |
| 903.5615       | 8  | L  | 12 | 1424.8802      | 712.9440        |
| 1000.6142      | 9  | P  | 11 | 1311.7961      | 656.4020        |
| 1097.6670      | 10 | P  | 10 | 1214.7434      | 607.8756        |
| 1198.7147      | 11 | T  | 9  | 1117.6906      | 559.3492        |
| 1354.8158      | 12 | R  | 8  | 1016.6429      | 508.8254        |
| 1451.8686      | 13 | P  | 7  | 860.5418       | 430.7748        |
| 1552.9162      | 14 | T  | 6  | 763.4891       | 382.2484        |
| 1667.9432      | 15 | D  | 5  | 662.4414       | 331.7246        |
| 1830.1013      | 16 | K  | 4  | 547.4144       | 274.2111        |
| 1927.1541      | 17 | P  | 3  | 385.2563       | 193.1321        |
| 2040.2381      | 18 | L  | 2  | 288.2036       | 144.6057        |
|                | 19 | R  | 1  | 175.1195       | 88.0637         |

N-term:+35.07 K(16):+162.16

X-range:

0 - 0

MassTol: Y-zoom:

0. 1.

MassType:

☐AVG ☒MONO

Axis:

☒1 ☐2

Label:

☒I ☐M ☐-

Ions:

a ☐+ ☐2+ ☐3+

b ☒+ ☐2+ ☐3+

c ☐+ ☐2+ ☐3+

x ☐+ ☐2+ ☐3+

y ☒+ ☒2+ ☐3+

z ☐+ ☐2+ ☐3+

hide H<sub>2</sub>O/NH<sub>3</sub> ☐

zoom 112-122 ☐

GO

LEALGIKEGTIPPEYR, MH+ 1842.0377, m/z 614.6841  
L OS G15 P120811 220811-s1.04825.04825.3.dta

scan 4825; 4.6e+000

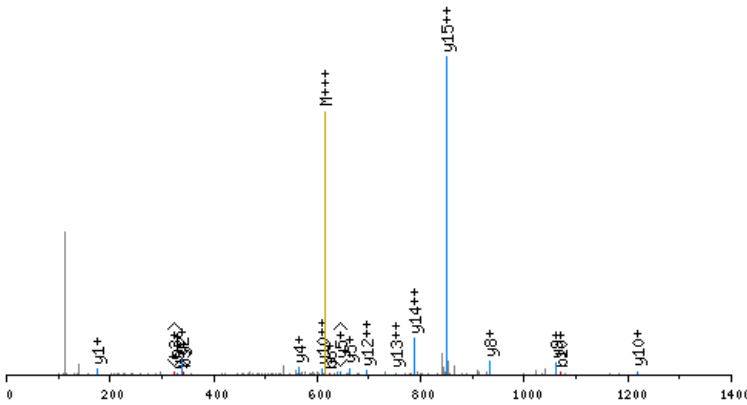

click image to zoom in; click top corners to zoom out

[precursor±]

scan 4821; 614.7 m/z; 7.5e+000

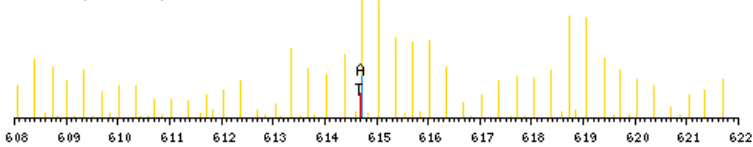

zoomed in precursor plot; T=theoretical m/z, A=acquired m/z

| b <sup>+</sup> | #  | AA | #  | y <sup>+</sup> | y <sup>2+</sup> |
|----------------|----|----|----|----------------|-----------------|
| 142.1232       | 1  | L  | 16 |                |                 |
| 271.1658       | 2  | E  | 15 | 1700.9223      | 850.9651        |
| 342.2029       | 3  | A  | 14 | 1571.8798      | 786.4438        |
| 455.2869       | 4  | L  | 13 | 1500.8426      | 750.9252        |
| 512.3084       | 5  | G  | 12 | 1387.7586      | 694.3832        |
| 625.3925       | 6  | I  | 11 | 1330.7371      | 665.8725        |
| 781.5188       | 7  | K  | 10 | 1217.6530      | 609.3304        |
| 910.5614       | 8  | E  | 9  | 1061.5267      | 531.2673        |
| 967.5828       | 9  | G  | 8  | 932.4842       | 466.7460        |
| 1068.6305      | 10 | T  | 7  | 875.4627       | 438.2353        |
| 1181.7146      | 11 | I  | 6  | 774.4150       | 387.7114        |
| 1278.7673      | 12 | P  | 5  | 661.3310       | 331.1694        |
| 1375.8201      | 13 | P  | 4  | 564.2782       | 282.6430        |
| 1504.8627      | 14 | E  | 3  | 467.2254       | 234.1166        |
| 1667.9260      | 15 | Y  | 2  | 338.1828       | 169.5953        |
|                | 16 | R  | 1  | 175.1195       | 88.0637         |

N-term:+29.04 K(7):+156.13

X-range:

0 - 0

MassTol: Y-zoom:

0. 1.

MassType:

☐AVG ☒MONO

Axis:

☒1 ☐2

Label:

☒I ☐M ☐-

Ions:

a ☐+ ☐2+ ☐3+

b ☒+ ☐2+ ☐3+

c ☐+ ☐2+ ☐3+

x ☐+ ☐2+ ☐3+

y ☒+ ☒2+ ☐3+

z ☐+ ☐2+ ☐3+

hide H<sub>2</sub>O/NH<sub>3</sub> ☐

zoom 112-122 ☐

GO

LECYSCVQKADDGCSPHR, MH+ 2237.9740, m/z 560.2490  
L OS G17 P120811 220811-s1.02494.02494.4.dta

scan 2494: 1.6e+000

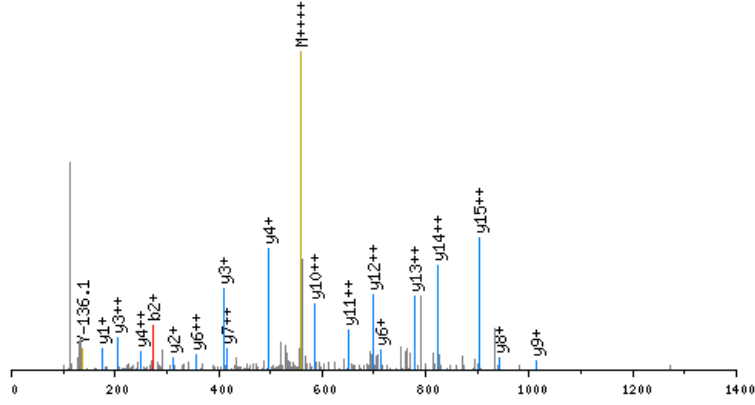

click image to zoom in; click top corners to zoom out [\[precursor±\]](#)

scan 2493: 560.2 m/z; 6.4e+000

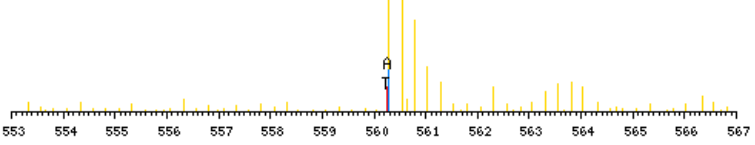

zoomed in precursor plot; T=theoretical m/z, A=acquired m/z

| b <sup>+</sup> | #  | AA | #  | y <sup>+</sup> | y <sup>2+</sup> |
|----------------|----|----|----|----------------|-----------------|
| 142.1232       | 1  | L  | 18 |                |                 |
| 271.1658       | 2  | E  | 17 | 2096.8587      | 1048.9333       |
| 431.1964       | 3  | C  | 16 | 1967.8161      | 984.4120        |
| 594.2597       | 4  | Y  | 15 | 1807.7855      | 904.3967        |
| 681.2917       | 5  | S  | 14 | 1644.7222      | 822.8650        |
| 841.3223       | 6  | C  | 13 | 1557.6902      | 779.3490        |
| 940.3907       | 7  | V  | 12 | 1397.6596      | 699.3337        |
| 1068.4493      | 8  | Q  | 11 | 1298.5911      | 649.7995        |
| 1224.5756      | 9  | K  | 10 | 1170.5326      | 585.7702        |
| 1295.6127      | 10 | A  | 9  | 1014.4063      | 507.7070        |
| 1410.6397      | 11 | D  | 8  | 943.3692       | 472.1885        |
| 1525.6666      | 12 | D  | 7  | 828.3422       | 414.6750        |
| 1582.6881      | 13 | G  | 6  | 713.3153       | 357.1615        |
| 1742.7187      | 14 | C  | 5  | 656.2938       | 328.6508        |
| 1829.7507      | 15 | S  | 4  | 496.2632       | 248.6355        |
| 1926.8035      | 16 | P  | 3  | 409.2312       | 205.1195        |
| 2063.8624      | 17 | H  | 2  | 312.1784       | 156.5931        |
|                | 18 | R  | 1  | 175.1195       | 88.0637         |

N-term:+29.04 C(3):+160.03  
C(6):+160.03 K(9):+156.13  
C(14):+160.03

X-range:

0 - 0

MassTol: Y-zoom:

0. 1.

MassType:

☐AVG ☒MONO

Axis:

☒1 ☐2

Label:

☒I ☐M ☐-

Ions:

a ☐+ ☐2+ ☐3+

b ☒+ ☐2+ ☐3+

c ☐+ ☐2+ ☐3+

x ☐+ ☐2+ ☐3+

y ☒+ ☒2+ ☐3+

z ☐+ ☐2+ ☐3+

hide H<sub>2</sub>O/NH<sub>3</sub> ☐

zoom 112-122 ☐

GO

LEELLTTQCDR, MH+ 1411.7314, m/z 471.2487  
H OS G13 P120811 220811-s1.04020.04020.3.dta

scan 4020; 1.6e+000

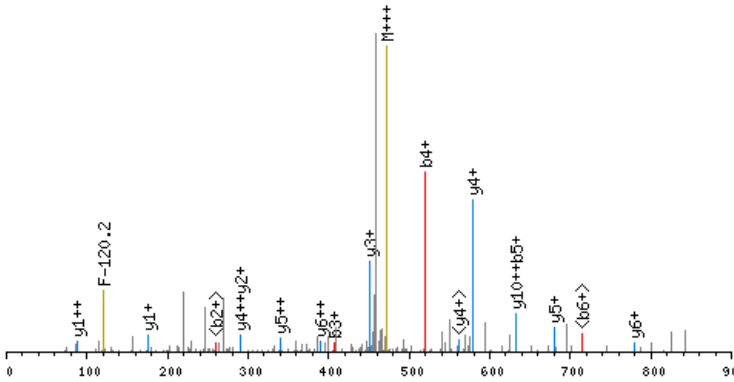

click image to zoom in; click top corners to zoom out [\[precursor±\]](#)

scan 4019; 471.2 m/z; 7.4e+001

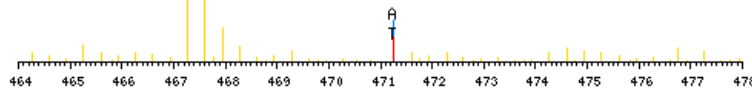

zoomed in precursor plot; T=theoretical m/z, A=acquired m/z

| b <sup>+</sup> | #  | AA | #  | y <sup>+</sup> | y <sup>2+</sup> |
|----------------|----|----|----|----------------|-----------------|
| 148.1550       | 1  | L  | 11 |                |                 |
| 277.1976       | 2  | E  | 10 | 1264.5843      | 632.7961        |
| 406.2402       | 3  | E  | 9  | 1135.5417      | 568.2748        |
| 519.3242       | 4  | L  | 8  | 1006.4991      | 503.7535        |
| 632.4083       | 5  | L  | 7  | 893.4150       | 447.2114        |
| 733.4560       | 6  | T  | 6  | 780.3310       | 390.6694        |
| 834.5036       | 7  | T  | 5  | 679.2833       | 340.1456        |
| 962.5622       | 8  | Q  | 4  | 578.2356       | 289.6217        |
| 1122.5928      | 9  | C  | 3  | 450.1770       | 225.5924        |
| 1237.6198      | 10 | D  | 2  | 290.1464       | 145.5771        |
|                | 11 | R  | 1  | 175.1195       | 88.0637         |

N-term:+35.07 C(9):+160.03

X-range:

0 - 0

MassTol: Y-zoom:

0. 1.

MassType:

☐AVG ☒MONO

Axis:

☒1 ☐2

Label:

☒I ☐M ☐-

Ions:

a ☐+ ☐2+ ☐3+

b ☒+ ☐2+ ☐3+

c ☐+ ☐2+ ☐3+

x ☐+ ☐2+ ☐3+

y ☒+ ☒2+ ☐3+

z ☐+ ☐2+ ☐3+

hide H<sub>2</sub>O/NH<sub>3</sub> ☐

zoom 112-122 ☐

GO

LEELSLEAQGIR, MH+ 1385.7640, m/z 462.5928  
L OS G13 P120811 220811-s1.05223.05223.3.dta

scan 5223; 1.6e+000

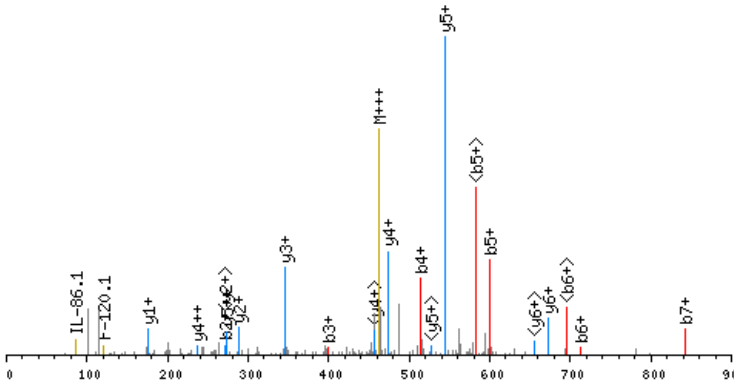

click image to zoom in; click top corners to zoom out

[precursor±]

scan 5219; 462.6 m/z; 1.1e+001

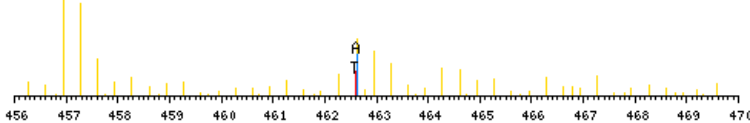

zoomed in precursor plot; T=theoretical m/z, A=acquired m/z

| b <sup>+</sup> | #  | AA | #  | y <sup>+</sup> | y <sup>2+</sup> |
|----------------|----|----|----|----------------|-----------------|
| 142.1232       | 1  | L  | 12 |                |                 |
| 271.1658       | 2  | E  | 11 | 1244.6487      | 622.8282        |
| 400.2084       | 3  | E  | 10 | 1115.6061      | 558.3069        |
| 513.2924       | 4  | L  | 9  | 986.5635       | 493.7856        |
| 600.3244       | 5  | S  | 8  | 873.4794       | 437.2436        |
| 713.4085       | 6  | L  | 7  | 786.4474       | 393.7276        |
| 842.4511       | 7  | E  | 6  | 673.3633       | 337.1856        |
| 913.4882       | 8  | A  | 5  | 544.3207       | 272.6643        |
| 1041.5468      | 9  | Q  | 4  | 473.2836       | 237.1457        |
| 1098.5683      | 10 | G  | 3  | 345.2250       | 173.1164        |
| 1211.6523      | 11 | I  | 2  | 288.2036       | 144.6057        |
|                | 12 | R  | 1  | 175.1195       | 88.0637         |

N-term:+29.04

X-range:

0 - 0

MassTol: Y-zoom:

0. 1.

MassType:

☐AVG ☒MONO

Axis:

☒1 ☐2

Label:

☒I ☐M ☐-

Ions:

a ☐+ ☐2+ ☐3+

b ☒+ ☐2+ ☐3+

c ☐+ ☐2+ ☐3+

x ☐+ ☐2+ ☐3+

y ☒+ ☒2+ ☐3+

z ☐+ ☐2+ ☐3+

hide H<sub>2</sub>O/NH<sub>3</sub> ☐

zoom 112-122 ☐

GO

LEIDVSNPQTVGVGR, MH+ 1617.9024, m/z 539.9723  
H OS G13 P120811 220811-s1.05253.05253.3.dta

scan 5253; 1.7e+000

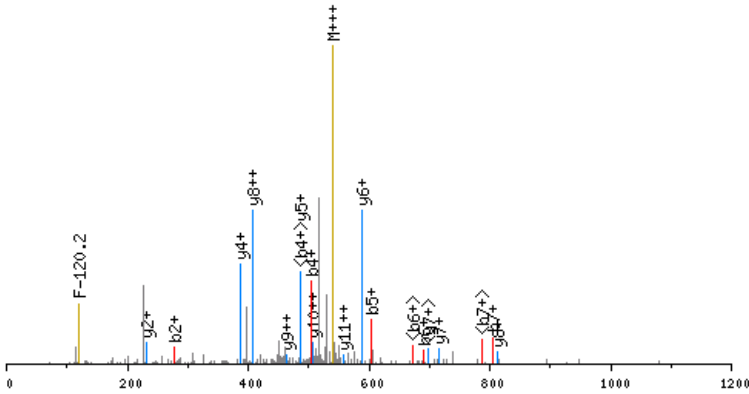

click image to zoom in; click top corners to zoom out

[precursor±]

scan 5249; 540.0 m/z; 6.3e+000

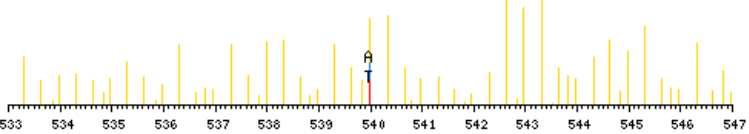

zoomed in precursor plot; T=theoretical m/z, A=acquired m/z

| b <sup>+</sup> | #  | AA | #  | y <sup>+</sup> | y <sup>2+</sup> |
|----------------|----|----|----|----------------|-----------------|
| 148.1550       | 1  | L  | 15 |                |                 |
| 277.1976       | 2  | E  | 14 | 1470.7552      | 735.8815        |
| 390.2816       | 3  | I  | 13 | 1341.7127      | 671.3602        |
| 505.3086       | 4  | D  | 12 | 1228.6286      | 614.8182        |
| 604.3770       | 5  | V  | 11 | 1113.6016      | 557.3047        |
| 691.4090       | 6  | S  | 10 | 1014.5332      | 507.7705        |
| 805.4519       | 7  | N  | 9  | 927.5012       | 464.2545        |
| 902.5047       | 8  | P  | 8  | 813.4583       | 407.2331        |
| 1030.5633      | 9  | Q  | 7  | 716.4055       | 358.7067        |
| 1131.6110      | 10 | T  | 6  | 588.3469       | 294.6774        |
| 1230.6794      | 11 | V  | 5  | 487.2993       | 244.1535        |
| 1287.7008      | 12 | G  | 4  | 388.2308       | 194.6193        |
| 1386.7692      | 13 | V  | 3  | 331.2094       | 166.1086        |
| 1443.7907      | 14 | G  | 2  | 232.1410       | 116.5744        |
|                | 15 | R  | 1  | 175.1195       | 88.0637         |

N-term:+35.07

X-range:

0 - 0

MassTol: Y-zoom:

0. 1.

MassType:

☐AVG ☒MONO

Axis:

☒1 ☐2

Label:

☒I ☐M ☐-

Ions:

a ☐+ ☐2+ ☐3+

b ☒+ ☐2+ ☐3+

c ☐+ ☐2+ ☐3+

x ☐+ ☐2+ ☐3+

y ☒+ ☒2+ ☐3+

z ☐+ ☐2+ ☐3+

hide H<sub>2</sub>O/NH<sub>3</sub> ☐

zoom 112-122 ☐

GO

LEINPETGAIFTR, MH+ 1488.8062, m/z 496.9402  
L OS G13 P120811 220811-s1.06057.06057.3.dta

scan 6057; 2.5e+000

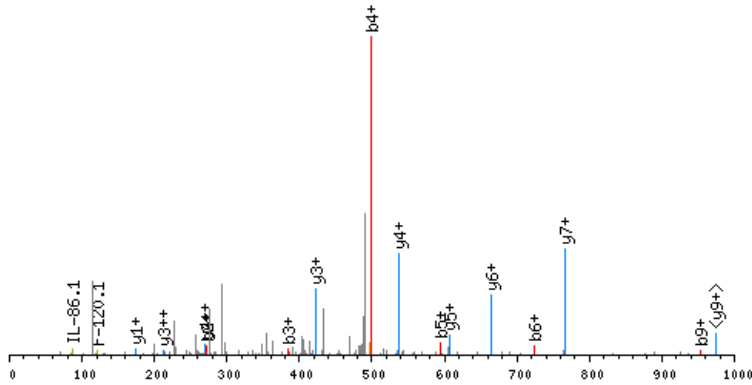

click image to zoom in; click top corners to zoom out

[precursor±]

scan 6054; 496.9 m/z; 7.8e+000

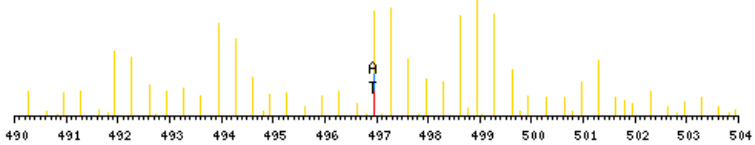

zoomed in precursor plot; T=theoretical m/z, A=acquired m/z

| b <sup>+</sup> | #  | AA | #  | y <sup>+</sup> | y <sup>2+</sup> |
|----------------|----|----|----|----------------|-----------------|
| 142.1232       | 1  | L  | 13 |                |                 |
| 271.1658       | 2  | E  | 12 | 1347.6909      | 674.3493        |
| 384.2498       | 3  | I  | 11 | 1218.6483      | 609.8280        |
| 498.2927       | 4  | N  | 10 | 1105.5642      | 553.2860        |
| 595.3455       | 5  | P  | 9  | 991.5213       | 496.2645        |
| 724.3881       | 6  | E  | 8  | 894.4685       | 447.7382        |
| 825.4358       | 7  | T  | 7  | 765.4259       | 383.2169        |
| 882.4572       | 8  | G  | 6  | 664.3782       | 332.6930        |
| 953.4944       | 9  | A  | 5  | 607.3568       | 304.1823        |
| 1066.5784      | 10 | I  | 4  | 536.3197       | 268.6637        |
| 1213.6468      | 11 | F  | 3  | 423.2356       | 212.1217        |
| 1314.6945      | 12 | T  | 2  | 276.1672       | 138.5875        |
|                | 13 | R  | 1  | 175.1195       | 88.0637         |

N-term:+29.04

LEVDVLEGTLCQPESGR, MH+ 1929.9591, m/z 643.9912  
L OS G12 P120811 220811-s1.04990.04990.3.dta

scan 4990; 2.1e+000

click image to zoom in; click top corners to zoom out      [precursor±]

scan 4987; 644.0 m/z; 2.7e+000

zoomed in precursor plot; T=theoretical m/z, A=acquired m/z

X-range:  
 -

MassTol: Y-zoom:

MassType:  
☐ AVG ☒ MONO

Axis:  
☒ 1 ☐ 2

Label:  
☒ I ☐ M ☐ -

Ions:  
a ☐ + ☐ 2+ ☐ 3+  
b ☒ + ☐ 2+ ☐ 3+  
c ☐ + ☐ 2+ ☐ 3+  
x ☐ + ☐ 2+ ☐ 3+  
y ☒ + ☒ 2+ ☐ 3+  
z ☐ + ☐ 2+ ☐ 3+

hide H<sub>2</sub>O/NH<sub>3</sub> ☐

zoom 112-122 ☐

GO

| b <sup>+</sup> | #  | AA | #  | y <sup>+</sup> | y <sup>2+</sup> |
|----------------|----|----|----|----------------|-----------------|
| 142.1232       | 1  | L  | 17 |                |                 |
| 271.1658       | 2  | E  | 16 | 1788.8438      | 894.9258        |
| 370.2342       | 3  | V  | 15 | 1659.8012      | 830.4045        |
| 485.2611       | 4  | D  | 14 | 1560.7327      | 780.8703        |
| 584.3295       | 5  | V  | 13 | 1445.7058      | 723.3568        |
| 697.4136       | 6  | L  | 12 | 1346.6374      | 673.8226        |
| 826.4562       | 7  | E  | 11 | 1233.5533      | 617.2806        |
| 883.4776       | 8  | G  | 10 | 1104.5107      | 552.7593        |
| 984.5253       | 9  | T  | 9  | 1047.4893      | 524.2485        |
| 1097.6094      | 10 | L  | 8  | 946.4416       | 473.7247        |
| 1225.6680      | 11 | Q  | 7  | 833.3575       | 417.1827        |
| 1385.6986      | 12 | C  | 6  | 705.2989       | 353.1534        |
| 1482.7513      | 13 | P  | 5  | 545.2683       | 273.1381        |
| 1611.7939      | 14 | E  | 4  | 448.2156       | 224.6117        |
| 1698.8260      | 15 | S  | 3  | 319.1730       | 160.0904        |
| 1755.8474      | 16 | G  | 2  | 232.1410       | 116.5744        |
|                | 17 | R  | 1  | 175.1195       | 88.0637         |

N-term:+29.04 C(12):+160.03

X-range:

0 - 0

MassTol: Y-zoom:

0. 1.

MassType:

☐ AVG ☒ MONO

Axis:

☒ 1 ☐ 2

Label:

☒ I ☐ M ☐ -

Ions:

a ☐ + ☐ 2+ ☐ 3+

b ☒ + ☐ 2+ ☐ 3+

c ☐ + ☐ 2+ ☐ 3+

x ☐ + ☐ 2+ ☐ 3+

y ☒ + ☒ 2+ ☐ 3+

z ☐ + ☐ 2+ ☐ 3+

hide H<sub>2</sub>O/NH<sub>3</sub> ☐

zoom 112-122 ☐

GO

LFGDKLCAIPNLR, MH+ 1584.9572, m/z 528.9906  
H OS G15 P120811 220811-s1.05297.05297.3.dta

scan 5297; 7.0e+000

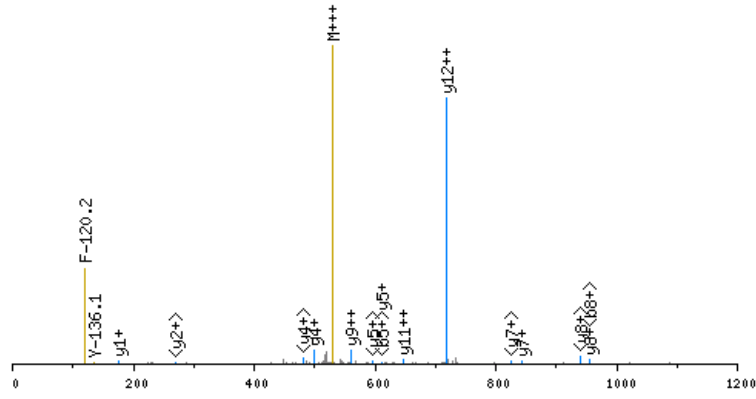

scan 5296; 529.0 m/z; 1.2e+001

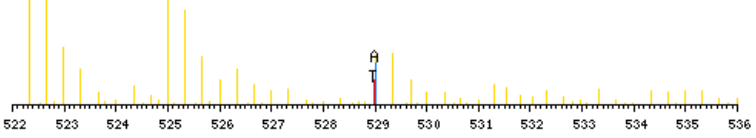

| b <sup>+</sup> | #  | AA | #  | y <sup>+</sup> | y <sup>2+</sup> |
|----------------|----|----|----|----------------|-----------------|
| 148.1550       | 1  | L  | 13 |                |                 |
| 295.2234       | 2  | F  | 12 | 1437.8100      | 719.4089        |
| 352.2448       | 3  | G  | 11 | 1290.7416      | 645.8747        |
| 467.2718       | 4  | D  | 10 | 1233.7201      | 617.3640        |
| 629.4299       | 5  | K  | 9  | 1118.6932      | 559.8505        |
| 742.5139       | 6  | L  | 8  | 956.5351       | 478.7715        |
| 902.5445       | 7  | C  | 7  | 843.4510       | 422.2294        |
| 973.5817       | 8  | A  | 6  | 683.4204       | 342.2141        |
| 1086.6657      | 9  | I  | 5  | 612.3833       | 306.6956        |
| 1183.7185      | 10 | P  | 4  | 499.2993       | 250.1535        |
| 1297.7614      | 11 | N  | 3  | 402.2465       | 201.6272        |
| 1410.8455      | 12 | L  | 2  | 288.2036       | 144.6057        |
|                | 13 | R  | 1  | 175.1195       | 88.0637         |

N-term:+35.07 K(5):+162.16  
C(7):+160.03

X-range:

0 - 0

MassTol: Y-zoom:

0. 1.

MassType:

☐AVG ☒MONO

Axis:

☒1 ☐2

Label:

☒I ☐M ☐-

Ions:

a ☐+ ☐2+ ☐3+

b ☒+ ☐2+ ☐3+

c ☐+ ☐2+ ☐3+

x ☐+ ☐2+ ☐3+

y ☒+ ☒2+ ☐3+

z ☐+ ☐2+ ☐3+

hide H<sub>2</sub>O/NH<sub>3</sub> ☐

zoom 112-122 ☐

GO

LGAEYMQSVGNMR, MH+ 1483.7037, m/z 495.2394  
L OS G13 P120811 220811-s1.04761.04761.3.dta

scan 4761; 5.8e+000

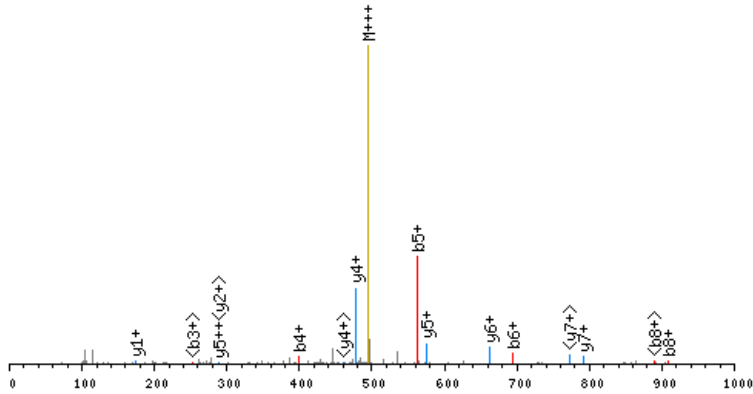

click image to zoom in; click top corners to zoom out

[precursor±]

scan 4759; 495.2 m/z; 8.7e+000

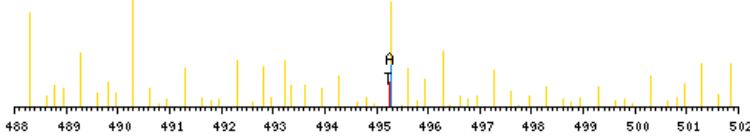

zoomed in precursor plot; T=theoretical m/z, A=acquired m/z

| b <sup>+</sup> | #  | AA | #  | y <sup>+</sup> | y <sup>2+</sup> |
|----------------|----|----|----|----------------|-----------------|
| 142.1232       | 1  | L  | 13 |                |                 |
| 199.1446       | 2  | G  | 12 | 1342.5884      | 671.7981        |
| 270.1817       | 3  | A  | 11 | 1285.5669      | 643.2874        |
| 399.2243       | 4  | E  | 10 | 1214.5298      | 607.7688        |
| 562.2877       | 5  | Y  | 9  | 1085.4872      | 543.2475        |
| 693.3281       | 6  | M  | 8  | 922.4239       | 461.7159        |
| 821.3867       | 7  | Q  | 7  | 791.3834       | 396.1956        |
| 908.4188       | 8  | S  | 6  | 663.3248       | 332.1663        |
| 1007.4872      | 9  | V  | 5  | 576.2928       | 288.6503        |
| 1064.5086      | 10 | G  | 4  | 477.2244       | 239.1161        |
| 1178.5516      | 11 | N  | 3  | 420.2029       | 210.6054        |
| 1309.5920      | 12 | M  | 2  | 306.1600       | 153.5839        |
|                | 13 | R  | 1  | 175.1195       | 88.0637         |

N-term:+29.04

X-range:

0 - 0

MassTol: Y-zoom:

0. 1.

MassType:

☐ AVG ☒ MONO

Axis:

☒ 1 ☐ 2

Label:

☒ I ☐ M ☐ -

Ions:

a ☐ + ☐ 2+ ☐ 3+

b ☒ + ☐ 2+ ☐ 3+

c ☐ + ☐ 2+ ☐ 3+

x ☐ + ☐ 2+ ☐ 3+

y ☒ + ☒ 2+ ☐ 3+

z ☐ + ☐ 2+ ☐ 3+

hide H<sub>2</sub>O/NH<sub>3</sub> ☐

zoom 112-122 ☐

GO

LGDFAIISLYR, MH+ 1188.6841, m/z 594.8457  
H OS G13 P120811 220811-s1.06420.06420.2.dta

scan 6420; 1.1e+001

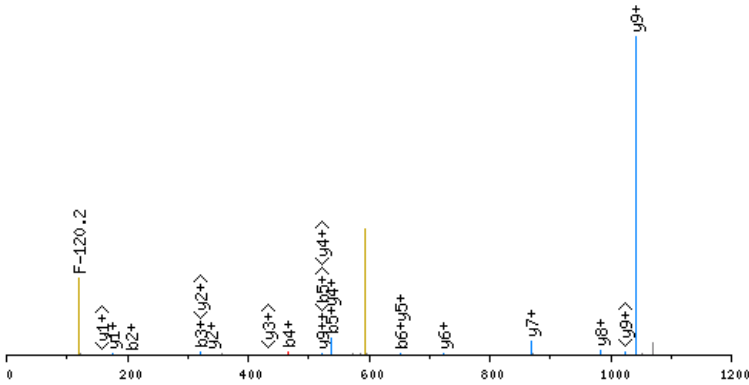

click image to zoom in; click top corners to zoom out

[precursor±]

scan 6419; 594.8 m/z; 1.6e+001

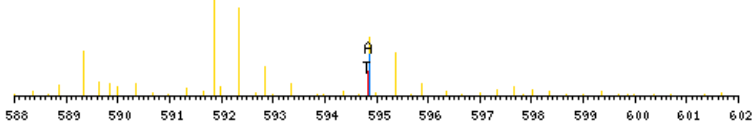

zoomed in precursor plot; T=theoretical m/z, A=acquired m/z

| b <sup>+</sup> | #  | AA | #  | y <sup>+</sup> | y <sup>2+</sup> |
|----------------|----|----|----|----------------|-----------------|
| 148.1550       | 1  | L  | 10 |                |                 |
| 205.1764       | 2  | G  | 9  | 1041.5369      | 521.2724        |
| 320.2034       | 3  | D  | 8  | 984.5155       | 492.7616        |
| 467.2718       | 4  | F  | 7  | 869.4885       | 435.2482        |
| 538.3089       | 5  | A  | 6  | 722.4201       | 361.7140        |
| 651.3930       | 6  | I  | 5  | 651.3830       | 326.1954        |
| 738.4250       | 7  | S  | 4  | 538.2989       | 269.6534        |
| 851.5091       | 8  | L  | 3  | 451.2669       | 226.1374        |
| 1014.5724      | 9  | Y  | 2  | 338.1828       | 169.5953        |
|                | 10 | R  | 1  | 175.1195       | 88.0637         |

N-term:+35.07

X-range:

0 - 0

MassTol: Y-zoom:

0. 1.

MassType:

☐AVG ☒MONO

Axis:

☒1 ☐2

Label:

☒I ☐M ☐-

Ions:

a ☐+ ☐2+ ☐3+

b ☒+ ☐2+ ☐3+

c ☐+ ☐2+ ☐3+

x ☐+ ☐2+ ☐3+

y ☒+ ☒2+ ☐3+

z ☐+ ☐2+ ☐3+

hide H<sub>2</sub>O/NH<sub>3</sub> ☐

zoom 112-122 ☐

GO

LGEKFDETTADGR, MH+ 1494.7440, m/z 498.9195  
L OS G16 P120811 220811-s1.02904.02904.3.dta

scan 2904; 9.5e+000

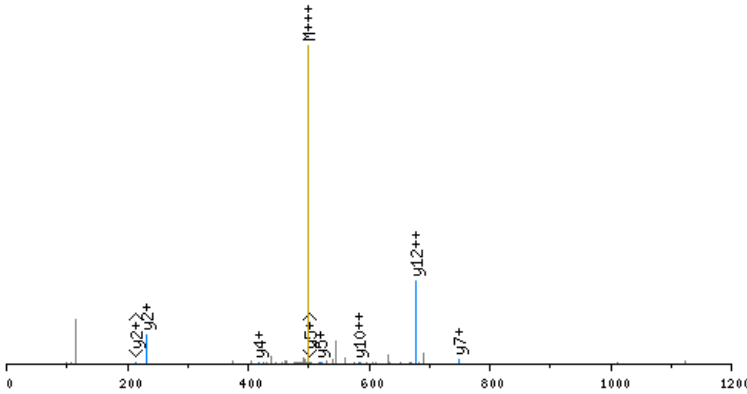

click image to zoom in; click top corners to zoom out [\[precursor±\]](#)

scan 2903; 498.9 m/z; 3.3e+002

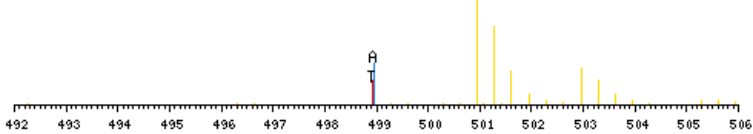

zoomed in precursor plot; T=theoretical m/z, A=acquired m/z

| b <sup>+</sup> | #  | AA | #  | y <sup>+</sup> | y <sup>2+</sup> |
|----------------|----|----|----|----------------|-----------------|
| 142.1232       | 1  | L  | 13 |                |                 |
| 199.1446       | 2  | G  | 12 | 1353.6287      | 677.3183        |
| 328.1872       | 3  | E  | 11 | 1296.6072      | 648.8075        |
| 484.3135       | 4  | K  | 10 | 1167.5646      | 584.2862        |
| 631.3819       | 5  | F  | 9  | 1011.4383      | 506.2231        |
| 746.4089       | 6  | D  | 8  | 864.3699       | 432.6889        |
| 875.4515       | 7  | E  | 7  | 749.3430       | 375.1754        |
| 976.4991       | 8  | T  | 6  | 620.3004       | 310.6541        |
| 1077.5468      | 9  | T  | 5  | 519.2527       | 260.1303        |
| 1148.5839      | 10 | A  | 4  | 418.2050       | 209.6064        |
| 1263.6109      | 11 | D  | 3  | 347.1679       | 174.0879        |
| 1320.6323      | 12 | G  | 2  | 232.1410       | 116.5744        |
|                | 13 | R  | 1  | 175.1195       | 88.0637         |

N-term:+29.04 K(4):+156.13

X-range:

0 - 0

MassTol: Y-zoom:

0. 1.

MassType:

☐ AVG ☒ MONO

Axis:

☒ 1 ☐ 2

Label:

☒ I ☐ M ☐ -

Ions:

a ☐ + ☐ 2+ ☐ 3+

b ☒ + ☐ 2+ ☐ 3+

c ☐ + ☐ 2+ ☐ 3+

x ☐ + ☐ 2+ ☐ 3+

y ☒ + ☒ 2+ ☐ 3+

z ☐ + ☐ 2+ ☐ 3+

hide H<sub>2</sub>O/NH<sub>3</sub> ☐

zoom 112-122 ☐

GO

LGMEERPYSR, MH+ 1358.6950, m/z 453.5699  
H OS G19 P120811 220811-s1.03973.03973.3.dta

scan 3973; 1.2e+000

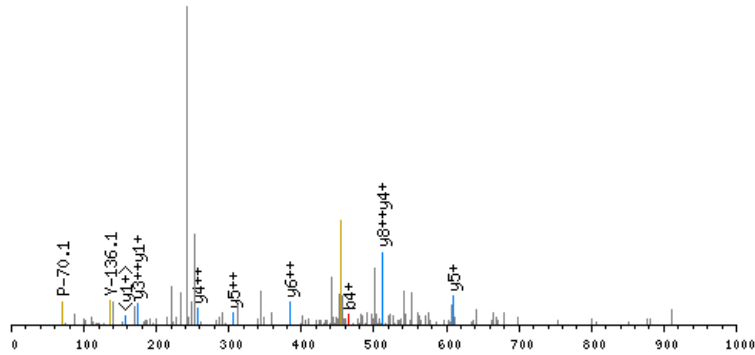

click image to zoom in; click top corners to zoom out [precursor±]

scan 3971; 453.6 m/z; 4.4e+001

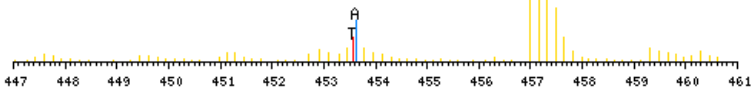

zoomed in precursor plot; T=theoretical m/z, A=acquired m/z

| b <sup>+</sup> | #  | AA | #  | y <sup>+</sup> | y <sup>2+</sup> |
|----------------|----|----|----|----------------|-----------------|
| 148.1550       | 1  | L  | 11 |                |                 |
| 205.1764       | 2  | G  | 10 | 1211.5479      | 606.2779        |
| 336.2169       | 3  | M  | 9  | 1154.5264      | 577.7671        |
| 465.2595       | 4  | E  | 8  | 1023.4859      | 512.2469        |
| 594.3021       | 5  | E  | 7  | 894.4434       | 447.7256        |
| 750.4032       | 6  | R  | 6  | 765.4008       | 383.2043        |
| 847.4560       | 7  | P  | 5  | 609.2997       | 305.1537        |
| 1010.5193      | 8  | Y  | 4  | 512.2469       | 256.6274        |
| 1097.5513      | 9  | S  | 3  | 349.1836       | 175.0957        |
| 1184.5834      | 10 | S  | 2  | 262.1515       | 131.5797        |
|                | 11 | R  | 1  | 175.1195       | 88.0637         |

N-term:+35.07

X-range:

0 - 0

MassTol: Y-zoom:

0. 1.

MassType:

☐ AVG ☒ MONO

Axis:

☒ 1 ☐ 2

Label:

☒ I ☐ M ☐ -

Ions:

a ☐ + ☐ 2+ ☐ 3+

b ☒ + ☐ 2+ ☐ 3+

c ☐ + ☐ 2+ ☐ 3+

x ☐ + ☐ 2+ ☐ 3+

y ☒ + ☒ 2+ ☐ 3+

z ☐ + ☐ 2+ ☐ 3+

hide H<sub>2</sub>O/NH<sub>3</sub> ☐

zoom 112-122 ☐

GO

LHLGVTPSVLR, MH+ 1225.7844, m/z 409.2663  
H OS G16 P120811 220811-s1.04896.04896.3.dta

scan 4896; 3.9e+000

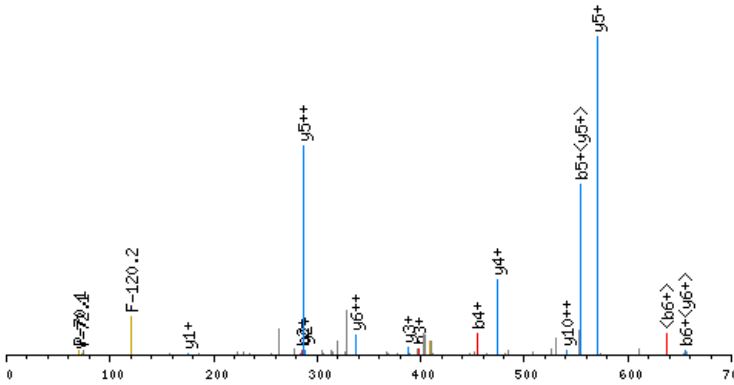

click image to zoom in; click top corners to zoom out [precursor±]

scan 4893; 409.3 m/z; 4.6e+000

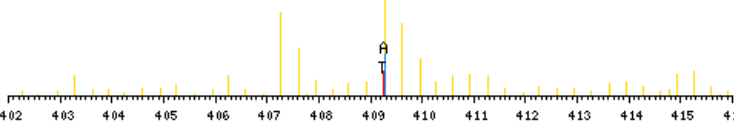

zoomed in precursor plot; T=theoretical m/z, A=acquired m/z

| b <sup>+</sup> | #  | AA | #  | y <sup>+</sup> | y <sup>2+</sup> |
|----------------|----|----|----|----------------|-----------------|
| 148.1550       | 1  | L  | 11 |                |                 |
| 285.2139       | 2  | H  | 10 | 1078.6373      | 539.8226        |
| 398.2979       | 3  | L  | 9  | 941.5784       | 471.2931        |
| 455.3194       | 4  | G  | 8  | 828.4943       | 414.7511        |
| 554.3878       | 5  | V  | 7  | 771.4729       | 386.2403        |
| 655.4355       | 6  | T  | 6  | 672.4044       | 336.7061        |
| 752.4883       | 7  | P  | 5  | 571.3568       | 286.1823        |
| 839.5203       | 8  | S  | 4  | 474.3040       | 237.6559        |
| 938.5887       | 9  | V  | 3  | 387.2720       | 194.1399        |
| 1051.6728      | 10 | L  | 2  | 288.2036       | 144.6057        |
|                | 11 | R  | 1  | 175.1195       | 88.0637         |

N-term:+35.07

X-range:

0 - 0

MassTol: Y-zoom:

0. 1.

MassType:

☐AVG ☒MONO

Axis:

☒1 ☐2

Label:

☒I ☐M ☐-

Ions:

a ☐+ ☐2+ ☐3+

b ☒+ ☐2+ ☐3+

c ☐+ ☐2+ ☐3+

x ☐+ ☐2+ ☐3+

y ☒+ ☒2+ ☐3+

z ☐+ ☐2+ ☐3+

hide H<sub>2</sub>O/NH<sub>3</sub> ☐

zoom 112-122 ☐

GO

LHTVYQSVELPETHQMLR, MH+ 2215.1757, m/z 554.5494  
H OS G17 P120811 220811-s1.05362.05362.4.dta

scan 5362; 2.6e+000

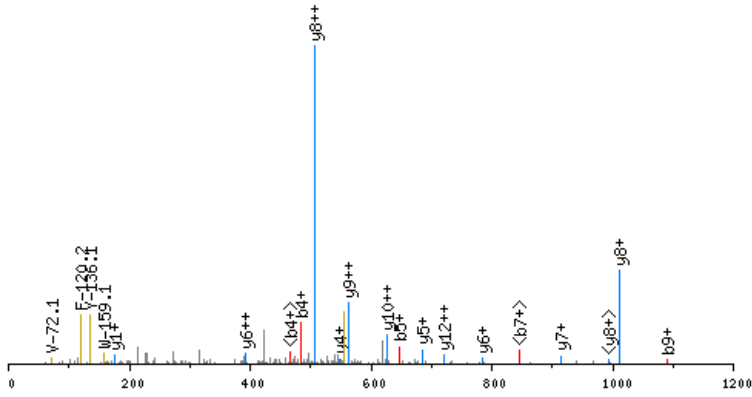

click image to zoom in; click top corners to zoom out [\[precursor±\]](#)

scan 5358; 554.5 m/z; 2.0e+001

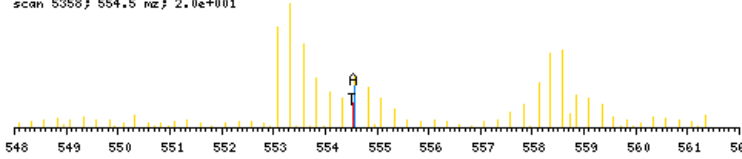

zoomed in precursor plot; T=theoretical m/z, A=acquired m/z

| b <sup>+</sup> | #  | AA | #  | y <sup>+</sup> | y <sup>2+</sup> |
|----------------|----|----|----|----------------|-----------------|
| 148.1550       | 1  | L  | 18 |                |                 |
| 285.2139       | 2  | H  | 17 | 2068.0286      | 1034.5182       |
| 386.2616       | 3  | T  | 16 | 1930.9697      | 965.9887        |
| 485.3300       | 4  | V  | 15 | 1829.9220      | 915.4649        |
| 648.3933       | 5  | Y  | 14 | 1730.8536      | 865.9307        |
| 776.4519       | 6  | Q  | 13 | 1567.7903      | 784.3990        |
| 863.4839       | 7  | S  | 12 | 1439.7317      | 720.3697        |
| 962.5523       | 8  | V  | 11 | 1352.6996      | 676.8537        |
| 1091.5949      | 9  | E  | 10 | 1253.6312      | 627.3195        |
| 1204.6790      | 10 | L  | 9  | 1124.5886      | 562.7982        |
| 1301.7317      | 11 | P  | 8  | 1011.5046      | 506.2562        |
| 1430.7743      | 12 | E  | 7  | 914.4518       | 457.7298        |
| 1531.8220      | 13 | T  | 6  | 785.4092       | 393.2085        |
| 1668.8809      | 14 | H  | 5  | 684.3615       | 342.6847        |
| 1796.9395      | 15 | Q  | 4  | 547.3026       | 274.1552        |
| 1927.9800      | 16 | M  | 3  | 419.2440       | 210.1259        |
| 2041.0640      | 17 | L  | 2  | 288.2036       | 144.6057        |
|                | 18 | R  | 1  | 175.1195       | 88.0637         |

N-term:+35.07

X-range:

0 - 0

MassTol: Y-zoom:

0. 1.

MassType:

☐ AVG ☒ MONO

Axis:

☒ 1 ☐ 2

Label:

☒ I ☐ M ☐ -

Ions:

a ☐ + ☐ 2+ ☐ 3+

b ☒ + ☐ 2+ ☐ 3+

c ☐ + ☐ 2+ ☐ 3+

x ☐ + ☐ 2+ ☐ 3+

y ☒ + ☒ 2+ ☐ 3+

z ☐ + ☐ 2+ ☐ 3+

hide H<sub>2</sub>O/NH<sub>3</sub> ☐

zoom 112-122 ☐

GO

LKGGDDLDPNYVLSSR, MH+ 1817.0081, m/z 606.3409  
H OS G15 P120811 220811-s1.04432.04432.3.dta

scan 4432; 1.5e+000

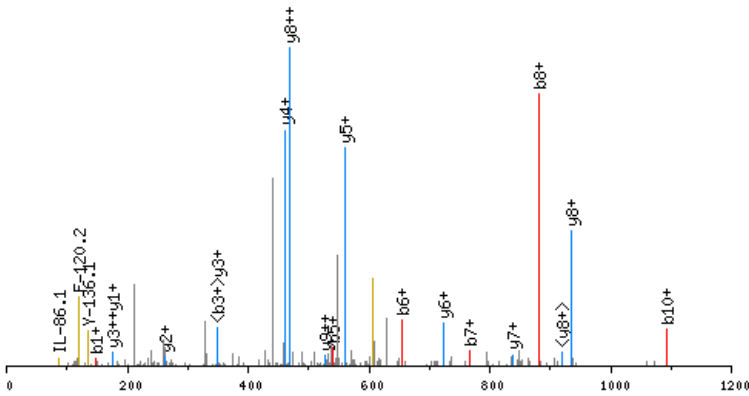

click image to zoom in; click top corners to zoom out

[precursor±]

scan 4431; 606.3 m/z; 8.7e+000

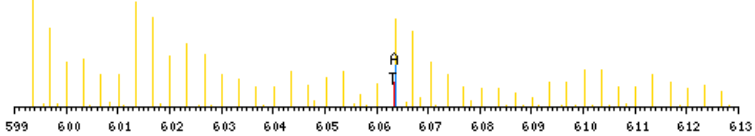

zoomed in precursor plot; T=theoretical m/z, A=acquired m/z

| b <sup>+</sup> | #  | AA | #  | y <sup>+</sup> | y <sup>2+</sup> |
|----------------|----|----|----|----------------|-----------------|
| 148.1550       | 1  | L  | 16 |                |                 |
| 310.3131       | 2  | K  | 15 | 1669.8610      | 835.4344        |
| 367.3345       | 3  | G  | 14 | 1507.7029      | 754.3554        |
| 424.3560       | 4  | G  | 13 | 1450.6814      | 725.8446        |
| 539.3829       | 5  | D  | 12 | 1393.6599      | 697.3339        |
| 654.4099       | 6  | D  | 11 | 1278.6330      | 639.8204        |
| 767.4939       | 7  | L  | 10 | 1163.6061      | 582.3069        |
| 882.5209       | 8  | D  | 9  | 1050.5220      | 525.7649        |
| 979.5736       | 9  | P  | 8  | 935.4951       | 468.2514        |
| 1093.6166      | 10 | N  | 7  | 838.4423       | 419.7251        |
| 1256.6799      | 11 | Y  | 6  | 724.3994       | 362.7036        |
| 1355.7483      | 12 | V  | 5  | 561.3360       | 281.1719        |
| 1468.8324      | 13 | L  | 4  | 462.2676       | 231.6377        |
| 1555.8644      | 14 | S  | 3  | 349.1836       | 175.0957        |
| 1642.8964      | 15 | S  | 2  | 262.1515       | 131.5797        |
|                | 16 | R  | 1  | 175.1195       | 88.0637         |

N-term:+35.07 K(2):+162.16

X-range:

0 - 0

MassTol: Y-zoom:

0. 1.

MassType:

☐ AVG ☒ MONO

Axis:

☒ 1 ☐ 2

Label:

☒ I ☐ M ☐ -

Ions:

a ☐ + ☐ 2+ ☐ 3+

b ☒ + ☐ 2+ ☐ 3+

c ☐ + ☐ 2+ ☐ 3+

x ☐ + ☐ 2+ ☐ 3+

y ☒ + ☒ 2+ ☐ 3+

z ☐ + ☐ 2+ ☐ 3+

hide H<sub>2</sub>O/NH<sub>3</sub> ☐

zoom 112-122 ☐

GO

LKGGMLFPKESPSR, MH+ 1630.9355, m/z 408.4893  
L OS G17 P120811 220811-s1.03576.03576.4.dta

scan 3576; 3.0e+001

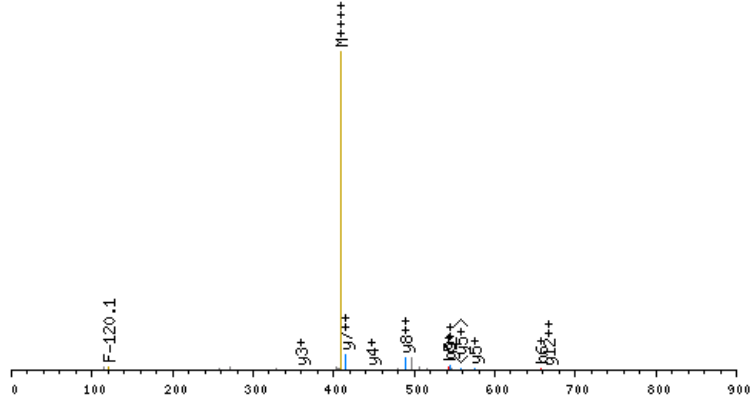

click image to zoom in; click top corners to zoom out [\[precursor±\]](#)

scan 3573; 408.5 m/z; 1.6e+002

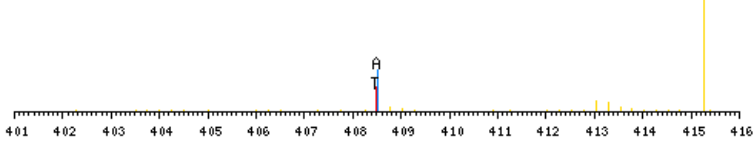

zoomed in precursor plot; T=theoretical m/z, A=acquired m/z

| b <sup>+</sup> | #  | AA | #  | y <sup>+</sup> | y <sup>2+</sup> |
|----------------|----|----|----|----------------|-----------------|
| 142.1232       | 1  | L  | 14 |                |                 |
| 298.2495       | 2  | K  | 13 | 1489.8202      | 745.4140        |
| 355.2709       | 3  | G  | 12 | 1333.6939      | 667.3508        |
| 412.2924       | 4  | G  | 11 | 1276.6724      | 638.8401        |
| 543.3329       | 5  | M  | 10 | 1219.6509      | 610.3294        |
| 656.4169       | 6  | L  | 9  | 1088.6105      | 544.8091        |
| 803.4854       | 7  | F  | 8  | 975.5264       | 488.2671        |
| 900.5381       | 8  | P  | 7  | 828.4580       | 414.7329        |
| 1056.6644      | 9  | K  | 6  | 731.4052       | 366.2065        |
| 1185.7070      | 10 | E  | 5  | 575.2789       | 288.1434        |
| 1272.7390      | 11 | S  | 4  | 446.2363       | 223.6221        |
| 1369.7918      | 12 | P  | 3  | 359.2043       | 180.1061        |
| 1456.8238      | 13 | S  | 2  | 262.1515       | 131.5797        |
|                | 14 | R  | 1  | 175.1195       | 88.0637         |

N-term:+29.04 K(2):+156.13  
K(9):+156.13

X-range:

0 - 0

MassTol: Y-zoom:

0. 1.

MassType:

☐ AVG ☒ MONO

Axis:

☒ 1 ☐ 2

Label:

☒ I ☐ M ☐ -

Ions:

a ☐ + ☐ 2+ ☐ 3+

b ☒ + ☐ 2+ ☐ 3+

c ☐ + ☐ 2+ ☐ 3+

x ☐ + ☐ 2+ ☐ 3+

y ☒ + ☒ 2+ ☐ 3+

z ☐ + ☐ 2+ ☐ 3+

hide H<sub>2</sub>O/NH<sub>3</sub> ☐

zoom 112-122 ☐

GO

LKGPKEISGFEGDTVSLR, MH+ 2017.1334, m/z 505.0388  
L OS G17 P120811 220811-s1.04999.04999.4.dta

scan 4999; 1.7e+000

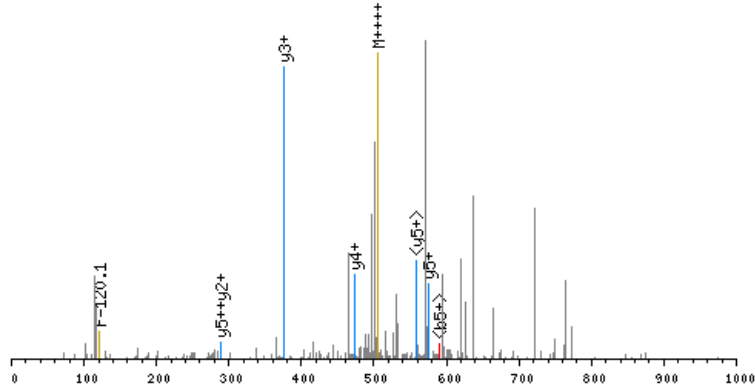

click image to zoom in; click top corners to zoom out [\[precursor±\]](#)

scan 4998; 505.0 m/z; 3.6e+002

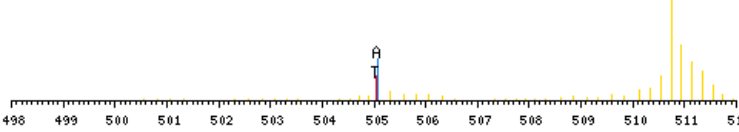

zoomed in precursor plot; T=theoretical m/z, A=acquired m/z

| b <sup>+</sup> | #  | AA | #  | y <sup>+</sup> | y <sup>2+</sup> |
|----------------|----|----|----|----------------|-----------------|
| 142.1232       | 1  | L  | 18 |                |                 |
| 298.2495       | 2  | K  | 17 | 1876.0181      | 938.5130        |
| 355.2709       | 3  | G  | 16 | 1719.8918      | 860.4498        |
| 452.3237       | 4  | P  | 15 | 1662.8703      | 831.9391        |
| 608.4500       | 5  | K  | 14 | 1565.8175      | 783.4127        |
| 737.4926       | 6  | E  | 13 | 1409.6912      | 705.3495        |
| 850.5766       | 7  | I  | 12 | 1280.6487      | 640.8282        |
| 937.6087       | 8  | S  | 11 | 1167.5646      | 584.2862        |
| 994.6301       | 9  | G  | 10 | 1080.5326      | 540.7702        |
| 1141.6986      | 10 | F  | 9  | 1023.5111      | 512.2595        |
| 1270.7411      | 11 | E  | 8  | 876.4427       | 438.7253        |
| 1327.7626      | 12 | G  | 7  | 747.4001       | 374.2040        |
| 1442.7896      | 13 | D  | 6  | 690.3786       | 345.6932        |
| 1543.8372      | 14 | T  | 5  | 575.3517       | 288.1798        |
| 1642.9056      | 15 | V  | 4  | 474.3040       | 237.6559        |
| 1729.9377      | 16 | S  | 3  | 375.2356       | 188.1217        |
| 1843.0217      | 17 | L  | 2  | 288.2036       | 144.6057        |
|                | 18 | R  | 1  | 175.1195       | 88.0637         |

N-term:+29.04 K(2):+156.13  
K(5):+156.13

X-range:

0 - 0

MassTol: Y-zoom:

0. 1.

MassType:

☐AVG ☒MONO

Axis:

☒1 ☐2

Label:

☒I ☐M ☐-

Ions:

a ☐+ ☐2+ ☐3+

b ☒+ ☐2+ ☐3+

c ☐+ ☐2+ ☐3+

x ☐+ ☐2+ ☐3+

y ☒+ ☒2+ ☐3+

z ☐+ ☐2+ ☐3+

hide H<sub>2</sub>O/NH<sub>3</sub> ☐

zoom 112-122 ☐

GO

LKLPVVVTADLR, MH+ 1351.8677, m/z 451.2941  
L OS G15 P120811 220811-s1.05347.05347.3.dta

scan 5347; 2.4e+000

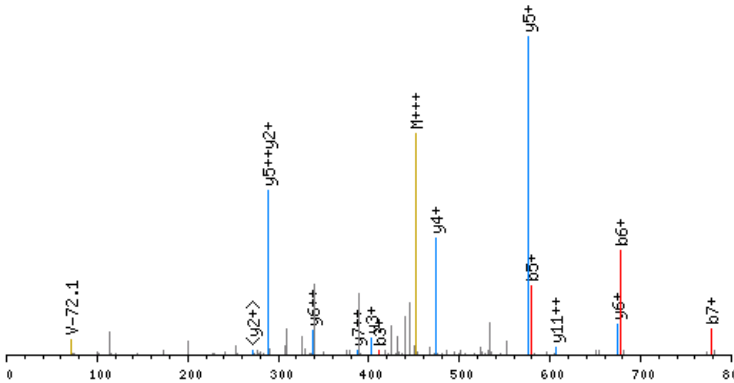

click image to zoom in; click top corners to zoom out

[precursor±]

scan 5346; 451.3 m/z; 3.1e+000

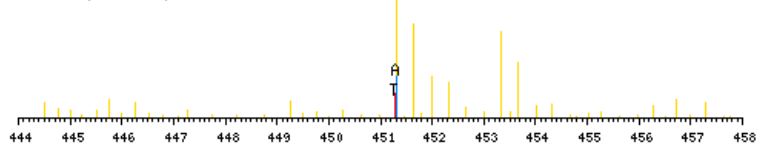

zoomed in precursor plot; T=theoretical m/z, A=acquired m/z

| b <sup>+</sup> | #  | AA | #  | y <sup>+</sup> | y <sup>2+</sup> |
|----------------|----|----|----|----------------|-----------------|
| 142.1232       | 1  | L  | 12 |                |                 |
| 298.2495       | 2  | K  | 11 | 1210.7524      | 605.8801        |
| 411.3335       | 3  | L  | 10 | 1054.6261      | 527.8169        |
| 508.3863       | 4  | P  | 9  | 941.5420       | 471.2749        |
| 579.4234       | 5  | A  | 8  | 844.4892       | 422.7485        |
| 678.4918       | 6  | V  | 7  | 773.4521       | 387.2300        |
| 777.5602       | 7  | V  | 6  | 674.3837       | 337.6958        |
| 878.6079       | 8  | T  | 5  | 575.3153       | 288.1616        |
| 949.6450       | 9  | A  | 4  | 474.2676       | 237.6377        |
| 1064.6720      | 10 | D  | 3  | 403.2305       | 202.1192        |
| 1177.7560      | 11 | L  | 2  | 288.2036       | 144.6057        |
|                | 12 | R  | 1  | 175.1195       | 88.0637         |

N-term:+29.04 K(2):+156.13

N-term: +29.04 C(3): +160.03

X-range:

0 - 0

MassTol: Y-zoom:

0. 1.

MassType:

☐ AVG ☒ MONO

Axis:

☒ 1 ☐ 2

Label:

☒ I ☐ M ☐ -

Ions:

a ☐ + ☐ 2+ ☐ 3+

b ☒ + ☐ 2+ ☐ 3+

c ☐ + ☐ 2+ ☐ 3+

x ☐ + ☐ 2+ ☐ 3+

y ☒ + ☒ 2+ ☐ 3+

z ☐ + ☐ 2+ ☐ 3+

hide H<sub>2</sub>O/NH<sub>3</sub> ☐

zoom 112-122 ☐

GO

LNIDHLSDDKLR, MH+ 1506.8916, m/z 377.4784  
H OS G17 P120811 220811-s1.04282.04282.4.dta

scan 4282; 1.4e+001

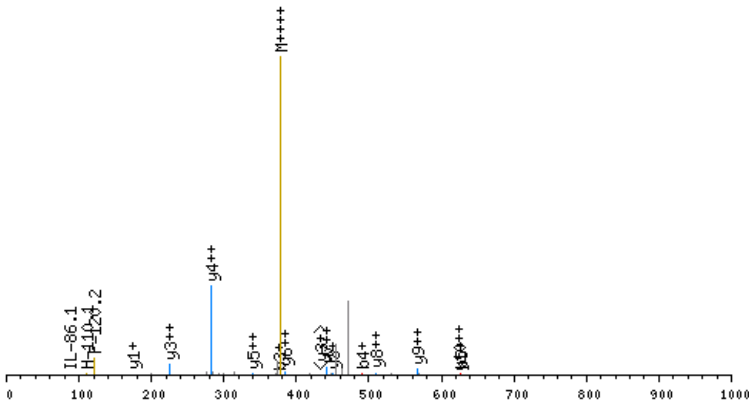

click image to zoom in; click top corners to zoom out

[precursor±]

scan 4278; 377.5 m/z; 4.2e+000

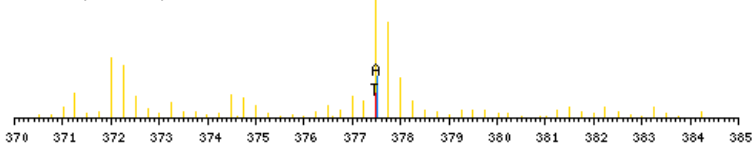

zoomed in precursor plot; T=theoretical m/z, A=acquired m/z

| b <sup>+</sup> | #  | AA | #  | y <sup>+</sup> | y <sup>2+</sup> |
|----------------|----|----|----|----------------|-----------------|
| 148.1550       | 1  | L  | 12 |                |                 |
| 262.1979       | 2  | N  | 11 | 1359.7445      | 680.3762        |
| 375.2820       | 3  | I  | 10 | 1245.7016      | 623.3547        |
| 490.3089       | 4  | D  | 9  | 1132.6175      | 566.8127        |
| 627.3678       | 5  | H  | 8  | 1017.5906      | 509.2992        |
| 740.4519       | 6  | L  | 7  | 880.5316       | 440.7697        |
| 827.4839       | 7  | S  | 6  | 767.4476       | 384.2277        |
| 942.5108       | 8  | D  | 5  | 680.4156       | 340.7117        |
| 1057.5378      | 9  | D  | 4  | 565.3886       | 283.1982        |
| 1219.6959      | 10 | K  | 3  | 450.3617       | 225.6847        |
| 1332.7800      | 11 | L  | 2  | 288.2036       | 144.6057        |
|                | 12 | R  | 1  | 175.1195       | 88.0637         |

N-term:+35.07 K(10):+162.16

X-range:

0 - 0

MassTol: Y-zoom:

0. 1.

MassType:

☐ AVG ☒ MONO

Axis:

☒ 1 ☐ 2

Label:

☒ I ☐ M ☐ -

Ions:

a ☐ + ☐ 2+ ☐ 3+

b ☒ + ☐ 2+ ☐ 3+

c ☐ + ☐ 2+ ☐ 3+

x ☐ + ☐ 2+ ☐ 3+

y ☒ + ☒ 2+ ☐ 3+

z ☐ + ☐ 2+ ☐ 3+

hide H<sub>2</sub>O/NH<sub>3</sub> ☐

zoom 112-122 ☐

GO

LPDTSIPGGSTPTVQVTPQLETR, MH+ 2422.2829, m/z 808.0992  
L OS G12 P120811 220811-s1.04516.04516.3.dta

scan 4516; 1.3e+000

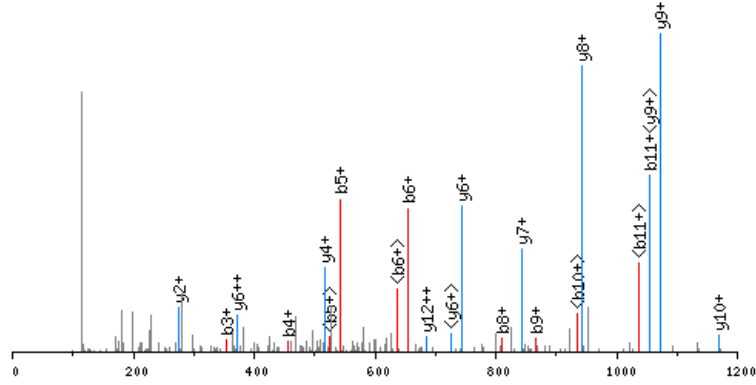

click image to zoom in; click top corners to zoom out [\[precursor±\]](#)

scan 4512; 808.1 m/z; 2.9e+000

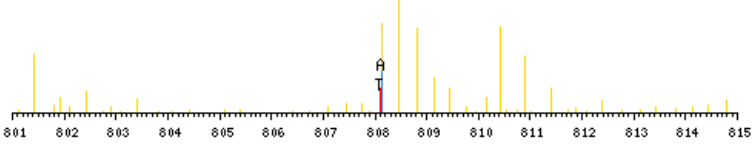

zoomed in precursor plot; T=theoretical m/z, A=acquired m/z

| b <sup>+</sup> | #  | AA | #  | y <sup>+</sup> | y <sup>2+</sup> |
|----------------|----|----|----|----------------|-----------------|
| 142.1232       | 1  | L  | 23 |                |                 |
| 239.1759       | 2  | P  | 22 | 2281.1676      | 1141.0877       |
| 354.2029       | 3  | D  | 21 | 2184.1148      | 1092.5613       |
| 455.2505       | 4  | T  | 20 | 2069.0879      | 1035.0478       |
| 542.2826       | 5  | S  | 19 | 1968.0402      | 984.5240        |
| 655.3666       | 6  | I  | 18 | 1881.0082      | 941.0080        |
| 752.4194       | 7  | P  | 17 | 1767.9241      | 884.4660        |
| 809.4409       | 8  | G  | 16 | 1670.8713      | 835.9396        |
| 866.4623       | 9  | G  | 15 | 1613.8499      | 807.4288        |
| 953.4944       | 10 | S  | 14 | 1556.8284      | 778.9181        |
| 1054.5420      | 11 | T  | 13 | 1469.7964      | 735.4021        |
| 1151.5948      | 12 | P  | 12 | 1368.7487      | 684.8783        |
| 1252.6425      | 13 | T  | 11 | 1271.6959      | 636.3519        |
| 1351.7109      | 14 | V  | 10 | 1170.6483      | 585.8280        |
| 1479.7695      | 15 | Q  | 9  | 1071.5798      | 536.2938        |
| 1578.8379      | 16 | V  | 8  | 943.5213       | 472.2645        |
| 1679.8856      | 17 | T  | 7  | 844.4529       | 422.7303        |
| 1776.9383      | 18 | P  | 6  | 743.4052       | 372.2065        |
| 1904.9969      | 19 | Q  | 5  | 646.3524       | 323.6801        |
| 2018.0810      | 20 | L  | 4  | 518.2938       | 259.6508        |
| 2147.1236      | 21 | E  | 3  | 405.2098       | 203.1088        |
| 2248.1712      | 22 | T  | 2  | 276.1672       | 138.5875        |
|                | 23 | R  | 1  | 175.1195       | 88.0637         |

N-term:+29.04

X-range:

0 - 0

MassTol: Y-zoom:

0. 1.

MassType:

☐AVG ☒MONO

Axis:

☒1 ☐2

Label:

☒I ☐M ☐-

Ions:

a ☐+ ☐2+ ☐3+

b ☒+ ☐2+ ☐3+

c ☐+ ☐2+ ☐3+

x ☐+ ☐2+ ☐3+

y ☒+ ☒2+ ☐3+

z ☐+ ☐2+ ☐3+

hide H<sub>2</sub>O/NH<sub>3</sub> ☐

zoom 112-122 ☐

GO

LQEDSLNVADLSSLR, MH+ 1687.8866, m/z 563.3004  
L OS G13 P120811 220811-s1.06255.06255.3.dta

scan 6255; 1.8e+000

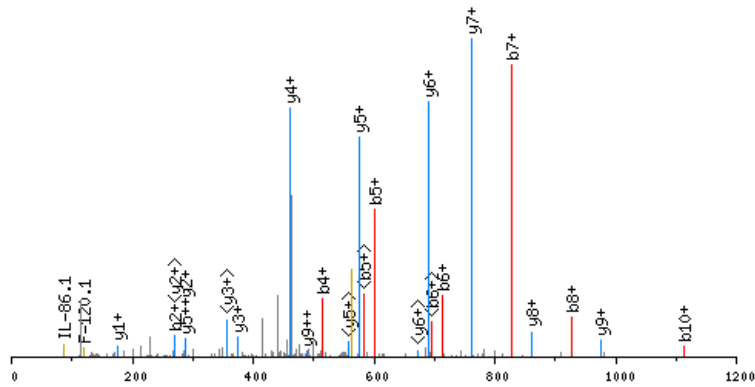

click image to zoom in; click top corners to zoom out

[precursor±]

scan 6254; 563.3 m/z; 9.4e+000

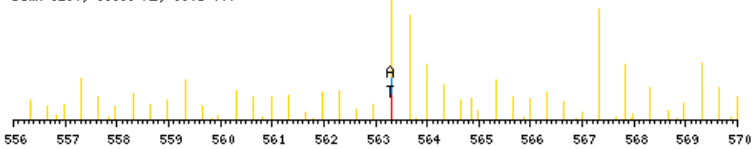

zoomed in precursor plot; T=theoretical m/z, A=acquired m/z

| b <sup>+</sup> | #  | AA | #  | y <sup>+</sup> | y <sup>2+</sup> |
|----------------|----|----|----|----------------|-----------------|
| 142.1232       | 1  | L  | 15 |                |                 |
| 270.1817       | 2  | Q  | 14 | 1546.7713      | 773.8896        |
| 399.2243       | 3  | E  | 13 | 1418.7127      | 709.8603        |
| 514.2513       | 4  | D  | 12 | 1289.6701      | 645.3390        |
| 601.2833       | 5  | S  | 11 | 1174.6432      | 587.8255        |
| 714.3674       | 6  | L  | 10 | 1087.6111      | 544.3095        |
| 828.4103       | 7  | N  | 9  | 974.5271       | 487.7675        |
| 927.4787       | 8  | V  | 8  | 860.4842       | 430.7460        |
| 998.5158       | 9  | A  | 7  | 761.4157       | 381.2118        |
| 1113.5428      | 10 | D  | 6  | 690.3786       | 345.6932        |
| 1226.6268      | 11 | L  | 5  | 575.3517       | 288.1798        |
| 1313.6589      | 12 | S  | 4  | 462.2676       | 231.6377        |
| 1400.6909      | 13 | S  | 3  | 375.2356       | 188.1217        |
| 1513.7750      | 14 | L  | 2  | 288.2036       | 144.6057        |
|                | 15 | R  | 1  | 175.1195       | 88.0637         |

N-term:+29.04

X-range:

0 - 0

MassTol: Y-zoom:

0. 1.

MassType:

☐ AVG ☒ MONO

Axis:

☒ 1 ☐ 2

Label:

☒ I ☐ M ☐ -

Ions:

a ☐ + ☐ 2+ ☐ 3+

b ☒ + ☐ 2+ ☐ 3+

c ☐ + ☐ 2+ ☐ 3+

x ☐ + ☐ 2+ ☐ 3+

y ☒ + ☒ 2+ ☐ 3+

z ☐ + ☐ 2+ ☐ 3+

hide H<sub>2</sub>O/NH<sub>3</sub> ☐

zoom 112-122 ☐

GO

LQEYFDGNLKR, MH+ 1450.8331, m/z 484.2825  
H OS G16 P120811 220811-s1.03941.03941.3.dta

scan 3941; 1.3e+001

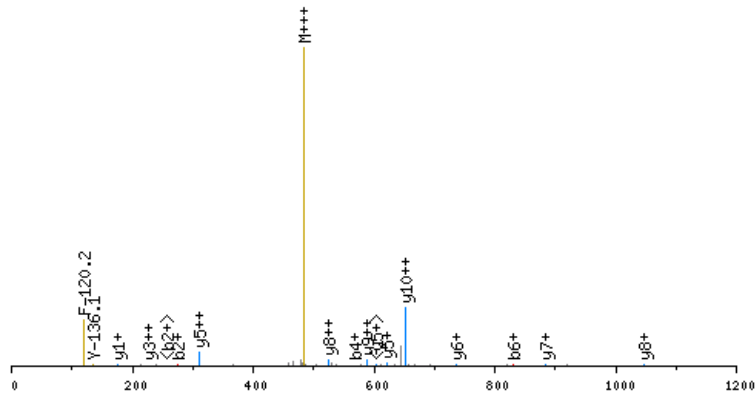

click image to zoom in; click top corners to zoom out

[precursor±]

scan 3938; 484.3 m/z; 1.9e+002

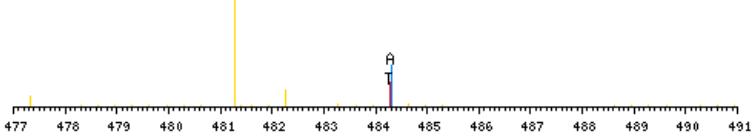

zoomed in precursor plot; T=theoretical m/z, A=acquired m/z

| b <sup>+</sup> | #  | AA | #  | y <sup>+</sup> | y <sup>2+</sup> |
|----------------|----|----|----|----------------|-----------------|
| 148.1550       | 1  | L  | 11 |                |                 |
| 276.2135       | 2  | Q  | 10 | 1303.6859      | 652.3469        |
| 405.2561       | 3  | E  | 9  | 1175.6273      | 588.3176        |
| 568.3195       | 4  | Y  | 8  | 1046.5847      | 523.7963        |
| 715.3879       | 5  | F  | 7  | 883.5214       | 442.2646        |
| 830.4148       | 6  | D  | 6  | 736.4530       | 368.7304        |
| 887.4363       | 7  | G  | 5  | 621.4261       | 311.2169        |
| 1001.4792      | 8  | N  | 4  | 564.4046       | 282.7062        |
| 1114.5633      | 9  | L  | 3  | 450.3617       | 225.6847        |
| 1276.7214      | 10 | K  | 2  | 337.2776       | 169.1427        |
|                | 11 | R  | 1  | 175.1195       | 88.0637         |

N-term:+35.07 K(10):+162.16

X-range:

0 - 0

MassTol: Y-zoom:

0. 1.

MassType:

☐ AVG ☒ MONO

Axis:

☒ 1 ☐ 2

Label:

☒ I ☐ M ☐ -

Ions:

a ☐ + ☐ 2+ ☐ 3+

b ☒ + ☐ 2+ ☐ 3+

c ☐ + ☐ 2+ ☐ 3+

x ☐ + ☐ 2+ ☐ 3+

y ☒ + ☒ 2+ ☐ 3+

z ☐ + ☐ 2+ ☐ 3+

hide H<sub>2</sub>O/NH<sub>3</sub> ☐

zoom 112-122 ☐

GO

LQIAATELEKEESR, MH+ 1672.9122, m/z 558.3089  
L OS G15 P120811 220811-s1.03912.03912.3.dta

scan 3912; 1.7e+001

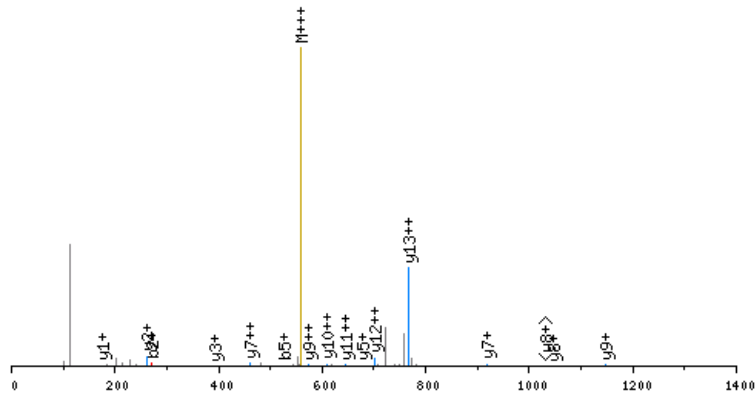

click image to zoom in; click top corners to zoom out

[precursor±]

scan 3911; 558.3 m/z; 3.4e+001

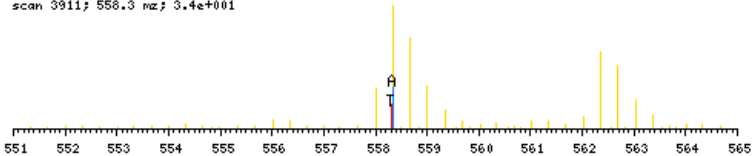

zoomed in precursor plot; T=theoretical m/z, A=acquired m/z

| b <sup>+</sup> | #  | AA | #  | y <sup>+</sup> | y <sup>2+</sup> |
|----------------|----|----|----|----------------|-----------------|
| 142.1232       | 1  | L  | 14 |                |                 |
| 270.1817       | 2  | Q  | 13 | 1531.7968      | 766.4023        |
| 383.2658       | 3  | I  | 12 | 1403.7382      | 702.3730        |
| 454.3029       | 4  | A  | 11 | 1290.6542      | 645.8310        |
| 525.3400       | 5  | A  | 10 | 1219.6171      | 610.3124        |
| 626.3877       | 6  | T  | 9  | 1148.5799      | 574.7939        |
| 755.4303       | 7  | E  | 8  | 1047.5323      | 524.2700        |
| 868.5144       | 8  | L  | 7  | 918.4897       | 459.7487        |
| 997.5570       | 9  | E  | 6  | 805.4056       | 403.2067        |
| 1153.6833      | 10 | K  | 5  | 676.3630       | 338.6854        |
| 1282.7259      | 11 | E  | 4  | 520.2367       | 260.6223        |
| 1411.7684      | 12 | E  | 3  | 391.1941       | 196.1010        |
| 1498.8005      | 13 | S  | 2  | 262.1515       | 131.5797        |
|                | 14 | R  | 1  | 175.1195       | 88.0637         |

N-term:+29.04 K(10):+156.13

X-range:

0 - 0

MassTol: Y-zoom:

0. 1.

MassType:

☐AVG ☒MONO

Axis:

☒1 ☐2

Label:

☒I ☐M ☐-

Ions:

a ☐+ ☐2+ ☐3+

b ☒+ ☐2+ ☐3+

c ☐+ ☐2+ ☐3+

x ☐+ ☐2+ ☐3+

y ☒+ ☒2+ ☐3+

z ☐+ ☐2+ ☐3+

hide H<sub>2</sub>O/NH<sub>3</sub> ☐

zoom 112-122 ☐

GO

LQQEDGISFEYHR, MH+ 1649.7923, m/z 550.6023  
L OS G16 P120811 220811-s1.04197.04197.3.dta

scan 4197; 4.9e+000

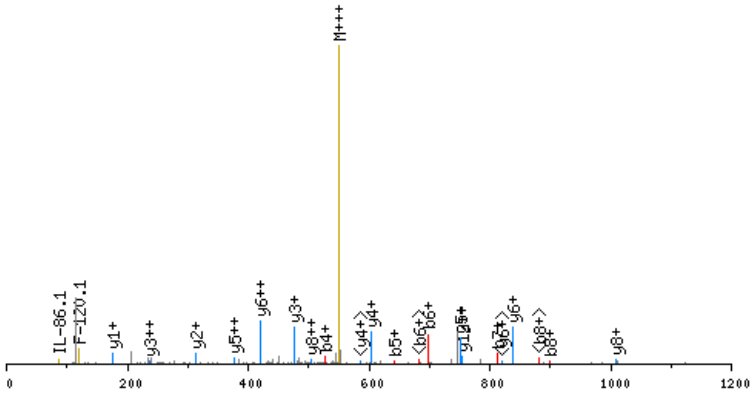

click image to zoom in; click top corners to zoom out

[precursor±]

scan 4193; 550.6 m/z; 5.7e+000

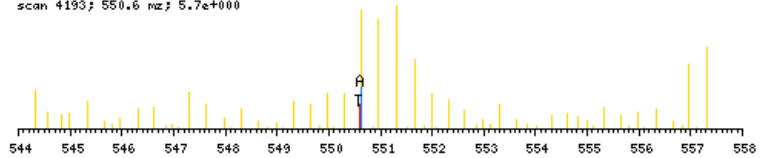

zoomed in precursor plot; T=theoretical m/z, A=acquired m/z

| b <sup>+</sup> | #  | AA | #  | y <sup>+</sup> | y <sup>2+</sup> |
|----------------|----|----|----|----------------|-----------------|
| 142.1232       | 1  | L  | 13 |                |                 |
| 270.1817       | 2  | Q  | 12 | 1508.6770      | 754.8424        |
| 398.2403       | 3  | Q  | 11 | 1380.6184      | 690.8131        |
| 527.2829       | 4  | E  | 10 | 1252.5598      | 626.7838        |
| 642.3099       | 5  | D  | 9  | 1123.5172      | 562.2625        |
| 699.3313       | 6  | G  | 8  | 1008.4903      | 504.7491        |
| 812.4154       | 7  | I  | 7  | 951.4688       | 476.2383        |
| 899.4474       | 8  | S  | 6  | 838.3848       | 419.6963        |
| 1046.5158      | 9  | F  | 5  | 751.3527       | 376.1803        |
| 1175.5584      | 10 | E  | 4  | 604.2843       | 302.6461        |
| 1338.6217      | 11 | Y  | 3  | 475.2417       | 238.1248        |
| 1475.6807      | 12 | H  | 2  | 312.1784       | 156.5931        |
|                | 13 | R  | 1  | 175.1195       | 88.0637         |

N-term:+29.04

N-term:+29.04

X-range:

0 - 0

MassTol: Y-zoom:

0. 1.

MassType:

☐AVG ☒MONO

Axis:

☒1 ☐2

Label:

☒I ☐M ☐-

Ions:

a ☐+ ☐2+ ☐3+

b ☒+ ☐2+ ☐3+

c ☐+ ☐2+ ☐3+

x ☐+ ☐2+ ☐3+

y ☒+ ☒2+ ☐3+

z ☐+ ☐2+ ☐3+

hide H<sub>2</sub>O/NH<sub>3</sub> ☐

zoom 112-122 ☐

GO

LQSIGTENTENRR, MH+ 1674.8411, m/z 558.9519  
L OS G16 P120811 220811-s1.02220.02220.3.dta

scan 2220; 7.9e+000

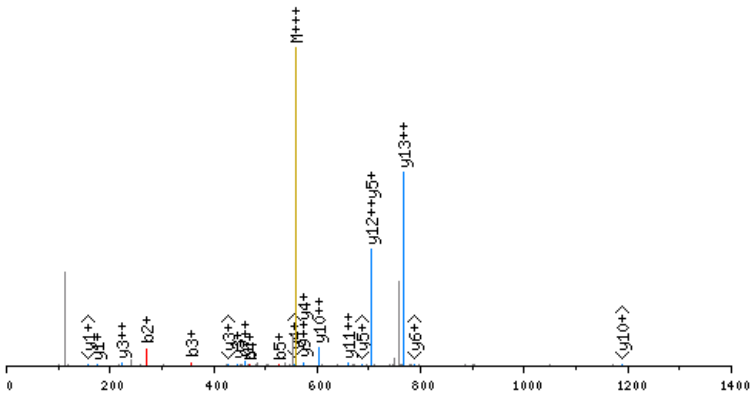

click image to zoom in; click top corners to zoom out

[precursor±]

scan 2218; 559.0 m/z; 5.3e+000

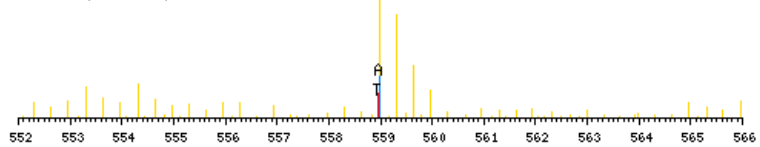

zoomed in precursor plot; T=theoretical m/z, A=acquired m/z

| b <sup>+</sup> | #  | AA | #  | y <sup>+</sup> | y <sup>2+</sup> |
|----------------|----|----|----|----------------|-----------------|
| 142.1232       | 1  | L  | 14 |                |                 |
| 270.1817       | 2  | Q  | 13 | 1533.7257      | 767.3668        |
| 357.2138       | 3  | S  | 12 | 1405.6672      | 703.3375        |
| 470.2978       | 4  | I  | 11 | 1318.6351      | 659.8215        |
| 527.3193       | 5  | G  | 10 | 1205.5511      | 603.2794        |
| 628.3670       | 6  | T  | 9  | 1148.5296      | 574.7687        |
| 757.4096       | 7  | E  | 8  | 1047.4819      | 524.2449        |
| 871.4525       | 8  | N  | 7  | 918.4393       | 459.7236        |
| 972.5002       | 9  | T  | 6  | 804.3964       | 402.7021        |
| 1101.5428      | 10 | E  | 5  | 703.3487       | 352.1783        |
| 1230.5854      | 11 | E  | 4  | 574.3061       | 287.6570        |
| 1344.6283      | 12 | N  | 3  | 445.2635       | 223.1357        |
| 1500.7294      | 13 | R  | 2  | 331.2206       | 166.1142        |
|                | 14 | R  | 1  | 175.1195       | 88.0637         |

N-term:+29.04

X-range:

0 - 0

MassTol: Y-zoom:

0. 1.

MassType:

☐AVG ☒MONO

Axis:

☒1 ☐2

Label:

☒I ☐M ☐-

Ions:

a ☐+ ☐2+ ☐3+

b ☒+ ☐2+ ☐3+

c ☐+ ☐2+ ☐3+

x ☐+ ☐2+ ☐3+

y ☒+ ☒2+ ☐3+

z ☐+ ☐2+ ☐3+

hide H<sub>2</sub>O/NH<sub>3</sub> ☐

zoom 112-122 ☐

GO

LRELISNASDALDKIR, MH+ 1870.0762, m/z 468.2745  
L OS G17 P120811 220811-s1.05729.05729.4.dta

scan 5729; 1.1e+001

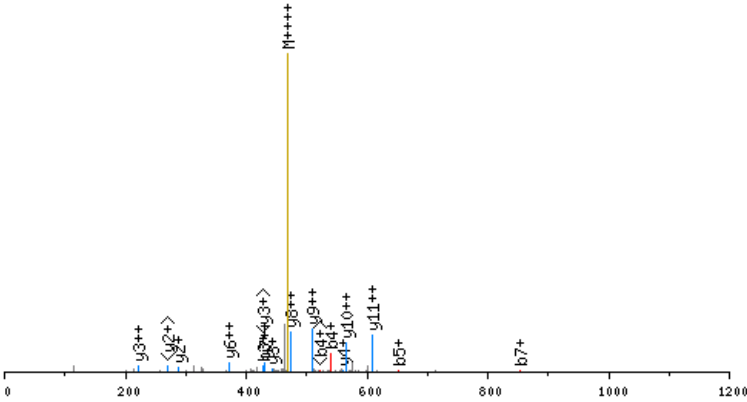

click image to zoom in; click top corners to zoom out

[precursor±]

scan 5728; 468.3 m/z; 1.0e+001

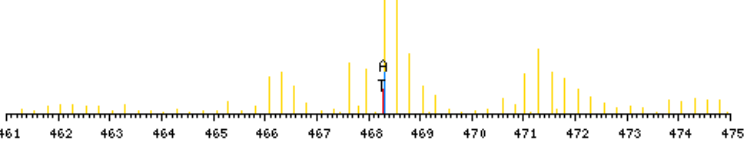

zoomed in precursor plot; T=theoretical m/z, A=acquired m/z

| b <sup>+</sup> | #  | AA | #  | y <sup>+</sup> | y <sup>2+</sup> |
|----------------|----|----|----|----------------|-----------------|
| 142.1232       | 1  | L  | 16 |                |                 |
| 298.2243       | 2  | R  | 15 | 1728.9609      | 864.9843        |
| 427.2669       | 3  | E  | 14 | 1572.8597      | 786.9338        |
| 540.3509       | 4  | L  | 13 | 1443.8172      | 722.4125        |
| 653.4350       | 5  | I  | 12 | 1330.7331      | 665.8705        |
| 740.4670       | 6  | S  | 11 | 1217.6490      | 609.3284        |
| 854.5100       | 7  | N  | 10 | 1130.6170      | 565.8124        |
| 925.5471       | 8  | A  | 9  | 1016.5741      | 508.7909        |
| 1012.5791      | 9  | S  | 8  | 945.5370       | 473.2724        |
| 1127.6060      | 10 | D  | 7  | 858.5049       | 429.7564        |
| 1198.6432      | 11 | A  | 6  | 743.4780       | 372.2429        |
| 1311.7272      | 12 | L  | 5  | 672.4409       | 336.7243        |
| 1426.7542      | 13 | D  | 4  | 559.3568       | 280.1823        |
| 1582.8805      | 14 | K  | 3  | 444.3299       | 222.6688        |
| 1695.9645      | 15 | I  | 2  | 288.2036       | 144.6057        |
|                | 16 | R  | 1  | 175.1195       | 88.0637         |

N-term:+29.04 K(14):+156.13

X-range:

0 - 0

MassTol: Y-zoom:

0. 1.

MassType:

☐ AVG ☒ MONO

Axis:

☒ 1 ☐ 2

Label:

☒ I ☐ M ☐ -

Ions:

a ☐ + ☐ 2+ ☐ 3+

b ☒ + ☐ 2+ ☐ 3+

c ☐ + ☐ 2+ ☐ 3+

x ☐ + ☐ 2+ ☐ 3+

y ☒ + ☒ 2+ ☐ 3+

z ☐ + ☐ 2+ ☐ 3+

hide H<sub>2</sub>O/NH<sub>3</sub> ☐

zoom 112-122 ☐

GO

LRENYGELADCCTKQEPER, MH+ 2424.1287, m/z 606.7876  
L OS G17 P120811 220811-s1.03204.03204.4.dta

scan 3204; 2.1e+000

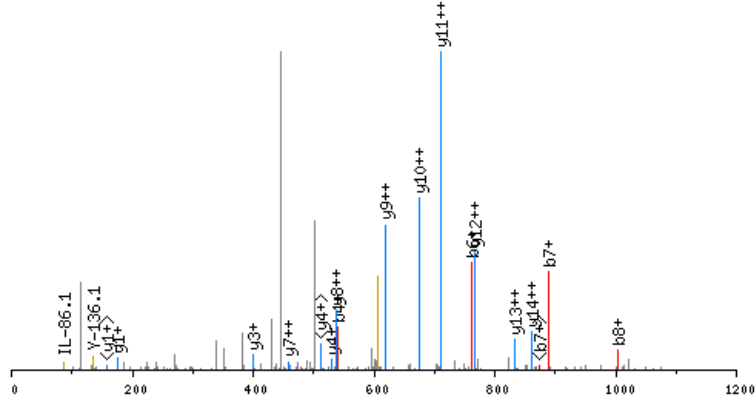

click image to zoom in; click top corners to zoom out [\[precursor±\]](#)

scan 3203; 606.8 m/z; 1.3e+001

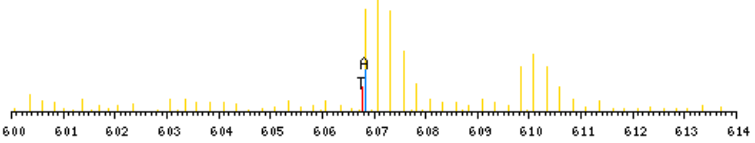

zoomed in precursor plot; T=theoretical m/z, A=acquired m/z

| b <sup>+</sup> | #  | AA | #  | y <sup>+</sup> | y <sup>2+</sup> |
|----------------|----|----|----|----------------|-----------------|
| 142.1232       | 1  | L  | 19 |                |                 |
| 298.2243       | 2  | R  | 18 | 2283.0133      | 1142.0106       |
| 427.2669       | 3  | E  | 17 | 2126.9122      | 1063.9600       |
| 541.3098       | 4  | N  | 16 | 1997.8696      | 999.4387        |
| 704.3731       | 5  | Y  | 15 | 1883.8267      | 942.4173        |
| 761.3946       | 6  | G  | 14 | 1720.7634      | 860.8856        |
| 890.4372       | 7  | E  | 13 | 1663.7419      | 832.3749        |
| 1003.5212      | 8  | L  | 12 | 1534.6993      | 767.8536        |
| 1074.5584      | 9  | A  | 11 | 1421.6153      | 711.3115        |
| 1189.5853      | 10 | D  | 10 | 1350.5782      | 675.7930        |
| 1349.6159      | 11 | C  | 9  | 1235.5512      | 618.2795        |
| 1509.6465      | 12 | C  | 8  | 1075.5206      | 538.2642        |
| 1610.6942      | 13 | T  | 7  | 915.4900       | 458.2489        |
| 1766.8205      | 14 | K  | 6  | 814.4423       | 407.7251        |
| 1894.8791      | 15 | Q  | 5  | 658.3160       | 329.6619        |
| 2023.9217      | 16 | E  | 4  | 530.2575       | 265.6326        |
| 2120.9744      | 17 | P  | 3  | 401.2149       | 201.1113        |
| 2250.0170      | 18 | E  | 2  | 304.1621       | 152.5850        |
|                | 19 | R  | 1  | 175.1195       | 88.0637         |

N-term:+29.04 C(11):+160.03  
C(12):+160.03 K(14):+156.13

N-term: +29.04 K(17) : +156.13

X-range:

0 - 0

MassTol: Y-zoom:

0. 1.

MassType:

☐AVG ☒MONO

Axis:

☒1 ☐2

Label:

☒I ☐M ☐-

Ions:

a ☐+ ☐2+ ☐3+

b ☒+ ☐2+ ☐3+

c ☐+ ☐2+ ☐3+

x ☐+ ☐2+ ☐3+

y ☒+ ☒2+ ☐3+

z ☐+ ☐2+ ☐3+

hide H<sub>2</sub>O/NH<sub>3</sub> ☐

zoom 112-122 ☐

GO

LRPGDCEVCISYLGR, MH+ 1828.9261, m/z 610.3135  
H OS G16 P120811 220811-s1.05056.05056.3.dta

scan 5056; 2.1e+000

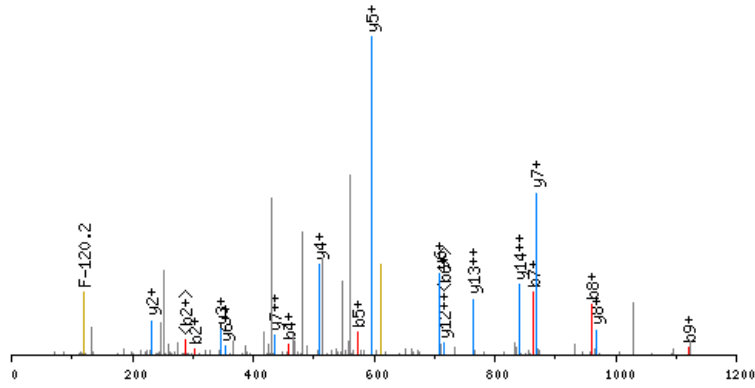

click image to zoom in; click top corners to zoom out [\[precursor±\]](#)

scan 5053; 610.3 m/z; 1.0e+001

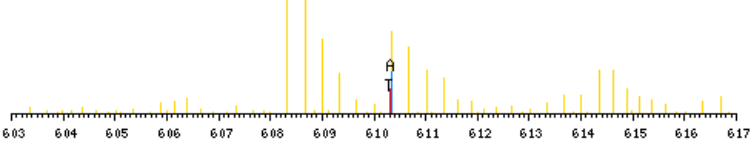

zoomed in precursor plot; T=theoretical m/z, A=acquired m/z

| b <sup>+</sup> | #  | AA | #  | y <sup>+</sup> | y <sup>2+</sup> |
|----------------|----|----|----|----------------|-----------------|
| 148.1550       | 1  | L  | 15 |                |                 |
| 304.2561       | 2  | R  | 14 | 1681.7789      | 841.3934        |
| 401.3088       | 3  | P  | 13 | 1525.6778      | 763.3428        |
| 458.3303       | 4  | G  | 12 | 1428.6251      | 714.8164        |
| 573.3572       | 5  | D  | 11 | 1371.6036      | 686.3057        |
| 733.3878       | 6  | C  | 10 | 1256.5767      | 628.7922        |
| 862.4304       | 7  | E  | 9  | 1096.5461      | 548.7769        |
| 961.4989       | 8  | V  | 8  | 967.5035       | 484.2556        |
| 1121.5295      | 9  | C  | 7  | 868.4350       | 434.7214        |
| 1234.6135      | 10 | I  | 6  | 708.4044       | 354.7061        |
| 1321.6455      | 11 | S  | 5  | 595.3204       | 298.1641        |
| 1484.7089      | 12 | Y  | 4  | 508.2884       | 254.6481        |
| 1597.7929      | 13 | L  | 3  | 345.2250       | 173.1164        |
| 1654.8144      | 14 | G  | 2  | 232.1410       | 116.5744        |
|                | 15 | R  | 1  | 175.1195       | 88.0637         |

N-term:+35.07 C(6):+160.03  
C(9):+160.03

X-range:

0 - 0

MassTol: Y-zoom:

0. 1.

MassType:

☐AVG ☒MONO

Axis:

☒1 ☐2

Label:

☒I ☐M ☐-

Ions:

a ☐+ ☐2+ ☐3+

b ☒+ ☐2+ ☐3+

c ☐+ ☐2+ ☐3+

x ☐+ ☐2+ ☐3+

y ☒+ ☒2+ ☐3+

z ☐+ ☐2+ ☐3+

hide H<sub>2</sub>O/NH<sub>3</sub> ☐

zoom 112-122 ☐

GO

LSGGSDGVVLYDLENASR, MH+ 1979.0085, m/z 660.3410  
L OS G15 P120811 220811-s1.05595.05595.3.dta

scan 5595; 1.8e+000

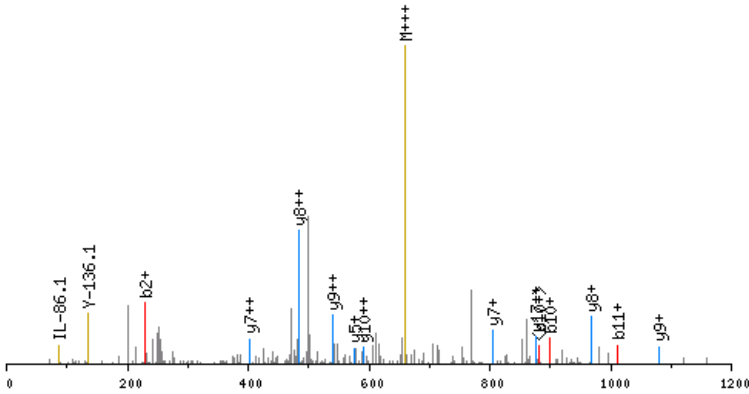

click image to zoom in; click top corners to zoom out [\[precursor±\]](#)

scan 5591; 660.3 m/z; 2.8e+001

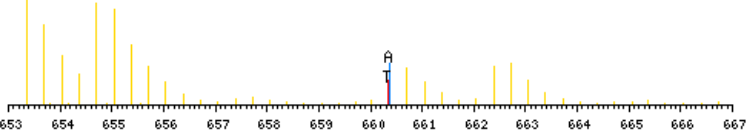

zoomed in precursor plot; T=theoretical m/z, A=acquired m/z

| b <sup>+</sup> | #  | AA | #  | y <sup>+</sup> | y <sup>2+</sup> |
|----------------|----|----|----|----------------|-----------------|
| 142.1232       | 1  | L  | 19 |                |                 |
| 229.1552       | 2  | S  | 18 | 1837.8932      | 919.4505        |
| 286.1767       | 3  | G  | 17 | 1750.8612      | 875.9345        |
| 343.1981       | 4  | G  | 16 | 1693.8397      | 847.4238        |
| 430.2301       | 5  | S  | 15 | 1636.8182      | 818.9130        |
| 545.2571       | 6  | D  | 14 | 1549.7862      | 775.3970        |
| 602.2786       | 7  | G  | 13 | 1434.7593      | 717.8835        |
| 701.3470       | 8  | V  | 12 | 1377.7378      | 689.3728        |
| 800.4154       | 9  | V  | 11 | 1278.6694      | 639.8386        |
| 899.4838       | 10 | V  | 10 | 1179.6010      | 590.3044        |
| 1012.5679      | 11 | L  | 9  | 1080.5326      | 540.7702        |
| 1175.6312      | 12 | Y  | 8  | 967.4485       | 484.2282        |
| 1290.6581      | 13 | D  | 7  | 804.3852       | 402.6965        |
| 1403.7422      | 14 | L  | 6  | 689.3582       | 345.1830        |
| 1532.7848      | 15 | E  | 5  | 576.2742       | 288.6410        |
| 1646.8277      | 16 | N  | 4  | 447.2316       | 224.1197        |
| 1717.8648      | 17 | A  | 3  | 333.1886       | 167.0982        |
| 1804.8969      | 18 | S  | 2  | 262.1515       | 131.5797        |
|                | 19 | R  | 1  | 175.1195       | 88.0637         |

N-term:+29.04

X-range:

0 - 0

MassTol: Y-zoom:

0. 1.

MassType:

☐ AVG ☒ MONO

Axis:

☒ 1 ☐ 2

Label:

☒ I ☐ M ☐ -

Ions:

a ☐ + ☐ 2+ ☐ 3+

b ☒ + ☐ 2+ ☐ 3+

c ☐ + ☐ 2+ ☐ 3+

x ☐ + ☐ 2+ ☐ 3+

y ☒ + ☒ 2+ ☐ 3+

z ☐ + ☐ 2+ ☐ 3+

hide H<sub>2</sub>O/NH<sub>3</sub> ☐

zoom 112-122 ☐

GO

LSKVITILKNR, MH+ 1255.8466, m/z 419.2871  
L OS G19 P120811 220811-s1.05887.05887.3.dta

scan 5887; 7.7e-001

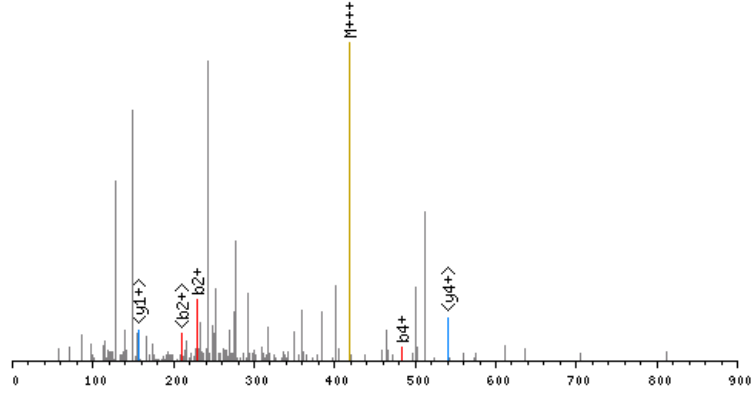

click image to zoom in; click top corners to zoom out [precursor±]

scan 5886; 419.3 m/z; 5.2e+000

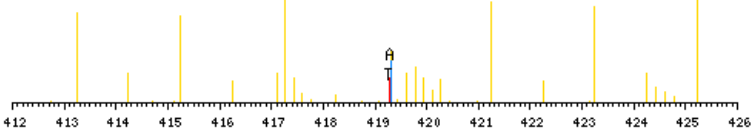

zoomed in precursor plot; T=theoretical m/z, A=acquired m/z

| b <sup>+</sup> | #  | AA | #  | y <sup>+</sup> | y <sup>2+</sup> |
|----------------|----|----|----|----------------|-----------------|
| 142.1232       | 1  | L  | 10 |                |                 |
| 229.1552       | 2  | S  | 9  | 1114.7313      | 557.8696        |
| 385.2815       | 3  | K  | 8  | 1027.6992      | 514.3535        |
| 484.3499       | 4  | V  | 7  | 871.5729       | 436.2904        |
| 585.3976       | 5  | T  | 6  | 772.5045       | 386.7562        |
| 698.4816       | 6  | I  | 5  | 671.4569       | 336.2323        |
| 811.5657       | 7  | L  | 4  | 558.3728       | 279.6903        |
| 967.6920       | 8  | K  | 3  | 445.2887       | 223.1483        |
| 1081.7349      | 9  | N  | 2  | 289.1624       | 145.0851        |
|                | 10 | R  | 1  | 175.1195       | 88.0637         |

N-term:+29.04 K(3):+156.13  
K(8):+156.13

X-range:

0 - 0

MassTol: Y-zoom:

0. 1.

MassType:

☐ AVG ☒ MONO

Axis:

☒ 1 ☐ 2

Label:

☒ I ☐ M ☐ -

Ions:

a ☐ + ☐ 2+ ☐ 3+

b ☒ + ☐ 2+ ☐ 3+

c ☐ + ☐ 2+ ☐ 3+

x ☐ + ☐ 2+ ☐ 3+

y ☒ + ☒ 2+ ☐ 3+

z ☐ + ☐ 2+ ☐ 3+

hide H<sub>2</sub>O/NH<sub>3</sub> ☐

zoom 112-122 ☐

GO

LSLLQDSGEVR, MH+ 1250.7168, m/z 625.8620  
H OS G13 P120811 220811-s1.04805.04805.2.dta

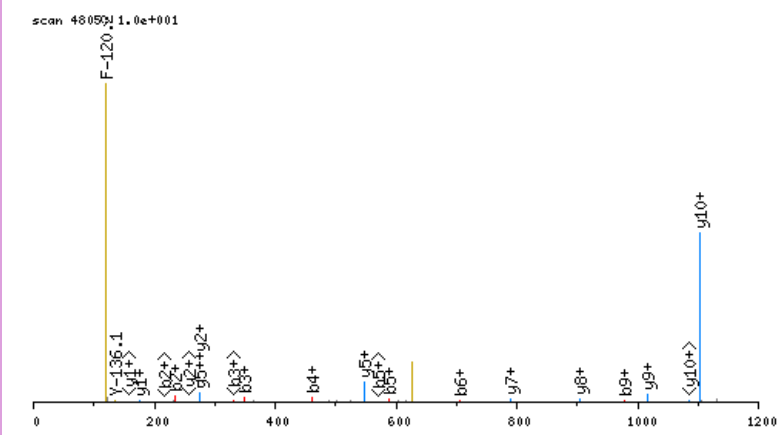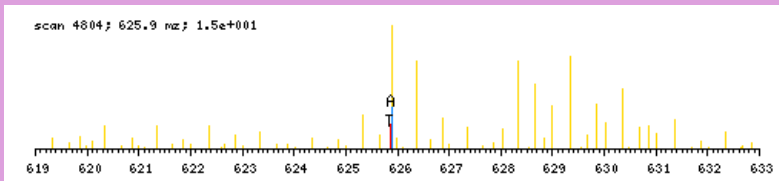

| b <sup>+</sup> | #  | AA | #  | y <sup>+</sup> | y <sup>2+</sup> |
|----------------|----|----|----|----------------|-----------------|
| 148.1550       | 1  | L  | 11 |                |                 |
| 235.1870       | 2  | S  | 10 | 1103.5697      | 552.2888        |
| 348.2711       | 3  | L  | 9  | 1016.5376      | 508.7727        |
| 461.3551       | 4  | L  | 8  | 903.4536       | 452.2307        |
| 589.4137       | 5  | Q  | 7  | 790.3695       | 395.6887        |
| 704.4406       | 6  | D  | 6  | 662.3109       | 331.6594        |
| 791.4727       | 7  | S  | 5  | 547.2840       | 274.1459        |
| 848.4941       | 8  | G  | 4  | 460.2520       | 230.6299        |
| 977.5367       | 9  | E  | 3  | 403.2305       | 202.1192        |
| 1076.6051      | 10 | V  | 2  | 274.1879       | 137.5979        |
|                | 11 | R  | 1  | 175.1195       | 88.0637         |

N-term:+35.07

X-range:

0 - 0

MassTol: Y-zoom:

0. 1.

MassType:

☐ AVG ☒ MONO

Axis:

☒ 1 ☐ 2

Label:

☒ I ☐ M ☐ -

Ions:

a ☐ + ☐ 2+ ☐ 3+

b ☒ + ☐ 2+ ☐ 3+

c ☐ + ☐ 2+ ☐ 3+

x ☐ + ☐ 2+ ☐ 3+

y ☒ + ☒ 2+ ☐ 3+

z ☐ + ☐ 2+ ☐ 3+

hide H<sub>2</sub>O/NH<sub>3</sub> ☐

zoom 112-122 ☐

GO

LSPTNCDASEPLAEKVLDLINKGR, MH+ 2742.5560, m/z 686.3945  
H OS G16 P120811 220811-s1.06332.06332.4.dta

scan 6332; 1.2e+000

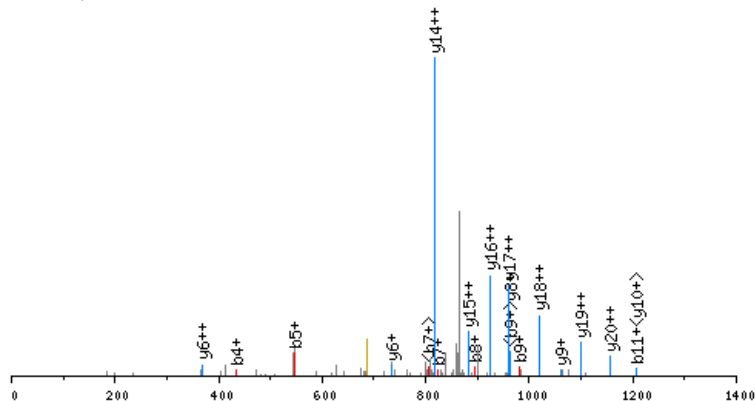

click image to zoom in; click top corners to zoom out

[precursor±]

scan 6331; 686.4 m/z; 2.0e+001

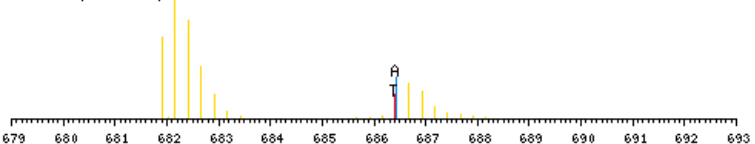

zoomed in precursor plot; T=theoretical m/z, A=acquired m/z

| b <sup>+</sup> | #  | AA | #  | y <sup>+</sup> | y <sup>2+</sup> |
|----------------|----|----|----|----------------|-----------------|
| 148.1550       | 1  | L  | 24 |                |                 |
| 235.1870       | 2  | S  | 23 | 2595.4089      | 1298.2083       |
| 332.2398       | 3  | P  | 22 | 2508.3768      | 1254.6923       |
| 433.2874       | 4  | T  | 21 | 2411.3241      | 1206.1659       |
| 547.3304       | 5  | N  | 20 | 2310.2764      | 1155.6421       |
| 707.3610       | 6  | C  | 19 | 2196.2335      | 1098.6206       |
| 822.3879       | 7  | D  | 18 | 2036.2029      | 1018.6053       |
| 893.4250       | 8  | A  | 17 | 1921.1759      | 961.0919        |
| 980.4570       | 9  | S  | 16 | 1850.1388      | 925.5733        |
| 1109.4996      | 10 | E  | 15 | 1763.1068      | 882.0573        |
| 1206.5524      | 11 | P  | 14 | 1634.0642      | 817.5360        |
| 1319.6365      | 12 | L  | 13 | 1537.0114      | 769.0096        |
| 1390.6736      | 13 | A  | 12 | 1423.9273      | 712.4676        |
| 1519.7162      | 14 | E  | 11 | 1352.8902      | 676.9490        |
| 1681.8743      | 15 | K  | 10 | 1223.8476      | 612.4277        |
| 1780.9427      | 16 | V  | 9  | 1061.6895      | 531.3487        |
| 1894.0268      | 17 | L  | 8  | 962.6211       | 481.8145        |
| 2009.0537      | 18 | D  | 7  | 849.5371       | 425.2724        |
| 2122.1378      | 19 | L  | 6  | 734.5101       | 367.7590        |
| 2235.2218      | 20 | I  | 5  | 621.4261       | 311.2169        |
| 2349.2648      | 21 | N  | 4  | 508.3420       | 254.6749        |
| 2511.4229      | 22 | K  | 3  | 394.2991       | 197.6534        |
| 2568.4443      | 23 | G  | 2  | 232.1410       | 116.5744        |
|                | 24 | R  | 1  | 175.1195       | 88.0637         |

N-term:+35.07 C(6):+160.03  
K(15):+162.16 K(22):+162.16

X-range:

0 - 0

MassTol: Y-zoom:

0. 1.

MassType:

☐AVG ☒MONO

Axis:

☒1 ☐2

Label:

☒I ☐M ☐-

Ions:

a ☐+ ☐2+ ☐3+

b ☒+ ☐2+ ☐3+

c ☐+ ☐2+ ☐3+

x ☐+ ☐2+ ☐3+

y ☒+ ☒2+ ☐3+

z ☐+ ☐2+ ☐3+

hide H<sub>2</sub>O/NH<sub>3</sub> ☐

zoom 112-122 ☐

GO

LTEAPLNPKANR, MH+ 1379.8011, m/z 460.6052  
L OS G15 P120811 220811-s1.02412.02412.3.dta

scan 2412; 1.1e+001

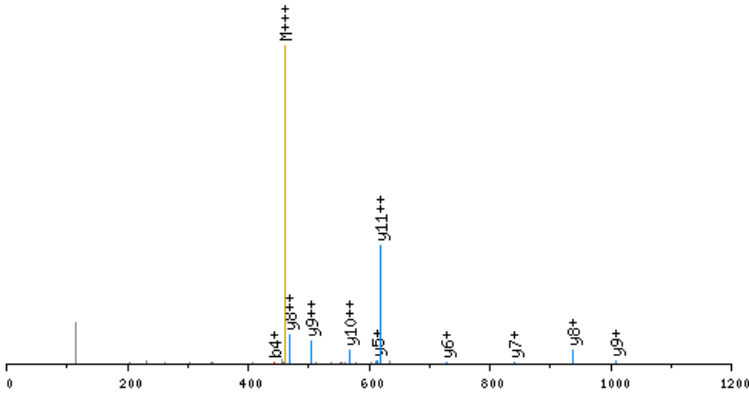

click image to zoom in; click top corners to zoom out

[precursor±]

scan 2411; 460.6 m/z; 2.9e+000

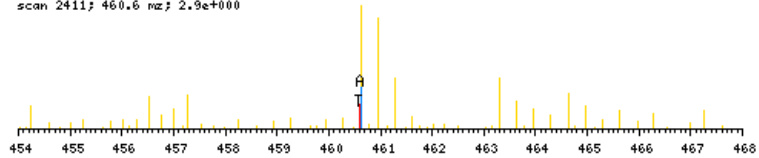

zoomed in precursor plot; T=theoretical m/z, A=acquired m/z

| b <sup>+</sup> | #  | AA | #  | y <sup>+</sup> | y <sup>2+</sup> |
|----------------|----|----|----|----------------|-----------------|
| 142.1232       | 1  | L  | 12 |                |                 |
| 243.1708       | 2  | T  | 11 | 1238.6857      | 619.8468        |
| 372.2134       | 3  | E  | 10 | 1137.6381      | 569.3229        |
| 443.2505       | 4  | A  | 9  | 1008.5955      | 504.8017        |
| 540.3033       | 5  | P  | 8  | 937.5584       | 469.2831        |
| 653.3874       | 6  | L  | 7  | 840.5056       | 420.7567        |
| 767.4303       | 7  | N  | 6  | 727.4215       | 364.2147        |
| 864.4831       | 8  | P  | 5  | 613.3786       | 307.1932        |
| 1020.6094      | 9  | K  | 4  | 516.3258       | 258.6668        |
| 1091.6465      | 10 | A  | 3  | 360.1995       | 180.6037        |
| 1205.6894      | 11 | N  | 2  | 289.1624       | 145.0851        |
|                | 12 | R  | 1  | 175.1195       | 88.0637         |

N-term:+29.04 K(9):+156.13

X-range:

0 - 0

MassTol: Y-zoom:

0. 1.

MassType:

☐ AVG ☒ MONO

Axis:

☒ 1 ☐ 2

Label:

☒ I ☐ M ☐ -

Ions:

a ☐ + ☐ 2+ ☐ 3+

b ☒ + ☐ 2+ ☐ 3+

c ☐ + ☐ 2+ ☐ 3+

x ☐ + ☐ 2+ ☐ 3+

y ☒ + ☒ 2+ ☐ 3+

z ☐ + ☐ 2+ ☐ 3+

hide H<sub>2</sub>O/NH<sub>3</sub> ☐

zoom 112-122 ☐

GO

LTEDEKQTMVDLHNQYR, MH+ 2176.0709, m/z 544.7732  
L OS G17 P120811 220811-s1.04011.04011.4.dta

scan 4011: 5.3e+000

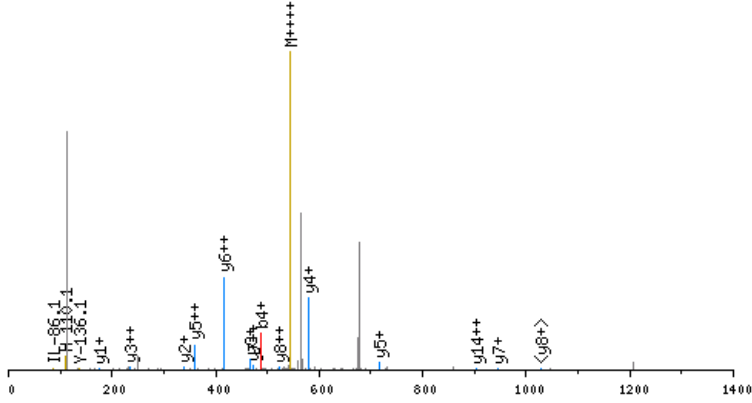

click image to zoom in; click top corners to zoom out [\[precursor±\]](#)

scan 4008: 544.8 m/z; 1.6e+001

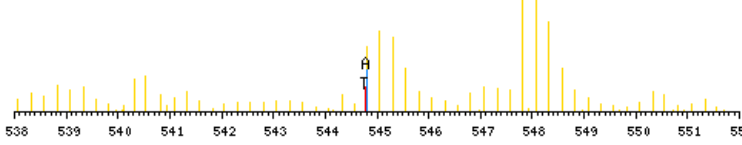

zoomed in precursor plot; T=theoretical m/z, A=acquired m/z

| b <sup>+</sup> | #  | AA | #  | y <sup>+</sup> | y <sup>2+</sup> |
|----------------|----|----|----|----------------|-----------------|
| 142.1232       | 1  | L  | 17 |                |                 |
| 243.1708       | 2  | T  | 16 | 2034.9555      | 1017.9817       |
| 372.2134       | 3  | E  | 15 | 1933.9078      | 967.4578        |
| 487.2404       | 4  | D  | 14 | 1804.8652      | 902.9365        |
| 616.2830       | 5  | E  | 13 | 1689.8383      | 845.4231        |
| 772.4093       | 6  | K  | 12 | 1560.7957      | 780.9018        |
| 900.4678       | 7  | Q  | 11 | 1404.6694      | 702.8386        |
| 1001.5155      | 8  | T  | 10 | 1276.6108      | 638.8093        |
| 1132.5560      | 9  | M  | 9  | 1175.5632      | 588.2855        |
| 1231.6244      | 10 | V  | 8  | 1044.5227      | 522.7652        |
| 1346.6514      | 11 | D  | 7  | 945.4543       | 473.2310        |
| 1459.7354      | 12 | L  | 6  | 830.4273       | 415.7176        |
| 1596.7943      | 13 | H  | 5  | 717.3432       | 359.1755        |
| 1710.8373      | 14 | N  | 4  | 580.2843       | 290.6461        |
| 1838.8959      | 15 | Q  | 3  | 466.2414       | 233.6246        |
| 2001.9592      | 16 | Y  | 2  | 338.1828       | 169.5953        |
|                | 17 | R  | 1  | 175.1195       | 88.0637         |

N-term:+29.04 K(6):+156.13

X-range:

$$0 - 0$$

0. 1.

☐ AVG ☒ MONO

1 2

☒ I ☐ M ☐ -

**a**  + <sup>2</sup> + <sup>3</sup> +

b. ☒ 1+ ☐ 2+ ☐ 3+

c

**y** ☒ + ☒ 2 + ☐ 3 +

$$z^{\frac{1}{2}} + z^{\frac{2}{2}} + z^{\frac{3}{2}}$$
mide  $\text{H}_2\text{O}/\text{NH}_3$ 

zoom 112-122

GO

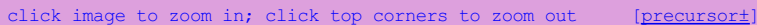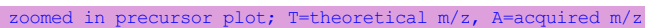

N-term: +29.04 K(9): +156.13

X-range:

0 - 0

MassTol: Y-zoom:

0. 1.

MassType:

☐ AVG ☒ MONO

Axis:

☒ 1 ☐ 2

Label:

☒ I ☐ M ☐ -

Ions:

a ☐ + ☐ 2+ ☐ 3+

b ☒ + ☐ 2+ ☐ 3+

c ☐ + ☐ 2+ ☐ 3+

x ☐ + ☐ 2+ ☐ 3+

y ☒ + ☒ 2+ ☐ 3+

z ☐ + ☐ 2+ ☐ 3+

hide H<sub>2</sub>O/NH<sub>3</sub> ☐

zoom 112-122 ☐

GO

LTLYDIAHTPGVAADLSHIETR, MH+ 2421.2778, m/z 606.0749  
L OS G16 P120811 220811-s1.06274.06274.4.dta

scan 6274; 9.3e-001

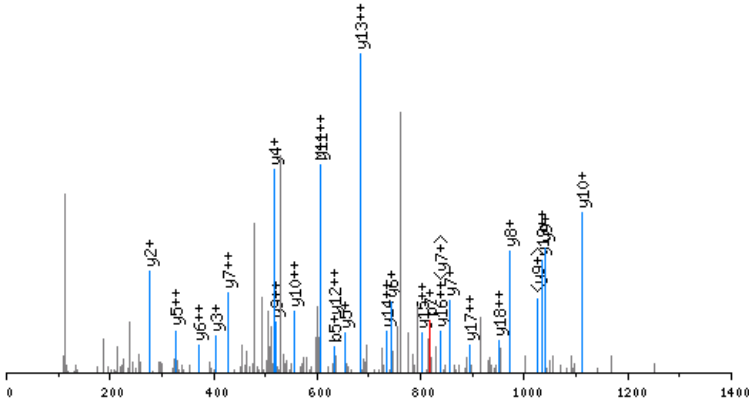

click image to zoom in; click top corners to zoom out [precursor±]

scan 6272; 606.1 m/z; 2.9e+000

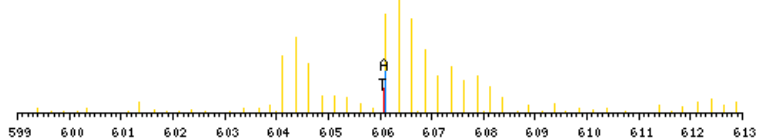

zoomed in precursor plot; T=theoretical m/z, A=acquired m/z

| b <sup>+</sup> | #  | AA | #  | y <sup>+</sup> | y <sup>2+</sup> |
|----------------|----|----|----|----------------|-----------------|
| 142.1232       | 1  | L  | 22 |                |                 |
| 243.1708       | 2  | T  | 21 | 2280.1624      | 1140.5851       |
| 356.2549       | 3  | L  | 20 | 2179.1148      | 1090.0613       |
| 519.3182       | 4  | Y  | 19 | 2066.0307      | 1033.5193       |
| 634.3452       | 5  | D  | 18 | 1902.9674      | 951.9876        |
| 747.4292       | 6  | I  | 17 | 1787.9404      | 894.4741        |
| 818.4664       | 7  | A  | 16 | 1674.8564      | 837.9321        |
| 955.5253       | 8  | H  | 15 | 1603.8192      | 802.4135        |
| 1056.5729      | 9  | T  | 14 | 1466.7603      | 733.8841        |
| 1153.6257      | 10 | P  | 13 | 1365.7127      | 683.3602        |
| 1210.6472      | 11 | G  | 12 | 1268.6599      | 634.8339        |
| 1309.7156      | 12 | V  | 11 | 1211.6384      | 606.3231        |
| 1380.7527      | 13 | A  | 10 | 1112.5700      | 556.7889        |
| 1451.7898      | 14 | A  | 9  | 1041.5329      | 521.2704        |
| 1566.8168      | 15 | D  | 8  | 970.4958       | 485.7518        |
| 1679.9008      | 16 | L  | 7  | 855.4688       | 428.2383        |
| 1766.9329      | 17 | S  | 6  | 742.3848       | 371.6963        |
| 1903.9918      | 18 | H  | 5  | 655.3527       | 328.1803        |
| 2017.0758      | 19 | I  | 4  | 518.2938       | 259.6508        |
| 2146.1184      | 20 | E  | 3  | 405.2098       | 203.1088        |
| 2247.1661      | 21 | T  | 2  | 276.1672       | 138.5875        |
|                | 22 | R  | 1  | 175.1195       | 88.0637         |

N-term:+29.04

X-range:

0 - 0

MassTol: Y-zoom:

0. 1.

MassType:

☐AVG ☒MONO

Axis:

☒1 ☐2

Label:

☒I ☐M ☐-

Ions:

a ☐+ ☐2+ ☐3+

b ☒+ ☐2+ ☐3+

c ☐+ ☐2+ ☐3+

x ☐+ ☐2+ ☐3+

y ☒+ ☒2+ ☐3+

z ☐+ ☐2+ ☐3+

hide H<sub>2</sub>O/NH<sub>3</sub> ☐

zoom 112-122 ☐

GO

LTPTHYLTKQDVER, MH+ 1756.9598, m/z 439.9954  
L OS G17 P120811 220811-s1.03327.03327.4.dta

scan 3327; 1.4e+001

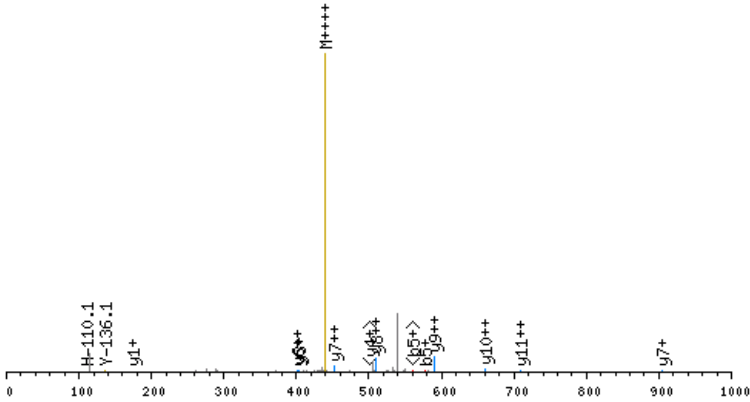

click image to zoom in; click top corners to zoom out

[precursor±]

scan 3323; 440.0 m/z; 1.5e+001

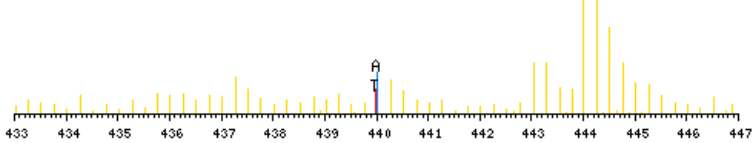

zoomed in precursor plot; T=theoretical m/z, A=acquired m/z

| b <sup>+</sup> | #  | AA | #  | y <sup>+</sup> | y <sup>2+</sup> |
|----------------|----|----|----|----------------|-----------------|
| 142.1232       | 1  | L  | 14 |                |                 |
| 243.1708       | 2  | T  | 13 | 1615.8444      | 808.4261        |
| 340.2236       | 3  | P  | 12 | 1514.7968      | 757.9023        |
| 441.2713       | 4  | T  | 11 | 1417.7440      | 709.3759        |
| 578.3302       | 5  | H  | 10 | 1316.6963      | 658.8521        |
| 741.3935       | 6  | Y  | 9  | 1179.6374      | 590.3226        |
| 854.4776       | 7  | L  | 8  | 1016.5741      | 508.7909        |
| 955.5253       | 8  | T  | 7  | 903.4900       | 452.2489        |
| 1111.6516      | 9  | K  | 6  | 802.4423       | 401.7251        |
| 1239.7101      | 10 | Q  | 5  | 646.3160       | 323.6619        |
| 1354.7371      | 11 | D  | 4  | 518.2575       | 259.6326        |
| 1453.8055      | 12 | V  | 3  | 403.2305       | 202.1192        |
| 1582.8481      | 13 | E  | 2  | 304.1621       | 152.5850        |
|                | 14 | R  | 1  | 175.1195       | 88.0637         |

N-term:+29.04 K(9):+156.13

LVGGSSSLGPSNFNAIR, MH+ 1761.9135, m/z 587.9760

L OS G13 P120811 220811-s1.05273.05273.3.dta

scan 5273; 2.4e+000

click image to zoom in; click top corners to zoom out    [precursor±]

scan 5269; 588.0 m/z; 1.6e+001

zoomed in precursor plot; T=theoretical m/z, A=acquired m/z

X-range:  

0-0

MassTol: Y-zoom:  

0.1.

MassType:  

☐AVG ☒MONO

Axis:  

☒1 ☐2

Label:  

☒I ☐M ☐-

Ions:  

a ☐+ ☐2+ ☐3+

b ☒+ ☐2+ ☐3+

c ☐+ ☐2+ ☐3+

x ☐+ ☐2+ ☐3+

y ☒+ ☒2+ ☐3+

z ☐+ ☐2+ ☐3+

hide H<sub>2</sub>O/NH<sub>3</sub> ☐

zoom 112-122 ☐

GO

| b <sup>+</sup> | #  | AA | #  | y <sup>+</sup> | y <sup>2+</sup> |
|----------------|----|----|----|----------------|-----------------|
| 142.1232       | 1  | L  | 17 |                |                 |
| 241.1916       | 2  | V  | 16 | 1620.7982      | 810.9030        |
| 356.2185       | 3  | D  | 15 | 1521.7298      | 761.3688        |
| 413.2400       | 4  | G  | 14 | 1406.7028      | 703.8553        |
| 500.2720       | 5  | S  | 13 | 1349.6814      | 675.3446        |
| 587.3040       | 6  | S  | 12 | 1262.6493      | 631.8286        |
| 674.3361       | 7  | S  | 11 | 1175.6173      | 588.3126        |
| 787.4201       | 8  | L  | 10 | 1088.5853      | 544.7965        |
| 844.4416       | 9  | G  | 9  | 975.5012       | 488.2545        |
| 941.4944       | 10 | P  | 8  | 918.4797       | 459.7438        |
| 1028.5264      | 11 | S  | 7  | 821.4270       | 411.2174        |
| 1142.5693      | 12 | N  | 6  | 734.3949       | 367.7014        |
| 1289.6377      | 13 | F  | 5  | 620.3520       | 310.6799        |
| 1403.6807      | 14 | N  | 4  | 473.2836       | 237.1457        |
| 1474.7178      | 15 | A  | 3  | 359.2407       | 180.1243        |
| 1587.8018      | 16 | I  | 2  | 288.2036       | 144.6057        |
|                | 17 | R  | 1  | 175.1195       | 88.0637         |

N-term:+29.04

X-range:

0 - 0

MassTol: Y-zoom:

0. 1.

MassType:

☐AVG ☒MONO

Axis:

☒1 ☐2

Label:

☒I ☐M ☐-

Ions:

a ☐+ ☐2+ ☐3+

b ☒+ ☐2+ ☐3+

c ☐+ ☐2+ ☐3+

x ☐+ ☐2+ ☐3+

y ☒+ ☒2+ ☐3+

z ☐+ ☐2+ ☐3+

hide H<sub>2</sub>O/NH<sub>3</sub> ☐

zoom 112-122 ☐

GO

LVGELLTSLPEVDERPCR, MH+ 2117.1488, m/z 530.0427  
H OS G15 P120811 220811-s1.04820.04820.4.dta

scan 4820; 2.4e+000

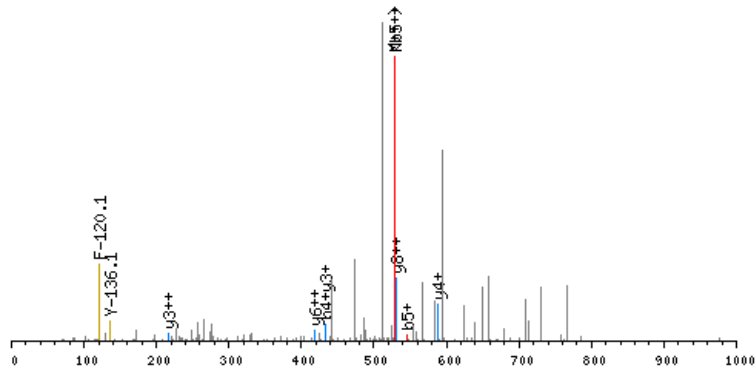

click image to zoom in; click top corners to zoom out [precursor±]

scan 4816; 530.0 m/z; 1.5e+001

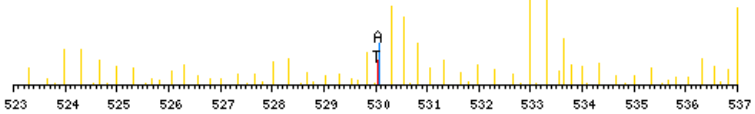

zoomed in precursor plot; T=theoretical m/z, A=acquired m/z

| b <sup>+</sup> | #  | AA | #  | y <sup>+</sup> | y <sup>2+</sup> |
|----------------|----|----|----|----------------|-----------------|
| 148.1550       | 1  | L  | 18 |                |                 |
| 247.2234       | 2  | V  | 17 | 1970.0017      | 985.5047        |
| 304.2448       | 3  | G  | 16 | 1870.9332      | 935.9705        |
| 433.2874       | 4  | E  | 15 | 1813.9118      | 907.4598        |
| 546.3715       | 5  | L  | 14 | 1684.8692      | 842.9385        |
| 659.4556       | 6  | L  | 13 | 1571.7851      | 786.3965        |
| 760.5032       | 7  | T  | 12 | 1458.7011      | 729.8544        |
| 847.5353       | 8  | S  | 11 | 1357.6534      | 679.3306        |
| 960.6193       | 9  | L  | 10 | 1270.6213      | 635.8146        |
| 1057.6721      | 10 | P  | 9  | 1157.5373      | 579.2726        |
| 1186.7147      | 11 | E  | 8  | 1060.4845      | 530.7462        |
| 1285.7831      | 12 | V  | 7  | 931.4419       | 466.2249        |
| 1400.8100      | 13 | D  | 6  | 832.3735       | 416.6907        |
| 1529.8526      | 14 | E  | 5  | 717.3466       | 359.1772        |
| 1685.9538      | 15 | R  | 4  | 588.3040       | 294.6559        |
| 1783.0065      | 16 | P  | 3  | 432.2029       | 216.6053        |
| 1943.0371      | 17 | C  | 2  | 335.1501       | 168.0790        |
|                | 18 | R  | 1  | 175.1195       | 88.0637         |

N-term:+35.07 C(17):+160.03

X-range:

0 - 0

MassTol: Y-zoom:

0. 1.

MassType:

☐AVG ☒MONO

Axis:

☒1 ☐2

Label:

☒I ☐M ☐-

Ions:

a ☐+ ☐2+ ☐3+

b ☒+ ☐2+ ☐3+

c ☐+ ☐2+ ☐3+

x ☐+ ☐2+ ☐3+

y ☒+ ☒2+ ☐3+

z ☐+ ☐2+ ☐3+

hide H<sub>2</sub>O/NH<sub>3</sub> ☐

zoom 112-122 ☐

GO

LVLEVAQHLGESTVR, MH+ 1678.9492, m/z 560.3212  
L OS G15 P120811 220811-s1.04918.04918.3.dta

scan 4918; 5.1e+000

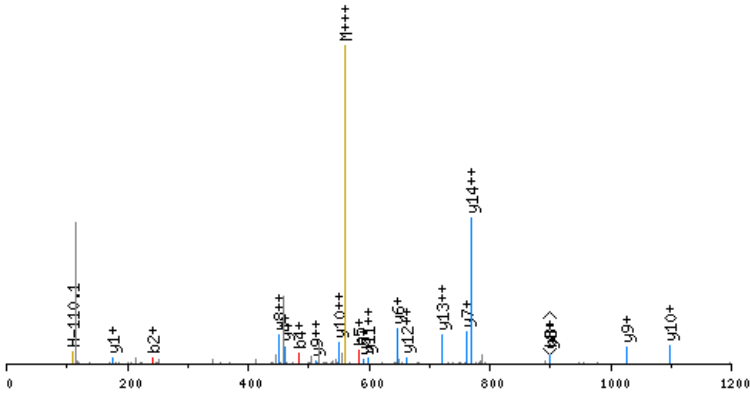

click image to zoom in; click top corners to zoom out

[precursor±]

scan 4916; 560.3 m/z; 2.1e+001

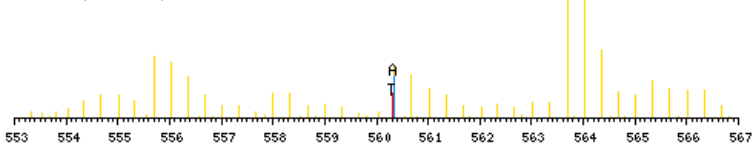

zoomed in precursor plot; T=theoretical m/z, A=acquired m/z

| b <sup>+</sup> | #  | AA | #  | y <sup>+</sup> | y <sup>2+</sup> |
|----------------|----|----|----|----------------|-----------------|
| 142.1232       | 1  | L  | 15 |                |                 |
| 241.1916       | 2  | V  | 14 | 1537.8338      | 769.4208        |
| 354.2756       | 3  | L  | 13 | 1438.7654      | 719.8866        |
| 483.3182       | 4  | E  | 12 | 1325.6814      | 663.3446        |
| 582.3866       | 5  | V  | 11 | 1196.6388      | 598.8233        |
| 653.4238       | 6  | A  | 10 | 1097.5703      | 549.2891        |
| 781.4823       | 7  | Q  | 9  | 1026.5332      | 513.7705        |
| 918.5413       | 8  | H  | 8  | 898.4747       | 449.7412        |
| 1031.6253      | 9  | L  | 7  | 761.4157       | 381.2118        |
| 1088.6468      | 10 | G  | 6  | 648.3317       | 324.6698        |
| 1217.6894      | 11 | E  | 5  | 591.3102       | 296.1590        |
| 1304.7214      | 12 | S  | 4  | 462.2676       | 231.6377        |
| 1405.7691      | 13 | T  | 3  | 375.2356       | 188.1217        |
| 1504.8375      | 14 | V  | 2  | 274.1879       | 137.5979        |
|                | 15 | R  | 1  | 175.1195       | 88.0637         |

N-term:+29.04

X-range:

0 - 0

MassTol: Y-zoom:

0. 1.

MassType:

☐AVG ☒MONO

Axis:

☒1 ☐2

Label:

☒I ☐M ☐-

Ions:

a ☐+ ☐2+ ☐3+

b ☒+ ☐2+ ☐3+

c ☐+ ☐2+ ☐3+

x ☐+ ☐2+ ☐3+

y ☒+ ☒2+ ☐3+

z ☐+ ☐2+ ☐3+

hide H<sub>2</sub>O/NH<sub>3</sub> ☐

zoom 112-122 ☐

GO

LVNDPQPEHPLR, MH+ 1442.7756, m/z 481.5967  
L OS G16 P120811 220811-s1.02645.02645.3.dta

scan 2645; 5.1e+000

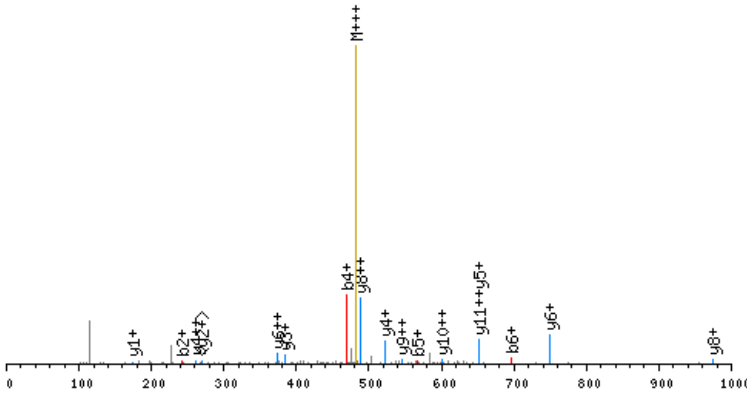

click image to zoom in; click top corners to zoom out

[precursor±]

scan 2643; 481.6 m/z; 3.2e+000

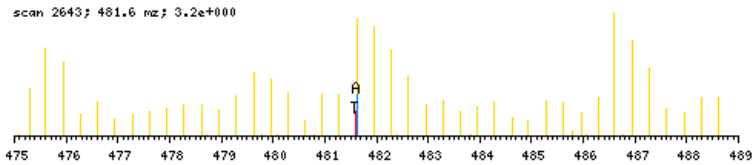

zoomed in precursor plot; T=theoretical m/z, A=acquired m/z

| b <sup>+</sup> | #  | AA | #  | y <sup>+</sup> | y <sup>2+</sup> |
|----------------|----|----|----|----------------|-----------------|
| 142.1232       | 1  | L  | 12 |                |                 |
| 241.1916       | 2  | V  | 11 | 1301.6602      | 651.3340        |
| 355.2345       | 3  | N  | 10 | 1202.5918      | 601.7998        |
| 470.2614       | 4  | D  | 9  | 1088.5489      | 544.7784        |
| 567.3142       | 5  | P  | 8  | 973.5219       | 487.2649        |
| 695.3728       | 6  | Q  | 7  | 876.4692       | 438.7385        |
| 792.4256       | 7  | P  | 6  | 748.4106       | 374.7092        |
| 921.4681       | 8  | E  | 5  | 651.3578       | 326.1828        |
| 1058.5271      | 9  | H  | 4  | 522.3152       | 261.6615        |
| 1155.5798      | 10 | P  | 3  | 385.2563       | 193.1321        |
| 1268.6639      | 11 | L  | 2  | 288.2036       | 144.6057        |
|                | 12 | R  | 1  | 175.1195       | 88.0637         |

N-term:+29.04

X-range:

0 - 0

MassTol: Y-zoom:

0. 1.

MassType:

☐ AVG ☒ MONO

Axis:

☒ 1 ☐ 2

Label:

☒ I ☐ M ☐ -

Ions:

a ☐ + ☐ 2+ ☐ 3+

b ☒ + ☐ 2+ ☐ 3+

c ☐ + ☐ 2+ ☐ 3+

x ☐ + ☐ 2+ ☐ 3+

y ☒ + ☒ 2+ ☐ 3+

z ☐ + ☐ 2+ ☐ 3+

hide H<sub>2</sub>O/NH<sub>3</sub> ☐

zoom 112-122 ☐

GO

LVVYPWTQR, MH+ 1189.6733, m/z 595.3403  
L OS G13 P120811 220811-s1.05617.05617.2.dta

scan 5617; 9.5e+000

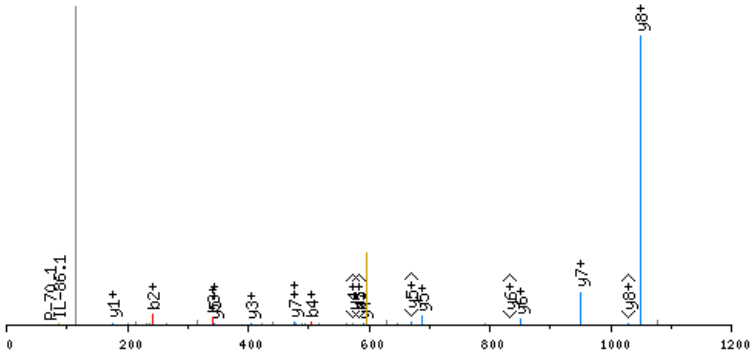

click image to zoom in; click top corners to zoom out

[precursor±]

scan 5614; 595.3 m/z; 2.2e+001

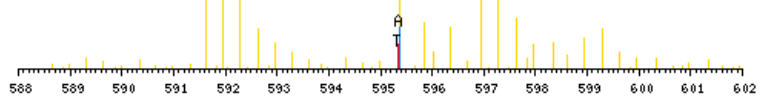

zoomed in precursor plot; T=theoretical m/z, A=acquired m/z

| b <sup>+</sup> | # | AA | # | y <sup>+</sup> | y <sup>2+</sup> |
|----------------|---|----|---|----------------|-----------------|
| 142.1232       | 1 | L  | 9 |                |                 |
| 241.1916       | 2 | V  | 8 | 1048.5580      | 524.7829        |
| 340.2600       | 3 | V  | 7 | 949.4896       | 475.2487        |
| 503.3233       | 4 | Y  | 6 | 850.4212       | 425.7145        |
| 600.3761       | 5 | P  | 5 | 687.3578       | 344.1828        |
| 786.4554       | 6 | W  | 4 | 590.3051       | 295.6564        |
| 887.5031       | 7 | T  | 3 | 404.2258       | 202.6168        |
| 1015.5617      | 8 | Q  | 2 | 303.1781       | 152.0930        |
|                | 9 | R  | 1 | 175.1195       | 88.0637         |

N-term: +29.04

X-range:  

0-0

MassTol: Y-zoom:  

0.1.

MassType:  

☐AVG☒MONO

Axis:  

☒1☐2

Label:  

☒I☐M☐-

Ions:  
a

☐+☐2+☐3+

  
b

☒+☐2+☐3+

  
c

☐+☐2+☐3+

  
x

☐+☐2+☐3+

  
y

☒+☒2+☐3+

  
z

☐+☐2+☐3+

  

hide H<sub>2</sub>O/NH<sub>3</sub>☐

zoom 112-122☐

GO

LVVVNEEDHLR, MH+ 1437.7490, m/z 479.9212  
L OS G16 P120811 220811-s1.04657.04657.3.dta

scan 4657; 7.3e+000

click image to zoom in; click top corners to zoom out [precursor±]

scan 4653; 479.9 m/z; 5.5e+001

zoomed in precursor plot; T=theoretical m/z, A=acquired m/z

| b <sup>+</sup> | #  | AA | #  | y <sup>+</sup> | y <sup>2+</sup> |
|----------------|----|----|----|----------------|-----------------|
| 142.1232       | 1  | L  | 11 |                |                 |
| 241.1916       | 2  | V  | 10 | 1296.6337      | 648.8207        |
| 427.2709       | 3  | W  | 9  | 1197.5653      | 599.2865        |
| 526.3393       | 4  | V  | 8  | 1011.4859      | 506.2469        |
| 640.3822       | 5  | N  | 7  | 912.4175       | 456.7127        |
| 769.4248       | 6  | E  | 6  | 798.3746       | 399.6912        |
| 898.4674       | 7  | E  | 5  | 669.3320       | 335.1699        |
| 1013.4944      | 8  | D  | 4  | 540.2894       | 270.6486        |
| 1150.5533      | 9  | H  | 3  | 425.2625       | 213.1352        |
| 1263.6373      | 10 | L  | 2  | 288.2036       | 144.6057        |
|                | 11 | R  | 1  | 175.1195       | 88.0637         |

N-term:+29.04

N-term: +35.07 K(13): +162.16

X-range:

0 - 0

MassTol: Y-zoom:

0. 1.

MassType:

☐AVG ☒MONO

Axis:

☒1 ☐2

Label:

☒I ☐M ☐-

Ions:

a ☐+ ☐2+ ☐3+

b ☒+ ☐2+ ☐3+

c ☐+ ☐2+ ☐3+

x ☐+ ☐2+ ☐3+

y ☒+ ☒2+ ☐3+

z ☐+ ☐2+ ☐3+

hide H<sub>2</sub>O/NH<sub>3</sub> ☐

zoom 112-122 ☐

GO

LYLGHNYVTAIR, MH+ 1447.8061, m/z 483.2736  
L OS G16 P120811 220811-s1.04706.04706.3.dta

scan 4706; 5.6e+000

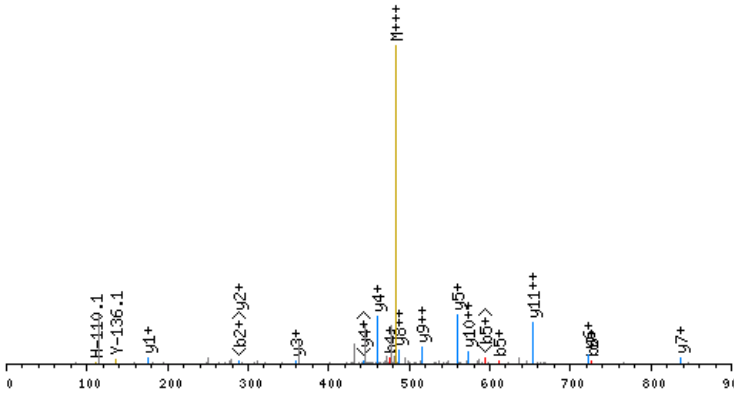

click image to zoom in; click top corners to zoom out

[precursor±]

scan 4703; 483.3 m/z; 7.1e+000

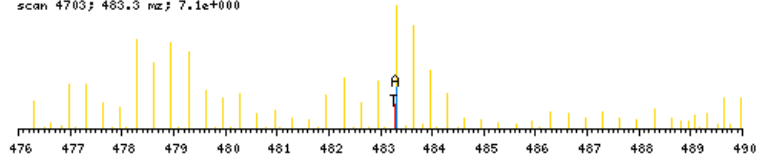

zoomed in precursor plot; T=theoretical m/z, A=acquired m/z

| b <sup>+</sup> | #  | AA | #  | y <sup>+</sup> | y <sup>2+</sup> |
|----------------|----|----|----|----------------|-----------------|
| 142.1232       | 1  | L  | 12 |                |                 |
| 305.1865       | 2  | Y  | 11 | 1306.6908      | 653.8493        |
| 418.2706       | 3  | L  | 10 | 1143.6275      | 572.3176        |
| 475.2920       | 4  | G  | 9  | 1030.5434      | 515.7756        |
| 612.3509       | 5  | H  | 8  | 973.5219       | 487.2649        |
| 726.3939       | 6  | N  | 7  | 836.4630       | 418.7354        |
| 889.4572       | 7  | Y  | 6  | 722.4201       | 361.7140        |
| 988.5256       | 8  | V  | 5  | 559.3568       | 280.1823        |
| 1089.5733      | 9  | T  | 4  | 460.2884       | 230.6481        |
| 1160.6104      | 10 | A  | 3  | 359.2407       | 180.1243        |
| 1273.6945      | 11 | I  | 2  | 288.2036       | 144.6057        |
|                | 12 | R  | 1  | 175.1195       | 88.0637         |

N-term:+29.04

N-term: +35.07 K(5): +162.16

X-range:

0 - 0

MassTol: Y-zoom:

0. 1.

MassType:

☐AVG ☒MONO

Axis:

☒1 ☐2

Label:

☒I ☐M ☐-

Ions:

a ☐+ ☐2+ ☐3+

b ☒+ ☐2+ ☐3+

c ☐+ ☐2+ ☐3+

x ☐+ ☐2+ ☐3+

y ☒+ ☒2+ ☐3+

z ☐+ ☐2+ ☐3+

hide H<sub>2</sub>O/NH<sub>3</sub> ☐

zoom 112-122 ☐

GO

LYSSDDVIELTPSNFNR, MH+ 2085.0140, m/z 695.6762  
L OS G13 P120811 220811-s1.06083.06083.3.dta

scan 6083; 2.9e+000

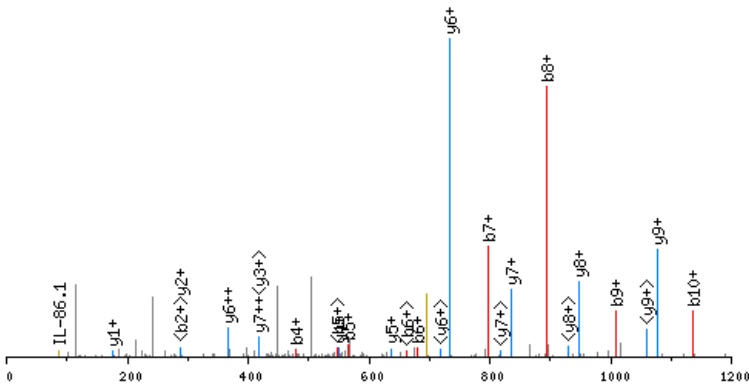

click image to zoom in; click top corners to zoom out

[precursor±]

scan 6079; 695.7 m/z; 6.0e+000

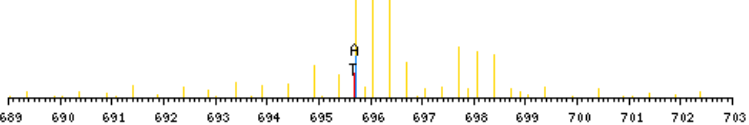

zoomed in precursor plot; T=theoretical m/z, A=acquired m/z

| b <sup>+</sup> | #  | AA | #  | y <sup>+</sup> | y <sup>2+</sup> |
|----------------|----|----|----|----------------|-----------------|
| 142.1232       | 1  | L  | 18 |                |                 |
| 305.1865       | 2  | Y  | 17 | 1943.8987      | 972.4533        |
| 392.2185       | 3  | S  | 16 | 1780.8353      | 890.9216        |
| 479.2505       | 4  | S  | 15 | 1693.8033      | 847.4056        |
| 566.2826       | 5  | S  | 14 | 1606.7713      | 803.8896        |
| 681.3095       | 6  | D  | 13 | 1519.7393      | 760.3735        |
| 796.3365       | 7  | D  | 12 | 1404.7123      | 702.8601        |
| 895.4049       | 8  | V  | 11 | 1289.6854      | 645.3466        |
| 1008.4889      | 9  | I  | 10 | 1190.6170      | 595.8124        |
| 1137.5315      | 10 | E  | 9  | 1077.5329      | 539.2704        |
| 1250.6156      | 11 | L  | 8  | 948.4903       | 474.7491        |
| 1351.6633      | 12 | T  | 7  | 835.4062       | 418.2070        |
| 1448.7160      | 13 | P  | 6  | 734.3586       | 367.6832        |
| 1535.7481      | 14 | S  | 5  | 637.3058       | 319.1568        |
| 1649.7910      | 15 | N  | 4  | 550.2738       | 275.6408        |
| 1796.8594      | 16 | F  | 3  | 436.2308       | 218.6193        |
| 1910.9023      | 17 | N  | 2  | 289.1624       | 145.0851        |
|                | 18 | R  | 1  | 175.1195       | 88.0637         |

N-term:+29.04



X-range:

0 - 0

MassTol: Y-zoom:

0. 1.

MassType:

☐AVG ☒MONO

Axis:

☒1 ☐2

Label:

☒I ☐M ☐-

Ions:

a ☐+ ☐2+ ☐3+

b ☒+ ☐2+ ☐3+

c ☐+ ☐2+ ☐3+

x ☐+ ☐2+ ☐3+

y ☒+ ☒2+ ☐3+

z ☐+ ☐2+ ☐3+

hide H<sub>2</sub>O/NH<sub>3</sub> ☐

zoom 112-122 ☐

GO

MAETFDQGAHHAFGQGGRR, MH+ 1944.8775, m/z 486.9748  
L OS G17 P120811 220811-s1.03224.03224.4.dta

scan 3224; 2.0e+000

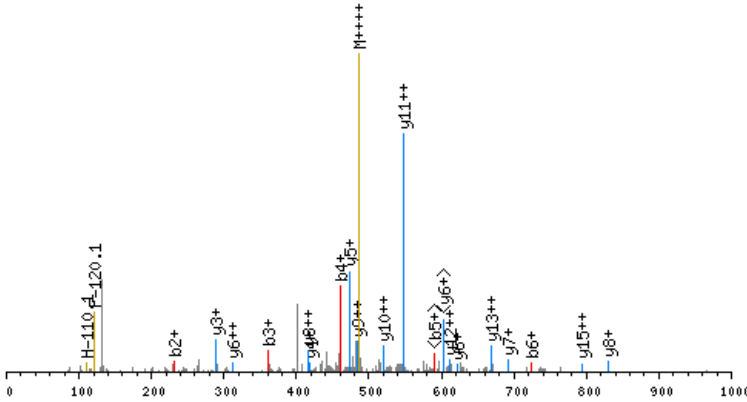

click image to zoom in; click top corners to zoom out

[precursor±]

scan 3223; 487.0 m/z; 1.1e+001

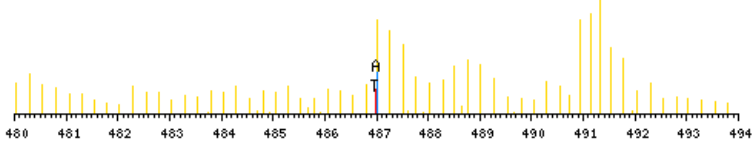

zoomed in precursor plot; T=theoretical m/z, A=acquired m/z

| b <sup>+</sup> | #  | AA | #  | y <sup>+</sup> | y <sup>2+</sup> |
|----------------|----|----|----|----------------|-----------------|
| 160.0796       | 1  | M  | 18 |                |                 |
| 231.1167       | 2  | A  | 17 | 1785.8057      | 893.4068        |
| 360.1593       | 3  | E  | 16 | 1714.7686      | 857.8882        |
| 461.2070       | 4  | T  | 15 | 1585.7260      | 793.3669        |
| 608.2754       | 5  | F  | 14 | 1484.6783      | 742.8431        |
| 723.3023       | 6  | D  | 13 | 1337.6099      | 669.3089        |
| 851.3609       | 7  | Q  | 12 | 1222.5830      | 611.7954        |
| 908.3824       | 8  | G  | 11 | 1094.5244      | 547.7661        |
| 979.4195       | 9  | A  | 10 | 1037.5029      | 519.2554        |
| 1116.4784      | 10 | H  | 9  | 966.4658       | 483.7368        |
| 1253.5373      | 11 | H  | 8  | 829.4069       | 415.2074        |
| 1324.5744      | 12 | A  | 7  | 692.3480       | 346.6779        |
| 1471.6428      | 13 | F  | 6  | 621.3109       | 311.1594        |
| 1528.6643      | 14 | G  | 5  | 474.2425       | 237.6251        |
| 1656.7229      | 15 | Q  | 4  | 417.2210       | 209.1144        |
| 1713.7443      | 16 | G  | 3  | 289.1624       | 145.0851        |
| 1770.7658      | 17 | G  | 2  | 232.1410       | 116.5744        |
|                | 18 | R  | 1  | 175.1195       | 88.0637         |

N-term:+29.04

X-range:

0 - 0

MassTol: Y-zoom:

0. 1.

MassType:

☐ AVG ☒ MONO

Axis:

☒ 1 ☐ 2

Label:

☒ I ☐ M ☐ -

Ions:

a ☐ + ☐ 2+ ☐ 3+

b ☒ + ☐ 2+ ☐ 3+

c ☐ + ☐ 2+ ☐ 3+

x ☐ + ☐ 2+ ☐ 3+

y ☒ + ☒ 2+ ☐ 3+

z ☐ + ☐ 2+ ☐ 3+

hide H<sub>2</sub>O/NH<sub>3</sub> ☐

zoom 112-122 ☐

GO

MDEIDSIGSSR, MH+ 1237.5734, m/z 619.2903  
L OS G13 P120811 220811-s1.03518.03518.2.dta

scan 3518; 4.3e+000

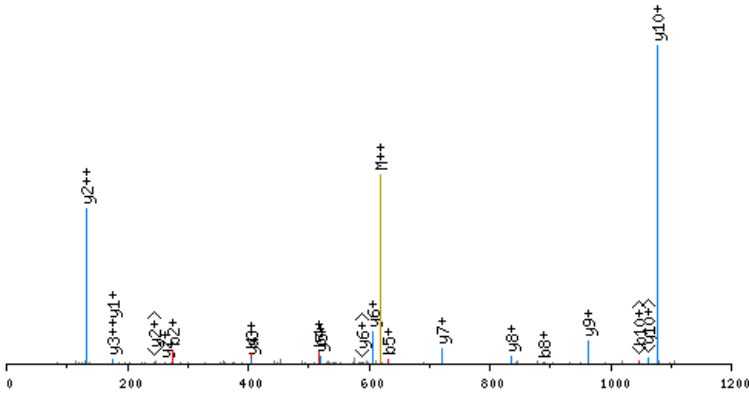

click image to zoom in; click top corners to zoom out

[precursor±]

scan 3514; 619.3 m/z; 2.0e+001

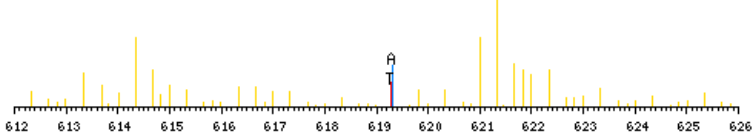

zoomed in precursor plot; T=theoretical m/z, A=acquired m/z

| b <sup>+</sup> | #  | AA | #  | y <sup>+</sup> | y <sup>2+</sup> |
|----------------|----|----|----|----------------|-----------------|
| 160.0796       | 1  | M  | 11 |                |                 |
| 275.1065       | 2  | D  | 10 | 1078.5017      | 539.7547        |
| 404.1491       | 3  | E  | 9  | 963.4747       | 482.2413        |
| 517.2332       | 4  | I  | 8  | 834.4321       | 417.7200        |
| 632.2601       | 5  | D  | 7  | 721.3481       | 361.1779        |
| 719.2922       | 6  | S  | 6  | 606.3211       | 303.6645        |
| 832.3762       | 7  | I  | 5  | 519.2891       | 260.1485        |
| 889.3977       | 8  | G  | 4  | 406.2050       | 203.6064        |
| 976.4297       | 9  | S  | 3  | 349.1836       | 175.0957        |
| 1063.4617      | 10 | S  | 2  | 262.1515       | 131.5797        |
|                | 11 | R  | 1  | 175.1195       | 88.0637         |

N-term:+29.04

X-range:

0 - 0

MassTol: Y-zoom:

0. 1.

MassType:

☐ AVG ☒ MONO

Axis:

☒ 1 ☐ 2

Label:

☒ I ☐ M ☐ -

Ions:

a ☐ + ☐ 2+ ☐ 3+

b ☒ + ☐ 2+ ☐ 3+

c ☐ + ☐ 2+ ☐ 3+

x ☐ + ☐ 2+ ☐ 3+

y ☒ + ☒ 2+ ☐ 3+

z ☐ + ☐ 2+ ☐ 3+

hide H<sub>2</sub>O/NH<sub>3</sub> ☐

zoom 112-122 ☐

GO

MDSALEALSGSLGKVPPEMWAKR, MH+ 2686.4676, m/z 672.3724  
L OS G14 P120811 220811-s1.05770.05770.4.dta

scan 5770; 3.0e-001

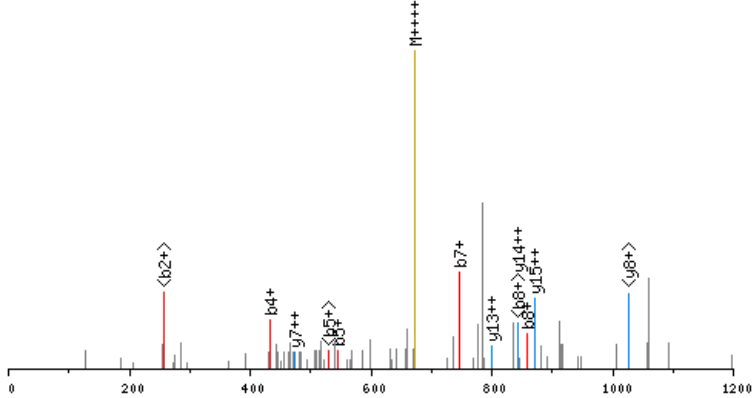

click image to zoom in; click top corners to zoom out

[precursor±]

scan 5766; 672.4 m/z; 2.0e+000

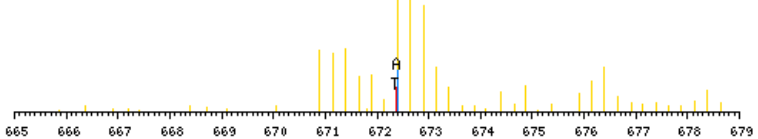

zoomed in precursor plot; T=theoretical m/z, A=acquired m/z

| b <sup>+</sup> | #  | AA | #  | y <sup>+</sup> | y <sup>2+</sup> |
|----------------|----|----|----|----------------|-----------------|
| 160.0796       | 1  | M  | 24 |                |                 |
| 275.1065       | 2  | D  | 23 | 2527.3959      | 1264.2019       |
| 362.1386       | 3  | S  | 22 | 2412.3689      | 1206.6884       |
| 433.1757       | 4  | A  | 21 | 2325.3369      | 1163.1724       |
| 546.2597       | 5  | L  | 20 | 2254.2998      | 1127.6538       |
| 675.3023       | 6  | E  | 19 | 2141.2157      | 1071.1118       |
| 746.3394       | 7  | A  | 18 | 2012.1731      | 1006.5905       |
| 859.4235       | 8  | L  | 17 | 1941.1360      | 971.0719        |
| 946.4555       | 9  | S  | 16 | 1828.0520      | 914.5299        |
| 1003.4770      | 10 | G  | 15 | 1741.0199      | 871.0139        |
| 1090.5090      | 11 | S  | 14 | 1683.9985      | 842.5031        |
| 1203.5931      | 12 | L  | 13 | 1596.9664      | 798.9871        |
| 1316.6772      | 13 | L  | 12 | 1483.8824      | 742.4451        |
| 1429.7612      | 14 | I  | 11 | 1370.7983      | 685.9031        |
| 1486.7827      | 15 | G  | 10 | 1257.7142      | 629.3610        |
| 1642.9090      | 16 | K  | 9  | 1200.6928      | 600.8503        |
| 1741.9774      | 17 | V  | 8  | 1044.5665      | 522.7872        |
| 1839.0302      | 18 | P  | 7  | 945.4981       | 473.2529        |
| 1968.0728      | 19 | E  | 6  | 848.4453       | 424.7266        |
| 2099.1132      | 20 | M  | 5  | 719.4027       | 360.2053        |
| 2285.1925      | 21 | W  | 4  | 588.3622       | 294.6850        |
| 2356.2297      | 22 | A  | 3  | 402.2829       | 201.6454        |
| 2512.3560      | 23 | K  | 2  | 331.2458       | 166.1268        |
|                | 24 | R  | 1  | 175.1195       | 88.0637         |

N-term: +29.04 K(16): +156.13  
K(23): +156.13

X-range:

0 - 0

MassTol: Y-zoom:

0. 1.

MassType:

☐ AVG ☒ MONO

Axis:

☒ 1 ☐ 2

Label:

☒ I ☐ M ☐ -

Ions:

a ☐ + ☐ 2+ ☐ 3+

b ☒ + ☐ 2+ ☐ 3+

c ☐ + ☐ 2+ ☐ 3+

x ☐ + ☐ 2+ ☐ 3+

y ☒ + ☒ 2+ ☐ 3+

z ☐ + ☐ 2+ ☐ 3+

hide H<sub>2</sub>O/NH<sub>3</sub> ☐

zoom 112-122 ☐

GO

MDVLAQEVALLEK, MH+ 1670.9767, m/z 557.6638  
L OS G15 P120811 220811-s1.06113.06113.3.dta

scan 6113; 4.5e+000

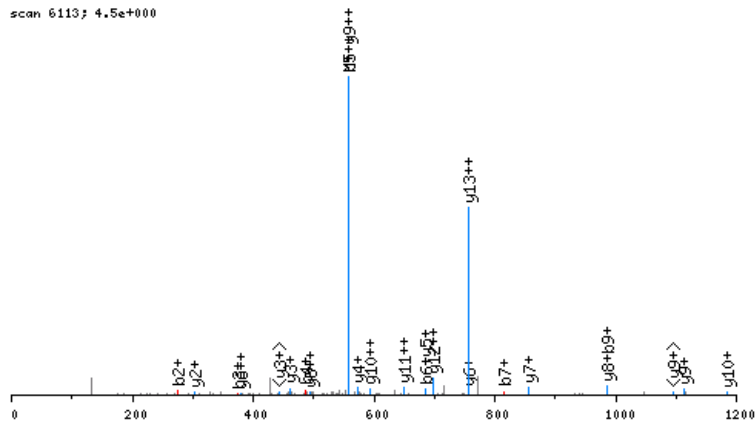

click image to zoom in; click top corners to zoom out

[precursor±]

scan 6111; 557.7 m/z; 1.5e+000

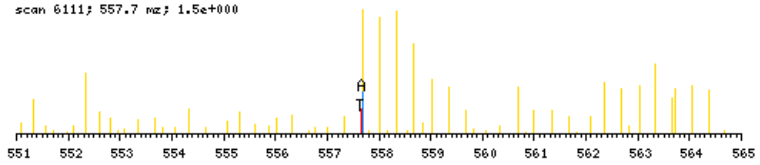

zoomed in precursor plot; T=theoretical m/z, A=acquired m/z

| b <sup>+</sup> | #  | AA | #  | y <sup>+</sup> | y <sup>2+</sup> |
|----------------|----|----|----|----------------|-----------------|
| 160.0796       | 1  | M  | 14 |                |                 |
| 275.1065       | 2  | D  | 13 | 1511.9049      | 756.4564        |
| 374.1749       | 3  | V  | 12 | 1396.8780      | 698.9429        |
| 487.2590       | 4  | L  | 11 | 1297.8096      | 649.4087        |
| 558.2961       | 5  | A  | 10 | 1184.7255      | 592.8667        |
| 686.3547       | 6  | Q  | 9  | 1113.6884      | 557.3481        |
| 815.3973       | 7  | E  | 8  | 985.6298       | 493.3188        |
| 914.4657       | 8  | V  | 7  | 856.5872       | 428.7975        |
| 985.5028       | 9  | A  | 6  | 757.5188       | 379.2633        |
| 1098.5869      | 10 | L  | 5  | 686.4817       | 343.7448        |
| 1211.6709      | 11 | L  | 4  | 573.3976       | 287.2027        |
| 1367.7972      | 12 | K  | 3  | 460.3136       | 230.6607        |
| 1496.8398      | 13 | E  | 2  | 304.1873       | 152.5976        |
|                | 14 | K  | 1  | 175.1447       | 88.0763         |

N-term:+29.04 K(12):+156.13  
K(14):+156.13

X-range:

$$0 - 0$$

0. 1.

☐ AVG ☒ MONO

1 2

☒ I ☐ M ☐ -

**a**  + <sup>2</sup> + <sup>3</sup> +

b. ☒ 1+ ☐ 2+ ☐ 3+

$\square + \square^{2+} + \square^{3+}$

**c**

| x | 1 | 2 | 3 |
|---|---|---|---|
|---|---|---|---|

**y** ☒<sup>+</sup> ☒<sup>2+</sup> ☐<sup>3+</sup>

$$z^{\frac{1}{2}} + \frac{1}{2}z^{\frac{3}{2}} + \frac{1}{8}z^{\frac{5}{2}} + \dots$$
hide H<sub>2</sub>O/NH<sub>3</sub>

From 113–123

GO

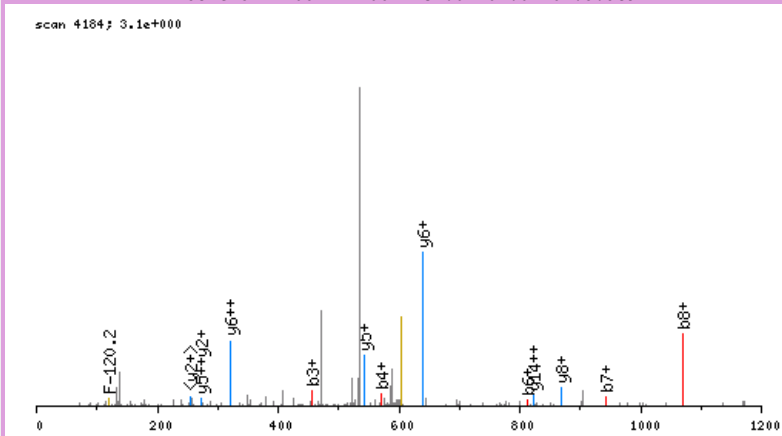

click image to zoom in; click top corners to zoom out [precursor±]

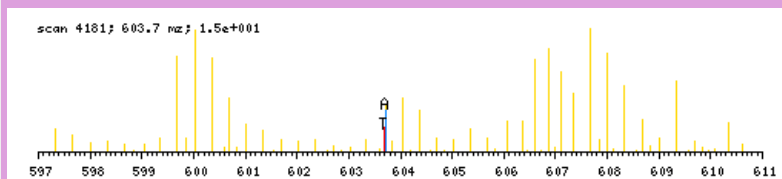

zoomed in precursor plot; T=theoretical m/z, A=acquired m/z

| $b^+$     | #  | AA | #  | $y^+$     | $y^{2+}$ |
|-----------|----|----|----|-----------|----------|
| 166.1114  | 1  | M  | 15 |           |          |
| 295.1540  | 2  | E  | 14 | 1643.9181 | 822.4630 |
| 457.3121  | 3  | K  | 13 | 1514.8755 | 757.9417 |
| 571.3550  | 4  | N  | 12 | 1352.7174 | 676.8626 |
| 699.4136  | 5  | Q  | 11 | 1238.6745 | 619.8412 |
| 812.4976  | 6  | L  | 10 | 1110.6159 | 555.8119 |
| 941.5402  | 7  | E  | 9  | 997.5318  | 499.2698 |
| 1070.5828 | 8  | E  | 8  | 868.4892  | 434.7485 |
| 1169.6512 | 9  | V  | 7  | 739.4466  | 370.2272 |
| 1266.7040 | 10 | P  | 6  | 640.3782  | 320.6930 |
| 1353.7360 | 11 | S  | 5  | 543.3255  | 272.1666 |
| 1424.7732 | 12 | A  | 4  | 456.2934  | 228.6506 |
| 1537.8572 | 13 | L  | 3  | 385.2563  | 193.1321 |
| 1634.9100 | 14 | P  | 2  | 272.1723  | 136.5900 |
|           | 15 | R  | 1  | 175.1195  | 88.0637  |

N-term: +35.07 K(3): +162.16

X-range:

0 - 0

MassTol: Y-zoom:

0. 1.

MassType:

☐ AVG ☒ MONO

Axis:

☒ 1 ☐ 2

Label:

☒ I ☐ M ☐ -

Ions:

a ☐ + ☐ 2+ ☐ 3+

b ☒ + ☐ 2+ ☐ 3+

c ☐ + ☐ 2+ ☐ 3+

x ☐ + ☐ 2+ ☐ 3+

y ☒ + ☒ 2+ ☐ 3+

z ☐ + ☐ 2+ ☐ 3+

hide H<sub>2</sub>O/NH<sub>3</sub> ☐

zoom 112-122 ☐

GO

MELHGEKGSSGKAAGDETGAQVER, MH+ 2475.2998, m/z 619.5804  
H OS G18 P120811 220811-s1.02318.02318.4.dta

scan 2318; 1.1e+001

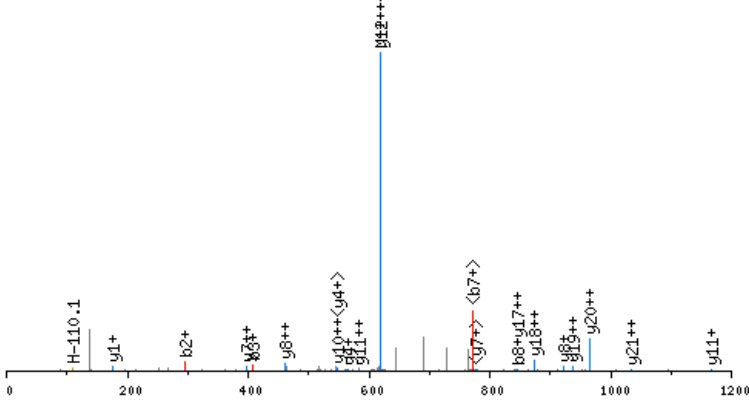

click image to zoom in; click top corners to zoom out

[precursor±]

scan 2316; 619.6 m/z; 7.9e+000

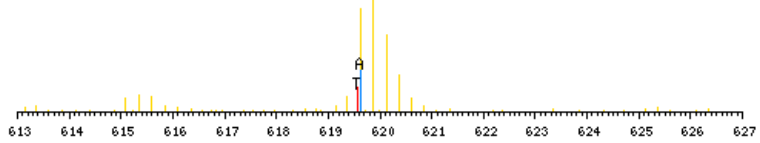

zoomed in precursor plot; T=theoretical m/z, A=acquired m/z

| b <sup>+</sup> | #  | AA | #  | y <sup>+</sup> | y <sup>2+</sup> |
|----------------|----|----|----|----------------|-----------------|
| 166.1114       | 1  | M  | 24 |                |                 |
| 295.1540       | 2  | E  | 23 | 2310.1963      | 1155.6020       |
| 408.2380       | 3  | L  | 22 | 2181.1537      | 1091.0807       |
| 545.2970       | 4  | H  | 21 | 2068.0696      | 1034.5387       |
| 602.3184       | 5  | G  | 20 | 1931.0107      | 966.0093        |
| 731.3610       | 6  | E  | 19 | 1873.9892      | 937.4985        |
| 788.3825       | 7  | G  | 18 | 1744.9466      | 872.9772        |
| 845.4039       | 8  | G  | 17 | 1687.9252      | 844.4665        |
| 932.4360       | 9  | S  | 16 | 1630.9037      | 815.9558        |
| 1019.4680      | 10 | S  | 15 | 1543.8717      | 772.4398        |
| 1076.4895      | 11 | G  | 14 | 1456.8397      | 728.9237        |
| 1238.6476      | 12 | K  | 13 | 1399.8182      | 700.4130        |
| 1309.6847      | 13 | A  | 12 | 1237.6601      | 619.3340        |
| 1380.7218      | 14 | A  | 11 | 1166.6230      | 583.8154        |
| 1437.7432      | 15 | G  | 10 | 1095.5859      | 548.2968        |
| 1552.7702      | 16 | D  | 9  | 1038.5644      | 519.7861        |
| 1681.8128      | 17 | E  | 8  | 923.5375       | 462.2726        |
| 1782.8605      | 18 | T  | 7  | 794.4949       | 397.7513        |
| 1839.8819      | 19 | G  | 6  | 693.4472       | 347.2275        |
| 1910.9190      | 20 | A  | 5  | 636.4257       | 318.7168        |
| 2073.0771      | 21 | K  | 4  | 565.3886       | 283.1982        |
| 2172.1456      | 22 | V  | 3  | 403.2305       | 202.1192        |
| 2301.1881      | 23 | E  | 2  | 304.1621       | 152.5850        |
|                | 24 | R  | 1  | 175.1195       | 88.0637         |

N-term:+35.07 K(12):+162.16  
K(21):+162.16

X-range:

0 - 0

MassTol: Y-zoom:

0. 1.

MassType:

AVG MONO

Axis:

1 2

Label:

I M -

Ions:

a + 2+ 3+

b + 2+ 3+

c + 2+ 3+

x + 2+ 3+

y + 2+ 3+

z + 2+ 3+

hide H<sub>2</sub>O/NH<sub>3</sub>

zoom 112-122

GO

MESAGIHETTYNSIMKCDIDIR, MH+ 2640.2471, m/z 660.8172  
L OS G16 P120811 220811-s1.05279.05279.4.dta

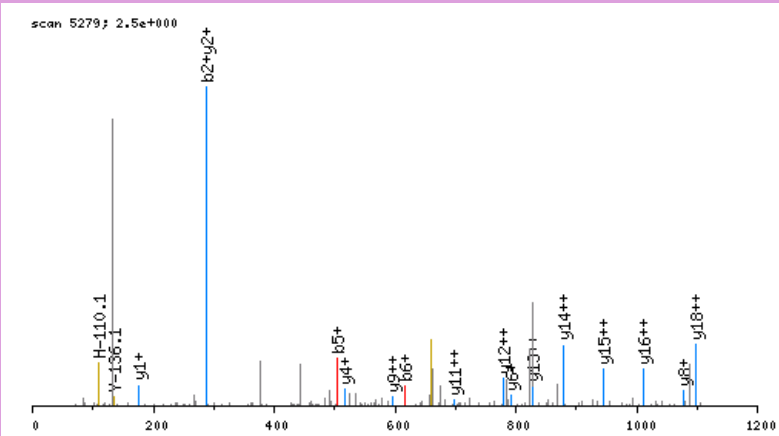

click image to zoom in; click top corners to zoom out

[precursor±]

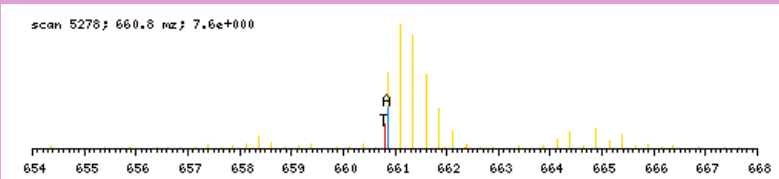

zoomed in precursor plot; T=theoretical m/z, A=acquired m/z

| b <sup>+</sup> | #  | AA | #  | y <sup>+</sup> | y <sup>2+</sup> |
|----------------|----|----|----|----------------|-----------------|
| 160.0796       | 1  | M  | 22 |                |                 |
| 289.1222       | 2  | E  | 21 | 2481.1754      | 1241.0916       |
| 376.1542       | 3  | S  | 20 | 2352.1328      | 1176.5703       |
| 447.1913       | 4  | A  | 19 | 2265.1008      | 1133.0543       |
| 504.2128       | 5  | G  | 18 | 2194.0636      | 1097.5357       |
| 617.2968       | 6  | I  | 17 | 2137.0422      | 1069.0250       |
| 754.3558       | 7  | H  | 16 | 2023.9581      | 1012.4830       |
| 883.3984       | 8  | E  | 15 | 1886.8992      | 943.9535        |
| 984.4460       | 9  | T  | 14 | 1757.8566      | 879.4322        |
| 1085.4937      | 10 | T  | 13 | 1656.8089      | 828.9084        |
| 1248.5570      | 11 | Y  | 12 | 1555.7612      | 778.3845        |
| 1362.6000      | 12 | N  | 11 | 1392.6979      | 696.8529        |
| 1449.6320      | 13 | S  | 10 | 1278.6550      | 639.8314        |
| 1562.7161      | 14 | I  | 9  | 1191.6230      | 596.3154        |
| 1693.7565      | 15 | M  | 8  | 1078.5389      | 539.7734        |
| 1849.8828      | 16 | K  | 7  | 947.4984       | 474.2531        |
| 2009.9134      | 17 | C  | 6  | 791.3721       | 396.1900        |
| 2124.9404      | 18 | D  | 5  | 631.3415       | 316.1747        |
| 2238.0245      | 19 | I  | 4  | 516.3146       | 258.6612        |
| 2353.0514      | 20 | D  | 3  | 403.2305       | 202.1192        |
| 2466.1355      | 21 | I  | 2  | 288.2036       | 144.6057        |
|                | 22 | R  | 1  | 175.1195       | 88.0637         |

N-term:+29.04 K(16):+156.13  
C(17):+160.03

X-range:

0 - 0

MassTol: Y-zoom:

0. 1.

MassType:

☐AVG ☒MONO

Axis:

☒1 ☐2

Label:

☒I ☐M ☐-

Ions:

a ☐+ ☐2+ ☐3+

b ☒+ ☐2+ ☐3+

c ☐+ ☐2+ ☐3+

x ☐+ ☐2+ ☐3+

y ☒+ ☒2+ ☐3+

z ☐+ ☐2+ ☐3+

hide H<sub>2</sub>O/NH<sub>3</sub> ☐

zoom 112-122 ☐

GO

MFDTPEQESPVKSPVVR, MH+ 1870.9737, m/z 624.3294  
L OS G15 P120811 220811-s1.03554.03554.3.dta

scan 3554; 4.2e+000

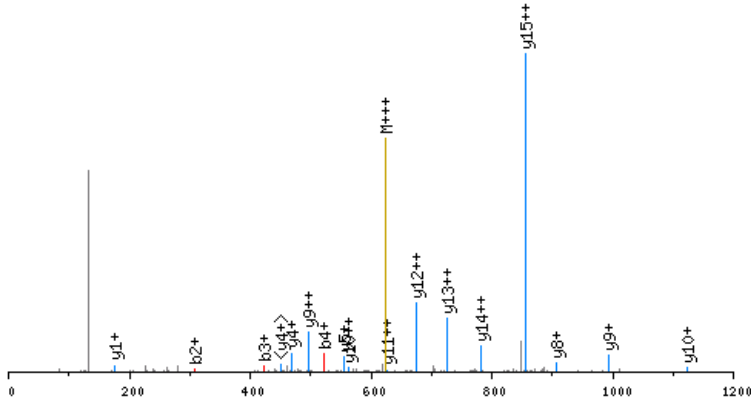

click image to zoom in; click top corners to zoom out

[precursor±]

scan 3551; 624.3 m/z; 1.2e+002

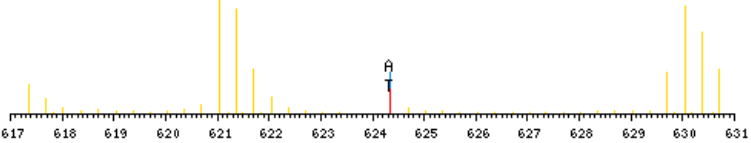

zoomed in precursor plot; T=theoretical m/z, A=acquired m/z

| b <sup>+</sup> | #  | AA | #  | y <sup>+</sup> | y <sup>2+</sup> |
|----------------|----|----|----|----------------|-----------------|
| 160.0796       | 1  | M  | 16 |                |                 |
| 307.1480       | 2  | F  | 15 | 1711.9019      | 856.4549        |
| 422.1749       | 3  | D  | 14 | 1564.8335      | 782.9207        |
| 523.2226       | 4  | T  | 13 | 1449.8066      | 725.4072        |
| 620.2754       | 5  | P  | 12 | 1348.7589      | 674.8834        |
| 748.3340       | 6  | Q  | 11 | 1251.7061      | 626.3570        |
| 877.3766       | 7  | E  | 10 | 1123.6476      | 562.3277        |
| 964.4086       | 8  | S  | 9  | 994.6050       | 497.8064        |
| 1061.4613      | 9  | P  | 8  | 907.5729       | 454.2904        |
| 1160.5298      | 10 | V  | 7  | 810.5202       | 405.7640        |
| 1316.6561      | 11 | K  | 6  | 711.4518       | 356.2298        |
| 1403.6881      | 12 | S  | 5  | 555.3255       | 278.1666        |
| 1500.7409      | 13 | P  | 4  | 468.2934       | 234.6506        |
| 1597.7936      | 14 | P  | 3  | 371.2407       | 186.1243        |
| 1696.8620      | 15 | V  | 2  | 274.1879       | 137.5979        |
|                | 16 | R  | 1  | 175.1195       | 88.0637         |

N-term:+29.04 K(11):+156.13

X-range:

0 - 0

MassTol: Y-zoom:

0. 1.

MassType:

☐ AVG ☒ MONO

Axis:

☒ 1 ☐ 2

Label:

☒ I ☐ M ☐ -

Ions:

a ☐ + ☐ 2+ ☐ 3+

b ☒ + ☐ 2+ ☐ 3+

c ☐ + ☐ 2+ ☐ 3+

x ☐ + ☐ 2+ ☐ 3+

y ☒ + ☒ 2+ ☐ 3+

z ☐ + ☐ 2+ ☐ 3+

hide H<sub>2</sub>O/NH<sub>3</sub> ☐

zoom 112-122 ☐

GO

MGESDDSLR, MH+ 1150.5414, m/z 575.7743  
L OS G14 P120811 220811-s1.03603.03603.2.dta

scan 3603; 5.3e+000

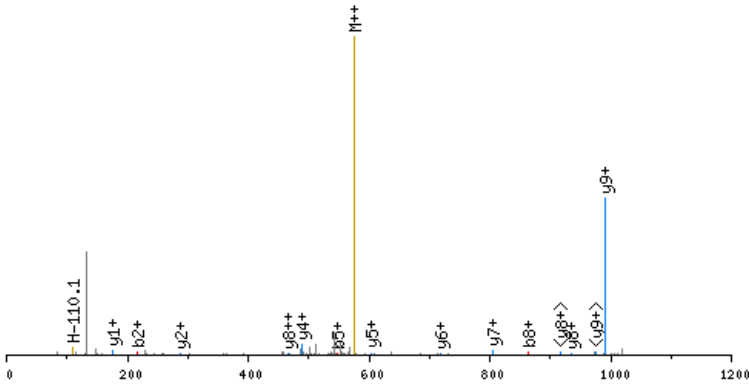

click image to zoom in; click top corners to zoom out

[precursor±]

scan 3601; 575.8 m/z; 1.1e+001

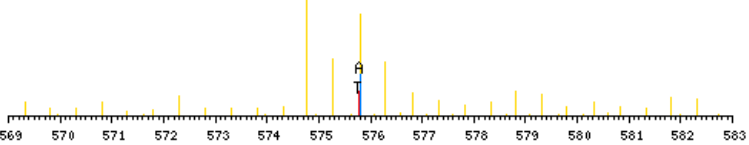

zoomed in precursor plot; T=theoretical m/z, A=acquired m/z

| b <sup>+</sup> | #  | AA | #  | y <sup>+</sup> | y <sup>2+</sup> |
|----------------|----|----|----|----------------|-----------------|
| 160.0796       | 1  | M  | 10 |                |                 |
| 217.1010       | 2  | G  | 9  | 991.4696       | 496.2387        |
| 346.1436       | 3  | E  | 8  | 934.4482       | 467.7280        |
| 433.1757       | 4  | S  | 7  | 805.4056       | 403.2067        |
| 548.2026       | 5  | D  | 6  | 718.3735       | 359.6907        |
| 663.2296       | 6  | D  | 5  | 603.3466       | 302.1772        |
| 750.2616       | 7  | S  | 4  | 488.3197       | 244.6637        |
| 863.3456       | 8  | I  | 3  | 401.2876       | 201.1477        |
| 976.4297       | 9  | L  | 2  | 288.2036       | 144.6057        |
|                | 10 | R  | 1  | 175.1195       | 88.0637         |

N-term: +29.04

N-term: +35.07 K(4): +162.16  
C(6): +160.03 K(15): +162.16

X-range:

0 - 0

MassTol: Y-zoom:

0. 1.

MassType:

☐ AVG ☒ MONO

Axis:

☒ 1 ☐ 2

Label:

☒ I ☐ M ☐ -

Ions:

a ☐ + ☐ 2+ ☐ 3+

b ☒ + ☐ 2+ ☐ 3+

c ☐ + ☐ 2+ ☐ 3+

x ☐ + ☐ 2+ ☐ 3+

y ☒ + ☒ 2+ ☐ 3+

z ☐ + ☐ 2+ ☐ 3+

hide H<sub>2</sub>O/NH<sub>3</sub> ☐

zoom 112-122 ☐

GO

MGQKDSYVGDEAQSQR, MH+ 1901.0287, m/z 476.0126  
H OS G17 P120811 220811-s1.01987.01987.4.dta

scan 1987; 1.4e+001

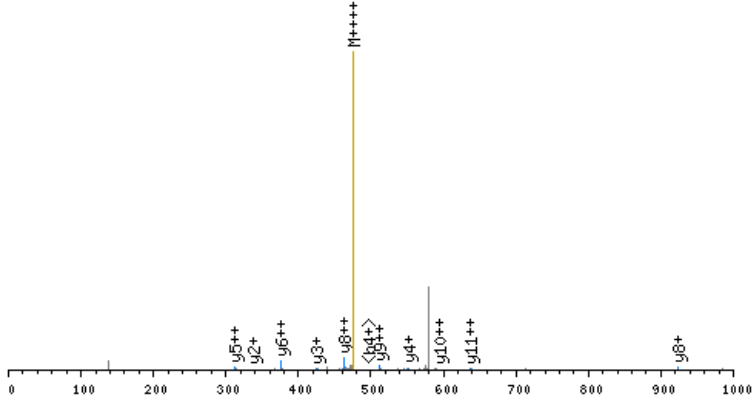

click image to zoom in; click top corners to zoom out

[precursor±]

scan 1983; 476.0 m/z; 2.3e+000

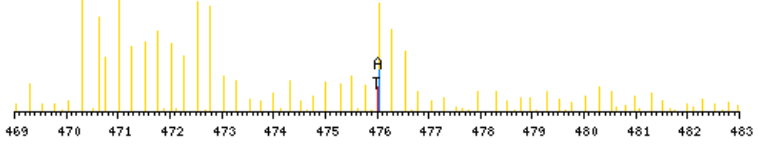

zoomed in precursor plot; T=theoretical m/z, A=acquired m/z

| b <sup>+</sup> | #  | AA | #  | y <sup>+</sup> | y <sup>2+</sup> |
|----------------|----|----|----|----------------|-----------------|
| 166.1114       | 1  | M  | 16 |                |                 |
| 223.1328       | 2  | G  | 15 | 1735.9252      | 868.4665        |
| 351.1914       | 3  | Q  | 14 | 1678.9037      | 839.9558        |
| 513.3495       | 4  | K  | 13 | 1550.8451      | 775.9265        |
| 628.3765       | 5  | D  | 12 | 1388.6870      | 694.8474        |
| 715.4085       | 6  | S  | 11 | 1273.6601      | 637.3340        |
| 878.4718       | 7  | Y  | 10 | 1186.6281      | 593.8179        |
| 977.5402       | 8  | V  | 9  | 1023.5647      | 512.2863        |
| 1034.5617      | 9  | G  | 8  | 924.4963       | 462.7521        |
| 1149.5886      | 10 | D  | 7  | 867.4749       | 434.2413        |
| 1278.6312      | 11 | E  | 6  | 752.4479       | 376.7279        |
| 1349.6684      | 12 | A  | 5  | 623.4053       | 312.2066        |
| 1477.7269      | 13 | Q  | 4  | 552.3682       | 276.6880        |
| 1564.7590      | 14 | S  | 3  | 424.3096       | 212.6587        |
| 1726.9171      | 15 | K  | 2  | 337.2776       | 169.1427        |
|                | 16 | R  | 1  | 175.1195       | 88.0637         |

N-term:+35.07 K(4):+162.16  
K(15):+162.16

N-term: +35.07

X-range:

0 - 0

MassTol: Y-zoom:

0. 1.

MassType:

☐AVG ☒MONO

Axis:

☒1 ☐2

Label:

☒I ☐M ☐-

Ions:

a ☐+ ☐2+ ☐3+

b ☒+ ☐2+ ☐3+

c ☐+ ☐2+ ☐3+

x ☐+ ☐2+ ☐3+

y ☒+ ☒2+ ☐3+

z ☐+ ☐2+ ☐3+

hide H<sub>2</sub>O/NH<sub>3</sub> ☐

zoom 112-122 ☐

GO

MILMGVTAFISIIDLCLQR, MH+ 2222.2114, m/z 556.3083  
L OS G18 P120811 220811-s1.05179.05179.4.dta

scan 5179; 2.0e+000

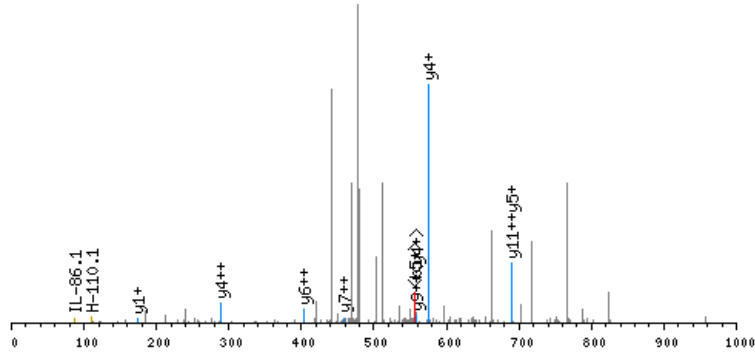

click image to zoom in; click top corners to zoom out [\[precursor±\]](#)

scan 5176; 556.3 m/z; 1.6e+001

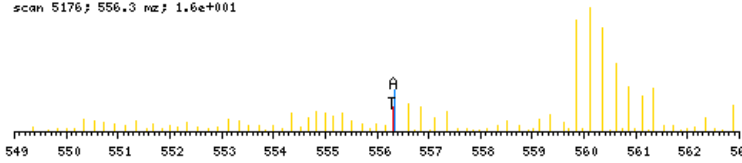

zoomed in precursor plot; T=theoretical m/z, A=acquired m/z

| b <sup>+</sup> | #  | AA | #  | y <sup>+</sup> | y <sup>2+</sup> |
|----------------|----|----|----|----------------|-----------------|
| 160.0796       | 1  | M  | 19 |                |                 |
| 273.1636       | 2  | I  | 18 | 2063.1397      | 1032.0737       |
| 386.2477       | 3  | L  | 17 | 1950.0556      | 975.5317        |
| 517.2882       | 4  | M  | 16 | 1836.9715      | 918.9897        |
| 574.3097       | 5  | G  | 15 | 1705.9311      | 853.4694        |
| 673.3781       | 6  | V  | 14 | 1648.9096      | 824.9587        |
| 774.4258       | 7  | T  | 13 | 1549.8412      | 775.4245        |
| 845.4629       | 8  | A  | 12 | 1448.7935      | 724.9007        |
| 992.5313       | 9  | F  | 11 | 1377.7564      | 689.3821        |
| 1105.6153      | 10 | I  | 10 | 1230.6880      | 615.8479        |
| 1192.6474      | 11 | S  | 9  | 1117.6039      | 559.3059        |
| 1305.7314      | 12 | I  | 8  | 1030.5719      | 515.7899        |
| 1418.8155      | 13 | I  | 7  | 917.4878       | 459.2478        |
| 1533.8424      | 14 | D  | 6  | 804.4037       | 402.7058        |
| 1646.9265      | 15 | L  | 5  | 689.3768       | 345.1923        |
| 1806.9571      | 16 | C  | 4  | 576.2927       | 288.6503        |
| 1920.0412      | 17 | L  | 3  | 416.2621       | 208.6350        |
| 2048.0998      | 18 | Q  | 2  | 303.1781       | 152.0930        |
|                | 19 | R  | 1  | 175.1195       | 88.0637         |

N-term:+29.04 C(16):+160.03



X-range:

0 - 0

MassTol: Y-zoom:

0. 1.

MassType:

☐ AVG ☒ MONO

Axis:

☒ 1 ☐ 2

Label:

☒ I ☐ M ☐ -

Ions:

a ☐ + ☐ 2+ ☐ 3+

b ☒ + ☐ 2+ ☐ 3+

c ☐ + ☐ 2+ ☐ 3+

x ☐ + ☐ 2+ ☐ 3+

y ☒ + ☒ 2+ ☐ 3+

z ☐ + ☐ 2+ ☐ 3+

hide H<sub>2</sub>O/NH<sub>3</sub> ☐

zoom 112-122 ☐

GO

MKQLPILEPGDKPR, MH+ 1706.0039, m/z 427.2564  
L OS G17 P120811 220811-s1.04199.04199.4.dta

scan 4199; 9.2e+000

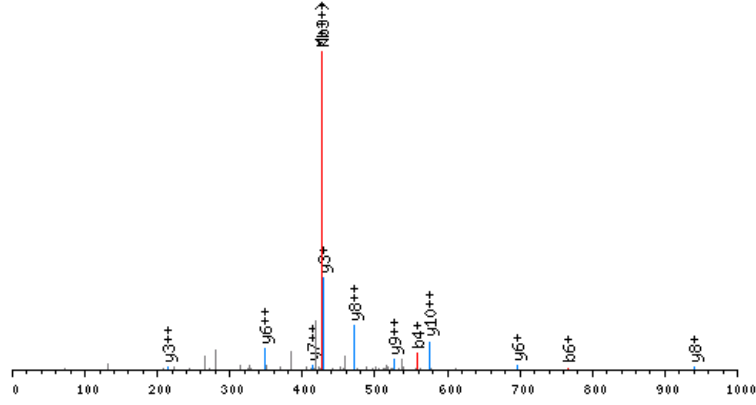

click image to zoom in; click top corners to zoom out [\[precursor±\]](#)

scan 4198; 427.3 m/z; 9.2e+000

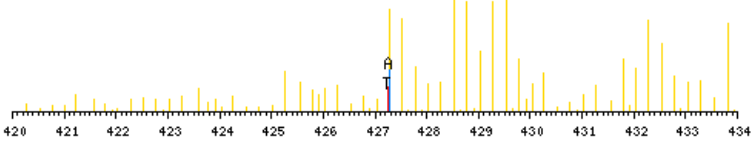

zoomed in precursor plot; T=theoretical m/z, A=acquired m/z

| b <sup>+</sup> | #  | AA | #  | y <sup>+</sup> | y <sup>2+</sup> |
|----------------|----|----|----|----------------|-----------------|
| 160.0796       | 1  | M  | 14 |                |                 |
| 316.2059       | 2  | K  | 13 | 1546.9322      | 773.9700        |
| 444.2645       | 3  | Q  | 12 | 1390.8059      | 695.9068        |
| 557.3485       | 4  | L  | 11 | 1262.7473      | 631.8776        |
| 654.4013       | 5  | P  | 10 | 1149.6632      | 575.3355        |
| 767.4854       | 6  | I  | 9  | 1052.6105      | 526.8091        |
| 880.5694       | 7  | L  | 8  | 939.5264       | 470.2671        |
| 1009.6120      | 8  | E  | 7  | 826.4423       | 413.7251        |
| 1106.6648      | 9  | P  | 6  | 697.3997       | 349.2038        |
| 1163.6862      | 10 | G  | 5  | 600.3470       | 300.6774        |
| 1278.7132      | 11 | D  | 4  | 543.3255       | 272.1667        |
| 1434.8395      | 12 | K  | 3  | 428.2986       | 214.6532        |
| 1531.8922      | 13 | P  | 2  | 272.1723       | 136.5900        |
|                | 14 | R  | 1  | 175.1195       | 88.0637         |

N-term:+29.04 K(2):+156.13  
K(12):+156.13

X-range:

0 - 0

MassTol: Y-zoom:

0. 1.

MassType:

☐AVG ☒MONO

Axis:

☒1 ☐2

Label:

☒I ☐M ☐-

Ions:

a ☐+ ☐2+ ☐3+

b ☒+ ☐2+ ☐3+

c ☐+ ☐2+ ☐3+

x ☐+ ☐2+ ☐3+

y ☒+ ☒2+ ☐3+

z ☐+ ☐2+ ☐3+

hide H<sub>2</sub>O/NH<sub>3</sub> ☐

zoom 112-122 ☐

GO

MKVFTVGPLPAEGR, MH+ 1569.9463, m/z 523.9870  
H OS G16 P120811 220811-s1.04957.04957.3.dta

scan 4957; 6.6e+000

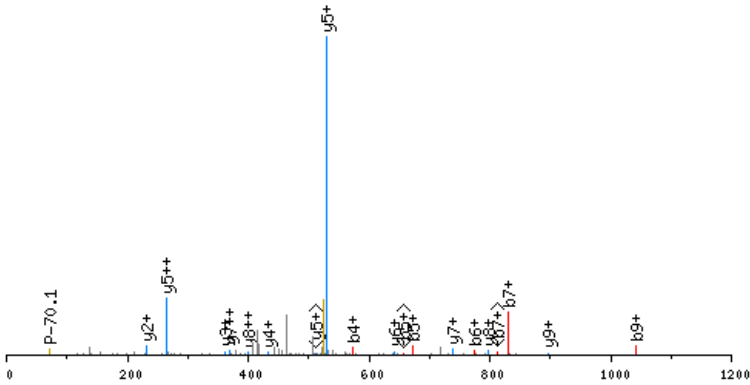

click image to zoom in; click top corners to zoom out

[precursor±]

scan 4953; 524.0 m/z; 8.9e+000

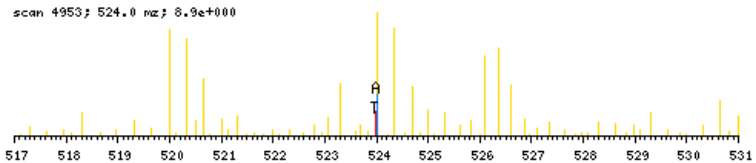

zoomed in precursor plot; T=theoretical m/z, A=acquired m/z

| b <sup>+</sup> | #  | AA | #  | y <sup>+</sup> | y <sup>2+</sup> |
|----------------|----|----|----|----------------|-----------------|
| 166.1114       | 1  | M  | 14 |                |                 |
| 328.2695       | 2  | K  | 13 | 1404.8427      | 702.9253        |
| 427.3379       | 3  | V  | 12 | 1242.6846      | 621.8462        |
| 574.4063       | 4  | F  | 11 | 1143.6162      | 572.3120        |
| 673.4747       | 5  | V  | 10 | 996.5478       | 498.7778        |
| 774.5224       | 6  | T  | 9  | 897.4794       | 449.2436        |
| 831.5439       | 7  | G  | 8  | 796.4317       | 398.7198        |
| 928.5966       | 8  | P  | 7  | 739.4103       | 370.2090        |
| 1041.6807      | 9  | L  | 6  | 642.3575       | 321.6827        |
| 1138.7335      | 10 | P  | 5  | 529.2734       | 265.1406        |
| 1209.7706      | 11 | A  | 4  | 432.2207       | 216.6142        |
| 1338.8132      | 12 | E  | 3  | 361.1836       | 181.0957        |
| 1395.8346      | 13 | G  | 2  | 232.1410       | 116.5744        |
|                | 14 | R  | 1  | 175.1195       | 88.0637         |

N-term:+35.07 K(2):+162.16

X-range:

0 - 0

MassTol: Y-zoom:

0. 1.

MassType:

☐AVG ☒MONO

Axis:

☒1 ☐2

Label:

☒I ☐M ☐-

Ions:

a ☐+ ☐2+ ☐3+

b ☒+ ☐2+ ☐3+

c ☐+ ☐2+ ☐3+

x ☐+ ☐2+ ☐3+

y ☒+ ☒2+ ☐3+

z ☐+ ☐2+ ☐3+

hide H<sub>2</sub>O/NH<sub>3</sub> ☐

zoom 112-122 ☐

GO

MLQIAATELEKEESRR, MH+ 1972.1173, m/z 493.7848  
H OS G17 P120811 220811-s1.04856.04856.4.dta

scan 4856; 9.5e+000

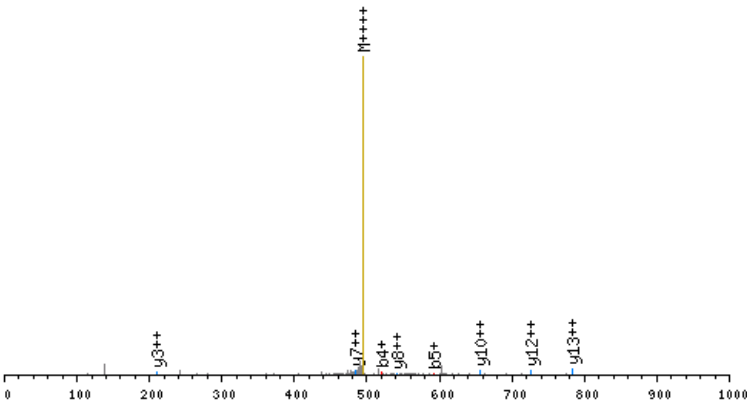

click image to zoom in; click top corners to zoom out [\[precursor±\]](#)

scan 4853; 493.8 m/z; 7.1e+001

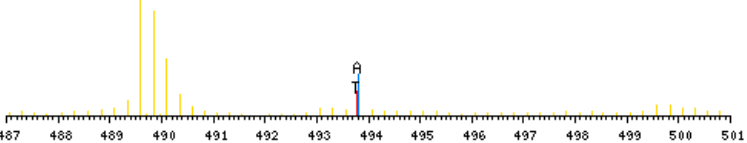

zoomed in precursor plot; T=theoretical m/z, A=acquired m/z

| b <sup>+</sup> | #  | AA | #  | y <sup>+</sup> | y <sup>2+</sup> |
|----------------|----|----|----|----------------|-----------------|
| 166.1114       | 1  | M  | 16 |                |                 |
| 279.1954       | 2  | L  | 15 | 1807.0138      | 904.0108        |
| 407.2540       | 3  | Q  | 14 | 1693.9297      | 847.4688        |
| 520.3381       | 4  | I  | 13 | 1565.8711      | 783.4395        |
| 591.3752       | 5  | A  | 12 | 1452.7871      | 726.8975        |
| 662.4123       | 6  | A  | 11 | 1381.7500      | 691.3789        |
| 763.4600       | 7  | T  | 10 | 1310.7129      | 655.8603        |
| 892.5026       | 8  | E  | 9  | 1209.6652      | 605.3365        |
| 1005.5867      | 9  | L  | 8  | 1080.6226      | 540.8152        |
| 1134.6292      | 10 | E  | 7  | 967.5385       | 484.2732        |
| 1296.7873      | 11 | K  | 6  | 838.4959       | 419.7519        |
| 1425.8299      | 12 | E  | 5  | 676.3378       | 338.6728        |
| 1554.8725      | 13 | E  | 4  | 547.2952       | 274.1515        |
| 1641.9046      | 14 | S  | 3  | 418.2526       | 209.6302        |
| 1798.0057      | 15 | R  | 2  | 331.2206       | 166.1142        |
|                | 16 | R  | 1  | 175.1195       | 88.0637         |

N-term:+35.07 K(11):+162.16

X-range:

0 - 0

MassTol: Y-zoom:

0. 1.

MassType:

☐AVG ☒MONO

Axis:

☒1 ☐2

Label:

☒I ☐M ☐-

Ions:

a ☐+ ☐2+ ☐3+

b ☒+ ☐2+ ☐3+

c ☐+ ☐2+ ☐3+

x ☐+ ☐2+ ☐3+

y ☒+ ☒2+ ☐3+

z ☐+ ☐2+ ☐3+

hide H<sub>2</sub>O/NH<sub>3</sub> ☐

zoom 112-122 ☐

GO

MNTELAFTKNQKDPGVLDK, MH+ 2332.2335, m/z 583.8138  
L OS G16 P120811 220811-s1.04949.04949.4.dta

scan 4949; 9.9e+000

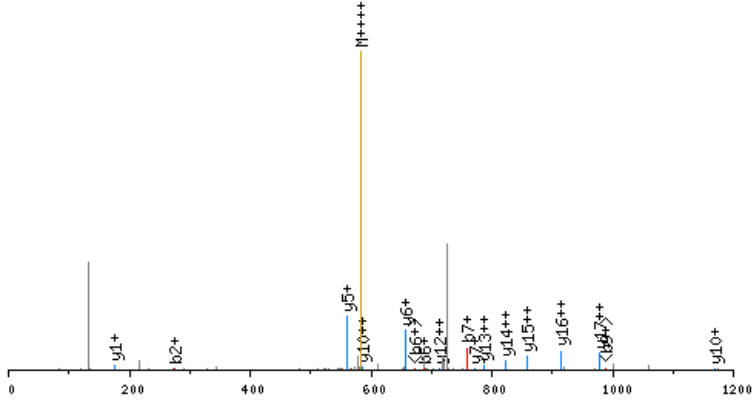

click image to zoom in; click top corners to zoom out (precursor±)

scan 4948; 583.8 m/z; 2.1e+001

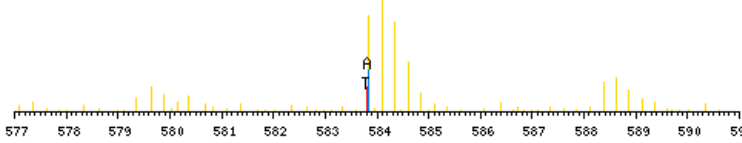

zoomed in precursor plot; T=theoretical m/z, A=acquired m/z

| b <sup>+</sup> | #  | AA | #  | y <sup>+</sup> | y <sup>2+</sup> |
|----------------|----|----|----|----------------|-----------------|
| 160.0796       | 1  | M  | 20 |                |                 |
| 274.1225       | 2  | N  | 19 | 2173.1618      | 1087.0848       |
| 375.1702       | 3  | T  | 18 | 2059.1189      | 1030.0633       |
| 504.2128       | 4  | E  | 17 | 1958.0712      | 979.5395        |
| 617.2968       | 5  | L  | 16 | 1829.0286      | 915.0182        |
| 688.3340       | 6  | A  | 15 | 1715.9445      | 858.4762        |
| 759.3711       | 7  | A  | 14 | 1644.9074      | 822.9576        |
| 906.4395       | 8  | F  | 13 | 1573.8703      | 787.4391        |
| 1007.4872      | 9  | T  | 12 | 1426.8019      | 713.9049        |
| 1163.6135      | 10 | K  | 11 | 1325.7542      | 663.3810        |
| 1277.6564      | 11 | N  | 10 | 1169.6279      | 585.3179        |
| 1405.7150      | 12 | Q  | 9  | 1055.5850      | 528.2964        |
| 1561.8413      | 13 | K  | 8  | 927.5264       | 464.2671        |
| 1676.8682      | 14 | D  | 7  | 771.4001       | 386.2040        |
| 1773.9210      | 15 | P  | 6  | 656.3731       | 328.6905        |
| 1830.9424      | 16 | G  | 5  | 559.3204       | 280.1641        |
| 1930.0109      | 17 | V  | 4  | 502.2989       | 251.6534        |
| 2043.0949      | 18 | L  | 3  | 403.2305       | 202.1192        |
| 2158.1219      | 19 | D  | 2  | 290.1464       | 145.5771        |
|                | 20 | R  | 1  | 175.1195       | 88.0637         |

N-term: +29.04 K(10): +156.13  
K(13): +156.13

X-range:

0 - 0

MassTol: Y-zoom:

0. 1.

MassType:

☐AVG ☒MONO

Axis:

☒1 ☐2

Label:

☒I ☐M ☐-

Ions:

a ☐+ ☐2+ ☐3+

b ☒+ ☐2+ ☐3+

c ☐+ ☐2+ ☐3+

x ☐+ ☐2+ ☐3+

y ☒+ ☒2+ ☐3+

z ☐+ ☐2+ ☐3+

hide H<sub>2</sub>O/NH<sub>3</sub> ☐

zoom 112-122 ☐

GO

MQDPDEEALRR, MH+ 1393.6958, m/z 465.2368  
H OS G16 P120811 220811-s1.02659.02659.3.dta

scan 2659; 2.2e+001

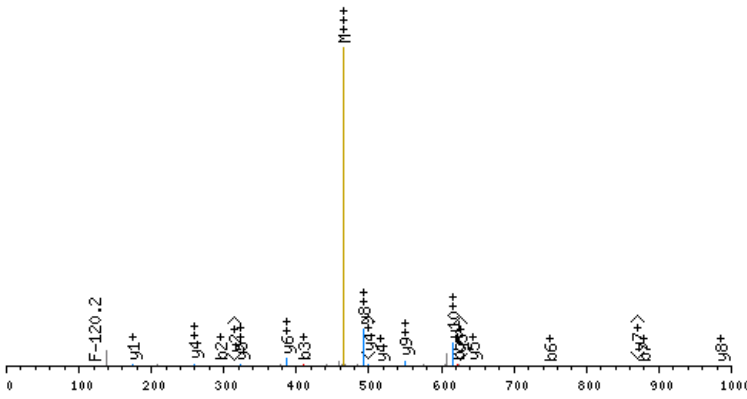

click image to zoom in; click top corners to zoom out

[precursor±]

scan 2658; 465.2 m/z; 6.4e+001

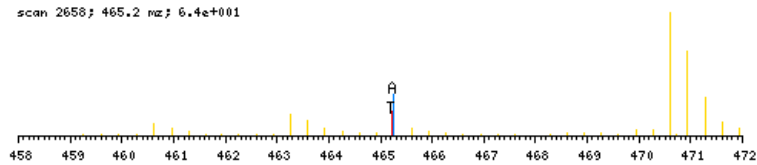

zoomed in precursor plot; T=theoretical m/z, A=acquired m/z

| b <sup>+</sup> | #  | AA | #  | y <sup>+</sup> | y <sup>2+</sup> |
|----------------|----|----|----|----------------|-----------------|
| 166.1114       | 1  | M  | 11 |                |                 |
| 294.1700       | 2  | Q  | 10 | 1228.5922      | 614.8000        |
| 409.1969       | 3  | D  | 9  | 1100.5336      | 550.7707        |
| 506.2497       | 4  | P  | 8  | 985.5067       | 493.2573        |
| 621.2766       | 5  | D  | 7  | 888.4539       | 444.7309        |
| 750.3192       | 6  | E  | 6  | 773.4270       | 387.2174        |
| 879.3618       | 7  | E  | 5  | 644.3844       | 322.6961        |
| 950.3989       | 8  | A  | 4  | 515.3418       | 258.1748        |
| 1063.4830      | 9  | L  | 3  | 444.3047       | 222.6563        |
| 1219.5841      | 10 | R  | 2  | 331.2206       | 166.1142        |
|                | 11 | R  | 1  | 175.1195       | 88.0637         |

N-term:+35.07

X-range:

0 - 0

MassTol: Y-zoom:

0. 1.

MassType:

☐ AVG ☒ MONO

Axis:

☒ 1 ☐ 2

Label:

☒ I ☐ M ☐ -

Ions:

a ☐ + ☐ 2+ ☐ 3+

b ☒ + ☐ 2+ ☐ 3+

c ☐ + ☐ 2+ ☐ 3+

x ☐ + ☐ 2+ ☐ 3+

y ☒ + ☒ 2+ ☐ 3+

z ☐ + ☐ 2+ ☐ 3+

hide H<sub>2</sub>O/NH<sub>3</sub> ☐

zoom 112-122 ☐

GO

MQKEITALAPSTMK, MH+ 1632.9069, m/z 544.9738  
L OS G15 P120811 220811-s1.03614.03614.3.dta

scan 3614; 2.9e+000

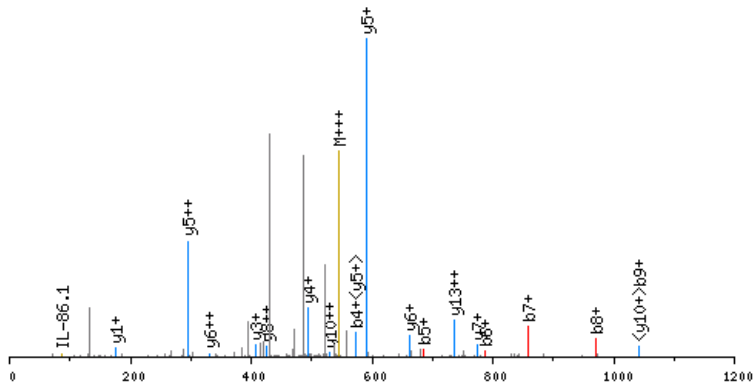

click image to zoom in; click top corners to zoom out [\[precursor±\]](#)

scan 3611; 545.0 m/z; 4.2e+001

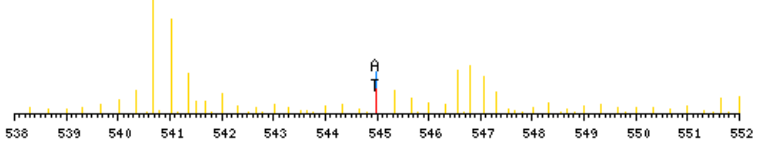

zoomed in precursor plot; T=theoretical m/z, A=acquired m/z

| b <sup>+</sup> | #  | AA | #  | y <sup>+</sup> | y <sup>2+</sup> |
|----------------|----|----|----|----------------|-----------------|
| 160.0796       | 1  | M  | 14 |                |                 |
| 288.1382       | 2  | Q  | 13 | 1473.8352      | 737.4215        |
| 444.2645       | 3  | K  | 12 | 1345.7766      | 673.3922        |
| 573.3071       | 4  | E  | 11 | 1189.6503      | 595.3290        |
| 686.3911       | 5  | I  | 10 | 1060.6077      | 530.8078        |
| 787.4388       | 6  | T  | 9  | 947.5236       | 474.2657        |
| 858.4759       | 7  | A  | 8  | 846.4759       | 423.7419        |
| 971.5600       | 8  | L  | 7  | 775.4388       | 388.2233        |
| 1042.5971      | 9  | A  | 6  | 662.3548       | 331.6813        |
| 1139.6499      | 10 | P  | 5  | 591.3176       | 296.1627        |
| 1226.6819      | 11 | S  | 4  | 494.2649       | 247.6364        |
| 1327.7296      | 12 | T  | 3  | 407.2329       | 204.1203        |
| 1458.7700      | 13 | M  | 2  | 306.1852       | 153.5965        |
|                | 14 | K  | 1  | 175.1447       | 88.0763         |

N-term:+29.04 K(3):+156.13  
K(14):+156.13

X-range:

0 - 0

MassTol: Y-zoom:

0. 1.

MassType:

☐ AVG ☒ MONO

Axis:

☒ 1 ☐ 2

Label:

☒ I ☐ M ☐ -

Ions:

a ☐ + ☐ 2+ ☐ 3+

b ☒ + ☐ 2+ ☐ 3+

c ☐ + ☐ 2+ ☐ 3+

x ☐ + ☐ 2+ ☐ 3+

y ☒ + ☒ 2+ ☐ 3+

z ☐ + ☐ 2+ ☐ 3+

hide H<sub>2</sub>O/NH<sub>3</sub> ☐

zoom 112-122 ☐

GO

MQKEITALAPSTMKIK, MH+ 1902.1173, m/z 476.2848  
L OS G16 P120811 220811-s1.04479.04479.4.dta

scan 4479; 1.2e+001

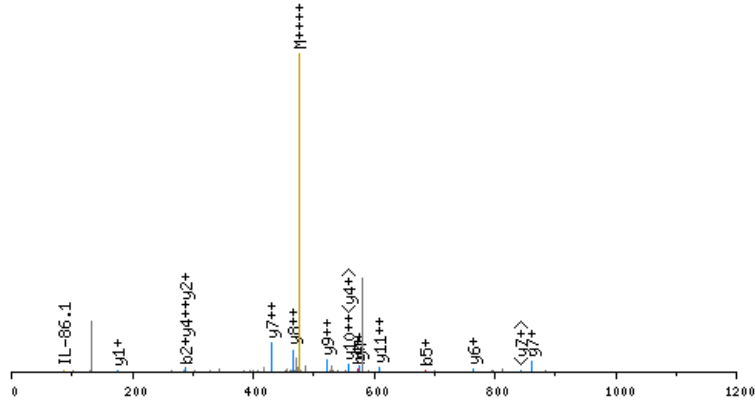

click image to zoom in; click top corners to zoom out [\[precursor±\]](#)

scan 4478; 476.3 m/z; 5.3e+001

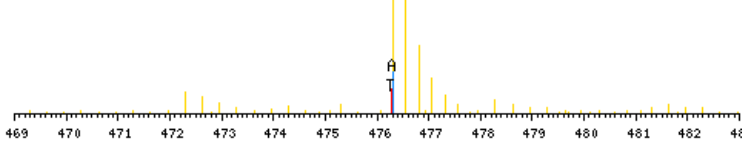

zoomed in precursor plot; T=theoretical m/z, A=acquired m/z

| b <sup>+</sup> | #  | AA | #  | y <sup>+</sup> | y <sup>2+</sup> |
|----------------|----|----|----|----------------|-----------------|
| 160.0796       | 1  | M  | 16 |                |                 |
| 288.1382       | 2  | Q  | 15 | 1743.0455      | 872.0267        |
| 444.2645       | 3  | K  | 14 | 1614.9869      | 807.9974        |
| 573.3071       | 4  | E  | 13 | 1458.8606      | 729.9342        |
| 686.3911       | 5  | I  | 12 | 1329.8180      | 665.4129        |
| 787.4388       | 6  | T  | 11 | 1216.7340      | 608.8709        |
| 858.4759       | 7  | A  | 10 | 1115.6863      | 558.3471        |
| 971.5600       | 8  | L  | 9  | 1044.6492      | 522.8285        |
| 1042.5971      | 9  | A  | 8  | 931.5651       | 466.2865        |
| 1139.6499      | 10 | P  | 7  | 860.5280       | 430.7679        |
| 1226.6819      | 11 | S  | 6  | 763.4752       | 382.2415        |
| 1327.7296      | 12 | T  | 5  | 676.4432       | 338.7255        |
| 1458.7700      | 13 | M  | 4  | 575.3955       | 288.2017        |
| 1614.8963      | 14 | K  | 3  | 444.3551       | 222.6814        |
| 1727.9804      | 15 | I  | 2  | 288.2288       | 144.6183        |
|                | 16 | K  | 1  | 175.1447       | 88.0763         |

N-term:+29.04 K(3):+156.13  
K(14):+156.13 K(16):+156.13

X-range:

0 - 0

MassTol: Y-zoom:

0. 1.

MassType:

☐AVG ☒MONO

Axis:

☒1 ☐2

Label:

☒I ☐M ☐-

Ions:

a ☐+ ☐2+ ☐3+

b ☒+ ☐2+ ☐3+

c ☐+ ☐2+ ☐3+

x ☐+ ☐2+ ☐3+

y ☒+ ☒2+ ☐3+

z ☐+ ☐2+ ☐3+

hide H<sub>2</sub>O/NH<sub>3</sub> ☐

zoom 112-122 ☐

GO

MQKEITALAPSTMKIKIIPPER, MH+ 2678.5717, m/z 670.3984  
L OS G17 P120811 220811-s1.05855.05855.4.dta

scan 5855; 3.7e+000

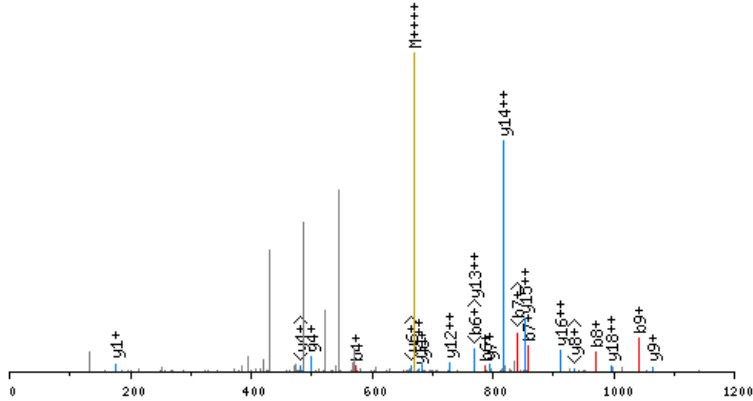

click image to zoom in; click top corners to zoom out

[precursor±]

scan 5853; 670.4 m/z; 5.1e+000

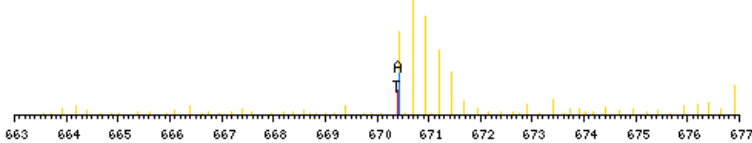

zoomed in precursor plot; T=theoretical m/z, A=acquired m/z

| b <sup>+</sup> | #  | AA | #  | y <sup>+</sup> | y <sup>2+</sup> |
|----------------|----|----|----|----------------|-----------------|
| 160.0796       | 1  | M  | 23 |                |                 |
| 288.1382       | 2  | Q  | 22 | 2519.5000      | 1260.2539       |
| 444.2645       | 3  | K  | 21 | 2391.4414      | 1196.2246       |
| 573.3071       | 4  | E  | 20 | 2235.3151      | 1118.1615       |
| 686.3911       | 5  | I  | 19 | 2106.2725      | 1053.6402       |
| 787.4388       | 6  | T  | 18 | 1993.1885      | 997.0981        |
| 858.4759       | 7  | A  | 17 | 1892.1408      | 946.5743        |
| 971.5600       | 8  | L  | 16 | 1821.1037      | 911.0557        |
| 1042.5971      | 9  | A  | 15 | 1708.0196      | 854.5137        |
| 1139.6499      | 10 | P  | 14 | 1636.9825      | 818.9952        |
| 1226.6819      | 11 | S  | 13 | 1539.9297      | 770.4688        |
| 1327.7296      | 12 | T  | 12 | 1452.8977      | 726.9528        |
| 1458.7700      | 13 | M  | 11 | 1351.8500      | 676.4289        |
| 1614.8963      | 14 | K  | 10 | 1220.8095      | 610.9087        |
| 1727.9804      | 15 | I  | 9  | 1064.6832      | 532.8455        |
| 1884.1067      | 16 | K  | 8  | 951.5992       | 476.3035        |
| 1997.1908      | 17 | I  | 7  | 795.4729       | 398.2403        |
| 2110.2748      | 18 | I  | 6  | 682.3888       | 341.6983        |
| 2181.3120      | 19 | A  | 5  | 569.3047       | 285.1563        |
| 2278.3647      | 20 | P  | 4  | 498.2676       | 249.6377        |
| 2375.4175      | 21 | P  | 3  | 401.2149       | 201.1113        |
| 2504.4601      | 22 | E  | 2  | 304.1621       | 152.5850        |
|                | 23 | R  | 1  | 175.1195       | 88.0637         |

N-term:+29.04 K(3):+156.13  
K(14):+156.13 K(16):+156.13

X-range:

0 - 0

MassTol: Y-zoom:

0. 1.

MassType:

☐AVG ☒MONO

Axis:

☒1 ☐2

Label:

☒I ☐M ☐-

Ions:

a ☐+ ☐2+ ☐3+

b ☒+ ☐2+ ☐3+

c ☐+ ☐2+ ☐3+

x ☐+ ☐2+ ☐3+

y ☒+ ☒2+ ☐3+

z ☐+ ☐2+ ☐3+

hide H<sub>2</sub>O/NH<sub>3</sub> ☐

zoom 112-122 ☐

GO

MSANALAIVFAPCILR, MH+ 1774.9711, m/z 592.3286  
L OS G18 P120811 220811-s1.05203.05203.3.dta

scan 5203; 6.0e-001

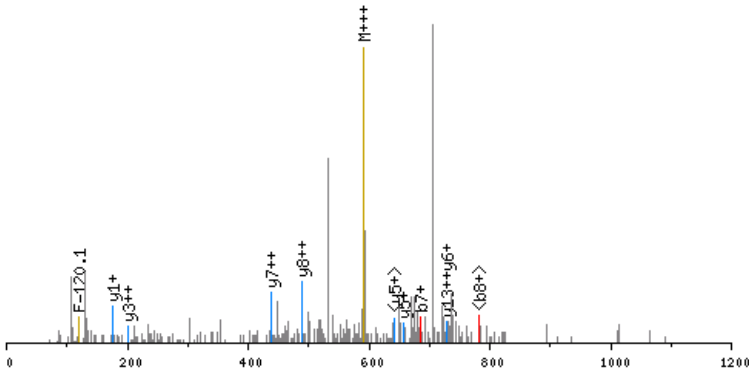

click image to zoom in; click top corners to zoom out

[precursor±]

scan 5201; 592.3 m/z; 3.7e+000

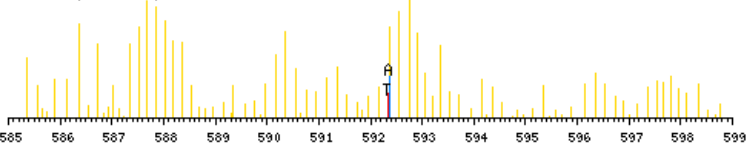

zoomed in precursor plot; T=theoretical m/z, A=acquired m/z

| b <sup>+</sup> | #  | AA | #  | y <sup>+</sup> | y <sup>2+</sup> |
|----------------|----|----|----|----------------|-----------------|
| 160.0796       | 1  | M  | 16 |                |                 |
| 247.1116       | 2  | S  | 15 | 1615.8994      | 808.4536        |
| 318.1487       | 3  | A  | 14 | 1528.8673      | 764.9376        |
| 432.1917       | 4  | N  | 13 | 1457.8302      | 729.4190        |
| 503.2288       | 5  | A  | 12 | 1343.7873      | 672.3976        |
| 616.3128       | 6  | L  | 11 | 1272.7502      | 636.8790        |
| 687.3499       | 7  | A  | 10 | 1159.6661      | 580.3370        |
| 800.4340       | 8  | I  | 9  | 1088.6290      | 544.8184        |
| 899.5024       | 9  | V  | 8  | 975.5449       | 488.2764        |
| 1046.5708      | 10 | F  | 7  | 876.4765       | 438.7422        |
| 1117.6080      | 11 | A  | 6  | 729.4081       | 365.2080        |
| 1214.6607      | 12 | P  | 5  | 658.3710       | 329.6894        |
| 1374.6913      | 13 | C  | 4  | 561.3182       | 281.1630        |
| 1487.7754      | 14 | I  | 3  | 401.2876       | 201.1477        |
| 1600.8594      | 15 | L  | 2  | 288.2036       | 144.6057        |
|                | 16 | R  | 1  | 175.1195       | 88.0637         |

N-term:+29.04 C(13):+160.03

X-range:

0 - 0

MassTol: Y-zoom:

0. 1.

MassType:

☐AVG ☒MONO

Axis:

☒1 ☐2

Label:

☒I ☐M ☐-

Ions:

a ☐+ ☐2+ ☐3+

b ☒+ ☐2+ ☐3+

c ☐+ ☐2+ ☐3+

x ☐+ ☐2+ ☐3+

y ☒+ ☒2+ ☐3+

z ☐+ ☐2+ ☐3+

hide H<sub>2</sub>O/NH<sub>3</sub> ☐

zoom 112-122 ☐

GO

MSLPELQQNPLVQR, MH+ 1680.9107, m/z 560.9751  
L OS G13 P120811 220811-s1.06358.06358.3.dta

scan 6358; 1.6e+000

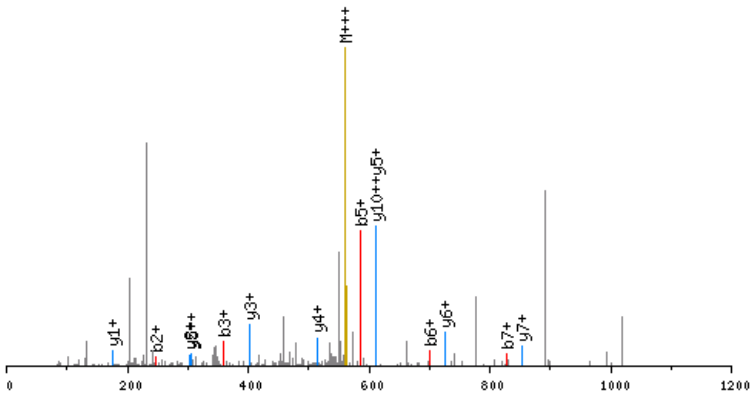

click image to zoom in; click top corners to zoom out

[precursor±]

scan 6354; 561.0 m/z; 5.2e+000

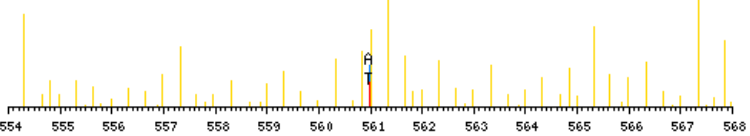

zoomed in precursor plot; T=theoretical m/z, A=acquired m/z

| b <sup>+</sup> | #  | AA | #  | y <sup>+</sup> | y <sup>2+</sup> |
|----------------|----|----|----|----------------|-----------------|
| 160.0796       | 1  | M  | 14 |                |                 |
| 247.1116       | 2  | S  | 13 | 1521.8389      | 761.4234        |
| 360.1957       | 3  | L  | 12 | 1434.8069      | 717.9074        |
| 457.2484       | 4  | P  | 11 | 1321.7228      | 661.3653        |
| 586.2910       | 5  | E  | 10 | 1224.6701      | 612.8389        |
| 699.3751       | 6  | L  | 9  | 1095.6275      | 548.3176        |
| 827.4337       | 7  | Q  | 8  | 982.5434       | 491.7756        |
| 955.4923       | 8  | Q  | 7  | 854.4848       | 427.7463        |
| 1069.5352      | 9  | N  | 6  | 726.4262       | 363.7170        |
| 1166.5879      | 10 | P  | 5  | 612.3833       | 306.6956        |
| 1279.6720      | 11 | L  | 4  | 515.3306       | 258.1692        |
| 1378.7404      | 12 | V  | 3  | 402.2465       | 201.6272        |
| 1506.7990      | 13 | Q  | 2  | 303.1781       | 152.0930        |
|                | 14 | R  | 1  | 175.1195       | 88.0637         |

N-term:+29.04

X-range:

0 - 0

MassTol: Y-zoom:

0. 1.

MassType:

☐ AVG ☒ MONO

Axis:

☒ 1 ☐ 2

Label:

☒ I ☐ M ☐ -

Ions:

a ☐ + ☐ 2+ ☐ 3+

b ☒ + ☐ 2+ ☐ 3+

c ☐ + ☐ 2+ ☐ 3+

x ☐ + ☐ 2+ ☐ 3+

y ☒ + ☒ 2+ ☐ 3+

z ☐ + ☐ 2+ ☐ 3+

hide H<sub>2</sub>O/NH<sub>3</sub> ☐

zoom 112-122 ☐

GO

MSYGYDEKSAGVSVPGPMGPSGPR, MH+ 2482.1747, m/z 828.0631  
L OS G14 P120811 220811-s1.04890.04890.3.dta

scan 4890; 3.7e+000

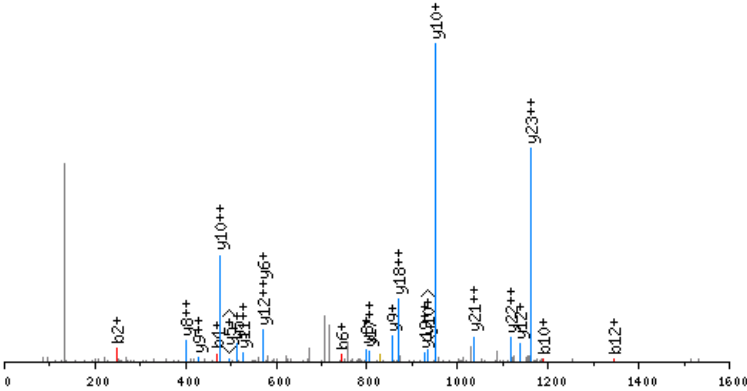

click image to zoom in; click top corners to zoom out [\[precursor±\]](#)

scan 4886; 828.1 m/z; 6.4e+001

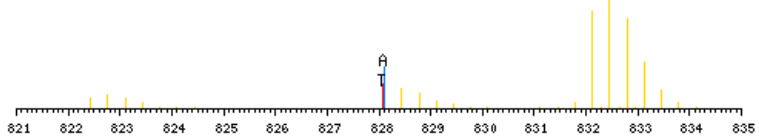

zoomed in precursor plot; T=theoretical m/z, A=acquired m/z

| b <sup>+</sup> | #  | AA | #  | y <sup>+</sup> | y <sup>2+</sup> |
|----------------|----|----|----|----------------|-----------------|
| 160.0796       | 1  | M  | 24 |                |                 |
| 247.1116       | 2  | S  | 23 | 2323.1029      | 1162.0554       |
| 410.1749       | 3  | Y  | 22 | 2236.0709      | 1118.5394       |
| 467.1964       | 4  | G  | 21 | 2073.0076      | 1037.0077       |
| 630.2597       | 5  | Y  | 20 | 2015.9861      | 1008.4970       |
| 745.2867       | 6  | D  | 19 | 1852.9228      | 926.9653        |
| 874.3293       | 7  | E  | 18 | 1737.8958      | 869.4518        |
| 1030.4556      | 8  | K  | 17 | 1608.8532      | 804.9305        |
| 1117.4876      | 9  | S  | 16 | 1452.7269      | 726.8674        |
| 1188.5247      | 10 | A  | 15 | 1365.6949      | 683.3514        |
| 1245.5462      | 11 | G  | 14 | 1294.6578      | 647.8328        |
| 1344.6146      | 12 | V  | 13 | 1237.6363      | 619.3221        |
| 1431.6466      | 13 | S  | 12 | 1138.5679      | 569.7879        |
| 1530.7150      | 14 | V  | 11 | 1051.5359      | 526.2718        |
| 1627.7678      | 15 | P  | 10 | 952.4675       | 476.7376        |
| 1684.7893      | 16 | G  | 9  | 855.4147       | 428.2113        |
| 1781.8420      | 17 | P  | 8  | 798.3932       | 399.7005        |
| 1912.8825      | 18 | M  | 7  | 701.3405       | 351.1741        |
| 1969.9040      | 19 | G  | 6  | 570.3000       | 285.6539        |
| 2066.9567      | 20 | P  | 5  | 513.2785       | 257.1432        |
| 2153.9888      | 21 | S  | 4  | 416.2258       | 208.6168        |
| 2211.0102      | 22 | G  | 3  | 329.1937       | 165.1008        |
| 2308.0630      | 23 | P  | 2  | 272.1723       | 136.5900        |
|                | 24 | R  | 1  | 175.1195       | 88.0637         |

N-term:+29.04 K(8):+156.13

X-range:

0 - 0

MassTol: Y-zoom:

0. 1.

MassType:

☐ AVG ☒ MONO

Axis:

☒ 1 ☐ 2

Label:

☒ I ☐ M ☐ -

Ions:

a ☐ + ☐ 2+ ☐ 3+

b ☒ + ☐ 2+ ☐ 3+

c ☐ + ☐ 2+ ☐ 3+

x ☐ + ☐ 2+ ☐ 3+

y ☒ + ☒ 2+ ☐ 3+

z ☐ + ☐ 2+ ☐ 3+

hide H<sub>2</sub>O/NH<sub>3</sub> ☐

zoom 112-122 ☐

GO

MVGMGQKDSYVGDEAQSQR, MH+ 2170.0637, m/z 543.2714  
L OS G17 P120811 220811-s1.02967.02967.4.dta

scan 2967: 7.5e+000

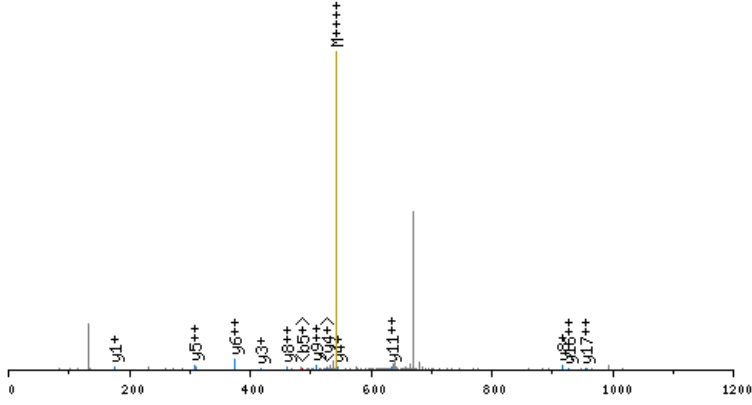

click image to zoom in; click top corners to zoom out [\[precursor±\]](#)

scan 2963: 543.3 m/z: 9.9e+000

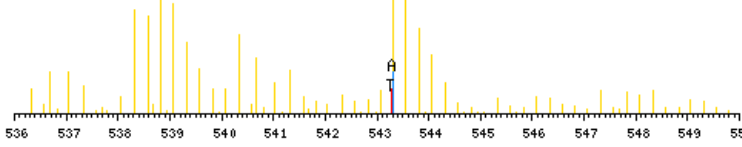

zoomed in precursor plot; T=theoretical m/z, A=acquired m/z

| b <sup>+</sup> | #  | AA | #  | y <sup>+</sup> | y <sup>2+</sup> |
|----------------|----|----|----|----------------|-----------------|
| 160.0796       | 1  | M  | 19 |                |                 |
| 259.1480       | 2  | V  | 18 | 2010.9919      | 1005.9999       |
| 316.1695       | 3  | G  | 17 | 1911.9235      | 956.4657        |
| 447.2099       | 4  | M  | 16 | 1854.9021      | 927.9549        |
| 504.2314       | 5  | G  | 15 | 1723.8616      | 862.4347        |
| 632.2900       | 6  | Q  | 14 | 1666.8401      | 833.9240        |
| 788.4163       | 7  | K  | 13 | 1538.7815      | 769.8947        |
| 903.4432       | 8  | D  | 12 | 1382.6552      | 691.8315        |
| 990.4753       | 9  | S  | 11 | 1267.6283      | 634.3181        |
| 1153.5386      | 10 | Y  | 10 | 1180.5963      | 590.8020        |
| 1252.6070      | 11 | V  | 9  | 1017.5329      | 509.2704        |
| 1309.6285      | 12 | G  | 8  | 918.4645       | 459.7362        |
| 1424.6554      | 13 | D  | 7  | 861.4431       | 431.2254        |
| 1553.6980      | 14 | E  | 6  | 746.4161       | 373.7120        |
| 1624.7351      | 15 | A  | 5  | 617.3735       | 309.1907        |
| 1752.7937      | 16 | Q  | 4  | 546.3364       | 273.6721        |
| 1839.8257      | 17 | S  | 3  | 418.2778       | 209.6428        |
| 1995.9520      | 18 | K  | 2  | 331.2458       | 166.1268        |
|                | 19 | R  | 1  | 175.1195       | 88.0637         |

N-term: +29.04 K(7): +156.13  
K(18): +156.13

X-range:

0 - 0

MassTol: Y-zoom:

0. 1.

MassType:

☐AVG ☒MONO

Axis:

☒1 ☐2

Label:

☒I ☐M ☐-

Ions:

a ☐+ ☐2+ ☐3+

b ☒+ ☐2+ ☐3+

c ☐+ ☐2+ ☐3+

x ☐+ ☐2+ ☐3+

y ☒+ ☒2+ ☐3+

z ☐+ ☐2+ ☐3+

hide H<sub>2</sub>O/NH<sub>3</sub> ☐

zoom 112-122 ☐

GO

MVIENDAGDER, MH+ 1276.5843, m/z 638.7958  
L OS G13 P120811 220811-s1.02587.02587.2.dta

scan 2587; 4.5e+000

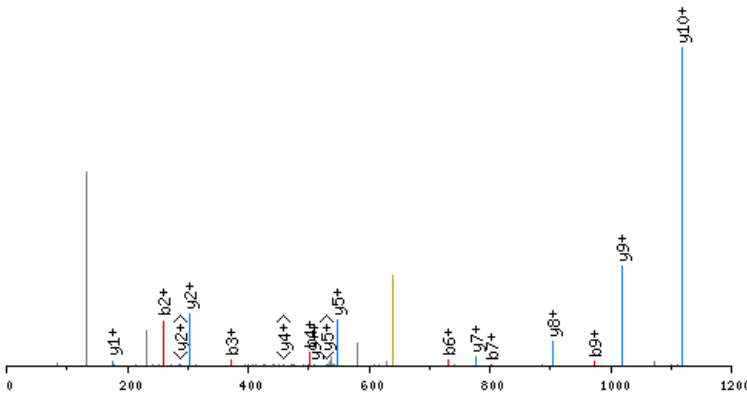

click image to zoom in; click top corners to zoom out

[precursor±]

scan 2584; 638.8 m/z; 4.0e+001

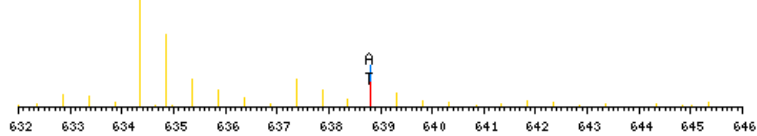

zoomed in precursor plot; T=theoretical m/z, A=acquired m/z

| b <sup>+</sup> | #  | AA | #  | y <sup>+</sup> | y <sup>2+</sup> |
|----------------|----|----|----|----------------|-----------------|
| 160.0796       | 1  | M  | 11 |                |                 |
| 259.1480       | 2  | V  | 10 | 1117.5126      | 559.2602        |
| 372.2321       | 3  | I  | 9  | 1018.4441      | 509.7260        |
| 501.2747       | 4  | E  | 8  | 905.3601       | 453.1840        |
| 615.3176       | 5  | N  | 7  | 776.3175       | 388.6627        |
| 730.3445       | 6  | D  | 6  | 662.2746       | 331.6412        |
| 801.3816       | 7  | A  | 5  | 547.2476       | 274.1277        |
| 858.4031       | 8  | G  | 4  | 476.2105       | 238.6092        |
| 973.4300       | 9  | D  | 3  | 419.1890       | 210.0984        |
| 1102.4726      | 10 | E  | 2  | 304.1621       | 152.5850        |
|                | 11 | R  | 1  | 175.1195       | 88.0637         |

N-term:+29.04

X-range:

0 - 0

MassTol: Y-zoom:

0. 1.

MassType:

☐AVG ☒MONO

Axis:

☒1 ☐2

Label:

☒I ☐M ☐-

Ions:

a ☐+ ☐2+ ☐3+

b ☒+ ☐2+ ☐3+

c ☐+ ☐2+ ☐3+

x ☐+ ☐2+ ☐3+

y ☒+ ☒2+ ☐3+

z ☐+ ☐2+ ☐3+

hide H<sub>2</sub>O/NH<sub>3</sub> ☐

zoom 112-122 ☐

GO

NADEFEDMVAEKR, MH+ 1609.7532, m/z 537.2559  
L OS G16 P120811 220811-s1.04674.04674.3.dta

scan 4674; 7.0e+000

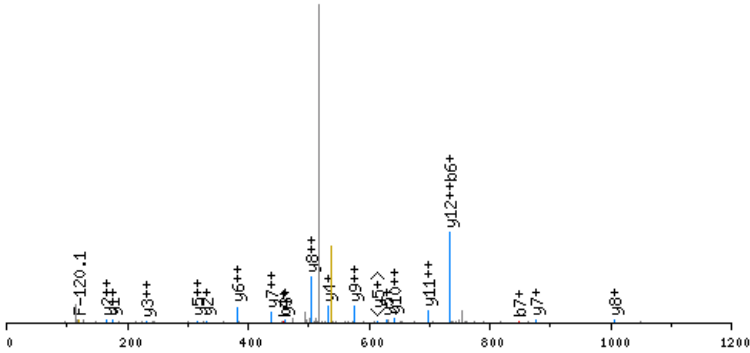

click image to zoom in; click top corners to zoom out [\[precursor±\]](#)

scan 4673; 537.3 m/z; 1.0e+001

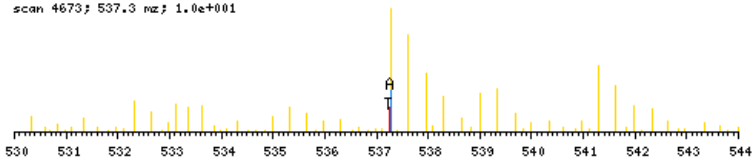

zoomed in precursor plot; T=theoretical m/z, A=acquired m/z

| b <sup>+</sup> | #  | AA | #  | y <sup>+</sup> | y <sup>2+</sup> |
|----------------|----|----|----|----------------|-----------------|
| 143.0820       | 1  | N  | 13 |                |                 |
| 214.1191       | 2  | A  | 12 | 1467.6790      | 734.3434        |
| 329.1461       | 3  | D  | 11 | 1396.6419      | 698.8249        |
| 458.1887       | 4  | E  | 10 | 1281.6149      | 641.3114        |
| 605.2571       | 5  | F  | 9  | 1152.5724      | 576.7901        |
| 734.2997       | 6  | E  | 8  | 1005.5039      | 503.2559        |
| 849.3266       | 7  | D  | 7  | 876.4613       | 438.7346        |
| 980.3671       | 8  | M  | 6  | 761.4344       | 381.2211        |
| 1079.4355      | 9  | V  | 5  | 630.3939       | 315.7009        |
| 1150.4726      | 10 | A  | 4  | 531.3255       | 266.1667        |
| 1279.5152      | 11 | E  | 3  | 460.2884       | 230.6481        |
| 1435.6415      | 12 | K  | 2  | 331.2458       | 166.1268        |
|                | 13 | R  | 1  | 175.1195       | 88.0637         |

N-term:+29.04 K(12):+156.13

X-range:

0 - 0

MassTol: Y-zoom:

0. 1.

MassType:

☐AVG ☒MONO

Axis:

☒1 ☐2

Label:

☒I ☐M ☐-

Ions:

a ☐+ ☐2+ ☐3+

b ☒+ ☐2+ ☐3+

c ☐+ ☐2+ ☐3+

x ☐+ ☐2+ ☐3+

y ☒+ ☒2+ ☐3+

z ☐+ ☐2+ ☐3+

hide H<sub>2</sub>O/NH<sub>3</sub> ☐

zoom 112-122 ☐

GO

NATEPVISFYDKR, MH+ 1595.8433, m/z 532.6193  
L OS G15 P120811 220811-s1.04269.04269.3.dta

scan 4269; 5.1e+000

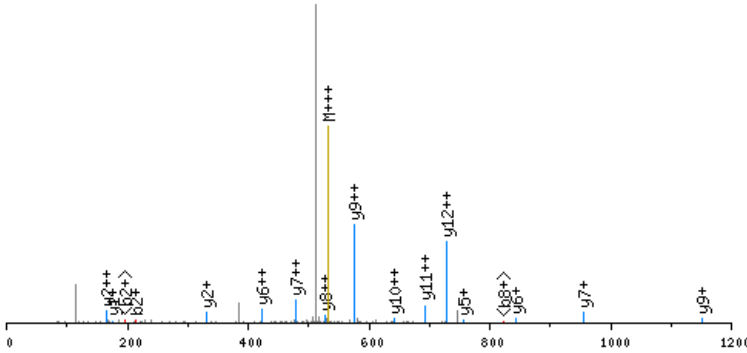

click image to zoom in; click top corners to zoom out

[precursor±]

scan 4266; 532.6 m/z; 1.0e+001

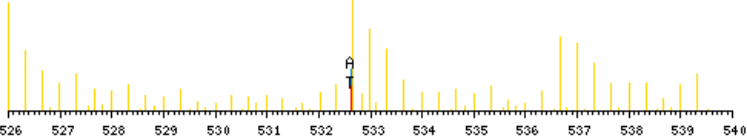

zoomed in precursor plot; T=theoretical m/z, A=acquired m/z

| b <sup>+</sup> | #  | AA | #  | y <sup>+</sup> | y <sup>2+</sup> |
|----------------|----|----|----|----------------|-----------------|
| 143.0820       | 1  | N  | 13 |                |                 |
| 214.1191       | 2  | A  | 12 | 1453.7691      | 727.3885        |
| 315.1668       | 3  | T  | 11 | 1382.7320      | 691.8699        |
| 444.2094       | 4  | E  | 10 | 1281.6843      | 641.3461        |
| 541.2622       | 5  | P  | 9  | 1152.6418      | 576.8248        |
| 640.3306       | 6  | V  | 8  | 1055.5890      | 528.2984        |
| 753.4147       | 7  | I  | 7  | 956.5206       | 478.7642        |
| 840.4467       | 8  | S  | 6  | 843.4365       | 422.2222        |
| 987.5151       | 9  | F  | 5  | 756.4045       | 378.7062        |
| 1150.5784      | 10 | Y  | 4  | 609.3361       | 305.1719        |
| 1265.6054      | 11 | D  | 3  | 446.2727       | 223.6403        |
| 1421.7317      | 12 | K  | 2  | 331.2458       | 166.1268        |
|                | 13 | R  | 1  | 175.1195       | 88.0637         |

N-term:+29.04 K(12):+156.13

X-range:

0 - 0

MassTol: Y-zoom:

0. 1.

MassType:

☐ AVG ☒ MONO

Axis:

☒ 1 ☐ 2

Label:

☒ I ☐ M ☐ -

Ions:

a ☐ + ☐ 2+ ☐ 3+

b ☒ + ☐ 2+ ☐ 3+

c ☐ + ☐ 2+ ☐ 3+

x ☐ + ☐ 2+ ☐ 3+

y ☒ + ☒ 2+ ☐ 3+

z ☐ + ☐ 2+ ☐ 3+

hide H<sub>2</sub>O/NH<sub>3</sub> ☐

zoom 112-122 ☐

GO

NATLSVEPEGR, MH+ 1200.6224, m/z 600.8148  
L OS G13 P120811 220811-s1.02865.02865.2.dta

scan 2865; 1.1e+000

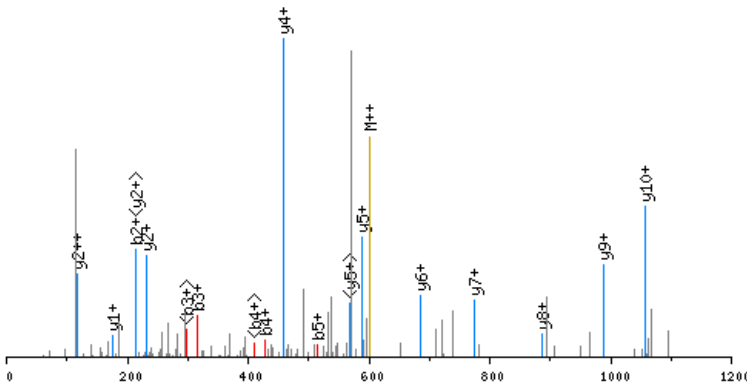

click image to zoom in; click top corners to zoom out

[precursor±]

scan 2864; 600.8 m/z; 2.0e+001

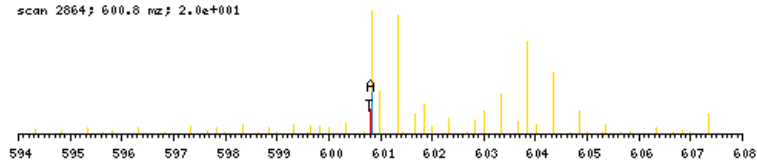

zoomed in precursor plot; T=theoretical m/z, A=acquired m/z

| b <sup>+</sup> | #  | AA | #  | y <sup>+</sup> | y <sup>2+</sup> |
|----------------|----|----|----|----------------|-----------------|
| 143.0820       | 1  | N  | 11 |                |                 |
| 214.1191       | 2  | A  | 10 | 1058.5482      | 529.7780        |
| 315.1668       | 3  | T  | 9  | 987.5111       | 494.2595        |
| 428.2509       | 4  | L  | 8  | 886.4634       | 443.7356        |
| 515.2829       | 5  | S  | 7  | 773.3794       | 387.1936        |
| 614.3513       | 6  | V  | 6  | 686.3473       | 343.6776        |
| 743.3939       | 7  | E  | 5  | 587.2789       | 294.1434        |
| 840.4467       | 8  | P  | 4  | 458.2363       | 229.6221        |
| 969.4893       | 9  | E  | 3  | 361.1836       | 181.0957        |
| 1026.5107      | 10 | G  | 2  | 232.1410       | 116.5744        |
|                | 11 | R  | 1  | 175.1195       | 88.0637         |

N-term:+29.04

X-range:

0 - 0

MassTol: Y-zoom:

0. 1.

MassType:

☐ AVG ☒ MONO

Axis:

☒ 1 ☐ 2

Label:

☒ I ☐ M ☐ -

Ions:

a ☐ + ☐ 2+ ☐ 3+

b ☒ + ☐ 2+ ☐ 3+

c ☐ + ☐ 2+ ☐ 3+

x ☐ + ☐ 2+ ☐ 3+

y ☒ + ☒ 2+ ☐ 3+

z ☐ + ☐ 2+ ☐ 3+

hide H<sub>2</sub>O/NH<sub>3</sub> ☐

zoom 112-122 ☐

GO

NDTFVHVTDLSGKETICR, MH+ 2148.0759, m/z 537.7744  
L OS G17 P120811 220811-s1.04989.04989.4.dta

scan 4989; 6.2e+000

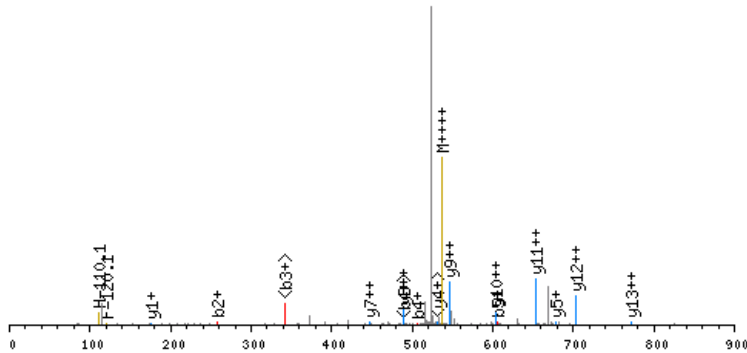

click image to zoom in; click top corners to zoom out [\[precursor±\]](#)

scan 4988; 537.8 m/z; 1.2e+001

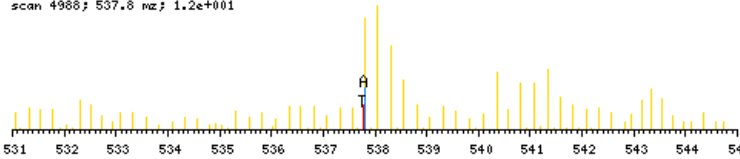

zoomed in precursor plot; T=theoretical m/z, A=acquired m/z

| b <sup>+</sup> | #  | AA | #  | y <sup>+</sup> | y <sup>2+</sup> |
|----------------|----|----|----|----------------|-----------------|
| 143.0820       | 1  | N  | 18 |                |                 |
| 258.1090       | 2  | D  | 17 | 2006.0017      | 1003.5048       |
| 359.1566       | 3  | T  | 16 | 1890.9747      | 945.9913        |
| 506.2251       | 4  | F  | 15 | 1789.9271      | 895.4674        |
| 605.2935       | 5  | V  | 14 | 1642.8587      | 821.9332        |
| 742.3524       | 6  | H  | 13 | 1543.7902      | 772.3990        |
| 841.4208       | 7  | V  | 12 | 1406.7313      | 703.8696        |
| 942.4685       | 8  | T  | 11 | 1307.6629      | 654.3354        |
| 1057.4954      | 9  | D  | 10 | 1206.6152      | 603.8115        |
| 1170.5795      | 10 | L  | 9  | 1091.5883      | 546.2981        |
| 1257.6115      | 11 | S  | 8  | 978.5042       | 489.7560        |
| 1314.6330      | 12 | G  | 7  | 891.4722       | 446.2400        |
| 1470.7593      | 13 | K  | 6  | 834.4507       | 417.7293        |
| 1599.8019      | 14 | E  | 5  | 678.3244       | 339.6661        |
| 1700.8496      | 15 | T  | 4  | 549.2818       | 275.1448        |
| 1813.9336      | 16 | I  | 3  | 448.2342       | 224.6210        |
| 1973.9642      | 17 | C  | 2  | 335.1501       | 168.0790        |
|                | 18 | R  | 1  | 175.1195       | 88.0637         |

N-term: +29.04 K(13): +156.13  
C(17): +160.03

X-range:

0 - 0

MassTol: Y-zoom:

0. 1.

MassType:

☐ AVG ☒ MONO

Axis:

☒ 1 ☐ 2

Label:

☒ I ☐ M ☐ -

Ions:

a ☐ + ☐ 2+ ☐ 3+

b ☒ + ☐ 2+ ☐ 3+

c ☐ + ☐ 2+ ☐ 3+

x ☐ + ☐ 2+ ☐ 3+

y ☒ + ☒ 2+ ☐ 3+

z ☐ + ☐ 2+ ☐ 3+

hide H<sub>2</sub>O/NH<sub>3</sub> ☐

zoom 112-122 ☐

GO

NDVGVTASALPAPGPSR, MH+ 1652.8607, m/z 551.6251  
L OS G15 P120811 220811-s1.05060.05060.3.dta

scan 5060; 1.2e+000

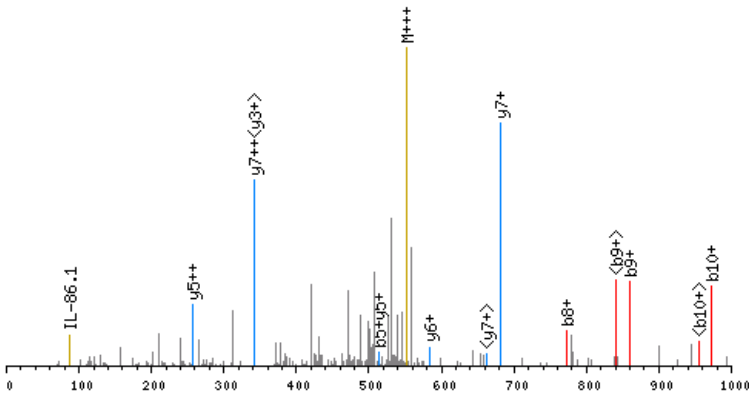

click image to zoom in; click top corners to zoom out

[precursor±]

scan 5056; 551.6 m/z; 5.2e+000

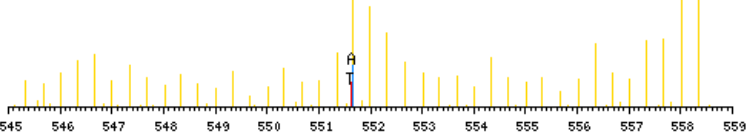

zoomed in precursor plot; T=theoretical m/z, A=acquired m/z

| b <sup>+</sup> | #  | AA | #  | y <sup>+</sup> | y <sup>2+</sup> |
|----------------|----|----|----|----------------|-----------------|
| 143.0820       | 1  | N  | 17 |                |                 |
| 258.1090       | 2  | D  | 16 | 1510.7865      | 755.8972        |
| 357.1774       | 3  | V  | 15 | 1395.7596      | 698.3837        |
| 414.1988       | 4  | G  | 14 | 1296.6912      | 648.8495        |
| 513.2673       | 5  | V  | 13 | 1239.6697      | 620.3388        |
| 614.3149       | 6  | T  | 12 | 1140.6013      | 570.8046        |
| 701.3470       | 7  | S  | 11 | 1039.5536      | 520.2807        |
| 772.3841       | 8  | A  | 10 | 952.5216       | 476.7647        |
| 859.4161       | 9  | S  | 9  | 881.4845       | 441.2462        |
| 972.5002       | 10 | L  | 8  | 794.4525       | 397.7301        |
| 1069.5529      | 11 | P  | 7  | 681.3684       | 341.1881        |
| 1140.5901      | 12 | A  | 6  | 584.3156       | 292.6617        |
| 1237.6428      | 13 | P  | 5  | 513.2785       | 257.1432        |
| 1294.6643      | 14 | G  | 4  | 416.2258       | 208.6168        |
| 1391.7170      | 15 | P  | 3  | 359.2043       | 180.1061        |
| 1478.7491      | 16 | S  | 2  | 262.1515       | 131.5797        |
|                | 17 | R  | 1  | 175.1195       | 88.0637         |

N-term:+29.04

X-range:

0 - 0

MassTol: Y-zoom:

0. 1.

MassType:

☐ AVG ☒ MONO

Axis:

☒ 1 ☐ 2

Label:

☒ I ☐ M ☐ -

Ions:

a ☐ + ☐ 2+ ☐ 3+

b ☒ + ☐ 2+ ☐ 3+

c ☐ + ☐ 2+ ☐ 3+

x ☐ + ☐ 2+ ☐ 3+

y ☒ + ☒ 2+ ☐ 3+

z ☐ + ☐ 2+ ☐ 3+

hide H<sub>2</sub>O/NH<sub>3</sub> ☐

zoom 112-122 ☐

GO

NEWASQTTDGKLEPVTKDVER, MH+ 2505.3686, m/z 627.0976  
H OS G17 P120811 220811-s1.04846.04846.4.dta

scan 4846; 1.8e+000

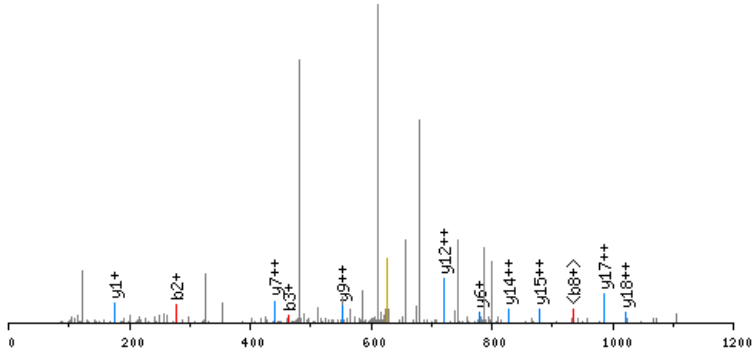

click image to zoom in; click top corners to zoom out

[precursor±]

scan 4843; 627.1 m/z; 5.8e+000

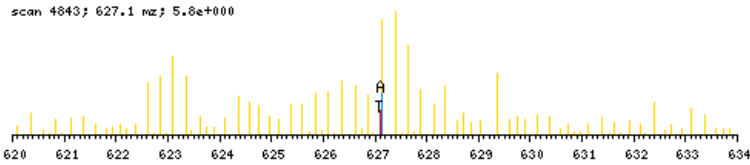

zoomed in precursor plot; T=theoretical m/z, A=acquired m/z

| b <sup>+</sup> | #  | AA | #  | y <sup>+</sup> | y <sup>2+</sup> |
|----------------|----|----|----|----------------|-----------------|
| 149.1138       | 1  | N  | 21 |                |                 |
| 278.1564       | 2  | E  | 20 | 2357.2626      | 1179.1352       |
| 464.2357       | 3  | W  | 19 | 2228.2200      | 1114.6139       |
| 535.2728       | 4  | A  | 18 | 2042.1406      | 1021.5742       |
| 622.3049       | 5  | S  | 17 | 1971.1035      | 986.0557        |
| 750.3635       | 6  | Q  | 16 | 1884.0715      | 942.5397        |
| 851.4111       | 7  | T  | 15 | 1756.0129      | 878.5104        |
| 952.4588       | 8  | T  | 14 | 1654.9652      | 827.9865        |
| 1067.4858      | 9  | D  | 13 | 1553.9176      | 777.4627        |
| 1124.5072      | 10 | G  | 12 | 1438.8906      | 719.9492        |
| 1286.6653      | 11 | K  | 11 | 1381.8692      | 691.4385        |
| 1399.7494      | 12 | L  | 10 | 1219.7111      | 610.3594        |
| 1496.8021      | 13 | P  | 9  | 1106.6270      | 553.8174        |
| 1625.8447      | 14 | E  | 8  | 1009.5742      | 505.2910        |
| 1724.9132      | 15 | V  | 7  | 880.5316       | 440.7697        |
| 1825.9608      | 16 | T  | 6  | 781.4632       | 391.2355        |
| 1988.1189      | 17 | K  | 5  | 680.4156       | 340.7117        |
| 2103.1459      | 18 | D  | 4  | 518.2575       | 259.6326        |
| 2202.2143      | 19 | V  | 3  | 403.2305       | 202.1192        |
| 2331.2569      | 20 | E  | 2  | 304.1621       | 152.5850        |
|                | 21 | R  | 1  | 175.1195       | 88.0637         |

N-term: +35.07 K(11): +162.16  
K(17): +162.16

N-term: +29.04 K(3): +156.13

X-range:

0 - 0

MassTol: Y-zoom:

0. 1.

MassType:

☐ AVG ☒ MONO

Axis:

☒ 1 ☐ 2

Label:

☒ I ☐ M ☐ -

Ions:

a ☐ + ☐ 2+ ☐ 3+

b ☒ + ☐ 2+ ☐ 3+

c ☐ + ☐ 2+ ☐ 3+

x ☐ + ☐ 2+ ☐ 3+

y ☒ + ☒ 2+ ☐ 3+

z ☐ + ☐ 2+ ☐ 3+

hide H<sub>2</sub>O/NH<sub>3</sub> ☐

zoom 112-122 ☐

GO

NFKGTIQELGQNQYAVSGEIVVDR, MH+ 2868.4896, m/z 717.8779  
L OS G16 P120811 220811-s1.05686.05686.4.dta

scan 5686; 1.3e+000

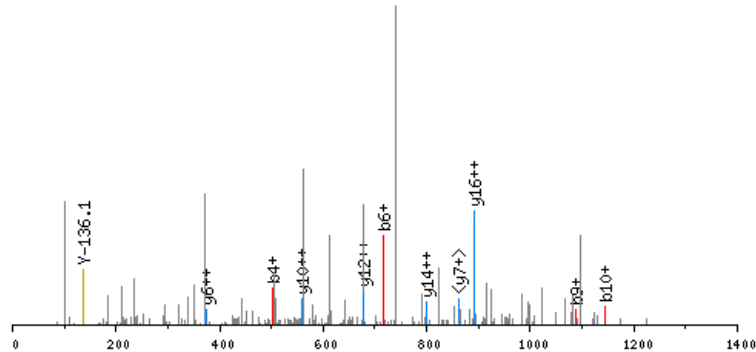

click image to zoom in; click top corners to zoom out

[precursor±]

scan 5683; 717.9 m/z; 1.2e+001

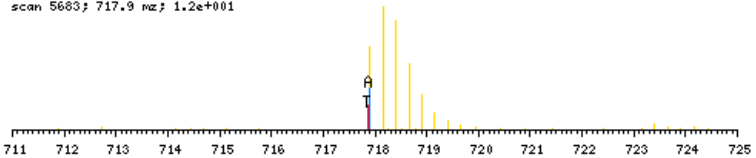

zoomed in precursor plot; T=theoretical m/z, A=acquired m/z

| b <sup>+</sup> | #  | AA | #  | y <sup>+</sup> | y <sup>2+</sup> |
|----------------|----|----|----|----------------|-----------------|
| 143.0820       | 1  | N  | 25 |                |                 |
| 290.1504       | 2  | F  | 24 | 2726.4154      | 1363.7116       |
| 446.2767       | 3  | K  | 23 | 2579.3470      | 1290.1774       |
| 503.2982       | 4  | G  | 22 | 2423.2207      | 1212.1143       |
| 604.3459       | 5  | T  | 21 | 2366.1992      | 1183.6035       |
| 717.4299       | 6  | I  | 20 | 2265.1515      | 1133.0797       |
| 845.4885       | 7  | Q  | 19 | 2152.0675      | 1076.5376       |
| 974.5311       | 8  | E  | 18 | 2024.0089      | 1012.5084       |
| 1087.6152      | 9  | L  | 17 | 1894.9663      | 947.9871        |
| 1144.6366      | 10 | G  | 16 | 1781.8822      | 891.4450        |
| 1272.6952      | 11 | Q  | 15 | 1724.8608      | 862.9343        |
| 1386.7382      | 12 | N  | 14 | 1596.8022      | 798.9050        |
| 1514.7967      | 13 | Q  | 13 | 1482.7593      | 741.8835        |
| 1677.8601      | 14 | Y  | 12 | 1354.7007      | 677.8543        |
| 1748.8972      | 15 | A  | 11 | 1191.6374      | 596.3226        |
| 1847.9656      | 16 | V  | 10 | 1120.6002      | 560.8040        |
| 1934.9976      | 17 | S  | 9  | 1021.5318      | 511.2698        |
| 1992.0191      | 18 | G  | 8  | 934.4998       | 467.7538        |
| 2121.0619      | 19 | E  | 7  | 877.4783       | 439.2431        |
| 2234.1457      | 20 | I  | 6  | 748.4357       | 374.7218        |
| 2381.2141      | 21 | F  | 5  | 635.3517       | 318.1798        |
| 2480.2826      | 22 | V  | 4  | 488.2833       | 244.6455        |
| 2579.3510      | 23 | V  | 3  | 389.2149       | 195.1113        |
| 2694.3779      | 24 | D  | 2  | 290.1464       | 145.5771        |
|                | 25 | R  | 1  | 175.1195       | 88.0637         |

N-term:+29.04 K(3):+156.13

N-term:+29.04

X-range:

0 - 0

MassTol: Y-zoom:

0. 1.

MassType:

☐AVG ☒MONO

Axis:

☒1 ☐2

Label:

☒I ☐M ☐-

Ions:

a ☐+ ☐2+ ☐3+

b ☒+ ☐2+ ☐3+

c ☐+ ☐2+ ☐3+

x ☐+ ☐2+ ☐3+

y ☒+ ☒2+ ☐3+

z ☐+ ☐2+ ☐3+

hide H<sub>2</sub>O/NH<sub>3</sub> ☐

zoom 112-122 ☐

GO

NICSLTTIQKIPR, MH+ 1599.9256, m/z 533.9800  
L OS G15 P120811 220811-s1.04994.04994.3.dta

scan 4994: 1.5e+001

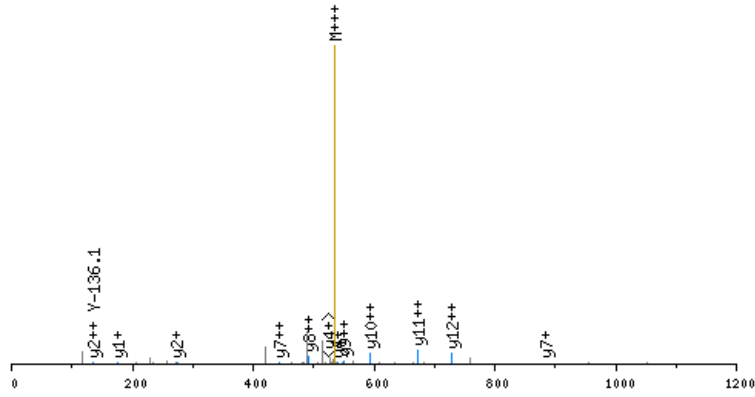

click image to zoom in; click top corners to zoom out [\[precursor±\]](#)

scan 4991: 534.0 m/z; 8.3e+000

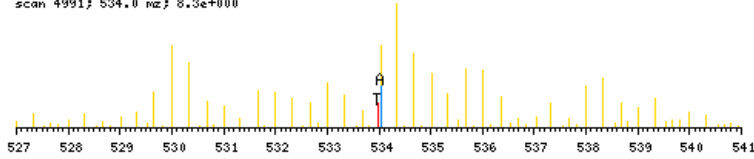

zoomed in precursor plot; T=theoretical m/z, A=acquired m/z

| b <sup>+</sup> | #  | AA | #  | y <sup>+</sup> | y <sup>2+</sup> |
|----------------|----|----|----|----------------|-----------------|
| 143.0820       | 1  | N  | 13 |                |                 |
| 256.1661       | 2  | I  | 12 | 1457.8514      | 729.4296        |
| 416.1967       | 3  | C  | 11 | 1344.7673      | 672.8876        |
| 503.2287       | 4  | S  | 10 | 1184.7367      | 592.8723        |
| 616.3128       | 5  | L  | 9  | 1097.7047      | 549.3563        |
| 717.3605       | 6  | T  | 8  | 984.6206       | 492.8142        |
| 818.4081       | 7  | T  | 7  | 883.5729       | 442.2904        |
| 931.4922       | 8  | I  | 6  | 782.5253       | 391.7665        |
| 1059.5508      | 9  | Q  | 5  | 669.4412       | 335.2245        |
| 1215.6771      | 10 | K  | 4  | 541.3826       | 271.1952        |
| 1328.7611      | 11 | I  | 3  | 385.2563       | 193.1321        |
| 1425.8139      | 12 | P  | 2  | 272.1723       | 136.5900        |
|                | 13 | R  | 1  | 175.1195       | 88.0637         |

N-term: +29.04 C(3): +160.03  
K(10): +156.13

X-range:

0 - 0

MassTol: Y-zoom:

0. 1.

MassType:

☐AVG ☒MONO

Axis:

☒1 ☐2

Label:

☒I ☐M ☐-

Ions:

a ☐+ ☐2+ ☐3+

b ☒+ ☐2+ ☐3+

c ☐+ ☐2+ ☐3+

x ☐+ ☐2+ ☐3+

y ☒+ ☒2+ ☐3+

z ☐+ ☐2+ ☐3+

hide H<sub>2</sub>O/NH<sub>3</sub> ☐

zoom 112-122 ☐

GO

NIVMTQSPKSMSSVGGER, MH+ 2050.0771, m/z 684.0306  
H OS G15 P120811 220811-s1.04072.04072.3.dta

scan 4072; 2.0e+000

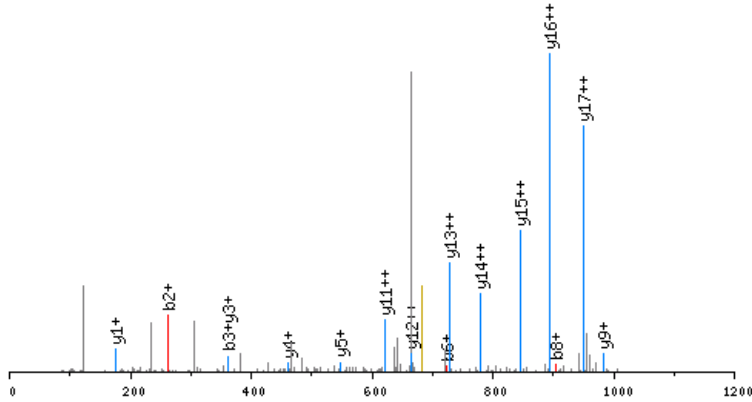

click image to zoom in; click top corners to zoom out

[precursor±]

scan 4071; 684.0 m/z; 4.7e+000

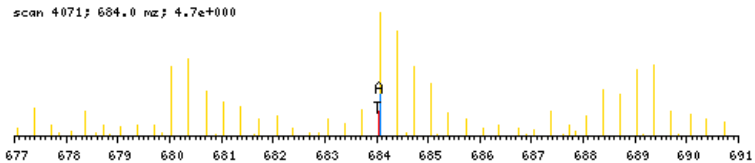

zoomed in precursor plot; T=theoretical m/z, A=acquired m/z

| b <sup>+</sup> | #  | AA | #  | y <sup>+</sup> | y <sup>2+</sup> |
|----------------|----|----|----|----------------|-----------------|
| 149.1138       | 1  | N  | 18 |                |                 |
| 262.1979       | 2  | I  | 17 | 1901.9711      | 951.4895        |
| 361.2663       | 3  | V  | 16 | 1788.8871      | 894.9474        |
| 492.3068       | 4  | M  | 15 | 1689.8187      | 845.4132        |
| 593.3545       | 5  | T  | 14 | 1558.7782      | 779.8930        |
| 721.4130       | 6  | Q  | 13 | 1457.7305      | 729.3692        |
| 808.4451       | 7  | S  | 12 | 1329.6719      | 665.3399        |
| 905.4978       | 8  | P  | 11 | 1242.6399      | 621.8239        |
| 1067.6559      | 9  | K  | 10 | 1145.5871      | 573.2975        |
| 1154.6880      | 10 | S  | 9  | 983.4290       | 492.2184        |
| 1285.7285      | 11 | M  | 8  | 896.3970       | 448.7024        |
| 1372.7605      | 12 | S  | 7  | 765.3565       | 383.1822        |
| 1503.8010      | 13 | M  | 6  | 678.3245       | 339.6662        |
| 1590.8330      | 14 | S  | 5  | 547.2840       | 274.1459        |
| 1689.9014      | 15 | V  | 4  | 460.2520       | 230.6299        |
| 1746.9229      | 16 | G  | 3  | 361.1836       | 181.0957        |
| 1875.9655      | 17 | E  | 2  | 304.1621       | 152.5850        |
|                | 18 | R  | 1  | 175.1195       | 88.0637         |

N-term:+35.07 K(9):+162.16

X-range:

0 - 0

MassTol: Y-zoom:

0. 1.

MassType:

☐AVG ☒MONO

Axis:

☒1 ☐2

Label:

☒I ☐M ☐-

Ions:

a ☐+ ☐2+ ☐3+

b ☒+ ☐2+ ☐3+

c ☐+ ☐2+ ☐3+

x ☐+ ☐2+ ☐3+

y ☒+ ☒2+ ☐3+

z ☐+ ☐2+ ☐3+

hide H<sub>2</sub>O/NH<sub>3</sub> ☐

zoom 112-122 ☐

GO

NKDQGGYEDFVEGLR, MH+ 1794.9299, m/z 598.9815  
H OS G16 P120811 220811-s1.05216.05216.3.dta

scan 5216; 1.7e+000

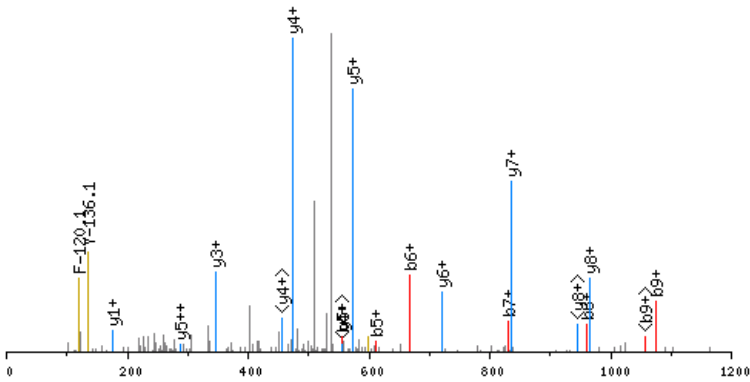

click image to zoom in; click top corners to zoom out

[precursor±]

scan 5213; 599.0 m/z; 1.8e+001

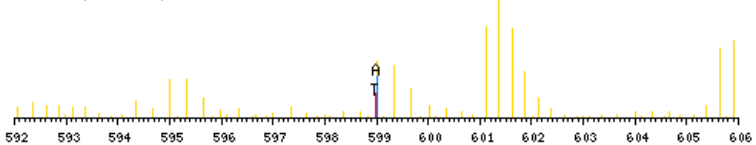

zoomed in precursor plot; T=theoretical m/z, A=acquired m/z

| b <sup>+</sup> | #  | AA | #  | y <sup>+</sup> | y <sup>2+</sup> |
|----------------|----|----|----|----------------|-----------------|
| 149.1138       | 1  | N  | 15 |                |                 |
| 311.2719       | 2  | K  | 14 | 1646.8239      | 823.9158        |
| 426.2989       | 3  | D  | 13 | 1484.6658      | 742.8368        |
| 554.3574       | 4  | Q  | 12 | 1369.6388      | 685.3233        |
| 611.3789       | 5  | G  | 11 | 1241.5802      | 621.2940        |
| 668.4004       | 6  | G  | 10 | 1184.5588      | 592.7833        |
| 831.4637       | 7  | Y  | 9  | 1127.5373      | 564.2726        |
| 960.5063       | 8  | E  | 8  | 964.4740       | 482.7409        |
| 1075.5332      | 9  | D  | 7  | 835.4314       | 418.2196        |
| 1222.6017      | 10 | F  | 6  | 720.4044       | 360.7061        |
| 1321.6701      | 11 | V  | 5  | 573.3360       | 287.1719        |
| 1450.7127      | 12 | E  | 4  | 474.2676       | 237.6377        |
| 1507.7341      | 13 | G  | 3  | 345.2250       | 173.1164        |
| 1620.8182      | 14 | L  | 2  | 288.2036       | 144.6057        |
|                | 15 | R  | 1  | 175.1195       | 88.0637         |

N-term:+35.07 K(2):+162.16

X-range:

0 - 0

MassTol: Y-zoom:

0. 1.

MassType:

☐ AVG ☒ MONO

Axis:

☒ 1 ☐ 2

Label:

☒ I ☐ M ☐ -

Ions:

a ☐ + ☐ 2+ ☐ 3+

b ☒ + ☐ 2+ ☐ 3+

c ☐ + ☐ 2+ ☐ 3+

x ☐ + ☐ 2+ ☐ 3+

y ☒ + ☒ 2+ ☐ 3+

z ☐ + ☐ 2+ ☐ 3+

hide H<sub>2</sub>O/NH<sub>3</sub> ☐

zoom 112-122 ☐

GO

NMGSDSLYYFR, MH+ 1380.6258, m/z 690.8165  
L OS G14 P120811 220811-s1.05290.05290.2.dta

scan 5290; 5.5e-001

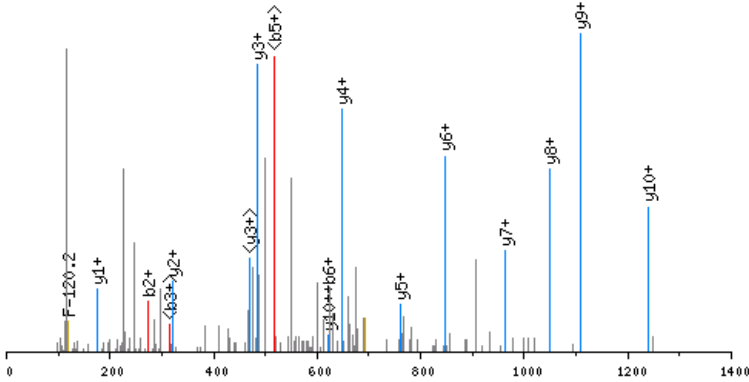

click image to zoom in; click top corners to zoom out

[precursor±]

scan 5286; 690.8 m/z; 2.1e+000

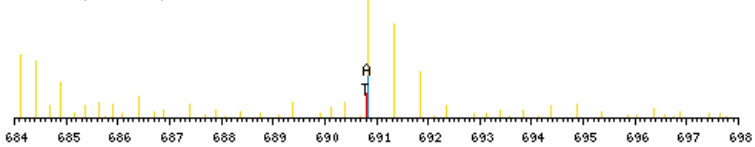

zoomed in precursor plot; T=theoretical m/z, A=acquired m/z

| b <sup>+</sup> | #  | AA | #  | y <sup>+</sup> | y <sup>2+</sup> |
|----------------|----|----|----|----------------|-----------------|
| 143.0820       | 1  | N  | 11 |                |                 |
| 274.1225       | 2  | M  | 10 | 1238.5516      | 619.7797        |
| 331.1440       | 3  | G  | 9  | 1107.5111      | 554.2595        |
| 418.1760       | 4  | S  | 8  | 1050.4896      | 525.7487        |
| 533.2029       | 5  | D  | 7  | 963.4576       | 482.2327        |
| 620.2350       | 6  | S  | 6  | 848.4307       | 424.7192        |
| 733.3190       | 7  | L  | 5  | 761.3986       | 381.2032        |
| 896.3824       | 8  | Y  | 4  | 648.3146       | 324.6612        |
| 1059.4457      | 9  | Y  | 3  | 485.2512       | 243.1295        |
| 1206.5141      | 10 | F  | 2  | 322.1879       | 161.5979        |
|                | 11 | R  | 1  | 175.1195       | 88.0637         |

N-term:+29.04

X-range:

0 - 0

MassTol: Y-zoom:

0. 1.

MassType:

☐ AVG ☒ MONO

Axis:

☒ 1 ☐ 2

Label:

☒ I ☐ M ☐ -

Ions:

a ☐ + ☐ 2+ ☐ 3+

b ☒ + ☐ 2+ ☐ 3+

c ☐ + ☐ 2+ ☐ 3+

x ☐ + ☐ 2+ ☐ 3+

y ☒ + ☒ 2+ ☐ 3+

z ☐ + ☐ 2+ ☐ 3+

hide H<sub>2</sub>O/NH<sub>3</sub> ☐

zoom 112-122 ☐

GO

NPVDDICIAPKR, MH+ 1465.8473, m/z 489.2873  
H OS G15 P120811 220811-s1.03742.03742.3.dta

scan 3742; 3.4e+001

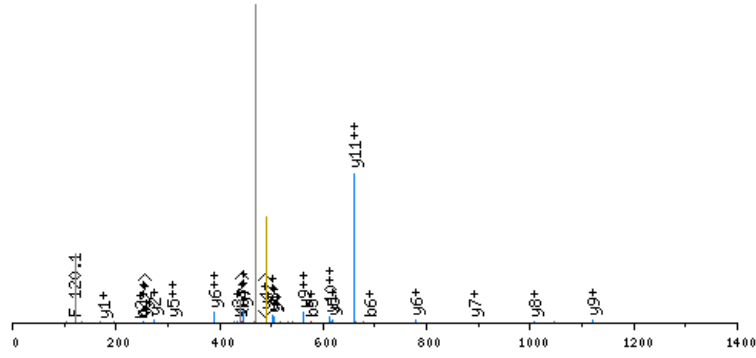

click image to zoom in; click top corners to zoom out [\[precursor±\]](#)

scan 3741; 489.3 m/z; 2.3e+002

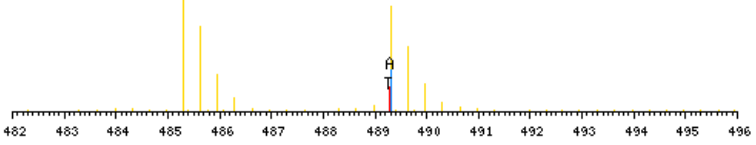

zoomed in precursor plot; T=theoretical m/z, A=acquired m/z

| b <sup>+</sup> | #  | AA | #  | y <sup>+</sup> | y <sup>2+</sup> |
|----------------|----|----|----|----------------|-----------------|
| 149.1138       | 1  | N  | 12 |                |                 |
| 246.1666       | 2  | P  | 11 | 1317.7413      | 659.3745        |
| 345.2350       | 3  | V  | 10 | 1220.6885      | 610.8482        |
| 460.2619       | 4  | D  | 9  | 1121.6201      | 561.3140        |
| 575.2889       | 5  | D  | 8  | 1006.5931      | 503.8005        |
| 688.3730       | 6  | I  | 7  | 891.5662       | 446.2870        |
| 848.4036       | 7  | C  | 6  | 778.4821       | 389.7450        |
| 961.4876       | 8  | I  | 5  | 618.4515       | 309.7297        |
| 1032.5247      | 9  | A  | 4  | 505.3675       | 253.1877        |
| 1194.6828      | 10 | K  | 3  | 434.3304       | 217.6691        |
| 1291.7356      | 11 | P  | 2  | 272.1723       | 136.5900        |
|                | 12 | R  | 1  | 175.1195       | 88.0637         |

N-term:+35.07 C(7):+160.03  
K(10):+162.16

X-range:

0 - 0

MassTol: Y-zoom:

0. 1.

MassType:

☐AVG ☒MONO

Axis:

☒1 ☐2

Label:

☒I ☐M ☐-

Ions:

a ☐+ ☐2+ ☐3+

b ☒+ ☐2+ ☐3+

c ☐+ ☐2+ ☐3+

x ☐+ ☐2+ ☐3+

y ☒+ ☒2+ ☐3+

z ☐+ ☐2+ ☐3+

hide H<sub>2</sub>O/NH<sub>3</sub> ☐

zoom 112-122 ☐

GO

NQLEEVPSALPR, MH+ 1380.7487, m/z 690.8780  
L OS G13 P120811 220811-s1.04685.04685.2.dta

scan 4685; 1.7e+000

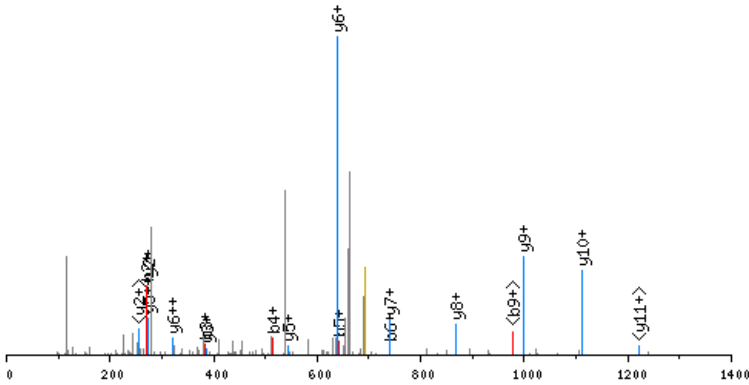

click image to zoom in; click top corners to zoom out

[precursor±]

scan 4684; 690.9 m/z; 1.9e+001

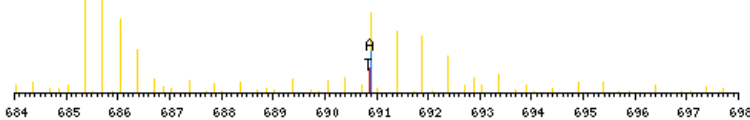

zoomed in precursor plot; T=theoretical m/z, A=acquired m/z

| b <sup>+</sup> | #  | AA | #  | y <sup>+</sup> | y <sup>2+</sup> |
|----------------|----|----|----|----------------|-----------------|
| 143.0820       | 1  | N  | 12 |                |                 |
| 271.1406       | 2  | Q  | 11 | 1238.6745      | 619.8412        |
| 384.2247       | 3  | L  | 10 | 1110.6159      | 555.8119        |
| 513.2673       | 4  | E  | 9  | 997.5318       | 499.2698        |
| 642.3099       | 5  | E  | 8  | 868.4892       | 434.7485        |
| 741.3783       | 6  | V  | 7  | 739.4466       | 370.2272        |
| 838.4310       | 7  | P  | 6  | 640.3782       | 320.6930        |
| 925.4631       | 8  | S  | 5  | 543.3255       | 272.1666        |
| 996.5002       | 9  | A  | 4  | 456.2934       | 228.6506        |
| 1109.5842      | 10 | L  | 3  | 385.2563       | 193.1321        |
| 1206.6370      | 11 | P  | 2  | 272.1723       | 136.5900        |
|                | 12 | R  | 1  | 175.1195       | 88.0637         |

N-term:+29.04

X-range:

0 - 0

MassTol: Y-zoom:

0. 1.

MassType:

☐ AVG ☒ MONO

Axis:

☒ 1 ☐ 2

Label:

☒ I ☐ M ☐ -

Ions:

a ☐ + ☐ 2+ ☐ 3+

b ☒ + ☐ 2+ ☐ 3+

c ☐ + ☐ 2+ ☐ 3+

x ☐ + ☐ 2+ ☐ 3+

y ☒ + ☒ 2+ ☐ 3+

z ☐ + ☐ 2+ ☐ 3+

hide H<sub>2</sub>O/NH<sub>3</sub> ☐

zoom 112-122 ☐

GO

NTDFAFSLYR, MH+ 1261.6217, m/z 631.3145  
L OS G14 P120811 220811-s1.05645.05645.2.dta

scan 5645; 8.5e-001

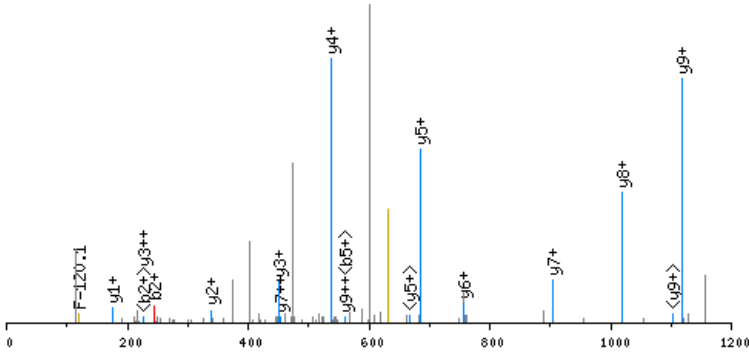

click image to zoom in; click top corners to zoom out [precursor±]

scan 5641; 631.3 m/z; 1.5e+000

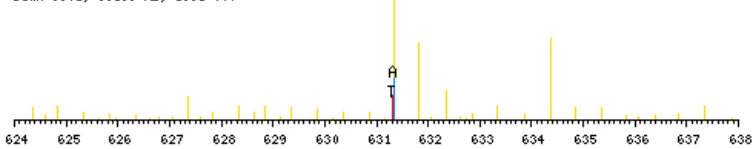

zoomed in precursor plot; T=theoretical m/z, A=acquired m/z

| b <sup>+</sup> | #  | AA | #  | y <sup>+</sup> | y <sup>2+</sup> |
|----------------|----|----|----|----------------|-----------------|
| 143.0820       | 1  | N  | 10 |                |                 |
| 244.1297       | 2  | T  | 9  | 1119.5475      | 560.2777        |
| 359.1566       | 3  | D  | 8  | 1018.4998      | 509.7538        |
| 506.2251       | 4  | F  | 7  | 903.4729       | 452.2403        |
| 577.2622       | 5  | A  | 6  | 756.4044       | 378.7061        |
| 724.3306       | 6  | F  | 5  | 685.3673       | 343.1876        |
| 811.3626       | 7  | S  | 4  | 538.2989       | 269.6534        |
| 924.4467       | 8  | L  | 3  | 451.2669       | 226.1374        |
| 1087.5100      | 9  | Y  | 2  | 338.1828       | 169.5953        |
|                | 10 | R  | 1  | 175.1195       | 88.0637         |

N-term:+29.04

X-range:

0 - 0

MassTol: Y-zoom:

0. 1.

MassType:

☐AVG ☒MONO

Axis:

☒1 ☐2

Label:

☒I ☐M ☐-

Ions:

a ☐+ ☐2+ ☐3+

b ☒+ ☐2+ ☐3+

c ☐+ ☐2+ ☐3+

x ☐+ ☐2+ ☐3+

y ☒+ ☒2+ ☐3+

z ☐+ ☐2+ ☐3+

hide H<sub>2</sub>O/NH<sub>3</sub> ☐

zoom 112-122 ☐

GO

NTGIICTIGPASR, MH+ 1387.7367, m/z 463.2504  
L OS G13 P120811 220811-s1.04322.04322.3.dta

scan 4322; 4.2e+000

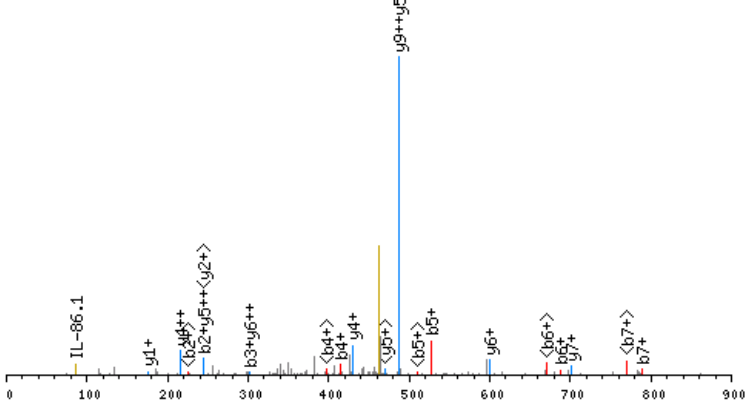

click image to zoom in; click top corners to zoom out

[precursor±]

scan 4319; 463.3 m/z; 8.6e+000

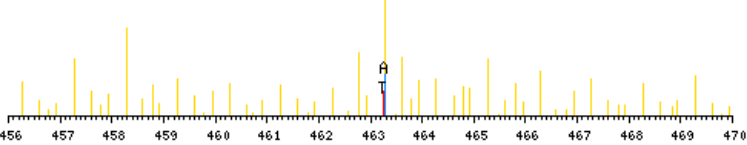

zoomed in precursor plot; T=theoretical m/z, A=acquired m/z

| b <sup>+</sup> | #  | AA | #  | y <sup>+</sup> | y <sup>2+</sup> |
|----------------|----|----|----|----------------|-----------------|
| 143.0820       | 1  | N  | 13 |                |                 |
| 244.1297       | 2  | T  | 12 | 1245.6625      | 623.3352        |
| 301.1512       | 3  | G  | 11 | 1144.6148      | 572.8113        |
| 414.2352       | 4  | I  | 10 | 1087.5933      | 544.3006        |
| 527.3193       | 5  | I  | 9  | 974.5093       | 487.7586        |
| 687.3499       | 6  | C  | 8  | 861.4252       | 431.2165        |
| 788.3976       | 7  | T  | 7  | 701.3946       | 351.2012        |
| 901.4816       | 8  | I  | 6  | 600.3469       | 300.6774        |
| 958.5031       | 9  | G  | 5  | 487.2629       | 244.1353        |
| 1055.5559      | 10 | P  | 4  | 430.2414       | 215.6246        |
| 1126.5930      | 11 | A  | 3  | 333.1886       | 167.0982        |
| 1213.6250      | 12 | S  | 2  | 262.1515       | 131.5797        |
|                | 13 | R  | 1  | 175.1195       | 88.0637         |

N-term:+29.04 C(6):+160.03

X-range:

0 - 0

MassTol: Y-zoom:

0. 1.

MassType:

☐AVG ☒MONO

Axis:

☒1 ☐2

Label:

☒I ☐M ☐-

Ions:

a ☐+ ☐2+ ☐3+

b ☒+ ☐2+ ☐3+

c ☐+ ☐2+ ☐3+

x ☐+ ☐2+ ☐3+

y ☒+ ☒2+ ☐3+

z ☐+ ☐2+ ☐3+

hide H<sub>2</sub>O/NH<sub>3</sub> ☐

zoom 112-122 ☐

GO

NYLEASSGTDAKNSSR, MH+ 1767.9149, m/z 589.9765  
H OS G13 P120811 220811-s1.04611.04611.3.dta

scan 4611; 9.9e-001

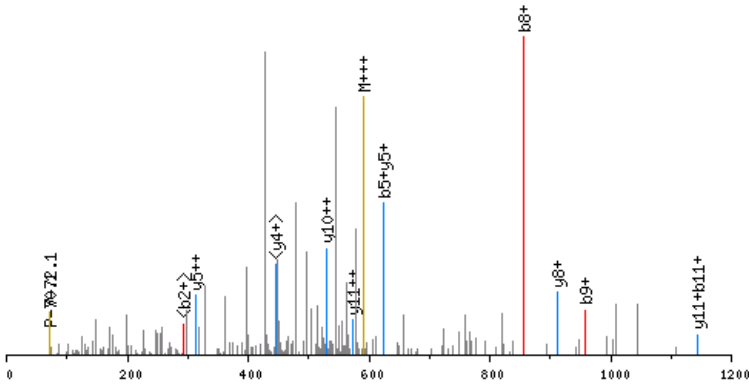

click image to zoom in; click top corners to zoom out

[precursor±]

scan 4609; 590.0 m/z; 3.0e+001

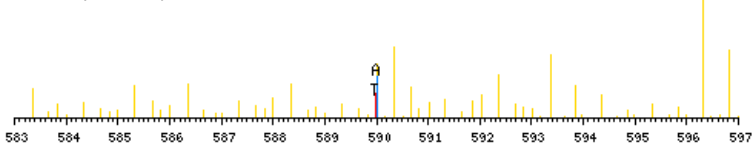

zoomed in precursor plot; T=theoretical m/z, A=acquired m/z

| b <sup>+</sup> | #  | AA | #  | y <sup>+</sup> | y <sup>2+</sup> |
|----------------|----|----|----|----------------|-----------------|
| 149.1138       | 1  | N  | 16 |                |                 |
| 312.1772       | 2  | Y  | 15 | 1619.8089      | 810.4084        |
| 425.2612       | 3  | L  | 14 | 1456.7456      | 728.8767        |
| 554.3038       | 4  | E  | 13 | 1343.6615      | 672.3347        |
| 625.3409       | 5  | A  | 12 | 1214.6190      | 607.8134        |
| 712.3730       | 6  | S  | 11 | 1143.5818      | 572.2948        |
| 799.4050       | 7  | S  | 10 | 1056.5498      | 528.7788        |
| 856.4264       | 8  | G  | 9  | 969.5178       | 485.2628        |
| 957.4741       | 9  | T  | 8  | 912.4963       | 456.7521        |
| 1072.5011      | 10 | D  | 7  | 811.4486       | 406.2282        |
| 1143.5382      | 11 | A  | 6  | 696.4217       | 348.7148        |
| 1305.6963      | 12 | K  | 5  | 625.3846       | 313.1962        |
| 1419.7392      | 13 | N  | 4  | 463.2265       | 232.1172        |
| 1506.7712      | 14 | S  | 3  | 349.1836       | 175.0957        |
| 1593.8033      | 15 | S  | 2  | 262.1515       | 131.5797        |
|                | 16 | R  | 1  | 175.1195       | 88.0637         |

N-term:+35.07 K(12):+162.16

X-range:

0 - 0

MassTol: Y-zoom:

0. 1.

MassType:

☐ AVG ☒ MONO

Axis:

☒ 1 ☐ 2

Label:

☒ I ☐ M ☐ -

Ions:

a ☐ + ☐ 2+ ☐ 3+

b ☒ + ☐ 2+ ☐ 3+

c ☐ + ☐ 2+ ☐ 3+

x ☐ + ☐ 2+ ☐ 3+

y ☒ + ☒ 2+ ☐ 3+

z ☐ + ☐ 2+ ☐ 3+

hide H<sub>2</sub>O/NH<sub>3</sub> ☐

zoom 112-122 ☐

GO

NYSKLLCGLLSDR, MH+ 1594.8627, m/z 532.2924  
L OS G16 P120811 220811-s1.06077.06077.3.dta

scan 6077; 4.1e+000

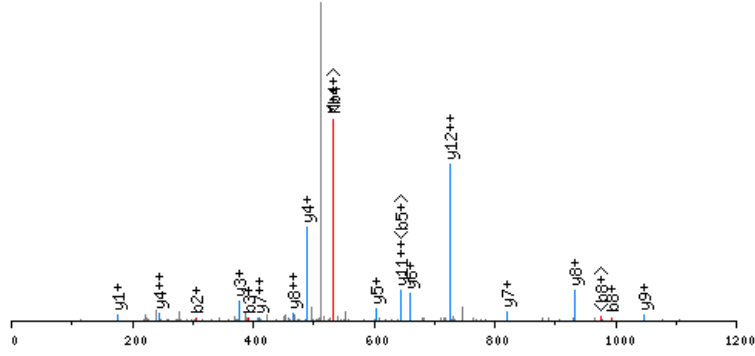

click image to zoom in; click top corners to zoom out [\[precursor±\]](#)

scan 6073; 532.3 m/z; 2.3e+000

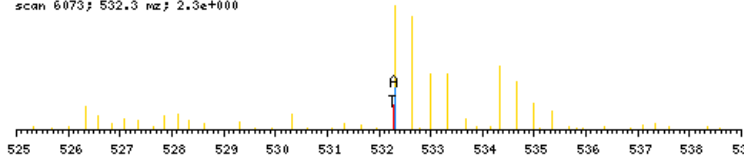

zoomed in precursor plot; T=theoretical m/z, A=acquired m/z

| b <sup>+</sup> | #  | AA | #  | y <sup>+</sup> | y <sup>2+</sup> |
|----------------|----|----|----|----------------|-----------------|
| 143.0820       | 1  | N  | 13 |                |                 |
| 306.1454       | 2  | Y  | 12 | 1452.7884      | 726.8981        |
| 393.1774       | 3  | S  | 11 | 1289.7251      | 645.3665        |
| 549.3037       | 4  | K  | 10 | 1202.6931      | 601.8505        |
| 662.3877       | 5  | L  | 9  | 1046.5668      | 523.7873        |
| 775.4718       | 6  | L  | 8  | 933.4827       | 467.2453        |
| 935.5024       | 7  | C  | 7  | 820.3987       | 410.7032        |
| 992.5239       | 8  | G  | 6  | 660.3681       | 330.6879        |
| 1105.6079      | 9  | L  | 5  | 603.3466       | 302.1772        |
| 1218.6920      | 10 | L  | 4  | 490.2625       | 245.6352        |
| 1305.7240      | 11 | S  | 3  | 377.1785       | 189.0931        |
| 1420.7510      | 12 | D  | 2  | 290.1464       | 145.5771        |
|                | 13 | R  | 1  | 175.1195       | 88.0637         |

N-term:+29.04 K(4):+156.13  
C(7):+160.03

X-range:

0 - 0

MassTol: Y-zoom:

0. 1.

MassType:

☐ AVG ☒ MONO

Axis:

☒ 1 ☐ 2

Label:

☒ I ☐ M ☐ -

Ions:

a ☐ + ☐ 2+ ☐ 3+

b ☒ + ☐ 2+ ☐ 3+

c ☐ + ☐ 2+ ☐ 3+

x ☐ + ☐ 2+ ☐ 3+

y ☒ + ☒ 2+ ☐ 3+

z ☐ + ☐ 2+ ☐ 3+

hide H<sub>2</sub>O/NH<sub>3</sub> ☐

zoom 112-122 ☐

GO

QASGGPVDIGPEYQQDLDR, MH+ 2072.9889, m/z 691.6678  
L OS G12 P120811 220811-s1.03865.03865.3.dta

scan 3865; 4.9e-001

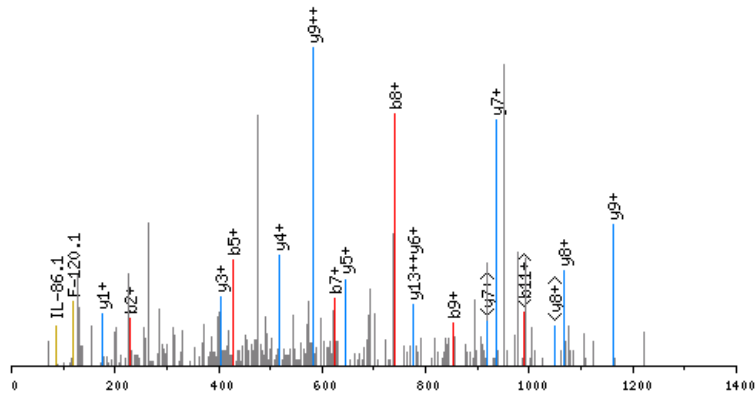

click image to zoom in; click top corners to zoom out

[precursor±]

scan 3862; 691.7 m/z; 8.5e+000

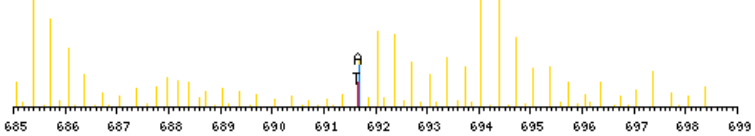

zoomed in precursor plot; T=theoretical m/z, A=acquired m/z

| b <sup>+</sup> | #  | AA | #  | y <sup>+</sup> | y <sup>2+</sup> |
|----------------|----|----|----|----------------|-----------------|
| 157.0977       | 1  | Q  | 19 |                |                 |
| 228.1348       | 2  | A  | 18 | 1916.8990      | 958.9534        |
| 315.1668       | 3  | S  | 17 | 1845.8619      | 923.4349        |
| 372.1883       | 4  | G  | 16 | 1758.8299      | 879.9188        |
| 429.2097       | 5  | G  | 15 | 1701.8084      | 851.4081        |
| 526.2625       | 6  | P  | 14 | 1644.7869      | 822.8974        |
| 625.3309       | 7  | V  | 13 | 1547.7342      | 774.3710        |
| 740.3579       | 8  | D  | 12 | 1448.6658      | 724.8368        |
| 853.4419       | 9  | I  | 11 | 1333.6388      | 667.3233        |
| 910.4634       | 10 | G  | 10 | 1220.5548      | 610.7813        |
| 1007.5162      | 11 | P  | 9  | 1163.5333      | 582.2706        |
| 1136.5588      | 12 | E  | 8  | 1066.4805      | 533.7442        |
| 1299.6221      | 13 | Y  | 7  | 937.4379       | 469.2229        |
| 1427.6807      | 14 | Q  | 6  | 774.3746       | 387.6912        |
| 1555.7392      | 15 | Q  | 5  | 646.3160       | 323.6619        |
| 1670.7662      | 16 | D  | 4  | 518.2575       | 259.6326        |
| 1783.8502      | 17 | L  | 3  | 403.2305       | 202.1192        |
| 1898.8772      | 18 | D  | 2  | 290.1464       | 145.5771        |
|                | 19 | R  | 1  | 175.1195       | 88.0637         |

N-term:+29.04

X-range:

0 - 0

MassTol: Y-zoom:

0. 1.

MassType:

☐ AVG ☒ MONO

Axis:

☒ 1 ☐ 2

Label:

☒ I ☐ M ☐ -

Ions:

a ☐ + ☐ 2+ ☐ 3+

b ☒ + ☐ 2+ ☐ 3+

c ☐ + ☐ 2+ ☐ 3+

x ☐ + ☐ 2+ ☐ 3+

y ☒ + ☒ 2+ ☐ 3+

z ☐ + ☐ 2+ ☐ 3+

hide H<sub>2</sub>O/NH<sub>3</sub> ☐

zoom 112-122 ☐

GO

QDGALVQHQQWDGKESTITR, MH+ 2353.1901, m/z 589.0530  
L OS G17 P120811 220811-s1.03554.03554.4.dta

scan 3554; 5.1e+000

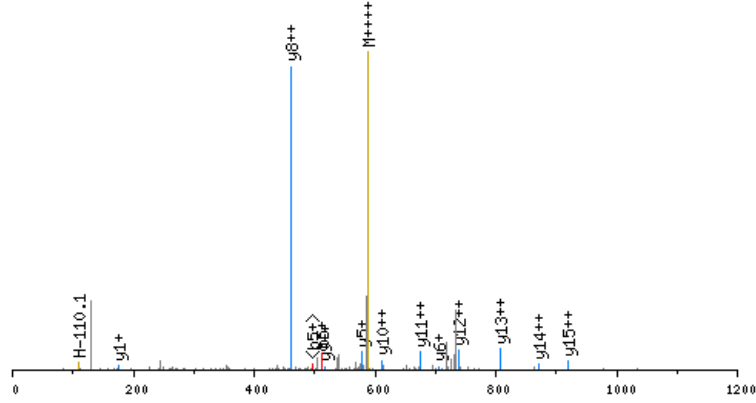

click image to zoom in; click top corners to zoom out [\[precursor±\]](#)

scan 3553; 589.1 m/z; 1.7e+001

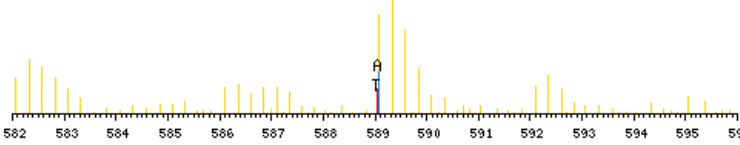

zoomed in precursor plot; T=theoretical m/z, A=acquired m/z

| b <sup>+</sup> | #  | AA | #  | y <sup>+</sup> | y <sup>2+</sup> |
|----------------|----|----|----|----------------|-----------------|
| 157.0977       | 1  | Q  | 20 |                |                 |
| 272.1246       | 2  | D  | 19 | 2197.1002      | 1099.0540       |
| 329.1461       | 3  | G  | 18 | 2082.0733      | 1041.5405       |
| 400.1832       | 4  | A  | 17 | 2025.0518      | 1013.0298       |
| 513.2673       | 5  | L  | 16 | 1954.0147      | 977.5113        |
| 612.3357       | 6  | V  | 15 | 1840.9306      | 920.9692        |
| 740.3943       | 7  | Q  | 14 | 1741.8622      | 871.4350        |
| 877.4532       | 8  | H  | 13 | 1613.8036      | 807.4057        |
| 1005.5117      | 9  | Q  | 12 | 1476.7447      | 738.8763        |
| 1133.5703      | 10 | Q  | 11 | 1348.6861      | 674.8470        |
| 1319.6496      | 11 | W  | 10 | 1220.6276      | 610.8177        |
| 1434.6766      | 12 | D  | 9  | 1034.5483      | 517.7780        |
| 1491.6980      | 13 | G  | 8  | 919.5213       | 460.2646        |
| 1647.8243      | 14 | K  | 7  | 862.4998       | 431.7538        |
| 1776.8669      | 15 | E  | 6  | 706.3735       | 353.6907        |
| 1863.8990      | 16 | S  | 5  | 577.3310       | 289.1694        |
| 1964.9466      | 17 | T  | 4  | 490.2989       | 245.6534        |
| 2078.0307      | 18 | I  | 3  | 389.2512       | 195.1295        |
| 2179.0784      | 19 | T  | 2  | 276.1672       | 138.5875        |
|                | 20 | R  | 1  | 175.1195       | 88.0637         |

N-term:+29.04 K(14):+156.13

X-range:

0 - 0

MassTol: Y-zoom:

0. 1.

MassType:

☐AVG ☒MONO

Axis:

☒1 ☐2

Label:

☒I ☐M ☐-

Ions:

a ☐+ ☐2+ ☐3+

b ☒+ ☐2+ ☐3+

c ☐+ ☐2+ ☐3+

x ☐+ ☐2+ ☐3+

y ☒+ ☒2+ ☐3+

z ☐+ ☐2+ ☐3+

hide H<sub>2</sub>O/NH<sub>3</sub> ☐

zoom 112-122 ☐

GO

QEDEPTIASPVGWPR, MH+ 1709.8498, m/z 570.6215  
L OS G13 P120811 220811-s1.05776.05776.3.dta

scan 5776; 9.2e-001

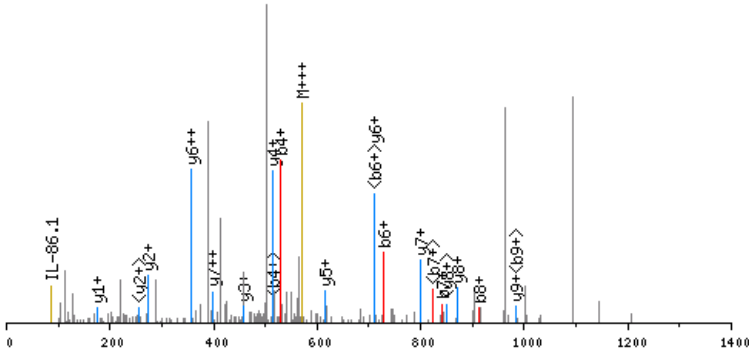

click image to zoom in; click top corners to zoom out

[precursor±]

scan 5774; 570.6 m/z; 5.2e+000

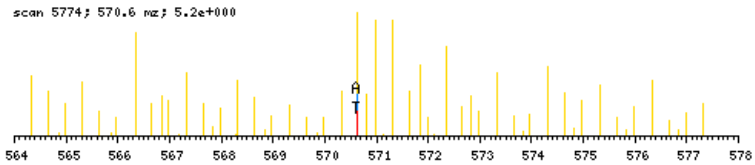

zoomed in precursor plot; T=theoretical m/z, A=acquired m/z

| b <sup>+</sup> | #  | AA | #  | y <sup>+</sup> | y <sup>2+</sup> |
|----------------|----|----|----|----------------|-----------------|
| 157.0977       | 1  | Q  | 15 |                |                 |
| 286.1403       | 2  | E  | 14 | 1553.7600      | 777.3839        |
| 401.1672       | 3  | D  | 13 | 1424.7174      | 712.8626        |
| 530.2098       | 4  | E  | 12 | 1309.6905      | 655.3491        |
| 627.2626       | 5  | P  | 11 | 1180.6479      | 590.8278        |
| 728.3102       | 6  | T  | 10 | 1083.5951      | 542.3015        |
| 841.3943       | 7  | I  | 9  | 982.5474       | 491.7776        |
| 912.4314       | 8  | A  | 8  | 869.4634       | 435.2356        |
| 999.4635       | 9  | S  | 7  | 798.4262       | 399.7170        |
| 1096.5162      | 10 | P  | 6  | 711.3942       | 356.2010        |
| 1195.5846      | 11 | V  | 5  | 614.3415       | 307.6746        |
| 1252.6061      | 12 | G  | 4  | 515.2730       | 258.1404        |
| 1438.6854      | 13 | W  | 3  | 458.2516       | 229.6297        |
| 1535.7382      | 14 | P  | 2  | 272.1723       | 136.5900        |
|                | 15 | R  | 1  | 175.1195       | 88.0637         |

N-term:+29.04

zoomed in precursor plot; T=theoretical m/z, A=acquired m/z

X-range:

0 - 0

MassTol: Y-zoom:

0. 1.

MassType:

☐AVG ☒MONO

Axis:

☒1 ☐2

Label:

☒I ☐M ☐-

Ions:

a ☐+ ☐2+ ☐3+

b ☒+ ☐2+ ☐3+

c ☐+ ☐2+ ☐3+

x ☐+ ☐2+ ☐3+

y ☒+ ☒2+ ☐3+

z ☐+ ☐2+ ☐3+

hide H<sub>2</sub>O/NH<sub>3</sub> ☐

zoom 112-122 ☐

GO

QEGDKVIRPGVSQAGEEME<sup>Q</sup>FGQGV<sup>R</sup>, MH+ 2887.4372, m/z 722.6148  
L OS G16 P120811 220811-s1.05142.05142.4.dta

scan 5142: 3.5e+000

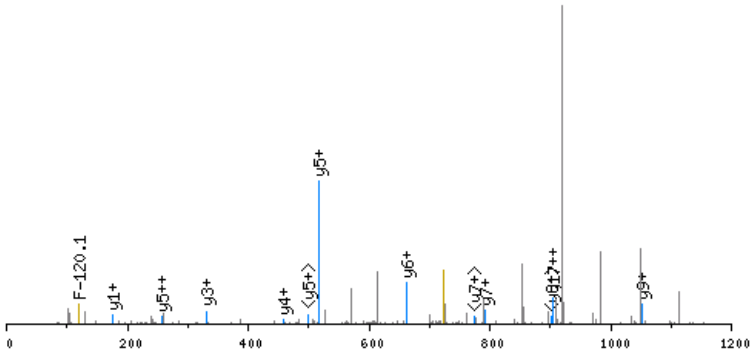

click image to zoom in; click top corners to zoom out [precursor±]

scan 5138: 722.6 m/z; 1.0e+001

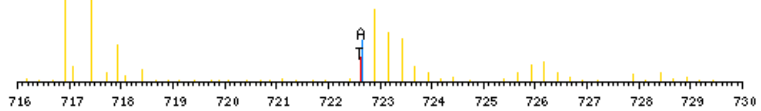

zoomed in precursor plot; T=theoretical m/z, A=acquired m/z

| b <sup>+</sup> | #  | AA | #  | y <sup>+</sup> | y <sup>2+</sup> |
|----------------|----|----|----|----------------|-----------------|
| 157.0977       | 1  | Q  | 26 |                |                 |
| 286.1403       | 2  | E  | 25 | 2731.3474      | 1366.1776       |
| 343.1617       | 3  | G  | 24 | 2602.3048      | 1301.6563       |
| 458.1887       | 4  | D  | 23 | 2545.2833      | 1273.1456       |
| 614.3150       | 5  | K  | 22 | 2430.2564      | 1215.6321       |
| 713.3834       | 6  | V  | 21 | 2274.1301      | 1137.5690       |
| 826.4675       | 7  | I  | 20 | 2175.0617      | 1088.0348       |
| 982.5686       | 8  | R  | 19 | 2061.9776      | 1031.4927       |
| 1079.6213      | 9  | P  | 18 | 1905.8765      | 953.4422        |
| 1136.6428      | 10 | G  | 17 | 1808.8237      | 904.9158        |
| 1235.7112      | 11 | V  | 16 | 1751.8023      | 876.4050        |
| 1322.7432      | 12 | S  | 15 | 1652.7339      | 826.8708        |
| 1450.8018      | 13 | Q  | 14 | 1565.7018      | 783.3548        |
| 1521.8389      | 14 | A  | 13 | 1437.6433      | 719.3255        |
| 1578.8604      | 15 | G  | 12 | 1366.6061      | 683.8070        |
| 1707.9030      | 16 | E  | 11 | 1309.5847      | 655.2963        |
| 1836.9456      | 17 | E  | 10 | 1180.5421      | 590.7750        |
| 1967.9861      | 18 | M  | 9  | 1051.4995      | 526.2537        |
| 2097.0287      | 19 | E  | 8  | 920.4590       | 460.7334        |
| 2225.0872      | 20 | Q  | 7  | 791.4164       | 396.2121        |
| 2372.1556      | 21 | F  | 6  | 663.3578       | 332.1828        |
| 2429.1771      | 22 | G  | 5  | 516.2894       | 258.6486        |
| 2557.2357      | 23 | Q  | 4  | 459.2680       | 230.1379        |
| 2614.2572      | 24 | G  | 3  | 331.2094       | 166.1086        |
| 2713.3256      | 25 | V  | 2  | 274.1879       | 137.5979        |
|                | 26 | R  | 1  | 175.1195       | 88.0637         |

N-term:+29.04 K(5):+156.13

X-range:

0 - 0

MassTol: Y-zoom:

0. 1.

MassType:

☐AVG ☒MONO

Axis:

☒1 ☐2

Label:

☒I ☐M ☐-

Ions:

a ☐+ ☐2+ ☐3+

b ☒+ ☐2+ ☐3+

c ☐+ ☐2+ ☐3+

x ☐+ ☐2+ ☐3+

y ☒+ ☒2+ ☐3+

z ☐+ ☐2+ ☐3+

hide H<sub>2</sub>O/NH<sub>3</sub> ☐

zoom 112-122 ☐

GO

QEIAQEFKTLFGR, MH+ 1622.8906, m/z 541.6351  
L OS G15 P120811 220811-s1.05975.05975.3.dta

scan 5975; 7.6e+000

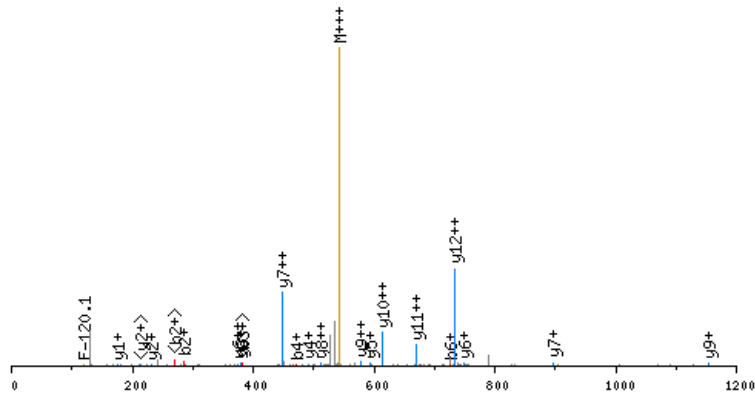

click image to zoom in; click top corners to zoom out [\[precursor±\]](#)

scan 5971; 541.6 m/z; 2.3e+000

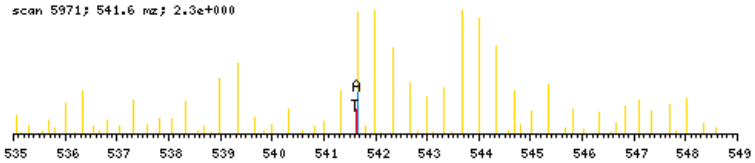

zoomed in precursor plot; T=theoretical m/z, A=acquired m/z

| b <sup>+</sup> | #  | AA | #  | y <sup>+</sup> | y <sup>2+</sup> |
|----------------|----|----|----|----------------|-----------------|
| 157.0977       | 1  | Q  | 13 |                |                 |
| 286.1403       | 2  | E  | 12 | 1466.8008      | 733.9043        |
| 399.2243       | 3  | I  | 11 | 1337.7582      | 669.3830        |
| 470.2614       | 4  | A  | 10 | 1224.6741      | 612.8410        |
| 598.3200       | 5  | Q  | 9  | 1153.6370      | 577.3224        |
| 727.3626       | 6  | E  | 8  | 1025.5784      | 513.2931        |
| 874.4310       | 7  | F  | 7  | 896.5358       | 448.7718        |
| 1030.5573      | 8  | K  | 6  | 749.4674       | 375.2376        |
| 1131.6050      | 9  | T  | 5  | 593.3411       | 297.1745        |
| 1244.6891      | 10 | L  | 4  | 492.2934       | 246.6506        |
| 1391.7575      | 11 | F  | 3  | 379.2094       | 190.1086        |
| 1448.7790      | 12 | G  | 2  | 232.1410       | 116.5744        |
|                | 13 | R  | 1  | 175.1195       | 88.0637         |

N-term:+29.04 K(8):+156.13

X-range:

0 - 0

MassTol: Y-zoom:

0. 1.

MassType:

☐AVG ☒MONO

Axis:

☒1 ☐2

Label:

☒I ☐M ☐-

Ions:

a ☐+ ☐2+ ☐3+

b ☒+ ☐2+ ☐3+

c ☐+ ☐2+ ☐3+

x ☐+ ☐2+ ☐3+

y ☒+ ☒2+ ☐3+

z ☐+ ☐2+ ☐3+

hide H<sub>2</sub>O/NH<sub>3</sub> ☐

zoom 112-122 ☐

GO

QEYDEAGPSIVHR, MH+ 1528.7396, m/z 510.2514  
L OS G16 P120811 220811-s1.03059.03059.3.dta

scan 3059; 3.6e+000

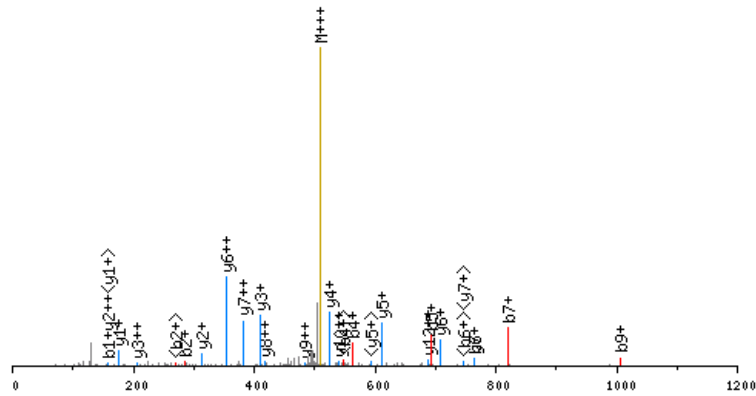

click image to zoom in; click top corners to zoom out

[precursor±]

scan 3058; 510.3 m/z; 1.1e+001

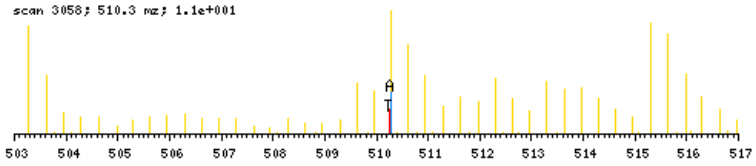

zoomed in precursor plot; T=theoretical m/z, A=acquired m/z

| b <sup>+</sup> | #  | AA | #  | y <sup>+</sup> | y <sup>2+</sup> |
|----------------|----|----|----|----------------|-----------------|
| 157.0977       | 1  | Q  | 13 |                |                 |
| 286.1403       | 2  | E  | 12 | 1372.6497      | 686.8288        |
| 449.2036       | 3  | Y  | 11 | 1243.6071      | 622.3075        |
| 564.2305       | 4  | D  | 10 | 1080.5438      | 540.7758        |
| 693.2731       | 5  | E  | 9  | 965.5169       | 483.2623        |
| 764.3102       | 6  | A  | 8  | 836.4743       | 418.7410        |
| 821.3317       | 7  | G  | 7  | 765.4371       | 383.2225        |
| 918.3845       | 8  | P  | 6  | 708.4157       | 354.7118        |
| 1005.4165      | 9  | S  | 5  | 611.3629       | 306.1854        |
| 1118.5006      | 10 | I  | 4  | 524.3309       | 262.6694        |
| 1217.5690      | 11 | V  | 3  | 411.2468       | 206.1273        |
| 1354.6279      | 12 | H  | 2  | 312.1784       | 156.5931        |
|                | 13 | R  | 1  | 175.1195       | 88.0637         |

N-term:+29.04

X-range:

0 - 0

MassTol: Y-zoom:

0. 1.

MassType:

☐AVG ☒MONO

Axis:

☒1 ☐2

Label:

☒I ☐M ☐-

Ions:

a ☐+ ☐2+ ☐3+

b ☒+ ☐2+ ☐3+

c ☐+ ☐2+ ☐3+

x ☐+ ☐2+ ☐3+

y ☒+ ☒2+ ☐3+

z ☐+ ☐2+ ☐3+

hide H<sub>2</sub>O/NH<sub>3</sub> ☐

zoom 112-122 ☐

GO

QEYIYSIHTR, MH+ 1337.6854, m/z 446.5666  
L OS G16 P120811 220811-s1.03550.03550.3.dta

scan 3550; 1.0e+001

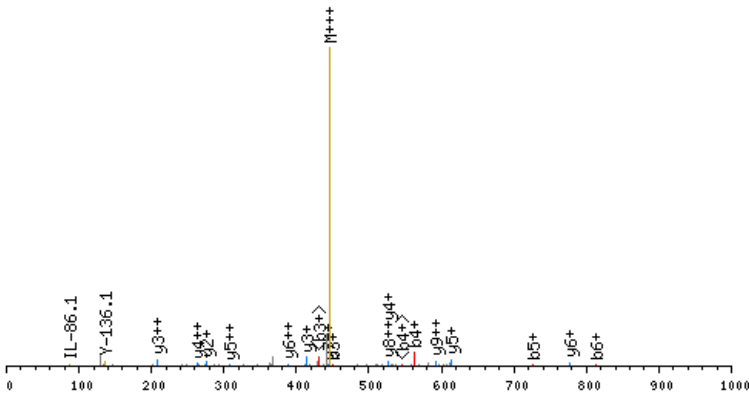

click image to zoom in; click top corners to zoom out

[precursor±]

scan 3548; 446.6 m/z; 8.4e+000

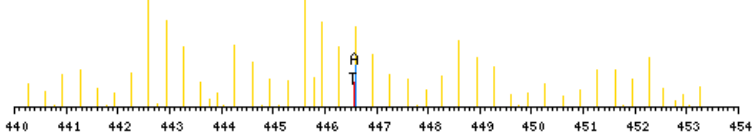

zoomed in precursor plot; T=theoretical m/z, A=acquired m/z

| b <sup>+</sup> | #  | AA | #  | y <sup>+</sup> | y <sup>2+</sup> |
|----------------|----|----|----|----------------|-----------------|
| 157.0977       | 1  | Q  | 10 |                |                 |
| 286.1403       | 2  | E  | 9  | 1181.5955      | 591.3017        |
| 449.2036       | 3  | Y  | 8  | 1052.5529      | 526.7804        |
| 562.2877       | 4  | I  | 7  | 889.4896       | 445.2487        |
| 725.3510       | 5  | Y  | 6  | 776.4055       | 388.7067        |
| 812.3830       | 6  | S  | 5  | 613.3422       | 307.1750        |
| 925.4671       | 7  | I  | 4  | 526.3102       | 263.6590        |
| 1062.5260      | 8  | H  | 3  | 413.2261       | 207.1170        |
| 1163.5737      | 9  | T  | 2  | 276.1672       | 138.5875        |
|                | 10 | R  | 1  | 175.1195       | 88.0637         |

N-term:+29.04

X-range:

0 - 0

MassTol: Y-zoom:

0. 1.

MassType:

☐AVG ☒MONO

Axis:

☒1 ☐2

Label:

☒I ☐M ☐-

Ions:

a ☐+ ☐2+ ☐3+

b ☒+ ☐2+ ☐3+

c ☐+ ☐2+ ☐3+

x ☐+ ☐2+ ☐3+

y ☒+ ☒2+ ☐3+

z ☐+ ☐2+ ☐3+

hide H<sub>2</sub>O/NH<sub>3</sub> ☐

zoom 112-122 ☐

GO

QGADAALHFNPR, MH+ 1324.6762, m/z 442.2302  
L OS G16 P120811 220811-s1.03371.03371.3.dta

scan 3371; 4.8e+000

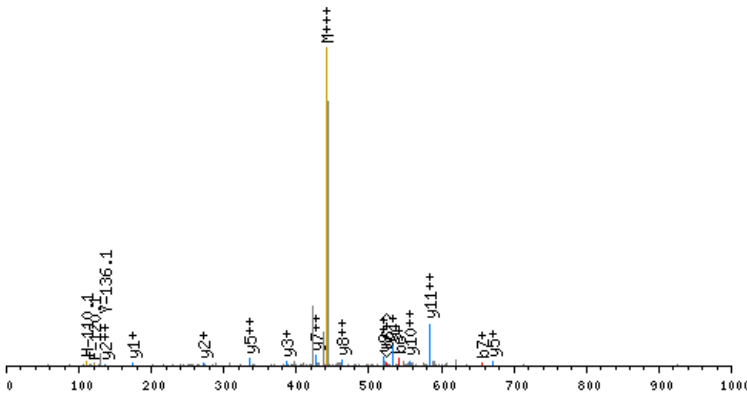

click image to zoom in; click top corners to zoom out [precursor±]

scan 3368; 442.2 m/z; 7.0e+000

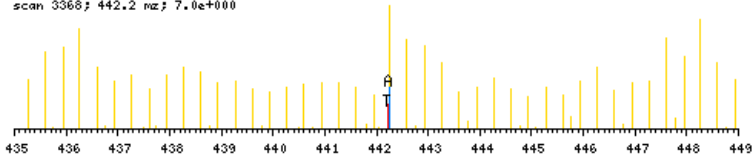

zoomed in precursor plot; T=theoretical m/z, A=acquired m/z

| b <sup>+</sup> | #  | AA | #  | y <sup>+</sup> | y <sup>2+</sup> |
|----------------|----|----|----|----------------|-----------------|
| 157.0977       | 1  | Q  | 12 |                |                 |
| 214.1191       | 2  | G  | 11 | 1168.5863      | 584.7971        |
| 285.1563       | 3  | A  | 10 | 1111.5649      | 556.2863        |
| 400.1832       | 4  | D  | 9  | 1040.5278      | 520.7678        |
| 471.2203       | 5  | A  | 8  | 925.5008       | 463.2543        |
| 542.2574       | 6  | A  | 7  | 854.4637       | 427.7358        |
| 655.3415       | 7  | L  | 6  | 783.4266       | 392.2172        |
| 792.4004       | 8  | H  | 5  | 670.3425       | 335.6752        |
| 939.4688       | 9  | F  | 4  | 533.2836       | 267.1457        |
| 1053.5117      | 10 | N  | 3  | 386.2152       | 193.6115        |
| 1150.5645      | 11 | P  | 2  | 272.1723       | 136.5900        |
|                | 12 | R  | 1  | 175.1195       | 88.0637         |

N-term:+29.04

X-range:

-

MassTol: Y-zoom:

MassType:

☐ AVG ☒ MONO

Axis:

☒ 1 ☐ 2

Label:

☒ I ☐ M ☐ -

Ions:

a ☐ + ☐ 2+ ☐ 3+

b ☒ + ☐ 2+ ☐ 3+

c ☐ + ☐ 2+ ☐ 3+

x ☐ + ☐ 2+ ☐ 3+

y ☒ + ☒ 2+ ☐ 3+

z ☐ + ☐ 2+ ☐ 3+

hide H<sub>2</sub>O/NH<sub>3</sub> ☐

zoom 112-122 ☐

GO

QGDGEDNHVDGDKGPR, MH+ 1763.8585, m/z 588.6243  
H OS G16 P120811 220811-s1.01991.01991.3.dta

scan 1991; 4.4e+000

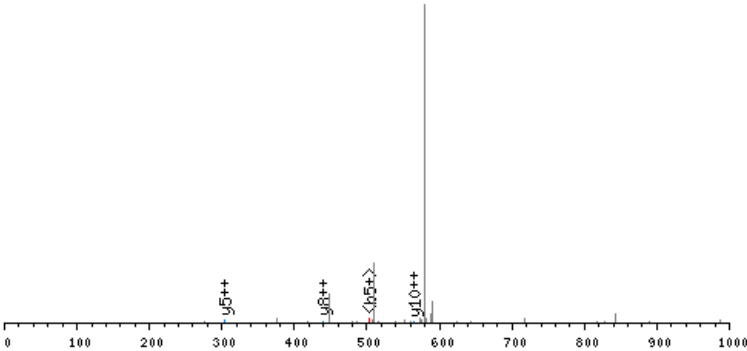

click image to zoom in; click top corners to zoom out

[precursor±]

scan 1989; 588.6 m/z; 1.3e+000

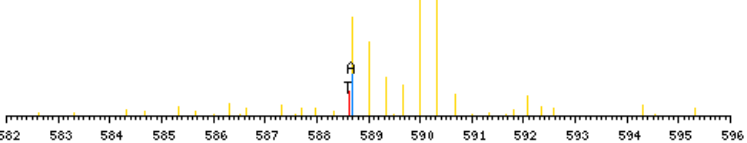

zoomed in precursor plot; T=theoretical m/z, A=acquired m/z

| b <sup>+</sup> | #  | AA | #  | y <sup>+</sup> | y <sup>2+</sup> |
|----------------|----|----|----|----------------|-----------------|
| 163.1295       | 1  | Q  | 16 |                |                 |
| 220.1509       | 2  | G  | 15 | 1601.7368      | 801.3723        |
| 335.1779       | 3  | D  | 14 | 1544.7154      | 772.8616        |
| 392.1993       | 4  | G  | 13 | 1429.6884      | 715.3481        |
| 521.2419       | 5  | E  | 12 | 1372.6670      | 686.8374        |
| 636.2689       | 6  | D  | 11 | 1243.6244      | 622.3161        |
| 750.3118       | 7  | N  | 10 | 1128.5974      | 564.8026        |
| 887.3707       | 8  | H  | 9  | 1014.5545      | 507.7812        |
| 986.4391       | 9  | V  | 8  | 877.4956       | 439.2517        |
| 1101.4661      | 10 | D  | 7  | 778.4272       | 389.7175        |
| 1158.4875      | 11 | G  | 6  | 663.4002       | 332.2040        |
| 1273.5145      | 12 | D  | 5  | 606.3788       | 303.6933        |
| 1435.6726      | 13 | K  | 4  | 491.3518       | 246.1798        |
| 1492.6941      | 14 | G  | 3  | 329.1937       | 165.1008        |
| 1589.7468      | 15 | P  | 2  | 272.1723       | 136.5900        |
|                | 16 | R  | 1  | 175.1195       | 88.0637         |

N-term:+35.07 K(13):+162.16

X-range:

0 - 0

MassTol: Y-zoom:

0. 1.

MassType:

☐AVG ☒MONO

Axis:

☒1 ☐2

Label:

☒I ☐M ☐-

Ions:

a ☐+ ☐2+ ☐3+

b ☒+ ☐2+ ☐3+

c ☐+ ☐2+ ☐3+

x ☐+ ☐2+ ☐3+

y ☒+ ☒2+ ☐3+

z ☐+ ☐2+ ☐3+

hide H<sub>2</sub>O/NH<sub>3</sub> ☐

zoom 112-122 ☐

GO

QIAATELEKEESR, MH+ 1559.8281, m/z 520.6142  
L OS G16 P120811 220811-s1.03094.03094.3.dta

scan 3094; 1.6e+001

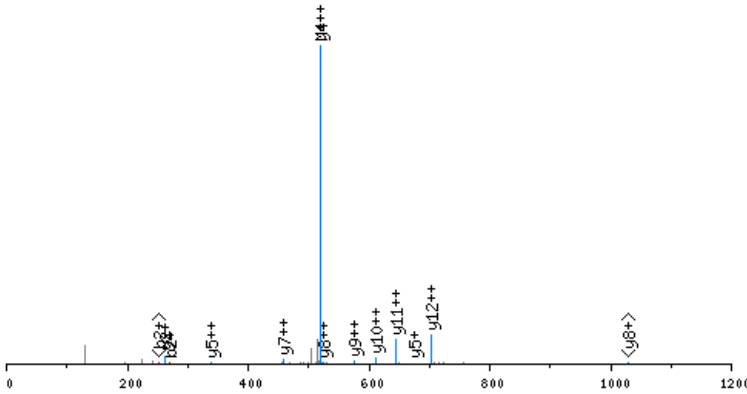

click image to zoom in; click top corners to zoom out [precursor±]

scan 3093; 520.6 m/z; 6.0e+000

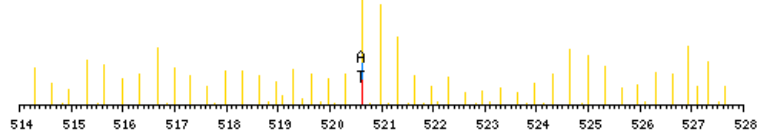

zoomed in precursor plot; T=theoretical m/z, A=acquired m/z

| b <sup>+</sup> | #  | AA | #  | y <sup>+</sup> | y <sup>2+</sup> |
|----------------|----|----|----|----------------|-----------------|
| 157.0977       | 1  | Q  | 13 |                |                 |
| 270.1817       | 2  | I  | 12 | 1403.7382      | 702.3730        |
| 341.2189       | 3  | A  | 11 | 1290.6542      | 645.8310        |
| 412.2560       | 4  | A  | 10 | 1219.6171      | 610.3124        |
| 513.3036       | 5  | T  | 9  | 1148.5799      | 574.7939        |
| 642.3462       | 6  | E  | 8  | 1047.5323      | 524.2700        |
| 755.4303       | 7  | L  | 7  | 918.4897       | 459.7487        |
| 884.4729       | 8  | E  | 6  | 805.4056       | 403.2067        |
| 1040.5992      | 9  | K  | 5  | 676.3630       | 338.6854        |
| 1169.6418      | 10 | E  | 4  | 520.2367       | 260.6223        |
| 1298.6844      | 11 | E  | 3  | 391.1941       | 196.1010        |
| 1385.7164      | 12 | S  | 2  | 262.1515       | 131.5797        |
|                | 13 | R  | 1  | 175.1195       | 88.0637         |

N-term:+29.04 K(9):+156.13

N-term:+29.04 K(2):+156.13

X-range:

0 - 0

MassTol: Y-zoom:

0. 1.

MassType:

☐AVG ☒MONO

Axis:

☒1 ☐2

Label:

☒I ☐M ☐-

Ions:

a ☐+ ☐2+ ☐3+

b ☒+ ☐2+ ☐3+

c ☐+ ☐2+ ☐3+

x ☐+ ☐2+ ☐3+

y ☒+ ☒2+ ☐3+

z ☐+ ☐2+ ☐3+

hide H<sub>2</sub>O/NH<sub>3</sub> ☐

zoom 112-122 ☐

GO

QKVAPLGAEIQESAR, MH+ 1652.9336, m/z 551.6494  
L OS G15 P120811 220811-s1.03245.03245.3.dta

scan 3245; 1.4e+000

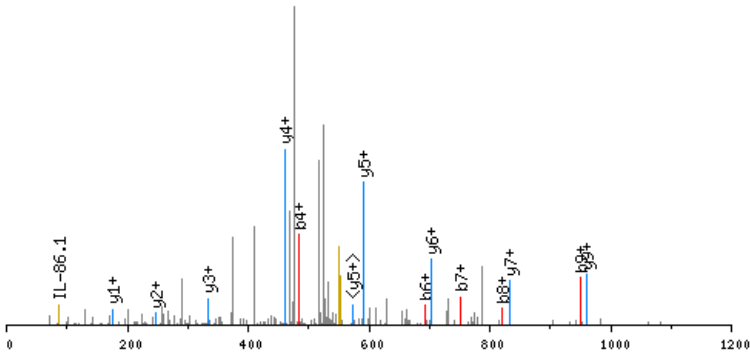

click image to zoom in; click top corners to zoom out

[precursor±]

scan 3241; 551.6 m/z; 1.1e+001

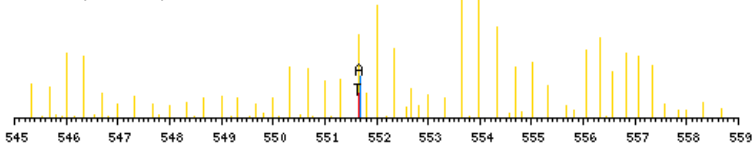

zoomed in precursor plot; T=theoretical m/z, A=acquired m/z

| b <sup>+</sup> | #  | AA | #  | y <sup>+</sup> | y <sup>2+</sup> |
|----------------|----|----|----|----------------|-----------------|
| 157.0977       | 1  | Q  | 15 |                |                 |
| 313.2240       | 2  | K  | 14 | 1496.8437      | 748.9258        |
| 412.2924       | 3  | V  | 13 | 1340.7174      | 670.8626        |
| 483.3295       | 4  | A  | 12 | 1241.6490      | 621.3284        |
| 580.3823       | 5  | P  | 11 | 1170.6119      | 585.8099        |
| 693.4663       | 6  | L  | 10 | 1073.5591      | 537.2835        |
| 750.4878       | 7  | G  | 9  | 960.4750       | 480.7414        |
| 821.5249       | 8  | A  | 8  | 903.4536       | 452.2307        |
| 950.5675       | 9  | E  | 7  | 832.4165       | 416.7121        |
| 1063.6516      | 10 | L  | 6  | 703.3739       | 352.1909        |
| 1191.7101      | 11 | Q  | 5  | 590.2898       | 295.6488        |
| 1320.7527      | 12 | E  | 4  | 462.2312       | 231.6195        |
| 1407.7848      | 13 | S  | 3  | 333.1886       | 167.0982        |
| 1478.8219      | 14 | A  | 2  | 246.1566       | 123.5822        |
|                | 15 | R  | 1  | 175.1195       | 88.0637         |

N-term:+29.04 K(2):+156.13

X-range:

0 - 0

MassTol: Y-zoom:

0. 1.

MassType:

☐AVG ☒MONO

Axis:

☒1 ☐2

Label:

☒I ☐M ☐-

Ions:

a ☐+ ☐2+ ☐3+

b ☒+ ☐2+ ☐3+

c ☐+ ☐2+ ☐3+

x ☐+ ☐2+ ☐3+

y ☒+ ☒2+ ☐3+

z ☐+ ☐2+ ☐3+

hide H<sub>2</sub>O/NH<sub>3</sub> ☐

zoom 112-122 ☐

GO

QLKEAKHIAEDSDR, MH+ 1723.9343, m/z 431.7390  
L OS G19 P120811 220811-s1.01943.01943.4.dta

scan 1943; 1.6e+000

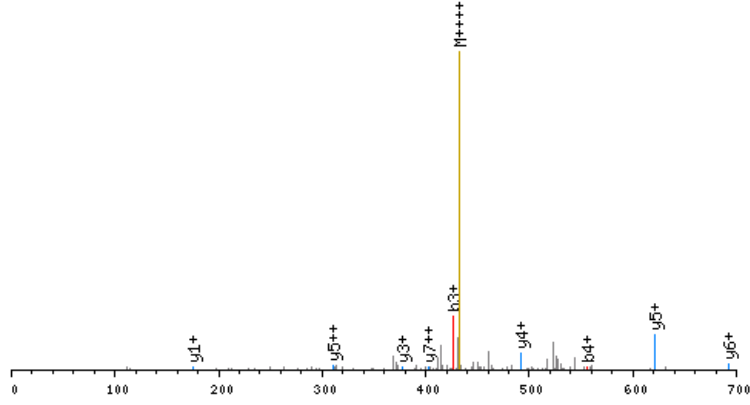

click image to zoom in; click top corners to zoom out

[precursor±]

scan 1941; 431.7 m/z; 2.5e+000

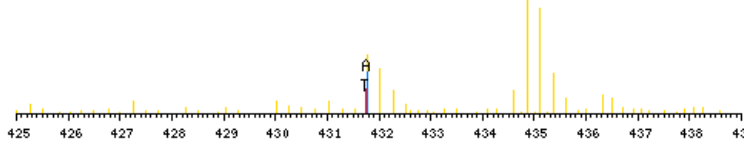

zoomed in precursor plot; T=theoretical m/z, A=acquired m/z

| b <sup>+</sup> | #  | AA | #  | y <sup>+</sup> | y <sup>2+</sup> |
|----------------|----|----|----|----------------|-----------------|
| 157.0977       | 1  | Q  | 14 |                |                 |
| 270.1817       | 2  | L  | 13 | 1567.8445      | 784.4261        |
| 426.3080       | 3  | K  | 12 | 1454.7604      | 727.8841        |
| 555.3506       | 4  | E  | 11 | 1298.6341      | 649.8210        |
| 626.3877       | 5  | A  | 10 | 1169.5915      | 585.2997        |
| 782.5140       | 6  | K  | 9  | 1098.5544      | 549.7811        |
| 919.5730       | 7  | H  | 8  | 942.4281       | 471.7180        |
| 1032.6570      | 8  | I  | 7  | 805.3692       | 403.1885        |
| 1103.6941      | 9  | A  | 6  | 692.2851       | 346.6465        |
| 1232.7367      | 10 | E  | 5  | 621.2480       | 311.1279        |
| 1347.7637      | 11 | D  | 4  | 492.2054       | 246.6066        |
| 1434.7957      | 12 | S  | 3  | 377.1785       | 189.0931        |
| 1549.8226      | 13 | D  | 2  | 290.1464       | 145.5771        |
|                | 14 | R  | 1  | 175.1195       | 88.0637         |

N-term:+29.04 K(3):+156.13  
K(6):+156.13

X-range:

0 - 0

MassTol: Y-zoom:

0. 1.

MassType:

☐AVG ☒MONO

Axis:

☒1 ☐2

Label:

☒I ☐M ☐-

Ions:

a ☐+ ☐2+ ☐3+

b ☒+ ☐2+ ☐3+

c ☐+ ☐2+ ☐3+

x ☐+ ☐2+ ☐3+

y ☒+ ☒2+ ☐3+

z ☐+ ☐2+ ☐3+

hide H<sub>2</sub>O/NH<sub>3</sub> ☐

zoom 112-122 ☐

GO

QLLLTADDR, MH+ 1072.6002, m/z 536.8037  
L OS G13 P120811 220811-s1.04240.04240.2.dta

scan 4240; 5.7e+000

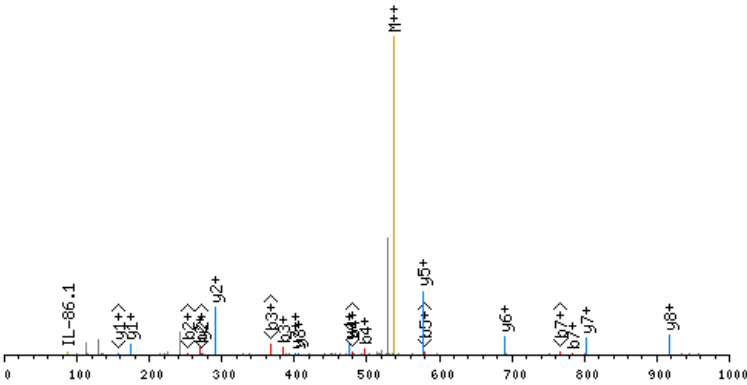

click image to zoom in; click top corners to zoom out

[precursor±]

scan 4239; 536.8 m/z; 5.1e+001

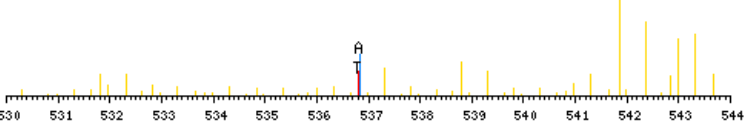

zoomed in precursor plot; T=theoretical m/z, A=acquired m/z

| b <sup>+</sup> | # | AA | # | y <sup>+</sup> | y <sup>2+</sup> |
|----------------|---|----|---|----------------|-----------------|
| 157.0977       | 1 | Q  | 9 |                |                 |
| 270.1817       | 2 | L  | 8 | 916.5104       | 458.7591        |
| 383.2658       | 3 | L  | 7 | 803.4263       | 402.2171        |
| 496.3499       | 4 | L  | 6 | 690.3422       | 345.6750        |
| 597.3975       | 5 | T  | 5 | 577.2582       | 289.1330        |
| 668.4347       | 6 | A  | 4 | 476.2105       | 238.6092        |
| 783.4616       | 7 | D  | 3 | 405.1734       | 203.0906        |
| 898.4885       | 8 | D  | 2 | 290.1464       | 145.5771        |
|                | 9 | R  | 1 | 175.1195       | 88.0637         |

N-term:+29.04

X-range:

0 - 0

MassTol: Y-zoom:

0. 1.

MassType:

☐AVG ☒MONO

Axis:

☒1 ☐2

Label:

☒I ☐M ☐-

Ions:

a ☐+ ☐2+ ☐3+

b ☒+ ☐2+ ☐3+

c ☐+ ☐2+ ☐3+

x ☐+ ☐2+ ☐3+

y ☒+ ☒2+ ☐3+

z ☐+ ☐2+ ☐3+

hide H<sub>2</sub>O/NH<sub>3</sub> ☐

zoom 112-122 ☐

GO

QLVDSGKVDPEAR, MH+ 1372.7436, m/z 458.2527  
L OS G16 P120811 220811-s1.02571.02571.3.dta

scan 2571; 2.0e+001

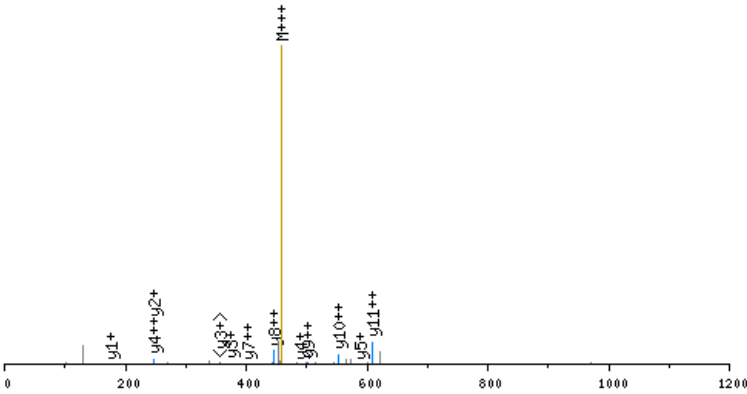

click image to zoom in; click top corners to zoom out [\[precursor±\]](#)

scan 2568; 458.3 m/z; 1.0e+001

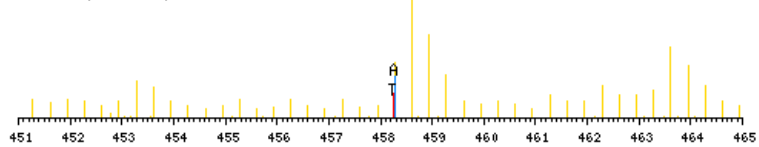

zoomed in precursor plot; T=theoretical m/z, A=acquired m/z

| b <sup>+</sup> | #  | AA | #  | y <sup>+</sup> | y <sup>2+</sup> |
|----------------|----|----|----|----------------|-----------------|
| 157.0977       | 1  | Q  | 12 |                |                 |
| 270.1817       | 2  | L  | 11 | 1216.6538      | 608.8308        |
| 369.2502       | 3  | V  | 10 | 1103.5697      | 552.2888        |
| 484.2771       | 4  | D  | 9  | 1004.5013      | 502.7546        |
| 571.3091       | 5  | S  | 8  | 889.4744       | 445.2411        |
| 628.3306       | 6  | G  | 7  | 802.4423       | 401.7251        |
| 784.4569       | 7  | K  | 6  | 745.4209       | 373.2143        |
| 883.5253       | 8  | V  | 5  | 589.2946       | 295.1512        |
| 998.5522       | 9  | D  | 4  | 490.2262       | 245.6170        |
| 1127.5948      | 10 | E  | 3  | 375.1992       | 188.1035        |
| 1198.6320      | 11 | A  | 2  | 246.1566       | 123.5822        |
|                | 12 | R  | 1  | 175.1195       | 88.0637         |

N-term:+29.04 K(7):+156.13

X-range:

0 - 0

MassTol: Y-zoom:

0. 1.

MassType:

☐ AVG ☒ MONO

Axis:

☒ 1 ☐ 2

Label:

☒ I ☐ M ☐ -

Ions:

a ☐ + ☐ 2+ ☐ 3+

b ☒ + ☐ 2+ ☐ 3+

c ☐ + ☐ 2+ ☐ 3+

x ☐ + ☐ 2+ ☐ 3+

y ☒ + ☒ 2+ ☐ 3+

z ☐ + ☐ 2+ ☐ 3+

hide H<sub>2</sub>O/NH<sub>3</sub> ☐

zoom 112-122 ☐

GO

QNYHQDAEAAINR, MH+ 1557.7410, m/z 519.9185  
L OS G16 P120811 220811-s1.02505.02505.3.dta

scan 2505; 2.5e+000

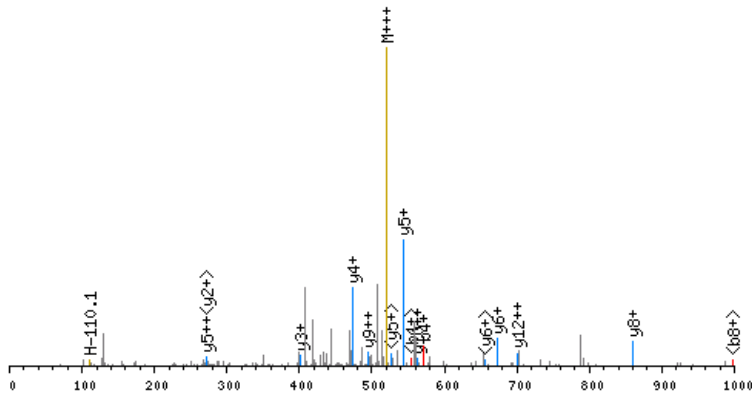

click image to zoom in; click top corners to zoom out

[precursor±]

scan 2503; 519.9 m/z; 4.9e+001

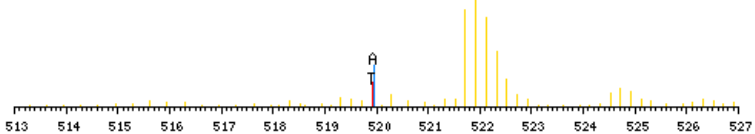

zoomed in precursor plot; T=theoretical m/z, A=acquired m/z

| b <sup>+</sup> | #  | AA | #  | y <sup>+</sup> | y <sup>2+</sup> |
|----------------|----|----|----|----------------|-----------------|
| 157.0977       | 1  | Q  | 13 |                |                 |
| 271.1406       | 2  | N  | 12 | 1401.6511      | 701.3295        |
| 434.2039       | 3  | Y  | 11 | 1287.6082      | 644.3080        |
| 571.2628       | 4  | H  | 10 | 1124.5449      | 562.7763        |
| 699.3214       | 5  | Q  | 9  | 987.4859       | 494.2469        |
| 814.3484       | 6  | D  | 8  | 859.4274       | 430.2176        |
| 885.3855       | 7  | A  | 7  | 744.4004       | 372.7041        |
| 1014.4281      | 8  | E  | 6  | 673.3633       | 337.1856        |
| 1085.4652      | 9  | A  | 5  | 544.3207       | 272.6643        |
| 1156.5023      | 10 | A  | 4  | 473.2836       | 237.1457        |
| 1269.5864      | 11 | I  | 3  | 402.2465       | 201.6272        |
| 1383.6293      | 12 | N  | 2  | 289.1624       | 145.0851        |
|                | 13 | R  | 1  | 175.1195       | 88.0637         |

N-term:+29.04

X-range:

0 - 0

MassTol: Y-zoom:

0. 1.

MassType:

☐AVG ☒MONO

Axis:

☒1 ☐2

Label:

☒I ☐M ☐-

Ions:

a ☐+ ☐2+ ☐3+

b ☒+ ☐2+ ☐3+

c ☐+ ☐2+ ☐3+

x ☐+ ☐2+ ☐3+

y ☒+ ☒2+ ☐3+

z ☐+ ☐2+ ☐3+

hide H<sub>2</sub>O/NH<sub>3</sub> ☐

zoom 112-122 ☐

GO

QPGEVSALGQGPAR, MH+ 1400.7710, m/z 467.5952  
H OS G16 P120811 220811-s1.04609.04609.3.dta

scan 4609; 7.1e+001

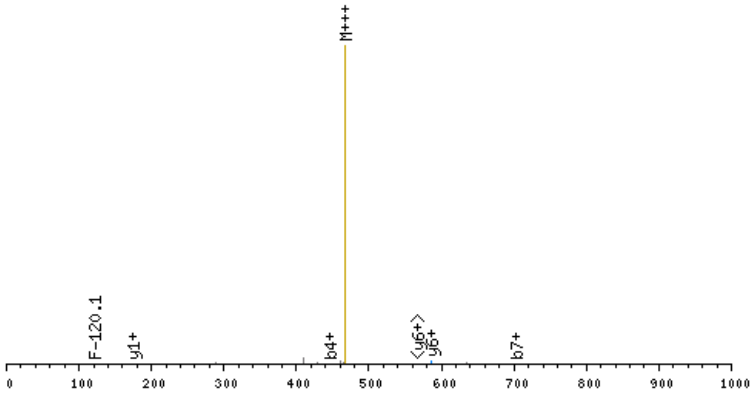

click image to zoom in; click top corners to zoom out

[precursor±]

scan 4608; 467.6 m/z; 2.9e+001

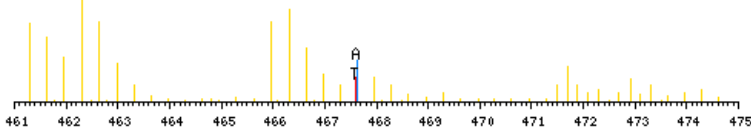

zoomed in precursor plot; T=theoretical m/z, A=acquired m/z

| b <sup>+</sup> | #  | AA | #  | y <sup>+</sup> | y <sup>2+</sup> |
|----------------|----|----|----|----------------|-----------------|
| 163.1295       | 1  | Q  | 14 |                |                 |
| 260.1822       | 2  | P  | 13 | 1238.6493      | 619.8286        |
| 317.2037       | 3  | G  | 12 | 1141.5966      | 571.3022        |
| 446.2463       | 4  | E  | 11 | 1084.5751      | 542.7915        |
| 545.3147       | 5  | V  | 10 | 955.5325       | 478.2702        |
| 632.3467       | 6  | S  | 9  | 856.4641       | 428.7360        |
| 703.3839       | 7  | A  | 8  | 769.4321       | 385.2199        |
| 816.4679       | 8  | L  | 7  | 698.3949       | 349.7014        |
| 873.4894       | 9  | G  | 6  | 585.3109       | 293.1594        |
| 1001.5480      | 10 | Q  | 5  | 528.2894       | 264.6486        |
| 1058.5694      | 11 | G  | 4  | 400.2308       | 200.6193        |
| 1155.6222      | 12 | P  | 3  | 343.2094       | 172.1086        |
| 1226.6593      | 13 | A  | 2  | 246.1566       | 123.5822        |
|                | 14 | R  | 1  | 175.1195       | 88.0637         |

N-term:+35.07

X-range:

0 - 0

MassTol: Y-zoom:

0. 1.

MassType:

☐AVG ☒MONO

Axis:

☒1 ☐2

Label:

☒I ☐M ☐-

Ions:

a ☐+ ☐2+ ☐3+

b ☒+ ☐2+ ☐3+

c ☐+ ☐2+ ☐3+

x ☐+ ☐2+ ☐3+

y ☒+ ☒2+ ☐3+

z ☐+ ☐2+ ☐3+

hide H<sub>2</sub>O/NH<sub>3</sub> ☐

zoom 112-122 ☐

GO

QPGLPAVLSSPSPPLSPR, MH+ 1828.0332, m/z 457.7638  
L OS G17 P120811 220811-s1.01879.01879.4.dta

scan 1879; 1.8e+001

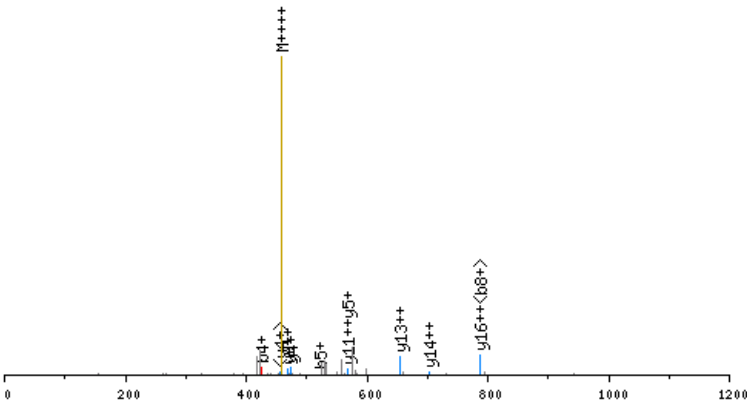

click image to zoom in; click top corners to zoom out [\[precursor±\]](#)

scan 1878; 457.8 m/z; 1.9e+001

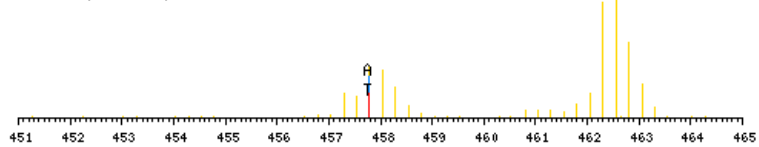

zoomed in precursor plot; T=theoretical m/z, A=acquired m/z

| b <sup>+</sup> | #  | AA | #  | y <sup>+</sup> | y <sup>2+</sup> |
|----------------|----|----|----|----------------|-----------------|
| 157.0977       | 1  | Q  | 18 |                |                 |
| 254.1504       | 2  | P  | 17 | 1671.9434      | 836.4756        |
| 311.1719       | 3  | G  | 16 | 1574.8906      | 787.9492        |
| 424.2560       | 4  | L  | 15 | 1517.8692      | 759.4385        |
| 521.3087       | 5  | P  | 14 | 1404.7851      | 702.8965        |
| 592.3458       | 6  | A  | 13 | 1307.7323      | 654.3701        |
| 691.4143       | 7  | V  | 12 | 1236.6952      | 618.8515        |
| 804.4983       | 8  | L  | 11 | 1137.6268      | 569.3173        |
| 891.5304       | 9  | S  | 10 | 1024.5427      | 512.7753        |
| 978.5624       | 10 | S  | 9  | 937.5107       | 469.2593        |
| 1075.6151      | 11 | P  | 8  | 850.4787       | 425.7433        |
| 1162.6472      | 12 | S  | 7  | 753.4259       | 377.2169        |
| 1259.6999      | 13 | P  | 6  | 666.3939       | 333.7009        |
| 1356.7527      | 14 | P  | 5  | 569.3411       | 285.1745        |
| 1469.8368      | 15 | L  | 4  | 472.2884       | 236.6481        |
| 1556.8688      | 16 | S  | 3  | 359.2043       | 180.1061        |
| 1653.9216      | 17 | P  | 2  | 272.1723       | 136.5900        |
|                | 18 | R  | 1  | 175.1195       | 88.0637         |

N-term:+29.04

X-range:

0 - 0

MassTol: Y-zoom:

0. 1.

MassType:

☐AVG ☒MONO

Axis:

☒1 ☐2

Label:

☒I ☐M ☐-

Ions:

a ☐+ ☐2+ ☐3+

b ☒+ ☐2+ ☐3+

c ☐+ ☐2+ ☐3+

x ☐+ ☐2+ ☐3+

y ☒+ ☒2+ ☐3+

z ☐+ ☐2+ ☐3+

hide H<sub>2</sub>O/NH<sub>3</sub> ☐

zoom 112-122 ☐

GO

QPHLSVSSAANGHLGR, MH+ 1664.9045, m/z 555.6397  
H OS G12 P120811 220811-s1.05480.05480.3.dta

scan 5480; 5.7e+000

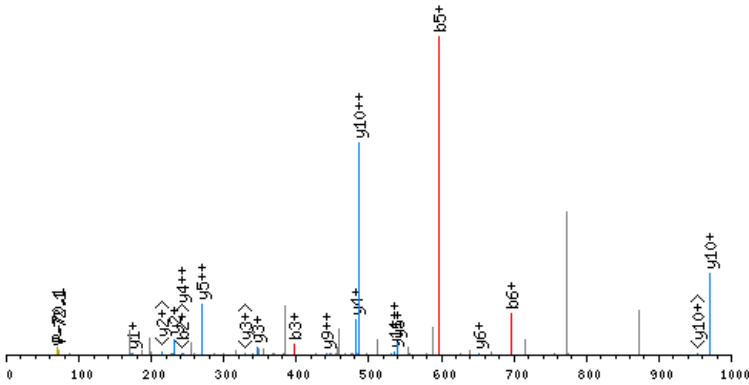

click image to zoom in; click top corners to zoom out

[precursor±]

scan 5477; 555.6 m/z; 8.7e+000

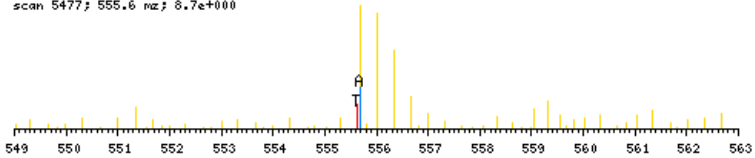

zoomed in precursor plot; T=theoretical m/z, A=acquired m/z

| b <sup>+</sup> | #  | AA | #  | y <sup>+</sup> | y <sup>2+</sup> |
|----------------|----|----|----|----------------|-----------------|
| 163.1295       | 1  | Q  | 16 |                |                 |
| 260.1822       | 2  | P  | 15 | 1502.7828      | 751.8953        |
| 397.2412       | 3  | H  | 14 | 1405.7300      | 703.3689        |
| 510.3252       | 4  | L  | 13 | 1268.6711      | 634.8395        |
| 597.3572       | 5  | S  | 12 | 1155.5871      | 578.2974        |
| 696.4257       | 6  | V  | 11 | 1068.5550      | 534.7814        |
| 783.4577       | 7  | S  | 10 | 969.4866       | 485.2472        |
| 870.4897       | 8  | S  | 9  | 882.4546       | 441.7312        |
| 941.5268       | 9  | A  | 8  | 795.4226       | 398.2152        |
| 1012.5639      | 10 | A  | 7  | 724.3854       | 362.6966        |
| 1126.6069      | 11 | N  | 6  | 653.3483       | 327.1781        |
| 1183.6283      | 12 | G  | 5  | 539.3054       | 270.1566        |
| 1320.6872      | 13 | H  | 4  | 482.2839       | 241.6459        |
| 1433.7713      | 14 | L  | 3  | 345.2250       | 173.1164        |
| 1490.7928      | 15 | G  | 2  | 232.1410       | 116.5744        |
|                | 16 | R  | 1  | 175.1195       | 88.0637         |

N-term:+35.07

X-range:

0 - 0

MassTol: Y-zoom:

0. 1.

MassType:

☐AVG ☒MONO

Axis:

☒1 ☐2

Label:

☒I ☐M ☐-

Ions:

a ☐+ ☐2+ ☐3+

b ☒+ ☐2+ ☐3+

c ☐+ ☐2+ ☐3+

x ☐+ ☐2+ ☐3+

y ☒+ ☒2+ ☐3+

z ☐+ ☐2+ ☐3+

hide H<sub>2</sub>O/NH<sub>3</sub> ☐

zoom 112-122 ☐

GO

QPPSASSSHSMGSSR, MH+ 1530.6971, m/z 510.9039  
L OS G13 P120811 220811-s1.04031.04031.3.dta

scan 4031; 1.4e+000

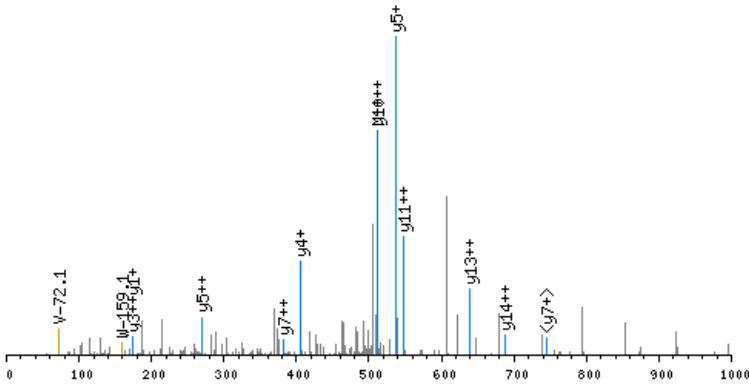

click image to zoom in; click top corners to zoom out [precursor±]

scan 4029; 510.9 m/z; 1.8e+001

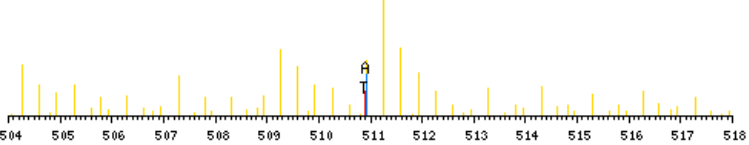

zoomed in precursor plot; T=theoretical m/z, A=acquired m/z

| b <sup>+</sup> | #  | AA | #  | y <sup>+</sup> | y <sup>2+</sup> |
|----------------|----|----|----|----------------|-----------------|
| 157.0977       | 1  | Q  | 15 |                |                 |
| 254.1504       | 2  | P  | 14 | 1374.6072      | 687.8075        |
| 351.2032       | 3  | P  | 13 | 1277.5544      | 639.2811        |
| 438.2352       | 4  | S  | 12 | 1180.5017      | 590.7547        |
| 509.2723       | 5  | A  | 11 | 1093.4696      | 547.2387        |
| 596.3044       | 6  | S  | 10 | 1022.4325      | 511.7202        |
| 683.3364       | 7  | S  | 9  | 935.4005       | 468.2042        |
| 770.3684       | 8  | S  | 8  | 848.3685       | 424.6881        |
| 907.4273       | 9  | H  | 7  | 761.3364       | 381.1721        |
| 994.4594       | 10 | S  | 6  | 624.2775       | 312.6427        |
| 1125.4999      | 11 | M  | 5  | 537.2455       | 269.1267        |
| 1182.5213      | 12 | G  | 4  | 406.2050       | 203.6064        |
| 1269.5533      | 13 | S  | 3  | 349.1836       | 175.0957        |
| 1356.5854      | 14 | S  | 2  | 262.1515       | 131.5797        |
|                | 15 | R  | 1  | 175.1195       | 88.0637         |

N-term:+29.04



X-range:

0 - 0

MassTol: Y-zoom:

0. 1.

MassType:

☐ AVG ☒ MONO

Axis:

☒ 1 ☐ 2

Label:

☒ I ☐ M ☐ -

Ions:

a ☐ + ☐ 2+ ☐ 3+

b ☒ + ☐ 2+ ☐ 3+

c ☐ + ☐ 2+ ☐ 3+

x ☐ + ☐ 2+ ☐ 3+

y ☒ + ☒ 2+ ☐ 3+

z ☐ + ☐ 2+ ☐ 3+

hide H<sub>2</sub>O/NH<sub>3</sub> ☐

zoom 112-122 ☐

GO

QTVAVGVIAVDKK, MH+ 1568.0152, m/z 392.7593  
L OS G17 P120811 220811-s1.03805.03805.4.dta

scan 3805; 3.4e+001

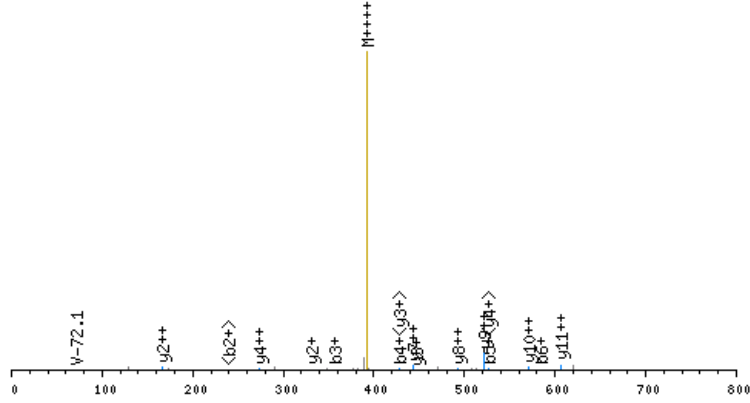

click image to zoom in; click top corners to zoom out [\[precursor±\]](#)

scan 3803; 392.8 mz; 7.1e+000

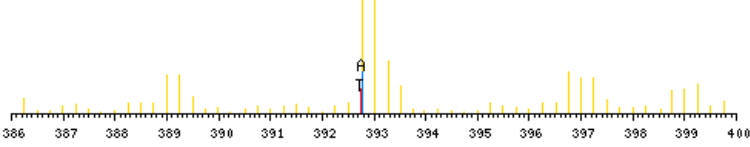

zoomed in precursor plot; T=theoretical m/z, A=acquired m/z

| b <sup>+</sup> | #  | AA | #  | y <sup>+</sup> | y <sup>2+</sup> |
|----------------|----|----|----|----------------|-----------------|
| 157.0977       | 1  | Q  | 14 |                |                 |
| 258.1454       | 2  | T  | 13 | 1411.9253      | 706.4666        |
| 357.2138       | 3  | V  | 12 | 1310.8776      | 655.9427        |
| 428.2509       | 4  | A  | 11 | 1211.8092      | 606.4085        |
| 527.3193       | 5  | V  | 10 | 1140.7721      | 570.8900        |
| 584.3408       | 6  | G  | 9  | 1041.7037      | 521.3558        |
| 683.4092       | 7  | V  | 8  | 984.6822       | 492.8450        |
| 796.4932       | 8  | I  | 7  | 885.6138       | 443.3108        |
| 952.6195       | 9  | K  | 6  | 772.5298       | 386.7688        |
| 1023.6567      | 10 | A  | 5  | 616.4035       | 308.7056        |
| 1122.7251      | 11 | V  | 4  | 545.3663       | 273.1871        |
| 1237.7520      | 12 | D  | 3  | 446.2979       | 223.6529        |
| 1393.8783      | 13 | K  | 2  | 331.2710       | 166.1394        |
|                | 14 | K  | 1  | 175.1447       | 88.0763         |

N-term:+29.04 K(9):+156.13  
K(13):+156.13 K(14):+156.13

X-range:

0 - 0

MassTol: Y-zoom:

0. 1.

MassType:

☐ AVG ☒ MONO

Axis:

☒ 1 ☐ 2

Label:

☒ I ☐ M ☐ -

Ions:

a ☐ + ☐ 2+ ☐ 3+

b ☒ + ☐ 2+ ☐ 3+

c ☐ + ☐ 2+ ☐ 3+

x ☐ + ☐ 2+ ☐ 3+

y ☒ + ☒ 2+ ☐ 3+

z ☐ + ☐ 2+ ☐ 3+

hide H<sub>2</sub>O/NH<sub>3</sub> ☐

zoom 112-122 ☐

GO

RAADEEAFEDNSEYYIR, MH+ 2071.9208, m/z 691.3118  
L OS G16 P120811 220811-s1.04260.04260.3.dta

scan 4260; 1.9e+000

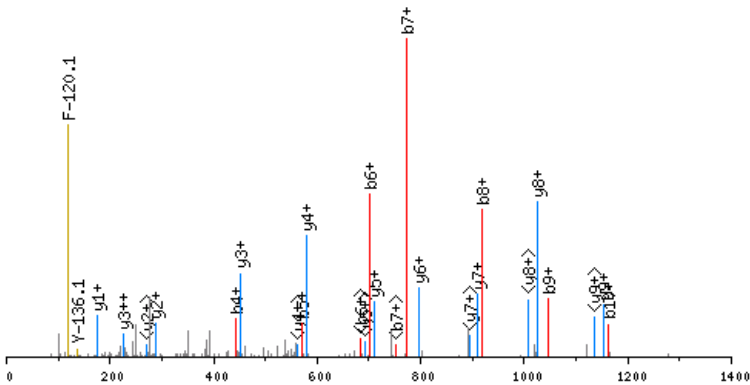

click image to zoom in; click top corners to zoom out

[precursor±]

scan 4258; 691.3 m/z; 7.2e+000

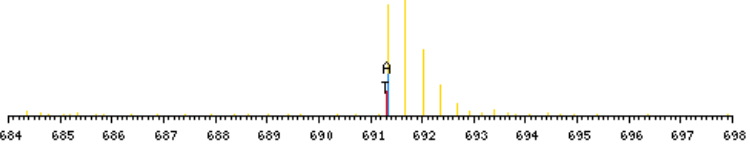

zoomed in precursor plot; T=theoretical m/z, A=acquired m/z

| b <sup>+</sup> | #  | AA | #  | y <sup>+</sup> | y <sup>2+</sup> |
|----------------|----|----|----|----------------|-----------------|
| 185.1402       | 1  | R  | 17 |                |                 |
| 256.1773       | 2  | A  | 16 | 1887.7885      | 944.3981        |
| 327.2144       | 3  | A  | 15 | 1816.7513      | 908.8796        |
| 442.2414       | 4  | D  | 14 | 1745.7142      | 873.3610        |
| 571.2840       | 5  | E  | 13 | 1630.6873      | 815.8476        |
| 700.3266       | 6  | E  | 12 | 1501.6447      | 751.3263        |
| 771.3637       | 7  | A  | 11 | 1372.6021      | 686.8050        |
| 918.4321       | 8  | F  | 10 | 1301.5650      | 651.2864        |
| 1047.4747      | 9  | E  | 9  | 1154.4966      | 577.7522        |
| 1162.5016      | 10 | D  | 8  | 1025.4540      | 513.2309        |
| 1276.5446      | 11 | N  | 7  | 910.4270       | 455.7174        |
| 1363.5766      | 12 | S  | 6  | 796.3841       | 398.6960        |
| 1492.6192      | 13 | E  | 5  | 709.3521       | 355.1800        |
| 1621.6618      | 14 | E  | 4  | 580.3095       | 290.6587        |
| 1784.7251      | 15 | Y  | 3  | 451.2669       | 226.1374        |
| 1897.8092      | 16 | I  | 2  | 288.2036       | 144.6057        |
|                | 17 | R  | 1  | 175.1195       | 88.0637         |

N-term:+29.04

X-range:

0 - 0

MassTol: Y-zoom:

0. 1.

MassType:

☐ AVG ☒ MONO

Axis:

☒ 1 ☐ 2

Label:

☒ I ☐ M ☐ -

Ions:

a ☐ + ☐ 2+ ☐ 3+

b ☒ + ☐ 2+ ☐ 3+

c ☐ + ☐ 2+ ☐ 3+

x ☐ + ☐ 2+ ☐ 3+

y ☒ + ☒ 2+ ☐ 3+

z ☐ + ☐ 2+ ☐ 3+

hide H<sub>2</sub>O/NH<sub>3</sub> ☐

zoom 112-122 ☐

GO

RAGSSSGVQASAGGLAADASR, MH+ 2105.0335, m/z 702.3494  
L OS G16 P120811 220811-s1.02620.02620.3.dta

scan 2620; 2.7e+000

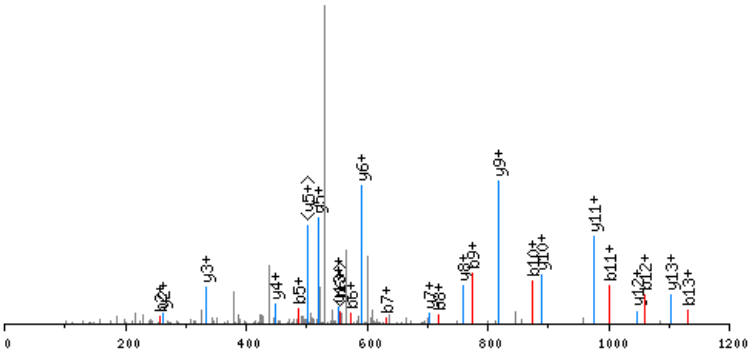

click image to zoom in; click top corners to zoom out [precursor±]

scan 2618; 702.3 m/z; 9.3e+000

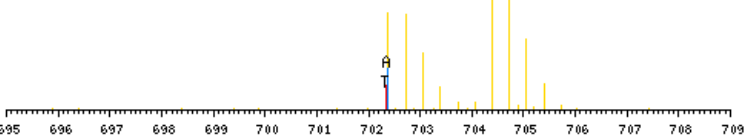

zoomed in precursor plot; T=theoretical m/z, A=acquired m/z

| b <sup>+</sup> | #  | AA | #  | y <sup>+</sup> | y <sup>2+</sup> |
|----------------|----|----|----|----------------|-----------------|
| 185.1402       | 1  | R  | 24 |                |                 |
| 256.1773       | 2  | A  | 23 | 1920.9011      | 960.9545        |
| 313.1988       | 3  | G  | 22 | 1849.8640      | 925.4359        |
| 400.2308       | 4  | S  | 21 | 1792.8426      | 896.9252        |
| 487.2628       | 5  | S  | 20 | 1705.8105      | 853.4092        |
| 574.2949       | 6  | S  | 19 | 1618.7785      | 809.8932        |
| 631.3163       | 7  | G  | 18 | 1531.7465      | 766.3771        |
| 718.3484       | 8  | S  | 17 | 1474.7250      | 737.8664        |
| 775.3698       | 9  | G  | 16 | 1387.6930      | 694.3504        |
| 874.4382       | 10 | V  | 15 | 1330.6715      | 665.8397        |
| 1002.4968      | 11 | Q  | 14 | 1231.6031      | 616.3055        |
| 1059.5183      | 12 | G  | 13 | 1103.5445      | 552.2762        |
| 1130.5554      | 13 | A  | 12 | 1046.5231      | 523.7654        |
| 1217.5874      | 14 | S  | 11 | 975.4859       | 488.2469        |
| 1288.6245      | 15 | A  | 10 | 888.4539       | 444.7309        |
| 1345.6460      | 16 | G  | 9  | 817.4168       | 409.2123        |
| 1402.6675      | 17 | G  | 8  | 760.3953       | 380.7016        |
| 1515.7515      | 18 | L  | 7  | 703.3739       | 352.1909        |
| 1586.7886      | 19 | A  | 6  | 590.2898       | 295.6488        |
| 1657.8258      | 20 | A  | 5  | 519.2527       | 260.1303        |
| 1772.8527      | 21 | D  | 4  | 448.2156       | 224.6117        |
| 1843.8898      | 22 | A  | 3  | 333.1886       | 167.0982        |
| 1930.9218      | 23 | S  | 2  | 262.1515       | 131.5797        |
|                | 24 | R  | 1  | 175.1195       | 88.0637         |

N-term:+29.04

X-range:

0 - 0

MassTol: Y-zoom:

0. 1.

MassType:

☐ AVG ☒ MONO

Axis:

☒ 1 ☐ 2

Label:

☒ I ☐ M ☐ -

Ions:

a ☐ + ☐ 2+ ☐ 3+

b ☒ + ☐ 2+ ☐ 3+

c ☐ + ☐ 2+ ☐ 3+

x ☐ + ☐ 2+ ☐ 3+

y ☒ + ☒ 2+ ☐ 3+

z ☐ + ☐ 2+ ☐ 3+

hide H<sub>2</sub>O/NH<sub>3</sub> ☐

zoom 112-122 ☐

GO

RAGSSSGVQ GASAGGLAADASRR, MH+ 2267.1664, m/z 567.5471  
H OS G17 P120811 220811-s1.02351.02351.4.dta

scan 2351; 2.6e+000

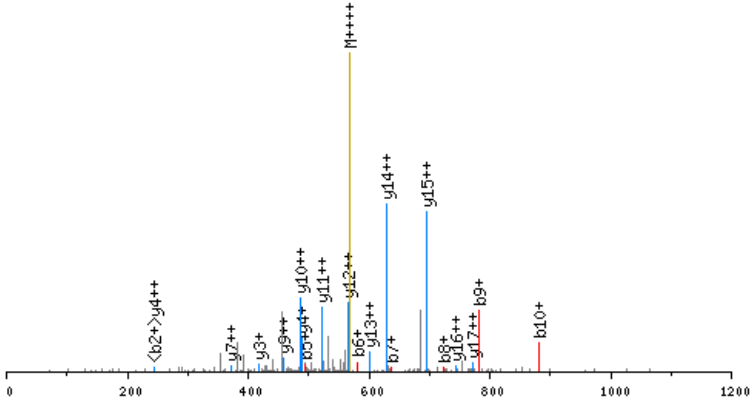

click image to zoom in; click top corners to zoom out [\[precursor±\]](#)

scan 2348; 567.5 m/z; 8.7e+000

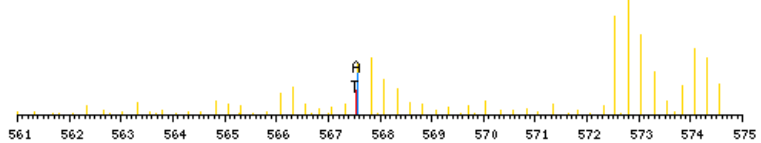

zoomed in precursor plot; T=theoretical m/z, A=acquired m/z

| b <sup>+</sup> | #  | AA | #  | y <sup>+</sup> | y <sup>2+</sup> |
|----------------|----|----|----|----------------|-----------------|
| 191.1720       | 1  | R  | 25 |                |                 |
| 262.2091       | 2  | A  | 24 | 2077.0022      | 1039.0050       |
| 319.2306       | 3  | G  | 23 | 2005.9651      | 1003.4865       |
| 406.2626       | 4  | S  | 22 | 1948.9437      | 974.9757        |
| 493.2946       | 5  | S  | 21 | 1861.9116      | 931.4597        |
| 580.3267       | 6  | S  | 20 | 1774.8796      | 887.9437        |
| 637.3481       | 7  | G  | 19 | 1687.8476      | 844.4277        |
| 724.3802       | 8  | S  | 18 | 1630.8261      | 815.9170        |
| 781.4016       | 9  | G  | 17 | 1543.7941      | 772.4010        |
| 880.4700       | 10 | V  | 16 | 1486.7726      | 743.8902        |
| 1008.5286      | 11 | Q  | 15 | 1387.7042      | 694.3560        |
| 1065.5501      | 12 | G  | 14 | 1259.6456      | 630.3267        |
| 1136.5872      | 13 | A  | 13 | 1202.6242      | 601.8160        |
| 1223.6192      | 14 | S  | 12 | 1131.5871      | 566.2974        |
| 1294.6563      | 15 | A  | 11 | 1044.5550      | 522.7814        |
| 1351.6778      | 16 | G  | 10 | 973.5179       | 487.2629        |
| 1408.6993      | 17 | G  | 9  | 916.4965       | 458.7521        |
| 1521.7833      | 18 | L  | 8  | 859.4750       | 430.2414        |
| 1592.8204      | 19 | A  | 7  | 746.3909       | 373.6994        |
| 1663.8576      | 20 | A  | 6  | 675.3538       | 338.1808        |
| 1778.8845      | 21 | D  | 5  | 604.3167       | 302.6623        |
| 1849.9216      | 22 | A  | 4  | 489.2898       | 245.1488        |
| 1936.9536      | 23 | S  | 3  | 418.2526       | 209.6302        |
| 2093.0548      | 24 | R  | 2  | 331.2206       | 166.1142        |
|                | 25 | R  | 1  | 175.1195       | 88.0637         |

N-term:+35.07

X-range:

0 - 0

MassTol: Y-zoom:

0. 1.

MassType:

☐AVG ☒MONO

Axis:

☒1 ☐2

Label:

☒I ☐M ☐-

Ions:

a ☐+ ☐2+ ☐3+

b ☒+ ☐2+ ☐3+

c ☐+ ☐2+ ☐3+

x ☐+ ☐2+ ☐3+

y ☒+ ☒2+ ☐3+

z ☐+ ☐2+ ☐3+

hide H<sub>2</sub>O/NH<sub>3</sub> ☐

zoom 112-122 ☐

GO

RAKVAMSHFEPSEYIR, MH+ 1977.0380, m/z 495.0150  
L OS G19 P120811 220811-s1.03637.03637.4.dta

scan 3637; 7.6e+000

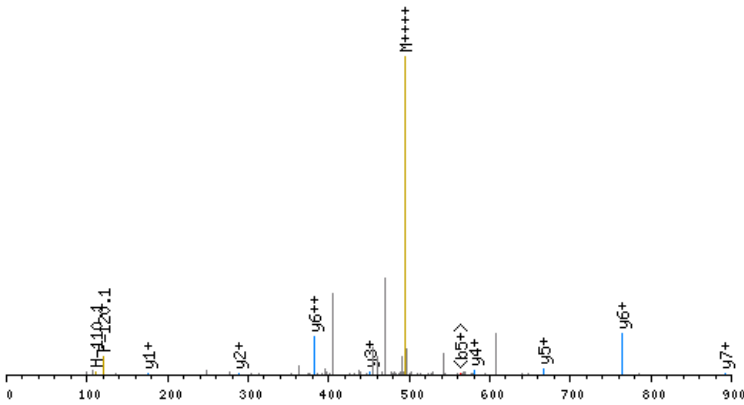

click image to zoom in; click top corners to zoom out

[precursor±]

scan 3636; 495.0 m/z; 2.5e+001

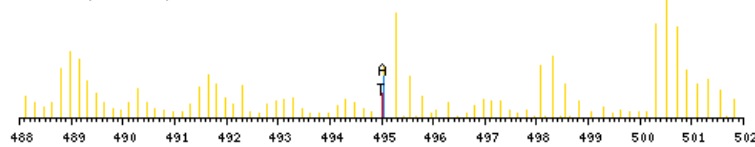

zoomed in precursor plot; T=theoretical m/z, A=acquired m/z

| b <sup>+</sup> | #  | AA | #  | y <sup>+</sup> | y <sup>2+</sup> |
|----------------|----|----|----|----------------|-----------------|
| 185.1402       | 1  | R  | 16 |                |                 |
| 256.1773       | 2  | A  | 15 | 1792.9057      | 896.9567        |
| 412.3036       | 3  | K  | 14 | 1721.8685      | 861.4382        |
| 511.3720       | 4  | V  | 13 | 1565.7422      | 783.3750        |
| 582.4092       | 5  | A  | 12 | 1466.6738      | 733.8408        |
| 713.4496       | 6  | M  | 11 | 1395.6367      | 698.3223        |
| 800.4817       | 7  | S  | 10 | 1264.5962      | 632.8020        |
| 937.5406       | 8  | H  | 9  | 1177.5642      | 589.2860        |
| 1084.6090      | 9  | F  | 8  | 1040.5053      | 520.7566        |
| 1213.6516      | 10 | E  | 7  | 893.4369       | 447.2223        |
| 1310.7043      | 11 | P  | 6  | 764.3943       | 382.7011        |
| 1397.7364      | 12 | S  | 5  | 667.3415       | 334.1747        |
| 1526.7790      | 13 | E  | 4  | 580.3095       | 290.6587        |
| 1689.8423      | 14 | Y  | 3  | 451.2669       | 226.1374        |
| 1802.9264      | 15 | I  | 2  | 288.2036       | 144.6057        |
|                | 16 | R  | 1  | 175.1195       | 88.0637         |

N-term:+29.04 K(3):+156.13

X-range:

0 - 0

MassTol: Y-zoom:

0. 1.

MassType:

☐ AVG ☒ MONO

Axis:

☒ 1 ☐ 2

Label:

☒ I ☐ M ☐ -

Ions:

a ☐ + ☐ 2+ ☐ 3+

b ☒ + ☐ 2+ ☐ 3+

c ☐ + ☐ 2+ ☐ 3+

x ☐ + ☐ 2+ ☐ 3+

y ☒ + ☒ 2+ ☐ 3+

z ☐ + ☐ 2+ ☐ 3+

hide H<sub>2</sub>O/NH<sub>3</sub> ☐

zoom 112-122 ☐

GO

RAPAAQPPAAAAPSAVGSPAAAPR, MH+ 2187.2210, m/z 547.5607  
H OS G15 P120811 220811-s1.02813.02813.4.dta

scan 2813; 1.4e+000

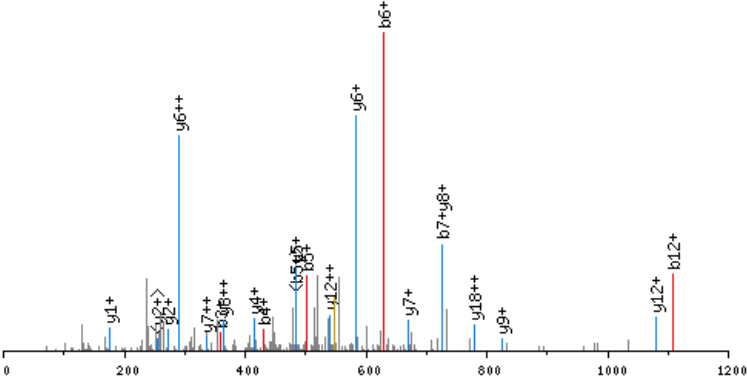

click image to zoom in; click top corners to zoom out [precursor±]

scan 2811; 547.6 m/z; 6.7e+001

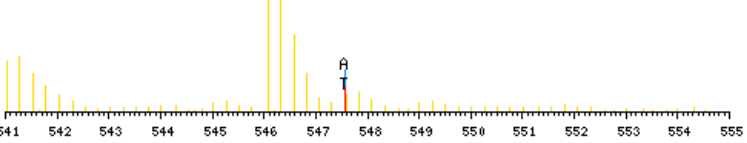

zoomed in precursor plot; T=theoretical m/z, A=acquired m/z

| b <sup>+</sup> | #  | AA | #  | y <sup>+</sup> | y <sup>2+</sup> |
|----------------|----|----|----|----------------|-----------------|
| 191.1720       | 1  | R  | 24 |                |                 |
| 262.2091       | 2  | A  | 23 | 1997.0568      | 999.0323        |
| 359.2619       | 3  | P  | 22 | 1926.0197      | 963.5138        |
| 430.2990       | 4  | A  | 21 | 1828.9670      | 914.9874        |
| 501.3361       | 5  | A  | 20 | 1757.9299      | 879.4688        |
| 629.3947       | 6  | Q  | 19 | 1686.8927      | 843.9503        |
| 726.4475       | 7  | P  | 18 | 1558.8342      | 779.9210        |
| 823.5002       | 8  | P  | 17 | 1461.7814      | 731.3946        |
| 894.5373       | 9  | A  | 16 | 1364.7286      | 682.8682        |
| 965.5744       | 10 | A  | 15 | 1293.6915      | 647.3497        |
| 1036.6116      | 11 | A  | 14 | 1222.6544      | 611.8311        |
| 1107.6487      | 12 | A  | 13 | 1151.6173      | 576.3126        |
| 1204.7014      | 13 | P  | 12 | 1080.5802      | 540.7940        |
| 1291.7335      | 14 | S  | 11 | 983.5274       | 492.2676        |
| 1362.7706      | 15 | A  | 10 | 896.4954       | 448.7516        |
| 1461.8390      | 16 | V  | 9  | 825.4583       | 413.2331        |
| 1518.8605      | 17 | G  | 8  | 726.3899       | 363.6988        |
| 1605.8925      | 18 | S  | 7  | 669.3684       | 335.1881        |
| 1702.9453      | 19 | P  | 6  | 582.3364       | 291.6721        |
| 1773.9824      | 20 | A  | 5  | 485.2836       | 243.1457        |
| 1845.0195      | 21 | A  | 4  | 414.2465       | 207.6272        |
| 1916.0566      | 22 | A  | 3  | 343.2094       | 172.1086        |
| 2013.1094      | 23 | P  | 2  | 272.1723       | 136.5900        |
|                | 24 | R  | 1  | 175.1195       | 88.0637         |

N-term:+35.07

X-range:

0 - 0

MassTol: Y-zoom:

0. 1.

MassType:

☐ AVG ☒ MONO

Axis:

☒ 1 ☐ 2

Label:

☒ I ☐ M ☐ -

Ions:

a ☐ + ☐ 2+ ☐ 3+

b ☒ + ☐ 2+ ☐ 3+

c ☐ + ☐ 2+ ☐ 3+

x ☐ + ☐ 2+ ☐ 3+

y ☒ + ☒ 2+ ☐ 3+

z ☐ + ☐ 2+ ☐ 3+

hide H<sub>2</sub>O/NH<sub>3</sub> ☐

zoom 112-122 ☐

GO

RAPSWIDTGLSEMR, MH+ 1646.8324, m/z 549.6157  
L OS G16 P120811 220811-s1.05631.05631.3.dta

scan 5631; 2.7e+000

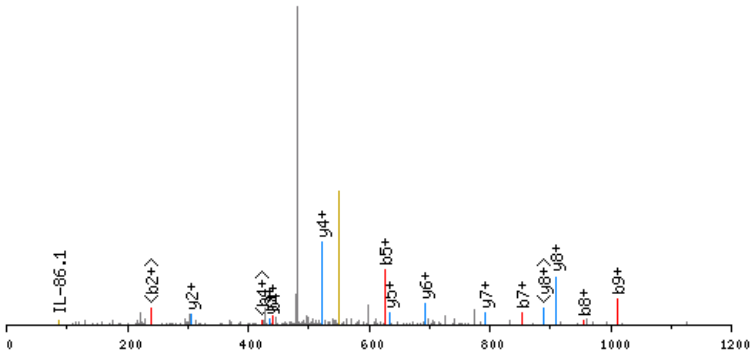

click image to zoom in; click top corners to zoom out [\[precursor±\]](#)

scan 5628; 549.6 m/z; 4.1e+000

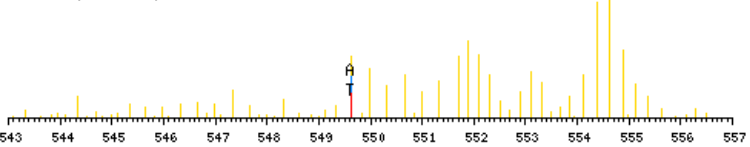

zoomed in precursor plot; T=theoretical m/z, A=acquired m/z

| b <sup>+</sup> | #  | AA | #  | y <sup>+</sup> | y <sup>2+</sup> |
|----------------|----|----|----|----------------|-----------------|
| 185.1402       | 1  | R  | 14 |                |                 |
| 256.1773       | 2  | A  | 13 | 1462.7000      | 731.8539        |
| 353.2301       | 3  | P  | 12 | 1391.6629      | 696.3354        |
| 440.2621       | 4  | S  | 11 | 1294.6102      | 647.8090        |
| 626.3414       | 5  | W  | 10 | 1207.5781      | 604.2930        |
| 739.4255       | 6  | I  | 9  | 1021.4988      | 511.2533        |
| 854.4524       | 7  | D  | 8  | 908.4148       | 454.7113        |
| 955.5001       | 8  | T  | 7  | 793.3878       | 397.1978        |
| 1012.5216      | 9  | G  | 6  | 692.3401       | 346.6740        |
| 1125.6056      | 10 | L  | 5  | 635.3187       | 318.1632        |
| 1212.6377      | 11 | S  | 4  | 522.2346       | 261.6212        |
| 1341.6803      | 12 | E  | 3  | 435.2026       | 218.1052        |
| 1472.7207      | 13 | M  | 2  | 306.1600       | 153.5839        |
|                | 14 | R  | 1  | 175.1195       | 88.0637         |

N-term:+29.04

X-range:

0 - 0

MassTol: Y-zoom:

0. 1.

MassType:

☐AVG ☒MONO

Axis:

☒1 ☐2

Label:

☒I ☐M ☐-

Ions:

a ☐+ ☐2+ ☐3+

b ☒+ ☐2+ ☐3+

c ☐+ ☐2+ ☐3+

x ☐+ ☐2+ ☐3+

y ☒+ ☒2+ ☐3+

z ☐+ ☐2+ ☐3+

hide H<sub>2</sub>O/NH<sub>3</sub> ☐

zoom 112-122 ☐

GO

RASAPLPGFSAPGR, MH+ 1411.7810, m/z 471.2652  
L OS G16 P120811 220811-s1.03945.03945.3.dta

scan 3945; 2.3e+000

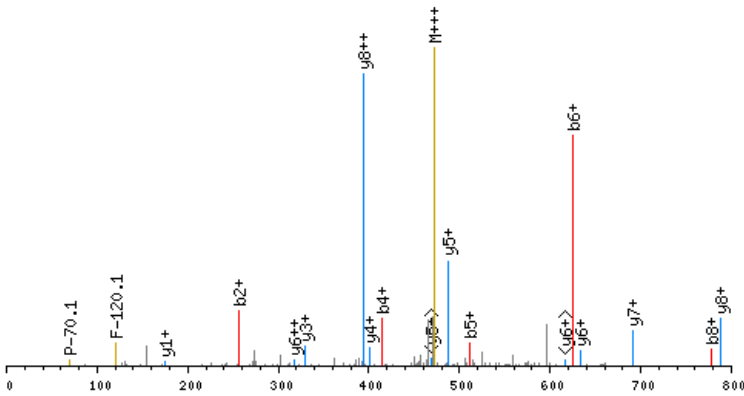

click image to zoom in; click top corners to zoom out

[precursor±]

scan 3943; 471.3 m/z; 1.8e+002

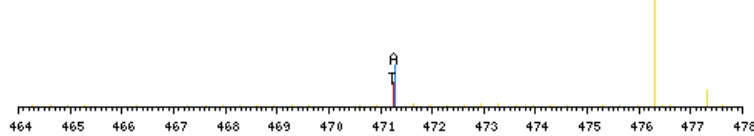

zoomed in precursor plot; T=theoretical m/z, A=acquired m/z

| b <sup>+</sup> | #  | AA | #  | y <sup>+</sup> | y <sup>2+</sup> |
|----------------|----|----|----|----------------|-----------------|
| 185.1402       | 1  | R  | 14 |                |                 |
| 256.1773       | 2  | A  | 13 | 1227.6486      | 614.3282        |
| 343.2094       | 3  | S  | 12 | 1156.6115      | 578.8097        |
| 414.2465       | 4  | A  | 11 | 1069.5795      | 535.2936        |
| 511.2992       | 5  | P  | 10 | 998.5423       | 499.7751        |
| 624.3833       | 6  | L  | 9  | 901.4896       | 451.2487        |
| 721.4361       | 7  | P  | 8  | 788.4055       | 394.7067        |
| 778.4575       | 8  | G  | 7  | 691.3527       | 346.1803        |
| 925.5259       | 9  | F  | 6  | 634.3313       | 317.6696        |
| 1012.5580      | 10 | S  | 5  | 487.2629       | 244.1353        |
| 1083.5951      | 11 | A  | 4  | 400.2308       | 200.6193        |
| 1180.6478      | 12 | P  | 3  | 329.1937       | 165.1008        |
| 1237.6693      | 13 | G  | 2  | 232.1410       | 116.5744        |
|                | 14 | R  | 1  | 175.1195       | 88.0637         |

N-term:+29.04

X-range:

0 - 0

MassTol: Y-zoom:

0. 1.

MassType:

☐AVG ☒MONO

Axis:

☒1 ☐2

Label:

☒I ☐M ☐-

Ions:

a ☐+ ☐2+ ☐3+

b ☒+ ☐2+ ☐3+

c ☐+ ☐2+ ☐3+

x ☐+ ☐2+ ☐3+

y ☒+ ☒2+ ☐3+

z ☐+ ☐2+ ☐3+

hide H<sub>2</sub>O/NH<sub>3</sub> ☐

zoom 112-122 ☐

GO

RCGESGHLAKDCDLQEDACYNCR, MH+ 2927.2291, m/z 732.5627  
L\_OS\_G19\_P120811\_220811-s1.02619.02619.4.dta

scan 2619; 2.2e+000

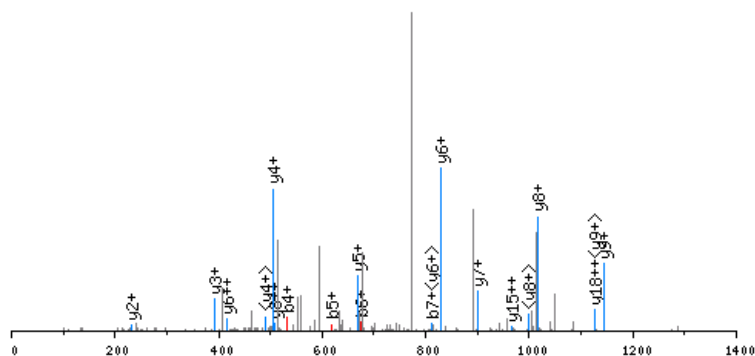

click image to zoom in; click top corners to zoom out

[precursor±]

scan 2618; 732.6 m/z; 5.1e+000

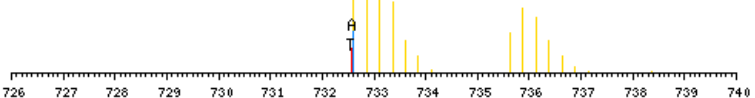

zoomed in precursor plot; T=theoretical m/z, A=acquired m/z

| b <sup>+</sup> | #  | AA | #  | y <sup>+</sup> | y <sup>2+</sup> |
|----------------|----|----|----|----------------|-----------------|
| 185.1402       | 1  | R  | 24 |                |                 |
| 345.1708       | 2  | C  | 23 | 2743.0967      | 1372.0523       |
| 402.1923       | 3  | G  | 22 | 2583.0661      | 1292.0370       |
| 531.2349       | 4  | E  | 21 | 2526.0447      | 1263.5262       |
| 618.2669       | 5  | S  | 20 | 2397.0021      | 1199.0050       |
| 675.2884       | 6  | G  | 19 | 2309.9701      | 1155.4889       |
| 812.3473       | 7  | H  | 18 | 2252.9486      | 1126.9782       |
| 925.4313       | 8  | L  | 17 | 2115.8897      | 1058.4488       |
| 996.4684       | 9  | A  | 16 | 2002.8056      | 1001.9067       |
| 1152.5947      | 10 | K  | 15 | 1931.7685      | 966.3882        |
| 1267.6217      | 11 | D  | 14 | 1775.6422      | 888.3250        |
| 1427.6523      | 12 | C  | 13 | 1660.6153      | 830.8115        |
| 1542.6792      | 13 | D  | 12 | 1500.5847      | 750.7962        |
| 1655.7633      | 14 | L  | 11 | 1385.5577      | 693.2828        |
| 1783.8219      | 15 | Q  | 10 | 1272.4736      | 636.7407        |
| 1912.8645      | 16 | E  | 9  | 1144.4151      | 572.7114        |
| 2027.8914      | 17 | D  | 8  | 1015.3725      | 508.1902        |
| 2098.9285      | 18 | A  | 7  | 900.3455       | 450.6767        |
| 2258.9591      | 19 | C  | 6  | 829.3084       | 415.1581        |
| 2422.0225      | 20 | Y  | 5  | 669.2778       | 335.1428        |
| 2536.0654      | 21 | N  | 4  | 506.2145       | 253.6112        |
| 2696.0960      | 22 | C  | 3  | 392.1716       | 196.5897        |
| 2753.1174      | 23 | G  | 2  | 232.1410       | 116.5744        |
|                | 24 | R  | 1  | 175.1195       | 88.0637         |

N-term:+29.04 C(2):+160.03

K(10):+156.13 C(12):+160.03

C(19):+160.03 C(22):+160.03

X-range:

0 - 0

MassTol: Y-zoom:

0. 1.

MassType:

☐AVG ☒MONO

Axis:

☒1 ☐2

Label:

☒I ☐M ☐-

Ions:

a ☐+ ☐2+ ☐3+

b ☒+ ☐2+ ☐3+

c ☐+ ☐2+ ☐3+

x ☐+ ☐2+ ☐3+

y ☒+ ☒2+ ☐3+

z ☐+ ☐2+ ☐3+

hide H<sub>2</sub>O/NH<sub>3</sub> ☐

zoom 112-122 ☐

GO

RCILDSELEGIR, MH+ 1488.7844, m/z 496.9330  
L OS G16 P120811 220811-s1.04981.04981.3.dta

scan 4981; 1.2e+000

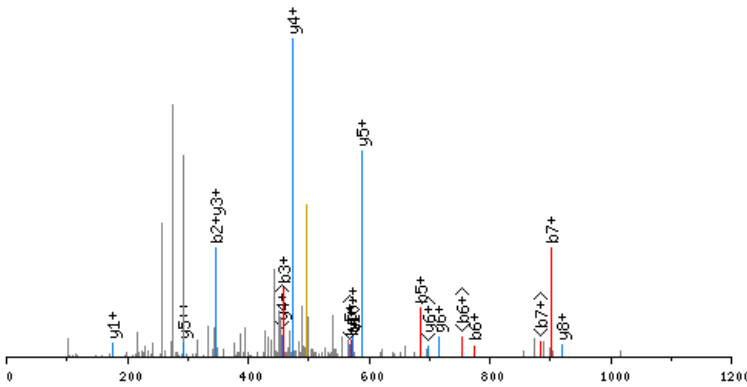

click image to zoom in; click top corners to zoom out [\[precursor±\]](#)

scan 4978; 496.9 m/z; 3.5e+000

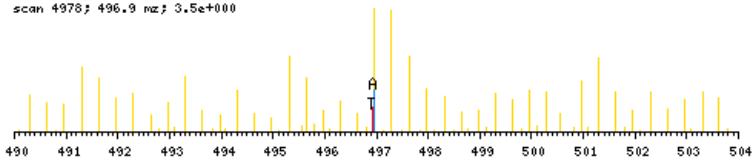

zoomed in precursor plot; T=theoretical m/z, A=acquired m/z

| b <sup>+</sup> | #  | AA | #  | y <sup>+</sup> | y <sup>2+</sup> |
|----------------|----|----|----|----------------|-----------------|
| 185.1402       | 1  | R  | 12 |                |                 |
| 345.1708       | 2  | C  | 11 | 1304.6520      | 652.8299        |
| 458.2549       | 3  | I  | 10 | 1144.6214      | 572.8146        |
| 571.3389       | 4  | L  | 9  | 1031.5373      | 516.2726        |
| 686.3659       | 5  | D  | 8  | 918.4533       | 459.7305        |
| 773.3979       | 6  | S  | 7  | 803.4263       | 402.2171        |
| 902.4405       | 7  | E  | 6  | 716.3943       | 358.7011        |
| 1015.5246      | 8  | L  | 5  | 587.3517       | 294.1798        |
| 1144.5672      | 9  | E  | 4  | 474.2676       | 237.6377        |
| 1201.5886      | 10 | G  | 3  | 345.2250       | 173.1164        |
| 1314.6727      | 11 | I  | 2  | 288.2036       | 144.6057        |
|                | 12 | R  | 1  | 175.1195       | 88.0637         |

N-term:+29.04 C(2):+160.03

X-range:

0 - 0

MassTol: Y-zoom:

0. 1.

MassType:

☐AVG ☒MONO

Axis:

☒1 ☐2

Label:

☒I ☐M ☐-

Ions:

a ☐+ ☐2+ ☐3+

b ☒+ ☐2+ ☐3+

c ☐+ ☐2+ ☐3+

x ☐+ ☐2+ ☐3+

y ☒+ ☒2+ ☐3+

z ☐+ ☐2+ ☐3+

hide H<sub>2</sub>O/NH<sub>3</sub> ☐

zoom 112-122 ☐

GO

RDDTLHETEDVKEAIR, MH+ 1995.0783, m/z 499.5250  
H OS G18 P120811 220811-s1.03479.03479.4.dta

scan 3479; 3.0e+000

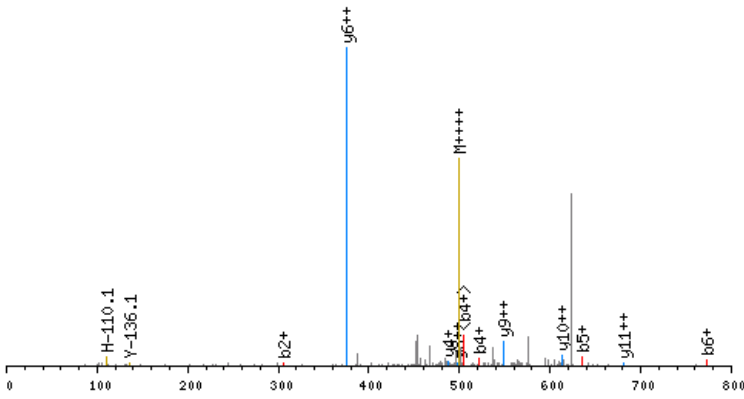

click image to zoom in; click top corners to zoom out

[precursor±]

scan 3476; 499.5 m/z; 7.1e+000

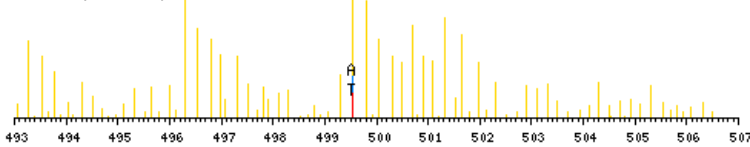

zoomed in precursor plot; T=theoretical m/z, A=acquired m/z

| b <sup>+</sup> | #  | AA | #  | y <sup>+</sup> | y <sup>2+</sup> |
|----------------|----|----|----|----------------|-----------------|
| 191.1720       | 1  | R  | 16 |                |                 |
| 306.1990       | 2  | D  | 15 | 1804.9141      | 902.9610        |
| 421.2259       | 3  | D  | 14 | 1689.8872      | 845.4475        |
| 522.2736       | 4  | T  | 13 | 1574.8602      | 787.9340        |
| 635.3576       | 5  | L  | 12 | 1473.8126      | 737.4102        |
| 772.4166       | 6  | H  | 11 | 1360.7285      | 680.8682        |
| 901.4591       | 7  | E  | 10 | 1223.6696      | 612.3387        |
| 1002.5068      | 8  | T  | 9  | 1094.6270      | 547.8174        |
| 1131.5494      | 9  | E  | 8  | 993.5793       | 497.2936        |
| 1246.5764      | 10 | D  | 7  | 864.5367       | 432.7723        |
| 1345.6448      | 11 | V  | 6  | 749.5098       | 375.2588        |
| 1507.8029      | 12 | K  | 5  | 650.4414       | 325.7246        |
| 1636.8455      | 13 | E  | 4  | 488.2833       | 244.6455        |
| 1707.8826      | 14 | A  | 3  | 359.2407       | 180.1243        |
| 1820.9666      | 15 | I  | 2  | 288.2036       | 144.6057        |
|                | 16 | R  | 1  | 175.1195       | 88.0637         |

N-term:+35.07 K(12):+162.16

X-range:

0 - 0

MassTol: Y-zoom:

0. 1.

MassType:

☐ AVG ☒ MONO

Axis:

☒ 1 ☐ 2

Label:

☒ I ☐ M ☐ -

Ions:

a ☐ + ☐ 2+ ☐ 3+

b ☒ + ☐ 2+ ☐ 3+

c ☐ + ☐ 2+ ☐ 3+

x ☐ + ☐ 2+ ☐ 3+

y ☒ + ☒ 2+ ☐ 3+

z ☐ + ☐ 2+ ☐ 3+

hide H<sub>2</sub>O/NH<sub>3</sub> ☐

zoom 112-122 ☐

GO

RDEAKKLEESDALQEAR, MH+ 2072.0988, m/z 518.7802  
L OS G19 P120811 220811-s1.02600.02600.4.dta

scan 2600; 3.3e+000

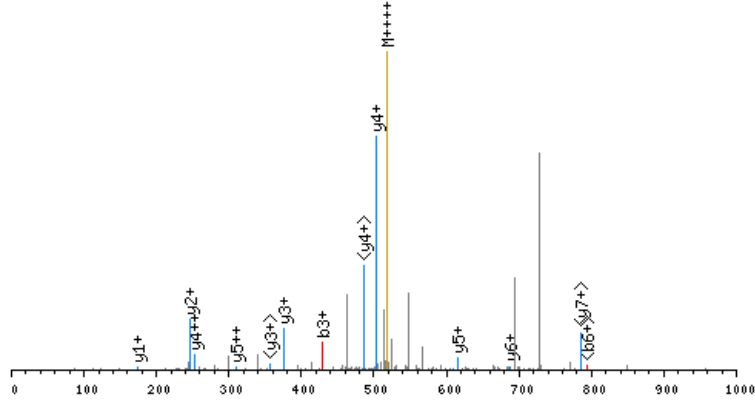

click image to zoom in; click top corners to zoom out [\[precursor±\]](#)

scan 2598; 518.8 m/z; 2.3e+000

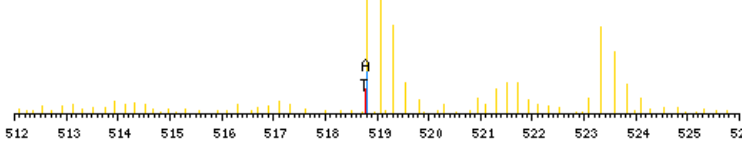

zoomed in precursor plot; T=theoretical m/z, A=acquired m/z

| b <sup>+</sup> | #  | AA | #  | y <sup>+</sup> | y <sup>2+</sup> |
|----------------|----|----|----|----------------|-----------------|
| 185.1402       | 1  | R  | 17 |                |                 |
| 300.1672       | 2  | D  | 16 | 1887.9664      | 944.4871        |
| 429.2097       | 3  | E  | 15 | 1772.9395      | 886.9737        |
| 500.2469       | 4  | A  | 14 | 1643.8969      | 822.4524        |
| 656.3732       | 5  | K  | 13 | 1572.8598      | 786.9338        |
| 812.4995       | 6  | K  | 12 | 1416.7335      | 708.8707        |
| 925.5835       | 7  | L  | 11 | 1260.6072      | 630.8075        |
| 1054.6261      | 8  | E  | 10 | 1147.5231      | 574.2655        |
| 1183.6687      | 9  | E  | 9  | 1018.4805      | 509.7442        |
| 1270.7007      | 10 | S  | 8  | 889.4379       | 445.2229        |
| 1385.7277      | 11 | D  | 7  | 802.4059       | 401.7069        |
| 1456.7648      | 12 | A  | 6  | 687.3790       | 344.1934        |
| 1569.8489      | 13 | L  | 5  | 616.3418       | 308.6748        |
| 1697.9074      | 14 | Q  | 4  | 503.2578       | 252.1328        |
| 1826.9500      | 15 | E  | 3  | 375.1992       | 188.1035        |
| 1897.9871      | 16 | A  | 2  | 246.1566       | 123.5822        |
|                | 17 | R  | 1  | 175.1195       | 88.0637         |

N-term:+29.04 K(5):+156.13  
K(6):+156.13

X-range:

0 - 0

MassTol: Y-zoom:

0. 1.

MassType:

☐AVG ☒MONO

Axis:

☒1 ☐2

Label:

☒I ☐M ☐-

Ions:

a ☐+ ☐2+ ☐3+

b ☒+ ☐2+ ☐3+

c ☐+ ☐2+ ☐3+

x ☐+ ☐2+ ☐3+

y ☒+ ☒2+ ☐3+

z ☐+ ☐2+ ☐3+

hide H<sub>2</sub>O/NH<sub>3</sub> ☐

zoom 112-122 ☐

GO

RDEEVHTGLGELLR, MH+ 1657.9085, m/z 553.3077  
H OS G18 P120811 220811-s1.04944.04944.3.dta

scan 4944; 1.2e+001

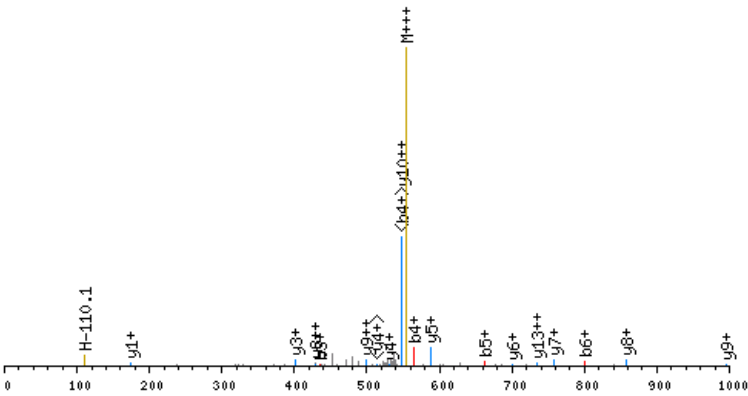

click image to zoom in; click top corners to zoom out

[precursor±]

scan 4941; 553.3 m/z; 2.9e+001

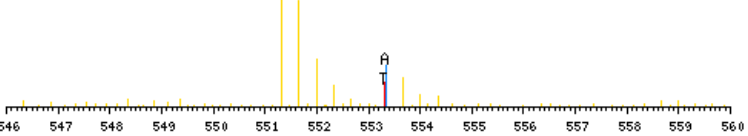

zoomed in precursor plot; T=theoretical m/z, A=acquired m/z

| b <sup>+</sup> | #  | AA | #  | y <sup>+</sup> | y <sup>2+</sup> |
|----------------|----|----|----|----------------|-----------------|
| 191.1720       | 1  | R  | 14 |                |                 |
| 306.1990       | 2  | D  | 13 | 1467.7443      | 734.3761        |
| 435.2415       | 3  | E  | 12 | 1352.7174      | 676.8626        |
| 564.2841       | 4  | E  | 11 | 1223.6748      | 612.3413        |
| 663.3526       | 5  | V  | 10 | 1094.6322      | 547.8200        |
| 800.4115       | 6  | H  | 9  | 995.5638       | 498.2858        |
| 901.4591       | 7  | T  | 8  | 858.5049       | 429.7564        |
| 958.4806       | 8  | G  | 7  | 757.4572       | 379.2325        |
| 1071.5647      | 9  | L  | 6  | 700.4357       | 350.7218        |
| 1128.5861      | 10 | G  | 5  | 587.3517       | 294.1798        |
| 1257.6287      | 11 | E  | 4  | 530.3302       | 265.6690        |
| 1370.7128      | 12 | L  | 3  | 401.2876       | 201.1477        |
| 1483.7969      | 13 | L  | 2  | 288.2036       | 144.6057        |
|                | 14 | R  | 1  | 175.1195       | 88.0637         |

N-term:+35.07

N-term: +29.04

X-range:

0 - 0

MassTol: Y-zoom:

0. 1.

MassType:

☐ AVG ☒ MONO

Axis:

☒ 1 ☐ 2

Label:

☒ I ☐ M ☐ -

Ions:

a ☐ + ☐ 2+ ☐ 3+

b ☒ + ☐ 2+ ☐ 3+

c ☐ + ☐ 2+ ☐ 3+

x ☐ + ☐ 2+ ☐ 3+

y ☒ + ☒ 2+ ☐ 3+

z ☐ + ☐ 2+ ☐ 3+

hide H<sub>2</sub>O/NH<sub>3</sub> ☐

zoom 112-122 ☐

GO

RDLIHDQDEEEEEEGQR, MH+ 2283.9965, m/z 571.7546  
L OS G18 P120811 220811-s1.02742.02742.4.dta

scan 2742; 1.1e+000

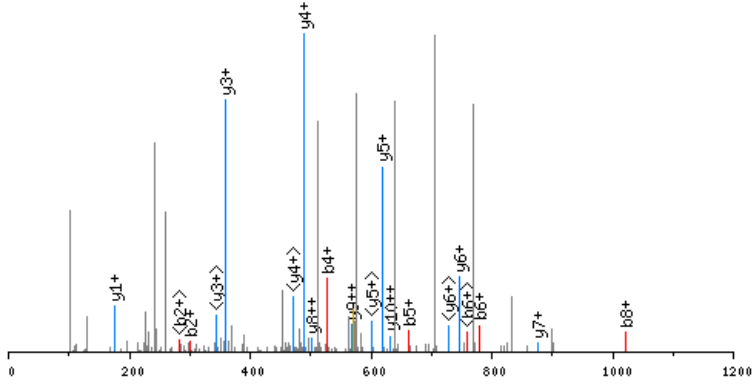

click image to zoom in; click top corners to zoom out [\[precursor±\]](#)

scan 2741; 571.8 m/z; 8.1e+000

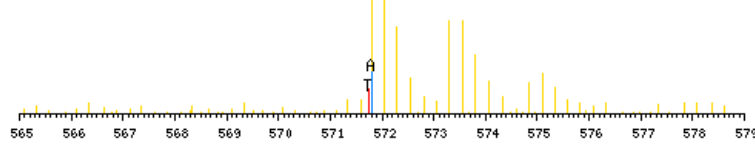

zoomed in precursor plot; T=theoretical m/z, A=acquired m/z

| b <sup>+</sup> | #  | AA | #  | y <sup>+</sup> | y <sup>2+</sup> |
|----------------|----|----|----|----------------|-----------------|
| 185.1402       | 1  | R  | 18 |                |                 |
| 300.1672       | 2  | D  | 17 | 2099.8641      | 1050.4360       |
| 413.2512       | 3  | L  | 16 | 1984.8372      | 992.9225        |
| 526.3353       | 4  | I  | 15 | 1871.7531      | 936.3805        |
| 663.3942       | 5  | H  | 14 | 1758.6691      | 879.8384        |
| 778.4211       | 6  | D  | 13 | 1621.6102      | 811.3090        |
| 906.4797       | 7  | Q  | 12 | 1506.5832      | 753.7955        |
| 1021.5067      | 8  | D  | 11 | 1378.5246      | 689.7662        |
| 1150.5493      | 9  | E  | 10 | 1263.4977      | 632.2528        |
| 1279.5918      | 10 | E  | 9  | 1134.4551      | 567.7315        |
| 1408.6344      | 11 | E  | 8  | 1005.4125      | 503.2102        |
| 1537.6770      | 12 | E  | 7  | 876.3699       | 438.6889        |
| 1666.7196      | 13 | E  | 6  | 747.3273       | 374.1676        |
| 1795.7622      | 14 | E  | 5  | 618.2847       | 309.6463        |
| 1924.8048      | 15 | E  | 4  | 489.2421       | 245.1250        |
| 1981.8263      | 16 | G  | 3  | 360.1995       | 180.6037        |
| 2109.8849      | 17 | Q  | 2  | 303.1781       | 152.0930        |
|                | 18 | R  | 1  | 175.1195       | 88.0637         |

N-term:+29.04

N-term: +29.04

X-range:

$$\boxed{0} - \boxed{0}$$

0. 1.

☐ AVG ☒ MONO

1 2

I M -

$$a \square + \square^2 + \square^3 +$$

b. ☒ 1 + ☐ 2 + ☐ 3 +

123

c.  $\frac{1}{2} \times \frac{1}{2} = \frac{1}{4}$   
 $\frac{1}{4} \times \frac{1}{2} = \frac{1}{8}$

| x | 1 | 2 | 3 |
|---|---|---|---|
|---|---|---|---|

y ☒+ ☒2+ ☐3+

$$z^{\frac{1}{2}} + z^{\frac{2}{2}} + z^{\frac{3}{2}}$$

112 12

GO

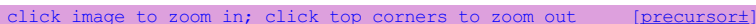

N-term: +29.04

zoomed in precursor plot; T=theoretical m/z, A=acquired m/z

X-range:

0 - 0

MassTol: Y-zoom:

0. 1.

MassType:

☐ AVG ☒ MONO

Axis:

☒ 1 ☐ 2

Label:

☒ I ☐ M ☐ -

Ions:

a ☐ + ☐ 2+ ☐ 3+

b ☒ + ☐ 2+ ☐ 3+

c ☐ + ☐ 2+ ☐ 3+

x ☐ + ☐ 2+ ☐ 3+

y ☒ + ☒ 2+ ☐ 3+

z ☐ + ☐ 2+ ☐ 3+

hide H<sub>2</sub>O/NH<sub>3</sub> ☐

zoom 112-122 ☐

GO

REGDVLTLLESER, MH+ 1544.8284, m/z 515.6143  
L OS G16 P120811 220811-s1.05805.05805.3.dta

scan 5805; 2.4e+000

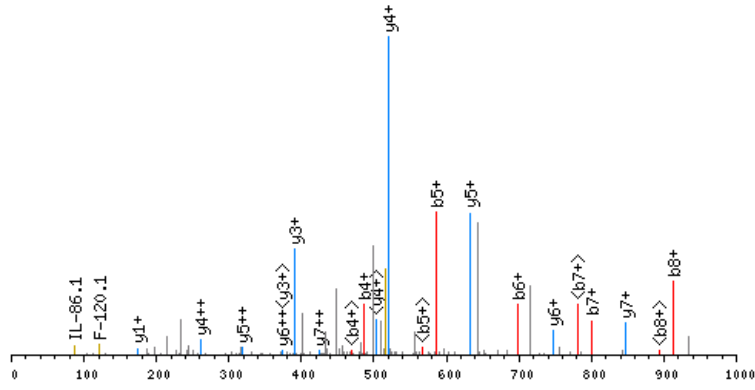

click image to zoom in; click top corners to zoom out [\[precursor±\]](#)

scan 5803; 515.6 m/z; 1.3e+001

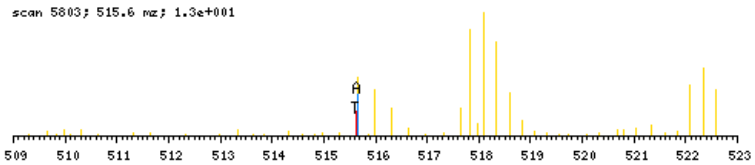

zoomed in precursor plot; T=theoretical m/z, A=acquired m/z

| b <sup>+</sup> | #  | AA | #  | y <sup>+</sup> | y <sup>2+</sup> |
|----------------|----|----|----|----------------|-----------------|
| 185.1402       | 1  | R  | 13 |                |                 |
| 314.1828       | 2  | E  | 12 | 1360.6960      | 680.8519        |
| 371.2043       | 3  | G  | 11 | 1231.6534      | 616.3306        |
| 486.2312       | 4  | D  | 10 | 1174.6319      | 587.8199        |
| 585.2996       | 5  | V  | 9  | 1059.6050      | 530.3064        |
| 698.3837       | 6  | L  | 8  | 960.5366       | 480.7722        |
| 799.4314       | 7  | T  | 7  | 847.4525       | 424.2302        |
| 912.5154       | 8  | L  | 6  | 746.4048       | 373.7063        |
| 1025.5995      | 9  | L  | 5  | 633.3208       | 317.1643        |
| 1154.6421      | 10 | E  | 4  | 520.2367       | 260.6223        |
| 1241.6741      | 11 | S  | 3  | 391.1941       | 196.1010        |
| 1370.7167      | 12 | E  | 2  | 304.1621       | 152.5850        |
|                | 13 | R  | 1  | 175.1195       | 88.0637         |

N-term:+29.04

X-range:

0 - 0

MassTol: Y-zoom:

0. 1.

MassType:

☐ AVG ☒ MONO

Axis:

☒ 1 ☐ 2

Label:

☒ I ☐ M ☐ -

Ions:

a ☐ + ☐ 2+ ☐ 3+

b ☒ + ☐ 2+ ☐ 3+

c ☐ + ☐ 2+ ☐ 3+

x ☐ + ☐ 2+ ☐ 3+

y ☒ + ☒ 2+ ☐ 3+

z ☐ + ☐ 2+ ☐ 3+

hide H<sub>2</sub>O/NH<sub>3</sub> ☐

zoom 112-122 ☐

GO

REGGVESAFHKTTSGATPAAIR, MH+ 2299.2159, m/z 575.5594  
L OS G18 P120811 220811-s1.03520.03520.4.dta

scan 3520; 2.6e+000

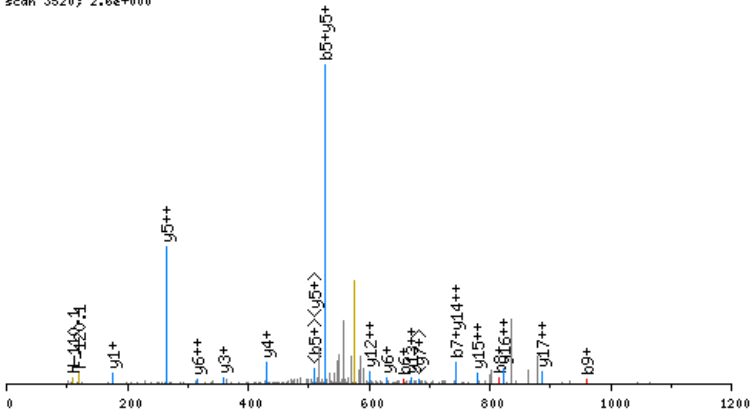

click image to zoom in; click top corners to zoom out [precursor±]

scan 3516; 575.6 m/z; 5.8e+000

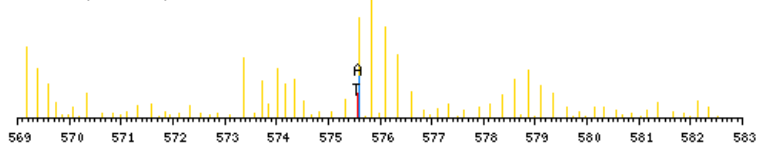

zoomed in precursor plot; T=theoretical m/z, A=acquired m/z

| b <sup>+</sup> | #  | AA | #  | y <sup>+</sup> | y <sup>2+</sup> |
|----------------|----|----|----|----------------|-----------------|
| 185.1402       | 1  | R  | 22 |                |                 |
| 314.1828       | 2  | E  | 21 | 2115.0835      | 1058.0457       |
| 371.2043       | 3  | G  | 20 | 1986.0409      | 993.5244        |
| 428.2257       | 4  | G  | 19 | 1929.0194      | 965.0136        |
| 527.2941       | 5  | V  | 18 | 1871.9980      | 936.5029        |
| 656.3367       | 6  | E  | 17 | 1772.9296      | 886.9687        |
| 743.3688       | 7  | S  | 16 | 1643.8870      | 822.4474        |
| 814.4059       | 8  | A  | 15 | 1556.8549      | 778.9314        |
| 961.4743       | 9  | F  | 14 | 1485.8178      | 743.4128        |
| 1098.5332      | 10 | H  | 13 | 1338.7494      | 669.8786        |
| 1254.6595      | 11 | K  | 12 | 1201.6905      | 601.3492        |
| 1355.7072      | 12 | T  | 11 | 1045.5642      | 523.2860        |
| 1456.7549      | 13 | T  | 10 | 944.5165       | 472.7622        |
| 1543.7869      | 14 | S  | 9  | 843.4688       | 422.2383        |
| 1600.8084      | 15 | G  | 8  | 756.4368       | 378.7223        |
| 1671.8455      | 16 | A  | 7  | 699.4153       | 350.2116        |
| 1772.8931      | 17 | T  | 6  | 628.3782       | 314.6930        |
| 1869.9459      | 18 | P  | 5  | 527.3306       | 264.1692        |
| 1940.9830      | 19 | A  | 4  | 430.2778       | 215.6428        |
| 2012.0201      | 20 | A  | 3  | 359.2407       | 180.1243        |
| 2125.1042      | 21 | I  | 2  | 288.2036       | 144.6057        |
|                | 22 | R  | 1  | 175.1195       | 88.0637         |

N-term:+29.04 K(11):+156.13

X-range:

0 - 0

MassTol: Y-zoom:

0. 1.

MassType:

☐AVG ☒MONO

Axis:

☒1 ☐2

Label:

☒I ☐M ☐-

Ions:

a ☐+ ☐2+ ☐3+

b ☒+ ☐2+ ☐3+

c ☐+ ☐2+ ☐3+

x ☐+ ☐2+ ☐3+

y ☒+ ☒2+ ☐3+

z ☐+ ☐2+ ☐3+

hide H<sub>2</sub>O/NH<sub>3</sub> ☐

zoom 112-122 ☐

GO

REGPCAVNLVLR, MH+ 1411.7843, m/z 471.2663  
L OS G16 P120811 220811-s1.04320.04320.3.dta

scan 4320; 2.1e+000

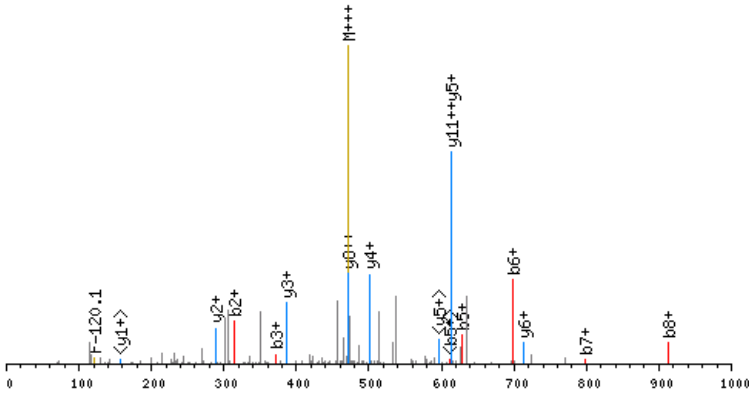

click image to zoom in; click top corners to zoom out

[precursor±]

scan 4318; 471.3 m/z; 6.0e+001

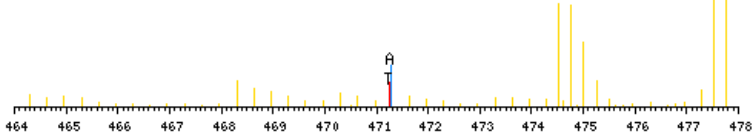

zoomed in precursor plot; T=theoretical m/z, A=acquired m/z

| b <sup>+</sup> | #  | AA | #  | y <sup>+</sup> | y <sup>2+</sup> |
|----------------|----|----|----|----------------|-----------------|
| 185.1402       | 1  | R  | 12 |                |                 |
| 314.1828       | 2  | E  | 11 | 1227.6519      | 614.3299        |
| 371.2043       | 3  | G  | 10 | 1098.6093      | 549.8086        |
| 468.2570       | 4  | P  | 9  | 1041.5879      | 521.2978        |
| 628.2876       | 5  | C  | 8  | 944.5351       | 472.7715        |
| 699.3247       | 6  | A  | 7  | 784.5045       | 392.7562        |
| 798.3932       | 7  | V  | 6  | 713.4674       | 357.2376        |
| 912.4361       | 8  | N  | 5  | 614.3990       | 307.7034        |
| 1025.5202      | 9  | L  | 4  | 500.3560       | 250.6819        |
| 1124.5886      | 10 | V  | 3  | 387.2720       | 194.1399        |
| 1237.6726      | 11 | L  | 2  | 288.2036       | 144.6057        |
|                | 12 | R  | 1  | 175.1195       | 88.0637         |

N-term:+29.04 C(5):+160.03

X-range:

0 - 0

MassTol: Y-zoom:

0. 1.

MassType:

☐ AVG ☒ MONO

Axis:

☒ 1 ☐ 2

Label:

☒ I ☐ M ☐ -

Ions:

a ☐ + ☐ 2+ ☐ 3+

b ☒ + ☐ 2+ ☐ 3+

c ☐ + ☐ 2+ ☐ 3+

x ☐ + ☐ 2+ ☐ 3+

y ☒ + ☒ 2+ ☐ 3+

z ☐ + ☐ 2+ ☐ 3+

hide H<sub>2</sub>O/NH<sub>3</sub> ☐

zoom 112-122 ☐

GO

REIAQDFKTDLR, MH+ 1559.9182, m/z 390.7350  
H OS G18 P120811 220811-s1.03680.03680.4.dta

scan 3680; 2.4e+000

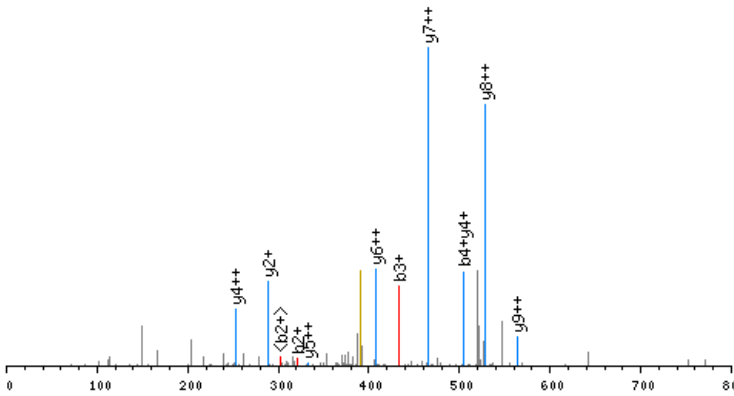

click image to zoom in; click top corners to zoom out

[precursor±]

scan 3676; 390.7 m/z; 3.0e+000

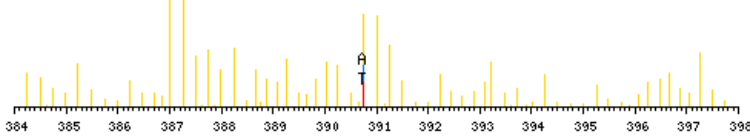

zoomed in precursor plot; T=theoretical m/z, A=acquired m/z

| b <sup>+</sup> | #  | AA | #  | y <sup>+</sup> | y <sup>2+</sup> |
|----------------|----|----|----|----------------|-----------------|
| 191.1720       | 1  | R  | 12 |                |                 |
| 320.2146       | 2  | E  | 11 | 1369.7540      | 685.3809        |
| 433.2987       | 3  | I  | 10 | 1240.7114      | 620.8596        |
| 504.3358       | 4  | A  | 9  | 1127.6273      | 564.3176        |
| 632.3944       | 5  | Q  | 8  | 1056.5902      | 528.7990        |
| 747.4213       | 6  | D  | 7  | 928.5316       | 464.7697        |
| 894.4897       | 7  | F  | 6  | 813.5047       | 407.2563        |
| 1056.6478      | 8  | K  | 5  | 666.4363       | 333.7221        |
| 1157.6955      | 9  | T  | 4  | 504.2782       | 252.6430        |
| 1272.7224      | 10 | D  | 3  | 403.2305       | 202.1192        |
| 1385.8065      | 11 | L  | 2  | 288.2036       | 144.6057        |
|                | 12 | R  | 1  | 175.1195       | 88.0637         |

N-term:+35.07 K(8):+162.16

X-range:

0 - 0

MassTol: Y-zoom:

0. 1.

MassType:

☐AVG ☒MONO

Axis:

☒1 ☐2

Label:

☒I ☐M ☐-

Ions:

a ☐+ ☐2+ ☐3+

b ☒+ ☐2+ ☐3+

c ☐+ ☐2+ ☐3+

x ☐+ ☐2+ ☐3+

y ☒+ ☒2+ ☐3+

z ☐+ ☐2+ ☐3+

hide H<sub>2</sub>O/NH<sub>3</sub> ☐

zoom 112-122 ☐

GO

RELEGEVENEQKR, MH+ 1683.9302, m/z 421.7380  
H OS G18 P120811 220811-s1.01962.01962.4.dta

scan 1962; 3.4e+000

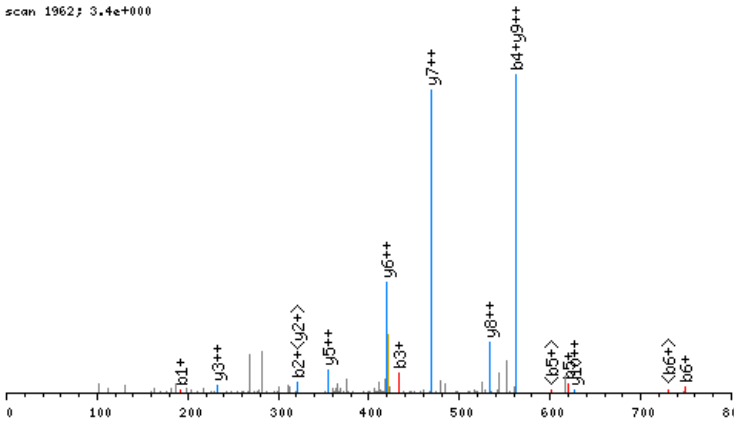

click image to zoom in; click top corners to zoom out [precursor±]

scan 1961; 421.7 m/z; 4.7e+000

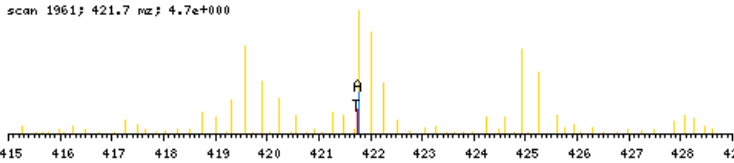

zoomed in precursor plot; T=theoretical m/z, A=acquired m/z

| b <sup>+</sup> | #  | AA | #  | y <sup>+</sup> | y <sup>2+</sup> |
|----------------|----|----|----|----------------|-----------------|
| 191.1720       | 1  | R  | 13 |                |                 |
| 320.2146       | 2  | E  | 12 | 1493.7660      | 747.3869        |
| 433.2987       | 3  | L  | 11 | 1364.7234      | 682.8656        |
| 562.3413       | 4  | E  | 10 | 1251.6394      | 626.3236        |
| 619.3627       | 5  | G  | 9  | 1122.5968      | 561.8023        |
| 748.4053       | 6  | E  | 8  | 1065.5753      | 533.2916        |
| 847.4737       | 7  | V  | 7  | 936.5327       | 468.7703        |
| 976.5163       | 8  | E  | 6  | 837.4643       | 419.2361        |
| 1090.5593      | 9  | N  | 5  | 708.4217       | 354.7148        |
| 1219.6018      | 10 | E  | 4  | 594.3788       | 297.6933        |
| 1347.6604      | 11 | Q  | 3  | 465.3362       | 233.1720        |
| 1509.8185      | 12 | K  | 2  | 337.2776       | 169.1427        |
|                | 13 | R  | 1  | 175.1195       | 88.0637         |

N-term:+35.07 K(12):+162.16

X-range:

0 - 0

MassTol: Y-zoom:

0. 1.

MassType:

☐ AVG ☒ MONO

Axis:

☒ 1 ☐ 2

Label:

☒ I ☐ M ☐ -

Ions:

a ☐ + ☐ 2+ ☐ 3+

b ☒ + ☐ 2+ ☐ 3+

c ☐ + ☐ 2+ ☐ 3+

x ☐ + ☐ 2+ ☐ 3+

y ☒ + ☒ 2+ ☐ 3+

z ☐ + ☐ 2+ ☐ 3+

hide H<sub>2</sub>O/NH<sub>3</sub> ☐

zoom 112-122 ☐

GO

RELISNASDALDKIR, MH+ 1756.9921, m/z 440.0035  
L OS G17 P120811 220811-s1.04762.04762.4.dta

scan 4762; 3.9e+000

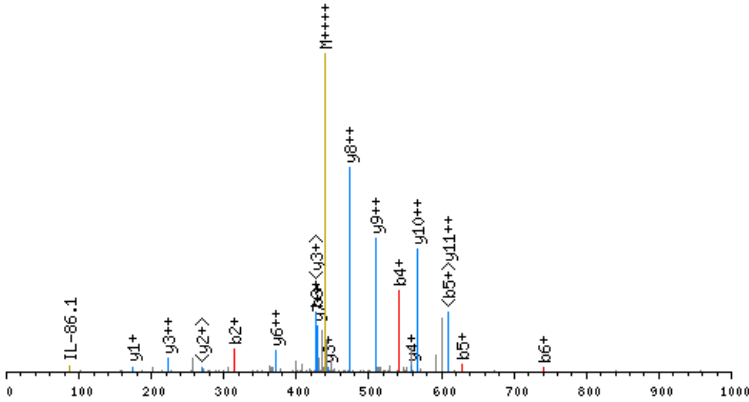

click image to zoom in; click top corners to zoom out

[precursor±]

scan 4758; 440.0 m/z; 9.5e+000

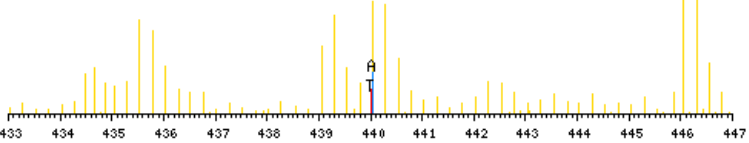

zoomed in precursor plot; T=theoretical m/z, A=acquired m/z

| b <sup>+</sup> | #  | AA | #  | y <sup>+</sup> | y <sup>2+</sup> |
|----------------|----|----|----|----------------|-----------------|
| 185.1402       | 1  | R  | 15 |                |                 |
| 314.1828       | 2  | E  | 14 | 1572.8597      | 786.9338        |
| 427.2669       | 3  | L  | 13 | 1443.8172      | 722.4125        |
| 540.3509       | 4  | I  | 12 | 1330.7331      | 665.8705        |
| 627.3830       | 5  | S  | 11 | 1217.6490      | 609.3284        |
| 741.4259       | 6  | N  | 10 | 1130.6170      | 565.8124        |
| 812.4630       | 7  | A  | 9  | 1016.5741      | 508.7909        |
| 899.4950       | 8  | S  | 8  | 945.5370       | 473.2724        |
| 1014.5220      | 9  | D  | 7  | 858.5049       | 429.7564        |
| 1085.5591      | 10 | A  | 6  | 743.4780       | 372.2429        |
| 1198.6432      | 11 | L  | 5  | 672.4409       | 336.7243        |
| 1313.6701      | 12 | D  | 4  | 559.3568       | 280.1823        |
| 1469.7964      | 13 | K  | 3  | 444.3299       | 222.6688        |
| 1582.8805      | 14 | I  | 2  | 288.2036       | 144.6057        |
|                | 15 | R  | 1  | 175.1195       | 88.0637         |

N-term:+29.04 K(13):+156.13

X-range:

0 - 0

MassTol: Y-zoom:

0. 1.

MassType:

☐AVG ☒MONO

Axis:

☒1 ☐2

Label:

☒I ☐M ☐-

Ions:

a ☐+ ☐2+ ☐3+

b ☒+ ☐2+ ☐3+

c ☐+ ☐2+ ☐3+

x ☐+ ☐2+ ☐3+

y ☒+ ☒2+ ☐3+

z ☐+ ☐2+ ☐3+

hide H<sub>2</sub>O/NH<sub>3</sub> ☐

zoom 112-122 ☐

GO

RELISNSSDALDKIR, MH+ 1772.9870, m/z 444.0022  
L OS G17 P120811 220811-s1.04161.04161.4.dta

scan 4161; 1.6e+000

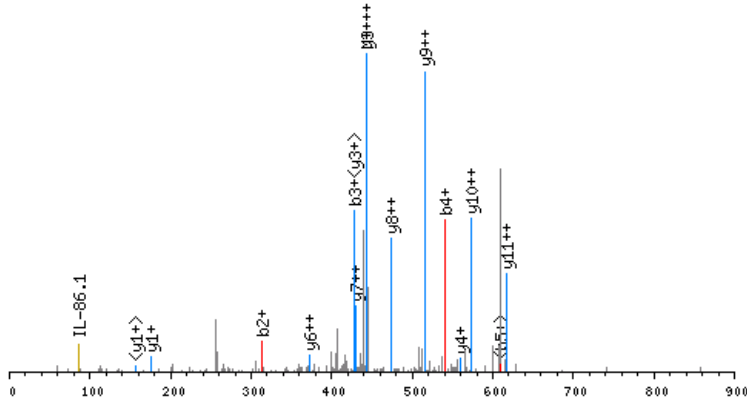

click image to zoom in; click top corners to zoom out

[precursor±]

scan 4158; 444.0 m/z; 8.1e+000

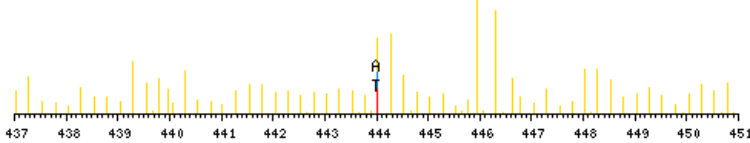

zoomed in precursor plot; T=theoretical m/z, A=acquired m/z

| b <sup>+</sup> | #  | AA | #  | y <sup>+</sup> | y <sup>2+</sup> |
|----------------|----|----|----|----------------|-----------------|
| 185.1402       | 1  | R  | 15 |                |                 |
| 314.1828       | 2  | E  | 14 | 1588.8547      | 794.9312        |
| 427.2669       | 3  | L  | 13 | 1459.8121      | 730.4099        |
| 540.3509       | 4  | I  | 12 | 1346.7280      | 673.8679        |
| 627.3830       | 5  | S  | 11 | 1233.6439      | 617.3259        |
| 741.4259       | 6  | N  | 10 | 1146.6119      | 573.8099        |
| 828.4579       | 7  | S  | 9  | 1032.5690      | 516.7884        |
| 915.4899       | 8  | S  | 8  | 945.5370       | 473.2724        |
| 1030.5169      | 9  | D  | 7  | 858.5049       | 429.7564        |
| 1101.5540      | 10 | A  | 6  | 743.4780       | 372.2429        |
| 1214.6381      | 11 | L  | 5  | 672.4409       | 336.7243        |
| 1329.6650      | 12 | D  | 4  | 559.3568       | 280.1823        |
| 1485.7913      | 13 | K  | 3  | 444.3299       | 222.6688        |
| 1598.8754      | 14 | I  | 2  | 288.2036       | 144.6057        |
|                | 15 | R  | 1  | 175.1195       | 88.0637         |

N-term:+29.04 K(13):+156.13

X-range:

0 - 0

MassTol: Y-zoom:

0. 1.

MassType:

☐ AVG ☒ MONO

Axis:

☒ 1 ☐ 2

Label:

☒ I ☐ M ☐ -

Ions:

a ☐ + ☐ 2+ ☐ 3+

b ☒ + ☐ 2+ ☐ 3+

c ☐ + ☐ 2+ ☐ 3+

x ☐ + ☐ 2+ ☐ 3+

y ☒ + ☒ 2+ ☐ 3+

z ☐ + ☐ 2+ ☐ 3+

hide H<sub>2</sub>O/NH<sub>3</sub> ☐

zoom 112-122 ☐

GO

RELMEEEKKDEGTGTLR, MH+ 1976.0487, m/z 494.7676  
L OS G19 P120811 220811-s1.02308.02308.4.dta

scan 2308; 8.1e+000

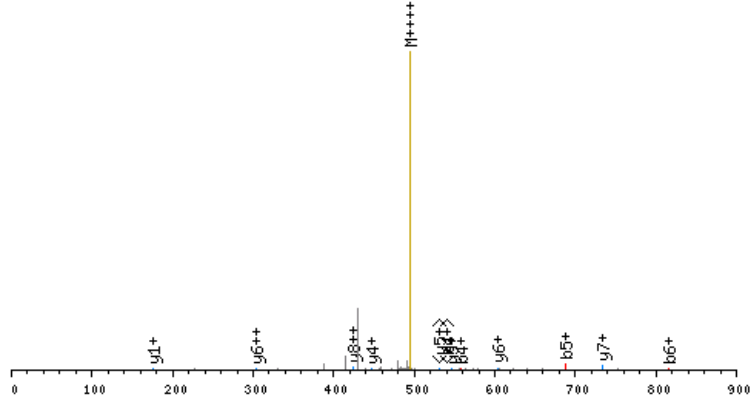

click image to zoom in; click top corners to zoom out [\[precursor±\]](#)

scan 2307; 494.8 m/z; 2.0e+000

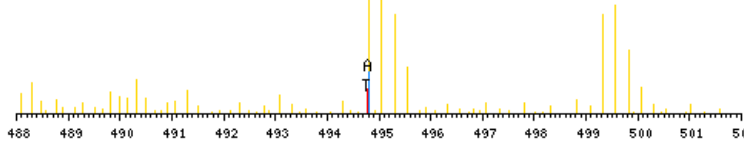

zoomed in precursor plot; T=theoretical m/z, A=acquired m/z

| b <sup>+</sup> | #  | AA | #  | y <sup>+</sup> | y <sup>2+</sup> |
|----------------|----|----|----|----------------|-----------------|
| 185.1402       | 1  | R  | 16 |                |                 |
| 314.1828       | 2  | E  | 15 | 1791.9163      | 896.4621        |
| 427.2669       | 3  | L  | 14 | 1662.8737      | 831.9408        |
| 558.3074       | 4  | M  | 13 | 1549.7897      | 775.3987        |
| 687.3499       | 5  | E  | 12 | 1418.7492      | 709.8785        |
| 816.3925       | 6  | E  | 11 | 1289.7066      | 645.3572        |
| 972.5188       | 7  | K  | 10 | 1160.6640      | 580.8359        |
| 1128.6451      | 8  | K  | 9  | 1004.5377      | 502.7728        |
| 1243.6721      | 9  | D  | 8  | 848.4114       | 424.7096        |
| 1372.7147      | 10 | E  | 7  | 733.3844       | 367.1961        |
| 1429.7361      | 11 | G  | 6  | 604.3418       | 302.6748        |
| 1530.7838      | 12 | T  | 5  | 547.3204       | 274.1641        |
| 1587.8053      | 13 | G  | 4  | 446.2727       | 223.6403        |
| 1688.8530      | 14 | T  | 3  | 389.2512       | 195.1295        |
| 1801.9370      | 15 | L  | 2  | 288.2036       | 144.6057        |
|                | 16 | R  | 1  | 175.1195       | 88.0637         |

N-term:+29.04 K(7):+156.13  
K(8):+156.13

N-term: +29.04 K(6): +156.13

X-range:

0 - 0

MassTol: Y-zoom:

0. 1.

MassType:

☐ AVG ☒ MONO

Axis:

☒ 1 ☐ 2

Label:

☒ I ☐ M ☐ -

Ions:

a ☐ + ☐ 2+ ☐ 3+

b ☒ + ☐ 2+ ☐ 3+

c ☐ + ☐ 2+ ☐ 3+

x ☐ + ☐ 2+ ☐ 3+

y ☒ + ☒ 2+ ☐ 3+

z ☐ + ☐ 2+ ☐ 3+

hide H<sub>2</sub>O/NH<sub>3</sub> ☐

zoom 112-122 ☐

GO

REPIDNLTPEER, MH+ 1496.7709, m/z 499.5951  
L OS G16 P120811 220811-s1.03311.03311.3.dta

scan 3311; 3.8e+000

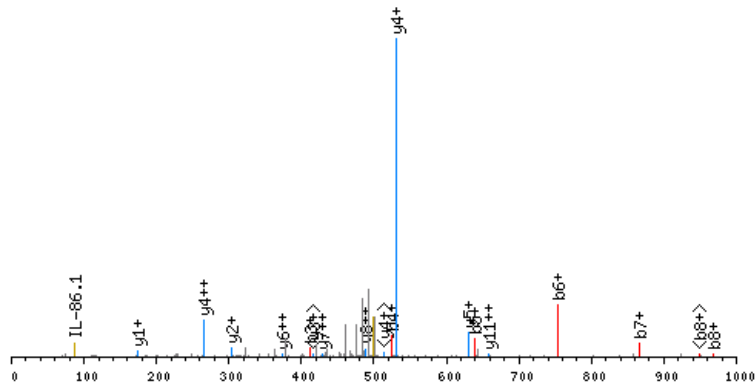

click image to zoom in; click top corners to zoom out [\[precursor±\]](#)

scan 3308; 499.6 m/z; 5.3e+000

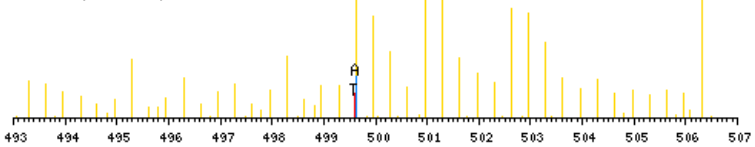

zoomed in precursor plot; T=theoretical m/z, A=acquired m/z

| b <sup>+</sup> | #  | AA | #  | y <sup>+</sup> | y <sup>2+</sup> |
|----------------|----|----|----|----------------|-----------------|
| 185.1402       | 1  | R  | 12 |                |                 |
| 314.1828       | 2  | E  | 11 | 1312.6385      | 656.8232        |
| 411.2356       | 3  | P  | 10 | 1183.5959      | 592.3019        |
| 524.3196       | 4  | I  | 9  | 1086.5431      | 543.7755        |
| 639.3466       | 5  | D  | 8  | 973.4591       | 487.2334        |
| 753.3895       | 6  | N  | 7  | 858.4321       | 429.7200        |
| 866.4736       | 7  | L  | 6  | 744.3892       | 372.6985        |
| 967.5212       | 8  | T  | 5  | 631.3051       | 316.1565        |
| 1064.5740      | 9  | P  | 4  | 530.2575       | 265.6326        |
| 1193.6166      | 10 | E  | 3  | 433.2047       | 217.1063        |
| 1322.6592      | 11 | E  | 2  | 304.1621       | 152.5850        |
|                | 12 | R  | 1  | 175.1195       | 88.0637         |

N-term:+29.04

X-range:

0 - 0

MassTol: Y-zoom:

0. 1.

MassType:

☐AVG ☒MONO

Axis:

☒1 ☐2

Label:

☒I ☐M ☐-

Ions:

a ☐+ ☐2+ ☐3+

b ☒+ ☐2+ ☐3+

c ☐+ ☐2+ ☐3+

x ☐+ ☐2+ ☐3+

y ☒+ ☒2+ ☐3+

z ☐+ ☐2+ ☐3+

hide H<sub>2</sub>O/NH<sub>3</sub> ☐

zoom 112-122 ☐

GO

REPPIMVTKQLEDNMNAYCGER, MH+ 2605.3212, m/z 652.0858  
H OS G17 P120811 220811-s1.05620.05620.4.dta

scan 5620; 2.5e+000

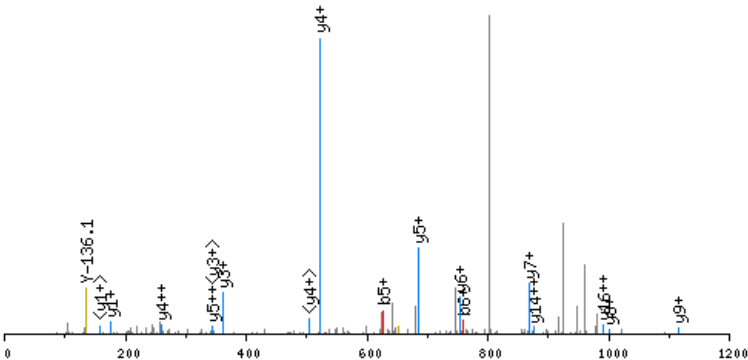

click image to zoom in; click top corners to zoom out

[precursor±]

scan 5618; 652.1 m/z; 7.8e+000

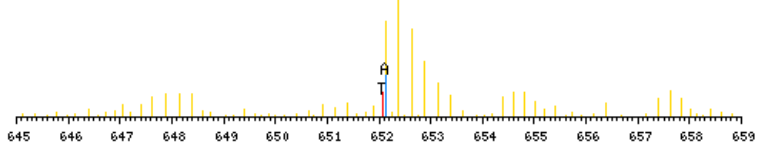

zoomed in precursor plot; T=theoretical m/z, A=acquired m/z

| b <sup>+</sup> | #  | AA | #  | y <sup>+</sup> | y <sup>2+</sup> |
|----------------|----|----|----|----------------|-----------------|
| 191.1720       | 1  | R  | 21 |                |                 |
| 320.2146       | 2  | E  | 20 | 2415.1571      | 1208.0824       |
| 417.2674       | 3  | P  | 19 | 2286.1145      | 1143.5611       |
| 514.3201       | 4  | P  | 18 | 2189.0617      | 1095.0348       |
| 627.4042       | 5  | I  | 17 | 2092.0089      | 1046.5084       |
| 758.4447       | 6  | M  | 16 | 1978.9249      | 989.9663        |
| 857.5131       | 7  | V  | 15 | 1847.8844      | 924.4461        |
| 958.5608       | 8  | T  | 14 | 1748.8160      | 874.9119        |
| 1120.7189      | 9  | K  | 13 | 1647.7683      | 824.3881        |
| 1248.7775      | 10 | Q  | 12 | 1485.6102      | 743.3090        |
| 1361.8615      | 11 | L  | 11 | 1357.5516      | 679.2797        |
| 1490.9041      | 12 | E  | 10 | 1244.4675      | 622.7377        |
| 1605.9311      | 13 | D  | 9  | 1115.4250      | 558.2164        |
| 1736.9715      | 14 | M  | 8  | 1000.3980      | 500.7029        |
| 1851.0145      | 15 | N  | 7  | 869.3575       | 435.1827        |
| 1922.0516      | 16 | A  | 6  | 755.3146       | 378.1612        |
| 2085.1149      | 17 | Y  | 5  | 684.2775       | 342.6427        |
| 2245.1455      | 18 | C  | 4  | 521.2142       | 261.1110        |
| 2302.1670      | 19 | G  | 3  | 361.1836       | 181.0957        |
| 2431.2096      | 20 | E  | 2  | 304.1621       | 152.5850        |
|                | 21 | R  | 1  | 175.1195       | 88.0637         |

N-term:+35.07 K(9):+162.16  
C(18):+160.03

X-range:

0 - 0

MassTol: Y-zoom:

0. 1.

MassType:

☐ AVG ☒ MONO

Axis:

☒ 1 ☐ 2

Label:

☒ I ☐ M ☐ -

Ions:

a ☐ + ☐ 2+ ☐ 3+

b ☒ + ☐ 2+ ☐ 3+

c ☐ + ☐ 2+ ☐ 3+

x ☐ + ☐ 2+ ☐ 3+

y ☒ + ☒ 2+ ☐ 3+

z ☐ + ☐ 2+ ☐ 3+

hide H<sub>2</sub>O/NH<sub>3</sub> ☐

zoom 112-122 ☐

GO

REQHPTKIPVIIER, MH+ 1784.1183, m/z 446.7850  
H OS G19 P120811 220811-s1.02969.02969.4.dta

scan 2969; 1.4e+001

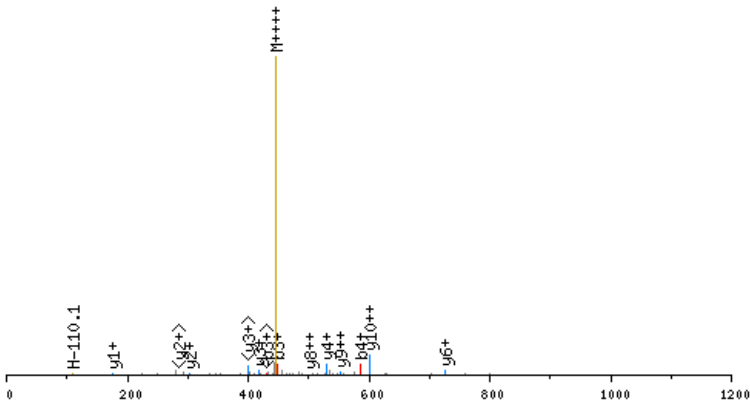

click image to zoom in; click top corners to zoom out

[precursor±]

scan 2966; 446.8 m/z; 1.1e+001

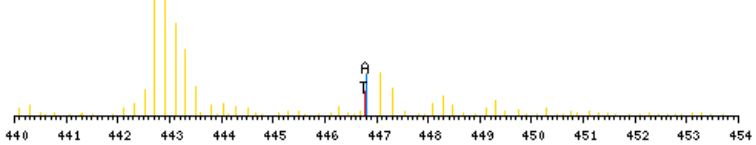

zoomed in precursor plot; T=theoretical m/z, A=acquired m/z

| b <sup>+</sup> | #  | AA | #  | y <sup>+</sup> | y <sup>2+</sup> |
|----------------|----|----|----|----------------|-----------------|
| 191.1720       | 1  | R  | 14 |                |                 |
| 320.2146       | 2  | E  | 13 | 1593.9541      | 797.4810        |
| 448.2732       | 3  | Q  | 12 | 1464.9115      | 732.9597        |
| 585.3321       | 4  | H  | 11 | 1336.8529      | 668.9304        |
| 682.3849       | 5  | P  | 10 | 1199.7940      | 600.4009        |
| 783.4325       | 6  | T  | 9  | 1102.7412      | 551.8745        |
| 945.5906       | 7  | K  | 8  | 1001.6936      | 501.3507        |
| 1058.6747      | 8  | I  | 7  | 839.5355       | 420.2716        |
| 1155.7275      | 9  | P  | 6  | 726.4514       | 363.7296        |
| 1254.7959      | 10 | V  | 5  | 629.3986       | 315.2032        |
| 1367.8799      | 11 | I  | 4  | 530.3302       | 265.6690        |
| 1480.9640      | 12 | I  | 3  | 417.2462       | 209.1270        |
| 1610.0066      | 13 | E  | 2  | 304.1621       | 152.5850        |
|                | 14 | R  | 1  | 175.1195       | 88.0637         |

N-term:+35.07 K(7):+162.16

X-range:

0 - 0

MassTol: Y-zoom:

0. 1.

MassType:

☐AVG ☒MONO

Axis:

☒1 ☐2

Label:

☒I ☐M ☐-

Ions:

a ☐+ ☐2+ ☐3+

b ☒+ ☐2+ ☐3+

c ☐+ ☐2+ ☐3+

x ☐+ ☐2+ ☐3+

y ☒+ ☒2+ ☐3+

z ☐+ ☐2+ ☐3+

hide H<sub>2</sub>O/NH<sub>3</sub> ☐

zoom 112-122 ☐

GO

RETNLESPLVDTHSKR, MH+ 2051.1249, m/z 513.5367  
L OS G19 P120811 220811-s1.03550.03550.4.dta

scan 3550; 7.8e+000

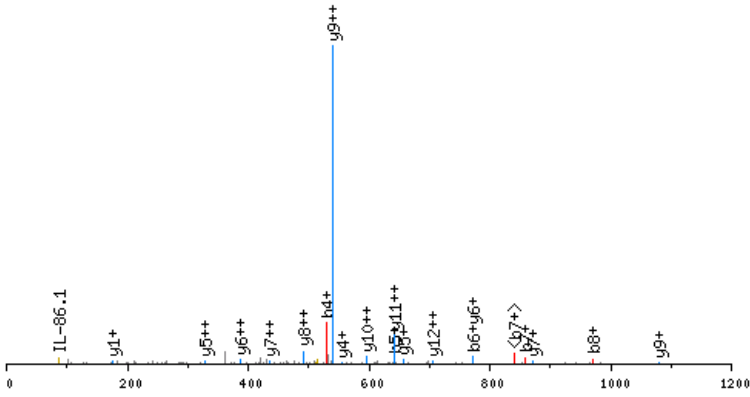

click image to zoom in; click top corners to zoom out [\[precursor±\]](#)

scan 3546; 513.5 m/z; 8.6e+000

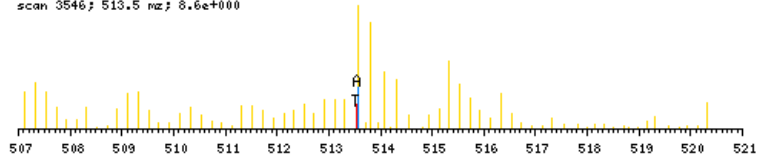

zoomed in precursor plot; T=theoretical m/z, A=acquired m/z

| b <sup>+</sup> | #  | AA | #  | y <sup>+</sup> | y <sup>2+</sup> |
|----------------|----|----|----|----------------|-----------------|
| 185.1402       | 1  | R  | 17 |                |                 |
| 314.1828       | 2  | E  | 16 | 1866.9926      | 934.0002        |
| 415.2305       | 3  | T  | 15 | 1737.9500      | 869.4789        |
| 529.2734       | 4  | N  | 14 | 1636.9023      | 818.9551        |
| 642.3575       | 5  | L  | 13 | 1522.8594      | 761.9336        |
| 771.4001       | 6  | E  | 12 | 1409.7753      | 705.3916        |
| 858.4321       | 7  | S  | 11 | 1280.7327      | 640.8703        |
| 971.5162       | 8  | L  | 10 | 1193.7007      | 597.3542        |
| 1068.5689      | 9  | P  | 9  | 1080.6166      | 540.8122        |
| 1181.6530      | 10 | L  | 8  | 983.5638       | 492.2858        |
| 1280.7214      | 11 | V  | 7  | 870.4798       | 435.7438        |
| 1395.7483      | 12 | D  | 6  | 771.4114       | 386.2096        |
| 1496.7960      | 13 | T  | 5  | 656.3844       | 328.6961        |
| 1633.8549      | 14 | H  | 4  | 555.3367       | 278.1723        |
| 1720.8870      | 15 | S  | 3  | 418.2778       | 209.6428        |
| 1877.0133      | 16 | K  | 2  | 331.2458       | 166.1268        |
|                | 17 | R  | 1  | 175.1195       | 88.0637         |

N-term:+29.04 K(16):+156.13

X-range:

0 - 0

MassTol: Y-zoom:

0. 1.

MassType:

☐AVG ☒MONO

Axis:

☒1 ☐2

Label:

☒I ☐M ☐-

Ions:

a ☐+ ☐2+ ☐3+

b ☒+ ☐2+ ☐3+

c ☐+ ☐2+ ☐3+

x ☐+ ☐2+ ☐3+

y ☒+ ☒2+ ☐3+

z ☐+ ☐2+ ☐3+

hide H<sub>2</sub>O/NH<sub>3</sub> ☐

zoom 112-122 ☐

GO

RFEEEEIKAEQEER, MH+ 1748.8819, m/z 437.9759  
L OS G18 P120811 220811-s1.02758.02758.4.dta

scan 2758; 8.9e-001

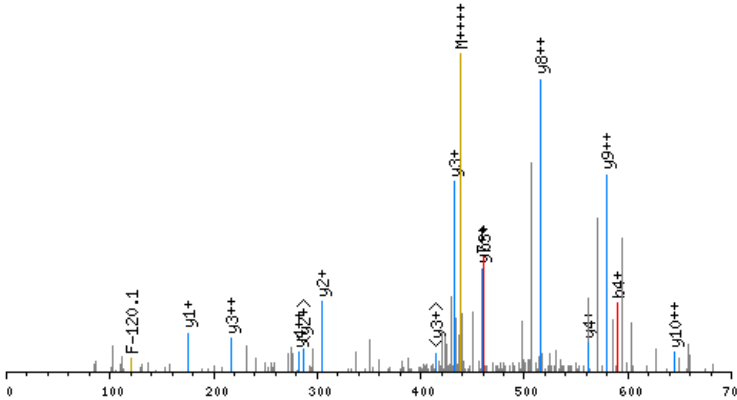

click image to zoom in; click top corners to zoom out

[precursor±]

scan 2756; 438.0 m/z; 6.2e+000

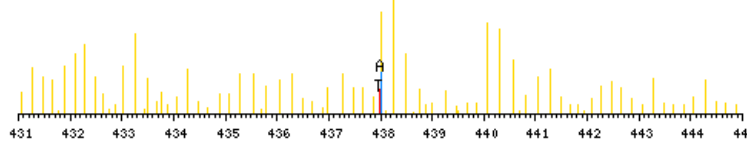

zoomed in precursor plot; T=theoretical m/z, A=acquired m/z

| b <sup>+</sup> | #  | AA | #  | y <sup>+</sup> | y <sup>2+</sup> |
|----------------|----|----|----|----------------|-----------------|
| 185.1402       | 1  | R  | 13 |                |                 |
| 332.2086       | 2  | F  | 12 | 1564.7495      | 782.8787        |
| 461.2512       | 3  | E  | 11 | 1417.6811      | 709.3445        |
| 590.2938       | 4  | E  | 10 | 1288.6385      | 644.8232        |
| 719.3364       | 5  | E  | 9  | 1159.5959      | 580.3019        |
| 832.4205       | 6  | I  | 8  | 1030.5533      | 515.7806        |
| 988.5468       | 7  | K  | 7  | 917.4693       | 459.2385        |
| 1059.5839      | 8  | A  | 6  | 761.3430       | 381.1754        |
| 1188.6265      | 9  | E  | 5  | 690.3059       | 345.6568        |
| 1316.6851      | 10 | Q  | 4  | 561.2633       | 281.1355        |
| 1445.7276      | 11 | E  | 3  | 433.2047       | 217.1063        |
| 1574.7702      | 12 | E  | 2  | 304.1621       | 152.5850        |
|                | 13 | R  | 1  | 175.1195       | 88.0637         |

N-term:+29.04 K(7):+156.13

X-range:

0 - 0

MassTol: Y-zoom:

0. 1.

MassType:

☐AVG ☒MONO

Axis:

☒1 ☐2

Label:

☒I ☐M ☐-

Ions:

a ☐+ ☐2+ ☐3+

b ☒+ ☐2+ ☐3+

c ☐+ ☐2+ ☐3+

x ☐+ ☐2+ ☐3+

y ☒+ ☒2+ ☐3+

z ☐+ ☐2+ ☐3+

hide H<sub>2</sub>O/NH<sub>3</sub> ☐

zoom 112-122 ☐

GO

RGDDGIFDDNFIEER, MH+ 1825.8357, m/z 609.2834  
L OS G16 P120811 220811-s1.05654.05654.3.dta

scan 5654; 2.1e+000

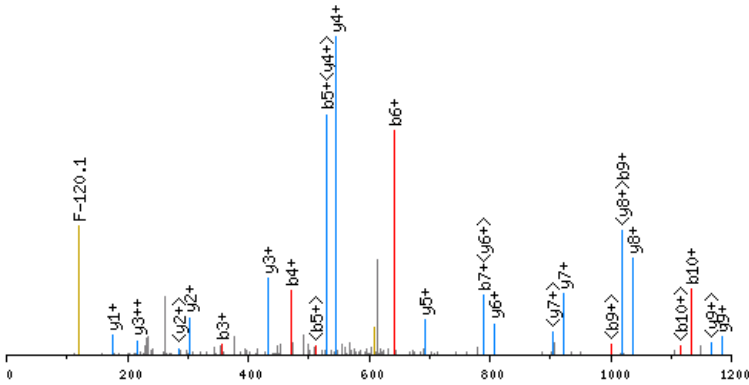

click image to zoom in; click top corners to zoom out

[precursor±]

scan 5653; 609.3 m/z; 5.4e+000

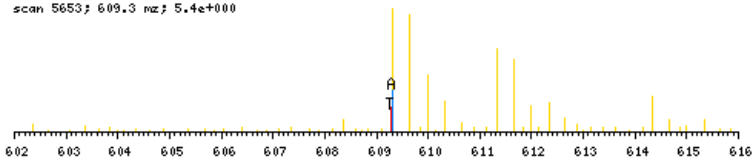

zoomed in precursor plot; T=theoretical m/z, A=acquired m/z

| b <sup>+</sup> | #  | AA | #  | y <sup>+</sup> | y <sup>2+</sup> |
|----------------|----|----|----|----------------|-----------------|
| 185.1402       | 1  | R  | 15 |                |                 |
| 242.1617       | 2  | G  | 14 | 1641.7033      | 821.3555        |
| 357.1886       | 3  | D  | 13 | 1584.6818      | 792.8448        |
| 472.2156       | 4  | D  | 12 | 1469.6549      | 735.3313        |
| 529.2370       | 5  | G  | 11 | 1354.6279      | 677.8179        |
| 642.3211       | 6  | I  | 10 | 1297.6065      | 649.3071        |
| 789.3895       | 7  | F  | 9  | 1184.5224      | 592.7651        |
| 904.4164       | 8  | D  | 8  | 1037.4540      | 519.2309        |
| 1019.4434      | 9  | D  | 7  | 922.4270       | 461.7174        |
| 1133.4863      | 10 | N  | 6  | 807.4001       | 404.2040        |
| 1280.5547      | 11 | F  | 5  | 693.3572       | 347.1825        |
| 1393.6388      | 12 | I  | 4  | 546.2888       | 273.6483        |
| 1522.6814      | 13 | E  | 3  | 433.2047       | 217.1063        |
| 1651.7240      | 14 | E  | 2  | 304.1621       | 152.5850        |
|                | 15 | R  | 1  | 175.1195       | 88.0637         |

N-term:+29.04

X-range:

0 - 0

MassTol: Y-zoom:

0. 1.

MassType:

☐ AVG ☒ MONO

Axis:

☒ 1 ☐ 2

Label:

☒ I ☐ M ☐ -

Ions:

a ☐ + ☐ 2+ ☐ 3+

b ☒ + ☐ 2+ ☐ 3+

c ☐ + ☐ 2+ ☐ 3+

x ☐ + ☐ 2+ ☐ 3+

y ☒ + ☒ 2+ ☐ 3+

z ☐ + ☐ 2+ ☐ 3+

hide H<sub>2</sub>O/NH<sub>3</sub> ☐

zoom 112-122 ☐

GO

RGDEGIFEESFIEER, MH+ 1846.9035, m/z 616.3060  
H OS G16 P120811 220811-s1.05640.05640.3.dta

scan 5640; 1.3e+000

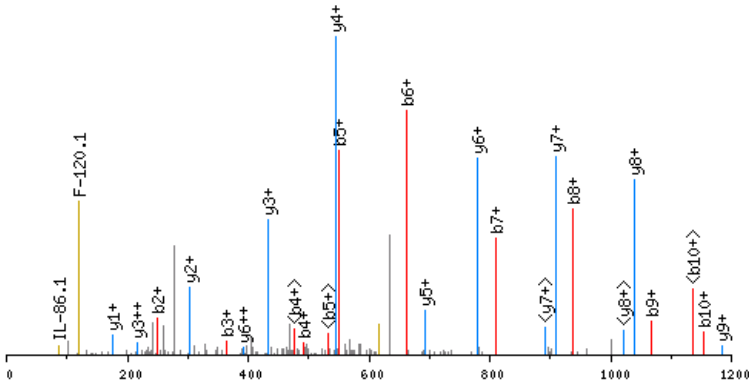

click image to zoom in; click top corners to zoom out [precursor±]

scan 5638; 616.3 m/z; 4.9e+000

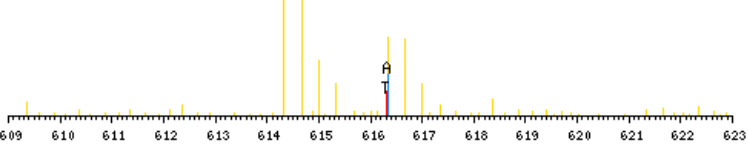

zoomed in precursor plot; T=theoretical m/z, A=acquired m/z

| b <sup>+</sup> | #  | AA | #  | y <sup>+</sup> | y <sup>2+</sup> |
|----------------|----|----|----|----------------|-----------------|
| 191.1720       | 1  | R  | 15 |                |                 |
| 248.1935       | 2  | G  | 14 | 1656.7393      | 828.8736        |
| 363.2204       | 3  | D  | 13 | 1599.7179      | 800.3628        |
| 492.2630       | 4  | E  | 12 | 1484.6909      | 742.8494        |
| 549.2845       | 5  | G  | 11 | 1355.6483      | 678.3281        |
| 662.3685       | 6  | I  | 10 | 1298.6269      | 649.8173        |
| 809.4370       | 7  | F  | 9  | 1185.5428      | 593.2753        |
| 938.4795       | 8  | E  | 8  | 1038.4744      | 519.7411        |
| 1067.5221      | 9  | E  | 7  | 909.4318       | 455.2198        |
| 1154.5542      | 10 | S  | 6  | 780.3892       | 390.6985        |
| 1301.6226      | 11 | F  | 5  | 693.3572       | 347.1825        |
| 1414.7066      | 12 | I  | 4  | 546.2888       | 273.6483        |
| 1543.7492      | 13 | E  | 3  | 433.2047       | 217.1063        |
| 1672.7918      | 14 | E  | 2  | 304.1621       | 152.5850        |
|                | 15 | R  | 1  | 175.1195       | 88.0637         |

N-term:+35.07

X-range:

0 - 0

MassTol: Y-zoom:

0. 1.

MassType:

☐AVG ☒MONO

Axis:

☒1 ☐2

Label:

☒I ☐M ☐-

Ions:

a ☐+ ☐2+ ☐3+

b ☒+ ☐2+ ☐3+

c ☐+ ☐2+ ☐3+

x ☐+ ☐2+ ☐3+

y ☒+ ☒2+ ☐3+

z ☐+ ☐2+ ☐3+

hide H<sub>2</sub>O/NH<sub>3</sub> ☐

zoom 112-122 ☐

GO

RGEAGAAGPSGPAGPR, MH+ 1435.7406, m/z 479.2517  
L OS G14 P120811 220811-s1.02139.02139.3.dta

scan 2139; 3.2e-001

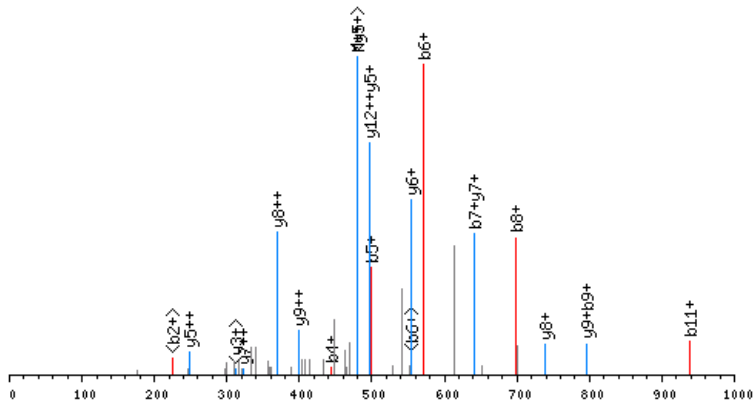

click image to zoom in; click top corners to zoom out

[precursor±]

scan 2138; 479.3 m/z; 7.9e-001

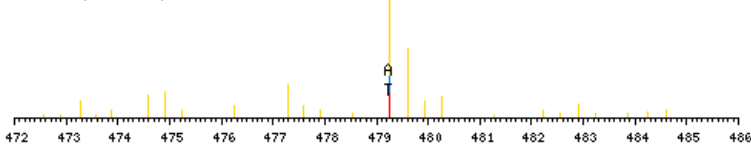

zoomed in precursor plot; T=theoretical m/z, A=acquired m/z

| b <sup>+</sup> | #  | AA | #  | y <sup>+</sup> | y <sup>2+</sup> |
|----------------|----|----|----|----------------|-----------------|
| 185.1402       | 1  | R  | 16 |                |                 |
| 242.1617       | 2  | G  | 15 | 1251.6082      | 626.3080        |
| 371.2043       | 3  | E  | 14 | 1194.5867      | 597.7973        |
| 442.2414       | 4  | A  | 13 | 1065.5441      | 533.2760        |
| 499.2628       | 5  | G  | 12 | 994.5070       | 497.7574        |
| 570.3000       | 6  | A  | 11 | 937.4856       | 469.2467        |
| 641.3371       | 7  | A  | 10 | 866.4484       | 433.7281        |
| 698.3585       | 8  | G  | 9  | 795.4113       | 398.2096        |
| 795.4113       | 9  | P  | 8  | 738.3899       | 369.6988        |
| 882.4433       | 10 | S  | 7  | 641.3371       | 321.1725        |
| 939.4648       | 11 | G  | 6  | 554.3051       | 277.6564        |
| 1036.5176      | 12 | P  | 5  | 497.2836       | 249.1457        |
| 1107.5547      | 13 | A  | 4  | 400.2308       | 200.6193        |
| 1164.5761      | 14 | G  | 3  | 329.1937       | 165.1008        |
| 1261.6289      | 15 | P  | 2  | 272.1723       | 136.5900        |
|                | 16 | R  | 1  | 175.1195       | 88.0637         |

N-term:+29.04

X-range:

0 - 0

MassTol: Y-zoom:

0. 1.

MassType:

☐AVG ☒MONO

Axis:

☒1 ☐2

Label:

☒I ☐M ☐-

Ions:

a ☐+ ☐2+ ☐3+

b ☒+ ☐2+ ☐3+

c ☐+ ☐2+ ☐3+

x ☐+ ☐2+ ☐3+

y ☒+ ☒2+ ☐3+

z ☐+ ☐2+ ☐3+

hide H<sub>2</sub>O/NH<sub>3</sub> ☐

zoom 112-122 ☐

GO

RGETGPAGPAGPIGPAGAR, MH+ 1722.9463, m/z 574.9870

H OS G16 P120811 220811-s1.02756.02756.3.dta

scan 2756; 1.9e+000

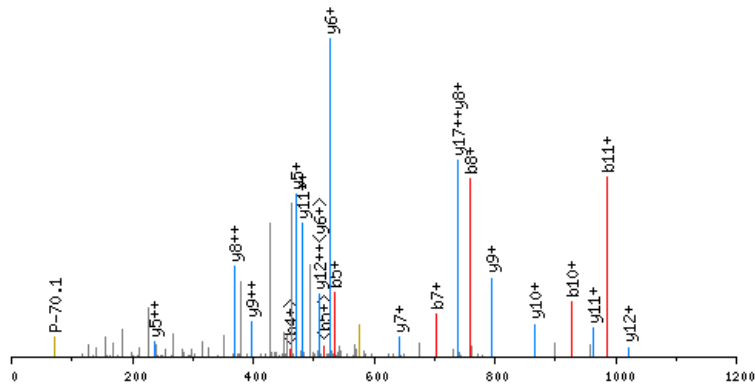

click image to zoom in; click top corners to zoom out

[precursor±]

scan 2753; 575.0 m/z; 7.0e+000

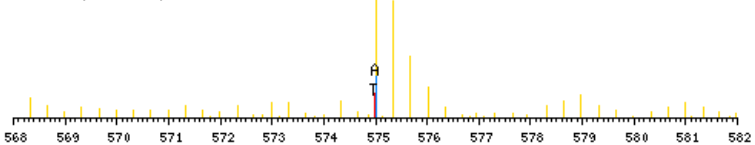

zoomed in precursor plot; T=theoretical m/z, A=acquired m/z

| b <sup>+</sup> | #  | AA | #  | y <sup>+</sup> | y <sup>2+</sup> |
|----------------|----|----|----|----------------|-----------------|
| 191.1720       | 1  | R  | 19 |                |                 |
| 248.1935       | 2  | G  | 18 | 1532.7821      | 766.8950        |
| 377.2361       | 3  | E  | 17 | 1475.7607      | 738.3842        |
| 478.2837       | 4  | T  | 16 | 1346.7181      | 673.8629        |
| 535.3052       | 5  | G  | 15 | 1245.6704      | 623.3391        |
| 632.3580       | 6  | P  | 14 | 1188.6489      | 594.8284        |
| 703.3951       | 7  | A  | 13 | 1091.5962      | 546.3020        |
| 760.4166       | 8  | G  | 12 | 1020.5591      | 510.7834        |
| 857.4693       | 9  | P  | 11 | 963.5376       | 482.2727        |
| 928.5064       | 10 | A  | 10 | 866.4848       | 433.7463        |
| 985.5279       | 11 | G  | 9  | 795.4477       | 398.2278        |
| 1082.5807      | 12 | P  | 8  | 738.4262       | 369.7170        |
| 1195.6647      | 13 | I  | 7  | 641.3735       | 321.1907        |
| 1252.6862      | 14 | G  | 6  | 528.2894       | 264.6486        |
| 1349.7389      | 15 | P  | 5  | 471.2680       | 236.1379        |
| 1420.7761      | 16 | A  | 4  | 374.2152       | 187.6115        |
| 1477.7975      | 17 | G  | 3  | 303.1781       | 152.0930        |
| 1548.8346      | 18 | A  | 2  | 246.1566       | 123.5822        |
|                | 19 | R  | 1  | 175.1195       | 88.0637         |

N-term:+35.07

X-range:

0 - 0

MassTol: Y-zoom:

0. 1.

MassType:

☐AVG ☒MONO

Axis:

☒1 ☐2

Label:

☒I ☐M ☐-

Ions:

a ☐+ ☐2+ ☐3+

b ☒+ ☐2+ ☐3+

c ☐+ ☐2+ ☐3+

x ☐+ ☐2+ ☐3+

y ☒+ ☒2+ ☐3+

z ☐+ ☐2+ ☐3+

hide H<sub>2</sub>O/NH<sub>3</sub> ☐

zoom 112-122 ☐

GO

RGGGGHDALKGPNVCGSR, MH+ 1850.9407, m/z 463.4906  
L OS G19 P120811 220811-s1.01957.01957.4.dta

scan 1957; 2.0e+001

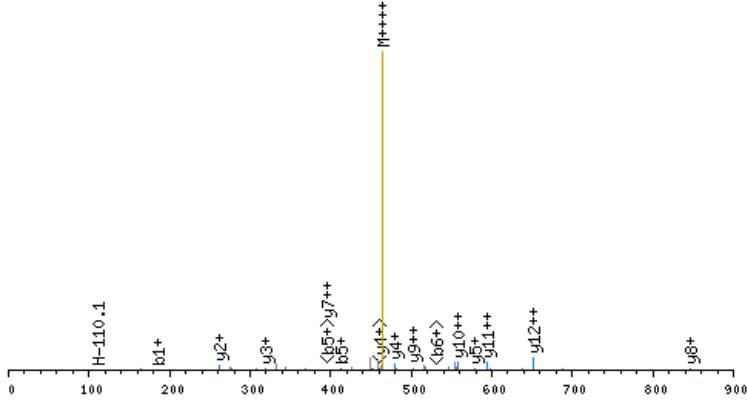

click image to zoom in; click top corners to zoom out [\[precursor±\]](#)

scan 1954; 463.5 m/z; 2.7e+000

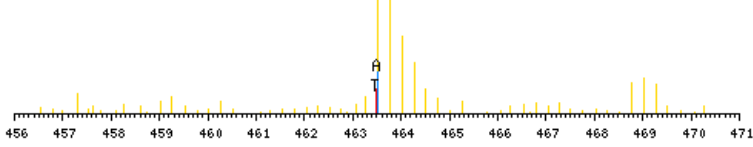

zoomed in precursor plot; T=theoretical m/z, A=acquired m/z

| b <sup>+</sup> | #  | AA | #  | y <sup>+</sup> | y <sup>2+</sup> |
|----------------|----|----|----|----------------|-----------------|
| 185.1402       | 1  | R  | 18 |                |                 |
| 242.1617       | 2  | G  | 17 | 1666.8083      | 833.9081        |
| 299.1831       | 3  | G  | 16 | 1609.7869      | 805.3974        |
| 356.2046       | 4  | G  | 15 | 1552.7654      | 776.8866        |
| 413.2261       | 5  | G  | 14 | 1495.7440      | 748.3759        |
| 550.2850       | 6  | H  | 13 | 1438.7225      | 719.8652        |
| 665.3119       | 7  | D  | 12 | 1301.6636      | 651.3357        |
| 736.3490       | 8  | A  | 11 | 1186.6366      | 593.8222        |
| 849.4331       | 9  | L  | 10 | 1115.5995      | 558.3037        |
| 1005.5594      | 10 | K  | 9  | 1002.5155      | 501.7616        |
| 1062.5809      | 11 | G  | 8  | 846.3892       | 423.6985        |
| 1159.6336      | 12 | P  | 7  | 789.3677       | 395.1878        |
| 1273.6766      | 13 | N  | 6  | 692.3149       | 346.6614        |
| 1372.7450      | 14 | V  | 5  | 578.2720       | 289.6399        |
| 1532.7756      | 15 | C  | 4  | 479.2036       | 240.1057        |
| 1589.7970      | 16 | G  | 3  | 319.1730       | 160.0904        |
| 1676.8291      | 17 | S  | 2  | 262.1515       | 131.5797        |
|                | 18 | R  | 1  | 175.1195       | 88.0637         |

N-term:+29.04 K(10):+156.13  
C(15):+160.03

X-range:

0 - 0

MassTol: Y-zoom:

0. 1.

MassType:

☐AVG ☒MONO

Axis:

☒1 ☐2

Label:

☒I ☐M ☐-

Ions:

a ☐+ ☐2+ ☐3+

b ☒+ ☐2+ ☐3+

c ☐+ ☐2+ ☐3+

x ☐+ ☐2+ ☐3+

y ☒+ ☒2+ ☐3+

z ☐+ ☐2+ ☐3+

hide H<sub>2</sub>O/NH<sub>3</sub> ☐

zoom 112-122 ☐

GO

RGQVGDLSPPQQEALAR, MH+ 1880.9942, m/z 627.6696  
L OS G16 P120811 220811-s1.03675.03675.3.dta

scan 3675; 2.9e+000

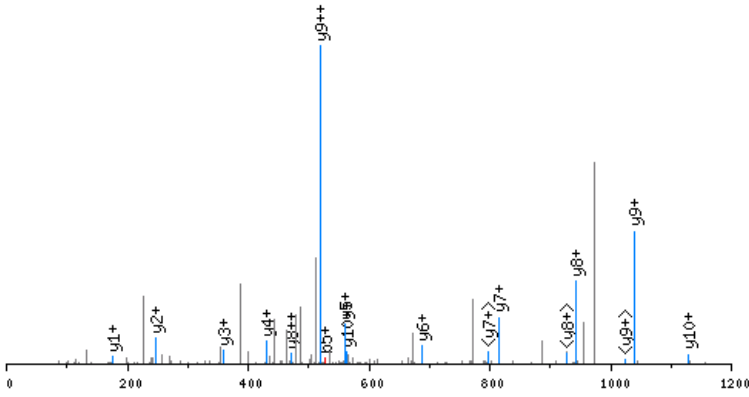

click image to zoom in; click top corners to zoom out

[precursor±]

scan 3673; 627.7 m/z; 3.9e+000

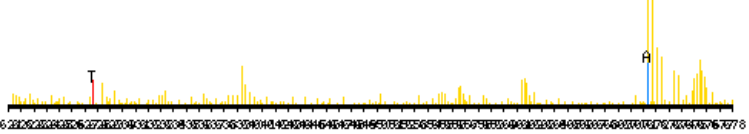

zoomed in precursor plot; T=theoretical m/z, A=acquired m/z

| b <sup>+</sup> | #  | AA | #  | y <sup>+</sup> | y <sup>2+</sup> |
|----------------|----|----|----|----------------|-----------------|
| 185.1402       | 1  | R  | 17 |                |                 |
| 242.1617       | 2  | G  | 16 | 1696.8618      | 848.9348        |
| 370.2203       | 3  | Q  | 15 | 1639.8404      | 820.4241        |
| 469.2887       | 4  | V  | 14 | 1511.7818      | 756.3948        |
| 526.3101       | 5  | G  | 13 | 1412.7134      | 706.8606        |
| 641.3371       | 6  | D  | 12 | 1355.6919      | 678.3499        |
| 754.4211       | 7  | L  | 11 | 1240.6650      | 620.8364        |
| 841.4532       | 8  | S  | 10 | 1127.5809      | 564.2944        |
| 938.5059       | 9  | P  | 9  | 1040.5489      | 520.7784        |
| 1066.5645      | 10 | Q  | 8  | 943.4961       | 472.2520        |
| 1194.6231      | 11 | Q  | 7  | 815.4375       | 408.2227        |
| 1322.6817      | 12 | Q  | 6  | 687.3790       | 344.1934        |
| 1451.7243      | 13 | E  | 5  | 559.3204       | 280.1641        |
| 1522.7614      | 14 | A  | 4  | 430.2778       | 215.6428        |
| 1635.8454      | 15 | L  | 3  | 359.2407       | 180.1243        |
| 1706.8825      | 16 | A  | 2  | 246.1566       | 123.5822        |
|                | 17 | R  | 1  | 175.1195       | 88.0637         |

N-term:+29.04

X-range:

0 - 0

MassTol: Y-zoom:

0. 1.

MassType:

☐ AVG ☒ MONO

Axis:

☒ 1 ☐ 2

Label:

☒ I ☐ M ☐ -

Ions:

a ☐ + ☐ 2+ ☐ 3+

b ☒ + ☐ 2+ ☐ 3+

c ☐ + ☐ 2+ ☐ 3+

x ☐ + ☐ 2+ ☐ 3+

y ☒ + ☒ 2+ ☐ 3+

z ☐ + ☐ 2+ ☐ 3+

hide H<sub>2</sub>O/NH<sub>3</sub> ☐

zoom 112-122 ☐

GO

RGTTGGVDTAAVGAVFDISNADR, MH+ 2183.1269, m/z 728.3805  
H OS G16 P120811 220811-s1.05786.05786.3.dta

scan 5786; 2.6e+000

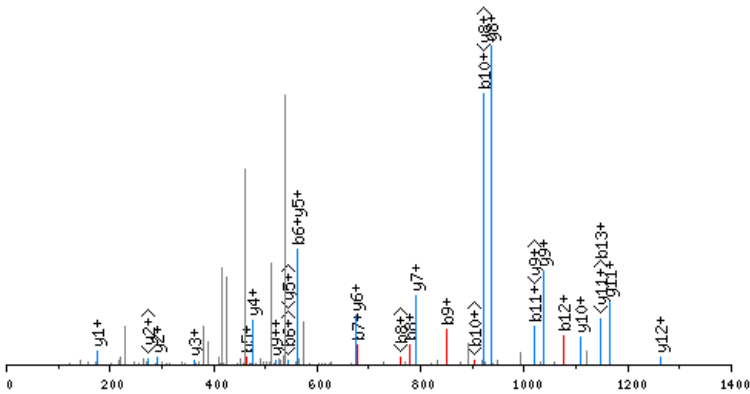

click image to zoom in; click top corners to zoom out [\[precursor±\]](#)

scan 5783; 728.4 m/z; 3.4e+000

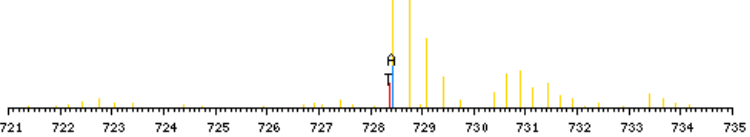

zoomed in precursor plot; T=theoretical m/z, A=acquired m/z

| b <sup>+</sup> | #  | AA | #  | y <sup>+</sup> | y <sup>2+</sup> |
|----------------|----|----|----|----------------|-----------------|
| 191.1720       | 1  | R  | 22 |                |                 |
| 248.1935       | 2  | G  | 21 | 1992.9627      | 996.9852        |
| 349.2412       | 3  | T  | 20 | 1935.9412      | 968.4745        |
| 406.2626       | 4  | G  | 19 | 1834.8935      | 917.9507        |
| 463.2841       | 5  | G  | 18 | 1777.8721      | 889.4399        |
| 562.3525       | 6  | V  | 17 | 1720.8506      | 860.9292        |
| 677.3794       | 7  | D  | 16 | 1621.7822      | 811.3950        |
| 778.4271       | 8  | T  | 15 | 1506.7552      | 753.8815        |
| 849.4642       | 9  | A  | 14 | 1405.7076      | 703.3577        |
| 920.5013       | 10 | A  | 13 | 1334.6705      | 667.8391        |
| 1019.5698      | 11 | V  | 12 | 1263.6333      | 632.3206        |
| 1076.5912      | 12 | G  | 11 | 1164.5649      | 582.7864        |
| 1147.6283      | 13 | A  | 10 | 1107.5435      | 554.2756        |
| 1246.6967      | 14 | V  | 9  | 1036.5063      | 518.7571        |
| 1393.7652      | 15 | F  | 8  | 937.4379       | 469.2229        |
| 1508.7921      | 16 | D  | 7  | 790.3695       | 395.6887        |
| 1621.8762      | 17 | I  | 6  | 675.3426       | 338.1752        |
| 1708.9082      | 18 | S  | 5  | 562.2585       | 281.6332        |
| 1822.9511      | 19 | N  | 4  | 475.2265       | 238.1172        |
| 1893.9882      | 20 | A  | 3  | 361.1836       | 181.0957        |
| 2009.0152      | 21 | D  | 2  | 290.1464       | 145.5771        |
|                | 22 | R  | 1  | 175.1195       | 88.0637         |

N-term:+35.07

X-range:

0 - 0

MassTol: Y-zoom:

0. 1.

MassType:

☐ AVG ☒ MONO

Axis:

☒ 1 ☐ 2

Label:

☒ I ☐ M ☐ -

Ions:

a ☐ + ☐ 2+ ☐ 3+

b ☒ + ☐ 2+ ☐ 3+

c ☐ + ☐ 2+ ☐ 3+

x ☐ + ☐ 2+ ☐ 3+

y ☒ + ☒ 2+ ☐ 3+

z ☐ + ☐ 2+ ☐ 3+

hide H<sub>2</sub>O/NH<sub>3</sub> ☐

zoom 112-122 ☐

GO

RGVSESQASDSEGHSDSEGGAVGAHR, MH+ 2815.2631, m/z 704.5712  
L OS G18 P120811 220811-s1.02508.02508.4.dta

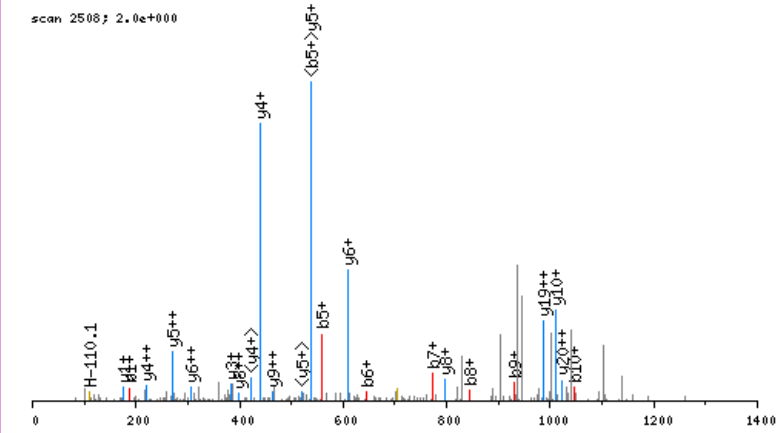

click image to zoom in; click top corners to zoom out [\[precursor±\]](#)

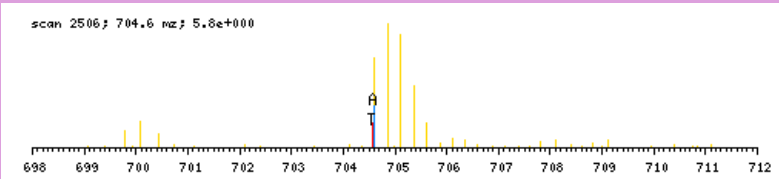

zoomed in precursor plot; T=theoretical m/z, A=acquired m/z

| b <sup>+</sup> | #  | AA | #  | y <sup>+</sup> | y <sup>2+</sup> |
|----------------|----|----|----|----------------|-----------------|
| 185.1402       | 1  | R  | 27 |                |                 |
| 242.1617       | 2  | G  | 26 | 2631.1308      | 1316.0693       |
| 341.2301       | 3  | V  | 25 | 2574.1093      | 1287.5586       |
| 428.2621       | 4  | S  | 24 | 2475.0409      | 1238.0244       |
| 557.3047       | 5  | E  | 23 | 2388.0088      | 1194.5083       |
| 644.3367       | 6  | S  | 22 | 2258.9663      | 1129.9870       |
| 772.3953       | 7  | Q  | 21 | 2171.9342      | 1086.4710       |
| 843.4324       | 8  | A  | 20 | 2043.8756      | 1022.4417       |
| 930.4645       | 9  | S  | 19 | 1972.8385      | 986.9232        |
| 1045.4914      | 10 | D  | 18 | 1885.8065      | 943.4072        |
| 1132.5234      | 11 | S  | 17 | 1770.7796      | 885.8937        |
| 1261.5660      | 12 | E  | 16 | 1683.7475      | 842.3777        |
| 1318.5875      | 13 | G  | 15 | 1554.7049      | 777.8564        |
| 1455.6464      | 14 | H  | 14 | 1497.6835      | 749.3457        |
| 1542.6784      | 15 | S  | 13 | 1360.6246      | 680.8162        |
| 1657.7054      | 16 | D  | 12 | 1273.5925      | 637.3002        |
| 1804.7738      | 17 | F  | 11 | 1158.5656      | 579.7867        |
| 1891.8058      | 18 | S  | 10 | 1011.4972      | 506.2525        |
| 2020.8484      | 19 | E  | 9  | 924.4652       | 462.7365        |
| 2077.8699      | 20 | G  | 8  | 795.4226       | 398.2152        |
| 2205.9284      | 21 | Q  | 7  | 738.4011       | 369.7045        |
| 2276.9656      | 22 | A  | 6  | 610.3425       | 305.6752        |
| 2376.0340      | 23 | V  | 5  | 539.3054       | 270.1566        |
| 2433.0554      | 24 | G  | 4  | 440.2370       | 220.6224        |
| 2504.0926      | 25 | A  | 3  | 383.2155       | 192.1117        |
| 2641.1515      | 26 | H  | 2  | 312.1784       | 156.5931        |
|                | 27 | R  | 1  | 175.1195       | 88.0637         |

N-term:+29.04

X-range:

0 - 0

MassTol: Y-zoom:

0. 1.

MassType:

☐ AVG ☒ MONO

Axis:

☒ 1 ☐ 2

Label:

☒ I ☐ M ☐ -

Ions:

a ☐ + ☐ 2+ ☐ 3+

b ☒ + ☐ 2+ ☐ 3+

c ☐ + ☐ 2+ ☐ 3+

x ☐ + ☐ 2+ ☐ 3+

y ☒ + ☒ 2+ ☐ 3+

z ☐ + ☐ 2+ ☐ 3+

hide H<sub>2</sub>O/NH<sub>3</sub> ☐

zoom 112-122 ☐

GO

RHHCHACGKIVCR, MH+ 1758.9214, m/z 440.4858  
H OS G17 P120811 220811-s1.02130.02130.4.dta

scan 2130; 7.4e-001

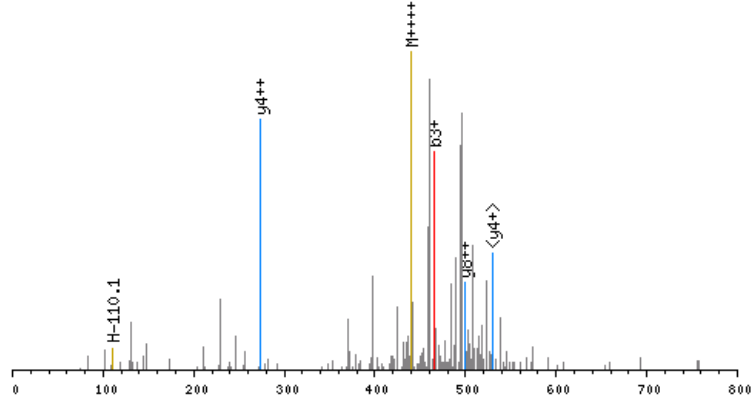

click image to zoom in; click top corners to zoom out [\[precursor±\]](#)

scan 2128; 440.5 m/z; 1.9e+001

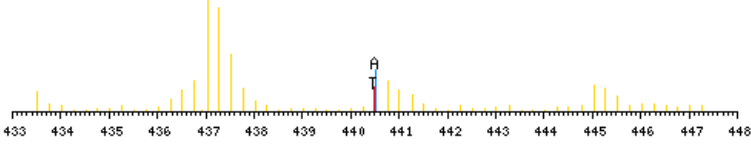

zoomed in precursor plot; T=theoretical m/z, A=acquired m/z

| b <sup>+</sup> | #  | AA | #  | y <sup>+</sup> | y <sup>2+</sup> |
|----------------|----|----|----|----------------|-----------------|
| 191.1720       | 1  | R  | 13 |                |                 |
| 328.2309       | 2  | H  | 12 | 1568.7572      | 784.8825        |
| 465.2898       | 3  | H  | 11 | 1431.6983      | 716.3531        |
| 625.3204       | 4  | C  | 10 | 1294.6394      | 647.8236        |
| 762.3793       | 5  | H  | 9  | 1134.6088      | 567.8083        |
| 833.4165       | 6  | A  | 8  | 997.5499       | 499.2788        |
| 993.4471       | 7  | C  | 7  | 926.5127       | 463.7603        |
| 1050.4685      | 8  | G  | 6  | 766.4821       | 383.7450        |
| 1212.6266      | 9  | K  | 5  | 709.4607       | 355.2343        |
| 1325.7107      | 10 | I  | 4  | 547.3026       | 274.1552        |
| 1424.7791      | 11 | V  | 3  | 434.2185       | 217.6132        |
| 1584.8097      | 12 | C  | 2  | 335.1501       | 168.0790        |
|                | 13 | R  | 1  | 175.1195       | 88.0637         |

N-term:+35.07 C(4):+160.03  
C(7):+160.03 K(9):+162.16  
C(12):+160.03

X-range:

0 - 0

MassTol: Y-zoom:

0. 1.

MassType:

☐ AVG ☒ MONO

Axis:

☒ 1 ☐ 2

Label:

☒ I ☐ M ☐ -

Ions:

a ☐ + ☐ 2+ ☐ 3+

b ☒ + ☐ 2+ ☐ 3+

c ☐ + ☐ 2+ ☐ 3+

x ☐ + ☐ 2+ ☐ 3+

y ☒ + ☒ 2+ ☐ 3+

z ☐ + ☐ 2+ ☐ 3+

hide H<sub>2</sub>O/NH<sub>3</sub> ☐

zoom 112-122 ☐

GO

RHPDYSVSLLLR, MH+ 1483.8385, m/z 495.2843  
L OS G18 P120811 220811-s1.05217.05217.3.dta

scan 5217; 3.2e+000

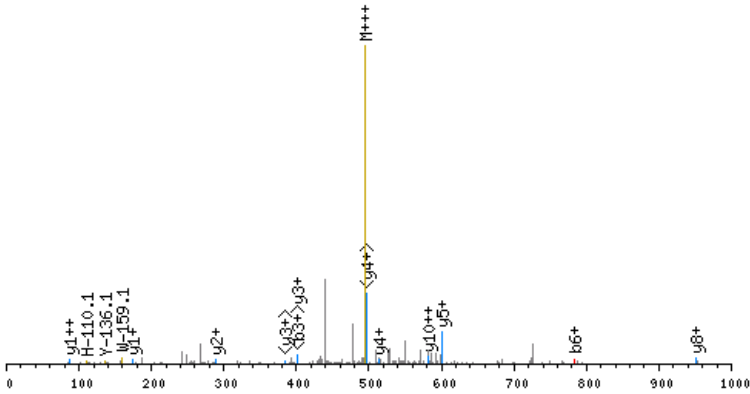

click image to zoom in; click top corners to zoom out [precursor±]

scan 5216; 495.3 m/z; 2.1e+001

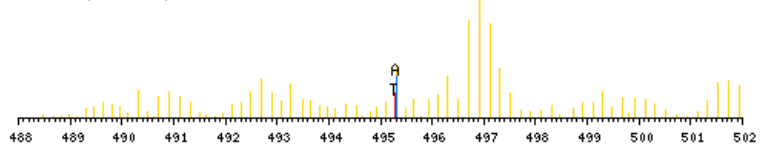

zoomed in precursor plot; T=theoretical m/z, A=acquired m/z

| b <sup>+</sup> | #  | AA | #  | y <sup>+</sup> | y <sup>2+</sup> |
|----------------|----|----|----|----------------|-----------------|
| 185.1402       | 1  | R  | 12 |                |                 |
| 322.1991       | 2  | H  | 11 | 1299.7061      | 650.3570        |
| 419.2519       | 3  | P  | 10 | 1162.6472      | 581.8275        |
| 534.2788       | 4  | D  | 9  | 1065.5944      | 533.3011        |
| 697.3422       | 5  | Y  | 8  | 950.5675       | 475.7877        |
| 784.3742       | 6  | S  | 7  | 787.5042       | 394.2560        |
| 883.4426       | 7  | V  | 6  | 700.4721       | 350.7400        |
| 970.4746       | 8  | S  | 5  | 601.4037       | 301.2058        |
| 1083.5587      | 9  | L  | 4  | 514.3717       | 257.6898        |
| 1196.6428      | 10 | L  | 3  | 401.2876       | 201.1477        |
| 1309.7268      | 11 | L  | 2  | 288.2036       | 144.6057        |
|                | 12 | R  | 1  | 175.1195       | 88.0637         |

N-term:+29.04

X-range:

0 - 0

MassTol: Y-zoom:

0. 1.

MassType:

☐ AVG ☒ MONO

Axis:

☒ 1 ☐ 2

Label:

☒ I ☐ M ☐ -

Ions:

a ☐ + ☐ 2+ ☐ 3+

b ☒ + ☐ 2+ ☐ 3+

c ☐ + ☐ 2+ ☐ 3+

x ☐ + ☐ 2+ ☐ 3+

y ☒ + ☒ 2+ ☐ 3+

z ☐ + ☐ 2+ ☐ 3+

hide H<sub>2</sub>O/NH<sub>3</sub> ☐

zoom 112-122 ☐

GO

RIINEPTAAAIAYGLDKKVGAE, MH+ 2540.4565, m/z 635.8696  
L OS G18 P120811 220811-s1.05900.05900.4.dta

scan 5900; 6.4e-001

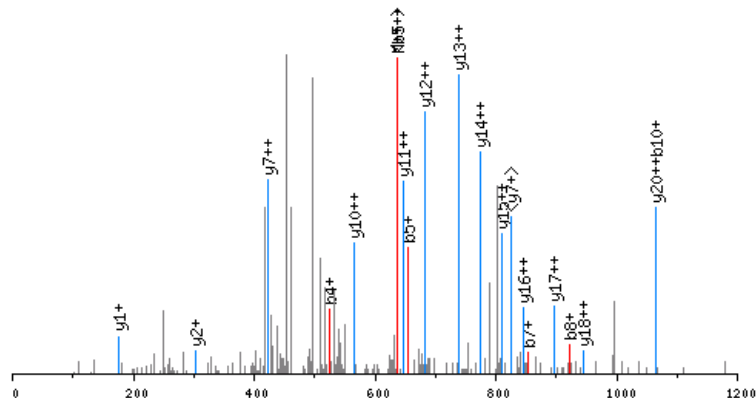

click image to zoom in; click top corners to zoom out

[precursor±]

scan 5896; 635.9 m/z; 2.3e+000

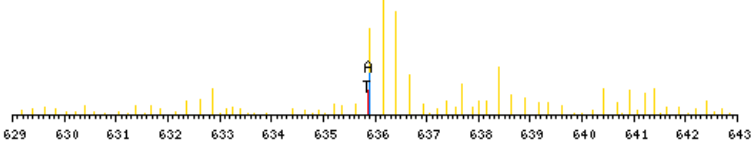

zoomed in precursor plot; T=theoretical m/z, A=acquired m/z

| b <sup>+</sup> | #  | AA | #  | y <sup>+</sup> | y <sup>2+</sup> |
|----------------|----|----|----|----------------|-----------------|
| 185.1402       | 1  | R  | 23 |                |                 |
| 298.2243       | 2  | I  | 22 | 2356.3241      | 1178.6660       |
| 411.3083       | 3  | I  | 21 | 2243.2400      | 1122.1239       |
| 525.3513       | 4  | N  | 20 | 2130.1560      | 1065.5819       |
| 654.3939       | 5  | E  | 19 | 2016.1130      | 1008.5604       |
| 751.4466       | 6  | P  | 18 | 1887.0704      | 944.0391        |
| 852.4943       | 7  | T  | 17 | 1790.0177      | 895.5128        |
| 923.5314       | 8  | A  | 16 | 1688.9700      | 844.9889        |
| 994.5685       | 9  | A  | 15 | 1617.9329      | 809.4704        |
| 1065.6056      | 10 | A  | 14 | 1546.8958      | 773.9518        |
| 1178.6897      | 11 | I  | 13 | 1475.8587      | 738.4332        |
| 1249.7268      | 12 | A  | 12 | 1362.7746      | 681.8912        |
| 1412.7901      | 13 | Y  | 11 | 1291.7375      | 646.3727        |
| 1469.8116      | 14 | G  | 10 | 1128.6742      | 564.8410        |
| 1582.8957      | 15 | L  | 9  | 1071.6527      | 536.3303        |
| 1697.9226      | 16 | D  | 8  | 958.5686       | 479.7882        |
| 1854.0489      | 17 | K  | 7  | 843.5417       | 422.2748        |
| 2010.1752      | 18 | K  | 6  | 687.4154       | 344.2116        |
| 2109.2436      | 19 | V  | 5  | 531.2891       | 266.1485        |
| 2166.2651      | 20 | G  | 4  | 432.2207       | 216.6142        |
| 2237.3022      | 21 | A  | 3  | 375.1992       | 188.1035        |
| 2366.3448      | 22 | E  | 2  | 304.1621       | 152.5850        |
|                | 23 | R  | 1  | 175.1195       | 88.0637         |

N-term:+29.04 K(17):+156.13

K(18):+156.13

X-range:

0 - 0

MassTol: Y-zoom:

0. 1.

MassType:

☐AVG ☒MONO

Axis:

☒1 ☐2

Label:

☒I ☐M ☐-

Ions:

a ☐+ ☐2+ ☐3+

b ☒+ ☐2+ ☐3+

c ☐+ ☐2+ ☐3+

x ☐+ ☐2+ ☐3+

y ☒+ ☒2+ ☐3+

z ☐+ ☐2+ ☐3+

hide H<sub>2</sub>O/NH<sub>3</sub> ☐

zoom 112-122 ☐

GO

RIVEDEPNKICEADR, MH+ 1899.9598, m/z 475.7454  
L OS G17 P120811 220811-s1.02622.02622.4.dta

scan 2622; 7.3e+000

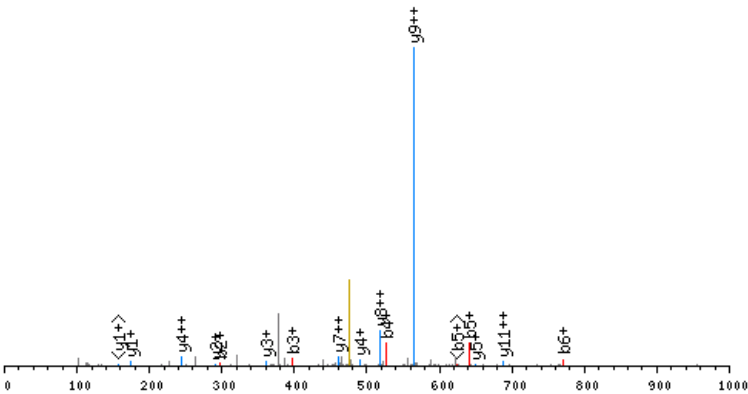

click image to zoom in; click top corners to zoom out

[precursor±]

scan 2618; 475.7 m/z; 2.6e+000

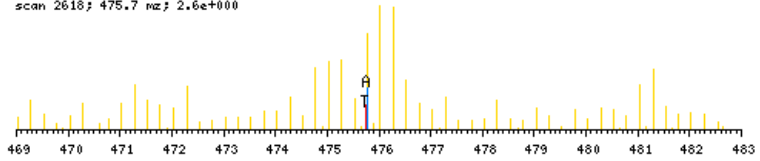

zoomed in precursor plot; T=theoretical m/z, A=acquired m/z

| b <sup>+</sup> | #  | AA | #  | y <sup>+</sup> | y <sup>2+</sup> |
|----------------|----|----|----|----------------|-----------------|
| 185.1402       | 1  | R  | 15 |                |                 |
| 298.2243       | 2  | I  | 14 | 1715.8274      | 858.4176        |
| 397.2927       | 3  | V  | 13 | 1602.7433      | 801.8756        |
| 526.3353       | 4  | E  | 12 | 1503.6749      | 752.3414        |
| 641.3622       | 5  | D  | 11 | 1374.6323      | 687.8201        |
| 770.4048       | 6  | E  | 10 | 1259.6054      | 630.3066        |
| 867.4576       | 7  | P  | 9  | 1130.5628      | 565.7853        |
| 981.5005       | 8  | N  | 8  | 1033.5100      | 517.2589        |
| 1137.6268      | 9  | K  | 7  | 919.4671       | 460.2375        |
| 1250.7109      | 10 | I  | 6  | 763.3408       | 382.1743        |
| 1410.7415      | 11 | C  | 5  | 650.2568       | 325.6323        |
| 1539.7841      | 12 | E  | 4  | 490.2262       | 245.6170        |
| 1610.8212      | 13 | A  | 3  | 361.1836       | 181.0957        |
| 1725.8481      | 14 | D  | 2  | 290.1464       | 145.5771        |
|                | 15 | R  | 1  | 175.1195       | 88.0637         |

N-term:+29.04 K(9):+156.13  
C(11):+160.03

N-term: +29.04

X-range:

0 - 0

MassTol: Y-zoom:

0. 1.

MassType:

☐AVG ☒MONO

Axis:

☒1 ☐2

Label:

☒I ☐M ☐-

Ions:

a ☐+ ☐2+ ☐3+

b ☒+ ☐2+ ☐3+

c ☐+ ☐2+ ☐3+

x ☐+ ☐2+ ☐3+

y ☒+ ☒2+ ☐3+

z ☐+ ☐2+ ☐3+

hide H<sub>2</sub>O/NH<sub>3</sub> ☐

zoom 112-122 ☐

GO

RKEEPPSLRPAPPPISGGGYR, MH+ 2317.2781, m/z 580.0750  
L OS G18 P120811 220811-s1.03644.03644.4.dta

scan 3644; 1.1e+001

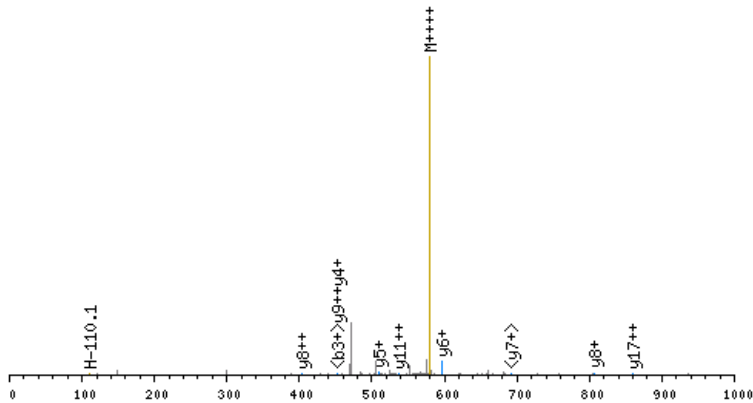

click image to zoom in; click top corners to zoom out [\[precursor±\]](#)

scan 3641; 580.1 m/z; 8.9e+000

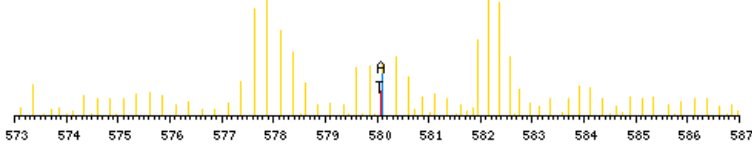

zoomed in precursor plot; T=theoretical m/z, A=acquired m/z

| b <sup>+</sup> | #  | AA | #  | y <sup>+</sup> | y <sup>2+</sup> |
|----------------|----|----|----|----------------|-----------------|
| 185.1402       | 1  | R  | 21 |                |                 |
| 341.2665       | 2  | K  | 20 | 2133.1457      | 1067.0768       |
| 470.3091       | 3  | E  | 19 | 1977.0194      | 989.0136        |
| 599.3517       | 4  | E  | 18 | 1847.9768      | 924.4923        |
| 696.4045       | 5  | P  | 17 | 1718.9342      | 859.9710        |
| 793.4572       | 6  | P  | 16 | 1621.8814      | 811.4446        |
| 880.4893       | 7  | S  | 15 | 1524.8287      | 762.9183        |
| 993.5733       | 8  | L  | 14 | 1437.7967      | 719.4022        |
| 1149.6744      | 9  | R  | 13 | 1324.7126      | 662.8602        |
| 1246.7272      | 10 | P  | 12 | 1168.6115      | 584.8097        |
| 1317.7643      | 11 | A  | 11 | 1071.5587      | 536.2833        |
| 1414.8171      | 12 | P  | 10 | 1000.5216      | 500.7647        |
| 1511.8698      | 13 | P  | 9  | 903.4688       | 452.2383        |
| 1608.9226      | 14 | P  | 8  | 806.4161       | 403.7120        |
| 1722.0067      | 15 | I  | 7  | 709.3633       | 355.1856        |
| 1809.0387      | 16 | S  | 6  | 596.2792       | 298.6435        |
| 1866.0602      | 17 | G  | 5  | 509.2472       | 255.1275        |
| 1923.0816      | 18 | G  | 4  | 452.2258       | 226.6168        |
| 1980.1031      | 19 | G  | 3  | 395.2043       | 198.1061        |
| 2143.1664      | 20 | Y  | 2  | 338.1828       | 169.5953        |
|                | 21 | R  | 1  | 175.1195       | 88.0637         |

N-term:+29.04 K(2):+156.13

X-range:

0 - 0

MassTol: Y-zoom:

0. 1.

MassType:

☐ AVG ☒ MONO

Axis:

☒ 1 ☐ 2

Label:

☒ I ☐ M ☐ -

Ions:

a ☐ + ☐ 2+ ☐ 3+

b ☒ + ☐ 2+ ☐ 3+

c ☐ + ☐ 2+ ☐ 3+

x ☐ + ☐ 2+ ☐ 3+

y ☒ + ☒ 2+ ☐ 3+

z ☐ + ☐ 2+ ☐ 3+

hide H<sub>2</sub>O/NH<sub>3</sub> ☐

zoom 112-122 ☐

GO

RKKAPPLVENEEAEPSR, MH+ 2034.1348, m/z 509.2892  
L OS G19 P120811 220811-s1.02129.02129.4.dta

scan 2129: 1.9e+000

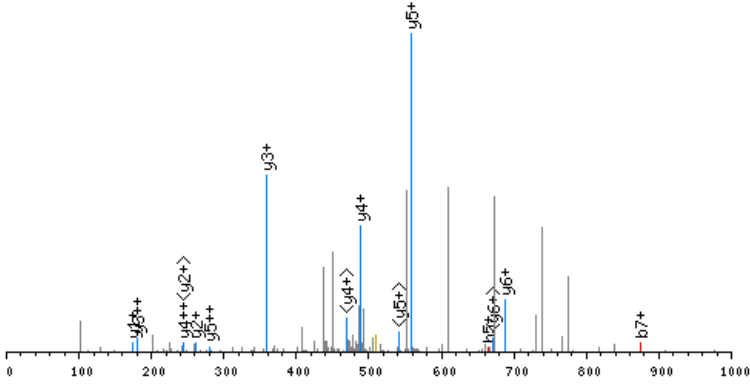

click image to zoom in; click top corners to zoom out [\[precursor±\]](#)

scan 2126: 509.3 m/z; 7.8e-001

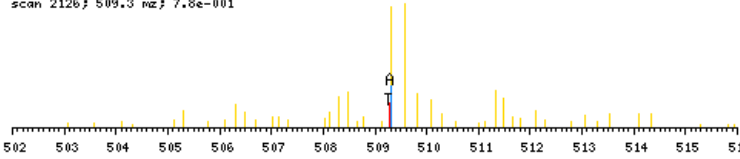

zoomed in precursor plot; T=theoretical m/z, A=acquired m/z

| b <sup>+</sup> | #  | AA | #  | y <sup>+</sup> | y <sup>2+</sup> |
|----------------|----|----|----|----------------|-----------------|
| 185.1402       | 1  | R  | 17 |                |                 |
| 341.2665       | 2  | K  | 16 | 1850.0024      | 925.5051        |
| 497.3928       | 3  | K  | 15 | 1693.8761      | 847.4420        |
| 568.4299       | 4  | A  | 14 | 1537.7498      | 769.3788        |
| 665.4827       | 5  | P  | 13 | 1466.7127      | 733.8603        |
| 762.5355       | 6  | P  | 12 | 1369.6599      | 685.3339        |
| 875.6195       | 7  | L  | 11 | 1272.6072      | 636.8075        |
| 974.6879       | 8  | V  | 10 | 1159.5231      | 580.2655        |
| 1103.7305      | 9  | E  | 9  | 1060.4547      | 530.7313        |
| 1217.7735      | 10 | N  | 8  | 931.4121       | 466.2100        |
| 1346.8160      | 11 | E  | 7  | 817.3692       | 409.1885        |
| 1475.8586      | 12 | E  | 6  | 688.3266       | 344.6672        |
| 1546.8958      | 13 | A  | 5  | 559.2840       | 280.1459        |
| 1675.9383      | 14 | E  | 4  | 488.2469       | 244.6274        |
| 1772.9911      | 15 | P  | 3  | 359.2043       | 180.1061        |
| 1860.0231      | 16 | S  | 2  | 262.1515       | 131.5797        |
|                | 17 | R  | 1  | 175.1195       | 88.0637         |

N-term:+29.04 K(2):+156.13  
K(3):+156.13

X-range:

0 - 0

MassTol: Y-zoom:

0. 1.

MassType:

☐AVG ☒MONO

Axis:

☒1 ☐2

Label:

☒I ☐M ☐-

Ions:

a ☐+ ☐2+ ☐3+

b ☒+ ☐2+ ☐3+

c ☐+ ☐2+ ☐3+

x ☐+ ☐2+ ☐3+

y ☒+ ☒2+ ☐3+

z ☐+ ☐2+ ☐3+

hide H<sub>2</sub>O/NH<sub>3</sub> ☐

zoom 112-122 ☐

GO

RLLLPQQAGFGECDR, MH+ 1787.9226, m/z 596.6457  
L OS G16 P120811 220811-s1.04916.04916.3.dta

scan 4916; 3.6e+000

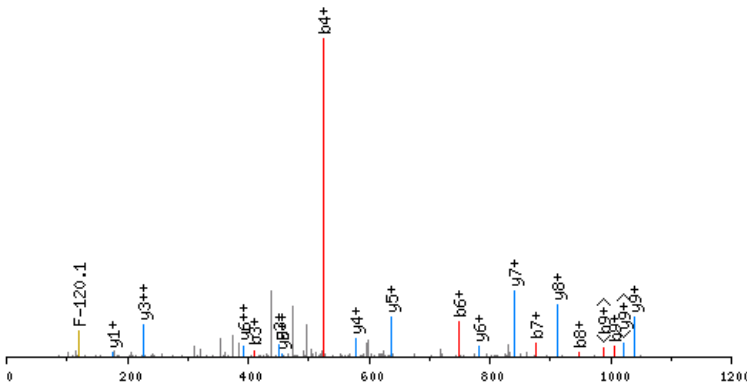

click image to zoom in; click top corners to zoom out [precursor±]

scan 4913; 596.6 m/z; 8.7e+000

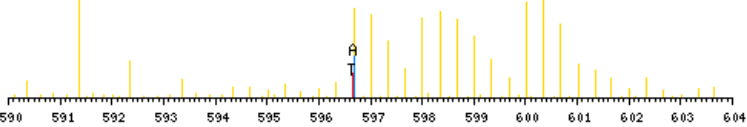

zoomed in precursor plot; T=theoretical m/z, A=acquired m/z

| b <sup>+</sup> | #  | AA | #  | y <sup>+</sup> | y <sup>2+</sup> |
|----------------|----|----|----|----------------|-----------------|
| 185.1402       | 1  | R  | 15 |                |                 |
| 298.2243       | 2  | L  | 14 | 1603.7902      | 802.3990        |
| 411.3083       | 3  | L  | 13 | 1490.7061      | 745.8570        |
| 524.3924       | 4  | L  | 12 | 1377.6221      | 689.3150        |
| 621.4452       | 5  | P  | 11 | 1264.5380      | 632.7729        |
| 749.5037       | 6  | Q  | 10 | 1167.4852      | 584.2465        |
| 877.5623       | 7  | Q  | 9  | 1039.4267      | 520.2172        |
| 948.5994       | 8  | A  | 8  | 911.3681       | 456.1880        |
| 1005.6209      | 9  | G  | 7  | 840.3310       | 420.6694        |
| 1152.6893      | 10 | F  | 6  | 783.3095       | 392.1587        |
| 1209.7108      | 11 | G  | 5  | 636.2411       | 318.6245        |
| 1338.7534      | 12 | E  | 4  | 579.2196       | 290.1137        |
| 1498.7840      | 13 | C  | 3  | 450.1770       | 225.5924        |
| 1613.8109      | 14 | D  | 2  | 290.1464       | 145.5771        |
|                | 15 | R  | 1  | 175.1195       | 88.0637         |

N-term:+29.04 C(13):+160.03

X-range:

0 - 0

MassTol: Y-zoom:

0. 1.

MassType:

☐ AVG ☒ MONO

Axis:

☒ 1 ☐ 2

Label:

☒ I ☐ M ☐ -

Ions:

a ☐ + ☐ 2+ ☐ 3+

b ☒ + ☐ 2+ ☐ 3+

c ☐ + ☐ 2+ ☐ 3+

x ☐ + ☐ 2+ ☐ 3+

y ☒ + ☒ 2+ ☐ 3+

z ☐ + ☐ 2+ ☐ 3+

hide H<sub>2</sub>O/NH<sub>3</sub> ☐

zoom 112-122 ☐

GO

RLQEALEAEER, MH+ 1484.8073, m/z 495.6073  
L OS G16 P120811 220811-s1.04097.04097.3.dta

scan 4097; 1.2e+000

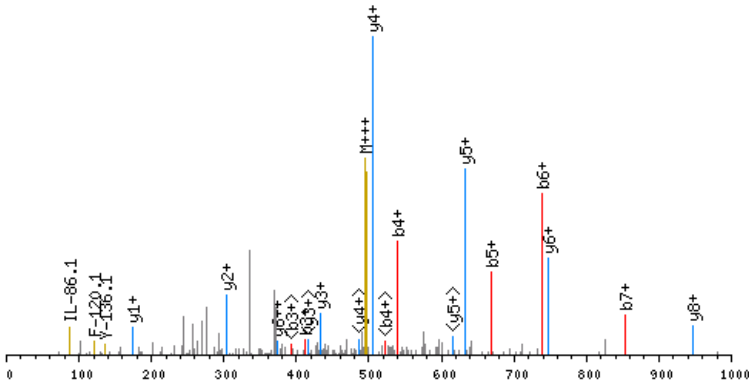

click image to zoom in; click top corners to zoom out

[precursor±]

scan 4093; 495.6 m/z; 1.5e+001

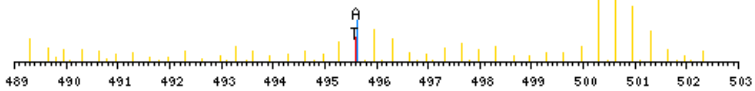

zoomed in precursor plot; T=theoretical m/z, A=acquired m/z

| b <sup>+</sup> | #  | AA | #  | y <sup>+</sup> | y <sup>2+</sup> |
|----------------|----|----|----|----------------|-----------------|
| 185.1402       | 1  | R  | 12 |                |                 |
| 298.2243       | 2  | L  | 11 | 1300.6749      | 650.8413        |
| 411.3083       | 3  | L  | 10 | 1187.5908      | 594.2993        |
| 539.3669       | 4  | Q  | 9  | 1074.5067      | 537.7573        |
| 668.4095       | 5  | E  | 8  | 946.4482       | 473.7280        |
| 739.4466       | 6  | A  | 7  | 817.4056       | 409.2067        |
| 852.5307       | 7  | L  | 6  | 746.3685       | 373.6881        |
| 981.5733       | 8  | E  | 5  | 633.2844       | 317.1461        |
| 1052.6104      | 9  | A  | 4  | 504.2418       | 252.6248        |
| 1181.6530      | 10 | E  | 3  | 433.2047       | 217.1063        |
| 1310.6956      | 11 | E  | 2  | 304.1621       | 152.5850        |
|                | 12 | R  | 1  | 175.1195       | 88.0637         |

N-term:+29.04

X-range:

0 - 0

MassTol: Y-zoom:

0. 1.

MassType:

☐ AVG ☒ MONO

Axis:

☒ 1 ☐ 2

Label:

☒ I ☐ M ☐ -

Ions:

a ☐ + ☐ 2+ ☐ 3+

b ☒ + ☐ 2+ ☐ 3+

c ☐ + ☐ 2+ ☐ 3+

x ☐ + ☐ 2+ ☐ 3+

y ☒ + ☒ 2+ ☐ 3+

z ☐ + ☐ 2+ ☐ 3+

hide H<sub>2</sub>O/NH<sub>3</sub> ☐

zoom 112-122 ☐

GO

RLPSGSGPASPTTGSVAVDIR, MH+ 1960.0676, m/z 654.0274  
H OS G16 P120811 220811-s1.03727.03727.3.dta

scan 3727; 2.0e+000

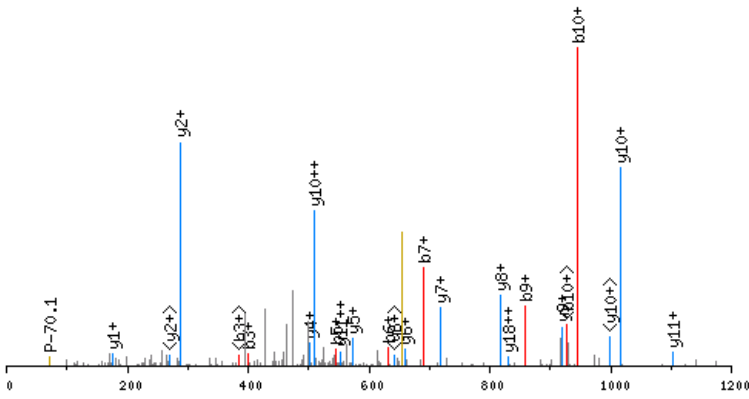

click image to zoom in; click top corners to zoom out

[precursor±]

scan 3723; 654.0 m/z; 3.0e+000

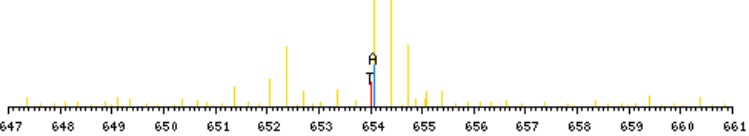

zoomed in precursor plot; T=theoretical m/z, A=acquired m/z

| b <sup>+</sup> | #  | AA | #  | y <sup>+</sup> | y <sup>2+</sup> |
|----------------|----|----|----|----------------|-----------------|
| 191.1720       | 1  | R  | 20 |                |                 |
| 304.2561       | 2  | L  | 19 | 1769.9034      | 885.4556        |
| 401.3088       | 3  | P  | 18 | 1656.8193      | 828.9136        |
| 488.3409       | 4  | S  | 17 | 1559.7665      | 780.3872        |
| 545.3623       | 5  | G  | 16 | 1472.7345      | 736.8712        |
| 632.3944       | 6  | S  | 15 | 1415.7130      | 708.3604        |
| 689.4158       | 7  | G  | 14 | 1328.6810      | 664.8444        |
| 786.4686       | 8  | P  | 13 | 1271.6596      | 636.3337        |
| 857.5057       | 9  | A  | 12 | 1174.6068      | 587.8073        |
| 944.5377       | 10 | S  | 11 | 1103.5697      | 552.2888        |
| 1041.5905      | 11 | P  | 10 | 1016.5376      | 508.7727        |
| 1142.6382      | 12 | T  | 9  | 919.4849       | 460.2464        |
| 1243.6859      | 13 | T  | 8  | 818.4372       | 409.7225        |
| 1300.7073      | 14 | G  | 7  | 717.3895       | 359.1987        |
| 1387.7393      | 15 | S  | 6  | 660.3681       | 330.6879        |
| 1458.7765      | 16 | A  | 5  | 573.3360       | 287.1719        |
| 1557.8449      | 17 | V  | 4  | 502.2989       | 251.6534        |
| 1672.8718      | 18 | D  | 3  | 403.2305       | 202.1192        |
| 1785.9559      | 19 | I  | 2  | 288.2036       | 144.6057        |
|                | 20 | R  | 1  | 175.1195       | 88.0637         |

N-term:+35.07



X-range:

0 - 0

MassTol: Y-zoom:

0. 1.

MassType:

☐AVG ☒MONO

Axis:

☒1 ☐2

Label:

☒I ☐M ☐-

Ions:

a ☐+ ☐2+ ☐3+

b ☒+ ☐2+ ☐3+

c ☐+ ☐2+ ☐3+

x ☐+ ☐2+ ☐3+

y ☒+ ☒2+ ☐3+

z ☐+ ☐2+ ☐3+

hide H<sub>2</sub>O/NH<sub>3</sub> ☐

zoom 112-122 ☐

GO

RLQSIGTENTENR, MH+ 1674.8411, m/z 558.9519  
L OS G16 P120811 220811-s1.02491.02491.3.dta

scan 2491; 2.5e+000

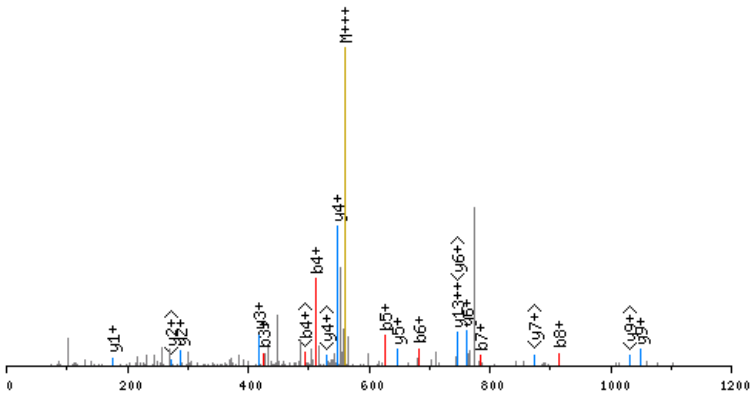

click image to zoom in; click top corners to zoom out

[precursor±]

scan 2488; 559.0 m/z; 5.4e+000

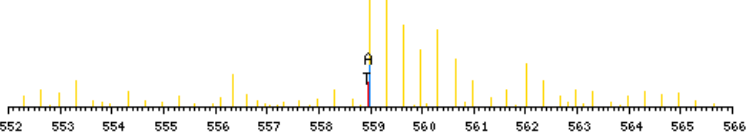

zoomed in precursor plot; T=theoretical m/z, A=acquired m/z

| b <sup>+</sup> | #  | AA | #  | y <sup>+</sup> | y <sup>2+</sup> |
|----------------|----|----|----|----------------|-----------------|
| 185.1402       | 1  | R  | 14 |                |                 |
| 298.2243       | 2  | L  | 13 | 1490.7087      | 745.8583        |
| 426.2829       | 3  | Q  | 12 | 1377.6246      | 689.3162        |
| 513.3149       | 4  | S  | 11 | 1249.5660      | 625.2869        |
| 626.3989       | 5  | I  | 10 | 1162.5340      | 581.7709        |
| 683.4204       | 6  | G  | 9  | 1049.4500      | 525.2289        |
| 784.4681       | 7  | T  | 8  | 992.4285       | 496.7182        |
| 913.5107       | 8  | E  | 7  | 891.3808       | 446.1943        |
| 1027.5536      | 9  | N  | 6  | 762.3382       | 381.6730        |
| 1128.6013      | 10 | T  | 5  | 648.2953       | 324.6516        |
| 1257.6439      | 11 | E  | 4  | 547.2476       | 274.1277        |
| 1386.6865      | 12 | E  | 3  | 418.2050       | 209.6064        |
| 1500.7294      | 13 | N  | 2  | 289.1624       | 145.0851        |
|                | 14 | R  | 1  | 175.1195       | 88.0637         |

N-term:+29.04



X-range:

0 - 0

MassTol: Y-zoom:

0. 1.

MassType:

☐AVG ☒MONO

Axis:

☒1 ☐2

Label:

☒I ☐M ☐-

Ions:

a ☐+ ☐2+ ☐3+

b ☒+ ☐2+ ☐3+

c ☐+ ☐2+ ☐3+

x ☐+ ☐2+ ☐3+

y ☒+ ☒2+ ☐3+

z ☐+ ☐2+ ☐3+

hide H<sub>2</sub>O/NH<sub>3</sub> ☐

zoom 112-122 ☐

GO

RMGESDDSilR, MH+ 1312.6743, m/z 438.2296  
H OS G16 P120811 220811-s1.02960.02960.3.dta

scan 2960; 1.4e+000

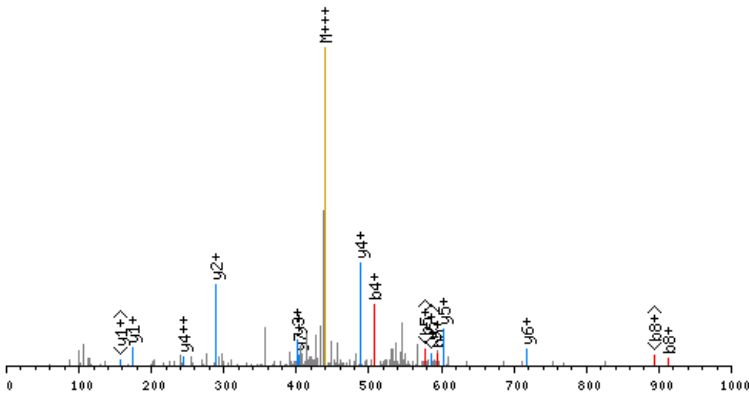

click image to zoom in; click top corners to zoom out

[precursor±]

scan 2958; 438.2 m/z; 6.3e+000

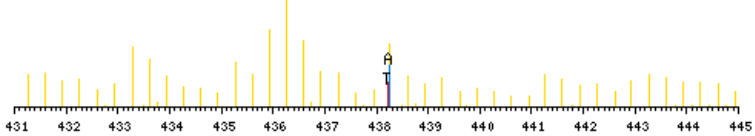

zoomed in precursor plot; T=theoretical m/z, A=acquired m/z

| b <sup>+</sup> | #  | AA | #  | y <sup>+</sup> | y <sup>2+</sup> |
|----------------|----|----|----|----------------|-----------------|
| 191.1720       | 1  | R  | 11 |                |                 |
| 322.2125       | 2  | M  | 10 | 1122.5101      | 561.7590        |
| 379.2340       | 3  | G  | 9  | 991.4696       | 496.2387        |
| 508.2766       | 4  | E  | 8  | 934.4482       | 467.7280        |
| 595.3086       | 5  | S  | 7  | 805.4056       | 403.2067        |
| 710.3355       | 6  | D  | 6  | 718.3735       | 359.6907        |
| 825.3625       | 7  | D  | 5  | 603.3466       | 302.1772        |
| 912.3945       | 8  | S  | 4  | 488.3197       | 244.6637        |
| 1025.4786      | 9  | I  | 3  | 401.2876       | 201.1477        |
| 1138.5626      | 10 | L  | 2  | 288.2036       | 144.6057        |
|                | 11 | R  | 1  | 175.1195       | 88.0637         |

N-term:+35.07

X-range:

0 - 0

MassTol: Y-zoom:

0. 1.

MassType:

☐ AVG ☒ MONO

Axis:

☒ 1 ☐ 2

Label:

☒ I ☐ M ☐ -

Ions:

a ☐ + ☐ 2+ ☐ 3+

b ☒ + ☐ 2+ ☐ 3+

c ☐ + ☐ 2+ ☐ 3+

x ☐ + ☐ 2+ ☐ 3+

y ☒ + ☒ 2+ ☐ 3+

z ☐ + ☐ 2+ ☐ 3+

hide H<sub>2</sub>O/NH<sub>3</sub> ☐

zoom 112-122 ☐

GO

RNDEELNKLGR, MH+ 1512.8498, m/z 378.9679  
L OS G18 P120811 220811-s1.04523.04523.4.dta

scan 4523; 3.3e+000

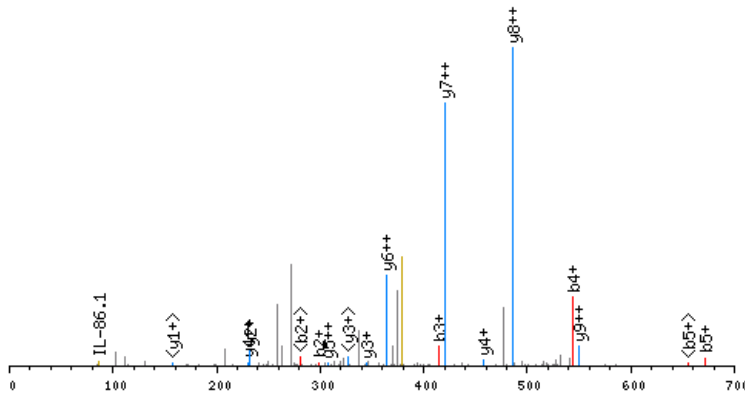

click image to zoom in; click top corners to zoom out

[precursor±]

scan 4521; 379.0 m/z; 9.9e+000

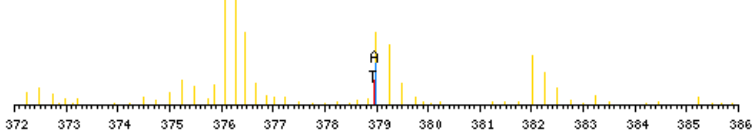

zoomed in precursor plot; T=theoretical m/z, A=acquired m/z

| b <sup>+</sup> | #  | AA | #  | y <sup>+</sup> | y <sup>2+</sup> |
|----------------|----|----|----|----------------|-----------------|
| 185.1402       | 1  | R  | 12 |                |                 |
| 299.1831       | 2  | N  | 11 | 1328.7174      | 664.8626        |
| 414.2101       | 3  | D  | 10 | 1214.6745      | 607.8412        |
| 543.2527       | 4  | E  | 9  | 1099.6476      | 550.3277        |
| 672.2953       | 5  | E  | 8  | 970.6050       | 485.8064        |
| 785.3793       | 6  | L  | 7  | 841.5624       | 421.2851        |
| 899.4223       | 7  | N  | 6  | 728.4783       | 364.7431        |
| 1055.5486      | 8  | K  | 5  | 614.4354       | 307.7216        |
| 1168.6326      | 9  | L  | 4  | 458.3091       | 229.6585        |
| 1281.7167      | 10 | L  | 3  | 345.2250       | 173.1164        |
| 1338.7382      | 11 | G  | 2  | 232.1410       | 116.5744        |
|                | 12 | R  | 1  | 175.1195       | 88.0637         |

N-term:+29.04 K(8):+156.13

X-range:

0 - 0

MassTol: Y-zoom:

0. 1.

MassType:

☐AVG ☒MONO

Axis:

☒1 ☐2

Label:

☒I ☐M ☐-

Ions:

a ☐+ ☐2+ ☐3+

b ☒+ ☐2+ ☐3+

c ☐+ ☐2+ ☐3+

x ☐+ ☐2+ ☐3+

y ☒+ ☒2+ ☐3+

z ☐+ ☐2+ ☐3+

hide H<sub>2</sub>O/NH<sub>3</sub> ☐

zoom 112-122 ☐

GO

RNGKYDLDFKSPDDPAR, MH+ 2096.1625, m/z 524.7961  
H OS G19 P120811 220811-s1.03178.03178.4.dta

scan 3178; 1.1e+001

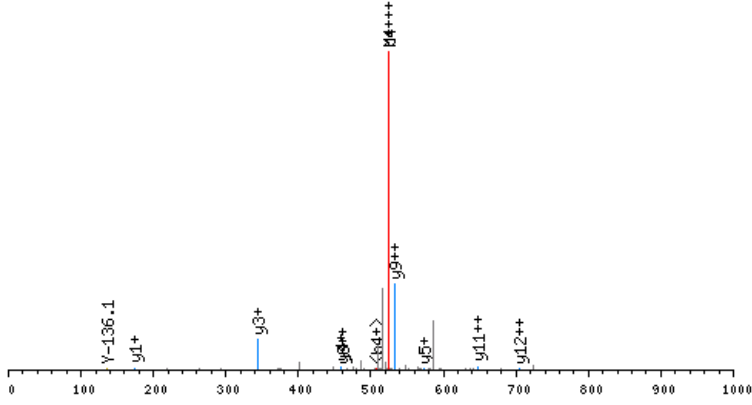

click image to zoom in; click top corners to zoom out

[precursor±]

scan 3176; 524.8 mz; 4.7e+000

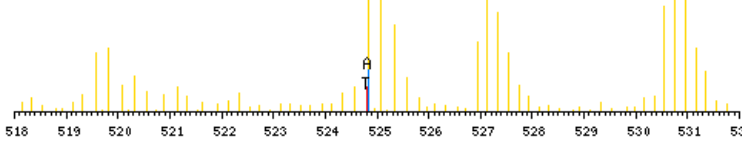

zoomed in precursor plot; T=theoretical m/z, A=acquired m/z

| b <sup>+</sup> | #  | AA | #  | y <sup>+</sup> | y <sup>2+</sup> |
|----------------|----|----|----|----------------|-----------------|
| 191.1720       | 1  | R  | 17 |                |                 |
| 305.2149       | 2  | N  | 16 | 1905.9983      | 953.5031        |
| 362.2364       | 3  | G  | 15 | 1791.9554      | 896.4816        |
| 524.3945       | 4  | K  | 14 | 1734.9339      | 867.9709        |
| 687.4578       | 5  | Y  | 13 | 1572.7758      | 786.8918        |
| 802.4848       | 6  | D  | 12 | 1409.7125      | 705.3602        |
| 915.5688       | 7  | L  | 11 | 1294.6856      | 647.8467        |
| 1030.5958      | 8  | D  | 10 | 1181.6015      | 591.3047        |
| 1177.6642      | 9  | F  | 9  | 1066.5746      | 533.7912        |
| 1339.8223      | 10 | K  | 8  | 919.5062       | 460.2570        |
| 1426.8543      | 11 | S  | 7  | 757.3481       | 379.1779        |
| 1523.9071      | 12 | P  | 6  | 670.3160       | 335.6619        |
| 1638.9340      | 13 | D  | 5  | 573.2633       | 287.1355        |
| 1753.9610      | 14 | D  | 4  | 458.2363       | 229.6221        |
| 1851.0137      | 15 | P  | 3  | 343.2094       | 172.1086        |
| 1922.0509      | 16 | A  | 2  | 246.1566       | 123.5822        |
|                | 17 | R  | 1  | 175.1195       | 88.0637         |

N-term:+35.07 K(4):+162.16  
K(10):+162.16

X-range:

0 - 0

MassTol: Y-zoom:

0. 1.

MassType:

☐AVG ☒MONO

Axis:

☒1 ☐2

Label:

☒I ☐M ☐-

Ions:

a ☐+ ☐2+ ☐3+

b ☒+ ☐2+ ☐3+

c ☐+ ☐2+ ☐3+

x ☐+ ☐2+ ☐3+

y ☒+ ☒2+ ☐3+

z ☐+ ☐2+ ☐3+

hide H<sub>2</sub>O/NH<sub>3</sub> ☐

zoom 112-122 ☐

GO

RNKEQGTIEDFVEGLR, MH+ 1997.0092, m/z 666.3413  
L OS G15 P120811 220811-s1.05138.05138.3.dta

scan 5138; 3.6e+000

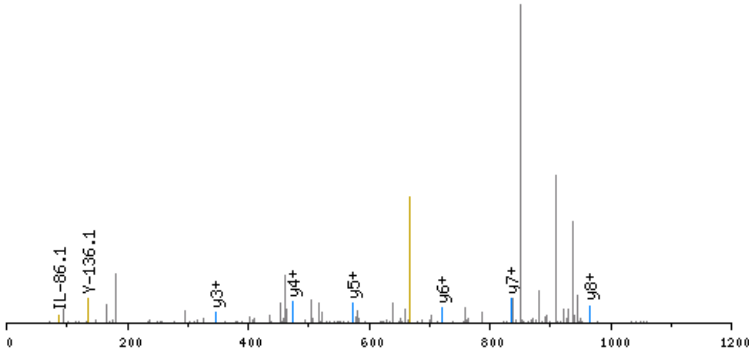

click image to zoom in; click top corners to zoom out [\[precursor±\]](#)

scan 5136; 666.3 m/z; 9.9e+000

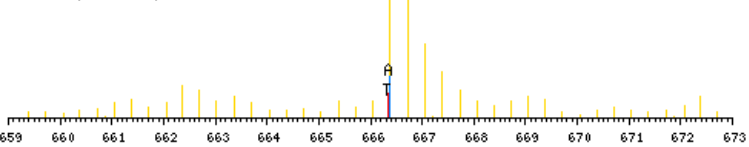

zoomed in precursor plot; T=theoretical m/z, A=acquired m/z

| b <sup>+</sup> | #  | AA | #  | y <sup>+</sup> | y <sup>2+</sup> |
|----------------|----|----|----|----------------|-----------------|
| 185.1402       | 1  | R  | 16 |                |                 |
| 299.1831       | 2  | N  | 15 | 1812.8769      | 906.9423        |
| 455.3094       | 3  | K  | 14 | 1698.8339      | 849.9209        |
| 584.3520       | 4  | E  | 13 | 1542.7076      | 771.8577        |
| 712.4106       | 5  | Q  | 12 | 1413.6650      | 707.3364        |
| 769.4321       | 6  | G  | 11 | 1285.6065      | 643.3071        |
| 870.4798       | 7  | T  | 10 | 1228.5850      | 614.7964        |
| 1033.5431      | 8  | Y  | 9  | 1127.5373      | 564.2726        |
| 1162.5857      | 9  | E  | 8  | 964.4740       | 482.7409        |
| 1277.6126      | 10 | D  | 7  | 835.4314       | 418.2196        |
| 1424.6810      | 11 | F  | 6  | 720.4044       | 360.7061        |
| 1523.7494      | 12 | V  | 5  | 573.3360       | 287.1719        |
| 1652.7920      | 13 | E  | 4  | 474.2676       | 237.6377        |
| 1709.8135      | 14 | G  | 3  | 345.2250       | 173.1164        |
| 1822.8976      | 15 | L  | 2  | 288.2036       | 144.6057        |
|                | 16 | R  | 1  | 175.1195       | 88.0637         |

N-term:+29.04 K(3):+156.13

X-range:

0 - 0

MassTol: Y-zoom:

0. 1.

MassType:

☐ AVG ☒ MONO

Axis:

☒ 1 ☐ 2

Label:

☒ I ☐ M ☐ -

Ions:

a ☐ + ☐ 2+ ☐ 3+

b ☒ + ☐ 2+ ☐ 3+

c ☐ + ☐ 2+ ☐ 3+

x ☐ + ☐ 2+ ☐ 3+

y ☒ + ☒ 2+ ☐ 3+

z ☐ + ☐ 2+ ☐ 3+

hide H<sub>2</sub>O/NH<sub>3</sub> ☐

zoom 112-122 ☐

GO

RPPVQVYGIEGR, MH+ 1404.8175, m/z 468.9440  
H OS G16 P120811 220811-s1.03581.03581.3.dta

scan 3581; 7.1e+000

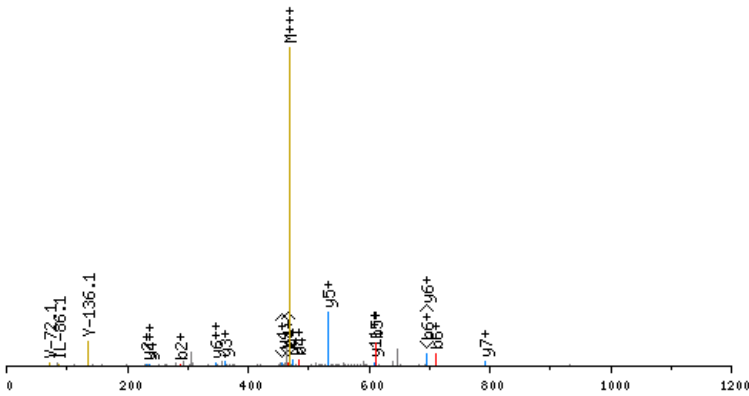

click image to zoom in; click top corners to zoom out

[precursor±]

scan 3578; 468.9 m/z; 1.1e+001

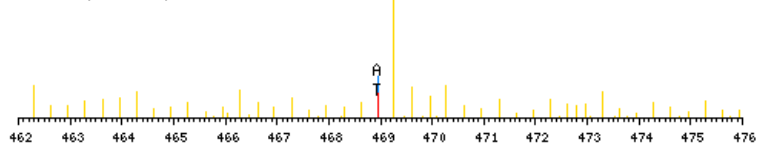

zoomed in precursor plot; T=theoretical m/z, A=acquired m/z

| b <sup>+</sup> | #  | AA | #  | y <sup>+</sup> | y <sup>2+</sup> |
|----------------|----|----|----|----------------|-----------------|
| 191.1720       | 1  | R  | 12 |                |                 |
| 288.2248       | 2  | P  | 11 | 1214.6533      | 607.8306        |
| 385.2775       | 3  | P  | 10 | 1117.6006      | 559.3042        |
| 484.3460       | 4  | V  | 9  | 1020.5478      | 510.7778        |
| 612.4045       | 5  | Q  | 8  | 921.4794       | 461.2436        |
| 711.4729       | 6  | V  | 7  | 793.4208       | 397.2143        |
| 874.5363       | 7  | Y  | 6  | 694.3524       | 347.6801        |
| 931.5577       | 8  | G  | 5  | 531.2891       | 266.1485        |
| 1044.6418      | 9  | I  | 4  | 474.2676       | 237.6377        |
| 1173.6844      | 10 | E  | 3  | 361.1836       | 181.0957        |
| 1230.7059      | 11 | G  | 2  | 232.1410       | 116.5744        |
|                | 12 | R  | 1  | 175.1195       | 88.0637         |

N-term:+35.07

X-range:

0 - 0

MassTol: Y-zoom:

0. 1.

MassType:

☐ AVG ☒ MONO

Axis:

☒ 1 ☐ 2

Label:

☒ I ☐ M ☐ -

Ions:

a ☐ + ☐ 2+ ☐ 3+

b ☒ + ☐ 2+ ☐ 3+

c ☐ + ☐ 2+ ☐ 3+

x ☐ + ☐ 2+ ☐ 3+

y ☒ + ☒ 2+ ☐ 3+

z ☐ + ☐ 2+ ☐ 3+

hide H<sub>2</sub>O/NH<sub>3</sub> ☐

zoom 112-122 ☐

GO

RQASGGPVDIGPEYQQDLDR, MH+ 2229.0900, m/z 743.7015  
L OS G16 P120811 220811-s1.04347.04347.3.dta

scan 4347; 2.4e+000

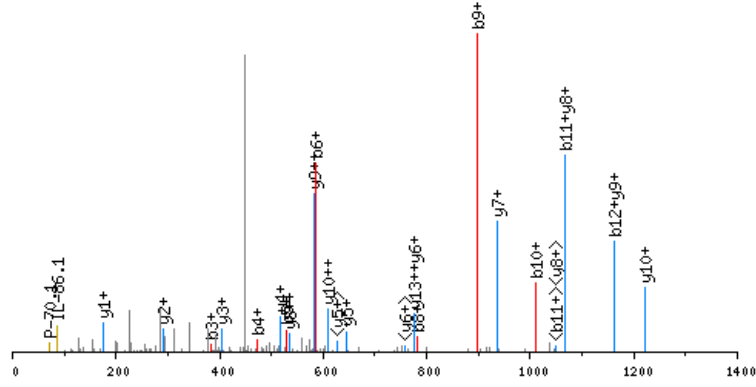

click image to zoom in; click top corners to zoom out [\[precursor±\]](#)

scan 4343; 743.7 m/z; 9.0e+000

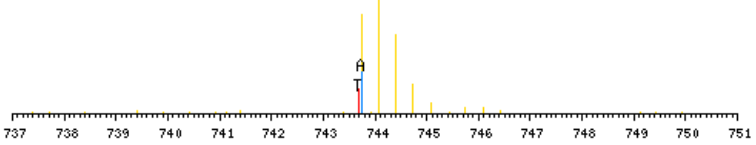

zoomed in precursor plot; T=theoretical m/z, A=acquired m/z

| b <sup>+</sup> | #  | AA | #  | y <sup>+</sup> | y <sup>2+</sup> |
|----------------|----|----|----|----------------|-----------------|
| 185.1402       | 1  | R  | 20 |                |                 |
| 313.1988       | 2  | Q  | 19 | 2044.9576      | 1022.9827       |
| 384.2359       | 3  | A  | 18 | 1916.8990      | 958.9534        |
| 471.2679       | 4  | S  | 17 | 1845.8619      | 923.4349        |
| 528.2894       | 5  | G  | 16 | 1758.8299      | 879.9188        |
| 585.3109       | 6  | G  | 15 | 1701.8084      | 851.4081        |
| 682.3636       | 7  | P  | 14 | 1644.7869      | 822.8974        |
| 781.4320       | 8  | V  | 13 | 1547.7342      | 774.3710        |
| 896.4590       | 9  | D  | 12 | 1448.6658      | 724.8368        |
| 1009.5430      | 10 | I  | 11 | 1333.6388      | 667.3233        |
| 1066.5645      | 11 | G  | 10 | 1220.5548      | 610.7813        |
| 1163.6173      | 12 | P  | 9  | 1163.5333      | 582.2706        |
| 1292.6599      | 13 | E  | 8  | 1066.4805      | 533.7442        |
| 1455.7232      | 14 | Y  | 7  | 937.4379       | 469.2229        |
| 1583.7818      | 15 | Q  | 6  | 774.3746       | 387.6912        |
| 1711.8403      | 16 | Q  | 5  | 646.3160       | 323.6619        |
| 1826.8673      | 17 | D  | 4  | 518.2575       | 259.6326        |
| 1939.9514      | 18 | L  | 3  | 403.2305       | 202.1192        |
| 2054.9783      | 19 | D  | 2  | 290.1464       | 145.5771        |
|                | 20 | R  | 1  | 175.1195       | 88.0637         |

N-term:+29.04

X-range:

0 - 0

MassTol: Y-zoom:

0. 1.

MassType:

☐AVG ☒MONO

Axis:

☒1 ☐2

Label:

☒I ☐M ☐-

Ions:

a ☐+ ☐2+ ☐3+

b ☒+ ☐2+ ☐3+

c ☐+ ☐2+ ☐3+

x ☐+ ☐2+ ☐3+

y ☒+ ☒2+ ☐3+

z ☐+ ☐2+ ☐3+

hide H<sub>2</sub>O/NH<sub>3</sub> ☐

zoom 112-122 ☐

GO

RQEELESVEAGVQGGAFEGTR, MH+ 2277.1111, m/z 759.7086  
L OS G16 P120811 220811-s1.04850.04850.3.dta

scan 4850; 1.8e+000

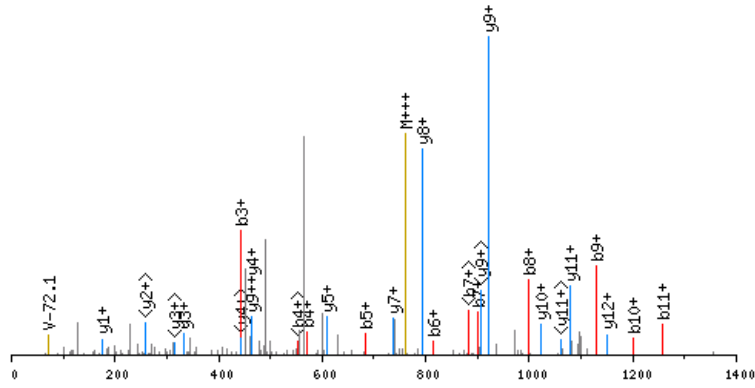

click image to zoom in; click top corners to zoom out [\[precursor±\]](#)

scan 4848; 759.7 m/z; 1.4e+001

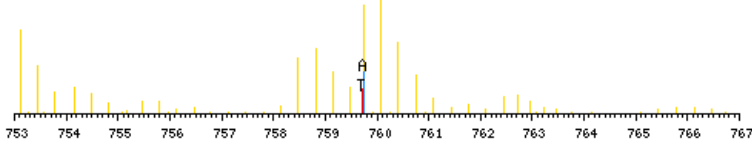

zoomed in precursor plot; T=theoretical m/z, A=acquired m/z

| b <sup>+</sup> | #  | AA | #  | y <sup>+</sup> | y <sup>2+</sup> |
|----------------|----|----|----|----------------|-----------------|
| 185.1402       | 1  | R  | 21 |                |                 |
| 313.1988       | 2  | Q  | 20 | 2092.9787      | 1046.9933       |
| 442.2414       | 3  | E  | 19 | 1964.9201      | 982.9640        |
| 571.2840       | 4  | E  | 18 | 1835.8775      | 918.4427        |
| 684.3680       | 5  | L  | 17 | 1706.8350      | 853.9214        |
| 813.4106       | 6  | E  | 16 | 1593.7509      | 797.3794        |
| 900.4427       | 7  | S  | 15 | 1464.7083      | 732.8581        |
| 999.5111       | 8  | V  | 14 | 1377.6763      | 689.3420        |
| 1128.5537      | 9  | E  | 13 | 1278.6079      | 639.8078        |
| 1199.5908      | 10 | A  | 12 | 1149.5653      | 575.2865        |
| 1256.6122      | 11 | G  | 11 | 1078.5281      | 539.7680        |
| 1355.6807      | 12 | V  | 10 | 1021.5067      | 511.2573        |
| 1483.7392      | 13 | Q  | 9  | 922.4383       | 461.7230        |
| 1540.7607      | 14 | G  | 8  | 794.3797       | 397.6938        |
| 1597.7822      | 15 | G  | 7  | 737.3582       | 369.1830        |
| 1668.8193      | 16 | A  | 6  | 680.3368       | 340.6723        |
| 1815.8877      | 17 | F  | 5  | 609.2997       | 305.1537        |
| 1944.9303      | 18 | E  | 4  | 462.2312       | 231.6195        |
| 2001.9517      | 19 | G  | 3  | 333.1886       | 167.0982        |
| 2102.9994      | 20 | T  | 2  | 276.1672       | 138.5875        |
|                | 21 | R  | 1  | 175.1195       | 88.0637         |

N-term:+29.04

X-range:

0 - 0

MassTol: Y-zoom:

0. 1.

MassType:

☐AVG ☒MONO

Axis:

☒1 ☐2

Label:

☒I ☐M ☐-

Ions:

a ☐+ ☐2+ ☐3+

b ☒+ ☐2+ ☐3+

c ☐+ ☐2+ ☐3+

x ☐+ ☐2+ ☐3+

y ☒+ ☒2+ ☐3+

z ☐+ ☐2+ ☐3+

hide H<sub>2</sub>O/NH<sub>3</sub> ☐

zoom 112-122 ☐

GO

RQISEDVDGPDNR, MH+ 1534.7673, m/z 512.2606  
H OS G16 P120811 220811-s1.02170.02170.3.dta

scan 2170; 4.8e+000

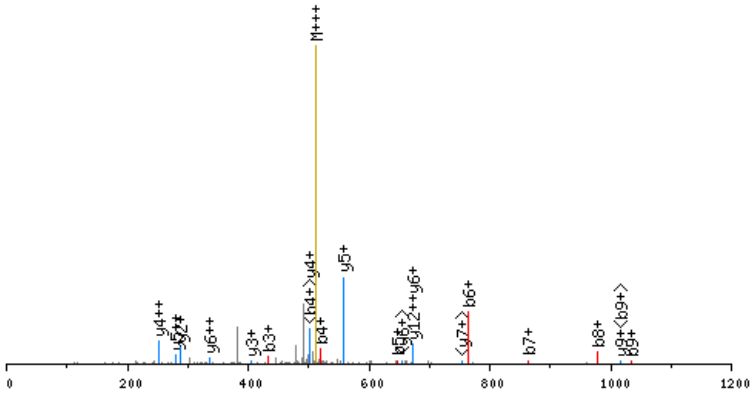

click image to zoom in; click top corners to zoom out

[precursor±]

scan 2168; 512.3 m/z; 5.0e+000

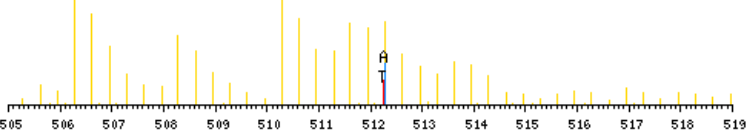

zoomed in precursor plot; T=theoretical m/z, A=acquired m/z

| b <sup>+</sup> | #  | AA | #  | y <sup>+</sup> | y <sup>2+</sup> |
|----------------|----|----|----|----------------|-----------------|
| 191.1720       | 1  | R  | 13 |                |                 |
| 319.2306       | 2  | Q  | 12 | 1344.6032      | 672.8055        |
| 432.3147       | 3  | I  | 11 | 1216.5446      | 608.7762        |
| 519.3467       | 4  | S  | 10 | 1103.4605      | 552.2342        |
| 648.3893       | 5  | E  | 9  | 1016.4285      | 508.7182        |
| 763.4162       | 6  | D  | 8  | 887.3859       | 444.1969        |
| 862.4846       | 7  | V  | 7  | 772.3590       | 386.6834        |
| 977.5116       | 8  | D  | 6  | 673.2905       | 337.1492        |
| 1034.5330      | 9  | G  | 5  | 558.2636       | 279.6357        |
| 1131.5858      | 10 | P  | 4  | 501.2421       | 251.1250        |
| 1246.6127      | 11 | D  | 3  | 404.1894       | 202.5986        |
| 1360.6557      | 12 | N  | 2  | 289.1624       | 145.0851        |
|                | 13 | R  | 1  | 175.1195       | 88.0637         |

N-term:+35.07

X-range:

0 - 0

MassTol: Y-zoom:

0. 1.

MassType:

☐ AVG ☒ MONO

Axis:

☒ 1 ☐ 2

Label:

☒ I ☐ M ☐ -

Ions:

a ☐ + ☐ 2+ ☐ 3+

b ☒ + ☐ 2+ ☐ 3+

c ☐ + ☐ 2+ ☐ 3+

x ☐ + ☐ 2+ ☐ 3+

y ☒ + ☒ 2+ ☐ 3+

z ☐ + ☐ 2+ ☐ 3+

hide H<sub>2</sub>O/NH<sub>3</sub> ☐

zoom 112-122 ☐

GO

RQPSPSQSSDSQVHSGVQVEGR, MH+ 2380.1605, m/z 595.7956  
L OS G17 P120811 220811-s1.02094.02094.4.dta

scan 2094; 1.5e+000

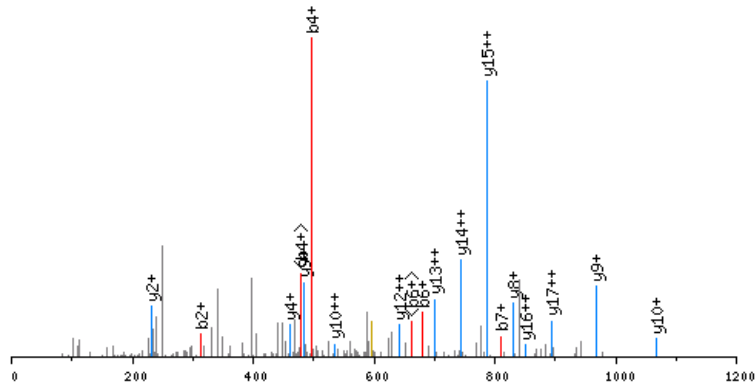

click image to zoom in; click top corners to zoom out [precursor±]

scan 2093; 595.8 m/z; 5.4e+000

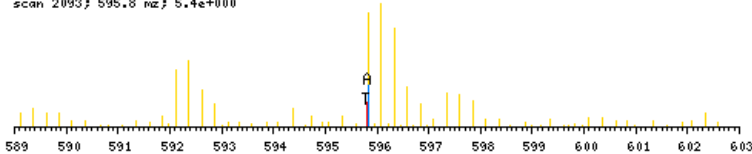

zoomed in precursor plot; T=theoretical m/z, A=acquired m/z

| b <sup>+</sup> | #  | AA | #  | y <sup>+</sup> | y <sup>2+</sup> |
|----------------|----|----|----|----------------|-----------------|
| 185.1402       | 1  | R  | 22 |                |                 |
| 313.1988       | 2  | Q  | 21 | 2196.0281      | 1098.5180       |
| 410.2516       | 3  | P  | 20 | 2067.9695      | 1034.4887       |
| 497.2836       | 4  | S  | 19 | 1970.9168      | 985.9623        |
| 594.3363       | 5  | P  | 18 | 1883.8848      | 942.4463        |
| 681.3684       | 6  | S  | 17 | 1786.8320      | 893.9199        |
| 809.4270       | 7  | Q  | 16 | 1699.8000      | 850.4039        |
| 896.4590       | 8  | S  | 15 | 1571.7414      | 786.3746        |
| 983.4910       | 9  | S  | 14 | 1484.7094      | 742.8586        |
| 1098.5180      | 10 | D  | 13 | 1397.6773      | 699.3426        |
| 1185.5500      | 11 | S  | 12 | 1282.6504      | 641.8291        |
| 1313.6086      | 12 | Q  | 11 | 1195.6184      | 598.3131        |
| 1412.6770      | 13 | V  | 10 | 1067.5598      | 534.2838        |
| 1549.7359      | 14 | H  | 9  | 968.4914       | 484.7496        |
| 1636.7679      | 15 | S  | 8  | 831.4325       | 416.2201        |
| 1693.7894      | 16 | G  | 7  | 744.4004       | 372.7041        |
| 1792.8578      | 17 | V  | 6  | 687.3790       | 344.1934        |
| 1920.9164      | 18 | Q  | 5  | 588.3105       | 294.6592        |
| 2019.9848      | 19 | V  | 4  | 460.2520       | 230.6299        |
| 2149.0274      | 20 | E  | 3  | 361.1836       | 181.0957        |
| 2206.0488      | 21 | G  | 2  | 232.1410       | 116.5744        |
|                | 22 | R  | 1  | 175.1195       | 88.0637         |

N-term:+29.04

X-range:

0 - 0

MassTol: Y-zoom:

0. 1.

MassType:

☐ AVG ☒ MONO

Axis:

☒ 1 ☐ 2

Label:

☒ I ☐ M ☐ -

Ions:

a ☐ + ☐ 2+ ☐ 3+

b ☒ + ☐ 2+ ☐ 3+

c ☐ + ☐ 2+ ☐ 3+

x ☐ + ☐ 2+ ☐ 3+

y ☒ + ☒ 2+ ☐ 3+

z ☐ + ☐ 2+ ☐ 3+

hide H<sub>2</sub>O/NH<sub>3</sub> ☐

zoom 112-122 ☐

GO

RSGEQEDAGELDFSGLLKR, MH+ 2232.1897, m/z 558.8029  
H OS G17 P120811 220811-s1.05922.05922.4.dta

scan 5922; 1.1e+000

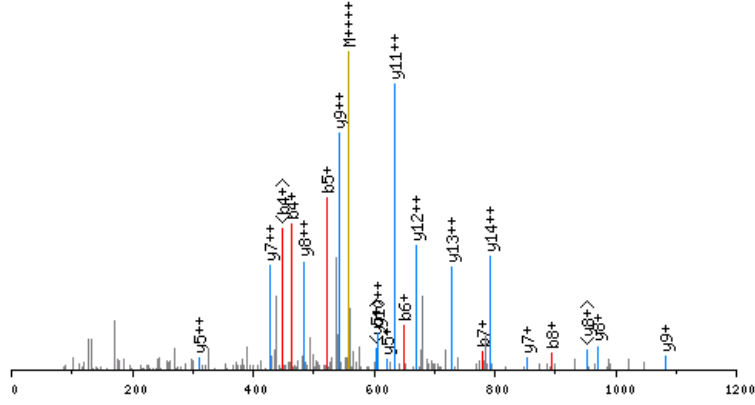

click image to zoom in; click top corners to zoom out (precursor±)

scan 5918; 558.8 m/z; 3.2e+000

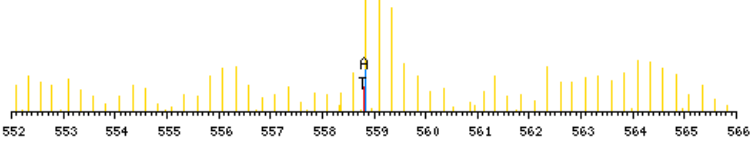

zoomed in precursor plot; T=theoretical m/z, A=acquired m/z

| b <sup>+</sup> | #  | AA | #  | y <sup>+</sup> | y <sup>2+</sup> |
|----------------|----|----|----|----------------|-----------------|
| 191.1720       | 1  | R  | 20 |                |                 |
| 278.2040       | 2  | S  | 19 | 2042.0255      | 1021.5167       |
| 335.2255       | 3  | G  | 18 | 1954.9934      | 978.0006        |
| 464.2681       | 4  | E  | 17 | 1897.9720      | 949.4899        |
| 521.2896       | 5  | G  | 16 | 1768.9294      | 884.9686        |
| 649.3481       | 6  | Q  | 15 | 1711.9079      | 856.4579        |
| 778.3907       | 7  | E  | 14 | 1583.8493      | 792.4286        |
| 893.4177       | 8  | D  | 13 | 1454.8068      | 727.9073        |
| 964.4548       | 9  | A  | 12 | 1339.7798      | 670.3938        |
| 1021.4763      | 10 | G  | 11 | 1268.7427      | 634.8753        |
| 1150.5188      | 11 | E  | 10 | 1211.7212      | 606.3645        |
| 1263.6029      | 12 | L  | 9  | 1082.6786      | 541.8432        |
| 1378.6299      | 13 | D  | 8  | 969.5946       | 485.3012        |
| 1525.6983      | 14 | F  | 7  | 854.5676       | 427.7877        |
| 1612.7303      | 15 | S  | 6  | 707.4992       | 354.2535        |
| 1669.7518      | 16 | G  | 5  | 620.4672       | 310.7375        |
| 1782.8358      | 17 | L  | 4  | 563.4457       | 282.2268        |
| 1895.9199      | 18 | L  | 3  | 450.3617       | 225.6847        |
| 2058.0780      | 19 | K  | 2  | 337.2776       | 169.1427        |
|                | 20 | R  | 1  | 175.1195       | 88.0637         |

N-term:+35.07 K(19):+162.16

X-range:

0 - 0

MassTol: Y-zoom:

0. 1.

MassType:

☐AVG ☒MONO

Axis:

☒1 ☐2

Label:

☒I ☐M ☐-

Ions:

a ☐+ ☐2+ ☐3+

b ☒+ ☐2+ ☐3+

c ☐+ ☐2+ ☐3+

x ☐+ ☐2+ ☐3+

y ☒+ ☒2+ ☐3+

z ☐+ ☐2+ ☐3+

hide H<sub>2</sub>O/NH<sub>3</sub> ☐

zoom 112-122 ☐

GO

RSPVHPESSEDEEHSVIPQR, MH+ 2343.1329, m/z 586.5387  
L OS G18 P120811 220811-s1.02715.02715.4.dta

scan 2715; 3.2e+000

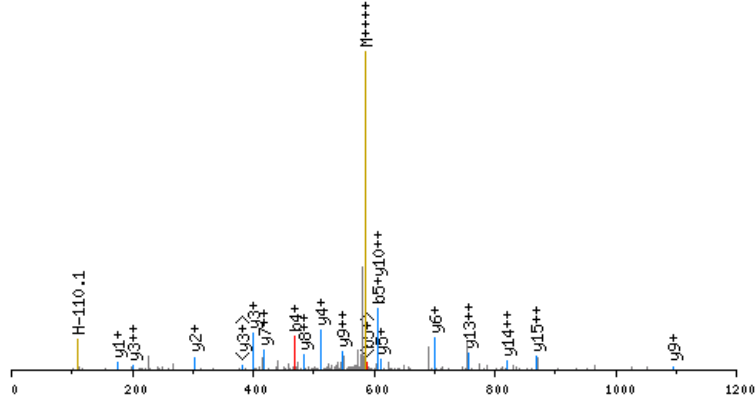

click image to zoom in; click top corners to zoom out [\[precursor±\]](#)

scan 2711; 586.5 m/z; 1.7e+001

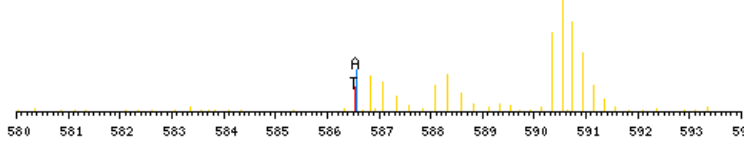

zoomed in precursor plot; T=theoretical m/z, A=acquired m/z

| b <sup>+</sup> | #  | AA | #  | y <sup>+</sup> | y <sup>2+</sup> |
|----------------|----|----|----|----------------|-----------------|
| 185.1402       | 1  | R  | 20 |                |                 |
| 272.1722       | 2  | S  | 19 | 2159.0005      | 1080.0042       |
| 369.2250       | 3  | P  | 18 | 2071.9685      | 1036.4882       |
| 468.2934       | 4  | V  | 17 | 1974.9157      | 987.9618        |
| 605.3523       | 5  | H  | 16 | 1875.8473      | 938.4276        |
| 702.4051       | 6  | P  | 15 | 1738.7884      | 869.8981        |
| 831.4477       | 7  | E  | 14 | 1641.7356      | 821.3717        |
| 918.4797       | 8  | S  | 13 | 1512.6930      | 756.8504        |
| 1005.5117      | 9  | S  | 12 | 1425.6610      | 713.3344        |
| 1134.5543      | 10 | E  | 11 | 1338.6290      | 669.8184        |
| 1249.5813      | 11 | D  | 10 | 1209.5864      | 605.2971        |
| 1378.6239      | 12 | E  | 9  | 1094.5594      | 547.7836        |
| 1507.6665      | 13 | E  | 8  | 965.5169       | 483.2623        |
| 1644.7254      | 14 | H  | 7  | 836.4743       | 418.7410        |
| 1731.7574      | 15 | S  | 6  | 699.4153       | 350.2116        |
| 1830.8258      | 16 | V  | 5  | 612.3833       | 306.6956        |
| 1943.9099      | 17 | I  | 4  | 513.3149       | 257.1614        |
| 2040.9626      | 18 | P  | 3  | 400.2308       | 200.6193        |
| 2169.0212      | 19 | Q  | 2  | 303.1781       | 152.0930        |
|                | 20 | R  | 1  | 175.1195       | 88.0637         |

N-term:+29.04

X-range:

0 - 0

MassTol: Y-zoom:

0. 1.

MassType:

☐ AVG ☒ MONO

Axis:

☒ 1 ☐ 2

Label:

☒ I ☐ M ☐ -

Ions:

a ☐ + ☐ 2+ ☐ 3+

b ☒ + ☐ 2+ ☐ 3+

c ☐ + ☐ 2+ ☐ 3+

x ☐ + ☐ 2+ ☐ 3+

y ☒ + ☒ 2+ ☐ 3+

z ☐ + ☐ 2+ ☐ 3+

hide H<sub>2</sub>O/NH<sub>3</sub> ☐

zoom 112-122 ☐

GO

RSPVHPESSEGEHSVVPQR, MH+ 2277.1436, m/z 570.0413  
H OS G18 P120811 220811-s1.02264.02264.4.dta

scan 2264; 6.0e+000

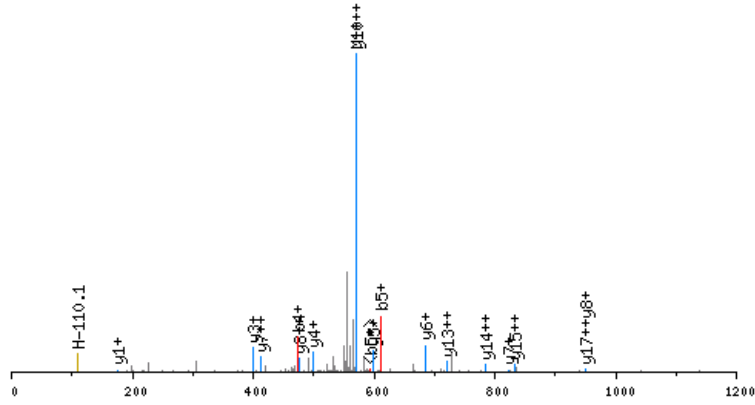

click image to zoom in; click top corners to zoom out [\[precursor±\]](#)

scan 2261; 570.0 m/z; 7.0e+000

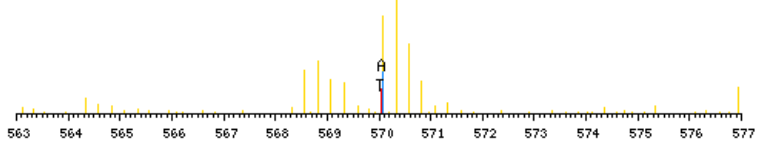

zoomed in precursor plot; T=theoretical m/z, A=acquired m/z

| b <sup>+</sup> | #  | AA | #  | y <sup>+</sup> | y <sup>2+</sup> |
|----------------|----|----|----|----------------|-----------------|
| 191.1720       | 1  | R  | 20 |                |                 |
| 278.2040       | 2  | S  | 19 | 2086.9794      | 1043.9936       |
| 375.2568       | 3  | P  | 18 | 1999.9474      | 1000.4776       |
| 474.3252       | 4  | V  | 17 | 1902.8946      | 951.9512        |
| 611.3841       | 5  | H  | 16 | 1803.8262      | 902.4170        |
| 708.4369       | 6  | P  | 15 | 1666.7673      | 833.8875        |
| 837.4795       | 7  | E  | 14 | 1569.7145      | 785.3612        |
| 924.5115       | 8  | S  | 13 | 1440.6719      | 720.8399        |
| 1011.5435      | 9  | S  | 12 | 1353.6399      | 677.3239        |
| 1140.5861      | 10 | E  | 11 | 1266.6079      | 633.8078        |
| 1197.6076      | 11 | G  | 10 | 1137.5653      | 569.2865        |
| 1326.6502      | 12 | E  | 9  | 1080.5438      | 540.7758        |
| 1455.6928      | 13 | E  | 8  | 951.5012       | 476.2545        |
| 1592.7517      | 14 | H  | 7  | 822.4586       | 411.7332        |
| 1679.7837      | 15 | S  | 6  | 685.3997       | 343.2038        |
| 1778.8521      | 16 | V  | 5  | 598.3677       | 299.6877        |
| 1877.9206      | 17 | V  | 4  | 499.2993       | 250.1535        |
| 1974.9733      | 18 | P  | 3  | 400.2308       | 200.6193        |
| 2103.0319      | 19 | Q  | 2  | 303.1781       | 152.0930        |
|                | 20 | R  | 1  | 175.1195       | 88.0637         |

N-term:+35.07

X-range:

0 - 0

MassTol: Y-zoom:

0. 1.

MassType:

☐AVG ☒MONO

Axis:

☒1 ☐2

Label:

☒I ☐M ☐-

Ions:

a ☐+ ☐2+ ☐3+

b ☒+ ☐2+ ☐3+

c ☐+ ☐2+ ☐3+

x ☐+ ☐2+ ☐3+

y ☒+ ☒2+ ☐3+

z ☐+ ☐2+ ☐3+

hide H<sub>2</sub>O/NH<sub>3</sub> ☐

zoom 112-122 ☐

GO

RSSVSGISLEDNR, MH+ 1447.7505, m/z 483.2550  
L OS G16 P120811 220811-s1.02927.02927.3.dta

scan 2927; 2.4e+000

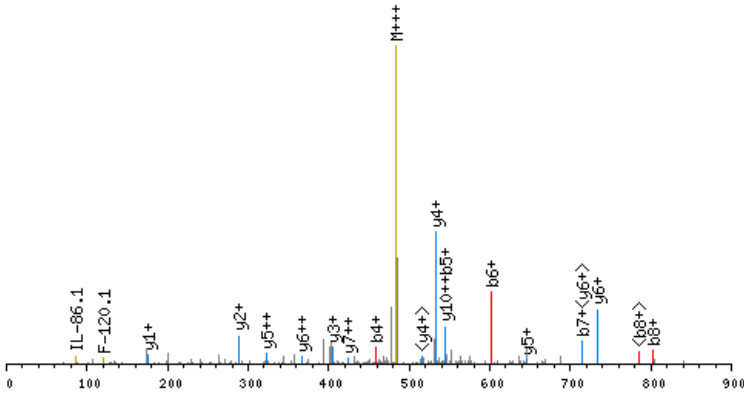

click image to zoom in; click top corners to zoom out

[precursor±]

scan 2923; 483.3 m/z; 1.1e+001

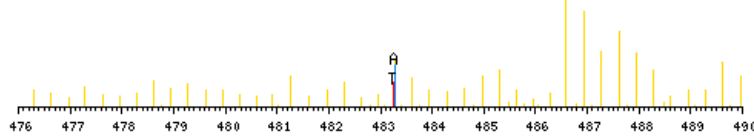

zoomed in precursor plot; T=theoretical m/z, A=acquired m/z

| b <sup>+</sup> | #  | AA | #  | y <sup>+</sup> | y <sup>2+</sup> |
|----------------|----|----|----|----------------|-----------------|
| 185.1402       | 1  | R  | 13 |                |                 |
| 272.1722       | 2  | S  | 12 | 1263.6181      | 632.3130        |
| 359.2043       | 3  | S  | 11 | 1176.5861      | 588.7969        |
| 458.2727       | 4  | V  | 10 | 1089.5540      | 545.2809        |
| 545.3047       | 5  | S  | 9  | 990.4856       | 495.7467        |
| 602.3262       | 6  | G  | 8  | 903.4536       | 452.2307        |
| 715.4102       | 7  | I  | 7  | 846.4321       | 423.7200        |
| 802.4423       | 8  | S  | 6  | 733.3481       | 367.1779        |
| 915.5263       | 9  | L  | 5  | 646.3160       | 323.6619        |
| 1044.5689      | 10 | E  | 4  | 533.2320       | 267.1199        |
| 1159.5959      | 11 | D  | 3  | 404.1894       | 202.5986        |
| 1273.6388      | 12 | N  | 2  | 289.1624       | 145.0851        |
|                | 13 | R  | 1  | 175.1195       | 88.0637         |

N-term:+29.04

X-range:

0 - 0

MassTol: Y-zoom:

0. 1.

MassType:

☐AVG ☒MONO

Axis:

☒1 ☐2

Label:

☒I ☐M ☐-

Ions:

a ☐+ ☐2+ ☐3+

b ☒+ ☐2+ ☐3+

c ☐+ ☐2+ ☐3+

x ☐+ ☐2+ ☐3+

y ☒+ ☒2+ ☐3+

z ☐+ ☐2+ ☐3+

hide H<sub>2</sub>O/NH<sub>3</sub> ☐

zoom 112-122 ☐

GO

RTDEAAAFQKVMNSLDSNR, MH+ 2138.0664, m/z 535.2721  
L OS G17 P120811 220811-s1.05537.05537.4.dta

scan 5537; 2.2e+000

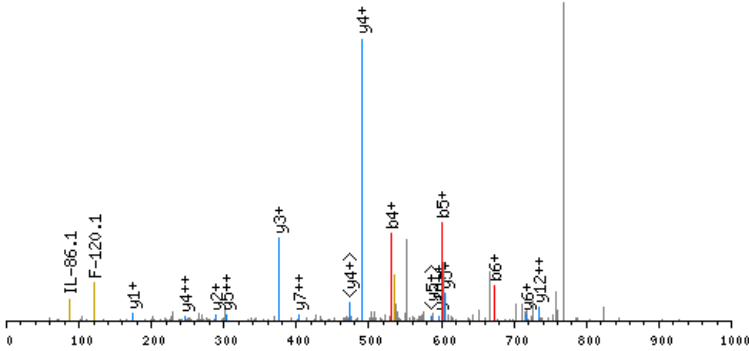

click image to zoom in; click top corners to zoom out [\[precursor±\]](#)

scan 5533; 535.3 m/z; 3.2e+001

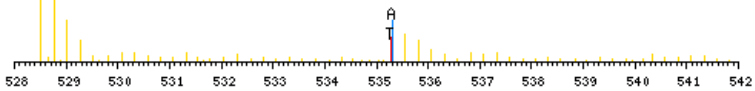

zoomed in precursor plot; T=theoretical m/z, A=acquired m/z

| b <sup>+</sup> | #  | AA | #  | y <sup>+</sup> | y <sup>2+</sup> |
|----------------|----|----|----|----------------|-----------------|
| 185.1402       | 1  | R  | 18 |                |                 |
| 286.1879       | 2  | T  | 17 | 1953.9341      | 977.4709        |
| 401.2148       | 3  | D  | 16 | 1852.8864      | 926.9471        |
| 530.2574       | 4  | E  | 15 | 1737.8594      | 869.4336        |
| 601.2945       | 5  | A  | 14 | 1608.8168      | 804.9123        |
| 672.3317       | 6  | A  | 13 | 1537.7797      | 769.3938        |
| 819.4001       | 7  | F  | 12 | 1466.7426      | 733.8752        |
| 947.4586       | 8  | Q  | 11 | 1319.6742      | 660.3410        |
| 1103.5849      | 9  | K  | 10 | 1191.6156      | 596.3117        |
| 1202.6534      | 10 | V  | 9  | 1035.4893      | 518.2486        |
| 1333.6938      | 11 | M  | 8  | 936.4209       | 468.7144        |
| 1420.7259      | 12 | S  | 7  | 805.3804       | 403.1941        |
| 1534.7688      | 13 | N  | 6  | 718.3484       | 359.6781        |
| 1647.8529      | 14 | L  | 5  | 604.3055       | 302.6566        |
| 1762.8798      | 15 | D  | 4  | 491.2214       | 246.1146        |
| 1849.9118      | 16 | S  | 3  | 376.1945       | 188.6011        |
| 1963.9548      | 17 | N  | 2  | 289.1624       | 145.0851        |
|                | 18 | R  | 1  | 175.1195       | 88.0637         |

N-term:+29.04 K(9):+156.13

X-range:

0 - 0

MassTol: Y-zoom:

0. 1.

MassType:

☐AVG ☒MONO

Axis:

☒1 ☐2

Label:

☒I ☐M ☐-

Ions:

a ☐+ ☐2+ ☐3+

b ☒+ ☐2+ ☐3+

c ☐+ ☐2+ ☐3+

x ☐+ ☐2+ ☐3+

y ☒+ ☒2+ ☐3+

z ☐+ ☐2+ ☐3+

hide H<sub>2</sub>O/NH<sub>3</sub> ☐

zoom 112-122 ☐

GO

RTQKEIGDIAGVADVTIR, MH+ 1998.1348, m/z 500.2892  
L OS G17 P120811 220811-s1.05204.05204.4.dta

scan 5204; 1.6e+000

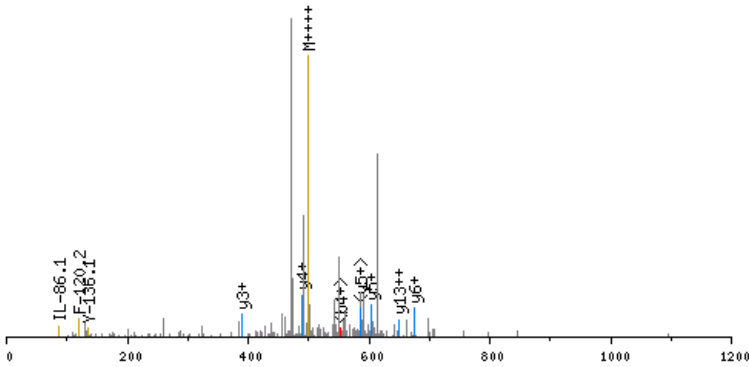

click image to zoom in; click top corners to zoom out

[precursor±]

scan 5203; 500.3 m/z; 1.5e+001

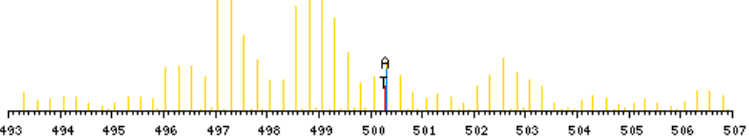

zoomed in precursor plot; T=theoretical m/z, A=acquired m/z

| b <sup>+</sup> | #  | AA | #  | y <sup>+</sup> | y <sup>2+</sup> |
|----------------|----|----|----|----------------|-----------------|
| 185.1402       | 1  | R  | 18 |                |                 |
| 286.1879       | 2  | T  | 17 | 1814.0024      | 907.5051        |
| 414.2465       | 3  | Q  | 16 | 1712.9547      | 856.9813        |
| 570.3728       | 4  | K  | 15 | 1584.8961      | 792.9520        |
| 699.4154       | 5  | E  | 14 | 1428.7698      | 714.8888        |
| 812.4994       | 6  | I  | 13 | 1299.7272      | 650.3675        |
| 869.5209       | 7  | G  | 12 | 1186.6432      | 593.8255        |
| 984.5478       | 8  | D  | 11 | 1129.6217      | 565.3148        |
| 1097.6319      | 9  | I  | 10 | 1014.5948      | 507.8013        |
| 1168.6690      | 10 | A  | 9  | 901.5107       | 451.2593        |
| 1225.6905      | 11 | G  | 8  | 830.4736       | 415.7407        |
| 1324.7589      | 12 | V  | 7  | 773.4521       | 387.2300        |
| 1395.7960      | 13 | A  | 6  | 674.3837       | 337.6958        |
| 1510.8229      | 14 | D  | 5  | 603.3466       | 302.1772        |
| 1609.8914      | 15 | V  | 4  | 488.3197       | 244.6637        |
| 1710.9390      | 16 | T  | 3  | 389.2512       | 195.1295        |
| 1824.0231      | 17 | I  | 2  | 288.2036       | 144.6057        |
|                | 18 | R  | 1  | 175.1195       | 88.0637         |

N-term:+29.04 K(4):+156.13

X-range:

0 - 0

MassTol: Y-zoom:

0. 1.

MassType:

☐ AVG ☒ MONO

Axis:

☒ 1 ☐ 2

Label:

☒ I ☐ M ☐ -

Ions:

a ☐ + ☐ 2+ ☐ 3+

b ☒ + ☐ 2+ ☐ 3+

c ☐ + ☐ 2+ ☐ 3+

x ☐ + ☐ 2+ ☐ 3+

y ☒ + ☒ 2+ ☐ 3+

z ☐ + ☐ 2+ ☐ 3+

hide H<sub>2</sub>O/NH<sub>3</sub> ☐

zoom 112-122 ☐

GO

RVAPEEHPTLLTEAPLNPKANR, MH+ 2509.3891, m/z 628.1027  
L OS G18 P120811 220811-s1.04367.04367.4.dta

scan 4367; 1.7e+001

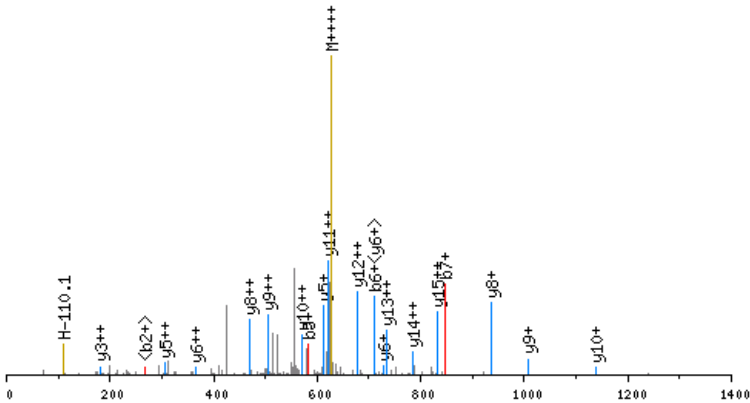

click image to zoom in; click top corners to zoom out [precursor±]

scan 4366; 628.1 m/z; 1.2e+002

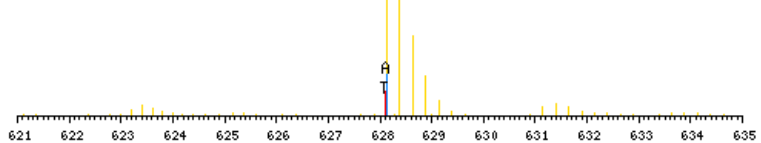

zoomed in precursor plot; T=theoretical m/z, A=acquired m/z

| b <sup>+</sup> | #  | AA | #  | y <sup>+</sup> | y <sup>2+</sup> |
|----------------|----|----|----|----------------|-----------------|
| 185.1402       | 1  | R  | 22 |                |                 |
| 284.2086       | 2  | V  | 21 | 2325.2567      | 1163.1323       |
| 355.2457       | 3  | A  | 20 | 2226.1883      | 1113.5981       |
| 452.2985       | 4  | P  | 19 | 2155.1512      | 1078.0795       |
| 581.3411       | 5  | E  | 18 | 2058.0984      | 1029.5531       |
| 710.3837       | 6  | E  | 17 | 1929.0558      | 965.0318        |
| 847.4426       | 7  | H  | 16 | 1800.0132      | 900.5105        |
| 944.4954       | 8  | P  | 15 | 1662.9543      | 831.9811        |
| 1045.5430      | 9  | T  | 14 | 1565.9016      | 783.4547        |
| 1158.6271      | 10 | L  | 13 | 1464.8539      | 732.9308        |
| 1271.7112      | 11 | L  | 12 | 1351.7698      | 676.3888        |
| 1372.7588      | 12 | T  | 11 | 1238.6857      | 619.8468        |
| 1501.8014      | 13 | E  | 10 | 1137.6381      | 569.3229        |
| 1572.8386      | 14 | A  | 9  | 1008.5955      | 504.8017        |
| 1669.8913      | 15 | P  | 8  | 937.5584       | 469.2831        |
| 1782.9754      | 16 | L  | 7  | 840.5056       | 420.7567        |
| 1897.0183      | 17 | N  | 6  | 727.4215       | 364.2147        |
| 1994.0711      | 18 | P  | 5  | 613.3786       | 307.1932        |
| 2150.1974      | 19 | K  | 4  | 516.3258       | 258.6668        |
| 2221.2345      | 20 | A  | 3  | 360.1995       | 180.6037        |
| 2335.2774      | 21 | N  | 2  | 289.1624       | 145.0851        |
|                | 22 | R  | 1  | 175.1195       | 88.0637         |

N-term:+29.04 K(19):+156.13

X-range:

0 - 0

MassTol: Y-zoom:

0. 1.

MassType:

☐AVG ☒MONO

Axis:

☒1 ☐2

Label:

☒I ☐M ☐-

Ions:

a ☐+ ☐2+ ☐3+

b ☒+ ☐2+ ☐3+

c ☐+ ☐2+ ☐3+

x ☐+ ☐2+ ☐3+

y ☒+ ☒2+ ☐3+

z ☐+ ☐2+ ☐3+

hide H<sub>2</sub>O/NH<sub>3</sub> ☐

zoom 112-122 ☐

GO

RVAPEEHPVLLTEAPLNPKANR, MH+ 2507.4098, m/z 627.6079  
L OS G18 P120811 220811-s1.04607.04607.4.dta

scan 4607; 7.4e+000

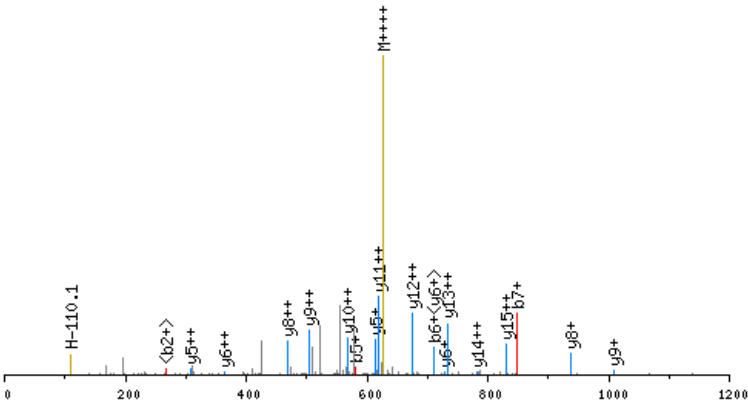

click image to zoom in; click top corners to zoom out [precursor±]

scan 4606; 627.6 m/z; 3.7e+001

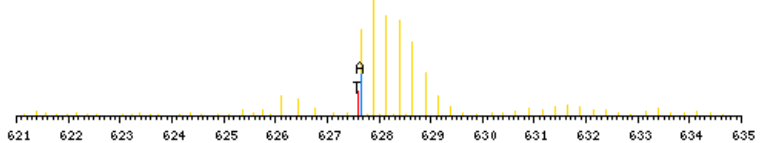

zoomed in precursor plot; T=theoretical m/z, A=acquired m/z

| b <sup>+</sup> | #  | AA | #  | y <sup>+</sup> | y <sup>2+</sup> |
|----------------|----|----|----|----------------|-----------------|
| 185.1402       | 1  | R  | 22 |                |                 |
| 284.2086       | 2  | V  | 21 | 2323.2774      | 1162.1426       |
| 355.2457       | 3  | A  | 20 | 2224.2090      | 1112.6084       |
| 452.2985       | 4  | P  | 19 | 2153.1719      | 1077.0899       |
| 581.3411       | 5  | E  | 18 | 2056.1192      | 1028.5635       |
| 710.3837       | 6  | E  | 17 | 1927.0766      | 964.0422        |
| 847.4426       | 7  | H  | 16 | 1798.0340      | 899.5209        |
| 944.4954       | 8  | P  | 15 | 1660.9751      | 830.9914        |
| 1043.5638      | 9  | V  | 14 | 1563.9223      | 782.4651        |
| 1156.6478      | 10 | L  | 13 | 1464.8539      | 732.9308        |
| 1269.7319      | 11 | L  | 12 | 1351.7698      | 676.3888        |
| 1370.7796      | 12 | T  | 11 | 1238.6857      | 619.8468        |
| 1499.8222      | 13 | E  | 10 | 1137.6381      | 569.3229        |
| 1570.8593      | 14 | A  | 9  | 1008.5955      | 504.8017        |
| 1667.9121      | 15 | P  | 8  | 937.5584       | 469.2831        |
| 1780.9961      | 16 | L  | 7  | 840.5056       | 420.7567        |
| 1895.0390      | 17 | N  | 6  | 727.4215       | 364.2147        |
| 1992.0918      | 18 | P  | 5  | 613.3786       | 307.1932        |
| 2148.2181      | 19 | K  | 4  | 516.3258       | 258.6668        |
| 2219.2552      | 20 | A  | 3  | 360.1995       | 180.6037        |
| 2333.2982      | 21 | N  | 2  | 289.1624       | 145.0851        |
|                | 22 | R  | 1  | 175.1195       | 88.0637         |

N-term:+29.04 K(19):+156.13

X-range:

0 - 0

MassTol: Y-zoom:

0. 1.

MassType:

☐AVG ☒MONO

Axis:

☒1 ☐2

Label:

☒I ☐M ☐-

Ions:

a ☐+ ☐2+ ☐3+

b ☒+ ☐2+ ☐3+

c ☐+ ☐2+ ☐3+

x ☐+ ☐2+ ☐3+

y ☒+ ☒2+ ☐3+

z ☐+ ☐2+ ☐3+

hide H<sub>2</sub>O/NH<sub>3</sub> ☐

zoom 112-122 ☐

GO

RVHPEAQAKVDVFR, MH+ 1707.9659, m/z 427.7469  
L OS G19 P120811 220811-s1.02712.02712.4.dta

scan 2712; 5.9e+000

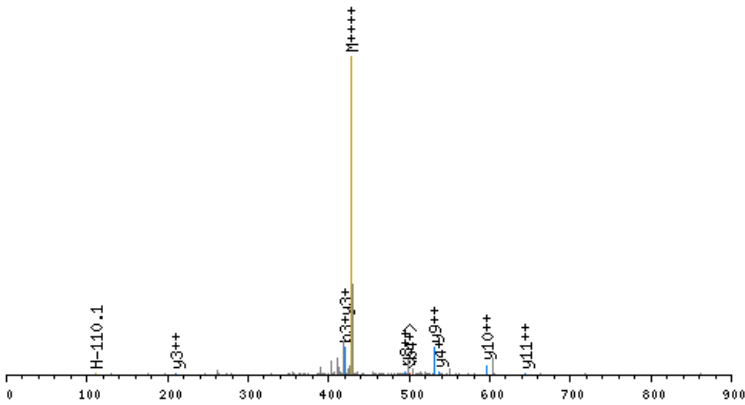

click image to zoom in; click top corners to zoom out

[precursor±]

scan 2711; 427.7 m/z; 1.5e+000

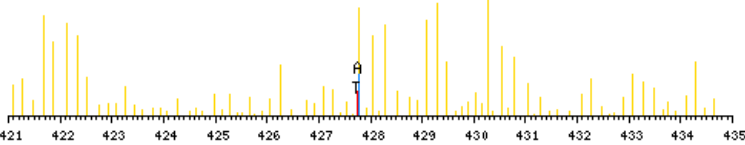

zoomed in precursor plot; T=theoretical m/z, A=acquired m/z

| b <sup>+</sup> | #  | AA | #  | y <sup>+</sup> | y <sup>2+</sup> |
|----------------|----|----|----|----------------|-----------------|
| 185.1402       | 1  | R  | 14 |                |                 |
| 284.2086       | 2  | V  | 13 | 1523.8335      | 762.4206        |
| 421.2675       | 3  | H  | 12 | 1424.7651      | 712.8864        |
| 518.3203       | 4  | P  | 11 | 1287.7061      | 644.3570        |
| 647.3629       | 5  | E  | 10 | 1190.6534      | 595.8306        |
| 718.4000       | 6  | A  | 9  | 1061.6108      | 531.3093        |
| 846.4586       | 7  | Q  | 8  | 990.5737       | 495.7908        |
| 917.4957       | 8  | A  | 7  | 862.5151       | 431.7615        |
| 1073.6220      | 9  | K  | 6  | 791.4780       | 396.2429        |
| 1172.6904      | 10 | V  | 5  | 635.3517       | 318.1798        |
| 1287.7174      | 11 | D  | 4  | 536.2833       | 268.6455        |
| 1386.7858      | 12 | V  | 3  | 421.2563       | 211.1321        |
| 1533.8542      | 13 | F  | 2  | 322.1879       | 161.5979        |
|                | 14 | R  | 1  | 175.1195       | 88.0637         |

N-term:+29.04 K(9):+156.13

X-range:

0 - 0

MassTol: Y-zoom:

0. 1.

MassType:

☐ AVG ☒ MONO

Axis:

☒ 1 ☐ 2

Label:

☒ I ☐ M ☐ -

Ions:

a ☐ + ☐ 2+ ☐ 3+

b ☒ + ☐ 2+ ☐ 3+

c ☐ + ☐ 2+ ☐ 3+

x ☐ + ☐ 2+ ☐ 3+

y ☒ + ☒ 2+ ☐ 3+

z ☐ + ☐ 2+ ☐ 3+

hide H<sub>2</sub>O/NH<sub>3</sub> ☐

zoom 112-122 ☐

GO

RVISSIEQKTER, MH+ 1501.8702, m/z 376.2230  
L OS G18 P120811 220811-s1.02109.02109.4.dta

scan 2109; 2.9e+000

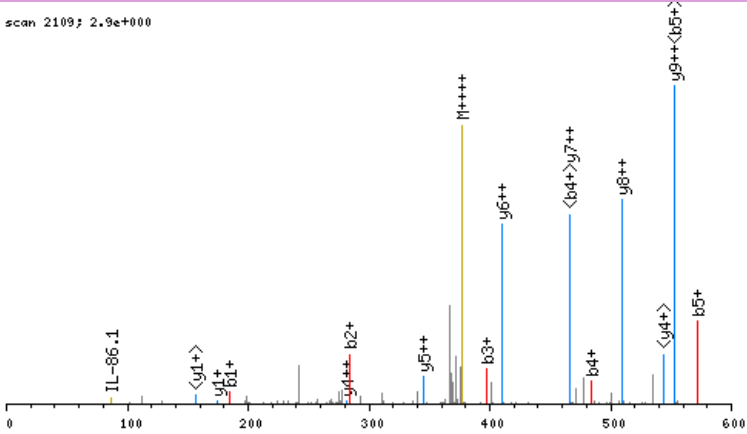

click image to zoom in; click top corners to zoom out

[precursor±]

scan 2106; 376.2 m/z; 8.1e+000

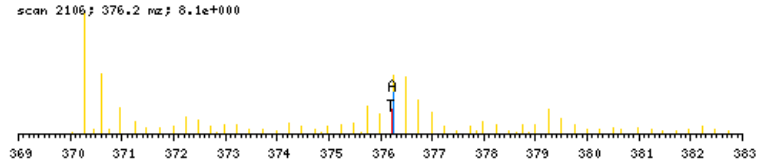

zoomed in precursor plot; T=theoretical m/z, A=acquired m/z

| b <sup>+</sup> | #  | AA | #  | y <sup>+</sup> | y <sup>2+</sup> |
|----------------|----|----|----|----------------|-----------------|
| 185.1402       | 1  | R  | 12 |                |                 |
| 284.2086       | 2  | V  | 11 | 1317.7378      | 659.3728        |
| 397.2927       | 3  | I  | 10 | 1218.6694      | 609.8386        |
| 484.3247       | 4  | S  | 9  | 1105.5854      | 553.2966        |
| 571.3567       | 5  | S  | 8  | 1018.5533      | 509.7806        |
| 684.4408       | 6  | I  | 7  | 931.5213       | 466.2646        |
| 813.4834       | 7  | E  | 6  | 818.4372       | 409.7225        |
| 941.5420       | 8  | Q  | 5  | 689.3946       | 345.2012        |
| 1097.6683      | 9  | K  | 4  | 561.3361       | 281.1719        |
| 1198.7160      | 10 | T  | 3  | 405.2098       | 203.1088        |
| 1327.7586      | 11 | E  | 2  | 304.1621       | 152.5850        |
|                | 12 | R  | 1  | 175.1195       | 88.0637         |

N-term:+29.04 K(9):+156.13

X-range:

0 - 0

MassTol: Y-zoom:

0. 1.

MassType:

☐AVG ☒MONO

Axis:

☒1 ☐2

Label:

☒I ☐M ☐-

Ions:

a ☐+ ☐2+ ☐3+

b ☒+ ☐2+ ☐3+

c ☐+ ☐2+ ☐3+

x ☐+ ☐2+ ☐3+

y ☒+ ☒2+ ☐3+

z ☐+ ☐2+ ☐3+

hide H<sub>2</sub>O/NH<sub>3</sub> ☐

zoom 112-122 ☐

GO

RVPTPNVSVVDLTCR, MH+ 1740.9430, m/z 580.9858  
L OS G16 P120811 220811-s1.05081.05081.3.dta

scan 5081; 1.4e+000

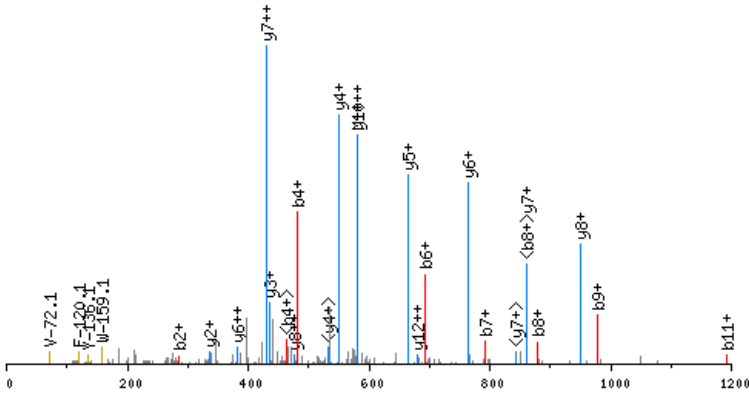

click image to zoom in; click top corners to zoom out

[precursor±]

scan 5078; 581.0 m/z; 4.6e+000

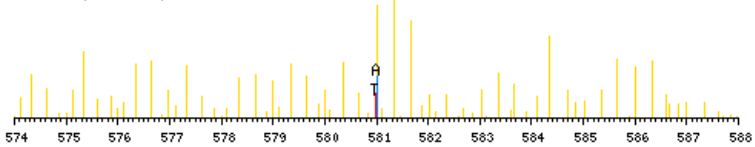

zoomed in precursor plot; T=theoretical m/z, A=acquired m/z

| b <sup>+</sup> | #  | AA | #  | y <sup>+</sup> | y <sup>2+</sup> |
|----------------|----|----|----|----------------|-----------------|
| 185.1402       | 1  | R  | 15 |                |                 |
| 284.2086       | 2  | V  | 14 | 1556.8106      | 778.9092        |
| 381.2614       | 3  | P  | 13 | 1457.7422      | 729.3750        |
| 482.3091       | 4  | T  | 12 | 1360.6894      | 680.8486        |
| 579.3618       | 5  | P  | 11 | 1259.6417      | 630.3248        |
| 693.4048       | 6  | N  | 10 | 1162.5890      | 581.7984        |
| 792.4732       | 7  | V  | 9  | 1048.5461      | 524.7769        |
| 879.5052       | 8  | S  | 8  | 949.4776       | 475.2427        |
| 978.5736       | 9  | V  | 7  | 862.4456       | 431.7267        |
| 1077.6420      | 10 | V  | 6  | 763.3772       | 382.1925        |
| 1192.6690      | 11 | D  | 5  | 664.3088       | 332.6583        |
| 1305.7530      | 12 | L  | 4  | 549.2818       | 275.1448        |
| 1406.8007      | 13 | T  | 3  | 436.1978       | 218.6028        |
| 1566.8313      | 14 | C  | 2  | 335.1501       | 168.0790        |
|                | 15 | R  | 1  | 175.1195       | 88.0637         |

N-term:+29.04 C(14):+160.03



X-range:

0 - 0

MassTol: Y-zoom:

0. 1.

MassType:

☐AVG ☒MONO

Axis:

☒1 ☐2

Label:

☒I ☐M ☐-

Ions:

a ☐+ ☐2+ ☐3+

b ☒+ ☐2+ ☐3+

c ☐+ ☐2+ ☐3+

x ☐+ ☐2+ ☐3+

y ☒+ ☒2+ ☐3+

z ☐+ ☐2+ ☐3+

hide H<sub>2</sub>O/NH<sub>3</sub> ☐

zoom 112-122 ☐

GO

RYALTFAEAQEACR, MH+ 1719.8700, m/z 430.7230  
H OS G17 P120811 220811-s1.02587.02587.4.dta

scan 2587; 1.2e+001

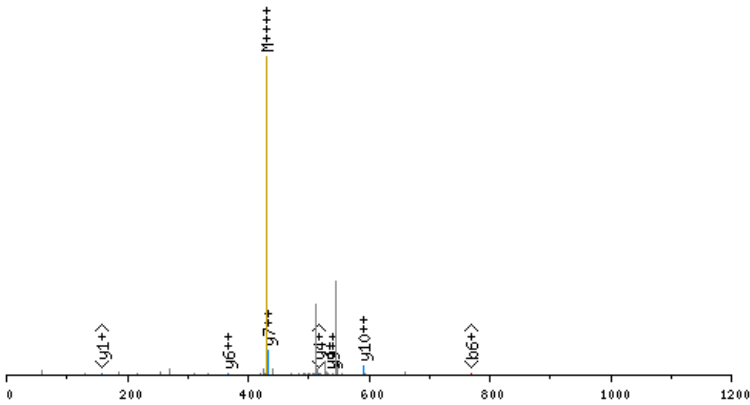

click image to zoom in; click top corners to zoom out

[precursor±]

scan 2583; 430.7 m/z; 3.2e+000

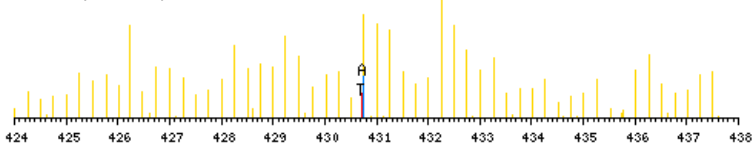

zoomed in precursor plot; T=theoretical m/z, A=acquired m/z

| b <sup>+</sup> | #  | AA | #  | y <sup>+</sup> | y <sup>2+</sup> |
|----------------|----|----|----|----------------|-----------------|
| 191.1720       | 1  | R  | 14 |                |                 |
| 354.2353       | 2  | Y  | 13 | 1529.7058      | 765.3568        |
| 425.2725       | 3  | A  | 12 | 1366.6425      | 683.8252        |
| 538.3565       | 4  | L  | 11 | 1295.6054      | 648.3066        |
| 639.4042       | 5  | T  | 10 | 1182.5213      | 591.7646        |
| 786.4726       | 6  | F  | 9  | 1081.4736      | 541.2407        |
| 857.5097       | 7  | A  | 8  | 934.4052       | 467.7065        |
| 986.5523       | 8  | E  | 7  | 863.3681       | 432.1880        |
| 1057.5894      | 9  | A  | 6  | 734.3255       | 367.6667        |
| 1185.6480      | 10 | Q  | 5  | 663.2884       | 332.1481        |
| 1314.6906      | 11 | E  | 4  | 535.2298       | 268.1188        |
| 1385.7277      | 12 | A  | 3  | 406.1872       | 203.5975        |
| 1545.7583      | 13 | C  | 2  | 335.1501       | 168.0790        |
|                | 14 | R  | 1  | 175.1195       | 88.0637         |

N-term:+35.07 C(13):+160.03

X-range:

0 - 0

MassTol: Y-zoom:

0. 1.

MassType:

☐ AVG ☒ MONO

Axis:

☒ 1 ☐ 2

Label:

☒ I ☐ M ☐ -

Ions:

a ☐ + ☐ 2+ ☐ 3+

b ☒ + ☐ 2+ ☐ 3+

c ☐ + ☐ 2+ ☐ 3+

x ☐ + ☐ 2+ ☐ 3+

y ☒ + ☒ 2+ ☐ 3+

z ☐ + ☐ 2+ ☐ 3+

hide H<sub>2</sub>O/NH<sub>3</sub> ☐

zoom 112-122 ☐

GO

RYIGIVKQAGLDR, MH+ 1544.9277, m/z 386.9874  
L OS G18 P120811 220811-s1.03663.03663.4.dta

scan 3663; 5.6e+000

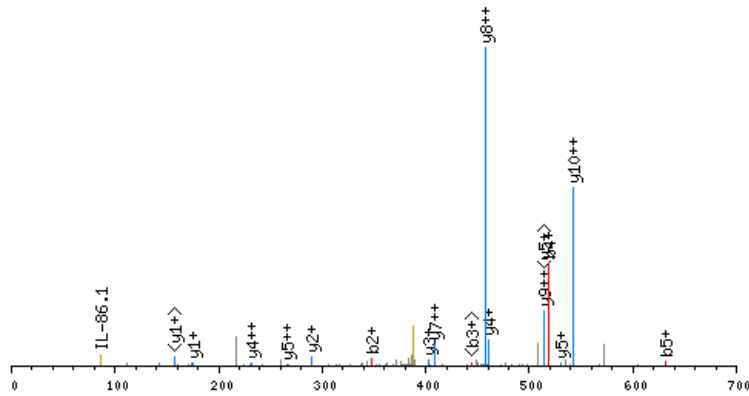

click image to zoom in; click top corners to zoom out [\[precursor±\]](#)

scan 3661; 387.0 m/z; 5.4e+000

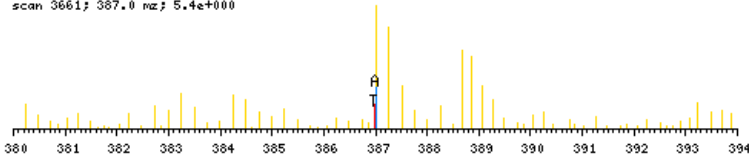

zoomed in precursor plot; T=theoretical m/z, A=acquired m/z

| b <sup>+</sup> | #  | AA | #  | y <sup>+</sup> | y <sup>2+</sup> |
|----------------|----|----|----|----------------|-----------------|
| 185.1402       | 1  | R  | 13 |                |                 |
| 348.2035       | 2  | Y  | 12 | 1360.7953      | 680.9016        |
| 461.2876       | 3  | I  | 11 | 1197.7320      | 599.3699        |
| 518.3091       | 4  | G  | 10 | 1084.6479      | 542.8279        |
| 631.3931       | 5  | I  | 9  | 1027.6264      | 514.3171        |
| 730.4615       | 6  | V  | 8  | 914.5424       | 457.7751        |
| 886.5878       | 7  | K  | 7  | 815.4740       | 408.2409        |
| 1014.6464      | 8  | Q  | 6  | 659.3477       | 330.1777        |
| 1085.6835      | 9  | A  | 5  | 531.2891       | 266.1485        |
| 1142.7050      | 10 | G  | 4  | 460.2520       | 230.6299        |
| 1255.7891      | 11 | L  | 3  | 403.2305       | 202.1192        |
| 1370.8160      | 12 | D  | 2  | 290.1464       | 145.5771        |
|                | 13 | R  | 1  | 175.1195       | 88.0637         |

N-term:+29.04 K(7):+156.13

X-range:

0 - 0

MassTol: Y-zoom:

0. 1.

MassType:

☐ AVG ☒ MONO

Axis:

☒ 1 ☐ 2

Label:

☒ I ☐ M ☐ -

Ions:

a ☐ + ☐ 2+ ☐ 3+

b ☒ + ☐ 2+ ☐ 3+

c ☐ + ☐ 2+ ☐ 3+

x ☐ + ☐ 2+ ☐ 3+

y ☒ + ☒ 2+ ☐ 3+

z ☐ + ☐ 2+ ☐ 3+

hide H<sub>2</sub>O/NH<sub>3</sub> ☐

zoom 112-122 ☐

GO

RYLAEVATGDDKKR, MH+ 1705.9601, m/z 427.2455  
L OS G19 P120811 220811-s1.02263.02263.4.dta

scan 2263; 2.7e+000

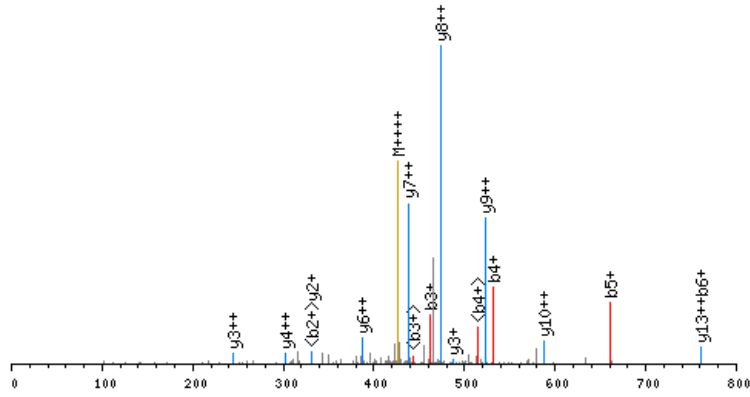

click image to zoom in; click top corners to zoom out [\[precursor±\]](#)

scan 2259; 427.2 m/z; 9.1e-001

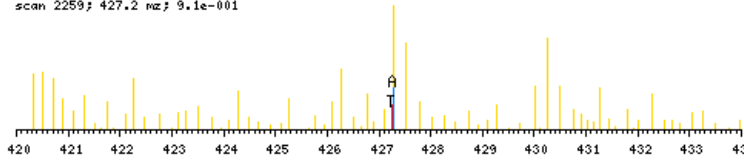

zoomed in precursor plot; T=theoretical m/z, A=acquired m/z

| b <sup>+</sup> | #  | AA | #  | y <sup>+</sup> | y <sup>2+</sup> |
|----------------|----|----|----|----------------|-----------------|
| 185.1402       | 1  | R  | 14 |                |                 |
| 348.2035       | 2  | Y  | 13 | 1521.8278      | 761.4178        |
| 461.2876       | 3  | L  | 12 | 1358.7644      | 679.8861        |
| 532.3247       | 4  | A  | 11 | 1245.6804      | 623.3441        |
| 661.3673       | 5  | E  | 10 | 1174.6433      | 587.8255        |
| 760.4357       | 6  | V  | 9  | 1045.6007      | 523.3042        |
| 831.4728       | 7  | A  | 8  | 946.5322       | 473.7700        |
| 932.5205       | 8  | T  | 7  | 875.4951       | 438.2515        |
| 989.5420       | 9  | G  | 6  | 774.4475       | 387.7276        |
| 1104.5689      | 10 | D  | 5  | 717.4260       | 359.2169        |
| 1219.5959      | 11 | D  | 4  | 602.3990       | 301.7034        |
| 1375.7222      | 12 | K  | 3  | 487.3721       | 244.1900        |
| 1531.8485      | 13 | K  | 2  | 331.2458       | 166.1268        |
|                | 14 | R  | 1  | 175.1195       | 88.0637         |

N-term:+29.04 K(12):+156.13  
K(13):+156.13

N-term: +35.07 K(16) : +162.16

X-range:

0 - 0

MassTol: Y-zoom:

0. 1.

MassType:

☐ AVG ☒ MONO

Axis:

☒ 1 ☐ 2

Label:

☒ I ☐ M ☐ -

Ions:

a ☐ + ☐ 2+ ☐ 3+

b ☒ + ☐ 2+ ☐ 3+

c ☐ + ☐ 2+ ☐ 3+

x ☐ + ☐ 2+ ☐ 3+

y ☒ + ☒ 2+ ☐ 3+

z ☐ + ☐ 2+ ☐ 3+

hide H<sub>2</sub>O/NH<sub>3</sub> ☐

zoom 112-122 ☐

GO

SAELSSSEGILDDR, MH+ 1419.6967, m/z 473.9038  
L OS G13 P120811 220811-s1.04513.04513.3.dta

scan 4513; 3.0e+000

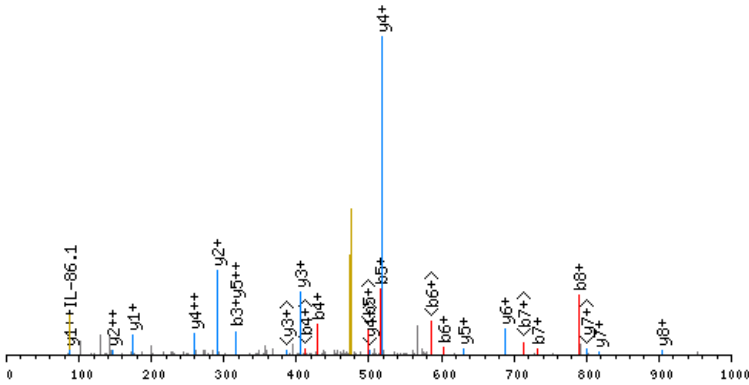

click image to zoom in; click top corners to zoom out

[precursor±]

scan 4509; 473.9 m/z; 7.1e+000

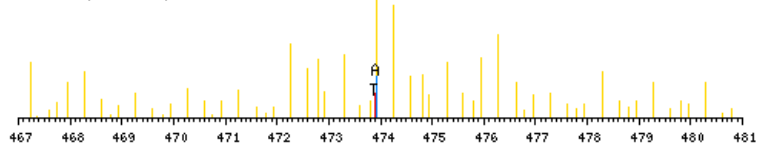

zoomed in precursor plot; T=theoretical m/z, A=acquired m/z

| b <sup>+</sup> | #  | AA | #  | y <sup>+</sup> | y <sup>2+</sup> |
|----------------|----|----|----|----------------|-----------------|
| 116.0711       | 1  | S  | 13 |                |                 |
| 187.1082       | 2  | A  | 12 | 1304.6334      | 652.8206        |
| 316.1508       | 3  | E  | 11 | 1233.5963      | 617.3021        |
| 429.2349       | 4  | L  | 10 | 1104.5537      | 552.7808        |
| 516.2669       | 5  | S  | 9  | 991.4696       | 496.2387        |
| 603.2990       | 6  | S  | 8  | 904.4376       | 452.7227        |
| 732.3415       | 7  | E  | 7  | 817.4056       | 409.2067        |
| 789.3630       | 8  | G  | 6  | 688.3630       | 344.6854        |
| 902.4471       | 9  | I  | 5  | 631.3415       | 316.1747        |
| 1015.5311      | 10 | L  | 4  | 518.2575       | 259.6326        |
| 1130.5581      | 11 | D  | 3  | 405.1734       | 203.0906        |
| 1245.5850      | 12 | D  | 2  | 290.1464       | 145.5771        |
|                | 13 | R  | 1  | 175.1195       | 88.0637         |

N-term:+29.04

X-range:

0 - 0

MassTol: Y-zoom:

0. 1.

MassType:

☐AVG ☒MONO

Axis:

☒1 ☐2

Label:

☒I ☐M ☐-

Ions:

a ☐+ ☐2+ ☐3+

b ☒+ ☐2+ ☐3+

c ☐+ ☐2+ ☐3+

x ☐+ ☐2+ ☐3+

y ☒+ ☒2+ ☐3+

z ☐+ ☐2+ ☐3+

hide H<sub>2</sub>O/NH<sub>3</sub> ☐

zoom 112-122 ☐

GO

SAELSSGILDDRNEEKR, MH+ 2116.1158, m/z 529.7844  
H OS G17 P120811 220811-s1.03660.03660.4.dta

scan 3660; 6.2e+000

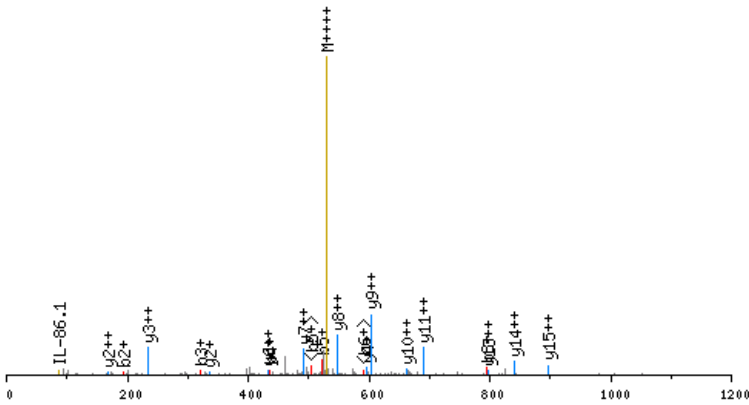

click image to zoom in; click top corners to zoom out

[precursor±]

scan 3658; 529.8 m/z; 2.5e+001

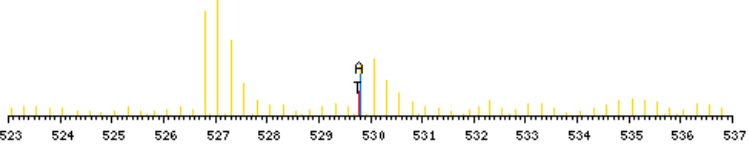

zoomed in precursor plot; T=theoretical m/z, A=acquired m/z

| b <sup>+</sup> | #  | AA | #  | y <sup>+</sup> | y <sup>2+</sup> |
|----------------|----|----|----|----------------|-----------------|
| 122.1029       | 1  | S  | 18 |                |                 |
| 193.1400       | 2  | A  | 17 | 1995.0207      | 998.0143        |
| 322.1826       | 3  | E  | 16 | 1923.9836      | 962.4957        |
| 435.2667       | 4  | L  | 15 | 1794.9410      | 897.9744        |
| 522.2987       | 5  | S  | 14 | 1681.8570      | 841.4324        |
| 609.3308       | 6  | S  | 13 | 1594.8249      | 797.9164        |
| 738.3733       | 7  | E  | 12 | 1507.7929      | 754.4004        |
| 795.3948       | 8  | G  | 11 | 1378.7503      | 689.8791        |
| 908.4789       | 9  | I  | 10 | 1321.7288      | 661.3683        |
| 1021.5629      | 10 | L  | 9  | 1208.6448      | 604.8263        |
| 1136.5899      | 11 | D  | 8  | 1095.5607      | 548.2843        |
| 1251.6168      | 12 | D  | 7  | 980.5338       | 490.7708        |
| 1407.7179      | 13 | R  | 6  | 865.5068       | 433.2573        |
| 1521.7609      | 14 | N  | 5  | 709.4057       | 355.2068        |
| 1650.8035      | 15 | E  | 4  | 595.3628       | 298.1853        |
| 1779.8461      | 16 | E  | 3  | 466.3202       | 233.6640        |
| 1942.0042      | 17 | K  | 2  | 337.2776       | 169.1427        |
|                | 18 | R  | 1  | 175.1195       | 88.0637         |

N-term:+35.07 K(17):+162.16

N-term: +29.04

X-range:

0 - 0

MassTol: Y-zoom:

0. 1.

MassType:

☐AVG ☒MONO

Axis:

☒1 ☐2

Label:

☒I ☐M ☐-

Ions:

a ☐+ ☐2+ ☐3+

b ☒+ ☐2+ ☐3+

c ☐+ ☐2+ ☐3+

x ☐+ ☐2+ ☐3+

y ☒+ ☒2+ ☐3+

z ☐+ ☐2+ ☐3+

hide H<sub>2</sub>O/NH<sub>3</sub> ☐

zoom 112-122 ☐

GO

SAGIHETTYNSIMKCDIDIR, MH+ 2380.1641, m/z 595.7965  
L OS G17 P120811 220811-s1.05286.05286.4.dta

scan 5286; 1.9e+000

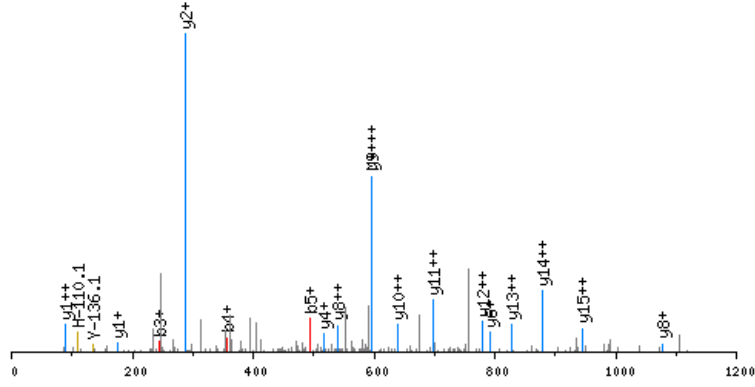

click image to zoom in; click top corners to zoom out [\[precursor±\]](#)

scan 5283; 595.8 m/z; 1.1e+001

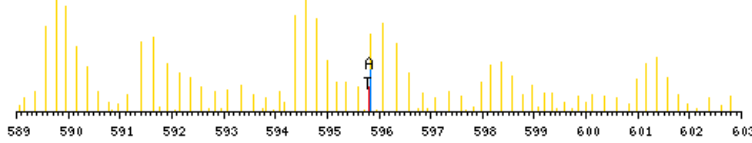

zoomed in precursor plot; T=theoretical m/z, A=acquired m/z

| b <sup>+</sup> | #  | AA | #  | y <sup>+</sup> | y <sup>2+</sup> |
|----------------|----|----|----|----------------|-----------------|
| 116.0711       | 1  | S  | 20 |                |                 |
| 187.1082       | 2  | A  | 19 | 2265.1008      | 1133.0543       |
| 244.1297       | 3  | G  | 18 | 2194.0636      | 1097.5357       |
| 357.2138       | 4  | I  | 17 | 2137.0422      | 1069.0250       |
| 494.2727       | 5  | H  | 16 | 2023.9581      | 1012.4830       |
| 623.3153       | 6  | E  | 15 | 1886.8992      | 943.9535        |
| 724.3630       | 7  | T  | 14 | 1757.8566      | 879.4322        |
| 825.4106       | 8  | T  | 13 | 1656.8089      | 828.9084        |
| 988.4740       | 9  | Y  | 12 | 1555.7612      | 778.3845        |
| 1102.5169      | 10 | N  | 11 | 1392.6979      | 696.8529        |
| 1189.5489      | 11 | S  | 10 | 1278.6550      | 639.8314        |
| 1302.6330      | 12 | I  | 9  | 1191.6230      | 596.3154        |
| 1433.6735      | 13 | M  | 8  | 1078.5389      | 539.7734        |
| 1589.7998      | 14 | K  | 7  | 947.4984       | 474.2531        |
| 1749.8304      | 15 | C  | 6  | 791.3721       | 396.1900        |
| 1864.8573      | 16 | D  | 5  | 631.3415       | 316.1747        |
| 1977.9414      | 17 | I  | 4  | 516.3146       | 258.6612        |
| 2092.9683      | 18 | D  | 3  | 403.2305       | 202.1192        |
| 2206.0524      | 19 | I  | 2  | 288.2036       | 144.6057        |
|                | 20 | R  | 1  | 175.1195       | 88.0637         |

N-term: +29.04 K(14): +156.13  
C(15): +160.03

X-range:

0 - 0

MassTol: Y-zoom:

0. 1.

MassType:

☐AVG ☒MONO

Axis:

☒1 ☐2

Label:

☒I ☐M ☐-

Ions:

a ☐+ ☐2+ ☐3+

b ☒+ ☐2+ ☐3+

c ☐+ ☐2+ ☐3+

x ☐+ ☐2+ ☐3+

y ☒+ ☒2+ ☐3+

z ☐+ ☐2+ ☐3+

hide H<sub>2</sub>O/NH<sub>3</sub> ☐

zoom 112-122 ☐

GO

SAGSAAAGPVEAAIR, MH+ 1355.7283, m/z 452.5809  
L OS G13 P120811 220811-s1.03598.03598.3.dta

scan 3598; 1.9e+000

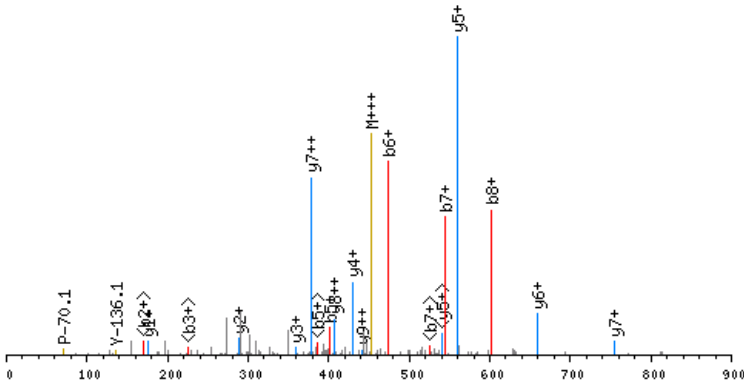

click image to zoom in; click top corners to zoom out [precursor±]

scan 3594; 452.6 m/z; 8.6e+000

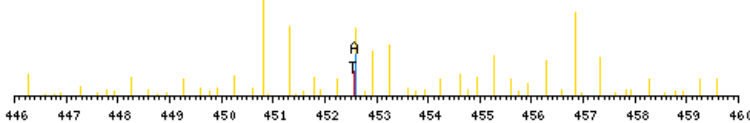

zoomed in precursor plot; T=theoretical m/z, A=acquired m/z

| b <sup>+</sup> | #  | AA | #  | y <sup>+</sup> | y <sup>2+</sup> |
|----------------|----|----|----|----------------|-----------------|
| 116.0711       | 1  | S  | 15 |                |                 |
| 187.1082       | 2  | A  | 14 | 1240.6650      | 620.8364        |
| 244.1297       | 3  | G  | 13 | 1169.6279      | 585.3178        |
| 331.1617       | 4  | S  | 12 | 1112.6064      | 556.8071        |
| 402.1988       | 5  | A  | 11 | 1025.5744      | 513.2911        |
| 473.2360       | 6  | A  | 10 | 954.5373       | 477.7725        |
| 544.2731       | 7  | A  | 9  | 883.5001       | 442.2540        |
| 601.2945       | 8  | G  | 8  | 812.4630       | 406.7354        |
| 698.3473       | 9  | P  | 7  | 755.4416       | 378.2247        |
| 797.4157       | 10 | V  | 6  | 658.3888       | 329.6983        |
| 926.4583       | 11 | E  | 5  | 559.3204       | 280.1641        |
| 997.4954       | 12 | A  | 4  | 430.2778       | 215.6428        |
| 1068.5325      | 13 | A  | 3  | 359.2407       | 180.1243        |
| 1181.6166      | 14 | I  | 2  | 288.2036       | 144.6057        |
|                | 15 | R  | 1  | 175.1195       | 88.0637         |

N-term:+29.04

X-range:

0 - 0

MassTol: Y-zoom:

0. 1.

MassType:

☐AVG ☒MONO

Axis:

☒1 ☐2

Label:

☒I ☐M ☐-

Ions:

a ☐+ ☐2+ ☐3+

b ☒+ ☐2+ ☐3+

c ☐+ ☐2+ ☐3+

x ☐+ ☐2+ ☐3+

y ☒+ ☒2+ ☐3+

z ☐+ ☐2+ ☐3+

hide H<sub>2</sub>O/NH<sub>3</sub> ☐

zoom 112-122 ☐

GO

SAGVSVPGPMGPSGPR, MH+ 1480.7582, m/z 494.2576  
L OS G13 P120811 220811-s1.03996.03996.3.dta

scan 3996; 2.4e+000

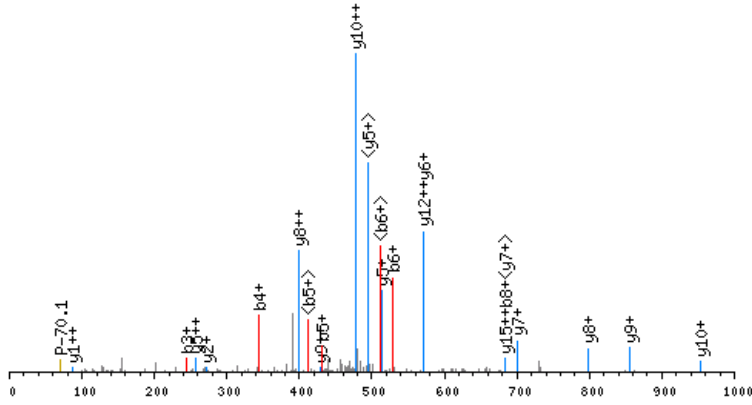

click image to zoom in; click top corners to zoom out

[precursor±]

scan 3994; 494.3 m/z; 4.5e+001

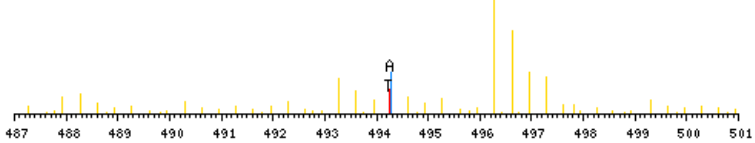

zoomed in precursor plot; T=theoretical m/z, A=acquired m/z

| b <sup>+</sup> | #  | AA | #  | y <sup>+</sup> | y <sup>2+</sup> |
|----------------|----|----|----|----------------|-----------------|
| 116.0711       | 1  | S  | 16 |                |                 |
| 187.1082       | 2  | A  | 15 | 1365.6949      | 683.3514        |
| 244.1297       | 3  | G  | 14 | 1294.6578      | 647.8328        |
| 343.1981       | 4  | V  | 13 | 1237.6363      | 619.3221        |
| 430.2301       | 5  | S  | 12 | 1138.5679      | 569.7879        |
| 529.2986       | 6  | V  | 11 | 1051.5359      | 526.2718        |
| 626.3513       | 7  | P  | 10 | 952.4675       | 476.7376        |
| 683.3728       | 8  | G  | 9  | 855.4147       | 428.2113        |
| 780.4256       | 9  | P  | 8  | 798.3932       | 399.7005        |
| 911.4660       | 10 | M  | 7  | 701.3405       | 351.1741        |
| 968.4875       | 11 | G  | 6  | 570.3000       | 285.6539        |
| 1065.5403      | 12 | P  | 5  | 513.2785       | 257.1432        |
| 1152.5723      | 13 | S  | 4  | 416.2258       | 208.6168        |
| 1209.5938      | 14 | G  | 3  | 329.1937       | 165.1008        |
| 1306.6465      | 15 | P  | 2  | 272.1723       | 136.5900        |
|                | 16 | R  | 1  | 175.1195       | 88.0637         |

N-term:+29.04

X-range:

0 - 0

MassTol: Y-zoom:

0. 1.

MassType:

☐AVG ☒MONO

Axis:

☒1 ☐2

Label:

☒I ☐M ☐-

Ions:

a ☐+ ☐2+ ☐3+

b ☒+ ☐2+ ☐3+

c ☐+ ☐2+ ☐3+

x ☐+ ☐2+ ☐3+

y ☒+ ☒2+ ☐3+

z ☐+ ☐2+ ☐3+

hide H<sub>2</sub>O/NH<sub>3</sub> ☐

zoom 112-122 ☐

GO

SALLILPDQGR, MH+ 1216.7477, m/z 608.8775  
H OS G13 P120811 220811-s1.05626.05626.2.dta

scan 5626; 1.6e+000

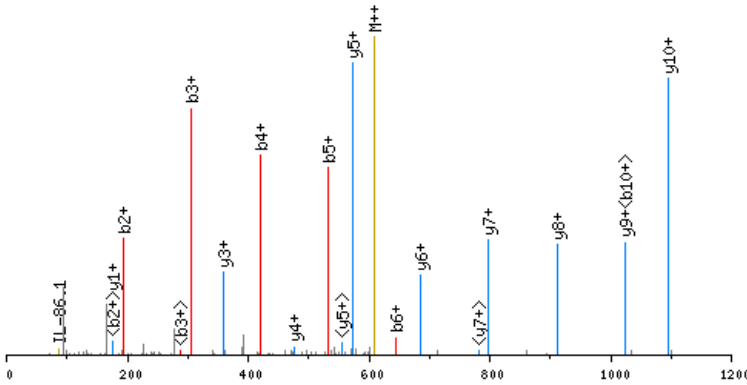

click image to zoom in; click top corners to zoom out [\[precursor±\]](#)

scan 5624; 608.9 m/z; 9.0e+000

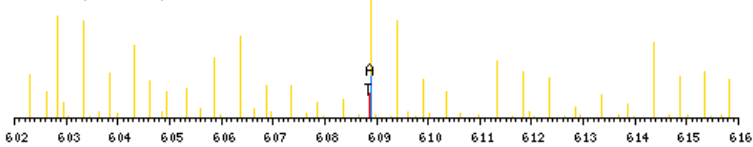

zoomed in precursor plot; T=theoretical m/z, A=acquired m/z

| b <sup>+</sup> | #  | AA | #  | y <sup>+</sup> | y <sup>2+</sup> |
|----------------|----|----|----|----------------|-----------------|
| 122.1029       | 1  | S  | 11 |                |                 |
| 193.1400       | 2  | A  | 10 | 1095.6526      | 548.3302        |
| 306.2241       | 3  | L  | 9  | 1024.6155      | 512.8117        |
| 419.3082       | 4  | L  | 8  | 911.5314       | 456.2696        |
| 532.3922       | 5  | I  | 7  | 798.4474       | 399.7276        |
| 645.4763       | 6  | L  | 6  | 685.3633       | 343.1856        |
| 742.5291       | 7  | P  | 5  | 572.2792       | 286.6435        |
| 857.5560       | 8  | D  | 4  | 475.2265       | 238.1172        |
| 985.6146       | 9  | Q  | 3  | 360.1995       | 180.6037        |
| 1042.6360      | 10 | G  | 2  | 232.1410       | 116.5744        |
|                | 11 | R  | 1  | 175.1195       | 88.0637         |

N-term:+35.07

X-range:

0 - 0

MassTol: Y-zoom:

0. 1.

MassType:

☐AVG ☒MONO

Axis:

☒1 ☐2

Label:

☒I ☐M ☐-

Ions:

a ☐+ ☐2+ ☐3+

b ☒+ ☐2+ ☐3+

c ☐+ ☐2+ ☐3+

x ☐+ ☐2+ ☐3+

y ☒+ ☒2+ ☐3+

z ☐+ ☐2+ ☐3+

hide H<sub>2</sub>O/NH<sub>3</sub> ☐

zoom 112-122 ☐

GO

SAMPFTASPAPSTR, MH+ 1448.7207, m/z 483.5784  
L OS G13 P120811 220811-s1.04026.04026.3.dta

scan 4026; 3.3e+000

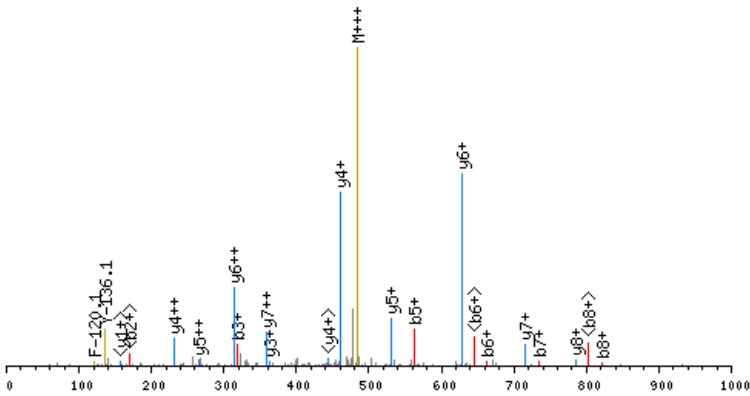

click image to zoom in; click top corners to zoom out

[precursor±]

scan 4024; 483.6 m/z; 1.3e+001

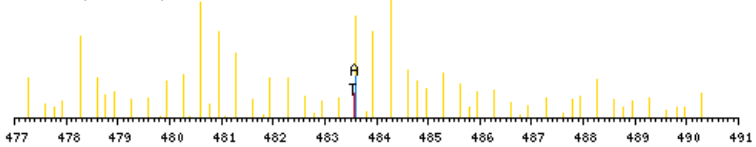

zoomed in precursor plot; T=theoretical m/z, A=acquired m/z

| b <sup>+</sup> | #  | AA | #  | y <sup>+</sup> | y <sup>2+</sup> |
|----------------|----|----|----|----------------|-----------------|
| 116.0711       | 1  | S  | 14 |                |                 |
| 187.1082       | 2  | A  | 13 | 1333.6574      | 667.3326        |
| 318.1487       | 3  | M  | 12 | 1262.6203      | 631.8141        |
| 415.2015       | 4  | P  | 11 | 1131.5798      | 566.2938        |
| 562.2699       | 5  | F  | 10 | 1034.5271      | 517.7675        |
| 663.3176       | 6  | T  | 9  | 887.4587       | 444.2332        |
| 734.3547       | 7  | A  | 8  | 786.4110       | 393.7094        |
| 821.3867       | 8  | S  | 7  | 715.3739       | 358.1909        |
| 918.4395       | 9  | P  | 6  | 628.3418       | 314.6748        |
| 989.4766       | 10 | A  | 5  | 531.2891       | 266.1485        |
| 1086.5294      | 11 | P  | 4  | 460.2520       | 230.6299        |
| 1173.5614      | 12 | S  | 3  | 363.1992       | 182.1035        |
| 1274.6091      | 13 | T  | 2  | 276.1672       | 138.5875        |
|                | 14 | R  | 1  | 175.1195       | 88.0637         |

N-term:+29.04

X-range:

0 - 0

MassTol: Y-zoom:

0. 1.

MassType:

☐ AVG ☒ MONO

Axis:

☒ 1 ☐ 2

Label:

☒ I ☐ M ☐ -

Ions:

a ☐ + ☐ 2+ ☐ 3+

b ☒ + ☐ 2+ ☐ 3+

c ☐ + ☐ 2+ ☐ 3+

x ☐ + ☐ 2+ ☐ 3+

y ☒ + ☒ 2+ ☐ 3+

z ☐ + ☐ 2+ ☐ 3+

hide H<sub>2</sub>O/NH<sub>3</sub> ☐

zoom 112-122 ☐

GO

SAMFVPFTPELKPKR, MH+ 1782.0352, m/z 446.2643  
L OS G17 P120811 220811-s1.05026.05026.4.dta

scan 5026; 2.0e+000

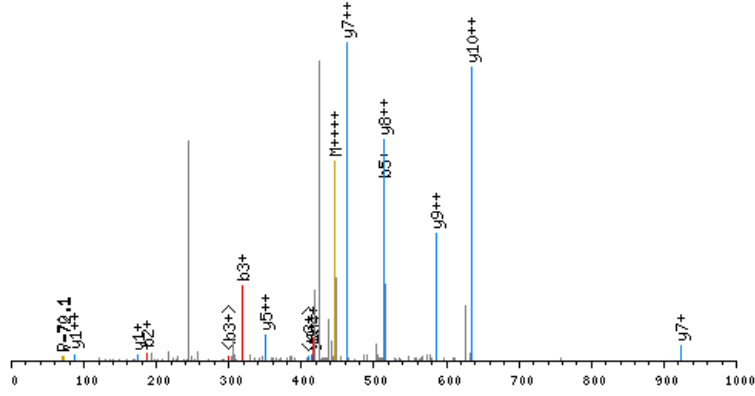

click image to zoom in; click top corners to zoom out [\[precursor±\]](#)

scan 5023; 446.3 m/z; 1.7e+001

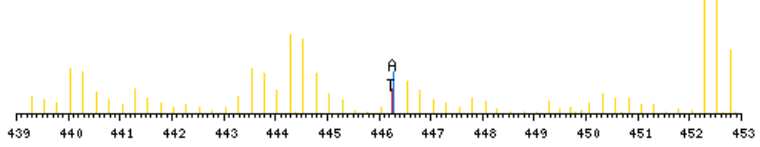

zoomed in precursor plot; T=theoretical m/z, A=acquired m/z

| b <sup>+</sup> | #  | AA | #  | y <sup>+</sup> | y <sup>2+</sup> |
|----------------|----|----|----|----------------|-----------------|
| 116.0711       | 1  | S  | 15 |                |                 |
| 187.1082       | 2  | A  | 14 | 1666.9719      | 833.9899        |
| 318.1487       | 3  | M  | 13 | 1595.9348      | 798.4713        |
| 415.2015       | 4  | P  | 12 | 1464.8943      | 732.9511        |
| 514.2699       | 5  | V  | 11 | 1367.8416      | 684.4247        |
| 611.3227       | 6  | P  | 10 | 1268.7731      | 634.8905        |
| 758.3911       | 7  | F  | 9  | 1171.7204      | 586.3641        |
| 859.4388       | 8  | T  | 8  | 1024.6520      | 512.8299        |
| 956.4915       | 9  | P  | 7  | 923.6043       | 462.3061        |
| 1085.5341      | 10 | E  | 6  | 826.5515       | 413.7797        |
| 1198.6182      | 11 | L  | 5  | 697.5089       | 349.2584        |
| 1354.7445      | 12 | K  | 4  | 584.4249       | 292.7163        |
| 1451.7972      | 13 | P  | 3  | 428.2986       | 214.6532        |
| 1607.9235      | 14 | K  | 2  | 331.2458       | 166.1268        |
|                | 15 | R  | 1  | 175.1195       | 88.0637         |

N-term:+29.04 K(12):+156.13  
K(14):+156.13

X-range:

0 - 0

MassTol: Y-zoom:

0. 1.

MassType:

☐ AVG ☒ MONO

Axis:

☒ 1 ☐ 2

Label:

☒ I ☐ M ☐ -

Ions:

a ☐ + ☐ 2+ ☐ 3+

b ☒ + ☐ 2+ ☐ 3+

c ☐ + ☐ 2+ ☐ 3+

x ☐ + ☐ 2+ ☐ 3+

y ☒ + ☒ 2+ ☐ 3+

z ☐ + ☐ 2+ ☐ 3+

hide H<sub>2</sub>O/NH<sub>3</sub> ☐

zoom 112-122 ☐

GO

SAPASSPQLSHDDTHSR, MH+ 1820.8527, m/z 455.9686  
L OS G17 P120811 220811-s1.01852.01852.4.dta

scan 1852; 2.6e+000

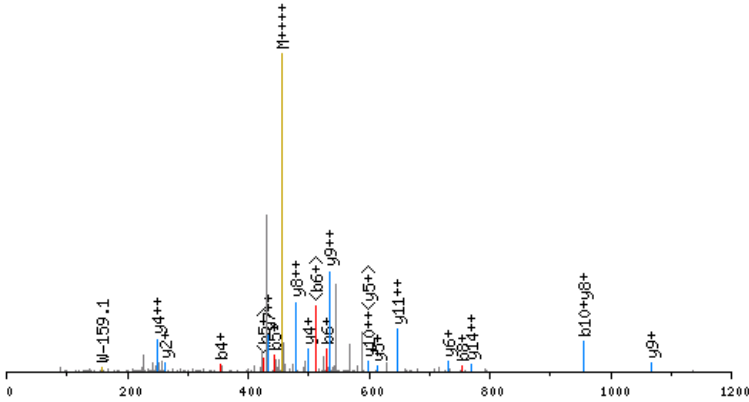

X-range:

0 - 0

MassTol: Y-zoom:

0. 1.

MassType:

☐ AVG ☒ MONO

Axis:

☒ 1 ☐ 2

Label:

☒ I ☐ M ☐ -

Ions:

a ☐ + ☐ 2+ ☐ 3+

b ☒ + ☐ 2+ ☐ 3+

c ☐ + ☐ 2+ ☐ 3+

x ☐ + ☐ 2+ ☐ 3+

y ☒ + ☒ 2+ ☐ 3+

z ☐ + ☐ 2+ ☐ 3+

hide H<sub>2</sub>O/NH<sub>3</sub> ☐

zoom 112-122 ☐

GO

SAPCEDPFTPAKILR, MH+ 1757.9260, m/z 586.6468  
L OS G15 P120811 220811-s1.04842.04842.3.dta

scan 4842; 2.3e+000

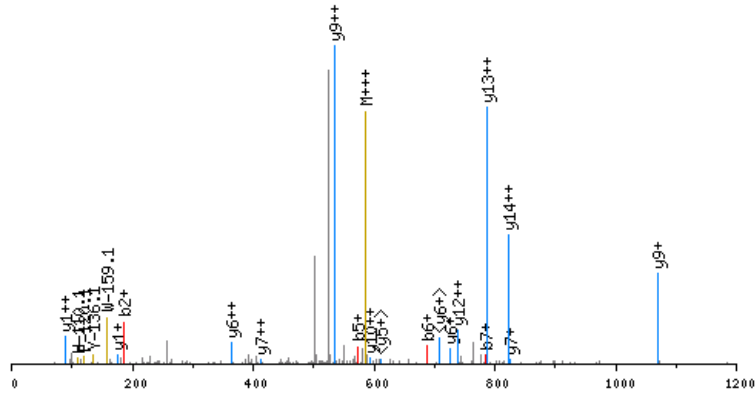

click image to zoom in; click top corners to zoom out [\[precursor±\]](#)

scan 4841; 586.6 m/z; 7.0e+000

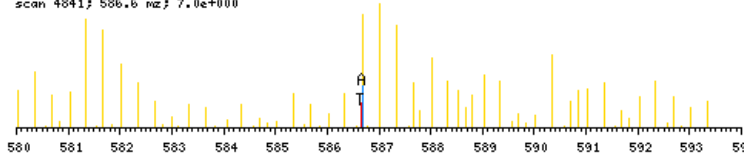

zoomed in precursor plot; T=theoretical m/z, A=acquired m/z

| b <sup>+</sup> | #  | AA | #  | y <sup>+</sup> | y <sup>2+</sup> |
|----------------|----|----|----|----------------|-----------------|
| 116.0711       | 1  | S  | 15 |                |                 |
| 187.1082       | 2  | A  | 14 | 1642.8627      | 821.9353        |
| 284.1610       | 3  | P  | 13 | 1571.8256      | 786.4167        |
| 444.1916       | 4  | C  | 12 | 1474.7728      | 737.8903        |
| 573.2342       | 5  | E  | 11 | 1314.7422      | 657.8750        |
| 688.2611       | 6  | D  | 10 | 1185.6996      | 593.3537        |
| 785.3139       | 7  | P  | 9  | 1070.6727      | 535.8402        |
| 932.3823       | 8  | F  | 8  | 973.6199       | 487.3139        |
| 1033.4300      | 9  | T  | 7  | 826.5515       | 413.7797        |
| 1130.4828      | 10 | P  | 6  | 725.5038       | 363.2558        |
| 1201.5199      | 11 | A  | 5  | 628.4510       | 314.7294        |
| 1357.6462      | 12 | K  | 4  | 557.4139       | 279.2109        |
| 1470.7302      | 13 | I  | 3  | 401.2876       | 201.1477        |
| 1583.8143      | 14 | L  | 2  | 288.2036       | 144.6057        |
|                | 15 | R  | 1  | 175.1195       | 88.0637         |

N-term:+29.04 C(4):+160.03  
K(12):+156.13

X-range:

0 - 0

MassTol: Y-zoom:

0. 1.

MassType:

☐ AVG ☒ MONO

Axis:

☒ 1 ☐ 2

Label:

☒ I ☐ M ☐ -

Ions:

a ☐ + ☐ 2+ ☐ 3+

b ☒ + ☐ 2+ ☐ 3+

c ☐ + ☐ 2+ ☐ 3+

x ☐ + ☐ 2+ ☐ 3+

y ☒ + ☒ 2+ ☐ 3+

z ☐ + ☐ 2+ ☐ 3+

hide H<sub>2</sub>O/NH<sub>3</sub> ☐

zoom 112-122 ☐

GO

SAPPKLASLKGVPEDAVETLAGSLGTR, MH+ 2847.6196, m/z 712.6604  
L OS G16 P120811 220811-s1.06269.06269.4.dta

scan 6269; 3.2e+000

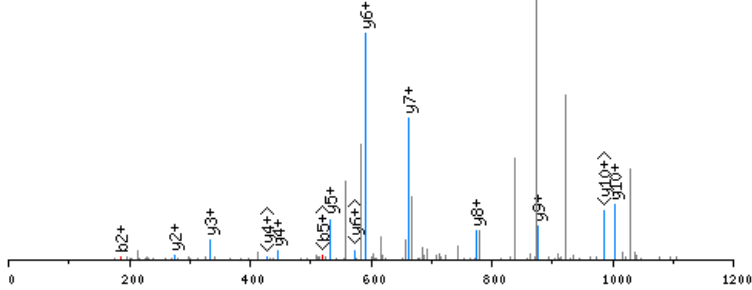

click image to zoom in; click top corners to zoom out [precursor±]

scan 6267; 712.7 m/z; 1.2e+001

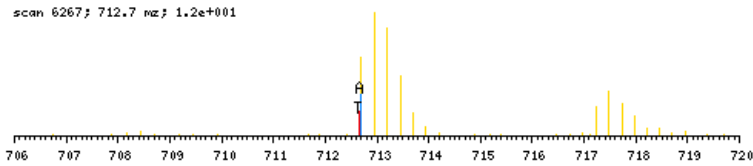

zoomed in precursor plot; T=theoretical m/z, A=acquired m/z

| b <sup>+</sup> | #  | AA | #  | y <sup>+</sup> | y <sup>2+</sup> |
|----------------|----|----|----|----------------|-----------------|
| 116.0711       | 1  | S  | 28 |                |                 |
| 187.1082       | 2  | A  | 27 | 2732.5563      | 1366.7821       |
| 284.1610       | 3  | P  | 26 | 2661.5192      | 1331.2635       |
| 381.2138       | 4  | P  | 25 | 2564.4664      | 1282.7371       |
| 537.3401       | 5  | K  | 24 | 2467.4136      | 1234.2107       |
| 650.4241       | 6  | L  | 23 | 2311.2873      | 1156.1476       |
| 721.4612       | 7  | A  | 22 | 2198.2033      | 1099.6055       |
| 808.4933       | 8  | S  | 21 | 2127.1662      | 1064.0870       |
| 921.5773       | 9  | L  | 20 | 2040.1341      | 1020.5710       |
| 1077.7036      | 10 | K  | 19 | 1927.0501      | 964.0289        |
| 1134.7251      | 11 | G  | 18 | 1770.9238      | 885.9658        |
| 1233.7935      | 12 | V  | 17 | 1713.9023      | 857.4551        |
| 1332.8619      | 13 | V  | 16 | 1614.8339      | 807.9209        |
| 1429.9147      | 14 | P  | 15 | 1515.7655      | 758.3867        |
| 1558.9573      | 15 | E  | 14 | 1418.7127      | 709.8603        |
| 1673.9842      | 16 | D  | 13 | 1289.6701      | 645.3390        |
| 1745.0213      | 17 | A  | 12 | 1174.6432      | 587.8255        |
| 1844.0898      | 18 | V  | 11 | 1103.6061      | 552.3069        |
| 1973.1324      | 19 | E  | 10 | 1004.5376      | 502.7727        |
| 2074.1800      | 20 | T  | 9  | 875.4951       | 438.2514        |
| 2187.2641      | 21 | L  | 8  | 774.4474       | 387.7276        |
| 2258.3012      | 22 | A  | 7  | 661.3633       | 331.1856        |
| 2315.3227      | 23 | G  | 6  | 590.3262       | 295.6670        |
| 2402.3547      | 24 | S  | 5  | 533.3047       | 267.1563        |
| 2515.4388      | 25 | L  | 4  | 446.2727       | 223.6403        |
| 2572.4602      | 26 | G  | 3  | 333.1886       | 167.0982        |
| 2673.5079      | 27 | T  | 2  | 276.1672       | 138.5875        |
|                | 28 | R  | 1  | 175.1195       | 88.0637         |

N-term:+29.04 K(5):+156.13  
K(10):+156.13

X-range:

0 - 0

MassTol: Y-zoom:

0. 1.

MassType:

☐AVG ☒MONO

Axis:

☒1 ☐2

Label:

☒I ☐M ☐-

Ions:

a ☐+ ☐2+ ☐3+

b ☒+ ☐2+ ☐3+

c ☐+ ☐2+ ☐3+

x ☐+ ☐2+ ☐3+

y ☒+ ☒2+ ☐3+

z ☐+ ☐2+ ☐3+

hide H<sub>2</sub>O/NH<sub>3</sub> ☐

zoom 112-122 ☐

GO

SAPASGTPPNKETAGLKVGSSR, MH+ 2285.2465, m/z 572.0671  
L OS G16 P120811 220811-s1.02946.02946.4.dta

scan 2946; 5.1e+000

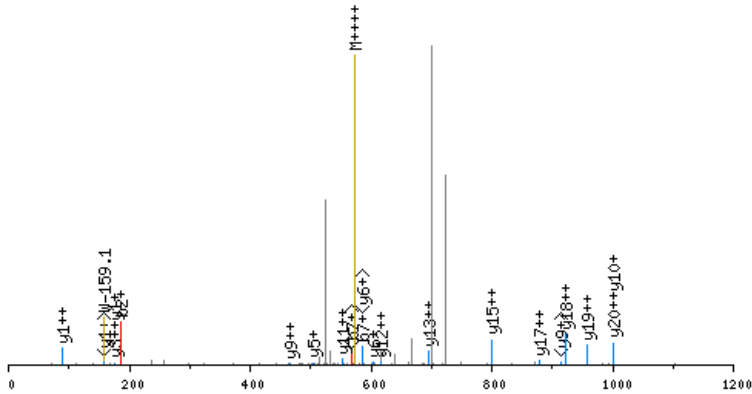

click image to zoom in; click top corners to zoom out

[precursor±]

scan 2943; 572.1 m/z; 7.9e+000

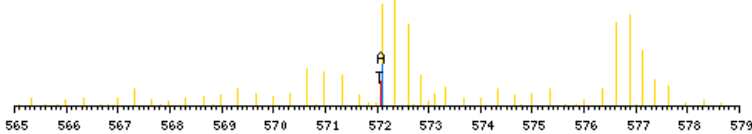

zoomed in precursor plot; T=theoretical m/z, A=acquired m/z

| b <sup>+</sup> | #  | AA | #  | y <sup>+</sup> | y <sup>2+</sup> |
|----------------|----|----|----|----------------|-----------------|
| 116.0711       | 1  | S  | 23 |                |                 |
| 187.1082       | 2  | A  | 22 | 2170.1832      | 1085.5955       |
| 284.1610       | 3  | P  | 21 | 2099.1461      | 1050.0770       |
| 371.1930       | 4  | S  | 20 | 2002.0934      | 1001.5506       |
| 442.2301       | 5  | A  | 19 | 1915.0613      | 958.0346        |
| 529.2622       | 6  | S  | 18 | 1844.0242      | 922.5160        |
| 586.2836       | 7  | G  | 17 | 1756.9922      | 879.0000        |
| 687.3313       | 8  | T  | 16 | 1699.9707      | 850.4893        |
| 784.3841       | 9  | P  | 15 | 1598.9231      | 799.9654        |
| 898.4270       | 10 | N  | 14 | 1501.8703      | 751.4391        |
| 1054.5533      | 11 | K  | 13 | 1387.8274      | 694.4176        |
| 1183.5959      | 12 | E  | 12 | 1231.7011      | 616.3544        |
| 1284.6436      | 13 | T  | 11 | 1102.6585      | 551.8331        |
| 1355.6807      | 14 | A  | 10 | 1001.6108      | 501.3093        |
| 1412.7022      | 15 | G  | 9  | 930.5737       | 465.7908        |
| 1525.7862      | 16 | L  | 8  | 873.5522       | 437.2800        |
| 1681.9125      | 17 | K  | 7  | 760.4681       | 380.7380        |
| 1780.9809      | 18 | V  | 6  | 604.3418       | 302.6748        |
| 1838.0024      | 19 | G  | 5  | 505.2734       | 253.1406        |
| 1937.0708      | 20 | V  | 4  | 448.2520       | 224.6299        |
| 2024.1028      | 21 | S  | 3  | 349.1836       | 175.0957        |
| 2111.1349      | 22 | S  | 2  | 262.1515       | 131.5797        |
|                | 23 | R  | 1  | 175.1195       | 88.0637         |

N-term:+29.04 K(11):+156.13  
K(17):+156.13

N-term: +35.07 K(4): +162.16

X-range:

0 - 0

MassTol: Y-zoom:

0. 1.

MassType:

☐AVG ☒MONO

Axis:

☒1 ☐2

Label:

☒I ☐M ☐-

Ions:

a ☐+ ☐2+ ☐3+

b ☒+ ☐2+ ☐3+

c ☐+ ☐2+ ☐3+

x ☐+ ☐2+ ☐3+

y ☒+ ☒2+ ☐3+

z ☐+ ☐2+ ☐3+

hide H<sub>2</sub>O/NH<sub>3</sub> ☐

zoom 112-122 ☐

GO

SASSTNLKDVLSNLIPEQAR, MH+ 2373.4202, m/z 594.1105  
H OS G16 P120811 220811-s1.06229.06229.4.dta

scan 6229; 9.2e+000

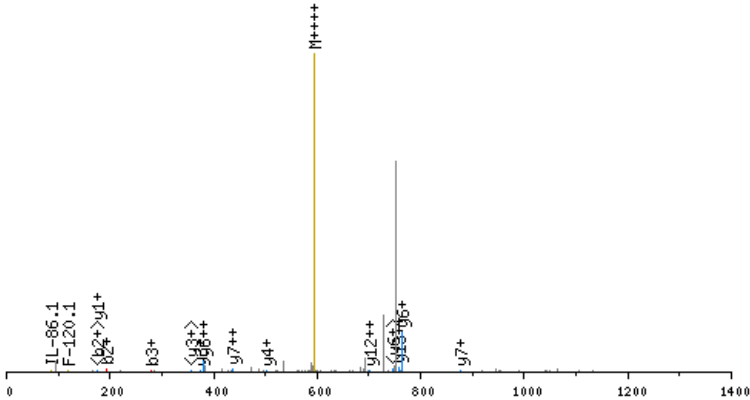

click image to zoom in; click top corners to zoom out

[precursor±]

scan 6227; 594.1 m/z; 1.1e+001

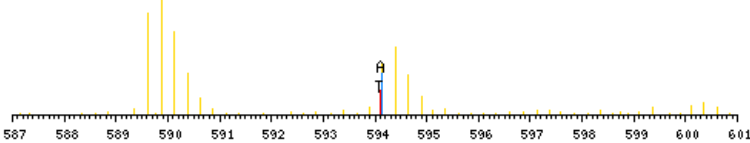

zoomed in precursor plot; T=theoretical m/z, A=acquired m/z

| b <sup>+</sup> | #  | AA | #  | y <sup>+</sup> | y <sup>2+</sup> |
|----------------|----|----|----|----------------|-----------------|
| 122.1029       | 1  | S  | 21 |                |                 |
| 193.1400       | 2  | A  | 20 | 2252.3251      | 1126.6665       |
| 280.1721       | 3  | S  | 19 | 2181.2880      | 1091.1479       |
| 367.2041       | 4  | S  | 18 | 2094.2560      | 1047.6319       |
| 468.2518       | 5  | T  | 17 | 2007.2239      | 1004.1159       |
| 582.2947       | 6  | N  | 16 | 1906.1762      | 953.5920        |
| 695.3788       | 7  | L  | 15 | 1792.1333      | 896.5706        |
| 857.5369       | 8  | K  | 14 | 1679.0493      | 840.0285        |
| 972.5638       | 9  | D  | 13 | 1516.8912      | 758.9495        |
| 1071.6322      | 10 | V  | 12 | 1401.8642      | 701.4360        |
| 1184.7163      | 11 | L  | 11 | 1302.7958      | 651.9018        |
| 1271.7483      | 12 | S  | 10 | 1189.7117      | 595.3598        |
| 1385.7912      | 13 | N  | 9  | 1102.6797      | 551.8438        |
| 1498.8753      | 14 | L  | 8  | 988.6368       | 494.8223        |
| 1611.9594      | 15 | I  | 7  | 875.5527       | 438.2803        |
| 1709.0121      | 16 | P  | 6  | 762.4686       | 381.7382        |
| 1871.1702      | 17 | K  | 5  | 665.4159       | 333.2119        |
| 2000.2128      | 18 | E  | 4  | 503.2578       | 252.1328        |
| 2128.2714      | 19 | Q  | 3  | 374.2152       | 187.6115        |
| 2199.3085      | 20 | A  | 2  | 246.1566       | 123.5822        |
|                | 21 | R  | 1  | 175.1195       | 88.0637         |

N-term:+35.07 K(8):+162.16  
K(17):+162.16

X-range:

0 - 0

MassTol: Y-zoom:

0. 1.

MassType:

☐ AVG ☒ MONO

Axis:

☒ 1 ☐ 2

Label:

☒ I ☐ M ☐ -

Ions:

a ☐ + ☐ 2+ ☐ 3+

b ☒ + ☐ 2+ ☐ 3+

c ☐ + ☐ 2+ ☐ 3+

x ☐ + ☐ 2+ ☐ 3+

y ☒ + ☒ 2+ ☐ 3+

z ☐ + ☐ 2+ ☐ 3+

hide H<sub>2</sub>O/NH<sub>3</sub> ☐

zoom 112-122 ☐

GO

SAVEKGEELSCEER, MH+ 1678.7958, m/z 560.2701  
L OS G16 P120811 220811-s1.02474.02474.3.dta

scan 2474; 1.9e+001

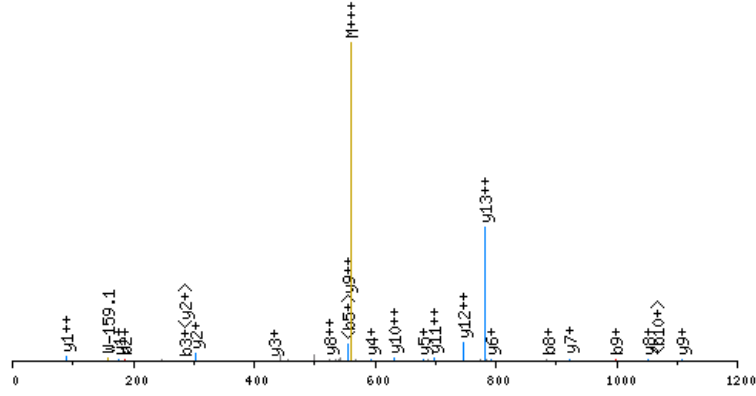

click image to zoom in; click top corners to zoom out [\[precursor±\]](#)

scan 2473; 560.3 m/z; 5.7e+000

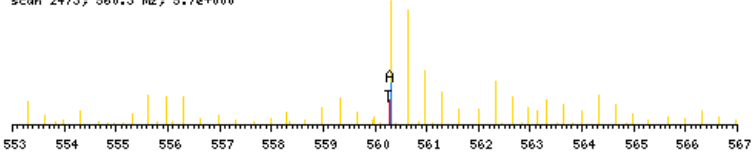

zoomed in precursor plot; T=theoretical m/z, A=acquired m/z

| b <sup>+</sup> | #  | AA | #  | y <sup>+</sup> | y <sup>2+</sup> |
|----------------|----|----|----|----------------|-----------------|
| 116.0711       | 1  | S  | 14 |                |                 |
| 187.1082       | 2  | A  | 13 | 1563.7325      | 782.3701        |
| 286.1767       | 3  | V  | 12 | 1492.6953      | 746.8516        |
| 415.2192       | 4  | E  | 11 | 1393.6269      | 697.3174        |
| 571.3455       | 5  | K  | 10 | 1264.5843      | 632.7961        |
| 628.3670       | 6  | G  | 9  | 1108.4580      | 554.7329        |
| 757.4096       | 7  | E  | 8  | 1051.4366      | 526.2222        |
| 886.4522       | 8  | E  | 7  | 922.3940       | 461.7009        |
| 999.5363       | 9  | L  | 6  | 793.3514       | 397.1796        |
| 1086.5683      | 10 | S  | 5  | 680.2673       | 340.6376        |
| 1246.5989      | 11 | C  | 4  | 593.2353       | 297.1216        |
| 1375.6415      | 12 | E  | 3  | 433.2047       | 217.1063        |
| 1504.6841      | 13 | E  | 2  | 304.1621       | 152.5850        |
|                | 14 | R  | 1  | 175.1195       | 88.0637         |

N-term:+29.04 K(5):+156.13  
C(11):+160.03

X-range:

$$\boxed{0} - \boxed{0}$$

0. 1.

AVG MONO

1 2

I M -

**a**  + <sup>2</sup> + <sup>3</sup> +

$\square^{\pm} \square^{2\pm} \square^{3\pm}$

**x**  +  2 +  3 +

$$z = \boxed{\phantom{00}} + \boxed{\phantom{00}}^2 + \boxed{\phantom{00}}^3 +$$

zoom 112-122

GO

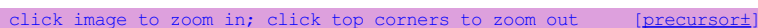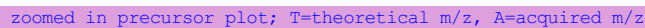

N-term: +29.04 K(9): +156.13  
K(10): +156.13

N-term: +35.07 C(2): +160.03

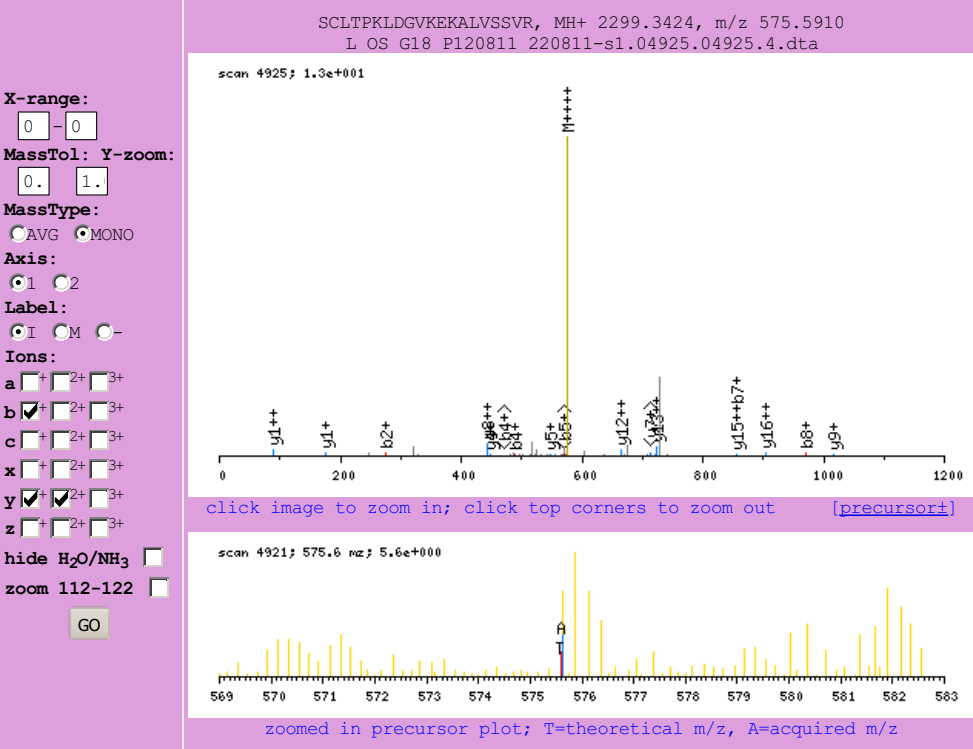

| b <sup>+</sup> | #  | AA | #  | y <sup>+</sup> | y <sup>2+</sup> |
|----------------|----|----|----|----------------|-----------------|
| 116.0711       | 1  | S  | 20 |                |                 |
| 276.1017       | 2  | C  | 19 | 2184.2790      | 1092.6434       |
| 389.1858       | 3  | L  | 18 | 2024.2484      | 1012.6281       |
| 490.2335       | 4  | T  | 17 | 1911.1644      | 956.0861        |
| 587.2862       | 5  | P  | 16 | 1810.1167      | 905.5623        |
| 743.4125       | 6  | K  | 15 | 1713.0639      | 857.0359        |
| 856.4966       | 7  | L  | 14 | 1556.9376      | 778.9727        |
| 971.5235       | 8  | D  | 13 | 1443.8536      | 722.4307        |
| 1028.5450      | 9  | G  | 12 | 1328.8266      | 664.9172        |
| 1127.6134      | 10 | V  | 11 | 1271.8052      | 636.4065        |
| 1283.7397      | 11 | K  | 10 | 1172.7368      | 586.8723        |
| 1412.7823      | 12 | E  | 9  | 1016.6105      | 508.8091        |
| 1568.9086      | 13 | K  | 8  | 887.5679       | 444.2878        |
| 1639.9457      | 14 | A  | 7  | 731.4416       | 366.2247        |
| 1753.0298      | 15 | L  | 6  | 660.4044       | 330.7061        |
| 1852.0982      | 16 | V  | 5  | 547.3204       | 274.1641        |
| 1939.1302      | 17 | S  | 4  | 448.2520       | 224.6299        |
| 2026.1623      | 18 | S  | 3  | 361.2199       | 181.1139        |
| 2125.2307      | 19 | V  | 2  | 274.1879       | 137.5979        |
|                | 20 | R  | 1  | 175.1195       | 88.0637         |

N-term:+29.04 C(2):+160.03  
K(6):+156.13 K(11):+156.13  
K(13):+156.13

X-range:

0 - 0

MassTol: Y-zoom:

0. 1.

MassType:

☐ AVG ☒ MONO

Axis:

☒ 1 ☐ 2

Label:

☒ I ☐ M ☐ -

Ions:

a ☐ + ☐ 2+ ☐ 3+

b ☒ + ☐ 2+ ☐ 3+

c ☐ + ☐ 2+ ☐ 3+

x ☐ + ☐ 2+ ☐ 3+

y ☒ + ☒ 2+ ☐ 3+

z ☐ + ☐ 2+ ☐ 3+

hide H<sub>2</sub>O/NH<sub>3</sub> ☐

zoom 112-122 ☐

GO

SCNLGEKFDETTADGR, MH+ 1855.8496, m/z 619.2880  
L OS G15 P120811 220811-s1.02998.02998.3.dta

scan 2998; 6.7e+000

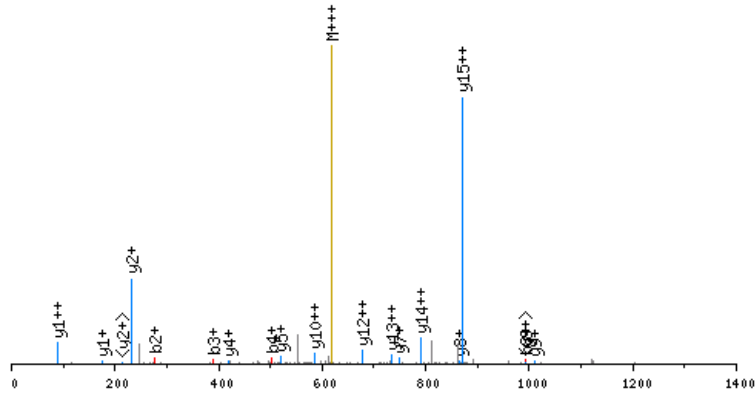

click image to zoom in; click top corners to zoom out

[precursor±]

scan 2996; 619.3 m/z; 8.3e+000

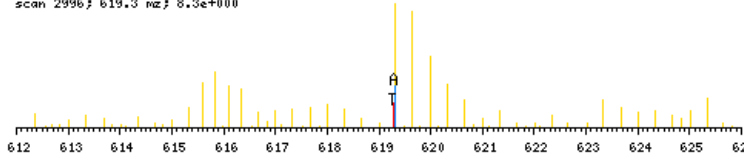

zoomed in precursor plot; T=theoretical m/z, A=acquired m/z

| b <sup>+</sup> | #  | AA | #  | y <sup>+</sup> | y <sup>2+</sup> |
|----------------|----|----|----|----------------|-----------------|
| 116.0711       | 1  | S  | 16 |                |                 |
| 276.1017       | 2  | C  | 15 | 1740.7863      | 870.8971        |
| 390.1447       | 3  | N  | 14 | 1580.7557      | 790.8818        |
| 503.2287       | 4  | L  | 13 | 1466.7127      | 733.8603        |
| 560.2502       | 5  | G  | 12 | 1353.6287      | 677.3183        |
| 689.2928       | 6  | E  | 11 | 1296.6072      | 648.8075        |
| 845.4191       | 7  | K  | 10 | 1167.5646      | 584.2862        |
| 992.4875       | 8  | F  | 9  | 1011.4383      | 506.2231        |
| 1107.5144      | 9  | D  | 8  | 864.3699       | 432.6889        |
| 1236.5570      | 10 | E  | 7  | 749.3430       | 375.1754        |
| 1337.6047      | 11 | T  | 6  | 620.3004       | 310.6541        |
| 1438.6524      | 12 | T  | 5  | 519.2527       | 260.1303        |
| 1509.6895      | 13 | A  | 4  | 418.2050       | 209.6064        |
| 1624.7164      | 14 | D  | 3  | 347.1679       | 174.0879        |
| 1681.7379      | 15 | G  | 2  | 232.1410       | 116.5744        |
|                | 16 | R  | 1  | 175.1195       | 88.0637         |

N-term:+29.04 C(2):+160.03  
K(7):+156.13

X-range:

0 - 0

MassTol: Y-zoom:

0. 1.

MassType:

☐ AVG ☒ MONO

Axis:

☒ 1 ☐ 2

Label:

☒ I ☐ M ☐ -

Ions:

a ☐ + ☐ 2+ ☐ 3+

b ☒ + ☐ 2+ ☐ 3+

c ☐ + ☐ 2+ ☐ 3+

x ☐ + ☐ 2+ ☐ 3+

y ☒ + ☒ 2+ ☐ 3+

z ☐ + ☐ 2+ ☐ 3+

hide H<sub>2</sub>O/NH<sub>3</sub> ☐

zoom 112-122 ☐

GO

SCQGIQCAPGQR, MH+ 1389.6366, m/z 463.8837  
L OS G14 P120811 220811-s1.02150.02150.3.dta

scan 2150; 4.1e+000

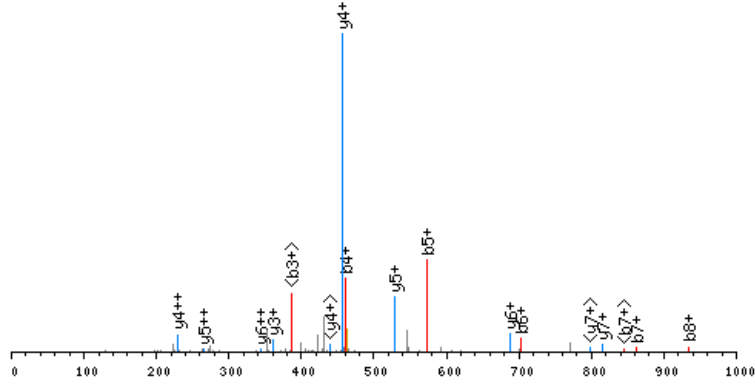

click image to zoom in; click top corners to zoom out [precursor±]

scan 2148; 463.9 m/z; 1.3e+000

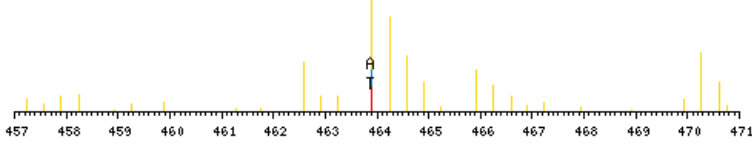

zoomed in precursor plot; T=theoretical m/z, A=acquired m/z

| b <sup>+</sup> | #  | AA | #  | y <sup>+</sup> | y <sup>2+</sup> |
|----------------|----|----|----|----------------|-----------------|
| 116.0711       | 1  | S  | 12 |                |                 |
| 276.1017       | 2  | C  | 11 | 1274.5733      | 637.7906        |
| 404.1603       | 3  | Q  | 10 | 1114.5427      | 557.7753        |
| 461.1818       | 4  | G  | 9  | 986.4841       | 493.7460        |
| 574.2658       | 5  | I  | 8  | 929.4627       | 465.2352        |
| 702.3244       | 6  | Q  | 7  | 816.3786       | 408.6932        |
| 862.3550       | 7  | C  | 6  | 688.3200       | 344.6639        |
| 933.3921       | 8  | A  | 5  | 528.2894       | 264.6486        |
| 1030.4449      | 9  | P  | 4  | 457.2523       | 229.1301        |
| 1087.4664      | 10 | G  | 3  | 360.1995       | 180.6037        |
| 1215.5249      | 11 | Q  | 2  | 303.1781       | 152.0930        |
|                | 12 | R  | 1  | 175.1195       | 88.0637         |

N-term:+29.04 C(2):+160.03  
C(7):+160.03

X-range:

0 - 0

MassTol: Y-zoom:

0. 1.

MassType:

☐AVG ☒MONO

Axis:

☒1 ☐2

Label:

☒I ☐M ☐-

Ions:

a ☐+ ☐2+ ☐3+

b ☒+ ☐2+ ☐3+

c ☐+ ☐2+ ☐3+

x ☐+ ☐2+ ☐3+

y ☒+ ☒2+ ☐3+

z ☐+ ☐2+ ☐3+

hide H<sub>2</sub>O/NH<sub>3</sub> ☐

zoom 112-122 ☐

GO

SCVGVFQHGKVEIANDQGNR, MH+ 2384.2145, m/z 596.8091  
L OS G17 P120811 220811-s1.04566.04566.4.dta

scan 4566; 1.3e+000

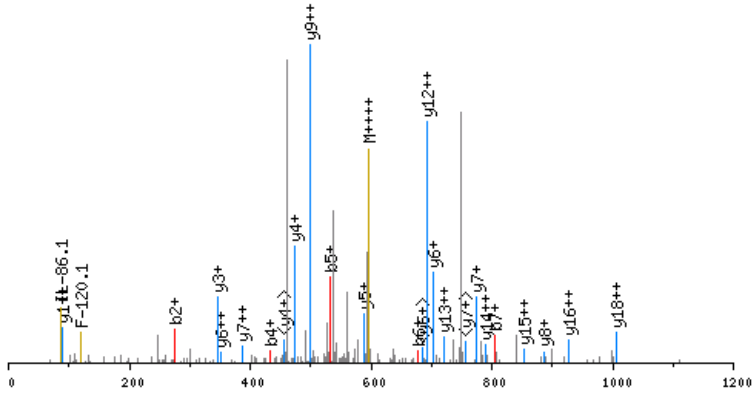

click image to zoom in; click top corners to zoom out

[precursor±]

scan 4563; 596.8 m/z; 1.8e+001

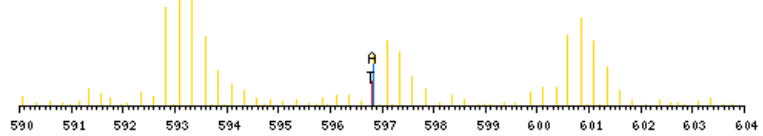

zoomed in precursor plot; T=theoretical m/z, A=acquired m/z

| b <sup>+</sup> | #  | AA | #  | y <sup>+</sup> | y <sup>2+</sup> |
|----------------|----|----|----|----------------|-----------------|
| 116.0711       | 1  | S  | 21 |                |                 |
| 276.1017       | 2  | C  | 20 | 2269.1511      | 1135.0795       |
| 375.1701       | 3  | V  | 19 | 2109.1205      | 1055.0642       |
| 432.1916       | 4  | G  | 18 | 2010.0521      | 1005.5300       |
| 531.2600       | 5  | V  | 17 | 1953.0307      | 977.0192        |
| 678.3284       | 6  | F  | 16 | 1853.9623      | 927.4850        |
| 806.3870       | 7  | Q  | 15 | 1706.8938      | 853.9508        |
| 943.4459       | 8  | H  | 14 | 1578.8353      | 789.9215        |
| 1000.4674      | 9  | G  | 13 | 1441.7764      | 721.3921        |
| 1156.5937      | 10 | K  | 12 | 1384.7549      | 692.8814        |
| 1255.6621      | 11 | V  | 11 | 1228.6286      | 614.8182        |
| 1384.7047      | 12 | E  | 10 | 1129.5602      | 565.2840        |
| 1497.7888      | 13 | I  | 9  | 1000.5176      | 500.7627        |
| 1610.8728      | 14 | I  | 8  | 887.4335       | 444.2207        |
| 1681.9099      | 15 | A  | 7  | 774.3495       | 387.6786        |
| 1795.9529      | 16 | N  | 6  | 703.3123       | 352.1601        |
| 1910.9798      | 17 | D  | 5  | 589.2694       | 295.1386        |
| 2039.0384      | 18 | Q  | 4  | 474.2425       | 237.6251        |
| 2096.0598      | 19 | G  | 3  | 346.1839       | 173.5959        |
| 2210.1028      | 20 | N  | 2  | 289.1624       | 145.0851        |
|                | 21 | R  | 1  | 175.1195       | 88.0637         |

N-term:+29.04 C(2):+160.03  
K(10):+156.13

SDADSEDDADSDDED, MH+ 1790.6536, m/z 597.5561  
H OS G13 P120811 220811-s1.02800.02800.3.dta

scan 2800; 9.6e+000

click image to zoom in; click top corners to zoom out    [precursor±]

scan 2799; 597.6 m/z; 1.7e+001

zoomed in precursor plot; T=theoretical m/z, A=acquired m/z

X-range:  

0 - 0

MassTol: Y-zoom:  

0. 1.

MassType:  

☐AVG ☒MONO

Axis:  

☒1 ☐2

Label:  

☒I ☐M ☐-

Ions:  

a ☐+ ☐2+ ☐3+

b ☒+ ☐2+ ☐3+

c ☐+ ☐2+ ☐3+

x ☐+ ☐2+ ☐3+

y ☒+ ☒2+ ☐3+

z ☐+ ☐2+ ☐3+

hide H<sub>2</sub>O/NH<sub>3</sub> ☐

zoom 112-122 ☐

GO

| b <sup>+</sup> | #  | AA | #  | y <sup>+</sup> | y <sup>2+</sup> |
|----------------|----|----|----|----------------|-----------------|
| 122.1029       | 1  | S  | 16 |                |                 |
| 237.1299       | 2  | D  | 15 | 1669.5585      | 835.2832        |
| 308.1670       | 3  | A  | 14 | 1554.5316      | 777.7697        |
| 423.1939       | 4  | D  | 13 | 1483.4945      | 742.2511        |
| 510.2260       | 5  | S  | 12 | 1368.4675      | 684.7377        |
| 639.2685       | 6  | E  | 11 | 1281.4355      | 641.2217        |
| 754.2955       | 7  | D  | 10 | 1152.3929      | 576.7004        |
| 869.3224       | 8  | D  | 9  | 1037.3660      | 519.1869        |
| 940.3595       | 9  | A  | 8  | 922.3390       | 461.6734        |
| 1055.3865      | 10 | D  | 7  | 851.3019       | 426.1549        |
| 1142.4185      | 11 | S  | 6  | 736.2750       | 368.6414        |
| 1257.4455      | 12 | D  | 5  | 649.2429       | 325.1254        |
| 1372.4724      | 13 | D  | 4  | 534.2160       | 267.6119        |
| 1501.5150      | 14 | E  | 3  | 419.1890       | 210.0984        |
| 1616.5419      | 15 | D  | 2  | 290.1464       | 145.5771        |
|                | 16 | R  | 1  | 175.1195       | 88.0637         |

N-term:+35.07

X-range:

0 - 0

MassTol: Y-zoom:

0. 1.

MassType:

☐AVG ☒MONO

Axis:

☒1 ☐2

Label:

☒I ☐M ☐-

Ions:

a ☐+ ☐2+ ☐3+

b ☒+ ☐2+ ☐3+

c ☐+ ☐2+ ☐3+

x ☐+ ☐2+ ☐3+

y ☒+ ☒2+ ☐3+

z ☐+ ☐2+ ☐3+

hide H<sub>2</sub>O/NH<sub>3</sub> ☐

zoom 112-122 ☐

GO

SDAPPLTLTGDKDR, MH+ 1553.8539, m/z 518.6228  
L OS G15 P120811 220811-s1.03927.03927.3.dta

scan 3927; 1.3e+001

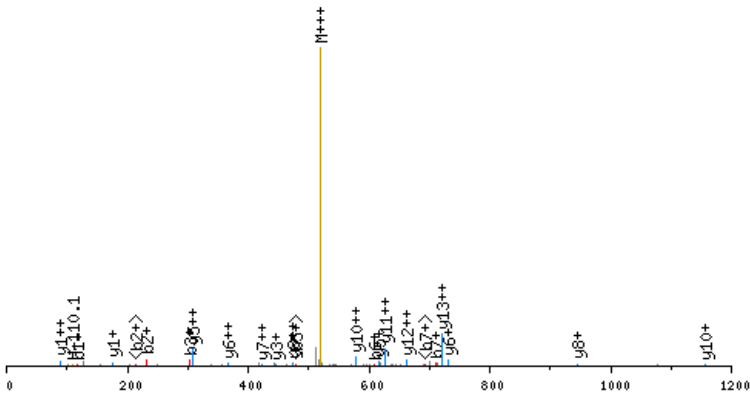

click image to zoom in; click top corners to zoom out

[precursor±]

scan 3926; 518.6 m/z; 2.0e+001

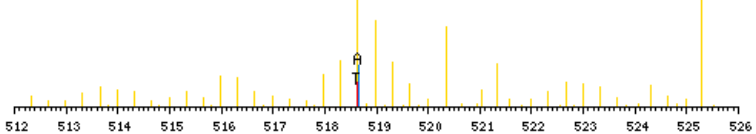

zoomed in precursor plot; T=theoretical m/z, A=acquired m/z

| b <sup>+</sup> | #  | AA | #  | y <sup>+</sup> | y <sup>2+</sup> |
|----------------|----|----|----|----------------|-----------------|
| 116.0711       | 1  | S  | 14 |                |                 |
| 231.0981       | 2  | D  | 13 | 1438.7906      | 719.8992        |
| 302.1352       | 3  | A  | 12 | 1323.7637      | 662.3857        |
| 399.1879       | 4  | P  | 11 | 1252.7265      | 626.8672        |
| 496.2407       | 5  | P  | 10 | 1155.6738      | 578.3408        |
| 609.3248       | 6  | L  | 9  | 1058.6210      | 529.8144        |
| 710.3725       | 7  | T  | 8  | 945.5370       | 473.2724        |
| 823.4565       | 8  | L  | 7  | 844.4893       | 422.7486        |
| 938.4835       | 9  | D  | 6  | 731.4052       | 366.2065        |
| 995.5049       | 10 | G  | 5  | 616.3783       | 308.6930        |
| 1108.5890      | 11 | I  | 4  | 559.3568       | 280.1823        |
| 1264.7153      | 12 | K  | 3  | 446.2727       | 223.6403        |
| 1379.7422      | 13 | D  | 2  | 290.1464       | 145.5771        |
|                | 14 | R  | 1  | 175.1195       | 88.0637         |

N-term:+29.04 K(12):+156.13

N-term: +29.04 C(4): +160.03

N-term:+29.04



X-range:

0 - 0

MassTol: Y-zoom:

0. 1.

MassType:

☐ AVG ☒ MONO

Axis:

☒ 1 ☐ 2

Label:

☒ I ☐ M ☐ -

Ions:

a ☐ + ☐ 2+ ☐ 3+

b ☒ + ☐ 2+ ☐ 3+

c ☐ + ☐ 2+ ☐ 3+

x ☐ + ☐ 2+ ☐ 3+

y ☒ + ☒ 2+ ☐ 3+

z ☐ + ☐ 2+ ☐ 3+

hide H<sub>2</sub>O/NH<sub>3</sub> ☐

zoom 112-122 ☐

GO

SDFGLESTTGEVPVVAIR, MH+ 1904.9969, m/z 635.6705  
L OS G12 P120811 220811-s1.05098.05098.3.dta

scan 5098; 3.1e+000

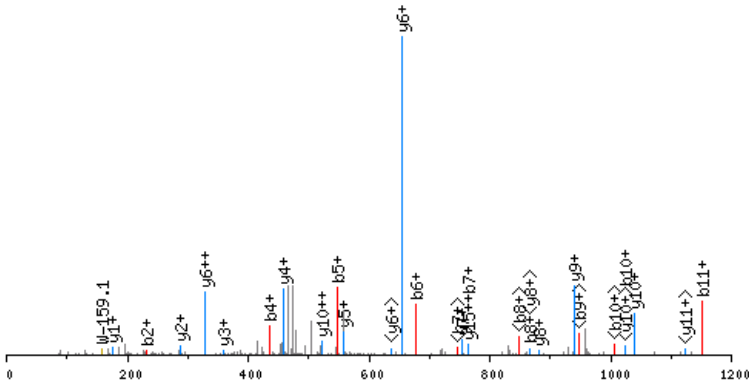

click image to zoom in; click top corners to zoom out

[precursor±]

scan 5097; 635.7 m/z; 9.1e+000

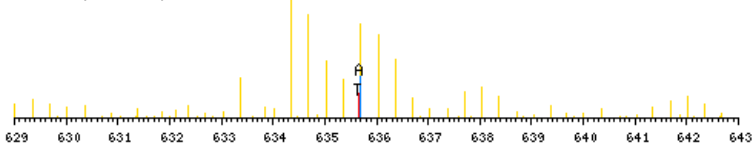

zoomed in precursor plot; T=theoretical m/z, A=acquired m/z

| b <sup>+</sup> | #  | AA | #  | y <sup>+</sup> | y <sup>2+</sup> |
|----------------|----|----|----|----------------|-----------------|
| 116.0711       | 1  | S  | 18 |                |                 |
| 231.0981       | 2  | D  | 17 | 1789.9336      | 895.4707        |
| 378.1665       | 3  | F  | 16 | 1674.9067      | 837.9572        |
| 435.1879       | 4  | G  | 15 | 1527.8382      | 764.4230        |
| 548.2720       | 5  | L  | 14 | 1470.8168      | 735.9123        |
| 677.3146       | 6  | E  | 13 | 1357.7327      | 679.3703        |
| 764.3466       | 7  | S  | 12 | 1228.6901      | 614.8490        |
| 865.3943       | 8  | T  | 11 | 1141.6581      | 571.3330        |
| 966.4420       | 9  | T  | 10 | 1040.6104      | 520.8091        |
| 1023.4635      | 10 | G  | 9  | 939.5627       | 470.2853        |
| 1152.5060      | 11 | E  | 8  | 882.5413       | 441.7746        |
| 1251.5745      | 12 | V  | 7  | 753.4987       | 377.2533        |
| 1348.6272      | 13 | P  | 6  | 654.4303       | 327.7190        |
| 1447.6956      | 14 | V  | 5  | 557.3775       | 279.1927        |
| 1546.7641      | 15 | V  | 4  | 458.3091       | 229.6585        |
| 1617.8012      | 16 | A  | 3  | 359.2407       | 180.1243        |
| 1730.8852      | 17 | I  | 2  | 288.2036       | 144.6057        |
|                | 18 | R  | 1  | 175.1195       | 88.0637         |

N-term:+29.04

X-range:

0 - 0

0. 1.

☐ AVG ☒ MONO

1 2

☒ I ☐ M ☐ -

**a**  + <sup>2</sup> + <sup>3</sup> +

b ☒ 1+ ☐ 2+ ☐ 3+
$$= \square + \square^2 + \square^3 + \dots$$

Y ☒ 1+ ☒ 2+ ☐ 3+

$$z_1 + z_2 + z_3 + \dots$$

zoom 112-12

30

744 745 746 747 748 749 750 751 752 753 754 755 756 757 758

zoomed in precursor plot; T=theoretical m/z, A=acquired m/z

| $b^+$     | #  | AA | #  | $y^+$     | $y^{2+}$  |
|-----------|----|----|----|-----------|-----------|
| 122.1029  | 1  | S  | 21 |           |           |
| 237.1299  | 2  | D  | 20 | 2129.0344 | 1065.0211 |
| 384.1983  | 3  | F  | 19 | 2014.0074 | 1007.5074 |
| 481.2510  | 4  | P  | 18 | 1866.9390 | 933.9734  |
| 552.2882  | 5  | A  | 17 | 1769.8863 | 885.4470  |
| 649.3409  | 6  | P  | 16 | 1698.8491 | 849.9285  |
| 746.3937  | 7  | P  | 15 | 1601.7964 | 801.4021  |
| 843.4465  | 8  | P  | 14 | 1504.7436 | 752.8757  |
| 1006.5098 | 9  | Y  | 13 | 1407.6909 | 704.3493  |
| 1093.5418 | 10 | S  | 12 | 1244.6275 | 622.8177  |
| 1164.5789 | 11 | A  | 11 | 1157.5955 | 579.3017  |
| 1263.6473 | 12 | V  | 10 | 1086.5584 | 543.7831  |
| 1350.6794 | 13 | S  | 9  | 987.4900  | 494.2489  |
| 1447.7321 | 14 | P  | 8  | 900.4579  | 450.7329  |
| 1544.7849 | 15 | P  | 7  | 803.4052  | 402.2065  |
| 1641.8377 | 16 | P  | 6  | 706.3524  | 353.6801  |
| 1770.8803 | 17 | E  | 5  | 609.2997  | 305.1537  |
| 1841.9174 | 18 | A  | 4  | 480.2571  | 240.6324  |
| 1988.9858 | 19 | F  | 3  | 409.2199  | 205.1139  |
| 2076.0178 | 20 | S  | 2  | 262.1515  | 131.5797  |
|           | 21 | R  | 1  | 175.1195  | 88.0637   |

N-term: +35.07

GO

X-range:

0 - 0

MassTol: Y-zoom:

0. 1.

MassType:

☐ AVG ☒ MONO

Axis:

☒ 1 ☐ 2

Label:

☒ I ☐ M ☐ -

Ions:

a ☐ + ☐ 2+ ☐ 3+

b ☒ + ☐ 2+ ☐ 3+

c ☐ + ☐ 2+ ☐ 3+

x ☐ + ☐ 2+ ☐ 3+

y ☒ + ☒ 2+ ☐ 3+

z ☐ + ☐ 2+ ☐ 3+

hide H<sub>2</sub>O/NH<sub>3</sub> ☐

zoom 112-122 ☐

GO

SDFTEEICR, MH+ 1184.5257, m/z 592.7665  
L OS G14 P120811 220811-s1.03894.03894.2.dta

scan 3894; 5.6e+000

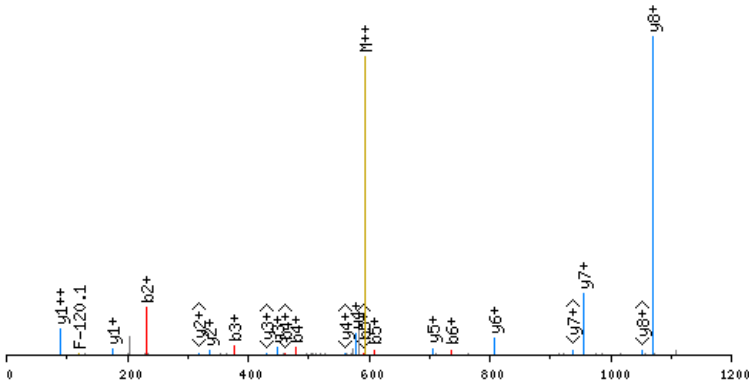

click image to zoom in; click top corners to zoom out

[precursor±]

scan 3891; 592.8 m/z; 7.0e+000

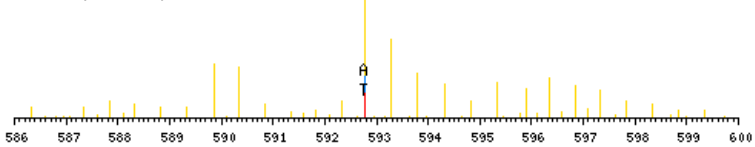

zoomed in precursor plot; T=theoretical m/z, A=acquired m/z

| b <sup>+</sup> | # | AA | # | y <sup>+</sup> | y <sup>2+</sup> |
|----------------|---|----|---|----------------|-----------------|
| 116.0711       | 1 | S  | 9 |                |                 |
| 231.0981       | 2 | D  | 8 | 1069.4624      | 535.2351        |
| 378.1665       | 3 | F  | 7 | 954.4354       | 477.7216        |
| 479.2142       | 4 | T  | 6 | 807.3670       | 404.1874        |
| 608.2568       | 5 | E  | 5 | 706.3194       | 353.6636        |
| 737.2994       | 6 | E  | 4 | 577.2768       | 289.1423        |
| 850.3834       | 7 | I  | 3 | 448.2342       | 224.6210        |
| 1010.4140      | 8 | C  | 2 | 335.1501       | 168.0790        |
|                | 9 | R  | 1 | 175.1195       | 88.0637         |

N-term:+29.04 C(8):+160.03

X-range:

0 - 0

MassTol: Y-zoom:

0. 1.

MassType:

☐ AVG ☒ MONO

Axis:

☒ 1 ☐ 2

Label:

☒ I ☐ M ☐ -

Ions:

a ☐ + ☐ 2+ ☐ 3+

b ☒ + ☐ 2+ ☐ 3+

c ☐ + ☐ 2+ ☐ 3+

x ☐ + ☐ 2+ ☐ 3+

y ☒ + ☒ 2+ ☐ 3+

z ☐ + ☐ 2+ ☐ 3+

hide H<sub>2</sub>O/NH<sub>3</sub> ☐

zoom 112-122 ☐

GO

SDKESILELITSR, MH+ 1546.8692, m/z 516.2946  
L OS G16 P120811 220811-s1.06155.06155.3.dta

scan 6155; 2.6e-001

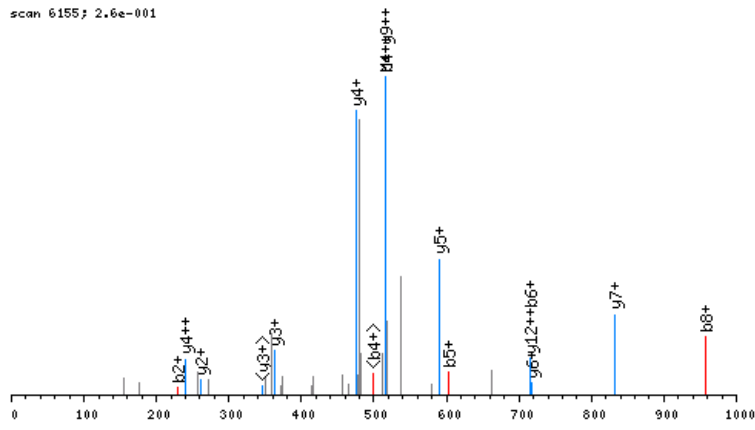

click image to zoom in; click top corners to zoom out

[precursor±]

scan 6152; 516.3 m/z; 3.3e+000

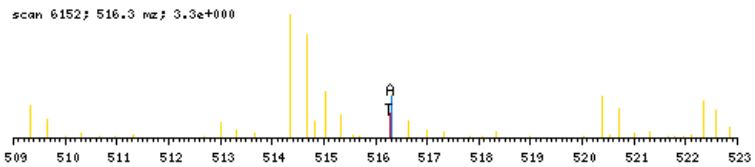

zoomed in precursor plot; T=theoretical m/z, A=acquired m/z

| b <sup>+</sup> | #  | AA | #  | y <sup>+</sup> | y <sup>2+</sup> |
|----------------|----|----|----|----------------|-----------------|
| 116.0711       | 1  | S  | 13 |                |                 |
| 231.0981       | 2  | D  | 12 | 1431.8059      | 716.4069        |
| 387.2244       | 3  | K  | 11 | 1316.7790      | 658.8934        |
| 516.2670       | 4  | E  | 10 | 1160.6527      | 580.8303        |
| 603.2990       | 5  | S  | 9  | 1031.6101      | 516.3090        |
| 716.3831       | 6  | I  | 8  | 944.5781       | 472.7929        |
| 829.4671       | 7  | L  | 7  | 831.4940       | 416.2509        |
| 958.5097       | 8  | E  | 6  | 718.4099       | 359.7089        |
| 1071.5938      | 9  | L  | 5  | 589.3673       | 295.1876        |
| 1184.6778      | 10 | I  | 4  | 476.2833       | 238.6455        |
| 1285.7255      | 11 | T  | 3  | 363.1992       | 182.1035        |
| 1372.7575      | 12 | S  | 2  | 262.1515       | 131.5797        |
|                | 13 | R  | 1  | 175.1195       | 88.0637         |

N-term:+29.04 K(3):+156.13

X-range:

0 - 0

MassTol: Y-zoom:

0. 1.

MassType:

☐AVG ☒MONO

Axis:

☒1 ☐2

Label:

☒I ☐M ☐-

Ions:

a ☐+ ☐2+ ☐3+

b ☒+ ☐2+ ☐3+

c ☐+ ☐2+ ☐3+

x ☐+ ☐2+ ☐3+

y ☒+ ☒2+ ☐3+

z ☐+ ☐2+ ☐3+

hide H<sub>2</sub>O/NH<sub>3</sub> ☐

zoom 112-122 ☐

GO

SDKEVEIAYSDVAKR, MH+ 1793.9650, m/z 449.2467  
L OS G17 P120811 220811-s1.03867.03867.4.dta

scan 3867; 1.5e+001

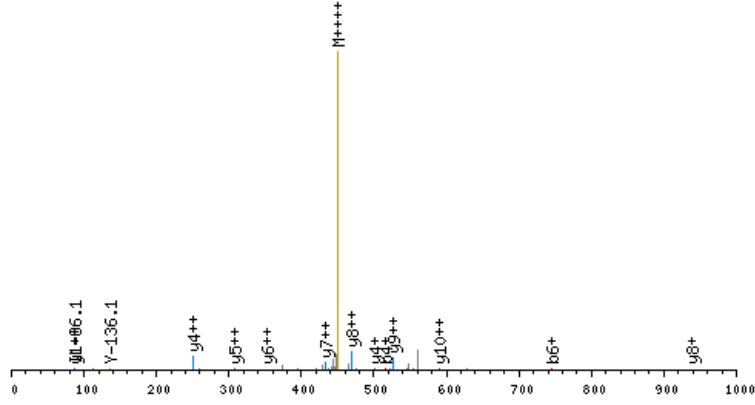

click image to zoom in; click top corners to zoom out [\[precursor±\]](#)

scan 3863; 449.2 m/z; 1.5e+001

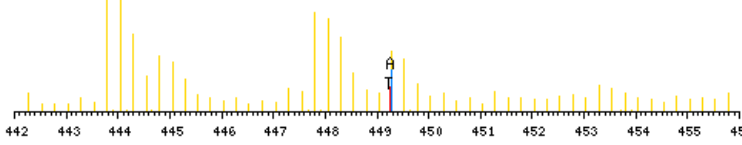

zoomed in precursor plot; T=theoretical m/z, A=acquired m/z

| b <sup>+</sup> | #  | AA | #  | y <sup>+</sup> | y <sup>2+</sup> |
|----------------|----|----|----|----------------|-----------------|
| 116.0711       | 1  | S  | 15 |                |                 |
| 231.0981       | 2  | D  | 14 | 1678.9016      | 839.9547        |
| 387.2244       | 3  | K  | 13 | 1563.8747      | 782.4413        |
| 516.2670       | 4  | E  | 12 | 1407.7484      | 704.3781        |
| 615.3354       | 5  | V  | 11 | 1278.7058      | 639.8568        |
| 744.3780       | 6  | E  | 10 | 1179.6374      | 590.3226        |
| 857.4620       | 7  | I  | 9  | 1050.5948      | 525.8013        |
| 928.4991       | 8  | A  | 8  | 937.5107       | 469.2593        |
| 1091.5625      | 9  | Y  | 7  | 866.4736       | 433.7407        |
| 1178.5945      | 10 | S  | 6  | 703.4103       | 352.2091        |
| 1293.6214      | 11 | D  | 5  | 616.3783       | 308.6930        |
| 1392.6899      | 12 | V  | 4  | 501.3513       | 251.1796        |
| 1463.7270      | 13 | A  | 3  | 402.2829       | 201.6454        |
| 1619.8533      | 14 | K  | 2  | 331.2458       | 166.1268        |
|                | 15 | R  | 1  | 175.1195       | 88.0637         |

N-term:+29.04 K(3):+156.13  
K(14):+156.13

X-range:

0 - 0

MassTol: Y-zoom:

0. 1.

MassType:

☐AVG ☒MONO

Axis:

☒1 ☐2

Label:

☒I ☐M ☐-

Ions:

a ☐+ ☐2+ ☐3+

b ☒+ ☐2+ ☐3+

c ☐+ ☐2+ ☐3+

x ☐+ ☐2+ ☐3+

y ☒+ ☒2+ ☐3+

z ☐+ ☐2+ ☐3+

hide H<sub>2</sub>O/NH<sub>3</sub> ☐

zoom 112-122 ☐

GO

SDKGVSSGPGPMGLMGPR, MH+ 1785.8992, m/z 595.9712  
L OS G15 P120811 220811-s1.03929.03929.3.dta

scan 3929; 9.5e-001

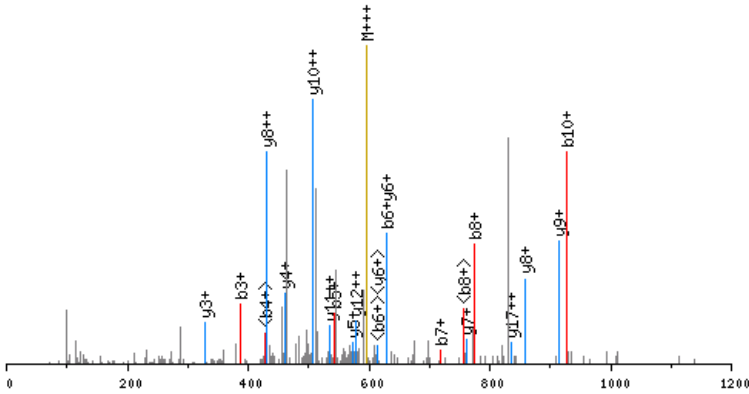

click image to zoom in; click top corners to zoom out

[precursor±]

scan 3926; 596.0 m/z; 2.3e+001

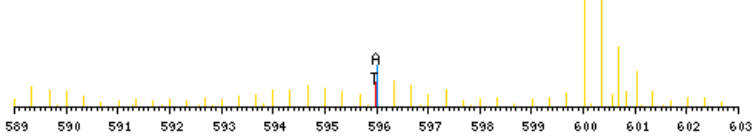

zoomed in precursor plot; T=theoretical m/z, A=acquired m/z

| b <sup>+</sup> | #  | AA | #  | y <sup>+</sup> | y <sup>2+</sup> |
|----------------|----|----|----|----------------|-----------------|
| 116.0711       | 1  | S  | 18 |                |                 |
| 231.0981       | 2  | D  | 17 | 1670.8359      | 835.9218        |
| 387.2244       | 3  | K  | 16 | 1555.8089      | 778.4084        |
| 444.2458       | 4  | G  | 15 | 1399.6826      | 700.3452        |
| 543.3142       | 5  | V  | 14 | 1342.6612      | 671.8345        |
| 630.3463       | 6  | S  | 13 | 1243.5927      | 622.3003        |
| 717.3783       | 7  | S  | 12 | 1156.5607      | 578.7843        |
| 774.3998       | 8  | G  | 11 | 1069.5287      | 535.2683        |
| 871.4525       | 9  | P  | 10 | 1012.5072      | 506.7575        |
| 928.4740       | 10 | G  | 9  | 915.4545       | 458.2311        |
| 1025.5268      | 11 | P  | 8  | 858.4330       | 429.7204        |
| 1156.5672      | 12 | M  | 7  | 761.3802       | 381.1940        |
| 1213.5887      | 13 | G  | 6  | 630.3397       | 315.6738        |
| 1326.6728      | 14 | L  | 5  | 573.3183       | 287.1631        |
| 1457.7133      | 15 | M  | 4  | 460.2342       | 230.6210        |
| 1514.7347      | 16 | G  | 3  | 329.1937       | 165.1008        |
| 1611.7875      | 17 | P  | 2  | 272.1723       | 136.5900        |
|                | 18 | R  | 1  | 175.1195       | 88.0637         |

N-term:+29.04 K(3):+156.13

N-term: +35.07

X-range:

0 - 0

MassTol: Y-zoom:

0. 1.

MassType:

☐AVG ☒MONO

Axis:

☒1 ☐2

Label:

☒I ☐M ☐-

Ions:

a ☐+ ☐2+ ☐3+

b ☒+ ☐2+ ☐3+

c ☐+ ☐2+ ☐3+

x ☐+ ☐2+ ☐3+

y ☒+ ☒2+ ☐3+

z ☐+ ☐2+ ☐3+

hide H<sub>2</sub>O/NH<sub>3</sub> ☐

zoom 112-122 ☐

GO

SDLPQEELVDQKCLLQKYTHR, MH+ 2702.5036, m/z 676.3813  
H OS G18 P120811 220811-s1.05950.05950.4.dta

scan 5950; 3.5e+000

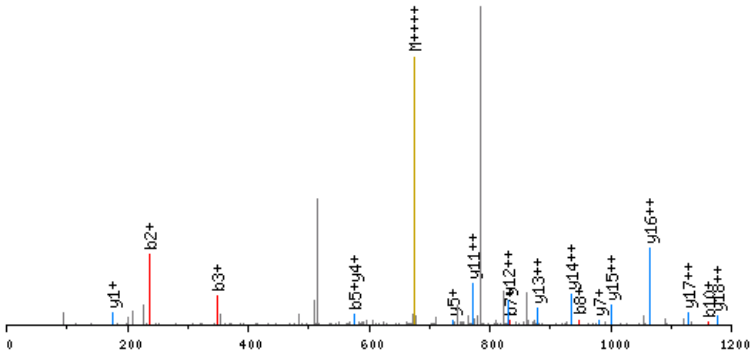

click image to zoom in; click top corners to zoom out

[precursor±]

scan 5946; 676.4 m/z; 2.5e+000

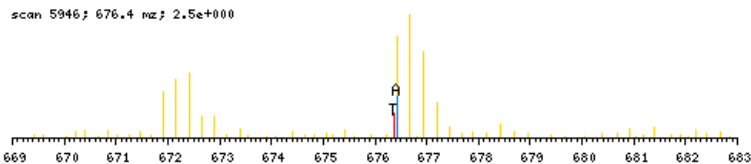

zoomed in precursor plot; T=theoretical m/z, A=acquired m/z

| b <sup>+</sup> | #  | AA | #  | y <sup>+</sup> | y <sup>2+</sup> |
|----------------|----|----|----|----------------|-----------------|
| 122.1029       | 1  | S  | 21 |                |                 |
| 237.1299       | 2  | D  | 20 | 2581.4085      | 1291.2081       |
| 350.2139       | 3  | L  | 19 | 2466.3815      | 1233.6947       |
| 447.2667       | 4  | P  | 18 | 2353.2975      | 1177.1526       |
| 575.3253       | 5  | Q  | 17 | 2256.2447      | 1128.6263       |
| 704.3679       | 6  | E  | 16 | 2128.1861      | 1064.5970       |
| 833.4105       | 7  | E  | 15 | 1999.1435      | 1000.0757       |
| 946.4945       | 8  | L  | 14 | 1870.1009      | 935.5544        |
| 1045.5629      | 9  | V  | 13 | 1757.0169      | 879.0123        |
| 1160.5899      | 10 | D  | 12 | 1657.9484      | 829.4781        |
| 1288.6485      | 11 | Q  | 11 | 1542.9215      | 771.9647        |
| 1450.8066      | 12 | K  | 10 | 1414.8629      | 707.9354        |
| 1610.8372      | 13 | C  | 9  | 1252.7048      | 626.8563        |
| 1723.9212      | 14 | L  | 8  | 1092.6742      | 546.8410        |
| 1837.0053      | 15 | L  | 7  | 979.5902       | 490.2990        |
| 1965.0639      | 16 | Q  | 6  | 866.5061       | 433.7570        |
| 2127.2220      | 17 | K  | 5  | 738.4475       | 369.7277        |
| 2290.2853      | 18 | Y  | 4  | 576.2894       | 288.6486        |
| 2391.3330      | 19 | T  | 3  | 413.2261       | 207.1170        |
| 2528.3919      | 20 | H  | 2  | 312.1784       | 156.5931        |
|                | 21 | R  | 1  | 175.1195       | 88.0637         |

N-term:+35.07 K(12):+162.16  
C(13):+160.03 K(17):+162.16

X-range:

0 - 0

MassTol: Y-zoom:

0. 1.

MassType:

☐ AVG ☒ MONO

Axis:

☒ 1 ☐ 2

Label:

☒ I ☐ M ☐ -

Ions:

a ☐ + ☐ 2+ ☐ 3+

b ☒ + ☐ 2+ ☐ 3+

c ☐ + ☐ 2+ ☐ 3+

x ☐ + ☐ 2+ ☐ 3+

y ☒ + ☒ 2+ ☐ 3+

z ☐ + ☐ 2+ ☐ 3+

hide H<sub>2</sub>O/NH<sub>3</sub> ☐

zoom 112-122 ☐

GO

SDNEDELLEYHR, MH+ 1547.6978, m/z 516.5708  
L OS G16 P120811 220811-s1.03871.03871.3.dta

scan 3871; 2.5e+000

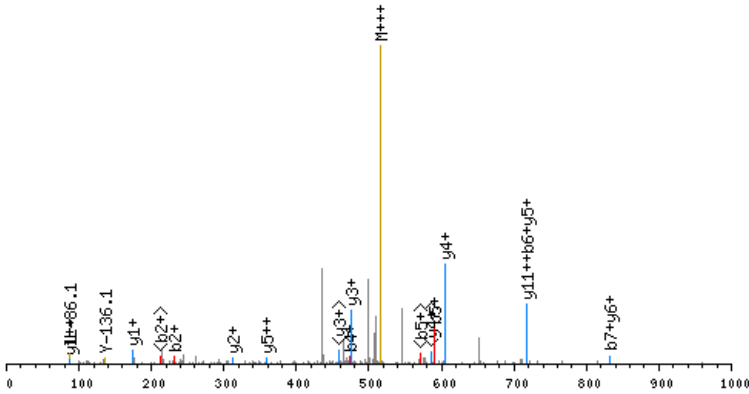

click image to zoom in; click top corners to zoom out

[precursor±]

scan 3868; 516.6 m/z; 6.3e+000

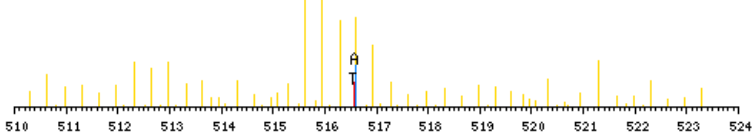

zoomed in precursor plot; T=theoretical m/z, A=acquired m/z

| b <sup>+</sup> | #  | AA | #  | y <sup>+</sup> | y <sup>2+</sup> |
|----------------|----|----|----|----------------|-----------------|
| 116.0711       | 1  | S  | 12 |                |                 |
| 231.0981       | 2  | D  | 11 | 1432.6345      | 716.8211        |
| 345.1410       | 3  | N  | 10 | 1317.6075      | 659.3077        |
| 474.1836       | 4  | E  | 9  | 1203.5646      | 602.2862        |
| 589.2105       | 5  | D  | 8  | 1074.5220      | 537.7649        |
| 718.2531       | 6  | E  | 7  | 959.4951       | 480.2514        |
| 831.3372       | 7  | L  | 6  | 830.4525       | 415.7301        |
| 944.4213       | 8  | L  | 5  | 717.3684       | 359.1881        |
| 1073.4638      | 9  | E  | 4  | 604.2843       | 302.6461        |
| 1236.5272      | 10 | Y  | 3  | 475.2417       | 238.1248        |
| 1373.5861      | 11 | H  | 2  | 312.1784       | 156.5931        |
|                | 12 | R  | 1  | 175.1195       | 88.0637         |

N-term:+29.04

N-term: +29.04 K(9): +156.13

X-range:

0 - 0

MassTol: Y-zoom:

0. 1.

MassType:

☐AVG ☒MONO

Axis:

☒1 ☐2

Label:

☒I ☐M ☐-

Ions:

a ☐+ ☐2+ ☐3+

b ☒+ ☐2+ ☐3+

c ☐+ ☐2+ ☐3+

x ☐+ ☐2+ ☐3+

y ☒+ ☒2+ ☐3+

z ☐+ ☐2+ ☐3+

hide H<sub>2</sub>O/NH<sub>3</sub> ☐

zoom 112-122 ☐

GO

SDNQPGVLIQVYEGER, MH+ 1831.9190, m/z 611.3112  
L OS G13 P120811 220811-s1.05768.05768.3.dta

scan 5768; 1.3e+000

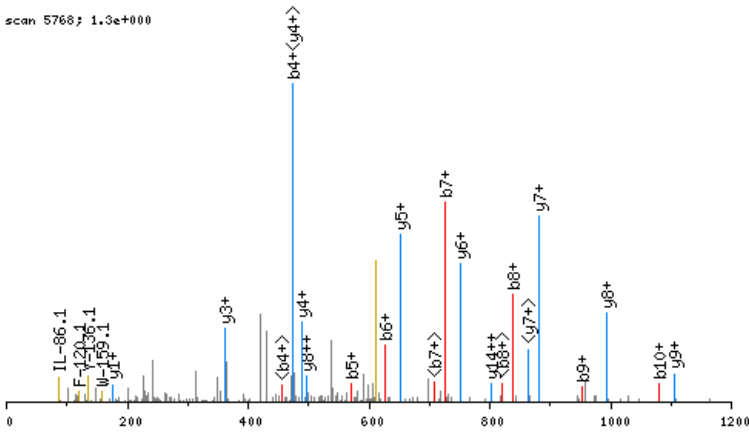

click image to zoom in; click top corners to zoom out

[precursor±]

scan 5764; 611.3 m/z; 5.7e+000

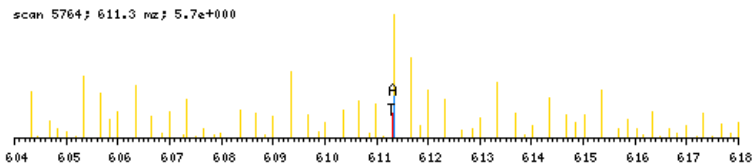

zoomed in precursor plot; T=theoretical m/z, A=acquired m/z

| b <sup>+</sup> | #  | AA | #  | y <sup>+</sup> | y <sup>2+</sup> |
|----------------|----|----|----|----------------|-----------------|
| 116.0711       | 1  | S  | 16 |                |                 |
| 231.0981       | 2  | D  | 15 | 1716.8557      | 858.9318        |
| 345.1410       | 3  | N  | 14 | 1601.8287      | 801.4183        |
| 473.1996       | 4  | Q  | 13 | 1487.7858      | 744.3968        |
| 570.2523       | 5  | P  | 12 | 1359.7272      | 680.3675        |
| 627.2738       | 6  | G  | 11 | 1262.6745      | 631.8412        |
| 726.3422       | 7  | V  | 10 | 1205.6530      | 603.3304        |
| 839.4263       | 8  | L  | 9  | 1106.5846      | 553.7962        |
| 952.5103       | 9  | I  | 8  | 993.5005       | 497.2542        |
| 1080.5689      | 10 | Q  | 7  | 880.4165       | 440.7121        |
| 1179.6373      | 11 | V  | 6  | 752.3579       | 376.6829        |
| 1342.7007      | 12 | Y  | 5  | 653.2895       | 327.1487        |
| 1471.7433      | 13 | E  | 4  | 490.2262       | 245.6170        |
| 1528.7647      | 14 | G  | 3  | 361.1836       | 181.0957        |
| 1657.8073      | 15 | E  | 2  | 304.1621       | 152.5850        |
|                | 16 | R  | 1  | 175.1195       | 88.0637         |

N-term:+29.04

N-term: +29.04 K(16) : +156.13

X-range:

0 - 0

MassTol: Y-zoom:

0. 1.

MassType:

☐AVG ☒MONO

Axis:

☒1 ☐2

Label:

☒I ☐M ☐-

Ions:

a ☐+ ☐2+ ☐3+

b ☒+ ☐2+ ☐3+

c ☐+ ☐2+ ☐3+

x ☐+ ☐2+ ☐3+

y ☒+ ☒2+ ☐3+

z ☐+ ☐2+ ☐3+

hide H<sub>2</sub>O/NH<sub>3</sub> ☐

zoom 112-122 ☐

GO

SDSASAVAPLAPGSEDNFAR, MH+ 1995.9835, m/z 665.9994  
H OS G12 P120811 220811-s1.03804.03804.3.dta

scan 3804; 3.3e+000

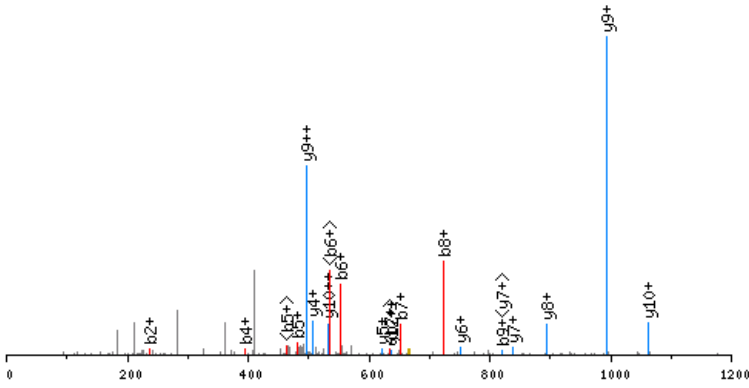

click image to zoom in; click top corners to zoom out

[precursor±]

scan 3802; 666.0 m/z; 8.6e+000

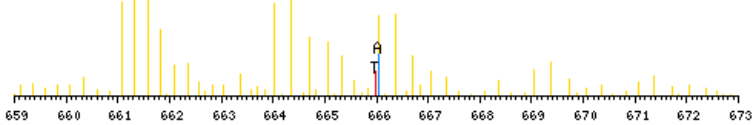

zoomed in precursor plot; T=theoretical m/z, A=acquired m/z

| b <sup>+</sup> | #  | AA | #  | y <sup>+</sup> | y <sup>2+</sup> |
|----------------|----|----|----|----------------|-----------------|
| 122.1029       | 1  | S  | 20 |                |                 |
| 237.1299       | 2  | D  | 19 | 1874.8884      | 937.9481        |
| 324.1619       | 3  | S  | 18 | 1759.8615      | 880.4347        |
| 395.1990       | 4  | A  | 17 | 1672.8295      | 836.9186        |
| 482.2310       | 5  | S  | 16 | 1601.7924      | 801.4001        |
| 553.2682       | 6  | A  | 15 | 1514.7603      | 757.8841        |
| 652.3366       | 7  | V  | 14 | 1443.7232      | 722.3655        |
| 723.3737       | 8  | A  | 13 | 1344.6548      | 672.8313        |
| 820.4264       | 9  | P  | 12 | 1273.6177      | 637.3128        |
| 933.5105       | 10 | L  | 11 | 1176.5649      | 588.7864        |
| 1004.5476      | 11 | A  | 10 | 1063.4809      | 532.2443        |
| 1101.6004      | 12 | P  | 9  | 992.4437       | 496.7258        |
| 1158.6219      | 13 | G  | 8  | 895.3910       | 448.1994        |
| 1245.6539      | 14 | S  | 7  | 838.3695       | 419.6887        |
| 1374.6965      | 15 | E  | 6  | 751.3375       | 376.1727        |
| 1489.7234      | 16 | D  | 5  | 622.2949       | 311.6514        |
| 1603.7663      | 17 | N  | 4  | 507.2680       | 254.1379        |
| 1750.8348      | 18 | F  | 3  | 393.2250       | 197.1164        |
| 1821.8719      | 19 | A  | 2  | 246.1566       | 123.5822        |
|                | 20 | R  | 1  | 175.1195       | 88.0637         |

N-term:+35.07

X-range:

0 - 0

MassTol: Y-zoom:

0. 1.

MassType:

☐AVG ☒MONO

Axis:

☒1 ☐2

Label:

☒I ☐M ☐-

Ions:

a ☐+ ☐2+ ☐3+

b ☒+ ☐2+ ☐3+

c ☐+ ☐2+ ☐3+

x ☐+ ☐2+ ☐3+

y ☒+ ☒2+ ☐3+

z ☐+ ☐2+ ☐3+

hide H<sub>2</sub>O/NH<sub>3</sub> ☐

zoom 112-122 ☐

GO

SDSGSGQVQGR, MH+ 1105.5238, m/z 553.2655  
L OS G19 P120811 220811-s1.01956.01956.2.dta

scan 1956; 2.8e+000

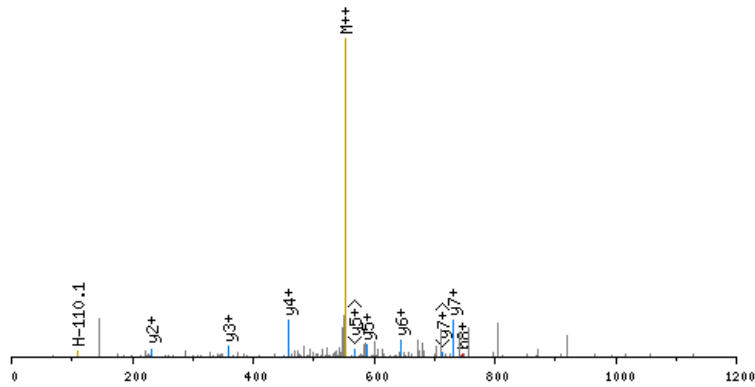

click image to zoom in; click top corners to zoom out [\[precursor±\]](#)

scan 1954; 553.3 m/z; 4.1e+000

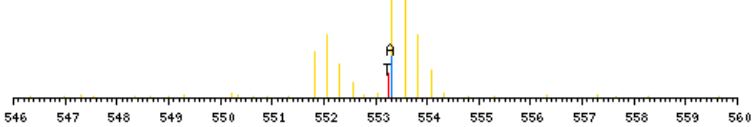

zoomed in precursor plot; T=theoretical m/z, A=acquired m/z

| b <sup>+</sup> | #  | AA | #  | y <sup>+</sup> | y <sup>2+</sup> |
|----------------|----|----|----|----------------|-----------------|
| 116.0711       | 1  | S  | 11 |                |                 |
| 231.0981       | 2  | D  | 10 | 990.4605       | 495.7341        |
| 318.1301       | 3  | S  | 9  | 875.4335       | 438.2207        |
| 375.1516       | 4  | G  | 8  | 788.4015       | 394.7047        |
| 462.1836       | 5  | S  | 7  | 731.3800       | 366.1939        |
| 519.2051       | 6  | G  | 6  | 644.3480       | 322.6779        |
| 647.2636       | 7  | Q  | 5  | 587.3265       | 294.1672        |
| 746.3320       | 8  | V  | 4  | 459.2680       | 230.1379        |
| 874.3906       | 9  | Q  | 3  | 360.1995       | 180.6037        |
| 931.4121       | 10 | G  | 2  | 232.1410       | 116.5744        |
|                | 11 | R  | 1  | 175.1195       | 88.0637         |

N-term:+29.04

X-range:

0 - 0

MassTol: Y-zoom:

0. 1.

MassType:

☐ AVG ☒ MONO

Axis:

☒ 1 ☐ 2

Label:

☒ I ☐ M ☐ -

Ions:

a ☐ + ☐ 2+ ☐ 3+

b ☒ + ☐ 2+ ☐ 3+

c ☐ + ☐ 2+ ☐ 3+

x ☐ + ☐ 2+ ☐ 3+

y ☒ + ☒ 2+ ☐ 3+

z ☐ + ☐ 2+ ☐ 3+

hide H<sub>2</sub>O/NH<sub>3</sub> ☐

zoom 112-122 ☐

GO

SDSMDTGAGSIR, MH+ 1224.5530, m/z 612.7801  
L OS G13 P120811 220811-s1.02392.02392.2.dta

scan 2392; 3.8e+000

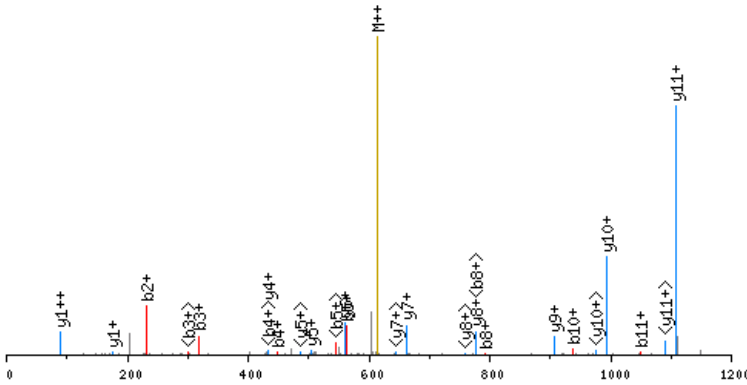

click image to zoom in; click top corners to zoom out

[precursor±]

scan 2389; 612.8 m/z; 2.3e+001

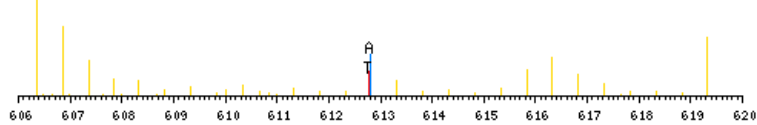

zoomed in precursor plot; T=theoretical m/z, A=acquired m/z

| b <sup>+</sup> | #  | AA | #  | y <sup>+</sup> | y <sup>2+</sup> |
|----------------|----|----|----|----------------|-----------------|
| 116.0711       | 1  | S  | 12 |                |                 |
| 231.0981       | 2  | D  | 11 | 1109.4897      | 555.2488        |
| 318.1301       | 3  | S  | 10 | 994.4628       | 497.7353        |
| 449.1706       | 4  | M  | 9  | 907.4307       | 454.2193        |
| 564.1975       | 5  | D  | 8  | 776.3903       | 388.6990        |
| 665.2452       | 6  | T  | 7  | 661.3633       | 331.1856        |
| 722.2667       | 7  | G  | 6  | 560.3156       | 280.6617        |
| 793.3038       | 8  | A  | 5  | 503.2942       | 252.1510        |
| 850.3252       | 9  | G  | 4  | 432.2571       | 216.6324        |
| 937.3573       | 10 | S  | 3  | 375.2356       | 188.1217        |
| 1050.4413      | 11 | I  | 2  | 288.2036       | 144.6057        |
|                | 12 | R  | 1  | 175.1195       | 88.0637         |

N-term:+29.04

X-range:

0 - 0

MassTol: Y-zoom:

0. 1.

MassType:

☐AVG ☒MONO

Axis:

☒1 ☐2

Label:

☒I ☐M ☐-

Ions:

a ☐+ ☐2+ ☐3+

b ☒+ ☐2+ ☐3+

c ☐+ ☐2+ ☐3+

x ☐+ ☐2+ ☐3+

y ☒+ ☒2+ ☐3+

z ☐+ ☐2+ ☐3+

hide H<sub>2</sub>O/NH<sub>3</sub> ☐

zoom 112-122 ☐

GO

SDSQVHSGVQVEGR, MH+ 1518.7724, m/z 506.9290  
H OS G16 P120811 220811-s1.02025.02025.3.dta

scan 2025; 8.2e+000

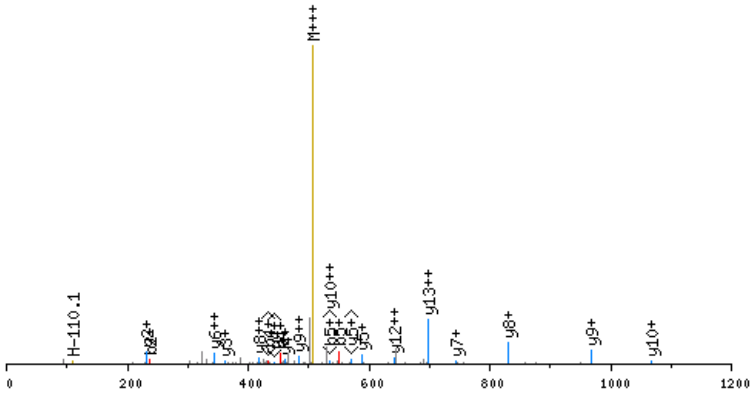

click image to zoom in; click top corners to zoom out

[precursor±]

scan 2023; 506.9 m/z; 7.2e+000

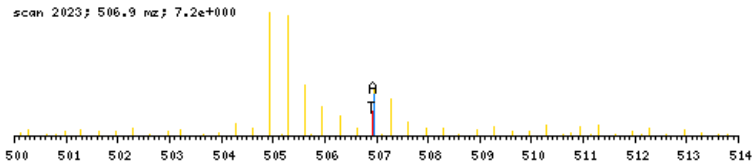

zoomed in precursor plot; T=theoretical m/z, A=acquired m/z

| b <sup>+</sup> | #  | AA | #  | y <sup>+</sup> | y <sup>2+</sup> |
|----------------|----|----|----|----------------|-----------------|
| 122.1029       | 1  | S  | 14 |                |                 |
| 237.1299       | 2  | D  | 13 | 1397.6773      | 699.3426        |
| 324.1619       | 3  | S  | 12 | 1282.6504      | 641.8291        |
| 452.2205       | 4  | Q  | 11 | 1195.6184      | 598.3131        |
| 551.2889       | 5  | V  | 10 | 1067.5598      | 534.2838        |
| 688.3478       | 6  | H  | 9  | 968.4914       | 484.7496        |
| 775.3798       | 7  | S  | 8  | 831.4325       | 416.2201        |
| 832.4013       | 8  | G  | 7  | 744.4004       | 372.7041        |
| 931.4697       | 9  | V  | 6  | 687.3790       | 344.1934        |
| 1059.5283      | 10 | Q  | 5  | 588.3105       | 294.6592        |
| 1158.5967      | 11 | V  | 4  | 460.2520       | 230.6299        |
| 1287.6393      | 12 | E  | 3  | 361.1836       | 181.0957        |
| 1344.6608      | 13 | G  | 2  | 232.1410       | 116.5744        |
|                | 14 | R  | 1  | 175.1195       | 88.0637         |

N-term:+35.07

X-range:

0 - 0

MassTol: Y-zoom:

0. 1.

MassType:

☐AVG ☒MONO

Axis:

☒1 ☐2

Label:

☒I ☐M ☐-

Ions:

a ☐+ ☐2+ ☐3+

b ☒+ ☐2+ ☐3+

c ☐+ ☐2+ ☐3+

x ☐+ ☐2+ ☐3+

y ☒+ ☒2+ ☐3+

z ☐+ ☐2+ ☐3+

hide H<sub>2</sub>O/NH<sub>3</sub> ☐

zoom 112-122 ☐

GO

SDSSDSMDTGAGSIR, MH+ 1513.6440, m/z 505.2195  
L OS G13 P120811 220811-s1.02523.02523.3.dta

scan 2523; 1.7e+000

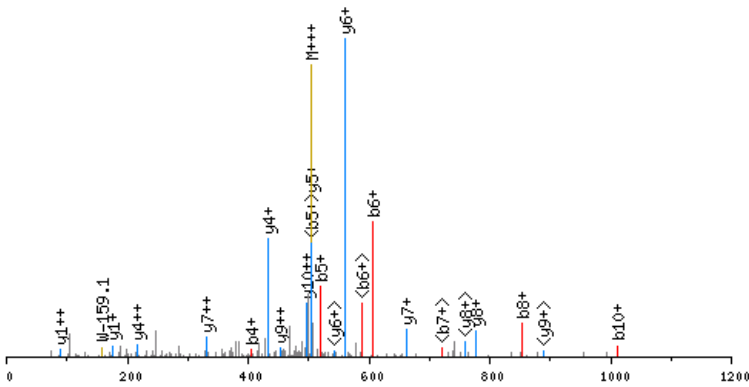

click image to zoom in; click top corners to zoom out [\[precursor±\]](#)

scan 2519; 505.2 m/z; 5.0e+000

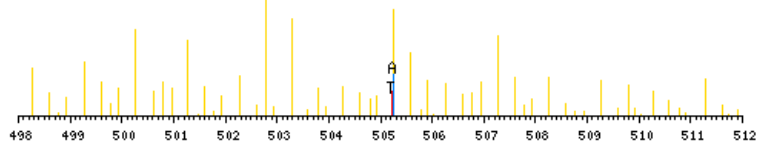

zoomed in precursor plot; T=theoretical m/z, A=acquired m/z

| b <sup>+</sup> | #  | AA | #  | y <sup>+</sup> | y <sup>2+</sup> |
|----------------|----|----|----|----------------|-----------------|
| 116.0711       | 1  | S  | 15 |                |                 |
| 231.0981       | 2  | D  | 14 | 1398.5807      | 699.7943        |
| 318.1301       | 3  | S  | 13 | 1283.5538      | 642.2808        |
| 405.1621       | 4  | S  | 12 | 1196.5217      | 598.7648        |
| 520.1891       | 5  | D  | 11 | 1109.4897      | 555.2488        |
| 607.2211       | 6  | S  | 10 | 994.4628       | 497.7353        |
| 738.2616       | 7  | M  | 9  | 907.4307       | 454.2193        |
| 853.2885       | 8  | D  | 8  | 776.3903       | 388.6990        |
| 954.3362       | 9  | T  | 7  | 661.3633       | 331.1856        |
| 1011.3577      | 10 | G  | 6  | 560.3156       | 280.6617        |
| 1082.3948      | 11 | A  | 5  | 503.2942       | 252.1510        |
| 1139.4162      | 12 | G  | 4  | 432.2571       | 216.6324        |
| 1226.4483      | 13 | S  | 3  | 375.2356       | 188.1217        |
| 1339.5323      | 14 | I  | 2  | 288.2036       | 144.6057        |
|                | 15 | R  | 1  | 175.1195       | 88.0637         |

N-term:+29.04

X-range:

0 - 0

MassTol: Y-zoom:

0. 1.

MassType:

☐ AVG ☒ MONO

Axis:

☒ 1 ☐ 2

Label:

☒ I ☐ M ☐ -

Ions:

a ☐ + ☐ 2+ ☐ 3+

b ☒ + ☐ 2+ ☐ 3+

c ☐ + ☐ 2+ ☐ 3+

x ☐ + ☐ 2+ ☐ 3+

y ☒ + ☒ 2+ ☐ 3+

z ☐ + ☐ 2+ ☐ 3+

hide H<sub>2</sub>O/NH<sub>3</sub> ☐

zoom 112-122 ☐

GO

SDTQFPSLQSTAKHVESR, MH+ 2074.0569, m/z 519.2697  
L OS G17 P120811 220811-s1.04187.04187.4.dta

scan 4187; 1.8e+000

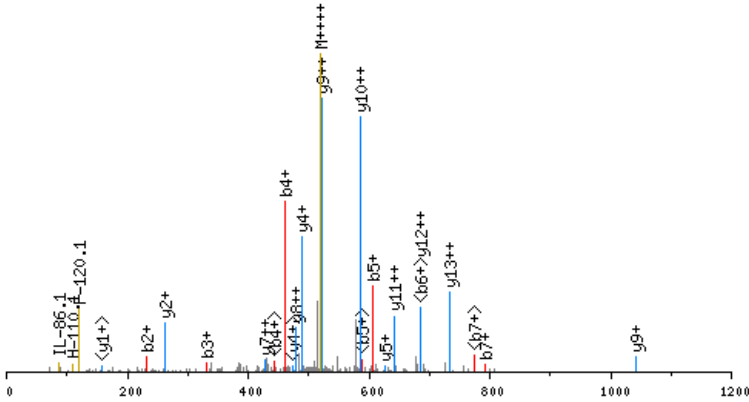

click image to zoom in; click top corners to zoom out

[precursor±]

scan 4183; 519.3 m/z; 9.2e+000

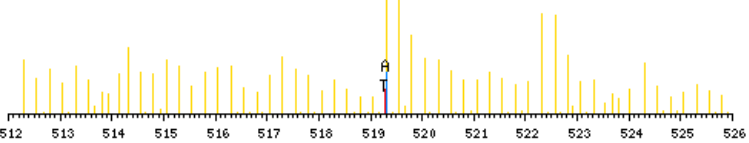

zoomed in precursor plot; T=theoretical m/z, A=acquired m/z

| b <sup>+</sup> | #  | AA | #  | y <sup>+</sup> | y <sup>2+</sup> |
|----------------|----|----|----|----------------|-----------------|
| 116.0711       | 1  | S  | 18 |                |                 |
| 231.0981       | 2  | D  | 17 | 1958.9936      | 980.0007        |
| 332.1458       | 3  | T  | 16 | 1843.9667      | 922.4872        |
| 460.2043       | 4  | Q  | 15 | 1742.9190      | 871.9634        |
| 607.2727       | 5  | F  | 14 | 1614.8604      | 807.9341        |
| 704.3255       | 6  | P  | 13 | 1467.7920      | 734.3999        |
| 791.3575       | 7  | S  | 12 | 1370.7392      | 685.8735        |
| 904.4416       | 8  | L  | 11 | 1283.7072      | 642.3575        |
| 1032.5002      | 9  | Q  | 10 | 1170.6231      | 585.8155        |
| 1119.5322      | 10 | S  | 9  | 1042.5646      | 521.7862        |
| 1220.5799      | 11 | T  | 8  | 955.5325       | 478.2702        |
| 1291.6170      | 12 | A  | 7  | 854.4849       | 427.7463        |
| 1447.7433      | 13 | K  | 6  | 783.4477       | 392.2278        |
| 1584.8022      | 14 | H  | 5  | 627.3214       | 314.1646        |
| 1683.8706      | 15 | V  | 4  | 490.2625       | 245.6352        |
| 1812.9132      | 16 | E  | 3  | 391.1941       | 196.1010        |
| 1899.9452      | 17 | S  | 2  | 262.1515       | 131.5797        |
|                | 18 | R  | 1  | 175.1195       | 88.0637         |

N-term:+29.04 K(13):+156.13

X-range:

0 - 0

MassTol: Y-zoom:

0. 1.

MassType:

☐AVG ☒MONO

Axis:

☒1 ☐2

Label:

☒I ☐M ☐-

Ions:

a ☐+ ☐2+ ☐3+

b ☒+ ☐2+ ☐3+

c ☐+ ☐2+ ☐3+

x ☐+ ☐2+ ☐3+

y ☒+ ☒2+ ☐3+

z ☐+ ☐2+ ☐3+

hide H<sub>2</sub>O/NH<sub>3</sub> ☐

zoom 112-122 ☐

GO

SDVLELTDENFESR, MH+ 1681.7921, m/z 561.2689  
L OS G14 P120811 220811-s1.05510.05510.3.dta

scan 5510; 2.3e+000

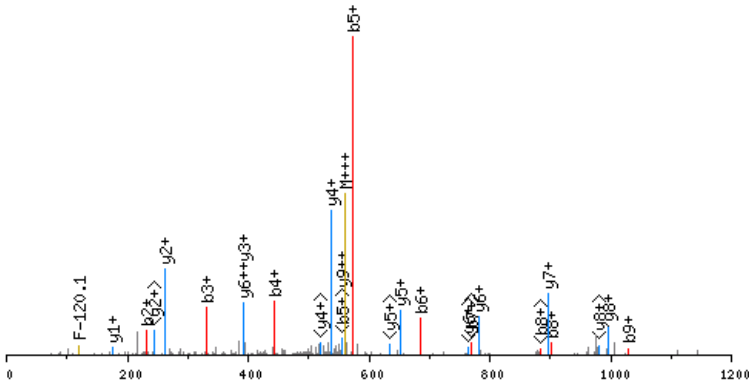

click image to zoom in; click top corners to zoom out

[precursor±]

scan 5506; 561.3 m/z; 4.2e+000

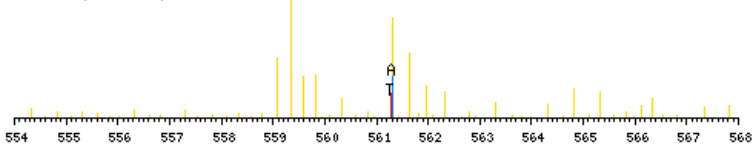

zoomed in precursor plot; T=theoretical m/z, A=acquired m/z

| b <sup>+</sup> | #  | AA | #  | y <sup>+</sup> | y <sup>2+</sup> |
|----------------|----|----|----|----------------|-----------------|
| 116.0711       | 1  | S  | 14 |                |                 |
| 231.0981       | 2  | D  | 13 | 1566.7288      | 783.8683        |
| 330.1665       | 3  | V  | 12 | 1451.7018      | 726.3548        |
| 443.2505       | 4  | L  | 11 | 1352.6334      | 676.8206        |
| 572.2931       | 5  | E  | 10 | 1239.5493      | 620.2786        |
| 685.3772       | 6  | L  | 9  | 1110.5067      | 555.7573        |
| 786.4249       | 7  | T  | 8  | 997.4227       | 499.2153        |
| 901.4518       | 8  | D  | 7  | 896.3750       | 448.6914        |
| 1030.4944      | 9  | E  | 6  | 781.3481       | 391.1779        |
| 1144.5373      | 10 | N  | 5  | 652.3055       | 326.6566        |
| 1291.6058      | 11 | F  | 4  | 538.2625       | 269.6352        |
| 1420.6484      | 12 | E  | 3  | 391.1941       | 196.1010        |
| 1507.6804      | 13 | S  | 2  | 262.1515       | 131.5797        |
|                | 14 | R  | 1  | 175.1195       | 88.0637         |

N-term:+29.04

X-range:

0 - 0

MassTol: Y-zoom:

0. 1.

MassType:

☐AVG ☒MONO

Axis:

☒1 ☐2

Label:

☒I ☐M ☐-

Ions:

a ☐+ ☐2+ ☐3+

b ☒+ ☐2+ ☐3+

c ☐+ ☐2+ ☐3+

x ☐+ ☐2+ ☐3+

y ☒+ ☒2+ ☐3+

z ☐+ ☐2+ ☐3+

hide H<sub>2</sub>O/NH<sub>3</sub> ☐

zoom 112-122 ☐

GO

SEAAQYNPEPPPPR, MH+ 1651.8080, m/z 551.2742  
L OS G13 P120811 220811-s1.02748.02748.3.dta

scan 2748; 3.0e+000

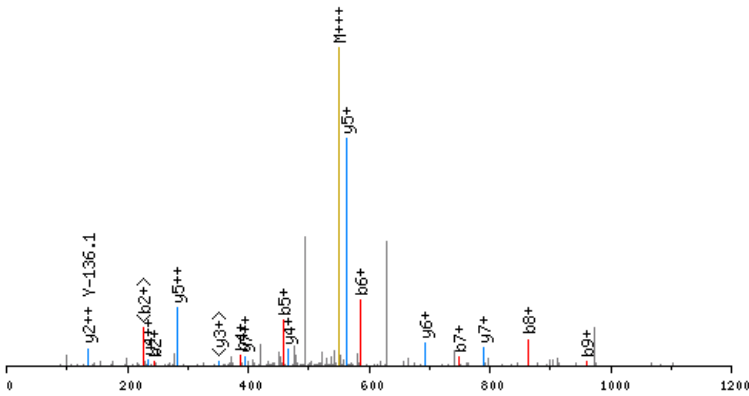

click image to zoom in; click top corners to zoom out [\[precursor±\]](#)

scan 2744; 551.3 m/z; 1.0e+001

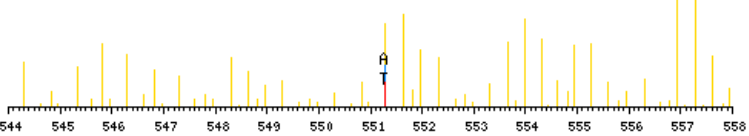

zoomed in precursor plot; T=theoretical m/z, A=acquired m/z

| b <sup>+</sup> | #  | AA | #  | y <sup>+</sup> | y <sup>2+</sup> |
|----------------|----|----|----|----------------|-----------------|
| 116.0711       | 1  | S  | 15 |                |                 |
| 245.1137       | 2  | E  | 14 | 1536.7447      | 768.8763        |
| 316.1508       | 3  | A  | 13 | 1407.7021      | 704.3550        |
| 387.1879       | 4  | A  | 12 | 1336.6650      | 668.8364        |
| 458.2251       | 5  | A  | 11 | 1265.6279      | 633.3178        |
| 529.2542       | 6  | Q  | 10 | 1194.5907      | 597.7993        |
| 599.2833       | 7  | Y  | 9  | 1066.5322      | 533.7700        |
| 670.3124       | 8  | N  | 8  | 903.4688       | 452.2383        |
| 741.3415       | 9  | P  | 7  | 789.4259       | 395.2169        |
| 812.3706       | 10 | E  | 6  | 692.3731       | 346.6905        |
| 883.3997       | 11 | P  | 5  | 563.3306       | 282.1692        |
| 954.4288       | 12 | P  | 4  | 466.2778       | 233.6428        |
| 1025.4579      | 13 | P  | 3  | 369.2250       | 185.1164        |
| 1096.4870      | 14 | P  | 2  | 272.1723       | 136.5900        |
| 1167.5161      | 15 | R  | 1  | 175.1195       | 88.0637         |

N-term:+29.04

X-range:

0 - 0

MassTol: Y-zoom:

0. 1.

MassType:

☐ AVG ☒ MONO

Axis:

☒ 1 ☐ 2

Label:

☒ I ☐ M ☐ -

Ions:

a ☐ + ☐ 2+ ☐ 3+

b ☒ + ☐ 2+ ☐ 3+

c ☐ + ☐ 2+ ☐ 3+

x ☐ + ☐ 2+ ☐ 3+

y ☒ + ☒ 2+ ☐ 3+

z ☐ + ☐ 2+ ☐ 3+

hide H<sub>2</sub>O/NH<sub>3</sub> ☐

zoom 112-122 ☐

GO

SEEAHAEDSVMDHHFR, MH+ 1924.8248, m/z 481.9617  
L OS G19 P120811 220811-s1.02737.02737.4.dta

scan 2737; 1.2e+001

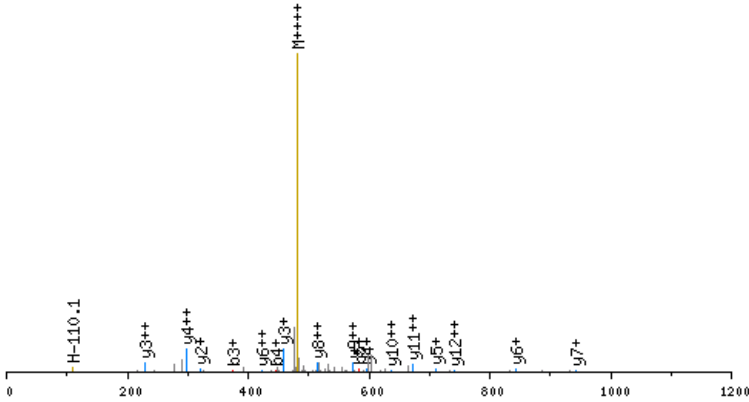

click image to zoom in; click top corners to zoom out [\[precursor±\]](#)

scan 2736; 482.0 m/z; 8.2e+000

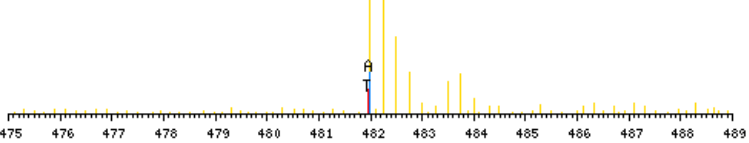

zoomed in precursor plot; T=theoretical m/z, A=acquired m/z

| b <sup>+</sup> | #  | AA | #  | y <sup>+</sup> | y <sup>2+</sup> |
|----------------|----|----|----|----------------|-----------------|
| 116.0711       | 1  | S  | 16 |                |                 |
| 245.1137       | 2  | E  | 15 | 1809.7615      | 905.3846        |
| 374.1563       | 3  | E  | 14 | 1680.7189      | 840.8634        |
| 445.1934       | 4  | A  | 13 | 1551.6763      | 776.3421        |
| 582.2523       | 5  | H  | 12 | 1480.6392      | 740.8235        |
| 653.2895       | 6  | A  | 11 | 1343.5803      | 672.2940        |
| 782.3320       | 7  | E  | 10 | 1272.5431      | 636.7755        |
| 897.3590       | 8  | D  | 9  | 1143.5006      | 572.2542        |
| 984.3910       | 9  | S  | 8  | 1028.4736      | 514.7407        |
| 1083.4594      | 10 | V  | 7  | 941.4416       | 471.2247        |
| 1214.4999      | 11 | M  | 6  | 842.3732       | 421.6905        |
| 1329.5269      | 12 | D  | 5  | 711.3327       | 356.1703        |
| 1466.5858      | 13 | H  | 4  | 596.3057       | 298.6568        |
| 1603.6447      | 14 | H  | 3  | 459.2468       | 230.1273        |
| 1750.7131      | 15 | F  | 2  | 322.1879       | 161.5979        |
|                | 16 | R  | 1  | 175.1195       | 88.0637         |

N-term:+29.04

X-range:

0 - 0

MassTol: Y-zoom:

0. 1.

MassType:

☐AVG ☒MONO

Axis:

☒1 ☐2

Label:

☒I ☐M ☐-

Ions:

a ☐+ ☐2+ ☐3+

b ☒+ ☐2+ ☐3+

c ☐+ ☐2+ ☐3+

x ☐+ ☐2+ ☐3+

y ☒+ ☒2+ ☐3+

z ☐+ ☐2+ ☐3+

hide H<sub>2</sub>O/NH<sub>3</sub> ☐

zoom 112-122 ☐

GO

SEEEELDTKLTR, MH+ 1505.7699, m/z 502.5948  
L OS G16 P120811 220811-s1.03304.03304.3.dta

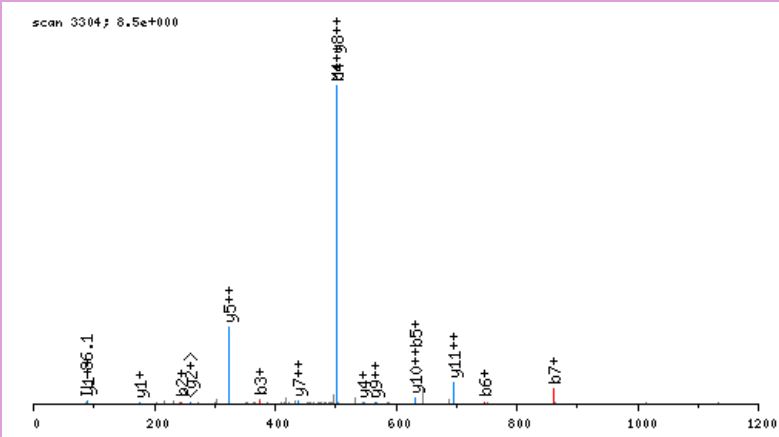

click image to zoom in; click top corners to zoom out

[precursor±]

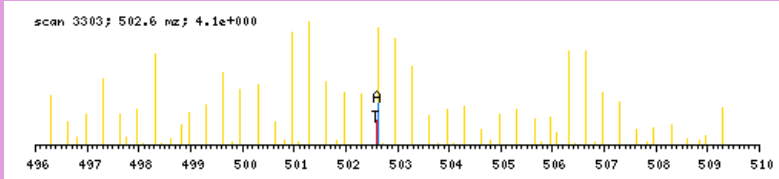

zoomed in precursor plot; T=theoretical m/z, A=acquired m/z

| b <sup>+</sup> | #  | AA | #  | y <sup>+</sup> | y <sup>2+</sup> |
|----------------|----|----|----|----------------|-----------------|
| 116.0711       | 1  | S  | 12 |                |                 |
| 245.1137       | 2  | E  | 11 | 1390.7066      | 695.8572        |
| 374.1563       | 3  | E  | 10 | 1261.6640      | 631.3359        |
| 503.1989       | 4  | E  | 9  | 1132.6214      | 566.8146        |
| 632.2415       | 5  | E  | 8  | 1003.5788      | 502.2933        |
| 745.3256       | 6  | L  | 7  | 874.5362       | 437.7720        |
| 860.3525       | 7  | D  | 6  | 761.4522       | 381.2300        |
| 961.4002       | 8  | T  | 5  | 646.4252       | 323.7165        |
| 1117.5265      | 9  | K  | 4  | 545.3775       | 273.1927        |
| 1230.6106      | 10 | L  | 3  | 389.2512       | 195.1295        |
| 1331.6582      | 11 | T  | 2  | 276.1672       | 138.5875        |
|                | 12 | R  | 1  | 175.1195       | 88.0637         |

N-term:+29.04 K(9):+156.13

X-range:

0 - 0

MassTol: Y-zoom:

0. 1.

MassType:

☐AVG ☒MONO

Axis:

☒1 ☐2

Label:

☒I ☐M ☐-

Ions:

a ☐+ ☐2+ ☐3+

b ☒+ ☐2+ ☐3+

c ☐+ ☐2+ ☐3+

x ☐+ ☐2+ ☐3+

y ☒+ ☒2+ ☐3+

z ☐+ ☐2+ ☐3+

hide H<sub>2</sub>O/NH<sub>3</sub> ☐

zoom 112-122 ☐

GO

SEFGDSSSPATR, MH+ 1268.5759, m/z 634.7916  
L OS G14 P120811 220811-s1.02257.02257.2.dta

scan 2257; 4.3e+000

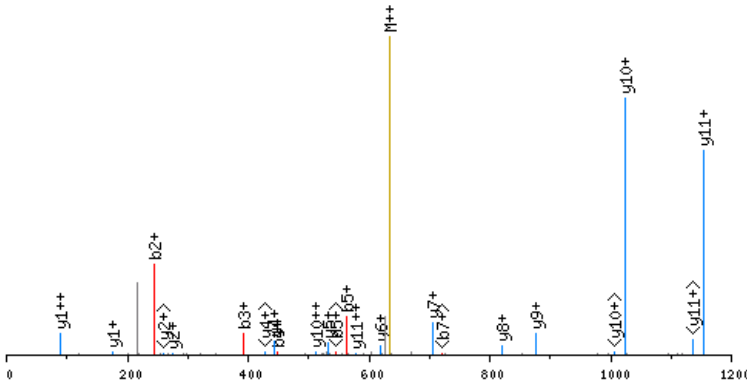

click image to zoom in; click top corners to zoom out

[precursor±]

scan 2256; 634.8 m/z; 3.8e+000

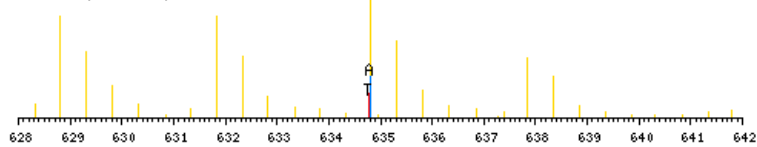

zoomed in precursor plot; T=theoretical m/z, A=acquired m/z

| b <sup>+</sup> | #  | AA | #  | y <sup>+</sup> | y <sup>2+</sup> |
|----------------|----|----|----|----------------|-----------------|
| 116.0711       | 1  | S  | 12 |                |                 |
| 245.1137       | 2  | E  | 11 | 1153.5126      | 577.2602        |
| 392.1821       | 3  | F  | 10 | 1024.4700      | 512.7389        |
| 449.2036       | 4  | G  | 9  | 877.4015       | 439.2047        |
| 564.2305       | 5  | D  | 8  | 820.3801       | 410.6940        |
| 651.2626       | 6  | S  | 7  | 705.3531       | 353.1805        |
| 738.2946       | 7  | S  | 6  | 618.3211       | 309.6645        |
| 825.3266       | 8  | S  | 5  | 531.2891       | 266.1485        |
| 922.3794       | 9  | P  | 4  | 444.2571       | 222.6324        |
| 993.4165       | 10 | A  | 3  | 347.2043       | 174.1061        |
| 1094.4642      | 11 | T  | 2  | 276.1672       | 138.5875        |
|                | 12 | R  | 1  | 175.1195       | 88.0637         |

N-term:+29.04

X-range:

0 - 0

MassTol: Y-zoom:

0. 1.

MassType:

☐ AVG ☒ MONO

Axis:

☒ 1 ☐ 2

Label:

☒ I ☐ M ☐ -

Ions:

a ☐ + ☐ 2+ ☐ 3+

b ☒ + ☐ 2+ ☐ 3+

c ☐ + ☐ 2+ ☐ 3+

x ☐ + ☐ 2+ ☐ 3+

y ☒ + ☒ 2+ ☐ 3+

z ☐ + ☐ 2+ ☐ 3+

hide H<sub>2</sub>O/NH<sub>3</sub> ☐

zoom 112-122 ☐

GO

SEFTSSLSTKESLR, MH+ 1639.9179, m/z 547.3108  
H OS G16 P120811 220811-s1.03896.03896.3.dta

scan 3896; 1.5e+001

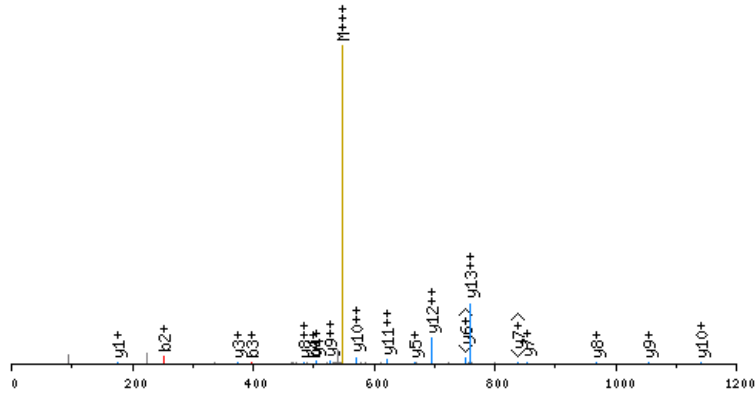

click image to zoom in; click top corners to zoom out

[precursor±]

scan 3893; 547.3 m/z; 9.4e+000

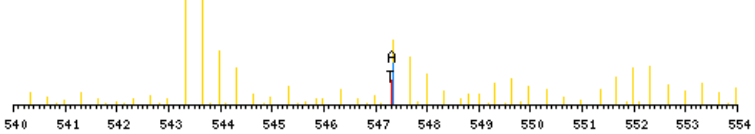

zoomed in precursor plot; T=theoretical m/z, A=acquired m/z

| b <sup>+</sup> | #  | AA | #  | y <sup>+</sup> | y <sup>2+</sup> |
|----------------|----|----|----|----------------|-----------------|
| 122.1029       | 1  | S  | 14 |                |                 |
| 251.1455       | 2  | E  | 13 | 1518.8228      | 759.9153        |
| 398.2139       | 3  | F  | 12 | 1389.7802      | 695.3940        |
| 499.2616       | 4  | T  | 11 | 1242.7118      | 621.8598        |
| 586.2936       | 5  | S  | 10 | 1141.6641      | 571.3360        |
| 673.3257       | 6  | S  | 9  | 1054.6321      | 527.8200        |
| 786.4097       | 7  | L  | 8  | 967.6001       | 484.3039        |
| 873.4418       | 8  | S  | 7  | 854.5160       | 427.7619        |
| 974.4894       | 9  | T  | 6  | 767.4840       | 384.2459        |
| 1136.6475      | 10 | K  | 5  | 666.4363       | 333.7221        |
| 1265.6901      | 11 | E  | 4  | 504.2782       | 252.6430        |
| 1352.7222      | 12 | S  | 3  | 375.2356       | 188.1217        |
| 1465.8062      | 13 | L  | 2  | 288.2036       | 144.6057        |
|                | 14 | R  | 1  | 175.1195       | 88.0637         |

N-term:+35.07 K(10):+162.16

X-range:

0 - 0

MassTol: Y-zoom:

0. 1.

MassType:

☐AVG ☒MONO

Axis:

☒1 ☐2

Label:

☒I ☐M ☐-

Ions:

a ☐+ ☐2+ ☐3+

b ☒+ ☐2+ ☐3+

c ☐+ ☐2+ ☐3+

x ☐+ ☐2+ ☐3+

y ☒+ ☒2+ ☐3+

z ☐+ ☐2+ ☐3+

hide H<sub>2</sub>O/NH<sub>3</sub> ☐

zoom 112-122 ☐

GO

SEGEHHSVVPQR, MH+ 1381.6712, m/z 461.2286  
L OS G16 P120811 220811-sl.02026.02026.3.dta

scan 2026; 9.0e+000

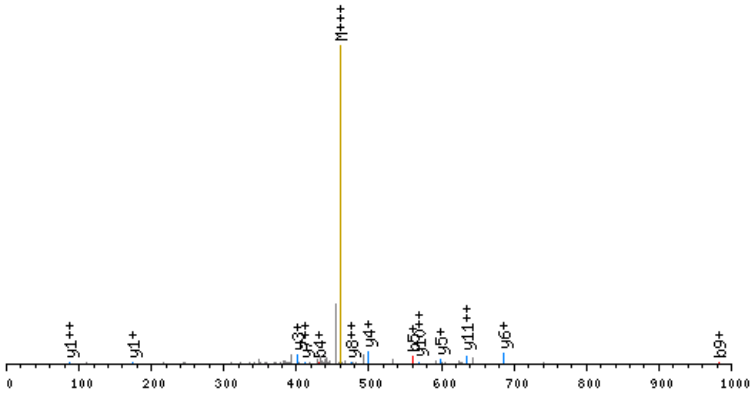

click image to zoom in; click top corners to zoom out [\[precursor±\]](#)

scan 2023; 461.2 m/z; 1.7e+000

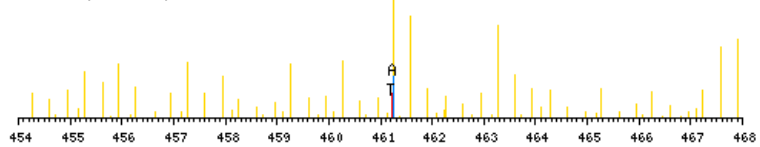

zoomed in precursor plot; T=theoretical m/z, A=acquired m/z

| b <sup>+</sup> | #  | AA | #  | y <sup>+</sup> | y <sup>2+</sup> |
|----------------|----|----|----|----------------|-----------------|
| 116.0711       | 1  | S  | 12 |                |                 |
| 245.1137       | 2  | E  | 11 | 1266.6079      | 633.8078        |
| 302.1352       | 3  | G  | 10 | 1137.5653      | 569.2865        |
| 431.1778       | 4  | E  | 9  | 1080.5438      | 540.7758        |
| 560.2204       | 5  | E  | 8  | 951.5012       | 476.2545        |
| 697.2793       | 6  | H  | 7  | 822.4586       | 411.7332        |
| 784.3113       | 7  | S  | 6  | 685.3997       | 343.2038        |
| 883.3797       | 8  | V  | 5  | 598.3677       | 299.6877        |
| 982.4481       | 9  | V  | 4  | 499.2993       | 250.1535        |
| 1079.5009      | 10 | P  | 3  | 400.2308       | 200.6193        |
| 1207.5595      | 11 | Q  | 2  | 303.1781       | 152.0930        |
|                | 12 | R  | 1  | 175.1195       | 88.0637         |

N-term:+29.04

N-term: +29.04

N-term: +29.04 K(3): +156.13  
K(4): +156.13

X-range:

0 - 0

MassTol: Y-zoom:

0. 1.

MassType:

☐ AVG ☒ MONO

Axis:

☒ 1 ☐ 2

Label:

☒ I ☐ M ☐ -

Ions:

a ☐ + ☐ 2+ ☐ 3+

b ☒ + ☐ 2+ ☐ 3+

c ☐ + ☐ 2+ ☐ 3+

x ☐ + ☐ 2+ ☐ 3+

y ☒ + ☒ 2+ ☐ 3+

z ☐ + ☐ 2+ ☐ 3+

hide H<sub>2</sub>O/NH<sub>3</sub> ☐

zoom 112-122 ☐

GO

SELEEDIIPEEDIISR, MH+ 1920.9866, m/z 641.0004  
H OS G12 P120811 220811-s1.05118.05118.3.dta

scan 5118; 4.5e+000

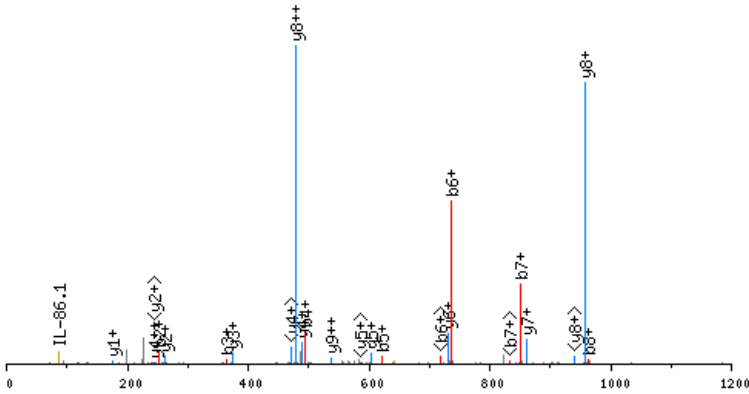

click image to zoom in; click top corners to zoom out [\[precursor±\]](#)

scan 5117; 641.0 m/z; 6.2e+000

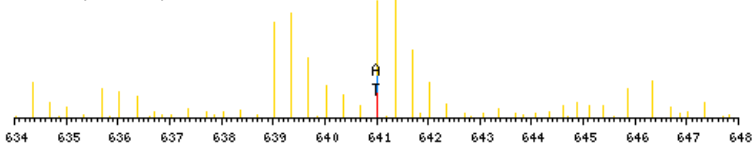

zoomed in precursor plot; T=theoretical m/z, A=acquired m/z

| b <sup>+</sup> | #  | AA | #  | y <sup>+</sup> | y <sup>2+</sup> |
|----------------|----|----|----|----------------|-----------------|
| 122.1029       | 1  | S  | 16 |                |                 |
| 251.1455       | 2  | E  | 15 | 1799.8915      | 900.4496        |
| 364.2296       | 3  | L  | 14 | 1670.8489      | 835.9283        |
| 493.2722       | 4  | E  | 13 | 1557.7648      | 779.3863        |
| 622.3148       | 5  | E  | 12 | 1428.7222      | 714.8650        |
| 737.3417       | 6  | D  | 11 | 1299.6796      | 650.3437        |
| 850.4258       | 7  | I  | 10 | 1184.6527      | 592.8303        |
| 963.5098       | 8  | I  | 9  | 1071.5686      | 536.2882        |
| 1060.5626      | 9  | P  | 8  | 958.4846       | 479.7462        |
| 1189.6052      | 10 | E  | 7  | 861.4318       | 431.2198        |
| 1318.6478      | 11 | E  | 6  | 732.3892       | 366.6985        |
| 1433.6747      | 12 | D  | 5  | 603.3466       | 302.1772        |
| 1546.7588      | 13 | I  | 4  | 488.3197       | 244.6637        |
| 1659.8429      | 14 | I  | 3  | 375.2356       | 188.1217        |
| 1746.8749      | 15 | S  | 2  | 262.1515       | 131.5797        |
|                | 16 | R  | 1  | 175.1195       | 88.0637         |

N-term:+35.07

X-range:

0 - 0

MassTol: Y-zoom:

0. 1.

MassType:

☐AVG ☒MONO

Axis:

☒1 ☐2

Label:

☒I ☐M ☐-

Ions:

a ☐+ ☐2+ ☐3+

b ☒+ ☐2+ ☐3+

c ☐+ ☐2+ ☐3+

x ☐+ ☐2+ ☐3+

y ☒+ ☒2+ ☐3+

z ☐+ ☐2+ ☐3+

hide H<sub>2</sub>O/NH<sub>3</sub> ☐

zoom 112-122 ☐

GO

SEPIMPEPGRDETVR, MH+ 1740.8590, m/z 580.9579  
L OS G15 P120811 220811-s1.03105.03105.3.dta

scan 3105; 5.2e+000

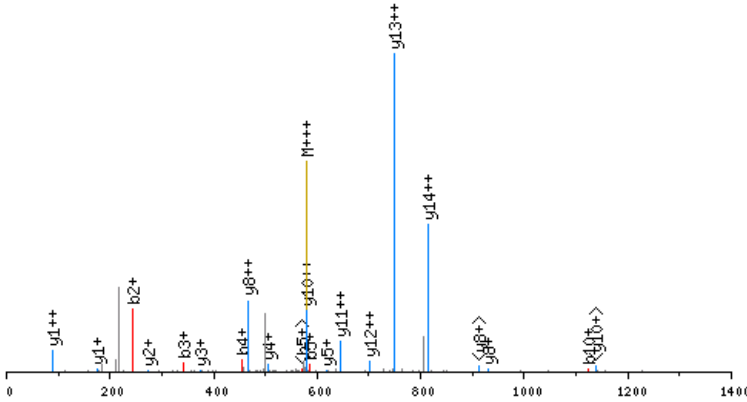

click image to zoom in; click top corners to zoom out

[precursor±]

scan 3101; 581.0 m/z; 9.8e+000

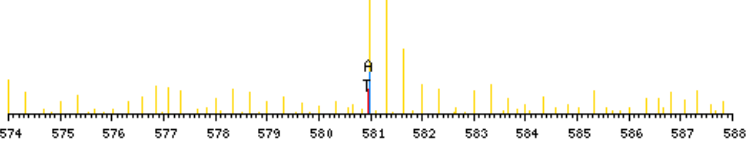

zoomed in precursor plot; T=theoretical m/z, A=acquired m/z

| b <sup>+</sup> | #  | AA | #  | y <sup>+</sup> | y <sup>2+</sup> |
|----------------|----|----|----|----------------|-----------------|
| 116.0711       | 1  | S  | 15 |                |                 |
| 245.1137       | 2  | E  | 14 | 1625.7957      | 813.4018        |
| 342.1665       | 3  | P  | 13 | 1496.7531      | 748.8805        |
| 455.2505       | 4  | I  | 12 | 1399.7004      | 700.3541        |
| 586.2910       | 5  | M  | 11 | 1286.6163      | 643.8121        |
| 683.3438       | 6  | P  | 10 | 1155.5758      | 578.2918        |
| 812.3864       | 7  | E  | 9  | 1058.5231      | 529.7654        |
| 909.4392       | 8  | P  | 8  | 929.4805       | 465.2441        |
| 966.4606       | 9  | G  | 7  | 832.4277       | 416.7178        |
| 1122.5617      | 10 | R  | 6  | 775.4062       | 388.2070        |
| 1237.5887      | 11 | D  | 5  | 619.3051       | 310.1565        |
| 1366.6313      | 12 | E  | 4  | 504.2782       | 252.6430        |
| 1467.6789      | 13 | T  | 3  | 375.2356       | 188.1217        |
| 1566.7474      | 14 | V  | 2  | 274.1879       | 137.5979        |
|                | 15 | R  | 1  | 175.1195       | 88.0637         |

N-term:+29.04

X-range:

0 - 0

MassTol: Y-zoom:

0. 1.

MassType:

☐AVG ☒MONO

Axis:

☒1 ☐2

Label:

☒I ☐M ☐-

Ions:

a ☐+ ☐2+ ☐3+

b ☒+ ☐2+ ☐3+

c ☐+ ☐2+ ☐3+

x ☐+ ☐2+ ☐3+

y ☒+ ☒2+ ☐3+

z ☐+ ☐2+ ☐3+

hide H<sub>2</sub>O/NH<sub>3</sub> ☐

zoom 112-122 ☐

GO

SEPQEVLIHIGSAHNR, MH+ 1701.8672, m/z 426.2223  
L OS G17 P120811 220811-s1.03214.03214.4.dta

scan 3214; 1.1e+001

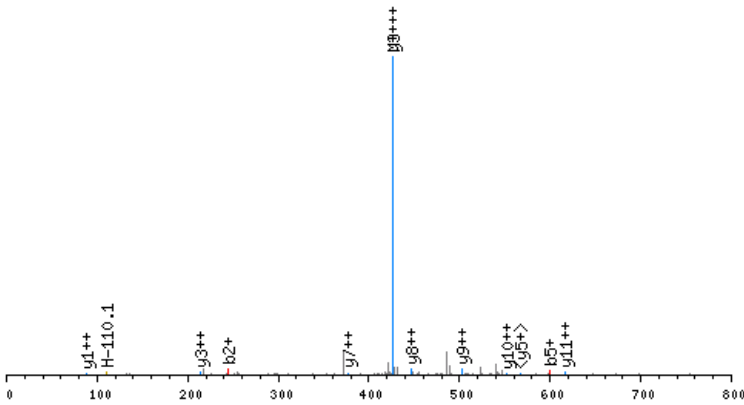

click image to zoom in; click top corners to zoom out [precursor±]

scan 3213; 426.2 m/z; 8.3e+000

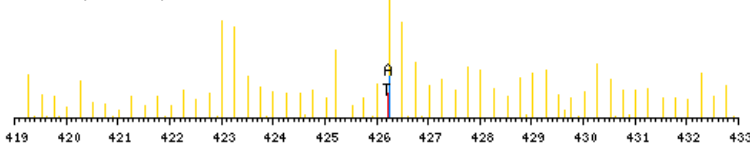

zoomed in precursor plot; T=theoretical m/z, A=acquired m/z

| b <sup>+</sup> | #  | AA | #  | y <sup>+</sup> | y <sup>2+</sup> |
|----------------|----|----|----|----------------|-----------------|
| 116.0711       | 1  | S  | 15 |                |                 |
| 245.1137       | 2  | E  | 14 | 1586.8039      | 793.9059        |
| 342.1665       | 3  | P  | 13 | 1457.7613      | 729.3846        |
| 470.2251       | 4  | Q  | 12 | 1360.7086      | 680.8582        |
| 599.2677       | 5  | E  | 11 | 1232.6500      | 616.8289        |
| 698.3361       | 6  | V  | 10 | 1103.6074      | 552.3076        |
| 811.4201       | 7  | L  | 9  | 1004.5390      | 502.7734        |
| 948.4790       | 8  | H  | 8  | 891.4549       | 446.2314        |
| 1061.5631      | 9  | I  | 7  | 754.3960       | 377.7019        |
| 1118.5846      | 10 | G  | 6  | 641.3119       | 321.1599        |
| 1205.6166      | 11 | S  | 5  | 584.2905       | 292.6492        |
| 1276.6537      | 12 | A  | 4  | 497.2585       | 249.1331        |
| 1413.7126      | 13 | H  | 3  | 426.2213       | 213.6146        |
| 1527.7556      | 14 | N  | 2  | 289.1624       | 145.0851        |
|                | 15 | R  | 1  | 175.1195       | 88.0637         |

N-term:+29.04

N-term: +29.04

X-range:

0 - 0

MassTol: Y-zoom:

0. 1.

MassType:

☐ AVG ☒ MONO

Axis:

☒ 1 ☐ 2

Label:

☒ I ☐ M ☐ -

Ions:

a ☐ + ☐ 2+ ☐ 3+

b ☒ + ☐ 2+ ☐ 3+

c ☐ + ☐ 2+ ☐ 3+

x ☐ + ☐ 2+ ☐ 3+

y ☒ + ☒ 2+ ☐ 3+

z ☐ + ☐ 2+ ☐ 3+

hide H<sub>2</sub>O/NH<sub>3</sub> ☐

zoom 112-122 ☐

GO

SEQEYKAGGSPASYHGSTSPR, MH+ 2309.0798, m/z 578.0254  
L OS G17 P120811 220811-s1.02135.02135.4.dta

scan 2135; 6.8e+000

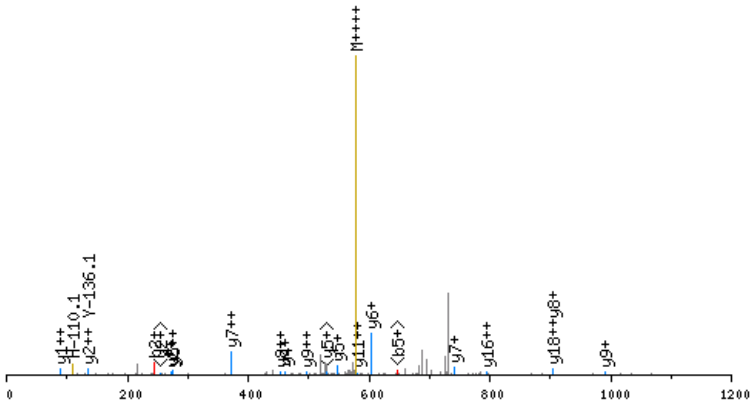

click image to zoom in; click top corners to zoom out [precursor±]

scan 2133; 578.0 m/z; 4.2e+001

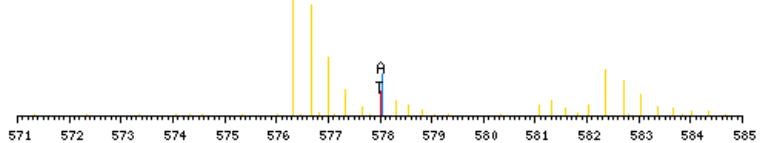

zoomed in precursor plot; T=theoretical m/z, A=acquired m/z

| b <sup>+</sup> | #  | AA | #  | y <sup>+</sup> | y <sup>2+</sup> |
|----------------|----|----|----|----------------|-----------------|
| 116.0711       | 1  | S  | 22 |                |                 |
| 245.1137       | 2  | E  | 21 | 2194.0165      | 1097.5122       |
| 373.1723       | 3  | Q  | 20 | 2064.9739      | 1032.9909       |
| 502.2149       | 4  | E  | 19 | 1936.9154      | 968.9616        |
| 665.2782       | 5  | Y  | 18 | 1807.8728      | 904.4403        |
| 722.2997       | 6  | G  | 17 | 1644.8094      | 822.9086        |
| 878.4260       | 7  | K  | 16 | 1587.7880      | 794.3979        |
| 949.4631       | 8  | A  | 15 | 1431.6617      | 716.3348        |
| 1006.4846      | 9  | G  | 14 | 1360.6246      | 680.8162        |
| 1063.5060      | 10 | G  | 13 | 1303.6031      | 652.3055        |
| 1150.5381      | 11 | S  | 12 | 1246.5816      | 623.7947        |
| 1247.5908      | 12 | P  | 11 | 1159.5496      | 580.2787        |
| 1318.6279      | 13 | A  | 10 | 1062.4968      | 531.7523        |
| 1405.6600      | 14 | S  | 9  | 991.4597       | 496.2338        |
| 1568.7233      | 15 | Y  | 8  | 904.4277       | 452.7178        |
| 1705.7822      | 16 | H  | 7  | 741.3644       | 371.1861        |
| 1762.8037      | 17 | G  | 6  | 604.3055       | 302.6566        |
| 1849.8357      | 18 | S  | 5  | 547.2840       | 274.1459        |
| 1950.8834      | 19 | T  | 4  | 460.2520       | 230.6299        |
| 2037.9154      | 20 | S  | 3  | 359.2043       | 180.1061        |
| 2134.9682      | 21 | P  | 2  | 272.1723       | 136.5900        |
|                | 22 | R  | 1  | 175.1195       | 88.0637         |

N-term:+29.04 K(7):+156.13

X-range:

0 - 0

MassTol: Y-zoom:

0. 1.

MassType:

☐ AVG ☒ MONO

Axis:

☒ 1 ☐ 2

Label:

☒ I ☐ M ☐ -

Ions:

a ☐ + ☐ 2+ ☐ 3+

b ☒ + ☐ 2+ ☐ 3+

c ☐ + ☐ 2+ ☐ 3+

x ☐ + ☐ 2+ ☐ 3+

y ☒ + ☒ 2+ ☐ 3+

z ☐ + ☐ 2+ ☐ 3+

hide H<sub>2</sub>O/NH<sub>3</sub> ☐

zoom 112-122 ☐

GO

SESAQELAEGQR, MH+ 1332.6395, m/z 444.8847  
L OS G14 P120811 220811-s1.02407.02407.3.dta

scan 2407; 2.7e+000

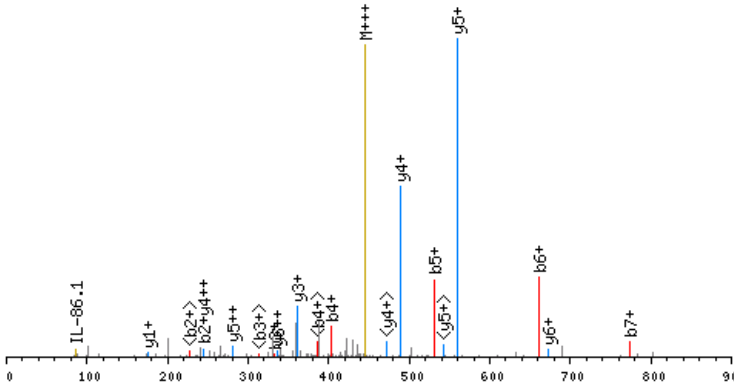

click image to zoom in; click top corners to zoom out

[precursor±]

scan 2406; 444.9 m/z; 3.6e+000

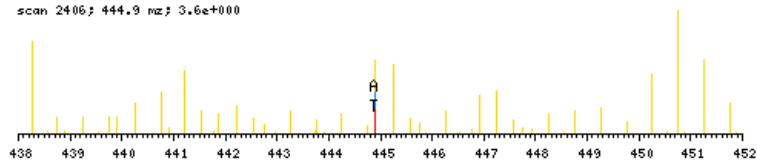

zoomed in precursor plot; T=theoretical m/z, A=acquired m/z

| b <sup>+</sup> | #  | AA | #  | y <sup>+</sup> | y <sup>2+</sup> |
|----------------|----|----|----|----------------|-----------------|
| 116.0711       | 1  | S  | 12 |                |                 |
| 245.1137       | 2  | E  | 11 | 1217.5762      | 609.2920        |
| 332.1458       | 3  | S  | 10 | 1088.5336      | 544.7707        |
| 403.1829       | 4  | A  | 9  | 1001.5016      | 501.2547        |
| 531.2414       | 5  | Q  | 8  | 930.4645       | 465.7362        |
| 660.2840       | 6  | E  | 7  | 802.4059       | 401.7069        |
| 773.3681       | 7  | L  | 6  | 673.3633       | 337.1856        |
| 844.4052       | 8  | A  | 5  | 560.2792       | 280.6435        |
| 973.4478       | 9  | E  | 4  | 489.2421       | 245.1250        |
| 1030.4693      | 10 | G  | 3  | 360.1995       | 180.6037        |
| 1158.5278      | 11 | Q  | 2  | 303.1781       | 152.0930        |
|                | 12 | R  | 1  | 175.1195       | 88.0637         |

N-term:+29.04

X-range:

0 - 0

MassTol: Y-zoom:

0. 1.

MassType:

☐AVG ☒MONO

Axis:

☒1 ☐2

Label:

☒I ☐M ☐-

Ions:

a ☐+ ☐2+ ☐3+

b ☒+ ☐2+ ☐3+

c ☐+ ☐2+ ☐3+

x ☐+ ☐2+ ☐3+

y ☒+ ☒2+ ☐3+

z ☐+ ☐2+ ☐3+

hide H<sub>2</sub>O/NH<sub>3</sub> ☐

zoom 112-122 ☐

GO

SESPYEDFLSADSKVLGR, MH+ 2056.0239, m/z 686.0128  
L OS G15 P120811 220811-s1.06019.06019.3.dta

scan 6019; 2.1e+000

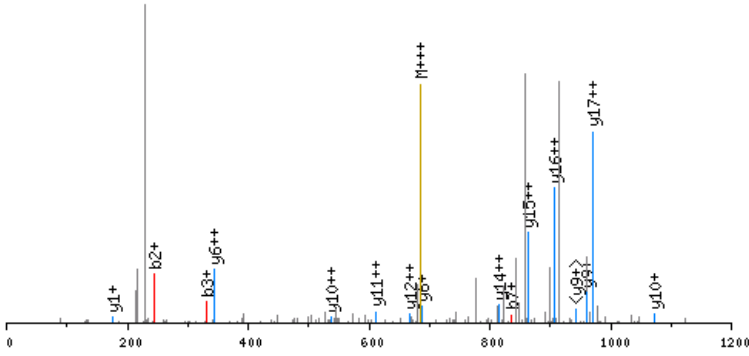

click image to zoom in; click top corners to zoom out

[precursor±]

scan 6016; 686.0 m/z; 6.1e+000

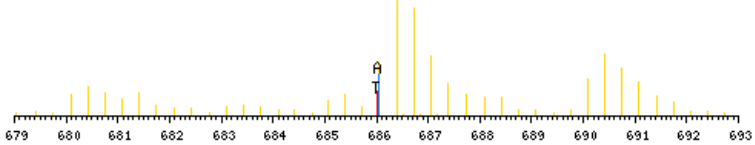

zoomed in precursor plot; T=theoretical m/z, A=acquired m/z

| b <sup>+</sup> | #  | AA | #  | y <sup>+</sup> | y <sup>2+</sup> |
|----------------|----|----|----|----------------|-----------------|
| 116.0711       | 1  | S  | 18 |                |                 |
| 245.1137       | 2  | E  | 17 | 1940.9606      | 970.9842        |
| 332.1458       | 3  | S  | 16 | 1811.9180      | 906.4629        |
| 429.1985       | 4  | P  | 15 | 1724.8860      | 862.9469        |
| 592.2618       | 5  | Y  | 14 | 1627.8332      | 814.4205        |
| 721.3044       | 6  | E  | 13 | 1464.7699      | 732.8888        |
| 836.3314       | 7  | D  | 12 | 1335.7273      | 668.3676        |
| 983.3998       | 8  | F  | 11 | 1220.7003      | 610.8541        |
| 1096.4839      | 9  | L  | 10 | 1073.6319      | 537.3199        |
| 1183.5159      | 10 | S  | 9  | 960.5479       | 480.7778        |
| 1254.5530      | 11 | A  | 8  | 873.5158       | 437.2618        |
| 1369.5799      | 12 | D  | 7  | 802.4787       | 401.7433        |
| 1456.6120      | 13 | S  | 6  | 687.4518       | 344.2298        |
| 1612.7383      | 14 | K  | 5  | 600.4197       | 300.7138        |
| 1711.8067      | 15 | V  | 4  | 444.2934       | 222.6506        |
| 1824.8907      | 16 | L  | 3  | 345.2250       | 173.1164        |
| 1881.9122      | 17 | G  | 2  | 232.1410       | 116.5744        |
|                | 18 | R  | 1  | 175.1195       | 88.0637         |

N-term:+29.04 K(14):+156.13

X-range:

0 - 0

MassTol: Y-zoom:

0. 1.

MassType:

☐ AVG ☒ MONO

Axis:

☒ 1 ☐ 2

Label:

☒ I ☐ M ☐ -

Ions:

a ☐ + ☐ 2+ ☐ 3+

b ☒ + ☐ 2+ ☐ 3+

c ☐ + ☐ 2+ ☐ 3+

x ☐ + ☐ 2+ ☐ 3+

y ☒ + ☒ 2+ ☐ 3+

z ☐ + ☐ 2+ ☐ 3+

hide H<sub>2</sub>O/NH<sub>3</sub> ☐

zoom 112-122 ☐

GO

SEQASDSEGHSDSEGQAVGAHR, MH+ 2503.0722, m/z 626.5235  
L OS G17 P120811 220811-s1.02414.02414.4.dta

scan 2414; 2.0e+000

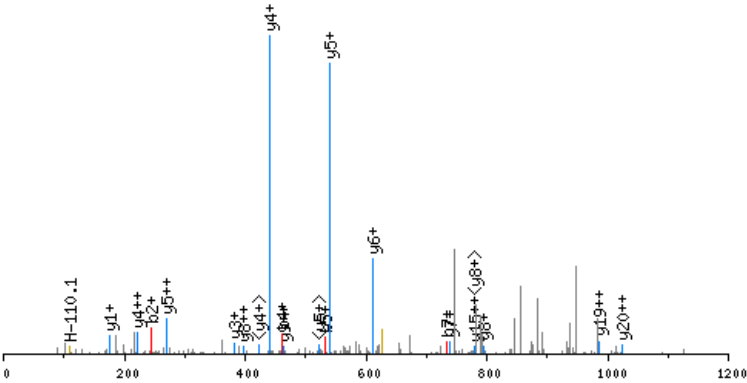

click image to zoom in; click top corners to zoom out [\[precursor±\]](#)

scan 2413; 626.5 m/z; 8.0e+000

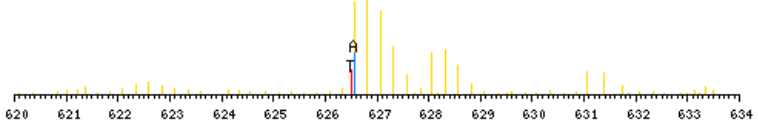

zoomed in precursor plot; T=theoretical m/z, A=acquired m/z

| b <sup>+</sup> | #  | AA | #  | y <sup>+</sup> | y <sup>2+</sup> |
|----------------|----|----|----|----------------|-----------------|
| 116.0711       | 1  | S  | 24 |                |                 |
| 245.1137       | 2  | E  | 23 | 2388.0088      | 1194.5083       |
| 332.1458       | 3  | S  | 22 | 2258.9663      | 1129.9870       |
| 460.2043       | 4  | Q  | 21 | 2171.9342      | 1086.4710       |
| 531.2414       | 5  | A  | 20 | 2043.8756      | 1022.4417       |
| 618.2735       | 6  | S  | 19 | 1972.8385      | 986.9232        |
| 733.3004       | 7  | D  | 18 | 1885.8065      | 943.4072        |
| 820.3324       | 8  | S  | 17 | 1770.7796      | 885.8937        |
| 949.3750       | 9  | E  | 16 | 1683.7475      | 842.3777        |
| 1006.3965      | 10 | G  | 15 | 1554.7049      | 777.8564        |
| 1143.4554      | 11 | H  | 14 | 1497.6835      | 749.3457        |
| 1230.4874      | 12 | S  | 13 | 1360.6246      | 680.8162        |
| 1345.5144      | 13 | D  | 12 | 1273.5925      | 637.3002        |
| 1492.5828      | 14 | F  | 11 | 1158.5656      | 579.7867        |
| 1579.6148      | 15 | S  | 10 | 1011.4972      | 506.2525        |
| 1708.6574      | 16 | E  | 9  | 924.4652       | 462.7365        |
| 1765.6789      | 17 | G  | 8  | 795.4226       | 398.2152        |
| 1893.7375      | 18 | Q  | 7  | 738.4011       | 369.7045        |
| 1964.7746      | 19 | A  | 6  | 610.3425       | 305.6752        |
| 2063.8430      | 20 | V  | 5  | 539.3054       | 270.1566        |
| 2120.8644      | 21 | G  | 4  | 440.2370       | 220.6224        |
| 2191.9016      | 22 | A  | 3  | 383.2155       | 192.1117        |
| 2328.9605      | 23 | H  | 2  | 312.1784       | 156.5931        |
|                | 24 | R  | 1  | 175.1195       | 88.0637         |

N-term:+29.04

X-range:

0 - 0

MassTol: Y-zoom:

0. 1.

MassType:

☐AVG ☒MONO

Axis:

☒1 ☐2

Label:

☒I ☐M ☐-

Ions:

a ☐+ ☐2+ ☐3+

b ☒+ ☐2+ ☐3+

c ☐+ ☐2+ ☐3+

x ☐+ ☐2+ ☐3+

y ☒+ ☒2+ ☐3+

z ☐+ ☐2+ ☐3+

hide H<sub>2</sub>O/NH<sub>3</sub> ☐

zoom 112-122 ☐

GO

SEVATQYSEDKAR, MH+ 1551.8291, m/z 517.9479  
H OS G16 P120811 220811-s1.02091.02091.3.dta

scan 2091; 1.2e+001

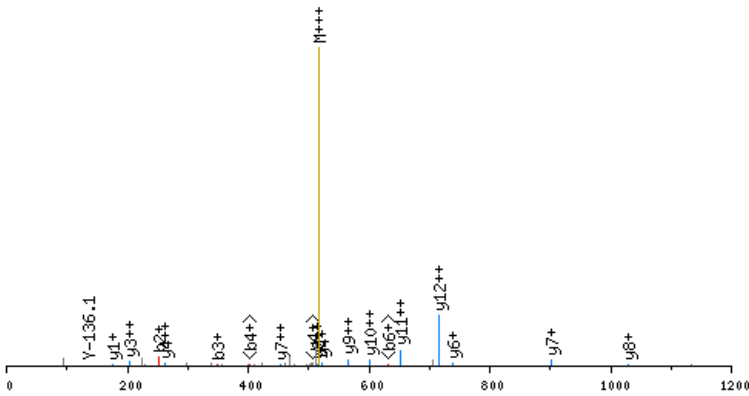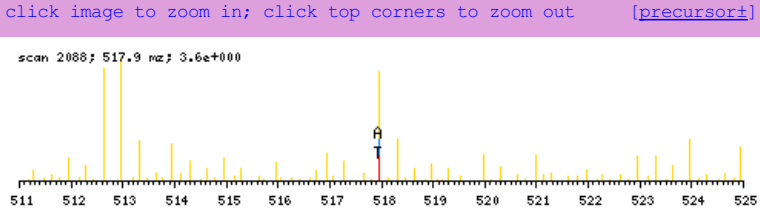

zoomed in precursor plot; T=theoretical m/z, A=acquired m/z

| b <sup>+</sup> | #  | AA | #  | y <sup>+</sup> | y <sup>2+</sup> |
|----------------|----|----|----|----------------|-----------------|
| 122.1029       | 1  | S  | 13 |                |                 |
| 251.1455       | 2  | E  | 12 | 1430.7340      | 715.8709        |
| 350.2139       | 3  | V  | 11 | 1301.6914      | 651.3496        |
| 421.2510       | 4  | A  | 10 | 1202.6230      | 601.8154        |
| 522.2987       | 5  | T  | 9  | 1131.5859      | 566.2968        |
| 650.3573       | 6  | Q  | 8  | 1030.5382      | 515.7730        |
| 813.4206       | 7  | Y  | 7  | 902.4796       | 451.7437        |
| 900.4527       | 8  | S  | 6  | 739.4163       | 370.2121        |
| 1029.4953      | 9  | E  | 5  | 652.3843       | 326.6960        |
| 1144.5222      | 10 | D  | 4  | 523.3417       | 262.1747        |
| 1306.6803      | 11 | K  | 3  | 408.3147       | 204.6613        |
| 1377.7174      | 12 | A  | 2  | 246.1566       | 123.5822        |
|                | 13 | R  | 1  | 175.1195       | 88.0637         |

N-term:+35.07 K(11):+162.16

X-range:

0 - 0

MassTol: Y-zoom:

0. 1.

MassType:

☐ AVG ☒ MONO

Axis:

☒ 1 ☐ 2

Label:

☒ I ☐ M ☐ -

Ions:

a ☐ + ☐ 2+ ☐ 3+

b ☒ + ☐ 2+ ☐ 3+

c ☐ + ☐ 2+ ☐ 3+

x ☐ + ☐ 2+ ☐ 3+

y ☒ + ☒ 2+ ☐ 3+

z ☐ + ☐ 2+ ☐ 3+

hide H<sub>2</sub>O/NH<sub>3</sub> ☐

zoom 112-122 ☐

GO

SEVCGQDITTKHMLPTVLR, MH+ 2241.1735, m/z 561.0488  
L OS G17 P120811 220811-s1.05309.05309.4.dta

scan 5309; 2.4e+000

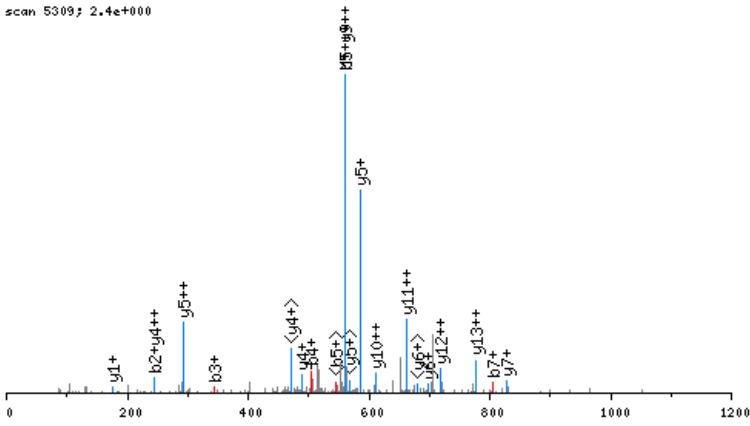

click image to zoom in; click top corners to zoom out [\[precursor±\]](#)

scan 5308; 561.0 m/z; 8.6e+000

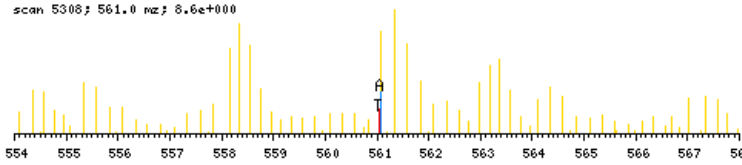

zoomed in precursor plot; T=theoretical m/z, A=acquired m/z

| b <sup>+</sup> | #  | AA | #  | y <sup>+</sup> | y <sup>2+</sup> |
|----------------|----|----|----|----------------|-----------------|
| 116.0711       | 1  | S  | 19 |                |                 |
| 245.1137       | 2  | E  | 18 | 2126.1102      | 1063.5590       |
| 344.1821       | 3  | V  | 17 | 1997.0676      | 999.0377        |
| 504.2127       | 4  | C  | 16 | 1897.9992      | 949.5035        |
| 561.2342       | 5  | G  | 15 | 1737.9686      | 869.4882        |
| 689.2928       | 6  | Q  | 14 | 1680.9471      | 840.9775        |
| 804.3197       | 7  | D  | 13 | 1552.8885      | 776.9482        |
| 917.4038       | 8  | I  | 12 | 1437.8616      | 719.4347        |
| 1018.4515      | 9  | T  | 11 | 1324.7775      | 662.8927        |
| 1119.4991      | 10 | T  | 10 | 1223.7299      | 612.3688        |
| 1275.6254      | 11 | K  | 9  | 1122.6822      | 561.8450        |
| 1412.6844      | 12 | H  | 8  | 966.5559       | 483.7819        |
| 1543.7248      | 13 | M  | 7  | 829.4970       | 415.2524        |
| 1656.8089      | 14 | L  | 6  | 698.4565       | 349.7322        |
| 1753.8617      | 15 | P  | 5  | 585.3724       | 293.1901        |
| 1854.9093      | 16 | T  | 4  | 488.3197       | 244.6637        |
| 1953.9778      | 17 | V  | 3  | 387.2720       | 194.1399        |
| 2067.0618      | 18 | L  | 2  | 288.2036       | 144.6057        |
|                | 19 | R  | 1  | 175.1195       | 88.0637         |

N-term: +29.04 C(4): +160.03  
K(11): +156.13

X-range:

0 - 0

MassTol: Y-zoom:

0. 1.

MassType:

☐AVG ☒MONO

Axis:

☒1 ☐2

Label:

☒I ☐M ☐-

Ions:

a ☐+ ☐2+ ☐3+

b ☒+ ☐2+ ☐3+

c ☐+ ☐2+ ☐3+

x ☐+ ☐2+ ☐3+

y ☒+ ☒2+ ☐3+

z ☐+ ☐2+ ☐3+

hide H<sub>2</sub>O/NH<sub>3</sub> ☐

zoom 112-122 ☐

GO

SEVDMCLKIR, MH+ 1146.6557, m/z 382.8901  
L OS G16 P120811 220811-s1.04280.04280.3.dta

scan 4280; 2.2e+001

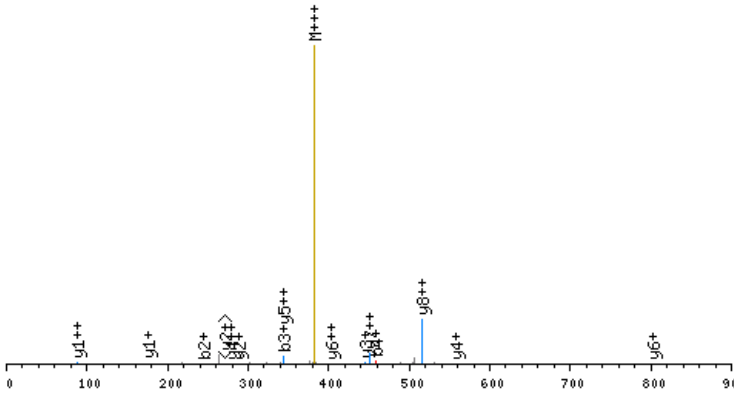

click image to zoom in; click top corners to zoom out

[precursor±]

scan 4278; 382.9 m/z; 8.7e+000

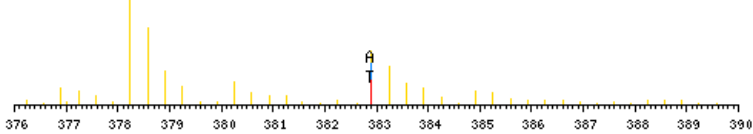

zoomed in precursor plot; T=theoretical m/z, A=acquired m/z

| b <sup>+</sup> | # | AA | # | y <sup>+</sup> | y <sup>2+</sup> |
|----------------|---|----|---|----------------|-----------------|
| 116.0711       | 1 | S  | 9 |                |                 |
| 245.1137       | 2 | E  | 8 | 1031.5924      | 516.3001        |
| 344.1821       | 3 | V  | 7 | 902.5498       | 451.7788        |
| 459.2091       | 4 | D  | 6 | 803.4814       | 402.2446        |
| 590.2496       | 5 | M  | 5 | 688.4544       | 344.7311        |
| 703.3336       | 6 | L  | 4 | 557.4139       | 279.2109        |
| 859.4599       | 7 | K  | 3 | 444.3299       | 222.6688        |
| 972.5440       | 8 | I  | 2 | 288.2036       | 144.6057        |
|                | 9 | R  | 1 | 175.1195       | 88.0637         |

N-term:+29.04 K(7):+156.13

X-range:

0 - 0

MassTol: Y-zoom:

0. 1.

MassType:

☐AVG ☒MONO

Axis:

☒1 ☐2

Label:

☒I ☐M ☐-

Ions:

a ☐+ ☐2+ ☐3+

b ☒+ ☐2+ ☐3+

c ☐+ ☐2+ ☐3+

x ☐+ ☐2+ ☐3+

y ☒+ ☒2+ ☐3+

z ☐+ ☐2+ ☐3+

hide H<sub>2</sub>O/NH<sub>3</sub> ☐

zoom 112-122 ☐

GO

SEVVLSGDDEDYQR, MH+ 1639.7451, m/z 547.2532  
L OS G13 P120811 220811-s1.03481.03481.3.dta

scan 3481; 2.6e+000

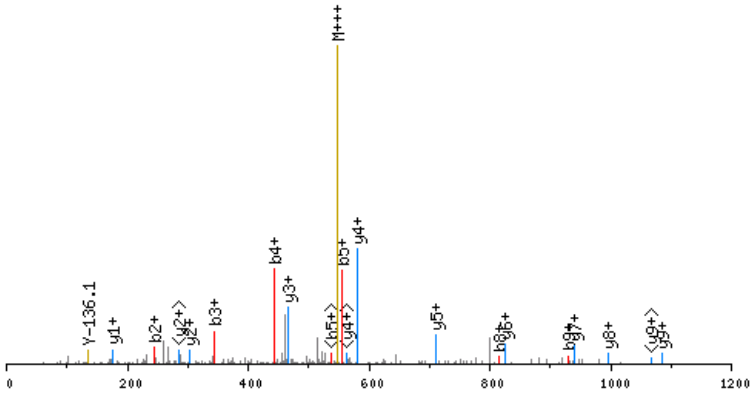

click image to zoom in; click top corners to zoom out

[precursor±]

scan 3479; 547.3 m/z; 6.0e+000

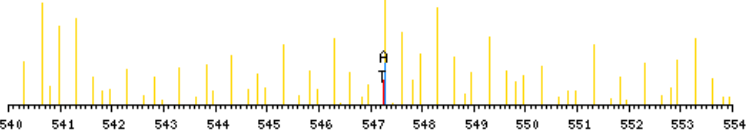

zoomed in precursor plot; T=theoretical m/z, A=acquired m/z

| b <sup>+</sup> | #  | AA | #  | y <sup>+</sup> | y <sup>2+</sup> |
|----------------|----|----|----|----------------|-----------------|
| 116.0711       | 1  | S  | 14 |                |                 |
| 245.1137       | 2  | E  | 13 | 1524.6818      | 762.8448        |
| 344.1821       | 3  | V  | 12 | 1395.6392      | 698.3235        |
| 443.2505       | 4  | V  | 11 | 1296.5708      | 648.7893        |
| 556.3346       | 5  | L  | 10 | 1197.5024      | 599.2551        |
| 643.3666       | 6  | S  | 9  | 1084.4183      | 542.7131        |
| 700.3881       | 7  | G  | 8  | 997.3863       | 499.1971        |
| 815.4150       | 8  | D  | 7  | 940.3648       | 470.6863        |
| 930.4420       | 9  | D  | 6  | 825.3379       | 413.1729        |
| 1059.4846      | 10 | E  | 5  | 710.3109       | 355.6594        |
| 1174.5115      | 11 | D  | 4  | 581.2683       | 291.1381        |
| 1337.5749      | 12 | Y  | 3  | 466.2414       | 233.6246        |
| 1465.6334      | 13 | Q  | 2  | 303.1781       | 152.0930        |
|                | 14 | R  | 1  | 175.1195       | 88.0637         |

N-term:+29.04

X-range:

0 - 0

MassTol: Y-zoom:

0. 1.

MassType:

☐AVG ☒MONO

Axis:

☒1 ☐2

Label:

☒I ☐M ☐-

Ions:

a ☐+ ☐2+ ☐3+

b ☒+ ☐2+ ☐3+

c ☐+ ☐2+ ☐3+

x ☐+ ☐2+ ☐3+

y ☒+ ☒2+ ☐3+

z ☐+ ☐2+ ☐3+

hide H<sub>2</sub>O/NH<sub>3</sub> ☐

zoom 112-122 ☐

GO

SFEVEEIEPPNSTPPR, MH+ 1855.9078, m/z 619.3074  
L OS G13 P120811 220811-s1.05276.05276.3.dta

scan 5276; 3.6e+000

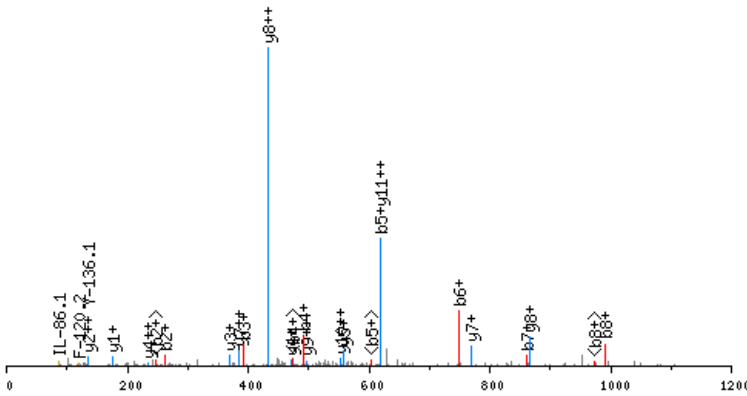

click image to zoom in; click top corners to zoom out

[precursor±]

scan 5274; 619.3 m/z; 6.2e+000

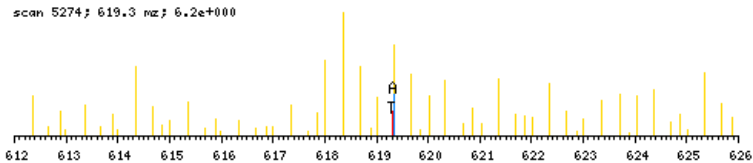

zoomed in precursor plot; T=theoretical m/z, A=acquired m/z

| b <sup>+</sup> | #  | AA | #  | y <sup>+</sup> | y <sup>2+</sup> |
|----------------|----|----|----|----------------|-----------------|
| 116.0711       | 1  | S  | 16 |                |                 |
| 263.1395       | 2  | F  | 15 | 1740.8445      | 870.9261        |
| 392.1821       | 3  | E  | 14 | 1593.7760      | 797.3919        |
| 491.2505       | 4  | V  | 13 | 1464.7334      | 732.8706        |
| 620.2931       | 5  | E  | 12 | 1365.6650      | 683.3364        |
| 749.3357       | 6  | E  | 11 | 1236.6224      | 618.8151        |
| 862.4198       | 7  | I  | 10 | 1107.5798      | 554.2938        |
| 991.4624       | 8  | E  | 9  | 994.4958       | 497.7518        |
| 1088.5152      | 9  | P  | 8  | 865.4532       | 433.2305        |
| 1185.5679      | 10 | P  | 7  | 768.4004       | 384.7041        |
| 1299.6108      | 11 | N  | 6  | 671.3477       | 336.1777        |
| 1386.6429      | 12 | S  | 5  | 557.3047       | 279.1563        |
| 1487.6906      | 13 | T  | 4  | 470.2727       | 235.6403        |
| 1584.7433      | 14 | P  | 3  | 369.2250       | 185.1164        |
| 1681.7961      | 15 | P  | 2  | 272.1723       | 136.5900        |
|                | 16 | R  | 1  | 175.1195       | 88.0637         |

N-term:+29.04

X-range:

0 - 0

MassTol: Y-zoom:

0. 1.

MassType:

☐AVG ☒MONO

Axis:

☒1 ☐2

Label:

☒I ☐M ☐-

Ions:

a ☐+ ☐2+ ☐3+

b ☒+ ☐2+ ☐3+

c ☐+ ☐2+ ☐3+

x ☐+ ☐2+ ☐3+

y ☒+ ☒2+ ☐3+

z ☐+ ☐2+ ☐3+

hide H<sub>2</sub>O/NH<sub>3</sub> ☐

zoom 112-122 ☐

GO

SFGEAGPEIVAPSAEGTAGSR, MH+ 2024.0148, m/z 675.3431

H OS G12 P120811 220811-s1.03836.03836.3.dta

scan 3836; 2.3e+000

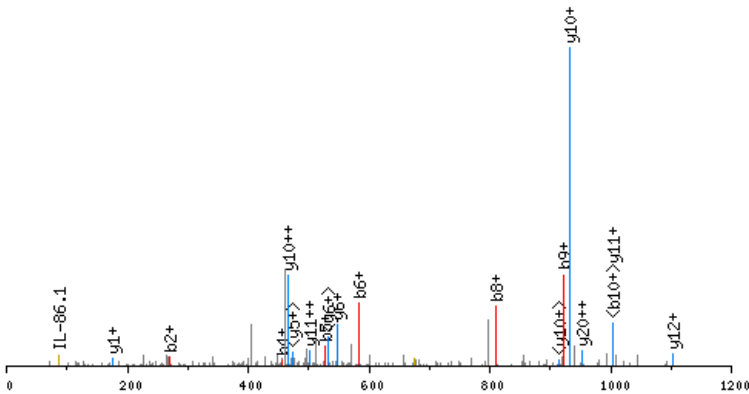

click image to zoom in; click top corners to zoom out

[precursor±]

scan 3832; 675.3 m/z; 2.2e+001

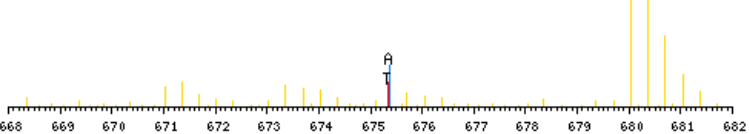

zoomed in precursor plot; T=theoretical m/z, A=acquired m/z

| b <sup>+</sup> | #  | AA | #  | y <sup>+</sup> | y <sup>2+</sup> |
|----------------|----|----|----|----------------|-----------------|
| 122.1029       | 1  | S  | 21 |                |                 |
| 269.1713       | 2  | F  | 20 | 1902.9197      | 951.9638        |
| 326.1928       | 3  | G  | 19 | 1755.8513      | 878.4296        |
| 455.2354       | 4  | E  | 18 | 1698.8299      | 849.9188        |
| 526.2725       | 5  | A  | 17 | 1569.7873      | 785.3975        |
| 583.2940       | 6  | G  | 16 | 1498.7502      | 749.8790        |
| 680.3467       | 7  | P  | 15 | 1441.7287      | 721.3683        |
| 809.3893       | 8  | E  | 14 | 1344.6759      | 672.8419        |
| 922.4734       | 9  | I  | 13 | 1215.6333      | 608.3206        |
| 1021.5418      | 10 | V  | 12 | 1102.5493      | 551.7786        |
| 1092.5789      | 11 | A  | 11 | 1003.4809      | 502.2443        |
| 1189.6317      | 12 | P  | 10 | 932.4437       | 466.7258        |
| 1276.6637      | 13 | S  | 9  | 835.3910       | 418.1994        |
| 1347.7008      | 14 | A  | 8  | 748.3590       | 374.6834        |
| 1476.7434      | 15 | E  | 7  | 677.3218       | 339.1648        |
| 1533.7649      | 16 | G  | 6  | 548.2792       | 274.6435        |
| 1634.8126      | 17 | T  | 5  | 491.2578       | 246.1328        |
| 1705.8497      | 18 | A  | 4  | 390.2101       | 195.6090        |
| 1762.8711      | 19 | G  | 3  | 319.1730       | 160.0904        |
| 1849.9032      | 20 | S  | 2  | 262.1515       | 131.5797        |
|                | 21 | R  | 1  | 175.1195       | 88.0637         |

N-term:+35.07

N-term: +29.04 K(12): +156.13

X-range:

0 - 0

MassTol: Y-zoom:

0. 1.

MassType:

☐AVG ☒MONO

Axis:

☒1 ☐2

Label:

☒I ☐M ☐-

Ions:

a ☐+ ☐2+ ☐3+

b ☒+ ☐2+ ☐3+

c ☐+ ☐2+ ☐3+

x ☐+ ☐2+ ☐3+

y ☒+ ☒2+ ☐3+

z ☐+ ☐2+ ☐3+

hide H<sub>2</sub>O/NH<sub>3</sub> ☐

zoom 112-122 ☐

GO

SFPTLKFFPASADR, MH+ 1639.8848, m/z 547.2998  
L OS G15 P120811 220811-s1.05867.05867.3.dta

scan 5867; 4.4e+000

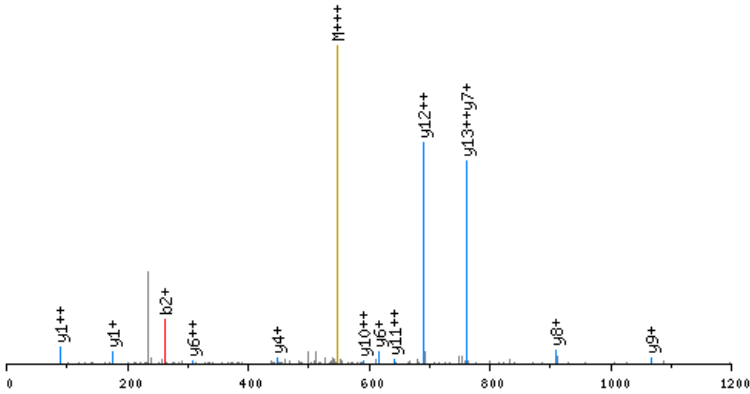

click image to zoom in; click top corners to zoom out

[precursor±]

scan 5866; 547.3 m/z; 1.8e+001

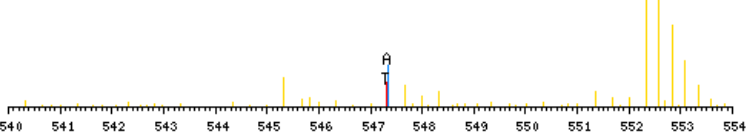

zoomed in precursor plot; T=theoretical m/z, A=acquired m/z

| b <sup>+</sup> | #  | AA | #  | y <sup>+</sup> | y <sup>2+</sup> |
|----------------|----|----|----|----------------|-----------------|
| 116.0711       | 1  | S  | 14 |                |                 |
| 263.1395       | 2  | F  | 13 | 1524.8215      | 762.9147        |
| 360.1923       | 3  | P  | 12 | 1377.7531      | 689.3805        |
| 461.2400       | 4  | T  | 11 | 1280.7003      | 640.8541        |
| 574.3240       | 5  | L  | 10 | 1179.6527      | 590.3302        |
| 730.4503       | 6  | K  | 9  | 1066.5686      | 533.7882        |
| 877.5188       | 7  | F  | 8  | 910.4423       | 455.7251        |
| 1024.5872      | 8  | F  | 7  | 763.3739       | 382.1909        |
| 1121.6399      | 9  | P  | 6  | 616.3055       | 308.6566        |
| 1192.6771      | 10 | A  | 5  | 519.2527       | 260.1303        |
| 1279.7091      | 11 | S  | 4  | 448.2156       | 224.6117        |
| 1350.7462      | 12 | A  | 3  | 361.1836       | 181.0957        |
| 1465.7731      | 13 | D  | 2  | 290.1464       | 145.5771        |
|                | 14 | R  | 1  | 175.1195       | 88.0637         |

N-term:+29.04 K(6):+156.13

X-range:

0 - 0

MassTol: Y-zoom:

0. 1.

MassType:

☐AVG ☒MONO

Axis:

☒1 ☐2

Label:

☒I ☐M ☐-

Ions:

a ☐+ ☐2+ ☐3+

b ☒+ ☐2+ ☐3+

c ☐+ ☐2+ ☐3+

x ☐+ ☐2+ ☐3+

y ☒+ ☒2+ ☐3+

z ☐+ ☐2+ ☐3+

hide H<sub>2</sub>O/NH<sub>3</sub> ☐

zoom 112-122 ☐

GO

SGAQASSTPLSPTR, MH+ 1387.7181, m/z 463.2442  
L OS G13 P120811 220811-s1.02323.02323.3.dta

scan 2323; 1.3e+000

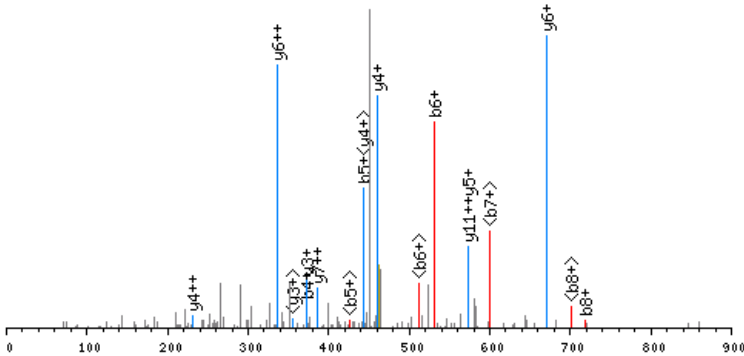

click image to zoom in; click top corners to zoom out

[precursor±]

scan 2319; 463.2 m/z; 4.0e+000

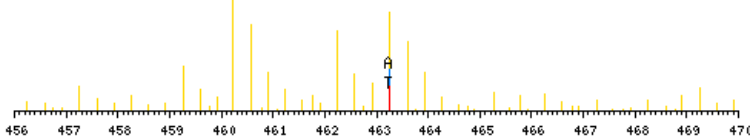

zoomed in precursor plot; T=theoretical m/z, A=acquired m/z

| b <sup>+</sup> | #  | AA | #  | y <sup>+</sup> | y <sup>2+</sup> |
|----------------|----|----|----|----------------|-----------------|
| 116.0711       | 1  | S  | 14 |                |                 |
| 173.0926       | 2  | G  | 13 | 1272.6548      | 636.8313        |
| 244.1297       | 3  | A  | 12 | 1215.6333      | 608.3206        |
| 372.1883       | 4  | Q  | 11 | 1144.5962      | 572.8020        |
| 443.2254       | 5  | A  | 10 | 1016.5376      | 508.7727        |
| 530.2574       | 6  | S  | 9  | 945.5005       | 473.2542        |
| 617.2895       | 7  | S  | 8  | 858.4685       | 429.7382        |
| 718.3371       | 8  | T  | 7  | 771.4365       | 386.2222        |
| 815.3899       | 9  | P  | 6  | 670.3888       | 335.6983        |
| 928.4740       | 10 | L  | 5  | 573.3360       | 287.1719        |
| 1015.5060      | 11 | S  | 4  | 460.2520       | 230.6299        |
| 1112.5588      | 12 | P  | 3  | 373.2199       | 187.1139        |
| 1213.6064      | 13 | T  | 2  | 276.1672       | 138.5875        |
|                | 14 | R  | 1  | 175.1195       | 88.0637         |

N-term:+29.04

X-range:

0 - 0

MassTol: Y-zoom:

0. 1.

MassType:

☐ AVG ☒ MONO

Axis:

☒ 1 ☐ 2

Label:

☒ I ☐ M ☐ -

Ions:

a ☐ + ☐ 2+ ☐ 3+

b ☒ + ☐ 2+ ☐ 3+

c ☐ + ☐ 2+ ☐ 3+

x ☐ + ☐ 2+ ☐ 3+

y ☒ + ☒ 2+ ☐ 3+

z ☐ + ☐ 2+ ☐ 3+

hide H<sub>2</sub>O/NH<sub>3</sub> ☐

zoom 112-122 ☐

GO

SGDSAPLQEAMAVLQHHDVSGTAR, MH+ 2576.2527, m/z 644.8186  
L OS G16 P120811 220811-s1.06166.06166.4.dta

scan 6166; 3.4e-001

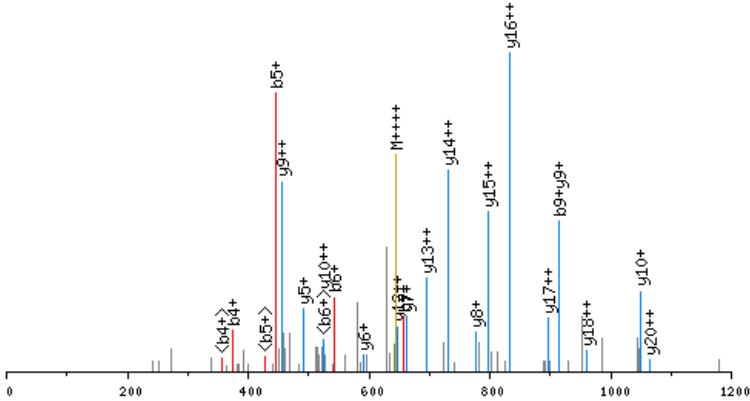

click image to zoom in; click top corners to zoom out [\[precursor±\]](#)

scan 6162; 644.8 m/z; 2.2e+000

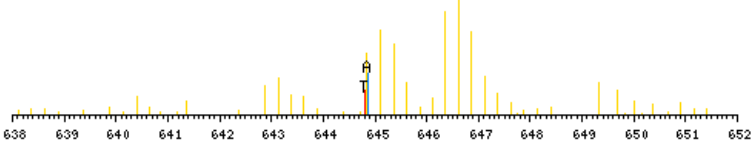

zoomed in precursor plot; T=theoretical m/z, A=acquired m/z

| b <sup>+</sup> | #  | AA | #  | y <sup>+</sup> | y <sup>2+</sup> |
|----------------|----|----|----|----------------|-----------------|
| 116.0711       | 1  | S  | 25 |                |                 |
| 173.0926       | 2  | G  | 24 | 2461.1894      | 1231.0986       |
| 288.1195       | 3  | D  | 23 | 2404.1679      | 1202.5879       |
| 375.1516       | 4  | S  | 22 | 2289.1410      | 1145.0744       |
| 446.1887       | 5  | A  | 21 | 2202.1090      | 1101.5584       |
| 543.2414       | 6  | P  | 20 | 2131.0718      | 1066.0398       |
| 656.3255       | 7  | L  | 19 | 2034.0191      | 1017.5135       |
| 784.3841       | 8  | Q  | 18 | 1920.9350      | 960.9714        |
| 913.4267       | 9  | E  | 17 | 1792.8764      | 896.9421        |
| 984.4638       | 10 | A  | 16 | 1663.8338      | 832.4208        |
| 1115.5043      | 11 | M  | 15 | 1592.7967      | 796.9023        |
| 1186.5414      | 12 | A  | 14 | 1461.7562      | 731.3820        |
| 1285.6098      | 13 | V  | 13 | 1390.7191      | 695.8635        |
| 1398.6939      | 14 | L  | 12 | 1291.6507      | 646.3293        |
| 1526.7524      | 15 | Q  | 11 | 1178.5667      | 589.7872        |
| 1663.8114      | 16 | H  | 10 | 1050.5081      | 525.7580        |
| 1800.8703      | 17 | H  | 9  | 913.4492       | 457.2285        |
| 1915.8972      | 18 | D  | 8  | 776.3903       | 388.6990        |
| 1986.9343      | 19 | A  | 7  | 661.3633       | 331.1856        |
| 2086.0027      | 20 | V  | 6  | 590.3262       | 295.6670        |
| 2173.0348      | 21 | S  | 5  | 491.2578       | 246.1328        |
| 2230.0562      | 22 | G  | 4  | 404.2258       | 202.6168        |
| 2331.1039      | 23 | T  | 3  | 347.2043       | 174.1061        |
| 2402.1410      | 24 | A  | 2  | 246.1566       | 123.5822        |
|                | 25 | R  | 1  | 175.1195       | 88.0637         |

N-term:+29.04

X-range:

0 - 0

MassTol: Y-zoom:

0. 1.

MassType:

☐ AVG ☒ MONO

Axis:

☒ 1 ☐ 2

Label:

☒ I ☐ M ☐ -

Ions:

a ☐ + ☐ 2+ ☐ 3+

b ☒ + ☐ 2+ ☐ 3+

c ☐ + ☐ 2+ ☐ 3+

x ☐ + ☐ 2+ ☐ 3+

y ☒ + ☒ 2+ ☐ 3+

z ☐ + ☐ 2+ ☐ 3+

hide H<sub>2</sub>O/NH<sub>3</sub> ☐

zoom 112-122 ☐

GO

SGEGNTSAAESSFSQEVAR, MH+ 1941.8790, m/z 647.9645  
L OS G13 P120811 220811-s1.03643.03643.3.dta

scan 3643; 5.5e-001

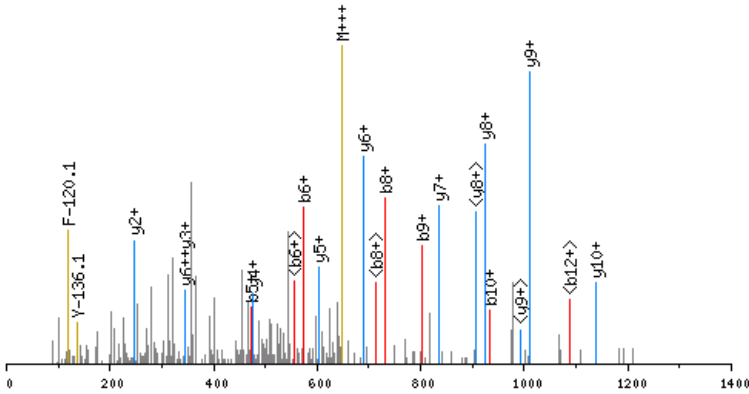

click image to zoom in; click top corners to zoom out

[precursor±]

scan 3639; 648.0 m/z; 1.8e+001

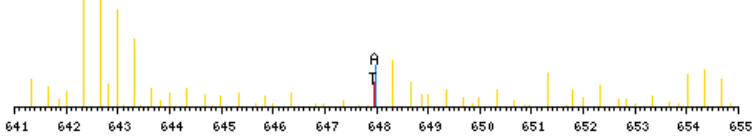

zoomed in precursor plot; T=theoretical m/z, A=acquired m/z

| b <sup>+</sup> | #  | AA | #  | y <sup>+</sup> | y <sup>2+</sup> |
|----------------|----|----|----|----------------|-----------------|
| 116.0711       | 1  | S  | 19 |                |                 |
| 173.0926       | 2  | G  | 18 | 1826.8157      | 913.9117        |
| 302.1352       | 3  | E  | 17 | 1769.7942      | 885.4010        |
| 359.1566       | 4  | G  | 16 | 1640.7516      | 820.8797        |
| 473.1996       | 5  | N  | 15 | 1583.7302      | 792.3690        |
| 574.2473       | 6  | T  | 14 | 1469.6872      | 735.3475        |
| 661.2793       | 7  | S  | 13 | 1368.6395      | 684.8237        |
| 732.3164       | 8  | A  | 12 | 1281.6075      | 641.3077        |
| 803.3535       | 9  | A  | 11 | 1210.5704      | 605.7891        |
| 932.3961       | 10 | E  | 10 | 1139.5333      | 570.2706        |
| 1019.4281      | 11 | S  | 9  | 1010.4907      | 505.7493        |
| 1106.4602      | 12 | S  | 8  | 923.4587       | 462.2332        |
| 1253.5286      | 13 | F  | 7  | 836.4266       | 418.7172        |
| 1340.5606      | 14 | S  | 6  | 689.3582       | 345.1830        |
| 1468.6192      | 15 | Q  | 5  | 602.3262       | 301.6670        |
| 1597.6618      | 16 | E  | 4  | 474.2676       | 237.6377        |
| 1696.7302      | 17 | V  | 3  | 345.2250       | 173.1164        |
| 1767.7673      | 18 | A  | 2  | 246.1566       | 123.5822        |
|                | 19 | R  | 1  | 175.1195       | 88.0637         |

N-term:+29.04

X-range:

0 - 0

MassTol: Y-zoom:

0. 1.

MassType:

☐ AVG ☒ MONO

Axis:

☒ 1 ☐ 2

Label:

☒ I ☐ M ☐ -

Ions:

a ☐ + ☐ 2+ ☐ 3+

b ☒ + ☐ 2+ ☐ 3+

c ☐ + ☐ 2+ ☐ 3+

x ☐ + ☐ 2+ ☐ 3+

y ☒ + ☒ 2+ ☐ 3+

z ☐ + ☐ 2+ ☐ 3+

hide H<sub>2</sub>O/NH<sub>3</sub> ☐

zoom 112-122 ☐

GO

SGEGQEDAGELDFSGLLKR, MH+ 2076.0886, m/z 692.7010  
H OS G15 P120811 220811-s1.05729.05729.3.dta

scan 5729; 5.0e+000

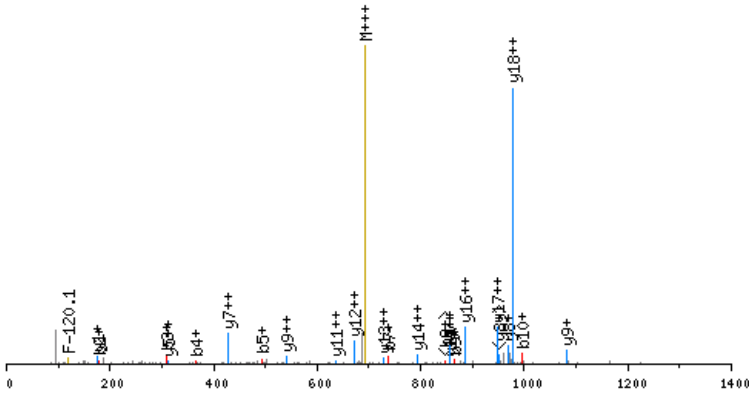

click image to zoom in; click top corners to zoom out

[precursor±]

scan 5726; 692.7 m/z; 1.9e+001

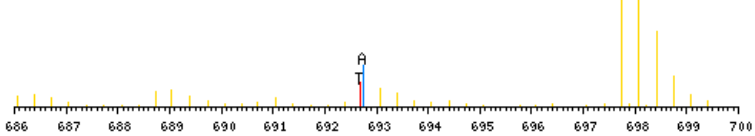

zoomed in precursor plot; T=theoretical m/z, A=acquired m/z

| b <sup>+</sup> | #  | AA | #  | y <sup>+</sup> | y <sup>2+</sup> |
|----------------|----|----|----|----------------|-----------------|
| 122.1029       | 1  | S  | 19 |                |                 |
| 179.1244       | 2  | G  | 18 | 1954.9934      | 978.0006        |
| 308.1670       | 3  | E  | 17 | 1897.9720      | 949.4899        |
| 365.1884       | 4  | G  | 16 | 1768.9294      | 884.9686        |
| 493.2470       | 5  | Q  | 15 | 1711.9079      | 856.4579        |
| 622.2896       | 6  | E  | 14 | 1583.8493      | 792.4286        |
| 737.3166       | 7  | D  | 13 | 1454.8068      | 727.9073        |
| 808.3537       | 8  | A  | 12 | 1339.7798      | 670.3938        |
| 865.3751       | 9  | G  | 11 | 1268.7427      | 634.8753        |
| 994.4177       | 10 | E  | 10 | 1211.7212      | 606.3645        |
| 1107.5018      | 11 | L  | 9  | 1082.6786      | 541.8432        |
| 1222.5287      | 12 | D  | 8  | 969.5946       | 485.3012        |
| 1369.5972      | 13 | F  | 7  | 854.5676       | 427.7877        |
| 1456.6292      | 14 | S  | 6  | 707.4992       | 354.2535        |
| 1513.6506      | 15 | G  | 5  | 620.4672       | 310.7375        |
| 1626.7347      | 16 | L  | 4  | 563.4457       | 282.2268        |
| 1739.8188      | 17 | L  | 3  | 450.3617       | 225.6847        |
| 1901.9769      | 18 | K  | 2  | 337.2776       | 169.1427        |
|                | 19 | R  | 1  | 175.1195       | 88.0637         |

N-term:+35.07 K(18):+162.16

X-range:

0 - 0

MassTol: Y-zoom:

0. 1.

MassType:

☐ AVG ☒ MONO

Axis:

☒ 1 ☐ 2

Label:

☒ I ☐ M ☐ -

Ions:

a ☐ + ☐ 2+ ☐ 3+

b ☒ + ☐ 2+ ☐ 3+

c ☐ + ☐ 2+ ☐ 3+

x ☐ + ☐ 2+ ☐ 3+

y ☒ + ☒ 2+ ☐ 3+

z ☐ + ☐ 2+ ☐ 3+

hide H<sub>2</sub>O/NH<sub>3</sub> ☐

zoom 112-122 ☐

GO

SGEHMDLTTCPLAAGGQKEKLR, MH+ 2455.2073, m/z 614.5573  
L OS G17 P120811 220811-s1.04535.04535.4.dta

scan 4535; 2.4e+000

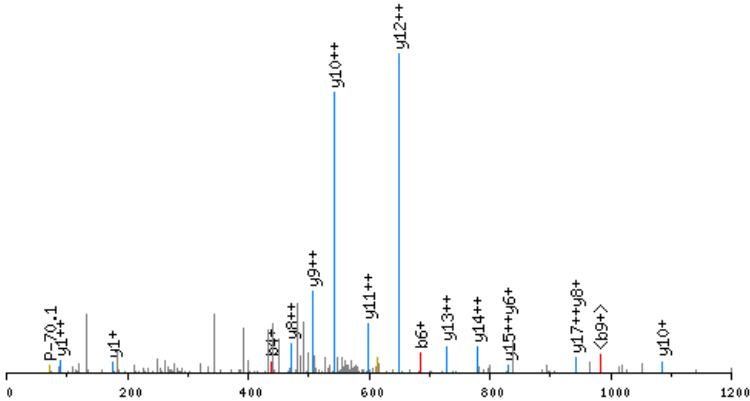

click image to zoom in; click top corners to zoom out [\[precursor±\]](#)

scan 4533; 614.6 m/z; 1.5e+001

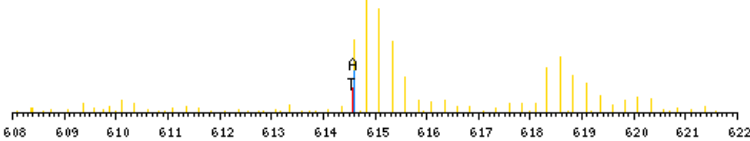

zoomed in precursor plot; T=theoretical m/z, A=acquired m/z

| b <sup>+</sup> | #  | AA | #  | y <sup>+</sup> | y <sup>2+</sup> |
|----------------|----|----|----|----------------|-----------------|
| 116.0711       | 1  | S  | 22 |                |                 |
| 173.0926       | 2  | G  | 21 | 2340.1440      | 1170.5759       |
| 302.1352       | 3  | E  | 20 | 2283.1225      | 1142.0652       |
| 439.1941       | 4  | H  | 19 | 2154.0800      | 1077.5439       |
| 570.2346       | 5  | M  | 18 | 2017.0210      | 1009.0144       |
| 685.2615       | 6  | D  | 17 | 1885.9806      | 943.4942        |
| 798.3456       | 7  | L  | 16 | 1770.9536      | 885.9807        |
| 899.3933       | 8  | T  | 15 | 1657.8696      | 829.4387        |
| 1000.4409      | 9  | T  | 14 | 1556.8219      | 778.9148        |
| 1160.4715      | 10 | C  | 13 | 1455.7742      | 728.3910        |
| 1257.5243      | 11 | P  | 12 | 1295.7436      | 648.3757        |
| 1370.6084      | 12 | L  | 11 | 1198.6908      | 599.8493        |
| 1441.6455      | 13 | A  | 10 | 1085.6068      | 543.3073        |
| 1512.6826      | 14 | A  | 9  | 1014.5697      | 507.7887        |
| 1569.7041      | 15 | G  | 8  | 943.5325       | 472.2702        |
| 1626.7255      | 16 | G  | 7  | 886.5111       | 443.7595        |
| 1754.7841      | 17 | Q  | 6  | 829.4896       | 415.2487        |
| 1882.8427      | 18 | Q  | 5  | 701.4310       | 351.2194        |
| 2011.8853      | 19 | E  | 4  | 573.3725       | 287.1901        |
| 2168.0116      | 20 | K  | 3  | 444.3299       | 222.6688        |
| 2281.0956      | 21 | L  | 2  | 288.2036       | 144.6057        |
|                | 22 | R  | 1  | 175.1195       | 88.0637         |

N-term: +29.04 C(10): +160.03  
K(20): +156.13

N-term: +29.04 K(12): +156.13

X-range:

0 - 0

MassTol: Y-zoom:

0. 1.

MassType:

☐AVG ☒MONO

Axis:

☒1 ☐2

Label:

☒I ☐M ☐-

Ions:

a ☐+ ☐2+ ☐3+

b ☒+ ☐2+ ☐3+

c ☐+ ☐2+ ☐3+

x ☐+ ☐2+ ☐3+

y ☒+ ☒2+ ☐3+

z ☐+ ☐2+ ☐3+

hide H<sub>2</sub>O/NH<sub>3</sub> ☐

zoom 112-122 ☐

GO

SGETAKGDYPLEAVR, MH+ 1660.9182, m/z 554.3109  
H OS G15 P120811 220811-s1.03065.03065.3.dta

scan 3065; 1.2e+001

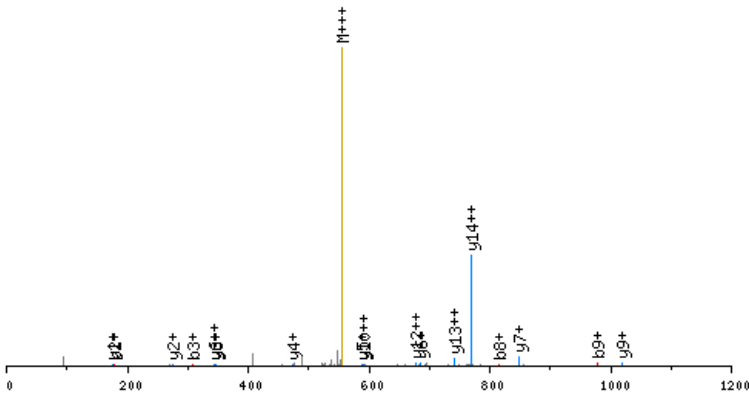

click image to zoom in; click top corners to zoom out

[precursor±]

scan 3061; 554.3 m/z; 3.3e+000

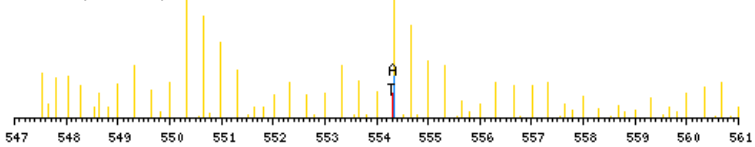

zoomed in precursor plot; T=theoretical m/z, A=acquired m/z

| b <sup>+</sup> | #  | AA | #  | y <sup>+</sup> | y <sup>2+</sup> |
|----------------|----|----|----|----------------|-----------------|
| 122.1029       | 1  | S  | 15 |                |                 |
| 179.1244       | 2  | G  | 14 | 1539.8231      | 770.4155        |
| 308.1670       | 3  | E  | 13 | 1482.8017      | 741.9047        |
| 409.2147       | 4  | T  | 12 | 1353.7591      | 677.3835        |
| 480.2518       | 5  | A  | 11 | 1252.7114      | 626.8596        |
| 642.4099       | 6  | K  | 10 | 1181.6743      | 591.3411        |
| 699.4313       | 7  | G  | 9  | 1019.5162      | 510.2620        |
| 814.4583       | 8  | D  | 8  | 962.4947       | 481.7513        |
| 977.5216       | 9  | Y  | 7  | 847.4678       | 424.2378        |
| 1074.5744      | 10 | P  | 6  | 684.4044       | 342.7061        |
| 1187.6584      | 11 | L  | 5  | 587.3517       | 294.1798        |
| 1316.7010      | 12 | E  | 4  | 474.2676       | 237.6377        |
| 1387.7381      | 13 | A  | 3  | 345.2250       | 173.1164        |
| 1486.8066      | 14 | V  | 2  | 274.1879       | 137.5979        |
|                | 15 | R  | 1  | 175.1195       | 88.0637         |

N-term:+35.07 K(6):+162.16

X-range:

0 - 0

MassTol: Y-zoom:

0. 1.

MassType:

☐AVG ☒MONO

Axis:

☒1 ☐2

Label:

☒I ☐M ☐-

Ions:

a ☐+ ☐2+ ☐3+

b ☒+ ☐2+ ☐3+

c ☐+ ☐2+ ☐3+

x ☐+ ☐2+ ☐3+

y ☒+ ☒2+ ☐3+

z ☐+ ☐2+ ☐3+

hide H<sub>2</sub>O/NH<sub>3</sub> ☐

zoom 112-122 ☐

GO

SGEVESHLSFLEKSLR, MH+ 1874.0024, m/z 469.2560  
L OS G17 P120811 220811-s1.05907.05907.4.dta

scan 5907; 4.4e+000

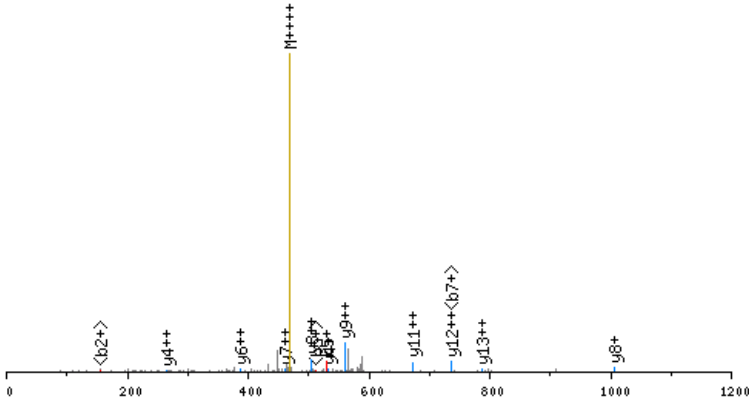

click image to zoom in; click top corners to zoom out

[precursor±]

scan 5903; 469.3 m/z; 2.7e+000

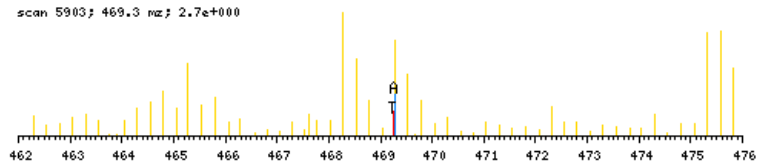

zoomed in precursor plot; T=theoretical m/z, A=acquired m/z

| b <sup>+</sup> | #  | AA | #  | y <sup>+</sup> | y <sup>2+</sup> |
|----------------|----|----|----|----------------|-----------------|
| 116.0711       | 1  | S  | 16 |                |                 |
| 173.0926       | 2  | G  | 15 | 1758.9391      | 879.9734        |
| 302.1352       | 3  | E  | 14 | 1701.9176      | 851.4627        |
| 401.2036       | 4  | V  | 13 | 1572.8750      | 786.9414        |
| 530.2462       | 5  | E  | 12 | 1473.8066      | 737.4072        |
| 617.2782       | 6  | S  | 11 | 1344.7640      | 672.8859        |
| 754.3371       | 7  | H  | 10 | 1257.7320      | 629.3699        |
| 867.4212       | 8  | L  | 9  | 1120.6731      | 560.8404        |
| 954.4532       | 9  | S  | 8  | 1007.5890      | 504.2984        |
| 1101.5216      | 10 | F  | 7  | 920.5570       | 460.7824        |
| 1214.6057      | 11 | L  | 6  | 773.4886       | 387.2482        |
| 1343.6483      | 12 | E  | 5  | 660.4045       | 330.7062        |
| 1499.7746      | 13 | K  | 4  | 531.3619       | 266.1849        |
| 1586.8066      | 14 | S  | 3  | 375.2356       | 188.1217        |
| 1699.8907      | 15 | L  | 2  | 288.2036       | 144.6057        |
|                | 16 | R  | 1  | 175.1195       | 88.0637         |

N-term:+29.04 K(13):+156.13

N-term: +29.04 K(17): +156.13

X-range:

0 - 0

MassTol: Y-zoom:

0. 1.

MassType:

☐ AVG ☒ MONO

Axis:

☒ 1 ☐ 2

Label:

☒ I ☐ M ☐ -

Ions:

a ☐ + ☐ 2+ ☐ 3+

b ☒ + ☐ 2+ ☐ 3+

c ☐ + ☐ 2+ ☐ 3+

x ☐ + ☐ 2+ ☐ 3+

y ☒ + ☒ 2+ ☐ 3+

z ☐ + ☐ 2+ ☐ 3+

hide H<sub>2</sub>O/NH<sub>3</sub> ☐

zoom 112-122 ☐

GO

SGGTTMYPGIADR, MH+ 1353.6473, m/z 677.3273  
L OS G13 P120811 220811-s1.03546.03546.2.dta

scan 3546; 2.3e+000

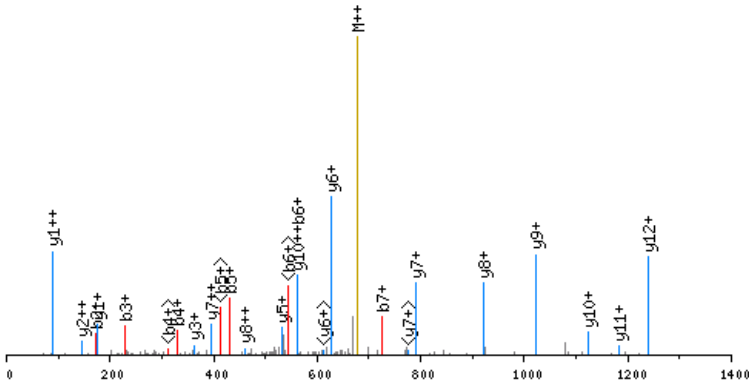

click image to zoom in; click top corners to zoom out

[precursor±]

scan 3544; 677.3 m/z; 1.0e+001

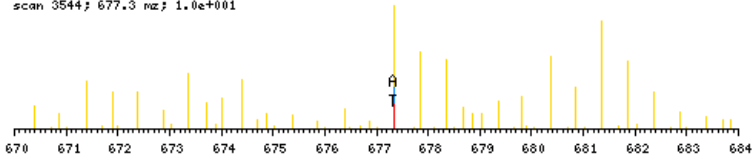

zoomed in precursor plot; T=theoretical m/z, A=acquired m/z

| b <sup>+</sup> | #  | AA | #  | y <sup>+</sup> | y <sup>2+</sup> |
|----------------|----|----|----|----------------|-----------------|
| 116.0711       | 1  | S  | 13 |                |                 |
| 173.0926       | 2  | G  | 12 | 1238.5839      | 619.7959        |
| 230.1141       | 3  | G  | 11 | 1181.5625      | 591.2852        |
| 331.1617       | 4  | T  | 10 | 1124.5410      | 562.7744        |
| 432.2094       | 5  | T  | 9  | 1023.4933      | 512.2506        |
| 563.2499       | 6  | M  | 8  | 922.4457       | 461.7267        |
| 726.3132       | 7  | Y  | 7  | 791.4052       | 396.2065        |
| 823.3660       | 8  | P  | 6  | 628.3418       | 314.6748        |
| 880.3875       | 9  | G  | 5  | 531.2891       | 266.1485        |
| 993.4715       | 10 | I  | 4  | 474.2676       | 237.6377        |
| 1064.5086      | 11 | A  | 3  | 361.1836       | 181.0957        |
| 1179.5356      | 12 | D  | 2  | 290.1464       | 145.5771        |
|                | 13 | R  | 1  | 175.1195       | 88.0637         |

N-term:+29.04

X-range:

0 - 0

MassTol: Y-zoom:

0. 1.

MassType:

☐ AVG ☒ MONO

Axis:

☒ 1 ☐ 2

Label:

☒ I ☐ M ☐ -

Ions:

a ☐ + ☐ 2+ ☐ 3+

b ☒ + ☐ 2+ ☐ 3+

c ☐ + ☐ 2+ ☐ 3+

x ☐ + ☐ 2+ ☐ 3+

y ☒ + ☒ 2+ ☐ 3+

z ☐ + ☐ 2+ ☐ 3+

hide H<sub>2</sub>O/NH<sub>3</sub> ☐

zoom 112-122 ☐

GO

SGIPETVPLSTVNR, MH+ 1497.8277, m/z 499.9474  
L OS G13 P120811 220811-s1.04826.04826.3.dta

scan 4826; 2.3e+000

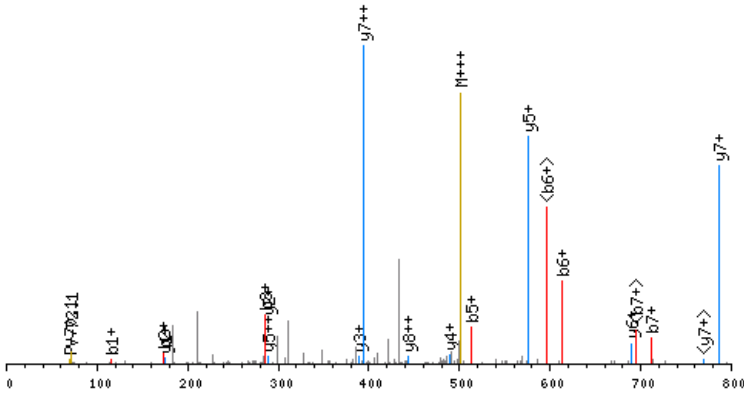

click image to zoom in; click top corners to zoom out

[precursor±]

scan 4824; 499.9 m/z; 1.5e+001

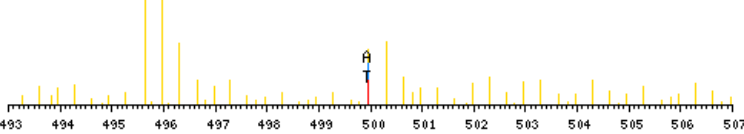

zoomed in precursor plot; T=theoretical m/z, A=acquired m/z

| b <sup>+</sup> | #  | AA | #  | y <sup>+</sup> | y <sup>2+</sup> |
|----------------|----|----|----|----------------|-----------------|
| 116.0711       | 1  | S  | 14 |                |                 |
| 173.0926       | 2  | G  | 13 | 1382.7644      | 691.8861        |
| 286.1767       | 3  | I  | 12 | 1325.7429      | 663.3754        |
| 383.2294       | 4  | P  | 11 | 1212.6588      | 606.8333        |
| 512.2720       | 5  | E  | 10 | 1115.6061      | 558.3069        |
| 613.3197       | 6  | T  | 9  | 986.5635       | 493.7856        |
| 712.3881       | 7  | V  | 8  | 885.5158       | 443.2618        |
| 809.4409       | 8  | P  | 7  | 786.4474       | 393.7276        |
| 922.5249       | 9  | L  | 6  | 689.3946       | 345.2012        |
| 1009.5570      | 10 | S  | 5  | 576.3105       | 288.6592        |
| 1110.6046      | 11 | T  | 4  | 489.2785       | 245.1432        |
| 1209.6731      | 12 | V  | 3  | 388.2308       | 194.6193        |
| 1323.7160      | 13 | N  | 2  | 289.1624       | 145.0851        |
|                | 14 | R  | 1  | 175.1195       | 88.0637         |

N-term:+29.04

X-range:

0 - 0

MassTol: Y-zoom:

0. 1.

MassType:

☐AVG ☒MONO

Axis:

☒1 ☐2

Label:

☒I ☐M ☐-

Ions:

a ☐+ ☐2+ ☐3+

b ☒+ ☐2+ ☐3+

c ☐+ ☐2+ ☐3+

x ☐+ ☐2+ ☐3+

y ☒+ ☒2+ ☐3+

z ☐+ ☐2+ ☐3+

hide H<sub>2</sub>O/NH<sub>3</sub> ☐

zoom 112-122 ☐

GO

SGLQGLPGLAGLHGDQGAPGVPVGPAGPR, MH+ 2567.3906, m/z 642.6031  
H\_OS\_G14\_P120811\_220811-s1.05618.05618.4.dta

scan 5618; 2.2e+000

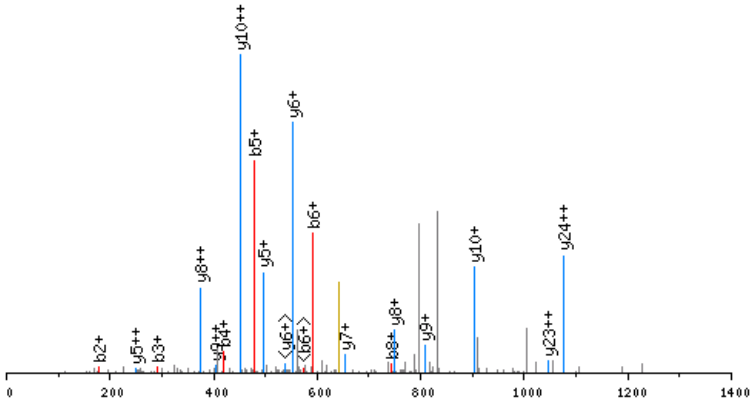

click image to zoom in; click top corners to zoom out

[precursor±]

scan 5618; 642.6 m/z; 3.5e+000

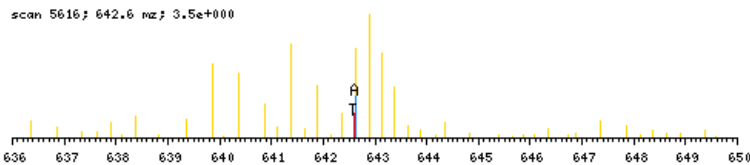

zoomed in precursor plot; T=theoretical m/z, A=acquired m/z

| b <sup>+</sup> | #  | AA | #  | y <sup>+</sup> | y <sup>2+</sup> |
|----------------|----|----|----|----------------|-----------------|
| 122.1029       | 1  | S  | 28 |                |                 |
| 179.1244       | 2  | G  | 27 | 2446.2955      | 1223.6517       |
| 292.2085       | 3  | L  | 26 | 2389.2741      | 1195.1409       |
| 420.2670       | 4  | Q  | 25 | 2276.1900      | 1138.5989       |
| 477.2885       | 5  | G  | 24 | 2148.1314      | 1074.5696       |
| 590.3726       | 6  | L  | 23 | 2091.1099      | 1046.0589       |
| 687.4253       | 7  | P  | 22 | 1978.0259      | 989.5169        |
| 744.4468       | 8  | G  | 21 | 1880.9731      | 940.9905        |
| 857.5309       | 9  | L  | 20 | 1823.9517      | 912.4797        |
| 928.5680       | 10 | A  | 19 | 1710.8676      | 855.9377        |
| 985.5894       | 11 | G  | 18 | 1639.8305      | 820.4192        |
| 1098.6735      | 12 | L  | 17 | 1582.8090      | 791.9084        |
| 1235.7324      | 13 | H  | 16 | 1469.7249      | 735.3664        |
| 1292.7539      | 14 | G  | 15 | 1332.6660      | 666.8369        |
| 1407.7808      | 15 | D  | 14 | 1275.6446      | 638.3262        |
| 1535.8394      | 16 | Q  | 13 | 1160.6176      | 580.8127        |
| 1592.8609      | 17 | G  | 12 | 1032.5591      | 516.7834        |
| 1663.8980      | 18 | A  | 11 | 975.5376       | 488.2727        |
| 1760.9507      | 19 | P  | 10 | 904.5005       | 452.7542        |
| 1817.9722      | 20 | G  | 9  | 807.4477       | 404.2278        |
| 1915.0250      | 21 | P  | 8  | 750.4262       | 375.7170        |
| 2014.0934      | 22 | V  | 7  | 653.3735       | 327.1907        |
| 2071.1148      | 23 | G  | 6  | 554.3051       | 277.6564        |
| 2168.1676      | 24 | P  | 5  | 497.2836       | 249.1457        |
| 2239.2047      | 25 | A  | 4  | 400.2308       | 200.6193        |
| 2296.2262      | 26 | G  | 3  | 329.1937       | 165.1008        |
| 2393.2789      | 27 | P  | 2  | 272.1723       | 136.5900        |
|                | 28 | R  | 1  | 175.1195       | 88.0637         |

N-term:+35.07

X-range:

0 - 0

MassTol: Y-zoom:

0. 1.

MassType:

☐ AVG ☒ MONO

Axis:

☒ 1 ☐ 2

Label:

☒ I ☐ M ☐ -

Ions:

a ☐ + ☐ 2+ ☐ 3+

b ☒ + ☐ 2+ ☐ 3+

c ☐ + ☐ 2+ ☐ 3+

x ☐ + ☐ 2+ ☐ 3+

y ☒ + ☒ 2+ ☐ 3+

z ☐ + ☐ 2+ ☐ 3+

hide H<sub>2</sub>O/NH<sub>3</sub> ☐

zoom 112-122 ☐

GO

SGLVKAGFAGDDAPR, MH+ 1516.8124, m/z 506.2756  
L OS G15 P120811 220811-s1.02943.02943.3.dta

scan 2943; 1.9e+001

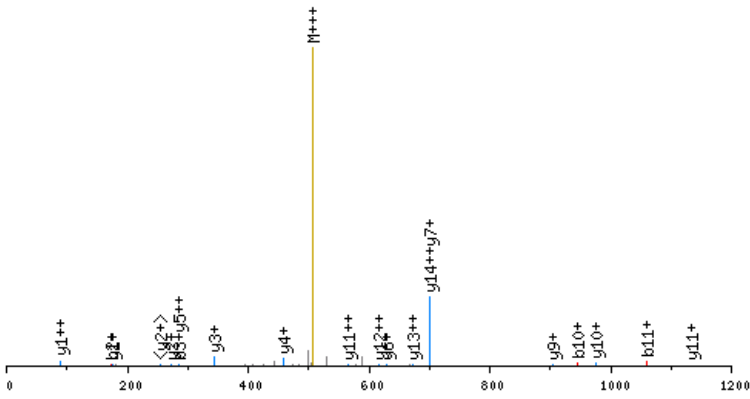

click image to zoom in; click top corners to zoom out [\[precursor±\]](#)

scan 2941; 506.3 m/z; 6.1e+000

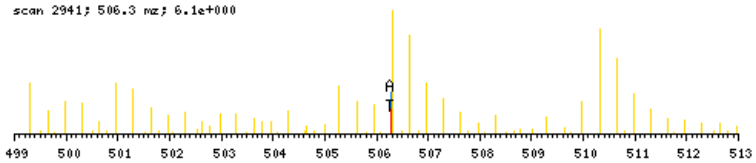

zoomed in precursor plot; T=theoretical m/z, A=acquired m/z

| b <sup>+</sup> | #  | AA | #  | y <sup>+</sup> | y <sup>2+</sup> |
|----------------|----|----|----|----------------|-----------------|
| 116.0711       | 1  | S  | 15 |                |                 |
| 173.0926       | 2  | G  | 14 | 1401.7491      | 701.3785        |
| 286.1767       | 3  | L  | 13 | 1344.7276      | 672.8677        |
| 385.2451       | 4  | V  | 12 | 1231.6435      | 616.3257        |
| 541.3714       | 5  | K  | 11 | 1132.5751      | 566.7915        |
| 612.4085       | 6  | A  | 10 | 976.4488       | 488.7283        |
| 669.4299       | 7  | G  | 9  | 905.4117       | 453.2098        |
| 816.4984       | 8  | F  | 8  | 848.3903       | 424.6990        |
| 887.5355       | 9  | A  | 7  | 701.3218       | 351.1648        |
| 944.5569       | 10 | G  | 6  | 630.2847       | 315.6463        |
| 1059.5839      | 11 | D  | 5  | 573.2633       | 287.1355        |
| 1174.6108      | 12 | D  | 4  | 458.2363       | 229.6221        |
| 1245.6479      | 13 | A  | 3  | 343.2094       | 172.1086        |
| 1342.7007      | 14 | P  | 2  | 272.1723       | 136.5900        |
|                | 15 | R  | 1  | 175.1195       | 88.0637         |

N-term:+29.04 K(5):+156.13

N-term: +29.04 C(4): +160.03  
K(5): +156.13

X-range:

0 - 0

MassTol: Y-zoom:

0. 1.

MassType:

☐AVG ☒MONO

Axis:

☒1 ☐2

Label:

☒I ☐M ☐-

Ions:

a ☐+ ☐2+ ☐3+

b ☒+ ☐2+ ☐3+

c ☐+ ☐2+ ☐3+

x ☐+ ☐2+ ☐3+

y ☒+ ☒2+ ☐3+

z ☐+ ☐2+ ☐3+

hide H<sub>2</sub>O/NH<sub>3</sub> ☐

zoom 112-122 ☐

GO

SGPGPMGLMGPR, MH+ 1190.6238, m/z 595.8155  
H OS G14 P120811 220811-s1.04559.04559.2.dta

scan 4559; 6.6e+000

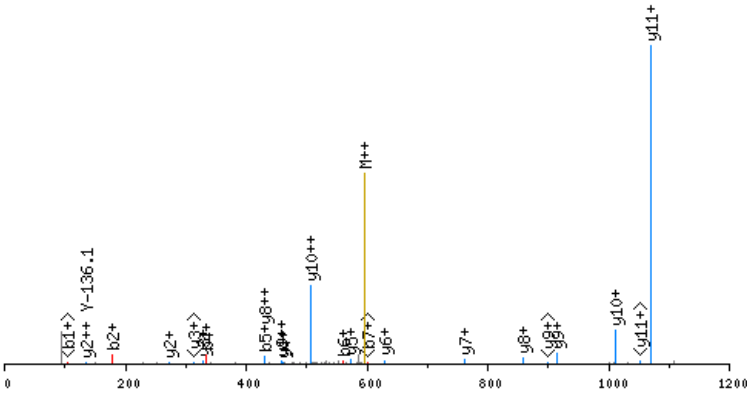

click image to zoom in; click top corners to zoom out

[precursor±]

scan 4556; 595.8 m/z; 5.0e+000

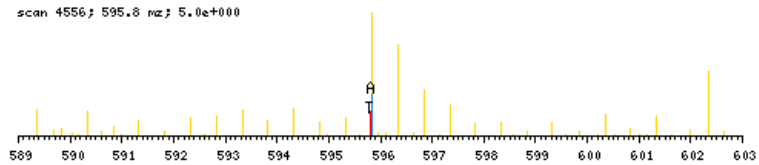

zoomed in precursor plot; T=theoretical m/z, A=acquired m/z

| b <sup>+</sup> | #  | AA | #  | y <sup>+</sup> | y <sup>2+</sup> |
|----------------|----|----|----|----------------|-----------------|
| 122.1029       | 1  | S  | 12 |                |                 |
| 179.1244       | 2  | G  | 11 | 1069.5287      | 535.2683        |
| 276.1772       | 3  | P  | 10 | 1012.5072      | 506.7575        |
| 333.1986       | 4  | G  | 9  | 915.4545       | 458.2311        |
| 430.2514       | 5  | P  | 8  | 858.4330       | 429.7204        |
| 561.2919       | 6  | M  | 7  | 761.3802       | 381.1940        |
| 618.3133       | 7  | G  | 6  | 630.3397       | 315.6738        |
| 731.3974       | 8  | L  | 5  | 573.3183       | 287.1631        |
| 862.4379       | 9  | M  | 4  | 460.2342       | 230.6210        |
| 919.4593       | 10 | G  | 3  | 329.1937       | 165.1008        |
| 1016.5121      | 11 | P  | 2  | 272.1723       | 136.5900        |
|                | 12 | R  | 1  | 175.1195       | 88.0637         |

N-term:+35.07

X-range:

0 - 0

MassTol: Y-zoom:

0. 1.

MassType:

☐AVG ☒MONO

Axis:

☒1 ☐2

Label:

☒I ☐M ☐-

Ions:

a ☐+ ☐2+ ☐3+

b ☒+ ☐2+ ☐3+

c ☐+ ☐2+ ☐3+

x ☐+ ☐2+ ☐3+

y ☒+ ☒2+ ☐3+

z ☐+ ☐2+ ☐3+

hide H<sub>2</sub>O/NH<sub>3</sub> ☐

zoom 112-122 ☐

GO

SGQKPVLSDVHAEELDR, MH+ 1806.9714, m/z 452.4983  
L OS G17 P120811 220811-s1.03806.03806.4.dta

scan 3806; 1.3e+001

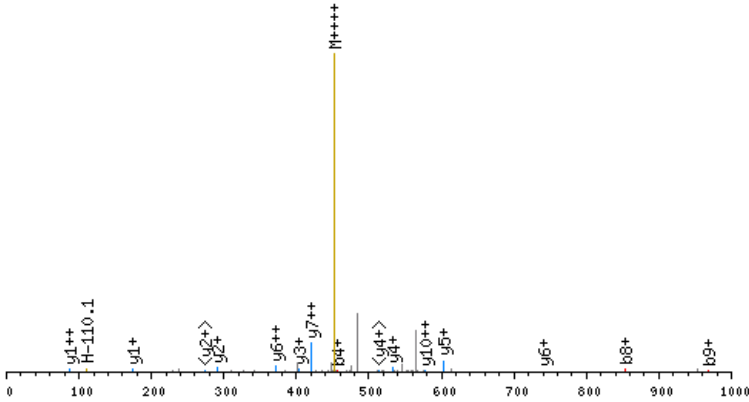

click image to zoom in; click top corners to zoom out

[precursor±]

scan 3803; 452.5 m/z; 3.8e+001

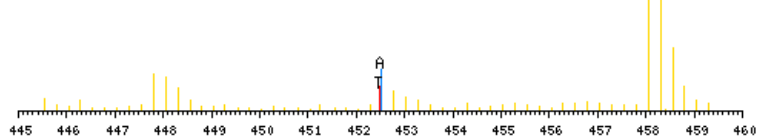

zoomed in precursor plot; T=theoretical m/z, A=acquired m/z

| b <sup>+</sup> | #  | AA | #  | y <sup>+</sup> | y <sup>2+</sup> |
|----------------|----|----|----|----------------|-----------------|
| 116.0711       | 1  | S  | 16 |                |                 |
| 173.0926       | 2  | G  | 15 | 1691.9081      | 846.4580        |
| 301.1512       | 3  | Q  | 14 | 1634.8866      | 817.9472        |
| 457.2775       | 4  | K  | 13 | 1506.8281      | 753.9179        |
| 554.3302       | 5  | P  | 12 | 1350.7018      | 675.8548        |
| 653.3986       | 6  | V  | 11 | 1253.6490      | 627.3284        |
| 766.4827       | 7  | L  | 10 | 1154.5806      | 577.7942        |
| 853.5147       | 8  | S  | 9  | 1041.4965      | 521.2522        |
| 968.5417       | 9  | D  | 8  | 954.4645       | 477.7362        |
| 1067.6101      | 10 | V  | 7  | 839.4375       | 420.2227        |
| 1204.6690      | 11 | H  | 6  | 740.3691       | 370.6885        |
| 1275.7061      | 12 | A  | 5  | 603.3102       | 302.1590        |
| 1404.7487      | 13 | E  | 4  | 532.2731       | 266.6405        |
| 1517.8328      | 14 | L  | 3  | 403.2305       | 202.1192        |
| 1632.8597      | 15 | D  | 2  | 290.1464       | 145.5771        |
|                | 16 | R  | 1  | 175.1195       | 88.0637         |

N-term:+29.04 K(4):+156.13

X-range:

0 - 0

MassTol: Y-zoom:

0. 1.

MassType:

☐ AVG ☒ MONO

Axis:

☒ 1 ☐ 2

Label:

☒ I ☐ M ☐ -

Ions:

a ☐ + ☐ 2+ ☐ 3+

b ☒ + ☐ 2+ ☐ 3+

c ☐ + ☐ 2+ ☐ 3+

x ☐ + ☐ 2+ ☐ 3+

y ☒ + ☒ 2+ ☐ 3+

z ☐ + ☐ 2+ ☐ 3+

hide H<sub>2</sub>O/NH<sub>3</sub> ☐

zoom 112-122 ☐

GO

SGQPGVPVGPAGVR, MH+ 1212.6913, m/z 606.8493  
H OS G14 P120811 220811-s1.02464.02464.2.dta

scan 2464; 2.7e+000

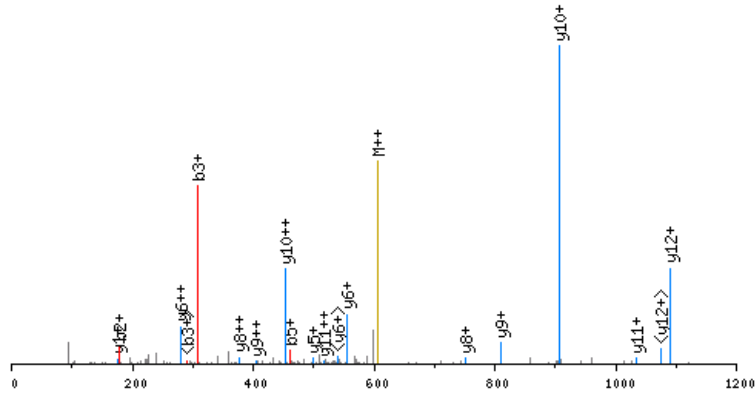

click image to zoom in; click top corners to zoom out

[precursor±]

scan 2461; 606.8 m/z; 4.3e+000

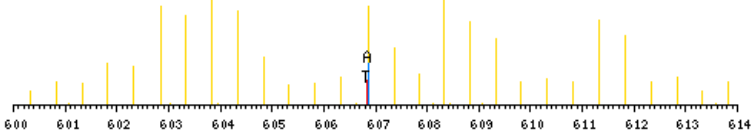

X-range:

0 - 0

MassTol: Y-zoom:

0. 1.

MassType:

☐ AVG ☒ MONO

Axis:

☒ 1 ☐ 2

Label:

☒ I ☐ M ☐ -

Ions:

a ☐ + ☐ 2+ ☐ 3+

b ☒ + ☐ 2+ ☐ 3+

c ☐ + ☐ 2+ ☐ 3+

x ☐ + ☐ 2+ ☐ 3+

y ☒ + ☒ 2+ ☐ 3+

z ☐ + ☐ 2+ ☐ 3+

hide H<sub>2</sub>O/NH<sub>3</sub> ☐

zoom 112-122 ☐

GO

SGSSKEGNECLLSKTR, MH+ 1836.9489, m/z 459.9927  
L OS G18 P120811 220811-s1.02057.02057.4.dta

scan 2057; 5.2e+000

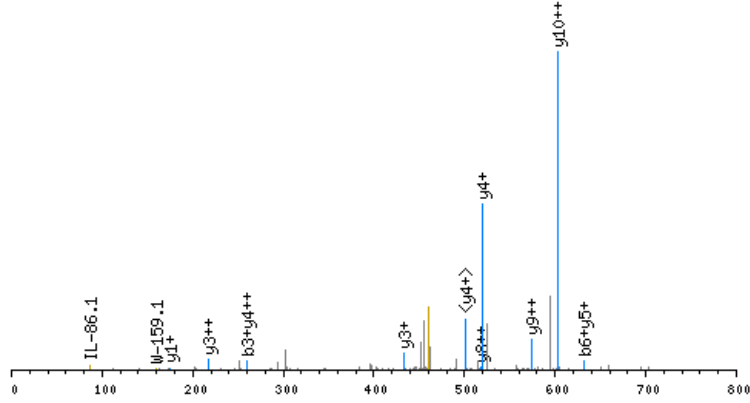

click image to zoom in; click top corners to zoom out [\[precursor±\]](#)

scan 2056; 460.0 m/z; 3.7e+000

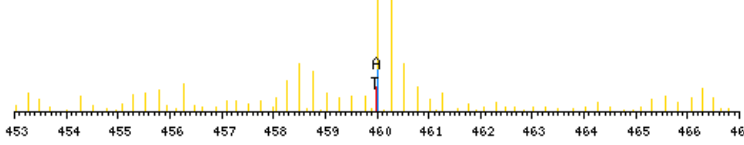

zoomed in precursor plot; T=theoretical m/z, A=acquired m/z

| b <sup>+</sup> | #  | AA | #  | y <sup>+</sup> | y <sup>2+</sup> |
|----------------|----|----|----|----------------|-----------------|
| 116.0711       | 1  | S  | 16 |                |                 |
| 173.0926       | 2  | G  | 15 | 1721.8856      | 861.4467        |
| 260.1246       | 3  | S  | 14 | 1664.8642      | 832.9360        |
| 347.1566       | 4  | S  | 13 | 1577.8321      | 789.4200        |
| 503.2829       | 5  | K  | 12 | 1490.8001      | 745.9040        |
| 632.3255       | 6  | E  | 11 | 1334.6738      | 667.8408        |
| 689.3470       | 7  | G  | 10 | 1205.6312      | 603.3195        |
| 803.3899       | 8  | N  | 9  | 1148.6098      | 574.8088        |
| 932.4325       | 9  | E  | 8  | 1034.5668      | 517.7873        |
| 1092.4631      | 10 | C  | 7  | 905.5242       | 453.2660        |
| 1205.5472      | 11 | L  | 6  | 745.4936       | 373.2507        |
| 1318.6313      | 12 | L  | 5  | 632.4096       | 316.7087        |
| 1405.6633      | 13 | S  | 4  | 519.3255       | 260.1667        |
| 1561.7896      | 14 | K  | 3  | 432.2935       | 216.6507        |
| 1662.8373      | 15 | T  | 2  | 276.1672       | 138.5875        |
|                | 16 | R  | 1  | 175.1195       | 88.0637         |

N-term:+29.04 K(5):+156.13  
C(10):+160.03 K(14):+156.13

X-range:

0 - 0

MassTol: Y-zoom:

0. 1.

MassType:

☐ AVG ☒ MONO

Axis:

☒ 1 ☐ 2

Label:

☒ I ☐ M ☐ -

Ions:

a ☐ + ☐ 2+ ☐ 3+

b ☒ + ☐ 2+ ☐ 3+

c ☐ + ☐ 2+ ☐ 3+

x ☐ + ☐ 2+ ☐ 3+

y ☒ + ☒ 2+ ☐ 3+

z ☐ + ☐ 2+ ☐ 3+

hide H<sub>2</sub>O/NH<sub>3</sub> ☐

zoom 112-122 ☐

GO

SGTNDPCALCSLHSIGKIGGAQNR, MH+ 2569.2614, m/z 643.0708  
L OS G17 P120811 220811-s1.04816.04816.4.dta

scan 4816; 2.7e+000

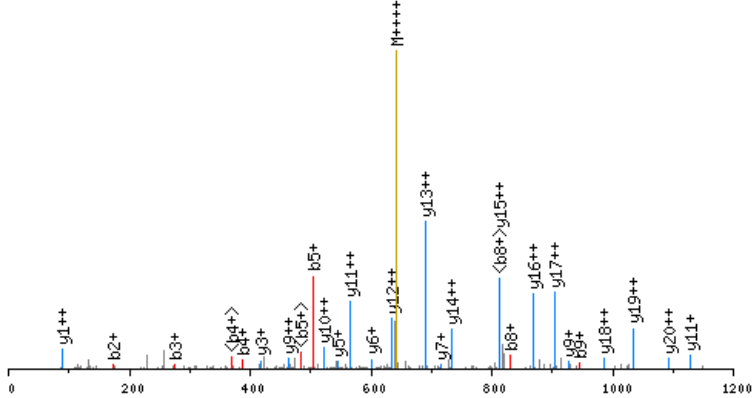

click image to zoom in; click top corners to zoom out

[precursor±]

scan 4813; 643.1 m/z; 7.4e+000

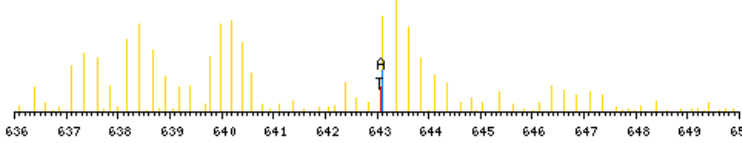

zoomed in precursor plot; T=theoretical m/z, A=acquired m/z

| b <sup>+</sup> | #  | AA | #  | y <sup>+</sup> | y <sup>2+</sup> |
|----------------|----|----|----|----------------|-----------------|
| 116.0711       | 1  | S  | 24 |                |                 |
| 173.0926       | 2  | G  | 23 | 2454.1981      | 1227.6030       |
| 274.1403       | 3  | T  | 22 | 2397.1767      | 1199.0922       |
| 388.1832       | 4  | N  | 21 | 2296.1290      | 1148.5684       |
| 503.2101       | 5  | D  | 20 | 2182.0861      | 1091.5469       |
| 600.2629       | 6  | P  | 19 | 2067.0591      | 1034.0335       |
| 760.2935       | 7  | C  | 18 | 1970.0063      | 985.5071        |
| 831.3306       | 8  | A  | 17 | 1809.9757      | 905.4918        |
| 944.4147       | 9  | L  | 16 | 1738.9386      | 869.9732        |
| 1104.4453      | 10 | C  | 15 | 1625.8546      | 813.4312        |
| 1191.4773      | 11 | S  | 14 | 1465.8240      | 733.4159        |
| 1304.5614      | 12 | L  | 13 | 1378.7919      | 689.8999        |
| 1441.6203      | 13 | H  | 12 | 1265.7079      | 633.3579        |
| 1528.6523      | 14 | S  | 11 | 1128.6490      | 564.8284        |
| 1641.7364      | 15 | I  | 10 | 1041.6169      | 521.3124        |
| 1698.7578      | 16 | G  | 9  | 928.5329       | 464.7703        |
| 1854.8841      | 17 | K  | 8  | 871.5114       | 436.2596        |
| 1967.9682      | 18 | I  | 7  | 715.3851       | 358.1965        |
| 2024.9897      | 19 | G  | 6  | 602.3010       | 301.6544        |
| 2082.0111      | 20 | G  | 5  | 545.2796       | 273.1437        |
| 2153.0482      | 21 | A  | 4  | 488.2581       | 244.6330        |
| 2281.1068      | 22 | Q  | 3  | 417.2210       | 209.1144        |
| 2395.1498      | 23 | N  | 2  | 289.1624       | 145.0851        |
|                | 24 | R  | 1  | 175.1195       | 88.0637         |

N-term:+29.04 C(7):+160.03  
C(10):+160.03 K(17):+156.13

X-range:

0 - 0

MassTol: Y-zoom:

0. 1.

MassType:

☐ AVG ☒ MONO

Axis:

☒ 1 ☐ 2

Label:

☒ I ☐ M ☐ -

Ions:

a ☐ + ☐ 2+ ☐ 3+

b ☒ + ☐ 2+ ☐ 3+

c ☐ + ☐ 2+ ☐ 3+

x ☐ + ☐ 2+ ☐ 3+

y ☒ + ☒ 2+ ☐ 3+

z ☐ + ☐ 2+ ☐ 3+

hide H<sub>2</sub>O/NH<sub>3</sub> ☐

zoom 112-122 ☐

GO

SGTPVHCPSPiR, MH+ 1341.7161, m/z 447.9102  
H OS G16 P120811 220811-s1.02422.02422.3.dta

scan 2422; 8.5e+000

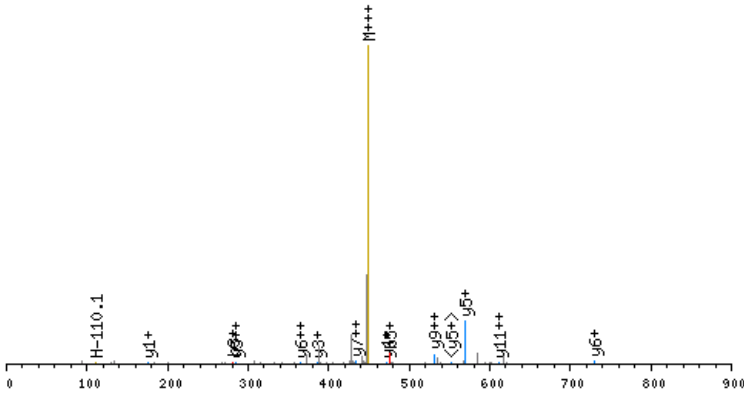

click image to zoom in; click top corners to zoom out

[precursor±]

scan 2418; 447.9 m/z; 1.2e+001

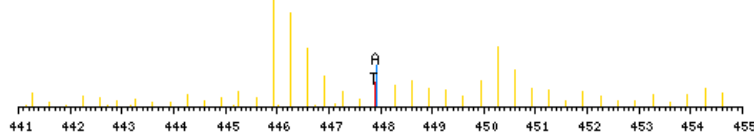

zoomed in precursor plot; T=theoretical m/z, A=acquired m/z

| b <sup>+</sup> | #  | AA | #  | y <sup>+</sup> | y <sup>2+</sup> |
|----------------|----|----|----|----------------|-----------------|
| 122.1029       | 1  | S  | 12 |                |                 |
| 179.1244       | 2  | G  | 11 | 1220.6210      | 610.8144        |
| 280.1721       | 3  | T  | 10 | 1163.5995      | 582.3037        |
| 377.2248       | 4  | P  | 9  | 1062.5518      | 531.7798        |
| 476.2932       | 5  | V  | 8  | 965.4990       | 483.2534        |
| 613.3522       | 6  | H  | 7  | 866.4306       | 433.7192        |
| 773.3828       | 7  | C  | 6  | 729.3717       | 365.1898        |
| 870.4355       | 8  | P  | 5  | 569.3411       | 285.1745        |
| 957.4676       | 9  | S  | 4  | 472.2884       | 236.6481        |
| 1054.5203      | 10 | P  | 3  | 385.2563       | 193.1321        |
| 1167.6044      | 11 | I  | 2  | 288.2036       | 144.6057        |
|                | 12 | R  | 1  | 175.1195       | 88.0637         |

N-term:+35.07 C(7):+160.03

X-range:

0 - 0

MassTol: Y-zoom:

0. 1.

MassType:

☐ AVG ☒ MONO

Axis:

☒ 1 ☐ 2

Label:

☒ I ☐ M ☐ -

Ions:

a ☐ + ☐ 2+ ☐ 3+

b ☒ + ☐ 2+ ☐ 3+

c ☐ + ☐ 2+ ☐ 3+

x ☐ + ☐ 2+ ☐ 3+

y ☒ + ☒ 2+ ☐ 3+

z ☐ + ☐ 2+ ☐ 3+

hide H<sub>2</sub>O/NH<sub>3</sub> ☐

zoom 112-122 ☐

GO

SGVKIHVSDQELQSANASVDDSR, MH+ 2498.2487, m/z 625.3176  
L OS G17 P120811 220811-s1.04025.04025.4.dta

scan 4025; 2.0e+000

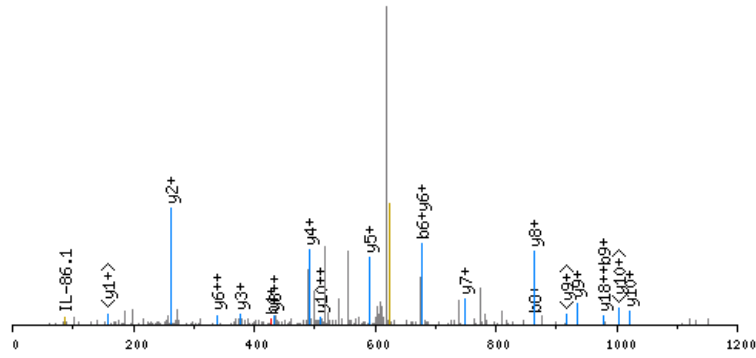

click image to zoom in; click top corners to zoom out [\[precursor±\]](#)

scan 4023; 625.3 m/z; 8.7e+000

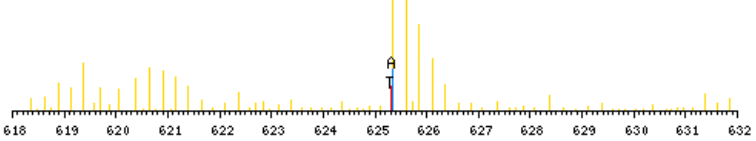

zoomed in precursor plot; T=theoretical m/z, A=acquired m/z

| b <sup>+</sup> | #  | AA | #  | y <sup>+</sup> | y <sup>2+</sup> |
|----------------|----|----|----|----------------|-----------------|
| 116.0711       | 1  | S  | 23 |                |                 |
| 173.0926       | 2  | G  | 22 | 2383.1854      | 1192.0966       |
| 272.1610       | 3  | V  | 21 | 2326.1639      | 1163.5859       |
| 428.2873       | 4  | K  | 20 | 2227.0955      | 1114.0517       |
| 541.3714       | 5  | I  | 19 | 2070.9692      | 1035.9885       |
| 678.4303       | 6  | H  | 18 | 1957.8852      | 979.4465        |
| 777.4987       | 7  | V  | 17 | 1820.8262      | 910.9170        |
| 864.5307       | 8  | S  | 16 | 1721.7578      | 861.3828        |
| 979.5577       | 9  | D  | 15 | 1634.7258      | 817.8668        |
| 1107.6162      | 10 | Q  | 14 | 1519.6989      | 760.3533        |
| 1236.6588      | 11 | E  | 13 | 1391.6403      | 696.3241        |
| 1349.7429      | 12 | L  | 12 | 1262.5977      | 631.8028        |
| 1477.8015      | 13 | Q  | 11 | 1149.5136      | 575.2607        |
| 1564.8335      | 14 | S  | 10 | 1021.4550      | 511.2314        |
| 1635.8706      | 15 | A  | 9  | 934.4230       | 467.7154        |
| 1749.9135      | 16 | N  | 8  | 863.3859       | 432.1969        |
| 1820.9507      | 17 | A  | 7  | 749.3430       | 375.1754        |
| 1907.9827      | 18 | S  | 6  | 678.3059       | 339.6568        |
| 2007.0511      | 19 | V  | 5  | 591.2738       | 296.1408        |
| 2122.0780      | 20 | D  | 4  | 492.2054       | 246.6066        |
| 2237.1050      | 21 | D  | 3  | 377.1785       | 189.0931        |
| 2324.1370      | 22 | S  | 2  | 262.1515       | 131.5797        |
|                | 23 | R  | 1  | 175.1195       | 88.0637         |

N-term:+29.04 K(4):+156.13

X-range:

0 - 0

MassTol: Y-zoom:

0. 1.

MassType:

☐AVG ☒MONO

Axis:

☒1 ☐2

Label:

☒I ☐M ☐-

Ions:

a ☐+ ☐2+ ☐3+

b ☒+ ☐2+ ☐3+

c ☐+ ☐2+ ☐3+

x ☐+ ☐2+ ☐3+

y ☒+ ☒2+ ☐3+

z ☐+ ☐2+ ☐3+

hide H<sub>2</sub>O/NH<sub>3</sub> ☐

zoom 112-122 ☐

GO

SGYLLPDTKAYGDR, MH+ 1611.8383, m/z 537.9509  
L OS G15 P120811 220811-s1.03853.03853.3.dta

scan 3853; 5.1e+000

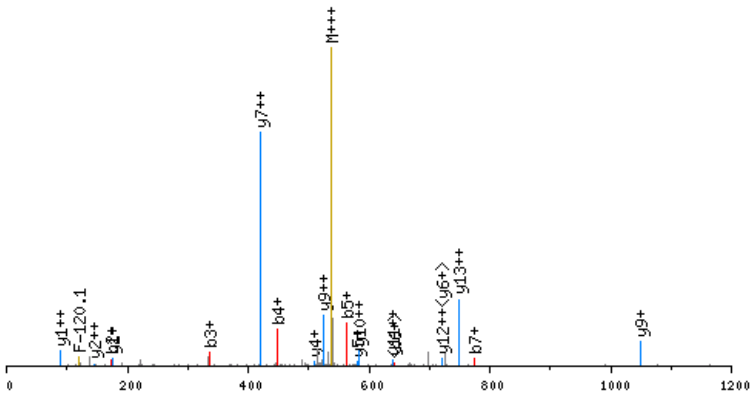

click image to zoom in; click top corners to zoom out

[precursor±]

scan 3851; 538.0 m/z; 4.9e+001

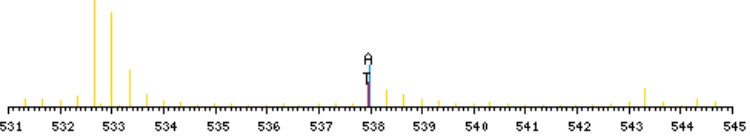

zoomed in precursor plot; T=theoretical m/z, A=acquired m/z

| b <sup>+</sup> | #  | AA | #  | y <sup>+</sup> | y <sup>2+</sup> |
|----------------|----|----|----|----------------|-----------------|
| 116.0711       | 1  | S  | 14 |                |                 |
| 173.0926       | 2  | G  | 13 | 1496.7750      | 748.8914        |
| 336.1559       | 3  | Y  | 12 | 1439.7535      | 720.3807        |
| 449.2400       | 4  | L  | 11 | 1276.6902      | 638.8490        |
| 562.3240       | 5  | L  | 10 | 1163.6061      | 582.3070        |
| 659.3768       | 6  | P  | 9  | 1050.5220      | 525.7649        |
| 774.4038       | 7  | D  | 8  | 953.4693       | 477.2385        |
| 875.4514       | 8  | T  | 7  | 838.4423       | 419.7251        |
| 1031.5777      | 9  | K  | 6  | 737.3946       | 369.2012        |
| 1102.6148      | 10 | A  | 5  | 581.2683       | 291.1381        |
| 1265.6782      | 11 | Y  | 4  | 510.2312       | 255.6195        |
| 1322.6996      | 12 | G  | 3  | 347.1679       | 174.0879        |
| 1437.7266      | 13 | D  | 2  | 290.1464       | 145.5771        |
|                | 14 | R  | 1  | 175.1195       | 88.0637         |

N-term:+29.04 K(9):+156.13

X-range:

0 - 0

MassTol: Y-zoom:

0. 1.

MassType:

☐AVG ☒MONO

Axis:

☒1 ☐2

Label:

☒I ☐M ☐-

Ions:

a ☐+ ☐2+ ☐3+

b ☒+ ☐2+ ☐3+

c ☐+ ☐2+ ☐3+

x ☐+ ☐2+ ☐3+

y ☒+ ☒2+ ☐3+

z ☐+ ☐2+ ☐3+

hide H<sub>2</sub>O/NH<sub>3</sub> ☐

zoom 112-122 ☐

GO

SHEIATNLGDFAIISLYR, MH+ 1941.0294, m/z 647.6813  
H OS G16 P120811 220811-s1.06251.06251.3.dta

scan 6251; 6.1e-001

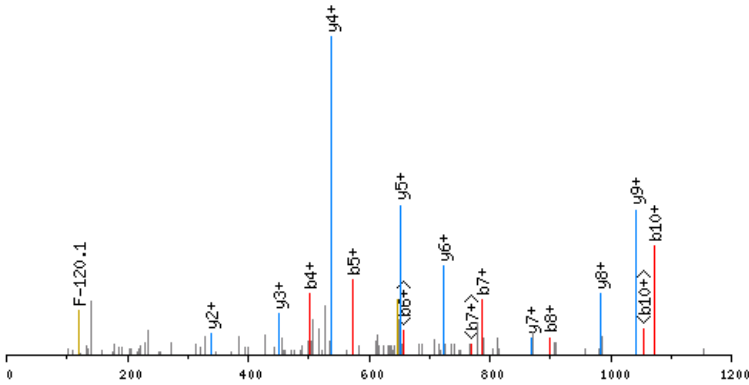

click image to zoom in; click top corners to zoom out

[precursor±]

scan 6247; 647.7 m/z; 3.5e+000

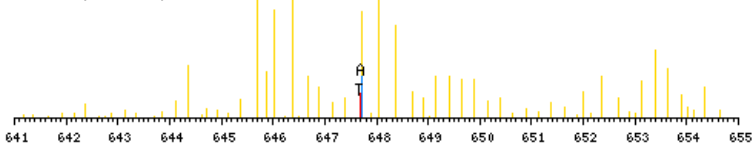

zoomed in precursor plot; T=theoretical m/z, A=acquired m/z

| b <sup>+</sup> | #  | AA | #  | y <sup>+</sup> | y <sup>2+</sup> |
|----------------|----|----|----|----------------|-----------------|
| 122.1029       | 1  | S  | 17 |                |                 |
| 259.1618       | 2  | H  | 16 | 1819.9343      | 910.4710        |
| 388.2044       | 3  | E  | 15 | 1682.8754      | 841.9416        |
| 501.2885       | 4  | I  | 14 | 1553.8328      | 777.4203        |
| 572.3256       | 5  | A  | 13 | 1440.7487      | 720.8783        |
| 673.3733       | 6  | T  | 12 | 1369.7116      | 685.3597        |
| 787.4162       | 7  | N  | 11 | 1268.6639      | 634.8359        |
| 900.5003       | 8  | L  | 10 | 1154.6210      | 577.8144        |
| 957.5217       | 9  | G  | 9  | 1041.5369      | 521.2724        |
| 1072.5487      | 10 | D  | 8  | 984.5155       | 492.7616        |
| 1219.6171      | 11 | F  | 7  | 869.4885       | 435.2482        |
| 1290.6542      | 12 | A  | 6  | 722.4201       | 361.7140        |
| 1403.7383      | 13 | I  | 5  | 651.3830       | 326.1954        |
| 1490.7703      | 14 | S  | 4  | 538.2989       | 269.6534        |
| 1603.8544      | 15 | L  | 3  | 451.2669       | 226.1374        |
| 1766.9177      | 16 | Y  | 2  | 338.1828       | 169.5953        |
|                | 17 | R  | 1  | 175.1195       | 88.0637         |

N-term:+35.07

X-range:

0 - 0

MassTol: Y-zoom:

0. 1.

MassType:

☐ AVG ☒ MONO

Axis:

☒ 1 ☐ 2

Label:

☒ I ☐ M ☐ -

Ions:

a ☐ + ☐ 2+ ☐ 3+

b ☒ + ☐ 2+ ☐ 3+

c ☐ + ☐ 2+ ☐ 3+

x ☐ + ☐ 2+ ☐ 3+

y ☒ + ☒ 2+ ☐ 3+

z ☐ + ☐ 2+ ☐ 3+

hide H<sub>2</sub>O/NH<sub>3</sub> ☐

zoom 112-122 ☐

GO

SHEIATNLGDFALR, MH+ 1571.8182, m/z 524.6109  
L OS G16 P120811 220811-s1.05242.05242.3.dta

scan 5242; 4.6e+000

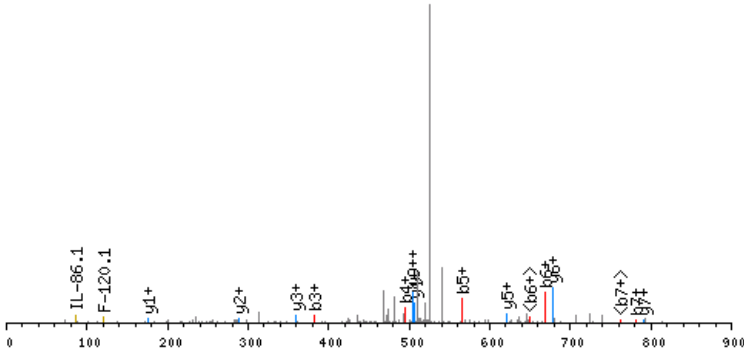

click image to zoom in; click top corners to zoom out [\[precursor±\]](#)

scan 5238; 524.6 m/z; 5.6e+001

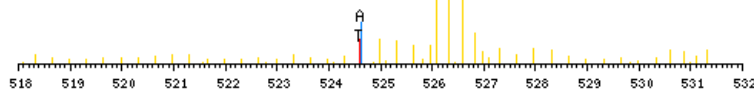

zoomed in precursor plot; T=theoretical m/z, A=acquired m/z

| b <sup>+</sup> | #  | AA | #  | y <sup>+</sup> | y <sup>2+</sup> |
|----------------|----|----|----|----------------|-----------------|
| 116.0711       | 1  | S  | 14 |                |                 |
| 253.1300       | 2  | H  | 13 | 1456.7549      | 728.8813        |
| 382.1726       | 3  | E  | 12 | 1319.6959      | 660.3519        |
| 495.2567       | 4  | I  | 11 | 1190.6533      | 595.8306        |
| 566.2938       | 5  | A  | 10 | 1077.5693      | 539.2886        |
| 667.3415       | 6  | T  | 9  | 1006.5322      | 503.7700        |
| 781.3844       | 7  | N  | 8  | 905.4845       | 453.2462        |
| 894.4685       | 8  | L  | 7  | 791.4416       | 396.2247        |
| 951.4899       | 9  | G  | 6  | 678.3575       | 339.6827        |
| 1066.5169      | 10 | D  | 5  | 621.3360       | 311.1719        |
| 1213.5853      | 11 | F  | 4  | 506.3091       | 253.6585        |
| 1284.6224      | 12 | A  | 3  | 359.2407       | 180.1243        |
| 1397.7065      | 13 | L  | 2  | 288.2036       | 144.6057        |
|                | 14 | R  | 1  | 175.1195       | 88.0637         |

N-term:+29.04

X-range:

0 - 0

MassTol: Y-zoom:

0. 1.

MassType:

☐AVG ☒MONO

Axis:

☒1 ☐2

Label:

☒I ☐M ☐-

Ions:

a ☐+ ☐2+ ☐3+

b ☒+ ☐2+ ☐3+

c ☐+ ☐2+ ☐3+

x ☐+ ☐2+ ☐3+

y ☒+ ☒2+ ☐3+

z ☐+ ☐2+ ☐3+

hide H<sub>2</sub>O/NH<sub>3</sub> ☐

zoom 112-122 ☐

GO

SHLLEGELEEYTKTIER, MH+ 2115.1610, m/z 529.5457  
H OS G17 P120811 220811-s1.06172.06172.4.dta

scan 6172; 1.2e+000

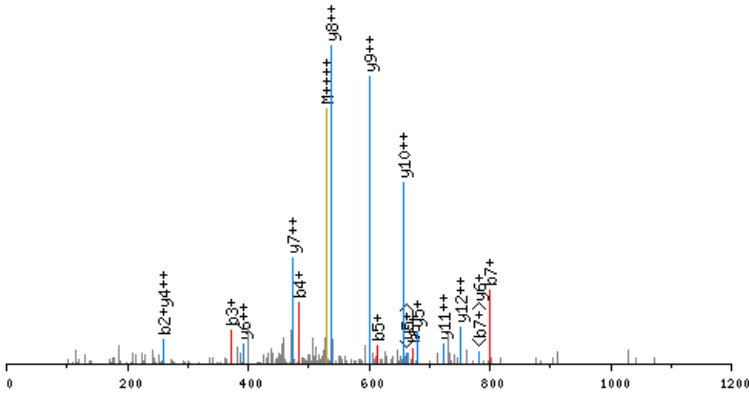

click image to zoom in; click top corners to zoom out

[precursor±]

scan 6168; 529.5 m/z; 2.2e+001

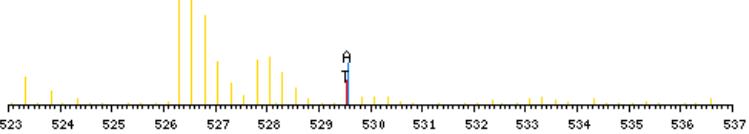

zoomed in precursor plot; T=theoretical m/z, A=acquired m/z

| b <sup>+</sup> | #  | AA | #  | y <sup>+</sup> | y <sup>2+</sup> |
|----------------|----|----|----|----------------|-----------------|
| 122.1029       | 1  | S  | 17 |                |                 |
| 259.1618       | 2  | H  | 16 | 1994.0659      | 997.5369        |
| 372.2459       | 3  | L  | 15 | 1857.0070      | 929.0074        |
| 485.3300       | 4  | L  | 14 | 1743.9229      | 872.4654        |
| 614.3726       | 5  | E  | 13 | 1630.8388      | 815.9233        |
| 671.3940       | 6  | G  | 12 | 1501.7963      | 751.4020        |
| 800.4366       | 7  | E  | 11 | 1444.7748      | 722.8913        |
| 913.5207       | 8  | L  | 10 | 1315.7322      | 658.3700        |
| 1042.5633      | 9  | E  | 9  | 1202.6481      | 601.8280        |
| 1171.6059      | 10 | E  | 8  | 1073.6055      | 537.3067        |
| 1334.6692      | 11 | Y  | 7  | 944.5629       | 472.7854        |
| 1435.7169      | 12 | T  | 6  | 781.4996       | 391.2537        |
| 1597.8750      | 13 | K  | 5  | 680.4519       | 340.7299        |
| 1698.9227      | 14 | T  | 4  | 518.2938       | 259.6508        |
| 1812.0067      | 15 | I  | 3  | 417.2462       | 209.1270        |
| 1941.0493      | 16 | E  | 2  | 304.1621       | 152.5850        |
|                | 17 | R  | 1  | 175.1195       | 88.0637         |

N-term:+35.07 K(13):+162.16

X-range:

0 - 0

MassTol: Y-zoom:

0. 1.

MassType:

☐ AVG ☒ MONO

Axis:

☒ 1 ☐ 2

Label:

☒ I ☐ M ☐ -

Ions:

a ☐ + ☐ 2+ ☐ 3+

b ☒ + ☐ 2+ ☐ 3+

c ☐ + ☐ 2+ ☐ 3+

x ☐ + ☐ 2+ ☐ 3+

y ☒ + ☒ 2+ ☐ 3+

z ☐ + ☐ 2+ ☐ 3+

hide H<sub>2</sub>O/NH<sub>3</sub> ☐

zoom 112-122 ☐

GO

SHTDVKVPDFSDYR, MH+ 1721.8499, m/z 431.2179  
L OS G17 P120811 220811-s1.04506.04506.4.dta

scan 4506; 5.0e+000

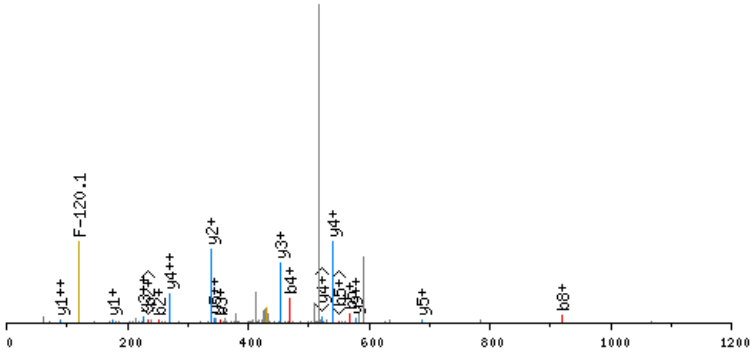

click image to zoom in; click top corners to zoom out

[precursor±]

scan 4503; 431.2 m/z; 1.2e+001

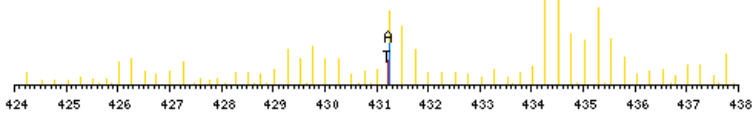

zoomed in precursor plot; T=theoretical m/z, A=acquired m/z

| b <sup>+</sup> | #  | AA | #  | y <sup>+</sup> | y <sup>2+</sup> |
|----------------|----|----|----|----------------|-----------------|
| 116.0711       | 1  | S  | 14 |                |                 |
| 253.1300       | 2  | H  | 13 | 1606.7866      | 803.8972        |
| 354.1777       | 3  | T  | 12 | 1469.7277      | 735.3677        |
| 469.2047       | 4  | D  | 11 | 1368.6800      | 684.8439        |
| 568.2731       | 5  | V  | 10 | 1253.6530      | 627.3304        |
| 724.3994       | 6  | K  | 9  | 1154.5846      | 577.7962        |
| 823.4678       | 7  | V  | 8  | 998.4583       | 499.7331        |
| 920.5206       | 8  | P  | 7  | 899.3899       | 450.1989        |
| 1035.5475      | 9  | D  | 6  | 802.3372       | 401.6725        |
| 1182.6159      | 10 | F  | 5  | 687.3102       | 344.1590        |
| 1269.6479      | 11 | S  | 4  | 540.2418       | 270.6248        |
| 1384.6749      | 12 | D  | 3  | 453.2098       | 227.1088        |
| 1547.7382      | 13 | Y  | 2  | 338.1828       | 169.5953        |
|                | 14 | R  | 1  | 175.1195       | 88.0637         |

N-term:+29.04 K(6):+156.13

X-range:

0 - 0

MassTol: Y-zoom:

0. 1.

MassType:

☐AVG ☒MONO

Axis:

☒1 ☐2

Label:

☒I ☐M ☐-

Ions:

a ☐+ ☐2+ ☐3+

b ☒+ ☐2+ ☐3+

c ☐+ ☐2+ ☐3+

x ☐+ ☐2+ ☐3+

y ☒+ ☒2+ ☐3+

z ☐+ ☐2+ ☐3+

hide H<sub>2</sub>O/NH<sub>3</sub> ☐

zoom 112-122 ☐

GO

SHTDVKVPDFSDYRR, MH+ 1877.9510, m/z 470.2432  
L OS G19 P120811 220811-s1.03628.03628.4.dta

scan 3628; 6.5e+000

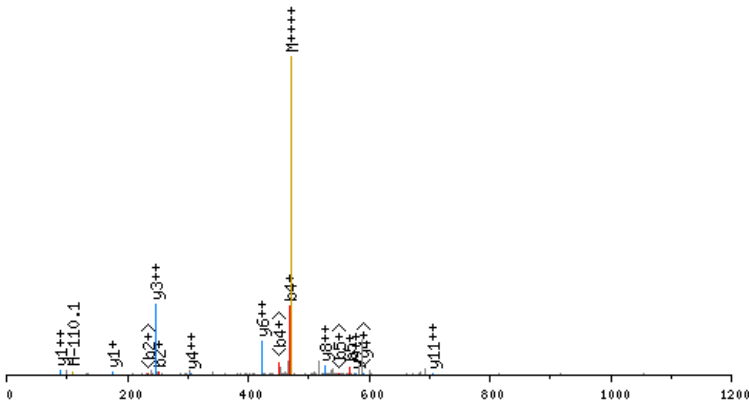

click image to zoom in; click top corners to zoom out

[precursor±]

scan 3626; 470.2 m/z; 1.1e+002

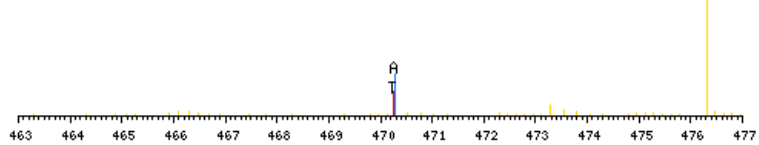

zoomed in precursor plot; T=theoretical m/z, A=acquired m/z

| b <sup>+</sup> | #  | AA | #  | y <sup>+</sup> | y <sup>2+</sup> |
|----------------|----|----|----|----------------|-----------------|
| 116.0711       | 1  | S  | 15 |                |                 |
| 253.1300       | 2  | H  | 14 | 1762.8877      | 881.9478        |
| 354.1777       | 3  | T  | 13 | 1625.8288      | 813.4183        |
| 469.2047       | 4  | D  | 12 | 1524.7811      | 762.8945        |
| 568.2731       | 5  | V  | 11 | 1409.7542      | 705.3810        |
| 724.3994       | 6  | K  | 10 | 1310.6857      | 655.8468        |
| 823.4678       | 7  | V  | 9  | 1154.5594      | 577.7836        |
| 920.5206       | 8  | P  | 8  | 1055.4910      | 528.2494        |
| 1035.5475      | 9  | D  | 7  | 958.4383       | 479.7230        |
| 1182.6159      | 10 | F  | 6  | 843.4113       | 422.2096        |
| 1269.6479      | 11 | S  | 5  | 696.3429       | 348.6754        |
| 1384.6749      | 12 | D  | 4  | 609.3109       | 305.1594        |
| 1547.7382      | 13 | Y  | 3  | 494.2839       | 247.6459        |
| 1703.8393      | 14 | R  | 2  | 331.2206       | 166.1142        |
|                | 15 | R  | 1  | 175.1195       | 88.0637         |

N-term:+29.04 K(6):+156.13

N-term:+29.04 C(3):+160.03  
K(13):+156.13 C(15):+160.03

X-range:

0 - 0

MassTol: Y-zoom:

0. 1.

MassType:

☐AVG ☒MONO

Axis:

☒1 ☐2

Label:

☒I ☐M ☐-

Ions:

a ☐+ ☐2+ ☐3+

b ☒+ ☐2+ ☐3+

c ☐+ ☐2+ ☐3+

x ☐+ ☐2+ ☐3+

y ☒+ ☒2+ ☐3+

z ☐+ ☐2+ ☐3+

hide H<sub>2</sub>O/NH<sub>3</sub> ☐

zoom 112-122 ☐

GO

SIDNSPVKWCALSHLER, MH+ 2068.0649, m/z 517.7717  
L OS G17 P120811 220811-s1.05635.05635.4.dta

scan 5635; 7.0e+000

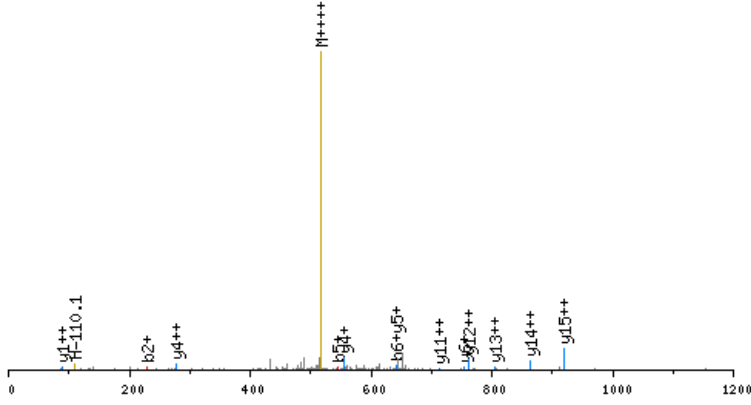

click image to zoom in; click top corners to zoom out [\[precursor±\]](#)

scan 5633; 517.8 m/z; 6.1e+000

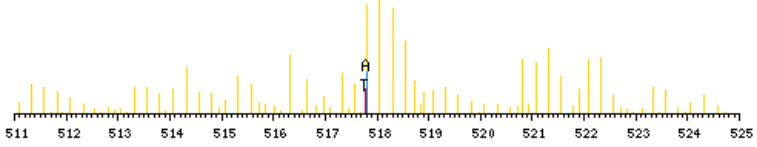

zoomed in precursor plot; T=theoretical m/z, A=acquired m/z

| b <sup>+</sup> | #  | AA | #  | y <sup>+</sup> | y <sup>2+</sup> |
|----------------|----|----|----|----------------|-----------------|
| 116.0711       | 1  | S  | 17 |                |                 |
| 229.1552       | 2  | I  | 16 | 1953.0016      | 977.0047        |
| 344.1821       | 3  | D  | 15 | 1839.9176      | 920.4627        |
| 458.2251       | 4  | N  | 14 | 1724.8906      | 862.9492        |
| 545.2571       | 5  | S  | 13 | 1610.8477      | 805.9278        |
| 642.3099       | 6  | P  | 12 | 1523.8157      | 762.4117        |
| 741.3783       | 7  | V  | 11 | 1426.7629      | 713.8854        |
| 897.5046       | 8  | K  | 10 | 1327.6945      | 664.3512        |
| 1083.5839      | 9  | W  | 9  | 1171.5682      | 586.2880        |
| 1243.6145      | 10 | C  | 8  | 985.4889       | 493.2484        |
| 1314.6516      | 11 | A  | 7  | 825.4583       | 413.2331        |
| 1427.7357      | 12 | L  | 6  | 754.4212       | 377.7145        |
| 1514.7677      | 13 | S  | 5  | 641.3371       | 321.1725        |
| 1651.8266      | 14 | H  | 4  | 554.3051       | 277.6564        |
| 1764.9107      | 15 | L  | 3  | 417.2462       | 209.1270        |
| 1893.9533      | 16 | E  | 2  | 304.1621       | 152.5850        |
|                | 17 | R  | 1  | 175.1195       | 88.0637         |

N-term:+29.04 K(8):+156.13  
C(10):+160.03

X-range:

0 - 0

MassTol: Y-zoom:

0. 1.

MassType:

☐AVG ☒MONO

Axis:

☒1 ☐2

Label:

☒I ☐M ☐-

Ions:

a ☐+ ☐2+ ☐3+

b ☒+ ☐2+ ☐3+

c ☐+ ☐2+ ☐3+

x ☐+ ☐2+ ☐3+

y ☒+ ☒2+ ☐3+

z ☐+ ☐2+ ☐3+

hide H<sub>2</sub>O/NH<sub>3</sub> ☐

zoom 112-122 ☐

GO

SIFGGAKPVDTAAR, MH+ 1445.8117, m/z 482.6087  
L OS G15 P120811 220811-s1.02945.02945.3.dta

scan 2945; 9.3e+000

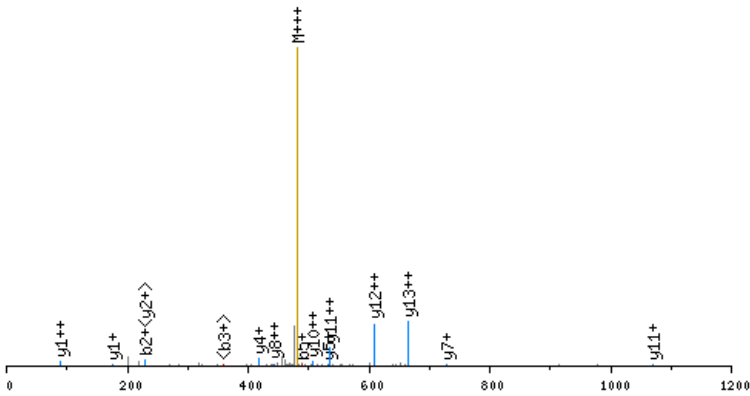

click image to zoom in; click top corners to zoom out

[precursor±]

scan 2941; 482.6 m/z; 1.3e+001

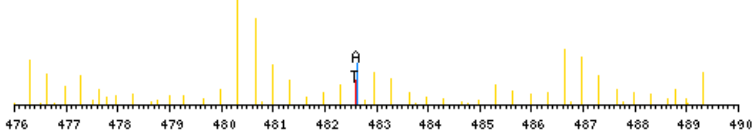

zoomed in precursor plot; T=theoretical m/z, A=acquired m/z

| b <sup>+</sup> | #  | AA | #  | y <sup>+</sup> | y <sup>2+</sup> |
|----------------|----|----|----|----------------|-----------------|
| 116.0711       | 1  | S  | 14 |                |                 |
| 229.1552       | 2  | I  | 13 | 1330.7483      | 665.8781        |
| 376.2236       | 3  | F  | 12 | 1217.6643      | 609.3361        |
| 433.2451       | 4  | G  | 11 | 1070.5959      | 535.8018        |
| 490.2665       | 5  | G  | 10 | 1013.5744      | 507.2911        |
| 561.3036       | 6  | A  | 9  | 956.5529       | 478.7804        |
| 717.4299       | 7  | K  | 8  | 885.5158       | 443.2618        |
| 814.4827       | 8  | P  | 7  | 729.3895       | 365.1987        |
| 913.5511       | 9  | V  | 6  | 632.3368       | 316.6723        |
| 1028.5781      | 10 | D  | 5  | 533.2683       | 267.1381        |
| 1129.6257      | 11 | T  | 4  | 418.2414       | 209.6246        |
| 1200.6629      | 12 | A  | 3  | 317.1937       | 159.1008        |
| 1271.7000      | 13 | A  | 2  | 246.1566       | 123.5822        |
|                | 14 | R  | 1  | 175.1195       | 88.0637         |

N-term:+29.04 K(7):+156.13

| $b^+$     | #  | AA | #  | $y^+$     | $y^{2+}$ |
|-----------|----|----|----|-----------|----------|
| 116.0711  | 1  | S  | 14 |           |          |
| 229.1552  | 2  | I  | 13 | 1487.7528 | 744.3803 |
| 286.1767  | 3  | G  | 12 | 1374.6687 | 687.8383 |
| 387.2243  | 4  | T  | 11 | 1317.6473 | 659.3275 |
| 500.3084  | 5  | L  | 10 | 1216.5996 | 608.8037 |
| 587.3404  | 6  | S  | 9  | 1103.5155 | 552.2617 |
| 702.3674  | 7  | D  | 8  | 1016.4835 | 508.7457 |
| 799.4201  | 8  | P  | 7  | 901.4566  | 451.2322 |
| 959.4507  | 9  | C  | 6  | 804.4038  | 402.7058 |
| 1115.5770 | 10 | K  | 5  | 644.3732  | 322.6905 |
| 1230.6040 | 11 | D  | 4  | 488.2469  | 244.6274 |
| 1327.6567 | 12 | P  | 3  | 373.2199  | 187.1139 |
| 1428.7044 | 13 | T  | 2  | 276.1672  | 138.5875 |
|           | 14 | R  | 1  | 175.1195  | 88.0637  |

X-range:

0 - 0

MassTol: Y-zoom:

0. 1.

MassType:

☐AVG ☒MONO

Axis:

☒1 ☐2

Label:

☒I ☐M ☐-

Ions:

a ☐+ ☐2+ ☐3+

b ☒+ ☐2+ ☐3+

c ☐+ ☐2+ ☐3+

x ☐+ ☐2+ ☐3+

y ☒+ ☒2+ ☐3+

z ☐+ ☐2+ ☐3+

hide H<sub>2</sub>O/NH<sub>3</sub> ☐

zoom 112-122 ☐

GO

SIIDTPGILSGAKQR, MH+ 1611.9434, m/z 537.9860  
L OS G15 P120811 220811-s1.04638.04638.3.dta

scan 4638; 9.3e+000

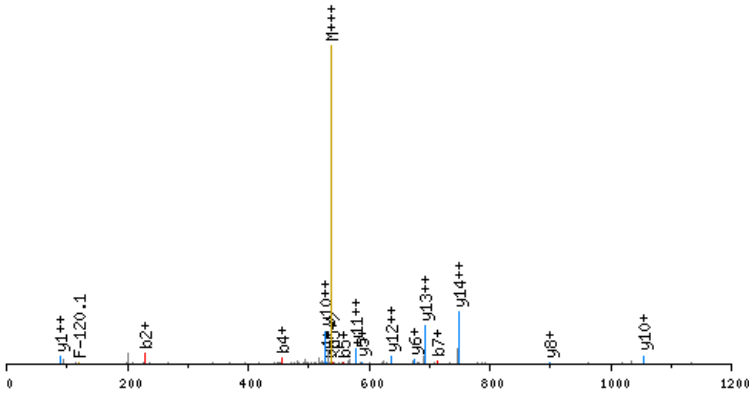

click image to zoom in; click top corners to zoom out

[precursor±]

scan 4636; 538.0 m/z; 5.4e+000

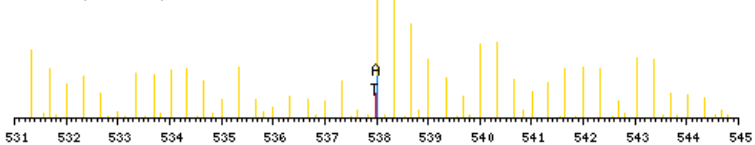

zoomed in precursor plot; T=theoretical m/z, A=acquired m/z

| b <sup>+</sup> | #  | AA | #  | y <sup>+</sup> | y <sup>2+</sup> |
|----------------|----|----|----|----------------|-----------------|
| 116.0711       | 1  | S  | 15 |                |                 |
| 229.1552       | 2  | I  | 14 | 1496.8801      | 748.9440        |
| 342.2393       | 3  | I  | 13 | 1383.7960      | 692.4019        |
| 457.2662       | 4  | D  | 12 | 1270.7120      | 635.8599        |
| 558.3139       | 5  | T  | 11 | 1155.6850      | 578.3464        |
| 655.3666       | 6  | P  | 10 | 1054.6373      | 527.8226        |
| 712.3881       | 7  | G  | 9  | 957.5846       | 479.2962        |
| 825.4722       | 8  | I  | 8  | 900.5631       | 450.7855        |
| 938.5562       | 9  | L  | 7  | 787.4790       | 394.2434        |
| 1025.5883      | 10 | S  | 6  | 674.3950       | 337.7014        |
| 1082.6097      | 11 | G  | 5  | 587.3630       | 294.1854        |
| 1153.6468      | 12 | A  | 4  | 530.3415       | 265.6747        |
| 1309.7731      | 13 | K  | 3  | 459.3044       | 230.1561        |
| 1437.8317      | 14 | Q  | 2  | 303.1781       | 152.0930        |
|                | 15 | R  | 1  | 175.1195       | 88.0637         |

N-term:+29.04 K(13):+156.13

X-range:

0 - 0

MassTol: Y-zoom:

0. 1.

MassType:

☐AVG ☒MONO

Axis:

☒1 ☐2

Label:

☒I ☐M ☐-

Ions:

a ☐+ ☐2+ ☐3+

b ☒+ ☐2+ ☐3+

c ☐+ ☐2+ ☐3+

x ☐+ ☐2+ ☐3+

y ☒+ ☒2+ ☐3+

z ☐+ ☐2+ ☐3+

hide H<sub>2</sub>O/NH<sub>3</sub> ☐

zoom 112-122 ☐

GO

SIMKCDIDIR, MH+ 1306.6863, m/z 436.2336  
L OS G16 P120811 220811-s1.03940.03940.3.dta

scan 3940; 9.2e+000

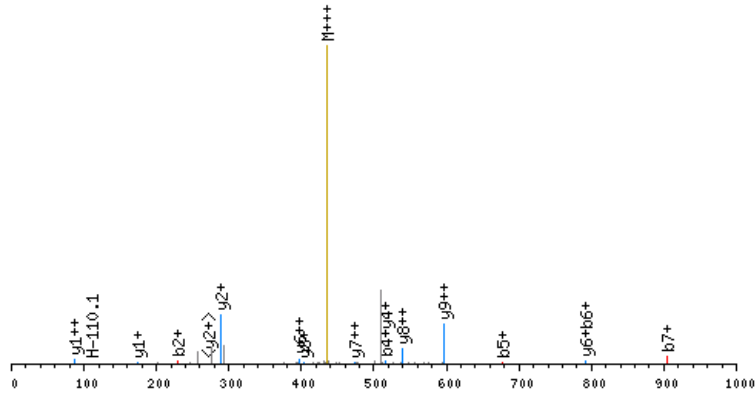

click image to zoom in; click top corners to zoom out [\[precursor±\]](#)

scan 3938; 436.2 m/z; 8.2e+000

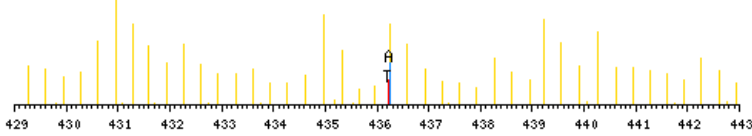

zoomed in precursor plot; T=theoretical m/z, A=acquired m/z

| b <sup>+</sup> | #  | AA | #  | y <sup>+</sup> | y <sup>2+</sup> |
|----------------|----|----|----|----------------|-----------------|
| 116.0711       | 1  | S  | 10 |                |                 |
| 229.1552       | 2  | I  | 9  | 1191.6230      | 596.3154        |
| 360.1957       | 3  | M  | 8  | 1078.5389      | 539.7734        |
| 516.3220       | 4  | K  | 7  | 947.4984       | 474.2531        |
| 676.3526       | 5  | C  | 6  | 791.3721       | 396.1900        |
| 791.3795       | 6  | D  | 5  | 631.3415       | 316.1747        |
| 904.4636       | 7  | I  | 4  | 516.3146       | 258.6612        |
| 1019.4905      | 8  | D  | 3  | 403.2305       | 202.1192        |
| 1132.5746      | 9  | I  | 2  | 288.2036       | 144.6057        |
|                | 10 | R  | 1  | 175.1195       | 88.0637         |

N-term:+29.04 K(4):+156.13  
C(5):+160.03

X-range:

0 - 0

MassTol: Y-zoom:

0. 1.

MassType:

☐AVG ☒MONO

Axis:

☒1 ☐2

Label:

☒I ☐M ☐-

Ions:

a ☐+ ☐2+ ☐3+

b ☒+ ☐2+ ☐3+

c ☐+ ☐2+ ☐3+

x ☐+ ☐2+ ☐3+

y ☒+ ☒2+ ☐3+

z ☐+ ☐2+ ☐3+

hide H<sub>2</sub>O/NH<sub>3</sub> ☐

zoom 112-122 ☐

GO

SIPFPPTPTPLTGR, MH+ 1512.8426, m/z 504.9524  
L OS G13 P120811 220811-s1.06235.06235.3.dta

scan 6235; 2.4e+000

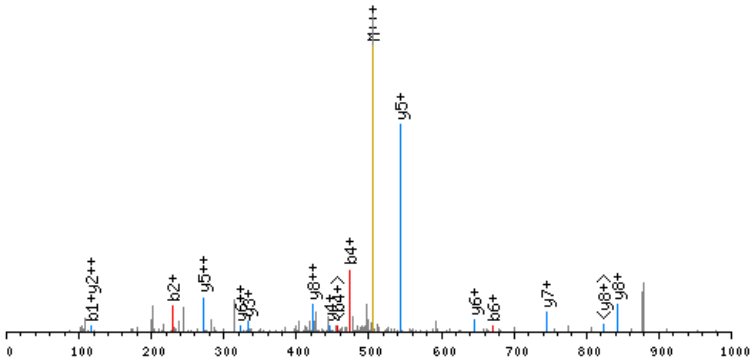

click image to zoom in; click top corners to zoom out

[precursor±]

scan 6234; 505.0 m/z; 3.9e+001

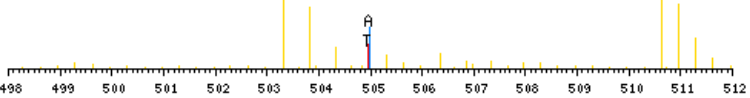

zoomed in precursor plot; T=theoretical m/z, A=acquired m/z

| b <sup>+</sup> | #  | AA | #  | y <sup>+</sup> | y <sup>2+</sup> |
|----------------|----|----|----|----------------|-----------------|
| 116.0711       | 1  | S  | 14 |                |                 |
| 229.1552       | 2  | I  | 13 | 1397.7793      | 699.3936        |
| 326.2080       | 3  | P  | 12 | 1284.6952      | 642.8515        |
| 473.2764       | 4  | F  | 11 | 1187.6424      | 594.3251        |
| 570.3291       | 5  | P  | 10 | 1040.5740      | 520.7909        |
| 671.3768       | 6  | T  | 9  | 943.5213       | 472.2645        |
| 768.4296       | 7  | P  | 8  | 842.4736       | 421.7407        |
| 869.4773       | 8  | T  | 7  | 745.4208       | 373.2143        |
| 970.5249       | 9  | T  | 6  | 644.3731       | 322.6905        |
| 1067.5777      | 10 | P  | 5  | 543.3255       | 272.1666        |
| 1180.6618      | 11 | L  | 4  | 446.2727       | 223.6403        |
| 1281.7094      | 12 | T  | 3  | 333.1886       | 167.0982        |
| 1338.7309      | 13 | G  | 2  | 232.1410       | 116.5744        |
|                | 14 | R  | 1  | 175.1195       | 88.0637         |

N-term:+29.04

X-range:

0 - 0

MassTol: Y-zoom:

0. 1.

MassType:

☐AVG ☒MONO

Axis:

☒1 ☐2

Label:

☒I ☐M ☐-

Ions:

a ☐+ ☐2+ ☐3+

b ☒+ ☐2+ ☐3+

c ☐+ ☐2+ ☐3+

x ☐+ ☐2+ ☐3+

y ☒+ ☒2+ ☐3+

z ☐+ ☐2+ ☐3+

hide H<sub>2</sub>O/NH<sub>3</sub> ☐

zoom 112-122 ☐

GO

SIPSHPSTAGKIFR, MH+ 1553.8804, m/z 389.2256  
L OS G17 P120811 220811-s1.03202.03202.4.dta

scan 3202; 1.2e+001

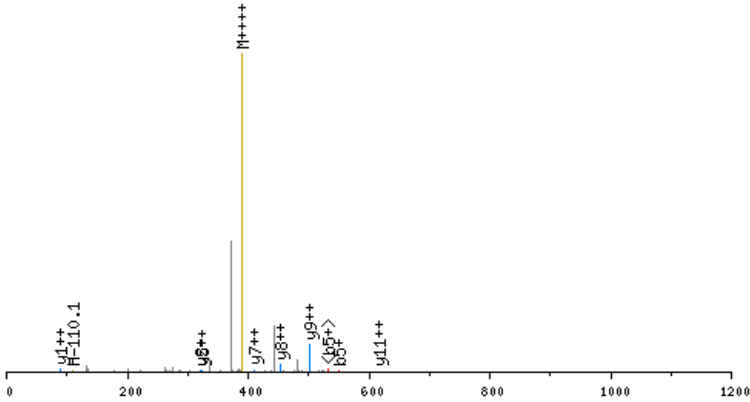

click image to zoom in; click top corners to zoom out

[precursor±]

scan 3198; 389.2 m/z; 5.8e+001

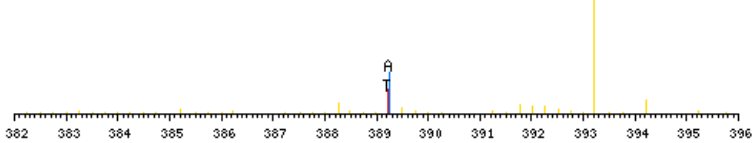

zoomed in precursor plot; T=theoretical m/z, A=acquired m/z

| b <sup>+</sup> | #  | AA | #  | y <sup>+</sup> | y <sup>2+</sup> |
|----------------|----|----|----|----------------|-----------------|
| 116.0711       | 1  | S  | 14 |                |                 |
| 229.1552       | 2  | I  | 13 | 1438.8171      | 719.9125        |
| 326.2080       | 3  | P  | 12 | 1325.7330      | 663.3704        |
| 413.2400       | 4  | S  | 11 | 1228.6803      | 614.8440        |
| 550.2989       | 5  | H  | 10 | 1141.6482      | 571.3280        |
| 647.3517       | 6  | P  | 9  | 1004.5893      | 502.7986        |
| 734.3837       | 7  | S  | 8  | 907.5366       | 454.2722        |
| 835.4314       | 8  | T  | 7  | 820.5045       | 410.7562        |
| 906.4685       | 9  | A  | 6  | 719.4569       | 360.2323        |
| 963.4899       | 10 | G  | 5  | 648.4197       | 324.7138        |
| 1119.6162      | 11 | K  | 4  | 591.3983       | 296.2031        |
| 1232.7003      | 12 | I  | 3  | 435.2720       | 218.1399        |
| 1379.7687      | 13 | F  | 2  | 322.1879       | 161.5979        |
|                | 14 | R  | 1  | 175.1195       | 88.0637         |

N-term:+29.04 K(11):+156.13

X-range:

0 - 0

MassTol: Y-zoom:

0. 1.

MassType:

☐AVG ☒MONO

Axis:

☒1 ☐2

Label:

☒I ☐M ☐-

Ions:

a ☐+ ☐2+ ☐3+

b ☒+ ☐2+ ☐3+

c ☐+ ☐2+ ☐3+

x ☐+ ☐2+ ☐3+

y ☒+ ☒2+ ☐3+

z ☐+ ☐2+ ☐3+

hide H<sub>2</sub>O/NH<sub>3</sub> ☐

zoom 112-122 ☐

GO

SITPAEVGVLVGKDR, MH+ 1596.9325, m/z 532.9823  
L OS G15 P120811 220811-s1.04979.04979.3.dta

scan 4979; 5.5e+000

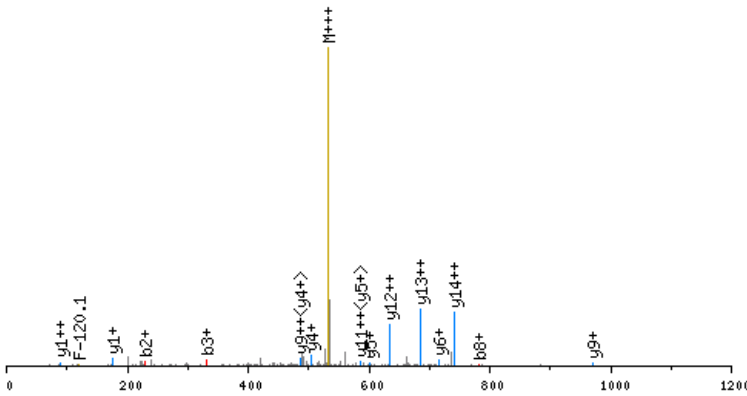

click image to zoom in; click top corners to zoom out

[precursor±]

scan 4976; 533.0 m/z; 3.6e+000

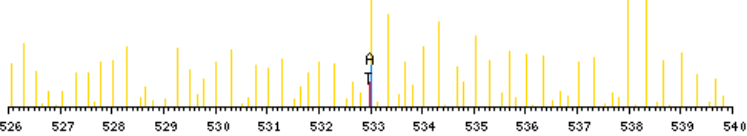

zoomed in precursor plot; T=theoretical m/z, A=acquired m/z

| b <sup>+</sup> | #  | AA | #  | y <sup>+</sup> | y <sup>2+</sup> |
|----------------|----|----|----|----------------|-----------------|
| 116.0711       | 1  | S  | 15 |                |                 |
| 229.1552       | 2  | I  | 14 | 1481.8692      | 741.4385        |
| 330.2029       | 3  | T  | 13 | 1368.7851      | 684.8965        |
| 427.2556       | 4  | P  | 12 | 1267.7374      | 634.3726        |
| 498.2927       | 5  | A  | 11 | 1170.6847      | 585.8463        |
| 627.3353       | 6  | E  | 10 | 1099.6476      | 550.3277        |
| 726.4038       | 7  | V  | 9  | 970.6050       | 485.8064        |
| 783.4252       | 8  | G  | 8  | 871.5366       | 436.2722        |
| 882.4936       | 9  | V  | 7  | 814.5151       | 407.7615        |
| 995.5777       | 10 | L  | 6  | 715.4467       | 358.2273        |
| 1094.6461      | 11 | V  | 5  | 602.3626       | 301.6852        |
| 1151.6676      | 12 | G  | 4  | 503.2942       | 252.1510        |
| 1307.7939      | 13 | K  | 3  | 446.2727       | 223.6403        |
| 1422.8208      | 14 | D  | 2  | 290.1464       | 145.5771        |
|                | 15 | R  | 1  | 175.1195       | 88.0637         |

N-term:+29.04 K(13):+156.13

X-range:

0 - 0

MassTol: Y-zoom:

0. 1.

MassType:

☐ AVG ☒ MONO

Axis:

☒ 1 ☐ 2

Label:

☒ I ☐ M ☐ -

Ions:

a ☐ + ☐ 2+ ☐ 3+

b ☒ + ☐ 2+ ☐ 3+

c ☐ + ☐ 2+ ☐ 3+

x ☐ + ☐ 2+ ☐ 3+

y ☒ + ☒ 2+ ☐ 3+

z ☐ + ☐ 2+ ☐ 3+

hide H<sub>2</sub>O/NH<sub>3</sub> ☐

zoom 112-122 ☐

GO

SIVDPKVIVEIHGVGQDVASR, MH+ 2274.2822, m/z 569.3260  
L OS G16 P120811 220811-s1.05875.05875.4.dta

scan 5875; 3.3e+000

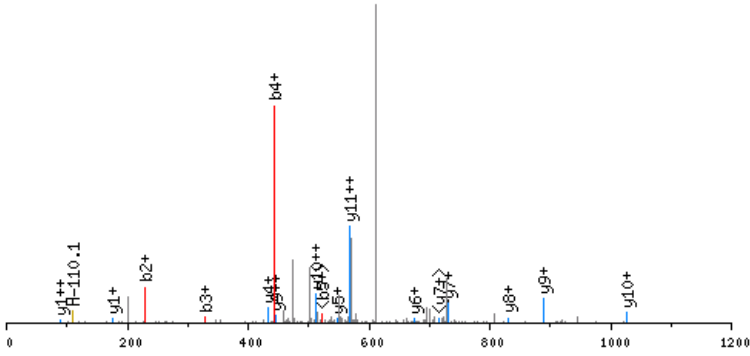

click image to zoom in; click top corners to zoom out [\[precursor±\]](#)

scan 5873; 569.3 m/z; 2.9e+000

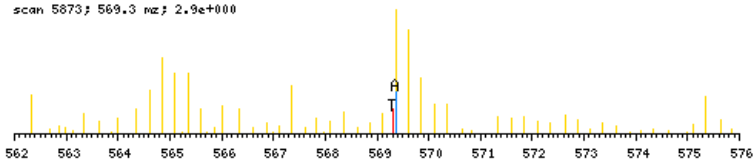

zoomed in precursor plot; T=theoretical m/z, A=acquired m/z

| b <sup>+</sup> | #  | AA | #  | y <sup>+</sup> | y <sup>2+</sup> |
|----------------|----|----|----|----------------|-----------------|
| 116.0711       | 1  | S  | 21 |                |                 |
| 229.1552       | 2  | I  | 20 | 2159.2189      | 1080.1133       |
| 328.2236       | 3  | V  | 19 | 2046.1348      | 1023.5713       |
| 443.2505       | 4  | D  | 18 | 1947.0664      | 974.0371        |
| 540.3033       | 5  | P  | 17 | 1832.0394      | 916.5236        |
| 696.4296       | 6  | K  | 16 | 1734.9867      | 867.9973        |
| 795.4980       | 7  | V  | 15 | 1578.8604      | 789.9341        |
| 908.5821       | 8  | I  | 14 | 1479.7920      | 740.3999        |
| 1007.6505      | 9  | V  | 13 | 1366.7079      | 683.8579        |
| 1136.6931      | 10 | E  | 12 | 1267.6395      | 634.3237        |
| 1249.7772      | 11 | I  | 11 | 1138.5969      | 569.8024        |
| 1386.8361      | 12 | H  | 10 | 1025.5128      | 513.2603        |
| 1443.8575      | 13 | G  | 9  | 888.4539       | 444.7309        |
| 1542.9260      | 14 | V  | 8  | 831.4325       | 416.2201        |
| 1599.9474      | 15 | G  | 7  | 732.3640       | 366.6859        |
| 1728.0060      | 16 | Q  | 6  | 675.3426       | 338.1752        |
| 1843.0329      | 17 | D  | 5  | 547.2840       | 274.1459        |
| 1942.1014      | 18 | V  | 4  | 432.2571       | 216.6324        |
| 2013.1385      | 19 | A  | 3  | 333.1886       | 167.0982        |
| 2100.1705      | 20 | S  | 2  | 262.1515       | 131.5797        |
|                | 21 | R  | 1  | 175.1195       | 88.0637         |

N-term:+29.04 K(6):+156.13

X-range:

0 - 0

MassTol: Y-zoom:

0. 1.

MassType:

☐ AVG ☒ MONO

Axis:

☒ 1 ☐ 2

Label:

☒ I ☐ M ☐ -

Ions:

a ☐ + ☐ 2+ ☐ 3+

b ☒ + ☐ 2+ ☐ 3+

c ☐ + ☐ 2+ ☐ 3+

x ☐ + ☐ 2+ ☐ 3+

y ☒ + ☒ 2+ ☐ 3+

z ☐ + ☐ 2+ ☐ 3+

hide H<sub>2</sub>O/NH<sub>3</sub> ☐

zoom 112-122 ☐

GO

SIVVSPILIPENQR, MH+ 1592.9375, m/z 531.6507  
L OS G13 P120811 220811-s1.06180.06180.3.dta

scan 6180; 3.2e+000

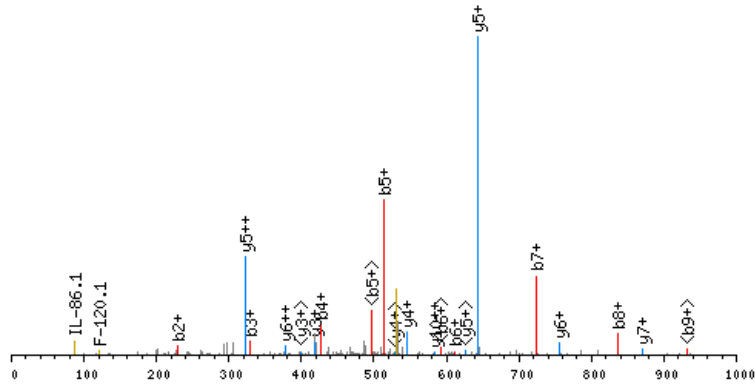

click image to zoom in; click top corners to zoom out

[precursor±]

scan 6179; 531.7 m/z; 5.8e+000

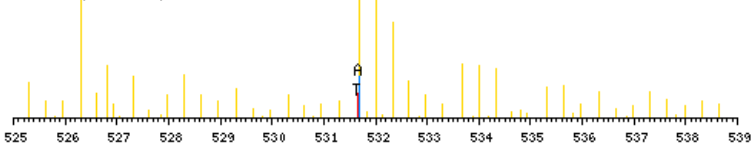

zoomed in precursor plot; T=theoretical m/z, A=acquired m/z

| b <sup>+</sup> | #  | AA | #  | y <sup>+</sup> | y <sup>2+</sup> |
|----------------|----|----|----|----------------|-----------------|
| 116.0711       | 1  | S  | 14 |                |                 |
| 229.1552       | 2  | I  | 13 | 1477.8742      | 739.4410        |
| 328.2236       | 3  | V  | 12 | 1364.7902      | 682.8990        |
| 427.2920       | 4  | V  | 11 | 1265.7218      | 633.3648        |
| 514.3240       | 5  | S  | 10 | 1166.6533      | 583.8306        |
| 611.3768       | 6  | P  | 9  | 1079.6213      | 540.3146        |
| 724.4609       | 7  | I  | 8  | 982.5686       | 491.7882        |
| 837.5449       | 8  | L  | 7  | 869.4845       | 435.2462        |
| 950.6290       | 9  | I  | 6  | 756.4004       | 378.7041        |
| 1047.6818      | 10 | P  | 5  | 643.3164       | 322.1621        |
| 1176.7244      | 11 | E  | 4  | 546.2636       | 273.6357        |
| 1290.7673      | 12 | N  | 3  | 417.2210       | 209.1144        |
| 1418.8259      | 13 | Q  | 2  | 303.1781       | 152.0930        |
|                | 14 | R  | 1  | 175.1195       | 88.0637         |

N-term:+29.04

X-range:

0 - 0

MassTol: Y-zoom:

0. 1.

MassType:

☐AVG ☒MONO

Axis:

☒1 ☐2

Label:

☒I ☐M ☐-

Ions:

a ☐+ ☐2+ ☐3+

b ☒+ ☐2+ ☐3+

c ☐+ ☐2+ ☐3+

x ☐+ ☐2+ ☐3+

y ☒+ ☒2+ ☐3+

z ☐+ ☐2+ ☐3+

hide H<sub>2</sub>O/NH<sub>3</sub> ☐

zoom 112-122 ☐

GO

SKADDLDDLKSSGVIQR, MH+ 1929.1021, m/z 483.0310  
L OS G17 P120811 220811-s1.05290.05290.4.dta

scan 5290; 4.8e+000

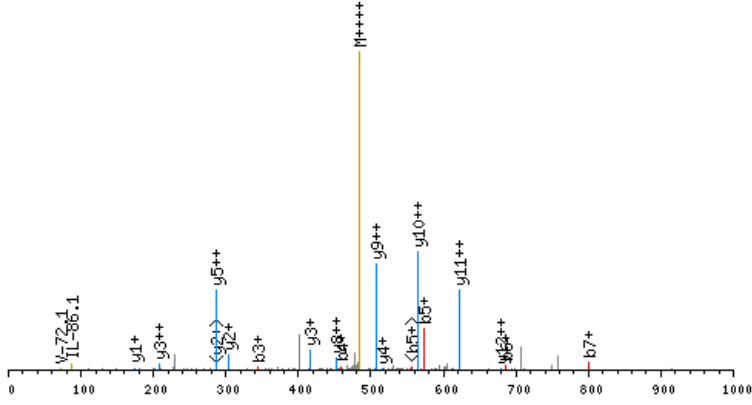

click image to zoom in; click top corners to zoom out [\[precursor±\]](#)

scan 5288; 483.0 m/z; 8.4e+000

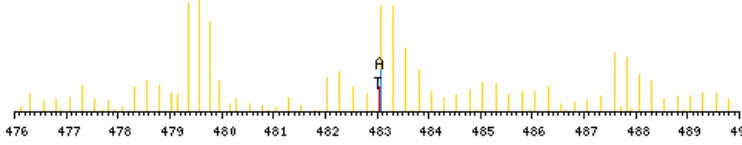

zoomed in precursor plot; T=theoretical m/z, A=acquired m/z

| b <sup>+</sup> | #  | AA | #  | y <sup>+</sup> | y <sup>2+</sup> |
|----------------|----|----|----|----------------|-----------------|
| 116.0711       | 1  | S  | 17 |                |                 |
| 272.1974       | 2  | K  | 16 | 1814.0388      | 907.5233        |
| 343.2345       | 3  | A  | 15 | 1657.9125      | 829.4602        |
| 458.2615       | 4  | D  | 14 | 1586.8754      | 793.9416        |
| 573.2884       | 5  | D  | 13 | 1471.8485      | 736.4281        |
| 686.3725       | 6  | L  | 12 | 1356.8215      | 678.9147        |
| 801.3994       | 7  | D  | 11 | 1243.7374      | 622.3726        |
| 914.4835       | 8  | L  | 10 | 1128.7105      | 564.8592        |
| 1027.5676      | 9  | L  | 9  | 1015.6264      | 508.3171        |
| 1183.6939      | 10 | K  | 8  | 902.5424       | 451.7751        |
| 1270.7259      | 11 | S  | 7  | 746.4161       | 373.7120        |
| 1357.7579      | 12 | S  | 6  | 659.3840       | 330.1959        |
| 1414.7794      | 13 | G  | 5  | 572.3520       | 286.6799        |
| 1513.8478      | 14 | V  | 4  | 515.3306       | 258.1692        |
| 1626.9319      | 15 | I  | 3  | 416.2621       | 208.6350        |
| 1754.9904      | 16 | Q  | 2  | 303.1781       | 152.0930        |
|                | 17 | R  | 1  | 175.1195       | 88.0637         |

N-term:+29.04 K(2):+156.13  
K(10):+156.13

X-range:

0 - 0

MassTol: Y-zoom:

0. 1.

MassType:

☐ AVG ☒ MONO

Axis:

☒ 1 ☐ 2

Label:

☒ I ☐ M ☐ -

Ions:

a ☐ + ☐ 2+ ☐ 3+

b ☒ + ☐ 2+ ☐ 3+

c ☐ + ☐ 2+ ☐ 3+

x ☐ + ☐ 2+ ☐ 3+

y ☒ + ☒ 2+ ☐ 3+

z ☐ + ☐ 2+ ☐ 3+

hide H<sub>2</sub>O/NH<sub>3</sub> ☐

zoom 112-122 ☐

GO

SKAEELHYPQGEHR, MH+ 1736.8720, m/z 434.9735  
L OS G19 P120811 220811-s1.02025.02025.4.dta

scan 2025; 8.4e+000

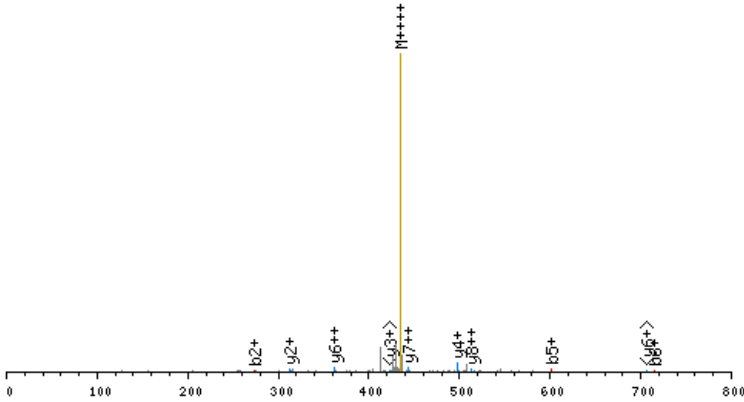

click image to zoom in; click top corners to zoom out

[precursor±]

scan 2022; 435.0 m/z; 2.2e+000

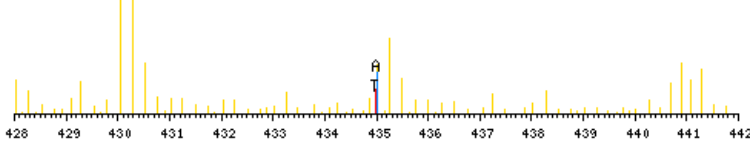

zoomed in precursor plot; T=theoretical m/z, A=acquired m/z

| b <sup>+</sup> | #  | AA | #  | y <sup>+</sup> | y <sup>2+</sup> |
|----------------|----|----|----|----------------|-----------------|
| 116.0711       | 1  | S  | 14 |                |                 |
| 272.1974       | 2  | K  | 13 | 1621.8087      | 811.4083        |
| 343.2345       | 3  | A  | 12 | 1465.6824      | 733.3451        |
| 472.2771       | 4  | E  | 11 | 1394.6453      | 697.8266        |
| 601.3197       | 5  | E  | 10 | 1265.6027      | 633.3053        |
| 714.4038       | 6  | L  | 9  | 1136.5601      | 568.7840        |
| 851.4627       | 7  | H  | 8  | 1023.4761      | 512.2419        |
| 1014.5260      | 8  | Y  | 7  | 886.4171       | 443.7125        |
| 1111.5788      | 9  | P  | 6  | 723.3538       | 362.1808        |
| 1239.6374      | 10 | Q  | 5  | 626.3010       | 313.6544        |
| 1296.6588      | 11 | G  | 4  | 498.2425       | 249.6251        |
| 1425.7014      | 12 | E  | 3  | 441.2210       | 221.1144        |
| 1562.7603      | 13 | H  | 2  | 312.1784       | 156.5931        |
|                | 14 | R  | 1  | 175.1195       | 88.0637         |

N-term:+29.04 K(2):+156.13

X-range:

0 - 0

MassTol: Y-zoom:

0. 1.

MassType:

☐AVG ☒MONO

Axis:

☒1 ☐2

Label:

☒I ☐M ☐-

Ions:

a ☐+ ☐2+ ☐3+

b ☒+ ☐2+ ☐3+

c ☐+ ☐2+ ☐3+

x ☐+ ☐2+ ☐3+

y ☒+ ☒2+ ☐3+

z ☐+ ☐2+ ☐3+

hide H<sub>2</sub>O/NH<sub>3</sub> ☐

zoom 112-122 ☐

GO

SKDQEDAMGGAVQAEQEAEQHSVIMR, MH+ 2912.4155, m/z 728.8593  
H OS G12 P120811 220811-s1.02874.02874.4.dta

scan 2874; 1.2e+000

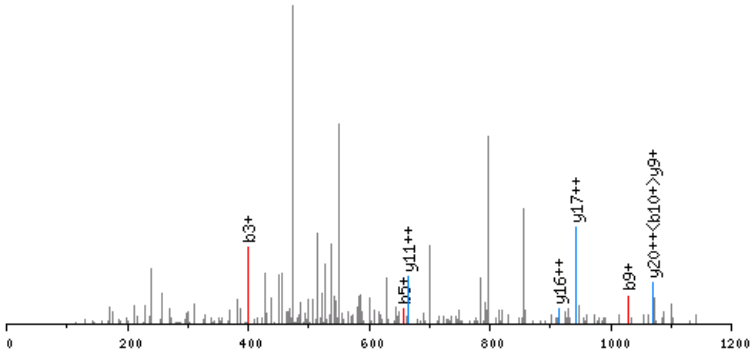

click image to zoom in; click top corners to zoom out [precursor±]

scan 2872; 728.9 m/z; 3.6e+000

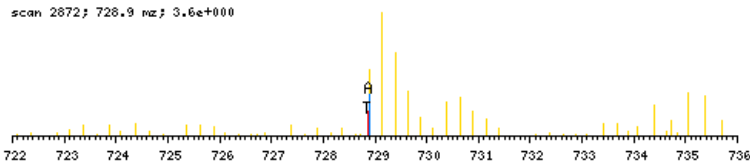

zoomed in precursor plot; T=theoretical m/z, A=acquired m/z

| b <sup>+</sup> | #  | AA | #  | y <sup>+</sup> | y <sup>2+</sup> |
|----------------|----|----|----|----------------|-----------------|
| 122.1029       | 1  | S  | 26 |                |                 |
| 284.2610       | 2  | K  | 25 | 2791.3204      | 1396.1641       |
| 399.2880       | 3  | D  | 24 | 2629.1623      | 1315.0850       |
| 527.3465       | 4  | Q  | 23 | 2514.1353      | 1257.5716       |
| 656.3891       | 5  | E  | 22 | 2386.0767      | 1193.5423       |
| 771.4161       | 6  | D  | 21 | 2257.0341      | 1129.0210       |
| 842.4532       | 7  | A  | 20 | 2142.0072      | 1071.5075       |
| 973.4937       | 8  | M  | 19 | 2070.9701      | 1035.9890       |
| 1030.5151      | 9  | G  | 18 | 1939.9296      | 970.4687        |
| 1087.5366      | 10 | G  | 17 | 1882.9081      | 941.9580        |
| 1158.5737      | 11 | A  | 16 | 1825.8867      | 913.4472        |
| 1257.6421      | 12 | V  | 15 | 1754.8496      | 877.9287        |
| 1385.7007      | 13 | Q  | 14 | 1655.7811      | 828.3945        |
| 1456.7378      | 14 | A  | 13 | 1527.7226      | 764.3652        |
| 1585.7804      | 15 | E  | 12 | 1456.6855      | 728.8466        |
| 1713.8390      | 16 | Q  | 11 | 1327.6429      | 664.3253        |
| 1842.8816      | 17 | E  | 10 | 1199.5843      | 600.2961        |
| 1913.9187      | 18 | A  | 9  | 1070.5417      | 535.7748        |
| 2042.9613      | 19 | E  | 8  | 999.5046       | 500.2562        |
| 2171.0199      | 20 | Q  | 7  | 870.4620       | 435.7349        |
| 2308.0788      | 21 | H  | 6  | 742.4034       | 371.7056        |
| 2395.1108      | 22 | S  | 5  | 605.3445       | 303.1762        |
| 2494.1792      | 23 | V  | 4  | 518.3125       | 259.6601        |
| 2607.2633      | 24 | I  | 3  | 419.2440       | 210.1259        |
| 2738.3038      | 25 | M  | 2  | 306.1600       | 153.5839        |
|                | 26 | R  | 1  | 175.1195       | 88.0637         |

N-term:+35.07 K(2):+162.16

N-term: +35.07 K(2): +162.16  
K(9): +162.16

X-range:

0 - 0

MassTol: Y-zoom:

0. 1.

MassType:

☐AVG ☒MONO

Axis:

☒1 ☐2

Label:

☒I ☐M ☐-

Ions:

a ☐+ ☐2+ ☐3+

b ☒+ ☐2+ ☐3+

c ☐+ ☐2+ ☐3+

x ☐+ ☐2+ ☐3+

y ☒+ ☒2+ ☐3+

z ☐+ ☐2+ ☐3+

hide H<sub>2</sub>O/NH<sub>3</sub> ☐

zoom 112-122 ☐

GO

SKLEPQIATASEYahr, MH+ 1856.9870, m/z 465.0022  
L OS G17 P120811 220811-s1.03590.03590.4.dta

scan 3590; 3.9e+000

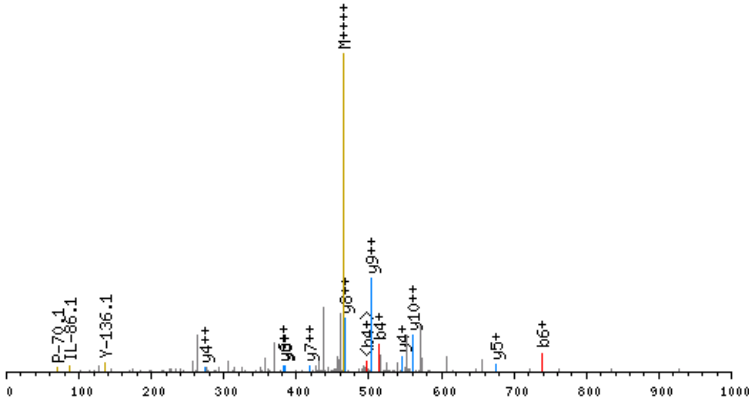

click image to zoom in; click top corners to zoom out

[precursor±]

scan 3588; 465.0 m/z; 1.3e+001

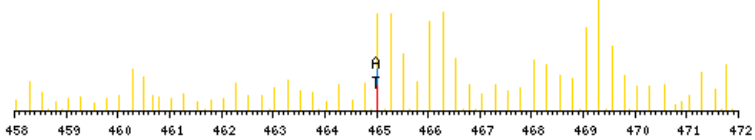

zoomed in precursor plot; T=theoretical m/z, A=acquired m/z

| b <sup>+</sup> | #  | AA | #  | y <sup>+</sup> | y <sup>2+</sup> |
|----------------|----|----|----|----------------|-----------------|
| 116.0711       | 1  | S  | 16 |                |                 |
| 272.1974       | 2  | K  | 15 | 1741.9237      | 871.4658        |
| 385.2815       | 3  | L  | 14 | 1585.7974      | 793.4026        |
| 514.3241       | 4  | E  | 13 | 1472.7134      | 736.8606        |
| 611.3768       | 5  | P  | 12 | 1343.6708      | 672.3393        |
| 739.4354       | 6  | Q  | 11 | 1246.6180      | 623.8129        |
| 852.5195       | 7  | I  | 10 | 1118.5594      | 559.7836        |
| 923.5566       | 8  | A  | 9  | 1005.4754      | 503.2416        |
| 1024.6043      | 9  | T  | 8  | 934.4383       | 467.7230        |
| 1095.6414      | 10 | A  | 7  | 833.3906       | 417.1992        |
| 1182.6734      | 11 | S  | 6  | 762.3535       | 381.6807        |
| 1311.7160      | 12 | E  | 5  | 675.3214       | 338.1646        |
| 1474.7793      | 13 | Y  | 4  | 546.2789       | 273.6433        |
| 1545.8165      | 14 | A  | 3  | 383.2155       | 192.1117        |
| 1682.8754      | 15 | H  | 2  | 312.1784       | 156.5931        |
|                | 16 | R  | 1  | 175.1195       | 88.0637         |

N-term:+29.04 K(2):+156.13

X-range:

0 - 0

MassTol: Y-zoom:

0. 1.

MassType:

☐AVG ☒MONO

Axis:

☒1 ☐2

Label:

☒I ☐M ☐-

Ions:

a ☐+ ☐2+ ☐3+

b ☒+ ☐2+ ☐3+

c ☐+ ☐2+ ☐3+

x ☐+ ☐2+ ☐3+

y ☒+ ☒2+ ☐3+

z ☐+ ☐2+ ☐3+

hide H<sub>2</sub>O/NH<sub>3</sub> ☐

zoom 112-122 ☐

GO

SKLGDVYVNDAFGTAHR, MH+ 1905.9823, m/z 477.2510  
L OS G17 P120811 220811-s1.04834.04834.4.dta

scan 4834; 1.7e+000

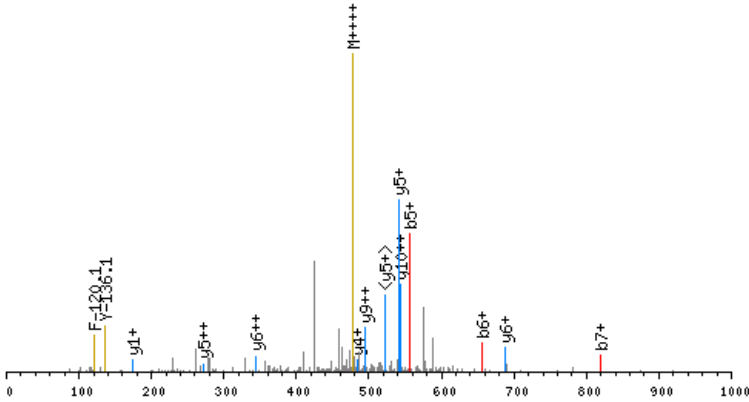

click image to zoom in; click top corners to zoom out

[precursor±]

scan 4833; 477.3 m/z; 8.8e+000

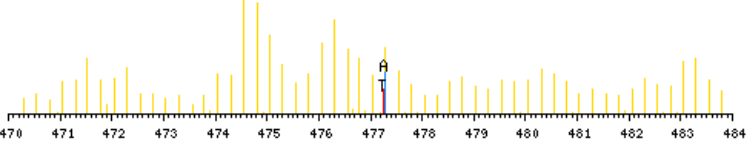

zoomed in precursor plot; T=theoretical m/z, A=acquired m/z

| b <sup>+</sup> | #  | AA | #  | y <sup>+</sup> | y <sup>2+</sup> |
|----------------|----|----|----|----------------|-----------------|
| 116.0711       | 1  | S  | 17 |                |                 |
| 272.1974       | 2  | K  | 16 | 1790.9190      | 895.9634        |
| 385.2815       | 3  | L  | 15 | 1634.7927      | 817.9003        |
| 442.3030       | 4  | G  | 14 | 1521.7086      | 761.3582        |
| 557.3299       | 5  | D  | 13 | 1464.6872      | 732.8475        |
| 656.3983       | 6  | V  | 12 | 1349.6602      | 675.3340        |
| 819.4616       | 7  | Y  | 11 | 1250.5918      | 625.7998        |
| 918.5301       | 8  | V  | 10 | 1087.5285      | 544.2682        |
| 1032.5730      | 9  | N  | 9  | 988.4601       | 494.7339        |
| 1147.5999      | 10 | D  | 8  | 874.4171       | 437.7125        |
| 1218.6370      | 11 | A  | 7  | 759.3902       | 380.1990        |
| 1365.7055      | 12 | F  | 6  | 688.3531       | 344.6805        |
| 1422.7269      | 13 | G  | 5  | 541.2847       | 271.1462        |
| 1523.7746      | 14 | T  | 4  | 484.2632       | 242.6355        |
| 1594.8117      | 15 | A  | 3  | 383.2155       | 192.1117        |
| 1731.8706      | 16 | H  | 2  | 312.1784       | 156.5931        |
|                | 17 | R  | 1  | 175.1195       | 88.0637         |

N-term:+29.04 K(2):+156.13

X-range:

0 - 0

MassTol: Y-zoom:

0. 1.

MassType:

☐ AVG ☒ MONO

Axis:

☒ 1 ☐ 2

Label:

☒ I ☐ M ☐ -

Ions:

a ☐ + ☐ 2+ ☐ 3+

b ☒ + ☐ 2+ ☐ 3+

c ☐ + ☐ 2+ ☐ 3+

x ☐ + ☐ 2+ ☐ 3+

y ☒ + ☒ 2+ ☐ 3+

z ☐ + ☐ 2+ ☐ 3+

hide H<sub>2</sub>O/NH<sub>3</sub> ☐

zoom 112-122 ☐

GO

SKLGPYNEELR, MH+ 1361.7429, m/z 454.5858  
L OS G16 P120811 220811-s1.03114.03114.3.dta

scan 3114; 5.4e+000

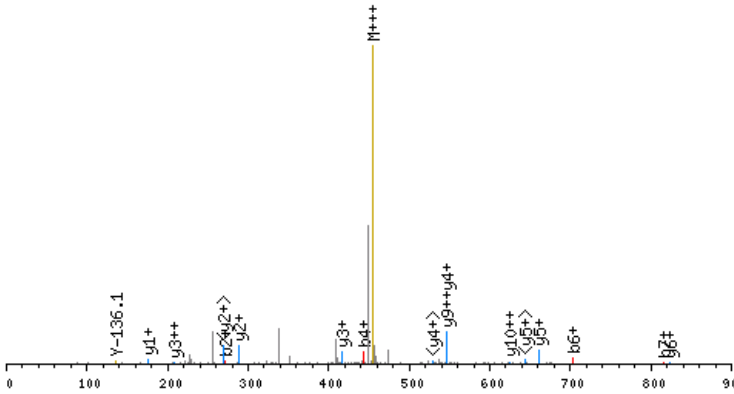

click image to zoom in; click top corners to zoom out [\[precursor±\]](#)

scan 3113; 454.6 m/z; 1.1e+001

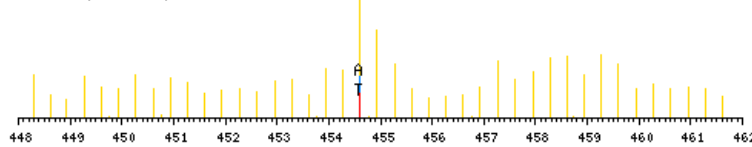

zoomed in precursor plot; T=theoretical m/z, A=acquired m/z

| b <sup>+</sup> | #  | AA | #  | y <sup>+</sup> | y <sup>2+</sup> |
|----------------|----|----|----|----------------|-----------------|
| 116.0711       | 1  | S  | 11 |                |                 |
| 272.1974       | 2  | K  | 10 | 1246.6796      | 623.8437        |
| 385.2815       | 3  | L  | 9  | 1090.5533      | 545.7806        |
| 442.3030       | 4  | G  | 8  | 977.4692       | 489.2385        |
| 539.3557       | 5  | P  | 7  | 920.4478       | 460.7278        |
| 702.4190       | 6  | Y  | 6  | 823.3950       | 412.2014        |
| 816.4620       | 7  | N  | 5  | 660.3317       | 330.6698        |
| 945.5046       | 8  | E  | 4  | 546.2888       | 273.6483        |
| 1074.5472      | 9  | E  | 3  | 417.2462       | 209.1270        |
| 1187.6312      | 10 | L  | 2  | 288.2036       | 144.6057        |
|                | 11 | R  | 1  | 175.1195       | 88.0637         |

N-term:+29.04 K(2):+156.13

X-range:

0 - 0

MassTol: Y-zoom:

0. 1.

MassType:

☐AVG ☒MONO

Axis:

☒1 ☐2

Label:

☒I ☐M ☐-

Ions:

a ☐+ ☐2+ ☐3+

b ☒+ ☐2+ ☐3+

c ☐+ ☐2+ ☐3+

x ☐+ ☐2+ ☐3+

y ☒+ ☒2+ ☐3+

z ☐+ ☐2+ ☐3+

hide H<sub>2</sub>O/NH<sub>3</sub> ☐

zoom 112-122 ☐

GO

SKPSPQLSAETPVAAALPEFPR, MH+ 2278.2447, m/z 570.3166  
L OS G15 P120811 220811-s1.05470.05470.4.dta

scan 5470; 2.2e+000

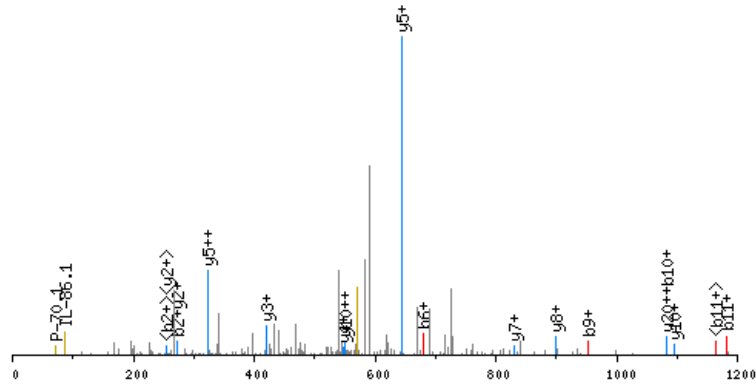

click image to zoom in; click top corners to zoom out [precursor±]

scan 5466; 570.3 m/z; 2.2e+001

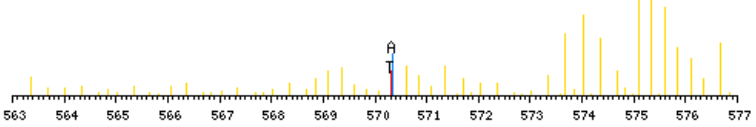

zoomed in precursor plot; T=theoretical m/z, A=acquired m/z

| b <sup>+</sup> | #  | AA | #  | y <sup>+</sup> | y <sup>2+</sup> |
|----------------|----|----|----|----------------|-----------------|
| 116.0711       | 1  | S  | 21 |                |                 |
| 272.1974       | 2  | K  | 20 | 2163.1814      | 1082.0946       |
| 369.2502       | 3  | P  | 19 | 2007.0551      | 1004.0315       |
| 456.2822       | 4  | S  | 18 | 1910.0024      | 955.5051        |
| 553.3350       | 5  | P  | 17 | 1822.9703      | 911.9891        |
| 681.3936       | 6  | Q  | 16 | 1725.9176      | 863.4627        |
| 794.4776       | 7  | L  | 15 | 1597.8590      | 799.4334        |
| 881.5097       | 8  | S  | 14 | 1484.7749      | 742.8914        |
| 952.5468       | 9  | A  | 13 | 1397.7429      | 699.3754        |
| 1081.5894      | 10 | E  | 12 | 1326.7058      | 663.8568        |
| 1182.6370      | 11 | T  | 11 | 1197.6632      | 599.3355        |
| 1279.6898      | 12 | P  | 10 | 1096.6155      | 548.8117        |
| 1378.7582      | 13 | V  | 9  | 999.5627       | 500.2853        |
| 1449.7953      | 14 | A  | 8  | 900.4943       | 450.7511        |
| 1520.8324      | 15 | A  | 7  | 829.4572       | 415.2325        |
| 1633.9165      | 16 | L  | 6  | 758.4201       | 379.7140        |
| 1730.9693      | 17 | P  | 5  | 645.3360       | 323.1719        |
| 1860.0119      | 18 | E  | 4  | 548.2833       | 274.6455        |
| 2007.0803      | 19 | F  | 3  | 419.2407       | 210.1243        |
| 2104.1330      | 20 | P  | 2  | 272.1723       | 136.5900        |
|                | 21 | R  | 1  | 175.1195       | 88.0637         |

N-term:+29.04 K(2):+156.13



X-range:

0 - 0

MassTol: Y-zoom:

0. 1.

MassType:

☐ AVG ☒ MONO

Axis:

☒ 1 ☐ 2

Label:

☒ I ☐ M ☐ -

Ions:

a ☐ + ☐ 2+ ☐ 3+

b ☒ + ☐ 2+ ☐ 3+

c ☐ + ☐ 2+ ☐ 3+

x ☐ + ☐ 2+ ☐ 3+

y ☒ + ☒ 2+ ☐ 3+

z ☐ + ☐ 2+ ☐ 3+

hide H<sub>2</sub>O/NH<sub>3</sub> ☐

zoom 112-122 ☐

GO

SKWPEPVFGR, MH+ 1270.7584, m/z 424.2577  
H OS G16 P120811 220811-s1.04675.04675.3.dta

scan 4675; 5.1e+000

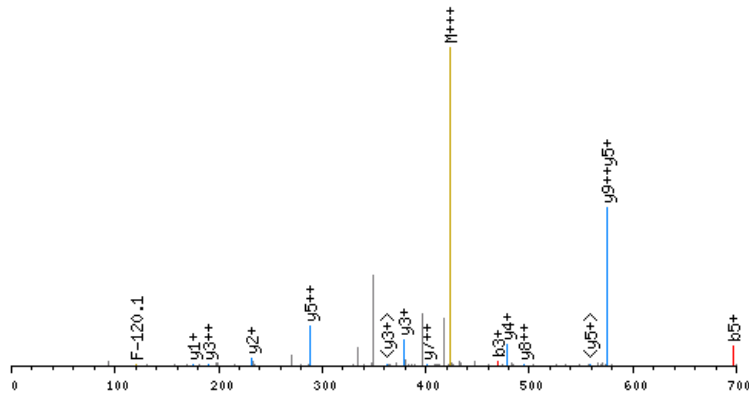

click image to zoom in; click top corners to zoom out

[precursor±]

scan 4673; 424.3 m/z; 1.3e+001

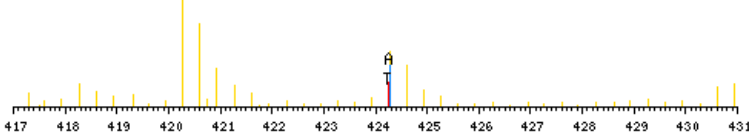

zoomed in precursor plot; T=theoretical m/z, A=acquired m/z

| b <sup>+</sup> | #  | AA | #  | y <sup>+</sup> | y <sup>2+</sup> |
|----------------|----|----|----|----------------|-----------------|
| 122.1029       | 1  | S  | 10 |                |                 |
| 284.2610       | 2  | K  | 9  | 1149.6633      | 575.3356        |
| 470.3403       | 3  | W  | 8  | 987.5052       | 494.2565        |
| 567.3931       | 4  | P  | 7  | 801.4259       | 401.2169        |
| 696.4357       | 5  | E  | 6  | 704.3731       | 352.6905        |
| 793.4885       | 6  | P  | 5  | 575.3306       | 288.1692        |
| 892.5569       | 7  | V  | 4  | 478.2778       | 239.6428        |
| 1039.6253      | 8  | F  | 3  | 379.2094       | 190.1086        |
| 1096.6468      | 9  | G  | 2  | 232.1410       | 116.5744        |
|                | 10 | R  | 1  | 175.1195       | 88.0637         |

N-term:+35.07 K(2):+162.16

X-range:

0 - 0

MassTol: Y-zoom:

0. 1.

MassType:

☐ AVG ☒ MONO

Axis:

☒ 1 ☐ 2

Label:

☒ I ☐ M ☐ -

Ions:

a ☐ + ☐ 2+ ☐ 3+

b ☒ + ☐ 2+ ☐ 3+

c ☐ + ☐ 2+ ☐ 3+

x ☐ + ☐ 2+ ☐ 3+

y ☒ + ☒ 2+ ☐ 3+

z ☐ + ☐ 2+ ☐ 3+

hide H<sub>2</sub>O/NH<sub>3</sub> ☐

zoom 112-122 ☐

GO

SLAEVPKEAPKVGILGSGDFAR, MH+ 2343.4137, m/z 586.6089  
H OS G16 P120811 220811-s1.05534.05534.4.dta

scan 5534; 7.0e+000

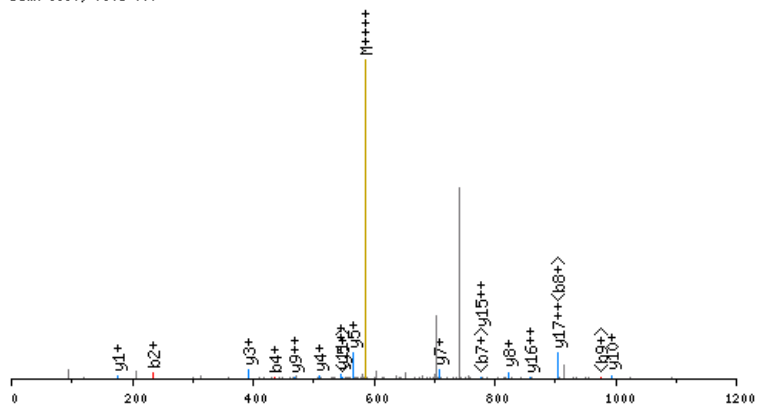

click image to zoom in; click top corners to zoom out

[precursor±]

scan 5533; 586.6 m/z; 4.2e+000

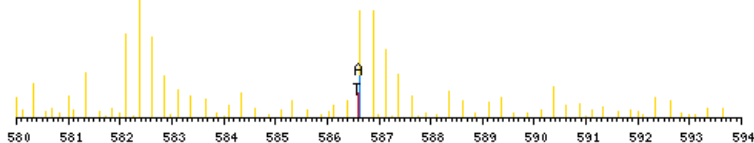

zoomed in precursor plot; T=theoretical m/z, A=acquired m/z

| b <sup>+</sup> | #  | AA | #  | y <sup>+</sup> | y <sup>2+</sup> |
|----------------|----|----|----|----------------|-----------------|
| 122.1029       | 1  | S  | 22 |                |                 |
| 235.1870       | 2  | L  | 21 | 2222.3186      | 1111.6632       |
| 306.2241       | 3  | A  | 20 | 2109.2345      | 1055.1212       |
| 435.2667       | 4  | E  | 19 | 2038.1974      | 1019.6026       |
| 534.3351       | 5  | V  | 18 | 1909.1548      | 955.0813        |
| 631.3879       | 6  | P  | 17 | 1810.0864      | 905.5471        |
| 793.5460       | 7  | K  | 16 | 1713.0336      | 857.0207        |
| 922.5886       | 8  | E  | 15 | 1550.8755      | 775.9417        |
| 993.6257       | 9  | A  | 14 | 1421.8329      | 711.4204        |
| 1090.6784      | 10 | P  | 13 | 1350.7958      | 675.9018        |
| 1252.8365      | 11 | K  | 12 | 1253.7430      | 627.3754        |
| 1351.9050      | 12 | V  | 11 | 1091.5849      | 546.2964        |
| 1408.9264      | 13 | G  | 10 | 992.5165       | 496.7622        |
| 1522.0105      | 14 | I  | 9  | 935.4951       | 468.2514        |
| 1635.0946      | 15 | L  | 8  | 822.4110       | 411.7094        |
| 1692.1160      | 16 | G  | 7  | 709.3269       | 355.1674        |
| 1779.1480      | 17 | S  | 6  | 652.3055       | 326.6566        |
| 1836.1695      | 18 | G  | 5  | 565.2734       | 283.1406        |
| 1951.1965      | 19 | D  | 4  | 508.2520       | 254.6299        |
| 2098.2649      | 20 | F  | 3  | 393.2250       | 197.1164        |
| 2169.3020      | 21 | A  | 2  | 246.1566       | 123.5822        |
|                | 22 | R  | 1  | 175.1195       | 88.0637         |

N-term:+35.07 K(7):+162.16  
K(11):+162.16

X-range:

0 - 0

MassTol: Y-zoom:

0. 1.

MassType:

☐ AVG ☒ MONO

Axis:

☒ 1 ☐ 2

Label:

☒ I ☐ M ☐ -

Ions:

a ☐ + ☐ 2+ ☐ 3+

b ☒ + ☐ 2+ ☐ 3+

c ☐ + ☐ 2+ ☐ 3+

x ☐ + ☐ 2+ ☐ 3+

y ☒ + ☒ 2+ ☐ 3+

z ☐ + ☐ 2+ ☐ 3+

hide H<sub>2</sub>O/NH<sub>3</sub> ☐

zoom 112-122 ☐

GO

SLEDLDLVIAGKKAR, MH+ 1712.0322, m/z 428.7635  
L OS G17 P120811 220811-s1.05881.05881.4.dta

scan 5881; 1.4e+000

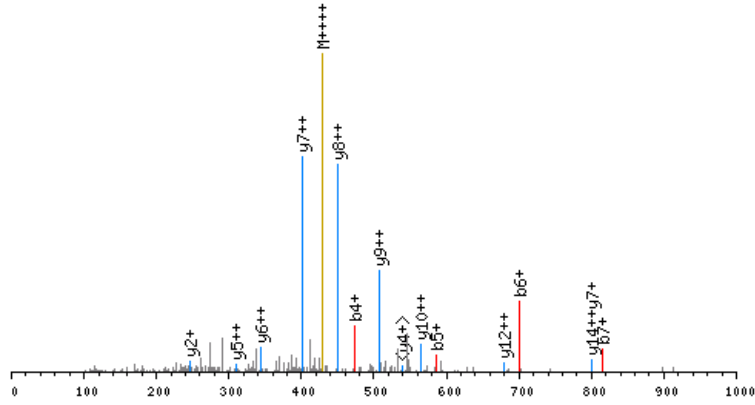

click image to zoom in; click top corners to zoom out

[precursor±]

scan 5878; 428.8 m/z; 2.1e+000

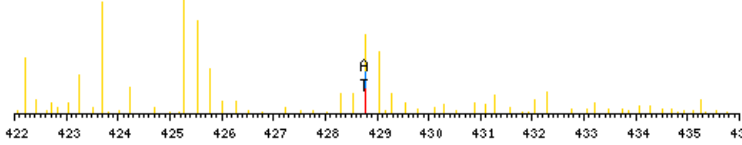

zoomed in precursor plot; T=theoretical m/z, A=acquired m/z

| b <sup>+</sup> | #  | AA | #  | y <sup>+</sup> | y <sup>2+</sup> |
|----------------|----|----|----|----------------|-----------------|
| 116.0711       | 1  | S  | 15 |                |                 |
| 229.1552       | 2  | L  | 14 | 1596.9689      | 798.9884        |
| 358.1978       | 3  | E  | 13 | 1483.8849      | 742.4464        |
| 473.2247       | 4  | D  | 12 | 1354.8423      | 677.9251        |
| 586.3088       | 5  | L  | 11 | 1239.8153      | 620.4116        |
| 701.3357       | 6  | D  | 10 | 1126.7313      | 563.8696        |
| 814.4198       | 7  | L  | 9  | 1011.7043      | 506.3561        |
| 913.4882       | 8  | V  | 8  | 898.6203       | 449.8140        |
| 1026.5723      | 9  | I  | 7  | 799.5519       | 400.2798        |
| 1097.6094      | 10 | A  | 6  | 686.4678       | 343.7378        |
| 1154.6309      | 11 | G  | 5  | 615.4307       | 308.2193        |
| 1310.7572      | 12 | K  | 4  | 558.4092       | 279.7085        |
| 1466.8835      | 13 | K  | 3  | 402.2829       | 201.6454        |
| 1537.9206      | 14 | A  | 2  | 246.1566       | 123.5822        |
|                | 15 | R  | 1  | 175.1195       | 88.0637         |

N-term:+29.04 K(12):+156.13  
K(13):+156.13

X-range:

0 - 0

MassTol: Y-zoom:

0. 1.

MassType:

☐AVG ☒MONO

Axis:

☒1 ☐2

Label:

☒I ☐M ☐-

Ions:

a ☐+ ☐2+ ☐3+

b ☒+ ☐2+ ☐3+

c ☐+ ☐2+ ☐3+

x ☐+ ☐2+ ☐3+

y ☒+ ☒2+ ☐3+

z ☐+ ☐2+ ☐3+

hide H<sub>2</sub>O/NH<sub>3</sub> ☐

zoom 112-122 ☐

GO

SLEGDHSTPPSAYGSVKPYTNFDAER, MH+ 2893.4281, m/z 724.1125  
H OS G16 P120811 220811-s1.04697.04697.4.dta

scan 4697; 2.4e+000

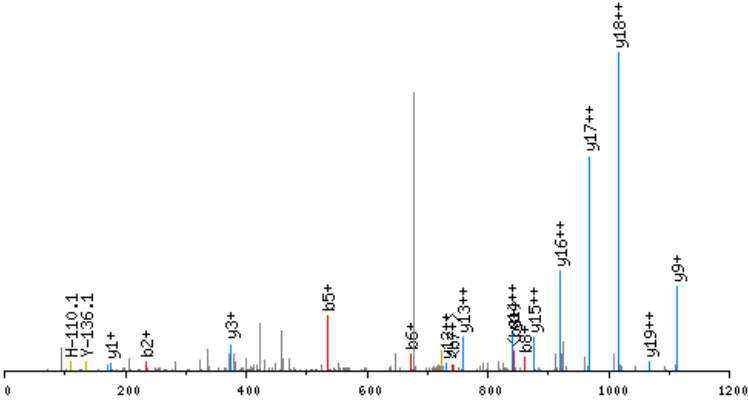

click image to zoom in; click top corners to zoom out [precursor+]

scan 4693; 724.1 m/z; 2.7e+001

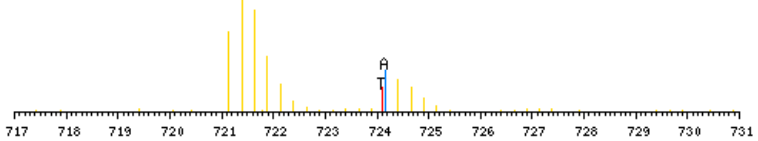

zoomed in precursor plot; T=theoretical m/z, A=acquired m/z

| b <sup>+</sup> | #  | AA | #  | y <sup>+</sup> | y <sup>2+</sup> |
|----------------|----|----|----|----------------|-----------------|
| 122.1029       | 1  | S  | 26 |                |                 |
| 235.1870       | 2  | L  | 25 | 2772.3330      | 1386.6704       |
| 364.2296       | 3  | E  | 24 | 2659.2489      | 1330.1284       |
| 421.2510       | 4  | G  | 23 | 2530.2063      | 1265.6071       |
| 536.2780       | 5  | D  | 22 | 2473.1848      | 1237.0963       |
| 673.3369       | 6  | H  | 21 | 2358.1579      | 1179.5829       |
| 760.3689       | 7  | S  | 20 | 2221.0990      | 1111.0534       |
| 861.4166       | 8  | T  | 19 | 2134.0669      | 1067.5374       |
| 958.4694       | 9  | P  | 18 | 2033.0193      | 1017.0135       |
| 1055.5221      | 10 | P  | 17 | 1935.9665      | 968.4872        |
| 1142.5542      | 11 | S  | 16 | 1838.9137      | 919.9608        |
| 1213.5913      | 12 | A  | 15 | 1751.8817      | 876.4448        |
| 1376.6546      | 13 | Y  | 14 | 1680.8446      | 840.9262        |
| 1433.6761      | 14 | G  | 13 | 1517.7813      | 759.3945        |
| 1520.7081      | 15 | S  | 12 | 1460.7598      | 730.8838        |
| 1619.7765      | 16 | V  | 11 | 1373.7278      | 687.3678        |
| 1781.9346      | 17 | K  | 10 | 1274.6594      | 637.8336        |
| 1878.9874      | 18 | P  | 9  | 1112.5013      | 556.7545        |
| 2042.0507      | 19 | Y  | 8  | 1015.4485      | 508.2282        |
| 2143.0984      | 20 | T  | 7  | 852.3852       | 426.6965        |
| 2257.1413      | 21 | N  | 6  | 751.3375       | 376.1727        |
| 2404.2097      | 22 | F  | 5  | 637.2946       | 319.1512        |
| 2519.2367      | 23 | D  | 4  | 490.2262       | 245.6170        |
| 2590.2738      | 24 | A  | 3  | 375.1992       | 188.1035        |
| 2719.3164      | 25 | E  | 2  | 304.1621       | 152.5850        |
|                | 26 | R  | 1  | 175.1195       | 88.0637         |

N-term: +35.07 K(17) : +162.16

X-range:

0 - 0

MassTol: Y-zoom:

0. 1.

MassType:

☐AVG ☒MONO

Axis:

☒1 ☐2

Label:

☒I ☐M ☐-

Ions:

a ☐+ ☐2+ ☐3+

b ☒+ ☐2+ ☐3+

c ☐+ ☐2+ ☐3+

x ☐+ ☐2+ ☐3+

y ☒+ ☒2+ ☐3+

z ☐+ ☐2+ ☐3+

hide H<sub>2</sub>O/NH<sub>3</sub> ☐

zoom 112-122 ☐

GO

SLEHILPELGIR, MH+ 1404.8215, m/z 468.9453  
L OS G16 P120811 220811-s1.06059.06059.3.dta

scan 6059; 2.1e+000

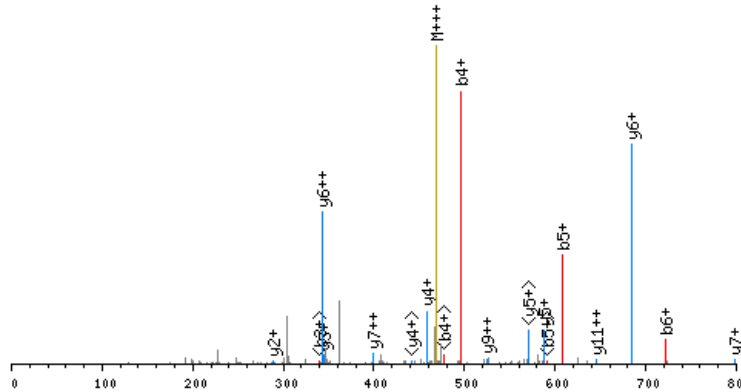

click image to zoom in; click top corners to zoom out

[precursor±]

scan 6058; 468.9 m/z; 3.8e+000

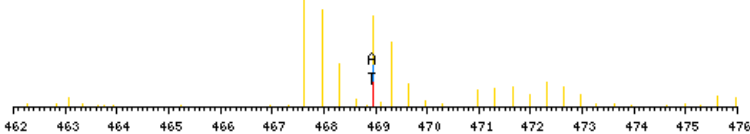

zoomed in precursor plot; T=theoretical m/z, A=acquired m/z

| b <sup>+</sup> | #  | AA | #  | y <sup>+</sup> | y <sup>2+</sup> |
|----------------|----|----|----|----------------|-----------------|
| 116.0711       | 1  | S  | 12 |                |                 |
| 229.1552       | 2  | L  | 11 | 1289.7581      | 645.3830        |
| 358.1978       | 3  | E  | 10 | 1176.6741      | 588.8410        |
| 495.2567       | 4  | H  | 9  | 1047.6315      | 524.3197        |
| 608.3408       | 5  | I  | 8  | 910.5726       | 455.7902        |
| 721.4248       | 6  | L  | 7  | 797.4885       | 399.2482        |
| 818.4776       | 7  | P  | 6  | 684.4044       | 342.7061        |
| 947.5202       | 8  | E  | 5  | 587.3517       | 294.1798        |
| 1060.6042      | 9  | L  | 4  | 458.3091       | 229.6585        |
| 1117.6257      | 10 | G  | 3  | 345.2250       | 173.1164        |
| 1230.7098      | 11 | I  | 2  | 288.2036       | 144.6057        |
|                | 12 | R  | 1  | 175.1195       | 88.0637         |

N-term:+29.04

N-term: +29.04 K(4): +156.13

X-range:

0 - 0

MassTol: Y-zoom:

0. 1.

MassType:

☐ AVG ☒ MONO

Axis:

☒ 1 ☐ 2

Label:

☒ I ☐ M ☐ -

Ions:

a ☐ + ☐ 2+ ☐ 3+

b ☒ + ☐ 2+ ☐ 3+

c ☐ + ☐ 2+ ☐ 3+

x ☐ + ☐ 2+ ☐ 3+

y ☒ + ☒ 2+ ☐ 3+

z ☐ + ☐ 2+ ☐ 3+

hide H<sub>2</sub>O/NH<sub>3</sub> ☐

zoom 112-122 ☐

GO

SLGFDEPAEQPVR, MH+ 1478.7703, m/z 493.5950  
H OS G13 P120811 220811-s1.04396.04396.3.dta

scan 4396; 2.4e+000

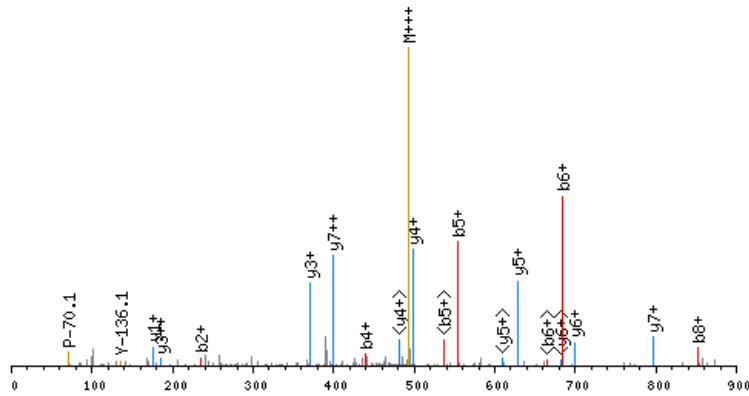

click image to zoom in; click top corners to zoom out

[precursor±]

scan 4394; 493.6 m/z; 1.1e+001

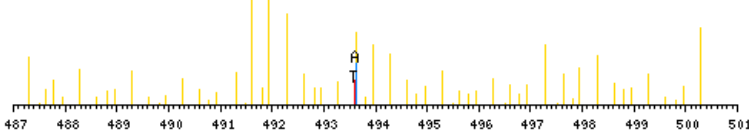

zoomed in precursor plot; T=theoretical m/z, A=acquired m/z

| b <sup>+</sup> | #  | AA | #  | y <sup>+</sup> | y <sup>2+</sup> |
|----------------|----|----|----|----------------|-----------------|
| 122.1029       | 1  | S  | 13 |                |                 |
| 235.1870       | 2  | L  | 12 | 1357.6752      | 679.3415        |
| 292.2085       | 3  | G  | 11 | 1244.5911      | 622.7995        |
| 439.2769       | 4  | F  | 10 | 1187.5697      | 594.2888        |
| 554.3038       | 5  | D  | 9  | 1040.5013      | 520.7545        |
| 683.3464       | 6  | E  | 8  | 925.4743       | 463.2411        |
| 780.3992       | 7  | P  | 7  | 796.4317       | 398.7198        |
| 851.4363       | 8  | A  | 6  | 699.3790       | 350.1934        |
| 980.4789       | 9  | E  | 5  | 628.3418       | 314.6748        |
| 1108.5375      | 10 | Q  | 4  | 499.2993       | 250.1535        |
| 1205.5902      | 11 | P  | 3  | 371.2407       | 186.1243        |
| 1304.6586      | 12 | V  | 2  | 274.1879       | 137.5979        |
|                | 13 | R  | 1  | 175.1195       | 88.0637         |

N-term:+35.07

X-range:

0 - 0

MassTol: Y-zoom:

0. 1.

MassType:

☐AVG ☒MONO

Axis:

☒1 ☐2

Label:

☒I ☐M ☐-

Ions:

a ☐+ ☐2+ ☐3+

b ☒+ ☐2+ ☐3+

c ☐+ ☐2+ ☐3+

x ☐+ ☐2+ ☐3+

y ☒+ ☒2+ ☐3+

z ☐+ ☐2+ ☐3+

hide H<sub>2</sub>O/NH<sub>3</sub> ☐

zoom 112-122 ☐

GO

SIGNAGNEIGR, MH+ 1115.5809, m/z 558.2941  
L OS G14 P120811 220811-s1.02572.02572.2.dta

scan 2572; 1.5e+001

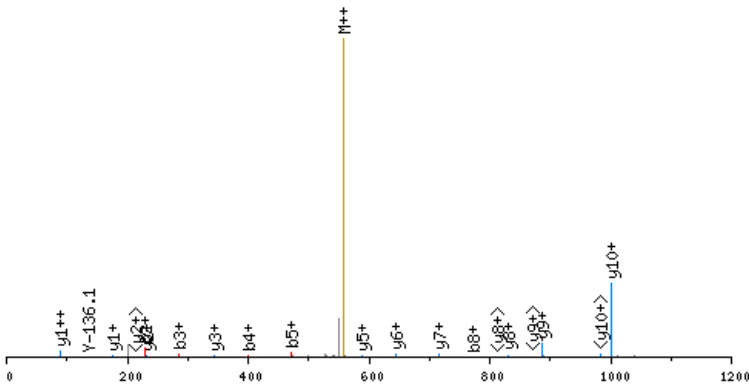

click image to zoom in; click top corners to zoom out

[precursor±]

scan 2571; 558.3 m/z; 4.3e+002

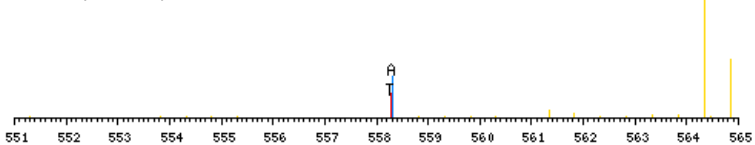

zoomed in precursor plot; T=theoretical m/z, A=acquired m/z

| b <sup>+</sup> | #  | AA | #  | y <sup>+</sup> | y <sup>2+</sup> |
|----------------|----|----|----|----------------|-----------------|
| 116.0711       | 1  | S  | 11 |                |                 |
| 229.1552       | 2  | L  | 10 | 1000.5176      | 500.7627        |
| 286.1767       | 3  | G  | 9  | 887.4335       | 444.2207        |
| 400.2196       | 4  | N  | 8  | 830.4121       | 415.7099        |
| 471.2567       | 5  | A  | 7  | 716.3691       | 358.6885        |
| 528.2782       | 6  | G  | 6  | 645.3320       | 323.1699        |
| 642.3211       | 7  | N  | 5  | 588.3105       | 294.6592        |
| 771.3637       | 8  | E  | 4  | 474.2676       | 237.6377        |
| 884.4477       | 9  | I  | 3  | 345.2250       | 173.1164        |
| 941.4692       | 10 | G  | 2  | 232.1410       | 116.5744        |
|                | 11 | R  | 1  | 175.1195       | 88.0637         |

N-term:+29.04

X-range:

0 - 0

MassTol: Y-zoom:

0. 1.

MassType:

☐ AVG ☒ MONO

Axis:

☒ 1 ☐ 2

Label:

☒ I ☐ M ☐ -

Ions:

a ☐ + ☐ 2+ ☐ 3+

b ☒ + ☐ 2+ ☐ 3+

c ☐ + ☐ 2+ ☐ 3+

x ☐ + ☐ 2+ ☐ 3+

y ☒ + ☒ 2+ ☐ 3+

z ☐ + ☐ 2+ ☐ 3+

hide H<sub>2</sub>O/NH<sub>3</sub> ☐

zoom 112-122 ☐

GO

SLHLGVTPSVLR, MH+ 1312.8165, m/z 438.2770  
H OS G16 P120811 220811-s1.04969.04969.3.dta

scan 4969; 3.3e+000

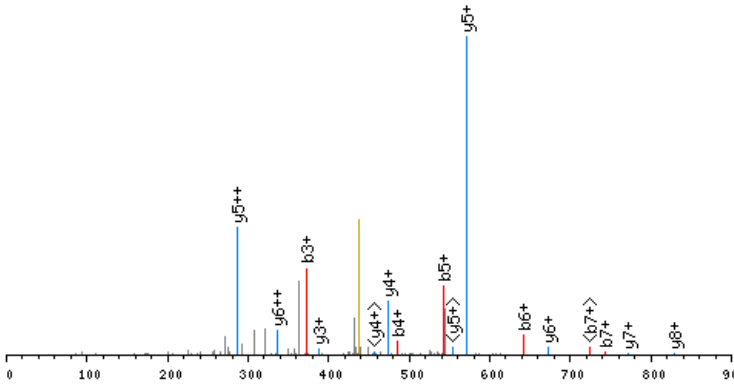

click image to zoom in; click top corners to zoom out

[precursor±]

scan 4968; 438.3 m/z; 2.2e+001

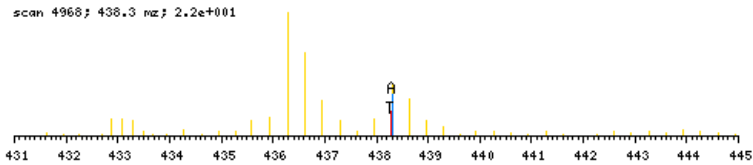

zoomed in precursor plot; T=theoretical m/z, A=acquired m/z

| b <sup>+</sup> | #  | AA | #  | y <sup>+</sup> | y <sup>2+</sup> |
|----------------|----|----|----|----------------|-----------------|
| 122.1029       | 1  | S  | 12 |                |                 |
| 235.1870       | 2  | L  | 11 | 1191.7214      | 596.3646        |
| 372.2459       | 3  | H  | 10 | 1078.6373      | 539.8226        |
| 485.3300       | 4  | L  | 9  | 941.5784       | 471.2931        |
| 542.3514       | 5  | G  | 8  | 828.4943       | 414.7511        |
| 641.4198       | 6  | V  | 7  | 771.4729       | 386.2403        |
| 742.4675       | 7  | T  | 6  | 672.4044       | 336.7061        |
| 839.5203       | 8  | P  | 5  | 571.3568       | 286.1823        |
| 926.5523       | 9  | S  | 4  | 474.3040       | 237.6559        |
| 1025.6207      | 10 | V  | 3  | 387.2720       | 194.1399        |
| 1138.7048      | 11 | L  | 2  | 288.2036       | 144.6057        |
|                | 12 | R  | 1  | 175.1195       | 88.0637         |

N-term:+35.07

X-range:

0 - 0

MassTol: Y-zoom:

0. 1.

MassType:

☐ AVG ☒ MONO

Axis:

☒ 1 ☐ 2

Label:

☒ I ☐ M ☐ -

Ions:

a ☐ + ☐ 2+ ☐ 3+

b ☒ + ☐ 2+ ☐ 3+

c ☐ + ☐ 2+ ☐ 3+

x ☐ + ☐ 2+ ☐ 3+

y ☒ + ☒ 2+ ☐ 3+

z ☐ + ☐ 2+ ☐ 3+

hide H<sub>2</sub>O/NH<sub>3</sub> ☐

zoom 112-122 ☐

GO

SLHTLFGDKLCAIPNLR, MH+ 2011.1162, m/z 503.5345  
L OS G17 P120811 220811-s1.06402.06402.4.dta

scan 6402; 2.3e+000

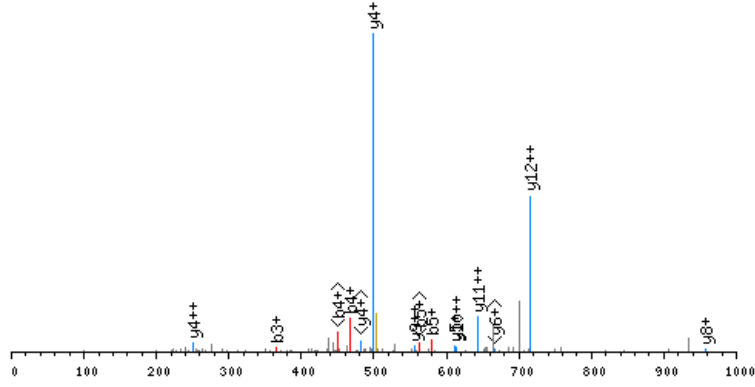

click image to zoom in; click top corners to zoom out [\[precursor±\]](#)

scan 6400; 503.5 m/z; 2.2e+000

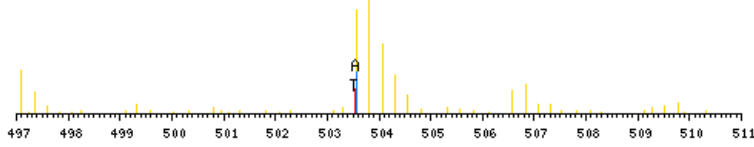

zoomed in precursor plot; T=theoretical m/z, A=acquired m/z

| b <sup>+</sup> | #  | AA | #  | y <sup>+</sup> | y <sup>2+</sup> |
|----------------|----|----|----|----------------|-----------------|
| 116.0711       | 1  | S  | 17 |                |                 |
| 229.1552       | 2  | L  | 16 | 1896.0529      | 948.5304        |
| 366.2141       | 3  | H  | 15 | 1782.9689      | 891.9883        |
| 467.2618       | 4  | T  | 14 | 1645.9100      | 823.4589        |
| 580.3458       | 5  | L  | 13 | 1544.8623      | 772.9351        |
| 727.4143       | 6  | F  | 12 | 1431.7782      | 716.3930        |
| 784.4357       | 7  | G  | 11 | 1284.7098      | 642.8588        |
| 899.4627       | 8  | D  | 10 | 1227.6883      | 614.3481        |
| 1055.5890      | 9  | K  | 9  | 1112.6614      | 556.8346        |
| 1168.6730      | 10 | L  | 8  | 956.5351       | 478.7715        |
| 1328.7036      | 11 | C  | 7  | 843.4510       | 422.2294        |
| 1399.7407      | 12 | A  | 6  | 683.4204       | 342.2141        |
| 1512.8248      | 13 | I  | 5  | 612.3833       | 306.6956        |
| 1609.8776      | 14 | P  | 4  | 499.2993       | 250.1535        |
| 1723.9205      | 15 | N  | 3  | 402.2465       | 201.6272        |
| 1837.0046      | 16 | L  | 2  | 288.2036       | 144.6057        |
|                | 17 | R  | 1  | 175.1195       | 88.0637         |

N-term:+29.04 K(9):+156.13  
C(11):+160.03

X-range:

0 - 0

MassTol: Y-zoom:

0. 1.

MassType:

☐ AVG ☒ MONO

Axis:

☒ 1 ☐ 2

Label:

☒ I ☐ M ☐ -

Ions:

a ☐ + ☐ 2+ ☐ 3+

b ☒ + ☐ 2+ ☐ 3+

c ☐ + ☐ 2+ ☐ 3+

x ☐ + ☐ 2+ ☐ 3+

y ☒ + ☒ 2+ ☐ 3+

z ☐ + ☐ 2+ ☐ 3+

hide H<sub>2</sub>O/NH<sub>3</sub> ☐

zoom 112-122 ☐

GO

SLKESPEKFQIEANFPR, MH+ 2104.1443, m/z 526.7915  
L OS G17 P120811 220811-s1.05252.05252.4.dta

scan 5252; 2.5e+000

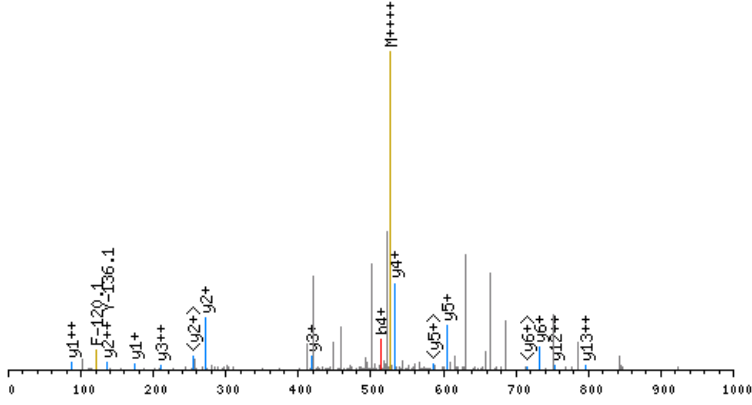

click image to zoom in; click top corners to zoom out

[precursor±]

scan 5248; 526.8 mz; 5.8e+000

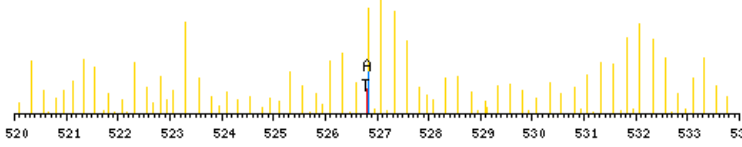

zoomed in precursor plot; T=theoretical m/z, A=acquired m/z

| b <sup>+</sup> | #  | AA | #  | y <sup>+</sup> | y <sup>2+</sup> |
|----------------|----|----|----|----------------|-----------------|
| 116.0711       | 1  | S  | 17 |                |                 |
| 229.1552       | 2  | L  | 16 | 1989.0810      | 995.0444        |
| 385.2815       | 3  | K  | 15 | 1875.9969      | 938.5024        |
| 514.3241       | 4  | E  | 14 | 1719.8706      | 860.4392        |
| 601.3561       | 5  | S  | 13 | 1590.8281      | 795.9179        |
| 698.4089       | 6  | P  | 12 | 1503.7960      | 752.4019        |
| 827.4515       | 7  | E  | 11 | 1406.7433      | 703.8755        |
| 983.5778       | 8  | K  | 10 | 1277.7007      | 639.3542        |
| 1130.6462      | 9  | F  | 9  | 1121.5744      | 561.2911        |
| 1258.7048      | 10 | Q  | 8  | 974.5060       | 487.7569        |
| 1371.7888      | 11 | I  | 7  | 846.4474       | 423.7276        |
| 1500.8314      | 12 | E  | 6  | 733.3633       | 367.1856        |
| 1571.8685      | 13 | A  | 5  | 604.3207       | 302.6643        |
| 1685.9115      | 14 | N  | 4  | 533.2836       | 267.1457        |
| 1832.9799      | 15 | F  | 3  | 419.2407       | 210.1243        |
| 1930.0326      | 16 | P  | 2  | 272.1723       | 136.5900        |
|                | 17 | R  | 1  | 175.1195       | 88.0637         |

N-term:+29.04 K(3):+156.13  
K(8):+156.13

X-range:

0 - 0

MassTol: Y-zoom:

0. 1.

MassType:

☐ AVG ☒ MONO

Axis:

☒ 1 ☐ 2

Label:

☒ I ☐ M ☐ -

Ions:

a ☐ + ☐ 2+ ☐ 3+

b ☒ + ☐ 2+ ☐ 3+

c ☐ + ☐ 2+ ☐ 3+

x ☐ + ☐ 2+ ☐ 3+

y ☒ + ☒ 2+ ☐ 3+

z ☐ + ☐ 2+ ☐ 3+

hide H<sub>2</sub>O/NH<sub>3</sub> ☐

zoom 112-122 ☐

GO

SLKGVVPEDAVETLAGSLGTR, MH+ 2167.2610, m/z 723.0919  
H OS G15 P120811 220811-s1.06188.06188.3.dta

scan 6186; 5.3e+000

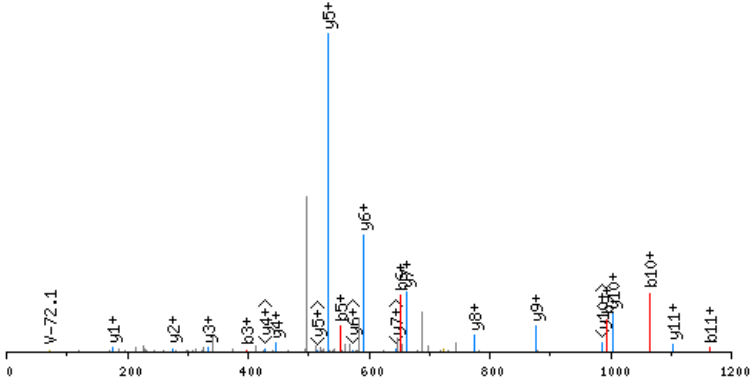

click image to zoom in; click top corners to zoom out [\[precursor±\]](#)

scan 6186; 723.1 m/z; 3.7e+001

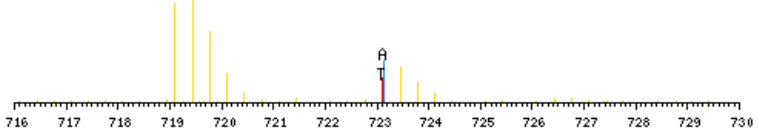

zoomed in precursor plot; T=theoretical m/z, A=acquired m/z

| b <sup>+</sup> | #  | AA | #  | y <sup>+</sup> | y <sup>2+</sup> |
|----------------|----|----|----|----------------|-----------------|
| 122.1029       | 1  | S  | 21 |                |                 |
| 235.1870       | 2  | L  | 20 | 2046.1659      | 1023.5869       |
| 397.3451       | 3  | K  | 19 | 1933.0819      | 967.0448        |
| 454.3666       | 4  | G  | 18 | 1770.9238      | 885.9658        |
| 553.4350       | 5  | V  | 17 | 1713.9023      | 857.4551        |
| 652.5034       | 6  | V  | 16 | 1614.8339      | 807.9209        |
| 749.5561       | 7  | P  | 15 | 1515.7655      | 758.3867        |
| 878.5987       | 8  | E  | 14 | 1418.7127      | 709.8603        |
| 993.6257       | 9  | D  | 13 | 1289.6701      | 645.3390        |
| 1064.6628      | 10 | A  | 12 | 1174.6432      | 587.8255        |
| 1163.7312      | 11 | V  | 11 | 1103.6061      | 552.3069        |
| 1292.7738      | 12 | E  | 10 | 1004.5376      | 502.7727        |
| 1393.8215      | 13 | T  | 9  | 875.4951       | 438.2514        |
| 1506.9055      | 14 | L  | 8  | 774.4474       | 387.7276        |
| 1577.9427      | 15 | A  | 7  | 661.3633       | 331.1856        |
| 1634.9641      | 16 | G  | 6  | 590.3262       | 295.6670        |
| 1721.9962      | 17 | S  | 5  | 533.3047       | 267.1563        |
| 1835.0802      | 18 | L  | 4  | 446.2727       | 223.6403        |
| 1892.1017      | 19 | G  | 3  | 333.1886       | 167.0982        |
| 1993.1494      | 20 | T  | 2  | 276.1672       | 138.5875        |
|                | 21 | R  | 1  | 175.1195       | 88.0637         |

N-term:+35.07 K(3):+162.16

X-range:

0 - 0

MassTol: Y-zoom:

0. 1.

MassType:

☐AVG ☒MONO

Axis:

☒1 ☐2

Label:

☒I ☐M ☐-

Ions:

a ☐+ ☐2+ ☐3+

b ☒+ ☐2+ ☐3+

c ☐+ ☐2+ ☐3+

x ☐+ ☐2+ ☐3+

y ☒+ ☒2+ ☐3+

z ☐+ ☐2+ ☐3+

hide H<sub>2</sub>O/NH<sub>3</sub> ☐

zoom 112-122 ☐

GO

SLLPASLLDHR, MH+ 1249.7268, m/z 417.2471  
L OS G16 P120811 220811-s1.05556.05556.3.dta

scan 5556; 7.5e+000

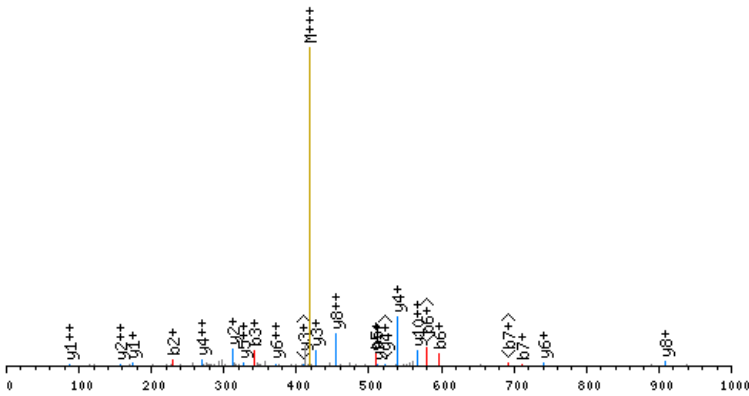

click image to zoom in; click top corners to zoom out [\[precursor±\]](#)

scan 5553; 417.2 m/z; 1.6e+000

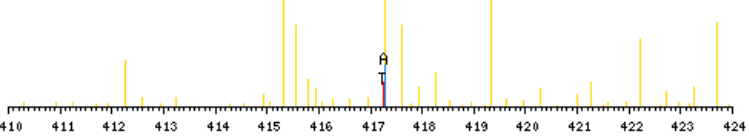

zoomed in precursor plot; T=theoretical m/z, A=acquired m/z

| b <sup>+</sup> | #  | AA | #  | y <sup>+</sup> | y <sup>2+</sup> |
|----------------|----|----|----|----------------|-----------------|
| 116.0711       | 1  | S  | 11 |                |                 |
| 229.1552       | 2  | L  | 10 | 1134.6635      | 567.8357        |
| 342.2393       | 3  | L  | 9  | 1021.5795      | 511.2936        |
| 439.2920       | 4  | P  | 8  | 908.4954       | 454.7516        |
| 510.3291       | 5  | A  | 7  | 811.4426       | 406.2252        |
| 597.3612       | 6  | S  | 6  | 740.4055       | 370.7067        |
| 710.4452       | 7  | L  | 5  | 653.3735       | 327.1907        |
| 823.5293       | 8  | L  | 4  | 540.2894       | 270.6486        |
| 938.5562       | 9  | D  | 3  | 427.2054       | 214.1066        |
| 1075.6151      | 10 | H  | 2  | 312.1784       | 156.5931        |
|                | 11 | R  | 1  | 175.1195       | 88.0637         |

N-term:+29.04

X-range:

0 - 0

MassTol: Y-zoom:

0. 1.

MassType:

☐ AVG ☒ MONO

Axis:

☒ 1 ☐ 2

Label:

☒ I ☐ M ☐ -

Ions:

a ☐ + ☐ 2+ ☐ 3+

b ☒ + ☐ 2+ ☐ 3+

c ☐ + ☐ 2+ ☐ 3+

x ☐ + ☐ 2+ ☐ 3+

y ☒ + ☒ 2+ ☐ 3+

z ☐ + ☐ 2+ ☐ 3+

hide H<sub>2</sub>O/NH<sub>3</sub> ☐

zoom 112-122 ☐

GO

SLLQDSGEVR, MH+ 1137.6328, m/z 569.3200  
H OS G14 P120811 220811-s1.03342.03342.2.dta

scan 3342; 1.3e+001

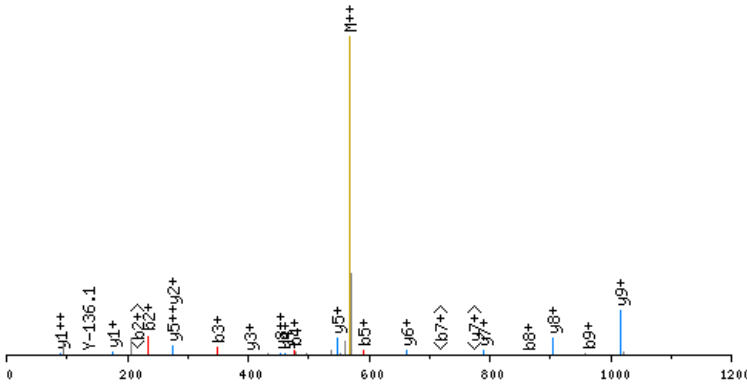

click image to zoom in; click top corners to zoom out [precursor±]

scan 3341; 569.3 m/z; 1.6e+001

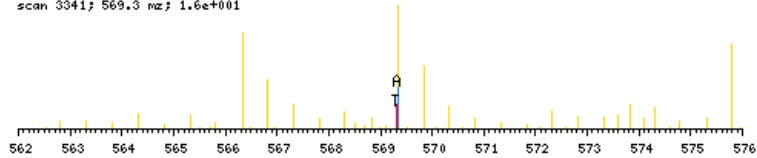

zoomed in precursor plot; T=theoretical m/z, A=acquired m/z

| b <sup>+</sup> | #  | AA | #  | y <sup>+</sup> | y <sup>2+</sup> |
|----------------|----|----|----|----------------|-----------------|
| 122.1029       | 1  | S  | 10 |                |                 |
| 235.1870       | 2  | L  | 9  | 1016.5376      | 508.7727        |
| 348.2711       | 3  | L  | 8  | 903.4536       | 452.2307        |
| 476.3296       | 4  | Q  | 7  | 790.3695       | 395.6887        |
| 591.3566       | 5  | D  | 6  | 662.3109       | 331.6594        |
| 678.3886       | 6  | S  | 5  | 547.2840       | 274.1459        |
| 735.4101       | 7  | G  | 4  | 460.2520       | 230.6299        |
| 864.4527       | 8  | E  | 3  | 403.2305       | 202.1192        |
| 963.5211       | 9  | V  | 2  | 274.1879       | 137.5979        |
|                | 10 | R  | 1  | 175.1195       | 88.0637         |

N-term:+35.07

X-range:

0 - 0

MassTol: Y-zoom:

0. 1.

MassType:

☐ AVG ☒ MONO

Axis:

☒ 1 ☐ 2

Label:

☒ I ☐ M ☐ -

Ions:

a ☐ + ☐ 2+ ☐ 3+

b ☒ + ☐ 2+ ☐ 3+

c ☐ + ☐ 2+ ☐ 3+

x ☐ + ☐ 2+ ☐ 3+

y ☒ + ☒ 2+ ☐ 3+

z ☐ + ☐ 2+ ☐ 3+

hide H<sub>2</sub>O/NH<sub>3</sub> ☐

zoom 112-122 ☐

GO

SLPEGVVDGIEVYSTKISKVTSR, MH+ 2708.4544, m/z 677.8691  
L OS G16 P120811 220811-s1.06258.06258.4.dta

scan 6258; 3.0e+000

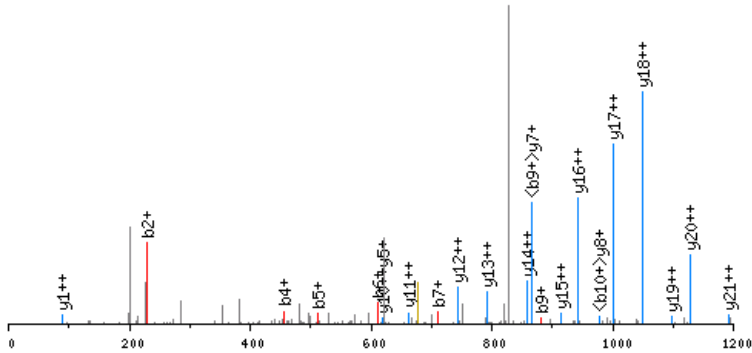

click image to zoom in; click top corners to zoom out

[precursor±]

scan 6257; 677.9 m/z; 2.0e+001

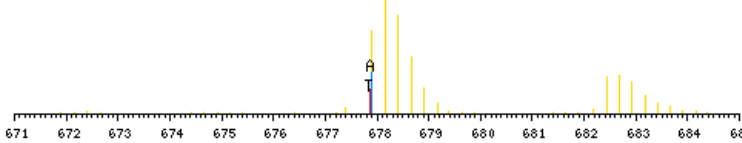

zoomed in precursor plot; T=theoretical m/z, A=acquired m/z

| b <sup>+</sup> | #  | AA | #  | y <sup>+</sup> | y <sup>2+</sup> |
|----------------|----|----|----|----------------|-----------------|
| 116.0711       | 1  | S  | 24 |                |                 |
| 229.1552       | 2  | L  | 23 | 2593.3911      | 1297.1995       |
| 326.2080       | 3  | P  | 22 | 2480.3071      | 1240.6575       |
| 455.2505       | 4  | E  | 21 | 2383.2543      | 1192.1311       |
| 512.2720       | 5  | G  | 20 | 2254.2117      | 1127.6098       |
| 611.3404       | 6  | V  | 19 | 2197.1903      | 1099.0990       |
| 710.4088       | 7  | V  | 18 | 2098.1218      | 1049.5648       |
| 825.4358       | 8  | D  | 17 | 1999.0534      | 1000.0306       |
| 882.4572       | 9  | G  | 16 | 1884.0265      | 942.5172        |
| 995.5413       | 10 | I  | 15 | 1827.0050      | 914.0064        |
| 1124.5839      | 11 | E  | 14 | 1713.9210      | 857.4644        |
| 1223.6523      | 12 | V  | 13 | 1584.8784      | 792.9431        |
| 1386.7156      | 13 | Y  | 12 | 1485.8099      | 743.4089        |
| 1473.7477      | 14 | S  | 11 | 1322.7466      | 661.8772        |
| 1574.7954      | 15 | T  | 10 | 1235.7146      | 618.3612        |
| 1730.9217      | 16 | K  | 9  | 1134.6669      | 567.8374        |
| 1844.0057      | 17 | I  | 8  | 978.5406       | 489.7742        |
| 1931.0377      | 18 | S  | 7  | 865.4566       | 433.2322        |
| 2091.0683      | 19 | C  | 6  | 778.4245       | 389.7162        |
| 2247.1946      | 20 | K  | 5  | 618.3939       | 309.7009        |
| 2346.2631      | 21 | V  | 4  | 462.2676       | 231.6377        |
| 2447.3107      | 22 | T  | 3  | 363.1992       | 182.1035        |
| 2534.3428      | 23 | S  | 2  | 262.1515       | 131.5797        |
|                | 24 | R  | 1  | 175.1195       | 88.0637         |

N-term:+29.04 K(16):+156.13

C(19):+160.03 K(20):+156.13

X-range:

0 - 0

MassTol: Y-zoom:

0. 1.

MassType:

☐AVG ☒MONO

Axis:

☒1 ☐2

Label:

☒I ☐M ☐-

Ions:

a ☐+ ☐2+ ☐3+

b ☒+ ☐2+ ☐3+

c ☐+ ☐2+ ☐3+

x ☐+ ☐2+ ☐3+

y ☒+ ☒2+ ☐3+

z ☐+ ☐2+ ☐3+

hide H<sub>2</sub>O/NH<sub>3</sub> ☐

zoom 112-122 ☐

GO

SLPELQQNPVLVQR, MH+ 1549.8702, m/z 517.2949  
L OS G13 P120811 220811-s1.05618.05618.3.dta

scan 5618; 3.6e+000

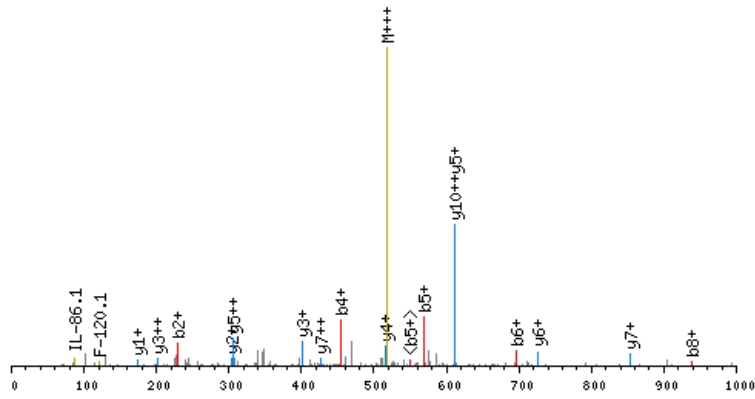

click image to zoom in; click top corners to zoom out

[precursor±]

scan 5614; 517.3 m/z; 1.3e+001

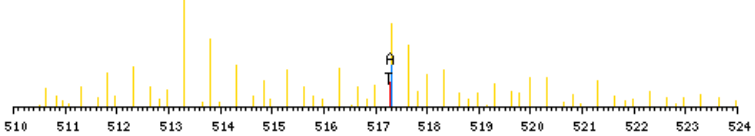

zoomed in precursor plot; T=theoretical m/z, A=acquired m/z

| b <sup>+</sup> | #  | AA | #  | y <sup>+</sup> | y <sup>2+</sup> |
|----------------|----|----|----|----------------|-----------------|
| 116.0711       | 1  | S  | 13 |                |                 |
| 229.1552       | 2  | L  | 12 | 1434.8069      | 717.9074        |
| 326.2080       | 3  | P  | 11 | 1321.7228      | 661.3653        |
| 455.2505       | 4  | E  | 10 | 1224.6701      | 612.8389        |
| 568.3346       | 5  | L  | 9  | 1095.6275      | 548.3176        |
| 696.3932       | 6  | Q  | 8  | 982.5434       | 491.7756        |
| 824.4518       | 7  | Q  | 7  | 854.4848       | 427.7463        |
| 938.4947       | 8  | N  | 6  | 726.4262       | 363.7170        |
| 1035.5475      | 9  | P  | 5  | 612.3833       | 306.6956        |
| 1148.6315      | 10 | L  | 4  | 515.3306       | 258.1692        |
| 1247.6999      | 11 | V  | 3  | 402.2465       | 201.6272        |
| 1375.7585      | 12 | Q  | 2  | 303.1781       | 152.0930        |
|                | 13 | R  | 1  | 175.1195       | 88.0637         |

N-term:+29.04

X-range:

0 - 0

MassTol: Y-zoom:

0. 1.

MassType:

☐AVG ☒MONO

Axis:

☒1 ☐2

Label:

☒I ☐M ☐-

Ions:

a ☐+ ☐2+ ☐3+

b ☒+ ☐2+ ☐3+

c ☐+ ☐2+ ☐3+

x ☐+ ☐2+ ☐3+

y ☒+ ☒2+ ☐3+

z ☐+ ☐2+ ☐3+

hide H<sub>2</sub>O/NH<sub>3</sub> ☐

zoom 112-122 ☐

GO

SLPGAPTASSGTAAYPALPNR, MH+ 2027.0562, m/z 676.3569  
L OS G12 P120811 220811-s1.04000.04000.3.dta

scan 4000; 8.4e-001

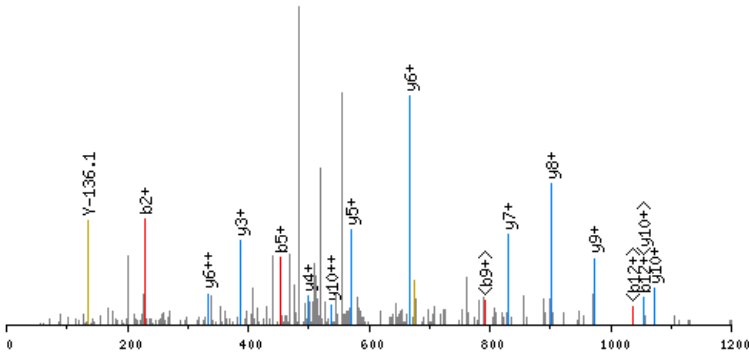

click image to zoom in; click top corners to zoom out

[precursor±]

scan 3997; 676.4 m/z; 4.9e+001

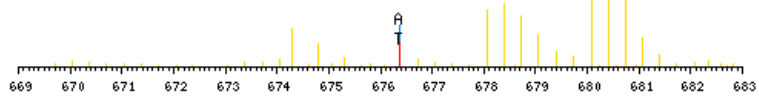

zoomed in precursor plot; T=theoretical m/z, A=acquired m/z

| b <sup>+</sup> | #  | AA | #  | y <sup>+</sup> | y <sup>2+</sup> |
|----------------|----|----|----|----------------|-----------------|
| 116.0711       | 1  | S  | 21 |                |                 |
| 229.1552       | 2  | L  | 20 | 1911.9929      | 956.5003        |
| 326.2080       | 3  | P  | 19 | 1798.9088      | 899.9583        |
| 383.2294       | 4  | G  | 18 | 1701.8560      | 851.4319        |
| 454.2665       | 5  | A  | 17 | 1644.8346      | 822.9212        |
| 551.3193       | 6  | P  | 16 | 1573.7974      | 787.4026        |
| 652.3670       | 7  | T  | 15 | 1476.7447      | 738.8763        |
| 723.4041       | 8  | A  | 14 | 1375.6970      | 688.3524        |
| 810.4361       | 9  | S  | 13 | 1304.6599      | 652.8339        |
| 897.4681       | 10 | S  | 12 | 1217.6279      | 609.3178        |
| 954.4896       | 11 | G  | 11 | 1130.5958      | 565.8018        |
| 1055.5373      | 12 | T  | 10 | 1073.5744      | 537.2911        |
| 1126.5744      | 13 | A  | 9  | 972.5267       | 486.7673        |
| 1197.6115      | 14 | A  | 8  | 901.4896       | 451.2487        |
| 1360.6748      | 15 | Y  | 7  | 830.4525       | 415.7301        |
| 1457.7276      | 16 | P  | 6  | 667.3891       | 334.1985        |
| 1528.7647      | 17 | A  | 5  | 570.3364       | 285.6721        |
| 1641.8488      | 18 | L  | 4  | 499.2993       | 250.1535        |
| 1738.9016      | 19 | P  | 3  | 386.2152       | 193.6115        |
| 1852.9445      | 20 | N  | 2  | 289.1624       | 145.0851        |
|                | 21 | R  | 1  | 175.1195       | 88.0637         |

N-term:+29.04

X-range:

0 - 0

MassTol: Y-zoom:

0. 1.

MassType:

☐ AVG ☒ MONO

Axis:

☒ 1 ☐ 2

Label:

☒ I ☐ M ☐ -

Ions:

a ☐ + ☐ 2+ ☐ 3+

b ☒ + ☐ 2+ ☐ 3+

c ☐ + ☐ 2+ ☐ 3+

x ☐ + ☐ 2+ ☐ 3+

y ☒ + ☒ 2+ ☐ 3+

z ☐ + ☐ 2+ ☐ 3+

hide H<sub>2</sub>O/NH<sub>3</sub> ☐

zoom 112-122 ☐

GO

SLPPHQKVLPPLSLPTMQAGTIAR, MH+ 2582.4493, m/z 646.3678  
L OS G16 P120811 220811-s1.05390.05390.4.dta

scan 5390; 1.4e+000

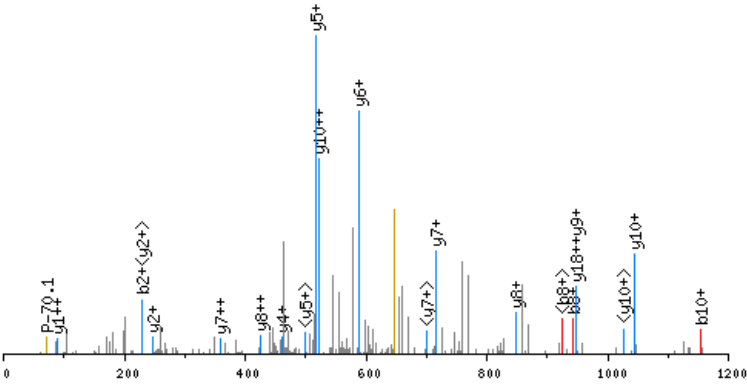

click image to zoom in; click top corners to zoom out [precursor±]

scan 5388; 646.4 m/z; 1.3e+001

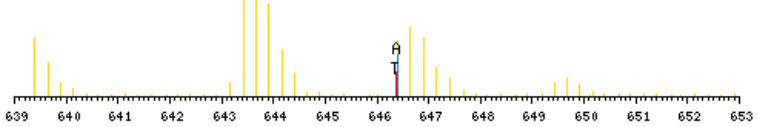

X-range:

0 - 0

MassTol: Y-zoom:

0. 1.

MassType:

☐AVG ☒MONO

Axis:

☒1 ☐2

Label:

☒I ☐M ☐-

Ions:

a ☐+ ☐2+ ☐3+

b ☒+ ☐2+ ☐3+

c ☐+ ☐2+ ☐3+

x ☐+ ☐2+ ☐3+

y ☒+ ☒2+ ☐3+

z ☐+ ☐2+ ☐3+

hide H<sub>2</sub>O/NH<sub>3</sub> ☐

zoom 112-122 ☐

GO

SLTKDLGGNAKCSDFTEEICR, MH+ 2485.2066, m/z 622.0571  
L\_OS\_G17\_P120811\_220811-s1.04899.04899.4.dta

scan 4899; 3.0e+000

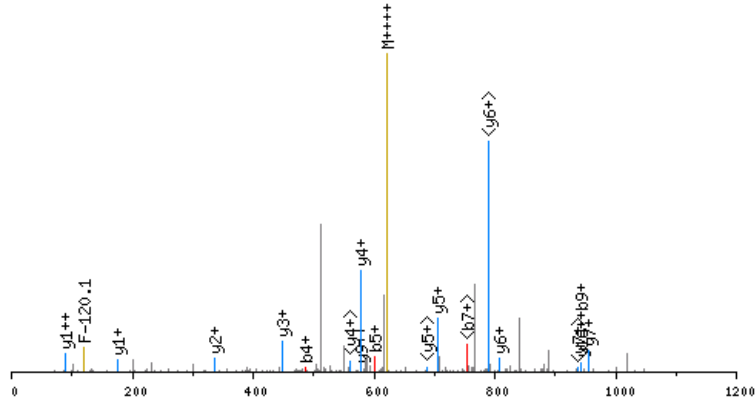

click image to zoom in; click top corners to zoom out

[precursor±]

scan 4898; 622.1 m/z; 8.7e+000

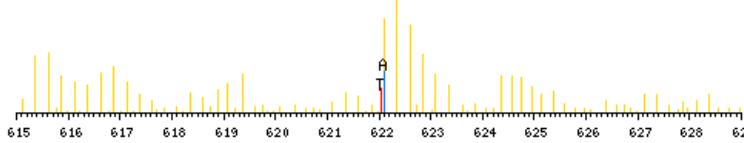

zoomed in precursor plot; T=theoretical m/z, A=acquired m/z

| b <sup>+</sup> | #  | AA | #  | y <sup>+</sup> | y <sup>2+</sup> |
|----------------|----|----|----|----------------|-----------------|
| 116.0711       | 1  | S  | 21 |                |                 |
| 229.1552       | 2  | L  | 20 | 2370.1433      | 1185.5756       |
| 330.2029       | 3  | T  | 19 | 2257.0593      | 1129.0335       |
| 486.3292       | 4  | K  | 18 | 2156.0116      | 1078.5097       |
| 601.3561       | 5  | D  | 17 | 1999.8853      | 1000.4466       |
| 714.4402       | 6  | L  | 16 | 1884.8583      | 942.9331        |
| 771.4616       | 7  | G  | 15 | 1771.7743      | 886.3911        |
| 828.4831       | 8  | G  | 14 | 1714.7528      | 857.8803        |
| 942.5260       | 9  | N  | 13 | 1657.7314      | 829.3696        |
| 1013.5631      | 10 | A  | 12 | 1543.6884      | 772.3481        |
| 1169.6894      | 11 | K  | 11 | 1472.6513      | 736.8296        |
| 1329.7200      | 12 | C  | 10 | 1316.5250      | 658.7664        |
| 1416.7521      | 13 | S  | 9  | 1156.4944      | 578.7511        |
| 1531.7790      | 14 | D  | 8  | 1069.4624      | 535.2351        |
| 1678.8474      | 15 | F  | 7  | 954.4354       | 477.7216        |
| 1779.8951      | 16 | T  | 6  | 807.3670       | 404.1874        |
| 1908.9377      | 17 | E  | 5  | 706.3194       | 353.6636        |
| 2037.9803      | 18 | E  | 4  | 577.2768       | 289.1423        |
| 2151.0644      | 19 | I  | 3  | 448.2342       | 224.6210        |
| 2311.0950      | 20 | C  | 2  | 335.1501       | 168.0790        |
|                | 21 | R  | 1  | 175.1195       | 88.0637         |

N-term:+29.04 K(4):+156.13  
K(11):+156.13 C(12):+160.03  
C(20):+160.03

X-range:

0 - 0

MassTol: Y-zoom:

0. 1.

MassType:

☐AVG ☒MONO

Axis:

☒1 ☐2

Label:

☒I ☐M ☐-

Ions:

a ☐+ ☐2+ ☐3+

b ☒+ ☐2+ ☐3+

c ☐+ ☐2+ ☐3+

x ☐+ ☐2+ ☐3+

y ☒+ ☒2+ ☐3+

z ☐+ ☐2+ ☐3+

hide H<sub>2</sub>O/NH<sub>3</sub> ☐

zoom 112-122 ☐

GO

SNALNEDTQDELGDPR, MH+ 1801.8204, m/z 601.2783  
L OS G13 P120811 220811-s1.03512.03512.3.dta

scan 3512; 2.9e+000

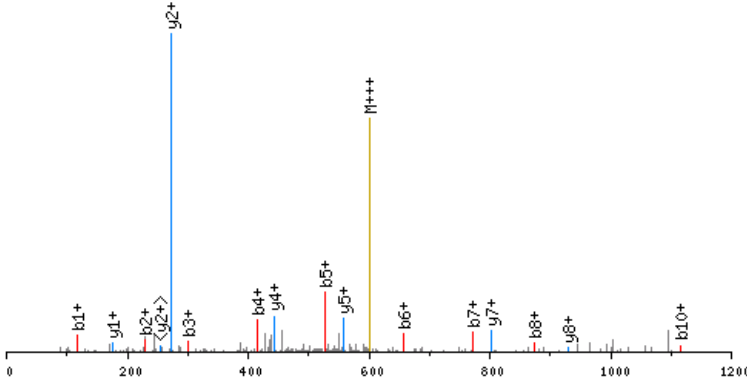

click image to zoom in; click top corners to zoom out [\[precursor±\]](#)

scan 3509; 601.3 m/z; 7.3e+000

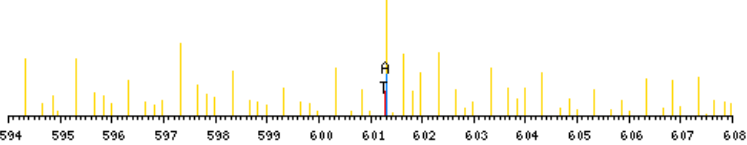

zoomed in precursor plot; T=theoretical m/z, A=acquired m/z

| b <sup>+</sup> | #  | AA | #  | y <sup>+</sup> | y <sup>2+</sup> |
|----------------|----|----|----|----------------|-----------------|
| 116.0711       | 1  | S  | 16 |                |                 |
| 230.1141       | 2  | N  | 15 | 1686.7571      | 843.8825        |
| 301.1512       | 3  | A  | 14 | 1572.7142      | 786.8610        |
| 414.2352       | 4  | L  | 13 | 1501.6771      | 751.3424        |
| 528.2782       | 5  | N  | 12 | 1388.5930      | 694.8004        |
| 657.3208       | 6  | E  | 11 | 1274.5501      | 637.7789        |
| 772.3477       | 7  | D  | 10 | 1145.5075      | 573.2576        |
| 873.3954       | 8  | T  | 9  | 1030.4805      | 515.7442        |
| 1001.4540      | 9  | Q  | 8  | 929.4328       | 465.2203        |
| 1116.4809      | 10 | D  | 7  | 801.3743       | 401.1910        |
| 1245.5235      | 11 | E  | 6  | 686.3473       | 343.6776        |
| 1358.6076      | 12 | L  | 5  | 557.3047       | 279.1563        |
| 1415.6290      | 13 | G  | 4  | 444.2207       | 222.6142        |
| 1530.6560      | 14 | D  | 3  | 387.1992       | 194.1035        |
| 1627.7087      | 15 | P  | 2  | 272.1723       | 136.5900        |
|                | 16 | R  | 1  | 175.1195       | 88.0637         |

N-term:+29.04

X-range:

0 - 0

MassTol: Y-zoom:

0. 1.

MassType:

☐ AVG ☒ MONO

Axis:

☒ 1 ☐ 2

Label:

☒ I ☐ M ☐ -

Ions:

a ☐ + ☐ 2+ ☐ 3+

b ☒ + ☐ 2+ ☐ 3+

c ☐ + ☐ 2+ ☐ 3+

x ☐ + ☐ 2+ ☐ 3+

y ☒ + ☒ 2+ ☐ 3+

z ☐ + ☐ 2+ ☐ 3+

hide H<sub>2</sub>O/NH<sub>3</sub> ☐

zoom 112-122 ☐

GO

SNASDALDKIR, MH+ 1245.6803, m/z 415.8983  
L OS G16 P120811 220811-s1.03295.03295.3.dta

scan 3295; 3.8e+001

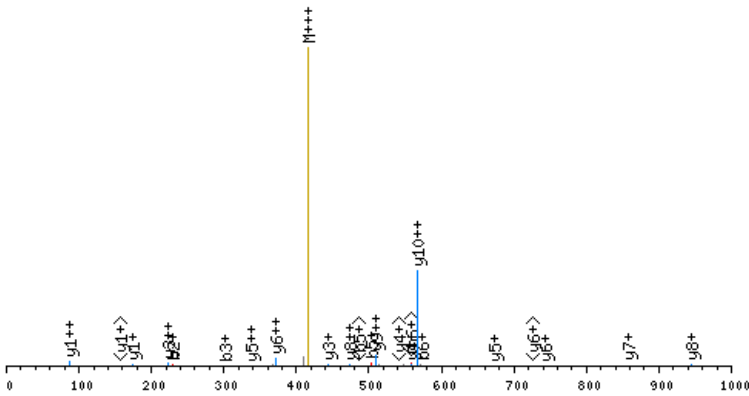

click image to zoom in; click top corners to zoom out

[precursor±]

scan 3293; 415.9 m/z; 7.1e+001

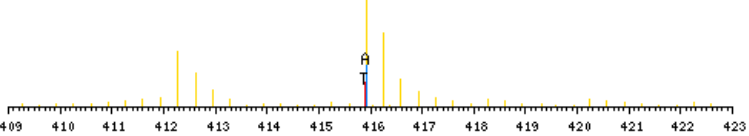

zoomed in precursor plot; T=theoretical m/z, A=acquired m/z

| b <sup>+</sup> | #  | AA | #  | y <sup>+</sup> | y <sup>2+</sup> |
|----------------|----|----|----|----------------|-----------------|
| 116.0711       | 1  | S  | 11 |                |                 |
| 230.1141       | 2  | N  | 10 | 1130.6170      | 565.8124        |
| 301.1512       | 3  | A  | 9  | 1016.5741      | 508.7909        |
| 388.1832       | 4  | S  | 8  | 945.5370       | 473.2724        |
| 503.2101       | 5  | D  | 7  | 858.5049       | 429.7564        |
| 574.2473       | 6  | A  | 6  | 743.4780       | 372.2429        |
| 687.3313       | 7  | L  | 5  | 672.4409       | 336.7243        |
| 802.3583       | 8  | D  | 4  | 559.3568       | 280.1823        |
| 958.4846       | 9  | K  | 3  | 444.3299       | 222.6688        |
| 1071.5686      | 10 | I  | 2  | 288.2036       | 144.6057        |
|                | 11 | R  | 1  | 175.1195       | 88.0637         |

N-term:+29.04 K(9):+156.13

N-term: +29.04 K(16): +156.13

X-range:

0 - 0

MassTol: Y-zoom:

0. 1.

MassType:

☐AVG ☒MONO

Axis:

☒1 ☐2

Label:

☒I ☐M ☐-

Ions:

a ☐+ ☐2+ ☐3+

b ☒+ ☐2+ ☐3+

c ☐+ ☐2+ ☐3+

x ☐+ ☐2+ ☐3+

y ☒+ ☒2+ ☐3+

z ☐+ ☐2+ ☐3+

hide H<sub>2</sub>O/NH<sub>3</sub> ☐

zoom 112-122 ☐

GO

SNEEIAMATVTALR, MH+ 1533.7946, m/z 511.9364  
L OS G13 P120811 220811-s1.05858.05858.3.dta

scan 5858; 2.3e+000

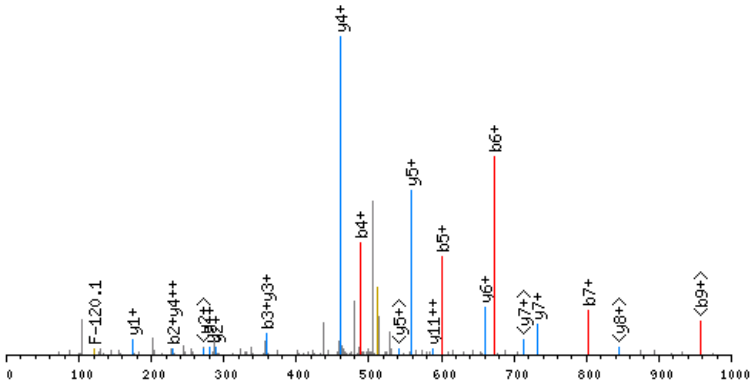

click image to zoom in; click top corners to zoom out

[precursor±]

scan 5854; 511.9 m/z; 1.5e+001

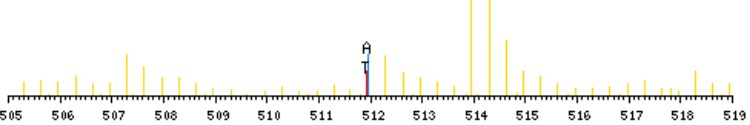

zoomed in precursor plot; T=theoretical m/z, A=acquired m/z

| b <sup>+</sup> | #  | AA | #  | y <sup>+</sup> | y <sup>2+</sup> |
|----------------|----|----|----|----------------|-----------------|
| 116.0711       | 1  | S  | 14 |                |                 |
| 230.1141       | 2  | N  | 13 | 1418.7313      | 709.8696        |
| 359.1566       | 3  | E  | 12 | 1304.6884      | 652.8481        |
| 488.1992       | 4  | E  | 11 | 1175.6458      | 588.3268        |
| 601.2833       | 5  | I  | 10 | 1046.6032      | 523.8055        |
| 672.3204       | 6  | A  | 9  | 933.5192       | 467.2635        |
| 803.3609       | 7  | M  | 8  | 862.4820       | 431.7449        |
| 874.3980       | 8  | A  | 7  | 731.4416       | 366.2247        |
| 975.4457       | 9  | T  | 6  | 660.4044       | 330.7061        |
| 1074.5141      | 10 | V  | 5  | 559.3568       | 280.1823        |
| 1175.5618      | 11 | T  | 4  | 460.2884       | 230.6481        |
| 1246.5989      | 12 | A  | 3  | 359.2407       | 180.1243        |
| 1359.6830      | 13 | L  | 2  | 288.2036       | 144.6057        |
|                | 14 | R  | 1  | 175.1195       | 88.0637         |

N-term:+29.04

X-range:

0 - 0

MassTol: Y-zoom:

0. 1.

MassType:

☐ AVG ☒ MONO

Axis:

☒ 1 ☐ 2

Label:

☒ I ☐ M ☐ -

Ions:

a ☐ + ☐ 2+ ☐ 3+

b ☒ + ☐ 2+ ☐ 3+

c ☐ + ☐ 2+ ☐ 3+

x ☐ + ☐ 2+ ☐ 3+

y ☒ + ☒ 2+ ☐ 3+

z ☐ + ☐ 2+ ☐ 3+

hide H<sub>2</sub>O/NH<sub>3</sub> ☐

zoom 112-122 ☐

GO

SNEELLDQLVR, MH+ 1349.7488, m/z 450.5878  
H OS G13 P120811 220811-s1.06012.06012.3.dta

scan 6012; 1.4e+000

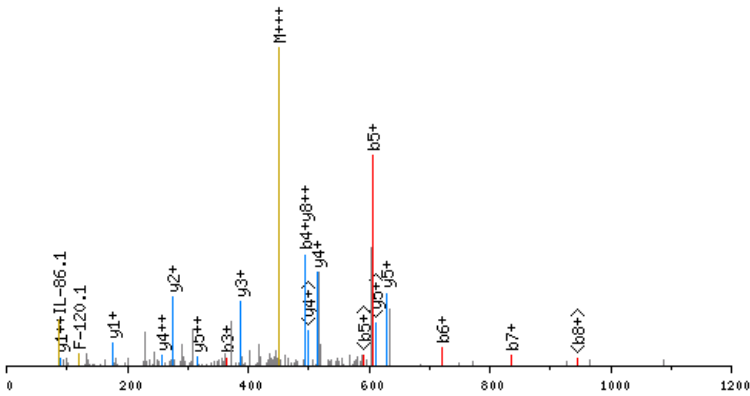

click image to zoom in; click top corners to zoom out

[precursor±]

scan 6009; 450.6 m/z; 7.2e+000

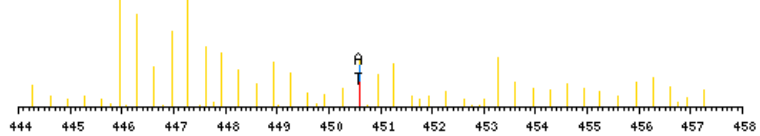

zoomed in precursor plot; T=theoretical m/z, A=acquired m/z

| b <sup>+</sup> | #  | AA | #  | y <sup>+</sup> | y <sup>2+</sup> |
|----------------|----|----|----|----------------|-----------------|
| 122.1029       | 1  | S  | 11 |                |                 |
| 236.1459       | 2  | N  | 10 | 1228.6537      | 614.8308        |
| 365.1884       | 3  | E  | 9  | 1114.6108      | 557.8093        |
| 494.2310       | 4  | E  | 8  | 985.5682       | 493.2880        |
| 607.3151       | 5  | L  | 7  | 856.5256       | 428.7667        |
| 720.3992       | 6  | L  | 6  | 743.4416       | 372.2247        |
| 835.4261       | 7  | D  | 5  | 630.3575       | 315.6827        |
| 963.4847       | 8  | Q  | 4  | 515.3306       | 258.1692        |
| 1076.5688      | 9  | L  | 3  | 387.2720       | 194.1399        |
| 1175.6372      | 10 | V  | 2  | 274.1879       | 137.5979        |
|                | 11 | R  | 1  | 175.1195       | 88.0637         |

N-term:+35.07

X-range:

0 - 0

MassTol: Y-zoom:

0. 1.

MassType:

☐AVG ☒MONO

Axis:

☒1 ☐2

Label:

☒I ☐M ☐-

Ions:

a ☐+ ☐2+ ☐3+

b ☒+ ☐2+ ☐3+

c ☐+ ☐2+ ☐3+

x ☐+ ☐2+ ☐3+

y ☒+ ☒2+ ☐3+

z ☐+ ☐2+ ☐3+

hide H<sub>2</sub>O/NH<sub>3</sub> ☐

zoom 112-122 ☐

GO

SNIEQMSSHKSEITELR, MH+ 2045.0337, m/z 512.0139  
L OS G17 P120811 220811-s1.03690.03690.4.dta

scan 3690; 5.5e+000

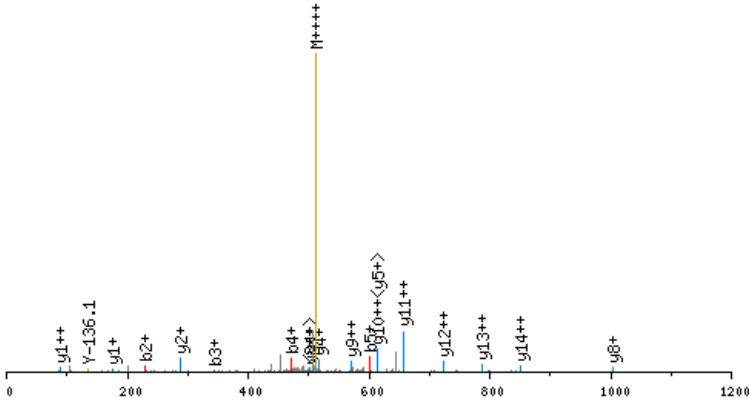

click image to zoom in; click top corners to zoom out

[precursor±]

scan 3688; 512.0 m/z; 1.5e+001

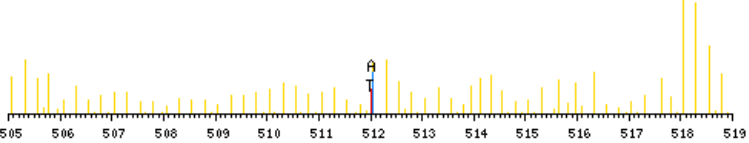

zoomed in precursor plot; T=theoretical m/z, A=acquired m/z

| b <sup>+</sup> | #  | AA | #  | y <sup>+</sup> | y <sup>2+</sup> |
|----------------|----|----|----|----------------|-----------------|
| 116.0711       | 1  | S  | 17 |                |                 |
| 230.1141       | 2  | N  | 16 | 1929.9704      | 965.4891        |
| 343.1981       | 3  | I  | 15 | 1815.9275      | 908.4677        |
| 472.2407       | 4  | E  | 14 | 1702.8434      | 851.9256        |
| 600.2993       | 5  | Q  | 13 | 1573.8009      | 787.4043        |
| 731.3398       | 6  | M  | 12 | 1445.7423      | 723.3751        |
| 818.3718       | 7  | S  | 11 | 1314.7018      | 657.8548        |
| 905.4038       | 8  | S  | 10 | 1227.6698      | 614.3388        |
| 1042.4627      | 9  | H  | 9  | 1140.6377      | 570.8228        |
| 1198.5890      | 10 | K  | 8  | 1003.5788      | 502.2933        |
| 1285.6211      | 11 | S  | 7  | 847.4525       | 424.2302        |
| 1414.6637      | 12 | E  | 6  | 760.4205       | 380.7142        |
| 1527.7477      | 13 | I  | 5  | 631.3779       | 316.1929        |
| 1628.7954      | 14 | T  | 4  | 518.2938       | 259.6508        |
| 1757.8380      | 15 | E  | 3  | 417.2462       | 209.1270        |
| 1870.9221      | 16 | L  | 2  | 288.2036       | 144.6057        |
|                | 17 | R  | 1  | 175.1195       | 88.0637         |

N-term:+29.04 K(10):+156.13

X-range:

0 - 0

MassTol: Y-zoom:

0. 1.

MassType:

☐AVG ☒MONO

Axis:

☒1 ☐2

Label:

☒I ☐M ☐-

Ions:

a ☐+ ☐2+ ☐3+

b ☒+ ☐2+ ☐3+

c ☐+ ☐2+ ☐3+

x ☐+ ☐2+ ☐3+

y ☒+ ☒2+ ☐3+

z ☐+ ☐2+ ☐3+

hide H<sub>2</sub>O/NH<sub>3</sub> ☐

zoom 112-122 ☐

GO

SNNKDQGGYEDFVEGLR, MH+ 1983.9412, m/z 661.9853  
L OS G16 P120811 220811-s1.05159.05159.3.dta

scan 5159; 3.0e+000

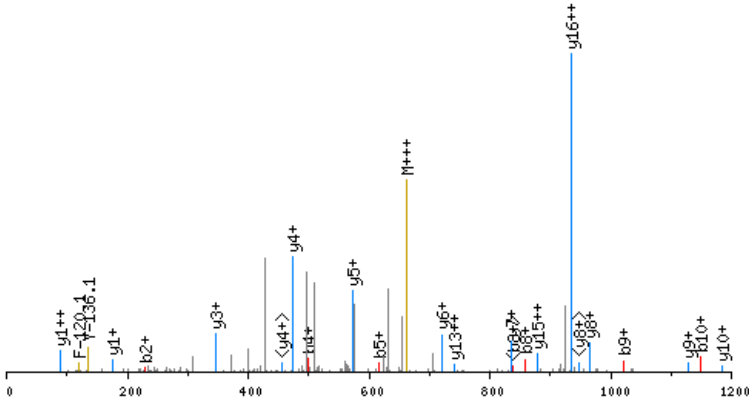

click image to zoom in; click top corners to zoom out

[precursor±]

scan 5158; 662.0 m/z; 3.6e+001

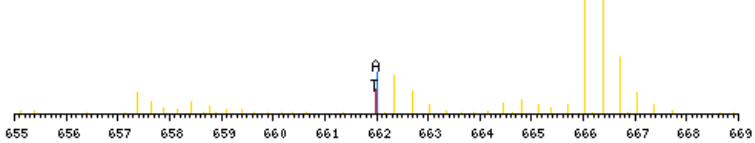

zoomed in precursor plot; T=theoretical m/z, A=acquired m/z

| b <sup>+</sup> | #  | AA | #  | y <sup>+</sup> | y <sup>2+</sup> |
|----------------|----|----|----|----------------|-----------------|
| 116.0711       | 1  | S  | 17 |                |                 |
| 230.1141       | 2  | N  | 16 | 1868.8779      | 934.9429        |
| 344.1570       | 3  | N  | 15 | 1754.8350      | 877.9214        |
| 500.2833       | 4  | K  | 14 | 1640.7921      | 820.8999        |
| 615.3102       | 5  | D  | 13 | 1484.6658      | 742.8368        |
| 743.3688       | 6  | Q  | 12 | 1369.6388      | 685.3233        |
| 800.3903       | 7  | G  | 11 | 1241.5802      | 621.2940        |
| 857.4117       | 8  | G  | 10 | 1184.5588      | 592.7833        |
| 1020.4751      | 9  | Y  | 9  | 1127.5373      | 564.2726        |
| 1149.5177      | 10 | E  | 8  | 964.4740       | 482.7409        |
| 1264.5446      | 11 | D  | 7  | 835.4314       | 418.2196        |
| 1411.6130      | 12 | F  | 6  | 720.4044       | 360.7061        |
| 1510.6814      | 13 | V  | 5  | 573.3360       | 287.1719        |
| 1639.7240      | 14 | E  | 4  | 474.2676       | 237.6377        |
| 1696.7455      | 15 | G  | 3  | 345.2250       | 173.1164        |
| 1809.8295      | 16 | L  | 2  | 288.2036       | 144.6057        |
|                | 17 | R  | 1  | 175.1195       | 88.0637         |

N-term:+29.04 K(4):+156.13

X-range:

0 - 0

MassTol: Y-zoom:

0. 1.

MassType:

☐ AVG ☒ MONO

Axis:

☒ 1 ☐ 2

Label:

☒ I ☐ M ☐ -

Ions:

a ☐ + ☐ 2+ ☐ 3+

b ☒ + ☐ 2+ ☐ 3+

c ☐ + ☐ 2+ ☐ 3+

x ☐ + ☐ 2+ ☐ 3+

y ☒ + ☒ 2+ ☐ 3+

z ☐ + ☐ 2+ ☐ 3+

hide H<sub>2</sub>O/NH<sub>3</sub> ☐

zoom 112-122 ☐

GO

SNNLCLHFNPR, MH+ 1399.6904, m/z 467.2350  
L OS G16 P120811 220811-s1.04036.04036.3.dta

scan 4036; 9.6e+000

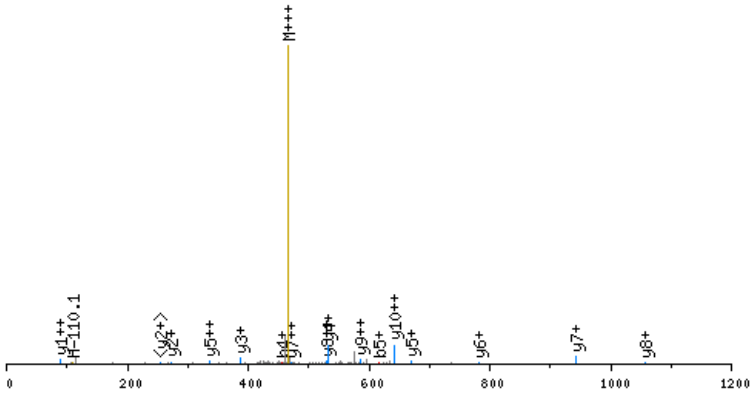

click image to zoom in; click top corners to zoom out [\[precursor±\]](#)

scan 4033; 467.2 m/z; 9.9e+001

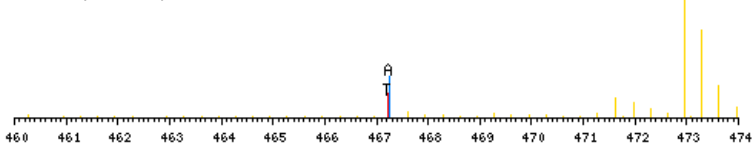

zoomed in precursor plot; T=theoretical m/z, A=acquired m/z

| b <sup>+</sup> | #  | AA | #  | y <sup>+</sup> | y <sup>2+</sup> |
|----------------|----|----|----|----------------|-----------------|
| 116.0711       | 1  | S  | 11 |                |                 |
| 230.1141       | 2  | N  | 10 | 1284.6271      | 642.8175        |
| 344.1570       | 3  | N  | 9  | 1170.5842      | 585.7960        |
| 457.2410       | 4  | L  | 8  | 1056.5412      | 528.7745        |
| 617.2716       | 5  | C  | 7  | 943.4572       | 472.2325        |
| 730.3557       | 6  | L  | 6  | 783.4266       | 392.2172        |
| 867.4146       | 7  | H  | 5  | 670.3425       | 335.6752        |
| 1014.4830      | 8  | F  | 4  | 533.2836       | 267.1457        |
| 1128.5260      | 9  | N  | 3  | 386.2152       | 193.6115        |
| 1225.5787      | 10 | P  | 2  | 272.1723       | 136.5900        |
|                | 11 | R  | 1  | 175.1195       | 88.0637         |

N-term:+29.04 C(5):+160.03

X-range:

0 - 0

MassTol: Y-zoom:

0. 1.

MassType:

☐AVG ☒MONO

Axis:

☒1 ☐2

Label:

☒I ☐M ☐-

Ions:

a ☐+ ☐2+ ☐3+

b ☒+ ☐2+ ☐3+

c ☐+ ☐2+ ☐3+

x ☐+ ☐2+ ☐3+

y ☒+ ☒2+ ☐3+

z ☐+ ☐2+ ☐3+

hide H<sub>2</sub>O/NH<sub>3</sub> ☐

zoom 112-122 ☐

GO

SNPGESSFDLADRLDPVEKIDR, MH+ 2516.2633, m/z 629.8213  
L OS G16 P120811 220811-s1.05814.05814.4.dta

scan 5814; 9.5e+000

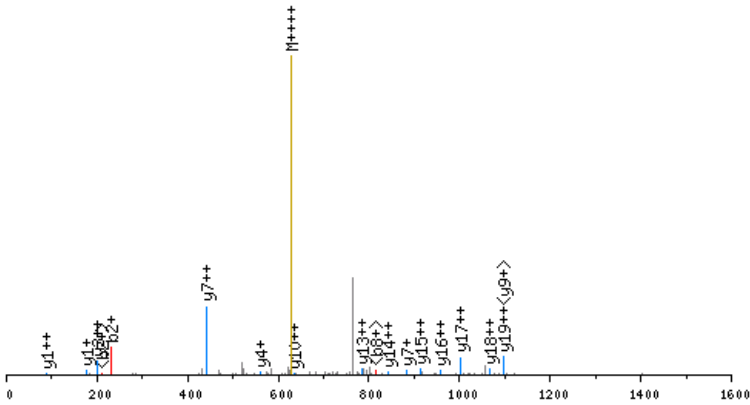

click image to zoom in; click top corners to zoom out [precursor±]

scan 5813; 629.8 m/z; 6.2e+000

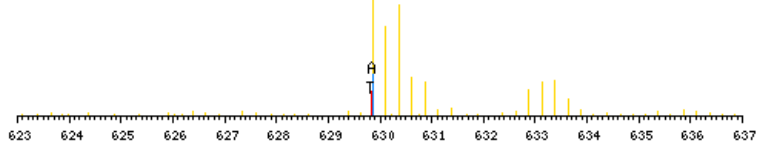

zoomed in precursor plot; T=theoretical m/z, A=acquired m/z

| b <sup>+</sup> | #  | AA | #  | y <sup>+</sup> | y <sup>2+</sup> |
|----------------|----|----|----|----------------|-----------------|
| 116.0711       | 1  | S  | 22 |                |                 |
| 230.1141       | 2  | N  | 21 | 2401.2000      | 1201.1039       |
| 327.1668       | 3  | P  | 20 | 2287.1571      | 1144.0824       |
| 384.1883       | 4  | G  | 19 | 2190.1043      | 1095.5561       |
| 513.2309       | 5  | E  | 18 | 2133.0828      | 1067.0453       |
| 600.2629       | 6  | S  | 17 | 2004.0402      | 1002.5240       |
| 687.2949       | 7  | S  | 16 | 1917.0082      | 959.0080        |
| 834.3633       | 8  | F  | 15 | 1829.9762      | 915.4920        |
| 949.3903       | 9  | D  | 14 | 1682.9078      | 841.9578        |
| 1062.4744      | 10 | L  | 13 | 1567.8808      | 784.4443        |
| 1133.5115      | 11 | A  | 12 | 1454.7968      | 727.9023        |
| 1248.5384      | 12 | D  | 11 | 1383.7596      | 692.3837        |
| 1404.6395      | 13 | R  | 10 | 1268.7327      | 634.8703        |
| 1517.7236      | 14 | L  | 9  | 1112.6316      | 556.8197        |
| 1632.7505      | 15 | D  | 8  | 999.5475       | 500.2777        |
| 1729.8033      | 16 | P  | 7  | 884.5206       | 442.7642        |
| 1828.8717      | 17 | V  | 6  | 787.4678       | 394.2378        |
| 1957.9143      | 18 | E  | 5  | 688.3994       | 344.7036        |
| 2114.0406      | 19 | K  | 4  | 559.3568       | 280.1823        |
| 2227.1247      | 20 | I  | 3  | 403.2305       | 202.1192        |
| 2342.1516      | 21 | D  | 2  | 290.1464       | 145.5771        |
|                | 22 | R  | 1  | 175.1195       | 88.0637         |

N-term:+29.04 K(19):+156.13

X-range:

0 - 0

MassTol: Y-zoom:

0. 1.

MassType:

☐AVG ☒MONO

Axis:

☒1 ☐2

Label:

☒I ☐M ☐-

Ions:

a ☐+ ☐2+ ☐3+

b ☒+ ☐2+ ☐3+

c ☐+ ☐2+ ☐3+

x ☐+ ☐2+ ☐3+

y ☒+ ☒2+ ☐3+

z ☐+ ☐2+ ☐3+

hide H<sub>2</sub>O/NH<sub>3</sub> ☐

zoom 112-122 ☐

GO

SNSAALIQQATTVKNKDIR, MH+ 2142.2247, m/z 536.3116  
L OS G17 P120811 220811-s1.04202.04202.4.dta

scan 4202; 2.1e+000

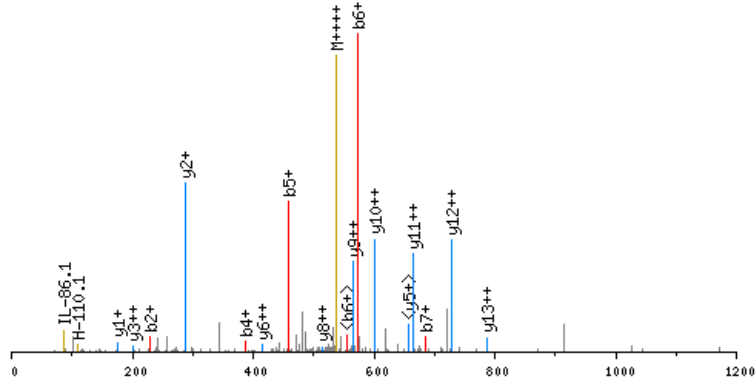

click image to zoom in; click top corners to zoom out [\[precursor±\]](#)

scan 4198; 536.3 m/z; 8.1e+000

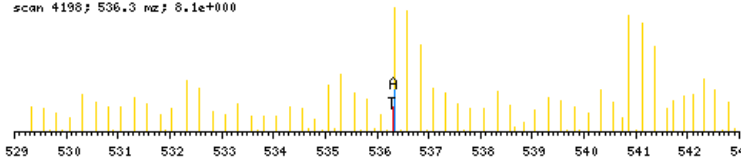

zoomed in precursor plot; T=theoretical m/z, A=acquired m/z

| b <sup>+</sup> | #  | AA | #  | y <sup>+</sup> | y <sup>2+</sup> |
|----------------|----|----|----|----------------|-----------------|
| 116.0711       | 1  | S  | 19 |                |                 |
| 230.1141       | 2  | N  | 18 | 2027.1614      | 1014.0846       |
| 317.1461       | 3  | S  | 17 | 1913.1185      | 957.0631        |
| 388.1832       | 4  | A  | 16 | 1826.0864      | 913.5471        |
| 459.2203       | 5  | A  | 15 | 1755.0493      | 878.0286        |
| 572.3044       | 6  | L  | 14 | 1684.0122      | 842.5100        |
| 685.3884       | 7  | I  | 13 | 1570.9281      | 785.9680        |
| 813.4470       | 8  | Q  | 12 | 1457.8441      | 729.4260        |
| 941.5056       | 9  | Q  | 11 | 1329.7855      | 665.3967        |
| 1012.5427      | 10 | A  | 10 | 1201.7269      | 601.3674        |
| 1113.5904      | 11 | T  | 9  | 1130.6898      | 565.8488        |
| 1214.6381      | 12 | T  | 8  | 1029.6421      | 515.3250        |
| 1313.7065      | 13 | V  | 7  | 928.5944       | 464.8011        |
| 1469.8328      | 14 | K  | 6  | 829.5260       | 415.2669        |
| 1583.8757      | 15 | N  | 5  | 673.3997       | 337.2038        |
| 1740.0020      | 16 | K  | 4  | 559.3568       | 280.1823        |
| 1855.0290      | 17 | D  | 3  | 403.2305       | 202.1192        |
| 1968.1130      | 18 | I  | 2  | 288.2036       | 144.6057        |
|                | 19 | R  | 1  | 175.1195       | 88.0637         |

N-term: +29.04 K(14): +156.13  
K(16): +156.13

X-range:

0 - 0

MassTol: Y-zoom:

0. 1.

MassType:

☐ AVG ☒ MONO

Axis:

☒ 1 ☐ 2

Label:

☒ I ☐ M ☐ -

Ions:

a ☐ + ☐ 2+ ☐ 3+

b ☒ + ☐ 2+ ☐ 3+

c ☐ + ☐ 2+ ☐ 3+

x ☐ + ☐ 2+ ☐ 3+

y ☒ + ☒ 2+ ☐ 3+

z ☐ + ☐ 2+ ☐ 3+

hide H<sub>2</sub>O/NH<sub>3</sub> ☐

zoom 112-122 ☐

GO

SNTDFAFSLYR, MH+ 1348.6537, m/z 674.8305  
L OS G14 P120811 220811-s1.05598.05598.2.dta

scan 5598; 2.0e+000

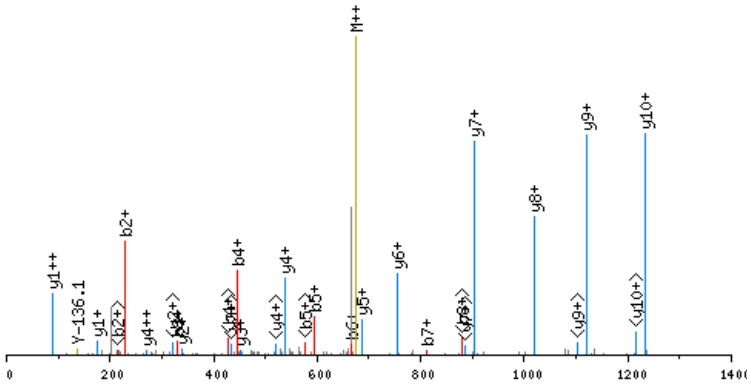

click image to zoom in; click top corners to zoom out

[precursor±]

scan 5596; 674.8 m/z; 5.9e+000

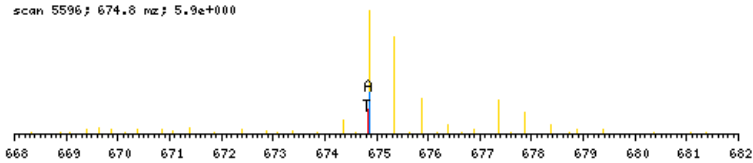

zoomed in precursor plot; T=theoretical m/z, A=acquired m/z

| b <sup>+</sup> | #  | AA | #  | y <sup>+</sup> | y <sup>2+</sup> |
|----------------|----|----|----|----------------|-----------------|
| 116.0711       | 1  | S  | 11 |                |                 |
| 230.1141       | 2  | N  | 10 | 1233.5904      | 617.2991        |
| 331.1617       | 3  | T  | 9  | 1119.5475      | 560.2777        |
| 446.1887       | 4  | D  | 8  | 1018.4998      | 509.7538        |
| 593.2571       | 5  | F  | 7  | 903.4729       | 452.2403        |
| 664.2942       | 6  | A  | 6  | 756.4044       | 378.7061        |
| 811.3626       | 7  | F  | 5  | 685.3673       | 343.1876        |
| 898.3946       | 8  | S  | 4  | 538.2989       | 269.6534        |
| 1011.4787      | 9  | L  | 3  | 451.2669       | 226.1374        |
| 1174.5420      | 10 | Y  | 2  | 338.1828       | 169.5953        |
|                | 11 | R  | 1  | 175.1195       | 88.0637         |

N-term:+29.04

X-range:

0 - 0

MassTol: Y-zoom:

0. 1.

MassType:

☐AVG ☒MONO

Axis:

☒1 ☐2

Label:

☒I ☐M ☐-

Ions:

a ☐+ ☐2+ ☐3+

b ☒+ ☐2+ ☐3+

c ☐+ ☐2+ ☐3+

x ☐+ ☐2+ ☐3+

y ☒+ ☒2+ ☐3+

z ☐+ ☐2+ ☐3+

hide H<sub>2</sub>O/NH<sub>3</sub> ☐

zoom 112-122 ☐

GO

SNTDVETQPGKTVIR, MH+ 1712.9819, m/z 571.6655  
H OS G15 P120811 220811-s1.02407.02407.3.dta

scan 2407; 1.1e+001

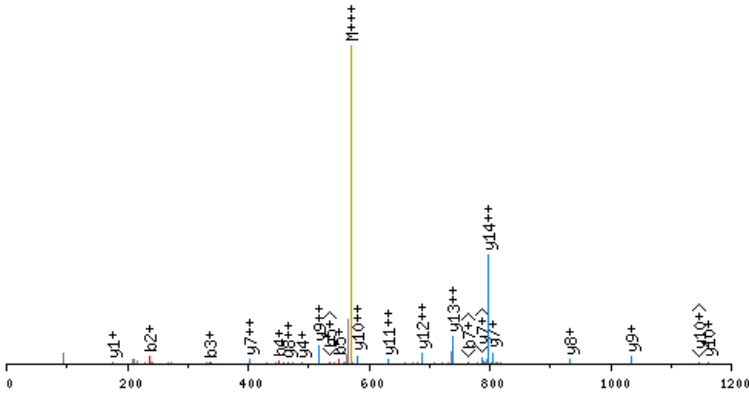

click image to zoom in; click top corners to zoom out

[precursor±]

scan 2406; 571.7 m/z; 1.1e+001

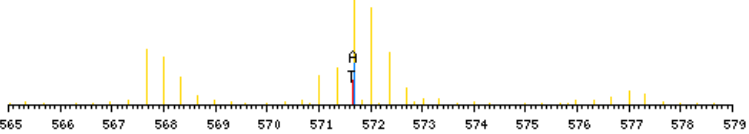

zoomed in precursor plot; T=theoretical m/z, A=acquired m/z

| b <sup>+</sup> | #  | AA | #  | y <sup>+</sup> | y <sup>2+</sup> |
|----------------|----|----|----|----------------|-----------------|
| 122.1029       | 1  | S  | 15 |                |                 |
| 236.1459       | 2  | N  | 14 | 1591.8868      | 796.4473        |
| 337.1935       | 3  | T  | 13 | 1477.8439      | 739.4258        |
| 452.2205       | 4  | D  | 12 | 1376.7962      | 688.9020        |
| 551.2889       | 5  | V  | 11 | 1261.7692      | 631.3885        |
| 680.3315       | 6  | E  | 10 | 1162.7008      | 581.8543        |
| 781.3792       | 7  | T  | 9  | 1033.6582      | 517.3330        |
| 909.4377       | 8  | Q  | 8  | 932.6106       | 466.8092        |
| 1006.4905      | 9  | P  | 7  | 804.5520       | 402.7799        |
| 1063.5120      | 10 | G  | 6  | 707.4992       | 354.2535        |
| 1225.6701      | 11 | K  | 5  | 650.4778       | 325.7428        |
| 1326.7177      | 12 | T  | 4  | 488.3197       | 244.6637        |
| 1425.7862      | 13 | V  | 3  | 387.2720       | 194.1399        |
| 1538.8702      | 14 | I  | 2  | 288.2036       | 144.6057        |
|                | 15 | R  | 1  | 175.1195       | 88.0637         |

N-term:+35.07 K(11):+162.16

X-range:

0 - 0

MassTol: Y-zoom:

0. 1.

MassType:

☐ AVG ☒ MONO

Axis:

☒ 1 ☐ 2

Label:

☒ I ☐ M ☐ -

Ions:

a ☐ + ☐ 2+ ☐ 3+

b ☒ + ☐ 2+ ☐ 3+

c ☐ + ☐ 2+ ☐ 3+

x ☐ + ☐ 2+ ☐ 3+

y ☒ + ☒ 2+ ☐ 3+

z ☐ + ☐ 2+ ☐ 3+

hide H<sub>2</sub>O/NH<sub>3</sub> ☐

zoom 112-122 ☐

GO

SNVEEADAAMAASPHAVDGNTELKR, MH+ 2738.3419, m/z 685.3409  
L OS G16 P120811 220811-s1.04447.04447.4.dta

scan 4447; 8.5e-001

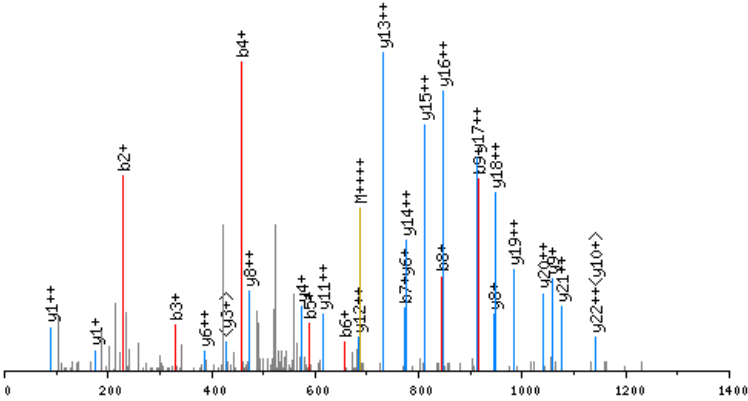

click image to zoom in; click top corners to zoom out

[precursor±]

scan 4443; 685.3 m/z; 8.4e+000

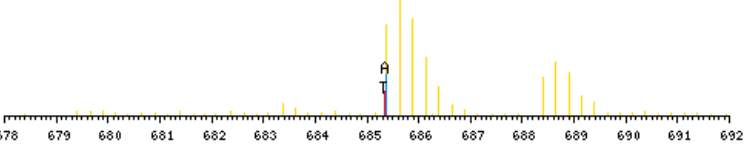

zoomed in precursor plot; T=theoretical m/z, A=acquired m/z

| b <sup>+</sup> | #  | AA | #  | y <sup>+</sup> | y <sup>2+</sup> |
|----------------|----|----|----|----------------|-----------------|
| 116.0711       | 1  | S  | 26 |                |                 |
| 230.1141       | 2  | N  | 25 | 2623.2786      | 1312.1432       |
| 329.1825       | 3  | V  | 24 | 2509.2357      | 1255.1218       |
| 458.2251       | 4  | E  | 23 | 2410.1673      | 1205.5876       |
| 587.2677       | 5  | E  | 22 | 2281.1247      | 1141.0663       |
| 658.3048       | 6  | A  | 21 | 2152.0821      | 1076.5450       |
| 773.3317       | 7  | D  | 20 | 2081.0450      | 1041.0264       |
| 844.3688       | 8  | A  | 19 | 1966.0181      | 983.5129        |
| 915.4059       | 9  | A  | 18 | 1894.9809      | 947.9944        |
| 1046.4464      | 10 | M  | 17 | 1823.9438      | 912.4758        |
| 1117.4835      | 11 | A  | 16 | 1692.9033      | 846.9556        |
| 1188.5207      | 12 | A  | 15 | 1621.8662      | 811.4370        |
| 1275.5527      | 13 | S  | 14 | 1550.8291      | 775.9185        |
| 1372.6054      | 14 | P  | 13 | 1463.7971      | 732.4025        |
| 1509.6644      | 15 | H  | 12 | 1366.7443      | 683.8761        |
| 1580.7015      | 16 | A  | 11 | 1229.6854      | 615.3466        |
| 1679.7699      | 17 | V  | 10 | 1158.6483      | 579.8281        |
| 1794.7968      | 18 | D  | 9  | 1059.5799      | 530.2939        |
| 1851.8183      | 19 | G  | 8  | 944.5529       | 472.7804        |
| 1965.8612      | 20 | N  | 7  | 887.5315       | 444.2697        |
| 2066.9089      | 21 | T  | 6  | 773.4886       | 387.2482        |
| 2165.9773      | 22 | V  | 5  | 672.4409       | 336.7243        |
| 2295.0199      | 23 | E  | 4  | 573.3725       | 287.1901        |
| 2408.1040      | 24 | L  | 3  | 444.3299       | 222.6688        |
| 2564.2303      | 25 | K  | 2  | 331.2458       | 166.1268        |
|                | 26 | R  | 1  | 175.1195       | 88.0637         |

N-term: +29.04 K(25): +156.13

X-range:

0 - 0

MassTol: Y-zoom:

0. 1.

MassType:

☐AVG ☒MONO

Axis:

☒1 ☐2

Label:

☒I ☐M ☐-

Ions:

a ☐+ ☐2+ ☐3+

b ☒+ ☐2+ ☐3+

c ☐+ ☐2+ ☐3+

x ☐+ ☐2+ ☐3+

y ☒+ ☒2+ ☐3+

z ☐+ ☐2+ ☐3+

hide H<sub>2</sub>O/NH<sub>3</sub> ☐

zoom 112-122 ☐

GO

SPASHEIATNLGDFALR, MH+ 1826.9401, m/z 609.6515  
L OS G15 P120811 220811-s1.05114.05114.3.dta

scan 5114; 1.0e+000

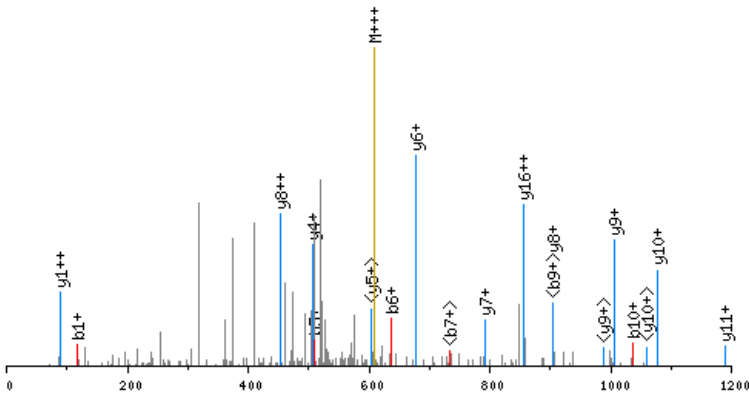

click image to zoom in; click top corners to zoom out

[precursor±]

scan 5111; 609.7 m/z; 7.2e+000

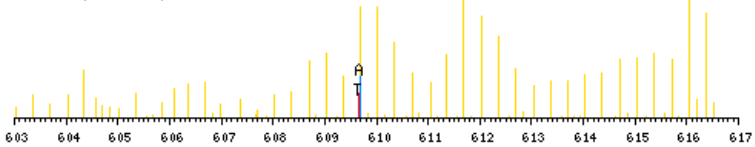

zoomed in precursor plot; T=theoretical m/z, A=acquired m/z

| b <sup>+</sup> | #  | AA | #  | y <sup>+</sup> | y <sup>2+</sup> |
|----------------|----|----|----|----------------|-----------------|
| 116.0711       | 1  | S  | 17 |                |                 |
| 213.1239       | 2  | P  | 16 | 1711.8768      | 856.4423        |
| 284.1610       | 3  | A  | 15 | 1614.8240      | 807.9159        |
| 371.1930       | 4  | S  | 14 | 1543.7869      | 772.3974        |
| 508.2519       | 5  | H  | 13 | 1456.7549      | 728.8813        |
| 637.2945       | 6  | E  | 12 | 1319.6959      | 660.3519        |
| 750.3786       | 7  | I  | 11 | 1190.6533      | 595.8306        |
| 821.4157       | 8  | A  | 10 | 1077.5693      | 539.2886        |
| 922.4634       | 9  | T  | 9  | 1006.5322      | 503.7700        |
| 1036.5063      | 10 | N  | 8  | 905.4845       | 453.2462        |
| 1149.5904      | 11 | L  | 7  | 791.4416       | 396.2247        |
| 1206.6119      | 12 | G  | 6  | 678.3575       | 339.6827        |
| 1321.6388      | 13 | D  | 5  | 621.3360       | 311.1719        |
| 1468.7072      | 14 | F  | 4  | 506.3091       | 253.6585        |
| 1539.7443      | 15 | A  | 3  | 359.2407       | 180.1243        |
| 1652.8284      | 16 | L  | 2  | 288.2036       | 144.6057        |
|                | 17 | R  | 1  | 175.1195       | 88.0637         |

N-term:+29.04



N-term:+29.04 C (16) :+160.03

X-range:

0 - 0

MassTol: Y-zoom:

0. 1.

MassType:

☐AVG ☒MONO

Axis:

☒1 ☐2

Label:

☒I ☐M ☐-

Ions:

a ☐+ ☐2+ ☐3+

b ☒+ ☐2+ ☐3+

c ☐+ ☐2+ ☐3+

x ☐+ ☐2+ ☐3+

y ☒+ ☒2+ ☐3+

z ☐+ ☐2+ ☐3+

hide H<sub>2</sub>O/NH<sub>3</sub> ☐

zoom 112-122 ☐

GO

SPTNCDASEPLAEKVLDLINKGR, MH+ 2611.3765, m/z 653.5996  
L OS G16 P120811 220811-s1.06322.06322.4.dta

scan 6322; 1.3e+000

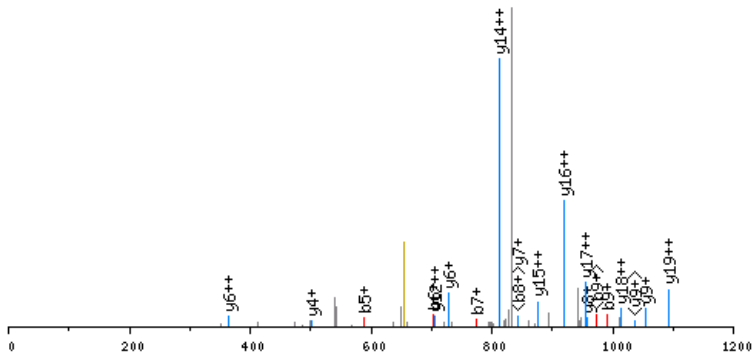

click image to zoom in; click top corners to zoom out [\[precursor±\]](#)

scan 6321; 653.6 m/z; 2.8e+000

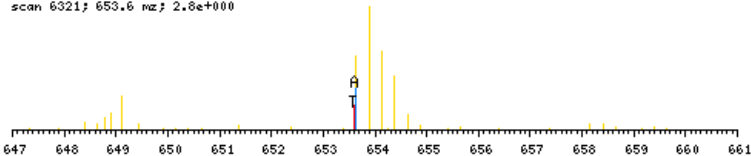

zoomed in precursor plot; T=theoretical m/z, A=acquired m/z

| b <sup>+</sup> | #  | AA | #  | y <sup>+</sup> | y <sup>2+</sup> |
|----------------|----|----|----|----------------|-----------------|
| 116.0711       | 1  | S  | 23 |                |                 |
| 213.1239       | 2  | P  | 22 | 2496.3132      | 1248.6605       |
| 314.1716       | 3  | T  | 21 | 2399.2605      | 1200.1341       |
| 428.2145       | 4  | N  | 20 | 2298.2128      | 1149.6103       |
| 588.2451       | 5  | C  | 19 | 2184.1699      | 1092.5888       |
| 703.2720       | 6  | D  | 18 | 2024.1393      | 1012.5735       |
| 774.3092       | 7  | A  | 17 | 1909.1123      | 955.0601        |
| 861.3412       | 8  | S  | 16 | 1838.0752      | 919.5415        |
| 990.3838       | 9  | E  | 15 | 1751.0432      | 876.0255        |
| 1087.4365      | 10 | P  | 14 | 1622.0006      | 811.5042        |
| 1200.5206      | 11 | L  | 13 | 1524.9478      | 762.9778        |
| 1271.5577      | 12 | A  | 12 | 1411.8637      | 706.4358        |
| 1400.6003      | 13 | E  | 11 | 1340.8266      | 670.9172        |
| 1556.7266      | 14 | K  | 10 | 1211.7840      | 606.3959        |
| 1655.7950      | 15 | V  | 9  | 1055.6577      | 528.3328        |
| 1768.8791      | 16 | L  | 8  | 956.5893       | 478.7986        |
| 1883.9060      | 17 | D  | 7  | 843.5053       | 422.2565        |
| 1996.9901      | 18 | L  | 6  | 728.4783       | 364.7431        |
| 2110.0742      | 19 | I  | 5  | 615.3943       | 308.2010        |
| 2224.1171      | 20 | N  | 4  | 502.3102       | 251.6590        |
| 2380.2434      | 21 | K  | 3  | 388.2673       | 194.6375        |
| 2437.2649      | 22 | G  | 2  | 232.1410       | 116.5744        |
|                | 23 | R  | 1  | 175.1195       | 88.0637         |

N-term:+29.04 C(5):+160.03  
K(14):+156.13 K(21):+156.13

X-range:

0 - 0

MassTol: Y-zoom:

0. 1.

MassType:

☐AVG ☒MONO

Axis:

☒1 ☐2

Label:

☒I ☐M ☐-

Ions:

a ☐+ ☐2+ ☐3+

b ☒+ ☐2+ ☐3+

c ☐+ ☐2+ ☐3+

x ☐+ ☐2+ ☐3+

y ☒+ ☒2+ ☐3+

z ☐+ ☐2+ ☐3+

hide H<sub>2</sub>O/NH<sub>3</sub> ☐

zoom 112-122 ☐

GO

SPVHPESSEGEHSVVPQR, MH+ 2115.0107, m/z 529.5081  
L OS G17 P120811 220811-s1.02417.02417.4.dta

scan 2417; 3.8e+000

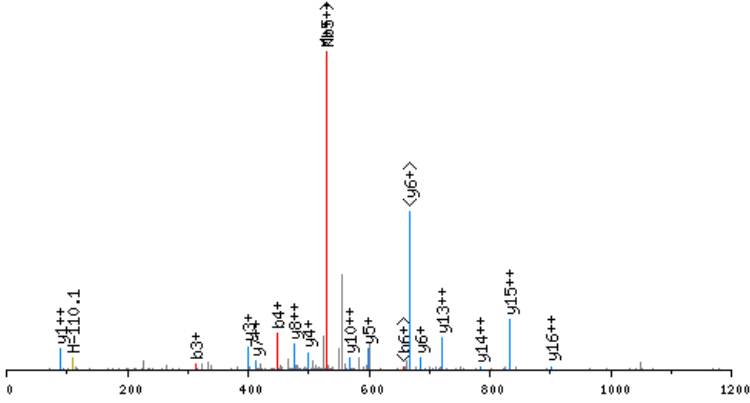

click image to zoom in; click top corners to zoom out [\[precursor±\]](#)

scan 2413; 529.5 m/z; 8.7e+000

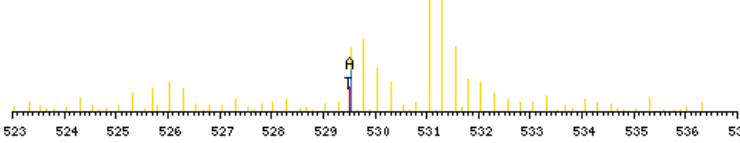

zoomed in precursor plot; T=theoretical m/z, A=acquired m/z

| b <sup>+</sup> | #  | AA | #  | y <sup>+</sup> | y <sup>2+</sup> |
|----------------|----|----|----|----------------|-----------------|
| 116.0711       | 1  | S  | 19 |                |                 |
| 213.1239       | 2  | P  | 18 | 1999.9474      | 1000.4776       |
| 312.1923       | 3  | V  | 17 | 1902.8946      | 951.9512        |
| 449.2512       | 4  | H  | 16 | 1803.8262      | 902.4170        |
| 546.3040       | 5  | P  | 15 | 1666.7673      | 833.8875        |
| 675.3466       | 6  | E  | 14 | 1569.7145      | 785.3612        |
| 762.3786       | 7  | S  | 13 | 1440.6719      | 720.8399        |
| 849.4106       | 8  | S  | 12 | 1353.6399      | 677.3239        |
| 978.4532       | 9  | E  | 11 | 1266.6079      | 633.8078        |
| 1035.4747      | 10 | G  | 10 | 1137.5653      | 569.2865        |
| 1164.5173      | 11 | E  | 9  | 1080.5438      | 540.7758        |
| 1293.5599      | 12 | E  | 8  | 951.5012       | 476.2545        |
| 1430.6188      | 13 | H  | 7  | 822.4586       | 411.7332        |
| 1517.6508      | 14 | S  | 6  | 685.3997       | 343.2038        |
| 1616.7192      | 15 | V  | 5  | 598.3677       | 299.6877        |
| 1715.7876      | 16 | V  | 4  | 499.2993       | 250.1535        |
| 1812.8404      | 17 | P  | 3  | 400.2308       | 200.6193        |
| 1940.8990      | 18 | Q  | 2  | 303.1781       | 152.0930        |
|                | 19 | R  | 1  | 175.1195       | 88.0637         |

N-term:+29.04

X-range:

0 - 0

MassTol: Y-zoom:

0. 1.

MassType:

☐ AVG ☒ MONO

Axis:

☒ 1 ☐ 2

Label:

☒ I ☐ M ☐ -

Ions:

a ☐ + ☐ 2+ ☐ 3+

b ☒ + ☐ 2+ ☐ 3+

c ☐ + ☐ 2+ ☐ 3+

x ☐ + ☐ 2+ ☐ 3+

y ☒ + ☒ 2+ ☐ 3+

z ☐ + ☐ 2+ ☐ 3+

hide H<sub>2</sub>O/NH<sub>3</sub> ☐

zoom 112-122 ☐

GO

SPVQADVYFPR, MH+ 1306.6795, m/z 436.2314  
L OS G13 P120811 220811-s1.04847.04847.3.dta

scan 4847; 2.3e+000

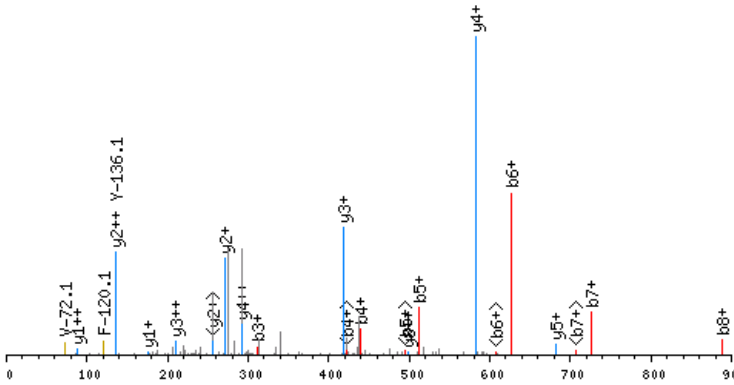

click image to zoom in; click top corners to zoom out

[precursor±]

scan 4844; 436.2 m/z; 6.2e+000

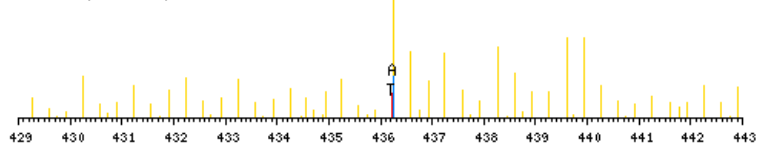

zoomed in precursor plot; T=theoretical m/z, A=acquired m/z

| b <sup>+</sup> | #  | AA | #  | y <sup>+</sup> | y <sup>2+</sup> |
|----------------|----|----|----|----------------|-----------------|
| 116.0711       | 1  | S  | 11 |                |                 |
| 213.1239       | 2  | P  | 10 | 1191.6162      | 596.3120        |
| 312.1923       | 3  | V  | 9  | 1094.5635      | 547.7856        |
| 440.2509       | 4  | Q  | 8  | 995.4951       | 498.2514        |
| 511.2880       | 5  | A  | 7  | 867.4365       | 434.2222        |
| 626.3149       | 6  | D  | 6  | 796.3994       | 398.7036        |
| 725.3834       | 7  | V  | 5  | 681.3724       | 341.1901        |
| 888.4467       | 8  | Y  | 4  | 582.3040       | 291.6559        |
| 1035.5151      | 9  | F  | 3  | 419.2407       | 210.1243        |
| 1132.5679      | 10 | P  | 2  | 272.1723       | 136.5900        |
|                | 11 | R  | 1  | 175.1195       | 88.0637         |

N-term:+29.04

X-range:

0 - 0

MassTol: Y-zoom:

0. 1.

MassType:

☐AVG ☒MONO

Axis:

☒1 ☐2

Label:

☒I ☐M ☐-

Ions:

a ☐+ ☐2+ ☐3+

b ☒+ ☐2+ ☐3+

c ☐+ ☐2+ ☐3+

x ☐+ ☐2+ ☐3+

y ☒+ ☒2+ ☐3+

z ☐+ ☐2+ ☐3+

hide H<sub>2</sub>O/NH<sub>3</sub> ☐

zoom 112-122 ☐

GO

SQAEFDKAAEEVKR, MH+ 1691.8969, m/z 423.7297  
L OS G17 P120811 220811-s1.03166.03166.4.dta

scan 3166; 2.0e+001

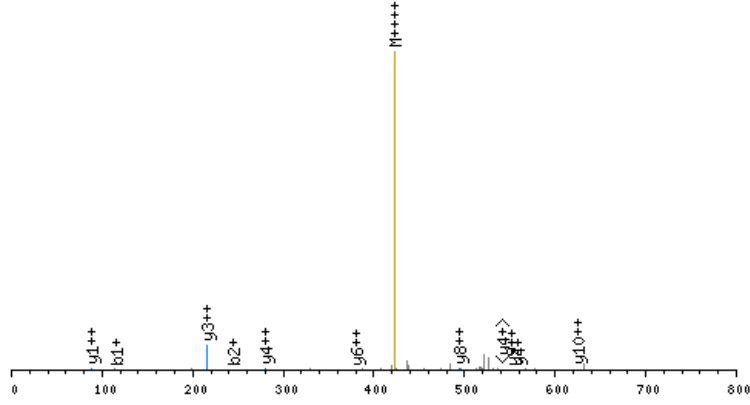

click image to zoom in; click top corners to zoom out [\[precursor±\]](#)

scan 3163; 423.7 m/z; 6.7e+000

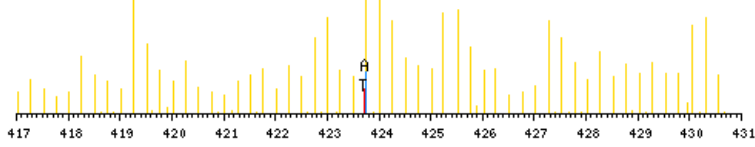

zoomed in precursor plot; T=theoretical m/z, A=acquired m/z

| b <sup>+</sup> | #  | AA | #  | y <sup>+</sup> | y <sup>2+</sup> |
|----------------|----|----|----|----------------|-----------------|
| 116.0711       | 1  | S  | 14 |                |                 |
| 244.1297       | 2  | Q  | 13 | 1576.8336      | 788.9207        |
| 315.1668       | 3  | A  | 12 | 1448.7750      | 724.8914        |
| 444.2094       | 4  | E  | 11 | 1377.7379      | 689.3729        |
| 591.2778       | 5  | F  | 10 | 1248.6953      | 624.8516        |
| 706.3048       | 6  | D  | 9  | 1101.6269      | 551.3173        |
| 862.4311       | 7  | K  | 8  | 986.5999       | 493.8039        |
| 933.4682       | 8  | A  | 7  | 830.4736       | 415.7407        |
| 1004.5053      | 9  | A  | 6  | 759.4365       | 380.2222        |
| 1133.5479      | 10 | E  | 5  | 688.3994       | 344.7036        |
| 1262.5905      | 11 | E  | 4  | 559.3568       | 280.1823        |
| 1361.6589      | 12 | V  | 3  | 430.3142       | 215.6610        |
| 1517.7852      | 13 | K  | 2  | 331.2458       | 166.1268        |
|                | 14 | R  | 1  | 175.1195       | 88.0637         |

N-term:+29.04 K(7):+156.13  
K(13):+156.13

X-range:

0 - 0

MassTol: Y-zoom:

0. 1.

MassType:

☐ AVG ☒ MONO

Axis:

☒ 1 ☐ 2

Label:

☒ I ☐ M ☐ -

Ions:

a ☐ + ☐ 2+ ☐ 3+

b ☒ + ☐ 2+ ☐ 3+

c ☐ + ☐ 2+ ☐ 3+

x ☐ + ☐ 2+ ☐ 3+

y ☒ + ☒ 2+ ☐ 3+

z ☐ + ☐ 2+ ☐ 3+

hide H<sub>2</sub>O/NH<sub>3</sub> ☐

zoom 112-122 ☐

GO

SQASDSEGHSDSFEGQAVGAHR, MH+ 2286.9975, m/z 572.5048  
L OS G17 P120811 220811-s1.02346.02346.4.dta

scan 2346; 2.0e+000

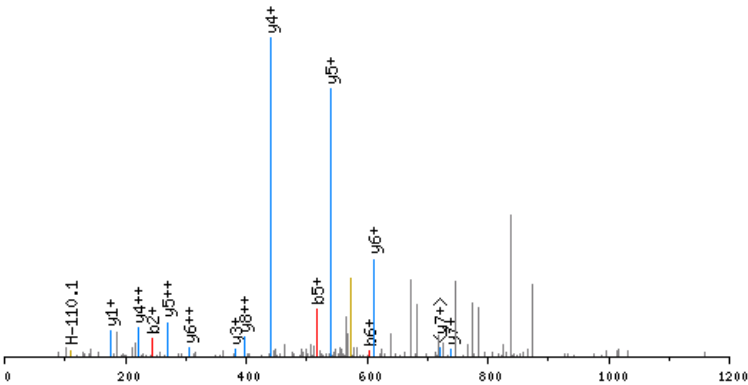

click image to zoom in; click top corners to zoom out [precursor±]

scan 2343; 572.5 m/z; 2.4e+001

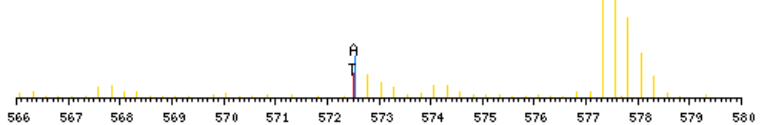

zoomed in precursor plot; T=theoretical m/z, A=acquired m/z

| b <sup>+</sup> | #  | AA | #  | y <sup>+</sup> | y <sup>2+</sup> |
|----------------|----|----|----|----------------|-----------------|
| 116.0711       | 1  | S  | 22 |                |                 |
| 244.1297       | 2  | Q  | 21 | 2171.9342      | 1086.4710       |
| 315.1668       | 3  | A  | 20 | 2043.8756      | 1022.4417       |
| 402.1988       | 4  | S  | 19 | 1972.8385      | 986.9232        |
| 517.2258       | 5  | D  | 18 | 1885.8065      | 943.4072        |
| 604.2578       | 6  | S  | 17 | 1770.7796      | 885.8937        |
| 733.3004       | 7  | E  | 16 | 1683.7475      | 842.3777        |
| 790.3219       | 8  | G  | 15 | 1554.7049      | 777.8564        |
| 927.3808       | 9  | H  | 14 | 1497.6835      | 749.3457        |
| 1014.4128      | 10 | S  | 13 | 1360.6246      | 680.8162        |
| 1129.4398      | 11 | D  | 12 | 1273.5925      | 637.3002        |
| 1276.5082      | 12 | F  | 11 | 1158.5656      | 579.7867        |
| 1363.5402      | 13 | S  | 10 | 1011.4972      | 506.2525        |
| 1492.5828      | 14 | E  | 9  | 924.4652       | 462.7365        |
| 1549.6043      | 15 | G  | 8  | 795.4226       | 398.2152        |
| 1677.6628      | 16 | Q  | 7  | 738.4011       | 369.7045        |
| 1748.7000      | 17 | A  | 6  | 610.3425       | 305.6752        |
| 1847.7684      | 18 | V  | 5  | 539.3054       | 270.1566        |
| 1904.7898      | 19 | G  | 4  | 440.2370       | 220.6224        |
| 1975.8269      | 20 | A  | 3  | 383.2155       | 192.1117        |
| 2112.8859      | 21 | H  | 2  | 312.1784       | 156.5931        |
|                | 22 | R  | 1  | 175.1195       | 88.0637         |

N-term:+29.04

X-range:

0 - 0

MassTol: Y-zoom:

0. 1.

MassType:

☐AVG ☒MONO

Axis:

☒1 ☐2

Label:

☒I ☐M ☐-

Ions:

a ☐+ ☐2+ ☐3+

b ☒+ ☐2+ ☐3+

c ☐+ ☐2+ ☐3+

x ☐+ ☐2+ ☐3+

y ☒+ ☒2+ ☐3+

z ☐+ ☐2+ ☐3+

hide H<sub>2</sub>O/NH<sub>3</sub> ☐

zoom 112-122 ☐

GO

SQDTVSVPECKSDQSKAR, MH+ 1977.0075, m/z 495.0073  
L OS G17 P120811 220811-s1.01951.01951.4.dta

scan 1951; 9.7e+000

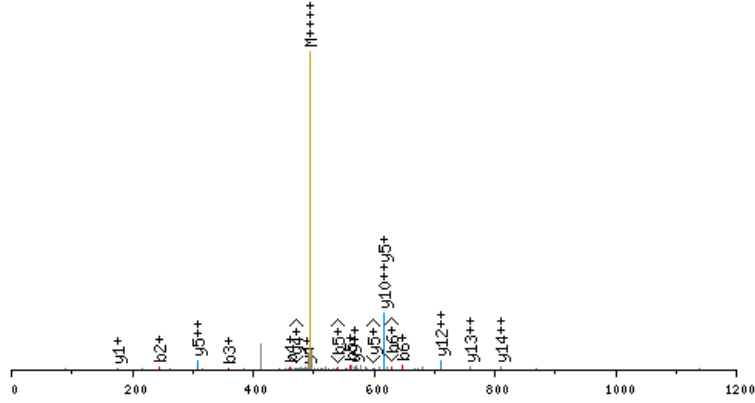

click image to zoom in; click top corners to zoom out [\[precursor±\]](#)

scan 1948; 495.0 m/z; 2.7e+000

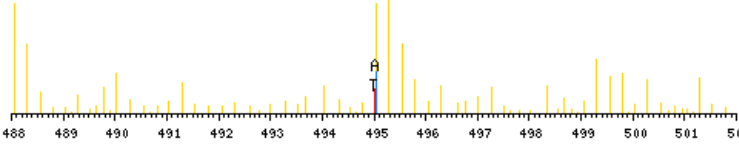

zoomed in precursor plot; T=theoretical m/z, A=acquired m/z

| b <sup>+</sup> | #  | AA | #  | y <sup>+</sup> | y <sup>2+</sup> |
|----------------|----|----|----|----------------|-----------------|
| 116.0711       | 1  | S  | 17 |                |                 |
| 244.1297       | 2  | Q  | 16 | 1861.9442      | 931.4760        |
| 359.1566       | 3  | D  | 15 | 1733.8856      | 867.4467        |
| 460.2043       | 4  | T  | 14 | 1618.8587      | 809.9333        |
| 559.2727       | 5  | V  | 13 | 1517.8110      | 759.4094        |
| 646.3048       | 6  | S  | 12 | 1418.7426      | 709.8752        |
| 745.3732       | 7  | V  | 11 | 1331.7106      | 666.3592        |
| 842.4259       | 8  | P  | 10 | 1232.6422      | 616.8250        |
| 1002.4565      | 9  | C  | 9  | 1135.5894      | 568.2986        |
| 1158.5828      | 10 | K  | 8  | 975.5588       | 488.2833        |
| 1245.6149      | 11 | S  | 7  | 819.4325       | 410.2202        |
| 1360.6418      | 12 | D  | 6  | 732.4005       | 366.7041        |
| 1488.7004      | 13 | Q  | 5  | 617.3735       | 309.1907        |
| 1575.7324      | 14 | S  | 4  | 489.3149       | 245.1614        |
| 1731.8587      | 15 | K  | 3  | 402.2829       | 201.6454        |
| 1802.8958      | 16 | A  | 2  | 246.1566       | 123.5822        |
|                | 17 | R  | 1  | 175.1195       | 88.0637         |

N-term:+29.04 C(9):+160.03  
K(10):+156.13 K(15):+156.13

X-range:

0 - 0

MassTol: Y-zoom:

0. 1.

MassType:

☐ AVG ☒ MONO

Axis:

☒ 1 ☐ 2

Label:

☒ I ☐ M ☐ -

Ions:

a ☐ + ☐ 2+ ☐ 3+

b ☒ + ☐ 2+ ☐ 3+

c ☐ + ☐ 2+ ☐ 3+

x ☐ + ☐ 2+ ☐ 3+

y ☒ + ☒ 2+ ☐ 3+

z ☐ + ☐ 2+ ☐ 3+

hide H<sub>2</sub>O/NH<sub>3</sub> ☐

zoom 112-122 ☐

GO

SQFQESDDADEDYGR, MH+ 1795.7471, m/z 599.2539  
H OS G13 P120811 220811-s1.02795.02795.3.dta

scan 2795; 2.3e+000

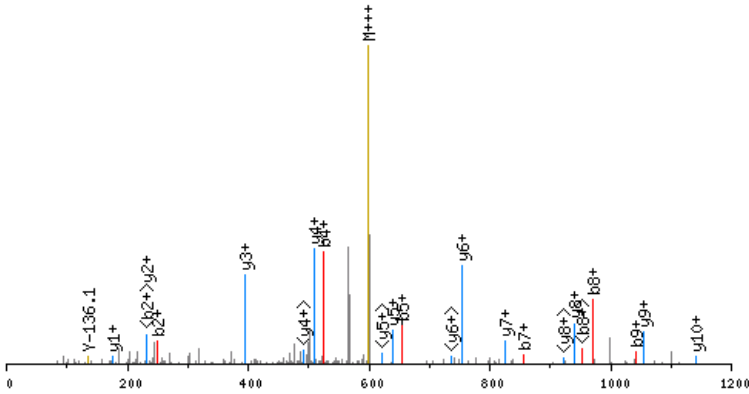

click image to zoom in; click top corners to zoom out [\[precursor±\]](#)

scan 2794; 599.3 m/z; 1.6e+001

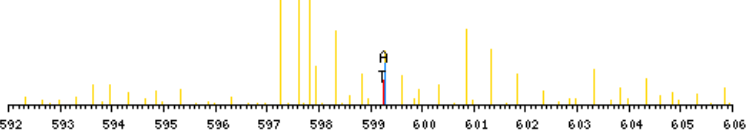

zoomed in precursor plot; T=theoretical m/z, A=acquired m/z

| b <sup>+</sup> | #  | AA | #  | y <sup>+</sup> | y <sup>2+</sup> |
|----------------|----|----|----|----------------|-----------------|
| 122.1029       | 1  | S  | 15 |                |                 |
| 250.1615       | 2  | Q  | 14 | 1674.6520      | 837.8299        |
| 397.2299       | 3  | F  | 13 | 1546.5934      | 773.8006        |
| 525.2885       | 4  | Q  | 12 | 1399.5250      | 700.2664        |
| 654.3311       | 5  | E  | 11 | 1271.4664      | 636.2371        |
| 741.3631       | 6  | S  | 10 | 1142.4238      | 571.7158        |
| 856.3901       | 7  | D  | 9  | 1055.3918      | 528.1998        |
| 971.4170       | 8  | D  | 8  | 940.3648       | 470.6863        |
| 1042.4541      | 9  | A  | 7  | 825.3379       | 413.1729        |
| 1157.4811      | 10 | D  | 6  | 754.3008       | 377.6543        |
| 1286.5237      | 11 | E  | 5  | 639.2738       | 320.1408        |
| 1401.5506      | 12 | D  | 4  | 510.2312       | 255.6195        |
| 1564.6139      | 13 | Y  | 3  | 395.2043       | 198.1061        |
| 1621.6354      | 14 | G  | 2  | 232.1410       | 116.5744        |
|                | 15 | R  | 1  | 175.1195       | 88.0637         |

N-term:+35.07

X-range:

0 - 0

MassTol: Y-zoom:

0. 1.

MassType:

☐AVG ☒MONO

Axis:

☒1 ☐2

Label:

☒I ☐M ☐-

Ions:

a ☐+ ☐2+ ☐3+

b ☒+ ☐2+ ☐3+

c ☐+ ☐2+ ☐3+

x ☐+ ☐2+ ☐3+

y ☒+ ☒2+ ☐3+

z ☐+ ☐2+ ☐3+

hide H<sub>2</sub>O/NH<sub>3</sub> ☐

zoom 112-122 ☐

GO

SQHQSILGNIR, MH+ 1280.7075, m/z 427.5740  
L OS G16 P120811 220811-s1.03192.03192.3.dta

scan 3192; 4.4e+000

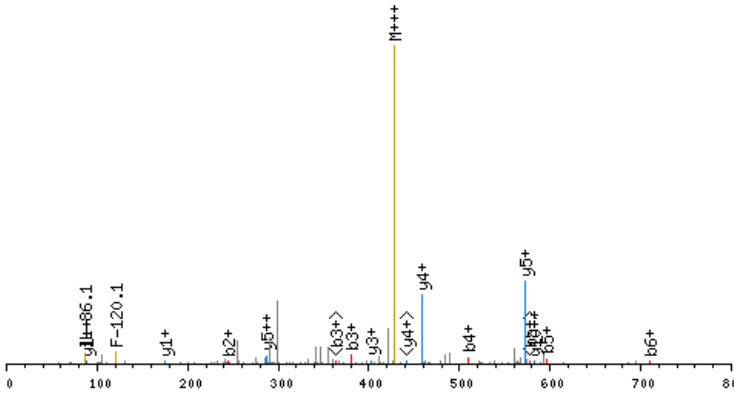

click image to zoom in; click top corners to zoom out

[precursor±]

scan 3188; 427.6 m/z; 1.7e+001

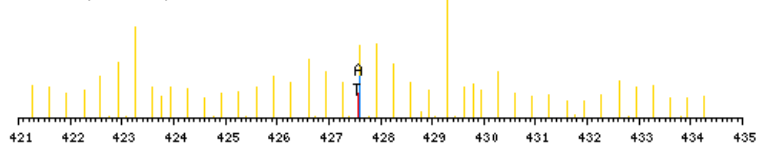

zoomed in precursor plot; T=theoretical m/z, A=acquired m/z

| b <sup>+</sup> | #  | AA | #  | y <sup>+</sup> | y <sup>2+</sup> |
|----------------|----|----|----|----------------|-----------------|
| 116.0711       | 1  | S  | 11 |                |                 |
| 244.1297       | 2  | Q  | 10 | 1165.6442      | 583.3260        |
| 381.1886       | 3  | H  | 9  | 1037.5856      | 519.2967        |
| 509.2472       | 4  | Q  | 8  | 900.5267       | 450.7673        |
| 596.2792       | 5  | S  | 7  | 772.4681       | 386.7380        |
| 709.3633       | 6  | L  | 6  | 685.4361       | 343.2220        |
| 822.4474       | 7  | L  | 5  | 572.3520       | 286.6799        |
| 879.4688       | 8  | G  | 4  | 459.2680       | 230.1379        |
| 993.5117       | 9  | N  | 3  | 402.2465       | 201.6272        |
| 1106.5958      | 10 | I  | 2  | 288.2036       | 144.6057        |
|                | 11 | R  | 1  | 175.1195       | 88.0637         |

N-term:+29.04

X-range:

0 - 0

MassTol: Y-zoom:

0. 1.

MassType:

☐AVG ☒MONO

Axis:

☒1 ☐2

Label:

☒I ☐M ☐-

Ions:

a ☐+ ☐2+ ☐3+

b ☒+ ☐2+ ☐3+

c ☐+ ☐2+ ☐3+

x ☐+ ☐2+ ☐3+

y ☒+ ☒2+ ☐3+

z ☐+ ☐2+ ☐3+

hide H<sub>2</sub>O/NH<sub>3</sub> ☐

zoom 112-122 ☐

GO

SQLLQEDSLNVADLSSLR, MH+ 2016.0613, m/z 672.6920  
L OS G12 P120811 220811-s1.05353.05353.3.dta

scan 5353; 1.1e+000

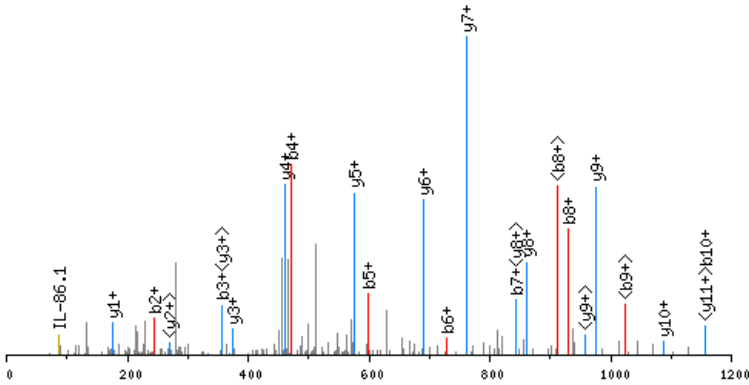

click image to zoom in; click top corners to zoom out

[precursor±]

scan 5352; 672.7 m/z; 9.3e+000

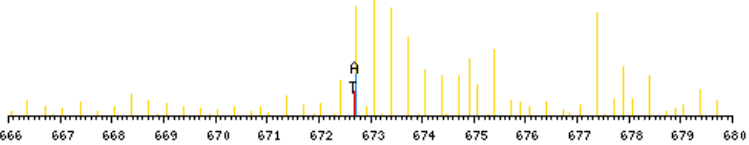

zoomed in precursor plot; T=theoretical m/z, A=acquired m/z

| b <sup>+</sup> | #  | AA | #  | y <sup>+</sup> | y <sup>2+</sup> |
|----------------|----|----|----|----------------|-----------------|
| 116.0711       | 1  | S  | 18 |                |                 |
| 244.1297       | 2  | Q  | 17 | 1900.9980      | 951.0029        |
| 357.2138       | 3  | L  | 16 | 1772.9394      | 886.9736        |
| 470.2978       | 4  | L  | 15 | 1659.8554      | 830.4316        |
| 598.3564       | 5  | Q  | 14 | 1546.7713      | 773.8896        |
| 727.3990       | 6  | E  | 13 | 1418.7127      | 709.8603        |
| 842.4259       | 7  | D  | 12 | 1289.6701      | 645.3390        |
| 929.4580       | 8  | S  | 11 | 1174.6432      | 587.8255        |
| 1042.5420      | 9  | L  | 10 | 1087.6111      | 544.3095        |
| 1156.5850      | 10 | N  | 9  | 974.5271       | 487.7675        |
| 1255.6534      | 11 | V  | 8  | 860.4842       | 430.7460        |
| 1326.6905      | 12 | A  | 7  | 761.4157       | 381.2118        |
| 1441.7174      | 13 | D  | 6  | 690.3786       | 345.6932        |
| 1554.8015      | 14 | L  | 5  | 575.3517       | 288.1798        |
| 1641.8335      | 15 | S  | 4  | 462.2676       | 231.6377        |
| 1728.8656      | 16 | S  | 3  | 375.2356       | 188.1217        |
| 1841.9496      | 17 | L  | 2  | 288.2036       | 144.6057        |
|                | 18 | R  | 1  | 175.1195       | 88.0637         |

N-term:+29.04

X-range:

0 - 0

MassTol: Y-zoom:

0. 1.

MassType:

☐ AVG ☒ MONO

Axis:

☒ 1 ☐ 2

Label:

☒ I ☐ M ☐ -

Ions:

a ☐ + ☐ 2+ ☐ 3+

b ☒ + ☐ 2+ ☐ 3+

c ☐ + ☐ 2+ ☐ 3+

x ☐ + ☐ 2+ ☐ 3+

y ☒ + ☒ 2+ ☐ 3+

z ☐ + ☐ 2+ ☐ 3+

hide H<sub>2</sub>O/NH<sub>3</sub> ☐

zoom 112-122 ☐

GO

SQQSASGAPVLLR, MH+ 1347.7808, m/z 449.9318  
H OS G13 P120811 220811-s1.03478.03478.3.dta

scan 3478; 2.5e+000

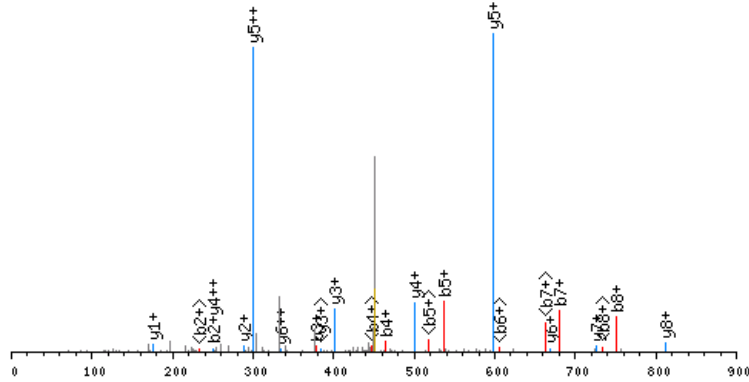

click image to zoom in; click top corners to zoom out

[precursor±]

scan 3474; 449.9 m/z; 1.2e+001

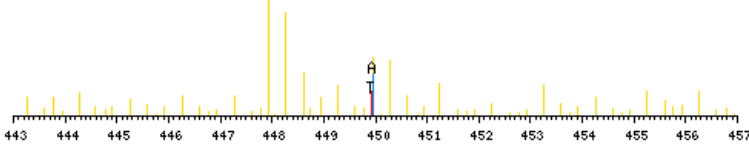

zoomed in precursor plot; T=theoretical m/z, A=acquired m/z

| b <sup>+</sup> | #  | AA | #  | y <sup>+</sup> | y <sup>2+</sup> |
|----------------|----|----|----|----------------|-----------------|
| 122.1029       | 1  | S  | 13 |                |                 |
| 250.1615       | 2  | Q  | 12 | 1226.6857      | 613.8468        |
| 378.2201       | 3  | Q  | 11 | 1098.6271      | 549.8175        |
| 465.2521       | 4  | S  | 10 | 970.5686       | 485.7882        |
| 536.2892       | 5  | A  | 9  | 883.5365       | 442.2722        |
| 623.3213       | 6  | S  | 8  | 812.4994       | 406.7536        |
| 680.3427       | 7  | G  | 7  | 725.4674       | 363.2376        |
| 751.3798       | 8  | A  | 6  | 668.4459       | 334.7269        |
| 848.4326       | 9  | P  | 5  | 597.4088       | 299.2083        |
| 947.5010       | 10 | V  | 4  | 500.3560       | 250.6819        |
| 1060.5851      | 11 | L  | 3  | 401.2876       | 201.1477        |
| 1173.6691      | 12 | L  | 2  | 288.2036       | 144.6057        |
|                | 13 | R  | 1  | 175.1195       | 88.0637         |

N-term:+35.07

X-range:

0 - 0

MassTol: Y-zoom:

0. 1.

MassType:

☐AVG ☒MONO

Axis:

☒1 ☐2

Label:

☒I ☐M ☐-

Ions:

a ☐+ ☐2+ ☐3+

b ☒+ ☐2+ ☐3+

c ☐+ ☐2+ ☐3+

x ☐+ ☐2+ ☐3+

y ☒+ ☒2+ ☐3+

z ☐+ ☐2+ ☐3+

hide H<sub>2</sub>O/NH<sub>3</sub> ☐

zoom 112-122 ☐

GO

SQSSDSQVHSGVQVEGR, MH+ 1820.8951, m/z 607.6365  
H OS G16 P120811 220811-s1.02061.02061.3.dta

scan 2061; 5.9e+000

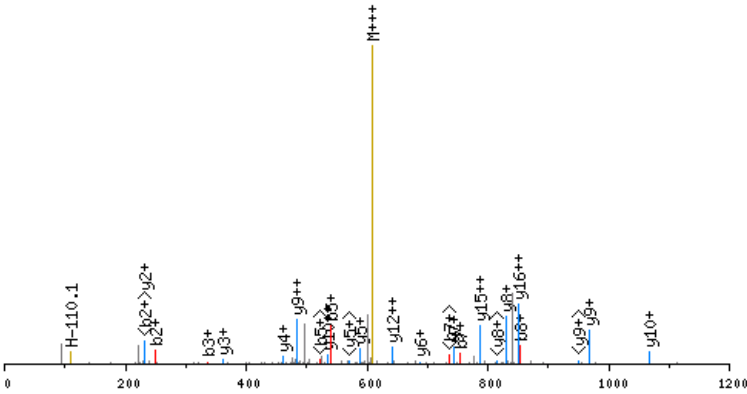

click image to zoom in; click top corners to zoom out [precursor±]

scan 2058; 607.6 m/z; 3.2e+001

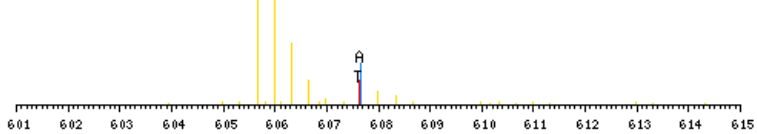

zoomed in precursor plot; T=theoretical m/z, A=acquired m/z

| b <sup>+</sup> | #  | AA | #  | y <sup>+</sup> | y <sup>2+</sup> |
|----------------|----|----|----|----------------|-----------------|
| 122.1029       | 1  | S  | 17 |                |                 |
| 250.1615       | 2  | Q  | 16 | 1699.8000      | 850.4039        |
| 337.1935       | 3  | S  | 15 | 1571.7414      | 786.3746        |
| 424.2256       | 4  | S  | 14 | 1484.7094      | 742.8586        |
| 539.2525       | 5  | D  | 13 | 1397.6773      | 699.3426        |
| 626.2845       | 6  | S  | 12 | 1282.6504      | 641.8291        |
| 754.3431       | 7  | Q  | 11 | 1195.6184      | 598.3131        |
| 853.4115       | 8  | V  | 10 | 1067.5598      | 534.2838        |
| 990.4704       | 9  | H  | 9  | 968.4914       | 484.7496        |
| 1077.5025      | 10 | S  | 8  | 831.4325       | 416.2201        |
| 1134.5239      | 11 | G  | 7  | 744.4004       | 372.7041        |
| 1233.5923      | 12 | V  | 6  | 687.3790       | 344.1934        |
| 1361.6509      | 13 | Q  | 5  | 588.3105       | 294.6592        |
| 1460.7193      | 14 | V  | 4  | 460.2520       | 230.6299        |
| 1589.7619      | 15 | E  | 3  | 361.1836       | 181.0957        |
| 1646.7834      | 16 | G  | 2  | 232.1410       | 116.5744        |
|                | 17 | R  | 1  | 175.1195       | 88.0637         |

N-term:+35.07

X-range:

0 - 0

MassTol: Y-zoom:

0. 1.

MassType:

☐ AVG ☒ MONO

Axis:

☒ 1 ☐ 2

Label:

☒ I ☐ M ☐ -

Ions:

a ☐ + ☐ 2+ ☐ 3+

b ☒ + ☐ 2+ ☐ 3+

c ☐ + ☐ 2+ ☐ 3+

x ☐ + ☐ 2+ ☐ 3+

y ☒ + ☒ 2+ ☐ 3+

z ☐ + ☐ 2+ ☐ 3+

hide H<sub>2</sub>O/NH<sub>3</sub> ☐

zoom 112-122 ☐

GO

SRGNPTVEVDLHTAKGR, MH+ 1893.0306, m/z 474.0131  
L OS G19 P120811 220811-s1.02496.02496.4.dta

scan 2496; 2.8e+000

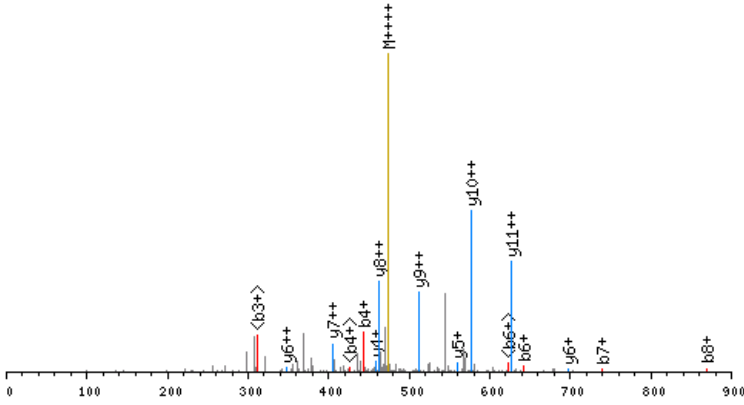

click image to zoom in; click top corners to zoom out

[precursor±]

scan 2493; 474.0 m/z; 2.5e+000

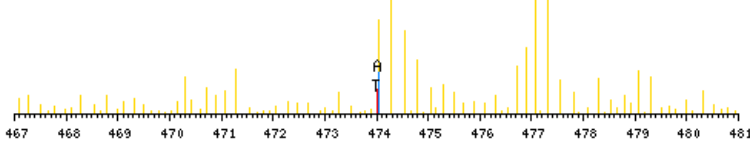

zoomed in precursor plot; T=theoretical m/z, A=acquired m/z

| b <sup>+</sup> | #  | AA | #  | y <sup>+</sup> | y <sup>2+</sup> |
|----------------|----|----|----|----------------|-----------------|
| 116.0711       | 1  | S  | 17 |                |                 |
| 272.1722       | 2  | R  | 16 | 1777.9673      | 889.4876        |
| 329.1937       | 3  | G  | 15 | 1621.8662      | 811.4370        |
| 443.2366       | 4  | N  | 14 | 1564.8448      | 782.9263        |
| 540.2894       | 5  | P  | 13 | 1450.8018      | 725.9048        |
| 641.3371       | 6  | T  | 12 | 1353.7491      | 677.3785        |
| 740.4055       | 7  | V  | 11 | 1252.7014      | 626.8546        |
| 869.4481       | 8  | E  | 10 | 1153.6330      | 577.3204        |
| 968.5165       | 9  | V  | 9  | 1024.5904      | 512.7991        |
| 1083.5434      | 10 | D  | 8  | 925.5220       | 463.2649        |
| 1196.6275      | 11 | L  | 7  | 810.4950       | 405.7514        |
| 1333.6864      | 12 | H  | 6  | 697.4110       | 349.2094        |
| 1434.7341      | 13 | T  | 5  | 560.3521       | 280.6799        |
| 1505.7712      | 14 | A  | 4  | 459.3044       | 230.1561        |
| 1661.8975      | 15 | K  | 3  | 388.2673       | 194.6375        |
| 1718.9190      | 16 | G  | 2  | 232.1410       | 116.5744        |
|                | 17 | R  | 1  | 175.1195       | 88.0637         |

N-term:+29.04 K(15):+156.13

X-range:

0 - 0

MassTol: Y-zoom:

0. 1.

MassType:

☐ AVG ☒ MONO

Axis:

☒ 1 ☐ 2

Label:

☒ I ☐ M ☐ -

Ions:

a ☐ + ☐ 2+ ☐ 3+

b ☒ + ☐ 2+ ☐ 3+

c ☐ + ☐ 2+ ☐ 3+

x ☐ + ☐ 2+ ☐ 3+

y ☒ + ☒ 2+ ☐ 3+

z ☐ + ☐ 2+ ☐ 3+

hide H<sub>2</sub>O/NH<sub>3</sub> ☐

zoom 112-122 ☐

GO

SSAAAEASAALKVRPER, MH+ 1782.0510, m/z 446.2682  
H OS G17 P120811 220811-s1.03544.03544.4.dta

scan 3544; 1.8e+001

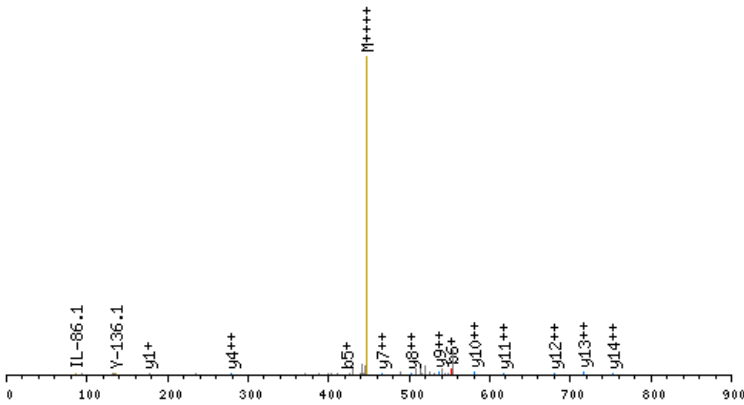

click image to zoom in; click top corners to zoom out

[precursor±]

scan 3543; 446.3 m/z; 1.1e+001

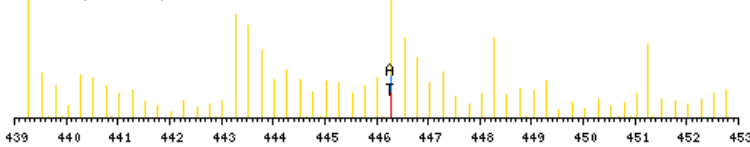

zoomed in precursor plot; T=theoretical m/z, A=acquired m/z

| b <sup>+</sup> | #  | AA | #  | y <sup>+</sup> | y <sup>2+</sup> |
|----------------|----|----|----|----------------|-----------------|
| 122.1029       | 1  | S  | 17 |                |                 |
| 209.1350       | 2  | S  | 16 | 1660.9559      | 830.9819        |
| 280.1721       | 3  | A  | 15 | 1573.9239      | 787.4658        |
| 351.2092       | 4  | A  | 14 | 1502.8867      | 751.9473        |
| 422.2463       | 5  | A  | 13 | 1431.8496      | 716.4287        |
| 551.2889       | 6  | E  | 12 | 1360.8125      | 680.9102        |
| 622.3260       | 7  | A  | 11 | 1231.7699      | 616.3889        |
| 709.3580       | 8  | S  | 10 | 1160.7328      | 580.8703        |
| 780.3951       | 9  | A  | 9  | 1073.7008      | 537.3543        |
| 851.4323       | 10 | A  | 8  | 1002.6637      | 501.8357        |
| 964.5163       | 11 | L  | 7  | 931.6265       | 466.3172        |
| 1126.6744      | 12 | K  | 6  | 818.5425       | 409.7752        |
| 1225.7428      | 13 | V  | 5  | 656.3844       | 328.6961        |
| 1381.8440      | 14 | R  | 4  | 557.3160       | 279.1619        |
| 1478.8967      | 15 | P  | 3  | 401.2149       | 201.1113        |
| 1607.9393      | 16 | E  | 2  | 304.1621       | 152.5850        |
|                | 17 | R  | 1  | 175.1195       | 88.0637         |

N-term:+35.07 K(12):+162.16

X-range:

0 - 0

MassTol: Y-zoom:

0. 1.

MassType:

☐AVG ☒MONO

Axis:

☒1 ☐2

Label:

☒I ☐M ☐-

Ions:

a ☐+ ☐2+ ☐3+

b ☒+ ☐2+ ☐3+

c ☐+ ☐2+ ☐3+

x ☐+ ☐2+ ☐3+

y ☒+ ☒2+ ☐3+

z ☐+ ☐2+ ☐3+

hide H<sub>2</sub>O/NH<sub>3</sub> ☐

zoom 112-122 ☐

GO

SSDAVAGPASSLKQR, MH+ 1529.8288, m/z 510.6144  
L OS G15 P120811 220811-s1.02370.02370.3.dta

scan 2370; 6.3e+000

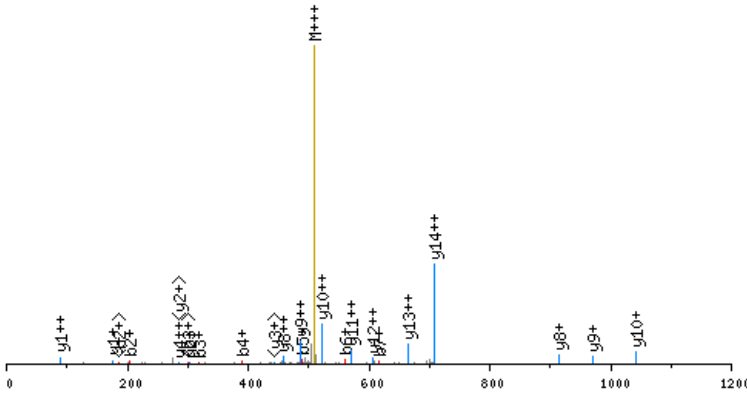

click image to zoom in; click top corners to zoom out [precursor±]

scan 2366; 510.6 m/z; 1.6e+000

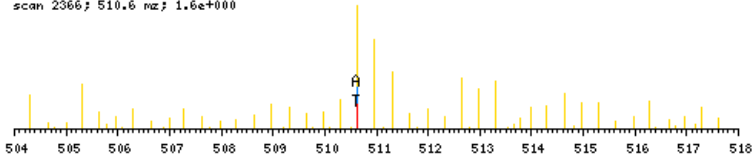

X-range:

0 - 0

MassTol: Y-zoom:

0. 1.

MassType:

☐ AVG ☒ MONO

Axis:

☒ 1 ☐ 2

Label:

☒ I ☐ M ☐ -

Ions:

a ☐ + ☐ 2+ ☐ 3+

b ☒ + ☐ 2+ ☐ 3+

c ☐ + ☐ 2+ ☐ 3+

x ☐ + ☐ 2+ ☐ 3+

y ☒ + ☒ 2+ ☐ 3+

z ☐ + ☐ 2+ ☐ 3+

hide H<sub>2</sub>O/NH<sub>3</sub> ☐

zoom 112-122 ☐

GO

SSDSMDTGAGSIR, MH+ 1311.5850, m/z 656.2962  
L OS G13 P120811 220811-s1.02387.02387.2.dta

scan 2387; 3.4e+000

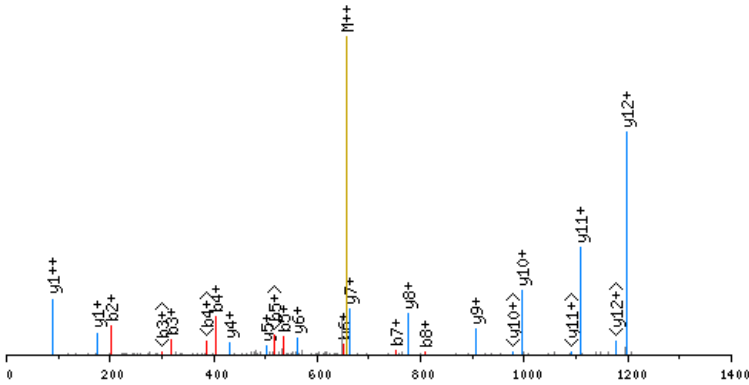

click image to zoom in; click top corners to zoom out

[precursor±]

scan 2384; 656.3 m/z; 7.8e+000

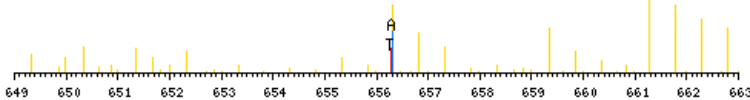

zoomed in precursor plot; T=theoretical m/z, A=acquired m/z

| b <sup>+</sup> | #  | AA | #  | y <sup>+</sup> | y <sup>2+</sup> |
|----------------|----|----|----|----------------|-----------------|
| 116.0711       | 1  | S  | 13 |                |                 |
| 203.1032       | 2  | S  | 12 | 1196.5217      | 598.7648        |
| 318.1301       | 3  | D  | 11 | 1109.4897      | 555.2488        |
| 405.1621       | 4  | S  | 10 | 994.4628       | 497.7353        |
| 536.2026       | 5  | M  | 9  | 907.4307       | 454.2193        |
| 651.2296       | 6  | D  | 8  | 776.3903       | 388.6990        |
| 752.2772       | 7  | T  | 7  | 661.3633       | 331.1856        |
| 809.2987       | 8  | G  | 6  | 560.3156       | 280.6617        |
| 880.3358       | 9  | A  | 5  | 503.2942       | 252.1510        |
| 937.3573       | 10 | G  | 4  | 432.2571       | 216.6324        |
| 1024.3893      | 11 | S  | 3  | 375.2356       | 188.1217        |
| 1137.4734      | 12 | I  | 2  | 288.2036       | 144.6057        |
|                | 13 | R  | 1  | 175.1195       | 88.0637         |

N-term:+29.04

X-range:

0 - 0

MassTol: Y-zoom:

0. 1.

MassType:

☐ AVG ☒ MONO

Axis:

☒ 1 ☐ 2

Label:

☒ I ☐ M ☐ -

Ions:

a ☐ + ☐ 2+ ☐ 3+

b ☒ + ☐ 2+ ☐ 3+

c ☐ + ☐ 2+ ☐ 3+

x ☐ + ☐ 2+ ☐ 3+

y ☒ + ☒ 2+ ☐ 3+

z ☐ + ☐ 2+ ☐ 3+

hide H<sub>2</sub>O/NH<sub>3</sub> ☐

zoom 112-122 ☐

GO

SSDSQVHSGVQVEGR, MH+ 1599.7727, m/z 533.9291  
L OS G16 P120811 220811-s1.02031.02031.3.dta

scan 2031; 1.3e+001

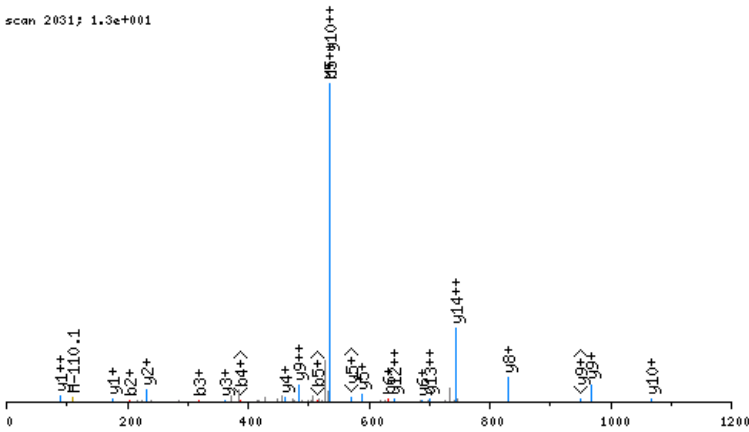

click image to zoom in; click top corners to zoom out

[precursor±]

scan 2028; 533.9 m/z; 3.2e+000

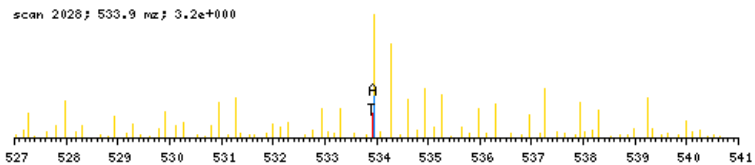

zoomed in precursor plot; T=theoretical m/z, A=acquired m/z

| b <sup>+</sup> | #  | AA | #  | y <sup>+</sup> | y <sup>2+</sup> |
|----------------|----|----|----|----------------|-----------------|
| 116.0711       | 1  | S  | 15 |                |                 |
| 203.1032       | 2  | S  | 14 | 1484.7094      | 742.8586        |
| 318.1301       | 3  | D  | 13 | 1397.6773      | 699.3426        |
| 405.1621       | 4  | S  | 12 | 1282.6504      | 641.8291        |
| 533.2207       | 5  | Q  | 11 | 1195.6184      | 598.3131        |
| 632.2891       | 6  | V  | 10 | 1067.5598      | 534.2838        |
| 769.3480       | 7  | H  | 9  | 968.4914       | 484.7496        |
| 856.3801       | 8  | S  | 8  | 831.4325       | 416.2201        |
| 913.4015       | 9  | G  | 7  | 744.4004       | 372.7041        |
| 1012.4699      | 10 | V  | 6  | 687.3790       | 344.1934        |
| 1140.5285      | 11 | Q  | 5  | 588.3105       | 294.6592        |
| 1239.5969      | 12 | V  | 4  | 460.2520       | 230.6299        |
| 1368.6395      | 13 | E  | 3  | 361.1836       | 181.0957        |
| 1425.6610      | 14 | G  | 2  | 232.1410       | 116.5744        |
|                | 15 | R  | 1  | 175.1195       | 88.0637         |

N-term:+29.04

X-range:

0 - 0

MassTol: Y-zoom:

0. 1.

MassType:

☐AVG ☒MONO

Axis:

☒1 ☐2

Label:

☒I ☐M ☐-

Ions:

a ☐+ ☐2+ ☐3+

b ☒+ ☐2+ ☐3+

c ☐+ ☐2+ ☐3+

x ☐+ ☐2+ ☐3+

y ☒+ ☒2+ ☐3+

z ☐+ ☐2+ ☐3+

hide H<sub>2</sub>O/NH<sub>3</sub> ☐

zoom 112-122 ☐

GO

SSEAPPLVNEDVKR, MH+ 1596.8597, m/z 532.9581  
L OS G15 P120811 220811-s1.02760.02760.3.dta

scan 2760; 8.6e+000

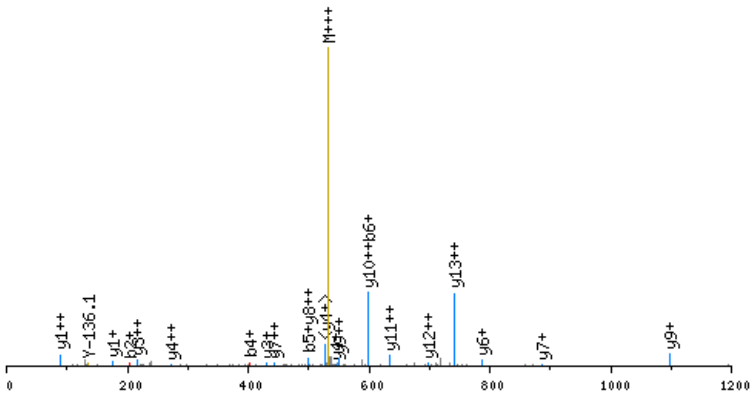

click image to zoom in; click top corners to zoom out

[precursor±]

scan 2756; 533.0 m/z; 1.1e+001

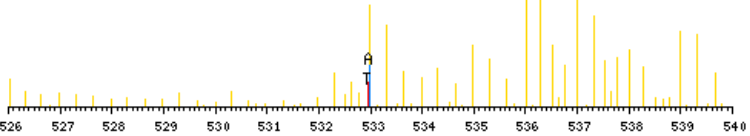

zoomed in precursor plot; T=theoretical m/z, A=acquired m/z

| b <sup>+</sup> | #  | AA | #  | y <sup>+</sup> | y <sup>2+</sup> |
|----------------|----|----|----|----------------|-----------------|
| 116.0711       | 1  | S  | 14 |                |                 |
| 203.1032       | 2  | S  | 13 | 1481.7964      | 741.4021        |
| 332.1458       | 3  | E  | 12 | 1394.7644      | 697.8861        |
| 403.1829       | 4  | A  | 11 | 1265.7218      | 633.3648        |
| 500.2356       | 5  | P  | 10 | 1194.6847      | 597.8463        |
| 597.2884       | 6  | P  | 9  | 1097.6319      | 549.3199        |
| 710.3725       | 7  | L  | 8  | 1000.5792      | 500.7935        |
| 809.4409       | 8  | V  | 7  | 887.4951       | 444.2515        |
| 923.4838       | 9  | N  | 6  | 788.4267       | 394.7173        |
| 1052.5264      | 10 | E  | 5  | 674.3838       | 337.6958        |
| 1167.5533      | 11 | D  | 4  | 545.3412       | 273.1745        |
| 1266.6217      | 12 | V  | 3  | 430.3142       | 215.6610        |
| 1422.7480      | 13 | K  | 2  | 331.2458       | 166.1268        |
|                | 14 | R  | 1  | 175.1195       | 88.0637         |

N-term:+29.04 K(13):+156.13

X-range:

0 - 0

MassTol: Y-zoom:

0. 1.

MassType:

☐AVG ☒MONO

Axis:

☒1 ☐2

Label:

☒I ☐M ☐-

Ions:

a ☐+ ☐2+ ☐3+

b ☒+ ☐2+ ☐3+

c ☐+ ☐2+ ☐3+

x ☐+ ☐2+ ☐3+

y ☒+ ☒2+ ☐3+

z ☐+ ☐2+ ☐3+

hide H<sub>2</sub>O/NH<sub>3</sub> ☐

zoom 112-122 ☐

GO

SSEGEHHSVVPQR, MH+ 1474.7350, m/z 492.2498  
H OS G16 P120811 220811-s1.02045.02045.3.dta

scan 2045; 9.6e+000

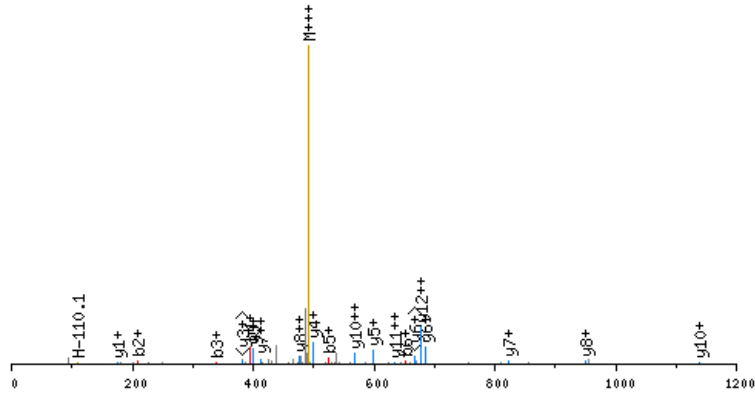

click image to zoom in; click top corners to zoom out

[precursor±]

scan 2043; 492.3 m/z; 6.7e+000

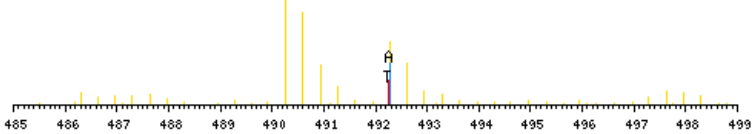

zoomed in precursor plot; T=theoretical m/z, A=acquired m/z

| b <sup>+</sup> | #  | AA | #  | y <sup>+</sup> | y <sup>2+</sup> |
|----------------|----|----|----|----------------|-----------------|
| 122.1029       | 1  | S  | 13 |                |                 |
| 209.1350       | 2  | S  | 12 | 1353.6399      | 677.3239        |
| 338.1776       | 3  | E  | 11 | 1266.6079      | 633.8078        |
| 395.1990       | 4  | G  | 10 | 1137.5653      | 569.2865        |
| 524.2416       | 5  | E  | 9  | 1080.5438      | 540.7758        |
| 653.2842       | 6  | E  | 8  | 951.5012       | 476.2545        |
| 790.3431       | 7  | H  | 7  | 822.4586       | 411.7332        |
| 877.3751       | 8  | S  | 6  | 685.3997       | 343.2038        |
| 976.4436       | 9  | V  | 5  | 598.3677       | 299.6877        |
| 1075.5120      | 10 | V  | 4  | 499.2993       | 250.1535        |
| 1172.5647      | 11 | P  | 3  | 400.2308       | 200.6193        |
| 1300.6233      | 12 | Q  | 2  | 303.1781       | 152.0930        |
|                | 13 | R  | 1  | 175.1195       | 88.0637         |

N-term:+35.07

X-range:

0 - 0

MassTol: Y-zoom:

0. 1.

MassType:

☐ AVG ☒ MONO

Axis:

☒ 1 ☐ 2

Label:

☒ I ☐ M ☐ -

Ions:

a ☐ + ☐ 2+ ☐ 3+

b ☒ + ☐ 2+ ☐ 3+

c ☐ + ☐ 2+ ☐ 3+

x ☐ + ☐ 2+ ☐ 3+

y ☒ + ☒ 2+ ☐ 3+

z ☐ + ☐ 2+ ☐ 3+

hide H<sub>2</sub>O/NH<sub>3</sub> ☐

zoom 112-122 ☐

GO

SSEVVLSGDDEDYQR, MH+ 1726.7771, m/z 576.2639  
L OS G13 P120811 220811-s1.03460.03460.3.dta

scan 3460; 5.5e+000

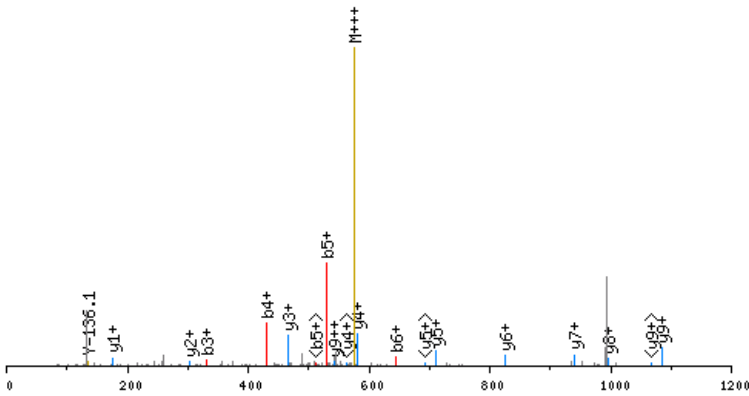

click image to zoom in; click top corners to zoom out

[precursor±]

scan 3459; 576.3 m/z; 9.0e+000

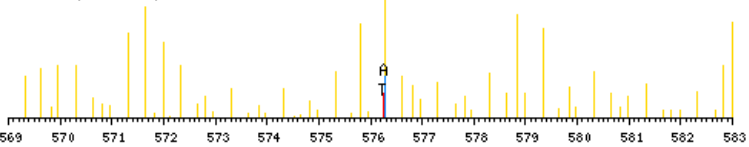

zoomed in precursor plot; T=theoretical m/z, A=acquired m/z

| b <sup>+</sup> | #  | AA | #  | y <sup>+</sup> | y <sup>2+</sup> |
|----------------|----|----|----|----------------|-----------------|
| 116.0711       | 1  | S  | 15 |                |                 |
| 203.1032       | 2  | S  | 14 | 1611.7138      | 806.3608        |
| 332.1458       | 3  | E  | 13 | 1524.6818      | 762.8448        |
| 431.2142       | 4  | V  | 12 | 1395.6392      | 698.3235        |
| 530.2826       | 5  | V  | 11 | 1296.5708      | 648.7893        |
| 643.3666       | 6  | L  | 10 | 1197.5024      | 599.2551        |
| 730.3987       | 7  | S  | 9  | 1084.4183      | 542.7131        |
| 787.4201       | 8  | G  | 8  | 997.3863       | 499.1971        |
| 902.4471       | 9  | D  | 7  | 940.3648       | 470.6863        |
| 1017.4740      | 10 | D  | 6  | 825.3379       | 413.1729        |
| 1146.5166      | 11 | E  | 5  | 710.3109       | 355.6594        |
| 1261.5436      | 12 | D  | 4  | 581.2683       | 291.1381        |
| 1424.6069      | 13 | Y  | 3  | 466.2414       | 233.6246        |
| 1552.6655      | 14 | Q  | 2  | 303.1781       | 152.0930        |
|                | 15 | R  | 1  | 175.1195       | 88.0637         |

N-term:+29.04

N-term:+29.04 K(13):+156.13

X-range:

0 - 0

MassTol: Y-zoom:

0. 1.

MassType:

☐AVG ☒MONO

Axis:

☒1 ☐2

Label:

☒I ☐M ☐-

Ions:

a ☐+ ☐2+ ☐3+

b ☒+ ☐2+ ☐3+

c ☐+ ☐2+ ☐3+

x ☐+ ☐2+ ☐3+

y ☒+ ☒2+ ☐3+

z ☐+ ☐2+ ☐3+

hide H<sub>2</sub>O/NH<sub>3</sub> ☐

zoom 112-122 ☐

GO

SSFIQGFVDHVKEDCDR, MH+ 2094.9918, m/z 524.5034  
L OS G17 P120811 220811-s1.06251.06251.4.dta

scan 6251: 2.2e+000

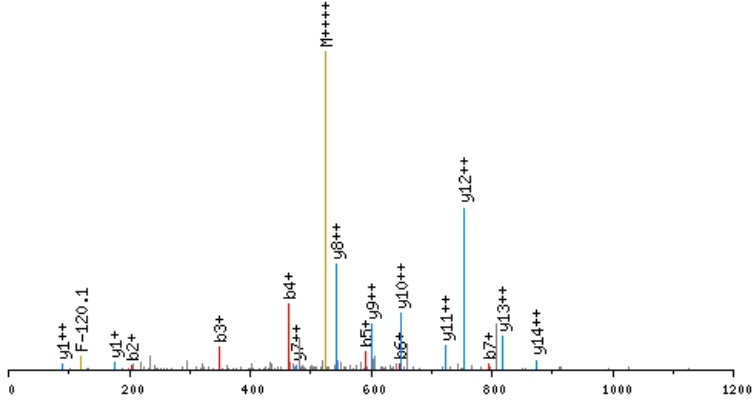

click image to zoom in; click top corners to zoom out [\[precursor±\]](#)

scan 6248: 524.5 m/z; 7.3e+000

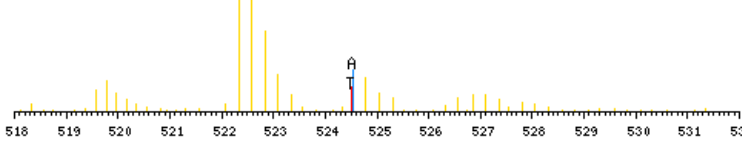

zoomed in precursor plot; T=theoretical m/z, A=acquired m/z

| b <sup>+</sup> | #  | AA | #  | y <sup>+</sup> | y <sup>2+</sup> |
|----------------|----|----|----|----------------|-----------------|
| 116.0711       | 1  | S  | 17 |                |                 |
| 203.1032       | 2  | S  | 16 | 1979.9285      | 990.4682        |
| 350.1716       | 3  | F  | 15 | 1892.8965      | 946.9522        |
| 463.2556       | 4  | I  | 14 | 1745.8281      | 873.4180        |
| 591.3142       | 5  | Q  | 13 | 1632.7440      | 816.8759        |
| 648.3357       | 6  | G  | 12 | 1504.6854      | 752.8466        |
| 795.4041       | 7  | F  | 11 | 1447.6640      | 724.3359        |
| 894.4725       | 8  | V  | 10 | 1300.5956      | 650.8017        |
| 1009.4994      | 9  | D  | 9  | 1201.5271      | 601.2675        |
| 1146.5584      | 10 | H  | 8  | 1086.5002      | 543.7540        |
| 1245.6268      | 11 | V  | 7  | 949.4413       | 475.2246        |
| 1401.7531      | 12 | K  | 6  | 850.3729       | 425.6904        |
| 1530.7957      | 13 | E  | 5  | 694.2466       | 347.6272        |
| 1645.8226      | 14 | D  | 4  | 565.2040       | 283.1059        |
| 1805.8532      | 15 | C  | 3  | 450.1770       | 225.5924        |
| 1920.8802      | 16 | D  | 2  | 290.1464       | 145.5771        |
|                | 17 | R  | 1  | 175.1195       | 88.0637         |

N-term:+29.04 K(12):+156.13  
C(15):+160.03

X-range:

0 - 0

MassTol: Y-zoom:

0. 1.

MassType:

☐ AVG ☒ MONO

Axis:

☒ 1 ☐ 2

Label:

☒ I ☐ M ☐ -

Ions:

a ☐ + ☐ 2+ ☐ 3+

b ☒ + ☐ 2+ ☐ 3+

c ☐ + ☐ 2+ ☐ 3+

x ☐ + ☐ 2+ ☐ 3+

y ☒ + ☒ 2+ ☐ 3+

z ☐ + ☐ 2+ ☐ 3+

hide H<sub>2</sub>O/NH<sub>3</sub> ☐

zoom 112-122 ☐

GO

SSGFSLEDPQTHSNR, MH+ 1689.7832, m/z 563.9326  
L OS G16 P120811 220811-s1.03235.03235.3.dta

scan 3235; 2.9e+000

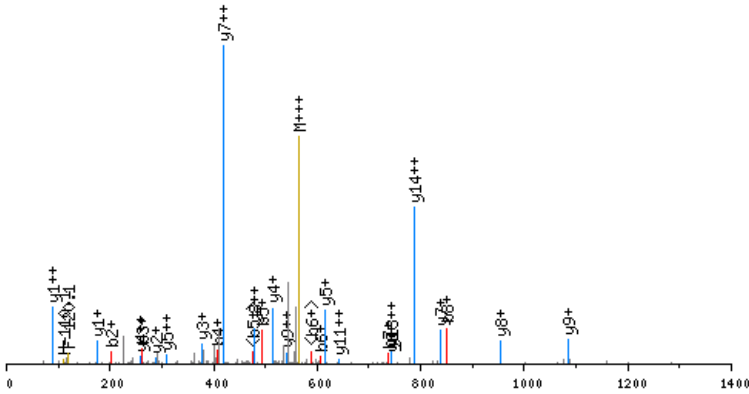

click image to zoom in; click top corners to zoom out

[precursor±]

scan 3233; 563.9 m/z; 1.4e+001

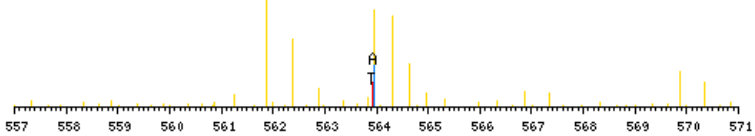

zoomed in precursor plot; T=theoretical m/z, A=acquired m/z

| b <sup>+</sup> | #  | AA | #  | y <sup>+</sup> | y <sup>2+</sup> |
|----------------|----|----|----|----------------|-----------------|
| 116.0711       | 1  | S  | 15 |                |                 |
| 203.1032       | 2  | S  | 14 | 1574.7199      | 787.8639        |
| 260.1246       | 3  | G  | 13 | 1487.6879      | 744.3479        |
| 407.1930       | 4  | F  | 12 | 1430.6664      | 715.8371        |
| 494.2251       | 5  | S  | 11 | 1283.5980      | 642.3029        |
| 607.3091       | 6  | L  | 10 | 1196.5660      | 598.7869        |
| 736.3517       | 7  | E  | 9  | 1083.4819      | 542.2449        |
| 851.3787       | 8  | D  | 8  | 954.4393       | 477.7236        |
| 948.4314       | 9  | P  | 7  | 839.4124       | 420.2101        |
| 1076.4900      | 10 | Q  | 6  | 742.3596       | 371.6837        |
| 1177.5377      | 11 | T  | 5  | 614.3010       | 307.6544        |
| 1314.5966      | 12 | H  | 4  | 513.2534       | 257.1306        |
| 1401.6286      | 13 | S  | 3  | 376.1945       | 188.6011        |
| 1515.6716      | 14 | N  | 2  | 289.1624       | 145.0851        |
|                | 15 | R  | 1  | 175.1195       | 88.0637         |

N-term:+29.04

N-term: +35.07 K(4): +162.16  
C(8): +160.03

X-range:

0 - 0

MassTol: Y-zoom:

0. 1.

MassType:

☐AVG ☒MONO

Axis:

☒1 ☐2

Label:

☒I ☐M ☐-

Ions:

a ☐+ ☐2+ ☐3+

b ☒+ ☐2+ ☐3+

c ☐+ ☐2+ ☐3+

x ☐+ ☐2+ ☐3+

y ☒+ ☒2+ ☐3+

z ☐+ ☐2+ ☐3+

hide H<sub>2</sub>O/NH<sub>3</sub> ☐

zoom 112-122 ☐

GO

SSGPGASPETQGKANVTR, MH+ 1811.9888, m/z 604.6678  
H OS G15 P120811 220811-s1.01929.01929.3.dta

scan 1929; 3.8e+000

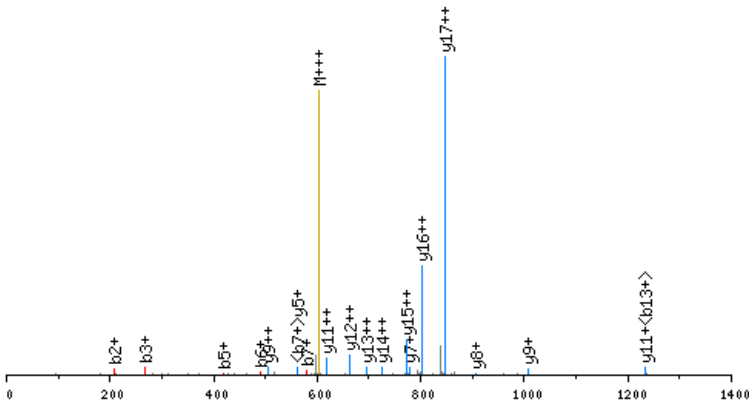

click image to zoom in; click top corners to zoom out

[precursor±]

scan 1928; 604.7 m/z; 2.4e+000

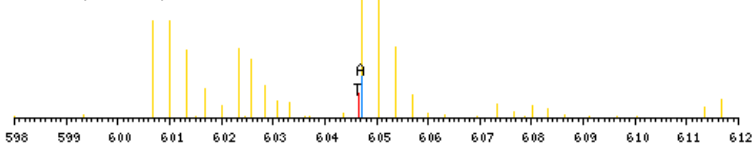

zoomed in precursor plot; T=theoretical m/z, A=acquired m/z

| b <sup>+</sup> | #  | AA | #  | y <sup>+</sup> | y <sup>2+</sup> |
|----------------|----|----|----|----------------|-----------------|
| 122.1029       | 1  | S  | 18 |                |                 |
| 209.1350       | 2  | S  | 17 | 1690.8937      | 845.9507        |
| 266.1564       | 3  | G  | 16 | 1603.8616      | 802.4347        |
| 363.2092       | 4  | P  | 15 | 1546.8402      | 773.9240        |
| 420.2306       | 5  | G  | 14 | 1449.7874      | 725.3976        |
| 491.2678       | 6  | A  | 13 | 1392.7660      | 696.8869        |
| 578.2998       | 7  | S  | 12 | 1321.7288      | 661.3683        |
| 675.3526       | 8  | P  | 11 | 1234.6968      | 617.8523        |
| 804.3951       | 9  | E  | 10 | 1137.6440      | 569.3259        |
| 905.4428       | 10 | T  | 9  | 1008.6015      | 504.8046        |
| 1033.5014      | 11 | Q  | 8  | 907.5538       | 454.2808        |
| 1090.5229      | 12 | G  | 7  | 779.4952       | 390.2515        |
| 1252.6810      | 13 | K  | 6  | 722.4737       | 361.7408        |
| 1323.7181      | 14 | A  | 5  | 560.3156       | 280.6617        |
| 1437.7610      | 15 | N  | 4  | 489.2785       | 245.1432        |
| 1536.8294      | 16 | V  | 3  | 375.2356       | 188.1217        |
| 1637.8771      | 17 | T  | 2  | 276.1672       | 138.5875        |
|                | 18 | R  | 1  | 175.1195       | 88.0637         |

N-term:+35.07 K(13):+162.16

X-range:

0 - 0

MassTol: Y-zoom:

0. 1.

MassType:

☐AVG ☒MONO

Axis:

☒1 ☐2

Label:

☒I ☐M ☐-

Ions:

a ☐+ ☐2+ ☐3+

b ☒+ ☐2+ ☐3+

c ☐+ ☐2+ ☐3+

x ☐+ ☐2+ ☐3+

y ☒+ ☒2+ ☐3+

z ☐+ ☐2+ ☐3+

hide H<sub>2</sub>O/NH<sub>3</sub> ☐

zoom 112-122 ☐

GO

SSGPTNASAFter, MH+ 1352.6446, m/z 676.8259  
L OS G14 P120811 220811-s1.02708.02708.2.dta

scan 2708; 3.1e+000

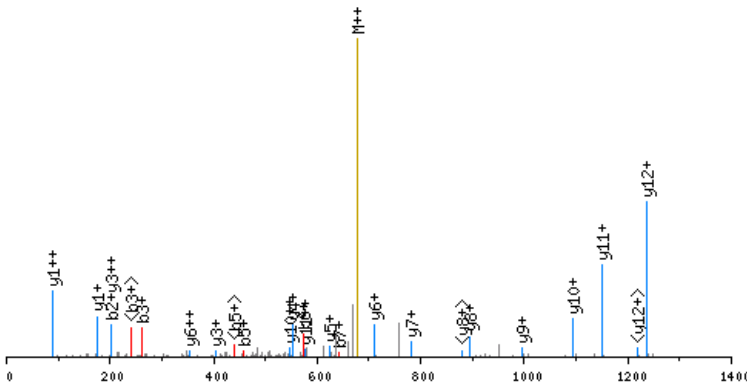

click image to zoom in; click top corners to zoom out

[precursor±]

scan 2706; 676.8 m/z; 1.0e+001

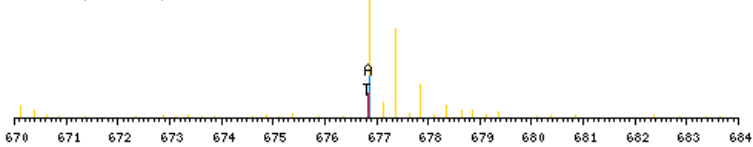

zoomed in precursor plot; T=theoretical m/z, A=acquired m/z

| b <sup>+</sup> | #  | AA | #  | y <sup>+</sup> | y <sup>2+</sup> |
|----------------|----|----|----|----------------|-----------------|
| 116.0711       | 1  | S  | 13 |                |                 |
| 203.1032       | 2  | S  | 12 | 1237.5813      | 619.2946        |
| 260.1246       | 3  | G  | 11 | 1150.5493      | 575.7786        |
| 357.1774       | 4  | P  | 10 | 1093.5278      | 547.2678        |
| 458.2251       | 5  | T  | 9  | 996.4750       | 498.7414        |
| 572.2680       | 6  | N  | 8  | 895.4274       | 448.2176        |
| 643.3051       | 7  | A  | 7  | 781.3844       | 391.1961        |
| 730.3371       | 8  | S  | 6  | 710.3473       | 355.6776        |
| 801.3742       | 9  | A  | 5  | 623.3153       | 312.1616        |
| 948.4427       | 10 | F  | 4  | 552.2782       | 276.6430        |
| 1049.4903      | 11 | T  | 3  | 405.2098       | 203.1088        |
| 1178.5329      | 12 | E  | 2  | 304.1621       | 152.5850        |
|                | 13 | R  | 1  | 175.1195       | 88.0637         |

N-term:+29.04

X-range:

0 - 0

MassTol: Y-zoom:

0. 1.

MassType:

☐ AVG ☒ MONO

Axis:

☒ 1 ☐ 2

Label:

☒ I ☐ M ☐ -

Ions:

a ☐ + ☐ 2+ ☐ 3+

b ☒ + ☐ 2+ ☐ 3+

c ☐ + ☐ 2+ ☐ 3+

x ☐ + ☐ 2+ ☐ 3+

y ☒ + ☒ 2+ ☐ 3+

z ☐ + ☐ 2+ ☐ 3+

hide H<sub>2</sub>O/NH<sub>3</sub> ☐

zoom 112-122 ☐

GO

SSHASSPYISSVQSYPGSASLAQSR, MH+ 2588.2805, m/z 863.4317  
H OS G12 P120811 220811-s1.04591.04591.3.dta

scan 4591; 1.4e+000

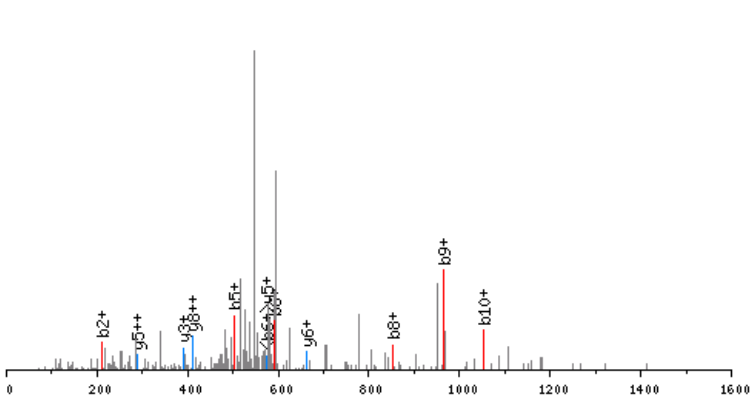

click image to zoom in; click top corners to zoom out [\[precursor+\]](#)

scan 4587; 863.4 m/z; 7.3e+000

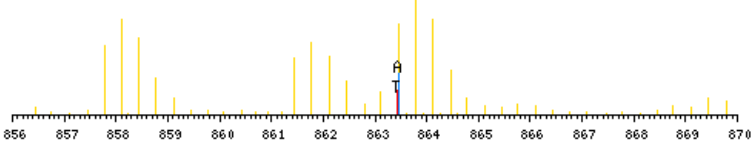

zoomed in precursor plot; T=theoretical m/z, A=acquired m/z

| b <sup>+</sup> | #  | AA | #  | y <sup>+</sup> | y <sup>2+</sup> |
|----------------|----|----|----|----------------|-----------------|
| 122.1029       | 1  | S  | 25 |                |                 |
| 209.1350       | 2  | S  | 24 | 2467.1854      | 1234.0966       |
| 346.1939       | 3  | H  | 23 | 2380.1533      | 1190.5806       |
| 417.2310       | 4  | A  | 22 | 2243.0944      | 1122.0511       |
| 504.2630       | 5  | S  | 21 | 2172.0573      | 1086.5326       |
| 591.2950       | 6  | S  | 20 | 2085.0253      | 1043.0165       |
| 688.3478       | 7  | P  | 19 | 1997.9932      | 999.5005        |
| 851.4111       | 8  | Y  | 18 | 1900.9405      | 950.9742        |
| 964.4952       | 9  | I  | 17 | 1737.8772      | 869.4425        |
| 1051.5272      | 10 | S  | 16 | 1624.7931      | 812.9005        |
| 1138.5593      | 11 | S  | 15 | 1537.7611      | 769.3844        |
| 1237.6277      | 12 | V  | 14 | 1450.7290      | 725.8684        |
| 1365.6862      | 13 | Q  | 13 | 1351.6606      | 676.3342        |
| 1452.7183      | 14 | S  | 12 | 1223.6020      | 612.3049        |
| 1615.7816      | 15 | Y  | 11 | 1136.5700      | 568.7889        |
| 1712.8344      | 16 | P  | 10 | 973.5067       | 487.2573        |
| 1769.8558      | 17 | G  | 9  | 876.4539       | 438.7309        |
| 1856.8879      | 18 | S  | 8  | 819.4325       | 410.2201        |
| 1927.9250      | 19 | A  | 7  | 732.4004       | 366.7041        |
| 2014.9570      | 20 | S  | 6  | 661.3633       | 331.1856        |
| 2128.0411      | 21 | L  | 5  | 574.3313       | 287.6696        |
| 2199.0782      | 22 | A  | 4  | 461.2472       | 231.1275        |
| 2327.1368      | 23 | Q  | 3  | 390.2101       | 195.6090        |
| 2414.1688      | 24 | S  | 2  | 262.1515       | 131.5797        |
|                | 25 | R  | 1  | 175.1195       | 88.0637         |

N-term:+35.07

X-range:

$$\boxed{0} - \boxed{0}$$

0. 1.

☐ AVG ☒ MONO

1 2

☒ I ☐ M ☐ -

**a**  +  2 +  3 +

b. ☒ 1+ ☐ 2+ ☐ 3+

$\square + \square^2 + \square^3 + \dots$

**c**

| x | 1 | 2 | 3 |
|---|---|---|---|
|---|---|---|---|

**y** ☒<sup>+</sup> ☒<sup>2+</sup> ☐<sup>3+</sup>

$$z \square + \square^2 + \square^3 +$$

zoom 112-122

BOOK 112 112

GO

```
[precursor±]
```

zoomed in precursor plot; T=theoretical m/z, A=acquired m/z

| $b^+$     | #  | AA | #  | $y^+$     | $y^{2+}$  |
|-----------|----|----|----|-----------|-----------|
| 116.0711  | 1  | S  | 23 |           |           |
| 203.1032  | 2  | S  | 22 | 2636.3056 | 1318.6567 |
| 316.1872  | 3  | I  | 21 | 2549.2736 | 1275.1407 |
| 445.2298  | 4  | E  | 20 | 2436.1895 | 1218.5987 |
| 573.2884  | 5  | Q  | 19 | 2307.1470 | 1154.0774 |
| 729.4147  | 6  | K  | 18 | 2179.0884 | 1090.0481 |
| 816.4467  | 7  | S  | 17 | 2022.9621 | 1011.9850 |
| 930.4896  | 8  | N  | 16 | 1935.9300 | 968.4689  |
| 1059.5322 | 9  | E  | 15 | 1821.8871 | 911.4475  |
| 1188.5748 | 10 | E  | 14 | 1692.8445 | 846.9262  |
| 1245.5963 | 11 | G  | 13 | 1563.8019 | 782.4049  |
| 1332.6283 | 12 | S  | 12 | 1506.7805 | 753.8941  |
| 1461.6709 | 13 | E  | 11 | 1419.7484 | 710.3781  |
| 1590.7135 | 14 | E  | 10 | 1290.7059 | 645.8568  |
| 1746.8398 | 15 | K  | 9  | 1161.6633 | 581.3355  |
| 1803.8613 | 16 | G  | 8  | 1005.5370 | 503.2724  |
| 1900.9140 | 17 | P  | 7  | 948.5155  | 474.7617  |
| 2029.9566 | 18 | E  | 6  | 851.4627  | 426.2353  |
| 2129.0250 | 19 | V  | 5  | 722.4201  | 361.7140  |
| 2285.1513 | 20 | K  | 4  | 623.3517  | 312.1798  |
| 2414.1939 | 21 | E  | 3  | 467.2254  | 234.1166  |
| 2577.2573 | 22 | Y  | 2  | 338.1828  | 169.5953  |
|           | 23 | R  | 1  | 175.1195  | 88.0637   |

N-term:+29.04 K(6):+156.13  
K(15):+156.13 K(20):+156.13

X-range:

0 - 0

MassTol: Y-zoom:

0. 1.

MassType:

☐ AVG ☒ MONO

Axis:

☒ 1 ☐ 2

Label:

☒ I ☐ M ☐ -

Ions:

a ☐ + ☐ 2+ ☐ 3+

b ☒ + ☐ 2+ ☐ 3+

c ☐ + ☐ 2+ ☐ 3+

x ☐ + ☐ 2+ ☐ 3+

y ☒ + ☒ 2+ ☐ 3+

z ☐ + ☐ 2+ ☐ 3+

hide H<sub>2</sub>O/NH<sub>3</sub> ☐

zoom 112-122 ☐

GO

SSIPLPSDDFKSTGIKVYEDR, MH+ 2438.2819, m/z 610.3259  
L OS G16 P120811 220811-s1.05609.05609.4.dta

scan 5609; 3.9e+000

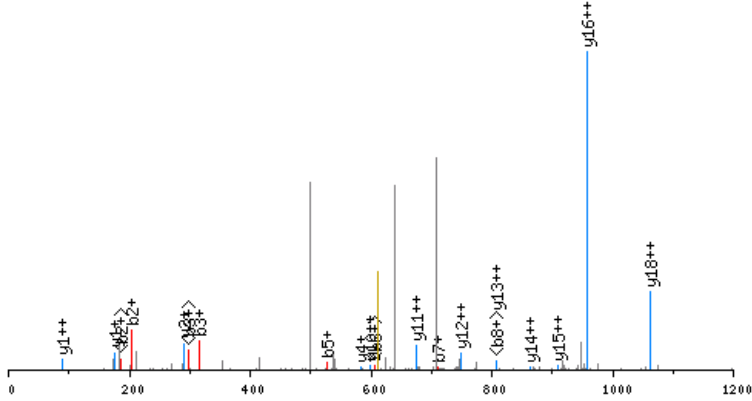

click image to zoom in; click top corners to zoom out

[precursor±]

scan 5608; 610.3 m/z; 8.5e+000

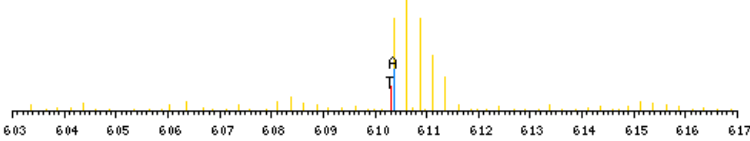

zoomed in precursor plot; T=theoretical m/z, A=acquired m/z

| b <sup>+</sup> | #  | AA | #  | y <sup>+</sup> | y <sup>2+</sup> |
|----------------|----|----|----|----------------|-----------------|
| 116.0711       | 1  | S  | 21 |                |                 |
| 203.1032       | 2  | S  | 20 | 2323.2186      | 1162.1132       |
| 316.1872       | 3  | I  | 19 | 2236.1866      | 1118.5972       |
| 413.2400       | 4  | P  | 18 | 2123.1025      | 1062.0552       |
| 526.3240       | 5  | L  | 17 | 2026.0498      | 1013.5288       |
| 623.3768       | 6  | P  | 16 | 1912.9657      | 956.9868        |
| 710.4088       | 7  | S  | 15 | 1815.9129      | 908.4604        |
| 825.4358       | 8  | D  | 14 | 1728.8809      | 864.9444        |
| 940.4627       | 9  | D  | 13 | 1613.8540      | 807.4309        |
| 1087.5311      | 10 | F  | 12 | 1498.8270      | 749.9174        |
| 1243.6574      | 11 | K  | 11 | 1351.7586      | 676.3832        |
| 1330.6895      | 12 | S  | 10 | 1195.6323      | 598.3201        |
| 1431.7371      | 13 | T  | 9  | 1108.6003      | 554.8041        |
| 1488.7586      | 14 | G  | 8  | 1007.5526      | 504.2802        |
| 1601.8427      | 15 | I  | 7  | 950.5311       | 475.7695        |
| 1757.9690      | 16 | K  | 6  | 837.4471       | 419.2275        |
| 1857.0374      | 17 | V  | 5  | 681.3208       | 341.1643        |
| 2020.1007      | 18 | Y  | 4  | 582.2524       | 291.6301        |
| 2149.1433      | 19 | E  | 3  | 419.1890       | 210.0984        |
| 2264.1703      | 20 | D  | 2  | 290.1464       | 145.5771        |
|                | 21 | R  | 1  | 175.1195       | 88.0637         |

N-term: +29.04 K(11): +156.13  
K(16): +156.13

X-range:

0 - 0

MassTol: Y-zoom:

0. 1.

MassType:

☐ AVG ☒ MONO

Axis:

☒ 1 ☐ 2

Label:

☒ I ☐ M ☐ -

Ions:

a ☐ + ☐ 2+ ☐ 3+

b ☒ + ☐ 2+ ☐ 3+

c ☐ + ☐ 2+ ☐ 3+

x ☐ + ☐ 2+ ☐ 3+

y ☒ + ☒ 2+ ☐ 3+

z ☐ + ☐ 2+ ☐ 3+

hide H<sub>2</sub>O/NH<sub>3</sub> ☐

zoom 112-122 ☐

GO

SSIPSHPSTAGKIFR, MH+ 1652.9760, m/z 413.9995  
H OS G17 P120811 220811-s1.03097.03097.4.dta

scan 3097; 1.2e+001

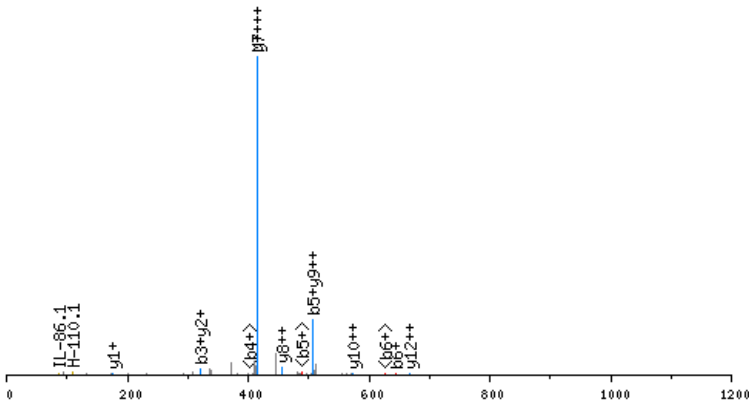

click image to zoom in; click top corners to zoom out [\[precursor±\]](#)

scan 3093; 414.0 m/z; 9.2e+000

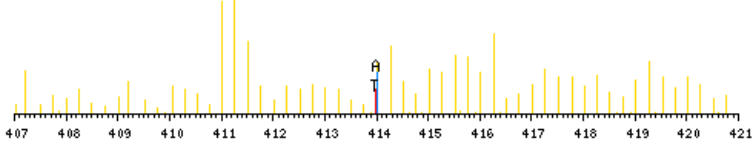

zoomed in precursor plot; T=theoretical m/z, A=acquired m/z

| b <sup>+</sup> | #  | AA | #  | y <sup>+</sup> | y <sup>2+</sup> |
|----------------|----|----|----|----------------|-----------------|
| 122.1029       | 1  | S  | 15 |                |                 |
| 209.1350       | 2  | S  | 14 | 1531.8809      | 766.4444        |
| 322.2190       | 3  | I  | 13 | 1444.8489      | 722.9284        |
| 419.2718       | 4  | P  | 12 | 1331.7648      | 666.3863        |
| 506.3038       | 5  | S  | 11 | 1234.7121      | 617.8599        |
| 643.3627       | 6  | H  | 10 | 1147.6800      | 574.3439        |
| 740.4155       | 7  | P  | 9  | 1010.6211      | 505.8145        |
| 827.4475       | 8  | S  | 8  | 913.5684       | 457.2881        |
| 928.4952       | 9  | T  | 7  | 826.5363       | 413.7721        |
| 999.5323       | 10 | A  | 6  | 725.4887       | 363.2482        |
| 1056.5538      | 11 | G  | 5  | 654.4515       | 327.7297        |
| 1218.7119      | 12 | K  | 4  | 597.4301       | 299.2190        |
| 1331.7959      | 13 | I  | 3  | 435.2720       | 218.1399        |
| 1478.8644      | 14 | F  | 2  | 322.1879       | 161.5979        |
|                | 15 | R  | 1  | 175.1195       | 88.0637         |

N-term:+35.07 K(12):+162.16

X-range:

0 - 0

MassTol: Y-zoom:

0. 1.

MassType:

☐AVG ☒MONO

Axis:

☒1 ☐2

Label:

☒I ☐M ☐-

Ions:

a ☐+ ☐2+ ☐3+

b ☒+ ☐2+ ☐3+

c ☐+ ☐2+ ☐3+

x ☐+ ☐2+ ☐3+

y ☒+ ☒2+ ☐3+

z ☐+ ☐2+ ☐3+

hide H<sub>2</sub>O/NH<sub>3</sub> ☐

zoom 112-122 ☐

GO

SSKELEDMNQKLFDLR, MH+ 2037.0691, m/z 510.0227  
L OS G17 P120811 220811-s1.05984.05984.4.dta

scan 5984; 1.7e+001

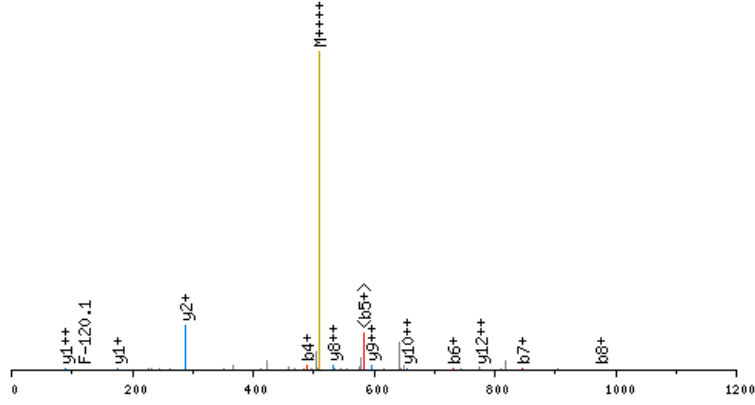

click image to zoom in; click top corners to zoom out [\[precursor±\]](#)

scan 5983; 510.0 m/z; 1.4e+001

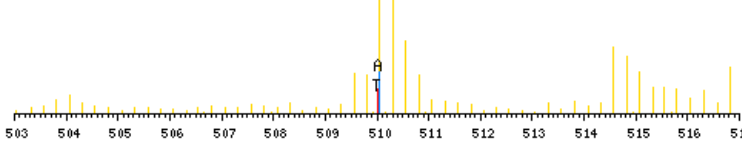

zoomed in precursor plot; T=theoretical m/z, A=acquired m/z

| b <sup>+</sup> | #  | AA | #  | y <sup>+</sup> | y <sup>2+</sup> |
|----------------|----|----|----|----------------|-----------------|
| 116.0711       | 1  | S  | 16 |                |                 |
| 203.1032       | 2  | S  | 15 | 1922.0058      | 961.5068        |
| 359.2295       | 3  | K  | 14 | 1834.9738      | 917.9908        |
| 488.2721       | 4  | E  | 13 | 1678.8475      | 839.9276        |
| 601.3561       | 5  | L  | 12 | 1549.8049      | 775.4064        |
| 730.3987       | 6  | E  | 11 | 1436.7208      | 718.8643        |
| 845.4257       | 7  | D  | 10 | 1307.6782      | 654.3430        |
| 976.4661       | 8  | M  | 9  | 1192.6513      | 596.8296        |
| 1090.5091      | 9  | N  | 8  | 1061.6108      | 531.3093        |
| 1218.5676      | 10 | Q  | 7  | 947.5679       | 474.2878        |
| 1374.6939      | 11 | K  | 6  | 819.5093       | 410.2586        |
| 1487.7780      | 12 | L  | 5  | 663.3830       | 332.1954        |
| 1634.8464      | 13 | F  | 4  | 550.2989       | 275.6534        |
| 1749.8734      | 14 | D  | 3  | 403.2305       | 202.1192        |
| 1862.9574      | 15 | L  | 2  | 288.2036       | 144.6057        |
|                | 16 | R  | 1  | 175.1195       | 88.0637         |

N-term:+29.04 K(3):+156.13  
K(11):+156.13

X-range:

0 - 0

MassTol: Y-zoom:

0. 1.

MassType:

☐ AVG ☒ MONO

Axis:

☒ 1 ☐ 2

Label:

☒ I ☐ M ☐ -

Ions:

a ☐ + ☐ 2+ ☐ 3+

b ☒ + ☐ 2+ ☐ 3+

c ☐ + ☐ 2+ ☐ 3+

x ☐ + ☐ 2+ ☐ 3+

y ☒ + ☒ 2+ ☐ 3+

z ☐ + ☐ 2+ ☐ 3+

hide H<sub>2</sub>O/NH<sub>3</sub> ☐

zoom 112-122 ☐

GO

SSLISNHKYVPR, MH+ 1343.7436, m/z 448.5860  
L OS G18 P120811 220811-s1.01943.01943.3.dta

scan 1943; 2.3e+001

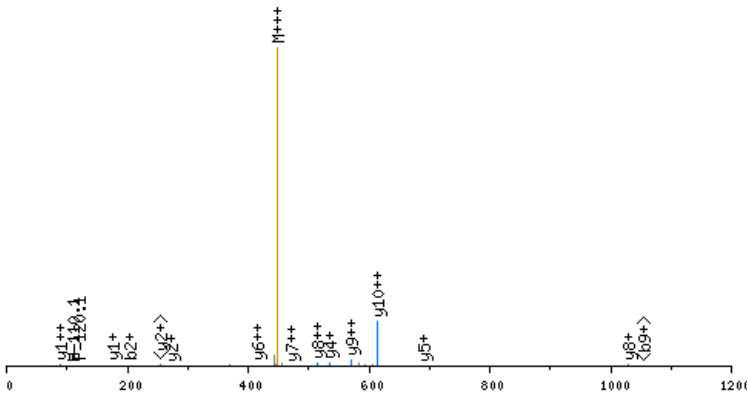

click image to zoom in; click top corners to zoom out

[precursor±]

scan 1941; 448.6 m/z; 4.3e+000

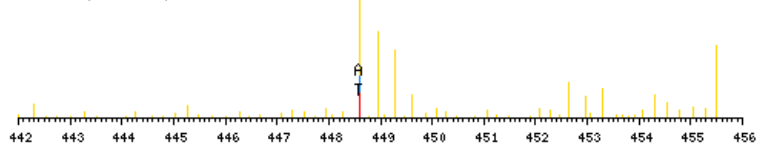

zoomed in precursor plot; T=theoretical m/z, A=acquired m/z

| b <sup>+</sup> | #  | AA | #  | y <sup>+</sup> | y <sup>2+</sup> |
|----------------|----|----|----|----------------|-----------------|
| 116.0711       | 1  | S  | 11 |                |                 |
| 203.1032       | 2  | S  | 10 | 1228.6803      | 614.8440        |
| 316.1872       | 3  | L  | 9  | 1141.6482      | 571.3280        |
| 403.2192       | 4  | S  | 8  | 1028.5642      | 514.7860        |
| 517.2622       | 5  | N  | 7  | 941.5321       | 471.2700        |
| 654.3211       | 6  | H  | 6  | 827.4892       | 414.2485        |
| 810.4474       | 7  | K  | 5  | 690.4303       | 345.7191        |
| 973.5107       | 8  | Y  | 4  | 534.3040       | 267.6559        |
| 1072.5791      | 9  | V  | 3  | 371.2407       | 186.1243        |
| 1169.6319      | 10 | P  | 2  | 272.1723       | 136.5900        |
|                | 11 | R  | 1  | 175.1195       | 88.0637         |

N-term:+29.04 K(7):+156.13

X-range:

0 - 0

MassTol: Y-zoom:

0. 1.

MassType:

☐AVG ☒MONO

Axis:

☒1 ☐2

Label:

☒I ☐M ☐-

Ions:

a ☐+ ☐2+ ☐3+

b ☒+ ☐2+ ☐3+

c ☐+ ☐2+ ☐3+

x ☐+ ☐2+ ☐3+

y ☒+ ☒2+ ☐3+

z ☐+ ☐2+ ☐3+

hide H<sub>2</sub>O/NH<sub>3</sub> ☐

zoom 112-122 ☐

GO

SSPFKVSPLSFGR, MH+ 1464.8215, m/z 488.9453  
L OS G16 P120811 220811-s1.05519.05519.3.dta

scan 5519; 3.2e+001

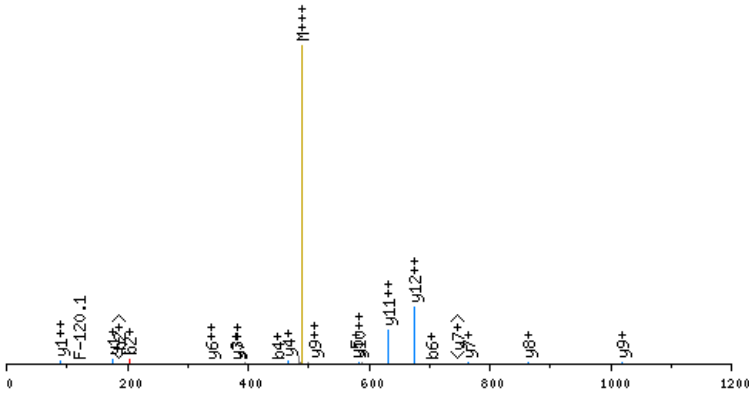

click image to zoom in; click top corners to zoom out

[precursor±]

scan 5518; 488.9 m/z; 2.3e+001

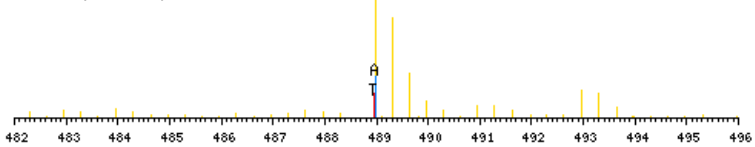

zoomed in precursor plot; T=theoretical m/z, A=acquired m/z

| b <sup>+</sup> | #  | AA | #  | y <sup>+</sup> | y <sup>2+</sup> |
|----------------|----|----|----|----------------|-----------------|
| 116.0711       | 1  | S  | 13 |                |                 |
| 203.1032       | 2  | S  | 12 | 1349.7582      | 675.3830        |
| 300.1559       | 3  | P  | 11 | 1262.7262      | 631.8670        |
| 447.2243       | 4  | F  | 10 | 1165.6734      | 583.3406        |
| 603.3506       | 5  | K  | 9  | 1018.6050      | 509.8064        |
| 702.4190       | 6  | V  | 8  | 862.4787       | 431.7433        |
| 789.4511       | 7  | S  | 7  | 763.4103       | 382.2090        |
| 886.5038       | 8  | P  | 6  | 676.3782       | 338.6930        |
| 999.5879       | 9  | L  | 5  | 579.3255       | 290.1666        |
| 1086.6199      | 10 | S  | 4  | 466.2414       | 233.6246        |
| 1233.6883      | 11 | F  | 3  | 379.2094       | 190.1086        |
| 1290.7098      | 12 | G  | 2  | 232.1410       | 116.5744        |
|                | 13 | R  | 1  | 175.1195       | 88.0637         |

N-term:+29.04 K(5):+156.13

X-range:

0 - 0

MassTol: Y-zoom:

0. 1.

MassType:

☐AVG ☒MONO

Axis:

☒1 ☐2

Label:

☒I ☐M ☐-

Ions:

a ☐+ ☐2+ ☐3+

b ☒+ ☐2+ ☐3+

c ☐+ ☐2+ ☐3+

x ☐+ ☐2+ ☐3+

y ☒+ ☒2+ ☐3+

z ☐+ ☐2+ ☐3+

hide H<sub>2</sub>O/NH<sub>3</sub> ☐

zoom 112-122 ☐

GO

SSSAPVASPNVR, MH+ 1199.6384, m/z 600.3228  
L OS G13 P120811 220811-s1.02242.02242.2.dta

scan 2242; 2.3e+000

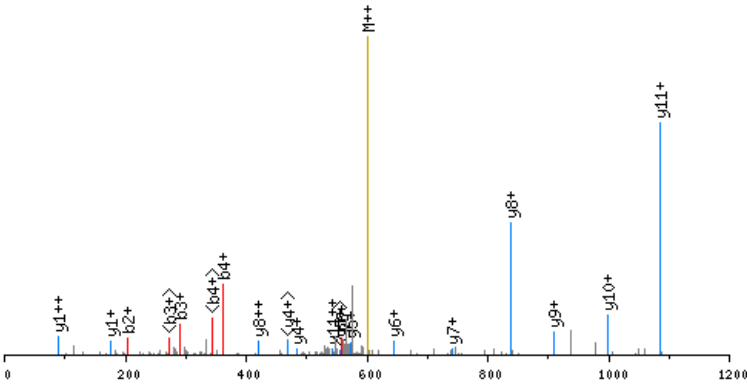

click image to zoom in; click top corners to zoom out

[precursor±]

scan 2239; 600.3 m/z; 5.7e+000

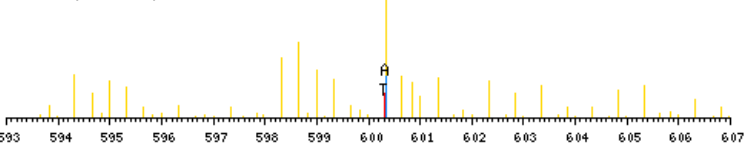

zoomed in precursor plot; T=theoretical m/z, A=acquired m/z

| b <sup>+</sup> | #  | AA | #  | y <sup>+</sup> | y <sup>2+</sup> |
|----------------|----|----|----|----------------|-----------------|
| 116.0711       | 1  | S  | 12 |                |                 |
| 203.1032       | 2  | S  | 11 | 1084.5751      | 542.7915        |
| 290.1352       | 3  | S  | 10 | 997.5431       | 499.2754        |
| 361.1723       | 4  | A  | 9  | 910.5110       | 455.7594        |
| 458.2251       | 5  | P  | 8  | 839.4739       | 420.2409        |
| 557.2935       | 6  | V  | 7  | 742.4212       | 371.7145        |
| 628.3306       | 7  | A  | 6  | 643.3527       | 322.1803        |
| 715.3626       | 8  | S  | 5  | 572.3156       | 286.6617        |
| 812.4154       | 9  | P  | 4  | 485.2836       | 243.1457        |
| 926.4583       | 10 | N  | 3  | 388.2308       | 194.6193        |
| 1025.5267      | 11 | V  | 2  | 274.1879       | 137.5979        |
|                | 12 | R  | 1  | 175.1195       | 88.0637         |

N-term:+29.04

X-range:

0 - 0

MassTol: Y-zoom:

0. 1.

MassType:

☐AVG ☒MONO

Axis:

☒1 ☐2

Label:

☒I ☐M ☐-

Ions:

a ☐+ ☐2+ ☐3+

b ☒+ ☐2+ ☐3+

c ☐+ ☐2+ ☐3+

x ☐+ ☐2+ ☐3+

y ☒+ ☒2+ ☐3+

z ☐+ ☐2+ ☐3+

hide H<sub>2</sub>O/NH<sub>3</sub> ☐

zoom 112-122 ☐

GO

SSSGIVSLGIGDR, MH+ 1275.6908, m/z 638.3491  
L OS G13 P120811 220811-s1.04828.04828.2.dta

scan 4828; 2.2e+000

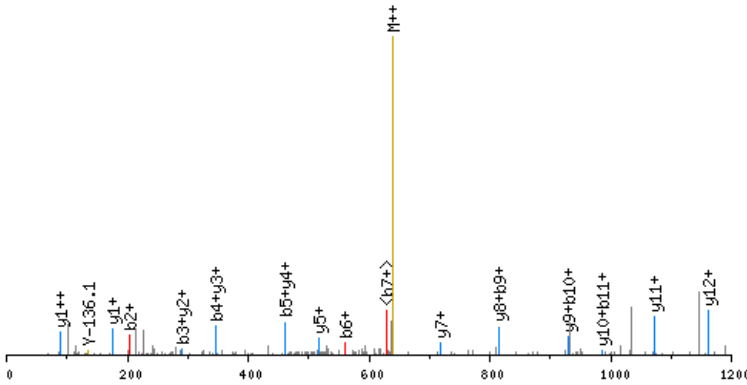

click image to zoom in; click top corners to zoom out

[precursor±]

scan 4824; 638.3 m/z; 2.1e+001

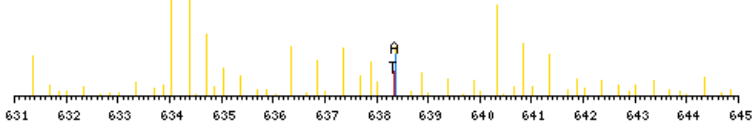

zoomed in precursor plot; T=theoretical m/z, A=acquired m/z

| b <sup>+</sup> | #  | AA | #  | y <sup>+</sup> | y <sup>2+</sup> |
|----------------|----|----|----|----------------|-----------------|
| 116.0711       | 1  | S  | 13 |                |                 |
| 203.1032       | 2  | S  | 12 | 1160.6275      | 580.8177        |
| 290.1352       | 3  | S  | 11 | 1073.5955      | 537.3017        |
| 347.1566       | 4  | G  | 10 | 986.5635       | 493.7856        |
| 460.2407       | 5  | I  | 9  | 929.5420       | 465.2749        |
| 559.3091       | 6  | V  | 8  | 816.4579       | 408.7329        |
| 646.3412       | 7  | S  | 7  | 717.3895       | 359.1987        |
| 759.4252       | 8  | L  | 6  | 630.3575       | 315.6827        |
| 816.4467       | 9  | G  | 5  | 517.2734       | 259.1406        |
| 929.5307       | 10 | I  | 4  | 460.2520       | 230.6299        |
| 986.5522       | 11 | G  | 3  | 347.1679       | 174.0879        |
| 1101.5792      | 12 | D  | 2  | 290.1464       | 145.5771        |
|                | 13 | R  | 1  | 175.1195       | 88.0637         |

N-term:+29.04

X-range:

0 - 0

MassTol: Y-zoom:

0. 1.

MassType:

☐ AVG ☒ MONO

Axis:

☒ 1 ☐ 2

Label:

☒ I ☐ M ☐ -

Ions:

a ☐ + ☐ 2+ ☐ 3+

b ☒ + ☐ 2+ ☐ 3+

c ☐ + ☐ 2+ ☐ 3+

x ☐ + ☐ 2+ ☐ 3+

y ☒ + ☒ 2+ ☐ 3+

z ☐ + ☐ 2+ ☐ 3+

hide H<sub>2</sub>O/NH<sub>3</sub> ☐

zoom 112-122 ☐

GO

SSSLPDICYR, MH+ 1225.5886, m/z 613.2980  
L OS G13 P120811 220811-s1.04211.04211.2.dta

scan 4211; 2.6e+000

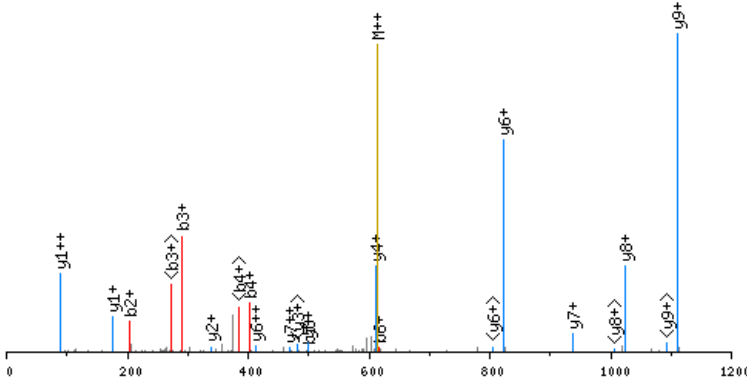

click image to zoom in; click top corners to zoom out

[precursor±]

scan 4209; 613.3 m/z; 9.3e+000

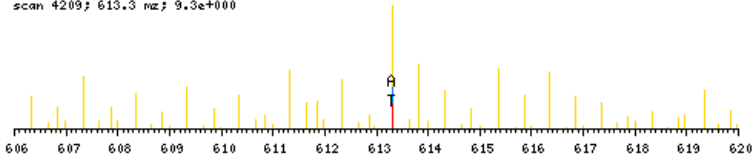

zoomed in precursor plot; T=theoretical m/z, A=acquired m/z

| b <sup>+</sup> | #  | AA | #  | y <sup>+</sup> | y <sup>2+</sup> |
|----------------|----|----|----|----------------|-----------------|
| 116.0711       | 1  | S  | 10 |                |                 |
| 203.1032       | 2  | S  | 9  | 1110.5253      | 555.7666        |
| 290.1352       | 3  | S  | 8  | 1023.4933      | 512.2506        |
| 403.2192       | 4  | L  | 7  | 936.4613       | 468.7345        |
| 500.2720       | 5  | P  | 6  | 823.3772       | 412.1925        |
| 615.2990       | 6  | D  | 5  | 726.3244       | 363.6661        |
| 728.3830       | 7  | I  | 4  | 611.2975       | 306.1527        |
| 888.4136       | 8  | C  | 3  | 498.2134       | 249.6106        |
| 1051.4769      | 9  | Y  | 2  | 338.1828       | 169.5953        |
|                | 10 | R  | 1  | 175.1195       | 88.0637         |

N-term:+29.04 C(8):+160.03

X-range:

0 - 0

MassTol: Y-zoom:

0. 1.

MassType:

☐AVG ☒MONO

Axis:

☒1 ☐2

Label:

☒I ☐M ☐-

Ions:

a ☐+ ☐2+ ☐3+

b ☒+ ☐2+ ☐3+

c ☐+ ☐2+ ☐3+

x ☐+ ☐2+ ☐3+

y ☒+ ☒2+ ☐3+

z ☐+ ☐2+ ☐3+

hide H<sub>2</sub>O/NH<sub>3</sub> ☐

zoom 112-122 ☐

GO

SSTNLKDVLSNLIPEQAR, MH+ 2197.2557, m/z 550.0694  
L OS G16 P120811 220811-s1.06234.06234.4.dta

scan 6234; 8.6e+000

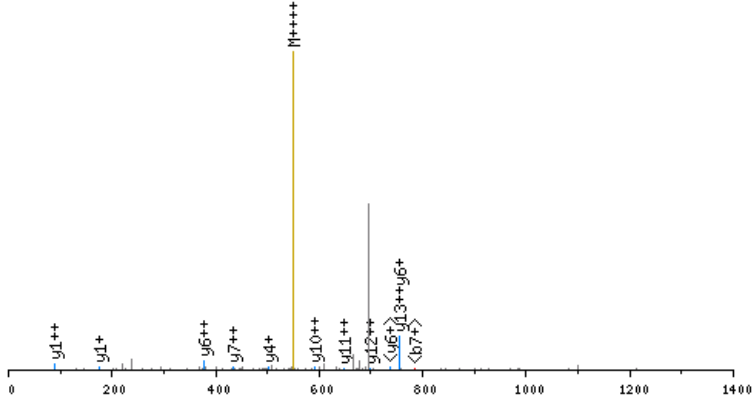

click image to zoom in; click top corners to zoom out [\[precursor±\]](#)

scan 6232; 550.1 m/z; 3.1e+000

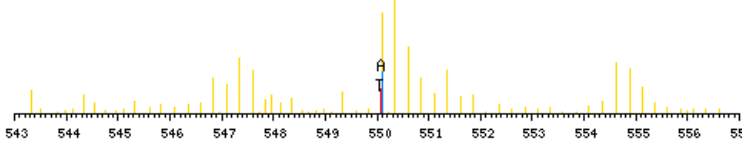

zoomed in precursor plot; T=theoretical m/z, A=acquired m/z

| b <sup>+</sup> | #  | AA | #  | y <sup>+</sup> | y <sup>2+</sup> |
|----------------|----|----|----|----------------|-----------------|
| 116.0711       | 1  | S  | 19 |                |                 |
| 203.1032       | 2  | S  | 18 | 2082.1924      | 1041.6001       |
| 304.1508       | 3  | T  | 17 | 1995.1603      | 998.0841        |
| 418.1938       | 4  | N  | 16 | 1894.1126      | 947.5602        |
| 531.2778       | 5  | L  | 15 | 1780.0697      | 890.5388        |
| 687.4041       | 6  | K  | 14 | 1666.9857      | 833.9967        |
| 802.4311       | 7  | D  | 13 | 1510.8594      | 755.9336        |
| 901.4995       | 8  | V  | 12 | 1395.8324      | 698.4201        |
| 1014.5835      | 9  | L  | 11 | 1296.7640      | 648.8859        |
| 1101.6156      | 10 | S  | 10 | 1183.6799      | 592.3439        |
| 1215.6585      | 11 | N  | 9  | 1096.6479      | 548.8279        |
| 1328.7426      | 12 | L  | 8  | 982.6050       | 491.8064        |
| 1441.8266      | 13 | I  | 7  | 869.5209       | 435.2644        |
| 1538.8794      | 14 | P  | 6  | 756.4368       | 378.7223        |
| 1695.0057      | 15 | K  | 5  | 659.3841       | 330.1960        |
| 1824.0483      | 16 | E  | 4  | 503.2578       | 252.1328        |
| 1952.1069      | 17 | Q  | 3  | 374.2152       | 187.6115        |
| 2023.1440      | 18 | A  | 2  | 246.1566       | 123.5822        |
|                | 19 | R  | 1  | 175.1195       | 88.0637         |

N-term:+29.04 K(6):+156.13  
K(15):+156.13

X-range:

0 - 0

MassTol: Y-zoom:

0. 1.

MassType:

☐ AVG ☒ MONO

Axis:

☒ 1 ☐ 2

Label:

☒ I ☐ M ☐ -

Ions:

a ☐ + ☐ 2+ ☐ 3+

b ☒ + ☐ 2+ ☐ 3+

c ☐ + ☐ 2+ ☐ 3+

x ☐ + ☐ 2+ ☐ 3+

y ☒ + ☒ 2+ ☐ 3+

z ☐ + ☐ 2+ ☐ 3+

hide H<sub>2</sub>O/NH<sub>3</sub> ☐

zoom 112-122 ☐

GO

SSTSAVPQIITHYTVHPR, MH+ 2010.0408, m/z 503.2657  
L OS G17 P120811 220811-s1.03637.03637.4.dta

scan 3637; 3.0e+000

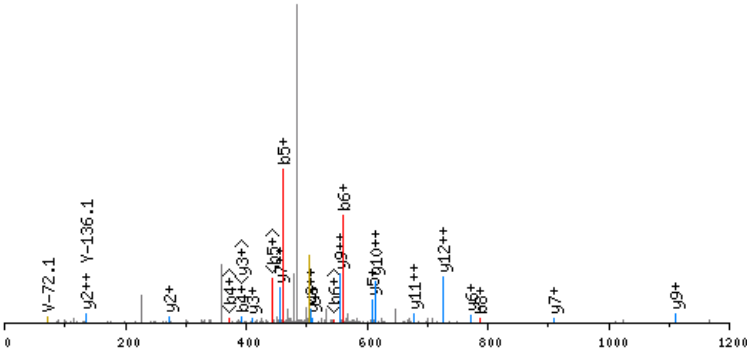

click image to zoom in; click top corners to zoom out [\[precursor±\]](#)

scan 3633; 503.3 m/z; 7.9e+000

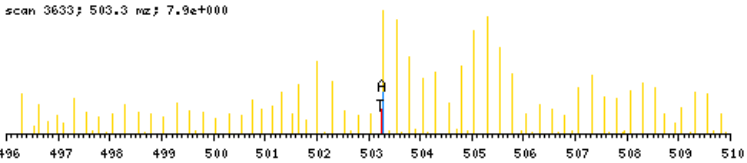

zoomed in precursor plot; T=theoretical m/z, A=acquired m/z

| b <sup>+</sup> | #  | AA | #  | y <sup>+</sup> | y <sup>2+</sup> |
|----------------|----|----|----|----------------|-----------------|
| 116.0711       | 1  | S  | 18 |                |                 |
| 203.1032       | 2  | S  | 17 | 1894.9775      | 947.9927        |
| 304.1508       | 3  | T  | 16 | 1807.9455      | 904.4767        |
| 391.1829       | 4  | S  | 15 | 1706.8978      | 853.9528        |
| 462.2200       | 5  | A  | 14 | 1619.8658      | 810.4368        |
| 561.2884       | 6  | V  | 13 | 1548.8287      | 774.9183        |
| 658.3412       | 7  | P  | 12 | 1449.7603      | 725.3840        |
| 786.3997       | 8  | Q  | 11 | 1352.7075      | 676.8577        |
| 899.4838       | 9  | I  | 10 | 1224.6489      | 612.8284        |
| 1000.5315      | 10 | T  | 9  | 1111.5649      | 556.2863        |
| 1101.5792      | 11 | T  | 8  | 1010.5172      | 505.7625        |
| 1238.6381      | 12 | H  | 7  | 909.4695       | 455.2387        |
| 1401.7014      | 13 | Y  | 6  | 772.4106       | 386.7092        |
| 1502.7491      | 14 | T  | 5  | 609.3473       | 305.1775        |
| 1601.8175      | 15 | V  | 4  | 508.2996       | 254.6537        |
| 1738.8764      | 16 | H  | 3  | 409.2312       | 205.1195        |
| 1835.9292      | 17 | P  | 2  | 272.1723       | 136.5900        |
|                | 18 | R  | 1  | 175.1195       | 88.0637         |

N-term:+29.04

X-range:

0 - 0

MassTol: Y-zoom:

0. 1.

MassType:

☐AVG ☒MONO

Axis:

☒1 ☐2

Label:

☒I ☐M ☐-

Ions:

a ☐+ ☐2+ ☐3+

b ☒+ ☐2+ ☐3+

c ☐+ ☐2+ ☐3+

x ☐+ ☐2+ ☐3+

y ☒+ ☒2+ ☐3+

z ☐+ ☐2+ ☐3+

hide H<sub>2</sub>O/NH<sub>3</sub> ☐

zoom 112-122 ☐

GO

SSVAQPSLHTAQKPR, MH+ 1662.9291, m/z 416.4877  
L OS G17 P120811 220811-s1.02061.02061.4.dta

scan 2061; 9.9e+000

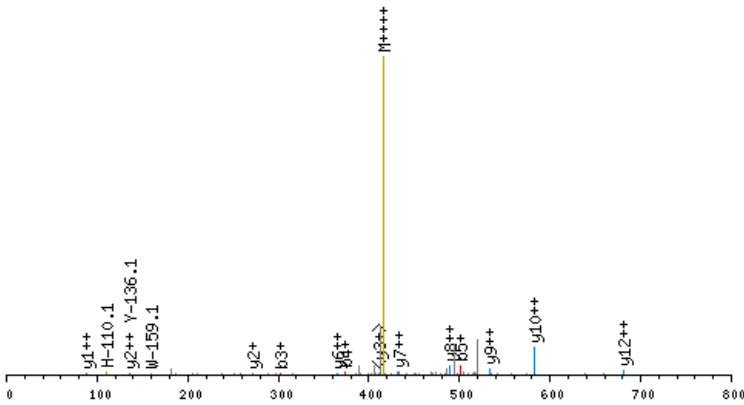

click image to zoom in; click top corners to zoom out [precursor±]

scan 2058; 416.5 m/z; 7.1e+000

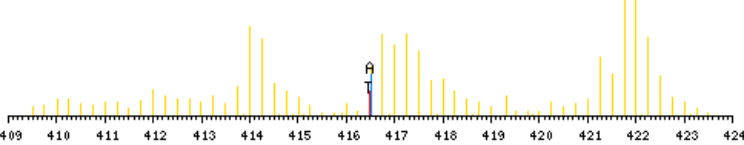

zoomed in precursor plot; T=theoretical m/z, A=acquired m/z

| b <sup>+</sup> | #  | AA | #  | y <sup>+</sup> | y <sup>2+</sup> |
|----------------|----|----|----|----------------|-----------------|
| 116.0711       | 1  | S  | 15 |                |                 |
| 203.1032       | 2  | S  | 14 | 1547.8658      | 774.4368        |
| 302.1716       | 3  | V  | 13 | 1460.8338      | 730.9208        |
| 373.2087       | 4  | A  | 12 | 1361.7654      | 681.3866        |
| 501.2673       | 5  | Q  | 11 | 1290.7283      | 645.8681        |
| 598.3200       | 6  | P  | 10 | 1162.6697      | 581.8388        |
| 685.3521       | 7  | S  | 9  | 1065.6169      | 533.3124        |
| 798.4361       | 8  | L  | 8  | 978.5849       | 489.7964        |
| 935.4950       | 9  | H  | 7  | 865.5008       | 433.2543        |
| 1036.5427      | 10 | T  | 6  | 728.4419       | 364.7249        |
| 1107.5798      | 11 | A  | 5  | 627.3943       | 314.2010        |
| 1235.6384      | 12 | Q  | 4  | 556.3571       | 278.6825        |
| 1391.7647      | 13 | K  | 3  | 428.2986       | 214.6532        |
| 1488.8175      | 14 | P  | 2  | 272.1723       | 136.5900        |
|                | 15 | R  | 1  | 175.1195       | 88.0637         |

N-term:+29.04 K(13):+156.13

X-range:

0 - 0

MassTol: Y-zoom:

0. 1.

MassType:

☐AVG ☒MONO

Axis:

☒1 ☐2

Label:

☒I ☐M ☐-

Ions:

a ☐+ ☐2+ ☐3+

b ☒+ ☐2+ ☐3+

c ☐+ ☐2+ ☐3+

x ☐+ ☐2+ ☐3+

y ☒+ ☒2+ ☐3+

z ☐+ ☐2+ ☐3+

hide H<sub>2</sub>O/NH<sub>3</sub> ☐

zoom 112-122 ☐

GO

SSVEEMAAESR, MH+ 1223.5578, m/z 612.2825  
L OS G13 P120811 220811-s1.02860.02860.2.dta

scan 2860; 3.2e+000

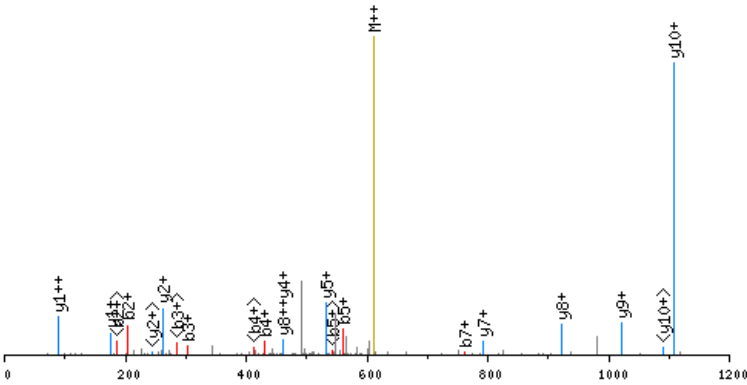

click image to zoom in; click top corners to zoom out

[precursor±]

scan 2859; 612.3 m/z; 2.0e+001

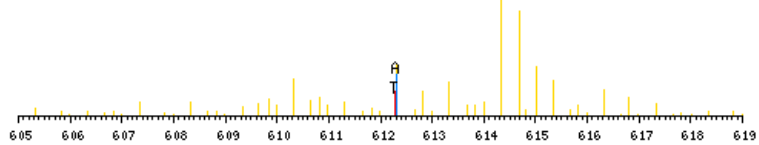

zoomed in precursor plot; T=theoretical m/z, A=acquired m/z

| b <sup>+</sup> | #  | AA | #  | y <sup>+</sup> | y <sup>2+</sup> |
|----------------|----|----|----|----------------|-----------------|
| 116.0711       | 1  | S  | 11 |                |                 |
| 203.1032       | 2  | S  | 10 | 1108.4945      | 554.7511        |
| 302.1716       | 3  | V  | 9  | 1021.4624      | 511.2351        |
| 431.2142       | 4  | E  | 8  | 922.3940       | 461.7009        |
| 560.2568       | 5  | E  | 7  | 793.3514       | 397.1796        |
| 691.2972       | 6  | M  | 6  | 664.3088       | 332.6583        |
| 762.3344       | 7  | A  | 5  | 533.2683       | 267.1381        |
| 833.3715       | 8  | A  | 4  | 462.2312       | 231.6195        |
| 962.4141       | 9  | E  | 3  | 391.1941       | 196.1010        |
| 1049.4461      | 10 | S  | 2  | 262.1515       | 131.5797        |
|                | 11 | R  | 1  | 175.1195       | 88.0637         |

N-term:+29.04

X-range:

0 - 0

MassTol: Y-zoom:

0. 1.

MassType:

☐ AVG ☒ MONO

Axis:

☒ 1 ☐ 2

Label:

☒ I ☐ M ☐ -

Ions:

a ☐ + ☐ 2+ ☐ 3+

b ☒ + ☐ 2+ ☐ 3+

c ☐ + ☐ 2+ ☐ 3+

x ☐ + ☐ 2+ ☐ 3+

y ☒ + ☒ 2+ ☐ 3+

z ☐ + ☐ 2+ ☐ 3+

hide H<sub>2</sub>O/NH<sub>3</sub> ☐

zoom 112-122 ☐

GO

SSVETQPAEEVR, MH+ 1359.6756, m/z 680.3414  
L OS G13 P120811 220811-s1.02310.02310.2.dta

scan 2310; 2.1e+000

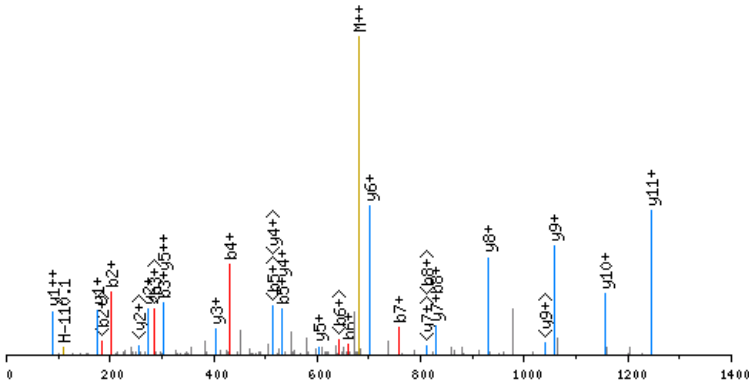

click image to zoom in; click top corners to zoom out

[precursor±]

scan 2309; 680.3 m/z; 7.5e+000

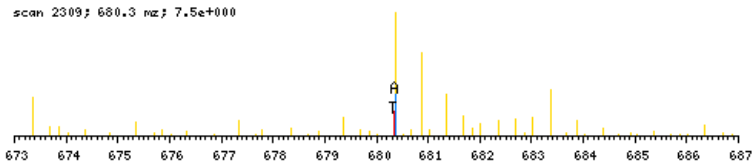

zoomed in precursor plot; T=theoretical m/z, A=acquired m/z

| b <sup>+</sup> | #  | AA | #  | y <sup>+</sup> | y <sup>2+</sup> |
|----------------|----|----|----|----------------|-----------------|
| 116.0711       | 1  | S  | 12 |                |                 |
| 203.1032       | 2  | S  | 11 | 1244.6123      | 622.8100        |
| 302.1716       | 3  | V  | 10 | 1157.5802      | 579.2940        |
| 431.2142       | 4  | E  | 9  | 1058.5118      | 529.7598        |
| 532.2618       | 5  | T  | 8  | 929.4692       | 465.2385        |
| 660.3204       | 6  | Q  | 7  | 828.4216       | 414.7147        |
| 757.3732       | 7  | P  | 6  | 700.3630       | 350.6854        |
| 828.4103       | 8  | A  | 5  | 603.3102       | 302.1590        |
| 957.4529       | 9  | E  | 4  | 532.2731       | 266.6405        |
| 1086.4955      | 10 | E  | 3  | 403.2305       | 202.1192        |
| 1185.5639      | 11 | V  | 2  | 274.1879       | 137.5979        |
|                | 12 | R  | 1  | 175.1195       | 88.0637         |

N-term:+29.04

X-range:

0 - 0

MassTol: Y-zoom:

0. 1.

MassType:

☐ AVG ☒ MONO

Axis:

☒ 1 ☐ 2

Label:

☒ I ☐ M ☐ -

Ions:

a ☐ + ☐ 2+ ☐ 3+

b ☒ + ☐ 2+ ☐ 3+

c ☐ + ☐ 2+ ☐ 3+

x ☐ + ☐ 2+ ☐ 3+

y ☒ + ☒ 2+ ☐ 3+

z ☐ + ☐ 2+ ☐ 3+

hide H<sub>2</sub>O/NH<sub>3</sub> ☐

zoom 112-122 ☐

GO

SSVEYEPKEKTFDKILIANR, MH+ 2479.3813, m/z 620.6008  
L OS G18 P120811 220811-s1.05193.05193.4.dta

scan 5193; 4.4e+000

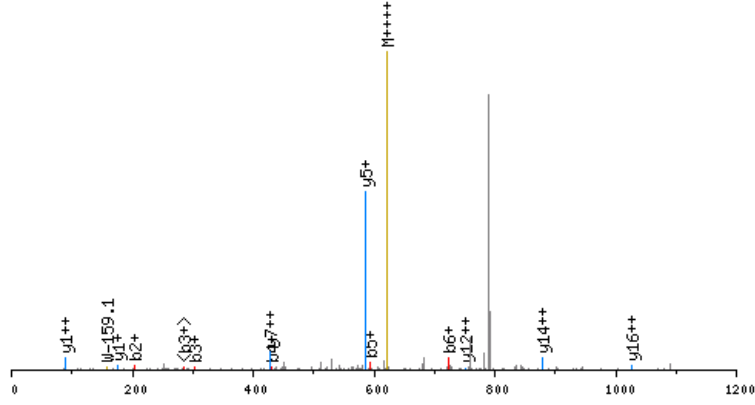

click image to zoom in; click top corners to zoom out [\[precursor±\]](#)

scan 5191; 620.6 m/z; 7.5e+000

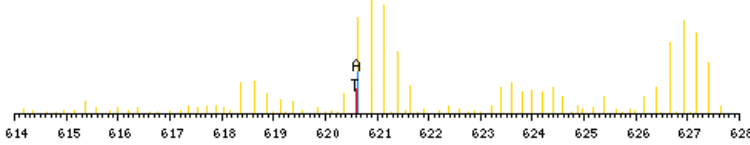

zoomed in precursor plot; T=theoretical m/z, A=acquired m/z

| b <sup>+</sup> | #  | AA | #  | y <sup>+</sup> | y <sup>2+</sup> |
|----------------|----|----|----|----------------|-----------------|
| 116.0711       | 1  | S  | 20 |                |                 |
| 203.1032       | 2  | S  | 19 | 2364.3180      | 1182.6629       |
| 302.1716       | 3  | V  | 18 | 2277.2860      | 1139.1469       |
| 431.2142       | 4  | E  | 17 | 2178.2175      | 1089.6127       |
| 594.2775       | 5  | Y  | 16 | 2049.1749      | 1025.0914       |
| 723.3201       | 6  | E  | 15 | 1886.1116      | 943.5597        |
| 820.3728       | 7  | P  | 14 | 1757.0690      | 879.0384        |
| 976.4991       | 8  | K  | 13 | 1660.0163      | 830.5120        |
| 1105.5417      | 9  | E  | 12 | 1503.8900      | 752.4489        |
| 1261.6680      | 10 | K  | 11 | 1374.8474      | 687.9276        |
| 1362.7157      | 11 | T  | 10 | 1218.7211      | 609.8644        |
| 1509.7841      | 12 | F  | 9  | 1117.6734      | 559.3406        |
| 1624.8111      | 13 | D  | 8  | 970.6050       | 485.8064        |
| 1780.9374      | 14 | K  | 7  | 855.5780       | 428.2929        |
| 1894.0214      | 15 | I  | 6  | 699.4517       | 350.2298        |
| 2007.1055      | 16 | L  | 5  | 586.3677       | 293.6877        |
| 2120.1896      | 17 | I  | 4  | 473.2836       | 237.1457        |
| 2191.2267      | 18 | A  | 3  | 360.1995       | 180.6037        |
| 2305.2696      | 19 | N  | 2  | 289.1624       | 145.0851        |
|                | 20 | R  | 1  | 175.1195       | 88.0637         |

N-term:+29.04 K(8):+156.13  
K(10):+156.13 K(14):+156.13

X-range:

0 - 0

MassTol: Y-zoom:

0. 1.

MassType:

☐AVG ☒MONO

Axis:

☒1 ☐2

Label:

☒I ☐M ☐-

Ions:

a ☐+ ☐2+ ☐3+

b ☒+ ☐2+ ☐3+

c ☐+ ☐2+ ☐3+

x ☐+ ☐2+ ☐3+

y ☒+ ☒2+ ☐3+

z ☐+ ☐2+ ☐3+

hide H<sub>2</sub>O/NH<sub>3</sub> ☐

zoom 112-122 ☐

GO

SSVYGASVSDLDLKR, MH+ 1668.8445, m/z 556.9530  
L OS G15 P120811 220811-s1.02942.02942.3.dta

scan 2942; 7.5e+000

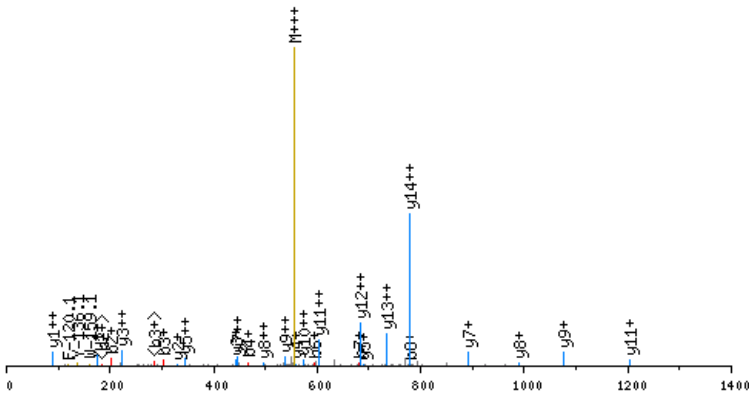

click image to zoom in; click top corners to zoom out

[precursor±]

scan 2941; 557.0 m/z; 6.5e+000

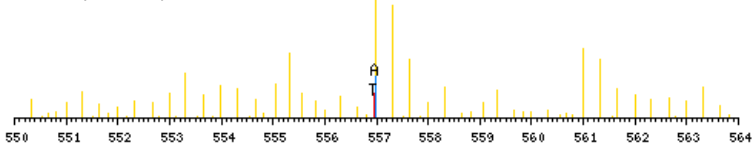

zoomed in precursor plot; T=theoretical m/z, A=acquired m/z

| b <sup>+</sup> | #  | AA | #  | y <sup>+</sup> | y <sup>2+</sup> |
|----------------|----|----|----|----------------|-----------------|
| 116.0711       | 1  | S  | 15 |                |                 |
| 203.1032       | 2  | S  | 14 | 1553.7812      | 777.3945        |
| 302.1716       | 3  | V  | 13 | 1466.7491      | 733.8785        |
| 465.2349       | 4  | Y  | 12 | 1367.6807      | 684.3443        |
| 522.2564       | 5  | G  | 11 | 1204.6174      | 602.8126        |
| 593.2935       | 6  | A  | 10 | 1147.5959      | 574.3019        |
| 680.3255       | 7  | S  | 9  | 1076.5588      | 538.7833        |
| 779.3939       | 8  | V  | 8  | 989.5268       | 495.2673        |
| 866.4259       | 9  | S  | 7  | 890.4584       | 445.7331        |
| 981.4529       | 10 | D  | 6  | 803.4263       | 402.2171        |
| 1110.4955      | 11 | E  | 5  | 688.3994       | 344.7036        |
| 1225.5224      | 12 | D  | 4  | 559.3568       | 280.1823        |
| 1338.6065      | 13 | L  | 3  | 444.3299       | 222.6688        |
| 1494.7328      | 14 | K  | 2  | 331.2458       | 166.1268        |
|                | 15 | R  | 1  | 175.1195       | 88.0637         |

N-term:+29.04 K(14):+156.13

X-range:

0 - 0

MassTol: Y-zoom:

0. 1.

MassType:

☐ AVG ☒ MONO

Axis:

☒ 1 ☐ 2

Label:

☒ I ☐ M ☐ -

Ions:

a ☐ + ☐ 2+ ☐ 3+

b ☒ + ☐ 2+ ☐ 3+

c ☐ + ☐ 2+ ☐ 3+

x ☐ + ☐ 2+ ☐ 3+

y ☒ + ☒ 2+ ☐ 3+

z ☐ + ☐ 2+ ☐ 3+

hide H<sub>2</sub>O/NH<sub>3</sub> ☐

zoom 112-122 ☐

GO

STESTASGMQDEVR, MH+ 1531.7122, m/z 511.2423  
H OS G13 P120811 220811-s1.02462.02462.3.dta

scan 2462; 5.1e+000

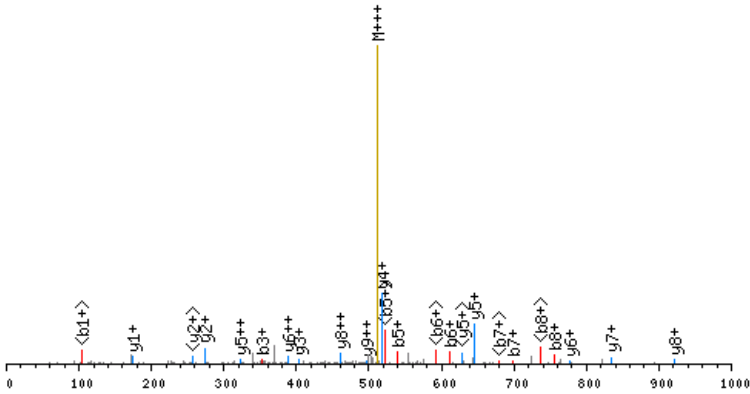

click image to zoom in; click top corners to zoom out [\[precursor±\]](#)

scan 2459; 511.2 m/z; 2.4e+001

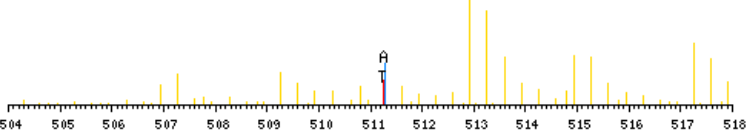

zoomed in precursor plot; T=theoretical m/z, A=acquired m/z

| b <sup>+</sup> | #  | AA | #  | y <sup>+</sup> | y <sup>2+</sup> |
|----------------|----|----|----|----------------|-----------------|
| 122.1029       | 1  | S  | 14 |                |                 |
| 223.1506       | 2  | T  | 13 | 1410.6171      | 705.8125        |
| 352.1932       | 3  | E  | 12 | 1309.5694      | 655.2886        |
| 439.2252       | 4  | S  | 11 | 1180.5268      | 590.7673        |
| 540.2729       | 5  | T  | 10 | 1093.4948      | 547.2513        |
| 611.3100       | 6  | A  | 9  | 992.4471       | 496.7275        |
| 698.3420       | 7  | S  | 8  | 921.4100       | 461.2089        |
| 755.3635       | 8  | G  | 7  | 834.3780       | 417.6929        |
| 886.4040       | 9  | M  | 6  | 777.3565       | 389.1822        |
| 1014.4626      | 10 | Q  | 5  | 646.3160       | 323.6619        |
| 1129.4895      | 11 | D  | 4  | 518.2575       | 259.6326        |
| 1258.5321      | 12 | E  | 3  | 403.2305       | 202.1192        |
| 1357.6005      | 13 | V  | 2  | 274.1879       | 137.5979        |
|                | 14 | R  | 1  | 175.1195       | 88.0637         |

N-term:+35.07

X-range:

0 - 0

MassTol: Y-zoom:

0. 1.

MassType:

☐AVG ☒MONO

Axis:

☒1 ☐2

Label:

☒I ☐M ☐-

Ions:

a ☐+ ☐2+ ☐3+

b ☒+ ☐2+ ☐3+

c ☐+ ☐2+ ☐3+

x ☐+ ☐2+ ☐3+

y ☒+ ☒2+ ☐3+

z ☐+ ☐2+ ☐3+

hide H<sub>2</sub>O/NH<sub>3</sub> ☐

zoom 112-122 ☐

GO

STGPGPMPAPR, MH+ 1095.5621, m/z 548.2847  
L OS G13 P120811 220811-s1.02432.02432.2.dta

scan 2432; 7.9e+000

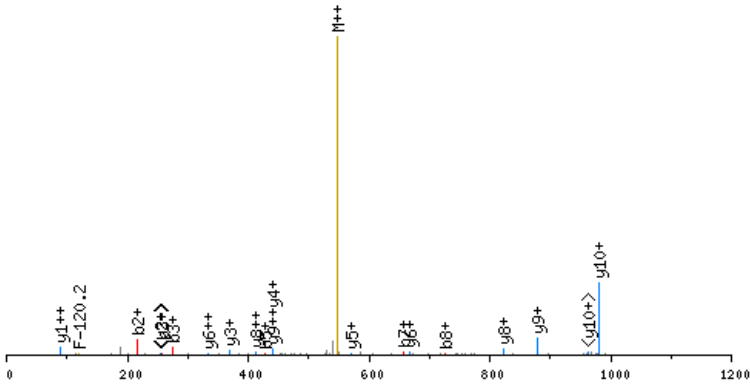

click image to zoom in; click top corners to zoom out [precursor±]

scan 2429; 548.3 m/z; 5.7e+000

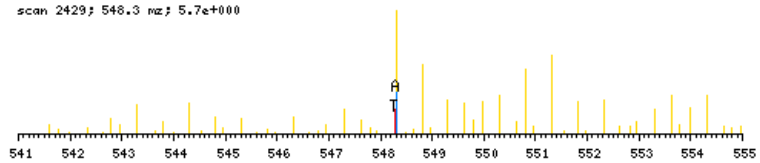

zoomed in precursor plot; T=theoretical m/z, A=acquired m/z

| b <sup>+</sup> | #  | AA | #  | y <sup>+</sup> | y <sup>2+</sup> |
|----------------|----|----|----|----------------|-----------------|
| 116.0711       | 1  | S  | 11 |                |                 |
| 217.1188       | 2  | T  | 10 | 980.4988       | 490.7533        |
| 274.1403       | 3  | G  | 9  | 879.4511       | 440.2295        |
| 371.1930       | 4  | P  | 8  | 822.4296       | 411.7187        |
| 428.2145       | 5  | G  | 7  | 725.3769       | 363.1923        |
| 525.2673       | 6  | P  | 6  | 668.3554       | 334.6816        |
| 656.3077       | 7  | M  | 5  | 571.3026       | 286.1552        |
| 727.3449       | 8  | A  | 4  | 440.2621       | 220.6350        |
| 824.3976       | 9  | P  | 3  | 369.2250       | 185.1164        |
| 921.4504       | 10 | P  | 2  | 272.1723       | 136.5900        |
|                | 11 | R  | 1  | 175.1195       | 88.0637         |

N-term:+29.04

zoomed in precursor plot; T=theoretical m/z, A=acquired m/z

X-range:

0 - 0

MassTol: Y-zoom:

0. 1.

MassType:

☐AVG ☒MONO

Axis:

☒1 ☐2

Label:

☒I ☐M ☐-

Ions:

a ☐+ ☐2+ ☐3+

b ☒+ ☐2+ ☐3+

c ☐+ ☐2+ ☐3+

x ☐+ ☐2+ ☐3+

y ☒+ ☒2+ ☐3+

z ☐+ ☐2+ ☐3+

hide H<sub>2</sub>O/NH<sub>3</sub> ☐

zoom 112-122 ☐

GO

STHQAAVVSKIDSR, MH+ 1554.8604, m/z 389.4706  
L OS G17 P120811 220811-s1.02126.02126.4.dta

scan 2126; 2.0e+001

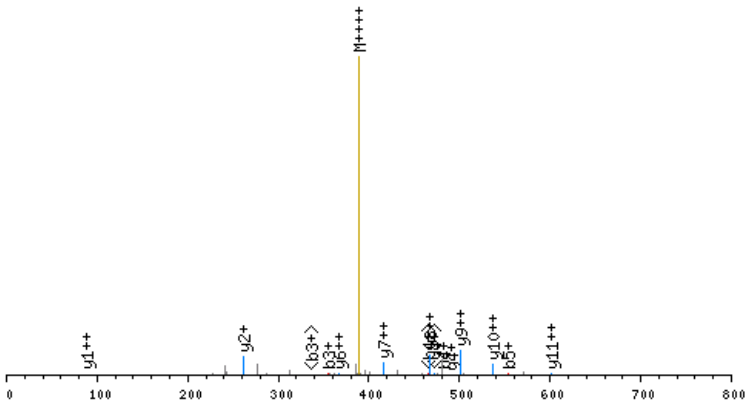

click image to zoom in; click top corners to zoom out

[precursor±]

scan 2123; 389.5 m/z; 5.9e+000

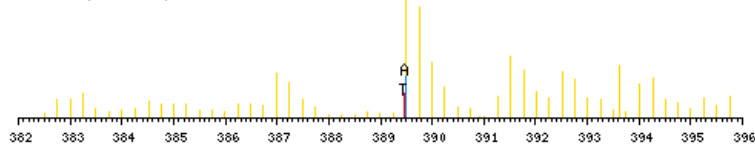

zoomed in precursor plot; T=theoretical m/z, A=acquired m/z

| b <sup>+</sup> | #  | AA | #  | y <sup>+</sup> | y <sup>2+</sup> |
|----------------|----|----|----|----------------|-----------------|
| 116.0711       | 1  | S  | 14 |                |                 |
| 217.1188       | 2  | T  | 13 | 1439.7971      | 720.4025        |
| 354.1777       | 3  | H  | 12 | 1338.7494      | 669.8786        |
| 482.2363       | 4  | Q  | 11 | 1201.6905      | 601.3492        |
| 553.2734       | 5  | A  | 10 | 1073.6319      | 537.3199        |
| 624.3105       | 6  | A  | 9  | 1002.5948      | 501.8013        |
| 723.3789       | 7  | V  | 8  | 931.5577       | 466.2828        |
| 822.4474       | 8  | V  | 7  | 832.4893       | 416.7486        |
| 909.4794       | 9  | S  | 6  | 733.4209       | 367.2143        |
| 1065.6057      | 10 | K  | 5  | 646.3888       | 323.6983        |
| 1178.6897      | 11 | I  | 4  | 490.2625       | 245.6352        |
| 1293.7167      | 12 | D  | 3  | 377.1785       | 189.0931        |
| 1380.7487      | 13 | S  | 2  | 262.1515       | 131.5797        |
|                | 14 | R  | 1  | 175.1195       | 88.0637         |

N-term:+29.04 K(10):+156.13

X-range:

0 - 0

MassTol: Y-zoom:

0. 1.

MassType:

☐ AVG ☒ MONO

Axis:

☒ 1 ☐ 2

Label:

☒ I ☐ M ☐ -

Ions:

a ☐ + ☐ 2+ ☐ 3+

b ☒ + ☐ 2+ ☐ 3+

c ☐ + ☐ 2+ ☐ 3+

x ☐ + ☐ 2+ ☐ 3+

y ☒ + ☒ 2+ ☐ 3+

z ☐ + ☐ 2+ ☐ 3+

hide H<sub>2</sub>O/NH<sub>3</sub> ☐

zoom 112-122 ☐

GO

STLSKPAPLTGTTLEVR, MH+ 1726.0115, m/z 576.0087  
L OS G15 P120811 220811-s1.04088.04088.3.dta

scan 4088; 1.0e+001

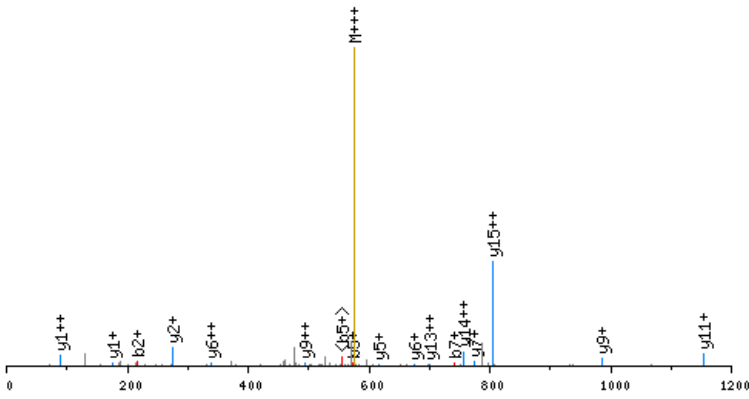

click image to zoom in; click top corners to zoom out

[precursor±]

scan 4086; 576.0 m/z; 5.9e+001

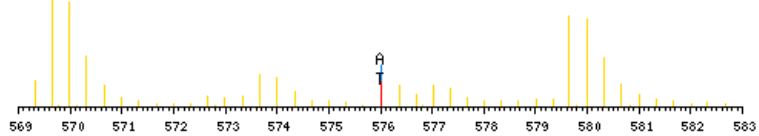

zoomed in precursor plot; T=theoretical m/z, A=acquired m/z

| b <sup>+</sup> | #  | AA | #  | y <sup>+</sup> | y <sup>2+</sup> |
|----------------|----|----|----|----------------|-----------------|
| 116.0711       | 1  | S  | 16 |                |                 |
| 217.1188       | 2  | T  | 15 | 1610.9482      | 805.9780        |
| 330.2029       | 3  | L  | 14 | 1509.9005      | 755.4542        |
| 417.2349       | 4  | S  | 13 | 1396.8164      | 698.9121        |
| 573.3612       | 5  | K  | 12 | 1309.7844      | 655.3961        |
| 670.4140       | 6  | P  | 11 | 1153.6581      | 577.3330        |
| 741.4511       | 7  | A  | 10 | 1056.6053      | 528.8066        |
| 838.5038       | 8  | P  | 9  | 985.5682       | 493.2880        |
| 951.5879       | 9  | L  | 8  | 888.5155       | 444.7616        |
| 1052.6356      | 10 | T  | 7  | 775.4314       | 388.2196        |
| 1109.6570      | 11 | G  | 6  | 674.3837       | 337.6958        |
| 1210.7047      | 12 | T  | 5  | 617.3623       | 309.1850        |
| 1323.7888      | 13 | L  | 4  | 516.3146       | 258.6612        |
| 1452.8314      | 14 | E  | 3  | 403.2305       | 202.1192        |
| 1551.8998      | 15 | V  | 2  | 274.1879       | 137.5979        |
|                | 16 | R  | 1  | 175.1195       | 88.0637         |

N-term:+29.04 K(5):+156.13

X-range:

0 - 0

MassTol: Y-zoom:

0. 1.

MassType:

☐ AVG ☒ MONO

Axis:

☒ 1 ☐ 2

Label:

☒ I ☐ M ☐ -

Ions:

a ☐ + ☐ 2+ ☐ 3+

b ☒ + ☐ 2+ ☐ 3+

c ☐ + ☐ 2+ ☐ 3+

x ☐ + ☐ 2+ ☐ 3+

y ☒ + ☒ 2+ ☐ 3+

z ☐ + ☐ 2+ ☐ 3+

hide H<sub>2</sub>O/NH<sub>3</sub> ☐

zoom 112-122 ☐

GO

STPPSAYGSVKPYTNFDAER, MH+ 2243.0984, m/z 748.3710  
L OS G15 P120811 220811-s1.04100.04100.3.dta

scan 4100; 3.4e+000

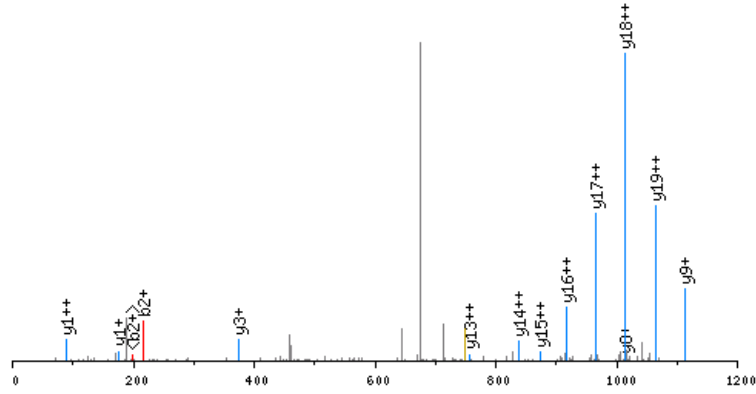

click image to zoom in; click top corners to zoom out [\[precursor±\]](#)

scan 4096; 748.4 m/z; 6.5e+000

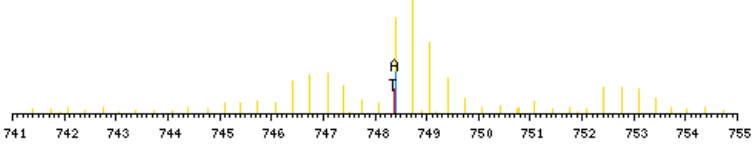

zoomed in precursor plot; T=theoretical m/z, A=acquired m/z

| b <sup>+</sup> | #  | AA | #  | y <sup>+</sup> | y <sup>2+</sup> |
|----------------|----|----|----|----------------|-----------------|
| 116.0711       | 1  | S  | 20 |                |                 |
| 217.1188       | 2  | T  | 19 | 2128.0351      | 1064.5215       |
| 314.1716       | 3  | P  | 18 | 2026.9875      | 1013.9976       |
| 411.2243       | 4  | P  | 17 | 1929.9347      | 965.4713        |
| 498.2564       | 5  | S  | 16 | 1832.8819      | 916.9449        |
| 569.2935       | 6  | A  | 15 | 1745.8499      | 873.4289        |
| 732.3568       | 7  | Y  | 14 | 1674.8128      | 837.9103        |
| 789.3783       | 8  | G  | 13 | 1511.7495      | 756.3786        |
| 876.4103       | 9  | S  | 12 | 1454.7280      | 727.8679        |
| 975.4787       | 10 | V  | 11 | 1367.6960      | 684.3519        |
| 1131.6050      | 11 | K  | 10 | 1268.6276      | 634.8177        |
| 1228.6578      | 12 | P  | 9  | 1112.5013      | 556.7545        |
| 1391.7211      | 13 | Y  | 8  | 1015.4485      | 508.2282        |
| 1492.7688      | 14 | T  | 7  | 852.3852       | 426.6965        |
| 1606.8117      | 15 | N  | 6  | 751.3375       | 376.1727        |
| 1753.8801      | 16 | F  | 5  | 637.2946       | 319.1512        |
| 1868.9071      | 17 | D  | 4  | 490.2262       | 245.6170        |
| 1939.9442      | 18 | A  | 3  | 375.1992       | 188.1035        |
| 2068.9868      | 19 | E  | 2  | 304.1621       | 152.5850        |
|                | 20 | R  | 1  | 175.1195       | 88.0637         |

N-term:+29.04 K(11):+156.13

X-range:

0 - 0

MassTol: Y-zoom:

0. 1.

MassType:

☐ AVG ☒ MONO

Axis:

☒ 1 ☐ 2

Label:

☒ I ☐ M ☐ -

Ions:

a ☐ + ☐ 2+ ☐ 3+

b ☒ + ☐ 2+ ☐ 3+

c ☐ + ☐ 2+ ☐ 3+

x ☐ + ☐ 2+ ☐ 3+

y ☒ + ☒ 2+ ☐ 3+

z ☐ + ☐ 2+ ☐ 3+

hide H<sub>2</sub>O/NH<sub>3</sub> ☐

zoom 112-122 ☐

GO

STSSMGTLPKQVKIVEVGPR, MH+ 2198.2583, m/z 550.3200  
L OS G16 P120811 220811-s1.04669.04669.4.dta

scan 4669; 1.8e+001

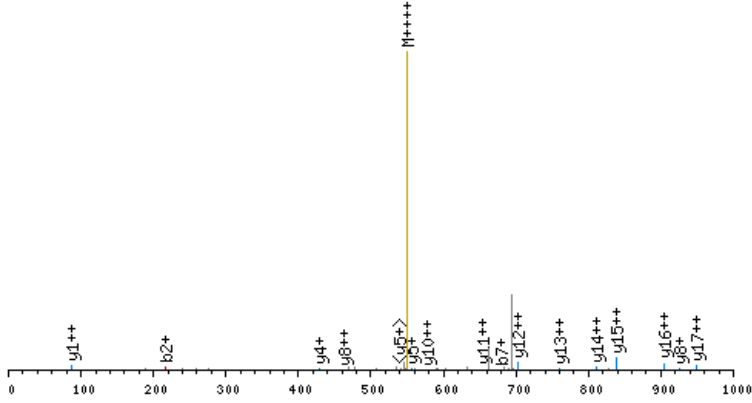

click image to zoom in; click top corners to zoom out [\[precursor±\]](#)

scan 4668; 550.3 mz; 9.6e+000

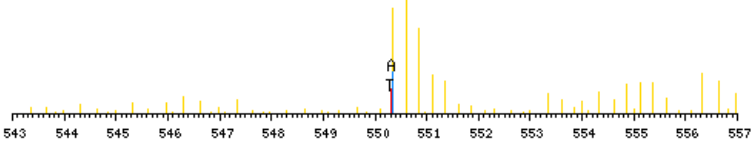

zoomed in precursor plot; T=theoretical m/z, A=acquired m/z

| b <sup>+</sup> | #  | AA | #  | y <sup>+</sup> | y <sup>2+</sup> |
|----------------|----|----|----|----------------|-----------------|
| 116.0711       | 1  | S  | 20 |                |                 |
| 217.1188       | 2  | T  | 19 | 2083.1950      | 1042.1014       |
| 304.1508       | 3  | S  | 18 | 1982.1473      | 991.5776        |
| 391.1829       | 4  | S  | 17 | 1895.1153      | 948.0616        |
| 522.2233       | 5  | M  | 16 | 1808.0833      | 904.5455        |
| 579.2448       | 6  | G  | 15 | 1677.0428      | 839.0253        |
| 680.2925       | 7  | T  | 14 | 1620.0213      | 810.5146        |
| 793.3766       | 8  | L  | 13 | 1518.9736      | 759.9907        |
| 890.4293       | 9  | P  | 12 | 1405.8896      | 703.4487        |
| 1046.5556      | 10 | K  | 11 | 1308.8368      | 654.9223        |
| 1174.6142      | 11 | Q  | 10 | 1152.7105      | 576.8592        |
| 1273.6826      | 12 | V  | 9  | 1024.6519      | 512.8299        |
| 1429.8089      | 13 | K  | 8  | 925.5835       | 463.2957        |
| 1542.8930      | 14 | I  | 7  | 769.4572       | 385.2325        |
| 1641.9614      | 15 | V  | 6  | 656.3731       | 328.6905        |
| 1771.0040      | 16 | E  | 5  | 557.3047       | 279.1563        |
| 1870.0724      | 17 | V  | 4  | 428.2621       | 214.6350        |
| 1927.0939      | 18 | G  | 3  | 329.1937       | 165.1008        |
| 2024.1466      | 19 | P  | 2  | 272.1723       | 136.5900        |
|                | 20 | R  | 1  | 175.1195       | 88.0637         |

N-term: +29.04 K(10): +156.13  
K(13): +156.13

X-range:

0 - 0

MassTol: Y-zoom:

0. 1.

MassType:

☐ AVG ☒ MONO

Axis:

☒ 1 ☐ 2

Label:

☒ I ☐ M ☐ -

Ions:

a ☐ + ☐ 2+ ☐ 3+

b ☒ + ☐ 2+ ☐ 3+

c ☐ + ☐ 2+ ☐ 3+

x ☐ + ☐ 2+ ☐ 3+

y ☒ + ☒ 2+ ☐ 3+

z ☐ + ☐ 2+ ☐ 3+

hide H<sub>2</sub>O/NH<sub>3</sub> ☐

zoom 112-122 ☐

GO

SVATKKTEQGPPSSEYIFER, MH+ 2338.2295, m/z 585.3128  
L OS G17 P120811 220811-s1.03796.03796.4.dta

scan 3796; 1.4e+000

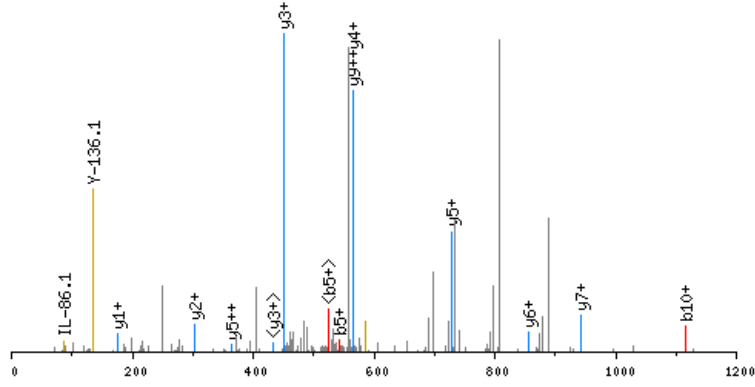

click image to zoom in; click top corners to zoom out [\[precursor±\]](#)

scan 3793; 585.3 m/z; 5.2e+000

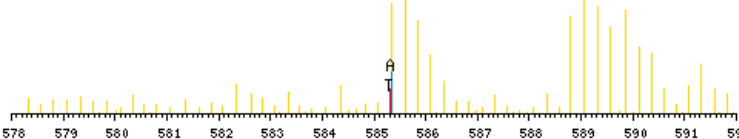

zoomed in precursor plot; T=theoretical m/z, A=acquired m/z

| b <sup>+</sup> | #  | AA | #  | y <sup>+</sup> | y <sup>2+</sup> |
|----------------|----|----|----|----------------|-----------------|
| 116.0711       | 1  | S  | 20 |                |                 |
| 215.1395       | 2  | V  | 19 | 2223.1662      | 1112.0870       |
| 286.1767       | 3  | A  | 18 | 2124.0978      | 1062.5528       |
| 387.2243       | 4  | T  | 17 | 2053.0607      | 1027.0342       |
| 543.3506       | 5  | K  | 16 | 1952.0130      | 976.5104        |
| 699.4769       | 6  | K  | 15 | 1795.8867      | 898.4473        |
| 800.5246       | 7  | T  | 14 | 1639.7604      | 820.3841        |
| 929.5672       | 8  | E  | 13 | 1538.7127      | 769.8603        |
| 1057.6258      | 9  | Q  | 12 | 1409.6701      | 705.3390        |
| 1114.6472      | 10 | G  | 11 | 1281.6115      | 641.3097        |
| 1211.7000      | 11 | P  | 10 | 1224.5901      | 612.7990        |
| 1308.7528      | 12 | P  | 9  | 1127.5373      | 564.2726        |
| 1395.7848      | 13 | S  | 8  | 1030.4846      | 515.7462        |
| 1482.8168      | 14 | S  | 7  | 943.4525       | 472.2302        |
| 1611.8594      | 15 | E  | 6  | 856.4205       | 428.7142        |
| 1774.9228      | 16 | Y  | 5  | 727.3779       | 364.1929        |
| 1888.0068      | 17 | I  | 4  | 564.3146       | 282.6612        |
| 2035.0752      | 18 | F  | 3  | 451.2305       | 226.1192        |
| 2164.1178      | 19 | E  | 2  | 304.1621       | 152.5850        |
|                | 20 | R  | 1  | 175.1195       | 88.0637         |

N-term:+29.04 K(5):+156.13  
K(6):+156.13

X-range:

0 - 0

MassTol: Y-zoom:

0. 1.

MassType:

☐AVG ☒MONO

Axis:

☒1 ☐2

Label:

☒I ☐M ☐-

Ions:

a ☐+ ☐2+ ☐3+

b ☒+ ☐2+ ☐3+

c ☐+ ☐2+ ☐3+

x ☐+ ☐2+ ☐3+

y ☒+ ☒2+ ☐3+

z ☐+ ☐2+ ☐3+

hide H<sub>2</sub>O/NH<sub>3</sub> ☐

zoom 112-122 ☐

GO

SVFYTVITFMLNPITYTLR, MH+ 2261.2831, m/z 566.0762  
H OS G16 P120811 220811-s1.05889.05889.4.dta

scan 5889; 4.3e+000

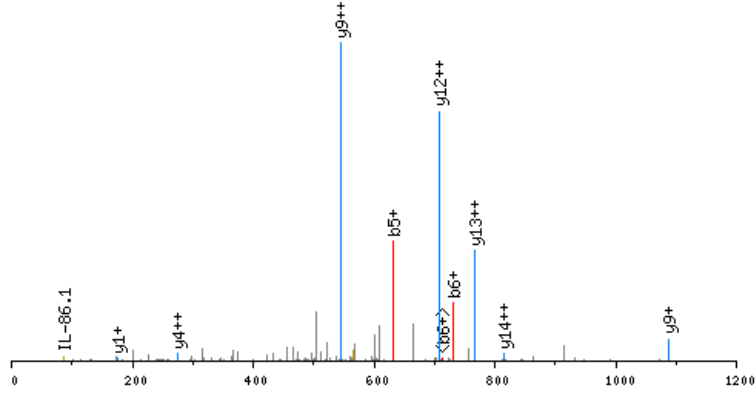

click image to zoom in; click top corners to zoom out [\[precursor±\]](#)

scan 5888; 566.1 m/z; 1.4e+001

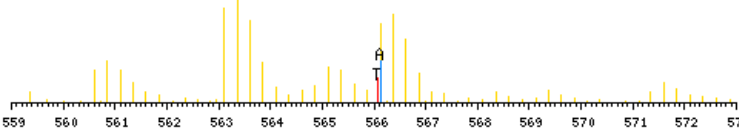

zoomed in precursor plot; T=theoretical m/z, A=acquired m/z

| b <sup>+</sup> | #  | AA | #  | y <sup>+</sup> | y <sup>2+</sup> |
|----------------|----|----|----|----------------|-----------------|
| 122.1029       | 1  | S  | 19 |                |                 |
| 221.1713       | 2  | V  | 18 | 2140.1880      | 1070.5979       |
| 368.2398       | 3  | F  | 17 | 2041.1196      | 1021.0637       |
| 531.3031       | 4  | Y  | 16 | 1894.0512      | 947.5295        |
| 632.3508       | 5  | T  | 15 | 1730.9879      | 865.9979        |
| 731.4192       | 6  | V  | 14 | 1629.9402      | 815.4740        |
| 844.5032       | 7  | I  | 13 | 1530.8718      | 765.9398        |
| 945.5509       | 8  | T  | 12 | 1417.7877      | 709.3978        |
| 1042.6037      | 9  | P  | 11 | 1316.7401      | 658.8739        |
| 1173.6442      | 10 | M  | 10 | 1219.6873      | 610.3476        |
| 1286.7282      | 11 | L  | 9  | 1088.6468      | 544.8273        |
| 1400.7712      | 12 | N  | 8  | 975.5627       | 488.2853        |
| 1497.8239      | 13 | P  | 7  | 861.5198       | 431.2638        |
| 1610.9080      | 14 | I  | 6  | 764.4670       | 382.7374        |
| 1709.9764      | 15 | V  | 5  | 651.3830       | 326.1954        |
| 1873.0397      | 16 | Y  | 4  | 552.3146       | 276.6612        |
| 1974.0874      | 17 | T  | 3  | 389.2512       | 195.1295        |
| 2087.1715      | 18 | L  | 2  | 288.2036       | 144.6057        |
|                | 19 | R  | 1  | 175.1195       | 88.0637         |

N-term:+35.07

X-range:

0 - 0

MassTol: Y-zoom:

0. 1.

MassType:

☐ AVG ☒ MONO

Axis:

☒ 1 ☐ 2

Label:

☒ I ☐ M ☐ -

Ions:

a ☐ + ☐ 2+ ☐ 3+

b ☒ + ☐ 2+ ☐ 3+

c ☐ + ☐ 2+ ☐ 3+

x ☐ + ☐ 2+ ☐ 3+

y ☒ + ☒ 2+ ☐ 3+

z ☐ + ☐ 2+ ☐ 3+

hide H<sub>2</sub>O/NH<sub>3</sub> ☐

zoom 112-122 ☐

GO

SVGPVGAVGPR, MH+ 1023.5951, m/z 512.3012  
L OS G13 P120811 220811-s1.03020.03020.2.dta

scan 3020; 1.0e+001

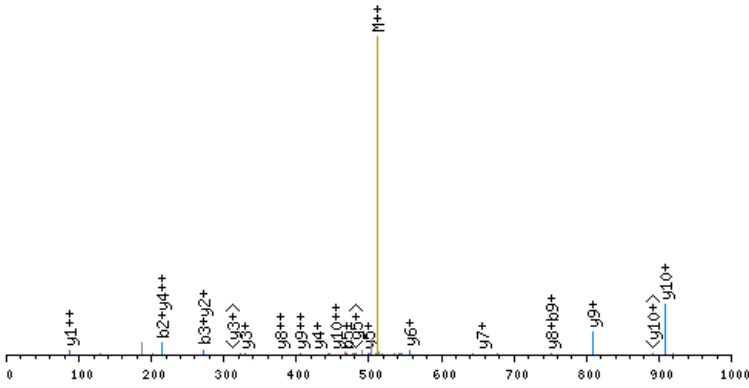

click image to zoom in; click top corners to zoom out

[precursor±]

scan 3019; 512.3 m/z; 1.8e+002

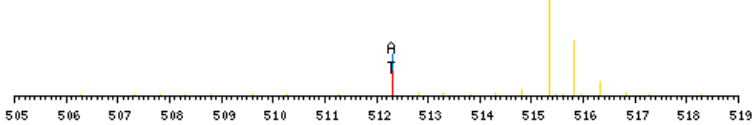

zoomed in precursor plot; T=theoretical m/z, A=acquired m/z

| b <sup>+</sup> | #  | AA | #  | y <sup>+</sup> | y <sup>2+</sup> |
|----------------|----|----|----|----------------|-----------------|
| 116.0711       | 1  | S  | 11 |                |                 |
| 215.1395       | 2  | V  | 10 | 908.5318       | 454.7698        |
| 272.1610       | 3  | G  | 9  | 809.4634       | 405.2356        |
| 369.2138       | 4  | P  | 8  | 752.4419       | 376.7249        |
| 468.2822       | 5  | V  | 7  | 655.3891       | 328.1985        |
| 525.3036       | 6  | G  | 6  | 556.3207       | 278.6643        |
| 596.3408       | 7  | A  | 5  | 499.2993       | 250.1535        |
| 695.4092       | 8  | V  | 4  | 428.2621       | 214.6350        |
| 752.4306       | 9  | G  | 3  | 329.1937       | 165.1008        |
| 849.4834       | 10 | P  | 2  | 272.1723       | 136.5900        |
|                | 11 | R  | 1  | 175.1195       | 88.0637         |

N-term:+29.04

zoomed in precursor plot; T=theoretical m/z, A=acquired m/z

N-term: +35.07 K(13): +162.16

X-range:

0 - 0

MassTol: Y-zoom:

0. 1.

MassType:

☐AVG ☒MONO

Axis:

☒1 ☐2

Label:

☒I ☐M ☐-

Ions:

a ☐+ ☐2+ ☐3+

b ☒+ ☐2+ ☐3+

c ☐+ ☐2+ ☐3+

x ☐+ ☐2+ ☐3+

y ☒+ ☒2+ ☐3+

z ☐+ ☐2+ ☐3+

hide H<sub>2</sub>O/NH<sub>3</sub> ☐

zoom 112-122 ☐

GO

SVMLQIAATELEKEESRR, MH+ 2146.1542, m/z 537.2940  
L OS G17 P120811 220811-s1.06384.06384.4.dta

scan 6384; 1.1e+000

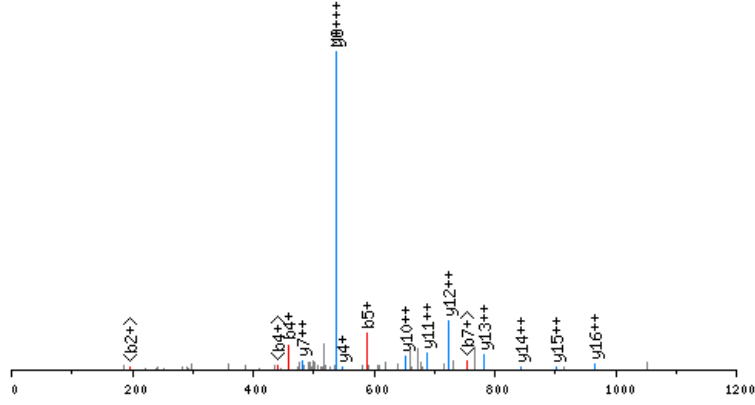

click image to zoom in; click top corners to zoom out [\[precursor±\]](#)

scan 6380; 537.3 m/z; 8.9e-001

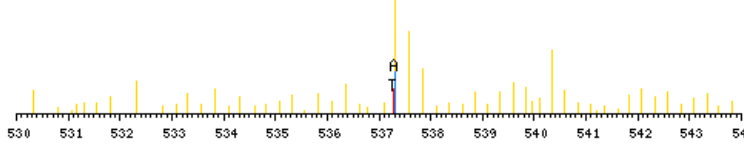

zoomed in precursor plot; T=theoretical m/z, A=acquired m/z

| b <sup>+</sup> | #  | AA | #  | y <sup>+</sup> | y <sup>2+</sup> |
|----------------|----|----|----|----------------|-----------------|
| 116.0711       | 1  | S  | 18 |                |                 |
| 215.1395       | 2  | V  | 17 | 2031.0909      | 1016.0494       |
| 346.1800       | 3  | M  | 16 | 1932.0225      | 966.5151        |
| 459.2641       | 4  | L  | 15 | 1800.9820      | 900.9949        |
| 587.3227       | 5  | Q  | 14 | 1687.8979      | 844.4529        |
| 700.4067       | 6  | I  | 13 | 1559.8393      | 780.4236        |
| 771.4438       | 7  | A  | 12 | 1446.7553      | 723.8816        |
| 842.4810       | 8  | A  | 11 | 1375.7182      | 688.3630        |
| 943.5286       | 9  | T  | 10 | 1304.6811      | 652.8444        |
| 1072.5712      | 10 | E  | 9  | 1203.6334      | 602.3206        |
| 1185.6553      | 11 | L  | 8  | 1074.5908      | 537.7993        |
| 1314.6979      | 12 | E  | 7  | 961.5067       | 481.2573        |
| 1470.8242      | 13 | K  | 6  | 832.4641       | 416.7360        |
| 1599.8668      | 14 | E  | 5  | 676.3378       | 338.6728        |
| 1728.9094      | 15 | E  | 4  | 547.2952       | 274.1515        |
| 1815.9414      | 16 | S  | 3  | 418.2526       | 209.6302        |
| 1972.0425      | 17 | R  | 2  | 331.2206       | 166.1142        |
|                | 18 | R  | 1  | 175.1195       | 88.0637         |

N-term:+29.04 K(13):+156.13

X-range:

0 - 0

MassTol: Y-zoom:

0. 1.

MassType:

☐ AVG ☒ MONO

Axis:

☒ 1 ☐ 2

Label:

☒ I ☐ M ☐ -

Ions:

a ☐ + ☐ 2+ ☐ 3+

b ☒ + ☐ 2+ ☐ 3+

c ☐ + ☐ 2+ ☐ 3+

x ☐ + ☐ 2+ ☐ 3+

y ☒ + ☒ 2+ ☐ 3+

z ☐ + ☐ 2+ ☐ 3+

hide H<sub>2</sub>O/NH<sub>3</sub> ☐

zoom 112-122 ☐

GO

SVPDEESKPASNTQVEGDEEAALLER, MH+ 2943.4071, m/z 736.6072  
L OS G14 P120811 220811-s1.04690.04690.4.dta

scan 4690; 8.5e-001

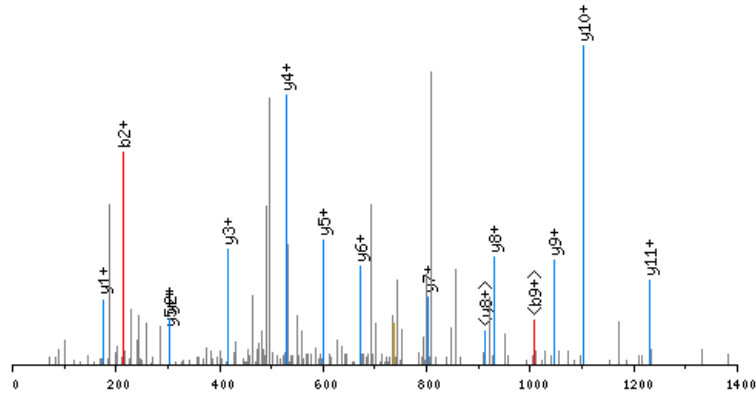

click image to zoom in; click top corners to zoom out

[precursor±]

scan 4686; 736.6 m/z; 6.1e+000

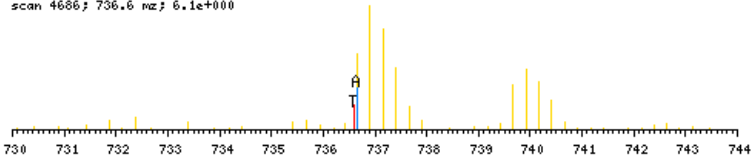

zoomed in precursor plot; T=theoretical m/z, A=acquired m/z

| b <sup>+</sup> | #  | AA | #  | y <sup>+</sup> | y <sup>2+</sup> |
|----------------|----|----|----|----------------|-----------------|
| 116.0711       | 1  | S  | 27 |                |                 |
| 215.1395       | 2  | V  | 26 | 2828.3438      | 1414.6758       |
| 312.1923       | 3  | P  | 25 | 2729.2754      | 1365.1416       |
| 427.2192       | 4  | D  | 24 | 2632.2226      | 1316.6152       |
| 556.2618       | 5  | E  | 23 | 2517.1957      | 1259.1018       |
| 685.3044       | 6  | E  | 22 | 2388.1531      | 1194.5805       |
| 772.3365       | 7  | S  | 21 | 2259.1105      | 1130.0592       |
| 928.4628       | 8  | K  | 20 | 2172.0785      | 1086.5431       |
| 1025.5155      | 9  | P  | 19 | 2015.9522      | 1008.4800       |
| 1096.5526      | 10 | A  | 18 | 1918.8994      | 959.9536        |
| 1183.5847      | 11 | S  | 17 | 1847.8623      | 924.4351        |
| 1270.6167      | 12 | S  | 16 | 1760.8303      | 880.9190        |
| 1384.6596      | 13 | N  | 15 | 1673.7982      | 837.4030        |
| 1485.7073      | 14 | T  | 14 | 1559.7553      | 780.3816        |
| 1613.7659      | 15 | Q  | 13 | 1458.7076      | 729.8577        |
| 1712.8343      | 16 | V  | 12 | 1330.6490      | 665.8284        |
| 1841.8769      | 17 | E  | 11 | 1231.5806      | 616.2942        |
| 1898.8984      | 18 | G  | 10 | 1102.5380      | 551.7729        |
| 2013.9253      | 19 | D  | 9  | 1045.5166      | 523.2622        |
| 2142.9679      | 20 | E  | 8  | 930.4896       | 465.7487        |
| 2272.0105      | 21 | E  | 7  | 801.4470       | 401.2274        |
| 2343.0476      | 22 | A  | 6  | 672.4044       | 336.7061        |
| 2414.0847      | 23 | A  | 5  | 601.3673       | 301.1876        |
| 2527.1688      | 24 | L  | 4  | 530.3302       | 265.6690        |
| 2640.2528      | 25 | L  | 3  | 417.2462       | 209.1270        |
| 2769.2954      | 26 | E  | 2  | 304.1621       | 152.5850        |
|                | 27 | R  | 1  | 175.1195       | 88.0637         |

N-term:+29.04 K(8):+156.13

X-range:

0 - 0

MassTol: Y-zoom:

0. 1.

MassType:

☐ AVG ☒ MONO

Axis:

☒ 1 ☐ 2

Label:

☒ I ☐ M ☐ -

Ions:

a ☐ + ☐ 2+ ☐ 3+

b ☒ + ☐ 2+ ☐ 3+

c ☐ + ☐ 2+ ☐ 3+

x ☐ + ☐ 2+ ☐ 3+

y ☒ + ☒ 2+ ☐ 3+

z ☐ + ☐ 2+ ☐ 3+

hide H<sub>2</sub>O/NH<sub>3</sub> ☐

zoom 112-122 ☐

GO

SVPLPAENVITITAGQR, MH+ 1680.9284, m/z 560.9810  
L OS G13 P120811 220811-s1.05095.05095.3.dta

scan 5095; 3.0e+000

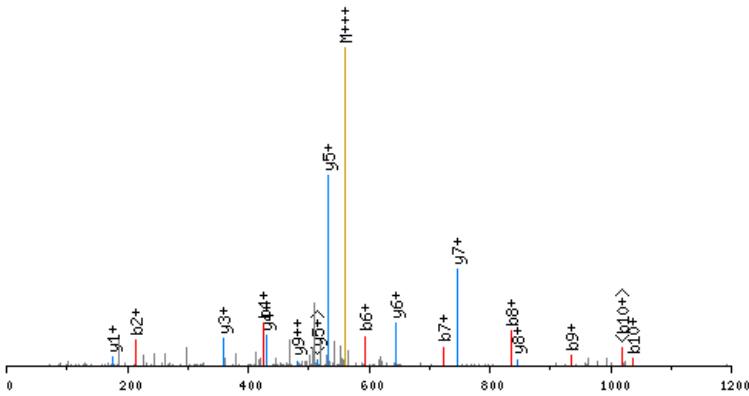

click image to zoom in; click top corners to zoom out

[precursor±]

scan 5094; 561.0 m/z; 9.0e+000

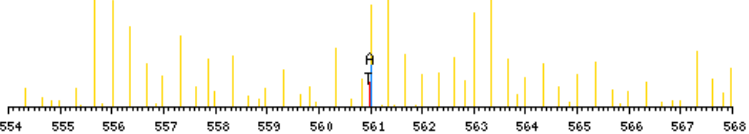

zoomed in precursor plot; T=theoretical m/z, A=acquired m/z

| b <sup>+</sup> | #  | AA | #  | y <sup>+</sup> | y <sup>2+</sup> |
|----------------|----|----|----|----------------|-----------------|
| 116.0711       | 1  | S  | 16 |                |                 |
| 215.1395       | 2  | V  | 15 | 1565.8651      | 783.4365        |
| 312.1923       | 3  | P  | 14 | 1466.7967      | 733.9023        |
| 425.2764       | 4  | L  | 13 | 1369.7440      | 685.3759        |
| 522.3291       | 5  | P  | 12 | 1256.6599      | 628.8339        |
| 593.3662       | 6  | A  | 11 | 1159.6071      | 580.3075        |
| 722.4088       | 7  | E  | 10 | 1088.5700      | 544.7889        |
| 836.4518       | 8  | N  | 9  | 959.5274       | 480.2676        |
| 935.5202       | 9  | V  | 8  | 845.4845       | 423.2462        |
| 1036.5679      | 10 | T  | 7  | 746.4161       | 373.7120        |
| 1149.6519      | 11 | I  | 6  | 645.3684       | 323.1881        |
| 1250.6996      | 12 | T  | 5  | 532.2843       | 266.6461        |
| 1321.7367      | 13 | A  | 4  | 431.2367       | 216.1222        |
| 1378.7582      | 14 | G  | 3  | 360.1995       | 180.6037        |
| 1506.8168      | 15 | Q  | 2  | 303.1781       | 152.0930        |
|                | 16 | R  | 1  | 175.1195       | 88.0637         |

N-term:+29.04

X-range:

0 - 0

MassTol: Y-zoom:

0. 1.

MassType:

☐AVG ☒MONO

Axis:

☒1 ☐2

Label:

☒I ☐M ☐-

Ions:

a ☐+ ☐2+ ☐3+

b ☒+ ☐2+ ☐3+

c ☐+ ☐2+ ☐3+

x ☐+ ☐2+ ☐3+

y ☒+ ☒2+ ☐3+

z ☐+ ☐2+ ☐3+

hide H<sub>2</sub>O/NH<sub>3</sub> ☐

zoom 112-122 ☐

GO

SVSVFNGAVSDDSKR, MH+ 1623.8342, m/z 541.9496  
L OS G15 P120811 220811-s1.03200.03200.3.dta

scan 3200; 5.0e+000

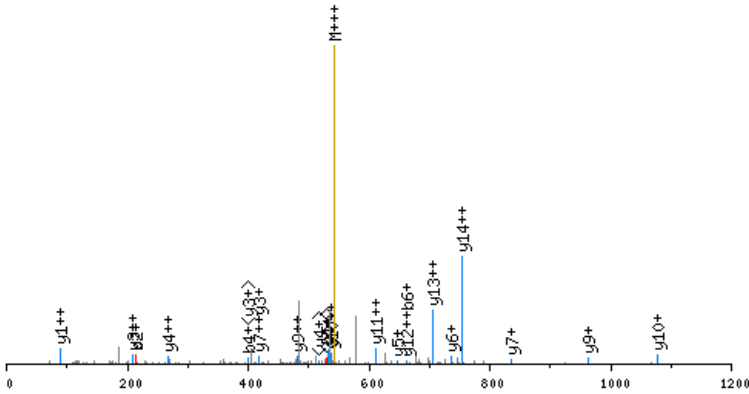

click image to zoom in; click top corners to zoom out [\[precursor±\]](#)

scan 3196; 541.9 m/z; 1.2e+001

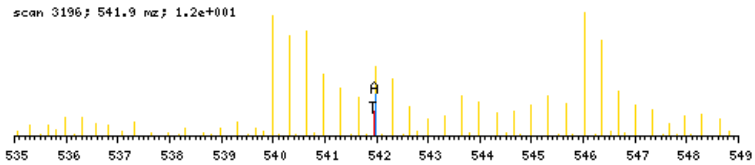

zoomed in precursor plot; T=theoretical m/z, A=acquired m/z

| b <sup>+</sup> | #  | AA | #  | y <sup>+</sup> | y <sup>2+</sup> |
|----------------|----|----|----|----------------|-----------------|
| 116.0711       | 1  | S  | 15 |                |                 |
| 215.1395       | 2  | V  | 14 | 1508.7709      | 754.8894        |
| 302.1716       | 3  | S  | 13 | 1409.7025      | 705.3552        |
| 401.2400       | 4  | V  | 12 | 1322.6705      | 661.8392        |
| 548.3084       | 5  | F  | 11 | 1223.6021      | 612.3050        |
| 662.3513       | 6  | N  | 10 | 1076.5337      | 538.7707        |
| 719.3728       | 7  | G  | 9  | 962.4907       | 481.7493        |
| 790.4099       | 8  | A  | 8  | 905.4693       | 453.2385        |
| 889.4783       | 9  | V  | 7  | 834.4322       | 417.7200        |
| 976.5103       | 10 | S  | 6  | 735.3637       | 368.1858        |
| 1091.5373      | 11 | D  | 5  | 648.3317       | 324.6698        |
| 1206.5642      | 12 | D  | 4  | 533.3048       | 267.1563        |
| 1293.5963      | 13 | S  | 3  | 418.2778       | 209.6428        |
| 1449.7226      | 14 | K  | 2  | 331.2458       | 166.1268        |
|                | 15 | R  | 1  | 175.1195       | 88.0637         |

N-term:+29.04 K(14):+156.13

X-range:

0 - 0

MassTol: Y-zoom:

0. 1.

MassType:

☐AVG ☒MONO

Axis:

☒1 ☐2

Label:

☒I ☐M ☐-

Ions:

a ☐+ ☐2+ ☐3+

b ☒+ ☐2+ ☐3+

c ☐+ ☐2+ ☐3+

x ☐+ ☐2+ ☐3+

y ☒+ ☒2+ ☐3+

z ☐+ ☐2+ ☐3+

hide H<sub>2</sub>O/NH<sub>3</sub> ☐

zoom 112-122 ☐

GO

SVTEQGAELSNEER, MH+ 1576.7454, m/z 526.2533  
L OS G13 P120811 220811-s1.02697.02697.3.dta

scan 2697; 3.0e+000

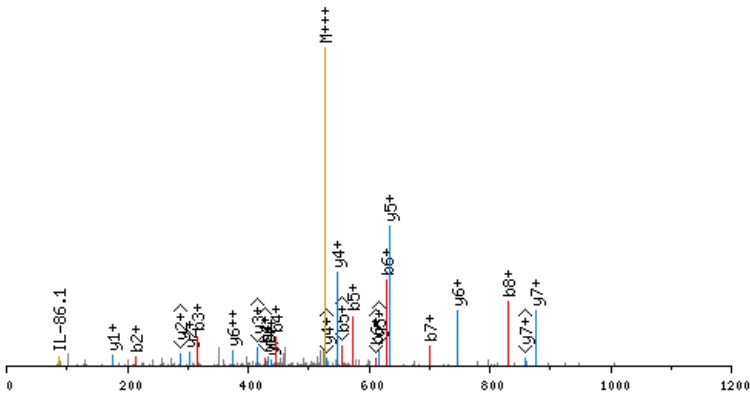

click image to zoom in; click top corners to zoom out

[precursor±]

scan 2694; 526.3 m/z; 5.0e+000

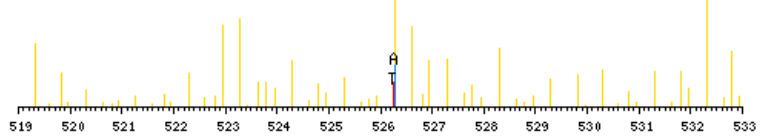

zoomed in precursor plot; T=theoretical m/z, A=acquired m/z

| b <sup>+</sup> | #  | AA | #  | y <sup>+</sup> | y <sup>2+</sup> |
|----------------|----|----|----|----------------|-----------------|
| 116.0711       | 1  | S  | 14 |                |                 |
| 215.1395       | 2  | V  | 13 | 1461.6821      | 731.3450        |
| 316.1872       | 3  | T  | 12 | 1362.6137      | 681.8108        |
| 445.2298       | 4  | E  | 11 | 1261.5660      | 631.2869        |
| 573.2884       | 5  | Q  | 10 | 1132.5235      | 566.7656        |
| 630.3099       | 6  | G  | 9  | 1004.4649      | 502.7364        |
| 701.3470       | 7  | A  | 8  | 947.4434       | 474.2256        |
| 830.3896       | 8  | E  | 7  | 876.4063       | 438.7071        |
| 943.4736       | 9  | L  | 6  | 747.3637       | 374.1858        |
| 1030.5057      | 10 | S  | 5  | 634.2796       | 317.6437        |
| 1144.5486      | 11 | N  | 4  | 547.2476       | 274.1277        |
| 1273.5912      | 12 | E  | 3  | 433.2047       | 217.1063        |
| 1402.6338      | 13 | E  | 2  | 304.1621       | 152.5850        |
|                | 14 | R  | 1  | 175.1195       | 88.0637         |

N-term:+29.04

X-range:

0 - 0

MassTol: Y-zoom:

0. 1.

MassType:

☐AVG ☒MONO

Axis:

☒1 ☐2

Label:

☒I ☐M ☐-

Ions:

a ☐+ ☐2+ ☐3+

b ☒+ ☐2+ ☐3+

c ☐+ ☐2+ ☐3+

x ☐+ ☐2+ ☐3+

y ☒+ ☒2+ ☐3+

z ☐+ ☐2+ ☐3+

hide H<sub>2</sub>O/NH<sub>3</sub> ☐

zoom 112-122 ☐

GO

SWYDNEYGYSNR, MH+ 1581.6610, m/z 527.8918  
L OS G14 P120811 220811-s1.04219.04219.3.dta

scan 4219; 3.6e+000

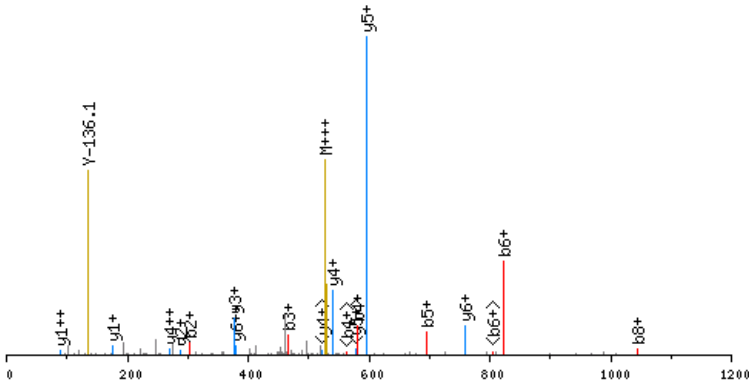

click image to zoom in; click top corners to zoom out

[precursor±]

scan 4216; 527.9 m/z; 1.1e+001

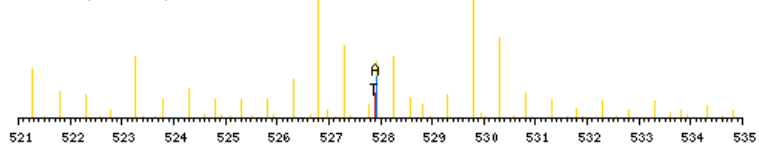

zoomed in precursor plot; T=theoretical m/z, A=acquired m/z

| b <sup>+</sup> | #  | AA | #  | y <sup>+</sup> | y <sup>2+</sup> |
|----------------|----|----|----|----------------|-----------------|
| 116.0711       | 1  | S  | 12 |                |                 |
| 302.1504       | 2  | W  | 11 | 1466.5977      | 733.8028        |
| 465.2138       | 3  | Y  | 10 | 1280.5184      | 640.7631        |
| 580.2407       | 4  | D  | 9  | 1117.4550      | 559.2314        |
| 694.2836       | 5  | N  | 8  | 1002.4281      | 501.7180        |
| 823.3262       | 6  | E  | 7  | 888.3852       | 444.6965        |
| 986.3896       | 7  | Y  | 6  | 759.3426       | 380.1752        |
| 1043.4110      | 8  | G  | 5  | 596.2792       | 298.6435        |
| 1206.4744      | 9  | Y  | 4  | 539.2578       | 270.1328        |
| 1293.5064      | 10 | S  | 3  | 376.1945       | 188.6011        |
| 1407.5493      | 11 | N  | 2  | 289.1624       | 145.0851        |
|                | 12 | R  | 1  | 175.1195       | 88.0637         |

N-term:+29.04

X-range:

0 - 0

MassTol: Y-zoom:

0. 1.

MassType:

☐AVG ☒MONO

Axis:

☒1 ☐2

Label:

☒I ☐M ☐-

Ions:

a ☐+ ☐2+ ☐3+

b ☒+ ☐2+ ☐3+

c ☐+ ☐2+ ☐3+

x ☐+ ☐2+ ☐3+

y ☒+ ☒2+ ☐3+

z ☐+ ☐2+ ☐3+

hide H<sub>2</sub>O/NH<sub>3</sub> ☐

zoom 112-122 ☐

GO

SYDPGSAKTIILNNGKTCR, MH+ 2066.0704, m/z 517.2731  
L OS G17 P120811 220811-s1.03630.03630.4.dta

scan 3630; 4.7e+001

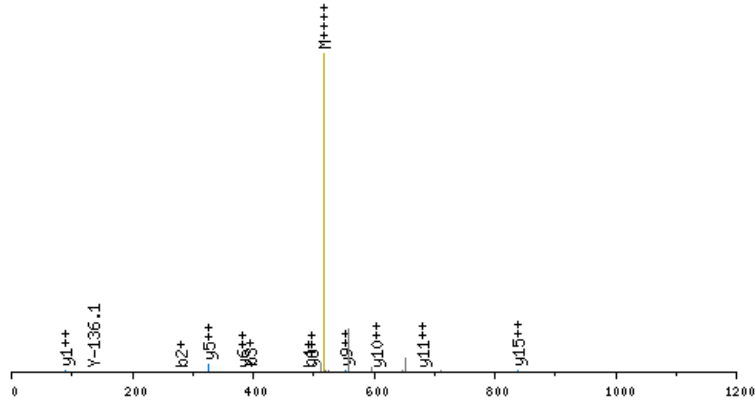

click image to zoom in; click top corners to zoom out [\[precursor±\]](#)

scan 3628; 517.3 m/z; 1.8e+001

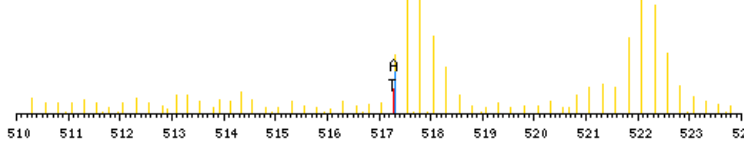

zoomed in precursor plot; T=theoretical m/z, A=acquired m/z

| b <sup>+</sup> | #  | AA | #  | y <sup>+</sup> | y <sup>2+</sup> |
|----------------|----|----|----|----------------|-----------------|
| 116.0711       | 1  | S  | 18 |                |                 |
| 279.1345       | 2  | Y  | 17 | 1951.0071      | 976.0075        |
| 394.1614       | 3  | D  | 16 | 1787.9438      | 894.4758        |
| 491.2142       | 4  | P  | 15 | 1672.9169      | 836.9623        |
| 548.2356       | 5  | G  | 14 | 1575.8641      | 788.4360        |
| 635.2677       | 6  | S  | 13 | 1518.8426      | 759.9252        |
| 706.3048       | 7  | A  | 12 | 1431.8106      | 716.4092        |
| 862.4311       | 8  | K  | 11 | 1360.7735      | 680.8907        |
| 963.4787       | 9  | T  | 10 | 1204.6472      | 602.8275        |
| 1076.5628      | 10 | I  | 9  | 1103.5995      | 552.3037        |
| 1189.6469      | 11 | L  | 8  | 990.5155       | 495.7616        |
| 1303.6898      | 12 | N  | 7  | 877.4314       | 439.2196        |
| 1417.7327      | 13 | N  | 6  | 763.3885       | 382.1981        |
| 1474.7542      | 14 | G  | 5  | 649.3455       | 325.1767        |
| 1630.8805      | 15 | K  | 4  | 592.3241       | 296.6660        |
| 1731.9282      | 16 | T  | 3  | 436.1978       | 218.6028        |
| 1891.9588      | 17 | C  | 2  | 335.1501       | 168.0790        |
|                | 18 | R  | 1  | 175.1195       | 88.0637         |

N-term:+29.04 K(8):+156.13  
K(15):+156.13 C(17):+160.03

X-range:

0 - 0

MassTol: Y-zoom:

0. 1.

MassType:

☐AVG ☒MONO

Axis:

☒1 ☐2

Label:

☒I ☐M ☐-

Ions:

a ☐+ ☐2+ ☐3+

b ☒+ ☐2+ ☐3+

c ☐+ ☐2+ ☐3+

x ☐+ ☐2+ ☐3+

y ☒+ ☒2+ ☐3+

z ☐+ ☐2+ ☐3+

hide H<sub>2</sub>O/NH<sub>3</sub> ☐

zoom 112-122 ☐

GO

SYELPDGQVITIGNER, MH+ 1818.9237, m/z 606.9794  
L OS G13 P120811 220811-s1.06356.06356.3.dta

scan 6356; 2.2e+000

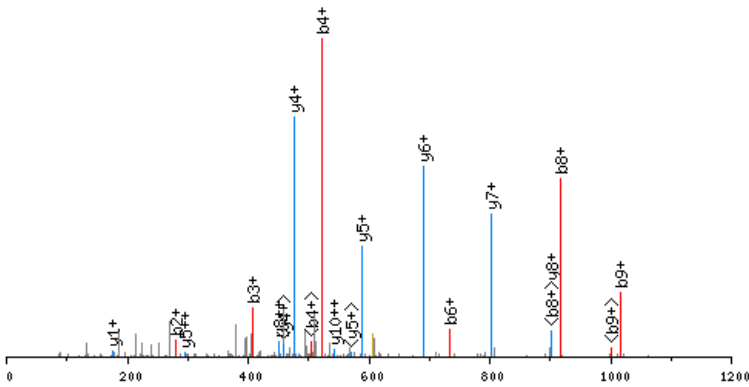

click image to zoom in; click top corners to zoom out

[precursor±]

scan 6354; 607.0 m/z; 5.1e+000

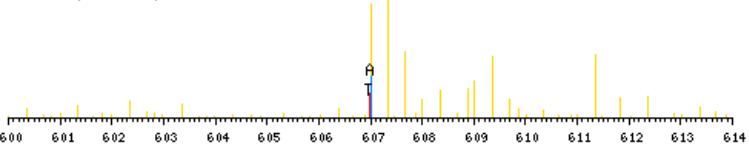

zoomed in precursor plot; T=theoretical m/z, A=acquired m/z

| b <sup>+</sup> | #  | AA | #  | y <sup>+</sup> | y <sup>2+</sup> |
|----------------|----|----|----|----------------|-----------------|
| 116.0711       | 1  | S  | 16 |                |                 |
| 279.1345       | 2  | Y  | 15 | 1703.8604      | 852.4341        |
| 408.1771       | 3  | E  | 14 | 1540.7971      | 770.9025        |
| 521.2611       | 4  | L  | 13 | 1411.7545      | 706.3812        |
| 618.3139       | 5  | P  | 12 | 1298.6705      | 649.8391        |
| 733.3408       | 6  | D  | 11 | 1201.6177      | 601.3128        |
| 790.3623       | 7  | G  | 10 | 1086.5907      | 543.7993        |
| 918.4209       | 8  | Q  | 9  | 1029.5693      | 515.2886        |
| 1017.4893      | 9  | V  | 8  | 901.5107       | 451.2593        |
| 1130.5733      | 10 | I  | 7  | 802.4423       | 401.7251        |
| 1231.6210      | 11 | T  | 6  | 689.3582       | 345.1830        |
| 1344.7051      | 12 | I  | 5  | 588.3105       | 294.6592        |
| 1401.7265      | 13 | G  | 4  | 475.2265       | 238.1172        |
| 1515.7695      | 14 | N  | 3  | 418.2050       | 209.6064        |
| 1644.8121      | 15 | E  | 2  | 304.1621       | 152.5850        |
|                | 16 | R  | 1  | 175.1195       | 88.0637         |

N-term:+29.04

X-range:

0 - 0

MassTol: Y-zoom:

0. 1.

MassType:

☐AVG ☒MONO

Axis:

☒1 ☐2

Label:

☒I ☐M ☐-

Ions:

a ☐+ ☐2+ ☐3+

b ☒+ ☐2+ ☐3+

c ☐+ ☐2+ ☐3+

x ☐+ ☐2+ ☐3+

y ☒+ ☒2+ ☐3+

z ☐+ ☐2+ ☐3+

hide H<sub>2</sub>O/NH<sub>3</sub> ☐

zoom 112-122 ☐

GO

SYGGYKEPAAPVSIQR, MH+ 1778.9441, m/z 593.6529  
L OS G15 P120811 220811-s1.03384.03384.3.dta

scan 3384; 9.1e+000

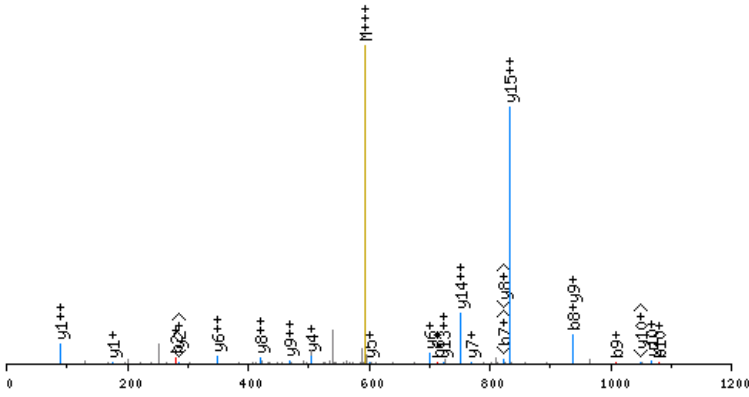

click image to zoom in; click top corners to zoom out [\[precursor±\]](#)

scan 3381; 593.7 m/z; 1.2e+001

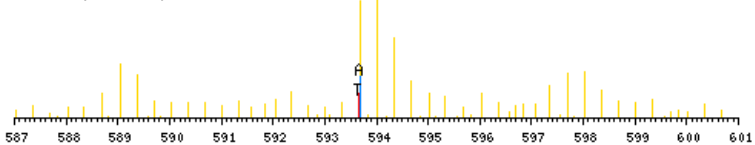

zoomed in precursor plot; T=theoretical m/z, A=acquired m/z

| b <sup>+</sup> | #  | AA | #  | y <sup>+</sup> | y <sup>2+</sup> |
|----------------|----|----|----|----------------|-----------------|
| 116.0711       | 1  | S  | 16 |                |                 |
| 279.1345       | 2  | Y  | 15 | 1663.8808      | 832.4443        |
| 336.1559       | 3  | G  | 14 | 1500.8175      | 750.9127        |
| 393.1774       | 4  | G  | 13 | 1443.7960      | 722.4019        |
| 556.2407       | 5  | Y  | 12 | 1386.7746      | 693.8912        |
| 712.3670       | 6  | K  | 11 | 1223.7112      | 612.3595        |
| 841.4096       | 7  | E  | 10 | 1067.5849      | 534.2964        |
| 938.4624       | 8  | P  | 9  | 938.5423       | 469.7751        |
| 1009.4995      | 9  | A  | 8  | 841.4896       | 421.2487        |
| 1080.5366      | 10 | A  | 7  | 770.4525       | 385.7301        |
| 1177.5894      | 11 | P  | 6  | 699.4153       | 350.2116        |
| 1276.6578      | 12 | V  | 5  | 602.3626       | 301.6852        |
| 1363.6898      | 13 | S  | 4  | 503.2942       | 252.1510        |
| 1476.7739      | 14 | I  | 3  | 416.2621       | 208.6350        |
| 1604.8324      | 15 | Q  | 2  | 303.1781       | 152.0930        |
|                | 16 | R  | 1  | 175.1195       | 88.0637         |

N-term:+29.04 K(6):+156.13

N-term: +35.07 K(7): +162.16

X-range:

0 - 0

MassTol: Y-zoom:

0. 1.

MassType:

☐AVG ☒MONO

Axis:

☒1 ☐2

Label:

☒I ☐M ☐-

Ions:

a ☐+ ☐2+ ☐3+

b ☒+ ☐2+ ☐3+

c ☐+ ☐2+ ☐3+

x ☐+ ☐2+ ☐3+

y ☒+ ☒2+ ☐3+

z ☐+ ☐2+ ☐3+

hide H<sub>2</sub>O/NH<sub>3</sub> ☐

zoom 112-122 ☐

GO

SYVSKAESTPEIAEQR, MH+ 1850.9500, m/z 617.6548  
L OS G15 P120811 220811-s1.02887.02887.3.dta

scan 2887; 2.8e+000

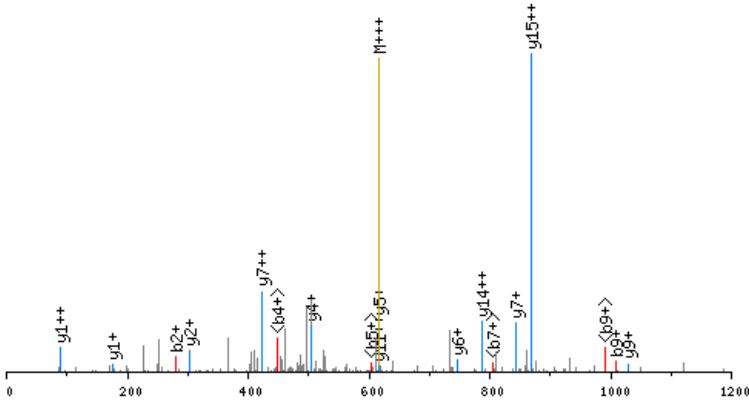

click image to zoom in; click top corners to zoom out

[precursor±]

scan 2886; 617.7 m/z; 1.3e+001

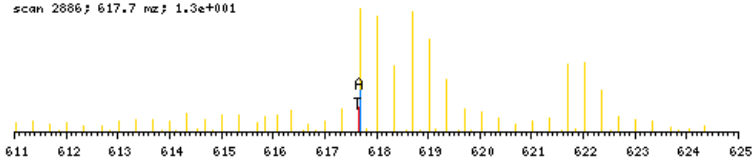

zoomed in precursor plot; T=theoretical m/z, A=acquired m/z

| b <sup>+</sup> | #  | AA | #  | y <sup>+</sup> | y <sup>2+</sup> |
|----------------|----|----|----|----------------|-----------------|
| 116.0711       | 1  | S  | 16 |                |                 |
| 279.1345       | 2  | Y  | 15 | 1735.8867      | 868.4473        |
| 378.2029       | 3  | V  | 14 | 1572.8234      | 786.9156        |
| 465.2349       | 4  | S  | 13 | 1473.7549      | 737.3814        |
| 621.3612       | 5  | K  | 12 | 1386.7229      | 693.8654        |
| 692.3983       | 6  | A  | 11 | 1230.5966      | 615.8022        |
| 821.4409       | 7  | E  | 10 | 1159.5595      | 580.2837        |
| 908.4729       | 8  | S  | 9  | 1030.5169      | 515.7624        |
| 1009.5206      | 9  | T  | 8  | 943.4849       | 472.2464        |
| 1106.5734      | 10 | P  | 7  | 842.4372       | 421.7225        |
| 1235.6160      | 11 | E  | 6  | 745.3844       | 373.1961        |
| 1348.7000      | 12 | I  | 5  | 616.3418       | 308.6748        |
| 1419.7371      | 13 | A  | 4  | 503.2578       | 252.1328        |
| 1548.7797      | 14 | E  | 3  | 432.2207       | 216.6142        |
| 1676.8383      | 15 | Q  | 2  | 303.1781       | 152.0930        |
|                | 16 | R  | 1  | 175.1195       | 88.0637         |

N-term:+29.04 K(5):+156.13

X-range:

0 - 0

MassTol: Y-zoom:

0. 1.

MassType:

☐ AVG ☒ MONO

Axis:

☒ 1 ☐ 2

Label:

☒ I ☐ M ☐ -

Ions:

a ☐ + ☐ 2+ ☐ 3+

b ☒ + ☐ 2+ ☐ 3+

c ☐ + ☐ 2+ ☐ 3+

x ☐ + ☐ 2+ ☐ 3+

y ☒ + ☒ 2+ ☐ 3+

z ☐ + ☐ 2+ ☐ 3+

hide H<sub>2</sub>O/NH<sub>3</sub> ☐

zoom 112-122 ☐

GO

TAASSSSLEKSYELPDGQVITIGNER, MH+ 2808.4267, m/z 702.8621  
L OS G14 P120811 220811-s1.05679.05679.4.dta

scan 5679; 2.2e+000

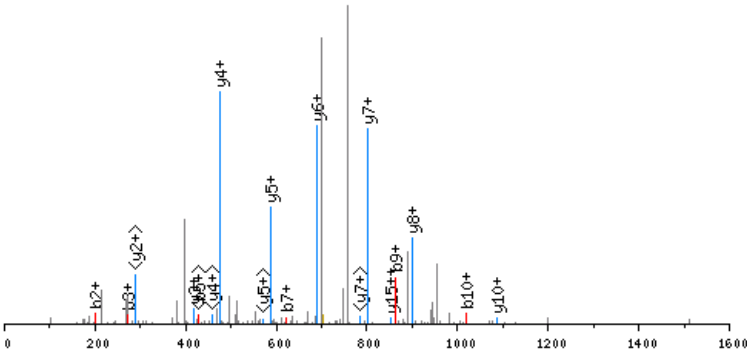

click image to zoom in; click top corners to zoom out [precursor±]

scan 5676; 702.9 m/z; 3.7e+000

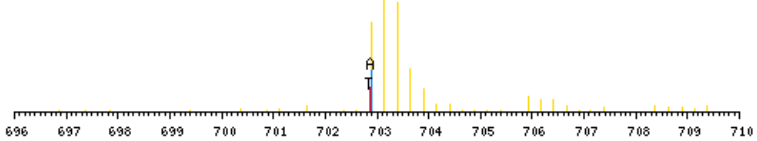

zoomed in precursor plot; T=theoretical m/z, A=acquired m/z

| b <sup>+</sup> | #  | AA | #  | y <sup>+</sup> | y <sup>2+</sup> |
|----------------|----|----|----|----------------|-----------------|
| 130.0868       | 1  | T  | 26 |                |                 |
| 201.1239       | 2  | A  | 25 | 2679.3478      | 1340.1778       |
| 272.1610       | 3  | A  | 24 | 2608.3107      | 1304.6592       |
| 359.1930       | 4  | S  | 23 | 2537.2735      | 1269.1407       |
| 446.2251       | 5  | S  | 22 | 2450.2415      | 1225.6247       |
| 533.2571       | 6  | S  | 21 | 2363.2095      | 1182.1087       |
| 620.2891       | 7  | S  | 20 | 2276.1775      | 1138.5926       |
| 733.3732       | 8  | L  | 19 | 2189.1454      | 1095.0766       |
| 862.4158       | 9  | E  | 18 | 2076.0614      | 1038.5346       |
| 1018.5421      | 10 | K  | 17 | 1947.0188      | 974.0133        |
| 1105.5741      | 11 | S  | 16 | 1790.8925      | 895.9501        |
| 1268.6374      | 12 | Y  | 15 | 1703.8604      | 852.4341        |
| 1397.6800      | 13 | E  | 14 | 1540.7971      | 770.9025        |
| 1510.7641      | 14 | L  | 13 | 1411.7545      | 706.3812        |
| 1607.8169      | 15 | P  | 12 | 1298.6705      | 649.8391        |
| 1722.8438      | 16 | D  | 11 | 1201.6177      | 601.3128        |
| 1779.8653      | 17 | G  | 10 | 1086.5907      | 543.7993        |
| 1907.9238      | 18 | Q  | 9  | 1029.5693      | 515.2886        |
| 2006.9923      | 19 | V  | 8  | 901.5107       | 451.2593        |
| 2120.0763      | 20 | I  | 7  | 802.4423       | 401.7251        |
| 2221.1240      | 21 | T  | 6  | 689.3582       | 345.1830        |
| 2334.2081      | 22 | I  | 5  | 588.3105       | 294.6592        |
| 2391.2295      | 23 | G  | 4  | 475.2265       | 238.1172        |
| 2505.2725      | 24 | N  | 3  | 418.2050       | 209.6064        |
| 2634.3150      | 25 | E  | 2  | 304.1621       | 152.5850        |
|                | 26 | R  | 1  | 175.1195       | 88.0637         |

N-term: +29.04 K(10) : +156.13

X-range:

0 - 0

MassTol: Y-zoom:

0. 1.

MassType:

☐ AVG ☒ MONO

Axis:

☒ 1 ☐ 2

Label:

☒ I ☐ M ☐ -

Ions:

a ☐ + ☐ 2+ ☐ 3+

b ☒ + ☐ 2+ ☐ 3+

c ☐ + ☐ 2+ ☐ 3+

x ☐ + ☐ 2+ ☐ 3+

y ☒ + ☒ 2+ ☐ 3+

z ☐ + ☐ 2+ ☐ 3+

hide H<sub>2</sub>O/NH<sub>3</sub> ☐

zoom 112-122 ☐

GO

TAAVGAVFDISNADR, MH+ 1540.8183, m/z 514.2776  
H OS G13 P120811 220811-s1.05642.05642.3.dta

scan 5642; 2.6e+000

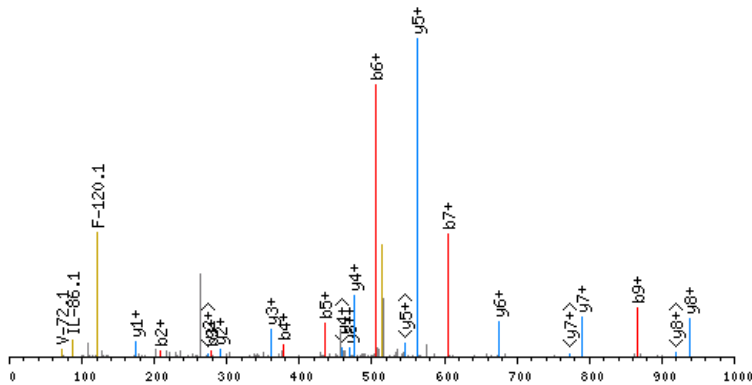

click image to zoom in; click top corners to zoom out

[precursor±]

scan 5639; 514.3 m/z; 1.1e+001

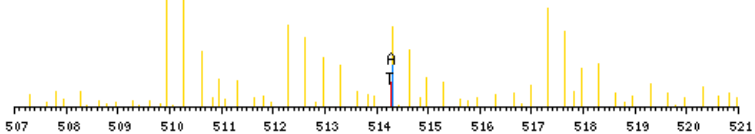

zoomed in precursor plot; T=theoretical m/z, A=acquired m/z

| b <sup>+</sup> | #  | AA | #  | y <sup>+</sup> | y <sup>2+</sup> |
|----------------|----|----|----|----------------|-----------------|
| 136.1186       | 1  | T  | 15 |                |                 |
| 207.1557       | 2  | A  | 14 | 1405.7076      | 703.3577        |
| 278.1928       | 3  | A  | 13 | 1334.6705      | 667.8391        |
| 377.2612       | 4  | V  | 12 | 1263.6333      | 632.3206        |
| 434.2827       | 5  | G  | 11 | 1164.5649      | 582.7864        |
| 505.3198       | 6  | A  | 10 | 1107.5435      | 554.2756        |
| 604.3882       | 7  | V  | 9  | 1036.5063      | 518.7571        |
| 751.4566       | 8  | F  | 8  | 937.4379       | 469.2229        |
| 866.4836       | 9  | D  | 7  | 790.3695       | 395.6887        |
| 979.5676       | 10 | I  | 6  | 675.3426       | 338.1752        |
| 1066.5997      | 11 | S  | 5  | 562.2585       | 281.6332        |
| 1180.6426      | 12 | N  | 4  | 475.2265       | 238.1172        |
| 1251.6797      | 13 | A  | 3  | 361.1836       | 181.0957        |
| 1366.7066      | 14 | D  | 2  | 290.1464       | 145.5771        |
|                | 15 | R  | 1  | 175.1195       | 88.0637         |

N-term:+35.07

X-range:

0 - 0

MassTol: Y-zoom:

0. 1.

MassType:

☐AVG ☒MONO

Axis:

☒1 ☐2

Label:

☒I ☐M ☐-

Ions:

a ☐+ ☐2+ ☐3+

b ☒+ ☐2+ ☐3+

c ☐+ ☐2+ ☐3+

x ☐+ ☐2+ ☐3+

y ☒+ ☒2+ ☐3+

z ☐+ ☐2+ ☐3+

hide H<sub>2</sub>O/NH<sub>3</sub> ☐

zoom 112-122 ☐

GO

TAEILELAGNAAR, MH+ 1362.7805, m/z 454.9317  
H OS G13 P120811 220811-s1.05723.05723.3.dta

scan 5723; 1.2e+000

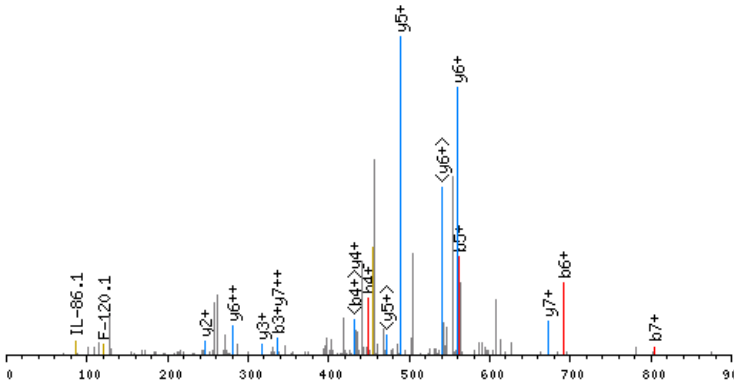

click image to zoom in; click top corners to zoom out

[precursor±]

scan 5719; 454.9 m/z; 5.5e+001

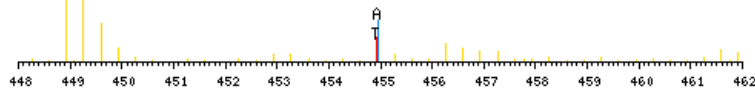

zoomed in precursor plot; T=theoretical m/z, A=acquired m/z

| b <sup>+</sup> | #  | AA | #  | y <sup>+</sup> | y <sup>2+</sup> |
|----------------|----|----|----|----------------|-----------------|
| 136.1186       | 1  | T  | 13 |                |                 |
| 207.1557       | 2  | A  | 12 | 1227.6697      | 614.3388        |
| 336.1983       | 3  | E  | 11 | 1156.6326      | 578.8202        |
| 449.2823       | 4  | I  | 10 | 1027.5900      | 514.2989        |
| 562.3664       | 5  | L  | 9  | 914.5060       | 457.7569        |
| 691.4090       | 6  | E  | 8  | 801.4219       | 401.2149        |
| 804.4931       | 7  | L  | 7  | 672.3793       | 336.6936        |
| 875.5302       | 8  | A  | 6  | 559.2952       | 280.1515        |
| 932.5516       | 9  | G  | 5  | 488.2581       | 244.6330        |
| 1046.5946      | 10 | N  | 4  | 431.2367       | 216.1222        |
| 1117.6317      | 11 | A  | 3  | 317.1937       | 159.1008        |
| 1188.6688      | 12 | A  | 2  | 246.1566       | 123.5822        |
|                | 13 | R  | 1  | 175.1195       | 88.0637         |

N-term:+35.07

X-range:

0 - 0

MassTol: Y-zoom:

0. 1.

MassType:

☐ AVG ☒ MONO

Axis:

☒ 1 ☐ 2

Label:

☒ I ☐ M ☐ -

Ions:

a ☐ + ☐ 2+ ☐ 3+

b ☒ + ☐ 2+ ☐ 3+

c ☐ + ☐ 2+ ☐ 3+

x ☐ + ☐ 2+ ☐ 3+

y ☒ + ☒ 2+ ☐ 3+

z ☐ + ☐ 2+ ☐ 3+

hide H<sub>2</sub>O/NH<sub>3</sub> ☐

zoom 112-122 ☐

GO

TAESGELHGLTTDEKFVEGVYR, MH+ 2494.2466, m/z 624.3171  
L OS G16 P120811 220811-s1.05394.05394.4.dta

scan 5394; 3.9e+000

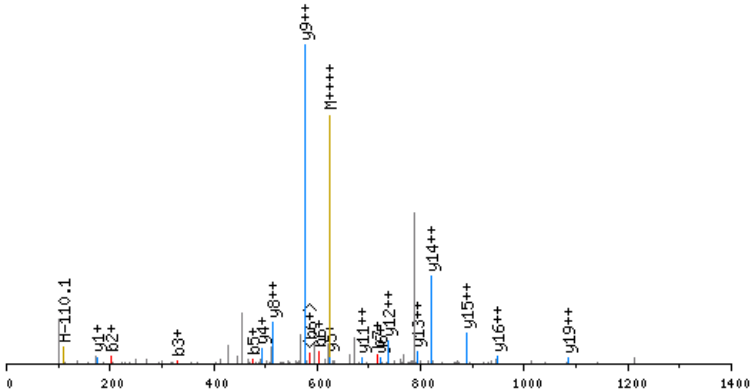

scan 5393; 624.3 m/z; 1.2e+001

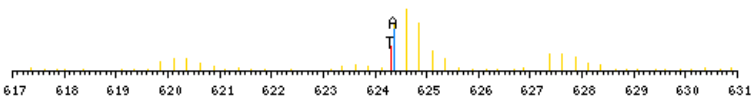

| b <sup>+</sup> | #  | AA | #  | y <sup>+</sup> | y <sup>2+</sup> |
|----------------|----|----|----|----------------|-----------------|
| 130.0868       | 1  | T  | 22 |                |                 |
| 201.1239       | 2  | A  | 21 | 2365.1676      | 1183.0877       |
| 330.1665       | 3  | E  | 20 | 2294.1305      | 1147.5692       |
| 417.1985       | 4  | S  | 19 | 2165.0879      | 1083.0479       |
| 474.2200       | 5  | G  | 18 | 2078.0559      | 1039.5319       |
| 603.2626       | 6  | E  | 17 | 2021.0344      | 1011.0211       |
| 716.3466       | 7  | L  | 16 | 1891.9918      | 946.4998        |
| 853.4055       | 8  | H  | 15 | 1778.9078      | 889.9578        |
| 910.4270       | 9  | G  | 14 | 1641.8488      | 821.4283        |
| 1023.5111      | 10 | L  | 13 | 1584.8274      | 792.9176        |
| 1124.5588      | 11 | T  | 12 | 1471.7433      | 736.3756        |
| 1225.6064      | 12 | T  | 11 | 1370.6956      | 685.8517        |
| 1340.6334      | 13 | D  | 10 | 1269.6480      | 635.3279        |
| 1469.6760      | 14 | E  | 9  | 1154.6210      | 577.8144        |
| 1625.8023      | 15 | K  | 8  | 1025.5784      | 513.2931        |
| 1772.8707      | 16 | F  | 7  | 869.4521       | 435.2300        |
| 1871.9391      | 17 | V  | 6  | 722.3837       | 361.6958        |
| 2000.9817      | 18 | E  | 5  | 623.3153       | 312.1616        |
| 2058.0032      | 19 | G  | 4  | 494.2727       | 247.6403        |
| 2157.0716      | 20 | V  | 3  | 437.2512       | 219.1295        |
| 2320.1349      | 21 | Y  | 2  | 338.1828       | 169.5953        |
|                | 22 | R  | 1  | 175.1195       | 88.0637         |

N-term:+29.04 K(15):+156.13

X-range:

0 - 0

MassTol: Y-zoom:

0. 1.

MassType:

☐AVG ☒MONO

Axis:

☒1 ☐2

Label:

☒I ☐M ☐-

Ions:

a ☐+ ☐2+ ☐3+

b ☒+ ☐2+ ☐3+

c ☐+ ☐2+ ☐3+

x ☐+ ☐2+ ☐3+

y ☒+ ☒2+ ☐3+

z ☐+ ☐2+ ☐3+

hide H<sub>2</sub>O/NH<sub>3</sub> ☐

zoom 112-122 ☐

GO

TAGDFSTTVIQNVNKAQVKIR, MH+ 2374.3459, m/z 594.3419  
L OS G16 P120811 220811-s1.05520.05520.4.dta

scan 5520; 2.0e+000

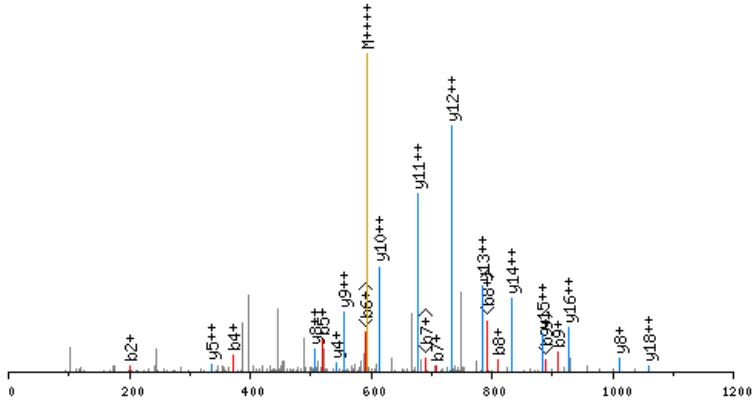

click image to zoom in; click top corners to zoom out

[precursor±]

scan 5518; 594.3 m/z; 5.6e+000

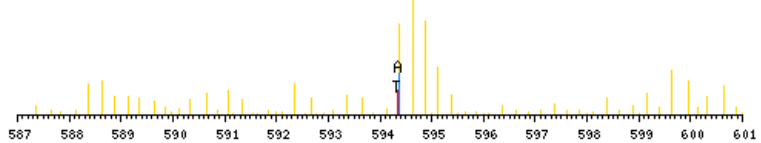

zoomed in precursor plot; T=theoretical m/z, A=acquired m/z

| b <sup>+</sup> | #  | AA | #  | y <sup>+</sup> | y <sup>2+</sup> |
|----------------|----|----|----|----------------|-----------------|
| 130.0868       | 1  | T  | 21 |                |                 |
| 201.1239       | 2  | A  | 20 | 2245.2669      | 1123.1374       |
| 258.1454       | 3  | G  | 19 | 2174.2298      | 1087.6188       |
| 373.1723       | 4  | D  | 18 | 2117.2083      | 1059.1081       |
| 520.2407       | 5  | F  | 17 | 2002.1814      | 1001.5946       |
| 607.2727       | 6  | S  | 16 | 1855.1130      | 928.0604        |
| 708.3204       | 7  | T  | 15 | 1768.0810      | 884.5444        |
| 809.3681       | 8  | T  | 14 | 1667.0333      | 834.0205        |
| 908.4365       | 9  | V  | 13 | 1565.9856      | 783.4967        |
| 1021.5206      | 10 | I  | 12 | 1466.9172      | 733.9625        |
| 1149.5792      | 11 | Q  | 11 | 1353.8331      | 677.4205        |
| 1263.6221      | 12 | N  | 10 | 1225.7745      | 613.3912        |
| 1362.6905      | 13 | V  | 9  | 1111.7316      | 556.3697        |
| 1476.7334      | 14 | N  | 8  | 1012.6632      | 506.8355        |
| 1632.8597      | 15 | K  | 7  | 898.6203       | 449.8140        |
| 1703.8968      | 16 | A  | 6  | 742.4940       | 371.7509        |
| 1831.9554      | 17 | Q  | 5  | 671.4569       | 336.2323        |
| 1931.0238      | 18 | V  | 4  | 543.3983       | 272.2031        |
| 2087.1501      | 19 | K  | 3  | 444.3299       | 222.6688        |
| 2200.2342      | 20 | I  | 2  | 288.2036       | 144.6057        |
|                | 21 | R  | 1  | 175.1195       | 88.0637         |

N-term: +29.04 K(15): +156.13  
K(19): +156.13

X-range:

0 - 0

MassTol: Y-zoom:

0. 1.

MassType:

☐AVG ☒MONO

Axis:

☒1 ☐2

Label:

☒I ☐M ☐-

Ions:

a ☐+ ☐2+ ☐3+

b ☒+ ☐2+ ☐3+

c ☐+ ☐2+ ☐3+

x ☐+ ☐2+ ☐3+

y ☒+ ☒2+ ☐3+

z ☐+ ☐2+ ☐3+

hide H<sub>2</sub>O/NH<sub>3</sub> ☐

zoom 112-122 ☐

GO

TAGDTHLGGEFDNR, MH+ 1632.7254, m/z 544.9133  
L OS G16 P120811 220811-s1.02931.02931.3.dta

scan 2931; 8.7e+000

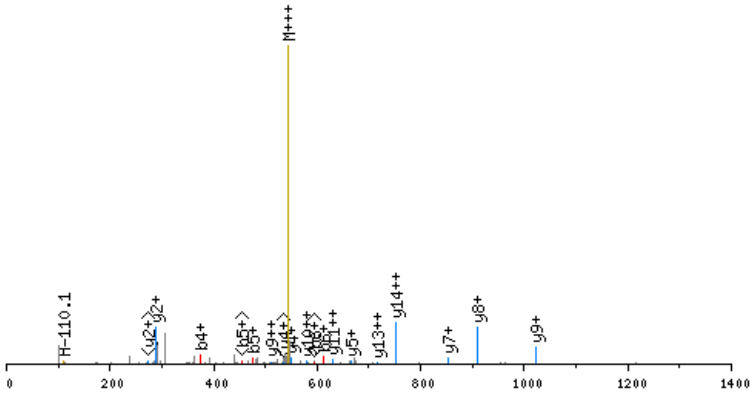

click image to zoom in; click top corners to zoom out

[precursor±]

scan 2928; 544.9 m/z; 1.6e+001

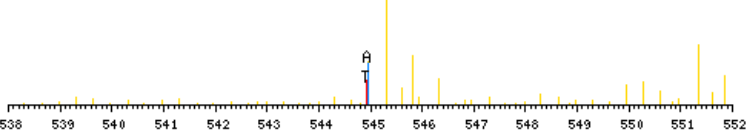

zoomed in precursor plot; T=theoretical m/z, A=acquired m/z

| b <sup>+</sup> | #  | AA | #  | y <sup>+</sup> | y <sup>2+</sup> |
|----------------|----|----|----|----------------|-----------------|
| 130.0868       | 1  | T  | 15 |                |                 |
| 201.1239       | 2  | A  | 14 | 1503.6464      | 752.3271        |
| 258.1454       | 3  | G  | 13 | 1432.6093      | 716.8086        |
| 373.1723       | 4  | D  | 12 | 1375.5878      | 688.2978        |
| 474.2200       | 5  | T  | 11 | 1260.5609      | 630.7844        |
| 611.2789       | 6  | H  | 10 | 1159.5132      | 580.2605        |
| 724.3630       | 7  | L  | 9  | 1022.4543      | 511.7311        |
| 781.3844       | 8  | G  | 8  | 909.3702       | 455.1890        |
| 838.4059       | 9  | G  | 7  | 852.3488       | 426.6783        |
| 967.4485       | 10 | E  | 6  | 795.3273       | 398.1676        |
| 1082.4754      | 11 | D  | 5  | 666.2847       | 333.6463        |
| 1229.5438      | 12 | F  | 4  | 551.2578       | 276.1328        |
| 1344.5708      | 13 | D  | 3  | 404.1894       | 202.5986        |
| 1458.6137      | 14 | N  | 2  | 289.1624       | 145.0851        |
|                | 15 | R  | 1  | 175.1195       | 88.0637         |

N-term:+29.04

X-range:

0 - 0

MassTol: Y-zoom:

0. 1.

MassType:

☐AVG ☒MONO

Axis:

☒1 ☐2

Label:

☒I ☐M ☐-

Ions:

a ☐+ ☐2+ ☐3+

b ☒+ ☐2+ ☐3+

c ☐+ ☐2+ ☐3+

x ☐+ ☐2+ ☐3+

y ☒+ ☒2+ ☐3+

z ☐+ ☐2+ ☐3+

hide H<sub>2</sub>O/NH<sub>3</sub> ☐

zoom 112-122 ☐

GO

TAKIALLEEAR, MH+ 1270.7735, m/z 424.2627  
L OS G16 P120811 220811-s1.04185.04185.3.dta

scan 4185; 1.4e+001

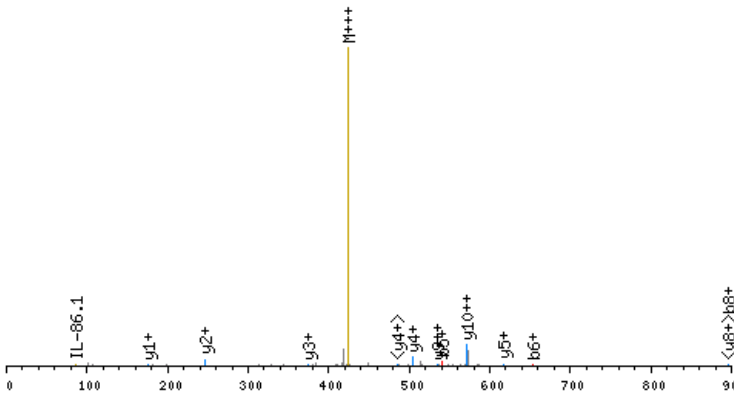

click image to zoom in; click top corners to zoom out

[precursor±]

scan 4183; 424.3 m/z; 2.4e+001

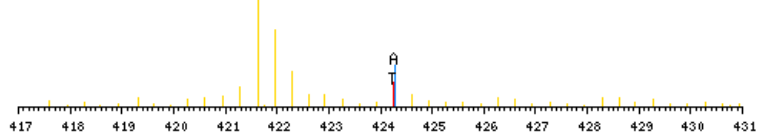

zoomed in precursor plot; T=theoretical m/z, A=acquired m/z

| b <sup>+</sup> | #  | AA | #  | y <sup>+</sup> | y <sup>2+</sup> |
|----------------|----|----|----|----------------|-----------------|
| 130.0868       | 1  | T  | 11 |                |                 |
| 201.1239       | 2  | A  | 10 | 1141.6945      | 571.3512        |
| 357.2502       | 3  | K  | 9  | 1070.6574      | 535.8326        |
| 470.3343       | 4  | I  | 8  | 914.5311       | 457.7695        |
| 541.3714       | 5  | A  | 7  | 801.4470       | 401.2274        |
| 654.4554       | 6  | L  | 6  | 730.4099       | 365.7089        |
| 767.5395       | 7  | L  | 5  | 617.3259       | 309.1668        |
| 896.5821       | 8  | E  | 4  | 504.2418       | 252.6248        |
| 1025.6247      | 9  | E  | 3  | 375.1992       | 188.1035        |
| 1096.6618      | 10 | A  | 2  | 246.1566       | 123.5822        |
|                | 11 | R  | 1  | 175.1195       | 88.0637         |

N-term:+29.04 K(3):+156.13

X-range:

0 - 0

MassTol: Y-zoom:

0. 1.

MassType:

☐ AVG ☒ MONO

Axis:

☒ 1 ☐ 2

Label:

☒ I ☐ M ☐ -

Ions:

a ☐ + ☐ 2+ ☐ 3+

b ☒ + ☐ 2+ ☐ 3+

c ☐ + ☐ 2+ ☐ 3+

x ☐ + ☐ 2+ ☐ 3+

y ☒ + ☒ 2+ ☐ 3+

z ☐ + ☐ 2+ ☐ 3+

hide H<sub>2</sub>O/NH<sub>3</sub> ☐

zoom 112-122 ☐

GO

TAKPFLGSMNQPAAPFSPTR, MH+ 2174.1432, m/z 544.2913  
L OS G15 P120811 220811-s1.04908.04908.4.dta

scan 4908; 1.4e+000

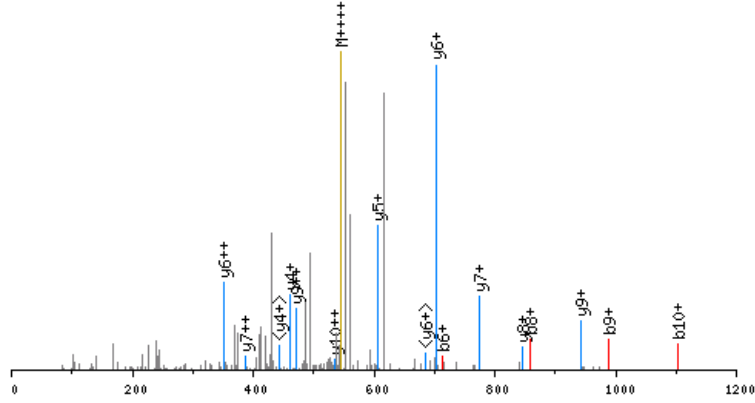

click image to zoom in; click top corners to zoom out [\[precursor±\]](#)

scan 4906; 544.3 m/z; 7.1e+000

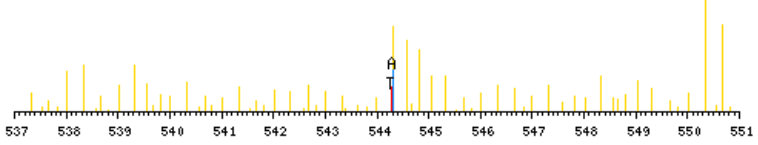

zoomed in precursor plot; T=theoretical m/z, A=acquired m/z

| b <sup>+</sup> | #  | AA | #  | y <sup>+</sup> | y <sup>2+</sup> |
|----------------|----|----|----|----------------|-----------------|
| 130.0868       | 1  | T  | 20 |                |                 |
| 201.1239       | 2  | A  | 19 | 2045.0643      | 1023.0361       |
| 357.2502       | 3  | K  | 18 | 1974.0272      | 987.5175        |
| 454.3030       | 4  | P  | 17 | 1817.9009      | 909.4543        |
| 601.3714       | 5  | F  | 16 | 1720.8481      | 860.9280        |
| 714.4554       | 6  | L  | 15 | 1573.7797      | 787.3938        |
| 771.4769       | 7  | G  | 14 | 1460.6956      | 730.8517        |
| 858.5089       | 8  | S  | 13 | 1403.6742      | 702.3410        |
| 989.5494       | 9  | M  | 12 | 1316.6421      | 658.8250        |
| 1103.5923      | 10 | N  | 11 | 1185.6016      | 593.3047        |
| 1231.6509      | 11 | Q  | 10 | 1071.5587      | 536.2833        |
| 1328.7037      | 12 | P  | 9  | 943.5001       | 472.2540        |
| 1399.7408      | 13 | A  | 8  | 846.4474       | 423.7276        |
| 1470.7779      | 14 | A  | 7  | 775.4103       | 388.2090        |
| 1567.8307      | 15 | P  | 6  | 704.3731       | 352.6905        |
| 1714.8991      | 16 | F  | 5  | 607.3204       | 304.1641        |
| 1801.9311      | 17 | S  | 4  | 460.2520       | 230.6299        |
| 1898.9839      | 18 | P  | 3  | 373.2199       | 187.1139        |
| 2000.0316      | 19 | T  | 2  | 276.1672       | 138.5875        |
|                | 20 | R  | 1  | 175.1195       | 88.0637         |

N-term:+29.04 K(3):+156.13

X-range:

0 - 0

MassTol: Y-zoom:

0. 1.

MassType:

☐AVG ☒MONO

Axis:

☒1 ☐2

Label:

☒I ☐M ☐-

Ions:

a ☐+ ☐2+ ☐3+

b ☒+ ☐2+ ☐3+

c ☐+ ☐2+ ☐3+

x ☐+ ☐2+ ☐3+

y ☒+ ☒2+ ☐3+

z ☐+ ☐2+ ☐3+

hide H<sub>2</sub>O/NH<sub>3</sub> ☐

zoom 112-122 ☐

GO

TANLGAGAAQPLR, MH+ 1267.7122, m/z 423.2423  
L OS G13 P120811 220811-s1.03073.03073.3.dta

scan 3073; 8.6e-001

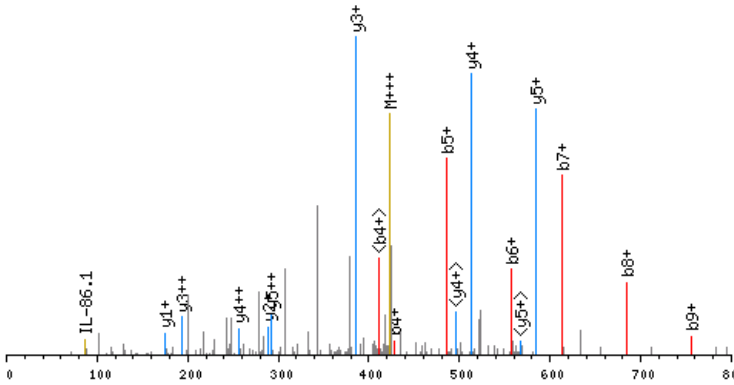

click image to zoom in; click top corners to zoom out [precursor±]

scan 3069; 423.2 m/z; 5.2e+000

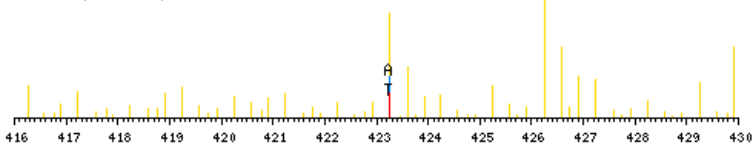

zoomed in precursor plot; T=theoretical m/z, A=acquired m/z

| b <sup>+</sup> | #  | AA | #  | y <sup>+</sup> | y <sup>2+</sup> |
|----------------|----|----|----|----------------|-----------------|
| 130.0868       | 1  | T  | 13 |                |                 |
| 201.1239       | 2  | A  | 12 | 1138.6333      | 569.8206        |
| 315.1668       | 3  | N  | 11 | 1067.5962      | 534.3020        |
| 428.2509       | 4  | L  | 10 | 953.5532       | 477.2805        |
| 485.2723       | 5  | G  | 9  | 840.4692       | 420.7385        |
| 556.3095       | 6  | A  | 8  | 783.4477       | 392.2278        |
| 613.3309       | 7  | G  | 7  | 712.4106       | 356.7092        |
| 684.3680       | 8  | A  | 6  | 655.3891       | 328.1985        |
| 755.4052       | 9  | A  | 5  | 584.3520       | 292.6799        |
| 883.4637       | 10 | Q  | 4  | 513.3149       | 257.1614        |
| 980.5165       | 11 | P  | 3  | 385.2563       | 193.1321        |
| 1093.6006      | 12 | L  | 2  | 288.2036       | 144.6057        |
|                | 13 | R  | 1  | 175.1195       | 88.0637         |

N-term:+29.04

X-range:

0 - 0

MassTol: Y-zoom:

0. 1.

MassType:

☐AVG ☒MONO

Axis:

☒1 ☐2

Label:

☒I ☐M ☐-

Ions:

a ☐+ ☐2+ ☐3+

b ☒+ ☐2+ ☐3+

c ☐+ ☐2+ ☐3+

x ☐+ ☐2+ ☐3+

y ☒+ ☒2+ ☐3+

z ☐+ ☐2+ ☐3+

hide H<sub>2</sub>O/NH<sub>3</sub> ☐

zoom 112-122 ☐

GO

TASAGIQVVGDDLTVTNPKR, MH+ 2098.1508, m/z 700.0551  
L OS G15 P120811 220811-s1.04505.04505.3.dta

scan 4505; 2.5e+000

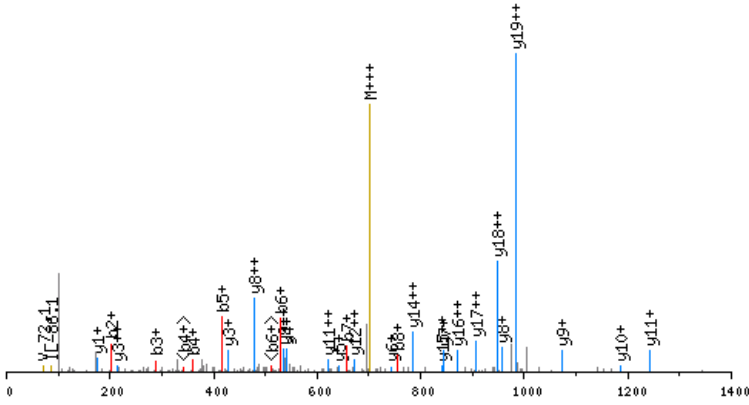

click image to zoom in; click top corners to zoom out

[precursor±]

scan 4501; 700.1 m/z; 5.9e+000

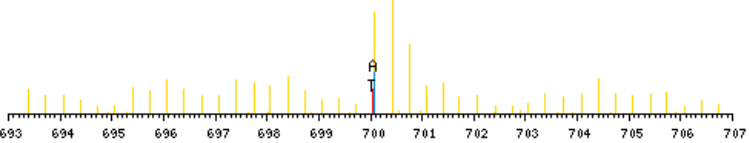

zoomed in precursor plot; T=theoretical m/z, A=acquired m/z

| b <sup>+</sup> | #  | AA | #  | y <sup>+</sup> | y <sup>2+</sup> |
|----------------|----|----|----|----------------|-----------------|
| 130.0868       | 1  | T  | 20 |                |                 |
| 201.1239       | 2  | A  | 19 | 1969.0719      | 985.0398        |
| 288.1559       | 3  | S  | 18 | 1898.0348      | 949.5213        |
| 359.1930       | 4  | A  | 17 | 1811.0027      | 906.0053        |
| 416.2145       | 5  | G  | 16 | 1739.9656      | 870.4867        |
| 529.2986       | 6  | I  | 15 | 1682.9441      | 841.9760        |
| 657.3571       | 7  | Q  | 14 | 1569.8601      | 785.4340        |
| 756.4256       | 8  | V  | 13 | 1441.8015      | 721.4047        |
| 855.4940       | 9  | V  | 12 | 1342.7331      | 671.8705        |
| 912.5154       | 10 | G  | 11 | 1243.6647      | 622.3363        |
| 1027.5424      | 11 | D  | 10 | 1186.6432      | 593.8255        |
| 1142.5693      | 12 | D  | 9  | 1071.6163      | 536.3120        |
| 1255.6534      | 13 | L  | 8  | 956.5893       | 478.7986        |
| 1356.7011      | 14 | T  | 7  | 843.5053       | 422.2565        |
| 1455.7695      | 15 | V  | 6  | 742.4576       | 371.7327        |
| 1556.8172      | 16 | T  | 5  | 643.3892       | 322.1985        |
| 1670.8601      | 17 | N  | 4  | 542.3415       | 271.6747        |
| 1767.9128      | 18 | P  | 3  | 428.2986       | 214.6532        |
| 1924.0391      | 19 | K  | 2  | 331.2458       | 166.1268        |
|                | 20 | R  | 1  | 175.1195       | 88.0637         |

N-term:+29.04 K(19):+156.13

X-range:

0 - 0

MassTol: Y-zoom:

0. 1.

MassType:

☐ AVG ☒ MONO

Axis:

☒ 1 ☐ 2

Label:

☒ I ☐ M ☐ -

Ions:

a ☐ + ☐ 2+ ☐ 3+

b ☒ + ☐ 2+ ☐ 3+

c ☐ + ☐ 2+ ☐ 3+

x ☐ + ☐ 2+ ☐ 3+

y ☒ + ☒ 2+ ☐ 3+

z ☐ + ☐ 2+ ☐ 3+

hide H<sub>2</sub>O/NH<sub>3</sub> ☐

zoom 112-122 ☐

GO

TASESISNLSEAGSVKKGER, MH+ 2134.1356, m/z 534.2894  
L OS G17 P120811 220811-s1.03035.03035.4.dta

scan 3035; 9.3e+000

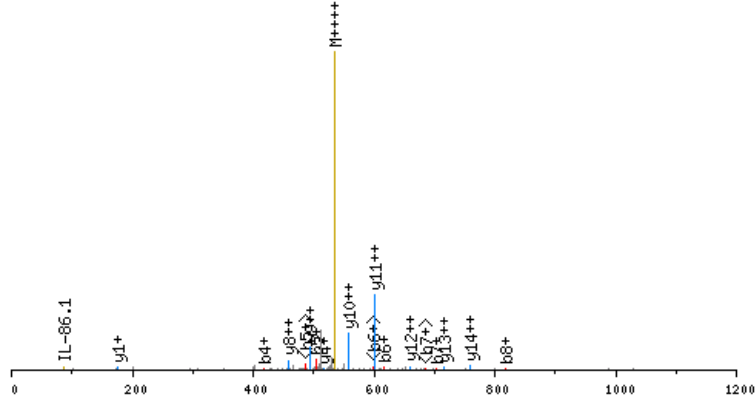

click image to zoom in; click top corners to zoom out [\[precursor±\]](#)

scan 3033; 534.3 m/z; 6.3e+000

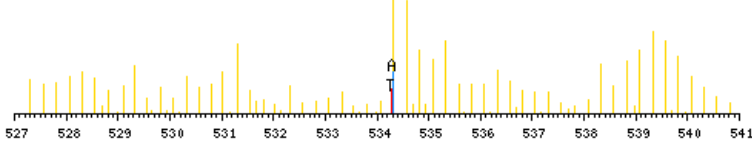

zoomed in precursor plot; T=theoretical m/z, A=acquired m/z

| b <sup>+</sup> | #  | AA | #  | y <sup>+</sup> | y <sup>2+</sup> |
|----------------|----|----|----|----------------|-----------------|
| 130.0868       | 1  | T  | 20 |                |                 |
| 201.1239       | 2  | A  | 19 | 2005.0566      | 1003.0322       |
| 288.1559       | 3  | S  | 18 | 1934.0195      | 967.5137        |
| 417.1985       | 4  | E  | 17 | 1846.9875      | 923.9977        |
| 504.2305       | 5  | S  | 16 | 1717.9449      | 859.4764        |
| 617.3146       | 6  | I  | 15 | 1630.9129      | 815.9604        |
| 704.3466       | 7  | S  | 14 | 1517.8288      | 759.4183        |
| 818.3896       | 8  | N  | 13 | 1430.7968      | 715.9023        |
| 931.4736       | 9  | L  | 12 | 1316.7539      | 658.8808        |
| 1018.5057      | 10 | S  | 11 | 1203.6698      | 602.3388        |
| 1147.5482      | 11 | E  | 10 | 1116.6378      | 558.8228        |
| 1218.5854      | 12 | A  | 9  | 987.5952       | 494.3015        |
| 1275.6068      | 13 | G  | 8  | 916.5581       | 458.7829        |
| 1362.6389      | 14 | S  | 7  | 859.5366       | 430.2722        |
| 1461.7073      | 15 | V  | 6  | 772.5046       | 386.7562        |
| 1617.8336      | 16 | K  | 5  | 673.4362       | 337.2220        |
| 1773.9599      | 17 | K  | 4  | 517.3099       | 259.1588        |
| 1830.9813      | 18 | G  | 3  | 361.1836       | 181.0957        |
| 1960.0239      | 19 | E  | 2  | 304.1621       | 152.5850        |
|                | 20 | R  | 1  | 175.1195       | 88.0637         |

N-term: +29.04 K(16): +156.13  
K(17): +156.13

X-range:

0 - 0

MassTol: Y-zoom:

0. 1.

MassType:

☐ AVG ☒ MONO

Axis:

☒ 1 ☐ 2

Label:

☒ I ☐ M ☐ -

Ions:

a ☐ + ☐ 2+ ☐ 3+

b ☒ + ☒ 2+ ☐ 3+

c ☐ + ☐ 2+ ☐ 3+

x ☐ + ☐ 2+ ☐ 3+

y ☒ + ☒ 2+ ☐ 3+

z ☐ + ☐ 2+ ☐ 3+

hide H<sub>2</sub>O/NH<sub>3</sub> ☐

zoom 112-122 ☐

GO

TASNVSSVPLPAENVTTITAGQR, MH+ 2240.1886, m/z 747.4011  
L OS G12 P120811 220811-s1.04276.04276.3.dta

scan 4276; 1.0e+000

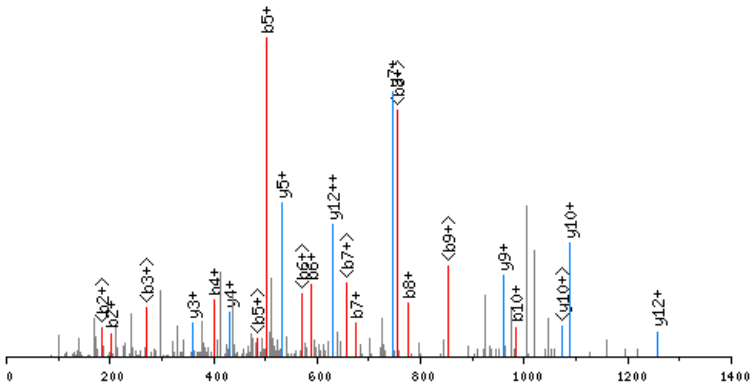

click image to zoom in; click top corners to zoom out [precursor±]

scan 4272; 747.4 m/z; 6.0e+000

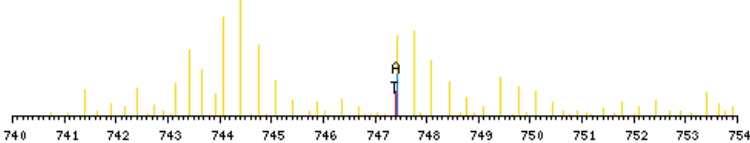

zoomed in precursor plot; T=theoretical m/z, A=acquired m/z

| b <sup>+</sup> | #  | AA | #  | y <sup>+</sup> | y <sup>2+</sup> |
|----------------|----|----|----|----------------|-----------------|
| 130.0868       | 1  | T  | 22 |                |                 |
| 201.1239       | 2  | A  | 21 | 2111.1097      | 1056.0587       |
| 288.1559       | 3  | S  | 20 | 2040.0726      | 1020.5402       |
| 402.1988       | 4  | N  | 19 | 1953.0405      | 977.0242        |
| 501.2673       | 5  | V  | 18 | 1838.9976      | 920.0027        |
| 588.2993       | 6  | S  | 17 | 1739.9292      | 870.4685        |
| 675.3313       | 7  | S  | 16 | 1652.8972      | 826.9525        |
| 774.3997       | 8  | V  | 15 | 1565.8651      | 783.4365        |
| 871.4525       | 9  | P  | 14 | 1466.7967      | 733.9023        |
| 984.5366       | 10 | L  | 13 | 1369.7440      | 685.3759        |
| 1081.5893      | 11 | P  | 12 | 1256.6599      | 628.8339        |
| 1152.6264      | 12 | A  | 11 | 1159.6071      | 580.3075        |
| 1281.6690      | 13 | E  | 10 | 1088.5700      | 544.7889        |
| 1395.7120      | 14 | N  | 9  | 959.5274       | 480.2676        |
| 1494.7804      | 15 | V  | 8  | 845.4845       | 423.2462        |
| 1595.8281      | 16 | T  | 7  | 746.4161       | 373.7120        |
| 1708.9121      | 17 | I  | 6  | 645.3684       | 323.1881        |
| 1809.9598      | 18 | T  | 5  | 532.2843       | 266.6461        |
| 1880.9969      | 19 | A  | 4  | 431.2367       | 216.1222        |
| 1938.0184      | 20 | G  | 3  | 360.1995       | 180.6037        |
| 2066.0769      | 21 | Q  | 2  | 303.1781       | 152.0930        |
|                | 22 | R  | 1  | 175.1195       | 88.0637         |

N-term:+29.04

X-range:

0 - 0

MassTol: Y-zoom:

0. 1.

MassType:

☐AVG ☒MONO

Axis:

☒1 ☐2

Label:

☒I ☐M ☐-

Ions:

a ☐+ ☐2+ ☐3+

b ☒+ ☐2+ ☐3+

c ☐+ ☐2+ ☐3+

x ☐+ ☐2+ ☐3+

y ☒+ ☒2+ ☐3+

z ☐+ ☐2+ ☐3+

hide H<sub>2</sub>O/NH<sub>3</sub> ☐

zoom 112-122 ☐

GO

TATPQQAQEVHEKLR, MH+ 1804.0353, m/z 451.7643  
H OS G17 P120811 220811-s1.02440.02440.4.dta

scan 2440; 2.3e+000

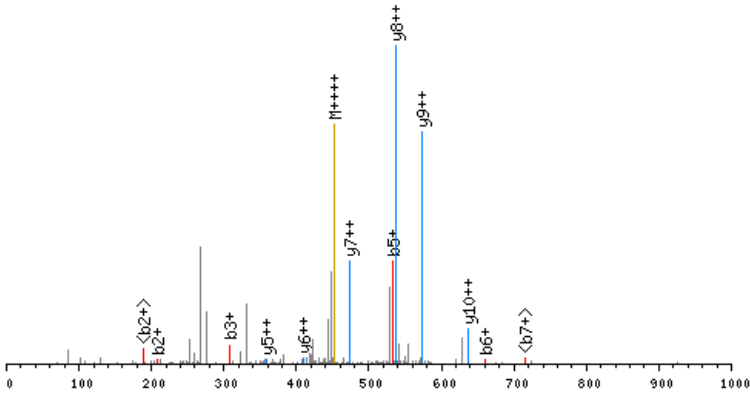

click image to zoom in; click top corners to zoom out

[precursor±]

scan 2438; 451.8 m/z; 4.4e+000

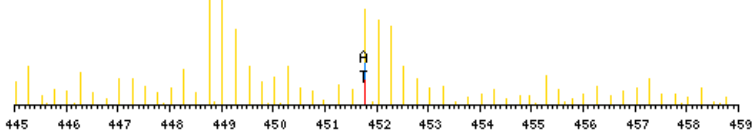

zoomed in precursor plot; T=theoretical m/z, A=acquired m/z

| b <sup>+</sup> | #  | AA | #  | y <sup>+</sup> | y <sup>2+</sup> |
|----------------|----|----|----|----------------|-----------------|
| 136.1186       | 1  | T  | 15 |                |                 |
| 207.1557       | 2  | A  | 14 | 1668.9246      | 834.9662        |
| 308.2034       | 3  | T  | 13 | 1597.8875      | 799.4476        |
| 405.2561       | 4  | P  | 12 | 1496.8398      | 748.9238        |
| 533.3147       | 5  | Q  | 11 | 1399.7870      | 700.3974        |
| 661.3733       | 6  | Q  | 10 | 1271.7284      | 636.3681        |
| 732.4104       | 7  | A  | 9  | 1143.6699      | 572.3388        |
| 860.4690       | 8  | Q  | 8  | 1072.6328      | 536.8203        |
| 989.5116       | 9  | E  | 7  | 944.5742       | 472.7910        |
| 1088.5800      | 10 | V  | 6  | 815.5316       | 408.2697        |
| 1225.6389      | 11 | H  | 5  | 716.4632       | 358.7355        |
| 1354.6815      | 12 | E  | 4  | 579.4043       | 290.2060        |
| 1516.8396      | 13 | K  | 3  | 450.3617       | 225.6847        |
| 1629.9237      | 14 | L  | 2  | 288.2036       | 144.6057        |
|                | 15 | R  | 1  | 175.1195       | 88.0637         |

N-term:+35.07 K(13):+162.16

X-range:

0 - 0

MassTol: Y-zoom:

0. 1.

MassType:

☐AVG ☒MONO

Axis:

☒1 ☐2

Label:

☒I ☐M ☐-

Ions:

a ☐+ ☐2+ ☐3+

b ☒+ ☐2+ ☐3+

c ☐+ ☐2+ ☐3+

x ☐+ ☐2+ ☐3+

y ☒+ ☒2+ ☐3+

z ☐+ ☐2+ ☐3+

hide H<sub>2</sub>O/NH<sub>3</sub> ☐

zoom 112-122 ☐

GO

TCCKAADKDTCTCFSTEGPNLVTR, MH+ 2633.3221, m/z 659.0860  
H OS G17 P120811 220811-s1.03781.03781.4.dta

scan 3781; 5.5e-001

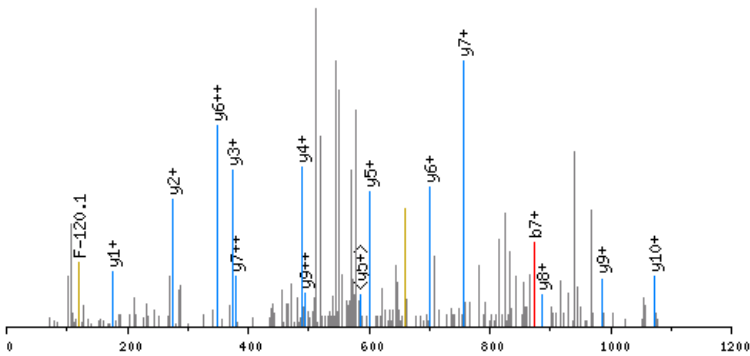

click image to zoom in; click top corners to zoom out [precursor±]

scan 3778; 659.1 m/z; 1.7e+001

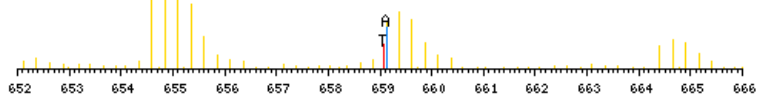

zoomed in precursor plot; T=theoretical m/z, A=acquired m/z

| b <sup>+</sup> | #  | AA | #  | y <sup>+</sup> | y <sup>2+</sup> |
|----------------|----|----|----|----------------|-----------------|
| 136.1186       | 1  | T  | 22 |                |                 |
| 296.1492       | 2  | C  | 21 | 2498.2113      | 1249.6096       |
| 456.1798       | 3  | C  | 20 | 2338.1807      | 1169.5943       |
| 618.3379       | 4  | K  | 19 | 2178.1501      | 1089.5790       |
| 689.3750       | 5  | A  | 18 | 2015.9920      | 1008.4999       |
| 760.4121       | 6  | A  | 17 | 1944.9549      | 972.9814        |
| 875.4390       | 7  | D  | 16 | 1873.9178      | 937.4628        |
| 1037.5971      | 8  | K  | 15 | 1758.8908      | 879.9493        |
| 1152.6241      | 9  | D  | 14 | 1596.7327      | 798.8703        |
| 1253.6718      | 10 | T  | 13 | 1481.7058      | 741.3568        |
| 1413.7024      | 11 | C  | 12 | 1380.6581      | 690.8330        |
| 1560.7708      | 12 | F  | 11 | 1220.6275      | 610.8177        |
| 1647.8028      | 13 | S  | 10 | 1073.5591      | 537.2835        |
| 1748.8505      | 14 | T  | 9  | 986.5271       | 493.7675        |
| 1877.8931      | 15 | E  | 8  | 885.4794       | 443.2436        |
| 1934.9145      | 16 | G  | 7  | 756.4368       | 378.7223        |
| 2031.9673      | 17 | P  | 6  | 699.4153       | 350.2116        |
| 2146.0102      | 18 | N  | 5  | 602.3626       | 301.6852        |
| 2259.0943      | 19 | L  | 4  | 488.3197       | 244.6637        |
| 2358.1627      | 20 | V  | 3  | 375.2356       | 188.1217        |
| 2459.2104      | 21 | T  | 2  | 276.1672       | 138.5875        |
|                | 22 | R  | 1  | 175.1195       | 88.0637         |

N-term:+35.07 C(2):+160.03  
C(3):+160.03 K(4):+162.16 K(8):+162.16  
C(11):+160.03

X-range:

0 - 0

MassTol: Y-zoom:

0. 1.

MassType:

☐AVG ☒MONO

Axis:

☒1 ☐2

Label:

☒I ☐M ☐-

Ions:

a ☐+ ☐2+ ☐3+

b ☒+ ☐2+ ☐3+

c ☐+ ☐2+ ☐3+

x ☐+ ☐2+ ☐3+

y ☒+ ☒2+ ☐3+

z ☐+ ☐2+ ☐3+

hide H<sub>2</sub>O/NH<sub>3</sub> ☐

zoom 112-122 ☐

GO

TCFSTEGPNLVTR, MH+ 1515.7689, m/z 505.9278  
H OS G13 P120811 220811-s1.04423.04423.3.dta

scan 4423; 8.0e-001

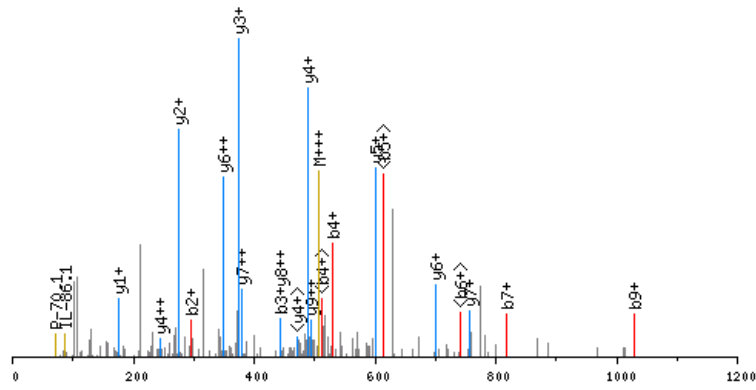

click image to zoom in; click top corners to zoom out

[precursor±]

scan 4419; 505.9 m/z; 2.4e+001

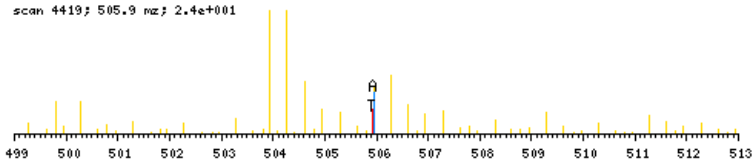

zoomed in precursor plot; T=theoretical m/z, A=acquired m/z

| b <sup>+</sup> | #  | AA | #  | y <sup>+</sup> | y <sup>2+</sup> |
|----------------|----|----|----|----------------|-----------------|
| 136.1186       | 1  | T  | 13 |                |                 |
| 296.1492       | 2  | C  | 12 | 1380.6581      | 690.8330        |
| 443.2176       | 3  | F  | 11 | 1220.6275      | 610.8177        |
| 530.2496       | 4  | S  | 10 | 1073.5591      | 537.2835        |
| 631.2973       | 5  | T  | 9  | 986.5271       | 493.7675        |
| 760.3399       | 6  | E  | 8  | 885.4794       | 443.2436        |
| 817.3614       | 7  | G  | 7  | 756.4368       | 378.7223        |
| 914.4141       | 8  | P  | 6  | 699.4153       | 350.2116        |
| 1028.4570      | 9  | N  | 5  | 602.3626       | 301.6852        |
| 1141.5411      | 10 | L  | 4  | 488.3197       | 244.6637        |
| 1240.6095      | 11 | V  | 3  | 375.2356       | 188.1217        |
| 1341.6572      | 12 | T  | 2  | 276.1672       | 138.5875        |
|                | 13 | R  | 1  | 175.1195       | 88.0637         |

N-term:+35.07 C(2):+160.03

X-range:

0 - 0

MassTol: Y-zoom:

0. 1.

MassType:

☐AVG ☒MONO

Axis:

☒1 ☐2

Label:

☒I ☐M ☐-

Ions:

a ☐+ ☐2+ ☐3+

b ☒+ ☐2+ ☐3+

c ☐+ ☐2+ ☐3+

x ☐+ ☐2+ ☐3+

y ☒+ ☒2+ ☐3+

z ☐+ ☐2+ ☐3+

hide H<sub>2</sub>O/NH<sub>3</sub> ☐

zoom 112-122 ☐

GO

TCPLAAGGQQEKLK, MH+ 1584.8531, m/z 528.9559  
L OS G15 P120811 220811-s1.02542.02542.3.dta

scan 2542; 1.7e+001

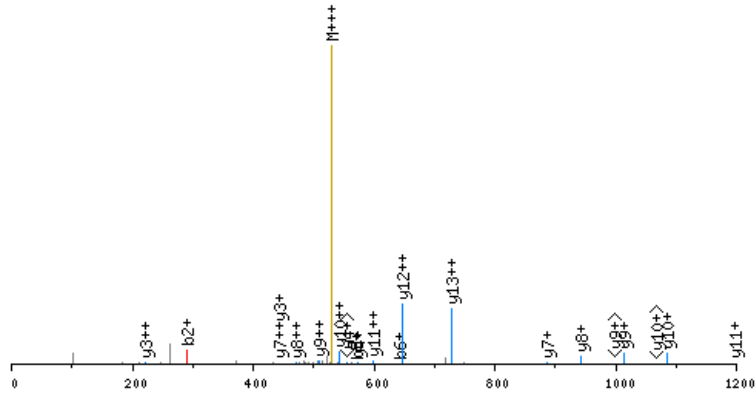

click image to zoom in; click top corners to zoom out [\[precursor±\]](#)

scan 2541; 528.0 m/z; 1.1e+001

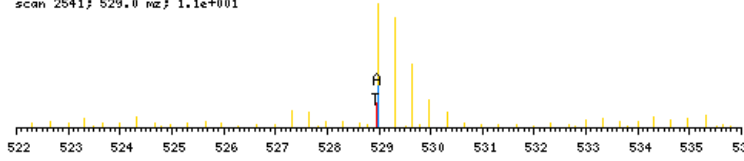

zoomed in precursor plot; T=theoretical m/z, A=acquired m/z

| b <sup>+</sup> | #  | AA | #  | y <sup>+</sup> | y <sup>2+</sup> |
|----------------|----|----|----|----------------|-----------------|
| 130.0868       | 1  | T  | 14 |                |                 |
| 290.1174       | 2  | C  | 13 | 1455.7742      | 728.3910        |
| 387.1701       | 3  | P  | 12 | 1295.7436      | 648.3757        |
| 500.2542       | 4  | L  | 11 | 1198.6908      | 599.8493        |
| 571.2913       | 5  | A  | 10 | 1085.6068      | 543.3073        |
| 642.3284       | 6  | A  | 9  | 1014.5697      | 507.7887        |
| 699.3499       | 7  | G  | 8  | 943.5325       | 472.2702        |
| 756.3714       | 8  | G  | 7  | 886.5111       | 443.7595        |
| 884.4299       | 9  | Q  | 6  | 829.4896       | 415.2487        |
| 1012.4885      | 10 | Q  | 5  | 701.4310       | 351.2194        |
| 1141.5311      | 11 | E  | 4  | 573.3725       | 287.1901        |
| 1297.6574      | 12 | K  | 3  | 444.3299       | 222.6688        |
| 1410.7415      | 13 | L  | 2  | 288.2036       | 144.6057        |
|                | 14 | R  | 1  | 175.1195       | 88.0637         |

N-term:+29.04 C(2):+160.03  
K(12):+156.13

X-range:

0 - 0

MassTol: Y-zoom:

0. 1.

MassType:

☐AVG ☒MONO

Axis:

☒1 ☐2

Label:

☒I ☐M ☐-

Ions:

a ☐+ ☐2+ ☐3+

b ☒+ ☐2+ ☐3+

c ☐+ ☐2+ ☐3+

x ☐+ ☐2+ ☐3+

y ☒+ ☒2+ ☐3+

z ☐+ ☐2+ ☐3+

hide H<sub>2</sub>O/NH<sub>3</sub> ☐

zoom 112-122 ☐

GO

TDAEKAAVSLWGKVNSEVVGGEALGR, MH+ 2903.4573, m/z 726.6198  
L OS G16 P120811 220811-s1.05864.05864.4.dta

scan 5864; 3.1e+000

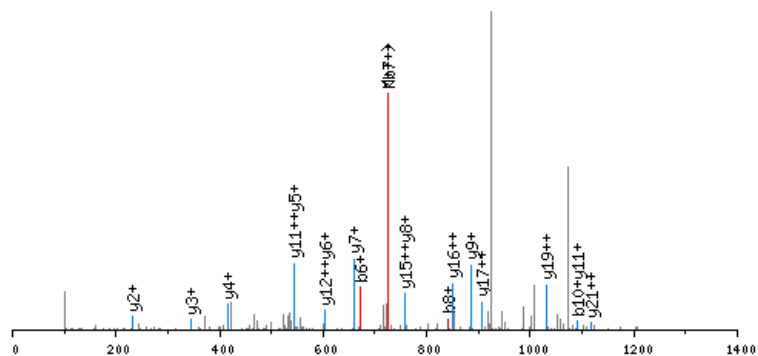

click image to zoom in; click top corners to zoom out

[precursor±]

scan 5863; 726.6 m/z; 1.5e+001

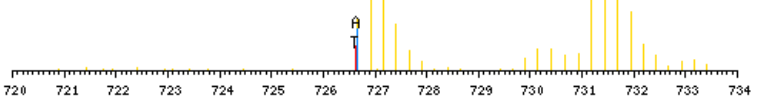

zoomed in precursor plot; T=theoretical m/z, A=acquired m/z

| b <sup>+</sup> | #  | AA | #  | y <sup>+</sup> | y <sup>2+</sup> |
|----------------|----|----|----|----------------|-----------------|
| 130.0868       | 1  | T  | 27 |                |                 |
| 245.1137       | 2  | D  | 26 | 2774.3783      | 1387.6931       |
| 316.1508       | 3  | A  | 25 | 2659.3514      | 1330.1796       |
| 445.1934       | 4  | E  | 24 | 2588.3143      | 1294.6611       |
| 601.3197       | 5  | K  | 23 | 2459.2717      | 1230.1398       |
| 672.3568       | 6  | A  | 22 | 2303.1454      | 1152.0766       |
| 743.3940       | 7  | A  | 21 | 2232.1083      | 1116.5581       |
| 842.4624       | 8  | V  | 20 | 2161.0712      | 1081.0395       |
| 929.4944       | 9  | S  | 19 | 2062.0028      | 1031.5053       |
| 1089.5250      | 10 | C  | 18 | 1974.9707      | 987.9893        |
| 1202.6091      | 11 | L  | 17 | 1814.9401      | 907.9740        |
| 1388.6884      | 12 | W  | 16 | 1701.8561      | 851.4319        |
| 1445.7098      | 13 | G  | 15 | 1515.7767      | 758.3923        |
| 1601.8361      | 14 | K  | 14 | 1458.7553      | 729.8816        |
| 1700.9046      | 15 | V  | 13 | 1302.6290      | 651.8184        |
| 1814.9475      | 16 | N  | 12 | 1203.5606      | 602.2842        |
| 1901.9795      | 17 | S  | 11 | 1089.5176      | 545.2627        |
| 2017.0065      | 18 | D  | 10 | 1002.4856      | 501.7467        |
| 2146.0490      | 19 | E  | 9  | 887.4587       | 444.2332        |
| 2245.1175      | 20 | V  | 8  | 758.4161       | 379.7120        |
| 2302.1389      | 21 | G  | 7  | 659.3477       | 330.1777        |
| 2359.1604      | 22 | G  | 6  | 602.3262       | 301.6670        |
| 2488.2030      | 23 | E  | 5  | 545.3047       | 273.1563        |
| 2559.2401      | 24 | A  | 4  | 416.2621       | 208.6350        |
| 2672.3242      | 25 | L  | 3  | 345.2250       | 173.1164        |
| 2729.3456      | 26 | G  | 2  | 232.1410       | 116.5744        |
|                | 27 | R  | 1  | 175.1195       | 88.0637         |

N-term:+29.04 K(5):+156.13  
C(10):+160.03 K(14):+156.13

X-range:

0 - 0

MassTol: Y-zoom:

0. 1.

MassType:

☐AVG ☒MONO

Axis:

☒1 ☐2

Label:

☒I ☐M ☐-

Ions:

a ☐+ ☐2+ ☐3+

b ☒+ ☐2+ ☐3+

c ☐+ ☐2+ ☐3+

x ☐+ ☐2+ ☐3+

y ☒+ ☒2+ ☐3+

z ☐+ ☐2+ ☐3+

hide H<sub>2</sub>O/NH<sub>3</sub> ☐

zoom 112-122 ☐

GO

TDEAAFQKVMNSNLDNR, MH+ 1981.9653, m/z 661.3266  
L OS G15 P120811 220811-s1.05372.05372.3.dta

scan 5372; 8.4e+000

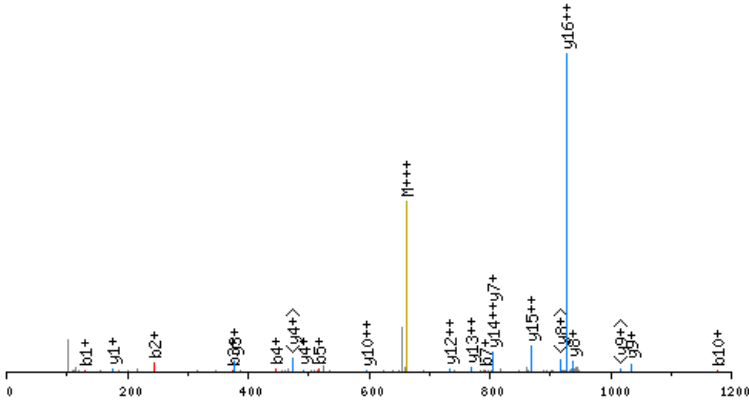

click image to zoom in; click top corners to zoom out [\[precursor±\]](#)

scan 5371; 661.3 m/z; 8.4e+000

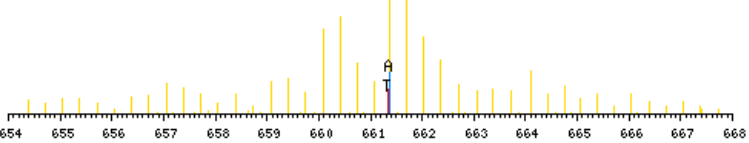

zoomed in precursor plot; T=theoretical m/z, A=acquired m/z

| b <sup>+</sup> | #  | AA | #  | y <sup>+</sup> | y <sup>2+</sup> |
|----------------|----|----|----|----------------|-----------------|
| 130.0868       | 1  | T  | 17 |                |                 |
| 245.1137       | 2  | D  | 16 | 1852.8864      | 926.9471        |
| 374.1563       | 3  | E  | 15 | 1737.8594      | 869.4336        |
| 445.1934       | 4  | A  | 14 | 1608.8168      | 804.9123        |
| 516.2305       | 5  | A  | 13 | 1537.7797      | 769.3938        |
| 663.2990       | 6  | F  | 12 | 1466.7426      | 733.8752        |
| 791.3575       | 7  | Q  | 11 | 1319.6742      | 660.3410        |
| 947.4838       | 8  | K  | 10 | 1191.6156      | 596.3117        |
| 1046.5522      | 9  | V  | 9  | 1035.4893      | 518.2486        |
| 1177.5927      | 10 | M  | 8  | 936.4209       | 468.7144        |
| 1264.6248      | 11 | S  | 7  | 805.3804       | 403.1941        |
| 1378.6677      | 12 | N  | 6  | 718.3484       | 359.6781        |
| 1491.7518      | 13 | L  | 5  | 604.3055       | 302.6566        |
| 1606.7787      | 14 | D  | 4  | 491.2214       | 246.1146        |
| 1693.8107      | 15 | S  | 3  | 376.1945       | 188.6011        |
| 1807.8537      | 16 | N  | 2  | 289.1624       | 145.0851        |
|                | 17 | R  | 1  | 175.1195       | 88.0637         |

N-term:+29.04 K(8):+156.13

X-range:

0 - 0

MassTol: Y-zoom:

0. 1.

MassType:

☐ AVG ☒ MONO

Axis:

☒ 1 ☐ 2

Label:

☒ I ☐ M ☐ -

Ions:

a ☐ + ☐ 2+ ☐ 3+

b ☒ + ☐ 2+ ☐ 3+

c ☐ + ☐ 2+ ☐ 3+

x ☐ + ☐ 2+ ☐ 3+

y ☒ + ☒ 2+ ☐ 3+

z ☐ + ☐ 2+ ☐ 3+

hide H<sub>2</sub>O/NH<sub>3</sub> ☐

zoom 112-122 ☐

GO

TDEEPVKLLES, MH+ 1646.0225, m/z 412.2611  
H OS G17 P120811 220811-s1.04554.04554.4.dta

scan 4554; 2.7e+001

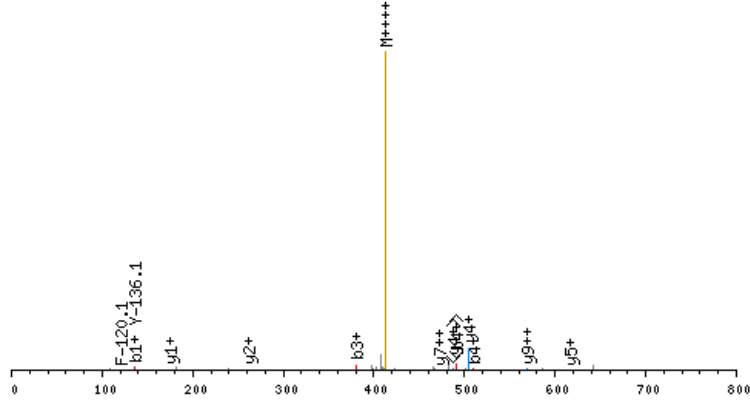

click image to zoom in; click top corners to zoom out [\[precursor±\]](#)

scan 4553; 412.3 m/z; 1.2e+001

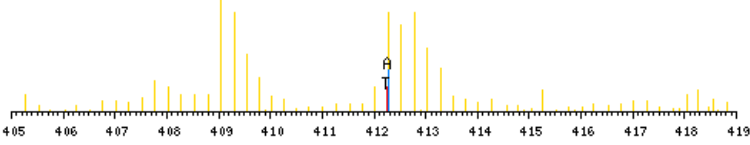

zoomed in precursor plot; T=theoretical m/z, A=acquired m/z

| b <sup>+</sup> | #  | AA | #  | y <sup>+</sup> | y <sup>2+</sup> |
|----------------|----|----|----|----------------|-----------------|
| 136.1186       | 1  | T  | 13 |                |                 |
| 251.1455       | 2  | D  | 12 | 1510.9118      | 755.9598        |
| 380.1881       | 3  | E  | 11 | 1395.8848      | 698.4463        |
| 509.2307       | 4  | E  | 10 | 1266.8422      | 633.9250        |
| 606.2835       | 5  | P  | 9  | 1137.7996      | 569.4037        |
| 705.3519       | 6  | V  | 8  | 1040.7469      | 520.8773        |
| 867.5100       | 7  | K  | 7  | 941.6785       | 471.3431        |
| 1029.6681      | 8  | K  | 6  | 779.5204       | 390.2641        |
| 1142.7521      | 9  | L  | 5  | 617.3623       | 309.1850        |
| 1255.8362      | 10 | L  | 4  | 504.2782       | 252.6430        |
| 1384.8788      | 11 | E  | 3  | 391.1941       | 196.1010        |
| 1471.9108      | 12 | S  | 2  | 262.1515       | 131.5797        |
|                | 13 | R  | 1  | 175.1195       | 88.0637         |

N-term:+35.07 K(7):+162.16  
K(8):+162.16

X-range:

0 - 0

MassTol: Y-zoom:

0. 1.

MassType:

☐AVG ☒MONO

Axis:

☒1 ☐2

Label:

☒I ☐M ☐-

Ions:

a ☐+ ☐2+ ☐3+

b ☒+ ☐2+ ☐3+

c ☐+ ☐2+ ☐3+

x ☐+ ☐2+ ☐3+

y ☒+ ☒2+ ☐3+

z ☐+ ☐2+ ☐3+

hide H<sub>2</sub>O/NH<sub>3</sub> ☐

zoom 112-122 ☐

GO

TDEKTLIEILATR, MH+ 1558.9056, m/z 520.3067  
L OS G15 P120811 220811-s1.06125.06125.3.dta

scan 6125; 4.6e+000

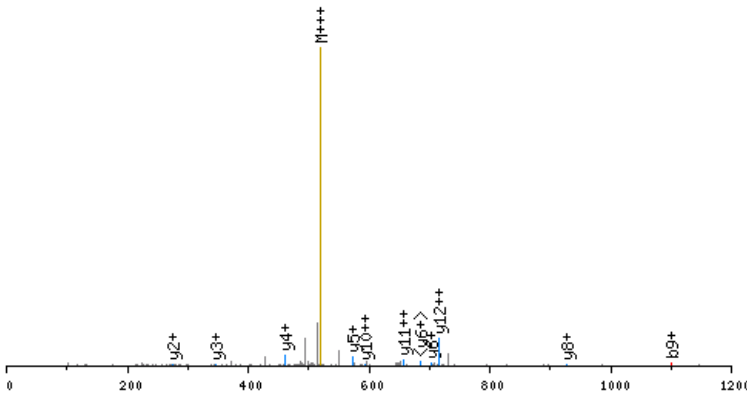

click image to zoom in; click top corners to zoom out

[precursor±]

scan 6121; 520.3 m/z; 1.5e+000

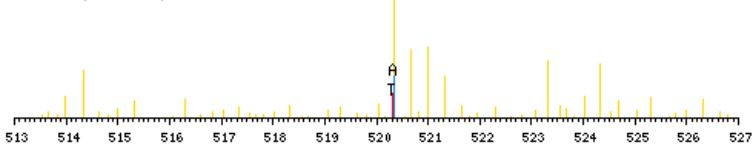

zoomed in precursor plot; T=theoretical m/z, A=acquired m/z

| b <sup>+</sup> | #  | AA | #  | y <sup>+</sup> | y <sup>2+</sup> |
|----------------|----|----|----|----------------|-----------------|
| 130.0868       | 1  | T  | 13 |                |                 |
| 245.1137       | 2  | D  | 12 | 1429.8267      | 715.4172        |
| 374.1563       | 3  | E  | 11 | 1314.7997      | 657.9038        |
| 530.2826       | 4  | K  | 10 | 1185.7571      | 593.3825        |
| 631.3303       | 5  | T  | 9  | 1029.6308      | 515.3193        |
| 744.4144       | 6  | L  | 8  | 928.5831       | 464.7955        |
| 857.4984       | 7  | I  | 7  | 815.4991       | 408.2535        |
| 986.5410       | 8  | E  | 6  | 702.4150       | 351.7114        |
| 1099.6251      | 9  | I  | 5  | 573.3724       | 287.1901        |
| 1212.7091      | 10 | L  | 4  | 460.2884       | 230.6481        |
| 1283.7463      | 11 | A  | 3  | 347.2043       | 174.1061        |
| 1384.7939      | 12 | T  | 2  | 276.1672       | 138.5875        |
|                | 13 | R  | 1  | 175.1195       | 88.0637         |

N-term:+29.04 K(4):+156.13

X-range:

0 - 0

MassTol: Y-zoom:

0. 1.

MassType:

☐AVG ☒MONO

Axis:

☒1 ☐2

Label:

☒I ☐M ☐-

Ions:

a ☐+ ☐2+ ☐3+

b ☒+ ☐2+ ☐3+

c ☐+ ☐2+ ☐3+

x ☐+ ☐2+ ☐3+

y ☒+ ☒2+ ☐3+

z ☐+ ☐2+ ☐3+

hide H<sub>2</sub>O/NH<sub>3</sub> ☐

zoom 112-122 ☐

GO

TDEKVLTEIIASR, MH+ 1530.8743, m/z 510.9630  
L OS G15 P120811 220811-s1.05044.05044.3.dta

scan 5044; 1.6e+001

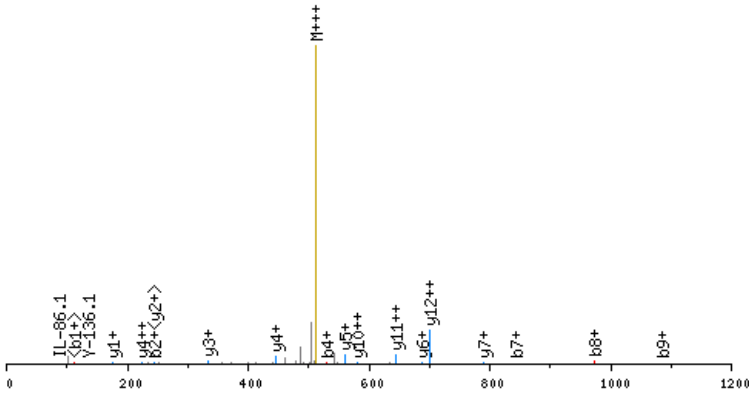

click image to zoom in; click top corners to zoom out

[precursor±]

scan 5041; 511.0 m/z; 6.7e+000

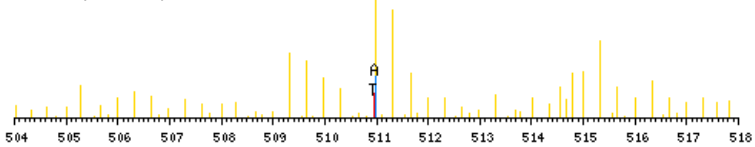

zoomed in precursor plot; T=theoretical m/z, A=acquired m/z

| b <sup>+</sup> | #  | AA | #  | y <sup>+</sup> | y <sup>2+</sup> |
|----------------|----|----|----|----------------|-----------------|
| 130.0868       | 1  | T  | 13 |                |                 |
| 245.1137       | 2  | D  | 12 | 1401.7954      | 701.4016        |
| 374.1563       | 3  | E  | 11 | 1286.7684      | 643.8881        |
| 530.2826       | 4  | K  | 10 | 1157.7258      | 579.3668        |
| 629.3510       | 5  | V  | 9  | 1001.5995      | 501.3037        |
| 742.4351       | 6  | L  | 8  | 902.5311       | 451.7695        |
| 843.4828       | 7  | T  | 7  | 789.4470       | 395.2274        |
| 972.5254       | 8  | E  | 6  | 688.3994       | 344.7036        |
| 1085.6094      | 9  | I  | 5  | 559.3568       | 280.1823        |
| 1198.6935      | 10 | I  | 4  | 446.2727       | 223.6403        |
| 1269.7306      | 11 | A  | 3  | 333.1886       | 167.0982        |
| 1356.7626      | 12 | S  | 2  | 262.1515       | 131.5797        |
|                | 13 | R  | 1  | 175.1195       | 88.0637         |

N-term:+29.04 K(4):+156.13

X-range:

0 - 0

MassTol: Y-zoom:

0. 1.

MassType:

☐AVG ☒MONO

Axis:

☒1 ☐2

Label:

☒I ☐M ☐-

Ions:

a ☐+ ☐2+ ☐3+

b ☒+ ☐2+ ☐3+

c ☐+ ☐2+ ☐3+

x ☐+ ☐2+ ☐3+

y ☒+ ☒2+ ☐3+

z ☐+ ☐2+ ☐3+

hide H<sub>2</sub>O/NH<sub>3</sub> ☐

zoom 112-122 ☐

GO

TDGASSSNCVTDISHLVR, MH+ 1946.9241, m/z 649.6462  
L OS G15 P120811 220811-s1.04483.04483.3.dta

scan 4483; 1.5e+000

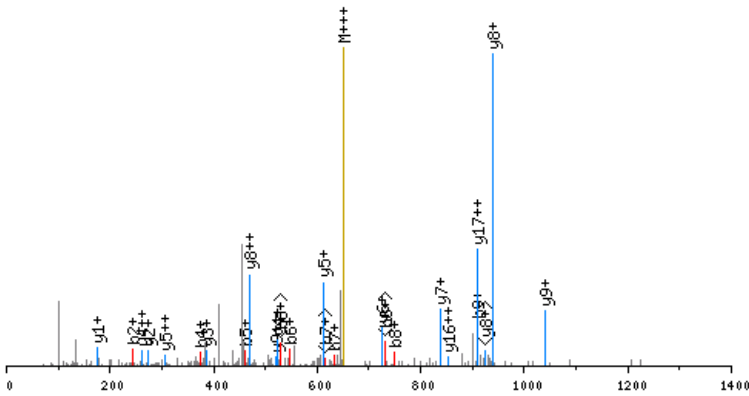

click image to zoom in; click top corners to zoom out

[precursor±]

scan 4481; 649.6 m/z; 2.3e+001

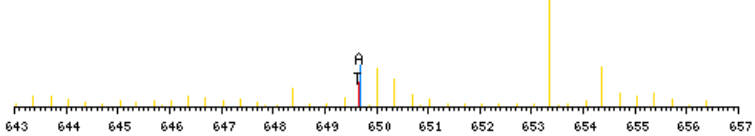

zoomed in precursor plot; T=theoretical m/z, A=acquired m/z

| b <sup>+</sup> | #  | AA | #  | y <sup>+</sup> | y <sup>2+</sup> |
|----------------|----|----|----|----------------|-----------------|
| 130.0868       | 1  | T  | 18 |                |                 |
| 245.1137       | 2  | D  | 17 | 1817.8452      | 909.4265        |
| 302.1352       | 3  | G  | 16 | 1702.8182      | 851.9130        |
| 373.1723       | 4  | A  | 15 | 1645.7967      | 823.4023        |
| 460.2043       | 5  | S  | 14 | 1574.7596      | 787.8837        |
| 547.2364       | 6  | S  | 13 | 1487.7276      | 744.3677        |
| 634.2684       | 7  | S  | 12 | 1400.6956      | 700.8517        |
| 748.3113       | 8  | N  | 11 | 1313.6635      | 657.3357        |
| 908.3419       | 9  | C  | 10 | 1199.6206      | 600.3142        |
| 1007.4103      | 10 | V  | 9  | 1039.5900      | 520.2989        |
| 1108.4580      | 11 | T  | 8  | 940.5216       | 470.7647        |
| 1223.4849      | 12 | D  | 7  | 839.4739       | 420.2409        |
| 1336.5690      | 13 | I  | 6  | 724.4470       | 362.7274        |
| 1423.6010      | 14 | S  | 5  | 611.3629       | 306.1854        |
| 1560.6600      | 15 | H  | 4  | 524.3309       | 262.6694        |
| 1673.7440      | 16 | L  | 3  | 387.2720       | 194.1399        |
| 1772.8124      | 17 | V  | 2  | 274.1879       | 137.5979        |
|                | 18 | R  | 1  | 175.1195       | 88.0637         |

N-term:+29.04 C(9):+160.03

X-range:

0 - 0

MassTol: Y-zoom:

0. 1.

MassType:

☐AVG ☒MONO

Axis:

☒1 ☐2

Label:

☒I ☐M ☐-

Ions:

a ☐+ ☐2+ ☐3+

b ☒+ ☐2+ ☐3+

c ☐+ ☐2+ ☐3+

x ☐+ ☐2+ ☐3+

y ☒+ ☒2+ ☐3+

z ☐+ ☐2+ ☐3+

hide H<sub>2</sub>O/NH<sub>3</sub> ☐

zoom 112-122 ☐

GO

TDLEKDIISDTSGDFF, MH+ 1867.9289, m/z 623.3145  
L OS G15 P120811 220811-s1.05385.05385.3.dta

scan 5385; 3.0e+000

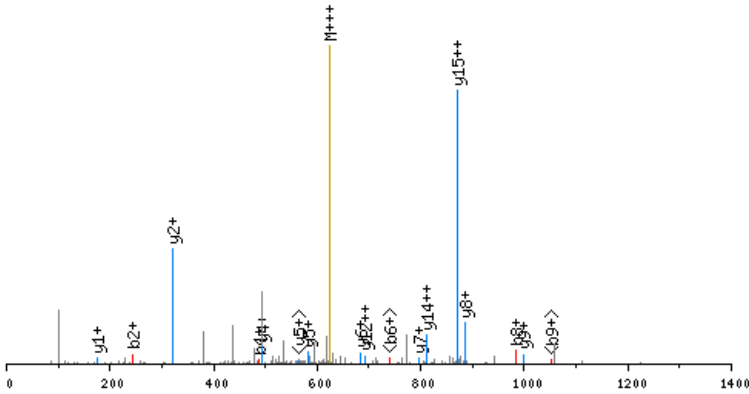

click image to zoom in; click top corners to zoom out [\[precursor±\]](#)

scan 5381; 623.3 m/z; 5.5e+000

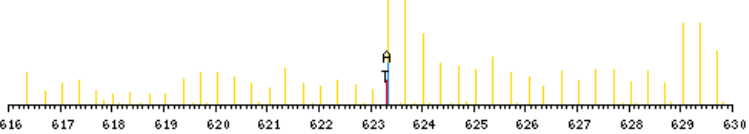

zoomed in precursor plot; T=theoretical m/z, A=acquired m/z

| b <sup>+</sup> | #  | AA | #  | y <sup>+</sup> | y <sup>2+</sup> |
|----------------|----|----|----|----------------|-----------------|
| 130.0868       | 1  | T  | 16 |                |                 |
| 245.1137       | 2  | D  | 15 | 1738.8500      | 869.9289        |
| 358.1978       | 3  | L  | 14 | 1623.8230      | 812.4154        |
| 487.2404       | 4  | E  | 13 | 1510.7390      | 755.8734        |
| 643.3667       | 5  | K  | 12 | 1381.6964      | 691.3521        |
| 758.3936       | 6  | D  | 11 | 1225.5701      | 613.2889        |
| 871.4777       | 7  | I  | 10 | 1110.5431      | 555.7755        |
| 984.5617       | 8  | I  | 9  | 997.4591       | 499.2334        |
| 1071.5938      | 9  | S  | 8  | 884.3750       | 442.6914        |
| 1186.6207      | 10 | D  | 7  | 797.3430       | 399.1754        |
| 1287.6684      | 11 | T  | 6  | 682.3160       | 341.6619        |
| 1374.7004      | 12 | S  | 5  | 581.2683       | 291.1381        |
| 1431.7219      | 13 | G  | 4  | 494.2363       | 247.6221        |
| 1546.7488      | 14 | D  | 3  | 437.2149       | 219.1113        |
| 1693.8172      | 15 | F  | 2  | 322.1879       | 161.5979        |
|                | 16 | R  | 1  | 175.1195       | 88.0637         |

N-term:+29.04 K(5):+156.13

X-range:

0 - 0

MassTol: Y-zoom:

0. 1.

MassType:

☐ AVG ☒ MONO

Axis:

☒ 1 ☐ 2

Label:

☒ I ☐ M ☐ -

Ions:

a ☐ + ☐ 2+ ☐ 3+

b ☒ + ☐ 2+ ☐ 3+

c ☐ + ☐ 2+ ☐ 3+

x ☐ + ☐ 2+ ☐ 3+

y ☒ + ☒ 2+ ☐ 3+

z ☐ + ☐ 2+ ☐ 3+

hide H<sub>2</sub>O/NH<sub>3</sub> ☐

zoom 112-122 ☐

GO

TDLNHENLKGGDDLDPNYVLSSR, MH+ 2628.2906, m/z 657.8281  
L OS G16 P120811 220811-s1.05099.05099.4.dta

scan 5099; 1.9e+000

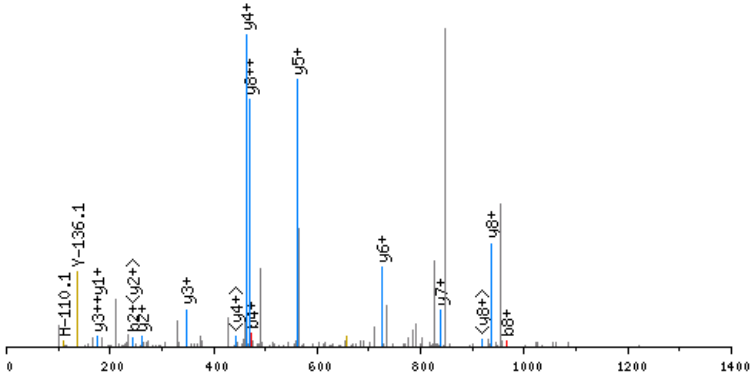

click image to zoom in; click top corners to zoom out

[precursor±]

scan 5098; 657.8 m/z; 1.2e+001

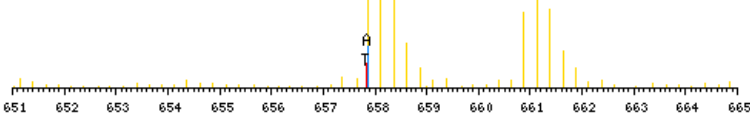

zoomed in precursor plot; T=theoretical m/z, A=acquired m/z

| b <sup>+</sup> | #  | AA | #  | y <sup>+</sup> | y <sup>2+</sup> |
|----------------|----|----|----|----------------|-----------------|
| 130.0868       | 1  | T  | 23 |                |                 |
| 245.1137       | 2  | D  | 22 | 2499.2116      | 1250.1097       |
| 358.1978       | 3  | L  | 21 | 2384.1847      | 1192.5962       |
| 472.2407       | 4  | N  | 20 | 2271.1006      | 1136.0542       |
| 609.2996       | 5  | H  | 19 | 2157.0577      | 1079.0327       |
| 738.3422       | 6  | E  | 18 | 2019.9988      | 1010.5033       |
| 852.3851       | 7  | N  | 17 | 1890.9562      | 945.9820        |
| 965.4692       | 8  | L  | 16 | 1776.9132      | 888.9605        |
| 1121.5955      | 9  | K  | 15 | 1663.8292      | 832.4185        |
| 1178.6170      | 10 | G  | 14 | 1507.7029      | 754.3554        |
| 1235.6384      | 11 | G  | 13 | 1450.6814      | 725.8446        |
| 1350.6654      | 12 | D  | 12 | 1393.6599      | 697.3339        |
| 1465.6923      | 13 | D  | 11 | 1278.6330      | 639.8204        |
| 1578.7764      | 14 | L  | 10 | 1163.6061      | 582.3069        |
| 1693.8033      | 15 | D  | 9  | 1050.5220      | 525.7649        |
| 1790.8561      | 16 | P  | 8  | 935.4951       | 468.2514        |
| 1904.8990      | 17 | N  | 7  | 838.4423       | 419.7251        |
| 2067.9624      | 18 | Y  | 6  | 724.3994       | 362.7036        |
| 2167.0308      | 19 | V  | 5  | 561.3360       | 281.1719        |
| 2280.1148      | 20 | L  | 4  | 462.2676       | 231.6377        |
| 2367.1469      | 21 | S  | 3  | 349.1836       | 175.0957        |
| 2454.1789      | 22 | S  | 2  | 262.1515       | 131.5797        |
|                | 23 | R  | 1  | 175.1195       | 88.0637         |

N-term:+29.04 K(9):+156.13

X-range:

0 - 0

MassTol: Y-zoom:

0. 1.

MassType:

☐AVG ☒MONO

Axis:

☒1 ☐2

Label:

☒I ☐M ☐-

Ions:

a ☐+ ☐2+ ☐3+

b ☒+ ☐2+ ☐3+

c ☐+ ☐2+ ☐3+

x ☐+ ☐2+ ☐3+

y ☒+ ☒2+ ☐3+

z ☐+ ☐2+ ☐3+

hide H<sub>2</sub>O/NH<sub>3</sub> ☐

zoom 112-122 ☐

GO

TDLQEAETIGR, MH+ 1428.8334, m/z 476.9493  
H OS G16 P120811 220811-s1.04020.04020.3.dta

scan 4020; 2.3e+001

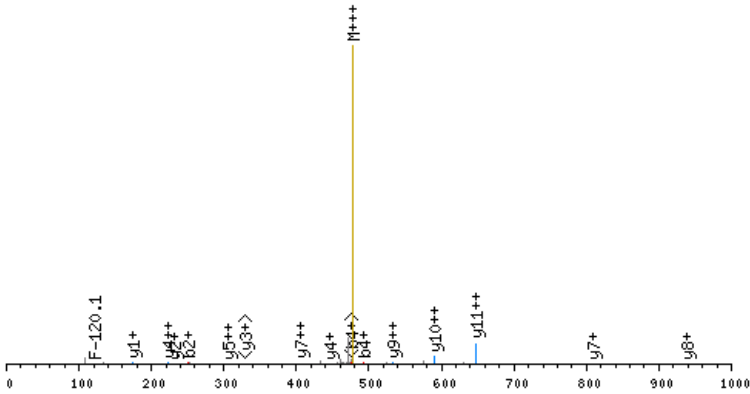

click image to zoom in; click top corners to zoom out [\[precursor±\]](#)

scan 4018; 476.9 m/z; 2.0e+001

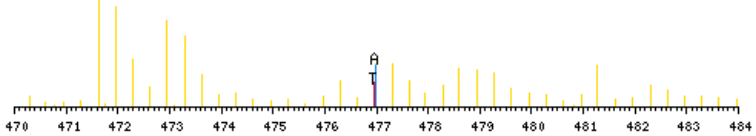

zoomed in precursor plot; T=theoretical m/z, A=acquired m/z

| b <sup>+</sup> | #  | AA | #  | y <sup>+</sup> | y <sup>2+</sup> |
|----------------|----|----|----|----------------|-----------------|
| 136.1186       | 1  | T  | 12 |                |                 |
| 251.1455       | 2  | D  | 11 | 1293.7227      | 647.3653        |
| 364.2296       | 3  | L  | 10 | 1178.6957      | 589.8518        |
| 492.2882       | 4  | Q  | 9  | 1065.6117      | 533.3098        |
| 621.3308       | 5  | E  | 8  | 937.5531       | 469.2805        |
| 692.3679       | 6  | A  | 7  | 808.5105       | 404.7592        |
| 821.4105       | 7  | E  | 6  | 737.4734       | 369.2406        |
| 983.5686       | 8  | K  | 5  | 608.4308       | 304.7193        |
| 1084.6162      | 9  | T  | 4  | 446.2727       | 223.6403        |
| 1197.7003      | 10 | I  | 3  | 345.2250       | 173.1164        |
| 1254.7218      | 11 | G  | 2  | 232.1410       | 116.5744        |
|                | 12 | R  | 1  | 175.1195       | 88.0637         |

N-term:+35.07 K(8):+162.16

X-range:

0 - 0

MassTol: Y-zoom:

0. 1.

MassType:

☐AVG ☒MONO

Axis:

☒1 ☐2

Label:

☒I ☐M ☐-

Ions:

a ☐+ ☐2+ ☐3+

b ☒+ ☐2+ ☐3+

c ☐+ ☐2+ ☐3+

x ☐+ ☐2+ ☐3+

y ☒+ ☒2+ ☐3+

z ☐+ ☐2+ ☐3+

hide H<sub>2</sub>O/NH<sub>3</sub> ☐

zoom 112-122 ☐

GO

TDLTKVNKECCHGDLLECADDR, MH+ 2733.2645, m/z 684.0716  
L OS G18 P120811 220811-s1.04272.04272.4.dta

scan 4272; 3.0e+000

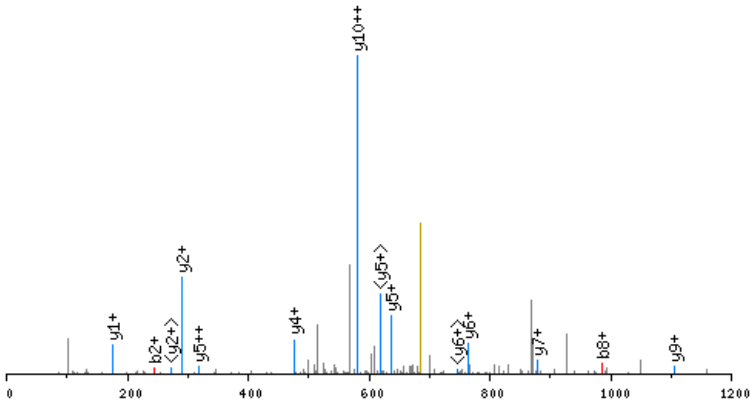

click image to zoom in; click top corners to zoom out

[precursor±]

scan 4271; 684.1 m/z; 9.0e+000

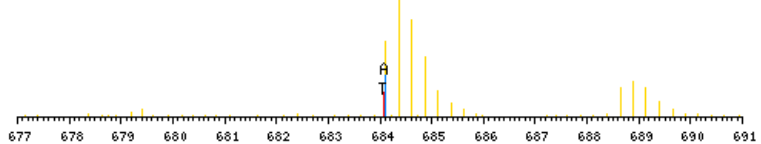

zoomed in precursor plot; T=theoretical m/z, A=acquired m/z

| b <sup>+</sup> | #  | AA | #  | y <sup>+</sup> | y <sup>2+</sup> |
|----------------|----|----|----|----------------|-----------------|
| 130.0868       | 1  | T  | 22 |                |                 |
| 245.1137       | 2  | D  | 21 | 2604.1856      | 1302.5967       |
| 358.1978       | 3  | L  | 20 | 2489.1586      | 1245.0832       |
| 459.2455       | 4  | T  | 19 | 2376.0746      | 1188.5412       |
| 615.3718       | 5  | K  | 18 | 2275.0269      | 1138.0174       |
| 714.4402       | 6  | V  | 17 | 2118.9006      | 1059.9542       |
| 828.4831       | 7  | N  | 16 | 2019.8322      | 1010.4200       |
| 984.6094       | 8  | K  | 15 | 1905.7892      | 953.3985        |
| 1113.6520      | 9  | E  | 14 | 1749.6629      | 875.3354        |
| 1273.6826      | 10 | C  | 13 | 1620.6203      | 810.8141        |
| 1433.7132      | 11 | C  | 12 | 1460.5897      | 730.7988        |
| 1570.7721      | 12 | H  | 11 | 1300.5591      | 650.7835        |
| 1627.7936      | 13 | G  | 10 | 1163.5002      | 582.2540        |
| 1742.8205      | 14 | D  | 9  | 1106.4788      | 553.7433        |
| 1855.9046      | 15 | L  | 8  | 991.4518       | 496.2298        |
| 1968.9886      | 16 | L  | 7  | 878.3678       | 439.6878        |
| 2098.0312      | 17 | E  | 6  | 765.2837       | 383.1458        |
| 2258.0618      | 18 | C  | 5  | 636.2411       | 318.6245        |
| 2329.0990      | 19 | A  | 4  | 476.2105       | 238.6092        |
| 2444.1259      | 20 | D  | 3  | 405.1734       | 203.0906        |
| 2559.1528      | 21 | D  | 2  | 290.1464       | 145.5771        |
|                | 22 | R  | 1  | 175.1195       | 88.0637         |

N-term:+29.04 K(5):+156.13  
K(8):+156.13 C(10):+160.03  
C(11):+160.03 C(18):+160.03

X-range:

0 - 0

MassTol: Y-zoom:

0. 1.

MassType:

☐ AVG ☒ MONO

Axis:

☒ 1 ☐ 2

Label:

☒ I ☐ M ☐ -

Ions:

a ☐ + ☐ 2+ ☐ 3+

b ☒ + ☐ 2+ ☐ 3+

c ☐ + ☐ 2+ ☐ 3+

x ☐ + ☐ 2+ ☐ 3+

y ☒ + ☒ 2+ ☐ 3+

z ☐ + ☐ 2+ ☐ 3+

hide H<sub>2</sub>O/NH<sub>3</sub> ☐

zoom 112-122 ☐

GO

TDSLVCAGIIASAR, MH+ 1629.9634, m/z 543.9926  
H OS G15 P120811 220811-s1.04223.04223.3.dta

scan 4223; 1.5e+001

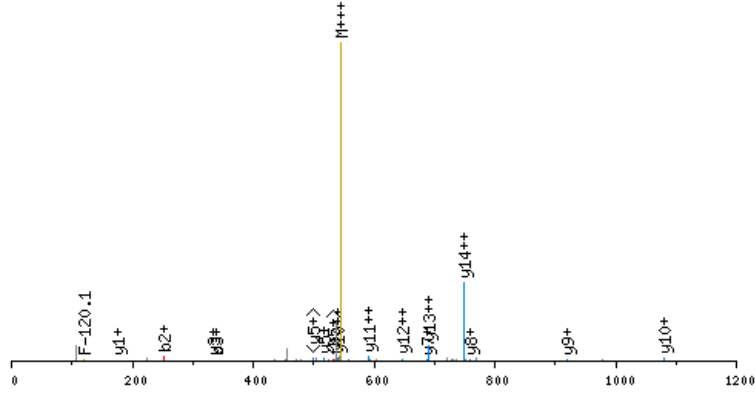

click image to zoom in; click top corners to zoom out [\[precursor±\]](#)

scan 4221; 544.0 m/z; 3.6e+001

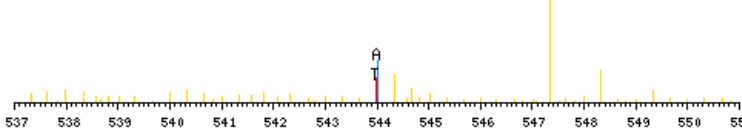

zoomed in precursor plot; T=theoretical m/z, A=acquired m/z

| b <sup>+</sup> | #  | AA | #  | y <sup>+</sup> | y <sup>2+</sup> |
|----------------|----|----|----|----------------|-----------------|
| 136.1186       | 1  | T  | 15 |                |                 |
| 251.1455       | 2  | D  | 14 | 1494.8526      | 747.9302        |
| 338.1776       | 3  | S  | 13 | 1379.8257      | 690.4167        |
| 451.2616       | 4  | L  | 12 | 1292.7936      | 646.9007        |
| 550.3300       | 5  | V  | 11 | 1179.7096      | 590.3587        |
| 710.3606       | 6  | C  | 10 | 1080.6412      | 540.8245        |
| 872.5187       | 7  | K  | 9  | 920.6106       | 460.8092        |
| 943.5558       | 8  | A  | 8  | 758.4525       | 379.7301        |
| 1000.5773      | 9  | G  | 7  | 687.4153       | 344.2116        |
| 1113.6614      | 10 | I  | 6  | 630.3939       | 315.7009        |
| 1226.7454      | 11 | I  | 5  | 517.3098       | 259.1588        |
| 1297.7825      | 12 | A  | 4  | 404.2258       | 202.6168        |
| 1384.8146      | 13 | S  | 3  | 333.1886       | 167.0982        |
| 1455.8517      | 14 | A  | 2  | 246.1566       | 123.5822        |
|                | 15 | R  | 1  | 175.1195       | 88.0637         |

N-term:+35.07 C(6):+160.03  
K(7):+162.16

X-range:

0 - 0

MassTol: Y-zoom:

0. 1.

MassType:

☐AVG ☒MONO

Axis:

☒1 ☐2

Label:

☒I ☐M ☐-

Ions:

a ☐+ ☐2+ ☐3+

b ☒+ ☐2+ ☐3+

c ☐+ ☐2+ ☐3+

x ☐+ ☐2+ ☐3+

y ☒+ ☒2+ ☐3+

z ☐+ ☐2+ ☐3+

hide H<sub>2</sub>O/NH<sub>3</sub> ☐

zoom 112-122 ☐

GO

TDTEDKGEFLSEGGGVR, MH+ 1864.9565, m/z 622.3237  
H OS G15 P120811 220811-s1.03193.03193.3.dta

scan 3193; 1.4e+001

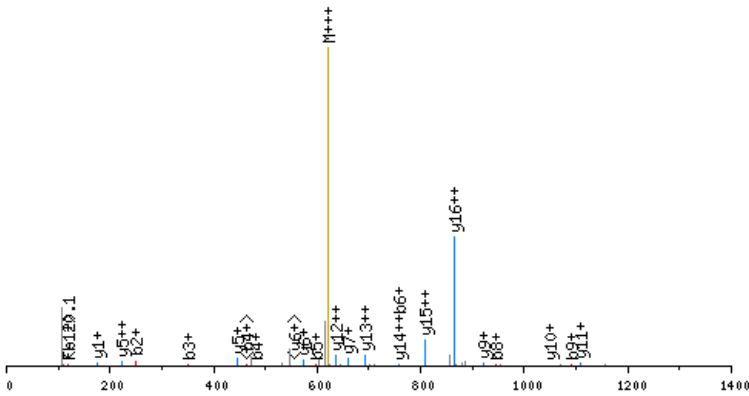

click image to zoom in; click top corners to zoom out

[precursor±]

scan 3191; 622.3 m/z; 2.9e+001

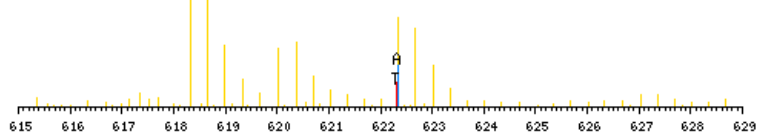

zoomed in precursor plot; T=theoretical m/z, A=acquired m/z

| b <sup>+</sup> | #  | AA | #  | y <sup>+</sup> | y <sup>2+</sup> |
|----------------|----|----|----|----------------|-----------------|
| 136.1186       | 1  | T  | 17 |                |                 |
| 251.1455       | 2  | D  | 16 | 1729.8457      | 865.4268        |
| 352.1932       | 3  | T  | 15 | 1614.8188      | 807.9133        |
| 481.2358       | 4  | E  | 14 | 1513.7711      | 757.3895        |
| 596.2627       | 5  | D  | 13 | 1384.7285      | 692.8682        |
| 758.4208       | 6  | K  | 12 | 1269.7016      | 635.3547        |
| 815.4423       | 7  | G  | 11 | 1107.5435      | 554.2756        |
| 944.4849       | 8  | E  | 10 | 1050.5220      | 525.7649        |
| 1091.5533      | 9  | F  | 9  | 921.4794       | 461.2436        |
| 1204.6374      | 10 | L  | 8  | 774.4110       | 387.7094        |
| 1291.6694      | 11 | S  | 7  | 661.3269       | 331.1674        |
| 1420.7120      | 12 | E  | 6  | 574.2949       | 287.6514        |
| 1477.7335      | 13 | G  | 5  | 445.2523       | 223.1301        |
| 1534.7549      | 14 | G  | 4  | 388.2308       | 194.6193        |
| 1591.7764      | 15 | G  | 3  | 331.2094       | 166.1086        |
| 1690.8448      | 16 | V  | 2  | 274.1879       | 137.5979        |
|                | 17 | R  | 1  | 175.1195       | 88.0637         |

N-term:+35.07 K(6):+162.16

X-range:

0 - 0

MassTol: Y-zoom:

0. 1.

MassType:

☐AVG ☒MONO

Axis:

☒1 ☐2

Label:

☒I ☐M ☐-

Ions:

a ☐+ ☐2+ ☐3+

b ☒+ ☐2+ ☐3+

c ☐+ ☐2+ ☐3+

x ☐+ ☐2+ ☐3+

y ☒+ ☒2+ ☐3+

z ☐+ ☐2+ ☐3+

hide H<sub>2</sub>O/NH<sub>3</sub> ☐

zoom 112-122 ☐

GO

TDVETQPGKTVIR, MH+ 1499.8433, m/z 500.6193  
L OS G15 P120811 220811-s1.02497.02497.3.dta

scan 2497; 3.3e+001

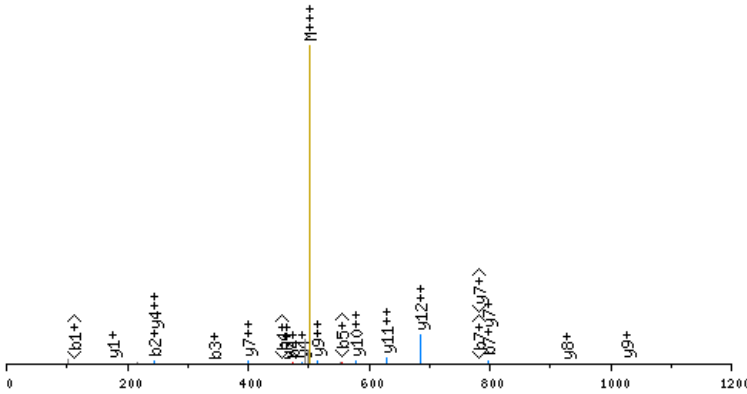

click image to zoom in; click top corners to zoom out [\[precursor±\]](#)

scan 2496; 500.6 m/z; 1.2e+001

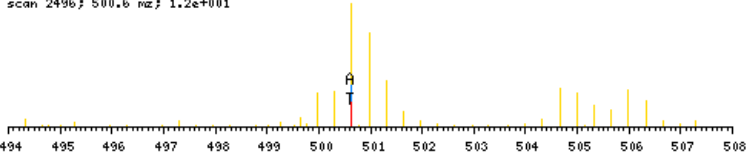

zoomed in precursor plot; T=theoretical m/z, A=acquired m/z

| b <sup>+</sup> | #  | AA | #  | y <sup>+</sup> | y <sup>2+</sup> |
|----------------|----|----|----|----------------|-----------------|
| 130.0868       | 1  | T  | 13 |                |                 |
| 245.1137       | 2  | D  | 12 | 1370.7644      | 685.8861        |
| 344.1821       | 3  | V  | 11 | 1255.7374      | 628.3726        |
| 473.2247       | 4  | E  | 10 | 1156.6690      | 578.8384        |
| 574.2724       | 5  | T  | 9  | 1027.6264      | 514.3171        |
| 702.3310       | 6  | Q  | 8  | 926.5788       | 463.7933        |
| 799.3837       | 7  | P  | 7  | 798.5202       | 399.7640        |
| 856.4052       | 8  | G  | 6  | 701.4674       | 351.2376        |
| 1012.5315      | 9  | K  | 5  | 644.4460       | 322.7269        |
| 1113.5792      | 10 | T  | 4  | 488.3197       | 244.6637        |
| 1212.6476      | 11 | V  | 3  | 387.2720       | 194.1399        |
| 1325.7317      | 12 | I  | 2  | 288.2036       | 144.6057        |
|                | 13 | R  | 1  | 175.1195       | 88.0637         |

N-term:+29.04 K(9):+156.13

X-range:

0 - 0

MassTol: Y-zoom:

0. 1.

MassType:

☐AVG ☒MONO

Axis:

☒1 ☐2

Label:

☒I ☐M ☐-

Ions:

a ☐+ ☐2+ ☐3+

b ☒+ ☐2+ ☐3+

c ☐+ ☐2+ ☐3+

x ☐+ ☐2+ ☐3+

y ☒+ ☒2+ ☐3+

z ☐+ ☐2+ ☐3+

hide H<sub>2</sub>O/NH<sub>3</sub> ☐

zoom 112-122 ☐

GO

TDVLQDHNAVLDFEHR, MH+ 1936.9517, m/z 484.9934  
L OS G17 P120811 220811-s1.05540.05540.4.dta

scan 5540; 3.3e+000

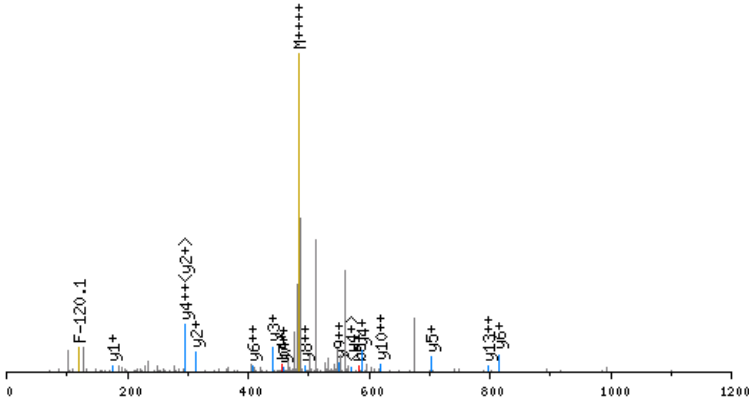

click image to zoom in; click top corners to zoom out [\[precursor±\]](#)

scan 5538; 485.0 m/z; 9.5e+000

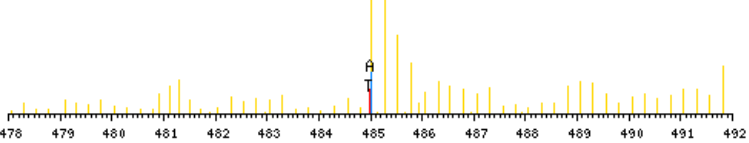

zoomed in precursor plot; T=theoretical m/z, A=acquired m/z

| b <sup>+</sup> | #  | AA | #  | y <sup>+</sup> | y <sup>2+</sup> |
|----------------|----|----|----|----------------|-----------------|
| 130.0868       | 1  | T  | 16 |                |                 |
| 245.1137       | 2  | D  | 15 | 1807.8727      | 904.4403        |
| 344.1821       | 3  | V  | 14 | 1692.8458      | 846.9268        |
| 457.2662       | 4  | L  | 13 | 1593.7774      | 797.3926        |
| 585.3248       | 5  | Q  | 12 | 1480.6933      | 740.8506        |
| 700.3517       | 6  | D  | 11 | 1352.6347      | 676.8213        |
| 837.4106       | 7  | H  | 10 | 1237.6078      | 619.3078        |
| 951.4536       | 8  | N  | 9  | 1100.5489      | 550.7784        |
| 1022.4907      | 9  | A  | 8  | 986.5060       | 493.7569        |
| 1121.5591      | 10 | V  | 7  | 915.4688       | 458.2383        |
| 1234.6432      | 11 | L  | 6  | 816.4004       | 408.7041        |
| 1349.6701      | 12 | D  | 5  | 703.3164       | 352.1621        |
| 1496.7385      | 13 | F  | 4  | 588.2894       | 294.6486        |
| 1625.7811      | 14 | E  | 3  | 441.2210       | 221.1144        |
| 1762.8400      | 15 | H  | 2  | 312.1784       | 156.5931        |
|                | 16 | R  | 1  | 175.1195       | 88.0637         |

N-term:+29.04

X-range:

0 - 0

MassTol: Y-zoom:

0. 1.

MassType:

☐ AVG ☒ MONO

Axis:

☒ 1 ☐ 2

Label:

☒ I ☐ M ☐ -

Ions:

a ☐ + ☐ 2+ ☐ 3+

b ☒ + ☐ 2+ ☐ 3+

c ☐ + ☐ 2+ ☐ 3+

x ☐ + ☐ 2+ ☐ 3+

y ☒ + ☒ 2+ ☐ 3+

z ☐ + ☐ 2+ ☐ 3+

hide H<sub>2</sub>O/NH<sub>3</sub> ☐

zoom 112-122 ☐

GO

TEAAAAATGVIGGIR, MH+ 1320.7699, m/z 440.9282  
H OS G13 P120811 220811-s1.04170.04170.3.dta

scan 4170; 2.6e+000

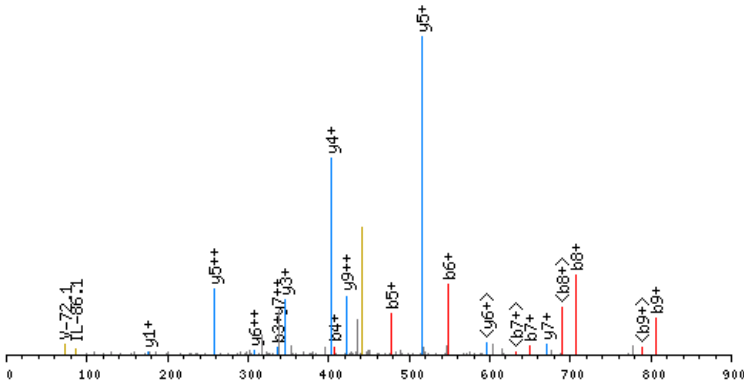

click image to zoom in; click top corners to zoom out

[precursor±]

scan 4169; 440.9 m/z; 8.2e+000

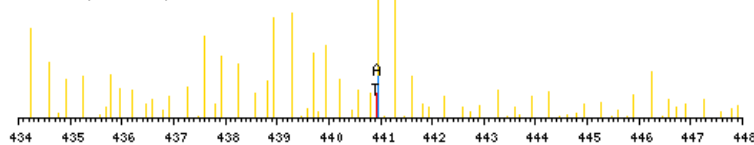

zoomed in precursor plot; T=theoretical m/z, A=acquired m/z

| b <sup>+</sup> | #  | AA | #  | y <sup>+</sup> | y <sup>2+</sup> |
|----------------|----|----|----|----------------|-----------------|
| 136.1186       | 1  | T  | 14 |                |                 |
| 265.1612       | 2  | E  | 13 | 1185.6592      | 593.3335        |
| 336.1983       | 3  | A  | 12 | 1056.6166      | 528.8122        |
| 407.2354       | 4  | A  | 11 | 985.5795       | 493.2936        |
| 478.2725       | 5  | A  | 10 | 914.5423       | 457.7751        |
| 549.3096       | 6  | A  | 9  | 843.5052       | 422.2565        |
| 650.3573       | 7  | T  | 8  | 772.4681       | 386.7380        |
| 707.3788       | 8  | G  | 7  | 671.4204       | 336.2141        |
| 806.4472       | 9  | V  | 6  | 614.3990       | 307.7034        |
| 919.5312       | 10 | I  | 5  | 515.3306       | 258.1692        |
| 976.5527       | 11 | G  | 4  | 402.2465       | 201.6272        |
| 1033.5742      | 12 | G  | 3  | 345.2250       | 173.1164        |
| 1146.6582      | 13 | I  | 2  | 288.2036       | 144.6057        |
|                | 14 | R  | 1  | 175.1195       | 88.0637         |

N-term:+35.07

N-term:+29.04 C(18):+160.03

X-range:

0 - 0

MassTol: Y-zoom:

0. 1.

MassType:

☐ AVG ☒ MONO

Axis:

☒ 1 ☐ 2

Label:

☒ I ☐ M ☐ -

Ions:

a ☐ + ☐ 2+ ☐ 3+

b ☒ + ☐ 2+ ☐ 3+

c ☐ + ☐ 2+ ☐ 3+

x ☐ + ☐ 2+ ☐ 3+

y ☒ + ☒ 2+ ☐ 3+

z ☐ + ☐ 2+ ☐ 3+

hide H<sub>2</sub>O/NH<sub>3</sub> ☐

zoom 112-122 ☐

GO

TEAPQVTGPIEVPVVR, MH+ 1719.9645, m/z 573.9930  
L OS G12 P120811 220811-s1.04529.04529.3.dta

scan 4529; 2.1e+000

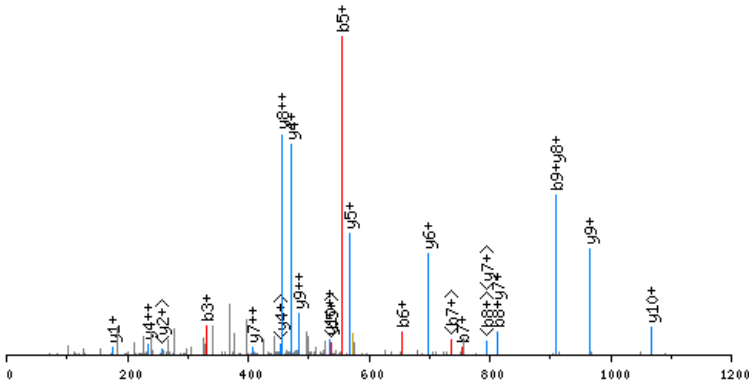

click image to zoom in; click top corners to zoom out

[precursor±]

scan 4527; 574.0 m/z; 2.6e+000

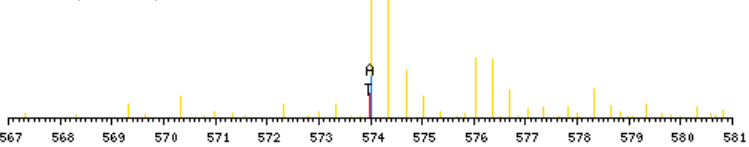

zoomed in precursor plot; T=theoretical m/z, A=acquired m/z

| b <sup>+</sup> | #  | AA | #  | y <sup>+</sup> | y <sup>2+</sup> |
|----------------|----|----|----|----------------|-----------------|
| 130.0868       | 1  | T  | 16 |                |                 |
| 259.1294       | 2  | E  | 15 | 1590.8855      | 795.9467        |
| 330.1665       | 3  | A  | 14 | 1461.8429      | 731.4254        |
| 427.2192       | 4  | P  | 13 | 1390.8058      | 695.9068        |
| 555.2778       | 5  | Q  | 12 | 1293.7531      | 647.3804        |
| 654.3462       | 6  | V  | 11 | 1165.6945      | 583.3512        |
| 755.3939       | 7  | T  | 10 | 1066.6261      | 533.8169        |
| 812.4154       | 8  | G  | 9  | 965.5784       | 483.2931        |
| 909.4681       | 9  | P  | 8  | 908.5569       | 454.7824        |
| 1022.5522      | 10 | I  | 7  | 811.5042       | 406.2560        |
| 1151.5948      | 11 | E  | 6  | 698.4201       | 349.7140        |
| 1250.6632      | 12 | V  | 5  | 569.3775       | 285.1927        |
| 1347.7160      | 13 | P  | 4  | 470.3091       | 235.6585        |
| 1446.7844      | 14 | V  | 3  | 373.2563       | 187.1321        |
| 1545.8528      | 15 | V  | 2  | 274.1879       | 137.5979        |
|                | 16 | R  | 1  | 175.1195       | 88.0637         |

N-term:+29.04

X-range:

0 - 0

MassTol: Y-zoom:

0. 1.

MassType:

☐ AVG ☒ MONO

Axis:

☒ 1 ☐ 2

Label:

☒ I ☐ M ☐ -

Ions:

a ☐ + ☐ 2+ ☐ 3+

b ☒ + ☐ 2+ ☐ 3+

c ☐ + ☐ 2+ ☐ 3+

x ☐ + ☐ 2+ ☐ 3+

y ☒ + ☒ 2+ ☐ 3+

z ☐ + ☐ 2+ ☐ 3+

hide H<sub>2</sub>O/NH<sub>3</sub> ☐

zoom 112-122 ☐

GO

TEEDPEGAMSVVSVETDDGTTR, MH+ 2454.0830, m/z 818.6992  
L OS G12 P120811 220811-s1.04234.04234.3.dta

scan 4234; 1.8e+000

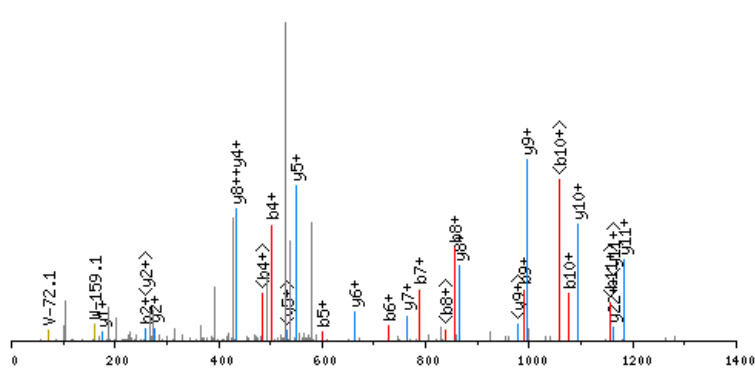

click image to zoom in; click top corners to zoom out [precursor±]

scan 4232; 818.7 m/z; 1.2e+002

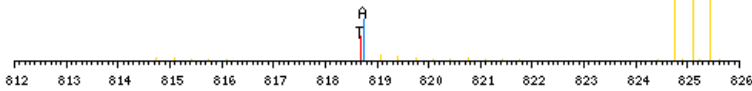

zoomed in precursor plot; T=theoretical m/z, A=acquired m/z

| b <sup>+</sup> | #  | AA | #  | y <sup>+</sup> | y <sup>2+</sup> |
|----------------|----|----|----|----------------|-----------------|
| 130.0868       | 1  | T  | 23 |                |                 |
| 259.1294       | 2  | E  | 22 | 2325.0040      | 1163.0059       |
| 388.1720       | 3  | E  | 21 | 2195.9614      | 1098.4846       |
| 503.1989       | 4  | D  | 20 | 2066.9188      | 1033.9633       |
| 600.2517       | 5  | P  | 19 | 1951.8919      | 976.4499        |
| 729.2943       | 6  | E  | 18 | 1854.8391      | 927.9235        |
| 786.3157       | 7  | G  | 17 | 1725.7965      | 863.4022        |
| 857.3528       | 8  | A  | 16 | 1668.7751      | 834.8914        |
| 988.3933       | 9  | M  | 15 | 1597.7379      | 799.3729        |
| 1075.4254      | 10 | S  | 14 | 1466.6975      | 733.8526        |
| 1174.4938      | 11 | V  | 13 | 1379.6654      | 690.3366        |
| 1273.5622      | 12 | V  | 12 | 1280.5970      | 640.8024        |
| 1360.5942      | 13 | S  | 11 | 1181.5286      | 591.2682        |
| 1459.6626      | 14 | V  | 10 | 1094.4966      | 547.7522        |
| 1588.7052      | 15 | E  | 9  | 995.4282       | 498.2180        |
| 1689.7529      | 16 | T  | 8  | 866.3856       | 433.6967        |
| 1790.8006      | 17 | T  | 7  | 765.3379       | 383.1729        |
| 1905.8275      | 18 | D  | 6  | 664.2902       | 332.6490        |
| 2020.8545      | 19 | D  | 5  | 549.2633       | 275.1355        |
| 2077.8759      | 20 | G  | 4  | 434.2363       | 217.6221        |
| 2178.9236      | 21 | T  | 3  | 377.2149       | 189.1113        |
| 2279.9713      | 22 | T  | 2  | 276.1672       | 138.5875        |
|                | 23 | R  | 1  | 175.1195       | 88.0637         |

N-term:+29.04

X-range:

0 - 0

MassTol: Y-zoom:

0. 1.

MassType:

☐AVG ☒MONO

Axis:

☒1 ☐2

Label:

☒I ☐M ☐-

Ions:

a ☐+ ☐2+ ☐3+

b ☒+ ☐2+ ☐3+

c ☐+ ☐2+ ☐3+

x ☐+ ☐2+ ☐3+

y ☒+ ☒2+ ☐3+

z ☐+ ☐2+ ☐3+

hide H<sub>2</sub>O/NH<sub>3</sub> ☐

zoom 112-122 ☐

GO

TEEILEKSFSQFGKLER, MH+ 2143.2499, m/z 536.5679  
H OS G17 P120811 220811-s1.06114.06114.4.dta

scan 6114; 1.2e+001

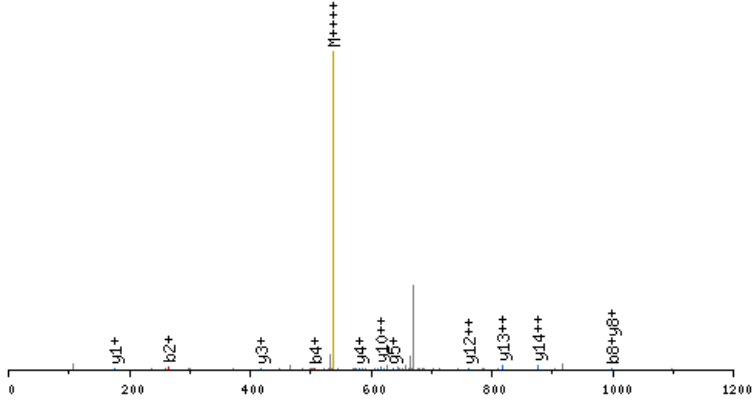

click image to zoom in; click top corners to zoom out [\[precursor±\]](#)

scan 6113; 536.6 m/z; 3.5e+000

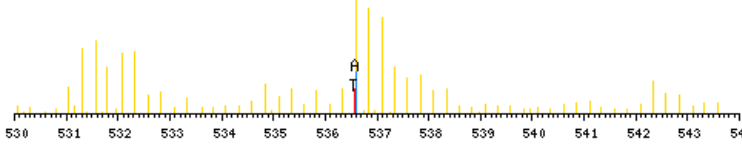

zoomed in precursor plot; T=theoretical m/z, A=acquired m/z

| b <sup>+</sup> | #  | AA | #  | y <sup>+</sup> | y <sup>2+</sup> |
|----------------|----|----|----|----------------|-----------------|
| 136.1186       | 1  | T  | 17 |                |                 |
| 265.1612       | 2  | E  | 16 | 2008.1392      | 1004.5735       |
| 394.2038       | 3  | E  | 15 | 1879.0966      | 940.0522        |
| 507.2878       | 4  | I  | 14 | 1750.0540      | 875.5309        |
| 620.3719       | 5  | L  | 13 | 1636.9699      | 818.9889        |
| 749.4145       | 6  | E  | 12 | 1523.8859      | 762.4469        |
| 911.5726       | 7  | K  | 11 | 1394.8433      | 697.9256        |
| 998.6046       | 8  | S  | 10 | 1232.6852      | 616.8465        |
| 1145.6730      | 9  | F  | 9  | 1145.6532      | 573.3305        |
| 1232.7051      | 10 | S  | 8  | 998.5847       | 499.7963        |
| 1360.7636      | 11 | Q  | 7  | 911.5527       | 456.2803        |
| 1507.8320      | 12 | F  | 6  | 783.4941       | 392.2510        |
| 1564.8535      | 13 | G  | 5  | 636.4257       | 318.7168        |
| 1727.0116      | 14 | K  | 4  | 579.4043       | 290.2060        |
| 1840.0957      | 15 | L  | 3  | 417.2462       | 209.1270        |
| 1969.1383      | 16 | E  | 2  | 304.1621       | 152.5850        |
|                | 17 | R  | 1  | 175.1195       | 88.0637         |

N-term:+35.07 K(7):+162.16  
K(14):+162.16

X-range:

0 - 0

MassTol: Y-zoom:

0. 1.

MassType:

☐AVG ☒MONO

Axis:

☒1 ☐2

Label:

☒I ☐M ☐-

Ions:

a ☐+ ☐2+ ☐3+

b ☒+ ☐2+ ☐3+

c ☐+ ☐2+ ☐3+

x ☐+ ☐2+ ☐3+

y ☒+ ☒2+ ☐3+

z ☐+ ☐2+ ☐3+

hide H<sub>2</sub>O/NH<sub>3</sub> ☐

zoom 112-122 ☐

GO

TEGAELPDITR, MH+ 1229.6377, m/z 615.3225  
L OS G13 P120811 220811-s1.04133.04133.2.dta

scan 4133; 4.3e+000

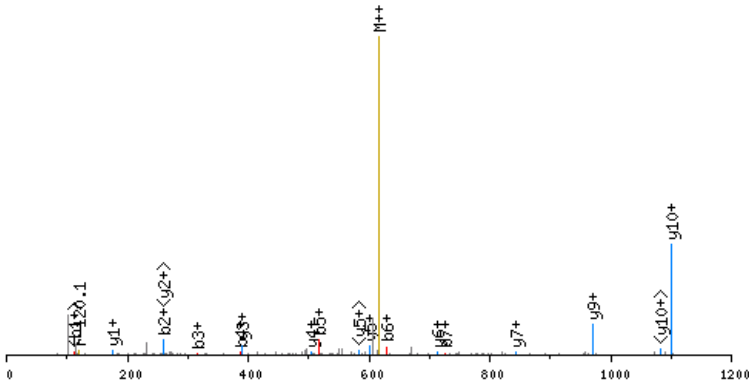

click image to zoom in; click top corners to zoom out

[precursor±]

scan 4129; 615.3 m/z; 5.8e+000

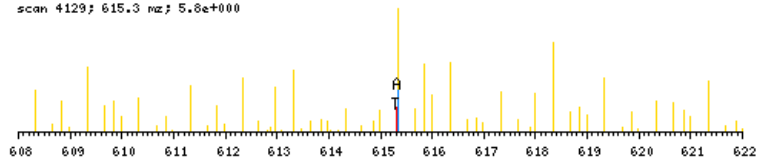

zoomed in precursor plot; T=theoretical m/z, A=acquired m/z

| b <sup>+</sup> | #  | AA | #  | y <sup>+</sup> | y <sup>2+</sup> |
|----------------|----|----|----|----------------|-----------------|
| 130.0868       | 1  | T  | 11 |                |                 |
| 259.1294       | 2  | E  | 10 | 1100.5588      | 550.7833        |
| 316.1508       | 3  | G  | 9  | 971.5162       | 486.2620        |
| 387.1879       | 4  | A  | 8  | 914.4947       | 457.7513        |
| 516.2305       | 5  | E  | 7  | 843.4576       | 422.2327        |
| 629.3146       | 6  | L  | 6  | 714.4150       | 357.7114        |
| 726.3674       | 7  | P  | 5  | 601.3310       | 301.1694        |
| 841.3943       | 8  | D  | 4  | 504.2782       | 252.6430        |
| 954.4784       | 9  | I  | 3  | 389.2512       | 195.1295        |
| 1055.5261      | 10 | T  | 2  | 276.1672       | 138.5875        |
|                | 11 | R  | 1  | 175.1195       | 88.0637         |

N-term:+29.04

N-term: +29.04

X-range:

0 - 0

MassTol: Y-zoom:

0. 1.

MassType:

☐ AVG ☒ MONO

Axis:

☒ 1 ☐ 2

Label:

☒ I ☐ M ☐ -

Ions:

a ☐ + ☐ 2+ ☐ 3+

b ☒ + ☐ 2+ ☐ 3+

c ☐ + ☐ 2+ ☐ 3+

x ☐ + ☐ 2+ ☐ 3+

y ☒ + ☒ 2+ ☐ 3+

z ☐ + ☐ 2+ ☐ 3+

hide H<sub>2</sub>O/NH<sub>3</sub> ☐

zoom 112-122 ☐

GO

TELAAFTKNQKDPGVLDLDR, MH+ 2087.1501, m/z 522.5430  
L OS G16 P120811 220811-s1.04491.04491.4.dta

scan 4491; 1.7e+001

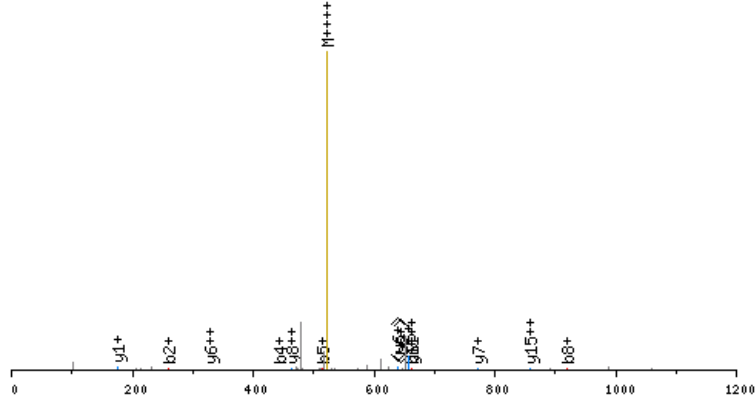

click image to zoom in; click top corners to zoom out [\[precursor±\]](#)

scan 4488; 522.5 m/z; 1.2e+001

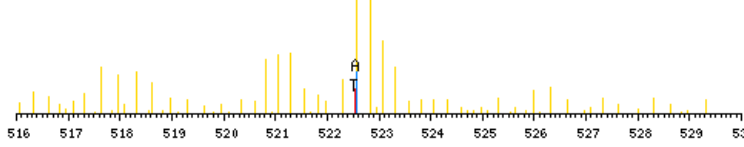

zoomed in precursor plot; T=theoretical m/z, A=acquired m/z

| b <sup>+</sup> | #  | AA | #  | y <sup>+</sup> | y <sup>2+</sup> |
|----------------|----|----|----|----------------|-----------------|
| 130.0868       | 1  | T  | 18 |                |                 |
| 259.1294       | 2  | E  | 17 | 1958.0712      | 979.5395        |
| 372.2134       | 3  | L  | 16 | 1829.0286      | 915.0182        |
| 443.2505       | 4  | A  | 15 | 1715.9445      | 858.4762        |
| 514.2877       | 5  | A  | 14 | 1644.9074      | 822.9576        |
| 661.3561       | 6  | F  | 13 | 1573.8703      | 787.4391        |
| 762.4038       | 7  | T  | 12 | 1426.8019      | 713.9049        |
| 918.5301       | 8  | K  | 11 | 1325.7542      | 663.3810        |
| 1032.5730      | 9  | N  | 10 | 1169.6279      | 585.3179        |
| 1160.6316      | 10 | Q  | 9  | 1055.5850      | 528.2964        |
| 1316.7579      | 11 | K  | 8  | 927.5264       | 464.2671        |
| 1431.7848      | 12 | D  | 7  | 771.4001       | 386.2040        |
| 1528.8376      | 13 | P  | 6  | 656.3731       | 328.6905        |
| 1585.8590      | 14 | G  | 5  | 559.3204       | 280.1641        |
| 1684.9274      | 15 | V  | 4  | 502.2989       | 251.6534        |
| 1798.0115      | 16 | L  | 3  | 403.2305       | 202.1192        |
| 1913.0385      | 17 | D  | 2  | 290.1464       | 145.5771        |
|                | 18 | R  | 1  | 175.1195       | 88.0637         |

N-term:+29.04 K(8):+156.13  
K(11):+156.13

X-range:

0 - 0

MassTol: Y-zoom:

0. 1.

MassType:

☐AVG ☒MONO

Axis:

☒1 ☐2

Label:

☒I ☐M ☐-

Ions:

a ☐+ ☐2+ ☐3+

b ☒+ ☐2+ ☐3+

c ☐+ ☐2+ ☐3+

x ☐+ ☐2+ ☐3+

y ☒+ ☒2+ ☐3+

z ☐+ ☐2+ ☐3+

hide H<sub>2</sub>O/NH<sub>3</sub> ☐

zoom 112-122 ☐

GO

TEMDSHEEKVFR, MH+ 1563.7477, m/z 391.6924  
L OS G17 P120811 220811-s1.02624.02624.4.dta

scan 2624; 2.1e+001

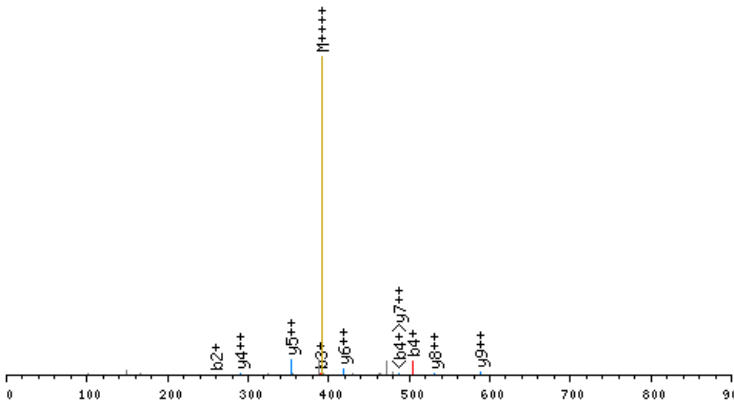

click image to zoom in; click top corners to zoom out [\[precursor±\]](#)

scan 2623; 391.7 m/z; 9.7e+000

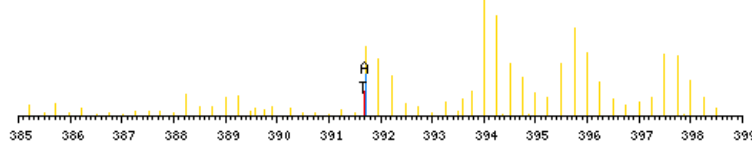

zoomed in precursor plot; T=theoretical m/z, A=acquired m/z

| b <sup>+</sup> | #  | AA | #  | y <sup>+</sup> | y <sup>2+</sup> |
|----------------|----|----|----|----------------|-----------------|
| 130.0868       | 1  | T  | 12 |                |                 |
| 259.1294       | 2  | E  | 11 | 1434.6688      | 717.8383        |
| 390.1699       | 3  | M  | 10 | 1305.6262      | 653.3170        |
| 505.1968       | 4  | D  | 9  | 1174.5857      | 587.7968        |
| 592.2288       | 5  | S  | 8  | 1059.5588      | 530.2833        |
| 729.2877       | 6  | H  | 7  | 972.5267       | 486.7673        |
| 858.3303       | 7  | E  | 6  | 835.4678       | 418.2378        |
| 987.3729       | 8  | E  | 5  | 706.4252       | 353.7165        |
| 1143.4992      | 9  | K  | 4  | 577.3826       | 289.1952        |
| 1242.5676      | 10 | V  | 3  | 421.2563       | 211.1321        |
| 1389.6361      | 11 | F  | 2  | 322.1879       | 161.5979        |
|                | 12 | R  | 1  | 175.1195       | 88.0637         |

N-term:+29.04 K(9):+156.13

X-range:

0 - 0

MassTol: Y-zoom:

0. 1.

MassType:

☐ AVG ☒ MONO

Axis:

☒ 1 ☐ 2

Label:

☒ I ☐ M ☐ -

Ions:

a ☐ + ☐ 2+ ☐ 3+

b ☒ + ☐ 2+ ☐ 3+

c ☐ + ☐ 2+ ☐ 3+

x ☐ + ☐ 2+ ☐ 3+

y ☒ + ☒ 2+ ☐ 3+

z ☐ + ☐ 2+ ☐ 3+

hide H<sub>2</sub>O/NH<sub>3</sub> ☐

zoom 112-122 ☐

GO

TEMVALNPDKPPADYKPPATR, MH+ 2542.3380, m/z 636.3400  
L OS G16 P120811 220811-s1.05432.05432.4.dta

scan 5432; 5.0e+000

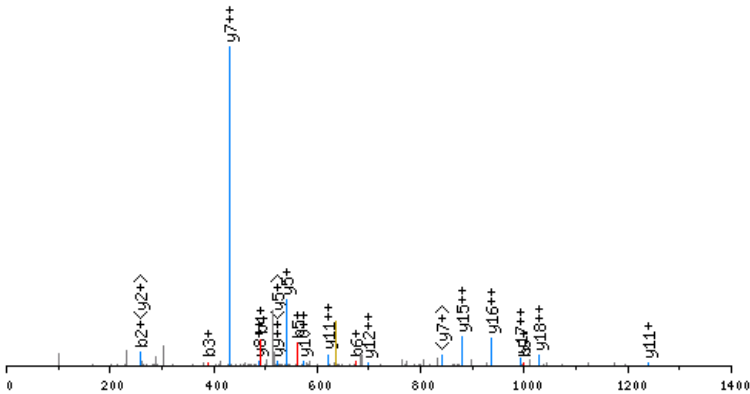

click image to zoom in; click top corners to zoom out

[precursor±]

scan 5428; 636.3 m/z; 3.8e+000

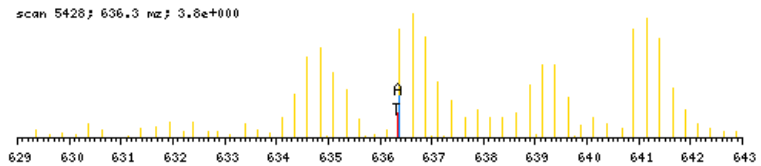

zoomed in precursor plot; T=theoretical m/z, A=acquired m/z

| b <sup>+</sup> | #  | AA | #  | y <sup>+</sup> | y <sup>2+</sup> |
|----------------|----|----|----|----------------|-----------------|
| 130.0868       | 1  | T  | 22 |                |                 |
| 259.1294       | 2  | E  | 21 | 2413.2591      | 1207.1334       |
| 390.1699       | 3  | M  | 20 | 2284.2165      | 1142.6121       |
| 489.2383       | 4  | V  | 19 | 2153.1760      | 1077.0919       |
| 560.2754       | 5  | A  | 18 | 2054.1076      | 1027.5577       |
| 673.3594       | 6  | L  | 17 | 1983.0704      | 992.0391        |
| 787.4024       | 7  | N  | 16 | 1869.9864      | 935.4971        |
| 884.4551       | 8  | P  | 15 | 1755.9435      | 878.4756        |
| 999.4821       | 9  | D  | 14 | 1658.8907      | 829.9493        |
| 1146.5505      | 10 | F  | 13 | 1543.8637      | 772.4358        |
| 1302.6768      | 11 | K  | 12 | 1396.7953      | 698.9016        |
| 1399.7296      | 12 | P  | 11 | 1240.6690      | 620.8384        |
| 1496.7823      | 13 | P  | 10 | 1143.6163      | 572.3120        |
| 1567.8194      | 14 | A  | 9  | 1046.5635      | 523.7857        |
| 1682.8464      | 15 | D  | 8  | 975.5264       | 488.2671        |
| 1845.9097      | 16 | Y  | 7  | 860.4994       | 430.7536        |
| 2002.0360      | 17 | K  | 6  | 697.4361       | 349.2220        |
| 2099.0888      | 18 | P  | 5  | 541.3098       | 271.1588        |
| 2196.1415      | 19 | P  | 4  | 444.2571       | 222.6324        |
| 2267.1787      | 20 | A  | 3  | 347.2043       | 174.1061        |
| 2368.2263      | 21 | T  | 2  | 276.1672       | 138.5875        |
|                | 22 | R  | 1  | 175.1195       | 88.0637         |

N-term:+29.04 K(11):+156.13  
K(17):+156.13

X-range:

0 - 0

MassTol: Y-zoom:

0. 1.

MassType:

☐AVG ☒MONO

Axis:

☒1 ☐2

Label:

☒I ☐M ☐-

Ions:

a ☐+ ☐2+ ☐3+

b ☒+ ☐2+ ☐3+

c ☐+ ☐2+ ☐3+

x ☐+ ☐2+ ☐3+

y ☒+ ☒2+ ☐3+

z ☐+ ☐2+ ☐3+

hide H<sub>2</sub>O/NH<sub>3</sub> ☐

zoom 112-122 ☐

GO

TEMVEVGPEDDEVGAER, MH+ 1889.8438, m/z 630.6195  
L OS G12 P120811 220811-s1.03503.03503.3.dta

scan 3503; 1.4e+000

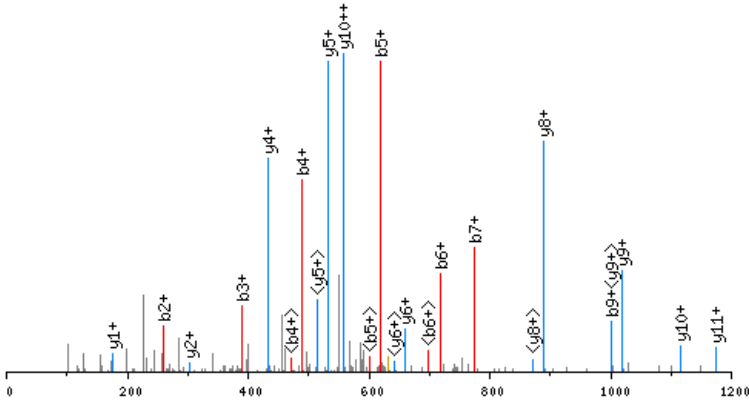

click image to zoom in; click top corners to zoom out

[precursor±]

scan 3502; 630.6 m/z; 4.4e+000

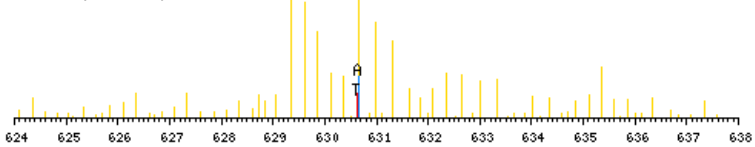

zoomed in precursor plot; T=theoretical m/z, A=acquired m/z

| b <sup>+</sup> | #  | AA | #  | y <sup>+</sup> | y <sup>2+</sup> |
|----------------|----|----|----|----------------|-----------------|
| 130.0868       | 1  | T  | 17 |                |                 |
| 259.1294       | 2  | E  | 16 | 1760.7649      | 880.8864        |
| 390.1699       | 3  | M  | 15 | 1631.7223      | 816.3651        |
| 489.2383       | 4  | V  | 14 | 1500.6818      | 750.8448        |
| 618.2809       | 5  | E  | 13 | 1401.6134      | 701.3106        |
| 717.3493       | 6  | V  | 12 | 1272.5708      | 636.7893        |
| 774.3707       | 7  | G  | 11 | 1173.5024      | 587.2551        |
| 871.4235       | 8  | P  | 10 | 1116.4809      | 558.7444        |
| 1000.4661      | 9  | E  | 9  | 1019.4282      | 510.2180        |
| 1115.4930      | 10 | D  | 8  | 890.3856       | 445.6967        |
| 1230.5200      | 11 | D  | 7  | 775.3586       | 388.1832        |
| 1359.5626      | 12 | E  | 6  | 660.3317       | 330.6698        |
| 1458.6310      | 13 | V  | 5  | 531.2891       | 266.1485        |
| 1515.6525      | 14 | G  | 4  | 432.2207       | 216.6142        |
| 1586.6896      | 15 | A  | 3  | 375.1992       | 188.1035        |
| 1715.7322      | 16 | E  | 2  | 304.1621       | 152.5850        |
|                | 17 | R  | 1  | 175.1195       | 88.0637         |

N-term:+29.04

X-range:

0 - 0

MassTol: Y-zoom:

0. 1.

MassType:

☐ AVG ☒ MONO

Axis:

☒ 1 ☐ 2

Label:

☒ I ☐ M ☐ -

Ions:

a ☐ + ☐ 2+ ☐ 3+

b ☒ + ☐ 2+ ☐ 3+

c ☐ + ☐ 2+ ☐ 3+

x ☐ + ☐ 2+ ☐ 3+

y ☒ + ☒ 2+ ☐ 3+

z ☐ + ☐ 2+ ☐ 3+

hide H<sub>2</sub>O/NH<sub>3</sub> ☐

zoom 112-122 ☐

GO

TEQEDAAVAKSLR, MH+ 1629.9176, m/z 408.2349  
L OS G17 P120811 220811-s1.02235.02235.4.dta

scan 2235; 1.4e+001

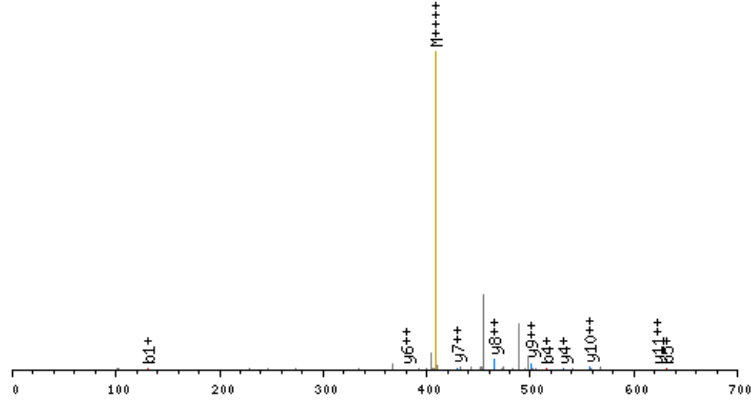

click image to zoom in; click top corners to zoom out

[precursor±]

scan 2233; 408.2 m/z; 1.1e+001

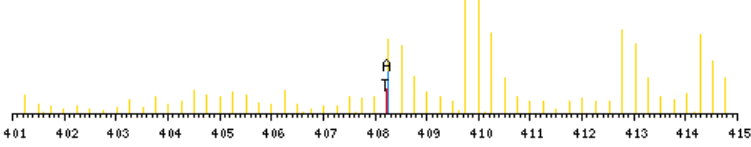

zoomed in precursor plot; T=theoretical m/z, A=acquired m/z

| b <sup>+</sup> | #  | AA | #  | y <sup>+</sup> | y <sup>2+</sup> |
|----------------|----|----|----|----------------|-----------------|
| 130.0868       | 1  | T  | 14 |                |                 |
| 259.1294       | 2  | E  | 13 | 1500.8387      | 750.9232        |
| 387.1879       | 3  | Q  | 12 | 1371.7961      | 686.4019        |
| 516.2305       | 4  | E  | 11 | 1243.7375      | 622.3727        |
| 631.2575       | 5  | D  | 10 | 1114.6949      | 557.8514        |
| 702.2946       | 6  | A  | 9  | 999.6679       | 500.3379        |
| 773.3317       | 7  | A  | 8  | 928.6308       | 464.8193        |
| 872.4001       | 8  | V  | 7  | 857.5937       | 429.3008        |
| 943.4372       | 9  | A  | 6  | 758.5253       | 379.7666        |
| 1099.5635      | 10 | K  | 5  | 687.4882       | 344.2480        |
| 1186.5956      | 11 | S  | 4  | 531.3619       | 266.1849        |
| 1342.7219      | 12 | K  | 3  | 444.3299       | 222.6688        |
| 1455.8059      | 13 | L  | 2  | 288.2036       | 144.6057        |
|                | 14 | R  | 1  | 175.1195       | 88.0637         |

N-term:+29.04 K(10):+156.13  
K(12):+156.13

X-range:

0 - 0

MassTol: Y-zoom:

0. 1.

MassType:

☐AVG ☒MONO

Axis:

☒1 ☐2

Label:

☒I ☐M ☐-

Ions:

a ☐+ ☐2+ ☐3+

b ☒+ ☐2+ ☐3+

c ☐+ ☐2+ ☐3+

x ☐+ ☐2+ ☐3+

y ☒+ ☒2+ ☐3+

z ☐+ ☐2+ ☐3+

hide H<sub>2</sub>O/NH<sub>3</sub> ☐

zoom 112-122 ☐

GO

TESQIVQKEAEQAER, MH+ 1801.9296, m/z 601.3147  
L OS G15 P120811 220811-s1.02647.02647.3.dta

scan 2647; 1.1e+001

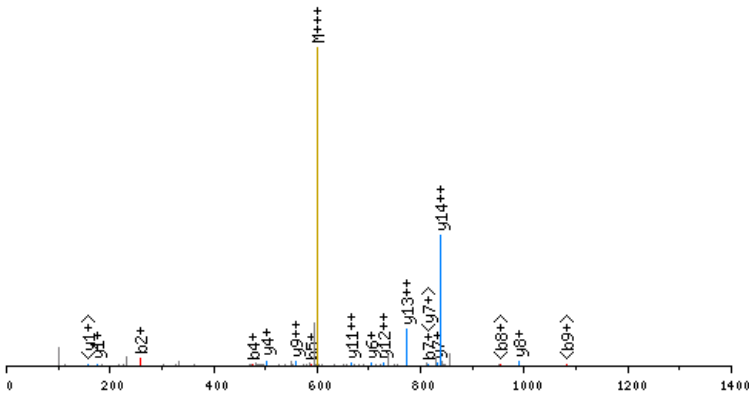

click image to zoom in; click top corners to zoom out [precursor±]

scan 2646; 601.3 m/z; 1.2e+001

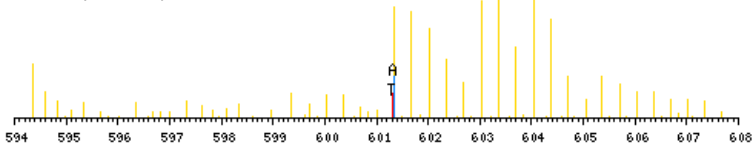

zoomed in precursor plot; T=theoretical m/z, A=acquired m/z

| b <sup>+</sup> | #  | AA | #  | y <sup>+</sup> | y <sup>2+</sup> |
|----------------|----|----|----|----------------|-----------------|
| 130.0868       | 1  | T  | 15 |                |                 |
| 259.1294       | 2  | E  | 14 | 1672.8506      | 836.9292        |
| 346.1614       | 3  | S  | 13 | 1543.8080      | 772.4079        |
| 474.2200       | 4  | Q  | 12 | 1456.7760      | 728.8919        |
| 587.3040       | 5  | I  | 11 | 1328.7174      | 664.8626        |
| 686.3725       | 6  | V  | 10 | 1215.6334      | 608.3206        |
| 814.4310       | 7  | Q  | 9  | 1116.5650      | 558.7864        |
| 970.5573       | 8  | K  | 8  | 988.5064       | 494.7571        |
| 1099.5999      | 9  | E  | 7  | 832.3801       | 416.6940        |
| 1170.6370      | 10 | A  | 6  | 703.3375       | 352.1727        |
| 1299.6796      | 11 | E  | 5  | 632.3004       | 316.6541        |
| 1427.7382      | 12 | Q  | 4  | 503.2578       | 252.1328        |
| 1498.7753      | 13 | A  | 3  | 375.1992       | 188.1035        |
| 1627.8179      | 14 | E  | 2  | 304.1621       | 152.5850        |
|                | 15 | R  | 1  | 175.1195       | 88.0637         |

N-term:+29.04 K(8):+156.13

N-term: +29.04 K(13): +156.13

X-range:

0 - 0

MassTol: Y-zoom:

0. 1.

MassType:

☐AVG ☒MONO

Axis:

☒1 ☐2

Label:

☒I ☐M ☐-

Ions:

a ☐+ ☐2+ ☐3+

b ☒+ ☐2+ ☐3+

c ☐+ ☐2+ ☐3+

x ☐+ ☐2+ ☐3+

y ☒+ ☒2+ ☐3+

z ☐+ ☐2+ ☐3+

hide H<sub>2</sub>O/NH<sub>3</sub> ☐

zoom 112-122 ☐

GO

TEVVCAPPTAYIDFAR, MH+ 1837.9158, m/z 613.3101  
L OS G12 P120811 220811-s1.05025.05025.3.dta

scan 5025; 1.7e+000

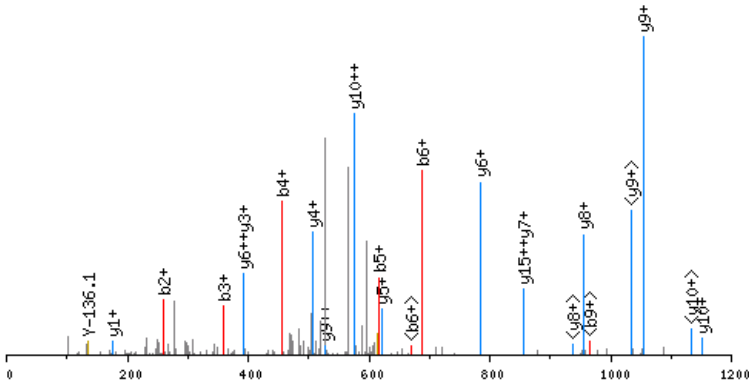

click image to zoom in; click top corners to zoom out

[precursor±]

scan 5022; 613.3 m/z; 6.4e+000

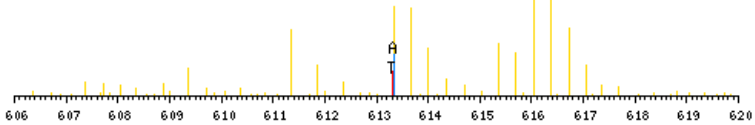

zoomed in precursor plot; T=theoretical m/z, A=acquired m/z

| b <sup>+</sup> | #  | AA | #  | y <sup>+</sup> | y <sup>2+</sup> |
|----------------|----|----|----|----------------|-----------------|
| 130.0868       | 1  | T  | 16 |                |                 |
| 259.1294       | 2  | E  | 15 | 1708.8368      | 854.9223        |
| 358.1978       | 3  | V  | 14 | 1579.7942      | 790.4010        |
| 457.2662       | 4  | V  | 13 | 1480.7258      | 740.8668        |
| 617.2968       | 5  | C  | 12 | 1381.6574      | 691.3326        |
| 688.3339       | 6  | A  | 11 | 1221.6268      | 611.3173        |
| 785.3867       | 7  | P  | 10 | 1150.5897      | 575.7988        |
| 882.4394       | 8  | P  | 9  | 1053.5369      | 527.2724        |
| 983.4871       | 9  | T  | 8  | 956.4842       | 478.7460        |
| 1054.5242      | 10 | A  | 7  | 855.4365       | 428.2222        |
| 1217.5876      | 11 | Y  | 6  | 784.3994       | 392.7036        |
| 1330.6716      | 12 | I  | 5  | 621.3360       | 311.1719        |
| 1445.6986      | 13 | D  | 4  | 508.2520       | 254.6299        |
| 1592.7670      | 14 | F  | 3  | 393.2250       | 197.1164        |
| 1663.8041      | 15 | A  | 2  | 246.1566       | 123.5822        |
|                | 16 | R  | 1  | 175.1195       | 88.0637         |

N-term:+29.04 C(5):+160.03

N-term: +29.04

X-range:

0 - 0

MassTol: Y-zoom:

0. 1.

MassType:

☐AVG ☒MONO

Axis:

☒1 ☐2

Label:

☒I ☐M ☐-

Ions:

a ☐+ ☐2+ ☐3+

b ☒+ ☐2+ ☐3+

c ☐+ ☐2+ ☐3+

x ☐+ ☐2+ ☐3+

y ☒+ ☒2+ ☐3+

z ☐+ ☐2+ ☐3+

hide H<sub>2</sub>O/NH<sub>3</sub> ☐

zoom 112-122 ☐

GO

TFAHLDATTVLSR, MH+ 1459.7909, m/z 487.2685  
L OS G16 P120811 220811-s1.05106.05106.3.dta

scan 5106; 4.4e+000

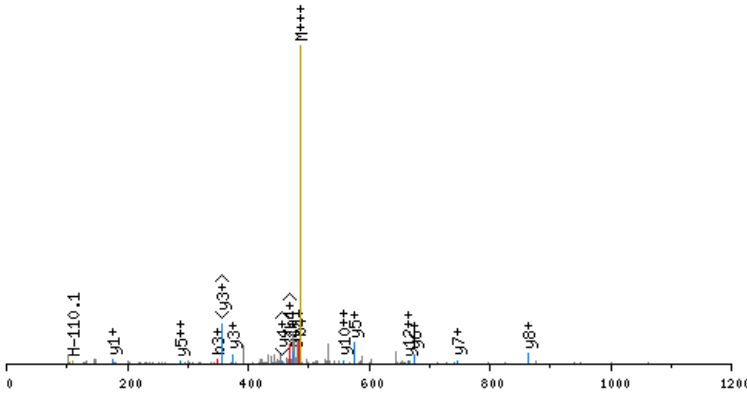

click image to zoom in; click top corners to zoom out

[precursor±]

scan 5103; 487.3 m/z; 1.1e+001

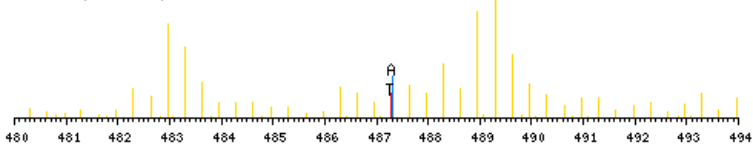

zoomed in precursor plot; T=theoretical m/z, A=acquired m/z

| b <sup>+</sup> | #  | AA | #  | y <sup>+</sup> | y <sup>2+</sup> |
|----------------|----|----|----|----------------|-----------------|
| 130.0868       | 1  | T  | 13 |                |                 |
| 277.1552       | 2  | F  | 12 | 1330.7119      | 665.8599        |
| 348.1923       | 3  | A  | 11 | 1183.6435      | 592.3257        |
| 485.2512       | 4  | H  | 10 | 1112.6064      | 556.8071        |
| 598.3353       | 5  | L  | 9  | 975.5475       | 488.2777        |
| 713.3622       | 6  | D  | 8  | 862.4634       | 431.7356        |
| 784.3993       | 7  | A  | 7  | 747.4365       | 374.2222        |
| 885.4470       | 8  | T  | 6  | 676.3994       | 338.7036        |
| 986.4947       | 9  | T  | 5  | 575.3517       | 288.1798        |
| 1085.5631      | 10 | V  | 4  | 474.3040       | 237.6559        |
| 1198.6472      | 11 | L  | 3  | 375.2356       | 188.1217        |
| 1285.6792      | 12 | S  | 2  | 262.1515       | 131.5797        |
|                | 13 | R  | 1  | 175.1195       | 88.0637         |

N-term:+29.04

X-range:

0 - 0

MassTol: Y-zoom:

0. 1.

MassType:

☐AVG ☒MONO

Axis:

☒1 ☐2

Label:

☒I ☐M ☐-

Ions:

a ☐+ ☐2+ ☐3+

b ☒+ ☐2+ ☐3+

c ☐+ ☐2+ ☐3+

x ☐+ ☐2+ ☐3+

y ☒+ ☒2+ ☐3+

z ☐+ ☐2+ ☐3+

hide H<sub>2</sub>O/NH<sub>3</sub> ☐

zoom 112-122 ☐

GO

TFDQGAHHAFGQGGR, MH+ 1613.7573, m/z 404.1948  
L OS G18 P120811 220811-s1.02387.02387.4.dta

scan 2387; 3.9e+000

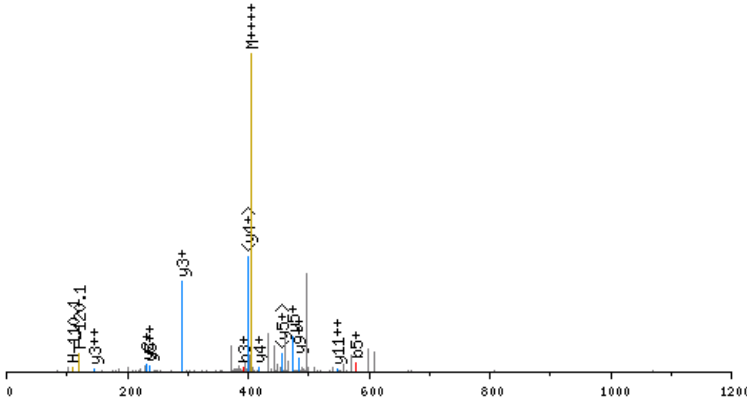

click image to zoom in; click top corners to zoom out

[precursor±]

scan 2386; 404.2 m/z; 5.8e+000

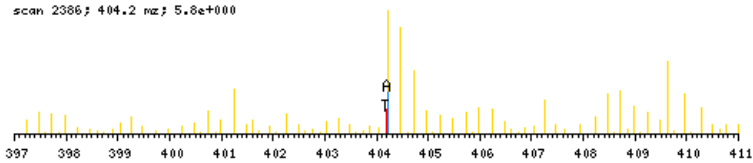

X-range:

0 - 0

MassTol: Y-zoom:

0. 1.

MassType:

☐ AVG ☒ MONO

Axis:

☒ 1 ☐ 2

Label:

☒ I ☐ M ☐ -

Ions:

a ☐ + ☐ 2+ ☐ 3+

b ☒ + ☐ 2+ ☐ 3+

c ☐ + ☐ 2+ ☐ 3+

x ☐ + ☐ 2+ ☐ 3+

y ☒ + ☒ 2+ ☐ 3+

z ☐ + ☐ 2+ ☐ 3+

hide H<sub>2</sub>O/NH<sub>3</sub> ☐

zoom 112-122 ☐

GO

TFESEFYLDDEKR, MH+ 1619.7957, m/z 540.6034  
L OS G16 P120811 220811-s1.04866.04866.3.dta

scan 4866; 9.3e+000

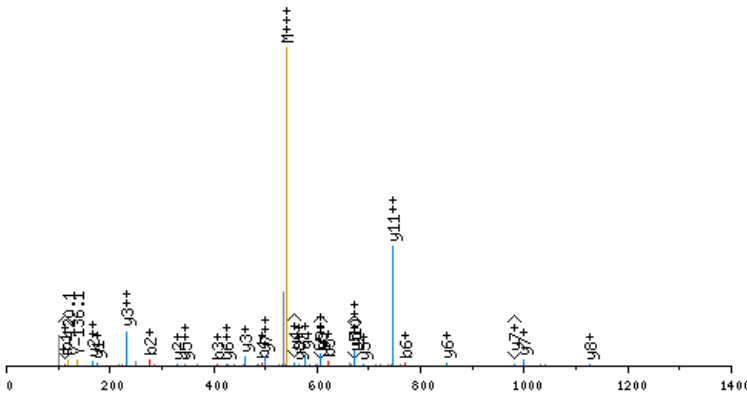

click image to zoom in; click top corners to zoom out

[precursor±]

scan 4863; 540.6 m/z; 6.2e+001

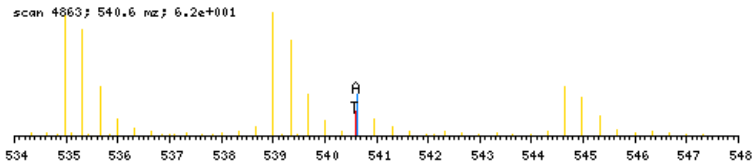

zoomed in precursor plot; T=theoretical m/z, A=acquired m/z

| b <sup>+</sup> | #  | AA | #  | y <sup>+</sup> | y <sup>2+</sup> |
|----------------|----|----|----|----------------|-----------------|
| 130.0868       | 1  | T  | 12 |                |                 |
| 277.1552       | 2  | F  | 11 | 1490.7168      | 745.8623        |
| 406.1978       | 3  | E  | 10 | 1343.6484      | 672.3281        |
| 493.2298       | 4  | S  | 9  | 1214.6058      | 607.8068        |
| 622.2724       | 5  | E  | 8  | 1127.5737      | 564.2908        |
| 769.3408       | 6  | F  | 7  | 998.5311       | 499.7695        |
| 932.4041       | 7  | Y  | 6  | 851.4627       | 426.2353        |
| 1045.4882      | 8  | L  | 5  | 688.3994       | 344.7036        |
| 1160.5152      | 9  | D  | 4  | 575.3153       | 288.1616        |
| 1289.5577      | 10 | E  | 3  | 460.2884       | 230.6481        |
| 1445.6840      | 11 | K  | 2  | 331.2458       | 166.1268        |
|                | 12 | R  | 1  | 175.1195       | 88.0637         |

N-term:+29.04 K(11):+156.13

X-range:

0 - 0

MassTol: Y-zoom:

0. 1.

MassType:

☐ AVG ☒ MONO

Axis:

☒ 1 ☐ 2

Label:

☒ I ☐ M ☐ -

Ions:

a ☐ + ☐ 2+ ☐ 3+

b ☒ + ☐ 2+ ☐ 3+

c ☐ + ☐ 2+ ☐ 3+

x ☐ + ☐ 2+ ☐ 3+

y ☒ + ☒ 2+ ☐ 3+

z ☐ + ☐ 2+ ☐ 3+

hide H<sub>2</sub>O/NH<sub>3</sub> ☐

zoom 112-122 ☐

GO

TFIAIKPDGVQR, MH+ 1412.8902, m/z 471.6349  
H OS G15 P120811 220811-s1.03895.03895.3.dta

scan 3895; 1.6e+001

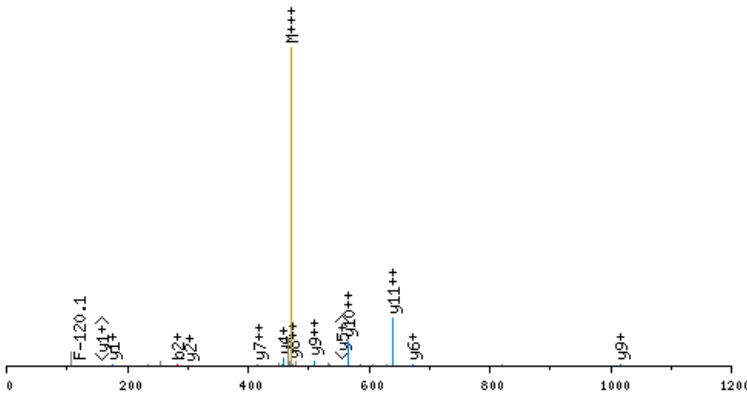

click image to zoom in; click top corners to zoom out

[precursor±]

scan 3891; 471.6 m/z; 1.1e+001

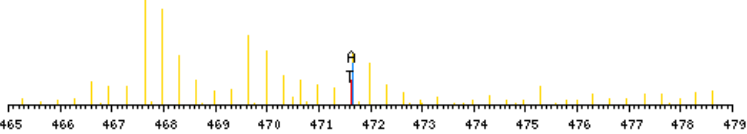

zoomed in precursor plot; T=theoretical m/z, A=acquired m/z

| b <sup>+</sup> | #  | AA | #  | y <sup>+</sup> | y <sup>2+</sup> |
|----------------|----|----|----|----------------|-----------------|
| 136.1186       | 1  | T  | 12 |                |                 |
| 283.1870       | 2  | F  | 11 | 1277.7794      | 639.3936        |
| 396.2711       | 3  | I  | 10 | 1130.7110      | 565.8594        |
| 467.3082       | 4  | A  | 9  | 1017.6269      | 509.3174        |
| 580.3922       | 5  | I  | 8  | 946.5898       | 473.7988        |
| 742.5503       | 6  | K  | 7  | 833.5058       | 417.2568        |
| 839.6031       | 7  | P  | 6  | 671.3477       | 336.1777        |
| 954.6300       | 8  | D  | 5  | 574.2949       | 287.6514        |
| 1011.6515      | 9  | G  | 4  | 459.2680       | 230.1379        |
| 1110.7199      | 10 | V  | 3  | 402.2465       | 201.6272        |
| 1238.7785      | 11 | Q  | 2  | 303.1781       | 152.0930        |
|                | 12 | R  | 1  | 175.1195       | 88.0637         |

N-term:+35.07 K(6):+162.16

X-range:

0 - 0

MassTol: Y-zoom:

0. 1.

MassType:

☐ AVG ☒ MONO

Axis:

☒ 1 ☐ 2

Label:

☒ I ☐ M ☐ -

Ions:

a ☐ + ☐ 2+ ☐ 3+

b ☒ + ☐ 2+ ☐ 3+

c ☐ + ☐ 2+ ☐ 3+

x ☐ + ☐ 2+ ☐ 3+

y ☒ + ☒ 2+ ☐ 3+

z ☐ + ☐ 2+ ☐ 3+

hide H<sub>2</sub>O/NH<sub>3</sub> ☐

zoom 112-122 ☐

GO

TFQDGLVQHQQWDGKESTITR, MH+ 2601.3062, m/z 651.0820  
L OS G17 P120811 220811-s1.04685.04685.4.dta

scan 4685; 3.9e+000

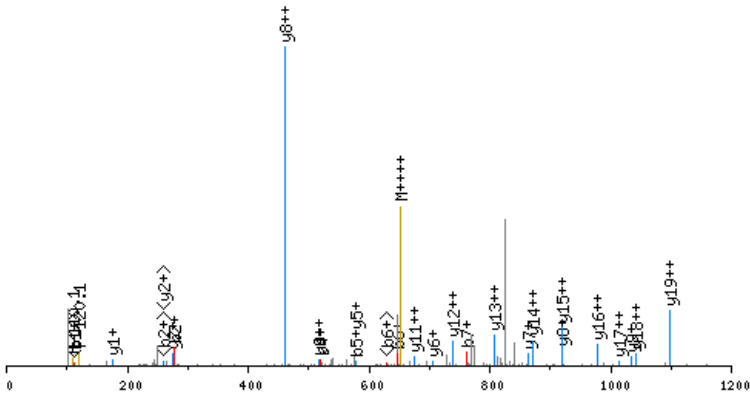

click image to zoom in; click top corners to zoom out [precursor±]

scan 4683; 651.1 m/z; 1.6e+001

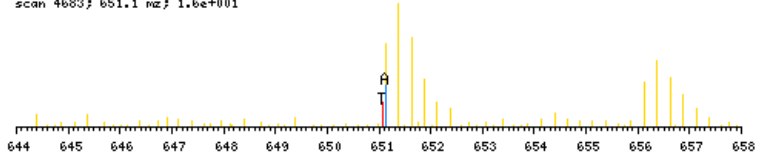

zoomed in precursor plot; T=theoretical m/z, A=acquired m/z

| b <sup>+</sup> | #  | AA | #  | y <sup>+</sup> | y <sup>2+</sup> |
|----------------|----|----|----|----------------|-----------------|
| 130.0868       | 1  | T  | 22 |                |                 |
| 277.1552       | 2  | F  | 21 | 2472.2272      | 1236.6175       |
| 405.2138       | 3  | Q  | 20 | 2325.1588      | 1163.0833       |
| 520.2407       | 4  | D  | 19 | 2197.1002      | 1099.0540       |
| 577.2622       | 5  | G  | 18 | 2082.0733      | 1041.5405       |
| 648.2993       | 6  | A  | 17 | 2025.0518      | 1013.0298       |
| 761.3834       | 7  | L  | 16 | 1954.0147      | 977.5113        |
| 860.4518       | 8  | V  | 15 | 1840.9306      | 920.9692        |
| 988.5103       | 9  | Q  | 14 | 1741.8622      | 871.4350        |
| 1125.5693      | 10 | H  | 13 | 1613.8036      | 807.4057        |
| 1253.6278      | 11 | Q  | 12 | 1476.7447      | 738.8763        |
| 1381.6864      | 12 | Q  | 11 | 1348.6861      | 674.8470        |
| 1567.7657      | 13 | W  | 10 | 1220.6276      | 610.8177        |
| 1682.7927      | 14 | D  | 9  | 1034.5483      | 517.7780        |
| 1739.8141      | 15 | G  | 8  | 919.5213       | 460.2646        |
| 1895.9404      | 16 | K  | 7  | 862.4998       | 431.7538        |
| 2024.9830      | 17 | E  | 6  | 706.3735       | 353.6907        |
| 2112.0151      | 18 | S  | 5  | 577.3310       | 289.1694        |
| 2213.0627      | 19 | T  | 4  | 490.2989       | 245.6534        |
| 2326.1468      | 20 | I  | 3  | 389.2512       | 195.1295        |
| 2427.1945      | 21 | T  | 2  | 276.1672       | 138.5875        |
|                | 22 | R  | 1  | 175.1195       | 88.0637         |

N-term:+29.04 K(16):+156.13

X-range:

0 - 0

MassTol: Y-zoom:

0. 1.

MassType:

☐AVG ☒MONO

Axis:

☒1 ☐2

Label:

☒I ☐M ☐-

Ions:

a ☐+ ☐2+ ☐3+

b ☒+ ☐2+ ☐3+

c ☐+ ☐2+ ☐3+

x ☐+ ☐2+ ☐3+

y ☒+ ☒2+ ☐3+

z ☐+ ☐2+ ☐3+

hide H<sub>2</sub>O/NH<sub>3</sub> ☐

zoom 112-122 ☐

GO

TFVAELKGLDPPAR, MH+ 1472.8477, m/z 491.6208  
L OS G15 P120811 220811-s1.04933.04933.3.dta

scan 4933; 1.7e+001

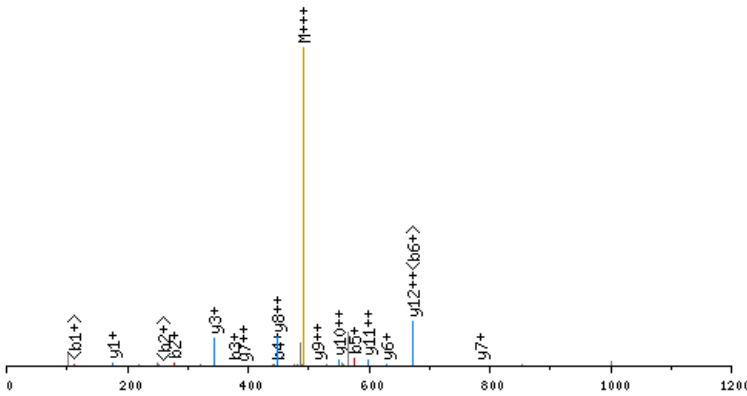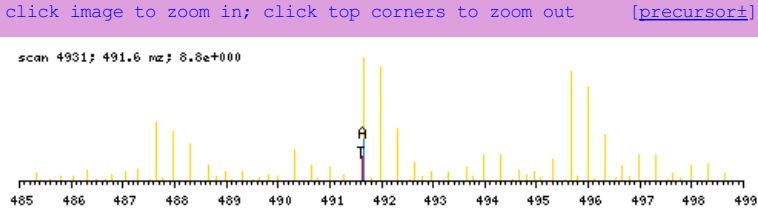

zoomed in precursor plot; T=theoretical m/z, A=acquired m/z

| b <sup>+</sup> | #  | AA | #  | y <sup>+</sup> | y <sup>2+</sup> |
|----------------|----|----|----|----------------|-----------------|
| 130.0868       | 1  | T  | 13 |                |                 |
| 277.1552       | 2  | F  | 12 | 1343.7687      | 672.3883        |
| 376.2236       | 3  | V  | 11 | 1196.7003      | 598.8541        |
| 447.2607       | 4  | A  | 10 | 1097.6319      | 549.3199        |
| 576.3033       | 5  | E  | 9  | 1026.5948      | 513.8013        |
| 689.3874       | 6  | L  | 8  | 897.5522       | 449.2800        |
| 845.5137       | 7  | K  | 7  | 784.4681       | 392.7380        |
| 902.5351       | 8  | G  | 6  | 628.3418       | 314.6748        |
| 1015.6192      | 9  | L  | 5  | 571.3204       | 286.1641        |
| 1130.6461      | 10 | D  | 4  | 458.2363       | 229.6221        |
| 1227.6989      | 11 | P  | 3  | 343.2094       | 172.1086        |
| 1298.7360      | 12 | A  | 2  | 246.1566       | 123.5822        |
|                | 13 | R  | 1  | 175.1195       | 88.0637         |

N-term:+29.04 K(7):+156.13

X-range:

0 - 0

MassTol: Y-zoom:

0. 1.

MassType:

☐ AVG ☒ MONO

Axis:

☒ 1 ☐ 2

Label:

☒ I ☐ M ☐ -

Ions:

a ☐ + ☐ 2+ ☐ 3+

b ☒ + ☐ 2+ ☐ 3+

c ☐ + ☐ 2+ ☐ 3+

x ☐ + ☐ 2+ ☐ 3+

y ☒ + ☒ 2+ ☐ 3+

z ☐ + ☐ 2+ ☐ 3+

hide H<sub>2</sub>O/NH<sub>3</sub> ☐

zoom 112-122 ☐

GO

TFVKDCEDPNPLIR, MH+ 1759.9052, m/z 587.3066  
L OS G15 P120811 220811-s1.04070.04070.3.dta

scan 4070; 3.6e+000

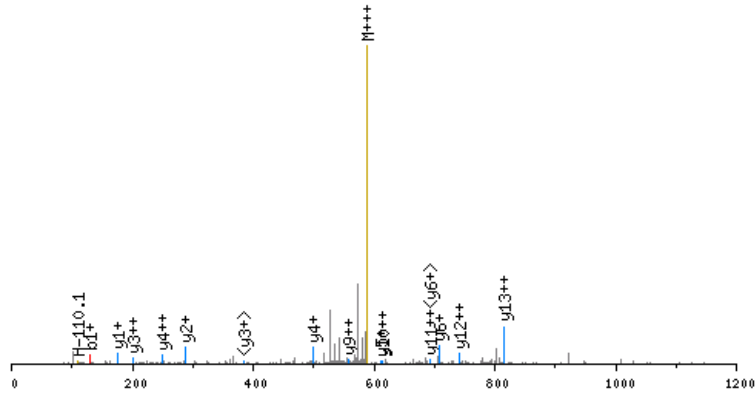

click image to zoom in; click top corners to zoom out [\[precursor±\]](#)

scan 4066; 587.3 mz; 6.6e+001

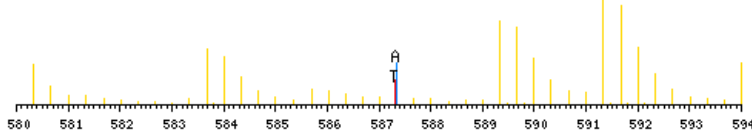

zoomed in precursor plot; T=theoretical m/z, A=acquired m/z

| b <sup>+</sup> | #  | AA | #  | y <sup>+</sup> | y <sup>2+</sup> |
|----------------|----|----|----|----------------|-----------------|
| 130.0868       | 1  | T  | 14 |                |                 |
| 277.1552       | 2  | F  | 13 | 1630.8263      | 815.9171        |
| 376.2236       | 3  | V  | 12 | 1483.7579      | 742.3829        |
| 532.3499       | 4  | K  | 11 | 1384.6895      | 692.8486        |
| 647.3768       | 5  | D  | 10 | 1228.5632      | 614.7855        |
| 807.4074       | 6  | C  | 9  | 1113.5362      | 557.2720        |
| 936.4500       | 7  | E  | 8  | 953.5056       | 477.2567        |
| 1051.4770      | 8  | D  | 7  | 824.4630       | 412.7354        |
| 1148.5297      | 9  | P  | 6  | 709.4361       | 355.2220        |
| 1262.5727      | 10 | N  | 5  | 612.3833       | 306.6956        |
| 1359.6254      | 11 | P  | 4  | 498.3404       | 249.6741        |
| 1472.7095      | 12 | L  | 3  | 401.2876       | 201.1477        |
| 1585.7936      | 13 | I  | 2  | 288.2036       | 144.6057        |
|                | 14 | R  | 1  | 175.1195       | 88.0637         |

N-term:+29.04 K(4):+156.13  
C(6):+160.03

| $b^+$     | #  | AA | #  | $y^+$     | $y^{2+}$ |
|-----------|----|----|----|-----------|----------|
| 130.0868  | 1  | T  | 18 |           |          |
| 277.1552  | 2  | F  | 17 | 1815.0380 | 908.0229 |
| 376.2236  | 3  | V  | 16 | 1667.9696 | 834.4887 |
| 463.2556  | 4  | S  | 15 | 1568.9012 | 784.9545 |
| 576.3397  | 5  | I  | 14 | 1481.8692 | 741.4385 |
| 677.3874  | 6  | T  | 13 | 1368.7851 | 684.8965 |
| 774.4401  | 7  | P  | 12 | 1267.7374 | 634.3726 |
| 845.4773  | 8  | A  | 11 | 1170.6847 | 585.8463 |
| 974.5198  | 9  | E  | 10 | 1099.6476 | 550.3277 |
| 1073.5883 | 10 | V  | 9  | 970.6050  | 485.8064 |
| 1130.6097 | 11 | G  | 8  | 871.5366  | 436.2722 |
| 1229.6781 | 12 | V  | 7  | 814.5151  | 407.7615 |
| 1342.7622 | 13 | L  | 6  | 715.4467  | 358.2273 |
| 1441.8306 | 14 | V  | 5  | 602.3626  | 301.6852 |
| 1498.8521 | 15 | G  | 4  | 503.2942  | 252.1510 |
| 1654.9784 | 16 | K  | 3  | 446.2727  | 223.6403 |
| 1770.0053 | 17 | D  | 2  | 290.1464  | 145.5771 |
|           | 18 | R  | 1  | 175.1195  | 88.0637  |

X-range:

0 - 0

MassTol: Y-zoom:

0. 1.

MassType:

☐ AVG ☒ MONO

Axis:

☒ 1 ☐ 2

Label:

☒ I ☐ M ☐ -

Ions:

a ☐ + ☐ 2+ ☐ 3+

b ☒ + ☐ 2+ ☐ 3+

c ☐ + ☐ 2+ ☐ 3+

x ☐ + ☐ 2+ ☐ 3+

y ☒ + ☒ 2+ ☐ 3+

z ☐ + ☐ 2+ ☐ 3+

hide H<sub>2</sub>O/NH<sub>3</sub> ☐

zoom 112-122 ☐

GO

TGAIVDVPVGEELLGR, MH+ 1658.9541, m/z 553.6562  
H OS G12 P120811 220811-s1.05299.05299.3.dta

scan 5299; 2.2e+000

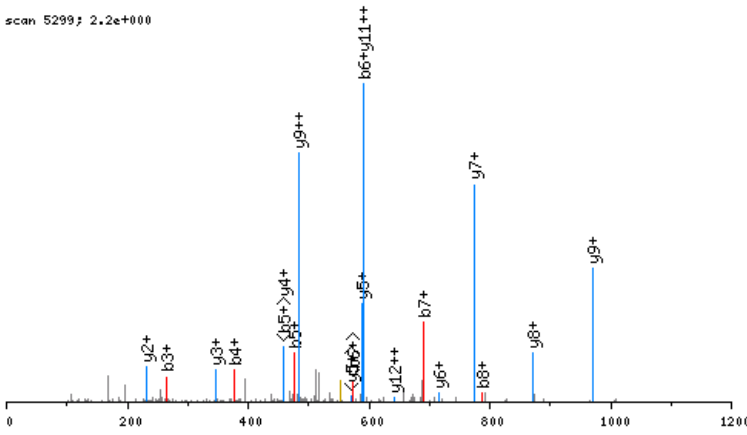

click image to zoom in; click top corners to zoom out

[precursor±]

scan 5297; 553.7 m/z; 3.0e+001

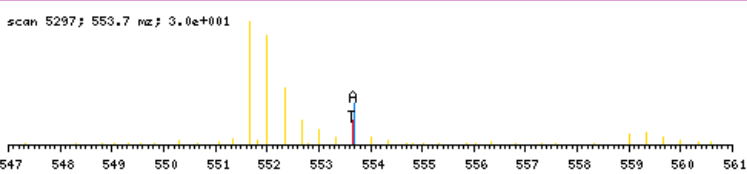

zoomed in precursor plot; T=theoretical m/z, A=acquired m/z

| b <sup>+</sup> | #  | AA | #  | y <sup>+</sup> | y <sup>2+</sup> |
|----------------|----|----|----|----------------|-----------------|
| 136.1186       | 1  | T  | 16 |                |                 |
| 193.1400       | 2  | G  | 15 | 1523.8433      | 762.4256        |
| 264.1772       | 3  | A  | 14 | 1466.8219      | 733.9148        |
| 377.2612       | 4  | I  | 13 | 1395.7848      | 698.3963        |
| 476.3296       | 5  | V  | 12 | 1282.7007      | 641.8543        |
| 591.3566       | 6  | D  | 11 | 1183.6323      | 592.3201        |
| 690.4250       | 7  | V  | 10 | 1068.6053      | 534.8066        |
| 787.4778       | 8  | P  | 9  | 969.5369       | 485.2724        |
| 886.5462       | 9  | V  | 8  | 872.4842       | 436.7460        |
| 943.5676       | 10 | G  | 7  | 773.4157       | 387.2118        |
| 1072.6102      | 11 | E  | 6  | 716.3943       | 358.7011        |
| 1201.6528      | 12 | E  | 5  | 587.3517       | 294.1798        |
| 1314.7369      | 13 | L  | 4  | 458.3091       | 229.6585        |
| 1427.8209      | 14 | L  | 3  | 345.2250       | 173.1164        |
| 1484.8424      | 15 | G  | 2  | 232.1410       | 116.5744        |
|                | 16 | R  | 1  | 175.1195       | 88.0637         |

N-term:+35.07

X-range:

0 - 0

MassTol: Y-zoom:

0. 1.

MassType:

☐ AVG ☒ MONO

Axis:

☒ 1 ☐ 2

Label:

☒ I ☐ M ☐ -

Ions:

a ☐ + ☐ 2+ ☐ 3+

b ☒ + ☐ 2+ ☐ 3+

c ☐ + ☐ 2+ ☐ 3+

x ☐ + ☐ 2+ ☐ 3+

y ☒ + ☒ 2+ ☐ 3+

z ☐ + ☐ 2+ ☐ 3+

hide H<sub>2</sub>O/NH<sub>3</sub> ☐

zoom 112-122 ☐

GO

TGECKITLSQVGDVLR, MH+ 1844.0587, m/z 615.3578  
H OS G15 P120811 220811-s1.05563.05563.3.dta

scan 5563; 5.5e+000

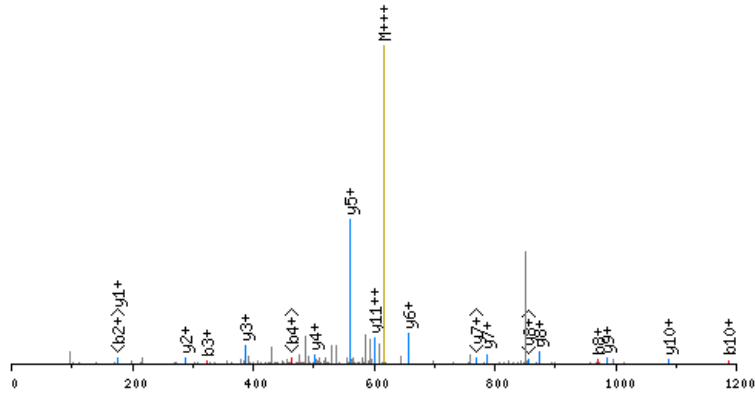

click image to zoom in; click top corners to zoom out [\[precursor±\]](#)

scan 5561; 615.4 m/z; 1.7e+001

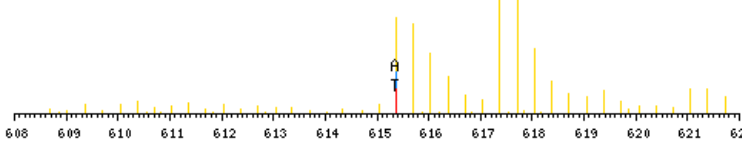

zoomed in precursor plot; T=theoretical m/z, A=acquired m/z

| b <sup>+</sup> | #  | AA | #  | y <sup>+</sup> | y <sup>2+</sup> |
|----------------|----|----|----|----------------|-----------------|
| 136.1186       | 1  | T  | 16 |                |                 |
| 193.1400       | 2  | G  | 15 | 1708.9480      | 854.9779        |
| 322.1826       | 3  | E  | 14 | 1651.9265      | 826.4672        |
| 482.2132       | 4  | C  | 13 | 1522.8839      | 761.9459        |
| 644.3713       | 5  | K  | 12 | 1362.8533      | 681.9306        |
| 757.4554       | 6  | I  | 11 | 1200.6952      | 600.8515        |
| 858.5031       | 7  | T  | 10 | 1087.6111      | 544.3095        |
| 971.5871       | 8  | L  | 9  | 986.5635       | 493.7856        |
| 1058.6192      | 9  | S  | 8  | 873.4794       | 437.2436        |
| 1186.6777      | 10 | Q  | 7  | 786.4474       | 393.7276        |
| 1285.7462      | 11 | V  | 6  | 658.3888       | 329.6983        |
| 1342.7676      | 12 | G  | 5  | 559.3204       | 280.1641        |
| 1457.7946      | 13 | D  | 4  | 502.2989       | 251.6534        |
| 1556.8630      | 14 | V  | 3  | 387.2720       | 194.1399        |
| 1669.9470      | 15 | L  | 2  | 288.2036       | 144.6057        |
|                | 16 | R  | 1  | 175.1195       | 88.0637         |

N-term:+35.07 C(4):+160.03  
K(5):+162.16

N-term: +29.04

X-range:

0 - 0

MassTol: Y-zoom:

0. 1.

MassType:

☐AVG ☒MONO

Axis:

☒1 ☐2

Label:

☒I ☐M ☐-

Ions:

a ☐+ ☐2+ ☐3+

b ☒+ ☐2+ ☐3+

c ☐+ ☐2+ ☐3+

x ☐+ ☐2+ ☐3+

y ☒+ ☒2+ ☐3+

z ☐+ ☐2+ ☐3+

hide H<sub>2</sub>O/NH<sub>3</sub> ☐

zoom 112-122 ☐

GO

TGGVDTAAVGAVFDISNADR, MH+ 1970.0043, m/z 657.3396  
H OS G12 P120811 220811-s1.05215.05215.3.dta

scan 5215; 2.3e+000

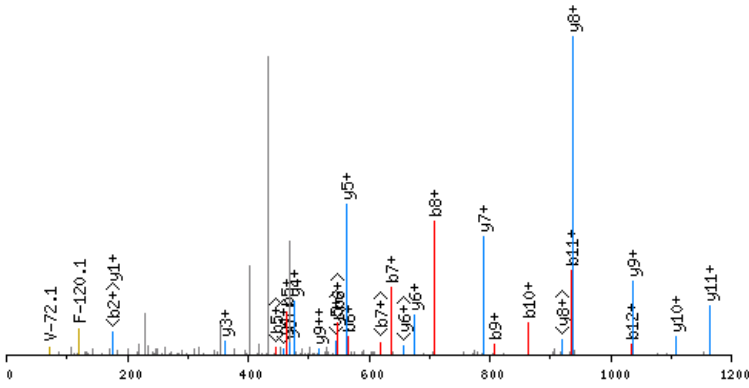

click image to zoom in; click top corners to zoom out

[precursor±]

scan 5212; 657.3 m/z; 8.4e+000

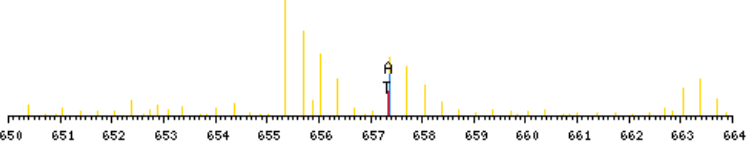

zoomed in precursor plot; T=theoretical m/z, A=acquired m/z

| b <sup>+</sup> | #  | AA | #  | y <sup>+</sup> | y <sup>2+</sup> |
|----------------|----|----|----|----------------|-----------------|
| 136.1186       | 1  | T  | 20 |                |                 |
| 193.1400       | 2  | G  | 19 | 1834.8935      | 917.9507        |
| 250.1615       | 3  | G  | 18 | 1777.8721      | 889.4399        |
| 349.2299       | 4  | V  | 17 | 1720.8506      | 860.9292        |
| 464.2569       | 5  | D  | 16 | 1621.7822      | 811.3950        |
| 565.3045       | 6  | T  | 15 | 1506.7552      | 753.8815        |
| 636.3417       | 7  | A  | 14 | 1405.7076      | 703.3577        |
| 707.3788       | 8  | A  | 13 | 1334.6705      | 667.8391        |
| 806.4472       | 9  | V  | 12 | 1263.6333      | 632.3206        |
| 863.4686       | 10 | G  | 11 | 1164.5649      | 582.7864        |
| 934.5058       | 11 | A  | 10 | 1107.5435      | 554.2756        |
| 1033.5742      | 12 | V  | 9  | 1036.5063      | 518.7571        |
| 1180.6426      | 13 | F  | 8  | 937.4379       | 469.2229        |
| 1295.6695      | 14 | D  | 7  | 790.3695       | 395.6887        |
| 1408.7536      | 15 | I  | 6  | 675.3426       | 338.1752        |
| 1495.7856      | 16 | S  | 5  | 562.2585       | 281.6332        |
| 1609.8286      | 17 | N  | 4  | 475.2265       | 238.1172        |
| 1680.8657      | 18 | A  | 3  | 361.1836       | 181.0957        |
| 1795.8926      | 19 | D  | 2  | 290.1464       | 145.5771        |
|                | 20 | R  | 1  | 175.1195       | 88.0637         |

N-term:+35.07



X-range:

0 - 0

MassTol: Y-zoom:

0. 1.

MassType:

☐ AVG ☒ MONO

Axis:

☒ 1 ☐ 2

Label:

☒ I ☐ M ☐ -

Ions:

a ☐ + ☐ 2+ ☐ 3+

b ☒ + ☐ 2+ ☐ 3+

c ☐ + ☐ 2+ ☐ 3+

x ☐ + ☐ 2+ ☐ 3+

y ☒ + ☒ 2+ ☐ 3+

z ☐ + ☐ 2+ ☐ 3+

hide H<sub>2</sub>O/NH<sub>3</sub> ☐

zoom 112-122 ☐

GO

TGPAGPAGPIGPAGAR, MH+ 1374.7493, m/z 458.9213  
L OS G13 P120811 220811-s1.03136.03136.3.dta

scan 3136; 2.7e+000

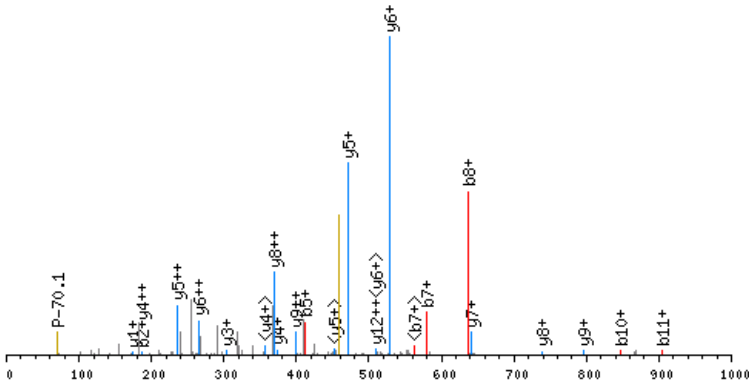

click image to zoom in; click top corners to zoom out

[precursor±]

scan 3134; 458.9 m/z; 6.2e+001

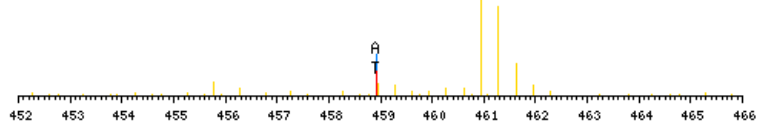

zoomed in precursor plot; T=theoretical m/z, A=acquired m/z

| b <sup>+</sup> | #  | AA | #  | y <sup>+</sup> | y <sup>2+</sup> |
|----------------|----|----|----|----------------|-----------------|
| 130.0868       | 1  | T  | 16 |                |                 |
| 187.1082       | 2  | G  | 15 | 1245.6704      | 623.3391        |
| 284.1610       | 3  | P  | 14 | 1188.6489      | 594.8284        |
| 355.1981       | 4  | A  | 13 | 1091.5962      | 546.3020        |
| 412.2196       | 5  | G  | 12 | 1020.5591      | 510.7834        |
| 509.2723       | 6  | P  | 11 | 963.5376       | 482.2727        |
| 580.3095       | 7  | A  | 10 | 866.4848       | 433.7463        |
| 637.3309       | 8  | G  | 9  | 795.4477       | 398.2278        |
| 734.3837       | 9  | P  | 8  | 738.4262       | 369.7170        |
| 847.4678       | 10 | I  | 7  | 641.3735       | 321.1907        |
| 904.4892       | 11 | G  | 6  | 528.2894       | 264.6486        |
| 1001.5420      | 12 | P  | 5  | 471.2680       | 236.1379        |
| 1072.5791      | 13 | A  | 4  | 374.2152       | 187.6115        |
| 1129.6006      | 14 | G  | 3  | 303.1781       | 152.0930        |
| 1200.6377      | 15 | A  | 2  | 246.1566       | 123.5822        |
|                | 16 | R  | 1  | 175.1195       | 88.0637         |

N-term:+29.04

X-range:

0 - 0

MassTol: Y-zoom:

0. 1.

MassType:

☐ AVG ☒ MONO

Axis:

☒ 1 ☐ 2

Label:

☒ I ☐ M ☐ -

Ions:

a ☐ + ☐ 2+ ☐ 3+

b ☒ + ☐ 2+ ☐ 3+

c ☐ + ☐ 2+ ☐ 3+

x ☐ + ☐ 2+ ☐ 3+

y ☒ + ☒ 2+ ☐ 3+

z ☐ + ☐ 2+ ☐ 3+

hide H<sub>2</sub>O/NH<sub>3</sub> ☐

zoom 112-122 ☐

GO

TGPNLHGLFGR, MH+ 1202.6858, m/z 401.5668  
H OS G16 P120811 220811-s1.05051.05051.3.dta

scan 5051; 1.0e+001

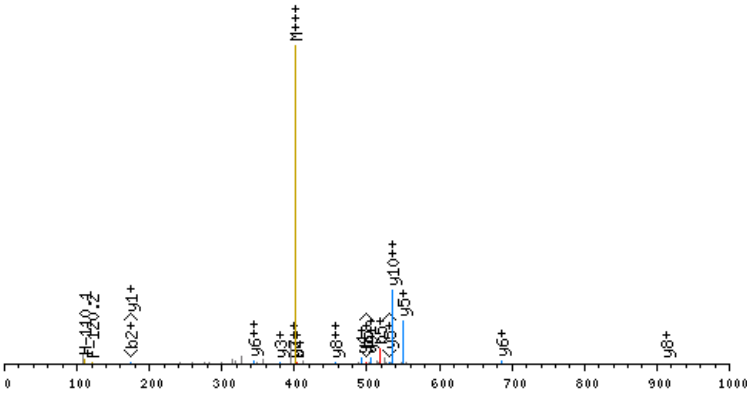

click image to zoom in; click top corners to zoom out [precursor±]

scan 5048; 401.6 m/z; 3.8e+000

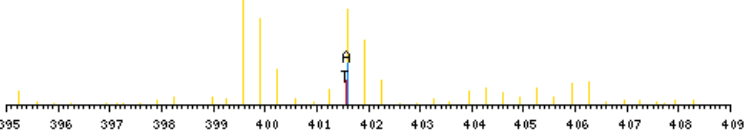

zoomed in precursor plot; T=theoretical m/z, A=acquired m/z

| b <sup>+</sup> | #  | AA | #  | y <sup>+</sup> | y <sup>2+</sup> |
|----------------|----|----|----|----------------|-----------------|
| 136.1186       | 1  | T  | 11 |                |                 |
| 193.1400       | 2  | G  | 10 | 1067.5750      | 534.2914        |
| 290.1928       | 3  | P  | 9  | 1010.5536      | 505.7807        |
| 404.2357       | 4  | N  | 8  | 913.5008       | 457.2543        |
| 517.3198       | 5  | L  | 7  | 799.4579       | 400.2329        |
| 654.3787       | 6  | H  | 6  | 686.3738       | 343.6908        |
| 711.4002       | 7  | G  | 5  | 549.3149       | 275.1614        |
| 824.4842       | 8  | L  | 4  | 492.2934       | 246.6506        |
| 971.5527       | 9  | F  | 3  | 379.2094       | 190.1086        |
| 1028.5741      | 10 | G  | 2  | 232.1410       | 116.5744        |
|                | 11 | R  | 1  | 175.1195       | 88.0637         |

N-term:+35.07

X-range:

0 - 0

MassTol: Y-zoom:

0. 1.

MassType:

☐AVG ☒MONO

Axis:

☒1 ☐2

Label:

☒I ☐M ☐-

Ions:

a ☐+ ☐2+ ☐3+

b ☒+ ☐2+ ☐3+

c ☐+ ☐2+ ☐3+

x ☐+ ☐2+ ☐3+

y ☒+ ☒2+ ☐3+

z ☐+ ☐2+ ☐3+

hide H<sub>2</sub>O/NH<sub>3</sub> ☐

zoom 112-122 ☐

GO

TGTEAAAAATGVIGGIR, MH+ 1472.8073, m/z 491.6073  
L OS G13 P120811 220811-s1.04496.04496.3.dta

scan 4496; 1.7e+000

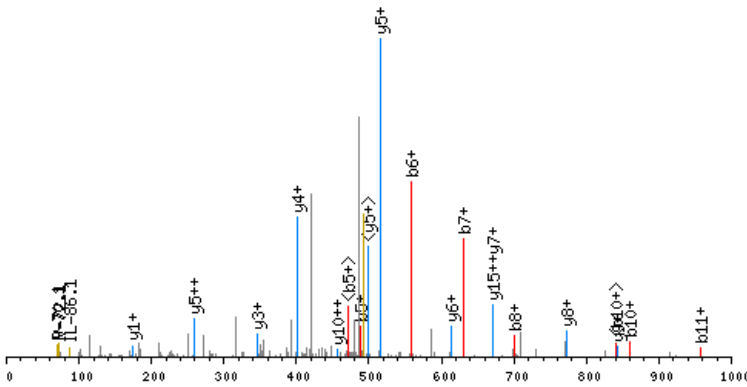

click image to zoom in; click top corners to zoom out [precursor±]

scan 4494; 491.6 m/z; 6.1e+001

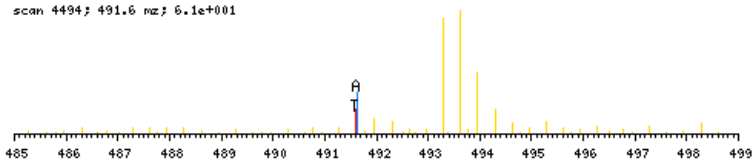

zoomed in precursor plot; T=theoretical m/z, A=acquired m/z

| b <sup>+</sup> | #  | AA | #  | y <sup>+</sup> | y <sup>2+</sup> |
|----------------|----|----|----|----------------|-----------------|
| 130.0868       | 1  | T  | 16 |                |                 |
| 187.1082       | 2  | G  | 15 | 1343.7283      | 672.3681        |
| 288.1559       | 3  | T  | 14 | 1286.7068      | 643.8573        |
| 417.1985       | 4  | E  | 13 | 1185.6592      | 593.3335        |
| 488.2356       | 5  | A  | 12 | 1056.6166      | 528.8122        |
| 559.2727       | 6  | A  | 11 | 985.5795       | 493.2936        |
| 630.3099       | 7  | A  | 10 | 914.5423       | 457.7751        |
| 701.3470       | 8  | A  | 9  | 843.5052       | 422.2565        |
| 802.3946       | 9  | T  | 8  | 772.4681       | 386.7380        |
| 859.4161       | 10 | G  | 7  | 671.4204       | 336.2141        |
| 958.4845       | 11 | V  | 6  | 614.3990       | 307.7034        |
| 1071.5686      | 12 | I  | 5  | 515.3306       | 258.1692        |
| 1128.5901      | 13 | G  | 4  | 402.2465       | 201.6272        |
| 1185.6115      | 14 | G  | 3  | 345.2250       | 173.1164        |
| 1298.6956      | 15 | I  | 2  | 288.2036       | 144.6057        |
|                | 16 | R  | 1  | 175.1195       | 88.0637         |

N-term:+29.04

X-range:

0 - 0

MassTol: Y-zoom:

0. 1.

MassType:

☐ AVG ☒ MONO

Axis:

☒ 1 ☐ 2

Label:

☒ I ☐ M ☐ -

Ions:

a ☐ + ☐ 2+ ☐ 3+

b ☒ + ☐ 2+ ☐ 3+

c ☐ + ☐ 2+ ☐ 3+

x ☐ + ☐ 2+ ☐ 3+

y ☒ + ☒ 2+ ☐ 3+

z ☐ + ☐ 2+ ☐ 3+

hide H<sub>2</sub>O/NH<sub>3</sub> ☐

zoom 112-122 ☐

GO

TGTQLPTKIDPEQK, MH+ 1639.9271, m/z 410.7372  
L OS G17 P120811 220811-s1.03644.03644.4.dta

scan 3644; 4.7e+001

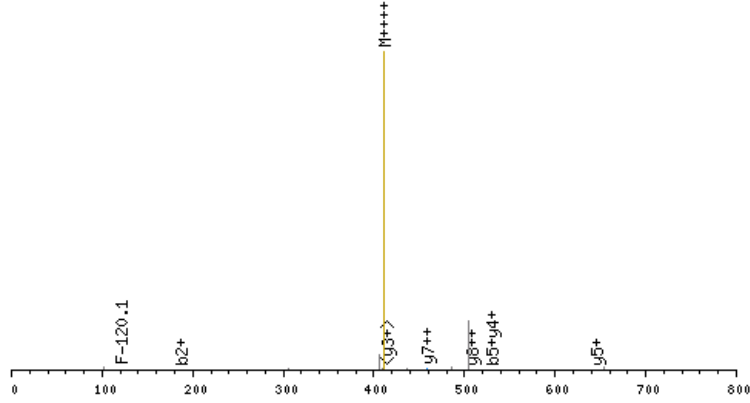

click image to zoom in; click top corners to zoom out [\[precursor±\]](#)

scan 3643; 410.7 m/z; 5.4e+001

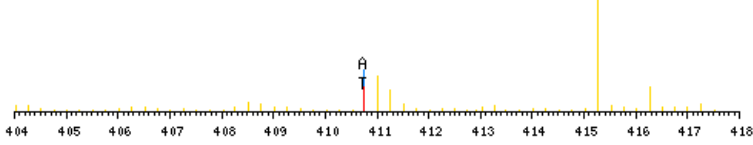

zoomed in precursor plot; T=theoretical m/z, A=acquired m/z

| b <sup>+</sup> | #  | AA | #  | y <sup>+</sup> | y <sup>2+</sup> |
|----------------|----|----|----|----------------|-----------------|
| 130.0868       | 1  | T  | 14 |                |                 |
| 187.1082       | 2  | G  | 13 | 1510.8482      | 755.9280        |
| 288.1559       | 3  | T  | 12 | 1453.8267      | 727.4173        |
| 416.2145       | 4  | Q  | 11 | 1352.7790      | 676.8934        |
| 529.2986       | 5  | L  | 10 | 1224.7204      | 612.8641        |
| 626.3513       | 6  | P  | 9  | 1111.6364      | 556.3221        |
| 727.3990       | 7  | T  | 8  | 1014.5836      | 507.7957        |
| 883.5253       | 8  | K  | 7  | 913.5359       | 457.2719        |
| 996.6094       | 9  | I  | 6  | 757.4096       | 379.2087        |
| 1111.6363      | 10 | D  | 5  | 644.3256       | 322.6667        |
| 1208.6891      | 11 | P  | 4  | 529.2986       | 265.1532        |
| 1337.7317      | 12 | E  | 3  | 432.2459       | 216.6268        |
| 1465.7902      | 13 | Q  | 2  | 303.2033       | 152.1055        |
|                | 14 | K  | 1  | 175.1447       | 88.0763         |

N-term:+29.04 K(8):+156.13  
K(14):+156.13

X-range:

0 - 0

MassTol: Y-zoom:

0. 1.

MassType:

☐AVG ☒MONO

Axis:

☒1 ☐2

Label:

☒I ☐M ☐-

Ions:

a ☐+ ☐2+ ☐3+

b ☒+ ☐2+ ☐3+

c ☐+ ☐2+ ☐3+

x ☐+ ☐2+ ☐3+

y ☒+ ☒2+ ☐3+

z ☐+ ☐2+ ☐3+

hide H<sub>2</sub>O/NH<sub>3</sub> ☐

zoom 112-122 ☐

GO

THEYHAETIKNVR, MH+ 1653.8713, m/z 414.2233  
L OS G19 P120811 220811-s1.02013.02013.4.dta

scan 2013; 1.9e+001

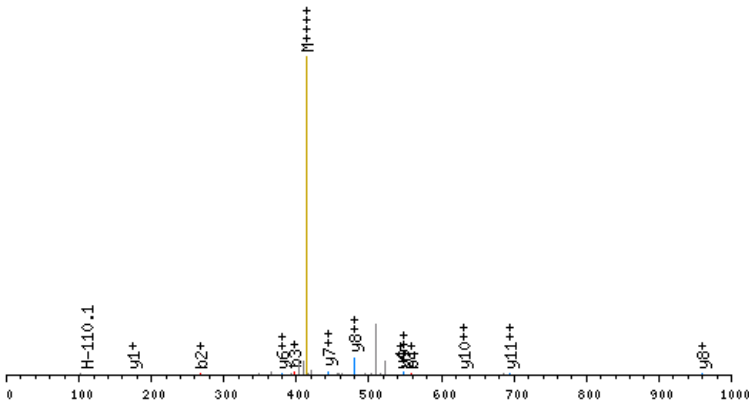

click image to zoom in; click top corners to zoom out [\[precursor±\]](#)

scan 2012; 414.2 m/z; 4.7e+000

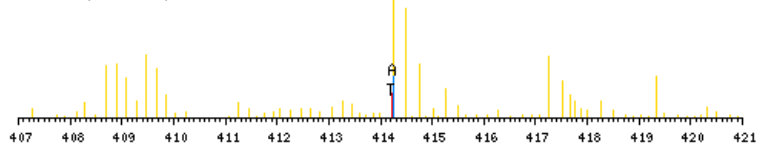

zoomed in precursor plot; T=theoretical m/z, A=acquired m/z

| b <sup>+</sup> | #  | AA | #  | y <sup>+</sup> | y <sup>2+</sup> |
|----------------|----|----|----|----------------|-----------------|
| 130.0868       | 1  | T  | 13 |                |                 |
| 267.1457       | 2  | H  | 12 | 1524.7923      | 762.9001        |
| 396.1883       | 3  | E  | 11 | 1387.7334      | 694.3706        |
| 559.2516       | 4  | Y  | 10 | 1258.6908      | 629.8493        |
| 696.3105       | 5  | H  | 9  | 1095.6275      | 548.3177        |
| 767.3476       | 6  | A  | 8  | 958.5686       | 479.7882        |
| 896.3902       | 7  | E  | 7  | 887.5315       | 444.2697        |
| 997.4379       | 8  | T  | 6  | 758.4889       | 379.7484        |
| 1110.5220      | 9  | I  | 5  | 657.4412       | 329.2245        |
| 1266.6483      | 10 | K  | 4  | 544.3571       | 272.6825        |
| 1380.6912      | 11 | N  | 3  | 388.2308       | 194.6193        |
| 1479.7596      | 12 | V  | 2  | 274.1879       | 137.5979        |
|                | 13 | R  | 1  | 175.1195       | 88.0637         |

N-term:+29.04 K(10):+156.13

X-range:

0 - 0

MassTol: Y-zoom:

0. 1.

MassType:

☐ AVG ☒ MONO

Axis:

☒ 1 ☐ 2

Label:

☒ I ☐ M ☐ -

Ions:

a ☐ + ☐ 2+ ☐ 3+

b ☒ + ☐ 2+ ☐ 3+

c ☐ + ☐ 2+ ☐ 3+

x ☐ + ☐ 2+ ☐ 3+

y ☒ + ☒ 2+ ☐ 3+

z ☐ + ☐ 2+ ☐ 3+

hide H<sub>2</sub>O/NH<sub>3</sub> ☐

zoom 112-122 ☐

GO

THFDPSCLFPACR, MH+ 1635.7411, m/z 545.9185  
L OS G16 P120811 220811-s1.05726.05726.3.dta

scan 5726; 4.7e+000

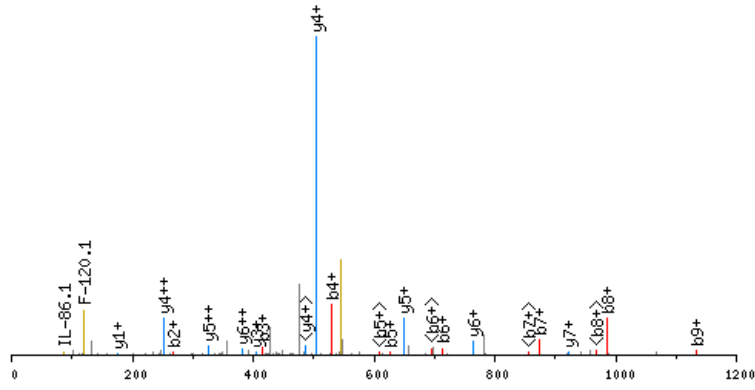

click image to zoom in; click top corners to zoom out [\[precursor±\]](#)

scan 5723; 545.9 m/z; 5.0e+000

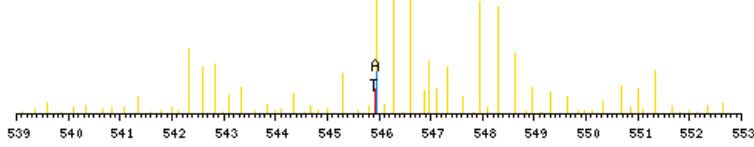

zoomed in precursor plot; T=theoretical m/z, A=acquired m/z

| b <sup>+</sup> | #  | AA | #  | y <sup>+</sup> | y <sup>2+</sup> |
|----------------|----|----|----|----------------|-----------------|
| 130.0868       | 1  | T  | 13 |                |                 |
| 267.1457       | 2  | H  | 12 | 1506.6621      | 753.8350        |
| 414.2141       | 3  | F  | 11 | 1369.6032      | 685.3055        |
| 529.2410       | 4  | D  | 10 | 1222.5348      | 611.7713        |
| 626.2938       | 5  | P  | 9  | 1107.5078      | 554.2578        |
| 713.3258       | 6  | S  | 8  | 1010.4551      | 505.7315        |
| 873.3564       | 7  | C  | 7  | 923.4231       | 462.2154        |
| 986.4405       | 8  | L  | 6  | 763.3925       | 382.2001        |
| 1133.5089      | 9  | F  | 5  | 650.3084       | 325.6581        |
| 1230.5617      | 10 | P  | 4  | 503.2400       | 252.1239        |
| 1301.5988      | 11 | A  | 3  | 406.1872       | 203.5975        |
| 1461.6294      | 12 | C  | 2  | 335.1501       | 168.0790        |
|                | 13 | R  | 1  | 175.1195       | 88.0637         |

N-term:+29.04 C(7):+160.03  
C(12):+160.03

X-range:

0 - 0

MassTol: Y-zoom:

0. 1.

MassType:

☐ AVG ☒ MONO

Axis:

☒ 1 ☐ 2

Label:

☒ I ☐ M ☐ -

Ions:

a ☐ + ☐ 2+ ☐ 3+

b ☒ + ☐ 2+ ☐ 3+

c ☐ + ☐ 2+ ☐ 3+

x ☐ + ☐ 2+ ☐ 3+

y ☒ + ☒ 2+ ☐ 3+

z ☐ + ☐ 2+ ☐ 3+

hide H<sub>2</sub>O/NH<sub>3</sub> ☐

zoom 112-122 ☐

GO

THLGGEFDNR, MH+ 1288.5922, m/z 430.2022  
L OS G17 P120811 220811-s1.02655.02655.3.dta

scan 2655; 8.4e-001

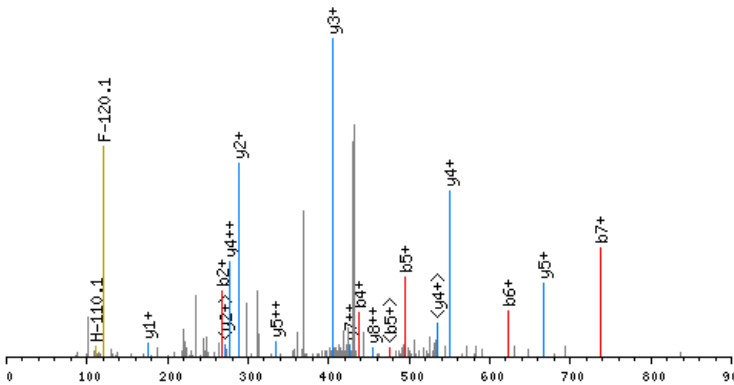

click image to zoom in; click top corners to zoom out

[precursor±]

scan 2653; 430.2 m/z; 8.2e+000

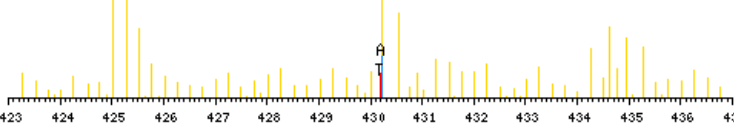

zoomed in precursor plot; T=theoretical m/z, A=acquired m/z

| b <sup>+</sup> | #  | AA | #  | y <sup>+</sup> | y <sup>2+</sup> |
|----------------|----|----|----|----------------|-----------------|
| 130.0868       | 1  | T  | 11 |                |                 |
| 267.1457       | 2  | H  | 10 | 1159.5132      | 580.2605        |
| 380.2298       | 3  | L  | 9  | 1022.4543      | 511.7311        |
| 437.2512       | 4  | G  | 8  | 909.3702       | 455.1890        |
| 494.2727       | 5  | G  | 7  | 852.3488       | 426.6783        |
| 623.3153       | 6  | E  | 6  | 795.3273       | 398.1676        |
| 738.3422       | 7  | D  | 5  | 666.2847       | 333.6463        |
| 885.4106       | 8  | F  | 4  | 551.2578       | 276.1328        |
| 1000.4376      | 9  | D  | 3  | 404.1894       | 202.5986        |
| 1114.4805      | 10 | N  | 2  | 289.1624       | 145.0851        |
|                | 11 | R  | 1  | 175.1195       | 88.0637         |

N-term:+29.04

X-range:

0 - 0

MassTol: Y-zoom:

0. 1.

MassType:

☐ AVG ☒ MONO

Axis:

☒ 1 ☐ 2

Label:

☒ I ☐ M ☐ -

Ions:

a ☐ + ☐ 2+ ☐ 3+

b ☒ + ☐ 2+ ☐ 3+

c ☐ + ☐ 2+ ☐ 3+

x ☐ + ☐ 2+ ☐ 3+

y ☒ + ☒ 2+ ☐ 3+

z ☐ + ☐ 2+ ☐ 3+

hide H<sub>2</sub>O/NH<sub>3</sub> ☐

zoom 112-122 ☐

GO

THLSTGDLLR, MH+ 1140.6377, m/z 380.8841  
L OS G16 P120811 220811-s1.03882.03882.3.dta

scan 3882; 1.0e+000

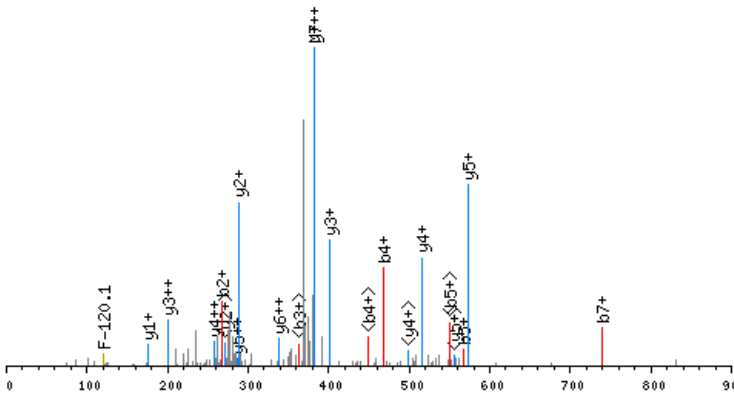

click image to zoom in; click top corners to zoom out

[precursor±]

scan 3878; 380.9 m/z; 2.5e+000

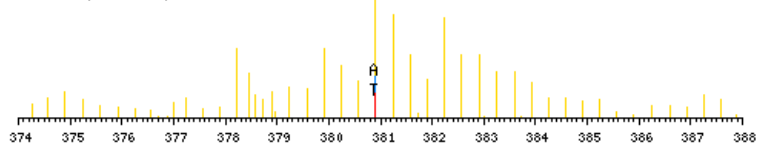

zoomed in precursor plot; T=theoretical m/z, A=acquired m/z

| b <sup>+</sup> | #  | AA | #  | y <sup>+</sup> | y <sup>2+</sup> |
|----------------|----|----|----|----------------|-----------------|
| 130.0868       | 1  | T  | 10 |                |                 |
| 267.1457       | 2  | H  | 9  | 1011.5587      | 506.2833        |
| 380.2298       | 3  | L  | 8  | 874.4998       | 437.7538        |
| 467.2618       | 4  | S  | 7  | 761.4157       | 381.2118        |
| 568.3095       | 5  | T  | 6  | 674.3837       | 337.6958        |
| 625.3309       | 6  | G  | 5  | 573.3360       | 287.1719        |
| 740.3579       | 7  | D  | 4  | 516.3146       | 258.6612        |
| 853.4419       | 8  | L  | 3  | 401.2876       | 201.1477        |
| 966.5260       | 9  | L  | 2  | 288.2036       | 144.6057        |
|                | 10 | R  | 1  | 175.1195       | 88.0637         |

N-term:+29.04

X-range:

0 - 0

MassTol: Y-zoom:

0. 1.

MassType:

☐ AVG ☒ MONO

Axis:

☒ 1 ☐ 2

Label:

☒ I ☐ M ☐ -

Ions:

a ☐ + ☐ 2+ ☐ 3+

b ☒ + ☐ 2+ ☐ 3+

c ☐ + ☐ 2+ ☐ 3+

x ☐ + ☐ 2+ ☐ 3+

y ☒ + ☒ 2+ ☐ 3+

z ☐ + ☐ 2+ ☐ 3+

hide H<sub>2</sub>O/NH<sub>3</sub> ☐

zoom 112-122 ☐

GO

TIAMDGTEGLVR, MH+ 1290.6727, m/z 645.8400  
L OS G13 P120811 220811-s1.04613.04613.2.dta

scan 4613; 5.5e+000

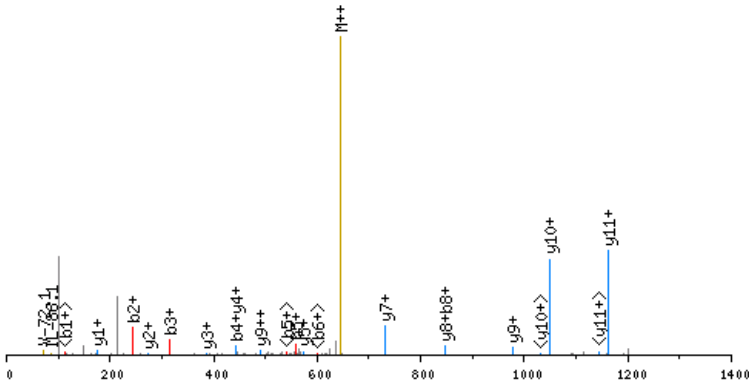

click image to zoom in; click top corners to zoom out

[precursor±]

scan 4609; 645.8 m/z; 3.9e+001

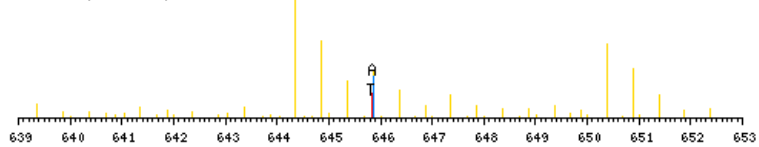

zoomed in precursor plot; T=theoretical m/z, A=acquired m/z

| b <sup>+</sup> | #  | AA | #  | y <sup>+</sup> | y <sup>2+</sup> |
|----------------|----|----|----|----------------|-----------------|
| 130.0868       | 1  | T  | 12 |                |                 |
| 243.1708       | 2  | I  | 11 | 1161.5938      | 581.3008        |
| 314.2080       | 3  | A  | 10 | 1048.5097      | 524.7588        |
| 445.2484       | 4  | M  | 9  | 977.4726       | 489.2402        |
| 560.2754       | 5  | D  | 8  | 846.4321       | 423.7200        |
| 617.2968       | 6  | G  | 7  | 731.4052       | 366.2065        |
| 718.3445       | 7  | T  | 6  | 674.3837       | 337.6958        |
| 847.3871       | 8  | E  | 5  | 573.3360       | 287.1719        |
| 904.4086       | 9  | G  | 4  | 444.2934       | 222.6506        |
| 1017.4926      | 10 | L  | 3  | 387.2720       | 194.1399        |
| 1116.5611      | 11 | V  | 2  | 274.1879       | 137.5979        |
|                | 12 | R  | 1  | 175.1195       | 88.0637         |

N-term:+29.04

X-range:

0 - 0

MassTol: Y-zoom:

0. 1.

MassType:

☐AVG ☒MONO

Axis:

☒1 ☐2

Label:

☒I ☐M ☐-

Ions:

a ☐+ ☐2+ ☐3+

b ☒+ ☐2+ ☐3+

c ☐+ ☐2+ ☐3+

x ☐+ ☐2+ ☐3+

y ☒+ ☒2+ ☐3+

z ☐+ ☐2+ ☐3+

hide H<sub>2</sub>O/NH<sub>3</sub> ☐

zoom 112-122 ☐

GO

TIAQDYGVLKADEGISFR, MH+ 2039.0813, m/z 680.3653  
L OS G15 P120811 220811-s1.05314.05314.3.dta

scan 5314; 6.1e+000

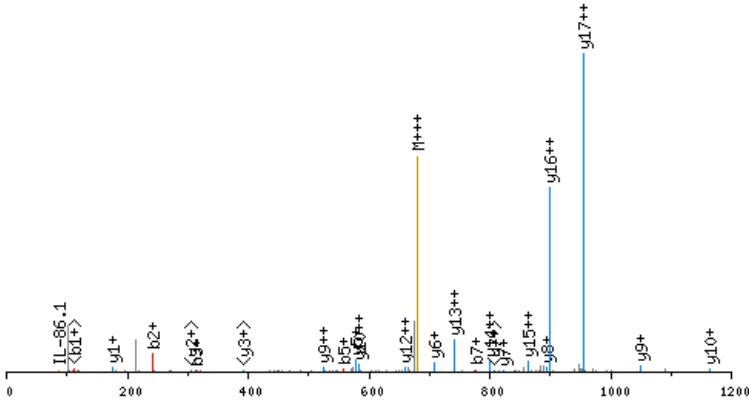

click image to zoom in; click top corners to zoom out

[precursor±]

scan 5311; 680.4 m/z; 5.7e+000

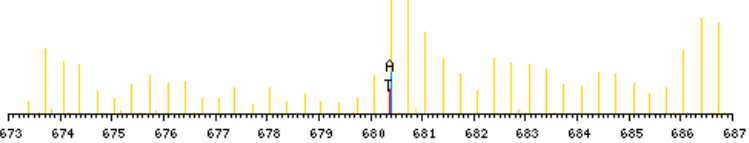

zoomed in precursor plot; T=theoretical m/z, A=acquired m/z

| b <sup>+</sup> | #  | AA | #  | y <sup>+</sup> | y <sup>2+</sup> |
|----------------|----|----|----|----------------|-----------------|
| 130.0868       | 1  | T  | 18 |                |                 |
| 243.1708       | 2  | I  | 17 | 1910.0024      | 955.5051        |
| 314.2080       | 3  | A  | 16 | 1796.9183      | 898.9631        |
| 442.2665       | 4  | Q  | 15 | 1725.8812      | 863.4445        |
| 557.2935       | 5  | D  | 14 | 1597.8226      | 799.4152        |
| 720.3568       | 6  | Y  | 13 | 1482.7957      | 741.9018        |
| 777.3783       | 7  | G  | 12 | 1319.7324      | 660.3701        |
| 876.4467       | 8  | V  | 11 | 1262.7109      | 631.8594        |
| 989.5307       | 9  | L  | 10 | 1163.6425      | 582.3252        |
| 1145.6570      | 10 | K  | 9  | 1050.5584      | 525.7831        |
| 1216.6942      | 11 | A  | 8  | 894.4321       | 447.7200        |
| 1331.7211      | 12 | D  | 7  | 823.3950       | 412.2014        |
| 1460.7637      | 13 | E  | 6  | 708.3681       | 354.6879        |
| 1517.7852      | 14 | G  | 5  | 579.3255       | 290.1666        |
| 1630.8692      | 15 | I  | 4  | 522.3040       | 261.6559        |
| 1717.9013      | 16 | S  | 3  | 409.2199       | 205.1139        |
| 1864.9697      | 17 | F  | 2  | 322.1879       | 161.5979        |
|                | 18 | R  | 1  | 175.1195       | 88.0637         |

N-term:+29.04 K(10):+156.13

X-range:

0 - 0

MassTol: Y-zoom:

0. 1.

MassType:

☐AVG ☒MONO

Axis:

☒1 ☐2

Label:

☒I ☐M ☐-

Ions:

a ☐+ ☐2+ ☐3+

b ☒+ ☐2+ ☐3+

c ☐+ ☐2+ ☐3+

x ☐+ ☐2+ ☐3+

y ☒+ ☒2+ ☐3+

z ☐+ ☐2+ ☐3+

hide H<sub>2</sub>O/NH<sub>3</sub> ☐

zoom 112-122 ☐

GO

TIFEVLPEKADR, MH+ 1473.8317, m/z 491.9488  
L OS G15 P120811 220811-s1.04618.04618.3.dta

scan 4618; 1.9e+001

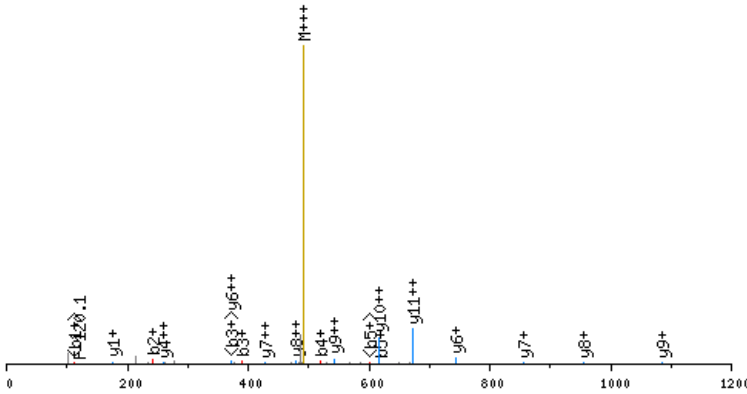

click image to zoom in; click top corners to zoom out

[precursor±]

scan 4616; 491.9 m/z; 3.3e+001

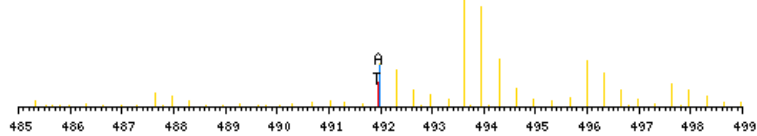

zoomed in precursor plot; T=theoretical m/z, A=acquired m/z

| b <sup>+</sup> | #  | AA | #  | y <sup>+</sup> | y <sup>2+</sup> |
|----------------|----|----|----|----------------|-----------------|
| 130.0868       | 1  | T  | 12 |                |                 |
| 243.1708       | 2  | I  | 11 | 1344.7528      | 672.8803        |
| 390.2393       | 3  | F  | 10 | 1231.6687      | 616.3383        |
| 519.2818       | 4  | E  | 9  | 1084.6003      | 542.8041        |
| 618.3503       | 5  | V  | 8  | 955.5577       | 478.2828        |
| 731.4343       | 6  | L  | 7  | 856.4893       | 428.7486        |
| 828.4871       | 7  | P  | 6  | 743.4052       | 372.2065        |
| 957.5297       | 8  | E  | 5  | 646.3525       | 323.6801        |
| 1113.6560      | 9  | K  | 4  | 517.3099       | 259.1588        |
| 1184.6931      | 10 | A  | 3  | 361.1836       | 181.0957        |
| 1299.7200      | 11 | D  | 2  | 290.1464       | 145.5771        |
|                | 12 | R  | 1  | 175.1195       | 88.0637         |

N-term:+29.04 K(9):+156.13

X-range:

0 - 0

MassTol: Y-zoom:

0. 1.

MassType:

☐ AVG ☒ MONO

Axis:

☒ 1 ☐ 2

Label:

☒ I ☐ M ☐ -

Ions:

a ☐ + ☐ 2+ ☐ 3+

b ☒ + ☐ 2+ ☐ 3+

c ☐ + ☐ 2+ ☐ 3+

x ☐ + ☐ 2+ ☐ 3+

y ☒ + ☒ 2+ ☐ 3+

z ☐ + ☐ 2+ ☐ 3+

hide H<sub>2</sub>O/NH<sub>3</sub> ☐

zoom 112-122 ☐

GO

TIKKQFLEELLTTQCDR, MH+ 2207.2110, m/z 552.5582  
L OS G17 P120811 220811-s1.06127.06127.4.dta

scan 6127; 1.5e+000

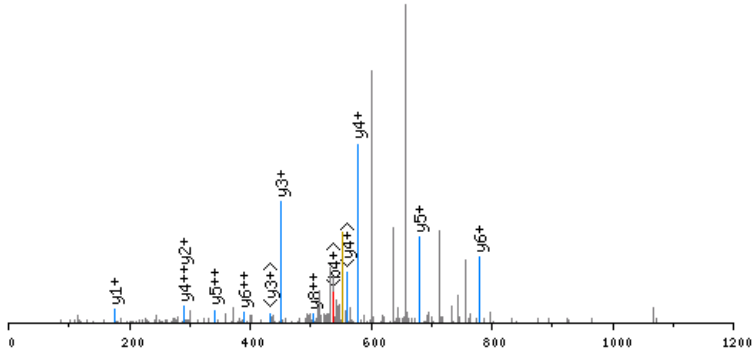

click image to zoom in; click top corners to zoom out [\[precursor±\]](#)

scan 6123; 552.6 m/z; 2.6e+000

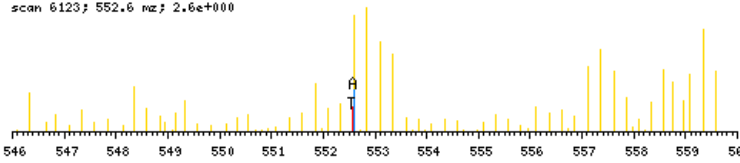

zoomed in precursor plot; T=theoretical m/z, A=acquired m/z

| b <sup>+</sup> | #  | AA | #  | y <sup>+</sup> | y <sup>2+</sup> |
|----------------|----|----|----|----------------|-----------------|
| 130.0868       | 1  | T  | 17 |                |                 |
| 243.1708       | 2  | I  | 16 | 2078.1320      | 1039.5699       |
| 399.2971       | 3  | K  | 15 | 1965.0479      | 983.0279        |
| 555.4234       | 4  | K  | 14 | 1808.9216      | 904.9647        |
| 683.4820       | 5  | Q  | 13 | 1652.7953      | 826.9016        |
| 830.5504       | 6  | F  | 12 | 1524.7368      | 762.8723        |
| 943.6345       | 7  | L  | 11 | 1377.6684      | 689.3381        |
| 1072.6771      | 8  | E  | 10 | 1264.5843      | 632.7961        |
| 1201.7197      | 9  | E  | 9  | 1135.5417      | 568.2748        |
| 1314.8037      | 10 | L  | 8  | 1006.4991      | 503.7535        |
| 1427.8878      | 11 | L  | 7  | 893.4150       | 447.2114        |
| 1528.9355      | 12 | T  | 6  | 780.3310       | 390.6694        |
| 1629.9832      | 13 | T  | 5  | 679.2833       | 340.1456        |
| 1758.0417      | 14 | Q  | 4  | 578.2356       | 289.6217        |
| 1918.0723      | 15 | C  | 3  | 450.1770       | 225.5924        |
| 2033.0993      | 16 | D  | 2  | 290.1464       | 145.5771        |
|                | 17 | R  | 1  | 175.1195       | 88.0637         |

N-term: +29.04 K(3): +156.13  
K(4): +156.13 C(15): +160.03

X-range:

0 - 0

MassTol: Y-zoom:

0. 1.

MassType:

☐ AVG ☒ MONO

Axis:

☒ 1 ☐ 2

Label:

☒ I ☐ M ☐ -

Ions:

a ☐ + ☐ 2+ ☐ 3+

b ☒ + ☐ 2+ ☐ 3+

c ☐ + ☐ 2+ ☐ 3+

x ☐ + ☐ 2+ ☐ 3+

y ☒ + ☒ 2+ ☐ 3+

z ☐ + ☐ 2+ ☐ 3+

hide H<sub>2</sub>O/NH<sub>3</sub> ☐

zoom 112-122 ☐

GO

TIQDTQEEKLEGGAAGR, MH+ 1958.0559, m/z 490.2694  
L OS G17 P120811 220811-s1.02422.02422.4.dta

scan 2422; 1.3e+001

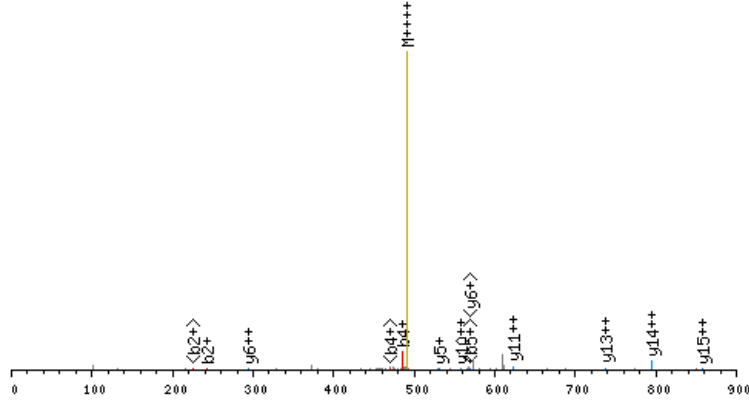

click image to zoom in; click top corners to zoom out

[precursor±]

scan 2418; 490.3 m/z; 2.2e+000

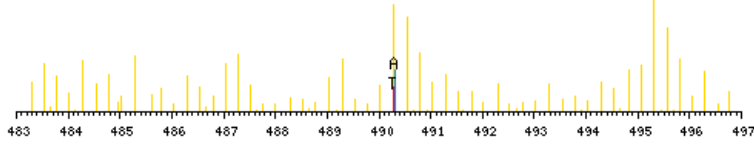

zoomed in precursor plot; T=theoretical m/z, A=acquired m/z

| b <sup>+</sup> | #  | AA | #  | y <sup>+</sup> | y <sup>2+</sup> |
|----------------|----|----|----|----------------|-----------------|
| 130.0868       | 1  | T  | 17 |                |                 |
| 243.1708       | 2  | I  | 16 | 1828.9769      | 914.9924        |
| 371.2294       | 3  | Q  | 15 | 1715.8929      | 858.4504        |
| 486.2564       | 4  | D  | 14 | 1587.8343      | 794.4211        |
| 587.3040       | 5  | T  | 13 | 1472.8074      | 736.9076        |
| 715.3626       | 6  | Q  | 12 | 1371.7597      | 686.3838        |
| 844.4052       | 7  | E  | 11 | 1243.7011      | 622.3545        |
| 973.4478       | 8  | E  | 10 | 1114.6585      | 557.8332        |
| 1129.5741      | 9  | K  | 9  | 985.6159       | 493.3119        |
| 1242.6582      | 10 | L  | 8  | 829.4896       | 415.2487        |
| 1371.7008      | 11 | E  | 7  | 716.4055       | 358.7067        |
| 1428.7222      | 12 | G  | 6  | 587.3630       | 294.1854        |
| 1485.7437      | 13 | G  | 5  | 530.3415       | 265.6747        |
| 1556.7808      | 14 | A  | 4  | 473.3200       | 237.1639        |
| 1627.8179      | 15 | A  | 3  | 402.2829       | 201.6454        |
| 1783.9442      | 16 | K  | 2  | 331.2458       | 166.1268        |
|                | 17 | R  | 1  | 175.1195       | 88.0637         |

N-term:+29.04 K(9):+156.13  
K(16):+156.13

X-range:

0 - 0

MassTol: Y-zoom:

0. 1.

MassType:

☐AVG ☒MONO

Axis:

☒1 ☐2

Label:

☒I ☐M ☐-

Ions:

a ☐+ ☐2+ ☐3+

b ☒+ ☐2+ ☐3+

c ☐+ ☐2+ ☐3+

x ☐+ ☐2+ ☐3+

y ☒+ ☒2+ ☐3+

z ☐+ ☐2+ ☐3+

hide H<sub>2</sub>O/NH<sub>3</sub> ☐

zoom 112-122 ☐

GO

TISKEELSSGDSLSPDPWKR, MH+ 2316.2088, m/z 579.8076  
L OS G17 P120811 220811-s1.04996.04996.4.dta

scan 4996; 5.6e+000

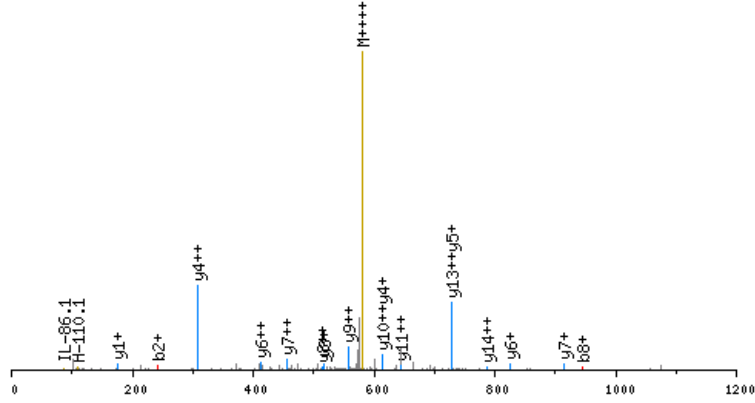

click image to zoom in; click top corners to zoom out [\[precursor±\]](#)

scan 4993; 579.8 mz; 5.4e+001

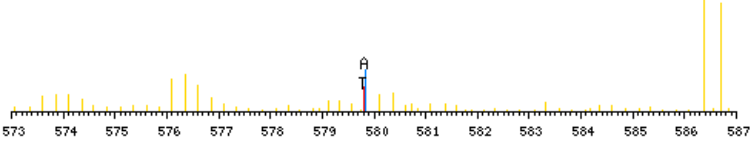

zoomed in precursor plot; T=theoretical m/z, A=acquired m/z

| b <sup>+</sup> | #  | AA | #  | y <sup>+</sup> | y <sup>2+</sup> |
|----------------|----|----|----|----------------|-----------------|
| 130.0868       | 1  | T  | 20 |                |                 |
| 243.1708       | 2  | I  | 19 | 2187.1298      | 1094.0688       |
| 330.2029       | 3  | S  | 18 | 2074.0457      | 1037.5268       |
| 486.3292       | 4  | K  | 17 | 1987.0137      | 994.0108        |
| 615.3718       | 5  | E  | 16 | 1830.8874      | 915.9476        |
| 744.4144       | 6  | E  | 15 | 1701.8448      | 851.4263        |
| 857.4984       | 7  | L  | 14 | 1572.8022      | 786.9050        |
| 944.5304       | 8  | S  | 13 | 1459.7182      | 730.3630        |
| 1031.5625      | 9  | S  | 12 | 1372.6861      | 686.8470        |
| 1088.5839      | 10 | G  | 11 | 1285.6541      | 643.3310        |
| 1203.6109      | 11 | D  | 10 | 1228.6326      | 614.8202        |
| 1290.6429      | 12 | S  | 9  | 1113.6057      | 557.3068        |
| 1403.7270      | 13 | L  | 8  | 1026.5737      | 513.7908        |
| 1490.7590      | 14 | S  | 7  | 913.4896       | 457.2487        |
| 1587.8118      | 15 | P  | 6  | 826.4576       | 413.7327        |
| 1702.8387      | 16 | D  | 5  | 729.4048       | 365.2063        |
| 1799.8915      | 17 | P  | 4  | 614.3779       | 307.6929        |
| 1985.9708      | 18 | W  | 3  | 517.3251       | 259.1665        |
| 2142.0971      | 19 | K  | 2  | 331.2458       | 166.1268        |
|                | 20 | R  | 1  | 175.1195       | 88.0637         |

N-term: +29.04 K(4): +156.13  
K(19): +156.13

N-term: +29.04 C(4): +160.03  
K(7): +156.13

X-range:

0 - 0

MassTol: Y-zoom:

0. 1.

MassType:

☐ AVG ☒ MONO

Axis:

☒ 1 ☐ 2

Label:

☒ I ☐ M ☐ -

Ions:

a ☐ + ☐ 2+ ☐ 3+

b ☒ + ☐ 2+ ☐ 3+

c ☐ + ☐ 2+ ☐ 3+

x ☐ + ☐ 2+ ☐ 3+

y ☒ + ☒ 2+ ☐ 3+

z ☐ + ☐ 2+ ☐ 3+

hide H<sub>2</sub>O/NH<sub>3</sub> ☐

zoom 112-122 ☐

GO

TIVEEVQDGKVISSR, MH+ 1715.9544, m/z 572.6563  
L OS G15 P120811 220811-s1.03329.03329.3.dta

scan 3329; 1.4e+001

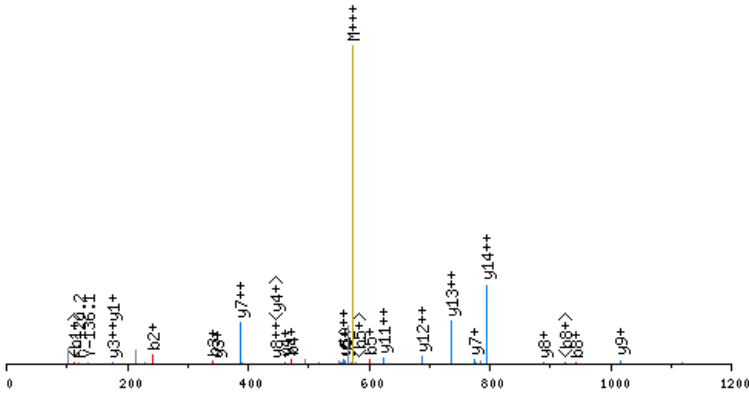

click image to zoom in; click top corners to zoom out

[precursor±]

scan 3326; 572.7 m/z; 7.5e+000

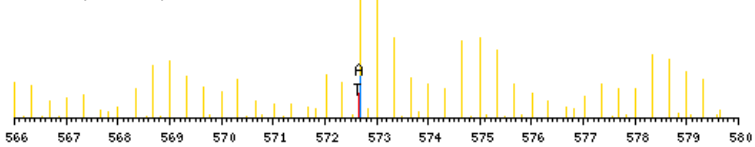

zoomed in precursor plot; T=theoretical m/z, A=acquired m/z

| b <sup>+</sup> | #  | AA | #  | y <sup>+</sup> | y <sup>2+</sup> |
|----------------|----|----|----|----------------|-----------------|
| 130.0868       | 1  | T  | 15 |                |                 |
| 243.1708       | 2  | I  | 14 | 1586.8754      | 793.9416        |
| 342.2393       | 3  | V  | 13 | 1473.7913      | 737.3996        |
| 471.2818       | 4  | E  | 12 | 1374.7229      | 687.8654        |
| 600.3244       | 5  | E  | 11 | 1245.6803      | 623.3441        |
| 699.3929       | 6  | V  | 10 | 1116.6377      | 558.8228        |
| 827.4514       | 7  | Q  | 9  | 1017.5693      | 509.2886        |
| 942.4784       | 8  | D  | 8  | 889.5107       | 445.2593        |
| 999.4998       | 9  | G  | 7  | 774.4838       | 387.7458        |
| 1155.6261      | 10 | K  | 6  | 717.4623       | 359.2351        |
| 1254.6946      | 11 | V  | 5  | 561.3360       | 281.1719        |
| 1367.7786      | 12 | I  | 4  | 462.2676       | 231.6377        |
| 1454.8106      | 13 | S  | 3  | 349.1836       | 175.0957        |
| 1541.8427      | 14 | S  | 2  | 262.1515       | 131.5797        |
|                | 15 | R  | 1  | 175.1195       | 88.0637         |

N-term:+29.04 K(10):+156.13

X-range:

0 - 0

MassTol: Y-zoom:

0. 1.

MassType:

☐ AVG ☒ MONO

Axis:

☒ 1 ☐ 2

Label:

☒ I ☐ M ☐ -

Ions:

a ☐ + ☐ 2+ ☐ 3+

b ☒ + ☐ 2+ ☐ 3+

c ☐ + ☐ 2+ ☐ 3+

x ☐ + ☐ 2+ ☐ 3+

y ☒ + ☒ 2+ ☐ 3+

z ☐ + ☐ 2+ ☐ 3+

hide H<sub>2</sub>O/NH<sub>3</sub> ☐

zoom 112-122 ☐

GO

TKGKEAPFFTHFDPSCLFPACR, MH+ 2550.2637, m/z 638.3214  
L\_OS\_G18\_P120811\_220811-s1.06260.06260.4.dta

scan 6260; 2.0e+000

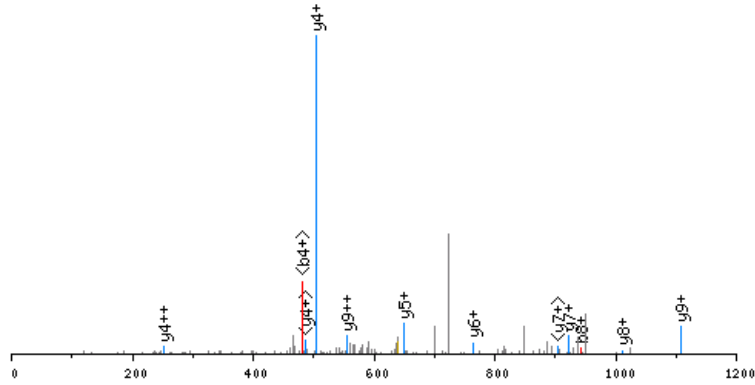

click image to zoom in; click top corners to zoom out

[precursor±]

scan 6256; 638.3 m/z; 1.4e+000

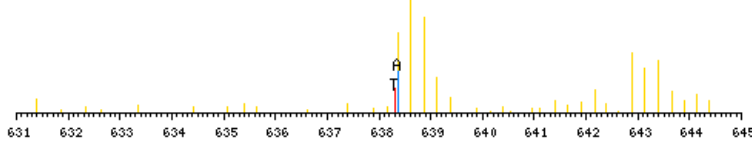

zoomed in precursor plot; T=theoretical m/z, A=acquired m/z

| b <sup>+</sup> | #  | AA | #  | y <sup>+</sup> | y <sup>2+</sup> |
|----------------|----|----|----|----------------|-----------------|
| 130.0868       | 1  | T  | 21 |                |                 |
| 286.2131       | 2  | K  | 20 | 2421.1847      | 1211.0963       |
| 343.2345       | 3  | G  | 19 | 2265.0584      | 1133.0331       |
| 499.3608       | 4  | K  | 18 | 2208.0370      | 1104.5224       |
| 628.4034       | 5  | E  | 17 | 2051.9107      | 1026.4593       |
| 699.4405       | 6  | A  | 16 | 1922.8681      | 961.9380        |
| 796.4933       | 7  | P  | 15 | 1851.8310      | 926.4194        |
| 943.5617       | 8  | F  | 14 | 1754.7782      | 877.8930        |
| 1044.6094      | 9  | T  | 13 | 1607.7098      | 804.3588        |
| 1181.6683      | 10 | H  | 12 | 1506.6621      | 753.8350        |
| 1328.7367      | 11 | F  | 11 | 1369.6032      | 685.3055        |
| 1443.7637      | 12 | D  | 10 | 1222.5348      | 611.7713        |
| 1540.8164      | 13 | P  | 9  | 1107.5078      | 554.2578        |
| 1627.8485      | 14 | S  | 8  | 1010.4551      | 505.7315        |
| 1787.8791      | 15 | C  | 7  | 923.4231       | 462.2154        |
| 1900.9631      | 16 | L  | 6  | 763.3925       | 382.2001        |
| 2048.0315      | 17 | F  | 5  | 650.3084       | 325.6581        |
| 2145.0843      | 18 | P  | 4  | 503.2400       | 252.1239        |
| 2216.1214      | 19 | A  | 3  | 406.1872       | 203.5975        |
| 2376.1520      | 20 | C  | 2  | 335.1501       | 168.0790        |
|                | 21 | R  | 1  | 175.1195       | 88.0637         |

N-term:+29.04 K(2):+156.13  
K(4):+156.13 C(15):+160.03  
C(20):+160.03

X-range:

0 - 0

MassTol: Y-zoom:

0. 1.

MassType:

☐AVG ☒MONO

Axis:

☒1 ☐2

Label:

☒I ☐M ☐-

Ions:

a ☐+ ☐2+ ☐3+

b ☒+ ☐2+ ☐3+

c ☐+ ☐2+ ☐3+

x ☐+ ☐2+ ☐3+

y ☒+ ☒2+ ☐3+

z ☐+ ☐2+ ☐3+

hide H<sub>2</sub>O/NH<sub>3</sub> ☐

zoom 112-122 ☐

GO

TKQEYDEAGPSIVHR, MH+ 1785.9135, m/z 447.2338  
L OS G17 P120811 220811-s1.02667.02667.4.dta

scan 2667; 6.7e+000

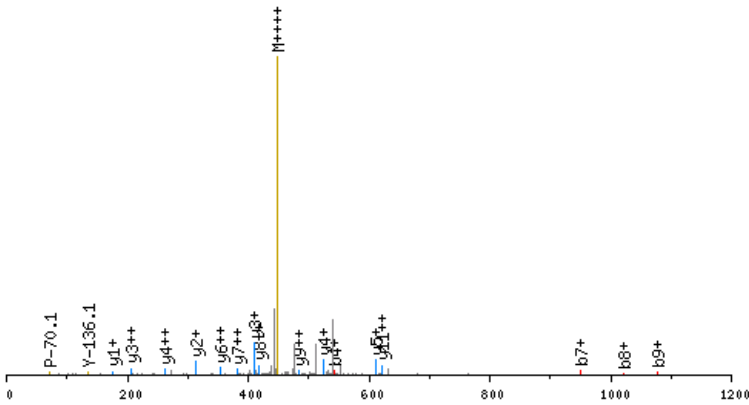

click image to zoom in; click top corners to zoom out

[precursor±]

scan 2663; 447.2 m/z; 5.6e+000

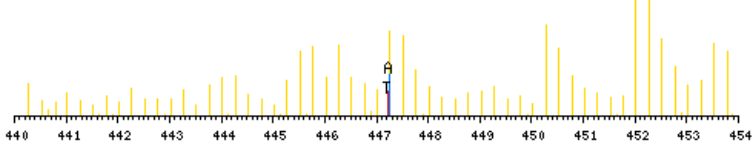

zoomed in precursor plot; T=theoretical m/z, A=acquired m/z

| b <sup>+</sup> | #  | AA | #  | y <sup>+</sup> | y <sup>2+</sup> |
|----------------|----|----|----|----------------|-----------------|
| 130.0868       | 1  | T  | 15 |                |                 |
| 286.2131       | 2  | K  | 14 | 1656.8346      | 828.9212        |
| 414.2717       | 3  | Q  | 13 | 1500.7083      | 750.8581        |
| 543.3142       | 4  | E  | 12 | 1372.6497      | 686.8288        |
| 706.3776       | 5  | Y  | 11 | 1243.6071      | 622.3075        |
| 821.4045       | 6  | D  | 10 | 1080.5438      | 540.7758        |
| 950.4471       | 7  | E  | 9  | 965.5169       | 483.2623        |
| 1021.4842      | 8  | A  | 8  | 836.4743       | 418.7410        |
| 1078.5057      | 9  | G  | 7  | 765.4371       | 383.2225        |
| 1175.5585      | 10 | P  | 6  | 708.4157       | 354.7118        |
| 1262.5905      | 11 | S  | 5  | 611.3629       | 306.1854        |
| 1375.6745      | 12 | I  | 4  | 524.3309       | 262.6694        |
| 1474.7430      | 13 | V  | 3  | 411.2468       | 206.1273        |
| 1611.8019      | 14 | H  | 2  | 312.1784       | 156.5931        |
|                | 15 | R  | 1  | 175.1195       | 88.0637         |

N-term:+29.04 K(2):+156.13

X-range:

0 - 0

MassTol: Y-zoom:

0. 1.

MassType:

☐AVG ☒MONO

Axis:

☒1 ☐2

Label:

☒I ☐M ☐-

Ions:

a ☐+ ☐2+ ☐3+

b ☒+ ☐2+ ☐3+

c ☐+ ☐2+ ☐3+

x ☐+ ☐2+ ☐3+

y ☒+ ☒2+ ☐3+

z ☐+ ☐2+ ☐3+

hide H<sub>2</sub>O/NH<sub>3</sub> ☐

zoom 112-122 ☐

GO

TKQSTVLAPVIDLKR, MH+ 1753.0952, m/z 439.0293  
L OS G17 P120811 220811-s1.04769.04769.4.dta

scan 4769; 8.4e+000

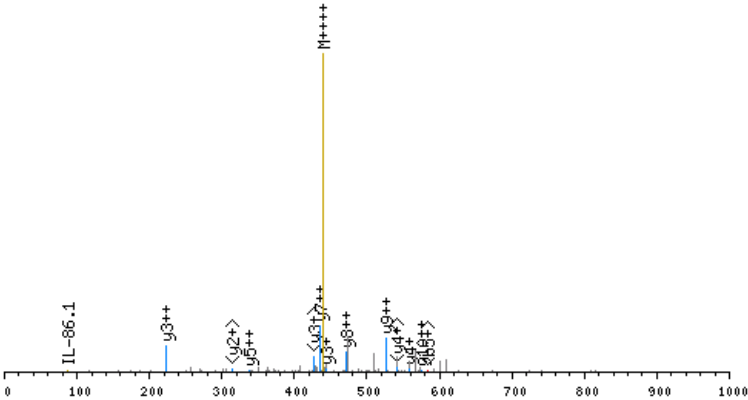

click image to zoom in; click top corners to zoom out [precursor±]

scan 4768; 439.0 m/z; 1.7e+001

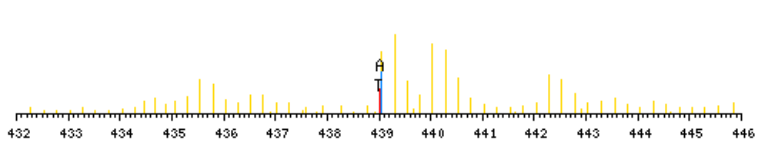

zoomed in precursor plot; T=theoretical m/z, A=acquired m/z

| b <sup>+</sup> | #  | AA | #  | y <sup>+</sup> | y <sup>2+</sup> |
|----------------|----|----|----|----------------|-----------------|
| 130.0868       | 1  | T  | 15 |                |                 |
| 286.2131       | 2  | K  | 14 | 1624.0162      | 812.5120        |
| 414.2717       | 3  | Q  | 13 | 1467.8899      | 734.4489        |
| 501.3037       | 4  | S  | 12 | 1339.8313      | 670.4196        |
| 602.3514       | 5  | T  | 11 | 1252.7993      | 626.9036        |
| 701.4198       | 6  | V  | 10 | 1151.7516      | 576.3797        |
| 814.5038       | 7  | L  | 9  | 1052.6832      | 526.8455        |
| 885.5410       | 8  | A  | 8  | 939.5992       | 470.3035        |
| 982.5937       | 9  | P  | 7  | 868.5620       | 434.7849        |
| 1081.6621      | 10 | V  | 6  | 771.5093       | 386.2586        |
| 1194.7462      | 11 | I  | 5  | 672.4409       | 336.7243        |
| 1309.7731      | 12 | D  | 4  | 559.3568       | 280.1823        |
| 1422.8572      | 13 | L  | 3  | 444.3299       | 222.6688        |
| 1578.9835      | 14 | K  | 2  | 331.2458       | 166.1268        |
|                | 15 | R  | 1  | 175.1195       | 88.0637         |

N-term:+29.04 K(2):+156.13  
K(14):+156.13

X-range:

0 - 0

MassTol: Y-zoom:

0. 1.

MassType:

☐AVG ☒MONO

Axis:

☒1 ☐2

Label:

☒I ☐M ☐-

Ions:

a ☐+ ☐2+ ☐3+

b ☒+ ☐2+ ☐3+

c ☐+ ☐2+ ☐3+

x ☐+ ☐2+ ☐3+

y ☒+ ☒2+ ☐3+

z ☐+ ☐2+ ☐3+

hide H<sub>2</sub>O/NH<sub>3</sub> ☐

zoom 112-122 ☐

GO

TKSLMDEVVKATSR, MH+ 1648.9308, m/z 412.9882  
L OS G17 P120811 220811-s1.05081.05081.4.dta

scan 5081; 2.2e+001

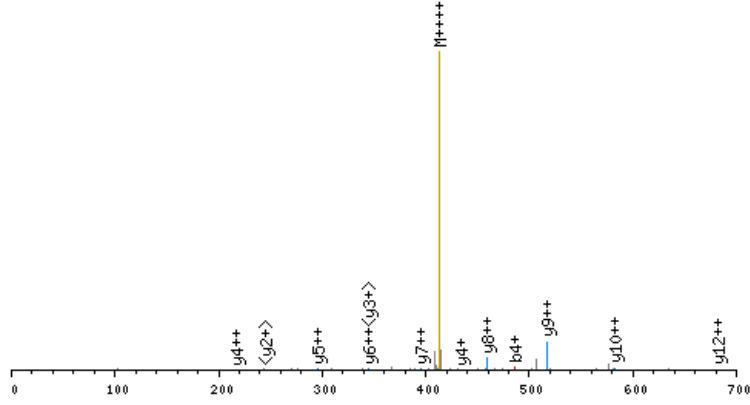

click image to zoom in; click top corners to zoom out [\[precursor±\]](#)

scan 5078; 413.0 mz; 1.8e+001

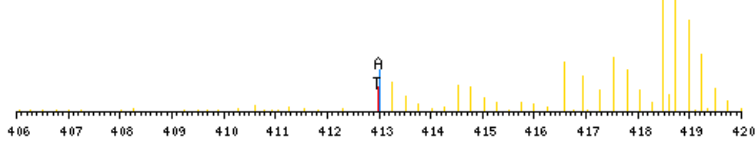

zoomed in precursor plot; T=theoretical m/z, A=acquired m/z

| b <sup>+</sup> | #  | AA | #  | y <sup>+</sup> | y <sup>2+</sup> |
|----------------|----|----|----|----------------|-----------------|
| 130.0868       | 1  | T  | 14 |                |                 |
| 286.2131       | 2  | K  | 13 | 1519.8519      | 760.4298        |
| 373.2451       | 3  | S  | 12 | 1363.7256      | 682.3667        |
| 486.3292       | 4  | L  | 11 | 1276.6935      | 638.8507        |
| 617.3697       | 5  | M  | 10 | 1163.6095      | 582.3086        |
| 732.3966       | 6  | D  | 9  | 1032.5690      | 516.7884        |
| 861.4392       | 7  | E  | 8  | 917.5420       | 459.2749        |
| 960.5076       | 8  | V  | 7  | 788.4994       | 394.7536        |
| 1059.5760      | 9  | V  | 6  | 689.4310       | 345.2194        |
| 1215.7023      | 10 | K  | 5  | 590.3626       | 295.6852        |
| 1286.7394      | 11 | A  | 4  | 434.2363       | 217.6221        |
| 1387.7871      | 12 | T  | 3  | 363.1992       | 182.1035        |
| 1474.8191      | 13 | S  | 2  | 262.1515       | 131.5797        |
|                | 14 | R  | 1  | 175.1195       | 88.0637         |

N-term:+29.04 K(2):+156.13  
K(10):+156.13

X-range:

0 - 0

MassTol: Y-zoom:

0. 1.

MassType:

☐ AVG ☒ MONO

Axis:

☒ 1 ☐ 2

Label:

☒ I ☐ M ☐ -

Ions:

a ☐ + ☐ 2+ ☐ 3+

b ☒ + ☐ 2+ ☐ 3+

c ☐ + ☐ 2+ ☐ 3+

x ☐ + ☐ 2+ ☐ 3+

y ☒ + ☒ 2+ ☐ 3+

z ☐ + ☐ 2+ ☐ 3+

hide H<sub>2</sub>O/NH<sub>3</sub> ☐

zoom 112-122 ☐

GO

TKVDKLDASESLR, MH+ 1545.8852, m/z 387.2268  
L OS G17 P120811 220811-s1.02799.02799.4.dta

scan 2799; 1.0e+001

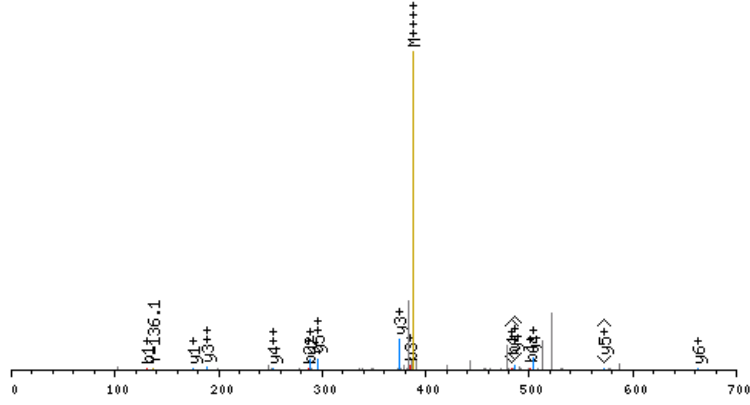

click image to zoom in; click top corners to zoom out [\[precursor±\]](#)

scan 2798; 387.2 m/z; 5.7e+000

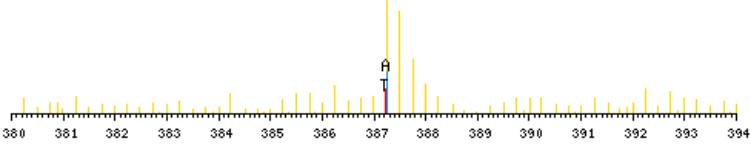

zoomed in precursor plot; T=theoretical m/z, A=acquired m/z

| b <sup>+</sup> | #  | AA | #  | y <sup>+</sup> | y <sup>2+</sup> |
|----------------|----|----|----|----------------|-----------------|
| 130.0868       | 1  | T  | 13 |                |                 |
| 286.2131       | 2  | K  | 12 | 1416.8063      | 708.9071        |
| 385.2815       | 3  | V  | 11 | 1260.6800      | 630.8439        |
| 500.3084       | 4  | D  | 10 | 1161.6116      | 581.3097        |
| 656.4347       | 5  | K  | 9  | 1046.5846      | 523.7962        |
| 769.5188       | 6  | L  | 8  | 890.4583       | 445.7331        |
| 884.5457       | 7  | D  | 7  | 777.3743       | 389.1910        |
| 955.5829       | 8  | A  | 6  | 662.3473       | 331.6776        |
| 1042.6149      | 9  | S  | 5  | 591.3102       | 296.1590        |
| 1171.6575      | 10 | E  | 4  | 504.2782       | 252.6430        |
| 1258.6895      | 11 | S  | 3  | 375.2356       | 188.1217        |
| 1371.7736      | 12 | L  | 2  | 288.2036       | 144.6057        |
|                | 13 | R  | 1  | 175.1195       | 88.0637         |

N-term:+29.04 K(2):+156.13  
K(5):+156.13

X-range:

0 - 0

MassTol: Y-zoom:

0. 1.

MassType:

☐AVG ☒MONO

Axis:

☒1 ☐2

Label:

☒I ☐M ☐-

Ions:

a ☐+ ☐2+ ☐3+

b ☒+ ☐2+ ☐3+

c ☐+ ☐2+ ☐3+

x ☐+ ☐2+ ☐3+

y ☒+ ☒2+ ☐3+

z ☐+ ☐2+ ☐3+

hide H<sub>2</sub>O/NH<sub>3</sub> ☐

zoom 112-122 ☐

GO

TKVNKECCHGDLLECADDR, MH+ 2422.2012, m/z 606.3058  
H OS G18 P120811 220811-s1.02740.02740.4.dta

scan 2740; 2.2e+000

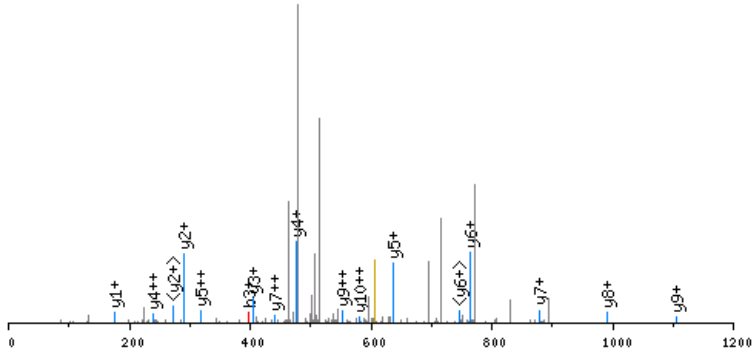

click image to zoom in; click top corners to zoom out [\[precursor±\]](#)

scan 2736; 606.3 m/z; 1.1e+001

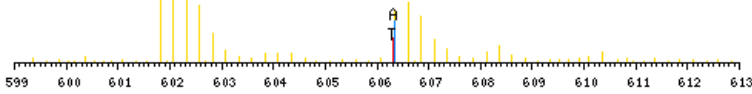

zoomed in precursor plot; T=theoretical m/z, A=acquired m/z

| b <sup>+</sup> | #  | AA | #  | y <sup>+</sup> | y <sup>2+</sup> |
|----------------|----|----|----|----------------|-----------------|
| 136.1186       | 1  | T  | 19 |                |                 |
| 298.2767       | 2  | K  | 18 | 2287.0905      | 1144.0492       |
| 397.3451       | 3  | V  | 17 | 2124.9324      | 1062.9701       |
| 511.3880       | 4  | N  | 16 | 2025.8640      | 1013.4359       |
| 673.5461       | 5  | K  | 15 | 1911.8210      | 956.4144        |
| 802.5887       | 6  | E  | 14 | 1749.6629      | 875.3354        |
| 962.6193       | 7  | C  | 13 | 1620.6203      | 810.8141        |
| 1122.6499      | 8  | C  | 12 | 1460.5897      | 730.7988        |
| 1259.7088      | 9  | H  | 11 | 1300.5591      | 650.7835        |
| 1316.7303      | 10 | G  | 10 | 1163.5002      | 582.2540        |
| 1431.7572      | 11 | D  | 9  | 1106.4788      | 553.7433        |
| 1544.8413      | 12 | L  | 8  | 991.4518       | 496.2298        |
| 1657.9254      | 13 | L  | 7  | 878.3678       | 439.6878        |
| 1786.9680      | 14 | E  | 6  | 765.2837       | 383.1458        |
| 1946.9986      | 15 | C  | 5  | 636.2411       | 318.6245        |
| 2018.0357      | 16 | A  | 4  | 476.2105       | 238.6092        |
| 2133.0626      | 17 | D  | 3  | 405.1734       | 203.0906        |
| 2248.0896      | 18 | D  | 2  | 290.1464       | 145.5771        |
|                | 19 | R  | 1  | 175.1195       | 88.0637         |

N-term:+35.07 K(2):+162.16  
K(5):+162.16 C(7):+160.03 C(8):+160.03  
C(15):+160.03

X-range:

0 - 0

MassTol: Y-zoom:

0. 1.

MassType:

☐ AVG ☒ MONO

Axis:

☒ 1 ☐ 2

Label:

☒ I ☐ M ☐ -

Ions:

a ☐ + ☐ 2+ ☐ 3+

b ☒ + ☐ 2+ ☐ 3+

c ☐ + ☐ 2+ ☐ 3+

x ☐ + ☐ 2+ ☐ 3+

y ☒ + ☒ 2+ ☐ 3+

z ☐ + ☐ 2+ ☐ 3+

hide H<sub>2</sub>O/NH<sub>3</sub> ☐

zoom 112-122 ☐

GO

TLDIESTECR, MH+ 1251.5890, m/z 626.2981  
L OS G13 P120811 220811-s1.03240.03240.2.dta

scan 3240; 4.0e+000

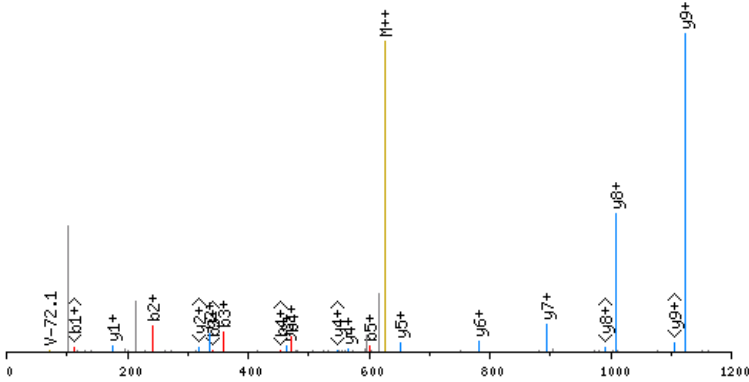

click image to zoom in; click top corners to zoom out [precursor±]

scan 3239; 626.3 m/z; 1.3e+001

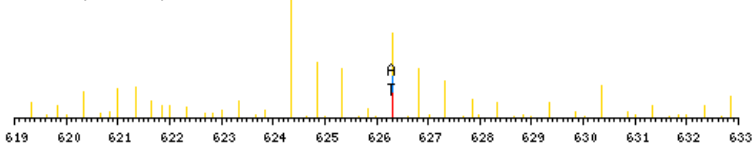

zoomed in precursor plot; T=theoretical m/z, A=acquired m/z

| b <sup>+</sup> | #  | AA | #  | y <sup>+</sup> | y <sup>2+</sup> |
|----------------|----|----|----|----------------|-----------------|
| 130.0868       | 1  | T  | 10 |                |                 |
| 243.1708       | 2  | L  | 9  | 1122.5101      | 561.7589        |
| 358.1978       | 3  | D  | 8  | 1009.4260      | 505.2169        |
| 471.2818       | 4  | I  | 7  | 894.3991       | 447.7034        |
| 600.3244       | 5  | E  | 6  | 781.3150       | 391.1614        |
| 687.3565       | 6  | S  | 5  | 652.2724       | 326.6401        |
| 788.4041       | 7  | T  | 4  | 565.2404       | 283.1241        |
| 917.4467       | 8  | E  | 3  | 464.1927       | 232.6003        |
| 1077.4773      | 9  | C  | 2  | 335.1501       | 168.0790        |
|                | 10 | R  | 1  | 175.1195       | 88.0637         |

N-term:+29.04 C(9):+160.03

X-range:

0 - 0

MassTol: Y-zoom:

0. 1.

MassType:

☐AVG ☒MONO

Axis:

☒1 ☐2

Label:

☒I ☐M ☐-

Ions:

a ☐+ ☐2+ ☐3+

b ☒+ ☐2+ ☐3+

c ☐+ ☐2+ ☐3+

x ☐+ ☐2+ ☐3+

y ☒+ ☒2+ ☐3+

z ☐+ ☐2+ ☐3+

hide H<sub>2</sub>O/NH<sub>3</sub> ☐

zoom 112-122 ☐

GO

TLEIPGSSDPNIVPDGDFSSSLVR, MH+ 2443.2356, m/z 815.0834  
L OS G12 P120811 220811-s1.05479.05479.3.dta

scan 5479; 6.7e+000

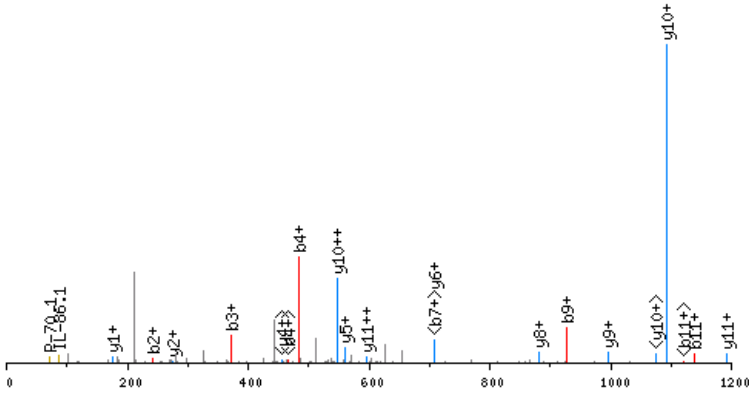

click image to zoom in; click top corners to zoom out

[precursor±]

scan 5477; 815.1 m/z; 3.2e+001

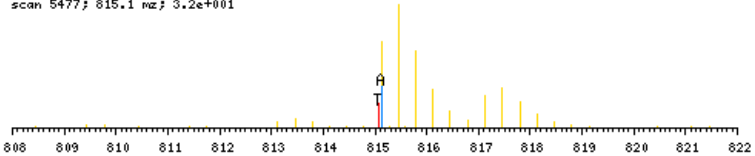

zoomed in precursor plot; T=theoretical m/z, A=acquired m/z

| b <sup>+</sup> | #  | AA | #  | y <sup>+</sup> | y <sup>2+</sup> |
|----------------|----|----|----|----------------|-----------------|
| 130.0868       | 1  | T  | 23 |                |                 |
| 243.1708       | 2  | L  | 22 | 2314.1567      | 1157.5823       |
| 372.2134       | 3  | E  | 21 | 2201.0726      | 1101.0402       |
| 485.2975       | 4  | I  | 20 | 2072.0300      | 1036.5189       |
| 582.3503       | 5  | P  | 19 | 1958.9460      | 979.9769        |
| 639.3717       | 6  | G  | 18 | 1861.8932      | 931.4505        |
| 726.4038       | 7  | S  | 17 | 1804.8717      | 902.9398        |
| 813.4358       | 8  | S  | 16 | 1717.8397      | 859.4238        |
| 928.4627       | 9  | D  | 15 | 1630.8077      | 815.9078        |
| 1025.5155      | 10 | P  | 14 | 1515.7807      | 758.3943        |
| 1139.5584      | 11 | N  | 13 | 1418.7280      | 709.8679        |
| 1252.6425      | 12 | I  | 12 | 1304.6850      | 652.8464        |
| 1351.7109      | 13 | V  | 11 | 1191.6010      | 596.3044        |
| 1448.7637      | 14 | P  | 10 | 1092.5326      | 546.7702        |
| 1563.7906      | 15 | D  | 9  | 995.4798       | 498.2438        |
| 1620.8121      | 16 | G  | 8  | 880.4529       | 440.7303        |
| 1735.8390      | 17 | D  | 7  | 823.4314       | 412.2196        |
| 1882.9074      | 18 | F  | 6  | 708.4044       | 354.7061        |
| 1969.9395      | 19 | S  | 5  | 561.3360       | 281.1719        |
| 2056.9715      | 20 | S  | 4  | 474.3040       | 237.6559        |
| 2170.0555      | 21 | L  | 3  | 387.2720       | 194.1399        |
| 2269.1240      | 22 | V  | 2  | 274.1879       | 137.5979        |
|                | 23 | R  | 1  | 175.1195       | 88.0637         |

N-term:+29.04

N-term: +29.04 K(5): +156.13

X-range:

0 - 0

MassTol: Y-zoom:

0. 1.

MassType:

☐ AVG ☒ MONO

Axis:

☒ 1 ☐ 2

Label:

☒ I ☐ M ☐ -

Ions:

a ☐ + ☐ 2+ ☐ 3+

b ☒ + ☐ 2+ ☐ 3+

c ☐ + ☐ 2+ ☐ 3+

x ☐ + ☐ 2+ ☐ 3+

y ☒ + ☒ 2+ ☐ 3+

z ☐ + ☐ 2+ ☐ 3+

hide H<sub>2</sub>O/NH<sub>3</sub> ☐

zoom 112-122 ☐

GO

TLFGDKLCAIPNLR, MH+ 1673.9412, m/z 558.6519  
L OS G15 P120811 220811-s1.05865.05865.3.dta

scan 5865; 4.4e+000

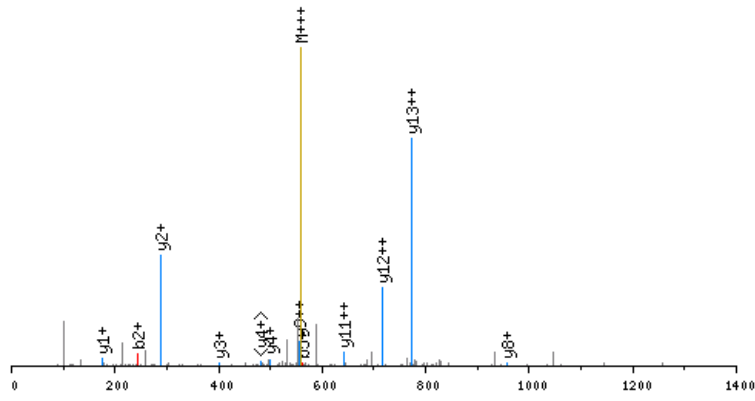

click image to zoom in; click top corners to zoom out

[precursor±]

scan 5861; 558.7 m/z; 2.1e+001

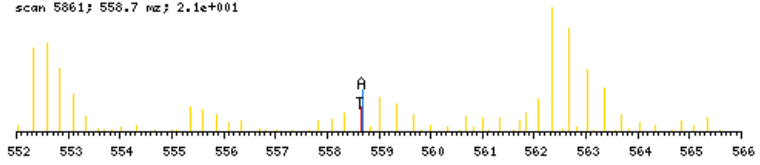

zoomed in precursor plot; T=theoretical m/z, A=acquired m/z

| b <sup>+</sup> | #  | AA | #  | y <sup>+</sup> | y <sup>2+</sup> |
|----------------|----|----|----|----------------|-----------------|
| 130.0868       | 1  | T  | 14 |                |                 |
| 243.1708       | 2  | L  | 13 | 1544.8623      | 772.9351        |
| 390.2393       | 3  | F  | 12 | 1431.7782      | 716.3930        |
| 447.2607       | 4  | G  | 11 | 1284.7098      | 642.8588        |
| 562.2877       | 5  | D  | 10 | 1227.6883      | 614.3481        |
| 718.4140       | 6  | K  | 9  | 1112.6614      | 556.8346        |
| 831.4980       | 7  | L  | 8  | 956.5351       | 478.7715        |
| 991.5286       | 8  | C  | 7  | 843.4510       | 422.2294        |
| 1062.5657      | 9  | A  | 6  | 683.4204       | 342.2141        |
| 1175.6498      | 10 | I  | 5  | 612.3833       | 306.6956        |
| 1272.7026      | 11 | P  | 4  | 499.2993       | 250.1535        |
| 1386.7455      | 12 | N  | 3  | 402.2465       | 201.6272        |
| 1499.8296      | 13 | L  | 2  | 288.2036       | 144.6057        |
|                | 14 | R  | 1  | 175.1195       | 88.0637         |

N-term:+29.04 K(6):+156.13  
C(8):+160.03

X-range:

0 - 0

MassTol: Y-zoom:

0. 1.

MassType:

☐AVG ☒MONO

Axis:

☒1 ☐2

Label:

☒I ☐M ☐-

Ions:

a ☐+ ☐2+ ☐3+

b ☒+ ☐2+ ☐3+

c ☐+ ☐2+ ☐3+

x ☐+ ☐2+ ☐3+

y ☒+ ☒2+ ☐3+

z ☐+ ☐2+ ☐3+

hide H<sub>2</sub>O/NH<sub>3</sub> ☐

zoom 112-122 ☐

GO

TLGVEVHPLVFHTNR, MH+ 1746.9655, m/z 437.4968  
L OS G17 P120811 220811-s1.05250.05250.4.dta

scan 5250; 1.1e+001

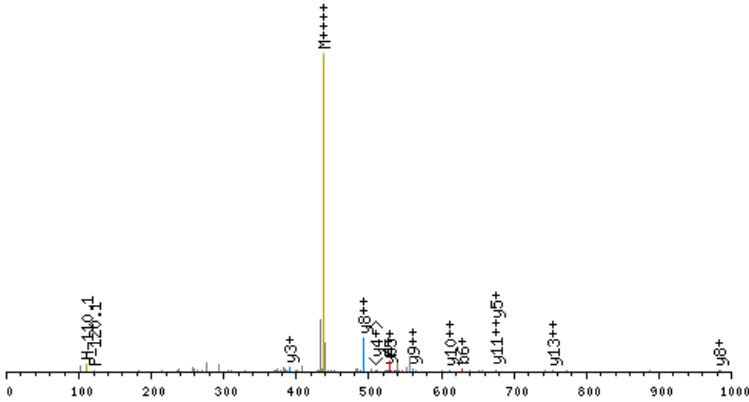

click image to zoom in; click top corners to zoom out [\[precursor±\]](#)

scan 5248; 437.5 m/z; 6.3e+000

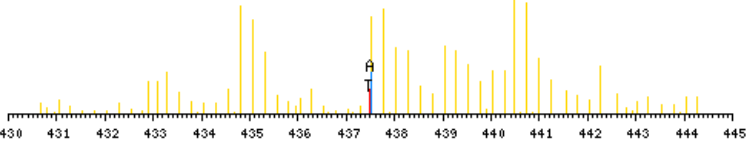

zoomed in precursor plot; T=theoretical m/z, A=acquired m/z

| b <sup>+</sup> | #  | AA | #  | y <sup>+</sup> | y <sup>2+</sup> |
|----------------|----|----|----|----------------|-----------------|
| 130.0868       | 1  | T  | 15 |                |                 |
| 243.1708       | 2  | L  | 14 | 1617.8865      | 809.4472        |
| 300.1923       | 3  | G  | 13 | 1504.8025      | 752.9051        |
| 399.2607       | 4  | V  | 12 | 1447.7810      | 724.3944        |
| 528.3033       | 5  | E  | 11 | 1348.7126      | 674.8602        |
| 627.3717       | 6  | V  | 10 | 1219.6700      | 610.3389        |
| 764.4306       | 7  | H  | 9  | 1120.6016      | 560.8047        |
| 861.4834       | 8  | P  | 8  | 983.5427       | 492.2752        |
| 974.5675       | 9  | L  | 7  | 886.4899       | 443.7489        |
| 1073.6359      | 10 | V  | 6  | 773.4058       | 387.2068        |
| 1220.7043      | 11 | F  | 5  | 674.3374       | 337.6726        |
| 1357.7632      | 12 | H  | 4  | 527.2690       | 264.1384        |
| 1458.8109      | 13 | T  | 3  | 390.2101       | 195.6090        |
| 1572.8538      | 14 | N  | 2  | 289.1624       | 145.0851        |
|                | 15 | R  | 1  | 175.1195       | 88.0637         |

N-term:+29.04

X-range:

0 - 0

MassTol: Y-zoom:

0. 1.

MassType:

☐ AVG ☒ MONO

Axis:

☒ 1 ☐ 2

Label:

☒ I ☐ M ☐ -

Ions:

a ☐ + ☐ 2+ ☐ 3+

b ☒ + ☐ 2+ ☐ 3+

c ☐ + ☐ 2+ ☐ 3+

x ☐ + ☐ 2+ ☐ 3+

y ☒ + ☒ 2+ ☐ 3+

z ☐ + ☐ 2+ ☐ 3+

hide H<sub>2</sub>O/NH<sub>3</sub> ☐

zoom 112-122 ☐

GO

TLLTEAPLNPKANR, MH+ 1593.9328, m/z 531.9825  
L OS G15 P120811 220811-s1.03783.03783.3.dta

scan 3783; 1.4e+001

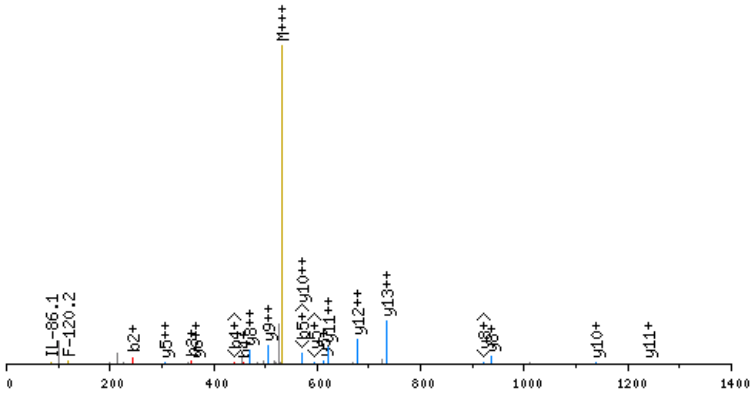

click image to zoom in; click top corners to zoom out

[precursor±]

scan 3781; 532.0 m/z; 1.4e+001

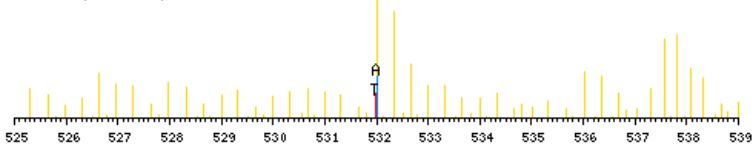

zoomed in precursor plot; T=theoretical m/z, A=acquired m/z

| b <sup>+</sup> | #  | AA | #  | y <sup>+</sup> | y <sup>2+</sup> |
|----------------|----|----|----|----------------|-----------------|
| 130.0868       | 1  | T  | 14 |                |                 |
| 243.1708       | 2  | L  | 13 | 1464.8539      | 732.9308        |
| 356.2549       | 3  | L  | 12 | 1351.7698      | 676.3888        |
| 457.3026       | 4  | T  | 11 | 1238.6857      | 619.8468        |
| 586.3452       | 5  | E  | 10 | 1137.6381      | 569.3229        |
| 657.3823       | 6  | A  | 9  | 1008.5955      | 504.8017        |
| 754.4351       | 7  | P  | 8  | 937.5584       | 469.2831        |
| 867.5191       | 8  | L  | 7  | 840.5056       | 420.7567        |
| 981.5620       | 9  | N  | 6  | 727.4215       | 364.2147        |
| 1078.6148      | 10 | P  | 5  | 613.3786       | 307.1932        |
| 1234.7411      | 11 | K  | 4  | 516.3258       | 258.6668        |
| 1305.7782      | 12 | A  | 3  | 360.1995       | 180.6037        |
| 1419.8212      | 13 | N  | 2  | 289.1624       | 145.0851        |
|                | 14 | R  | 1  | 175.1195       | 88.0637         |

N-term:+29.04 K(11):+156.13

X-range:

0 - 0

MassTol: Y-zoom:

0. 1.

MassType:

☐AVG ☒MONO

Axis:

☒1 ☐2

Label:

☒I ☐M ☐-

Ions:

a ☐+ ☐2+ ☐3+

b ☒+ ☐2+ ☐3+

c ☐+ ☐2+ ☐3+

x ☐+ ☐2+ ☐3+

y ☒+ ☒2+ ☐3+

z ☐+ ☐2+ ☐3+

hide H<sub>2</sub>O/NH<sub>3</sub> ☐

zoom 112-122 ☐

GO

TLPENALLSVEASGSAQENMPSLARR, MH+ 2775.4523, m/z 694.6185  
H OS G18 P120811 220811-s1.02529.02529.4.dta

scan 2529; 1.5e+000

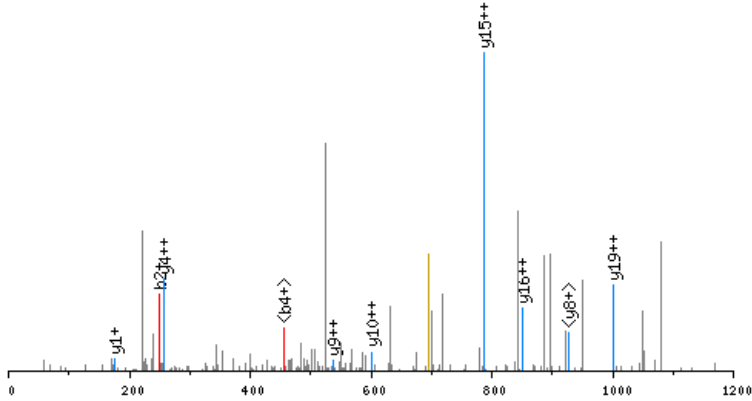

click image to zoom in; click top corners to zoom out [precursor±]

scan 2526; 694.6 m/z; 1.2e+001

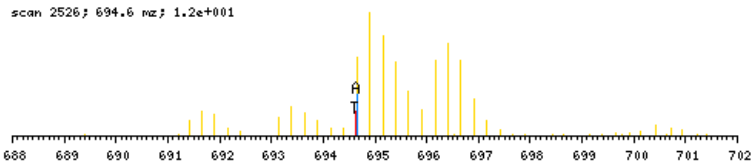

zoomed in precursor plot; T=theoretical m/z, A=acquired m/z

| b <sup>+</sup> | #  | AA | #  | y <sup>+</sup> | y <sup>2+</sup> |
|----------------|----|----|----|----------------|-----------------|
| 136.1186       | 1  | T  | 26 |                |                 |
| 249.2026       | 2  | L  | 25 | 2640.3415      | 1320.6747       |
| 346.2554       | 3  | P  | 24 | 2527.2575      | 1264.1326       |
| 475.2980       | 4  | E  | 23 | 2430.2047      | 1215.6063       |
| 589.3409       | 5  | N  | 22 | 2301.1621      | 1151.0850       |
| 660.3780       | 6  | A  | 21 | 2187.1192      | 1094.0635       |
| 773.4621       | 7  | L  | 20 | 2116.0821      | 1058.5450       |
| 886.5462       | 8  | L  | 19 | 2002.9980      | 1002.0029       |
| 973.5782       | 9  | S  | 18 | 1889.9139      | 945.4609        |
| 1072.6466      | 10 | V  | 17 | 1802.8819      | 901.9449        |
| 1201.6892      | 11 | E  | 16 | 1703.8135      | 852.4107        |
| 1272.7263      | 12 | A  | 15 | 1574.7709      | 787.8894        |
| 1359.7583      | 13 | S  | 14 | 1503.7338      | 752.3708        |
| 1416.7798      | 14 | G  | 13 | 1416.7018      | 708.8548        |
| 1503.8118      | 15 | S  | 12 | 1359.6803      | 680.3441        |
| 1574.8490      | 16 | A  | 11 | 1272.6483      | 636.8281        |
| 1702.9075      | 17 | Q  | 10 | 1201.6112      | 601.3095        |
| 1831.9501      | 18 | E  | 9  | 1073.5526      | 537.2802        |
| 1945.9931      | 19 | N  | 8  | 944.5100       | 472.7589        |
| 2077.0335      | 20 | M  | 7  | 830.4671       | 415.7374        |
| 2174.0863      | 21 | P  | 6  | 699.4266       | 350.2172        |
| 2261.1183      | 22 | S  | 5  | 602.3738       | 301.6908        |
| 2374.2024      | 23 | L  | 4  | 515.3418       | 258.1748        |
| 2445.2395      | 24 | A  | 3  | 402.2577       | 201.6328        |
| 2601.3406      | 25 | R  | 2  | 331.2206       | 166.1142        |
|                | 26 | R  | 1  | 175.1195       | 88.0637         |

N-term:+35.07

N-term:+29.04 K(12):+156.13

X-range:

0 - 0

MassTol: Y-zoom:

0. 1.

MassType:

☐AVG ☒MONO

Axis:

☒1 ☐2

Label:

☒I ☐M ☐-

Ions:

a ☐+ ☐2+ ☐3+

b ☒+ ☐2+ ☐3+

c ☐+ ☐2+ ☐3+

x ☐+ ☐2+ ☐3+

y ☒+ ☒2+ ☐3+

z ☐+ ☐2+ ☐3+

hide H<sub>2</sub>O/NH<sub>3</sub> ☐

zoom 112-122 ☐

GO

TLPLNFDKAGDHR, MH+ 1539.8284, m/z 385.7125  
L OS G17 P120811 220811-s1.04410.04410.4.dta

scan 4410; 5.9e+000

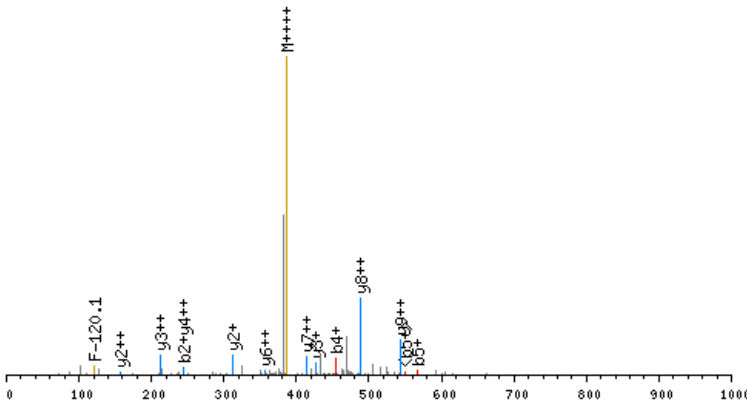

click image to zoom in; click top corners to zoom out

[precursor±]

scan 4408; 385.7 m/z; 3.2e+001

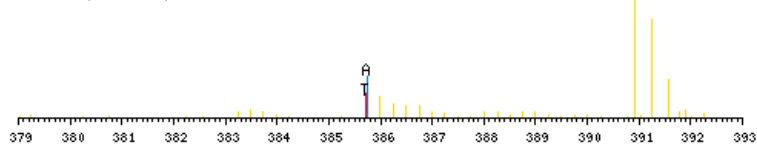

zoomed in precursor plot; T=theoretical m/z, A=acquired m/z

| b <sup>+</sup> | #  | AA | #  | y <sup>+</sup> | y <sup>2+</sup> |
|----------------|----|----|----|----------------|-----------------|
| 130.0868       | 1  | T  | 13 |                |                 |
| 243.1708       | 2  | L  | 12 | 1410.7494      | 705.8786        |
| 340.2236       | 3  | P  | 11 | 1297.6653      | 649.3366        |
| 453.3077       | 4  | L  | 10 | 1200.6126      | 600.8102        |
| 567.3506       | 5  | N  | 9  | 1087.5285      | 544.2682        |
| 714.4190       | 6  | F  | 8  | 973.4856       | 487.2467        |
| 829.4460       | 7  | D  | 7  | 826.4172       | 413.7125        |
| 985.5723       | 8  | K  | 6  | 711.3902       | 356.1990        |
| 1056.6094      | 9  | A  | 5  | 555.2639       | 278.1359        |
| 1113.6308      | 10 | G  | 4  | 484.2268       | 242.6173        |
| 1228.6578      | 11 | D  | 3  | 427.2054       | 214.1066        |
| 1365.7167      | 12 | H  | 2  | 312.1784       | 156.5931        |
|                | 13 | R  | 1  | 175.1195       | 88.0637         |

N-term:+29.04 K(8):+156.13

X-range:

0 - 0

MassTol: Y-zoom:

0. 1.

MassType:

☐AVG ☒MONO

Axis:

☒1 ☐2

Label:

☒I ☐M ☐-

Ions:

a ☐+ ☐2+ ☐3+

b ☒+ ☐2+ ☐3+

c ☐+ ☐2+ ☐3+

x ☐+ ☐2+ ☐3+

y ☒+ ☒2+ ☐3+

z ☐+ ☐2+ ☐3+

hide H<sub>2</sub>O/NH<sub>3</sub> ☐

zoom 112-122 ☐

GO

TLSMIEEEIR, MH+ 1248.6509, m/z 624.8291  
L OS G13 P120811 220811-s1.05430.05430.2.dta

scan 5430; 2.9e+000

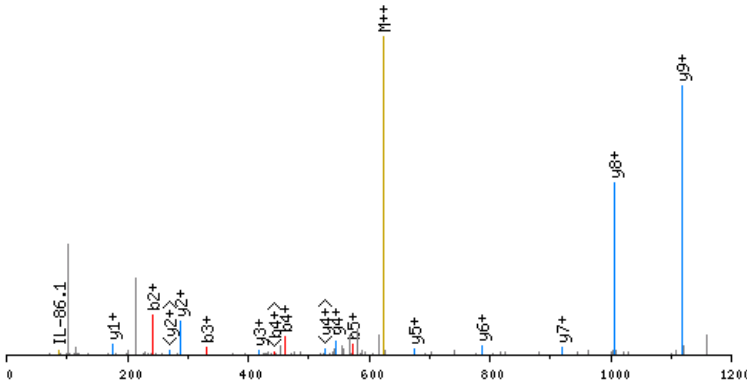

click image to zoom in; click top corners to zoom out

[precursor±]

scan 5429; 624.8 m/z; 1.1e+001

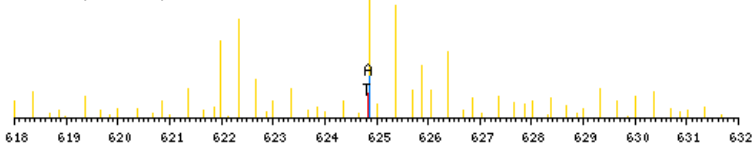

zoomed in precursor plot; T=theoretical m/z, A=acquired m/z

| b <sup>+</sup> | #  | AA | #  | y <sup>+</sup> | y <sup>2+</sup> |
|----------------|----|----|----|----------------|-----------------|
| 130.0868       | 1  | T  | 10 |                |                 |
| 243.1708       | 2  | L  | 9  | 1119.5720      | 560.2899        |
| 330.2029       | 3  | S  | 8  | 1006.4879      | 503.7479        |
| 461.2434       | 4  | M  | 7  | 919.4559       | 460.2319        |
| 574.3274       | 5  | I  | 6  | 788.4154       | 394.7116        |
| 703.3700       | 6  | E  | 5  | 675.3313       | 338.1696        |
| 832.4126       | 7  | E  | 4  | 546.2888       | 273.6483        |
| 961.4552       | 8  | E  | 3  | 417.2462       | 209.1270        |
| 1074.5393      | 9  | I  | 2  | 288.2036       | 144.6057        |
|                | 10 | R  | 1  | 175.1195       | 88.0637         |

N-term:+29.04

X-range:

0 - 0

MassTol: Y-zoom:

0. 1.

MassType:

☐ AVG ☒ MONO

Axis:

☒ 1 ☐ 2

Label:

☒ I ☐ M ☐ -

Ions:

a ☐ + ☐ 2+ ☐ 3+

b ☒ + ☐ 2+ ☐ 3+

c ☐ + ☐ 2+ ☐ 3+

x ☐ + ☐ 2+ ☐ 3+

y ☒ + ☒ 2+ ☐ 3+

z ☐ + ☐ 2+ ☐ 3+

hide H<sub>2</sub>O/NH<sub>3</sub> ☐

zoom 112-122 ☐

GO

TLVLTPDPAPSR, MH+ 1312.7112, m/z 656.8593  
L OS G13 P120811 220811-s1.04261.04261.2.dta

scan 4261; 1.4e+000

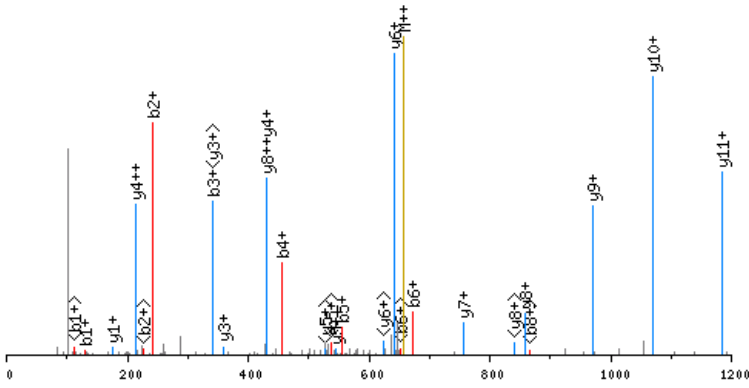

click image to zoom in; click top corners to zoom out

[precursor±]

scan 4259; 656.9 m/z; 1.2e+001

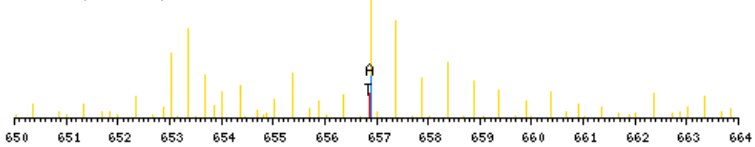

zoomed in precursor plot; T=theoretical m/z, A=acquired m/z

| b <sup>+</sup> | #  | AA | #  | y <sup>+</sup> | y <sup>2+</sup> |
|----------------|----|----|----|----------------|-----------------|
| 130.0868       | 1  | T  | 12 |                |                 |
| 243.1708       | 2  | L  | 11 | 1183.6323      | 592.3201        |
| 342.2393       | 3  | V  | 10 | 1070.5482      | 535.7780        |
| 455.3233       | 4  | L  | 9  | 971.4798       | 486.2438        |
| 556.3710       | 5  | T  | 8  | 858.3957       | 429.7018        |
| 671.3979       | 6  | D  | 7  | 757.3481       | 379.1779        |
| 768.4507       | 7  | P  | 6  | 642.3211       | 321.6645        |
| 883.4776       | 8  | D  | 5  | 545.2683       | 273.1381        |
| 954.5148       | 9  | A  | 4  | 430.2414       | 215.6246        |
| 1051.5675      | 10 | P  | 3  | 359.2043       | 180.1061        |
| 1138.5996      | 11 | S  | 2  | 262.1515       | 131.5797        |
|                | 12 | R  | 1  | 175.1195       | 88.0637         |

N-term:+29.04

X-range:

0 - 0

MassTol: Y-zoom:

0. 1.

MassType:

☐ AVG ☒ MONO

Axis:

☒ 1 ☐ 2

Label:

☒ I ☐ M ☐ -

Ions:

a ☐ + ☐ 2+ ☐ 3+

b ☒ + ☐ 2+ ☐ 3+

c ☐ + ☐ 2+ ☐ 3+

x ☐ + ☐ 2+ ☐ 3+

y ☒ + ☒ 2+ ☐ 3+

z ☐ + ☐ 2+ ☐ 3+

hide H<sub>2</sub>O/NH<sub>3</sub> ☐

zoom 112-122 ☐

GO

TMYPGIADR, MH+ 1051.5246, m/z 526.2659  
L OS G14 P120811 220811-s1.03602.03602.2.dta

scan 3602; 9.2e+000

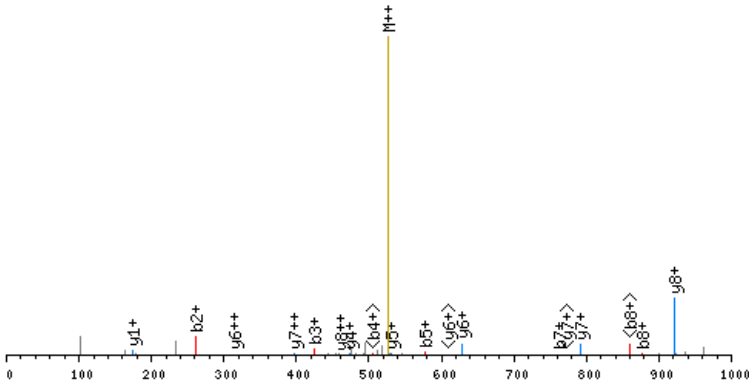

click image to zoom in; click top corners to zoom out

[precursor±]

scan 3601; 526.3 m/z; 1.5e+001

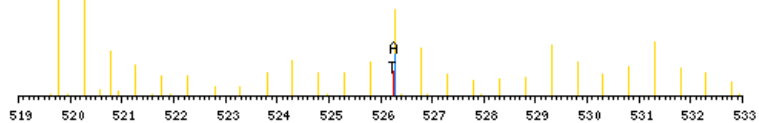

zoomed in precursor plot; T=theoretical m/z, A=acquired m/z

| b <sup>+</sup> | # | AA | # | y <sup>+</sup> | y <sup>2+</sup> |
|----------------|---|----|---|----------------|-----------------|
| 130.0868       | 1 | T  | 9 |                |                 |
| 261.1273       | 2 | M  | 8 | 922.4457       | 461.7267        |
| 424.1906       | 3 | Y  | 7 | 791.4052       | 396.2065        |
| 521.2434       | 4 | P  | 6 | 628.3418       | 314.6748        |
| 578.2648       | 5 | G  | 5 | 531.2891       | 266.1485        |
| 691.3489       | 6 | I  | 4 | 474.2676       | 237.6377        |
| 762.3860       | 7 | A  | 3 | 361.1836       | 181.0957        |
| 877.4129       | 8 | D  | 2 | 290.1464       | 145.5771        |
|                | 9 | R  | 1 | 175.1195       | 88.0637         |

N-term:+29.04

X-range:

0 - 0

MassTol: Y-zoom:

0. 1.

MassType:

☐AVG ☒MONO

Axis:

☒1 ☐2

Label:

☒I ☐M ☐-

Ions:

a ☐+ ☐2+ ☐3+

b ☒+ ☐2+ ☐3+

c ☐+ ☐2+ ☐3+

x ☐+ ☐2+ ☐3+

y ☒+ ☒2+ ☐3+

z ☐+ ☐2+ ☐3+

hide H<sub>2</sub>O/NH<sub>3</sub> ☐

zoom 112-122 ☐

GO

TNGETTTQGLDGLSER, MH+ 1706.8197, m/z 569.6114  
L OS G13 P120811 220811-s1.03485.03485.3.dta

scan 3485; 1.9e+000

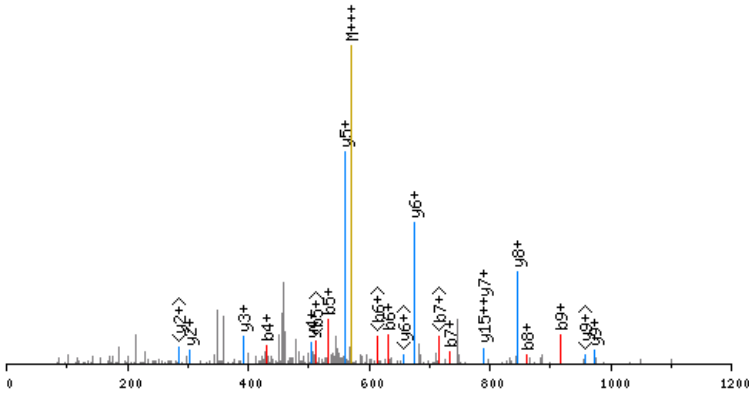

click image to zoom in; click top corners to zoom out

[precursor±]

scan 3484; 569.6 m/z; 4.1e+001

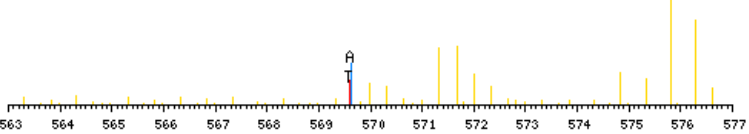

zoomed in precursor plot; T=theoretical m/z, A=acquired m/z

| b <sup>+</sup> | #  | AA | #  | y <sup>+</sup> | y <sup>2+</sup> |
|----------------|----|----|----|----------------|-----------------|
| 130.0868       | 1  | T  | 16 |                |                 |
| 244.1297       | 2  | N  | 15 | 1577.7407      | 789.3743        |
| 301.1512       | 3  | G  | 14 | 1463.6978      | 732.3528        |
| 430.1938       | 4  | E  | 13 | 1406.6763      | 703.8421        |
| 531.2414       | 5  | T  | 12 | 1277.6337      | 639.3208        |
| 632.2891       | 6  | T  | 11 | 1176.5861      | 588.7969        |
| 733.3368       | 7  | T  | 10 | 1075.5384      | 538.2731        |
| 861.3954       | 8  | Q  | 9  | 974.4907       | 487.7493        |
| 918.4168       | 9  | G  | 8  | 846.4321       | 423.7200        |
| 1031.5009      | 10 | L  | 7  | 789.4107       | 395.2092        |
| 1146.5278      | 11 | D  | 6  | 676.3266       | 338.6672        |
| 1203.5493      | 12 | G  | 5  | 561.2997       | 281.1537        |
| 1316.6334      | 13 | L  | 4  | 504.2782       | 252.6430        |
| 1403.6654      | 14 | S  | 3  | 391.1941       | 196.1010        |
| 1532.7080      | 15 | E  | 2  | 304.1621       | 152.5850        |
|                | 16 | R  | 1  | 175.1195       | 88.0637         |

N-term:+29.04

X-range:

0 - 0

MassTol: Y-zoom:

0. 1.

MassType:

☐AVG ☒MONO

Axis:

☒1 ☐2

Label:

☒I ☐M ☐-

Ions:

a ☐+ ☐2+ ☐3+

b ☒+ ☐2+ ☐3+

c ☐+ ☐2+ ☐3+

x ☐+ ☐2+ ☐3+

y ☒+ ☒2+ ☐3+

z ☐+ ☐2+ ☐3+

hide H<sub>2</sub>O/NH<sub>3</sub> ☐

zoom 112-122 ☐

GO

TNLESPLVDTHSKR, MH+ 1765.9812, m/z 442.2508  
L OS G17 P120811 220811-s1.04766.04766.4.dta

scan 4766; 4.3e+000

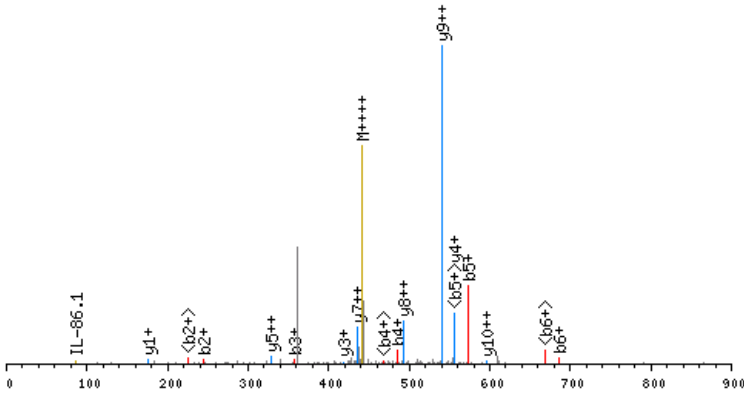

click image to zoom in; click top corners to zoom out [precursor±]

scan 4763; 442.3 m/z; 1.4e+001

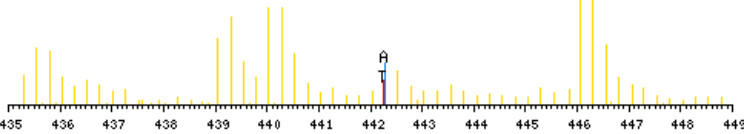

zoomed in precursor plot; T=theoretical m/z, A=acquired m/z

| b <sup>+</sup> | #  | AA | #  | y <sup>+</sup> | y <sup>2+</sup> |
|----------------|----|----|----|----------------|-----------------|
| 130.0868       | 1  | T  | 15 |                |                 |
| 244.1297       | 2  | N  | 14 | 1636.9023      | 818.9551        |
| 357.2138       | 3  | L  | 13 | 1522.8594      | 761.9336        |
| 486.2564       | 4  | E  | 12 | 1409.7753      | 705.3916        |
| 573.2884       | 5  | S  | 11 | 1280.7327      | 640.8703        |
| 686.3725       | 6  | L  | 10 | 1193.7007      | 597.3542        |
| 783.4252       | 7  | P  | 9  | 1080.6166      | 540.8122        |
| 896.5093       | 8  | L  | 8  | 983.5638       | 492.2858        |
| 995.5777       | 9  | V  | 7  | 870.4798       | 435.7438        |
| 1110.6046      | 10 | D  | 6  | 771.4114       | 386.2096        |
| 1211.6523      | 11 | T  | 5  | 656.3844       | 328.6961        |
| 1348.7112      | 12 | H  | 4  | 555.3367       | 278.1723        |
| 1435.7433      | 13 | S  | 3  | 418.2778       | 209.6428        |
| 1591.8696      | 14 | K  | 2  | 331.2458       | 166.1268        |
|                | 15 | R  | 1  | 175.1195       | 88.0637         |

N-term:+29.04 K(14):+156.13

X-range:

0 - 0

MassTol: Y-zoom:

0. 1.

MassType:

☐ AVG ☒ MONO

Axis:

☒ 1 ☐ 2

Label:

☒ I ☐ M ☐ -

Ions:

a ☐ + ☐ 2+ ☐ 3+

b ☒ + ☐ 2+ ☐ 3+

c ☐ + ☐ 2+ ☐ 3+

x ☐ + ☐ 2+ ☐ 3+

y ☒ + ☒ 2+ ☐ 3+

z ☐ + ☐ 2+ ☐ 3+

hide H<sub>2</sub>O/NH<sub>3</sub> ☐

zoom 112-122 ☐

GO

TNLGDFAIISLYR, MH+ 1397.7429, m/z 699.3751  
L OS G13 P120811 220811-s1.06747.06747.2.dta

scan 6747; 3.6e+000

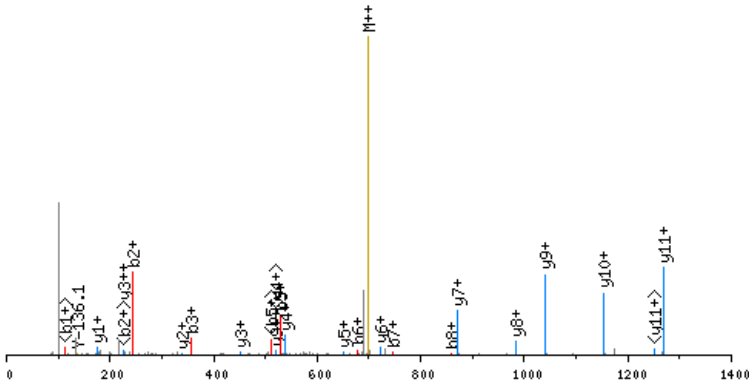

click image to zoom in; click top corners to zoom out

[precursor±]

scan 6744; 699.4 m/z; 1.2e+001

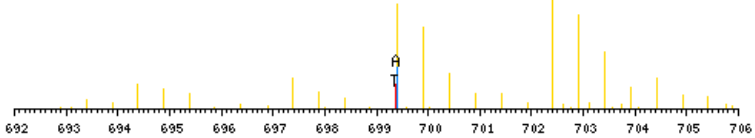

zoomed in precursor plot; T=theoretical m/z, A=acquired m/z

| b <sup>+</sup> | #  | AA | #  | y <sup>+</sup> | y <sup>2+</sup> |
|----------------|----|----|----|----------------|-----------------|
| 130.0868       | 1  | T  | 12 |                |                 |
| 244.1297       | 2  | N  | 11 | 1268.6639      | 634.8359        |
| 357.2138       | 3  | L  | 10 | 1154.6210      | 577.8144        |
| 414.2352       | 4  | G  | 9  | 1041.5369      | 521.2724        |
| 529.2622       | 5  | D  | 8  | 984.5155       | 492.7616        |
| 676.3306       | 6  | F  | 7  | 869.4885       | 435.2482        |
| 747.3677       | 7  | A  | 6  | 722.4201       | 361.7140        |
| 860.4518       | 8  | I  | 5  | 651.3830       | 326.1954        |
| 947.4838       | 9  | S  | 4  | 538.2989       | 269.6534        |
| 1060.5679      | 10 | L  | 3  | 451.2669       | 226.1374        |
| 1223.6312      | 11 | Y  | 2  | 338.1828       | 169.5953        |
|                | 12 | R  | 1  | 175.1195       | 88.0637         |

N-term:+29.04

X-range:

0 - 0

MassTol: Y-zoom:

0. 1.

MassType:

☐AVG ☒MONO

Axis:

☒1 ☐2

Label:

☒I ☐M ☐-

Ions:

a ☐+ ☐2+ ☐3+

b ☒+ ☐2+ ☐3+

c ☐+ ☐2+ ☐3+

x ☐+ ☐2+ ☐3+

y ☒+ ☒2+ ☐3+

z ☐+ ☐2+ ☐3+

hide H<sub>2</sub>O/NH<sub>3</sub> ☐

zoom 112-122 ☐

GO

TNQELQEIINR, MH+ 1272.6548, m/z 424.8898  
L OS G14 P120811 220811-s1.02638.02638.3.dta

scan 2638; 4.0e+000

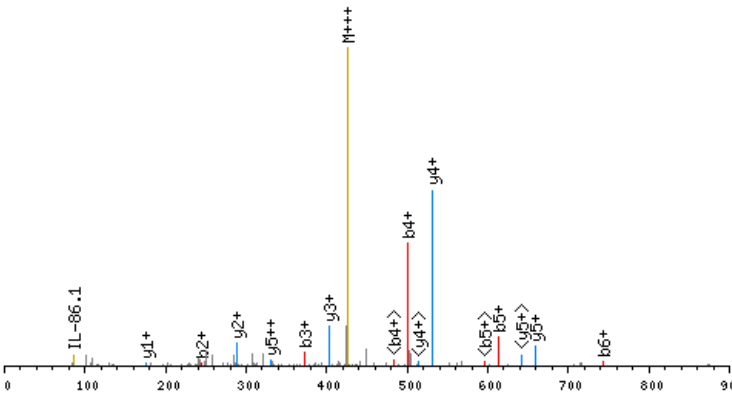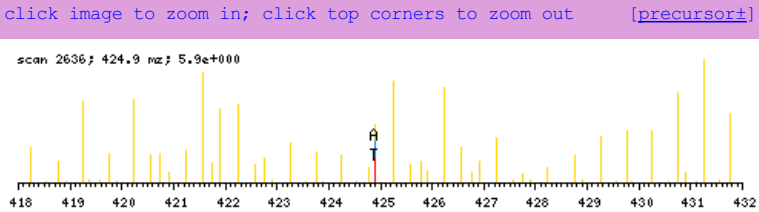

zoomed in precursor plot; T=theoretical m/z, A=acquired m/z

| b <sup>+</sup> | #  | AA | #  | y <sup>+</sup> | y <sup>2+</sup> |
|----------------|----|----|----|----------------|-----------------|
| 130.0868       | 1  | T  | 10 |                |                 |
| 244.1297       | 2  | N  | 9  | 1143.5758      | 572.2918        |
| 372.1883       | 3  | Q  | 8  | 1029.5329      | 515.2704        |
| 501.2309       | 4  | E  | 7  | 901.4743       | 451.2411        |
| 614.3149       | 5  | L  | 6  | 772.4317       | 386.7198        |
| 742.3735       | 6  | Q  | 5  | 659.3477       | 330.1777        |
| 871.4161       | 7  | E  | 4  | 531.2891       | 266.1485        |
| 984.5002       | 8  | I  | 3  | 402.2465       | 201.6272        |
| 1098.5431      | 9  | N  | 2  | 289.1624       | 145.0851        |
|                | 10 | R  | 1  | 175.1195       | 88.0637         |

N-term:+29.04

X-range:

0 - 0

MassTol: Y-zoom:

0. 1.

MassType:

☐AVG ☒MONO

Axis:

☒1 ☐2

Label:

☒I ☐M ☐-

Ions:

a ☐+ ☐2+ ☐3+

b ☒+ ☐2+ ☐3+

c ☐+ ☐2+ ☐3+

x ☐+ ☐2+ ☐3+

y ☒+ ☒2+ ☐3+

z ☐+ ☐2+ ☐3+

hide H<sub>2</sub>O/NH<sub>3</sub> ☐

zoom 112-122 ☐

GO

TPGVAADLSHIETR, MH+ 1500.8234, m/z 500.9460  
H OS G15 P120811 220811-s1.03748.03748.3.dta

scan 3748; 6.0e+000

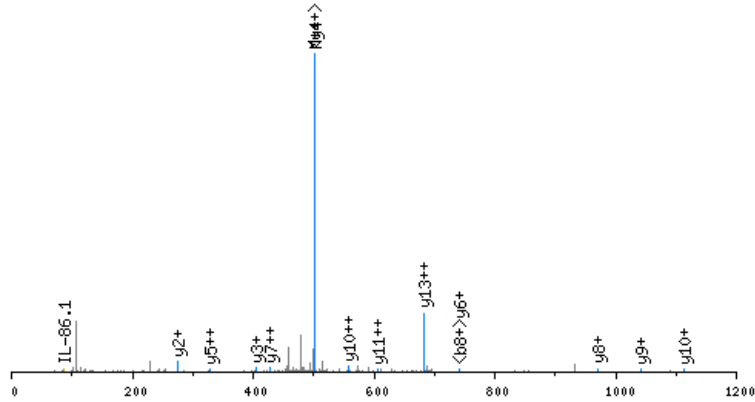

click image to zoom in; click top corners to zoom out

[precursor±]

scan 3746; 500.9 m/z; 4.4e+001

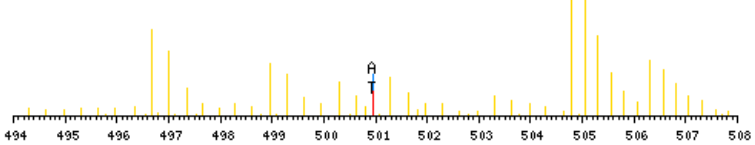

zoomed in precursor plot; T=theoretical m/z, A=acquired m/z

| b <sup>+</sup> | #  | AA | #  | y <sup>+</sup> | y <sup>2+</sup> |
|----------------|----|----|----|----------------|-----------------|
| 136.1186       | 1  | T  | 14 |                |                 |
| 233.1713       | 2  | P  | 13 | 1365.7127      | 683.3602        |
| 290.1928       | 3  | G  | 12 | 1268.6599      | 634.8339        |
| 389.2612       | 4  | V  | 11 | 1211.6384      | 606.3231        |
| 460.2983       | 5  | A  | 10 | 1112.5700      | 556.7889        |
| 531.3354       | 6  | A  | 9  | 1041.5329      | 521.2704        |
| 646.3624       | 7  | D  | 8  | 970.4958       | 485.7518        |
| 759.4465       | 8  | L  | 7  | 855.4688       | 428.2383        |
| 846.4785       | 9  | S  | 6  | 742.3848       | 371.6963        |
| 983.5374       | 10 | H  | 5  | 655.3527       | 328.1803        |
| 1096.6215      | 11 | I  | 4  | 518.2938       | 259.6508        |
| 1225.6641      | 12 | E  | 3  | 405.2098       | 203.1088        |
| 1326.7117      | 13 | T  | 2  | 276.1672       | 138.5875        |
|                | 14 | R  | 1  | 175.1195       | 88.0637         |

N-term:+35.07

N-term: +29.04 K(3): +156.13

X-range:

0 - 0

MassTol: Y-zoom:

0. 1.

MassType:

☐AVG ☒MONO

Axis:

☒1 ☐2

Label:

☒I ☐M ☐-

Ions:

a ☐+ ☐2+ ☐3+

b ☒+ ☐2+ ☐3+

c ☐+ ☐2+ ☐3+

x ☐+ ☐2+ ☐3+

y ☒+ ☒2+ ☐3+

z ☐+ ☐2+ ☐3+

hide H<sub>2</sub>O/NH<sub>3</sub> ☐

zoom 112-122 ☐

GO

TPLPNLQNGPIYAR, MH+ 1581.8753, m/z 527.9633  
L OS G13 P120811 220811-s1.05473.05473.3.dta

scan 5473; 1.4e+001

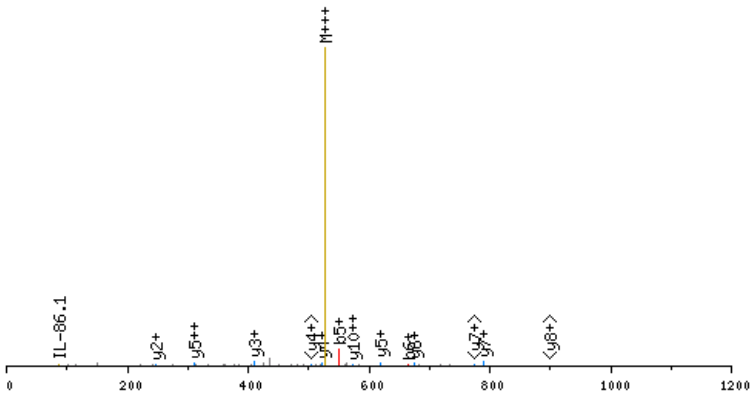

click image to zoom in; click top corners to zoom out [\[precursor±\]](#)

scan 5469; 528.0 m/z; 2.0e+001

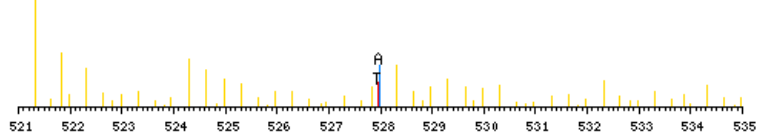

zoomed in precursor plot; T=theoretical m/z, A=acquired m/z

| b <sup>+</sup> | #  | AA | #  | y <sup>+</sup> | y <sup>2+</sup> |
|----------------|----|----|----|----------------|-----------------|
| 130.0868       | 1  | T  | 14 |                |                 |
| 227.1395       | 2  | P  | 13 | 1452.7963      | 726.9021        |
| 340.2236       | 3  | L  | 12 | 1355.7436      | 678.3757        |
| 437.2764       | 4  | P  | 11 | 1242.6595      | 621.8337        |
| 551.3193       | 5  | N  | 10 | 1145.6067      | 573.3073        |
| 664.4034       | 6  | L  | 9  | 1031.5638      | 516.2858        |
| 792.4619       | 7  | Q  | 8  | 918.4797       | 459.7438        |
| 906.5049       | 8  | N  | 7  | 790.4212       | 395.7145        |
| 963.5263       | 9  | G  | 6  | 676.3782       | 338.6930        |
| 1060.5791      | 10 | P  | 5  | 619.3568       | 310.1823        |
| 1173.6632      | 11 | I  | 4  | 522.3040       | 261.6559        |
| 1336.7265      | 12 | Y  | 3  | 409.2199       | 205.1139        |
| 1407.7636      | 13 | A  | 2  | 246.1566       | 123.5822        |
|                | 14 | R  | 1  | 175.1195       | 88.0637         |

N-term:+29.04

X-range:

0 - 0

MassTol: Y-zoom:

0. 1.

MassType:

☐ AVG ☒ MONO

Axis:

☒ 1 ☐ 2

Label:

☒ I ☐ M ☐ -

Ions:

a ☐ + ☐ 2+ ☐ 3+

b ☒ + ☐ 2+ ☐ 3+

c ☐ + ☐ 2+ ☐ 3+

x ☐ + ☐ 2+ ☐ 3+

y ☒ + ☒ 2+ ☐ 3+

z ☐ + ☐ 2+ ☐ 3+

hide H<sub>2</sub>O/NH<sub>3</sub> ☐

zoom 112-122 ☐

GO

TPSALAIMENANVLAR, MH+ 1704.9530, m/z 568.9892  
H OS G13 P120811 220811-s1.06727.06727.3.dta

scan 6727; 5.5e+000

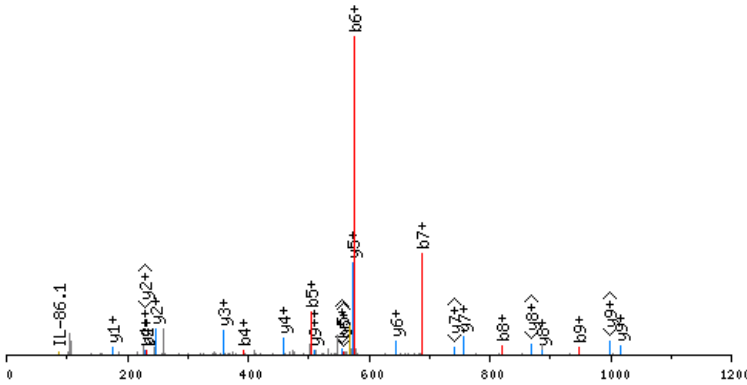

click image to zoom in; click top corners to zoom out [precursor±]

scan 6724; 569.0 m/z; 2.3e+001

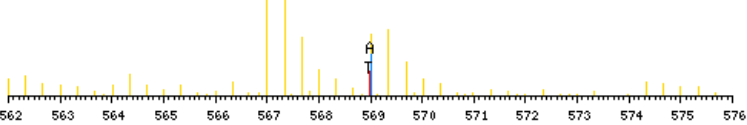

zoomed in precursor plot; T=theoretical m/z, A=acquired m/z

| b <sup>+</sup> | #  | AA | #  | y <sup>+</sup> | y <sup>2+</sup> |
|----------------|----|----|----|----------------|-----------------|
| 136.1186       | 1  | T  | 16 |                |                 |
| 233.1713       | 2  | P  | 15 | 1569.8423      | 785.4251        |
| 320.2034       | 3  | S  | 14 | 1472.7895      | 736.8987        |
| 391.2405       | 4  | A  | 13 | 1385.7575      | 693.3827        |
| 504.3245       | 5  | L  | 12 | 1314.7204      | 657.8641        |
| 575.3617       | 6  | A  | 11 | 1201.6363      | 601.3221        |
| 688.4457       | 7  | I  | 10 | 1130.5992      | 565.8035        |
| 819.4862       | 8  | M  | 9  | 1017.5151      | 509.2615        |
| 948.5288       | 9  | E  | 8  | 886.4747       | 443.7412        |
| 1062.5717      | 10 | N  | 7  | 757.4321       | 379.2199        |
| 1133.6088      | 11 | A  | 6  | 643.3891       | 322.1985        |
| 1247.6518      | 12 | N  | 5  | 572.3520       | 286.6799        |
| 1346.7202      | 13 | V  | 4  | 458.3091       | 229.6585        |
| 1459.8043      | 14 | L  | 3  | 359.2407       | 180.1243        |
| 1530.8414      | 15 | A  | 2  | 246.1566       | 123.5822        |
|                | 16 | R  | 1  | 175.1195       | 88.0637         |

N-term:+35.07

X-range:

0 - 0

MassTol: Y-zoom:

0. 1.

MassType:

☐ AVG ☒ MONO

Axis:

☒ 1 ☐ 2

Label:

☒ I ☐ M ☐ -

Ions:

a ☐ + ☐ 2+ ☐ 3+

b ☒ + ☐ 2+ ☐ 3+

c ☐ + ☐ 2+ ☐ 3+

x ☐ + ☐ 2+ ☐ 3+

y ☒ + ☒ 2+ ☐ 3+

z ☐ + ☐ 2+ ☐ 3+

hide H<sub>2</sub>O/NH<sub>3</sub> ☐

zoom 112-122 ☐

GO

TPSVDHGFLVTR, MH+ 1356.7275, m/z 452.9140  
L OS G16 P120811 220811-s1.04039.04039.3.dta

scan 4039; 8.5e+000

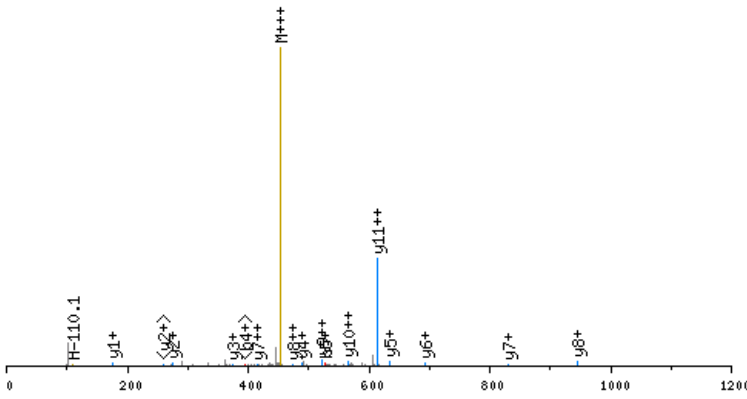

click image to zoom in; click top corners to zoom out

[precursor±]

scan 4038; 452.9 m/z; 6.4e+000

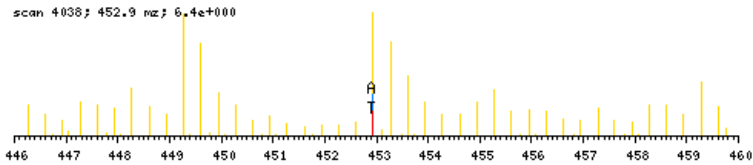

zoomed in precursor plot; T=theoretical m/z, A=acquired m/z

| b <sup>+</sup> | #  | AA | #  | y <sup>+</sup> | y <sup>2+</sup> |
|----------------|----|----|----|----------------|-----------------|
| 130.0868       | 1  | T  | 12 |                |                 |
| 227.1395       | 2  | P  | 11 | 1227.6486      | 614.3282        |
| 314.1716       | 3  | S  | 10 | 1130.5958      | 565.8018        |
| 413.2400       | 4  | V  | 9  | 1043.5638      | 522.2858        |
| 528.2669       | 5  | D  | 8  | 944.4954       | 472.7516        |
| 665.3258       | 6  | H  | 7  | 829.4684       | 415.2381        |
| 722.3473       | 7  | G  | 6  | 692.4095       | 346.7087        |
| 869.4157       | 8  | F  | 5  | 635.3881       | 318.1979        |
| 982.4998       | 9  | L  | 4  | 488.3197       | 244.6637        |
| 1081.5682      | 10 | V  | 3  | 375.2356       | 188.1217        |
| 1182.6159      | 11 | T  | 2  | 276.1672       | 138.5875        |
|                | 12 | R  | 1  | 175.1195       | 88.0637         |

N-term:+29.04

X-range:

0 - 0

MassTol: Y-zoom:

0. 1.

MassType:

☐ AVG ☒ MONO

Axis:

☒ 1 ☐ 2

Label:

☒ I ☐ M ☐ -

Ions:

a ☐ + ☐ 2+ ☐ 3+

b ☒ + ☐ 2+ ☐ 3+

c ☐ + ☐ 2+ ☐ 3+

x ☐ + ☐ 2+ ☐ 3+

y ☒ + ☒ 2+ ☐ 3+

z ☐ + ☐ 2+ ☐ 3+

hide H<sub>2</sub>O/NH<sub>3</sub> ☐

zoom 112-122 ☐

GO

TPVSEHVTKCCSGSLVER, MH+ 2114.1009, m/z 529.2807  
H OS G17 P120811 220811-s1.02634.02634.4.dta

scan 2634; 5.2e+000

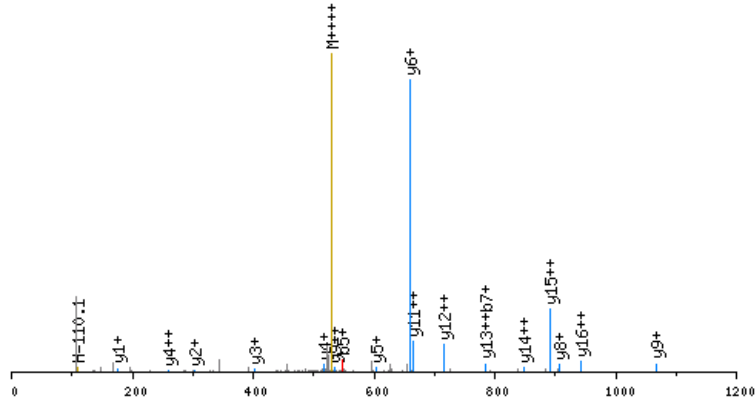

click image to zoom in; click top corners to zoom out [\[precursor±\]](#)

scan 2633; 529.3 m/z; 1.5e+001

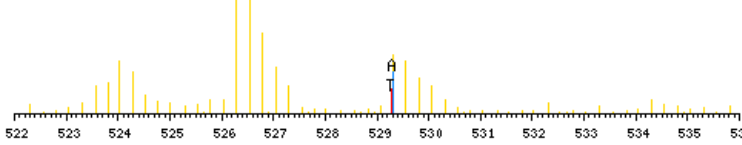

X-range:

0 - 0

MassTol: Y-zoom:

0. 1.

MassType:

☐AVG ☒MONO

Axis:

☒1 ☐2

Label:

☒I ☐M ☐-

Ions:

a ☐+ ☐2+ ☐3+

b ☒+ ☐2+ ☐3+

c ☐+ ☐2+ ☐3+

x ☐+ ☐2+ ☐3+

y ☒+ ☒2+ ☐3+

z ☐+ ☐2+ ☐3+

hide H<sub>2</sub>O/NH<sub>3</sub> ☐

zoom 112-122 ☐

GO

TQKAPQVSTPTLVEAAR, MH+ 1853.0496, m/z 618.3547  
L OS G12 P120811 220811-s1.03626.03626.3.dta

scan 3626; 1.1e+000

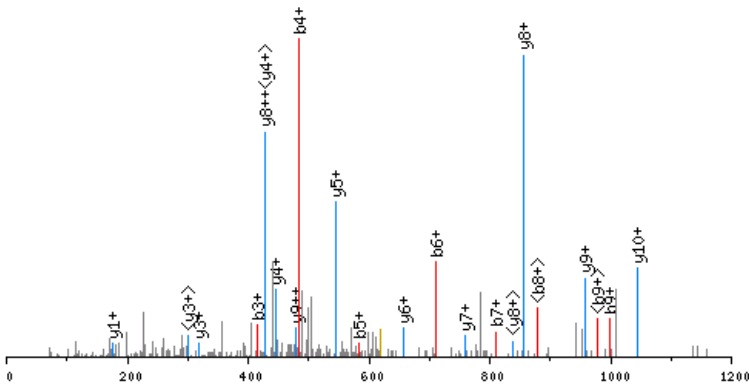

click image to zoom in; click top corners to zoom out

[precursor±]

scan 3622; 618.4 m/z; 3.1e+000

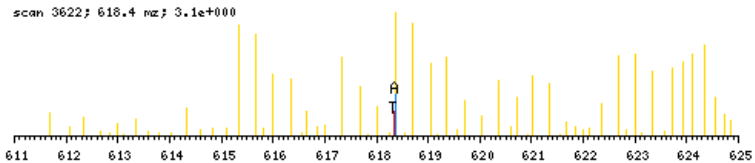

zoomed in precursor plot; T=theoretical m/z, A=acquired m/z

| b <sup>+</sup> | #  | AA | #  | y <sup>+</sup> | y <sup>2+</sup> |
|----------------|----|----|----|----------------|-----------------|
| 130.0868       | 1  | T  | 17 |                |                 |
| 258.1454       | 2  | Q  | 16 | 1723.9707      | 862.4893        |
| 414.2717       | 3  | K  | 15 | 1595.9121      | 798.4600        |
| 485.3088       | 4  | A  | 14 | 1439.7858      | 720.3968        |
| 582.3615       | 5  | P  | 13 | 1368.7487      | 684.8783        |
| 710.4201       | 6  | Q  | 12 | 1271.6959      | 636.3519        |
| 809.4885       | 7  | V  | 11 | 1143.6374      | 572.3226        |
| 896.5206       | 8  | S  | 10 | 1044.5689      | 522.7884        |
| 997.5682       | 9  | T  | 9  | 957.5369       | 479.2724        |
| 1094.6210      | 10 | P  | 8  | 856.4892       | 428.7485        |
| 1195.6687      | 11 | T  | 7  | 759.4365       | 380.2222        |
| 1308.7527      | 12 | L  | 6  | 658.3888       | 329.6983        |
| 1407.8212      | 13 | V  | 5  | 545.3047       | 273.1563        |
| 1536.8637      | 14 | E  | 4  | 446.2363       | 223.6221        |
| 1607.9009      | 15 | A  | 3  | 317.1937       | 159.1008        |
| 1678.9380      | 16 | A  | 2  | 246.1566       | 123.5822        |
|                | 17 | R  | 1  | 175.1195       | 88.0637         |

N-term:+29.04 K(3):+156.13

X-range:

0 - 0

MassTol: Y-zoom:

0. 1.

MassType:

☐AVG ☒MONO

Axis:

☒1 ☐2

Label:

☒I ☐M ☐-

Ions:

a ☐+ ☐2+ ☐3+

b ☒+ ☐2+ ☐3+

c ☐+ ☐2+ ☐3+

x ☐+ ☐2+ ☐3+

y ☒+ ☒2+ ☐3+

z ☐+ ☐2+ ☐3+

hide H<sub>2</sub>O/NH<sub>3</sub> ☐

zoom 112-122 ☐

GO

TQKFSNEEIAMATVTALR, MH+ 2066.0956, m/z 689.3701  
L OS G15 P120811 220811-s1.05503.05503.3.dta

scan 5503; 5.9e+000

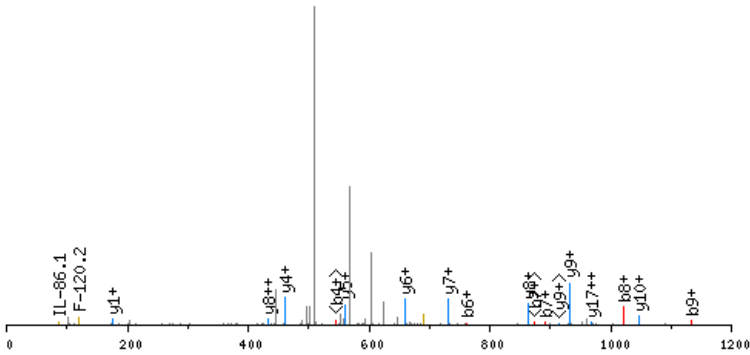

click image to zoom in; click top corners to zoom out [precursor±]

scan 5501; 689.4 m/z; 1.0e+001

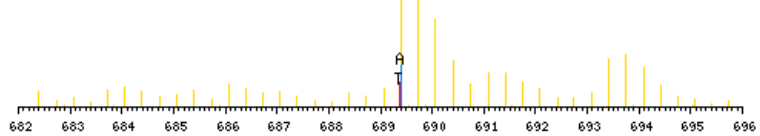

zoomed in precursor plot; T=theoretical m/z, A=acquired m/z

| b <sup>+</sup> | #  | AA | #  | y <sup>+</sup> | y <sup>2+</sup> |
|----------------|----|----|----|----------------|-----------------|
| 130.0868       | 1  | T  | 18 |                |                 |
| 258.1454       | 2  | Q  | 17 | 1937.0167      | 969.0122        |
| 414.2717       | 3  | K  | 16 | 1808.9581      | 904.9830        |
| 561.3401       | 4  | F  | 15 | 1652.8318      | 826.9198        |
| 648.3721       | 5  | S  | 14 | 1505.7634      | 753.3856        |
| 762.4150       | 6  | N  | 13 | 1418.7313      | 709.8696        |
| 891.4576       | 7  | E  | 12 | 1304.6884      | 652.8481        |
| 1020.5002      | 8  | E  | 11 | 1175.6458      | 588.3268        |
| 1133.5843      | 9  | I  | 10 | 1046.6032      | 523.8055        |
| 1204.6214      | 10 | A  | 9  | 933.5192       | 467.2635        |
| 1335.6619      | 11 | M  | 8  | 862.4820       | 431.7449        |
| 1406.6990      | 12 | A  | 7  | 731.4416       | 366.2247        |
| 1507.7467      | 13 | T  | 6  | 660.4044       | 330.7061        |
| 1606.8151      | 14 | V  | 5  | 559.3568       | 280.1823        |
| 1707.8628      | 15 | T  | 4  | 460.2884       | 230.6481        |
| 1778.8999      | 16 | A  | 3  | 359.2407       | 180.1243        |
| 1891.9839      | 17 | L  | 2  | 288.2036       | 144.6057        |
|                | 18 | R  | 1  | 175.1195       | 88.0637         |

N-term:+29.04 K(3):+156.13

X-range:

0 - 0

MassTol: Y-zoom:

0. 1.

MassType:

☐AVG ☒MONO

Axis:

☒1 ☐2

Label:

☒I ☐M ☐-

Ions:

a ☐+ ☐2+ ☐3+

b ☒+ ☐2+ ☐3+

c ☐+ ☐2+ ☐3+

x ☐+ ☐2+ ☐3+

y ☒+ ☒2+ ☐3+

z ☐+ ☐2+ ☐3+

hide H<sub>2</sub>O/NH<sub>3</sub> ☐

zoom 112-122 ☐

GO

TQKTVDGPSGLWR, MH+ 1675.0392, m/z 419.5152  
H OS G17 P120811 220811-s1.02895.02895.4.dta

scan 2895; 2.5e+001

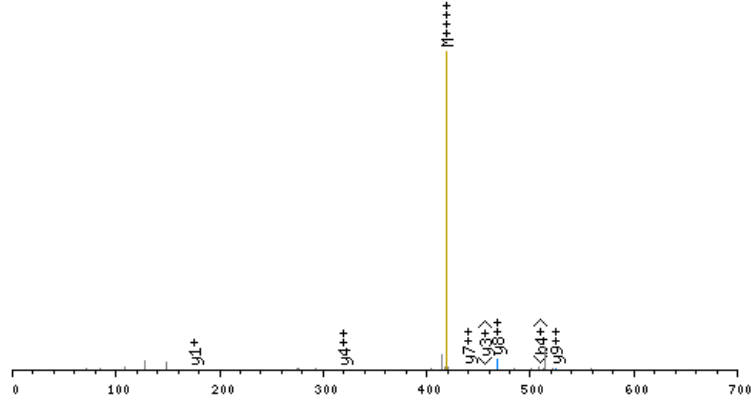

click image to zoom in; click top corners to zoom out [\[precursor±\]](#)

scan 2893; 419.5 m/z; 8.6e+000

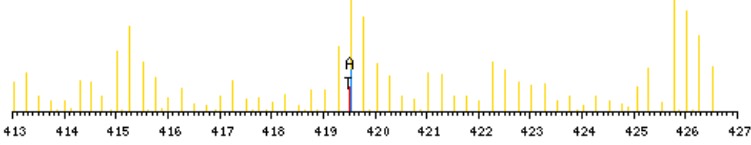

zoomed in precursor plot; T=theoretical m/z, A=acquired m/z

| b <sup>+</sup> | #  | AA | #  | y <sup>+</sup> | y <sup>2+</sup> |
|----------------|----|----|----|----------------|-----------------|
| 136.1186       | 1  | T  | 14 |                |                 |
| 264.1772       | 2  | Q  | 13 | 1539.9284      | 770.4681        |
| 426.3353       | 3  | K  | 12 | 1411.8698      | 706.4388        |
| 527.3829       | 4  | T  | 11 | 1249.7117      | 625.3598        |
| 626.4513       | 5  | V  | 10 | 1148.6641      | 574.8359        |
| 741.4783       | 6  | D  | 9  | 1049.5956      | 525.3017        |
| 798.4998       | 7  | G  | 8  | 934.5687       | 467.7883        |
| 895.5525       | 8  | P  | 7  | 877.5472       | 439.2775        |
| 982.5845       | 9  | S  | 6  | 780.4945       | 390.7511        |
| 1039.6060      | 10 | G  | 5  | 693.4624       | 347.2351        |
| 1201.7641      | 11 | K  | 4  | 636.4410       | 318.7244        |
| 1314.8482      | 12 | L  | 3  | 474.2829       | 237.6454        |
| 1500.9275      | 13 | W  | 2  | 361.1988       | 181.1033        |
|                | 14 | R  | 1  | 175.1195       | 88.0637         |

N-term:+35.07 K(3):+162.16  
K(11):+162.16

X-range:

0 - 0

MassTol: Y-zoom:

0. 1.

MassType:

☐AVG ☒MONO

Axis:

☒1 ☐2

Label:

☒I ☐M ☐-

Ions:

a ☐+ ☐2+ ☐3+

b ☒+ ☐2+ ☐3+

c ☐+ ☐2+ ☐3+

x ☐+ ☐2+ ☐3+

y ☒+ ☒2+ ☐3+

z ☐+ ☐2+ ☐3+

hide H<sub>2</sub>O/NH<sub>3</sub> ☐

zoom 112-122 ☐

GO

TQLAPHSEQMR, MH+ 1325.6636, m/z 442.5594  
L OS G16 P120811 220811-s1.02202.02202.3.dta

scan 2202; 1.3e+001

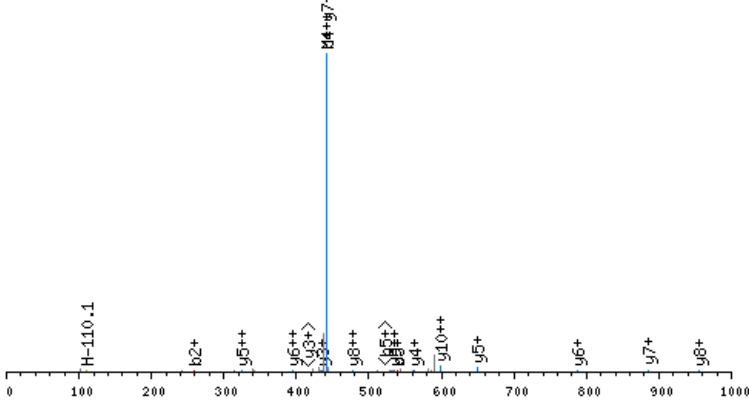

click image to zoom in; click top corners to zoom out

[precursor±]

scan 2198; 442.6 m/z; 4.1e+000

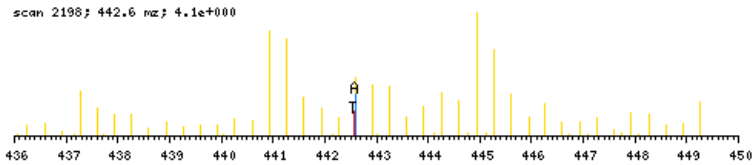

zoomed in precursor plot; T=theoretical m/z, A=acquired m/z

| b <sup>+</sup> | #  | AA | #  | y <sup>+</sup> | y <sup>2+</sup> |
|----------------|----|----|----|----------------|-----------------|
| 130.0868       | 1  | T  | 11 |                |                 |
| 258.1454       | 2  | Q  | 10 | 1196.5846      | 598.7962        |
| 371.2294       | 3  | L  | 9  | 1068.5260      | 534.7669        |
| 442.2665       | 4  | A  | 8  | 955.4420       | 478.2249        |
| 539.3193       | 5  | P  | 7  | 884.4049       | 442.7063        |
| 676.3782       | 6  | H  | 6  | 787.3521       | 394.1800        |
| 763.4102       | 7  | S  | 5  | 650.2932       | 325.6505        |
| 892.4528       | 8  | E  | 4  | 563.2612       | 282.1345        |
| 1020.5114      | 9  | Q  | 3  | 434.2186       | 217.6132        |
| 1151.5519      | 10 | M  | 2  | 306.1600       | 153.5839        |
|                | 11 | R  | 1  | 175.1195       | 88.0637         |

N-term:+29.04

X-range:

0 - 0

MassTol: Y-zoom:

0. 1.

MassType:

☐AVG ☒MONO

Axis:

☒1 ☐2

Label:

☒I ☐M ☐-

Ions:

a ☐+ ☐2+ ☐3+

b ☒+ ☐2+ ☐3+

c ☐+ ☐2+ ☐3+

x ☐+ ☐2+ ☐3+

y ☒+ ☒2+ ☐3+

z ☐+ ☐2+ ☐3+

hide H<sub>2</sub>O/NH<sub>3</sub> ☐

zoom 112-122 ☐

GO

TQVEGDEEAALLER, MH+ 1587.7866, m/z 529.9337  
L OS G13 P120811 220811-s1.04530.04530.3.dta

scan 4530; 5.2e+000

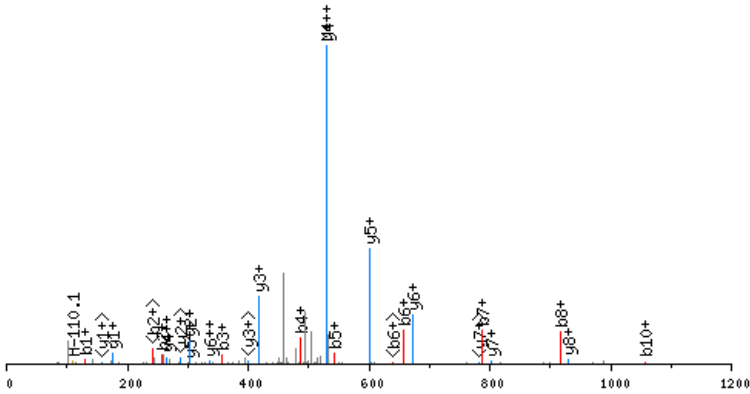

click image to zoom in; click top corners to zoom out

[precursor±]

scan 4529; 529.9 m/z; 1.8e+001

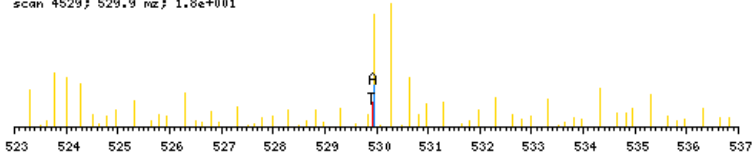

zoomed in precursor plot; T=theoretical m/z, A=acquired m/z

| b <sup>+</sup> | #  | AA | #  | y <sup>+</sup> | y <sup>2+</sup> |
|----------------|----|----|----|----------------|-----------------|
| 130.0868       | 1  | T  | 14 |                |                 |
| 258.1454       | 2  | Q  | 13 | 1458.7076      | 729.8577        |
| 357.2138       | 3  | V  | 12 | 1330.6490      | 665.8284        |
| 486.2564       | 4  | E  | 11 | 1231.5806      | 616.2942        |
| 543.2778       | 5  | G  | 10 | 1102.5380      | 551.7729        |
| 658.3048       | 6  | D  | 9  | 1045.5166      | 523.2622        |
| 787.3474       | 7  | E  | 8  | 930.4896       | 465.7487        |
| 916.3900       | 8  | E  | 7  | 801.4470       | 401.2274        |
| 987.4271       | 9  | A  | 6  | 672.4044       | 336.7061        |
| 1058.4642      | 10 | A  | 5  | 601.3673       | 301.1876        |
| 1171.5482      | 11 | L  | 4  | 530.3302       | 265.6690        |
| 1284.6323      | 12 | L  | 3  | 417.2462       | 209.1270        |
| 1413.6749      | 13 | E  | 2  | 304.1621       | 152.5850        |
|                | 14 | R  | 1  | 175.1195       | 88.0637         |

N-term:+29.04

X-range:

0 - 0

MassTol: Y-zoom:

0. 1.

MassType:

☐AVG ☒MONO

Axis:

☒1 ☐2

Label:

☒I ☐M ☐-

Ions:

a ☐+ ☐2+ ☐3+

b ☒+ ☐2+ ☐3+

c ☐+ ☐2+ ☐3+

x ☐+ ☐2+ ☐3+

y ☒+ ☒2+ ☐3+

z ☐+ ☐2+ ☐3+

hide H<sub>2</sub>O/NH<sub>3</sub> ☐

zoom 112-122 ☐

GO

TQWREDEEEAAR, MH+ 1676.7516, m/z 559.5887  
L OS G16 P120811 220811-s1.02504.02504.3.dta

scan 2504; 1.6e+001

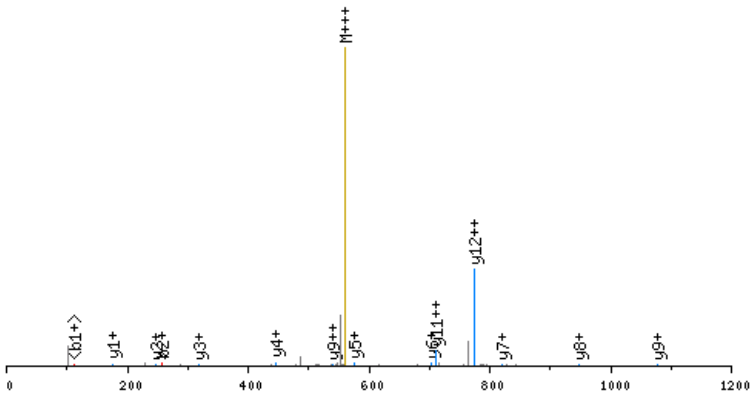

click image to zoom in; click top corners to zoom out

[precursor±]

scan 2503; 559.6 m/z; 1.7e+001

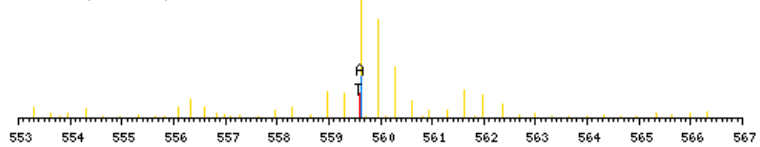

zoomed in precursor plot; T=theoretical m/z, A=acquired m/z

| b <sup>+</sup> | #  | AA | #  | y <sup>+</sup> | y <sup>2+</sup> |
|----------------|----|----|----|----------------|-----------------|
| 130.0868       | 1  | T  | 13 |                |                 |
| 258.1454       | 2  | Q  | 12 | 1547.6726      | 774.3402        |
| 444.2247       | 3  | W  | 11 | 1419.6141      | 710.3109        |
| 600.3258       | 4  | R  | 10 | 1233.5347      | 617.2713        |
| 729.3684       | 5  | E  | 9  | 1077.4336      | 539.2207        |
| 858.4110       | 6  | E  | 8  | 948.3910       | 474.6994        |
| 973.4379       | 7  | D  | 7  | 819.3485       | 410.1781        |
| 1102.4805      | 8  | E  | 6  | 704.3215       | 352.6647        |
| 1231.5231      | 9  | E  | 5  | 575.2789       | 288.1434        |
| 1360.5657      | 10 | E  | 4  | 446.2363       | 223.6221        |
| 1431.6028      | 11 | A  | 3  | 317.1937       | 159.1008        |
| 1502.6399      | 12 | A  | 2  | 246.1566       | 123.5822        |
|                | 13 | R  | 1  | 175.1195       | 88.0637         |

N-term:+29.04



X-range:

0 - 0

MassTol: Y-zoom:

0. 1.

MassType:

☐AVG ☒MONO

Axis:

☒1 ☐2

Label:

☒I ☐M ☐-

Ions:

a ☐+ ☐2+ ☐3+

b ☒+ ☐2+ ☐3+

c ☐+ ☐2+ ☐3+

x ☐+ ☐2+ ☐3+

y ☒+ ☒2+ ☐3+

z ☐+ ☐2+ ☐3+

hide H<sub>2</sub>O/NH<sub>3</sub> ☐

zoom 112-122 ☐

GO

TRGTVTDFPGFDGR, MH+ 1553.7712, m/z 518.5953  
L OS G16 P120811 220811-s1.04552.04552.3.dta

scan 4552; 1.1e+000

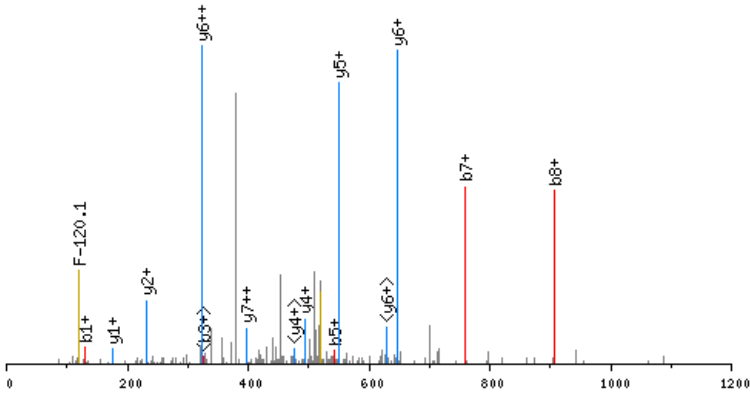

click image to zoom in; click top corners to zoom out

[precursor±]

scan 4548; 518.6 m/z; 4.8e+000

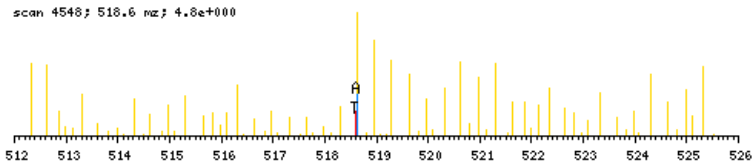

zoomed in precursor plot; T=theoretical m/z, A=acquired m/z

| b <sup>+</sup> | #  | AA | #  | y <sup>+</sup> | y <sup>2+</sup> |
|----------------|----|----|----|----------------|-----------------|
| 130.0868       | 1  | T  | 14 |                |                 |
| 286.1879       | 2  | R  | 13 | 1424.6923      | 712.8500        |
| 343.2094       | 3  | G  | 12 | 1268.5911      | 634.7995        |
| 444.2570       | 4  | T  | 11 | 1211.5697      | 606.2888        |
| 543.3254       | 5  | V  | 10 | 1110.5220      | 555.7649        |
| 644.3731       | 6  | T  | 9  | 1011.4536      | 506.2307        |
| 759.4001       | 7  | D  | 8  | 910.4059       | 455.7069        |
| 906.4685       | 8  | F  | 7  | 795.3790       | 398.1934        |
| 1003.5212      | 9  | P  | 6  | 648.3105       | 324.6592        |
| 1060.5427      | 10 | G  | 5  | 551.2578       | 276.1328        |
| 1207.6111      | 11 | F  | 4  | 494.2363       | 247.6221        |
| 1322.6381      | 12 | D  | 3  | 347.1679       | 174.0879        |
| 1379.6595      | 13 | G  | 2  | 232.1410       | 116.5744        |
|                | 14 | R  | 1  | 175.1195       | 88.0637         |

N-term:+29.04

X-range:

0 - 0

MassTol: Y-zoom:

0. 1.

MassType:

☐ AVG ☒ MONO

Axis:

☒ 1 ☐ 2

Label:

☒ I ☐ M ☐ -

Ions:

a ☐ + ☐ 2+ ☐ 3+

b ☒ + ☐ 2+ ☐ 3+

c ☐ + ☐ 2+ ☐ 3+

x ☐ + ☐ 2+ ☐ 3+

y ☒ + ☒ 2+ ☐ 3+

z ☐ + ☐ 2+ ☐ 3+

hide H<sub>2</sub>O/NH<sub>3</sub> ☐

zoom 112-122 ☐

GO

TRKPVDDQYEDCYLAR, MH+ 1969.9805, m/z 493.2506  
L OS G18 P120811 220811-s1.03483.03483.4.dta

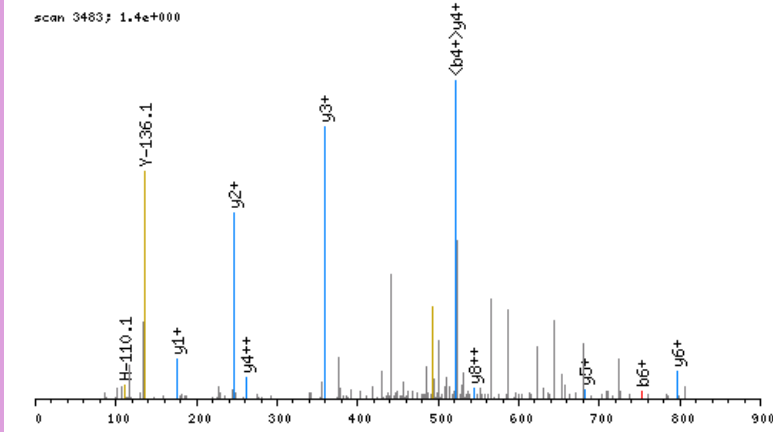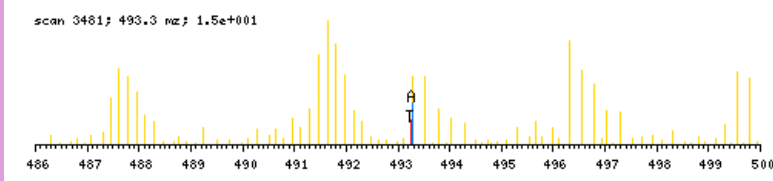

| b <sup>+</sup> | #  | AA | #  | y <sup>+</sup> | y <sup>2+</sup> |
|----------------|----|----|----|----------------|-----------------|
| 130.0868       | 1  | T  | 15 |                |                 |
| 286.1879       | 2  | R  | 14 | 1840.9016      | 920.9547        |
| 442.3142       | 3  | K  | 13 | 1684.8005      | 842.9041        |
| 539.3670       | 4  | P  | 12 | 1528.6742      | 764.8410        |
| 638.4354       | 5  | V  | 11 | 1431.6214      | 716.3146        |
| 753.4623       | 6  | D  | 10 | 1332.5530      | 666.7804        |
| 881.5209       | 7  | Q  | 9  | 1217.5260      | 609.2669        |
| 1044.5842      | 8  | Y  | 8  | 1089.4675      | 545.2376        |
| 1173.6268      | 9  | E  | 7  | 926.4041       | 463.7060        |
| 1288.6538      | 10 | D  | 6  | 797.3616       | 399.1847        |
| 1448.6844      | 11 | C  | 5  | 682.3346       | 341.6712        |
| 1611.7477      | 12 | Y  | 4  | 522.3040       | 261.6559        |
| 1724.8317      | 13 | L  | 3  | 359.2407       | 180.1243        |
| 1795.8689      | 14 | A  | 2  | 246.1566       | 123.5822        |
|                | 15 | R  | 1  | 175.1195       | 88.0637         |

N-term: +29.04 K(3): +156.13  
C(11): +160.03

X-range:

0 - 0

MassTol: Y-zoom:

0. 1.

MassType:

☐AVG ☒MONO

Axis:

☒1 ☐2

Label:

☒I ☐M ☐-

Ions:

a ☐+ ☐2+ ☐3+

b ☒+ ☐2+ ☐3+

c ☐+ ☐2+ ☐3+

x ☐+ ☐2+ ☐3+

y ☒+ ☒2+ ☐3+

z ☐+ ☐2+ ☐3+

hide H<sub>2</sub>O/NH<sub>3</sub> ☐

zoom 112-122 ☐

GO

TSAIPASVNLADSR, MH+ 1429.7651, m/z 477.2599  
L OS G13 P120811 220811-s1.04363.04363.3.dta

scan 4363; 1.2e+000

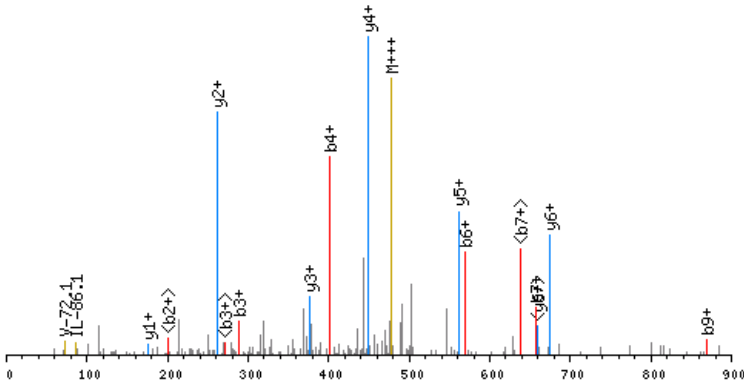

click image to zoom in; click top corners to zoom out

[precursor±]

scan 4359; 477.3 m/z; 6.9e+000

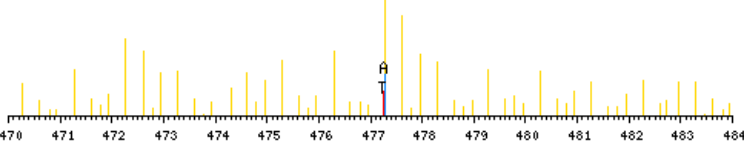

zoomed in precursor plot; T=theoretical m/z, A=acquired m/z

| b <sup>+</sup> | #  | AA | #  | y <sup>+</sup> | y <sup>2+</sup> |
|----------------|----|----|----|----------------|-----------------|
| 130.0868       | 1  | T  | 14 |                |                 |
| 217.1188       | 2  | S  | 13 | 1300.6861      | 650.8470        |
| 288.1559       | 3  | A  | 12 | 1213.6541      | 607.3310        |
| 401.2400       | 4  | I  | 11 | 1142.6170      | 571.8124        |
| 498.2927       | 5  | P  | 10 | 1029.5329      | 515.2704        |
| 569.3299       | 6  | A  | 9  | 932.4801       | 466.7440        |
| 656.3619       | 7  | S  | 8  | 861.4430       | 431.2254        |
| 755.4303       | 8  | V  | 7  | 774.4110       | 387.7094        |
| 869.4732       | 9  | N  | 6  | 675.3426       | 338.1752        |
| 982.5573       | 10 | L  | 5  | 561.2997       | 281.1537        |
| 1053.5944      | 11 | A  | 4  | 448.2156       | 224.6117        |
| 1168.6214      | 12 | D  | 3  | 377.1785       | 189.0931        |
| 1255.6534      | 13 | S  | 2  | 262.1515       | 131.5797        |
|                | 14 | R  | 1  | 175.1195       | 88.0637         |

N-term:+29.04

X-range:

0 - 0

MassTol: Y-zoom:

0. 1.

MassType:

☐ AVG ☒ MONO

Axis:

☒ 1 ☐ 2

Label:

☒ I ☐ M ☐ -

Ions:

a ☐ + ☐ 2+ ☐ 3+

b ☒ + ☐ 2+ ☐ 3+

c ☐ + ☐ 2+ ☐ 3+

x ☐ + ☐ 2+ ☐ 3+

y ☒ + ☒ 2+ ☐ 3+

z ☐ + ☐ 2+ ☐ 3+

hide H<sub>2</sub>O/NH<sub>3</sub> ☐

zoom 112-122 ☐

GO

TSEVVVNTKEQGKWGR, MH+ 1950.0449, m/z 488.2667  
L OS G17 P120811 220811-s1.03684.03684.4.dta

scan 3684; 6.5e+000

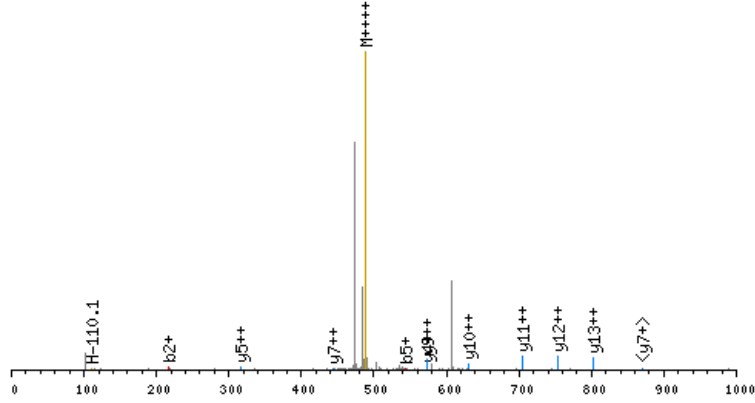

click image to zoom in; click top corners to zoom out [\[precursor±\]](#)

scan 3683; 488.3 m/z; 9.3e+001

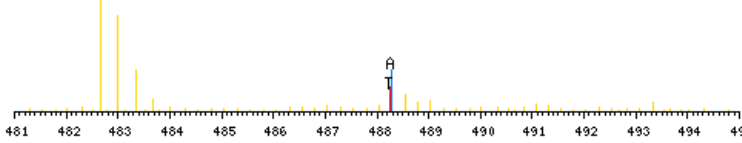

zoomed in precursor plot; T=theoretical m/z, A=acquired m/z

| b <sup>+</sup> | #  | AA | #  | y <sup>+</sup> | y <sup>2+</sup> |
|----------------|----|----|----|----------------|-----------------|
| 130.0868       | 1  | T  | 16 |                |                 |
| 217.1188       | 2  | S  | 15 | 1820.9660      | 910.9869        |
| 346.1614       | 3  | E  | 14 | 1733.9340      | 867.4709        |
| 445.2298       | 4  | V  | 13 | 1604.8914      | 802.9496        |
| 544.2982       | 5  | V  | 12 | 1505.8229      | 753.4154        |
| 691.3666       | 6  | F  | 11 | 1406.7545      | 703.8812        |
| 805.4096       | 7  | N  | 10 | 1259.6861      | 630.3470        |
| 906.4572       | 8  | T  | 9  | 1145.6432      | 573.3255        |
| 1062.5835      | 9  | K  | 8  | 1044.5955      | 522.8017        |
| 1191.6261      | 10 | E  | 7  | 888.4692       | 444.7385        |
| 1319.6847      | 11 | Q  | 6  | 759.4266       | 380.2172        |
| 1376.7062      | 12 | G  | 5  | 631.3680       | 316.1879        |
| 1532.8325      | 13 | K  | 4  | 574.3466       | 287.6772        |
| 1718.9118      | 14 | W  | 3  | 418.2203       | 209.6141        |
| 1775.9333      | 15 | G  | 2  | 232.1410       | 116.5744        |
|                | 16 | R  | 1  | 175.1195       | 88.0637         |

N-term:+29.04 K(9):+156.13  
K(13):+156.13

X-range:

0 - 0

MassTol: Y-zoom:

0. 1.

MassType:

☐ AVG ☒ MONO

Axis:

☒ 1 ☐ 2

Label:

☒ I ☐ M ☐ -

Ions:

a ☐ + ☐ 2+ ☐ 3+

b ☒ + ☐ 2+ ☐ 3+

c ☐ + ☐ 2+ ☐ 3+

x ☐ + ☐ 2+ ☐ 3+

y ☒ + ☒ 2+ ☐ 3+

z ☐ + ☐ 2+ ☐ 3+

hide H<sub>2</sub>O/NH<sub>3</sub> ☐

zoom 112-122 ☐

GO

TSFKENPTTFMGHYLHEVAR, MH+ 2421.2025, m/z 606.0561  
L OS G18 P120811 220811-s1.06124.06124.4.dta

scan 6124; 2.0e+000

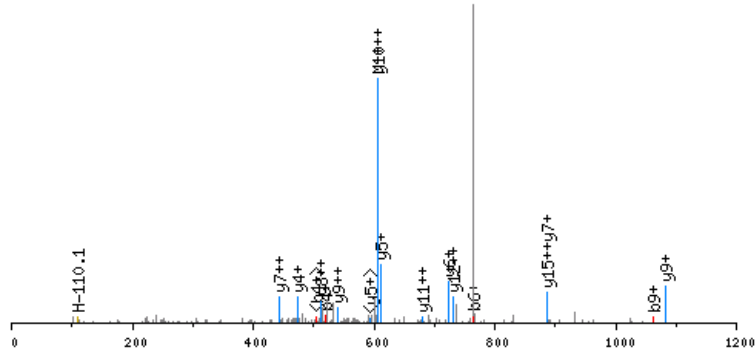

click image to zoom in; click top corners to zoom out [\[precursor±\]](#)

scan 6121; 606.1 m/z; 2.2e+000

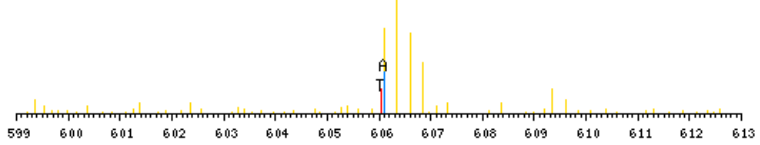

zoomed in precursor plot; T=theoretical m/z, A=acquired m/z

| b <sup>+</sup> | #  | AA | #  | y <sup>+</sup> | y <sup>2+</sup> |
|----------------|----|----|----|----------------|-----------------|
| 130.0868       | 1  | T  | 20 |                |                 |
| 217.1188       | 2  | S  | 19 | 2292.1236      | 1146.5657       |
| 364.1872       | 3  | F  | 18 | 2205.0916      | 1103.0497       |
| 520.3135       | 4  | K  | 17 | 2058.0231      | 1029.5155       |
| 649.3561       | 5  | E  | 16 | 1901.8968      | 951.4523        |
| 763.3990       | 6  | N  | 15 | 1772.8542      | 886.9310        |
| 860.4518       | 7  | P  | 14 | 1658.8113      | 829.9096        |
| 961.4995       | 8  | T  | 13 | 1561.7586      | 781.3832        |
| 1062.5472      | 9  | T  | 12 | 1460.7109      | 730.8594        |
| 1209.6156      | 10 | F  | 11 | 1359.6632      | 680.3355        |
| 1340.6561      | 11 | M  | 10 | 1212.5948      | 606.8013        |
| 1397.6775      | 12 | G  | 9  | 1081.5543      | 541.2811        |
| 1534.7364      | 13 | H  | 8  | 1024.5328      | 512.7703        |
| 1697.7998      | 14 | Y  | 7  | 887.4739       | 444.2409        |
| 1810.8838      | 15 | L  | 6  | 724.4106       | 362.7092        |
| 1947.9427      | 16 | H  | 5  | 611.3265       | 306.1672        |
| 2076.9853      | 17 | E  | 4  | 474.2676       | 237.6377        |
| 2176.0537      | 18 | V  | 3  | 345.2250       | 173.1164        |
| 2247.0909      | 19 | A  | 2  | 246.1566       | 123.5822        |
|                | 20 | R  | 1  | 175.1195       | 88.0637         |

N-term:+29.04 K(4):+156.13

X-range:

0 - 0

MassTol: Y-zoom:

0. 1.

MassType:

☐AVG ☒MONO

Axis:

☒1 ☐2

Label:

☒I ☐M ☐-

Ions:

a ☐+ ☐2+ ☐3+

b ☒+ ☐2+ ☐3+

c ☐+ ☐2+ ☐3+

x ☐+ ☐2+ ☐3+

y ☒+ ☒2+ ☐3+

z ☐+ ☐2+ ☐3+

hide H<sub>2</sub>O/NH<sub>3</sub> ☐

zoom 112-122 ☐

GO

TSIAIDTIINQKR, MH+ 1528.9063, m/z 510.3069  
L OS G15 P120811 220811-s1.04837.04837.3.dta

scan 4837; 1.6e+001

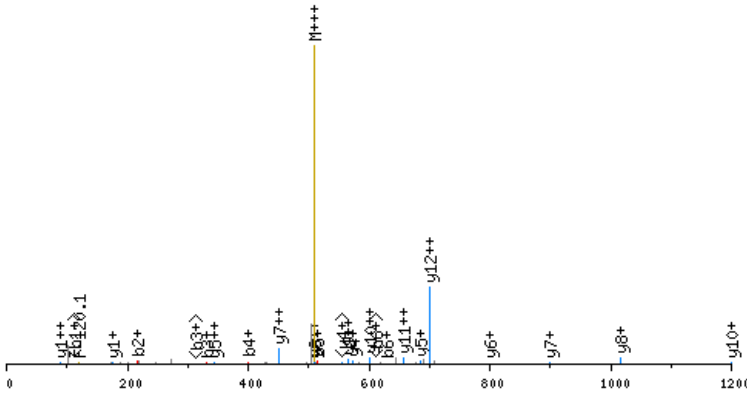

click image to zoom in; click top corners to zoom out

[precursor±]

scan 4836; 510.3 m/z; 1.1e+001

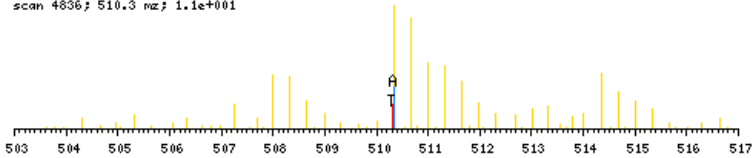

zoomed in precursor plot; T=theoretical m/z, A=acquired m/z

| b <sup>+</sup> | #  | AA | #  | y <sup>+</sup> | y <sup>2+</sup> |
|----------------|----|----|----|----------------|-----------------|
| 130.0868       | 1  | T  | 13 |                |                 |
| 217.1188       | 2  | S  | 12 | 1399.8273      | 700.4176        |
| 330.2029       | 3  | I  | 11 | 1312.7953      | 656.9016        |
| 401.2400       | 4  | A  | 10 | 1199.7112      | 600.3595        |
| 514.3240       | 5  | I  | 9  | 1128.6741      | 564.8410        |
| 629.3510       | 6  | D  | 8  | 1015.5901      | 508.2989        |
| 730.3987       | 7  | T  | 7  | 900.5631       | 450.7855        |
| 843.4827       | 8  | I  | 6  | 799.5154       | 400.2616        |
| 956.5668       | 9  | I  | 5  | 686.4314       | 343.7196        |
| 1070.6097      | 10 | N  | 4  | 573.3473       | 287.1776        |
| 1198.6683      | 11 | Q  | 3  | 459.3044       | 230.1561        |
| 1354.7946      | 12 | K  | 2  | 331.2458       | 166.1268        |
|                | 13 | R  | 1  | 175.1195       | 88.0637         |

N-term:+29.04 K(12):+156.13

X-range:

0 - 0

MassTol: Y-zoom:

0. 1.

MassType:

☐AVG ☒MONO

Axis:

☒1 ☐2

Label:

☒I ☐M ☐-

Ions:

a ☐+ ☐2+ ☐3+

b ☒+ ☐2+ ☐3+

c ☐+ ☐2+ ☐3+

x ☐+ ☐2+ ☐3+

y ☒+ ☒2+ ☐3+

z ☐+ ☐2+ ☐3+

hide H<sub>2</sub>O/NH<sub>3</sub> ☐

zoom 112-122 ☐

GO

TSSFSDKYGLGHVTEPR, MH+ 1936.9769, m/z 484.9997  
L OS G17 P120811 220811-s1.04121.04121.4.dta

scan 4121; 5.8e+000

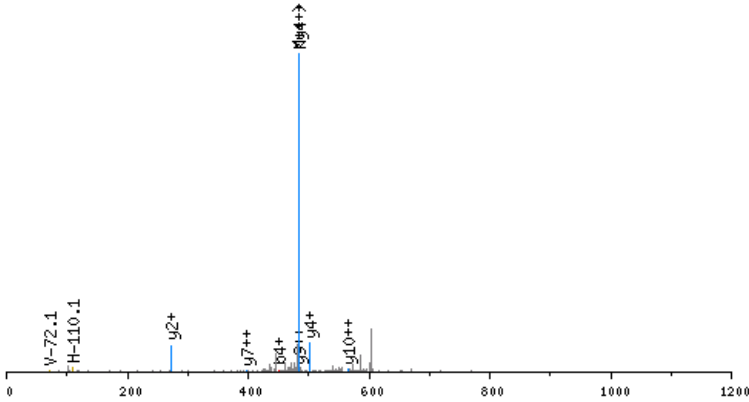

click image to zoom in; click top corners to zoom out

[precursor±]

scan 4118; 485.0 m/z; 2.0e+001

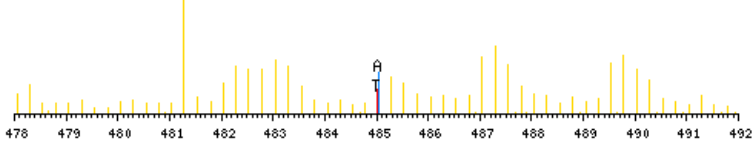

zoomed in precursor plot; T=theoretical m/z, A=acquired m/z

| b <sup>+</sup> | #  | AA | #  | y <sup>+</sup> | y <sup>2+</sup> |
|----------------|----|----|----|----------------|-----------------|
| 130.0868       | 1  | T  | 17 |                |                 |
| 217.1188       | 2  | S  | 16 | 1807.8979      | 904.4529        |
| 304.1508       | 3  | S  | 15 | 1720.8659      | 860.9369        |
| 451.2192       | 4  | F  | 14 | 1633.8339      | 817.4208        |
| 538.2513       | 5  | S  | 13 | 1486.7655      | 743.8866        |
| 653.2782       | 6  | D  | 12 | 1399.7334      | 700.3706        |
| 809.4045       | 7  | K  | 11 | 1284.7065      | 642.8572        |
| 972.4678       | 8  | Y  | 10 | 1128.5802      | 564.7940        |
| 1029.4893      | 9  | G  | 9  | 965.5169       | 483.2623        |
| 1142.5734      | 10 | L  | 8  | 908.4954       | 454.7516        |
| 1199.5948      | 11 | G  | 7  | 795.4113       | 398.2096        |
| 1336.6538      | 12 | H  | 6  | 738.3899       | 369.6988        |
| 1435.7222      | 13 | V  | 5  | 601.3310       | 301.1694        |
| 1536.7698      | 14 | T  | 4  | 502.2625       | 251.6352        |
| 1665.8124      | 15 | E  | 3  | 401.2149       | 201.1113        |
| 1762.8652      | 16 | P  | 2  | 272.1723       | 136.5900        |
|                | 17 | R  | 1  | 175.1195       | 88.0637         |

N-term:+29.04 K(7):+156.13

X-range:

0 - 0

MassTol: Y-zoom:

0. 1.

MassType:

☐AVG ☒MONO

Axis:

☒1 ☐2

Label:

☒I ☐M ☐-

Ions:

a ☐+ ☐2+ ☐3+

b ☒+ ☐2+ ☐3+

c ☐+ ☐2+ ☐3+

x ☐+ ☐2+ ☐3+

y ☒+ ☒2+ ☐3+

z ☐+ ☐2+ ☐3+

hide H<sub>2</sub>O/NH<sub>3</sub> ☐

zoom 112-122 ☐

GO

TSSMGTLPKQVKIVEVGPR, MH+ 2111.2263, m/z 528.5620  
L OS G16 P120811 220811-s1.04661.04661.4.dta

scan 4661: 7.5e+000

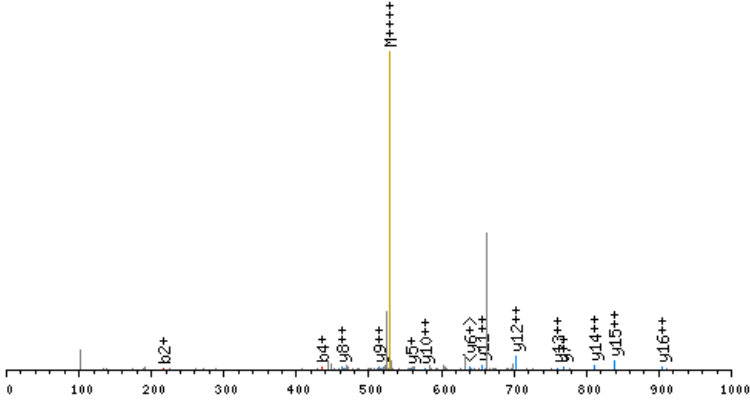

click image to zoom in; click top corners to zoom out (precursor±)

scan 4658: 528.6 m/z; 1.0e+001

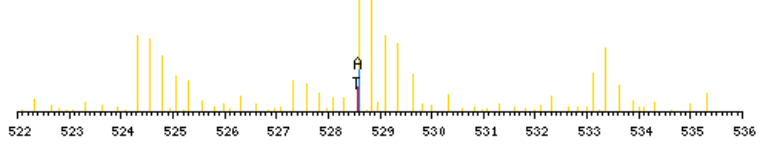

zoomed in precursor plot; T=theoretical m/z, A=acquired m/z

| b <sup>+</sup> | #  | AA | #  | y <sup>+</sup> | y <sup>2+</sup> |
|----------------|----|----|----|----------------|-----------------|
| 130.0868       | 1  | T  | 19 |                |                 |
| 217.1188       | 2  | S  | 18 | 1982.1473      | 991.5776        |
| 304.1508       | 3  | S  | 17 | 1895.1153      | 948.0616        |
| 435.1913       | 4  | M  | 16 | 1808.0833      | 904.5455        |
| 492.2128       | 5  | G  | 15 | 1677.0428      | 839.0253        |
| 593.2605       | 6  | T  | 14 | 1620.0213      | 810.5146        |
| 706.3445       | 7  | L  | 13 | 1518.9736      | 759.9907        |
| 803.3973       | 8  | P  | 12 | 1405.8896      | 703.4487        |
| 959.5236       | 9  | K  | 11 | 1308.8368      | 654.9223        |
| 1087.5822      | 10 | Q  | 10 | 1152.7105      | 576.8592        |
| 1186.6506      | 11 | V  | 9  | 1024.6519      | 512.8299        |
| 1342.7769      | 12 | K  | 8  | 925.5835       | 463.2957        |
| 1455.8609      | 13 | I  | 7  | 769.4572       | 385.2325        |
| 1554.9294      | 14 | V  | 6  | 656.3731       | 328.6905        |
| 1683.9720      | 15 | E  | 5  | 557.3047       | 279.1563        |
| 1783.0404      | 16 | V  | 4  | 428.2621       | 214.6350        |
| 1840.0618      | 17 | G  | 3  | 329.1937       | 165.1008        |
| 1937.1146      | 18 | P  | 2  | 272.1723       | 136.5900        |
|                | 19 | R  | 1  | 175.1195       | 88.0637         |

N-term: +29.04 K(9): +156.13  
K(12): +156.13

X-range:

0 - 0

MassTol: Y-zoom:

0. 1.

MassType:

☐AVG ☒MONO

Axis:

☒1 ☐2

Label:

☒I ☐M ☐-

Ions:

a ☐+ ☐2+ ☐3+

b ☒+ ☐2+ ☐3+

c ☐+ ☐2+ ☐3+

x ☐+ ☐2+ ☐3+

y ☒+ ☒2+ ☐3+

z ☐+ ☐2+ ☐3+

hide H<sub>2</sub>O/NH<sub>3</sub> ☐

zoom 112-122 ☐

GO

TSSMTEGLQPASVVVLPR, MH+ 1906.0531, m/z 636.0226  
H OS G12 P120811 220811-s1.04835.04835.3.dta

scan 4835; 2.3e+000

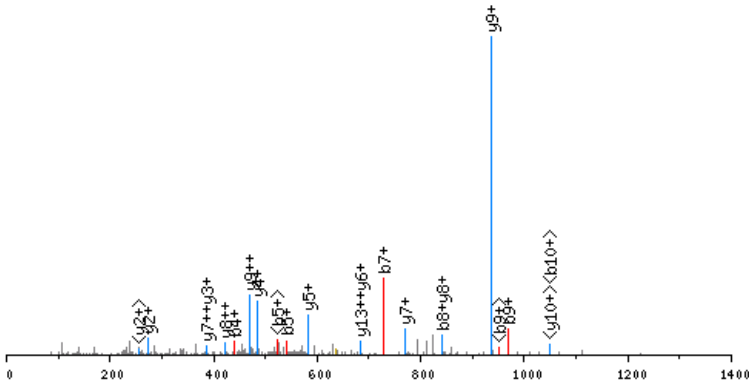

click image to zoom in; click top corners to zoom out

[precursor±]

scan 4832; 636.0 m/z; 6.8e+000

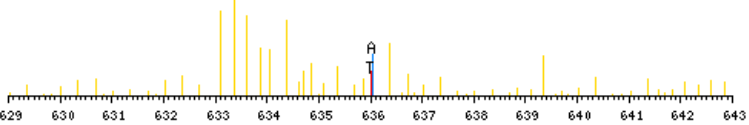

zoomed in precursor plot; T=theoretical m/z, A=acquired m/z

| b <sup>+</sup> | #  | AA | #  | y <sup>+</sup> | y <sup>2+</sup> |
|----------------|----|----|----|----------------|-----------------|
| 136.1186       | 1  | T  | 18 |                |                 |
| 223.1506       | 2  | S  | 17 | 1770.9424      | 885.9751        |
| 310.1826       | 3  | S  | 16 | 1683.9104      | 842.4591        |
| 441.2231       | 4  | M  | 15 | 1596.8783      | 798.9431        |
| 542.2708       | 5  | T  | 14 | 1465.8379      | 733.4228        |
| 671.3134       | 6  | E  | 13 | 1364.7902      | 682.8990        |
| 728.3349       | 7  | G  | 12 | 1235.7476      | 618.3777        |
| 841.4189       | 8  | L  | 11 | 1178.7261      | 589.8670        |
| 969.4775       | 9  | Q  | 10 | 1065.6421      | 533.3249        |
| 1066.5303      | 10 | P  | 9  | 937.5835       | 469.2957        |
| 1137.5674      | 11 | A  | 8  | 840.5307       | 420.7693        |
| 1224.5994      | 12 | S  | 7  | 769.4936       | 385.2507        |
| 1323.6678      | 13 | V  | 6  | 682.4616       | 341.7347        |
| 1422.7362      | 14 | V  | 5  | 583.3932       | 292.2005        |
| 1521.8046      | 15 | V  | 4  | 484.3247       | 242.6663        |
| 1634.8887      | 16 | L  | 3  | 385.2563       | 193.1321        |
| 1731.9415      | 17 | P  | 2  | 272.1723       | 136.5900        |
|                | 18 | R  | 1  | 175.1195       | 88.0637         |

N-term:+35.07

X-range:

0 - 0

MassTol: Y-zoom:

0. 1.

MassType:

☐AVG ☒MONO

Axis:

☒1 ☐2

Label:

☒I ☐M ☐-

Ions:

a ☐+ ☐2+ ☐3+

b ☒+ ☐2+ ☐3+

c ☐+ ☐2+ ☐3+

x ☐+ ☐2+ ☐3+

y ☒+ ☒2+ ☐3+

z ☐+ ☐2+ ☐3+

hide H<sub>2</sub>O/NH<sub>3</sub> ☐

zoom 112-122 ☐

GO

TSSYGGYKEPAAPVSIQR, MH+ 1967.0238, m/z 656.3461  
L OS G15 P120811 220811-s1.03423.03423.3.dta

scan 3423; 9.1e+000

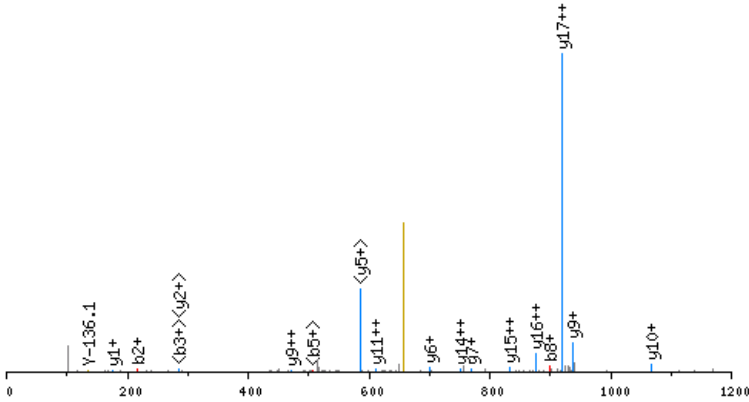

click image to zoom in; click top corners to zoom out [precursor±]

scan 3421; 656.3 m/z; 1.5e+001

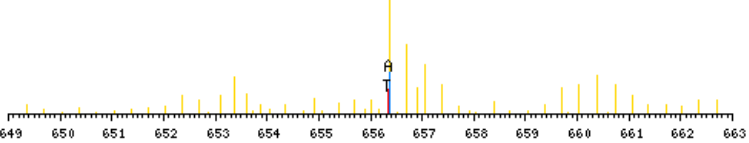

zoomed in precursor plot; T=theoretical m/z, A=acquired m/z

| b <sup>+</sup> | #  | AA | #  | y <sup>+</sup> | y <sup>2+</sup> |
|----------------|----|----|----|----------------|-----------------|
| 130.0868       | 1  | T  | 18 |                |                 |
| 217.1188       | 2  | S  | 17 | 1837.9449      | 919.4763        |
| 304.1508       | 3  | S  | 16 | 1750.9128      | 875.9603        |
| 467.2142       | 4  | Y  | 15 | 1663.8808      | 832.4443        |
| 524.2356       | 5  | G  | 14 | 1500.8175      | 750.9127        |
| 581.2571       | 6  | G  | 13 | 1443.7960      | 722.4019        |
| 744.3204       | 7  | Y  | 12 | 1386.7746      | 693.8912        |
| 900.4467       | 8  | K  | 11 | 1223.7112      | 612.3595        |
| 1029.4893      | 9  | E  | 10 | 1067.5849      | 534.2964        |
| 1126.5421      | 10 | P  | 9  | 938.5423       | 469.7751        |
| 1197.5792      | 11 | A  | 8  | 841.4896       | 421.2487        |
| 1268.6163      | 12 | A  | 7  | 770.4525       | 385.7301        |
| 1365.6691      | 13 | P  | 6  | 699.4153       | 350.2116        |
| 1464.7375      | 14 | V  | 5  | 602.3626       | 301.6852        |
| 1551.7695      | 15 | S  | 4  | 503.2942       | 252.1510        |
| 1664.8536      | 16 | I  | 3  | 416.2621       | 208.6350        |
| 1792.9122      | 17 | Q  | 2  | 303.1781       | 152.0930        |
|                | 18 | R  | 1  | 175.1195       | 88.0637         |

N-term:+29.04 K(8):+156.13

X-range:

0 - 0

MassTol: Y-zoom:

0. 1.

MassType:

☐ AVG ☒ MONO

Axis:

☒ 1 ☐ 2

Label:

☒ I ☐ M ☐ -

Ions:

a ☐ + ☐ 2+ ☐ 3+

b ☒ + ☐ 2+ ☐ 3+

c ☐ + ☐ 2+ ☐ 3+

x ☐ + ☐ 2+ ☐ 3+

y ☒ + ☒ 2+ ☐ 3+

z ☐ + ☐ 2+ ☐ 3+

hide H<sub>2</sub>O/NH<sub>3</sub> ☐

zoom 112-122 ☐

GO

TSSYSALSEPSR, MH+ 1318.6703, m/z 659.8388  
H OS G13 P120811 220811-s1.02776.02776.2.dta

scan 2776; 3.8e+000

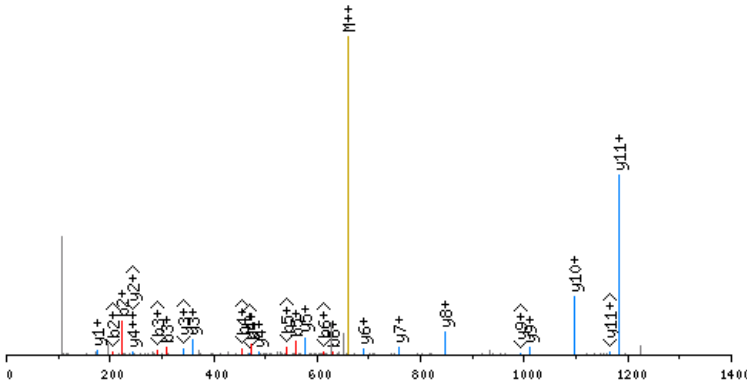

click image to zoom in; click top corners to zoom out

[precursor±]

scan 2774; 659.8 m/z; 7.9e+000

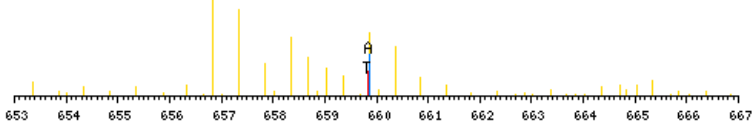

zoomed in precursor plot; T=theoretical m/z, A=acquired m/z

| b <sup>+</sup> | #  | AA | #  | y <sup>+</sup> | y <sup>2+</sup> |
|----------------|----|----|----|----------------|-----------------|
| 136.1186       | 1  | T  | 12 |                |                 |
| 223.1506       | 2  | S  | 11 | 1183.5595      | 592.2837        |
| 310.1826       | 3  | S  | 10 | 1096.5275      | 548.7677        |
| 473.2460       | 4  | Y  | 9  | 1009.4954      | 505.2516        |
| 560.2780       | 5  | S  | 8  | 846.4321       | 423.7200        |
| 631.3151       | 6  | A  | 7  | 759.4001       | 380.2040        |
| 744.3992       | 7  | L  | 6  | 688.3630       | 344.6854        |
| 831.4312       | 8  | S  | 5  | 575.2789       | 288.1434        |
| 960.4738       | 9  | E  | 4  | 488.2469       | 244.6274        |
| 1057.5266      | 10 | P  | 3  | 359.2043       | 180.1061        |
| 1144.5586      | 11 | S  | 2  | 262.1515       | 131.5797        |
|                | 12 | R  | 1  | 175.1195       | 88.0637         |

N-term:+35.07

X-range:

0 - 0

MassTol: Y-zoom:

0. 1.

MassType:

☐ AVG ☒ MONO

Axis:

☒ 1 ☐ 2

Label:

☒ I ☐ M ☐ -

Ions:

a ☐ + ☐ 2+ ☐ 3+

b ☒ + ☐ 2+ ☐ 3+

c ☐ + ☐ 2+ ☐ 3+

x ☐ + ☐ 2+ ☐ 3+

y ☒ + ☒ 2+ ☐ 3+

z ☐ + ☐ 2+ ☐ 3+

hide H<sub>2</sub>O/NH<sub>3</sub> ☐

zoom 112-122 ☐

GO

TSVATKKTEQGPPSSEYIFER, MH+ 2439.2772, m/z 610.5748  
L OS G17 P120811 220811-s1.03924.03924.4.dta

scan 3924; 1.3e+000

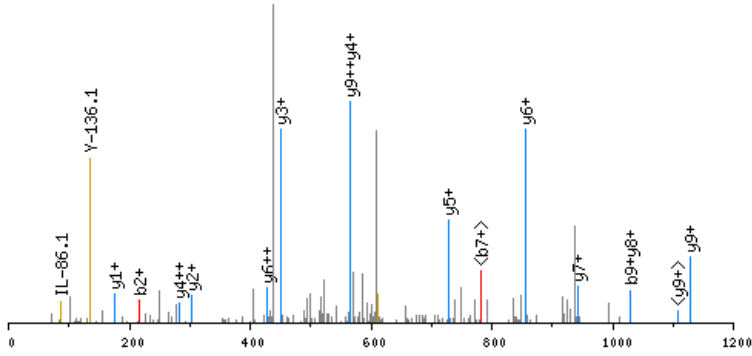

click image to zoom in; click top corners to zoom out

[precursor±]

scan 3923; 610.6 m/z; 8.7e+001

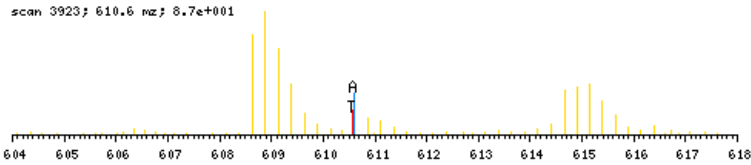

zoomed in precursor plot; T=theoretical m/z, A=acquired m/z

| b <sup>+</sup> | #  | AA | #  | y <sup>+</sup> | y <sup>2+</sup> |
|----------------|----|----|----|----------------|-----------------|
| 130.0868       | 1  | T  | 21 |                |                 |
| 217.1188       | 2  | S  | 20 | 2310.1982      | 1155.6030       |
| 316.1872       | 3  | V  | 19 | 2223.1662      | 1112.0870       |
| 387.2243       | 4  | A  | 18 | 2124.0978      | 1062.5528       |
| 488.2720       | 5  | T  | 17 | 2053.0607      | 1027.0342       |
| 644.3983       | 6  | K  | 16 | 1952.0130      | 976.5104        |
| 800.5246       | 7  | K  | 15 | 1795.8867      | 898.4473        |
| 901.5723       | 8  | T  | 14 | 1639.7604      | 820.3841        |
| 1030.6149      | 9  | E  | 13 | 1538.7127      | 769.8603        |
| 1158.6735      | 10 | Q  | 12 | 1409.6701      | 705.3390        |
| 1215.6949      | 11 | G  | 11 | 1281.6115      | 641.3097        |
| 1312.7477      | 12 | P  | 10 | 1224.5901      | 612.7990        |
| 1409.8005      | 13 | P  | 9  | 1127.5373      | 564.2726        |
| 1496.8325      | 14 | S  | 8  | 1030.4846      | 515.7462        |
| 1583.8645      | 15 | S  | 7  | 943.4525       | 472.2302        |
| 1712.9071      | 16 | E  | 6  | 856.4205       | 428.7142        |
| 1875.9704      | 17 | Y  | 5  | 727.3779       | 364.1929        |
| 1989.0545      | 18 | I  | 4  | 564.3146       | 282.6612        |
| 2136.1229      | 19 | F  | 3  | 451.2305       | 226.1192        |
| 2265.1655      | 20 | E  | 2  | 304.1621       | 152.5850        |
|                | 21 | R  | 1  | 175.1195       | 88.0637         |

N-term:+29.04 K(6):+156.13  
K(7):+156.13

X-range:

0 - 0

MassTol: Y-zoom:

0. 1.

MassType:

☐AVG ☒MONO

Axis:

☒1 ☐2

Label:

☒I ☐M ☐-

Ions:

a ☐+ ☐2+ ☐3+

b ☒+ ☐2+ ☐3+

c ☐+ ☐2+ ☐3+

x ☐+ ☐2+ ☐3+

y ☒+ ☒2+ ☐3+

z ☐+ ☐2+ ☐3+

hide H<sub>2</sub>O/NH<sub>3</sub> ☐

zoom 112-122 ☐

GO

TTAAPKAGPGMVR, MH+ 1312.7411, m/z 438.2519  
L OS G15 P120811 220811-s1.02138.02138.3.dta

scan 2138; 1.9e+001

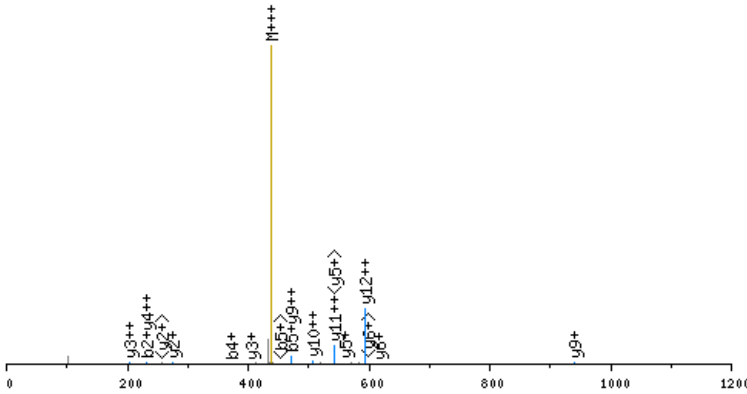

click image to zoom in; click top corners to zoom out

[precursor±]

scan 2136; 438.3 m/z; 2.5e+000

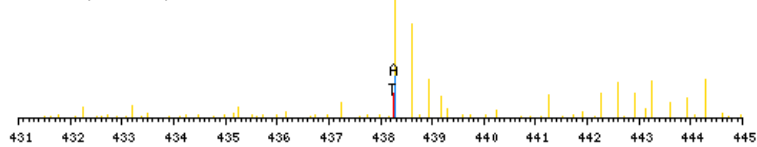

zoomed in precursor plot; T=theoretical m/z, A=acquired m/z

| b <sup>+</sup> | #  | AA | #  | y <sup>+</sup> | y <sup>2+</sup> |
|----------------|----|----|----|----------------|-----------------|
| 130.0868       | 1  | T  | 13 |                |                 |
| 231.1345       | 2  | T  | 12 | 1183.6622      | 592.3350        |
| 302.1716       | 3  | A  | 11 | 1082.6145      | 541.8112        |
| 373.2087       | 4  | A  | 10 | 1011.5774      | 506.2926        |
| 470.2614       | 5  | P  | 9  | 940.5403       | 470.7740        |
| 626.3877       | 6  | K  | 8  | 843.4875       | 422.2477        |
| 697.4249       | 7  | A  | 7  | 687.3612       | 344.1845        |
| 754.4463       | 8  | G  | 6  | 616.3241       | 308.6660        |
| 851.4991       | 9  | P  | 5  | 559.3026       | 280.1552        |
| 908.5206       | 10 | G  | 4  | 462.2499       | 231.6288        |
| 1039.5610      | 11 | M  | 3  | 405.2284       | 203.1181        |
| 1138.6295      | 12 | V  | 2  | 274.1879       | 137.5979        |
|                | 13 | R  | 1  | 175.1195       | 88.0637         |

N-term:+29.04 K(6):+156.13



X-range:

0 - 0

MassTol: Y-zoom:

0. 1.

MassType:

☐ AVG ☒ MONO

Axis:

☒ 1 ☐ 2

Label:

☒ I ☐ M ☐ -

Ions:

a ☐ + ☐ 2+ ☐ 3+

b ☒ + ☐ 2+ ☐ 3+

c ☐ + ☐ 2+ ☐ 3+

x ☐ + ☐ 2+ ☐ 3+

y ☒ + ☒ 2+ ☐ 3+

z ☐ + ☐ 2+ ☐ 3+

hide H<sub>2</sub>O/NH<sub>3</sub> ☐

zoom 112-122 ☐

GO

TTCPLAAGGQOEKLR, MH+ 1685.9008, m/z 562.6385  
L OS G15 P120811 220811-s1.02600.02600.3.dta

scan 2600; 7.4e+000

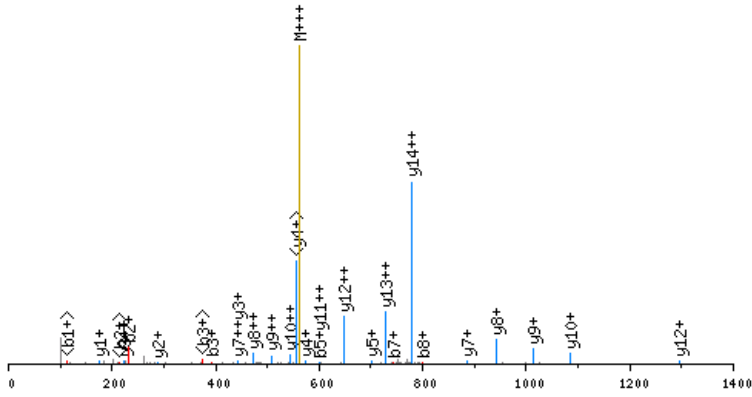

click image to zoom in; click top corners to zoom out

[precursor±]

scan 2596; 562.6 m/z; 5.4e+000

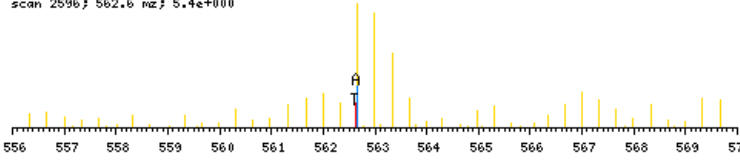

zoomed in precursor plot; T=theoretical m/z, A=acquired m/z

| b <sup>+</sup> | #  | AA | #  | y <sup>+</sup> | y <sup>2+</sup> |
|----------------|----|----|----|----------------|-----------------|
| 130.0868       | 1  | T  | 15 |                |                 |
| 231.1345       | 2  | T  | 14 | 1556.8219      | 778.9148        |
| 391.1651       | 3  | C  | 13 | 1455.7742      | 728.3910        |
| 488.2178       | 4  | P  | 12 | 1295.7436      | 648.3757        |
| 601.3019       | 5  | L  | 11 | 1198.6908      | 599.8493        |
| 672.3390       | 6  | A  | 10 | 1085.6068      | 543.3073        |
| 743.3761       | 7  | A  | 9  | 1014.5697      | 507.7887        |
| 800.3976       | 8  | G  | 8  | 943.5325       | 472.2702        |
| 857.4190       | 9  | G  | 7  | 886.5111       | 443.7595        |
| 985.4776       | 10 | Q  | 6  | 829.4896       | 415.2487        |
| 1113.5362      | 11 | Q  | 5  | 701.4310       | 351.2194        |
| 1242.5788      | 12 | E  | 4  | 573.3725       | 287.1901        |
| 1398.7051      | 13 | K  | 3  | 444.3299       | 222.6688        |
| 1511.7892      | 14 | L  | 2  | 288.2036       | 144.6057        |
|                | 15 | R  | 1  | 175.1195       | 88.0637         |

N-term:+29.04 C(3):+160.03  
K(13):+156.13

X-range:

0 - 0

MassTol: Y-zoom:

0. 1.

MassType:

☐AVG ☒MONO

Axis:

☒1 ☐2

Label:

☒I ☐M ☐-

Ions:

a ☐+ ☐2+ ☐3+

b ☒+ ☐2+ ☐3+

c ☐+ ☐2+ ☐3+

x ☐+ ☐2+ ☐3+

y ☒+ ☒2+ ☐3+

z ☐+ ☐2+ ☐3+

hide H<sub>2</sub>O/NH<sub>3</sub> ☐

zoom 112-122 ☐

GO

TTFAHLDATTVLSR, MH+ 1560.8386, m/z 520.9510  
L OS G15 P120811 220811-s1.04903.04903.3.dta

scan 4903; 5.6e+000

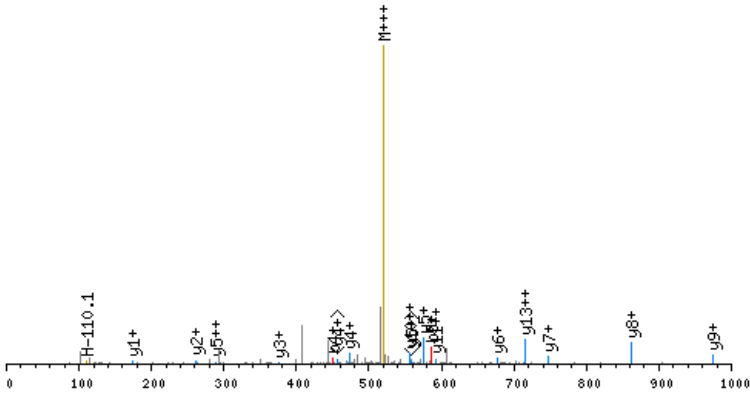

click image to zoom in; click top corners to zoom out

[precursor±]

scan 4901; 521.0 m/z; 4.8e+000

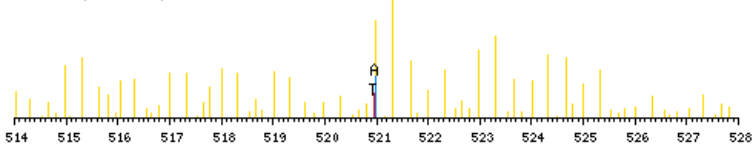

zoomed in precursor plot; T=theoretical m/z, A=acquired m/z

| b <sup>+</sup> | #  | AA | #  | y <sup>+</sup> | y <sup>2+</sup> |
|----------------|----|----|----|----------------|-----------------|
| 130.0868       | 1  | T  | 14 |                |                 |
| 231.1345       | 2  | T  | 13 | 1431.7596      | 716.3837        |
| 378.2029       | 3  | F  | 12 | 1330.7119      | 665.8599        |
| 449.2400       | 4  | A  | 11 | 1183.6435      | 592.3257        |
| 586.2989       | 5  | H  | 10 | 1112.6064      | 556.8071        |
| 699.3830       | 6  | L  | 9  | 975.5475       | 488.2777        |
| 814.4099       | 7  | D  | 8  | 862.4634       | 431.7356        |
| 885.4470       | 8  | A  | 7  | 747.4365       | 374.2222        |
| 986.4947       | 9  | T  | 6  | 676.3994       | 338.7036        |
| 1087.5424      | 10 | T  | 5  | 575.3517       | 288.1798        |
| 1186.6108      | 11 | V  | 4  | 474.3040       | 237.6559        |
| 1299.6949      | 12 | L  | 3  | 375.2356       | 188.1217        |
| 1386.7269      | 13 | S  | 2  | 262.1515       | 131.5797        |
|                | 14 | R  | 1  | 175.1195       | 88.0637         |

N-term:+29.04

X-range:

0 - 0

MassTol: Y-zoom:

0. 1.

MassType:

☐AVG ☒MONO

Axis:

☒1 ☐2

Label:

☒I ☐M ☐-

Ions:

a ☐+ ☐2+ ☐3+

b ☒+ ☐2+ ☐3+

c ☐+ ☐2+ ☐3+

x ☐+ ☐2+ ☐3+

y ☒+ ☒2+ ☐3+

z ☐+ ☐2+ ☐3+

hide H<sub>2</sub>O/NH<sub>3</sub> ☐

zoom 112-122 ☐

GO

TTFMGHYLHEVAR, MH+ 1589.7898, m/z 398.2029  
L OS G18 P120811 220811-s1.04777.04777.4.dta

scan 4777; 1.1e+001

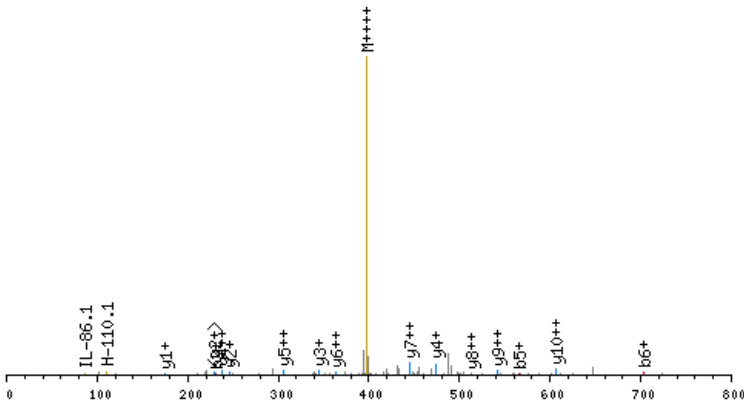

click image to zoom in; click top corners to zoom out

[precursor±]

scan 4776; 398.2 m/z; 7.5e+000

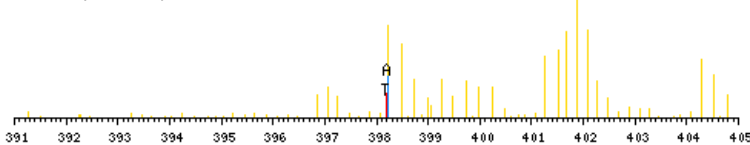

zoomed in precursor plot; T=theoretical m/z, A=acquired m/z

| b <sup>+</sup> | #  | AA | #  | y <sup>+</sup> | y <sup>2+</sup> |
|----------------|----|----|----|----------------|-----------------|
| 130.0868       | 1  | T  | 13 |                |                 |
| 231.1345       | 2  | T  | 12 | 1460.7109      | 730.8594        |
| 378.2029       | 3  | F  | 11 | 1359.6632      | 680.3355        |
| 509.2434       | 4  | M  | 10 | 1212.5948      | 606.8013        |
| 566.2648       | 5  | G  | 9  | 1081.5543      | 541.2811        |
| 703.3237       | 6  | H  | 8  | 1024.5328      | 512.7703        |
| 866.3871       | 7  | Y  | 7  | 887.4739       | 444.2409        |
| 979.4711       | 8  | L  | 6  | 724.4106       | 362.7092        |
| 1116.5300      | 9  | H  | 5  | 611.3265       | 306.1672        |
| 1245.5726      | 10 | E  | 4  | 474.2676       | 237.6377        |
| 1344.6410      | 11 | V  | 3  | 345.2250       | 173.1164        |
| 1415.6782      | 12 | A  | 2  | 246.1566       | 123.5822        |
|                | 13 | R  | 1  | 175.1195       | 88.0637         |

N-term:+29.04

X-range:

0 - 0

MassTol: Y-zoom:

0. 1.

MassType:

☐AVG ☒MONO

Axis:

☒1 ☐2

Label:

☒I ☐M ☐-

Ions:

a ☐+ ☐2+ ☐3+

b ☒+ ☐2+ ☐3+

c ☐+ ☐2+ ☐3+

x ☐+ ☐2+ ☐3+

y ☒+ ☒2+ ☐3+

z ☐+ ☐2+ ☐3+

hide H<sub>2</sub>O/NH<sub>3</sub> ☐

zoom 112-122 ☐

GO

TTFNVQDGPDPFQDR, MH+ 1673.7983, m/z 558.6043  
H OS G13 P120811 220811-s1.04852.04852.3.dta

scan 4852; 2.2e+000

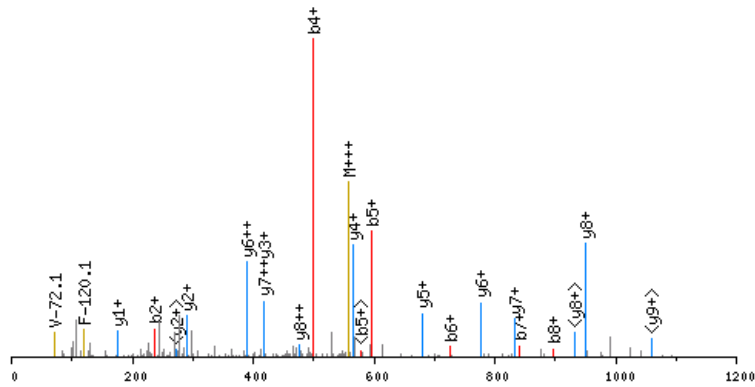

click image to zoom in; click top corners to zoom out

[precursor±]

scan 4849; 558.6 m/z; 1.5e+001

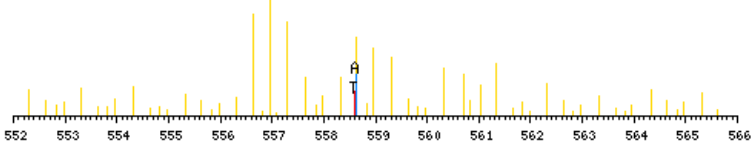

zoomed in precursor plot; T=theoretical m/z, A=acquired m/z

| b <sup>+</sup> | #  | AA | #  | y <sup>+</sup> | y <sup>2+</sup> |
|----------------|----|----|----|----------------|-----------------|
| 136.1186       | 1  | T  | 14 |                |                 |
| 237.1663       | 2  | T  | 13 | 1538.6876      | 769.8477        |
| 384.2347       | 3  | F  | 12 | 1437.6399      | 719.3239        |
| 498.2776       | 4  | N  | 11 | 1290.5715      | 645.7896        |
| 597.3460       | 5  | V  | 10 | 1176.5285      | 588.7682        |
| 725.4046       | 6  | Q  | 9  | 1077.4601      | 539.2340        |
| 840.4315       | 7  | D  | 8  | 949.4015       | 475.2047        |
| 897.4530       | 8  | G  | 7  | 834.3746       | 417.6912        |
| 994.5058       | 9  | P  | 6  | 777.3531       | 389.1805        |
| 1109.5327      | 10 | D  | 5  | 680.3004       | 340.6541        |
| 1256.6011      | 11 | F  | 4  | 565.2734       | 283.1406        |
| 1384.6597      | 12 | Q  | 3  | 418.2050       | 209.6064        |
| 1499.6866      | 13 | D  | 2  | 290.1464       | 145.5771        |
|                | 14 | R  | 1  | 175.1195       | 88.0637         |

N-term:+35.07

X-range:

0 - 0

MassTol: Y-zoom:

0. 1.

MassType:

☐ AVG ☒ MONO

Axis:

☒ 1 ☐ 2

Label:

☒ I ☐ M ☐ -

Ions:

a ☐ + ☐ 2+ ☐ 3+

b ☒ + ☐ 2+ ☐ 3+

c ☐ + ☐ 2+ ☐ 3+

x ☐ + ☐ 2+ ☐ 3+

y ☒ + ☒ 2+ ☐ 3+

z ☐ + ☐ 2+ ☐ 3+

hide H<sub>2</sub>O/NH<sub>3</sub> ☐

zoom 112-122 ☐

GO

TTIAGLVFR, MH+ 1005.6097, m/z 503.3085  
L OS G14 P120811 220811-s1.05697.05697.2.dta

scan 5697; 1.3e+001

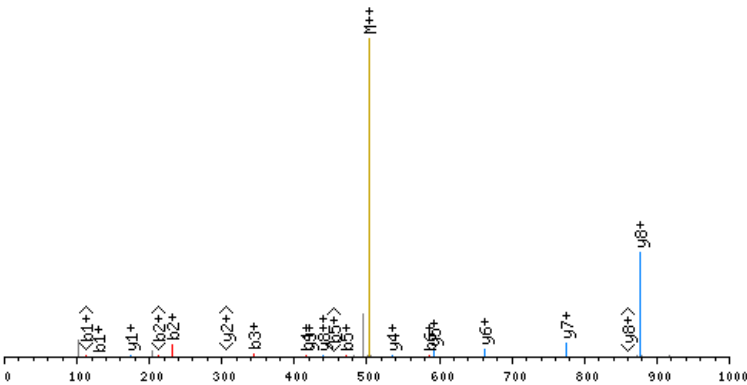

click image to zoom in; click top corners to zoom out [precursor±]

scan 5696; 503.3 m/z; 8.6e+000

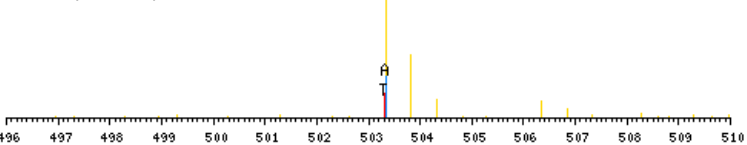

zoomed in precursor plot; T=theoretical m/z, A=acquired m/z

| b <sup>+</sup> | # | AA | # | y <sup>+</sup> | y <sup>2+</sup> |
|----------------|---|----|---|----------------|-----------------|
| 130.0868       | 1 | T  | 9 |                |                 |
| 231.1345       | 2 | T  | 8 | 876.5307       | 438.7693        |
| 344.2185       | 3 | I  | 7 | 775.4830       | 388.2454        |
| 415.2556       | 4 | A  | 6 | 662.3990       | 331.7034        |
| 472.2771       | 5 | G  | 5 | 591.3619       | 296.1848        |
| 585.3612       | 6 | L  | 4 | 534.3404       | 267.6741        |
| 684.4296       | 7 | V  | 3 | 421.2563       | 211.1321        |
| 831.4980       | 8 | F  | 2 | 322.1879       | 161.5979        |
|                | 9 | R  | 1 | 175.1195       | 88.0637         |

N-term:+29.04

X-range:

0 - 0

MassTol: Y-zoom:

0. 1.

MassType:

☐AVG ☒MONO

Axis:

☒1 ☐2

Label:

☒I ☐M ☐-

Ions:

a ☐+ ☐2+ ☐3+

b ☒+ ☐2+ ☐3+

c ☐+ ☐2+ ☐3+

x ☐+ ☐2+ ☐3+

y ☒+ ☒2+ ☐3+

z ☐+ ☐2+ ☐3+

hide H<sub>2</sub>O/NH<sub>3</sub> ☐

zoom 112-122 ☐

GO

TTIAGVVYKDGIVLGADTR, MH+ 2017.1970, m/z 673.0705  
H OS G15 P120811 220811-s1.05569.05569.3.dta

scan 5569; 6.2e+000

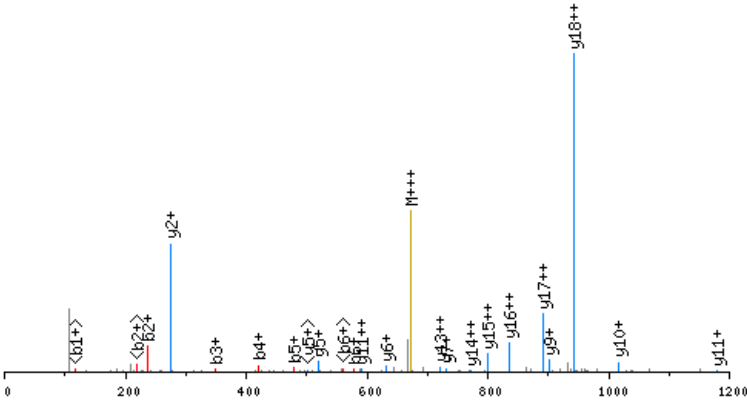

click image to zoom in; click top corners to zoom out

[precursor±]

scan 5566; 673.1 m/z; 3.8e+001

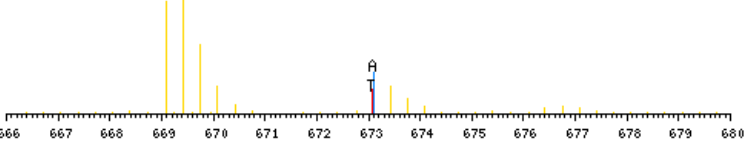

zoomed in precursor plot; T=theoretical m/z, A=acquired m/z

| b <sup>+</sup> | #  | AA | #  | y <sup>+</sup> | y <sup>2+</sup> |
|----------------|----|----|----|----------------|-----------------|
| 136.1186       | 1  | T  | 19 |                |                 |
| 237.1663       | 2  | T  | 18 | 1882.0862      | 941.5470        |
| 350.2503       | 3  | I  | 17 | 1781.0385      | 891.0232        |
| 421.2874       | 4  | A  | 16 | 1667.9545      | 834.4812        |
| 478.3089       | 5  | G  | 15 | 1596.9174      | 798.9626        |
| 577.3773       | 6  | V  | 14 | 1539.8959      | 770.4519        |
| 676.4457       | 7  | V  | 13 | 1440.8275      | 720.9177        |
| 839.5091       | 8  | Y  | 12 | 1341.7591      | 671.3835        |
| 1001.6672      | 9  | K  | 11 | 1178.6957      | 589.8518        |
| 1116.6941      | 10 | D  | 10 | 1016.5376      | 508.7727        |
| 1173.7156      | 11 | G  | 9  | 901.5107       | 451.2593        |
| 1286.7996      | 12 | I  | 8  | 844.4892       | 422.7485        |
| 1385.8680      | 13 | V  | 7  | 731.4052       | 366.2065        |
| 1498.9521      | 14 | L  | 6  | 632.3368       | 316.6723        |
| 1555.9736      | 15 | G  | 5  | 519.2527       | 260.1303        |
| 1627.0107      | 16 | A  | 4  | 462.2312       | 231.6195        |
| 1742.0376      | 17 | D  | 3  | 391.1941       | 196.1010        |
| 1843.0853      | 18 | T  | 2  | 276.1672       | 138.5875        |
|                | 19 | R  | 1  | 175.1195       | 88.0637         |

N-term:+35.07 K(9):+162.16

X-range:

0 - 0

MassTol: Y-zoom:

0. 1.

MassType:

☐AVG ☒MONO

Axis:

☒1 ☐2

Label:

☒I ☐M ☐-

Ions:

a ☐+ ☐2+ ☐3+

b ☒+ ☐2+ ☐3+

c ☐+ ☐2+ ☐3+

x ☐+ ☐2+ ☐3+

y ☒+ ☒2+ ☐3+

z ☐+ ☐2+ ☐3+

hide H<sub>2</sub>O/NH<sub>3</sub> ☐

zoom 112-122 ☐

GO

TTIFEVLPEKADR, MH+ 1574.8794, m/z 525.6313  
L OS G15 P120811 220811-s1.05407.05407.3.dta

scan 5407; 1.7e+001

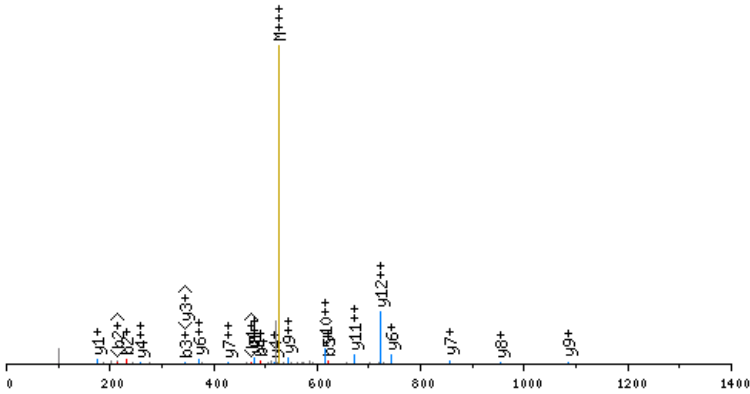

click image to zoom in; click top corners to zoom out

[precursor±]

scan 5406; 525.6 m/z; 1.7e+001

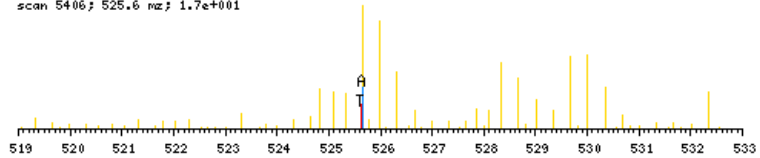

zoomed in precursor plot; T=theoretical m/z, A=acquired m/z

| b <sup>+</sup> | #  | AA | #  | y <sup>+</sup> | y <sup>2+</sup> |
|----------------|----|----|----|----------------|-----------------|
| 130.0868       | 1  | T  | 13 |                |                 |
| 231.1345       | 2  | T  | 12 | 1445.8004      | 723.4041        |
| 344.2185       | 3  | I  | 11 | 1344.7528      | 672.8803        |
| 491.2869       | 4  | F  | 10 | 1231.6687      | 616.3383        |
| 620.3295       | 5  | E  | 9  | 1084.6003      | 542.8041        |
| 719.3979       | 6  | V  | 8  | 955.5577       | 478.2828        |
| 832.4820       | 7  | L  | 7  | 856.4893       | 428.7486        |
| 929.5348       | 8  | P  | 6  | 743.4052       | 372.2065        |
| 1058.5774      | 9  | E  | 5  | 646.3525       | 323.6801        |
| 1214.7037      | 10 | K  | 4  | 517.3099       | 259.1588        |
| 1285.7408      | 11 | A  | 3  | 361.1836       | 181.0957        |
| 1400.7677      | 12 | D  | 2  | 290.1464       | 145.5771        |
|                | 13 | R  | 1  | 175.1195       | 88.0637         |

N-term:+29.04 K(10):+156.13

X-range:

0 - 0

MassTol: Y-zoom:

0. 1.

MassType:

☐ AVG ☒ MONO

Axis:

☒ 1 ☐ 2

Label:

☒ I ☐ M ☐ -

Ions:

a ☐ + ☐ 2+ ☐ 3+

b ☒ + ☐ 2+ ☐ 3+

c ☐ + ☐ 2+ ☐ 3+

x ☐ + ☐ 2+ ☐ 3+

y ☒ + ☒ 2+ ☐ 3+

z ☐ + ☐ 2+ ☐ 3+

hide H<sub>2</sub>O/NH<sub>3</sub> ☐

zoom 112-122 ☐

GO

TTMYPGIADR, MH+ 1158.6041, m/z 579.8057  
H OS G13 P120811 220811-s1.03667.03667.2.dta

scan 3667; 3.2e+000

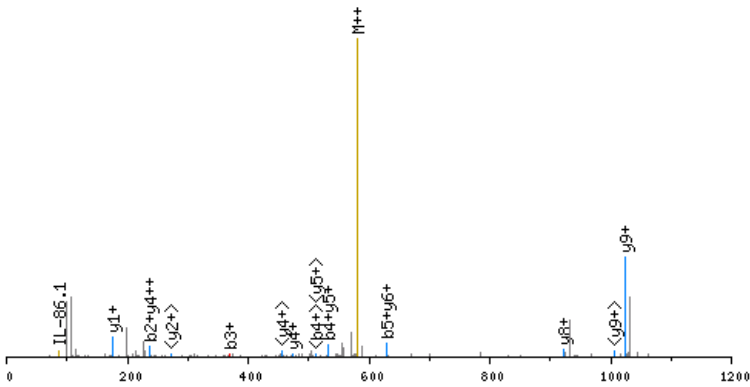

click image to zoom in; click top corners to zoom out

[precursor±]

scan 3664; 579.8 m/z; 1.2e+001

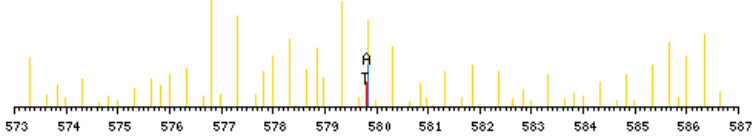

zoomed in precursor plot; T=theoretical m/z, A=acquired m/z

| b <sup>+</sup> | #  | AA | #  | y <sup>+</sup> | y <sup>2+</sup> |
|----------------|----|----|----|----------------|-----------------|
| 136.1186       | 1  | T  | 10 |                |                 |
| 237.1663       | 2  | T  | 9  | 1023.4933      | 512.2506        |
| 368.2067       | 3  | M  | 8  | 922.4457       | 461.7267        |
| 531.2701       | 4  | Y  | 7  | 791.4052       | 396.2065        |
| 628.3228       | 5  | P  | 6  | 628.3418       | 314.6748        |
| 685.3443       | 6  | G  | 5  | 531.2891       | 266.1485        |
| 798.4284       | 7  | I  | 4  | 474.2676       | 237.6377        |
| 869.4655       | 8  | A  | 3  | 361.1836       | 181.0957        |
| 984.4924       | 9  | D  | 2  | 290.1464       | 145.5771        |
|                | 10 | R  | 1  | 175.1195       | 88.0637         |

N-term:+35.07

X-range:

0 - 0

MassTol: Y-zoom:

0. 1.

MassType:

☐AVG ☒MONO

Axis:

☒1 ☐2

Label:

☒I ☐M ☐-

Ions:

a ☐+ ☐2+ ☐3+

b ☒+ ☐2+ ☐3+

c ☐+ ☐2+ ☐3+

x ☐+ ☐2+ ☐3+

y ☒+ ☒2+ ☐3+

z ☐+ ☐2+ ☐3+

hide H<sub>2</sub>O/NH<sub>3</sub> ☐

zoom 112-122 ☐

GO

TTPSYVAFDTDER, MH+ 1515.7331, m/z 758.3702  
L OS G13 P120811 220811-s1.04678.04678.2.dta

scan 4678; 2.8e+000

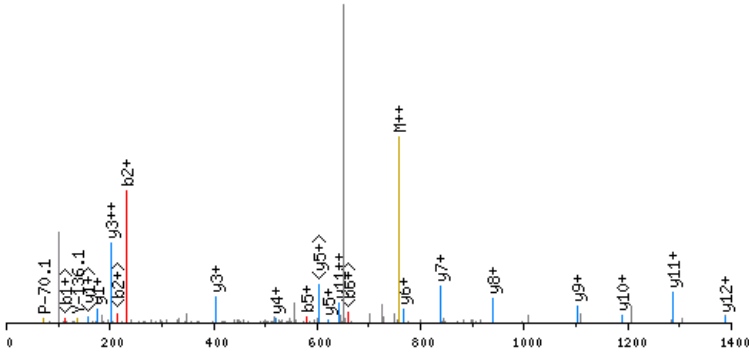

click image to zoom in; click top corners to zoom out

[precursor±]

scan 4674; 758.4 m/z; 9.6e+000

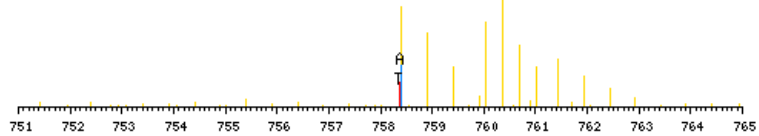

zoomed in precursor plot; T=theoretical m/z, A=acquired m/z

| b <sup>+</sup> | #  | AA | #  | y <sup>+</sup> | y <sup>2+</sup> |
|----------------|----|----|----|----------------|-----------------|
| 130.0868       | 1  | T  | 13 |                |                 |
| 231.1345       | 2  | T  | 12 | 1386.6541      | 693.8310        |
| 328.1872       | 3  | P  | 11 | 1285.6065      | 643.3071        |
| 415.2192       | 4  | S  | 10 | 1188.5537      | 594.7808        |
| 578.2826       | 5  | Y  | 9  | 1101.5217      | 551.2647        |
| 677.3510       | 6  | V  | 8  | 938.4583       | 469.7331        |
| 748.3881       | 7  | A  | 7  | 839.3899       | 420.1989        |
| 895.4565       | 8  | F  | 6  | 768.3528       | 384.6803        |
| 996.5042       | 9  | T  | 5  | 621.2844       | 311.1461        |
| 1111.5311      | 10 | D  | 4  | 520.2367       | 260.6223        |
| 1212.5788      | 11 | T  | 3  | 405.2098       | 203.1088        |
| 1341.6214      | 12 | E  | 2  | 304.1621       | 152.5850        |
|                | 13 | R  | 1  | 175.1195       | 88.0637         |

N-term:+29.04

X-range:

0 - 0

MassTol: Y-zoom:

0. 1.

MassType:

☐AVG ☒MONO

Axis:

☒1 ☐2

Label:

☒I ☐M ☐-

Ions:

a ☐+ ☐2+ ☐3+

b ☒+ ☐2+ ☐3+

c ☐+ ☐2+ ☐3+

x ☐+ ☐2+ ☐3+

y ☒+ ☒2+ ☐3+

z ☐+ ☐2+ ☐3+

hide H<sub>2</sub>O/NH<sub>3</sub> ☐

zoom 112-122 ☐

GO

TTTTAVHIQPAQEQAR, MH+ 1779.9353, m/z 593.9833  
L OS G15 P120811 220811-s1.02404.02404.3.dta

scan 2404; 3.8e+000

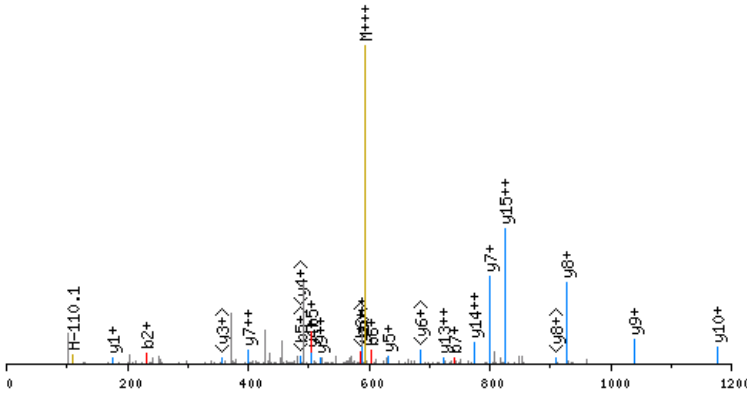

click image to zoom in; click top corners to zoom out [precursor±]

scan 2401; 594.0 m/z; 6.7e+000

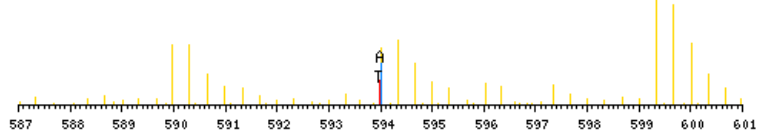

zoomed in precursor plot; T=theoretical m/z, A=acquired m/z

| b <sup>+</sup> | #  | AA | #  | y <sup>+</sup> | y <sup>2+</sup> |
|----------------|----|----|----|----------------|-----------------|
| 130.0868       | 1  | T  | 16 |                |                 |
| 231.1345       | 2  | T  | 15 | 1650.8564      | 825.9321        |
| 332.1821       | 3  | T  | 14 | 1549.8087      | 775.4083        |
| 433.2298       | 4  | T  | 13 | 1448.7610      | 724.8844        |
| 504.2669       | 5  | A  | 12 | 1347.7133      | 674.3606        |
| 603.3353       | 6  | V  | 11 | 1276.6762      | 638.8420        |
| 740.3943       | 7  | H  | 10 | 1177.6078      | 589.3078        |
| 853.4783       | 8  | I  | 9  | 1040.5489      | 520.7784        |
| 981.5369       | 9  | Q  | 8  | 927.4648       | 464.2363        |
| 1078.5897      | 10 | P  | 7  | 799.4062       | 400.2070        |
| 1149.6268      | 11 | A  | 6  | 702.3535       | 351.6807        |
| 1277.6854      | 12 | Q  | 5  | 631.3164       | 316.1621        |
| 1406.7279      | 13 | E  | 4  | 503.2578       | 252.1328        |
| 1534.7865      | 14 | Q  | 3  | 374.2152       | 187.6115        |
| 1605.8236      | 15 | A  | 2  | 246.1566       | 123.5822        |
|                | 16 | R  | 1  | 175.1195       | 88.0637         |

N-term:+29.04

X-range:

0 - 0

MassTol: Y-zoom:

0. 1.

MassType:

☐AVG ☒MONO

Axis:

☒1 ☐2

Label:

☒I ☐M ☐-

Ions:

a ☐+ ☐2+ ☐3+

b ☒+ ☐2+ ☐3+

c ☐+ ☐2+ ☐3+

x ☐+ ☐2+ ☐3+

y ☒+ ☒2+ ☐3+

z ☐+ ☐2+ ☐3+

hide H<sub>2</sub>O/NH<sub>3</sub> ☐

zoom 112-122 ☐

GO

TTVFSCNLGEKFDETTADGR, MH+ 2304.0818, m/z 768.6988  
L OS G15 P120811 220811-s1.04973.04973.3.dta

scan 4973; 5.7e+000

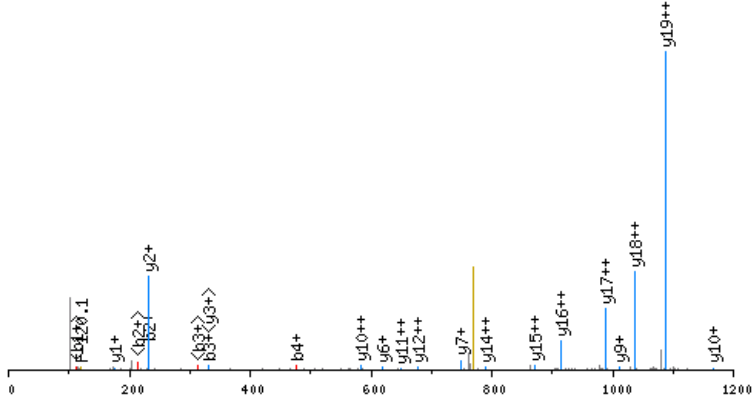

click image to zoom in; click top corners to zoom out

[precursor±]

scan 4971; 768.7 m/z; 6.3e+000

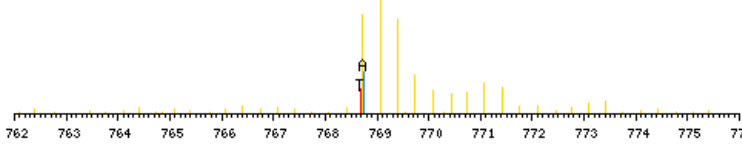

zoomed in precursor plot; T=theoretical m/z, A=acquired m/z

| b <sup>+</sup> | #  | AA | #  | y <sup>+</sup> | y <sup>2+</sup> |
|----------------|----|----|----|----------------|-----------------|
| 130.0868       | 1  | T  | 20 |                |                 |
| 231.1345       | 2  | T  | 19 | 2175.0028      | 1088.0053       |
| 330.2029       | 3  | V  | 18 | 2073.9551      | 1037.4815       |
| 477.2713       | 4  | F  | 17 | 1974.8867      | 987.9473        |
| 564.3033       | 5  | S  | 16 | 1827.8183      | 914.4131        |
| 724.3339       | 6  | C  | 15 | 1740.7863      | 870.8971        |
| 838.3768       | 7  | N  | 14 | 1580.7557      | 790.8818        |
| 951.4609       | 8  | L  | 13 | 1466.7127      | 733.8603        |
| 1008.4824      | 9  | G  | 12 | 1353.6287      | 677.3183        |
| 1137.5250      | 10 | E  | 11 | 1296.6072      | 648.8075        |
| 1293.6513      | 11 | K  | 10 | 1167.5646      | 584.2862        |
| 1440.7197      | 12 | F  | 9  | 1011.4383      | 506.2231        |
| 1555.7466      | 13 | D  | 8  | 864.3699       | 432.6889        |
| 1684.7892      | 14 | E  | 7  | 749.3430       | 375.1754        |
| 1785.8369      | 15 | T  | 6  | 620.3004       | 310.6541        |
| 1886.8846      | 16 | T  | 5  | 519.2527       | 260.1303        |
| 1957.9217      | 17 | A  | 4  | 418.2050       | 209.6064        |
| 2072.9486      | 18 | D  | 3  | 347.1679       | 174.0879        |
| 2129.9701      | 19 | G  | 2  | 232.1410       | 116.5744        |
|                | 20 | R  | 1  | 175.1195       | 88.0637         |

N-term: +29.04 C(6): +160.03  
K(11): +156.13

X-range:

0 - 0

MassTol: Y-zoom:

0. 1.

MassType:

☐AVG ☒MONO

Axis:

☒1 ☐2

Label:

☒I ☐M ☐-

Ions:

a ☐+ ☐2+ ☐3+

b ☒+ ☐2+ ☐3+

c ☐+ ☐2+ ☐3+

x ☐+ ☐2+ ☐3+

y ☒+ ☒2+ ☐3+

z ☐+ ☐2+ ☐3+

hide H<sub>2</sub>O/NH<sub>3</sub> ☐

zoom 112-122 ☐

GO

TVAKNKDQGTYYEDYVEGLR, MH+ 2270.1669, m/z 568.2972  
L OS G17 P120811 220811-s1.04416.04416.4.dta

scan 4416: 3.0e+000

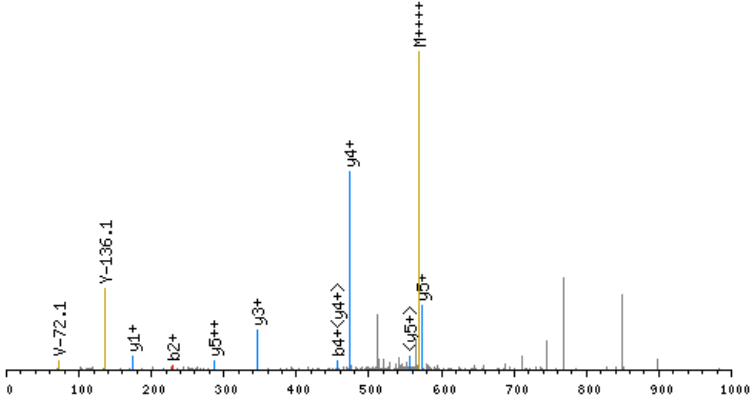

click image to zoom in; click top corners to zoom out [\[precursor±\]](#)

scan 4413: 568.3 m/z; 1.8e+001

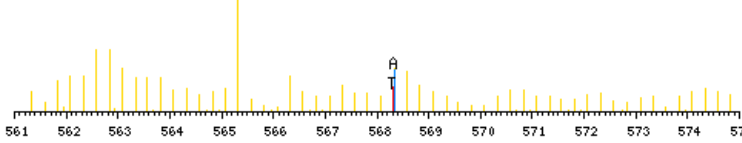

zoomed in precursor plot; T=theoretical m/z, A=acquired m/z

| b <sup>+</sup> | #  | AA | #  | y <sup>+</sup> | y <sup>2+</sup> |
|----------------|----|----|----|----------------|-----------------|
| 130.0868       | 1  | T  | 19 |                |                 |
| 229.1552       | 2  | V  | 18 | 2141.0879      | 1071.0479       |
| 300.1923       | 3  | A  | 17 | 2042.0195      | 1021.5137       |
| 456.3186       | 4  | K  | 16 | 1970.9824      | 985.9951        |
| 570.3615       | 5  | N  | 15 | 1814.8561      | 907.9320        |
| 726.4878       | 6  | K  | 14 | 1700.8132      | 850.9105        |
| 841.5148       | 7  | D  | 13 | 1544.6869      | 772.8474        |
| 969.5734       | 8  | Q  | 12 | 1429.6599      | 715.3339        |
| 1026.5948      | 9  | G  | 11 | 1301.6014      | 651.3046        |
| 1127.6425      | 10 | T  | 10 | 1244.5799      | 622.7939        |
| 1290.7058      | 11 | Y  | 9  | 1143.5322      | 572.2700        |
| 1419.7484      | 12 | E  | 8  | 980.4689       | 490.7384        |
| 1534.7754      | 13 | D  | 7  | 851.4263       | 426.2171        |
| 1697.8387      | 14 | Y  | 6  | 736.3994       | 368.7036        |
| 1796.9071      | 15 | V  | 5  | 573.3360       | 287.1719        |
| 1925.9497      | 16 | E  | 4  | 474.2676       | 237.6377        |
| 1982.9712      | 17 | G  | 3  | 345.2250       | 173.1164        |
| 2096.0552      | 18 | L  | 2  | 288.2036       | 144.6057        |
|                | 19 | R  | 1  | 175.1195       | 88.0637         |

N-term:+29.04 K(4):+156.13  
K(6):+156.13

X-range:

0 - 0

MassTol: Y-zoom:

0. 1.

MassType:

☐AVG ☒MONO

Axis:

☒1 ☐2

Label:

☒I ☐M ☐-

Ions:

a ☐+ ☐2+ ☐3+

b ☒+ ☐2+ ☐3+

c ☐+ ☐2+ ☐3+

x ☐+ ☐2+ ☐3+

y ☒+ ☒2+ ☐3+

z ☐+ ☐2+ ☐3+

hide H<sub>2</sub>O/NH<sub>3</sub> ☐

zoom 112-122 ☐

GO

TVATPLNQVANPNSAIFGGAR, MH+ 2126.1358, m/z 709.3835  
L OS G12 P120811 220811-s1.04846.04846.3.dta

scan 4846; 1.5e+000

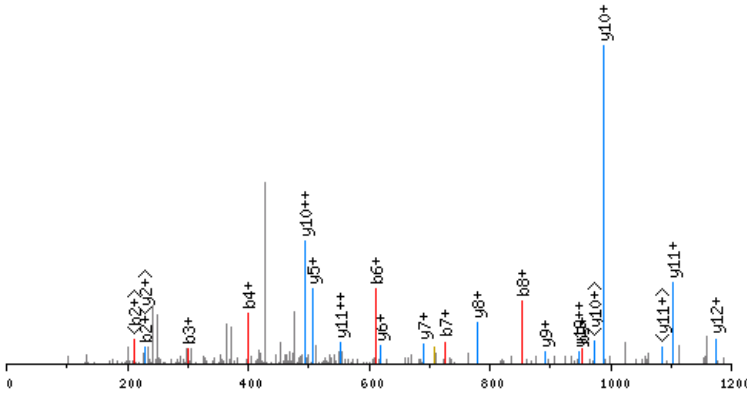

click image to zoom in; click top corners to zoom out

[precursor±]

scan 4842; 709.4 m/z; 2.5e+000

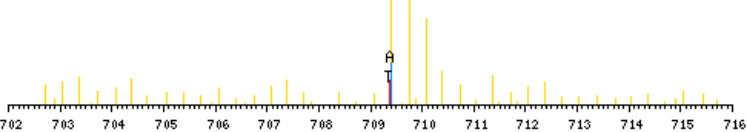

zoomed in precursor plot; T=theoretical m/z, A=acquired m/z

| b <sup>+</sup> | #  | AA | #  | y <sup>+</sup> | y <sup>2+</sup> |
|----------------|----|----|----|----------------|-----------------|
| 130.0868       | 1  | T  | 21 |                |                 |
| 229.1552       | 2  | V  | 20 | 1997.0568      | 999.0323        |
| 300.1923       | 3  | A  | 19 | 1897.9884      | 949.4981        |
| 401.2400       | 4  | T  | 18 | 1826.9513      | 913.9796        |
| 498.2927       | 5  | P  | 17 | 1725.9036      | 863.4557        |
| 611.3768       | 6  | L  | 16 | 1628.8509      | 814.9294        |
| 725.4197       | 7  | N  | 15 | 1515.7668      | 758.3873        |
| 853.4783       | 8  | Q  | 14 | 1401.7239      | 701.3659        |
| 952.5467       | 9  | V  | 13 | 1273.6653      | 637.3366        |
| 1023.5838      | 10 | A  | 12 | 1174.5969      | 587.8024        |
| 1137.6268      | 11 | N  | 11 | 1103.5598      | 552.2838        |
| 1234.6795      | 12 | P  | 10 | 989.5169       | 495.2623        |
| 1348.7225      | 13 | N  | 9  | 892.4641       | 446.7360        |
| 1435.7545      | 14 | S  | 8  | 778.4212       | 389.7145        |
| 1506.7916      | 15 | A  | 7  | 691.3891       | 346.1985        |
| 1619.8757      | 16 | I  | 6  | 620.3520       | 310.6799        |
| 1766.9441      | 17 | F  | 5  | 507.2680       | 254.1379        |
| 1823.9655      | 18 | G  | 4  | 360.1995       | 180.6037        |
| 1880.9870      | 19 | G  | 3  | 303.1781       | 152.0930        |
| 1952.0241      | 20 | A  | 2  | 246.1566       | 123.5822        |
|                | 21 | R  | 1  | 175.1195       | 88.0637         |

N-term:+29.04

X-range:

0 - 0

MassTol: Y-zoom:

0. 1.

MassType:

☐ AVG ☒ MONO

Axis:

☒ 1 ☐ 2

Label:

☒ I ☐ M ☐ -

Ions:

a ☐ + ☐ 2+ ☐ 3+

b ☒ + ☐ 2+ ☐ 3+

c ☐ + ☐ 2+ ☐ 3+

x ☐ + ☐ 2+ ☐ 3+

y ☒ + ☒ 2+ ☐ 3+

z ☐ + ☐ 2+ ☐ 3+

hide H<sub>2</sub>O/NH<sub>3</sub> ☐

zoom 112-122 ☐

GO

TVATPLNQVANPNSAIFGGARPR, MH+ 2379.2897, m/z 793.7681  
L OS G15 P120811 220811-s1.05300.05300.3.dta

scan 5300; 4.1e+000

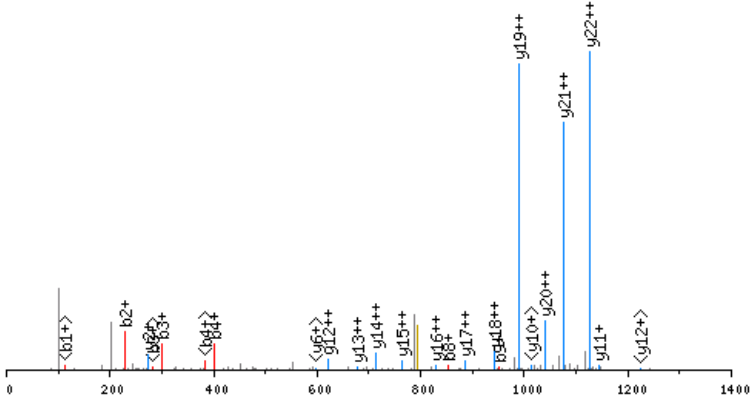

click image to zoom in; click top corners to zoom out

[precursor±]

scan 5296; 793.8 m/z; 6.8e+000

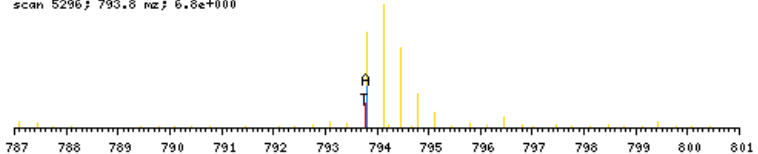

zoomed in precursor plot; T=theoretical m/z, A=acquired m/z

| b <sup>+</sup> | #  | AA | #  | y <sup>+</sup> | y <sup>2+</sup> |
|----------------|----|----|----|----------------|-----------------|
| 130.0868       | 1  | T  | 23 |                |                 |
| 229.1552       | 2  | V  | 22 | 2250.2107      | 1125.6093       |
| 300.1923       | 3  | A  | 21 | 2151.1423      | 1076.0751       |
| 401.2400       | 4  | T  | 20 | 2080.1052      | 1040.5565       |
| 498.2927       | 5  | P  | 19 | 1979.0575      | 990.0327        |
| 611.3768       | 6  | L  | 18 | 1882.0048      | 941.5063        |
| 725.4197       | 7  | N  | 17 | 1768.9207      | 884.9643        |
| 853.4783       | 8  | Q  | 16 | 1654.8778      | 827.9428        |
| 952.5467       | 9  | V  | 15 | 1526.8192      | 763.9135        |
| 1023.5838      | 10 | A  | 14 | 1427.7508      | 714.3793        |
| 1137.6268      | 11 | N  | 13 | 1356.7137      | 678.8607        |
| 1234.6795      | 12 | P  | 12 | 1242.6707      | 621.8393        |
| 1348.7225      | 13 | N  | 11 | 1145.6180      | 573.3129        |
| 1435.7545      | 14 | S  | 10 | 1031.5750      | 516.2914        |
| 1506.7916      | 15 | A  | 9  | 944.5430       | 472.7754        |
| 1619.8757      | 16 | I  | 8  | 873.5059       | 437.2569        |
| 1766.9441      | 17 | F  | 7  | 760.4218       | 380.7148        |
| 1823.9655      | 18 | G  | 6  | 613.3534       | 307.1806        |
| 1880.9870      | 19 | G  | 5  | 556.3320       | 278.6699        |
| 1952.0241      | 20 | A  | 4  | 499.3105       | 250.1592        |
| 2108.1252      | 21 | R  | 3  | 428.2734       | 214.6406        |
| 2205.1780      | 22 | P  | 2  | 272.1723       | 136.5900        |
|                | 23 | R  | 1  | 175.1195       | 88.0637         |

N-term:+29.04

X-range:

0 - 0

MassTol: Y-zoom:

0. 1.

MassType:

☐AVG ☒MONO

Axis:

☒1 ☐2

Label:

☒I ☐M ☐-

Ions:

a ☐+ ☐2+ ☐3+

b ☒+ ☐2+ ☐3+

c ☐+ ☐2+ ☐3+

x ☐+ ☐2+ ☐3+

y ☒+ ☒2+ ☐3+

z ☐+ ☐2+ ☐3+

hide H<sub>2</sub>O/NH<sub>3</sub> ☐

zoom 112-122 ☐

GO

TVEGDVNTDPWAGYR, MH+ 1707.7978, m/z 569.9375  
L OS G13 P120811 220811-s1.04981.04981.3.dta

scan 4981; 2.1e+000

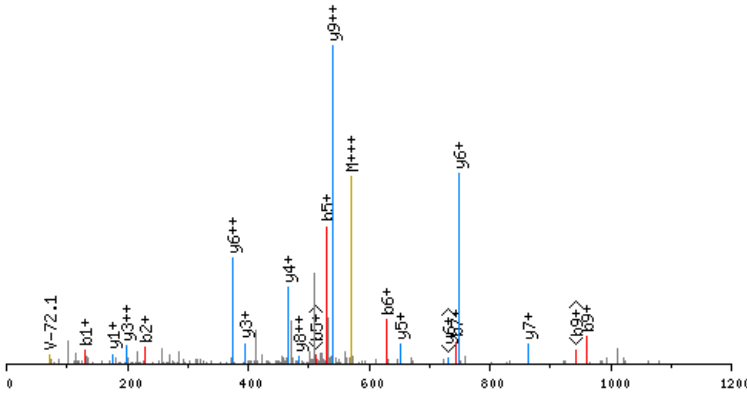

click image to zoom in; click top corners to zoom out [\[precursor±\]](#)

scan 4979; 569.9 m/z; 5.7e+000

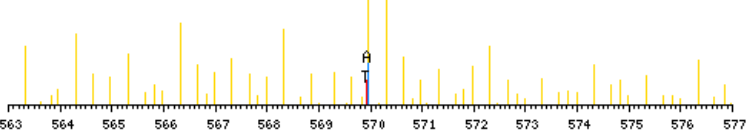

zoomed in precursor plot; T=theoretical m/z, A=acquired m/z

| b <sup>+</sup> | #  | AA | #  | y <sup>+</sup> | y <sup>2+</sup> |
|----------------|----|----|----|----------------|-----------------|
| 130.0868       | 1  | T  | 15 |                |                 |
| 229.1552       | 2  | V  | 14 | 1578.7189      | 789.8633        |
| 358.1978       | 3  | E  | 13 | 1479.6504      | 740.3291        |
| 415.2192       | 4  | G  | 12 | 1350.6079      | 675.8078        |
| 530.2462       | 5  | D  | 11 | 1293.5864      | 647.2971        |
| 629.3146       | 6  | V  | 10 | 1178.5594      | 589.7836        |
| 743.3575       | 7  | N  | 9  | 1079.4910      | 540.2494        |
| 844.4052       | 8  | T  | 8  | 965.4481       | 483.2280        |
| 959.4322       | 9  | D  | 7  | 864.4004       | 432.7041        |
| 1056.4849      | 10 | P  | 6  | 749.3735       | 375.1907        |
| 1242.5642      | 11 | W  | 5  | 652.3207       | 326.6643        |
| 1313.6013      | 12 | A  | 4  | 466.2414       | 233.6246        |
| 1370.6228      | 13 | G  | 3  | 395.2043       | 198.1061        |
| 1533.6861      | 14 | Y  | 2  | 338.1828       | 169.5953        |
|                | 15 | R  | 1  | 175.1195       | 88.0637         |

N-term:+29.04

X-range:

0 - 0

MassTol: Y-zoom:

0. 1.

MassType:

☐AVG ☒MONO

Axis:

☒1 ☐2

Label:

☒I ☐M ☐-

Ions:

a ☐+ ☐2+ ☐3+

b ☒+ ☐2+ ☐3+

c ☐+ ☐2+ ☐3+

x ☐+ ☐2+ ☐3+

y ☒+ ☒2+ ☐3+

z ☐+ ☐2+ ☐3+

hide H<sub>2</sub>O/NH<sub>3</sub> ☐

zoom 112-122 ☐

GO

TVESTSLYNKVAAQGEVVR, MH+ 2107.1399, m/z 703.0515  
L OS G15 P120811 220811-s1.04189.04189.3.dta

scan 4189; 3.8e+000

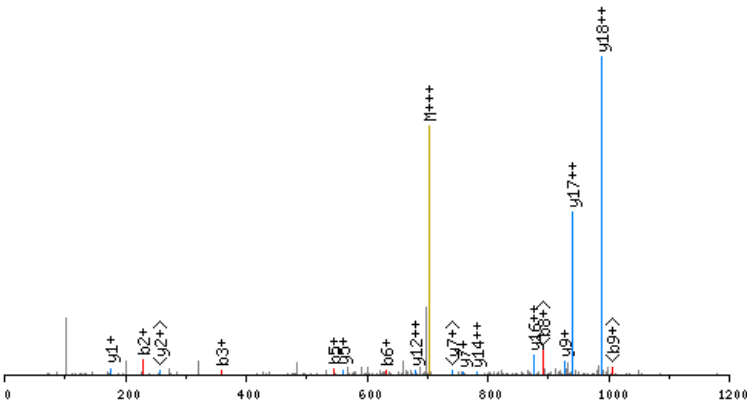

click image to zoom in; click top corners to zoom out

[precursor±]

scan 4186; 703.1 m/z; 9.9e+000

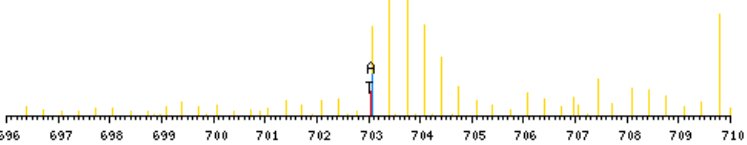

zoomed in precursor plot; T=theoretical m/z, A=acquired m/z

| b <sup>+</sup> | #  | AA | #  | y <sup>+</sup> | y <sup>2+</sup> |
|----------------|----|----|----|----------------|-----------------|
| 130.0868       | 1  | T  | 19 |                |                 |
| 229.1552       | 2  | V  | 18 | 1978.0610      | 989.5344        |
| 358.1978       | 3  | E  | 17 | 1878.9926      | 940.0002        |
| 445.2298       | 4  | S  | 16 | 1749.9500      | 875.4789        |
| 546.2775       | 5  | T  | 15 | 1662.9179      | 831.9629        |
| 633.3095       | 6  | S  | 14 | 1561.8703      | 781.4390        |
| 746.3936       | 7  | L  | 13 | 1474.8382      | 737.9230        |
| 909.4569       | 8  | Y  | 12 | 1361.7542      | 681.3810        |
| 1023.4998      | 9  | N  | 11 | 1198.6908      | 599.8493        |
| 1179.6261      | 10 | K  | 10 | 1084.6479      | 542.8279        |
| 1278.6946      | 11 | V  | 9  | 928.5216       | 464.7647        |
| 1349.7317      | 12 | A  | 8  | 829.4532       | 415.2305        |
| 1420.7688      | 13 | A  | 7  | 758.4161       | 379.7120        |
| 1548.8274      | 14 | Q  | 6  | 687.3790       | 344.1934        |
| 1605.8488      | 15 | G  | 5  | 559.3204       | 280.1641        |
| 1734.8914      | 16 | E  | 4  | 502.2989       | 251.6534        |
| 1833.9598      | 17 | V  | 3  | 373.2563       | 187.1321        |
| 1933.0282      | 18 | V  | 2  | 274.1879       | 137.5979        |
|                | 19 | R  | 1  | 175.1195       | 88.0637         |

N-term:+29.04 K(10):+156.13

X-range:

0 - 0

MassTol: Y-zoom:

0. 1.

MassType:

☐AVG ☒MONO

Axis:

☒1 ☐2

Label:

☒I ☐M ☐-

Ions:

a ☐+ ☐2+ ☐3+

b ☒+ ☐2+ ☐3+

c ☐+ ☐2+ ☐3+

x ☐+ ☐2+ ☐3+

y ☒+ ☒2+ ☐3+

z ☐+ ☐2+ ☐3+

hide H<sub>2</sub>O/NH<sub>3</sub> ☐

zoom 112-122 ☐

GO

TVEVDLHTAKGR, MH+ 1393.8440, m/z 465.2862  
H OS G17 P120811 220811-s1.02589.02589.3.dta

scan 2589; 1.1e+001

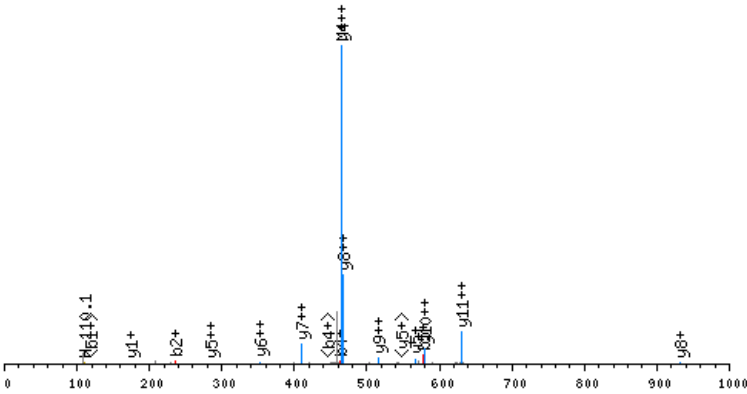

click image to zoom in; click top corners to zoom out [\[precursor±\]](#)

scan 2588; 465.3 m/z; 7.4e+000

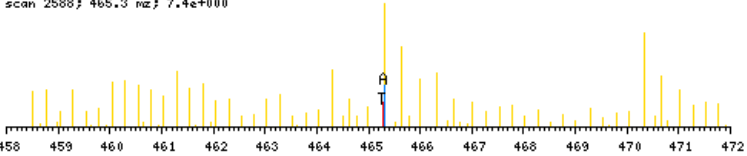

zoomed in precursor plot; T=theoretical m/z, A=acquired m/z

| b <sup>+</sup> | #  | AA | #  | y <sup>+</sup> | y <sup>2+</sup> |
|----------------|----|----|----|----------------|-----------------|
| 136.1186       | 1  | T  | 12 |                |                 |
| 235.1870       | 2  | V  | 11 | 1258.7332      | 629.8705        |
| 364.2296       | 3  | E  | 10 | 1159.6648      | 580.3363        |
| 463.2980       | 4  | V  | 9  | 1030.6222      | 515.8150        |
| 578.3249       | 5  | D  | 8  | 931.5538       | 466.2808        |
| 691.4090       | 6  | L  | 7  | 816.5268       | 408.7673        |
| 828.4679       | 7  | H  | 6  | 703.4428       | 352.2253        |
| 929.5156       | 8  | T  | 5  | 566.3839       | 283.6958        |
| 1000.5527      | 9  | A  | 4  | 465.3362       | 233.1720        |
| 1162.7108      | 10 | K  | 3  | 394.2991       | 197.6534        |
| 1219.7323      | 11 | G  | 2  | 232.1410       | 116.5744        |
|                | 12 | R  | 1  | 175.1195       | 88.0637         |

N-term:+35.07 K(10):+162.16

X-range:

0 - 0

MassTol: Y-zoom:

0. 1.

MassType:

☐AVG ☒MONO

Axis:

☒1 ☐2

Label:

☒I ☐M ☐-

Ions:

a ☐+ ☐2+ ☐3+

b ☒+ ☐2+ ☐3+

c ☐+ ☐2+ ☐3+

x ☐+ ☐2+ ☐3+

y ☒+ ☒2+ ☐3+

z ☐+ ☐2+ ☐3+

hide H<sub>2</sub>O/NH<sub>3</sub> ☐

zoom 112-122 ☐

GO

TVFKDLFDPIIQDR, MH+ 1762.9744, m/z 588.3296  
L OS G15 P120811 220811-s1.06227.06227.3.dta

scan 6227; 1.9e+001

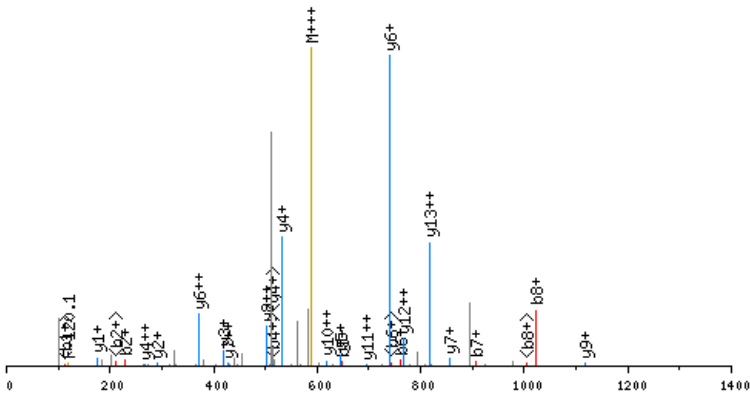

click image to zoom in; click top corners to zoom out

[precursor±]

scan 6226; 588.3 m/z; 3.1e+002

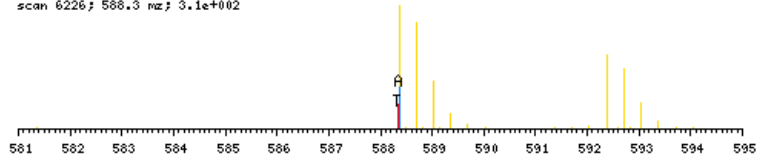

zoomed in precursor plot; T=theoretical m/z, A=acquired m/z

| b <sup>+</sup> | #  | AA | #  | y <sup>+</sup> | y <sup>2+</sup> |
|----------------|----|----|----|----------------|-----------------|
| 130.0868       | 1  | T  | 14 |                |                 |
| 229.1552       | 2  | V  | 13 | 1633.8954      | 817.4516        |
| 376.2236       | 3  | F  | 12 | 1534.8270      | 767.9174        |
| 532.3499       | 4  | K  | 11 | 1387.7586      | 694.3832        |
| 647.3768       | 5  | D  | 10 | 1231.6323      | 616.3201        |
| 760.4609       | 6  | L  | 9  | 1116.6053      | 558.8066        |
| 907.5293       | 7  | F  | 8  | 1003.5213      | 502.2645        |
| 1022.5563      | 8  | D  | 7  | 856.4529       | 428.7303        |
| 1119.6090      | 9  | P  | 6  | 741.4259       | 371.2169        |
| 1232.6931      | 10 | I  | 5  | 644.3731       | 322.6905        |
| 1345.7772      | 11 | I  | 4  | 531.2891       | 266.1485        |
| 1473.8357      | 12 | Q  | 3  | 418.2050       | 209.6064        |
| 1588.8627      | 13 | D  | 2  | 290.1464       | 145.5771        |
|                | 14 | R  | 1  | 175.1195       | 88.0637         |

N-term:+29.04 K(4):+156.13

X-range:

0 - 0

MassTol: Y-zoom:

0. 1.

MassType:

☐ AVG ☒ MONO

Axis:

☒ 1 ☐ 2

Label:

☒ I ☐ M ☐ -

Ions:

a ☐ + ☐ 2+ ☐ 3+

b ☒ + ☐ 2+ ☐ 3+

c ☐ + ☐ 2+ ☐ 3+

x ☐ + ☐ 2+ ☐ 3+

y ☒ + ☒ 2+ ☐ 3+

z ☐ + ☐ 2+ ☐ 3+

hide H<sub>2</sub>O/NH<sub>3</sub> ☐

zoom 112-122 ☐

GO

TVGAVALDCR, MH+ 1089.5726, m/z 545.2899  
L OS G14 P120811 220811-s1.03303.03303.2.dta

scan 3303; 2.8e+001

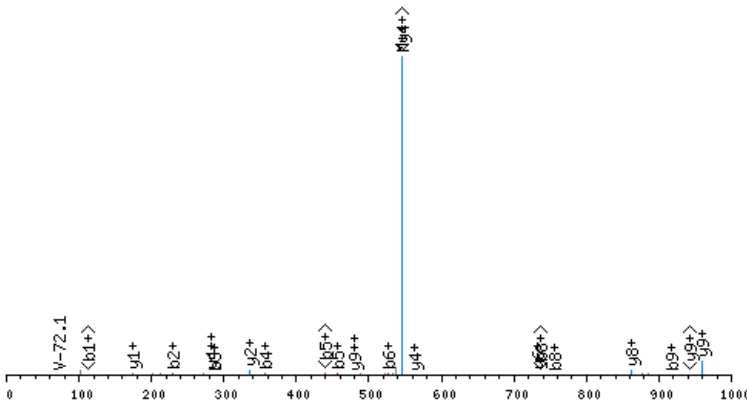

click image to zoom in; click top corners to zoom out

[precursor±]

scan 3301; 545.3 m/z; 3.7e+001

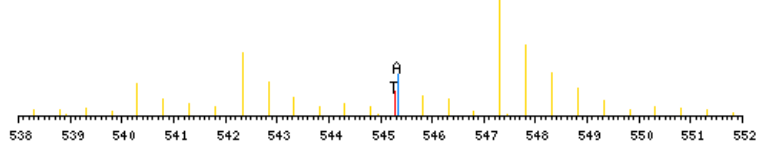

zoomed in precursor plot; T=theoretical m/z, A=acquired m/z

| b <sup>+</sup> | #  | AA | #  | y <sup>+</sup> | y <sup>2+</sup> |
|----------------|----|----|----|----------------|-----------------|
| 130.0868       | 1  | T  | 10 |                |                 |
| 229.1552       | 2  | V  | 9  | 960.4936       | 480.7507        |
| 286.1767       | 3  | G  | 8  | 861.4252       | 431.2165        |
| 357.2138       | 4  | A  | 7  | 804.4037       | 402.7058        |
| 456.2822       | 5  | V  | 6  | 733.3666       | 367.1872        |
| 527.3193       | 6  | A  | 5  | 634.2982       | 317.6530        |
| 640.4034       | 7  | L  | 4  | 563.2611       | 282.1345        |
| 755.4303       | 8  | D  | 3  | 450.1770       | 225.5924        |
| 915.4609       | 9  | C  | 2  | 335.1501       | 168.0790        |
|                | 10 | R  | 1  | 175.1195       | 88.0637         |

N-term:+29.04 C(9):+160.03

X-range:

0 - 0

MassTol: Y-zoom:

0. 1.

MassType:

☐AVG ☒MONO

Axis:

☒1 ☐2

Label:

☒I ☐M ☐-

Ions:

a ☐+ ☐2+ ☐3+

b ☒+ ☐2+ ☐3+

c ☐+ ☐2+ ☐3+

x ☐+ ☐2+ ☐3+

y ☒+ ☒2+ ☐3+

z ☐+ ☐2+ ☐3+

hide H<sub>2</sub>O/NH<sub>3</sub> ☐

zoom 112-122 ☐

GO

TVHAIATQKTVDGPSGLWR, MH+ 2368.4201, m/z 592.8605  
H OS G18 P120811 220811-s1.04043.04043.4.dta

scan 4043; 3.0e+000

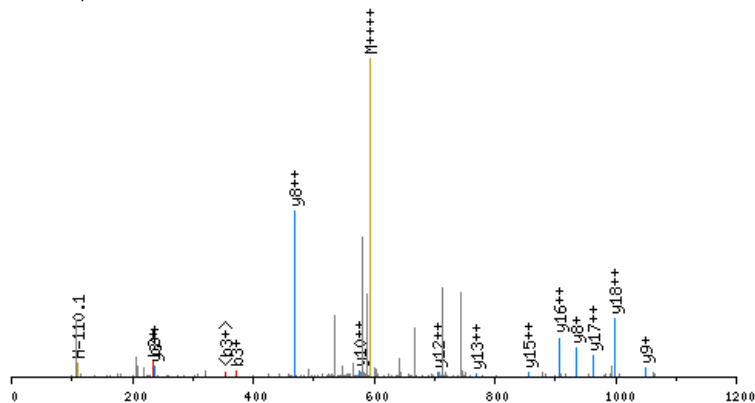

click image to zoom in; click top corners to zoom out

[precursor±]

scan 4041; 592.9 m/z; 8.6e+000

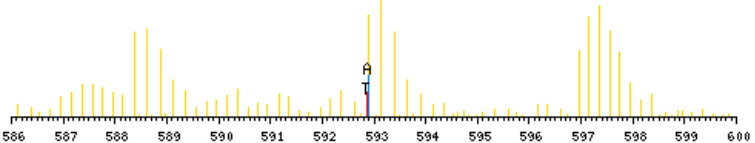

zoomed in precursor plot; T=theoretical m/z, A=acquired m/z

| b <sup>+</sup> | #  | AA | #  | y <sup>+</sup> | y <sup>2+</sup> |
|----------------|----|----|----|----------------|-----------------|
| 136.1186       | 1  | T  | 21 |                |                 |
| 235.1870       | 2  | V  | 20 | 2233.3094      | 1117.1586       |
| 372.2459       | 3  | H  | 19 | 2134.2410      | 1067.6244       |
| 443.2830       | 4  | A  | 18 | 1997.1821      | 999.0949        |
| 556.3671       | 5  | I  | 17 | 1926.1449      | 963.5764        |
| 657.4148       | 6  | T  | 16 | 1813.0609      | 907.0344        |
| 728.4519       | 7  | A  | 15 | 1712.0132      | 856.5105        |
| 829.4996       | 8  | T  | 14 | 1640.9761      | 820.9920        |
| 957.5581       | 9  | Q  | 13 | 1539.9284      | 770.4681        |
| 1119.7162      | 10 | K  | 12 | 1411.8698      | 706.4388        |
| 1220.7639      | 11 | T  | 11 | 1249.7117      | 625.3598        |
| 1319.8323      | 12 | V  | 10 | 1148.6641      | 574.8359        |
| 1434.8593      | 13 | D  | 9  | 1049.5956      | 525.3017        |
| 1491.8807      | 14 | G  | 8  | 934.5687       | 467.7883        |
| 1588.9335      | 15 | P  | 7  | 877.5472       | 439.2775        |
| 1675.9655      | 16 | S  | 6  | 780.4945       | 390.7511        |
| 1732.9870      | 17 | G  | 5  | 693.4624       | 347.2351        |
| 1895.1451      | 18 | K  | 4  | 636.4410       | 318.7244        |
| 2008.2291      | 19 | L  | 3  | 474.2829       | 237.6454        |
| 2194.3085      | 20 | W  | 2  | 361.1988       | 181.1033        |
|                | 21 | R  | 1  | 175.1195       | 88.0637         |

N-term: +35.07 K(10): +162.16  
K(18): +162.16

X-range:

0 - 0

MassTol: Y-zoom:

0. 1.

MassType:

☐ AVG ☒ MONO

Axis:

☒ 1 ☐ 2

Label:

☒ I ☐ M ☐ -

Ions:

a ☐ + ☐ 2+ ☐ 3+

b ☒ + ☐ 2+ ☐ 3+

c ☐ + ☐ 2+ ☐ 3+

x ☐ + ☐ 2+ ☐ 3+

y ☒ + ☒ 2+ ☐ 3+

z ☐ + ☐ 2+ ☐ 3+

hide H<sub>2</sub>O/NH<sub>3</sub> ☐

zoom 112-122 ☐

GO

TVIIIEQSWGSPKVTGDTVAK, MH+ 2455.4177, m/z 614.6099  
L OS G16 P120811 220811-s1.05126.05126.4.dta

scan 5126; 5.4e+000

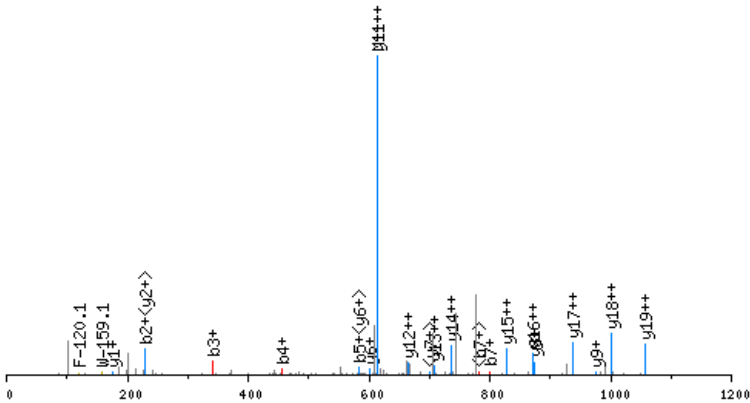

click image to zoom in; click top corners to zoom out [\[precursor±\]](#)

scan 5123; 614.6 m/z; 7.9e+000

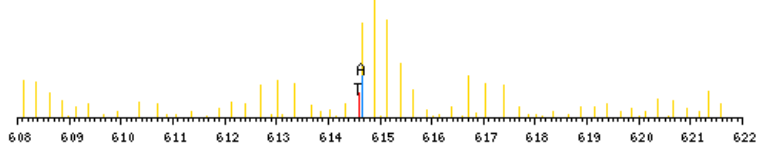

zoomed in precursor plot; T=theoretical m/z, A=acquired m/z

| b <sup>+</sup> | #  | AA | #  | y <sup>+</sup> | y <sup>2+</sup> |
|----------------|----|----|----|----------------|-----------------|
| 130.0868       | 1  | T  | 22 |                |                 |
| 229.1552       | 2  | V  | 21 | 2326.3387      | 1163.6733       |
| 342.2393       | 3  | I  | 20 | 2227.2703      | 1114.1391       |
| 455.3233       | 4  | I  | 19 | 2114.1862      | 1057.5970       |
| 584.3659       | 5  | E  | 18 | 2001.1022      | 1001.0550       |
| 712.4245       | 6  | Q  | 17 | 1872.0596      | 936.5337        |
| 799.4565       | 7  | S  | 16 | 1744.0010      | 872.5044        |
| 985.5358       | 8  | W  | 15 | 1656.9690      | 828.9884        |
| 1042.5573      | 9  | G  | 14 | 1470.8897      | 735.9487        |
| 1129.5893      | 10 | S  | 13 | 1413.8682      | 707.4380        |
| 1226.6421      | 11 | P  | 12 | 1326.8362      | 663.9220        |
| 1382.7684      | 12 | K  | 11 | 1229.7834      | 615.3956        |
| 1481.8368      | 13 | V  | 10 | 1073.6571      | 537.3325        |
| 1582.8845      | 14 | T  | 9  | 974.5887       | 487.7983        |
| 1739.0108      | 15 | K  | 8  | 873.5410       | 437.2744        |
| 1854.0377      | 16 | D  | 7  | 717.4147       | 359.2113        |
| 1911.0592      | 17 | G  | 6  | 602.3878       | 301.6978        |
| 2010.1276      | 18 | V  | 5  | 545.3663       | 273.1871        |
| 2111.1753      | 19 | T  | 4  | 446.2979       | 223.6529        |
| 2210.2437      | 20 | V  | 3  | 345.2502       | 173.1290        |
| 2281.2808      | 21 | A  | 2  | 246.1818       | 123.5948        |
|                | 22 | K  | 1  | 175.1447       | 88.0763         |

N-term:+29.04 K(12):+156.13  
K(15):+156.13 K(22):+156.13

X-range:

0 - 0

MassTol: Y-zoom:

0. 1.

MassType:

☐AVG ☒MONO

Axis:

☒1 ☐2

Label:

☒I ☐M ☐-

Ions:

a ☐+ ☐2+ ☐3+

b ☒+ ☐2+ ☐3+

c ☐+ ☐2+ ☐3+

x ☐+ ☐2+ ☐3+

y ☒+ ☒2+ ☐3+

z ☐+ ☐2+ ☐3+

hide H<sub>2</sub>O/NH<sub>3</sub> ☐

zoom 112-122 ☐

GO

TVIQEVKTSNVAR, MH+ 1500.8750, m/z 500.9632  
L OS G15 P120811 220811-s1.02512.02512.3.dta

scan 2512; 2.0e+001

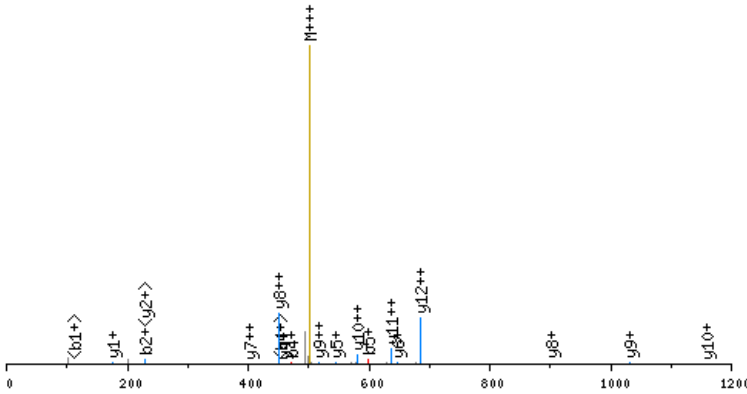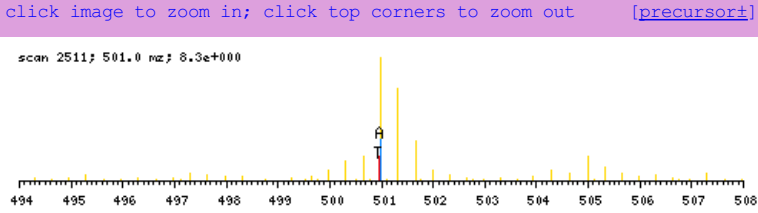

zoomed in precursor plot; T=theoretical m/z, A=acquired m/z

| b <sup>+</sup> | #  | AA | #  | y <sup>+</sup> | y <sup>2+</sup> |
|----------------|----|----|----|----------------|-----------------|
| 130.0868       | 1  | T  | 13 |                |                 |
| 229.1552       | 2  | V  | 12 | 1371.7960      | 686.4019        |
| 342.2393       | 3  | I  | 11 | 1272.7276      | 636.8677        |
| 470.2978       | 4  | Q  | 10 | 1159.6435      | 580.3257        |
| 599.3404       | 5  | E  | 9  | 1031.5850      | 516.2964        |
| 698.4088       | 6  | V  | 8  | 902.5424       | 451.7751        |
| 854.5351       | 7  | K  | 7  | 803.4740       | 402.2409        |
| 955.5828       | 8  | T  | 6  | 647.3477       | 324.1777        |
| 1042.6148      | 9  | S  | 5  | 546.3000       | 273.6539        |
| 1156.6578      | 10 | N  | 4  | 459.2680       | 230.1379        |
| 1255.7262      | 11 | V  | 3  | 345.2250       | 173.1164        |
| 1326.7633      | 12 | A  | 2  | 246.1566       | 123.5822        |
|                | 13 | R  | 1  | 175.1195       | 88.0637         |

N-term:+29.04 K(7):+156.13

N-term:+29.04 K(12):+156.13

X-range:

0 - 0

MassTol: Y-zoom:

0. 1.

MassType:

☐ AVG ☒ MONO

Axis:

☒ 1 ☐ 2

Label:

☒ I ☐ M ☐ -

Ions:

a ☐ + ☐ 2+ ☐ 3+

b ☒ + ☐ 2+ ☐ 3+

c ☐ + ☐ 2+ ☐ 3+

x ☐ + ☐ 2+ ☐ 3+

y ☒ + ☒ 2+ ☐ 3+

z ☐ + ☐ 2+ ☐ 3+

hide H<sub>2</sub>O/NH<sub>3</sub> ☐

zoom 112-122 ☐

GO

TVLSGGTTMYPGIADR, MH+ 1666.8474, m/z 556.2873  
L OS G13 P120811 220811-s1.05028.05028.3.dta

scan 5028; 2.6e+000

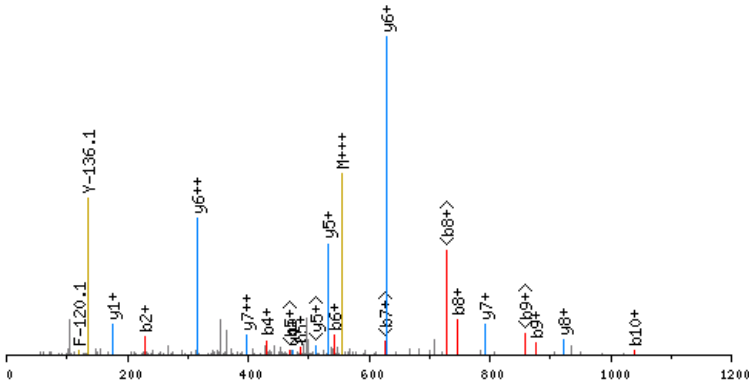

click image to zoom in; click top corners to zoom out

[precursor±]

scan 5024; 556.3 m/z; 2.7e+001

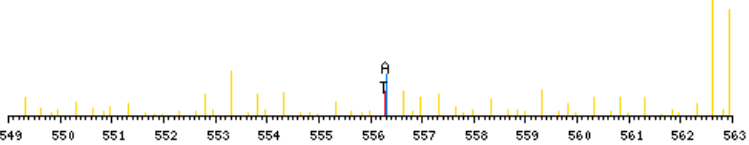

zoomed in precursor plot; T=theoretical m/z, A=acquired m/z

| b <sup>+</sup> | #  | AA | #  | y <sup>+</sup> | y <sup>2+</sup> |
|----------------|----|----|----|----------------|-----------------|
| 130.0868       | 1  | T  | 16 |                |                 |
| 229.1552       | 2  | V  | 15 | 1537.7685      | 769.3881        |
| 342.2393       | 3  | L  | 14 | 1438.7000      | 719.8539        |
| 429.2713       | 4  | S  | 13 | 1325.6160      | 663.3119        |
| 486.2927       | 5  | G  | 12 | 1238.5839      | 619.7959        |
| 543.3142       | 6  | G  | 11 | 1181.5625      | 591.2852        |
| 644.3619       | 7  | T  | 10 | 1124.5410      | 562.7744        |
| 745.4096       | 8  | T  | 9  | 1023.4933      | 512.2506        |
| 876.4501       | 9  | M  | 8  | 922.4457       | 461.7267        |
| 1039.5134      | 10 | Y  | 7  | 791.4052       | 396.2065        |
| 1136.5661      | 11 | P  | 6  | 628.3418       | 314.6748        |
| 1193.5876      | 12 | G  | 5  | 531.2891       | 266.1485        |
| 1306.6717      | 13 | I  | 4  | 474.2676       | 237.6377        |
| 1377.7088      | 14 | A  | 3  | 361.1836       | 181.0957        |
| 1492.7357      | 15 | D  | 2  | 290.1464       | 145.5771        |
|                | 16 | R  | 1  | 175.1195       | 88.0637         |

N-term:+29.04

X-range:

0 - 0

MassTol: Y-zoom:

0. 1.

MassType:

☐AVG ☒MONO

Axis:

☒1 ☐2

Label:

☒I ☐M ☐-

Ions:

a ☐+ ☐2+ ☐3+

b ☒+ ☐2+ ☐3+

c ☐+ ☐2+ ☐3+

x ☐+ ☐2+ ☐3+

y ☒+ ☒2+ ☐3+

z ☐+ ☐2+ ☐3+

hide H<sub>2</sub>O/NH<sub>3</sub> ☐

zoom 112-122 ☐

GO

TVSLHLGVTPSVLR, MH+ 1506.9008, m/z 502.9718  
L OS G15 P120811 220811-s1.05158.05158.3.dta

scan 5158; 5.0e+000

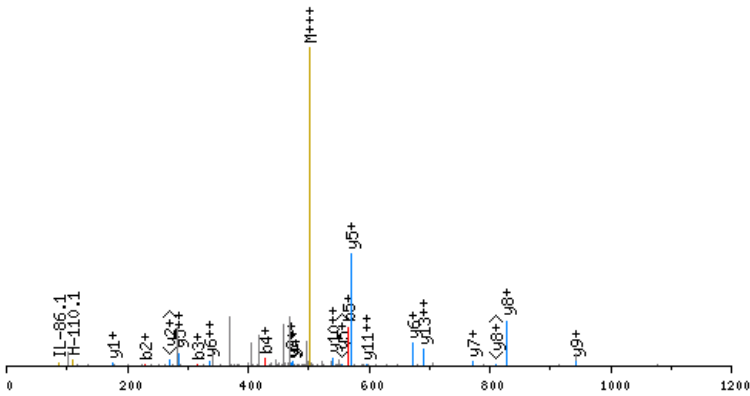

click image to zoom in; click top corners to zoom out

[precursor±]

scan 5156; 503.0 m/z; 5.4e+000

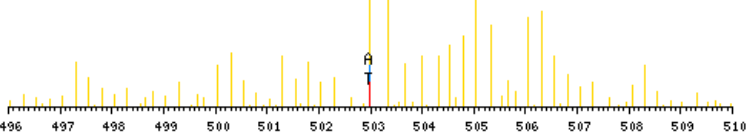

zoomed in precursor plot; T=theoretical m/z, A=acquired m/z

| b <sup>+</sup> | #  | AA | #  | y <sup>+</sup> | y <sup>2+</sup> |
|----------------|----|----|----|----------------|-----------------|
| 130.0868       | 1  | T  | 14 |                |                 |
| 229.1552       | 2  | V  | 13 | 1377.8218      | 689.4148        |
| 316.1872       | 3  | S  | 12 | 1278.7534      | 639.8806        |
| 429.2713       | 4  | L  | 11 | 1191.7214      | 596.3646        |
| 566.3302       | 5  | H  | 10 | 1078.6373      | 539.8226        |
| 679.4143       | 6  | L  | 9  | 941.5784       | 471.2931        |
| 736.4357       | 7  | G  | 8  | 828.4943       | 414.7511        |
| 835.5041       | 8  | V  | 7  | 771.4729       | 386.2403        |
| 936.5518       | 9  | T  | 6  | 672.4044       | 336.7061        |
| 1033.6046      | 10 | P  | 5  | 571.3568       | 286.1823        |
| 1120.6366      | 11 | S  | 4  | 474.3040       | 237.6559        |
| 1219.7050      | 12 | V  | 3  | 387.2720       | 194.1399        |
| 1332.7891      | 13 | L  | 2  | 288.2036       | 144.6057        |
|                | 14 | R  | 1  | 175.1195       | 88.0637         |

N-term:+29.04

X-range:

0 - 0

MassTol: Y-zoom:

0. 1.

MassType:

☐ AVG ☒ MONO

Axis:

☒ 1 ☐ 2

Label:

☒ I ☐ M ☐ -

Ions:

a ☐ + ☐ 2+ ☐ 3+

b ☒ + ☐ 2+ ☐ 3+

c ☐ + ☐ 2+ ☐ 3+

x ☐ + ☐ 2+ ☐ 3+

y ☒ + ☒ 2+ ☐ 3+

z ☐ + ☐ 2+ ☐ 3+

hide H<sub>2</sub>O/NH<sub>3</sub> ☐

zoom 112-122 ☐

GO

TVSSDQMAKLR, MH+ 1303.7680, m/z 435.2609  
H OS G16 P120811 220811-s1.02749.02749.3.dta

scan 2749; 1.3e+001

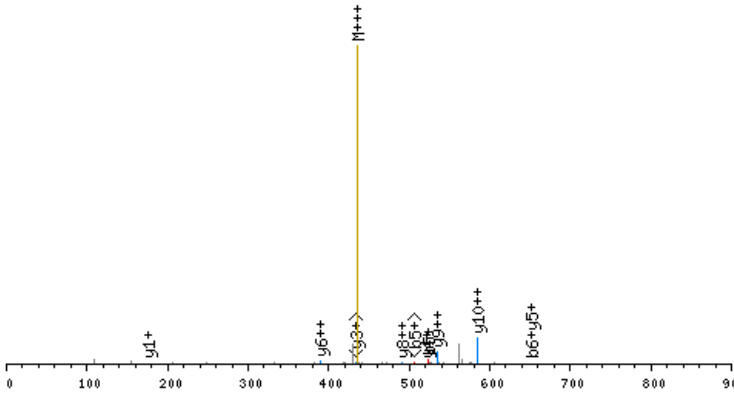

click image to zoom in; click top corners to zoom out [precursor±]

scan 2748; 435.3 m/z; 2.5e+001

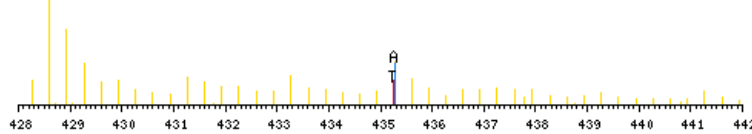

zoomed in precursor plot; T=theoretical m/z, A=acquired m/z

| b <sup>+</sup> | #  | AA | #  | y <sup>+</sup> | y <sup>2+</sup> |
|----------------|----|----|----|----------------|-----------------|
| 136.1186       | 1  | T  | 11 |                |                 |
| 235.1870       | 2  | V  | 10 | 1168.6573      | 584.8325        |
| 322.2190       | 3  | S  | 9  | 1069.5888      | 535.2983        |
| 409.2510       | 4  | S  | 8  | 982.5568       | 491.7823        |
| 524.2780       | 5  | D  | 7  | 895.5248       | 448.2663        |
| 652.3366       | 6  | Q  | 6  | 780.4978       | 390.7528        |
| 783.3771       | 7  | M  | 5  | 652.4393       | 326.7235        |
| 854.4142       | 8  | A  | 4  | 521.3988       | 261.2033        |
| 1016.5723      | 9  | K  | 3  | 450.3617       | 225.6847        |
| 1129.6563      | 10 | L  | 2  | 288.2036       | 144.6057        |
|                | 11 | R  | 1  | 175.1195       | 88.0637         |

N-term:+35.07 K(9):+162.16

zoomed in precursor plot; T=theoretical m/z, A=acquired m/z

N-term: +29.04 K(4): +156.13

X-range:

0 - 0

MassTol: Y-zoom:

0. 1.

MassType:

☐ AVG ☒ MONO

Axis:

☒ 1 ☐ 2

Label:

☒ I ☐ M ☐ -

Ions:

a ☐ + ☐ 2+ ☐ 3+

b ☒ + ☐ 2+ ☐ 3+

c ☐ + ☐ 2+ ☐ 3+

x ☐ + ☐ 2+ ☐ 3+

y ☒ + ☒ 2+ ☐ 3+

z ☐ + ☐ 2+ ☐ 3+

hide H<sub>2</sub>O/NH<sub>3</sub> ☐

zoom 112-122 ☐

GO

TWVVLGHSEK, MH+ 1211.6537, m/z 404.5561  
L OS G16 P120811 220811-s1.04296.04296.3.dta

scan 4296; 1.5e+001

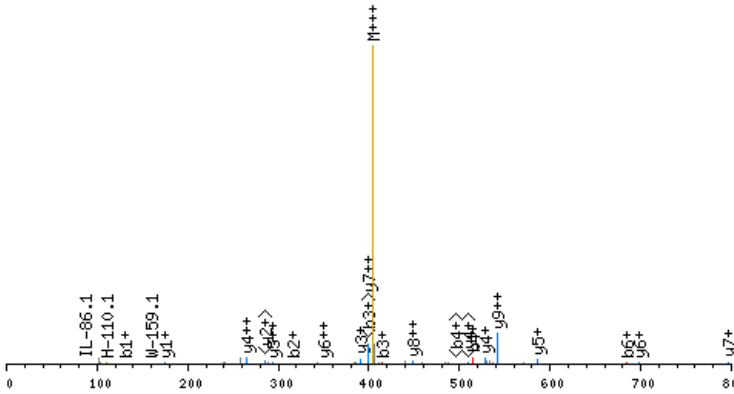

click image to zoom in; click top corners to zoom out

[precursor±]

scan 4293; 404.6 m/z; 5.5e+000

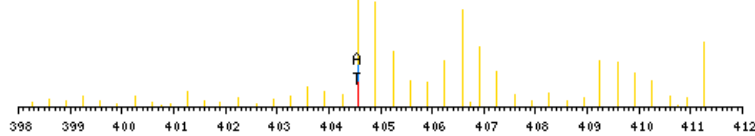

zoomed in precursor plot; T=theoretical m/z, A=acquired m/z

| b <sup>+</sup> | #  | AA | #  | y <sup>+</sup> | y <sup>2+</sup> |
|----------------|----|----|----|----------------|-----------------|
| 130.0868       | 1  | T  | 10 |                |                 |
| 316.1661       | 2  | W  | 9  | 1082.5747      | 541.7913        |
| 415.2345       | 3  | V  | 8  | 896.4954       | 448.7516        |
| 514.3029       | 4  | V  | 7  | 797.4270       | 399.2174        |
| 627.3870       | 5  | L  | 6  | 698.3586       | 349.6832        |
| 684.4084       | 6  | G  | 5  | 585.2745       | 293.1412        |
| 821.4674       | 7  | H  | 4  | 528.2530       | 264.6304        |
| 908.4994       | 8  | S  | 3  | 391.1941       | 196.1010        |
| 1037.5420      | 9  | E  | 2  | 304.1621       | 152.5850        |
|                | 10 | R  | 1  | 175.1195       | 88.0637         |

N-term:+29.04

X-range:

0 - 0

MassTol: Y-zoom:

0. 1.

MassType:

☐AVG ☒MONO

Axis:

☒1 ☐2

Label:

☒I ☐M ☐-

Ions:

a ☐+ ☐2+ ☐3+

b ☒+ ☐2+ ☐3+

c ☐+ ☐2+ ☐3+

x ☐+ ☐2+ ☐3+

y ☒+ ☒2+ ☐3+

z ☐+ ☐2+ ☐3+

hide H<sub>2</sub>O/NH<sub>3</sub> ☐

zoom 112-122 ☐

GO

TYEEGLSHLTAEQGATLER, MH+ 2139.0782, m/z 713.6976  
H OS G15 P120811 220811-s1.04780.04780.3.dta

scan 4780; 1.6e+000

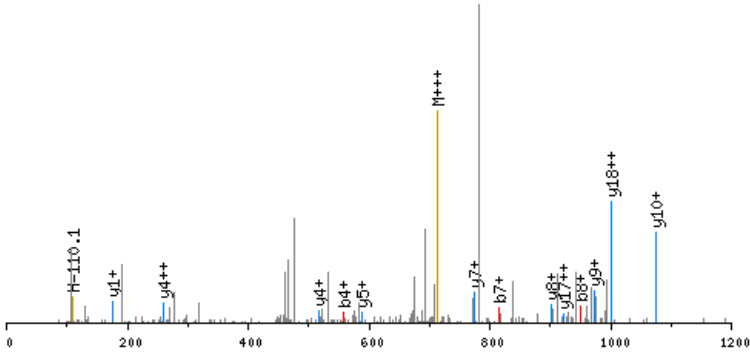

click image to zoom in; click top corners to zoom out [\[precursor±\]](#)

scan 4776; 713.7 m/z; 1.1e+002

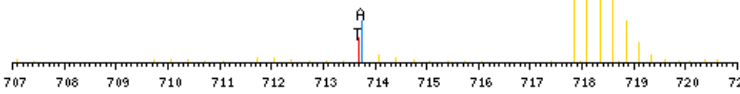

zoomed in precursor plot; T=theoretical m/z, A=acquired m/z

| b <sup>+</sup> | #  | AA | #  | y <sup>+</sup> | y <sup>2+</sup> |
|----------------|----|----|----|----------------|-----------------|
| 136.1186       | 1  | T  | 19 |                |                 |
| 299.1819       | 2  | Y  | 18 | 2003.9674      | 1002.4876       |
| 428.2245       | 3  | E  | 17 | 1840.9041      | 920.9560        |
| 557.2671       | 4  | E  | 16 | 1711.8615      | 856.4347        |
| 614.2886       | 5  | G  | 15 | 1582.8189      | 791.9134        |
| 727.3726       | 6  | L  | 14 | 1525.7974      | 763.4026        |
| 814.4046       | 7  | S  | 13 | 1412.7134      | 706.8606        |
| 951.4636       | 8  | H  | 12 | 1325.6814      | 663.3446        |
| 1064.5476      | 9  | L  | 11 | 1188.6224      | 594.8151        |
| 1165.5953      | 10 | T  | 10 | 1075.5384      | 538.2731        |
| 1236.6324      | 11 | A  | 9  | 974.4907       | 487.7493        |
| 1365.6750      | 12 | E  | 8  | 903.4536       | 452.2307        |
| 1422.6965      | 13 | G  | 7  | 774.4110       | 387.7094        |
| 1550.7551      | 14 | Q  | 6  | 717.3895       | 359.1987        |
| 1621.7922      | 15 | A  | 5  | 589.3310       | 295.1694        |
| 1722.8398      | 16 | T  | 4  | 518.2938       | 259.6508        |
| 1835.9239      | 17 | L  | 3  | 417.2462       | 209.1270        |
| 1964.9665      | 18 | E  | 2  | 304.1621       | 152.5850        |
|                | 19 | R  | 1  | 175.1195       | 88.0637         |

N-term:+35.07

X-range:

0 - 0

MassTol: Y-zoom:

0. 1.

MassType:

☐ AVG ☒ MONO

Axis:

☒ 1 ☐ 2

Label:

☒ I ☐ M ☐ -

Ions:

a ☐ + ☐ 2+ ☐ 3+

b ☒ + ☐ 2+ ☐ 3+

c ☐ + ☐ 2+ ☐ 3+

x ☐ + ☐ 2+ ☐ 3+

y ☒ + ☒ 2+ ☐ 3+

z ☐ + ☐ 2+ ☐ 3+

hide H<sub>2</sub>O/NH<sub>3</sub> ☐

zoom 112-122 ☐

GO

VAEQADLEQAFSPSDPCVDR, MH+ 2377.0617, m/z 793.0254  
L OS G12 P120811 220811-s1.04299.04299.3.dta

scan 4299; 1.7e+000

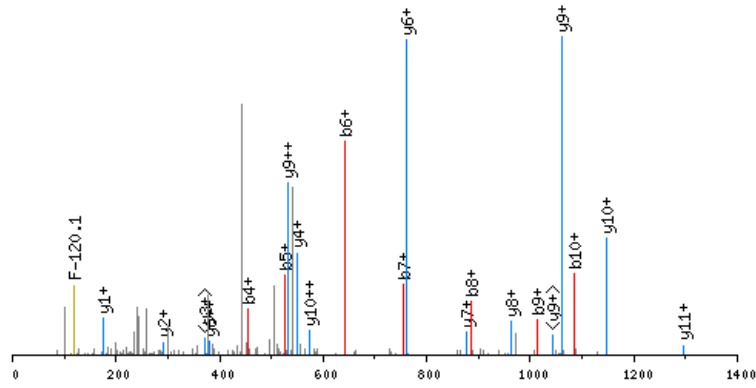

click image to zoom in; click top corners to zoom out [\[precursor±\]](#)

scan 4297; 793.0 m/z; 7.2e+000

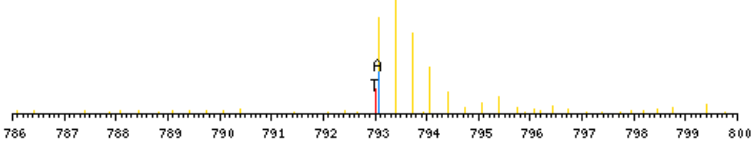

zoomed in precursor plot; T=theoretical m/z, A=acquired m/z

| b <sup>+</sup> | #  | AA | #  | y <sup>+</sup> | y <sup>2+</sup> |
|----------------|----|----|----|----------------|-----------------|
| 128.1075       | 1  | V  | 21 |                |                 |
| 199.1446       | 2  | A  | 20 | 2249.9620      | 1125.4849       |
| 328.1872       | 3  | E  | 19 | 2178.9249      | 1089.9664       |
| 456.2458       | 4  | Q  | 18 | 2049.8823      | 1025.4451       |
| 527.2829       | 5  | A  | 17 | 1921.8237      | 961.4158        |
| 642.3099       | 6  | D  | 16 | 1850.7866      | 925.8972        |
| 755.3939       | 7  | L  | 15 | 1735.7597      | 868.3838        |
| 884.4365       | 8  | E  | 14 | 1622.6756      | 811.8417        |
| 1012.4951      | 9  | Q  | 13 | 1493.6330      | 747.3204        |
| 1083.5322      | 10 | A  | 12 | 1365.5745      | 683.2911        |
| 1230.6006      | 11 | F  | 11 | 1294.5373      | 647.7726        |
| 1317.6326      | 12 | S  | 10 | 1147.4689      | 574.2384        |
| 1414.6854      | 13 | P  | 9  | 1060.4369      | 530.7224        |
| 1501.7174      | 14 | S  | 8  | 963.3841       | 482.1960        |
| 1616.7444      | 15 | D  | 7  | 876.3521       | 438.6800        |
| 1713.7971      | 16 | P  | 6  | 761.3252       | 381.1665        |
| 1828.8241      | 17 | D  | 5  | 664.2724       | 332.6401        |
| 1988.8547      | 18 | C  | 4  | 549.2455       | 275.1266        |
| 2087.9231      | 19 | V  | 3  | 389.2149       | 195.1113        |
| 2202.9500      | 20 | D  | 2  | 290.1464       | 145.5771        |
|                | 21 | R  | 1  | 175.1195       | 88.0637         |

N-term:+29.04 C(18):+160.03

X-range:

0 - 0

MassTol: Y-zoom:

0. 1.

MassType:

☐AVG ☒MONO

Axis:

☒1 ☐2

Label:

☒I ☐M ☐-

Ions:

a ☐+ ☐2+ ☐3+

b ☒+ ☐2+ ☐3+

c ☐+ ☐2+ ☐3+

x ☐+ ☐2+ ☐3+

y ☒+ ☒2+ ☐3+

z ☐+ ☐2+ ☐3+

hide H<sub>2</sub>O/NH<sub>3</sub> ☐

zoom 112-122 ☐

GO

VAGPQPAQTGAPQGSGLGEYLFFER, MH+ 2401.2152, m/z 801.0766  
L OS G12 P120811 220811-s1.04979.04979.3.dta

scan 4979; 2.3e+000

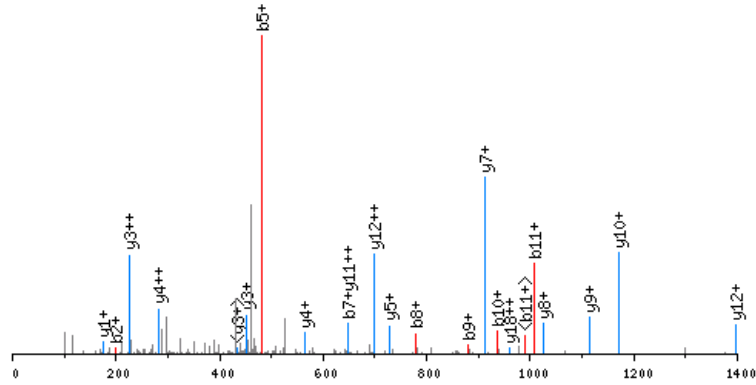

click image to zoom in; click top corners to zoom out

[precursor±]

scan 4977; 801.1 m/z; 8.1e+000

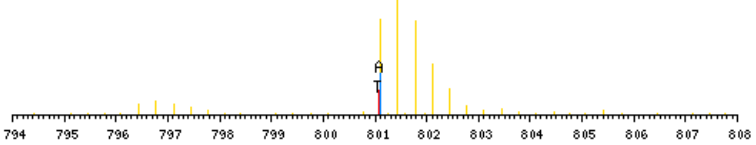

zoomed in precursor plot; T=theoretical m/z, A=acquired m/z

| b <sup>+</sup> | #  | AA | #  | y <sup>+</sup> | y <sup>2+</sup> |
|----------------|----|----|----|----------------|-----------------|
| 128.1075       | 1  | V  | 23 |                |                 |
| 199.1446       | 2  | A  | 22 | 2274.1155      | 1137.5617       |
| 256.1661       | 3  | G  | 21 | 2203.0784      | 1102.0431       |
| 353.2189       | 4  | P  | 20 | 2146.0569      | 1073.5324       |
| 481.2774       | 5  | Q  | 19 | 2049.0041      | 1025.0060       |
| 578.3302       | 6  | P  | 18 | 1920.9456      | 960.9767        |
| 649.3673       | 7  | A  | 17 | 1823.8928      | 912.4503        |
| 777.4259       | 8  | Q  | 16 | 1752.8557      | 876.9318        |
| 878.4736       | 9  | T  | 15 | 1624.7971      | 812.9025        |
| 935.4950       | 10 | G  | 14 | 1523.7494      | 762.3786        |
| 1006.5321      | 11 | A  | 13 | 1466.7280      | 733.8679        |
| 1103.5849      | 12 | P  | 12 | 1395.6909      | 698.3493        |
| 1231.6435      | 13 | Q  | 11 | 1298.6381      | 649.8230        |
| 1288.6649      | 14 | G  | 10 | 1170.5795      | 585.7937        |
| 1375.6970      | 15 | S  | 9  | 1113.5580      | 557.2829        |
| 1488.7810      | 16 | L  | 8  | 1026.5260      | 513.7669        |
| 1545.8025      | 17 | G  | 7  | 913.4420       | 457.2249        |
| 1674.8451      | 18 | E  | 6  | 856.4205       | 428.7142        |
| 1837.9084      | 19 | Y  | 5  | 727.3779       | 364.1929        |
| 1950.9925      | 20 | L  | 4  | 564.3146       | 282.6612        |
| 2098.0609      | 21 | F  | 3  | 451.2305       | 226.1192        |
| 2227.1035      | 22 | E  | 2  | 304.1621       | 152.5850        |
|                | 23 | R  | 1  | 175.1195       | 88.0637         |

N-term:+29.04

X-range:

0 - 0

MassTol: Y-zoom:

0. 1.

MassType:

☐AVG ☒MONO

Axis:

☒1 ☐2

Label:

☒I ☐M ☐-

Ions:

a ☐+ ☐2+ ☐3+

b ☒+ ☐2+ ☐3+

c ☐+ ☐2+ ☐3+

x ☐+ ☐2+ ☐3+

y ☒+ ☒2+ ☐3+

z ☐+ ☐2+ ☐3+

hide H<sub>2</sub>O/NH<sub>3</sub> ☐

zoom 112-122 ☐

GO

VANQDFVENVLVR, MH+ 1530.8280, m/z 510.9475  
L OS G13 P120811 220811-s1.05991.05991.3.dta

scan 5991; 2.2e+000

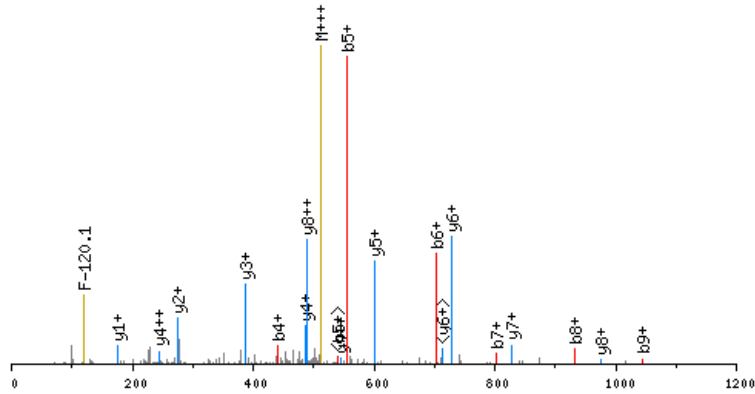

click image to zoom in; click top corners to zoom out

[precursor±]

scan 5989; 510.9 m/z; 5.3e+000

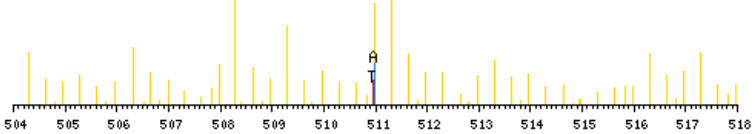

zoomed in precursor plot; T=theoretical m/z, A=acquired m/z

| b <sup>+</sup> | #  | AA | #  | y <sup>+</sup> | y <sup>2+</sup> |
|----------------|----|----|----|----------------|-----------------|
| 128.1075       | 1  | V  | 13 |                |                 |
| 199.1446       | 2  | A  | 12 | 1403.7283      | 702.3681        |
| 313.1876       | 3  | N  | 11 | 1332.6912      | 666.8495        |
| 441.2461       | 4  | Q  | 10 | 1218.6483      | 609.8280        |
| 556.2731       | 5  | D  | 9  | 1090.5897      | 545.7988        |
| 703.3415       | 6  | F  | 8  | 975.5627       | 488.2853        |
| 802.4099       | 7  | V  | 7  | 828.4943       | 414.7511        |
| 931.4525       | 8  | E  | 6  | 729.4259       | 365.2169        |
| 1045.4954      | 9  | N  | 5  | 600.3833       | 300.6956        |
| 1144.5638      | 10 | V  | 4  | 486.3404       | 243.6741        |
| 1257.6479      | 11 | L  | 3  | 387.2720       | 194.1399        |
| 1356.7163      | 12 | V  | 2  | 274.1879       | 137.5979        |
|                | 13 | R  | 1  | 175.1195       | 88.0637         |

N-term:+29.04

X-range:

0 - 0

MassTol: Y-zoom:

0. 1.

MassType:

☐ AVG ☒ MONO

Axis:

☒ 1 ☐ 2

Label:

☒ I ☐ M ☐ -

Ions:

a ☐ + ☐ 2+ ☐ 3+

b ☒ + ☐ 2+ ☐ 3+

c ☐ + ☐ 2+ ☐ 3+

x ☐ + ☐ 2+ ☐ 3+

y ☒ + ☒ 2+ ☐ 3+

z ☐ + ☐ 2+ ☐ 3+

hide H<sub>2</sub>O/NH<sub>3</sub> ☐

zoom 112-122 ☐

GO

VAPEEHPTLLTEAPLNPKANR, MH+ 2353.2880, m/z 589.0775  
L OS G16 P120811 220811-s1.04604.04604.4.dta

scan 4604; 2.5e+000

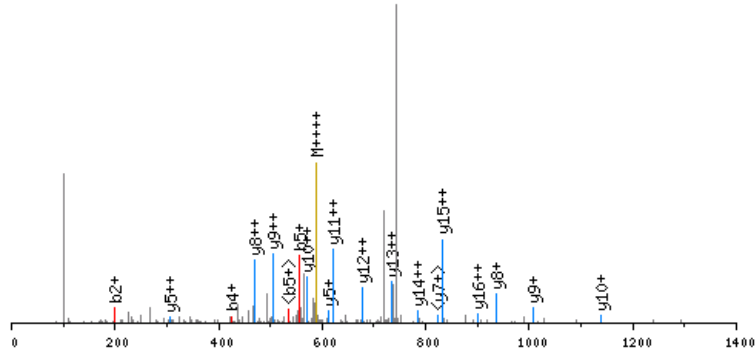

click image to zoom in; click top corners to zoom out [\[precursor±\]](#)

scan 4603; 589.1 m/z; 5.6e+002

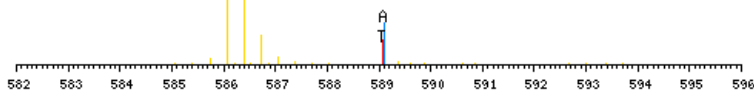

zoomed in precursor plot; T=theoretical m/z, A=acquired m/z

| b <sup>+</sup> | #  | AA | #  | y <sup>+</sup> | y <sup>2+</sup> |
|----------------|----|----|----|----------------|-----------------|
| 128.1075       | 1  | V  | 21 |                |                 |
| 199.1446       | 2  | A  | 20 | 2226.1883      | 1113.5981       |
| 296.1974       | 3  | P  | 19 | 2155.1512      | 1078.0795       |
| 425.2400       | 4  | E  | 18 | 2058.0984      | 1029.5531       |
| 554.2826       | 5  | E  | 17 | 1929.0558      | 965.0318        |
| 691.3415       | 6  | H  | 16 | 1800.0132      | 900.5105        |
| 788.3943       | 7  | P  | 15 | 1662.9543      | 831.9811        |
| 889.4419       | 8  | T  | 14 | 1565.9016      | 783.4547        |
| 1002.5260      | 9  | L  | 13 | 1464.8539      | 732.9308        |
| 1115.6101      | 10 | L  | 12 | 1351.7698      | 676.3888        |
| 1216.6577      | 11 | T  | 11 | 1238.6857      | 619.8468        |
| 1345.7003      | 12 | E  | 10 | 1137.6381      | 569.3229        |
| 1416.7374      | 13 | A  | 9  | 1008.5955      | 504.8017        |
| 1513.7902      | 14 | P  | 8  | 937.5584       | 469.2831        |
| 1626.8743      | 15 | L  | 7  | 840.5056       | 420.7567        |
| 1740.9172      | 16 | N  | 6  | 727.4215       | 364.2147        |
| 1837.9700      | 17 | P  | 5  | 613.3786       | 307.1932        |
| 1994.0963      | 18 | K  | 4  | 516.3258       | 258.6668        |
| 2065.1334      | 19 | A  | 3  | 360.1995       | 180.6037        |
| 2179.1763      | 20 | N  | 2  | 289.1624       | 145.0851        |
|                | 21 | R  | 1  | 175.1195       | 88.0637         |

N-term:+29.04 K(18):+156.13

X-range:

0 - 0

MassTol: Y-zoom:

0. 1.

MassType:

☐AVG ☒MONO

Axis:

☒1 ☐2

Label:

☒I ☐M ☐-

Ions:

a ☐+ ☐2+ ☐3+

b ☒+ ☐2+ ☐3+

c ☐+ ☐2+ ☐3+

x ☐+ ☐2+ ☐3+

y ☒+ ☒2+ ☐3+

z ☐+ ☐2+ ☐3+

hide H<sub>2</sub>O/NH<sub>3</sub> ☐

zoom 112-122 ☐

GO

VAPEEHPVLLTEAPLNPKANR, MH+ 2351.3087, m/z 588.5826  
L OS G16 P120811 220811-s1.04740.04740.4.dta

scan 4740; 1.8e+000

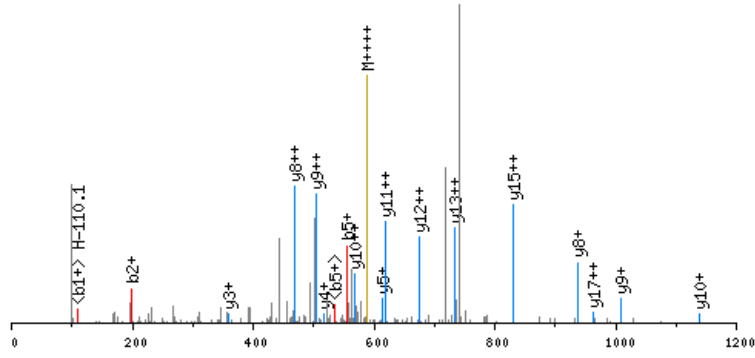

click image to zoom in; click top corners to zoom out [\[precursor±\]](#)

scan 4738; 588.6 m/z; 1.2e+001

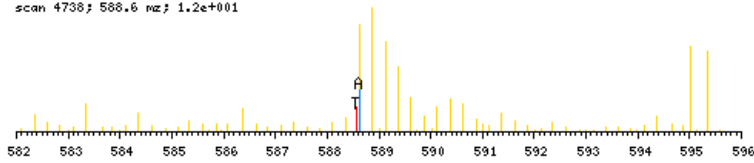

zoomed in precursor plot; T=theoretical m/z, A=acquired m/z

| b <sup>+</sup> | #  | AA | #  | y <sup>+</sup> | y <sup>2+</sup> |
|----------------|----|----|----|----------------|-----------------|
| 128.1075       | 1  | V  | 21 |                |                 |
| 199.1446       | 2  | A  | 20 | 2224.2090      | 1112.6084       |
| 296.1974       | 3  | P  | 19 | 2153.1719      | 1077.0899       |
| 425.2400       | 4  | E  | 18 | 2056.1192      | 1028.5635       |
| 554.2826       | 5  | E  | 17 | 1927.0766      | 964.0422        |
| 691.3415       | 6  | H  | 16 | 1798.0340      | 899.5209        |
| 788.3943       | 7  | P  | 15 | 1660.9751      | 830.9914        |
| 887.4627       | 8  | V  | 14 | 1563.9223      | 782.4651        |
| 1000.5467      | 9  | L  | 13 | 1464.8539      | 732.9308        |
| 1113.6308      | 10 | L  | 12 | 1351.7698      | 676.3888        |
| 1214.6785      | 11 | T  | 11 | 1238.6857      | 619.8468        |
| 1343.7211      | 12 | E  | 10 | 1137.6381      | 569.3229        |
| 1414.7582      | 13 | A  | 9  | 1008.5955      | 504.8017        |
| 1511.8109      | 14 | P  | 8  | 937.5584       | 469.2831        |
| 1624.8950      | 15 | L  | 7  | 840.5056       | 420.7567        |
| 1738.9379      | 16 | N  | 6  | 727.4215       | 364.2147        |
| 1835.9907      | 17 | P  | 5  | 613.3786       | 307.1932        |
| 1992.1170      | 18 | K  | 4  | 516.3258       | 258.6668        |
| 2063.1541      | 19 | A  | 3  | 360.1995       | 180.6037        |
| 2177.1970      | 20 | N  | 2  | 289.1624       | 145.0851        |
|                | 21 | R  | 1  | 175.1195       | 88.0637         |

N-term:+29.04 K(18):+156.13

X-range:

0 - 0

MassTol: Y-zoom:

0. 1.

MassType:

☐AVG ☒MONO

Axis:

☒1 ☐2

Label:

☒I ☐M ☐-

Ions:

a ☐+ ☐2+ ☐3+

b ☒+ ☐2+ ☐3+

c ☐+ ☐2+ ☐3+

x ☐+ ☐2+ ☐3+

y ☒+ ☒2+ ☐3+

z ☐+ ☐2+ ☐3+

hide H<sub>2</sub>O/NH<sub>3</sub> ☐

zoom 112-122 ☐

GO

VAQPKNLEGYVGFANLPNQVYR, MH+ 2533.3567, m/z 634.0946  
L OS G15 P120811 220811-s1.05858.05858.4.dta

scan 5858; 2.5e+000

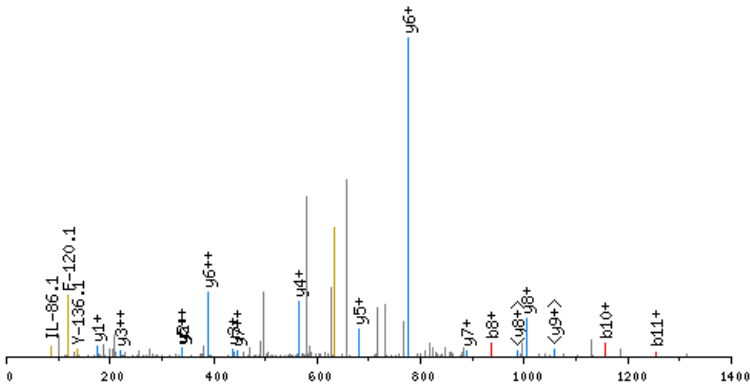

click image to zoom in; click top corners to zoom out [precursor±]

scan 5856; 634.1 m/z; 5.9e+000

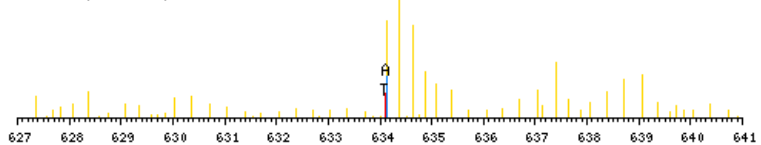

zoomed in precursor plot; T=theoretical m/z, A=acquired m/z

| b <sup>+</sup> | #  | AA | #  | y <sup>+</sup> | y <sup>2+</sup> |
|----------------|----|----|----|----------------|-----------------|
| 128.1075       | 1  | V  | 22 |                |                 |
| 199.1446       | 2  | A  | 21 | 2406.2570      | 1203.6324       |
| 327.2032       | 3  | Q  | 20 | 2335.2199      | 1168.1139       |
| 424.2560       | 4  | P  | 19 | 2207.1613      | 1104.0846       |
| 580.3823       | 5  | K  | 18 | 2110.1086      | 1055.5582       |
| 694.4252       | 6  | N  | 17 | 1953.9823      | 977.4951        |
| 807.5093       | 7  | L  | 16 | 1839.9394      | 920.4736        |
| 936.5519       | 8  | E  | 15 | 1726.8553      | 863.9316        |
| 993.5733       | 9  | G  | 14 | 1597.8127      | 799.4103        |
| 1156.6366      | 10 | Y  | 13 | 1540.7912      | 770.8995        |
| 1255.7051      | 11 | V  | 12 | 1377.7279      | 689.3679        |
| 1312.7265      | 12 | G  | 11 | 1278.6595      | 639.8337        |
| 1459.7949      | 13 | F  | 10 | 1221.6380      | 611.3229        |
| 1530.8321      | 14 | A  | 9  | 1074.5696      | 537.7887        |
| 1644.8750      | 15 | N  | 8  | 1003.5325      | 502.2702        |
| 1757.9590      | 16 | L  | 7  | 889.4896       | 445.2487        |
| 1855.0118      | 17 | P  | 6  | 776.4055       | 388.7067        |
| 1969.0547      | 18 | N  | 5  | 679.3527       | 340.1803        |
| 2097.1133      | 19 | Q  | 4  | 565.3098       | 283.1588        |
| 2196.1817      | 20 | V  | 3  | 437.2512       | 219.1295        |
| 2359.2451      | 21 | Y  | 2  | 338.1828       | 169.5953        |
|                | 22 | R  | 1  | 175.1195       | 88.0637         |

N-term:+29.04 K(5):+156.13

X-range:

0 - 0

MassTol: Y-zoom:

0. 1.

MassType:

☐AVG ☒MONO

Axis:

☒1 ☐2

Label:

☒I ☐M ☐-

Ions:

a ☐+ ☐2+ ☐3+

b ☒+ ☐2+ ☐3+

c ☐+ ☐2+ ☐3+

x ☐+ ☐2+ ☐3+

y ☒+ ☒2+ ☐3+

z ☐+ ☐2+ ☐3+

hide H<sub>2</sub>O/NH<sub>3</sub> ☐

zoom 112-122 ☐

GO

VATGLMEDDGKPR, MH+ 1444.7470, m/z 482.2539  
L OS G15 P120811 220811-s1.02564.02564.3.dta

scan 2564; 1.1e+001

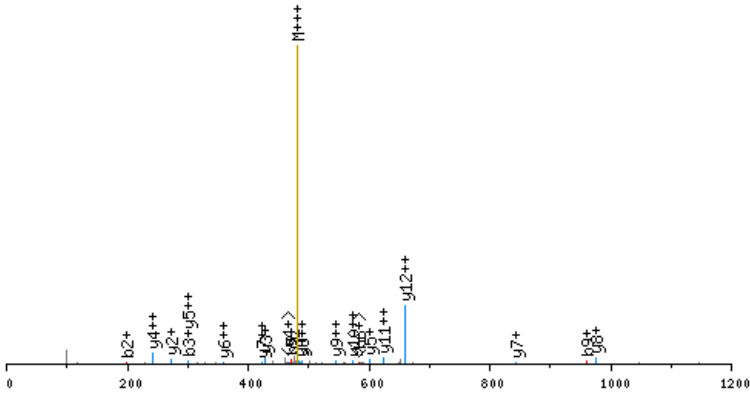

click image to zoom in; click top corners to zoom out [\[precursor±\]](#)

scan 2561; 482.3 m/z; 2.5e+000

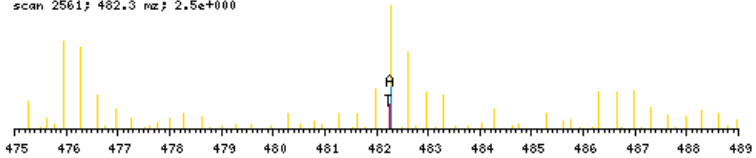

zoomed in precursor plot; T=theoretical m/z, A=acquired m/z

| b <sup>+</sup> | #  | AA | #  | y <sup>+</sup> | y <sup>2+</sup> |
|----------------|----|----|----|----------------|-----------------|
| 128.1075       | 1  | V  | 13 |                |                 |
| 199.1446       | 2  | A  | 12 | 1317.6473      | 659.3276        |
| 300.1923       | 3  | T  | 11 | 1246.6102      | 623.8090        |
| 357.2138       | 4  | G  | 10 | 1145.5625      | 573.2852        |
| 470.2978       | 5  | L  | 9  | 1088.5411      | 544.7744        |
| 601.3383       | 6  | M  | 8  | 975.4570       | 488.2324        |
| 730.3809       | 7  | E  | 7  | 844.4165       | 422.7122        |
| 845.4079       | 8  | D  | 6  | 715.3739       | 358.1909        |
| 960.4348       | 9  | D  | 5  | 600.3470       | 300.6774        |
| 1017.4563      | 10 | G  | 4  | 485.3200       | 243.1639        |
| 1173.5826      | 11 | K  | 3  | 428.2986       | 214.6532        |
| 1270.6353      | 12 | P  | 2  | 272.1723       | 136.5900        |
|                | 13 | R  | 1  | 175.1195       | 88.0637         |

N-term:+29.04 K(11):+156.13

N-term: +35.07

X-range:

0 - 0

MassTol: Y-zoom:

0. 1.

MassType:

☐ AVG ☒ MONO

Axis:

☒ 1 ☐ 2

Label:

☒ I ☐ M ☐ -

Ions:

a ☐ + ☐ 2+ ☐ 3+

b ☒ + ☐ 2+ ☐ 3+

c ☐ + ☐ 2+ ☐ 3+

x ☐ + ☐ 2+ ☐ 3+

y ☒ + ☒ 2+ ☐ 3+

z ☐ + ☐ 2+ ☐ 3+

hide H<sub>2</sub>O/NH<sub>3</sub> ☐

zoom 112-122 ☐

GO

VAVMHGETEGTVPGNALVVDPEKPFRR, MH+ 2805.4609, m/z 702.1207  
L OS G16 P120811 220811-s1.05509.05509.4.dta

scan 5509; 1.6e+000

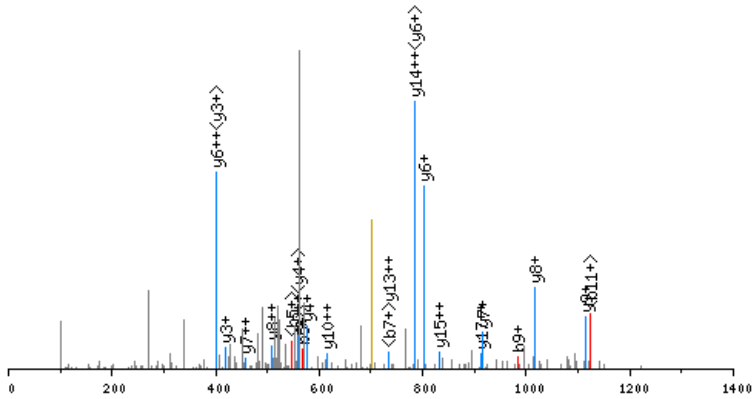

click image to zoom in; click top corners to zoom out [precursor±]

scan 5508; 702.1 m/z; 6.3e+000

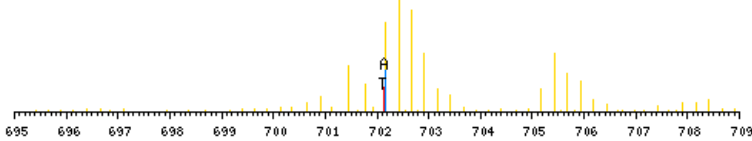

zoomed in precursor plot; T=theoretical m/z, A=acquired m/z

| b <sup>+</sup> | #  | AA | #  | y <sup>+</sup> | y <sup>2+</sup> |
|----------------|----|----|----|----------------|-----------------|
| 128.1075       | 1  | V  | 26 |                |                 |
| 199.1446       | 2  | A  | 25 | 2678.3612      | 1339.6845       |
| 298.2130       | 3  | V  | 24 | 2607.3241      | 1304.1660       |
| 429.2535       | 4  | M  | 23 | 2508.2557      | 1254.6318       |
| 566.3124       | 5  | H  | 22 | 2377.2152      | 1189.1115       |
| 623.3339       | 6  | G  | 21 | 2240.1563      | 1120.5821       |
| 752.3765       | 7  | E  | 20 | 2183.1349      | 1092.0713       |
| 853.4242       | 8  | T  | 19 | 2054.0923      | 1027.5500       |
| 982.4668       | 9  | E  | 18 | 1953.0446      | 977.0262        |
| 1039.4882      | 10 | G  | 17 | 1824.0020      | 912.5049        |
| 1140.5359      | 11 | T  | 16 | 1766.9805      | 883.9942        |
| 1239.6043      | 12 | V  | 15 | 1665.9329      | 833.4703        |
| 1336.6571      | 13 | P  | 14 | 1566.8644      | 783.9361        |
| 1393.6786      | 14 | G  | 13 | 1469.8117      | 735.4098        |
| 1507.7215      | 15 | N  | 12 | 1412.7902      | 706.8990        |
| 1578.7586      | 16 | A  | 11 | 1298.7473      | 649.8776        |
| 1691.8427      | 17 | L  | 10 | 1227.7102      | 614.3590        |
| 1790.9111      | 18 | V  | 9  | 1114.6261      | 557.8170        |
| 1889.9795      | 19 | V  | 8  | 1015.5577      | 508.2828        |
| 2005.0064      | 20 | D  | 7  | 916.4893       | 458.7486        |
| 2102.0592      | 21 | P  | 6  | 801.4623       | 401.2351        |
| 2231.1018      | 22 | E  | 5  | 704.4096       | 352.7087        |
| 2387.2281      | 23 | K  | 4  | 575.3670       | 288.1874        |
| 2484.2808      | 24 | P  | 3  | 419.2407       | 210.1243        |
| 2631.3493      | 25 | F  | 2  | 322.1879       | 161.5979        |
|                | 26 | R  | 1  | 175.1195       | 88.0637         |

N-term: +29.04 K(23): +156.13

X-range:

0 - 0

MassTol: Y-zoom:

0. 1.

MassType:

☐ AVG ☒ MONO

Axis:

☒ 1 ☐ 2

Label:

☒ I ☐ M ☐ -

Ions:

a ☐ + ☐ 2+ ☐ 3+b ☒ + ☐ 2+ ☐ 3+c ☐ + ☐ 2+ ☐ 3+x ☐ + ☐ 2+ ☐ 3+y ☒ + ☒ 2+ ☐ 3+z ☐ + ☐ 2+ ☐ 3+hide H<sub>2</sub>O/NH<sub>3</sub> ☐zoom 112-122 ☐

GO

VDEEDGGDGQAGPDEGEVDSCLR, MH+ 2433.9952, m/z 812.0032

L OS G12 P120811 220811-s1.03098.03098.3.dta

scan 3098; 1.3e+000

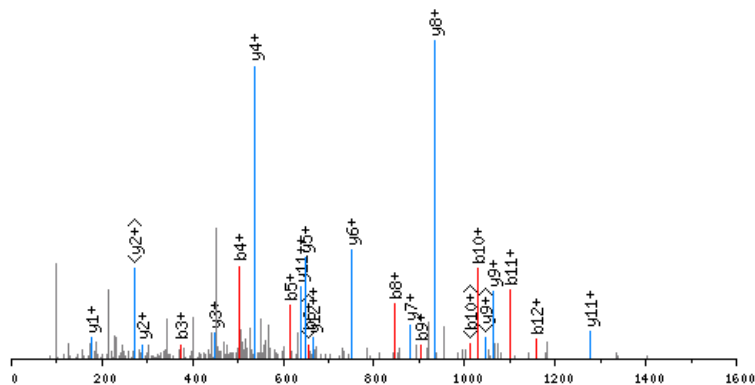

click image to zoom in; click top corners to zoom out

[\[precursor±\]](#)

scan 3097; 812.0 m/z; 7.7e+000

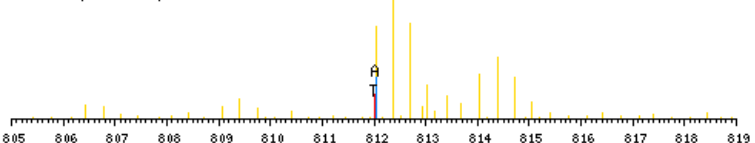

zoomed in precursor plot; T=theoretical m/z, A=acquired m/z

| b <sup>+</sup> | #  | AA | #  | y <sup>+</sup> | y <sup>2+</sup> |
|----------------|----|----|----|----------------|-----------------|
| 128.1075       | 1  | V  | 23 |                |                 |
| 243.1345       | 2  | D  | 22 | 2306.8955      | 1153.9516       |
| 372.1771       | 3  | E  | 21 | 2191.8685      | 1096.4382       |
| 501.2196       | 4  | E  | 20 | 2062.8259      | 1031.9169       |
| 616.2466       | 5  | D  | 19 | 1933.7833      | 967.3956        |
| 673.2681       | 6  | G  | 18 | 1818.7564      | 909.8821        |
| 730.2895       | 7  | G  | 17 | 1761.7349      | 881.3714        |
| 845.3165       | 8  | D  | 16 | 1704.7135      | 852.8606        |
| 902.3379       | 9  | G  | 15 | 1589.6865      | 795.3472        |
| 1030.3965      | 10 | Q  | 14 | 1532.6651      | 766.8364        |
| 1101.4336      | 11 | A  | 13 | 1404.6065      | 702.8072        |
| 1158.4551      | 12 | G  | 12 | 1333.5694      | 667.2886        |
| 1255.5078      | 13 | P  | 11 | 1276.5479      | 638.7779        |
| 1370.5348      | 14 | D  | 10 | 1179.4951      | 590.2515        |
| 1499.5774      | 15 | E  | 9  | 1064.4682      | 532.7380        |
| 1556.5988      | 16 | G  | 8  | 935.4256       | 468.2167        |
| 1685.6414      | 17 | E  | 7  | 878.4041       | 439.7060        |
| 1784.7098      | 18 | V  | 6  | 749.3616       | 375.1847        |
| 1899.7368      | 19 | D  | 5  | 650.2931       | 325.6505        |
| 1986.7688      | 20 | S  | 4  | 535.2662       | 268.1370        |
| 2146.7994      | 21 | C  | 3  | 448.2342       | 224.6210        |
| 2259.8835      | 22 | L  | 2  | 288.2036       | 144.6057        |
|                | 23 | R  | 1  | 175.1195       | 88.0637         |

N-term:+29.04 C(21):+160.03

X-range:

0 - 0

MassTol: Y-zoom:

0. 1.

MassType:

☐AVG ☒MONO

Axis:

☒1 ☐2

Label:

☒I ☐M ☐-

Ions:

a ☐+ ☐2+ ☐3+

b ☒+ ☐2+ ☐3+

c ☐+ ☐2+ ☐3+

x ☐+ ☐2+ ☐3+

y ☒+ ☒2+ ☐3+

z ☐+ ☐2+ ☐3+

hide H<sub>2</sub>O/NH<sub>3</sub> ☐

zoom 112-122 ☐

GO

VDGSSSLGPSNFNAIR, MH+ 1648.8294, m/z 550.2813  
L OS G13 P120811 220811-s1.04821.04821.3.dta

scan 4821; 3.6e+000

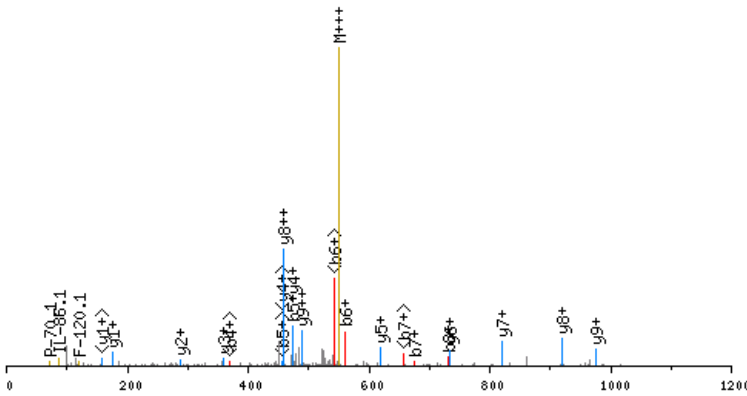

click image to zoom in; click top corners to zoom out [\[precursor±\]](#)

scan 4819; 550.3 m/z; 2.0e+001

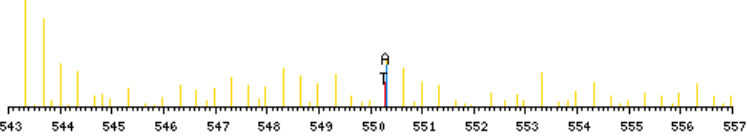

zoomed in precursor plot; T=theoretical m/z, A=acquired m/z

| b <sup>+</sup> | #  | AA | #  | y <sup>+</sup> | y <sup>2+</sup> |
|----------------|----|----|----|----------------|-----------------|
| 128.1075       | 1  | V  | 16 |                |                 |
| 243.1345       | 2  | D  | 15 | 1521.7298      | 761.3688        |
| 300.1559       | 3  | G  | 14 | 1406.7028      | 703.8553        |
| 387.1879       | 4  | S  | 13 | 1349.6814      | 675.3446        |
| 474.2200       | 5  | S  | 12 | 1262.6493      | 631.8286        |
| 561.2520       | 6  | S  | 11 | 1175.6173      | 588.3126        |
| 674.3361       | 7  | L  | 10 | 1088.5853      | 544.7965        |
| 731.3575       | 8  | G  | 9  | 975.5012       | 488.2545        |
| 828.4103       | 9  | P  | 8  | 918.4797       | 459.7438        |
| 915.4423       | 10 | S  | 7  | 821.4270       | 411.2174        |
| 1029.4853      | 11 | N  | 6  | 734.3949       | 367.7014        |
| 1176.5537      | 12 | F  | 5  | 620.3520       | 310.6799        |
| 1290.5966      | 13 | N  | 4  | 473.2836       | 237.1457        |
| 1361.6337      | 14 | A  | 3  | 359.2407       | 180.1243        |
| 1474.7178      | 15 | I  | 2  | 288.2036       | 144.6057        |
|                | 16 | R  | 1  | 175.1195       | 88.0637         |

N-term:+29.04

X-range:

0 - 0

MassTol: Y-zoom:

0. 1.

MassType:

☐AVG ☒MONO

Axis:

☒1 ☐2

Label:

☒I ☐M ☐-

Ions:

a ☐+ ☐2+ ☐3+

b ☒+ ☐2+ ☐3+

c ☐+ ☐2+ ☐3+

x ☐+ ☐2+ ☐3+

y ☒+ ☒2+ ☐3+

z ☐+ ☐2+ ☐3+

hide H<sub>2</sub>O/NH<sub>3</sub> ☐

zoom 112-122 ☐

GO

VDISGLQLALAER, MH+ 1418.8431, m/z 473.6192  
H OS G19 P120811 220811-s1.04470.04470.3.dta

scan 4470; 2.4e+000

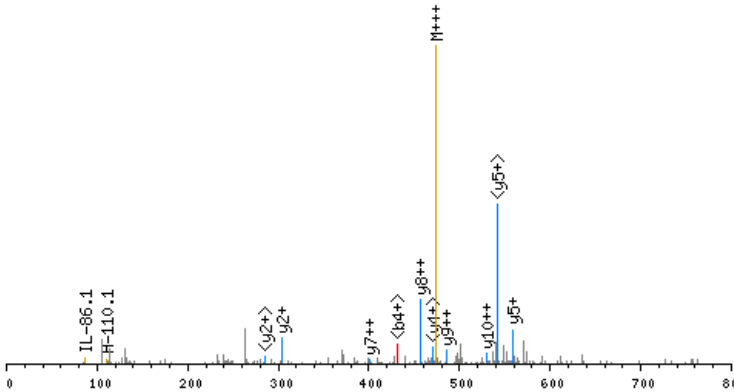

X-range:

0 - 0

MassTol: Y-zoom:

0. 1.

MassType:

☐ AVG ☒ MONO

Axis:

☒ 1 ☐ 2

Label:

☒ I ☐ M ☐ -

Ions:

a ☐ + ☐ 2+ ☐ 3+

b ☒ + ☐ 2+ ☐ 3+

c ☐ + ☐ 2+ ☐ 3+

x ☐ + ☐ 2+ ☐ 3+

y ☒ + ☒ 2+ ☐ 3+

z ☐ + ☐ 2+ ☐ 3+

hide H<sub>2</sub>O/NH<sub>3</sub> ☐

zoom 112-122 ☐

GO

VDLEPTVIDEVR, MH+ 1412.7637, m/z 471.5927  
L OS G13 P120811 220811-s1.05810.05810.3.dta

scan 5810; 3.6e+000

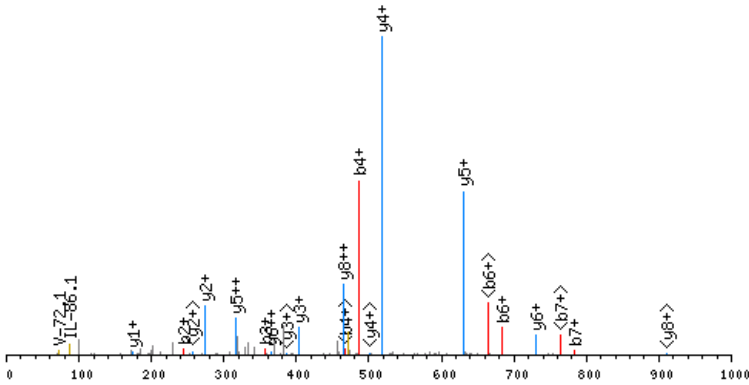

click image to zoom in; click top corners to zoom out

[precursor±]

scan 5809; 471.6 m/z; 8.6e+000

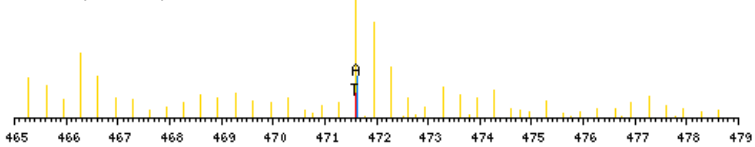

zoomed in precursor plot; T=theoretical m/z, A=acquired m/z

| b <sup>+</sup> | #  | AA | #  | y <sup>+</sup> | y <sup>2+</sup> |
|----------------|----|----|----|----------------|-----------------|
| 128.1075       | 1  | V  | 12 |                |                 |
| 243.1345       | 2  | D  | 11 | 1285.6640      | 643.3359        |
| 356.2185       | 3  | L  | 10 | 1170.6370      | 585.8224        |
| 485.2611       | 4  | E  | 9  | 1057.5530      | 529.2804        |
| 582.3139       | 5  | P  | 8  | 928.5104       | 464.7591        |
| 683.3616       | 6  | T  | 7  | 831.4576       | 416.2327        |
| 782.4300       | 7  | V  | 6  | 730.4099       | 365.7089        |
| 895.5140       | 8  | I  | 5  | 631.3415       | 316.1747        |
| 1010.5410      | 9  | D  | 4  | 518.2575       | 259.6326        |
| 1139.5836      | 10 | E  | 3  | 403.2305       | 202.1192        |
| 1238.6520      | 11 | V  | 2  | 274.1879       | 137.5979        |
|                | 12 | R  | 1  | 175.1195       | 88.0637         |

N-term:+29.04

X-range:

0 - 0

MassTol: Y-zoom:

0. 1.

MassType:

☐AVG ☒MONO

Axis:

☒1 ☐2

Label:

☒I ☐M ☐-

Ions:

a ☐+ ☐2+ ☐3+

b ☒+ ☐2+ ☐3+

c ☐+ ☐2+ ☐3+

x ☐+ ☐2+ ☐3+

y ☒+ ☒2+ ☐3+

z ☐+ ☐2+ ☐3+

hide H<sub>2</sub>O/NH<sub>3</sub> ☐

zoom 112-122 ☐

GO

VDLNSEIDTNQNSLR, MH+ 1745.8670, m/z 582.6272  
L OS G13 P120811 220811-s1.04591.04591.3.dta

scan 4591; 1.5e+000

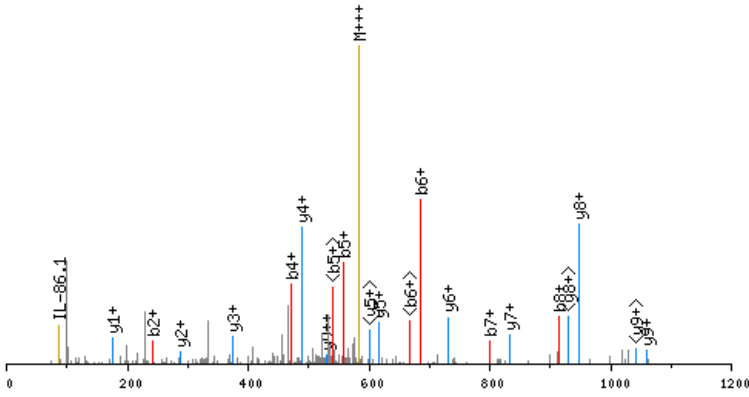

click image to zoom in; click top corners to zoom out [\[precursor±\]](#)

scan 4589; 582.6 m/z; 9.5e+000

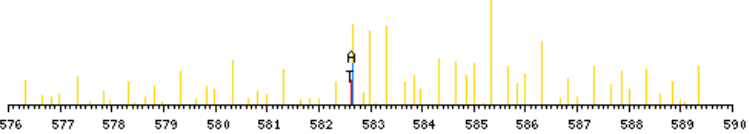

zoomed in precursor plot; T=theoretical m/z, A=acquired m/z

| b <sup>+</sup> | #  | AA | #  | y <sup>+</sup> | y <sup>2+</sup> |
|----------------|----|----|----|----------------|-----------------|
| 128.1075       | 1  | V  | 15 |                |                 |
| 243.1345       | 2  | D  | 14 | 1618.7673      | 809.8875        |
| 356.2185       | 3  | L  | 13 | 1503.7403      | 752.3741        |
| 470.2614       | 4  | N  | 12 | 1390.6563      | 695.8320        |
| 557.2935       | 5  | S  | 11 | 1276.6133      | 638.8106        |
| 686.3361       | 6  | E  | 10 | 1189.5813      | 595.2946        |
| 799.4201       | 7  | I  | 9  | 1060.5387      | 530.7733        |
| 914.4471       | 8  | D  | 8  | 947.4546       | 474.2312        |
| 1015.4948      | 9  | T  | 7  | 832.4277       | 416.7178        |
| 1129.5377      | 10 | N  | 6  | 731.3800       | 366.1939        |
| 1257.5963      | 11 | Q  | 5  | 617.3371       | 309.1725        |
| 1371.6392      | 12 | N  | 4  | 489.2785       | 245.1432        |
| 1458.6712      | 13 | S  | 3  | 375.2356       | 188.1217        |
| 1571.7553      | 14 | L  | 2  | 288.2036       | 144.6057        |
|                | 15 | R  | 1  | 175.1195       | 88.0637         |

N-term:+29.04

X-range:

0 - 0

MassTol: Y-zoom:

0. 1.

MassType:

☐AVG ☒MONO

Axis:

☒1 ☐2

Label:

☒I ☐M ☐-

Ions:

a ☐+ ☐2+ ☐3+

b ☒+ ☐2+ ☐3+

c ☐+ ☐2+ ☐3+

x ☐+ ☐2+ ☐3+

y ☒+ ☒2+ ☐3+

z ☐+ ☐2+ ☐3+

hide H<sub>2</sub>O/NH<sub>3</sub> ☐

zoom 112-122 ☐

GO

VDLSQVAPTDIEEGMR, MH+ 1902.9119, m/z 634.9755  
L OS G12 P120811 220811-s1.04524.04524.3.dta

scan 4524; 2.9e+000

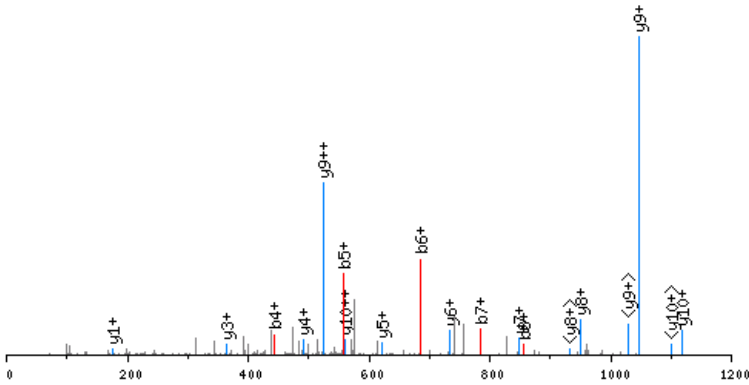

click image to zoom in; click top corners to zoom out [\[precursor±\]](#)

scan 4522; 635.0 m/z; 7.7e+000

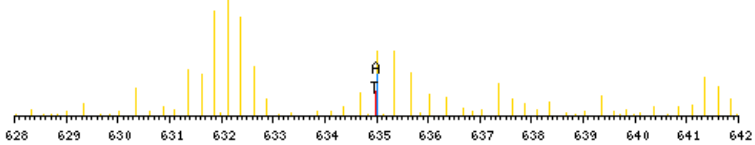

zoomed in precursor plot; T=theoretical m/z, A=acquired m/z

| b <sup>+</sup> | #  | AA | #  | y <sup>+</sup> | y <sup>2+</sup> |
|----------------|----|----|----|----------------|-----------------|
| 128.1075       | 1  | V  | 17 |                |                 |
| 243.1345       | 2  | D  | 16 | 1775.8122      | 888.4100        |
| 356.2185       | 3  | L  | 15 | 1660.7852      | 830.8965        |
| 443.2505       | 4  | S  | 14 | 1547.7012      | 774.3545        |
| 558.2775       | 5  | D  | 13 | 1460.6691      | 730.8385        |
| 686.3361       | 6  | Q  | 12 | 1345.6422      | 673.3250        |
| 785.4045       | 7  | V  | 11 | 1217.5836      | 609.2957        |
| 856.4416       | 8  | A  | 10 | 1118.5152      | 559.7615        |
| 953.4944       | 9  | P  | 9  | 1047.4781      | 524.2430        |
| 1054.5420      | 10 | T  | 8  | 950.4253       | 475.7166        |
| 1169.5690      | 11 | D  | 7  | 849.3776       | 425.1927        |
| 1282.6530      | 12 | I  | 6  | 734.3507       | 367.6793        |
| 1411.6956      | 13 | E  | 5  | 621.2666       | 311.1372        |
| 1540.7382      | 14 | E  | 4  | 492.2240       | 246.6159        |
| 1597.7597      | 15 | G  | 3  | 363.1814       | 182.0946        |
| 1728.8002      | 16 | M  | 2  | 306.1600       | 153.5839        |
|                | 17 | R  | 1  | 175.1195       | 88.0637         |

N-term:+29.04

X-range:

0 - 0

MassTol: Y-zoom:

0. 1.

MassType:

☐AVG ☒MONO

Axis:

☒1 ☐2

Label:

☒I ☐M ☐-

Ions:

a ☐+ ☐2+ ☐3+

b ☒+ ☐2+ ☐3+

c ☐+ ☐2+ ☐3+

x ☐+ ☐2+ ☐3+

y ☒+ ☒2+ ☐3+

z ☐+ ☐2+ ☐3+

hide H<sub>2</sub>O/NH<sub>3</sub> ☐

zoom 112-122 ☐

GO

VDLTFQTNLVPYPR, MH+ 1819.9594, m/z 607.3247  
L OS G12 P120811 220811-s1.05415.05415.3.dta

scan 5415; 6.3e+000

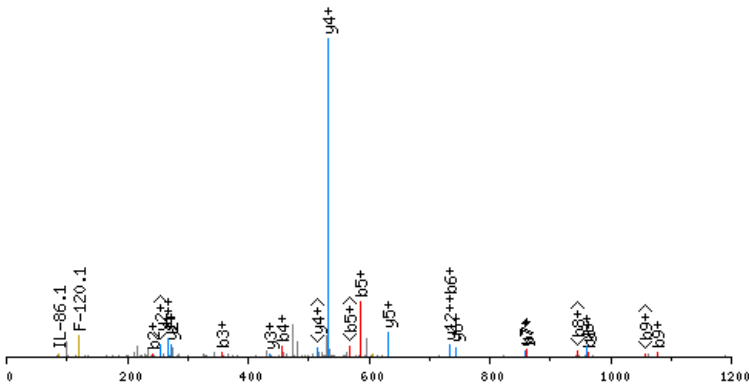

click image to zoom in; click top corners to zoom out

[precursor±]

scan 5412; 607.3 m/z; 6.6e+000

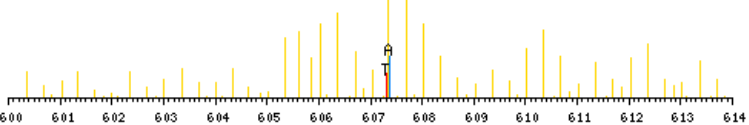

zoomed in precursor plot; T=theoretical m/z, A=acquired m/z

| b <sup>+</sup> | #  | AA | #  | y <sup>+</sup> | y <sup>2+</sup> |
|----------------|----|----|----|----------------|-----------------|
| 128.1075       | 1  | V  | 15 |                |                 |
| 243.1345       | 2  | D  | 14 | 1692.8597      | 846.9338        |
| 356.2185       | 3  | L  | 13 | 1577.8328      | 789.4203        |
| 457.2662       | 4  | T  | 12 | 1464.7487      | 732.8783        |
| 586.3088       | 5  | E  | 11 | 1363.7010      | 682.3544        |
| 733.3772       | 6  | F  | 10 | 1234.6584      | 617.8331        |
| 861.4358       | 7  | Q  | 9  | 1087.5900      | 544.2989        |
| 962.4835       | 8  | T  | 8  | 959.5314       | 480.2696        |
| 1076.5264      | 9  | N  | 7  | 858.4838       | 429.7458        |
| 1189.6105      | 10 | L  | 6  | 744.4408       | 372.7243        |
| 1288.6789      | 11 | V  | 5  | 631.3568       | 316.1823        |
| 1385.7316      | 12 | P  | 4  | 532.2884       | 266.6481        |
| 1548.7950      | 13 | Y  | 3  | 435.2356       | 218.1217        |
| 1645.8477      | 14 | P  | 2  | 272.1723       | 136.5900        |
|                | 15 | R  | 1  | 175.1195       | 88.0637         |

N-term:+29.04

X-range:

0 - 0

MassTol: Y-zoom:

0. 1.

MassType:

☐AVG ☒MONO

Axis:

☒1 ☐2

Label:

☒I ☐M ☐-

Ions:

a ☐+ ☐2+ ☐3+

b ☒+ ☐2+ ☐3+

c ☐+ ☐2+ ☐3+

x ☐+ ☐2+ ☐3+

y ☒+ ☒2+ ☐3+

z ☐+ ☐2+ ☐3+

hide H<sub>2</sub>O/NH<sub>3</sub> ☐

zoom 112-122 ☐

GO

VDVHPESQTAGSVDILR, MH+ 1850.9612, m/z 617.6586  
L OS G15 P120811 220811-s1.04164.04164.3.dta

scan 4164; 1.3e+000

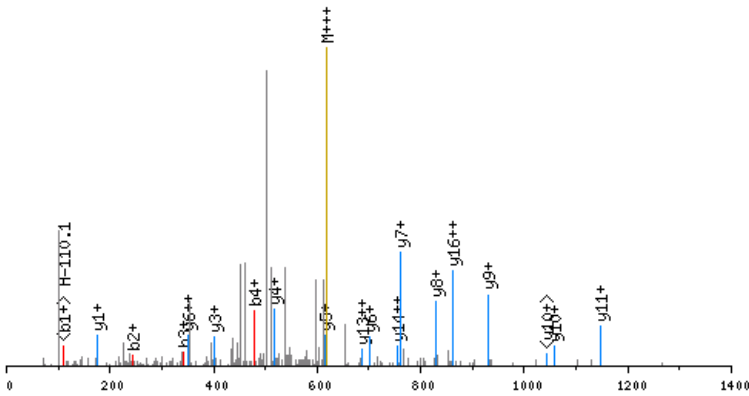

click image to zoom in; click top corners to zoom out

[precursor±]

scan 4161; 617.7 m/z; 3.7e+001

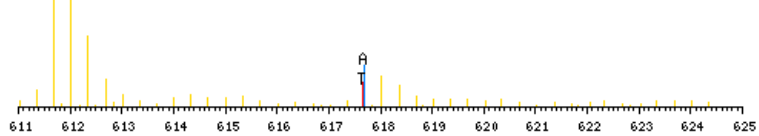

zoomed in precursor plot; T=theoretical m/z, A=acquired m/z

| b <sup>+</sup> | #  | AA | #  | y <sup>+</sup> | y <sup>2+</sup> |
|----------------|----|----|----|----------------|-----------------|
| 128.1075       | 1  | V  | 17 |                |                 |
| 243.1345       | 2  | D  | 16 | 1723.8615      | 862.4347        |
| 342.2029       | 3  | V  | 15 | 1608.8346      | 804.9212        |
| 479.2618       | 4  | H  | 14 | 1509.7661      | 755.3870        |
| 576.3145       | 5  | P  | 13 | 1372.7072      | 686.8575        |
| 705.3571       | 6  | E  | 12 | 1275.6545      | 638.3311        |
| 792.3892       | 7  | S  | 11 | 1146.6119      | 573.8099        |
| 920.4477       | 8  | Q  | 10 | 1059.5798      | 530.2938        |
| 1021.4954      | 9  | T  | 9  | 931.5213       | 466.2645        |
| 1092.5325      | 10 | A  | 8  | 830.4736       | 415.7407        |
| 1149.5540      | 11 | G  | 7  | 759.4365       | 380.2222        |
| 1236.5860      | 12 | S  | 6  | 702.4150       | 351.7114        |
| 1335.6544      | 13 | V  | 5  | 615.3830       | 308.1954        |
| 1450.6814      | 14 | D  | 4  | 516.3146       | 258.6612        |
| 1563.7655      | 15 | I  | 3  | 401.2876       | 201.1477        |
| 1676.8495      | 16 | L  | 2  | 288.2036       | 144.6057        |
|                | 17 | R  | 1  | 175.1195       | 88.0637         |

N-term:+29.04

N-term: +29.04

X-range:

0 - 0

MassTol: Y-zoom:

0. 1.

MassType:

☐AVG ☒MONO

Axis:

☒1 ☐2

Label:

☒I ☐M ☐-

Ions:

a ☐+ ☐2+ ☐3+

b ☒+ ☐2+ ☐3+

c ☐+ ☐2+ ☐3+

x ☐+ ☐2+ ☐3+

y ☒+ ☒2+ ☐3+

z ☐+ ☐2+ ☐3+

hide H<sub>2</sub>O/NH<sub>3</sub> ☐

zoom 112-122 ☐

GO

VEDNEDDDDEGEELLHHHR, MH+ 2337.0079, m/z 585.0074  
H OS G19 P120811 220811-s1.02764.02764.4.dta

scan 2764; 1.8e+000

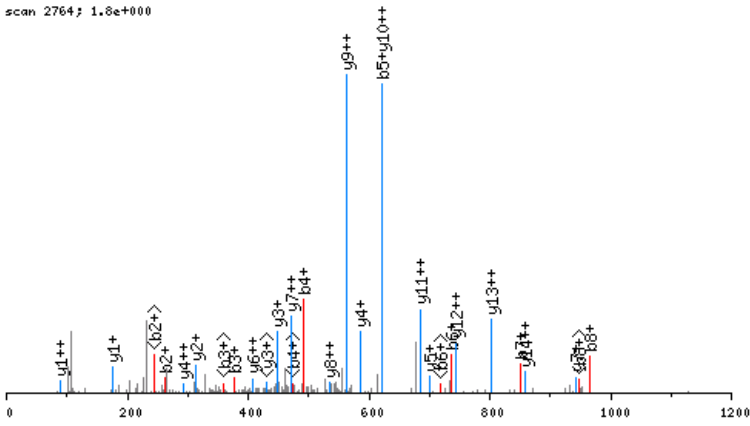

click image to zoom in; click top corners to zoom out [\[precursor±\]](#)

scan 2761; 585.0 m/z; 7.5e+000

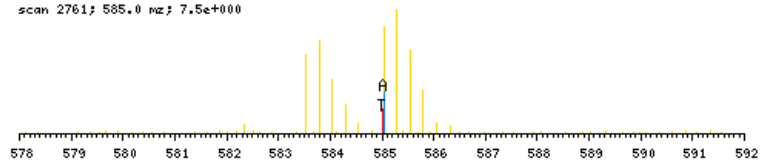

zoomed in precursor plot; T=theoretical m/z, A=acquired m/z

| b <sup>+</sup> | #  | AA | #  | y <sup>+</sup> | y <sup>2+</sup> |
|----------------|----|----|----|----------------|-----------------|
| 134.1393       | 1  | V  | 19 |                |                 |
| 263.1819       | 2  | E  | 18 | 2203.8764      | 1102.4421       |
| 378.2089       | 3  | D  | 17 | 2074.8338      | 1037.9208       |
| 492.2518       | 4  | N  | 16 | 1959.8069      | 980.4074        |
| 621.2944       | 5  | E  | 15 | 1845.7640      | 923.3859        |
| 736.3213       | 6  | D  | 14 | 1716.7214      | 858.8646        |
| 851.3483       | 7  | D  | 13 | 1601.6944      | 801.3511        |
| 966.3752       | 8  | D  | 12 | 1486.6675      | 743.8377        |
| 1095.4178      | 9  | E  | 11 | 1371.6406      | 686.3242        |
| 1210.4447      | 10 | D  | 10 | 1242.5980      | 621.8029        |
| 1267.4662      | 11 | G  | 9  | 1127.5710      | 564.2894        |
| 1396.5088      | 12 | E  | 8  | 1070.5496      | 535.7787        |
| 1525.5514      | 13 | E  | 7  | 941.5070       | 471.2574        |
| 1638.6355      | 14 | L  | 6  | 812.4644       | 406.7361        |
| 1751.7195      | 15 | L  | 5  | 699.3803       | 350.1941        |
| 1888.7784      | 16 | H  | 4  | 586.2962       | 293.6520        |
| 2025.8373      | 17 | H  | 3  | 449.2373       | 225.1226        |
| 2162.8962      | 18 | H  | 2  | 312.1784       | 156.5931        |
|                | 19 | R  | 1  | 175.1195       | 88.0637         |

N-term:+35.07

X-range:

0 - 0

MassTol: Y-zoom:

0. 1.

MassType:

☐AVG ☒MONO

Axis:

☒1 ☐2

Label:

☒I ☐M ☐-

Ions:

a ☐+ ☐2+ ☐3+

b ☒+ ☐2+ ☐3+

c ☐+ ☐2+ ☐3+

x ☐+ ☐2+ ☐3+

y ☒+ ☒2+ ☐3+

z ☐+ ☐2+ ☐3+

hide H<sub>2</sub>O/NH<sub>3</sub> ☐

zoom 112-122 ☐

GO

VEEVQDGKVISSR, MH+ 1501.8226, m/z 501.2791  
L OS G15 P120811 220811-s1.02307.02307.3.dta

scan 2307; 1.4e+001

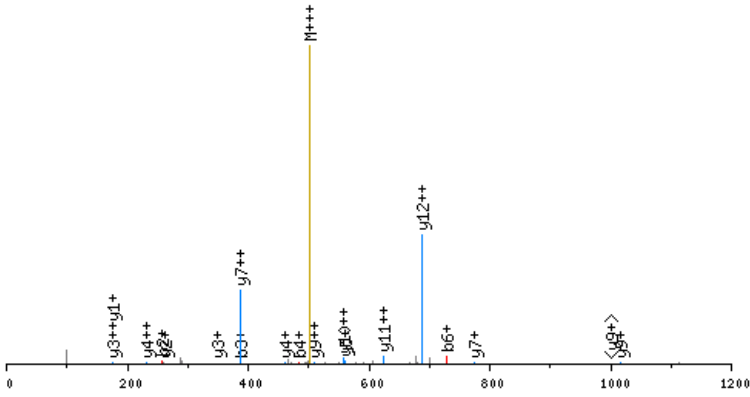

click image to zoom in; click top corners to zoom out

[precursor±]

scan 2306; 501.3 m/z; 9.0e+000

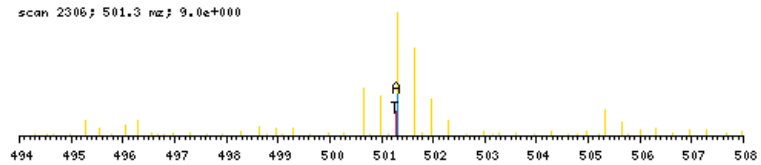

zoomed in precursor plot; T=theoretical m/z, A=acquired m/z

| b <sup>+</sup> | #  | AA | #  | y <sup>+</sup> | y <sup>2+</sup> |
|----------------|----|----|----|----------------|-----------------|
| 128.1075       | 1  | V  | 13 |                |                 |
| 257.1501       | 2  | E  | 12 | 1374.7229      | 687.8654        |
| 386.1927       | 3  | E  | 11 | 1245.6803      | 623.3441        |
| 485.2611       | 4  | V  | 10 | 1116.6377      | 558.8228        |
| 613.3197       | 5  | Q  | 9  | 1017.5693      | 509.2886        |
| 728.3466       | 6  | D  | 8  | 889.5107       | 445.2593        |
| 785.3681       | 7  | G  | 7  | 774.4838       | 387.7458        |
| 941.4944       | 8  | K  | 6  | 717.4623       | 359.2351        |
| 1040.5628      | 9  | V  | 5  | 561.3360       | 281.1719        |
| 1153.6469      | 10 | I  | 4  | 462.2676       | 231.6377        |
| 1240.6789      | 11 | S  | 3  | 349.1836       | 175.0957        |
| 1327.7109      | 12 | S  | 2  | 262.1515       | 131.5797        |
|                | 13 | R  | 1  | 175.1195       | 88.0637         |

N-term:+29.04 K(8):+156.13

X-range:

0 - 0

MassTol: Y-zoom:

0. 1.

MassType:

☐AVG ☒MONO

Axis:

☒1 ☐2

Label:

☒I ☐M ☐-

Ions:

a ☐+ ☐2+ ☐3+

b ☒+ ☐2+ ☐3+

c ☐+ ☐2+ ☐3+

x ☐+ ☐2+ ☐3+

y ☒+ ☒2+ ☐3+

z ☐+ ☐2+ ☐3+

hide H<sub>2</sub>O/NH<sub>3</sub> ☐

zoom 112-122 ☐

GO

VEGELYCETHAR, MH+ 1491.6901, m/z 497.9016  
L OS G16 P120811 220811-s1.02601.02601.3.dta

scan 2601; 6.0e+000

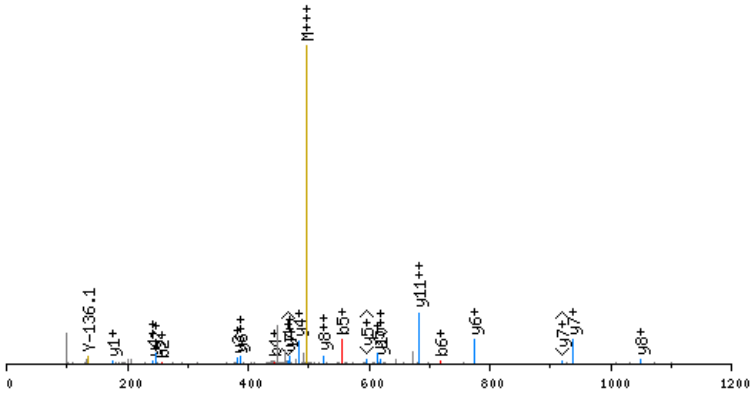

click image to zoom in; click top corners to zoom out

[precursor±]

scan 2598; 497.9 m/z; 1.8e+001

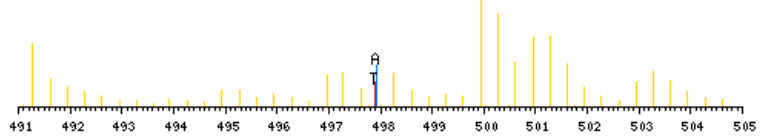

zoomed in precursor plot; T=theoretical m/z, A=acquired m/z

| b <sup>+</sup> | #  | AA | #  | y <sup>+</sup> | y <sup>2+</sup> |
|----------------|----|----|----|----------------|-----------------|
| 128.1075       | 1  | V  | 12 |                |                 |
| 257.1501       | 2  | E  | 11 | 1364.5904      | 682.7991        |
| 314.1716       | 3  | G  | 10 | 1235.5478      | 618.2778        |
| 443.2142       | 4  | E  | 9  | 1178.5264      | 589.7671        |
| 556.2982       | 5  | L  | 8  | 1049.4838      | 525.2458        |
| 719.3616       | 6  | Y  | 7  | 936.3997       | 468.7038        |
| 879.3922       | 7  | C  | 6  | 773.3364       | 387.1721        |
| 1008.4347      | 8  | E  | 5  | 613.3058       | 307.1568        |
| 1109.4824      | 9  | T  | 4  | 484.2632       | 242.6355        |
| 1246.5413      | 10 | H  | 3  | 383.2155       | 192.1117        |
| 1317.5785      | 11 | A  | 2  | 246.1566       | 123.5822        |
|                | 12 | R  | 1  | 175.1195       | 88.0637         |

N-term:+29.04 C(7):+160.03

X-range:

$$\boxed{0} - \boxed{0}$$

0. 1.

☐ AVG ☒ MONO

1 2

☒ I ☐ M ☐ -

**a**  + <sup>2</sup> + <sup>3</sup> +

g.  $\square + \square^2 + \square^3 + \dots$

[illegible]
$$z \square + \square^2 + \square^3 +$$

zoom 112-122

60

GO

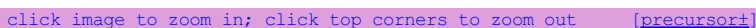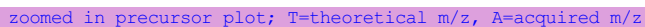

N-term: +29.04 K(3): +156.13

X-range:

0 - 0

MassTol: Y-zoom:

0. 1.

MassType:

☐AVG ☒MONO

Axis:

☒1 ☐2

Label:

☒I ☐M ☐-

Ions:

a ☐+ ☐2+ ☐3+

b ☒+ ☐2+ ☐3+

c ☐+ ☐2+ ☐3+

x ☐+ ☐2+ ☐3+

y ☒+ ☒2+ ☐3+

z ☐+ ☐2+ ☐3+

hide H<sub>2</sub>O/NH<sub>3</sub> ☐

zoom 112-122 ☐

GO

VEKGAEAGSQAEGSPLHPR, MH+ 1976.0201, m/z 494.7605  
L OS G17 P120811 220811-s1.02160.02160.4.dta

scan 2160; 3.6e+000

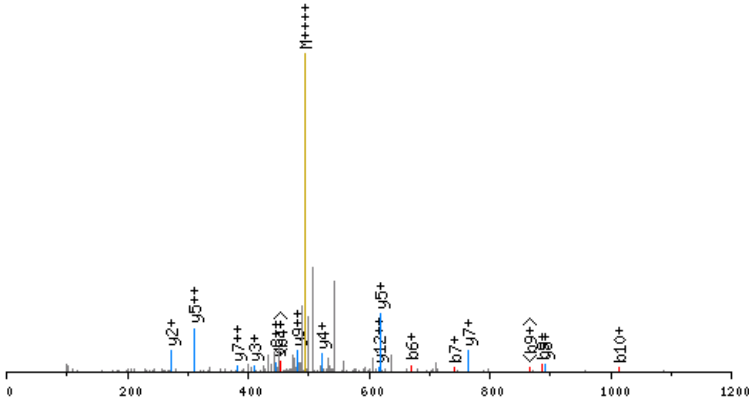

click image to zoom in; click top corners to zoom out

[precursor±]

scan 2158; 494.8 m/z; 5.0e+000

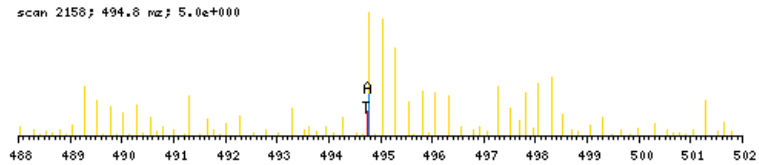

zoomed in precursor plot; T=theoretical m/z, A=acquired m/z

| b <sup>+</sup> | #  | AA | #  | y <sup>+</sup> | y <sup>2+</sup> |
|----------------|----|----|----|----------------|-----------------|
| 128.1075       | 1  | V  | 19 |                |                 |
| 257.1501       | 2  | E  | 18 | 1848.9205      | 924.9641        |
| 413.2764       | 3  | K  | 17 | 1719.8779      | 860.4428        |
| 470.2979       | 4  | G  | 16 | 1563.7516      | 782.3797        |
| 541.3350       | 5  | A  | 15 | 1506.7301      | 753.8690        |
| 670.3776       | 6  | E  | 14 | 1435.6930      | 718.3504        |
| 741.4147       | 7  | A  | 13 | 1306.6504      | 653.8291        |
| 798.4362       | 8  | G  | 12 | 1235.6133      | 618.3105        |
| 885.4682       | 9  | S  | 11 | 1178.5918      | 589.7998        |
| 1013.5268      | 10 | Q  | 10 | 1091.5598      | 546.2838        |
| 1084.5639      | 11 | A  | 9  | 963.5012       | 482.2545        |
| 1213.6065      | 12 | E  | 8  | 892.4641       | 446.7360        |
| 1270.6279      | 13 | G  | 7  | 763.4215       | 382.2147        |
| 1357.6600      | 14 | S  | 6  | 706.4000       | 353.7039        |
| 1454.7127      | 15 | P  | 5  | 619.3680       | 310.1879        |
| 1567.7968      | 16 | L  | 4  | 522.3152       | 261.6615        |
| 1704.8557      | 17 | H  | 3  | 409.2312       | 205.1195        |
| 1801.9085      | 18 | P  | 2  | 272.1723       | 136.5900        |
|                | 19 | R  | 1  | 175.1195       | 88.0637         |

N-term:+29.04 K(3):+156.13

X-range:

0 - 0

MassTol: Y-zoom:

0. 1.

MassType:

☐AVG ☒MONO

Axis:

☒1 ☐2

Label:

☒I ☐M ☐-

Ions:

a ☐+ ☐2+ ☐3+

b ☒+ ☐2+ ☐3+

c ☐+ ☐2+ ☐3+

x ☐+ ☐2+ ☐3+

y ☒+ ☒2+ ☐3+

z ☐+ ☐2+ ☐3+

hide H<sub>2</sub>O/NH<sub>3</sub> ☐

zoom 112-122 ☐

GO

VESVDDKGSSYFSMDSAEGR, MH+ 2221.9923, m/z 741.3356  
L OS G15 P120811 220811-s1.04047.04047.3.dta

scan 4047: 9.0e+000

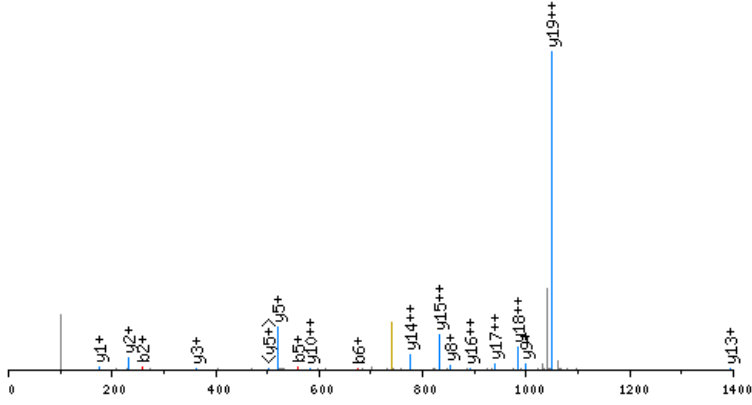

click image to zoom in; click top corners to zoom out [\[precursor±\]](#)

scan 4046: 741.3 m/z; 1.1e+001

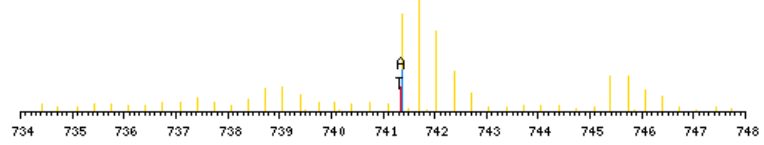

zoomed in precursor plot; T=theoretical m/z, A=acquired m/z

| b <sup>+</sup> | #  | AA | #  | y <sup>+</sup> | y <sup>2+</sup> |
|----------------|----|----|----|----------------|-----------------|
| 128.1075       | 1  | V  | 20 |                |                 |
| 257.1501       | 2  | E  | 19 | 2094.8926      | 1047.9502       |
| 344.1821       | 3  | S  | 18 | 1965.8500      | 983.4289        |
| 443.2505       | 4  | V  | 17 | 1878.8180      | 939.9129        |
| 558.2775       | 5  | D  | 16 | 1779.7496      | 890.3787        |
| 673.3044       | 6  | D  | 15 | 1664.7227      | 832.8652        |
| 829.4307       | 7  | K  | 14 | 1549.6957      | 775.3518        |
| 886.4522       | 8  | G  | 13 | 1393.5694      | 697.2886        |
| 973.4842       | 9  | S  | 12 | 1336.5480      | 668.7779        |
| 1060.5163      | 10 | S  | 11 | 1249.5159      | 625.2619        |
| 1223.5796      | 11 | Y  | 10 | 1162.4839      | 581.7459        |
| 1370.6480      | 12 | F  | 9  | 999.4206       | 500.2142        |
| 1457.6800      | 13 | S  | 8  | 852.3522       | 426.6800        |
| 1588.7205      | 14 | M  | 7  | 765.3201       | 383.1640        |
| 1703.7475      | 15 | D  | 6  | 634.2796       | 317.6437        |
| 1790.7795      | 16 | S  | 5  | 519.2527       | 260.1303        |
| 1861.8166      | 17 | A  | 4  | 432.2207       | 216.6142        |
| 1990.8592      | 18 | E  | 3  | 361.1836       | 181.0957        |
| 2047.8807      | 19 | G  | 2  | 232.1410       | 116.5744        |
|                | 20 | R  | 1  | 175.1195       | 88.0637         |

N-term:+29.04 K(7):+156.13

N-term:+29.04

X-range:

0 - 0

MassTol: Y-zoom:

0. 1.

MassType:

☐ AVG ☒ MONO

Axis:

☒ 1 ☐ 2

Label:

☒ I ☐ M ☐ -

Ions:

a ☐ + ☐ 2+ ☐ 3+

b ☒ + ☐ 2+ ☐ 3+

c ☐ + ☐ 2+ ☐ 3+

x ☐ + ☐ 2+ ☐ 3+

y ☒ + ☒ 2+ ☐ 3+

z ☐ + ☐ 2+ ☐ 3+

hide H<sub>2</sub>O/NH<sub>3</sub> ☐

zoom 112-122 ☐

GO

VEVGPEDEVGAER, MH+ 1528.7131, m/z 510.2425  
L OS G13 P120811 220811-s1.03270.03270.3.dta

scan 3270; 2.3e+000

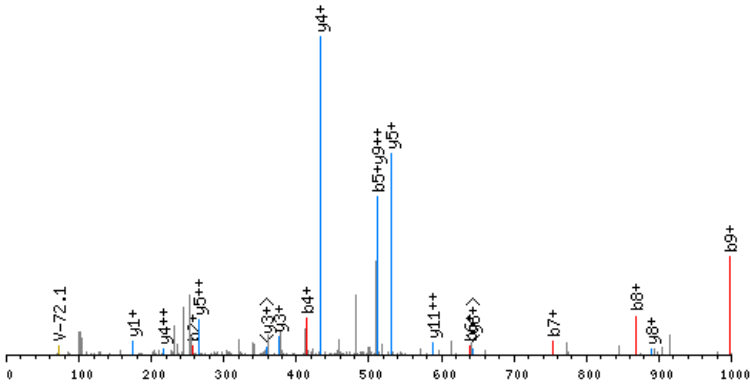

click image to zoom in; click top corners to zoom out

[precursor±]

scan 3269; 510.2 m/z; 1.0e+001

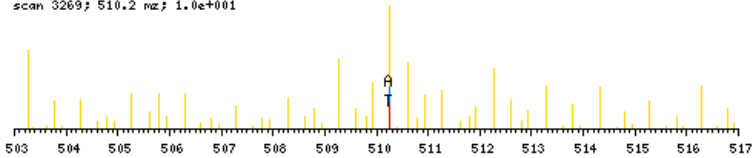

zoomed in precursor plot; T=theoretical m/z, A=acquired m/z

| b <sup>+</sup> | #  | AA | #  | y <sup>+</sup> | y <sup>2+</sup> |
|----------------|----|----|----|----------------|-----------------|
| 128.1075       | 1  | V  | 14 |                |                 |
| 257.1501       | 2  | E  | 13 | 1401.6134      | 701.3106        |
| 356.2185       | 3  | V  | 12 | 1272.5708      | 636.7893        |
| 413.2400       | 4  | G  | 11 | 1173.5024      | 587.2551        |
| 510.2927       | 5  | P  | 10 | 1116.4809      | 558.7444        |
| 639.3353       | 6  | E  | 9  | 1019.4282      | 510.2180        |
| 754.3623       | 7  | D  | 8  | 890.3856       | 445.6967        |
| 869.3892       | 8  | D  | 7  | 775.3586       | 388.1832        |
| 998.4318       | 9  | E  | 6  | 660.3317       | 330.6698        |
| 1097.5002      | 10 | V  | 5  | 531.2891       | 266.1485        |
| 1154.5217      | 11 | G  | 4  | 432.2207       | 216.6142        |
| 1225.5588      | 12 | A  | 3  | 375.1992       | 188.1035        |
| 1354.6014      | 13 | E  | 2  | 304.1621       | 152.5850        |
|                | 14 | R  | 1  | 175.1195       | 88.0637         |

N-term:+29.04

N-term: +29.04 K(4): +156.13

N-term: +29.04 K(4): +156.13

N-term: +35.07

X-range:

0 - 0

MassTol: Y-zoom:

0. 1.

MassType:

☐AVG ☒MONO

Axis:

☒1 ☐2

Label:

☒I ☐M ☐-

Ions:

a ☐+ ☐2+ ☐3+

b ☒+ ☐2+ ☐3+

c ☐+ ☐2+ ☐3+

x ☐+ ☐2+ ☐3+

y ☒+ ☒2+ ☐3+

z ☐+ ☐2+ ☐3+

hide H<sub>2</sub>O/NH<sub>3</sub> ☐

zoom 112-122 ☐

GO

VGDLSPQQQEALAR, MH+ 1539.8131, m/z 513.9425  
L OS G13 P120811 220811-s1.03465.03465.3.dta

scan 3465; 2.2e+000

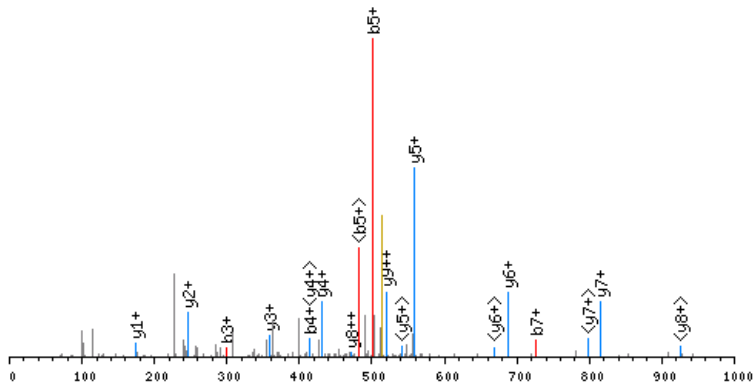

click image to zoom in; click top corners to zoom out

[precursor±]

scan 3464; 513.9 m/z; 8.0e+000

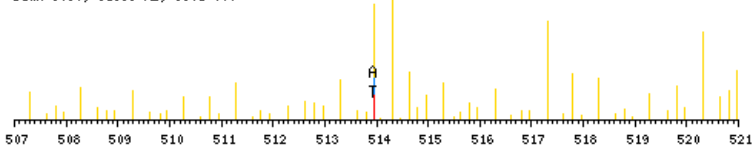

zoomed in precursor plot; T=theoretical m/z, A=acquired m/z

| b <sup>+</sup> | #  | AA | #  | y <sup>+</sup> | y <sup>2+</sup> |
|----------------|----|----|----|----------------|-----------------|
| 128.1075       | 1  | V  | 14 |                |                 |
| 185.1290       | 2  | G  | 13 | 1412.7134      | 706.8606        |
| 300.1559       | 3  | D  | 12 | 1355.6919      | 678.3499        |
| 413.2400       | 4  | L  | 11 | 1240.6650      | 620.8364        |
| 500.2720       | 5  | S  | 10 | 1127.5809      | 564.2944        |
| 597.3248       | 6  | P  | 9  | 1040.5489      | 520.7784        |
| 725.3834       | 7  | Q  | 8  | 943.4961       | 472.2520        |
| 853.4419       | 8  | Q  | 7  | 815.4375       | 408.2227        |
| 981.5005       | 9  | Q  | 6  | 687.3790       | 344.1934        |
| 1110.5431      | 10 | E  | 5  | 559.3204       | 280.1641        |
| 1181.5802      | 11 | A  | 4  | 430.2778       | 215.6428        |
| 1294.6643      | 12 | L  | 3  | 359.2407       | 180.1243        |
| 1365.7014      | 13 | A  | 2  | 246.1566       | 123.5822        |
|                | 14 | R  | 1  | 175.1195       | 88.0637         |

N-term:+29.04

X-range:

0 - 0

MassTol: Y-zoom:

0. 1.

MassType:

☐AVG ☒MONO

Axis:

☒1 ☐2

Label:

☒I ☐M ☐-

Ions:

a ☐+ ☐2+ ☐3+

b ☒+ ☐2+ ☐3+

c ☐+ ☐2+ ☐3+

x ☐+ ☐2+ ☐3+

y ☒+ ☒2+ ☐3+

z ☐+ ☐2+ ☐3+

hide H<sub>2</sub>O/NH<sub>3</sub> ☐

zoom 112-122 ☐

GO

VGGDGSASEAAR, MH+ 1104.5285, m/z 552.7679  
L OS G14 P120811 220811-s1.02243.02243.2.dta

scan 2243; 1.4e+001

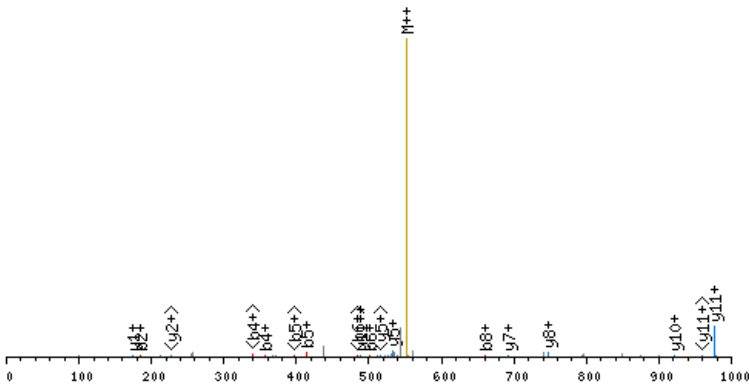

click image to zoom in; click top corners to zoom out

[precursor±]

scan 2241; 552.8 m/z; 8.5e+000

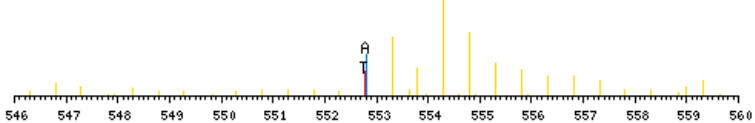

zoomed in precursor plot; T=theoretical m/z, A=acquired m/z

| b <sup>+</sup> | #  | AA | #  | y <sup>+</sup> | y <sup>2+</sup> |
|----------------|----|----|----|----------------|-----------------|
| 128.1075       | 1  | V  | 12 |                |                 |
| 185.1290       | 2  | G  | 11 | 977.4288       | 489.2183        |
| 242.1504       | 3  | G  | 10 | 920.4074       | 460.7076        |
| 357.1774       | 4  | D  | 9  | 863.3859       | 432.1969        |
| 414.1988       | 5  | G  | 8  | 748.3590       | 374.6834        |
| 501.2309       | 6  | S  | 7  | 691.3375       | 346.1727        |
| 572.2680       | 7  | A  | 6  | 604.3055       | 302.6566        |
| 659.3000       | 8  | S  | 5  | 533.2683       | 267.1381        |
| 788.3426       | 9  | E  | 4  | 446.2363       | 223.6221        |
| 859.3797       | 10 | A  | 3  | 317.1937       | 159.1008        |
| 930.4168       | 11 | A  | 2  | 246.1566       | 123.5822        |
|                | 12 | R  | 1  | 175.1195       | 88.0637         |

N-term:+29.04

X-range:

0 - 0

MassTol: Y-zoom:

0. 1.

MassType:

☐AVG ☒MONO

Axis:

☒1 ☐2

Label:

☒I ☐M ☐-

Ions:

a ☐+ ☐2+ ☐3+

b ☒+ ☐2+ ☐3+

c ☐+ ☐2+ ☐3+

x ☐+ ☐2+ ☐3+

y ☒+ ☒2+ ☐3+

z ☐+ ☐2+ ☐3+

hide H<sub>2</sub>O/NH<sub>3</sub> ☐

zoom 112-122 ☐

GO

VGGEASAAVEKLVSQVR, MH+ 1684.9598, m/z 562.3248  
L OS G15 P120811 220811-s1.05402.05402.3.dta

scan 5402; 8.8e+000

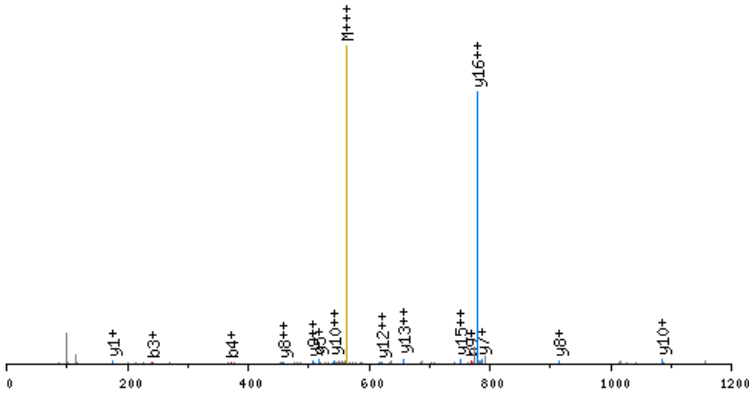

click image to zoom in; click top corners to zoom out

[precursor±]

scan 5401; 562.3 m/z; 2.6e+001

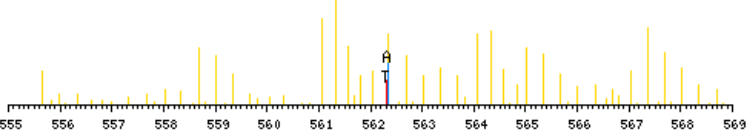

zoomed in precursor plot; T=theoretical m/z, A=acquired m/z

| b <sup>+</sup> | #  | AA | #  | y <sup>+</sup> | y <sup>2+</sup> |
|----------------|----|----|----|----------------|-----------------|
| 128.1075       | 1  | V  | 17 |                |                 |
| 185.1290       | 2  | G  | 16 | 1557.8601      | 779.4340        |
| 242.1504       | 3  | G  | 15 | 1500.8386      | 750.9232        |
| 371.1930       | 4  | E  | 14 | 1443.8172      | 722.4125        |
| 442.2301       | 5  | A  | 13 | 1314.7746      | 657.8912        |
| 529.2622       | 6  | S  | 12 | 1243.7374      | 622.3726        |
| 600.2993       | 7  | A  | 11 | 1156.7054      | 578.8566        |
| 671.3364       | 8  | A  | 10 | 1085.6683      | 543.3381        |
| 770.4048       | 9  | V  | 9  | 1014.6312      | 507.8195        |
| 899.4474       | 10 | E  | 8  | 915.5628       | 458.2853        |
| 1055.5737      | 11 | K  | 7  | 786.5202       | 393.7640        |
| 1168.6578      | 12 | L  | 6  | 630.3939       | 315.7009        |
| 1267.7262      | 13 | V  | 5  | 517.3098       | 259.1588        |
| 1354.7582      | 14 | S  | 4  | 418.2414       | 209.6246        |
| 1411.7797      | 15 | G  | 3  | 331.2094       | 166.1086        |
| 1510.8481      | 16 | V  | 2  | 274.1879       | 137.5979        |
|                | 17 | R  | 1  | 175.1195       | 88.0637         |

N-term:+29.04 K(11):+156.13

X-range:

0 - 0

MassTol: Y-zoom:

0. 1.

MassType:

☐ AVG ☒ MONO

Axis:

☒ 1 ☐ 2

Label:

☒ I ☐ M ☐ -

Ions:

a ☐ + ☐ 2+ ☐ 3+

b ☒ + ☐ 2+ ☐ 3+

c ☐ + ☐ 2+ ☐ 3+

x ☐ + ☐ 2+ ☐ 3+

y ☒ + ☒ 2+ ☐ 3+

z ☐ + ☐ 2+ ☐ 3+

hide H<sub>2</sub>O/NH<sub>3</sub> ☐

zoom 112-122 ☐

GO

VGGIKEDTEHHLR, MH+ 1675.8768, m/z 419.7246  
L OS G19 P120811 220811-s1.02157.02157.4.dta

scan 2157; 1.7e+001

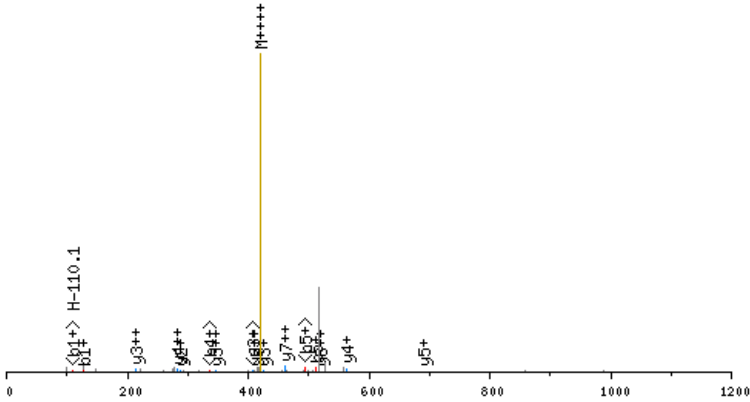

click image to zoom in; click top corners to zoom out

[precursor±]

scan 2156; 419.7 m/z; 2.5e+001

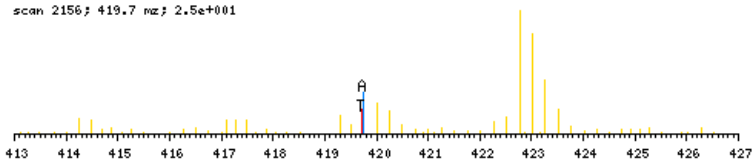

zoomed in precursor plot; T=theoretical m/z, A=acquired m/z

| b <sup>+</sup> | #  | AA | #  | y <sup>+</sup> | y <sup>2+</sup> |
|----------------|----|----|----|----------------|-----------------|
| 128.1075       | 1  | V  | 14 |                |                 |
| 185.1290       | 2  | G  | 13 | 1548.7771      | 774.8925        |
| 242.1504       | 3  | G  | 12 | 1491.7556      | 746.3817        |
| 355.2345       | 4  | I  | 11 | 1434.7342      | 717.8710        |
| 511.3608       | 5  | K  | 10 | 1321.6501      | 661.3290        |
| 640.4034       | 6  | E  | 9  | 1165.5238      | 583.2658        |
| 755.4303       | 7  | D  | 8  | 1036.4812      | 518.7445        |
| 856.4780       | 8  | T  | 7  | 921.4543       | 461.2310        |
| 985.5206       | 9  | E  | 6  | 820.4066       | 410.7072        |
| 1114.5632      | 10 | E  | 5  | 691.3640       | 346.1859        |
| 1251.6221      | 11 | H  | 4  | 562.3214       | 281.6646        |
| 1388.6810      | 12 | H  | 3  | 425.2625       | 213.1352        |
| 1501.7651      | 13 | L  | 2  | 288.2036       | 144.6057        |
|                | 14 | R  | 1  | 175.1195       | 88.0637         |

N-term:+29.04 K(5):+156.13

X-range:

0 - 0

MassTol: Y-zoom:

0. 1.

MassType:

☐AVG ☒MONO

Axis:

☒1 ☐2

Label:

☒I ☐M ☐-

Ions:

a ☐+ ☐2+ ☐3+

b ☒+ ☐2+ ☐3+

c ☐+ ☐2+ ☐3+

x ☐+ ☐2+ ☐3+

y ☒+ ☒2+ ☐3+

z ☐+ ☐2+ ☐3+

hide H<sub>2</sub>O/NH<sub>3</sub> ☐

zoom 112-122 ☐

GO

VGTKCCTLPEDQR, MH+ 1619.7885, m/z 540.6010  
L OS G13 P120811 220811-s1.02166.02166.3.dta

scan 2166; 5.2e+000

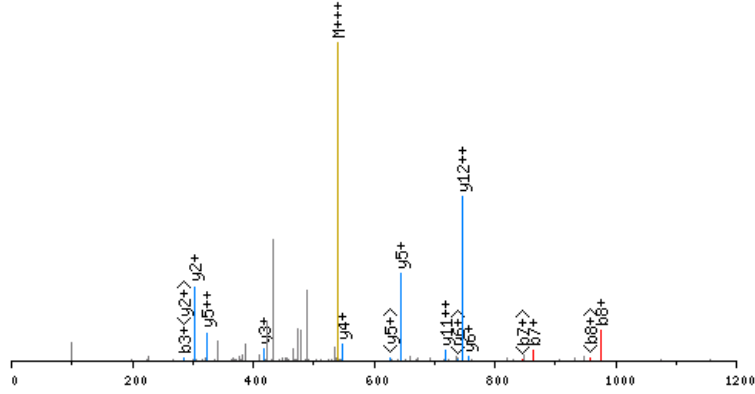

click image to zoom in; click top corners to zoom out [\[precursor±\]](#)

scan 2164; 540.6 m/z; 8.3e+000

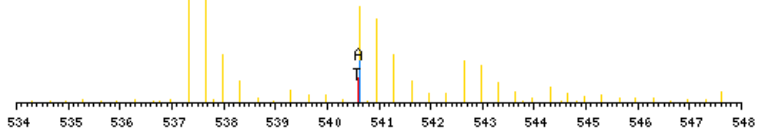

zoomed in precursor plot; T=theoretical m/z, A=acquired m/z

| b <sup>+</sup> | #  | AA | #  | y <sup>+</sup> | y <sup>2+</sup> |
|----------------|----|----|----|----------------|-----------------|
| 128.1075       | 1  | V  | 13 |                |                 |
| 185.1290       | 2  | G  | 12 | 1492.6888      | 746.8483        |
| 286.1767       | 3  | T  | 11 | 1435.6673      | 718.3376        |
| 442.3030       | 4  | K  | 10 | 1334.6196      | 667.8137        |
| 602.3336       | 5  | C  | 9  | 1178.4933      | 589.7506        |
| 762.3642       | 6  | C  | 8  | 1018.4627      | 509.7353        |
| 863.4118       | 7  | T  | 7  | 858.4321       | 429.7200        |
| 976.4959       | 8  | L  | 6  | 757.3844       | 379.1961        |
| 1073.5487      | 9  | P  | 5  | 644.3004       | 322.6541        |
| 1202.5913      | 10 | E  | 4  | 547.2476       | 274.1277        |
| 1317.6182      | 11 | D  | 3  | 418.2050       | 209.6064        |
| 1445.6768      | 12 | Q  | 2  | 303.1781       | 152.0930        |
|                | 13 | R  | 1  | 175.1195       | 88.0637         |

N-term:+29.04 K(4):+156.13  
C(5):+160.03 C(6):+160.03

X-range:

0 - 0

MassTol: Y-zoom:

0. 1.

MassType:

☐ AVG ☒ MONO

Axis:

☒ 1 ☐ 2

Label:

☒ I ☐ M ☐ -

Ions:

a ☐ + ☐ 2+ ☐ 3+

b ☒ + ☐ 2+ ☐ 3+

c ☐ + ☐ 2+ ☐ 3+

x ☐ + ☐ 2+ ☐ 3+

y ☒ + ☒ 2+ ☐ 3+

z ☐ + ☐ 2+ ☐ 3+

hide H<sub>2</sub>O/NH<sub>3</sub> ☐

zoom 112-122 ☐

GO

VGTMSEKFDCHYCR, MH+ 1857.8721, m/z 465.2235  
H OS G17 P120811 220811-s1.03077.03077.4.dta

scan 3077; 1.0e+001

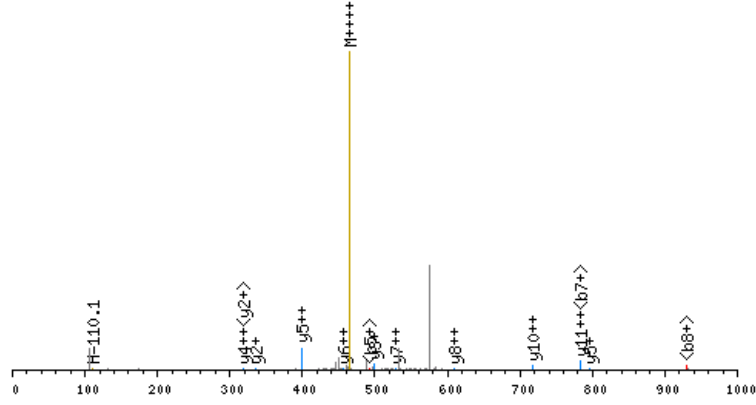

click image to zoom in; click top corners to zoom out [\[precursor±\]](#)

scan 3073; 465.2 m/z; 9.0e+000

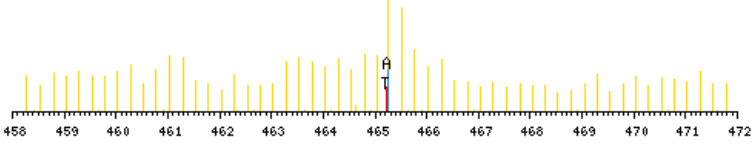

zoomed in precursor plot; T=theoretical m/z, A=acquired m/z

| b <sup>+</sup> | #  | AA | #  | y <sup>+</sup> | y <sup>2+</sup> |
|----------------|----|----|----|----------------|-----------------|
| 134.1393       | 1  | V  | 14 |                |                 |
| 191.1608       | 2  | G  | 13 | 1724.7406      | 862.8742        |
| 292.2085       | 3  | T  | 12 | 1667.7192      | 834.3635        |
| 423.2489       | 4  | M  | 11 | 1566.6715      | 783.8397        |
| 510.2810       | 5  | S  | 10 | 1435.6310      | 718.3194        |
| 639.3236       | 6  | E  | 9  | 1348.5990      | 674.8034        |
| 801.4817       | 7  | K  | 8  | 1219.5564      | 610.2821        |
| 948.5501       | 8  | F  | 7  | 1057.3983      | 529.2031        |
| 1063.5770      | 9  | D  | 6  | 910.3299       | 455.6689        |
| 1223.6076      | 10 | C  | 5  | 795.3029       | 398.1554        |
| 1360.6665      | 11 | H  | 4  | 635.2723       | 318.1401        |
| 1523.7299      | 12 | Y  | 3  | 498.2134       | 249.6106        |
| 1683.7605      | 13 | C  | 2  | 335.1501       | 168.0790        |
|                | 14 | R  | 1  | 175.1195       | 88.0637         |

N-term:+35.07 K(7):+162.16  
C(10):+160.03 C(13):+160.03

X-range:

0 - 0

MassTol: Y-zoom:

0. 1.

MassType:

☐AVG ☒MONO

Axis:

☒1 ☐2

Label:

☒I ☐M ☐-

Ions:

a ☐+ ☐2+ ☐3+

b ☒+ ☐2+ ☐3+

c ☐+ ☐2+ ☐3+

x ☐+ ☐2+ ☐3+

y ☒+ ☒2+ ☐3+

z ☐+ ☐2+ ☐3+

hide H<sub>2</sub>O/NH<sub>3</sub> ☐

zoom 112-122 ☐

GO

VGVKPVGSDPDFQPELSGAGSR, MH+ 2255.1672, m/z 564.5473  
L OS G15 P120811 220811-s1.04258.04258.4.dta

scan 4258; 1.0e+001

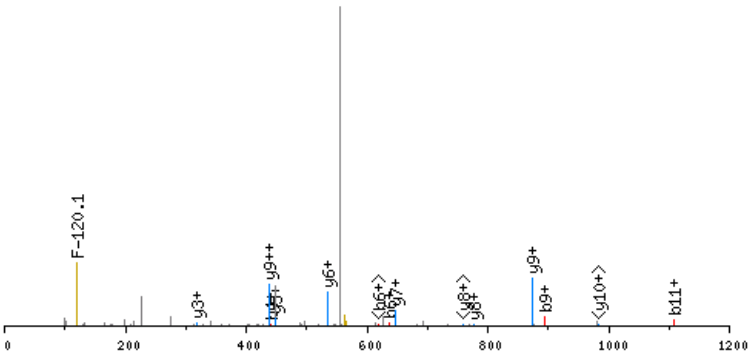

click image to zoom in; click top corners to zoom out [precursor±]

scan 4256; 564.5 m/z; 7.9e+001

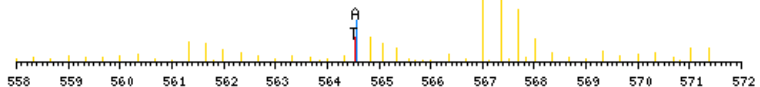

zoomed in precursor plot; T=theoretical m/z, A=acquired m/z

| b <sup>+</sup> | #  | AA | #  | y <sup>+</sup> | y <sup>2+</sup> |
|----------------|----|----|----|----------------|-----------------|
| 128.1075       | 1  | V  | 22 |                |                 |
| 185.1290       | 2  | G  | 21 | 2128.0675      | 1064.5377       |
| 284.1974       | 3  | V  | 20 | 2071.0460      | 1036.0269       |
| 440.3237       | 4  | K  | 19 | 1971.9776      | 986.4927        |
| 537.3765       | 5  | P  | 18 | 1815.8513      | 908.4296        |
| 636.4449       | 6  | V  | 17 | 1718.7986      | 859.9032        |
| 693.4663       | 7  | G  | 16 | 1619.7302      | 810.3690        |
| 780.4984       | 8  | S  | 15 | 1562.7087      | 781.8583        |
| 895.5253       | 9  | D  | 14 | 1475.6767      | 738.3422        |
| 992.5781       | 10 | P  | 13 | 1360.6497      | 680.8288        |
| 1107.6050      | 11 | D  | 12 | 1263.5970      | 632.3024        |
| 1254.6734      | 12 | F  | 11 | 1148.5700      | 574.7889        |
| 1382.7320      | 13 | Q  | 10 | 1001.5016      | 501.2547        |
| 1479.7848      | 14 | P  | 9  | 873.4430       | 437.2254        |
| 1608.8274      | 15 | E  | 8  | 776.3903       | 388.6990        |
| 1721.9114      | 16 | L  | 7  | 647.3477       | 324.1777        |
| 1808.9435      | 17 | S  | 6  | 534.2636       | 267.6357        |
| 1865.9649      | 18 | G  | 5  | 447.2316       | 224.1197        |
| 1937.0020      | 19 | A  | 4  | 390.2101       | 195.6090        |
| 1994.0235      | 20 | G  | 3  | 319.1730       | 160.0904        |
| 2081.0555      | 21 | S  | 2  | 262.1515       | 131.5797        |
|                | 22 | R  | 1  | 175.1195       | 88.0637         |

N-term:+29.04 K(4):+156.13

X-range:

0 - 0

MassTol: Y-zoom:

0. 1.

MassType:

☐AVG ☒MONO

Axis:

☒1 ☐2

Label:

☒I ☐M ☐-

Ions:

a ☐+ ☐2+ ☐3+

b ☒+ ☐2+ ☐3+

c ☐+ ☐2+ ☐3+

x ☐+ ☐2+ ☐3+

y ☒+ ☒2+ ☐3+

z ☐+ ☐2+ ☐3+

hide H<sub>2</sub>O/NH<sub>3</sub> ☐

zoom 112-122 ☐

GO

VGVPPTETGALTINR, MH+ 1455.8171, m/z 485.9439  
L OS G13 P120811 220811-s1.04856.04856.3.dta

scan 4856; 2.2e+000

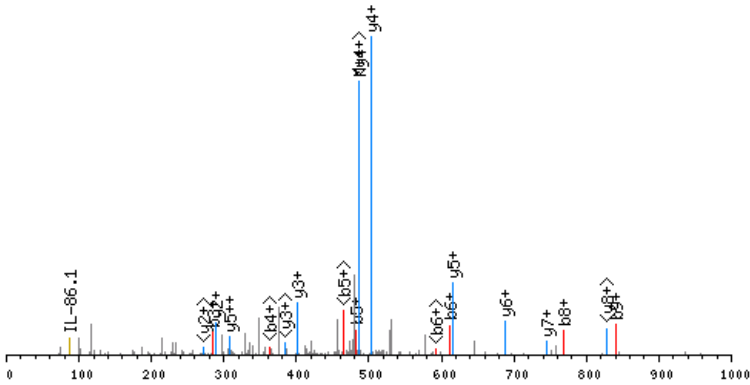

click image to zoom in; click top corners to zoom out

[precursor±]

scan 4854; 485.9 m/z; 1.2e+001

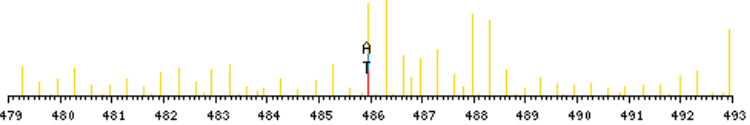

zoomed in precursor plot; T=theoretical m/z, A=acquired m/z

| b <sup>+</sup> | #  | AA | #  | y <sup>+</sup> | y <sup>2+</sup> |
|----------------|----|----|----|----------------|-----------------|
| 128.1075       | 1  | V  | 14 |                |                 |
| 185.1290       | 2  | G  | 13 | 1328.7174      | 664.8626        |
| 284.1974       | 3  | V  | 12 | 1271.6959      | 636.3519        |
| 381.2502       | 4  | P  | 11 | 1172.6275      | 586.8177        |
| 482.2978       | 5  | T  | 10 | 1075.5748      | 538.2913        |
| 611.3404       | 6  | E  | 9  | 974.5271       | 487.7675        |
| 712.3881       | 7  | T  | 8  | 845.4845       | 423.2462        |
| 769.4096       | 8  | G  | 7  | 744.4368       | 372.7223        |
| 840.4467       | 9  | A  | 6  | 687.4153       | 344.2116        |
| 953.5307       | 10 | L  | 5  | 616.3782       | 308.6930        |
| 1054.5784      | 11 | T  | 4  | 503.2942       | 252.1510        |
| 1167.6625      | 12 | L  | 3  | 402.2465       | 201.6272        |
| 1281.7054      | 13 | N  | 2  | 289.1624       | 145.0851        |
|                | 14 | R  | 1  | 175.1195       | 88.0637         |

N-term:+29.04

X-range:

0 - 0

MassTol: Y-zoom:

0. 1.

MassType:

☐ AVG ☒ MONO

Axis:

☒ 1 ☐ 2

Label:

☒ I ☐ M ☐ -

Ions:

a ☐ + ☐ 2+ ☐ 3+

b ☒ + ☐ 2+ ☐ 3+

c ☐ + ☐ 2+ ☐ 3+

x ☐ + ☐ 2+ ☐ 3+

y ☒ + ☒ 2+ ☐ 3+

z ☐ + ☐ 2+ ☐ 3+

hide H<sub>2</sub>O/NH<sub>3</sub> ☐

zoom 112-122 ☐

GO

VGVS DPNSQAGQQGLVEPTQFAR, MH+ 2413.2112, m/z 604.0582

L OS G12 P120811 220811-s1.04039.04039.4.dta

scan 4039; 1.4e+000

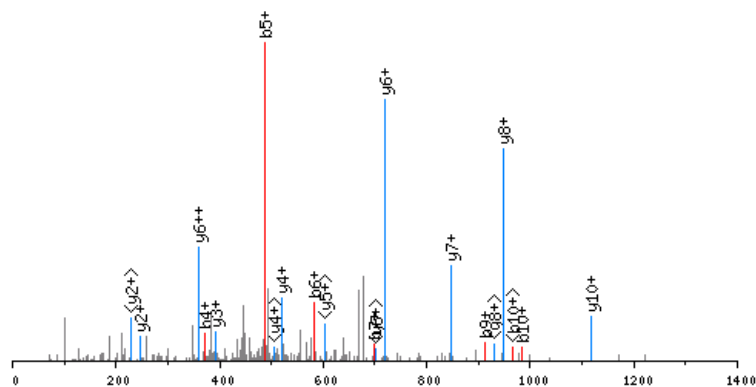

click image to zoom in; click top corners to zoom out [precursor±]

scan 4037; 604.1 m/z; 4.5e+000

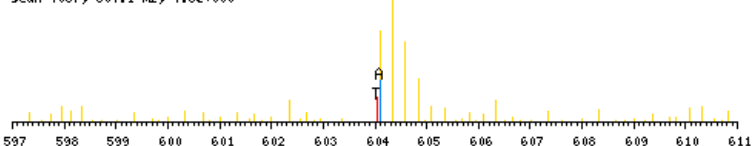

zoomed in precursor plot; T=theoretical m/z, A=acquired m/z

| b <sup>+</sup> | #  | AA | #  | y <sup>+</sup> | y <sup>2+</sup> |
|----------------|----|----|----|----------------|-----------------|
| 128.1075       | 1  | V  | 23 |                |                 |
| 185.1290       | 2  | G  | 22 | 2286.1115      | 1143.5596       |
| 284.1974       | 3  | V  | 21 | 2229.0900      | 1115.0489       |
| 371.2294       | 4  | S  | 20 | 2130.0216      | 1065.5147       |
| 486.2564       | 5  | D  | 19 | 2042.9896      | 1021.9987       |
| 583.3091       | 6  | P  | 18 | 1927.9626      | 964.4852        |
| 697.3521       | 7  | N  | 17 | 1830.9098      | 915.9588        |
| 784.3841       | 8  | S  | 16 | 1716.8669      | 858.9374        |
| 912.4427       | 9  | Q  | 15 | 1629.8349      | 815.4214        |
| 983.4798       | 10 | A  | 14 | 1501.7763      | 751.3921        |
| 1040.5012      | 11 | G  | 13 | 1430.7392      | 715.8735        |
| 1168.5598      | 12 | Q  | 12 | 1373.7177      | 687.3628        |
| 1296.6184      | 13 | Q  | 11 | 1245.6592      | 623.3335        |
| 1353.6399      | 14 | G  | 10 | 1117.6006      | 559.3042        |
| 1466.7239      | 15 | L  | 9  | 1060.5791      | 530.7935        |
| 1565.7923      | 16 | V  | 8  | 947.4951       | 474.2514        |
| 1694.8349      | 17 | E  | 7  | 848.4266       | 424.7172        |
| 1791.8877      | 18 | P  | 6  | 719.3840       | 360.1959        |
| 1892.9354      | 19 | T  | 5  | 622.3313       | 311.6696        |
| 2020.9939      | 20 | Q  | 4  | 521.2836       | 261.1457        |
| 2168.0624      | 21 | F  | 3  | 393.2250       | 197.1164        |
| 2239.0995      | 22 | A  | 2  | 246.1566       | 123.5822        |
|                | 23 | R  | 1  | 175.1195       | 88.0637         |

N-term:+29.04

X-range:

0 - 0

MassTol: Y-zoom:

0. 1.

MassType:

☐AVG ☒MONO

Axis:

☒1 ☐2

Label:

☒I ☐M ☐-

Ions:

a ☐+ ☐2+ ☐3+

b ☒+ ☐2+ ☐3+

c ☐+ ☐2+ ☐3+

x ☐+ ☐2+ ☐3+

y ☒+ ☒2+ ☐3+

z ☐+ ☐2+ ☐3+

hide H<sub>2</sub>O/NH<sub>3</sub> ☐

zoom 112-122 ☐

GO

VHEGYQGLVDGGEHIR, MH+ 1799.9252, m/z 450.7368  
H OS G18 P120811 220811-s1.03789.03789.4.dta

scan 3789; 1.8e+001

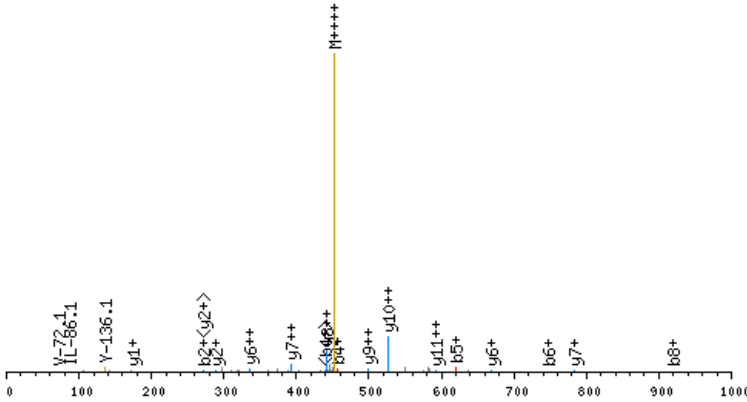

click image to zoom in; click top corners to zoom out [\[precursor±\]](#)

scan 3786; 450.7 m/z; 1.3e+001

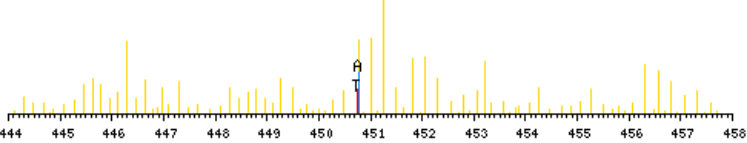

zoomed in precursor plot; T=theoretical m/z, A=acquired m/z

| b <sup>+</sup> | #  | AA | #  | y <sup>+</sup> | y <sup>2+</sup> |
|----------------|----|----|----|----------------|-----------------|
| 134.1393       | 1  | V  | 16 |                |                 |
| 271.1982       | 2  | H  | 15 | 1666.7938      | 833.9008        |
| 400.2408       | 3  | E  | 14 | 1529.7348      | 765.3713        |
| 457.2623       | 4  | G  | 13 | 1400.6923      | 700.8500        |
| 620.3256       | 5  | Y  | 12 | 1343.6708      | 672.3393        |
| 748.3842       | 6  | Q  | 11 | 1180.6075      | 590.8076        |
| 805.4057       | 7  | G  | 10 | 1052.5489      | 526.7784        |
| 918.4897       | 8  | L  | 9  | 995.5274       | 498.2676        |
| 1017.5581      | 9  | V  | 8  | 882.4434       | 441.7256        |
| 1132.5851      | 10 | D  | 7  | 783.3749       | 392.1914        |
| 1189.6065      | 11 | G  | 6  | 668.3480       | 334.6779        |
| 1246.6280      | 12 | G  | 5  | 611.3265       | 306.1672        |
| 1375.6706      | 13 | E  | 4  | 554.3051       | 277.6564        |
| 1512.7295      | 14 | H  | 3  | 425.2625       | 213.1352        |
| 1625.8136      | 15 | I  | 2  | 288.2036       | 144.6057        |
|                | 16 | R  | 1  | 175.1195       | 88.0637         |

N-term:+35.07

X-range:

0 - 0

MassTol: Y-zoom:

0. 1.

MassType:

☐AVG ☒MONO

Axis:

☒1 ☐2

Label:

☒I ☐M ☐-

Ions:

a ☐+ ☐2+ ☐3+

b ☒+ ☐2+ ☐3+

c ☐+ ☐2+ ☐3+

x ☐+ ☐2+ ☐3+

y ☒+ ☒2+ ☐3+

z ☐+ ☐2+ ☐3+

hide H<sub>2</sub>O/NH<sub>3</sub> ☐

zoom 112-122 ☐

GO

VHPESSEGEHSHVVPQR, MH+ 1930.9259, m/z 483.4869  
L OS G17 P120811 220811-s1.02189.02189.4.dta

scan 2189; 2.0e+000

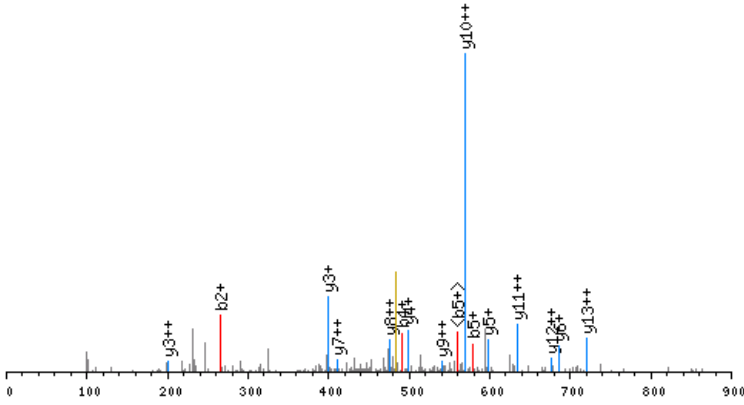

click image to zoom in; click top corners to zoom out

[precursor±]

scan 2188; 483.5 m/z; 4.4e+000

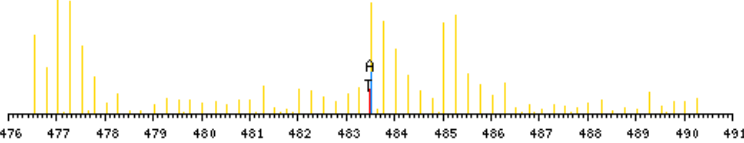

zoomed in precursor plot; T=theoretical m/z, A=acquired m/z

| b <sup>+</sup> | #  | AA | #  | y <sup>+</sup> | y <sup>2+</sup> |
|----------------|----|----|----|----------------|-----------------|
| 128.1075       | 1  | V  | 17 |                |                 |
| 265.1664       | 2  | H  | 16 | 1803.8262      | 902.4170        |
| 362.2192       | 3  | P  | 15 | 1666.7673      | 833.8875        |
| 491.2618       | 4  | E  | 14 | 1569.7145      | 785.3612        |
| 578.2938       | 5  | S  | 13 | 1440.6719      | 720.8399        |
| 665.3258       | 6  | S  | 12 | 1353.6399      | 677.3239        |
| 794.3684       | 7  | E  | 11 | 1266.6079      | 633.8078        |
| 851.3899       | 8  | G  | 10 | 1137.5653      | 569.2865        |
| 980.4325       | 9  | E  | 9  | 1080.5438      | 540.7758        |
| 1109.4751      | 10 | E  | 8  | 951.5012       | 476.2545        |
| 1246.5340      | 11 | H  | 7  | 822.4586       | 411.7332        |
| 1333.5660      | 12 | S  | 6  | 685.3997       | 343.2038        |
| 1432.6344      | 13 | V  | 5  | 598.3677       | 299.6877        |
| 1531.7029      | 14 | V  | 4  | 499.2993       | 250.1535        |
| 1628.7556      | 15 | P  | 3  | 400.2308       | 200.6193        |
| 1756.8142      | 16 | Q  | 2  | 303.1781       | 152.0930        |
|                | 17 | R  | 1  | 175.1195       | 88.0637         |

N-term:+29.04

X-range:

0 - 0

MassTol: Y-zoom:

0. 1.

MassType:

☐ AVG ☒ MONO

Axis:

☒ 1 ☐ 2

Label:

☒ I ☐ M ☐ -

Ions:

a ☐ + ☐ 2+ ☐ 3+

b ☒ + ☐ 2+ ☐ 3+

c ☐ + ☐ 2+ ☐ 3+

x ☐ + ☐ 2+ ☐ 3+

y ☒ + ☒ 2+ ☐ 3+

z ☐ + ☐ 2+ ☐ 3+

hide H<sub>2</sub>O/NH<sub>3</sub> ☐

zoom 112-122 ☐

GO

VHVTDLGKETICR, MH+ 1670.8899, m/z 418.4779  
L OS G17 P120811 220811-s1.03337.03337.4.dta

scan 3337; 7.4e+000

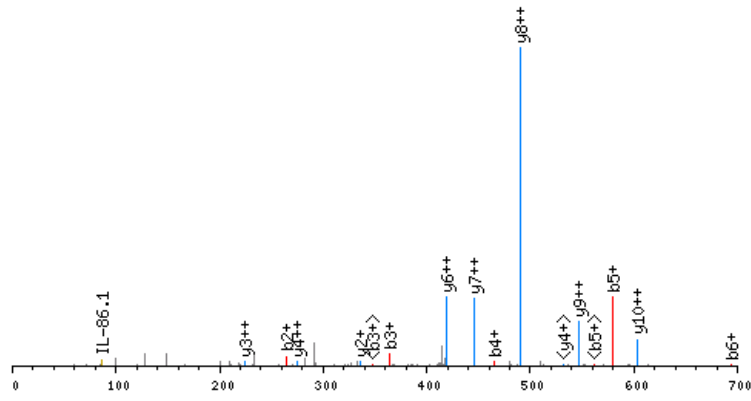

click image to zoom in; click top corners to zoom out

[precursor±]

scan 3333; 418.5 m/z; 7.9e+000

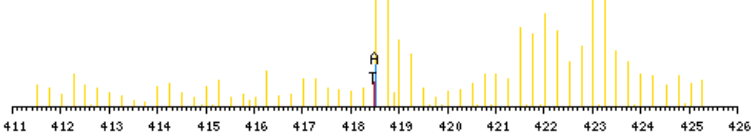

zoomed in precursor plot; T=theoretical m/z, A=acquired m/z

| b <sup>+</sup> | #  | AA | #  | y <sup>+</sup> | y <sup>2+</sup> |
|----------------|----|----|----|----------------|-----------------|
| 128.1075       | 1  | V  | 14 |                |                 |
| 265.1664       | 2  | H  | 13 | 1543.7902      | 772.3990        |
| 364.2348       | 3  | V  | 12 | 1406.7313      | 703.8696        |
| 465.2825       | 4  | T  | 11 | 1307.6629      | 654.3354        |
| 580.3095       | 5  | D  | 10 | 1206.6152      | 603.8115        |
| 693.3935       | 6  | L  | 9  | 1091.5883      | 546.2981        |
| 780.4256       | 7  | S  | 8  | 978.5042       | 489.7560        |
| 837.4470       | 8  | G  | 7  | 891.4722       | 446.2400        |
| 993.5733       | 9  | K  | 6  | 834.4507       | 417.7293        |
| 1122.6159      | 10 | E  | 5  | 678.3244       | 339.6661        |
| 1223.6636      | 11 | T  | 4  | 549.2818       | 275.1448        |
| 1336.7477      | 12 | I  | 3  | 448.2342       | 224.6210        |
| 1496.7783      | 13 | C  | 2  | 335.1501       | 168.0790        |
|                | 14 | R  | 1  | 175.1195       | 88.0637         |

N-term:+29.04 K(9):+156.13  
C(13):+160.03

X-range:

0 - 0

MassTol: Y-zoom:

0. 1.

MassType:

☐ AVG ☒ MONO

Axis:

☒ 1 ☐ 2

Label:

☒ I ☐ M ☐ -

Ions:

a ☐ + ☐ 2+ ☐ 3+

b ☒ + ☐ 2+ ☐ 3+

c ☐ + ☐ 2+ ☐ 3+

x ☐ + ☐ 2+ ☐ 3+

y ☒ + ☒ 2+ ☐ 3+

z ☐ + ☐ 2+ ☐ 3+

hide H<sub>2</sub>O/NH<sub>3</sub> ☐

zoom 112-122 ☐

GO

VISSSGHAELAR, MH+ 1302.7230, m/z 434.9125  
H OS G16 P120811 220811-s1.02184.02184.3.dta

scan 2184; 1.4e+001

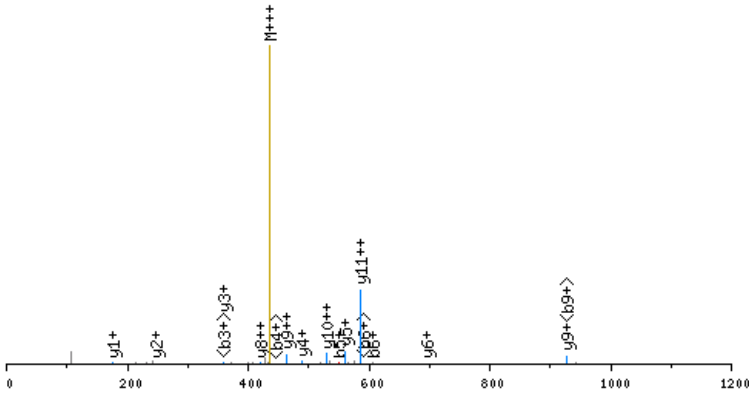

click image to zoom in; click top corners to zoom out [\[precursor±\]](#)

scan 2183; 434.9 m/z; 3.7e+000

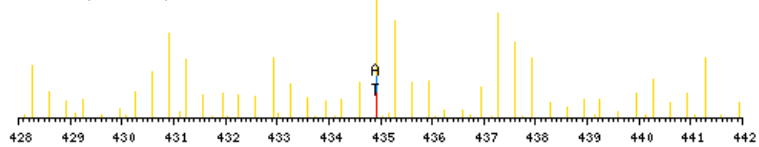

zoomed in precursor plot; T=theoretical m/z, A=acquired m/z

| b <sup>+</sup> | #  | AA | #  | y <sup>+</sup> | y <sup>2+</sup> |
|----------------|----|----|----|----------------|-----------------|
| 134.1393       | 1  | V  | 12 |                |                 |
| 247.2234       | 2  | I  | 11 | 1169.5915      | 585.2997        |
| 376.2660       | 3  | E  | 10 | 1056.5074      | 528.7576        |
| 463.2980       | 4  | S  | 9  | 927.4648       | 464.2363        |
| 550.3300       | 5  | S  | 8  | 840.4328       | 420.7203        |
| 607.3515       | 6  | G  | 7  | 753.4008       | 377.2043        |
| 744.4104       | 7  | H  | 6  | 696.3793       | 348.6936        |
| 815.4475       | 8  | A  | 5  | 559.3204       | 280.1641        |
| 944.4901       | 9  | E  | 4  | 488.2833       | 244.6455        |
| 1057.5742      | 10 | L  | 3  | 359.2407       | 180.1243        |
| 1128.6113      | 11 | A  | 2  | 246.1566       | 123.5822        |
|                | 12 | R  | 1  | 175.1195       | 88.0637         |

N-term:+35.07

X-range:

0 - 0

MassTol: Y-zoom:

0. 1.

MassType:

☐ AVG ☒ MONO

Axis:

☒ 1 ☐ 2

Label:

☒ I ☐ M ☐ -

Ions:

a ☐ + ☐ 2+ ☐ 3+

b ☒ + ☐ 2+ ☐ 3+

c ☐ + ☐ 2+ ☐ 3+

x ☐ + ☐ 2+ ☐ 3+

y ☒ + ☒ 2+ ☐ 3+

z ☐ + ☐ 2+ ☐ 3+

hide H<sub>2</sub>O/NH<sub>3</sub> ☐

zoom 112-122 ☐

GO

VIGGKPANVGDPWQVAIKDQQR, MH+ 2552.3990, m/z 638.8552  
L OS G16 P120811 220811-s1.05386.05386.4.dta

scan 5386; 8.8e+000

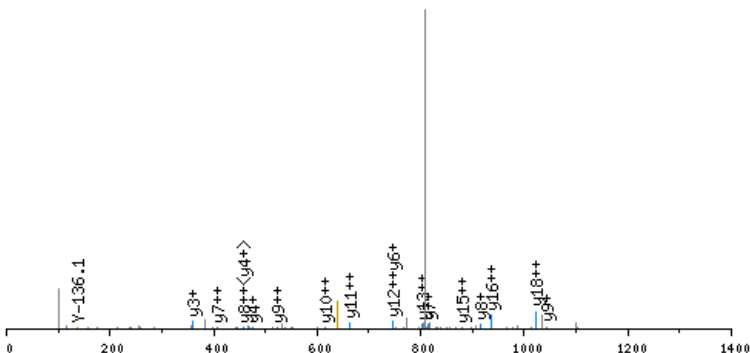

click image to zoom in; click top corners to zoom out

[precursor±]

scan 5383; 638.9 m/z; 8.0e+000

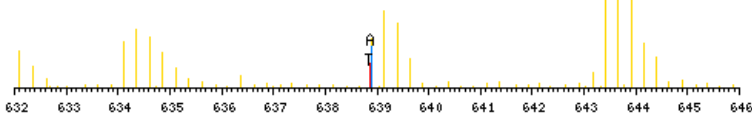

zoomed in precursor plot; T=theoretical m/z, A=acquired m/z

| b <sup>+</sup> | #  | AA | #  | y <sup>+</sup> | y <sup>2+</sup> |
|----------------|----|----|----|----------------|-----------------|
| 128.1075       | 1  | V  | 23 |                |                 |
| 241.1916       | 2  | I  | 22 | 2425.2993      | 1213.1536       |
| 298.2130       | 3  | G  | 21 | 2312.2152      | 1156.6115       |
| 355.2345       | 4  | G  | 20 | 2255.1937      | 1128.1008       |
| 511.3608       | 5  | K  | 19 | 2198.1723      | 1099.5901       |
| 608.4136       | 6  | P  | 18 | 2042.0460      | 1021.5269       |
| 679.4507       | 7  | A  | 17 | 1944.9932      | 973.0005        |
| 793.4936       | 8  | N  | 16 | 1873.9561      | 937.4820        |
| 892.5620       | 9  | V  | 15 | 1759.9132      | 880.4605        |
| 949.5835       | 10 | G  | 14 | 1660.8448      | 830.9263        |
| 1064.6104      | 11 | D  | 13 | 1603.8233      | 802.4156        |
| 1227.6738      | 12 | Y  | 12 | 1488.7964      | 744.9021        |
| 1324.7265      | 13 | P  | 11 | 1325.7330      | 663.3704        |
| 1510.8058      | 14 | W  | 10 | 1228.6803      | 614.8440        |
| 1638.8644      | 15 | Q  | 9  | 1042.6010      | 521.8044        |
| 1737.9328      | 16 | V  | 8  | 914.5424       | 457.7751        |
| 1808.9699      | 17 | A  | 7  | 815.4740       | 408.2409        |
| 1922.0540      | 18 | I  | 6  | 744.4368       | 372.7223        |
| 2078.1803      | 19 | K  | 5  | 631.3528       | 316.1803        |
| 2193.2072      | 20 | D  | 4  | 475.2265       | 238.1172        |
| 2250.2287      | 21 | G  | 3  | 360.1995       | 180.6037        |
| 2378.2873      | 22 | Q  | 2  | 303.1781       | 152.0930        |
|                | 23 | R  | 1  | 175.1195       | 88.0637         |

N-term:+29.04 K(5):+156.13  
K(19):+156.13

N-term: +35.07 K(3): +162.16

X-range:

0 - 0

MassTol: Y-zoom:

0. 1.

MassType:

☐AVG ☒MONO

Axis:

☒1 ☐2

Label:

☒I ☐M ☐-

Ions:

a ☐+ ☐2+ ☐3+

b ☒+ ☐2+ ☐3+

c ☐+ ☐2+ ☐3+

x ☐+ ☐2+ ☐3+

y ☒+ ☒2+ ☐3+

z ☐+ ☐2+ ☐3+

hide H<sub>2</sub>O/NH<sub>3</sub> ☐

zoom 112-122 ☐

GO

VIPELNGKLTGMAFR, MH+ 1701.9726, m/z 567.9957  
L OS G15 P120811 220811-s1.05493.05493.3.dta

scan 5493; 6.0e+000

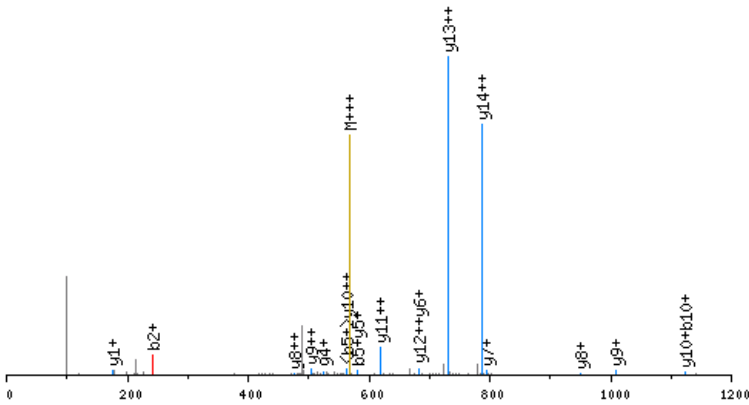

click image to zoom in; click top corners to zoom out

[precursor±]

scan 5491; 568.0 m/z; 1.6e+001

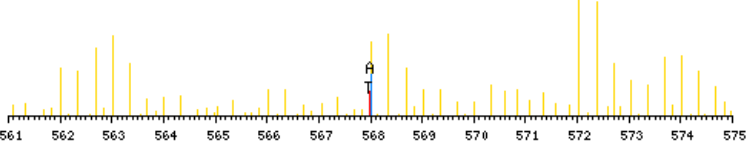

zoomed in precursor plot; T=theoretical m/z, A=acquired m/z

| b <sup>+</sup> | #  | AA | #  | y <sup>+</sup> | y <sup>2+</sup> |
|----------------|----|----|----|----------------|-----------------|
| 128.1075       | 1  | V  | 15 |                |                 |
| 241.1916       | 2  | I  | 14 | 1574.8729      | 787.9404        |
| 338.2443       | 3  | P  | 13 | 1461.7888      | 731.3983        |
| 467.2869       | 4  | E  | 12 | 1364.7361      | 682.8719        |
| 580.3710       | 5  | L  | 11 | 1235.6935      | 618.3506        |
| 694.4139       | 6  | N  | 10 | 1122.6094      | 561.8086        |
| 751.4354       | 7  | G  | 9  | 1008.5665      | 504.7872        |
| 907.5617       | 8  | K  | 8  | 951.5450       | 476.2764        |
| 1020.6458      | 9  | L  | 7  | 795.4187       | 398.2133        |
| 1121.6934      | 10 | T  | 6  | 682.3347       | 341.6712        |
| 1178.7149      | 11 | G  | 5  | 581.2870       | 291.1474        |
| 1309.7554      | 12 | M  | 4  | 524.2655       | 262.6367        |
| 1380.7925      | 13 | A  | 3  | 393.2250       | 197.1164        |
| 1527.8609      | 14 | F  | 2  | 322.1879       | 161.5979        |
|                | 15 | R  | 1  | 175.1195       | 88.0637         |

N-term:+29.04 K(8):+156.13

N-term:+29.04



X-range:

0 - 0

MassTol: Y-zoom:

0. 1.

MassType:

☐AVG ☒MONO

Axis:

☒1 ☐2

Label:

☒I ☐M ☐-

Ions:

a ☐+ ☐2+ ☐3+

b ☒+ ☐2+ ☐3+

c ☐+ ☐2+ ☐3+

x ☐+ ☐2+ ☐3+

y ☒+ ☒2+ ☐3+

z ☐+ ☐2+ ☐3+

hide H<sub>2</sub>O/NH<sub>3</sub> ☐

zoom 112-122 ☐

GO

VKGVDEATIIDILTKR, MH+ 1855.1269, m/z 464.5372  
L OS G17 P120811 220811-s1.06524.06524.4.dta

scan 6524; 1.3e+000

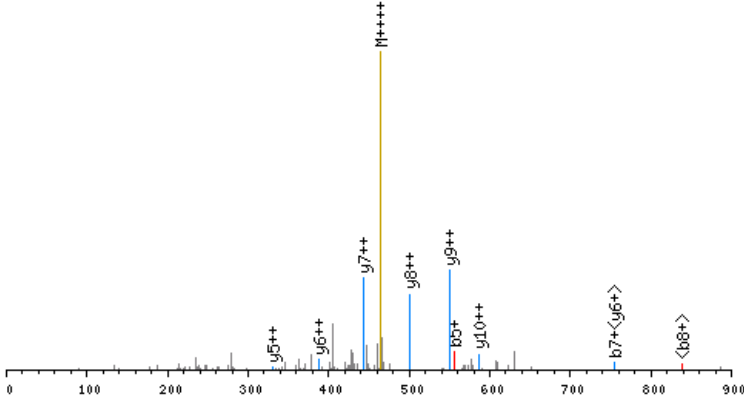

click image to zoom in; click top corners to zoom out [\[precursor±\]](#)

scan 6520; 464.5 m/z; 1.5e+000

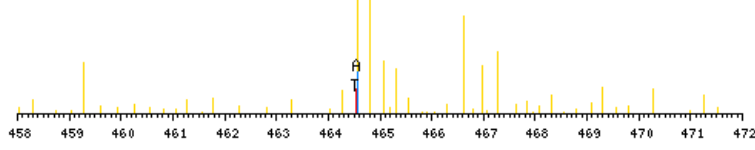

zoomed in precursor plot; T=theoretical m/z, A=acquired m/z

| b <sup>+</sup> | #  | AA | #  | y <sup>+</sup> | y <sup>2+</sup> |
|----------------|----|----|----|----------------|-----------------|
| 128.1075       | 1  | V  | 16 |                |                 |
| 284.2338       | 2  | K  | 15 | 1728.0272      | 864.5175        |
| 341.2553       | 3  | G  | 14 | 1571.9009      | 786.4544        |
| 440.3237       | 4  | V  | 13 | 1514.8794      | 757.9436        |
| 555.3506       | 5  | D  | 12 | 1415.8110      | 708.4094        |
| 684.3932       | 6  | E  | 11 | 1300.7841      | 650.8959        |
| 755.4303       | 7  | A  | 10 | 1171.7415      | 586.3746        |
| 856.4780       | 8  | T  | 9  | 1100.7044      | 550.8561        |
| 969.5621       | 9  | I  | 8  | 999.6567       | 500.3323        |
| 1082.6461      | 10 | I  | 7  | 886.5726       | 443.7902        |
| 1197.6731      | 11 | D  | 6  | 773.4886       | 387.2482        |
| 1310.7572      | 12 | I  | 5  | 658.4616       | 329.7347        |
| 1423.8412      | 13 | L  | 4  | 545.3775       | 273.1927        |
| 1524.8889      | 14 | T  | 3  | 432.2935       | 216.6507        |
| 1681.0152      | 15 | K  | 2  | 331.2458       | 166.1268        |
|                | 16 | R  | 1  | 175.1195       | 88.0637         |

N-term:+29.04 K(2):+156.13  
K(15):+156.13

X-range:

0 - 0

MassTol: Y-zoom:

0. 1.

MassType:

☐ AVG ☒ MONO

Axis:

☒ 1 ☐ 2

Label:

☒ I ☐ M ☐ -

Ions:

a ☐ + ☐ 2+ ☐ 3+

b ☒ + ☐ 2+ ☐ 3+

c ☐ + ☐ 2+ ☐ 3+

x ☐ + ☐ 2+ ☐ 3+

y ☒ + ☒ 2+ ☐ 3+

z ☐ + ☐ 2+ ☐ 3+

hide H<sub>2</sub>O/NH<sub>3</sub> ☐

zoom 112-122 ☐

GO

VKLIVESGGGLVQPGGSLR, MH+ 1809.0598, m/z 603.6915  
L OS G15 P120811 220811-s1.04550.04550.3.dta

scan 4550; 2.4e+000

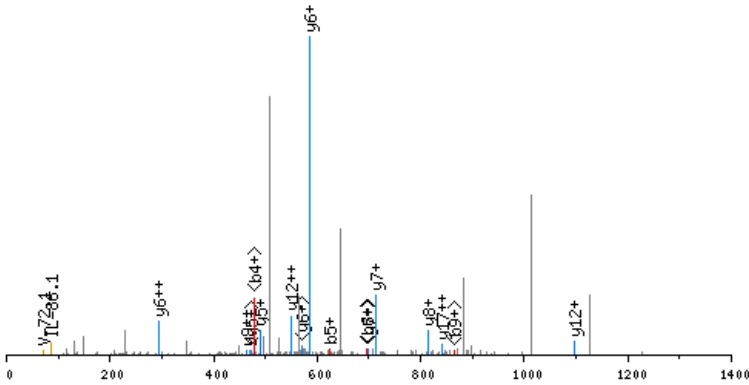

click image to zoom in; click top corners to zoom out

[precursor±]

scan 4546; 603.7 m/z; 1.7e+002

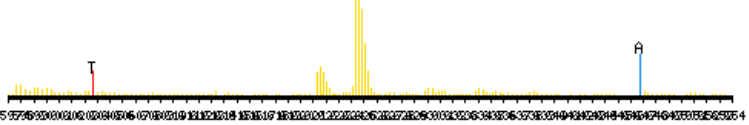

zoomed in precursor plot; T=theoretical m/z, A=acquired m/z

| b <sup>+</sup> | #  | AA | #  | y <sup>+</sup> | y <sup>2+</sup> |
|----------------|----|----|----|----------------|-----------------|
| 128.1075       | 1  | V  | 18 |                |                 |
| 284.2338       | 2  | K  | 17 | 1681.9601      | 841.4840        |
| 397.3179       | 3  | L  | 16 | 1525.8338      | 763.4208        |
| 496.3863       | 4  | V  | 15 | 1412.7498      | 706.8788        |
| 625.4289       | 5  | E  | 14 | 1313.6814      | 657.3446        |
| 712.4609       | 6  | S  | 13 | 1184.6388      | 592.8233        |
| 769.4824       | 7  | G  | 12 | 1097.6067      | 549.3073        |
| 826.5038       | 8  | G  | 11 | 1040.5853      | 520.7965        |
| 883.5253       | 9  | G  | 10 | 983.5638       | 492.2858        |
| 996.6094       | 10 | L  | 9  | 926.5423       | 463.7751        |
| 1095.6778      | 11 | V  | 8  | 813.4583       | 407.2331        |
| 1223.7364      | 12 | Q  | 7  | 714.3899       | 357.6988        |
| 1320.7891      | 13 | P  | 6  | 586.3313       | 293.6696        |
| 1377.8106      | 14 | G  | 5  | 489.2785       | 245.1432        |
| 1434.8321      | 15 | G  | 4  | 432.2571       | 216.6324        |
| 1521.8641      | 16 | S  | 3  | 375.2356       | 188.1217        |
| 1634.9481      | 17 | L  | 2  | 288.2036       | 144.6057        |
|                | 18 | R  | 1  | 175.1195       | 88.0637         |

N-term:+29.04 K(2):+156.13

X-range:

0 - 0

MassTol: Y-zoom:

0. 1.

MassType:

☐ AVG ☒ MONO

Axis:

☒ 1 ☐ 2

Label:

☒ I ☐ M ☐ -

Ions:

a ☐ + ☐ 2+ ☐ 3+

b ☒ + ☐ 2+ ☐ 3+

c ☐ + ☐ 2+ ☐ 3+

x ☐ + ☐ 2+ ☐ 3+

y ☒ + ☒ 2+ ☐ 3+

z ☐ + ☐ 2+ ☐ 3+

hide H<sub>2</sub>O/NH<sub>3</sub> ☐

zoom 112-122 ☐

GO

VLDSGDGVTHNVPIYEGYALPHAIRM, MH+ 2852.4405, m/z 713.8656  
L OS G16 P120811 220811-s1.05990.05990.4.dta

scan 5990; 1.9e+000

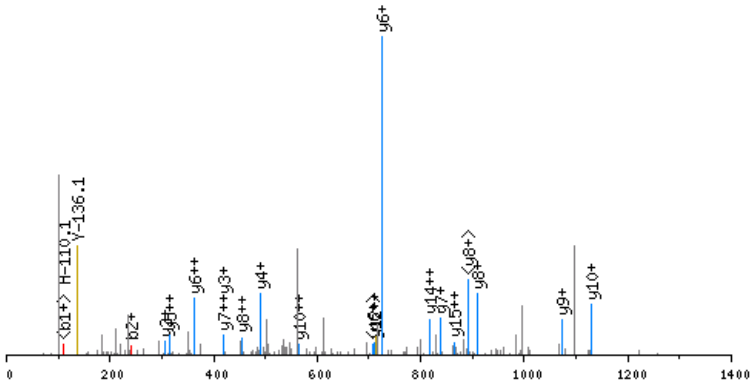

click image to zoom in; click top corners to zoom out [precursor±]

scan 5988; 713.9 m/z; 8.5e+000

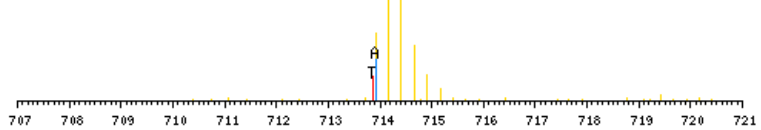

zoomed in precursor plot; T=theoretical m/z, A=acquired m/z

| b <sup>+</sup> | #  | AA | #  | y <sup>+</sup> | y <sup>2+</sup> |
|----------------|----|----|----|----------------|-----------------|
| 128.1075       | 1  | V  | 26 |                |                 |
| 241.1916       | 2  | L  | 25 | 2725.3408      | 1363.1743       |
| 356.2185       | 3  | D  | 24 | 2612.2567      | 1306.6323       |
| 443.2505       | 4  | S  | 23 | 2497.2298      | 1249.1188       |
| 500.2720       | 5  | G  | 22 | 2410.1978      | 1205.6028       |
| 615.2990       | 6  | D  | 21 | 2353.1763      | 1177.0921       |
| 672.3204       | 7  | G  | 20 | 2238.1494      | 1119.5786       |
| 771.3888       | 8  | V  | 19 | 2181.1279      | 1091.0679       |
| 872.4365       | 9  | T  | 18 | 2082.0595      | 1041.5337       |
| 1009.4954      | 10 | H  | 17 | 1981.0118      | 991.0098        |
| 1123.5384      | 11 | N  | 16 | 1843.9529      | 922.4804        |
| 1222.6068      | 12 | V  | 15 | 1729.9100      | 865.4589        |
| 1319.6595      | 13 | P  | 14 | 1630.8416      | 815.9247        |
| 1432.7436      | 14 | I  | 13 | 1533.7888      | 767.3983        |
| 1595.8069      | 15 | Y  | 12 | 1420.7047      | 710.8563        |
| 1724.8495      | 16 | E  | 11 | 1257.6414      | 629.3246        |
| 1781.8710      | 17 | G  | 10 | 1128.5988      | 564.8033        |
| 1944.9343      | 18 | Y  | 9  | 1071.5773      | 536.2926        |
| 2015.9714      | 19 | A  | 8  | 908.5140       | 454.7609        |
| 2129.0555      | 20 | L  | 7  | 837.4769       | 419.2424        |
| 2226.1082      | 21 | P  | 6  | 724.3928       | 362.7003        |
| 2363.1672      | 22 | H  | 5  | 627.3401       | 314.1740        |
| 2434.2043      | 23 | A  | 4  | 490.2812       | 245.6445        |
| 2547.2883      | 24 | I  | 3  | 419.2440       | 210.1259        |
| 2678.3288      | 25 | M  | 2  | 306.1600       | 153.5839        |
|                | 26 | R  | 1  | 175.1195       | 88.0637         |

N-term:+29.04

X-range:

0 - 0

MassTol: Y-zoom:

0. 1.

MassType:

☐AVG ☒MONO

Axis:

☒1 ☐2

Label:

☒I ☐M ☐-

Ions:

a ☐+ ☐2+ ☐3+

b ☒+ ☐2+ ☐3+

c ☐+ ☐2+ ☐3+

x ☐+ ☐2+ ☐3+

y ☒+ ☒2+ ☐3+

z ☐+ ☐2+ ☐3+

hide H<sub>2</sub>O/NH<sub>3</sub> ☐

zoom 112-122 ☐

GO

VLESTMVCVDNSEYMR, MH+ 1960.8818, m/z 654.2988  
L OS G13 P120811 220811-s1.05275.05275.3.dta

scan 5275; 1.6e+000

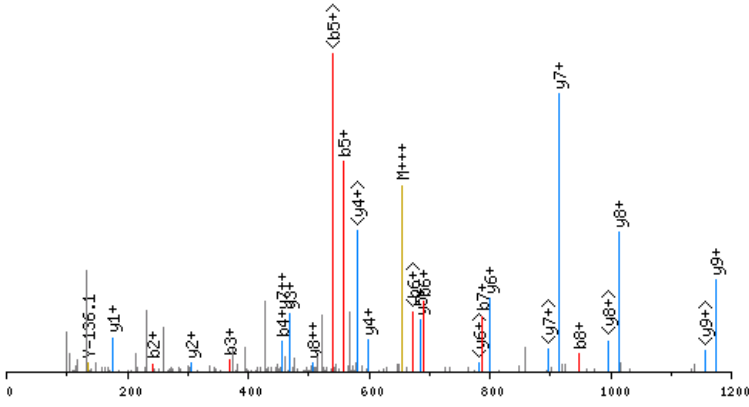

click image to zoom in; click top corners to zoom out

[precursor±]

scan 5274; 654.3 m/z; 6.0e+000

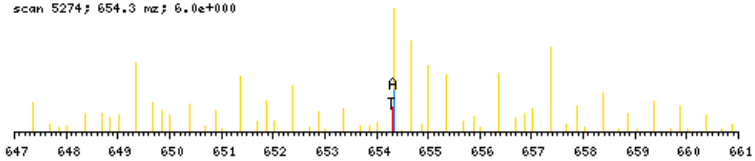

zoomed in precursor plot; T=theoretical m/z, A=acquired m/z

| b <sup>+</sup> | #  | AA | #  | y <sup>+</sup> | y <sup>2+</sup> |
|----------------|----|----|----|----------------|-----------------|
| 128.1075       | 1  | V  | 16 |                |                 |
| 241.1916       | 2  | L  | 15 | 1833.7821      | 917.3950        |
| 370.2342       | 3  | E  | 14 | 1720.6980      | 860.8529        |
| 457.2662       | 4  | S  | 13 | 1591.6554      | 796.3316        |
| 558.3139       | 5  | T  | 12 | 1504.6234      | 752.8156        |
| 689.3544       | 6  | M  | 11 | 1403.5757      | 702.2918        |
| 788.4228       | 7  | V  | 10 | 1272.5352      | 636.7715        |
| 948.4534       | 8  | C  | 9  | 1173.4668      | 587.2373        |
| 1047.5218      | 9  | V  | 8  | 1013.4362      | 507.2220        |
| 1162.5487      | 10 | D  | 7  | 914.3678       | 457.6878        |
| 1276.5917      | 11 | N  | 6  | 799.3409       | 400.1743        |
| 1363.6237      | 12 | S  | 5  | 685.2979       | 343.1529        |
| 1492.6663      | 13 | E  | 4  | 598.2659       | 299.6369        |
| 1655.7296      | 14 | Y  | 3  | 469.2233       | 235.1156        |
| 1786.7701      | 15 | M  | 2  | 306.1600       | 153.5839        |
|                | 16 | R  | 1  | 175.1195       | 88.0637         |

N-term:+29.04 C(8):+160.03

X-range:

0 - 0

MassTol: Y-zoom:

0. 1.

MassType:

☐AVG ☒MONO

Axis:

☒1 ☐2

Label:

☒I ☐M ☐-

Ions:

a ☐+ ☐2+ ☐3+

b ☒+ ☐2+ ☐3+

c ☐+ ☐2+ ☐3+

x ☐+ ☐2+ ☐3+

y ☒+ ☒2+ ☐3+

z ☐+ ☐2+ ☐3+

hide H<sub>2</sub>O/NH<sub>3</sub> ☐

zoom 112-122 ☐

GO

VLEVAQHLGESTVR, MH+ 1565.8651, m/z 522.6266  
L OS G15 P120811 220811-s1.03617.03617.3.dta

scan 3617; 6.3e+000

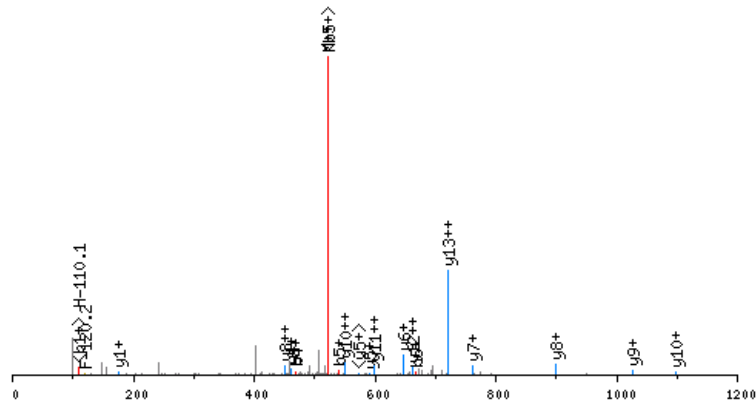

click image to zoom in; click top corners to zoom out

[precursor±]

scan 3616; 522.6 m/z; 1.1e+002

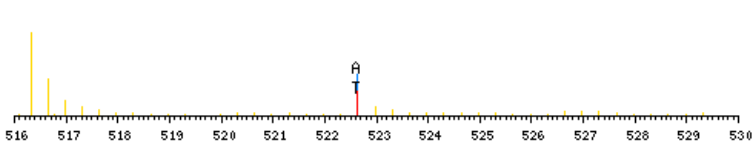

zoomed in precursor plot; T=theoretical m/z, A=acquired m/z

| b <sup>+</sup> | #  | AA | #  | y <sup>+</sup> | y <sup>2+</sup> |
|----------------|----|----|----|----------------|-----------------|
| 128.1075       | 1  | V  | 14 |                |                 |
| 241.1916       | 2  | L  | 13 | 1438.7654      | 719.8866        |
| 370.2342       | 3  | E  | 12 | 1325.6814      | 663.3446        |
| 469.3026       | 4  | V  | 11 | 1196.6388      | 598.8233        |
| 540.3397       | 5  | A  | 10 | 1097.5703      | 549.2891        |
| 668.3983       | 6  | Q  | 9  | 1026.5332      | 513.7705        |
| 805.4572       | 7  | H  | 8  | 898.4747       | 449.7412        |
| 918.5413       | 8  | L  | 7  | 761.4157       | 381.2118        |
| 975.5627       | 9  | G  | 6  | 648.3317       | 324.6698        |
| 1104.6053      | 10 | E  | 5  | 591.3102       | 296.1590        |
| 1191.6373      | 11 | S  | 4  | 462.2676       | 231.6377        |
| 1292.6850      | 12 | T  | 3  | 375.2356       | 188.1217        |
| 1391.7534      | 13 | V  | 2  | 274.1879       | 137.5979        |
|                | 14 | R  | 1  | 175.1195       | 88.0637         |

N-term:+29.04

X-range:

0 - 0

MassTol: Y-zoom:

0. 1.

MassType:

☐ AVG ☒ MONO

Axis:

☒ 1 ☐ 2

Label:

☒ I ☐ M ☐ -

Ions:

a ☐ + ☐ 2+ ☐ 3+

b ☒ + ☐ 2+ ☐ 3+

c ☐ + ☐ 2+ ☐ 3+

x ☐ + ☐ 2+ ☐ 3+

y ☒ + ☒ 2+ ☐ 3+

z ☐ + ☐ 2+ ☐ 3+

hide H<sub>2</sub>O/NH<sub>3</sub> ☐

zoom 112-122 ☐

GO

VLQEIIESDGKGDPNKPSGFR, MH+ 2370.2669, m/z 593.3222  
L OS G16 P120811 220811-s1.04481.04481.4.dta

scan 4481; 4.4e+000

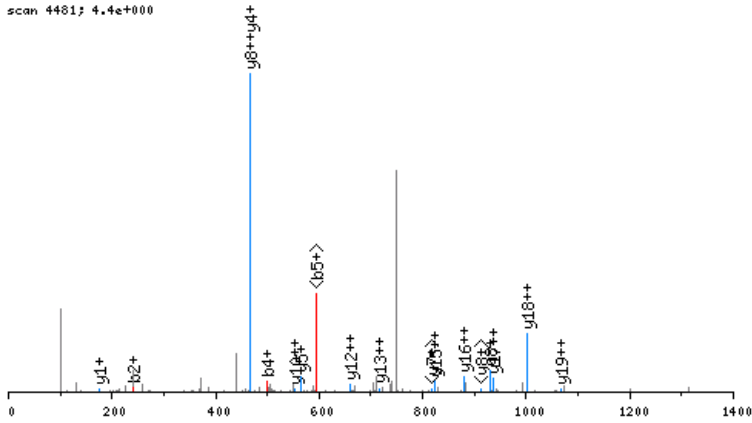

click image to zoom in; click top corners to zoom out

[precursor±]

scan 4478; 593.3 m/z; 1.0e+001

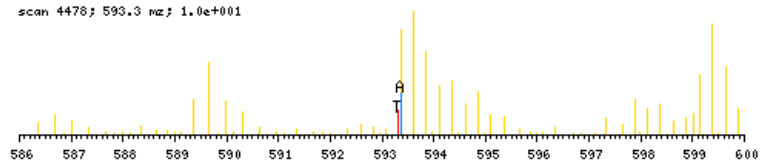

zoomed in precursor plot; T=theoretical m/z, A=acquired m/z

| b <sup>+</sup> | #  | AA | #  | y <sup>+</sup> | y <sup>2+</sup> |
|----------------|----|----|----|----------------|-----------------|
| 128.1075       | 1  | V  | 21 |                |                 |
| 241.1916       | 2  | L  | 20 | 2243.1673      | 1122.0875       |
| 369.2502       | 3  | Q  | 19 | 2130.0832      | 1065.5455       |
| 498.2927       | 4  | E  | 18 | 2002.0246      | 1001.5162       |
| 611.3768       | 5  | I  | 17 | 1872.9820      | 936.9949        |
| 724.4609       | 6  | L  | 16 | 1759.8980      | 880.4529        |
| 853.5035       | 7  | E  | 15 | 1646.8139      | 823.9109        |
| 940.5355       | 8  | S  | 14 | 1517.7713      | 759.3896        |
| 1055.5624      | 9  | D  | 13 | 1430.7393      | 715.8736        |
| 1112.5839      | 10 | G  | 12 | 1315.7123      | 658.3601        |
| 1268.7102      | 11 | K  | 11 | 1258.6909      | 629.8493        |
| 1325.7317      | 12 | G  | 10 | 1102.5646      | 551.7862        |
| 1440.7586      | 13 | D  | 9  | 1045.5431      | 523.2755        |
| 1537.8114      | 14 | P  | 8  | 930.5162       | 465.7620        |
| 1651.8543      | 15 | N  | 7  | 833.4634       | 417.2356        |
| 1807.9806      | 16 | K  | 6  | 719.4205       | 360.2141        |
| 1905.0334      | 17 | P  | 5  | 563.2942       | 282.1510        |
| 1992.0654      | 18 | S  | 4  | 466.2414       | 233.6246        |
| 2049.0869      | 19 | G  | 3  | 379.2094       | 190.1086        |
| 2196.1553      | 20 | F  | 2  | 322.1879       | 161.5979        |
|                | 21 | R  | 1  | 175.1195       | 88.0637         |

N-term: +29.04 K(11): +156.13  
K(16): +156.13

N-term: +29.04

X-range:

0 - 0

MassTol: Y-zoom:

0. 1.

MassType:

☐AVG ☒MONO

Axis:

☒1 ☐2

Label:

☒I ☐M ☐-

Ions:

a ☐+ ☐2+ ☐3+

b ☒+ ☐2+ ☐3+

c ☐+ ☐2+ ☐3+

x ☐+ ☐2+ ☐3+

y ☒+ ☒2+ ☐3+

z ☐+ ☐2+ ☐3+

hide H<sub>2</sub>O/NH<sub>3</sub> ☐

zoom 112-122 ☐

GO

VLTAEPGDDVR, MH+ 1286.6592, m/z 643.8332  
L OS G13 P120811 220811-s1.02720.02720.2.dta

scan 2720; 4.3e+000

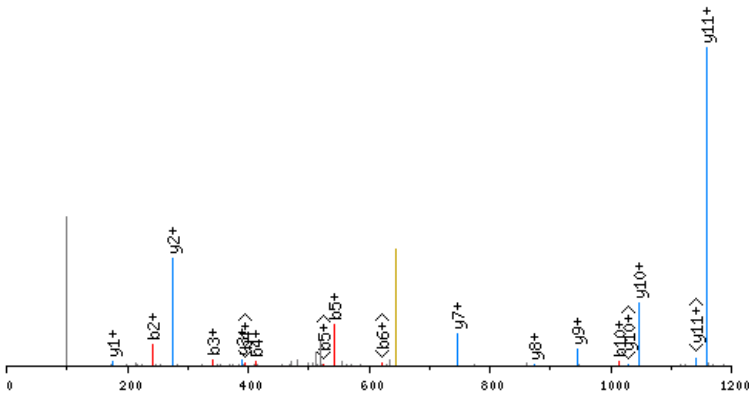

click image to zoom in; click top corners to zoom out

[precursor±]

scan 2719; 643.8 m/z; 1.1e+001

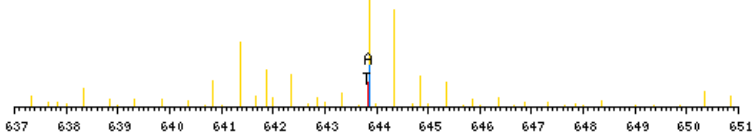

zoomed in precursor plot; T=theoretical m/z, A=acquired m/z

| b <sup>+</sup> | #  | AA | #  | y <sup>+</sup> | y <sup>2+</sup> |
|----------------|----|----|----|----------------|-----------------|
| 128.1075       | 1  | V  | 12 |                |                 |
| 241.1916       | 2  | L  | 11 | 1159.5595      | 580.2837        |
| 342.2393       | 3  | T  | 10 | 1046.4754      | 523.7416        |
| 413.2764       | 4  | A  | 9  | 945.4278       | 473.2178        |
| 542.3190       | 5  | E  | 8  | 874.3907       | 437.6992        |
| 639.3717       | 6  | P  | 7  | 745.3481       | 373.1779        |
| 726.4038       | 7  | S  | 6  | 648.2953       | 324.6516        |
| 783.4252       | 8  | G  | 5  | 561.2633       | 281.1355        |
| 898.4522       | 9  | D  | 4  | 504.2418       | 252.6248        |
| 1013.4791      | 10 | D  | 3  | 389.2149       | 195.1113        |
| 1112.5475      | 11 | V  | 2  | 274.1879       | 137.5979        |
|                | 12 | R  | 1  | 175.1195       | 88.0637         |

N-term:+29.04

N-term: +35.07 C(4): +160.03

X-range:

0 - 0

MassTol: Y-zoom:

0. 1.

MassType:

☐ AVG ☒ MONO

Axis:

☒ 1 ☐ 2

Label:

☒ I ☐ M ☐ -

Ions:

a ☐ + ☐ 2+ ☐ 3+

b ☒ + ☐ 2+ ☐ 3+

c ☐ + ☐ 2+ ☐ 3+

x ☐ + ☐ 2+ ☐ 3+

y ☒ + ☒ 2+ ☐ 3+

z ☐ + ☐ 2+ ☐ 3+

hide H<sub>2</sub>O/NH<sub>3</sub> ☐

zoom 112-122 ☐

GO

VLTPDLYNKLR, MH+ 1387.8313, m/z 463.2820  
L OS G16 P120811 220811-s1.04860.04860.3.dta

scan 4860; 2.3e+001

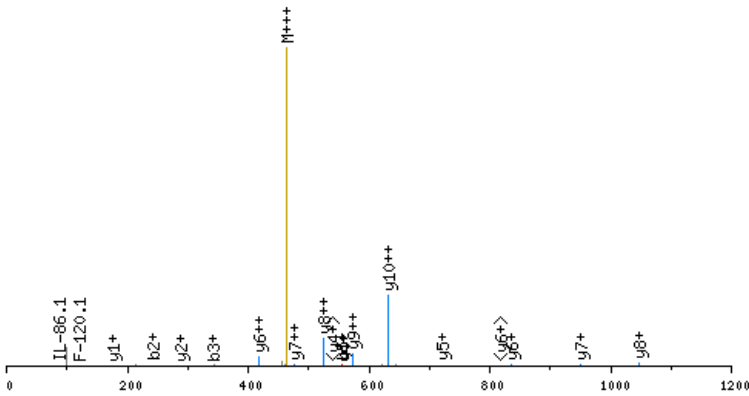

click image to zoom in; click top corners to zoom out

[precursor±]

scan 4858; 463.3 m/z; 5.0e+001

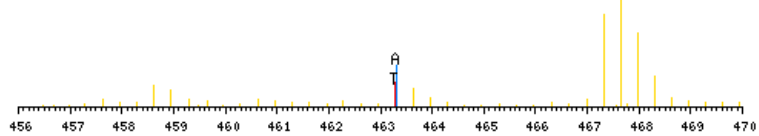

zoomed in precursor plot; T=theoretical m/z, A=acquired m/z

| b <sup>+</sup> | #  | AA | #  | y <sup>+</sup> | y <sup>2+</sup> |
|----------------|----|----|----|----------------|-----------------|
| 128.1075       | 1  | V  | 11 |                |                 |
| 241.1916       | 2  | L  | 10 | 1260.7316      | 630.8697        |
| 342.2393       | 3  | T  | 9  | 1147.6476      | 574.3277        |
| 439.2920       | 4  | P  | 8  | 1046.5999      | 523.8039        |
| 554.3190       | 5  | D  | 7  | 949.5471       | 475.2775        |
| 667.4030       | 6  | L  | 6  | 834.5202       | 417.7640        |
| 830.4664       | 7  | Y  | 5  | 721.4361       | 361.2220        |
| 944.5093       | 8  | N  | 4  | 558.3728       | 279.6903        |
| 1100.6356      | 9  | K  | 3  | 444.3299       | 222.6688        |
| 1213.7196      | 10 | L  | 2  | 288.2036       | 144.6057        |
|                | 11 | R  | 1  | 175.1195       | 88.0637         |

N-term:+29.04 K(9):+156.13

X-range:

0 - 0

MassTol: Y-zoom:

0. 1.

MassType:

☐AVG ☒MONO

Axis:

☒1 ☐2

Label:

☒I ☐M ☐-

Ions:

a ☐+ ☐2+ ☐3+

b ☒+ ☐2+ ☐3+

c ☐+ ☐2+ ☐3+

x ☐+ ☐2+ ☐3+

y ☒+ ☒2+ ☐3+

z ☐+ ☐2+ ☐3+

hide H<sub>2</sub>O/NH<sub>3</sub> ☐

zoom 112-122 ☐

GO

VLYPNDNFFEGKELR, MH+ 1896.9860, m/z 633.0002  
L OS G15 P120811 220811-s1.05284.05284.3.dta

scan 5284; 3.3e+000

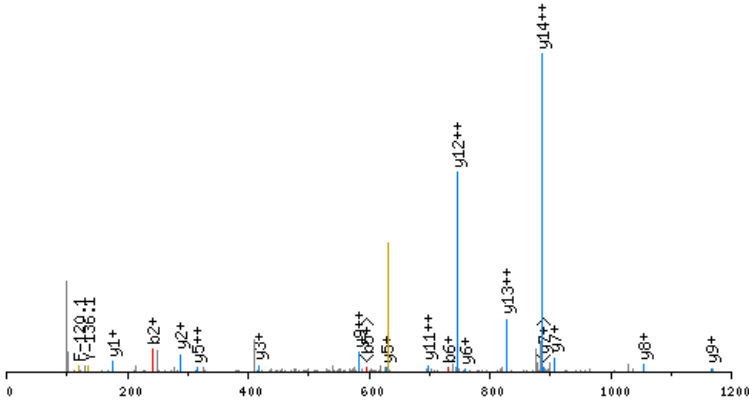

click image to zoom in; click top corners to zoom out

[precursor±]

scan 5281; 633.0 m/z; 1.7e+001

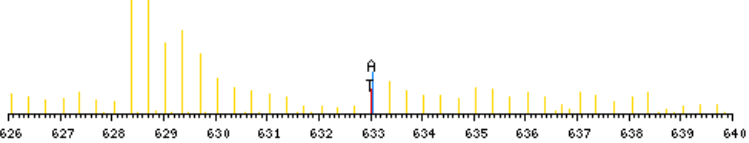

zoomed in precursor plot; T=theoretical m/z, A=acquired m/z

| b <sup>+</sup> | #  | AA | #  | y <sup>+</sup> | y <sup>2+</sup> |
|----------------|----|----|----|----------------|-----------------|
| 128.1075       | 1  | V  | 15 |                |                 |
| 241.1916       | 2  | L  | 14 | 1769.8863      | 885.4471        |
| 404.2549       | 3  | Y  | 13 | 1656.8022      | 828.9050        |
| 501.3077       | 4  | P  | 12 | 1493.7389      | 747.3734        |
| 615.3506       | 5  | N  | 11 | 1396.6861      | 698.8470        |
| 730.3775       | 6  | D  | 10 | 1282.6432      | 641.8255        |
| 844.4205       | 7  | N  | 9  | 1167.6163      | 584.3120        |
| 991.4889       | 8  | F  | 8  | 1053.5733      | 527.2906        |
| 1138.5573      | 9  | F  | 7  | 906.5049       | 453.7564        |
| 1267.5999      | 10 | E  | 6  | 759.4365       | 380.2222        |
| 1324.6214      | 11 | G  | 5  | 630.3939       | 315.7009        |
| 1480.7477      | 12 | K  | 4  | 573.3725       | 287.1901        |
| 1609.7902      | 13 | E  | 3  | 417.2462       | 209.1270        |
| 1722.8743      | 14 | L  | 2  | 288.2036       | 144.6057        |
|                | 15 | R  | 1  | 175.1195       | 88.0637         |

N-term:+29.04 K(12):+156.13



X-range:

0 - 0

MassTol: Y-zoom:

0. 1.

MassType:

☐AVG ☒MONO

Axis:

☒1 ☐2

Label:

☒I ☐M ☐-

Ions:

a ☐+ ☐2+ ☐3+

b ☒+ ☐2+ ☐3+

c ☐+ ☐2+ ☐3+

x ☐+ ☐2+ ☐3+

y ☒+ ☒2+ ☐3+

z ☐+ ☐2+ ☐3+

hide H<sub>2</sub>O/NH<sub>3</sub> ☐

zoom 112-122 ☐

GO

VMLGETNPADSKPGTIR, MH+ 1841.9795, m/z 614.6647  
L OS G15 P120811 220811-s1.03352.03352.3.dta

scan 3352; 5.7e+000

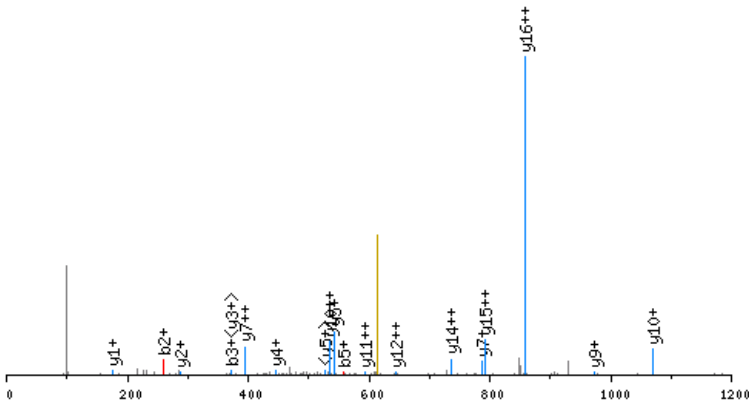

click image to zoom in; click top corners to zoom out

[precursor±]

scan 3351; 614.7 m/z; 4.0e+001

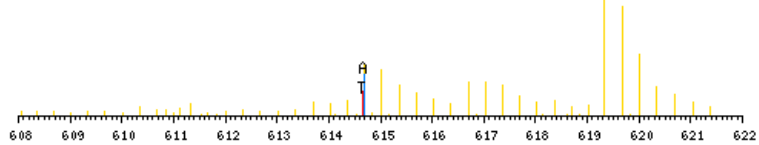

zoomed in precursor plot; T=theoretical m/z, A=acquired m/z

| b <sup>+</sup> | #  | AA | #  | y <sup>+</sup> | y <sup>2+</sup> |
|----------------|----|----|----|----------------|-----------------|
| 128.1075       | 1  | V  | 17 |                |                 |
| 259.1480       | 2  | M  | 16 | 1714.8798      | 857.9438        |
| 372.2321       | 3  | L  | 15 | 1583.8393      | 792.4236        |
| 429.2535       | 4  | G  | 14 | 1470.7553      | 735.8816        |
| 558.2961       | 5  | E  | 13 | 1413.7338      | 707.3708        |
| 659.3438       | 6  | T  | 12 | 1284.6912      | 642.8495        |
| 773.3867       | 7  | N  | 11 | 1183.6435      | 592.3257        |
| 870.4395       | 8  | P  | 10 | 1069.6006      | 535.3042        |
| 941.4766       | 9  | A  | 9  | 972.5479       | 486.7778        |
| 1056.5035      | 10 | D  | 8  | 901.5107       | 451.2593        |
| 1143.5356      | 11 | S  | 7  | 786.4838       | 393.7458        |
| 1299.6619      | 12 | K  | 6  | 699.4518       | 350.2298        |
| 1396.7146      | 13 | P  | 5  | 543.3255       | 272.1666        |
| 1453.7361      | 14 | G  | 4  | 446.2727       | 223.6403        |
| 1554.7838      | 15 | T  | 3  | 389.2512       | 195.1295        |
| 1667.8678      | 16 | I  | 2  | 288.2036       | 144.6057        |
|                | 17 | R  | 1  | 175.1195       | 88.0637         |

N-term:+29.04 K(12):+156.13

X-range:

0 - 0

MassTol: Y-zoom:

0. 1.

MassType:

☐ AVG ☒ MONO

Axis:

☒ 1 ☐ 2

Label:

☒ I ☐ M ☐ -

Ions:

a ☐ + ☐ 2+ ☐ 3+

b ☒ + ☐ 2+ ☐ 3+

c ☐ + ☐ 2+ ☐ 3+

x ☐ + ☐ 2+ ☐ 3+

y ☒ + ☒ 2+ ☐ 3+

z ☐ + ☐ 2+ ☐ 3+

hide H<sub>2</sub>O/NH<sub>3</sub> ☐

zoom 112-122 ☐

GO

VMVGMGQKDSYVGDEAQSQR, MH+ 2269.1321, m/z 568.0385  
L OS G17 P120811 220811-s1.03456.03456.4.dta

scan 3456: 5.5e+000

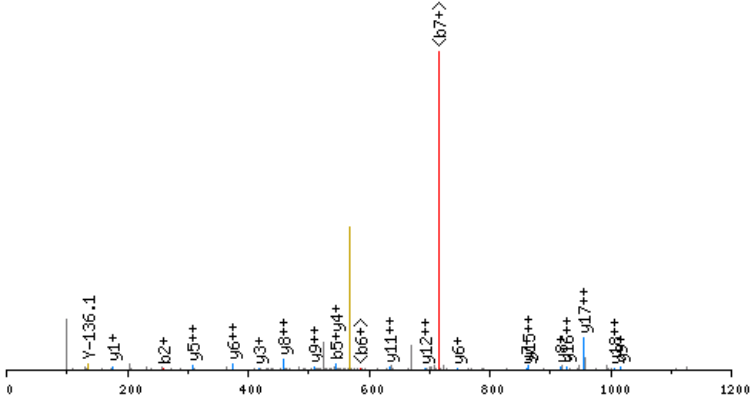

click image to zoom in; click top corners to zoom out [\[precursor±\]](#)

scan 3453: 568.0 m/z; 1.0e+001

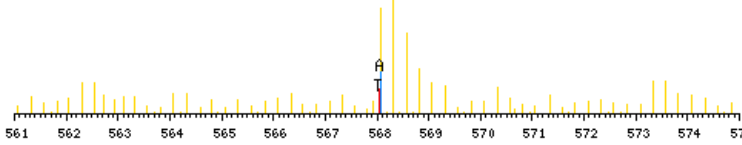

zoomed in precursor plot; T=theoretical m/z, A=acquired m/z

| b <sup>+</sup> | #  | AA | #  | y <sup>+</sup> | y <sup>2+</sup> |
|----------------|----|----|----|----------------|-----------------|
| 128.1075       | 1  | V  | 20 |                |                 |
| 259.1480       | 2  | M  | 19 | 2142.0324      | 1071.5201       |
| 358.2164       | 3  | V  | 18 | 2010.9919      | 1005.9999       |
| 415.2379       | 4  | G  | 17 | 1911.9235      | 956.4657        |
| 546.2784       | 5  | M  | 16 | 1854.9021      | 927.9549        |
| 603.2998       | 6  | G  | 15 | 1723.8616      | 862.4347        |
| 731.3584       | 7  | Q  | 14 | 1666.8401      | 833.9240        |
| 887.4847       | 8  | K  | 13 | 1538.7815      | 769.8947        |
| 1002.5116      | 9  | D  | 12 | 1382.6552      | 691.8315        |
| 1089.5437      | 10 | S  | 11 | 1267.6283      | 634.3181        |
| 1252.6070      | 11 | Y  | 10 | 1180.5963      | 590.8020        |
| 1351.6754      | 12 | V  | 9  | 1017.5329      | 509.2704        |
| 1408.6969      | 13 | G  | 8  | 918.4645       | 459.7362        |
| 1523.7238      | 14 | D  | 7  | 861.4431       | 431.2254        |
| 1652.7664      | 15 | E  | 6  | 746.4161       | 373.7120        |
| 1723.8035      | 16 | A  | 5  | 617.3735       | 309.1907        |
| 1851.8621      | 17 | Q  | 4  | 546.3364       | 273.6721        |
| 1938.8941      | 18 | S  | 3  | 418.2778       | 209.6428        |
| 2095.0204      | 19 | K  | 2  | 331.2458       | 166.1268        |
|                | 20 | R  | 1  | 175.1195       | 88.0637         |

N-term: +29.04 K(8): +156.13  
K(19): +156.13

X-range:

0 - 0

MassTol: Y-zoom:

0. 1.

MassType:

☐AVG ☒MONO

Axis:

☒1 ☐2

Label:

☒I ☐M ☐-

Ions:

a ☐+ ☐2+ ☐3+

b ☒+ ☐2+ ☐3+

c ☐+ ☐2+ ☐3+

x ☐+ ☐2+ ☐3+

y ☒+ ☒2+ ☐3+

z ☐+ ☐2+ ☐3+

hide H<sub>2</sub>O/NH<sub>3</sub> ☐

zoom 112-122 ☐

GO

VNDPQPEHPLR, MH+ 1329.6915, m/z 443.9020  
L OS G16 P120811 220811-s1.02219.02219.3.dta

scan 2219; 2.2e+001

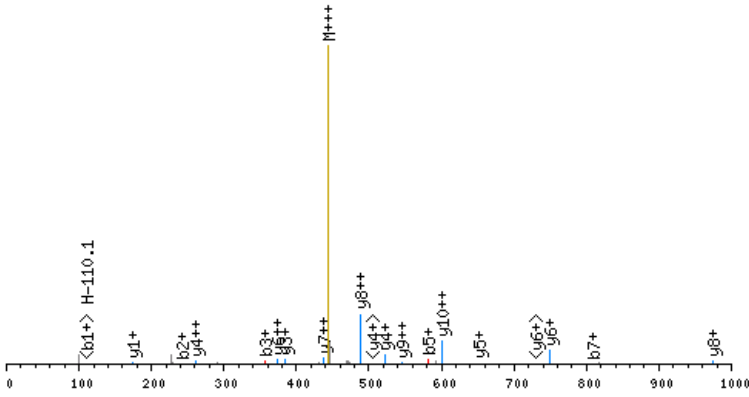

click image to zoom in; click top corners to zoom out

[precursor±]

scan 2218; 443.9 m/z; 1.4e+001

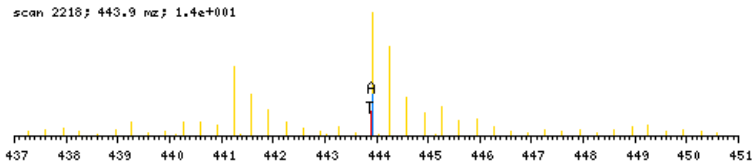

zoomed in precursor plot; T=theoretical m/z, A=acquired m/z

| b <sup>+</sup> | #  | AA | #  | y <sup>+</sup> | y <sup>2+</sup> |
|----------------|----|----|----|----------------|-----------------|
| 128.1075       | 1  | V  | 11 |                |                 |
| 242.1504       | 2  | N  | 10 | 1202.5918      | 601.7998        |
| 357.1774       | 3  | D  | 9  | 1088.5489      | 544.7784        |
| 454.2301       | 4  | P  | 8  | 973.5219       | 487.2649        |
| 582.2887       | 5  | Q  | 7  | 876.4692       | 438.7385        |
| 679.3415       | 6  | P  | 6  | 748.4106       | 374.7092        |
| 808.3841       | 7  | E  | 5  | 651.3578       | 326.1828        |
| 945.4430       | 8  | H  | 4  | 522.3152       | 261.6615        |
| 1042.4958      | 9  | P  | 3  | 385.2563       | 193.1321        |
| 1155.5798      | 10 | L  | 2  | 288.2036       | 144.6057        |
|                | 11 | R  | 1  | 175.1195       | 88.0637         |

N-term:+29.04

X-range:

0 - 0

MassTol: Y-zoom:

0. 1.

MassType:

☐AVG ☒MONO

Axis:

☒1 ☐2

Label:

☒I ☐M ☐-

Ions:

a ☐+ ☐2+ ☐3+

b ☒+ ☐2+ ☐3+

c ☐+ ☐2+ ☐3+

x ☐+ ☐2+ ☐3+

y ☒+ ☒2+ ☐3+

z ☐+ ☐2+ ☐3+

hide H<sub>2</sub>O/NH<sub>3</sub> ☐

zoom 112-122 ☐

GO

VNHPQVSALLGEEDEEALHYLTR, MH+ 2648.3320, m/z 662.8385  
L OS G16 P120811 220811-s1.06224.06224.4.dta

scan 6224; 1.0e+000

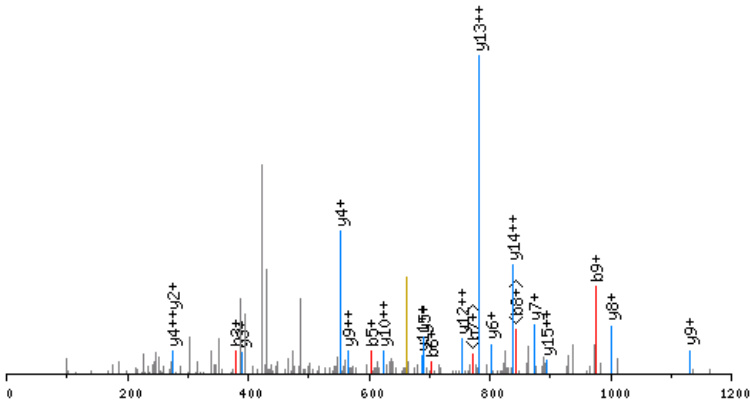

click image to zoom in; click top corners to zoom out [\[precursor±\]](#)

scan 6222; 662.8 m/z; 2.5e+000

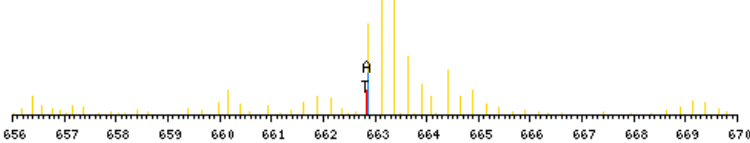

zoomed in precursor plot; T=theoretical m/z, A=acquired m/z

| b <sup>+</sup> | #  | AA | #  | y <sup>+</sup> | y <sup>2+</sup> |
|----------------|----|----|----|----------------|-----------------|
| 128.1075       | 1  | V  | 23 |                |                 |
| 242.1504       | 2  | N  | 22 | 2521.2323      | 1261.1201       |
| 379.2094       | 3  | H  | 21 | 2407.1894      | 1204.0986       |
| 476.2621       | 4  | P  | 20 | 2270.1305      | 1135.5691       |
| 604.3207       | 5  | Q  | 19 | 2173.0777      | 1087.0428       |
| 703.3891       | 6  | V  | 18 | 2045.0191      | 1023.0135       |
| 790.4211       | 7  | S  | 17 | 1945.9507      | 973.4793        |
| 861.4583       | 8  | A  | 16 | 1858.9187      | 929.9633        |
| 974.5423       | 9  | L  | 15 | 1787.8816      | 894.4447        |
| 1087.6264      | 10 | L  | 14 | 1674.7975      | 837.9027        |
| 1144.6478      | 11 | G  | 13 | 1561.7134      | 781.3606        |
| 1273.6904      | 12 | E  | 12 | 1504.6920      | 752.8499        |
| 1402.7330      | 13 | E  | 11 | 1375.6494      | 688.3286        |
| 1517.7600      | 14 | D  | 10 | 1246.6068      | 623.8073        |
| 1646.8026      | 15 | E  | 9  | 1131.5798      | 566.2938        |
| 1775.8452      | 16 | E  | 8  | 1002.5373      | 501.7725        |
| 1846.8823      | 17 | A  | 7  | 873.4947       | 437.2512        |
| 1959.9663      | 18 | L  | 6  | 802.4575       | 401.7327        |
| 2097.0252      | 19 | H  | 5  | 689.3735       | 345.1907        |
| 2260.0886      | 20 | Y  | 4  | 552.3146       | 276.6612        |
| 2373.1726      | 21 | L  | 3  | 389.2512       | 195.1295        |
| 2474.2203      | 22 | T  | 2  | 276.1672       | 138.5875        |
|                | 23 | R  | 1  | 175.1195       | 88.0637         |

N-term:+29.04

X-range:

0 - 0

MassTol: Y-zoom:

0. 1.

MassType:

☐ AVG ☒ MONO

Axis:

☒ 1 ☐ 2

Label:

☒ I ☐ M ☐ -

Ions:

a ☐ + ☐ 2+ ☐ 3+

b ☒ + ☐ 2+ ☐ 3+

c ☐ + ☐ 2+ ☐ 3+

x ☐ + ☐ 2+ ☐ 3+

y ☒ + ☒ 2+ ☐ 3+

z ☐ + ☐ 2+ ☐ 3+

hide H<sub>2</sub>O/NH<sub>3</sub> ☐

zoom 112-122 ☐

GO

VNPDEVGGEALGR, MH+ 1346.7128, m/z 673.8600  
H OS G13 P120811 220811-s1.03735.03735.2.dta

scan 3735; 3.7e+000

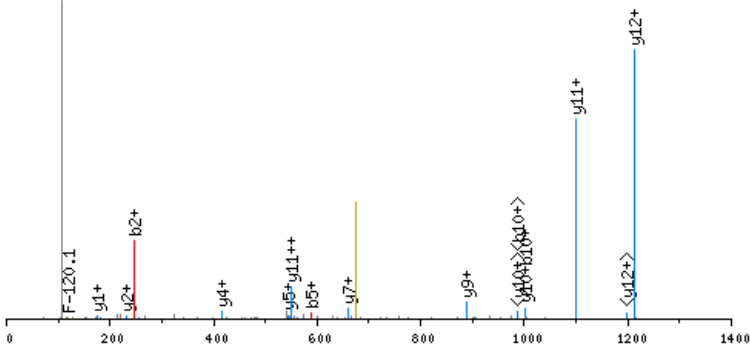

click image to zoom in; click top corners to zoom out

[precursor±]

scan 3734; 673.9 m/z; 2.4e+001

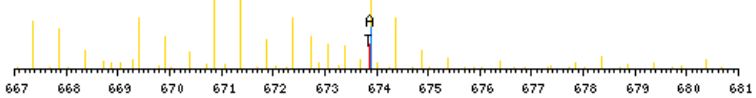

zoomed in precursor plot; T=theoretical m/z, A=acquired m/z

| b <sup>+</sup> | #  | AA | #  | y <sup>+</sup> | y <sup>2+</sup> |
|----------------|----|----|----|----------------|-----------------|
| 134.1393       | 1  | V  | 13 |                |                 |
| 248.1822       | 2  | N  | 12 | 1213.5813      | 607.2946        |
| 345.2350       | 3  | P  | 11 | 1099.5384      | 550.2731        |
| 460.2619       | 4  | D  | 10 | 1002.4856      | 501.7467        |
| 589.3045       | 5  | E  | 9  | 887.4587       | 444.2332        |
| 688.3730       | 6  | V  | 8  | 758.4161       | 379.7120        |
| 745.3944       | 7  | G  | 7  | 659.3477       | 330.1777        |
| 802.4159       | 8  | G  | 6  | 602.3262       | 301.6670        |
| 931.4585       | 9  | E  | 5  | 545.3047       | 273.1563        |
| 1002.4956      | 10 | A  | 4  | 416.2621       | 208.6350        |
| 1115.5797      | 11 | L  | 3  | 345.2250       | 173.1164        |
| 1172.6011      | 12 | G  | 2  | 232.1410       | 116.5744        |
|                | 13 | R  | 1  | 175.1195       | 88.0637         |

N-term:+35.07

X-range:

0 - 0

MassTol: Y-zoom:

0. 1.

MassType:

☐ AVG ☒ MONO

Axis:

☒ 1 ☐ 2

Label:

☒ I ☐ M ☐ -

Ions:

a ☐ + ☐ 2+ ☐ 3+

b ☒ + ☐ 2+ ☐ 3+

c ☐ + ☐ 2+ ☐ 3+

x ☐ + ☐ 2+ ☐ 3+

y ☒ + ☒ 2+ ☐ 3+

z ☐ + ☐ 2+ ☐ 3+

hide H<sub>2</sub>O/NH<sub>3</sub> ☐

zoom 112-122 ☐

GO

VNPTVFFDITADDEPLGR, MH+ 2034.0184, m/z 678.6776  
L OS G12 P120811 220811-s1.05559.05559.3.dta

scan 5559; 2.0e+000

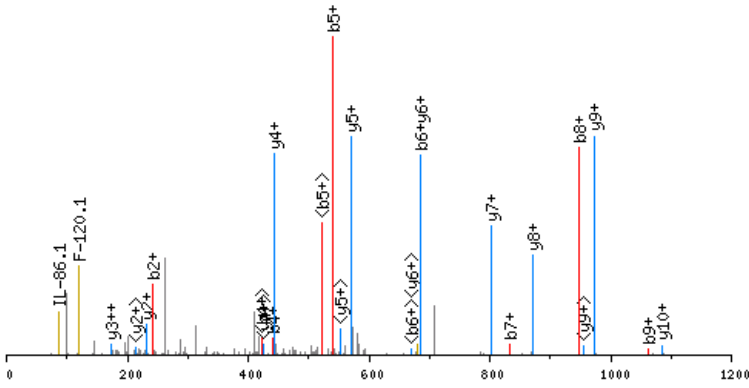

click image to zoom in; click top corners to zoom out

[precursor±]

scan 5557; 678.7 m/z; 1.5e+001

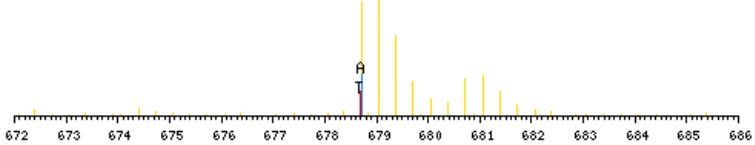

zoomed in precursor plot; T=theoretical m/z, A=acquired m/z

| b <sup>+</sup> | #  | AA | #  | y <sup>+</sup> | y <sup>2+</sup> |
|----------------|----|----|----|----------------|-----------------|
| 128.1075       | 1  | V  | 18 |                |                 |
| 242.1504       | 2  | N  | 17 | 1906.9187      | 953.9633        |
| 339.2032       | 3  | P  | 16 | 1792.8758      | 896.9418        |
| 440.2509       | 4  | T  | 15 | 1695.8230      | 848.4154        |
| 539.3193       | 5  | V  | 14 | 1594.7753      | 797.8916        |
| 686.3877       | 6  | F  | 13 | 1495.7069      | 748.3574        |
| 833.4561       | 7  | F  | 12 | 1348.6385      | 674.8232        |
| 948.4831       | 8  | D  | 11 | 1201.5701      | 601.2889        |
| 1061.5671      | 9  | I  | 10 | 1086.5431      | 543.7755        |
| 1162.6148      | 10 | T  | 9  | 973.4591       | 487.2334        |
| 1233.6519      | 11 | A  | 8  | 872.4114       | 436.7096        |
| 1348.6789      | 12 | D  | 7  | 801.3743       | 401.1910        |
| 1463.7058      | 13 | D  | 6  | 686.3473       | 343.6776        |
| 1592.7484      | 14 | E  | 5  | 571.3204       | 286.1641        |
| 1689.8012      | 15 | P  | 4  | 442.2778       | 221.6428        |
| 1802.8852      | 16 | L  | 3  | 345.2250       | 173.1164        |
| 1859.9067      | 17 | G  | 2  | 232.1410       | 116.5744        |
|                | 18 | R  | 1  | 175.1195       | 88.0637         |

N-term:+29.04

X-range:

0 - 0

MassTol: Y-zoom:

0. 1.

MassType:

☐ AVG ☒ MONO

Axis:

☒ 1 ☐ 2

Label:

☒ I ☐ M ☐ -

Ions:

a ☐ + ☐ 2+ ☐ 3+

b ☒ + ☐ 2+ ☐ 3+

c ☐ + ☐ 2+ ☐ 3+

x ☐ + ☐ 2+ ☐ 3+

y ☒ + ☒ 2+ ☐ 3+

z ☐ + ☐ 2+ ☐ 3+

hide H<sub>2</sub>O/NH<sub>3</sub> ☐

zoom 112-122 ☐

GO

VNSDEVGGEALGR, MH+ 1330.6603, m/z 444.2249  
L OS G13 P120811 220811-s1.02956.02956.3.dta

scan 2956; 1.6e+000

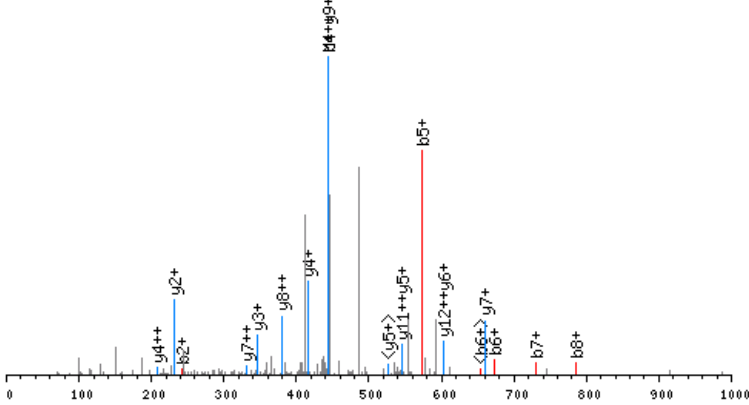

click image to zoom in; click top corners to zoom out

[precursor±]

scan 2954; 444.2 m/z; 8.1e+000

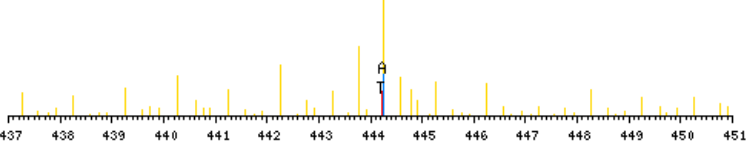

zoomed in precursor plot; T=theoretical m/z, A=acquired m/z

| b <sup>+</sup> | #  | AA | #  | y <sup>+</sup> | y <sup>2+</sup> |
|----------------|----|----|----|----------------|-----------------|
| 128.1075       | 1  | V  | 13 |                |                 |
| 242.1504       | 2  | N  | 12 | 1203.5606      | 602.2842        |
| 329.1825       | 3  | S  | 11 | 1089.5176      | 545.2627        |
| 444.2094       | 4  | D  | 10 | 1002.4856      | 501.7467        |
| 573.2520       | 5  | E  | 9  | 887.4587       | 444.2332        |
| 672.3204       | 6  | V  | 8  | 758.4161       | 379.7120        |
| 729.3419       | 7  | G  | 7  | 659.3477       | 330.1777        |
| 786.3633       | 8  | G  | 6  | 602.3262       | 301.6670        |
| 915.4059       | 9  | E  | 5  | 545.3047       | 273.1563        |
| 986.4431       | 10 | A  | 4  | 416.2621       | 208.6350        |
| 1099.5271      | 11 | L  | 3  | 345.2250       | 173.1164        |
| 1156.5486      | 12 | G  | 2  | 232.1410       | 116.5744        |
|                | 13 | R  | 1  | 175.1195       | 88.0637         |

N-term:+29.04

X-range:

0 - 0

MassTol: Y-zoom:

0. 1.

MassType:

☐AVG ☒MONO

Axis:

☒1 ☐2

Label:

☒I ☐M ☐-

Ions:

a ☐+ ☐2+ ☐3+

b ☒+ ☐2+ ☐3+

c ☐+ ☐2+ ☐3+

x ☐+ ☐2+ ☐3+

y ☒+ ☒2+ ☐3+

z ☐+ ☐2+ ☐3+

hide H<sub>2</sub>O/NH<sub>3</sub> ☐

zoom 112-122 ☐

GO

VNVFTTILTSR, MH+ 1278.7421, m/z 426.9189  
L OS G16 P120811 220811-s1.03252.03252.3.dta

scan 3252; 5.1e+000

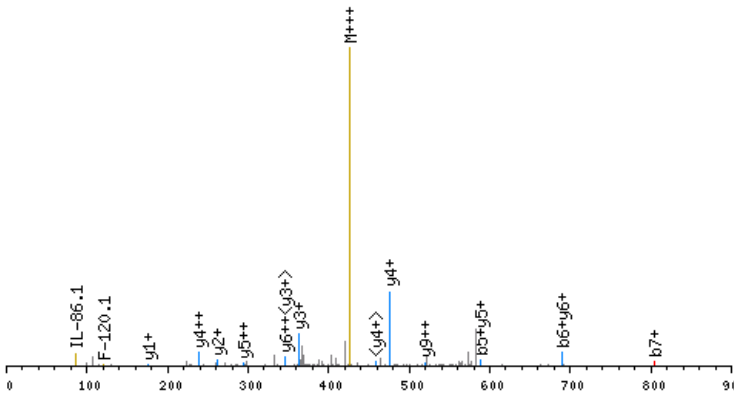

click image to zoom in; click top corners to zoom out

[precursor±]

scan 3248; 426.9 m/z; 7.2e+000

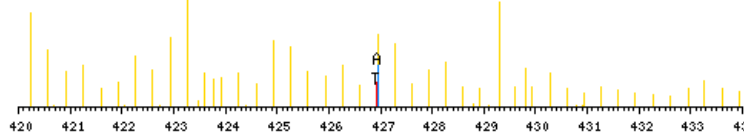

zoomed in precursor plot; T=theoretical m/z, A=acquired m/z

| b <sup>+</sup> | #  | AA | #  | y <sup>+</sup> | y <sup>2+</sup> |
|----------------|----|----|----|----------------|-----------------|
| 128.1075       | 1  | V  | 11 |                |                 |
| 242.1504       | 2  | N  | 10 | 1151.6424      | 576.3251        |
| 341.2189       | 3  | V  | 9  | 1037.5995      | 519.3037        |
| 488.2873       | 4  | F  | 8  | 938.5311       | 469.7695        |
| 589.3349       | 5  | T  | 7  | 791.4627       | 396.2353        |
| 690.3826       | 6  | T  | 6  | 690.4150       | 345.7114        |
| 803.4667       | 7  | I  | 5  | 589.3673       | 295.1876        |
| 916.5508       | 8  | L  | 4  | 476.2833       | 238.6455        |
| 1017.5984      | 9  | T  | 3  | 363.1992       | 182.1035        |
| 1104.6305      | 10 | S  | 2  | 262.1515       | 131.5797        |
|                | 11 | R  | 1  | 175.1195       | 88.0637         |

N-term:+29.04

X-range:

0 - 0

MassTol: Y-zoom:

0. 1.

MassType:

☐AVG ☒MONO

Axis:

☒1 ☐2

Label:

☒I ☐M ☐-

Ions:

a ☐+ ☐2+ ☐3+

b ☒+ ☐2+ ☐3+

c ☐+ ☐2+ ☐3+

x ☐+ ☐2+ ☐3+

y ☒+ ☒2+ ☐3+

z ☐+ ☐2+ ☐3+

hide H<sub>2</sub>O/NH<sub>3</sub> ☐

zoom 112-122 ☐

GO

VPTLNVSVDLTCR, MH+ 1600.8732, m/z 534.2959  
L OS G13 P120811 220811-s1.05502.05502.3.dta

scan 5502; 3.2e+000

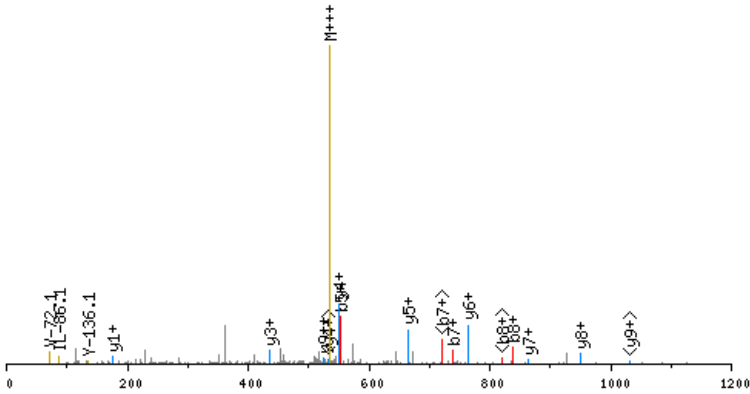

click image to zoom in; click top corners to zoom out

[precursor±]

scan 5499; 534.3 m/z; 2.7e+001

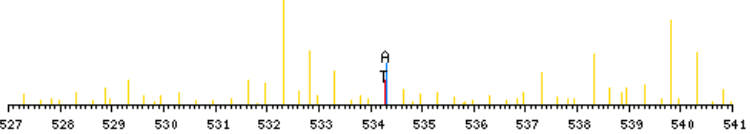

zoomed in precursor plot; T=theoretical m/z, A=acquired m/z

| b <sup>+</sup> | #  | AA | #  | y <sup>+</sup> | y <sup>2+</sup> |
|----------------|----|----|----|----------------|-----------------|
| 128.1075       | 1  | V  | 14 |                |                 |
| 225.1603       | 2  | P  | 13 | 1473.7735      | 737.3907        |
| 326.2080       | 3  | T  | 12 | 1376.7207      | 688.8643        |
| 439.2920       | 4  | L  | 11 | 1275.6730      | 638.3404        |
| 553.3349       | 5  | N  | 10 | 1162.5890      | 581.7984        |
| 652.4034       | 6  | V  | 9  | 1048.5461      | 524.7769        |
| 739.4354       | 7  | S  | 8  | 949.4776       | 475.2427        |
| 838.5038       | 8  | V  | 7  | 862.4456       | 431.7267        |
| 937.5722       | 9  | V  | 6  | 763.3772       | 382.1925        |
| 1052.5992      | 10 | D  | 5  | 664.3088       | 332.6583        |
| 1165.6832      | 11 | L  | 4  | 549.2818       | 275.1448        |
| 1266.7309      | 12 | T  | 3  | 436.1978       | 218.6028        |
| 1426.7615      | 13 | C  | 2  | 335.1501       | 168.0790        |
|                | 14 | R  | 1  | 175.1195       | 88.0637         |

N-term:+29.04 C(13):+160.03

N-term:+29.04 C(13):+160.03

X-range:

0 - 0

MassTol: Y-zoom:

0. 1.

MassType:

☐AVG ☒MONO

Axis:

☒1 ☐2

Label:

☒I ☐M ☐-

Ions:

a ☐+ ☐2+ ☐3+

b ☒+ ☐2+ ☐3+

c ☐+ ☐2+ ☐3+

x ☐+ ☐2+ ☐3+

y ☒+ ☒2+ ☐3+

z ☐+ ☐2+ ☐3+

hide H<sub>2</sub>O/NH<sub>3</sub> ☐

zoom 112-122 ☐

GO

VQAWYMDSTADPR, MH+ 1696.7641, m/z 566.2595  
L OS G13 P120811 220811-s1.04845.04845.3.dta

scan 4845; 9.5e+000

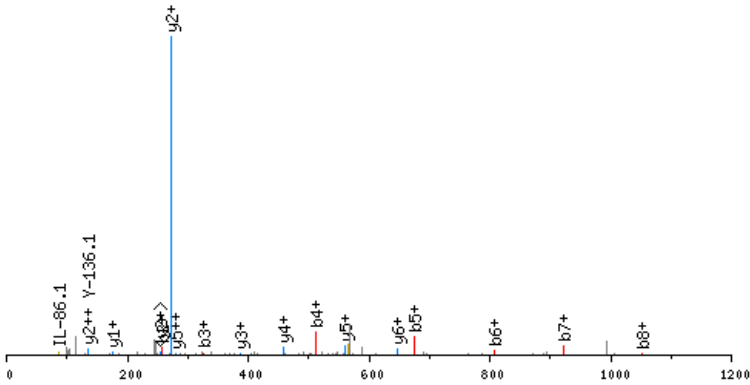

click image to zoom in; click top corners to zoom out [\[precursor±\]](#)

scan 4844; 566.3 m/z; 1.4e+001

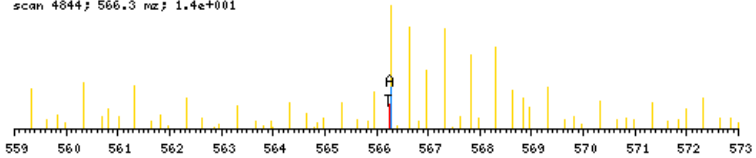

zoomed in precursor plot; T=theoretical m/z, A=acquired m/z

| b <sup>+</sup> | #  | AA | #  | y <sup>+</sup> | y <sup>2+</sup> |
|----------------|----|----|----|----------------|-----------------|
| 128.1075       | 1  | V  | 14 |                |                 |
| 256.1661       | 2  | Q  | 13 | 1569.6644      | 785.3361        |
| 327.2032       | 3  | A  | 12 | 1441.6058      | 721.3068        |
| 513.2825       | 4  | W  | 11 | 1370.5687      | 685.7883        |
| 676.3458       | 5  | Y  | 10 | 1184.4894      | 592.7486        |
| 807.3863       | 6  | M  | 9  | 1021.4260      | 511.2169        |
| 922.4133       | 7  | D  | 8  | 890.3856       | 445.6967        |
| 1051.4559      | 8  | E  | 7  | 775.3586       | 388.1832        |
| 1138.4879      | 9  | S  | 6  | 646.3160       | 323.6619        |
| 1239.5356      | 10 | T  | 5  | 559.2840       | 280.1459        |
| 1310.5727      | 11 | A  | 4  | 458.2363       | 229.6221        |
| 1425.5996      | 12 | D  | 3  | 387.1992       | 194.1035        |
| 1522.6524      | 13 | P  | 2  | 272.1723       | 136.5900        |
|                | 14 | R  | 1  | 175.1195       | 88.0637         |

N-term:+29.04

X-range:

0 - 0

MassTol: Y-zoom:

0. 1.

MassType:

☐AVG ☒MONO

Axis:

☒1 ☐2

Label:

☒I ☐M ☐-

Ions:

a ☐+ ☐2+ ☐3+

b ☒+ ☐2+ ☐3+

c ☐+ ☐2+ ☐3+

x ☐+ ☐2+ ☐3+

y ☒+ ☒2+ ☐3+

z ☐+ ☐2+ ☐3+

hide H<sub>2</sub>O/NH<sub>3</sub> ☐

zoom 112-122 ☐

GO

VQKYGYTHLSTGDLLR, MH+ 1919.1027, m/z 480.5311  
H OS G17 P120811 220811-s1.04672.04672.4.dta

scan 4672; 5.9e+000

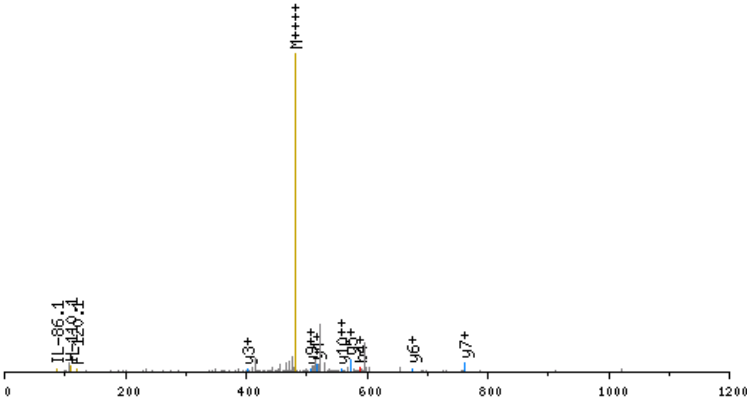

click image to zoom in; click top corners to zoom out

[precursor±]

scan 4668; 480.5 m/z; 1.4e+001

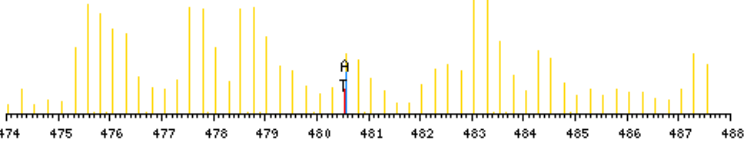

zoomed in precursor plot; T=theoretical m/z, A=acquired m/z

| b <sup>+</sup> | #  | AA | #  | y <sup>+</sup> | y <sup>2+</sup> |
|----------------|----|----|----|----------------|-----------------|
| 134.1393       | 1  | V  | 16 |                |                 |
| 262.1979       | 2  | Q  | 15 | 1785.9712      | 893.4895        |
| 424.3560       | 3  | K  | 14 | 1657.9126      | 829.4602        |
| 587.4193       | 4  | Y  | 13 | 1495.7545      | 748.3812        |
| 644.4408       | 5  | G  | 12 | 1332.6912      | 666.8495        |
| 807.5041       | 6  | Y  | 11 | 1275.6697      | 638.3388        |
| 908.5518       | 7  | T  | 10 | 1112.6064      | 556.8071        |
| 1045.6107      | 8  | H  | 9  | 1011.5587      | 506.2833        |
| 1158.6948      | 9  | L  | 8  | 874.4998       | 437.7538        |
| 1245.7268      | 10 | S  | 7  | 761.4157       | 381.2118        |
| 1346.7745      | 11 | T  | 6  | 674.3837       | 337.6958        |
| 1403.7959      | 12 | G  | 5  | 573.3360       | 287.1719        |
| 1518.8229      | 13 | D  | 4  | 516.3146       | 258.6612        |
| 1631.9069      | 14 | L  | 3  | 401.2876       | 201.1477        |
| 1744.9910      | 15 | L  | 2  | 288.2036       | 144.6057        |
|                | 16 | R  | 1  | 175.1195       | 88.0637         |

N-term:+35.07 K(3):+162.16

X-range:

0 - 0

MassTol: Y-zoom:

0. 1.

MassType:

☐ AVG ☒ MONO

Axis:

☒ 1 ☐ 2

Label:

☒ I ☐ M ☐ -

Ions:

a ☐ + ☐ 2+ ☐ 3+

b ☒ + ☐ 2+ ☐ 3+

c ☐ + ☐ 2+ ☐ 3+

x ☐ + ☐ 2+ ☐ 3+

y ☒ + ☒ 2+ ☐ 3+

z ☐ + ☐ 2+ ☐ 3+

hide H<sub>2</sub>O/NH<sub>3</sub> ☐

zoom 112-122 ☐

GO

VQLQQSGAELVK, MH+ 1355.7899, m/z 452.6015  
L OS G13 P120811 220811-s1.04173.04173.3.dta

scan 4173; 1.2e+000

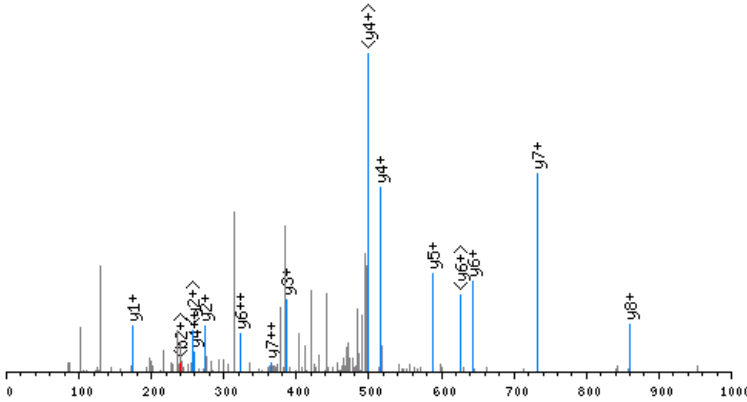

click image to zoom in; click top corners to zoom out

[precursor±]

scan 4169; 452.6 m/z; 2.1e+001

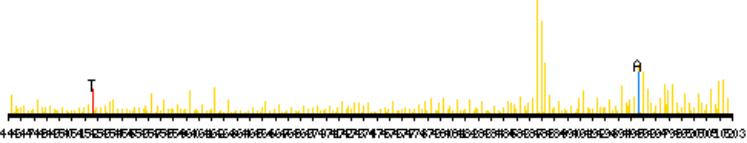

zoomed in precursor plot; T=theoretical m/z, A=acquired m/z

| b <sup>+</sup> | #  | AA | #  | y <sup>+</sup> | y <sup>2+</sup> |
|----------------|----|----|----|----------------|-----------------|
| 128.1075       | 1  | V  | 12 |                |                 |
| 256.1661       | 2  | Q  | 11 | 1228.6902      | 614.8490        |
| 369.2502       | 3  | L  | 10 | 1100.6316      | 550.8197        |
| 497.3087       | 4  | Q  | 9  | 987.5475       | 494.2777        |
| 625.3673       | 5  | Q  | 8  | 859.4889       | 430.2484        |
| 712.3993       | 6  | S  | 7  | 731.4304       | 366.2191        |
| 769.4208       | 7  | G  | 6  | 644.3983       | 322.7031        |
| 840.4579       | 8  | A  | 5  | 587.3769       | 294.1923        |
| 969.5005       | 9  | E  | 4  | 516.3398       | 258.6738        |
| 1082.5846      | 10 | L  | 3  | 387.2972       | 194.1525        |
| 1181.6530      | 11 | V  | 2  | 274.2131       | 137.6105        |
|                | 12 | K  | 1  | 175.1447       | 88.0763         |

N-term:+29.04 K(12):+156.13

X-range:

0 - 0

MassTol: Y-zoom:

0. 1.

MassType:

☐AVG ☒MONO

Axis:

☒1 ☐2

Label:

☒I ☐M ☐-

Ions:

a ☐+ ☐2+ ☐3+

b ☒+ ☐2+ ☐3+

c ☐+ ☐2+ ☐3+

x ☐+ ☐2+ ☐3+

y ☒+ ☒2+ ☐3+

z ☐+ ☐2+ ☐3+

hide H<sub>2</sub>O/NH<sub>3</sub> ☐

zoom 112-122 ☐

GO

VRDNQSGSLLFIGR, MH+ 1595.9081, m/z 532.6409  
H OS G16 P120811 220811-s1.04931.04931.3.dta

scan 4931; 2.0e+000

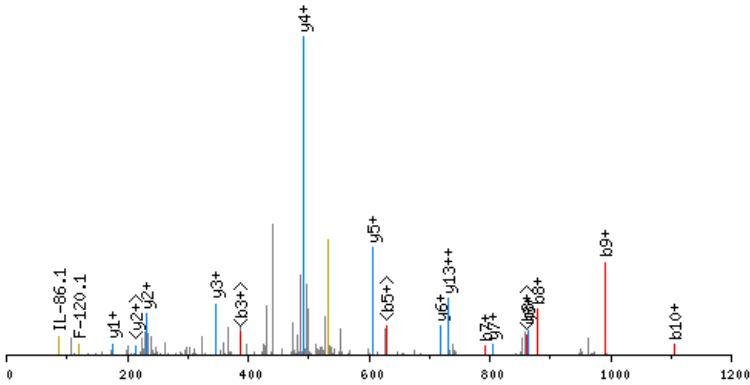

click image to zoom in; click top corners to zoom out [\[precursor±\]](#)

scan 4928; 532.6 m/z; 1.3e+001

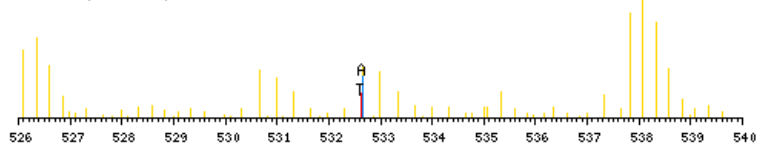

zoomed in precursor plot; T=theoretical m/z, A=acquired m/z

| b <sup>+</sup> | #  | AA | #  | y <sup>+</sup> | y <sup>2+</sup> |
|----------------|----|----|----|----------------|-----------------|
| 134.1393       | 1  | V  | 14 |                |                 |
| 290.2404       | 2  | R  | 13 | 1462.7767      | 731.8922        |
| 405.2674       | 3  | D  | 12 | 1306.6755      | 653.8417        |
| 519.3103       | 4  | N  | 11 | 1191.6486      | 596.3282        |
| 647.3689       | 5  | Q  | 10 | 1077.6057      | 539.3067        |
| 734.4009       | 6  | S  | 9  | 949.5471       | 475.2775        |
| 791.4224       | 7  | G  | 8  | 862.5151       | 431.7614        |
| 878.4544       | 8  | S  | 7  | 805.4936       | 403.2507        |
| 991.5385       | 9  | L  | 6  | 718.4616       | 359.7347        |
| 1104.6225      | 10 | L  | 5  | 605.3775       | 303.1927        |
| 1251.6909      | 11 | F  | 4  | 492.2934       | 246.6506        |
| 1364.7750      | 12 | I  | 3  | 345.2250       | 173.1164        |
| 1421.7965      | 13 | G  | 2  | 232.1410       | 116.5744        |
|                | 14 | R  | 1  | 175.1195       | 88.0637         |

N-term:+35.07

X-range:

0 - 0

MassTol: Y-zoom:

0. 1.

MassType:

☐AVG ☒MONO

Axis:

☒1 ☐2

Label:

☒I ☐M ☐-

Ions:

a ☐+ ☐2+ ☐3+

b ☒+ ☐2+ ☐3+

c ☐+ ☐2+ ☐3+

x ☐+ ☐2+ ☐3+

y ☒+ ☒2+ ☐3+

z ☐+ ☐2+ ☐3+

hide H<sub>2</sub>O/NH<sub>3</sub> ☐

zoom 112-122 ☐

GO

VREGDVLTLLESER, MH+ 1643.8968, m/z 548.6371  
L OS G16 P120811 220811-s1.06029.06029.3.dta

scan 6029; 4.1e+000

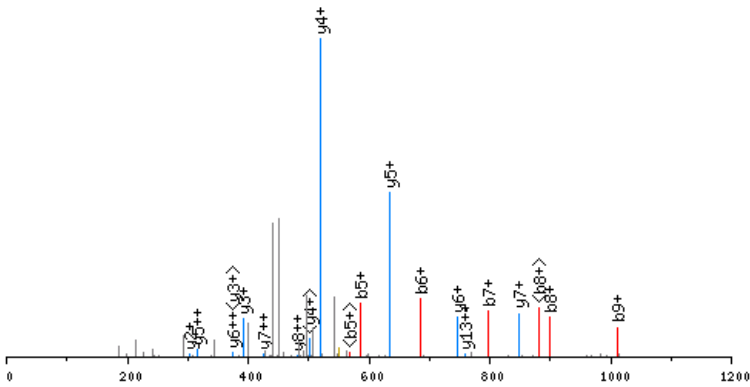

click image to zoom in; click top corners to zoom out [\[precursor±\]](#)

scan 6028; 548.6 m/z; 1.5e+001

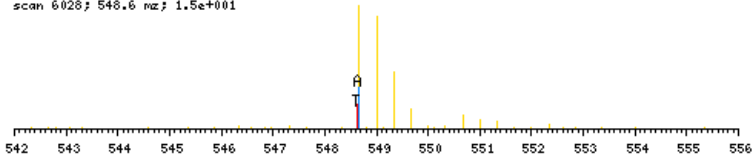

zoomed in precursor plot; T=theoretical m/z, A=acquired m/z

| b <sup>+</sup> | #  | AA | #  | y <sup>+</sup> | y <sup>2+</sup> |
|----------------|----|----|----|----------------|-----------------|
| 128.1075       | 1  | V  | 14 |                |                 |
| 284.2086       | 2  | R  | 13 | 1516.7971      | 758.9025        |
| 413.2512       | 3  | E  | 12 | 1360.6960      | 680.8519        |
| 470.2727       | 4  | G  | 11 | 1231.6534      | 616.3306        |
| 585.2996       | 5  | D  | 10 | 1174.6319      | 587.8199        |
| 684.3680       | 6  | V  | 9  | 1059.6050      | 530.3064        |
| 797.4521       | 7  | L  | 8  | 960.5366       | 480.7722        |
| 898.4998       | 8  | T  | 7  | 847.4525       | 424.2302        |
| 1011.5838      | 9  | L  | 6  | 746.4048       | 373.7063        |
| 1124.6679      | 10 | L  | 5  | 633.3208       | 317.1643        |
| 1253.7105      | 11 | E  | 4  | 520.2367       | 260.6223        |
| 1340.7425      | 12 | S  | 3  | 391.1941       | 196.1010        |
| 1469.7851      | 13 | E  | 2  | 304.1621       | 152.5850        |
|                | 14 | R  | 1  | 175.1195       | 88.0637         |

N-term:+29.04

X-range:

0 - 0

MassTol: Y-zoom:

0. 1.

MassType:

☐AVG ☒MONO

Axis:

☒1 ☐2

Label:

☒I ☐M ☐-

Ions:

a ☐+ ☐2+ ☐3+

b ☒+ ☐2+ ☐3+

c ☐+ ☐2+ ☐3+

x ☐+ ☐2+ ☐3+

y ☒+ ☒2+ ☐3+

z ☐+ ☐2+ ☐3+

hide H<sub>2</sub>O/NH<sub>3</sub> ☐

zoom 112-122 ☐

GO

VRELEGEVENEQKR, MH+ 1782.9986, m/z 446.5051  
H OS G17 P120811 220811-s1.02327.02327.4.dta

scan 2327; 1.3e+001

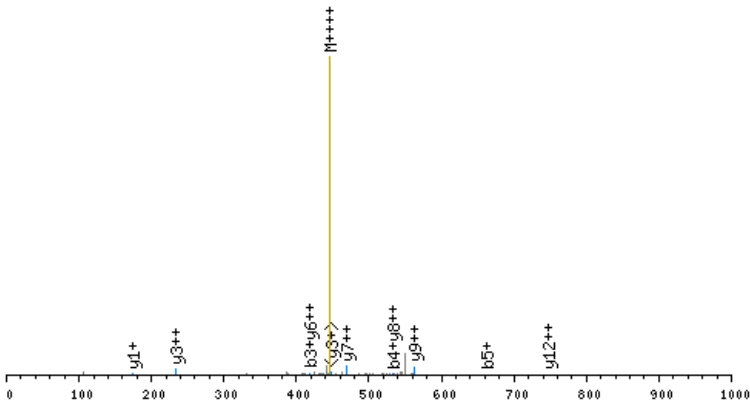

click image to zoom in; click top corners to zoom out

[precursor±]

scan 2323; 446.5 m/z; 3.4e+000

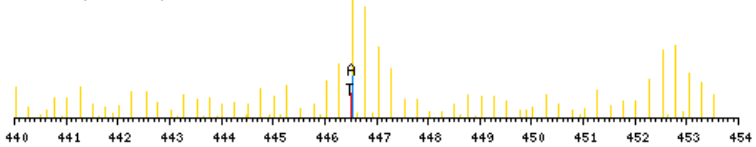

zoomed in precursor plot; T=theoretical m/z, A=acquired m/z

| b <sup>+</sup> | #  | AA | #  | y <sup>+</sup> | y <sup>2+</sup> |
|----------------|----|----|----|----------------|-----------------|
| 134.1393       | 1  | V  | 14 |                |                 |
| 290.2404       | 2  | R  | 13 | 1649.8671      | 825.4375        |
| 419.2830       | 3  | E  | 12 | 1493.7660      | 747.3869        |
| 532.3671       | 4  | L  | 11 | 1364.7234      | 682.8656        |
| 661.4097       | 5  | E  | 10 | 1251.6394      | 626.3236        |
| 718.4311       | 6  | G  | 9  | 1122.5968      | 561.8023        |
| 847.4737       | 7  | E  | 8  | 1065.5753      | 533.2916        |
| 946.5421       | 8  | V  | 7  | 936.5327       | 468.7703        |
| 1075.5847      | 9  | E  | 6  | 837.4643       | 419.2361        |
| 1189.6277      | 10 | N  | 5  | 708.4217       | 354.7148        |
| 1318.6703      | 11 | E  | 4  | 594.3788       | 297.6933        |
| 1446.7288      | 12 | Q  | 3  | 465.3362       | 233.1720        |
| 1608.8869      | 13 | K  | 2  | 337.2776       | 169.1427        |
|                | 14 | R  | 1  | 175.1195       | 88.0637         |

N-term:+35.07 K(13):+162.16

X-range:

0 - 0

MassTol: Y-zoom:

0. 1.

MassType:

☐AVG ☒MONO

Axis:

☒1 ☐2

Label:

☒I ☐M ☐-

Ions:

a ☐+ ☐2+ ☐3+

b ☒+ ☐2+ ☐3+

c ☐+ ☐2+ ☐3+

x ☐+ ☐2+ ☐3+

y ☒+ ☒2+ ☐3+

z ☐+ ☐2+ ☐3+

hide H<sub>2</sub>O/NH<sub>3</sub> ☐

zoom 112-122 ☐

GO

VRELENEVEVEQKR, MH+ 1840.0201, m/z 460.7605  
H OS G18 P120811 220811-s1.02553.02553.4.dta

scan 2553; 1.4e+001

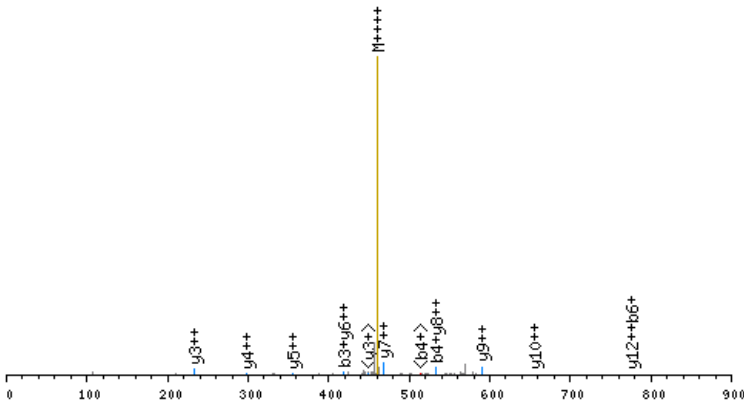

click image to zoom in; click top corners to zoom out

[precursor±]

scan 2551; 460.8 m/z; 7.5e+000

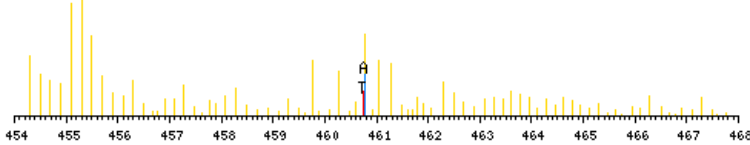

zoomed in precursor plot; T=theoretical m/z, A=acquired m/z

| b <sup>+</sup> | #  | AA | #  | y <sup>+</sup> | y <sup>2+</sup> |
|----------------|----|----|----|----------------|-----------------|
| 134.1393       | 1  | V  | 14 |                |                 |
| 290.2404       | 2  | R  | 13 | 1706.8886      | 853.9482        |
| 419.2830       | 3  | E  | 12 | 1550.7875      | 775.8977        |
| 532.3671       | 4  | L  | 11 | 1421.7449      | 711.3764        |
| 661.4097       | 5  | E  | 10 | 1308.6608      | 654.8343        |
| 775.4526       | 6  | N  | 9  | 1179.6182      | 590.3130        |
| 904.4952       | 7  | E  | 8  | 1065.5753      | 533.2916        |
| 1003.5636      | 8  | V  | 7  | 936.5327       | 468.7703        |
| 1132.6062      | 9  | E  | 6  | 837.4643       | 419.2361        |
| 1246.6491      | 10 | N  | 5  | 708.4217       | 354.7148        |
| 1375.6917      | 11 | E  | 4  | 594.3788       | 297.6933        |
| 1503.7503      | 12 | Q  | 3  | 465.3362       | 233.1720        |
| 1665.9084      | 13 | K  | 2  | 337.2776       | 169.1427        |
|                | 14 | R  | 1  | 175.1195       | 88.0637         |

N-term:+35.07 K(13):+162.16

X-range:

0 - 0

MassTol: Y-zoom:

0. 1.

MassType:

☐ AVG ☒ MONO

Axis:

☒ 1 ☐ 2

Label:

☒ I ☐ M ☐ -

Ions:

a ☐ + ☐ 2+ ☐ 3+

b ☒ + ☐ 2+ ☐ 3+

c ☐ + ☐ 2+ ☐ 3+

x ☐ + ☐ 2+ ☐ 3+

y ☒ + ☒ 2+ ☐ 3+

z ☐ + ☐ 2+ ☐ 3+

hide H<sub>2</sub>O/NH<sub>3</sub> ☐

zoom 112-122 ☐

GO

VREPPIMVTKQLEDNMAYCGER, MH+ 2704.3897, m/z 676.8529  
H OS G17 P120811 220811-s1.05872.05872.4.dta

scan 5872; 1.5e+000

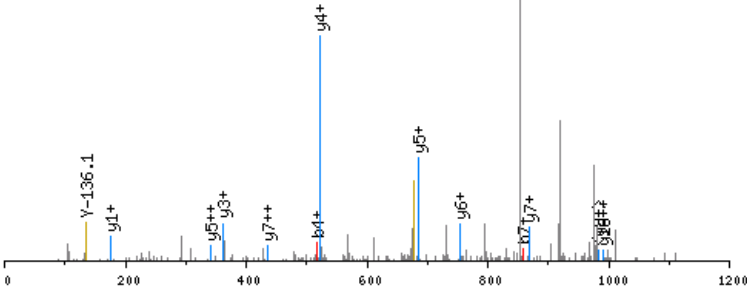

click image to zoom in; click top corners to zoom out [precursor±]

scan 5868; 676.9 m/z; 1.0e+001

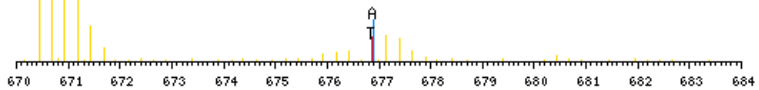

zoomed in precursor plot; T=theoretical m/z, A=acquired m/z

| b <sup>+</sup> | #  | AA | #  | y <sup>+</sup> | y <sup>2+</sup> |
|----------------|----|----|----|----------------|-----------------|
| 134.1393       | 1  | V  | 22 |                |                 |
| 290.2404       | 2  | R  | 21 | 2571.2582      | 1286.1330       |
| 419.2830       | 3  | E  | 20 | 2415.1571      | 1208.0824       |
| 516.3358       | 4  | P  | 19 | 2286.1145      | 1143.5611       |
| 613.3885       | 5  | P  | 18 | 2189.0617      | 1095.0348       |
| 726.4726       | 6  | I  | 17 | 2092.0089      | 1046.5084       |
| 857.5131       | 7  | M  | 16 | 1978.9249      | 989.9663        |
| 956.5815       | 8  | V  | 15 | 1847.8844      | 924.4461        |
| 1057.6292      | 9  | T  | 14 | 1748.8160      | 874.9119        |
| 1219.7873      | 10 | K  | 13 | 1647.7683      | 824.3881        |
| 1347.8459      | 11 | Q  | 12 | 1485.6102      | 743.3090        |
| 1460.9299      | 12 | L  | 11 | 1357.5516      | 679.2797        |
| 1589.9725      | 13 | E  | 10 | 1244.4675      | 622.7377        |
| 1704.9995      | 14 | D  | 9  | 1115.4250      | 558.2164        |
| 1836.0399      | 15 | M  | 8  | 1000.3980      | 500.7029        |
| 1950.0829      | 16 | N  | 7  | 869.3575       | 435.1827        |
| 2021.1200      | 17 | A  | 6  | 755.3146       | 378.1612        |
| 2184.1833      | 18 | Y  | 5  | 684.2775       | 342.6427        |
| 2344.2139      | 19 | C  | 4  | 521.2142       | 261.1110        |
| 2401.2354      | 20 | G  | 3  | 361.1836       | 181.0957        |
| 2530.2780      | 21 | E  | 2  | 304.1621       | 152.5850        |
|                | 22 | R  | 1  | 175.1195       | 88.0637         |

N-term:+35.07 K(10):+162.16  
C(19):+160.03

X-range:

0 - 0

MassTol: Y-zoom:

0. 1.

MassType:

☐ AVG ☒ MONO

Axis:

☒ 1 ☐ 2

Label:

☒ I ☐ M ☐ -

Ions:

a ☐ + ☐ 2+ ☐ 3+

b ☒ + ☐ 2+ ☐ 3+

c ☐ + ☐ 2+ ☐ 3+

x ☐ + ☐ 2+ ☐ 3+

y ☒ + ☒ 2+ ☐ 3+

z ☐ + ☐ 2+ ☐ 3+

hide H<sub>2</sub>O/NH<sub>3</sub> ☐

zoom 112-122 ☐

GO

VSDNELQELSTQGSR, MH+ 1690.8248, m/z 564.2798  
L OS G13 P120811 220811-s1.04275.04275.3.dta

scan 4275; 2.4e+000

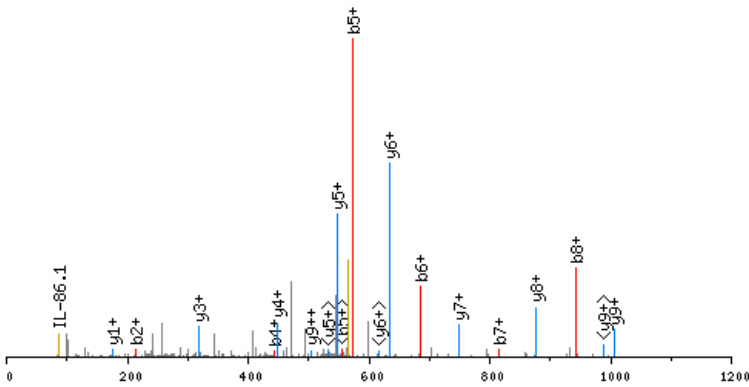

click image to zoom in; click top corners to zoom out

[precursor±]

scan 4274; 564.3 m/z; 1.5e+001

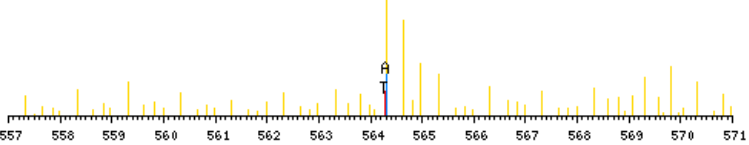

zoomed in precursor plot; T=theoretical m/z, A=acquired m/z

| b <sup>+</sup> | #  | AA | #  | y <sup>+</sup> | y <sup>2+</sup> |
|----------------|----|----|----|----------------|-----------------|
| 128.1075       | 1  | V  | 15 |                |                 |
| 215.1395       | 2  | S  | 14 | 1563.7251      | 782.3664        |
| 330.1665       | 3  | D  | 13 | 1476.6930      | 738.8504        |
| 444.2094       | 4  | N  | 12 | 1361.6661      | 681.3370        |
| 573.2520       | 5  | E  | 11 | 1247.6232      | 624.3155        |
| 686.3361       | 6  | L  | 10 | 1118.5806      | 559.7942        |
| 814.3946       | 7  | Q  | 9  | 1005.4965      | 503.2522        |
| 943.4372       | 8  | E  | 8  | 877.4379       | 439.2229        |
| 1056.5213      | 9  | L  | 7  | 748.3953       | 374.7016        |
| 1143.5533      | 10 | S  | 6  | 635.3113       | 318.1596        |
| 1244.6010      | 11 | T  | 5  | 548.2792       | 274.6435        |
| 1372.6596      | 12 | Q  | 4  | 447.2316       | 224.1197        |
| 1429.6811      | 13 | G  | 3  | 319.1730       | 160.0904        |
| 1516.7131      | 14 | S  | 2  | 262.1515       | 131.5797        |
|                | 15 | R  | 1  | 175.1195       | 88.0637         |

N-term:+29.04

X-range:

0 - 0

MassTol: Y-zoom:

0. 1.

MassType:

☐AVG ☒MONO

Axis:

☒1 ☐2

Label:

☒I ☐M ☐-

Ions:

a ☐+ ☐2+ ☐3+

b ☒+ ☐2+ ☐3+

c ☐+ ☐2+ ☐3+

x ☐+ ☐2+ ☐3+

y ☒+ ☒2+ ☐3+

z ☐+ ☐2+ ☐3+

hide H<sub>2</sub>O/NH<sub>3</sub> ☐

zoom 112-122 ☐

GO

VSDSSDSMDTGAGSIR, MH+ 1618.7442, m/z 540.2529  
H OS G13 P120811 220811-s1.02753.02753.3.dta

scan 2753; 4.6e+000

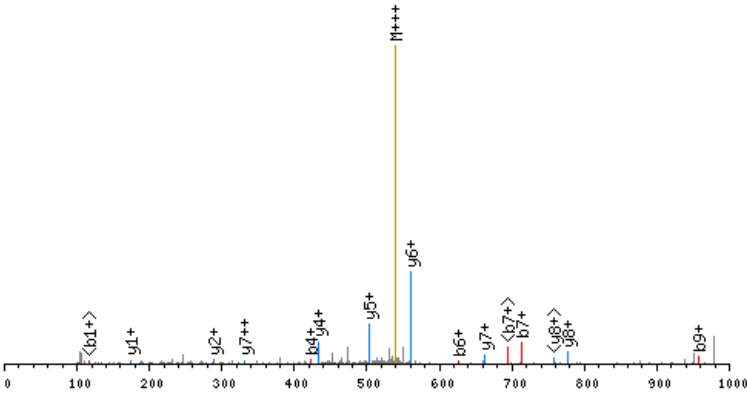

click image to zoom in; click top corners to zoom out

[precursor±]

scan 2749; 540.3 m/z; 1.0e+001

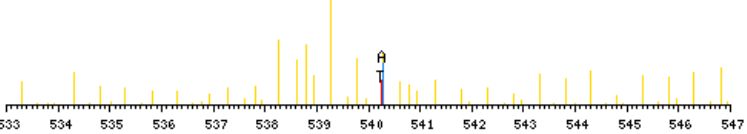

zoomed in precursor plot; T=theoretical m/z, A=acquired m/z

| b <sup>+</sup> | #  | AA | #  | y <sup>+</sup> | y <sup>2+</sup> |
|----------------|----|----|----|----------------|-----------------|
| 134.1393       | 1  | V  | 16 |                |                 |
| 221.1713       | 2  | S  | 15 | 1485.6127      | 743.3103        |
| 336.1983       | 3  | D  | 14 | 1398.5807      | 699.7943        |
| 423.2303       | 4  | S  | 13 | 1283.5538      | 642.2808        |
| 510.2623       | 5  | S  | 12 | 1196.5217      | 598.7648        |
| 625.2893       | 6  | D  | 11 | 1109.4897      | 555.2488        |
| 712.3213       | 7  | S  | 10 | 994.4628       | 497.7353        |
| 843.3618       | 8  | M  | 9  | 907.4307       | 454.2193        |
| 958.3887       | 9  | D  | 8  | 776.3903       | 388.6990        |
| 1059.4364      | 10 | T  | 7  | 661.3633       | 331.1856        |
| 1116.4579      | 11 | G  | 6  | 560.3156       | 280.6617        |
| 1187.4950      | 12 | A  | 5  | 503.2942       | 252.1510        |
| 1244.5165      | 13 | G  | 4  | 432.2571       | 216.6324        |
| 1331.5485      | 14 | S  | 3  | 375.2356       | 188.1217        |
| 1444.6326      | 15 | I  | 2  | 288.2036       | 144.6057        |
|                | 16 | R  | 1  | 175.1195       | 88.0637         |

N-term:+35.07

X-range:

0 - 0

MassTol: Y-zoom:

0. 1.

MassType:

☐AVG ☒MONO

Axis:

☒1 ☐2

Label:

☒I ☐M ☐-

Ions:

a ☐+ ☐2+ ☐3+

b ☒+ ☐2+ ☐3+

c ☐+ ☐2+ ☐3+

x ☐+ ☐2+ ☐3+

y ☒+ ☒2+ ☐3+

z ☐+ ☐2+ ☐3+

hide H<sub>2</sub>O/NH<sub>3</sub> ☐

zoom 112-122 ☐

GO

VSEGSAAAMAGESMAQR, MH+ 1680.7685, m/z 560.9277  
L OS G13 P120811 220811-s1.03920.03920.3.dta

scan 3920; 2.2e+000

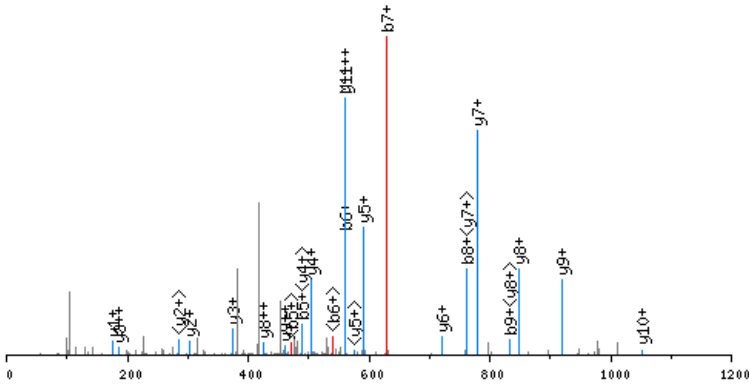

click image to zoom in; click top corners to zoom out [\[precursor±\]](#)

scan 3919; 560.9 m/z; 1.0e+001

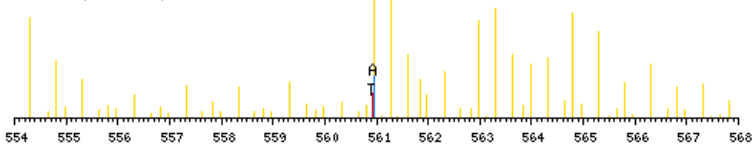

zoomed in precursor plot; T=theoretical m/z, A=acquired m/z

| b <sup>+</sup> | #  | AA | #  | y <sup>+</sup> | y <sup>2+</sup> |
|----------------|----|----|----|----------------|-----------------|
| 128.1075       | 1  | V  | 17 |                |                 |
| 215.1395       | 2  | S  | 16 | 1553.6688      | 777.3383        |
| 344.1821       | 3  | E  | 15 | 1466.6368      | 733.8223        |
| 401.2036       | 4  | G  | 14 | 1337.5942      | 669.3010        |
| 488.2356       | 5  | S  | 13 | 1280.5727      | 640.7903        |
| 559.2727       | 6  | A  | 12 | 1193.5407      | 597.2743        |
| 630.3099       | 7  | A  | 11 | 1122.5036      | 561.7557        |
| 761.3503       | 8  | M  | 10 | 1051.4665      | 526.2371        |
| 832.3875       | 9  | A  | 9  | 920.4260       | 460.7169        |
| 903.4246       | 10 | A  | 8  | 849.3889       | 425.1984        |
| 960.4460       | 11 | G  | 7  | 778.3518       | 389.6798        |
| 1089.4886      | 12 | E  | 6  | 721.3303       | 361.1691        |
| 1176.5207      | 13 | S  | 5  | 592.2877       | 296.6478        |
| 1307.5611      | 14 | M  | 4  | 505.2557       | 253.1318        |
| 1378.5983      | 15 | A  | 3  | 374.2152       | 187.6115        |
| 1506.6568      | 16 | Q  | 2  | 303.1781       | 152.0930        |
|                | 17 | R  | 1  | 175.1195       | 88.0637         |

N-term:+29.04

N-term:+29.04

X-range:

0 - 0

MassTol: Y-zoom:

0. 1.

MassType:

☐AVG ☒MONO

Axis:

☒1 ☐2

Label:

☒I ☐M ☐-

Ions:

a ☐+ ☐2+ ☐3+

b ☒+ ☐2+ ☐3+

c ☐+ ☐2+ ☐3+

x ☐+ ☐2+ ☐3+

y ☒+ ☒2+ ☐3+

z ☐+ ☐2+ ☐3+

hide H<sub>2</sub>O/NH<sub>3</sub> ☐

zoom 112-122 ☐

GO

VSFELFADKVPKTAENFR, MH+ 2182.1913, m/z 546.3033  
L OS G16 P120811 220811-s1.05991.05991.4.dta

scan 5991: 7.0e+000

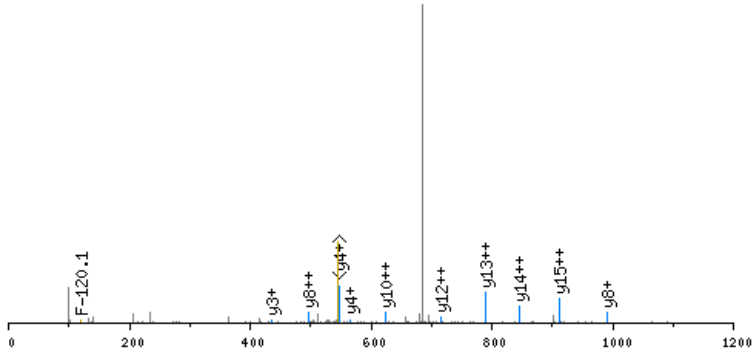

click image to zoom in; click top corners to zoom out [\[precursor±\]](#)

scan 5988: 546.3 m/z; 3.4e+000

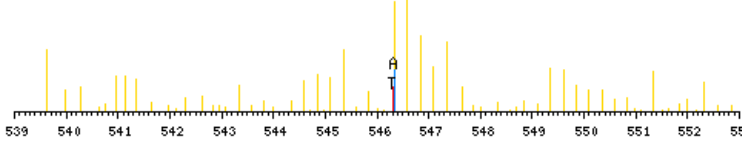

zoomed in precursor plot; T=theoretical m/z, A=acquired m/z

| b <sup>+</sup> | #  | AA | #  | y <sup>+</sup> | y <sup>2+</sup> |
|----------------|----|----|----|----------------|-----------------|
| 128.1075       | 1  | V  | 18 |                |                 |
| 215.1395       | 2  | S  | 17 | 2055.0916      | 1028.0497       |
| 362.2080       | 3  | F  | 16 | 1968.0595      | 984.5337        |
| 491.2505       | 4  | E  | 15 | 1820.9911      | 910.9995        |
| 604.3346       | 5  | L  | 14 | 1691.9485      | 846.4782        |
| 751.4030       | 6  | F  | 13 | 1578.8645      | 789.9362        |
| 822.4401       | 7  | A  | 12 | 1431.7961      | 716.4019        |
| 937.4671       | 8  | D  | 11 | 1360.7589      | 680.8834        |
| 1093.5934      | 9  | K  | 10 | 1245.7320      | 623.3699        |
| 1192.6618      | 10 | V  | 9  | 1089.6057      | 545.3068        |
| 1289.7146      | 11 | P  | 8  | 990.5373       | 495.7726        |
| 1445.8409      | 12 | K  | 7  | 893.4845       | 447.2462        |
| 1546.8885      | 13 | T  | 6  | 737.3582       | 369.1830        |
| 1617.9257      | 14 | A  | 5  | 636.3105       | 318.6592        |
| 1746.9682      | 15 | E  | 4  | 565.2734       | 283.1406        |
| 1861.0112      | 16 | N  | 3  | 436.2308       | 218.6193        |
| 2008.0796      | 17 | F  | 2  | 322.1879       | 161.5979        |
|                | 18 | R  | 1  | 175.1195       | 88.0637         |

N-term:+29.04 K(9):+156.13  
K(12):+156.13

X-range:

0 - 0

MassTol: Y-zoom:

0. 1.

MassType:

☐ AVG ☒ MONO

Axis:

☒ 1 ☐ 2

Label:

☒ I ☐ M ☐ -

Ions:

a ☐ + ☐ 2+ ☐ 3+b ☒ + ☐ 2+ ☐ 3+c ☐ + ☐ 2+ ☐ 3+x ☐ + ☐ 2+ ☐ 3+y ☒ + ☒ 2+ ☐ 3+z ☐ + ☐ 2+ ☐ 3+hide H<sub>2</sub>O/NH<sub>3</sub> ☐zoom 112-122 ☐

GO

VSGEHMDLTTCPLAAGGQKEKLR, MH+ 2554.2757, m/z 639.3244  
L OS G16 P120811 220811-s1.04509.04509.4.dta

scan 4509; 2.0e+000

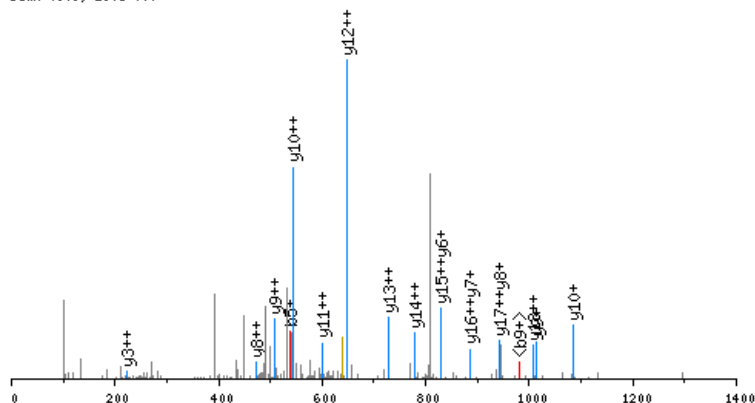

click image to zoom in; click top corners to zoom out

[\[precursor±\]](#)

scan 4508; 639.3 m/z; 2.3e+001

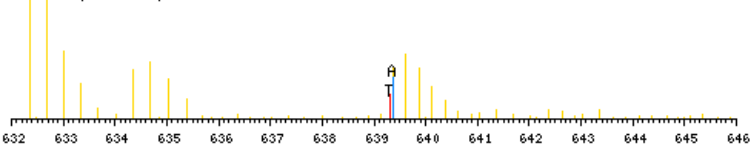

zoomed in precursor plot; T=theoretical m/z, A=acquired m/z

| b <sup>+</sup> | #  | AA | #  | y <sup>+</sup> | y <sup>2+</sup> |
|----------------|----|----|----|----------------|-----------------|
| 128.1075       | 1  | V  | 23 |                |                 |
| 215.1395       | 2  | S  | 22 | 2427.1760      | 1214.0919       |
| 272.1610       | 3  | G  | 21 | 2340.1440      | 1170.5759       |
| 401.2036       | 4  | E  | 20 | 2283.1225      | 1142.0652       |
| 538.2625       | 5  | H  | 19 | 2154.0800      | 1077.5439       |
| 669.3030       | 6  | M  | 18 | 2017.0210      | 1009.0144       |
| 784.3299       | 7  | D  | 17 | 1885.9806      | 943.4942        |
| 897.4140       | 8  | L  | 16 | 1770.9536      | 885.9807        |
| 998.4617       | 9  | T  | 15 | 1657.8696      | 829.4387        |
| 1099.5094      | 10 | T  | 14 | 1556.8219      | 778.9148        |
| 1259.5400      | 11 | C  | 13 | 1455.7742      | 728.3910        |
| 1356.5927      | 12 | P  | 12 | 1295.7436      | 648.3757        |
| 1469.6768      | 13 | L  | 11 | 1198.6908      | 599.8493        |
| 1540.7139      | 14 | A  | 10 | 1085.6068      | 543.3073        |
| 1611.7510      | 15 | A  | 9  | 1014.5697      | 507.7887        |
| 1668.7725      | 16 | G  | 8  | 943.5325       | 472.2702        |
| 1725.7939      | 17 | G  | 7  | 886.5111       | 443.7595        |
| 1853.8525      | 18 | Q  | 6  | 829.4896       | 415.2487        |
| 1981.9111      | 19 | Q  | 5  | 701.4310       | 351.2194        |
| 2110.9537      | 20 | E  | 4  | 573.3725       | 287.1901        |
| 2267.0800      | 21 | K  | 3  | 444.3299       | 222.6688        |
| 2380.1641      | 22 | L  | 2  | 288.2036       | 144.6057        |
|                | 23 | R  | 1  | 175.1195       | 88.0637         |

N-term: +29.04 C(11): +160.03

K(21): +156.13

X-range:

0 - 0

MassTol: Y-zoom:

0. 1.

MassType:

☐AVG ☒MONO

Axis:

☒1 ☐2

Label:

☒I ☐M ☐-

Ions:

a ☐+ ☐2+ ☐3+

b ☒+ ☐2+ ☐3+

c ☐+ ☐2+ ☐3+

x ☐+ ☐2+ ☐3+

y ☒+ ☒2+ ☐3+

z ☐+ ☐2+ ☐3+

hide H<sub>2</sub>O/NH<sub>3</sub> ☐

zoom 112-122 ☐

GO

VSITPAEVGVLVGKDR, MH+ 1696.0009, m/z 566.0052  
L OS G15 P120811 220811-s1.05530.05530.3.dta

scan 5530; 5.6e+000

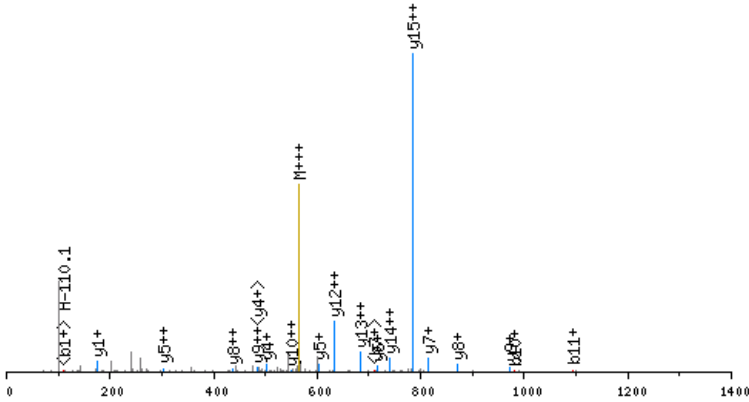

click image to zoom in; click top corners to zoom out

[precursor±]

scan 5526; 566.0 m/z; 1.7e+001

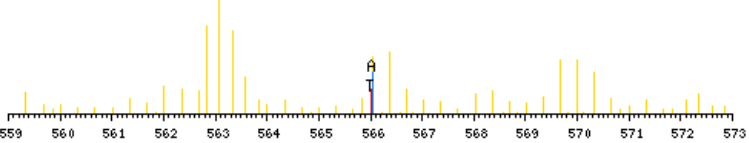

zoomed in precursor plot; T=theoretical m/z, A=acquired m/z

| b <sup>+</sup> | #  | AA | #  | y <sup>+</sup> | y <sup>2+</sup> |
|----------------|----|----|----|----------------|-----------------|
| 128.1075       | 1  | V  | 16 |                |                 |
| 215.1395       | 2  | S  | 15 | 1568.9012      | 784.9545        |
| 328.2236       | 3  | I  | 14 | 1481.8692      | 741.4385        |
| 429.2713       | 4  | T  | 13 | 1368.7851      | 684.8965        |
| 526.3240       | 5  | P  | 12 | 1267.7374      | 634.3726        |
| 597.3612       | 6  | A  | 11 | 1170.6847      | 585.8463        |
| 726.4038       | 7  | E  | 10 | 1099.6476      | 550.3277        |
| 825.4722       | 8  | V  | 9  | 970.6050       | 485.8064        |
| 882.4936       | 9  | G  | 8  | 871.5366       | 436.2722        |
| 981.5620       | 10 | V  | 7  | 814.5151       | 407.7615        |
| 1094.6461      | 11 | L  | 6  | 715.4467       | 358.2273        |
| 1193.7145      | 12 | V  | 5  | 602.3626       | 301.6852        |
| 1250.7360      | 13 | G  | 4  | 503.2942       | 252.1510        |
| 1406.8623      | 14 | K  | 3  | 446.2727       | 223.6403        |
| 1521.8892      | 15 | D  | 2  | 290.1464       | 145.5771        |
|                | 16 | R  | 1  | 175.1195       | 88.0637         |

N-term:+29.04 K(14):+156.13

X-range:

0 - 0

MassTol: Y-zoom:

0. 1.

MassType:

☐AVG ☒MONO

Axis:

☒1 ☐2

Label:

☒I ☐M ☐-

Ions:

a ☐+ ☐2+ ☐3+

b ☒+ ☐2+ ☐3+

c ☐+ ☐2+ ☐3+

x ☐+ ☐2+ ☐3+

y ☒+ ☒2+ ☐3+

z ☐+ ☐2+ ☐3+

hide H<sub>2</sub>O/NH<sub>3</sub> ☐

zoom 112-122 ☐

GO

VSTVGSMVFSEGEAQR, MH+ 1717.8643, m/z 573.2929  
H OS G13 P120811 220811-s1.05053.05053.3.dta

scan 5053; 2.4e+000

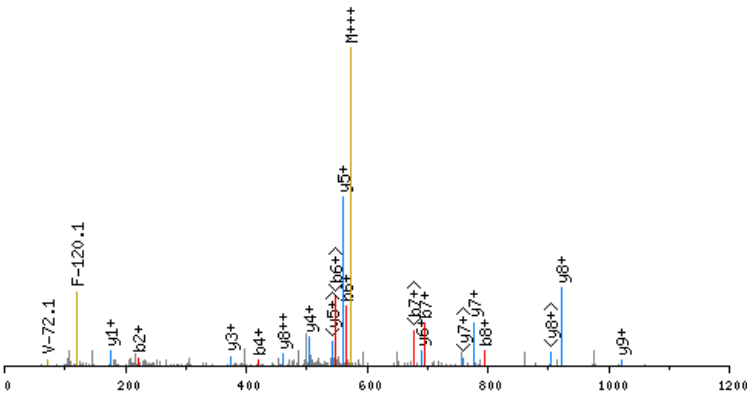

click image to zoom in; click top corners to zoom out [precursor±]

scan 5049; 573.3 m/z; 2.6e+001

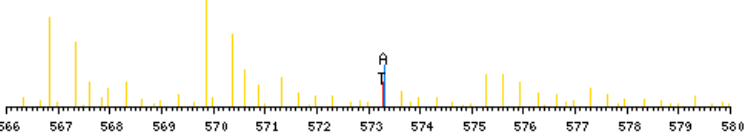

zoomed in precursor plot; T=theoretical m/z, A=acquired m/z

| b <sup>+</sup> | #  | AA | #  | y <sup>+</sup> | y <sup>2+</sup> |
|----------------|----|----|----|----------------|-----------------|
| 134.1393       | 1  | V  | 16 |                |                 |
| 221.1713       | 2  | S  | 15 | 1584.7328      | 792.8703        |
| 322.2190       | 3  | T  | 14 | 1497.7008      | 749.3543        |
| 421.2874       | 4  | V  | 13 | 1396.6531      | 698.8305        |
| 478.3089       | 5  | G  | 12 | 1297.5847      | 649.2963        |
| 565.3409       | 6  | S  | 11 | 1240.5632      | 620.7855        |
| 696.3814       | 7  | M  | 10 | 1153.5312      | 577.2695        |
| 795.4498       | 8  | V  | 9  | 1022.4907      | 511.7493        |
| 942.5182       | 9  | F  | 8  | 923.4223       | 462.2151        |
| 1029.5503      | 10 | S  | 7  | 776.3539       | 388.6808        |
| 1158.5929      | 11 | E  | 6  | 689.3218       | 345.1648        |
| 1215.6143      | 12 | G  | 5  | 560.2792       | 280.6435        |
| 1344.6569      | 13 | E  | 4  | 503.2578       | 252.1328        |
| 1415.6940      | 14 | A  | 3  | 374.2152       | 187.6115        |
| 1543.7526      | 15 | Q  | 2  | 303.1781       | 152.0930        |
|                | 16 | R  | 1  | 175.1195       | 88.0637         |

N-term:+35.07

X-range:

0 - 0

MassTol: Y-zoom:

0. 1.

MassType:

☐AVG ☒MONO

Axis:

☒1 ☐2

Label:

☒I ☐M ☐-

Ions:

a ☐+ ☐2+ ☐3+

b ☒+ ☐2+ ☐3+

c ☐+ ☐2+ ☐3+

x ☐+ ☐2+ ☐3+

y ☒+ ☒2+ ☐3+

z ☐+ ☐2+ ☐3+

hide H<sub>2</sub>O/NH<sub>3</sub> ☐

zoom 112-122 ☐

GO

VSVPGPMGPSGPR, MH+ 1271.6994, m/z 636.3533  
H OS G13 P120811 220811-s1.03828.03828.2.dta

scan 3828; 2.8e+000

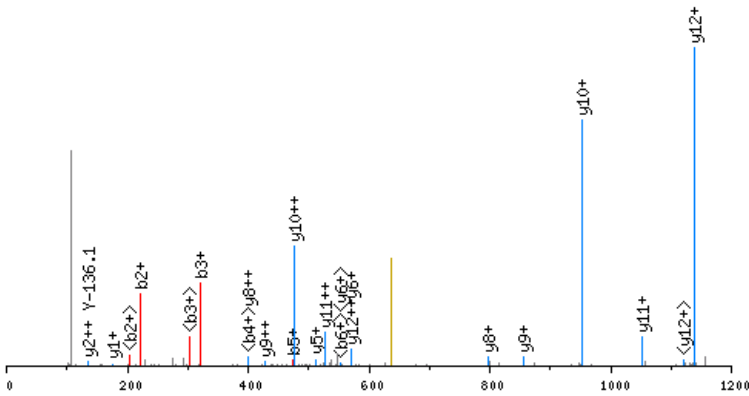

click image to zoom in; click top corners to zoom out

[precursor±]

scan 3824; 636.4 m/z; 8.1e+000

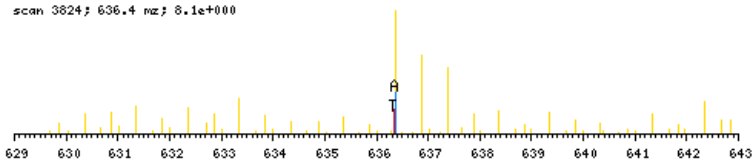

zoomed in precursor plot; T=theoretical m/z, A=acquired m/z

| b <sup>+</sup> | #  | AA | #  | y <sup>+</sup> | y <sup>2+</sup> |
|----------------|----|----|----|----------------|-----------------|
| 134.1393       | 1  | V  | 13 |                |                 |
| 221.1713       | 2  | S  | 12 | 1138.5679      | 569.7879        |
| 320.2398       | 3  | V  | 11 | 1051.5359      | 526.2718        |
| 417.2925       | 4  | P  | 10 | 952.4675       | 476.7376        |
| 474.3140       | 5  | G  | 9  | 855.4147       | 428.2113        |
| 571.3667       | 6  | P  | 8  | 798.3932       | 399.7005        |
| 702.4072       | 7  | M  | 7  | 701.3405       | 351.1741        |
| 759.4287       | 8  | G  | 6  | 570.3000       | 285.6539        |
| 856.4815       | 9  | P  | 5  | 513.2785       | 257.1432        |
| 943.5135       | 10 | S  | 4  | 416.2258       | 208.6168        |
| 1000.5350      | 11 | G  | 3  | 329.1937       | 165.1008        |
| 1097.5877      | 12 | P  | 2  | 272.1723       | 136.5900        |
|                | 13 | R  | 1  | 175.1195       | 88.0637         |

N-term:+35.07

X-range:

0 - 0

MassTol: Y-zoom:

0. 1.

MassType:

☐AVG ☒MONO

Axis:

☒1 ☐2

Label:

☒I ☐M ☐-

Ions:

a ☐+ ☐2+ ☐3+

b ☒+ ☐2+ ☐3+

c ☐+ ☐2+ ☐3+

x ☐+ ☐2+ ☐3+

y ☒+ ☒2+ ☐3+

z ☐+ ☐2+ ☐3+

hide H<sub>2</sub>O/NH<sub>3</sub> ☐

zoom 112-122 ☐

GO

VTAGKDGVANVSIEDR, MH+ 1686.9027, m/z 562.9724  
L OS G15 P120811 220811-s1.02925.02925.3.dta

scan 2925; 7.0e+000

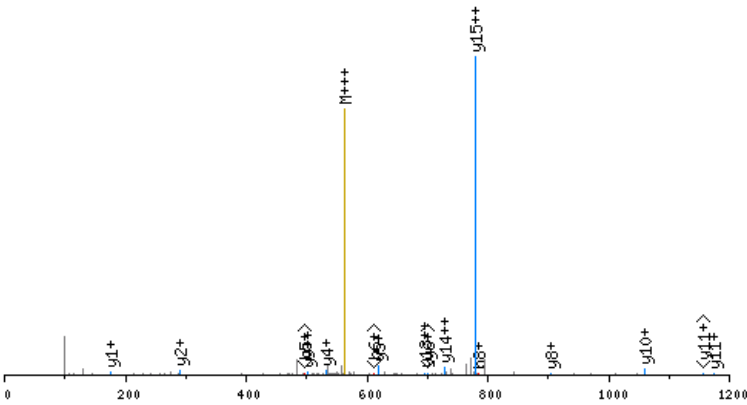

click image to zoom in; click top corners to zoom out

[precursor±]

scan 2921; 563.0 m/z; 8.2e+000

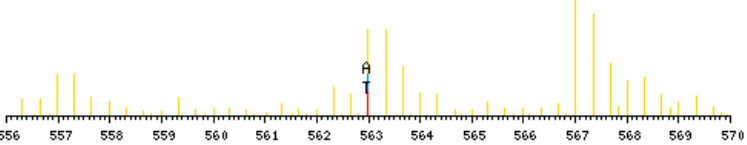

zoomed in precursor plot; T=theoretical m/z, A=acquired m/z

| b <sup>+</sup> | #  | AA | #  | y <sup>+</sup> | y <sup>2+</sup> |
|----------------|----|----|----|----------------|-----------------|
| 128.1075       | 1  | V  | 16 |                |                 |
| 229.1552       | 2  | T  | 15 | 1559.8030      | 780.4054        |
| 300.1923       | 3  | A  | 14 | 1458.7553      | 729.8816        |
| 357.2138       | 4  | G  | 13 | 1387.7182      | 694.3630        |
| 513.3401       | 5  | K  | 12 | 1330.6967      | 665.8523        |
| 628.3670       | 6  | D  | 11 | 1174.5704      | 587.7891        |
| 685.3885       | 7  | G  | 10 | 1059.5435      | 530.2756        |
| 784.4569       | 8  | V  | 9  | 1002.5220      | 501.7649        |
| 855.4940       | 9  | A  | 8  | 903.4536       | 452.2307        |
| 969.5369       | 10 | N  | 7  | 832.4165       | 416.7121        |
| 1068.6053      | 11 | V  | 6  | 718.3735       | 359.6907        |
| 1155.6374      | 12 | S  | 5  | 619.3051       | 310.1565        |
| 1268.7214      | 13 | I  | 4  | 532.2731       | 266.6405        |
| 1397.7640      | 14 | E  | 3  | 419.1890       | 210.0984        |
| 1512.7910      | 15 | D  | 2  | 290.1464       | 145.5771        |
|                | 16 | R  | 1  | 175.1195       | 88.0637         |

N-term:+29.04 K(5):+156.13

X-range:

0 - 0

MassTol: Y-zoom:

0. 1.

MassType:

☐AVG ☒MONO

Axis:

☒1 ☐2

Label:

☒I ☐M ☐-

Ions:

a ☐+ ☐2+ ☐3+

b ☒+ ☐2+ ☐3+

c ☐+ ☐2+ ☐3+

x ☐+ ☐2+ ☐3+

y ☒+ ☒2+ ☐3+

z ☐+ ☐2+ ☐3+

hide H<sub>2</sub>O/NH<sub>3</sub> ☐

zoom 112-122 ☐

GO

VTDVPDDVQPIASLPGVAR, MH+ 1977.0657, m/z 659.6934  
L OS G12 P120811 220811-s1.04870.04870.3.dta

scan 4870; 3.0e+000

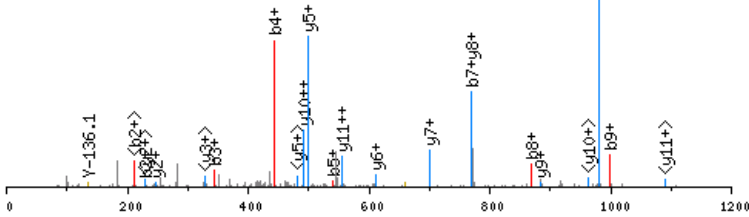

click image to zoom in; click top corners to zoom out

[precursor±]

scan 4867; 659.7 m/z; 3.8e+000

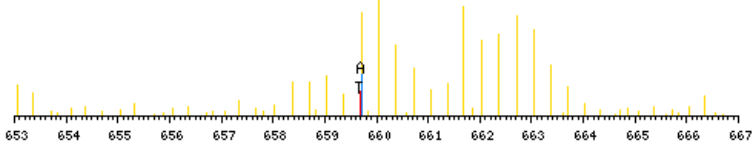

zoomed in precursor plot; T=theoretical m/z, A=acquired m/z

| b <sup>+</sup> | #  | AA | #  | y <sup>+</sup> | y <sup>2+</sup> |
|----------------|----|----|----|----------------|-----------------|
| 128.1075       | 1  | V  | 19 |                |                 |
| 229.1552       | 2  | T  | 18 | 1849.9660      | 925.4869        |
| 344.1821       | 3  | D  | 17 | 1748.9183      | 874.9631        |
| 443.2505       | 4  | V  | 16 | 1633.8913      | 817.4496        |
| 540.3033       | 5  | P  | 15 | 1534.8229      | 767.9154        |
| 655.3303       | 6  | D  | 14 | 1437.7702      | 719.3890        |
| 770.3572       | 7  | D  | 13 | 1322.7432      | 661.8755        |
| 869.4256       | 8  | V  | 12 | 1207.7163      | 604.3621        |
| 997.4842       | 9  | Q  | 11 | 1108.6479      | 554.8278        |
| 1094.5370      | 10 | P  | 10 | 980.5893       | 490.7986        |
| 1207.6210      | 11 | I  | 9  | 883.5365       | 442.2722        |
| 1278.6581      | 12 | A  | 8  | 770.4525       | 385.7301        |
| 1365.6902      | 13 | S  | 7  | 699.4153       | 350.2116        |
| 1478.7742      | 14 | L  | 6  | 612.3833       | 306.6956        |
| 1575.8270      | 15 | P  | 5  | 499.2993       | 250.1535        |
| 1632.8485      | 16 | G  | 4  | 402.2465       | 201.6272        |
| 1731.9169      | 17 | V  | 3  | 345.2250       | 173.1164        |
| 1802.9540      | 18 | A  | 2  | 246.1566       | 123.5822        |
|                | 19 | R  | 1  | 175.1195       | 88.0637         |

N-term:+29.04

X-range:

0 - 0

MassTol: Y-zoom:

0. 1.

MassType:

☐ AVG ☒ MONO

Axis:

☒ 1 ☐ 2

Label:

☒ I ☐ M ☐ -

Ions:

a ☐ + ☐ 2+ ☐ 3+

b ☒ + ☐ 2+ ☐ 3+

c ☐ + ☐ 2+ ☐ 3+

x ☐ + ☐ 2+ ☐ 3+

y ☒ + ☒ 2+ ☐ 3+

z ☐ + ☐ 2+ ☐ 3+

hide H<sub>2</sub>O/NH<sub>3</sub> ☐

zoom 112-122 ☐

GO

VTFDEELRPLPVSVR, MH+ 1784.9910, m/z 595.6685  
L OS G15 P120811 220811-s1.05588.05588.3.dta

scan 5588; 1.3e+001

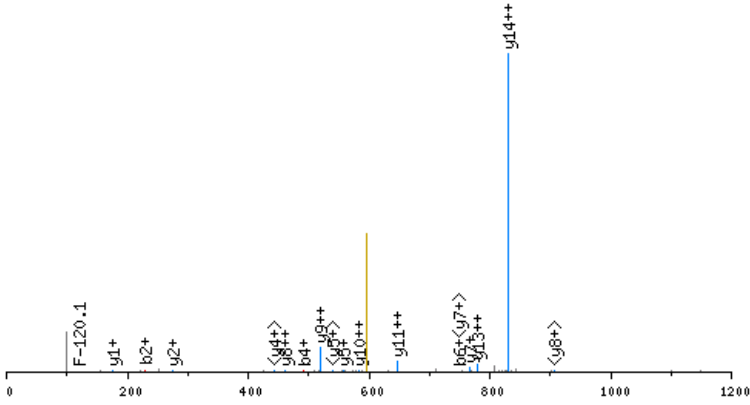

click image to zoom in; click top corners to zoom out [precursor±]

scan 5586; 595.7 m/z; 1.2e+001

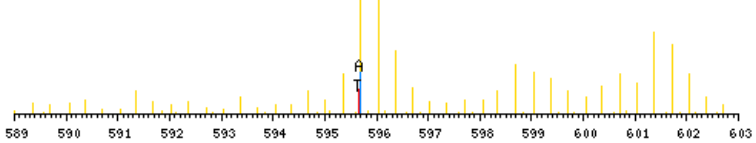

zoomed in precursor plot; T=theoretical m/z, A=acquired m/z

| b <sup>+</sup> | #  | AA | #  | y <sup>+</sup> | y <sup>2+</sup> |
|----------------|----|----|----|----------------|-----------------|
| 128.1075       | 1  | V  | 15 |                |                 |
| 229.1552       | 2  | T  | 14 | 1657.8913      | 829.4496        |
| 376.2236       | 3  | F  | 13 | 1556.8437      | 778.9257        |
| 491.2505       | 4  | D  | 12 | 1409.7753      | 705.3915        |
| 620.2931       | 5  | E  | 11 | 1294.7483      | 647.8781        |
| 749.3357       | 6  | E  | 10 | 1165.7057      | 583.3568        |
| 862.4198       | 7  | L  | 9  | 1036.6631      | 518.8355        |
| 1018.5209      | 8  | R  | 8  | 923.5791       | 462.2934        |
| 1115.5737      | 9  | P  | 7  | 767.4779       | 384.2429        |
| 1228.6577      | 10 | L  | 6  | 670.4252       | 335.7165        |
| 1325.7105      | 11 | P  | 5  | 557.3411       | 279.1745        |
| 1424.7789      | 12 | V  | 4  | 460.2884       | 230.6481        |
| 1511.8109      | 13 | S  | 3  | 361.2199       | 181.1139        |
| 1610.8794      | 14 | V  | 2  | 274.1879       | 137.5979        |
|                | 15 | R  | 1  | 175.1195       | 88.0637         |

N-term:+29.04

X-range:

0 - 0

MassTol: Y-zoom:

0. 1.

MassType:

☐AVG ☒MONO

Axis:

☒1 ☐2

Label:

☒I ☐M ☐-

Ions:

a ☐+ ☐2+ ☐3+

b ☒+ ☐2+ ☐3+

c ☐+ ☐2+ ☐3+

x ☐+ ☐2+ ☐3+

y ☒+ ☒2+ ☐3+

z ☐+ ☐2+ ☐3+

hide H<sub>2</sub>O/NH<sub>3</sub> ☐

zoom 112-122 ☐

GO

VTIIDAPGHR, MH+ 1112.6640, m/z 371.5595  
H OS G16 P120811 220811-s1.03050.03050.3.dta

scan 3050; 5.2e+000

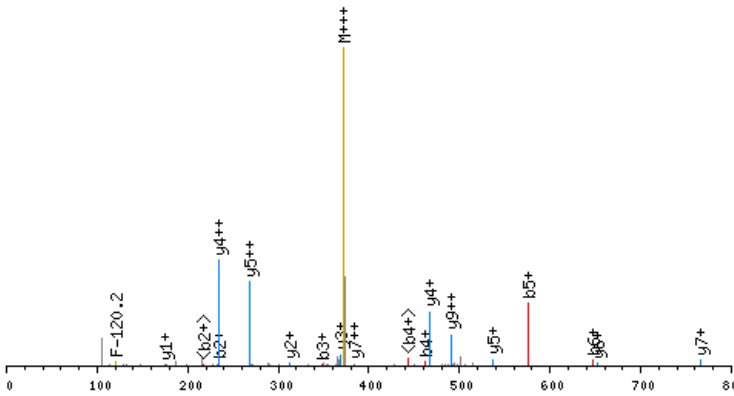

click image to zoom in; click top corners to zoom out

[precursor±]

scan 3048; 371.6 m/z; 5.9e+000

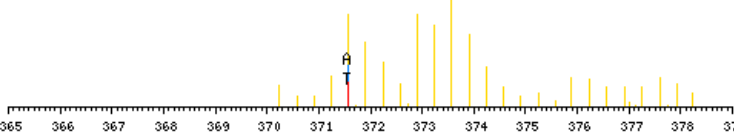

zoomed in precursor plot; T=theoretical m/z, A=acquired m/z

| b <sup>+</sup> | #  | AA | #  | y <sup>+</sup> | y <sup>2+</sup> |
|----------------|----|----|----|----------------|-----------------|
| 134.1393       | 1  | V  | 10 |                |                 |
| 235.1870       | 2  | T  | 9  | 979.5325       | 490.2702        |
| 348.2711       | 3  | I  | 8  | 878.4848       | 439.7463        |
| 461.3551       | 4  | I  | 7  | 765.4008       | 383.2043        |
| 576.3821       | 5  | D  | 6  | 652.3167       | 326.6623        |
| 647.4192       | 6  | A  | 5  | 537.2898       | 269.1488        |
| 744.4719       | 7  | P  | 4  | 466.2526       | 233.6302        |
| 801.4934       | 8  | G  | 3  | 369.1999       | 185.1039        |
| 938.5523       | 9  | H  | 2  | 312.1784       | 156.5931        |
|                | 10 | R  | 1  | 175.1195       | 88.0637         |

N-term: +35.07

X-range:

0 - 0

MassTol: Y-zoom:

0. 1.

MassType:

☐ AVG ☒ MONO

Axis:

☒ 1 ☐ 2

Label:

☒ I ☐ M ☐ -

Ions:

a ☐ + ☐ 2+ ☐ 3+

b ☒ + ☐ 2+ ☐ 3+

c ☐ + ☐ 2+ ☐ 3+

x ☐ + ☐ 2+ ☐ 3+

y ☒ + ☒ 2+ ☐ 3+

z ☐ + ☐ 2+ ☐ 3+

hide H<sub>2</sub>O/NH<sub>3</sub> ☐

zoom 112-122 ☐

GO

VTQLDLDPKELSR, MH+ 1626.9067, m/z 542.9737  
L OS G15 P120811 220811-s1.03973.03973.3.dta

scan 3973; 5.1e+000

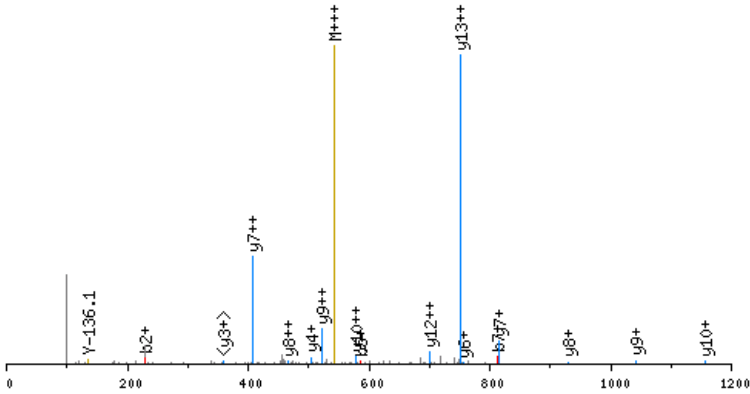

click image to zoom in; click top corners to zoom out

[precursor±]

scan 3971; 543.0 m/z; 7.8e+000

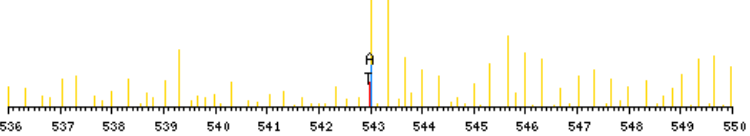

zoomed in precursor plot; T=theoretical m/z, A=acquired m/z

| b <sup>+</sup> | #  | AA | #  | y <sup>+</sup> | y <sup>2+</sup> |
|----------------|----|----|----|----------------|-----------------|
| 128.1075       | 1  | V  | 14 |                |                 |
| 229.1552       | 2  | T  | 13 | 1499.8070      | 750.4074        |
| 357.2138       | 3  | Q  | 12 | 1398.7593      | 699.8836        |
| 470.2978       | 4  | L  | 11 | 1270.7007      | 635.8543        |
| 585.3248       | 5  | D  | 10 | 1157.6167      | 579.3122        |
| 698.4088       | 6  | L  | 9  | 1042.5897      | 521.7988        |
| 813.4358       | 7  | D  | 8  | 929.5057       | 465.2567        |
| 870.4572       | 8  | G  | 7  | 814.4787       | 407.7433        |
| 967.5100       | 9  | P  | 6  | 757.4573       | 379.2325        |
| 1123.6363      | 10 | K  | 5  | 660.4045       | 330.7062        |
| 1252.6789      | 11 | E  | 4  | 504.2782       | 252.6430        |
| 1365.7630      | 12 | L  | 3  | 375.2356       | 188.1217        |
| 1452.7950      | 13 | S  | 2  | 262.1515       | 131.5797        |
|                | 14 | R  | 1  | 175.1195       | 88.0637         |

N-term:+29.04 K(10):+156.13

X-range:

0 - 0

MassTol: Y-zoom:

0. 1.

MassType:

☐AVG ☒MONO

Axis:

☒1 ☐2

Label:

☒I ☐M ☐-

Ions:

a ☐+ ☐2+ ☐3+

b ☒+ ☐2+ ☐3+

c ☐+ ☐2+ ☐3+

x ☐+ ☐2+ ☐3+

y ☒+ ☒2+ ☐3+

z ☐+ ☐2+ ☐3+

hide H<sub>2</sub>O/NH<sub>3</sub> ☐

zoom 112-122 ☐

GO

VVAGGPEVTLTPER, MH+ 1458.8380, m/z 486.9508  
H OS G13 P120811 220811-s1.04146.04146.3.dta

scan 4146; 1.2e+000

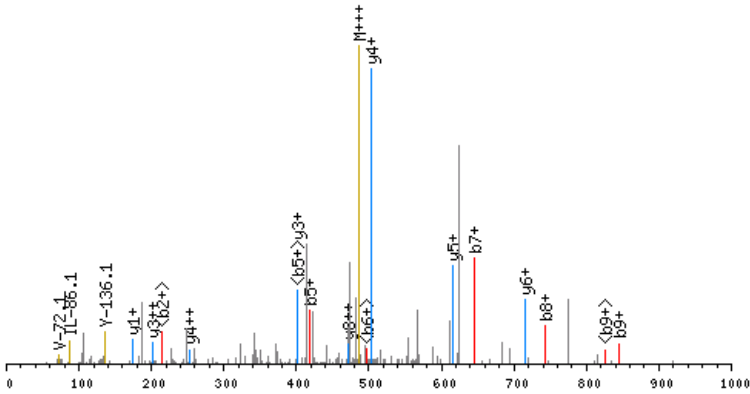

click image to zoom in; click top corners to zoom out

[precursor±]

scan 4144; 487.0 m/z; 4.8e+000

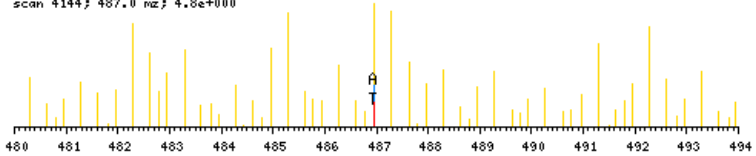

zoomed in precursor plot; T=theoretical m/z, A=acquired m/z

| b <sup>+</sup> | #  | AA | #  | y <sup>+</sup> | y <sup>2+</sup> |
|----------------|----|----|----|----------------|-----------------|
| 134.1393       | 1  | V  | 14 |                |                 |
| 233.2077       | 2  | V  | 13 | 1325.7065      | 663.3572        |
| 304.2448       | 3  | A  | 12 | 1226.6381      | 613.8230        |
| 361.2663       | 4  | G  | 11 | 1155.6010      | 578.3044        |
| 418.2878       | 5  | G  | 10 | 1098.5795      | 549.7937        |
| 515.3405       | 6  | P  | 9  | 1041.5580      | 521.2829        |
| 644.3831       | 7  | E  | 8  | 944.5053       | 472.7566        |
| 743.4515       | 8  | V  | 7  | 815.4627       | 408.2353        |
| 844.4992       | 9  | T  | 6  | 716.3943       | 358.7011        |
| 957.5833       | 10 | L  | 5  | 615.3466       | 308.1772        |
| 1058.6310      | 11 | T  | 4  | 502.2625       | 251.6352        |
| 1155.6837      | 12 | P  | 3  | 401.2149       | 201.1113        |
| 1284.7263      | 13 | E  | 2  | 304.1621       | 152.5850        |
|                | 14 | R  | 1  | 175.1195       | 88.0637         |

N-term:+35.07

X-range:

0 - 0

MassTol: Y-zoom:

0. 1.

MassType:

☐ AVG ☒ MONO

Axis:

☒ 1 ☐ 2

Label:

☒ I ☐ M ☐ -

Ions:

a ☐ + ☐ 2+ ☐ 3+

b ☒ + ☐ 2+ ☐ 3+

c ☐ + ☐ 2+ ☐ 3+

x ☐ + ☐ 2+ ☐ 3+

y ☒ + ☒ 2+ ☐ 3+

z ☐ + ☐ 2+ ☐ 3+

hide H<sub>2</sub>O/NH<sub>3</sub> ☐

zoom 112-122 ☐

GO

VVANSPANADYQER, MH+ 1567.7928, m/z 523.2691  
H OS G13 P120811 220811-s1.02460.02460.3.dta

scan 2460; 3.6e+000

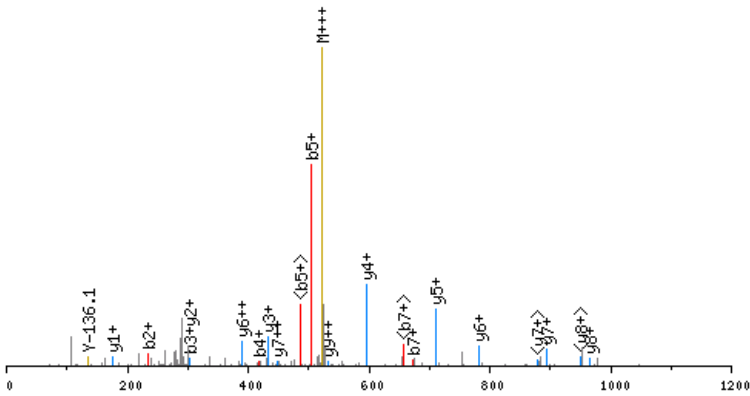

click image to zoom in; click top corners to zoom out

[precursor±]

scan 2459; 523.3 m/z; 2.4e+001

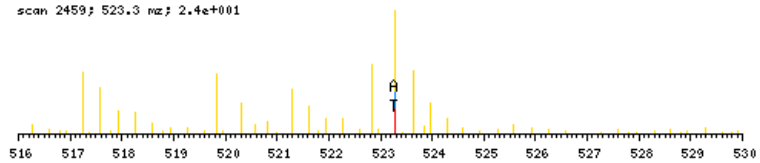

zoomed in precursor plot; T=theoretical m/z, A=acquired m/z

| b <sup>+</sup> | #  | AA | #  | y <sup>+</sup> | y <sup>2+</sup> |
|----------------|----|----|----|----------------|-----------------|
| 134.1393       | 1  | V  | 14 |                |                 |
| 233.2077       | 2  | V  | 13 | 1434.6613      | 717.8346        |
| 304.2448       | 3  | A  | 12 | 1335.5929      | 668.3004        |
| 418.2878       | 4  | N  | 11 | 1264.5558      | 632.7818        |
| 505.3198       | 5  | S  | 10 | 1150.5129      | 575.7604        |
| 602.3726       | 6  | P  | 9  | 1063.4809      | 532.2443        |
| 673.4097       | 7  | A  | 8  | 966.4281       | 483.7180        |
| 787.4526       | 8  | N  | 7  | 895.3910       | 448.1994        |
| 858.4897       | 9  | A  | 6  | 781.3481       | 391.1779        |
| 973.5167       | 10 | D  | 5  | 710.3109       | 355.6594        |
| 1136.5800      | 11 | Y  | 4  | 595.2840       | 298.1459        |
| 1264.6386      | 12 | Q  | 3  | 432.2207       | 216.6142        |
| 1393.6812      | 13 | E  | 2  | 304.1621       | 152.5850        |
|                | 14 | R  | 1  | 175.1195       | 88.0637         |

N-term:+35.07

X-range:

0 - 0

MassTol: Y-zoom:

0. 1.

MassType:

☐ AVG ☒ MONO

Axis:

☒ 1 ☐ 2

Label:

☒ I ☐ M ☐ -

Ions:

a ☐ + ☐ 2+ ☐ 3+

b ☒ + ☐ 2+ ☐ 3+

c ☐ + ☐ 2+ ☐ 3+

x ☐ + ☐ 2+ ☐ 3+

y ☒ + ☒ 2+ ☐ 3+

z ☐ + ☐ 2+ ☐ 3+

hide H<sub>2</sub>O/NH<sub>3</sub> ☐

zoom 112-122 ☐

GO

VVAPTISSPVCQEQLVEAGR, MH+ 2168.1385, m/z 723.3843  
L OS G12 P120811 220811-s1.04413.04413.3.dta

scan 4413; 1.1e+000

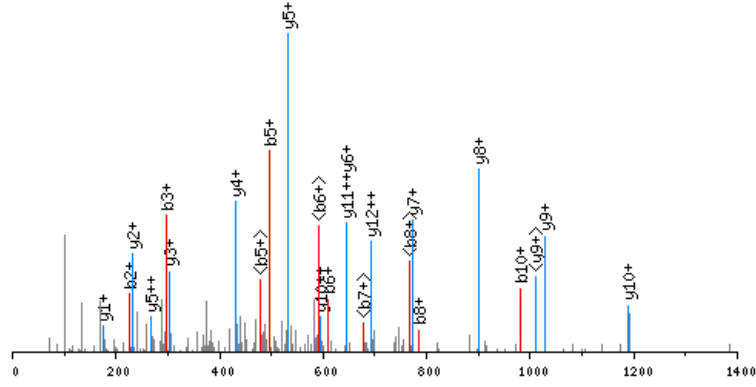

click image to zoom in; click top corners to zoom out

[precursor±]

scan 4412; 723.4 m/z; 1.5e+001

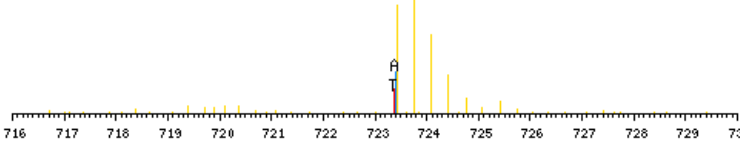

zoomed in precursor plot; T=theoretical m/z, A=acquired m/z

| b <sup>+</sup> | #  | AA | #  | y <sup>+</sup> | y <sup>2+</sup> |
|----------------|----|----|----|----------------|-----------------|
| 128.1075       | 1  | V  | 20 |                |                 |
| 227.1759       | 2  | V  | 19 | 2041.0388      | 1021.0233       |
| 298.2130       | 3  | A  | 18 | 1941.9704      | 971.4891        |
| 395.2658       | 4  | P  | 17 | 1870.9332      | 935.9705        |
| 496.3135       | 5  | T  | 16 | 1773.8805      | 887.4441        |
| 609.3975       | 6  | I  | 15 | 1672.8328      | 836.9203        |
| 696.4296       | 7  | S  | 14 | 1559.7487      | 780.3783        |
| 783.4616       | 8  | S  | 13 | 1472.7167      | 736.8623        |
| 880.5144       | 9  | P  | 12 | 1385.6847      | 693.3463        |
| 979.5828       | 10 | V  | 11 | 1288.6319      | 644.8199        |
| 1139.6134      | 11 | C  | 10 | 1189.5635      | 595.2857        |
| 1267.6720      | 12 | Q  | 9  | 1029.5329      | 515.2704        |
| 1396.7146      | 13 | E  | 8  | 901.4743       | 451.2411        |
| 1524.7731      | 14 | Q  | 7  | 772.4317       | 386.7198        |
| 1637.8572      | 15 | L  | 6  | 644.3731       | 322.6905        |
| 1736.9256      | 16 | V  | 5  | 531.2891       | 266.1485        |
| 1865.9682      | 17 | E  | 4  | 432.2207       | 216.6142        |
| 1937.0053      | 18 | A  | 3  | 303.1781       | 152.0930        |
| 1994.0268      | 19 | G  | 2  | 232.1410       | 116.5744        |
|                | 20 | R  | 1  | 175.1195       | 88.0637         |

N-term:+29.04 C(11):+160.03

X-range:

0 - 0

MassTol: Y-zoom:

0. 1.

MassType:

☐AVG ☒MONO

Axis:

☒1 ☐2

Label:

☒I ☐M ☐-

Ions:

a ☐+ ☐2+ ☐3+

b ☒+ ☐2+ ☐3+

c ☐+ ☐2+ ☐3+

x ☐+ ☐2+ ☐3+

y ☒+ ☒2+ ☐3+

z ☐+ ☐2+ ☐3+

hide H<sub>2</sub>O/NH<sub>3</sub> ☐

zoom 112-122 ☐

GO

VVEHPEFLKAGKEPGLQIWR, MH+ 2435.4664, m/z 609.6220  
H OS G18 P120811 220811-s1.05908.05908.4.dta

scan 5908; 5.4e+000

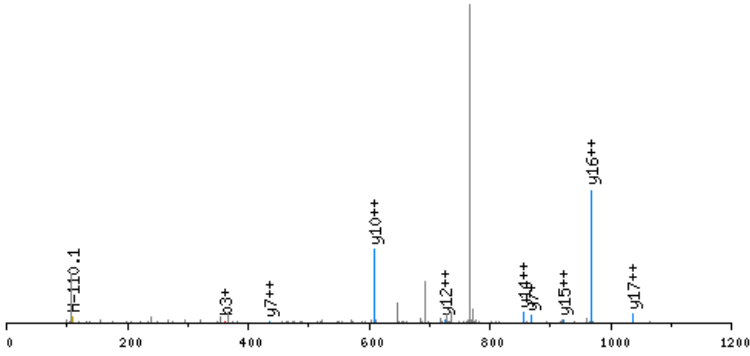

click image to zoom in; click top corners to zoom out [\[precursor±\]](#)

scan 5906; 609.6 mz; 4.2e+000

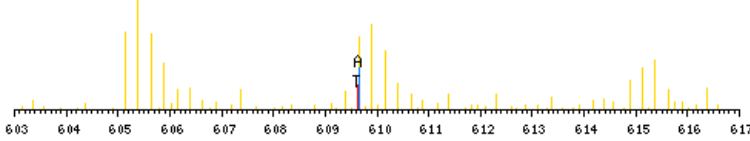

zoomed in precursor plot; T=theoretical m/z, A=acquired m/z

| b <sup>+</sup> | #  | AA | #  | y <sup>+</sup> | y <sup>2+</sup> |
|----------------|----|----|----|----------------|-----------------|
| 134.1393       | 1  | V  | 20 |                |                 |
| 233.2077       | 2  | V  | 19 | 2302.3349      | 1151.6713       |
| 362.2503       | 3  | E  | 18 | 2203.2665      | 1102.1371       |
| 499.3092       | 4  | H  | 17 | 2074.2239      | 1037.6158       |
| 596.3620       | 5  | P  | 16 | 1937.1650      | 969.0864        |
| 725.4046       | 6  | E  | 15 | 1840.1122      | 920.5600        |
| 872.4730       | 7  | F  | 14 | 1711.0696      | 856.0387        |
| 985.5571       | 8  | L  | 13 | 1564.0012      | 782.5045        |
| 1147.7152      | 9  | K  | 12 | 1450.9171      | 725.9625        |
| 1218.7523      | 10 | A  | 11 | 1288.7590      | 644.8834        |
| 1275.7737      | 11 | G  | 10 | 1217.7219      | 609.3649        |
| 1437.9318      | 12 | K  | 9  | 1160.7004      | 580.8541        |
| 1566.9744      | 13 | E  | 8  | 998.5423       | 499.7751        |
| 1664.0272      | 14 | P  | 7  | 869.4997       | 435.2538        |
| 1721.0487      | 15 | G  | 6  | 772.4470       | 386.7274        |
| 1834.1327      | 16 | L  | 5  | 715.4255       | 358.2167        |
| 1962.1913      | 17 | Q  | 4  | 602.3415       | 301.6746        |
| 2075.2754      | 18 | I  | 3  | 474.2829       | 237.6454        |
| 2261.3547      | 19 | W  | 2  | 361.1988       | 181.1033        |
|                | 20 | R  | 1  | 175.1195       | 88.0637         |

N-term:+35.07 K(9):+162.16  
K(12):+162.16

X-range:

0 - 0

MassTol: Y-zoom:

0. 1.

MassType:

☐ AVG ☒ MONO

Axis:

☒ 1 ☐ 2

Label:

☒ I ☐ M ☐ -

Ions:

a ☐ + ☐ 2+ ☐ 3+

b ☒ + ☐ 2+ ☐ 3+

c ☐ + ☐ 2+ ☐ 3+

x ☐ + ☐ 2+ ☐ 3+

y ☒ + ☒ 2+ ☐ 3+

z ☐ + ☐ 2+ ☐ 3+

hide H<sub>2</sub>O/NH<sub>3</sub> ☐

zoom 112-122 ☐

GO

VVEKDTTINEIEDTFR, MH+ 1965.0181, m/z 655.6775  
L OS G15 P120811 220811-s1.05457.05457.3.dta

scan 5457; 6.6e+000

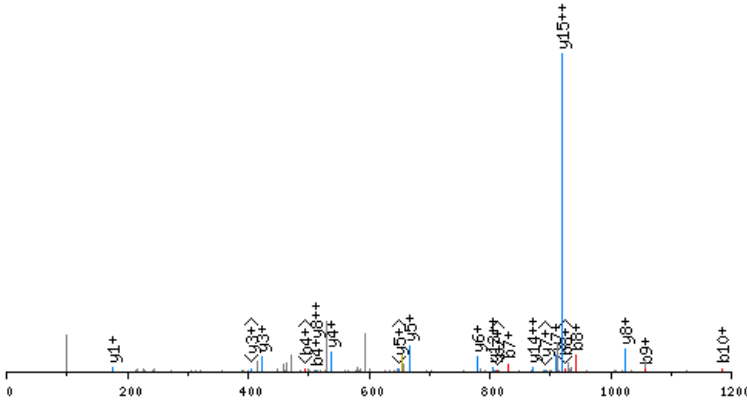

click image to zoom in; click top corners to zoom out

[precursor±]

scan 5456; 655.7 m/z; 1.1e+001

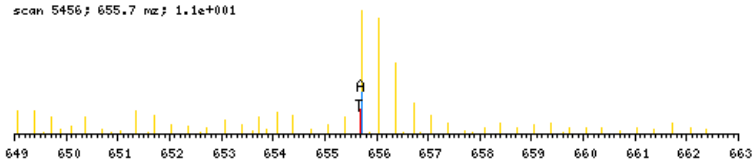

zoomed in precursor plot; T=theoretical m/z, A=acquired m/z

| b <sup>+</sup> | #  | AA | #  | y <sup>+</sup> | y <sup>2+</sup> |
|----------------|----|----|----|----------------|-----------------|
| 128.1075       | 1  | V  | 16 |                |                 |
| 227.1759       | 2  | V  | 15 | 1837.9184      | 919.4631        |
| 356.2185       | 3  | E  | 14 | 1738.8500      | 869.9289        |
| 512.3448       | 4  | K  | 13 | 1609.8074      | 805.4076        |
| 627.3718       | 5  | D  | 12 | 1453.6811      | 727.3445        |
| 728.4194       | 6  | T  | 11 | 1338.6541      | 669.8310        |
| 829.4671       | 7  | T  | 10 | 1237.6065      | 619.3071        |
| 942.5512       | 8  | I  | 9  | 1136.5588      | 568.7833        |
| 1056.5941      | 9  | N  | 8  | 1023.4747      | 512.2413        |
| 1185.6367      | 10 | E  | 7  | 909.4318       | 455.2198        |
| 1298.7208      | 11 | I  | 6  | 780.3892       | 390.6985        |
| 1427.7634      | 12 | E  | 5  | 667.3051       | 334.1565        |
| 1542.7903      | 13 | D  | 4  | 538.2625       | 269.6352        |
| 1643.8380      | 14 | T  | 3  | 423.2356       | 212.1217        |
| 1790.9064      | 15 | F  | 2  | 322.1879       | 161.5979        |
|                | 16 | R  | 1  | 175.1195       | 88.0637         |

N-term:+29.04 K(4):+156.13

X-range:

0 - 0

MassTol: Y-zoom:

0. 1.

MassType:

☐AVG ☒MONO

Axis:

☒1 ☐2

Label:

☒I ☐M ☐-

Ions:

a ☐+ ☐2+ ☐3+

b ☒+ ☐2+ ☐3+

c ☐+ ☐2+ ☐3+

x ☐+ ☐2+ ☐3+

y ☒+ ☒2+ ☐3+

z ☐+ ☐2+ ☐3+

hide H<sub>2</sub>O/NH<sub>3</sub> ☐

zoom 112-122 ☐

GO

VVETLQEVTLR, MH+ 1443.8059, m/z 481.9401  
L OS G13 P120811 220811-s1.05073.05073.3.dta

scan 5073; 2.0e+000

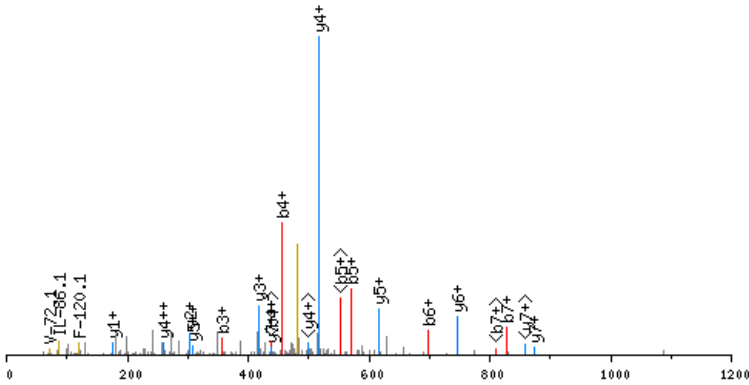

click image to zoom in; click top corners to zoom out [precursor±]

scan 5069; 481.9 m/z; 6.1e+000

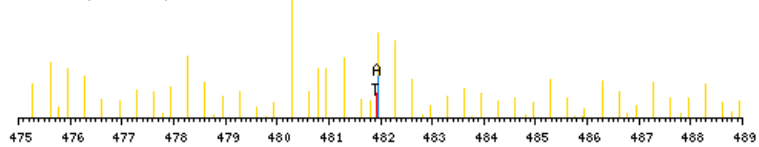

zoomed in precursor plot; T=theoretical m/z, A=acquired m/z

| b <sup>+</sup> | #  | AA | #  | y <sup>+</sup> | y <sup>2+</sup> |
|----------------|----|----|----|----------------|-----------------|
| 128.1075       | 1  | V  | 12 |                |                 |
| 227.1759       | 2  | V  | 11 | 1316.7062      | 658.8570        |
| 356.2185       | 3  | E  | 10 | 1217.6378      | 609.3228        |
| 457.2662       | 4  | T  | 9  | 1088.5952      | 544.8015        |
| 570.3503       | 5  | L  | 8  | 987.5475       | 494.2777        |
| 698.4088       | 6  | Q  | 7  | 874.4634       | 437.7356        |
| 827.4514       | 7  | E  | 6  | 746.4048       | 373.7063        |
| 926.5198       | 8  | V  | 5  | 617.3623       | 309.1850        |
| 1027.5675      | 9  | T  | 4  | 518.2938       | 259.6508        |
| 1140.6516      | 10 | L  | 3  | 417.2462       | 209.1270        |
| 1269.6942      | 11 | E  | 2  | 304.1621       | 152.5850        |
|                | 12 | R  | 1  | 175.1195       | 88.0637         |

N-term:+29.04

X-range:

0 - 0

MassTol: Y-zoom:

0. 1.

MassType:

☐AVG ☒MONO

Axis:

☒1 ☐2

Label:

☒I ☐M ☐-

Ions:

a ☐+ ☐2+ ☐3+

b ☒+ ☐2+ ☐3+

c ☐+ ☐2+ ☐3+

x ☐+ ☐2+ ☐3+

y ☒+ ☒2+ ☐3+

z ☐+ ☐2+ ☐3+

hide H<sub>2</sub>O/NH<sub>3</sub> ☐

zoom 112-122 ☐

GO

VVGDDDEYLLHFHHR, MH+ 1651.7981, m/z 413.7050  
L OS G19 P120811 220811-s1.02977.02977.4.dta

scan 2977; 6.0e+000

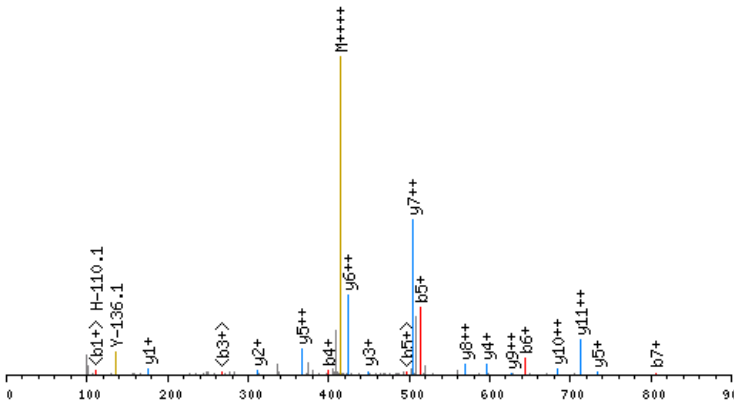

click image to zoom in; click top corners to zoom out

[precursor±]

scan 2976; 413.7 m/z; 9.0e+000

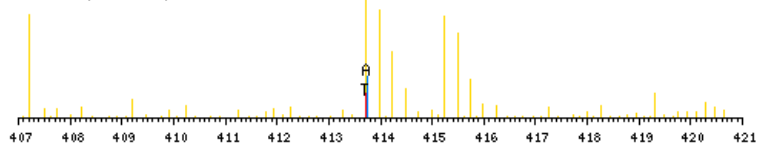

zoomed in precursor plot; T=theoretical m/z, A=acquired m/z

| b <sup>+</sup> | #  | AA | #  | y <sup>+</sup> | y <sup>2+</sup> |
|----------------|----|----|----|----------------|-----------------|
| 128.1075       | 1  | V  | 13 |                |                 |
| 227.1759       | 2  | V  | 12 | 1524.6984      | 762.8531        |
| 284.1974       | 3  | G  | 11 | 1425.6300      | 713.3189        |
| 399.2243       | 4  | D  | 10 | 1368.6085      | 684.8082        |
| 514.2513       | 5  | D  | 9  | 1253.5816      | 627.2947        |
| 643.2939       | 6  | E  | 8  | 1138.5546      | 569.7812        |
| 806.3572       | 7  | Y  | 7  | 1009.5120      | 505.2599        |
| 919.4413       | 8  | L  | 6  | 846.4487       | 423.7283        |
| 1056.5002      | 9  | H  | 5  | 733.3647       | 367.1862        |
| 1203.5686      | 10 | F  | 4  | 596.3057       | 298.6568        |
| 1340.6275      | 11 | H  | 3  | 449.2373       | 225.1226        |
| 1477.6864      | 12 | H  | 2  | 312.1784       | 156.5931        |
|                | 13 | R  | 1  | 175.1195       | 88.0637         |

N-term:+29.04

X-range:

0 - 0

MassTol: Y-zoom:

0. 1.

MassType:

☐AVG ☒MONO

Axis:

☒1 ☐2

Label:

☒I ☐M ☐-

Ions:

a ☐+ ☐2+ ☐3+

b ☒+ ☐2+ ☐3+

c ☐+ ☐2+ ☐3+

x ☐+ ☐2+ ☐3+

y ☒+ ☒2+ ☐3+

z ☐+ ☐2+ ☐3+

hide H<sub>2</sub>O/NH<sub>3</sub> ☐

zoom 112-122 ☐

GO

VVVDALSGLKGDLAGR, MH+ 1625.9590, m/z 542.6579  
L OS G15 P120811 220811-s1.05415.05415.3.dta

scan 5415; 4.9e+000

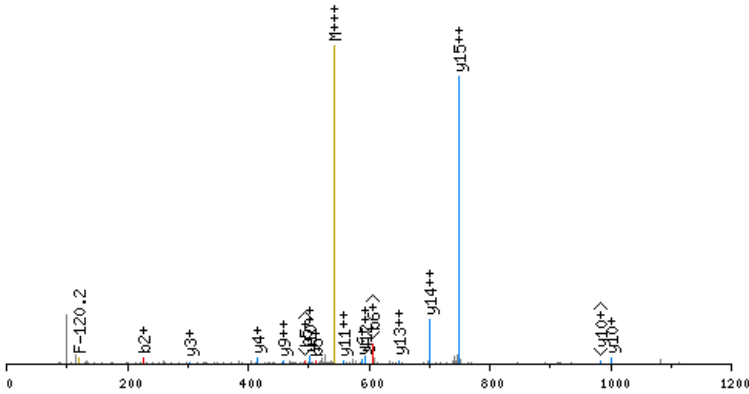

click image to zoom in; click top corners to zoom out

[precursor±]

scan 5411; 542.7 m/z; 3.8e+000

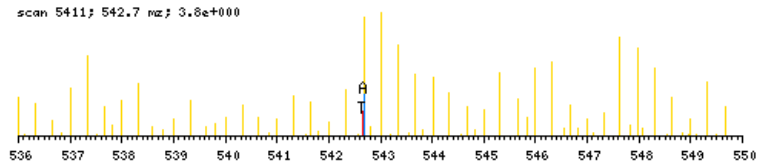

zoomed in precursor plot; T=theoretical m/z, A=acquired m/z

| b <sup>+</sup> | #  | AA | #  | y <sup>+</sup> | y <sup>2+</sup> |
|----------------|----|----|----|----------------|-----------------|
| 128.1075       | 1  | V  | 16 |                |                 |
| 227.1759       | 2  | V  | 15 | 1498.8594      | 749.9336        |
| 326.2443       | 3  | V  | 14 | 1399.7909      | 700.3994        |
| 441.2713       | 4  | D  | 13 | 1300.7225      | 650.8652        |
| 512.3084       | 5  | A  | 12 | 1185.6956      | 593.3517        |
| 625.3925       | 6  | L  | 11 | 1114.6585      | 557.8331        |
| 712.4245       | 7  | S  | 10 | 1001.5744      | 501.2911        |
| 769.4460       | 8  | G  | 9  | 914.5424       | 457.7751        |
| 882.5300       | 9  | L  | 8  | 857.5209       | 429.2644        |
| 1038.6563      | 10 | K  | 7  | 744.4368       | 372.7223        |
| 1095.6778      | 11 | G  | 6  | 588.3105       | 294.6592        |
| 1210.7047      | 12 | D  | 5  | 531.2891       | 266.1485        |
| 1323.7888      | 13 | L  | 4  | 416.2621       | 208.6350        |
| 1394.8259      | 14 | A  | 3  | 303.1781       | 152.0930        |
| 1451.8474      | 15 | G  | 2  | 232.1410       | 116.5744        |
|                | 16 | R  | 1  | 175.1195       | 88.0637         |

N-term:+29.04 K(10):+156.13

X-range:

0 - 0

MassTol: Y-zoom:

0. 1.

MassType:

☐AVG ☒MONO

Axis:

☒1 ☐2

Label:

☒I ☐M ☐-

Ions:

a ☐+ ☐2+ ☐3+

b ☒+ ☐2+ ☐3+

c ☐+ ☐2+ ☐3+

x ☐+ ☐2+ ☐3+

y ☒+ ☒2+ ☐3+

z ☐+ ☐2+ ☐3+

hide H<sub>2</sub>O/NH<sub>3</sub> ☐

zoom 112-122 ☐

GO

VVVPDVESLPSWAQKR, MH+ 1866.0489, m/z 622.6878  
L OS G15 P120811 220811-s1.05668.05668.3.dta

scan 5668; 3.7e+000

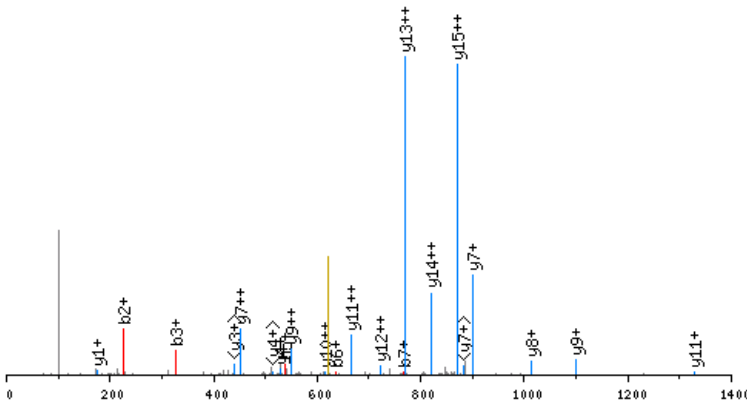

click image to zoom in; click top corners to zoom out

[precursor±]

scan 5666; 622.7 m/z; 1.3e+001

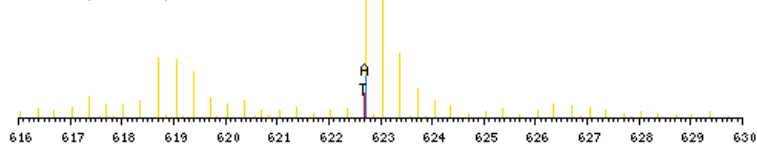

zoomed in precursor plot; T=theoretical m/z, A=acquired m/z

| b <sup>+</sup> | #  | AA | #  | y <sup>+</sup> | y <sup>2+</sup> |
|----------------|----|----|----|----------------|-----------------|
| 128.1075       | 1  | V  | 16 |                |                 |
| 227.1759       | 2  | V  | 15 | 1738.9492      | 869.9785        |
| 326.2443       | 3  | V  | 14 | 1639.8808      | 820.4443        |
| 423.2971       | 4  | P  | 13 | 1540.8124      | 770.9101        |
| 538.3240       | 5  | D  | 12 | 1443.7596      | 722.3837        |
| 637.3925       | 6  | V  | 11 | 1328.7327      | 664.8703        |
| 766.4351       | 7  | E  | 10 | 1229.6643      | 615.3361        |
| 853.4671       | 8  | S  | 9  | 1100.6217      | 550.8148        |
| 966.5511       | 9  | L  | 8  | 1013.5897      | 507.2987        |
| 1063.6039      | 10 | P  | 7  | 900.5056       | 450.7567        |
| 1150.6359      | 11 | S  | 6  | 803.4528       | 402.2303        |
| 1336.7153      | 12 | W  | 5  | 716.4208       | 358.7143        |
| 1407.7524      | 13 | A  | 4  | 530.3415       | 265.6747        |
| 1535.8109      | 14 | Q  | 3  | 459.3044       | 230.1561        |
| 1691.9372      | 15 | K  | 2  | 331.2458       | 166.1268        |
|                | 16 | R  | 1  | 175.1195       | 88.0637         |

N-term:+29.04 K(15):+156.13

X-range:

0 - 0

MassTol: Y-zoom:

0. 1.

MassType:

☐ AVG ☒ MONO

Axis:

☒ 1 ☐ 2

Label:

☒ I ☐ M ☐ -

Ions:

a ☐ + ☐ 2+ ☐ 3+

b ☒ + ☐ 2+ ☐ 3+

c ☐ + ☐ 2+ ☐ 3+

x ☐ + ☐ 2+ ☐ 3+

y ☒ + ☒ 2+ ☐ 3+

z ☐ + ☐ 2+ ☐ 3+

hide H<sub>2</sub>O/NH<sub>3</sub> ☐

zoom 112-122 ☐

GO

VVSVVIGSQNSQLR, MH+ 1513.8702, m/z 505.2949  
L OS G13 P120811 220811-s1.04471.04471.3.dta

scan 4471; 1.9e+000

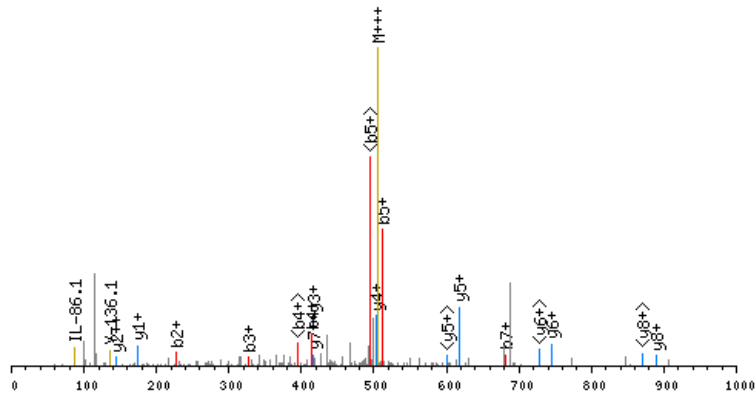

click image to zoom in; click top corners to zoom out

[precursor±]

scan 4469; 505.3 m/z; 1.1e+001

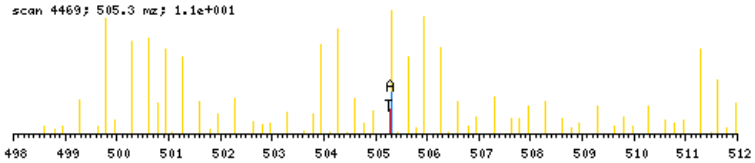

zoomed in precursor plot; T=theoretical m/z, A=acquired m/z

| b <sup>+</sup> | #  | AA | #  | y <sup>+</sup> | y <sup>2+</sup> |
|----------------|----|----|----|----------------|-----------------|
| 128.1075       | 1  | V  | 14 |                |                 |
| 227.1759       | 2  | V  | 13 | 1386.7705      | 693.8892        |
| 326.2443       | 3  | V  | 12 | 1287.7021      | 644.3550        |
| 413.2764       | 4  | S  | 11 | 1188.6337      | 594.8207        |
| 512.3448       | 5  | V  | 10 | 1101.6016      | 551.3047        |
| 625.4288       | 6  | I  | 9  | 1002.5332      | 501.7705        |
| 682.4503       | 7  | G  | 8  | 889.4492       | 445.2285        |
| 769.4823       | 8  | S  | 7  | 832.4277       | 416.7178        |
| 897.5409       | 9  | Q  | 6  | 745.3957       | 373.2018        |
| 1011.5838      | 10 | N  | 5  | 617.3371       | 309.1725        |
| 1098.6159      | 11 | S  | 4  | 503.2942       | 252.1510        |
| 1226.6745      | 12 | Q  | 3  | 416.2621       | 208.6350        |
| 1339.7585      | 13 | L  | 2  | 288.2036       | 144.6057        |
|                | 14 | R  | 1  | 175.1195       | 88.0637         |

N-term:+29.04

X-range:

0 - 0

MassTol: Y-zoom:

0. 1.

MassType:

☐AVG ☒MONO

Axis:

☒1 ☐2

Label:

☒I ☐M ☐-

Ions:

a ☐+ ☐2+ ☐3+

b ☒+ ☐2+ ☐3+

c ☐+ ☐2+ ☐3+

x ☐+ ☐2+ ☐3+

y ☒+ ☒2+ ☐3+

z ☐+ ☐2+ ☐3+

hide H<sub>2</sub>O/NH<sub>3</sub> ☐

zoom 112-122 ☐

GO

VYDQELLGPSDKSEAALR, MH+ 2047.0712, m/z 683.0286  
L OS G15 P120811 220811-s1.04193.04193.3.dta

scan 4193; 1.2e+001

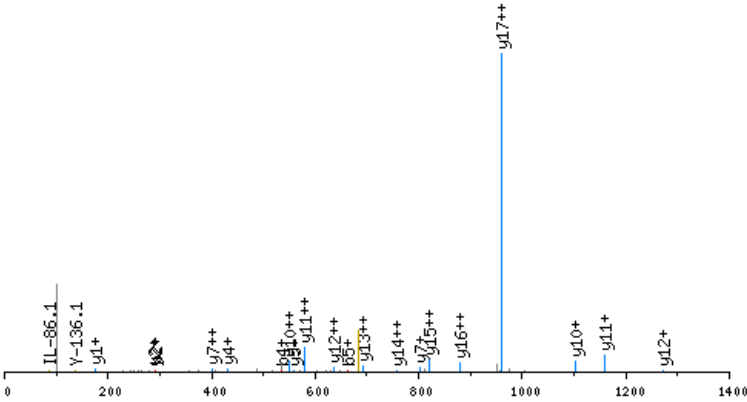

click image to zoom in; click top corners to zoom out

[precursor±]

scan 4191; 683.0 m/z; 9.6e+000

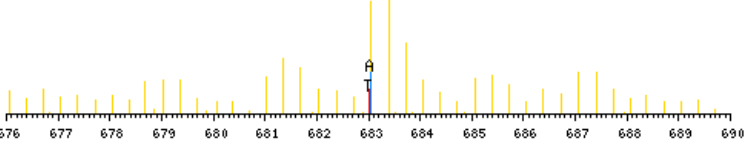

zoomed in precursor plot; T=theoretical m/z, A=acquired m/z

| b <sup>+</sup> | #  | AA | #  | y <sup>+</sup> | y <sup>2+</sup> |
|----------------|----|----|----|----------------|-----------------|
| 128.1075       | 1  | V  | 18 |                |                 |
| 291.1708       | 2  | Y  | 17 | 1919.9715      | 960.4897        |
| 406.1978       | 3  | D  | 16 | 1756.9082      | 878.9580        |
| 534.2564       | 4  | Q  | 15 | 1641.8812      | 821.4445        |
| 663.2990       | 5  | E  | 14 | 1513.8226      | 757.4152        |
| 776.3830       | 6  | L  | 13 | 1384.7800      | 692.8939        |
| 889.4671       | 7  | L  | 12 | 1271.6960      | 636.3519        |
| 946.4885       | 8  | G  | 11 | 1158.6119      | 579.8099        |
| 1043.5413      | 9  | P  | 10 | 1101.5904      | 551.2991        |
| 1130.5733      | 10 | S  | 9  | 1004.5377      | 502.7728        |
| 1245.6003      | 11 | D  | 8  | 917.5057       | 459.2567        |
| 1401.7266      | 12 | K  | 7  | 802.4787       | 401.7433        |
| 1488.7586      | 13 | S  | 6  | 646.3524       | 323.6801        |
| 1617.8012      | 14 | E  | 5  | 559.3204       | 280.1641        |
| 1688.8383      | 15 | A  | 4  | 430.2778       | 215.6428        |
| 1759.8754      | 16 | A  | 3  | 359.2407       | 180.1243        |
| 1872.9595      | 17 | L  | 2  | 288.2036       | 144.6057        |
|                | 18 | R  | 1  | 175.1195       | 88.0637         |

N-term:+29.04 K(12):+156.13

X-range:

MassTol: Y-zoom:

0. 1.

MassType:

☐ AVG ☒ MONO

Axis:

1 2

Label:

☒ I   
 ☐ M   
 ☐ -

Ions:

**a**  + <sup>2</sup> + <sup>3</sup> +

b. ☒ 1+ ☐ 2+ ☐ 3+
$$= \square + \square^2 + \square^3 + \dots$$

c

| x | 1 | 2 | 3 |
|---|---|---|---|
|---|---|---|---|

**y** ☒<sup>+</sup> ☒<sup>2+</sup> ☐<sup>3+</sup>

$$z^2 + z^2 + z^3 +$$
hide  $\text{H}_2\text{O}/\text{NH}_3$  ☐

zoom 112-122

GO

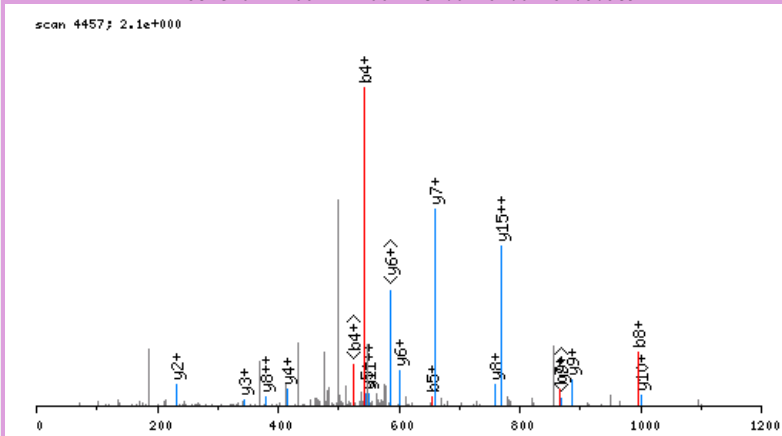

click image to zoom in; click top corners to zoom out

```
[precursor±]
```

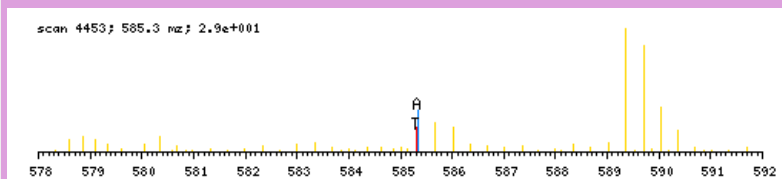

zoomed in precursor plot; T=theoretical m/z, A=acquired m/z

| $b^+$     | #  | AA | #  | $y^+$     | $y^{2+}$ |
|-----------|----|----|----|-----------|----------|
| 215.1184  | 1  | W  | 16 |           |          |
| 286.1555  | 2  | A  | 15 | 1539.8131 | 770.4105 |
| 442.2818  | 3  | K  | 14 | 1468.7760 | 734.8919 |
| 541.3502  | 4  | V  | 13 | 1312.6497 | 656.8288 |
| 655.3932  | 5  | N  | 12 | 1213.5813 | 607.2946 |
| 752.4459  | 6  | P  | 11 | 1099.5384 | 550.2731 |
| 867.4729  | 7  | D  | 10 | 1002.4856 | 501.7467 |
| 996.5155  | 8  | E  | 9  | 887.4587  | 444.2332 |
| 1095.5839 | 9  | V  | 8  | 758.4161  | 379.7120 |
| 1152.6053 | 10 | G  | 7  | 659.3477  | 330.1777 |
| 1209.6268 | 11 | G  | 6  | 602.3262  | 301.6670 |
| 1338.6694 | 12 | E  | 5  | 545.3047  | 273.1563 |
| 1409.7065 | 13 | A  | 4  | 416.2621  | 208.6350 |
| 1522.7906 | 14 | L  | 3  | 345.2250  | 173.1164 |
| 1579.8120 | 15 | G  | 2  | 232.1410  | 116.5744 |
|           | 16 | R  | 1  | 175.1195  | 88.0637  |

N-term: +29.04 K(3): +156.13

X-range:

0 - 0

MassTol: Y-zoom:

0. 1.

MassType:

☐AVG ☒MONO

Axis:

☒1 ☐2

Label:

☒I ☐M ☐-

Ions:

a ☐+ ☐2+ ☐3+

b ☒+ ☐2+ ☐3+

c ☐+ ☐2+ ☐3+

x ☐+ ☐2+ ☐3+

y ☒+ ☒2+ ☐3+

z ☐+ ☐2+ ☐3+

hide H<sub>2</sub>O/NH<sub>3</sub> ☐

zoom 112-122 ☐

GO

WELTILHTNDVHSR, MH+ 1748.9084, m/z 437.9825  
L OS G17 P120811 220811-s1.05640.05640.4.dta

scan 5640; 4.6e+000

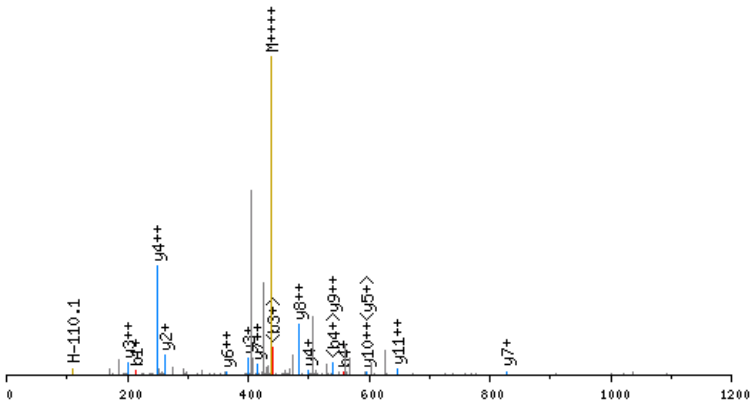

click image to zoom in; click top corners to zoom out

[precursor±]

scan 5638; 438.0 m/z; 6.4e+000

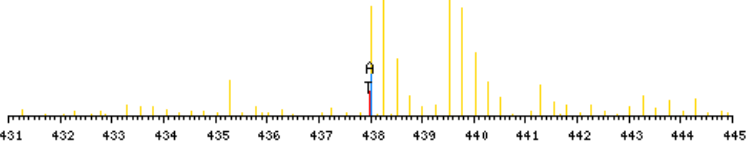

zoomed in precursor plot; T=theoretical m/z, A=acquired m/z

| b <sup>+</sup> | #  | AA | #  | y <sup>+</sup> | y <sup>2+</sup> |
|----------------|----|----|----|----------------|-----------------|
| 215.1184       | 1  | W  | 14 |                |                 |
| 344.1610       | 2  | E  | 13 | 1534.7978      | 767.9028        |
| 457.2451       | 3  | L  | 12 | 1405.7552      | 703.3815        |
| 558.2927       | 4  | T  | 11 | 1292.6711      | 646.8395        |
| 671.3768       | 5  | I  | 10 | 1191.6234      | 596.3156        |
| 784.4609       | 6  | L  | 9  | 1078.5394      | 539.7736        |
| 921.5198       | 7  | H  | 8  | 965.4553       | 483.2316        |
| 1022.5675      | 8  | T  | 7  | 828.3964       | 414.7021        |
| 1136.6104      | 9  | N  | 6  | 727.3487       | 364.1783        |
| 1251.6373      | 10 | D  | 5  | 613.3058       | 307.1568        |
| 1350.7058      | 11 | V  | 4  | 498.2789       | 249.6433        |
| 1487.7647      | 12 | H  | 3  | 399.2104       | 200.1091        |
| 1574.7967      | 13 | S  | 2  | 262.1515       | 131.5797        |
|                | 14 | R  | 1  | 175.1195       | 88.0637         |

N-term:+29.04

X-range:

0 - 0

MassTol: Y-zoom:

0. 1.

MassType:

☐AVG ☒MONO

Axis:

☒1 ☐2

Label:

☒I ☐M ☐-

Ions:

a ☐+ ☐2+ ☐3+

b ☒+ ☐2+ ☐3+

c ☐+ ☐2+ ☐3+

x ☐+ ☐2+ ☐3+

y ☒+ ☒2+ ☐3+

z ☐+ ☐2+ ☐3+

hide H<sub>2</sub>O/NH<sub>3</sub> ☐

zoom 112-122 ☐

GO

WGKIGGHGAEYGAELER, MH+ 1969.0568, m/z 493.0197  
H OS G17 P120811 220811-s1.04252.04252.4.dta

scan 4252; 3.8e+000

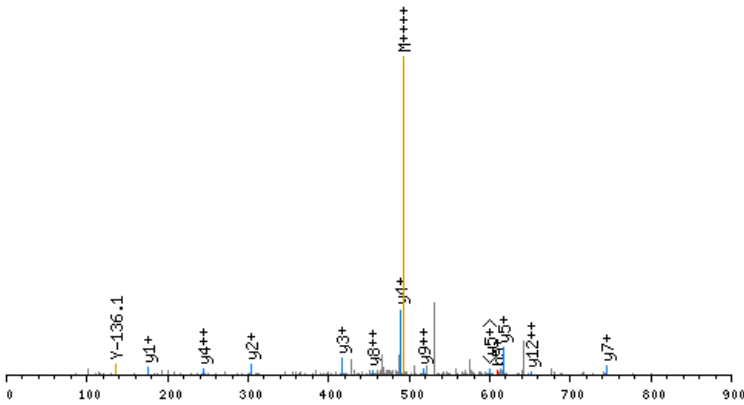

click image to zoom in; click top corners to zoom out

[precursor±]

scan 4248; 493.0 m/z; 1.2e+001

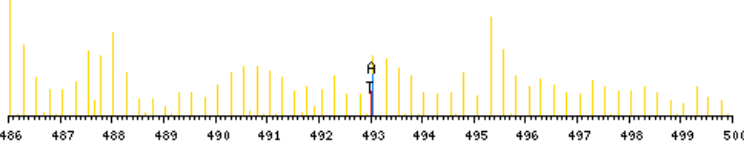

zoomed in precursor plot; T=theoretical m/z, A=acquired m/z

| b <sup>+</sup> | #  | AA | #  | y <sup>+</sup> | y <sup>2+</sup> |
|----------------|----|----|----|----------------|-----------------|
| 221.1502       | 1  | W  | 18 |                |                 |
| 278.1717       | 2  | G  | 17 | 1748.9144      | 874.9611        |
| 440.3298       | 3  | K  | 16 | 1691.8929      | 846.4504        |
| 553.4138       | 4  | I  | 15 | 1529.7348      | 765.3713        |
| 610.4353       | 5  | G  | 14 | 1416.6508      | 708.8293        |
| 667.4568       | 6  | G  | 13 | 1359.6293      | 680.3186        |
| 804.5157       | 7  | H  | 12 | 1302.6079      | 651.8078        |
| 861.5371       | 8  | G  | 11 | 1165.5489      | 583.2784        |
| 932.5743       | 9  | A  | 10 | 1108.5275      | 554.7677        |
| 1061.6169      | 10 | E  | 9  | 1037.4904      | 519.2491        |
| 1224.6802      | 11 | Y  | 8  | 908.4478       | 454.7278        |
| 1281.7016      | 12 | G  | 7  | 745.3844       | 373.1961        |
| 1352.7388      | 13 | A  | 6  | 688.3630       | 344.6854        |
| 1481.7814      | 14 | E  | 5  | 617.3259       | 309.1668        |
| 1552.8185      | 15 | A  | 4  | 488.2833       | 244.6455        |
| 1665.9025      | 16 | L  | 3  | 417.2462       | 209.1270        |
| 1794.9451      | 17 | E  | 2  | 304.1621       | 152.5850        |
|                | 18 | R  | 1  | 175.1195       | 88.0637         |

N-term:+35.07 K(3):+162.16

N-term: +29.04 K(3): +156.13

X-range:

0 - 0

MassTol: Y-zoom:

0. 1.

MassType:

☐AVG ☒MONO

Axis:

☒1 ☐2

Label:

☒I ☐M ☐-

Ions:

a ☐+ ☐2+ ☐3+

b ☒+ ☐2+ ☐3+

c ☐+ ☐2+ ☐3+

x ☐+ ☐2+ ☐3+

y ☒+ ☒2+ ☐3+

z ☐+ ☐2+ ☐3+

hide H<sub>2</sub>O/NH<sub>3</sub> ☐

zoom 112-122 ☐

GO

WISKQEYDEAGPSIVHR, MH+ 2071.0613, m/z 518.5208  
L OS G17 P120811 220811-s1.04141.04141.4.dta

scan 4141; 2.9e+000

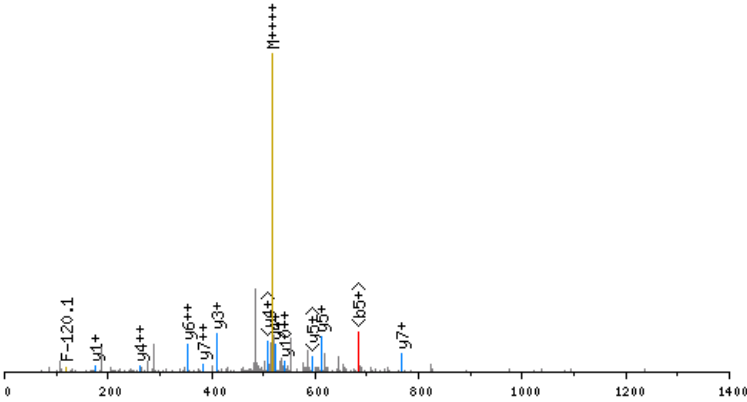

click image to zoom in; click top corners to zoom out

[precursor±]

scan 4138; 518.5 m/z; 6.6e+001

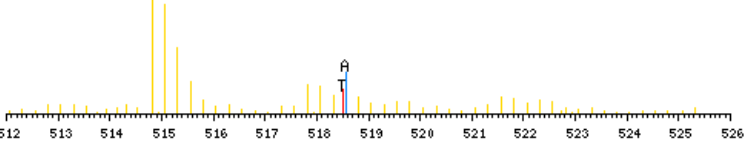

zoomed in precursor plot; T=theoretical m/z, A=acquired m/z

| b <sup>+</sup> | #  | AA | #  | y <sup>+</sup> | y <sup>2+</sup> |
|----------------|----|----|----|----------------|-----------------|
| 215.1184       | 1  | W  | 17 |                |                 |
| 328.2025       | 2  | I  | 16 | 1856.9507      | 928.9793        |
| 415.2345       | 3  | S  | 15 | 1743.8666      | 872.4372        |
| 571.3608       | 4  | K  | 14 | 1656.8346      | 828.9212        |
| 699.4194       | 5  | Q  | 13 | 1500.7083      | 750.8581        |
| 828.4620       | 6  | E  | 12 | 1372.6497      | 686.8288        |
| 991.5253       | 7  | Y  | 11 | 1243.6071      | 622.3075        |
| 1106.5522      | 8  | D  | 10 | 1080.5438      | 540.7758        |
| 1235.5948      | 9  | E  | 9  | 965.5169       | 483.2623        |
| 1306.6320      | 10 | A  | 8  | 836.4743       | 418.7410        |
| 1363.6534      | 11 | G  | 7  | 765.4371       | 383.2225        |
| 1460.7062      | 12 | P  | 6  | 708.4157       | 354.7118        |
| 1547.7382      | 13 | S  | 5  | 611.3629       | 306.1854        |
| 1660.8223      | 14 | I  | 4  | 524.3309       | 262.6694        |
| 1759.8907      | 15 | V  | 3  | 411.2468       | 206.1273        |
| 1896.9496      | 16 | H  | 2  | 312.1784       | 156.5931        |
|                | 17 | R  | 1  | 175.1195       | 88.0637         |

N-term:+29.04 K(4):+156.13

X-range:

0 - 0

MassTol: Y-zoom:

0. 1.

MassType:

☐AVG ☒MONO

Axis:

☒1 ☐2

Label:

☒I ☐M ☐-

Ions:

a ☐+ ☐2+ ☐3+

b ☒+ ☐2+ ☐3+

c ☐+ ☐2+ ☐3+

x ☐+ ☐2+ ☐3+

y ☒+ ☒2+ ☐3+

z ☐+ ☐2+ ☐3+

hide H<sub>2</sub>O/NH<sub>3</sub> ☐

zoom 112-122 ☐

GO

WISKQEYDESGPSIVHR, MH+ 2099.1198, m/z 525.5354  
H OS G17 P120811 220811-s1.03899.03899.4.dta

scan 3899; 2.5e+000

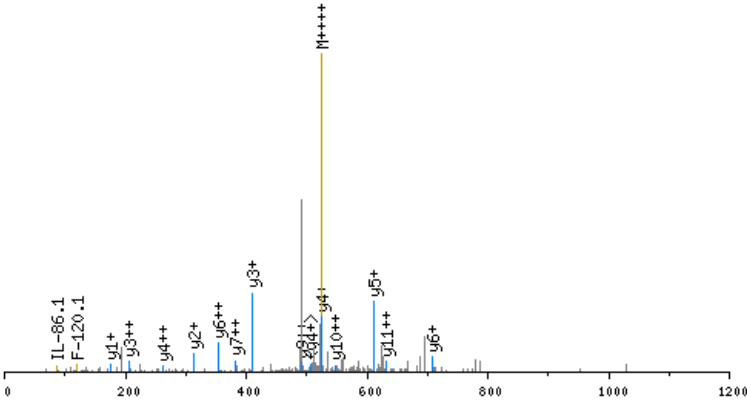

click image to zoom in; click top corners to zoom out

[precursor±]

scan 3898; 525.5 m/z; 1.1e+001

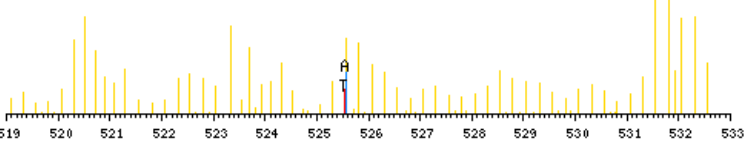

X-range:

0 - 0

MassTol: Y-zoom:

0. 1.

MassType:

☐AVG ☒MONO

Axis:

☒1 ☐2

Label:

☒I ☐M ☐-

Ions:

a ☐+ ☐2+ ☐3+

b ☒+ ☐2+ ☐3+

c ☐+ ☐2+ ☐3+

x ☐+ ☐2+ ☐3+

y ☒+ ☒2+ ☐3+

z ☐+ ☐2+ ☐3+

hide H<sub>2</sub>O/NH<sub>3</sub> ☐

zoom 112-122 ☐

GO

WITKQEYDEAGPSIVHR, MH+ 2097.1405, m/z 525.0406  
H OS G17 P120811 220811-s1.04399.04399.4.dta

scan 4399; 2.2e+000

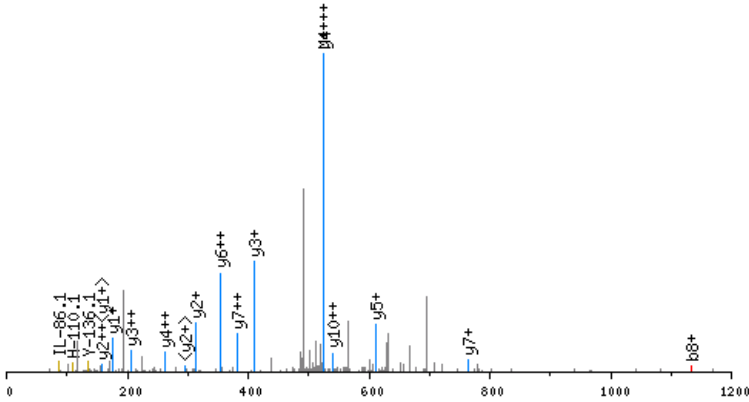

click image to zoom in; click top corners to zoom out [\[precursor±\]](#)

scan 4398; 525.0 m/z; 1.9e+001

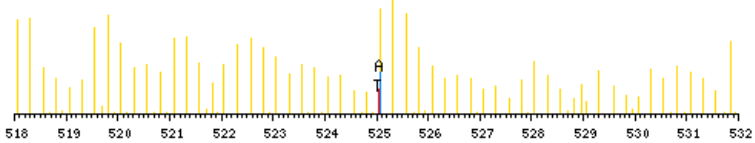

zoomed in precursor plot; T=theoretical m/z, A=acquired m/z

| b <sup>+</sup> | #  | AA | #  | y <sup>+</sup> | y <sup>2+</sup> |
|----------------|----|----|----|----------------|-----------------|
| 221.1502       | 1  | W  | 17 |                |                 |
| 334.2343       | 2  | I  | 16 | 1876.9981      | 939.0030        |
| 435.2820       | 3  | T  | 15 | 1763.9141      | 882.4609        |
| 597.4401       | 4  | K  | 14 | 1662.8664      | 831.9371        |
| 725.4986       | 5  | Q  | 13 | 1500.7083      | 750.8581        |
| 854.5412       | 6  | E  | 12 | 1372.6497      | 686.8288        |
| 1017.6046      | 7  | Y  | 11 | 1243.6071      | 622.3075        |
| 1132.6315      | 8  | D  | 10 | 1080.5438      | 540.7758        |
| 1261.6741      | 9  | E  | 9  | 965.5169       | 483.2623        |
| 1332.7112      | 10 | A  | 8  | 836.4743       | 418.7410        |
| 1389.7327      | 11 | G  | 7  | 765.4371       | 383.2225        |
| 1486.7854      | 12 | P  | 6  | 708.4157       | 354.7118        |
| 1573.8175      | 13 | S  | 5  | 611.3629       | 306.1854        |
| 1686.9015      | 14 | I  | 4  | 524.3309       | 262.6694        |
| 1785.9699      | 15 | V  | 3  | 411.2468       | 206.1273        |
| 1923.0289      | 16 | H  | 2  | 312.1784       | 156.5931        |
|                | 17 | R  | 1  | 175.1195       | 88.0637         |

N-term:+35.07 K(4):+162.16

X-range:

0 - 0

MassTol: Y-zoom:

0. 1.

MassType:

☐ AVG ☒ MONO

Axis:

☒ 1 ☐ 2

Label:

☒ I ☐ M ☐ -

Ions:

a ☐ + ☐ 2+ ☐ 3+

b ☒ + ☐ 2+ ☐ 3+

c ☐ + ☐ 2+ ☐ 3+

x ☐ + ☐ 2+ ☐ 3+

y ☒ + ☒ 2+ ☐ 3+

z ☐ + ☐ 2+ ☐ 3+

hide H<sub>2</sub>O/NH<sub>3</sub> ☐

zoom 112-122 ☐

GO

WLEINPETGAIFTR, MH+ 1674.8855, m/z 558.9667  
L OS G13 P120811 220811-s1.06711.06711.3.dta

scan 6711; 1.5e+000

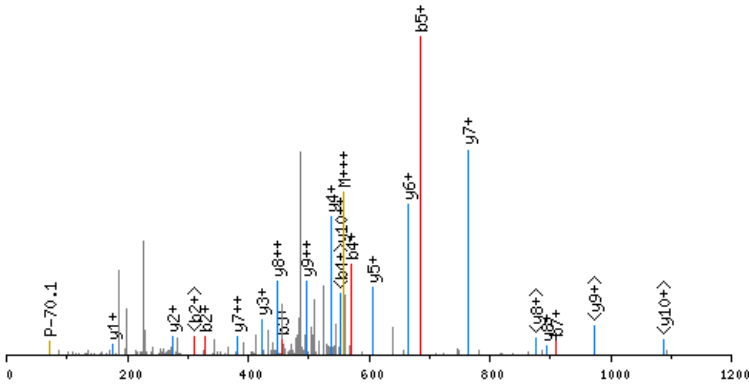

click image to zoom in; click top corners to zoom out [\[precursor±\]](#)

scan 6709; 559.0 m/z; 1.1e+001

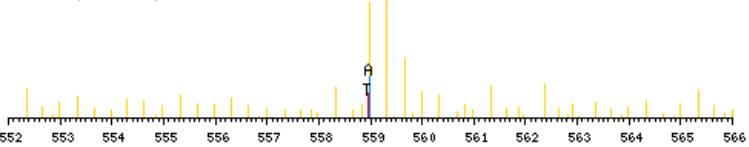

zoomed in precursor plot; T=theoretical m/z, A=acquired m/z

| b <sup>+</sup> | #  | AA | #  | y <sup>+</sup> | y <sup>2+</sup> |
|----------------|----|----|----|----------------|-----------------|
| 215.1184       | 1  | W  | 14 |                |                 |
| 328.2025       | 2  | L  | 13 | 1460.7749      | 730.8914        |
| 457.2451       | 3  | E  | 12 | 1347.6909      | 674.3493        |
| 570.3291       | 4  | I  | 11 | 1218.6483      | 609.8280        |
| 684.3721       | 5  | N  | 10 | 1105.5642      | 553.2860        |
| 781.4248       | 6  | P  | 9  | 991.5213       | 496.2645        |
| 910.4674       | 7  | E  | 8  | 894.4685       | 447.7382        |
| 1011.5151      | 8  | T  | 7  | 765.4259       | 383.2169        |
| 1068.5366      | 9  | G  | 6  | 664.3782       | 332.6930        |
| 1139.5737      | 10 | A  | 5  | 607.3568       | 304.1823        |
| 1252.6577      | 11 | I  | 4  | 536.3197       | 268.6637        |
| 1399.7262      | 12 | F  | 3  | 423.2356       | 212.1217        |
| 1500.7738      | 13 | T  | 2  | 276.1672       | 138.5875        |
|                | 14 | R  | 1  | 175.1195       | 88.0637         |

N-term:+29.04

X-range:

0 - 0

MassTol: Y-zoom:

0. 1.

MassType:

☐ AVG ☒ MONO

Axis:

☒ 1 ☐ 2

Label:

☒ I ☐ M ☐ -

Ions:

a ☐ + ☐ 2+ ☐ 3+

b ☒ + ☐ 2+ ☐ 3+

c ☐ + ☐ 2+ ☐ 3+

x ☐ + ☐ 2+ ☐ 3+

y ☒ + ☒ 2+ ☐ 3+

z ☐ + ☐ 2+ ☐ 3+

hide H<sub>2</sub>O/NH<sub>3</sub> ☐

zoom 112-122 ☐

GO

WLHSDKFTLKVR, MH+ 1613.9532, m/z 404.2438  
L OS G17 P120811 220811-s1.02572.02572.4.dta

scan 2572; 3.3e+000

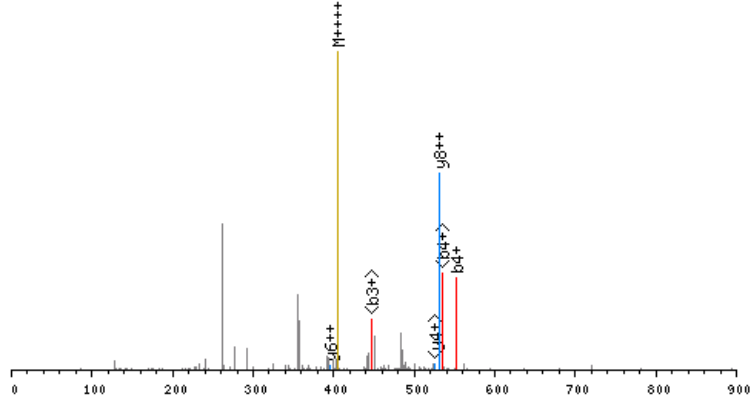

click image to zoom in; click top corners to zoom out [\[precursor±\]](#)

scan 2568; 404.2 m/z; 4.5e+000

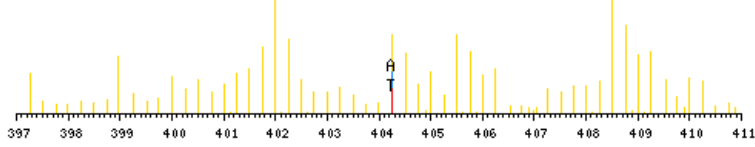

zoomed in precursor plot; T=theoretical m/z, A=acquired m/z

| b <sup>+</sup> | #  | AA | #  | y <sup>+</sup> | y <sup>2+</sup> |
|----------------|----|----|----|----------------|-----------------|
| 215.1184       | 1  | W  | 12 |                |                 |
| 328.2025       | 2  | L  | 11 | 1399.8426      | 700.4252        |
| 465.2614       | 3  | H  | 10 | 1286.7586      | 643.8832        |
| 552.2934       | 4  | S  | 9  | 1149.6996      | 575.3537        |
| 667.3204       | 5  | D  | 8  | 1062.6676      | 531.8377        |
| 823.4467       | 6  | K  | 7  | 947.6407       | 474.3242        |
| 970.5151       | 7  | F  | 6  | 791.5144       | 396.2611        |
| 1071.5628      | 8  | T  | 5  | 644.4460       | 322.7269        |
| 1184.6468      | 9  | L  | 4  | 543.3983       | 272.2031        |
| 1340.7731      | 10 | K  | 3  | 430.3142       | 215.6610        |
| 1439.8415      | 11 | V  | 2  | 274.1879       | 137.5979        |
|                | 12 | R  | 1  | 175.1195       | 88.0637         |

N-term: +29.04 K(6): +156.13  
K(10): +156.13

X-range:

0 - 0

MassTol: Y-zoom:

0. 1.

MassType:

☐AVG ☒MONO

Axis:

☒1 ☐2

Label:

☒I ☐M ☐-

Ions:

a ☐+ ☐2+ ☐3+

b ☒+ ☐2+ ☐3+

c ☐+ ☐2+ ☐3+

x ☐+ ☐2+ ☐3+

y ☒+ ☒2+ ☐3+

z ☐+ ☐2+ ☐3+

hide H<sub>2</sub>O/NH<sub>3</sub> ☐

zoom 112-122 ☐

GO

WVFEEDIGGR, MH+ 1235.6060, m/z 618.3067  
L OS G13 P120811 220811-s1.05738.05738.2.dta

scan 5738; 1.3e+000

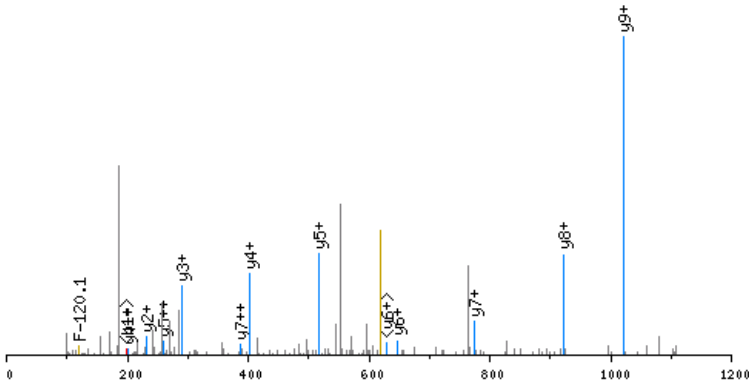

click image to zoom in; click top corners to zoom out

[precursor±]

scan 5734; 618.3 m/z; 8.3e+000

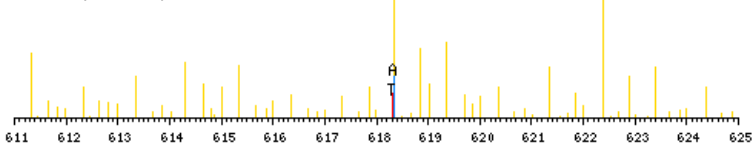

zoomed in precursor plot; T=theoretical m/z, A=acquired m/z

| b <sup>+</sup> | #  | AA | #  | y <sup>+</sup> | y <sup>2+</sup> |
|----------------|----|----|----|----------------|-----------------|
| 215.1184       | 1  | W  | 10 |                |                 |
| 314.1868       | 2  | V  | 9  | 1021.4954      | 511.2516        |
| 461.2552       | 3  | F  | 8  | 922.4270       | 461.7174        |
| 590.2978       | 4  | E  | 7  | 775.3586       | 388.1832        |
| 719.3404       | 5  | E  | 6  | 646.3160       | 323.6619        |
| 834.3674       | 6  | D  | 5  | 517.2734       | 259.1406        |
| 947.4514       | 7  | I  | 4  | 402.2465       | 201.6272        |
| 1004.4729      | 8  | G  | 3  | 289.1624       | 145.0851        |
| 1061.4944      | 9  | G  | 2  | 232.1410       | 116.5744        |
|                | 10 | R  | 1  | 175.1195       | 88.0637         |

N-term:+29.04

X-range:

0 - 0

MassTol: Y-zoom:

0. 1.

MassType:

☐ AVG ☒ MONO

Axis:

☒ 1 ☐ 2

Label:

☒ I ☐ M ☐ -

Ions:

a ☐ + ☐ 2+ ☐ 3+

b ☒ + ☐ 2+ ☐ 3+

c ☐ + ☐ 2+ ☐ 3+

x ☐ + ☐ 2+ ☐ 3+

y ☒ + ☒ 2+ ☐ 3+

z ☐ + ☐ 2+ ☐ 3+

hide H<sub>2</sub>O/NH<sub>3</sub> ☐

zoom 112-122 ☐

GO

YDESGPSIVHR, MH+ 1287.6333, m/z 429.8826  
L OS G16 P120811 220811-s1.02685.02685.3.dta

scan 2685; 6.9e+000

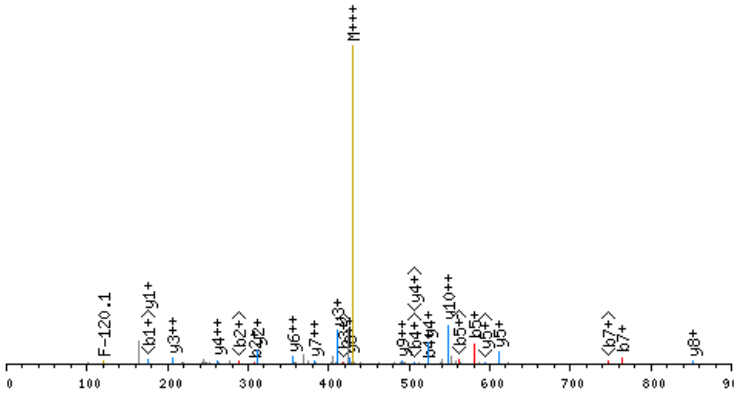

click image to zoom in; click top corners to zoom out

[precursor±]

scan 2683; 429.9 m/z; 7.0e+000

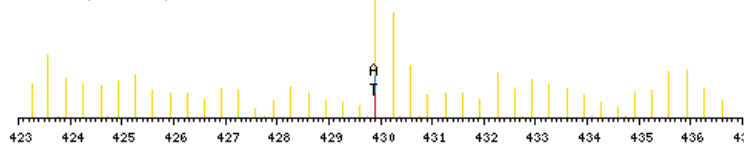

zoomed in precursor plot; T=theoretical m/z, A=acquired m/z

| b <sup>+</sup> | #  | AA | #  | y <sup>+</sup> | y <sup>2+</sup> |
|----------------|----|----|----|----------------|-----------------|
| 192.1024       | 1  | Y  | 11 |                |                 |
| 307.1294       | 2  | D  | 10 | 1096.5387      | 548.7733        |
| 436.1720       | 3  | E  | 9  | 981.5118       | 491.2598        |
| 523.2040       | 4  | S  | 8  | 852.4692       | 426.7385        |
| 580.2255       | 5  | G  | 7  | 765.4371       | 383.2225        |
| 677.2782       | 6  | P  | 6  | 708.4157       | 354.7118        |
| 764.3102       | 7  | S  | 5  | 611.3629       | 306.1854        |
| 877.3943       | 8  | I  | 4  | 524.3309       | 262.6694        |
| 976.4627       | 9  | V  | 3  | 411.2468       | 206.1273        |
| 1113.5216      | 10 | H  | 2  | 312.1784       | 156.5931        |
|                | 11 | R  | 1  | 175.1195       | 88.0637         |

N-term:+29.04

X-range:

0 - 0

MassTol: Y-zoom:

0. 1.

MassType:

☐AVG ☒MONO

Axis:

☒1 ☐2

Label:

☒I ☐M ☐-

Ions:

a ☐+ ☐2+ ☐3+

b ☒+ ☐2+ ☐3+

c ☐+ ☐2+ ☐3+

x ☐+ ☐2+ ☐3+

y ☒+ ☒2+ ☐3+

z ☐+ ☐2+ ☐3+

hide H<sub>2</sub>O/NH<sub>3</sub> ☐

zoom 112-122 ☐

GO

YDIAHTPGVAADLSHIETR, MH+ 2094.0620, m/z 524.2709  
L OS G17 P120811 220811-s1.05675.05675.4.dta

scan 5675; 2.1e+000

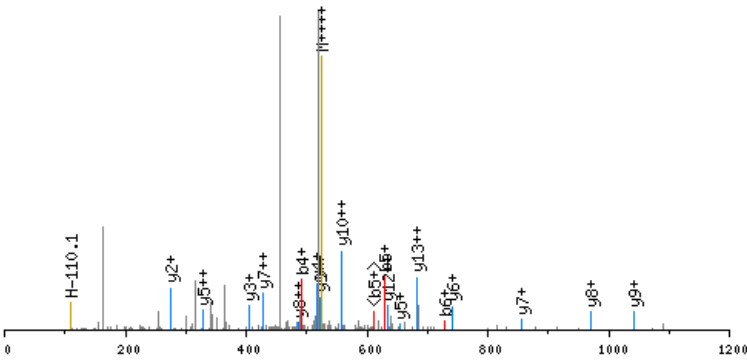

click image to zoom in; click top corners to zoom out

[precursor±]

scan 5673; 524.3 m/z; 1.3e+001

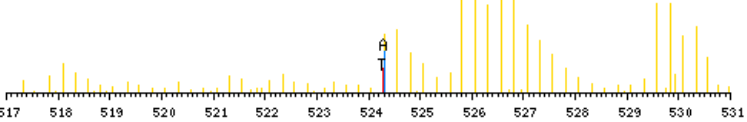

zoomed in precursor plot; T=theoretical m/z, A=acquired m/z

| b <sup>+</sup> | #  | AA | #  | y <sup>+</sup> | y <sup>2+</sup> |
|----------------|----|----|----|----------------|-----------------|
| 192.1024       | 1  | Y  | 19 |                |                 |
| 307.1294       | 2  | D  | 18 | 1902.9674      | 951.9876        |
| 420.2134       | 3  | I  | 17 | 1787.9404      | 894.4741        |
| 491.2505       | 4  | A  | 16 | 1674.8564      | 837.9321        |
| 628.3095       | 5  | H  | 15 | 1603.8192      | 802.4135        |
| 729.3571       | 6  | T  | 14 | 1466.7603      | 733.8841        |
| 826.4099       | 7  | P  | 13 | 1365.7127      | 683.3602        |
| 883.4314       | 8  | G  | 12 | 1268.6599      | 634.8339        |
| 982.4998       | 9  | V  | 11 | 1211.6384      | 606.3231        |
| 1053.5369      | 10 | A  | 10 | 1112.5700      | 556.7889        |
| 1124.5740      | 11 | A  | 9  | 1041.5329      | 521.2704        |
| 1239.6010      | 12 | D  | 8  | 970.4958       | 485.7518        |
| 1352.6850      | 13 | L  | 7  | 855.4688       | 428.2383        |
| 1439.7170      | 14 | S  | 6  | 742.3848       | 371.6963        |
| 1576.7760      | 15 | H  | 5  | 655.3527       | 328.1803        |
| 1689.8600      | 16 | I  | 4  | 518.2938       | 259.6508        |
| 1818.9026      | 17 | E  | 3  | 405.2098       | 203.1088        |
| 1919.9503      | 18 | T  | 2  | 276.1672       | 138.5875        |
|                | 19 | R  | 1  | 175.1195       | 88.0637         |

N-term:+29.04

N-term: +35.07

X-range:

0 - 0

MassTol: Y-zoom:

0. 1.

MassType:

☐ AVG ☒ MONO

Axis:

☒ 1 ☐ 2

Label:

☒ I ☐ M ☐ -

Ions:

a ☐ + ☐ 2+ ☐ 3+

b ☒ + ☐ 2+ ☐ 3+

c ☐ + ☐ 2+ ☐ 3+

x ☐ + ☐ 2+ ☐ 3+

y ☒ + ☒ 2+ ☐ 3+

z ☐ + ☐ 2+ ☐ 3+

hide H<sub>2</sub>O/NH<sub>3</sub> ☐

zoom 112-122 ☐

GO

YEKPTQTEAPQVTGPIEVPPVVR, MH+ 2393.3080, m/z 599.0825  
L OS G14 P120811 220811-s1.05142.05142.4.dta

scan 5142; 5.4e+000

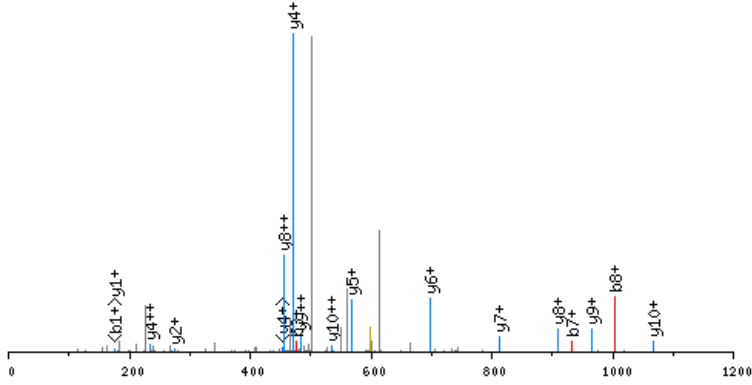

click image to zoom in; click top corners to zoom out [\[precursor±\]](#)

scan 5141; 599.1 m/z; 2.2e+001

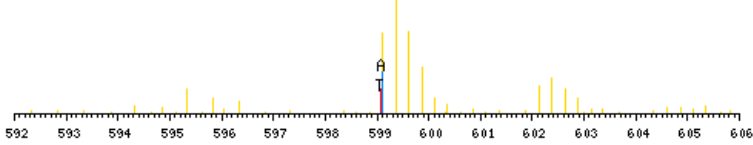

zoomed in precursor plot; T=theoretical m/z, A=acquired m/z

| b <sup>+</sup> | #  | AA | #  | y <sup>+</sup> | y <sup>2+</sup> |
|----------------|----|----|----|----------------|-----------------|
| 192.1024       | 1  | Y  | 21 |                |                 |
| 321.1450       | 2  | E  | 20 | 2202.2134      | 1101.6106       |
| 477.2713       | 3  | K  | 19 | 2073.1709      | 1037.0893       |
| 574.3241       | 4  | P  | 18 | 1917.0446      | 959.0262        |
| 702.3827       | 5  | Q  | 17 | 1819.9918      | 910.4998        |
| 803.4303       | 6  | T  | 16 | 1691.9332      | 846.4705        |
| 932.4729       | 7  | E  | 15 | 1590.8855      | 795.9467        |
| 1003.5100      | 8  | A  | 14 | 1461.8429      | 731.4254        |
| 1100.5628      | 9  | P  | 13 | 1390.8058      | 695.9068        |
| 1228.6214      | 10 | Q  | 12 | 1293.7531      | 647.3804        |
| 1327.6898      | 11 | V  | 11 | 1165.6945      | 583.3512        |
| 1428.7375      | 12 | T  | 10 | 1066.6261      | 533.8169        |
| 1485.7589      | 13 | G  | 9  | 965.5784       | 483.2931        |
| 1582.8117      | 14 | P  | 8  | 908.5569       | 454.7824        |
| 1695.8958      | 15 | I  | 7  | 811.5042       | 406.2560        |
| 1824.9384      | 16 | E  | 6  | 698.4201       | 349.7140        |
| 1924.0068      | 17 | V  | 5  | 569.3775       | 285.1927        |
| 2021.0595      | 18 | P  | 4  | 470.3091       | 235.6585        |
| 2120.1280      | 19 | V  | 3  | 373.2563       | 187.1321        |
| 2219.1964      | 20 | V  | 2  | 274.1879       | 137.5979        |
|                | 21 | R  | 1  | 175.1195       | 88.0637         |

N-term:+29.04 K(3):+156.13

X-range:

0 - 0

MassTol: Y-zoom:

0. 1.

MassType:

☐ AVG ☒ MONO

Axis:

☒ 1 ☐ 2

Label:

☒ I ☐ M ☐ -

Ions:

a ☐ + ☐ 2+ ☐ 3+

b ☒ + ☐ 2+ ☐ 3+

c ☐ + ☐ 2+ ☐ 3+

x ☐ + ☐ 2+ ☐ 3+

y ☒ + ☒ 2+ ☐ 3+

z ☐ + ☐ 2+ ☐ 3+

hide H<sub>2</sub>O/NH<sub>3</sub> ☐

zoom 112-122 ☐

GO

YELPDGQVITIGNER, MH+ 1731.8917, m/z 577.9688  
L OS G13 P120811 220811-s1.06097.06097.3.dta

scan 6097; 2.6e+000

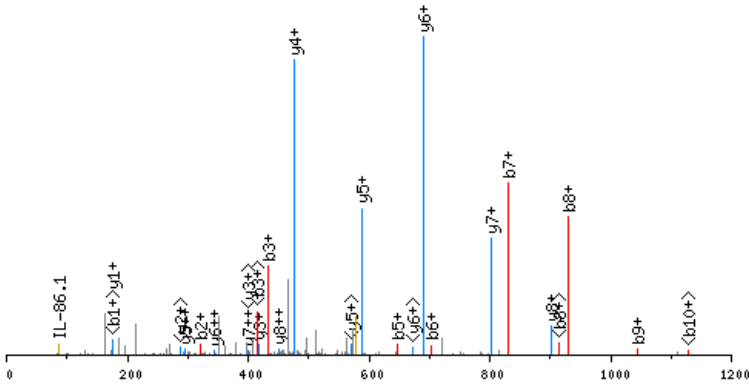

click image to zoom in; click top corners to zoom out

[precursor±]

scan 6094; 578.0 m/z; 6.5e+000

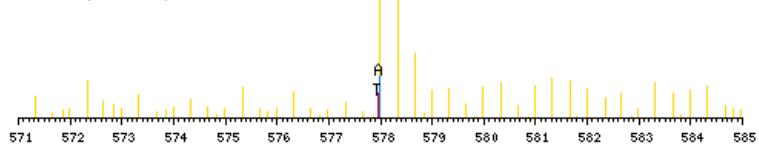

zoomed in precursor plot; T=theoretical m/z, A=acquired m/z

| b <sup>+</sup> | #  | AA | #  | y <sup>+</sup> | y <sup>2+</sup> |
|----------------|----|----|----|----------------|-----------------|
| 192.1024       | 1  | Y  | 15 |                |                 |
| 321.1450       | 2  | E  | 14 | 1540.7971      | 770.9025        |
| 434.2291       | 3  | L  | 13 | 1411.7545      | 706.3812        |
| 531.2818       | 4  | P  | 12 | 1298.6705      | 649.8391        |
| 646.3088       | 5  | D  | 11 | 1201.6177      | 601.3128        |
| 703.3303       | 6  | G  | 10 | 1086.5907      | 543.7993        |
| 831.3888       | 7  | Q  | 9  | 1029.5693      | 515.2886        |
| 930.4572       | 8  | V  | 8  | 901.5107       | 451.2593        |
| 1043.5413      | 9  | I  | 7  | 802.4423       | 401.7251        |
| 1144.5890      | 10 | T  | 6  | 689.3582       | 345.1830        |
| 1257.6731      | 11 | I  | 5  | 588.3105       | 294.6592        |
| 1314.6945      | 12 | G  | 4  | 475.2265       | 238.1172        |
| 1428.7374      | 13 | N  | 3  | 418.2050       | 209.6064        |
| 1557.7800      | 14 | E  | 2  | 304.1621       | 152.5850        |
|                | 15 | R  | 1  | 175.1195       | 88.0637         |

N-term:+29.04

X-range:

0 - 0

MassTol: Y-zoom:

0. 1.

MassType:

☐ AVG ☒ MONO

Axis:

☒ 1 ☐ 2

Label:

☒ I ☐ M ☐ -

Ions:

a ☐ + ☐ 2+ ☐ 3+

b ☒ + ☐ 2+ ☐ 3+

c ☐ + ☐ 2+ ☐ 3+

x ☐ + ☐ 2+ ☐ 3+

y ☒ + ☒ 2+ ☐ 3+

z ☐ + ☐ 2+ ☐ 3+

hide H<sub>2</sub>O/NH<sub>3</sub> ☐

zoom 112-122 ☐

GO

YERDEGNLLTEKQKLR, MH+ 2190.1883, m/z 548.3025  
L OS G19 P120811 220811-s1.02869.02869.4.dta

scan 2869; 1.1e+001

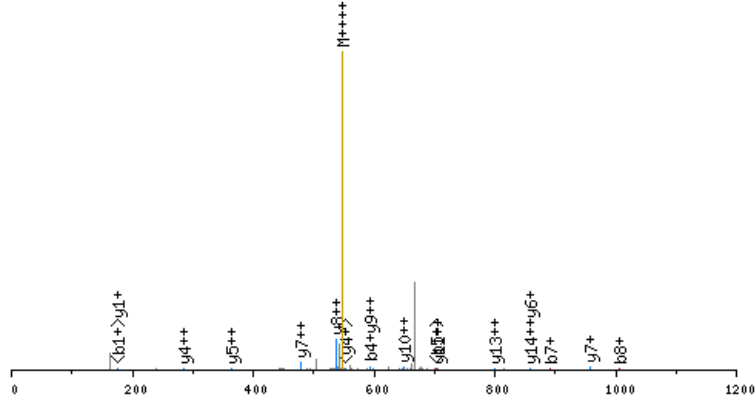

click image to zoom in; click top corners to zoom out [\[precursor±\]](#)

scan 2866; 548.3 m/z; 2.6e+000

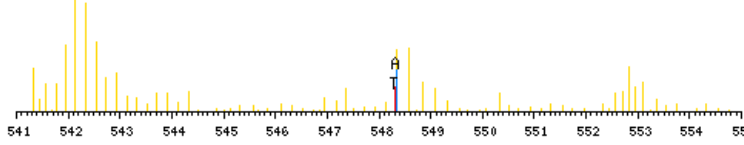

zoomed in precursor plot; T=theoretical m/z, A=acquired m/z

| b <sup>+</sup> | #  | AA | #  | y <sup>+</sup> | y <sup>2+</sup> |
|----------------|----|----|----|----------------|-----------------|
| 192.1024       | 1  | Y  | 17 |                |                 |
| 321.1450       | 2  | E  | 16 | 1999.0937      | 1000.0508       |
| 477.2461       | 3  | R  | 15 | 1870.0511      | 935.5295        |
| 592.2731       | 4  | D  | 14 | 1713.9500      | 857.4789        |
| 721.3157       | 5  | E  | 13 | 1598.9231      | 799.9654        |
| 778.3371       | 6  | G  | 12 | 1469.8805      | 735.4441        |
| 892.3801       | 7  | N  | 11 | 1412.8590      | 706.9334        |
| 1006.4230      | 8  | N  | 10 | 1298.8161      | 649.9119        |
| 1119.5071      | 9  | L  | 9  | 1184.7731      | 592.8905        |
| 1232.5911      | 10 | L  | 8  | 1071.6891      | 536.3485        |
| 1333.6388      | 11 | T  | 7  | 958.6050       | 479.8064        |
| 1462.6814      | 12 | E  | 6  | 857.5573       | 429.2826        |
| 1618.8077      | 13 | K  | 5  | 728.5147       | 364.7613        |
| 1746.8663      | 14 | Q  | 4  | 572.3884       | 286.6981        |
| 1902.9926      | 15 | K  | 3  | 444.3299       | 222.6688        |
| 2016.0766      | 16 | L  | 2  | 288.2036       | 144.6057        |
|                | 17 | R  | 1  | 175.1195       | 88.0637         |

N-term: +29.04 K(13): +156.13  
K(15): +156.13

X-range:

0 - 0

MassTol: Y-zoom:

0. 1.

MassType:

☐ AVG ☒ MONO

Axis:

☒ 1 ☐ 2

Label:

☒ I ☐ M ☐ -

Ions:

a ☐ + ☐ 2+ ☐ 3+

b ☒ + ☐ 2+ ☐ 3+

c ☐ + ☐ 2+ ☐ 3+

x ☐ + ☐ 2+ ☐ 3+

y ☒ + ☒ 2+ ☐ 3+

z ☐ + ☐ 2+ ☐ 3+

hide H<sub>2</sub>O/NH<sub>3</sub> ☐

zoom 112-122 ☐

GO

YERPVHLHLVALNTPVAGDIR, MH+ 2261.2770, m/z 566.0747  
L OS G17 P120811 220811-s1.06076.06076.4.dta

scan 6076; 1.7e+000

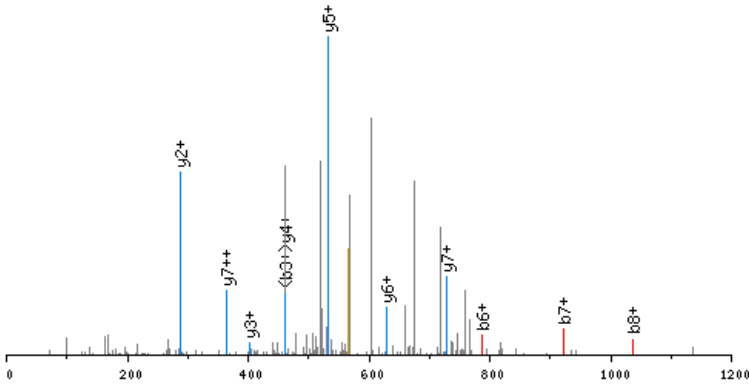

click image to zoom in; click top corners to zoom out [\[precursor±\]](#)

scan 6073; 566.1 m/z; 6.8e+000

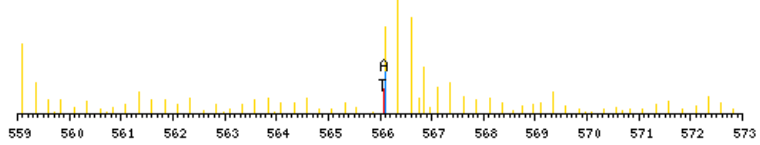

zoomed in precursor plot; T=theoretical m/z, A=acquired m/z

| b <sup>+</sup> | #  | AA | #  | y <sup>+</sup> | y <sup>2+</sup> |
|----------------|----|----|----|----------------|-----------------|
| 192.1024       | 1  | Y  | 20 |                |                 |
| 321.1450       | 2  | E  | 19 | 2070.1824      | 1035.5951       |
| 477.2461       | 3  | R  | 18 | 1941.1398      | 971.0738        |
| 574.2989       | 4  | P  | 17 | 1785.0387      | 893.0233        |
| 673.3673       | 5  | V  | 16 | 1687.9859      | 844.4969        |
| 786.4514       | 6  | L  | 15 | 1588.9175      | 794.9627        |
| 923.5103       | 7  | H  | 14 | 1475.8334      | 738.4206        |
| 1036.5944      | 8  | L  | 13 | 1338.7745      | 669.8912        |
| 1135.6628      | 9  | V  | 12 | 1225.6905      | 613.3491        |
| 1206.6999      | 10 | A  | 11 | 1126.6220      | 563.8149        |
| 1319.7839      | 11 | L  | 10 | 1055.5849      | 528.2964        |
| 1433.8269      | 12 | N  | 9  | 942.5009       | 471.7543        |
| 1534.8745      | 13 | T  | 8  | 828.4579       | 414.7329        |
| 1631.9273      | 14 | P  | 7  | 727.4103       | 364.2090        |
| 1730.9957      | 15 | V  | 6  | 630.3575       | 315.6827        |
| 1802.0328      | 16 | A  | 5  | 531.2891       | 266.1485        |
| 1859.0543      | 17 | G  | 4  | 460.2520       | 230.6299        |
| 1974.0812      | 18 | D  | 3  | 403.2305       | 202.1192        |
| 2087.1653      | 19 | I  | 2  | 288.2036       | 144.6057        |
|                | 20 | R  | 1  | 175.1195       | 88.0637         |

N-term:+29.04

X-range:

0 - 0

MassTol: Y-zoom:

0. 1.

MassType:

☐ AVG ☒ MONO

Axis:

☒ 1 ☐ 2

Label:

☒ I ☐ M ☐ -

Ions:

a ☐ + ☐ 2+ ☐ 3+

b ☒ + ☐ 2+ ☐ 3+

c ☐ + ☐ 2+ ☐ 3+

x ☐ + ☐ 2+ ☐ 3+

y ☒ + ☒ 2+ ☐ 3+

z ☐ + ☐ 2+ ☐ 3+

hide H<sub>2</sub>O/NH<sub>3</sub> ☐

zoom 112-122 ☐

GO

YFKEQFLDGDWTR, MH+ 1945.9448, m/z 649.3198  
L OS G16 P120811 220811-s1.05600.05600.3.dta

scan 5600; 2.7e+000

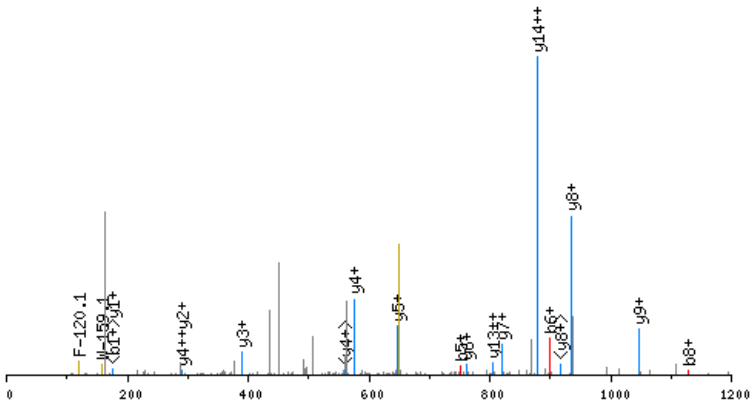

click image to zoom in; click top corners to zoom out

[precursor±]

scan 5598; 649.3 m/z; 3.1e+000

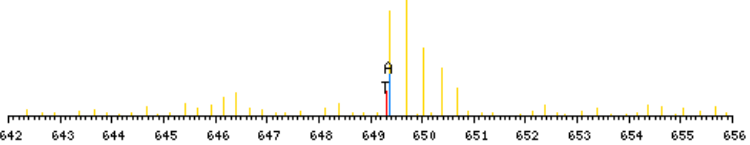

zoomed in precursor plot; T=theoretical m/z, A=acquired m/z

| b <sup>+</sup> | #  | AA | #  | y <sup>+</sup> | y <sup>2+</sup> |
|----------------|----|----|----|----------------|-----------------|
| 192.1024       | 1  | Y  | 15 |                |                 |
| 339.1708       | 2  | F  | 14 | 1754.8502      | 877.9290        |
| 495.2971       | 3  | K  | 13 | 1607.7818      | 804.3948        |
| 624.3397       | 4  | E  | 12 | 1451.6555      | 726.3317        |
| 752.3983       | 5  | Q  | 11 | 1322.6129      | 661.8104        |
| 899.4667       | 6  | F  | 10 | 1194.5544      | 597.7811        |
| 1012.5508      | 7  | L  | 9  | 1047.4859      | 524.2469        |
| 1127.5777      | 8  | D  | 8  | 934.4019       | 467.7049        |
| 1184.5992      | 9  | G  | 7  | 819.3749       | 410.1914        |
| 1299.6261      | 10 | D  | 6  | 762.3535       | 381.6807        |
| 1370.6633      | 11 | A  | 5  | 647.3265       | 324.1672        |
| 1556.7426      | 12 | W  | 4  | 576.2894       | 288.6486        |
| 1657.7902      | 13 | T  | 3  | 390.2101       | 195.6090        |
| 1771.8332      | 14 | N  | 2  | 289.1624       | 145.0851        |
|                | 15 | R  | 1  | 175.1195       | 88.0637         |

N-term:+29.04 K(3):+156.13

X-range:

0 - 0

MassTol: Y-zoom:

0. 1.

MassType:

☐ AVG ☒ MONO

Axis:

☒ 1 ☐ 2

Label:

☒ I ☐ M ☐ -

Ions:

a ☐ + ☐ 2+ ☐ 3+

b ☒ + ☐ 2+ ☐ 3+

c ☐ + ☐ 2+ ☐ 3+

x ☐ + ☐ 2+ ☐ 3+

y ☒ + ☒ 2+ ☐ 3+

z ☐ + ☐ 2+ ☐ 3+

hide H<sub>2</sub>O/NH<sub>3</sub> ☐

zoom 112-122 ☐

GO

YGDLEKDKGLQTSQDAR, MH+ 2008.0352, m/z 502.7642  
L OS G17 P120811 220811-s1.02719.02719.4.dta

scan 2719; 9.2e+000

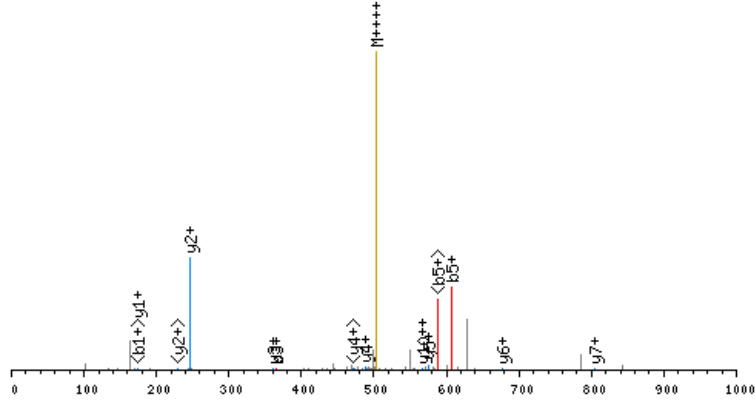

click image to zoom in; click top corners to zoom out [\[precursor±\]](#)

scan 2718; 502.8 m/z; 2.0e+001

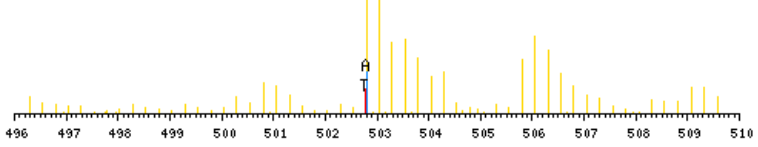

zoomed in precursor plot; T=theoretical m/z, A=acquired m/z

| b <sup>+</sup> | #  | AA | #  | y <sup>+</sup> | y <sup>2+</sup> |
|----------------|----|----|----|----------------|-----------------|
| 192.1024       | 1  | Y  | 17 |                |                 |
| 249.1239       | 2  | G  | 16 | 1816.9406      | 908.9742        |
| 364.1508       | 3  | D  | 15 | 1759.9191      | 880.4635        |
| 477.2349       | 4  | L  | 14 | 1644.8921      | 822.9500        |
| 606.2775       | 5  | E  | 13 | 1531.8081      | 766.4080        |
| 762.4038       | 6  | K  | 12 | 1402.7655      | 701.8867        |
| 877.4307       | 7  | D  | 11 | 1246.6392      | 623.8235        |
| 1033.5570      | 8  | K  | 10 | 1131.6122      | 566.3100        |
| 1090.5785      | 9  | G  | 9  | 975.4859       | 488.2469        |
| 1203.6626      | 10 | L  | 8  | 918.4645       | 459.7362        |
| 1331.7211      | 11 | Q  | 7  | 805.3804       | 403.1941        |
| 1432.7688      | 12 | T  | 6  | 677.3218       | 339.1648        |
| 1519.8008      | 13 | S  | 5  | 576.2742       | 288.6410        |
| 1647.8594      | 14 | Q  | 4  | 489.2421       | 245.1250        |
| 1762.8864      | 15 | D  | 3  | 361.1836       | 181.0957        |
| 1833.9235      | 16 | A  | 2  | 246.1566       | 123.5822        |
|                | 17 | R  | 1  | 175.1195       | 88.0637         |

N-term:+29.04 K(6):+156.13  
K(8):+156.13

X-range:

0 - 0

MassTol: Y-zoom:

0. 1.

MassType:

☐AVG ☒MONO

Axis:

☒1 ☐2

Label:

☒I ☐M ☐-

Ions:

a ☐+ ☐2+ ☐3+

b ☒+ ☐2+ ☐3+

c ☐+ ☐2+ ☐3+

x ☐+ ☐2+ ☐3+

y ☒+ ☒2+ ☐3+

z ☐+ ☐2+ ☐3+

hide H<sub>2</sub>O/NH<sub>3</sub> ☐

zoom 112-122 ☐

GO

YGGYKEPAAPVSIQR, MH+ 1691.9121, m/z 564.6422  
L OS G15 P120811 220811-s1.03330.03330.3.dta

scan 3330; 1.1e+001

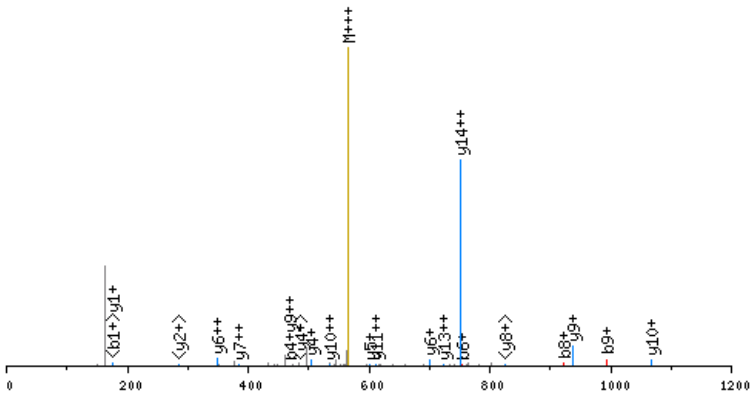

click image to zoom in; click top corners to zoom out

[precursor±]

scan 3326; 564.6 m/z; 7.0e+000

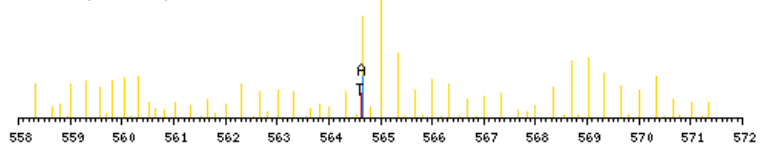

zoomed in precursor plot; T=theoretical m/z, A=acquired m/z

| b <sup>+</sup> | #  | AA | #  | y <sup>+</sup> | y <sup>2+</sup> |
|----------------|----|----|----|----------------|-----------------|
| 192.1024       | 1  | Y  | 15 |                |                 |
| 249.1239       | 2  | G  | 14 | 1500.8175      | 750.9127        |
| 306.1454       | 3  | G  | 13 | 1443.7960      | 722.4019        |
| 469.2087       | 4  | Y  | 12 | 1386.7746      | 693.8912        |
| 625.3350       | 5  | K  | 11 | 1223.7112      | 612.3595        |
| 754.3776       | 6  | E  | 10 | 1067.5849      | 534.2964        |
| 851.4303       | 7  | P  | 9  | 938.5423       | 469.7751        |
| 922.4675       | 8  | A  | 8  | 841.4896       | 421.2487        |
| 993.5046       | 9  | A  | 7  | 770.4525       | 385.7301        |
| 1090.5573      | 10 | P  | 6  | 699.4153       | 350.2116        |
| 1189.6257      | 11 | V  | 5  | 602.3626       | 301.6852        |
| 1276.6578      | 12 | S  | 4  | 503.2942       | 252.1510        |
| 1389.7418      | 13 | I  | 3  | 416.2621       | 208.6350        |
| 1517.8004      | 14 | Q  | 2  | 303.1781       | 152.0930        |
|                | 15 | R  | 1  | 175.1195       | 88.0637         |

N-term:+29.04 K(5):+156.13

X-range:

0 - 0

MassTol: Y-zoom:

0. 1.

MassType:

☐AVG ☒MONO

Axis:

☒1 ☐2

Label:

☒I ☐M ☐-

Ions:

a ☐+ ☐2+ ☐3+

b ☒+ ☐2+ ☐3+

c ☐+ ☐2+ ☐3+

x ☐+ ☐2+ ☐3+

y ☒+ ☒2+ ☐3+

z ☐+ ☐2+ ☐3+

hide H<sub>2</sub>O/NH<sub>3</sub> ☐

zoom 112-122 ☐

GO

YGIDDNLLHYNR, MH+ 1520.7497, m/z 507.5881  
L OS G16 P120811 220811-s1.05082.05082.3.dta

scan 5082; 3.9e+000

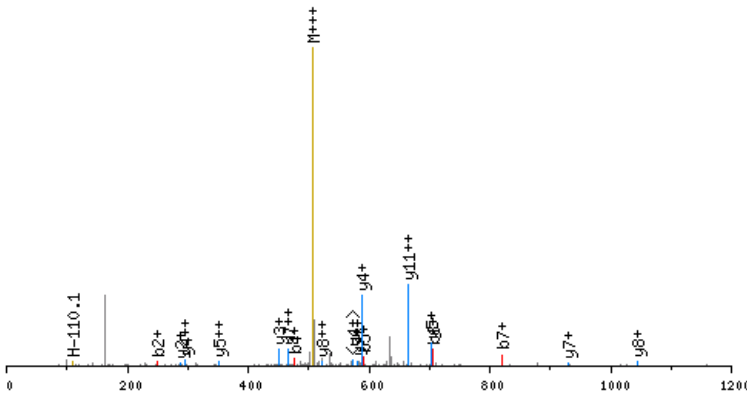

click image to zoom in; click top corners to zoom out

[precursor±]

scan 5078; 507.6 m/z; 4.6e+000

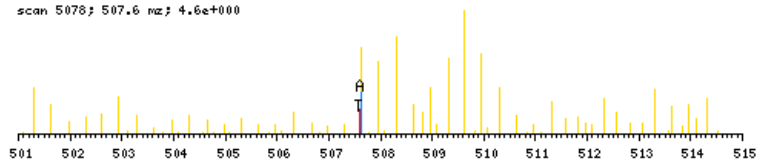

zoomed in precursor plot; T=theoretical m/z, A=acquired m/z

| b <sup>+</sup> | #  | AA | #  | y <sup>+</sup> | y <sup>2+</sup> |
|----------------|----|----|----|----------------|-----------------|
| 192.1024       | 1  | Y  | 12 |                |                 |
| 249.1239       | 2  | G  | 11 | 1329.6551      | 665.3315        |
| 362.2080       | 3  | I  | 10 | 1272.6337      | 636.8207        |
| 477.2349       | 4  | D  | 9  | 1159.5496      | 580.2787        |
| 592.2618       | 5  | D  | 8  | 1044.5227      | 522.7652        |
| 706.3048       | 6  | N  | 7  | 929.4957       | 465.2518        |
| 819.3888       | 7  | L  | 6  | 815.4528       | 408.2303        |
| 932.4729       | 8  | L  | 5  | 702.3687       | 351.6883        |
| 1069.5318      | 9  | H  | 4  | 589.2847       | 295.1462        |
| 1232.5951      | 10 | Y  | 3  | 452.2258       | 226.6168        |
| 1346.6381      | 11 | N  | 2  | 289.1624       | 145.0851        |
|                | 12 | R  | 1  | 175.1195       | 88.0637         |

N-term:+29.04

X-range:

0 - 0

MassTol: Y-zoom:

0. 1.

MassType:

☐ AVG ☒ MONO

Axis:

☒ 1 ☐ 2

Label:

☒ I ☐ M ☐ -

Ions:

a ☐ + ☐ 2+ ☐ 3+

b ☒ + ☐ 2+ ☐ 3+

c ☐ + ☐ 2+ ☐ 3+

x ☐ + ☐ 2+ ☐ 3+

y ☒ + ☒ 2+ ☐ 3+

z ☐ + ☐ 2+ ☐ 3+

hide H<sub>2</sub>O/NH<sub>3</sub> ☐

zoom 112-122 ☐

GO

YGINDPVADKLLKR, MH+ 1685.9955, m/z 422.2543  
L OS G17 P120811 220811-s1.05211.05211.4.dta

scan 5211; 7.7e+000

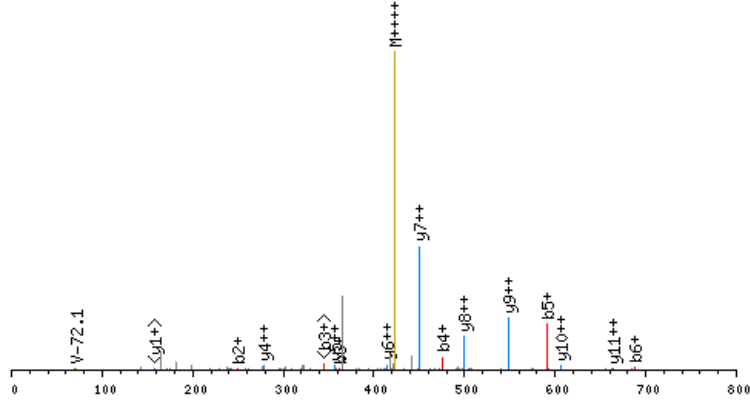

click image to zoom in; click top corners to zoom out [\[precursor±\]](#)

scan 5208; 422.3 m/z; 5.9e+000

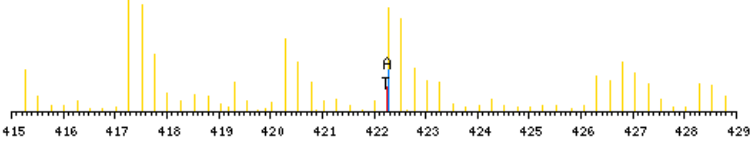

zoomed in precursor plot; T=theoretical m/z, A=acquired m/z

| b <sup>+</sup> | #  | AA | #  | y <sup>+</sup> | y <sup>2+</sup> |
|----------------|----|----|----|----------------|-----------------|
| 192.1024       | 1  | Y  | 14 |                |                 |
| 249.1239       | 2  | G  | 13 | 1494.9009      | 747.9543        |
| 362.2080       | 3  | I  | 12 | 1437.8794      | 719.4436        |
| 476.2509       | 4  | N  | 11 | 1324.7953      | 662.9016        |
| 591.2778       | 5  | D  | 10 | 1210.7524      | 605.8801        |
| 688.3306       | 6  | P  | 9  | 1095.7255      | 548.3666        |
| 787.3990       | 7  | V  | 8  | 998.6727       | 499.8403        |
| 858.4361       | 8  | A  | 7  | 899.6043       | 450.3061        |
| 973.4631       | 9  | D  | 6  | 828.5672       | 414.7875        |
| 1129.5894      | 10 | K  | 5  | 713.5402       | 357.2740        |
| 1242.6734      | 11 | L  | 4  | 557.4139       | 279.2109        |
| 1355.7575      | 12 | L  | 3  | 444.3299       | 222.6688        |
| 1511.8838      | 13 | K  | 2  | 331.2458       | 166.1268        |
|                | 14 | R  | 1  | 175.1195       | 88.0637         |

N-term:+29.04 K(10):+156.13  
K(13):+156.13

X-range:

0 - 0

MassTol: Y-zoom:

0. 1.

MassType:

☐ AVG ☒ MONO

Axis:

☒ 1 ☐ 2

Label:

☒ I ☐ M ☐ -

Ions:

a ☐ + ☐ 2+ ☐ 3+

b ☒ + ☐ 2+ ☐ 3+

c ☐ + ☐ 2+ ☐ 3+

x ☐ + ☐ 2+ ☐ 3+

y ☒ + ☒ 2+ ☐ 3+

z ☐ + ☐ 2+ ☐ 3+

hide H<sub>2</sub>O/NH<sub>3</sub> ☐

zoom 112-122 ☐

GO

YGYDEKSAGVSPGPMGPGSGPR, MH+ 2276.1658, m/z 759.3934  
H OS G15 P120811 220811-s1.04192.04192.3.dta

scan 4192; 4.6e+000

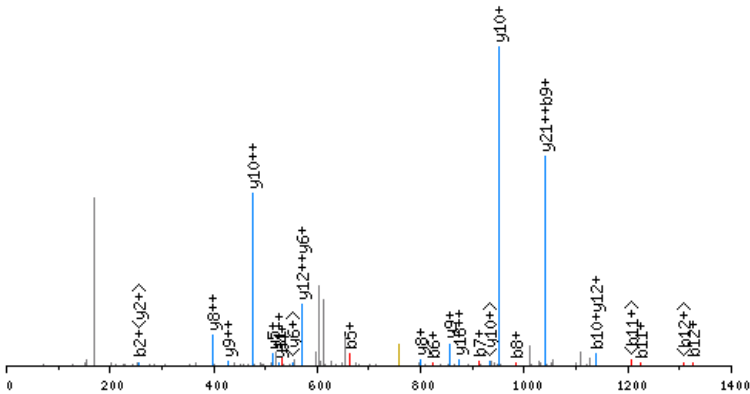

click image to zoom in; click top corners to zoom out [precursor±]

scan 4191; 759.4 m/z; 1.2e+001

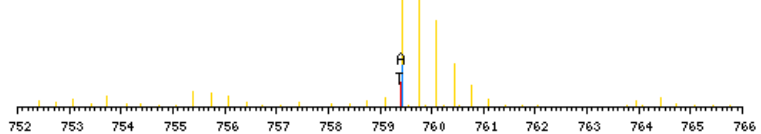

zoomed in precursor plot; T=theoretical m/z, A=acquired m/z

| b <sup>+</sup> | #  | AA | #  | y <sup>+</sup> | y <sup>2+</sup> |
|----------------|----|----|----|----------------|-----------------|
| 198.1342       | 1  | Y  | 22 |                |                 |
| 255.1557       | 2  | G  | 21 | 2079.0394      | 1040.0236       |
| 418.2190       | 3  | Y  | 20 | 2022.0179      | 1011.5129       |
| 533.2460       | 4  | D  | 19 | 1858.9546      | 929.9812        |
| 662.2886       | 5  | E  | 18 | 1743.9276      | 872.4677        |
| 824.4467       | 6  | K  | 17 | 1614.8850      | 807.9464        |
| 911.4787       | 7  | S  | 16 | 1452.7269      | 726.8674        |
| 982.5158       | 8  | A  | 15 | 1365.6949      | 683.3514        |
| 1039.5373      | 9  | G  | 14 | 1294.6578      | 647.8328        |
| 1138.6057      | 10 | V  | 13 | 1237.6363      | 619.3221        |
| 1225.6377      | 11 | S  | 12 | 1138.5679      | 569.7879        |
| 1324.7061      | 12 | V  | 11 | 1051.5359      | 526.2718        |
| 1421.7589      | 13 | P  | 10 | 952.4675       | 476.7376        |
| 1478.7803      | 14 | G  | 9  | 855.4147       | 428.2113        |
| 1575.8331      | 15 | P  | 8  | 798.3932       | 399.7005        |
| 1706.8736      | 16 | M  | 7  | 701.3405       | 351.1741        |
| 1763.8951      | 17 | G  | 6  | 570.3000       | 285.6539        |
| 1860.9478      | 18 | P  | 5  | 513.2785       | 257.1432        |
| 1947.9799      | 19 | S  | 4  | 416.2258       | 208.6168        |
| 2005.0013      | 20 | G  | 3  | 329.1937       | 165.1008        |
| 2102.0541      | 21 | P  | 2  | 272.1723       | 136.5900        |
|                | 22 | R  | 1  | 175.1195       | 88.0637         |

N-term:+35.07 K(6):+162.16

X-range:

0 - 0

MassTol: Y-zoom:

0. 1.

MassType:

☐ AVG ☒ MONO

Axis:

☒ 1 ☐ 2

Label:

☒ I ☐ M ☐ -

Ions:

a ☐ + ☐ 2+ ☐ 3+

b ☒ + ☐ 2+ ☐ 3+

c ☐ + ☐ 2+ ☐ 3+

x ☐ + ☐ 2+ ☐ 3+

y ☒ + ☒ 2+ ☐ 3+

z ☐ + ☐ 2+ ☐ 3+

hide H<sub>2</sub>O/NH<sub>3</sub> ☐

zoom 112-122 ☐

GO

YGYTHLSTGDLLR, MH+ 1529.8176, m/z 510.6107  
H OS G16 P120811 220811-s1.04894.04894.3.dta

scan 4894; 4.6e+000

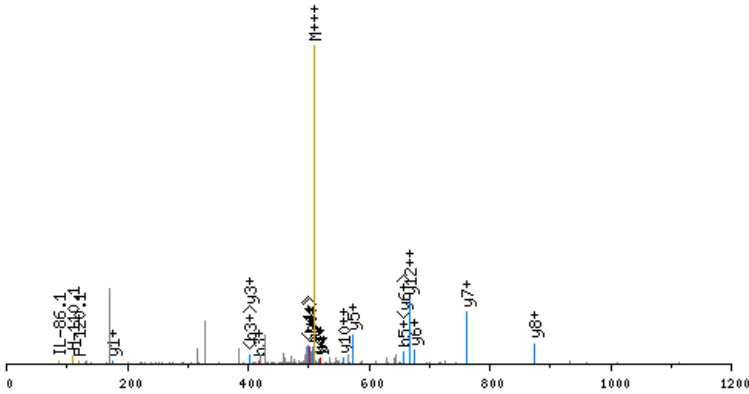

click image to zoom in; click top corners to zoom out [\[precursor±\]](#)

scan 4893; 510.6 m/z; 4.8e+001

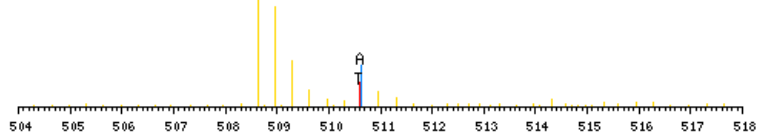

zoomed in precursor plot; T=theoretical m/z, A=acquired m/z

| b <sup>+</sup> | #  | AA | #  | y <sup>+</sup> | y <sup>2+</sup> |
|----------------|----|----|----|----------------|-----------------|
| 198.1342       | 1  | Y  | 13 |                |                 |
| 255.1557       | 2  | G  | 12 | 1332.6912      | 666.8495        |
| 418.2190       | 3  | Y  | 11 | 1275.6697      | 638.3388        |
| 519.2667       | 4  | T  | 10 | 1112.6064      | 556.8071        |
| 656.3256       | 5  | H  | 9  | 1011.5587      | 506.2833        |
| 769.4097       | 6  | L  | 8  | 874.4998       | 437.7538        |
| 856.4417       | 7  | S  | 7  | 761.4157       | 381.2118        |
| 957.4894       | 8  | T  | 6  | 674.3837       | 337.6958        |
| 1014.5108      | 9  | G  | 5  | 573.3360       | 287.1719        |
| 1129.5378      | 10 | D  | 4  | 516.3146       | 258.6612        |
| 1242.6219      | 11 | L  | 3  | 401.2876       | 201.1477        |
| 1355.7059      | 12 | L  | 2  | 288.2036       | 144.6057        |
|                | 13 | R  | 1  | 175.1195       | 88.0637         |

N-term:+35.07

X-range:

0 - 0

MassTol: Y-zoom:

0. 1.

MassType:

☐ AVG ☒ MONO

Axis:

☒ 1 ☐ 2

Label:

☒ I ☐ M ☐ -

Ions:

a ☐ + ☐ 2+ ☐ 3+

b ☒ + ☐ 2+ ☐ 3+

c ☐ + ☐ 2+ ☐ 3+

x ☐ + ☐ 2+ ☐ 3+

y ☒ + ☒ 2+ ☐ 3+

z ☐ + ☐ 2+ ☐ 3+

hide H<sub>2</sub>O/NH<sub>3</sub> ☐

zoom 112-122 ☐

GO

YHAFSGAQKAETAANR, MH+ 1777.8986, m/z 445.2301  
L OS G18 P120811 220811-s1.02207.02207.4.dta

scan 2207; 1.4e+000

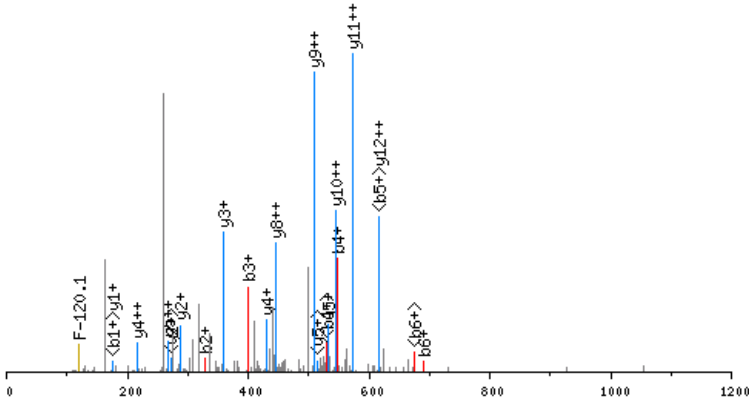

click image to zoom in; click top corners to zoom out

[precursor±]

scan 2206; 445.2 m/z; 1.1e+001

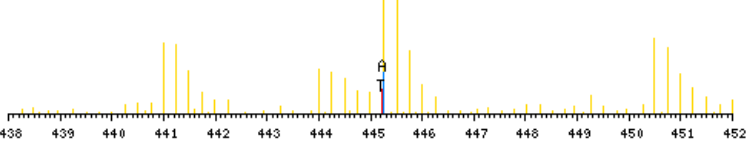

zoomed in precursor plot; T=theoretical m/z, A=acquired m/z

| b <sup>+</sup> | #  | AA | #  | y <sup>+</sup> | y <sup>2+</sup> |
|----------------|----|----|----|----------------|-----------------|
| 192.1024       | 1  | Y  | 16 |                |                 |
| 329.1613       | 2  | H  | 15 | 1586.8040      | 793.9059        |
| 400.1985       | 3  | A  | 14 | 1449.7451      | 725.3764        |
| 547.2669       | 4  | F  | 13 | 1378.7079      | 689.8579        |
| 634.2989       | 5  | S  | 12 | 1231.6395      | 616.3237        |
| 691.3204       | 6  | G  | 11 | 1144.6075      | 572.8077        |
| 762.3575       | 7  | A  | 10 | 1087.5860      | 544.2969        |
| 890.4161       | 8  | Q  | 9  | 1016.5489      | 508.7784        |
| 1046.5424      | 9  | K  | 8  | 888.4903       | 444.7491        |
| 1117.5795      | 10 | A  | 7  | 732.3640       | 366.6859        |
| 1246.6221      | 11 | E  | 6  | 661.3269       | 331.1674        |
| 1347.6697      | 12 | T  | 5  | 532.2843       | 266.6461        |
| 1418.7069      | 13 | A  | 4  | 431.2367       | 216.1222        |
| 1489.7440      | 14 | A  | 3  | 360.1995       | 180.6037        |
| 1603.7869      | 15 | N  | 2  | 289.1624       | 145.0851        |
|                | 16 | R  | 1  | 175.1195       | 88.0637         |

N-term:+29.04 K(9):+156.13

X-range:

0 - 0

MassTol: Y-zoom:

0. 1.

MassType:

☐AVG ☒MONO

Axis:

☒1 ☐2

Label:

☒I ☐M ☐-

Ions:

a ☐+ ☐2+ ☐3+

b ☒+ ☐2+ ☐3+

c ☐+ ☐2+ ☐3+

x ☐+ ☐2+ ☐3+

y ☒+ ☒2+ ☐3+

z ☐+ ☐2+ ☐3+

hide H<sub>2</sub>O/NH<sub>3</sub> ☐

zoom 112-122 ☐

GO

YIDGVIMEEATVSGILGKR, MH+ 2095.1109, m/z 699.0418  
L OS G15 P120811 220811-s1.06210.06210.3.dta

scan 6210; 1.1e+001

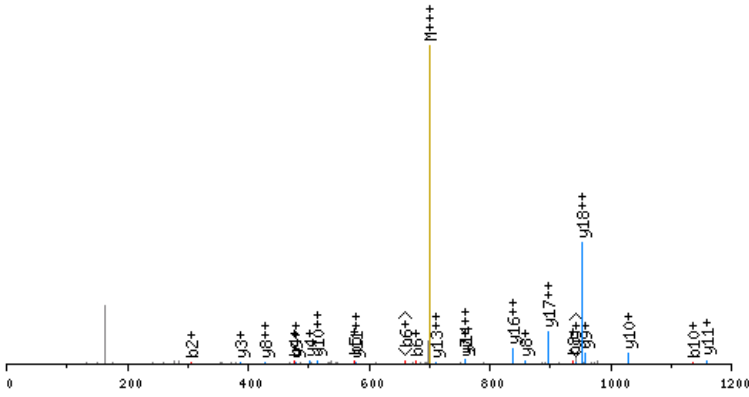

X-range:

0 - 0

MassTol: Y-zoom:

0. 1.

MassType:

☐ AVG ☒ MONO

Axis:

☒ 1 ☐ 2

Label:

☒ I ☐ M ☐ -

Ions:

a ☐ + ☐ 2+ ☐ 3+

b ☒ + ☐ 2+ ☐ 3+

c ☐ + ☐ 2+ ☐ 3+

x ☐ + ☐ 2+ ☐ 3+

y ☒ + ☒ 2+ ☐ 3+

z ☐ + ☐ 2+ ☐ 3+

hide H<sub>2</sub>O/NH<sub>3</sub> ☐

zoom 112-122 ☐

GO

YIDPEKGDIVTVVSPALLDR, MH+ 2256.2491, m/z 752.7546  
L OS G14 P120811 220811-s1.05939.05939.3.dta

scan 5939; 2.5e+000

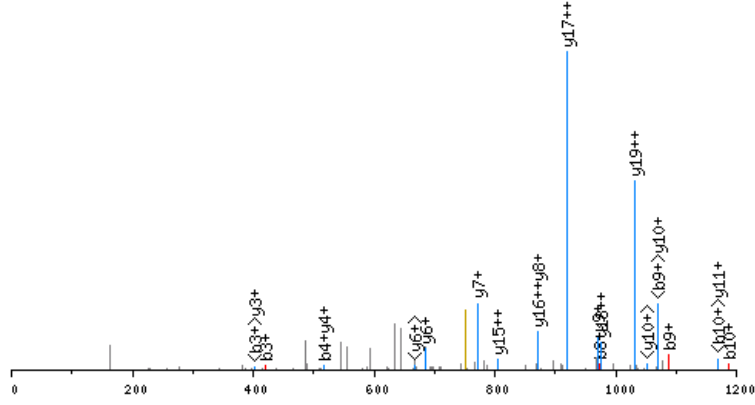

click image to zoom in; click top corners to zoom out [\[precursor±\]](#)

scan 5937; 752.8 m/z; 1.7e+000

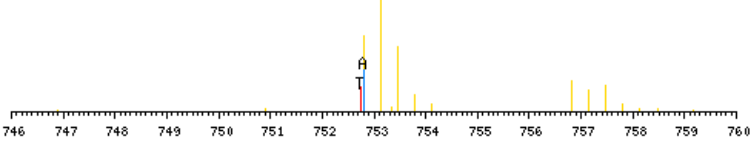

zoomed in precursor plot; T=theoretical m/z, A=acquired m/z

| b <sup>+</sup> | #  | AA | #  | y <sup>+</sup> | y <sup>2+</sup> |
|----------------|----|----|----|----------------|-----------------|
| 192.1024       | 1  | Y  | 20 |                |                 |
| 305.1865       | 2  | I  | 19 | 2065.1545      | 1033.0812       |
| 420.2134       | 3  | D  | 18 | 1952.0705      | 976.5391        |
| 517.2662       | 4  | P  | 17 | 1837.0435      | 919.0257        |
| 646.3088       | 5  | E  | 16 | 1739.9908      | 870.4993        |
| 802.4351       | 6  | K  | 15 | 1610.9482      | 805.9780        |
| 859.4566       | 7  | G  | 14 | 1454.8219      | 727.9148        |
| 974.4835       | 8  | D  | 13 | 1397.8004      | 699.4041        |
| 1087.5676      | 9  | I  | 12 | 1282.7735      | 641.8906        |
| 1186.6360      | 10 | V  | 11 | 1169.6894      | 585.3486        |
| 1287.6837      | 11 | T  | 10 | 1070.6210      | 535.8144        |
| 1386.7521      | 12 | V  | 9  | 969.5733       | 485.2906        |
| 1485.8205      | 13 | V  | 8  | 870.5049       | 435.7564        |
| 1572.8525      | 14 | S  | 7  | 771.4365       | 386.2222        |
| 1669.9053      | 15 | P  | 6  | 684.4044       | 342.7061        |
| 1740.9424      | 16 | A  | 5  | 587.3517       | 294.1798        |
| 1854.0265      | 17 | L  | 4  | 516.3146       | 258.6612        |
| 1967.1105      | 18 | L  | 3  | 403.2305       | 202.1192        |
| 2082.1375      | 19 | D  | 2  | 290.1464       | 145.5771        |
|                | 20 | R  | 1  | 175.1195       | 88.0637         |

N-term:+29.04 K(6):+156.13

X-range:

0 - 0

MassTol: Y-zoom:

0. 1.

MassType:

☐AVG ☒MONO

Axis:

☒1 ☐2

Label:

☒I ☐M ☐-

Ions:

a ☐+ ☐2+ ☐3+

b ☒+ ☐2+ ☐3+

c ☐+ ☐2+ ☐3+

x ☐+ ☐2+ ☐3+

y ☒+ ☒2+ ☐3+

z ☐+ ☐2+ ☐3+

hide H<sub>2</sub>O/NH<sub>3</sub> ☐

zoom 112-122 ☐

GO

YKGLEEEGEEGNKQNLK, MH+ 2077.0566, m/z 520.0196  
L OS G17 P120811 220811-s1.02522.02522.4.dta

scan 2522; 8.1e+000

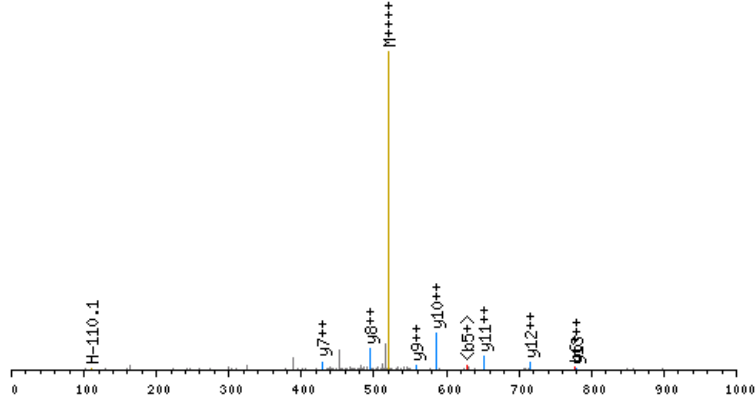

click image to zoom in; click top corners to zoom out [\[precursor±\]](#)

scan 2518; 520.0 m/z; 6.7e+000

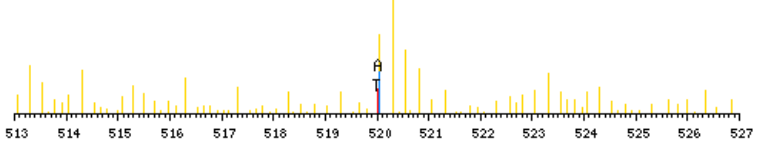

zoomed in precursor plot; T=theoretical m/z, A=acquired m/z

| b <sup>+</sup> | #  | AA | #  | y <sup>+</sup> | y <sup>2+</sup> |
|----------------|----|----|----|----------------|-----------------|
| 192.1024       | 1  | Y  | 17 |                |                 |
| 348.2287       | 2  | K  | 16 | 1885.9620      | 943.4849        |
| 405.2502       | 3  | G  | 15 | 1729.8357      | 865.4218        |
| 518.3343       | 4  | L  | 14 | 1672.8143      | 836.9110        |
| 647.3768       | 5  | E  | 13 | 1559.7302      | 780.3690        |
| 776.4194       | 6  | E  | 12 | 1430.6876      | 715.8477        |
| 905.4620       | 7  | E  | 11 | 1301.6450      | 651.3264        |
| 962.4835       | 8  | G  | 10 | 1172.6024      | 586.8051        |
| 1091.5261      | 9  | E  | 9  | 1115.5809      | 558.2944        |
| 1220.5687      | 10 | E  | 8  | 986.5384       | 493.7731        |
| 1277.5901      | 11 | G  | 7  | 857.4958       | 429.2518        |
| 1391.6331      | 12 | N  | 6  | 800.4743       | 400.7411        |
| 1547.7594      | 13 | K  | 5  | 686.4314       | 343.7196        |
| 1675.8180      | 14 | Q  | 4  | 530.3051       | 265.6564        |
| 1789.8609      | 15 | N  | 3  | 402.2465       | 201.6272        |
| 1902.9449      | 16 | L  | 2  | 288.2036       | 144.6057        |
|                | 17 | R  | 1  | 175.1195       | 88.0637         |

N-term:+29.04 K(2):+156.13  
K(13):+156.13

X-range:

0 - 0

MassTol: Y-zoom:

0. 1.

MassType:

☐ AVG ☒ MONO

Axis:

☒ 1 ☐ 2

Label:

☒ I ☐ M ☐ -

Ions:

a ☐ + ☐ 2+ ☐ 3+

b ☒ + ☐ 2+ ☐ 3+

c ☐ + ☐ 2+ ☐ 3+

x ☐ + ☐ 2+ ☐ 3+

y ☒ + ☒ 2+ ☐ 3+

z ☐ + ☐ 2+ ☐ 3+

hide H<sub>2</sub>O/NH<sub>3</sub> ☐

zoom 112-122 ☐

GO

YKTDLEKDIISDTSGDFR, MH+ 2187.1186, m/z 547.5351  
L OS G17 P120811 220811-s1.05869.05869.4.dta

scan 5869; 1.4e+000

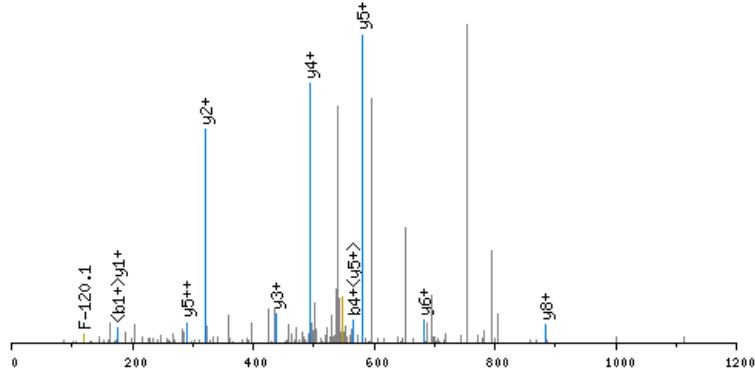

click image to zoom in; click top corners to zoom out [\[precursor±\]](#)

scan 5868; 547.5 m/z; 5.9e+000

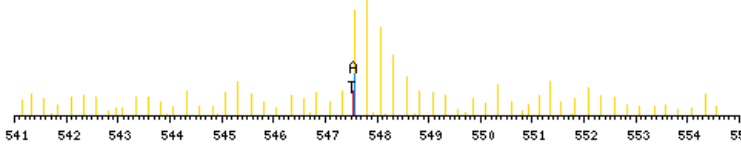

zoomed in precursor plot; T=theoretical m/z, A=acquired m/z

| b <sup>+</sup> | #  | AA | #  | y <sup>+</sup> | y <sup>2+</sup> |
|----------------|----|----|----|----------------|-----------------|
| 192.1024       | 1  | Y  | 18 |                |                 |
| 348.2287       | 2  | K  | 17 | 1996.0239      | 998.5159        |
| 449.2764       | 3  | T  | 16 | 1839.8976      | 920.4527        |
| 564.3034       | 4  | D  | 15 | 1738.8500      | 869.9289        |
| 677.3874       | 5  | L  | 14 | 1623.8230      | 812.4154        |
| 806.4300       | 6  | E  | 13 | 1510.7390      | 755.8734        |
| 962.5563       | 7  | K  | 12 | 1381.6964      | 691.3521        |
| 1077.5833      | 8  | D  | 11 | 1225.5701      | 613.2889        |
| 1190.6673      | 9  | I  | 10 | 1110.5431      | 555.7755        |
| 1303.7514      | 10 | I  | 9  | 997.4591       | 499.2334        |
| 1390.7834      | 11 | S  | 8  | 884.3750       | 442.6914        |
| 1505.8103      | 12 | D  | 7  | 797.3430       | 399.1754        |
| 1606.8580      | 13 | T  | 6  | 682.3160       | 341.6619        |
| 1693.8901      | 14 | S  | 5  | 581.2683       | 291.1381        |
| 1750.9115      | 15 | G  | 4  | 494.2363       | 247.6221        |
| 1865.9385      | 16 | D  | 3  | 437.2149       | 219.1113        |
| 2013.0069      | 17 | F  | 2  | 322.1879       | 161.5979        |
|                | 18 | R  | 1  | 175.1195       | 88.0637         |

N-term:+29.04 K(2):+156.13  
K(7):+156.13

X-range:

0 - 0

MassTol: Y-zoom:

0. 1.

MassType:

☐ AVG ☒ MONO

Axis:

☒ 1 ☐ 2

Label:

☒ I ☐ M ☐ -

Ions:

a ☐ + ☐ 2+ ☐ 3+

b ☒ + ☐ 2+ ☐ 3+

c ☐ + ☐ 2+ ☐ 3+

x ☐ + ☐ 2+ ☐ 3+

y ☒ + ☒ 2+ ☐ 3+

z ☐ + ☐ 2+ ☐ 3+

hide H<sub>2</sub>O/NH<sub>3</sub> ☐

zoom 112-122 ☐

GO

YLDNNKISNIPDEYFKR, MH+ 2231.2561, m/z 558.5695  
H OS G17 P120811 220811-s1.05649.05649.4.dta

scan 5649; 5.8e+000

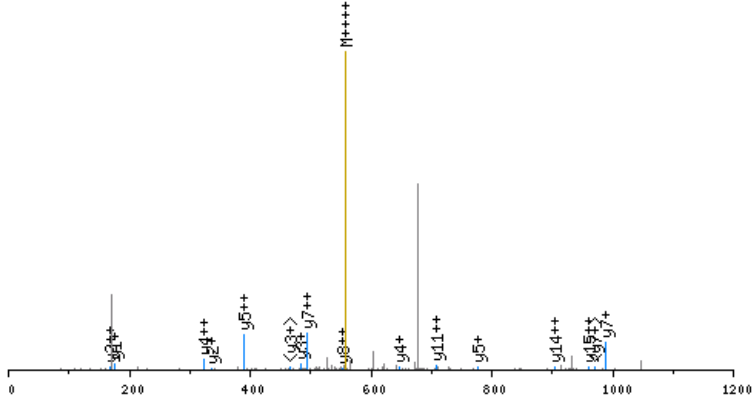

click image to zoom in; click top corners to zoom out [\[precursor±\]](#)

scan 5648; 558.6 m/z; 7.7e+000

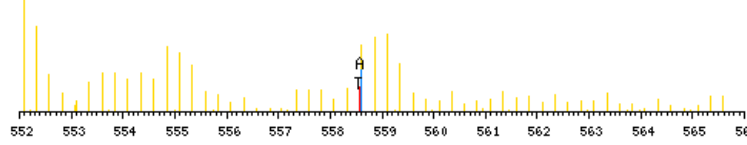

zoomed in precursor plot; T=theoretical m/z, A=acquired m/z

| b <sup>+</sup> | #  | AA | #  | y <sup>+</sup> | y <sup>2+</sup> |
|----------------|----|----|----|----------------|-----------------|
| 198.1342       | 1  | Y  | 17 |                |                 |
| 311.2183       | 2  | L  | 16 | 2034.1297      | 1017.5688       |
| 426.2452       | 3  | D  | 15 | 1921.0456      | 961.0267        |
| 540.2882       | 4  | N  | 14 | 1806.0187      | 903.5133        |
| 654.3311       | 5  | N  | 13 | 1691.9758      | 846.4918        |
| 816.4892       | 6  | K  | 12 | 1577.9328      | 789.4703        |
| 929.5733       | 7  | I  | 11 | 1415.7747      | 708.3913        |
| 1016.6053      | 8  | S  | 10 | 1302.6907      | 651.8492        |
| 1130.6482      | 9  | N  | 9  | 1215.6586      | 608.3332        |
| 1243.7323      | 10 | I  | 8  | 1101.6157      | 551.3118        |
| 1340.7850      | 11 | P  | 7  | 988.5316       | 494.7697        |
| 1455.8120      | 12 | D  | 6  | 891.4789       | 446.2434        |
| 1584.8546      | 13 | E  | 5  | 776.4519       | 388.7299        |
| 1747.9179      | 14 | Y  | 4  | 647.4093       | 324.2086        |
| 1894.9863      | 15 | F  | 3  | 484.3460       | 242.6769        |
| 2057.1444      | 16 | K  | 2  | 337.2776       | 169.1427        |
|                | 17 | R  | 1  | 175.1195       | 88.0637         |

N-term: +35.07 K(6): +162.16  
K(16): +162.16

X-range:

0 - 0

MassTol: Y-zoom:

0. 1.

MassType:

☐AVG ☒MONO

Axis:

☒1 ☐2

Label:

☒I ☐M ☐-

Ions:

a ☐+ ☐2+ ☐3+

b ☒+ ☐2+ ☐3+

c ☐+ ☐2+ ☐3+

x ☐+ ☐2+ ☐3+

y ☒+ ☒2+ ☐3+

z ☐+ ☐2+ ☐3+

hide H<sub>2</sub>O/NH<sub>3</sub> ☐

zoom 112-122 ☐

GO

YLTLDIESTECR, MH+ 1527.7364, m/z 509.9170  
L OS G13 P120811 220811-s1.05408.05408.3.dta

scan 5408; 2.2e+000

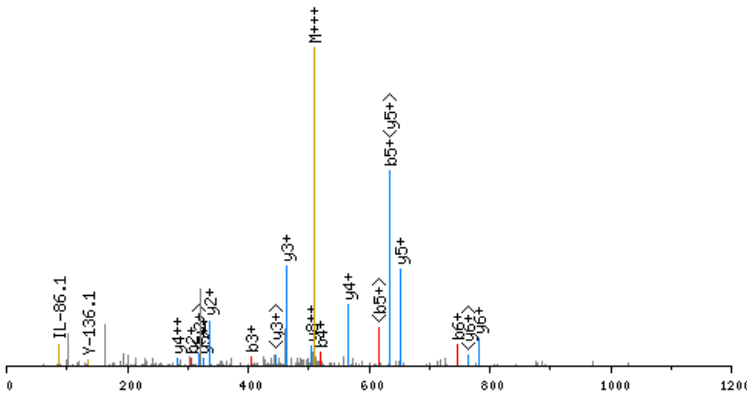

click image to zoom in; click top corners to zoom out

[precursor±]

scan 5404; 509.9 m/z; 5.4e+000

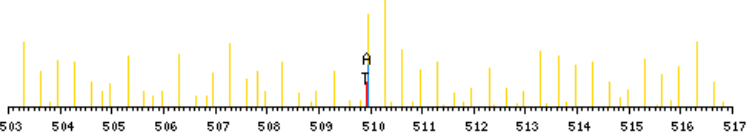

zoomed in precursor plot; T=theoretical m/z, A=acquired m/z

| b <sup>+</sup> | #  | AA | #  | y <sup>+</sup> | y <sup>2+</sup> |
|----------------|----|----|----|----------------|-----------------|
| 192.1024       | 1  | Y  | 12 |                |                 |
| 305.1865       | 2  | L  | 11 | 1336.6418      | 668.8248        |
| 406.2342       | 3  | T  | 10 | 1223.5577      | 612.2828        |
| 519.3182       | 4  | L  | 9  | 1122.5101      | 561.7589        |
| 634.3452       | 5  | D  | 8  | 1009.4260      | 505.2169        |
| 747.4292       | 6  | I  | 7  | 894.3991       | 447.7034        |
| 876.4718       | 7  | E  | 6  | 781.3150       | 391.1614        |
| 963.5039       | 8  | S  | 5  | 652.2724       | 326.6401        |
| 1064.5515      | 9  | T  | 4  | 565.2404       | 283.1241        |
| 1193.5941      | 10 | E  | 3  | 464.1927       | 232.6003        |
| 1353.6247      | 11 | C  | 2  | 335.1501       | 168.0790        |
|                | 12 | R  | 1  | 175.1195       | 88.0637         |

N-term:+29.04 C(11):+160.03

X-range:

0 - 0

MassTol: Y-zoom:

0. 1.

MassType:

☐AVG ☒MONO

Axis:

☒1 ☐2

Label:

☒I ☐M ☐-

Ions:

a ☐+ ☐2+ ☐3+

b ☒+ ☐2+ ☐3+

c ☐+ ☐2+ ☐3+

x ☐+ ☐2+ ☐3+

y ☒+ ☒2+ ☐3+

z ☐+ ☐2+ ☐3+

hide H<sub>2</sub>O/NH<sub>3</sub> ☐

zoom 112-122 ☐

GO

YMEKNQLEEVPSALPR, MH+ 1972.0850, m/z 658.0332  
H OS G15 P120811 220811-s1.04409.04409.3.dta

scan 4409; 3.2e+000

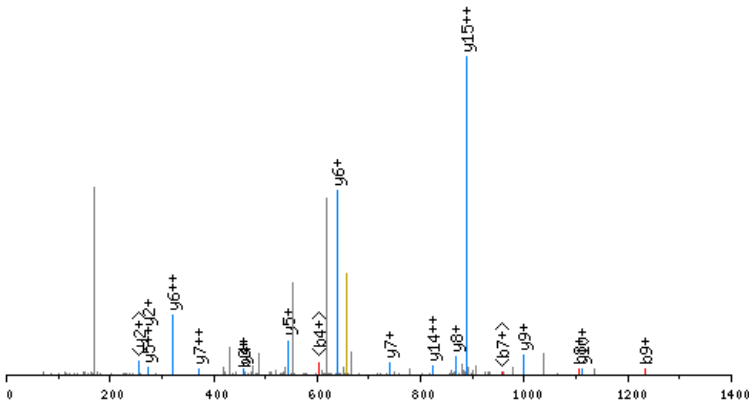

click image to zoom in; click top corners to zoom out

[precursor±]

scan 4406; 658.0 m/z; 7.1e+001

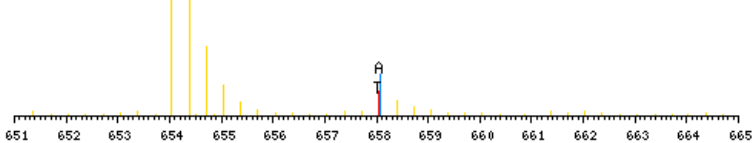

zoomed in precursor plot; T=theoretical m/z, A=acquired m/z

| b <sup>+</sup> | #  | AA | #  | y <sup>+</sup> | y <sup>2+</sup> |
|----------------|----|----|----|----------------|-----------------|
| 198.1342       | 1  | Y  | 16 |                |                 |
| 329.1747       | 2  | M  | 15 | 1774.9586      | 887.9832        |
| 458.2173       | 3  | E  | 14 | 1643.9181      | 822.4630        |
| 620.3754       | 4  | K  | 13 | 1514.8755      | 757.9417        |
| 734.4183       | 5  | N  | 12 | 1352.7174      | 676.8626        |
| 862.4769       | 6  | Q  | 11 | 1238.6745      | 619.8412        |
| 975.5610       | 7  | L  | 10 | 1110.6159      | 555.8119        |
| 1104.6036      | 8  | E  | 9  | 997.5318       | 499.2698        |
| 1233.6462      | 9  | E  | 8  | 868.4892       | 434.7485        |
| 1332.7146      | 10 | V  | 7  | 739.4466       | 370.2272        |
| 1429.7673      | 11 | P  | 6  | 640.3782       | 320.6930        |
| 1516.7994      | 12 | S  | 5  | 543.3255       | 272.1666        |
| 1587.8365      | 13 | A  | 4  | 456.2934       | 228.6506        |
| 1700.9205      | 14 | L  | 3  | 385.2563       | 193.1321        |
| 1797.9733      | 15 | P  | 2  | 272.1723       | 136.5900        |
|                | 16 | R  | 1  | 175.1195       | 88.0637         |

N-term:+35.07 K(4):+162.16

X-range:

0 - 0

MassTol: Y-zoom:

0. 1.

MassType:

☐ AVG ☒ MONO

Axis:

☒ 1 ☐ 2

Label:

☒ I ☐ M ☐ -

Ions:

a ☐ + ☐ 2+ ☐ 3+

b ☒ + ☐ 2+ ☐ 3+

c ☐ + ☐ 2+ ☐ 3+

x ☐ + ☐ 2+ ☐ 3+

y ☒ + ☒ 2+ ☐ 3+

z ☐ + ☐ 2+ ☐ 3+

hide H<sub>2</sub>O/NH<sub>3</sub> ☐

zoom 112-122 ☐

GO

YNATEPVISFYDKR, MH+ 1770.9703, m/z 590.9949  
H OS G15 P120811 220811-s1.04785.04785.3.dta

scan 4785; 3.9e+000

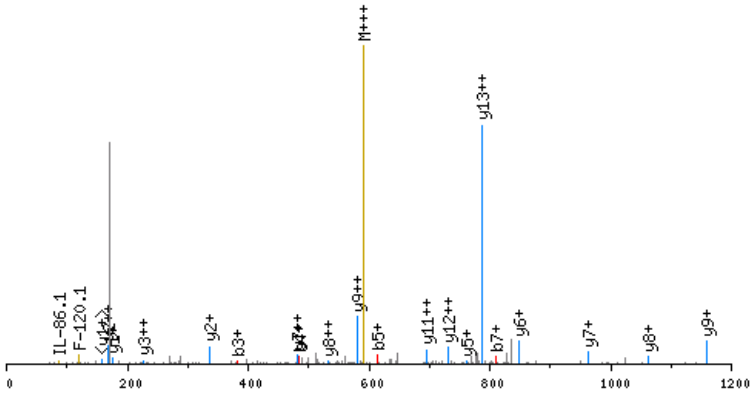

click image to zoom in; click top corners to zoom out

[precursor±]

scan 4781; 591.0 m/z; 1.5e+001

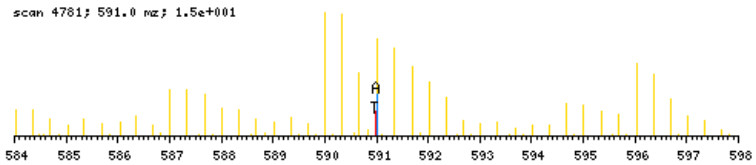

zoomed in precursor plot; T=theoretical m/z, A=acquired m/z

| b <sup>+</sup> | #  | AA | #  | y <sup>+</sup> | y <sup>2+</sup> |
|----------------|----|----|----|----------------|-----------------|
| 198.1342       | 1  | Y  | 14 |                |                 |
| 312.1772       | 2  | N  | 13 | 1573.8439      | 787.4258        |
| 383.2143       | 3  | A  | 12 | 1459.8009      | 730.4044        |
| 484.2619       | 4  | T  | 11 | 1388.7638      | 694.8858        |
| 613.3045       | 5  | E  | 10 | 1287.7161      | 644.3620        |
| 710.3573       | 6  | P  | 9  | 1158.6736      | 579.8407        |
| 809.4257       | 7  | V  | 8  | 1061.6208      | 531.3143        |
| 922.5098       | 8  | I  | 7  | 962.5524       | 481.7801        |
| 1009.5418      | 9  | S  | 6  | 849.4683       | 425.2381        |
| 1156.6102      | 10 | F  | 5  | 762.4363       | 381.7221        |
| 1319.6736      | 11 | Y  | 4  | 615.3679       | 308.1878        |
| 1434.7005      | 12 | D  | 3  | 452.3045       | 226.6562        |
| 1596.8586      | 13 | K  | 2  | 337.2776       | 169.1427        |
|                | 14 | R  | 1  | 175.1195       | 88.0637         |

N-term:+35.07 K(13):+162.16

X-range:

0 - 0

MassTol: Y-zoom:

0. 1.

MassType:

☐AVG ☒MONO

Axis:

☒1 ☐2

Label:

☒I ☐M ☐-

Ions:

a ☐+ ☐2+ ☐3+

b ☒+ ☐2+ ☐3+

c ☐+ ☐2+ ☐3+

x ☐+ ☐2+ ☐3+

y ☒+ ☒2+ ☐3+

z ☐+ ☐2+ ☐3+

hide H<sub>2</sub>O/NH<sub>3</sub> ☐

zoom 112-122 ☐

GO

YNLDPQEGGECALMR, MH+ 1780.7998, m/z 594.2714  
L OS G13 P120811 220811-s1.05058.05058.3.dta

scan 5058; 2.2e+000

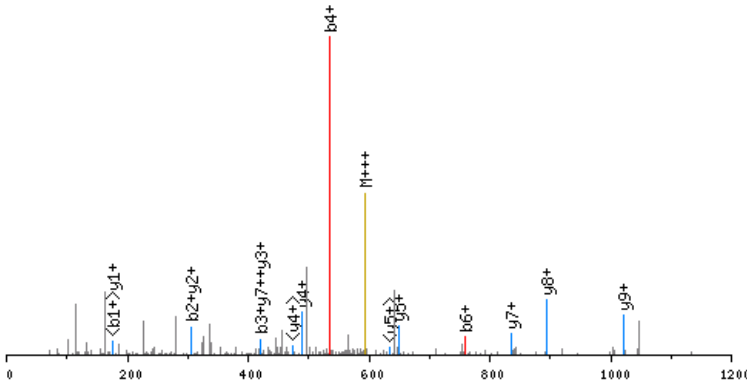

click image to zoom in; click top corners to zoom out [precursor±]

scan 5054; 594.3 m/z; 2.2e+001

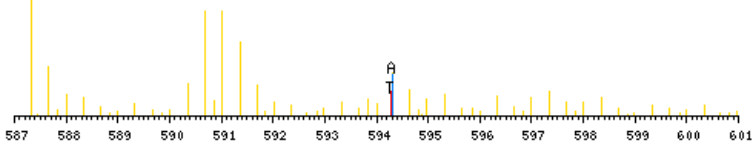

zoomed in precursor plot; T=theoretical m/z, A=acquired m/z

| b <sup>+</sup> | #  | AA | #  | y <sup>+</sup> | y <sup>2+</sup> |
|----------------|----|----|----|----------------|-----------------|
| 192.1024       | 1  | Y  | 15 |                |                 |
| 306.1454       | 2  | N  | 14 | 1589.7052      | 795.3565        |
| 419.2294       | 3  | L  | 13 | 1475.6622      | 738.3350        |
| 534.2564       | 4  | D  | 12 | 1362.5782      | 681.7930        |
| 631.3091       | 5  | P  | 11 | 1247.5512      | 624.2795        |
| 759.3677       | 6  | Q  | 10 | 1150.4985      | 575.7531        |
| 888.4103       | 7  | E  | 9  | 1022.4399      | 511.7239        |
| 945.4318       | 8  | G  | 8  | 893.3973       | 447.2026        |
| 1002.4532      | 9  | G  | 7  | 836.3758       | 418.6918        |
| 1131.4958      | 10 | E  | 6  | 779.3544       | 390.1811        |
| 1291.5264      | 11 | C  | 5  | 650.3118       | 325.6598        |
| 1362.5635      | 12 | A  | 4  | 490.2812       | 245.6445        |
| 1475.6476      | 13 | L  | 3  | 419.2440       | 210.1259        |
| 1606.6881      | 14 | M  | 2  | 306.1600       | 153.5839        |
|                | 15 | R  | 1  | 175.1195       | 88.0637         |

N-term:+29.04 C(11):+160.03

X-range:

0 - 0

MassTol: Y-zoom:

0. 1.

MassType:

☐AVG ☒MONO

Axis:

☒1 ☐2

Label:

☒I ☐M ☐-

Ions:

a ☐+ ☐2+ ☐3+

b ☒+ ☐2+ ☐3+

c ☐+ ☐2+ ☐3+

x ☐+ ☐2+ ☐3+

y ☒+ ☒2+ ☐3+

z ☐+ ☐2+ ☐3+

hide H<sub>2</sub>O/NH<sub>3</sub> ☐

zoom 112-122 ☐

GO

YQACSGPILPHR, MH+ 1426.7265, m/z 476.2470  
L OS G16 P120811 220811-s1.03176.03176.3.dta

scan 3176; 4.7e+000

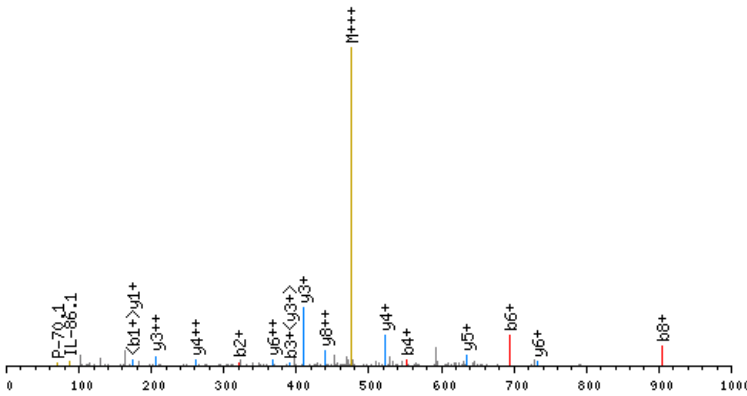

click image to zoom in; click top corners to zoom out

[precursor±]

scan 3173; 476.2 m/z; 1.8e+001

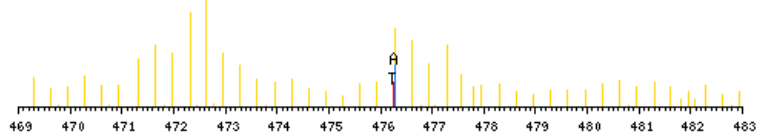

zoomed in precursor plot; T=theoretical m/z, A=acquired m/z

| b <sup>+</sup> | #  | AA | #  | y <sup>+</sup> | y <sup>2+</sup> |
|----------------|----|----|----|----------------|-----------------|
| 192.1024       | 1  | Y  | 12 |                |                 |
| 320.1610       | 2  | Q  | 11 | 1235.6319      | 618.3198        |
| 391.1981       | 3  | A  | 10 | 1107.5733      | 554.2905        |
| 551.2287       | 4  | C  | 9  | 1036.5362      | 518.7720        |
| 638.2607       | 5  | S  | 8  | 876.5056       | 438.7567        |
| 695.2822       | 6  | G  | 7  | 789.4735       | 395.2407        |
| 792.3350       | 7  | P  | 6  | 732.4521       | 366.7299        |
| 905.4190       | 8  | I  | 5  | 635.3993       | 318.2036        |
| 1018.5031      | 9  | L  | 4  | 522.3152       | 261.6615        |
| 1115.5559      | 10 | P  | 3  | 409.2312       | 205.1195        |
| 1252.6148      | 11 | H  | 2  | 312.1784       | 156.5931        |
|                | 12 | R  | 1  | 175.1195       | 88.0637         |

N-term:+29.04 C(4):+160.03

X-range:

0 - 0

MassTol: Y-zoom:

0. 1.

MassType:

☐ AVG ☒ MONO

Axis:

☒ 1 ☐ 2

Label:

☒ I ☐ M ☐ -

Ions:

a ☐ + ☐ 2+ ☐ 3+

b ☒ + ☐ 2+ ☐ 3+

c ☐ + ☐ 2+ ☐ 3+

x ☐ + ☐ 2+ ☐ 3+

y ☒ + ☒ 2+ ☐ 3+

z ☐ + ☐ 2+ ☐ 3+

hide H<sub>2</sub>O/NH<sub>3</sub> ☐

zoom 112-122 ☐

GO

YQEGSKNKSLNSEMDNILANLR, MH+ 2608.3405, m/z 652.8406  
L OS G17 P120811 220811-s1.06357.06357.4.dta

scan 6357; 1.1e+000

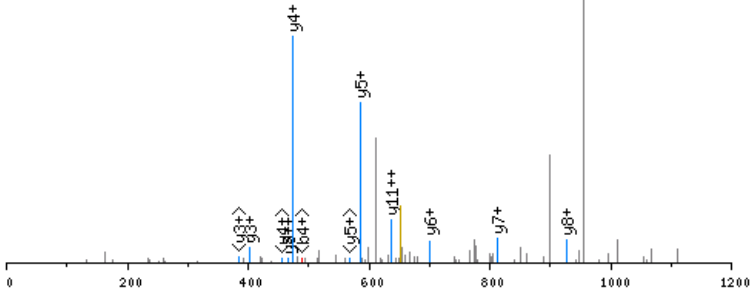

click image to zoom in; click top corners to zoom out [\[precursor±\]](#)

scan 6353; 652.8 m/z; 1.5e+000

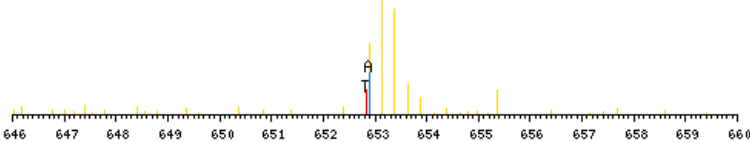

zoomed in precursor plot; T=theoretical m/z, A=acquired m/z

| b <sup>+</sup> | #  | AA | #  | y <sup>+</sup> | y <sup>2+</sup> |
|----------------|----|----|----|----------------|-----------------|
| 192.1024       | 1  | Y  | 22 |                |                 |
| 320.1610       | 2  | Q  | 21 | 2417.2459      | 1209.1269       |
| 449.2036       | 3  | E  | 20 | 2289.1873      | 1145.0976       |
| 506.2251       | 4  | G  | 19 | 2160.1448      | 1080.5763       |
| 593.2571       | 5  | S  | 18 | 2103.1233      | 1052.0656       |
| 749.3834       | 6  | K  | 17 | 2016.0913      | 1008.5495       |
| 863.4263       | 7  | N  | 16 | 1859.9650      | 930.4864        |
| 1019.5526      | 8  | K  | 15 | 1745.9220      | 873.4649        |
| 1106.5846      | 9  | S  | 14 | 1589.7957      | 795.4018        |
| 1219.6687      | 10 | L  | 13 | 1502.7637      | 751.8858        |
| 1333.7116      | 11 | N  | 12 | 1389.6796      | 695.3437        |
| 1420.7437      | 12 | S  | 11 | 1275.6367      | 638.3223        |
| 1549.7863      | 13 | E  | 10 | 1188.6047      | 594.8063        |
| 1680.8267      | 14 | M  | 9  | 1059.5621      | 530.2850        |
| 1795.8537      | 15 | D  | 8  | 928.5216       | 464.7647        |
| 1909.8966      | 16 | N  | 7  | 813.4947       | 407.2512        |
| 2022.9807      | 17 | I  | 6  | 699.4517       | 350.2298        |
| 2136.0647      | 18 | L  | 5  | 586.3677       | 293.6877        |
| 2207.1019      | 19 | A  | 4  | 473.2836       | 237.1457        |
| 2321.1448      | 20 | N  | 3  | 402.2465       | 201.6272        |
| 2434.2288      | 21 | L  | 2  | 288.2036       | 144.6057        |
|                | 22 | R  | 1  | 175.1195       | 88.0637         |

N-term:+29.04 K(6):+156.13  
K(8):+156.13

X-range:

0 - 0

MassTol: Y-zoom:

0. 1.

MassType:

☐AVG ☒MONO

Axis:

☒1 ☐2

Label:

☒I ☐M ☐-

Ions:

a ☐+ ☐2+ ☐3+

b ☒+ ☐2+ ☐3+

c ☐+ ☐2+ ☐3+

x ☐+ ☐2+ ☐3+

y ☒+ ☒2+ ☐3+

z ☐+ ☐2+ ☐3+

hide H<sub>2</sub>O/NH<sub>3</sub> ☐

zoom 112-122 ☐

GO

YQLETDKFEFGKLR, MH+ 2167.3076, m/z 542.5824  
H OS G18 P120811 220811-s1.05413.05413.4.dta

scan 5413; 1.1e+001

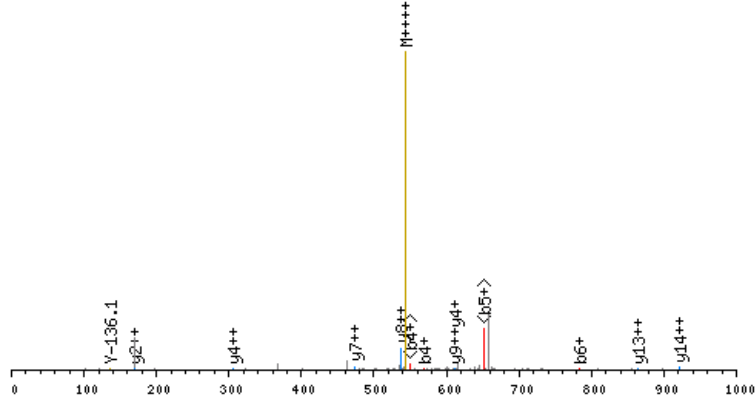

click image to zoom in; click top corners to zoom out [\[precursor±\]](#)

scan 5411; 542.6 m/z; 8.6e+000

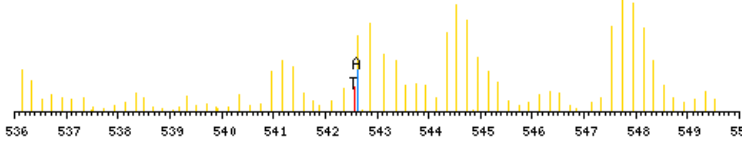

zoomed in precursor plot; T=theoretical m/z, A=acquired m/z

| b <sup>+</sup> | #  | AA | #  | y <sup>+</sup> | y <sup>2+</sup> |
|----------------|----|----|----|----------------|-----------------|
| 198.1342       | 1  | Y  | 16 |                |                 |
| 326.1928       | 2  | Q  | 15 | 1970.1812      | 985.5945        |
| 439.2769       | 3  | L  | 14 | 1842.1226      | 921.5652        |
| 568.3195       | 4  | E  | 13 | 1729.0386      | 865.0232        |
| 669.3671       | 5  | T  | 12 | 1599.9960      | 800.5019        |
| 784.3941       | 6  | D  | 11 | 1498.9483      | 749.9781        |
| 946.5522       | 7  | K  | 10 | 1383.9213      | 692.4646        |
| 1093.6206      | 8  | F  | 9  | 1221.7632      | 611.3855        |
| 1222.6632      | 9  | E  | 8  | 1074.6948      | 537.8513        |
| 1369.7316      | 10 | F  | 7  | 945.6522       | 473.3300        |
| 1426.7531      | 11 | G  | 6  | 798.5838       | 399.7958        |
| 1555.7957      | 12 | E  | 5  | 741.5624       | 371.2851        |
| 1717.9538      | 13 | K  | 4  | 612.5198       | 306.7638        |
| 1831.0378      | 14 | L  | 3  | 450.3617       | 225.6847        |
| 1993.1959      | 15 | K  | 2  | 337.2776       | 169.1427        |
|                | 16 | R  | 1  | 175.1195       | 88.0637         |

N-term:+35.07 K(7):+162.16  
K(13):+162.16 K(15):+162.16

X-range:

0 - 0

MassTol: Y-zoom:

0. 1.

MassType:

☐AVG ☒MONO

Axis:

☒1 ☐2

Label:

☒I ☐M ☐-

Ions:

a ☐+ ☐2+ ☐3+

b ☒+ ☐2+ ☐3+

c ☐+ ☐2+ ☐3+

x ☐+ ☐2+ ☐3+

y ☒+ ☒2+ ☐3+

z ☐+ ☐2+ ☐3+

hide H<sub>2</sub>O/NH<sub>3</sub> ☐

zoom 112-122 ☐

GO

YRPPFVLDALGR, MH+ 1381.7956, m/z 461.2700  
L OS G16 P120811 220811-s1.05089.05089.3.dta

scan 5089; 9.2e+000

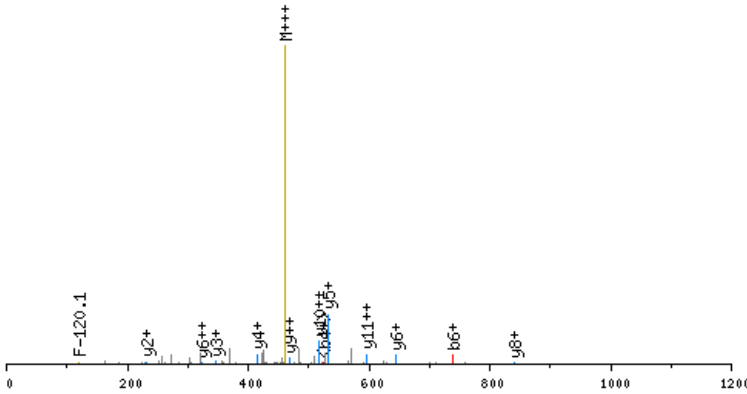

click image to zoom in; click top corners to zoom out

[precursor±]

scan 5088; 461.3 m/z; 6.0e+000

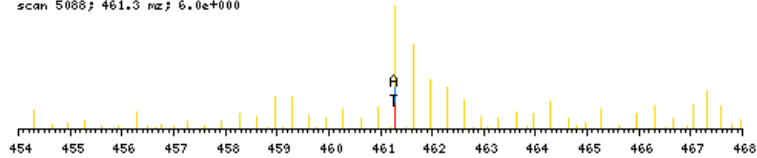

zoomed in precursor plot; T=theoretical m/z, A=acquired m/z

| b <sup>+</sup> | #  | AA | #  | y <sup>+</sup> | y <sup>2+</sup> |
|----------------|----|----|----|----------------|-----------------|
| 192.1024       | 1  | Y  | 12 |                |                 |
| 348.2035       | 2  | R  | 11 | 1190.7010      | 595.8544        |
| 445.2563       | 3  | P  | 10 | 1034.5999      | 517.8038        |
| 542.3091       | 4  | P  | 9  | 937.5471       | 469.2775        |
| 639.3618       | 5  | P  | 8  | 840.4943       | 420.7511        |
| 738.4302       | 6  | V  | 7  | 743.4416       | 372.2247        |
| 851.5143       | 7  | L  | 6  | 644.3731       | 322.6905        |
| 966.5413       | 8  | D  | 5  | 531.2891       | 266.1485        |
| 1037.5784      | 9  | A  | 4  | 416.2621       | 208.6350        |
| 1150.6624      | 10 | L  | 3  | 345.2250       | 173.1164        |
| 1207.6839      | 11 | G  | 2  | 232.1410       | 116.5744        |
|                | 12 | R  | 1  | 175.1195       | 88.0637         |

N-term:+29.04

N-term: +29.04 K(4): +156.13

N-term: +29.04

X-range:

0 - 0

MassTol: Y-zoom:

0. 1.

MassType:

☐AVG ☒MONO

Axis:

☒1 ☐2

Label:

☒I ☐M ☐-

Ions:

a ☐+ ☐2+ ☐3+

b ☒+ ☐2+ ☐3+

c ☐+ ☐2+ ☐3+

x ☐+ ☐2+ ☐3+

y ☒+ ☒2+ ☐3+

z ☐+ ☐2+ ☐3+

hide H<sub>2</sub>O/NH<sub>3</sub> ☐

zoom 112-122 ☐

GO

YSEGEAHSEVSQR, MH+ 1506.6824, m/z 502.8990  
L OS G16 P120811 220811-s1.01961.01961.3.dta

scan 1961; 1.2e+000

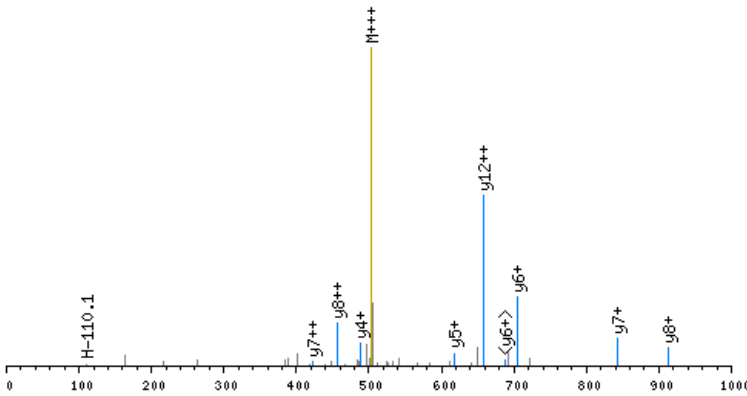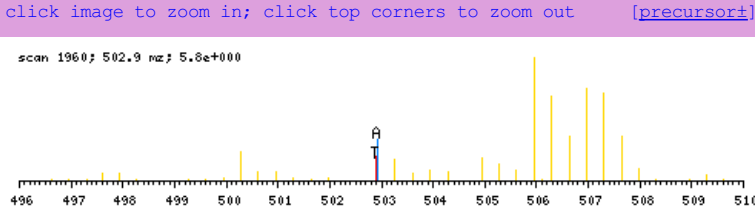

zoomed in precursor plot; T=theoretical m/z, A=acquired m/z

| b <sup>+</sup> | #  | AA | #  | y <sup>+</sup> | y <sup>2+</sup> |
|----------------|----|----|----|----------------|-----------------|
| 192.1024       | 1  | Y  | 13 |                |                 |
| 279.1345       | 2  | S  | 12 | 1315.5878      | 658.2978        |
| 408.1771       | 3  | E  | 11 | 1228.5558      | 614.7818        |
| 465.1985       | 4  | G  | 10 | 1099.5132      | 550.2605        |
| 594.2411       | 5  | E  | 9  | 1042.4918      | 521.7498        |
| 665.2782       | 6  | A  | 8  | 913.4492       | 457.2285        |
| 802.3371       | 7  | H  | 7  | 842.4121       | 421.7099        |
| 889.3692       | 8  | S  | 6  | 705.3531       | 353.1805        |
| 1018.4118      | 9  | E  | 5  | 618.3211       | 309.6645        |
| 1117.4802      | 10 | V  | 4  | 489.2785       | 245.1432        |
| 1204.5122      | 11 | S  | 3  | 390.2101       | 195.6090        |
| 1332.5708      | 12 | Q  | 2  | 303.1781       | 152.0930        |
|                | 13 | R  | 1  | 175.1195       | 88.0637         |

N-term:+29.04

X-range:

0 - 0

MassTol: Y-zoom:

0. 1.

MassType:

☐ AVG ☒ MONO

Axis:

☒ 1 ☐ 2

Label:

☒ I ☐ M ☐ -

Ions:

a ☐ + ☐ 2+ ☐ 3+

b ☒ + ☐ 2+ ☐ 3+

c ☐ + ☐ 2+ ☐ 3+

x ☐ + ☐ 2+ ☐ 3+

y ☒ + ☒ 2+ ☐ 3+

z ☐ + ☐ 2+ ☐ 3+

hide H<sub>2</sub>O/NH<sub>3</sub> ☐

zoom 112-122 ☐

GO

YSLLPASLLDHR, MH+ 1412.7901, m/z 471.6016  
L OS G15 P120811 220811-s1.05803.05803.3.dta

scan 5803; 4.0e+000

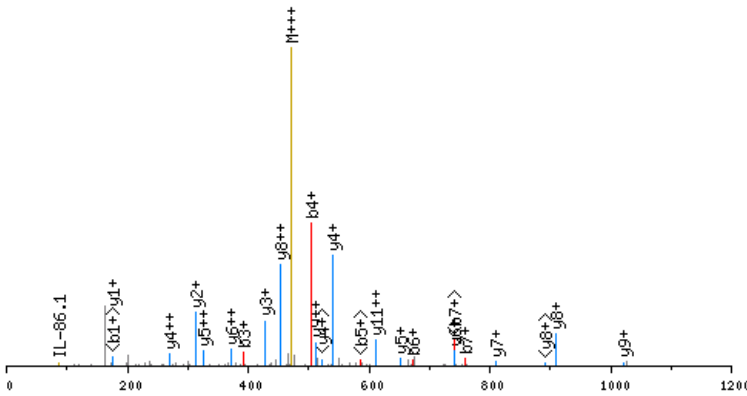

click image to zoom in; click top corners to zoom out

[precursor±]

scan 5801; 471.6 m/z; 4.7e+000

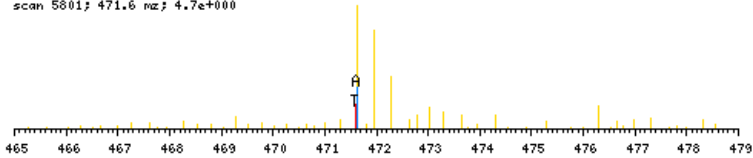

zoomed in precursor plot; T=theoretical m/z, A=acquired m/z

| b <sup>+</sup> | #  | AA | #  | y <sup>+</sup> | y <sup>2+</sup> |
|----------------|----|----|----|----------------|-----------------|
| 192.1024       | 1  | Y  | 12 |                |                 |
| 279.1345       | 2  | S  | 11 | 1221.6955      | 611.3517        |
| 392.2185       | 3  | L  | 10 | 1134.6635      | 567.8357        |
| 505.3026       | 4  | L  | 9  | 1021.5795      | 511.2936        |
| 602.3553       | 5  | P  | 8  | 908.4954       | 454.7516        |
| 673.3925       | 6  | A  | 7  | 811.4426       | 406.2252        |
| 760.4245       | 7  | S  | 6  | 740.4055       | 370.7067        |
| 873.5086       | 8  | L  | 5  | 653.3735       | 327.1907        |
| 986.5926       | 9  | L  | 4  | 540.2894       | 270.6486        |
| 1101.6196      | 10 | D  | 3  | 427.2054       | 214.1066        |
| 1238.6785      | 11 | H  | 2  | 312.1784       | 156.5931        |
|                | 12 | R  | 1  | 175.1195       | 88.0637         |

N-term:+29.04

X-range:

0 - 0

MassTol: Y-zoom:

0. 1.

MassType:

☐ AVG ☒ MONO

Axis:

☒ 1 ☐ 2

Label:

☒ I ☐ M ☐ -

Ions:

a ☐ + ☐ 2+ ☐ 3+

b ☒ + ☐ 2+ ☐ 3+

c ☐ + ☐ 2+ ☐ 3+

x ☐ + ☐ 2+ ☐ 3+

y ☒ + ☒ 2+ ☐ 3+

z ☐ + ☐ 2+ ☐ 3+

hide H<sub>2</sub>O/NH<sub>3</sub> ☐

zoom 112-122 ☐

GO

YSSADQSSLMEESEAEQAQR, MH+ 2144.9406, m/z 715.6517  
L OS G13 P120811 220811-s1.04052.04052.3.dta

scan 4052; 9.1e-001

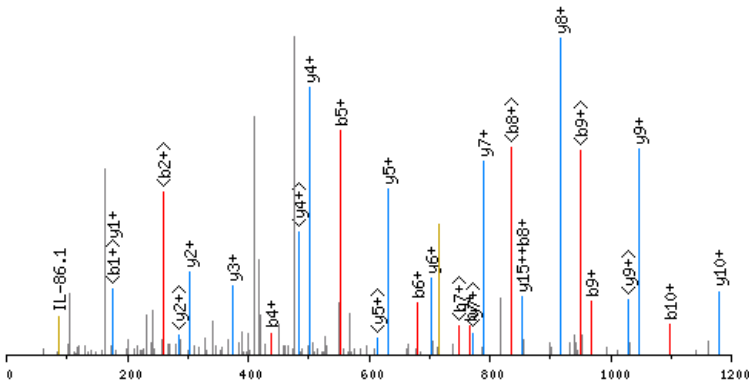

click image to zoom in; click top corners to zoom out

[precursor±]

scan 4049; 715.7 m/z; 6.1e+000

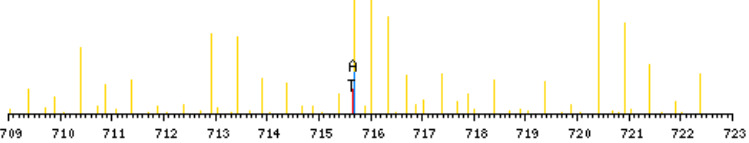

zoomed in precursor plot; T=theoretical m/z, A=acquired m/z

| b <sup>+</sup> | #  | AA | #  | y <sup>+</sup> | y <sup>2+</sup> |
|----------------|----|----|----|----------------|-----------------|
| 192.1024       | 1  | Y  | 19 |                |                 |
| 279.1345       | 2  | S  | 18 | 1953.8460      | 977.4269        |
| 366.1665       | 3  | S  | 17 | 1866.8140      | 933.9109        |
| 437.2036       | 4  | A  | 16 | 1779.7819      | 890.3949        |
| 552.2305       | 5  | D  | 15 | 1708.7448      | 854.8763        |
| 680.2891       | 6  | Q  | 14 | 1593.7179      | 797.3628        |
| 767.3211       | 7  | S  | 13 | 1465.6593      | 733.3336        |
| 854.3532       | 8  | S  | 12 | 1378.6273      | 689.8175        |
| 967.4372       | 9  | L  | 11 | 1291.5952      | 646.3015        |
| 1098.4777      | 10 | M  | 10 | 1178.5112      | 589.7595        |
| 1227.5203      | 11 | E  | 9  | 1047.4707      | 524.2393        |
| 1356.5629      | 12 | E  | 8  | 918.4281       | 459.7180        |
| 1443.5949      | 13 | S  | 7  | 789.3855       | 395.1967        |
| 1514.6321      | 14 | A  | 6  | 702.3535       | 351.6807        |
| 1643.6746      | 15 | E  | 5  | 631.3164       | 316.1621        |
| 1771.7332      | 16 | Q  | 4  | 502.2738       | 251.6408        |
| 1842.7703      | 17 | A  | 3  | 374.2152       | 187.6115        |
| 1970.8289      | 18 | Q  | 2  | 303.1781       | 152.0930        |
|                | 19 | R  | 1  | 175.1195       | 88.0637         |

N-term:+29.04

X-range:

0 - 0

MassTol: Y-zoom:

0. 1.

MassType:

☐AVG ☒MONO

Axis:

☒1 ☐2

Label:

☒I ☐M ☐-

Ions:

a ☐+ ☐2+ ☐3+

b ☒+ ☐2+ ☐3+

c ☐+ ☐2+ ☐3+

x ☐+ ☐2+ ☐3+

y ☒+ ☒2+ ☐3+

z ☐+ ☐2+ ☐3+

hide H<sub>2</sub>O/NH<sub>3</sub> ☐

zoom 112-122 ☐

GO

YSSSDVDIELTPSNFNR, MH+ 1971.9300, m/z 657.9815  
L OS G13 P120811 220811-s1.05843.05843.3.dta

scan 5843; 3.0e+000

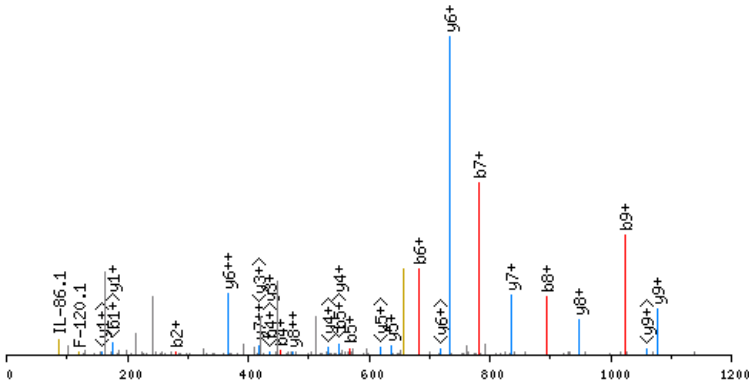

click image to zoom in; click top corners to zoom out

[precursor±]

scan 5839; 658.0 m/z; 1.0e+001

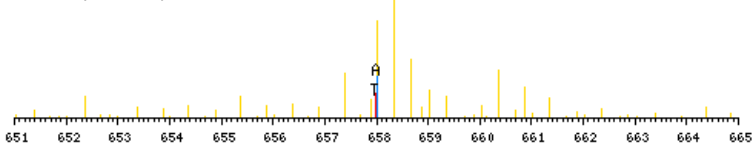

zoomed in precursor plot; T=theoretical m/z, A=acquired m/z

| b <sup>+</sup> | #  | AA | #  | y <sup>+</sup> | y <sup>2+</sup> |
|----------------|----|----|----|----------------|-----------------|
| 192.1024       | 1  | Y  | 17 |                |                 |
| 279.1345       | 2  | S  | 16 | 1780.8353      | 890.9216        |
| 366.1665       | 3  | S  | 15 | 1693.8033      | 847.4056        |
| 453.1985       | 4  | S  | 14 | 1606.7713      | 803.8896        |
| 568.2255       | 5  | D  | 13 | 1519.7393      | 760.3735        |
| 683.2524       | 6  | D  | 12 | 1404.7123      | 702.8601        |
| 782.3208       | 7  | V  | 11 | 1289.6854      | 645.3466        |
| 895.4049       | 8  | I  | 10 | 1190.6170      | 595.8124        |
| 1024.4475      | 9  | E  | 9  | 1077.5329      | 539.2704        |
| 1137.5315      | 10 | L  | 8  | 948.4903       | 474.7491        |
| 1238.5792      | 11 | T  | 7  | 835.4062       | 418.2070        |
| 1335.6320      | 12 | P  | 6  | 734.3586       | 367.6832        |
| 1422.6640      | 13 | S  | 5  | 637.3058       | 319.1568        |
| 1536.7069      | 14 | N  | 4  | 550.2738       | 275.6408        |
| 1683.7753      | 15 | F  | 3  | 436.2308       | 218.6193        |
| 1797.8183      | 16 | N  | 2  | 289.1624       | 145.0851        |
|                | 17 | R  | 1  | 175.1195       | 88.0637         |

N-term:+29.04

X-range:

0 - 0

MassTol: Y-zoom:

0. 1.

MassType:

☐AVG ☒MONO

Axis:

☒1 ☐2

Label:

☒I ☐M ☐-

Ions:

a ☐+ ☐2+ ☐3+

b ☒+ ☐2+ ☐3+

c ☐+ ☐2+ ☐3+

x ☐+ ☐2+ ☐3+

y ☒+ ☒2+ ☐3+

z ☐+ ☐2+ ☐3+

hide H<sub>2</sub>O/NH<sub>3</sub> ☐

zoom 112-122 ☐

GO

YSVPEGQSKYVEEPR, MH+ 1823.9180, m/z 608.6442  
L OS G15 P120811 220811-s1.02969.02969.3.dta

scan 2969; 3.5e+000

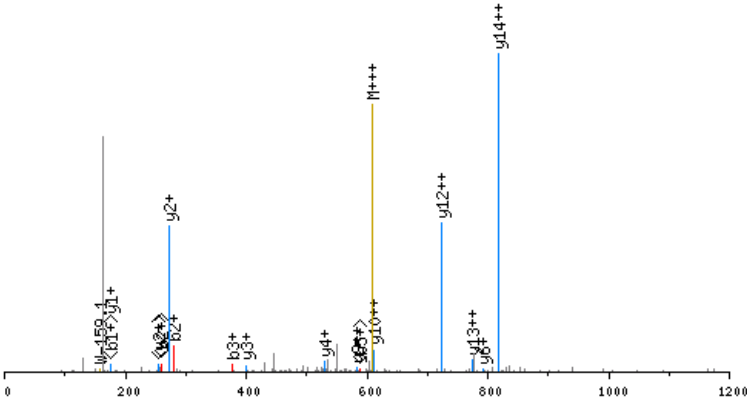

click image to zoom in; click top corners to zoom out

[precursor±]

scan 2966; 608.6 m/z; 1.7e+001

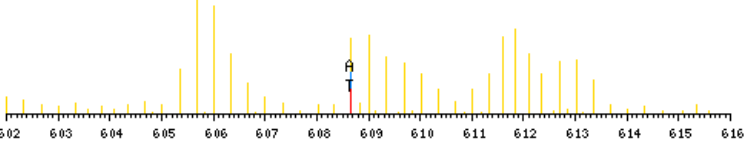

zoomed in precursor plot; T=theoretical m/z, A=acquired m/z

| b <sup>+</sup> | #  | AA | #  | y <sup>+</sup> | y <sup>2+</sup> |
|----------------|----|----|----|----------------|-----------------|
| 192.1024       | 1  | Y  | 15 |                |                 |
| 279.1345       | 2  | S  | 14 | 1632.8234      | 816.9156        |
| 378.2029       | 3  | V  | 13 | 1545.7913      | 773.3996        |
| 475.2556       | 4  | P  | 12 | 1446.7229      | 723.8654        |
| 604.2982       | 5  | E  | 11 | 1349.6702      | 675.3390        |
| 661.3197       | 6  | G  | 10 | 1220.6276      | 610.8177        |
| 789.3783       | 7  | Q  | 9  | 1163.6061      | 582.3070        |
| 876.4103       | 8  | S  | 8  | 1035.5475      | 518.2777        |
| 1032.5366      | 9  | K  | 7  | 948.5155       | 474.7617        |
| 1195.5999      | 10 | Y  | 6  | 792.3892       | 396.6985        |
| 1294.6683      | 11 | V  | 5  | 629.3259       | 315.1668        |
| 1423.7109      | 12 | E  | 4  | 530.2575       | 265.6326        |
| 1552.7535      | 13 | E  | 3  | 401.2149       | 201.1113        |
| 1649.8063      | 14 | P  | 2  | 272.1723       | 136.5900        |
|                | 15 | R  | 1  | 175.1195       | 88.0637         |

N-term:+29.04 K(9):+156.13

N-term: +29.04 K(4): +156.13

X-range:

0 - 0

MassTol: Y-zoom:

0. 1.

MassType:

☐ AVG ☒ MONO

Axis:

☒ 1 ☐ 2

Label:

☒ I ☐ M ☐ -

Ions:

a ☐ + ☐ 2+ ☐ 3+

b ☒ + ☐ 2+ ☐ 3+

c ☐ + ☐ 2+ ☐ 3+

x ☐ + ☐ 2+ ☐ 3+

y ☒ + ☒ 2+ ☐ 3+

z ☐ + ☐ 2+ ☐ 3+

hide H<sub>2</sub>O/NH<sub>3</sub> ☐

zoom 112-122 ☐

GO

YVDAGAETMTQR, MH+ 1375.6740, m/z 459.2295  
H OS G13 P120811 220811-s1.02656.02656.3.dta

scan 2656; 2.3e+000

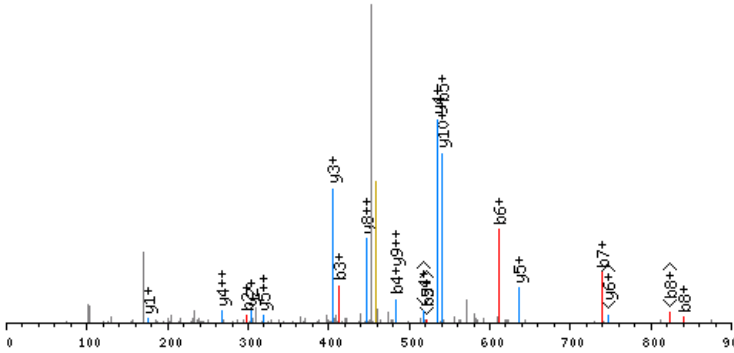

click image to zoom in; click top corners to zoom out [precursor±]

scan 2654; 459.2 m/z; 5.6e+000

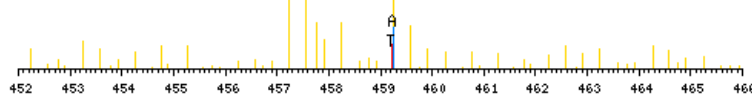

zoomed in precursor plot; T=theoretical m/z, A=acquired m/z

| b <sup>+</sup> | #  | AA | #  | y <sup>+</sup> | y <sup>2+</sup> |
|----------------|----|----|----|----------------|-----------------|
| 198.1342       | 1  | Y  | 12 |                |                 |
| 297.2026       | 2  | V  | 11 | 1178.5476      | 589.7777        |
| 412.2296       | 3  | D  | 10 | 1079.4791      | 540.2435        |
| 483.2667       | 4  | A  | 9  | 964.4522       | 482.7300        |
| 540.2882       | 5  | G  | 8  | 893.4151       | 447.2115        |
| 611.3253       | 6  | A  | 7  | 836.3936       | 418.7007        |
| 740.3679       | 7  | E  | 6  | 765.3565       | 383.1822        |
| 841.4155       | 8  | T  | 5  | 636.3139       | 318.6609        |
| 972.4560       | 9  | M  | 4  | 535.2662       | 268.1370        |
| 1073.5037      | 10 | T  | 3  | 404.2258       | 202.6168        |
| 1201.5623      | 11 | Q  | 2  | 303.1781       | 152.0930        |
|                | 12 | R  | 1  | 175.1195       | 88.0637         |

N-term:+35.07



X-range:

0 - 0

MassTol: Y-zoom:

0. 1.

MassType:

☐ AVG ☒ MONO

Axis:

☒ 1 ☐ 2

Label:

☒ I ☐ M ☐ -

Ions:

a ☐ + ☐ 2+ ☐ 3+

b ☒ + ☐ 2+ ☐ 3+

c ☐ + ☐ 2+ ☐ 3+

x ☐ + ☐ 2+ ☐ 3+

y ☒ + ☒ 2+ ☐ 3+

z ☐ + ☐ 2+ ☐ 3+

hide H<sub>2</sub>O/NH<sub>3</sub> ☐

zoom 112-122 ☐

GO

YVLEQASSHIGNSTQAAVR, MH+ 2059.0572, m/z 687.0239  
L OS G15 P120811 220811-s1.03422.03422.3.dta

scan 3422; 4.4e+000

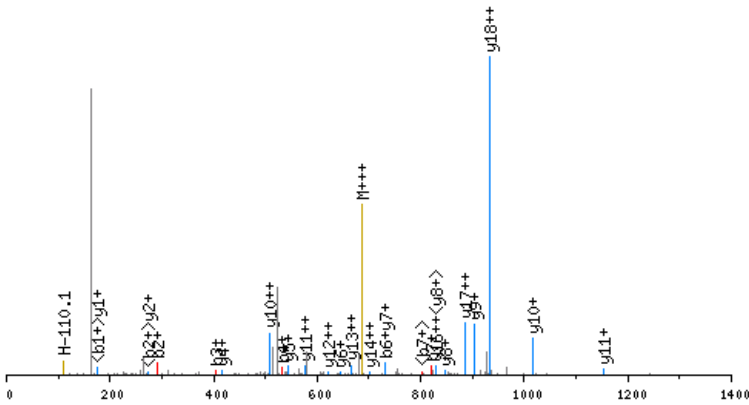

click image to zoom in; click top corners to zoom out

[precursor±]

scan 3421; 687.0 m/z; 1.7e+001

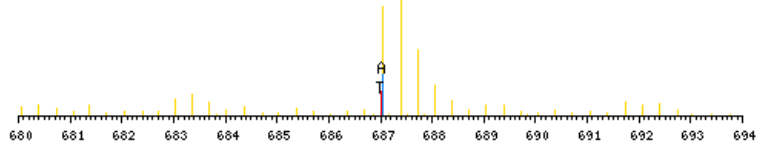

zoomed in precursor plot; T=theoretical m/z, A=acquired m/z

| b <sup>+</sup> | #  | AA | #  | y <sup>+</sup> | y <sup>2+</sup> |
|----------------|----|----|----|----------------|-----------------|
| 192.1024       | 1  | Y  | 19 |                |                 |
| 291.1708       | 2  | V  | 18 | 1867.9626      | 934.4852        |
| 404.2549       | 3  | L  | 17 | 1768.8942      | 884.9510        |
| 533.2975       | 4  | E  | 16 | 1655.8101      | 828.4090        |
| 661.3561       | 5  | Q  | 15 | 1526.7675      | 763.8877        |
| 732.3932       | 6  | A  | 14 | 1398.7090      | 699.8584        |
| 819.4252       | 7  | S  | 13 | 1327.6719      | 664.3398        |
| 906.4572       | 8  | S  | 12 | 1240.6398      | 620.8238        |
| 1043.5162      | 9  | H  | 11 | 1153.6078      | 577.3078        |
| 1156.6002      | 10 | I  | 10 | 1016.5489      | 508.7784        |
| 1213.6217      | 11 | G  | 9  | 903.4648       | 452.2363        |
| 1327.6646      | 12 | N  | 8  | 846.4434       | 423.7256        |
| 1414.6966      | 13 | S  | 7  | 732.4004       | 366.7041        |
| 1515.7443      | 14 | T  | 6  | 645.3684       | 323.1881        |
| 1643.8029      | 15 | Q  | 5  | 544.3207       | 272.6643        |
| 1714.8400      | 16 | A  | 4  | 416.2621       | 208.6350        |
| 1785.8771      | 17 | A  | 3  | 345.2250       | 173.1164        |
| 1884.9455      | 18 | V  | 2  | 274.1879       | 137.5979        |
|                | 19 | R  | 1  | 175.1195       | 88.0637         |

N-term:+29.04

X-range:

0 - 0

MassTol: Y-zoom:

0. 1.

MassType:

☐AVG ☒MONO

Axis:

☒1 ☐2

Label:

☒I ☐M ☐-

Ions:

a ☐+ ☐2+ ☐3+

b ☒+ ☐2+ ☐3+

c ☐+ ☐2+ ☐3+

x ☐+ ☐2+ ☐3+

y ☒+ ☒2+ ☐3+

z ☐+ ☐2+ ☐3+

hide H<sub>2</sub>O/NH<sub>3</sub> ☐

zoom 112-122 ☐

GO

YVLTCPNSNLGTGLR, MH+ 1584.8631, m/z 528.9592  
H OS G13 P120811 220811-s1.05353.05353.3.dta

scan 5353; 1.2e+001

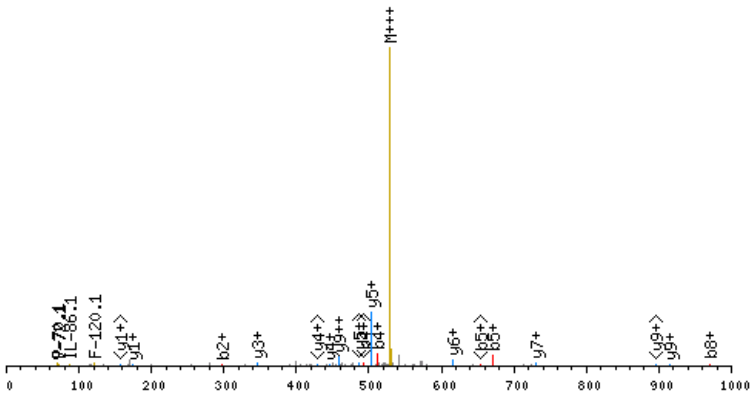

click image to zoom in; click top corners to zoom out

[precursor±]

scan 5349; 529.0 m/z; 4.7e+001

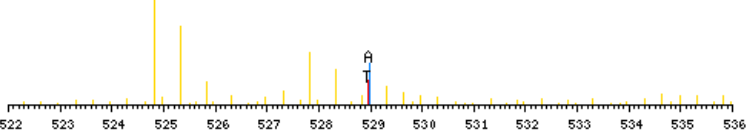

zoomed in precursor plot; T=theoretical m/z, A=acquired m/z

| b <sup>+</sup> | #  | AA | #  | y <sup>+</sup> | y <sup>2+</sup> |
|----------------|----|----|----|----------------|-----------------|
| 198.1342       | 1  | Y  | 14 |                |                 |
| 297.2026       | 2  | V  | 13 | 1387.7367      | 694.3723        |
| 410.2867       | 3  | L  | 12 | 1288.6683      | 644.8381        |
| 511.3344       | 4  | T  | 11 | 1175.5842      | 588.2960        |
| 671.3650       | 5  | C  | 10 | 1074.5366      | 537.7722        |
| 768.4177       | 6  | P  | 9  | 914.5060       | 457.7569        |
| 855.4498       | 7  | S  | 8  | 817.4532       | 409.2305        |
| 969.4927       | 8  | N  | 7  | 730.4212       | 365.7145        |
| 1082.5768      | 9  | L  | 6  | 616.3782       | 308.6930        |
| 1139.5982      | 10 | G  | 5  | 503.2942       | 252.1510        |
| 1240.6459      | 11 | T  | 4  | 446.2727       | 223.6403        |
| 1297.6674      | 12 | G  | 3  | 345.2250       | 173.1164        |
| 1410.7514      | 13 | L  | 2  | 288.2036       | 144.6057        |
|                | 14 | R  | 1  | 175.1195       | 88.0637         |

N-term:+35.07 C(5):+160.03

X-range:

0 - 0

MassTol: Y-zoom:

0. 1.

MassType:

☐ AVG ☒ MONO

Axis:

☒ 1 ☐ 2

Label:

☒ I ☐ M ☐ -

Ions:

a ☐ + ☐ 2+ ☐ 3+

b ☒ + ☐ 2+ ☐ 3+

c ☐ + ☐ 2+ ☐ 3+

x ☐ + ☐ 2+ ☐ 3+

y ☒ + ☒ 2+ ☐ 3+

z ☐ + ☐ 2+ ☐ 3+

hide H<sub>2</sub>O/NH<sub>3</sub> ☐

zoom 112-122 ☐

GO

YYEPDCLAYGAKAAR, MH+ 1803.8739, m/z 601.9628  
L OS G15 P120811 220811-s1.03493.03493.3.dta

scan 3493; 3.7e+000

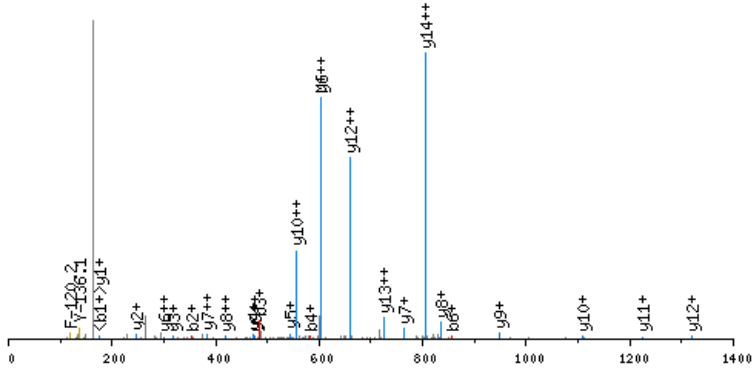

click image to zoom in; click top corners to zoom out

[precursor±]

scan 3491; 602.0 m/z; 4.6e+000

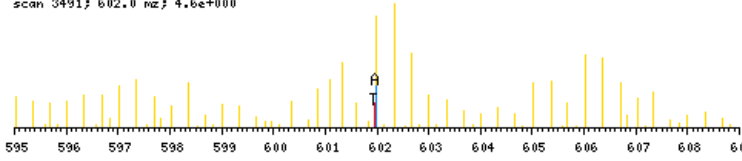

zoomed in precursor plot; T=theoretical m/z, A=acquired m/z

| b <sup>+</sup> | #  | AA | #  | y <sup>+</sup> | y <sup>2+</sup> |
|----------------|----|----|----|----------------|-----------------|
| 192.1024       | 1  | Y  | 15 |                |                 |
| 355.1658       | 2  | Y  | 14 | 1612.7793      | 806.8936        |
| 484.2084       | 3  | E  | 13 | 1449.7160      | 725.3619        |
| 581.2611       | 4  | P  | 12 | 1320.6734      | 660.8406        |
| 696.2881       | 5  | D  | 11 | 1223.6207      | 612.3142        |
| 856.3187       | 6  | C  | 10 | 1108.5937      | 554.8008        |
| 969.4027       | 7  | L  | 9  | 948.5631       | 474.7855        |
| 1040.4398      | 8  | A  | 8  | 835.4790       | 418.2434        |
| 1203.5032      | 9  | Y  | 7  | 764.4419       | 382.7249        |
| 1260.5246      | 10 | G  | 6  | 601.3786       | 301.1932        |
| 1331.5617      | 11 | A  | 5  | 544.3571       | 272.6825        |
| 1487.6880      | 12 | K  | 4  | 473.3200       | 237.1639        |
| 1558.7252      | 13 | A  | 3  | 317.1937       | 159.1008        |
| 1629.7623      | 14 | A  | 2  | 246.1566       | 123.5822        |
|                | 15 | R  | 1  | 175.1195       | 88.0637         |

N-term:+29.04 C(6):+160.03  
K(12):+156.13

X-range:

0 - 0

MassTol: Y-zoom:

0. 1.

MassType:

☐AVG ☒MONO

Axis:

☒1 ☐2

Label:

☒I ☐M ☐-

Ions:

a ☐+ ☐2+ ☐3+

b ☒+ ☐2+ ☐3+

c ☐+ ☐2+ ☐3+

x ☐+ ☐2+ ☐3+

y ☒+ ☒2+ ☐3+

z ☐+ ☐2+ ☐3+

hide H<sub>2</sub>O/NH<sub>3</sub> ☐

zoom 112-122 ☐

GO

YYSSSIWGPTCDGLDR, MH+ 1910.8806, m/z 478.4756  
H OS G17 P120811 220811-s1.04634.04634.4.dta

scan 4634; 3.0e+001

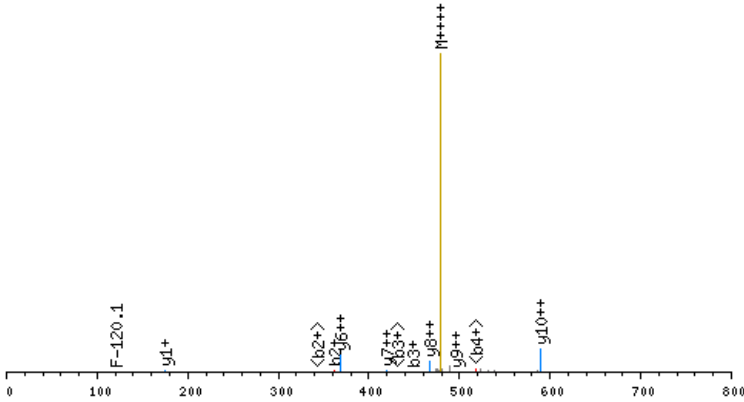

click image to zoom in; click top corners to zoom out [precursor±]

scan 4633; 478.5 m/z; 3.1e+001

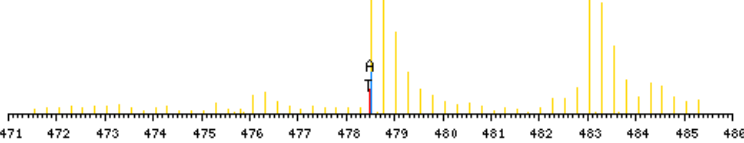

zoomed in precursor plot; T=theoretical m/z, A=acquired m/z

| b <sup>+</sup> | #  | AA | #  | y <sup>+</sup> | y <sup>2+</sup> |
|----------------|----|----|----|----------------|-----------------|
| 198.1342       | 1  | Y  | 16 |                |                 |
| 361.1976       | 2  | Y  | 15 | 1713.7542      | 857.3810        |
| 448.2296       | 3  | S  | 14 | 1550.6909      | 775.8494        |
| 535.2616       | 4  | S  | 13 | 1463.6589      | 732.3333        |
| 622.2936       | 5  | S  | 12 | 1376.6268      | 688.8173        |
| 735.3777       | 6  | I  | 11 | 1289.5948      | 645.3013        |
| 921.4570       | 7  | W  | 10 | 1176.5107      | 588.7593        |
| 978.4785       | 8  | G  | 9  | 990.4314       | 495.7196        |
| 1075.5312      | 9  | P  | 8  | 933.4100       | 467.2089        |
| 1176.5789      | 10 | T  | 7  | 836.3572       | 418.6825        |
| 1336.6095      | 11 | C  | 6  | 735.3095       | 368.1587        |
| 1451.6365      | 12 | D  | 5  | 575.2789       | 288.1434        |
| 1508.6579      | 13 | G  | 4  | 460.2520       | 230.6299        |
| 1621.7420      | 14 | L  | 3  | 403.2305       | 202.1192        |
| 1736.7689      | 15 | D  | 2  | 290.1464       | 145.5771        |
|                | 16 | R  | 1  | 175.1195       | 88.0637         |

N-term:+35.07 C(11):+160.03
